# Supplementary material for: Lysozyme-Induced Transcriptional Regulation of TNF-α Pathway Genes in Cells of the Monocyte Lineage
Source: MDPI journal article supplement (doi:10.3390/ijms20215502), 2019-11-05
Supplement: s1 [file s1]

gene\_expression\_table

| Name         | LZ vs. C 0H - Fold change | LZ vs. C 0H - P-value | LZ vs. C 0H - FDR p-value |
|--------------|---------------------------|-----------------------|---------------------------|
| LOC105378947 | 3.2353357581              | 0.554787377           | 0.9999763851              |
| OR4F16       | 1.174700458               | 0.5991193406          | 0.9999763851              |
| LOC107984841 | 3.2361532718              | 0.5546934395          | 0.9999763851              |
| SAMD11       | 7.7488609396              | 0.3054535756          | 0.9999763851              |
| NOC2L        | 1.5461618678              | 0.0791181993          | 0.9999763851              |
| KLHL17       | -1.1145079958             | 0.8163643571          | 0.9999763851              |
| PERM1        | 9.9312452783              | 0.2485636994          | 0.9999763851              |
| HES4         | 1.7587700475              | 0.436247796           | 0.9999763851              |
| ISG15        | -3.730383726              | 1.05E-08              | 3.57E-05                  |
| AGRN         | 1.0390605202              | 0.8508273187          | 0.9999763851              |
| RNF223       | -2.2178496717             | 0.4263037525          | 0.9999763851              |
| C1orf159     | -1.0178513312             | 0.9703924314          | 0.9999763851              |
| TTLL10       | 3.2356557963              | 0.5547505991          | 0.9999763851              |
| SDF4         | -1.0082437213             | 0.9556899836          | 0.9999763851              |
| B3GALT6      | 1.2217146279              | 0.2396664651          | 0.9999763851              |
| FAM132A      | -4.2849908816             | 0.4028453076          | 0.9999763851              |
| UBE2J2       | 1.2163737243              | 0.2109203609          | 0.9999763851              |
| SCNN1D       | -1.3487875373             | 0.588516679           | 0.9999763851              |
| ACAP3        | 1.0463571199              | 0.9151483756          | 0.9999763851              |
| PUSL1        | 1.1732893185              | 0.6030477562          | 0.9999763851              |
| CPSF3L       | -1.1939441443             | 0.3842183421          | 0.9999763851              |
| CPTP         | 1.1414167913              | 0.7163034955          | 0.9999763851              |
| TAS1R3       | 0                         | 0                     | 0                         |
| DVL1         | 1.0143284427              | 0.94371939            | 0.9999763851              |
| MXRA8        | 0                         | 0                     | 0                         |
| AURKAIP1     | -1.0056458463             | 0.9706011664          | 0.9999763851              |
| CCNL2        | -1.1774100633             | 0.2956263159          | 0.9999763851              |
| MRPL20       | 1.0319266771              | 0.8137183017          | 0.9999763851              |
| ATAD3C       | 3.2356557963              | 0.5547505991          | 0.9999763851              |
| ATAD3B       | 1.0281248046              | 0.9174971078          | 0.9999763851              |
| ATAD3A       | 1.3772262623              | 0.0715036014          | 0.9999763851              |
| TMEM240      | 1.8132233098              | 0.5634960726          | 0.9999763851              |
| SSU72        | 1.2013887752              | 0.3122483153          | 0.9999763851              |
| C1orf233     | -2.1176139011             | 0.1457079401          | 0.9999763851              |
| MIB2         | -1.6523757442             | 0.2606090588          | 0.9999763851              |
| MMP23B       | 3.2353357581              | 0.554787377           | 0.9999763851              |
| CDK11B       | 1.1587195806              | 0.5282351157          | 0.9999763851              |
| SLC35E2B     | -1.7746476327             | 0.301503033           | 0.9999763851              |
| CDK11A       | 1.0055874539              | 0.9906962358          | 0.9999763851              |
| SLC35E2      | -1.2702338265             | 0.1431285802          | 0.9999763851              |
| NADK         | 1.2954686403              | 0.149975455           | 0.9999763851              |
| GNB1         | 1.3165781373              | 0.039505316           | 0.9999763851              |
| LOC105378949 | 3.2356557963              | 0.5547505991          | 0.9999763851              |
| CALML6       | 0                         | 0                     | 0                         |
| TMEM52       | -7.5647903763             | 0.2176246281          | 0.9999763851              |
| CFAP74       | 3.2353357581              | 0.554787377           | 0.9999763851              |
| PRKCZ        | -1.0852711617             | 0.9285820278          | 0.9999763851              |
| LOC100506504 | 10.4285443305             | 0.2415083907          | 0.9999763851              |

gene\_expression\_table

|          |               |              |              |
|----------|---------------|--------------|--------------|
| FAAP20   | -1.0802270554 | 0.724048885  | 0.9999763851 |
| SKI      | -1.0114378384 | 0.9536114695 | 0.9999763851 |
| MORN1    | -1.2600768367 | 0.752558555  | 0.9999763851 |
| RER1     | 1.0968467061  | 0.5191661191 | 0.9999763851 |
| PEX10    | -1.3154339304 | 0.8205576571 | 0.9999763851 |
| PLCH2    | 0             | 0            | 0            |
| PANK4    | -1.1295257451 | 0.8772514809 | 0.9999763851 |
| TNFRSF14 | -1.1848431621 | 0.5975706626 | 0.9999763851 |
| FAM213B  | 1.370603997   | 0.2344892638 | 0.9999763851 |
| PRDM16   | 3.2361532718  | 0.5546934395 | 0.9999763851 |
| MEGF6    | -4.2849908816 | 0.4028453076 | 0.9999763851 |
| TPRG1L   | -1.0618961302 | 0.7344983515 | 0.9999763851 |
| WRAP73   | -1.2617491889 | 0.1324104744 | 0.9999763851 |
| TP73     | -1.2791513211 | 0.6734222451 | 0.9999763851 |
| CCDC27   | -1.3154339304 | 0.8205576571 | 0.9999763851 |
| LRRC47   | -1.3847160182 | 0.0318397468 | 0.9999763851 |
| CEP104   | -1.0095793631 | 0.9761424763 | 0.9999763851 |
| DFFB     | -1.4837504829 | 0.0442488539 | 0.9999763851 |
| C1orf174 | 1.2573545516  | 0.2718368116 | 0.9999763851 |
| NPHP4    | -1.0111546758 | 0.9714146213 | 0.9999763851 |
| KCNAB2   | -1.2811364388 | 0.1046163373 | 0.9999763851 |
| CHD5     | 3.2353357581  | 0.554787377  | 0.9999763851 |
| RPL22    | -1.088625411  | 0.4753557957 | 0.9999763851 |
| RNF207   | -1.3154339304 | 0.8205576571 | 0.9999763851 |
| ICMT     | 1.0740827468  | 0.6777485154 | 0.9999763851 |
| GPR153   | 1.1425651427  | 0.7870991548 | 0.9999763851 |
| ACOT7    | 1.0781361188  | 0.6851325867 | 0.9999763851 |
| NOL9     | -1.0051786172 | 0.9736009758 | 0.9999763851 |
| TAS1R1   | 0             | 0            | 0            |
| ZBTB48   | -1.0625597214 | 0.8949548817 | 0.9999763851 |
| KLHL21   | -1.0686103144 | 0.7084214503 | 0.9999763851 |
| PHF13    | -1.00008624   | 0.9996854632 | 0.9999763851 |
| THAP3    | -1.1555612359 | 0.4216100473 | 0.9999763851 |
| DNAJC11  | -1.5155260696 | 0.3099023206 | 0.9999763851 |
| CAMTA1   | 1.3088858435  | 0.1900563935 | 0.9999763851 |
| VAMP3    | 1.2869549966  | 0.2759914382 | 0.9999763851 |
| PER3     | -1.4580055137 | 0.1291807939 | 0.9999763851 |
| UTS2     | 11.4763420597 | 0.2057475773 | 0.9999763851 |
| TNFRSF9  | -1.3709710942 | 0.748951574  | 0.9999763851 |
| PARK7    | 1.0810796221  | 0.5295730195 | 0.9999763851 |
| ERRFI1   | -1.0166702806 | 0.977057038  | 0.9999763851 |
| RERE     | -1.2241734493 | 0.2028619646 | 0.9999763851 |
| ENO1     | -1.0128188539 | 0.9191809382 | 0.9999763851 |
| CA6      | 7.7192231741  | 0.2780352706 | 0.9999763851 |
| SLC2A7   | 3.2353357581  | 0.554787377  | 0.9999763851 |
| SLC2A5   | 1.0597414331  | 0.7730105805 | 0.9999763851 |
| GPR157   | 18.9337530925 | 0.1183250341 | 0.9999763851 |
| H6PD     | -1.1730435764 | 0.4602718919 | 0.9999763851 |
| SPSB1    | 1.077972134   | 0.8912753648 | 0.9999763851 |

gene\_expression\_table

|              |               |              |              |
|--------------|---------------|--------------|--------------|
| SLC25A33     | -1.3986516995 | 0.1838661971 | 0.9999763851 |
| TMEM201      | -1.2085686918 | 0.4349202455 | 0.9999763851 |
| LOC107985734 | 1.4896325716  | 0.2380463107 | 0.9999763851 |
| PIK3CD       | -1.3567501826 | 0.0268320016 | 0.9999763851 |
| CLSTN1       | 1.0392187447  | 0.8232239638 | 0.9999763851 |
| CTNNBIP1     | -1.0507736543 | 0.7828352545 | 0.9999763851 |
| LZIC         | 1.1023423199  | 0.6141908316 | 0.9999763851 |
| NMNAT1       | -1.264629083  | 0.5312243894 | 0.9999763851 |
| RBP7         | -4.2849908816 | 0.4028453076 | 0.9999763851 |
| UBE4B        | 1.0657174402  | 0.8010091842 | 0.9999763851 |
| KIF1B        | 1.2219776479  | 0.3899456608 | 0.9999763851 |
| PGD          | -1.0302013907 | 0.8711931508 | 0.9999763851 |
| APITD1       | -1.2067848304 | 0.4417597325 | 0.9999763851 |
| APITD1-CORT  | 0             | 0            | 0            |
| CORT         | -1.0022999659 | 0.9974194811 | 0.9999763851 |
| DFFA         | -1.2616288061 | 0.3871490765 | 0.9999763851 |
| PEX14        | -1.4814491832 | 0.1410820361 | 0.9999763851 |
| CASZ1        | -1.0771227858 | 0.7558744199 | 0.9999763851 |
| TARDBP       | -1.1914952151 | 0.1783366818 | 0.9999763851 |
| MASP2        | -4.2849908816 | 0.4028453076 | 0.9999763851 |
| SRM          | 1.2535065026  | 0.0819309754 | 0.9999763851 |
| EXOSC10      | 1.2586203042  | 0.2628603303 | 0.9999763851 |
| MTOR         | -1.089050219  | 0.6808115178 | 0.9999763851 |
| UBIAD1       | 1.4441434306  | 0.0682871743 | 0.9999763851 |
| DISP3        | 2.1749090749  | 0.2902963936 | 0.9999763851 |
| FBXO44       | 1.0270472827  | 0.9776236632 | 0.9999763851 |
| FBXO6        | -2.0938791425 | 0.1311548144 | 0.9999763851 |
| MAD2L2       | 1.1817117671  | 0.4247699789 | 0.9999763851 |
| DRAXIN       | 1.0302158107  | 0.9680755921 | 0.9999763851 |
| AGTRAP       | -1.0450736439 | 0.7908901697 | 0.9999763851 |
| MTHFR        | 1.5899501076  | 0.1846224876 | 0.9999763851 |
| CLCN6        | 1.1567081039  | 0.665179057  | 0.9999763851 |
| KIAA2013     | -1.1227694078 | 0.4101468624 | 0.9999763851 |
| PLOD1        | -1.2090169908 | 0.2501471455 | 0.9999763851 |
| MFN2         | -1.0513352565 | 0.7880695764 | 0.9999763851 |
| MIIP         | -1.200174099  | 0.5534347562 | 0.9999763851 |
| TNFRSF1B     | -1.1703221131 | 0.2908432668 | 0.9999763851 |
| VPS13D       | 1.1666597452  | 0.5375589315 | 0.9999763851 |
| DHRS3        | -1.3715341606 | 0.4900407406 | 0.9999763851 |
| HNRNPCL1     | -1.0092282152 | 0.9905053495 | 0.9999763851 |
| PRDM2        | -1.2222613113 | 0.2975697473 | 0.9999763851 |
| KAZN         | -1.6835365895 | 0.1330391167 | 0.9999763851 |
| TMEM51       | -1.1492735539 | 0.8452962127 | 0.9999763851 |
| C1orf195     | 0             | 0            | 0            |
| EFHD2        | 1.0048361664  | 0.977147235  | 0.9999763851 |
| CTRC         | 3.2361532718  | 0.5546934395 | 0.9999763851 |
| CELA2A       | -4.2864494036 | 0.4027150576 | 0.9999763851 |
| CELA2B       | -1.6822287229 | 0.4686804752 | 0.9999763851 |
| CASP9        | 1.1639808388  | 0.7442533189 | 0.9999763851 |

gene\_expression\_table

|              |               |              |              |
|--------------|---------------|--------------|--------------|
| DNAJC16      | -1.0451501088 | 0.9190510566 | 0.9999763851 |
| AGMAT        | 0             | 0            | 0            |
| DDI2         | 1.3406186202  | 0.7024599618 | 0.9999763851 |
| RSC1A1       | 12.4427966444 | 0.1868322323 | 0.9999763851 |
| PLEKHM2      | -1.3446329162 | 0.2043512162 | 0.9999763851 |
| SLC25A34     | 3.2353357581  | 0.554787377  | 0.9999763851 |
| TMEM82       | 0             | 0            | 0            |
| FBLIM1       | -4.2849908816 | 0.4028453076 | 0.9999763851 |
| UQCRHL       | 1.3474731584  | 0.0879372367 | 0.9999763851 |
| SPEN         | 1.3087159369  | 0.2867057139 | 0.9999763851 |
| ZBTB17       | -1.191194284  | 0.673835896  | 0.9999763851 |
| ARHGEF19     | 1.1341393112  | 0.6975739546 | 0.9999763851 |
| ANO7P1       | 3.2361532718  | 0.5546934395 | 0.9999763851 |
| RSG1         | 3.2353357581  | 0.554787377  | 0.9999763851 |
| FBXO42       | 1.5304620398  | 0.1495632736 | 0.9999763851 |
| SZRD1        | 1.2764111599  | 0.1836186681 | 0.9999763851 |
| NECAP2       | 1.0358674562  | 0.8632038033 | 0.9999763851 |
| FAM231B      | 0             | 0            | 0            |
| NBPF1        | 1.2362886503  | 0.3311611848 | 0.9999763851 |
| LOC102723383 | 0             | 0            | 0            |
| MST1L        | -1.4020601044 | 0.285441333  | 0.9999763851 |
| CROCC        | -2.6293060006 | 0.0591438487 | 0.9999763851 |
| ATP13A2      | 3.2449000269  | 0.0177855534 | 0.9999763851 |
| SDHB         | 1.1094444485  | 0.5304868464 | 0.9999763851 |
| PADI2        | -1.2522894312 | 0.6244386287 | 0.9999763851 |
| PADI3        | -2.3217011239 | 0.4357700933 | 0.9999763851 |
| PADI4        | 1.8137824633  | 0.5633863058 | 0.9999763851 |
| RCC2         | -1.2273911715 | 0.1541266858 | 0.9999763851 |
| ARHGEF10L    | -1.3074921711 | 0.3449107834 | 0.9999763851 |
| ACTL8        | 1.5358098925  | 0.2074089023 | 0.9999763851 |
| IGSF21       | 0             | 0            | 0            |
| ALDH4A1      | 1.1910339965  | 0.3546468207 | 0.9999763851 |
| IFFO2        | 1.099610368   | 0.8314390123 | 0.9999763851 |
| UBR4         | -1.081994277  | 0.5950480478 | 0.9999763851 |
| EMC1         | -1.1620024768 | 0.340940226  | 0.9999763851 |
| MRT04        | 1.3227616372  | 0.1165370528 | 0.9999763851 |
| AKR7A3       | 1.3516202149  | 0.6130596441 | 0.9999763851 |
| AKR7A2       | 1.0906266199  | 0.5924502318 | 0.9999763851 |
| PQLC2        | -1.0610345935 | 0.8808049213 | 0.9999763851 |
| CAPZB        | -1.3282602261 | 0.031202376  | 0.9999763851 |
| MINOS1       | 1.2877439777  | 0.0582233431 | 0.9999763851 |
| MINOS1-NBL1  | 0             | 0            | 0            |
| NBL1         | 1.0275312208  | 0.9771627006 | 0.9999763851 |
| TMCO4        | 1.2509797067  | 0.5190719194 | 0.9999763851 |
| OTUD3        | 2.1319137281  | 0.1718552059 | 0.9999763851 |
| PLA2G2D      | 0             | 0            | 0            |
| PLA2G2C      | -1.3063941    | 0.6034609742 | 0.9999763851 |
| UBXN10       | -2.8642315427 | 0.0005256    | 0.5206160142 |
| VWA5B1       | -7.5622178268 | 0.2177145568 | 0.9999763851 |

gene\_expression\_table

|         |               |              |              |
|---------|---------------|--------------|--------------|
| CAMK2N1 | 1.3668805525  | 0.4890888903 | 0.9999763851 |
| MUL1    | 1.4013617921  | 0.2512066017 | 0.9999763851 |
| CDA     | 1.3549226673  | 0.2405985083 | 0.9999763851 |
| PINK1   | 1.1993785606  | 0.3627658435 | 0.9999763851 |
| DDOST   | -1.2065714781 | 0.3230165015 | 0.9999763851 |
| KIF17   | -1.0849160377 | 0.8968604788 | 0.9999763851 |
| HP1BP3  | 1.1671146963  | 0.2902501932 | 0.9999763851 |
| EIF4G3  | 1.0937346032  | 0.6906345008 | 0.9999763851 |
| ECE1    | 1.0466511912  | 0.8285864559 | 0.9999763851 |
| NBPF3   | -1.866246204  | 0.0555079382 | 0.9999763851 |
| RAP1GAP | 0             | 0            | 0            |
| USP48   | -1.1251461385 | 0.4340374529 | 0.9999763851 |
| LDLRAD2 | 1.0279042192  | 0.9761267789 | 0.9999763851 |
| HSPG2   | 0             | 0            | 0            |
| CELA3A  | 5.4781708352  | 0.3745527127 | 0.9999763851 |
| CDC42   | 1.1351419722  | 0.3345931252 | 0.9999763851 |
| ZBTB40  | -1.1166057691 | 0.7355956481 | 0.9999763851 |
| EPHA8   | 0             | 0            | 0            |
| C1QA    | 1.6117722432  | 0.3344605921 | 0.9999763851 |
| C1QB    | 0             | 0            | 0            |
| EPHB2   | -1.3158816768 | 0.8203229797 | 0.9999763851 |
| KDM1A   | -1.098581633  | 0.684524642  | 0.9999763851 |
| LUZP1   | -1.3038212819 | 0.2940734353 | 0.9999763851 |
| HNRNPR  | 1.2304240465  | 0.1665833315 | 0.9999763851 |
| ZNF436  | -1.4307993596 | 0.494865237  | 0.9999763851 |
| TCEA3   | -1.0611824601 | 0.9005410891 | 0.9999763851 |
| ASAP3   | -1.3154339304 | 0.8205576571 | 0.9999763851 |
| E2F2    | -1.0347668092 | 0.8660790216 | 0.9999763851 |
| ID3     | 1.2661450094  | 0.7597475913 | 0.9999763851 |
| RPL11   | 1.0194037102  | 0.8690248342 | 0.9999763851 |
| TCEB3   | -1.0689686945 | 0.744931492  | 0.9999763851 |
| PITHD1  | 1.2581761367  | 0.166452002  | 0.9999763851 |
| LYPLA2  | 1.1268043874  | 0.4344546813 | 0.9999763851 |
| GALE    | -1.0200757478 | 0.9389769545 | 0.9999763851 |
| HMGCL   | -1.2336977324 | 0.5102408997 | 0.9999763851 |
| FUCA1   | -1.0817369301 | 0.6043949421 | 0.9999763851 |
| CNR2    | 1.6099279025  | 0.1016389644 | 0.9999763851 |
| PNRC2   | 1.0542540952  | 0.7679180619 | 0.9999763851 |
| SRSF10  | 1.0157418012  | 0.9159352384 | 0.9999763851 |
| MYOM3   | 0             | 0            | 0            |
| IL22RA1 | 0             | 0            | 0            |
| IFNLR1  | 0             | 0            | 0            |
| GRHL3   | 1.2867653957  | 0.8303027073 | 0.9999763851 |
| STPG1   | 1.3261442362  | 0.7481308662 | 0.9999763851 |
| NIPAL3  | 1.7498218804  | 0.1302972877 | 0.9999763851 |
| RCAN3   | 1.4670354898  | 0.498132032  | 0.9999763851 |
| NCMAP   | 0             | 0            | 0            |
| SRRM1   | 1.0310513695  | 0.8284256726 | 0.9999763851 |
| CLIC4   | -1.2421295315 | 0.3306171329 | 0.9999763851 |

gene\_expression\_table

|          |                |              |              |
|----------|----------------|--------------|--------------|
| RUNX3    | 1.0523960626   | 0.6920371863 | 0.9999763851 |
| SYF2     | -1.0332529439  | 0.849509142  | 0.9999763851 |
| RSRP1    | -1.0968404282  | 0.6244630843 | 0.9999763851 |
| TMEM50A  | 1.1663825021   | 0.4320550433 | 0.9999763851 |
| RHCE     | -1.3475331976  | 0.7688178297 | 0.9999763851 |
| TMEM57   | 1.3751821414   | 0.2330431253 | 0.9999763851 |
| LDLRAP1  | 1.1806295713   | 0.4113780214 | 0.9999763851 |
| MAN1C1   | 1.1326643262   | 0.8792464483 | 0.9999763851 |
| SEPN1    | 1.4404315282   | 0.1589759444 | 0.9999763851 |
| MTFR1L   | -40.9972410401 | 0.0218231458 | 0.9999763851 |
| AUNIP    | 1.3913138705   | 0.1063272315 | 0.9999763851 |
| PAQR7    | 3.2353357581   | 0.554787377  | 0.9999763851 |
| STMN1    | 1.0636664556   | 0.5933236956 | 0.9999763851 |
| PAFAH2   | -1.0056922468  | 0.9879745456 | 0.9999763851 |
| PDIK1L   | -1.2574156331  | 0.7171083699 | 0.9999763851 |
| FAM110D  | -1.0351013771  | 0.9593129508 | 0.9999763851 |
| ZNF593   | 1.1818495503   | 0.3186987545 | 0.9999763851 |
| CNKSR1   | 3.2356557963   | 0.5547505991 | 0.9999763851 |
| CATSPER4 | 0              | 0            | 0            |
| CEP85    | -1.0822680815  | 0.7944456243 | 0.9999763851 |
| SH3BGRL3 | 1.2286048015   | 0.1992119706 | 0.9999763851 |
| UBXN11   | 1.027554661    | 0.9756517998 | 0.9999763851 |
| CD52     | -1.0404139104  | 0.8243362932 | 0.9999763851 |
| LIN28A   | -4.2849908816  | 0.4028453076 | 0.9999763851 |
| DHDDS    | -1.6797920108  | 0.0670160399 | 0.9999763851 |
| HMGN2    | 1.4199846747   | 0.004526     | 0.9999763851 |
| RPS6KA1  | 1.0096851677   | 0.9590364726 | 0.9999763851 |
| ARID1A   | 1.0309196656   | 0.8583610318 | 0.9999763851 |
| PIGV     | 1.511699786    | 0.4786618003 | 0.9999763851 |
| ZDHHC18  | 1.2242987547   | 0.4016810075 | 0.9999763851 |
| SFN      | -1.1491729646  | 0.847779038  | 0.9999763851 |
| GPN2     | 1.0648972176   | 0.8542674712 | 0.9999763851 |
| GPATCH3  | 1.1565287774   | 0.6517534415 | 0.9999763851 |
| NUDC     | 1.2108105044   | 0.2338512031 | 0.9999763851 |
| KDF1     | 0              | 0            | 0            |
| TRNP1    | 1.62522264     | 0.5744236099 | 0.9999763851 |
| SLC9A1   | 1.2006389141   | 0.6175123491 | 0.9999763851 |
| WDTC1    | 1.12167016     | 0.7327891125 | 0.9999763851 |
| TMEM222  | -1.0957233907  | 0.7450479096 | 0.9999763851 |
| SYTL1    | 1.2448173907   | 0.6109771672 | 0.9999763851 |
| MAP3K6   | -1.6685488022  | 0.2499416412 | 0.9999763851 |
| FCN3     | 0              | 0            | 0            |
| GPR3     | 3.2361532718   | 0.5546934395 | 0.9999763851 |
| WASF2    | 1.0901609584   | 0.5925482224 | 0.9999763851 |
| AHDC1    | 1.101622642    | 0.7783063855 | 0.9999763851 |
| FGR      | 1.0677232935   | 0.7730948165 | 0.9999763851 |
| IFI6     | -5.4025441211  | 6.16E-10     | 3.01E-06     |
| FAM76A   | -2.2349198472  | 0.0703768246 | 0.9999763851 |
| STX12    | -1.2304642165  | 0.428059802  | 0.9999763851 |

gene\_expression\_table

|          |                |              |              |
|----------|----------------|--------------|--------------|
| PPP1R8   | 1.5680697646   | 0.009504     | 0.9999763851 |
| THEMIS2  | 1.2339528129   | 0.2922779136 | 0.9999763851 |
| RPA2     | 1.1365826064   | 0.3799677251 | 0.9999763851 |
| SMPDL3B  | -7.5622178268  | 0.2177145568 | 0.9999763851 |
| XKR8     | 1.3706686629   | 0.3674901675 | 0.9999763851 |
| EYA3     | -1.2688574231  | 0.1806205706 | 0.9999763851 |
| PTAFR    | -1.7460333819  | 0.00886      | 0.9999763851 |
| DNAJC8   | 1.0010121842   | 0.9948902754 | 0.9999763851 |
| ATPIF1   | -1.0168057009  | 0.8978314225 | 0.9999763851 |
| SESN2    | -1.513336191   | 0.1914034435 | 0.9999763851 |
| MED18    | 1.5329222667   | 0.1264405606 | 0.9999763851 |
| PHACTR4  | 1.1823043678   | 0.40033852   | 0.9999763851 |
| RCC1     | -1.033461336   | 0.8088548783 | 0.9999763851 |
| TRNAU1AP | 1.0648769255   | 0.7827119148 | 0.9999763851 |
| TAF12    | -1.1813360361  | 0.3721629073 | 0.9999763851 |
| GMEB1    | -1.0587083132  | 0.8560791701 | 0.9999763851 |
| YTHDF2   | 1.2607475794   | 0.1057631326 | 0.9999763851 |
| OPRD1    | 0              | 0            | 0            |
| EPB41    | -1.203763665   | 0.4854706396 | 0.9999763851 |
| TMEM200B | 1.0834237965   | 0.6104609929 | 0.9999763851 |
| SRSF4    | -1.1570466299  | 0.4136713489 | 0.9999763851 |
| MECR     | -1.4173138948  | 0.1886477124 | 0.9999763851 |
| PTPRU    | 1.1107539683   | 0.8060895868 | 0.9999763851 |
| MATN1    | -1.9577848643  | 0.3993333243 | 0.9999763851 |
| LAPTM5   | -1.0607557082  | 0.6493937013 | 0.9999763851 |
| PUM1     | 1.060730575    | 0.7073312768 | 0.9999763851 |
| NKAIN1   | -4.2849908816  | 0.4028453076 | 0.9999763851 |
| SNRNP40  | -1.0562260042  | 0.8655201862 | 0.9999763851 |
| ZCCHC17  | 1.5213857738   | 0.3095286202 | 0.9999763851 |
| FABP3    | 1.2254478425   | 0.348313789  | 0.9999763851 |
| SERINC2  | -1.081459568   | 0.7503780051 | 0.9999763851 |
| TINAGL1  | 0              | 0            | 0            |
| HCRTR1   | 0              | 0            | 0            |
| PEF1     | 1.1734555506   | 0.4645705727 | 0.9999763851 |
| COL16A1  | 0              | 0            | 0            |
| ADGRB2   | 0              | 0            | 0            |
| SPOCD1   | -15.8725894304 | 0.00719      | 0.9999763851 |
| PTP4A2   | -1.0889136629  | 0.4986668648 | 0.9999763851 |
| KHDRBS1  | 1.2996534026   | 0.0558781468 | 0.9999763851 |
| TMEM39B  | -1.3277520943  | 0.2270795529 | 0.9999763851 |
| KPNA6    | 1.3806841363   | 0.0727999418 | 0.9999763851 |
| TXLNA    | 1.5717321995   | 0.0306217739 | 0.9999763851 |
| CCDC28B  | 1.0169984421   | 0.9311680911 | 0.9999763851 |
| TMEM234  | 3.2361532718   | 0.5546934395 | 0.9999763851 |
| IQCC     | 1.1338949431   | 0.8799751866 | 0.9999763851 |
| DCDC2B   | 0              | 0            | 0            |
| EIF3I    | 1.489220349    | 0.0129344258 | 0.9999763851 |
| LCK      | -1.9657157813  | 0.458714207  | 0.9999763851 |
| HDAC1    | 1.1106681006   | 0.4844432564 | 0.9999763851 |

gene\_expression\_table

|           |               |              |              |
|-----------|---------------|--------------|--------------|
| MARCKSL1  | -1.4443312498 | 0.0298793785 | 0.9999763851 |
| FAM229A   | -1.3942010814 | 0.6863515839 | 0.9999763851 |
| TSSK3     | 0             | 0            | 0            |
| BSDC1     | -1.8123280412 | 0.0752509865 | 0.9999763851 |
| ZBTB8A    | 1.2272294314  | 0.6566691172 | 0.9999763851 |
| ZBTB8OS   | 1.1013490248  | 0.7307733939 | 0.9999763851 |
| RBBP4     | 1.8465089398  | 0.0737870877 | 0.9999763851 |
| SYNC      | 1.0343561594  | 0.8545529821 | 0.9999763851 |
| KIAA1522  | 1.0301493879  | 0.9655000661 | 0.9999763851 |
| YARS      | 1.2456231905  | 0.1417942902 | 0.9999763851 |
| S100PBP   | -1.0241720764 | 0.9340862931 | 0.9999763851 |
| FNDC5     | -7.5647903763 | 0.2176246281 | 0.9999763851 |
| TMEM54    | 1.9215420498  | 0.4502798488 | 0.9999763851 |
| RNF19B    | 1.3712054902  | 0.2544792138 | 0.9999763851 |
| AK2       | -1.0332253788 | 0.8009381203 | 0.9999763851 |
| AZIN2     | -1.3713173847 | 0.744373445  | 0.9999763851 |
| TRIM62    | -1.1974053127 | 0.8020098371 | 0.9999763851 |
| ZNF362    | 1.2507927833  | 0.5167684076 | 0.9999763851 |
| A3GALT2   | -4.2849908816 | 0.4028453076 | 0.9999763851 |
| PHC2      | -1.3864284638 | 0.1488605724 | 0.9999763851 |
| ZSCAN20   | 1.8139617088  | 0.5768737227 | 0.9999763851 |
| CSMD2     | -1.315303824  | 0.8206171563 | 0.9999763851 |
| SMIM12    | 1.0429840383  | 0.8268966976 | 0.9999763851 |
| DLGAP3    | 0             | 0            | 0            |
| TMEM35B   | -1.1045245155 | 0.8011295043 | 0.9999763851 |
| ZMYM6     | -1.1850181137 | 0.5348878489 | 0.9999763851 |
| ZMYM1     | -1.0288429291 | 0.9342748108 | 0.9999763851 |
| SFPQ      | -1.2135663739 | 0.123071045  | 0.9999763851 |
| ZMYM4     | -1.0484473863 | 0.7235662879 | 0.9999763851 |
| KIAA0319L | -1.0634223685 | 0.7145210223 | 0.9999763851 |
| NCDN      | 1.3072634951  | 0.6713947708 | 0.9999763851 |
| TFAP2E    | 1.1465380583  | 0.5868284037 | 0.9999763851 |
| PSMB2     | 1.1440482277  | 0.3652391144 | 0.9999763851 |
| C1orf216  | 1.0577637794  | 0.8743426099 | 0.9999763851 |
| CLSPN     | 1.2867573272  | 0.1587778789 | 0.9999763851 |
| AGO4      | -1.419097851  | 0.1563229254 | 0.9999763851 |
| AGO1      | 1.0977887122  | 0.6986308333 | 0.9999763851 |
| AGO3      | -1.3423274056 | 0.3017980552 | 0.9999763851 |
| ADPRHL2   | -1.4063529219 | 0.0502653695 | 0.9999763851 |
| COL8A2    | 3.2361532718  | 0.5546934395 | 0.9999763851 |
| TRAPPC3   | 1.0402064676  | 0.8071220241 | 0.9999763851 |
| MAP7D1    | 1.3630876688  | 0.1107116129 | 0.9999763851 |
| THRAP3    | 1.1953128571  | 0.1736719219 | 0.9999763851 |
| SH3D21    | 2.3406309168  | 0.4061106601 | 0.9999763851 |
| EVA1B     | -2.3222877795 | 0.4499253493 | 0.9999763851 |
| STK40     | 1.3627588291  | 0.0800004676 | 0.9999763851 |
| LSM10     | 1.2707950058  | 0.1873159281 | 0.9999763851 |
| OSCP1     | -1.1229725452 | 0.8410441136 | 0.9999763851 |
| MRPS15    | 1.0072888836  | 0.9800625082 | 0.9999763851 |



gene\_expression\_table

|          |               |              |              |
|----------|---------------|--------------|--------------|
| CSF3R    | 1.1980054699  | 0.496096585  | 0.9999763851 |
| GRIK3    | -1.8670181425 | 0.1635603156 | 0.9999763851 |
| ZC3H12A  | 1.1363282285  | 0.4620162506 | 0.9999763851 |
| MEAF6    | -1.4783698659 | 0.0473098713 | 0.9999763851 |
| SNIP1    | -1.4838422186 | 0.175033542  | 0.9999763851 |
| DNALI1   | 0             | 0            | 0            |
| GNL2     | -1.3070153459 | 0.1727987443 | 0.9999763851 |
| C1orf109 | -1.1159279385 | 0.8336084609 | 0.9999763851 |
| CDCA8    | -1.2162283908 | 0.1301918354 | 0.9999763851 |
| EPHA10   | 0             | 0            | 0            |
| MANEAL   | -1.2336255799 | 0.4117282158 | 0.9999763851 |
| YRDC     | -1.2254727571 | 0.4229349423 | 0.9999763851 |
| C1orf122 | 1.0639161696  | 0.7284146051 | 0.9999763851 |
| MTF1     | -1.3756051828 | 0.2744568868 | 0.9999763851 |
| INPP5B   | 1.2824126562  | 0.2131103937 | 0.9999763851 |
| SF3A3    | -1.1678705615 | 0.2763331792 | 0.9999763851 |
| FHL3     | 1.1752618031  | 0.4351565841 | 0.9999763851 |
| UTP11    | 1.2816916059  | 0.1137338877 | 0.9999763851 |
| POU3F1   | 0             | 0            | 0            |
| RRAGC    | -1.0850088641 | 0.6351472896 | 0.9999763851 |
| MYCBP    | 1.4733430206  | 0.0302198045 | 0.9999763851 |
| GJA9     | 7.722359209   | 0.2874653569 | 0.9999763851 |
| RHBDL2   | 1.9234638322  | 0.4244885585 | 0.9999763851 |
| AKIRIN1  | -1.1223776694 | 0.5739319236 | 0.9999763851 |
| NDUFS5   | -1.0370693717 | 0.7759800332 | 0.9999763851 |
| MACF1    | -1.2899927641 | 0.1050251605 | 0.9999763851 |
| BMP8A    | 1.3264062359  | 0.7554980028 | 0.9999763851 |
| PABPC4   | -1.4659153476 | 0.0153432966 | 0.9999763851 |
| HEYL     | 0             | 0            | 0            |
| HPCAL4   | 0             | 0            | 0            |
| PPIE     | 1.0454151045  | 0.8214937213 | 0.9999763851 |
| BMP8B    | 7.4933530102  | 0.2989996747 | 0.9999763851 |
| OXCT2    | 3.2356557963  | 0.5547505991 | 0.9999763851 |
| TRIT1    | -1.204003756  | 0.4414480557 | 0.9999763851 |
| MYCL     | 2.7978015099  | 0.1325958573 | 0.9999763851 |
| MFSD2A   | 1.0516550026  | 0.8337114477 | 0.9999763851 |
| CAP1     | 1.2786951759  | 0.0901760968 | 0.9999763851 |
| PPT1     | -1.0827602096 | 0.5718902911 | 0.9999763851 |
| RLF      | -1.2041312042 | 0.4283639205 | 0.9999763851 |
| ZMPSTE24 | 1.3774094353  | 0.1978727565 | 0.9999763851 |
| COL9A2   | 1.2654869437  | 0.5583906881 | 0.9999763851 |
| SMAP2    | 1.1673937482  | 0.4425049331 | 0.9999763851 |
| ZFP69B   | 2.8203441424  | 0.209650288  | 0.9999763851 |
| ZFP69    | -1.4222660396 | 0.6158386455 | 0.9999763851 |
| EXO5     | 2.1067706904  | 0.1124684758 | 0.9999763851 |
| ZNF684   | -2.321702064  | 0.1782047152 | 0.9999763851 |
| RIMS3    | 1.018375304   | 0.95694932   | 0.9999763851 |
| NFYC     | -1.0897062364 | 0.7564935629 | 0.9999763851 |
| KCNQ4    | 3.2356557963  | 0.5547505991 | 0.9999763851 |

gene\_expression\_table

|              |               |              |              |
|--------------|---------------|--------------|--------------|
| CITED4       | 1.1033113336  | 0.6464066241 | 0.9999763851 |
| CTPS1        | 1.179096483   | 0.343188561  | 0.9999763851 |
| SLFNL1       | 1.3576108079  | 0.7959116151 | 0.9999763851 |
| SCMH1        | -1.1459226781 | 0.4879558582 | 0.9999763851 |
| FOXO6        | 1.1084459858  | 0.8163228227 | 0.9999763851 |
| HIVEP3       | -3.2405822385 | 0.0483564757 | 0.9999763851 |
| FOXJ3        | -1.1273761182 | 0.5244907001 | 0.9999763851 |
| RIMKLA       | 0             | 0            | 0            |
| ZMYND12      | -4.2849908816 | 0.4028453076 | 0.9999763851 |
| PPCS         | 1.0657023898  | 0.7686289001 | 0.9999763851 |
| CCDC30       | -3.1526523138 | 0.2046958923 | 0.9999763851 |
| PPIH         | -1.0749600167 | 0.6116493447 | 0.9999763851 |
| YBX1         | 1.0126449093  | 0.9394509667 | 0.9999763851 |
| P3H1         | -1.0094521501 | 0.9668420056 | 0.9999763851 |
| C1orf50      | 1.2131929708  | 0.6325554469 | 0.9999763851 |
| LOC100129924 | 0             | 0            | 0            |
| SVBP         | 1.7286417065  | 0.2511120207 | 0.9999763851 |
| ERMAP        | -1.4348894959 | 0.4650630281 | 0.9999763851 |
| ZNF691       | -1.8628321812 | 0.3658551233 | 0.9999763851 |
| SLC2A1       | 1.261520985   | 0.1727866701 | 0.9999763851 |
| EBNA1BP2     | 1.204286912   | 0.2517569072 | 0.9999763851 |
| CFAP57       | -4.2849908816 | 0.4028453076 | 0.9999763851 |
| C1orf210     | 0             | 0            | 0            |
| TIE1         | 0             | 0            | 0            |
| MPL          | 0             | 0            | 0            |
| CDC20        | 1.3981109525  | 0.0714615304 | 0.9999763851 |
| ELOVL1       | 1.0688798244  | 0.8221522541 | 0.9999763851 |
| MED8         | 1.0334395702  | 0.8694987083 | 0.9999763851 |
| SZT2         | -2.712424071  | 0.1658745147 | 0.9999763851 |
| HYI          | 1.2418628383  | 0.3905338457 | 0.9999763851 |
| PTPRF        | -1.9096097289 | 0.1145861384 | 0.9999763851 |
| KDM4A        | 1.1138255623  | 0.5474097204 | 0.9999763851 |
| ST3GAL3      | 1.0012855074  | 0.9970513974 | 0.9999763851 |
| IPO13        | 1.9412048835  | 0.043864734  | 0.9999763851 |
| DPH2         | 1.4523595612  | 0.1355191493 | 0.9999763851 |
| ATP6V0B      | -1.2734918491 | 0.0805539925 | 0.9999763851 |
| B4GALT2      | -1.0930164211 | 0.6262146172 | 0.9999763851 |
| CCDC24       | -2.2413309057 | 0.3242360431 | 0.9999763851 |
| SLC6A9       | 0             | 0            | 0            |
| KLF17        | 1.0243527553  | 0.93160954   | 0.9999763851 |
| DMAP1        | 2.014637565   | 0.176361245  | 0.9999763851 |
| ERI3         | -1.301206318  | 0.3350862144 | 0.9999763851 |
| RNF220       | -1.0263134702 | 0.8769070476 | 0.9999763851 |
| TMEM53       | 1.3683883835  | 0.4355491148 | 0.9999763851 |
| C1orf228     | -1.2441005715 | 0.2063254001 | 0.9999763851 |
| KIF2C        | 1.0938915703  | 0.5434066598 | 0.9999763851 |
| RPS8         | -1.0546302799 | 0.6763404266 | 0.9999763851 |
| BEST4        | -7.5622178268 | 0.2177145568 | 0.9999763851 |
| PLK3         | -1.1806494914 | 0.6083184779 | 0.9999763851 |

gene\_expression\_table

|          |               |              |              |
|----------|---------------|--------------|--------------|
| TCTEX1D4 | 6.368054416   | 0.3491336461 | 0.9999763851 |
| BTBD19   | -4.2849908816 | 0.4028453076 | 0.9999763851 |
| PTCH2    | 2.3403997491  | 0.4168427477 | 0.9999763851 |
| EIF2B3   | 1.234625829   | 0.3840771048 | 0.9999763851 |
| HECTD3   | -1.3079652595 | 0.5952824969 | 0.9999763851 |
| UROD     | 1.3983273592  | 0.02344798   | 0.9999763851 |
| ZSWIM5   | 9.9624059448  | 0.2315301533 | 0.9999763851 |
| HPDL     | 0             | 0            | 0            |
| MUTYH    | 1.001554667   | 0.997215672  | 0.9999763851 |
| TOE1     | 1.4418110646  | 0.1201378768 | 0.9999763851 |
| TESK2    | -2.4944383406 | 0.1879532499 | 0.9999763851 |
| MMACHC   | 1.1233250589  | 0.7732186807 | 0.9999763851 |
| PRDX1    | 1.0040527974  | 0.976366907  | 0.9999763851 |
| AKR1A1   | -1.0867381317 | 0.6362519242 | 0.9999763851 |
| NASP     | 1.1405989486  | 0.309707639  | 0.9999763851 |
| GPBP1L1  | -1.0987944205 | 0.5975313729 | 0.9999763851 |
| TMEM69   | -1.138064785  | 0.6629594767 | 0.9999763851 |
| IPP      | 1.1934007193  | 0.7476980061 | 0.9999763851 |
| MAST2    | 1.171017994   | 0.5779643661 | 0.9999763851 |
| PIK3R3   | -1.4249978991 | 0.1616800594 | 0.9999763851 |
| TSPAN1   | 0             | 0            | 0            |
| POMGNT1  | 1.5197618288  | 0.3428943336 | 0.9999763851 |
| RAD54L   | 1.0174672472  | 0.9475685472 | 0.9999763851 |
| LRRC41   | -1.0209425382 | 0.9263620071 | 0.9999763851 |
| UQCRH    | 1.2039942633  | 0.1173091837 | 0.9999763851 |
| NSUN4    | -1.0544361942 | 0.8460527835 | 0.9999763851 |
| FAAH     | 1.7492118798  | 0.2028231509 | 0.9999763851 |
| DMBX1    | 0             | 0            | 0            |
| MKNK1    | 1.1287633192  | 0.5908690192 | 0.9999763851 |
| MOB3C    | 1.0314251651  | 0.9600071573 | 0.9999763851 |
| ATPAF1   | -1.0958025414 | 0.7522087972 | 0.9999763851 |
| TEX38    | 0             | 0            | 0            |
| EFCAB14  | 1.2778015554  | 0.2316317792 | 0.9999763851 |
| CYP4Z1   | 5.4781708352  | 0.3745527127 | 0.9999763851 |
| STIL     | -1.2712084615 | 0.2304664548 | 0.9999763851 |
| CMPK1    | -1.1278467171 | 0.4998078876 | 0.9999763851 |
| FOXE3    | 3.2356557963  | 0.5547505991 | 0.9999763851 |
| FOXD2    | 2.3920809821  | 0.1294240634 | 0.9999763851 |
| TRABD2B  | 0             | 0            | 0            |
| SPATA6   | -1.6825599095 | 0.4644371097 | 0.9999763851 |
| AGBL4    | -1.3475331976 | 0.7683386714 | 0.9999763851 |
| ELAVL4   | -4.2864494036 | 0.4027150576 | 0.9999763851 |
| FAF1     | -1.1424742321 | 0.5069642762 | 0.9999763851 |
| CDKN2C   | 1.2604632305  | 0.3387733237 | 0.9999763851 |
| RNF11    | 1.6221515261  | 0.0257843808 | 0.9999763851 |
| TTC39A   | 3.2353357581  | 0.554787377  | 0.9999763851 |
| EPS15    | 1.1509760211  | 0.4572438922 | 0.9999763851 |
| OSBPL9   | -1.1619456025 | 0.3883086625 | 0.9999763851 |
| NRDC     | 1.3577275062  | 0.0760404766 | 0.9999763851 |

gene\_expression\_table

|          |               |              |              |
|----------|---------------|--------------|--------------|
| RAB3B    | 0             | 0            | 0            |
| TXNDC12  | 1.2125014789  | 0.162345766  | 0.9999763851 |
| KTI12    | 1.3780698625  | 0.3836035132 | 0.9999763851 |
| BTF3L4   | -1.4670098702 | 0.0315139786 | 0.9999763851 |
| ZFYVE9   | -1.1288786827 | 0.7329015124 | 0.9999763851 |
| CC2D1B   | -1.1353715088 | 0.7631190466 | 0.9999763851 |
| ORC1     | 1.1653216603  | 0.449537265  | 0.9999763851 |
| PRPF38A  | 1.0465644099  | 0.765633682  | 0.9999763851 |
| ZCCHC11  | -1.1705331575 | 0.4652149051 | 0.9999763851 |
| GPX7     | 0             | 0            | 0            |
| COA7     | 1.241435741   | 0.5504933027 | 0.9999763851 |
| ZYG11B   | 1.1218493062  | 0.4150157654 | 0.9999763851 |
| ZYG11A   | 2.1492013829  | 0.2180858772 | 0.9999763851 |
| ECHDC2   | -1.4083241465 | 0.6544677626 | 0.9999763851 |
| SCP2     | -1.1459447402 | 0.5342818151 | 0.9999763851 |
| SLC1A7   | -4.2849908816 | 0.4028453076 | 0.9999763851 |
| CPT2     | 1.3898267733  | 0.3157861028 | 0.9999763851 |
| C1orf123 | 1.282769805   | 0.2398022004 | 0.9999763851 |
| MAGOH    | -1.3661819099 | 0.0848880741 | 0.9999763851 |
| LRP8     | -1.1599241494 | 0.2844723797 | 0.9999763851 |
| GLIS1    | -3.3295429242 | 0.2525387851 | 0.9999763851 |
| NDC1     | -1.0295957802 | 0.8586732177 | 0.9999763851 |
| YIPF1    | 1.4693104963  | 0.2202750165 | 0.9999763851 |
| DIO1     | -1.3155492632 | 0.8262553345 | 0.9999763851 |
| HSPB11   | -1.2880687492 | 0.1808757109 | 0.9999763851 |
| LRRC42   | -1.1254239821 | 0.4771152926 | 0.9999763851 |
| TMEM59   | -1.0319373506 | 0.8294880011 | 0.9999763851 |
| TCEANC2  | 1.61881294    | 0.1082493465 | 0.9999763851 |
| CYB5RL   | -1.6268130118 | 0.27816549   | 0.9999763851 |
| MRPL37   | -1.076789284  | 0.6325273204 | 0.9999763851 |
| SSBP3    | -1.0999915452 | 0.5245488907 | 0.9999763851 |
| ACOT11   | -2.6351957541 | 0.2411378651 | 0.9999763851 |
| FAM151A  | 1.2306513941  | 0.5770694621 | 0.9999763851 |
| TTC4     | 1.056290461   | 0.7649869104 | 0.9999763851 |
| PARS2    | 1.4989395884  | 0.3648968522 | 0.9999763851 |
| TTC22    | 0             | 0            | 0            |
| LEXM     | -1.3157515262 | 0.8228795024 | 0.9999763851 |
| DHCR24   | -1.4167981913 | 0.0100058065 | 0.9999763851 |
| TMEM61   | 0             | 0            | 0            |
| USP24    | 1.1359023621  | 0.6007514195 | 0.9999763851 |
| PLPP3    | 1.0779215982  | 0.8988615317 | 0.9999763851 |
| C1orf168 | 0             | 0            | 0            |
| C8B      | 3.2356557963  | 0.5547505991 | 0.9999763851 |
| DAB1     | 4.4484168982  | 0.1372823053 | 0.9999763851 |
| OMA1     | -1.1263510553 | 0.7560129484 | 0.9999763851 |
| MYSM1    | -1.1929248172 | 0.6000005937 | 0.9999763851 |
| JUN      | -1.6499275215 | 0.0107187099 | 0.9999763851 |
| FGGY     | 1.1254081046  | 0.7375101646 | 0.9999763851 |
| HOOK1    | 3.2353357581  | 0.554787377  | 0.9999763851 |

gene\_expression\_table

|              |               |              |              |
|--------------|---------------|--------------|--------------|
| NFIA         | 1.6796325003  | 0.0765620578 | 0.9999763851 |
| TM2D1        | -1.4714785237 | 0.0383601022 | 0.9999763851 |
| PATJ         | 1.2869631997  | 0.8233366737 | 0.9999763851 |
| KANK4        | 1.4171435615  | 0.3670631318 | 0.9999763851 |
| USP1         | 1.006724314   | 0.9628074921 | 0.9999763851 |
| DOCK7        | -1.5066556591 | 0.4259607502 | 0.9999763851 |
| ATG4C        | -1.1876800422 | 0.7267025893 | 0.9999763851 |
| ALG6         | 1.1598967152  | 0.6272186165 | 0.9999763851 |
| ITGB3BP      | -1.038488582  | 0.8522071856 | 0.9999763851 |
| EFCAB7       | -1.6179658945 | 0.2563496448 | 0.9999763851 |
| PGM1         | 1.5159143692  | 0.003727     | 0.9999763851 |
| ROR1         | 0             | 0            | 0            |
| CACHD1       | -4.2864494036 | 0.4027150576 | 0.9999763851 |
| RAVER2       | -1.277986891  | 0.6565646065 | 0.9999763851 |
| JAK1         | -1.0607228959 | 0.750178617  | 0.9999763851 |
| LOC107983962 | 1.2872739558  | 0.823346684  | 0.9999763851 |
| AK4          | 1.1160385574  | 0.6016049397 | 0.9999763851 |
| DNAJC6       | 1.0277462901  | 0.9757638168 | 0.9999763851 |
| LEPROT       | -1.4411210315 | 0.1934824586 | 0.9999763851 |
| PDE4B        | 1.1549158921  | 0.6282365768 | 0.9999763851 |
| SGIP1        | 0             | 0            | 0            |
| WDR78        | 1.6251513227  | 0.5896897148 | 0.9999763851 |
| MIER1        | -1.1526540481 | 0.6110127086 | 0.9999763851 |
| SLC35D1      | -1.0052802913 | 0.9920420512 | 0.9999763851 |
| IL12RB2      | 2.3403997491  | 0.4169269104 | 0.9999763851 |
| SERBP1       | 1.06332528    | 0.6012211798 | 0.9999763851 |
| GADD45A      | -2.6444442696 | 0.0290133933 | 0.9999763851 |
| GNG12        | 1.0452961372  | 0.893151198  | 0.9999763851 |
| DIRAS3       | 0             | 0            | 0            |
| DEPDC1       | 1.0812620512  | 0.8113653217 | 0.9999763851 |
| LRRC7        | -1.080916289  | 0.9219620637 | 0.9999763851 |
| LRRC40       | -1.1592062522 | 0.5341309734 | 0.9999763851 |
| SRSF11       | -1.0835638365 | 0.5394004115 | 0.9999763851 |
| ANKRD13C     | -1.136622131  | 0.6466843829 | 0.9999763851 |
| HHLA3        | 1.6688831311  | 0.4451512916 | 0.9999763851 |
| CTH          | -1.7399553654 | 0.2241587259 | 0.9999763851 |
| PTGER3       | 0             | 0            | 0            |
| ZRANB2       | 1.0551770608  | 0.6951717105 | 0.9999763851 |
| NEGR1        | -1.0156680097 | 0.9726446607 | 0.9999763851 |
| FPGT         | -1.2875792692 | 0.7315004988 | 0.9999763851 |
| FPGT-TNNI3K  | 4.3099016468  | 0.2319860646 | 0.9999763851 |
| TNNI3K       | 3.2353357581  | 0.554787377  | 0.9999763851 |
| LOC105378803 | 0             | 0            | 0            |
| CRYZ         | -1.1821581157 | 0.7825378475 | 0.9999763851 |
| TYW3         | -1.1379034424 | 0.5983812248 | 0.9999763851 |
| ACADM        | -1.0665218744 | 0.7246986445 | 0.9999763851 |
| RABGGTB      | 1.2812219559  | 0.5185707431 | 0.9999763851 |
| MSH4         | 0             | 0            | 0            |
| ST6GALNAC3   | -1.7080263853 | 0.0927863622 | 0.9999763851 |

gene\_expression\_table

|         |               |              |              |
|---------|---------------|--------------|--------------|
| PIGK    | -1.0256958331 | 0.8668538253 | 0.9999763851 |
| AK5     | -1.0810230665 | 0.9184042055 | 0.9999763851 |
| ZZZ3    | -1.0771341689 | 0.6715152479 | 0.9999763851 |
| USP33   | -1.0123051483 | 0.9515305478 | 0.9999763851 |
| FAM73A  | -1.1489484111 | 0.6822387202 | 0.9999763851 |
| NEXN    | -2.5591355727 | 0.2873473728 | 0.9999763851 |
| FUBP1   | -1.1215377691 | 0.4133570466 | 0.9999763851 |
| DNAJB4  | 1.0329089223  | 0.9460111055 | 0.9999763851 |
| IFI44L  | 0             | 0            | 0            |
| IFI44   | -7.5690339649 | 0.2288949944 | 0.9999763851 |
| ADGRL4  | 0             | 0            | 0            |
| ADGRL2  | -8.342239448  | 0.2168368514 | 0.9999763851 |
| PRKACB  | 1.8752000307  | 0.2887564352 | 0.9999763851 |
| SAMD13  | 1.5491073841  | 0.5508222679 | 0.9999763851 |
| RPF1    | -1.007125149  | 0.970882643  | 0.9999763851 |
| GNG5    | 1.2197277957  | 0.171195485  | 0.9999763851 |
| SPATA1  | -1.901207257  | 0.1080420508 | 0.9999763851 |
| CTBS    | -1.2618921825 | 0.5401062119 | 0.9999763851 |
| SSX2IP  | 1.4848798847  | 0.2478331301 | 0.9999763851 |
| WDR63   | 3.2361532718  | 0.5546934395 | 0.9999763851 |
| SYDE2   | 1.0920005331  | 0.8613118991 | 0.9999763851 |
| C1orf52 | 1.0934518004  | 0.5945647388 | 0.9999763851 |
| BCL10   | -1.6542940914 | 0.0665958873 | 0.9999763851 |
| DDAH1   | 0             | 0            | 0            |
| ZNHIT6  | -1.066036495  | 0.7796831474 | 0.9999763851 |
| COL24A1 | 0             | 0            | 0            |
| ODF2L   | 3.21452506    | 0.0699367023 | 0.9999763851 |
| CLCA4   | 0             | 0            | 0            |
| SH3GLB1 | 1.0482768737  | 0.8253941624 | 0.9999763851 |
| SEP15   | 1.0120557381  | 0.9456939363 | 0.9999763851 |
| HS2ST1  | -1.5058913433 | 0.0345192174 | 0.9999763851 |
| LMO4    | 1.252266097   | 0.3549176189 | 0.9999763851 |
| PKN2    | 1.1983007114  | 0.5365931953 | 0.9999763851 |
| GTF2B   | 1.2675988651  | 0.2998947978 | 0.9999763851 |
| KYAT3   | -1.0257173553 | 0.9250827778 | 0.9999763851 |
| RBMXL1  | 1.7264313563  | 0.1579628373 | 0.9999763851 |
| GBP3    | 5.4770877341  | 0.3746135179 | 0.9999763851 |
| GBP1    | -4.2864494036 | 0.4027150576 | 0.9999763851 |
| GBP2    | 0             | 0            | 0            |
| GBP5    | -1.1747890416 | 0.8269564911 | 0.9999763851 |
| LRRC8B  | 1.0307744197  | 0.9406823856 | 0.9999763851 |
| LRRC8C  | -1.3444874888 | 0.3005306634 | 0.9999763851 |
| LRRC8D  | -1.7006561141 | 0.034361671  | 0.9999763851 |
| ZNF326  | 1.0671236887  | 0.7940501348 | 0.9999763851 |
| ZNF644  | 1.0881377686  | 0.6718445569 | 0.9999763851 |
| HFM1    | -1.5886842618 | 0.3607312972 | 0.9999763851 |
| CDC7    | -1.0652127259 | 0.8215513268 | 0.9999763851 |
| TGFBR3  | -1.327843339  | 0.3520694664 | 0.9999763851 |
| BRDT    | 0             | 0            | 0            |

gene\_expression\_table

|              |               |              |              |
|--------------|---------------|--------------|--------------|
| EPHX4        | 3.2361532718  | 0.5546934395 | 0.9999763851 |
| SETSIIP      | 5.4784711963  | 0.3745358536 | 0.9999763851 |
| C1orf146     | 0             | 0            | 0            |
| GLMN         | 1.1493689076  | 0.4326194013 | 0.9999763851 |
| RPAP2        | -1.3158393667 | 0.828121228  | 0.9999763851 |
| GFI1         | 1.0169248846  | 0.9055430262 | 0.9999763851 |
| EVI5         | 1.1146588378  | 0.8394716519 | 0.9999763851 |
| RPL5         | 1.0325206885  | 0.7873666158 | 0.9999763851 |
| FAM69A       | 2.1485439616  | 0.2194572952 | 0.9999763851 |
| MTF2         | 1.0775093189  | 0.6902472954 | 0.9999763851 |
| TMED5        | 1.0629953743  | 0.7259689147 | 0.9999763851 |
| CCDC18       | -1.2954278811 | 0.2412495494 | 0.9999763851 |
| DR1          | -1.0875125239 | 0.6995979514 | 0.9999763851 |
| FNBP1L       | -1.1957618347 | 0.7958145403 | 0.9999763851 |
| BCAR3        | -1.0157357434 | 0.9794065735 | 0.9999763851 |
| DNTTIP2      | 1.1951412336  | 0.3656962456 | 0.9999763851 |
| GCLM         | 1.0355595807  | 0.8747065604 | 0.9999763851 |
| ABCD3        | -1.1382090997 | 0.5825470763 | 0.9999763851 |
| F3           | -1.3219738921 | 0.6269807691 | 0.9999763851 |
| SLC44A3      | 3.2353357581  | 0.554787377  | 0.9999763851 |
| ALG14        | 1.0332174016  | 0.9436058602 | 0.9999763851 |
| TMEM56       | -4.2849908816 | 0.4028453076 | 0.9999763851 |
| RWDD3        | -1.2041751285 | 0.6660799448 | 0.9999763851 |
| PTBP2        | 1.0050067075  | 0.9857920479 | 0.9999763851 |
| DPYD         | -1.4193729064 | 0.1627447451 | 0.9999763851 |
| PLPPR4       | 3.2356557963  | 0.5547505991 | 0.9999763851 |
| AGL          | 1.2737544387  | 0.5539509627 | 0.9999763851 |
| SLC35A3      | -1.4144790023 | 0.2146920306 | 0.9999763851 |
| MFSD14A      | -1.4875632814 | 0.3719236359 | 0.9999763851 |
| SASS6        | 1.3874498252  | 0.1484160027 | 0.9999763851 |
| TRMT13       | 1.2653379663  | 0.5521026142 | 0.9999763851 |
| LRRC39       | 2.5213873366  | 0.2621812916 | 0.9999763851 |
| DBT          | -1.0851002247 | 0.6817333818 | 0.9999763851 |
| RTCA         | -1.0780913449 | 0.7094130514 | 0.9999763851 |
| CDC14A       | 1.255251492   | 0.6084776913 | 0.9999763851 |
| EXTL2        | 1.7126026959  | 0.0716652317 | 0.9999763851 |
| SLC30A7      | 1.1072566221  | 0.631074171  | 0.9999763851 |
| DPH5         | -1.1273829776 | 0.7965249122 | 0.9999763851 |
| OLFM3        | 0             | 0            | 0            |
| COL11A1      | -1.3157515262 | 0.822832452  | 0.9999763851 |
| LOC101928436 | 3.2353357581  | 0.554787377  | 0.9999763851 |
| RNPC3        | 4.9062743278  | 0.003441     | 0.9999763851 |
| AMY2B        | -1.2118231382 | 0.7205584961 | 0.9999763851 |
| AMY1B        | 0             | 0            | 0            |
| PRMT6        | 1.0581252742  | 0.8759791608 | 0.9999763851 |
| NTNG1        | 0             | 0            | 0            |
| VAV3         | 1.35378055    | 0.1921197091 | 0.9999763851 |
| SLC25A24     | -1.406703979  | 0.06204141   | 0.9999763851 |
| FAM102B      | -1.564234202  | 0.438695862  | 0.9999763851 |

gene\_expression\_table

|              |               |              |              |
|--------------|---------------|--------------|--------------|
| HENMT1       | -1.1099481984 | 0.6063269117 | 0.9999763851 |
| PRPF38B      | -1.2074534887 | 0.2608145278 | 0.9999763851 |
| FNDC7        | 0             | 0            | 0            |
| STXBP3       | -1.387737892  | 0.3483584401 | 0.9999763851 |
| AKNAD1       | 0             | 0            | 0            |
| GPSM2        | -1.1207577255 | 0.7357632184 | 0.9999763851 |
| CLCC1        | -1.3415817296 | 0.1625407549 | 0.9999763851 |
| WDR47        | -1.079137627  | 0.8148515104 | 0.9999763851 |
| TAF13        | 5.4770877341  | 0.3746135179 | 0.9999763851 |
| TMEM167B     | -1.9447695232 | 0.019663035  | 0.9999763851 |
| SARS         | 1.3065974407  | 0.1868383053 | 0.9999763851 |
| CELSR2       | -1.1960247227 | 0.7898838677 | 0.9999763851 |
| PSRC1        | 1.0883895327  | 0.7267532753 | 0.9999763851 |
| SORT1        | 0             | 0            | 0            |
| PSMA5        | 1.1071728435  | 0.6246323091 | 0.9999763851 |
| ATXN7L2      | -1.1492864126 | 0.8527946758 | 0.9999763851 |
| CYB561D1     | -1.0633232478 | 0.8526468959 | 0.9999763851 |
| AMIGO1       | 3.2356557963  | 0.5547505991 | 0.9999763851 |
| GNAI3        | 1.1565285708  | 0.3068819808 | 0.9999763851 |
| GNAT2        | -1.3950272772 | 0.6764095329 | 0.9999763851 |
| AMPD2        | -1.2319178835 | 0.322793879  | 0.9999763851 |
| GSTM1        | -1.3154339304 | 0.8205576571 | 0.9999763851 |
| CSF1         | 0             | 0            | 0            |
| AHCYL1       | -1.2230577047 | 0.1326607278 | 0.9999763851 |
| STRIP1       | 1.0657902922  | 0.7369663567 | 0.9999763851 |
| ALX3         | -1.5727227257 | 0.376861244  | 0.9999763851 |
| KCNC4        | 1.127376782   | 0.6971269255 | 0.9999763851 |
| RBM15        | -1.0788728479 | 0.6948006004 | 0.9999763851 |
| SLC16A4      | 1.2000422762  | 0.7007775812 | 0.9999763851 |
| LAMTOR5      | 1.221469121   | 0.188506146  | 0.9999763851 |
| KCNA3        | -7.5622178268 | 0.2177145568 | 0.9999763851 |
| CD53         | 1.8396376641  | 0.0682631385 | 0.9999763851 |
| LRIF1        | -1.1976607876 | 0.4442197914 | 0.9999763851 |
| DRAM2        | -1.2428847538 | 0.344709214  | 0.9999763851 |
| CEPT1        | -1.0065185197 | 0.9791000939 | 0.9999763851 |
| DENND2D      | 1.287490194   | 0.2178410691 | 0.9999763851 |
| CHI3L2       | 0             | 0            | 0            |
| PIFO         | 3.2353357581  | 0.554787377  | 0.9999763851 |
| OVGP1        | 7.7204093521  | 0.288300348  | 0.9999763851 |
| WDR77        | 1.1733753465  | 0.4284249163 | 0.9999763851 |
| ATP5F1       | 1.0709323043  | 0.5713702809 | 0.9999763851 |
| C1orf162     | -1.4016562451 | 0.2060864647 | 0.9999763851 |
| TMIGD3       | 1.813344484   | 0.5819592412 | 0.9999763851 |
| ADORA3       | 3.2353357581  | 0.554787377  | 0.9999763851 |
| RAP1A        | -1.1672483763 | 0.2994057901 | 0.9999763851 |
| LOC107985184 | 3.2353357581  | 0.554787377  | 0.9999763851 |
| FAM212B      | 1.9703420756  | 0.2529395872 | 0.9999763851 |
| DDX20        | 1.0908848551  | 0.7194808803 | 0.9999763851 |
| CTTNBP2NL    | -1.7346211034 | 0.444497219  | 0.9999763851 |



gene\_expression\_table

|              |               |              |              |
|--------------|---------------|--------------|--------------|
| WNT2B        | 0             | 0            | 0            |
| ST7L         | -1.2978410352 | 0.4227121455 | 0.9999763851 |
| CAPZA1       | 1.0675562467  | 0.6370398968 | 0.9999763851 |
| MOV10        | 1.2334603554  | 0.4237737167 | 0.9999763851 |
| RHOC         | 1.2656255628  | 0.4144301139 | 0.9999763851 |
| PPM1J        | 1.0277578074  | 0.9761746374 | 0.9999763851 |
| FAM19A3      | 0             | 0            | 0            |
| SLC16A1      | 1.2339578655  | 0.1610249189 | 0.9999763851 |
| LRIG2        | -1.8322554312 | 0.071015689  | 0.9999763851 |
| MAGI3        | -1.0366595916 | 0.9301123367 | 0.9999763851 |
| PHTF1        | 1.0706784256  | 0.7988772108 | 0.9999763851 |
| RSBN1        | -1.9102531985 | 0.0161900996 | 0.9999763851 |
| PTPN22       | -2.0518164499 | 0.0106006161 | 0.9999763851 |
| BCL2L15      | 1.027554661   | 0.975638146  | 0.9999763851 |
| AP4B1        | 1.1972041652  | 0.4885946472 | 0.9999763851 |
| DCLRE1B      | -1.2078395962 | 0.4969751633 | 0.9999763851 |
| HIPK1        | -1.0513870735 | 0.7797007743 | 0.9999763851 |
| OLFML3       | -7.5664585246 | 0.2266693929 | 0.9999763851 |
| TRIM33       | -1.1154023967 | 0.4992088404 | 0.9999763851 |
| BCAS2        | 1.2332193498  | 0.3129737184 | 0.9999763851 |
| DENND2C      | -1.315303824  | 0.8206171563 | 0.9999763851 |
| NRAS         | -1.0838610897 | 0.7169438978 | 0.9999763851 |
| CSDE1        | -1.3512044182 | 0.0128127024 | 0.9999763851 |
| SIKE1        | 1.0155076801  | 0.9463013852 | 0.9999763851 |
| SYCP1        | 2.6096308531  | 0.3725895477 | 0.9999763851 |
| TSPAN2       | -1.0576047247 | 0.8260322152 | 0.9999763851 |
| VANGL1       | -1.0154795398 | 0.9374804827 | 0.9999763851 |
| SLC22A15     | -1.7136463658 | 0.086579135  | 0.9999763851 |
| MAB21L3      | 1.8144198156  | 0.5860619697 | 0.9999763851 |
| ATP1A1       | 1.0324660122  | 0.8323123889 | 0.9999763851 |
| CD58         | -1.2302268426 | 0.3546395784 | 0.9999763851 |
| IGSF3        | -2.062085586  | 0.325289347  | 0.9999763851 |
| CD2          | -7.5622178268 | 0.2177145568 | 0.9999763851 |
| CD101        | -1.3259774455 | 0.7080148362 | 0.9999763851 |
| TTF2         | 1.1213178826  | 0.5499800545 | 0.9999763851 |
| TRIM45       | -1.4294697437 | 0.5411731667 | 0.9999763851 |
| MAN1A2       | -1.2502135669 | 0.2668853316 | 0.9999763851 |
| FAM46C       | 1.0518616614  | 0.7611607995 | 0.9999763851 |
| GDAP2        | -1.4482036688 | 0.272343121  | 0.9999763851 |
| WDR3         | 1.0838966575  | 0.6590437066 | 0.9999763851 |
| SPAG17       | 2.2691674219  | 0.0879064108 | 0.9999763851 |
| TBX15        | 0             | 0            | 0            |
| WARS2        | 1.2193952735  | 0.5383942732 | 0.9999763851 |
| ZNF697       | -1.1540493772 | 0.7927618033 | 0.9999763851 |
| PHGDH        | 1.2342417119  | 0.1751241068 | 0.9999763851 |
| NOTCH2       | -1.3037390021 | 0.1556512424 | 0.9999763851 |
| SEC22B       | -1.0160529687 | 0.9342810764 | 0.9999763851 |
| NBPF8        | 1.3332507287  | 0.4500770998 | 0.9999763851 |
| LOC100996724 | -1.8944365684 | 0.4327296728 | 0.9999763851 |

gene\_expression\_table

|              |                |              |              |
|--------------|----------------|--------------|--------------|
| LOC101929796 | -2.5587422769  | 0.2940369625 | 0.9999763851 |
| NBPF26       | -12.8287151494 | 0.0007027    | 0.6510516988 |
| PPIAL4A      | -1.9555716929  | 0.4957436191 | 0.9999763851 |
| LOC100996720 | 1.8136032532   | 0.5955006303 | 0.9999763851 |
| LOC105369199 | 1.3256045991   | 0.7561119736 | 0.9999763851 |
| LOC100996721 | -2.2382543016  | 0.2851758488 | 0.9999763851 |
| LOC100996318 | 1.6568794408   | 0.5804676196 | 0.9999763851 |
| FAM72B       | -1.381021336   | 0.3273191067 | 0.9999763851 |
| SRGAP2C      | 1.1016093311   | 0.6891633823 | 0.9999763851 |
| LOC107985108 | -1.6205404778  | 0.4233854166 | 0.9999763851 |
| FAM72C       | 1.2671394648   | 0.7711183844 | 0.9999763851 |
| PPIAL4E      | 0              | 0            | 0            |
| NBPF15       | -1.432833698   | 0.1306402296 | 0.9999763851 |
| PPIAL4F      | -4.2849908816  | 0.4028453076 | 0.9999763851 |
| SRGAP2B      | 1.0686036807   | 0.8111207848 | 0.9999763851 |
| FAM72D       | 1.8974640918   | 0.2189315318 | 0.9999763851 |
| LOC101929805 | 2.3407592913   | 0.4273028978 | 0.9999763851 |
| NBPF20       | 1.1336215097   | 0.8697170658 | 0.9999763851 |
| LOC105371303 | 1.5317288444   | 0.3936174128 | 0.9999763851 |
| GPR89A       | 1.1914041795   | 0.4211765317 | 0.9999763851 |
| PDZK1        | -1.2936836943  | 0.6069785979 | 0.9999763851 |
| CD160        | -1.435564605   | 0.4659176213 | 0.9999763851 |
| RNF115       | 1.3555294217   | 0.1142880866 | 0.9999763851 |
| POLR3C       | 1.315789257    | 0.2645690455 | 0.9999763851 |
| NUDT17       | -1.4308433661  | 0.1249730051 | 0.9999763851 |
| ANKRD35      | 1.0424794224   | 0.8550773258 | 0.9999763851 |
| ITGA10       | 0              | 0            | 0            |
| PEX11B       | 1.6273535305   | 0.0377111398 | 0.9999763851 |
| RBM8A        | 1.0422702584   | 0.7451489387 | 0.9999763851 |
| LIX1L        | -1.2426114623  | 0.2366273813 | 0.9999763851 |
| POLR3GL      | -1.490738166   | 0.1044646868 | 0.9999763851 |
| ANKRD34A     | 2.34099053     | 0.4001141468 | 0.9999763851 |
| TXNIP        | -1.1741521134  | 0.5096025456 | 0.9999763851 |
| NBPF10       | 1.2867653957   | 0.8302601326 | 0.9999763851 |
| NOTCH2NL     | -1.3155492632  | 0.8262133195 | 0.9999763851 |
| LOC105371242 | -4.2864494036  | 0.4027150576 | 0.9999763851 |
| NBPF12       | -1.7851710282  | 0.1761059492 | 0.9999763851 |
| PRKAB2       | -2.2729676677  | 0.0319256079 | 0.9999763851 |
| CHD1L        | 1.0718297596   | 0.6339408405 | 0.9999763851 |
| BCL9         | 1.1246242259   | 0.7969567034 | 0.9999763851 |
| GPR89B       | -1.1153704227  | 0.7073520298 | 0.9999763851 |
| NBPF11       | 1.1272587345   | 0.6884538008 | 0.9999763851 |
| PPIAL4G      | 3.9290176215   | 0.1118265154 | 0.9999763851 |
| NBPF14       | -1.1641941032  | 0.3600061734 | 0.9999763851 |
| LOC100996763 | -1.1271073854  | 0.7416745505 | 0.9999763851 |
| LOC100996517 | 42.193091832   | 0.05359176   | 0.9999763851 |
| PDE4DIP      | -1.3788695055  | 0.3876950863 | 0.9999763851 |
| NBPF9        | -1.2506571049  | 0.8039287911 | 0.9999763851 |
| LOC100996716 | 1.2117822176   | 0.6110682655 | 0.9999763851 |

gene\_expression\_table

|              |                |              |              |
|--------------|----------------|--------------|--------------|
| LOC653513    | -4.3331566429  | 0.1395575407 | 0.9999763851 |
| LOC100996717 | -1.44239004    | 0.2668790172 | 0.9999763851 |
| NBPF19       | 1.9447930831   | 0.1563583428 | 0.9999763851 |
| PPIAL4C      | 0              | 0            | 0            |
| FCGR1A       | 1.0527400853   | 0.857589463  | 0.9999763851 |
| HIST2H2BF    | -4.3424739515  | 0.0811973008 | 0.9999763851 |
| HIST2H3D     | -1.3161718537  | 0.8277563775 | 0.9999763851 |
| HIST2H4A     | 1.813344484    | 0.5819964267 | 0.9999763851 |
| HIST2H3C     | -2.3220580825  | 0.4429616903 | 0.9999763851 |
| HIST2H2AA3   | 1.0909116947   | 0.8271879995 | 0.9999763851 |
| HIST2H2AA4   | 1.2747271793   | 0.5556263711 | 0.9999763851 |
| HIST2H3A     | -3.3292136073  | 0.2382175538 | 0.9999763851 |
| HIST2H4B     | -1.5918873484  | 0.6446118987 | 0.9999763851 |
| HIST2H2BE    | 1.6366750224   | 0.4805828117 | 0.9999763851 |
| HIST2H2AC    | 1.5954768462   | 0.4014275276 | 0.9999763851 |
| HIST2H2AB    | 1.2874012553   | 0.8192055827 | 0.9999763851 |
| BOLA1        | 1.4570229755   | 0.4933567456 | 0.9999763851 |
| SF3B4        | 1.2617130229   | 0.2401744871 | 0.9999763851 |
| MTMR11       | -1.6467400147  | 0.4408765834 | 0.9999763851 |
| OTUD7B       | -2.4486332546  | 0.1552205728 | 0.9999763851 |
| VPS45        | -1.0198978496  | 0.9515542242 | 0.9999763851 |
| PLEKHO1      | -1.0619217124  | 0.7465447405 | 0.9999763851 |
| ANP32E       | 1.0521507098   | 0.7054046205 | 0.9999763851 |
| CA14         | 1.6062903958   | 0.6466460568 | 0.9999763851 |
| APH1A        | -1.1977140902  | 0.2076445163 | 0.9999763851 |
| C1orf54      | -17.4061108707 | 0.0751382059 | 0.9999763851 |
| CIART        | -7.5647903763  | 0.2176246281 | 0.9999763851 |
| MRPS21       | 1.0460951848   | 0.7857895266 | 0.9999763851 |
| PRPF3        | -1.0147482064  | 0.938560045  | 0.9999763851 |
| RPRD2        | -1.3757368245  | 0.0530965646 | 0.9999763851 |
| TARS2        | -1.3060327519  | 0.4337745949 | 0.9999763851 |
| ECM1         | -1.4251442267  | 0.5941988919 | 0.9999763851 |
| ADAMTSL4     | -7.5622178268  | 0.2177145568 | 0.9999763851 |
| LOC107983947 | 0              | 0            | 0            |
| MCL1         | -1.1177766841  | 0.3855973826 | 0.9999763851 |
| ENSA         | 1.0866647576   | 0.587518744  | 0.9999763851 |
| GOLPH3L      | 1.2236057104   | 0.3715179841 | 0.9999763851 |
| CTSS         | -1.3930122343  | 0.1940977269 | 0.9999763851 |
| CTSK         | 1.5508263305   | 0.5741530212 | 0.9999763851 |
| ARNT         | -1.8420317982  | 0.008088     | 0.9999763851 |
| SETDB1       | -1.4704594162  | 0.0580222203 | 0.9999763851 |
| CERS2        | -1.4511143597  | 0.1470051795 | 0.9999763851 |
| ANXA9        | 1.624741281    | 0.5901758802 | 0.9999763851 |
| FAM63A       | -1.2032443692  | 0.74471745   | 0.9999763851 |
| PRUNE        | -1.24957653    | 0.2427886769 | 0.9999763851 |
| BNIP1        | -2.3220580825  | 0.4412254448 | 0.9999763851 |
| C1orf56      | -1.0011870397  | 0.9936264848 | 0.9999763851 |
| CDC42SE1     | -1.3730016089  | 0.2290611368 | 0.9999763851 |
| MLLT11       | 3.2356557963   | 0.5547505991 | 0.9999763851 |

gene\_expression\_table

|                 |               |              |              |
|-----------------|---------------|--------------|--------------|
| GABPB2          | -1.0131874908 | 0.9474173243 | 0.9999763851 |
| SEMA6C          | -2.5519849925 | 0.366972053  | 0.9999763851 |
| LYSMD1          | -2.388225611  | 0.2016075703 | 0.9999763851 |
| TNFAIP8L2       | -1.2303481196 | 0.7580222184 | 0.9999763851 |
| TNFAIP8L2-SCNM1 | 0             | 0            | 0            |
| SCNM1           | 1.151571266   | 0.4685611914 | 0.9999763851 |
| TMOD4           | 9.9619682616  | 0.2312959428 | 0.9999763851 |
| VPS72           | 1.0138573928  | 0.9294384901 | 0.9999763851 |
| PIP5K1A         | -1.3872536611 | 0.1473567212 | 0.9999763851 |
| PSMD4           | 1.0324928049  | 0.8358314618 | 0.9999763851 |
| ZNF687          | -1.4504358563 | 0.1594826336 | 0.9999763851 |
| PI4KB           | 1.2897562968  | 0.2204211482 | 0.9999763851 |
| RFX5            | 1.3230819179  | 0.2680304145 | 0.9999763851 |
| SELENBP1        | 0             | 0            | 0            |
| PSMB4           | 1.2120455538  | 0.1878660556 | 0.9999763851 |
| POGZ            | -1.2269093491 | 0.282728933  | 0.9999763851 |
| CGN             | -5.3414526768 | 0.0966968323 | 0.9999763851 |
| TUFT1           | -1.1088558938 | 0.8900763784 | 0.9999763851 |
| SNX27           | 1.2812339433  | 0.2137679447 | 0.9999763851 |
| CELF3           | 0             | 0            | 0            |
| MRPL9           | -1.2148020154 | 0.2439102425 | 0.9999763851 |
| OAZ3            | 3.2353357581  | 0.554787377  | 0.9999763851 |
| TDRKH           | 1.3707143557  | 0.4404910355 | 0.9999763851 |
| RORC            | 0             | 0            | 0            |
| THEM5           | 0             | 0            | 0            |
| THEM4           | 1.1048224175  | 0.5912607219 | 0.9999763851 |
| S100A10         | 1.0349587196  | 0.8665300516 | 0.9999763851 |
| S100A11         | 1.0782019856  | 0.6133634613 | 0.9999763851 |
| TCHH            | 3.7682243222  | 0.2257640701 | 0.9999763851 |
| FLG             | 0             | 0            | 0            |
| PGLYRP4         | -2.5611869689 | 0.2935474297 | 0.9999763851 |
| S100A9          | 1.1849574673  | 0.2771293344 | 0.9999763851 |
| S100A12         | -4.2849908816 | 0.4028453076 | 0.9999763851 |
| S100A8          | -1.0498598655 | 0.8034566104 | 0.9999763851 |
| S100A6          | -1.1009403755 | 0.4437381118 | 0.9999763851 |
| S100A5          | 0             | 0            | 0            |
| S100A4          | -1.0587914147 | 0.6480528822 | 0.9999763851 |
| S100A3          | 0             | 0            | 0            |
| S100A2          | 1.0956757311  | 0.8956196498 | 0.9999763851 |
| S100A16         | 5.4781708352  | 0.3745527127 | 0.9999763851 |
| S100A13         | 1.0987760401  | 0.8356121536 | 0.9999763851 |
| S100A1          | 4.6902702261  | 0.1352949237 | 0.9999763851 |
| CHTOP           | 1.360206339   | 0.0327114551 | 0.9999763851 |
| SNAPIN          | -1.1655260263 | 0.3318378667 | 0.9999763851 |
| ILF2            | 1.0443466865  | 0.7883855495 | 0.9999763851 |
| INTS3           | -1.7727038833 | 0.275983452  | 0.9999763851 |
| SLC27A3         | 1.059382013   | 0.8733050322 | 0.9999763851 |
| GATAD2B         | -1.0441594867 | 0.7905859451 | 0.9999763851 |
| DENND4B         | -1.081161521  | 0.72225433   | 0.9999763851 |

gene\_expression\_table

|              |               |              |              |
|--------------|---------------|--------------|--------------|
| CRTC2        | 2.0582329403  | 0.1817524752 | 0.9999763851 |
| SLC39A1      | -1.1296923632 | 0.5507989956 | 0.9999763851 |
| CREB3L4      | -1.299823342  | 0.5266325284 | 0.9999763851 |
| JTB          | -1.0307804305 | 0.8084407147 | 0.9999763851 |
| RAB13        | -1.3410807493 | 0.1992601122 | 0.9999763851 |
| RPS27        | 1.2816087907  | 0.0579259837 | 0.9999763851 |
| NUP210L      | -2.1357363271 | 0.00456      | 0.9999763851 |
| TPM3         | 1.0410958636  | 0.7381717874 | 0.9999763851 |
| C1orf189     | 0             | 0            | 0            |
| C1orf43      | -1.0180047575 | 0.8983178138 | 0.9999763851 |
| UBAP2L       | -1.0001601104 | 0.9992219996 | 0.9999763851 |
| HAX1         | 1.1334518983  | 0.410724924  | 0.9999763851 |
| ATP8B2       | -1.3979355019 | 0.2824956428 | 0.9999763851 |
| IL6R         | -1.150599819  | 0.3026044363 | 0.9999763851 |
| SHE          | 2.3389220976  | 0.0332783348 | 0.9999763851 |
| TDRD10       | -4.2864494036 | 0.4027150576 | 0.9999763851 |
| UBE2Q1       | 1.2723874063  | 0.1608155356 | 0.9999763851 |
| CHRNA2       | 0             | 0            | 0            |
| ADAR         | 1.1469920068  | 0.3130373548 | 0.9999763851 |
| KCNN3        | -1.3158816768 | 0.8203229797 | 0.9999763851 |
| PMVK         | -1.1767724419 | 0.2540503034 | 0.9999763851 |
| PBXIP1       | -1.8284886844 | 0.0134326638 | 0.9999763851 |
| PYGO2        | 1.2089373577  | 0.4224194502 | 0.9999763851 |
| LOC101928120 | 1.2033560084  | 0.4308440614 | 0.9999763851 |
| SHC1         | 1.4565287385  | 0.4871473964 | 0.9999763851 |
| CKS1B        | -1.1445129826 | 0.3343695485 | 0.9999763851 |
| FLAD1        | 1.1811669064  | 0.3552341173 | 0.9999763851 |
| ZBTB7B       | -1.0803368274 | 0.7999695782 | 0.9999763851 |
| DCST2        | -4.287394647  | 0.4026306792 | 0.9999763851 |
| DCST1        | 1.9253836052  | 0.2060004179 | 0.9999763851 |
| ADAM15       | 1.1348667598  | 0.4333609897 | 0.9999763851 |
| EFNA4        | -1.3667385249 | 0.4315127815 | 0.9999763851 |
| EFNA3        | 1.2454645608  | 0.6986114833 | 0.9999763851 |
| EFNA1        | 1.2808976007  | 0.7495758492 | 0.9999763851 |
| SLC50A1      | 1.0921361189  | 0.6617028498 | 0.9999763851 |
| DPM3         | -1.0946344766 | 0.577172513  | 0.9999763851 |
| KRTCAP2      | -1.0063815542 | 0.9639357508 | 0.9999763851 |
| TRIM46       | 2.8674942058  | 0.3052941215 | 0.9999763851 |
| MUC1         | -1.1593995914 | 0.7091879533 | 0.9999763851 |
| THBS3        | -3.1528628322 | 0.2026298137 | 0.9999763851 |
| MTX1         | -1.1399972765 | 0.4987001827 | 0.9999763851 |
| GBA          | 1.097511022   | 0.7704556429 | 0.9999763851 |
| FAM189B      | 1.2719719588  | 0.4841774416 | 0.9999763851 |
| SCAMP3       | 1.0350486681  | 0.835797729  | 0.9999763851 |
| CLK2         | 1.2166669437  | 0.4445591562 | 0.9999763851 |
| HCN3         | 2.2215959932  | 0.3502437171 | 0.9999763851 |
| FDPS         | -1.0051346616 | 0.9778254532 | 0.9999763851 |
| RUSC1-AS1    | 1.3934050331  | 0.0665473821 | 0.9999763851 |
| RUSC1        | 1.1553988663  | 0.6157186158 | 0.9999763851 |

gene\_expression\_table

|          |               |              |              |
|----------|---------------|--------------|--------------|
| ASH1L    | -1.1759361663 | 0.3699420076 | 0.9999763851 |
| MSTO1    | 1.0515966867  | 0.7872245284 | 0.9999763851 |
| YY1AP1   | 1.1987507809  | 0.2208076114 | 0.9999763851 |
| DAP3     | -1.070187162  | 0.6541279283 | 0.9999763851 |
| GON4L    | -1.2174335513 | 0.4677682675 | 0.9999763851 |
| SYT11    | -1.3715126673 | 0.7510413575 | 0.9999763851 |
| RIT1     | -1.0061298774 | 0.9795546526 | 0.9999763851 |
| KIAA0907 | -1.0617987621 | 0.7752451873 | 0.9999763851 |
| ARHGEF2  | 1.1198784675  | 0.5569123317 | 0.9999763851 |
| SSR2     | 1.1258418768  | 0.3608695518 | 0.9999763851 |
| UBQLN4   | 1.1093269548  | 0.7030113309 | 0.9999763851 |
| LAMTOR2  | -1.1606592508 | 0.3508997143 | 0.9999763851 |
| MEX3A    | -1.0545686913 | 0.9163560124 | 0.9999763851 |
| LMNA     | 1.0306480629  | 0.8466898109 | 0.9999763851 |
| SEMA4A   | -1.640520605  | 0.1665268943 | 0.9999763851 |
| SLC25A44 | 1.0632475349  | 0.7757036579 | 0.9999763851 |
| PMF1     | -1.1898802798 | 0.3906576286 | 0.9999763851 |
| BGLAP    | 1.0276562285  | 0.9749720028 | 0.9999763851 |
| PAQR6    | 1.2259289984  | 0.5874846482 | 0.9999763851 |
| SMG5     | 1.1510937597  | 0.520984932  | 0.9999763851 |
| TMEM79   | 1.6659695968  | 0.3787706685 | 0.9999763851 |
| GLMP     | -1.3181851579 | 0.2203204729 | 0.9999763851 |
| CCT3     | 1.3798226018  | 0.0112582558 | 0.9999763851 |
| TSACC    | 1.0281638254  | 0.9765136019 | 0.9999763851 |
| C1orf61  | -1.6468494889 | 0.4444559941 | 0.9999763851 |
| MEF2D    | -1.4108285042 | 0.0543069272 | 0.9999763851 |
| IQGAP3   | 1.047488889   | 0.8870817548 | 0.9999763851 |
| NAXE     | 1.1620797367  | 0.3044645567 | 0.9999763851 |
| GPATCH4  | -2.3023833833 | 0.1951728721 | 0.9999763851 |
| HAPLN2   | -2.3217011239 | 0.4357748964 | 0.9999763851 |
| BCAN     | -2.4281122475 | 0.277146081  | 0.9999763851 |
| CRABP2   | -2.2372730517 | 0.3099480393 | 0.9999763851 |
| ISG20L2  | -1.0927570266 | 0.6161501789 | 0.9999763851 |
| RRNAD1   | 1.1457251594  | 0.6857144331 | 0.9999763851 |
| MRPL24   | 1.0384978731  | 0.8207499167 | 0.9999763851 |
| HDGF     | 1.0571650153  | 0.6440761861 | 0.9999763851 |
| PRCC     | -1.8059244363 | 0.0294598564 | 0.9999763851 |
| SH2D2A   | 1.0499328592  | 0.8871855803 | 0.9999763851 |
| NTRK1    | 0             | 0            | 0            |
| PEAR1    | 7.7488609396  | 0.3055345795 | 0.9999763851 |
| LRRC71   | 0             | 0            | 0            |
| ARHGEF11 | 1.6241172672  | 0.5986866126 | 0.9999763851 |
| ETV3     | -1.0177490021 | 0.9686309973 | 0.9999763851 |
| FCRL2    | 0             | 0            | 0            |
| FCRL1    | 0             | 0            | 0            |
| CD1D     | 1.5499082437  | 0.5571928434 | 0.9999763851 |
| CD1A     | 12.2062282412 | 0.1875343457 | 0.9999763851 |
| CD1B     | 3.2356557963  | 0.5547505991 | 0.9999763851 |
| CD1C     | -2.3401094535 | 0.2613324175 | 0.9999763851 |

gene\_expression\_table

|          |               |              |              |
|----------|---------------|--------------|--------------|
| SPTA1    | 3.2356557963  | 0.5547505991 | 0.9999763851 |
| MNDA     | 1.0011503061  | 0.9943464011 | 0.9999763851 |
| PYHIN1   | 1.5573674027  | 0.4354502129 | 0.9999763851 |
| IFI16    | -1.0780941428 | 0.6423337524 | 0.9999763851 |
| AIM2     | -3.1438286037 | 0.1493990602 | 0.9999763851 |
| DUSP23   | 1.2206979703  | 0.3209792572 | 0.9999763851 |
| FCRL6    | 0             | 0            | 0            |
| SLAMF8   | -1.946482244  | 0.1341665652 | 0.9999763851 |
| C1orf204 | 5.4770877341  | 0.3746135179 | 0.9999763851 |
| VSIG8    | 3.2356557963  | 0.5547505991 | 0.9999763851 |
| TAGLN2   | 1.0591641584  | 0.6981495535 | 0.9999763851 |
| SLAMF9   | 0             | 0            | 0            |
| PIGM     | 1.0142445777  | 0.94067109   | 0.9999763851 |
| IGSF8    | 1.2115524546  | 0.6553109416 | 0.9999763851 |
| CASQ1    | 3.2353357581  | 0.554787377  | 0.9999763851 |
| PEA15    | 1.2817772252  | 0.2703759705 | 0.9999763851 |
| DCAF8    | -1.0928480136 | 0.5933599548 | 0.9999763851 |
| PEX19    | 1.232474398   | 0.3653255314 | 0.9999763851 |
| COPA     | -1.0516051792 | 0.7582572358 | 0.9999763851 |
| NCSTN    | 1.0572259099  | 0.8328655425 | 0.9999763851 |
| NHLH1    | -1.5918873484 | 0.6448733186 | 0.9999763851 |
| CD84     | 0             | 0            | 0            |
| SLAMF1   | 3.2353357581  | 0.554787377  | 0.9999763851 |
| CD48     | 1.1665406493  | 0.6052866289 | 0.9999763851 |
| SLAMF7   | -3.7496649203 | 0.1128297175 | 0.9999763851 |
| LY9      | 1.3261442362  | 0.7480478279 | 0.9999763851 |
| CD244    | -1.2733695535 | 0.3533546471 | 0.9999763851 |
| ITLN1    | -4.2849908816 | 0.4028453076 | 0.9999763851 |
| F11R     | 1.0177856078  | 0.9165515984 | 0.9999763851 |
| TSTD1    | -4.2849908816 | 0.4028453076 | 0.9999763851 |
| USF1     | -1.3158816768 | 0.8203229797 | 0.9999763851 |
| ARHGAP30 | -1.2819455835 | 0.1303717753 | 0.9999763851 |
| NECTIN4  | 0             | 0            | 0            |
| PFDN2    | -1.2105738492 | 0.196330021  | 0.9999763851 |
| NIT1     | -1.0667169133 | 0.7941114271 | 0.9999763851 |
| DEDD     | 0             | 0            | 0            |
| UFC1     | 1.0070992749  | 0.9643749311 | 0.9999763851 |
| USP21    | -1.2460931847 | 0.7218799605 | 0.9999763851 |
| PPOX     | -1.3047889611 | 0.2980399979 | 0.9999763851 |
| B4GALT3  | -1.0561811682 | 0.8875509022 | 0.9999763851 |
| ADAMTS4  | 0             | 0            | 0            |
| NDUFS2   | -1.4961899163 | 0.002888     | 0.9999763851 |
| FCER1G   | -1.8635681125 | 0.002735     | 0.9999763851 |
| TOMM40L  | 2.7543183162  | 0.001166     | 0.8594669785 |
| NR1I3    | -4.2939733029 | 0.005433     | 0.9999763851 |
| PCP4L1   | 1.325955166   | 0.7487022553 | 0.9999763851 |
| MPZ      | 1.433664499   | 0.1228399261 | 0.9999763851 |
| SDHC     | -1.0125083909 | 0.9257897888 | 0.9999763851 |
| CFAP126  | -4.2849908816 | 0.4028453076 | 0.9999763851 |

gene\_expression\_table

|          |               |              |              |
|----------|---------------|--------------|--------------|
| FCGR2A   | -1.1998575617 | 0.4876434681 | 0.9999763851 |
| HSPA6    | -2.4817290922 | 0.1994228953 | 0.9999763851 |
| FCGR3A   | -4.0107040788 | 0.1999292346 | 0.9999763851 |
| FCGR3B   | 3.2356557963  | 0.5547505991 | 0.9999763851 |
| FCGR2B   | -2.8046993736 | 0.044452776  | 0.9999763851 |
| FCRLA    | -5.7462213657 | 0.0147566938 | 0.9999763851 |
| FCRLB    | -2.06934004   | 0.1151622813 | 0.9999763851 |
| DUSP12   | 1.0872914566  | 0.6643265468 | 0.9999763851 |
| ATF6     | -1.5448398882 | 0.1334097308 | 0.9999763851 |
| OLFML2B  | -1.3154339304 | 0.8205576571 | 0.9999763851 |
| NOS1AP   | 1.0002576586  | 0.9997940268 | 0.9999763851 |
| C1orf226 | -7.5622178268 | 0.2177145568 | 0.9999763851 |
| UHMK1    | 1.0363787593  | 0.8783556344 | 0.9999763851 |
| UAP1     | -1.3128199543 | 0.376621597  | 0.9999763851 |
| RGS5     | -1.0196127275 | 0.9752972769 | 0.9999763851 |
| NUF2     | -1.0104977114 | 0.9533214524 | 0.9999763851 |
| RXRG     | 0             | 0            | 0            |
| MGST3    | -1.449187843  | 0.005327     | 0.9999763851 |
| ALDH9A1  | 1.3886283382  | 0.0249627168 | 0.9999763851 |
| TMCO1    | 1.2002852189  | 0.1950250832 | 0.9999763851 |
| UCK2     | -1.1715683759 | 0.3128621271 | 0.9999763851 |
| FAM78B   | -4.2864494036 | 0.4027150576 | 0.9999763851 |
| POGK     | 1.1026165978  | 0.6048159013 | 0.9999763851 |
| TADA1    | 1.1316554702  | 0.5781979615 | 0.9999763851 |
| POU2F1   | -1.3770720542 | 0.0902995786 | 0.9999763851 |
| CD247    | -1.406657056  | 0.6694280141 | 0.9999763851 |
| CREG1    | -1.0427441967 | 0.8341435116 | 0.9999763851 |
| RCSD1    | 1.1007389606  | 0.5145787712 | 0.9999763851 |
| MPZL1    | -1.0634584883 | 0.7392593604 | 0.9999763851 |
| ADCY10   | -3.1534488363 | 0.1717799846 | 0.9999763851 |
| MPC2     | 1.0512709282  | 0.7314038067 | 0.9999763851 |
| DCAF6    | -1.219777617  | 0.2267813009 | 0.9999763851 |
| GPR161   | -4.2849908816 | 0.4028453076 | 0.9999763851 |
| TIPRL    | -1.1209102894 | 0.4175596054 | 0.9999763851 |
| SFT2D2   | 2.0141755765  | 0.1774053269 | 0.9999763851 |
| TBX19    | -3.9223203142 | 0.0711702913 | 0.9999763851 |
| ATP1B1   | 1.2499200512  | 0.6597977783 | 0.9999763851 |
| NME7     | -1.4810140327 | 0.3352740582 | 0.9999763851 |
| BLZF1    | 1.032823483   | 0.9442529827 | 0.9999763851 |
| CCDC181  | 0             | 0            | 0            |
| SLC19A2  | 1.0889112855  | 0.9196655925 | 0.9999763851 |
| SELL     | 2.6282277398  | 0.1112294005 | 0.9999763851 |
| METTL18  | -1.4285462622 | 0.5393339392 | 0.9999763851 |
| C1orf112 | 1.298994176   | 0.1781216973 | 0.9999763851 |
| SCYL3    | -2.2601303969 | 0.0751994704 | 0.9999763851 |
| KIFAP3   | 1.348590037   | 0.4348126546 | 0.9999763851 |
| GORAB    | -1.2380211518 | 0.6426875883 | 0.9999763851 |
| PRRX1    | 0             | 0            | 0            |
| FMO2     | 0             | 0            | 0            |



gene\_expression\_table

|           |               |              |              |
|-----------|---------------|--------------|--------------|
| FMO1      | -1.1235515614 | 0.8524922458 | 0.9999763851 |
| FMO4      | -1.1815471621 | 0.2524743197 | 0.9999763851 |
| PRRC2C    | 1.0879156039  | 0.5129525653 | 0.9999763851 |
| MYOC      | 3.2353357581  | 0.554787377  | 0.9999763851 |
| VAMP4     | -1.5458910777 | 0.2129737492 | 0.9999763851 |
| METTL13   | 1.3189756584  | 0.1672034303 | 0.9999763851 |
| DNM3      | -1.0535819566 | 0.9017469924 | 0.9999763851 |
| C1orf105  | 1.3254881051  | 0.7679649235 | 0.9999763851 |
| PIGC      | -1.5811033866 | 0.0388202535 | 0.9999763851 |
| SUCO      | 1.0448720241  | 0.8193921626 | 0.9999763851 |
| FASLG     | 3.2353357581  | 0.554787377  | 0.9999763851 |
| TNFSF4    | 1.696196843   | 0.2721274453 | 0.9999763851 |
| PRDX6     | 1.0749207081  | 0.6117682336 | 0.9999763851 |
| LOC730159 | 0             | 0            | 0            |
| ANKRD45   | 7.7488609396  | 0.3056154965 | 0.9999763851 |
| KLHL20    | -1.1216698915 | 0.6558540889 | 0.9999763851 |
| CENPL     | -1.1689979606 | 0.5412170814 | 0.9999763851 |
| DARS2     | 1.3459980149  | 0.1412117905 | 0.9999763851 |
| ZBTB37    | 1.0281638254  | 0.9765424521 | 0.9999763851 |
| RC3H1     | -1.2068734287 | 0.4474521286 | 0.9999763851 |
| RABGAP1L  | -1.411561274  | 0.1277954236 | 0.9999763851 |
| CACYBP    | 1.0778622106  | 0.5398075088 | 0.9999763851 |
| MRPS14    | -1.0961453291 | 0.5570606017 | 0.9999763851 |
| TNN       | -1.5049537523 | 0.0711845732 | 0.9999763851 |
| TNR       | 4.9725786265  | 0.1100739501 | 0.9999763851 |
| RFWD2     | -1.0847246266 | 0.7091649829 | 0.9999763851 |
| PAPPA2    | 0             | 0            | 0            |
| SEC16B    | 0             | 0            | 0            |
| RASAL2    | -1.3290629654 | 0.5483041713 | 0.9999763851 |
| LINC00083 | 0             | 0            | 0            |
| RALGPS2   | -1.5504730795 | 0.2468906418 | 0.9999763851 |
| FAM20B    | 1.0859065772  | 0.6795751696 | 0.9999763851 |
| TOR3A     | -1.2128092255 | 0.2217872839 | 0.9999763851 |
| ABL2      | -1.4286184811 | 0.0886931974 | 0.9999763851 |
| SOAT1     | 1.0701273451  | 0.7836750489 | 0.9999763851 |
| AXDND1    | 5.4790129495  | 0.3751913962 | 0.9999763851 |
| FAM163A   | 0             | 0            | 0            |
| TOR1AIP2  | 1.2808915888  | 0.1280935883 | 0.9999763851 |
| TOR1AIP1  | 1.0819500062  | 0.6996881387 | 0.9999763851 |
| CEP350    | -1.1621534905 | 0.4027792184 | 0.9999763851 |
| QSOX1     | -1.1759727425 | 0.2117954646 | 0.9999763851 |
| LHX4      | -2.0108457684 | 0.4190952835 | 0.9999763851 |
| ACBD6     | 1.1477221495  | 0.4222962398 | 0.9999763851 |
| XPR1      | 1.5655091706  | 0.0757111    | 0.9999763851 |
| KIAA1614  | -1.598713419  | 0.5554914697 | 0.9999763851 |
| STX6      | -1.4493760166 | 0.0545227574 | 0.9999763851 |
| MR1       | 1.1839036608  | 0.5809118468 | 0.9999763851 |
| IER5      | -1.1867712704 | 0.2349762053 | 0.9999763851 |
| CACNA1E   | 0             | 0            | 0            |

gene\_expression\_table

|          |               |              |              |
|----------|---------------|--------------|--------------|
| ZNF648   | 3.2353357581  | 0.554787377  | 0.9999763851 |
| GLUL     | -1.1103304053 | 0.5250161469 | 0.9999763851 |
| RGSL1    | 0             | 0            | 0            |
| RNASEL   | -1.000061298  | 0.999862539  | 0.9999763851 |
| RGS16    | -2.6933726902 | 1.80E-05     | 0.0402963288 |
| NPL      | 1.9244931186  | 0.0831740148 | 0.9999763851 |
| DHX9     | 1.3773725349  | 0.110261246  | 0.9999763851 |
| SHCBP1L  | 1.3417088146  | 0.6972953714 | 0.9999763851 |
| LAMC1    | -1.5078702112 | 0.0613848314 | 0.9999763851 |
| LAMC2    | 3.2353357581  | 0.554787377  | 0.9999763851 |
| NMNAT2   | 15.5019390839 | 0.162998722  | 0.9999763851 |
| SMG7     | -1.0623036171 | 0.6570357744 | 0.9999763851 |
| NCF2     | -2.1541375242 | 0.018365499  | 0.9999763851 |
| ARPC5    | -1.0265235593 | 0.8404490161 | 0.9999763851 |
| RGL1     | 4.1545939766  | 0.1790719693 | 0.9999763851 |
| COLGALT2 | 1.4381534126  | 0.433731487  | 0.9999763851 |
| TSEN15   | -1.2188813587 | 0.2995574386 | 0.9999763851 |
| C1orf21  | -1.7456384649 | 0.0007429    | 0.6510516988 |
| EDEM3    | 1.1575905138  | 0.3971292374 | 0.9999763851 |
| FAM129A  | 1.1675930346  | 0.3403237227 | 0.9999763851 |
| RNF2     | 1.4201559333  | 0.1265199169 | 0.9999763851 |
| TRMT1L   | -1.2581748746 | 0.1239985224 | 0.9999763851 |
| SWT1     | 1.0788104453  | 0.8830712373 | 0.9999763851 |
| IVNS1ABP | 1.1180427667  | 0.4399408406 | 0.9999763851 |
| HMCN1    | 0             | 0            | 0            |
| PRG4     | -1.1445217789 | 0.6113903606 | 0.9999763851 |
| TPR      | -1.0272553864 | 0.872898569  | 0.9999763851 |
| C1orf27  | 1.6366304021  | 0.0990731554 | 0.9999763851 |
| PTGS2    | -2.9315971648 | 0.0345590853 | 0.9999763851 |
| PLA2G4A  | -1.4138717488 | 0.1831602796 | 0.9999763851 |
| RGS18    | 1.2625516817  | 0.2781151034 | 0.9999763851 |
| RGS1     | -1.5972028858 | 0.2288061555 | 0.9999763851 |
| RGS13    | 0             | 0            | 0            |
| RGS2     | -1.9501691009 | 0.3588530544 | 0.9999763851 |
| UCHL5    | 1.1626307567  | 0.3017458324 | 0.9999763851 |
| TROVE2   | 1.0575460082  | 0.735311562  | 0.9999763851 |
| GLRX2    | 1.2778100101  | 0.2450076348 | 0.9999763851 |
| CDC73    | 1.2602792118  | 0.2668129261 | 0.9999763851 |
| CFHR4    | 0             | 0            | 0            |
| ASPM     | -1.0838321223 | 0.7015612959 | 0.9999763851 |
| ZBTB41   | -1.414852501  | 0.6315218082 | 0.9999763851 |
| CRB1     | 0             | 0            | 0            |
| DENND1B  | 1.1291582731  | 0.662256638  | 0.9999763851 |
| C1orf53  | 2.631623025   | 0.1149645872 | 0.9999763851 |
| NEK7     | 1.1004396935  | 0.7364959663 | 0.9999763851 |
| PTPRC    | -1.3626087866 | 0.0458200668 | 0.9999763851 |
| ZNF281   | -1.1272112548 | 0.4769125955 | 0.9999763851 |
| KIF14    | 1.2534434094  | 0.1568403366 | 0.9999763851 |
| DDX59    | 1.2490800189  | 0.7079294704 | 0.9999763851 |

gene\_expression\_table

|              |                |              |              |
|--------------|----------------|--------------|--------------|
| CAMSAP2      | -2.5419532854  | 0.054070927  | 0.9999763851 |
| C1orf106     | 1.168655229    | 0.4892841527 | 0.9999763851 |
| KIF21B       | 1.4156601674   | 0.0765734249 | 0.9999763851 |
| CACNA1S      | -4.2864494036  | 0.4027150576 | 0.9999763851 |
| ASCL5        | 0              | 0            | 0            |
| TMEM9        | -1.168852567   | 0.3973565477 | 0.9999763851 |
| LAD1         | 0              | 0            | 0            |
| PHLDA3       | 1.2869488883   | 0.8189667132 | 0.9999763851 |
| CSRP1        | 1.2798555106   | 0.2331649683 | 0.9999763851 |
| LOC107985246 | 2.3401939765   | 0.4037104303 | 0.9999763851 |
| NAV1         | 1.0955803262   | 0.6516967525 | 0.9999763851 |
| IPO9         | 1.2396492614   | 0.1955247659 | 0.9999763851 |
| SHISA4       | -4.3365422435  | 0.1769061646 | 0.9999763851 |
| LMOD1        | -3.3280817062  | 0.2437290808 | 0.9999763851 |
| TIMM17A      | 1.1058392345   | 0.4994751163 | 0.9999763851 |
| RNPEP        | 1.0797245704   | 0.6534081615 | 0.9999763851 |
| ELF3         | 3.2356557963   | 0.5547505991 | 0.9999763851 |
| GPR37L1      | 0              | 0            | 0            |
| ARL8A        | -1.2431881205  | 0.1153912965 | 0.9999763851 |
| PTPN7        | -1.0502172995  | 0.7607465022 | 0.9999763851 |
| LGR6         | 0              | 0            | 0            |
| UBE2T        | 1.0967698139   | 0.5804527335 | 0.9999763851 |
| PPP1R12B     | 1.1488737757   | 0.2706204971 | 0.9999763851 |
| SYT2         | 1.0276562285   | 0.9749568208 | 0.9999763851 |
| KDM5B        | 1.0426538087   | 0.7704619553 | 0.9999763851 |
| RABIF        | 1.079866816    | 0.7200055693 | 0.9999763851 |
| KLHL12       | -1.0920485491  | 0.6398074437 | 0.9999763851 |
| ADIPOR1      | -1.0452420823  | 0.8556728463 | 0.9999763851 |
| CYB5R1       | -1.0359668383  | 0.931906619  | 0.9999763851 |
| TMEM183A     | 1.1142324753   | 0.5983817408 | 0.9999763851 |
| PPFIA4       | -1.1483163584  | 0.8581191922 | 0.9999763851 |
| MYBPH        | 2.8663267584   | 0.3071313305 | 0.9999763851 |
| CHI3L1       | -1.1902618325  | 0.2920722028 | 0.9999763851 |
| CHIT1        | -10.7999546676 | 0.0001991    | 0.2613243706 |
| BTG2         | -1.4483197087  | 0.2851760483 | 0.9999763851 |
| ATP2B4       | 1.2449335534   | 0.1832625618 | 0.9999763851 |
| LAX1         | 2.2088270228   | 0.002833     | 0.9999763851 |
| ZC3H11A      | 1.0081972115   | 0.9608644287 | 0.9999763851 |
| ZBED6        | -1.256908463   | 0.7027795348 | 0.9999763851 |
| SNRPE        | 1.1537080499   | 0.2768452146 | 0.9999763851 |
| SOX13        | -4.9419266265  | 0.0417233463 | 0.9999763851 |
| ETNK2        | 0              | 0            | 0            |
| REN          | 3.2361532718   | 0.5546934395 | 0.9999763851 |
| PLEKHA6      | 1.624741281    | 0.5898390997 | 0.9999763851 |
| PPP1R15B     | -1.0839517004  | 0.6690937    | 0.9999763851 |
| PIK3C2B      | 1.6764913239   | 0.0078       | 0.9999763851 |
| MDM4         | -1.0010211801  | 0.9958483063 | 0.9999763851 |
| LRRN2        | 0              | 0            | 0            |
| NFASC        | 3.2353357581   | 0.554787377  | 0.9999763851 |

gene\_expression\_table

|              |               |              |              |
|--------------|---------------|--------------|--------------|
| TMEM81       | -1.9665380586 | 0.4647627012 | 0.9999763851 |
| RBBP5        | 1.1516433606  | 0.4775540633 | 0.9999763851 |
| DSTYK        | -1.2350002556 | 0.2638177343 | 0.9999763851 |
| TMCC2        | -1.4448633361 | 0.31005423   | 0.9999763851 |
| KLHDC8A      | -1.6419444001 | 0.001779     | 0.9999763851 |
| LEMD1        | 0             | 0            | 0            |
| CDK18        | -1.7346410473 | 0.4883019977 | 0.9999763851 |
| MFSD4A       | 1.1334347738  | 0.8813011476 | 0.9999763851 |
| ELK4         | -1.1313222959 | 0.6971522345 | 0.9999763851 |
| SLC45A3      | -1.2014834037 | 0.5249356123 | 0.9999763851 |
| NUCKS1       | 1.0288183624  | 0.8124869535 | 0.9999763851 |
| RAB29        | 1.0553415902  | 0.7752434901 | 0.9999763851 |
| SLC41A1      | 1.1427311309  | 0.5814567219 | 0.9999763851 |
| PM20D1       | 4.3099016468  | 0.231928679  | 0.9999763851 |
| SLC26A9      | 1.0614829508  | 0.7341409358 | 0.9999763851 |
| RAB7B        | -1.5319719579 | 0.147279759  | 0.9999763851 |
| C1orf186     | -2.0614985279 | 0.2954510093 | 0.9999763851 |
| FAM72A       | -1.4595440907 | 0.6537626087 | 0.9999763851 |
| SRGAP2       | -1.0409909061 | 0.8175823864 | 0.9999763851 |
| IKBKE        | 1.1962459603  | 0.3316463109 | 0.9999763851 |
| RASSF5       | -1.2064303847 | 0.6510917841 | 0.9999763851 |
| EIF2D        | -1.0163651427 | 0.9038504193 | 0.9999763851 |
| DYRK3        | -1.0577757904 | 0.8009561548 | 0.9999763851 |
| MAPKAPK2     | -1.0605113394 | 0.673189447  | 0.9999763851 |
| IL10         | -3.3284109188 | 0.2423554398 | 0.9999763851 |
| IL19         | 2.3406309168  | 0.4060494981 | 0.9999763851 |
| IL24         | -1.2301452062 | 0.7476243508 | 0.9999763851 |
| FCMR         | 1.3952230027  | 0.1116801928 | 0.9999763851 |
| PIGR         | -7.5647903763 | 0.2176246281 | 0.9999763851 |
| YOD1         | 1.5501101194  | 0.1555917508 | 0.9999763851 |
| CD55         | -1.3081529372 | 0.2536038116 | 0.9999763851 |
| CR1          | -1.071695521  | 0.8570760425 | 0.9999763851 |
| CD46         | 1.1512012964  | 0.4145784119 | 0.9999763851 |
| CD34         | 0             | 0            | 0            |
| LOC105372883 | 0             | 0            | 0            |
| PLXNA2       | -4.2849908816 | 0.4028453076 | 0.9999763851 |
| LAMB3        | -1.4391263345 | 0.6925824661 | 0.9999763851 |
| HSD11B1      | 0             | 0            | 0            |
| TRAF3IP3     | -1.4304387769 | 0.48482272   | 0.9999763851 |
| C1orf74      | -1.0118087356 | 0.9460965592 | 0.9999763851 |
| DIEXF        | 1.6305411606  | 0.1130488079 | 0.9999763851 |
| SYT14        | 0             | 0            | 0            |
| HHAT         | -2.11701454   | 0.1724029672 | 0.9999763851 |
| RCOR3        | 1.0463504491  | 0.837460115  | 0.9999763851 |
| TRAF5        | 2.3883691069  | 0.0442017374 | 0.9999763851 |
| SLC30A1      | -1.7201161798 | 0.1914105944 | 0.9999763851 |
| NEK2         | -1.4315960423 | 0.1010601875 | 0.9999763851 |
| LPGAT1       | -1.3132800332 | 0.1155179091 | 0.9999763851 |
| INTS7        | 1.618255245   | 0.0299742801 | 0.9999763851 |

gene\_expression\_table

|              |               |              |              |
|--------------|---------------|--------------|--------------|
| DTL          | 1.024994917   | 0.8589823777 | 0.9999763851 |
| PPP2R5A      | 1.056946182   | 0.6926406858 | 0.9999763851 |
| TMEM206      | 1.2467177837  | 0.4633648067 | 0.9999763851 |
| NENF         | 1.0730706436  | 0.637505344  | 0.9999763851 |
| ATF3         | -2.1966220146 | 0.0637902335 | 0.9999763851 |
| BATF3        | 1.6979164668  | 0.1449685579 | 0.9999763851 |
| NSL1         | -1.0778368634 | 0.7259114948 | 0.9999763851 |
| TATDN3       | 1.2217548231  | 0.4880921233 | 0.9999763851 |
| FLVCR1       | 1.0114994304  | 0.9555864417 | 0.9999763851 |
| VASH2        | 1.2872739558  | 0.8232731242 | 0.9999763851 |
| ANGEL2       | 1.0213697067  | 0.9414633104 | 0.9999763851 |
| RPS6KC1      | 1.1429294821  | 0.7794310758 | 0.9999763851 |
| PROX1        | 0             | 0            | 0            |
| SMYD2        | -1.5649573985 | 0.0186269288 | 0.9999763851 |
| PTPN14       | 1.3280268994  | 0.7331737794 | 0.9999763851 |
| CENPF        | 1.1141466881  | 0.4020519802 | 0.9999763851 |
| KCTD3        | -1.4872814561 | 0.2268210138 | 0.9999763851 |
| USH2A        | -4.2864494036 | 0.4027150576 | 0.9999763851 |
| ESRRG        | 3.2356557963  | 0.5547505991 | 0.9999763851 |
| GPATCH2      | -1.2258173831 | 0.4615179634 | 0.9999763851 |
| SPATA17      | 3.2353357581  | 0.554787377  | 0.9999763851 |
| RRP15        | 1.1767648256  | 0.4291484025 | 0.9999763851 |
| TGFB2        | -1.3713018672 | 0.7312784555 | 0.9999763851 |
| LYPLAL1      | 1.0106720339  | 0.9645302671 | 0.9999763851 |
| SLC30A10     | 0             | 0            | 0            |
| EPRS         | 1.2169531166  | 0.1671111236 | 0.9999763851 |
| BPNT1        | 1.1279574795  | 0.6134933238 | 0.9999763851 |
| IARS2        | -1.2337935557 | 0.2374234932 | 0.9999763851 |
| RAB3GAP2     | 1.1982468803  | 0.2362284553 | 0.9999763851 |
| MARK1        | 1.0275312208  | 0.9771806264 | 0.9999763851 |
| MARC1        | 0             | 0            | 0            |
| HLX          | 1.0925602859  | 0.6794112757 | 0.9999763851 |
| DUSP10       | -1.7332721092 | 0.4770374529 | 0.9999763851 |
| HHIPL2       | 3.2353357581  | 0.554787377  | 0.9999763851 |
| TAF1A        | 1.2432181721  | 0.5174690828 | 0.9999763851 |
| MIA3         | 1.2906152316  | 0.2851097062 | 0.9999763851 |
| AIDA         | 1.118693876   | 0.5014806366 | 0.9999763851 |
| BROX         | 1.0200402595  | 0.9326223815 | 0.9999763851 |
| FAM177B      | 5.4781708352  | 0.3745527127 | 0.9999763851 |
| DISP1        | -1.6891760355 | 0.1459623624 | 0.9999763851 |
| CAPN2        | 1.5024948974  | 0.009317     | 0.9999763851 |
| TP53BP2      | -1.0408820879 | 0.8140846113 | 0.9999763851 |
| LOC107985330 | -1.0852711617 | 0.9285760414 | 0.9999763851 |
| FBXO28       | 1.1548797206  | 0.4949216235 | 0.9999763851 |
| DEGS1        | 1.6004476434  | 0.0388445229 | 0.9999763851 |
| NVL          | -1.1411080156 | 0.5927089375 | 0.9999763851 |
| CNIH4        | 1.1753729208  | 0.2677476371 | 0.9999763851 |
| WDR26        | 1.0915398418  | 0.6214804081 | 0.9999763851 |
| CNIH3        | -1.6429934142 | 0.0649179273 | 0.9999763851 |

gene\_expression\_table

|              |               |              |              |
|--------------|---------------|--------------|--------------|
| DNAH14       | -1.0264930697 | 0.9336981446 | 0.9999763851 |
| LBR          | 1.0217827645  | 0.8619584671 | 0.9999763851 |
| ENAH         | 1.1681948128  | 0.6628724957 | 0.9999763851 |
| SRP9         | 1.3828532625  | 0.0908672978 | 0.9999763851 |
| EPHX1        | -1.1149875749 | 0.6500373451 | 0.9999763851 |
| TMEM63A      | -1.7141788209 | 0.071758446  | 0.9999763851 |
| PYCR2        | 1.1743207251  | 0.3006305166 | 0.9999763851 |
| SDE2         | -1.0882525933 | 0.7137821784 | 0.9999763851 |
| H3F3A        | 1.1165098578  | 0.3493484825 | 0.9999763851 |
| ACBD3        | -1.4223894497 | 0.0250536071 | 0.9999763851 |
| LIN9         | 1.0710612774  | 0.7613163191 | 0.9999763851 |
| PARP1        | -1.3548878514 | 0.0452081041 | 0.9999763851 |
| ITPKB        | 1.7186508518  | 0.0917581235 | 0.9999763851 |
| PSEN2        | 1.1278326735  | 0.5789056635 | 0.9999763851 |
| ADCK3        | 1.0584649725  | 0.6882782063 | 0.9999763851 |
| CDC42BPA     | -1.8158058555 | 0.4784760064 | 0.9999763851 |
| ZNF678       | 0             | 0            | 0            |
| SNAP47       | 1.3589559912  | 0.1813217562 | 0.9999763851 |
| JMJD4        | 1.06300796    | 0.8123367972 | 0.9999763851 |
| PRSS38       | 0             | 0            | 0            |
| LOC107985355 | 0             | 0            | 0            |
| WNT3A        | 0             | 0            | 0            |
| ARF1         | 1.0929279738  | 0.4959848822 | 0.9999763851 |
| C1orf35      | 1.1098589773  | 0.6114560887 | 0.9999763851 |
| MRPL55       | 1.2718929491  | 0.1934389216 | 0.9999763851 |
| GUK1         | -1.0018643492 | 0.9900826968 | 0.9999763851 |
| GJC2         | 3.2353357581  | 0.554787377  | 0.9999763851 |
| IBA57        | 1.6947657343  | 0.2800415757 | 0.9999763851 |
| OBSCN        | 1.3583735382  | 0.598178681  | 0.9999763851 |
| LOC101927401 | 1.8145193361  | 0.579007064  | 0.9999763851 |
| TRIM11       | -1.058196852  | 0.7068371326 | 0.9999763851 |
| TRIM17       | -7.5647903763 | 0.2176246281 | 0.9999763851 |
| HIST3H2A     | 0             | 0            | 0            |
| RNF187       | 1.1158267107  | 0.4320846438 | 0.9999763851 |
| BTNL10       | -1.7347162507 | 0.4694691399 | 0.9999763851 |
| RHOU         | 1.4234022233  | 0.0182922463 | 0.9999763851 |
| LOC105373132 | -3.3750646091 | 0.0271745729 | 0.9999763851 |
| RAB4A        | -1.1029128504 | 0.578361165  | 0.9999763851 |
| SPHAR        | 1.0383925775  | 0.9074925649 | 0.9999763851 |
| CCSAP        | -1.2037347462 | 0.3477775283 | 0.9999763851 |
| ACTA1        | 0             | 0            | 0            |
| NUP133       | 1.2140038275  | 0.2090820467 | 0.9999763851 |
| ABCB10       | 1.1992225944  | 0.3934831978 | 0.9999763851 |
| TAF5L        | 1.6091859184  | 0.0820436865 | 0.9999763851 |
| URB2         | -1.2079157725 | 0.4573281787 | 0.9999763851 |
| GALNT2       | 1.1570605444  | 0.3201250166 | 0.9999763851 |
| PGBD5        | -1.4414448586 | 0.3384827533 | 0.9999763851 |
| COG2         | 1.2289912372  | 0.3887726781 | 0.9999763851 |
| CAPN9        | 0             | 0            | 0            |

gene\_expression\_table

|          |               |              |              |
|----------|---------------|--------------|--------------|
| C1orf198 | 1.0573262353  | 0.7991512635 | 0.9999763851 |
| TTC13    | -2.9617156352 | 0.0160361979 | 0.9999763851 |
| ARV1     | 1.414230029   | 0.1191092526 | 0.9999763851 |
| FAM89A   | 1.3163089146  | 0.2760554353 | 0.9999763851 |
| TRIM67   | 0             | 0            | 0            |
| C1orf131 | 1.1569822016  | 0.4248689219 | 0.9999763851 |
| GNPAT    | 1.2681250064  | 0.1928786541 | 0.9999763851 |
| EXOC8    | 1.4595704504  | 0.1210403826 | 0.9999763851 |
| SPRTN    | 1.2380260214  | 0.394735285  | 0.9999763851 |
| EGLN1    | -1.072455917  | 0.7666156583 | 0.9999763851 |
| TSNAX    | -1.1774992262 | 0.2699754598 | 0.9999763851 |
| DISC1    | -1.3306149506 | 0.2054468284 | 0.9999763851 |
| SIPA1L2  | 1.5348527306  | 0.1388688108 | 0.9999763851 |
| MAP10    | 1.2195107938  | 0.5649982765 | 0.9999763851 |
| NTPCR    | 1.0592817209  | 0.8117393738 | 0.9999763851 |
| PCNX2    | 1.3413311511  | 0.3632694601 | 0.9999763851 |
| KIAA1804 | -1.0829099927 | 0.862226659  | 0.9999763851 |
| SLC35F3  | 2.5912551305  | 0.1773652625 | 0.9999763851 |
| COA6     | 1.2994728289  | 0.1747938436 | 0.9999763851 |
| TARBP1   | -1.0236855949 | 0.9346355457 | 0.9999763851 |
| IRF2BP2  | -1.0979092043 | 0.4668852771 | 0.9999763851 |
| TOMM20   | -1.3073814928 | 0.0604089754 | 0.9999763851 |
| RBM34    | -1.3940363338 | 0.095976249  | 0.9999763851 |
| ARID4B   | -1.0221273458 | 0.9044635958 | 0.9999763851 |
| GGPS1    | 1.4191432578  | 0.1669939237 | 0.9999763851 |
| TBCE     | -1.9671220856 | 0.0322880083 | 0.9999763851 |
| B3GALNT2 | -1.0814806951 | 0.5909540923 | 0.9999763851 |
| GNG4     | 0             | 0            | 0            |
| LYST     | -1.0726706566 | 0.6693160007 | 0.9999763851 |
| NID1     | 3.2356557963  | 0.5547505991 | 0.9999763851 |
| GPR137B  | -3.039585867  | 0.1308351339 | 0.9999763851 |
| ERO1B    | -2.300598904  | 0.0637079481 | 0.9999763851 |
| EDARADD  | 1.3690402154  | 0.360362666  | 0.9999763851 |
| LGALS8   | -1.1066431886 | 0.5325778836 | 0.9999763851 |
| HEATR1   | -1.6266040895 | 0.1634986334 | 0.9999763851 |
| ACTN2    | 0             | 0            | 0            |
| MTR      | 1.0750887389  | 0.7516076956 | 0.9999763851 |
| RYR2     | 1.577482471   | 0.4114816587 | 0.9999763851 |
| CHRM3    | 1.0306913768  | 0.9663586235 | 0.9999763851 |
| FMN2     | -1.1305053662 | 0.8413969899 | 0.9999763851 |
| RGS7     | -1.2640353805 | 0.3011901278 | 0.9999763851 |
| FH       | -1.1660451657 | 0.4258885275 | 0.9999763851 |
| KMO      | 1.695765772   | 0.4035122561 | 0.9999763851 |
| OPN3     | -1.266178856  | 0.252669258  | 0.9999763851 |
| CHML     | 2.010067585   | 0.1553250476 | 0.9999763851 |
| EXO1     | 1.0992796121  | 0.7054169536 | 0.9999763851 |
| PLD5     | 0             | 0            | 0            |
| CEP170   | -1.3176287362 | 0.1607315415 | 0.9999763851 |
| SDCCAG8  | 1.0600258414  | 0.7712726603 | 0.9999763851 |

gene\_expression\_table

|              |                |              |              |
|--------------|----------------|--------------|--------------|
| AKT3         | -1.222737104   | 0.5946752517 | 0.9999763851 |
| ZBTB18       | -1.0997549815  | 0.8019385282 | 0.9999763851 |
| C1orf100     | -1.3151016298  | 0.8209191532 | 0.9999763851 |
| ADSS         | -1.0787092763  | 0.6830259621 | 0.9999763851 |
| C1orf101     | 1.3261589136   | 0.7392619172 | 0.9999763851 |
| DESI2        | 1.0395005483   | 0.8599576227 | 0.9999763851 |
| COX20        | 1.0330195      | 0.8794952146 | 0.9999763851 |
| HNRNPU       | 1.0418939195   | 0.7263311312 | 0.9999763851 |
| EFCAB2       | -1.4258863983  | 0.1013598931 | 0.9999763851 |
| KIF26B       | -1.3124898922  | 0.6379235716 | 0.9999763851 |
| SMYD3        | -1.0379322718  | 0.791102053  | 0.9999763851 |
| TFB2M        | 1.5576026172   | 0.0808448455 | 0.9999763851 |
| CNST         | 1.0393581549   | 0.8869990845 | 0.9999763851 |
| SCCPDH       | -1.0031275293  | 0.9811424175 | 0.9999763851 |
| AHCTF1       | -1.2851628739  | 0.2145846429 | 0.9999763851 |
| ZNF670       | 1.1912917425   | 0.4624319641 | 0.9999763851 |
| ZNF669       | -2.66053263    | 0.1881799047 | 0.9999763851 |
| ZNF124       | 1.5543571304   | 0.0691458767 | 0.9999763851 |
| ZNF496       | -1.4157066625  | 0.6339385014 | 0.9999763851 |
| LOC107985115 | 5.4781708352   | 0.3745527127 | 0.9999763851 |
| NLRP3        | -1.8121833565  | 0.0257981329 | 0.9999763851 |
| GCSAML       | 0              | 0            | 0            |
| TRIM58       | 1.3885242882   | 0.636859239  | 0.9999763851 |
| OR2T8        | 0              | 0            | 0            |
| OR2L13       | 0              | 0            | 0            |
| SH3BP5L      | 1.1403516318   | 0.5034566375 | 0.9999763851 |
| ZNF672       | 1.338613774    | 0.2727406526 | 0.9999763851 |
| ZNF692       | 1.5269799671   | 0.4164224723 | 0.9999763851 |
| PGBD2        | -1.2571676518  | 0.7062574259 | 0.9999763851 |
| SH3YL1       | -1.6881725486  | 0.1959582488 | 0.9999763851 |
| ACP1         | 1.0084972055   | 0.9546866715 | 0.9999763851 |
| FAM150B      | -19.2975026899 | 0.0747390423 | 0.9999763851 |
| LOC101927262 | 1.432536289    | 0.7056197696 | 0.9999763851 |
| TMEM18       | 1.0376183753   | 0.8441603075 | 0.9999763851 |
| TPO          | 0              | 0            | 0            |
| LOC102723730 | 0              | 0            | 0            |
| PXDN         | 0              | 0            | 0            |
| TSSC1        | -1.189270716   | 0.3908551375 | 0.9999763851 |
| TRAPPC12     | 1.0971314572   | 0.6775834857 | 0.9999763851 |
| ADI1         | 1.0476070101   | 0.7454619571 | 0.9999763851 |
| RNASEH1      | 1.4055190025   | 0.0443460047 | 0.9999763851 |
| RPS7         | 1.0399635508   | 0.747004298  | 0.9999763851 |
| COLEC11      | 1.6242600155   | 0.5622221146 | 0.9999763851 |
| ALLC         | 0              | 0            | 0            |
| CMPK2        | -1.762719092   | 0.1891342668 | 0.9999763851 |
| RSAD2        | -5.3416241096  | 0.0827512079 | 0.9999763851 |
| RNF144A      | 1.1237411547   | 0.5598252903 | 0.9999763851 |
| ID2          | 1.0055770466   | 0.9672544026 | 0.9999763851 |
| KIDINS220    | -1.5874002138  | 0.0183525391 | 0.9999763851 |



gene\_expression\_table

|              |               |              |              |
|--------------|---------------|--------------|--------------|
| MBOAT2       | -4.2864494036 | 0.4027150576 | 0.9999763851 |
| ITGB1BP1     | 1.4799748357  | 0.008451     | 0.9999763851 |
| CPSF3        | -1.0301695395 | 0.8472081564 | 0.9999763851 |
| IAH1         | 1.2572725474  | 0.264329027  | 0.9999763851 |
| ADAM17       | -1.1245407305 | 0.4115700557 | 0.9999763851 |
| YWHAQ        | 1.1596965101  | 0.2715541254 | 0.9999763851 |
| TAF1B        | 1.0900979943  | 0.7426858041 | 0.9999763851 |
| GRHL1        | 1.5500442495  | 0.5675474939 | 0.9999763851 |
| KLF11        | 0             | 0            | 0            |
| RRM2         | 1.1767022222  | 0.1921767341 | 0.9999763851 |
| C2orf48      | -1.0882443234 | 0.6920370257 | 0.9999763851 |
| HPCAL1       | -1.2012811567 | 0.1993491558 | 0.9999763851 |
| ODC1         | -1.0870956003 | 0.5514138426 | 0.9999763851 |
| NOL10        | -1.0538603756 | 0.7706399034 | 0.9999763851 |
| ATP6V1C2     | -2.3308983668 | 0.1742927847 | 0.9999763851 |
| PDIA6        | -1.098722879  | 0.4388309972 | 0.9999763851 |
| C2orf50      | 0             | 0            | 0            |
| PQLC3        | -1.2498228987 | 0.3393359442 | 0.9999763851 |
| ROCK2        | -1.0501075553 | 0.7955645025 | 0.9999763851 |
| E2F6         | -1.081783891  | 0.654903945  | 0.9999763851 |
| GREB1        | 1.1439155847  | 0.660903732  | 0.9999763851 |
| LPIN1        | 1.2615875172  | 0.1462667779 | 0.9999763851 |
| TRIB2        | 1.3527663374  | 0.0712842355 | 0.9999763851 |
| NBAS         | 1.0262684822  | 0.9051213462 | 0.9999763851 |
| DDX1         | 1.2602488997  | 0.1727901949 | 0.9999763851 |
| FAM49A       | -2.0639259657 | 0.0425306027 | 0.9999763851 |
| RAD51AP2     | 3.2361532718  | 0.5546934395 | 0.9999763851 |
| VSNL1        | 7.7488609396  | 0.3056963296 | 0.9999763851 |
| SMC6         | 1.1060688479  | 0.6376889314 | 0.9999763851 |
| GEN1         | -1.1501165544 | 0.5895348389 | 0.9999763851 |
| RDH14        | -1.3489467621 | 0.2302414953 | 0.9999763851 |
| NT5C1B-RDH14 | 0             | 0            | 0            |
| TTC32        | -1.438772044  | 0.4126556588 | 0.9999763851 |
| LAPTM4A      | -1.2838017296 | 0.0521825831 | 0.9999763851 |
| PUM2         | 1.1236476402  | 0.4235149182 | 0.9999763851 |
| LOC107985856 | 0             | 0            | 0            |
| HS1BP3       | 1.3736731313  | 0.102802268  | 0.9999763851 |
| LDAH         | 1.3850261424  | 0.0952750193 | 0.9999763851 |
| LOC107985792 | 0             | 0            | 0            |
| KLHL29       | -1.3714374731 | 0.7337777464 | 0.9999763851 |
| ATAD2B       | -1.2034981149 | 0.4052927491 | 0.9999763851 |
| UBXN2A       | 1.0101496188  | 0.9770806976 | 0.9999763851 |
| MFSD2B       | 2.0155685261  | 0.4138816669 | 0.9999763851 |
| WDCP         | -1.0420774881 | 0.8526568339 | 0.9999763851 |
| FKBP1B       | 2.2534767074  | 0.3735854402 | 0.9999763851 |
| SF3B6        | 1.115079315   | 0.4636735404 | 0.9999763851 |
| FAM228B      | -1.6633350468 | 0.056527654  | 0.9999763851 |
| TP53I3       | 0             | 0            | 0            |
| FAM228A      | -1.315303824  | 0.8206171563 | 0.9999763851 |

gene\_expression\_table

|         |                |              |              |
|---------|----------------|--------------|--------------|
| ITSN2   | 1.087711955    | 0.6295278702 | 0.9999763851 |
| NCOA1   | -1.4097336706  | 0.2129215729 | 0.9999763851 |
| PTRHD1  | -1.5176931502  | 0.037686896  | 0.9999763851 |
| CENPO   | 1.2771421293   | 0.1157550345 | 0.9999763851 |
| ADCY3   | -1.4216025334  | 0.1746366735 | 0.9999763851 |
| DNAJC27 | 1.1436674817   | 0.7911446084 | 0.9999763851 |
| EFR3B   | 1.278970045    | 0.374590486  | 0.9999763851 |
| DNMT3A  | -1.0424540121  | 0.8888622534 | 0.9999763851 |
| DTNB    | 1.0337751987   | 0.8942763355 | 0.9999763851 |
| ASXL2   | 1.1406881434   | 0.4535134815 | 0.9999763851 |
| KIF3C   | 1.1783065881   | 0.7005898276 | 0.9999763851 |
| RAB10   | 1.279311693    | 0.0986402696 | 0.9999763851 |
| GAREM2  | 1.3843154403   | 0.0444336695 | 0.9999763851 |
| HADHA   | 1.0139543316   | 0.9437541629 | 0.9999763851 |
| HADHB   | 1.0583173815   | 0.7297702511 | 0.9999763851 |
| ADGRF3  | -1.394553145   | 0.6912186114 | 0.9999763851 |
| EPT1    | 1.1855795817   | 0.4539996747 | 0.9999763851 |
| DRC1    | -1.3154339304  | 0.8205576571 | 0.9999763851 |
| CIB4    | 3.2353357581   | 0.554787377  | 0.9999763851 |
| SLC35F6 | -1.0333725574  | 0.8662299831 | 0.9999763851 |
| CENPA   | 1.0060876646   | 0.9766024825 | 0.9999763851 |
| DPYSL5  | 7.7488609396   | 0.305777082  | 0.9999763851 |
| MAPRE3  | 7.7192231741   | 0.2780352706 | 0.9999763851 |
| TMEM214 | 1.5562072344   | 0.0869868067 | 0.9999763851 |
| AGBL5   | 1.2255088861   | 0.3258256701 | 0.9999763851 |
| OST4    | -1.0191982216  | 0.9111057126 | 0.9999763851 |
| EMILIN1 | 1.325955166    | 0.748945782  | 0.9999763851 |
| KHK     | 1.3067868184   | 0.5351088923 | 0.9999763851 |
| ABHD1   | 16.6918753579  | 0.1320442202 | 0.9999763851 |
| PREB    | 1.0802539431   | 0.6285313659 | 0.9999763851 |
| SLC5A6  | 1.0640729196   | 0.7431571875 | 0.9999763851 |
| ATRAID  | -1.148780957   | 0.458098647  | 0.9999763851 |
| CAD     | 1.1168840181   | 0.5394414575 | 0.9999763851 |
| TRIM54  | 0              | 0            | 0            |
| UCN     | -1.1116250788  | 0.8542790178 | 0.9999763851 |
| MPV17   | 1.3189486249   | 0.234051062  | 0.9999763851 |
| GTF3C2  | 1.0597187345   | 0.8011712825 | 0.9999763851 |
| EIF2B4  | -1.0217395644  | 0.92804605   | 0.9999763851 |
| SNX17   | 1.1064823609   | 0.586503082  | 0.9999763851 |
| ZNF513  | 1.8136032532   | 0.5951921074 | 0.9999763851 |
| PPM1G   | 1.0195653192   | 0.881329213  | 0.9999763851 |
| NRBP1   | -1.1087404898  | 0.560966312  | 0.9999763851 |
| KRTCAP3 | 3.2356557963   | 0.5547505991 | 0.9999763851 |
| IFT172  | 3.2356557963   | 0.5547505991 | 0.9999763851 |
| C2orf16 | 1.2869488883   | 0.8189909969 | 0.9999763851 |
| ZNF512  | 1.308229032    | 0.1543179029 | 0.9999763851 |
| CCDC121 | -10.8422096127 | 0.1439257484 | 0.9999763851 |
| GPN1    | -1.0931885671  | 0.5997138692 | 0.9999763851 |
| SUPT7L  | 1.3027543022   | 0.2552113773 | 0.9999763851 |

gene\_expression\_table

|          |               |              |              |
|----------|---------------|--------------|--------------|
| SLC4A1AP | -1.1184967074 | 0.5306043995 | 0.9999763851 |
| MRPL33   | -1.2612029286 | 0.2585476449 | 0.9999763851 |
| RBKS     | 1.03638979    | 0.9611342334 | 0.9999763851 |
| BRE      | -1.2138532658 | 0.3133597188 | 0.9999763851 |
| FOSL2    | 1.0527006686  | 0.7833717672 | 0.9999763851 |
| PLB1     | -1.3708355312 | 0.7478119744 | 0.9999763851 |
| PPP1CB   | 1.1678127183  | 0.3044319711 | 0.9999763851 |
| SPDYA    | 1.2257229004  | 0.7466143562 | 0.9999763851 |
| TRMT61B  | 1.2062310354  | 0.3750512419 | 0.9999763851 |
| WDR43    | 1.0818430411  | 0.5810376127 | 0.9999763851 |
| FAM179A  | -1.6465635173 | 0.4724225492 | 0.9999763851 |
| CLIP4    | 1.0505152305  | 0.9609042588 | 0.9999763851 |
| ALK      | 0             | 0            | 0            |
| YPEL5    | -1.1309096567 | 0.5777044456 | 0.9999763851 |
| LBH      | 2.5195872738  | 0.2430923148 | 0.9999763851 |
| LCLAT1   | 1.5487639993  | 0.0576017967 | 0.9999763851 |
| CAPN13   | -4.287394647  | 0.4026306792 | 0.9999763851 |
| GALNT14  | 1.3316041862  | 0.1598189001 | 0.9999763851 |
| XDH      | 0             | 0            | 0            |
| SRD5A2   | 0             | 0            | 0            |
| MEMO1    | 1.0003142026  | 0.998711558  | 0.9999763851 |
| DPY30    | 1.3330703024  | 0.1419905517 | 0.9999763851 |
| SPAST    | -1.0786321364 | 0.7288880156 | 0.9999763851 |
| SLC30A6  | 1.3653786981  | 0.1562459732 | 0.9999763851 |
| NLRC4    | -1.8153473988 | 0.4783188166 | 0.9999763851 |
| YIPF4    | -1.0164732355 | 0.9431206982 | 0.9999763851 |
| BIRC6    | 1.1083718614  | 0.5349948639 | 0.9999763851 |
| TTC27    | 1.0527325707  | 0.8665672744 | 0.9999763851 |
| LTBP1    | 1.3263859237  | 0.4507635577 | 0.9999763851 |
| RASGRP3  | 1.8131652995  | 0.5813691012 | 0.9999763851 |
| FAM98A   | 1.1869076495  | 0.3398289187 | 0.9999763851 |
| CRIM1    | -1.8157062896 | 0.4699720344 | 0.9999763851 |
| FEZ2     | -1.0344478115 | 0.8529754667 | 0.9999763851 |
| VIT      | -1.2927005519 | 0.5318125783 | 0.9999763851 |
| STRN     | -1.3286155222 | 0.0848989372 | 0.9999763851 |
| HEATR5B  | 1.0716936802  | 0.8218470713 | 0.9999763851 |
| GPATCH11 | 1.1540913993  | 0.6117349577 | 0.9999763851 |
| EIF2AK2  | -1.0599626053 | 0.7687682823 | 0.9999763851 |
| CEBPZOS  | 1.1617193387  | 0.2973171983 | 0.9999763851 |
| CEBPZ    | -1.0407036996 | 0.854007645  | 0.9999763851 |
| NDUFAF7  | 1.1018352216  | 0.7182562241 | 0.9999763851 |
| PRKD3    | -1.4356236793 | 0.4435231656 | 0.9999763851 |
| CDC42EP3 | 1.0531272985  | 0.7211362939 | 0.9999763851 |
| RMDN2    | 3.2353357581  | 0.554787377  | 0.9999763851 |
| CYP1B1   | -1.6824870848 | 0.4555260885 | 0.9999763851 |
| ATL2     | -1.1145686507 | 0.5730443113 | 0.9999763851 |
| HNRNPLL  | -4.2849908816 | 0.4028453076 | 0.9999763851 |
| GALM     | 1.0272717886  | 0.9763520096 | 0.9999763851 |
| SRSF7    | 1.1896566698  | 0.1722171844 | 0.9999763851 |

gene\_expression\_table

|              |               |              |              |
|--------------|---------------|--------------|--------------|
| GEMIN6       | -1.110001124  | 0.6825055789 | 0.9999763851 |
| DHX57        | -1.6912821635 | 0.1835810695 | 0.9999763851 |
| MORN2        | 7.5959889452  | 0.005376     | 0.9999763851 |
| SOS1         | 1.1436337525  | 0.4797284352 | 0.9999763851 |
| CDKL4        | 0             | 0            | 0            |
| MAP4K3       | 1.4088536585  | 0.2964281978 | 0.9999763851 |
| TMEM178A     | 0             | 0            | 0            |
| THUMPD2      | 1.1575074525  | 0.6078914394 | 0.9999763851 |
| SLC8A1       | -4.2864494036 | 0.4027150576 | 0.9999763851 |
| EML4         | -1.6764906029 | 0.0003754    | 0.439186721  |
| COX7A2L      | -1.1043007756 | 0.4546553042 | 0.9999763851 |
| KCNG3        | -2.3209115874 | 0.4622161811 | 0.9999763851 |
| MTA3         | -1.3883071659 | 0.1446450142 | 0.9999763851 |
| OXER1        | -1.9659101454 | 0.4308207028 | 0.9999763851 |
| HAAO         | 1.0277462901  | 0.9757625931 | 0.9999763851 |
| ZFP36L2      | 1.0336416409  | 0.7869635463 | 0.9999763851 |
| THADA        | 1.0434821601  | 0.8306360382 | 0.9999763851 |
| DYNC2LI1     | 1.8723955021  | 0.5237072844 | 0.9999763851 |
| LRPPRC       | 1.1304115511  | 0.4405393036 | 0.9999763851 |
| PPM1B        | 1.0651626276  | 0.680338186  | 0.9999763851 |
| PREPL        | 1.2380366674  | 0.1933582431 | 0.9999763851 |
| CAMKMT       | -1.971292034  | 0.001782     | 0.9999763851 |
| SRBD1        | -1.5928709463 | 0.0799034067 | 0.9999763851 |
| LOC102724965 | 5.4776292235  | 0.3745831165 | 0.9999763851 |
| PRKCE        | -1.0292749024 | 0.9083540727 | 0.9999763851 |
| EPAS1        | 1.3439762932  | 0.443528971  | 0.9999763851 |
| ATP6V1E2     | 1.3458151177  | 0.2684008386 | 0.9999763851 |
| RHOQ         | -2.9512094836 | 0.0180535395 | 0.9999763851 |
| PIGF         | 1.4643959653  | 0.0863784067 | 0.9999763851 |
| CRIPT        | 1.3775819513  | 0.1746016123 | 0.9999763851 |
| SOCS5        | -1.285616125  | 0.3294421071 | 0.9999763851 |
| MCFD2        | 1.1000968395  | 0.5772400204 | 0.9999763851 |
| TTC7A        | -1.1659152008 | 0.4673408271 | 0.9999763851 |
| C2orf61      | -1.7354771749 | 0.4610815461 | 0.9999763851 |
| CALM2        | -1.0137813509 | 0.9189882775 | 0.9999763851 |
| MSH2         | -1.1357998396 | 0.5160744001 | 0.9999763851 |
| KCNK12       | 1.8139019215  | 0.5818413221 | 0.9999763851 |
| MSH6         | 1.0853944235  | 0.5724917196 | 0.9999763851 |
| FBXO11       | -1.0214232282 | 0.9106956777 | 0.9999763851 |
| FOXN2        | 1.054745941   | 0.7991630709 | 0.9999763851 |
| PPP1R21      | 1.131179799   | 0.681863498  | 0.9999763851 |
| STON1        | 1.027644744   | 0.9774807983 | 0.9999763851 |
| LHCGR        | 0             | 0            | 0            |
| ASB3         | -1.1067714597 | 0.7095820506 | 0.9999763851 |
| GPR75-ASB3   | 1.342772839   | 0.4505185335 | 0.9999763851 |
| CHAC2        | 1.321110215   | 0.5060978172 | 0.9999763851 |
| ERLEC1       | 1.0636953367  | 0.7931369705 | 0.9999763851 |
| PSME4        | -1.0784706666 | 0.629606575  | 0.9999763851 |
| ACYP2        | -1.4483300894 | 0.2096416084 | 0.9999763851 |

gene\_expression\_table

|              |               |              |              |
|--------------|---------------|--------------|--------------|
| SPTBN1       | 1.50164491    | 0.00754      | 0.9999763851 |
| EML6         | -1.6869571388 | 0.2831814493 | 0.9999763851 |
| RTN4         | 1.1568404118  | 0.2513290308 | 0.9999763851 |
| CLHC1        | -1.2507021559 | 0.6167086561 | 0.9999763851 |
| RPS27A       | -1.235077644  | 0.0989980096 | 0.9999763851 |
| MTIF2        | -1.0047395273 | 0.9784041219 | 0.9999763851 |
| CCDC88A      | -1.281720043  | 0.093791524  | 0.9999763851 |
| CFAP36       | -1.5423634354 | 0.2139785669 | 0.9999763851 |
| PPP4R3B      | -1.0308706825 | 0.8310822389 | 0.9999763851 |
| PNPT1        | 1.0173325989  | 0.92544304   | 0.9999763851 |
| CCDC85A      | 0             | 0            | 0            |
| VRK2         | 1.1257957434  | 0.653220876  | 0.9999763851 |
| LOC107984043 | 1.1322528341  | 0.8825188119 | 0.9999763851 |
| FANCL        | 1.144404358   | 0.5296900122 | 0.9999763851 |
| BCL11A       | -1.0721956879 | 0.6453183373 | 0.9999763851 |
| PAPOLG       | 1.1811939394  | 0.5558612063 | 0.9999763851 |
| REL          | -1.5214001104 | 0.0415106114 | 0.9999763851 |
| PUS10        | -1.3015109125 | 0.1397802069 | 0.9999763851 |
| PEX13        | -1.5429143958 | 0.1967210093 | 0.9999763851 |
| KIAA1841     | 1.2223646681  | 0.6866069743 | 0.9999763851 |
| AHSA2        | 1.106877086   | 0.5277167343 | 0.9999763851 |
| USP34        | -1.1224957927 | 0.6703546068 | 0.9999763851 |
| XPO1         | 1.3113273552  | 0.0351216098 | 0.9999763851 |
| FAM161A      | -1.1385539513 | 0.70245366   | 0.9999763851 |
| CCT4         | -1.0134428003 | 0.9120268644 | 0.9999763851 |
| COMMD1       | -1.268751871  | 0.1707268122 | 0.9999763851 |
| B3GNT2       | -1.4274545135 | 0.0809286414 | 0.9999763851 |
| TMEM17       | 5.4776292235  | 0.3745831165 | 0.9999763851 |
| EHBP1        | -1.2337115932 | 0.3395307119 | 0.9999763851 |
| OTX1         | 1.2263565036  | 0.6714721801 | 0.9999763851 |
| WDPCP        | -1.1568317067 | 0.6161114894 | 0.9999763851 |
| MDH1         | 1.0624159527  | 0.6458166987 | 0.9999763851 |
| UGP2         | -1.1276651119 | 0.4460470039 | 0.9999763851 |
| VPS54        | 1.0867395771  | 0.7522772309 | 0.9999763851 |
| AFTPH        | -1.2890781143 | 0.1979181162 | 0.9999763851 |
| SERTAD2      | -1.0226514326 | 0.8899303859 | 0.9999763851 |
| SLC1A4       | 1.0607169423  | 0.6867381001 | 0.9999763851 |
| CEP68        | 1.5248785194  | 0.274759176  | 0.9999763851 |
| RAB1A        | -1.0237616723 | 0.8555427974 | 0.9999763851 |
| ACTR2        | 1.0987856392  | 0.4684845082 | 0.9999763851 |
| SPRED2       | -1.1294902392 | 0.647145588  | 0.9999763851 |
| MEIS1        | -1.0896004414 | 0.5987921936 | 0.9999763851 |
| ETAA1        | -1.7858228363 | 0.204721115  | 0.9999763851 |
| C1D          | 1.0450761103  | 0.7875441959 | 0.9999763851 |
| WDR92        | 1.1168545673  | 0.6569235823 | 0.9999763851 |
| PNO1         | 1.1789633401  | 0.3582884595 | 0.9999763851 |
| PPP3R1       | -1.0151243697 | 0.9143244234 | 0.9999763851 |
| CNRIP1       | 1.0268207743  | 0.9771394108 | 0.9999763851 |
| PLEK         | 1.1867012473  | 0.2317231772 | 0.9999763851 |

gene\_expression\_table

|           |               |              |              |
|-----------|---------------|--------------|--------------|
| FBXO48    | -1.1228875834 | 0.8547702516 | 0.9999763851 |
| APLF      | -1.1550995243 | 0.7941305324 | 0.9999763851 |
| ARHGAP25  | 1.3637935162  | 0.1189643085 | 0.9999763851 |
| ANTXR1    | 3.2356557963  | 0.5547505991 | 0.9999763851 |
| GFPT1     | -1.3922766146 | 0.0878597507 | 0.9999763851 |
| NFU1      | -1.339815096  | 0.1550560841 | 0.9999763851 |
| AAK1      | 1.1415752274  | 0.4217329832 | 0.9999763851 |
| ANXA4     | -1.0959420662 | 0.6324399369 | 0.9999763851 |
| GMCL1     | 1.1076539834  | 0.5489596845 | 0.9999763851 |
| SNRNP27   | 1.1870286079  | 0.403856724  | 0.9999763851 |
| MXD1      | -1.1976738389 | 0.4575237098 | 0.9999763851 |
| ASPRV1    | 2.8683753118  | 0.2970239536 | 0.9999763851 |
| PCBP1     | 1.0246180889  | 0.8535331483 | 0.9999763851 |
| C2orf42   | 1.1647633948  | 0.7495638197 | 0.9999763851 |
| TIA1      | 1.1763165918  | 0.4261515316 | 0.9999763851 |
| PCYOX1    | -1.3743857604 | 0.0267636196 | 0.9999763851 |
| SNRPG     | -1.0671039586 | 0.5880833828 | 0.9999763851 |
| FAM136A   | 1.1257171013  | 0.501554028  | 0.9999763851 |
| TGFA      | 1.6241887583  | 0.5813605053 | 0.9999763851 |
| CLEC4F    | 0             | 0            | 0            |
| VAX2      | -1.315303824  | 0.8206171563 | 0.9999763851 |
| ATP6V1B1  | 1.7955828734  | 0.2867099268 | 0.9999763851 |
| TEX261    | 1.4270854773  | 0.0327520538 | 0.9999763851 |
| NAGK      | 1.3952870539  | 0.2431710997 | 0.9999763851 |
| MCEE      | -1.3822405422 | 0.3766611981 | 0.9999763851 |
| MPHOSPH10 | -1.2249881759 | 0.3581147062 | 0.9999763851 |
| ZNF638    | -1.1775845548 | 0.3990530189 | 0.9999763851 |
| DYSF      | 1.3635876576  | 0.1732447172 | 0.9999763851 |
| EXOC6B    | 1.2867653957  | 0.8302200816 | 0.9999763851 |
| EMX1      | 0             | 0            | 0            |
| SFXN5     | 1.1679083758  | 0.5812122433 | 0.9999763851 |
| RAB11FIP5 | -1.2468168198 | 0.2477623091 | 0.9999763851 |
| NOTO      | 0             | 0            | 0            |
| SMYD5     | -1.3620636421 | 0.6368377281 | 0.9999763851 |
| PRADC1    | 1.0129300777  | 0.9656951153 | 0.9999763851 |
| CCT7      | -1.0350100581 | 0.7999910039 | 0.9999763851 |
| FBXO41    | 1.5968276379  | 0.1651166133 | 0.9999763851 |
| ALMS1     | 1.8157003876  | 0.1214582642 | 0.9999763851 |
| TPRKB     | 1.0307255886  | 0.8819738451 | 0.9999763851 |
| DUSP11    | 1.0036050462  | 0.9885961386 | 0.9999763851 |
| STAMBP    | -1.1061510203 | 0.7018111654 | 0.9999763851 |
| ACTG2     | 0             | 0            | 0            |
| DGUOK     | -1.0167055867 | 0.9207469825 | 0.9999763851 |
| TET3      | -1.1325057796 | 0.5958103997 | 0.9999763851 |
| BOLA3     | 1.2286026936  | 0.2597593711 | 0.9999763851 |
| MOB1A     | 1.4238131745  | 0.0349642558 | 0.9999763851 |
| MTHFD2    | -1.1211063026 | 0.4420067432 | 0.9999763851 |
| SLC4A5    | -1.281853878  | 0.3481963662 | 0.9999763851 |
| DCTN1     | 1.2889258401  | 0.2646920084 | 0.9999763851 |

gene\_expression\_table

|          |               |              |              |
|----------|---------------|--------------|--------------|
| C2orf81  | -1.080916289  | 0.9218494159 | 0.9999763851 |
| WDR54    | -1.0382665908 | 0.8834081126 | 0.9999763851 |
| RTKN     | 0             | 0            | 0            |
| INO80B   | 1.2172563436  | 0.7055631978 | 0.9999763851 |
| WBP1     | -1.2907936775 | 0.3098200842 | 0.9999763851 |
| MOGS     | 1.0005382248  | 0.9979450567 | 0.9999763851 |
| MRPL53   | 1.4765991151  | 0.0229825898 | 0.9999763851 |
| CCDC142  | -2.9937056245 | 0.1615965695 | 0.9999763851 |
| TTC31    | 1.6242712064  | 0.1898982261 | 0.9999763851 |
| LBX2     | 3.2356557963  | 0.5547505991 | 0.9999763851 |
| PCGF1    | -2.0110792645 | 0.2231009582 | 0.9999763851 |
| DQX1     | 0             | 0            | 0            |
| AUP1     | 1.2152265407  | 0.2409094809 | 0.9999763851 |
| HTRA2    | 1.3308698118  | 0.2479591739 | 0.9999763851 |
| LOXL3    | -2.3763485512 | 0.4067077572 | 0.9999763851 |
| DOK1     | -1.2433211656 | 0.1477399957 | 0.9999763851 |
| M1AP     | -1.4153036866 | 0.6387328106 | 0.9999763851 |
| SEMA4F   | 0             | 0            | 0            |
| HK2      | -1.2476028608 | 0.2130856504 | 0.9999763851 |
| POLE4    | 1.0018790596  | 0.9915204116 | 0.9999763851 |
| TACR1    | 1.1892050826  | 0.8083244611 | 0.9999763851 |
| MRPL19   | -1.5786340388 | 0.0156258948 | 0.9999763851 |
| GCFC2    | -1.0639563986 | 0.8601929054 | 0.9999763851 |
| LRRTM4   | 3.2361532718  | 0.5546934395 | 0.9999763851 |
| CTNNA2   | 5.4770877341  | 0.3746135179 | 0.9999763851 |
| SUCLG1   | 1.1029527461  | 0.4957967366 | 0.9999763851 |
| DNAH6    | 0             | 0            | 0            |
| TRABD2A  | -4.2849908816 | 0.4028453076 | 0.9999763851 |
| TMSB10   | -1.1337601534 | 0.3770608755 | 0.9999763851 |
| KCMF1    | 1.2377568161  | 0.285959735  | 0.9999763851 |
| TCF7L1   | -2.2383770602 | 0.3301996687 | 0.9999763851 |
| TGOLN2   | -1.2689429059 | 0.0854042447 | 0.9999763851 |
| RETSAT   | 1.1130819889  | 0.563271458  | 0.9999763851 |
| ELMOD3   | 1.128763695   | 0.7570667636 | 0.9999763851 |
| CAPG     | 1.1359314632  | 0.4406142068 | 0.9999763851 |
| SH2D6    | 0             | 0            | 0            |
| MAT2A    | 1.0198804115  | 0.8823139831 | 0.9999763851 |
| GGCX     | -1.0186141143 | 0.9440969484 | 0.9999763851 |
| VAMP8    | -1.1317356375 | 0.3551138233 | 0.9999763851 |
| VAMP5    | -1.0157801405 | 0.9771486462 | 0.9999763851 |
| RNF181   | -1.0672732615 | 0.7511287799 | 0.9999763851 |
| TMEM150A | -1.0356386932 | 0.9396850031 | 0.9999763851 |
| USP39    | 1.2216049891  | 0.2704184296 | 0.9999763851 |
| C2orf68  | -1.4699587079 | 0.1567987807 | 0.9999763851 |
| ATOH8    | 2.8682179169  | 0.3019372198 | 0.9999763851 |
| ST3GAL5  | 1.3036963729  | 0.5592653088 | 0.9999763851 |
| POLR1A   | 1.1181992119  | 0.7093815731 | 0.9999763851 |
| PTCD3    | 1.0643579535  | 0.7044545482 | 0.9999763851 |
| IMMT     | 1.3018007913  | 0.0732684497 | 0.9999763851 |

gene\_expression\_table

|              |               |              |              |
|--------------|---------------|--------------|--------------|
| MRPL35       | 1.2305812311  | 0.2547223322 | 0.9999763851 |
| KDM3A        | -2.210488049  | 0.0007811    | 0.6568370458 |
| CHMP3        | -1.0513119976 | 0.7577621645 | 0.9999763851 |
| RNF103-CHMP3 | -1.9451744431 | 0.4383692894 | 0.9999763851 |
| RNF103       | -1.9877309057 | 0.1505008152 | 0.9999763851 |
| RMND5A       | -1.2177526697 | 0.318928986  | 0.9999763851 |
| CD8A         | 0             | 0            | 0            |
| CD8B         | 0             | 0            | 0            |
| PLGLB1       | 7.7204093521  | 0.2881896654 | 0.9999763851 |
| LOC730268    | 1.0631873881  | 0.8974318562 | 0.9999763851 |
| RGPD2        | -1.6534026074 | 0.2581321001 | 0.9999763851 |
| KRCC1        | -1.1737646797 | 0.5211092162 | 0.9999763851 |
| EIF2AK3      | -1.6666198591 | 0.0671035089 | 0.9999763851 |
| RPIA         | -1.2420000559 | 0.1976195011 | 0.9999763851 |
| LOC107985911 | -1.3214631849 | 0.5690647226 | 0.9999763851 |
| TEKT4        | 7.7488609396  | 0.3058577563 | 0.9999763851 |
| MRPS5        | 1.2426220328  | 0.1750842263 | 0.9999763851 |
| ZNF514       | -4.3327792956 | 0.1654925197 | 0.9999763851 |
| ZNF2         | -1.7344697458 | 0.454054257  | 0.9999763851 |
| KCNIP3       | 0             | 0            | 0            |
| FAHD2A       | -1.0322542091 | 0.8987337781 | 0.9999763851 |
| ANKRD36C     | -1.1187044772 | 0.6616498032 | 0.9999763851 |
| LOC107984110 | 0             | 0            | 0            |
| GPAT2        | 1.0408311207  | 0.959749795  | 0.9999763851 |
| ASTL         | 7.7599005912  | 0.2898575514 | 0.9999763851 |
| DUSP2        | 1.1112905062  | 0.6216869168 | 0.9999763851 |
| STARD7       | -1.0730594048 | 0.5530232333 | 0.9999763851 |
| TMEM127      | 1.4376745279  | 0.1318752406 | 0.9999763851 |
| CIAO1        | 1.1019880542  | 0.5405328236 | 0.9999763851 |
| SNRNP200     | 1.3307224643  | 0.0460934643 | 0.9999763851 |
| NCAPH        | 1.1259600006  | 0.4641526807 | 0.9999763851 |
| ARID5A       | 1.4461813237  | 0.0549773423 | 0.9999763851 |
| KANSL3       | -1.0997603701 | 0.60625043   | 0.9999763851 |
| FER1L5       | 0             | 0            | 0            |
| LMAN2L       | 1.5467827042  | 0.1189191726 | 0.9999763851 |
| CNNM4        | -1.8992688232 | 0.055017229  | 0.9999763851 |
| CNNM3        | -1.0433072276 | 0.8545354838 | 0.9999763851 |
| ANKRD23      | -1.0537130233 | 0.9182419571 | 0.9999763851 |
| ANKRD39      | 1.1609452035  | 0.3835696884 | 0.9999763851 |
| SEMA4C       | 1.2064374145  | 0.2169368647 | 0.9999763851 |
| FAM178B      | -3.3302773804 | 0.2299524791 | 0.9999763851 |
| FAHD2B       | -1.1015850729 | 0.7001300645 | 0.9999763851 |
| ANKRD36      | -1.6663798667 | 0.3061143595 | 0.9999763851 |
| ANKRD36B     | -1.2214116021 | 0.3761733749 | 0.9999763851 |
| COX5B        | 1.0102030401  | 0.9347982024 | 0.9999763851 |
| ACTR1B       | 1.0094778478  | 0.946718742  | 0.9999763851 |
| ZAP70        | 1.813344484   | 0.5820336358 | 0.9999763851 |
| TMEM131      | 1.0562564288  | 0.7335566298 | 0.9999763851 |
| VWA3B        | 3.2353357581  | 0.554787377  | 0.9999763851 |



gene\_expression\_table

|              |               |              |              |
|--------------|---------------|--------------|--------------|
| INPP4A       | 1.0192312552  | 0.9077453102 | 0.9999763851 |
| COA5         | -1.1046072051 | 0.6118765378 | 0.9999763851 |
| UNC50        | 1.4380021782  | 0.2331515865 | 0.9999763851 |
| MGAT4A       | 1.3297552504  | 0.1786145587 | 0.9999763851 |
| KIAA1211L    | -1.0755082442 | 0.7977674856 | 0.9999763851 |
| TSGA10       | 1.5807548893  | 0.1818240065 | 0.9999763851 |
| C2orf15      | -1.6219931477 | 0.4436846426 | 0.9999763851 |
| LIPT1        | 4.1100123697  | 0.1007263803 | 0.9999763851 |
| MITD1        | -1.3563111278 | 0.1552092989 | 0.9999763851 |
| MRPL30       | -1.1650567664 | 0.3717197832 | 0.9999763851 |
| LYG2         | 1.0270472827  | 0.9776204387 | 0.9999763851 |
| TXNDC9       | 1.3286524472  | 0.1935058476 | 0.9999763851 |
| EIF5B        | -1.0060512258 | 0.9608784015 | 0.9999763851 |
| REV1         | -1.1475183994 | 0.4777509799 | 0.9999763851 |
| AFF3         | -1.1483793728 | 0.8593637268 | 0.9999763851 |
| LONRF2       | 3.2356557963  | 0.5547505991 | 0.9999763851 |
| CHST10       | 1.7771737389  | 0.030601334  | 0.9999763851 |
| PDCL3        | -2.0596204881 | 0.0698354965 | 0.9999763851 |
| NPAS2        | 0             | 0            | 0            |
| RPL31        | -1.035186772  | 0.769726902  | 0.9999763851 |
| TBC1D8       | -1.0041110489 | 0.9923308766 | 0.9999763851 |
| CNOT11       | -1.3388081756 | 0.0666895219 | 0.9999763851 |
| RNF149       | -1.3010473315 | 0.1946273161 | 0.9999763851 |
| CREG2        | 1.1294335392  | 0.8449647978 | 0.9999763851 |
| RFX8         | -1.7171302182 | 0.1205232019 | 0.9999763851 |
| MAP4K4       | -1.0639167558 | 0.681890303  | 0.9999763851 |
| IL1R2        | 0             | 0            | 0            |
| IL1R1        | 1.3262899408  | 0.7594254998 | 0.9999763851 |
| IL18R1       | 1.4203047017  | 0.2820066814 | 0.9999763851 |
| IL18RAP      | 1.8612147697  | 0.2010349174 | 0.9999763851 |
| SLC9A4       | 0             | 0            | 0            |
| SLC9A2       | -2.4440355816 | 0.4439069782 | 0.9999763851 |
| MFSD9        | -1.4813240664 | 0.1789293071 | 0.9999763851 |
| TMEM182      | 1.2100357382  | 0.6008460605 | 0.9999763851 |
| MRPS9        | -1.0610741291 | 0.7292454941 | 0.9999763851 |
| TGFBRAP1     | 1.0368474459  | 0.8230817278 | 0.9999763851 |
| C2orf49      | -1.1195121669 | 0.6561072983 | 0.9999763851 |
| FHL2         | -1.3714374731 | 0.7336360884 | 0.9999763851 |
| NCK2         | 1.0219431309  | 0.9125964542 | 0.9999763851 |
| C2orf40      | -4.2864494036 | 0.4027150576 | 0.9999763851 |
| UXS1         | 1.023158894   | 0.8808816156 | 0.9999763851 |
| RGPD3        | 0             | 0            | 0            |
| LOC107985931 | 0             | 0            | 0            |
| SULT1C2      | 0             | 0            | 0            |
| GCC2         | -1.6142246857 | 0.0451607739 | 0.9999763851 |
| LIMS1        | -1.213314902  | 0.1828073918 | 0.9999763851 |
| RANBP2       | 1.0214071416  | 0.8908219343 | 0.9999763851 |
| CCDC138      | 1.053416032   | 0.8452734528 | 0.9999763851 |
| EDAR         | 0             | 0            | 0            |

gene\_expression\_table

|              |                |              |              |
|--------------|----------------|--------------|--------------|
| SH3RF3       | 1.0734923781   | 0.7994345489 | 0.9999763851 |
| SEPT10       | 1.9834686116   | 0.1499094332 | 0.9999763851 |
| SOWAHC       | -1.0756553267  | 0.8347383746 | 0.9999763851 |
| RGPD5        | -14.1139127893 | 0.1018289369 | 0.9999763851 |
| LIMS3        | 0              | 0            | 0            |
| MALL         | 0              | 0            | 0            |
| NPHP1        | 0              | 0            | 0            |
| LIMS4        | 0              | 0            | 0            |
| RGPD6        | -1.045438992   | 0.9610160069 | 0.9999763851 |
| BUB1         | -1.2480313723  | 0.2305172057 | 0.9999763851 |
| ACOXL        | 1.2512644887   | 0.521863797  | 0.9999763851 |
| BCL2L11      | 1.2733425569   | 0.1685161822 | 0.9999763851 |
| ANAPC1       | 1.1031592173   | 0.505694661  | 0.9999763851 |
| MERTK        | -1.0270070658  | 0.9057698921 | 0.9999763851 |
| TMEM87B      | -1.1405864677  | 0.5050447268 | 0.9999763851 |
| FBLN7        | -1.0971100786  | 0.8676021818 | 0.9999763851 |
| ZC3H8        | -1.2219743294  | 0.3066724101 | 0.9999763851 |
| ZC3H6        | -1.2718349738  | 0.5098842696 | 0.9999763851 |
| RGPD8        | -1.4249254444  | 0.6101019289 | 0.9999763851 |
| TTL          | -1.1345145882  | 0.4141526962 | 0.9999763851 |
| POLR1B       | 1.2236250052   | 0.2745990447 | 0.9999763851 |
| CHCHD5       | 2.587886895    | 0.0429304897 | 0.9999763851 |
| SLC20A1      | -1.0658843322  | 0.6320687838 | 0.9999763851 |
| NT5DC4       | -1.4461138135  | 0.1880286321 | 0.9999763851 |
| CKAP2L       | 1.1274883687   | 0.5454925737 | 0.9999763851 |
| IL1B         | -7.9941504099  | 9.66E-12     | 1.04E-07     |
| IL36G        | 5.4770877341   | 0.3746135179 | 0.9999763851 |
| IL36A        | 0              | 0            | 0            |
| IL36B        | 0              | 0            | 0            |
| IL36RN       | -7.5647903763  | 0.2176246281 | 0.9999763851 |
| IL1RN        | -6.062531604   | 3.23E-09     | 1.24E-05     |
| PSD4         | 1.3316955254   | 0.1109782799 | 0.9999763851 |
| PAX8         | 2.2197442392   | 0.3827732759 | 0.9999763851 |
| CBWD2        | -1.1501557732  | 0.6625856998 | 0.9999763851 |
| FOXD4L1      | -1.8252752883  | 0.4396499131 | 0.9999763851 |
| RABL2A       | -1.4112614935  | 0.2843419853 | 0.9999763851 |
| SLC35F5      | 1.3593234382   | 0.167721857  | 0.9999763851 |
| ACTR3        | 1.2241783698   | 0.1476125658 | 0.9999763851 |
| DDX18        | -1.1369028626  | 0.3894054282 | 0.9999763851 |
| LOC107985939 | 1.1429815926   | 0.7565703052 | 0.9999763851 |
| CCDC93       | -1.3974597658  | 0.0786853912 | 0.9999763851 |
| INSIG2       | -1.6497102849  | 0.1883267835 | 0.9999763851 |
| MARCO        | -1.7494132661  | 0.1069887274 | 0.9999763851 |
| STEAP3       | 1.3251796054   | 0.2872637719 | 0.9999763851 |
| C2orf76      | -2.0486799378  | 0.2151357512 | 0.9999763851 |
| DBI          | -1.190950259   | 0.1530585697 | 0.9999763851 |
| SCTR         | 0              | 0            | 0            |
| CFAP221      | 0              | 0            | 0            |
| TMEM177      | -1.5728911116  | 0.1233092937 | 0.9999763851 |

gene\_expression\_table

|              |               |              |              |
|--------------|---------------|--------------|--------------|
| PTPN4        | -1.2533885642 | 0.5262666626 | 0.9999763851 |
| EPB41L5      | -1.3158816768 | 0.8203229797 | 0.9999763851 |
| TMEM185B     | 1.2800922138  | 0.1307734764 | 0.9999763851 |
| RALB         | -1.5204433696 | 0.004249     | 0.9999763851 |
| INHBB        | 0             | 0            | 0            |
| TFCP2L1      | 0             | 0            | 0            |
| CLASP1       | -1.1491943618 | 0.3402246172 | 0.9999763851 |
| NIFK         | 1.2405136054  | 0.1587750247 | 0.9999763851 |
| TSN          | 1.1175265115  | 0.4609286173 | 0.9999763851 |
| CNTNAP5      | 5.4770877341  | 0.3746135179 | 0.9999763851 |
| GYPC         | -1.1108671394 | 0.4195399387 | 0.9999763851 |
| BIN1         | 1.3638024281  | 0.2213738185 | 0.9999763851 |
| ERCC3        | 1.0087546418  | 0.9611343498 | 0.9999763851 |
| MAP3K2       | 1.1124101115  | 0.5801403512 | 0.9999763851 |
| PROC         | -1.3154339304 | 0.8205576571 | 0.9999763851 |
| IWS1         | 1.1484238619  | 0.3896505443 | 0.9999763851 |
| LIMS2        | 1.0542383865  | 0.8046896137 | 0.9999763851 |
| GPR17        | -1.3157515262 | 0.8227855444 | 0.9999763851 |
| SFT2D3       | -1.0886417021 | 0.7739156355 | 0.9999763851 |
| WDR33        | 1.0659363653  | 0.6970446659 | 0.9999763851 |
| POLR2D       | -1.137911618  | 0.5116338305 | 0.9999763851 |
| LOC107985803 | 1.6096975159  | 0.204839876  | 0.9999763851 |
| AMMECR1L     | 1.4456391063  | 0.1457521704 | 0.9999763851 |
| SAP130       | 1.0274861459  | 0.8800199645 | 0.9999763851 |
| UGGT1        | 1.0489172896  | 0.7656211274 | 0.9999763851 |
| HS6ST1       | 1.2803615879  | 0.1751980264 | 0.9999763851 |
| RAB6C        | -3.1528628322 | 0.202248388  | 0.9999763851 |
| CCDC74B      | -4.2849908816 | 0.4028453076 | 0.9999763851 |
| SMPD4        | -1.1526450932 | 0.2565084101 | 0.9999763851 |
| MZT2B        | -1.0128241802 | 0.9255979016 | 0.9999763851 |
| TUBA3E       | 3.2361532718  | 0.5546934395 | 0.9999763851 |
| CCDC115      | -1.7253992275 | 0.001068     | 0.833154348  |
| IMP4         | 1.092733122   | 0.6042809177 | 0.9999763851 |
| PTPN18       | 1.4586197561  | 0.071081198  | 0.9999763851 |
| POTEI        | -1.2279078578 | 0.1645039133 | 0.9999763851 |
| FAM168B      | 1.3143457626  | 0.0976177827 | 0.9999763851 |
| PLEKHB2      | 1.3164726749  | 0.0656147391 | 0.9999763851 |
| WTH3DI       | -3.7978639386 | 0.2119439624 | 0.9999763851 |
| MZT2A        | 1.1691105424  | 0.3199047164 | 0.9999763851 |
| CCDC74A      | -1.0550245006 | 0.9552374595 | 0.9999763851 |
| C2orf27A     | -1.113460946  | 0.6186113448 | 0.9999763851 |
| MGAT5        | -1.0268694645 | 0.8598628634 | 0.9999763851 |
| TMEM163      | -1.1122312474 | 0.4507727924 | 0.9999763851 |
| ACMSD        | 1.5102429321  | 0.5414379252 | 0.9999763851 |
| CCNT2        | 1.2442592626  | 0.3602406347 | 0.9999763851 |
| RAB3GAP1     | -1.2865543081 | 0.1785395959 | 0.9999763851 |
| ZRANB3       | -1.2125368491 | 0.2925639616 | 0.9999763851 |
| R3HDM1       | 1.1278613382  | 0.4888598206 | 0.9999763851 |
| LOC107985946 | 0             | 0            | 0            |

gene\_expression\_table

|            |               |              |              |
|------------|---------------|--------------|--------------|
| UBXN4      | -1.1537219212 | 0.483133874  | 0.9999763851 |
| LCT        | -1.3151016298 | 0.8209556205 | 0.9999763851 |
| MCM6       | 1.3733382774  | 0.0110091128 | 0.9999763851 |
| DARS       | 1.1007945623  | 0.4757582746 | 0.9999763851 |
| CXCR4      | -1.089537404  | 0.4998023687 | 0.9999763851 |
| THSD7B     | -7.5664585246 | 0.2266167716 | 0.9999763851 |
| HNMT       | 1.3647763335  | 0.5423491451 | 0.9999763851 |
| SPOPL      | -1.5834751417 | 0.1194871292 | 0.9999763851 |
| NXPH2      | 0             | 0            | 0            |
| ARHGAP15   | -1.0502905104 | 0.7400504591 | 0.9999763851 |
| GTDC1      | 1.2910500905  | 0.4148260026 | 0.9999763851 |
| ZEB2       | -1.6915579332 | 0.008295     | 0.9999763851 |
| ACVR2A     | -5.7918925833 | 0.1509002625 | 0.9999763851 |
| ORC4       | 1.0887046696  | 0.6813109391 | 0.9999763851 |
| MBD5       | -1.056370503  | 0.8435271623 | 0.9999763851 |
| EPC2       | -1.0118928759 | 0.9529805139 | 0.9999763851 |
| KIF5C      | -1.5352827146 | 0.00169      | 0.9999763851 |
| LYPD6B     | -1.0453655538 | 0.9385241153 | 0.9999763851 |
| MMADHC     | 1.0682028691  | 0.6608349488 | 0.9999763851 |
| RBM43      | -1.6160275616 | 0.2644448311 | 0.9999763851 |
| NMI        | 1.177517447   | 0.3299443549 | 0.9999763851 |
| TNFAIP6    | -4.2864494036 | 0.4027150576 | 0.9999763851 |
| RIF1       | -1.0448133566 | 0.7835605872 | 0.9999763851 |
| NEB        | 1.1971594869  | 0.7106462339 | 0.9999763851 |
| ARL5A      | 1.1408676765  | 0.4028961212 | 0.9999763851 |
| CACNB4     | -1.2401979461 | 0.4448675194 | 0.9999763851 |
| STAM2      | -1.1744975129 | 0.5989277265 | 0.9999763851 |
| FMNL2      | -1.2521389154 | 0.4524624584 | 0.9999763851 |
| PRPF40A    | 1.0531539214  | 0.7183131685 | 0.9999763851 |
| ARL6IP6    | -1.1879572039 | 0.3936072265 | 0.9999763851 |
| GALNT13    | -4.2864494036 | 0.4027150576 | 0.9999763851 |
| KCNJ3      | 0             | 0            | 0            |
| NR4A2      | -1.6831517933 | 0.4363769469 | 0.9999763851 |
| GPD2       | -1.4037781742 | 0.2895274188 | 0.9999763851 |
| GALNT5     | 0             | 0            | 0            |
| ERMN       | 0             | 0            | 0            |
| CYTIP      | 1.3658340055  | 0.4683579203 | 0.9999763851 |
| ACVR1      | -2.2165260254 | 0.2363025112 | 0.9999763851 |
| UPP2       | 2.3401939765  | 0.403890843  | 0.9999763851 |
| PKP4       | -1.3404489624 | 0.2351458445 | 0.9999763851 |
| TANC1      | -1.5510068859 | 0.3690648191 | 0.9999763851 |
| WDSUB1     | -1.5504586825 | 0.1018525871 | 0.9999763851 |
| BAZ2B      | -1.1715748754 | 0.6496607764 | 0.9999763851 |
| MARCH7     | 1.0024187022  | 0.9892143563 | 0.9999763851 |
| CD302      | -2.6629764642 | 0.0123545902 | 0.9999763851 |
| LY75-CD302 | 33.3819854938 | 0.0772464494 | 0.9999763851 |
| LY75       | 1.4755288217  | 0.4708784779 | 0.9999763851 |
| ITGB6      | 0             | 0            | 0            |
| RBMS1      | 1.2158649977  | 0.2165533968 | 0.9999763851 |

gene\_expression\_table

|                 |               |              |              |
|-----------------|---------------|--------------|--------------|
| TANK            | -1.5510086139 | 0.0540655241 | 0.9999763851 |
| PSMD14          | 1.2651599853  | 0.0900390766 | 0.9999763851 |
| TBR1            | 1.287203384   | 0.8304822833 | 0.9999763851 |
| FAP             | -4.0702668798 | 0.0155904502 | 0.9999763851 |
| IFIH1           | -1.1548451273 | 0.5123944174 | 0.9999763851 |
| GCA             | 1.5676312967  | 0.1129655165 | 0.9999763851 |
| GRB14           | -1.1078669959 | 0.53137739   | 0.9999763851 |
| COBLL1          | 0             | 0            | 0            |
| SCN2A           | -4.2849908816 | 0.4028453076 | 0.9999763851 |
| GALNT3          | -1.345634794  | 0.5007276973 | 0.9999763851 |
| TTC21B          | -2.2104919443 | 0.008274     | 0.9999763851 |
| B3GALT1         | 0             | 0            | 0            |
| STK39           | 1.2875826832  | 0.0974493574 | 0.9999763851 |
| CERS6           | -1.2153364155 | 0.2347303616 | 0.9999763851 |
| NOSTRIN         | -1.6880138705 | 0.2499161077 | 0.9999763851 |
| SPC25           | 1.0586218826  | 0.7829050059 | 0.9999763851 |
| DHRS9           | -1.0299800453 | 0.9016944456 | 0.9999763851 |
| LRP2            | 3.2356557963  | 0.5547505991 | 0.9999763851 |
| BBS5            | 1.3627548182  | 0.5243377697 | 0.9999763851 |
| KLHL41          | -1.407939759  | 0.6698538146 | 0.9999763851 |
| FASTKD1         | 1.0378822123  | 0.8743439619 | 0.9999763851 |
| PPIG            | 1.1485763478  | 0.3616544547 | 0.9999763851 |
| PHOSPHO2        | 1.255717164   | 0.5914567131 | 0.9999763851 |
| PHOSPHO2-KLHL23 | -1.6593349313 | 0.3346611771 | 0.9999763851 |
| KLHL23          | -1.0552853955 | 0.7725668301 | 0.9999763851 |
| SSB             | 1.1266577587  | 0.4001946605 | 0.9999763851 |
| METTL5          | -1.4010851323 | 0.2483041405 | 0.9999763851 |
| UBR3            | -1.1840710714 | 0.4030694268 | 0.9999763851 |
| MYO3B           | 1.0991008447  | 0.8399132411 | 0.9999763851 |
| ERICH2          | -1.0860476531 | 0.8728611828 | 0.9999763851 |
| GAD1            | -1.0889276106 | 0.8415788258 | 0.9999763851 |
| GORASP2         | 1.0155828628  | 0.9151323953 | 0.9999763851 |
| TLK1            | 1.1770333151  | 0.3405868971 | 0.9999763851 |
| METTL8          | 1.0957312771  | 0.6429496946 | 0.9999763851 |
| DCAF17          | -1.0650188182 | 0.8374081718 | 0.9999763851 |
| CYBRD1          | -1.183723567  | 0.4902051974 | 0.9999763851 |
| DYNC1I2         | -1.028831282  | 0.8156466637 | 0.9999763851 |
| SLC25A12        | -1.0201591107 | 0.9060279096 | 0.9999763851 |
| HAT1            | 1.329659192   | 0.082784236  | 0.9999763851 |
| METAP1D         | 1.0672187123  | 0.8133199352 | 0.9999763851 |
| DLX1            | 1.5006771831  | 0.0125623929 | 0.9999763851 |
| DLX2            | 1.0557951289  | 0.8466659238 | 0.9999763851 |
| ITGA6           | -1.0963829722 | 0.484725696  | 0.9999763851 |
| PDK1            | -1.1244532323 | 0.3302215589 | 0.9999763851 |
| RAPGEF4         | -1.3711818216 | 0.7358439975 | 0.9999763851 |
| ZAK             | 1.2430807307  | 0.2580011987 | 0.9999763851 |
| CDCA7           | 1.0585635182  | 0.7389662898 | 0.9999763851 |
| SP3             | -1.3790486573 | 0.0745906272 | 0.9999763851 |
| OLA1            | 1.3155003919  | 0.0427314064 | 0.9999763851 |

gene\_expression\_table

|              |               |              |              |
|--------------|---------------|--------------|--------------|
| CIR1         | -1.3157650748 | 0.1959790288 | 0.9999763851 |
| SCRN3        | -1.1759179026 | 0.5792347872 | 0.9999763851 |
| GPR155       | -3.368395211  | 0.0626175119 | 0.9999763851 |
| WIPF1        | -1.0459841812 | 0.7421501978 | 0.9999763851 |
| CHN1         | -1.7334433524 | 0.4693833927 | 0.9999763851 |
| ATF2         | -1.094572815  | 0.6598390343 | 0.9999763851 |
| ATP5G3       | -1.0858167284 | 0.4631874557 | 0.9999763851 |
| KIAA1715     | -1.0431332864 | 0.7871694096 | 0.9999763851 |
| HOXD11       | 3.2356557963  | 0.5547505991 | 0.9999763851 |
| MTX2         | 1.0816473494  | 0.6751414187 | 0.9999763851 |
| LOC105373759 | 5.4776292235  | 0.3745831165 | 0.9999763851 |
| HNRNPA3      | 1.0520386633  | 0.6869630563 | 0.9999763851 |
| NFE2L2       | 1.2743260254  | 0.2368101713 | 0.9999763851 |
| AGPS         | 1.0773193477  | 0.6428684649 | 0.9999763851 |
| TTC30B       | -1.3157515262 | 0.822738687  | 0.9999763851 |
| TTC30A       | 1.2866381786  | 0.8226816388 | 0.9999763851 |
| PDE11A       | 3.2353357581  | 0.554787377  | 0.9999763851 |
| RBM45        | 1.1350834036  | 0.8010610213 | 0.9999763851 |
| PRKRA        | -1.0089241456 | 0.9571466869 | 0.9999763851 |
| DFNB59       | -1.8847490183 | 0.0375268866 | 0.9999763851 |
| FKBP7        | 1.3680439253  | 0.4843730687 | 0.9999763851 |
| PLEKHA3      | -1.0210413177 | 0.9171599352 | 0.9999763851 |
| TTN          | -1.4418754866 | 0.3607696841 | 0.9999763851 |
| SESTD1       | 1.0188638266  | 0.9697764847 | 0.9999763851 |
| CWC22        | 1.371359466   | 0.1401334365 | 0.9999763851 |
| UBE2E3       | -1.0164499562 | 0.9286090016 | 0.9999763851 |
| ITGA4        | 1.0050723152  | 0.9724437888 | 0.9999763851 |
| CERKL        | -1.8582989466 | 0.1078815235 | 0.9999763851 |
| SSFA2        | 1.2656507543  | 0.641213252  | 0.9999763851 |
| PDE1A        | 1.0833376575  | 0.9038766628 | 0.9999763851 |
| DNAJC10      | 1.136151586   | 0.4359589748 | 0.9999763851 |
| DUSP19       | 5.4770877341  | 0.3746135179 | 0.9999763851 |
| NUP35        | 1.1574604991  | 0.5652056993 | 0.9999763851 |
| LOC105373780 | -2.5584892659 | 0.2979878675 | 0.9999763851 |
| ZNF804A      | 1.0785132654  | 0.8845443462 | 0.9999763851 |
| FSIP2        | 0             | 0            | 0            |
| ZC3H15       | 1.3546550011  | 0.0502096382 | 0.9999763851 |
| ITGAV        | -1.0439366194 | 0.9212761022 | 0.9999763851 |
| GULP1        | 0             | 0            | 0            |
| COL5A2       | 0             | 0            | 0            |
| WDR75        | -1.0988918807 | 0.6047422117 | 0.9999763851 |
| SLC40A1      | 1.6802495696  | 0.185189774  | 0.9999763851 |
| ASNSD1       | 1.1753507171  | 0.5574068427 | 0.9999763851 |
| ANKAR        | -1.2839721658 | 0.5580995611 | 0.9999763851 |
| OSGEPL1      | -1.0451537772 | 0.9050379132 | 0.9999763851 |
| ORMDL1       | 1.0319372792  | 0.8294712036 | 0.9999763851 |
| PMS1         | 1.3217197514  | 0.1879895107 | 0.9999763851 |
| C2orf88      | -1.2811588713 | 0.3624489837 | 0.9999763851 |
| HIBCH        | 1.1349096448  | 0.5116731198 | 0.9999763851 |

gene\_expression\_table

|              |               |              |              |
|--------------|---------------|--------------|--------------|
| INPP1        | 1.4611209985  | 0.2043350135 | 0.9999763851 |
| MFSD6        | -1.1656630398 | 0.7871895855 | 0.9999763851 |
| NEMP2        | 1.0631248897  | 0.7625183607 | 0.9999763851 |
| NAB1         | -1.20097097   | 0.5442048614 | 0.9999763851 |
| GLS          | 1.203461595   | 0.1926900557 | 0.9999763851 |
| STAT1        | -1.1953625942 | 0.2761892204 | 0.9999763851 |
| MYO1B        | 0             | 0            | 0            |
| NABP1        | 1.3226010982  | 0.2475407877 | 0.9999763851 |
| SLC39A10     | 1.0064679317  | 0.9818166269 | 0.9999763851 |
| LOC107985971 | -2.3501290511 | 0.2085925271 | 0.9999763851 |
| DNAH7        | 9.9604381148  | 0.22157015   | 0.9999763851 |
| STK17B       | -1.5977058749 | 0.0159562928 | 0.9999763851 |
| HECW2        | -2.5039523457 | 0.34035271   | 0.9999763851 |
| CCDC150      | 1.0744721392  | 0.8507730122 | 0.9999763851 |
| GTF3C3       | -1.2046045428 | 0.3390577206 | 0.9999763851 |
| PGAP1        | 1.3586119758  | 0.5599282744 | 0.9999763851 |
| ANKRD44      | -1.3433371022 | 0.1160359233 | 0.9999763851 |
| SF3B1        | 1.101481233   | 0.4974251565 | 0.9999763851 |
| COQ10B       | 1.0617070171  | 0.8280451738 | 0.9999763851 |
| HSPD1        | 1.2161936565  | 0.0912274092 | 0.9999763851 |
| HSPE1        | 1.0887192882  | 0.4934485097 | 0.9999763851 |
| MOB4         | -1.0505769986 | 0.7500889766 | 0.9999763851 |
| RFTN2        | -1.1626873995 | 0.8207088244 | 0.9999763851 |
| MARS2        | 1.0337698243  | 0.8920860869 | 0.9999763851 |
| SATB2        | -1.5936448944 | 0.1454563281 | 0.9999763851 |
| C2orf69      | 1.1881869609  | 0.337079388  | 0.9999763851 |
| TYW5         | -1.5149198995 | 0.1991055342 | 0.9999763851 |
| C2orf47      | 1.147649169   | 0.5194294567 | 0.9999763851 |
| SPATS2L      | 1.0318857931  | 0.9238246089 | 0.9999763851 |
| KCTD18       | 1.9017460936  | 0.1555647612 | 0.9999763851 |
| SGO2         | 1.0596181592  | 0.7477135576 | 0.9999763851 |
| BZW1         | 1.211907776   | 0.1950992502 | 0.9999763851 |
| CLK1         | -1.1544409364 | 0.5488455555 | 0.9999763851 |
| PPIL3        | 1.1455048655  | 0.7071168376 | 0.9999763851 |
| NIF3L1       | 1.228196225   | 0.2937299599 | 0.9999763851 |
| ORC2         | 1.2499423679  | 0.292056781  | 0.9999763851 |
| FAM126B      | -1.235272467  | 0.4290910986 | 0.9999763851 |
| NDUFB3       | 1.1427828103  | 0.4727724289 | 0.9999763851 |
| CFLAR        | -1.1019682055 | 0.592961849  | 0.9999763851 |
| CASP10       | -1.1572308395 | 0.7637527567 | 0.9999763851 |
| CASP8        | 1.0254997488  | 0.9161144297 | 0.9999763851 |
| ALS2CR12     | 3.2356557963  | 0.5547505991 | 0.9999763851 |
| TRAK2        | 1.082142696   | 0.7706218423 | 0.9999763851 |
| STRADB       | 1.2576512613  | 0.4504591554 | 0.9999763851 |
| ALS2CR11     | -2.3220580825 | 0.4395237051 | 0.9999763851 |
| TMEM237      | 1.0129802543  | 0.9785239909 | 0.9999763851 |
| MPP4         | 0             | 0            | 0            |
| ALS2         | -1.6085366287 | 0.2740261171 | 0.9999763851 |
| FZD7         | -1.4076905562 | 0.6701866575 | 0.9999763851 |

gene\_expression\_table

|          |               |              |              |
|----------|---------------|--------------|--------------|
| SUMO1    | 1.029316589   | 0.8781096652 | 0.9999763851 |
| NOP58    | 1.0919372119  | 0.5823471407 | 0.9999763851 |
| BMPR2    | -1.4215924811 | 0.1991912045 | 0.9999763851 |
| FAM117B  | 2.1367227261  | 0.0676758763 | 0.9999763851 |
| ICA1L    | 1.1852358057  | 0.7409840788 | 0.9999763851 |
| WDR12    | -1.171679205  | 0.4404440694 | 0.9999763851 |
| CARF     | -2.5593885838 | 0.3082814576 | 0.9999763851 |
| NBEAL1   | 1.0905719519  | 0.5039409136 | 0.9999763851 |
| CYP20A1  | -1.6052227925 | 0.0562555368 | 0.9999763851 |
| ABI2     | -1.7145036848 | 0.073039098  | 0.9999763851 |
| NRP2     | -2.289781123  | 0.1126782447 | 0.9999763851 |
| INO80D   | -1.8487364466 | 0.00746      | 0.9999763851 |
| NDUFS1   | 1.3394131029  | 0.1283652978 | 0.9999763851 |
| EEF1B2   | 1.0474872267  | 0.714454433  | 0.9999763851 |
| ZDBF2    | -1.0709997525 | 0.8763967921 | 0.9999763851 |
| MDH1B    | 3.2356557963  | 0.5547505991 | 0.9999763851 |
| FASTKD2  | 1.1412278598  | 0.4930903934 | 0.9999763851 |
| KLF7     | -1.022452828  | 0.9568913447 | 0.9999763851 |
| CREB1    | -1.3921878447 | 0.3511713107 | 0.9999763851 |
| METTL21A | 1.1061644715  | 0.5519756905 | 0.9999763851 |
| CCNYL1   | -1.9225301651 | 0.0304967662 | 0.9999763851 |
| FZD5     | -1.393561973  | 0.3028240493 | 0.9999763851 |
| PLEKHM3  | 1.1604187905  | 0.7882500505 | 0.9999763851 |
| IDH1     | -1.1942428059 | 0.2184182577 | 0.9999763851 |
| PIKFYVE  | -1.0591188143 | 0.8397599606 | 0.9999763851 |
| PTH2R    | 0             | 0            | 0            |
| RPE      | -1.0520036112 | 0.8239077838 | 0.9999763851 |
| KANSL1L  | -1.6389769298 | 0.2548164182 | 0.9999763851 |
| LANCL1   | 1.2060033109  | 0.2709701544 | 0.9999763851 |
| CPS1     | 1.6142457716  | 0.4217179675 | 0.9999763851 |
| ERBB4    | 1.6250621554  | 0.550833575  | 0.9999763851 |
| BARD1    | 1.0811184434  | 0.6718522546 | 0.9999763851 |
| ABCA12   | 1.030747947   | 0.9668202631 | 0.9999763851 |
| ATIC     | -1.0172597613 | 0.9050531181 | 0.9999763851 |
| FN1      | -1.1230477663 | 0.8441633752 | 0.9999763851 |
| MREG     | -1.0239678005 | 0.9571046039 | 0.9999763851 |
| PECR     | -1.0065652436 | 0.9901000633 | 0.9999763851 |
| TMEM169  | 3.2353357581  | 0.554787377  | 0.9999763851 |
| XRCC5    | 1.0736427223  | 0.5830282156 | 0.9999763851 |
| MARCH4   | -1.3161718537 | 0.8279629082 | 0.9999763851 |
| SMARCA1  | 1.1233166013  | 0.7599740781 | 0.9999763851 |
| RPL37A   | 1.0139632833  | 0.9066603815 | 0.9999763851 |
| IGFBP2   | -1.0941830822 | 0.5904810871 | 0.9999763851 |
| IGFBP5   | 3.2361532718  | 0.5546934395 | 0.9999763851 |
| TNS1     | -1.3160416743 | 0.8274241686 | 0.9999763851 |
| CXCR2    | 1.1585942996  | 0.5959401862 | 0.9999763851 |
| ARPC2    | 1.2127283019  | 0.130647845  | 0.9999763851 |
| GPBAR1   | 0             | 0            | 0            |
| AAMP     | -1.31624394   | 0.0565075456 | 0.9999763851 |



gene\_expression\_table

|              |               |              |              |
|--------------|---------------|--------------|--------------|
| PNKD         | 1.0807595273  | 0.6446703911 | 0.9999763851 |
| TMBIM1       | -1.608883212  | 0.2429873729 | 0.9999763851 |
| CATIP        | -1.3950272772 | 0.67648818   | 0.9999763851 |
| SLC11A1      | -6.346613468  | 0.0588664936 | 0.9999763851 |
| CTDSP1       | -1.2279642169 | 0.181960746  | 0.9999763851 |
| VIL1         | 0             | 0            | 0            |
| USP37        | -1.6746698715 | 0.0125361703 | 0.9999763851 |
| CNOT9        | 1.1348935546  | 0.4411261718 | 0.9999763851 |
| PLCD4        | 3.478538239   | 0.2573416581 | 0.9999763851 |
| ZNF142       | 1.2586333958  | 0.4738039921 | 0.9999763851 |
| BCS1L        | 1.2647652031  | 0.4211559409 | 0.9999763851 |
| RNF25        | 1.6062903958  | 0.6464772155 | 0.9999763851 |
| STK36        | 1.0512676278  | 0.8447935887 | 0.9999763851 |
| TTLL4        | -1.2577809428 | 0.2525127221 | 0.9999763851 |
| CYP27A1      | 0             | 0            | 0            |
| WNT6         | 1.2809090962  | 0.6171266537 | 0.9999763851 |
| WNT10A       | 2.2669099672  | 0.4734597612 | 0.9999763851 |
| CDK5R2       | -2.3222877795 | 0.4500648964 | 0.9999763851 |
| NHEJ1        | 1.058833886   | 0.903003388  | 0.9999763851 |
| SLC23A3      | 2.3404251821  | 0.4102399801 | 0.9999763851 |
| CNPPD1       | 1.0265087714  | 0.8691456693 | 0.9999763851 |
| FAM134A      | 1.2411878366  | 0.2514461794 | 0.9999763851 |
| ZFAND2B      | -1.0994281092 | 0.586056761  | 0.9999763851 |
| ABCB6        | 1.2445757792  | 0.6423741543 | 0.9999763851 |
| ATG9A        | -1.1896060824 | 0.4069822469 | 0.9999763851 |
| ANKZF1       | 1.2631552229  | 0.3054530456 | 0.9999763851 |
| GLB1L        | 1.3421210769  | 0.701026043  | 0.9999763851 |
| STK16        | 1.0349392099  | 0.8933431834 | 0.9999763851 |
| TUBA4A       | -1.0059257707 | 0.9628133189 | 0.9999763851 |
| DNAJB2       | -1.0064810351 | 0.9872717574 | 0.9999763851 |
| PTPRN        | 0             | 0            | 0            |
| DNPEP        | 1.4141411733  | 0.0603376325 | 0.9999763851 |
| DES          | 0             | 0            | 0            |
| SPEG         | -1.3154339304 | 0.8205576571 | 0.9999763851 |
| LOC100996693 | 0             | 0            | 0            |
| GMPPA        | -1.2861708228 | 0.548629652  | 0.9999763851 |
| ASIC4        | 0             | 0            | 0            |
| CHPF         | 1.5089755748  | 0.0670160627 | 0.9999763851 |
| TMEM198      | 4.4488556079  | 0.1488038074 | 0.9999763851 |
| INHA         | 0             | 0            | 0            |
| STK11IP      | 1.3518913178  | 0.3256132792 | 0.9999763851 |
| SGPP2        | -1.4083241465 | 0.6545786505 | 0.9999763851 |
| FARSB        | 1.0019542801  | 0.9911622876 | 0.9999763851 |
| ACSL3        | -1.151837056  | 0.4114028002 | 0.9999763851 |
| AP1S3        | 1.413938195   | 0.3455269105 | 0.9999763851 |
| WDFY1        | -1.6115323606 | 0.0330033867 | 0.9999763851 |
| MRPL44       | 1.1190298388  | 0.5980882635 | 0.9999763851 |
| SERPINE2     | -1.2930574702 | 0.0697667096 | 0.9999763851 |
| CUL3         | 1.2897414016  | 0.186417693  | 0.9999763851 |

gene\_expression\_table

|          |               |              |              |
|----------|---------------|--------------|--------------|
| DOCK10   | -1.1927869136 | 0.4791008504 | 0.9999763851 |
| NYAP2    | 3.2353357581  | 0.554787377  | 0.9999763851 |
| IRS1     | -1.4328446441 | 0.5056254598 | 0.9999763851 |
| RHBDD1   | -1.4455661865 | 0.2533291841 | 0.9999763851 |
| COL4A4   | 1.8881414096  | 0.5402431434 | 0.9999763851 |
| COL4A3   | -1.3157515262 | 0.8226830038 | 0.9999763851 |
| MFF      | -1.0751054924 | 0.6957496572 | 0.9999763851 |
| AGFG1    | 1.2721291976  | 0.2531649773 | 0.9999763851 |
| CCL20    | -3.2612224403 | 0.0246048323 | 0.9999763851 |
| DAW1     | 0             | 0            | 0            |
| DNER     | 0             | 0            | 0            |
| TRIP12   | 1.0569083798  | 0.7581450531 | 0.9999763851 |
| SLC16A14 | 3.2353357581  | 0.554787377  | 0.9999763851 |
| SP110    | -1.1005813323 | 0.7165116417 | 0.9999763851 |
| SP140    | 1.8138024348  | 0.5770921647 | 0.9999763851 |
| SP140L   | 1.7589657787  | 0.1679799387 | 0.9999763851 |
| SP100    | -1.5910363362 | 0.0290113406 | 0.9999763851 |
| CAB39    | -1.0491007222 | 0.840068039  | 0.9999763851 |
| ITM2C    | -1.0381525376 | 0.8730539    | 0.9999763851 |
| GPR55    | -1.2612794495 | 0.3938336729 | 0.9999763851 |
| PSMD1    | 1.1855203404  | 0.2633463644 | 0.9999763851 |
| ARMC9    | -1.003472981  | 0.9782275909 | 0.9999763851 |
| B3GNT7   | 0             | 0            | 0            |
| NCL      | 1.0618950076  | 0.6135822398 | 0.9999763851 |
| PTMA     | -1.4152922392 | 0.006595     | 0.9999763851 |
| PDE6D    | -1.3646188803 | 0.2776171639 | 0.9999763851 |
| COPS7B   | -1.0053745708 | 0.9817081137 | 0.9999763851 |
| DIS3L2   | 1.2228272837  | 0.5122888671 | 0.9999763851 |
| CHRNA    | 0             | 0            | 0            |
| TIGD1    | -1.3644955467 | 0.6906903137 | 0.9999763851 |
| EIF4E2   | 1.0298798404  | 0.8372276761 | 0.9999763851 |
| EFHD1    | -4.2849908816 | 0.4028453076 | 0.9999763851 |
| GIGYF2   | 1.0075672987  | 0.9690259828 | 0.9999763851 |
| KCNJ13   | 3.2361532718  | 0.5546934395 | 0.9999763851 |
| INPP5D   | -1.0656500116 | 0.6724686222 | 0.9999763851 |
| ATG16L1  | -1.1259116752 | 0.790438015  | 0.9999763851 |
| SAG      | 1.2869488883  | 0.8190152004 | 0.9999763851 |
| DGKD     | 1.168029501   | 0.3217599549 | 0.9999763851 |
| USP40    | 1.1372511472  | 0.6940439831 | 0.9999763851 |
| UGT1A8   | 0             | 0            | 0            |
| HJURP    | -1.1317195226 | 0.5104703586 | 0.9999763851 |
| TRPM8    | 0             | 0            | 0            |
| ARL4C    | 1.0426561918  | 0.7768635251 | 0.9999763851 |
| SH3BP4   | 0             | 0            | 0            |
| AGAP1    | -4.3331566429 | 0.1395554976 | 0.9999763851 |
| ASB18    | 0             | 0            | 0            |
| ACKR3    | -1.2958166054 | 0.7397560477 | 0.9999763851 |
| COPS8    | 1.4653084177  | 0.0639875658 | 0.9999763851 |
| COL6A3   | -7.5622178268 | 0.2177145568 | 0.9999763851 |

gene\_expression\_table

|              |               |              |              |
|--------------|---------------|--------------|--------------|
| MLPH         | -2.0420845165 | 0.0483724655 | 0.9999763851 |
| RAB17        | -1.334991364  | 0.6555336911 | 0.9999763851 |
| LRRFIP1      | 1.0107219472  | 0.9316701231 | 0.9999763851 |
| RBM44        | 1.924244766   | 0.44965329   | 0.9999763851 |
| UBE2F        | 1.1264957133  | 0.5053587244 | 0.9999763851 |
| SCLY         | 1.5877250627  | 0.02648611   | 0.9999763851 |
| ESPNL        | 3.2353357581  | 0.554787377  | 0.9999763851 |
| KLHL30       | -1.3715126673 | 0.7509237272 | 0.9999763851 |
| FAM132B      | -1.4346570644 | 0.2611773109 | 0.9999763851 |
| ILKAP        | -1.0952838523 | 0.5230096299 | 0.9999763851 |
| HES6         | 1.0760954497  | 0.6423186805 | 0.9999763851 |
| PER2         | 1.1173494516  | 0.7024880715 | 0.9999763851 |
| TRAF3IP1     | -1.3413723037 | 0.3009655949 | 0.9999763851 |
| ASB1         | -1.0247048659 | 0.9251589075 | 0.9999763851 |
| TWIST2       | -2.3222877795 | 0.4502048392 | 0.9999763851 |
| HDAC4        | 0             | 0            | 0            |
| NDUFA10      | -1.0365361364 | 0.8281832422 | 0.9999763851 |
| COPS9        | 1.7919480141  | 0.0004264    | 0.4545015308 |
| GPC1         | -1.5401845921 | 0.3097298624 | 0.9999763851 |
| ANKMY1       | 1.7773630804  | 0.2370355448 | 0.9999763851 |
| DUSP28       | -1.3200992251 | 0.5541112764 | 0.9999763851 |
| RNPEPL1      | -1.0957050206 | 0.713383221  | 0.9999763851 |
| CAPN10       | 1.0051659711  | 0.9905851628 | 0.9999763851 |
| GPR35        | -2.0858069141 | 0.1110354187 | 0.9999763851 |
| KIF1A        | 0             | 0            | 0            |
| SNED1        | 3.2356557963  | 0.5547505991 | 0.9999763851 |
| MTERF4       | 1.3243738256  | 0.4543828446 | 0.9999763851 |
| PASK         | 1.098391833   | 0.8417049788 | 0.9999763851 |
| PPP1R7       | 1.1411371994  | 0.5658770134 | 0.9999763851 |
| ANO7         | 0             | 0            | 0            |
| HDLBP        | 1.0155421423  | 0.9266311192 | 0.9999763851 |
| LOC101927509 | 0             | 0            | 0            |
| SEPT2        | 1.0293414913  | 0.8592843763 | 0.9999763851 |
| FARP2        | 1.7104570823  | 0.1386774286 | 0.9999763851 |
| STK25        | -1.1210164156 | 0.5152197405 | 0.9999763851 |
| THAP4        | 1.106299355   | 0.6326684507 | 0.9999763851 |
| ATG4B        | -1.0592140668 | 0.7616685109 | 0.9999763851 |
| DTYMK        | 1.1493513229  | 0.4284809433 | 0.9999763851 |
| ING5         | 1.1430300728  | 0.6366830987 | 0.9999763851 |
| D2HGDH       | 1.1642255242  | 0.4520376843 | 0.9999763851 |
| NEU4         | -4.2849908816 | 0.4028453076 | 0.9999763851 |
| LOC101927174 | 0             | 0            | 0            |
| CNTN6        | 0             | 0            | 0            |
| CNTN4        | 0             | 0            | 0            |
| TRNT1        | 1.1477712501  | 0.5295638966 | 0.9999763851 |
| CRBN         | -1.0727123653 | 0.7566466531 | 0.9999763851 |
| LRRN1        | 3.2353357581  | 0.554787377  | 0.9999763851 |
| SUMF1        | -1.1221714937 | 0.6320226751 | 0.9999763851 |
| SETMAR       | 1.8056665272  | 0.2099207542 | 0.9999763851 |

gene\_expression\_table

|             |               |              |              |
|-------------|---------------|--------------|--------------|
| ITPR1       | -1.1523439634 | 0.5318456503 | 0.9999763851 |
| BHLHE40     | -1.3000491284 | 0.282705716  | 0.9999763851 |
| ARL8B       | -1.0762454222 | 0.6173299236 | 0.9999763851 |
| EDEM1       | -1.2668210846 | 0.4765169547 | 0.9999763851 |
| GRM7        | 3.2356557963  | 0.5547505991 | 0.9999763851 |
| CAV3        | 0             | 0            | 0            |
| OXTR        | -4.3327792956 | 0.1655012474 | 0.9999763851 |
| RAD18       | -1.0456554272 | 0.8370740494 | 0.9999763851 |
| SRGAP3      | -4.018630071  | 0.0332148527 | 0.9999763851 |
| THUMPD3     | 1.1862630021  | 0.4075195454 | 0.9999763851 |
| SETD5       | -1.181070644  | 0.218698143  | 0.9999763851 |
| LHFPL4      | 3.2361532718  | 0.5546934395 | 0.9999763851 |
| MTMR14      | -1.0558994764 | 0.7685427489 | 0.9999763851 |
| CPNE9       | 2.9534611339  | 0.194219602  | 0.9999763851 |
| BRPF1       | 1.0314917624  | 0.8506219087 | 0.9999763851 |
| OGG1        | -1.2909260049 | 0.1369812943 | 0.9999763851 |
| CAMK1       | 0             | 0            | 0            |
| TADA3       | 1.091662145   | 0.6866751692 | 0.9999763851 |
| ARPC4       | 1.1375239018  | 0.4419371741 | 0.9999763851 |
| ARPC4-TTLL3 | 0             | 0            | 0            |
| TTLL3       | -1.0019250308 | 0.9939583944 | 0.9999763851 |
| RPUSD3      | -1.1410465573 | 0.4485492182 | 0.9999763851 |
| CIDEC       | 0             | 0            | 0            |
| JAGN1       | -1.0576824332 | 0.7330036675 | 0.9999763851 |
| IL17RE      | 1.0304093918  | 0.9664855273 | 0.9999763851 |
| IL17RC      | -1.8173414279 | 0.4639470588 | 0.9999763851 |
| CRELD1      | 1.1959239111  | 0.7311287311 | 0.9999763851 |
| PRRT3       | -7.5622178268 | 0.2177145568 | 0.9999763851 |
| EMC3        | -1.0437297612 | 0.7728017795 | 0.9999763851 |
| LOC401052   | 1.2044957046  | 0.4531537824 | 0.9999763851 |
| FANCD2      | -1.4162910309 | 0.2544841531 | 0.9999763851 |
| FANCD2OS    | 1.5322833884  | 0.0118674101 | 0.9999763851 |
| BRK1        | 1.1184858665  | 0.3854711568 | 0.9999763851 |
| VHL         | -1.3974022382 | 0.0290985738 | 0.9999763851 |
| IRAK2       | -1.5730923026 | 0.130151282  | 0.9999763851 |
| TATDN2      | -1.1225303251 | 0.4648594309 | 0.9999763851 |
| GHRL        | -1.1488069744 | 0.8543538549 | 0.9999763851 |
| SEC13       | 1.1066405779  | 0.4749992385 | 0.9999763851 |
| ATP2B2      | -1.5447668635 | 0.5555166043 | 0.9999763851 |
| SLC6A11     | 0             | 0            | 0            |
| HRH1        | 1.0004240003  | 0.9986444717 | 0.9999763851 |
| ATG7        | -1.1267348979 | 0.490798587  | 0.9999763851 |
| VGLL4       | -1.0080901155 | 0.9615569158 | 0.9999763851 |
| TAMM41      | 1.040875015   | 0.8496813845 | 0.9999763851 |
| TIMP4       | -4.2864494036 | 0.4027150576 | 0.9999763851 |
| PPARG       | 1.0623332917  | 0.8119056555 | 0.9999763851 |
| TSEN2       | 1.4672224812  | 0.1710384784 | 0.9999763851 |
| MKRN2OS     | -1.4081850562 | 0.65013235   | 0.9999763851 |
| MKRN2       | 1.3127130603  | 0.2395461498 | 0.9999763851 |

gene\_expression\_table

|           |               |              |              |
|-----------|---------------|--------------|--------------|
| RAF1      | -1.1071698394 | 0.6542091221 | 0.9999763851 |
| TMEM40    | 0             | 0            | 0            |
| CAND2     | 7.4933530102  | 0.2989396898 | 0.9999763851 |
| RPL32     | 1.0287151038  | 0.8081143108 | 0.9999763851 |
| IQSEC1    | 1.0332635126  | 0.8869647729 | 0.9999763851 |
| NUP210    | 1.0453770233  | 0.730295552  | 0.9999763851 |
| HDAC11    | -2.7940687382 | 0.0568493373 | 0.9999763851 |
| FBLN2     | 0             | 0            | 0            |
| CHCHD4    | 1.1102781544  | 0.5206172992 | 0.9999763851 |
| TMEM43    | -1.1752097473 | 0.4680949095 | 0.9999763851 |
| XPC       | -1.0883473716 | 0.7627548108 | 0.9999763851 |
| LSM3      | 1.1397783878  | 0.3148169451 | 0.9999763851 |
| SLC6A6    | -1.3415713902 | 0.0665190302 | 0.9999763851 |
| CCDC174   | 1.004888712   | 0.987330815  | 0.9999763851 |
| C3orf20   | 1.0686473141  | 0.8890315687 | 0.9999763851 |
| FGD5      | -4.2849908816 | 0.4028453076 | 0.9999763851 |
| NR2C2     | -1.3464551322 | 0.2280016849 | 0.9999763851 |
| MRPS25    | 1.0012684488  | 0.9932513762 | 0.9999763851 |
| RBSN      | -1.2003374826 | 0.4292591695 | 0.9999763851 |
| CAPN7     | 1.2553257784  | 0.2869455725 | 0.9999763851 |
| SH3BP5    | 1.007076005   | 0.9686154191 | 0.9999763851 |
| METTL6    | 1.3382482306  | 0.2792513666 | 0.9999763851 |
| EAH1      | -1.1759955159 | 0.4516963407 | 0.9999763851 |
| COLQ      | -1.4840867037 | 0.2713885716 | 0.9999763851 |
| HACL1     | -1.349716291  | 0.2570146444 | 0.9999763851 |
| BTD       | 1.0922041155  | 0.8273107258 | 0.9999763851 |
| ANKRD28   | -1.3767791716 | 0.0460540382 | 0.9999763851 |
| GALNT15   | 3.2353357581  | 0.554787377  | 0.9999763851 |
| DPH3      | 1.2691034552  | 0.2568972474 | 0.9999763851 |
| OXNAD1    | 1.322243449   | 0.0932391268 | 0.9999763851 |
| RFTN1     | -1.3428126404 | 0.3782957564 | 0.9999763851 |
| PLCL2     | 1.0075327263  | 0.9863553957 | 0.9999763851 |
| TBC1D5    | 1.2357949024  | 0.2108171523 | 0.9999763851 |
| LOC339862 | -1.8164522609 | 0.1477357667 | 0.9999763851 |
| SATB1     | -1.1595432777 | 0.3049584518 | 0.9999763851 |
| RAB5A     | 1.1738981864  | 0.3164260599 | 0.9999763851 |
| PP2D1     | 16.6918753579 | 0.1320521391 | 0.9999763851 |
| KAT2B     | -1.2473636661 | 0.4846479579 | 0.9999763851 |
| SGO1      | -1.0475916265 | 0.8019187081 | 0.9999763851 |
| ZNF385D   | 7.7488609396  | 0.3059383556 | 0.9999763851 |
| UBE2E2    | 1.4054848718  | 0.2996660234 | 0.9999763851 |
| UBE2E1    | -1.0940932977 | 0.7230490882 | 0.9999763851 |
| NKIRAS1   | 1.1325197708  | 0.3350055184 | 0.9999763851 |
| RPL15     | 1.0589733125  | 0.6269142279 | 0.9999763851 |
| NR1D2     | -1.4410787947 | 0.4050751534 | 0.9999763851 |
| RARB      | 1.3264789913  | 0.7365958046 | 0.9999763851 |
| TOP2B     | 1.0478263509  | 0.7016755118 | 0.9999763851 |
| NGLY1     | -1.0834540683 | 0.6362328654 | 0.9999763851 |
| OXSM      | -1.0426858592 | 0.8795744584 | 0.9999763851 |

gene\_expression\_table

|          |               |              |              |
|----------|---------------|--------------|--------------|
| NEK10    | 2.3090331185  | 0.1558297642 | 0.9999763851 |
| SLC4A7   | 1.067768791   | 0.7609120272 | 0.9999763851 |
| EOMES    | 5.4784711963  | 0.3745358536 | 0.9999763851 |
| CMC1     | 1.1195603727  | 0.5863939411 | 0.9999763851 |
| AZI2     | 1.1276762637  | 0.499121037  | 0.9999763851 |
| ZCWPW2   | 2.8345356849  | 0.3327756039 | 0.9999763851 |
| TGFB2    | 1.0055675201  | 0.9822270647 | 0.9999763851 |
| STT3B    | 1.0045017876  | 0.9749817907 | 0.9999763851 |
| OSBPL10  | 0             | 0            | 0            |
| GPD1L    | -1.4487308991 | 0.0744995686 | 0.9999763851 |
| CMTM8    | -1.0214219889 | 0.9548364502 | 0.9999763851 |
| CMTM7    | 1.1406010161  | 0.5341857646 | 0.9999763851 |
| CMTM6    | -1.250469408  | 0.0703500523 | 0.9999763851 |
| DYNC1LI1 | 1.3843067166  | 0.1118360057 | 0.9999763851 |
| CNOT10   | -1.2619950065 | 0.4048294927 | 0.9999763851 |
| TRIM71   | -1.9429501577 | 0.2004535376 | 0.9999763851 |
| GLB1     | -1.0504794572 | 0.7365524079 | 0.9999763851 |
| CRTAP    | -1.2736912009 | 0.0758954065 | 0.9999763851 |
| FBXL2    | 2.8676515213  | 0.2915761253 | 0.9999763851 |
| UBP1     | -1.0752055631 | 0.6291853231 | 0.9999763851 |
| CLASP2   | -1.1610091359 | 0.4320930931 | 0.9999763851 |
| PDCD6IP  | -1.1983893958 | 0.2820790897 | 0.9999763851 |
| STAC     | -1.0269784107 | 0.9486325388 | 0.9999763851 |
| EPM2AIP1 | 1.0717816676  | 0.7242224313 | 0.9999763851 |
| MLH1     | 1.3299277551  | 0.1409753694 | 0.9999763851 |
| LRRFIP2  | 1.0785932459  | 0.706945258  | 0.9999763851 |
| GOLGA4   | -1.3905315185 | 0.0219224215 | 0.9999763851 |
| C3orf35  | -1.8717794426 | 0.3395007389 | 0.9999763851 |
| ITGA9    | -1.5733616565 | 0.3774394479 | 0.9999763851 |
| CTDSPL   | 1.1539201667  | 0.4311058932 | 0.9999763851 |
| VILL     | -1.6039579189 | 0.1805367231 | 0.9999763851 |
| PLCD1    | 18.0173590016 | 0.1388117476 | 0.9999763851 |
| DLEC1    | 1.6246521587  | 0.5746381271 | 0.9999763851 |
| ACAA1    | -1.0295529533 | 0.8650338596 | 0.9999763851 |
| MYD88    | 1.5289821076  | 0.0585515538 | 0.9999763851 |
| OXSRI    | -1.0330184437 | 0.8712528786 | 0.9999763851 |
| SLC22A14 | 3.2353357581  | 0.554787377  | 0.9999763851 |
| XYLB     | -1.2174112535 | 0.2692664988 | 0.9999763851 |
| ACVR2B   | 1.0625449955  | 0.8540412275 | 0.9999763851 |
| EXO2     | 1.9363876517  | 0.048611527  | 0.9999763851 |
| SCN5A    | -1.8164818713 | 0.4779791507 | 0.9999763851 |
| SCN10A   | 0             | 0            | 0            |
| SCN11A   | -4.2849908816 | 0.4028453076 | 0.9999763851 |
| WDR48    | 1.0897050618  | 0.7209698274 | 0.9999763851 |
| GORASP1  | 1.3839674353  | 0.3978612769 | 0.9999763851 |
| TTC21A   | 3.2353357581  | 0.554787377  | 0.9999763851 |
| CSRNP1   | -1.7191583623 | 0.0501804363 | 0.9999763851 |
| XIRP1    | -8.342239448  | 0.2163081661 | 0.9999763851 |
| CX3CR1   | 2.4012906669  | 0.0538026956 | 0.9999763851 |

gene\_expression\_table

|          |               |              |              |
|----------|---------------|--------------|--------------|
| SLC25A38 | -1.334034802  | 0.0815532523 | 0.9999763851 |
| RPSA     | 1.0717623891  | 0.5628741385 | 0.9999763851 |
| MYRIP    | -1.1953557556 | 0.7975410711 | 0.9999763851 |
| EIF1B    | 1.0185260796  | 0.9108009824 | 0.9999763851 |
| ENTPD3   | 0             | 0            | 0            |
| RPL14    | 1.0177508349  | 0.8910703578 | 0.9999763851 |
| ZNF619   | -1.1548225619 | 0.7833257766 | 0.9999763851 |
| ZNF620   | 2.3405535777  | 0.4308645521 | 0.9999763851 |
| ZNF621   | 1.1170664285  | 0.7693185044 | 0.9999763851 |
| CTNNB1   | -1.0215252336 | 0.8811382445 | 0.9999763851 |
| ULK4     | 1.6845986357  | 0.1416753386 | 0.9999763851 |
| TRAK1    | -1.1775891752 | 0.3463772208 | 0.9999763851 |
| SEC22C   | 1.1174244077  | 0.5507149401 | 0.9999763851 |
| SS18L2   | -1.2641030885 | 0.1406550747 | 0.9999763851 |
| NKTR     | -1.2681687265 | 0.1638393158 | 0.9999763851 |
| ZBTB47   | 1.8415859751  | 0.0332598878 | 0.9999763851 |
| CCDC13   | 2.9291342347  | 0.3283490844 | 0.9999763851 |
| HIGD1A   | 1.3143274591  | 0.0651441084 | 0.9999763851 |
| ACKR2    | 1.1723339317  | 0.7697497117 | 0.9999763851 |
| FAM198A  | -2.7031708163 | 0.0244698715 | 0.9999763851 |
| POMGNT2  | 1.0190202406  | 0.9128029301 | 0.9999763851 |
| SNRK     | -1.1832772497 | 0.4216762857 | 0.9999763851 |
| ANO10    | -1.23763864   | 0.4053514189 | 0.9999763851 |
| ABHD5    | 1.3958741906  | 0.2346355976 | 0.9999763851 |
| TOPAZ1   | 0             | 0            | 0            |
| TCAIM    | -1.0866861808 | 0.6977980858 | 0.9999763851 |
| ZNF445   | -1.4319310951 | 0.2119951858 | 0.9999763851 |
| ZNF852   | 1.566866561   | 0.3081323845 | 0.9999763851 |
| ZKSCAN7  | 0             | 0            | 0            |
| ZNF197   | -1.0292467562 | 0.9407412209 | 0.9999763851 |
| ZNF35    | 1.1897545502  | 0.7989394451 | 0.9999763851 |
| KIAA1143 | 1.009163893   | 0.9483005362 | 0.9999763851 |
| KIF15    | 1.1225444413  | 0.5877998829 | 0.9999763851 |
| TMEM42   | -1.1598170686 | 0.6114323215 | 0.9999763851 |
| TGM4     | -1.3717398996 | 0.7338113203 | 0.9999763851 |
| ZDHHC3   | -1.1136408878 | 0.474869207  | 0.9999763851 |
| EXOSC7   | 1.0500351774  | 0.7351020077 | 0.9999763851 |
| CLEC3B   | 1.3409143441  | 0.7126222688 | 0.9999763851 |
| CDCP1    | -1.4290145507 | 0.5263961287 | 0.9999763851 |
| TMEM158  | -1.8381419039 | 3.47E-05     | 0.0718176673 |
| LARS2    | 1.0405342131  | 0.8746924846 | 0.9999763851 |
| LIMD1    | -1.3513996155 | 0.2846240039 | 0.9999763851 |
| SACM1L   | -1.0646522032 | 0.6458156236 | 0.9999763851 |
| SLC6A20  | 0             | 0            | 0            |
| LZTFL1   | -1.0503551024 | 0.7992238996 | 0.9999763851 |
| FYCO1    | 1.2055907042  | 0.6104066983 | 0.9999763851 |
| CCR1     | -1.6849455268 | 0.0983348929 | 0.9999763851 |
| CCR3     | 1.286354513   | 0.820733428  | 0.9999763851 |
| CCR2     | 16.6960867465 | 0.1348328872 | 0.9999763851 |

gene\_expression\_table

|          |               |              |              |
|----------|---------------|--------------|--------------|
| CCRL2    | -1.3721150467 | 0.7447608683 | 0.9999763851 |
| LTF      | -1.9507065805 | 0.3146843414 | 0.9999763851 |
| LRRC2    | 0             | 0            | 0            |
| TDGF1    | 0             | 0            | 0            |
| PTH1R    | 0             | 0            | 0            |
| CCDC12   | 1.3325320271  | 0.0922206878 | 0.9999763851 |
| NBEAL2   | 1.1951278832  | 0.3510620049 | 0.9999763851 |
| SETD2    | -1.0570765965 | 0.7364368405 | 0.9999763851 |
| KIF9     | -1.055371679  | 0.7914033392 | 0.9999763851 |
| KLHL18   | 1.6965654779  | 0.0306084394 | 0.9999763851 |
| PTPN23   | 1.2425710678  | 0.3065395238 | 0.9999763851 |
| SCAP     | 1.0427310614  | 0.786892453  | 0.9999763851 |
| ELP6     | -1.1362490776 | 0.5673381854 | 0.9999763851 |
| CSPG5    | -7.5664585246 | 0.2265643942 | 0.9999763851 |
| SMARCC1  | -1.1643628995 | 0.2304893968 | 0.9999763851 |
| DHX30    | 1.2050419075  | 0.2011843909 | 0.9999763851 |
| MAP4     | 1.1084478407  | 0.4663627025 | 0.9999763851 |
| CDC25A   | 1.0680911555  | 0.6642944652 | 0.9999763851 |
| CAMP     | 1.1601789857  | 0.8601794734 | 0.9999763851 |
| ZNF589   | -1.2603689241 | 0.5057108829 | 0.9999763851 |
| NME6     | -1.053044499  | 0.8407376939 | 0.9999763851 |
| SPINK8   | 3.2353357581  | 0.554787377  | 0.9999763851 |
| FBXW12   | 0             | 0            | 0            |
| PLXNB1   | -1.294661912  | 0.6305398827 | 0.9999763851 |
| CCDC51   | 1.2013557477  | 0.2786685372 | 0.9999763851 |
| TMA7     | -1.0154187393 | 0.8974134317 | 0.9999763851 |
| ATRIP    | 1.0089601549  | 0.9763413814 | 0.9999763851 |
| TREX1    | 1.5022661609  | 0.1618609865 | 0.9999763851 |
| SHISA5   | -1.3364532799 | 0.0440299301 | 0.9999763851 |
| PFKFB4   | 1.0207868011  | 0.9556409858 | 0.9999763851 |
| COL7A1   | 1.079433243   | 0.8576945853 | 0.9999763851 |
| UQCRC1   | 1.2064796723  | 0.2104636208 | 0.9999763851 |
| TMEM89   | 3.2361532718  | 0.5546934395 | 0.9999763851 |
| SLC26A6  | 1.118477166   | 0.693116269  | 0.9999763851 |
| CELSR3   | -1.6218005948 | 0.4141172723 | 0.9999763851 |
| NCKIPSD  | 1.5065159811  | 0.1258889398 | 0.9999763851 |
| IP6K2    | -1.2586364913 | 0.1681478956 | 0.9999763851 |
| PRKAR2A  | 1.0183801972  | 0.8878884122 | 0.9999763851 |
| SLC25A20 | -1.4461583372 | 0.2018691835 | 0.9999763851 |
| ARIH2OS  | -1.3151016298 | 0.8209848177 | 0.9999763851 |
| ARIH2    | -1.0512004785 | 0.7166486665 | 0.9999763851 |
| P4HTM    | 0             | 0            | 0            |
| WDR6     | 1.2044969422  | 0.7915381575 | 0.9999763851 |
| DALRD3   | 1.0216360171  | 0.8901636728 | 0.9999763851 |
| NDUFAF3  | 1.1935092929  | 0.3256037592 | 0.9999763851 |
| IMPDH2   | -1.0868893997 | 0.6039213461 | 0.9999763851 |
| QRICH1   | 1.1450961859  | 0.5364572909 | 0.9999763851 |
| QARS     | 1.1297647221  | 0.4522697408 | 0.9999763851 |
| USP19    | -1.2730732952 | 0.1945546773 | 0.9999763851 |



gene\_expression\_table

|              |               |              |              |
|--------------|---------------|--------------|--------------|
| CCDC71       | 1.112968273   | 0.5667916624 | 0.9999763851 |
| KLHDC8B      | -4.287394647  | 0.4026306792 | 0.9999763851 |
| C3orf84      | 0             | 0            | 0            |
| CCDC36       | 5.4770877341  | 0.3746135179 | 0.9999763851 |
| C3orf62      | -1.1344077061 | 0.7464283734 | 0.9999763851 |
| USP4         | 1.4407884265  | 0.0439216841 | 0.9999763851 |
| LOC107986084 | 1.2866381786  | 0.8226168136 | 0.9999763851 |
| GPX1         | 1.0181788103  | 0.8841901527 | 0.9999763851 |
| RHOA         | 1.0813294127  | 0.5118091751 | 0.9999763851 |
| TCTA         | 1.2073106237  | 0.5647292456 | 0.9999763851 |
| AMT          | 1.3652112359  | 0.5197398213 | 0.9999763851 |
| NICN1        | -1.086531101  | 0.7732150215 | 0.9999763851 |
| DAG1         | 1.0816065448  | 0.7410029171 | 0.9999763851 |
| APEH         | 1.2019178786  | 0.2176038003 | 0.9999763851 |
| MST1         | -1.2662554053 | 0.5405902545 | 0.9999763851 |
| RNF123       | -1.1094899287 | 0.6124824654 | 0.9999763851 |
| AMIGO3       | -1.571868157  | 0.3997137873 | 0.9999763851 |
| GMPPB        | -1.3360123905 | 0.5553974268 | 0.9999763851 |
| IP6K1        | 1.2458110077  | 0.3273545291 | 0.9999763851 |
| CDHR4        | 0             | 0            | 0            |
| FAM212A      | -1.4492943105 | 0.1819169842 | 0.9999763851 |
| UBA7         | 1.4029474039  | 0.5112435416 | 0.9999763851 |
| TRAIP        | 1.4269612769  | 0.2948756568 | 0.9999763851 |
| CAMKV        | -7.5622178268 | 0.2177145568 | 0.9999763851 |
| MST1R        | 0             | 0            | 0            |
| MON1A        | 1.2570816648  | 0.4967978932 | 0.9999763851 |
| RBM6         | 1.10637051    | 0.5831500528 | 0.9999763851 |
| RBM5         | 1.1745119895  | 0.3176497104 | 0.9999763851 |
| SEMA3F       | 1.2668875868  | 0.6492200187 | 0.9999763851 |
| GNAI2        | 1.1859683028  | 0.2025705929 | 0.9999763851 |
| SEMA3B       | 1.3258241993  | 0.7378409434 | 0.9999763851 |
| IFRD2        | 1.1505585744  | 0.3909206296 | 0.9999763851 |
| HYAL3        | 1.4232167389  | 0.2290981588 | 0.9999763851 |
| NAT6         | -2.4060847021 | 0.025561888  | 0.9999763851 |
| HYAL1        | 5.4784711963  | 0.3745358536 | 0.9999763851 |
| HYAL2        | -1.2022077587 | 0.5648776522 | 0.9999763851 |
| TUSC2        | -1.099290443  | 0.622775354  | 0.9999763851 |
| RASSF1       | -1.4364298205 | 0.0525935931 | 0.9999763851 |
| ZMYND10      | -1.148669206  | 0.8578196038 | 0.9999763851 |
| NPRL2        | 1.3267267255  | 0.1078827133 | 0.9999763851 |
| CYB561D2     | 1.3623915418  | 0.2598492146 | 0.9999763851 |
| TMEM115      | 1.1385385199  | 0.565983322  | 0.9999763851 |
| CACNA2D2     | 1.8685954806  | 0.5480020904 | 0.9999763851 |
| C3orf18      | 1.7330034736  | 0.1931047234 | 0.9999763851 |
| HEMK1        | 1.008711577   | 0.9781373666 | 0.9999763851 |
| CISH         | -1.0607911621 | 0.8243468088 | 0.9999763851 |
| MAPKAPK3     | 1.0674408861  | 0.6857148619 | 0.9999763851 |
| MANF         | -1.2842339611 | 0.1088014636 | 0.9999763851 |
| RBM15B       | -1.1465585236 | 0.3686786284 | 0.9999763851 |

gene\_expression\_table

|              |                |              |              |
|--------------|----------------|--------------|--------------|
| VPRBP        | -1.1215421365  | 0.628602949  | 0.9999763851 |
| RAD54L2      | -1.035563939   | 0.8512324164 | 0.9999763851 |
| TEX264       | 1.1010967543   | 0.6584734852 | 0.9999763851 |
| RRP9         | 1.4528148907   | 0.0646924354 | 0.9999763851 |
| PARP3        | 1.1536660933   | 0.6311394132 | 0.9999763851 |
| PCBP4        | 1.0630267301   | 0.8302649895 | 0.9999763851 |
| ABHD14B      | 1.5036434156   | 0.020672614  | 0.9999763851 |
| ABHD14A      | 1.206409269    | 0.5178664215 | 0.9999763851 |
| ABHD14A-ACY1 | -31.0891925927 | 0.0379638326 | 0.9999763851 |
| ACY1         | -1.1714401286  | 0.4653538541 | 0.9999763851 |
| RPL29        | 1.1348291983   | 0.2860303677 | 0.9999763851 |
| DUSP7        | -1.2655429917  | 0.2810170373 | 0.9999763851 |
| POC1A        | -1.3870331004  | 0.0909580128 | 0.9999763851 |
| ALAS1        | -1.3431951387  | 0.1602276443 | 0.9999763851 |
| TLR9         | 2.3918191881   | 0.1134620566 | 0.9999763851 |
| TWF2         | -1.2528705581  | 0.1915441461 | 0.9999763851 |
| PPM1M        | -1.2909116169  | 0.5669662911 | 0.9999763851 |
| WDR82        | 1.1168592529   | 0.4062727201 | 0.9999763851 |
| GLYCTK       | 1.6712807673   | 0.4611016166 | 0.9999763851 |
| DNAH1        | -1.318758176   | 0.5780306891 | 0.9999763851 |
| BAP1         | 1.2092857934   | 0.2657621708 | 0.9999763851 |
| PHF7         | -1.3824878834  | 0.0760843585 | 0.9999763851 |
| SEMA3G       | 1.3716875655   | 0.3001268341 | 0.9999763851 |
| NISCH        | 1.0744379843   | 0.7406030408 | 0.9999763851 |
| NT5DC2       | 1.062034588    | 0.8439791066 | 0.9999763851 |
| SMIM4        | 1.4403855545   | 0.0195705699 | 0.9999763851 |
| PBRM1        | -1.0202071526  | 0.9018105178 | 0.9999763851 |
| GNL3         | 1.1423785752   | 0.3490961165 | 0.9999763851 |
| GLT8D1       | -1.1432929983  | 0.4786635641 | 0.9999763851 |
| SPCS1        | 1.2652883548   | 0.1175221587 | 0.9999763851 |
| NEK4         | 1.25484259     | 0.4035220135 | 0.9999763851 |
| ITIH4        | 1.5114252137   | 0.3657064773 | 0.9999763851 |
| MUSTN1       | 7.7199860138   | 0.2826011338 | 0.9999763851 |
| TMEM110      | -1.2981616433  | 0.2819922572 | 0.9999763851 |
| SFMBT1       | 1.1516812757   | 0.6214011268 | 0.9999763851 |
| LOC105377135 | 1.0274983165   | 0.9757481446 | 0.9999763851 |
| RFT1         | -1.3809935403  | 0.0745629145 | 0.9999763851 |
| PRKCD        | -1.0970845745  | 0.6140752348 | 0.9999763851 |
| TKT          | 1.0544997161   | 0.7493719153 | 0.9999763851 |
| DCP1A        | -1.0449757749  | 0.8223454459 | 0.9999763851 |
| CACNA1D      | 3.2361532718   | 0.5546934395 | 0.9999763851 |
| IL17RB       | -1.4386322103  | 0.4485935632 | 0.9999763851 |
| ACTR8        | -1.0560428932  | 0.8092423462 | 0.9999763851 |
| SELK         | -1.0709099804  | 0.7311887482 | 0.9999763851 |
| CACNA2D3     | 1.5012317313   | 0.007362     | 0.9999763851 |
| WNT5A        | 0              | 0            | 0            |
| CCDC66       | 1.2447981031   | 0.2946166604 | 0.9999763851 |
| FAM208A      | -1.2808206717  | 0.2766327271 | 0.9999763851 |
| ARHGEF3      | -1.433835654   | 0.0754697903 | 0.9999763851 |

gene\_expression\_table

|              |               |              |              |
|--------------|---------------|--------------|--------------|
| SPATA12      | -1.1495270598 | 0.8432431454 | 0.9999763851 |
| HESX1        | -1.3709710942 | 0.7487098914 | 0.9999763851 |
| APPL1        | -1.2954282256 | 0.3557036608 | 0.9999763851 |
| ASB14        | -1.2474039722 | 0.2092845849 | 0.9999763851 |
| PDE12        | -1.3268415177 | 0.0543962715 | 0.9999763851 |
| ARF4         | -1.029760818  | 0.8261470739 | 0.9999763851 |
| DENND6A      | -1.0179271407 | 0.9712458391 | 0.9999763851 |
| SLMAP        | -1.2023597996 | 0.4089025179 | 0.9999763851 |
| FLNB         | 1.0106445256  | 0.9438235523 | 0.9999763851 |
| LOC105377650 | -4.2864494036 | 0.4027150576 | 0.9999763851 |
| DNASE1L3     | 0             | 0            | 0            |
| ABHD6        | -1.3020370284 | 0.3743615908 | 0.9999763851 |
| RPP14        | 1.1808778314  | 0.4742222503 | 0.9999763851 |
| PXK          | -1.0936020386 | 0.5419470112 | 0.9999763851 |
| PDHB         | 1.1283951438  | 0.5021333572 | 0.9999763851 |
| KCTD6        | 2.3090611935  | 0.1771782426 | 0.9999763851 |
| ACOX2        | 2.5225909253  | 0.0990722959 | 0.9999763851 |
| FAM107A      | 0             | 0            | 0            |
| FAM3D        | -1.3154339304 | 0.8205576571 | 0.9999763851 |
| C3orf67      | 0             | 0            | 0            |
| FHIT         | -1.4331262132 | 0.4996837349 | 0.9999763851 |
| PTPRG        | -1.0523028827 | 0.7128055231 | 0.9999763851 |
| CADPS        | -1.3151016298 | 0.821010945  | 0.9999763851 |
| SYNPR        | 3.2353357581  | 0.554787377  | 0.9999763851 |
| THOC7        | 1.3001255069  | 0.0709121042 | 0.9999763851 |
| ATXN7        | -1.6156840739 | 0.0142518415 | 0.9999763851 |
| PSMD6        | 1.5431751623  | 0.0168415862 | 0.9999763851 |
| PRICKLE2     | 0             | 0            | 0            |
| ADAMTS9      | -1.5367359325 | 0.4414005628 | 0.9999763851 |
| MAGI1        | 5.4781708352  | 0.3745527127 | 0.9999763851 |
| SLC25A26     | 1.2230601644  | 0.340329827  | 0.9999763851 |
| LRIG1        | -1.0356699342 | 0.9588830561 | 0.9999763851 |
| KBTBD8       | 2.0914187992  | 0.0461059561 | 0.9999763851 |
| SUCLG2       | -1.321776646  | 0.1167072645 | 0.9999763851 |
| EOGT         | 1.1614567738  | 0.7167575371 | 0.9999763851 |
| TMF1         | -1.2398489956 | 0.4365061081 | 0.9999763851 |
| UBA3         | 1.1289396586  | 0.4682721371 | 0.9999763851 |
| ARL6IP5      | -1.0240098    | 0.873655646  | 0.9999763851 |
| FRMD4B       | -1.2848784482 | 0.4453886241 | 0.9999763851 |
| MITF         | -1.559876047  | 0.3820186292 | 0.9999763851 |
| FOXP1        | 1.0863499396  | 0.5825911636 | 0.9999763851 |
| EIF4E3       | 1.2015752383  | 0.3079674235 | 0.9999763851 |
| PROK2        | 1.0986927862  | 0.7362073779 | 0.9999763851 |
| RYBP         | -1.0672101765 | 0.6896426489 | 0.9999763851 |
| SHQ1         | 1.1158188329  | 0.6031230408 | 0.9999763851 |
| GXYLT2       | -2.9105919729 | 0.0649478678 | 0.9999763851 |
| PPP4R2       | 1.0114932557  | 0.9371914059 | 0.9999763851 |
| CNTN3        | 0             | 0            | 0            |
| ZNF717       | 7.7211724672  | 0.2779709379 | 0.9999763851 |

gene\_expression\_table

|              |               |              |              |
|--------------|---------------|--------------|--------------|
| ROBO1        | 0             | 0            | 0            |
| GBE1         | -1.0061687211 | 0.9703935322 | 0.9999763851 |
| CADM2        | 12.2055584829 | 0.17807181   | 0.9999763851 |
| CHMP2B       | 1.1959537026  | 0.2915277672 | 0.9999763851 |
| POU1F1       | 0             | 0            | 0            |
| HTR1F        | 0             | 0            | 0            |
| CGGBP1       | 1.0077751846  | 0.9610768337 | 0.9999763851 |
| ZNF654       | 1.0452015979  | 0.8444188116 | 0.9999763851 |
| C3orf38      | 1.2441935159  | 0.2768198796 | 0.9999763851 |
| EPHA3        | 0             | 0            | 0            |
| PROS1        | 1.1271106302  | 0.7655154619 | 0.9999763851 |
| ARL13B       | -1.0579648884 | 0.8583771357 | 0.9999763851 |
| DHFRL1       | -1.0103031309 | 0.9790520265 | 0.9999763851 |
| NSUN3        | -1.9110287029 | 0.1338317742 | 0.9999763851 |
| EPHA6        | 1.1717179916  | 0.7699833094 | 0.9999763851 |
| ARL6         | -1.2948054853 | 0.60878962   | 0.9999763851 |
| CRYBG3       | -1.2204840837 | 0.7215920718 | 0.9999763851 |
| MINA         | 1.150341172   | 0.5158985821 | 0.9999763851 |
| GABRR3       | 3.2356557963  | 0.5547505991 | 0.9999763851 |
| CLDND1       | 1.2304480623  | 0.4507309247 | 0.9999763851 |
| CPOX         | 1.1445562619  | 0.4733118136 | 0.9999763851 |
| ST3GAL6      | -1.3531219507 | 0.2112117614 | 0.9999763851 |
| DCBLD2       | -1.6239009366 | 0.072955016  | 0.9999763851 |
| COL8A1       | -4.287394647  | 0.4026306792 | 0.9999763851 |
| CMSS1        | 1.3274399103  | 0.0535222942 | 0.9999763851 |
| TBC1D23      | -1.2544461108 | 0.3660767516 | 0.9999763851 |
| NIT2         | -1.05396332   | 0.7731786445 | 0.9999763851 |
| TOMM70       | -1.3228420713 | 0.0348044416 | 0.9999763851 |
| LNP1         | -1.3722068069 | 0.7436936864 | 0.9999763851 |
| TMEM45A      | -1.6814919341 | 0.4672141193 | 0.9999763851 |
| ADGRG7       | 5.4781708352  | 0.3745527127 | 0.9999763851 |
| TFG          | -1.086508216  | 0.5711392284 | 0.9999763851 |
| IMPG2        | 1.2865522343  | 0.8248288601 | 0.9999763851 |
| SENP7        | -1.8524248627 | 0.0111026412 | 0.9999763851 |
| TRMT10C      | 1.4460357287  | 0.0271500582 | 0.9999763851 |
| PCNP         | 1.0521476734  | 0.6747860109 | 0.9999763851 |
| ZBTB11       | 1.4213218371  | 0.0854192528 | 0.9999763851 |
| RPL24        | -1.0655664024 | 0.6235275006 | 0.9999763851 |
| LOC105374013 | -2.0607746097 | 0.3328245492 | 0.9999763851 |
| CEP97        | -1.1899313222 | 0.5113865898 | 0.9999763851 |
| NXPE3        | 1.1300497749  | 0.3896473501 | 0.9999763851 |
| NFKBIZ       | 1.0752693155  | 0.8002211296 | 0.9999763851 |
| ALCAM        | -3.0163924595 | 0.0577613048 | 0.9999763851 |
| CBLB         | -2.2903861361 | 0.0965124574 | 0.9999763851 |
| BBX          | -1.1940754517 | 0.3334027285 | 0.9999763851 |
| CD47         | 1.1333650593  | 0.4622578721 | 0.9999763851 |
| IFT57        | 1.034785049   | 0.8568061014 | 0.9999763851 |
| MYH15        | 1.10776511    | 0.7764920144 | 0.9999763851 |
| KIAA1524     | 1.2830248059  | 0.2986100436 | 0.9999763851 |

gene\_expression\_table

|              |               |              |              |
|--------------|---------------|--------------|--------------|
| DZIP3        | 1.2497919335  | 0.6951384701 | 0.9999763851 |
| GUCA1C       | -4.2849908816 | 0.4028453076 | 0.9999763851 |
| MORC1        | 5.4770877341  | 0.3746135179 | 0.9999763851 |
| DPPA2        | 0             | 0            | 0            |
| DPPA4        | 0             | 0            | 0            |
| NECTIN3      | 0             | 0            | 0            |
| CD96         | 1.3280783098  | 0.1538805362 | 0.9999763851 |
| PLCXD2       | -3.3275701064 | 0.2301333816 | 0.9999763851 |
| PHLDB2       | 0             | 0            | 0            |
| ABHD10       | 1.1996908227  | 0.3461019033 | 0.9999763851 |
| SLC9C1       | 5.4776292235  | 0.3745831165 | 0.9999763851 |
| BTLA         | -1.3158816768 | 0.8203229797 | 0.9999763851 |
| ATG3         | 1.2067566644  | 0.3131054586 | 0.9999763851 |
| SLC35A5      | -1.1471946769 | 0.6895664555 | 0.9999763851 |
| GTPBP8       | -1.1901389799 | 0.4768102251 | 0.9999763851 |
| NEPRO        | -1.0424583423 | 0.7924047644 | 0.9999763851 |
| LOC107986113 | 0             | 0            | 0            |
| CFAP44       | 1.0986161065  | 0.8500854026 | 0.9999763851 |
| SPICE1       | -1.3149226732 | 0.6056882455 | 0.9999763851 |
| SIDT1        | -1.3154339304 | 0.8205576571 | 0.9999763851 |
| USF3         | -1.2483957135 | 0.589932625  | 0.9999763851 |
| NAA50        | -1.029028059  | 0.8480829196 | 0.9999763851 |
| ATP6V1A      | 1.1213851828  | 0.5049916193 | 0.9999763851 |
| ZDHHC23      | 1.3612513664  | 0.567051184  | 0.9999763851 |
| CCDC191      | 1.1338327296  | 0.8700834379 | 0.9999763851 |
| QTRT2        | 1.0752573285  | 0.7653207601 | 0.9999763851 |
| DRD3         | 0             | 0            | 0            |
| ZBTB20       | -1.5352362153 | 0.3730103917 | 0.9999763851 |
| IGSF11       | 0             | 0            | 0            |
| B4GALT4      | 1.0344040943  | 0.9256505017 | 0.9999763851 |
| ARHGAP31     | -1.04266864   | 0.8914542338 | 0.9999763851 |
| TMEM39A      | 1.0558861887  | 0.8335660469 | 0.9999763851 |
| POGLUT1      | -1.0375027647 | 0.8633055254 | 0.9999763851 |
| TIMMDC1      | 1.0354266142  | 0.8270546839 | 0.9999763851 |
| POPDC2       | -4.2849908816 | 0.4028453076 | 0.9999763851 |
| COX17        | -1.1591526319 | 0.3560511583 | 0.9999763851 |
| NR1I2        | 5.4776292235  | 0.3745831165 | 0.9999763851 |
| GSK3B        | -1.0913111269 | 0.6286214537 | 0.9999763851 |
| GPR156       | -2.0621986833 | 0.3113130119 | 0.9999763851 |
| LRRC58       | 1.0922279939  | 0.6373266579 | 0.9999763851 |
| NDUFB4       | 1.1544829114  | 0.3671804974 | 0.9999763851 |
| HGD          | -2.3222877795 | 0.4503451913 | 0.9999763851 |
| RABL3        | 1.3551844819  | 0.2129861142 | 0.9999763851 |
| GTF2E1       | 1.2314720159  | 0.4066519983 | 0.9999763851 |
| STXBP5L      | -1.8141758814 | 0.1955903771 | 0.9999763851 |
| POLQ         | 1.1865803144  | 0.3321813005 | 0.9999763851 |
| ARGFX        | 0             | 0            | 0            |
| FBXO40       | 0             | 0            | 0            |
| HCLS1        | -1.1975317537 | 0.3144297203 | 0.9999763851 |

gene\_expression\_table

|              |               |              |              |
|--------------|---------------|--------------|--------------|
| GOLGB1       | -1.364060152  | 0.1669265564 | 0.9999763851 |
| IQCB1        | 1.4605806774  | 0.0747851665 | 0.9999763851 |
| EAF2         | -1.2382236431 | 0.371051894  | 0.9999763851 |
| SLC15A2      | -2.0436668011 | 0.1732534927 | 0.9999763851 |
| ILDR1        | -1.8156851364 | 0.4778610011 | 0.9999763851 |
| CD86         | -3.3292136073 | 0.2379956236 | 0.9999763851 |
| CASR         | 1.2867653957  | 0.8301799774 | 0.9999763851 |
| CSTA         | 1.1763287397  | 0.2789094277 | 0.9999763851 |
| CCDC58       | -1.2451012674 | 0.3933266204 | 0.9999763851 |
| FAM162A      | -1.418614005  | 0.0405247107 | 0.9999763851 |
| WDR5B        | -1.5839476518 | 0.3957262794 | 0.9999763851 |
| KPNA1        | 1.3584532803  | 0.1302371068 | 0.9999763851 |
| PARP9        | 1.1244495853  | 0.7324308501 | 0.9999763851 |
| DTX3L        | 1.0136044232  | 0.9410879452 | 0.9999763851 |
| PARP14       | -1.3806837706 | 0.2038033385 | 0.9999763851 |
| HSPBAP1      | -2.0856679879 | 0.0822658967 | 0.9999763851 |
| DIRC2        | 1.1978957411  | 0.7182803215 | 0.9999763851 |
| PDIA5        | 1.0343358777  | 0.9022552323 | 0.9999763851 |
| SEC22A       | -1.3178798201 | 0.2921924024 | 0.9999763851 |
| ADCY5        | 0             | 0            | 0            |
| HACD2        | 1.8992761065  | 0.0432932506 | 0.9999763851 |
| MYLK         | -2.2165521716 | 0.2490218059 | 0.9999763851 |
| CCDC14       | -1.2821340801 | 0.2870973127 | 0.9999763851 |
| KALRN        | 0             | 0            | 0            |
| UMPS         | -1.0449918993 | 0.811453882  | 0.9999763851 |
| ITGB5        | -1.9345822491 | 0.0714793578 | 0.9999763851 |
| HEG1         | -1.2987563215 | 0.4604260968 | 0.9999763851 |
| SLC12A8      | -5.7100371403 | 0.0616082413 | 0.9999763851 |
| ZNF148       | -1.1150045063 | 0.5639239983 | 0.9999763851 |
| SNX4         | -1.3367762236 | 0.1520496104 | 0.9999763851 |
| OSBPL11      | 1.0145080908  | 0.9817435881 | 0.9999763851 |
| LOC105374312 | -5.3392819425 | 0.0876453287 | 0.9999763851 |
| ALG1L        | 1.9200533293  | 0.0254666832 | 0.9999763851 |
| SLC41A3      | -1.3313219867 | 0.3308205911 | 0.9999763851 |
| ALDH1L1      | 7.0806012919  | 0.0454991489 | 0.9999763851 |
| KLF15        | 2.5193387991  | 0.2487840621 | 0.9999763851 |
| CFAP100      | 7.4933530102  | 0.2988796184 | 0.9999763851 |
| LOC105374089 | 3.2361532718  | 0.5546934395 | 0.9999763851 |
| ZXDC         | -1.4433762618 | 0.0582713305 | 0.9999763851 |
| UROC1        | 1.0021081365  | 0.994793735  | 0.9999763851 |
| CHST13       | 1.193773795   | 0.5217511196 | 0.9999763851 |
| C3orf22      | 0             | 0            | 0            |
| TXNRD3NB     | 1.9041554506  | 0.0443729241 | 0.9999763851 |
| TXNRD3       | -2.8993041198 | 0.1243070475 | 0.9999763851 |
| CHCHD6       | -1.123333201  | 0.7310221809 | 0.9999763851 |
| PLXNA1       | 1.2850063457  | 0.3656600284 | 0.9999763851 |
| TPRA1        | 1.0897055243  | 0.696900668  | 0.9999763851 |
| MCM2         | 1.0032946365  | 0.9797291721 | 0.9999763851 |
| PODXL2       | -1.7352888029 | 0.3006003262 | 0.9999763851 |

gene\_expression\_table

|            |               |              |              |
|------------|---------------|--------------|--------------|
| ABTB1      | 1.4979084202  | 0.3744068123 | 0.9999763851 |
| MGLL       | -1.0288739368 | 0.8730314715 | 0.9999763851 |
| SEC61A1    | -1.3613514316 | 0.2141122329 | 0.9999763851 |
| RUVBL1     | 1.5091163311  | 0.006531     | 0.9999763851 |
| EEFSEC     | -1.043499337  | 0.9016183649 | 0.9999763851 |
| GATA2      | -1.1960111917 | 0.7988338311 | 0.9999763851 |
| RPN1       | -1.889485087  | 6.15E-05     | 0.1067663916 |
| RAB7A      | 1.1416529658  | 0.2978133377 | 0.9999763851 |
| ACAD9      | 1.5001230251  | 0.0349171674 | 0.9999763851 |
| KIAA1257   | -1.329606002  | 0.2995934432 | 0.9999763851 |
| EFCC1      | 3.2361532718  | 0.5546934395 | 0.9999763851 |
| RAB43      | -1.1754554033 | 0.8029741723 | 0.9999763851 |
| ISY1-RAB43 | -1.9389267434 | 0.0582569698 | 0.9999763851 |
| ISY1       | 1.5596843249  | 0.026964423  | 0.9999763851 |
| CNBP       | 1.1533170375  | 0.3805088729 | 0.9999763851 |
| COPG1      | 1.2715838875  | 0.3820797756 | 0.9999763851 |
| HMCEs      | -1.1817352051 | 0.439209796  | 0.9999763851 |
| H1FX       | 1.0703540063  | 0.6869977005 | 0.9999763851 |
| EFCAB12    | 3.2361532718  | 0.5546934395 | 0.9999763851 |
| MBD4       | -1.2057059345 | 0.3256494347 | 0.9999763851 |
| IFT122     | -1.1004004339 | 0.7633567856 | 0.9999763851 |
| RHO        | 0             | 0            | 0            |
| H1FOO      | -4.287394647  | 0.4026306792 | 0.9999763851 |
| PLXND1     | -1.0908978969 | 0.6386477162 | 0.9999763851 |
| TMCC1      | 1.0758950116  | 0.8118089378 | 0.9999763851 |
| ALG1L2     | -1.9507065805 | 0.3140694428 | 0.9999763851 |
| COL6A6     | 0             | 0            | 0            |
| PIK3R4     | -1.1384797168 | 0.7089230503 | 0.9999763851 |
| ATP2C1     | -1.3173035742 | 0.196566555  | 0.9999763851 |
| ASTE1      | 2.8283024368  | 0.1159001738 | 0.9999763851 |
| NEK11      | 1.1330495498  | 0.8752853443 | 0.9999763851 |
| NUDT16     | -1.2790937307 | 0.459461889  | 0.9999763851 |
| MRPL3      | 1.0877945579  | 0.5511625589 | 0.9999763851 |
| CPNE4      | 1.133559305   | 0.8722117747 | 0.9999763851 |
| ACPP       | 1.2874012553  | 0.8191714702 | 0.9999763851 |
| DNAJC13    | 1.7008710294  | 0.1181825924 | 0.9999763851 |
| ACAD11     | 1.0421519038  | 0.9130657926 | 0.9999763851 |
| UBA5       | 1.4485955787  | 0.1556588297 | 0.9999763851 |
| NPHP3      | 1.2261550526  | 0.6297653084 | 0.9999763851 |
| BFSP2      | 0             | 0            | 0            |
| CDV3       | -1.2095416571 | 0.1468645937 | 0.9999763851 |
| TOPBP1     | -1.000571662  | 0.9974872961 | 0.9999763851 |
| SRPRB      | 1.1203203707  | 0.4407196439 | 0.9999763851 |
| RAB6B      | -1.4154271261 | 0.6105519133 | 0.9999763851 |
| RYK        | -1.4196169208 | 0.1985608003 | 0.9999763851 |
| ANAPC13    | 1.2937699588  | 0.2322744005 | 0.9999763851 |
| CEP63      | -1.1206833447 | 0.6919882854 | 0.9999763851 |
| KY         | 5.4770877341  | 0.3746135179 | 0.9999763851 |
| EPHB1      | 3.2356557963  | 0.5547505991 | 0.9999763851 |

gene\_expression\_table

|          |                |              |              |
|----------|----------------|--------------|--------------|
| PPP2R3A  | 3.2353357581   | 0.554787377  | 0.9999763851 |
| MSL2     | -1.0290040451  | 0.8948327409 | 0.9999763851 |
| PCCB     | -1.3703195315  | 0.1804244061 | 0.9999763851 |
| STAG1    | -1.0990950867  | 0.6835688835 | 0.9999763851 |
| SLC35G2  | -1.0115279726  | 0.9793242514 | 0.9999763851 |
| NCK1     | 1.325472434    | 0.3244849119 | 0.9999763851 |
| CLDN18   | 3.0263279955   | 0.3115123768 | 0.9999763851 |
| DZIP1L   | -1.1182596865  | 0.8416090494 | 0.9999763851 |
| DBR1     | 1.36433666     | 0.3165024618 | 0.9999763851 |
| ARMC8    | -1.1206637347  | 0.6995450574 | 0.9999763851 |
| NME9     | 2.2039386922   | 0.0871165417 | 0.9999763851 |
| MRAS     | 1.1215631341   | 0.736840376  | 0.9999763851 |
| ESYT3    | 3.2361532718   | 0.5546934395 | 0.9999763851 |
| CEP70    | -2.3214980365  | 0.4340847305 | 0.9999763851 |
| FAIM     | 0              | 0            | 0            |
| PIK3CB   | -1.0044235021  | 0.98014716   | 0.9999763851 |
| MRPS22   | 3.0817853726   | 0.0812207485 | 0.9999763851 |
| COPB2    | -1.0905174599  | 0.5833727256 | 0.9999763851 |
| RBP1     | 0              | 0            | 0            |
| NMNAT3   | 1.1586670295   | 0.6787876709 | 0.9999763851 |
| CLSTN2   | 7.7488609396   | 0.3060188822 | 0.9999763851 |
| SLC25A36 | -1.1477604482  | 0.4262419206 | 0.9999763851 |
| PXYLP1   | 1.0954376344   | 0.8124072421 | 0.9999763851 |
| ZBTB38   | 1.0783381642   | 0.8865784378 | 0.9999763851 |
| RASA2    | -1.0031005329  | 0.9909261704 | 0.9999763851 |
| RNF7     | 1.5115371712   | 0.011745776  | 0.9999763851 |
| ATP1B3   | 1.1065199984   | 0.4558271206 | 0.9999763851 |
| TFDP2    | -1.0032631199  | 0.989578547  | 0.9999763851 |
| GK5      | -1.2491605722  | 0.5052323166 | 0.9999763851 |
| XRN1     | -1.0079813763  | 0.973906207  | 0.9999763851 |
| ATR      | 1.1163191522   | 0.7491071181 | 0.9999763851 |
| PLS1     | 2.9500515526   | 0.0661112868 | 0.9999763851 |
| TRPC1    | -10.183182718  | 0.0189055694 | 0.9999763851 |
| PCOLCE2  | 1.015287222    | 0.9606934461 | 0.9999763851 |
| U2SURP   | 1.1699132347   | 0.2551432936 | 0.9999763851 |
| CHST2    | -1.2766016143  | 0.2113230031 | 0.9999763851 |
| SLC9A9   | 1.3140287705   | 0.2896217013 | 0.9999763851 |
| C3orf58  | -1.4175084152  | 0.1762733961 | 0.9999763851 |
| PLSCR2   | -4.2864494036  | 0.4027150576 | 0.9999763851 |
| PLSCR1   | 1.4160330642   | 0.3696201134 | 0.9999763851 |
| AGTR1    | 0              | 0            | 0            |
| GYG1     | 1.4916053228   | 0.0230472735 | 0.9999763851 |
| HLTF     | 1.2411653478   | 0.4243373204 | 0.9999763851 |
| HPS3     | -1.0122062592  | 0.9576506294 | 0.9999763851 |
| TM4SF18  | 3.2353357581   | 0.554787377  | 0.9999763851 |
| TM4SF1   | -20.6759688086 | 0.0533591965 | 0.9999763851 |
| WWTR1    | 1.1334755146   | 0.7159284901 | 0.9999763851 |
| COMMD2   | 1.1169392129   | 0.5695515988 | 0.9999763851 |
| ANKUB1   | 0              | 0            | 0            |



gene\_expression\_table

|          |                |              |              |
|----------|----------------|--------------|--------------|
| RNF13    | -1.0705624897  | 0.7909327981 | 0.9999763851 |
| PFN2     | -14.1139127893 | 0.1026741279 | 0.9999763851 |
| TMEM183B | 1.1866562053   | 0.243979103  | 0.9999763851 |
| TSC22D2  | -1.5040659276  | 0.1812830095 | 0.9999763851 |
| SERP1    | 1.2480385638   | 0.0783297525 | 0.9999763851 |
| EIF2A    | -1.3491447492  | 0.2107029877 | 0.9999763851 |
| SELT     | -1.1466450818  | 0.3333040997 | 0.9999763851 |
| ERICH6   | 3.2353357581   | 0.554787377  | 0.9999763851 |
| SIAH2    | -1.193068942   | 0.3118797431 | 0.9999763851 |
| MED12L   | 1.03080245     | 0.9607462247 | 0.9999763851 |
| GPR171   | -4.2849908816  | 0.4028453076 | 0.9999763851 |
| P2RY14   | 3.2361532718   | 0.5546934395 | 0.9999763851 |
| IGSF10   | 1.0739559714   | 0.8227247301 | 0.9999763851 |
| AADAC    | 1.287203384    | 0.8307715124 | 0.9999763851 |
| SUCNR1   | 1.1828012293   | 0.2904246611 | 0.9999763851 |
| MBNL1    | -1.0816252979  | 0.5449949587 | 0.9999763851 |
| RAP2B    | -1.0646947091  | 0.6899067043 | 0.9999763851 |
| DHX36    | 1.2891496731   | 0.3239619076 | 0.9999763851 |
| GPR149   | 3.2353357581   | 0.554787377  | 0.9999763851 |
| C3orf33  | -1.4368678031  | 0.4210711557 | 0.9999763851 |
| SLC33A1  | -1.1014309721  | 0.7431639924 | 0.9999763851 |
| GMPS     | 1.0778815819   | 0.6460767614 | 0.9999763851 |
| KCNAB1   | 1.266669579    | 0.4830414795 | 0.9999763851 |
| SSR3     | 1.0031182999   | 0.9802115072 | 0.9999763851 |
| TIPARP   | 1.121767671    | 0.6120785446 | 0.9999763851 |
| LEKR1    | -1.1935389971  | 0.5020187721 | 0.9999763851 |
| CCNL1    | 1.0844142186   | 0.7118782283 | 0.9999763851 |
| VEPH1    | -2.237494204   | 0.2906043448 | 0.9999763851 |
| PTX3     | -2.5458658279  | 0.1259180064 | 0.9999763851 |
| SHOX2    | -1.4285626083  | 0.2374738367 | 0.9999763851 |
| RSRC1    | 1.2213200779   | 0.3659981823 | 0.9999763851 |
| MLF1     | -8.342239448   | 0.2161333573 | 0.9999763851 |
| GFM1     | 1.044277047    | 0.7945210606 | 0.9999763851 |
| MFSD1    | 1.4222314307   | 0.0411856249 | 0.9999763851 |
| SCHIP1   | -1.3740925027  | 0.4403496329 | 0.9999763851 |
| IL12A    | 7.7211724672   | 0.2779709379 | 0.9999763851 |
| C3orf80  | -1.1773255455  | 0.5368400348 | 0.9999763851 |
| IFT80    | 1.176064011    | 0.6340745022 | 0.9999763851 |
| SMC4     | 1.1073248362   | 0.4071640736 | 0.9999763851 |
| TRIM59   | 1.039782197    | 0.8555909553 | 0.9999763851 |
| KPNA4    | 1.0626062953   | 0.7526470014 | 0.9999763851 |
| PPM1L    | -1.3867362463  | 0.41941401   | 0.9999763851 |
| NMD3     | -1.1785338781  | 0.3598328091 | 0.9999763851 |
| WDR49    | -4.2849908816  | 0.4028453076 | 0.9999763851 |
| PDCD10   | 1.5868598332   | 0.0212106476 | 0.9999763851 |
| SERPIN1  | -2.6622871132  | 0.2012933849 | 0.9999763851 |
| GOLIM4   | -1.0831537958  | 0.714500085  | 0.9999763851 |
| MECOM    | -1.1354342752  | 0.4132114098 | 0.9999763851 |
| ACTRT3   | 1.62522264     | 0.574692917  | 0.9999763851 |

gene\_expression\_table

|          |               |              |              |
|----------|---------------|--------------|--------------|
| MYNN     | 1.2525246941  | 0.5371126958 | 0.9999763851 |
| LRRC34   | 3.2353357581  | 0.554787377  | 0.9999763851 |
| SAMD7    | 0             | 0            | 0            |
| SEC62    | -1.0738961241 | 0.6228552324 | 0.9999763851 |
| GPR160   | 1.3872744966  | 0.0519239027 | 0.9999763851 |
| PHC3     | -1.4869040765 | 0.0487453151 | 0.9999763851 |
| PRKCI    | -1.0399940248 | 0.9309503545 | 0.9999763851 |
| SKIL     | -1.3405418309 | 0.4923153716 | 0.9999763851 |
| RPL22L1  | 1.2295312824  | 0.1628626064 | 0.9999763851 |
| EIF5A2   | 1.5243873974  | 0.3198487405 | 0.9999763851 |
| TNIK     | -1.30841373   | 0.1515852228 | 0.9999763851 |
| PLD1     | 1.0598758974  | 0.8008150816 | 0.9999763851 |
| TMEM212  | 0             | 0            | 0            |
| FNDC3B   | -1.186582602  | 0.3294220045 | 0.9999763851 |
| TNFSF10  | 1.012169218   | 0.9748507091 | 0.9999763851 |
| NCEH1    | -1.5412829136 | 0.4023437467 | 0.9999763851 |
| ECT2     | 1.0407242035  | 0.8542573809 | 0.9999763851 |
| NLGN1    | -1.315303824  | 0.8206171563 | 0.9999763851 |
| NAALADL2 | 3.2353357581  | 0.554787377  | 0.9999763851 |
| TBL1XR1  | -1.1941899888 | 0.2452560275 | 0.9999763851 |
| ZMAT3    | -1.1573184836 | 0.7542163964 | 0.9999763851 |
| PIK3CA   | -1.0988824076 | 0.7458773327 | 0.9999763851 |
| KCNMB3   | 1.9656656116  | 0.3707760737 | 0.9999763851 |
| ZNF639   | -1.1822404165 | 0.5781405411 | 0.9999763851 |
| MFN1     | -1.2774889986 | 0.3888802003 | 0.9999763851 |
| GNB4     | 1.3072620977  | 0.115035686  | 0.9999763851 |
| ACTL6A   | 1.2852637101  | 0.1888240541 | 0.9999763851 |
| MRPL47   | 1.3908277742  | 0.1720275416 | 0.9999763851 |
| NDUFB5   | -1.1469082456 | 0.4251682611 | 0.9999763851 |
| USP13    | -1.0921580628 | 0.6582349969 | 0.9999763851 |
| PEX5L    | -1.9659101454 | 0.4317898946 | 0.9999763851 |
| TTC14    | 1.2351177415  | 0.3909414474 | 0.9999763851 |
| FXR1     | 1.0250748735  | 0.9109887346 | 0.9999763851 |
| DNAJC19  | 1.0343371087  | 0.8698879757 | 0.9999763851 |
| ATP11B   | -1.0134592009 | 0.9537656599 | 0.9999763851 |
| DCUN1D1  | 1.0678398268  | 0.7957640667 | 0.9999763851 |
| MCCC1    | -1.101569338  | 0.6518870931 | 0.9999763851 |
| LAMP3    | 0             | 0            | 0            |
| MCF2L2   | 2.1957575791  | 0.307600681  | 0.9999763851 |
| B3GNT5   | 1.1352440294  | 0.5624485733 | 0.9999763851 |
| KLHL6    | 1.1028784299  | 0.8243955637 | 0.9999763851 |
| KLHL24   | -1.636255078  | 0.0689647976 | 0.9999763851 |
| YEATS2   | -1.7284583682 | 0.029756778  | 0.9999763851 |
| MAP6D1   | -2.7902229124 | 0.0442875052 | 0.9999763851 |
| PARL     | -1.0668614564 | 0.6852256418 | 0.9999763851 |
| ABCC5    | -1.0502418533 | 0.8323059812 | 0.9999763851 |
| EIF2B5   | -1.3384084533 | 0.0659253294 | 0.9999763851 |
| DVL3     | -1.7586402079 | 0.006934     | 0.9999763851 |
| AP2M1    | 1.2252323556  | 0.1759188177 | 0.9999763851 |

gene\_expression\_table

|         |                |              |              |
|---------|----------------|--------------|--------------|
| ABCF3   | -1.0276468447  | 0.9457563316 | 0.9999763851 |
| ALG3    | 1.1381009579   | 0.4609074001 | 0.9999763851 |
| ECE2    | 1.6353343936   | 0.0428548569 | 0.9999763851 |
| CAMK2N2 | -1.4347038381  | 0.3393964851 | 0.9999763851 |
| PSMD2   | 1.030245285    | 0.8610167877 | 0.9999763851 |
| EIF4G1  | 1.0204520903   | 0.878519736  | 0.9999763851 |
| CLCN2   | 1.8742558907   | 0.2632551888 | 0.9999763851 |
| POLR2H  | -1.2823382844  | 0.1178527899 | 0.9999763851 |
| CHRD    | 0              | 0            | 0            |
| EPHB3   | 9.9312452783   | 0.2485677018 | 0.9999763851 |
| MAGEF1  | -1.0969243478  | 0.7325117665 | 0.9999763851 |
| VPS8    | -1.3055160532  | 0.2489096725 | 0.9999763851 |
| C3orf70 | -1.315303824   | 0.8206171563 | 0.9999763851 |
| EHHADH  | -1.2562050205  | 0.7082883295 | 0.9999763851 |
| MAP3K13 | -1.1142281527  | 0.5627279432 | 0.9999763851 |
| TMEM41A | -1.0972966182  | 0.734342475  | 0.9999763851 |
| SENP2   | 1.1891614677   | 0.5408643692 | 0.9999763851 |
| IGF2BP2 | -1.1600855189  | 0.5748796538 | 0.9999763851 |
| TRA2B   | 1.1231176457   | 0.4382280626 | 0.9999763851 |
| ETV5    | -1.1521590587  | 0.3433829977 | 0.9999763851 |
| DGKG    | -2.1421506715  | 0.005164     | 0.9999763851 |
| CRYGS   | -7.5664585246  | 0.2265122542 | 0.9999763851 |
| TBCCD1  | 1.1997581502   | 0.6805700871 | 0.9999763851 |
| DNAJB11 | -1.0589844835  | 0.7322090031 | 0.9999763851 |
| HRG     | 0              | 0            | 0            |
| KNG1    | 3.2361532718   | 0.5546934395 | 0.9999763851 |
| EIF4A2  | -1.3590588899  | 0.0433253619 | 0.9999763851 |
| RFC4    | -1.029944895   | 0.9121645386 | 0.9999763851 |
| ST6GAL1 | -1.0769217109  | 0.613285779  | 0.9999763851 |
| RPL39L  | -1.0233066419  | 0.9368943067 | 0.9999763851 |
| BCL6    | -1.7096752905  | 0.1029711582 | 0.9999763851 |
| LPP     | -1.3594690425  | 0.1796405858 | 0.9999763851 |
| TP63    | 0              | 0            | 0            |
| CLDN16  | 0              | 0            | 0            |
| TMEM207 | 0              | 0            | 0            |
| IL1RAP  | 1.2005852893   | 0.6046810427 | 0.9999763851 |
| UTS2B   | 0              | 0            | 0            |
| FGF12   | 0              | 0            | 0            |
| MB21D2  | 1.2321174685   | 0.6710419103 | 0.9999763851 |
| ATP13A4 | 1.0271815929   | 0.978028051  | 0.9999763851 |
| OPA1    | -1.0590971327  | 0.7642667327 | 0.9999763851 |
| HES1    | -13.1418879802 | 0.000152     | 0.2098020317 |
| ATP13A3 | 1.2003249358   | 0.2994160788 | 0.9999763851 |
| TMEM44  | 2.1124281032   | 0.1409457607 | 0.9999763851 |
| LSG1    | -1.1598792625  | 0.4208147841 | 0.9999763851 |
| FAM43A  | -1.3120672656  | 0.1291656231 | 0.9999763851 |
| XXYLT1  | -1.0331871839  | 0.8762068886 | 0.9999763851 |
| ACAP2   | 1.1732183574   | 0.4030260011 | 0.9999763851 |
| PPP1R2  | 1.0620475561   | 0.7886863846 | 0.9999763851 |

gene\_expression\_table

|              |               |              |              |
|--------------|---------------|--------------|--------------|
| MUC20        | 1.4701226961  | 0.6325676268 | 0.9999763851 |
| TNK2         | 1.0430366211  | 0.831492427  | 0.9999763851 |
| LOC105374301 | 0             | 0            | 0            |
| TFRC         | 1.2755563165  | 0.0555491828 | 0.9999763851 |
| SLC51A       | -1.2944792306 | 0.6141973559 | 0.9999763851 |
| PCYT1A       | 1.1227331014  | 0.8019848471 | 0.9999763851 |
| TCTEX1D2     | 1.3898325242  | 0.2021808174 | 0.9999763851 |
| TM4SF19      | -5.1487074295 | 0.003751     | 0.9999763851 |
| UBXN7        | -1.3785889735 | 0.0451035592 | 0.9999763851 |
| RNF168       | 1.1934114606  | 0.4951632227 | 0.9999763851 |
| SMCO1        | 3.2356557963  | 0.5547505991 | 0.9999763851 |
| WDR53        | 1.0737815799  | 0.8607630547 | 0.9999763851 |
| FBXO45       | -1.0203955058 | 0.9069217783 | 0.9999763851 |
| NRROS        | -1.6244294592 | 0.0578579901 | 0.9999763851 |
| CEP19        | -1.2942163544 | 0.5121840697 | 0.9999763851 |
| PIGX         | -1.1644522501 | 0.4389351766 | 0.9999763851 |
| PAK2         | -1.0007072127 | 0.996346109  | 0.9999763851 |
| SENP5        | -1.061542734  | 0.7831165342 | 0.9999763851 |
| NCBP2        | 1.0344049594  | 0.8640970697 | 0.9999763851 |
| PIGZ         | -1.6914686964 | 0.1719905867 | 0.9999763851 |
| MELTF        | -1.3381931295 | 0.1455118097 | 0.9999763851 |
| DLG1         | -1.0832744062 | 0.7179523204 | 0.9999763851 |
| BDH1         | 1.216484259   | 0.2257162803 | 0.9999763851 |
| RUBCN        | -1.4213561069 | 0.1591309257 | 0.9999763851 |
| FYTDD1       | 1.1521391975  | 0.4291728741 | 0.9999763851 |
| LRCH3        | -1.1538483885 | 0.5987491325 | 0.9999763851 |
| IQCG         | -1.05311448   | 0.8495209267 | 0.9999763851 |
| RPL35A       | -1.106422405  | 0.3859488717 | 0.9999763851 |
| LMLN         | 1.6105560359  | 0.1658522727 | 0.9999763851 |
| FAM157A      | -4.7792357159 | 0.0182542221 | 0.9999763851 |
| ZNF718       | 0             | 0            | 0            |
| ZNF732       | 0             | 0            | 0            |
| ZNF141       | 1.1264088673  | 0.3321538719 | 0.9999763851 |
| ZNF721       | -1.2705567171 | 0.503971729  | 0.9999763851 |
| PIGG         | 1.1760872649  | 0.5968489971 | 0.9999763851 |
| PDE6B        | -1.315303824  | 0.8206171563 | 0.9999763851 |
| ATP5I        | 1.0180072294  | 0.9028366698 | 0.9999763851 |
| MYL5         | -2.7217225437 | 0.0141203559 | 0.9999763851 |
| MFSD7        | 0             | 0            | 0            |
| PCGF3        | -1.3527976385 | 0.0550932875 | 0.9999763851 |
| CPLX1        | 0             | 0            | 0            |
| GAK          | 1.2247927757  | 0.222768965  | 0.9999763851 |
| TMEM175      | 1.1414405581  | 0.7946078199 | 0.9999763851 |
| DGKQ         | -1.0010232133 | 0.9970016742 | 0.9999763851 |
| SLC26A1      | 1.1329115851  | 0.8742573041 | 0.9999763851 |
| IDUA         | 1.8888297566  | 0.593759522  | 0.9999763851 |
| FGFRL1       | 1.2630517183  | 0.4944535967 | 0.9999763851 |
| SPON2        | -1.2823592232 | 0.1829867057 | 0.9999763851 |
| CTBP1        | -1.0338563786 | 0.7988251259 | 0.9999763851 |

gene\_expression\_table

|          |               |              |              |
|----------|---------------|--------------|--------------|
| MAEA     | 1.4620014463  | 0.0440905242 | 0.9999763851 |
| UVSSA    | -1.9881850467 | 0.1813232557 | 0.9999763851 |
| CRIPAK   | -1.4349511833 | 0.4484662141 | 0.9999763851 |
| FAM53A   | -1.5697725216 | 0.2307806184 | 0.9999763851 |
| SLBP     | 1.0268424454  | 0.8889614077 | 0.9999763851 |
| TMEM129  | -1.2134925058 | 0.2325885259 | 0.9999763851 |
| TACC3    | 1.1129078934  | 0.4531742802 | 0.9999763851 |
| FGFR3    | 9.9624059448  | 0.2315386396 | 0.9999763851 |
| LETM1    | 1.0000573328  | 0.999733374  | 0.9999763851 |
| WHSC1    | -1.0820767385 | 0.6094193642 | 0.9999763851 |
| NELFA    | -1.2494520054 | 0.1591542191 | 0.9999763851 |
| C4orf48  | 1.0876136086  | 0.8466977609 | 0.9999763851 |
| NAT8L    | -1.0866106505 | 0.7985619139 | 0.9999763851 |
| POLN     | 1.5810707843  | 0.2137478199 | 0.9999763851 |
| HAUS3    | 1.9298099233  | 0.2579707582 | 0.9999763851 |
| MXD4     | -1.1825399502 | 0.565673035  | 0.9999763851 |
| ZFYVE28  | -1.0485303181 | 0.8957156613 | 0.9999763851 |
| CFAP99   | 0             | 0            | 0            |
| RNF4     | -1.2341676555 | 0.4532977448 | 0.9999763851 |
| FAM193A  | 1.3731783823  | 0.23345049   | 0.9999763851 |
| TNIP2    | 1.5040785766  | 0.1541308447 | 0.9999763851 |
| SH3BP2   | 1.2770137422  | 0.2211383312 | 0.9999763851 |
| ADD1     | 1.0956544562  | 0.5659602973 | 0.9999763851 |
| MFSD10   | 1.0557483755  | 0.6696105047 | 0.9999763851 |
| NOP14    | -1.0687504927 | 0.6653018209 | 0.9999763851 |
| GRK4     | 1.4693815047  | 0.3916238203 | 0.9999763851 |
| HTT      | -1.2426012352 | 0.2009990566 | 0.9999763851 |
| MSANTD1  | -1.6817502083 | 0.4746188271 | 0.9999763851 |
| RGS12    | -1.2443191648 | 0.3731727382 | 0.9999763851 |
| LRPAP1   | 1.1870726488  | 0.1694177919 | 0.9999763851 |
| ADRA2C   | -1.315303824  | 0.8206171563 | 0.9999763851 |
| TMEM128  | 1.2336156806  | 0.6360815995 | 0.9999763851 |
| LYAR     | 1.0634526933  | 0.7140384016 | 0.9999763851 |
| ZBTB49   | -1.085116324  | 0.8529919374 | 0.9999763851 |
| NSG1     | -4.2864494036 | 0.4027150576 | 0.9999763851 |
| STX18    | 1.2850675239  | 0.3721312582 | 0.9999763851 |
| MSX1     | 1.0325803783  | 0.9229054902 | 0.9999763851 |
| CYTL1    | -1.0361486706 | 0.9389324599 | 0.9999763851 |
| STK32B   | -3.3272796812 | 0.2460356765 | 0.9999763851 |
| EVC2     | 0             | 0            | 0            |
| C4orf50  | -2.5767557147 | 0.3126719162 | 0.9999763851 |
| WFS1     | 0             | 0            | 0            |
| PPP2R2C  | -1.6268327642 | 0.2591915247 | 0.9999763851 |
| MAN2B2   | 1.1650254167  | 0.3460393532 | 0.9999763851 |
| MRFAP1   | 1.0727636309  | 0.6243406112 | 0.9999763851 |
| S100P    | 1.1836417259  | 0.1878709638 | 0.9999763851 |
| MRFAP1L1 | 1.3237198661  | 0.0784371357 | 0.9999763851 |
| BLOC1S4  | -1.1567051375 | 0.4875607336 | 0.9999763851 |
| KIAA0232 | -1.2797987247 | 0.3763859493 | 0.9999763851 |

gene\_expression\_table

|          |               |              |              |
|----------|---------------|--------------|--------------|
| TBC1D14  | 1.1772628259  | 0.3291238858 | 0.9999763851 |
| CCDC96   | 6.368054416   | 0.3491474795 | 0.9999763851 |
| TADA2B   | 1.1392776459  | 0.6517671668 | 0.9999763851 |
| GRPEL1   | 1.1638151777  | 0.3916176955 | 0.9999763851 |
| SORCS2   | 1.0463114448  | 0.8471144732 | 0.9999763851 |
| AFAP1    | 3.2356557963  | 0.5547505991 | 0.9999763851 |
| ABLIM2   | 3.6908783983  | 0.155915947  | 0.9999763851 |
| SH3TC1   | -2.3367314853 | 0.0123156375 | 0.9999763851 |
| HTRA3    | 5.4776292235  | 0.3745831165 | 0.9999763851 |
| ACOX3    | -1.4161766541 | 0.209930935  | 0.9999763851 |
| TRMT44   | 1.9562973384  | 0.1408713812 | 0.9999763851 |
| HMX1     | 3.2356557963  | 0.5547505991 | 0.9999763851 |
| FAM86KP  | 0             | 0            | 0            |
| SLC2A9   | -1.2422489176 | 0.4410732374 | 0.9999763851 |
| WDR1     | 1.1012128055  | 0.4818630942 | 0.9999763851 |
| ZNF518B  | -1.7724666178 | 0.2815466456 | 0.9999763851 |
| CLNK     | 0             | 0            | 0            |
| RAB28    | -1.25527926   | 0.3015839939 | 0.9999763851 |
| NKX3-2   | 0             | 0            | 0            |
| BOD1L1   | 1.010821934   | 0.9544491091 | 0.9999763851 |
| CPEB2    | -1.7410046481 | 0.157277291  | 0.9999763851 |
| C1QTNF7  | 1.9668088044  | 0.3527516592 | 0.9999763851 |
| CC2D2A   | 1.5100940589  | 0.5369787292 | 0.9999763851 |
| FBXL5    | 1.1717067714  | 0.4154238468 | 0.9999763851 |
| FAM200B  | 1.5176220905  | 0.2974567623 | 0.9999763851 |
| BST1     | -1.107597204  | 0.6321073823 | 0.9999763851 |
| CD38     | 1.2202990301  | 0.2994968427 | 0.9999763851 |
| FGFBP2   | -1.082138348  | 0.7500888453 | 0.9999763851 |
| PROM1    | -1.7994722457 | 0.518998306  | 0.9999763851 |
| TAPT1    | -1.1587327924 | 0.4504971733 | 0.9999763851 |
| QDPR     | 1.1327645257  | 0.5241970159 | 0.9999763851 |
| LAP3     | 1.0186243512  | 0.9406683522 | 0.9999763851 |
| MED28    | -1.028441362  | 0.8699929784 | 0.9999763851 |
| FAM184B  | 3.0102857067  | 0.108772236  | 0.9999763851 |
| DCAF16   | -1.0549102842 | 0.7512258104 | 0.9999763851 |
| NCAPG    | -1.0639280345 | 0.7504094943 | 0.9999763851 |
| LCORL    | -1.4910940494 | 0.0734346397 | 0.9999763851 |
| PACRGL   | 1.7579989224  | 0.4436784171 | 0.9999763851 |
| ADGRA3   | 1.0318771274  | 0.9421514932 | 0.9999763851 |
| PPARGC1A | -2.1007484104 | 0.002553     | 0.9999763851 |
| DHX15    | 1.2938164663  | 0.0711236451 | 0.9999763851 |
| CCDC149  | -1.3158816768 | 0.8203229797 | 0.9999763851 |
| SEPSECS  | -1.1374647481 | 0.8003136121 | 0.9999763851 |
| PI4K2B   | -1.0550790696 | 0.8220284989 | 0.9999763851 |
| ZCCHC4   | -1.0628052168 | 0.8947986973 | 0.9999763851 |
| ANAPC4   | 1.0480911223  | 0.8509241908 | 0.9999763851 |
| SEL1L3   | -1.8455485512 | 0.0198729108 | 0.9999763851 |
| SMIM20   | 1.2988912559  | 0.5035502254 | 0.9999763851 |
| RBPJ     | -1.1501262422 | 0.3568885261 | 0.9999763851 |

gene\_expression\_table

|          |               |              |              |
|----------|---------------|--------------|--------------|
| TBC1D19  | -1.3955017315 | 0.6890604737 | 0.9999763851 |
| STIM2    | -1.4188455255 | 0.1787927395 | 0.9999763851 |
| PCDH7    | -1.3158816768 | 0.8203229797 | 0.9999763851 |
| ARAP2    | 1.3659539746  | 0.4785017248 | 0.9999763851 |
| DTHD1    | 0             | 0            | 0            |
| C4orf19  | -1.3375066151 | 0.5148613622 | 0.9999763851 |
| RELL1    | 1.5915896242  | 0.0252829066 | 0.9999763851 |
| PGM2     | -1.0738016629 | 0.7424676907 | 0.9999763851 |
| TBC1D1   | -1.1208674434 | 0.4882228262 | 0.9999763851 |
| PTTG2    | -2.3214980365 | 0.434695234  | 0.9999763851 |
| KLF3     | -1.2874031024 | 0.436757811  | 0.9999763851 |
| TLR1     | -7.5647903763 | 0.2176246281 | 0.9999763851 |
| FAM114A1 | -1.0546608592 | 0.9396385026 | 0.9999763851 |
| TMEM156  | 1.4845744246  | 0.5084253436 | 0.9999763851 |
| KLHL5    | 1.0085894724  | 0.9714825084 | 0.9999763851 |
| WDR19    | -1.3199842814 | 0.5569193553 | 0.9999763851 |
| RFC1     | -1.0504740903 | 0.7470811106 | 0.9999763851 |
| KLB      | -4.287394647  | 0.4026306792 | 0.9999763851 |
| RPL9     | 1.0360877857  | 0.807099414  | 0.9999763851 |
| LIAS     | -1.3366791839 | 0.3096603661 | 0.9999763851 |
| UGDH     | 1.1022334604  | 0.7447771372 | 0.9999763851 |
| SMIM14   | -1.4865693181 | 0.1906690922 | 0.9999763851 |
| UBE2K    | -1.0759389286 | 0.6531413881 | 0.9999763851 |
| PDS5A    | -1.4348399905 | 0.012791086  | 0.9999763851 |
| N4BP2    | 1.3139349046  | 0.5244614682 | 0.9999763851 |
| RHOH     | -1.6218880674 | 0.1070363003 | 0.9999763851 |
| RBM47    | 1.0433636009  | 0.8769365528 | 0.9999763851 |
| NSUN7    | -7.5664585246 | 0.2264603451 | 0.9999763851 |
| APBB2    | 1.1726446997  | 0.4911039614 | 0.9999763851 |
| LIMCH1   | 0             | 0            | 0            |
| TMEM33   | 1.1394892856  | 0.4086242246 | 0.9999763851 |
| DCAF4L1  | -3.5156187543 | 0.1697255493 | 0.9999763851 |
| SLC30A9  | 1.2029382445  | 0.436962168  | 0.9999763851 |
| ATP8A1   | -1.560273095  | 0.2229754011 | 0.9999763851 |
| YIPF7    | -4.2849908816 | 0.4028453076 | 0.9999763851 |
| GUF1     | 2.282706334   | 0.0125693986 | 0.9999763851 |
| GNPDA2   | 2.7408203244  | 0.1806493815 | 0.9999763851 |
| GABRB1   | -4.2849908816 | 0.4028453076 | 0.9999763851 |
| COMMD8   | 1.4383799478  | 0.1698610411 | 0.9999763851 |
| ATP10D   | 1.1735024689  | 0.7592627571 | 0.9999763851 |
| CORIN    | 1.8140611791  | 0.5846585145 | 0.9999763851 |
| NFXL1    | -1.2595156937 | 0.4879085401 | 0.9999763851 |
| TXK      | -3.1552159335 | 0.1779442196 | 0.9999763851 |
| TEC      | 1.6245095224  | 0.5657710166 | 0.9999763851 |
| SLAIN2   | 1.0117354529  | 0.9624421511 | 0.9999763851 |
| FRYL     | 1.0003405083  | 0.9985850864 | 0.9999763851 |
| OCIAD1   | -1.2445861868 | 0.1079809318 | 0.9999763851 |
| DCUN1D4  | 1.1127324824  | 0.7334314148 | 0.9999763851 |
| USP46    | 1.1337334788  | 0.8709612797 | 0.9999763851 |

gene\_expression\_table

|           |               |              |              |
|-----------|---------------|--------------|--------------|
| RASL11B   | -1.315303824  | 0.8206171563 | 0.9999763851 |
| SCFD2     | 1.0352267643  | 0.9145642358 | 0.9999763851 |
| FIP1L1    | -1.2162236182 | 0.2801527742 | 0.9999763851 |
| LNK1      | 1.2800950129  | 0.6390483545 | 0.9999763851 |
| CHIC2     | -1.5345073782 | 0.1656900135 | 0.9999763851 |
| KIT       | 1.3257077688  | 0.7618555768 | 0.9999763851 |
| KDR       | 0             | 0            | 0            |
| SRD5A3    | 1.2326051615  | 0.2608156415 | 0.9999763851 |
| TMEM165   | 1.1911375557  | 0.3989151165 | 0.9999763851 |
| CLOCK     | -1.0136140271 | 0.983743704  | 0.9999763851 |
| EXOC1     | 1.3049558338  | 0.3278150342 | 0.9999763851 |
| CEP135    | 1.1878095634  | 0.6238044249 | 0.9999763851 |
| AASDH     | -1.2403869811 | 0.4373511546 | 0.9999763851 |
| PPAT      | -1.083581999  | 0.7360581786 | 0.9999763851 |
| PAICS     | 1.2790418563  | 0.0787847729 | 0.9999763851 |
| SRP72     | 1.1878680166  | 0.1863320189 | 0.9999763851 |
| ARL9      | 0             | 0            | 0            |
| REST      | 1.3166583482  | 0.2169957535 | 0.9999763851 |
| NOA1      | -1.2890966877 | 0.3299452005 | 0.9999763851 |
| POLR2B    | -1.1852990369 | 0.273914481  | 0.9999763851 |
| IGFBP7    | -1.0935440221 | 0.6856998492 | 0.9999763851 |
| ADGRL3    | -1.1950744547 | 0.6368039176 | 0.9999763851 |
| EPHA5     | 1.068546911   | 0.6524476546 | 0.9999763851 |
| CENPC     | -1.0921731205 | 0.7828224972 | 0.9999763851 |
| STAP1     | 1.1649666292  | 0.7558170958 | 0.9999763851 |
| UBA6      | -1.1643901678 | 0.4727495754 | 0.9999763851 |
| GNRHR     | 0             | 0            | 0            |
| TMPRSS11D | 3.2353357581  | 0.554787377  | 0.9999763851 |
| TMPRSS11F | 0             | 0            | 0            |
| YTHDC1    | 1.0876836535  | 0.6025775433 | 0.9999763851 |
| UGT2A2    | -4.2849908816 | 0.4028453076 | 0.9999763851 |
| SULT1B1   | 3.2353357581  | 0.554787377  | 0.9999763851 |
| UTP3      | 1.1171911976  | 0.5044975576 | 0.9999763851 |
| RUFY3     | -1.470438136  | 0.297146182  | 0.9999763851 |
| GRSF1     | -1.2509995584 | 0.1261100335 | 0.9999763851 |
| MOB1B     | -1.3618151029 | 0.4393753445 | 0.9999763851 |
| DCK       | 1.2040053286  | 0.5182777697 | 0.9999763851 |
| SLC4A4    | 0             | 0            | 0            |
| COX18     | -1.1072678687 | 0.6856011223 | 0.9999763851 |
| ANKRD17   | 1.0610594126  | 0.7211217424 | 0.9999763851 |
| CXCL8     | -2.1226426784 | 0.0011       | 0.8381590036 |
| CXCL6     | 1.2866381786  | 0.8225514932 | 0.9999763851 |
| PF4V1     | 5.4781708352  | 0.3745527127 | 0.9999763851 |
| PPBP      | -4.3381560983 | 0.1571039335 | 0.9999763851 |
| CXCL5     | 0             | 0            | 0            |
| CXCL3     | 0             | 0            | 0            |
| CXCL2     | 1.0299009028  | 0.9680669521 | 0.9999763851 |
| MTHFD2L   | 1.4242050291  | 0.2197531218 | 0.9999763851 |
| RCHY1     | 1.3443063725  | 0.2261165134 | 0.9999763851 |



gene\_expression\_table

|              |               |              |              |
|--------------|---------------|--------------|--------------|
| THAP6        | -3.1539335425 | 0.1560971771 | 0.9999763851 |
| C4orf26      | 0             | 0            | 0            |
| CDKL2        | 0             | 0            | 0            |
| G3BP2        | 1.1920571081  | 0.301988519  | 0.9999763851 |
| USO1         | -1.2914170303 | 0.3077726524 | 0.9999763851 |
| NAAA         | 1.0571697919  | 0.770543817  | 0.9999763851 |
| SDAD1        | 1.1171301611  | 0.6348697452 | 0.9999763851 |
| ART3         | -2.3512645813 | 0.0806570148 | 0.9999763851 |
| CXCL10       | -1.1067104994 | 0.7535841099 | 0.9999763851 |
| CXCL11       | -4.2864494036 | 0.4027150576 | 0.9999763851 |
| NUP54        | -1.1348538065 | 0.6781680871 | 0.9999763851 |
| SCARB2       | -1.2410951018 | 0.3072402823 | 0.9999763851 |
| FAM47E       | -1.5416912797 | 0.6826008231 | 0.9999763851 |
| FAM47E-STBD1 | 1.1902374898  | 0.8038783922 | 0.9999763851 |
| STBD1        | -1.7449096743 | 0.2147488318 | 0.9999763851 |
| CCDC158      | -5.7918925833 | 0.1508437595 | 0.9999763851 |
| SHROOM3      | 0             | 0            | 0            |
| SEPT11       | 1.2042940426  | 0.5447857733 | 0.9999763851 |
| CCNI         | 1.1396213147  | 0.3001120811 | 0.9999763851 |
| CCNG2        | -1.5493290245 | 0.1869844655 | 0.9999763851 |
| CXCL13       | 0             | 0            | 0            |
| CNOT6L       | 1.2494804394  | 0.3805480153 | 0.9999763851 |
| MRPL1        | -1.155042445  | 0.4327751427 | 0.9999763851 |
| FRAS1        | 1.0492709541  | 0.7843690435 | 0.9999763851 |
| BMP2K        | -1.1352818852 | 0.5825657649 | 0.9999763851 |
| PAQR3        | -1.0235316757 | 0.893631629  | 0.9999763851 |
| NAA11        | 1.2051753167  | 0.2519354577 | 0.9999763851 |
| ANTXR2       | -1.0348695615 | 0.8736248246 | 0.9999763851 |
| PRDM8        | 1.2552092302  | 0.3931284801 | 0.9999763851 |
| LOC107986215 | -1.3154339304 | 0.8205576571 | 0.9999763851 |
| HNRNPD       | 1.1480102407  | 0.2732581953 | 0.9999763851 |
| HNRNPDL      | 1.0698288225  | 0.5856906499 | 0.9999763851 |
| ENOPH1       | 1.1130584483  | 0.6066227194 | 0.9999763851 |
| TMEM150C     | 18.5663370642 | 5.83E-05     | 0.1067663916 |
| SCD5         | -1.4848881099 | 0.1400528121 | 0.9999763851 |
| SEC31A       | 1.069516196   | 0.7680668318 | 0.9999763851 |
| THAP9        | 2.027155953   | 0.4565858217 | 0.9999763851 |
| LIN54        | -1.2071175708 | 0.447080185  | 0.9999763851 |
| COPS4        | 1.2106908088  | 0.4003582732 | 0.9999763851 |
| PLAC8        | -1.2759525062 | 0.4342237833 | 0.9999763851 |
| COQ2         | -1.2158285418 | 0.2668167718 | 0.9999763851 |
| HPSE         | 1.5501349378  | 0.3909125046 | 0.9999763851 |
| HELQ         | 2.7811444689  | 0.0480747177 | 0.9999763851 |
| MRPS18C      | -1.1384524923 | 0.4519739357 | 0.9999763851 |
| FAM175A      | -1.0833082856 | 0.8045678854 | 0.9999763851 |
| GPAT3        | 1.202593002   | 0.5375763439 | 0.9999763851 |
| CDS1         | -1.3161718537 | 0.8283869414 | 0.9999763851 |
| WDFY3        | -1.5673900329 | 0.2105407982 | 0.9999763851 |
| ARHGAP24     | -1.8915159376 | 0.2432791975 | 0.9999763851 |

gene\_expression\_table

|          |                |              |              |
|----------|----------------|--------------|--------------|
| SLC10A6  | 0              | 0            | 0            |
| C4orf36  | 7.7219356627   | 0.2871728309 | 0.9999763851 |
| AFF1     | 1.0328722823   | 0.845197565  | 0.9999763851 |
| KLHL8    | 1.0671989501   | 0.7980100737 | 0.9999763851 |
| HSD17B13 | -2.5600051511  | 0.2551953091 | 0.9999763851 |
| HSD17B11 | 1.0001160746   | 0.9996121197 | 0.9999763851 |
| NUDT9    | 1.3710545995   | 0.2990601602 | 0.9999763851 |
| SPARCL1  | 0              | 0            | 0            |
| SPP1     | -16.7128947179 | 0            | 0            |
| PKD2     | 1.2018106325   | 0.6260982749 | 0.9999763851 |
| PPM1K    | -1.2658500736  | 0.3573069364 | 0.9999763851 |
| HERC6    | -4.7486078443  | 0.0859010109 | 0.9999763851 |
| HERC5    | -2.1074911394  | 0.0553427893 | 0.9999763851 |
| PIGY     | 1.5226701091   | 0.055863487  | 0.9999763851 |
| PYURF    | 1.0462207029   | 0.8199302568 | 0.9999763851 |
| HERC3    | -1.3209946069  | 0.5352547278 | 0.9999763851 |
| FAM13A   | -1.1490595167  | 0.8521121188 | 0.9999763851 |
| TIGD2    | 1.6427550276   | 0.3265931446 | 0.9999763851 |
| GPRIN3   | -1.1491729646  | 0.8479881239 | 0.9999763851 |
| CCSER1   | -1.3199491909  | 0.0790718867 | 0.9999763851 |
| GRID2    | 3.2356557963   | 0.5547505991 | 0.9999763851 |
| SMARCAD1 | 1.2186632612   | 0.4506048862 | 0.9999763851 |
| HPGDS    | 0              | 0            | 0            |
| PDLIM5   | 1.0147533103   | 0.9478754046 | 0.9999763851 |
| UNC5C    | -1.2271284135  | 0.530077268  | 0.9999763851 |
| STPG2    | 1.0754508071   | 0.926308326  | 0.9999763851 |
| RAP1GDS1 | 1.573611224    | 0.009066     | 0.9999763851 |
| TSPAN5   | -1.0982545278  | 0.7119501816 | 0.9999763851 |
| EIF4E    | 1.1171100019   | 0.4669030604 | 0.9999763851 |
| METAP1   | 1.0823874698   | 0.6635511912 | 0.9999763851 |
| ADH5     | -1.2813552179  | 0.1889398215 | 0.9999763851 |
| TRMT10A  | 1.0984285422   | 0.8461403166 | 0.9999763851 |
| DAPP1    | -1.331698876   | 0.6378999261 | 0.9999763851 |
| LAMTOR3  | 1.2140064845   | 0.5307303547 | 0.9999763851 |
| DNAJB14  | 1.1161396164   | 0.703527385  | 0.9999763851 |
| H2AFZ    | -1.1518569535  | 0.2200050751 | 0.9999763851 |
| EMCN     | 0              | 0            | 0            |
| PPP3CA   | -1.0837749694  | 0.6335918541 | 0.9999763851 |
| BANK1    | 0              | 0            | 0            |
| SLC39A8  | 1.422515618    | 0.0638353265 | 0.9999763851 |
| NFKB1    | 1.2556376591   | 0.2039447703 | 0.9999763851 |
| MANBA    | -1.647097176   | 0.0180444493 | 0.9999763851 |
| UBE2D3   | -1.1299094468  | 0.30702579   | 0.9999763851 |
| CISD2    | -1.1096324395  | 0.5345519789 | 0.9999763851 |
| SLC9B1   | -2.3222877795  | 0.4504859661 | 0.9999763851 |
| SLC9B2   | 1.077543515    | 0.7672214132 | 0.9999763851 |
| BDH2     | -1.013117539   | 0.9701845889 | 0.9999763851 |
| CENPE    | 1.407373725    | 0.0708888024 | 0.9999763851 |
| TACR3    | 3.2353357581   | 0.554787377  | 0.9999763851 |

gene\_expression\_table

|              |               |              |              |
|--------------|---------------|--------------|--------------|
| TET2         | -1.1960569267 | 0.6353434242 | 0.9999763851 |
| PPA2         | -1.0015539194 | 0.9925581341 | 0.9999763851 |
| ARHGEF38     | -1.3157515262 | 0.8225133873 | 0.9999763851 |
| INTS12       | -1.3406620238 | 0.3127239279 | 0.9999763851 |
| GSTCD        | 1.0226914481  | 0.9437369346 | 0.9999763851 |
| NPNT         | 0             | 0            | 0            |
| TBCK         | -1.2565638732 | 0.4464824629 | 0.9999763851 |
| AIMP1        | -1.0013722044 | 0.9935607105 | 0.9999763851 |
| LOC107986216 | 0             | 0            | 0            |
| PAPSS1       | 1.030038545   | 0.896396286  | 0.9999763851 |
| SGMS2        | -1.0356181086 | 0.9414035386 | 0.9999763851 |
| CYP2U1       | 0             | 0            | 0            |
| HADH         | 1.2582845488  | 0.1484634146 | 0.9999763851 |
| LEF1         | -4.2864494036 | 0.4027150576 | 0.9999763851 |
| RPL34        | -1.052130748  | 0.689442608  | 0.9999763851 |
| OSTC         | -1.0379316479 | 0.8081053725 | 0.9999763851 |
| SEC24B       | 1.0928228087  | 0.7180987483 | 0.9999763851 |
| CCDC109B     | 1.1571373806  | 0.5533393134 | 0.9999763851 |
| CASP6        | 1.0853809703  | 0.6944615366 | 0.9999763851 |
| PLA2G12A     | 1.2730221868  | 0.3544196166 | 0.9999763851 |
| GAR1         | 1.2670246486  | 0.1080875721 | 0.9999763851 |
| RRH          | 0             | 0            | 0            |
| LRIT3        | -4.287394647  | 0.4026306792 | 0.9999763851 |
| ELOVL6       | 0             | 0            | 0            |
| C4orf32      | 1.6822464147  | 0.163738542  | 0.9999763851 |
| AP1AR        | -1.2232674253 | 0.4292608793 | 0.9999763851 |
| TIFA         | 1.1685062055  | 0.5938619413 | 0.9999763851 |
| ALPK1        | -1.5014218323 | 0.2037492959 | 0.9999763851 |
| ZGRF1        | -1.386022444  | 0.3394022199 | 0.9999763851 |
| LARP7        | 1.401158557   | 0.1090562262 | 0.9999763851 |
| ANK2         | 1.7768474191  | 0.0007473    | 0.6510516988 |
| CAMK2D       | 1.1089323737  | 0.8152634383 | 0.9999763851 |
| UGT8         | 6.368054416   | 0.3491544048 | 0.9999763851 |
| NDST3        | 1.2869488883  | 0.8190393436 | 0.9999763851 |
| PRSS12       | 1.3549794337  | 0.6408840014 | 0.9999763851 |
| METTL14      | 1.0625563436  | 0.8542849361 | 0.9999763851 |
| SEC24D       | -1.1021096772 | 0.6056123818 | 0.9999763851 |
| SYNPO2       | 1.286354513   | 0.820736494  | 0.9999763851 |
| MYOZ2        | 0             | 0            | 0            |
| USP53        | 1.1165323446  | 0.8615979356 | 0.9999763851 |
| C4orf3       | 1.256153715   | 0.1781326305 | 0.9999763851 |
| PDE5A        | 1.1617715381  | 0.7178733882 | 0.9999763851 |
| MAD2L1       | 1.390514629   | 0.0563123885 | 0.9999763851 |
| ANXA5        | 1.080888217   | 0.6411877792 | 0.9999763851 |
| EXOSC9       | 1.0688402276  | 0.7336745199 | 0.9999763851 |
| CCNA2        | 1.0067022434  | 0.9621296337 | 0.9999763851 |
| BBS7         | -1.0624089353 | 0.9009500062 | 0.9999763851 |
| TRPC3        | 0             | 0            | 0            |
| KIAA1109     | -1.6192143192 | 0.1252442052 | 0.9999763851 |

gene\_expression\_table

|          |               |              |              |
|----------|---------------|--------------|--------------|
| BBS12    | 2.8919248679  | 0.3275957387 | 0.9999763851 |
| FGF2     | -2.5593885838 | 0.3085129336 | 0.9999763851 |
| NUDT6    | -2.293109698  | 0.0921057855 | 0.9999763851 |
| SPATA5   | 1.0002073169  | 0.99944365   | 0.9999763851 |
| SPRY1    | 1.9894954061  | 0.3034692612 | 0.9999763851 |
| ANKRD50  | -1.6253771944 | 0.5661731301 | 0.9999763851 |
| FAT4     | 3.2353357581  | 0.554787377  | 0.9999763851 |
| INTU     | 0             | 0            | 0            |
| SLC25A31 | 0             | 0            | 0            |
| HSPA4L   | -1.1111893603 | 0.7045620482 | 0.9999763851 |
| PLK4     | 1.3119415123  | 0.4298756636 | 0.9999763851 |
| MFSD8    | -1.5339127666 | 0.3597857662 | 0.9999763851 |
| ABHD18   | 1.2522910089  | 0.265633347  | 0.9999763851 |
| LARP1B   | -1.4668342783 | 0.0964994245 | 0.9999763851 |
| PGRMC2   | 1.0229148277  | 0.9002087051 | 0.9999763851 |
| JADE1    | 1.2557321103  | 0.1974887377 | 0.9999763851 |
| SCLT1    | -1.1068523862 | 0.6387781806 | 0.9999763851 |
| C4orf33  | -1.0597336095 | 0.8940004901 | 0.9999763851 |
| SLC7A11  | -1.6032197253 | 0.0125000975 | 0.9999763851 |
| NOCT     | 1.1226966385  | 0.7977141362 | 0.9999763851 |
| ELF2     | 1.0848895405  | 0.7139498408 | 0.9999763851 |
| MGARP    | 5.4784711963  | 0.3745358536 | 0.9999763851 |
| NDUFC1   | 1.3936693387  | 0.0458513825 | 0.9999763851 |
| NAA15    | -1.2427274364 | 0.2199414353 | 0.9999763851 |
| RAB33B   | -1.2728224451 | 0.5872567352 | 0.9999763851 |
| SETD7    | -1.1060288371 | 0.6023401121 | 0.9999763851 |
| MGST2    | 1.1033112629  | 0.4466290835 | 0.9999763851 |
| MAML3    | -1.22639426   | 0.4717370387 | 0.9999763851 |
| SCOC     | -1.1248296681 | 0.6581272647 | 0.9999763851 |
| CLGN     | 2.1743121231  | 0.288220291  | 0.9999763851 |
| ELMOD2   | -1.4522487716 | 0.352541687  | 0.9999763851 |
| RNF150   | 0             | 0            | 0            |
| ZNF330   | 1.0574806748  | 0.7738404283 | 0.9999763851 |
| INPP4B   | -1.0013292194 | 0.9946423531 | 0.9999763851 |
| USP38    | -1.2852492726 | 0.3127201804 | 0.9999763851 |
| GAB1     | -1.2384147505 | 0.5737159702 | 0.9999763851 |
| SMARCA5  | 1.1890487834  | 0.2807054778 | 0.9999763851 |
| FREM3    | 0             | 0            | 0            |
| HHIP     | 5.4776292235  | 0.3745831165 | 0.9999763851 |
| ANAPC10  | 1.6643198842  | 0.2778787977 | 0.9999763851 |
| ABCE1    | 1.1446474202  | 0.3478345501 | 0.9999763851 |
| OTUD4    | 2.0340623597  | 0.006858     | 0.9999763851 |
| SMAD1    | 0             | 0            | 0            |
| MMAA     | 1.9538319373  | 0.3873463274 | 0.9999763851 |
| C4orf51  | 5.4770877341  | 0.3746135179 | 0.9999763851 |
| LSM6     | -1.3517755293 | 0.1687594151 | 0.9999763851 |
| SLC10A7  | -1.1772401109 | 0.6801211517 | 0.9999763851 |
| TMEM184C | 1.0995934927  | 0.8356547924 | 0.9999763851 |
| PRMT9    | 1.2792150955  | 0.3409378111 | 0.9999763851 |

gene\_expression\_table

|          |               |              |              |
|----------|---------------|--------------|--------------|
| ARHGAP10 | -1.229834886  | 0.7597812191 | 0.9999763851 |
| NR3C2    | -2.3214980365 | 0.4351998275 | 0.9999763851 |
| DCLK2    | -4.2849908816 | 0.4028453076 | 0.9999763851 |
| LRBA     | -1.1376206353 | 0.7126403037 | 0.9999763851 |
| RPS3A    | -1.0858190464 | 0.5246830263 | 0.9999763851 |
| SH3D19   | 9.9614219348  | 0.2203097956 | 0.9999763851 |
| GATB     | -1.6166137326 | 0.2594721822 | 0.9999763851 |
| FBXW7    | -1.2376108889 | 0.2890719164 | 0.9999763851 |
| TMEM154  | -1.0759294333 | 0.8469343959 | 0.9999763851 |
| TIGD4    | 0             | 0            | 0            |
| ARFIP1   | 2.5601600361  | 0.0710306602 | 0.9999763851 |
| FHDC1    | -1.3977001462 | 0.4854329951 | 0.9999763851 |
| MND1     | -1.0839831739 | 0.6826872775 | 0.9999763851 |
| KIAA0922 | -1.4032483146 | 0.1130334153 | 0.9999763851 |
| TLR2     | -1.8444638303 | 0.2881950487 | 0.9999763851 |
| RNF175   | 0             | 0            | 0            |
| SFRP2    | 0             | 0            | 0            |
| PLRG1    | -1.1239428    | 0.637306906  | 0.9999763851 |
| FGB      | 5.4790129495  | 0.3753326899 | 0.9999763851 |
| RBM46    | 3.2353357581  | 0.554787377  | 0.9999763851 |
| ASIC5    | 5.4781708352  | 0.3745527127 | 0.9999763851 |
| TDO2     | -6.1820830156 | 0.0004033    | 0.4429482063 |
| CTSO     | -1.4336216598 | 0.5431179172 | 0.9999763851 |
| GLRB     | 3.2353357581  | 0.554787377  | 0.9999763851 |
| GRIA2    | 0             | 0            | 0            |
| TMEM144  | -1.2942500023 | 0.6174680893 | 0.9999763851 |
| RXFP1    | 0             | 0            | 0            |
| C4orf46  | -1.13185205   | 0.5212886628 | 0.9999763851 |
| ETFDH    | -1.9154384599 | 0.0616699513 | 0.9999763851 |
| PPID     | 1.0042502086  | 0.9834845588 | 0.9999763851 |
| FNIP2    | -1.8571734693 | 0.001165     | 0.8594669785 |
| C4orf45  | 6.5213929566  | 0.0192650197 | 0.9999763851 |
| RAPGEF2  | -1.9857368557 | 0.1230135899 | 0.9999763851 |
| FSTL5    | 0             | 0            | 0            |
| NAF1     | -1.1561682569 | 0.5338976513 | 0.9999763851 |
| TMA16    | -1.4350137047 | 0.0636087362 | 0.9999763851 |
| MARCH1   | -1.2620299418 | 0.7409721149 | 0.9999763851 |
| ANP32C   | -1.3717838846 | 0.7498319246 | 0.9999763851 |
| APELA    | 0             | 0            | 0            |
| TMEM192  | 1.1684511279  | 0.4778300295 | 0.9999763851 |
| KLHL2    | -1.3105381531 | 0.4324501055 | 0.9999763851 |
| MSMO1    | -1.2390044602 | 0.314149743  | 0.9999763851 |
| CPE      | -2.6603009385 | 0.1945638402 | 0.9999763851 |
| SPOCK3   | 0             | 0            | 0            |
| DDX60    | 1.2815256224  | 0.7940112845 | 0.9999763851 |
| DDX60L   | -1.4482994521 | 0.2640877781 | 0.9999763851 |
| CBR4     | -1.5537816711 | 0.0550063097 | 0.9999763851 |
| SH3RF1   | -1.5561198097 | 0.1915994258 | 0.9999763851 |
| NEK1     | -1.0448320985 | 0.9068158747 | 0.9999763851 |

gene\_expression\_table

|              |               |              |              |
|--------------|---------------|--------------|--------------|
| CLCN3        | -1.2291183436 | 0.3639434238 | 0.9999763851 |
| HPF1         | -1.204412426  | 0.3682537872 | 0.9999763851 |
| MFAP3L       | -1.4217670568 | 0.5902939428 | 0.9999763851 |
| GALNTL6      | 5.4770877341  | 0.3746135179 | 0.9999763851 |
| GALNT7       | 1.0901802494  | 0.70501677   | 0.9999763851 |
| HMGB2        | -1.235449581  | 0.3058774826 | 0.9999763851 |
| SAP30        | -1.5138803647 | 0.163723602  | 0.9999763851 |
| SCRG1        | -3.0146678557 | 0.0810158537 | 0.9999763851 |
| HAND2        | 0             | 0            | 0            |
| FBXO8        | -1.4079846504 | 0.6793411967 | 0.9999763851 |
| CEP44        | -1.0444677949 | 0.8938225661 | 0.9999763851 |
| GPM6A        | 0             | 0            | 0            |
| ASB5         | 0             | 0            | 0            |
| SPCS3        | -1.1068315597 | 0.4561985166 | 0.9999763851 |
| NEIL3        | -1.0819801774 | 0.7506692006 | 0.9999763851 |
| AGA          | -1.2903424981 | 0.2583268971 | 0.9999763851 |
| LOC285500    | -1.1966292775 | 0.7920922107 | 0.9999763851 |
| TENM3        | -1.3709710942 | 0.7484705277 | 0.9999763851 |
| DCTD         | 1.4951146823  | 0.0614194283 | 0.9999763851 |
| WWC2         | 2.8687666286  | 0.1459114632 | 0.9999763851 |
| CLDN22       | 1.349683529   | 0.6749312302 | 0.9999763851 |
| LOC107986217 | 0             | 0            | 0            |
| CDKN2AIP     | 1.1702761325  | 0.5474426319 | 0.9999763851 |
| ING2         | 1.1453428599  | 0.4792088443 | 0.9999763851 |
| RWDD4        | 1.021524123   | 0.9093606898 | 0.9999763851 |
| TRAPPC11     | -1.0309606102 | 0.8972493591 | 0.9999763851 |
| STOX2        | 1.1747070055  | 0.5236993701 | 0.9999763851 |
| ENPP6        | 0             | 0            | 0            |
| IRF2         | -1.3759070126 | 0.4143580367 | 0.9999763851 |
| CASP3        | 1.3235654395  | 0.2802419009 | 0.9999763851 |
| PRIMPOL      | 1.5491924319  | 0.5377707716 | 0.9999763851 |
| CENPU        | 1.2233564881  | 0.2474440965 | 0.9999763851 |
| ACSL1        | 1.1139512805  | 0.5444566976 | 0.9999763851 |
| CFAP97       | 1.5372837252  | 0.0444207809 | 0.9999763851 |
| SNX25        | 1.0845209046  | 0.8701279009 | 0.9999763851 |
| LRP2BP       | 1.5489906133  | 0.5725077297 | 0.9999763851 |
| ANKRD37      | -2.5290144326 | 0.0834805787 | 0.9999763851 |
| UFSP2        | -1.0163884814 | 0.9529698758 | 0.9999763851 |
| C4orf47      | -1.3713173847 | 0.744040857  | 0.9999763851 |
| FAM149A      | 0             | 0            | 0            |
| CYP4V2       | 1.208087406   | 0.3524931907 | 0.9999763851 |
| KLKB1        | 1.6257221546  | 0.5967441092 | 0.9999763851 |
| F11          | 5.4790129495  | 0.3754356866 | 0.9999763851 |
| FAT1         | 3.2356557963  | 0.5547505991 | 0.9999763851 |
| ZFP42        | -4.2849908816 | 0.4028453076 | 0.9999763851 |
| FRG1         | -1.0710314888 | 0.6471719935 | 0.9999763851 |
| CCDC127      | 1.363881472   | 0.5474380469 | 0.9999763851 |
| SDHA         | -1.028194942  | 0.8403896637 | 0.9999763851 |
| PDCD6        | 1.1652379177  | 0.3237611231 | 0.9999763851 |

gene\_expression\_table

|              |               |              |              |
|--------------|---------------|--------------|--------------|
| AHRR         | -1.1906058445 | 0.3642471873 | 0.9999763851 |
| EXOC3        | -1.0737605579 | 0.6813380552 | 0.9999763851 |
| SLC9A3       | -1.1016049459 | 0.7710587737 | 0.9999763851 |
| CEP72        | 1.5470780217  | 0.1582432918 | 0.9999763851 |
| LOC101929895 | 9.9619682616  | 0.2312787469 | 0.9999763851 |
| ZDHHC11      | 3.1165674937  | 0.1715472926 | 0.9999763851 |
| BRD9         | 1.1095046498  | 0.5737361322 | 0.9999763851 |
| TRIP13       | 1.2253692208  | 0.3142024972 | 0.9999763851 |
| SLC12A7      | 1.3788134048  | 0.7084343816 | 0.9999763851 |
| TERT         | 1.0272952748  | 0.9775187538 | 0.9999763851 |
| CLPTM1L      | -1.0944523267 | 0.5059698834 | 0.9999763851 |
| LPCAT1       | 1.2314482354  | 0.2028154931 | 0.9999763851 |
| MRPL36       | -1.2391296706 | 0.2302305204 | 0.9999763851 |
| NDUFS6       | 1.1268306312  | 0.385312181  | 0.9999763851 |
| ADAMTS16     | 0             | 0            | 0            |
| ICE1         | 1.1338173263  | 0.6085113608 | 0.9999763851 |
| MED10        | -1.1746505679 | 0.4358773797 | 0.9999763851 |
| NSUN2        | -1.2586099463 | 0.1836930704 | 0.9999763851 |
| SRD5A1       | -1.5464300369 | 0.172284816  | 0.9999763851 |
| PAPD7        | 1.3272140271  | 0.3278855255 | 0.9999763851 |
| ADCY2        | 18.2947739705 | 0.150179073  | 0.9999763851 |
| FASTKD3      | 1.1079745143  | 0.7944069785 | 0.9999763851 |
| MTRR         | 1.1425979009  | 0.6241310009 | 0.9999763851 |
| SEMA5A       | 3.2353357581  | 0.554787377  | 0.9999763851 |
| FAM173B      | 1.0320974006  | 0.9221007787 | 0.9999763851 |
| CCT5         | 1.2508132988  | 0.0701522824 | 0.9999763851 |
| MARCH6       | 1.0028277798  | 0.9881600434 | 0.9999763851 |
| ROPN1L       | 1.2451878652  | 0.6413505763 | 0.9999763851 |
| LOC105369214 | 0             | 0            | 0            |
| ANKRD33B     | 1.1928599878  | 0.4755675729 | 0.9999763851 |
| DAP          | 1.020277823   | 0.8982707271 | 0.9999763851 |
| DNAH5        | 0             | 0            | 0            |
| TRIO         | -1.8391085221 | 0.1241848701 | 0.9999763851 |
| FAM105A      | -1.3579731069 | 0.6947105643 | 0.9999763851 |
| OTULIN       | 1.0967807893  | 0.6426899807 | 0.9999763851 |
| ANKH         | -1.6720999618 | 0.1251828667 | 0.9999763851 |
| FBXL7        | 3.2353357581  | 0.554787377  | 0.9999763851 |
| ZNF622       | -1.0124149774 | 0.9682488784 | 0.9999763851 |
| FAM134B      | -1.0942721156 | 0.5574644958 | 0.9999763851 |
| MYO10        | 1.6701562626  | 0.2405779072 | 0.9999763851 |
| BASP1        | 1.2138388766  | 0.2025633959 | 0.9999763851 |
| CDH18        | -1.315303824  | 0.8206171563 | 0.9999763851 |
| CDH12        | -1.2473421265 | 0.4846981226 | 0.9999763851 |
| CDH10        | 3.2356557963  | 0.5547505991 | 0.9999763851 |
| CDH6         | 3.2353357581  | 0.554787377  | 0.9999763851 |
| DROSHA       | -1.0083131701 | 0.9700519136 | 0.9999763851 |
| C5orf22      | 1.3519899252  | 0.1392657729 | 0.9999763851 |
| PDZD2        | 3.3745826092  | 0.002649     | 0.9999763851 |
| GOLPH3       | -1.0064794072 | 0.9706343362 | 0.9999763851 |

gene\_expression\_table

|          |               |              |              |
|----------|---------------|--------------|--------------|
| MTMR12   | -1.1128186202 | 0.7044269244 | 0.9999763851 |
| ZFR      | 1.1805519355  | 0.4154627842 | 0.9999763851 |
| SUB1     | -1.035908532  | 0.7791023536 | 0.9999763851 |
| NPR3     | 0             | 0            | 0            |
| TARS     | -1.1688223867 | 0.2768165296 | 0.9999763851 |
| ADAMTS12 | -1.0365000139 | 0.939724395  | 0.9999763851 |
| SLC45A2  | 5.4784711963  | 0.3745358536 | 0.9999763851 |
| AMACR    | -1.122607055  | 0.6172844992 | 0.9999763851 |
| C1QTNF3  | 1.1139743991  | 0.825894664  | 0.9999763851 |
| RAI14    | 7.7204093521  | 0.2880799703 | 0.9999763851 |
| TTC23L   | 1.0277462901  | 0.9757593063 | 0.9999763851 |
| RAD1     | -1.0065558416 | 0.974974658  | 0.9999763851 |
| BRIX1    | 1.0475222536  | 0.8147204312 | 0.9999763851 |
| DNAJC21  | 1.0648239295  | 0.7388007403 | 0.9999763851 |
| SPEF2    | 3.2353357581  | 0.554787377  | 0.9999763851 |
| CAPSL    | 0             | 0            | 0            |
| UGT3A1   | 0             | 0            | 0            |
| UGT3A2   | 0             | 0            | 0            |
| LMBRD2   | 1.019178451   | 0.9511885408 | 0.9999763851 |
| SKP2     | 1.010106987   | 0.9537645527 | 0.9999763851 |
| NADK2    | 1.1890743034  | 0.4077011875 | 0.9999763851 |
| RANBP3L  | 0             | 0            | 0            |
| SLC1A3   | 1.0313460152  | 0.9425337514 | 0.9999763851 |
| NIPBL    | 1.0028494494  | 0.9854846891 | 0.9999763851 |
| C5orf42  | 1.194342259   | 0.3611314359 | 0.9999763851 |
| NUP155   | -1.1465963961 | 0.6331928248 | 0.9999763851 |
| WDR70    | -1.1528282791 | 0.5245421344 | 0.9999763851 |
| EGFLAM   | 0             | 0            | 0            |
| RICTOR   | -1.3800150214 | 0.2139514793 | 0.9999763851 |
| FYB      | 1.163794998   | 0.5359784372 | 0.9999763851 |
| C9       | -4.2864494036 | 0.4027150576 | 0.9999763851 |
| DAB2     | -1.7714603521 | 0.2988191245 | 0.9999763851 |
| PTGER4   | -1.6990889299 | 0.0431805404 | 0.9999763851 |
| TTC33    | -3.6747177393 | 0.1931151166 | 0.9999763851 |
| PRKAA1   | -1.1577391151 | 0.5453531994 | 0.9999763851 |
| RPL37    | 1.0793623142  | 0.5292698612 | 0.9999763851 |
| CARD6    | 1.0615520261  | 0.898558141  | 0.9999763851 |
| C7       | -7.5622178268 | 0.2177145568 | 0.9999763851 |
| PLCXD3   | 0             | 0            | 0            |
| OXCT1    | 1.5016088246  | 0.133359043  | 0.9999763851 |
| C5orf51  | 1.253548887   | 0.4615056856 | 0.9999763851 |
| FBXO4    | 1.4212629034  | 0.1916695825 | 0.9999763851 |
| GHR      | 1.2866381786  | 0.8224897331 | 0.9999763851 |
| SEPP1    | 0             | 0            | 0            |
| ANXA2R   | -1.3372592868 | 0.0699291494 | 0.9999763851 |
| ZNF131   | 1.086898254   | 0.7323244428 | 0.9999763851 |
| NIM1K    | -1.3154339304 | 0.8205576571 | 0.9999763851 |
| HMGCS1   | -1.0917094462 | 0.6237411636 | 0.9999763851 |
| TMEM267  | -1.2572901881 | 0.4107223017 | 0.9999763851 |



gene\_expression\_table

|          |               |              |              |
|----------|---------------|--------------|--------------|
| C5orf34  | 1.3611910537  | 0.5505174976 | 0.9999763851 |
| PAIP1    | 1.1162284714  | 0.6223733884 | 0.9999763851 |
| NNT      | -1.2785787609 | 0.1311952866 | 0.9999763851 |
| MRPS30   | -1.4633034756 | 0.0754729668 | 0.9999763851 |
| HCN1     | 0             | 0            | 0            |
| EMB      | 1.2765785972  | 0.2753771178 | 0.9999763851 |
| PARP8    | 1.0322659531  | 0.9462243091 | 0.9999763851 |
| PELO     | 1.2457531369  | 0.3859198919 | 0.9999763851 |
| ITGA1    | 1.1447333993  | 0.8765821901 | 0.9999763851 |
| ITGA2    | 3.2356557963  | 0.5547505991 | 0.9999763851 |
| MOCS2    | -1.300942886  | 0.4931808278 | 0.9999763851 |
| FST      | -4.287394647  | 0.4026306792 | 0.9999763851 |
| NDUFS4   | 1.1611500398  | 0.4229890686 | 0.9999763851 |
| ARL15    | -1.0264098069 | 0.9305384066 | 0.9999763851 |
| SNX18    | -1.4050843109 | 0.2694386048 | 0.9999763851 |
| CDC20B   | 0             | 0            | 0            |
| CCNO     | 3.3940373312  | 0.2284542701 | 0.9999763851 |
| DHX29    | 1.0279249515  | 0.8980545797 | 0.9999763851 |
| SKIV2L2  | 1.0908364731  | 0.6182025513 | 0.9999763851 |
| PLPP1    | 3.3222963726  | 0.0159383191 | 0.9999763851 |
| SLC38A9  | 1.1284190029  | 0.6940396891 | 0.9999763851 |
| DDX4     | 0             | 0            | 0            |
| IL31RA   | 1.0721046145  | 0.8895376753 | 0.9999763851 |
| IL6ST    | 1.4730422263  | 0.3935397287 | 0.9999763851 |
| MAP3K1   | -1.8657528234 | 0.0470704441 | 0.9999763851 |
| SETD9    | -1.1576691309 | 0.6617655499 | 0.9999763851 |
| MIER3    | 1.027644744   | 0.9775449549 | 0.9999763851 |
| GPBP1    | -1.2729873009 | 0.1316691284 | 0.9999763851 |
| PLK2     | -1.3154339304 | 0.8205576571 | 0.9999763851 |
| GAPT     | 1.2370774927  | 0.4176638119 | 0.9999763851 |
| RAB3C    | 1.3496981678  | 0.6618895999 | 0.9999763851 |
| PDE4D    | 1.0494437221  | 0.8349144389 | 0.9999763851 |
| DEPDC1B  | -1.1801724753 | 0.38976722   | 0.9999763851 |
| ELOVL7   | -5.3416241096 | 0.0832549721 | 0.9999763851 |
| ERCC8    | 2.0297988877  | 0.1270784268 | 0.9999763851 |
| NDUFAF2  | 1.2760462595  | 0.2630941422 | 0.9999763851 |
| SMIM15   | -1.003471392  | 0.9903336711 | 0.9999763851 |
| ZSWIM6   | -1.1615828914 | 0.5838043997 | 0.9999763851 |
| KIF2A    | 1.2063524007  | 0.3405315704 | 0.9999763851 |
| DIMT1    | 1.1026851294  | 0.5822798633 | 0.9999763851 |
| IPO11    | 1.0168309472  | 0.9509490403 | 0.9999763851 |
| LRRC70   | -4.2864494036 | 0.4027150576 | 0.9999763851 |
| RGS7BP   | 0             | 0            | 0            |
| FAM159B  | -7.5622178268 | 0.2177145568 | 0.9999763851 |
| SREK1IP1 | -1.0674789252 | 0.72359263   | 0.9999763851 |
| CWC27    | 1.0036494938  | 0.9855311691 | 0.9999763851 |
| ADAMTS6  | 3.2353357581  | 0.554787377  | 0.9999763851 |
| CENPK    | -1.0260147302 | 0.9065100995 | 0.9999763851 |
| PPWD1    | -1.0436959252 | 0.8957371606 | 0.9999763851 |

gene\_expression\_table

|              |                |              |              |
|--------------|----------------|--------------|--------------|
| TRIM23       | 1.2793384004   | 0.6434907424 | 0.9999763851 |
| TRAPPC13     | 1.1767575576   | 0.553476984  | 0.9999763851 |
| SGTB         | 1.0315755169   | 0.9467751201 | 0.9999763851 |
| NLN          | -1.0172690578  | 0.9313873694 | 0.9999763851 |
| ERBIN        | 1.0371371172   | 0.8566336588 | 0.9999763851 |
| SREK1        | 1.0194482272   | 0.9090055451 | 0.9999763851 |
| MAST4        | 1.8136032532   | 0.5948809763 | 0.9999763851 |
| PIK3R1       | 1.1848553405   | 0.2567139726 | 0.9999763851 |
| SLC30A5      | 1.0317057902   | 0.9012887237 | 0.9999763851 |
| CCNB1        | 1.0936217148   | 0.5557234296 | 0.9999763851 |
| CENPH        | -1.1698024954  | 0.5034810836 | 0.9999763851 |
| MRPS36       | -1.0139998568  | 0.9301881695 | 0.9999763851 |
| CDK7         | -1.775327643   | 0.3002198612 | 0.9999763851 |
| CCDC125      | 1.6650197809   | 0.0734706097 | 0.9999763851 |
| AK6          | 1.0056001956   | 0.974843088  | 0.9999763851 |
| TAF9         | 1.2022376639   | 0.2241238402 | 0.9999763851 |
| RAD17        | -1.2417177958  | 0.2654276525 | 0.9999763851 |
| MARVELD2     | -4.2849908816  | 0.4028453076 | 0.9999763851 |
| GTF2H2C      | -1.4837348679  | 0.3693808373 | 0.9999763851 |
| SERF1B       | 1.5675103224   | 0.4616650372 | 0.9999763851 |
| SMN2         | -1.7201309463  | 0.1211048637 | 0.9999763851 |
| LOC107986354 | 0              | 0            | 0            |
| SERF1A       | 1.198709426    | 0.7216013186 | 0.9999763851 |
| SMN1         | -1.0931170377  | 0.8312051539 | 0.9999763851 |
| NAIP         | 1.032631767    | 0.902739453  | 0.9999763851 |
| GTF2H2       | -1.0587047992  | 0.8148951894 | 0.9999763851 |
| LOC107986352 | -10.8422096127 | 0.1434763784 | 0.9999763851 |
| LOC107986353 | -3.7489679912  | 0.1057436943 | 0.9999763851 |
| BDP1         | 1.0536761547   | 0.8340660496 | 0.9999763851 |
| MCCC2        | 1.3544926024   | 0.0874318893 | 0.9999763851 |
| MAP1B        | 1.8142404796   | 0.5680221692 | 0.9999763851 |
| MRPS27       | -1.1771582637  | 0.2597252541 | 0.9999763851 |
| PTCD2        | -1.3986233071  | 0.3120962747 | 0.9999763851 |
| TNPO1        | 1.0698079969   | 0.6642165571 | 0.9999763851 |
| FCHO2        | 1.8137824633   | 0.5633863058 | 0.9999763851 |
| FOXD1        | -1.940446983   | 0.1183048709 | 0.9999763851 |
| BTF3         | 1.0287149299   | 0.8237335446 | 0.9999763851 |
| ANKRA2       | -1.968664074   | 0.0977539434 | 0.9999763851 |
| UTP15        | 1.2121834804   | 0.474552359  | 0.9999763851 |
| ARHGEF28     | 5.6508551585   | 0.0443799389 | 0.9999763851 |
| ENC1         | -1.7343545975  | 0.4566121889 | 0.9999763851 |
| HEXB         | -1.1317733674  | 0.4088478275 | 0.9999763851 |
| GFM2         | 1.2632069501   | 0.4608574497 | 0.9999763851 |
| NSA2         | 1.0721873083   | 0.5898381939 | 0.9999763851 |
| FAM169A      | -3.3284109188  | 0.2422458152 | 0.9999763851 |
| ANKRD31      | -7.5647903763  | 0.2176246281 | 0.9999763851 |
| HMGCR        | -1.2071024166  | 0.2598485477 | 0.9999763851 |
| COL4A3BP     | -1.2299962021  | 0.3244120804 | 0.9999763851 |
| POLK         | -1.2483936913  | 0.4250880288 | 0.9999763851 |

gene\_expression\_table

|          |               |              |              |
|----------|---------------|--------------|--------------|
| ANKDD1B  | 1.2315138108  | 0.7930333038 | 0.9999763851 |
| POC5     | -1.7864048017 | 0.1955388735 | 0.9999763851 |
| SV2C     | -1.8719268659 | 0.3710114725 | 0.9999763851 |
| IQGAP2   | 1.0666330679  | 0.757162646  | 0.9999763851 |
| F2R      | 1.5540089775  | 0.5615744147 | 0.9999763851 |
| CRHBP    | -4.2864494036 | 0.4027150576 | 0.9999763851 |
| AGGF1    | 1.105637555   | 0.6509809011 | 0.9999763851 |
| ZBED3    | 1.6038585578  | 0.307708966  | 0.9999763851 |
| PDE8B    | -3.0806189565 | 0.1290820471 | 0.9999763851 |
| WDR41    | -1.308169079  | 0.2189957088 | 0.9999763851 |
| OTP      | 3.2353357581  | 0.554787377  | 0.9999763851 |
| TBCA     | -1.2756512989 | 0.0476454889 | 0.9999763851 |
| AP3B1    | -1.1307099154 | 0.5665352894 | 0.9999763851 |
| SCAMP1   | -1.1416259037 | 0.408209981  | 0.9999763851 |
| ARSB     | -1.0181071179 | 0.9565283684 | 0.9999763851 |
| JMY      | 1.0300270506  | 0.8498549792 | 0.9999763851 |
| HOMER1   | -1.2025267623 | 0.6484810084 | 0.9999763851 |
| PAPD4    | 1.3750879473  | 0.2654900227 | 0.9999763851 |
| CMYA5    | 0             | 0            | 0            |
| MTX3     | 0             | 0            | 0            |
| THBS4    | -1.7337096776 | 0.4786781179 | 0.9999763851 |
| SERINC5  | -1.4066552203 | 0.2082326005 | 0.9999763851 |
| ZFYVE16  | 1.0519851191  | 0.8564203476 | 0.9999763851 |
| FAM151B  | -1.0418588519 | 0.944162312  | 0.9999763851 |
| DHFR     | 1.0683887893  | 0.6009708296 | 0.9999763851 |
| MTRNR2L2 | -2.1365060939 | 9.63E-06     | 0.0235467048 |
| MSH3     | -1.2990694178 | 0.3508257282 | 0.9999763851 |
| RASGRF2  | 9.9624059448  | 0.2315471014 | 0.9999763851 |
| CKMT2    | 20.799085697  | 7.21E-11     | 4.31E-07     |
| ZCCHC9   | 1.0013621484  | 0.9957054878 | 0.9999763851 |
| ACOT12   | 2.3407592913  | 0.4269677734 | 0.9999763851 |
| SSBP2    | -1.5447339161 | 0.2028156496 | 0.9999763851 |
| ATG10    | 1.7530520053  | 0.0163448595 | 0.9999763851 |
| RPS23    | 1.0825437927  | 0.4978635748 | 0.9999763851 |
| ATP6AP1L | -3.0164295697 | 0.0800525572 | 0.9999763851 |
| TMEM167A | -1.1887439211 | 0.2806827082 | 0.9999763851 |
| XRCC4    | 1.2755036466  | 0.5430916698 | 0.9999763851 |
| VCAN     | 3.2353357581  | 0.554787377  | 0.9999763851 |
| COX7C    | 1.154623255   | 0.244525171  | 0.9999763851 |
| RASA1    | -1.5937874697 | 0.0907235579 | 0.9999763851 |
| CCNH     | -1.0970873269 | 0.6955009708 | 0.9999763851 |
| TMEM161B | 2.0025381574  | 0.1552880968 | 0.9999763851 |
| MEF2C    | 1.4052763861  | 0.2520103609 | 0.9999763851 |
| CETN3    | 1.0282352085  | 0.8573127588 | 0.9999763851 |
| MBLAC2   | 2.0927749596  | 0.0915461587 | 0.9999763851 |
| POLR3G   | 1.0956731458  | 0.7904871151 | 0.9999763851 |
| LYSMD3   | -1.1170247957 | 0.6941083451 | 0.9999763851 |
| ARRDC3   | 1.5099452149  | 0.542638918  | 0.9999763851 |
| NR2F1    | 1.3406186202  | 0.7026896893 | 0.9999763851 |

gene\_expression\_table

|              |               |              |              |
|--------------|---------------|--------------|--------------|
| FAM172A      | 1.0878740233  | 0.6223693281 | 0.9999763851 |
| KIAA0825     | 1.0945342559  | 0.8965971969 | 0.9999763851 |
| SLF1         | -1.6512078915 | 0.0798476454 | 0.9999763851 |
| MCTP1        | -1.2858772868 | 0.1933390603 | 0.9999763851 |
| FAM81B       | -4.2849908816 | 0.4028453076 | 0.9999763851 |
| TTC37        | -1.1706789818 | 0.5502880119 | 0.9999763851 |
| ARSK         | -1.9373716923 | 0.0482348772 | 0.9999763851 |
| RFESD        | -3.3272796812 | 0.2456402057 | 0.9999763851 |
| SPATA9       | 0             | 0            | 0            |
| RHOBTB3      | 0             | 0            | 0            |
| GLRX         | 1.0234550894  | 0.8946808773 | 0.9999763851 |
| LOC102724720 | -1.3154339304 | 0.8205576571 | 0.9999763851 |
| ELL2         | -2.9675189681 | 0.0611094455 | 0.9999763851 |
| CAST         | 1.5891505389  | 0.2868055959 | 0.9999763851 |
| ERAP1        | -1.1635943169 | 0.4892676851 | 0.9999763851 |
| ERAP2        | -1.5848281994 | 0.3611434329 | 0.9999763851 |
| LOC101929747 | 3.2356557963  | 0.5547505991 | 0.9999763851 |
| LNPEP        | -1.1481507873 | 0.6748774685 | 0.9999763851 |
| LIX1         | -1.3948894265 | 0.6799644931 | 0.9999763851 |
| RIOK2        | 1.1693005131  | 0.5511569783 | 0.9999763851 |
| CHD1         | 1.3195610312  | 0.1631124018 | 0.9999763851 |
| LOC100652833 | 0             | 0            | 0            |
| FAM174A      | -1.6309957392 | 0.1952230627 | 0.9999763851 |
| ST8SIA4      | 1.3341592963  | 0.1362095382 | 0.9999763851 |
| SLCO4C1      | -1.2848160912 | 0.5743594087 | 0.9999763851 |
| PAM          | -1.5798006741 | 0.0661296139 | 0.9999763851 |
| GIN1         | -1.8165815049 | 0.4746912067 | 0.9999763851 |
| PPIP5K2      | -1.3580247762 | 0.1168063605 | 0.9999763851 |
| C5orf30      | -1.0545833002 | 0.8734296562 | 0.9999763851 |
| EFNA5        | 3.2356557963  | 0.5547505991 | 0.9999763851 |
| FBXL17       | 1.5469427682  | 0.053419978  | 0.9999763851 |
| FER          | 1.0322800741  | 0.9510622492 | 0.9999763851 |
| PJA2         | -1.157385705  | 0.3961537472 | 0.9999763851 |
| MAN2A1       | -1.263116436  | 0.2274879757 | 0.9999763851 |
| TMEM232      | 0             | 0            | 0            |
| SLC25A46     | 1.1893696271  | 0.4200689215 | 0.9999763851 |
| WDR36        | -1.0854751162 | 0.6770445866 | 0.9999763851 |
| STARD4       | -1.9064802739 | 0.0369870394 | 0.9999763851 |
| NREP         | 1.411495399   | 0.0381969471 | 0.9999763851 |
| EPB41L4A     | -1.564279968  | 0.015274556  | 0.9999763851 |
| APC          | -1.2546908028 | 0.3456481161 | 0.9999763851 |
| SRP19        | 1.0765281899  | 0.6607126881 | 0.9999763851 |
| REEP5        | -1.5015911137 | 0.2427780701 | 0.9999763851 |
| DCP2         | 1.1431060207  | 0.5050676797 | 0.9999763851 |
| MCC          | 3.2353357581  | 0.554787377  | 0.9999763851 |
| YTHDC2       | -1.41969129   | 0.1700302102 | 0.9999763851 |
| KCNN2        | -1.7520744477 | 0.2065543168 | 0.9999763851 |
| TRIM36       | 1.3407820359  | 0.7147820854 | 0.9999763851 |
| PGGT1B       | 1.0490856426  | 0.8565738431 | 0.9999763851 |

gene\_expression\_table

|              |               |              |              |
|--------------|---------------|--------------|--------------|
| CCDC112      | -1.1273823203 | 0.6968775075 | 0.9999763851 |
| FEM1C        | 1.0732627226  | 0.8480605384 | 0.9999763851 |
| TICAM2       | 0             | 0            | 0            |
| TMED7-TICAM2 | -1.2498986999 | 0.4865361796 | 0.9999763851 |
| TMED7        | -1.0335201779 | 0.905858675  | 0.9999763851 |
| ATG12        | -1.2075932983 | 0.3513252039 | 0.9999763851 |
| AP3S1        | -1.1764626148 | 0.3327530666 | 0.9999763851 |
| LVRN         | 3.2353357581  | 0.554787377  | 0.9999763851 |
| ARL14EPL     | 1.0009947738  | 0.9940214408 | 0.9999763851 |
| COMMD10      | 1.2799856445  | 0.3387271038 | 0.9999763851 |
| SEMA6A       | -2.5487783651 | 0.1140509541 | 0.9999763851 |
| DTWD2        | -1.0700717465 | 0.6288295893 | 0.9999763851 |
| DMXL1        | -1.3990154195 | 0.3414084987 | 0.9999763851 |
| TNFAIP8      | -1.3817809126 | 0.034347209  | 0.9999763851 |
| HSD17B4      | -1.0881652793 | 0.69641269   | 0.9999763851 |
| PRR16        | 0             | 0            | 0            |
| SRFBP1       | -1.3517268404 | 0.343509771  | 0.9999763851 |
| LOX          | 0             | 0            | 0            |
| ZNF474       | 0             | 0            | 0            |
| SNX2         | -1.0389108698 | 0.8057363678 | 0.9999763851 |
| SNX24        | -4.3352072989 | 0.1515507502 | 0.9999763851 |
| PPIC         | 0             | 0            | 0            |
| CEP120       | -1.1045657066 | 0.6851057233 | 0.9999763851 |
| CSNK1G3      | -1.1486121256 | 0.5657606046 | 0.9999763851 |
| GRAMD3       | 0             | 0            | 0            |
| PHAX         | 1.7051924843  | 0.1482362717 | 0.9999763851 |
| TEX43        | 0             | 0            | 0            |
| LMNB1        | -1.1163235083 | 0.4713965397 | 0.9999763851 |
| MARCH3       | -2.1912989202 | 0.0189101366 | 0.9999763851 |
| MEGF10       | -4.287394647  | 0.4026306792 | 0.9999763851 |
| PRRC1        | -1.3776938236 | 0.0555987375 | 0.9999763851 |
| CCDC192      | -1.1820879394 | 0.7421986139 | 0.9999763851 |
| SLC12A2      | 1.2199487697  | 0.3917108225 | 0.9999763851 |
| ISOC1        | 1.1722292081  | 0.5300619524 | 0.9999763851 |
| ADAMTS19     | 0             | 0            | 0            |
| HINT1        | -1.1747433422 | 0.1739616219 | 0.9999763851 |
| LYRM7        | 1.1260650562  | 0.6332086168 | 0.9999763851 |
| CDC42SE2     | -1.0157492495 | 0.9468599796 | 0.9999763851 |
| FNIP1        | -1.3844811081 | 0.1705498344 | 0.9999763851 |
| ACSL6        | 1.7580757543  | 0.4309464653 | 0.9999763851 |
| IL3          | 0             | 0            | 0            |
| SLC22A4      | -1.2636518444 | 0.5000518047 | 0.9999763851 |
| SLC22A5      | -1.0877958255 | 0.769428697  | 0.9999763851 |
| IRF1         | -1.1458979993 | 0.6335117999 | 0.9999763851 |
| RAD50        | -1.0947723928 | 0.7086616672 | 0.9999763851 |
| IL4          | 0             | 0            | 0            |
| KIF3A        | 1.031230197   | 0.9525578979 | 0.9999763851 |
| CCNI2        | 0             | 0            | 0            |
| SEPT8        | -1.2160661565 | 0.3434123335 | 0.9999763851 |

gene\_expression\_table

|            |                |              |              |
|------------|----------------|--------------|--------------|
| GDF9       | 0              | 0            | 0            |
| UQCRQ      | 1.1078720448   | 0.4129865986 | 0.9999763851 |
| LEAP2      | 1.8136032532   | 0.594590364  | 0.9999763851 |
| AFF4       | -1.6099145059  | 0.1200311409 | 0.9999763851 |
| ZCCHC10    | 1.1412099429   | 0.6668671236 | 0.9999763851 |
| HSPA4      | -1.198795388   | 0.3507582851 | 0.9999763851 |
| C5orf15    | -1.3161865823  | 0.1707117165 | 0.9999763851 |
| VDAC1      | -1.1002831775  | 0.5306268282 | 0.9999763851 |
| TCF7       | 3.2353357581   | 0.554787377  | 0.9999763851 |
| SKP1       | 1.0374739805   | 0.7844187868 | 0.9999763851 |
| PPP2CA     | 1.2530993626   | 0.1147117146 | 0.9999763851 |
| CDKL3      | -1.1541631479  | 0.7852744789 | 0.9999763851 |
| UBE2B      | -1.3230199474  | 0.1606651347 | 0.9999763851 |
| CDKN2AIPNL | -1.1619180137  | 0.5861487389 | 0.9999763851 |
| JADE2      | 1.4821235331   | 0.0844989709 | 0.9999763851 |
| SAR1B      | 1.0055313518   | 0.9813904477 | 0.9999763851 |
| SEC24A     | -1.0237789293  | 0.9318003261 | 0.9999763851 |
| CAMLG      | -1.2464569194  | 0.1903344522 | 0.9999763851 |
| DDX46      | 1.2181127865   | 0.2271641123 | 0.9999763851 |
| C5orf24    | -1.1840119095  | 0.4169757847 | 0.9999763851 |
| TXNDC15    | 1.3361019637   | 0.1100119051 | 0.9999763851 |
| PCBD2      | -1.075784922   | 0.5570560047 | 0.9999763851 |
| CATSPER3   | -2.071297876   | 0.1061464698 | 0.9999763851 |
| PITX1      | 2.1616088585   | 0.006889     | 0.9999763851 |
| C5orf66    | 1.3428586414   | 0.5071091904 | 0.9999763851 |
| H2AFY      | 1.0469595388   | 0.7385907231 | 0.9999763851 |
| CXCL14     | 0              | 0            | 0            |
| SLC25A48   | -1.0803829108  | 0.921672941  | 0.9999763851 |
| TGFB1      | -10.8458971147 | 0.1433597877 | 0.9999763851 |
| SMAD5      | 1.0095363977   | 0.9693953821 | 0.9999763851 |
| SPOCK1     | -1.0874546536  | 0.8051376623 | 0.9999763851 |
| KLHL3      | -4.2864494036  | 0.4027150576 | 0.9999763851 |
| HNRNPA0    | -1.1135184955  | 0.3858589531 | 0.9999763851 |
| MYOT       | -1.3946909469  | 0.71478671   | 0.9999763851 |
| PKD2L2     | 1.730302978    | 0.1650268848 | 0.9999763851 |
| FAM13B     | 1.283581429    | 0.4393518731 | 0.9999763851 |
| NME5       | 0              | 0            | 0            |
| BRD8       | 1.1637986196   | 0.5086804596 | 0.9999763851 |
| KIF20A     | 1.0388101443   | 0.8671636894 | 0.9999763851 |
| CDC23      | 1.0007795933   | 0.9973445443 | 0.9999763851 |
| GFRA3      | 0              | 0            | 0            |
| CDC25C     | -1.6340413022  | 0.1591878748 | 0.9999763851 |
| FAM53C     | -1.2778879422  | 0.1912500561 | 0.9999763851 |
| KDM3B      | -1.8138472326  | 0.0330953316 | 0.9999763851 |
| EGR1       | -1.3655134517  | 0.3345336318 | 0.9999763851 |
| ETF1       | 1.0436404415   | 0.7605969815 | 0.9999763851 |
| HSPA9      | -1.0050831432  | 0.9732525418 | 0.9999763851 |
| CTNNA1     | 1.2229704509   | 0.3479516401 | 0.9999763851 |
| SIL1       | -1.6230240837  | 0.0445087979 | 0.9999763851 |

gene\_expression\_table

|                 |               |              |              |
|-----------------|---------------|--------------|--------------|
| MATR3           | 1.1295049835  | 0.4293294823 | 0.9999763851 |
| PAIP2           | 1.0645334165  | 0.8485470867 | 0.9999763851 |
| SLC23A1         | -1.1880898117 | 0.3460184105 | 0.9999763851 |
| MZB1            | 1.3085209175  | 0.6210520445 | 0.9999763851 |
| SPATA24         | 1.1327761444  | 0.8747914308 | 0.9999763851 |
| DNAJC18         | 1.6857129034  | 0.3148839628 | 0.9999763851 |
| ECSCR           | -1.3716482783 | 0.7377245996 | 0.9999763851 |
| TMEM173         | 1.1150224288  | 0.585410117  | 0.9999763851 |
| UBE2D2          | 1.0212756737  | 0.8867828949 | 0.9999763851 |
| CXXC5           | 1.0888926823  | 0.6395867376 | 0.9999763851 |
| PSD2            | 3.2356557963  | 0.5547505991 | 0.9999763851 |
| NRG2            | 3.2353357581  | 0.554787377  | 0.9999763851 |
| PURA            | -1.3440683414 | 0.1409325343 | 0.9999763851 |
| IGIP            | -1.5114413735 | 0.3258384346 | 0.9999763851 |
| CYSTM1          | -3.3685676065 | 0.0940787265 | 0.9999763851 |
| PFDN1           | 1.2199860856  | 0.2187000662 | 0.9999763851 |
| HBEGF           | -1.9673293586 | 0.0282493532 | 0.9999763851 |
| ANKHD1          | -1.0430474576 | 0.8377020979 | 0.9999763851 |
| ANKHD1-EIF4EBP3 | 1.4411002879  | 0.458942252  | 0.9999763851 |
| EIF4EBP3        | -1.0105516683 | 0.9751040845 | 0.9999763851 |
| SRA1            | 1.5287513252  | 0.1539988889 | 0.9999763851 |
| APBB3           | 1.7581722929  | 0.4280050507 | 0.9999763851 |
| SLC35A4         | -1.0134756743 | 0.9544118717 | 0.9999763851 |
| TMCO6           | -1.4325783176 | 0.4765600414 | 0.9999763851 |
| CD14            | -7.5622178268 | 0.2177145568 | 0.9999763851 |
| NDUFA2          | 1.1719785289  | 0.3026992074 | 0.9999763851 |
| IK              | -1.1769459506 | 0.359337595  | 0.9999763851 |
| WDR55           | -1.7278081733 | 0.0296743137 | 0.9999763851 |
| DND1            | 1.1505384589  | 0.7314979266 | 0.9999763851 |
| HARS            | 1.0665594668  | 0.8154698205 | 0.9999763851 |
| HARS2           | -1.0208088603 | 0.9405243558 | 0.9999763851 |
| ZMAT2           | -1.3075549877 | 0.0499064585 | 0.9999763851 |
| PCDHA1          | 0             | 0            | 0            |
| PCDHB2          | 1.7500801512  | 0.5399738241 | 0.9999763851 |
| PCDHB3          | 0             | 0            | 0            |
| PCDHB16         | 0             | 0            | 0            |
| PCDHB9          | 0             | 0            | 0            |
| PCDHB10         | 0             | 0            | 0            |
| PCDHB14         | 0             | 0            | 0            |
| TAF7            | 1.2120035213  | 0.2753184362 | 0.9999763851 |
| PCDHGA1         | 0             | 0            | 0            |
| PCDHGB2         | -1.3151016298 | 0.8210358465 | 0.9999763851 |
| PCDHGA5         | 3.2356557963  | 0.5547505991 | 0.9999763851 |
| PCDHGA6         | -1.5416912797 | 0.6822921782 | 0.9999763851 |
| DIAPH1          | 1.2540398548  | 0.1131610425 | 0.9999763851 |
| HDAC3           | -1.2688316816 | 0.1673193195 | 0.9999763851 |
| RELL2           | -3.5263270662 | 0.0226684974 | 0.9999763851 |
| FCHSD1          | 2.2692722146  | 0.175986875  | 0.9999763851 |
| ARAP3           | -1.4447343307 | 0.2591314051 | 0.9999763851 |

gene\_expression\_table

|          |                |              |              |
|----------|----------------|--------------|--------------|
| KIAA0141 | -1.0745995006  | 0.7492213718 | 0.9999763851 |
| PCDH12   | -1.0168655014  | 0.9689401748 | 0.9999763851 |
| RNF14    | -1.3805816571  | 0.2125795669 | 0.9999763851 |
| GNPDA1   | -1.0268806897  | 0.8876999037 | 0.9999763851 |
| NDFIP1   | -1.0153876591  | 0.9275471863 | 0.9999763851 |
| SPRY4    | -1.3714374731  | 0.7335244774 | 0.9999763851 |
| FGF1     | -4.2864494036  | 0.4027150576 | 0.9999763851 |
| ARHGAP26 | -1.4049714896  | 0.1254477339 | 0.9999763851 |
| NR3C1    | 1.0197893251   | 0.9155713797 | 0.9999763851 |
| YIPF5    | -1.2425334927  | 0.2547564212 | 0.9999763851 |
| KCTD16   | -4.287394647   | 0.4026306792 | 0.9999763851 |
| GRXCR2   | 0              | 0            | 0            |
| SH3RF2   | 0              | 0            | 0            |
| PLAC8L1  | 3.2353357581   | 0.554787377  | 0.9999763851 |
| LARS     | 1.0255270847   | 0.8661933871 | 0.9999763851 |
| RBM27    | 1.2695716025   | 0.2822370486 | 0.9999763851 |
| TCERG1   | 1.0135270151   | 0.9329030201 | 0.9999763851 |
| DPYSL3   | -4.3514532582  | 0.0205389788 | 0.9999763851 |
| JAKMIP2  | -20.6921206198 | 0.0599099101 | 0.9999763851 |
| SPINK14  | 3.2356557963   | 0.5547505991 | 0.9999763851 |
| SPINK13  | 0              | 0            | 0            |
| FBXO38   | -1.1012212704  | 0.7729249184 | 0.9999763851 |
| HTR4     | -4.2849908816  | 0.4028453076 | 0.9999763851 |
| ADRB2    | -1.7770936465  | 0.0227716217 | 0.9999763851 |
| GRPEL2   | 1.1697704486   | 0.5224381191 | 0.9999763851 |
| PCYOX1L  | -1.1044549699  | 0.6334647319 | 0.9999763851 |
| IL17B    | 1.8145193361   | 0.5777749766 | 0.9999763851 |
| CSNK1A1  | 1.2677264113   | 0.1585535003 | 0.9999763851 |
| ARHGEF37 | -2.3209115874  | 0.4620416282 | 0.9999763851 |
| PPARGC1B | 1.4026020849   | 0.2965096614 | 0.9999763851 |
| PDE6A    | -1.3154339304  | 0.8205576571 | 0.9999763851 |
| SLC26A2  | 1.0600218663   | 0.7818659059 | 0.9999763851 |
| TIGD6    | 1.2869488883   | 0.8192981379 | 0.9999763851 |
| HMGXB3   | 1.0377449105   | 0.9001776168 | 0.9999763851 |
| CSF1R    | 1.1136314063   | 0.3597254529 | 0.9999763851 |
| CDX1     | 0              | 0            | 0            |
| SLC6A7   | 0              | 0            | 0            |
| CAMK2A   | 0              | 0            | 0            |
| TCOF1    | 1.3051780921   | 0.2084530638 | 0.9999763851 |
| CD74     | -2.1595611468  | 0.007857     | 0.9999763851 |
| RPS14    | -1.1371811063  | 0.3279137754 | 0.9999763851 |
| NDST1    | -1.0489280572  | 0.7622470796 | 0.9999763851 |
| SYNPO    | 3.2356557963   | 0.5547505991 | 0.9999763851 |
| RBM22    | -1.3939909523  | 0.0526193041 | 0.9999763851 |
| DCTN4    | -1.0081483343  | 0.97911102   | 0.9999763851 |
| SMIM3    | -1.0312351099  | 0.8490962339 | 0.9999763851 |
| IRGM     | -1.315303824   | 0.8206171563 | 0.9999763851 |
| GPX3     | 3.2361532718   | 0.5546934395 | 0.9999763851 |
| TNIP1    | 1.085406994    | 0.6739486537 | 0.9999763851 |



gene\_expression\_table

|              |               |              |              |
|--------------|---------------|--------------|--------------|
| ANXA6        | 1.0113708098  | 0.9319255361 | 0.9999763851 |
| CCDC69       | -1.2418316932 | 0.2395884883 | 0.9999763851 |
| LOC105378230 | 3.2353357581  | 0.554787377  | 0.9999763851 |
| GM2A         | -1.2252411179 | 0.2915648772 | 0.9999763851 |
| SLC36A3      | 3.2361532718  | 0.5546934395 | 0.9999763851 |
| SLC36A1      | -1.0490453212 | 0.8754747555 | 0.9999763851 |
| SPARC        | -7.5647903763 | 0.2176246281 | 0.9999763851 |
| ATOX1        | -1.0064278152 | 0.9758739643 | 0.9999763851 |
| G3BP1        | -1.0473718592 | 0.7498732515 | 0.9999763851 |
| GLRA1        | 3.0263279955  | 0.3115700401 | 0.9999763851 |
| FAM114A2     | 1.0893432568  | 0.7985961817 | 0.9999763851 |
| MFAP3        | 1.1968019865  | 0.6235588644 | 0.9999763851 |
| GALNT10      | -1.1693746321 | 0.4747997409 | 0.9999763851 |
| SAP30L       | -1.0323602148 | 0.8687921959 | 0.9999763851 |
| LARP1        | 1.1248374295  | 0.4808724868 | 0.9999763851 |
| FAXDC2       | 1.5670546705  | 0.2795090808 | 0.9999763851 |
| CNOT8        | 1.0460582615  | 0.8458151004 | 0.9999763851 |
| GEMIN5       | 1.5023703383  | 0.0768621916 | 0.9999763851 |
| MRPL22       | -1.0697514124 | 0.7497981712 | 0.9999763851 |
| KIF4B        | -1.1168215278 | 0.8600835236 | 0.9999763851 |
| SGCD         | 3.2356557963  | 0.5547505991 | 0.9999763851 |
| TIMD4        | 0             | 0            | 0            |
| HAVCR2       | -7.5664585246 | 0.2263571921 | 0.9999763851 |
| MED7         | -1.7539069202 | 0.3004110086 | 0.9999763851 |
| CYFIP2       | 1.1632338587  | 0.444099768  | 0.9999763851 |
| SOX30        | 0             | 0            | 0            |
| THG1L        | -1.1499816039 | 0.5079728324 | 0.9999763851 |
| LSM11        | 1.25862468    | 0.5218580594 | 0.9999763851 |
| CLINT1       | -1.1486301191 | 0.5029575071 | 0.9999763851 |
| EBF1         | -1.0569678118 | 0.8933020074 | 0.9999763851 |
| RNF145       | 1.2318567466  | 0.2489003337 | 0.9999763851 |
| UBLCP1       | 1.202397692   | 0.474101566  | 0.9999763851 |
| ADRA1B       | -1.0847550188 | 0.6224205807 | 0.9999763851 |
| TTC1         | 1.0002501273  | 0.9988195572 | 0.9999763851 |
| PWWP2A       | -1.0089122074 | 0.9677389195 | 0.9999763851 |
| FABP6        | -1.3154339304 | 0.8205576571 | 0.9999763851 |
| CCNJL        | 1.0438732601  | 0.8432223354 | 0.9999763851 |
| ZBED8        | -3.3264391549 | 0.2740318683 | 0.9999763851 |
| SLU7         | 1.0378378892  | 0.851262215  | 0.9999763851 |
| PTTG1        | 1.3030244098  | 0.1028561638 | 0.9999763851 |
| ATP10B       | -2.3227998731 | 0.4384090875 | 0.9999763851 |
| GABRB2       | 0             | 0            | 0            |
| CCNG1        | 1.0702745978  | 0.7213632317 | 0.9999763851 |
| NUDCD2       | -1.0352930687 | 0.8853099154 | 0.9999763851 |
| HMMR         | 1.1151479677  | 0.5936879568 | 0.9999763851 |
| MAT2B        | 1.2100435965  | 0.3622352782 | 0.9999763851 |
| WWC1         | -1.315303824  | 0.8206171563 | 0.9999763851 |
| RARS         | 1.2289263869  | 0.2399183768 | 0.9999763851 |
| PANK3        | 1.1255489526  | 0.7150289392 | 0.9999763851 |

gene\_expression\_table

|          |               |              |              |
|----------|---------------|--------------|--------------|
| SLIT3    | -1.3154339304 | 0.8205576571 | 0.9999763851 |
| SPDL1    | 1.0380266976  | 0.8470102679 | 0.9999763851 |
| DOCK2    | -1.0014383892 | 0.9937981797 | 0.9999763851 |
| C5orf58  | -1.4298152945 | 0.5324548037 | 0.9999763851 |
| LCP2     | 1.0890640737  | 0.5932705599 | 0.9999763851 |
| KCNIP1   | 1.0278478563  | 0.9759371063 | 0.9999763851 |
| KCNMB1   | 1.8309300162  | 0.2403158441 | 0.9999763851 |
| RANBP17  | 0             | 0            | 0            |
| NPM1     | 1.1127709422  | 0.4420663976 | 0.9999763851 |
| FGF18    | 0             | 0            | 0            |
| FBXW11   | 1.3007573377  | 0.3293280918 | 0.9999763851 |
| STK10    | 1.292463118   | 0.104516222  | 0.9999763851 |
| EFCAB9   | 7.7488609396  | 0.306063442  | 0.9999763851 |
| UBTD2    | -1.0734606083 | 0.8199035404 | 0.9999763851 |
| SH3PXD2B | -1.5899635701 | 0.1421405993 | 0.9999763851 |
| NEURL1B  | -1.3145826607 | 0.0799435306 | 0.9999763851 |
| DUSP1    | -1.0636117229 | 0.8984347309 | 0.9999763851 |
| ERGIC1   | 1.112369021   | 0.6167791956 | 0.9999763851 |
| RPL26L1  | -1.1166789592 | 0.5356225617 | 0.9999763851 |
| ATP6V0E1 | -1.1378254862 | 0.4000076312 | 0.9999763851 |
| CREBRF   | -1.2287093703 | 0.6650442501 | 0.9999763851 |
| BNIP1    | 1.1821588963  | 0.640152621  | 0.9999763851 |
| STC2     | 0             | 0            | 0            |
| BOD1     | 1.1279816408  | 0.6138282389 | 0.9999763851 |
| CPEB4    | -1.0113323872 | 0.9785550984 | 0.9999763851 |
| HMP19    | 0             | 0            | 0            |
| SFXN1    | -1.0813967429 | 0.6306584392 | 0.9999763851 |
| HRH2     | -1.0158926982 | 0.9611368643 | 0.9999763851 |
| CPLX2    | 0             | 0            | 0            |
| THOC3    | -1.2862780529 | 0.225665919  | 0.9999763851 |
| FAM153B  | 0             | 0            | 0            |
| SIMC1    | -1.3517402332 | 0.2709176894 | 0.9999763851 |
| KIAA1191 | 1.1231753977  | 0.598199386  | 0.9999763851 |
| ARL10    | 2.1898530381  | 0.0932715052 | 0.9999763851 |
| NOP16    | -1.0828370655 | 0.6266816572 | 0.9999763851 |
| HIGD2A   | 1.0107336606  | 0.9481618855 | 0.9999763851 |
| CLTB     | 1.3064627426  | 0.1917166162 | 0.9999763851 |
| FAF2     | 1.1605017343  | 0.5240843689 | 0.9999763851 |
| RNF44    | -1.2278833135 | 0.3606905001 | 0.9999763851 |
| CDHR2    | 9.9312452783  | 0.248571704  | 0.9999763851 |
| GPRIN1   | 1.2872739558  | 0.823199828  | 0.9999763851 |
| TSPAN17  | 1.3865306171  | 0.1616943158 | 0.9999763851 |
| UNC5A    | -2.4722032711 | 0.0162714699 | 0.9999763851 |
| HK3      | 2.5918265342  | 0.1720915532 | 0.9999763851 |
| UIMC1    | -1.2219585324 | 0.480139307  | 0.9999763851 |
| ZNF346   | -1.165637376  | 0.4845047742 | 0.9999763851 |
| FGFR4    | 0             | 0            | 0            |
| NSD1     | -1.0066831822 | 0.9795199421 | 0.9999763851 |
| RAB24    | 1.191827495   | 0.4384099002 | 0.9999763851 |

gene\_expression\_table

|              |               |              |              |
|--------------|---------------|--------------|--------------|
| PRELID1      | 1.2392551038  | 0.1132141269 | 0.9999763851 |
| MXD3         | -1.2734465399 | 0.2867942235 | 0.9999763851 |
| LMAN2        | -1.329736006  | 0.0224027058 | 0.9999763851 |
| RGS14        | 1.1248505837  | 0.6625029083 | 0.9999763851 |
| SLC34A1      | 0             | 0            | 0            |
| F12          | 1.5448092247  | 0.0468022512 | 0.9999763851 |
| GRK6         | 1.1578445421  | 0.3950917926 | 0.9999763851 |
| PRR7         | -1.1364457606 | 0.5640940914 | 0.9999763851 |
| DBN1         | 1.0330706281  | 0.901026743  | 0.9999763851 |
| PDLIM7       | 2.375646122   | 0.0438465364 | 0.9999763851 |
| DOK3         | -1.1268218746 | 0.5099106524 | 0.9999763851 |
| DDX41        | 1.0613932891  | 0.7599829569 | 0.9999763851 |
| FAM193B      | -2.9860395318 | 0.0314884637 | 0.9999763851 |
| TMED9        | -1.1146119307 | 0.3950343941 | 0.9999763851 |
| B4GALT7      | 1.1793587329  | 0.412755337  | 0.9999763851 |
| FAM153A      | 1.1402814242  | 0.8191118827 | 0.9999763851 |
| N4BP3        | 3.0864801482  | 0.3123107395 | 0.9999763851 |
| RMND5B       | -1.1241424001 | 0.724707939  | 0.9999763851 |
| NHP2         | 1.1497750015  | 0.3576628199 | 0.9999763851 |
| HNRNPAB      | 1.2071105457  | 0.1895377802 | 0.9999763851 |
| PHYKPL       | -1.6351434787 | 0.138894839  | 0.9999763851 |
| COL23A1      | 1.0558437182  | 0.8263950877 | 0.9999763851 |
| CLK4         | -1.4449771506 | 0.3141887912 | 0.9999763851 |
| LOC102724657 | 5.4781708352  | 0.3745527127 | 0.9999763851 |
| ZNF354A      | 1.1432178119  | 0.7644331663 | 0.9999763851 |
| ZFP2         | 1.0156708     | 0.9843163845 | 0.9999763851 |
| ZNF454       | -4.2864494036 | 0.4027150576 | 0.9999763851 |
| ZNF354C      | -1.0281042328 | 0.9660991904 | 0.9999763851 |
| RUFY1        | 1.1668053172  | 0.4476650866 | 0.9999763851 |
| HNRNPH1      | -1.1739393047 | 0.2084249518 | 0.9999763851 |
| CANX         | -1.0105851451 | 0.93661336   | 0.9999763851 |
| MAML1        | -1.0644122754 | 0.7593711873 | 0.9999763851 |
| LTC4S        | -1.9665380586 | 0.4649954536 | 0.9999763851 |
| MGAT4B       | 1.1547107643  | 0.3081534752 | 0.9999763851 |
| SQSTM1       | -1.100891526  | 0.5100785141 | 0.9999763851 |
| C5orf45      | 1.9234847933  | 0.4409858345 | 0.9999763851 |
| TBC1D9B      | -1.0198859634 | 0.9104713834 | 0.9999763851 |
| RNF130       | 1.0480085305  | 0.8089449377 | 0.9999763851 |
| MAPK9        | -1.7039899964 | 0.0566909813 | 0.9999763851 |
| CNOT6        | -1.1670010485 | 0.3422330604 | 0.9999763851 |
| MGAT1        | 1.0201442584  | 0.899787473  | 0.9999763851 |
| ZFP62        | -1.5630381647 | 0.1367644137 | 0.9999763851 |
| BTNL8        | 7.7192231741  | 0.2782707334 | 0.9999763851 |
| BTNL3        | 1.1235489843  | 0.8887158854 | 0.9999763851 |
| BTNL9        | 0             | 0            | 0            |
| TRIM7        | 1.3309109743  | 0.4419099056 | 0.9999763851 |
| TRIM41       | 1.0310899617  | 0.9154024576 | 0.9999763851 |
| RACK1        | 1.1363422888  | 0.2932821553 | 0.9999763851 |
| TRIM52       | 1.0331774172  | 0.9315504759 | 0.9999763851 |

gene\_expression\_table

|              |               |              |              |
|--------------|---------------|--------------|--------------|
| OR4F3        | 7.4933530102  | 0.2988194544 | 0.9999763851 |
| DUSP22       | -1.3334843025 | 0.0689783311 | 0.9999763851 |
| IRF4         | 0             | 0            | 0            |
| EXOC2        | 1.0527962553  | 0.8135231698 | 0.9999763851 |
| HUS1B        | 0             | 0            | 0            |
| FOXC1        | -1.002854239  | 0.98390514   | 0.9999763851 |
| GMDS         | 1.0633471786  | 0.7264081501 | 0.9999763851 |
| MYLK4        | -2.3212684229 | 0.4457081023 | 0.9999763851 |
| WRNIP1       | -1.6255183566 | 0.0522188792 | 0.9999763851 |
| SERPINB1     | 1.1174187187  | 0.3762945995 | 0.9999763851 |
| SERPINB9     | 0             | 0            | 0            |
| SERPINB6     | 1.0614402741  | 0.8085620198 | 0.9999763851 |
| NQO2         | 1.871095762   | 0.005377     | 0.9999763851 |
| RIPK1        | -1.3600967295 | 0.1470196257 | 0.9999763851 |
| BPHL         | -1.2633222574 | 0.6187620644 | 0.9999763851 |
| TUBB2A       | 1.4471291231  | 0.1673804881 | 0.9999763851 |
| PSMG4        | 1.199115031   | 0.3299313822 | 0.9999763851 |
| PRPF4B       | 1.1448490863  | 0.431145989  | 0.9999763851 |
| FAM217A      | 0             | 0            | 0            |
| C6orf201     | 0             | 0            | 0            |
| ECI2         | 1.1867934925  | 0.4095264875 | 0.9999763851 |
| CDYL         | 1.1937141994  | 0.413022128  | 0.9999763851 |
| RPP40        | 1.373180136   | 0.2046216572 | 0.9999763851 |
| LYRM4        | -1.0951263794 | 0.5874755201 | 0.9999763851 |
| FARS2        | 1.0110918591  | 0.9538133653 | 0.9999763851 |
| LY86         | 1.168799638   | 0.7851988158 | 0.9999763851 |
| RREB1        | 1.1399080677  | 0.5174439093 | 0.9999763851 |
| SSR1         | -1.0034439005 | 0.9817877547 | 0.9999763851 |
| CAGE1        | -1.7728569902 | 0.2878106055 | 0.9999763851 |
| RIOK1        | 1.0829986487  | 0.7000332669 | 0.9999763851 |
| SNRNP48      | 1.1958741207  | 0.4912068544 | 0.9999763851 |
| TXNDC5       | -1.0418038076 | 0.830530858  | 0.9999763851 |
| BLOC1S5      | 1.2073832161  | 0.5073841549 | 0.9999763851 |
| EEF1E1       | 1.2015479138  | 0.3983350906 | 0.9999763851 |
| SLC35B3      | -1.5572663444 | 0.1843255065 | 0.9999763851 |
| LOC107983965 | 3.2353357581  | 0.554787377  | 0.9999763851 |
| GCNT2        | 1.7960129086  | 0.2738372475 | 0.9999763851 |
| C6orf52      | 1.080806403   | 0.9300751612 | 0.9999763851 |
| PAK1IP1      | 1.1011194953  | 0.731507482  | 0.9999763851 |
| TMEM14C      | 1.0902346985  | 0.5833302326 | 0.9999763851 |
| TMEM14B      | 1.0368765127  | 0.8294347783 | 0.9999763851 |
| MAK          | 1.0309914225  | 0.9539298003 | 0.9999763851 |
| SYCP2L       | 0             | 0            | 0            |
| SMIM13       | 1.102970576   | 0.7296526583 | 0.9999763851 |
| NEDD9        | -1.0015502022 | 0.9941218394 | 0.9999763851 |
| TMEM170B     | -1.2031435942 | 0.629981179  | 0.9999763851 |
| ADTRP        | -1.6862542947 | 0.5029729576 | 0.9999763851 |
| HIVEP1       | -1.7965983223 | 0.1075879351 | 0.9999763851 |
| EDN1         | -4.287394647  | 0.4026306792 | 0.9999763851 |

gene\_expression\_table

|                     |               |              |              |
|---------------------|---------------|--------------|--------------|
| PHACTR1             | 1.048909848   | 0.8971040141 | 0.9999763851 |
| TBC1D7-LOC100130357 | -2.8954939448 | 0.1031374145 | 0.9999763851 |
| LOC100130357        | -1.9358492725 | 0.1794595207 | 0.9999763851 |
| TBC1D7              | -1.0964044636 | 0.7291248559 | 0.9999763851 |
| GFOD1               | 1.1204546568  | 0.5692277502 | 0.9999763851 |
| SIRT5               | -1.8154850617 | 0.0370015592 | 0.9999763851 |
| NOL7                | 1.2867658583  | 0.1527092405 | 0.9999763851 |
| RANBP9              | -2.0435742997 | 0.0767853163 | 0.9999763851 |
| MCUR1               | 1.1265670181  | 0.6302894636 | 0.9999763851 |
| CD83                | 1.0900573575  | 0.6909963875 | 0.9999763851 |
| JARID2              | -1.0281380524 | 0.8364772847 | 0.9999763851 |
| DTNBP1              | -1.0625573106 | 0.7385454519 | 0.9999763851 |
| MYLIP               | -1.2423939185 | 0.2372608349 | 0.9999763851 |
| GMPR                | -1.2291531336 | 0.4275012611 | 0.9999763851 |
| ATXN1               | -2.1107222195 | 0.0007695    | 0.6568370458 |
| CAP2                | 0             | 0            | 0            |
| FAM8A1              | -1.3710217679 | 0.4272488728 | 0.9999763851 |
| NUP153              | 1.0077032902  | 0.9627955799 | 0.9999763851 |
| TPMT                | -1.0274776969 | 0.9212508016 | 0.9999763851 |
| KDM1B               | -1.1662637326 | 0.6355381457 | 0.9999763851 |
| DEK                 | 1.0735137278  | 0.6380575792 | 0.9999763851 |
| MBOAT1              | -1.3652390417 | 0.2618926622 | 0.9999763851 |
| E2F3                | -1.0800786676 | 0.6719351348 | 0.9999763851 |
| CDKAL1              | -1.3710069214 | 0.1967909662 | 0.9999763851 |
| SOX4                | 1.1329926733  | 0.5112785847 | 0.9999763851 |
| MRS2                | 1.4059691433  | 0.334629559  | 0.9999763851 |
| GPLD1               | -1.9649399627 | 0.4633510527 | 0.9999763851 |
| ALDH5A1             | 1.0550720662  | 0.8182683786 | 0.9999763851 |
| KIAA0319            | 0             | 0            | 0            |
| TDP2                | 1.1097167271  | 0.716812405  | 0.9999763851 |
| ACOT13              | -1.6500534154 | 0.0288478327 | 0.9999763851 |
| C6orf62             | 1.290500015   | 0.175119709  | 0.9999763851 |
| GMNN                | 1.2040262067  | 0.2992667262 | 0.9999763851 |
| FAM65B              | -1.0810584893 | 0.9277710023 | 0.9999763851 |
| LRRC16A             | 1.3371096606  | 0.5606154336 | 0.9999763851 |
| SLC17A2             | 0             | 0            | 0            |
| TRIM38              | -1.3296395049 | 0.3308849748 | 0.9999763851 |
| HIST1H3A            | 3.2353357581  | 0.554787377  | 0.9999763851 |
| HIST1H4B            | 0             | 0            | 0            |
| HIST1H3B            | 0             | 0            | 0            |
| HIST1H2AB           | -2.3214980365 | 0.4356694687 | 0.9999763851 |
| HIST1H2BB           | 3.2353357581  | 0.554787377  | 0.9999763851 |
| HIST1H3C            | 5.5007639251  | 0.0820165818 | 0.9999763851 |
| HIST1H1C            | 1.3840473097  | 0.19617271   | 0.9999763851 |
| HIST1H4C            | -1.1424830125 | 0.3490995262 | 0.9999763851 |
| HIST1H2BC           | -1.3158816768 | 0.8203229797 | 0.9999763851 |
| HIST1H2AC           | -2.3227998731 | 0.4393018063 | 0.9999763851 |
| HIST1H1E            | -2.6922490556 | 0.2894499135 | 0.9999763851 |
| HIST1H2BD           | 1.9439386629  | 0.1725410944 | 0.9999763851 |

gene\_expression\_table

|           |                |              |              |
|-----------|----------------|--------------|--------------|
| HIST1H4D  | 0              | 0            | 0            |
| HIST1H3D  | 1.02953687     | 0.9674511753 | 0.9999763851 |
| HIST1H2BF | 12.2036838333  | 0.1842407399 | 0.9999763851 |
| HIST1H4E  | 1.3931546432   | 0.780500185  | 0.9999763851 |
| HIST1H1D  | 1.3017937938   | 0.5827569262 | 0.9999763851 |
| HIST1H3F  | 1.432536289    | 0.7055682726 | 0.9999763851 |
| HIST1H2BH | 3.395936765    | 0.2436383267 | 0.9999763851 |
| HIST1H4H  | -4.287394647   | 0.4026306792 | 0.9999763851 |
| BTN3A2    | -1.3739855382  | 0.2993391487 | 0.9999763851 |
| BTN2A2    | 1.1893748374   | 0.7992261052 | 0.9999763851 |
| BTN3A1    | -1.0361602273  | 0.9386077569 | 0.9999763851 |
| BTN3A3    | 2.7932054058   | 0.2348296718 | 0.9999763851 |
| BTN2A1    | -1.4425936126  | 0.3116159148 | 0.9999763851 |
| HMGN4     | 1.1620728604   | 0.4304138487 | 0.9999763851 |
| ABT1      | -1.2492280853  | 0.1212026377 | 0.9999763851 |
| ZNF322    | 0              | 0            | 0            |
| HIST1H2BJ | -1.3715126673  | 0.7508069165 | 0.9999763851 |
| HIST1H2AG | 1.027554661    | 0.9756512103 | 0.9999763851 |
| HIST1H2BK | 1.3733021616   | 0.356493371  | 0.9999763851 |
| HIST1H4I  | -4.3471027681  | 0.0736681408 | 0.9999763851 |
| HIST1H2AH | 2.8679346912   | 0.2853554691 | 0.9999763851 |
| ZNF391    | -14.1139127893 | 0.1029631119 | 0.9999763851 |
| ZNF184    | 1.5874882539   | 0.3330291155 | 0.9999763851 |
| HIST1H2BL | -2.3222877795  | 0.4506271768 | 0.9999763851 |
| HIST1H2AI | 1.1594180032   | 0.8885293561 | 0.9999763851 |
| HIST1H3H  | -7.5647903763  | 0.2176246281 | 0.9999763851 |
| HIST1H2AJ | 12.2185410059  | 0.2032706859 | 0.9999763851 |
| HIST1H2BM | 0              | 0            | 0            |
| HIST1H4J  | -1.2763412932  | 0.5497413118 | 0.9999763851 |
| HIST1H4K  | 1.3330083285   | 0.6870523879 | 0.9999763851 |
| HIST1H2AK | 0              | 0            | 0            |
| HIST1H2BN | 0              | 0            | 0            |
| HIST1H2AL | 13.0486682238  | 0.1811889602 | 0.9999763851 |
| HIST1H1B  | -1.3714374731  | 0.7334000329 | 0.9999763851 |
| HIST1H3J  | -3.1553169002  | 0.1647503595 | 0.9999763851 |
| HIST1H2AM | 1.9659465739   | 0.3446433874 | 0.9999763851 |
| HIST1H2BO | 1.2869488883   | 0.8194288953 | 0.9999763851 |
| OR2B2     | -4.2849908816  | 0.4028453076 | 0.9999763851 |
| OR2B6     | 0              | 0            | 0            |
| ZNF165    | 1.1695260761   | 0.7891522264 | 0.9999763851 |
| ZSCAN16   | 5.7467514146   | 0.0890156596 | 0.9999763851 |
| ZKSCAN8   | 1.0486314085   | 0.8629341143 | 0.9999763851 |
| ZSCAN9    | 1.3988502013   | 0.2439725787 | 0.9999763851 |
| ZKSCAN4   | -1.0125657412  | 0.9674572788 | 0.9999763851 |
| NKAPL     | 0              | 0            | 0            |
| ZSCAN26   | -1.7344697458  | 0.454110681  | 0.9999763851 |
| PGBD1     | -1.158513231   | 0.7301951407 | 0.9999763851 |
| ZSCAN31   | 1.0949541325   | 0.8930596511 | 0.9999763851 |
| ZKSCAN3   | 1.292477824    | 0.4934975649 | 0.9999763851 |

gene\_expression\_table

|              |                |              |              |
|--------------|----------------|--------------|--------------|
| GPX6         | 0              | 0            | 0            |
| TRIM27       | -1.2204826048  | 0.2263320891 | 0.9999763851 |
| OR2H2        | 0              | 0            | 0            |
| GABBR1       | 1.1675190011   | 0.7088251579 | 0.9999763851 |
| MOG          | 0              | 0            | 0            |
| HLA-F        | -1.7096486986  | 0.273465867  | 0.9999763851 |
| HLA-G        | 0              | 0            | 0            |
| HLA-A        | -1.079111361   | 0.5855363408 | 0.9999763851 |
| ZNRD1        | -1.0388863158  | 0.8253915168 | 0.9999763851 |
| PPP1R11      | 1.0827162259   | 0.7203155703 | 0.9999763851 |
| RNF39        | 3.7441009688   | 0.2476895772 | 0.9999763851 |
| TRIM31       | 0              | 0            | 0            |
| TRIM26       | 1.3544335938   | 0.1375912662 | 0.9999763851 |
| TRIM39       | -20.0378342472 | 0.0892204583 | 0.9999763851 |
| TRIM39-RPP21 | -1.1573686005  | 0.7427884485 | 0.9999763851 |
| RPP21        | -1.1127851704  | 0.6539898097 | 0.9999763851 |
| HLA-E        | -1.5072059691  | 0.003625     | 0.9999763851 |
| GNL1         | 1.0987763497   | 0.638703301  | 0.9999763851 |
| PRR3         | 1.1456993984   | 0.6225473516 | 0.9999763851 |
| ABCF1        | 1.2335808128   | 0.1481646686 | 0.9999763851 |
| PPP1R10      | -1.1770030549  | 0.3539269016 | 0.9999763851 |
| MRPS18B      | -1.0313267437  | 0.8165273578 | 0.9999763851 |
| ATAT1        | 1.4842005632   | 0.5232350533 | 0.9999763851 |
| C6orf136     | 1.0117350175   | 0.9743631906 | 0.9999763851 |
| DHX16        | 1.0155177103   | 0.9481413597 | 0.9999763851 |
| PPP1R18      | 1.1202586693   | 0.425575773  | 0.9999763851 |
| NRM          | 1.090831491    | 0.680838766  | 0.9999763851 |
| MDC1         | -1.1108862188  | 0.5410051403 | 0.9999763851 |
| TUBB         | 1.1120620968   | 0.3826158046 | 0.9999763851 |
| FLOT1        | 1.1453415904   | 0.4769329628 | 0.9999763851 |
| IER3         | -2.8235114951  | 1.43E-07     | 0.0004266    |
| DDR1         | 0              | 0            | 0            |
| GTF2H4       | -1.0921363389  | 0.6628029503 | 0.9999763851 |
| VAR2         | 1.232147775    | 0.4308935742 | 0.9999763851 |
| PSORS1C1     | 3.2361532718   | 0.5546934395 | 0.9999763851 |
| CCHCR1       | -1.1396682755  | 0.6330207147 | 0.9999763851 |
| TCF19        | 1.1880288265   | 0.3771669073 | 0.9999763851 |
| POU5F1       | -2.3901671273  | 0.2049653457 | 0.9999763851 |
| HLA-C        | 1.0139129072   | 0.9083474318 | 0.9999763851 |
| HLA-B        | -1.1130410705  | 0.3529404656 | 0.9999763851 |
| MICA         | -5.3300550044  | 0.00568      | 0.9999763851 |
| MICB         | -1.2485856028  | 0.3767962661 | 0.9999763851 |
| DDX39B       | 1.316538806    | 0.2442027782 | 0.9999763851 |
| ATP6V1G2     | -1.315303824   | 0.8206171563 | 0.9999763851 |
| NFKBIL1      | 1.039116412    | 0.9507855786 | 0.9999763851 |
| LTA          | -3.3275701064  | 0.2296160779 | 0.9999763851 |
| TNF          | -1.3565048605  | 0.3938437439 | 0.9999763851 |
| LTB          | -1.2716043255  | 0.3954933343 | 0.9999763851 |
| LST1         | 1.0178406016   | 0.9304903466 | 0.9999763851 |

gene\_expression\_table

|         |               |              |              |
|---------|---------------|--------------|--------------|
| NCR3    | 0             | 0            | 0            |
| AIF1    | -1.0313053768 | 0.8219982288 | 0.9999763851 |
| PRRC2A  | -1.0436765172 | 0.8548639305 | 0.9999763851 |
| BAG6    | 1.2622328658  | 0.1482369216 | 0.9999763851 |
| APOM    | 1.1162737823  | 0.8189082035 | 0.9999763851 |
| C6orf47 | -1.2526089319 | 0.4444352123 | 0.9999763851 |
| GPANK1  | 1.1262935268  | 0.6061673408 | 0.9999763851 |
| CSNK2B  | -1.111051353  | 0.6178038402 | 0.9999763851 |
| LY6G5C  | -4.1323543353 | 0.2116983892 | 0.9999763851 |
| ABHD16A | -1.2511027301 | 0.1489326732 | 0.9999763851 |
| LY6G6F  | 0             | 0            | 0            |
| LY6G6D  | 0             | 0            | 0            |
| LY6G6C  | -4.2864494036 | 0.4027150576 | 0.9999763851 |
| C6orf25 | 3.2353357581  | 0.554787377  | 0.9999763851 |
| DDAH2   | -1.209428745  | 0.4606087591 | 0.9999763851 |
| CLIC1   | -1.0255940494 | 0.887545273  | 0.9999763851 |
| MSH5    | 1.5038533918  | 0.3206245341 | 0.9999763851 |
| SAPCD1  | -1.5993699949 | 0.2386112253 | 0.9999763851 |
| VWA7    | 3.2361532718  | 0.5546934395 | 0.9999763851 |
| VARS    | 1.4004270135  | 0.0715753125 | 0.9999763851 |
| LSM2    | -1.2445964545 | 0.1173032334 | 0.9999763851 |
| HSPA1L  | 1.4536849862  | 0.5998516948 | 0.9999763851 |
| HSPA1A  | -1.3068858933 | 0.1533762596 | 0.9999763851 |
| HSPA1B  | 1.0307397793  | 0.9394662322 | 0.9999763851 |
| C6orf48 | -1.0036979326 | 0.9766038038 | 0.9999763851 |
| NEU1    | 1.1802597002  | 0.2414554302 | 0.9999763851 |
| SLC44A4 | -4.3342515471 | 0.1407355628 | 0.9999763851 |
| EHMT2   | 1.1977690051  | 0.377919572  | 0.9999763851 |
| C2      | -1.3448369019 | 0.3702703197 | 0.9999763851 |
| CFB     | 0             | 0            | 0            |
| NELFE   | -1.1432636923 | 0.4716488323 | 0.9999763851 |
| SKIV2L  | 1.1158867863  | 0.6433037083 | 0.9999763851 |
| DXO     | 1.4193087527  | 0.3955382139 | 0.9999763851 |
| STK19   | 1.1877151069  | 0.4730321971 | 0.9999763851 |
| C4A     | 3.2361532718  | 0.5546934395 | 0.9999763851 |
| C4B     | 0             | 0            | 0            |
| CYP21A2 | 1.2869488883  | 0.8195618665 | 0.9999763851 |
| TNXB    | -1.3708355312 | 0.7476295757 | 0.9999763851 |
| ATF6B   | -1.0317851214 | 0.8790885174 | 0.9999763851 |
| FKBPL   | 1.0820364507  | 0.8681455525 | 0.9999763851 |
| PRRT1   | 7.7211724672  | 0.2779709379 | 0.9999763851 |
| PPT2    | 1.601609162   | 0.048671121  | 0.9999763851 |
| EGFL8   | 1.2445072841  | 0.6554110332 | 0.9999763851 |
| AGPAT1  | 1.1555723305  | 0.4667118456 | 0.9999763851 |
| RNF5    | -1.0408365126 | 0.7988439409 | 0.9999763851 |
| AGER    | 1.2552297886  | 0.328727511  | 0.9999763851 |
| PBX2    | -1.2677708339 | 0.4558133494 | 0.9999763851 |
| GPSM3   | -1.3571603628 | 0.6496251316 | 0.9999763851 |
| BTNL2   | 0             | 0            | 0            |



gene\_expression\_table

|             |               |              |              |
|-------------|---------------|--------------|--------------|
| HLA-DRA     | -4.1569222306 | 6.13E-05     | 0.1067663916 |
| HLA-DRB5    | -3.8874746295 | 0.004145     | 0.9999763851 |
| HLA-DRB1    | -3.0580329935 | 0.004268     | 0.9999763851 |
| HLA-DQA1    | 0             | 0            | 0            |
| HLA-DQB1    | -4.2849908816 | 0.4028453076 | 0.9999763851 |
| HLA-DQB2    | 0             | 0            | 0            |
| HLA-DOB     | 1.3544447817  | 0.6246627528 | 0.9999763851 |
| TAP2        | 1.0806491141  | 0.6128763048 | 0.9999763851 |
| PSMB8       | -1.0863811535 | 0.5579720761 | 0.9999763851 |
| TAP1        | 1.0674921463  | 0.6976855195 | 0.9999763851 |
| PSMB9       | 1.0041462236  | 0.9818447128 | 0.9999763851 |
| HLA-DMB     | -1.3717838846 | 0.7497288712 | 0.9999763851 |
| HLA-DMA     | -4.439622732  | 0.1610722081 | 0.9999763851 |
| BRD2        | 1.1324951578  | 0.4733483943 | 0.9999763851 |
| HLA-DPA1    | -6.873511443  | 0.0740539612 | 0.9999763851 |
| HLA-DPB1    | -4.2849908816 | 0.4028453076 | 0.9999763851 |
| COL11A2     | -2.3217011239 | 0.4355680547 | 0.9999763851 |
| RXRβ        | 1.0290642613  | 0.8855348643 | 0.9999763851 |
| SLC39A7     | -1.3069194868 | 0.1694861383 | 0.9999763851 |
| HSD17B8     | -1.3154339304 | 0.8205576571 | 0.9999763851 |
| RING1       | -1.2346253125 | 0.3997639897 | 0.9999763851 |
| VPS52       | 1.4078728668  | 0.1823690597 | 0.9999763851 |
| RPS18       | -1.0246697185 | 0.8325409311 | 0.9999763851 |
| WDR46       | 1.4420574504  | 0.0258098785 | 0.9999763851 |
| PFDN6       | 1.171836825   | 0.6616807212 | 0.9999763851 |
| RGL2        | 1.5673863565  | 0.1058453692 | 0.9999763851 |
| TAPBP       | 1.0795239262  | 0.6016790093 | 0.9999763851 |
| ZBTB22      | 1.8271023597  | 0.2382582789 | 0.9999763851 |
| DAXX        | 1.0468507633  | 0.7994633165 | 0.9999763851 |
| KIFC1       | -1.1693818425 | 0.2718539388 | 0.9999763851 |
| PHF1        | -2.1335533219 | 0.1103124001 | 0.9999763851 |
| CUTA        | 1.047381073   | 0.7572631763 | 0.9999763851 |
| SYNGAP1     | 1.3500680352  | 0.6817324792 | 0.9999763851 |
| ZBTB9       | 2.0077272611  | 0.2076621845 | 0.9999763851 |
| BAK1        | -1.4058129006 | 0.1640587645 | 0.9999763851 |
| ITPR3       | 1.0653352255  | 0.7259616133 | 0.9999763851 |
| UQCC2       | 1.7306862161  | 0.001235     | 0.8877123975 |
| LEMD2       | -1.1584054121 | 0.4768064393 | 0.9999763851 |
| GRM4        | 0             | 0            | 0            |
| HMGA1       | 1.0240936374  | 0.865206954  | 0.9999763851 |
| C6orf1      | -1.0969881584 | 0.5768730555 | 0.9999763851 |
| NUDT3       | -1.8915302495 | 6.62E-05     | 0.1114052542 |
| RPS10-NUDT3 | 6.7289516799  | 0.0008724    | 0.7222990014 |
| RPS10       | 1.0659986387  | 0.6139187632 | 0.9999763851 |
| PACSIN1     | 0             | 0            | 0            |
| C6orf106    | -1.1409810007 | 0.3744386594 | 0.9999763851 |
| SNRPC       | 1.0701711077  | 0.599406673  | 0.9999763851 |
| UHRF1BP1    | 1.0129025062  | 0.9650812812 | 0.9999763851 |
| TAF11       | 1.5347618451  | 0.0127948793 | 0.9999763851 |

gene\_expression\_table

|              |               |              |              |
|--------------|---------------|--------------|--------------|
| ANKS1A       | -1.412609226  | 0.0276593207 | 0.9999763851 |
| SCUBE3       | -1.6613257169 | 0.5372589806 | 0.9999763851 |
| ZNF76        | -1.5785323773 | 0.111021089  | 0.9999763851 |
| DEF6         | 1.3921969005  | 0.0728931032 | 0.9999763851 |
| PPARD        | 1.0121633381  | 0.9653127521 | 0.9999763851 |
| FANCE        | -1.0869160903 | 0.6355340917 | 0.9999763851 |
| RPL10A       | -1.1555252134 | 0.2019472043 | 0.9999763851 |
| TEAD3        | 7.7204093521  | 0.2879712462 | 0.9999763851 |
| TULP1        | 1.3260278971  | 0.7356363825 | 0.9999763851 |
| FKBP5        | 1.2577852996  | 0.1622877808 | 0.9999763851 |
| ARMC12       | 3.2353357581  | 0.554787377  | 0.9999763851 |
| CLPSL2       | 0             | 0            | 0            |
| CLPSL1       | 3.2356557963  | 0.5547505991 | 0.9999763851 |
| SRPK1        | 1.2287548547  | 0.2372923813 | 0.9999763851 |
| SLC26A8      | 1.1332235671  | 0.8775145921 | 0.9999763851 |
| MAPK14       | 1.0206219905  | 0.8948870152 | 0.9999763851 |
| MAPK13       | -1.4158302751 | 0.6302808572 | 0.9999763851 |
| BRPF3        | 1.9281764229  | 0.0605497017 | 0.9999763851 |
| PNPLA1       | 1.6226464637  | 0.2844609798 | 0.9999763851 |
| ETV7         | 1.1665343232  | 0.748393306  | 0.9999763851 |
| PXT1         | 0             | 0            | 0            |
| KCTD20       | 1.0763906677  | 0.6726939536 | 0.9999763851 |
| STK38        | -1.0910421376 | 0.6644928954 | 0.9999763851 |
| SRSF3        | 1.1055702909  | 0.4004525456 | 0.9999763851 |
| CDKN1A       | -1.7193195151 | 0.0431703437 | 0.9999763851 |
| RAB44        | 1.3657705797  | 0.0656729029 | 0.9999763851 |
| CPNE5        | -1.1638622622 | 0.6504706901 | 0.9999763851 |
| C6orf89      | -1.0203370123 | 0.8871502959 | 0.9999763851 |
| PPIL1        | 1.3584065155  | 0.038170088  | 0.9999763851 |
| PI16         | 3.2356557963  | 0.5547505991 | 0.9999763851 |
| MTCH1        | 1.0525178827  | 0.7000245797 | 0.9999763851 |
| PIM1         | -1.2918127437 | 0.1320409694 | 0.9999763851 |
| TMEM217      | 2.407854628   | 0.146589779  | 0.9999763851 |
| TBC1D22B     | -1.021394029  | 0.9457581476 | 0.9999763851 |
| RNF8         | 1.2377771851  | 0.2972919164 | 0.9999763851 |
| LOC107986531 | 0             | 0            | 0            |
| CMTR1        | -1.1712090826 | 0.4576166623 | 0.9999763851 |
| CCDC167      | -1.0139481072 | 0.9317216983 | 0.9999763851 |
| MDGA1        | -1.6479730166 | 0.4712945128 | 0.9999763851 |
| ZFAND3       | 1.1812153012  | 0.2468949758 | 0.9999763851 |
| BTBD9        | 1.3691236703  | 0.416749668  | 0.9999763851 |
| GLO1         | 1.1217509757  | 0.3444200061 | 0.9999763851 |
| DNAH8        | -4.3338228569 | 0.1404318024 | 0.9999763851 |
| SAYSD1       | -1.1493738841 | 0.5012672948 | 0.9999763851 |
| KCNK5        | 1.1462649934  | 0.5537859876 | 0.9999763851 |
| KIF6         | -4.2864494036 | 0.4027150576 | 0.9999763851 |
| DAAM2        | 0             | 0            | 0            |
| MOCS1        | 0             | 0            | 0            |
| UNC5CL       | 3.2353357581  | 0.554787377  | 0.9999763851 |

gene\_expression\_table

|              |               |              |              |
|--------------|---------------|--------------|--------------|
| APOBEC2      | 1.1334347738  | 0.8813103257 | 0.9999763851 |
| OARD1        | -1.0803406925 | 0.7693396242 | 0.9999763851 |
| NFYA         | -1.0384695716 | 0.8530541423 | 0.9999763851 |
| TREM2        | -3.3295429242 | 0.2522859573 | 0.9999763851 |
| TREML2       | 1.1659487415  | 0.6571782306 | 0.9999763851 |
| TREML4       | 0             | 0            | 0            |
| TREM1        | -5.6775738349 | 3.69E-05     | 0.0734702713 |
| NCR2         | -1.8514073702 | 0.0758420951 | 0.9999763851 |
| FOXP4        | 1.1826038557  | 0.5376432012 | 0.9999763851 |
| TFEB         | 1.012545413   | 0.9493078966 | 0.9999763851 |
| FRS3         | -1.0358731694 | 0.9588091495 | 0.9999763851 |
| PRICKLE4     | 1.8140611791  | 0.5849939348 | 0.9999763851 |
| TOMM6        | 1.1196341116  | 0.3260014588 | 0.9999763851 |
| USP49        | 1.0692698325  | 0.7290472565 | 0.9999763851 |
| MED20        | -1.0119640774 | 0.9465615314 | 0.9999763851 |
| BYSL         | 1.2030940444  | 0.2394192144 | 0.9999763851 |
| CCND3        | 1.2972618728  | 0.050878361  | 0.9999763851 |
| TAF8         | 1.4941732541  | 0.0815937503 | 0.9999763851 |
| C6orf132     | 3.2353357581  | 0.554787377  | 0.9999763851 |
| GUCA1A       | 0             | 0            | 0            |
| GUCA1B       | -1.4822028091 | 0.4890505289 | 0.9999763851 |
| MRPS10       | 1.0792021131  | 0.5563499708 | 0.9999763851 |
| TRERF1       | -1.0028561598 | 0.9864764537 | 0.9999763851 |
| LOC107986596 | -1.949721077  | 0.3508375077 | 0.9999763851 |
| UBR2         | -1.1188966184 | 0.5133662104 | 0.9999763851 |
| PRPH2        | 0             | 0            | 0            |
| TBCC         | 1.0059763525  | 0.969748239  | 0.9999763851 |
| GLTSCR1L     | -1.220312238  | 0.2954314148 | 0.9999763851 |
| RPL7L1       | 1.1217284398  | 0.361294495  | 0.9999763851 |
| C6orf226     | 1.7574593324  | 0.442324695  | 0.9999763851 |
| PTCRA        | -4.2864494036 | 0.4027150576 | 0.9999763851 |
| CNPY3        | 1.1589763219  | 0.4578530195 | 0.9999763851 |
| CNPY3-GNMT   | 1.0056447524  | 0.9727034618 | 0.9999763851 |
| PEX6         | -1.0562128771 | 0.800251561  | 0.9999763851 |
| MEA1         | 1.0436369579  | 0.7367193442 | 0.9999763851 |
| PPP2R5D      | 2.3116608094  | 0.0797852139 | 0.9999763851 |
| KLHDC3       | 1.0467323482  | 0.7267949098 | 0.9999763851 |
| RRP36        | 1.1788412298  | 0.2715892533 | 0.9999763851 |
| CUL7         | -1.0685767374 | 0.8222644228 | 0.9999763851 |
| MRPL2        | 1.3151480869  | 0.1066079709 | 0.9999763851 |
| KLC4         | -1.0778855142 | 0.7994648555 | 0.9999763851 |
| SRF          | -1.1869425882 | 0.1643204028 | 0.9999763851 |
| CUL9         | -1.2441265444 | 0.277649362  | 0.9999763851 |
| DNPH1        | 1.0601421455  | 0.6478598197 | 0.9999763851 |
| TTBK1        | 7.7211724672  | 0.2779709379 | 0.9999763851 |
| CRIP3        | 1.4463034795  | 0.0533500486 | 0.9999763851 |
| ZNF318       | -1.0671797592 | 0.6841960465 | 0.9999763851 |
| ABCC10       | -1.0869186916 | 0.8214477469 | 0.9999763851 |
| DLK2         | 1.0314934075  | 0.9611515549 | 0.9999763851 |

gene\_expression\_table

|          |               |              |              |
|----------|---------------|--------------|--------------|
| TJAP1    | -1.2076376767 | 0.273368086  | 0.9999763851 |
| LRRC73   | -1.3721150467 | 0.7444800139 | 0.9999763851 |
| YIPF3    | 1.5628800426  | 0.0202834091 | 0.9999763851 |
| POLR1C   | 1.0481548662  | 0.6929190638 | 0.9999763851 |
| XPO5     | -3.4503326209 | 0.0233320685 | 0.9999763851 |
| POLH     | -1.0214360731 | 0.8934943258 | 0.9999763851 |
| GTPBP2   | 1.0093072281  | 0.9720846375 | 0.9999763851 |
| MAD2L1BP | -1.0081116646 | 0.9640559747 | 0.9999763851 |
| RSPH9    | 1.325955166   | 0.7492862409 | 0.9999763851 |
| MRPS18A  | 1.1316574259  | 0.4280038823 | 0.9999763851 |
| VEGFA    | -1.0049625357 | 0.9782906021 | 0.9999763851 |
| C6orf223 | 1.2096806648  | 0.3944290945 | 0.9999763851 |
| MRPL14   | 1.1221021697  | 0.3559307774 | 0.9999763851 |
| TMEM63B  | 1.0070404208  | 0.972303037  | 0.9999763851 |
| CAPN11   | 3.2356557963  | 0.5547505991 | 0.9999763851 |
| SLC29A1  | 1.0124401578  | 0.92423441   | 0.9999763851 |
| HSP90AB1 | -1.049514962  | 0.6665379601 | 0.9999763851 |
| SLC35B2  | -1.0260010535 | 0.882233389  | 0.9999763851 |
| NFKBIE   | 1.1334837816  | 0.4408688126 | 0.9999763851 |
| TMEM151B | -1.3955017315 | 0.689342747  | 0.9999763851 |
| TCTE1    | 2.4514020909  | 0.3850422181 | 0.9999763851 |
| AARS2    | 1.3657065372  | 0.1184646056 | 0.9999763851 |
| SPATS1   | 5.4784711963  | 0.3745358536 | 0.9999763851 |
| CDC5L    | 1.037109002   | 0.8187987601 | 0.9999763851 |
| SUPT3H   | 1.250643843   | 0.3978619388 | 0.9999763851 |
| RUNX2    | -1.0492086453 | 0.7813075978 | 0.9999763851 |
| RCAN2    | 0             | 0            | 0            |
| TDRD6    | -1.315303824  | 0.8206171563 | 0.9999763851 |
| MEP1A    | 0             | 0            | 0            |
| ADGRF1   | 0             | 0            | 0            |
| TNFRSF21 | -1.6084677558 | 0.0400999668 | 0.9999763851 |
| CD2AP    | 1.0792387885  | 0.7070903433 | 0.9999763851 |
| ADGRF2   | 1.1896371946  | 0.7988015917 | 0.9999763851 |
| ADGRF4   | -1.7084677273 | 0.3890526785 | 0.9999763851 |
| MUT      | -1.1910037127 | 0.4583296213 | 0.9999763851 |
| CENPQ    | -1.2984387629 | 0.3833928946 | 0.9999763851 |
| C6orf141 | 0             | 0            | 0            |
| RHAG     | 0             | 0            | 0            |
| PKHD1    | -1.3158816768 | 0.8203229797 | 0.9999763851 |
| MCM3     | 1.2133019234  | 0.130235486  | 0.9999763851 |
| PAQR8    | 1.1379272057  | 0.5451547124 | 0.9999763851 |
| EFHC1    | -1.1227774568 | 0.8508022187 | 0.9999763851 |
| TRAM2    | -1.4191632377 | 0.0419417383 | 0.9999763851 |
| TMEM14A  | -1.0437533583 | 0.8221339067 | 0.9999763851 |
| GSTA3    | 3.2353357581  | 0.554787377  | 0.9999763851 |
| GSTA4    | -1.0717596186 | 0.8633478991 | 0.9999763851 |
| ICK      | -1.1203610564 | 0.7759966146 | 0.9999763851 |
| FBXO9    | 1.5105593683  | 0.006789     | 0.9999763851 |
| GCM1     | -1.7711401125 | 0.2157917524 | 0.9999763851 |

gene\_expression\_table

|           |                |              |              |
|-----------|----------------|--------------|--------------|
| ELOVL5    | -1.0474148973  | 0.7215473631 | 0.9999763851 |
| GCLC      | 1.1079033769   | 0.5507004006 | 0.9999763851 |
| LRRC1     | -1.8368912216  | 0.0971180894 | 0.9999763851 |
| MLIP      | -7.5647903763  | 0.2176246281 | 0.9999763851 |
| TINAG     | 0              | 0            | 0            |
| FAM83B    | 0              | 0            | 0            |
| HMGCLL1   | 0              | 0            | 0            |
| BMP5      | 0              | 0            | 0            |
| COL21A1   | -3.3269505881  | 0.2580204562 | 0.9999763851 |
| DST       | -1.2129285898  | 0.328418692  | 0.9999763851 |
| BEND6     | 1.169174563    | 0.3982542401 | 0.9999763851 |
| KIAA1586  | -1.0427592776  | 0.823235729  | 0.9999763851 |
| ZNF451    | -1.0977682612  | 0.5258135868 | 0.9999763851 |
| BAG2      | 1.2760186269   | 0.468259409  | 0.9999763851 |
| RAB23     | 1.1867635619   | 0.5968835092 | 0.9999763851 |
| PRIM2     | -1.1471719155  | 0.505948824  | 0.9999763851 |
| MTRNR2L9  | -1.2670579504  | 0.3402691062 | 0.9999763851 |
| PTP4A1    | -1.1568619607  | 0.2706848226 | 0.9999763851 |
| PHF3      | -1.0914976412  | 0.6324546205 | 0.9999763851 |
| EYS       | 1.0999689805   | 0.7689957749 | 0.9999763851 |
| LOC441155 | 18.9347928613  | 0.114046703  | 0.9999763851 |
| ADGRB3    | 0              | 0            | 0            |
| LMBRD1    | -1.4763678669  | 0.1231893088 | 0.9999763851 |
| FAM135A   | -1.703596772   | 0.1626616082 | 0.9999763851 |
| SDHAF4    | -2.010880934   | 0.2148009337 | 0.9999763851 |
| SMAP1     | 1.3216296414   | 0.143461253  | 0.9999763851 |
| OGFRL1    | 1.2291366728   | 0.473155489  | 0.9999763851 |
| RIMS1     | -4.2849908816  | 0.4028453076 | 0.9999763851 |
| KCNQ5     | -1.6123994012  | 0.0119665963 | 0.9999763851 |
| KHDC1L    | 3.2356557963   | 0.5547505991 | 0.9999763851 |
| KHDC1     | -1.0306365966  | 0.9303566738 | 0.9999763851 |
| DDX43     | 0              | 0            | 0            |
| MB21D1    | -1.9610914961  | 0.0155348571 | 0.9999763851 |
| MTO1      | 1.7074391115   | 0.0901637141 | 0.9999763851 |
| EEF1A1    | -1.1994300987  | 0.166763282  | 0.9999763851 |
| SLC17A5   | 1.2207096619   | 0.207676873  | 0.9999763851 |
| CD109     | -10.8385246611 | 0.1453015101 | 0.9999763851 |
| COX7A2    | 1.2358646627   | 0.10241246   | 0.9999763851 |
| TMEM30A   | 1.0126600474   | 0.930727631  | 0.9999763851 |
| FILIP1    | 1.8140812535   | 0.5878146406 | 0.9999763851 |
| SENP6     | -1.8111234909  | 0.0127677396 | 0.9999763851 |
| MYO6      | 0              | 0            | 0            |
| MEI4      | 3.2356557963   | 0.5547505991 | 0.9999763851 |
| IRAK1BP1  | -1.0815224328  | 0.9262924998 | 0.9999763851 |
| PHIP      | -1.2061432484  | 0.2384960355 | 0.9999763851 |
| TTK       | 1.0583253094   | 0.7893276165 | 0.9999763851 |
| BCKDHB    | 1.1378874951   | 0.7093366969 | 0.9999763851 |
| FAM46A    | 1.0892111776   | 0.6887004191 | 0.9999763851 |
| IBTK      | -1.1084036985  | 0.5998623255 | 0.9999763851 |

gene\_expression\_table

|              |               |              |              |
|--------------|---------------|--------------|--------------|
| TPBG         | -4.2849908816 | 0.4028453076 | 0.9999763851 |
| UBE3D        | 1.0351109789  | 0.9296290841 | 0.9999763851 |
| DOPEY1       | -1.2525198743 | 0.6385929001 | 0.9999763851 |
| PGM3         | -1.4479946306 | 0.1338797839 | 0.9999763851 |
| RWDD2A       | 1.8888297566  | 0.5937927916 | 0.9999763851 |
| ME1          | 1.3703087869  | 0.3489766819 | 0.9999763851 |
| CYB5R4       | 1.730418368   | 0.1664685948 | 0.9999763851 |
| MRAP2        | 0             | 0            | 0            |
| CEP162       | -1.4341321573 | 0.4685405061 | 0.9999763851 |
| SNX14        | -1.1942361256 | 0.3294395799 | 0.9999763851 |
| SYNCRIP      | 1.2176558038  | 0.1223751758 | 0.9999763851 |
| LOC107986532 | -1.0807156495 | 0.9291988419 | 0.9999763851 |
| ZNF292       | -1.4301043057 | 0.0703579246 | 0.9999763851 |
| GJB7         | 0             | 0            | 0            |
| SMIM8        | -1.2527940068 | 0.5262642636 | 0.9999763851 |
| C6orf163     | 7.7211724672  | 0.2779709379 | 0.9999763851 |
| SLC35A1      | -1.0663356269 | 0.7735933849 | 0.9999763851 |
| RARS2        | 1.4931995045  | 0.1702026761 | 0.9999763851 |
| ORC3         | 1.0218846004  | 0.9245136806 | 0.9999763851 |
| AKIRIN2      | -1.241328187  | 0.4635220948 | 0.9999763851 |
| RNGTT        | 1.350549265   | 0.1759765583 | 0.9999763851 |
| PNRC1        | -1.5399169699 | 0.0861251539 | 0.9999763851 |
| PM20D2       | 1.2243377737  | 0.1977508311 | 0.9999763851 |
| GABRR1       | 0             | 0            | 0            |
| UBE2J1       | 1.0836087475  | 0.6198539499 | 0.9999763851 |
| RRAGD        | -1.0165675422 | 0.933353489  | 0.9999763851 |
| ANKRD6       | -4.0207005432 | 0.0447300815 | 0.9999763851 |
| LYRM2        | 1.0053063086  | 0.979472967  | 0.9999763851 |
| MDN1         | 1.0800354728  | 0.6316413815 | 0.9999763851 |
| CASP8AP2     | -1.5492547216 | 0.109530628  | 0.9999763851 |
| BACH2        | -2.8987629076 | 0.0620455048 | 0.9999763851 |
| MAP3K7       | -1.2838378668 | 0.1556178771 | 0.9999763851 |
| EPHA7        | 0             | 0            | 0            |
| MANEA        | 1.4124334722  | 0.4083499387 | 0.9999763851 |
| UFL1         | -1.5846674331 | 0.1647542822 | 0.9999763851 |
| GPR63        | 1.3580191471  | 0.5962668121 | 0.9999763851 |
| NDUFAF4      | 1.351638631   | 0.3319358051 | 0.9999763851 |
| KLHL32       | 2.8679346912  | 0.2849790884 | 0.9999763851 |
| MMS22L       | -1.2287749538 | 0.4726297733 | 0.9999763851 |
| FBXL4        | -1.3081859926 | 0.4237864019 | 0.9999763851 |
| COQ3         | 1.9932608239  | 0.0194599068 | 0.9999763851 |
| PNISR        | -1.3079541648 | 0.0974398984 | 0.9999763851 |
| TSTD3        | -1.131876121  | 0.7218770577 | 0.9999763851 |
| USP45        | -1.4638331383 | 0.624152621  | 0.9999763851 |
| CCNC         | 1.2788335761  | 0.1941539081 | 0.9999763851 |
| PRDM13       | 0             | 0            | 0            |
| ASCC3        | 1.2143531641  | 0.3617331803 | 0.9999763851 |
| LOC102724422 | 0             | 0            | 0            |
| GRIK2        | 5.4776292235  | 0.3745831165 | 0.9999763851 |

gene\_expression\_table

|              |               |              |              |
|--------------|---------------|--------------|--------------|
| HACE1        | 1.2473684242  | 0.6794463821 | 0.9999763851 |
| LIN28B       | -4.2849908816 | 0.4028453076 | 0.9999763851 |
| BVES         | 3.2356557963  | 0.5547505991 | 0.9999763851 |
| PREP         | 1.1059939742  | 0.6058563353 | 0.9999763851 |
| PRDM1        | -2.3530139268 | 0.0663961605 | 0.9999763851 |
| ATG5         | -1.0158620999 | 0.9529249312 | 0.9999763851 |
| AIM1         | 1.3137035423  | 0.1784261115 | 0.9999763851 |
| RTN4IP1      | 1.0279179327  | 0.8974401616 | 0.9999763851 |
| QRSL1        | 1.6330003008  | 0.1622756277 | 0.9999763851 |
| CD24         | 1.1285928346  | 0.7693268702 | 0.9999763851 |
| C6orf203     | 1.0500438305  | 0.8255166149 | 0.9999763851 |
| BEND3        | 1.1299140175  | 0.7763637691 | 0.9999763851 |
| PDSS2        | 1.3120687954  | 0.1677281114 | 0.9999763851 |
| SOBP         | 1.6316087781  | 0.1573700897 | 0.9999763851 |
| SCML4        | -4.2849908816 | 0.4028453076 | 0.9999763851 |
| SEC63        | -1.2515762906 | 0.1529774511 | 0.9999763851 |
| OSTM1        | -1.1486603698 | 0.6148770227 | 0.9999763851 |
| SNX3         | 1.196106392   | 0.3964735143 | 0.9999763851 |
| LACE1        | 1.1727168467  | 0.7269856526 | 0.9999763851 |
| FOXO3        | 1.0888147867  | 0.64250281   | 0.9999763851 |
| ARMC2        | 1.0749377199  | 0.7937397887 | 0.9999763851 |
| SESN1        | -1.1319081309 | 0.8237118329 | 0.9999763851 |
| CEP57L1      | 1.3441803356  | 0.356975107  | 0.9999763851 |
| LOC105377934 | 1.2921998209  | 0.6032579091 | 0.9999763851 |
| LOC100996634 | 1.8140611791  | 0.5846844351 | 0.9999763851 |
| CD164        | 1.2208525338  | 0.1733465654 | 0.9999763851 |
| PPIL6        | 1.2179289398  | 0.6929640669 | 0.9999763851 |
| SMPD2        | -1.2647120687 | 0.5909564232 | 0.9999763851 |
| MICAL1       | 1.226230989   | 0.3713420352 | 0.9999763851 |
| ZBTB24       | -1.6013245408 | 0.3751386787 | 0.9999763851 |
| AK9          | -1.4742186188 | 0.513609135  | 0.9999763851 |
| FIG4         | -1.4359415136 | 0.3878882242 | 0.9999763851 |
| WASF1        | -1.2341042692 | 0.345177248  | 0.9999763851 |
| CDC40        | 1.3142478017  | 0.254109296  | 0.9999763851 |
| METTL24      | -4.2849908816 | 0.4028453076 | 0.9999763851 |
| DDO          | -1.2297276897 | 0.7514173651 | 0.9999763851 |
| SLC22A16     | 1.0962555457  | 0.7395877126 | 0.9999763851 |
| CDK19        | -1.0952444576 | 0.5979874212 | 0.9999763851 |
| AMD1         | 1.205527965   | 0.2001795839 | 0.9999763851 |
| GTF3C6       | 1.0169736326  | 0.9053530751 | 0.9999763851 |
| RPF2         | 1.0976697574  | 0.6317361314 | 0.9999763851 |
| SLC16A10     | 1.6215399586  | 0.1097487974 | 0.9999763851 |
| MFSD4B       | -2.0967354172 | 0.2624298551 | 0.9999763851 |
| REV3L        | -1.1948108063 | 0.5074012391 | 0.9999763851 |
| TRAF3IP2     | 1.1518009378  | 0.591536374  | 0.9999763851 |
| FYN          | 1.0046315933  | 0.9920383047 | 0.9999763851 |
| TUBE1        | 1.7657721624  | 0.172729343  | 0.9999763851 |
| FAM229B      | -1.3280998313 | 0.5340536917 | 0.9999763851 |
| MARCKS       | 1.1308916209  | 0.3407246766 | 0.9999763851 |

gene\_expression\_table

|          |                |              |              |
|----------|----------------|--------------|--------------|
| HDAC2    | 1.1501019878   | 0.3584023448 | 0.9999763851 |
| FRK      | -4.2864494036  | 0.4027150577 | 0.9999763851 |
| NT5DC1   | 1.238749935    | 0.4887214752 | 0.9999763851 |
| COL10A1  | 0              | 0            | 0            |
| TSPYL4   | -1.2207995474  | 0.6968644478 | 0.9999763851 |
| DSE      | 1.4469538193   | 0.1036669902 | 0.9999763851 |
| TSPYL1   | 1.2409039469   | 0.306831724  | 0.9999763851 |
| FAM26D   | 0              | 0            | 0            |
| RWDD1    | -1.1886723202  | 0.3079024293 | 0.9999763851 |
| RSPH4A   | -1.3154339304  | 0.8205576571 | 0.9999763851 |
| ZUFSP    | -1.2213614463  | 0.663616369  | 0.9999763851 |
| KPNA5    | 1.6082661877   | 0.1743862546 | 0.9999763851 |
| ROS1     | -1.966276531   | 0.4565057531 | 0.9999763851 |
| DCBLD1   | -1.3760918252  | 0.4448069427 | 0.9999763851 |
| GOPC     | -1.0987264323  | 0.6162387525 | 0.9999763851 |
| NUS1     | 1.1627120146   | 0.4332822575 | 0.9999763851 |
| SLC35F1  | 1.3848774703   | 0.1911237801 | 0.9999763851 |
| CEP85L   | 1.4881741755   | 0.3488928894 | 0.9999763851 |
| PLN      | 0              | 0            | 0            |
| MCM9     | 1.7037661383   | 0.1886410815 | 0.9999763851 |
| ASF1A    | 1.1852952967   | 0.5581023769 | 0.9999763851 |
| TBC1D32  | -1.0476390497  | 0.9474907295 | 0.9999763851 |
| GJA1     | 0              | 0            | 0            |
| HSF2     | -1.2812372033  | 0.2723198375 | 0.9999763851 |
| SERINC1  | -1.0847337247  | 0.713795971  | 0.9999763851 |
| PKIB     | 7.7211724672   | 0.2779709379 | 0.9999763851 |
| FABP7    | 0              | 0            | 0            |
| SMPDL3A  | -3.3295429242  | 0.2520819079 | 0.9999763851 |
| TRDN     | 10.4285443305  | 0.2414635521 | 0.9999763851 |
| NKAIN2   | -1.3157515262  | 0.8223941627 | 0.9999763851 |
| RNF217   | 0              | 0            | 0            |
| TPD52L1  | -4.2864494036  | 0.4027150577 | 0.9999763851 |
| HDDC2    | 1.1686767847   | 0.3538930219 | 0.9999763851 |
| NCOA7    | 1.2756840241   | 0.2476794175 | 0.9999763851 |
| HINT3    | -1.0191924291  | 0.9268747613 | 0.9999763851 |
| TRMT11   | -1.2922129281  | 0.4208201658 | 0.9999763851 |
| CENPW    | 1.1005936778   | 0.5162379684 | 0.9999763851 |
| RSPO3    | 0              | 0            | 0            |
| RNF146   | 1.1293715103   | 0.6040782753 | 0.9999763851 |
| ECHDC1   | -1.3867458064  | 0.0791697995 | 0.9999763851 |
| KIAA0408 | -20.6735088573 | 0.0596784778 | 0.9999763851 |
| SOGA3    | -1.3158816768  | 0.8203229797 | 0.9999763851 |
| C6orf58  | 0              | 0            | 0            |
| LAMA2    | 0              | 0            | 0            |
| ARHGAP18 | 1.0875837793   | 0.7428036023 | 0.9999763851 |
| L3MBTL3  | 2.6536751413   | 0.0846132643 | 0.9999763851 |
| SAMD3    | 0              | 0            | 0            |
| EPB41L2  | 0              | 0            | 0            |
| ARG1     | -1.3945372452  | 0.6923954461 | 0.9999763851 |



gene\_expression\_table

|         |               |              |              |
|---------|---------------|--------------|--------------|
| MED23   | -1.2888772595 | 0.4000088184 | 0.9999763851 |
| ENPP3   | 0             | 0            | 0            |
| CTAGE9  | 0             | 0            | 0            |
| ENPP1   | 0             | 0            | 0            |
| STX7    | -1.0264157338 | 0.9180024705 | 0.9999763851 |
| VNN2    | 0             | 0            | 0            |
| SLC18B1 | 0             | 0            | 0            |
| RPS12   | -1.0908391691 | 0.4604119943 | 0.9999763851 |
| EYA4    | 1.3576108079  | 0.7958575571 | 0.9999763851 |
| TBPL1   | -1.0019981827 | 0.9953135518 | 0.9999763851 |
| SLC2A12 | -1.0801101658 | 0.9305702272 | 0.9999763851 |
| SGK1    | 1.2245528207  | 0.6379606866 | 0.9999763851 |
| ALDH8A1 | 1.7868451227  | 0.5987183051 | 0.9999763851 |
| HBS1L   | 1.1917185729  | 0.3810967979 | 0.9999763851 |
| MYB     | -1.4143075971 | 0.008165     | 0.9999763851 |
| AH11    | -1.1943993967 | 0.5035170024 | 0.9999763851 |
| PDE7B   | 0             | 0            | 0            |
| MTFR2   | 1.2473224675  | 0.3075865547 | 0.9999763851 |
| BCLAF1  | 1.1728448645  | 0.2132735595 | 0.9999763851 |
| MAP7    | -1.3304807702 | 0.3284699732 | 0.9999763851 |
| MAP3K5  | -1.003712937  | 0.9819582226 | 0.9999763851 |
| PEX7    | -1.2156517911 | 0.5966166723 | 0.9999763851 |
| IFNGR1  | 1.3454004999  | 0.434598124  | 0.9999763851 |
| TNFAIP3 | -1.7230252927 | 0.0608266532 | 0.9999763851 |
| ARFGEF3 | -1.035203499  | 0.9620562309 | 0.9999763851 |
| HEBP2   | -1.0707222049 | 0.6705591536 | 0.9999763851 |
| NHSL1   | -1.0884255882 | 0.8126876408 | 0.9999763851 |
| GVQW2   | -1.3717838846 | 0.749694777  | 0.9999763851 |
| CCDC28A | -1.4969762645 | 0.0508750907 | 0.9999763851 |
| ECT2L   | 1.3500680352  | 0.6816657837 | 0.9999763851 |
| REPS1   | 1.0208529483  | 0.9142969021 | 0.9999763851 |
| ABRACL  | -1.1634888863 | 0.1996821567 | 0.9999763851 |
| HECA    | -1.2751658844 | 0.1906799201 | 0.9999763851 |
| TXLNB   | -2.6583180448 | 0.2228894538 | 0.9999763851 |
| CITED2  | -1.0361213583 | 0.8533535631 | 0.9999763851 |
| NMBR    | 5.4770877341  | 0.3746135179 | 0.9999763851 |
| VTA1    | 1.0777272804  | 0.6880954873 | 0.9999763851 |
| HIVP2   | -1.0724400783 | 0.7179205181 | 0.9999763851 |
| AIG1    | 1.6862503526  | 0.003915     | 0.9999763851 |
| ADAT2   | 1.0057349704  | 0.9793023517 | 0.9999763851 |
| PEX3    | -1.0946458236 | 0.6967839079 | 0.9999763851 |
| FUCA2   | 1.207460313   | 0.3549507106 | 0.9999763851 |
| PHACTR2 | -1.3068227128 | 0.3061450378 | 0.9999763851 |
| LTV1    | 1.3896833392  | 0.1858319533 | 0.9999763851 |
| PLAGL1  | -1.4466165318 | 0.2011689131 | 0.9999763851 |
| SF3B5   | 1.0474717302  | 0.7537655678 | 0.9999763851 |
| STX11   | -1.1789827383 | 0.6645183531 | 0.9999763851 |
| UTRN    | -1.0010697271 | 0.9959173065 | 0.9999763851 |
| EPM2A   | 1.3411938723  | 0.7190877752 | 0.9999763851 |

gene\_expression\_table

|          |               |              |              |
|----------|---------------|--------------|--------------|
| FBXO30   | 1.2803327132  | 0.4753208115 | 0.9999763851 |
| SHPRH    | -1.3730257125 | 0.3371568481 | 0.9999763851 |
| GRM1     | 0             | 0            | 0            |
| RAB32    | 1.6716607621  | 0.007951     | 0.9999763851 |
| ADGB     | -2.2172342137 | 0.240633903  | 0.9999763851 |
| STXBP5   | 1.039232723   | 0.8070730387 | 0.9999763851 |
| SASH1    | -1.506459725  | 0.2560554472 | 0.9999763851 |
| UST      | 1.2280506827  | 0.7913354969 | 0.9999763851 |
| TAB2     | -1.3662940011 | 0.1165347147 | 0.9999763851 |
| ZC3H12D  | -1.2488104335 | 0.6000278683 | 0.9999763851 |
| PPIL4    | 1.4585017579  | 0.1649458145 | 0.9999763851 |
| GINM1    | -1.4379340561 | 0.4507102514 | 0.9999763851 |
| KATNA1   | -1.5371062944 | 0.0369350778 | 0.9999763851 |
| LATS1    | -1.2120781    | 0.5065755597 | 0.9999763851 |
| NUP43    | 1.5618587269  | 0.0174950989 | 0.9999763851 |
| PCMT1    | 1.0190438243  | 0.8808168542 | 0.9999763851 |
| LRP11    | 1.087401112   | 0.6699597928 | 0.9999763851 |
| RAET1E   | 1.3258969121  | 0.7482148046 | 0.9999763851 |
| RAET1G   | -1.9647456674 | 0.4667580718 | 0.9999763851 |
| ULBP2    | 17.8309472943 | 0.1311012957 | 0.9999763851 |
| ULBP1    | 0             | 0            | 0            |
| ULBP3    | 3.2353357581  | 0.554787377  | 0.9999763851 |
| PPP1R14C | -1.3535347227 | 0.1211577436 | 0.9999763851 |
| PLEKHG1  | -1.3713018672 | 0.7312784555 | 0.9999763851 |
| MTHFD1L  | 1.1677072628  | 0.3444221413 | 0.9999763851 |
| AKAP12   | 3.2353357581  | 0.554787377  | 0.9999763851 |
| ZBTB2    | 1.0178172013  | 0.9584263534 | 0.9999763851 |
| RMND1    | 1.6082665467  | 0.0989129975 | 0.9999763851 |
| ARMT1    | 1.7995737228  | 0.0784539531 | 0.9999763851 |
| CCDC170  | 10.1794135333 | 0.2227082573 | 0.9999763851 |
| SYNE1    | -2.387679463  | 0.250963581  | 0.9999763851 |
| MYCT1    | 0             | 0            | 0            |
| FBXO5    | -1.1059803881 | 0.6735589113 | 0.9999763851 |
| MTRF1L   | 1.3858279321  | 0.1012554968 | 0.9999763851 |
| RGS17    | 0             | 0            | 0            |
| IPCEF1   | -1.196159321  | 0.5447872011 | 0.9999763851 |
| CNKSR3   | 1.1458418283  | 0.7335384756 | 0.9999763851 |
| SCAF8    | 1.0455429258  | 0.8122677138 | 0.9999763851 |
| TFB1M    | -1.033779693  | 0.8784563299 | 0.9999763851 |
| NOX3     | 0             | 0            | 0            |
| ARID1B   | 1.3263303579  | 0.1116515092 | 0.9999763851 |
| TMEM242  | 1.2404845018  | 0.3656965958 | 0.9999763851 |
| ZDHHC14  | -1.1359847401 | 0.537617409  | 0.9999763851 |
| SNX9     | -1.5825973022 | 0.2432679778 | 0.9999763851 |
| SYNJ2    | 1.1304465917  | 0.5089536125 | 0.9999763851 |
| SERAC1   | 1.2400199432  | 0.6259876835 | 0.9999763851 |
| GTF2H5   | -1.0605960473 | 0.7971014152 | 0.9999763851 |
| TULP4    | -1.027905502  | 0.8978640112 | 0.9999763851 |
| TMEM181  | -1.0214938428 | 0.9367116225 | 0.9999763851 |

gene\_expression\_table

|              |               |              |              |
|--------------|---------------|--------------|--------------|
| DYNLT1       | 1.3591633902  | 0.1281995316 | 0.9999763851 |
| SYTL3        | 2.5943187527  | 0.4291761521 | 0.9999763851 |
| EZR          | 1.0799653326  | 0.5813778945 | 0.9999763851 |
| C6orf99      | -3.6747177393 | 0.1929122622 | 0.9999763851 |
| RSPH3        | 1.7077281375  | 0.1198766276 | 0.9999763851 |
| TAGAP        | 1.2403990118  | 0.274098919  | 0.9999763851 |
| SOD2         | 1.0165210628  | 0.9067569597 | 0.9999763851 |
| WTAP         | 1.2837840517  | 0.0862048231 | 0.9999763851 |
| ACAT2        | -1.5236417268 | 0.1878059385 | 0.9999763851 |
| TCP1         | 1.1035520587  | 0.400917535  | 0.9999763851 |
| MRPL18       | 1.0386082935  | 0.7974875655 | 0.9999763851 |
| PNLDC1       | -2.5588825616 | 0.3182945072 | 0.9999763851 |
| IGF2R        | -1.4328453811 | 0.0191503346 | 0.9999763851 |
| SLC22A1      | 1.3264789913  | 0.7365304439 | 0.9999763851 |
| SLC22A3      | -4.2849908816 | 0.4028453076 | 0.9999763851 |
| MAP3K4       | -1.3281093608 | 0.1304341216 | 0.9999763851 |
| AGPAT4       | -1.2101498166 | 0.3928323733 | 0.9999763851 |
| PARK2        | -1.4073512753 | 0.6477548675 | 0.9999763851 |
| PACRG        | -2.3214980365 | 0.4361267576 | 0.9999763851 |
| QKI          | -1.2236603551 | 0.1707430916 | 0.9999763851 |
| C6orf118     | 0             | 0            | 0            |
| PDE10A       | 0             | 0            | 0            |
| PRR18        | 0             | 0            | 0            |
| SFT2D1       | 1.0909647162  | 0.574051668  | 0.9999763851 |
| MPC1         | 1.1037081178  | 0.5712580278 | 0.9999763851 |
| RPS6KA2      | 1.088224954   | 0.7776854976 | 0.9999763851 |
| RNASET2      | 1.0139044383  | 0.9279685604 | 0.9999763851 |
| FGFR1OP      | -1.106691354  | 0.6922730782 | 0.9999763851 |
| TCP10L2      | 0             | 0            | 0            |
| THBS2        | 3.7878555937  | 0.1335689782 | 0.9999763851 |
| WDR27        | -1.0435173128 | 0.900681031  | 0.9999763851 |
| C6orf120     | 1.4222302241  | 0.0854055231 | 0.9999763851 |
| PHF10        | -1.2552056841 | 0.3395919942 | 0.9999763851 |
| TCTE3        | 1.6852133521  | 0.3567744131 | 0.9999763851 |
| ERMARD       | -1.0217536457 | 0.9461462251 | 0.9999763851 |
| DLL1         | -1.0159162816 | 0.9563944047 | 0.9999763851 |
| FAM120B      | 1.2077284526  | 0.3975677018 | 0.9999763851 |
| PSMB1        | -1.2229389378 | 0.1098652498 | 0.9999763851 |
| TBP          | -1.1755004017 | 0.5748029008 | 0.9999763851 |
| PDCD2        | 1.2266835514  | 0.1787451049 | 0.9999763851 |
| LOC101929692 | -1.3943388833 | 0.6978395358 | 0.9999763851 |
| LOC105375112 | -2.6392692278 | 0.2037510509 | 0.9999763851 |
| FAM20C       | -1.3746319532 | 0.1420402549 | 0.9999763851 |
| PDGFA        | 1.4677562844  | 0.4921005175 | 0.9999763851 |
| PRKAR1B      | 1.304572789   | 0.2529036119 | 0.9999763851 |
| DNAAF5       | -1.4620686098 | 0.0444845339 | 0.9999763851 |
| SUN1         | -1.229310616  | 0.442398656  | 0.9999763851 |
| GET4         | -1.0495872442 | 0.8049029128 | 0.9999763851 |
| ADAP1        | 1.2006607582  | 0.4051123297 | 0.9999763851 |

gene\_expression\_table

|              |               |              |              |
|--------------|---------------|--------------|--------------|
| COX19        | 1.1490664863  | 0.3852750456 | 0.9999763851 |
| C7orf50      | -1.0286649341 | 0.8446517921 | 0.9999763851 |
| GPR146       | -1.3285230121 | 0.5504873399 | 0.9999763851 |
| GPER1        | 1.2865109866  | 0.8332890582 | 0.9999763851 |
| ZFAND2A      | 1.0465430187  | 0.8788128453 | 0.9999763851 |
| UNCX         | 3.2353357581  | 0.554787377  | 0.9999763851 |
| MICALL2      | 1.1205508003  | 0.7371148509 | 0.9999763851 |
| INTS1        | 1.0893398421  | 0.7909095996 | 0.9999763851 |
| MAFK         | -1.0353512704 | 0.8998782062 | 0.9999763851 |
| PSMG3        | -1.4213609899 | 0.0115694198 | 0.9999763851 |
| ELFN1        | 1.0302684927  | 0.9328343505 | 0.9999763851 |
| MAD1L1       | 1.1134167364  | 0.5000522479 | 0.9999763851 |
| MRM2         | -1.1423661451 | 0.5782057211 | 0.9999763851 |
| NUDT1        | 1.2627479314  | 0.1641686371 | 0.9999763851 |
| SNX8         | 1.2429741178  | 0.2389987227 | 0.9999763851 |
| EIF3B        | 1.1494704623  | 0.2993822495 | 0.9999763851 |
| CHST12       | -1.2147667984 | 0.3694418207 | 0.9999763851 |
| LFNG         | -1.2863371215 | 0.4744010428 | 0.9999763851 |
| BRAT1        | 1.1811938198  | 0.3962921104 | 0.9999763851 |
| IQCE         | 1.5950137501  | 0.1926779545 | 0.9999763851 |
| TTYH3        | -1.1838460142 | 0.3147666812 | 0.9999763851 |
| AMZ1         | -1.6845306815 | 0.1404340331 | 0.9999763851 |
| GNA12        | -1.1564270927 | 0.3101802877 | 0.9999763851 |
| SDK1         | -1.6135797963 | 0.0444410753 | 0.9999763851 |
| LOC105375131 | 0             | 0            | 0            |
| FO XK1       | 1.0460439162  | 0.7643410799 | 0.9999763851 |
| AP5Z1        | 1.1356374427  | 0.4557332701 | 0.9999763851 |
| RADIL        | 1.2659578115  | 0.5728551857 | 0.9999763851 |
| RBAK         | 1.1107271141  | 0.8344933529 | 0.9999763851 |
| RBAK-RBAKDN  | -1.1271483256 | 0.8699978408 | 0.9999763851 |
| WIP12        | 1.0790050059  | 0.6138945473 | 0.9999763851 |
| SLC29A4      | 3.392655372   | 0.2312814813 | 0.9999763851 |
| TNRC18       | -1.0497135041 | 0.7659396233 | 0.9999763851 |
| FBXL18       | -1.0221272571 | 0.9279937042 | 0.9999763851 |
| ACTB         | 1.0680961438  | 0.5753255288 | 0.9999763851 |
| FSCN1        | -2.5593885838 | 0.3087159846 | 0.9999763851 |
| LOC107986762 | 1.2121405506  | 0.6313524744 | 0.9999763851 |
| RNF216       | 1.0532468783  | 0.7443640488 | 0.9999763851 |
| OCM          | -4.2864494036 | 0.4027150576 | 0.9999763851 |
| CCZ1         | 1.204740328   | 0.3199103008 | 0.9999763851 |
| PMS2         | 1.0272428791  | 0.9139102564 | 0.9999763851 |
| AIMP2        | -1.5847923668 | 0.0117694623 | 0.9999763851 |
| EIF2AK1      | 1.0335605711  | 0.8253487333 | 0.9999763851 |
| USP42        | 1.1266788205  | 0.6918528206 | 0.9999763851 |
| CYTH3        | -1.0059429769 | 0.9810185437 | 0.9999763851 |
| FAM220A      | 1.0398188398  | 0.8531052781 | 0.9999763851 |
| RAC1         | 1.2437852244  | 0.0718189011 | 0.9999763851 |
| DAGLB        | -1.329805302  | 0.212746387  | 0.9999763851 |
| KDELRL2      | -1.0618250649 | 0.6749785842 | 0.9999763851 |

gene\_expression\_table

|              |               |              |              |
|--------------|---------------|--------------|--------------|
| GRID2IP      | 0             | 0            | 0            |
| ZDHHC4       | 1.374991703   | 0.2481159832 | 0.9999763851 |
| C7orf26      | 1.0080017172  | 0.9727504268 | 0.9999763851 |
| ZNF853       | 1.8888297566  | 0.5937856039 | 0.9999763851 |
| ZNF316       | -1.119083406  | 0.5223625992 | 0.9999763851 |
| ZNF12        | -1.2047687689 | 0.389945581  | 0.9999763851 |
| RSPH10B2     | 0             | 0            | 0            |
| CCZ1B        | -1.127945212  | 0.4879294808 | 0.9999763851 |
| C1GALT1      | -1.2410766168 | 0.2994965975 | 0.9999763851 |
| MIOS         | -1.0571491483 | 0.8365334947 | 0.9999763851 |
| RPA3         | 1.1247752168  | 0.4124502373 | 0.9999763851 |
| UMAD1        | -1.1047346439 | 0.7098880836 | 0.9999763851 |
| GLCCI1       | 1.1152747909  | 0.5213669277 | 0.9999763851 |
| ICA1         | -2.4959539324 | 0.0206445382 | 0.9999763851 |
| NXPH1        | 0             | 0            | 0            |
| NDUFA4       | 1.3973154398  | 0.0152409492 | 0.9999763851 |
| PHF14        | 1.0299579949  | 0.8602793657 | 0.9999763851 |
| THSD7A       | 3.2353357581  | 0.554787377  | 0.9999763851 |
| TMEM106B     | -1.3886499572 | 0.3428994851 | 0.9999763851 |
| ARL4A        | 1.024184787   | 0.921639489  | 0.9999763851 |
| SOSTDC1      | 0             | 0            | 0            |
| ANKMY2       | -1.1152182159 | 0.7211177889 | 0.9999763851 |
| BZW2         | -1.1080828312 | 0.5498094987 | 0.9999763851 |
| TSPAN13      | 0             | 0            | 0            |
| AHR          | -1.4850263799 | 0.1724200511 | 0.9999763851 |
| SNX13        | -1.051947998  | 0.8829972058 | 0.9999763851 |
| HDAC9        | 0             | 0            | 0            |
| TWISTNB      | 1.4045408894  | 0.0406468179 | 0.9999763851 |
| MACC1        | 1.5486451741  | 0.3619847107 | 0.9999763851 |
| SP4          | 1.313059784   | 0.5043302541 | 0.9999763851 |
| DNAH11       | -1.133152361  | 0.7575687991 | 0.9999763851 |
| CDCA7L       | 1.0389006805  | 0.7973914388 | 0.9999763851 |
| RAPGEF5      | 0             | 0            | 0            |
| TOMM7        | -1.231791851  | 0.0941943248 | 0.9999763851 |
| FAM126A      | 1.3220487992  | 0.221827423  | 0.9999763851 |
| KLHL7        | -1.1347366538 | 0.6363949736 | 0.9999763851 |
| NUPL2        | -1.6433117329 | 0.0703872288 | 0.9999763851 |
| GNPMB        | -1.6201312029 | 0.003014     | 0.9999763851 |
| MALSU1       | 1.2938253468  | 0.132130534  | 0.9999763851 |
| IGF2BP3      | 1.1438678081  | 0.5157725994 | 0.9999763851 |
| TRA2A        | -1.215350831  | 0.1669181876 | 0.9999763851 |
| CCDC126      | 1.0866224378  | 0.8474746166 | 0.9999763851 |
| FAM221A      | 0             | 0            | 0            |
| STK31        | 0             | 0            | 0            |
| LOC107986777 | 0             | 0            | 0            |
| MPP6         | -1.7727550014 | 0.1821757109 | 0.9999763851 |
| DFNA5        | 3.2353357581  | 0.554787377  | 0.9999763851 |
| OSBPL3       | -1.3015993756 | 0.3137132845 | 0.9999763851 |
| CYCS         | 1.348888814   | 0.0217302403 | 0.9999763851 |

gene\_expression\_table

|              |               |              |              |
|--------------|---------------|--------------|--------------|
| C7orf31      | -1.086337313  | 0.8518103479 | 0.9999763851 |
| LOC646588    | -1.5326255354 | 0.3273559566 | 0.9999763851 |
| NFE2L3       | -1.2680859889 | 0.4626954618 | 0.9999763851 |
| HNRNPA2B1    | 1.1624967127  | 0.3188248218 | 0.9999763851 |
| CBX3         | 1.0330378287  | 0.7837102051 | 0.9999763851 |
| SNX10        | 1.2962543332  | 0.0746438689 | 0.9999763851 |
| C7orf71      | 0             | 0            | 0            |
| SKAP2        | 1.0850232822  | 0.6231097707 | 0.9999763851 |
| HOXA1        | -2.0624023724 | 0.3159041639 | 0.9999763851 |
| HOXA2        | 1.8139617088  | 0.5773955095 | 0.9999763851 |
| HOXA3        | 1.1979476908  | 0.7131292907 | 0.9999763851 |
| HOXA4        | -1.6817502083 | 0.4753426566 | 0.9999763851 |
| HOXA5        | 1.4284463338  | 0.3964082208 | 0.9999763851 |
| HOXA6        | 0             | 0            | 0            |
| HOXA7        | 1.5678512442  | 0.2011211293 | 0.9999763851 |
| HOXA9        | -1.4231209207 | 0.0732854132 | 0.9999763851 |
| HOXA10       | -1.1047881842 | 0.4954656902 | 0.9999763851 |
| HOXA11       | -1.0806221785 | 0.6663107186 | 0.9999763851 |
| HOXA13       | -1.0593234938 | 0.8755017111 | 0.9999763851 |
| EVX1         | 1.2869488883  | 0.8196978268 | 0.9999763851 |
| HIBADH       | -1.4119049299 | 0.217173095  | 0.9999763851 |
| TAX1BP1      | 1.0579613571  | 0.6476879451 | 0.9999763851 |
| JAZF1        | -1.3902764042 | 0.1283912589 | 0.9999763851 |
| CREB5        | -2.3225701307 | 0.4434188202 | 0.9999763851 |
| CPVL         | -1.0966514822 | 0.7040599468 | 0.9999763851 |
| CHN2         | 1.1179927641  | 0.7683746224 | 0.9999763851 |
| PRR15        | 3.2356557963  | 0.5547505991 | 0.9999763851 |
| LOC101928208 | 0             | 0            | 0            |
| WIPF3        | 3.2353357581  | 0.554787377  | 0.9999763851 |
| FKBP14       | -1.2170633691 | 0.641733647  | 0.9999763851 |
| PLEKHA8      | 1.2993674237  | 0.5924896239 | 0.9999763851 |
| MTURN        | -1.1603790588 | 0.4485720602 | 0.9999763851 |
| ZNRF2        | -1.5631097096 | 0.0865154286 | 0.9999763851 |
| NOD1         | 1.2710994888  | 0.4072166317 | 0.9999763851 |
| LOC101928268 | 2.8946978995  | 0.3713424171 | 0.9999763851 |
| GGCT         | -1.1084568192 | 0.4477798508 | 0.9999763851 |
| GARS         | 1.1059617356  | 0.5053268989 | 0.9999763851 |
| FAM188B      | 3.2356557963  | 0.5547505991 | 0.9999763851 |
| CCDC129      | 3.2353357581  | 0.554787377  | 0.9999763851 |
| LSM5         | 1.0098540477  | 0.9434868349 | 0.9999763851 |
| AVL9         | -1.0979690673 | 0.5600040563 | 0.9999763851 |
| KBTBD2       | -1.1128294411 | 0.6244685223 | 0.9999763851 |
| FKBP9        | 2.5194489141  | 0.2710522815 | 0.9999763851 |
| NT5C3A       | -1.0314720559 | 0.8536062362 | 0.9999763851 |
| RP9          | -1.210295034  | 0.375377743  | 0.9999763851 |
| BBS9         | -1.0967436785 | 0.8470930984 | 0.9999763851 |
| DPY19L1      | -1.198464454  | 0.4522853041 | 0.9999763851 |
| TBX20        | 3.2353357581  | 0.554787377  | 0.9999763851 |
| HERPUD2      | -1.1662609782 | 0.5603819431 | 0.9999763851 |

gene\_expression\_table

|              |                |              |              |
|--------------|----------------|--------------|--------------|
| SEPT7        | 1.0682474528   | 0.6057566305 | 0.9999763851 |
| EEPD1        | 1.057563572    | 0.7859715397 | 0.9999763851 |
| KIAA0895     | -3.0826121034  | 0.104637516  | 0.9999763851 |
| ANLN         | -1.5004737976  | 0.0575964775 | 0.9999763851 |
| AOAH         | 1.0337794545   | 0.9247821455 | 0.9999763851 |
| ELMO1        | -1.8383664782  | 0.009758     | 0.9999763851 |
| GPR141       | 1.6845813354   | 0.1489837267 | 0.9999763851 |
| NME8         | 4.9736751744   | 0.1121871596 | 0.9999763851 |
| SFRP4        | 3.2353357581   | 0.554787377  | 0.9999763851 |
| EPDR1        | 1.1458237419   | 0.4732568993 | 0.9999763851 |
| STARD3NL     | -1.1599549494  | 0.4407167629 | 0.9999763851 |
| TARP         | 1.2730653865   | 0.408096528  | 0.9999763851 |
| AMPH         | 1.224539777    | 0.758670947  | 0.9999763851 |
| VPS41        | -1.1282015585  | 0.573760314  | 0.9999763851 |
| POU6F2       | -4.2849908816  | 0.4028453076 | 0.9999763851 |
| YAE1D1       | -1.0196651264  | 0.9501900046 | 0.9999763851 |
| RALA         | 1.095492144    | 0.5900677156 | 0.9999763851 |
| CDK13        | 1.2752800796   | 0.3063835027 | 0.9999763851 |
| MPLKIP       | 1.3939085476   | 0.0981958103 | 0.9999763851 |
| SUGCT        | -2.0001755787  | 0.100419344  | 0.9999763851 |
| INHBA        | -12.7231911949 | 3.09E-14     | 5.54E-10     |
| GLI3         | 3.2353357581   | 0.554787377  | 0.9999763851 |
| C7orf25      | -1.1378395056  | 0.7828604638 | 0.9999763851 |
| PSMA2        | 1.1706611118   | 0.2380284777 | 0.9999763851 |
| MRPL32       | 1.0334710135   | 0.8854176074 | 0.9999763851 |
| HECW1        | 3.9179071451   | 0.1947667958 | 0.9999763851 |
| STK17A       | -1.2191700914  | 0.4746847413 | 0.9999763851 |
| COA1         | 1.0054088224   | 0.9721329502 | 0.9999763851 |
| BLVRA        | 1.1789463547   | 0.4026653141 | 0.9999763851 |
| MRPS24       | 1.0664325442   | 0.6743878102 | 0.9999763851 |
| URGCP-MRPS24 | 17.0964048721  | 0.1497629194 | 0.9999763851 |
| URGCP        | 1.0468936009   | 0.8888735338 | 0.9999763851 |
| LOC107986791 | 3.1108254173   | 0.2256589065 | 0.9999763851 |
| UBE2D4       | 2.3705921744   | 0.005659     | 0.9999763851 |
| SPDYE1       | 25.6678580218  | 0.0811866116 | 0.9999763851 |
| DBNL         | 1.1531973685   | 0.5346928854 | 0.9999763851 |
| PGAM2        | -14.1218219134 | 0.1013475713 | 0.9999763851 |
| POLM         | 2.0266506433   | 0.1473179989 | 0.9999763851 |
| POLD2        | 1.0026928218   | 0.9867681316 | 0.9999763851 |
| GCK          | 5.4770877341   | 0.3746135179 | 0.9999763851 |
| YKT6         | 1.143714748    | 0.4549882942 | 0.9999763851 |
| NUDCD3       | 1.0417061798   | 0.7322824367 | 0.9999763851 |
| NPC1L1       | 0              | 0            | 0            |
| DDX56        | 1.0123323431   | 0.948168058  | 0.9999763851 |
| TMED4        | 1.0759285031   | 0.6529610637 | 0.9999763851 |
| OGDH         | 1.0926219429   | 0.658103219  | 0.9999763851 |
| ZMIZ2        | 1.0275830709   | 0.8842294661 | 0.9999763851 |
| PPIA         | 1.1314256047   | 0.2861199226 | 0.9999763851 |
| H2AFV        | 1.097995633    | 0.4858648736 | 0.9999763851 |

gene\_expression\_table

|              |               |              |              |
|--------------|---------------|--------------|--------------|
| PURB         | 1.0884674369  | 0.6642499686 | 0.9999763851 |
| MYO1G        | -1.1744664923 | 0.4828918037 | 0.9999763851 |
| CCM2         | 1.1374873956  | 0.4906748608 | 0.9999763851 |
| NACAD        | 0             | 0            | 0            |
| TBRG4        | 1.2109207131  | 0.2419167053 | 0.9999763851 |
| ADCY1        | 1.4854101668  | 0.2569611734 | 0.9999763851 |
| TNS3         | -1.0646944547 | 0.7501007794 | 0.9999763851 |
| PKD1L1       | -1.3012214104 | 0.6239224869 | 0.9999763851 |
| HUS1         | 1.1335363412  | 0.64352396   | 0.9999763851 |
| SUN3         | 1.9239491811  | 0.433246221  | 0.9999763851 |
| UPP1         | -1.8524539147 | 0.0517927113 | 0.9999763851 |
| ABCA13       | 1.4214641047  | 0.6299148796 | 0.9999763851 |
| IKZF1        | 1.1803764552  | 0.2181061867 | 0.9999763851 |
| FIGNL1       | -1.0359786311 | 0.8407326173 | 0.9999763851 |
| DDC          | 1.6253118249  | 0.5750177155 | 0.9999763851 |
| GRB10        | 1.4136037747  | 0.0214759489 | 0.9999763851 |
| COBL         | 1.6243491221  | 0.5664322505 | 0.9999763851 |
| SEC61G       | -1.5986312416 | 0.004749     | 0.9999763851 |
| LANCL2       | 1.7083674139  | 0.0790142082 | 0.9999763851 |
| VOPP1        | -1.1258158404 | 0.5576034844 | 0.9999763851 |
| LOC101060341 | 0             | 0            | 0            |
| SEPT14       | 0             | 0            | 0            |
| ZNF713       | 2.4170276959  | 0.1758547997 | 0.9999763851 |
| MRPS17       | 1.2128111819  | 0.4116369404 | 0.9999763851 |
| GBAS         | 1.1194606158  | 0.4824879695 | 0.9999763851 |
| PSPH         | 1.1382185409  | 0.5371136662 | 0.9999763851 |
| CCT6A        | 1.1947851875  | 0.1711798835 | 0.9999763851 |
| SUMF2        | -1.6872825634 | 0.2054476845 | 0.9999763851 |
| PHKG1        | 1.2669721097  | 0.2491935427 | 0.9999763851 |
| CHCHD2       | -1.1479022718 | 0.2643242381 | 0.9999763851 |
| LOC100287294 | 0             | 0            | 0            |
| ZNF479       | 0             | 0            | 0            |
| LOC107986805 | 2.3406309168  | 0.4060501105 | 0.9999763851 |
| ZNF735       | 0             | 0            | 0            |
| ZNF679       | 0             | 0            | 0            |
| ZNF736       | -4.2849908816 | 0.4028453076 | 0.9999763851 |
| ZNF680       | -1.4888352741 | 0.2069827013 | 0.9999763851 |
| ZNF107       | -1.0508956747 | 0.84290331   | 0.9999763851 |
| ZNF138       | -1.0729018924 | 0.8690422057 | 0.9999763851 |
| ZNF273       | -1.2547157149 | 0.3981182387 | 0.9999763851 |
| ZNF117       | 0             | 0            | 0            |
| LOC107986705 | -2.1156977606 | 0.1655422058 | 0.9999763851 |
| ZNF92        | -1.8291300434 | 0.0855494284 | 0.9999763851 |
| LOC101929322 | -1.9480990641 | 0.3316726962 | 0.9999763851 |
| VKORC1L1     | 1.013816593   | 0.9363214399 | 0.9999763851 |
| GUSB         | 1.3010864341  | 0.0814449706 | 0.9999763851 |
| ASL          | 1.5460012317  | 0.0920076971 | 0.9999763851 |
| CRCP         | 1.1654884662  | 0.3399902737 | 0.9999763851 |
| TPST1        | -5.3347590109 | 8.82E-05     | 0.1438827417 |



gene\_expression\_table

|              |                |              |              |
|--------------|----------------|--------------|--------------|
| KCTD7        | -1.1240552884  | 0.5484778446 | 0.9999763851 |
| RABGEF1      | 1.0680353064   | 0.7216677111 | 0.9999763851 |
| TMEM248      | 1.034763318    | 0.8205642058 | 0.9999763851 |
| SBDS         | 1.1482245208   | 0.6236361747 | 0.9999763851 |
| TYW1         | -1.052980845   | 0.7977673666 | 0.9999763851 |
| AUTS2        | 3.2361532718   | 0.5546934395 | 0.9999763851 |
| CALN1        | 2.1743612496   | 0.3142134991 | 0.9999763851 |
| TYW1B        | 1.1916049594   | 0.6783498221 | 0.9999763851 |
| POM121       | 1.2883535175   | 0.0535239316 | 0.9999763851 |
| TRIM74       | 1.0116836987   | 0.9385654264 | 0.9999763851 |
| SPDYE11      | 0              | 0            | 0            |
| NSUN5        | 1.028682763    | 0.8356754949 | 0.9999763851 |
| FKBP6        | -7.5647903763  | 0.2176246281 | 0.9999763851 |
| FZD9         | 1.0300813919   | 0.9662262396 | 0.9999763851 |
| BAZ1B        | 1.2721596092   | 0.1191175671 | 0.9999763851 |
| BCL7B        | 1.5568038595   | 0.0638081998 | 0.9999763851 |
| TBL2         | -1.2027232664  | 0.3902448502 | 0.9999763851 |
| VPS37D       | -14.1235077517 | 0.0960269008 | 0.9999763851 |
| DNAJC30      | 1.2421084522   | 0.6190204294 | 0.9999763851 |
| WBSCR22      | -1.0271873135  | 0.8701588163 | 0.9999763851 |
| STX1A        | -1.7346211034  | 0.4442349129 | 0.9999763851 |
| ABHD11       | -1.1490291748  | 0.6727019035 | 0.9999763851 |
| CLDN4        | 1.2869488883   | 0.8198374627 | 0.9999763851 |
| WBSCR27      | -4.2849908816  | 0.4028453076 | 0.9999763851 |
| LIMK1        | -1.0486645347  | 0.8593613004 | 0.9999763851 |
| EIF4H        | 1.2164068878   | 0.1381167362 | 0.9999763851 |
| LAT2         | 1.1224522092   | 0.3680278282 | 0.9999763851 |
| RFC2         | 1.0855980361   | 0.6541270068 | 0.9999763851 |
| CLIP2        | -1.8616301137  | 0.2899918013 | 0.9999763851 |
| GTF2I        | 1.3724467001   | 0.0124781066 | 0.9999763851 |
| NCF1         | 1.2302557502   | 0.4636179342 | 0.9999763851 |
| GTF2IRD2     | 1.2403673619   | 0.3196941717 | 0.9999763851 |
| GATSL2       | -1.0897331625  | 0.8620339786 | 0.9999763851 |
| RCC1L        | 1.4676966812   | 0.017320005  | 0.9999763851 |
| GTF2IRD2B    | -1.9054160201  | 0.2181824354 | 0.9999763851 |
| TRIM73       | 1.3652112359   | 0.519848658  | 0.9999763851 |
| POM121C      | -1.1312570689  | 0.4750681582 | 0.9999763851 |
| SPDYE5       | 6.368054416    | 0.3491682726 | 0.9999763851 |
| HIP1         | -1.3376808546  | 0.0871746469 | 0.9999763851 |
| CCL26        | 1.287203384    | 0.8310555568 | 0.9999763851 |
| CCL24        | 0              | 0            | 0            |
| RHBDD2       | -1.0263862488  | 0.9112103021 | 0.9999763851 |
| POR          | -1.0156303811  | 0.9311682612 | 0.9999763851 |
| TMEM120A     | -1.3926190429  | 0.0593785979 | 0.9999763851 |
| STYXL1       | 1.2550338396   | 0.3200630987 | 0.9999763851 |
| MDH2         | -1.2823587699  | 0.0614451096 | 0.9999763851 |
| LOC107986711 | 3.2353357581   | 0.554787377  | 0.9999763851 |
| SRRM3        | -2.2378380635  | 0.2934725787 | 0.9999763851 |
| HSPB1        | 1.2215632519   | 0.1217406919 | 0.9999763851 |

gene\_expression\_table

|              |               |              |              |
|--------------|---------------|--------------|--------------|
| YWHAG        | -1.0092469091 | 0.9413345488 | 0.9999763851 |
| SSC4D        | -1.3155492632 | 0.8261713847 | 0.9999763851 |
| ZP3          | 78.1389315045 | 0.0227503897 | 0.9999763851 |
| DTX2         | -1.00749963   | 0.9754354981 | 0.9999763851 |
| LOC105375355 | -1.3948129396 | 0.6825391405 | 0.9999763851 |
| SPDYE16      | -2.5519849925 | 0.3670892633 | 0.9999763851 |
| POMZP3       | -1.1602744916 | 0.4049682728 | 0.9999763851 |
| SPDYE17      | -1.3956396272 | 0.7086142632 | 0.9999763851 |
| SPDYE18      | 3.2356557963  | 0.5547505991 | 0.9999763851 |
| CCDC146      | -1.1227023204 | 0.8439040104 | 0.9999763851 |
| FGL2         | -1.3158816768 | 0.8203229797 | 0.9999763851 |
| GSAP         | -1.2927829929 | 0.3357304937 | 0.9999763851 |
| PTPN12       | 1.1186151785  | 0.4853938825 | 0.9999763851 |
| RSBN1L       | 1.495303933   | 0.1401550032 | 0.9999763851 |
| TMEM60       | 1.300878672   | 0.2308215209 | 0.9999763851 |
| PHTF2        | -1.488029285  | 0.0342954132 | 0.9999763851 |
| CD36         | 1.2042995172  | 0.224660613  | 0.9999763851 |
| SEMA3C       | 0             | 0            | 0            |
| PCLO         | 0             | 0            | 0            |
| SEMA3E       | 0             | 0            | 0            |
| KIAA1324L    | 3.2356557963  | 0.5547505991 | 0.9999763851 |
| DMTF1        | -1.0475929348 | 0.9175870281 | 0.9999763851 |
| TMEM243      | 1.7681732715  | 0.1531744259 | 0.9999763851 |
| CROT         | 0             | 0            | 0            |
| ABCB4        | 0             | 0            | 0            |
| SLC25A40     | 1.2114651276  | 0.4263832093 | 0.9999763851 |
| DBF4         | 1.0088100305  | 0.9696729819 | 0.9999763851 |
| ADAM22       | 1.2271473258  | 0.5400016229 | 0.9999763851 |
| SRI          | 1.1317656442  | 0.39818441   | 0.9999763851 |
| ZNF804B      | 0             | 0            | 0            |
| STEAP1       | -1.4247848768 | 0.5842374704 | 0.9999763851 |
| CFAP69       | 0             | 0            | 0            |
| GTPBP10      | 1.1948858339  | 0.5410311155 | 0.9999763851 |
| CLDN12       | 1.2869488883  | 0.8199814146 | 0.9999763851 |
| LOC102723899 | -2.3222877795 | 0.4507688368 | 0.9999763851 |
| CDK14        | -1.0297650955 | 0.8965629522 | 0.9999763851 |
| FZD1         | 1.4689483778  | 0.5007779952 | 0.9999763851 |
| MTERF1       | 1.2022777405  | 0.7558869724 | 0.9999763851 |
| AKAP9        | -1.3851411871 | 0.0898086519 | 0.9999763851 |
| CYP51A1      | -1.1684489699 | 0.2822574634 | 0.9999763851 |
| KRIT1        | 1.3468981445  | 0.0998064985 | 0.9999763851 |
| ANKIB1       | -1.6019220054 | 0.0423115949 | 0.9999763851 |
| GATAD1       | -1.1016397833 | 0.7259426403 | 0.9999763851 |
| ERVW-1       | 0             | 0            | 0            |
| PEX1         | 1.265567881   | 0.580122472  | 0.9999763851 |
| RBM48        | 2.3003736834  | 0.041799148  | 0.9999763851 |
| FAM133B      | -1.0321585418 | 0.8685596857 | 0.9999763851 |
| CDK6         | 1.0507650045  | 0.7172731672 | 0.9999763851 |
| SAMD9        | -1.7541501495 | 0.1177032502 | 0.9999763851 |

gene\_expression\_table

|              |               |              |              |
|--------------|---------------|--------------|--------------|
| SAMD9L       | -4.6971544391 | 0.0748617416 | 0.9999763851 |
| VPS50        | -1.062560424  | 0.8606597789 | 0.9999763851 |
| BET1         | -1.2331400996 | 0.4891558517 | 0.9999763851 |
| CASD1        | -1.366696748  | 0.4199395349 | 0.9999763851 |
| PPP1R9A      | 0             | 0            | 0            |
| PON3         | 0             | 0            | 0            |
| PON2         | 1.7551621564  | 0.0646017307 | 0.9999763851 |
| DYNC1I1      | -1.4268484256 | 0.5780095417 | 0.9999763851 |
| SLC25A13     | 1.0609732377  | 0.7664321594 | 0.9999763851 |
| SHFM1        | -1.0540032366 | 0.7017784396 | 0.9999763851 |
| SDHAF3       | 1.2847060092  | 0.3281059859 | 0.9999763851 |
| ASNS         | -1.779055394  | 0.042180879  | 0.9999763851 |
| LOC107986827 | 1.7592136256  | 0.4457276065 | 0.9999763851 |
| OCM2         | 3.2353357581  | 0.554787377  | 0.9999763851 |
| LMTK2        | -1.2713648927 | 0.5536422756 | 0.9999763851 |
| TECPR1       | -1.0270065693 | 0.9262083892 | 0.9999763851 |
| BRI3         | 1.0285699665  | 0.8192591687 | 0.9999763851 |
| BAIAP2L1     | -1.1912102323 | 0.2492142708 | 0.9999763851 |
| NPTX2        | -1.3710462586 | 0.7615898281 | 0.9999763851 |
| TRRAP        | -1.5469149503 | 0.139033385  | 0.9999763851 |
| SMURF1       | 1.1467407327  | 0.6764053913 | 0.9999763851 |
| KPNA7        | -4.2849908816 | 0.4028453076 | 0.9999763851 |
| ARPC1A       | -1.2608322605 | 0.2784577983 | 0.9999763851 |
| ARPC1B       | 1.0390450041  | 0.7913334311 | 0.9999763851 |
| PDAP1        | 1.0415028014  | 0.7828712571 | 0.9999763851 |
| BUD31        | 1.1262173631  | 0.4676405344 | 0.9999763851 |
| PTCD1        | 14.446008687  | 0.1577541434 | 0.9999763851 |
| ATP5J2-PTCD1 | 0             | 0            | 0            |
| CPSF4        | -1.1626148587 | 0.4717407775 | 0.9999763851 |
| ATP5J2       | 1.0890001278  | 0.5409414341 | 0.9999763851 |
| ZNF789       | 1.0989839006  | 0.8128183266 | 0.9999763851 |
| ZNF394       | -1.0766156499 | 0.7531241496 | 0.9999763851 |
| ZKSCAN5      | -1.009302712  | 0.9713197197 | 0.9999763851 |
| FAM200A      | -1.6199909674 | 0.4517141176 | 0.9999763851 |
| ZNF655       | 1.9719302285  | 0.0004979    | 0.5153264972 |
| GS1-259H13.2 | 3.1346807871  | 0.2968391969 | 0.9999763851 |
| ZSCAN25      | 1.345907943   | 0.3601442194 | 0.9999763851 |
| CYP3A5       | 2.591684032   | 0.1693979146 | 0.9999763851 |
| CYP3A7       | 9.9624059448  | 0.2315099272 | 0.9999763851 |
| CYP3A43      | 0             | 0            | 0            |
| TRIM4        | 1.1671803253  | 0.445693855  | 0.9999763851 |
| ZKSCAN1      | -1.0438058947 | 0.7965140985 | 0.9999763851 |
| ZSCAN21      | 3.2161501486  | 0.0897292495 | 0.9999763851 |
| ZNF3         | 1.1594331036  | 0.6129651644 | 0.9999763851 |
| COPS6        | -1.0168255986 | 0.9180326247 | 0.9999763851 |
| MCM7         | 1.1447565675  | 0.2967441159 | 0.9999763851 |
| AP4M1        | 1.7913131739  | 0.0464373172 | 0.9999763851 |
| TAF6         | 1.6488217526  | 0.0902934773 | 0.9999763851 |
| CNPY4        | 1.0802618785  | 0.7805255726 | 0.9999763851 |

gene\_expression\_table

|              |                |              |              |
|--------------|----------------|--------------|--------------|
| MBLAC1       | 12.2024790685  | 0.1819162385 | 0.9999763851 |
| LAMTOR4      | 1.1614854217   | 0.3510749749 | 0.9999763851 |
| C7orf43      | 1.0305490671   | 0.9501192505 | 0.9999763851 |
| GAL3ST4      | 3.1150297783   | 0.1784429497 | 0.9999763851 |
| GPC2         | 1.5020206484   | 0.595518     | 0.9999763851 |
| STAG3        | -1.209301103   | 0.5145811454 | 0.9999763851 |
| GATS         | -1.9654362824  | 0.4778430398 | 0.9999763851 |
| SPDYE3       | 1.2799008528   | 0.6133680451 | 0.9999763851 |
| PILRB        | 1.4257727745   | 0.0570378154 | 0.9999763851 |
| PILRA        | -1.2053868316  | 0.6690828323 | 0.9999763851 |
| ZCWPW1       | -1.4290643539  | 0.5224140734 | 0.9999763851 |
| MEPCE        | -1.1489303376  | 0.4903438998 | 0.9999763851 |
| PPP1R35      | -1.0341414086  | 0.8638163751 | 0.9999763851 |
| C7orf61      | -1.3944607594  | 0.697549577  | 0.9999763851 |
| TSC22D4      | 1.1034161578   | 0.5566377809 | 0.9999763851 |
| AGFG2        | 1.4666968614   | 0.5099418282 | 0.9999763851 |
| SAP25        | 1.2812270507   | 0.6328575526 | 0.9999763851 |
| LRCH4        | -1.6735246496  | 0.0315148035 | 0.9999763851 |
| ZASP         | 1.2505648436   | 0.4210039892 | 0.9999763851 |
| FBXO24       | 1.1334347738   | 0.8812595716 | 0.9999763851 |
| PCOLCE       | 1.7343484554   | 0.2271428026 | 0.9999763851 |
| MOSPD3       | 1.3403479028   | 0.1258704939 | 0.9999763851 |
| TFR2         | 1.4361889031   | 0.2566163307 | 0.9999763851 |
| GNB2         | -1.1244168047  | 0.3667707991 | 0.9999763851 |
| GIGYF1       | -1.092116278   | 0.7211343967 | 0.9999763851 |
| POP7         | -1.0237684779  | 0.8586887118 | 0.9999763851 |
| EPO          | 3.2356557963   | 0.5547505991 | 0.9999763851 |
| EPHB4        | 1.1513000895   | 0.4670878805 | 0.9999763851 |
| SLC12A9      | 1.3978130107   | 0.1806262012 | 0.9999763851 |
| TRIP6        | -1.1234645008  | 0.8363557165 | 0.9999763851 |
| SRRT         | 1.0449515701   | 0.7589269472 | 0.9999763851 |
| UFSP1        | 2.2212549951   | 0.3556854729 | 0.9999763851 |
| MUC3A        | 3.2356557963   | 0.5547505991 | 0.9999763851 |
| MUC12        | 0              | 0            | 0            |
| TRIM56       | -1.053427523   | 0.7410472063 | 0.9999763851 |
| SERPINE1     | -18.4802551288 | 0.0001291    | 0.1878439983 |
| AP1S1        | 1.0067196653   | 0.9891548453 | 0.9999763851 |
| VGFB         | -1.1962228143  | 0.7972904931 | 0.9999763851 |
| MOGAT3       | 0              | 0            | 0            |
| PLOD3        | -1.1057018411  | 0.5865985675 | 0.9999763851 |
| ZNHIT1       | 1.0217857268   | 0.9036715459 | 0.9999763851 |
| CLDN15       | -1.2134598188  | 0.5747275998 | 0.9999763851 |
| FIS1         | -1.2561509121  | 0.2010315273 | 0.9999763851 |
| IFT22        | 2.7880133726   | 0.0908064682 | 0.9999763851 |
| COL26A1      | 5.4781708352   | 0.3745527127 | 0.9999763851 |
| CUX1         | 1.0163759511   | 0.9166410007 | 0.9999763851 |
| SPDYE6       | 9.9312452783   | 0.2486353486 | 0.9999763851 |
| LOC100289561 | 1.673619509    | 0.4236672576 | 0.9999763851 |
| PRKRIP1      | 1.0328374856   | 0.9235876721 | 0.9999763851 |

gene\_expression\_table

|              |               |              |              |
|--------------|---------------|--------------|--------------|
| ORAI2        | 1.0392534547  | 0.8109607281 | 0.9999763851 |
| ALKBH4       | 1.4888225777  | 0.2744189662 | 0.9999763851 |
| LRWD1        | -2.6603009385 | 0.1946738494 | 0.9999763851 |
| POLR2J       | -1.2145813177 | 0.3064877079 | 0.9999763851 |
| RASA4B       | 0             | 0            | 0            |
| LOC107983993 | 0             | 0            | 0            |
| POLR2J3      | 1.0089954394  | 0.9652881497 | 0.9999763851 |
| LOC102724229 | -1.1196184556 | 0.8189927681 | 0.9999763851 |
| RASA4        | -1.8159853009 | 0.478604594  | 0.9999763851 |
| POLR2J2      | 1.4449856502  | 0.5449034009 | 0.9999763851 |
| UPK3BL       | -1.371091068  | 0.7484873287 | 0.9999763851 |
| FBXL13       | 1.4318936151  | 0.1082619162 | 0.9999763851 |
| FAM185A      | -1.0892180603 | 0.7506760557 | 0.9999763851 |
| NFE4         | 1.3317707718  | 0.6601972729 | 0.9999763851 |
| ARMC10       | 1.0656971818  | 0.7206636175 | 0.9999763851 |
| NAPEPLD      | -1.9256800829 | 0.0647040826 | 0.9999763851 |
| PMPCB        | 1.1238791348  | 0.5156746575 | 0.9999763851 |
| DNAJC2       | 1.0549212145  | 0.8446306158 | 0.9999763851 |
| PSMC2        | -1.19656883   | 0.1540966075 | 0.9999763851 |
| SLC26A5      | 5.4781708352  | 0.3745527127 | 0.9999763851 |
| RELN         | 0             | 0            | 0            |
| ORC5         | -1.0338762551 | 0.9100251593 | 0.9999763851 |
| LHFPL3       | -1.8524439232 | 0.2062397362 | 0.9999763851 |
| KMT2E        | -1.1346058734 | 0.5080522737 | 0.9999763851 |
| SRPK2        | -1.303337299  | 0.101628381  | 0.9999763851 |
| PUS7         | 1.2618104364  | 0.3397138619 | 0.9999763851 |
| RINT1        | 1.4461902254  | 0.2752129056 | 0.9999763851 |
| ATXN7L1      | -1.1269100093 | 0.7069992646 | 0.9999763851 |
| CDHR3        | 1.9230607285  | 0.4470996142 | 0.9999763851 |
| SYPL1        | 1.1629346815  | 0.2881039119 | 0.9999763851 |
| NAMPT        | -1.0105440606 | 0.9493115781 | 0.9999763851 |
| CCDC71L      | 1.3688597115  | 0.4078431595 | 0.9999763851 |
| PIK3CG       | -1.2234812458 | 0.3581719499 | 0.9999763851 |
| PRKAR2B      | -1.014356189  | 0.9623156199 | 0.9999763851 |
| HBP1         | -1.2093542669 | 0.4685871111 | 0.9999763851 |
| COG5         | 1.4531138015  | 0.2063591417 | 0.9999763851 |
| GPR22        | -4.2864494036 | 0.4027150576 | 0.9999763851 |
| DUS4L        | -1.2346199706 | 0.524190447  | 0.9999763851 |
| BCAP29       | -1.1969289209 | 0.4592612032 | 0.9999763851 |
| SLC26A4      | -4.5995992229 | 0.1605548602 | 0.9999763851 |
| CBLL1        | -1.2569069293 | 0.4003054319 | 0.9999763851 |
| DLD          | 1.5495543508  | 0.003463     | 0.9999763851 |
| NRCAM        | 0             | 0            | 0            |
| PNPLA8       | -1.550326225  | 0.2890871085 | 0.9999763851 |
| THAP5        | -1.3718527825 | 0.2133293136 | 0.9999763851 |
| DNAJB9       | -1.7577873142 | 0.038087293  | 0.9999763851 |
| IMMP2L       | -1.1779074577 | 0.5451659866 | 0.9999763851 |
| DOCK4        | 1.1438127432  | 0.8674029573 | 0.9999763851 |
| ZNF277       | -1.4424144392 | 0.3384422939 | 0.9999763851 |

gene\_expression\_table

|              |               |              |              |
|--------------|---------------|--------------|--------------|
| IFRD1        | 1.2605333674  | 0.4029606176 | 0.9999763851 |
| LSMEM1       | 3.2353357581  | 0.554787377  | 0.9999763851 |
| TMEM168      | 1.1089275909  | 0.7904350518 | 0.9999763851 |
| BMT2         | -1.3211198904 | 0.3618786663 | 0.9999763851 |
| MDFIC        | 1.3022525694  | 0.3481098137 | 0.9999763851 |
| TFEC         | 1.8138024348  | 0.5768982502 | 0.9999763851 |
| TES          | 1.296628076   | 0.3136043733 | 0.9999763851 |
| CAPZA2       | 1.0510457015  | 0.8179629542 | 0.9999763851 |
| ST7          | -1.3819268034 | 0.3761256608 | 0.9999763851 |
| CFTR         | 0             | 0            | 0            |
| CTTNBP2      | 5.4781708352  | 0.3745527127 | 0.9999763851 |
| LSM8         | 1.040225237   | 0.8196280048 | 0.9999763851 |
| ING3         | -1.2769585099 | 0.328284084  | 0.9999763851 |
| CPED1        | 0             | 0            | 0            |
| FAM3C        | 1.1932462846  | 0.4543505732 | 0.9999763851 |
| CADPS2       | 1.0262948724  | 0.9788500541 | 0.9999763851 |
| NDUFA5       | -1.1607463535 | 0.3695663698 | 0.9999763851 |
| ASB15        | 0             | 0            | 0            |
| WASL         | -1.8540910445 | 0.4097533821 | 0.9999763851 |
| POT1         | -1.6455958656 | 0.0570632832 | 0.9999763851 |
| ZNF800       | 1.2826424203  | 0.3638767268 | 0.9999763851 |
| GCC1         | 1.260495218   | 0.2679199795 | 0.9999763851 |
| ARF5         | -1.0588299491 | 0.7717288313 | 0.9999763851 |
| SND1         | 1.0987437621  | 0.5139869387 | 0.9999763851 |
| RBM28        | -1.0094952909 | 0.9652033447 | 0.9999763851 |
| PRRT4        | 1.8693032305  | 0.1326026597 | 0.9999763851 |
| IMPDH1       | 1.0685166136  | 0.7302868034 | 0.9999763851 |
| HILPDA       | -1.945838168  | 0.003028     | 0.9999763851 |
| METTL2B      | -1.2993229644 | 0.4976832443 | 0.9999763851 |
| FAM71F2      | -1.9663843334 | 0.476508184  | 0.9999763851 |
| FAM71F1      | 3.2353357581  | 0.554787377  | 0.9999763851 |
| CALU         | -1.2109437025 | 0.2147955128 | 0.9999763851 |
| OPN1SW       | -4.3316847633 | 0.1687825633 | 0.9999763851 |
| CCDC136      | -1.0679378543 | 0.7910914553 | 0.9999763851 |
| ATP6V1F      | -1.1260258665 | 0.4702532794 | 0.9999763851 |
| LOC100130705 | 1.5495665418  | 0.5563644089 | 0.9999763851 |
| IRF5         | 1.0277365203  | 0.9239947893 | 0.9999763851 |
| TNPO3        | -1.2219893577 | 0.1657249651 | 0.9999763851 |
| TSPAN33      | -1.2256426962 | 0.6433721869 | 0.9999763851 |
| SMO          | 1.2866381786  | 0.8224275873 | 0.9999763851 |
| AHCYL2       | -2.9688820569 | 0.0310987832 | 0.9999763851 |
| STRIP2       | 1.2249691435  | 0.7524637155 | 0.9999763851 |
| SMKR1        | -4.2849908816 | 0.4028453076 | 0.9999763851 |
| NRF1         | 1.5538406436  | 0.0755770827 | 0.9999763851 |
| UBE2H        | -1.115986649  | 0.612123744  | 0.9999763851 |
| ZC3HC1       | -1.2698792734 | 0.2823146177 | 0.9999763851 |
| KLHDC10      | 1.0927383015  | 0.7174448363 | 0.9999763851 |
| TMEM209      | 1.2660009925  | 0.4310092531 | 0.9999763851 |
| CPA5         | 0             | 0            | 0            |

gene\_expression\_table

|                |               |              |              |
|----------------|---------------|--------------|--------------|
| CEP41          | -1.2622708615 | 0.4113883407 | 0.9999763851 |
| MEST           | 0             | 0            | 0            |
| COPG2          | -1.3772969212 | 0.4325882662 | 0.9999763851 |
| TSGA13         | 0             | 0            | 0            |
| MKLN1          | 1.0071973984  | 0.9672636541 | 0.9999763851 |
| PODXL          | -1.2699511628 | 0.2729241891 | 0.9999763851 |
| PLXNA4         | 0             | 0            | 0            |
| CHCHD3         | 1.4018184941  | 0.0120684538 | 0.9999763851 |
| EXOC4          | -1.1373139244 | 0.4745637935 | 0.9999763851 |
| LRGUK          | 0             | 0            | 0            |
| SLC35B4        | 1.144676811   | 0.5437955191 | 0.9999763851 |
| AKR1B15        | 0             | 0            | 0            |
| BPGM           | -1.1044788179 | 0.8049647853 | 0.9999763851 |
| CALD1          | -4.287394647  | 0.4026306792 | 0.9999763851 |
| AGBL3          | 1.0954359883  | 0.892881712  | 0.9999763851 |
| C7orf49        | 1.0032161556  | 0.9895938427 | 0.9999763851 |
| TMEM140        | -2.7550513428 | 0.095252233  | 0.9999763851 |
| WDR91          | -1.98808452   | 0.0655207501 | 0.9999763851 |
| CNOT4          | 1.645595549   | 0.1278190377 | 0.9999763851 |
| NUP205         | 1.1654208446  | 0.5260626212 | 0.9999763851 |
| C7orf73        | 1.2936396508  | 0.1222371871 | 0.9999763851 |
| SLC13A4        | -1.8254196192 | 0.4539876142 | 0.9999763851 |
| LUZP6          | -1.1084024167 | 0.4837885847 | 0.9999763851 |
| MTPN           | 1.0481197273  | 0.7526529306 | 0.9999763851 |
| CHRM2          | 0             | 0            | 0            |
| PTN            | 3.2356557963  | 0.5547505991 | 0.9999763851 |
| DGKI           | -1.0264773286 | 0.8406414173 | 0.9999763851 |
| CREB3L2        | -1.1906675204 | 0.3174455083 | 0.9999763851 |
| LOC100130880   | 3.2361532718  | 0.5546934395 | 0.9999763851 |
| AKR1D1         | 0             | 0            | 0            |
| TRIM24         | -1.4214426375 | 0.170576949  | 0.9999763851 |
| SVOPL          | 0             | 0            | 0            |
| ATP6V0A4       | 0             | 0            | 0            |
| KIAA1549       | -1.430050834  | 0.5394927005 | 0.9999763851 |
| ZC3HAV1        | -1.1436195888 | 0.3979275    | 0.9999763851 |
| TTC26          | 1.0417717796  | 0.9336885605 | 0.9999763851 |
| UBN2           | 1.0178058951  | 0.9616027636 | 0.9999763851 |
| LUC7L2         | -1.3445014557 | 0.0431168178 | 0.9999763851 |
| C7orf55        | -1.2220450386 | 0.4047334616 | 0.9999763851 |
| C7orf55-LUC7L2 | 1.2664941716  | 0.7819606336 | 0.9999763851 |
| HIPK2          | 1.0038952002  | 0.9808706516 | 0.9999763851 |
| TBXAS1         | 1.039632449   | 0.7973534339 | 0.9999763851 |
| PARP12         | -1.076056544  | 0.8459356546 | 0.9999763851 |
| KDM7A          | 1.6448847496  | 0.3382553044 | 0.9999763851 |
| SLC37A3        | 1.5007464133  | 0.3573145612 | 0.9999763851 |
| RAB19          | 0             | 0            | 0            |
| MKRN1          | -1.0568706076 | 0.7876241559 | 0.9999763851 |
| ADCK2          | -1.1149911171 | 0.5813856853 | 0.9999763851 |
| NDUFB2         | 1.0282568252  | 0.8639422449 | 0.9999763851 |

gene\_expression\_table

|              |               |              |              |
|--------------|---------------|--------------|--------------|
| BRAF         | -1.1885728102 | 0.4631981259 | 0.9999763851 |
| MRPS33       | 1.077191044   | 0.6935135282 | 0.9999763851 |
| TMEM178B     | -4.2864494036 | 0.4027150576 | 0.9999763851 |
| AGK          | -1.0378467481 | 0.9215653342 | 0.9999763851 |
| KIAA1147     | 1.045784423   | 0.8522787339 | 0.9999763851 |
| WEE2         | 3.2353357581  | 0.554787377  | 0.9999763851 |
| SSBP1        | -1.1390383599 | 0.3762204388 | 0.9999763851 |
| PRSS37       | 0             | 0            | 0            |
| CLEC5A       | -1.1429477392 | 0.5482043743 | 0.9999763851 |
| MGAM         | 1.7952300153  | 0.2592030523 | 0.9999763851 |
| MGAM2        | 5.4781708352  | 0.3745527127 | 0.9999763851 |
| EPHB6        | -1.251972694  | 0.6214264958 | 0.9999763851 |
| TRPV6        | 0             | 0            | 0            |
| KEL          | 1.4852250107  | 0.5071786273 | 0.9999763851 |
| OR6V1        | 0             | 0            | 0            |
| PIP          | 0             | 0            | 0            |
| GSTK1        | -1.0986039579 | 0.6267835153 | 0.9999763851 |
| CASP2        | -1.0817185402 | 0.5923620908 | 0.9999763851 |
| CLCN1        | 3.2356557963  | 0.5547505991 | 0.9999763851 |
| FAM131B      | 2.8345356849  | 0.3324761417 | 0.9999763851 |
| LOC100507507 | 1.0879252635  | 0.8520900292 | 0.9999763851 |
| ZYX          | 1.2154052789  | 0.2744682412 | 0.9999763851 |
| EPHA1        | 1.0953952354  | 0.724211736  | 0.9999763851 |
| LOC101928422 | 6.368054416   | 0.3491752152 | 0.9999763851 |
| TCAF2        | -1.9498743893 | 0.3211403515 | 0.9999763851 |
| TCAF1        | -1.0146583012 | 0.9650716657 | 0.9999763851 |
| TPK1         | -2.3437421063 | 0.0286777084 | 0.9999763851 |
| CNTNAP2      | -1.8919466972 | 0.2216852657 | 0.9999763851 |
| CUL1         | 1.1559033425  | 0.3616115311 | 0.9999763851 |
| EZH2         | 1.3751208806  | 0.1184798313 | 0.9999763851 |
| PDIA4        | -1.249551815  | 0.1283609228 | 0.9999763851 |
| ZNF786       | 2.3406309168  | 0.4064998765 | 0.9999763851 |
| ZNF425       | -3.3284109188 | 0.2422780785 | 0.9999763851 |
| ZNF398       | -1.1505850001 | 0.6757588464 | 0.9999763851 |
| ZNF282       | -1.1279750704 | 0.6271694393 | 0.9999763851 |
| ZNF212       | -1.0716946815 | 0.8422101461 | 0.9999763851 |
| ZNF783       | -2.7177561303 | 0.1581637869 | 0.9999763851 |
| ZNF777       | 1.2997010458  | 0.2582767168 | 0.9999763851 |
| ZNF746       | 2.2676908633  | 0.0156067308 | 0.9999763851 |
| KRBA1        | 1.005759094   | 0.9891590912 | 0.9999763851 |
| ZNF467       | 2.3399628165  | 0.4287847126 | 0.9999763851 |
| SSPO         | 0             | 0            | 0            |
| ZNF862       | 2.0392704743  | 0.0786456448 | 0.9999763851 |
| ATP6V0E2     | 1.5076098516  | 0.1523718194 | 0.9999763851 |
| ACTR3C       | 5.4790129495  | 0.3755300282 | 0.9999763851 |
| REPIN1       | 1.0425666032  | 0.8105158122 | 0.9999763851 |
| ZNF775       | 1.2357073156  | 0.5353976021 | 0.9999763851 |
| GIMAP6       | 0             | 0            | 0            |
| GIMAP2       | -2.2386708426 | 0.3228075893 | 0.9999763851 |



gene\_expression\_table

|              |               |              |              |
|--------------|---------------|--------------|--------------|
| GIMAP1       | 3.1181383987  | 0.1644481717 | 0.9999763851 |
| GIMAP5       | -1.2301452062 | 0.7475757252 | 0.9999763851 |
| TMEM176B     | 0             | 0            | 0            |
| TMEM176A     | 0             | 0            | 0            |
| AOC1         | 4.2952862008  | 0.0174898113 | 0.9999763851 |
| KCNH2        | -1.148769585  | 0.8524480909 | 0.9999763851 |
| NOS3         | 1.4700672986  | 0.6282958928 | 0.9999763851 |
| ATG9B        | 1.3642607159  | 0.2404378931 | 0.9999763851 |
| ABCB8        | 1.5224190013  | 0.2953660822 | 0.9999763851 |
| ASIC3        | -4.2849908816 | 0.4028453076 | 0.9999763851 |
| CDK5         | 1.6414863076  | 0.1283550728 | 0.9999763851 |
| SLC4A2       | 1.1097280139  | 0.7211673493 | 0.9999763851 |
| FASTK        | 1.2134624697  | 0.3099068408 | 0.9999763851 |
| TMUB1        | 1.034986563   | 0.9166283544 | 0.9999763851 |
| AGAP3        | -1.2645526064 | 0.1622459227 | 0.9999763851 |
| ASB10        | 3.2353357581  | 0.554787377  | 0.9999763851 |
| ABCF2        | 1.162485388   | 0.444492397  | 0.9999763851 |
| CHPF2        | 1.2230015943  | 0.6314072868 | 0.9999763851 |
| SMARCD3      | -1.1561688231 | 0.5338962639 | 0.9999763851 |
| NUB1         | 1.003230485   | 0.9865390006 | 0.9999763851 |
| WDR86        | 0             | 0            | 0            |
| CRYGN        | 3.2361532718  | 0.5546934395 | 0.9999763851 |
| RHEB         | 1.1198816058  | 0.4395619225 | 0.9999763851 |
| PRKAG2       | -1.5042685252 | 0.1263404086 | 0.9999763851 |
| GALNTL5      | 0             | 0            | 0            |
| GALNT11      | -1.5151731585 | 0.3392634407 | 0.9999763851 |
| KMT2C        | 1.0081522651  | 0.9652181705 | 0.9999763851 |
| XRCC2        | -2.2009269002 | 0.1330182492 | 0.9999763851 |
| ACTR3B       | 1.420167376   | 0.37771521   | 0.9999763851 |
| DPP6         | -4.287394647  | 0.4026306792 | 0.9999763851 |
| PAXIP1       | -1.0921052317 | 0.7191404986 | 0.9999763851 |
| INSIG1       | 1.098043046   | 0.566422573  | 0.9999763851 |
| CNPY1        | 0             | 0            | 0            |
| RBM33        | -1.040247496  | 0.8216489381 | 0.9999763851 |
| SHH          | -1.1960111917 | 0.7986160897 | 0.9999763851 |
| RNF32        | 1.3712615059  | 0.3506300527 | 0.9999763851 |
| LMBR1        | -1.1549860672 | 0.5772522782 | 0.9999763851 |
| NOM1         | 1.0061963107  | 0.9837036735 | 0.9999763851 |
| MNX1         | 0             | 0            | 0            |
| UBE3C        | -1.2362450796 | 0.2723486973 | 0.9999763851 |
| DNAJB6       | 1.0649713633  | 0.6581283139 | 0.9999763851 |
| PTPRN2       | 1.2238256159  | 0.1940897266 | 0.9999763851 |
| NCAPG2       | 1.227705825   | 0.2841848852 | 0.9999763851 |
| ESYT2        | 1.0842470507  | 0.5446453596 | 0.9999763851 |
| WDR60        | -1.4462633224 | 0.1898811196 | 0.9999763851 |
| LOC101927506 | -1.3032413687 | 0.4237502393 | 0.9999763851 |
| ZNF596       | 1.0603640252  | 0.9187222914 | 0.9999763851 |
| FBXO25       | -1.1787543677 | 0.417556954  | 0.9999763851 |
| ERICH1       | 1.0429366413  | 0.8073255904 | 0.9999763851 |

gene\_expression\_table

|              |               |              |              |
|--------------|---------------|--------------|--------------|
| LOC105377774 | 0             | 0            | 0            |
| CLN8         | 1.1435750234  | 0.5165600216 | 0.9999763851 |
| ARHGEF10     | -1.152788508  | 0.3383661556 | 0.9999763851 |
| KBTBD11      | 1.0579831489  | 0.6714738048 | 0.9999763851 |
| MYOM2        | 1.2167155364  | 0.6934042691 | 0.9999763851 |
| CSMD1        | -1.1494263678 | 0.8551670286 | 0.9999763851 |
| MCPH1        | -1.0092042184 | 0.9737700029 | 0.9999763851 |
| AGPAT5       | 1.0604882267  | 0.7265222185 | 0.9999763851 |
| DEFB1        | -1.1362077083 | 0.7906079227 | 0.9999763851 |
| DEFA6        | 3.2356557963  | 0.5547505991 | 0.9999763851 |
| DEFA3        | 0             | 0            | 0            |
| LOC101928095 | 3.2356557963  | 0.5547505991 | 0.9999763851 |
| DEFB107B     | 0             | 0            | 0            |
| SGK223       | 1.6240330447  | 0.1740344477 | 0.9999763851 |
| MFHAS1       | 1.019818381   | 0.9198398018 | 0.9999763851 |
| ERI1         | 1.009192244   | 0.9613795581 | 0.9999763851 |
| PPP1R3B      | -1.2274062003 | 0.5252792829 | 0.9999763851 |
| TNKS         | -1.1677562568 | 0.4657381213 | 0.9999763851 |
| MSRA         | 1.0771462741  | 0.6565629718 | 0.9999763851 |
| PRSS55       | 0             | 0            | 0            |
| RP1L1        | -7.5664585246 | 0.2262040232 | 0.9999763851 |
| C8orf74      | 0             | 0            | 0            |
| SOX7         | -4.287394647  | 0.4026306792 | 0.9999763851 |
| PINX1        | 1.5534800774  | 0.0546158456 | 0.9999763851 |
| XKR6         | 0             | 0            | 0            |
| MTMR9        | 1.0440636445  | 0.8223917365 | 0.9999763851 |
| BLK          | 0             | 0            | 0            |
| GATA4        | 3.2361532718  | 0.5546934395 | 0.9999763851 |
| NEIL2        | -1.1043267839 | 0.6072977078 | 0.9999763851 |
| FDFT1        | 1.1087028495  | 0.441346208  | 0.9999763851 |
| CTSB         | -1.4385375411 | 0.0220313104 | 0.9999763851 |
| FAM86B1      | 1.6938437942  | 0.6482137545 | 0.9999763851 |
| FAM86B2      | 2.7888075642  | 0.0791380525 | 0.9999763851 |
| LONRF1       | 1.0576498276  | 0.7963966868 | 0.9999763851 |
| SGCZ         | 3.2361532718  | 0.5546934395 | 0.9999763851 |
| TUSC3        | 0             | 0            | 0            |
| ZDHHC2       | 1.1706923952  | 0.3751755433 | 0.9999763851 |
| CNOT7        | -1.0880305422 | 0.5614371017 | 0.9999763851 |
| VPS37A       | -1.005026464  | 0.9854952552 | 0.9999763851 |
| MTMR7        | -1.2775131623 | 0.645953223  | 0.9999763851 |
| SLC7A2       | 0             | 0            | 0            |
| PDGFRL       | 2.3718951865  | 0.4298080056 | 0.9999763851 |
| MTUS1        | 6.5527883443  | 0.0604654102 | 0.9999763851 |
| FGL1         | -2.9214815332 | 0.2255412548 | 0.9999763851 |
| PCM1         | -1.1754375874 | 0.2744839348 | 0.9999763851 |
| ASAH1        | -1.1648416212 | 0.3038487466 | 0.9999763851 |
| NAT1         | 1.5792356417  | 0.2523822491 | 0.9999763851 |
| PSD3         | -6.7190164239 | 0.0168710208 | 0.9999763851 |
| CSGALNACT1   | -4.2849908816 | 0.4028453076 | 0.9999763851 |

gene\_expression\_table

|              |               |              |              |
|--------------|---------------|--------------|--------------|
| INTS10       | 1.0289547713  | 0.8477526861 | 0.9999763851 |
| ATP6V1B2     | -1.163518063  | 0.2776621727 | 0.9999763851 |
| LZTS1        | -1.0993155783 | 0.8549022551 | 0.9999763851 |
| GFRA2        | 3.2353357581  | 0.554787377  | 0.9999763851 |
| DOK2         | 1.2227263711  | 0.3518472625 | 0.9999763851 |
| XPO7         | 1.3646850532  | 0.0396533149 | 0.9999763851 |
| NPM2         | 0             | 0            | 0            |
| FGF17        | 3.2361532718  | 0.5546934395 | 0.9999763851 |
| DMTN         | 0             | 0            | 0            |
| FAM160B2     | 1.0341944798  | 0.904489878  | 0.9999763851 |
| NUDT18       | 1.3411938723  | 0.7188283026 | 0.9999763851 |
| REEP4        | 1.2189329004  | 0.3119568966 | 0.9999763851 |
| BMP1         | -1.1425383389 | 0.604674118  | 0.9999763851 |
| PHYHIP       | -1.315303824  | 0.8206171563 | 0.9999763851 |
| POLR3D       | -1.1574171561 | 0.6074902132 | 0.9999763851 |
| PIWIL2       | -1.3154339304 | 0.8205576571 | 0.9999763851 |
| SLC39A14     | 1.0259840595  | 0.9056486958 | 0.9999763851 |
| PPP3CC       | 1.0817588787  | 0.8298605094 | 0.9999763851 |
| SORBS3       | 1.4373308199  | 0.0586194251 | 0.9999763851 |
| PDLIM2       | 1.0991104274  | 0.624111947  | 0.9999763851 |
| LOC107986876 | -1.2303879832 | 0.7501769833 | 0.9999763851 |
| CCAR2        | 1.0446393582  | 0.878752623  | 0.9999763851 |
| BIN3         | -1.1213769521 | 0.6508656537 | 0.9999763851 |
| EGR3         | -2.4274267559 | 0.444512626  | 0.9999763851 |
| PEBP4        | -2.3220580825 | 0.4379866635 | 0.9999763851 |
| LOC107984124 | -3.6013971471 | 0.1475950682 | 0.9999763851 |
| RHOBTB2      | -1.1017419755 | 0.6450123638 | 0.9999763851 |
| TNFRSF10B    | 1.0597962099  | 0.771675869  | 0.9999763851 |
| TNFRSF10C    | 1.3416940469  | 0.7101625849 | 0.9999763851 |
| TNFRSF10D    | 1.4332638114  | 0.1928969018 | 0.9999763851 |
| TNFRSF10A    | -2.5600051511 | 0.2551919212 | 0.9999763851 |
| CHMP7        | -1.2478132897 | 0.3684863237 | 0.9999763851 |
| R3HCC1       | 1.3985996961  | 0.2603718541 | 0.9999763851 |
| LOXL2        | -2.2684489947 | 0.0897041859 | 0.9999763851 |
| ENTPD4       | 1.0592170798  | 0.8465746069 | 0.9999763851 |
| SLC25A37     | 1.0064786111  | 0.9644771447 | 0.9999763851 |
| NKX3-1       | 1.9229787277  | 0.4494377664 | 0.9999763851 |
| STC1         | 1.2867653957  | 0.8301398163 | 0.9999763851 |
| ADAMDEC1     | -6.3107594234 | 0.001443     | 0.9833300676 |
| DOCK5        | -1.2786711062 | 0.2517035205 | 0.9999763851 |
| GNRH1        | -1.817658111  | 0.4893544708 | 0.9999763851 |
| KCTD9        | 1.3212186742  | 0.2122866179 | 0.9999763851 |
| CDCA2        | 1.206659786   | 0.2650265567 | 0.9999763851 |
| PPP2R2A      | 1.0282154786  | 0.8516664593 | 0.9999763851 |
| BNIP3L       | 1.0724375763  | 0.709035667  | 0.9999763851 |
| PNMA2        | 3.2353357581  | 0.554787377  | 0.9999763851 |
| DPYSL2       | 1.0729100739  | 0.6424729382 | 0.9999763851 |
| ADRA1A       | 3.2353357581  | 0.554787377  | 0.9999763851 |
| TRIM35       | -1.0233682613 | 0.9191432708 | 0.9999763851 |

gene\_expression\_table

|           |               |              |              |
|-----------|---------------|--------------|--------------|
| PTK2B     | 1.0834284135  | 0.6129108127 | 0.9999763851 |
| CHRNA2    | 0             | 0            | 0            |
| CLU       | 1.3414047442  | 0.1384967216 | 0.9999763851 |
| SCARA3    | -1.0726805543 | 0.8582000601 | 0.9999763851 |
| CCDC25    | -1.0067341735 | 0.9676799004 | 0.9999763851 |
| ESCO2     | 1.9672305522  | 0.0352105008 | 0.9999763851 |
| PBK       | 1.2619692003  | 0.1990293938 | 0.9999763851 |
| ELP3      | -1.0154903507 | 0.9348709302 | 0.9999763851 |
| PNOC      | 0             | 0            | 0            |
| ZNF395    | -1.099623388  | 0.5585524064 | 0.9999763851 |
| FBXO16    | 0             | 0            | 0            |
| EXTL3     | 1.3288910258  | 0.3258158961 | 0.9999763851 |
| INTS9     | 1.2121485014  | 0.4134545908 | 0.9999763851 |
| HMBOX1    | -1.3448864747 | 0.2448941456 | 0.9999763851 |
| KIF13B    | 1.0300839327  | 0.9518122402 | 0.9999763851 |
| DUSP4     | 1.3255544809  | 0.1763344276 | 0.9999763851 |
| SARAF     | 1.0171353809  | 0.9133091191 | 0.9999763851 |
| LEPROTL1  | -1.0061328951 | 0.968936976  | 0.9999763851 |
| MBOAT4    | 1.6248125624  | 0.5711456773 | 0.9999763851 |
| DCTN6     | 1.1969183505  | 0.4548920034 | 0.9999763851 |
| GTF2E2    | 1.0500526515  | 0.7634339484 | 0.9999763851 |
| GSR       | 1.0793188762  | 0.6139673865 | 0.9999763851 |
| UBXN8     | -1.0243023348 | 0.9126350169 | 0.9999763851 |
| PPP2CB    | -1.3341345691 | 0.1760758379 | 0.9999763851 |
| PURG      | 0             | 0            | 0            |
| WRN       | 1.1521303174  | 0.5762933101 | 0.9999763851 |
| NRG1      | -1.3708355312 | 0.7474480451 | 0.9999763851 |
| FUT10     | 1.0129043461  | 0.9639044789 | 0.9999763851 |
| MAK16     | -2.6620159038 | 9.14E-05     | 0.1447401432 |
| TTI2      | 3.8630893811  | 1.00E-06     | 0.002699     |
| RNF122    | 1.0280058166  | 0.9750561227 | 0.9999763851 |
| DUSP26    | 0             | 0            | 0            |
| UNC5D     | 3.2356557963  | 0.5547505991 | 0.9999763851 |
| ZNF703    | 1.0856559564  | 0.6970820605 | 0.9999763851 |
| ERLIN2    | -1.3153234859 | 0.2186008144 | 0.9999763851 |
| PROSC     | 1.2267447587  | 0.2460114131 | 0.9999763851 |
| ADGRA2    | -1.066062659  | 0.6775410842 | 0.9999763851 |
| BRF2      | -1.0638730528 | 0.7084096568 | 0.9999763851 |
| RAB11FIP1 | 1.0149166326  | 0.9326850055 | 0.9999763851 |
| EIF4EBP1  | -1.0890685398 | 0.663186681  | 0.9999763851 |
| ASH2L     | 1.0885071947  | 0.5946804104 | 0.9999763851 |
| STAR      | -1.8294751893 | 0.0793776121 | 0.9999763851 |
| LSM1      | 1.2040323987  | 0.365498686  | 0.9999763851 |
| BAG4      | 1.0557350448  | 0.7838883256 | 0.9999763851 |
| DDHD2     | 1.2128575914  | 0.3794195116 | 0.9999763851 |
| PLPP5     | 1.0081284723  | 0.9782103242 | 0.9999763851 |
| WHSC1L1   | -1.0880417053 | 0.6735051696 | 0.9999763851 |
| LETM2     | 1.1406059108  | 0.8268710036 | 0.9999763851 |
| FGFR1     | 1.3241974546  | 0.4559237843 | 0.9999763851 |

gene\_expression\_table

|         |               |              |              |
|---------|---------------|--------------|--------------|
| TACC1   | 1.0425537857  | 0.7448355208 | 0.9999763851 |
| PLEKHA2 | 1.0385359501  | 0.7952760373 | 0.9999763851 |
| TM2D2   | 1.6068927566  | 0.0282422178 | 0.9999763851 |
| ADAM9   | 1.4550699438  | 0.3461120508 | 0.9999763851 |
| ADAM32  | -1.6348888287 | 0.3753617822 | 0.9999763851 |
| ADAM18  | 0             | 0            | 0            |
| IDO2    | 3.2356557963  | 0.5547505991 | 0.9999763851 |
| ZMAT4   | 0             | 0            | 0            |
| GOLGA7  | -1.2706863904 | 0.1464848051 | 0.9999763851 |
| GIN54   | 2.0478219626  | 0.0217006917 | 0.9999763851 |
| GPAT4   | 1.0174088714  | 0.9106729016 | 0.9999763851 |
| ANK1    | 1.7349366192  | 0.230323362  | 0.9999763851 |
| KAT6A   | -1.0290856422 | 0.8549017917 | 0.9999763851 |
| AP3M2   | 1.3131380334  | 0.3250121124 | 0.9999763851 |
| PLAT    | 0             | 0            | 0            |
| IKBKB   | -1.3820034023 | 0.1146948094 | 0.9999763851 |
| POLB    | 1.3407709621  | 0.2667210306 | 0.9999763851 |
| DKK4    | -4.2864494036 | 0.4027150576 | 0.9999763851 |
| VDAC3   | 1.0838697098  | 0.5462600802 | 0.9999763851 |
| SLC20A2 | -1.0479340919 | 0.8138877403 | 0.9999763851 |
| SMIM19  | 1.540076391   | 0.0704941204 | 0.9999763851 |
| THAP1   | 1.746702179   | 0.1162530926 | 0.9999763851 |
| RNF170  | -1.1018826496 | 0.6477426669 | 0.9999763851 |
| HOOK3   | 1.0133405051  | 0.9346183523 | 0.9999763851 |
| FNTA    | 1.1619438452  | 0.3590933086 | 0.9999763851 |
| POMK    | 2.34099053    | 0.3999111465 | 0.9999763851 |
| HGSNAT  | 1.3053388029  | 0.2113487013 | 0.9999763851 |
| SPIDR   | -1.6034251166 | 0.0332215248 | 0.9999763851 |
| CEBPD   | 7.7192231741  | 0.2782707334 | 0.9999763851 |
| PRKDC   | 1.0266437769  | 0.8754379185 | 0.9999763851 |
| MCM4    | 1.1825452925  | 0.2142825582 | 0.9999763851 |
| UBE2V2  | -1.1835284581 | 0.1925514982 | 0.9999763851 |
| SNTG1   | 0             | 0            | 0            |
| PXDNL   | 5.4781708352  | 0.3745527127 | 0.9999763851 |
| PCMTD1  | -1.0867524902 | 0.7576084892 | 0.9999763851 |
| ST18    | 3.2361532718  | 0.5546934395 | 0.9999763851 |
| FAM150A | 0             | 0            | 0            |
| RB1CC1  | -1.2105452699 | 0.4012354925 | 0.9999763851 |
| OPRK1   | 1.1346379968  | 0.5902408663 | 0.9999763851 |
| ATP6V1H | 1.2709322457  | 0.270087636  | 0.9999763851 |
| RGS20   | -4.2849908816 | 0.4028453076 | 0.9999763851 |
| TCEA1   | -1.0269224857 | 0.8879403369 | 0.9999763851 |
| LYPLA1  | 1.4487581206  | 0.0192311475 | 0.9999763851 |
| MRPL15  | 1.0616357253  | 0.6880334228 | 0.9999763851 |
| RP1     | 6.368054416   | 0.3491821635 | 0.9999763851 |
| TMEM68  | -1.0477853461 | 0.8781669371 | 0.9999763851 |
| TGS1    | 1.1521810797  | 0.4395768762 | 0.9999763851 |
| LYN     | -1.1105043527 | 0.4766837322 | 0.9999763851 |
| RPS20   | 1.0479476681  | 0.7012615761 | 0.9999763851 |

gene\_expression\_table

|              |               |              |              |
|--------------|---------------|--------------|--------------|
| PLAG1        | 1.0172688829  | 0.9498968131 | 0.9999763851 |
| CHCHD7       | 1.1891295795  | 0.238004314  | 0.9999763851 |
| IMPAD1       | -1.1111356375 | 0.5548146279 | 0.9999763851 |
| UBXN2B       | -1.0448300484 | 0.8049453653 | 0.9999763851 |
| SDCBP        | -1.8682211847 | 0.1439379878 | 0.9999763851 |
| NSMAF        | -1.2484053101 | 0.0958118738 | 0.9999763851 |
| TOX          | -2.5596117216 | 0.2615742465 | 0.9999763851 |
| RAB2A        | -1.2201517894 | 0.1539852589 | 0.9999763851 |
| CHD7         | -1.394553145  | 0.6912352536 | 0.9999763851 |
| LOC105375938 | 1.2869488883  | 0.8201303114 | 0.9999763851 |
| CLVS1        | 3.6822803285  | 0.1937397534 | 0.9999763851 |
| ASPH         | -1.6101603492 | 0.1061890958 | 0.9999763851 |
| NKAIN3       | 5.4790129495  | 0.3756234837 | 0.9999763851 |
| YTHDF3       | -1.2618751124 | 0.1142120203 | 0.9999763851 |
| CYP7B1       | 0             | 0            | 0            |
| ARMC1        | 1.1259473867  | 0.4485182965 | 0.9999763851 |
| MTFR1        | 1.1978861101  | 0.3712977355 | 0.9999763851 |
| PDE7A        | 1.3092091275  | 0.558097201  | 0.9999763851 |
| DNAJC5B      | -1.3158816768 | 0.8203229797 | 0.9999763851 |
| TRIM55       | 7.4933530102  | 0.2987077671 | 0.9999763851 |
| RRS1         | -1.0326179662 | 0.8398968301 | 0.9999763851 |
| ADHFE1       | 0             | 0            | 0            |
| MYBL1        | 2.1540433933  | 0.1038866927 | 0.9999763851 |
| VCPIP1       | -1.53186198   | 0.0806246417 | 0.9999763851 |
| C8orf44      | 3.7682243222  | 0.2257682304 | 0.9999763851 |
| C8orf44-SGK3 | -1.5947065317 | 0.077697772  | 0.9999763851 |
| SGK3         | 1.2505118907  | 0.5118545335 | 0.9999763851 |
| MCMD2C2      | -1.0522684077 | 0.7175096505 | 0.9999763851 |
| TCF24        | -4.2849908816 | 0.4028453076 | 0.9999763851 |
| COPS5        | 1.3733825717  | 0.1043460423 | 0.9999763851 |
| CSPP1        | -1.0297929625 | 0.9062599159 | 0.9999763851 |
| ARFGEF1      | -1.1062204244 | 0.6552764523 | 0.9999763851 |
| CPA6         | 1.027554661   | 0.9756568037 | 0.9999763851 |
| SULF1        | 0             | 0            | 0            |
| PRDM14       | 0             | 0            | 0            |
| NCOA2        | -1.1471955195 | 0.6081182073 | 0.9999763851 |
| TRAM1        | -1.0172530996 | 0.916051658  | 0.9999763851 |
| LACTB2       | 1.0729406712  | 0.801816672  | 0.9999763851 |
| XKR9         | -4.2849908816 | 0.4028453076 | 0.9999763851 |
| KCNB2        | 3.2356557963  | 0.5547505991 | 0.9999763851 |
| TERF1        | 1.0302418787  | 0.8731524169 | 0.9999763851 |
| SBSPON       | 2.8699786574  | 0.2275014857 | 0.9999763851 |
| C8orf89      | 0             | 0            | 0            |
| RPL7         | 1.2483960303  | 0.0612657832 | 0.9999763851 |
| RDH10        | -1.0372532667 | 0.9142791095 | 0.9999763851 |
| STAU2        | 1.0091927785  | 0.9542264913 | 0.9999763851 |
| UBE2W        | -2.1045879989 | 0.0178730665 | 0.9999763851 |
| TCEB1        | 1.0367425103  | 0.8083411912 | 0.9999763851 |
| TMEM70       | -1.3196262818 | 0.1409588848 | 0.9999763851 |

gene\_expression\_table

|              |                |              |              |
|--------------|----------------|--------------|--------------|
| LY96         | 1.2870761236   | 0.8160709833 | 0.9999763851 |
| GDAP1        | 3.6824427513   | 0.0711644253 | 0.9999763851 |
| ZFHX4        | 0              | 0            | 0            |
| PEX2         | -1.005099002   | 0.9856968383 | 0.9999763851 |
| LOC105375907 | -10.8458971147 | 0.143297758  | 0.9999763851 |
| ZC2HC1A      | 0              | 0            | 0            |
| IL7          | -3.0625500992  | 0.1535337395 | 0.9999763851 |
| MRPS28       | 1.1529148827   | 0.6011280599 | 0.9999763851 |
| TPD52        | 1.959384623    | 0.0154744288 | 0.9999763851 |
| ZNF704       | 3.2353357581   | 0.554787377  | 0.9999763851 |
| PAG1         | -1.1514079534  | 0.3952447469 | 0.9999763851 |
| FABP5        | -1.1228160801  | 0.4309918747 | 0.9999763851 |
| IMPA1        | 1.5593807263   | 0.0164639935 | 0.9999763851 |
| SLC10A5      | -4.2849908816  | 0.4028453076 | 0.9999763851 |
| ZFAND1       | -1.237777719   | 0.6465559301 | 0.9999763851 |
| SNX16        | 1.4995339414   | 0.4512081041 | 0.9999763851 |
| LRRCC1       | 1.2804626953   | 0.3557880341 | 0.9999763851 |
| E2F5         | 1.6147583029   | 0.4303877657 | 0.9999763851 |
| C8orf59      | -1.128203331   | 0.4498807463 | 0.9999763851 |
| CA13         | 0              | 0            | 0            |
| CA3          | 0              | 0            | 0            |
| ATP6V0D2     | -7.5647903763  | 0.2176246281 | 0.9999763851 |
| WWP1         | -1.3066821489  | 0.6164945661 | 0.9999763851 |
| RMDN1        | -1.1742706176  | 0.4235470363 | 0.9999763851 |
| CPNE3        | 1.3169713144   | 0.0476031897 | 0.9999763851 |
| CNBD1        | 10.4285443305  | 0.2414187314 | 0.9999763851 |
| MMP16        | 3.2353357581   | 0.554787377  | 0.9999763851 |
| RIPK2        | -1.5845031786  | 0.3782776676 | 0.9999763851 |
| OSGIN2       | 1.0044678214   | 0.9815058608 | 0.9999763851 |
| NBN          | -1.1336121546  | 0.5705107675 | 0.9999763851 |
| DECR1        | 1.1632906229   | 0.4317237135 | 0.9999763851 |
| CALB1        | 3.2361532718   | 0.5546934395 | 0.9999763851 |
| TMEM64       | -1.0107884713  | 0.9720612535 | 0.9999763851 |
| NECAB1       | 0              | 0            | 0            |
| C8orf88      | -4.2849908816  | 0.4028453076 | 0.9999763851 |
| TMEM55A      | -1.4513062802  | 0.3941834571 | 0.9999763851 |
| OTUD6B       | -1.1455204108  | 0.5938638676 | 0.9999763851 |
| LRRC69       | -1.0377913173  | 0.943433887  | 0.9999763851 |
| SLC26A7      | 0              | 0            | 0            |
| TRIQQ        | 3.2361532718   | 0.5546934395 | 0.9999763851 |
| FAM92A1      | 16.68931238    | 0.1282237357 | 0.9999763851 |
| RBM12B       | 1.2355188726   | 0.4673562656 | 0.9999763851 |
| TMEM67       | -2.5616116111  | 0.3180401137 | 0.9999763851 |
| PDP1         | 1.1347062888   | 0.6199933211 | 0.9999763851 |
| CDH17        | -1.3158816768  | 0.8203229797 | 0.9999763851 |
| RAD54B       | -1.2409726533  | 0.5254821756 | 0.9999763851 |
| FSBP         | -2.5595294703  | 0.3313983831 | 0.9999763851 |
| KIAA1429     | 1.0150765162   | 0.9279112938 | 0.9999763851 |
| DPY19L4      | 1.0196018649   | 0.9455722808 | 0.9999763851 |

gene\_expression\_table

|              |               |              |              |
|--------------|---------------|--------------|--------------|
| INTS8        | 1.3364022371  | 0.3745241867 | 0.9999763851 |
| CCNE2        | 3.7488601547  | 0.0213945604 | 0.9999763851 |
| NDUFAF6      | -1.367640106  | 0.1216497897 | 0.9999763851 |
| PLEKHF2      | -1.0305481475 | 0.8805727142 | 0.9999763851 |
| C8orf37      | 2.1695825873  | 0.4532423473 | 0.9999763851 |
| UQCRB        | -1.0483086239 | 0.7090369211 | 0.9999763851 |
| MTERF3       | 2.0140400713  | 0.1958351475 | 0.9999763851 |
| PTDSS1       | -1.0738019293 | 0.580977574  | 0.9999763851 |
| CPQ          | -1.3250400972 | 0.1359969495 | 0.9999763851 |
| MTDH         | -1.0591801378 | 0.6299636056 | 0.9999763851 |
| LAPTM4B      | 5.4770877341  | 0.3746135179 | 0.9999763851 |
| MATN2        | 3.2356557963  | 0.5547505991 | 0.9999763851 |
| RPL30        | -1.0172902628 | 0.8971506862 | 0.9999763851 |
| ERICH5       | 3.2356557963  | 0.5547505991 | 0.9999763851 |
| RIDA         | 1.1500645434  | 0.5086081001 | 0.9999763851 |
| POP1         | 1.2372070932  | 0.3241224367 | 0.9999763851 |
| NIPAL2       | 1.1107555331  | 0.6982254012 | 0.9999763851 |
| STK3         | -1.4241948029 | 0.193440807  | 0.9999763851 |
| VPS13B       | 1.0554937377  | 0.80476688   | 0.9999763851 |
| COX6C        | -1.1737227755 | 0.1959688688 | 0.9999763851 |
| RGS22        | 3.2353357581  | 0.554787377  | 0.9999763851 |
| FBXO43       | -2.8354075942 | 0.0152263282 | 0.9999763851 |
| POLR2K       | 1.0563097794  | 0.7956891145 | 0.9999763851 |
| SPAG1        | 1.1421174847  | 0.789795773  | 0.9999763851 |
| RNF19A       | -1.0386571315 | 0.8942369549 | 0.9999763851 |
| ANKRD46      | -1.3160897641 | 0.2444144846 | 0.9999763851 |
| PABPC1       | 1.1562436235  | 0.273846531  | 0.9999763851 |
| YWHAZ        | 1.1136845338  | 0.3568112561 | 0.9999763851 |
| ZNF706       | 1.4611536178  | 0.0248054797 | 0.9999763851 |
| GRHL2        | -1.3154339304 | 0.8205576571 | 0.9999763851 |
| NCALD        | 1.2607119075  | 0.4622572671 | 0.9999763851 |
| RRM2B        | -1.3689541823 | 0.2076157972 | 0.9999763851 |
| UBR5         | -1.0569893753 | 0.7381709571 | 0.9999763851 |
| KLF10        | 1.0369944912  | 0.8856566578 | 0.9999763851 |
| LOC101927245 | 3.2356557963  | 0.5547505991 | 0.9999763851 |
| LOC107986873 | 1.9410444986  | 0.0577707054 | 0.9999763851 |
| AZIN1        | -1.0125047424 | 0.9336375479 | 0.9999763851 |
| ATP6V1C1     | -1.0318091797 | 0.8768324791 | 0.9999763851 |
| BAALC        | 5.4776292235  | 0.3745831165 | 0.9999763851 |
| CTHRC1       | 1.7889997486  | 0.4430561517 | 0.9999763851 |
| SLC25A32     | 1.1731002443  | 0.3832294477 | 0.9999763851 |
| DCAF13       | 1.157540306   | 0.3801294601 | 0.9999763851 |
| DCSTAMP      | -7.348280118  | 0.003043     | 0.9999763851 |
| DPYS         | 3.2356557963  | 0.5547505991 | 0.9999763851 |
| ZFPM2        | 1.2869488883  | 0.820284766  | 0.9999763851 |
| OXR1         | -1.3160416743 | 0.8273188224 | 0.9999763851 |
| ANGPT1       | 0             | 0            | 0            |
| RSPO2        | -1.3154339304 | 0.8205576571 | 0.9999763851 |
| EIF3E        | -1.0654213796 | 0.6733477971 | 0.9999763851 |



gene\_expression\_table

|              |               |              |              |
|--------------|---------------|--------------|--------------|
| EMC2         | 1.0828516477  | 0.6858123481 | 0.9999763851 |
| TRHR         | 3.2353357581  | 0.554787377  | 0.9999763851 |
| NUDCD1       | 1.0453846255  | 0.8572309215 | 0.9999763851 |
| ENY2         | 1.1077136231  | 0.5404840797 | 0.9999763851 |
| PKHD1L1      | 0             | 0            | 0            |
| EBAG9        | 1.1684835695  | 0.5487226903 | 0.9999763851 |
| CSMD3        | 0             | 0            | 0            |
| TRPS1        | 0             | 0            | 0            |
| EIF3H        | 1.0852775113  | 0.5860029758 | 0.9999763851 |
| UTP23        | 1.4160905498  | 0.2158903567 | 0.9999763851 |
| RAD21        | 1.171139379   | 0.2246521849 | 0.9999763851 |
| SLC30A8      | 0             | 0            | 0            |
| MED30        | -1.3483595022 | 0.1766711155 | 0.9999763851 |
| EXT1         | -1.3158816768 | 0.8203229797 | 0.9999763851 |
| SAMD12       | -1.315303824  | 0.8206171563 | 0.9999763851 |
| MAL2         | 0             | 0            | 0            |
| NOV          | -1.3184224589 | 0.4570199892 | 0.9999763851 |
| TAF2         | -1.0847163728 | 0.6750476981 | 0.9999763851 |
| DSCC1        | 1.128139477   | 0.4696858834 | 0.9999763851 |
| DEPTOR       | -2.0577216265 | 0.0432314028 | 0.9999763851 |
| COL14A1      | 0             | 0            | 0            |
| MRPL13       | 1.0724863516  | 0.6673766183 | 0.9999763851 |
| MTBP         | 1.242084178   | 0.5683162366 | 0.9999763851 |
| SNTB1        | -1.1102883523 | 0.5197689663 | 0.9999763851 |
| ZHX2         | -1.3821220995 | 0.3949950573 | 0.9999763851 |
| DERL1        | 1.1422082637  | 0.3856336652 | 0.9999763851 |
| TBC1D31      | 1.0190916226  | 0.9543427582 | 0.9999763851 |
| C8orf76      | 1.015377145   | 0.9390940245 | 0.9999763851 |
| ZHX1-C8orf76 | -3.5755910691 | 0.1288494926 | 0.9999763851 |
| ZHX1         | 1.2488043423  | 0.2292352643 | 0.9999763851 |
| ATAD2        | -1.0851010578 | 0.6136224313 | 0.9999763851 |
| WDYHV1       | 1.6947153005  | 0.0924906518 | 0.9999763851 |
| FBXO32       | -4.4559126662 | 0.001263     | 0.894101927  |
| ANXA13       | 0             | 0            | 0            |
| FAM91A1      | 1.1496297567  | 0.4295061752 | 0.9999763851 |
| FER1L6       | 0             | 0            | 0            |
| TMEM65       | 1.0960345728  | 0.5101694289 | 0.9999763851 |
| TRMT12       | 1.2294531996  | 0.5598157328 | 0.9999763851 |
| RNF139       | 1.4771475472  | 0.0272855884 | 0.9999763851 |
| TATDN1       | -1.1878366718 | 0.2288021274 | 0.9999763851 |
| NDUFB9       | 1.0463204234  | 0.7095143924 | 0.9999763851 |
| MTSS1        | -1.0066325552 | 0.9897651172 | 0.9999763851 |
| SQLE         | -1.0280527015 | 0.8654880425 | 0.9999763851 |
| KIAA0196     | 1.5787178173  | 0.0290788851 | 0.9999763851 |
| NSMCE2       | -1.2904312553 | 0.0617165053 | 0.9999763851 |
| TRIB1        | -2.0623786617 | 0.3152408669 | 0.9999763851 |
| MYC          | 1.1649185816  | 0.5167043664 | 0.9999763851 |
| GSDMC        | 0             | 0            | 0            |
| FAM49B       | -1.1121637699 | 0.427671201  | 0.9999763851 |

gene\_expression\_table

|         |                |              |              |
|---------|----------------|--------------|--------------|
| ASAP1   | -1.2473570434  | 0.2416942349 | 0.9999763851 |
| EFR3A   | 1.0539072798   | 0.8051795113 | 0.9999763851 |
| HHLA1   | 0              | 0            | 0            |
| KCNQ3   | 1.6240996663   | 0.5566551786 | 0.9999763851 |
| LRRC6   | -1.3710462586  | 0.7617555962 | 0.9999763851 |
| TMEM71  | 2.0313258944   | 0.0979654213 | 0.9999763851 |
| PHF20L1 | 1.331258793    | 0.1001838341 | 0.9999763851 |
| TG      | 1.595494579    | 0.2109856831 | 0.9999763851 |
| SLA     | 1.1846698446   | 0.278134793  | 0.9999763851 |
| WISP1   | 0              | 0            | 0            |
| NDRG1   | 1.2539587871   | 0.1571652665 | 0.9999763851 |
| ST3GAL1 | -1.0634767112  | 0.670490098  | 0.9999763851 |
| ZFAT    | -1.0254325963  | 0.937538564  | 0.9999763851 |
| FAM135B | 1.0310184702   | 0.9596632217 | 0.9999763851 |
| COL22A1 | -3.3001189282  | 0.0758440668 | 0.9999763851 |
| TRAPPC9 | 1.0870429928   | 0.6894414329 | 0.9999763851 |
| CHRA1   | -1.1099034481  | 0.6823227514 | 0.9999763851 |
| AGO2    | -1.3248386508  | 0.1193676222 | 0.9999763851 |
| DENND3  | -1.2502031159  | 0.1606714613 | 0.9999763851 |
| SLC45A4 | 1.2561837095   | 0.1904482544 | 0.9999763851 |
| GPR20   | -4.2864494036  | 0.4027150576 | 0.9999763851 |
| PTP4A3  | 1.3400821203   | 0.3853351754 | 0.9999763851 |
| TSNARE1 | -1.1453118218  | 0.5273941892 | 0.9999763851 |
| ADGRB1  | -1.0300371575  | 0.9610439186 | 0.9999763851 |
| JRK     | 1.4100026603   | 0.2957597358 | 0.9999763851 |
| PSCA    | -14.1187086092 | 0.0979429    | 0.9999763851 |
| LY6K    | 0              | 0            | 0            |
| THEM6   | 1.0281954075   | 0.8848886009 | 0.9999763851 |
| GML     | -4.019862227   | 0.0281217507 | 0.9999763851 |
| LY6E    | -1.4890278981  | 0.0140810221 | 0.9999763851 |
| C8orf31 | -4.2849908816  | 0.4028453076 | 0.9999763851 |
| GPIHBP1 | 0              | 0            | 0            |
| ZFP41   | 1.1480677451   | 0.7784327362 | 0.9999763851 |
| GLI4    | 1.3406186202   | 0.7026521051 | 0.9999763851 |
| ZNF696  | 1.3704689566   | 0.3587884482 | 0.9999763851 |
| TOP1MT  | -1.1048386768  | 0.5748891036 | 0.9999763851 |
| ZC3H3   | 1.1020710098   | 0.6660130065 | 0.9999763851 |
| GSDMD   | -1.1750175617  | 0.3355162369 | 0.9999763851 |
| MROH6   | -1.079686599   | 0.8233658746 | 0.9999763851 |
| NAPRT   | 1.2473808269   | 0.2317447378 | 0.9999763851 |
| EEF1D   | -1.0934180838  | 0.5021319197 | 0.9999763851 |
| TIGD5   | 1.570638626    | 0.2660133584 | 0.9999763851 |
| PYCRL   | 1.7379490089   | 0.2866993556 | 0.9999763851 |
| TSTA3   | 1.3481552047   | 0.1853450499 | 0.9999763851 |
| ZNF623  | -1.3646033691  | 0.444383834  | 0.9999763851 |
| ZNF707  | 1.1234425176   | 0.7923370859 | 0.9999763851 |
| SCRIB   | 1.0172954087   | 0.9503202189 | 0.9999763851 |
| PUF60   | -1.0827258833  | 0.6748521137 | 0.9999763851 |
| NRBP2   | -2.3534778273  | 0.0821357113 | 0.9999763851 |

gene\_expression\_table

|              |               |              |              |
|--------------|---------------|--------------|--------------|
| PLEC         | -1.0229379022 | 0.9116160073 | 0.9999763851 |
| PARP10       | -1.8746606282 | 0.3553885246 | 0.9999763851 |
| GRINA        | -1.0846213695 | 0.60885892   | 0.9999763851 |
| OPLAH        | 1.1900936369  | 0.8126829972 | 0.9999763851 |
| EXOSC4       | 1.0610821823  | 0.7210151355 | 0.9999763851 |
| GPAA1        | -1.0703091748 | 0.6587602306 | 0.9999763851 |
| CYC1         | 1.1622858615  | 0.2605545515 | 0.9999763851 |
| SHARPIN      | -1.7190876755 | 0.0974960092 | 0.9999763851 |
| MAF1         | 1.2351562318  | 0.227698311  | 0.9999763851 |
| WDR97        | -4.2849908816 | 0.4028453076 | 0.9999763851 |
| HGH1         | 1.4220413028  | 0.2094064918 | 0.9999763851 |
| MROH1        | -1.0196891832 | 0.9394992958 | 0.9999763851 |
| BOP1         | 1.2585413352  | 0.1649874542 | 0.9999763851 |
| SCX          | -1.9440624723 | 0.1375665664 | 0.9999763851 |
| HSF1         | -1.0584767853 | 0.7310300543 | 0.9999763851 |
| DGAT1        | -1.1483201326 | 0.5596457856 | 0.9999763851 |
| SCRT1        | 3.2356557963  | 0.5547505991 | 0.9999763851 |
| TMEM249      | 1.0102638454  | 0.9884365864 | 0.9999763851 |
| FBXL6        | 2.1397134371  | 0.0435901977 | 0.9999763851 |
| SLC52A2      | 1.0979850407  | 0.5727483592 | 0.9999763851 |
| ADCK5        | 1.8999924656  | 0.1425456128 | 0.9999763851 |
| CPSF1        | 1.8688830099  | 0.007991     | 0.9999763851 |
| SLC39A4      | 1.0305225036  | 0.9051048931 | 0.9999763851 |
| VPS28        | 1.144903607   | 0.4802348406 | 0.9999763851 |
| TONSL        | 1.0974633436  | 0.7240552053 | 0.9999763851 |
| CYHR1        | -1.0305864516 | 0.8674914018 | 0.9999763851 |
| KIFC2        | 0             | 0            | 0            |
| FOXH1        | 1.1130684164  | 0.6644326683 | 0.9999763851 |
| PPP1R16A     | 1.4238206429  | 0.287474715  | 0.9999763851 |
| MFSD3        | 1.1314138894  | 0.6065094511 | 0.9999763851 |
| RECQL4       | -1.0083886279 | 0.9589103237 | 0.9999763851 |
| LRRC14       | 1.133785151   | 0.702221855  | 0.9999763851 |
| LRRC24       | 1.4321406453  | 0.2484986505 | 0.9999763851 |
| C8orf82      | 1.0229226905  | 0.9695079924 | 0.9999763851 |
| ARHGAP39     | -1.3157515262 | 0.8223957341 | 0.9999763851 |
| ZNF251       | -1.6880094949 | 0.0619954524 | 0.9999763851 |
| ZNF34        | -1.1956050279 | 0.7982698734 | 0.9999763851 |
| RPL8         | 1.0666206141  | 0.5893552547 | 0.9999763851 |
| ZNF517       | -1.2212653632 | 0.664385966  | 0.9999763851 |
| ZNF7         | -1.0068064973 | 0.9856165711 | 0.9999763851 |
| COMMD5       | -1.3639574501 | 0.0528740479 | 0.9999763851 |
| ZNF250       | -1.0482436097 | 0.8789975961 | 0.9999763851 |
| ZNF16        | -1.0561204258 | 0.8442608948 | 0.9999763851 |
| LOC107986987 | 0             | 0            | 0            |
| C8orf33      | 1.0413633888  | 0.8384075092 | 0.9999763851 |
| LOC107983994 | 5.4770877341  | 0.3746135179 | 0.9999763851 |
| WASH1        | 1.113945423   | 0.5537330394 | 0.9999763851 |
| FOXD4        | 7.7488609396  | 0.3060538318 | 0.9999763851 |
| CBWD1        | 1.7572156823  | 0.001936     | 0.9999763851 |

gene\_expression\_table

|          |               |              |              |
|----------|---------------|--------------|--------------|
| DOCK8    | 1.0675372946  | 0.8059410437 | 0.9999763851 |
| C9orf66  | 2.8791826771  | 0.2412543662 | 0.9999763851 |
| KANK1    | 1.0799577951  | 0.6993337387 | 0.9999763851 |
| DMRT1    | 0             | 0            | 0            |
| SMARCA2  | 1.2894108424  | 0.137443788  | 0.9999763851 |
| VLDLR    | -1.286676189  | 0.4723572827 | 0.9999763851 |
| PUM3     | -1.2385201276 | 0.1627017927 | 0.9999763851 |
| RFX3     | -2.0558572505 | 0.0830436661 | 0.9999763851 |
| GLIS3    | 3.2353357581  | 0.554787377  | 0.9999763851 |
| PLPP6    | 1.3620056689  | 0.5501900276 | 0.9999763851 |
| CDC37L1  | -1.0602463444 | 0.8734924755 | 0.9999763851 |
| AK3      | 1.254055931   | 0.2667370385 | 0.9999763851 |
| RCL1     | -1.3349517858 | 0.1589117894 | 0.9999763851 |
| JAK2     | -1.0635819984 | 0.858200087  | 0.9999763851 |
| INSL6    | 1.4853712947  | 0.5117403326 | 0.9999763851 |
| RLN1     | 0             | 0            | 0            |
| PLGRKT   | -1.3449836187 | 0.5040923813 | 0.9999763851 |
| CD274    | -1.3151016298 | 0.8210852002 | 0.9999763851 |
| PDCD1LG2 | 3.2353357581  | 0.554787377  | 0.9999763851 |
| RIC1     | -1.0361301795 | 0.9055663952 | 0.9999763851 |
| ERMP1    | -1.1451616851 | 0.545899785  | 0.9999763851 |
| KIAA2026 | -1.188449319  | 0.5327026192 | 0.9999763851 |
| MLANA    | -1.7654496905 | 0.5421321503 | 0.9999763851 |
| RANBP6   | -1.1104141706 | 0.6890721437 | 0.9999763851 |
| UHRF2    | -1.0726883997 | 0.7340796006 | 0.9999763851 |
| GLDC     | -1.3158816768 | 0.8203229797 | 0.9999763851 |
| KDM4C    | 1.0512338861  | 0.780697094  | 0.9999763851 |
| TMEM261  | 1.4010109169  | 0.1370926971 | 0.9999763851 |
| PTPRD    | -1.30626541   | 0.6126738185 | 0.9999763851 |
| LURAP1L  | -2.3217011239 | 0.4355766872 | 0.9999763851 |
| FREM1    | 0             | 0            | 0            |
| TTC39B   | 0             | 0            | 0            |
| SNAPC3   | -1.1917196451 | 0.4498228765 | 0.9999763851 |
| PSIP1    | -1.1465956252 | 0.4414994755 | 0.9999763851 |
| CCDC171  | 1.359700539   | 0.5933881588 | 0.9999763851 |
| BNC2     | -1.3297810912 | 0.3509675909 | 0.9999763851 |
| CNTLN    | -1.4693925787 | 0.0653489038 | 0.9999763851 |
| SH3GL2   | -4.2849908816 | 0.4028453076 | 0.9999763851 |
| ADAMTSL1 | -4.2849908816 | 0.4028453076 | 0.9999763851 |
| SAXO1    | -1.2843945718 | 0.6674649296 | 0.9999763851 |
| RRAGA    | -1.1564715988 | 0.3528735611 | 0.9999763851 |
| HAUS6    | -1.019084379  | 0.9413109249 | 0.9999763851 |
| PLIN2    | -1.6275512937 | 0.000384     | 0.4396020528 |
| DENND4C  | -1.503999038  | 0.1061842909 | 0.9999763851 |
| RPS6     | -1.074565803  | 0.5474539716 | 0.9999763851 |
| ACER2    | -1.0805963894 | 0.9257141641 | 0.9999763851 |
| SLC24A2  | 1.4200447571  | 0.6745299961 | 0.9999763851 |
| MLLT3    | 1.2162627286  | 0.6949209112 | 0.9999763851 |
| FOCAD    | -1.0361594383 | 0.8584237894 | 0.9999763851 |

gene\_expression\_table

|           |               |              |              |
|-----------|---------------|--------------|--------------|
| HACD4     | -1.0609572332 | 0.8538375093 | 0.9999763851 |
| KLHL9     | -1.0913605166 | 0.6904713634 | 0.9999763851 |
| MTAP      | -1.2430941661 | 0.3280349121 | 0.9999763851 |
| CDKN2A    | 1.0073527891  | 0.9616884703 | 0.9999763851 |
| CDKN2B    | 1.0951597789  | 0.8919882384 | 0.9999763851 |
| CAAP1     | 1.0916188512  | 0.7738700686 | 0.9999763851 |
| PLAA      | -1.0963055653 | 0.7327621294 | 0.9999763851 |
| IFT74     | -1.0560434138 | 0.9108691523 | 0.9999763851 |
| LRRC19    | 5.4781708352  | 0.3745527127 | 0.9999763851 |
| MOB3B     | -1.1173334845 | 0.822305597  | 0.9999763851 |
| IFNK      | 0             | 0            | 0            |
| C9orf72   | -1.1255766836 | 0.7168536833 | 0.9999763851 |
| ACO1      | -1.2808471111 | 0.2080097038 | 0.9999763851 |
| DDX58     | -1.462352467  | 0.4737739818 | 0.9999763851 |
| TOPORS    | -1.2032631612 | 0.4928868525 | 0.9999763851 |
| NDUFB6    | 1.1247594267  | 0.5844688715 | 0.9999763851 |
| TAF1L     | 1.2868359435  | 0.8211331271 | 0.9999763851 |
| APTX      | 1.3672617029  | 0.1035447404 | 0.9999763851 |
| DNAJA1    | 1.0322507328  | 0.8329630152 | 0.9999763851 |
| SMU1      | 1.2776277247  | 0.1747514848 | 0.9999763851 |
| B4GALT1   | -1.2728642678 | 0.0989527069 | 0.9999763851 |
| SPINK4    | 1.0273967864  | 0.9753446573 | 0.9999763851 |
| BAG1      | 1.0303231931  | 0.8537297507 | 0.9999763851 |
| CHMP5     | -1.3687833855 | 0.0339452197 | 0.9999763851 |
| NFX1      | -1.0981250715 | 0.6616282509 | 0.9999763851 |
| AQP3      | 9.9614219348  | 0.2204168573 | 0.9999763851 |
| NOL6      | 1.3645800931  | 0.1184296003 | 0.9999763851 |
| UBE2R2    | -1.2075737288 | 0.2456451681 | 0.9999763851 |
| UBAP2     | 1.2805906892  | 0.255651132  | 0.9999763851 |
| DCAF12    | -1.324226696  | 0.0856354568 | 0.9999763851 |
| UBAP1     | 1.2327121093  | 0.1614126723 | 0.9999763851 |
| KIF24     | 1.0271487798  | 0.9777810704 | 0.9999763851 |
| NUDT2     | -1.332579958  | 0.3420838718 | 0.9999763851 |
| KIAA1161  | -1.1896333359 | 0.5976767418 | 0.9999763851 |
| C9orf24   | -1.5066055279 | 0.2624813462 | 0.9999763851 |
| FAM219A   | 2.6539157614  | 0.2942499482 | 0.9999763851 |
| ENHO      | 1.027644744   | 0.9776324385 | 0.9999763851 |
| RPP25L    | 1.0423548825  | 0.842720602  | 0.9999763851 |
| DCTN3     | 1.3148100676  | 0.1579803451 | 0.9999763851 |
| ARID3C    | 3.2353357581  | 0.554787377  | 0.9999763851 |
| SIGMAR1   | 1.1152701893  | 0.5920838885 | 0.9999763851 |
| GALT      | 1.3046695472  | 0.5404700004 | 0.9999763851 |
| IL11RA    | -1.1025877923 | 0.7334223836 | 0.9999763851 |
| CCL27     | 0             | 0            | 0            |
| LOC730098 | -4.2849908816 | 0.4028453076 | 0.9999763851 |
| PHF24     | 1.0274983165  | 0.9757328476 | 0.9999763851 |
| FAM205C   | 0             | 0            | 0            |
| DNAJB5    | -1.9496141069 | 0.3129399936 | 0.9999763851 |
| VCP       | 1.1012850307  | 0.455182609  | 0.9999763851 |

gene\_expression\_table

|              |                |              |              |
|--------------|----------------|--------------|--------------|
| FANCG        | -1.2097506569  | 0.3369959682 | 0.9999763851 |
| PIGO         | 1.6101837194   | 0.2473061134 | 0.9999763851 |
| STOML2       | -1.1471538264  | 0.2794893894 | 0.9999763851 |
| FAM214B      | -2.1173141197  | 0.1342190419 | 0.9999763851 |
| UNC13B       | 1.4398911185   | 0.2865945989 | 0.9999763851 |
| RUSC2        | -1.6382503713  | 0.2993683659 | 0.9999763851 |
| FAM166B      | 0              | 0            | 0            |
| TESK1        | 1.6940282912   | 0.2714177434 | 0.9999763851 |
| CD72         | 1.0272717886   | 0.9763454022 | 0.9999763851 |
| SIT1         | 0              | 0            | 0            |
| CCDC107      | -1.0202292189  | 0.9353385008 | 0.9999763851 |
| ARHGEF39     | 1.0534203474   | 0.8892972107 | 0.9999763851 |
| TPM2         | -5.5810225657  | 0.1050200998 | 0.9999763851 |
| TLN1         | 1.092304729    | 0.6344824079 | 0.9999763851 |
| CREB3        | -1.1130833213  | 0.7104055241 | 0.9999763851 |
| GBA2         | -1.2656798021  | 0.6073026954 | 0.9999763851 |
| RGP1         | 3.2361532718   | 0.5546934395 | 0.9999763851 |
| NPR2         | -1.4086684429  | 0.1064340838 | 0.9999763851 |
| SPAG8        | -14.1187086092 | 0.0980455964 | 0.9999763851 |
| HINT2        | 1.1083919763   | 0.6224783917 | 0.9999763851 |
| TMEM8B       | 1.2493247399   | 0.7057007986 | 0.9999763851 |
| RECK         | 1.2841082437   | 0.3623663114 | 0.9999763851 |
| GLIPR2       | -1.1127550279  | 0.5342069247 | 0.9999763851 |
| CLTA         | 1.0929897714   | 0.4987387607 | 0.9999763851 |
| GNE          | -1.0508762794  | 0.8590682033 | 0.9999763851 |
| RNF38        | 1.1325554197   | 0.6552862676 | 0.9999763851 |
| MELK         | 1.0582336841   | 0.8026796482 | 0.9999763851 |
| PAX5         | 1.4704803692   | 0.3438352433 | 0.9999763851 |
| ZCCHC7       | -1.6270953275  | 0.0386594921 | 0.9999763851 |
| GRHPR        | 1.1346084002   | 0.5347723412 | 0.9999763851 |
| ZBTB5        | 1.1527925122   | 0.6317775019 | 0.9999763851 |
| POLR1E       | 1.1031467499   | 0.700662701  | 0.9999763851 |
| FBXO10       | -1.4337189649  | 0.0661498201 | 0.9999763851 |
| TOMM5        | 1.2489976691   | 0.0840916173 | 0.9999763851 |
| FRMPD1       | -1.2075354762  | 0.7804751596 | 0.9999763851 |
| TRMT10B      | 1.0520558225   | 0.8564409238 | 0.9999763851 |
| EXOSC3       | 1.0314823313   | 0.8879004606 | 0.9999763851 |
| DCAF10       | 1.1330332019   | 0.4546308502 | 0.9999763851 |
| SLC25A51     | 1.6703467261   | 0.4627637299 | 0.9999763851 |
| SHB          | 1.1967819733   | 0.7262616107 | 0.9999763851 |
| ALDH1B1      | 1.1627563179   | 0.5187027347 | 0.9999763851 |
| CNTNAP3      | -1.3158816768  | 0.8203229797 | 0.9999763851 |
| ANKRD20A2    | 0              | 0            | 0            |
| LOC101929959 | 3.2361532718   | 0.5546934395 | 0.9999763851 |
| CBWD6        | -11.3553837208 | 0.0264067104 | 0.9999763851 |
| CNTNAP3B     | 1.5763434412   | 0.4248543391 | 0.9999763851 |
| LOC107984126 | 7.4933530102   | 0.2985955846 | 0.9999763851 |
| LOC100289279 | 0              | 0            | 0            |
| LOC107987001 | -1.8920890108  | 0.2402718518 | 0.9999763851 |

gene\_expression\_table

|              |               |              |              |
|--------------|---------------|--------------|--------------|
| LOC107987020 | 1.7450428903  | 0.6325021146 | 0.9999763851 |
| LOC100996643 | 1.2869488883  | 0.8204454189 | 0.9999763851 |
| ANKRD20A4    | 0             | 0            | 0            |
| LOC107987067 | -4.2864494036 | 0.4027150576 | 0.9999763851 |
| LOC105379443 | 0             | 0            | 0            |
| CBWD5        | 1.2138491204  | 0.2400487238 | 0.9999763851 |
| ZNF658       | -1.3154339304 | 0.8205576571 | 0.9999763851 |
| ANKRD20A1    | 1.0279042192  | 0.9761167157 | 0.9999763851 |
| CBWD3        | -1.9401132992 | 0.003241     | 0.9999763851 |
| PIP5K1B      | -1.1899619792 | 0.5994777923 | 0.9999763851 |
| FAM122A      | 1.3122760622  | 0.5156070774 | 0.9999763851 |
| FXN          | 1.1300369432  | 0.5176900858 | 0.9999763851 |
| TJP2         | -1.4153779564 | 0.0902885729 | 0.9999763851 |
| PTAR1        | -1.1401087448 | 0.6650630895 | 0.9999763851 |
| C9orf135     | 0             | 0            | 0            |
| MAMDC2       | 1.0088696185  | 0.9438432389 | 0.9999763851 |
| SMC5         | -1.0463368722 | 0.812350064  | 0.9999763851 |
| KLF9         | -1.6070866372 | 0.2530441111 | 0.9999763851 |
| TRPM3        | 3.2361532718  | 0.5546934395 | 0.9999763851 |
| TMEM2        | -1.6853462283 | 0.0339196004 | 0.9999763851 |
| ABHD17B      | 1.1368964633  | 0.6891996259 | 0.9999763851 |
| C9orf85      | -1.3681500532 | 0.427184063  | 0.9999763851 |
| GDA          | -1.6472991724 | 0.452777616  | 0.9999763851 |
| ZFAND5       | 1.0784688248  | 0.5985702405 | 0.9999763851 |
| TMC1         | -2.6922490556 | 0.2893265166 | 0.9999763851 |
| ALDH1A1      | 5.4776292235  | 0.3745831165 | 0.9999763851 |
| ANXA1        | 1.0779464342  | 0.7785584415 | 0.9999763851 |
| RORB         | -1.4385420949 | 0.4289731639 | 0.9999763851 |
| C9orf40      | 1.4134133827  | 0.0492885953 | 0.9999763851 |
| CARNMT1      | 1.4932725115  | 0.0940573791 | 0.9999763851 |
| NMRK1        | -1.3521723279 | 0.4955567366 | 0.9999763851 |
| OSTF1        | -1.0296781401 | 0.9102486598 | 0.9999763851 |
| PCSK5        | 2.7026796819  | 0.199886923  | 0.9999763851 |
| RFK          | -1.362654174  | 0.0423335258 | 0.9999763851 |
| GCNT1        | -1.0988339395 | 0.7054074501 | 0.9999763851 |
| PRUNE2       | -2.5042299531 | 0.0698735021 | 0.9999763851 |
| VPS13A       | -1.1420159437 | 0.5941254024 | 0.9999763851 |
| GNAQ         | -1.0863454815 | 0.6173534542 | 0.9999763851 |
| CEP78        | 1.3945438682  | 0.1724688251 | 0.9999763851 |
| PSAT1        | -1.0128039403 | 0.9301406448 | 0.9999763851 |
| TLE4         | -1.1630806134 | 0.4963753339 | 0.9999763851 |
| FRMD3        | -1.1818290031 | 0.3042318996 | 0.9999763851 |
| IDNK         | 1.5304942689  | 0.379398497  | 0.9999763851 |
| UBQLN1       | -1.067817395  | 0.6322523689 | 0.9999763851 |
| GKAP1        | -1.2032710508 | 0.7133251699 | 0.9999763851 |
| KIF27        | -1.4338155876 | 0.4815054425 | 0.9999763851 |
| C9orf64      | 1.6862854291  | 0.3095196926 | 0.9999763851 |
| HNRNPK       | -1.4293757942 | 0.003499     | 0.9999763851 |
| RMI1         | 1.0680407692  | 0.8195597189 | 0.9999763851 |

gene\_expression\_table

|           |               |              |              |
|-----------|---------------|--------------|--------------|
| SLC28A3   | -4.2849908816 | 0.4028453076 | 0.9999763851 |
| NTRK2     | 3.2356557963  | 0.5547505991 | 0.9999763851 |
| AGTPBP1   | -1.1742719589 | 0.4001740998 | 0.9999763851 |
| NAA35     | -1.0621056295 | 0.7044102318 | 0.9999763851 |
| GOLM1     | 1.4207068373  | 0.0516695317 | 0.9999763851 |
| C9orf153  | 0             | 0            | 0            |
| ISCA1     | 1.4032643055  | 0.127331769  | 0.9999763851 |
| ZCCHC6    | -1.0297707304 | 0.8964874425 | 0.9999763851 |
| GAS1      | 1.8145193361  | 0.5774836285 | 0.9999763851 |
| DAPK1     | -1.0460465895 | 0.757358437  | 0.9999763851 |
| CTSL      | -4.287394647  | 0.4026306792 | 0.9999763851 |
| CDK20     | -1.3954727771 | 0.7076496332 | 0.9999763851 |
| SPIN1     | -1.2196894768 | 0.2477990573 | 0.9999763851 |
| NXNL2     | 0             | 0            | 0            |
| S1PR3     | 1.4793732198  | 0.3346515661 | 0.9999763851 |
| SHC3      | 1.3575315598  | 0.6157286415 | 0.9999763851 |
| CKS2      | -1.0406973934 | 0.8282783276 | 0.9999763851 |
| SECISBP2  | -1.0687514163 | 0.7957017286 | 0.9999763851 |
| SEMA4D    | 1.1427203064  | 0.4388256282 | 0.9999763851 |
| SYK       | 1.1313540501  | 0.3965117539 | 0.9999763851 |
| AUH       | -1.190381716  | 0.5349905664 | 0.9999763851 |
| NFIL3     | -1.2043991989 | 0.4937630668 | 0.9999763851 |
| ROR2      | 1.2869631997  | 0.8235334545 | 0.9999763851 |
| SPTLC1    | -1.4657871867 | 0.0149521168 | 0.9999763851 |
| IARS      | 1.103030641   | 0.5906097314 | 0.9999763851 |
| NOL8      | 1.436064063   | 0.0916866956 | 0.9999763851 |
| CENPP     | -1.3204363091 | 0.1744050445 | 0.9999763851 |
| OGN       | 5.4781708352  | 0.3745527127 | 0.9999763851 |
| OMD       | 3.2361532718  | 0.5546934395 | 0.9999763851 |
| ASPN      | 5.4781708352  | 0.3745527127 | 0.9999763851 |
| ECM2      | -2.3893004408 | 0.2387173544 | 0.9999763851 |
| IPPK      | 1.4991995774  | 0.3648071119 | 0.9999763851 |
| BICD2     | -1.2916019732 | 0.4281712414 | 0.9999763851 |
| ZNF484    | -1.9665380586 | 0.4655882819 | 0.9999763851 |
| FGD3      | -1.2295235471 | 0.5969595849 | 0.9999763851 |
| CARD19    | 1.2158417811  | 0.3275374437 | 0.9999763851 |
| NINJ1     | -1.2170866783 | 0.578778076  | 0.9999763851 |
| WNK2      | 0             | 0            | 0            |
| FAM120AOS | 1.3578926719  | 0.2379449237 | 0.9999763851 |
| FAM120A   | 1.0710973731  | 0.6078472425 | 0.9999763851 |
| PHF2      | 1.2282530599  | 0.4613503359 | 0.9999763851 |
| BARX1     | 2.3819299027  | 0.2314664695 | 0.9999763851 |
| PTPDC1    | 1.1543701575  | 0.7890880015 | 0.9999763851 |
| ZNF169    | -1.1616341521 | 0.7783152214 | 0.9999763851 |
| NUTM2F    | -2.4668543404 | 0.4373911847 | 0.9999763851 |
| LOC728026 | -1.1718061449 | 0.7025896338 | 0.9999763851 |
| MFSD14B   | 1.1121773183  | 0.5872157249 | 0.9999763851 |
| FBP1      | 0             | 0            | 0            |
| C9orf3    | -1.1546673765 | 0.5890268125 | 0.9999763851 |



gene\_expression\_table

|                |               |              |              |
|----------------|---------------|--------------|--------------|
| FANCC          | -1.6549455077 | 0.1909639688 | 0.9999763851 |
| PTCH1          | -1.357946363  | 0.4686064683 | 0.9999763851 |
| ERCC6L2        | 1.2950503608  | 0.3950369837 | 0.9999763851 |
| HSD17B3        | 0             | 0            | 0            |
| SLC35D2        | 0             | 0            | 0            |
| ZNF367         | -1.0281705436 | 0.8990507777 | 0.9999763851 |
| HABP4          | -1.3619727376 | 0.322693256  | 0.9999763851 |
| CDC14B         | -1.7346410473 | 0.4884043883 | 0.9999763851 |
| AAED1          | -1.8929385914 | 0.2099174747 | 0.9999763851 |
| ZNF510         | -1.7663530955 | 0.3353361767 | 0.9999763851 |
| ZNF782         | 1.3667310916  | 0.5973777972 | 0.9999763851 |
| NUTM2G         | -2.3222130951 | 0.4504474497 | 0.9999763851 |
| CTSV           | 1.2869488883  | 0.8206129236 | 0.9999763851 |
| TDRD7          | -2.148568609  | 0.0408512148 | 0.9999763851 |
| TMOD1          | -1.1240435479 | 0.8529602621 | 0.9999763851 |
| TSTD2          | 1.7446573669  | 0.0781923322 | 0.9999763851 |
| NCBP1          | 1.4897704265  | 0.5576337855 | 0.9999763851 |
| XPA            | 1.1162406597  | 0.5360741526 | 0.9999763851 |
| TRMO           | 1.3142360065  | 0.3210206791 | 0.9999763851 |
| ANP32B         | 1.0117423553  | 0.9217857533 | 0.9999763851 |
| NANS           | 1.1140620628  | 0.5009822794 | 0.9999763851 |
| TRIM14         | 1.014874258   | 0.9392974891 | 0.9999763851 |
| CORO2A         | -1.0232790478 | 0.9082262173 | 0.9999763851 |
| TBC1D2         | 1.0164134504  | 0.935990877  | 0.9999763851 |
| GABBR2         | 1.0631544433  | 0.894611596  | 0.9999763851 |
| ANKS6          | 1.2107734211  | 0.4076721036 | 0.9999763851 |
| COL15A1        | 16.6876660904 | 0.1287829899 | 0.9999763851 |
| TGFBR1         | -1.1401824273 | 0.3219450074 | 0.9999763851 |
| ALG2           | -1.0416911523 | 0.8561765936 | 0.9999763851 |
| SEC61B         | 1.2267343354  | 0.1534653    | 0.9999763851 |
| NR4A3          | 0             | 0            | 0            |
| STX17          | 1.8463964425  | 0.026081221  | 0.9999763851 |
| ERP44          | 1.1087897422  | 0.6618038501 | 0.9999763851 |
| INVS           | -1.3136773018 | 0.2531361402 | 0.9999763851 |
| TEX10          | 1.2288383165  | 0.3550916404 | 0.9999763851 |
| MSANTD3        | 1.0746461843  | 0.7648923409 | 0.9999763851 |
| MSANTD3-TMEFF1 | -1.4718977929 | 0.5502694686 | 0.9999763851 |
| MURC           | 0             | 0            | 0            |
| PLPPR1         | 0             | 0            | 0            |
| MRPL50         | -1.0543064498 | 0.8359422044 | 0.9999763851 |
| ZNF189         | 3.1348667383  | 0.076064056  | 0.9999763851 |
| ALDOB          | 0             | 0            | 0            |
| RNF20          | -1.2852122563 | 0.2580008927 | 0.9999763851 |
| GRIN3A         | -1.8165815049 | 0.4742437528 | 0.9999763851 |
| SMC2           | 1.0683906703  | 0.6369647491 | 0.9999763851 |
| NIPSNAP3A      | -1.0317174994 | 0.8563318859 | 0.9999763851 |
| NIPSNAP3B      | -1.0054744133 | 0.9910384289 | 0.9999763851 |
| ABCA1          | -7.5622178268 | 0.2177145568 | 0.9999763851 |
| SLC44A1        | -1.085702025  | 0.6285100873 | 0.9999763851 |

gene\_expression\_table

|               |               |              |              |
|---------------|---------------|--------------|--------------|
| FSD1L         | 1.2153836787  | 0.6151676368 | 0.9999763851 |
| FKTN          | 1.3302725252  | 0.4390117041 | 0.9999763851 |
| TAL2          | 0             | 0            | 0            |
| TMEM38B       | -1.2736952199 | 0.1639780788 | 0.9999763851 |
| ZNF462        | 0             | 0            | 0            |
| RAD23B        | 1.0481662113  | 0.743501764  | 0.9999763851 |
| KLF4          | 1.600981085   | 0.4582199418 | 0.9999763851 |
| IKBKAP        | 1.4303035818  | 0.0676989456 | 0.9999763851 |
| FAM206A       | -1.011503618  | 0.9497869076 | 0.9999763851 |
| CTNNAL1       | -1.044395343  | 0.8759427304 | 0.9999763851 |
| TMEM245       | -1.1104836154 | 0.6441189726 | 0.9999763851 |
| EPB41L4B      | 0             | 0            | 0            |
| PTPN3         | 1.0078917917  | 0.9793671819 | 0.9999763851 |
| AKAP2         | -1.1527631095 | 0.3194495306 | 0.9999763851 |
| C9orf152      | 0             | 0            | 0            |
| TXN           | 1.0090728589  | 0.9612274003 | 0.9999763851 |
| TXNDC8        | -1.0351581998 | 0.9578046258 | 0.9999763851 |
| SVEP1         | 1.6609402791  | 0.2713423199 | 0.9999763851 |
| MUSK          | 0             | 0            | 0            |
| LPAR1         | -1.8172614764 | 0.4924033287 | 0.9999763851 |
| KIAA0368      | -1.3042631738 | 0.1040416369 | 0.9999763851 |
| PTGR1         | 0             | 0            | 0            |
| DNAJC25       | 2.2397267087  | 0.1155137259 | 0.9999763851 |
| DNAJC25-GNG10 | -4.4737841935 | 0.0703526802 | 0.9999763851 |
| GNG10         | 1.0608389507  | 0.722136205  | 0.9999763851 |
| C9orf84       | -1.427780369  | 0.5512477001 | 0.9999763851 |
| UGCG          | -1.1321426257 | 0.7134735977 | 0.9999763851 |
| SUSD1         | 1.9876202062  | 0.3043609346 | 0.9999763851 |
| PTBP3         | -1.0924213881 | 0.6406366305 | 0.9999763851 |
| HSDL2         | 1.0524349057  | 0.8118941317 | 0.9999763851 |
| KIAA1958      | 1.0058249855  | 0.9780622566 | 0.9999763851 |
| INIP          | 1.0768822303  | 0.8271359522 | 0.9999763851 |
| SNX30         | 1.5651177242  | 0.3531167973 | 0.9999763851 |
| SLC46A2       | 0             | 0            | 0            |
| ZNF883        | 0             | 0            | 0            |
| SLC31A2       | -1.7559775848 | 0.1403278028 | 0.9999763851 |
| FKBP15        | 1.013790067   | 0.9690571009 | 0.9999763851 |
| SLC31A1       | 1.1464104408  | 0.4677542534 | 0.9999763851 |
| CDC26         | 1.0982423741  | 0.6993308942 | 0.9999763851 |
| PRPF4         | 1.3186822302  | 0.2162940327 | 0.9999763851 |
| RNF183        | 3.2356557963  | 0.5547505991 | 0.9999763851 |
| WDR31         | -1.9492754797 | 0.3439396048 | 0.9999763851 |
| BSPRY         | 1.1329024962  | 0.756123277  | 0.9999763851 |
| HDHD3         | 1.1333354589  | 0.8698393542 | 0.9999763851 |
| ALAD          | -1.284404498  | 0.5357906094 | 0.9999763851 |
| POLE3         | -1.0561884249 | 0.6611029933 | 0.9999763851 |
| C9orf43       | -4.2864494036 | 0.4027150576 | 0.9999763851 |
| RGS3          | 1.6249017024  | 0.5570296953 | 0.9999763851 |
| ZNF618        | -1.0594156207 | 0.8654115327 | 0.9999763851 |

gene\_expression\_table

|          |                |              |              |
|----------|----------------|--------------|--------------|
| COL27A1  | 2.8197880227   | 0.1994971414 | 0.9999763851 |
| ORM1     | -1.3154339304  | 0.8205576571 | 0.9999763851 |
| ORM2     | 3.2361532718   | 0.5546934395 | 0.9999763851 |
| AKNA     | 1.224487139    | 0.3359902349 | 0.9999763851 |
| WHRN     | -1.6481169983  | 0.4665104648 | 0.9999763851 |
| ATP6V1G1 | -1.1423900637  | 0.3052842433 | 0.9999763851 |
| C9orf91  | -1.6250767384  | 0.1158699236 | 0.9999763851 |
| TNFSF15  | -14.1218219134 | 0.1012622274 | 0.9999763851 |
| DEC1     | 0              | 0            | 0            |
| PAPPA    | 1.2868359435   | 0.821136059  | 0.9999763851 |
| ASTN2    | 1.6401870795   | 0.1024958053 | 0.9999763851 |
| TRIM32   | -1.818898251   | 0.2492423032 | 0.9999763851 |
| TLR4     | 1.75912153     | 0.0341797958 | 0.9999763851 |
| BRINP1   | 0              | 0            | 0            |
| CDK5RAP2 | -1.4112567957  | 0.081580631  | 0.9999763851 |
| MEGF9    | -1.1602953579  | 0.6474487167 | 0.9999763851 |
| FBXW2    | 1.1486772943   | 0.4468640067 | 0.9999763851 |
| PSMD5    | -1.1887559249  | 0.3860863664 | 0.9999763851 |
| PHF19    | 1.4530850141   | 0.0286678342 | 0.9999763851 |
| TRAF1    | -1.3719041759  | 0.7491476502 | 0.9999763851 |
| C5       | 2.309949263    | 0.1695128747 | 0.9999763851 |
| CNTRL    | -1.058947545   | 0.7968771668 | 0.9999763851 |
| RAB14    | -1.6153811884  | 0.001304     | 0.9116837145 |
| GSN      | -1.8319891166  | 0.0955440429 | 0.9999763851 |
| STOM     | 1.4673073682   | 0.0246239673 | 0.9999763851 |
| DAB2IP   | -1.9668180936  | 0.4711036877 | 0.9999763851 |
| TTLL11   | 1.7726991575   | 0.0563574559 | 0.9999763851 |
| NDUFA8   | -1.0104669066  | 0.9448903897 | 0.9999763851 |
| MORN5    | -4.2849908816  | 0.4028453076 | 0.9999763851 |
| RBM18    | 1.3235099296   | 0.2969998803 | 0.9999763851 |
| MRRF     | 1.6409889624   | 0.0983889626 | 0.9999763851 |
| PTGS1    | -1.4368458787  | 0.041749375  | 0.9999763851 |
| OR1J2    | 0              | 0            | 0            |
| PDCL     | -1.0352849975  | 0.8662318594 | 0.9999763851 |
| RC3H2    | -1.1951838885  | 0.6286076329 | 0.9999763851 |
| ZBTB6    | 1.7018174596   | 0.259281846  | 0.9999763851 |
| ZBTB26   | -1.9659101454  | 0.4330083403 | 0.9999763851 |
| RABGAP1  | 1.0734628279   | 0.7638854644 | 0.9999763851 |
| STRBP    | -1.2457557502  | 0.2543073657 | 0.9999763851 |
| CRB2     | 0              | 0            | 0            |
| DENND1A  | 1.0019349318   | 0.9925034682 | 0.9999763851 |
| LHX2     | -2.4601618341  | 0.0682953778 | 0.9999763851 |
| NEK6     | -1.2586818316  | 0.1200994363 | 0.9999763851 |
| PSMB7    | 1.0854624161   | 0.5135004734 | 0.9999763851 |
| NR5A1    | 0              | 0            | 0            |
| NR6A1    | 1.0180746967   | 0.9419269609 | 0.9999763851 |
| OLFML2A  | 1.1066314536   | 0.862106592  | 0.9999763851 |
| WDR38    | 3.2353357581   | 0.554787377  | 0.9999763851 |
| RPL35    | 1.2920617182   | 0.0417266139 | 0.9999763851 |

gene\_expression\_table

|            |               |              |              |
|------------|---------------|--------------|--------------|
| ARPC5L     | -1.0511098053 | 0.7333350909 | 0.9999763851 |
| GOLGA1     | 1.6446863712  | 0.3175854061 | 0.9999763851 |
| SCAI       | -1.1755828149 | 0.6067591909 | 0.9999763851 |
| PPP6C      | -1.0293860456 | 0.8702081381 | 0.9999763851 |
| RABEPK     | 1.0599298826  | 0.7616606244 | 0.9999763851 |
| HSPA5      | -1.1930980902 | 0.172358332  | 0.9999763851 |
| GAPVD1     | 1.1529852506  | 0.5841194324 | 0.9999763851 |
| MAPKAP1    | 1.4446388626  | 0.0569625996 | 0.9999763851 |
| PBX3       | -1.3109147982 | 0.086707122  | 0.9999763851 |
| MVB12B     | -1.0124255437 | 0.9354910183 | 0.9999763851 |
| ZBTB43     | -1.0228293514 | 0.927577496  | 0.9999763851 |
| ZBTB34     | -1.0718982213 | 0.8649662694 | 0.9999763851 |
| RALGPS1    | -1.1138651893 | 0.8187207939 | 0.9999763851 |
| GARNL3     | -1.8725992231 | 0.3205258278 | 0.9999763851 |
| ZNF79      | 2.799028425   | 0.126607932  | 0.9999763851 |
| RPL12      | 1.0534319819  | 0.6930457963 | 0.9999763851 |
| LRSAM1     | -1.2403239507 | 0.5756742367 | 0.9999763851 |
| FAM129B    | 1.236026333   | 0.2724398645 | 0.9999763851 |
| STXBP1     | 1.1627248867  | 0.5274164534 | 0.9999763851 |
| PTRH1      | 1.0275809886  | 0.9576395509 | 0.9999763851 |
| TTC16      | 0             | 0            | 0            |
| TOR2A      | 1.044169403   | 0.8803191232 | 0.9999763851 |
| SH2D3C     | 1.3775907027  | 0.4834760416 | 0.9999763851 |
| CDK9       | 1.127554366   | 0.7641117508 | 0.9999763851 |
| FPGS       | -1.0150951592 | 0.9320822655 | 0.9999763851 |
| ENG        | 1.0031215334  | 0.9884980291 | 0.9999763851 |
| AK1        | 1.3262752232  | 0.7420374029 | 0.9999763851 |
| ST6GALNAC6 | 1.4843598846  | 0.2442921497 | 0.9999763851 |
| ST6GALNAC4 | -1.4018717905 | 0.2821044931 | 0.9999763851 |
| PIP5KL1    | -1.1245500639 | 0.8352721746 | 0.9999763851 |
| DPM2       | 1.67547459    | 0.0913757914 | 0.9999763851 |
| FAM102A    | 1.1111395401  | 0.7250182304 | 0.9999763851 |
| NAIF1      | 1.4028425303  | 0.2595311101 | 0.9999763851 |
| SLC25A25   | 1.3978085319  | 0.2397968853 | 0.9999763851 |
| PTGES2     | -1.0906524881 | 0.7648119467 | 0.9999763851 |
| C9orf16    | -1.2547198293 | 0.4846212878 | 0.9999763851 |
| CIZ1       | -1.0096991286 | 0.9619064114 | 0.9999763851 |
| DNM1       | 1.6601904867  | 0.3624463587 | 0.9999763851 |
| GOLGA2     | -1.4981538449 | 0.0513578247 | 0.9999763851 |
| SWI5       | -1.1951432965 | 0.5387780167 | 0.9999763851 |
| TRUB2      | 1.1760665768  | 0.5338993292 | 0.9999763851 |
| COQ4       | 1.1589198719  | 0.5460528317 | 0.9999763851 |
| SLC27A4    | 1.1348932798  | 0.7056260352 | 0.9999763851 |
| URM1       | -1.2397061803 | 0.1691425109 | 0.9999763851 |
| CERCAM     | 1.0855646724  | 0.7807757616 | 0.9999763851 |
| ODF2       | 1.1424552908  | 0.5704958561 | 0.9999763851 |
| GLE1       | -1.5193340799 | 0.00374      | 0.9999763851 |
| SPTAN1     | -1.3166771546 | 0.2829826359 | 0.9999763851 |
| WDR34      | 1.3051552326  | 0.0994079688 | 0.9999763851 |

gene\_expression\_table

|           |               |              |              |
|-----------|---------------|--------------|--------------|
| SET       | 1.1230899437  | 0.3075123262 | 0.9999763851 |
| PKN3      | 1.7669460201  | 0.1885514336 | 0.9999763851 |
| ZDHHC12   | 1.4758880504  | 0.267943328  | 0.9999763851 |
| ZER1      | -1.71960772   | 0.1148946035 | 0.9999763851 |
| TBC1D13   | 1.8247620725  | 0.0389215737 | 0.9999763851 |
| ENDOG     | 1.1025993542  | 0.5697620297 | 0.9999763851 |
| C9orf114  | 1.6621407841  | 0.1633260743 | 0.9999763851 |
| KYAT1     | -1.9803152966 | 0.0498709869 | 0.9999763851 |
| LRRC8A    | 1.1089656077  | 0.6728515864 | 0.9999763851 |
| PHYHD1    | 0             | 0            | 0            |
| DOLK      | 1.8301434462  | 0.1860975807 | 0.9999763851 |
| NUP188    | -1.039693804  | 0.8085143696 | 0.9999763851 |
| SH3GLB2   | -1.0099838896 | 0.9781795044 | 0.9999763851 |
| FAM73B    | -1.4060752702 | 0.2335662843 | 0.9999763851 |
| DOLPP1    | 1.4209833715  | 0.452821417  | 0.9999763851 |
| CRAT      | -1.1387519898 | 0.6993705861 | 0.9999763851 |
| PPP2R4    | 1.3989763488  | 0.1164584117 | 0.9999763851 |
| IER5L     | 1.0475909463  | 0.8401625156 | 0.9999763851 |
| NTMT1     | 7.5217611033  | 0.0411721632 | 0.9999763851 |
| ASB6      | 1.0120460414  | 0.9442584918 | 0.9999763851 |
| PRRX2     | 0             | 0            | 0            |
| PTGES     | -3.0819688013 | 0.1350901342 | 0.9999763851 |
| TOR1B     | 1.518254932   | 0.0972609679 | 0.9999763851 |
| TOR1A     | 1.0263693285  | 0.8898699628 | 0.9999763851 |
| C9orf78   | -1.0614348868 | 0.6402072989 | 0.9999763851 |
| USP20     | -1.1081496276 | 0.5764788525 | 0.9999763851 |
| FNBP1     | 1.0210297633  | 0.8679828672 | 0.9999763851 |
| GPR107    | -1.4025319731 | 0.0782784902 | 0.9999763851 |
| NCS1      | -1.0337384718 | 0.9007806609 | 0.9999763851 |
| HMCN2     | 0             | 0            | 0            |
| ASS1      | -1.6107004734 | 0.0542474448 | 0.9999763851 |
| FUBP3     | -1.4195844395 | 0.0789679395 | 0.9999763851 |
| PRDM12    | 0             | 0            | 0            |
| EXOSC2    | 1.3291888385  | 0.2333034164 | 0.9999763851 |
| ABL1      | -1.0077983939 | 0.9678482478 | 0.9999763851 |
| QRFP      | -4.2849908816 | 0.4028453076 | 0.9999763851 |
| FIBCD1    | 1.4043593911  | 0.3255833197 | 0.9999763851 |
| AIF1L     | 0             | 0            | 0            |
| NUP214    | 1.1156137814  | 0.5879924611 | 0.9999763851 |
| FAM78A    | 1.1782453432  | 0.4984769062 | 0.9999763851 |
| PRRC2B    | -1.3382310599 | 0.1421058016 | 0.9999763851 |
| POMT1     | 13.0486682238 | 0.181312288  | 0.9999763851 |
| UCK1      | 1.1825037047  | 0.6281291508 | 0.9999763851 |
| LOC642515 | 0             | 0            | 0            |
| RAPGEF1   | 1.1473032841  | 0.54928026   | 0.9999763851 |
| MED27     | 1.0463616764  | 0.7730314365 | 0.9999763851 |
| NTNG2     | -1.3001131679 | 0.3424686551 | 0.9999763851 |
| SETX      | 1.2787987097  | 0.3227772159 | 0.9999763851 |
| TTF1      | 1.2772068104  | 0.1985636284 | 0.9999763851 |

gene\_expression\_table

|              |               |              |              |
|--------------|---------------|--------------|--------------|
| CFAP77       | -4.2864494036 | 0.4027150576 | 0.9999763851 |
| DDX31        | 1.0859188704  | 0.7535187093 | 0.9999763851 |
| GTF3C4       | -1.1043339428 | 0.5721874532 | 0.9999763851 |
| AK8          | -3.3294360969 | 0.2395755018 | 0.9999763851 |
| SPACA9       | 2.7885870269  | 0.0921679679 | 0.9999763851 |
| TSC1         | 1.1470839235  | 0.632873079  | 0.9999763851 |
| GTF3C5       | -1.0260264395 | 0.8743203179 | 0.9999763851 |
| CEL          | -4.3342515471 | 0.1405566338 | 0.9999763851 |
| RALGDS       | -1.2842198819 | 0.1381662173 | 0.9999763851 |
| GBGT1        | 1.9906522869  | 0.2910050433 | 0.9999763851 |
| SURF6        | 1.1486704957  | 0.3956251896 | 0.9999763851 |
| MED22        | -1.0395883013 | 0.880718955  | 0.9999763851 |
| RPL7A        | -1.06939035   | 0.5627175207 | 0.9999763851 |
| SURF1        | -1.1735182106 | 0.5484984984 | 0.9999763851 |
| SURF2        | 1.2672731558  | 0.5708994064 | 0.9999763851 |
| SURF4        | 1.0453219074  | 0.7688279804 | 0.9999763851 |
| STKLD1       | 1.1336585844  | 0.8772375055 | 0.9999763851 |
| REXO4        | 1.4370362158  | 0.0542609243 | 0.9999763851 |
| ADAMTS13     | 1.8136032532  | 0.5941211288 | 0.9999763851 |
| CACFD1       | 3.4758470146  | 0.0468823228 | 0.9999763851 |
| SLC2A6       | 7.7211724672  | 0.2779709379 | 0.9999763851 |
| ADAMTSL2     | 0             | 0            | 0            |
| SARDH        | 0             | 0            | 0            |
| VAV2         | -1.3107985259 | 0.1528647798 | 0.9999763851 |
| BRD3         | 1.0074820752  | 0.9626297635 | 0.9999763851 |
| WDR5         | -1.0076796777 | 0.9592606505 | 0.9999763851 |
| RXRA         | 1.3758142483  | 0.0328517095 | 0.9999763851 |
| COL5A1       | 0             | 0            | 0            |
| FCN1         | 1.0064028117  | 0.9866277677 | 0.9999763851 |
| PPP1R26      | 1.6870764756  | 0.332925959  | 0.9999763851 |
| C9orf116     | -1.0853454036 | 0.8981327655 | 0.9999763851 |
| MRPS2        | 1.0291485821  | 0.8439241733 | 0.9999763851 |
| GLT6D1       | 0             | 0            | 0            |
| KCNT1        | 0             | 0            | 0            |
| CAMSAP1      | -1.1555210169 | 0.6472058107 | 0.9999763851 |
| UBAC1        | 1.005018407   | 0.9719600287 | 0.9999763851 |
| NACC2        | 1.5039737695  | 0.0761470461 | 0.9999763851 |
| C9orf69      | 1.0955650147  | 0.6156175497 | 0.9999763851 |
| LOC107987142 | 1.287203384   | 0.8313351269 | 0.9999763851 |
| LHX3         | 3.2353357581  | 0.554787377  | 0.9999763851 |
| QSOX2        | 1.3451472929  | 0.3482153789 | 0.9999763851 |
| CCDC187      | 0             | 0            | 0            |
| GPSM1        | 0             | 0            | 0            |
| DNLZ         | -1.2523681884 | 0.4381207828 | 0.9999763851 |
| CARD9        | -1.8497396327 | 0.1951733951 | 0.9999763851 |
| SNAPC4       | -1.0017726746 | 0.9960124783 | 0.9999763851 |
| SDCCAG3      | -1.2440123885 | 0.2282967124 | 0.9999763851 |
| PMPCA        | 1.0754244855  | 0.6940360869 | 0.9999763851 |
| INPP5E       | 2.3255510872  | 0.0835396976 | 0.9999763851 |

gene\_expression\_table

|          |               |              |              |
|----------|---------------|--------------|--------------|
| SEC16A   | -1.0597433903 | 0.7677601567 | 0.9999763851 |
| NOTCH1   | 1.2893689256  | 0.1882271126 | 0.9999763851 |
| EGFL7    | -1.7420007258 | 0.2244504392 | 0.9999763851 |
| AGPAT2   | 1.1852434809  | 0.3513087217 | 0.9999763851 |
| FAM69B   | -1.2593896088 | 0.320775637  | 0.9999763851 |
| LCN10    | -4.2849908816 | 0.4028453076 | 0.9999763851 |
| LCN6     | 0             | 0            | 0            |
| TMEM141  | -1.0402064156 | 0.8530510203 | 0.9999763851 |
| CCDC183  | 1.2671911569  | 0.6528299093 | 0.9999763851 |
| RABL6    | 1.2440132253  | 0.1873741489 | 0.9999763851 |
| PHPT1    | -1.0474055508 | 0.8062161965 | 0.9999763851 |
| MAMDC4   | 3.3952287445  | 0.2424412637 | 0.9999763851 |
| EDF1     | 1.1087027575  | 0.4566736237 | 0.9999763851 |
| TRAF2    | 1.0153505021  | 0.9648317337 | 0.9999763851 |
| FBXW5    | 1.0155705136  | 0.9325273408 | 0.9999763851 |
| C8G      | -2.4440355816 | 0.4436151611 | 0.9999763851 |
| C9orf142 | -1.0759936984 | 0.8209212899 | 0.9999763851 |
| CLIC3    | 0             | 0            | 0            |
| ABCA2    | 20.2949411759 | 0.1207307807 | 0.9999763851 |
| C9orf139 | 1.2865109866  | 0.8334383935 | 0.9999763851 |
| FUT7     | 1.0479999936  | 0.8870749341 | 0.9999763851 |
| NPDC1    | -1.0144903535 | 0.9555278816 | 0.9999763851 |
| ENTPD2   | 0             | 0            | 0            |
| SAPCD2   | 1.2757054906  | 0.1412237608 | 0.9999763851 |
| UAP1L1   | 1.3997613402  | 0.118011653  | 0.9999763851 |
| MAN1B1   | 1.1165054798  | 0.6475210862 | 0.9999763851 |
| DPP7     | -1.2678493068 | 0.1869493223 | 0.9999763851 |
| LRRC26   | 0             | 0            | 0            |
| ANAPC2   | 0             | 0            | 0            |
| SSNA1    | 1.1546260337  | 0.3875936719 | 0.9999763851 |
| TPRN     | 1.462610597   | 0.2135108633 | 0.9999763851 |
| TMEM203  | 1.1370696386  | 0.5282271295 | 0.9999763851 |
| NDOR1    | 1.0391995142  | 0.928692599  | 0.9999763851 |
| RNF208   | 1.2865109866  | 0.8335873235 | 0.9999763851 |
| CYSRT1   | 1.8139617088  | 0.5779223724 | 0.9999763851 |
| SLC34A3  | 0             | 0            | 0            |
| TUBB4B   | 1.003098129   | 0.9831891842 | 0.9999763851 |
| FAM166A  | -1.9663843334 | 0.4764302308 | 0.9999763851 |
| NELFB    | 1.0030753002  | 0.9852280831 | 0.9999763851 |
| TOR4A    | 1.2403195898  | 0.2842222953 | 0.9999763851 |
| NRARP    | -1.2870893299 | 0.3998958579 | 0.9999763851 |
| EXD3     | 1.242910695   | 0.5512190762 | 0.9999763851 |
| NOXA1    | 4.9748777347  | 0.1018700777 | 0.9999763851 |
| NSMF     | 1.8997470176  | 0.0465844676 | 0.9999763851 |
| PNPLA7   | 1.2868359435  | 0.8210968834 | 0.9999763851 |
| MRPL41   | 1.1355272914  | 0.4394940949 | 0.9999763851 |
| DPH7     | -1.1310936908 | 0.573783197  | 0.9999763851 |
| ZMYND19  | -1.2817765109 | 0.3274005272 | 0.9999763851 |
| ARRDC1   | 1.2604856478  | 0.3505011265 | 0.9999763851 |

gene\_expression\_table

|              |               |              |              |
|--------------|---------------|--------------|--------------|
| EHMT1        | -1.2238136449 | 0.3049522544 | 0.9999763851 |
| FAM157B      | 1.5276737168  | 0.2570181449 | 0.9999763851 |
| ZMYND11      | -1.1467792511 | 0.4538335489 | 0.9999763851 |
| DIP2C        | -2.6587266395 | 0.1997709661 | 0.9999763851 |
| LARP4B       | -1.1317061308 | 0.3867909827 | 0.9999763851 |
| GTPBP4       | -1.038136083  | 0.7918829786 | 0.9999763851 |
| IDI2         | 2.4770826173  | 0.0421920504 | 0.9999763851 |
| IDI1         | -1.1330304916 | 0.5075727367 | 0.9999763851 |
| WDR37        | -1.3960041553 | 0.2025955797 | 0.9999763851 |
| ADARB2       | 1.8846717628  | 0.1103997922 | 0.9999763851 |
| LOC101927824 | 7.7192231741  | 0.2782707334 | 0.9999763851 |
| PFKP         | -1.0509401828 | 0.7860960012 | 0.9999763851 |
| PITRM1       | 1.51766418    | 0.0362139051 | 0.9999763851 |
| KLF6         | -1.5574004387 | 0.007303     | 0.9999763851 |
| AKR1C1       | 7.4933530102  | 0.2985445178 | 0.9999763851 |
| AKR1C2       | 7.7488609396  | 0.30604422   | 0.9999763851 |
| AKR1C3       | 5.4770877341  | 0.3746135179 | 0.9999763851 |
| NET1         | -1.185198129  | 0.4235625601 | 0.9999763851 |
| ASB13        | -1.0975922777 | 0.7453325089 | 0.9999763851 |
| FAM208B      | -1.335126453  | 0.2428587568 | 0.9999763851 |
| GDI2         | -1.191919218  | 0.1585779604 | 0.9999763851 |
| ANKRD16      | 1.6491085401  | 0.2178624659 | 0.9999763851 |
| FBXO18       | -1.4457112944 | 0.2258347345 | 0.9999763851 |
| IL15RA       | -1.2719915409 | 0.5189030354 | 0.9999763851 |
| IL2RA        | 0             | 0            | 0            |
| RBM17        | -1.0116073204 | 0.9407391283 | 0.9999763851 |
| PFKFB3       | -1.0828318755 | 0.635565173  | 0.9999763851 |
| PRKCQ        | -1.3319546752 | 0.3272350104 | 0.9999763851 |
| SFMBT2       | -1.3929953701 | 0.1035154592 | 0.9999763851 |
| KIN          | -1.1539615691 | 0.7449715033 | 0.9999763851 |
| ATP5C1       | -1.2505841073 | 0.1826801474 | 0.9999763851 |
| TAF3         | 1.2865833997  | 0.2698252271 | 0.9999763851 |
| GATA3        | 0             | 0            | 0            |
| CELF2        | 1.1107563488  | 0.4276428832 | 0.9999763851 |
| USP6NL       | -1.4271299095 | 0.5799896856 | 0.9999763851 |
| LOC107984208 | 0             | 0            | 0            |
| ECHDC3       | 0             | 0            | 0            |
| PROSER2      | -1.3020932657 | 0.4581893591 | 0.9999763851 |
| UPF2         | -1.0841753676 | 0.6902596447 | 0.9999763851 |
| DHTKD1       | -1.0947309863 | 0.6737401064 | 0.9999763851 |
| SEC61A2      | -1.1078402714 | 0.7368966347 | 0.9999763851 |
| NUDT5        | 1.4483644655  | 0.0628063733 | 0.9999763851 |
| CDC123       | 1.334279998   | 0.0526424446 | 0.9999763851 |
| CAMK1D       | -1.0898785616 | 0.7022830768 | 0.9999763851 |
| CCDC3        | 0             | 0            | 0            |
| OPTN         | -1.1879022687 | 0.4334745196 | 0.9999763851 |
| MCM10        | 1.1989046599  | 0.3912352954 | 0.9999763851 |
| PHYH         | -1.2592876644 | 0.4164111012 | 0.9999763851 |
| SEPHS1       | 1.1534900846  | 0.3718938703 | 0.9999763851 |



gene\_expression\_table

|             |               |              |              |
|-------------|---------------|--------------|--------------|
| BEND7       | 0             | 0            | 0            |
| PRPF18      | -1.3038500007 | 0.3582810102 | 0.9999763851 |
| FRMD4A      | -3.7489679912 | 0.1056863984 | 0.9999763851 |
| FAM107B     | 1.1226709472  | 0.4339217475 | 0.9999763851 |
| CDNF        | 3.2361532718  | 0.5546934395 | 0.9999763851 |
| HSPA14      | 1.2758823837  | 0.1353027984 | 0.9999763851 |
| SUV39H2     | 1.7689525345  | 0.4240876668 | 0.9999763851 |
| DCLRE1C     | 1.0136592644  | 0.9412542664 | 0.9999763851 |
| ACBD7       | 1.2870761236  | 0.8160709833 | 0.9999763851 |
| RPP38       | -1.0649133204 | 0.846531529  | 0.9999763851 |
| NMT2        | 1.0535512441  | 0.8326925426 | 0.9999763851 |
| FAM188A     | 1.2016035043  | 0.6436702891 | 0.9999763851 |
| PTER        | -1.2157970631 | 0.4292372864 | 0.9999763851 |
| C1QL3       | 1.7969999196  | 0.2765017484 | 0.9999763851 |
| RSU1        | 1.0898782563  | 0.5583775796 | 0.9999763851 |
| TRDMT1      | 1.7579580407  | 0.4338806613 | 0.9999763851 |
| VIM         | -3.8760288064 | 1.92E-05     | 0.0412638911 |
| HACD1       | 1.4891726905  | 0.2330267312 | 0.9999763851 |
| STAM        | -1.282054125  | 0.4037090904 | 0.9999763851 |
| TMEM236     | 3.2361532718  | 0.5546934395 | 0.9999763851 |
| MRC1        | 0             | 0            | 0            |
| CACNB2      | -1.333277728  | 0.4114947162 | 0.9999763851 |
| NSUN6       | 1.1237523584  | 0.791579165  | 0.9999763851 |
| ARL5B       | -1.1171101007 | 0.6392106948 | 0.9999763851 |
| PLXDC2      | -1.9661045084 | 0.453457533  | 0.9999763851 |
| SKIDA1      | 0             | 0            | 0            |
| MLLT10      | 1.6525164228  | 0.1300049447 | 0.9999763851 |
| DNAJC1      | -1.2946572915 | 0.1107792618 | 0.9999763851 |
| COMMD3      | -1.007704891  | 0.9552525588 | 0.9999763851 |
| COMMD3-BMI1 | -1.0687042921 | 0.9325672115 | 0.9999763851 |
| BMI1        | 1.0309157868  | 0.8033689869 | 0.9999763851 |
| SPAG6       | 1.193263566   | 0.4963395463 | 0.9999763851 |
| PIP4K2A     | 1.0571655908  | 0.7287877592 | 0.9999763851 |
| ARMC3       | 0             | 0            | 0            |
| MSRB2       | 1.6000355819  | 0.0356264605 | 0.9999763851 |
| OTUD1       | 2.8672419672  | 0.3103828854 | 0.9999763851 |
| KIAA1217    | -3.2837744538 | 0.0545169772 | 0.9999763851 |
| ARHGAP21    | 1.1483926048  | 0.5886486088 | 0.9999763851 |
| THNSL1      | -1.4073673926 | 0.67478989   | 0.9999763851 |
| ENKUR       | 3.2353357581  | 0.554787377  | 0.9999763851 |
| APBB1IP     | 1.2725130525  | 0.1324931821 | 0.9999763851 |
| PDSS1       | 1.3643389243  | 0.3477032333 | 0.9999763851 |
| ABI1        | 1.0542103453  | 0.7694977714 | 0.9999763851 |
| ANKRD26     | 1.0337843191  | 0.9302757929 | 0.9999763851 |
| YME1L1      | 1.2254692216  | 0.1543758403 | 0.9999763851 |
| MASTL       | -1.5540399947 | 0.218113573  | 0.9999763851 |
| ACBD5       | 2.224467511   | 0.0228452651 | 0.9999763851 |
| RAB18       | -1.3075363155 | 0.1008226144 | 0.9999763851 |
| MKX         | 0             | 0            | 0            |

gene\_expression\_table

|              |               |              |              |
|--------------|---------------|--------------|--------------|
| ARMC4        | -7.5622178268 | 0.2177145568 | 0.9999763851 |
| MPP7         | 1.1411132031  | 0.5969112488 | 0.9999763851 |
| WAC          | -1.2121870701 | 0.1944490521 | 0.9999763851 |
| BAMBI        | -1.2190011384 | 0.4884821042 | 0.9999763851 |
| SVIL         | 1.5359848111  | 0.1301318376 | 0.9999763851 |
| KIAA1462     | 1.8778891881  | 0.1664208711 | 0.9999763851 |
| MTPAP        | -1.0886024732 | 0.6590545118 | 0.9999763851 |
| MAP3K8       | 1.0504056933  | 0.8161953317 | 0.9999763851 |
| ZNF438       | 1.0462705393  | 0.8101000529 | 0.9999763851 |
| ZEB1         | 2.8182416066  | 0.2019120972 | 0.9999763851 |
| ARHGAP12     | -1.2535571721 | 0.3563367205 | 0.9999763851 |
| KIF5B        | 1.1854652447  | 0.2279011118 | 0.9999763851 |
| EPC1         | -1.0137090768 | 0.9451838337 | 0.9999763851 |
| CCDC7        | -1.7847353177 | 0.0671684177 | 0.9999763851 |
| ITGB1        | 1.1378174453  | 0.4582031549 | 0.9999763851 |
| NRP1         | -4.04068853   | 0.1312233848 | 0.9999763851 |
| LOC105376488 | -4.1323543353 | 0.2115526896 | 0.9999763851 |
| PARD3        | 2.3398344857  | 0.4133387514 | 0.9999763851 |
| CUL2         | -1.4488995931 | 0.2113688004 | 0.9999763851 |
| CREM         | 1.0235181839  | 0.929365868  | 0.9999763851 |
| CCNY         | -1.0090830796 | 0.9485705656 | 0.9999763851 |
| ANKRD30A     | 3.2353357581  | 0.554787377  | 0.9999763851 |
| ZNF248       | -1.107052137  | 0.7205077955 | 0.9999763851 |
| ZNF25        | -2.2197236441 | 0.0108170859 | 0.9999763851 |
| ZNF33A       | -1.3621433495 | 0.0975384407 | 0.9999763851 |
| ZNF37A       | 1.486460666   | 0.0287063449 | 0.9999763851 |
| ZNF33B       | 1.2547049557  | 0.5570972114 | 0.9999763851 |
| BMS1         | -1.1047261569 | 0.5265509378 | 0.9999763851 |
| RET          | -4.2849908816 | 0.4028453076 | 0.9999763851 |
| CSGALNACT2   | -1.2636109227 | 0.2088557988 | 0.9999763851 |
| RASGEF1A     | 0             | 0            | 0            |
| HNRNPF       | -1.0204285988 | 0.8710719746 | 0.9999763851 |
| ZNF32        | -1.181723761  | 0.7474101105 | 0.9999763851 |
| TMEM72       | -1.1491729646 | 0.8481357365 | 0.9999763851 |
| RASSF4       | 1.4035550145  | 0.0728845761 | 0.9999763851 |
| C10orf25     | -4.3342515471 | 0.1403801422 | 0.9999763851 |
| ZNF22        | 1.0526325354  | 0.7812774213 | 0.9999763851 |
| ALOX5        | 3.2356557963  | 0.5547505991 | 0.9999763851 |
| MARCH8       | -1.3404654384 | 0.1452398255 | 0.9999763851 |
| ZFAND4       | -1.053758897  | 0.9198673225 | 0.9999763851 |
| FAM21C       | -1.3285885305 | 0.2204816431 | 0.9999763851 |
| FAM25E       | 3.2353357581  | 0.554787377  | 0.9999763851 |
| AGAP4        | -1.0052361772 | 0.9919615135 | 0.9999763851 |
| TIMM23       | 1.2998059111  | 0.1040693291 | 0.9999763851 |
| NCOA4        | 1.2686654285  | 0.0812398639 | 0.9999763851 |
| ANTXR1       | 3.2361532718  | 0.5546934395 | 0.9999763851 |
| LOC107984026 | 7.7878683154  | 0.0271494815 | 0.9999763851 |
| SYT15        | -1.1490595167 | 0.8521920567 | 0.9999763851 |
| ANXA8        | -1.0987792284 | 0.7584237601 | 0.9999763851 |

gene\_expression\_table

|           |               |              |              |
|-----------|---------------|--------------|--------------|
| AGAP9     | 1.6243668162  | 0.5953234889 | 0.9999763851 |
| FRMPD2    | 0             | 0            | 0            |
| MAPK8     | -1.0159569792 | 0.9514185105 | 0.9999763851 |
| WDFY4     | 1.2647554825  | 0.2852483678 | 0.9999763851 |
| LRRC18    | 0             | 0            | 0            |
| VSTM4     | 0             | 0            | 0            |
| C10orf128 | 1.689326647   | 0.0156308726 | 0.9999763851 |
| ERCC6     | -1.5977494888 | 0.1395141053 | 0.9999763851 |
| PGBD3     | 1.9665069869  | 0.380756122  | 0.9999763851 |
| CHAT      | 0             | 0            | 0            |
| C10orf53  | 3.2353357581  | 0.554787377  | 0.9999763851 |
| OGDHL     | 1.2869488883  | 0.8207674385 | 0.9999763851 |
| PARG      | 1.2001585789  | 0.6352968538 | 0.9999763851 |
| TIMM23B   | -1.21717731   | 0.4666456168 | 0.9999763851 |
| AGAP6     | -1.3504062993 | 0.3579932544 | 0.9999763851 |
| FAM21A    | 1.5840102541  | 0.0434169723 | 0.9999763851 |
| SGMS1     | -1.504530746  | 0.250601656  | 0.9999763851 |
| PRKG1     | -1.1491729646 | 0.8482307178 | 0.9999763851 |
| CSTF2T    | 1.5072276666  | 0.0652160916 | 0.9999763851 |
| ZWINT     | 1.0778039014  | 0.611368984  | 0.9999763851 |
| IPMK      | -1.9244394993 | 0.0125198203 | 0.9999763851 |
| CISD1     | 1.2114560708  | 0.3535086302 | 0.9999763851 |
| UBE2D1    | 1.1389064505  | 0.6711499294 | 0.9999763851 |
| TFAM      | -1.0771487817 | 0.6554544661 | 0.9999763851 |
| BICC1     | -1.0263302305 | 0.9539385027 | 0.9999763851 |
| PHYHIPL   | 3.2356557963  | 0.5547505991 | 0.9999763851 |
| SLC16A9   | 1.0177424686  | 0.9586743554 | 0.9999763851 |
| CCDC6     | -1.4483030344 | 0.0196719726 | 0.9999763851 |
| CDK1      | 1.0104413471  | 0.9420320722 | 0.9999763851 |
| ARID5B    | -3.3284109188 | 0.2427071832 | 0.9999763851 |
| RTKN2     | 0             | 0            | 0            |
| ZNF365    | 0             | 0            | 0            |
| ADO       | -1.0659611257 | 0.7579370665 | 0.9999763851 |
| EGR2      | -3.1559763085 | 0.1811594967 | 0.9999763851 |
| NRBF2     | -1.133777439  | 0.6141919325 | 0.9999763851 |
| JMJD1C    | -1.2599703224 | 0.4132101017 | 0.9999763851 |
| REEP3     | 0             | 0            | 0            |
| DNAJC12   | -3.7464240212 | 0.1398552477 | 0.9999763851 |
| SIRT1     | -1.1258785493 | 0.630055791  | 0.9999763851 |
| HERC4     | -1.2209854762 | 0.3604791486 | 0.9999763851 |
| MYPN      | 3.2353357581  | 0.554787377  | 0.9999763851 |
| PBLD      | 5.4790129495  | 0.3757193507 | 0.9999763851 |
| HNRNPH3   | 1.0447619908  | 0.7887177146 | 0.9999763851 |
| RUFY2     | -1.5530955003 | 0.3276351892 | 0.9999763851 |
| DNA2      | -1.9923980812 | 0.037019664  | 0.9999763851 |
| SLC25A16  | 1.3161558074  | 0.5299451961 | 0.9999763851 |
| TET1      | -1.7928551696 | 0.063252743  | 0.9999763851 |
| CCAR1     | -1.024622964  | 0.8737690131 | 0.9999763851 |
| STOX1     | 3.2356557963  | 0.5547505991 | 0.9999763851 |

gene\_expression\_table

|           |               |              |              |
|-----------|---------------|--------------|--------------|
| DDX50     | 1.0592118339  | 0.7414076852 | 0.9999763851 |
| DDX21     | 1.0939992895  | 0.4993144937 | 0.9999763851 |
| KIF1BP    | -1.0486347201 | 0.9170936101 | 0.9999763851 |
| SRGN      | 1.1523264374  | 0.2513396275 | 0.9999763851 |
| VPS26A    | 1.358921533   | 0.096552737  | 0.9999763851 |
| SUPV3L1   | -1.6328194669 | 0.1075970386 | 0.9999763851 |
| HKDC1     | -7.5647903763 | 0.2176246281 | 0.9999763851 |
| HK1       | 1.005304992   | 0.9701636763 | 0.9999763851 |
| TACR2     | -1.3154339304 | 0.8205576571 | 0.9999763851 |
| TSPAN15   | -1.0803829108 | 0.9216984918 | 0.9999763851 |
| H2AFY2    | 0             | 0            | 0            |
| AIFM2     | 1.9216708403  | 0.4666539967 | 0.9999763851 |
| TYSND1    | -1.0998248599 | 0.7466721725 | 0.9999763851 |
| SAR1A     | -1.0848474349 | 0.6150097605 | 0.9999763851 |
| PPA1      | 1.3763695697  | 0.009301     | 0.9999763851 |
| LRRC20    | 1.3952985806  | 0.2593190867 | 0.9999763851 |
| EIF4EBP2  | 1.0746257704  | 0.6374883429 | 0.9999763851 |
| NODAL     | 0             | 0            | 0            |
| PALD1     | -2.4840175982 | 0.1707209957 | 0.9999763851 |
| PRF1      | 0             | 0            | 0            |
| ADAMTS14  | -1.3710462586 | 0.7619212495 | 0.9999763851 |
| SGPL1     | -1.508703732  | 0.2318572489 | 0.9999763851 |
| PCBD1     | 1.4287486362  | 0.0570351191 | 0.9999763851 |
| SLC29A3   | 1.1848656123  | 0.5788389069 | 0.9999763851 |
| CDH23     | 1.3259726427  | 0.7105573285 | 0.9999763851 |
| C10orf105 | 2.3407592913  | 0.42663657   | 0.9999763851 |
| C10orf54  | 1.1365701103  | 0.5863658994 | 0.9999763851 |
| PSAP      | -1.4748597948 | 0.00178      | 0.9999763851 |
| SPOCK2    | 0             | 0            | 0            |
| ASCC1     | -1.245203271  | 0.4300244976 | 0.9999763851 |
| ANAPC16   | 1.1986417738  | 0.2601839774 | 0.9999763851 |
| DDIT4     | -1.289757765  | 0.146270355  | 0.9999763851 |
| DNAJB12   | 1.7865457543  | 0.0545411025 | 0.9999763851 |
| MICU1     | -1.0911841987 | 0.6327325137 | 0.9999763851 |
| MCU       | -1.4376367353 | 0.1077307178 | 0.9999763851 |
| OIT3      | 1.2169952033  | 0.8019634658 | 0.9999763851 |
| P4HA1     | -1.1594101938 | 0.427739862  | 0.9999763851 |
| NUDT13    | 1.6110435152  | 0.2048689835 | 0.9999763851 |
| ECD       | -1.3999454175 | 0.292157649  | 0.9999763851 |
| FAM149B1  | -1.3822046165 | 0.3565793379 | 0.9999763851 |
| DNAJC9    | 1.2852163259  | 0.0751107473 | 0.9999763851 |
| MRPS16    | 1.4185518436  | 0.0178177661 | 0.9999763851 |
| CFAP70    | 1.2493677488  | 0.6915260791 | 0.9999763851 |
| ANXA7     | 1.0226223617  | 0.8886032217 | 0.9999763851 |
| MSS51     | -1.9647456674 | 0.4670688857 | 0.9999763851 |
| PPP3CB    | 1.5216261928  | 0.0274740326 | 0.9999763851 |
| USP54     | -1.1126860973 | 0.7088829528 | 0.9999763851 |
| AGAP5     | -1.2528461868 | 0.8154925613 | 0.9999763851 |
| SEC24C    | -1.0922285977 | 0.6558070164 | 0.9999763851 |

gene\_expression\_table

|          |               |              |              |
|----------|---------------|--------------|--------------|
| FUT11    | 1.0594535678  | 0.8501549536 | 0.9999763851 |
| CHCHD1   | 1.1007104448  | 0.5792875639 | 0.9999763851 |
| ZSWIM8   | 1.2784112794  | 0.5009386897 | 0.9999763851 |
| NDST2    | 1.1646865819  | 0.5678188543 | 0.9999763851 |
| CAMK2G   | 1.0887092959  | 0.6588724435 | 0.9999763851 |
| PLAU     | -1.0900485969 | 0.7008877174 | 0.9999763851 |
| C10orf55 | 0             | 0            | 0            |
| VCL      | -1.2830650381 | 0.2542161428 | 0.9999763851 |
| AP3M1    | 1.5065079695  | 0.0598650881 | 0.9999763851 |
| ADK      | -1.1084855186 | 0.5032096961 | 0.9999763851 |
| KAT6B    | 1.2912962828  | 0.5928581364 | 0.9999763851 |
| DUPD1    | 1.0803193328  | 0.8198617506 | 0.9999763851 |
| DUSP13   | 0             | 0            | 0            |
| SAMD8    | -1.0301645798 | 0.9624348605 | 0.9999763851 |
| VDAC2    | 1.1143064241  | 0.4540496737 | 0.9999763851 |
| COMTD1   | 1.5279303089  | 0.0614057097 | 0.9999763851 |
| ZNF503   | 1.0798750465  | 0.6902751972 | 0.9999763851 |
| C10orf11 | -1.2343803304 | 0.3107329971 | 0.9999763851 |
| KCNMA1   | 3.2361532718  | 0.5546934395 | 0.9999763851 |
| DLG5     | 1.028073281   | 0.8918154264 | 0.9999763851 |
| POLR3A   | 1.2261821008  | 0.4333704546 | 0.9999763851 |
| RPS24    | 1.0077024216  | 0.952436144  | 0.9999763851 |
| ZMIZ1    | -1.1741355171 | 0.4127135422 | 0.9999763851 |
| PPIF     | 1.1422698771  | 0.3047606579 | 0.9999763851 |
| ZCCHC24  | -1.4198124442 | 0.1517123757 | 0.9999763851 |
| EIF5AL1  | 1.3761556368  | 0.1566694688 | 0.9999763851 |
| NUTM2B   | 0             | 0            | 0            |
| TMEM254  | -1.0353098561 | 0.9275926056 | 0.9999763851 |
| PLAC9    | -2.7159660136 | 0.1427636224 | 0.9999763851 |
| ANXA11   | 1.2224360938  | 0.2123435703 | 0.9999763851 |
| FAM213A  | -1.9482682667 | 0.3554043225 | 0.9999763851 |
| TSPAN14  | 1.046014878   | 0.7710395168 | 0.9999763851 |
| SH2D4B   | 1.2862273491  | 0.8293392712 | 0.9999763851 |
| GHITM    | 1.2405429994  | 0.0927058676 | 0.9999763851 |
| C10orf99 | 0             | 0            | 0            |
| CCSER2   | 1.0490795055  | 0.8908703838 | 0.9999763851 |
| GRID1    | -4.2864494036 | 0.4027150576 | 0.9999763851 |
| WAPL     | 1.1934222148  | 0.2651006538 | 0.9999763851 |
| LDB3     | 7.7488609396  | 0.3060229829 | 0.9999763851 |
| BMPR1A   | 1.8462191135  | 0.2318500436 | 0.9999763851 |
| GLUD1    | -1.056571541  | 0.7781739575 | 0.9999763851 |
| FAM35A   | -1.0874718771 | 0.5902706491 | 0.9999763851 |
| NUTM2A   | 3.2356557963  | 0.5547505991 | 0.9999763851 |
| MINPP1   | 1.0136112833  | 0.9711043879 | 0.9999763851 |
| PAPSS2   | 0             | 0            | 0            |
| ATAD1    | 1.1625351611  | 0.5030624858 | 0.9999763851 |
| KLLN     | 3.2353357581  | 0.554787377  | 0.9999763851 |
| PTEN     | -1.064913514  | 0.6212703293 | 0.9999763851 |
| RNLS     | -1.3305441684 | 0.531944401  | 0.9999763851 |

gene\_expression\_table

|           |               |              |              |
|-----------|---------------|--------------|--------------|
| LIPJ      | 0             | 0            | 0            |
| LIPM      | 3.2361532718  | 0.5546934395 | 0.9999763851 |
| ANKRD22   | 3.922469612   | 0.1728578129 | 0.9999763851 |
| STAMBPL1  | -1.7016367315 | 0.146041691  | 0.9999763851 |
| ACTA2     | -1.4166688595 | 0.6478521083 | 0.9999763851 |
| FAS       | 1.078437726   | 0.8560118111 | 0.9999763851 |
| LIPA      | -1.0437490334 | 0.8370651979 | 0.9999763851 |
| IFIT2     | -4.9389863757 | 0.0459126109 | 0.9999763851 |
| IFIT3     | -4.7124369261 | 0.0001219    | 0.1822932891 |
| IFIT1     | -4.452374454  | 0.0149907392 | 0.9999763851 |
| IFIT5     | 1.8928577306  | 0.4866844079 | 0.9999763851 |
| PANK1     | -1.4473774847 | 0.2217989422 | 0.9999763851 |
| KIF20B    | 1.1200770599  | 0.5400115407 | 0.9999763851 |
| HTR7      | 3.2353357581  | 0.554787377  | 0.9999763851 |
| RPP30     | -1.244019471  | 0.5010159461 | 0.9999763851 |
| ANKRD1    | 0             | 0            | 0            |
| PCGF5     | -1.419280569  | 0.1487350531 | 0.9999763851 |
| TNKS2     | 1.1371914808  | 0.5937903876 | 0.9999763851 |
| FGFBP3    | -1.4386212672 | 0.3966570688 | 0.9999763851 |
| BTAF1     | -1.5341924225 | 0.1099965165 | 0.9999763851 |
| CPEB3     | 1.2643855079  | 0.5000954591 | 0.9999763851 |
| MARCH5    | -1.5865819262 | 0.0171344252 | 0.9999763851 |
| IDE       | -1.2752003243 | 0.3848552952 | 0.9999763851 |
| KIF11     | 1.3497019207  | 0.1713366676 | 0.9999763851 |
| HHEX      | 1.1944099268  | 0.4900875819 | 0.9999763851 |
| EXOC6     | 1.7729620821  | 0.0305741279 | 0.9999763851 |
| CYP26A1   | -4.2849908816 | 0.4028453076 | 0.9999763851 |
| MYOF      | -1.3957650729 | 0.7120029752 | 0.9999763851 |
| CEP55     | 1.3716572599  | 0.1873187194 | 0.9999763851 |
| FRA10AC1  | 1.0500790048  | 0.8551031113 | 0.9999763851 |
| PLCE1     | 1.9257563044  | 0.2026850018 | 0.9999763851 |
| NOC3L     | 1.1070848958  | 0.653830896  | 0.9999763851 |
| TBC1D12   | 1.2867653957  | 0.8300995955 | 0.9999763851 |
| HELLS     | 1.1175121923  | 0.5587524477 | 0.9999763851 |
| CYP2C18   | -4.2849908816 | 0.4028453076 | 0.9999763851 |
| CYP2C19   | 0             | 0            | 0            |
| CYP2C9    | 3.2353357581  | 0.554787377  | 0.9999763851 |
| CYP2C8    | 0             | 0            | 0            |
| ALDH18A1  | -1.354670874  | 0.0657091427 | 0.9999763851 |
| TCTN3     | 1.1547106538  | 0.4485831446 | 0.9999763851 |
| ENTPD1    | 1.1957618756  | 0.4440006431 | 0.9999763851 |
| C10orf131 | 0             | 0            | 0            |
| CC2D2B    | 1.966636009   | 0.3499667665 | 0.9999763851 |
| CCNJ      | 1.1333904196  | 0.6536258018 | 0.9999763851 |
| ZNF518A   | 1.0086801481  | 0.9666510518 | 0.9999763851 |
| BLNK      | -1.2491748198 | 0.5871102564 | 0.9999763851 |
| DNTT      | -2.3214980365 | 0.4365300349 | 0.9999763851 |
| TLL2      | -1.394935021  | 0.7122094033 | 0.9999763851 |
| TM9SF3    | -1.173085336  | 0.1987102481 | 0.9999763851 |

gene\_expression\_table

|           |               |              |              |
|-----------|---------------|--------------|--------------|
| PIK3AP1   | -1.1393698337 | 0.5166310479 | 0.9999763851 |
| LCOR      | -1.0395907431 | 0.8539804282 | 0.9999763851 |
| C10orf12  | -1.0163160609 | 0.9782973355 | 0.9999763851 |
| SLIT1     | 1.0299460308  | 0.9688152998 | 0.9999763851 |
| ARHGAP19  | -1.3825162976 | 0.0535015858 | 0.9999763851 |
| FRAT1     | 1.2592440571  | 0.3901549251 | 0.9999763851 |
| FRAT2     | 1.5836787245  | 0.004868     | 0.9999763851 |
| RRP12     | 1.1988454122  | 0.3551580394 | 0.9999763851 |
| LOC644215 | 2.3406309168  | 0.4065662218 | 0.9999763851 |
| PGAM1     | 1.2847351348  | 0.0877709456 | 0.9999763851 |
| EXOSC1    | 1.152391092   | 0.5362749721 | 0.9999763851 |
| ZDHHC16   | 1.4379219091  | 0.2356373814 | 0.9999763851 |
| MMS19     | 1.0674529083  | 0.6771594704 | 0.9999763851 |
| UBTD1     | -1.0384170457 | 0.839000135  | 0.9999763851 |
| ANKRD2    | 0             | 0            | 0            |
| HOGA1     | 0             | 0            | 0            |
| PI4K2A    | 1.0523050855  | 0.8328712017 | 0.9999763851 |
| AVPI1     | 1.0306913768  | 0.9663663879 | 0.9999763851 |
| MARVELD1  | 0             | 0            | 0            |
| ZFYVE27   | 1.2431771806  | 0.2973992945 | 0.9999763851 |
| SFRP5     | 0             | 0            | 0            |
| GOLGA7B   | -1.1865044235 | 0.5515338829 | 0.9999763851 |
| R3HCC1L   | -1.4340983205 | 0.1989575907 | 0.9999763851 |
| LOXL4     | -4.2849908816 | 0.4028453076 | 0.9999763851 |
| PYROXD2   | 1.1987778498  | 0.3065170022 | 0.9999763851 |
| HPS1      | 1.0784631874  | 0.6127871606 | 0.9999763851 |
| HPSE2     | -1.3713173847 | 0.7437037807 | 0.9999763851 |
| GOT1      | 1.0989769021  | 0.6311506662 | 0.9999763851 |
| SLC25A28  | 1.1085477988  | 0.7619249141 | 0.9999763851 |
| ENTPD7    | -3.7493386361 | 0.1114123703 | 0.9999763851 |
| COX15     | 1.1765319427  | 0.3336806202 | 0.9999763851 |
| CUTC      | 1.0393879572  | 0.8510021628 | 0.9999763851 |
| ABCC2     | -1.0298310449 | 0.92879698   | 0.9999763851 |
| DNMBP     | -1.5623913641 | 0.2016233652 | 0.9999763851 |
| CPN1      | 0             | 0            | 0            |
| ERLIN1    | -1.1681908088 | 0.2593090935 | 0.9999763851 |
| CHUK      | -1.0667777682 | 0.7451813205 | 0.9999763851 |
| CWF19L1   | 1.2480955274  | 0.3709117718 | 0.9999763851 |
| BLOC1S2   | -1.0568180935 | 0.7701392613 | 0.9999763851 |
| SCD       | -1.1723026395 | 0.2568613703 | 0.9999763851 |
| WNT8B     | -1.1491729646 | 0.8484018332 | 0.9999763851 |
| SEC31B    | 1.1224441006  | 0.6935659246 | 0.9999763851 |
| NDUFB8    | 1.1621214334  | 0.2355714474 | 0.9999763851 |
| HIF1AN    | -1.0552464916 | 0.8017134908 | 0.9999763851 |
| PAX2      | 0             | 0            | 0            |
| SLF2      | 1.1505430053  | 0.5419633901 | 0.9999763851 |
| MRPL43    | 1.13191723    | 0.4075944082 | 0.9999763851 |
| C10orf2   | -1.1480002274 | 0.4779069042 | 0.9999763851 |
| LZTS2     | -1.1334715548 | 0.7102451389 | 0.9999763851 |

gene\_expression\_table

|          |                |              |              |
|----------|----------------|--------------|--------------|
| PDZD7    | -1.4249413061  | 0.6087749825 | 0.9999763851 |
| SFXN3    | -1.2627502236  | 0.2829993355 | 0.9999763851 |
| KAZALD1  | 1.5970252596   | 0.0243955597 | 0.9999763851 |
| BTRC     | 1.0694951511   | 0.8231249914 | 0.9999763851 |
| POLL     | 1.2917088661   | 0.4009072931 | 0.9999763851 |
| DPCD     | -1.104724475   | 0.7954280428 | 0.9999763851 |
| FBXW4    | -1.2236048847  | 0.3894734867 | 0.9999763851 |
| NPM3     | -1.3895268265  | 0.009395     | 0.9999763851 |
| MGEA5    | 1.0687200677   | 0.6261721583 | 0.9999763851 |
| KCNIP2   | 1.0894780223   | 0.9290979185 | 0.9999763851 |
| C10orf76 | 1.0671472725   | 0.7944278412 | 0.9999763851 |
| HPS6     | -1.255871624   | 0.3129234296 | 0.9999763851 |
| LDB1     | 1.001481805    | 0.9956830128 | 0.9999763851 |
| PPRC1    | 1.8869872272   | 0.015668474  | 0.9999763851 |
| NOLC1    | 1.3350947101   | 0.025876258  | 0.9999763851 |
| ELOVL3   | 1.5208572074   | 0.1457369553 | 0.9999763851 |
| PITX3    | 0              | 0            | 0            |
| GBF1     | 1.1306696009   | 0.518959133  | 0.9999763851 |
| NFKB2    | 2.4754293524   | 0.2005573491 | 0.9999763851 |
| PSD      | -1.3154339304  | 0.8205576571 | 0.9999763851 |
| FBXL15   | 1.4691642448   | 0.2407783418 | 0.9999763851 |
| CUEDC2   | 1.3040091908   | 0.2121442201 | 0.9999763851 |
| C10orf95 | 0              | 0            | 0            |
| MFSD13A  | -1.1313021227  | 0.7099064585 | 0.9999763851 |
| ACTR1A   | 1.1895251048   | 0.518586387  | 0.9999763851 |
| SUFU     | -1.1649728581  | 0.5337437037 | 0.9999763851 |
| TRIM8    | 1.3286628829   | 0.2845881786 | 0.9999763851 |
| ARL3     | 1.2431180238   | 0.2592383122 | 0.9999763851 |
| SFXN2    | 1.3614039826   | 0.3289098684 | 0.9999763851 |
| WBP1L    | -1.1123632911  | 0.5316387304 | 0.9999763851 |
| CYP17A1  | -4.2849908816  | 0.4028453076 | 0.9999763851 |
| BORCS7   | -1.2806983362  | 0.2742832874 | 0.9999763851 |
| AS3MT    | 0              | 0            | 0            |
| CNNM2    | -1.253349311   | 0.4446273867 | 0.9999763851 |
| NT5C2    | -1.1401409178  | 0.4060446003 | 0.9999763851 |
| RPEL1    | -19.2174470604 | 0.0691494629 | 0.9999763851 |
| PCGF6    | 1.3237528899   | 0.3664647692 | 0.9999763851 |
| TAF5     | -1.0006454179  | 0.9979289417 | 0.9999763851 |
| USMG5    | 1.2370923304   | 0.1556486924 | 0.9999763851 |
| PDCD11   | 1.1976709788   | 0.2970417419 | 0.9999763851 |
| CALHM2   | 1.6912538201   | 0.0567271979 | 0.9999763851 |
| CALHM1   | 0              | 0            | 0            |
| NEURL1   | 1.509580932    | 0.5403772662 | 0.9999763851 |
| SH3PXD2A | -1.1200215877  | 0.5249262738 | 0.9999763851 |
| OBFC1    | 1.7469303317   | 0.1046832561 | 0.9999763851 |
| SLK      | 1.0270816425   | 0.8492695324 | 0.9999763851 |
| COL17A1  | -1.966276531   | 0.4562735265 | 0.9999763851 |
| SFR1     | -1.4410781675  | 0.3220354368 | 0.9999763851 |
| CFAP43   | 9.9639367786   | 0.2203391531 | 0.9999763851 |



gene\_expression\_table

|              |               |              |              |
|--------------|---------------|--------------|--------------|
| GSTO1        | -1.1693669463 | 0.2583460039 | 0.9999763851 |
| GSTO2        | -1.3704303691 | 0.42335635   | 0.9999763851 |
| ITPRIP       | -1.0383711009 | 0.8425706535 | 0.9999763851 |
| SORCS3       | -3.5156187543 | 0.1696872133 | 0.9999763851 |
| SORCS1       | 1.287203384   | 0.8316108013 | 0.9999763851 |
| XPNPEP1      | 1.0374644315  | 0.81373403   | 0.9999763851 |
| ADD3         | 1.1601255181  | 0.4265415229 | 0.9999763851 |
| LOC105378479 | 5.4770877341  | 0.3746135179 | 0.9999763851 |
| MXI1         | -1.3145386162 | 0.1901122825 | 0.9999763851 |
| SMNDC1       | 1.0137814032  | 0.9314654447 | 0.9999763851 |
| DUSP5        | -1.5736822895 | 0.228659524  | 0.9999763851 |
| SMC3         | 1.1101083649  | 0.4461678897 | 0.9999763851 |
| RBM20        | 0             | 0            | 0            |
| PDCD4        | -1.2032165598 | 0.2011368689 | 0.9999763851 |
| BBIP1        | 1.909761605   | 0.0465382379 | 0.9999763851 |
| SHOC2        | -1.1939461008 | 0.3051331512 | 0.9999763851 |
| GPAM         | -1.0550268381 | 0.8628568019 | 0.9999763851 |
| ACSL5        | -2.7131089336 | 0.1511136884 | 0.9999763851 |
| ZDHHC6       | 1.2925506417  | 0.1935362265 | 0.9999763851 |
| VTI1A        | -1.0459042202 | 0.8636298478 | 0.9999763851 |
| TCF7L2       | 1.8003661677  | 0.0401618153 | 0.9999763851 |
| NRAP         | 0             | 0            | 0            |
| CASP7        | -1.0084930073 | 0.9786837489 | 0.9999763851 |
| DCLRE1A      | 2.1487114209  | 0.2253505247 | 0.9999763851 |
| NHLRC2       | -1.3134935995 | 0.4466365282 | 0.9999763851 |
| ADRB1        | 1.1570040918  | 0.8865554867 | 0.9999763851 |
| CCDC186      | -1.0165392043 | 0.9692226474 | 0.9999763851 |
| TDRD1        | 7.7488609396  | 0.3060017416 | 0.9999763851 |
| AFAP1L2      | 3.2356557963  | 0.5547505991 | 0.9999763851 |
| ABLIM1       | -1.0833074967 | 0.7458504106 | 0.9999763851 |
| FAM160B1     | 1.3575565792  | 0.2471779291 | 0.9999763851 |
| TRUB1        | -1.1552182069 | 0.4835673199 | 0.9999763851 |
| HSPA12A      | 0             | 0            | 0            |
| ENO4         | 0             | 0            | 0            |
| SHTN1        | 0             | 0            | 0            |
| SLC18A2      | 2.0598070501  | 0.0310544561 | 0.9999763851 |
| PDZD8        | -1.2935336416 | 0.1433020953 | 0.9999763851 |
| EMX2         | -4.2849908816 | 0.4028453076 | 0.9999763851 |
| RAB11FIP2    | -1.2315422062 | 0.5740405512 | 0.9999763851 |
| FAM204A      | 1.0793839346  | 0.7421577046 | 0.9999763851 |
| CACUL1       | -1.0468966333 | 0.8115821677 | 0.9999763851 |
| EIF3A        | -1.0733947284 | 0.6561447284 | 0.9999763851 |
| FAM45A       | 1.2982530607  | 0.2534492093 | 0.9999763851 |
| SFXN4        | 1.2545927603  | 0.1662559672 | 0.9999763851 |
| PRDX3        | 1.3579765755  | 0.0943848805 | 0.9999763851 |
| GRK5         | 1.2449460941  | 0.5883260389 | 0.9999763851 |
| RGS10        | 1.1545167366  | 0.398882808  | 0.9999763851 |
| TIAL1        | -1.2930018493 | 0.1179030625 | 0.9999763851 |
| BAG3         | -1.2339926131 | 0.5033839092 | 0.9999763851 |

gene\_expression\_table

|              |               |              |              |
|--------------|---------------|--------------|--------------|
| INPP5F       | -1.4578013109 | 0.259403341  | 0.9999763851 |
| MCMBP        | 1.2160915711  | 0.311028016  | 0.9999763851 |
| SEC23IP      | 1.1910306666  | 0.4409067385 | 0.9999763851 |
| PLPP4        | 0             | 0            | 0            |
| WDR11        | 1.3239127919  | 0.3440404769 | 0.9999763851 |
| ATE1         | 1.1574661856  | 0.5386966345 | 0.9999763851 |
| NSMCE4A      | 1.479035653   | 0.1176146611 | 0.9999763851 |
| TACC2        | 3.2353357581  | 0.554787377  | 0.9999763851 |
| BTBD16       | 0             | 0            | 0            |
| PLEKHA1      | -1.0368629227 | 0.9388126276 | 0.9999763851 |
| HTRA1        | -3.8382377092 | 0.005404     | 0.9999763851 |
| C10orf120    | 0             | 0            | 0            |
| FAM24B       | -1.2915514768 | 0.5587208434 | 0.9999763851 |
| C10orf88     | 2.2745276088  | 0.0824298643 | 0.9999763851 |
| PSTK         | -1.3948129396 | 0.6824769794 | 0.9999763851 |
| IKZF5        | -1.1804274504 | 0.5476954981 | 0.9999763851 |
| ACADSB       | -1.0381811629 | 0.8916542795 | 0.9999763851 |
| BUB3         | 1.1945919005  | 0.190719034  | 0.9999763851 |
| CHST15       | 0             | 0            | 0            |
| OAT          | 1.2863960258  | 0.1887505941 | 0.9999763851 |
| LHPP         | 1.1572257991  | 0.660649247  | 0.9999763851 |
| LOC107984159 | 0             | 0            | 0            |
| FAM53B       | -1.2727850804 | 0.2472960051 | 0.9999763851 |
| METTL10      | -1.2182464339 | 0.3121793757 | 0.9999763851 |
| FAM175B      | 1.0239585932  | 0.9326154759 | 0.9999763851 |
| ZRANB1       | 1.0306998984  | 0.9118162733 | 0.9999763851 |
| CTBP2        | 1.1688695279  | 0.420889897  | 0.9999763851 |
| TEX36        | 0             | 0            | 0            |
| EDRF1        | -1.3291942657 | 0.445696718  | 0.9999763851 |
| UROS         | 1.2691519355  | 0.2897264179 | 0.9999763851 |
| BCCIP        | 1.1177244679  | 0.5261388951 | 0.9999763851 |
| DHX32        | -4.2864494036 | 0.4027150576 | 0.9999763851 |
| FANK1        | -4.2849908816 | 0.4028453076 | 0.9999763851 |
| ADAM12       | -7.5622178268 | 0.2177145568 | 0.9999763851 |
| PTPRE        | -1.0753601417 | 0.733139309  | 0.9999763851 |
| MKI67        | 1.3150506741  | 0.0492587852 | 0.9999763851 |
| MGMT         | 0             | 0            | 0            |
| EBF3         | 1.1993473325  | 0.5393512812 | 0.9999763851 |
| GLRX3        | 1.2315647751  | 0.2304673085 | 0.9999763851 |
| PPP2R2D      | -1.1300206787 | 0.5681161829 | 0.9999763851 |
| BNIP3        | 1.285973213   | 0.2971185531 | 0.9999763851 |
| STK32C       | 1.0591614067  | 0.7513998596 | 0.9999763851 |
| LRRC27       | 1.4551263046  | 0.4624594753 | 0.9999763851 |
| PWWP2B       | 1.0959404905  | 0.6828947506 | 0.9999763851 |
| C10orf91     | 0             | 0            | 0            |
| LOC107984282 | 5.4770877341  | 0.3746135179 | 0.9999763851 |
| INPP5A       | -1.4457183815 | 0.2844367719 | 0.9999763851 |
| NKX6-2       | -1.4503491785 | 0.0677222243 | 0.9999763851 |
| VENTX        | 1.4561621084  | 0.4733776806 | 0.9999763851 |

gene\_expression\_table

|              |               |              |              |
|--------------|---------------|--------------|--------------|
| ADAM8        | 1.0733608887  | 0.8573672073 | 0.9999763851 |
| TUBGCP2      | 1.0597857097  | 0.7340972913 | 0.9999763851 |
| ZNF511       | -1.0235615146 | 0.9032418088 | 0.9999763851 |
| PRAP1        | 0             | 0            | 0            |
| FUOM         | 1.0509768657  | 0.8906527617 | 0.9999763851 |
| ECHS1        | -1.0401881261 | 0.7888610762 | 0.9999763851 |
| MTG1         | -1.1837340823 | 0.6066189755 | 0.9999763851 |
| SPRN         | 2.5202262643  | 0.2772382374 | 0.9999763851 |
| CYP2E1       | 9.9624059448  | 0.2314727708 | 0.9999763851 |
| SCGB1C1      | 3.2353357581  | 0.554787377  | 0.9999763851 |
| BET1L        | 1.2641209224  | 0.2186164612 | 0.9999763851 |
| RIC8A        | 1.5811781315  | 0.008492     | 0.9999763851 |
| SIRT3        | 1.0595963625  | 0.8474528594 | 0.9999763851 |
| PSMD13       | -1.1017898316 | 0.4780456203 | 0.9999763851 |
| NLRP6        | -2.3209115874 | 0.4617202599 | 0.9999763851 |
| ATHL1        | -1.1346497424 | 0.7413817045 | 0.9999763851 |
| IFITM2       | 1.0888384964  | 0.5042228972 | 0.9999763851 |
| IFITM1       | 1.3670163388  | 0.1280306777 | 0.9999763851 |
| IFITM3       | -1.3154339304 | 0.8205576571 | 0.9999763851 |
| SIGIRR       | 1.3878502127  | 0.1838736393 | 0.9999763851 |
| ANO9         | 0             | 0            | 0            |
| PTDSS2       | -1.0954654781 | 0.666017894  | 0.9999763851 |
| RNH1         | 1.1651701115  | 0.3100347603 | 0.9999763851 |
| LRRC56       | 5.4776292235  | 0.3745831165 | 0.9999763851 |
| HRAS         | 1.523820577   | 0.1948253469 | 0.9999763851 |
| LMNTD2       | -1.4079687435 | 0.6448100812 | 0.9999763851 |
| RASSF7       | -1.1562405362 | 0.6261986804 | 0.9999763851 |
| PHRF1        | 1.1315867871  | 0.4903034469 | 0.9999763851 |
| IRF7         | -1.1598159168 | 0.7754581207 | 0.9999763851 |
| CDHR5        | 0             | 0            | 0            |
| DRD4         | 0             | 0            | 0            |
| DEAF1        | -1.1271597983 | 0.4593684757 | 0.9999763851 |
| TMEM80       | 2.0537095626  | 0.006206     | 0.9999763851 |
| EPS8L2       | 3.2353357581  | 0.554787377  | 0.9999763851 |
| TALDO1       | 1.2117818625  | 0.1235572561 | 0.9999763851 |
| PDDC1        | -1.0355604617 | 0.8662461958 | 0.9999763851 |
| SLC25A22     | -1.2682881137 | 0.5703197371 | 0.9999763851 |
| PANO1        | -1.0810230665 | 0.9183118938 | 0.9999763851 |
| PIDD1        | -1.6011851216 | 0.3896990657 | 0.9999763851 |
| RPLP2        | 1.0079880607  | 0.948595219  | 0.9999763851 |
| PNPLA2       | 1.3337636591  | 0.2142017887 | 0.9999763851 |
| CRACR2B      | 1.8002526059  | 0.1132156194 | 0.9999763851 |
| CD151        | 1.218879019   | 0.3600766079 | 0.9999763851 |
| POLR2L       | 1.3006552709  | 0.07276114   | 0.9999763851 |
| TSPAN4       | 1.7537362318  | 0.1570043559 | 0.9999763851 |
| CHID1        | -1.0080532677 | 0.9560065999 | 0.9999763851 |
| AP2A2        | -1.2432139538 | 0.3182778851 | 0.9999763851 |
| MUC6         | 0             | 0            | 0            |
| LOC101927503 | 0             | 0            | 0            |

gene\_expression\_table

|              |                |              |              |
|--------------|----------------|--------------|--------------|
| MUC5B        | 0              | 0            | 0            |
| TOLLIP       | -1.2320387137  | 0.1987810928 | 0.9999763851 |
| BRSK2        | 0              | 0            | 0            |
| MOB2         | 1.1200052521   | 0.7152710928 | 0.9999763851 |
| DUSP8        | 3.2361532718   | 0.5546934395 | 0.9999763851 |
| IFITM10      | 1.0294704161   | 0.9669274527 | 0.9999763851 |
| CTSD         | -1.1666172837  | 0.2610024919 | 0.9999763851 |
| TNNI2        | -4.2864494036  | 0.4027150576 | 0.9999763851 |
| LSP1         | 1.2294887479   | 0.2479387883 | 0.9999763851 |
| TNNT3        | 0              | 0            | 0            |
| MRPL23       | 1.325623298    | 0.1834944224 | 0.9999763851 |
| HOTS         | -7.5622178268  | 0.2177145568 | 0.9999763851 |
| ASCL2        | 2.2137747159   | 0.0216549649 | 0.9999763851 |
| C11orf21     | 1.2870761236   | 0.8160709833 | 0.9999763851 |
| TSPAN32      | -1.1002038147  | 0.7584032646 | 0.9999763851 |
| TSSC4        | 1.2046996235   | 0.484118437  | 0.9999763851 |
| TRPM5        | 0              | 0            | 0            |
| KCNQ1        | -1.0412222277  | 0.8367513609 | 0.9999763851 |
| CDKN1C       | 1.050070356    | 0.9028401825 | 0.9999763851 |
| SLC22A18AS   | -1.2562050205  | 0.7085481797 | 0.9999763851 |
| SLC22A18     | -1.3861836028  | 0.3325300008 | 0.9999763851 |
| PHLDA2       | 1.0681016286   | 0.7613114134 | 0.9999763851 |
| NAP1L4       | 1.1295773766   | 0.3820027785 | 0.9999763851 |
| CARS         | 1.1568626616   | 0.4015394939 | 0.9999763851 |
| OSBPL5       | -1.4548833948  | 0.0868266071 | 0.9999763851 |
| ZNF195       | -1.1270820338  | 0.6497152799 | 0.9999763851 |
| LOC105376525 | -1.3158816768  | 0.8203229797 | 0.9999763851 |
| ART1         | -1.3157515262  | 0.8223973021 | 0.9999763851 |
| CHRNA10      | 1.0281638254   | 0.9765707018 | 0.9999763851 |
| NUP98        | -1.0386768445  | 0.8494487214 | 0.9999763851 |
| PGAP2        | 1.0874064405   | 0.7723709221 | 0.9999763851 |
| RHOG         | 1.2231846012   | 0.1578576604 | 0.9999763851 |
| STIM1        | -1.2073858184  | 0.2732160055 | 0.9999763851 |
| RRM1         | -1.0236619168  | 0.8493632702 | 0.9999763851 |
| TRIM21       | -1.3876816948  | 0.360685681  | 0.9999763851 |
| TRIM68       | -2.3212684229  | 0.447354629  | 0.9999763851 |
| TRIM5        | 1.1209121282   | 0.7603390199 | 0.9999763851 |
| TRIM34       | 1.3407820359   | 0.7146293923 | 0.9999763851 |
| TRIM22       | -3.0368738636  | 0.1019843322 | 0.9999763851 |
| C11orf42     | -10.8385246611 | 0.1453473185 | 0.9999763851 |
| FAM160A2     | 1.5170758868   | 0.0986661746 | 0.9999763851 |
| CNGA4        | -2.6604789227  | 0.1932206488 | 0.9999763851 |
| SMPD1        | 1.0175127479   | 0.9363584697 | 0.9999763851 |
| APBB1        | -4.2864494036  | 0.4027150576 | 0.9999763851 |
| HPX          | 0              | 0            | 0            |
| TRIM3        | 1.6938437942   | 0.6482542272 | 0.9999763851 |
| ARFIP2       | 1.1284664006   | 0.7747265309 | 0.9999763851 |
| TIMM10B      | -1.0395982519  | 0.8570873922 | 0.9999763851 |
| DNHD1        | 1.2936707046   | 0.5572557448 | 0.9999763851 |

gene\_expression\_table

|          |                |              |              |
|----------|----------------|--------------|--------------|
| RRP8     | 1.1956970232   | 0.4908605823 | 0.9999763851 |
| ILK      | 1.4064341007   | 0.0592223874 | 0.9999763851 |
| TAF10    | -1.2249366693  | 0.5354806869 | 0.9999763851 |
| TPP1     | -1.023417204   | 0.8791117141 | 0.9999763851 |
| DCHS1    | -1.3158393667  | 0.8280718157 | 0.9999763851 |
| MRPL17   | 1.1287492713   | 0.4468674425 | 0.9999763851 |
| NLRP14   | -4.2849908816  | 0.4028453076 | 0.9999763851 |
| SYT9     | 0              | 0            | 0            |
| OLFML1   | 1.2866381786   | 0.8225176192 | 0.9999763851 |
| PPFIBP2  | -1.3334061201  | 0.3468883623 | 0.9999763851 |
| CYB5R2   | 0              | 0            | 0            |
| EIF3F    | 1.0359637597   | 0.8141368002 | 0.9999763851 |
| TUB      | 0              | 0            | 0            |
| RIC3     | 3.2353357581   | 0.554787377  | 0.9999763851 |
| LMO1     | 1.0198511656   | 0.9456704056 | 0.9999763851 |
| STK33    | 0              | 0            | 0            |
| TRIM66   | -1.5293856892  | 0.1499616007 | 0.9999763851 |
| RPL27A   | -1.0560971285  | 0.684715362  | 0.9999763851 |
| ST5      | 5.4784711963   | 0.3745358536 | 0.9999763851 |
| AKIP1    | 1.02817935     | 0.9075040951 | 0.9999763851 |
| C11orf16 | -4.2864494036  | 0.4027150576 | 0.9999763851 |
| TMEM9B   | -1.2843448044  | 0.2487869682 | 0.9999763851 |
| NRIP3    | -2.0988867482  | 0.0120910656 | 0.9999763851 |
| SCUBE2   | -2.3209115874  | 0.4613944243 | 0.9999763851 |
| DENND5A  | -1.6998322356  | 0.0275945356 | 0.9999763851 |
| TMEM41B  | -1.2097148337  | 0.3817491183 | 0.9999763851 |
| IPO7     | 1.0585444115   | 0.7080832625 | 0.9999763851 |
| ZNF143   | -1.4874685974  | 0.1565095185 | 0.9999763851 |
| WEE1     | 1.1564633722   | 0.5194280829 | 0.9999763851 |
| SWAP70   | -1.4446435678  | 0.110727556  | 0.9999763851 |
| SBF2     | -1.6412232356  | 0.0831806815 | 0.9999763851 |
| ADM      | -24.1442657935 | 1.19E-05     | 0.027763203  |
| AMPD3    | -1.1094127078  | 0.647280633  | 0.9999763851 |
| MTRNR2L8 | -1.4210747916  | 0.0268134487 | 0.9999763851 |
| RNF141   | -1.1136249807  | 0.5842196965 | 0.9999763851 |
| MRVI1    | -1.3263815267  | 0.4218136692 | 0.9999763851 |
| CTR9     | 1.1295338724   | 0.4836051763 | 0.9999763851 |
| EIF4G2   | 1.1004750933   | 0.5145828946 | 0.9999763851 |
| ZBED5    | -1.0075228815  | 0.9812611408 | 0.9999763851 |
| CSNK2A3  | 1.1552768729   | 0.7987874843 | 0.9999763851 |
| USP47    | -1.1825623229  | 0.362358175  | 0.9999763851 |
| MICAL2   | -1.5874464891  | 0.147499296  | 0.9999763851 |
| MICALCL  | -5.6080522719  | 0.1117474342 | 0.9999763851 |
| TEAD1    | 0              | 0            | 0            |
| ARNTL    | -1.3906985905  | 0.3840620169 | 0.9999763851 |
| BTBD10   | -1.2123166596  | 0.54104405   | 0.9999763851 |
| PTH      | -1.0281765664  | 0.8886340452 | 0.9999763851 |
| FAR1     | 1.170973175    | 0.5371579558 | 0.9999763851 |
| SPON1    | 0              | 0            | 0            |

gene\_expression\_table

|              |               |              |              |
|--------------|---------------|--------------|--------------|
| COPB1        | 1.0387497685  | 0.8209013173 | 0.9999763851 |
| PSMA1        | -1.0283233684 | 0.8700105943 | 0.9999763851 |
| PDE3B        | -1.6544378424 | 0.2576446952 | 0.9999763851 |
| CYP2R1       | 1.0419785874  | 0.8833410107 | 0.9999763851 |
| LOC107984314 | 3.2361532718  | 0.5546934395 | 0.9999763851 |
| INSC         | 0             | 0            | 0            |
| SOX6         | -4.2849908816 | 0.4028453076 | 0.9999763851 |
| C11orf58     | -1.1096952991 | 0.4953584327 | 0.9999763851 |
| PLEKHA7      | -1.1559070418 | 0.2374189885 | 0.9999763851 |
| RPS13        | 1.1176245987  | 0.3727566394 | 0.9999763851 |
| PIK3C2A      | -1.158687391  | 0.5810024371 | 0.9999763851 |
| NUCB2        | -1.0088886763 | 0.9470185718 | 0.9999763851 |
| NCR3LG1      | -2.774230463  | 0.0784695365 | 0.9999763851 |
| KCNJ11       | 1.5490136109  | 0.3237788062 | 0.9999763851 |
| KCNC1        | -1.3160416743 | 0.8272147023 | 0.9999763851 |
| SERGEF       | -1.390733637  | 0.2005380556 | 0.9999763851 |
| SAAL1        | 1.3108294194  | 0.1804650067 | 0.9999763851 |
| MRGPRX3      | 0             | 0            | 0            |
| SAA4         | 0             | 0            | 0            |
| HPS5         | -1.0487490121 | 0.915093015  | 0.9999763851 |
| GTF2H1       | -1.1353098397 | 0.5200919978 | 0.9999763851 |
| LDHA         | 1.5713581681  | 0.0001381    | 0.1956409862 |
| LDHAL6A      | 1.7868451227  | 0.5989310412 | 0.9999763851 |
| TSG101       | 1.8143602283  | 0.0568853602 | 0.9999763851 |
| UEVLD        | 1.2424325408  | 0.4407166508 | 0.9999763851 |
| SPTY2D1      | 1.2028307756  | 0.4742560896 | 0.9999763851 |
| TMEM86A      | 0             | 0            | 0            |
| IGSF22       | 3.2353357581  | 0.554787377  | 0.9999763851 |
| ZDHHC13      | -2.2647966062 | 0.1228626797 | 0.9999763851 |
| E2F8         | 1.2261666389  | 0.4776066832 | 0.9999763851 |
| NAV2         | -1.263684942  | 0.2803075134 | 0.9999763851 |
| HTATIP2      | 1.5387792626  | 0.0139263845 | 0.9999763851 |
| PRMT3        | -1.000165457  | 0.999582439  | 0.9999763851 |
| NELL1        | -1.4157843229 | 0.612753461  | 0.9999763851 |
| FANCF        | -1.9412091951 | 0.1494134001 | 0.9999763851 |
| LUZP2        | 3.2353357581  | 0.554787377  | 0.9999763851 |
| LGR4         | -4.2849908816 | 0.4028453076 | 0.9999763851 |
| LIN7C        | 1.2200237807  | 0.4585956717 | 0.9999763851 |
| BDNF         | 0             | 0            | 0            |
| KIF18A       | -1.2210442353 | 0.5418002616 | 0.9999763851 |
| METTL15      | 1.1983325423  | 0.3851182292 | 0.9999763851 |
| ARL14EP      | -1.1461350495 | 0.5320824206 | 0.9999763851 |
| DCDC5        | 0             | 0            | 0            |
| DCDC1        | -4.2849908816 | 0.4028453076 | 0.9999763851 |
| DNAJC24      | -1.5190729878 | 0.4050723199 | 0.9999763851 |
| IMMP1L       | 1.0251276472  | 0.9037885592 | 0.9999763851 |
| ELP4         | -1.2796723791 | 0.416406905  | 0.9999763851 |
| PAX6         | 2.382974333   | 0.2355539459 | 0.9999763851 |
| RCN1         | 1.488474938   | 0.1777323214 | 0.9999763851 |

gene\_expression\_table

|              |               |              |              |
|--------------|---------------|--------------|--------------|
| WT1          | 1.0170204453  | 0.9465335782 | 0.9999763851 |
| EIF3M        | 1.2040348813  | 0.2283869647 | 0.9999763851 |
| CCDC73       | 1.4187907312  | 0.4508305076 | 0.9999763851 |
| PRRG4        | 1.1779207     | 0.686760044  | 0.9999763851 |
| QSER1        | 1.3643514649  | 0.1703496707 | 0.9999763851 |
| TCP11L1      | -1.0150102882 | 0.9725549011 | 0.9999763851 |
| CSTF3        | -1.3996472136 | 0.0767666209 | 0.9999763851 |
| HIPK3        | -1.0283086345 | 0.8875270884 | 0.9999763851 |
| FBXO3        | 1.0576664542  | 0.8561291336 | 0.9999763851 |
| LMO2         | 1.1819567914  | 0.4101371485 | 0.9999763851 |
| CAPRIN1      | 1.0452498843  | 0.7899218348 | 0.9999763851 |
| NAT10        | 1.0520468466  | 0.7430810511 | 0.9999763851 |
| ABTB2        | 1.0304020284  | 0.9504726675 | 0.9999763851 |
| CAT          | 1.1484747071  | 0.3628374604 | 0.9999763851 |
| APIP         | -1.2470971516 | 0.453648454  | 0.9999763851 |
| PDHX         | 1.482476071   | 0.1893539301 | 0.9999763851 |
| CD44         | -1.1770998506 | 0.2418331237 | 0.9999763851 |
| SLC1A2       | 0             | 0            | 0            |
| FJX1         | -2.5604817607 | 0.2731422845 | 0.9999763851 |
| TRIM44       | -1.0225749403 | 0.8893578303 | 0.9999763851 |
| LDLRAD3      | 1.040469927   | 0.8630793116 | 0.9999763851 |
| COMMD9       | -1.27223215   | 0.3787309123 | 0.9999763851 |
| PRR5L        | 1.8525489671  | 0.1467431427 | 0.9999763851 |
| TRAF6        | 1.1859266318  | 0.7056408559 | 0.9999763851 |
| C11orf74     | 1.6338700832  | 0.2739925035 | 0.9999763851 |
| API5         | 1.1176637559  | 0.5592458002 | 0.9999763851 |
| TTC17        | -1.0343656598 | 0.8641413251 | 0.9999763851 |
| HSD17B12     | 2.4405833224  | 0.0449227536 | 0.9999763851 |
| ALKBH3       | -1.0569601447 | 0.761313524  | 0.9999763851 |
| ACCSL        | -1.3151016298 | 0.8211947154 | 0.9999763851 |
| C11orf96     | -1.0447361553 | 0.9067119433 | 0.9999763851 |
| EXT2         | -1.3204355981 | 0.1823691007 | 0.9999763851 |
| ALX4         | -3.3275701064 | 0.2296160779 | 0.9999763851 |
| CD82         | -2.0078462284 | 0.0001175    | 0.1806818129 |
| TSPAN18      | 1.316696459   | 0.2777835441 | 0.9999763851 |
| TP53I11      | 1.0324850193  | 0.8408422484 | 0.9999763851 |
| LOC101060179 | -1.3715126673 | 0.7506909141 | 0.9999763851 |
| CHST1        | 1.8139617088  | 0.5784350384 | 0.9999763851 |
| SLC35C1      | -1.0904200057 | 0.6873227931 | 0.9999763851 |
| CRY2         | -1.2702381915 | 0.4208823877 | 0.9999763851 |
| MAPK8IP1     | -3.3280817062 | 0.2431049726 | 0.9999763851 |
| PEX16        | 1.9471619863  | 0.2454515101 | 0.9999763851 |
| PHF21A       | -1.5313052123 | 0.1246518302 | 0.9999763851 |
| CREB3L1      | 3.2361532718  | 0.5546934395 | 0.9999763851 |
| DGKZ         | 1.2486886879  | 0.1986642592 | 0.9999763851 |
| MDK          | 1.0773444223  | 0.8936517727 | 0.9999763851 |
| AMBRA1       | -1.018873575  | 0.8726534988 | 0.9999763851 |
| HARBI1       | 3.3654696961  | 0.1580529345 | 0.9999763851 |
| ATG13        | 1.392797841   | 0.1804657778 | 0.9999763851 |

gene\_expression\_table

|          |               |              |              |
|----------|---------------|--------------|--------------|
| ARHGAP1  | 1.162729018   | 0.4140895538 | 0.9999763851 |
| ZNF408   | 1.3349646538  | 0.3931084199 | 0.9999763851 |
| F2       | 3.2353357581  | 0.554787377  | 0.9999763851 |
| CKAP5    | 1.3288398066  | 0.1193279371 | 0.9999763851 |
| LRP4     | -7.5647903763 | 0.2176246281 | 0.9999763851 |
| C11orf49 | 1.0989324126  | 0.8396180905 | 0.9999763851 |
| ARFGAP2  | 1.2803920328  | 0.208225975  | 0.9999763851 |
| PACSN3   | -1.0497023957 | 0.8402180243 | 0.9999763851 |
| DDB2     | 1.1591585179  | 0.5222403341 | 0.9999763851 |
| ACP2     | 1.0885190141  | 0.8438358517 | 0.9999763851 |
| NR1H3    | -2.2152323827 | 0.2441191925 | 0.9999763851 |
| MADD     | -1.1812179649 | 0.5193928253 | 0.9999763851 |
| MYBPC3   | -1.816422855  | 0.4359989028 | 0.9999763851 |
| SPI1     | 1.1622116163  | 0.5667893654 | 0.9999763851 |
| SLC39A13 | 1.1637306491  | 0.6418948832 | 0.9999763851 |
| PSMC3    | 1.0446675582  | 0.82361331   | 0.9999763851 |
| RAPSN    | 0             | 0            | 0            |
| CELF1    | -1.0489536745 | 0.7996311246 | 0.9999763851 |
| PTPMT1   | 1.119984549   | 0.5056619521 | 0.9999763851 |
| KBTBD4   | 1.3745641786  | 0.7399429411 | 0.9999763851 |
| NDUFS3   | -1.4833912503 | 0.0104770122 | 0.9999763851 |
| FAM180B  | -3.3269505881 | 0.2594254525 | 0.9999763851 |
| C1QTNF4  | 0             | 0            | 0            |
| MTCH2    | -1.3530215083 | 0.0180224222 | 0.9999763851 |
| AGBL2    | -2.3209115874 | 0.4610635141 | 0.9999763851 |
| FNBP4    | -1.336060578  | 0.1220682127 | 0.9999763851 |
| NUP160   | 1.3271788544  | 0.2561392257 | 0.9999763851 |
| PTPRJ    | -1.5591949695 | 0.1271272522 | 0.9999763851 |
| TNKS1BP1 | 2.0526865509  | 0.1738510117 | 0.9999763851 |
| SSRP1    | -1.0274583285 | 0.8439148387 | 0.9999763851 |
| P2RX3    | 0             | 0            | 0            |
| PRG2     | -2.0609782294 | 0.3008190586 | 0.9999763851 |
| SLC43A3  | -1.004859436  | 0.9706806319 | 0.9999763851 |
| RTN4RL2  | -1.3124628314 | 0.6128228316 | 0.9999763851 |
| SLC43A1  | -1.0501628322 | 0.7664175936 | 0.9999763851 |
| TIMM10   | 1.2403251906  | 0.2278733561 | 0.9999763851 |
| UBE2L6   | -1.1707722522 | 0.4530285376 | 0.9999763851 |
| CLP1     | -1.3082371081 | 0.4746835972 | 0.9999763851 |
| ZDHHC5   | -1.0716252208 | 0.6507863493 | 0.9999763851 |
| MED19    | 1.0476662048  | 0.8517039531 | 0.9999763851 |
| TMX2     | -1.2002581092 | 0.2444365504 | 0.9999763851 |
| C11orf31 | 1.1732042399  | 0.2213765479 | 0.9999763851 |
| BTBD18   | 9.9629524019  | 0.2192284853 | 0.9999763851 |
| CTNND1   | -1.1802901363 | 0.7540192034 | 0.9999763851 |
| OR9Q1    | 0             | 0            | 0            |
| LPXN     | 1.0118617639  | 0.9387642623 | 0.9999763851 |
| ZFP91    | 1.0478979516  | 0.7670009228 | 0.9999763851 |
| GLYATL1  | 0             | 0            | 0            |
| FAM111A  | 1.243090902   | 0.1632047737 | 0.9999763851 |



gene\_expression\_table

|          |               |              |              |
|----------|---------------|--------------|--------------|
| DTX4     | -2.0660393506 | 0.0553880684 | 0.9999763851 |
| MPEG1    | 0             | 0            | 0            |
| OSBP     | 1.1302014727  | 0.666022616  | 0.9999763851 |
| PATL1    | -1.3238132256 | 0.1007266607 | 0.9999763851 |
| STX3     | 1.099030712   | 0.5184429641 | 0.9999763851 |
| MRPL16   | 1.10502152    | 0.5189140645 | 0.9999763851 |
| GIF      | -4.2864494036 | 0.4027150576 | 0.9999763851 |
| TCN1     | -1.3154339304 | 0.8205576571 | 0.9999763851 |
| MS4A3    | -1.2231442609 | 0.5024608206 | 0.9999763851 |
| MS4A2    | -4.287394647  | 0.4026306792 | 0.9999763851 |
| MS4A6A   | 1.349505569   | 0.6824616559 | 0.9999763851 |
| MS4A4E   | 0             | 0            | 0            |
| MS4A4A   | -4.2849908816 | 0.4028453076 | 0.9999763851 |
| MS4A7    | -1.0193796434 | 0.9441413143 | 0.9999763851 |
| MS4A5    | 0             | 0            | 0            |
| CCDC86   | 1.0144334144  | 0.9675855466 | 0.9999763851 |
| PTGDR2   | 1.0797026578  | 0.8772102504 | 0.9999763851 |
| ZP1      | 0             | 0            | 0            |
| PRPF19   | 1.2999227171  | 0.087974938  | 0.9999763851 |
| TMEM109  | -1.1626081622 | 0.3378465537 | 0.9999763851 |
| TMEM132A | -1.3154339304 | 0.8205576571 | 0.9999763851 |
| SLC15A3  | -1.3158816768 | 0.8203229797 | 0.9999763851 |
| CD6      | -5.3422739143 | 0.0885609822 | 0.9999763851 |
| CD5      | 1.287203384   | 0.8318830578 | 0.9999763851 |
| VPS37C   | 1.1042445014  | 0.6201542937 | 0.9999763851 |
| VWCE     | 1.1331614061  | 0.8702271379 | 0.9999763851 |
| DDB1     | -1.3087696554 | 0.02950501   | 0.9999763851 |
| TKFC     | 2.1868632022  | 0.0242118047 | 0.9999763851 |
| CYB561A3 | 1.2228637109  | 0.2854554761 | 0.9999763851 |
| TMEM138  | 1.06677647    | 0.8350843861 | 0.9999763851 |
| TMEM216  | -1.1195868461 | 0.7725248488 | 0.9999763851 |
| CPSF7    | -1.290889535  | 0.1979234541 | 0.9999763851 |
| SDHAF2   | 1.2966040974  | 0.1979898362 | 0.9999763851 |
| PPP1R32  | -3.3272796812 | 0.2440049033 | 0.9999763851 |
| DAGLA    | 1.8135020099  | 0.5902512871 | 0.9999763851 |
| MYRF     | 1.1817745558  | 0.6268599799 | 0.9999763851 |
| TMEM258  | 1.1209639972  | 0.4565439604 | 0.9999763851 |
| FEN1     | -1.1625104956 | 0.2635633954 | 0.9999763851 |
| FADS1    | 1.118350171   | 0.4943443193 | 0.9999763851 |
| FADS2    | -1.050270132  | 0.7757088393 | 0.9999763851 |
| FADS3    | -2.6618053695 | 0.0503244689 | 0.9999763851 |
| RAB3IL1  | -1.1277510391 | 0.8131505558 | 0.9999763851 |
| BEST1    | 5.4784711963  | 0.3745358536 | 0.9999763851 |
| FTH1     | -2.279345415  | 4.43E-07     | 0.001254     |
| INCENP   | -1.0131210356 | 0.9450268714 | 0.9999763851 |
| SCGB2A1  | 0             | 0            | 0            |
| ASRGL1   | 1.2645294143  | 0.2440199209 | 0.9999763851 |
| AHNAK    | -1.5090075488 | 0.00967      | 0.9999763851 |
| EEF1G    | 1.1141529289  | 0.372690679  | 0.9999763851 |

gene\_expression\_table

|          |               |              |              |
|----------|---------------|--------------|--------------|
| TUT1     | -1.1819730229 | 0.6274702415 | 0.9999763851 |
| MTA2     | 1.2709066462  | 0.1972937268 | 0.9999763851 |
| EML3     | 1.6969887163  | 0.1401414116 | 0.9999763851 |
| ROM1     | 1.0953517363  | 0.8964715001 | 0.9999763851 |
| B3GAT3   | -1.2174601429 | 0.4496248384 | 0.9999763851 |
| GANAB    | -1.2572940375 | 0.1532480796 | 0.9999763851 |
| INTS5    | 1.2400381557  | 0.508332947  | 0.9999763851 |
| C11orf98 | -1.0407593017 | 0.8570174429 | 0.9999763851 |
| LBHD1    | 12.2062282412 | 0.1876867146 | 0.9999763851 |
| METTL12  | -1.2208277452 | 0.6759019168 | 0.9999763851 |
| UQCC3    | 1.1313479325  | 0.4995760156 | 0.9999763851 |
| UBXN1    | 1.0239201175  | 0.8871859951 | 0.9999763851 |
| LRRN4CL  | 0             | 0            | 0            |
| BSCL2    | -1.0882385856 | 0.8122003297 | 0.9999763851 |
| HNRNPUL2 | 1.1113384765  | 0.5575867619 | 0.9999763851 |
| TTC9C    | 1.835448846   | 0.1134222441 | 0.9999763851 |
| ZBTB3    | -1.8177798391 | 0.4637711422 | 0.9999763851 |
| POLR2G   | -1.0872916886 | 0.606231998  | 0.9999763851 |
| TAF6L    | -1.406657056  | 0.6693786986 | 0.9999763851 |
| TMEM179B | 1.1108116713  | 0.5654030997 | 0.9999763851 |
| TMEM223  | 1.6134707631  | 0.0775449336 | 0.9999763851 |
| NXF1     | 1.2095247063  | 0.433484436  | 0.9999763851 |
| STX5     | 1.6229824428  | 0.3231204292 | 0.9999763851 |
| WDR74    | -1.5232345967 | 0.0411637389 | 0.9999763851 |
| SLC3A2   | 1.1685887597  | 0.3426477096 | 0.9999763851 |
| HRASLS5  | 0             | 0            | 0            |
| LGALS12  | 1.483694972   | 0.0202108271 | 0.9999763851 |
| RARRES3  | 12.2012745411 | 0.188290858  | 0.9999763851 |
| ATL3     | 1.0492488921  | 0.7789970683 | 0.9999763851 |
| RTN3     | -1.1139640448 | 0.4446882499 | 0.9999763851 |
| C11orf95 | -1.3026553232 | 0.3179510519 | 0.9999763851 |
| C11orf84 | 1.1501624171  | 0.6310977453 | 0.9999763851 |
| MARK2    | 1.6196175664  | 0.1049143762 | 0.9999763851 |
| RCOR2    | -7.5664585246 | 0.2260541296 | 0.9999763851 |
| NAA40    | 2.0135785869  | 0.1691796767 | 0.9999763851 |
| COX8A    | 1.1195958257  | 0.3829647666 | 0.9999763851 |
| OTUB1    | -1.0720661067 | 0.7191594043 | 0.9999763851 |
| MACROD1  | 1.0819762035  | 0.7414101895 | 0.9999763851 |
| FLRT1    | 2.5294022043  | 0.2955322964 | 0.9999763851 |
| STIP1    | 1.2411612936  | 0.1501942945 | 0.9999763851 |
| FERMT3   | -1.1324365637 | 0.3646140369 | 0.9999763851 |
| TRPT1    | -1.5856150365 | 0.4018879357 | 0.9999763851 |
| NUDT22   | 1.3214281743  | 0.4025691961 | 0.9999763851 |
| DNAJC4   | -1.346752514  | 0.5056951645 | 0.9999763851 |
| VEGFB    | -2.5602582481 | 0.2739893701 | 0.9999763851 |
| FKBP2    | 1.1520967501  | 0.5149599608 | 0.9999763851 |
| PPP1R14B | -1.031208036  | 0.8102260922 | 0.9999763851 |
| PLCB3    | 1.1352532707  | 0.5624501511 | 0.9999763851 |
| BAD      | 1.0561382742  | 0.88337991   | 0.9999763851 |

gene\_expression\_table

|              |               |              |              |
|--------------|---------------|--------------|--------------|
| GPR137       | 1.030012456   | 0.966792439  | 0.9999763851 |
| KCNK4        | 3.2353357581  | 0.554787377  | 0.9999763851 |
| TEX40        | 3.2353357581  | 0.554787377  | 0.9999763851 |
| ESRRA        | 1.1241949748  | 0.7983541789 | 0.9999763851 |
| TRMT112      | -1.3172769959 | 0.0228606395 | 0.9999763851 |
| PRDX5        | -1.0746649281 | 0.7870951223 | 0.9999763851 |
| CCDC88B      | -1.201883171  | 0.5527224229 | 0.9999763851 |
| RPS6KA4      | 1.7619379809  | 0.0554205974 | 0.9999763851 |
| RASGRP2      | -1.0638637113 | 0.7350710645 | 0.9999763851 |
| PYGM         | 1.6242600155  | 0.561953739  | 0.9999763851 |
| SF1          | 1.1571592486  | 0.2834119323 | 0.9999763851 |
| MAP4K2       | -1.7212327308 | 0.0959479782 | 0.9999763851 |
| MEN1         | 1.0045798836  | 0.982123976  | 0.9999763851 |
| EHD1         | -1.0071407265 | 0.9625461786 | 0.9999763851 |
| ATG2A        | 1.1026640234  | 0.6659339055 | 0.9999763851 |
| PPP2R5B      | -1.2565073761 | 0.7040724342 | 0.9999763851 |
| MAJIN        | 3.2356557963  | 0.5547505991 | 0.9999763851 |
| BATF2        | -1.9661492502 | 0.4737530821 | 0.9999763851 |
| ARL2         | -1.1296263162 | 0.5981508201 | 0.9999763851 |
| SNX15        | -1.3449153029 | 0.3350817122 | 0.9999763851 |
| SAC3D1       | 1.0285804126  | 0.8703648878 | 0.9999763851 |
| NAALADL1     | 0             | 0            | 0            |
| CDCA5        | 1.717724697   | 0.002834     | 0.9999763851 |
| ZFPL1        | -2.2442957359 | 0.063759107  | 0.9999763851 |
| TMEM262      | 0             | 0            | 0            |
| VPS51        | -1.675207249  | 0.0533977071 | 0.9999763851 |
| TM7SF2       | -1.7376064016 | 0.2806654257 | 0.9999763851 |
| ZNHIT2       | -1.4244255272 | 0.5877023505 | 0.9999763851 |
| FAU          | -1.2402466359 | 0.0909018905 | 0.9999763851 |
| MRPL49       | 1.120445842   | 0.6790432479 | 0.9999763851 |
| SYVN1        | 1.5158388998  | 0.0791004365 | 0.9999763851 |
| CAPN1        | 1.176352579   | 0.3381612643 | 0.9999763851 |
| SLC22A20     | 1.9220906279  | 0.4463275739 | 0.9999763851 |
| POLA2        | -1.0309871549 | 0.8768981943 | 0.9999763851 |
| CDC42EP2     | -2.5595294703 | 0.3316288706 | 0.9999763851 |
| DPF2         | 1.4482677287  | 0.0455477238 | 0.9999763851 |
| TIGD3        | -1.6460380751 | 0.4436071582 | 0.9999763851 |
| SLC25A45     | 1.5505881706  | 0.5536185115 | 0.9999763851 |
| FRMD8        | -1.2770177567 | 0.1547288856 | 0.9999763851 |
| LOC101927789 | -1.1464451114 | 0.8080570339 | 0.9999763851 |
| SCYL1        | -2.1914873857 | 0.006676     | 0.9999763851 |
| LTBP3        | 2.6108942912  | 0.0423947525 | 0.9999763851 |
| SSSCA1       | 1.1681740725  | 0.5956630871 | 0.9999763851 |
| FAM89B       | 1.0122830567  | 0.9662129723 | 0.9999763851 |
| EHBP1L1      | 1.0867556325  | 0.8528223935 | 0.9999763851 |
| MAP3K11      | -1.0384701228 | 0.8872745145 | 0.9999763851 |
| PCNX3        | 1.5783118254  | 0.4063594651 | 0.9999763851 |
| SIPA1        | 2.914697366   | 0.0755996307 | 0.9999763851 |
| RELA         | -1.0412708593 | 0.801957789  | 0.9999763851 |

gene\_expression\_table

|              |               |              |              |
|--------------|---------------|--------------|--------------|
| KAT5         | 1.7574593324  | 0.4419655219 | 0.9999763851 |
| RNASEH2C     | 1.216537129   | 0.2221093648 | 0.9999763851 |
| AP5B1        | 1.1005314116  | 0.6056491187 | 0.9999763851 |
| OVOL1        | 0             | 0            | 0            |
| SNX32        | 0             | 0            | 0            |
| CFL1         | -1.0284267113 | 0.8112191676 | 0.9999763851 |
| MUS81        | 1.1773342207  | 0.5498543999 | 0.9999763851 |
| EFEMP2       | -2.3295566515 | 0.3229213845 | 0.9999763851 |
| CTSW         | 0             | 0            | 0            |
| FIBP         | 1.1343712798  | 0.5651212583 | 0.9999763851 |
| CCDC85B      | 1.0009834747  | 0.9982609096 | 0.9999763851 |
| FOSL1        | -1.1159645743 | 0.7692835156 | 0.9999763851 |
| C11orf68     | 1.6555746083  | 0.2286995038 | 0.9999763851 |
| DRAP1        | 1.0174493166  | 0.9478094132 | 0.9999763851 |
| TSGA10IP     | 5.4770877341  | 0.3746135179 | 0.9999763851 |
| SART1        | -1.5541105705 | 0.3569856994 | 0.9999763851 |
| EIF1AD       | 1.0858778812  | 0.7209433125 | 0.9999763851 |
| BANF1        | 1.1104025442  | 0.5366630071 | 0.9999763851 |
| CATSPER1     | 0             | 0            | 0            |
| SF3B2        | 1.0653078201  | 0.6559165097 | 0.9999763851 |
| PACS1        | 1.3261442362  | 0.7479785331 | 0.9999763851 |
| KLC2         | 1.5428214719  | 0.539053522  | 0.9999763851 |
| RAB1B        | 1.0615112096  | 0.7188503301 | 0.9999763851 |
| CNIH2        | 1.0204530064  | 0.983670156  | 0.9999763851 |
| YIF1A        | 1.0384514402  | 0.8624629334 | 0.9999763851 |
| TMEM151A     | 5.4781708352  | 0.3745527127 | 0.9999763851 |
| RIN1         | 1.2721844354  | 0.4077144764 | 0.9999763851 |
| BRMS1        | 1.1741240448  | 0.4930003948 | 0.9999763851 |
| B4GAT1       | -1.3763682718 | 0.4338678011 | 0.9999763851 |
| SLC29A2      | -1.3154339304 | 0.8205576571 | 0.9999763851 |
| NPAS4        | 1.2872739558  | 0.8231267639 | 0.9999763851 |
| MRPL11       | -1.0124176423 | 0.9390797451 | 0.9999763851 |
| PELI3        | -1.4443368534 | 0.3582238424 | 0.9999763851 |
| DPP3         | 1.4919907328  | 0.0769017581 | 0.9999763851 |
| BBS1         | 1.7450428903  | 0.632553386  | 0.9999763851 |
| ZDHHC24      | -1.0314839288 | 0.9137022144 | 0.9999763851 |
| CCDC87       | 0             | 0            | 0            |
| CCS          | 1.198960756   | 0.6444355609 | 0.9999763851 |
| RBM14        | 1.3396031948  | 0.171748147  | 0.9999763851 |
| RBM14-RBM4   | -3.5443870889 | 0.0127432346 | 0.9999763851 |
| RBM4         | -1.2445372745 | 0.1212344514 | 0.9999763851 |
| RBM4B        | -1.0214433455 | 0.9141390128 | 0.9999763851 |
| SPTBN2       | 1.8137824633  | 0.5636614767 | 0.9999763851 |
| C11orf80     | 1.135845862   | 0.819803762  | 0.9999763851 |
| RCE1         | 1.5501971516  | 0.5508474977 | 0.9999763851 |
| PC           | 1.7451114492  | 0.3459884553 | 0.9999763851 |
| LRFN4        | -1.3063735095 | 0.1822042325 | 0.9999763851 |
| SYT12        | -2.5519849925 | 0.3672751297 | 0.9999763851 |
| LOC107984341 | 2.8674942058  | 0.3051338712 | 0.9999763851 |

gene\_expression\_table

|           |               |              |              |
|-----------|---------------|--------------|--------------|
| KDM2A     | -1.1057036686 | 0.5706638956 | 0.9999763851 |
| GRK2      | 1.3466320652  | 0.0410543501 | 0.9999763851 |
| ANKRD13D  | -1.0654807703 | 0.7887927614 | 0.9999763851 |
| SSH3      | 1.5488017649  | 0.5478215345 | 0.9999763851 |
| POLD4     | -1.3022440858 | 0.3748337604 | 0.9999763851 |
| CLCF1     | -2.3210912367 | 0.1860179279 | 0.9999763851 |
| RAD9A     | 1.2522196733  | 0.546983369  | 0.9999763851 |
| PPP1CA    | -1.0426140781 | 0.7923625911 | 0.9999763851 |
| TBC1D10C  | 1.6485236883  | 0.0987545195 | 0.9999763851 |
| CARNS1    | 0             | 0            | 0            |
| RPS6KB2   | -1.245622969  | 0.1619822784 | 0.9999763851 |
| PTPRCAP   | -4.2849908816 | 0.4028453076 | 0.9999763851 |
| CORO1B    | 1.3413703944  | 0.7016505406 | 0.9999763851 |
| CABP4     | 3.2361532718  | 0.5546934395 | 0.9999763851 |
| TMEM134   | -1.2356356493 | 0.4507195652 | 0.9999763851 |
| AIP       | 1.1887057207  | 0.4954655157 | 0.9999763851 |
| PITPNM1   | 3.1090798703  | 0.1420690117 | 0.9999763851 |
| CDK2AP2   | -1.0206858404 | 0.9155979113 | 0.9999763851 |
| GSTP1     | 1.0443950044  | 0.7642498787 | 0.9999763851 |
| NDUFV1    | -1.0936144335 | 0.625458558  | 0.9999763851 |
| NUDT8     | 1.2120602209  | 0.4614977122 | 0.9999763851 |
| TBX10     | 0             | 0            | 0            |
| UNC93B1   | 1.315783129   | 0.2568295293 | 0.9999763851 |
| ALDH3B1   | 1.536652845   | 0.082465148  | 0.9999763851 |
| NDUFS8    | 1.508349381   | 0.0392652091 | 0.9999763851 |
| TCIRG1    | -1.7431796887 | 0.0003921    | 0.4396020528 |
| CHKA      | 1.0558715428  | 0.7908767651 | 0.9999763851 |
| KMT5B     | 1.2729661331  | 0.3206196012 | 0.9999763851 |
| C11orf24  | 1.1585371987  | 0.5211890806 | 0.9999763851 |
| LRP5      | -1.1926402477 | 0.6140596541 | 0.9999763851 |
| PPP6R3    | -1.1282258727 | 0.4296692974 | 0.9999763851 |
| GAL       | -1.4080455631 | 0.236041005  | 0.9999763851 |
| TESMIN    | 1.1238503373  | 0.707273313  | 0.9999763851 |
| CPT1A     | -1.1784113049 | 0.2680978126 | 0.9999763851 |
| MRPL21    | 1.111918143   | 0.6006196884 | 0.9999763851 |
| IGHMBP2   | -1.0450733255 | 0.9283650227 | 0.9999763851 |
| TPCN2     | 1.1257162644  | 0.6175410505 | 0.9999763851 |
| MYEOV     | 1.9925962985  | 0.4276660305 | 0.9999763851 |
| CCND1     | -1.4210949265 | 0.5923516988 | 0.9999763851 |
| ORAOV1    | -1.1373337057 | 0.490458352  | 0.9999763851 |
| ANO1      | -4.2864494036 | 0.4027150576 | 0.9999763851 |
| FADD      | 1.2007616417  | 0.2626466184 | 0.9999763851 |
| PPFIA1    | 1.0858056468  | 0.685984558  | 0.9999763851 |
| CTTN      | 7.722359209   | 0.2874446962 | 0.9999763851 |
| SHANK2    | 1.0277462901  | 0.9757572405 | 0.9999763851 |
| DHCR7     | 1.2881789078  | 0.129147185  | 0.9999763851 |
| NADSYN1   | -1.0448563285 | 0.8323539553 | 0.9999763851 |
| KRTAP5-10 | -4.2849908816 | 0.4028453076 | 0.9999763851 |
| FAM86C1   | 1.2442206333  | 0.643528236  | 0.9999763851 |

gene\_expression\_table

|              |               |              |              |
|--------------|---------------|--------------|--------------|
| ZNF705E      | -4.2864494036 | 0.4027150576 | 0.9999763851 |
| LOC100129216 | 5.4784711963  | 0.3745358536 | 0.9999763851 |
| RNF121       | 1.7953519338  | 0.0648212335 | 0.9999763851 |
| IL18BP       | -4.9394901244 | 0.0454676904 | 0.9999763851 |
| NUMA1        | -1.0437112545 | 0.8196585342 | 0.9999763851 |
| LRTOMT       | -2.4191812103 | 0.1185371269 | 0.9999763851 |
| LAMTOR1      | -1.036557434  | 0.8180444347 | 0.9999763851 |
| ANAPC15      | -1.0001841089 | 0.9994775231 | 0.9999763851 |
| FOLR3        | -4.2849908816 | 0.4028453076 | 0.9999763851 |
| FOLR2        | 0             | 0            | 0            |
| INPPL1       | 1.2014172385  | 0.3201764713 | 0.9999763851 |
| PHOX2A       | 0             | 0            | 0            |
| CLPB         | -1.0735973567 | 0.8678854197 | 0.9999763851 |
| PDE2A        | 2.5098011754  | 0.4395977304 | 0.9999763851 |
| ARAP1        | -1.024471907  | 0.8826217268 | 0.9999763851 |
| STARD10      | -3.7476955756 | 0.1101822092 | 0.9999763851 |
| ATG16L2      | -1.0711396247 | 0.6604686682 | 0.9999763851 |
| FCHSD2       | -1.0989347282 | 0.706004538  | 0.9999763851 |
| P2RY2        | 1.2889734854  | 0.320717372  | 0.9999763851 |
| P2RY6        | 1.0147626614  | 0.9568770254 | 0.9999763851 |
| ARHGEF17     | 1.1570600642  | 0.6838099751 | 0.9999763851 |
| RELT         | -1.6129557959 | 0.0863037936 | 0.9999763851 |
| FAM168A      | 1.1804954333  | 0.6621406232 | 0.9999763851 |
| PLEKHB1      | 0             | 0            | 0            |
| RAB6A        | -1.2536742049 | 0.1858333075 | 0.9999763851 |
| MRPL48       | 1.3353298256  | 0.1864873624 | 0.9999763851 |
| COA4         | 1.3436378606  | 0.0794314062 | 0.9999763851 |
| PAAF1        | 1.724050441   | 0.0790463794 | 0.9999763851 |
| DNAJB13      | -1.3161718537 | 0.8286049067 | 0.9999763851 |
| UCP2         | -1.1067838923 | 0.7190849319 | 0.9999763851 |
| UCP3         | 1.027644744   | 0.9776658337 | 0.9999763851 |
| C2CD3        | -1.1270203652 | 0.7805359844 | 0.9999763851 |
| PPME1        | -1.1992385941 | 0.5189184882 | 0.9999763851 |
| PGM2L1       | -1.0597661417 | 0.8798597939 | 0.9999763851 |
| KCNE3        | -1.5761220861 | 0.0698976886 | 0.9999763851 |
| LIPT2        | 1.2363030365  | 0.7851059401 | 0.9999763851 |
| LOC100287896 | 1.461772119   | 0.5972841681 | 0.9999763851 |
| POLD3        | -1.3631566548 | 0.1466381893 | 0.9999763851 |
| CHRD2        | 0             | 0            | 0            |
| RNF169       | -1.3952982372 | 0.1621821523 | 0.9999763851 |
| XRR1         | 1.6676353015  | 0.092474176  | 0.9999763851 |
| SPCS2        | -1.1645322612 | 0.2955976028 | 0.9999763851 |
| NEU3         | -3.5693441777 | 0.0997686245 | 0.9999763851 |
| SLCO2B1      | -4.2849908816 | 0.4028453076 | 0.9999763851 |
| ARRB1        | 1.0185070741  | 0.8936942159 | 0.9999763851 |
| RPS3         | 1.0111740709  | 0.9297611455 | 0.9999763851 |
| KLHL35       | 1.4836611752  | 0.510002522  | 0.9999763851 |
| GDPD5        | 1.1155755303  | 0.7498090188 | 0.9999763851 |
| SERP1H1      | -3.1563891683 | 0.1985369756 | 0.9999763851 |

gene\_expression\_table

|               |               |              |              |
|---------------|---------------|--------------|--------------|
| DGAT2         | 1.0993384034  | 0.750459544  | 0.9999763851 |
| UVRAG         | 1.1154461669  | 0.5791322435 | 0.9999763851 |
| THAP12        | -1.2359220512 | 0.2861987592 | 0.9999763851 |
| LOC100506127  | 1.7574012207  | 0.4563628961 | 0.9999763851 |
| EMSY          | 1.0047624586  | 0.9882887708 | 0.9999763851 |
| LRRC32        | 0             | 0            | 0            |
| TSKU          | 1.293138255   | 0.5080209778 | 0.9999763851 |
| ACER3         | 1.1676214644  | 0.5806179135 | 0.9999763851 |
| CAPN5         | -1.1959066992 | 0.7977185273 | 0.9999763851 |
| MYO7A         | -1.4889425408 | 0.3691873014 | 0.9999763851 |
| PAK1          | -1.1811552572 | 0.3813519639 | 0.9999763851 |
| LOC107987163  | -1.7842319031 | 0.2668247326 | 0.9999763851 |
| AQP11         | 1.922830455   | 0.4619641046 | 0.9999763851 |
| CLNS1A        | -1.1857376123 | 0.26743614   | 0.9999763851 |
| RSF1          | -1.0702066481 | 0.7036354525 | 0.9999763851 |
| AAMDC         | 1.1774367818  | 0.5510614692 | 0.9999763851 |
| INTS4         | 1.2897962377  | 0.6135164093 | 0.9999763851 |
| NDUFC2-KCTD14 | -1.1494500921 | 0.8539263637 | 0.9999763851 |
| NDUFC2        | 1.5004646008  | 0.004831     | 0.9999763851 |
| ALG8          | 1.5427277387  | 0.0174339231 | 0.9999763851 |
| KCTD21        | 1.2792966707  | 0.6250374225 | 0.9999763851 |
| USP35         | -1.9143611748 | 0.003703     | 0.9999763851 |
| GAB2          | 1.0321351827  | 0.9341974879 | 0.9999763851 |
| NARS2         | 1.2978009956  | 0.4811750543 | 0.9999763851 |
| PRCP          | -1.0761678674 | 0.6082538354 | 0.9999763851 |
| DDIAS         | 1.8132200733  | 0.0498565486 | 0.9999763851 |
| RAB30         | -1.0097592345 | 0.9913143167 | 0.9999763851 |
| PCF11         | -1.0581617769 | 0.7446219406 | 0.9999763851 |
| ANKRD42       | 1.1766460192  | 0.7119344815 | 0.9999763851 |
| CCDC90B       | -1.2840642084 | 0.2795022152 | 0.9999763851 |
| TMEM126B      | 1.3174874926  | 0.1687338702 | 0.9999763851 |
| TMEM126A      | 1.2989286428  | 0.2398859338 | 0.9999763851 |
| CREBZF        | -1.0001158534 | 0.9994640303 | 0.9999763851 |
| CCDC83        | -4.2864494036 | 0.4027150576 | 0.9999763851 |
| PICALM        | 1.0005461492  | 0.9970919231 | 0.9999763851 |
| EED           | -1.4436888609 | 0.0417242824 | 0.9999763851 |
| C11orf73      | 1.3506954796  | 0.3006647502 | 0.9999763851 |
| CCDC81        | -4.2849908816 | 0.4028453076 | 0.9999763851 |
| ME3           | 1.2490665649  | 0.6891501225 | 0.9999763851 |
| FZD4          | -3.3294360969 | 0.2401993702 | 0.9999763851 |
| TMEM135       | 1.1557101781  | 0.6821822268 | 0.9999763851 |
| RAB38         | -2.5616934468 | 0.2767599224 | 0.9999763851 |
| CTSC          | 1.0529294202  | 0.7863925464 | 0.9999763851 |
| GRM5          | 0             | 0            | 0            |
| NOX4          | 0             | 0            | 0            |
| FOLH1B        | 0             | 0            | 0            |
| NAALAD2       | 1.1398942771  | 0.8201346513 | 0.9999763851 |
| CHORDC1       | 1.082445148   | 0.7312055905 | 0.9999763851 |
| FAT3          | -1.3154339304 | 0.8205576571 | 0.9999763851 |

gene\_expression\_table

|          |               |              |              |
|----------|---------------|--------------|--------------|
| SLC36A4  | 2.2449332928  | 0.0274954344 | 0.9999763851 |
| SMCO4    | -1.2832893042 | 0.309391455  | 0.9999763851 |
| CEP295   | -1.2810113349 | 0.2416677928 | 0.9999763851 |
| TAF1D    | 1.6442860233  | 0.0226397121 | 0.9999763851 |
| C11orf54 | 1.1134501195  | 0.7722426636 | 0.9999763851 |
| MED17    | 1.1201543217  | 0.6875551788 | 0.9999763851 |
| HEPHL1   | 0             | 0            | 0            |
| PANX1    | -1.1307821804 | 0.6848715402 | 0.9999763851 |
| MRE11A   | -1.1720410399 | 0.475510112  | 0.9999763851 |
| ANKRD49  | -1.4469657545 | 0.1857358243 | 0.9999763851 |
| C11orf97 | -2.3209115874 | 0.4607268102 | 0.9999763851 |
| FUT4     | 1.364818085   | 0.0870329021 | 0.9999763851 |
| PIWIL4   | -1.2173951742 | 0.6272534066 | 0.9999763851 |
| AMOTL1   | 1.5801325271  | 0.1846220677 | 0.9999763851 |
| CWC15    | 1.0179464936  | 0.9232834958 | 0.9999763851 |
| SRSF8    | -1.1109891469 | 0.5744700623 | 0.9999763851 |
| ENDOD1   | -1.3217747202 | 0.4735220445 | 0.9999763851 |
| SESN3    | 1.0208478557  | 0.9691053071 | 0.9999763851 |
| FAM76B   | 1.2875518292  | 0.3218643288 | 0.9999763851 |
| CEP57    | -1.1503577323 | 0.4700765328 | 0.9999763851 |
| MTMR2    | 1.0018974266  | 0.9937247305 | 0.9999763851 |
| MAML2    | -1.627682253  | 0.2615210651 | 0.9999763851 |
| CCDC82   | 1.460456132   | 0.3203838581 | 0.9999763851 |
| JRKL     | -1.6207139327 | 0.4424263779 | 0.9999763851 |
| CNTN5    | 5.4781708352  | 0.3745527127 | 0.9999763851 |
| ARHGAP42 | 7.7211724672  | 0.2779709379 | 0.9999763851 |
| TMEM133  | 5.4770877341  | 0.3746135179 | 0.9999763851 |
| TRPC6    | 0             | 0            | 0            |
| C11orf70 | -4.2849908816 | 0.4028453076 | 0.9999763851 |
| BIRC3    | 1.4098853934  | 0.4301552738 | 0.9999763851 |
| BIRC2    | -1.1298355859 | 0.5423583039 | 0.9999763851 |
| TMEM123  | 1.0097609095  | 0.9536972714 | 0.9999763851 |
| MMP7     | -3.3291448741 | 0.2509160445 | 0.9999763851 |
| MMP20    | 0             | 0            | 0            |
| MMP8     | 1.1333715873  | 0.8726005559 | 0.9999763851 |
| MMP10    | -8.342239448  | 0.2154408104 | 0.9999763851 |
| MMP1     | -4.6343491481 | 3.92E-11     | 2.64E-07     |
| MMP3     | -5.3420894951 | 0.107104171  | 0.9999763851 |
| DCUN1D5  | -1.4863914839 | 0.0303605823 | 0.9999763851 |
| DYNC2H1  | -1.4398891606 | 0.4515666575 | 0.9999763851 |
| CASP4    | -1.2754335354 | 0.5673738748 | 0.9999763851 |
| CASP1    | -1.6289638637 | 0.2468401906 | 0.9999763851 |
| CARD16   | -1.0416486765 | 0.9634135134 | 0.9999763851 |
| MSANTD4  | -1.5497302023 | 0.2020454122 | 0.9999763851 |
| KBTBD3   | -1.1443525594 | 0.8866090056 | 0.9999763851 |
| AASDHPPT | 1.0654617698  | 0.8000769253 | 0.9999763851 |
| GUCY1A2  | -1.1904273562 | 0.594903681  | 0.9999763851 |
| CWF19L2  | -1.0781169176 | 0.798977013  | 0.9999763851 |
| ALKBH8   | -1.7727596799 | 0.3006990432 | 0.9999763851 |



gene\_expression\_table

|          |               |              |              |
|----------|---------------|--------------|--------------|
| SLC35F2  | 1.1620365995  | 0.7158638779 | 0.9999763851 |
| RAB39A   | 0             | 0            | 0            |
| CUL5     | -1.2667161869 | 0.2121395773 | 0.9999763851 |
| ACAT1    | 1.0170073898  | 0.91480362   | 0.9999763851 |
| NPAT     | 1.1267828244  | 0.7201433059 | 0.9999763851 |
| ATM      | -1.311395496  | 0.2791372587 | 0.9999763851 |
| KDELC2   | -3.5820989397 | 0.005343     | 0.9999763851 |
| EXPH5    | 1.2803213157  | 0.6466122346 | 0.9999763851 |
| DDX10    | 1.2524836573  | 0.2188734688 | 0.9999763851 |
| ZC3H12C  | -1.0440126181 | 0.9266218969 | 0.9999763851 |
| RDX      | 1.0003973295  | 0.9984608595 | 0.9999763851 |
| FDX1     | -1.108353712  | 0.5738217796 | 0.9999763851 |
| ARHGAP20 | 3.2353357581  | 0.554787377  | 0.9999763851 |
| SIK2     | 1.1826785705  | 0.6468623915 | 0.9999763851 |
| PPP2R1B  | 1.1205983644  | 0.4842055193 | 0.9999763851 |
| ALG9     | -1.2304465284 | 0.538375643  | 0.9999763851 |
| FDXACB1  | 1.6466739695  | 0.2373638424 | 0.9999763851 |
| C11orf1  | -1.3504460039 | 0.3665520678 | 0.9999763851 |
| HSPB2    | 0             | 0            | 0            |
| C11orf52 | 0             | 0            | 0            |
| DIXDC1   | -2.3222877795 | 0.450910957  | 0.9999763851 |
| DLAT     | -8.3604661647 | 0.0290780452 | 0.9999763851 |
| PIH1D2   | 1.4568251364  | 0.0835611223 | 0.9999763851 |
| C11orf57 | -1.2811951234 | 0.3293782385 | 0.9999763851 |
| TIMM8B   | 1.0344259866  | 0.8206773495 | 0.9999763851 |
| SDHD     | 1.8432973052  | 0.0369855774 | 0.9999763851 |
| IL18     | -1.3946909469 | 0.7147517481 | 0.9999763851 |
| TEX12    | 0             | 0            | 0            |
| BCO2     | 2.3398344857  | 0.4135656902 | 0.9999763851 |
| PTS      | 1.0568629461  | 0.829886905  | 0.9999763851 |
| PLET1    | 3.2361532718  | 0.5546934395 | 0.9999763851 |
| NCAM1    | -5.0519831528 | 0.0413915934 | 0.9999763851 |
| TTC12    | -1.3953638359 | 0.6936906344 | 0.9999763851 |
| TMPRSS5  | 0             | 0            | 0            |
| ZW10     | 1.1380744274  | 0.4597575193 | 0.9999763851 |
| USP28    | 1.5423203699  | 0.1200665698 | 0.9999763851 |
| HTR3B    | 0             | 0            | 0            |
| ZBTB16   | -2.6615286456 | 0.1869435458 | 0.9999763851 |
| C11orf71 | 1.4658599468  | 0.5109208968 | 0.9999763851 |
| RBM7     | -1.7522679011 | 0.0918201139 | 0.9999763851 |
| REXO2    | 1.1059719989  | 0.671617501  | 0.9999763851 |
| NXPE2    | -2.3214980365 | 0.4366467708 | 0.9999763851 |
| BUD13    | -1.0548760322 | 0.8471293087 | 0.9999763851 |
| ZPR1     | 1.2120087295  | 0.4392411754 | 0.9999763851 |
| SIK3     | -1.6215814123 | 0.0345749104 | 0.9999763851 |
| PAFAH1B2 | -1.0965839776 | 0.5029567447 | 0.9999763851 |
| SIDT2    | 1.0231141341  | 0.9373311592 | 0.9999763851 |
| TAGLN    | -2.2178496717 | 0.4267261952 | 0.9999763851 |
| PCSK7    | 1.0317365674  | 0.8978952417 | 0.9999763851 |

gene\_expression\_table

|          |               |              |              |
|----------|---------------|--------------|--------------|
| RNF214   | -1.2329246863 | 0.5735694382 | 0.9999763851 |
| BACE1    | -1.4284678387 | 0.5770606471 | 0.9999763851 |
| CEP164   | 1.2949616389  | 0.3771936769 | 0.9999763851 |
| FXVD2    | 3.2361532718  | 0.5546934395 | 0.9999763851 |
| FXVD6    | 2.3403997491  | 0.4171851616 | 0.9999763851 |
| IL10RA   | -1.0268089327 | 0.9294099452 | 0.9999763851 |
| JAML     | 3.2353357581  | 0.554787377  | 0.9999763851 |
| MPZL3    | 0             | 0            | 0            |
| CD3E     | 2.1016747882  | 0.5172996432 | 0.9999763851 |
| CD3G     | 0             | 0            | 0            |
| UBE4A    | 1.3550670981  | 0.113295973  | 0.9999763851 |
| ATP5L    | -1.3052322202 | 0.0256513894 | 0.9999763851 |
| KMT2A    | -1.2884919816 | 0.3224336452 | 0.9999763851 |
| TMEM25   | -1.1334584708 | 0.7593433652 | 0.9999763851 |
| IFT46    | 9.0182935529  | 0.2608495149 | 0.9999763851 |
| ARCN1    | -1.3166740593 | 0.1600939323 | 0.9999763851 |
| PHLDB1   | 1.0271487798  | 0.9777882605 | 0.9999763851 |
| DDX6     | -1.2180204013 | 0.1587119066 | 0.9999763851 |
| CXCR5    | -2.9861951639 | 0.0442663886 | 0.9999763851 |
| BCL9L    | -1.0351698453 | 0.9623707877 | 0.9999763851 |
| UPK2     | 0             | 0            | 0            |
| FOXR1    | 0             | 0            | 0            |
| CCDC84   | -1.3505206804 | 0.4984231448 | 0.9999763851 |
| RPS25    | 1.0540873508  | 0.7656647951 | 0.9999763851 |
| TRAPPC4  | 1.0298276653  | 0.8607142902 | 0.9999763851 |
| SLC37A4  | 1.6398301766  | 0.0580339511 | 0.9999763851 |
| HYOU1    | 1.0077941852  | 0.9614315505 | 0.9999763851 |
| VPS11    | 1.3234492558  | 0.4296193548 | 0.9999763851 |
| HMBS     | 1.6570081571  | 0.0137998607 | 0.9999763851 |
| H2AFX    | -1.0345128081 | 0.8461772579 | 0.9999763851 |
| DPAGT1   | 1.4031041064  | 0.177508555  | 0.9999763851 |
| C2CD2L   | -1.029742369  | 0.9289993328 | 0.9999763851 |
| HINFP    | 1.0688575366  | 0.8915966954 | 0.9999763851 |
| NLRX1    | 1.252607192   | 0.5278707508 | 0.9999763851 |
| CBL      | -1.2935150851 | 0.174295431  | 0.9999763851 |
| RNF26    | 1.0117842166  | 0.9547439063 | 0.9999763851 |
| USP2     | -1.4422814889 | 0.6418633521 | 0.9999763851 |
| NECTIN1  | 1.1753784252  | 0.577019469  | 0.9999763851 |
| OAF      | -1.0371590333 | 0.8420324712 | 0.9999763851 |
| TMEM136  | 0             | 0            | 0            |
| ARHGEF12 | 4.4613963453  | 0.02510871   | 0.9999763851 |
| SC5D     | -1.0051991567 | 0.9868206056 | 0.9999763851 |
| SORL1    | 1.0533635738  | 0.7488602299 | 0.9999763851 |
| UBASH3B  | 1.0750676819  | 0.6133015735 | 0.9999763851 |
| CRTAM    | 3.2361532718  | 0.5546934395 | 0.9999763851 |
| C11orf63 | 1.7584422599  | 0.448089874  | 0.9999763851 |
| HSPA8    | 1.1210857482  | 0.3318252021 | 0.9999763851 |
| GRAMD1B  | -1.0405076573 | 0.833776492  | 0.9999763851 |
| SCN3B    | 12.1150575073 | 0.1935053692 | 0.9999763851 |

gene\_expression\_table

|              |               |              |              |
|--------------|---------------|--------------|--------------|
| ZNF202       | -1.1268821418 | 0.7938470845 | 0.9999763851 |
| VWA5A        | -2.1283157091 | 0.1193169916 | 0.9999763851 |
| OR8G5        | 3.2353357581  | 0.554787377  | 0.9999763851 |
| TBRG1        | 1.2002398463  | 0.3742189224 | 0.9999763851 |
| SIAE         | 1.0883507656  | 0.8430905565 | 0.9999763851 |
| SPA17        | 4.9743874554  | 0.1013229557 | 0.9999763851 |
| NRGN         | 1.5680568372  | 0.0659097285 | 0.9999763851 |
| VSIG2        | 1.7447664027  | 0.3572062657 | 0.9999763851 |
| ESAM         | 0             | 0            | 0            |
| MSANTD2      | -1.1485931013 | 0.8489951402 | 0.9999763851 |
| ROBO3        | -1.4294246668 | 0.5387190379 | 0.9999763851 |
| CCDC15       | -1.5666222009 | 0.2291863852 | 0.9999763851 |
| SLC37A2      | -1.2133026633 | 0.4043635041 | 0.9999763851 |
| TMEM218      | -1.1527732967 | 0.4737511048 | 0.9999763851 |
| PKNOX2       | -1.3709710942 | 0.7480489583 | 0.9999763851 |
| FEZ1         | 3.2353357581  | 0.554787377  | 0.9999763851 |
| EI24         | 1.0651277587  | 0.6279704872 | 0.9999763851 |
| STT3A        | -1.0509716589 | 0.8045400931 | 0.9999763851 |
| CHEK1        | -1.1979059207 | 0.4538173584 | 0.9999763851 |
| ACRV1        | 3.3300007086  | 0.101203885  | 0.9999763851 |
| PATE4        | 0             | 0            | 0            |
| HYLS1        | 1.3427855291  | 0.766209566  | 0.9999763851 |
| PUS3         | 1.9505880649  | 0.0167025056 | 0.9999763851 |
| CDON         | -1.0477046426 | 0.9130827507 | 0.9999763851 |
| LOC105369591 | 0             | 0            | 0            |
| RPUSD4       | 1.1025683607  | 0.6939179025 | 0.9999763851 |
| FAM118B      | 3.2356557963  | 0.5547505991 | 0.9999763851 |
| SRPRA        | -1.04045024   | 0.8407572776 | 0.9999763851 |
| FOXRED1      | -1.0198393273 | 0.9321438735 | 0.9999763851 |
| TIRAP        | -1.8170402834 | 0.4612648103 | 0.9999763851 |
| DCPS         | -1.2034088468 | 0.2592990255 | 0.9999763851 |
| ST3GAL4      | -1.1872475607 | 0.331043967  | 0.9999763851 |
| ETS1         | -1.1432044445 | 0.4427971187 | 0.9999763851 |
| FLI1         | -1.2856701017 | 0.1108252676 | 0.9999763851 |
| KCNJ1        | -2.387415242  | 0.1994751072 | 0.9999763851 |
| C11orf45     | 1.281021076   | 0.6278819723 | 0.9999763851 |
| ARHGAP32     | 1.2796805414  | 0.3342992563 | 0.9999763851 |
| BARX2        | 0             | 0            | 0            |
| TMEM45B      | -1.4159079662 | 0.6106094087 | 0.9999763851 |
| NFRKB        | -1.1125046297 | 0.6395885715 | 0.9999763851 |
| PRDM10       | 1.1735024689  | 0.7592989575 | 0.9999763851 |
| APLP2        | 1.0600948959  | 0.645071191  | 0.9999763851 |
| ST14         | 0             | 0            | 0            |
| ZBTB44       | -1.0170394511 | 0.9061432836 | 0.9999763851 |
| JAM3         | 1.4018110974  | 0.2629076277 | 0.9999763851 |
| NCAPD3       | 1.6093199957  | 0.1088499801 | 0.9999763851 |
| VPS26B       | 1.2106199021  | 0.2598928117 | 0.9999763851 |
| THYN1        | 1.126765711   | 0.519327967  | 0.9999763851 |
| ACAD8        | -1.0506770252 | 0.8888489299 | 0.9999763851 |

gene\_expression\_table

|              |               |              |              |
|--------------|---------------|--------------|--------------|
| IQSEC3       | -2.037919908  | 0.4308742935 | 0.9999763851 |
| SLC6A12      | -1.3154339304 | 0.8205576571 | 0.9999763851 |
| SLC6A13      | 0             | 0            | 0            |
| KDM5A        | 1.1556593628  | 0.4731910774 | 0.9999763851 |
| CCDC77       | 1.0206647194  | 0.9526668595 | 0.9999763851 |
| B4GALNT3     | 1.3582418801  | 0.5651099155 | 0.9999763851 |
| NINJ2        | 1.0411710409  | 0.8957462119 | 0.9999763851 |
| WNK1         | 1.2506531947  | 0.1722724379 | 0.9999763851 |
| RAD52        | -1.0809624948 | 0.6607869766 | 0.9999763851 |
| ERC1         | -1.263705764  | 0.3060291146 | 0.9999763851 |
| FBXL14       | 1.2870167985  | 0.3085679203 | 0.9999763851 |
| WNT5B        | 3.2353357581  | 0.554787377  | 0.9999763851 |
| ADIPOR2      | 1.0344256097  | 0.8224577966 | 0.9999763851 |
| CACNA2D4     | -1.4159103415 | 0.1049750955 | 0.9999763851 |
| DCP1B        | 1.3130992724  | 0.6476834362 | 0.9999763851 |
| CACNA1C      | 1.3174677035  | 0.4905105285 | 0.9999763851 |
| FKBP4        | 1.0189482716  | 0.9074544403 | 0.9999763851 |
| ITFG2        | -1.1264604962 | 0.7393438531 | 0.9999763851 |
| NRIP2        | -1.9649399627 | 0.4624713245 | 0.9999763851 |
| LOC101929469 | 1.8136032532  | 0.5936433508 | 0.9999763851 |
| FOXM1        | -1.0803009863 | 0.6574656063 | 0.9999763851 |
| RHNO1        | -1.0116385133 | 0.9610742502 | 0.9999763851 |
| TULP3        | -2.1386792405 | 0.0443763238 | 0.9999763851 |
| TEAD4        | -4.2849908816 | 0.4028453076 | 0.9999763851 |
| TSPAN9       | 1.1303300756  | 0.2946827138 | 0.9999763851 |
| CRACR2A      | -1.5034858819 | 0.2304274565 | 0.9999763851 |
| PARP11       | 1.2810764603  | 0.4454070136 | 0.9999763851 |
| CCND2        | -1.0022657819 | 0.9901131285 | 0.9999763851 |
| TIGAR        | -1.3835329262 | 0.3576012447 | 0.9999763851 |
| C12orf4      | -1.6665665338 | 0.0894600368 | 0.9999763851 |
| RAD51AP1     | -1.093125409  | 0.6801551931 | 0.9999763851 |
| DYRK4        | 1.2897802709  | 0.4083818954 | 0.9999763851 |
| AKAP3        | -2.3222877795 | 0.4510535509 | 0.9999763851 |
| NDUFA9       | 1.3551043853  | 0.0791316537 | 0.9999763851 |
| KCNA6        | -1.4078456073 | 0.6523815848 | 0.9999763851 |
| VWF          | -1.3154339304 | 0.8205576571 | 0.9999763851 |
| CD9          | -1.4889549815 | 0.1013083694 | 0.9999763851 |
| PLEKHG6      | 1.0276562285  | 0.9749404666 | 0.9999763851 |
| TNFRSF1A     | -1.278099635  | 0.1719141242 | 0.9999763851 |
| LTBR         | -1.3962107668 | 0.1588013625 | 0.9999763851 |
| CD27         | -1.9607753243 | 0.3468462156 | 0.9999763851 |
| TAPBPL       | 1.2212990596  | 0.7249164228 | 0.9999763851 |
| VAMP1        | 1.854443779   | 0.1451917865 | 0.9999763851 |
| MRPL51       | 1.0601963822  | 0.6847359567 | 0.9999763851 |
| NCAPD2       | 1.3349188643  | 0.0907123617 | 0.9999763851 |
| GAPDH        | 1.162567248   | 0.2096633372 | 0.9999763851 |
| IFFO1        | -1.8419078132 | 0.0361636907 | 0.9999763851 |
| NOP2         | 1.1182161592  | 0.5837093852 | 0.9999763851 |
| CHD4         | -1.0648360591 | 0.648614847  | 0.9999763851 |

gene\_expression\_table

|              |               |              |              |
|--------------|---------------|--------------|--------------|
| LPAR5        | 0             | 0            | 0            |
| ING4         | -1.5316049682 | 0.106134764  | 0.9999763851 |
| ZNF384       | -1.0806909421 | 0.9257208946 | 0.9999763851 |
| PIANP        | 0             | 0            | 0            |
| COPS7A       | 1.1361341026  | 0.5585706901 | 0.9999763851 |
| MLF2         | 1.0043605061  | 0.9796557739 | 0.9999763851 |
| PTMS         | -3.3707866895 | 0.0760156811 | 0.9999763851 |
| CD4          | -1.9583625423 | 0.002616     | 0.9999763851 |
| GPR162       | 4.0100732174  | 0.092674205  | 0.9999763851 |
| P3H3         | 0             | 0            | 0            |
| GNB3         | 1.2068244943  | 0.7388347796 | 0.9999763851 |
| CDCA3        | 1.0509855951  | 0.805758824  | 0.9999763851 |
| USP5         | 1.1599005311  | 0.5760346524 | 0.9999763851 |
| TPI1         | 1.0736395399  | 0.605573557  | 0.9999763851 |
| SPSB2        | 1.8308492597  | 0.2221102442 | 0.9999763851 |
| LRRC23       | 1.7937734078  | 0.2742282374 | 0.9999763851 |
| ENO2         | -1.2066415907 | 0.6077059447 | 0.9999763851 |
| ATN1         | -1.3876013709 | 0.5592854581 | 0.9999763851 |
| C12orf57     | 1.0608841114  | 0.6960711895 | 0.9999763851 |
| PTPN6        | 1.2299091006  | 0.3333270635 | 0.9999763851 |
| PHB2         | 1.0029521756  | 0.9820812625 | 0.9999763851 |
| EMG1         | 1.0265346575  | 0.8984703422 | 0.9999763851 |
| LPCAT3       | 1.0145103141  | 0.949205554  | 0.9999763851 |
| C1R          | -4.3338228569 | 0.1406162149 | 0.9999763851 |
| C1RL         | 1.1838848411  | 0.6976778895 | 0.9999763851 |
| RBP5         | 0             | 0            | 0            |
| CLSTN3       | 5.4790129495  | 0.3759263024 | 0.9999763851 |
| PEX5         | -1.2050188027 | 0.6578286764 | 0.9999763851 |
| CD163L1      | 1.0158315147  | 0.9640692406 | 0.9999763851 |
| APOBEC1      | -7.5622178268 | 0.2177145568 | 0.9999763851 |
| NANOG        | 1.2867653957  | 0.8300593121 | 0.9999763851 |
| SLC2A14      | -2.3233606776 | 0.4606540202 | 0.9999763851 |
| SLC2A3       | -1.5839517417 | 0.009095     | 0.9999763851 |
| FOXJ2        | 1.2358838774  | 0.5359166854 | 0.9999763851 |
| C3AR1        | 1.0572168065  | 0.907348269  | 0.9999763851 |
| NECAP1       | 1.500566265   | 0.3840509599 | 0.9999763851 |
| CLEC4A       | -4.2864494036 | 0.4027150576 | 0.9999763851 |
| FAM90A1      | 1.6889837257  | 0.5257211958 | 0.9999763851 |
| CLEC6A       | 3.2353357581  | 0.554787377  | 0.9999763851 |
| CLEC4D       | 0             | 0            | 0            |
| CLEC4E       | 3.2353357581  | 0.554787377  | 0.9999763851 |
| AICDA        | 0             | 0            | 0            |
| RIMKLB       | -1.4307207903 | 0.5121677191 | 0.9999763851 |
| PHC1         | -1.5219491751 | 0.3405771983 | 0.9999763851 |
| M6PR         | -1.0307072292 | 0.8932054804 | 0.9999763851 |
| KLRG1        | -1.5222481543 | 0.3262697284 | 0.9999763851 |
| LOC728715    | -1.3716482783 | 0.7379337699 | 0.9999763851 |
| LOC105376678 | -2.3222877795 | 0.4511966308 | 0.9999763851 |
| KLRB1        | -1.3942010814 | 0.6866801413 | 0.9999763851 |

gene\_expression\_table

|              |                |              |              |
|--------------|----------------|--------------|--------------|
| LOC105369728 | -14.1218219134 | 0.1012694921 | 0.9999763851 |
| CLEC2D       | -1.3773671343  | 0.2576906435 | 0.9999763851 |
| CLECL1       | 1.223014665    | 0.1714336947 | 0.9999763851 |
| CD69         | -1.2947353761  | 0.3574718524 | 0.9999763851 |
| KLRF1        | 2.3396033966   | 0.4202464014 | 0.9999763851 |
| CLEC2B       | -1.1053561302  | 0.4270481667 | 0.9999763851 |
| KLRF2        | -4.2849908816  | 0.4028453076 | 0.9999763851 |
| CLEC2A       | -1.1451177614  | 0.4176092349 | 0.9999763851 |
| CLEC12A      | -1.179741572   | 0.3186594552 | 0.9999763851 |
| CLEC1B       | 1.9569793291   | 0.1261980914 | 0.9999763851 |
| CLEC12B      | 1.0686406341   | 0.9156239439 | 0.9999763851 |
| CLEC1A       | 0              | 0            | 0            |
| CLEC7A       | -4.2864494036  | 0.4027150576 | 0.9999763851 |
| OLR1         | -1.9665787608  | 0.4507082304 | 0.9999763851 |
| TMEM52B      | 2.4673165638   | 0.3081930627 | 0.9999763851 |
| GABARAPL1    | -1.3813335983  | 0.5942230549 | 0.9999763851 |
| MAGOHB       | -1.0657812115  | 0.7720234114 | 0.9999763851 |
| STYK1        | 0              | 0            | 0            |
| PRR4         | 9.0182935529   | 0.2609092261 | 0.9999763851 |
| PRH1         | -1.4872057783  | 0.1999842305 | 0.9999763851 |
| PRH2         | 3.2353357581   | 0.554787377  | 0.9999763851 |
| PRH1-TAS2R14 | 2.0522850196   | 0.2163751342 | 0.9999763851 |
| TAS2R20      | -1.3713018672  | 0.7312784555 | 0.9999763851 |
| SMIM10L1     | -1.1035941466  | 0.6722274371 | 0.9999763851 |
| TAS2R42      | 3.2356557963   | 0.5547505991 | 0.9999763851 |
| PRB2         | 0              | 0            | 0            |
| ETV6         | -1.7110359294  | 0.0165517854 | 0.9999763851 |
| BCL2L14      | -3.3287018261  | 0.2432318723 | 0.9999763851 |
| LOC100506248 | -1.0267611171  | 0.8620071521 | 0.9999763851 |
| LRP6         | -1.3160416743  | 0.827111756  | 0.9999763851 |
| BORCS5       | -1.7105841649  | 0.2855292439 | 0.9999763851 |
| DUSP16       | -1.3660704831  | 0.096177093  | 0.9999763851 |
| CREBL2       | -1.27741639    | 0.4661415069 | 0.9999763851 |
| GPR19        | 1.1979463287   | 0.7308991062 | 0.9999763851 |
| CDKN1B       | -1.5311947631  | 0.003942     | 0.9999763851 |
| APOLD1       | -1.8621602614  | 0.0109143542 | 0.9999763851 |
| DDX47        | 1.1741180746   | 0.6935564891 | 0.9999763851 |
| FAM234B      | -1.2791784011  | 0.6198824746 | 0.9999763851 |
| GPRC5D       | 0              | 0            | 0            |
| HEBP1        | 1.0749218048   | 0.6761717498 | 0.9999763851 |
| GSG1         | -2.5600051511  | 0.2551885332 | 0.9999763851 |
| EMP1         | -2.2449641806  | 0.004633     | 0.9999763851 |
| GRIN2B       | 3.2356557963   | 0.5547505991 | 0.9999763851 |
| ATF7IP       | -1.5606018786  | 0.0790300641 | 0.9999763851 |
| C12orf60     | -1.6000437015  | 0.4089217587 | 0.9999763851 |
| H2AFJ        | -1.3158816768  | 0.8203229797 | 0.9999763851 |
| WBP11        | -1.3808917577  | 0.0891101928 | 0.9999763851 |
| SMCO3        | 0              | 0            | 0            |
| ART4         | 0              | 0            | 0            |

gene\_expression\_table

|          |               |              |              |
|----------|---------------|--------------|--------------|
| ERP27    | 1.8308244325  | 0.3752642869 | 0.9999763851 |
| ARHGDIB  | 1.2675477183  | 0.0422967967 | 0.9999763851 |
| PDE6H    | 3.2356557963  | 0.5547505991 | 0.9999763851 |
| PTPRO    | -4.2849908816 | 0.4028453076 | 0.9999763851 |
| EPS8     | 1.3262899408  | 0.7595844133 | 0.9999763851 |
| STRAP    | 1.078410246   | 0.6412728349 | 0.9999763851 |
| DERA     | -1.1809434159 | 0.5149571525 | 0.9999763851 |
| SLC15A5  | 0             | 0            | 0            |
| MGST1    | 1.1864304412  | 0.3221895407 | 0.9999763851 |
| PLCZ1    | 1.01706669    | 0.9418734652 | 0.9999763851 |
| AEBP2    | 1.0244775335  | 0.9241828573 | 0.9999763851 |
| PDE3A    | 1.2587826646  | 0.4498440593 | 0.9999763851 |
| SLCO1B7  | 3.2353357581  | 0.554787377  | 0.9999763851 |
| SLCO1B1  | 0             | 0            | 0            |
| PYROXD1  | 1.374321878   | 0.103971806  | 0.9999763851 |
| RECQL    | -2.1907380469 | 0.077650129  | 0.9999763851 |
| GOLT1B   | 1.1641908516  | 0.4852191293 | 0.9999763851 |
| GYS2     | 6.368054416   | 0.3491891175 | 0.9999763851 |
| LDHB     | 1.1941797877  | 0.1368990723 | 0.9999763851 |
| ABCC9    | 0             | 0            | 0            |
| CMAS     | -1.2696767654 | 0.220574821  | 0.9999763851 |
| ST8SIA1  | 0             | 0            | 0            |
| C2CD5    | -1.317121473  | 0.3896799217 | 0.9999763851 |
| ETNK1    | -1.0934677069 | 0.617939118  | 0.9999763851 |
| SOX5     | -1.3157515262 | 0.8223988689 | 0.9999763851 |
| BCAT1    | -1.0339624653 | 0.8485265576 | 0.9999763851 |
| LRMP     | -1.9057962763 | 0.1369813077 | 0.9999763851 |
| CASC1    | 1.2454866827  | 0.8305954337 | 0.9999763851 |
| LYRM5    | 2.2525498699  | 0.0835794197 | 0.9999763851 |
| KRAS     | 1.1116076138  | 0.5570289451 | 0.9999763851 |
| LMNTD1   | 3.2361532718  | 0.5546934395 | 0.9999763851 |
| BHLHE41  | 1.6182325762  | 0.4523455056 | 0.9999763851 |
| SSPN     | -2.3217011239 | 0.435585292  | 0.9999763851 |
| ITPR2    | 1.3118767628  | 0.3033206988 | 0.9999763851 |
| ASUN     | 1.0280155056  | 0.8903136334 | 0.9999763851 |
| FGFR1OP2 | -1.4339256786 | 0.070077276  | 0.9999763851 |
| TM7SF3   | -1.0982844089 | 0.5097843669 | 0.9999763851 |
| MED21    | 1.4543830584  | 0.1417851921 | 0.9999763851 |
| C12orf71 | 0             | 0            | 0            |
| STK38L   | 1.1115930993  | 0.7220522451 | 0.9999763851 |
| ARNTL2   | 1.185296182   | 0.7165145745 | 0.9999763851 |
| SMCO2    | 0             | 0            | 0            |
| PPFIBP1  | -3.088460367  | 0.007789     | 0.9999763851 |
| REP15    | 0             | 0            | 0            |
| MRPS35   | 1.3639118056  | 0.0571773411 | 0.9999763851 |
| KLHL42   | -1.1919161296 | 0.3327528336 | 0.9999763851 |
| CCDC91   | 1.0733932509  | 0.7940682375 | 0.9999763851 |
| FAR2     | -1.1271144273 | 0.6708875755 | 0.9999763851 |
| ERGIC2   | -1.0723959035 | 0.7459784794 | 0.9999763851 |

gene\_expression\_table

|          |                |              |              |
|----------|----------------|--------------|--------------|
| IPO8     | 1.3495129021   | 0.1520583297 | 0.9999763851 |
| CAPRIN2  | 1.9673046429   | 0.3556155176 | 0.9999763851 |
| DDX11    | 1.2411278332   | 0.4966667032 | 0.9999763851 |
| OVOS2    | 7.7488609396   | 0.3059804961 | 0.9999763851 |
| FAM60A   | 1.0874294147   | 0.6629174683 | 0.9999763851 |
| DENND5B  | 0              | 0            | 0            |
| ETFBKMT  | -10.3797341339 | 0.0137668691 | 0.9999763851 |
| AMN1     | -1.3778718463  | 0.4532522613 | 0.9999763851 |
| H3F3C    | 0              | 0            | 0            |
| KIAA1551 | -1.1307508007  | 0.6838135318 | 0.9999763851 |
| BICD1    | -1.2257825366  | 0.4174886108 | 0.9999763851 |
| FGD4     | 1.0097257706   | 0.954525635  | 0.9999763851 |
| DNM1L    | 1.0744190344   | 0.6525097427 | 0.9999763851 |
| YARS2    | -1.0413307662  | 0.8863415275 | 0.9999763851 |
| SYT10    | 0              | 0            | 0            |
| ALG10    | 1.1142028814   | 0.8847026385 | 0.9999763851 |
| ALG10B   | -1.2914969252  | 0.3981572677 | 0.9999763851 |
| CPNE8    | 1.3729073284   | 0.3903695724 | 0.9999763851 |
| KIF21A   | -1.0670397333  | 0.8462441559 | 0.9999763851 |
| SLC2A13  | -1.3506115695  | 0.4924534057 | 0.9999763851 |
| LRRK2    | 0              | 0            | 0            |
| MUC19    | 3.2361532718   | 0.5546934395 | 0.9999763851 |
| CNTN1    | 3.2356557963   | 0.5547505991 | 0.9999763851 |
| PDZRN4   | -1.887160399   | 0.0605198417 | 0.9999763851 |
| GXYLT1   | -1.5006822338  | 0.0378881136 | 0.9999763851 |
| YAF2     | 1.0983589586   | 0.6185831095 | 0.9999763851 |
| ZCRB1    | -1.1094492781  | 0.5710826962 | 0.9999763851 |
| PPHLN1   | 1.0429105735   | 0.7747715166 | 0.9999763851 |
| PRICKLE1 | 1.9672084963   | 0.4361707133 | 0.9999763851 |
| ADAMTS20 | 3.2356557963   | 0.5547505991 | 0.9999763851 |
| PUS7L    | -1.3012745614  | 0.3726395662 | 0.9999763851 |
| IRAK4    | 1.1740900496   | 0.5594751174 | 0.9999763851 |
| TWF1     | 1.020188711    | 0.9458097593 | 0.9999763851 |
| TMEM117  | -2.560793319   | 0.2842140824 | 0.9999763851 |
| NELL2    | 3.2356557963   | 0.5547505991 | 0.9999763851 |
| ANO6     | -1.1578274269  | 0.6302608396 | 0.9999763851 |
| ARID2    | -1.1506197858  | 0.5768500868 | 0.9999763851 |
| SCAF11   | -1.0110574562  | 0.9370486954 | 0.9999763851 |
| SLC38A1  | 1.2066671239   | 0.2369485443 | 0.9999763851 |
| SLC38A2  | 1.2271925499   | 0.1707606731 | 0.9999763851 |
| SLC38A4  | 0              | 0            | 0            |
| AMIGO2   | 5.4790129495   | 0.3762270444 | 0.9999763851 |
| PCED1B   | -1.0863345041  | 0.8632896557 | 0.9999763851 |
| RPAP3    | 1.4539082266   | 0.1176291472 | 0.9999763851 |
| ENDOU    | 0              | 0            | 0            |
| RAPGEF3  | -7.5622178268  | 0.2177145568 | 0.9999763851 |
| SLC48A1  | 1.2642745034   | 0.4892678972 | 0.9999763851 |
| HDAC7    | -1.2883792986  | 0.165515083  | 0.9999763851 |
| VDR      | -1.2140099331  | 0.3267171635 | 0.9999763851 |



gene\_expression\_table

|          |               |              |              |
|----------|---------------|--------------|--------------|
| TMEM106C | -1.2760280268 | 0.1449685733 | 0.9999763851 |
| SENP1    | -1.3326566059 | 0.2713811414 | 0.9999763851 |
| PFKM     | 14.4482274128 | 0.15092542   | 0.9999763851 |
| ASB8     | -1.1184497767 | 0.6613156813 | 0.9999763851 |
| ZNF641   | 1.2251858726  | 0.7478337156 | 0.9999763851 |
| C12orf54 | 6.368054416   | 0.3491960774 | 0.9999763851 |
| ANP32D   | 0             | 0            | 0            |
| KANSL2   | 1.1693806602  | 0.4646005284 | 0.9999763851 |
| CCNT1    | 1.4443049625  | 0.0932298187 | 0.9999763851 |
| CACNB3   | 1.0019060314  | 0.9946243066 | 0.9999763851 |
| DDX23    | 1.2732764948  | 0.1559279644 | 0.9999763851 |
| RND1     | 3.3680355205  | 0.2626171715 | 0.9999763851 |
| CCDC65   | -1.9647456674 | 0.4668002959 | 0.9999763851 |
| FKBP11   | 1.325955166   | 0.7493014348 | 0.9999763851 |
| ARF3     | 1.0153077251  | 0.9178805863 | 0.9999763851 |
| WNT10B   | 1.3662413441  | 0.5183024283 | 0.9999763851 |
| WNT1     | 0             | 0            | 0            |
| DDN      | 0             | 0            | 0            |
| PRKAG1   | -1.3164821438 | 0.226568568  | 0.9999763851 |
| KMT2D    | -1.1975892914 | 0.4882034401 | 0.9999763851 |
| RHEBL1   | -1.1136064003 | 0.6382350518 | 0.9999763851 |
| LMBR1L   | -1.4402112053 | 0.3931295054 | 0.9999763851 |
| TUBA1B   | -1.0971762785 | 0.4190869824 | 0.9999763851 |
| TUBA1A   | -1.0480101495 | 0.7425101697 | 0.9999763851 |
| TUBA1C   | -1.1091508177 | 0.3682329793 | 0.9999763851 |
| PRPH     | -1.9654362824 | 0.4778548266 | 0.9999763851 |
| TROAP    | -1.3220726355 | 0.4043267527 | 0.9999763851 |
| C1QL4    | 3.2356557963  | 0.5547505991 | 0.9999763851 |
| SPATS2   | 1.3989121072  | 0.2941693859 | 0.9999763851 |
| MCRS1    | 1.054919057   | 0.7947388225 | 0.9999763851 |
| FAM186B  | 1.5498231645  | 0.5451352725 | 0.9999763851 |
| PRPF40B  | -1.4351206863 | 0.449626059  | 0.9999763851 |
| FMNL3    | 1.011351558   | 0.9767684969 | 0.9999763851 |
| TMBIM6   | 1.1369336709  | 0.3288446411 | 0.9999763851 |
| NCKAP5L  | -1.1973379604 | 0.8034421863 | 0.9999763851 |
| BCDIN3D  | -1.5606624867 | 0.3482060469 | 0.9999763851 |
| FAIM2    | 0             | 0            | 0            |
| AQP6     | -4.2849908816 | 0.4028453076 | 0.9999763851 |
| RACGAP1  | 1.0750443486  | 0.6963764069 | 0.9999763851 |
| ASIC1    | -1.2608756966 | 0.2925182096 | 0.9999763851 |
| SMARCD1  | 1.274453323   | 0.4652088953 | 0.9999763851 |
| COX14    | 1.1479511909  | 0.3275518091 | 0.9999763851 |
| CERS5    | 1.0226958662  | 0.9239027888 | 0.9999763851 |
| LIMA1    | -1.1482733712 | 0.5269366991 | 0.9999763851 |
| LARP4    | -1.0492208539 | 0.7807706192 | 0.9999763851 |
| DIP2B    | -1.2860764275 | 0.3418098884 | 0.9999763851 |
| ATF1     | -1.0198107596 | 0.9264464811 | 0.9999763851 |
| TMPRSS12 | 0             | 0            | 0            |
| METTL7A  | 1.4014822113  | 0.2305499446 | 0.9999763851 |

gene\_expression\_table

|          |                |              |              |
|----------|----------------|--------------|--------------|
| HIGD1C   | 12.2055584829  | 0.1780614767 | 0.9999763851 |
| SLC11A2  | 1.1759996854   | 0.5595462097 | 0.9999763851 |
| LETMD1   | 1.2696519671   | 0.2717558203 | 0.9999763851 |
| CSRNP2   | -1.3196367789  | 0.5563539322 | 0.9999763851 |
| TFCP2    | 1.0783264607   | 0.6502619906 | 0.9999763851 |
| POU6F1   | 1.6426539897   | 0.366230928  | 0.9999763851 |
| DAZAP2   | -1.079708293   | 0.5982328885 | 0.9999763851 |
| SMAGP    | 1.2815256224   | 0.7943925444 | 0.9999763851 |
| BIN2     | -1.2054559085  | 0.3225942626 | 0.9999763851 |
| CELA1    | -1.0658620272  | 0.9360605674 | 0.9999763851 |
| GALNT6   | -1.2171767658  | 0.3401276819 | 0.9999763851 |
| SLC4A8   | -2.3227182272  | 0.1433892385 | 0.9999763851 |
| SCN8A    | -2.5766131218  | 0.0564204456 | 0.9999763851 |
| FIGNL2   | 2.027155953    | 0.4561872529 | 0.9999763851 |
| ACVRL1   | -5.5367104188  | 0.0318782444 | 0.9999763851 |
| ACVR1B   | -2.2277517054  | 0.007771     | 0.9999763851 |
| GRASP    | -2.4440355816  | 0.4434695289 | 0.9999763851 |
| NR4A1    | 1.1390433155   | 0.8350984278 | 0.9999763851 |
| ATG101   | -1.2342403926  | 0.2560601265 | 0.9999763851 |
| KRT80    | 0              | 0            | 0            |
| KRT7     | -1.7802290875  | 0.520804732  | 0.9999763851 |
| KRT86    | 1.0560111589   | 0.716729178  | 0.9999763851 |
| KRT81    | 1.5956463682   | 0.1870072494 | 0.9999763851 |
| KRT2     | -1.0346478895  | 0.9604887723 | 0.9999763851 |
| KRT1     | -20.6829910744 | 0.056372274  | 0.9999763851 |
| KRT77    | 0              | 0            | 0            |
| KRT3     | -1.0629193228  | 0.9429506554 | 0.9999763851 |
| KRT4     | 0              | 0            | 0            |
| KRT79    | -9.0566712722  | 0.0551899426 | 0.9999763851 |
| KRT78    | -4.2864494036  | 0.4027150576 | 0.9999763851 |
| EIF4B    | -1.1054358986  | 0.5092774729 | 0.9999763851 |
| TNS2     | 5.4784711963   | 0.3745358536 | 0.9999763851 |
| SPRYD3   | 1.3009924456   | 0.4589672075 | 0.9999763851 |
| IGFBP6   | 1.9229787277   | 0.4494470579 | 0.9999763851 |
| SOAT2    | 1.8142404796   | 0.5678116976 | 0.9999763851 |
| CSAD     | -2.5610465578  | 0.2827494718 | 0.9999763851 |
| ZNF740   | -1.1804194403  | 0.5869645893 | 0.9999763851 |
| ITGB7    | -4.6450398006  | 0.0004307    | 0.4545015308 |
| RARG     | -1.0164253063  | 0.9779732893 | 0.9999763851 |
| MFSD5    | 1.4563531      | 0.089265473  | 0.9999763851 |
| ESPL1    | 1.6291323892   | 0.0911363827 | 0.9999763851 |
| PFDN5    | -1.3010829267  | 0.1250406317 | 0.9999763851 |
| C12orf10 | -1.3673585473  | 0.2630428083 | 0.9999763851 |
| AAAS     | -1.4940668448  | 0.2843531942 | 0.9999763851 |
| SP1      | -1.2939628123  | 0.2875548805 | 0.9999763851 |
| PRR13    | -1.0760630455  | 0.5866095563 | 0.9999763851 |
| PCBP2    | -1.0241398896  | 0.8498098253 | 0.9999763851 |
| MAP3K12  | -4.2864494036  | 0.4027150576 | 0.9999763851 |
| TARBP2   | 1.1455776172   | 0.6239438968 | 0.9999763851 |

gene\_expression\_table

|              |                |              |              |
|--------------|----------------|--------------|--------------|
| NPFF         | 1.8137824633   | 0.5639230692 | 0.9999763851 |
| ATF7         | 1.4172000507   | 0.4687992903 | 0.9999763851 |
| ATP5G2       | -1.0327621783  | 0.7923230233 | 0.9999763851 |
| CALCOCO1     | -3.7510687687  | 0.10461698   | 0.9999763851 |
| HOXC11       | 3.2353357581   | 0.554787377  | 0.9999763851 |
| HOXC10       | -1.2264847888  | 0.4964468664 | 0.9999763851 |
| HOXC9        | -1.0806556559  | 0.9243074408 | 0.9999763851 |
| LOC107984512 | 0              | 0            | 0            |
| HOXC8        | -2.384593258   | 0.1959859761 | 0.9999763851 |
| HOXC6        | -1.3907093864  | 0.3144885423 | 0.9999763851 |
| HOXC5        | -14.1266231044 | 0.0934860779 | 0.9999763851 |
| HOXC4        | -1.2179546502  | 0.6362964223 | 0.9999763851 |
| SMUG1        | -1.2176171242  | 0.5871840894 | 0.9999763851 |
| CBX5         | 1.1357829648   | 0.4181835842 | 0.9999763851 |
| HNRNPA1      | 1.2358746064   | 0.0976169469 | 0.9999763851 |
| NFE2         | 1.1709907292   | 0.4735997042 | 0.9999763851 |
| COPZ1        | -1.2347514516  | 0.2387026811 | 0.9999763851 |
| GPR84        | 1.2600857935   | 0.4046665229 | 0.9999763851 |
| ZNF385A      | 5.0439373197   | 0.1373919139 | 0.9999763851 |
| ITGA5        | 1.3252539819   | 0.1349715915 | 0.9999763851 |
| GTSF1        | 1.4019998954   | 0.0711194924 | 0.9999763851 |
| NCKAP1L      | 1.0605476193   | 0.6453733337 | 0.9999763851 |
| PDE1B        | -1.3016311333  | 0.5086680194 | 0.9999763851 |
| METTL7B      | -1.9661045084  | 0.4534785671 | 0.9999763851 |
| ITGA7        | -1.2364244735  | 0.6561766678 | 0.9999763851 |
| BLOC1S1      | 1.3847052766   | 0.088155645  | 0.9999763851 |
| RDH5         | 2.3396033966   | 0.4195336873 | 0.9999763851 |
| CD63         | -1.4427490365  | 0.004669     | 0.9999763851 |
| GDF11        | 1.1649936507   | 0.5930395516 | 0.9999763851 |
| SARNP        | 1.2341142649   | 0.1696493315 | 0.9999763851 |
| ORMDL2       | -1.1024527533  | 0.6981427948 | 0.9999763851 |
| DNAJC14      | 1.2052932884   | 0.7140409236 | 0.9999763851 |
| MMP19        | -1.6009524639  | 0.3424507204 | 0.9999763851 |
| PYM1         | -1.2968803677  | 0.2360833161 | 0.9999763851 |
| DGKA         | -1.3400248288  | 0.3759060896 | 0.9999763851 |
| PMEL         | -2.4440355816  | 0.4432184348 | 0.9999763851 |
| CDK2         | -1.2664749725  | 0.1505215264 | 0.9999763851 |
| RAB5B        | -1.7263628306  | 0.001008     | 0.7976857137 |
| SUOX         | -2.3882538214  | 0.2039514464 | 0.9999763851 |
| IKZF4        | -1.3815626988  | 0.7462525959 | 0.9999763851 |
| RPS26        | 1.1818099431   | 0.4896654199 | 0.9999763851 |
| PA2G4        | -1.0368902275  | 0.7638635184 | 0.9999763851 |
| RPL41        | -1.0450875133  | 0.7046968234 | 0.9999763851 |
| ZC3H10       | -1.5856089735  | 0.3884915118 | 0.9999763851 |
| ESYT1        | 1.2538702881   | 0.1867489324 | 0.9999763851 |
| LOC107987175 | 0              | 0            | 0            |
| MYL6B        | -1.1176748757  | 0.6285168017 | 0.9999763851 |
| MYL6         | 1.0096359395   | 0.9454915792 | 0.9999763851 |
| SMARCC2      | 1.0861791589   | 0.6764776978 | 0.9999763851 |

gene\_expression\_table

|          |               |              |              |
|----------|---------------|--------------|--------------|
| RNF41    | -1.1178255036 | 0.6804172692 | 0.9999763851 |
| NABP2    | 1.2369280863  | 0.2819900412 | 0.9999763851 |
| ANKRD52  | 1.129642016   | 0.6330471908 | 0.9999763851 |
| COQ10A   | -1.1256157506 | 0.781398033  | 0.9999763851 |
| CS       | 1.1962129382  | 0.199235243  | 0.9999763851 |
| CNPY2    | 1.0058470155  | 0.9713834079 | 0.9999763851 |
| PAN2     | -1.4422794878 | 0.3329084101 | 0.9999763851 |
| IL23A    | -2.3884896926 | 0.2362464309 | 0.9999763851 |
| STAT2    | -2.237104103  | 0.014089415  | 0.9999763851 |
| TIMELESS | -1.0448018256 | 0.8036760493 | 0.9999763851 |
| SPRYD4   | -1.0502065902 | 0.8893673825 | 0.9999763851 |
| GLS2     | 19.4295281995 | 0.1168822197 | 0.9999763851 |
| BAZ2A    | -1.3990320541 | 0.1674366198 | 0.9999763851 |
| ATP5B    | 1.1551663802  | 0.230680047  | 0.9999763851 |
| PTGES3   | -1.0249118322 | 0.8434892508 | 0.9999763851 |
| NACA     | 1.0847532938  | 0.5290258523 | 0.9999763851 |
| PRIM1    | -1.3753060378 | 0.3879855354 | 0.9999763851 |
| HSD17B6  | -1.015368255  | 0.9782471204 | 0.9999763851 |
| RDH16    | 0             | 0            | 0            |
| GPR182   | 0             | 0            | 0            |
| ZBTB39   | 1.6738056472  | 0.2335313431 | 0.9999763851 |
| TAC3     | -4.2864494036 | 0.4027150576 | 0.9999763851 |
| MYO1A    | 1.2867653957  | 0.8300189633 | 0.9999763851 |
| NEMP1    | 1.0334617858  | 0.8952091416 | 0.9999763851 |
| NAB2     | 1.0738088626  | 0.8206363691 | 0.9999763851 |
| STAT6    | 1.0708001324  | 0.7693418495 | 0.9999763851 |
| LRP1     | 0             | 0            | 0            |
| NXPH4    | -1.0810230665 | 0.9182586474 | 0.9999763851 |
| SHMT2    | 1.0210378276  | 0.8942781235 | 0.9999763851 |
| NDUFA4L2 | -1.3155492632 | 0.8261295197 | 0.9999763851 |
| STAC3    | 1.9661403391  | 0.3468098204 | 0.9999763851 |
| R3HDM2   | -1.1171701541 | 0.6989810798 | 0.9999763851 |
| INHBE    | -1.3710462586 | 0.7620868046 | 0.9999763851 |
| GLI1     | 1.7432383105  | 0.3363935773 | 0.9999763851 |
| ARHGAP9  | 1.1273757736  | 0.3953737558 | 0.9999763851 |
| MARS     | 1.2245044181  | 0.2325078268 | 0.9999763851 |
| DDIT3    | -1.0130599365 | 0.9616924742 | 0.9999763851 |
| MBD6     | -1.4784390749 | 0.1564422424 | 0.9999763851 |
| DCTN2    | 1.0351143167  | 0.8112585338 | 0.9999763851 |
| KIF5A    | 0             | 0            | 0            |
| PIP4K2C  | -1.0511522002 | 0.8059590378 | 0.9999763851 |
| DTX3     | 3.2353357581  | 0.554787377  | 0.9999763851 |
| ARHGEF25 | 1.3166612325  | 0.512196322  | 0.9999763851 |
| B4GALNT1 | 1.4035461069  | 0.5107049853 | 0.9999763851 |
| OS9      | -1.1125850509 | 0.5684800048 | 0.9999763851 |
| AGAP2    | 2.0014523426  | 0.058932647  | 0.9999763851 |
| TSPAN31  | -1.3158393667 | 0.828022737  | 0.9999763851 |
| CDK4     | -1.0653580613 | 0.6790328936 | 0.9999763851 |
| MARCH9   | -1.4522402311 | 0.1891823743 | 0.9999763851 |

gene\_expression\_table

|              |               |              |              |
|--------------|---------------|--------------|--------------|
| CYP27B1      | 1.8300010925  | 0.3755956347 | 0.9999763851 |
| METTL1       | -1.2111696858 | 0.5156002855 | 0.9999763851 |
| METTL21B     | -1.0440247144 | 0.8712518178 | 0.9999763851 |
| TSFM         | -1.1222150249 | 0.6026250864 | 0.9999763851 |
| AVIL         | 1.1395802074  | 0.8210180636 | 0.9999763851 |
| CTDSP2       | -1.0524694221 | 0.7251525612 | 0.9999763851 |
| ATP23        | 1.8155966892  | 0.0401856557 | 0.9999763851 |
| FAM19A2      | -1.0438195622 | 0.8468584009 | 0.9999763851 |
| USP15        | -1.4663283799 | 0.0757193091 | 0.9999763851 |
| MON2         | -1.2057748068 | 0.5189394406 | 0.9999763851 |
| PPM1H        | -1.1585895879 | 0.7098807152 | 0.9999763851 |
| TMEM5        | -1.0327801934 | 0.9381799147 | 0.9999763851 |
| SRGAP1       | -1.2038877456 | 0.7029617524 | 0.9999763851 |
| C12orf66     | 1.1987700037  | 0.7039884516 | 0.9999763851 |
| XPOT         | 1.7539496929  | 0.0007286    | 0.6510516988 |
| TBK1         | -1.4376052732 | 0.4083939747 | 0.9999763851 |
| RASSF3       | -1.0744961362 | 0.751900866  | 0.9999763851 |
| GNS          | -1.0866715991 | 0.5966824599 | 0.9999763851 |
| TBC1D30      | 1.3415763937  | 0.6951087905 | 0.9999763851 |
| WIF1         | 0             | 0            | 0            |
| LEMD3        | 1.4179080198  | 0.1985431086 | 0.9999763851 |
| MSRB3        | 1.1186632532  | 0.4824272368 | 0.9999763851 |
| HMGA2        | 3.2353357581  | 0.554787377  | 0.9999763851 |
| LOC100129940 | 0             | 0            | 0            |
| LLPH         | 1.153222613   | 0.3783481134 | 0.9999763851 |
| TMBIM4       | -1.0367084778 | 0.8192895079 | 0.9999763851 |
| IRAK3        | 1.1703613646  | 0.346671282  | 0.9999763851 |
| HELB         | 1.3764516987  | 0.6092752561 | 0.9999763851 |
| GRIP1        | -1.9611742755 | 0.0609968596 | 0.9999763851 |
| CAND1        | -1.1321526656 | 0.4267968118 | 0.9999763851 |
| DYRK2        | -1.4682883541 | 0.1386160072 | 0.9999763851 |
| MDM1         | 1.3253189807  | 0.4924627294 | 0.9999763851 |
| RAP1B        | -1.1818597803 | 0.2354564477 | 0.9999763851 |
| NUP107       | 1.0091781346  | 0.9691932706 | 0.9999763851 |
| SLC35E3      | -1.5601557122 | 0.1121021493 | 0.9999763851 |
| MDM2         | 1.2219979853  | 0.4369192603 | 0.9999763851 |
| CPM          | 1.1765662098  | 0.6376044304 | 0.9999763851 |
| CPSF6        | 1.3215883416  | 0.0494016788 | 0.9999763851 |
| LYZ          | -1.3669658748 | 0.0869199127 | 0.9999763851 |
| YEATS4       | -1.1637343363 | 0.4386705026 | 0.9999763851 |
| FRS2         | -1.3214047712 | 0.5063138756 | 0.9999763851 |
| CCT2         | -1.0219004506 | 0.8689292733 | 0.9999763851 |
| BEST3        | 3.2353357581  | 0.554787377  | 0.9999763851 |
| RAB3IP       | 2.2435235174  | 0.0108368454 | 0.9999763851 |
| MYRFL        | 5.4781708352  | 0.3745527127 | 0.9999763851 |
| CNOT2        | 1.1823793977  | 0.3504903407 | 0.9999763851 |
| KCNMB4       | -3.3272796812 | 0.2432983936 | 0.9999763851 |
| PTPRB        | -1.1390506844 | 0.7292068483 | 0.9999763851 |
| PTPRR        | 0             | 0            | 0            |

gene\_expression\_table

|              |               |              |              |
|--------------|---------------|--------------|--------------|
| ZFC3H1       | -1.2632087649 | 0.5037280418 | 0.9999763851 |
| THAP2        | -2.0471526469 | 0.1532216967 | 0.9999763851 |
| TMEM19       | 1.4494567783  | 0.2834248967 | 0.9999763851 |
| RAB21        | 1.0617035472  | 0.7532999984 | 0.9999763851 |
| TBC1D15      | 1.0841369938  | 0.6538755465 | 0.9999763851 |
| TPH2         | 0             | 0            | 0            |
| TRHDE        | -4.2849908816 | 0.4028453076 | 0.9999763851 |
| ATXN7L3B     | 1.2859308211  | 0.2188961716 | 0.9999763851 |
| GLIPR1       | 1.2330585255  | 0.2632767943 | 0.9999763851 |
| KRR1         | -1.4396652144 | 0.3151871719 | 0.9999763851 |
| PHLDA1       | -1.7445027335 | 0.116735103  | 0.9999763851 |
| NAP1L1       | -1.1900657307 | 0.1831690929 | 0.9999763851 |
| BBS10        | -1.3948129396 | 0.6824171443 | 0.9999763851 |
| OSBPL8       | -1.0773507625 | 0.6470274596 | 0.9999763851 |
| ZDHHC17      | -1.8142908552 | 0.1961389679 | 0.9999763851 |
| CSRP2        | 0             | 0            | 0            |
| SYT1         | 3.2353357581  | 0.554787377  | 0.9999763851 |
| PAWR         | 0             | 0            | 0            |
| PPP1R12A     | -1.1098482068 | 0.5982727939 | 0.9999763851 |
| LOC107984534 | 0             | 0            | 0            |
| OTOGL        | 0             | 0            | 0            |
| PTPRQ        | 0             | 0            | 0            |
| PPFIA2       | 3.2356557963  | 0.5547505991 | 0.9999763851 |
| CCDC59       | 1.1313126825  | 0.5336763931 | 0.9999763851 |
| METTL25      | -1.4361212023 | 0.4463144691 | 0.9999763851 |
| TMTC2        | 1.245188991   | 0.5656833032 | 0.9999763851 |
| LRRIQ1       | 0             | 0            | 0            |
| MGAT4C       | 1.3264789913  | 0.7364653153 | 0.9999763851 |
| C12orf50     | 0             | 0            | 0            |
| C12orf29     | 1.1284689447  | 0.7015390269 | 0.9999763851 |
| CEP290       | -1.507367245  | 0.2995486116 | 0.9999763851 |
| TMTC3        | 1.8338024858  | 0.1622993667 | 0.9999763851 |
| DUSP6        | -1.0772985462 | 0.6125684594 | 0.9999763851 |
| POC1B        | 1.0728240527  | 0.75944187   | 0.9999763851 |
| GALNT4       | 4.8791443919  | 0.0119753603 | 0.9999763851 |
| ATP2B1       | -1.2319005127 | 0.2625366812 | 0.9999763851 |
| DCN          | 0             | 0            | 0            |
| BTG1         | -1.3762231099 | 0.0238101753 | 0.9999763851 |
| CLLU1OS      | 0             | 0            | 0            |
| PLEKHG7      | 1.8888297566  | 0.5937424439 | 0.9999763851 |
| EEA1         | -1.1609678916 | 0.5744726564 | 0.9999763851 |
| NUDT4        | 1.1257780379  | 0.4252355397 | 0.9999763851 |
| UBE2N        | 1.071059093   | 0.6610136971 | 0.9999763851 |
| MRPL42       | 1.2055858703  | 0.2870388985 | 0.9999763851 |
| SOCS2        | 4.4659480018  | 0.0189331185 | 0.9999763851 |
| CRADD        | 1.0532517376  | 0.8918397042 | 0.9999763851 |
| PLXNC1       | 1.3766957264  | 0.221495003  | 0.9999763851 |
| CEP83        | -1.5866901523 | 0.1330849648 | 0.9999763851 |
| NDUFA12      | 1.388199735   | 0.027171701  | 0.9999763851 |

gene\_expression\_table

|           |               |              |              |
|-----------|---------------|--------------|--------------|
| NR2C1     | 1.056695501   | 0.8471069127 | 0.9999763851 |
| FGD6      | -1.3373750721 | 0.5214808288 | 0.9999763851 |
| VEZT      | 1.3226203449  | 0.2275108441 | 0.9999763851 |
| METAP2    | -1.0403892141 | 0.7612254046 | 0.9999763851 |
| USP44     | 1.6372041402  | 0.0125820513 | 0.9999763851 |
| NTN4      | 3.2356557963  | 0.5547505991 | 0.9999763851 |
| SNRPF     | 1.1424641012  | 0.3630883163 | 0.9999763851 |
| CCDC38    | -1.9672070343 | 0.4589649407 | 0.9999763851 |
| AMDHD1    | 1.8145193361  | 0.5769212622 | 0.9999763851 |
| HAL       | -1.0400495026 | 0.952350152  | 0.9999763851 |
| LTA4H     | -1.3406994067 | 0.1626335555 | 0.9999763851 |
| ELK3      | -1.0767776346 | 0.6899154922 | 0.9999763851 |
| CDK17     | 1.0535408318  | 0.8563018775 | 0.9999763851 |
| NEDD1     | -1.2534975641 | 0.2250237113 | 0.9999763851 |
| TMPO      | -1.1082455856 | 0.4114642247 | 0.9999763851 |
| SLC25A3   | 1.4802807089  | 0.00155      | 0.9999763851 |
| IKBIP     | 1.0855182472  | 0.7216795562 | 0.9999763851 |
| APAF1     | -1.4110698006 | 0.2843397327 | 0.9999763851 |
| ANKS1B    | -4.3327792956 | 0.1655099731 | 0.9999763851 |
| UHRF1BP1L | 1.0690837976  | 0.7971214744 | 0.9999763851 |
| ACTR6     | -1.3342619073 | 0.3206561677 | 0.9999763851 |
| DEPDC4    | -1.3157515262 | 0.8224004334 | 0.9999763851 |
| SCYL2     | 1.2857852807  | 0.3732899472 | 0.9999763851 |
| NR1H4     | 0             | 0            | 0            |
| GAS2L3    | -1.6899157383 | 0.2658794665 | 0.9999763851 |
| UTP20     | -1.0218852586 | 0.937424121  | 0.9999763851 |
| ARL1      | -1.063374598  | 0.7105963071 | 0.9999763851 |
| CHPT1     | 1.1639389253  | 0.4515621415 | 0.9999763851 |
| SYCP3     | 9.9312452783  | 0.2486349035 | 0.9999763851 |
| GNPTAB    | -1.0658243062 | 0.7538044472 | 0.9999763851 |
| DRAM1     | -1.1393632939 | 0.5544736177 | 0.9999763851 |
| CCDC53    | -1.1577250277 | 0.7454565085 | 0.9999763851 |
| NUP37     | 1.1234130511  | 0.5998784207 | 0.9999763851 |
| PARBP     | 1.0057682772  | 0.9897441132 | 0.9999763851 |
| PMCH      | -1.0799166688 | 0.691230467  | 0.9999763851 |
| IGF1      | 5.4770877341  | 0.3746135179 | 0.9999763851 |
| STAB2     | -3.9253679416 | 0.057276238  | 0.9999763851 |
| NT5DC3    | 1.0274719886  | 0.916105305  | 0.9999763851 |
| HSP90B1   | -1.3835376718 | 0.0128406001 | 0.9999763851 |
| C12orf73  | -1.1832343782 | 0.5566733626 | 0.9999763851 |
| TDG       | 1.2487174004  | 0.2029189865 | 0.9999763851 |
| GLT8D2    | 3.7152157043  | 0.1014605005 | 0.9999763851 |
| HCFC2     | 1.7347411924  | 0.2343756956 | 0.9999763851 |
| NFYB      | -1.5496772939 | 0.0669699932 | 0.9999763851 |
| TXNRD1    | 1.1047394712  | 0.4427414818 | 0.9999763851 |
| CHST11    | -1.0946474727 | 0.5565379744 | 0.9999763851 |
| SLC41A2   | 1.3502752571  | 0.6713058002 | 0.9999763851 |
| C12orf45  | -1.1060650023 | 0.700456703  | 0.9999763851 |
| ALDH1L2   | 9.0182935529  | 0.2609690465 | 0.9999763851 |

gene\_expression\_table

|          |               |              |              |
|----------|---------------|--------------|--------------|
| KIAA1033 | 1.2605271666  | 0.3660854302 | 0.9999763851 |
| APPL2    | 1.0978401185  | 0.7858816265 | 0.9999763851 |
| C12orf75 | 1.2222459419  | 0.2783078122 | 0.9999763851 |
| CKAP4    | 1.0717099893  | 0.609348928  | 0.9999763851 |
| TCP11L2  | 5.4781708352  | 0.3745527127 | 0.9999763851 |
| POLR3B   | -1.2960787455 | 0.3371190281 | 0.9999763851 |
| RFX4     | -1.315303824  | 0.8206171563 | 0.9999763851 |
| RIC8B    | 1.3878896577  | 0.4715255896 | 0.9999763851 |
| TMEM263  | -1.6311976455 | 0.1008366958 | 0.9999763851 |
| MTERF2   | -1.1551770576 | 0.7825692367 | 0.9999763851 |
| CRY1     | 1.0319839448  | 0.9030242979 | 0.9999763851 |
| BTBD11   | 1.0187933879  | 0.961267209  | 0.9999763851 |
| PWP1     | 1.1453893163  | 0.4790782747 | 0.9999763851 |
| PRDM4    | -1.012037051  | 0.9604775799 | 0.9999763851 |
| WSCD2    | 0             | 0            | 0            |
| FICD     | 1.8134439204  | 0.5785866709 | 0.9999763851 |
| SART3    | -1.0951297196 | 0.6336299882 | 0.9999763851 |
| ISCU     | 1.0672279869  | 0.7642579399 | 0.9999763851 |
| SELPLG   | -1.0369584988 | 0.8367484486 | 0.9999763851 |
| CORO1C   | -1.1209327294 | 0.5810036114 | 0.9999763851 |
| SSH1     | -1.1009962177 | 0.7761576304 | 0.9999763851 |
| USP30    | -1.4422318051 | 0.3485687063 | 0.9999763851 |
| ALKBH2   | 1.1183908697  | 0.7113590959 | 0.9999763851 |
| UNG      | -1.0871539234 | 0.6014385169 | 0.9999763851 |
| ACACB    | 1.0884716508  | 0.7372743599 | 0.9999763851 |
| FOXN4    | 1.8139617088  | 0.5795007922 | 0.9999763851 |
| MYO1H    | -1.3154339304 | 0.8205576571 | 0.9999763851 |
| KCTD10   | 1.0410285939  | 0.8397078125 | 0.9999763851 |
| UBE3B    | -1.3429483816 | 0.2109646488 | 0.9999763851 |
| MMAB     | 1.1228686272  | 0.5937001865 | 0.9999763851 |
| MVK      | 1.0410147721  | 0.869302523  | 0.9999763851 |
| FAM222A  | 1.1618338782  | 0.7127844588 | 0.9999763851 |
| GLTP     | -1.3191119898 | 0.1554094666 | 0.9999763851 |
| TCHP     | -1.0264093798 | 0.926849083  | 0.9999763851 |
| GIT2     | 1.3374276907  | 0.2080345625 | 0.9999763851 |
| ANKRD13A | 1.0041735482  | 0.9839454475 | 0.9999763851 |
| C12orf76 | 1.4286150572  | 0.3980598449 | 0.9999763851 |
| IFT81    | -1.0855005302 | 0.8789912013 | 0.9999763851 |
| ATP2A2   | 1.2481138143  | 0.1192868588 | 0.9999763851 |
| ANAPC7   | 1.1176796956  | 0.5696110091 | 0.9999763851 |
| ARPC3    | -1.5145216783 | 0.006513     | 0.9999763851 |
| GPN3     | -1.0448127287 | 0.8584853047 | 0.9999763851 |
| FAM216A  | -1.0690174217 | 0.6456271283 | 0.9999763851 |
| VPS29    | 1.0443776619  | 0.8154696192 | 0.9999763851 |
| RAD9B    | -1.1608121394 | 0.5428138779 | 0.9999763851 |
| PPTC7    | -3.3295429242 | 0.2520233306 | 0.9999763851 |
| TCTN1    | -1.0763452518 | 0.8848488471 | 0.9999763851 |
| HVCN1    | 1.4500352271  | 0.5019378363 | 0.9999763851 |
| PPP1CC   | -1.0764171224 | 0.5859565    | 0.9999763851 |



gene\_expression\_table

|           |               |              |              |
|-----------|---------------|--------------|--------------|
| CCDC63    | 0             | 0            | 0            |
| CUX2      | 1.0836209381  | 0.7374389153 | 0.9999763851 |
| FAM109A   | -1.0368101062 | 0.9376592811 | 0.9999763851 |
| SH2B3     | -1.0144670007 | 0.9500456182 | 0.9999763851 |
| ATXN2     | 1.1144554766  | 0.6043080282 | 0.9999763851 |
| BRAP      | 2.2325830412  | 0.0324054358 | 0.9999763851 |
| ACAD10    | -1.0052070851 | 0.9888218496 | 0.9999763851 |
| ALDH2     | 1.8142404796  | 0.56760804   | 0.9999763851 |
| MAPKAPK5  | -1.0918749052 | 0.7285806186 | 0.9999763851 |
| TMEM116   | -1.157574336  | 0.7091335357 | 0.9999763851 |
| ERP29     | 1.0902688123  | 0.4962121647 | 0.9999763851 |
| NAA25     | 1.0402846135  | 0.87424391   | 0.9999763851 |
| TRAFD1    | 1.2372833671  | 0.5658177748 | 0.9999763851 |
| HECTD4    | -1.1349790134 | 0.642618607  | 0.9999763851 |
| RPL6      | 1.0597824479  | 0.6227854658 | 0.9999763851 |
| PTPN11    | 1.1460229687  | 0.5122241492 | 0.9999763851 |
| OAS1      | -4.7786096117 | 0.00586      | 0.9999763851 |
| OAS3      | -1.2557903015 | 0.5052812826 | 0.9999763851 |
| OAS2      | -2.4031966624 | 0.1541753007 | 0.9999763851 |
| RASAL1    | 0             | 0            | 0            |
| CFAP73    | -1.0481261601 | 0.7500331978 | 0.9999763851 |
| DDX54     | -1.2497188948 | 0.6323760728 | 0.9999763851 |
| RITA1     | -1.0680559507 | 0.7541438809 | 0.9999763851 |
| IQCD      | 1.0275875807  | 0.9774412141 | 0.9999763851 |
| TPCN1     | 1.7422300925  | 0.0799334549 | 0.9999763851 |
| SLC8B1    | 1.2819157687  | 0.2626933217 | 0.9999763851 |
| PLBD2     | 1.2823000855  | 0.3587497204 | 0.9999763851 |
| SDSL      | 2.0638935339  | 0.254686542  | 0.9999763851 |
| RBM19     | -1.0556518783 | 0.8271309921 | 0.9999763851 |
| MED13L    | -1.2404714034 | 0.2254952353 | 0.9999763851 |
| MAP1LC3B2 | -1.6140694975 | 0.4640180831 | 0.9999763851 |
| C12orf49  | -1.0245979387 | 0.8809297881 | 0.9999763851 |
| RNFT2     | -1.0628405718 | 0.9007521036 | 0.9999763851 |
| HRK       | -1.1069884702 | 0.8174866028 | 0.9999763851 |
| FBXW8     | -1.2763875162 | 0.3122437392 | 0.9999763851 |
| TESC      | 1.2001886431  | 0.1696135094 | 0.9999763851 |
| FBXO21    | -1.7282325433 | 0.114830198  | 0.9999763851 |
| NOS1      | 0             | 0            | 0            |
| RFC5      | 1.0203532753  | 0.9011063185 | 0.9999763851 |
| WSB2      | -1.7085584318 | 0.2506228776 | 0.9999763851 |
| VSIG10    | 1.503528631   | 0.1676503262 | 0.9999763851 |
| PEBP1     | 1.0892677477  | 0.4614154807 | 0.9999763851 |
| TAOK3     | 1.1575928138  | 0.2192893245 | 0.9999763851 |
| SUDS3     | -2.1039798632 | 0.0201684054 | 0.9999763851 |
| SRRM4     | 0             | 0            | 0            |
| TMEM233   | 0             | 0            | 0            |
| PRKAB1    | 1.0141263359  | 0.9598232867 | 0.9999763851 |
| CIT       | 1.1823059654  | 0.5104306755 | 0.9999763851 |
| BICDL1    | -1.026798645  | 0.9628770982 | 0.9999763851 |

gene\_expression\_table

|          |                |              |              |
|----------|----------------|--------------|--------------|
| RAB35    | -1.1366364673  | 0.4510806144 | 0.9999763851 |
| GCN1     | 1.138519209    | 0.3815926602 | 0.9999763851 |
| RPLP0    | 1.0813457709   | 0.5189791923 | 0.9999763851 |
| PXN      | -1.4466819936  | 0.0708873162 | 0.9999763851 |
| SIRT4    | -1.0806648985  | 0.9257079518 | 0.9999763851 |
| PLA2G1B  | -7.5622178268  | 0.2177145568 | 0.9999763851 |
| MSI1     | 3.2356557963   | 0.5547505991 | 0.9999763851 |
| COX6A1   | 1.2219243676   | 0.1359002484 | 0.9999763851 |
| TRIAP1   | -1.190675255   | 0.2137084274 | 0.9999763851 |
| GATC     | 1.6117798265   | 0.2679978835 | 0.9999763851 |
| SRSF9    | -1.1875976429  | 0.1840011289 | 0.9999763851 |
| DYNLL1   | 1.1645600498   | 0.214676498  | 0.9999763851 |
| COQ5     | -1.1452480954  | 0.479100134  | 0.9999763851 |
| RNF10    | -1.0523059729  | 0.740277968  | 0.9999763851 |
| POP5     | 1.4117881067   | 0.109476915  | 0.9999763851 |
| CABP1    | 1.027554661    | 0.975654119  | 0.9999763851 |
| MLEC     | -1.0416825998  | 0.7839491997 | 0.9999763851 |
| UNC119B  | 1.2424415035   | 0.5165805344 | 0.9999763851 |
| ACADS    | -1.2933471009  | 0.1892659263 | 0.9999763851 |
| SPPL3    | 1.225645404    | 0.3709628013 | 0.9999763851 |
| HNF1A    | 1.6236002864   | 0.5936648968 | 0.9999763851 |
| C12orf43 | -1.2017092396  | 0.5050439407 | 0.9999763851 |
| OASL     | -14.7252461469 | 0.0978119437 | 0.9999763851 |
| P2RX7    | 1.5159317688   | 0.2988363527 | 0.9999763851 |
| P2RX4    | -1.1541456714  | 0.6218300844 | 0.9999763851 |
| CAMKK2   | 1.0161620368   | 0.9260761685 | 0.9999763851 |
| ANAPC5   | 1.2681176469   | 0.1081127059 | 0.9999763851 |
| RNF34    | 1.101646536    | 0.6038113897 | 0.9999763851 |
| KDM2B    | 1.0607665261   | 0.754714381  | 0.9999763851 |
| ORAI1    | -1.0305119758  | 0.8753577549 | 0.9999763851 |
| MORN3    | 3.2353357581   | 0.554787377  | 0.9999763851 |
| TMEM120B | -1.090584448   | 0.7774021473 | 0.9999763851 |
| RHOF     | 1.9067530143   | 0.002617     | 0.9999763851 |
| SETD1B   | -1.0516260059  | 0.775411655  | 0.9999763851 |
| HPD      | 2.5371732676   | 0.2688076764 | 0.9999763851 |
| PSMD9    | 1.0214233139   | 0.8847302376 | 0.9999763851 |
| WDR66    | -3.5004921496  | 0.1012598367 | 0.9999763851 |
| BCL7A    | 1.1789171499   | 0.5574991189 | 0.9999763851 |
| MLXIP    | -1.0970278948  | 0.6339495902 | 0.9999763851 |
| LRRC43   | 7.7211724672   | 0.2779709379 | 0.9999763851 |
| B3GNT4   | 1.1884456013   | 0.3306919682 | 0.9999763851 |
| DIABLO   | 1.0549969765   | 0.8897010051 | 0.9999763851 |
| VPS33A   | 1.1535425065   | 0.5839633502 | 0.9999763851 |
| CLIP1    | 1.1983501327   | 0.5626449986 | 0.9999763851 |
| ZCCHC8   | -1.2612930663  | 0.3918867923 | 0.9999763851 |
| RSRC2    | -1.347470579   | 0.0971267375 | 0.9999763851 |
| KNTC1    | -1.0862933446  | 0.7829949159 | 0.9999763851 |
| HCAR2    | 0              | 0            | 0            |
| DENR     | -1.0428348499  | 0.7957657472 | 0.9999763851 |

gene\_expression\_table

|                |               |              |              |
|----------------|---------------|--------------|--------------|
| CCDC62         | -2.0624499785 | 0.3046934717 | 0.9999763851 |
| HIP1R          | 1.0798895836  | 0.8002348375 | 0.9999763851 |
| VPS37B         | 1.1004919326  | 0.7641276814 | 0.9999763851 |
| ABCB9          | -1.246996882  | 0.6156584494 | 0.9999763851 |
| OGFOD2         | 1.4588583651  | 0.2001928054 | 0.9999763851 |
| ARL6IP4        | 1.0843644845  | 0.567252205  | 0.9999763851 |
| PITPNM2        | -1.1364685749 | 0.7981193492 | 0.9999763851 |
| MPHOSPH9       | 1.195495662   | 0.3326091313 | 0.9999763851 |
| C12orf65       | -1.3579189174 | 0.1215615475 | 0.9999763851 |
| CDK2AP1        | 1.2928593571  | 0.2573384603 | 0.9999763851 |
| SBNO1          | -1.0937421358 | 0.615806713  | 0.9999763851 |
| KMT5A          | 1.9012661905  | 0.1217582485 | 0.9999763851 |
| RILPL2         | -1.0836191629 | 0.5609031408 | 0.9999763851 |
| SNRNP35        | -1.1045077582 | 0.8043455073 | 0.9999763851 |
| RILPL1         | 1.0306012855  | 0.9665926947 | 0.9999763851 |
| TMED2          | -1.0597390377 | 0.7568405968 | 0.9999763851 |
| DDX55          | -1.0334437111 | 0.8410842808 | 0.9999763851 |
| EIF2B1         | 1.1899582372  | 0.2619259105 | 0.9999763851 |
| GTF2H3         | -1.0544547337 | 0.8613149399 | 0.9999763851 |
| ATP6V0A2       | -1.2761605512 | 0.3347914284 | 0.9999763851 |
| DNAH10         | -1.415563406  | 0.4334008684 | 0.9999763851 |
| CCDC92         | 1.0622977031  | 0.8356107745 | 0.9999763851 |
| ZNF664         | 1.1909153774  | 0.2328393866 | 0.9999763851 |
| ZNF664-FAM101A | -1.491584767  | 0.295555348  | 0.9999763851 |
| NCOR2          | 1.1646795964  | 0.3749150096 | 0.9999763851 |
| SCARB1         | 1.2733310231  | 0.2787266884 | 0.9999763851 |
| UBC            | 1.0807084084  | 0.5879865337 | 0.9999763851 |
| DHX37          | 1.1057595541  | 0.7360000724 | 0.9999763851 |
| BRI3BP         | -1.2676671308 | 0.1313234577 | 0.9999763851 |
| AACS           | 1.014844671   | 0.9596813234 | 0.9999763851 |
| TMEM132B       | -6.3085154939 | 0.001787     | 0.9999763851 |
| LOC107984465   | 3.2353357581  | 0.554787377  | 0.9999763851 |
| LOC107984449   | 0             | 0            | 0            |
| TMEM132C       | 0             | 0            | 0            |
| SLC15A4        | 1.2675769726  | 0.2957534025 | 0.9999763851 |
| LOC101929984   | 0             | 0            | 0            |
| TMEM132D       | -1.3955017315 | 0.6896676877 | 0.9999763851 |
| RIMBP2         | 0             | 0            | 0            |
| STX2           | 1.2591650677  | 0.4480026073 | 0.9999763851 |
| RAN            | 1.0148911031  | 0.8974478844 | 0.9999763851 |
| SFSWAP         | 1.3112729362  | 0.1337957609 | 0.9999763851 |
| MMP17          | 1.1607221631  | 0.8158246639 | 0.9999763851 |
| ULK1           | -1.0209429437 | 0.9127082848 | 0.9999763851 |
| PUS1           | 1.0411308625  | 0.847819404  | 0.9999763851 |
| EP400          | 1.0134138078  | 0.9472839842 | 0.9999763851 |
| DDX51          | 1.1237782774  | 0.6001416683 | 0.9999763851 |
| NOC4L          | 1.2472114703  | 0.5183944052 | 0.9999763851 |
| GALNT9         | 4.0584869584  | 0.0356586285 | 0.9999763851 |
| MUC8           | 0             | 0            | 0            |

gene\_expression\_table

|              |               |              |              |
|--------------|---------------|--------------|--------------|
| FBRSL1       | 1.0085281906  | 0.9682465698 | 0.9999763851 |
| LRCOL1       | 7.7488609396  | 0.3059592464 | 0.9999763851 |
| P2RX2        | 0             | 0            | 0            |
| POLE         | -1.1635256109 | 0.5728404307 | 0.9999763851 |
| PXMP2        | 1.6152919211  | 0.0433596475 | 0.9999763851 |
| PGAM5        | 1.1589002785  | 0.4614945051 | 0.9999763851 |
| ANKLE2       | 1.0865010662  | 0.669668886  | 0.9999763851 |
| GOLGA3       | -1.0169128737 | 0.9113980396 | 0.9999763851 |
| ZNF605       | -1.0159154378 | 0.9783684179 | 0.9999763851 |
| ZNF26        | -1.2310110463 | 0.5996281408 | 0.9999763851 |
| ZNF84        | -1.1746984042 | 0.5592761201 | 0.9999763851 |
| ZNF140       | -1.3720072732 | 0.4144057991 | 0.9999763851 |
| ZNF891       | -1.3151016298 | 0.8212266933 | 0.9999763851 |
| ZNF10        | 1.2869488883  | 0.8209286526 | 0.9999763851 |
| ZNF268       | 1.0994425743  | 0.8848880562 | 0.9999763851 |
| TPTE2        | -4.2849908816 | 0.4028453076 | 0.9999763851 |
| MPHOSPH8     | 1.1423760863  | 0.4372619512 | 0.9999763851 |
| PSPC1        | 1.145763669   | 0.4981021878 | 0.9999763851 |
| ZMYM5        | -1.3457828145 | 0.4997430838 | 0.9999763851 |
| ZMYM2        | -1.4656083347 | 0.0979763531 | 0.9999763851 |
| GJA3         | 1.8136231599  | 0.5627419009 | 0.9999763851 |
| GJB2         | 1.7600058205  | 0.2482309662 | 0.9999763851 |
| GJB6         | 3.2353357581  | 0.554787377  | 0.9999763851 |
| CRYL1        | 1.0884036112  | 0.7414526211 | 0.9999763851 |
| IFT88        | 1.1434559725  | 0.7547759294 | 0.9999763851 |
| IL17D        | 1.126568796   | 0.7219221313 | 0.9999763851 |
| EEF1AKMT1    | -1.0314719684 | 0.9123771591 | 0.9999763851 |
| XPO4         | -1.1968115817 | 0.481090372  | 0.9999763851 |
| LATS2        | 1.0218216658  | 0.9395944826 | 0.9999763851 |
| SAP18        | -1.0437256997 | 0.7499741727 | 0.9999763851 |
| SKA3         | 1.0493857185  | 0.8138879907 | 0.9999763851 |
| MRPL57       | 1.2912938345  | 0.0887115288 | 0.9999763851 |
| LOC101928764 | 3.2361532718  | 0.5546934395 | 0.9999763851 |
| ZDHHC20      | -1.0556732778 | 0.7545260836 | 0.9999763851 |
| MICU2        | -1.2192858978 | 0.4043661341 | 0.9999763851 |
| FGF9         | -4.2864494036 | 0.4027150576 | 0.9999763851 |
| SGCG         | 0             | 0            | 0            |
| SACS         | 1.3620951349  | 0.0885838447 | 0.9999763851 |
| TNFRSF19     | 1.0300362649  | 0.9688504826 | 0.9999763851 |
| MIPEP        | 1.7137045638  | 0.0386979418 | 0.9999763851 |
| C1QTNF9B-AS1 | 2.3839656649  | 0.225884284  | 0.9999763851 |
| SPATA13      | -1.0974604745 | 0.7854000248 | 0.9999763851 |
| PARP4        | 1.075309685   | 0.7515271404 | 0.9999763851 |
| ATP12A       | 6.368054416   | 0.349203043  | 0.9999763851 |
| RNF17        | 0             | 0            | 0            |
| CENPJ        | -1.3955890483 | 0.1926448071 | 0.9999763851 |
| PABPC3       | 1.2179591309  | 0.3001180125 | 0.9999763851 |
| MTMR6        | 1.6581580088  | 0.0182499863 | 0.9999763851 |
| NUP58        | 1.1454053591  | 0.5255336929 | 0.9999763851 |

gene\_expression\_table

|                |               |              |              |
|----------------|---------------|--------------|--------------|
| ATP8A2         | -1.3233953713 | 0.7047340731 | 0.9999763851 |
| SHISA2         | 1.7928823177  | 0.0880219463 | 0.9999763851 |
| RNF6           | 1.0425678762  | 0.8824054789 | 0.9999763851 |
| CDK8           | 1.1273898284  | 0.7404569468 | 0.9999763851 |
| WASF3          | -1.4391263345 | 0.6925013455 | 0.9999763851 |
| GPR12          | 0             | 0            | 0            |
| USP12          | -1.0128593849 | 0.9518920232 | 0.9999763851 |
| RPL21          | 1.1931911716  | 0.2799459693 | 0.9999763851 |
| RASL11A        | 0             | 0            | 0            |
| GTF3A          | 1.2630896172  | 0.130004301  | 0.9999763851 |
| MTIF3          | 1.004947455   | 0.9842628975 | 0.9999763851 |
| LNK2           | -1.0785835147 | 0.7077263006 | 0.9999763851 |
| POLR1D         | -1.0099746801 | 0.9439944002 | 0.9999763851 |
| PDX1           | 3.2361532718  | 0.5546934395 | 0.9999763851 |
| CDX2           | 0             | 0            | 0            |
| FLT3           | -1.3161718537 | 0.8288271375 | 0.9999763851 |
| PAN3           | -1.2502869806 | 0.2378163287 | 0.9999763851 |
| FLT1           | 1.6702739263  | 0.4623279285 | 0.9999763851 |
| POMP           | 1.0884109285  | 0.5035844696 | 0.9999763851 |
| SLC46A3        | 0             | 0            | 0            |
| MTUS2          | 1.3422974682  | 0.7193093082 | 0.9999763851 |
| SLC7A1         | 1.1517298807  | 0.4539754429 | 0.9999763851 |
| UBL3           | -1.3737975077 | 0.1960099766 | 0.9999763851 |
| KATNAL1        | -1.9154154343 | 0.0628503988 | 0.9999763851 |
| HMGB1          | -1.1235385483 | 0.3230932378 | 0.9999763851 |
| USPL1          | -1.1395736879 | 0.6980017986 | 0.9999763851 |
| ALOX5AP        | -1.1246689653 | 0.4417971728 | 0.9999763851 |
| MEDAG          | 0             | 0            | 0            |
| HSPH1          | 1.0630232672  | 0.6740765585 | 0.9999763851 |
| B3GLCT         | 1.0614218676  | 0.8944605946 | 0.9999763851 |
| FRY            | -1.0880251013 | 0.754941191  | 0.9999763851 |
| ZAR1L          | -1.3154339304 | 0.8205576571 | 0.9999763851 |
| BRCA2          | -1.8573895885 | 0.1218912923 | 0.9999763851 |
| N4BP2L1        | -1.937382965  | 0.0562632522 | 0.9999763851 |
| N4BP2L2        | 1.027866861   | 0.8811981838 | 0.9999763851 |
| PDS5B          | -1.2165168527 | 0.3442953778 | 0.9999763851 |
| KL             | 0             | 0            | 0            |
| STARD13        | 1.3576108079  | 0.7957172822 | 0.9999763851 |
| RFC3           | -1.0091083545 | 0.9657303546 | 0.9999763851 |
| NBEA           | -1.3158816768 | 0.8203229796 | 0.9999763851 |
| DCLK1          | 0             | 0            | 0            |
| CCDC169-SOHLH2 | -2.3270898917 | 0.1874348492 | 0.9999763851 |
| CCDC169        | 5.4979928157  | 0.0934985193 | 0.9999763851 |
| SPG20          | -1.1376847162 | 0.3815221552 | 0.9999763851 |
| CCNA1          | 1.1326662498  | 0.5729201338 | 0.9999763851 |
| RFXAP          | 1.0703924237  | 0.8059306183 | 0.9999763851 |
| SMAD9          | -3.3295429242 | 0.2519647292 | 0.9999763851 |
| ALG5           | 1.2361899045  | 0.1734213601 | 0.9999763851 |
| EXOSC8         | -1.0149354528 | 0.9418089327 | 0.9999763851 |

gene\_expression\_table

|          |               |              |              |
|----------|---------------|--------------|--------------|
| SUPT20H  | 1.1452447525  | 0.8090056193 | 0.9999763851 |
| UFM1     | -1.3486509972 | 0.1512987889 | 0.9999763851 |
| PROSER1  | -1.0268141656 | 0.9147612162 | 0.9999763851 |
| NHLRC3   | -1.2795221109 | 0.4846602832 | 0.9999763851 |
| LHFP     | -1.3296842173 | 0.5342529675 | 0.9999763851 |
| COG6     | -1.1462578978 | 0.7191773116 | 0.9999763851 |
| FOXO1    | 1.1945087061  | 0.5767013586 | 0.9999763851 |
| MRPS31   | 1.3930160408  | 0.1966536592 | 0.9999763851 |
| SLC25A15 | -1.4928849167 | 0.197944303  | 0.9999763851 |
| ELF1     | -1.4483263347 | 0.0692645525 | 0.9999763851 |
| WBP4     | -1.2937870376 | 0.363677588  | 0.9999763851 |
| KBTBD6   | -1.0710159452 | 0.7512032046 | 0.9999763851 |
| KBTBD7   | -1.770321806  | 0.1730201304 | 0.9999763851 |
| MTRF1    | 1.113847379   | 0.7558948988 | 0.9999763851 |
| NAA16    | -1.3199689805 | 0.3588627852 | 0.9999763851 |
| RGCC     | -1.3673305384 | 0.4401552175 | 0.9999763851 |
| VWA8     | 1.314194154   | 0.3758172082 | 0.9999763851 |
| DGKH     | -1.0082790795 | 0.9719073785 | 0.9999763851 |
| AKAP11   | 1.3702889139  | 0.3015148917 | 0.9999763851 |
| EPSTI1   | -4.2864494036 | 0.4027150576 | 0.9999763851 |
| DNAJC15  | -1.1955812749 | 0.6464561724 | 0.9999763851 |
| ENOX1    | 0             | 0            | 0            |
| CCDC122  | -2.3214980365 | 0.4368799648 | 0.9999763851 |
| LACC1    | -1.8878800522 | 0.1713064801 | 0.9999763851 |
| SERP2    | 0             | 0            | 0            |
| TSC22D1  | 1.5888029347  | 0.1137816275 | 0.9999763851 |
| NUFIP1   | 1.0162348354  | 0.9317992587 | 0.9999763851 |
| GPALPP1  | 1.0798342924  | 0.6814382523 | 0.9999763851 |
| GTF2F2   | -1.0625295572 | 0.708051814  | 0.9999763851 |
| TPT1     | 1.0167674024  | 0.8829407859 | 0.9999763851 |
| SLC25A30 | 1.1297420685  | 0.6989120703 | 0.9999763851 |
| COG3     | -1.4338022674 | 0.1330826482 | 0.9999763851 |
| ZC3H13   | -1.0444324469 | 0.7933962088 | 0.9999763851 |
| CPB2     | -10.844600477 | 0.1422232425 | 0.9999763851 |
| LCP1     | -1.0101167137 | 0.9366000634 | 0.9999763851 |
| LRRC63   | -2.3877824956 | 0.2390456433 | 0.9999763851 |
| LRCH1    | 1.0082861712  | 0.9687828568 | 0.9999763851 |
| ESD      | 1.1103681811  | 0.549549017  | 0.9999763851 |
| SUCLA2   | 1.7572405781  | 0.0108544453 | 0.9999763851 |
| NUDT15   | 1.2147270957  | 0.3966575855 | 0.9999763851 |
| MED4     | 1.0969401126  | 0.5340958542 | 0.9999763851 |
| ITM2B    | 1.0077968007  | 0.9549010499 | 0.9999763851 |
| RB1      | -1.1959122532 | 0.2692407392 | 0.9999763851 |
| RCBTB2   | 1.3017810321  | 0.0707400095 | 0.9999763851 |
| CYSLTR2  | 0             | 0            | 0            |
| FNDC3A   | -1.2089911247 | 0.3205067299 | 0.9999763851 |
| CDADC1   | -1.0516063636 | 0.8300852381 | 0.9999763851 |
| CAB39L   | -1.7772896743 | 0.009375     | 0.9999763851 |
| SETDB2   | 1.0849467892  | 0.7027568597 | 0.9999763851 |

gene\_expression\_table

|              |               |              |              |
|--------------|---------------|--------------|--------------|
| SETDB2-PHF11 | 0             | 0            | 0            |
| PHF11        | -1.1126545412 | 0.5845450654 | 0.9999763851 |
| RCBTB1       | -1.0880884245 | 0.7281816933 | 0.9999763851 |
| ARL11        | -1.1891643579 | 0.5427997699 | 0.9999763851 |
| EBPL         | -1.0767780729 | 0.6304190019 | 0.9999763851 |
| KPNA3        | 1.0591418317  | 0.7214188649 | 0.9999763851 |
| SPRYD7       | 1.1720926153  | 0.4444115968 | 0.9999763851 |
| TRIM13       | -1.0846376079 | 0.6482651794 | 0.9999763851 |
| KCNRG        | -1.0800633574 | 0.7967473884 | 0.9999763851 |
| DLEU7        | 1.276674184   | 0.505066503  | 0.9999763851 |
| RNASEH2B     | 1.1982174179  | 0.2157644497 | 0.9999763851 |
| FAM124A      | -1.9197578446 | 0.1150025293 | 0.9999763851 |
| SERPINE3     | -7.5622178268 | 0.2177145568 | 0.9999763851 |
| INTS6        | 1.2695153484  | 0.1950715216 | 0.9999763851 |
| WDFY2        | -1.013445227  | 0.9470864202 | 0.9999763851 |
| DHRS12       | 1.250998045   | 0.5111871576 | 0.9999763851 |
| CCDC70       | -7.5622178268 | 0.2177145568 | 0.9999763851 |
| ATP7B        | 1.3593776586  | 0.5989975472 | 0.9999763851 |
| ALG11        | -1.217570241  | 0.5957587584 | 0.9999763851 |
| UTP14C       | 1.0456607091  | 0.8293307722 | 0.9999763851 |
| LOC107984562 | -6.7239400998 | 0.0177063447 | 0.9999763851 |
| NEK5         | -4.2849908816 | 0.4028453076 | 0.9999763851 |
| NEK3         | -1.0503595166 | 0.8544249519 | 0.9999763851 |
| THSD1        | 1.9436648833  | 0.1470473319 | 0.9999763851 |
| VPS36        | -1.1953617845 | 0.3471006689 | 0.9999763851 |
| CKAP2        | 1.0764817955  | 0.6481334293 | 0.9999763851 |
| HNRNPA1L2    | 1.0703167922  | 0.7884464097 | 0.9999763851 |
| SUGT1        | 1.1252938069  | 0.4254095138 | 0.9999763851 |
| LECT1        | 7.7192231741  | 0.2782707334 | 0.9999763851 |
| OLFM4        | 0             | 0            | 0            |
| DIAPH3       | 1.0390231012  | 0.8174100331 | 0.9999763851 |
| TDRD3        | 1.2801490406  | 0.3640315375 | 0.9999763851 |
| MZT1         | 1.067831973   | 0.6849034664 | 0.9999763851 |
| BORA         | -1.2841586617 | 0.3195032063 | 0.9999763851 |
| DIS3         | 1.089589204   | 0.5174703835 | 0.9999763851 |
| PIBF1        | -1.2015293973 | 0.4481151845 | 0.9999763851 |
| KLF5         | -2.2051397677 | 0.1670732594 | 0.9999763851 |
| KLF12        | 0             | 0            | 0            |
| TBC1D4       | -1.2806176768 | 0.2068507237 | 0.9999763851 |
| COMMD6       | -1.2265628773 | 0.1270575063 | 0.9999763851 |
| UCHL3        | 1.5125917048  | 0.00455      | 0.9999763851 |
| LMO7         | -1.4009298347 | 0.1516180504 | 0.9999763851 |
| KCTD12       | -4.2849908816 | 0.4028453076 | 0.9999763851 |
| ACOD1        | -1.3715126673 | 0.7507171393 | 0.9999763851 |
| CLN5         | 1.7772431003  | 0.0147107803 | 0.9999763851 |
| FBXL3        | 1.0789760474  | 0.672435692  | 0.9999763851 |
| MYCBP2       | 1.0940161879  | 0.4857284112 | 0.9999763851 |
| SCEL         | 0             | 0            | 0            |
| SLAIN1       | 1.5099452149  | 0.5429892632 | 0.9999763851 |

gene\_expression\_table

|              |                |              |              |
|--------------|----------------|--------------|--------------|
| LOC107987188 | -1.5020071852  | 0.3209561268 | 0.9999763851 |
| POU4F1       | 1.3320004752   | 0.7386776771 | 0.9999763851 |
| RNF219       | 1.2770512181   | 0.1116327523 | 0.9999763851 |
| RBM26        | 1.1738165351   | 0.3042246082 | 0.9999763851 |
| NDFIP2       | -1.4072122324  | 0.6699289508 | 0.9999763851 |
| SPRY2        | 1.3935957345   | 0.2579501105 | 0.9999763851 |
| GPC6         | -2.5608753354  | 0.262256475  | 0.9999763851 |
| DCT          | -3.3295429242  | 0.2518232852 | 0.9999763851 |
| TGDS         | -1.2847157431  | 0.4615239888 | 0.9999763851 |
| GPR180       | -1.1608669276  | 0.5143063616 | 0.9999763851 |
| ABCC4        | -1.1115315794  | 0.6464088186 | 0.9999763851 |
| CLDN10       | -1.315303824   | 0.8206171563 | 0.9999763851 |
| DZIP1        | 1.3260278971   | 0.7357146261 | 0.9999763851 |
| DNAJC3       | -1.138293383   | 0.439974785  | 0.9999763851 |
| UGGT2        | -1.1363688399  | 0.6404466807 | 0.9999763851 |
| HS6ST3       | -4.2864494036  | 0.4027150576 | 0.9999763851 |
| MBNL2        | -1.3951205161  | 0.694452287  | 0.9999763851 |
| RAP2A        | -1.1256573413  | 0.581430869  | 0.9999763851 |
| IPO5         | 1.0238008028   | 0.8777670836 | 0.9999763851 |
| FARP1        | 1.2867653957   | 0.8300426537 | 0.9999763851 |
| STK24        | 1.0470901044   | 0.7590561231 | 0.9999763851 |
| SLC15A1      | 3.2353357581   | 0.554787377  | 0.9999763851 |
| DOCK9        | -1.6634732451  | 0.1271076274 | 0.9999763851 |
| UBAC2        | 1.0327717731   | 0.8475389058 | 0.9999763851 |
| GPR18        | 1.9286482047   | 0.2100163897 | 0.9999763851 |
| GPR183       | -1.202523987   | 0.6225277988 | 0.9999763851 |
| TM9SF2       | 1.0198308211   | 0.9040258773 | 0.9999763851 |
| CLYBL        | 1.1737421692   | 0.539826704  | 0.9999763851 |
| PCCA         | -1.1810196669  | 0.3854033594 | 0.9999763851 |
| GGACT        | 1.2310267785   | 0.1343875497 | 0.9999763851 |
| TMTC4        | 1.0240005833   | 0.900166536  | 0.9999763851 |
| ITGBL1       | -13.1048806834 | 0.1324481376 | 0.9999763851 |
| FGF14        | -1.9660821036  | 0.4622956112 | 0.9999763851 |
| TPP2         | 1.1522778798   | 0.4703453159 | 0.9999763851 |
| TEX30        | 1.705862946    | 0.0629855538 | 0.9999763851 |
| BIVM-ERCC5   | 18.9271138591  | 0.1177496117 | 0.9999763851 |
| ERCC5        | -1.2634201006  | 0.3622742119 | 0.9999763851 |
| EFNB2        | 9.9604381148   | 0.2218973023 | 0.9999763851 |
| ARGLU1       | -1.1576207106  | 0.3334622764 | 0.9999763851 |
| FAM155A      | 1.2718841722   | 0.7771465425 | 0.9999763851 |
| LIG4         | 1.8974116751   | 0.2923483741 | 0.9999763851 |
| ABHD13       | 1.2521208762   | 0.480551666  | 0.9999763851 |
| TNFSF13B     | 1.127484244    | 0.3421445943 | 0.9999763851 |
| MYO16        | 1.1526791883   | 0.7910763709 | 0.9999763851 |
| IRS2         | 1.0363210839   | 0.7780630521 | 0.9999763851 |
| COL4A1       | 3.4147527346   | 0.1247694125 | 0.9999763851 |
| COL4A2       | -1.0682221617  | 0.6889316246 | 0.9999763851 |
| RAB20        | 1.1246744277   | 0.4434178406 | 0.9999763851 |
| NAXD         | -1.208052497   | 0.5721950269 | 0.9999763851 |



gene\_expression\_table

|              |               |              |              |
|--------------|---------------|--------------|--------------|
| CARS2        | 1.1625313792  | 0.3056443968 | 0.9999763851 |
| LOC105376684 | -4.2864494036 | 0.4027150576 | 0.9999763851 |
| ING1         | 1.3896920299  | 0.2144012331 | 0.9999763851 |
| LOC105370362 | 3.2361532718  | 0.5546934395 | 0.9999763851 |
| ANKRD10      | -1.1372659035 | 0.4599805023 | 0.9999763851 |
| ARHGEF7      | 1.6052778367  | 0.0258682061 | 0.9999763851 |
| TEX29        | -1.3710462586 | 0.7622082741 | 0.9999763851 |
| SPACA7       | 3.2353357581  | 0.554787377  | 0.9999763851 |
| TUBGCP3      | -1.3367834488 | 0.0500123711 | 0.9999763851 |
| ATP11AUN     | 3.2353357581  | 0.554787377  | 0.9999763851 |
| ATP11A       | -1.2351865397 | 0.29494355   | 0.9999763851 |
| MCF2L        | -1.3154339304 | 0.8205576571 | 0.9999763851 |
| F10          | 2.5202262643  | 0.2771054268 | 0.9999763851 |
| LOC102724474 | 5.4776292235  | 0.3745831165 | 0.9999763851 |
| PROZ         | -1.3721150467 | 0.7444453804 | 0.9999763851 |
| PCID2        | 1.0130262065  | 0.9394839179 | 0.9999763851 |
| CUL4A        | -1.1707755843 | 0.3046859359 | 0.9999763851 |
| LAMP1        | -1.0532020886 | 0.6714159566 | 0.9999763851 |
| GRTP1        | 2.8037355282  | 0.1605777343 | 0.9999763851 |
| LOC101928841 | 1.8139019215  | 0.5819978038 | 0.9999763851 |
| ADPRHL1      | 1.5493286353  | 0.556702986  | 0.9999763851 |
| DCUN1D2      | -1.6044120687 | 0.1583964223 | 0.9999763851 |
| TMCO3        | 1.0346779978  | 0.8949365969 | 0.9999763851 |
| TFDP1        | -1.2002953361 | 0.1523776575 | 0.9999763851 |
| ATP4B        | 0             | 0            | 0            |
| LOC105377805 | 1.8131652995  | 0.5810759404 | 0.9999763851 |
| TMEM255B     | -1.1404788704 | 0.7098194    | 0.9999763851 |
| GAS6         | 1.1124412839  | 0.8250699041 | 0.9999763851 |
| LINC00452    | 0             | 0            | 0            |
| RASA3        | -1.027898279  | 0.8496882704 | 0.9999763851 |
| LOC101929355 | 3.2353357581  | 0.554787377  | 0.9999763851 |
| CDC16        | 1.2208437067  | 0.3065209345 | 0.9999763851 |
| UPF3A        | -1.1128576611 | 0.5566860618 | 0.9999763851 |
| CHAMP1       | 1.4230506103  | 0.1140013589 | 0.9999763851 |
| TTC5         | 1.3691429619  | 0.2866337295 | 0.9999763851 |
| CCNB1IP1     | -1.1722109164 | 0.4963152086 | 0.9999763851 |
| PARP2        | -1.4978774039 | 0.241503862  | 0.9999763851 |
| TEP1         | -1.2209578689 | 0.6677290967 | 0.9999763851 |
| KLHL33       | 0             | 0            | 0            |
| OSGEP        | -1.9134730607 | 0.0199619857 | 0.9999763851 |
| APEX1        | -1.1768784529 | 0.4858985716 | 0.9999763851 |
| TMEM55B      | -1.4496322545 | 0.1345557388 | 0.9999763851 |
| PNP          | 1.4207030268  | 0.005714     | 0.9999763851 |
| RNASE11      | -1.4167465726 | 0.6306109352 | 0.9999763851 |
| ANG          | 1.4562362196  | 0.6629487923 | 0.9999763851 |
| RNASE4       | -3.3704537804 | 0.0730760137 | 0.9999763851 |
| RNASE6       | 0             | 0            | 0            |
| RNASE1       | 0             | 0            | 0            |
| RNASE3       | 1.0138863098  | 0.946175862  | 0.9999763851 |

gene\_expression\_table

|               |               |              |              |
|---------------|---------------|--------------|--------------|
| RNASE2        | 1.1527565413  | 0.3331128879 | 0.9999763851 |
| METTL17       | 1.0702560619  | 0.7526430115 | 0.9999763851 |
| NDRG2         | 0             | 0            | 0            |
| ARHGEF40      | -1.0807630082 | 0.8016790503 | 0.9999763851 |
| ZNF219        | -1.1477187905 | 0.6931031218 | 0.9999763851 |
| TMEM253       | 0             | 0            | 0            |
| HNRNPC        | 1.0890903032  | 0.4712844896 | 0.9999763851 |
| RPGRIP1       | 1.5497553448  | 0.5828862717 | 0.9999763851 |
| SUPT16H       | -1.2045469432 | 0.189072318  | 0.9999763851 |
| CHD8          | -1.2105311477 | 0.4783325129 | 0.9999763851 |
| RAB2B         | -1.0606772872 | 0.8403229304 | 0.9999763851 |
| TOX4          | 1.0426880755  | 0.8158640679 | 0.9999763851 |
| METTL3        | -1.1459068635 | 0.7176043985 | 0.9999763851 |
| DAD1          | 1.0571415312  | 0.7236253161 | 0.9999763851 |
| ABHD4         | -2.0107465889 | 0.1983251074 | 0.9999763851 |
| OXA1L         | 1.3656499798  | 0.0982982244 | 0.9999763851 |
| SLC7A7        | -3.1926989958 | 0.009916     | 0.9999763851 |
| MRPL52        | 1.0241282711  | 0.867682537  | 0.9999763851 |
| MMP14         | -7.5622178268 | 0.2177145568 | 0.9999763851 |
| LRP10         | -1.1204316341 | 0.6282036435 | 0.9999763851 |
| REM2          | 5.4770877341  | 0.3746135179 | 0.9999763851 |
| RBM23         | -1.0730725531 | 0.8034091347 | 0.9999763851 |
| PRMT5         | 1.1037018694  | 0.5430444404 | 0.9999763851 |
| HAUS4         | 1.1222409733  | 0.6036359946 | 0.9999763851 |
| AJUBA         | -1.0848090731 | 0.8949558776 | 0.9999763851 |
| C14orf93      | 4.9781511567  | 0.1090416082 | 0.9999763851 |
| PSMB5         | -1.0539860337 | 0.7485843686 | 0.9999763851 |
| CDH24         | 1.1333354589  | 0.8697279169 | 0.9999763851 |
| LOC105370705  | 0             | 0            | 0            |
| ACIN1         | -1.1065482002 | 0.6265992053 | 0.9999763851 |
| C14orf119     | 1.2335039717  | 0.2567110236 | 0.9999763851 |
| CEBPE         | 1.3580658612  | 0.0697396595 | 0.9999763851 |
| SLC7A8        | 1.5848328097  | 0.1932995148 | 0.9999763851 |
| RNF212B       | -3.3288155965 | 0.2424150695 | 0.9999763851 |
| HOMEZ         | -1.2606665903 | 0.5594715839 | 0.9999763851 |
| PPP1R3E       | -1.6083734375 | 0.1389760744 | 0.9999763851 |
| BCL2L2        | -2.3214980365 | 0.4369965837 | 0.9999763851 |
| BCL2L2-PABPN1 | -1.5833626518 | 0.6002463987 | 0.9999763851 |
| PABPN1        | 1.1462970993  | 0.4151708635 | 0.9999763851 |
| NGDN          | -1.201163443  | 0.234509199  | 0.9999763851 |
| THTPA         | -1.3158393667 | 0.8279642648 | 0.9999763851 |
| ZFH2          | 1.2870761236  | 0.8160709833 | 0.9999763851 |
| AP1G2         | -1.0198206672 | 0.9500443818 | 0.9999763851 |
| DHRS4         | 1.0947700809  | 0.6119871589 | 0.9999763851 |
| DHRS4L2       | 1.1783128022  | 0.6101609051 | 0.9999763851 |
| DHRS4L1       | 1.0268535045  | 0.9784766606 | 0.9999763851 |
| NRL           | 3.7126144389  | 0.1266038921 | 0.9999763851 |
| PCK2          | -1.1165025049 | 0.6604029116 | 0.9999763851 |
| DCAF11        | -1.3107333445 | 0.093686061  | 0.9999763851 |

gene\_expression\_table

|            |               |              |              |
|------------|---------------|--------------|--------------|
| FITM1      | 3.2353357581  | 0.554787377  | 0.9999763851 |
| PSME1      | 1.5007227872  | 0.0152458755 | 0.9999763851 |
| EMC9       | -1.309406502  | 0.4731994394 | 0.9999763851 |
| PSME2      | 1.2594192156  | 0.1739214409 | 0.9999763851 |
| RNF31      | -1.1070836643 | 0.8119518588 | 0.9999763851 |
| IRF9       | 3.3716563396  | 0.2594998905 | 0.9999763851 |
| REC8       | 1.0058242696  | 0.9918215703 | 0.9999763851 |
| IPO4       | 1.1158617614  | 0.6974426322 | 0.9999763851 |
| TM9SF1     | -1.2361716764 | 0.3985835177 | 0.9999763851 |
| TSSK4      | 3.2353357581  | 0.554787377  | 0.9999763851 |
| CHMP4A     | 1.313620252   | 0.1285289898 | 0.9999763851 |
| MDP1       | -1.2398810344 | 0.7239925434 | 0.9999763851 |
| NEDD8-MDP1 | -3.1011527746 | 0.0547646753 | 0.9999763851 |
| NEDD8      | 1.0319351712  | 0.8497598073 | 0.9999763851 |
| GMPR2      | -1.1917603061 | 0.3219898871 | 0.9999763851 |
| TINF2      | 1.9767289733  | 0.007579     | 0.9999763851 |
| TGM1       | 1.3421649772  | 0.7036281394 | 0.9999763851 |
| RABGGTA    | 1.0116223261  | 0.9733368601 | 0.9999763851 |
| DHRS1      | -1.0098810639 | 0.9471036536 | 0.9999763851 |
| NOP9       | 1.1535378754  | 0.5453141247 | 0.9999763851 |
| CIDEB      | 1.5503890537  | 0.1526643051 | 0.9999763851 |
| LTB4R      | -1.0497563294 | 0.7852464657 | 0.9999763851 |
| ADCY4      | 1.0319749808  | 0.951164983  | 0.9999763851 |
| RIPK3      | 1.2241909054  | 0.7566147316 | 0.9999763851 |
| KHNYN      | -1.1472914366 | 0.7167256897 | 0.9999763851 |
| CBLN3      | 1.0272952748  | 0.9775286953 | 0.9999763851 |
| SDR39U1    | 1.1750370259  | 0.4042078615 | 0.9999763851 |
| CMA1       | 1.2869488883  | 0.8209826444 | 0.9999763851 |
| CTSG       | -1.1490343211 | 0.3023759425 | 0.9999763851 |
| GZMB       | 3.2356557963  | 0.5547505991 | 0.9999763851 |
| STXBP6     | 3.2356557963  | 0.5547505991 | 0.9999763851 |
| PRKD1      | 0             | 0            | 0            |
| G2E3       | 1.1677360944  | 0.4900317109 | 0.9999763851 |
| SCFD1      | 1.2069165106  | 0.4730583567 | 0.9999763851 |
| COCH       | 0             | 0            | 0            |
| STRN3      | 1.1246066681  | 0.5453176177 | 0.9999763851 |
| AP4S1      | 1.6141925788  | 0.4103037139 | 0.9999763851 |
| HECTD1     | -1.0209899056 | 0.9210810726 | 0.9999763851 |
| HEATR5A    | -1.3247786941 | 0.4298367639 | 0.9999763851 |
| DTD2       | 1.4213972935  | 0.1072269762 | 0.9999763851 |
| NUBPL      | 1.0264058989  | 0.9153675379 | 0.9999763851 |
| ARHGAP5    | -1.9393868411 | 0.0694479439 | 0.9999763851 |
| AKAP6      | 1.5501834829  | 0.2836250088 | 0.9999763851 |
| SPTSSA     | -1.1004679569 | 0.6136804115 | 0.9999763851 |
| EAPP       | -1.1997132288 | 0.4493304483 | 0.9999763851 |
| SNX6       | 1.3842227211  | 0.0444905077 | 0.9999763851 |
| CFL2       | 1.3672691571  | 0.5165783555 | 0.9999763851 |
| BAZ1A      | 1.0501471126  | 0.8101214168 | 0.9999763851 |
| SRP54      | -1.1320106821 | 0.558227719  | 0.9999763851 |

gene\_expression\_table

|          |               |              |              |
|----------|---------------|--------------|--------------|
| FAM177A1 | 1.0863932551  | 0.7801205452 | 0.9999763851 |
| PPP2R3C  | 1.1996428849  | 0.4130826932 | 0.9999763851 |
| KIAA0391 | -1.1441982339 | 0.5883429011 | 0.9999763851 |
| PSMA6    | 1.0862837101  | 0.5875886124 | 0.9999763851 |
| NFKBIA   | -1.2800045647 | 0.1035756334 | 0.9999763851 |
| RALGAPA1 | -1.0447196859 | 0.898346144  | 0.9999763851 |
| BRMS1L   | 1.1525850614  | 0.7602440885 | 0.9999763851 |
| MBIP     | -2.1294557464 | 0.1039780616 | 0.9999763851 |
| SEC23A   | -1.0765067747 | 0.7597682469 | 0.9999763851 |
| GEMIN2   | -1.5451294964 | 0.3654252861 | 0.9999763851 |
| TRAPPC6B | 1.6667841079  | 0.1314481423 | 0.9999763851 |
| PNN      | -1.0578444442 | 0.7489333966 | 0.9999763851 |
| MIA2     | 0             | 0            | 0            |
| CTAGE5   | -1.2740539157 | 0.3412698915 | 0.9999763851 |
| FBXO33   | 1.1003612957  | 0.6947338477 | 0.9999763851 |
| LRFN5    | 0             | 0            | 0            |
| C14orf28 | -1.7332721092 | 0.4777599329 | 0.9999763851 |
| KLHL28   | -1.702782182  | 0.1455679255 | 0.9999763851 |
| FAM179B  | -1.0583554569 | 0.9135167201 | 0.9999763851 |
| PRPF39   | 1.0346199249  | 0.8926827061 | 0.9999763851 |
| FKBP3    | 1.2537137095  | 0.3058901387 | 0.9999763851 |
| FANCM    | -1.4329170107 | 0.510622977  | 0.9999763851 |
| MIS18BP1 | -1.2379865672 | 0.2601157231 | 0.9999763851 |
| RPL10L   | 0             | 0            | 0            |
| RPS29    | -1.1800301485 | 0.1643516854 | 0.9999763851 |
| LRR1     | 1.0331292858  | 0.8330660597 | 0.9999763851 |
| RPL36AL  | 1.0231039924  | 0.863854277  | 0.9999763851 |
| MGAT2    | -1.5207716133 | 0.1051578036 | 0.9999763851 |
| DNAAF2   | -1.2794884001 | 0.465138609  | 0.9999763851 |
| POLE2    | -1.2999820927 | 0.3303263415 | 0.9999763851 |
| KLHDC1   | -1.7016113555 | 0.5931451629 | 0.9999763851 |
| KLHDC2   | -1.0023968826 | 0.9909206364 | 0.9999763851 |
| NEMF     | 1.3905846548  | 0.1313459178 | 0.9999763851 |
| ARF6     | 1.0917989334  | 0.5027545646 | 0.9999763851 |
| VCPKMT   | 1.6314611786  | 0.1700931061 | 0.9999763851 |
| SOS2     | -1.4720055868 | 0.1299994561 | 0.9999763851 |
| L2HGDH   | -1.1647574798 | 0.6506114682 | 0.9999763851 |
| ATP5S    | 1.4953438031  | 0.1780203159 | 0.9999763851 |
| CDKL1    | -1.3226524418 | 0.5085876018 | 0.9999763851 |
| MAP4K5   | -1.0321679061 | 0.9245985775 | 0.9999763851 |
| ATL1     | 2.5893856813  | 0.1954557046 | 0.9999763851 |
| SAV1     | -1.2657156961 | 0.6556004234 | 0.9999763851 |
| NIN      | 1.0687392552  | 0.7124274438 | 0.9999763851 |
| ABHD12B  | 1.5501971516  | 0.5511432317 | 0.9999763851 |
| PYGL     | 1.0765112361  | 0.6879872194 | 0.9999763851 |
| TRIM9    | -1.1820732547 | 0.7637413137 | 0.9999763851 |
| TMX1     | 1.2518879514  | 0.1862764341 | 0.9999763851 |
| FRMD6    | -3.3284109188 | 0.2428427922 | 0.9999763851 |
| GNG2     | 1.511213481   | 0.0409084038 | 0.9999763851 |

gene\_expression\_table

|              |               |              |              |
|--------------|---------------|--------------|--------------|
| C14orf166    | 1.2148103366  | 0.1916802534 | 0.9999763851 |
| NID2         | -1.1243143183 | 0.8470262754 | 0.9999763851 |
| PTGER2       | -1.1213042985 | 0.6335665291 | 0.9999763851 |
| TXNDC16      | -1.7222722635 | 0.1494111666 | 0.9999763851 |
| GPR137C      | 9.9624059448  | 0.2314356309 | 0.9999763851 |
| ERO1A        | 1.0201846462  | 0.900966848  | 0.9999763851 |
| PSMC6        | 1.0693474516  | 0.6709955777 | 0.9999763851 |
| STYX         | 1.007908665   | 0.9842396563 | 0.9999763851 |
| GNPNAT1      | 1.0021613767  | 0.9930641806 | 0.9999763851 |
| DDHD1        | -1.2316149889 | 0.4385556438 | 0.9999763851 |
| CDKN3        | 1.0240424827  | 0.8908720197 | 0.9999763851 |
| CNIH1        | -1.1436271977 | 0.4242379924 | 0.9999763851 |
| GMFB         | 1.4997469069  | 0.0546788206 | 0.9999763851 |
| CGRRF1       | 2.0277299818  | 0.1423376925 | 0.9999763851 |
| SAMD4A       | -1.0807623952 | 0.9264695345 | 0.9999763851 |
| GCH1         | 1.2626044358  | 0.3008476076 | 0.9999763851 |
| WDHD1        | 1.335243219   | 0.2501600254 | 0.9999763851 |
| SOCS4        | -1.1951072689 | 0.5251057439 | 0.9999763851 |
| MAPK1IP1L    | 1.1776942056  | 0.3267971866 | 0.9999763851 |
| LGALS3       | -1.1634326155 | 0.498469466  | 0.9999763851 |
| DLGAP5       | -1.2691218387 | 0.2803533398 | 0.9999763851 |
| FBXO34       | -1.5614029831 | 0.2135085909 | 0.9999763851 |
| ATG14        | -1.8127308044 | 0.1757977154 | 0.9999763851 |
| TBPL2        | 3.2361532718  | 0.5546934395 | 0.9999763851 |
| KTN1         | 1.3075799796  | 0.06729228   | 0.9999763851 |
| PELI2        | -1.428657825  | 0.373030472  | 0.9999763851 |
| TMEM260      | -1.0297308187 | 0.9352899765 | 0.9999763851 |
| EXOC5        | 1.4539583699  | 0.0885441514 | 0.9999763851 |
| AP5M1        | 1.5782605759  | 0.1269109295 | 0.9999763851 |
| NAA30        | 1.4356543638  | 0.2351201898 | 0.9999763851 |
| C14orf37     | 0             | 0            | 0            |
| ACTR10       | 1.1511706914  | 0.4606048501 | 0.9999763851 |
| PSMA3        | 1.0234588834  | 0.9011701073 | 0.9999763851 |
| ARID4A       | 1.3329057256  | 0.2468966278 | 0.9999763851 |
| TOMM20L      | -7.9575607668 | 0.0002467    | 0.3161474386 |
| TIMM9        | 1.6813332878  | 0.0108531779 | 0.9999763851 |
| KIAA0586     | 1.0227249762  | 0.9198227172 | 0.9999763851 |
| DACT1        | -4.2849908816 | 0.4028453076 | 0.9999763851 |
| DAAM1        | 1.4143009003  | 0.3616523408 | 0.9999763851 |
| GPR135       | -1.8158646428 | 0.4740903721 | 0.9999763851 |
| L3HYPDH      | -1.1363427917 | 0.7769987364 | 0.9999763851 |
| JKAMP        | 1.0478567807  | 0.875379534  | 0.9999763851 |
| RTN1         | 0             | 0            | 0            |
| PCNX4        | -1.0904900687 | 0.750827833  | 0.9999763851 |
| DHRS7        | -1.5118023216 | 0.0354534664 | 0.9999763851 |
| PPM1A        | -1.1754685973 | 0.4437331243 | 0.9999763851 |
| LOC105378189 | 0             | 0            | 0            |
| MNAT1        | -2.0055683193 | 0.0942932127 | 0.9999763851 |
| TRMT5        | 1.9031476545  | 0.004128     | 0.9999763851 |

gene\_expression\_table

|             |               |              |              |
|-------------|---------------|--------------|--------------|
| SLC38A6     | -1.6401961624 | 0.2690018137 | 0.9999763851 |
| PRKCH       | 3.2356557963  | 0.5547505991 | 0.9999763851 |
| HIF1A       | -1.1518373097 | 0.5931302381 | 0.9999763851 |
| SNAPC1      | -1.0749243009 | 0.8622463986 | 0.9999763851 |
| KCNH5       | 0             | 0            | 0            |
| RHOJ        | 0             | 0            | 0            |
| GPHB5       | 0             | 0            | 0            |
| PPP2R5E     | 1.2076049774  | 0.3539292112 | 0.9999763851 |
| WDR89       | 1.0629801063  | 0.7831745382 | 0.9999763851 |
| SYNE2       | -1.203081765  | 0.7269933713 | 0.9999763851 |
| MTHFD1      | 1.1020669887  | 0.8616357511 | 0.9999763851 |
| ZBTB25      | -1.0569206728 | 0.7313549487 | 0.9999763851 |
| ZBTB1       | 1.0124752921  | 0.962031826  | 0.9999763851 |
| HSPA2       | -1.3157515262 | 0.8224035558 | 0.9999763851 |
| PPP1R36     | -4.2864494036 | 0.4027150576 | 0.9999763851 |
| PLEKHG3     | -1.185778748  | 0.7418801732 | 0.9999763851 |
| SPTB        | 2.0270981464  | 0.1179245092 | 0.9999763851 |
| CHURC1      | -1.1206877067 | 0.4819131192 | 0.9999763851 |
| CHURC1-FNTB | 1.0407242355  | 0.9323516262 | 0.9999763851 |
| GPX2        | -4.2849908816 | 0.4028453076 | 0.9999763851 |
| FNTB        | -1.0407883986 | 0.9419681682 | 0.9999763851 |
| MAX         | -1.1461162834 | 0.281107642  | 0.9999763851 |
| FUT8        | -1.3178189483 | 0.6015254756 | 0.9999763851 |
| GPHN        | -1.3357278221 | 0.2903238619 | 0.9999763851 |
| MPP5        | 1.0417389841  | 0.8688580388 | 0.9999763851 |
| ATP6V1D     | -1.3169916224 | 0.1662882389 | 0.9999763851 |
| EIF2S1      | 1.1362322023  | 0.3895203774 | 0.9999763851 |
| TMEM229B    | 1.1892052954  | 0.423430025  | 0.9999763851 |
| PLEKHH1     | 3.3925476883  | 0.2301995251 | 0.9999763851 |
| PIGH        | 1.4679150796  | 0.2307880839 | 0.9999763851 |
| ARG2        | 1.2478968186  | 0.3234753689 | 0.9999763851 |
| VTI1B       | -1.750250261  | 0.1521541198 | 0.9999763851 |
| RDH11       | -1.1391097737 | 0.4629414406 | 0.9999763851 |
| RDH12       | -1.3944607594 | 0.6978930708 | 0.9999763851 |
| ZFYVE26     | 1.0038295049  | 0.9872274157 | 0.9999763851 |
| RAD51B      | -1.1705912028 | 0.5650171054 | 0.9999763851 |
| ZFP36L1     | -3.1662181208 | 0.003627     | 0.9999763851 |
| ACTN1       | -1.0456842589 | 0.7366392887 | 0.9999763851 |
| DCAF5       | -1.2535287924 | 0.2833305957 | 0.9999763851 |
| EXD2        | -1.0359312355 | 0.9576186513 | 0.9999763851 |
| GALNT16     | 7.7204093521  | 0.2878634691 | 0.9999763851 |
| ERH         | 1.0162091537  | 0.8971454522 | 0.9999763851 |
| SLC39A9     | -1.3635425342 | 0.1150242361 | 0.9999763851 |
| SUSD6       | 1.2157404572  | 0.4100785312 | 0.9999763851 |
| SRSF5       | -1.0330865123 | 0.8219109625 | 0.9999763851 |
| SMOC1       | 1.0206841205  | 0.8686086455 | 0.9999763851 |
| SLC8A3      | 0             | 0            | 0            |
| COX16       | 1.2054760487  | 0.5647951731 | 0.9999763851 |
| SYNJ2BP     | 0             | 0            | 0            |

gene\_expression\_table

|           |               |              |              |
|-----------|---------------|--------------|--------------|
| ADAM20    | 3.2353357581  | 0.554787377  | 0.9999763851 |
| MED6      | 1.0199759989  | 0.9250893073 | 0.9999763851 |
| TTC9      | -1.0804548487 | 0.7631158124 | 0.9999763851 |
| MAP3K9    | 1.0968516109  | 0.8800685302 | 0.9999763851 |
| PCNX1     | 1.1253050877  | 0.5214364492 | 0.9999763851 |
| SIPA1L1   | -1.1369142867 | 0.6876653804 | 0.9999763851 |
| RGS6      | -4.287394647  | 0.4026306792 | 0.9999763851 |
| DCAF4     | -1.4415258552 | 0.4021861259 | 0.9999763851 |
| ZFYVE1    | -1.445019819  | 0.1656985214 | 0.9999763851 |
| RBM25     | 1.069422282   | 0.6971617675 | 0.9999763851 |
| PSEN1     | -1.1293259948 | 0.527924022  | 0.9999763851 |
| PAPLN     | -1.3077628127 | 0.5117873797 | 0.9999763851 |
| NUMB      | -1.1911377986 | 0.3987313101 | 0.9999763851 |
| HEATR4    | -3.1563891683 | 0.1984612855 | 0.9999763851 |
| C14orf169 | 1.3049487892  | 0.1284646981 | 0.9999763851 |
| ACOT1     | 3.2353357581  | 0.554787377  | 0.9999763851 |
| ACOT4     | 0             | 0            | 0            |
| DNAL1     | 1.4855176074  | 0.5232243796 | 0.9999763851 |
| PNMA1     | -2.4128397145 | 0.0391017463 | 0.9999763851 |
| ELMSAN1   | -1.0818943607 | 0.7436330002 | 0.9999763851 |
| PTGR2     | -1.1126938801 | 0.8229495989 | 0.9999763851 |
| ZNF410    | 1.1286188094  | 0.7560178809 | 0.9999763851 |
| FAM161B   | -1.2987553962 | 0.4747507686 | 0.9999763851 |
| COQ6      | -1.1483402483 | 0.8095036785 | 0.9999763851 |
| ENTPD5    | 1.225790229   | 0.7596250559 | 0.9999763851 |
| BBOF1     | 2.4644821133  | 0.2157217278 | 0.9999763851 |
| ALDH6A1   | -1.9917023999 | 0.009553     | 0.9999763851 |
| LIN52     | -1.1530202597 | 0.563991113  | 0.9999763851 |
| ABCD4     | 1.5941751628  | 0.2482873459 | 0.9999763851 |
| SYNDIG1L  | -1.966276531  | 0.4562605965 | 0.9999763851 |
| NPC2      | -1.1667725453 | 0.3030871551 | 0.9999763851 |
| ISCA2     | -1.1642555862 | 0.4970732755 | 0.9999763851 |
| LTBP2     | -1.4078779033 | 0.6705865709 | 0.9999763851 |
| AREL1     | -1.2662499317 | 0.3852683626 | 0.9999763851 |
| FCF1      | 1.4298848901  | 0.0271950435 | 0.9999763851 |
| YLPM1     | 1.3849210421  | 0.0669287796 | 0.9999763851 |
| PROX2     | -3.5515374526 | 0.0239735744 | 0.9999763851 |
| DLST      | 1.2137455894  | 0.4689433068 | 0.9999763851 |
| RPS6KL1   | -7.5622178268 | 0.2177145568 | 0.9999763851 |
| PGF       | 3.2361532718  | 0.5546934395 | 0.9999763851 |
| EIF2B2    | 1.2704114302  | 0.2687437385 | 0.9999763851 |
| ACYP1     | 1.1043386127  | 0.7389587014 | 0.9999763851 |
| ZC2HC1C   | 0             | 0            | 0            |
| NEK9      | -1.1178767928 | 0.561374169  | 0.9999763851 |
| TMED10    | -1.0110647419 | 0.9341625779 | 0.9999763851 |
| FOS       | -1.9940432718 | 0.003145     | 0.9999763851 |
| JDP2      | 1.1180428059  | 0.4867551132 | 0.9999763851 |
| BATF      | 1.1992822003  | 0.2467520832 | 0.9999763851 |
| FLVCR2    | -1.0375898469 | 0.8118000791 | 0.9999763851 |

gene\_expression\_table

|              |               |              |              |
|--------------|---------------|--------------|--------------|
| C14orf1      | 1.3048477792  | 0.122434486  | 0.9999763851 |
| TTLL5        | -1.1841105081 | 0.5597943887 | 0.9999763851 |
| TGFB3        | -1.1428539459 | 0.8692422886 | 0.9999763851 |
| IFT43        | 1.140469041   | 0.8246909778 | 0.9999763851 |
| GPATCH2L     | -1.2344097505 | 0.2336781602 | 0.9999763851 |
| ESRRB        | 6.368054416   | 0.3492100145 | 0.9999763851 |
| VASH1        | 1.0712510693  | 0.7827542291 | 0.9999763851 |
| ANGEL1       | -1.1757067823 | 0.5866332573 | 0.9999763851 |
| LRRC74A      | -4.2849908816 | 0.4028453076 | 0.9999763851 |
| IRF2BPL      | -1.1618014716 | 0.3856275204 | 0.9999763851 |
| LOC107984638 | 3.3962720959  | 0.2487408509 | 0.9999763851 |
| LOC105370579 | -1.3713018672 | 0.7312784555 | 0.9999763851 |
| CIPC         | -1.0580576228 | 0.8550714343 | 0.9999763851 |
| ZDHHC22      | -1.3154339304 | 0.8205576571 | 0.9999763851 |
| TMEM63C      | 3.0369471101  | 0.0561625942 | 0.9999763851 |
| POMT2        | 1.253371753   | 0.4286488574 | 0.9999763851 |
| GSTZ1        | -1.3297796194 | 0.4325604954 | 0.9999763851 |
| TMED8        | 1.1691735018  | 0.4005888637 | 0.9999763851 |
| SAMD15       | 0             | 0            | 0            |
| NOXRED1      | -1.8155268442 | 0.4541459751 | 0.9999763851 |
| VIPAS39      | -1.2157281827 | 0.5556524596 | 0.9999763851 |
| AHSA1        | 1.0621606248  | 0.6917742413 | 0.9999763851 |
| SPTLC2       | -1.0766039449 | 0.7020797058 | 0.9999763851 |
| ALKBH1       | 1.5933038533  | 0.2086715079 | 0.9999763851 |
| SLIRP        | 1.0850229077  | 0.5131100829 | 0.9999763851 |
| SNW1         | -1.1223119469 | 0.4599898777 | 0.9999763851 |
| C14orf178    | -1.3955017315 | 0.6893712014 | 0.9999763851 |
| ADCK1        | 1.1618795222  | 0.7432025849 | 0.9999763851 |
| DIO2         | 3.2353357581  | 0.554787377  | 0.9999763851 |
| CEP128       | 1.0247946641  | 0.9319968898 | 0.9999763851 |
| TSHR         | -2.3227998731 | 0.4412873135 | 0.9999763851 |
| GTF2A1       | -1.0495842426 | 0.8284045633 | 0.9999763851 |
| SEL1L        | 1.2039481119  | 0.3018510768 | 0.9999763851 |
| FLRT2        | 0             | 0            | 0            |
| GALC         | 1.1845842897  | 0.6399514638 | 0.9999763851 |
| GPR65        | -2.0618162662 | 0.2890546301 | 0.9999763851 |
| SPATA7       | -2.5596117216 | 0.2619061677 | 0.9999763851 |
| PTPN21       | 3.2353357581  | 0.554787377  | 0.9999763851 |
| ZC3H14       | 1.2903767883  | 0.255127638  | 0.9999763851 |
| EML5         | 1.77355136    | 0.3504963136 | 0.9999763851 |
| TTC8         | -1.1275107155 | 0.7955702427 | 0.9999763851 |
| FOXN3        | 1.0964283051  | 0.5427838305 | 0.9999763851 |
| EFCAB11      | -1.2759764368 | 0.5680131961 | 0.9999763851 |
| TDP1         | 1.0772430571  | 0.690036859  | 0.9999763851 |
| PSMC1        | -1.1608491844 | 0.3161498401 | 0.9999763851 |
| NRDE2        | 1.3352783103  | 0.4981655874 | 0.9999763851 |
| CALM1        | 1.094122918   | 0.5096106212 | 0.9999763851 |
| TTC7B        | -1.3087201242 | 0.0287706073 | 0.9999763851 |
| RPS6KA5      | -1.3849626133 | 0.1522951946 | 0.9999763851 |



gene\_expression\_table

|              |               |              |              |
|--------------|---------------|--------------|--------------|
| C14orf159    | -1.0049876255 | 0.9845396301 | 0.9999763851 |
| GPR68        | -1.5213785253 | 0.1236563295 | 0.9999763851 |
| CCDC88C      | -1.1175268014 | 0.5211530474 | 0.9999763851 |
| PPP4R3A      | 1.1224576486  | 0.5249201912 | 0.9999763851 |
| CATSPERB     | 0             | 0            | 0            |
| TC2N         | 1.0692787428  | 0.8883308497 | 0.9999763851 |
| TRIP11       | -1.2378789805 | 0.3765916494 | 0.9999763851 |
| ATXN3        | -1.0115922948 | 0.958513672  | 0.9999763851 |
| NDUFB1       | 1.3576675492  | 0.023313147  | 0.9999763851 |
| CPSF2        | 1.0674670837  | 0.7248906416 | 0.9999763851 |
| SLC24A4      | 7.7199860138  | 0.2827668552 | 0.9999763851 |
| RIN3         | 1.1817431331  | 0.6461993912 | 0.9999763851 |
| LGMN         | 5.4781708352  | 0.3745527127 | 0.9999763851 |
| GOLGA5       | -2.2246364432 | 0.0170812706 | 0.9999763851 |
| ITPK1        | 1.2976657101  | 0.2073266597 | 0.9999763851 |
| MOAP1        | 1.0674639794  | 0.8032700415 | 0.9999763851 |
| TMEM251      | -1.1325204832 | 0.704940744  | 0.9999763851 |
| C14orf142    | 1.315643376   | 0.1708421086 | 0.9999763851 |
| UBR7         | 1.4740366494  | 0.0707631629 | 0.9999763851 |
| BTBD7        | 1.0278739796  | 0.8706606071 | 0.9999763851 |
| UNC79        | -1.2836274026 | 0.198231551  | 0.9999763851 |
| COX8C        | 1.0335261549  | 0.8557657131 | 0.9999763851 |
| ASB2         | 1.0511307685  | 0.8628037794 | 0.9999763851 |
| OTUB2        | -1.1044064817 | 0.7029547957 | 0.9999763851 |
| DDX24        | 1.0325919958  | 0.8667395332 | 0.9999763851 |
| IFI27L1      | 1.0280982828  | 0.9044647402 | 0.9999763851 |
| IFI27        | -6.5395499284 | 0.0715111971 | 0.9999763851 |
| IFI27L2      | -1.0992163363 | 0.5986522715 | 0.9999763851 |
| PPP4R4       | -1.0246989039 | 0.9749672939 | 0.9999763851 |
| SERPINA1     | -1.108707669  | 0.8100578236 | 0.9999763851 |
| DICER1       | 1.2942199142  | 0.2289826149 | 0.9999763851 |
| CLMN         | -1.3677549179 | 0.3948519917 | 0.9999763851 |
| SYNE3        | 1.5133967596  | 0.3969241141 | 0.9999763851 |
| LOC105370641 | 0             | 0            | 0            |
| GLRX5        | 1.2172729524  | 0.1852724744 | 0.9999763851 |
| ATG2B        | 1.394769684   | 0.2867195369 | 0.9999763851 |
| GSKIP        | 1.3943642907  | 0.2198523295 | 0.9999763851 |
| AK7          | 3.2353357581  | 0.554787377  | 0.9999763851 |
| PAPOLA       | -1.0180835712 | 0.8967296884 | 0.9999763851 |
| VRK1         | 1.0536756255  | 0.7480691266 | 0.9999763851 |
| BCL11B       | -1.1484927822 | 0.8521482357 | 0.9999763851 |
| SETD3        | -1.0854165674 | 0.6110688692 | 0.9999763851 |
| CCNK         | 1.0720321805  | 0.7889561101 | 0.9999763851 |
| CCDC85C      | 1.3718298627  | 0.3005497654 | 0.9999763851 |
| HHIPL1       | -7.5622178268 | 0.2177145568 | 0.9999763851 |
| CYP46A1      | -1.3661346698 | 0.1688078642 | 0.9999763851 |
| EML1         | 2.3413502536  | 0.4226333491 | 0.9999763851 |
| EVL          | 1.1848555144  | 0.313605435  | 0.9999763851 |
| DEGS2        | 0             | 0            | 0            |

gene\_expression\_table

|              |               |              |              |
|--------------|---------------|--------------|--------------|
| YY1          | 1.0486176224  | 0.7710142475 | 0.9999763851 |
| SLC25A29     | -1.0282824703 | 0.8927303433 | 0.9999763851 |
| WARS         | 1.0417389437  | 0.8495607048 | 0.9999763851 |
| WDR25        | 1.0993343646  | 0.7035438152 | 0.9999763851 |
| BEGAIN       | -1.0849160377 | 0.8968117556 | 0.9999763851 |
| DLK1         | -1.0170263897 | 0.9761886005 | 0.9999763851 |
| DIO3         | 0             | 0            | 0            |
| PPP2R5C      | 1.2151784139  | 0.1841789101 | 0.9999763851 |
| DYNC1H1      | -1.0496332211 | 0.7177116537 | 0.9999763851 |
| HSP90AA1     | 1.2139586818  | 0.0922553605 | 0.9999763851 |
| WDR20        | -1.4464015966 | 0.209170409  | 0.9999763851 |
| MOK          | -1.5611789752 | 0.3779139874 | 0.9999763851 |
| ZNF839       | 1.0481449855  | 0.8628926118 | 0.9999763851 |
| CINP         | 1.1588701408  | 0.6016683475 | 0.9999763851 |
| TECPR2       | -1.361400044  | 0.2369778653 | 0.9999763851 |
| ANKRD9       | -1.3248028807 | 0.4333211325 | 0.9999763851 |
| RCOR1        | -1.0192896859 | 0.9044059243 | 0.9999763851 |
| TRAF3        | -1.0568947635 | 0.7945691727 | 0.9999763851 |
| CDC42BPB     | -1.2313879396 | 0.7534607881 | 0.9999763851 |
| TNFAIP2      | -1.2391850792 | 0.188693506  | 0.9999763851 |
| LOC105370687 | 3.2353357581  | 0.554787377  | 0.9999763851 |
| EIF5         | 1.1968001626  | 0.2060968784 | 0.9999763851 |
| MARK3        | 1.0468550507  | 0.749500943  | 0.9999763851 |
| CKB          | -1.8508980143 | 0.2114411285 | 0.9999763851 |
| TRMT61A      | 1.0374283598  | 0.873652458  | 0.9999763851 |
| BAG5         | -1.0068434975 | 0.9698822471 | 0.9999763851 |
| APOPT1       | 1.1489241552  | 0.4835441661 | 0.9999763851 |
| KLC1         | 1.3242871579  | 0.0560895019 | 0.9999763851 |
| XRCC3        | -1.0552694049 | 0.8061165559 | 0.9999763851 |
| ZFYVE21      | 1.0032978266  | 0.9850350721 | 0.9999763851 |
| PPP1R13B     | 1.0311420768  | 0.9411968039 | 0.9999763851 |
| C14orf2      | 1.2069243396  | 0.1459850737 | 0.9999763851 |
| TDRD9        | -1.6184601085 | 0.2518078696 | 0.9999763851 |
| INF2         | 1.385537808   | 0.1212786272 | 0.9999763851 |
| ADSSL1       | -7.5664585246 | 0.2259050528 | 0.9999763851 |
| SIVA1        | 1.1700916619  | 0.215816606  | 0.9999763851 |
| AKT1         | -1.036920636  | 0.8134654133 | 0.9999763851 |
| ZBTB42       | 1.1584377343  | 0.7061349718 | 0.9999763851 |
| CEP170B      | 3.2356557963  | 0.5547505991 | 0.9999763851 |
| PLD4         | -7.5622178268 | 0.2177145568 | 0.9999763851 |
| C14orf79     | 1.1719216794  | 0.7691029435 | 0.9999763851 |
| CDCA4        | -1.1102896237 | 0.4864017597 | 0.9999763851 |
| GPR132       | 1.0118504824  | 0.9761482386 | 0.9999763851 |
| JAG2         | -1.7344697458 | 0.4549805961 | 0.9999763851 |
| NUDT14       | -1.2197310707 | 0.5872713466 | 0.9999763851 |
| BRF1         | -1.4458167332 | 0.1751336033 | 0.9999763851 |
| BTBD6        | 1.2533673879  | 0.2519341463 | 0.9999763851 |
| PACS2        | 1.1468523263  | 0.4990745253 | 0.9999763851 |
| TEX22        | 1.1739877281  | 0.7950675747 | 0.9999763851 |

gene\_expression\_table

|              |               |              |              |
|--------------|---------------|--------------|--------------|
| MTA1         | -1.0646540693 | 0.7026327636 | 0.9999763851 |
| CRIP2        | 0             | 0            | 0            |
| CRIP1        | 1.0480191054  | 0.9202174948 | 0.9999763851 |
| C14orf80     | -1.0393995099 | 0.8968977105 | 0.9999763851 |
| TMEM121      | -1.0795865172 | 0.8110368543 | 0.9999763851 |
| LOC105369274 | 0             | 0            | 0            |
| POTEB        | 7.7599005912  | 0.2899043981 | 0.9999763851 |
| NIPA2        | 1.4071729286  | 0.0357478972 | 0.9999763851 |
| CYFIP1       | 1.0149206188  | 0.9409662282 | 0.9999763851 |
| TUBGCP5      | 1.1940219778  | 0.504030799  | 0.9999763851 |
| SNRPN        | 1.4130640769  | 0.0653569086 | 0.9999763851 |
| SNURF        | 1.0175453049  | 0.9322869323 | 0.9999763851 |
| UBE3A        | 1.0471442782  | 0.7736064532 | 0.9999763851 |
| ATP10A       | 0             | 0            | 0            |
| GABRB3       | 4.5321181295  | 0.0803767201 | 0.9999763851 |
| GABRG3       | 3.2361532718  | 0.5546934395 | 0.9999763851 |
| HERC2        | -1.2118257861 | 0.2305135007 | 0.9999763851 |
| HERC2P11     | 9.9312452783  | 0.2486169813 | 0.9999763851 |
| GOLGA8M      | 1.3496267716  | 0.3969554083 | 0.9999763851 |
| APBA2        | 1.0906194713  | 0.7899790954 | 0.9999763851 |
| FAM189A1     | -3.3291448741 | 0.2508455485 | 0.9999763851 |
| NSMCE3       | 1.3974216759  | 0.2388207023 | 0.9999763851 |
| TJP1         | 2.1351997131  | 5.83E-06     | 0.0149348367 |
| GOLGA8J      | -1.2619776428 | 0.2219031399 | 0.9999763851 |
| CHRFAM7A     | -2.2393906731 | 0.0637349995 | 0.9999763851 |
| LOC101060569 | -1.0810230665 | 0.9182800245 | 0.9999763851 |
| LOC101927579 | -1.5745091213 | 0.2435473376 | 0.9999763851 |
| LOC101930434 | 3.2361532718  | 0.5546934395 | 0.9999763851 |
| FAN1         | -1.7543527075 | 0.0248244023 | 0.9999763851 |
| MTMR10       | 3.5495567446  | 0.0218975379 | 0.9999763851 |
| TRPM1        | 3.2356557963  | 0.5547505991 | 0.9999763851 |
| LOC283710    | -7.5647903763 | 0.2176246281 | 0.9999763851 |
| KLF13        | 1.2592326539  | 0.2311073856 | 0.9999763851 |
| OTUD7A       | -1.976218429  | 0.1378958941 | 0.9999763851 |
| GOLGA8K      | -3.6368469092 | 0.1554927842 | 0.9999763851 |
| GOLGA8O      | 11.8381114083 | 0.001365     | 0.941889539  |
| LOC100653133 | 0             | 0            | 0            |
| GOLGA8N      | 1.113102083   | 0.5433411917 | 0.9999763851 |
| ARHGAP11A    | 1.084768125   | 0.5898444544 | 0.9999763851 |
| SCG5         | -1.8910486008 | 0.0157103928 | 0.9999763851 |
| FMN1         | 0             | 0            | 0            |
| RYR3         | 1.9654718743  | 0.3595065335 | 0.9999763851 |
| AVEN         | 1.2931182987  | 0.3619190869 | 0.9999763851 |
| EMC7         | 1.1780301381  | 0.2854961034 | 0.9999763851 |
| PGBD4        | 1.8142404796  | 0.5674129376 | 0.9999763851 |
| KATNBL1      | 1.3238575552  | 0.216929908  | 0.9999763851 |
| EMC4         | -1.2161981917 | 0.2895942999 | 0.9999763851 |
| SLC12A6      | -1.1125219664 | 0.7618550212 | 0.9999763851 |
| NOP10        | 1.1747329187  | 0.2136104567 | 0.9999763851 |

gene\_expression\_table

|            |               |              |              |
|------------|---------------|--------------|--------------|
| NUTM1      | 0             | 0            | 0            |
| LPCAT4     | 1.0141869896  | 0.9762975438 | 0.9999763851 |
| GOLGA8A    | -1.3743618633 | 0.2964119494 | 0.9999763851 |
| GOLGA8B    | 1.2688210612  | 0.3975334954 | 0.9999763851 |
| AQR        | 1.0098447889  | 0.9608453386 | 0.9999763851 |
| ZNF770     | -1.0996962667 | 0.5544166066 | 0.9999763851 |
| DPH6       | -1.0439398283 | 0.8968513524 | 0.9999763851 |
| C15orf41   | -1.2509530446 | 0.3582324957 | 0.9999763851 |
| MEIS2      | 1.1900007014  | 0.5621461544 | 0.9999763851 |
| SPRED1     | -1.4430537563 | 0.3465959521 | 0.9999763851 |
| FAM98B     | 1.0700841631  | 0.7195468982 | 0.9999763851 |
| RASGRP1    | 1.3258969121  | 0.7484675255 | 0.9999763851 |
| C15orf53   | 5.4781708352  | 0.3745527127 | 0.9999763851 |
| THBS1      | 0             | 0            | 0            |
| FSIP1      | -1.8165442169 | 0.4624811618 | 0.9999763851 |
| EIF2AK4    | 1.0605477037  | 0.7277965219 | 0.9999763851 |
| SRP14      | 1.1264795055  | 0.3387693795 | 0.9999763851 |
| BMF        | 1.1180839932  | 0.6892792366 | 0.9999763851 |
| BUB1B      | 1.511547826   | 0.1288416318 | 0.9999763851 |
| BUB1B-PAK6 | -1.2204694913 | 0.5005382317 | 0.9999763851 |
| ANKRD63    | 1.8324140901  | 0.2228966347 | 0.9999763851 |
| PLCB2      | 1.2848014778  | 0.1976645379 | 0.9999763851 |
| INAFM2     | 1.195187054   | 0.4240531193 | 0.9999763851 |
| C15orf52   | -1.1555457336 | 0.7962874948 | 0.9999763851 |
| DISP2      | -1.6471937774 | 0.4537137196 | 0.9999763851 |
| KNSTRN     | -1.0614259536 | 0.7311179555 | 0.9999763851 |
| IVD        | -1.0974068487 | 0.6197037695 | 0.9999763851 |
| BAHD1      | 1.0122519739  | 0.9424247162 | 0.9999763851 |
| CHST14     | -1.3702525313 | 0.1697687576 | 0.9999763851 |
| C15orf57   | -1.1410620197 | 0.5496241715 | 0.9999763851 |
| RPUSD2     | -1.1131288859 | 0.5630430192 | 0.9999763851 |
| CASC5      | -1.1448917158 | 0.4424627929 | 0.9999763851 |
| RAD51      | -1.089837143  | 0.5581883376 | 0.9999763851 |
| RMDN3      | -1.4350911753 | 0.0585268741 | 0.9999763851 |
| GCHFR      | 1.1924470622  | 0.3358074592 | 0.9999763851 |
| DNAJC17    | 1.3306699864  | 0.5030739621 | 0.9999763851 |
| C15orf62   | -7.5622178268 | 0.2177145568 | 0.9999763851 |
| ZFYVE19    | -1.0801789211 | 0.7455842843 | 0.9999763851 |
| PPP1R14D   | 0             | 0            | 0            |
| SPINT1     | 1.2967961371  | 0.5425933948 | 0.9999763851 |
| RHOV       | 1.6045400131  | 0.2024907551 | 0.9999763851 |
| VPS18      | 1.2621565212  | 0.346436461  | 0.9999763851 |
| DLL4       | 3.2356557963  | 0.5547505991 | 0.9999763851 |
| CHAC1      | 1.3101246791  | 0.5448501399 | 0.9999763851 |
| INO80      | 1.1103208773  | 0.600121524  | 0.9999763851 |
| CHP1       | -1.1584784781 | 0.4439124906 | 0.9999763851 |
| OIP5       | 1.0054354677  | 0.9715069188 | 0.9999763851 |
| NUSAP1     | 1.2257056745  | 0.1259725679 | 0.9999763851 |
| NDUFAF1    | 1.1699036908  | 0.4392382153 | 0.9999763851 |

gene\_expression\_table

|          |               |              |              |
|----------|---------------|--------------|--------------|
| RTF1     | -1.1998248253 | 0.2042816524 | 0.9999763851 |
| ITPKA    | 1.2033287128  | 0.4484124519 | 0.9999763851 |
| RPAP1    | -1.0386994409 | 0.8765390845 | 0.9999763851 |
| TYRO3    | 1.0947740043  | 0.5555333148 | 0.9999763851 |
| MGA      | -1.4838154859 | 0.2202135214 | 0.9999763851 |
| MAPKBP1  | -1.0092518449 | 0.9799958602 | 0.9999763851 |
| JMJD7    | 1.3415898104  | 0.1838731273 | 0.9999763851 |
| PLA2G4B  | 1.0326480616  | 0.9473537026 | 0.9999763851 |
| SPTBN5   | -1.9667102674 | 0.4562426721 | 0.9999763851 |
| EHD4     | -1.074281164  | 0.8490042051 | 0.9999763851 |
| PLA2G4D  | 2.027155953   | 0.4566921088 | 0.9999763851 |
| PLA2G4F  | 0             | 0            | 0            |
| VPS39    | 1.2753525472  | 0.3459292581 | 0.9999763851 |
| TMEM87A  | -1.3200894816 | 0.0502886223 | 0.9999763851 |
| GANC     | -2.0942123789 | 0.0323628423 | 0.9999763851 |
| CAPN3    | 3.0070207342  | 0.0977427145 | 0.9999763851 |
| ZNF106   | -1.0938068302 | 0.5752899308 | 0.9999763851 |
| SNAP23   | -1.1609792616 | 0.8263604482 | 0.9999763851 |
| LRRC57   | 1.1664480927  | 0.3258770286 | 0.9999763851 |
| HAUS2    | 1.3826180953  | 0.0629863809 | 0.9999763851 |
| STARD9   | -1.4825451185 | 0.1412892508 | 0.9999763851 |
| CDAN1    | 1.4510492157  | 0.2770559418 | 0.9999763851 |
| TTBK2    | -1.4857512099 | 0.2497441979 | 0.9999763851 |
| UBR1     | -1.3889793987 | 0.1371681461 | 0.9999763851 |
| TMEM62   | 1.1471782791  | 0.5997731008 | 0.9999763851 |
| CCNDBP1  | 1.0779928553  | 0.6533026495 | 0.9999763851 |
| EPB42    | 0             | 0            | 0            |
| TGM5     | 1.6139567595  | 0.0628517449 | 0.9999763851 |
| TGM7     | 0             | 0            | 0            |
| LCMT2    | 1.5022389329  | 0.2879370514 | 0.9999763851 |
| ADAL     | 1.5617218108  | 0.242415469  | 0.9999763851 |
| ZSCAN29  | -1.4156852347 | 0.200059224  | 0.9999763851 |
| TUBGCP4  | -1.0730342888 | 0.6849125558 | 0.9999763851 |
| TP53BP1  | -1.0105262219 | 0.9788288289 | 0.9999763851 |
| MAP1A    | -1.3157515262 | 0.822405115  | 0.9999763851 |
| PPIP5K1  | -1.2952959251 | 0.571130903  | 0.9999763851 |
| CATSPER2 | 1.2306977958  | 0.5592351738 | 0.9999763851 |
| CKMT1A   | -1.4214535124 | 0.5872146233 | 0.9999763851 |
| PDIA3    | -1.149166722  | 0.4177319432 | 0.9999763851 |
| ELL3     | 1.0787893643  | 0.8503745427 | 0.9999763851 |
| SERF2    | -1.0763217179 | 0.5735296156 | 0.9999763851 |
| SERINC4  | 0             | 0            | 0            |
| HYPK     | 1.2075143774  | 0.2312081274 | 0.9999763851 |
| MFAP1    | 1.0479773392  | 0.8009967266 | 0.9999763851 |
| WDR76    | 1.2272267104  | 0.2370309686 | 0.9999763851 |
| FRMD5    | -1.8164974932 | 0.2877322169 | 0.9999763851 |
| CASC4    | 1.4922170707  | 0.046406942  | 0.9999763851 |
| CTDSPL2  | 1.2960489645  | 0.2325709765 | 0.9999763851 |
| EIF3J    | -1.0459879141 | 0.7350514867 | 0.9999763851 |

gene\_expression\_table

|              |                |              |              |
|--------------|----------------|--------------|--------------|
| SPG11        | 1.3799735952   | 0.1431856016 | 0.9999763851 |
| PATL2        | -1.2571014048  | 0.7135055873 | 0.9999763851 |
| B2M          | 1.062627034    | 0.624183536  | 0.9999763851 |
| SORD         | -1.1512425569  | 0.3239825866 | 0.9999763851 |
| DUOXA1       | -7.5622178268  | 0.2177145568 | 0.9999763851 |
| DUOX1        | 3.2356557963   | 0.5547505991 | 0.9999763851 |
| SHF          | 1.7450428903   | 0.6326046324 | 0.9999763851 |
| SLC28A2      | -10.8385246611 | 0.1452344072 | 0.9999763851 |
| GATM         | -1.3161718537  | 0.8290538512 | 0.9999763851 |
| SPATA5L1     | -1.0826106007  | 0.8422581788 | 0.9999763851 |
| C15orf48     | -1.3940632796  | 0.7033607529 | 0.9999763851 |
| LOC105376714 | 1.2865109866   | 0.8337358825 | 0.9999763851 |
| SLC30A4      | -7.3573348511  | 0.0415312621 | 0.9999763851 |
| BLOC1S6      | 1.1247503106   | 0.4446884243 | 0.9999763851 |
| SQRDL        | 1.0588702751   | 0.6604545531 | 0.9999763851 |
| SEMA6D       | 1.2067719715   | 0.3192996386 | 0.9999763851 |
| SLC24A5      | 0              | 0            | 0            |
| SLC12A1      | -7.5647903763  | 0.2176246281 | 0.9999763851 |
| DUT          | 1.3399467374   | 0.0270343383 | 0.9999763851 |
| FBN1         | -2.0616365036  | 0.2870938773 | 0.9999763851 |
| CEP152       | -1.1526293349  | 0.3869675404 | 0.9999763851 |
| EID1         | 1.0951354147   | 0.4877543507 | 0.9999763851 |
| SECISBP2L    | -1.3255552882  | 0.163874075  | 0.9999763851 |
| COPS2        | -1.0241836036  | 0.8691070942 | 0.9999763851 |
| GALK2        | 1.0282123421   | 0.8633282678 | 0.9999763851 |
| FAM227B      | -1.679491499   | 0.1787567505 | 0.9999763851 |
| DTWD1        | -1.0924569781  | 0.7111827754 | 0.9999763851 |
| ATP8B4       | 1.2969524787   | 0.0750553594 | 0.9999763851 |
| SLC27A2      | 2.6245799343   | 0.0203770122 | 0.9999763851 |
| HDC          | -4.2849908816  | 0.4028453076 | 0.9999763851 |
| GABPB1       | -1.145621223   | 0.4553928255 | 0.9999763851 |
| USP8         | -1.1302296627  | 0.5370921077 | 0.9999763851 |
| USP50        | 3.4795886266   | 0.1215585104 | 0.9999763851 |
| TRPM7        | -1.2388429003  | 0.1456686646 | 0.9999763851 |
| SPPL2A       | 1.0936801666   | 0.6784871508 | 0.9999763851 |
| AP4E1        | -1.1568220072  | 0.4513266463 | 0.9999763851 |
| CYP19A1      | -4.2864494036  | 0.4027150576 | 0.9999763851 |
| GLDN         | -1.3154339304  | 0.8205576571 | 0.9999763851 |
| DMXL2        | -1.0229663256  | 0.8740061105 | 0.9999763851 |
| SCG3         | -2.3214980365  | 0.4371133126 | 0.9999763851 |
| LYSMD2       | 1.0226860115   | 0.906161627  | 0.9999763851 |
| TMOD2        | -1.1761801462  | 0.5917656762 | 0.9999763851 |
| TMOD3        | -1.0009590706  | 0.9947474184 | 0.9999763851 |
| LEO1         | 1.0071616295   | 0.9754310277 | 0.9999763851 |
| MAPK6        | 1.0091413333   | 0.951825807  | 0.9999763851 |
| GNB5         | -1.0066914591  | 0.9784347992 | 0.9999763851 |
| MYO5C        | 1.853680583    | 0.4438768915 | 0.9999763851 |
| MYO5A        | -1.234391415   | 0.5153683471 | 0.9999763851 |
| ARPP19       | 1.2137378175   | 0.2233467991 | 0.9999763851 |

gene\_expression\_table

|              |               |              |              |
|--------------|---------------|--------------|--------------|
| FAM214A      | -1.5005740005 | 0.2072645796 | 0.9999763851 |
| LOC107983981 | 1.1886434711  | 0.769483385  | 0.9999763851 |
| UNC13C       | 0             | 0            | 0            |
| RSL24D1      | -1.0844241121 | 0.5537846483 | 0.9999763851 |
| RAB27A       | -1.049161985  | 0.7198137458 | 0.9999763851 |
| PIGBOS1      | 1.079324942   | 0.7558661512 | 0.9999763851 |
| PIGB         | -1.6179934434 | 0.0966603458 | 0.9999763851 |
| CCPG1        | 1.0989471035  | 0.4972607038 | 0.9999763851 |
| C15orf65     | -1.3717838846 | 0.7496607128 | 0.9999763851 |
| DYX1C1       | 1.3886971814  | 0.6551591573 | 0.9999763851 |
| PYGO1        | 0             | 0            | 0            |
| PRTG         | -2.3214980365 | 0.437230213  | 0.9999763851 |
| NEDD4        | 1.032850494   | 0.8942378607 | 0.9999763851 |
| RFX7         | -1.3302461797 | 0.1817786519 | 0.9999763851 |
| TEX9         | 1.7590401103  | 0.4576017216 | 0.9999763851 |
| MNS1         | -1.1115570433 | 0.8819103505 | 0.9999763851 |
| ZNF280D      | 1.0084786864  | 0.9758946843 | 0.9999763851 |
| TCF12        | -1.4140854878 | 0.0160689497 | 0.9999763851 |
| CGNL1        | 1.2491760998  | 0.6936243595 | 0.9999763851 |
| POLR2M       | 1.0043673644  | 0.9838257035 | 0.9999763851 |
| ALDH1A2      | 0             | 0            | 0            |
| LOC101928635 | 0             | 0            | 0            |
| AQP9         | -8.9954408168 | 0.0160073831 | 0.9999763851 |
| LIPC         | 0             | 0            | 0            |
| ADAM10       | 1.0007608381  | 0.9967265596 | 0.9999763851 |
| FAM63B       | 1.0793425334  | 0.6772356069 | 0.9999763851 |
| SLTM         | 1.0531369254  | 0.7149306498 | 0.9999763851 |
| RNF111       | 1.2372563758  | 0.4414508672 | 0.9999763851 |
| CCNB2        | -1.0174106925 | 0.8917698565 | 0.9999763851 |
| MYO1E        | -1.4431270474 | 0.3279646756 | 0.9999763851 |
| FAM81A       | -1.1420017683 | 0.6705647982 | 0.9999763851 |
| GTF2A2       | 1.1586460456  | 0.3605510977 | 0.9999763851 |
| BNIP2        | 1.0440213206  | 0.7594356327 | 0.9999763851 |
| ANXA2        | 1.2006487618  | 0.1967999219 | 0.9999763851 |
| ICE2         | 1.36812103    | 0.1075580053 | 0.9999763851 |
| RORA         | -2.5948264407 | 0.0765471993 | 0.9999763851 |
| VPS13C       | 1.0300095272  | 0.8637009754 | 0.9999763851 |
| LOC105370849 | 0             | 0            | 0            |
| TLN2         | -1.8023222043 | 0.0492829908 | 0.9999763851 |
| TPM1         | 1.0832154117  | 0.6942982566 | 0.9999763851 |
| LACTB        | -1.3248116562 | 0.1557426696 | 0.9999763851 |
| RPS27L       | 1.0682656678  | 0.6447126875 | 0.9999763851 |
| RAB8B        | -1.2468571291 | 0.302567835  | 0.9999763851 |
| APH1B        | 1.0073115753  | 0.9726643106 | 0.9999763851 |
| CA12         | 3.2353357581  | 0.554787377  | 0.9999763851 |
| USP3         | 1.2103649667  | 0.2592892866 | 0.9999763851 |
| FBXL22       | 1.0301153598  | 0.8963998083 | 0.9999763851 |
| HERC1        | -1.1645223241 | 0.5351442161 | 0.9999763851 |
| DAPK2        | 1.4837238256  | 0.4464315257 | 0.9999763851 |

gene\_expression\_table

|          |                |              |              |
|----------|----------------|--------------|--------------|
| FAM96A   | -1.1166570594  | 0.3879828081 | 0.9999763851 |
| SNX1     | -1.2475149636  | 0.1448785147 | 0.9999763851 |
| SNX22    | -1.4579219457  | 0.0221519135 | 0.9999763851 |
| PPIB     | -21.5726182549 | 0.0723492168 | 0.9999763851 |
| CSNK1G1  | -1.2252929639  | 0.3555901115 | 0.9999763851 |
| KIAA0101 | 1.0379948138   | 0.7663458906 | 0.9999763851 |
| TRIP4    | -1.1359188837  | 0.6537441782 | 0.9999763851 |
| ZNF609   | -1.4355233392  | 0.0410162379 | 0.9999763851 |
| OAZ2     | 1.0051234332   | 0.9745274458 | 0.9999763851 |
| RBPMS2   | 3.2356557963   | 0.5547505991 | 0.9999763851 |
| PIF1     | 1.1306282344   | 0.5490600858 | 0.9999763851 |
| PLEKHO2  | 1.2494013776   | 0.2961304378 | 0.9999763851 |
| ANKDD1A  | 1.0327525483   | 0.9025477575 | 0.9999763851 |
| SPG21    | 1.0486410616   | 0.7154900168 | 0.9999763851 |
| MTFMT    | -1.3583788028  | 0.1090665212 | 0.9999763851 |
| RASL12   | 0              | 0            | 0            |
| UBAP1L   | -2.2160441003  | 0.225803791  | 0.9999763851 |
| PDCD7    | -1.1445984222  | 0.47040392   | 0.9999763851 |
| CLPX     | 1.1727195968   | 0.3632793369 | 0.9999763851 |
| PARP16   | 1.0459919078   | 0.835276476  | 0.9999763851 |
| IGDCC3   | 3.2356557963   | 0.5547505991 | 0.9999763851 |
| IGDCC4   | -1.371091068   | 0.7484030603 | 0.9999763851 |
| DPP8     | -1.1544653224  | 0.4278024043 | 0.9999763851 |
| HACD3    | 1.2788600355   | 0.0980768489 | 0.9999763851 |
| VWA9     | 1.1109841579   | 0.6316752037 | 0.9999763851 |
| SLC24A1  | 1.4753751177   | 0.0806294451 | 0.9999763851 |
| DENND4A  | -1.0111700098  | 0.9559498323 | 0.9999763851 |
| RAB11A   | -1.019789901   | 0.8946769817 | 0.9999763851 |
| MEGF11   | -4.2849908816  | 0.4028453076 | 0.9999763851 |
| DIS3L    | 1.0489947442   | 0.8027102094 | 0.9999763851 |
| TIPIN    | -1.0451623442  | 0.823648412  | 0.9999763851 |
| MAP2K1   | -1.8426234914  | 0.0434699276 | 0.9999763851 |
| SNAPC5   | 1.0814280189   | 0.6184750146 | 0.9999763851 |
| RPL4     | -1.1048625948  | 0.4340406693 | 0.9999763851 |
| ZWILCH   | -1.295372828   | 0.4335069502 | 0.9999763851 |
| LCTL     | 1.0084462472   | 0.9570932293 | 0.9999763851 |
| SMAD6    | -1.1730080493  | 0.5423427694 | 0.9999763851 |
| SMAD3    | -1.4309809053  | 0.1047715548 | 0.9999763851 |
| AAGAB    | -1.395080981   | 0.0184062468 | 0.9999763851 |
| IQCH     | 1.2112706036   | 0.571660306  | 0.9999763851 |
| C15orf61 | -1.0268933593  | 0.8744327438 | 0.9999763851 |
| MAP2K5   | 1.064375052    | 0.7592522728 | 0.9999763851 |
| SKOR1    | 1.4987063639   | 0.3640738393 | 0.9999763851 |
| PIAS1    | -1.1665509386  | 0.3338070866 | 0.9999763851 |
| CALML4   | -1.1291675761  | 0.5887793628 | 0.9999763851 |
| CLN6     | 1.1940407882   | 0.3081585047 | 0.9999763851 |
| FEM1B    | 1.2392646243   | 0.2165279896 | 0.9999763851 |
| ITGA11   | 1.0949541325   | 0.8930561542 | 0.9999763851 |
| CORO2B   | -1.8155805633  | 0.2919182654 | 0.9999763851 |



gene\_expression\_table

|              |               |              |              |
|--------------|---------------|--------------|--------------|
| ANP32A       | 1.0239196929  | 0.8574375183 | 0.9999763851 |
| SPESP1       | 1.0273967864  | 0.9753624609 | 0.9999763851 |
| NOX5         | 0             | 0            | 0            |
| GLCE         | 1.2177422228  | 0.681030015  | 0.9999763851 |
| PAQR5        | -2.5519849925 | 0.3673796027 | 0.9999763851 |
| KIF23        | 1.0075853624  | 0.9681040816 | 0.9999763851 |
| RPLP1        | 1.0622378963  | 0.6126181498 | 0.9999763851 |
| TLE3         | 1.0318258355  | 0.824824701  | 0.9999763851 |
| UACA         | -1.0005497817 | 0.9979871265 | 0.9999763851 |
| LARP6        | -1.3154339304 | 0.8205576571 | 0.9999763851 |
| LRRC49       | 0             | 0            | 0            |
| THAP10       | 0             | 0            | 0            |
| THSD4        | 1.0186740864  | 0.9080875182 | 0.9999763851 |
| MYO9A        | -1.0212240708 | 0.9147966941 | 0.9999763851 |
| SENP8        | -2.3220580825 | 0.4365515537 | 0.9999763851 |
| GRAMD2       | 0             | 0            | 0            |
| PKM          | 1.1063172187  | 0.4136400498 | 0.9999763851 |
| PARP6        | -1.2673098767 | 0.2889158182 | 0.9999763851 |
| CELF6        | -1.434036104  | 0.4692753993 | 0.9999763851 |
| HEXA         | -1.0235875123 | 0.8838604896 | 0.9999763851 |
| ARIH1        | -1.0971502195 | 0.5517805853 | 0.9999763851 |
| GOLGA6B      | 0             | 0            | 0            |
| BBS4         | 1.2026743796  | 0.6438688769 | 0.9999763851 |
| ADPGK        | 1.0483710119  | 0.805453605  | 0.9999763851 |
| NEO1         | 1.3035167051  | 0.3107391718 | 0.9999763851 |
| LOC107984728 | -4.2864494036 | 0.4027150577 | 0.9999763851 |
| REC114       | -4.0939088663 | 0.196705311  | 0.9999763851 |
| NPTN         | -1.0873050083 | 0.5706403584 | 0.9999763851 |
| CD276        | -1.5100843857 | 0.2789106089 | 0.9999763851 |
| STOML1       | -1.079446406  | 0.7824961939 | 0.9999763851 |
| PML          | 1.0684569094  | 0.7194653408 | 0.9999763851 |
| LOC732265    | 0             | 0            | 0            |
| STRA6        | 1.875820524   | 0.4834469148 | 0.9999763851 |
| CCDC33       | 14.4496536579 | 0.1576050684 | 0.9999763851 |
| SEMA7A       | -1.4680969778 | 0.3638904739 | 0.9999763851 |
| UBL7         | 1.3718132832  | 0.2001899047 | 0.9999763851 |
| ARID3B       | 1.1245591249  | 0.7402789812 | 0.9999763851 |
| CLK3         | -1.2765509237 | 0.3099807964 | 0.9999763851 |
| EDC3         | 1.290012244   | 0.3313009307 | 0.9999763851 |
| CYP1A1       | 1.9603274464  | 0.006903     | 0.9999763851 |
| CSK          | -1.055654525  | 0.729802855  | 0.9999763851 |
| CPLX3        | 0             | 0            | 0            |
| ULK3         | -1.0826950941 | 0.5845690224 | 0.9999763851 |
| SCAMP2       | -1.5085140934 | 0.005593     | 0.9999763851 |
| MPI          | -1.3689345067 | 0.1300770921 | 0.9999763851 |
| FAM219B      | 1.0130167433  | 0.9445768499 | 0.9999763851 |
| COX5A        | 1.3308810339  | 0.0158460388 | 0.9999763851 |
| RPP25        | 1.0282463515  | 0.9031117762 | 0.9999763851 |
| SCAMP5       | 1.237058262   | 0.4045081618 | 0.9999763851 |

gene\_expression\_table

|              |               |              |              |
|--------------|---------------|--------------|--------------|
| PPCDC        | -1.336207849  | 0.3935569671 | 0.9999763851 |
| C15orf39     | -1.0276284391 | 0.9031742446 | 0.9999763851 |
| LOC105376731 | 0             | 0            | 0            |
| COMMD4       | 1.2354737932  | 0.2196721879 | 0.9999763851 |
| NEIL1        | 1.8815691358  | 0.3797756536 | 0.9999763851 |
| MAN2C1       | 1.3306386159  | 0.2972555662 | 0.9999763851 |
| SIN3A        | -1.0154983511 | 0.9392003039 | 0.9999763851 |
| PTPN9        | 1.0047304414  | 0.98242446   | 0.9999763851 |
| SNUPN        | 1.3129650794  | 0.1596982012 | 0.9999763851 |
| IMP3         | -1.2389673855 | 0.1063924595 | 0.9999763851 |
| SNX33        | -2.5474362455 | 0.0486548944 | 0.9999763851 |
| UBE2Q2       | -1.1044439159 | 0.5703283971 | 0.9999763851 |
| FBXO22       | 1.2003633378  | 0.3157640966 | 0.9999763851 |
| NRG4         | -1.131206398  | 0.6707792487 | 0.9999763851 |
| TMEM266      | 3.410933624   | 0.1443048838 | 0.9999763851 |
| ETFA         | -1.1151466065 | 0.3866265057 | 0.9999763851 |
| ISL2         | 1.6697244135  | 0.436121507  | 0.9999763851 |
| SCAPER       | -1.1722008032 | 0.4930456041 | 0.9999763851 |
| RCN2         | -1.0595820767 | 0.740207631  | 0.9999763851 |
| PSTPIP1      | 1.3973120488  | 0.1532124175 | 0.9999763851 |
| TSPAN3       | -1.1119662725 | 0.4633977341 | 0.9999763851 |
| PEAK1        | -1.3057613625 | 0.1772178881 | 0.9999763851 |
| HMG20A       | -1.2104808074 | 0.2272736955 | 0.9999763851 |
| LINGO1       | -4.2864494036 | 0.4027150577 | 0.9999763851 |
| TBC1D2B      | -1.0206279598 | 0.9062753052 | 0.9999763851 |
| CIB2         | -1.762890411  | 0.2557075219 | 0.9999763851 |
| IDH3A        | -1.0599201751 | 0.7538849088 | 0.9999763851 |
| ACSBG1       | -2.0620617764 | 0.3255177884 | 0.9999763851 |
| DNAJA4       | 1.1392672551  | 0.6610125897 | 0.9999763851 |
| WDR61        | 1.0687175096  | 0.6348249763 | 0.9999763851 |
| IREB2        | -1.032437139  | 0.8294422191 | 0.9999763851 |
| HYKK         | -4.2864494036 | 0.4027150576 | 0.9999763851 |
| PSMA4        | 1.0549534316  | 0.6665092124 | 0.9999763851 |
| CHRNA5       | 1.3752710391  | 0.2825872603 | 0.9999763851 |
| CHRNA3       | -1.0808570019 | 0.9213116299 | 0.9999763851 |
| CHRNA4       | 0             | 0            | 0            |
| ADAMTS7      | -1.734127143  | 0.4720132604 | 0.9999763851 |
| MORF4L1      | -1.2399341761 | 0.0770376873 | 0.9999763851 |
| CTSH         | -1.2456126596 | 0.2182140867 | 0.9999763851 |
| RASGRF1      | -1.9647456674 | 0.4666785999 | 0.9999763851 |
| ANKRD34C     | 0             | 0            | 0            |
| TMED3        | -1.138806241  | 0.3024300581 | 0.9999763851 |
| KIAA1024     | -1.0346922203 | 0.9416203726 | 0.9999763851 |
| MTHFS        | 1.1762027674  | 0.3344714158 | 0.9999763851 |
| ST20-MTHFS   | 0             | 0            | 0            |
| ST20         | 1.0948940003  | 0.5558530845 | 0.9999763851 |
| BCL2A1       | -1.2144856475 | 0.1381299707 | 0.9999763851 |
| ZFAND6       | -1.0615944308 | 0.6908514317 | 0.9999763851 |
| FAH          | 1.1159820333  | 0.4452241914 | 0.9999763851 |

gene\_expression\_table

|              |                |              |              |
|--------------|----------------|--------------|--------------|
| ARNT2        | 3.2361532718   | 0.5546934395 | 0.9999763851 |
| ABHD17C      | -1.6190833591  | 0.0001712    | 0.2302753662 |
| CEMIP        | -1.3470658739  | 0.5372310133 | 0.9999763851 |
| MESDC2       | 1.0810427116   | 0.5674264197 | 0.9999763851 |
| MESDC1       | -1.4733843402  | 0.007659     | 0.9999763851 |
| CFAP161      | 0              | 0            | 0            |
| IL16         | 1.395399928    | 0.0546502364 | 0.9999763851 |
| STARD5       | -1.7611771642  | 0.2386080919 | 0.9999763851 |
| TMC3         | -1.3048572565  | 0.581285498  | 0.9999763851 |
| MEX3B        | -1.4251277271  | 0.5598666089 | 0.9999763851 |
| EFL1         | 1.1282205658   | 0.6034177634 | 0.9999763851 |
| SAXO2        | 0              | 0            | 0            |
| GOLGA6L10    | -1.3151016298  | 0.821261495  | 0.9999763851 |
| GOLGA6L9     | -1.2388924391  | 0.5817515287 | 0.9999763851 |
| RPS17        | 1.0283278139   | 0.8092452057 | 0.9999763851 |
| AP3B2        | 3.2356557963   | 0.5547505991 | 0.9999763851 |
| FSD2         | -1.3703523424  | 0.1675439246 | 0.9999763851 |
| WHAMM        | 1.0801136599   | 0.7729873551 | 0.9999763851 |
| HOMER2       | -1.0850230024  | 0.9014494212 | 0.9999763851 |
| FAM103A1     | 1.0557268552   | 0.7737321306 | 0.9999763851 |
| C15orf40     | 1.2582131845   | 0.4055015639 | 0.9999763851 |
| BTBD1        | -1.4950721211  | 0.2282978279 | 0.9999763851 |
| TM6SF1       | -1.1274970118  | 0.6292121797 | 0.9999763851 |
| HDGFRP3      | 1.548733729    | 0.4184307244 | 0.9999763851 |
| SH3GL3       | 0              | 0            | 0            |
| ADAMTSL3     | -1.3157515262  | 0.8224529522 | 0.9999763851 |
| UBE2Q2L      | -1.315303824   | 0.8206171563 | 0.9999763851 |
| GOLGA6L4     | 1.8137824633   | 0.5647228959 | 0.9999763851 |
| LOC105376722 | 0              | 0            | 0            |
| LOC102724135 | 2.7613468677   | 0.1587819227 | 0.9999763851 |
| ZSCAN2       | 1.4960066429   | 0.2590935642 | 0.9999763851 |
| WDR73        | -1.1658181548  | 0.5828766852 | 0.9999763851 |
| NMB          | 1.3057634074   | 0.1031565035 | 0.9999763851 |
| SEC11A       | -1.2592941295  | 0.0773616049 | 0.9999763851 |
| ZNF592       | 1.1489701094   | 0.3388460237 | 0.9999763851 |
| SLC28A1      | 3.2361532718   | 0.5546934395 | 0.9999763851 |
| PDE8A        | -1.5582407316  | 0.2085754345 | 0.9999763851 |
| LOC101929479 | -19.2975026899 | 0.0745445842 | 0.9999763851 |
| AKAP13       | -1.0288844925  | 0.8577265686 | 0.9999763851 |
| KLHL25       | -1.2518394342  | 0.4801689335 | 0.9999763851 |
| NTRK3        | 1.1566956761   | 0.4512497748 | 0.9999763851 |
| MRPL46       | 1.3380795409   | 0.0967193209 | 0.9999763851 |
| MRPS11       | 1.3920473231   | 0.0930551005 | 0.9999763851 |
| DET1         | -1.2381588911  | 0.6404330018 | 0.9999763851 |
| AEN          | 1.1946929691   | 0.2416118021 | 0.9999763851 |
| ISG20        | -2.9373390517  | 0.0646454926 | 0.9999763851 |
| ACAN         | 0              | 0            | 0            |
| HAPLN3       | 3.2356557963   | 0.5547505991 | 0.9999763851 |
| MFGE8        | -1.0296977446  | 0.9241841833 | 0.9999763851 |

gene\_expression\_table

|                |                |              |              |
|----------------|----------------|--------------|--------------|
| ABHD2          | -1.1455530671  | 0.3567952458 | 0.9999763851 |
| FANCI          | 1.2835677552   | 0.4233776346 | 0.9999763851 |
| POLG           | -1.06220127    | 0.6804538248 | 0.9999763851 |
| TICRR          | -1.0585400835  | 0.8158426695 | 0.9999763851 |
| KIF7           | -1.4286541955  | 0.5388886767 | 0.9999763851 |
| PLIN1          | 0              | 0            | 0            |
| PEX11A         | 1.8131652995   | 0.5810863128 | 0.9999763851 |
| WDR93          | 0              | 0            | 0            |
| MESP1          | 12.4427966444  | 0.1869118792 | 0.9999763851 |
| MESP2          | -2.5604817607  | 0.2733447017 | 0.9999763851 |
| ANPEP          | 1.0661557403   | 0.6502601026 | 0.9999763851 |
| AP3S2          | -1.03283249    | 0.8696375071 | 0.9999763851 |
| C15orf38-AP3S2 | -10.8385246611 | 0.1451971321 | 0.9999763851 |
| ZNF710         | -1.0136292866  | 0.9564018768 | 0.9999763851 |
| IDH2           | -1.1783266727  | 0.2634830123 | 0.9999763851 |
| SEMA4B         | 1.110619294    | 0.8084943371 | 0.9999763851 |
| CIB1           | 1.2575008902   | 0.1898120354 | 0.9999763851 |
| GDPGP1         | 5.4770877341   | 0.3746135179 | 0.9999763851 |
| NGRN           | 1.3937291778   | 0.0480453227 | 0.9999763851 |
| ZNF774         | 9.9624059448   | 0.2313849172 | 0.9999763851 |
| IQGAP1         | -1.0116379513  | 0.9351477093 | 0.9999763851 |
| CRTC3          | 1.1970287763   | 0.1762923345 | 0.9999763851 |
| BLM            | 1.1012603346   | 0.6469031147 | 0.9999763851 |
| FURIN          | -1.1145076094  | 0.4588390473 | 0.9999763851 |
| FES            | 1.3053348228   | 0.2238833712 | 0.9999763851 |
| MAN2A2         | -1.0464334895  | 0.8526298425 | 0.9999763851 |
| UNC45A         | -1.0985448978  | 0.5592072739 | 0.9999763851 |
| HDDC3          | 1.2034611299   | 0.3140553555 | 0.9999763851 |
| RCCD1          | -1.1361094306  | 0.433365491  | 0.9999763851 |
| PRC1           | 1.3195044057   | 0.1089111675 | 0.9999763851 |
| VPS33B         | 2.0325084624   | 0.0978903991 | 0.9999763851 |
| SV2B           | 1.4057119189   | 0.332556999  | 0.9999763851 |
| SLCO3A1        | 1.1586293796   | 0.3517347177 | 0.9999763851 |
| C15orf32       | 0              | 0            | 0            |
| FAM174B        | -3.3667365964  | 0.0822007356 | 0.9999763851 |
| CHD2           | -1.0365736049  | 0.8430556635 | 0.9999763851 |
| RGMA           | 3.2356557963   | 0.5547505991 | 0.9999763851 |
| MCTP2          | -1.0579204029  | 0.8617249193 | 0.9999763851 |
| NR2F2          | 1.2801664493   | 0.2726140955 | 0.9999763851 |
| IGF1R          | 1.2115166815   | 0.3382240344 | 0.9999763851 |
| LRRC28         | -2.2834115981  | 0.0122441296 | 0.9999763851 |
| MEF2A          | -1.2621672826  | 0.3073621695 | 0.9999763851 |
| LYSMD4         | 2.0798362004   | 0.0162703516 | 0.9999763851 |
| ADAMTS17       | 1.2726068991   | 0.4108725946 | 0.9999763851 |
| CERS3          | -1.1484927822  | 0.8523925759 | 0.9999763851 |
| LINS1          | -1.0471396859  | 0.8899055053 | 0.9999763851 |
| ASB7           | -1.059137913   | 0.8533191585 | 0.9999763851 |
| ALDH1A3        | -4.2849908816  | 0.4028453076 | 0.9999763851 |
| LRRK1          | 1.1448917872   | 0.6931854778 | 0.9999763851 |

gene\_expression\_table

|              |               |              |              |
|--------------|---------------|--------------|--------------|
| CHSY1        | 1.0577187938  | 0.7046736059 | 0.9999763851 |
| VIMP         | -1.0571620308 | 0.7473591819 | 0.9999763851 |
| SNRPA1       | -1.0767428149 | 0.5999943248 | 0.9999763851 |
| TM2D3        | 1.0764353056  | 0.672074307  | 0.9999763851 |
| TARSL2       | -1.0136338617 | 0.9550842088 | 0.9999763851 |
| LOC100128108 | -1.3943388833 | 0.6976327539 | 0.9999763851 |
| POLR3K       | -1.0165584321 | 0.907206148  | 0.9999763851 |
| SNRNP25      | 1.3905933568  | 0.0851033157 | 0.9999763851 |
| RHBDF1       | 3.2356557963  | 0.5547505991 | 0.9999763851 |
| MPG          | 1.0330846715  | 0.8303231701 | 0.9999763851 |
| NPRL3        | 1.2030850339  | 0.4987779448 | 0.9999763851 |
| LUC7L        | 1.9186905814  | 0.002195     | 0.9999763851 |
| FAM234A      | 1.1519953019  | 0.6665568051 | 0.9999763851 |
| RGS11        | 0             | 0            | 0            |
| PDIA2        | 0             | 0            | 0            |
| AXIN1        | 1.5160490518  | 0.0356339568 | 0.9999763851 |
| MRPL28       | -1.1241765729 | 0.6294902255 | 0.9999763851 |
| TMEM8A       | 1.0831728164  | 0.7426384802 | 0.9999763851 |
| NME4         | 1.1296753348  | 0.5195929392 | 0.9999763851 |
| DECR2        | 2.1439120143  | 0.0155517712 | 0.9999763851 |
| RAB11FIP3    | 1.0805876287  | 0.8189984717 | 0.9999763851 |
| CAPN15       | 1.2643818596  | 0.3496774341 | 0.9999763851 |
| NHLRC4       | -1.3158816768 | 0.8203229796 | 0.9999763851 |
| PIGQ         | -2.0848233926 | 0.085346169  | 0.9999763851 |
| RAB40C       | 1.0864762822  | 0.7471396997 | 0.9999763851 |
| WFIKK1       | 18.9337530925 | 0.1183773971 | 0.9999763851 |
| C16orf13     | -1.0822646173 | 0.7107952525 | 0.9999763851 |
| MCRIP2       | -1.410614508  | 0.1195210882 | 0.9999763851 |
| WDR90        | -1.1779247292 | 0.3855296921 | 0.9999763851 |
| RHOT2        | 1.0097721214  | 0.9588582037 | 0.9999763851 |
| RHBDL1       | -1.258591527  | 0.7129985657 | 0.9999763851 |
| STUB1        | 1.3197891344  | 0.1162558364 | 0.9999763851 |
| JMJD8        | -2.9668522646 | 0.0870408888 | 0.9999763851 |
| WDR24        | 1.1981701765  | 0.7240252433 | 0.9999763851 |
| FBXL16       | -1.2483867832 | 0.553550747  | 0.9999763851 |
| METR1        | 1.278271816   | 0.6339068788 | 0.9999763851 |
| FAM173A      | -1.1163994476 | 0.705052052  | 0.9999763851 |
| CCDC78       | 0             | 0            | 0            |
| HAGHL        | 1.0081732941  | 0.9782212905 | 0.9999763851 |
| NARFL        | -1.1819151916 | 0.6365281905 | 0.9999763851 |
| RPUSD1       | -1.0094307391 | 0.9715711343 | 0.9999763851 |
| CHTF18       | 1.0093574677  | 0.9730114563 | 0.9999763851 |
| PRR25        | -4.2849908816 | 0.4028453076 | 0.9999763851 |
| LMF1         | -1.0576923102 | 0.8949890405 | 0.9999763851 |
| SSTR5        | -4.2849908816 | 0.4028453076 | 0.9999763851 |
| CACNA1H      | 0             | 0            | 0            |
| TPSB2        | -4.2864494036 | 0.4027150576 | 0.9999763851 |
| TPSAB1       | 1.2303080856  | 0.1909914731 | 0.9999763851 |
| UBE2I        | 1.1214247916  | 0.4717530393 | 0.9999763851 |

gene\_expression\_table

|          |               |              |              |
|----------|---------------|--------------|--------------|
| TSR3     | -1.04213887   | 0.7861851537 | 0.9999763851 |
| GNPTG    | -1.1917560214 | 0.4150418815 | 0.9999763851 |
| UNKL     | -1.4417042689 | 0.3230376368 | 0.9999763851 |
| C16orf91 | -1.1191339506 | 0.6659416977 | 0.9999763851 |
| CCDC154  | 1.1134374935  | 0.8328927841 | 0.9999763851 |
| CLCN7    | 1.1054136073  | 0.5610658448 | 0.9999763851 |
| TELO2    | 1.2528458085  | 0.3791536574 | 0.9999763851 |
| IFT140   | -2.5785151148 | 0.0485244425 | 0.9999763851 |
| TMEM204  | 5.4776292235  | 0.3745831165 | 0.9999763851 |
| CRAMP1   | -1.0557782062 | 0.8464320726 | 0.9999763851 |
| HN1L     | 1.2966353491  | 0.0904506016 | 0.9999763851 |
| MAPK8IP3 | 1.2904932202  | 0.3620531615 | 0.9999763851 |
| NME3     | -1.6821549226 | 0.4452894633 | 0.9999763851 |
| MRPS34   | 1.154830355   | 0.3175641198 | 0.9999763851 |
| EME2     | 0             | 0            | 0            |
| SPSB3    | 1.0921832798  | 0.7162252386 | 0.9999763851 |
| NUBP2    | 1.2248948424  | 0.3102937786 | 0.9999763851 |
| HAGH     | -1.4095429277 | 0.1359648251 | 0.9999763851 |
| FAHD1    | 1.0138046614  | 0.9591203708 | 0.9999763851 |
| MEIOB    | 0             | 0            | 0            |
| HS3ST6   | 0             | 0            | 0            |
| MSRB1    | 1.2680704053  | 0.1013902321 | 0.9999763851 |
| RPL3L    | 0             | 0            | 0            |
| NDUFB10  | 1.1205990837  | 0.4729709851 | 0.9999763851 |
| RPS2     | 1.3593533714  | 0.0126147678 | 0.9999763851 |
| TBL3     | 1.0020475844  | 0.9963509966 | 0.9999763851 |
| NOXO1    | -1.3711818216 | 0.7359931333 | 0.9999763851 |
| GFER     | 1.0320381057  | 0.9368389146 | 0.9999763851 |
| ZNF598   | 1.2495188393  | 0.1168687306 | 0.9999763851 |
| NPW      | 0             | 0            | 0            |
| NTHL1    | 1.366244644   | 0.2286111654 | 0.9999763851 |
| TSC2     | -1.3584939481 | 0.4661881996 | 0.9999763851 |
| PKD1     | -1.4435428726 | 0.28968819   | 0.9999763851 |
| TRAF7    | 1.1272947192  | 0.5636399778 | 0.9999763851 |
| MLST8    | -1.1204673359 | 0.6612891712 | 0.9999763851 |
| BRICD5   | -1.3022505632 | 0.640124484  | 0.9999763851 |
| PGP      | 1.5781216412  | 0.007961     | 0.9999763851 |
| E4F1     | 1.2645775038  | 0.4059302504 | 0.9999763851 |
| DNASE1L2 | 7.7219356627  | 0.2870682832 | 0.9999763851 |
| ECI1     | 1.3182201719  | 0.1230785016 | 0.9999763851 |
| RNPS1    | 1.0701364561  | 0.6654009185 | 0.9999763851 |
| ABCA3    | 1.2896441358  | 0.3852406677 | 0.9999763851 |
| CCNF     | -1.1142264841 | 0.5192506212 | 0.9999763851 |
| C16orf59 | 1.5854863787  | 0.0774005772 | 0.9999763851 |
| TBC1D24  | 1.0873909459  | 0.7111290583 | 0.9999763851 |
| ATP6V0C  | 1.0273033991  | 0.839666264  | 0.9999763851 |
| AMDHD2   | 1.3252610453  | 0.3276124255 | 0.9999763851 |
| CEMP1    | 1.3281447959  | 0.3027725563 | 0.9999763851 |
| PDPK1    | -1.1914516084 | 0.4456902708 | 0.9999763851 |

gene\_expression\_table

|             |                |              |              |
|-------------|----------------|--------------|--------------|
| KCTD5       | -1.1312103628  | 0.520868247  | 0.9999763851 |
| PRSS27      | -1.3708355312  | 0.7473175529 | 0.9999763851 |
| SRRM2       | -1.3582543752  | 0.0188234188 | 0.9999763851 |
| TCEB2       | 1.1094274353   | 0.4753478849 | 0.9999763851 |
| PRSS41      | 0              | 0            | 0            |
| ZG16B       | -2.3209115874  | 0.4600323819 | 0.9999763851 |
| PRSS22      | 0              | 0            | 0            |
| FLYWCH2     | 1.7592136256   | 0.4466700096 | 0.9999763851 |
| FLYWCH1     | -1.547818952   | 0.2126747191 | 0.9999763851 |
| KREMEN2     | 1.4605855953   | 0.2388093381 | 0.9999763851 |
| PAQR4       | 1.0753630423   | 0.6569532651 | 0.9999763851 |
| PKMYT1      | 18.2197362899  | 0.1335428821 | 0.9999763851 |
| CLDN9       | 7.4933530102   | 0.2984933196 | 0.9999763851 |
| TNFRSF12A   | -1.3948299892  | 0.3367272453 | 0.9999763851 |
| HCFC1R1     | -1.0477997223  | 0.8490439345 | 0.9999763851 |
| THOC6       | -1.4148090745  | 0.6667649706 | 0.9999763851 |
| BICDL2      | -1.3158816768  | 0.8203229796 | 0.9999763851 |
| MMP25       | 1.3133007328   | 0.0515846602 | 0.9999763851 |
| IL32        | 1.1193375794   | 0.4635950604 | 0.9999763851 |
| ZNF213      | 1.4676600125   | 0.4961183188 | 0.9999763851 |
| OR1F1       | 1.3931546432   | 0.7805583477 | 0.9999763851 |
| ZNF200      | -1.028224716   | 0.9367976837 | 0.9999763851 |
| MEFV        | 3.2353357581   | 0.554787377  | 0.9999763851 |
| ZNF263      | 1.2751690848   | 0.465035147  | 0.9999763851 |
| TIGD7       | -1.946360247   | 0.2368441498 | 0.9999763851 |
| ZNF75A      | 1.4444279444   | 0.2394998052 | 0.9999763851 |
| ZSCAN32     | 1.4360936694   | 0.5558711813 | 0.9999763851 |
| ZNF174      | 1.4172262368   | 0.3767007479 | 0.9999763851 |
| ZNF597      | 2.5233645174   | 0.101584876  | 0.9999763851 |
| NAA60       | 1.6011212398   | 0.0813784656 | 0.9999763851 |
| CLUAP1      | 1.3698099455   | 0.4101006846 | 0.9999763851 |
| NLRC3       | 1.6670781462   | 0.0144887982 | 0.9999763851 |
| SLX4        | 1.7360868867   | 0.2780065091 | 0.9999763851 |
| DNASE1      | 1.3150705446   | 0.0897501219 | 0.9999763851 |
| TRAP1       | 2.0878543187   | 0.240335612  | 0.9999763851 |
| CREBBP      | 1.1399191197   | 0.540262033  | 0.9999763851 |
| ADCY9       | -1.4454723025  | 0.2757415412 | 0.9999763851 |
| TFAP4       | 1.1460204305   | 0.6640595    | 0.9999763851 |
| GLIS2       | -1.0785703051  | 0.801579469  | 0.9999763851 |
| PAM16       | -1.1509405224  | 0.6326677604 | 0.9999763851 |
| CORO7-PAM16 | -54.8867774144 | 0.0136746322 | 0.9999763851 |
| CORO7       | 2.7211475822   | 0.001237     | 0.8877123975 |
| DNAJA3      | 1.1166241625   | 0.5073435087 | 0.9999763851 |
| NMRAL1      | 2.0357182782   | 0.007023     | 0.9999763851 |
| HMOX2       | 1.2626919311   | 0.1937348116 | 0.9999763851 |
| CDIP1       | 1.1912725459   | 0.4857217854 | 0.9999763851 |
| C16orf96    | -1.1634453187  | 0.7150725687 | 0.9999763851 |
| UBALD1      | 1.2881944537   | 0.4983693459 | 0.9999763851 |
| MGRN1       | 1.2210769515   | 0.3781611324 | 0.9999763851 |

gene\_expression\_table

|              |               |              |              |
|--------------|---------------|--------------|--------------|
| NUDT16L1     | -1.2657109448 | 0.1575239908 | 0.9999763851 |
| ANKS3        | -1.6534620495 | 0.2495103305 | 0.9999763851 |
| ZNF500       | 1.9573813386  | 0.1320207215 | 0.9999763851 |
| SEPT12       | 0             | 0            | 0            |
| SMIM22       | 5.4770877341  | 0.3746135179 | 0.9999763851 |
| ROGDI        | -1.2208847101 | 0.367380131  | 0.9999763851 |
| GLYR1        | 1.1740992552  | 0.3671448411 | 0.9999763851 |
| UBN1         | -1.0270039832 | 0.8572584245 | 0.9999763851 |
| SEC14L5      | 0             | 0            | 0            |
| NAGPA        | -1.5235019618 | 0.0804947756 | 0.9999763851 |
| C16orf89     | 0             | 0            | 0            |
| ALG1         | 46.8233069212 | 0.0377462812 | 0.9999763851 |
| EEF2KMT      | -1.1753371232 | 0.4673938232 | 0.9999763851 |
| TMEM114      | 0             | 0            | 0            |
| METTL22      | -1.8398035576 | 0.1470699994 | 0.9999763851 |
| ABAT         | -1.0352603217 | 0.9579358385 | 0.9999763851 |
| TMEM186      | 1.0191054807  | 0.937777144  | 0.9999763851 |
| PMM2         | -1.0970809583 | 0.6556786632 | 0.9999763851 |
| CARHSP1      | 1.0903596638  | 0.6321925872 | 0.9999763851 |
| USP7         | 1.1221343066  | 0.4258602963 | 0.9999763851 |
| C16orf72     | -1.1933340555 | 0.2699064436 | 0.9999763851 |
| ATF7IP2      | 1.0716525358  | 0.8072306839 | 0.9999763851 |
| EMP2         | -1.2848646031 | 0.1926745537 | 0.9999763851 |
| TEKT5        | -7.5622178268 | 0.2177145568 | 0.9999763851 |
| NUBP1        | 1.0435669252  | 0.8771334749 | 0.9999763851 |
| TVP23A       | 0             | 0            | 0            |
| CIITA        | -1.4077065642 | 0.6444410636 | 0.9999763851 |
| DEXI         | 1.0727743412  | 0.6180717715 | 0.9999763851 |
| CLEC16A      | 1.1514611162  | 0.592927736  | 0.9999763851 |
| LOC107984859 | 3.2353357581  | 0.554787377  | 0.9999763851 |
| SOCS1        | 1.5887888751  | 0.3277158303 | 0.9999763851 |
| RMI2         | 1.0790026953  | 0.6573504288 | 0.9999763851 |
| LOC400499    | -1.7351751251 | 0.4560530772 | 0.9999763851 |
| LITAF        | 1.1406332842  | 0.2983596491 | 0.9999763851 |
| SNN          | 1.3072077413  | 0.2359624007 | 0.9999763851 |
| TXNDC11      | 1.0787329428  | 0.8376633331 | 0.9999763851 |
| ZC3H7A       | 1.0695218942  | 0.8214219227 | 0.9999763851 |
| RSL1D1       | 1.116342662   | 0.4532424427 | 0.9999763851 |
| GSPT1        | 1.1939219773  | 0.194238728  | 0.9999763851 |
| SNX29        | -1.0433654426 | 0.9000943839 | 0.9999763851 |
| CPPED1       | -1.0783837494 | 0.8137191823 | 0.9999763851 |
| SHISA9       | 1.8140611791  | 0.5843782687 | 0.9999763851 |
| ERCC4        | -1.3808683643 | 0.378826146  | 0.9999763851 |
| MKL2         | 1.0919788133  | 0.8096981335 | 0.9999763851 |
| PARN         | -1.2092362333 | 0.403591255  | 0.9999763851 |
| BFAR         | 1.0278734383  | 0.894417184  | 0.9999763851 |
| PLA2G10      | 3.3937384616  | 0.2324742559 | 0.9999763851 |
| NOMO1        | 1.039203756   | 0.8465774872 | 0.9999763851 |
| NPIPA1       | -1.249350536  | 0.6464093256 | 0.9999763851 |



gene\_expression\_table

|              |               |              |              |
|--------------|---------------|--------------|--------------|
| PDXDC1       | -1.709503123  | 0.0005209    | 0.5206160142 |
| NTAN1        | -1.0198854673 | 0.930979823  | 0.9999763851 |
| RRN3         | -1.4127622903 | 0.048840002  | 0.9999763851 |
| NPIPA5       | -7.5647903763 | 0.2176246281 | 0.9999763851 |
| C16orf45     | -1.4300348335 | 0.5354813571 | 0.9999763851 |
| KIAA0430     | -1.8681323242 | 0.002616     | 0.9999763851 |
| NDE1         | 1.1390346241  | 0.4109388104 | 0.9999763851 |
| MYH11        | -1.4261611759 | 0.5857172933 | 0.9999763851 |
| FOPNL        | -1.250215949  | 0.2119122471 | 0.9999763851 |
| ABCC1        | -1.1417350748 | 0.6237147033 | 0.9999763851 |
| NOMO3        | 2.3818235376  | 0.2353385649 | 0.9999763851 |
| NPIPA7       | -1.4129914544 | 0.6387901956 | 0.9999763851 |
| XYLT1        | 1.3957375972  | 0.228882788  | 0.9999763851 |
| NPIPA8       | 7.7488609396  | 0.3059379923 | 0.9999763851 |
| LOC102723728 | 1.0222936935  | 0.8636181296 | 0.9999763851 |
| NOMO2        | 1.027644744   | 0.977726264  | 0.9999763851 |
| RPS15A       | 1.0053673729  | 0.963149077  | 0.9999763851 |
| ARL6IP1      | 1.1783908529  | 0.3065891607 | 0.9999763851 |
| SMG1         | 1.0123230705  | 0.9597420893 | 0.9999763851 |
| COQ7         | -1.8158263248 | 0.2088892072 | 0.9999763851 |
| ITPRIPL2     | -1.1242300002 | 0.8483581398 | 0.9999763851 |
| SYT17        | -4.2864494036 | 0.4027150576 | 0.9999763851 |
| TMC5         | 1.6243491221  | 0.5671682172 | 0.9999763851 |
| GDE1         | 1.0658568849  | 0.6668607039 | 0.9999763851 |
| CCP110       | -1.0468046711 | 0.8372220359 | 0.9999763851 |
| C16orf62     | -1.2572963427 | 0.3142199126 | 0.9999763851 |
| KNOP1        | -1.0974585998 | 0.6550976306 | 0.9999763851 |
| IQCK         | 1.1908637081  | 0.8036880892 | 0.9999763851 |
| GPRC5B       | 2.3407592913  | 0.4264645427 | 0.9999763851 |
| ACSM5        | 0             | 0            | 0            |
| ACSM1        | -4.2849908816 | 0.4028453076 | 0.9999763851 |
| THUMPD1      | 1.236387244   | 0.265591576  | 0.9999763851 |
| ACSM3        | 0             | 0            | 0            |
| ERI2         | 1.0035685331  | 0.9893075266 | 0.9999763851 |
| LOC81691     | 1.1443480656  | 0.7389554061 | 0.9999763851 |
| DCUN1D3      | -1.3622162529 | 0.437935214  | 0.9999763851 |
| LYRM1        | 1.0632691158  | 0.8219976702 | 0.9999763851 |
| TMEM159      | -1.6303129344 | 0.293061738  | 0.9999763851 |
| CRYM         | 0             | 0            | 0            |
| NPIP3        | 0             | 0            | 0            |
| METTL9       | 1.4043451064  | 0.0190263261 | 0.9999763851 |
| OTOA         | -1.0351581998 | 0.9578210637 | 0.9999763851 |
| UQCRC2       | -1.0060444589 | 0.9684350326 | 0.9999763851 |
| PDZD9        | 5.4770877341  | 0.3746135179 | 0.9999763851 |
| C16orf52     | 1.2556219454  | 0.4527397015 | 0.9999763851 |
| VWA3A        | -4.2849908816 | 0.4028453076 | 0.9999763851 |
| SDR42E2      | 0             | 0            | 0            |
| EEF2K        | -1.0750102471 | 0.6986637985 | 0.9999763851 |
| POLR3E       | 1.3607879792  | 0.182809921  | 0.9999763851 |

gene\_expression\_table

|              |               |              |              |
|--------------|---------------|--------------|--------------|
| CDR2         | 1.6377558733  | 0.0507530284 | 0.9999763851 |
| NPIPB5       | -1.5561499223 | 0.2237663546 | 0.9999763851 |
| LOC107984851 | 10.231382017  | 0.2261759961 | 0.9999763851 |
| HS3ST2       | 1.0623586752  | 0.7971252751 | 0.9999763851 |
| USP31        | -1.2346620905 | 0.4159489864 | 0.9999763851 |
| COG7         | -1.0865877167 | 0.8072712281 | 0.9999763851 |
| GGA2         | -1.1851574011 | 0.3421985886 | 0.9999763851 |
| EARS2        | -1.4014576459 | 0.321075952  | 0.9999763851 |
| UBFD1        | -1.5901305471 | 0.0651096642 | 0.9999763851 |
| NDUFAB1      | 1.0617126774  | 0.6474379872 | 0.9999763851 |
| PALB2        | -1.1107403175 | 0.719691592  | 0.9999763851 |
| DCTN5        | -1.052809328  | 0.7991346401 | 0.9999763851 |
| PLK1         | -1.0498230818 | 0.7704871316 | 0.9999763851 |
| PRKCB        | 1.0512573724  | 0.6919716922 | 0.9999763851 |
| RBBP6        | -1.2086489254 | 0.1983663808 | 0.9999763851 |
| TNRC6A       | 1.0365424575  | 0.8379281788 | 0.9999763851 |
| SLC5A11      | -4.3352959826 | 0.1433550293 | 0.9999763851 |
| ARHGAP17     | 1.141277847   | 0.6111652593 | 0.9999763851 |
| LCMT1        | 1.2792434359  | 0.365211968  | 0.9999763851 |
| ZKSCAN2      | -2.0563269266 | 0.3431899436 | 0.9999763851 |
| HS3ST4       | 1.0271487798  | 0.9778343721 | 0.9999763851 |
| KDM8         | -1.0543030667 | 0.9163413891 | 0.9999763851 |
| NSMCE1       | 1.0284273312  | 0.8858595052 | 0.9999763851 |
| IL4R         | 1.0651160478  | 0.688300917  | 0.9999763851 |
| IL21R        | -1.5329190378 | 0.5267840422 | 0.9999763851 |
| GTF3C1       | -1.012673157  | 0.9493973703 | 0.9999763851 |
| KIAA0556     | -1.2781210127 | 0.7682070384 | 0.9999763851 |
| GSG1L        | 0             | 0            | 0            |
| XPO6         | 1.0710867194  | 0.7037754626 | 0.9999763851 |
| SBK1         | 2.2735484122  | 0.0757901906 | 0.9999763851 |
| NPIPB6       | 14.3882523344 | 0.1834756444 | 0.9999763851 |
| EIF3CL       | 1.0002235821  | 0.9991794598 | 0.9999763851 |
| CLN3         | 1.1643219308  | 0.4508234884 | 0.9999763851 |
| APOBR        | -1.2335633808 | 0.4575807767 | 0.9999763851 |
| IL27         | 5.4790129495  | 0.376569852  | 0.9999763851 |
| NUPR1        | 3.2356557963  | 0.5547505991 | 0.9999763851 |
| SGF29        | -1.1984251502 | 0.5241615395 | 0.9999763851 |
| SULT1A2      | 0             | 0            | 0            |
| SULT1A1      | -1.2627066896 | 0.1517417558 | 0.9999763851 |
| NPIPB8       | 0             | 0            | 0            |
| EIF3C        | 1.9803336519  | 0.007139     | 0.9999763851 |
| NPIPB9       | 1.2396974231  | 0.7289048746 | 0.9999763851 |
| ATXN2L       | -1.1419585324 | 0.5345814203 | 0.9999763851 |
| TUFM         | -1.1133651351 | 0.4104598314 | 0.9999763851 |
| SH2B1        | 1.1765503364  | 0.4654682002 | 0.9999763851 |
| ATP2A1       | 1.2744858108  | 0.4980689778 | 0.9999763851 |
| RABEP2       | 1.1445056083  | 0.7561803815 | 0.9999763851 |
| CD19         | 1.0757570521  | 0.8767986127 | 0.9999763851 |
| NFATC2IP     | -1.2533248505 | 0.2699235424 | 0.9999763851 |

gene\_expression\_table

|              |               |              |              |
|--------------|---------------|--------------|--------------|
| SPNS1        | 1.4652718213  | 0.3390014976 | 0.9999763851 |
| LAT          | -1.405180248  | 0.1043476394 | 0.9999763851 |
| LOC107984832 | -1.0874314895 | 0.8222602559 | 0.9999763851 |
| NPIPB11      | -1.3581901144 | 0.5199396722 | 0.9999763851 |
| BOLA2-SMG1P6 | -1.0046112753 | 0.9808492816 | 0.9999763851 |
| BOLA2        | 1.2905287366  | 0.2590561076 | 0.9999763851 |
| SLX1B        | 1.158290244   | 0.5743977522 | 0.9999763851 |
| SULT1A4      | -2.1237124164 | 0.1138711062 | 0.9999763851 |
| SPN          | -1.007605927  | 0.9639982709 | 0.9999763851 |
| QPRT         | -1.0334370292 | 0.8304858742 | 0.9999763851 |
| C16orf54     | 1.471094976   | 0.2137934358 | 0.9999763851 |
| KIF22        | 1.2275450497  | 0.3010181947 | 0.9999763851 |
| MAZ          | -1.2125697723 | 0.2437650282 | 0.9999763851 |
| PRRT2        | 3.2356557963  | 0.5547505991 | 0.9999763851 |
| PAGR1        | -1.2002296341 | 0.2380425159 | 0.9999763851 |
| MVP          | -1.2837924324 | 0.7540149713 | 0.9999763851 |
| CDIPT        | 1.1521562548  | 0.5019422052 | 0.9999763851 |
| SEZ6L2       | -1.7051915203 | 0.020358759  | 0.9999763851 |
| ASPHD1       | -1.0053000015 | 0.9917008245 | 0.9999763851 |
| KCTD13       | 1.1061700908  | 0.7684962146 | 0.9999763851 |
| TMEM219      | -1.3309675751 | 0.1176341303 | 0.9999763851 |
| TAOK2        | -1.2582927336 | 0.5581329347 | 0.9999763851 |
| HIRIP3       | 1.6501236438  | 0.0996907815 | 0.9999763851 |
| INO80E       | 1.7161788927  | 0.2779766859 | 0.9999763851 |
| DOC2A        | -1.1616645801 | 0.5846330003 | 0.9999763851 |
| C16orf92     | 0             | 0            | 0            |
| ALDOA        | -1.0692696351 | 0.6253106041 | 0.9999763851 |
| PPP4C        | -1.4405208139 | 0.182202088  | 0.9999763851 |
| TBX6         | 1.8136032532  | 0.5931965901 | 0.9999763851 |
| YPEL3        | 1.0875204518  | 0.8524940683 | 0.9999763851 |
| GDPD3        | 1.1707681772  | 0.6575169146 | 0.9999763851 |
| MAPK3        | 1.1039763567  | 0.6879721207 | 0.9999763851 |
| CORO1A       | 1.2938710133  | 0.0404992847 | 0.9999763851 |
| BOLA2B       | 1.3977108366  | 0.1349232907 | 0.9999763851 |
| SLX1A        | 1.1399060968  | 0.6403113486 | 0.9999763851 |
| SULT1A3      | 2.8642644956  | 0.0574470559 | 0.9999763851 |
| LOC613037    | -3.2709536258 | 0.1436203394 | 0.9999763851 |
| CD2BP2       | -1.0017322143 | 0.993774963  | 0.9999763851 |
| TBC1D10B     | 1.0741491662  | 0.7935623449 | 0.9999763851 |
| MYLPP        | -1.0167501853 | 0.9768439533 | 0.9999763851 |
| SEPT1        | -1.7725705758 | 0.2892585841 | 0.9999763851 |
| ZNF48        | -1.1072837095 | 0.7074698057 | 0.9999763851 |
| ZNF771       | -1.9776151526 | 0.1205691429 | 0.9999763851 |
| DCTPP1       | 1.3647147032  | 0.0416363252 | 0.9999763851 |
| SEPHS2       | 1.2780659236  | 0.0830553176 | 0.9999763851 |
| ITGAL        | 1.0732754703  | 0.7658399804 | 0.9999763851 |
| ZNF768       | -1.0579207406 | 0.7868301349 | 0.9999763851 |
| ZNF747       | -1.1650784505 | 0.8440812259 | 0.9999763851 |
| ZNF764       | -1.0861299175 | 0.8714928775 | 0.9999763851 |

gene\_expression\_table

|           |               |              |              |
|-----------|---------------|--------------|--------------|
| ZNF688    | -1.4318485396 | 0.5083015153 | 0.9999763851 |
| ZNF785    | -2.2054783554 | 0.1352122226 | 0.9999763851 |
| ZNF689    | 1.2046670653  | 0.5122284892 | 0.9999763851 |
| PRR14     | 1.3066994432  | 0.3350393634 | 0.9999763851 |
| FBR5      | 1.7218443259  | 0.0217179631 | 0.9999763851 |
| LOC730183 | -2.2385982899 | 0.2960934568 | 0.9999763851 |
| SRCAP     | 1.0752626087  | 0.8651516287 | 0.9999763851 |
| TMEM265   | 2.3083799844  | 0.1549062382 | 0.9999763851 |
| PHKG2     | 1.1678783373  | 0.7064204423 | 0.9999763851 |
| CCDC189   | -1.4910755477 | 0.2852526381 | 0.9999763851 |
| RNF40     | 1.60132526    | 0.0383232778 | 0.9999763851 |
| ZNF629    | -1.0296909279 | 0.9336641585 | 0.9999763851 |
| BCL7C     | -1.5281672709 | 0.1395671118 | 0.9999763851 |
| CTF1      | 0             | 0            | 0            |
| FBXL19    | -1.1774901235 | 0.5689535814 | 0.9999763851 |
| ORAI3     | -1.2465002924 | 0.3229889699 | 0.9999763851 |
| SETD1A    | -1.4289230219 | 0.1010017143 | 0.9999763851 |
| HSD3B7    | -4.2849908816 | 0.4028453076 | 0.9999763851 |
| STX4      | 1.0228608943  | 0.912623003  | 0.9999763851 |
| ZNF668    | -1.1247852448 | 0.7773221481 | 0.9999763851 |
| ZNF646    | 1.3241637928  | 0.4750385688 | 0.9999763851 |
| PRSS53    | 1.2867653957  | 0.8300179538 | 0.9999763851 |
| VKORC1    | 1.0027937231  | 0.9857212161 | 0.9999763851 |
| BCKDK     | 1.3153126416  | 0.2809663169 | 0.9999763851 |
| KAT8      | 1.0492086771  | 0.8197177097 | 0.9999763851 |
| PRSS36    | 3.2361532718  | 0.5546934395 | 0.9999763851 |
| FUS       | 1.3212793553  | 0.0390303837 | 0.9999763851 |
| PYCARD    | -1.1131203687 | 0.6188824606 | 0.9999763851 |
| ITGAM     | 1.0291407439  | 0.926893828  | 0.9999763851 |
| ITGAX     | -2.8468892561 | 0.0268812909 | 0.9999763851 |
| ITGAD     | -4.2849908816 | 0.4028453076 | 0.9999763851 |
| ARMC5     | 1.3124769122  | 0.1393597552 | 0.9999763851 |
| TGFB1I1   | -1.2767981988 | 0.6536366834 | 0.9999763851 |
| SLC5A2    | -1.4185994118 | 0.1694242056 | 0.9999763851 |
| C16orf58  | 7.6089345734  | 0.0381452559 | 0.9999763851 |
| ZNF720    | 1.5251117717  | 0.2776037019 | 0.9999763851 |
| ZNF267    | -1.6621400061 | 0.0647704893 | 0.9999763851 |
| SHCBP1    | -1.0568975437 | 0.7643891364 | 0.9999763851 |
| VPS35     | 1.3143900426  | 0.0630622114 | 0.9999763851 |
| ORC6      | 1.06593017    | 0.7552700535 | 0.9999763851 |
| C16orf87  | 1.8604390903  | 0.1907744327 | 0.9999763851 |
| GPT2      | -1.2132523032 | 0.2222077888 | 0.9999763851 |
| DNAJA2    | 1.2692492838  | 0.2802859784 | 0.9999763851 |
| NETO2     | -1.3001100519 | 0.29413876   | 0.9999763851 |
| ITFG1     | -1.1835122402 | 0.328392921  | 0.9999763851 |
| PHKB      | 1.4679355433  | 0.1131607932 | 0.9999763851 |
| ABCC11    | -4.2849908816 | 0.4028453076 | 0.9999763851 |
| LONP2     | 1.2716409777  | 0.2289855293 | 0.9999763851 |
| SIAH1     | -1.3042104128 | 0.3015585315 | 0.9999763851 |

gene\_expression\_table

|           |               |              |              |
|-----------|---------------|--------------|--------------|
| N4BP1     | 1.148449662   | 0.5655659713 | 0.9999763851 |
| CNEP1R1   | -1.0355551732 | 0.9614598426 | 0.9999763851 |
| HEATR3    | 1.2828776604  | 0.1838657094 | 0.9999763851 |
| PAPD5     | 1.0613876049  | 0.7642755019 | 0.9999763851 |
| ADCY7     | 1.0212958619  | 0.9319620858 | 0.9999763851 |
| BRD7      | 1.0090391145  | 0.9517377319 | 0.9999763851 |
| NKD1      | -1.5730895081 | 0.49983691   | 0.9999763851 |
| SNX20     | -1.3570916218 | 0.4839550286 | 0.9999763851 |
| NOD2      | 1.3420325123  | 0.6975998781 | 0.9999763851 |
| CYLD      | -1.0644237681 | 0.8225274063 | 0.9999763851 |
| CHD9      | -1.0385032728 | 0.8727509631 | 0.9999763851 |
| LOC643802 | 3.2356557963  | 0.5547505991 | 0.9999763851 |
| RBL2      | -1.0983280931 | 0.7759953984 | 0.9999763851 |
| AKTIP     | -1.1966685147 | 0.6178015989 | 0.9999763851 |
| RPGRIP1L  | 1.7962512653  | 0.2964238608 | 0.9999763851 |
| FTO       | 1.1076976324  | 0.6107027743 | 0.9999763851 |
| IRX3      | -1.2670355964 | 0.2116743639 | 0.9999763851 |
| CRNDE     | 1.0177227776  | 0.9257644365 | 0.9999763851 |
| IRX5      | 1.0625249051  | 0.897368082  | 0.9999763851 |
| MMP2      | -1.6884118522 | 0.2189759046 | 0.9999763851 |
| LPCAT2    | -1.2131434911 | 0.3433990505 | 0.9999763851 |
| CES1      | -1.2519275495 | 0.2353195657 | 0.9999763851 |
| AMFR      | -1.0501479855 | 0.8498767415 | 0.9999763851 |
| NUDT21    | -1.2409161599 | 0.2490331997 | 0.9999763851 |
| OGFOD1    | 1.5550603304  | 0.0397643384 | 0.9999763851 |
| BBS2      | 1.2047897185  | 0.446038062  | 0.9999763851 |
| MT2A      | 1.112490146   | 0.4849809333 | 0.9999763851 |
| MT1E      | -1.317161512  | 0.0845050407 | 0.9999763851 |
| MT1F      | 1.0299718578  | 0.9137329146 | 0.9999763851 |
| MT1G      | 1.132070048   | 0.4667125107 | 0.9999763851 |
| MT1X      | -1.3393974676 | 0.2532686854 | 0.9999763851 |
| NUP93     | 1.1158054623  | 0.4148978972 | 0.9999763851 |
| HERPUD1   | -1.0280014612 | 0.8896518339 | 0.9999763851 |
| CETP      | 0             | 0            | 0            |
| NLRC5     | -1.2394438584 | 0.2840613238 | 0.9999763851 |
| CPNE2     | 1.0264769189  | 0.9022498335 | 0.9999763851 |
| FAM192A   | 1.1289990301  | 0.5710400258 | 0.9999763851 |
| RSPRY1    | 1.4028746246  | 0.2961345335 | 0.9999763851 |
| ARL2BP    | -1.6968818127 | 0.032004934  | 0.9999763851 |
| CCL22     | 3.2356557963  | 0.5547505991 | 0.9999763851 |
| CCL17     | 0             | 0            | 0            |
| CIAPIN1   | 1.1319494705  | 0.597012216  | 0.9999763851 |
| COQ9      | 1.1159689206  | 0.7712865204 | 0.9999763851 |
| POLR2C    | -1.1053704912 | 0.5915616434 | 0.9999763851 |
| DOK4      | -1.3625919741 | 0.4346640864 | 0.9999763851 |
| CCDC102A  | 1.4559388088  | 0.4565764204 | 0.9999763851 |
| ADGRG5    | 1.2254274439  | 0.7467288428 | 0.9999763851 |
| ADGRG1    | 0             | 0            | 0            |
| ADGRG3    | -3.0007254032 | 0.0622552446 | 0.9999763851 |

gene\_expression\_table

|              |               |              |              |
|--------------|---------------|--------------|--------------|
| KATNB1       | 1.3766737223  | 0.2284758319 | 0.9999763851 |
| KIFC3        | 16.6918753579 | 0.1320089484 | 0.9999763851 |
| CNGB1        | 5.4781708352  | 0.3745527127 | 0.9999763851 |
| ZNF319       | 1.6276641846  | 0.2246328247 | 0.9999763851 |
| USB1         | 1.1773118019  | 0.3920911698 | 0.9999763851 |
| MMP15        | 1.367312239   | 0.467678077  | 0.9999763851 |
| CFAP20       | 1.0338112889  | 0.8412422474 | 0.9999763851 |
| CSNK2A2      | -1.1869734549 | 0.3030477501 | 0.9999763851 |
| CCDC113      | 1.2869488883  | 0.821092998  | 0.9999763851 |
| PRSS54       | -1.3714374731 | 0.7332709577 | 0.9999763851 |
| GIN3         | 1.2689990134  | 0.2909128651 | 0.9999763851 |
| NDRG4        | 3.1827248461  | 0.1129407392 | 0.9999763851 |
| SETD6        | -1.0684586477 | 0.7544828105 | 0.9999763851 |
| CNOT1        | 1.0845163416  | 0.6179082097 | 0.9999763851 |
| SLC38A7      | 1.5890074071  | 0.4231488651 | 0.9999763851 |
| GOT2         | 1.1739130499  | 0.2831761744 | 0.9999763851 |
| BEAN1        | -4.2849908816 | 0.4028453076 | 0.9999763851 |
| TK2          | -1.4148698791 | 0.4021213002 | 0.9999763851 |
| CKLF         | -1.2739843359 | 0.1066837763 | 0.9999763851 |
| CMTM1        | -1.6644409499 | 0.0611960983 | 0.9999763851 |
| CMTM2        | 3.2356557963  | 0.5547505991 | 0.9999763851 |
| CMTM4        | -1.2509437445 | 0.4500849279 | 0.9999763851 |
| CMTM3        | 1.4596957905  | 0.0215056788 | 0.9999763851 |
| DYNC1LI2     | 1.0277188775  | 0.9053577794 | 0.9999763851 |
| TERB1        | 0             | 0            | 0            |
| NAE1         | 1.1491538314  | 0.3591858936 | 0.9999763851 |
| PDP2         | 1.1276351151  | 0.5607630168 | 0.9999763851 |
| RRAD         | 0             | 0            | 0            |
| FAM96B       | 1.1893246022  | 0.3036379211 | 0.9999763851 |
| CES2         | 1.1652777522  | 0.5260152044 | 0.9999763851 |
| CES3         | 1.164363665   | 0.7454379348 | 0.9999763851 |
| CES4A        | 3.2353357581  | 0.554787377  | 0.9999763851 |
| CBFB         | 1.2792720509  | 0.1608033682 | 0.9999763851 |
| C16orf70     | -1.4276067727 | 0.5506213428 | 0.9999763851 |
| B3GNT9       | 1.0159553944  | 0.9674854292 | 0.9999763851 |
| TRADD        | 1.1186688471  | 0.725177035  | 0.9999763851 |
| FBXL8        | 5.4781708352  | 0.3745527127 | 0.9999763851 |
| NOL3         | -1.0872048538 | 0.8636920486 | 0.9999763851 |
| KIAA0895L    | 2.1207130064  | 0.1438653947 | 0.9999763851 |
| EXOC3L1      | 0             | 0            | 0            |
| E2F4         | 1.1476882968  | 0.4056008269 | 0.9999763851 |
| ELMO3        | -1.0362251892 | 0.9602994275 | 0.9999763851 |
| LRRC29       | 0             | 0            | 0            |
| LOC105369155 | -3.3272796812 | 0.2424955191 | 0.9999763851 |
| TMEM208      | 1.0594206605  | 0.7820243101 | 0.9999763851 |
| FHOD1        | -1.1158591381 | 0.4692712154 | 0.9999763851 |
| SLC9A5       | 1.0955921063  | 0.8993695964 | 0.9999763851 |
| PLEKHG4      | 1.054664986   | 0.8204331037 | 0.9999763851 |
| KCTD19       | -8.342239448  | 0.2147985685 | 0.9999763851 |

gene\_expression\_table

|              |               |              |              |
|--------------|---------------|--------------|--------------|
| LRRC36       | 3.2356557963  | 0.5547505991 | 0.9999763851 |
| TPPP3        | 3.2356557963  | 0.5547505991 | 0.9999763851 |
| ATP6V0D1     | -1.2368112955 | 0.4975663831 | 0.9999763851 |
| AGRP         | -4.2849908816 | 0.4028453076 | 0.9999763851 |
| FAM65A       | -1.1355325181 | 0.6262530807 | 0.9999763851 |
| LOC107984813 | 0             | 0            | 0            |
| CTCF         | 1.1783612825  | 0.3774134623 | 0.9999763851 |
| CARMIL2      | -4.2849908816 | 0.4028453076 | 0.9999763851 |
| ACD          | -1.1036621065 | 0.7235580681 | 0.9999763851 |
| PAR6A        | 1.3829444468  | 0.6360363249 | 0.9999763851 |
| ENKD1        | -1.1461750681 | 0.6420011317 | 0.9999763851 |
| C16orf86     | -1.3154339304 | 0.8205576571 | 0.9999763851 |
| GFOD2        | 1.0594645413  | 0.8311543128 | 0.9999763851 |
| RANBP10      | -1.3408992778 | 0.1871054102 | 0.9999763851 |
| TSNAXIP1     | -1.1982896796 | 0.2170494683 | 0.9999763851 |
| CENPT        | -1.5141799262 | 0.3173209968 | 0.9999763851 |
| THAP11       | -1.0406045361 | 0.8065582985 | 0.9999763851 |
| NUTF2        | -1.0779157431 | 0.7059793302 | 0.9999763851 |
| EDC4         | -1.0809745187 | 0.6156161    | 0.9999763851 |
| NRN1L        | 1.2872739558  | 0.8229961387 | 0.9999763851 |
| PSKH1        | -1.2446907532 | 0.3015177265 | 0.9999763851 |
| CTRL         | 1.1081639824  | 0.7318903874 | 0.9999763851 |
| PSMB10       | 1.0724592139  | 0.6905621261 | 0.9999763851 |
| LCAT         | -2.3209115874 | 0.4596723125 | 0.9999763851 |
| SLC12A4      | -1.4304003311 | 0.569588286  | 0.9999763851 |
| DPEP2        | -1.9306444188 | 0.3794725725 | 0.9999763851 |
| DDX28        | 1.2702395184  | 0.2802455181 | 0.9999763851 |
| DUS2         | 1.4070953692  | 0.3175209247 | 0.9999763851 |
| NFATC3       | -1.1139346016 | 0.4683715147 | 0.9999763851 |
| ESRP2        | -1.0208803598 | 0.9124381823 | 0.9999763851 |
| PLA2G15      | -1.6496225342 | 0.0884417053 | 0.9999763851 |
| SLC7A6       | 1.4286998782  | 0.2351809258 | 0.9999763851 |
| SLC7A6OS     | -1.0460045128 | 0.8744731485 | 0.9999763851 |
| PRMT7        | -1.0275940386 | 0.9217410347 | 0.9999763851 |
| SMPD3        | 1.041027979   | 0.9582907678 | 0.9999763851 |
| ZFP90        | 1.4060713105  | 0.3666968526 | 0.9999763851 |
| CDH3         | 9.0182935529  | 0.2609674114 | 0.9999763851 |
| CDH1         | 0             | 0            | 0            |
| TANGO6       | -1.0877352973 | 0.8348999467 | 0.9999763851 |
| HAS3         | 1.1562207354  | 0.3747441924 | 0.9999763851 |
| CHTF8        | -2.2066914541 | 0.3421276514 | 0.9999763851 |
| UTP4         | 1.8725298335  | 0.003185     | 0.9999763851 |
| SNTB2        | -1.7037707755 | 0.2002314089 | 0.9999763851 |
| VPS4A        | -1.127281704  | 0.4877933072 | 0.9999763851 |
| PDF          | 1.084201425   | 0.6517830251 | 0.9999763851 |
| COG8         | 1.512982915   | 0.3749393992 | 0.9999763851 |
| NIP7         | 1.2150079594  | 0.4030261025 | 0.9999763851 |
| TMED6        | -1.7383115404 | 0.2659013851 | 0.9999763851 |
| TERF2        | 1.0075482427  | 0.9662086143 | 0.9999763851 |

gene\_expression\_table

|              |               |              |              |
|--------------|---------------|--------------|--------------|
| CYB5B        | 1.0300475451  | 0.8775579876 | 0.9999763851 |
| NFAT5        | -1.1474882311 | 0.5644548571 | 0.9999763851 |
| NQO1         | 1.1104434052  | 0.5333787769 | 0.9999763851 |
| NOB1         | 1.0917219753  | 0.6235660186 | 0.9999763851 |
| WWP2         | -1.0528262407 | 0.7736859843 | 0.9999763851 |
| PDPR         | -1.0371000208 | 0.8685895746 | 0.9999763851 |
| CLEC18C      | 5.4776292235  | 0.3745831165 | 0.9999763851 |
| LOC107984138 | 1.2847127328  | 0.3830454116 | 0.9999763851 |
| EXOSC6       | 1.0337016061  | 0.8905187403 | 0.9999763851 |
| AARS         | 1.0218976378  | 0.9212748614 | 0.9999763851 |
| DDX19B       | 1.9282328564  | 0.044682014  | 0.9999763851 |
| DDX19A       | 1.3915109285  | 0.1063380268 | 0.9999763851 |
| ST3GAL2      | -1.5861199845 | 0.0630002649 | 0.9999763851 |
| FUK          | 1.4582509317  | 0.3118333737 | 0.9999763851 |
| COG4         | -1.2354058875 | 0.587670106  | 0.9999763851 |
| SF3B3        | 1.1521447994  | 0.385888672  | 0.9999763851 |
| IL34         | 3.2353357581  | 0.554787377  | 0.9999763851 |
| MTSS1L       | 5.4776292235  | 0.3745831165 | 0.9999763851 |
| VAC14        | -1.3977241544 | 0.3241088061 | 0.9999763851 |
| HYDIN        | -2.9413009608 | 0.1738340989 | 0.9999763851 |
| CMTR2        | 1.3298922017  | 0.3447550053 | 0.9999763851 |
| ZNF23        | -2.4440355816 | 0.4429677948 | 0.9999763851 |
| TAT          | 0             | 0            | 0            |
| MARVELD3     | 0             | 0            | 0            |
| PHLPP2       | 1.0882934963  | 0.8549309515 | 0.9999763851 |
| AP1G1        | -1.4542722784 | 0.0761787373 | 0.9999763851 |
| ATXN1L       | -1.0432573948 | 0.8964668994 | 0.9999763851 |
| ZNF821       | -2.1524685389 | 0.0416364764 | 0.9999763851 |
| IST1         | 1.0485181386  | 0.7481576976 | 0.9999763851 |
| PKD1L3       | 5.4770877341  | 0.3746135179 | 0.9999763851 |
| DHODH        | 1.2405841432  | 0.3982637473 | 0.9999763851 |
| TXNL4B       | 1.0337503277  | 0.9353428307 | 0.9999763851 |
| HP           | -1.620272684  | 0.4305429354 | 0.9999763851 |
| HPR          | 0             | 0            | 0            |
| DHX38        | -1.1306646719 | 0.5021436339 | 0.9999763851 |
| PMFBP1       | 1.027554661   | 0.9756370564 | 0.9999763851 |
| LOC107984814 | -7.5622178268 | 0.2177145568 | 0.9999763851 |
| ZFH3         | -1.1945980561 | 0.2965049    | 0.9999763851 |
| PSMD7        | 1.0866327228  | 0.5756408936 | 0.9999763851 |
| NPIP15       | -1.9285516304 | 0.4974475048 | 0.9999763851 |
| CLEC18B      | 0             | 0            | 0            |
| GLG1         | -1.0630873983 | 0.6628587521 | 0.9999763851 |
| RFWD3        | -1.1222519806 | 0.5285949729 | 0.9999763851 |
| MLKL         | 1.4444564486  | 0.2010852286 | 0.9999763851 |
| FA2H         | 5.4776292235  | 0.3745831165 | 0.9999763851 |
| WDR59        | -1.5758582453 | 0.1001297294 | 0.9999763851 |
| ZNRF1        | 1.2331864921  | 0.2985334421 | 0.9999763851 |
| LDHD         | -4.2849908816 | 0.4028453076 | 0.9999763851 |
| ZFP1         | 2.5902663417  | 0.1883429208 | 0.9999763851 |



gene\_expression\_table

|              |               |              |              |
|--------------|---------------|--------------|--------------|
| CFDP1        | -1.1065122731 | 0.6185594296 | 0.9999763851 |
| TMEM170A     | 1.2016783547  | 0.4905421418 | 0.9999763851 |
| CHST5        | -1.3158816768 | 0.8203229797 | 0.9999763851 |
| TMEM231      | -2.2871333017 | 0.1127327287 | 0.9999763851 |
| GABARAPL2    | -1.0880431678 | 0.5799621223 | 0.9999763851 |
| ADAT1        | 1.1201594825  | 0.6872012934 | 0.9999763851 |
| KARS         | 1.1477100849  | 0.3407732386 | 0.9999763851 |
| TERF2IP      | -1.0002069302 | 0.9988252984 | 0.9999763851 |
| CNTNAP4      | 1.0981889172  | 0.7314521061 | 0.9999763851 |
| MON1B        | 2.6013599918  | 0.2508681234 | 0.9999763851 |
| SYCE1L       | 1.0350683151  | 0.8534258609 | 0.9999763851 |
| ADAMTS18     | 0             | 0            | 0            |
| NUDT7        | 1.0895551508  | 0.8552430632 | 0.9999763851 |
| VAT1L        | 0             | 0            | 0            |
| WVOX         | -1.1440753219 | 0.4223930498 | 0.9999763851 |
| DYNLRB2      | 0             | 0            | 0            |
| CDYL2        | -1.2838111839 | 0.3620566672 | 0.9999763851 |
| CMC2         | 1.3325414652  | 0.2186226989 | 0.9999763851 |
| CENPN        | -1.1122291502 | 0.7345284208 | 0.9999763851 |
| ATMIN        | 1.2744846658  | 0.2684639782 | 0.9999763851 |
| C16orf46     | 1.3505403582  | 0.6843337746 | 0.9999763851 |
| GCSH         | 1.0947926752  | 0.6365138581 | 0.9999763851 |
| PKD1L2       | 0             | 0            | 0            |
| BCO1         | 3.2353357581  | 0.554787377  | 0.9999763851 |
| GAN          | -2.196793761  | 0.0988727129 | 0.9999763851 |
| CMIP         | -1.1129042172 | 0.5341615109 | 0.9999763851 |
| PLCG2        | -1.1751889714 | 0.3603480324 | 0.9999763851 |
| HSD17B2      | 0             | 0            | 0            |
| MPHOSPH6     | 1.0630453121  | 0.6805983626 | 0.9999763851 |
| HSBP1        | 1.09707018    | 0.5160321205 | 0.9999763851 |
| MLYCD        | 1.0645599416  | 0.839359949  | 0.9999763851 |
| LOC105371371 | -1.3154339304 | 0.8205576571 | 0.9999763851 |
| OSGIN1       | 1.1853645663  | 0.7830833345 | 0.9999763851 |
| NECAB2       | 0             | 0            | 0            |
| MBTPS1       | 1.1844574891  | 0.3504294451 | 0.9999763851 |
| HSDL1        | 1.0312683987  | 0.9048830426 | 0.9999763851 |
| DNAAF1       | 3.2353357581  | 0.554787377  | 0.9999763851 |
| TAF1C        | -1.0108914973 | 0.9619176432 | 0.9999763851 |
| KCNG4        | 0             | 0            | 0            |
| WFDC1        | -1.2865931055 | 0.7364990454 | 0.9999763851 |
| ATP2C2       | -2.3893004408 | 0.2387205476 | 0.9999763851 |
| TLDC1        | -1.8724972875 | 0.1626913659 | 0.9999763851 |
| COTL1        | -1.1180082884 | 0.3495379183 | 0.9999763851 |
| KLHL36       | -1.0578326959 | 0.7688221933 | 0.9999763851 |
| USP10        | 1.0207891179  | 0.9019607456 | 0.9999763851 |
| ZDHHC7       | 1.0752308913  | 0.6251397585 | 0.9999763851 |
| KIAA0513     | -1.554288553  | 0.3423427355 | 0.9999763851 |
| GSE1         | -1.2811436126 | 0.2763045468 | 0.9999763851 |
| GINS2        | 1.0647384453  | 0.6896858851 | 0.9999763851 |

gene\_expression\_table

|              |               |              |              |
|--------------|---------------|--------------|--------------|
| C16orf74     | -1.1999599755 | 0.2540986074 | 0.9999763851 |
| EMC8         | 1.1746422046  | 0.339171823  | 0.9999763851 |
| COX4I1       | 1.2609797481  | 0.0718006453 | 0.9999763851 |
| IRF8         | -1.8692701989 | 0.102096509  | 0.9999763851 |
| FOXF1        | -1.2762952295 | 0.669588532  | 0.9999763851 |
| MTHFSD       | 1.1818304825  | 0.5301502246 | 0.9999763851 |
| FOXL1        | 0             | 0            | 0            |
| C16orf95     | -1.21567076   | 0.5518037188 | 0.9999763851 |
| FBXO31       | -1.3566039499 | 0.2427074331 | 0.9999763851 |
| MAP1LC3B     | 1.0182129829  | 0.9148772218 | 0.9999763851 |
| ZCCHC14      | -1.368381082  | 0.2511384251 | 0.9999763851 |
| KLHDC4       | 1.1529184678  | 0.5882618517 | 0.9999763851 |
| LOC105371397 | 0             | 0            | 0            |
| SLC7A5       | -1.0806116659 | 0.7009602738 | 0.9999763851 |
| CA5A         | -4.2849908816 | 0.4028453076 | 0.9999763851 |
| BANP         | -1.5221452646 | 0.1348481309 | 0.9999763851 |
| LOC107984862 | 0             | 0            | 0            |
| ZNF469       | -1.8727248054 | 0.3026340166 | 0.9999763851 |
| ZFPM1        | 5.8993332406  | 0.0789660619 | 0.9999763851 |
| ZC3H18       | 1.2228940656  | 0.361211411  | 0.9999763851 |
| CYBA         | 1.5142168573  | 0.1690943423 | 0.9999763851 |
| MVD          | 1.1058210883  | 0.615690914  | 0.9999763851 |
| SNAI3        | -1.047573144  | 0.8822422776 | 0.9999763851 |
| RNF166       | -1.3385991307 | 0.1353656807 | 0.9999763851 |
| CTU2         | 1.0561722097  | 0.8522571444 | 0.9999763851 |
| PIEZO1       | -1.202551081  | 0.3527691277 | 0.9999763851 |
| CDT1         | 1.0430994381  | 0.8177790142 | 0.9999763851 |
| APRT         | 1.0517268197  | 0.7356044131 | 0.9999763851 |
| GALNS        | -1.3550833716 | 0.2535111902 | 0.9999763851 |
| TRAPPC2L     | 1.0511554219  | 0.7926974051 | 0.9999763851 |
| PABPN1L      | -7.5664585246 | 0.2257565985 | 0.9999763851 |
| CBFA2T3      | 1.0347578143  | 0.8906405406 | 0.9999763851 |
| LOC100129697 | 0             | 0            | 0            |
| ACSF3        | 2.0365389983  | 0.0966431959 | 0.9999763851 |
| CDH15        | -4.2864494036 | 0.4027150576 | 0.9999763851 |
| ZNF778       | 1.1833479949  | 0.7221336636 | 0.9999763851 |
| ANKRD11      | 1.0935009085  | 0.5305311692 | 0.9999763851 |
| LOC100287036 | -4.2849908816 | 0.4028453076 | 0.9999763851 |
| SPG7         | 1.1649467242  | 0.4438074421 | 0.9999763851 |
| RPL13        | -1.0331751359 | 0.7834245229 | 0.9999763851 |
| CPNE7        | -1.3765878235 | 0.2430668564 | 0.9999763851 |
| DPEP1        | 1.6135829349  | 0.0231730331 | 0.9999763851 |
| CHMP1A       | -1.2107723729 | 0.2697813648 | 0.9999763851 |
| SPATA33      | -1.008394933  | 0.9806441135 | 0.9999763851 |
| CDK10        | -1.0434279787 | 0.8531638765 | 0.9999763851 |
| SPATA2L      | 1.027554661   | 0.9756469146 | 0.9999763851 |
| VPS9D1       | 1.4260670756  | 0.4259126361 | 0.9999763851 |
| ZNF276       | 1.0563761465  | 0.804768624  | 0.9999763851 |
| FANCA        | 1.2344847171  | 0.4670237474 | 0.9999763851 |

gene\_expression\_table

|              |               |              |              |
|--------------|---------------|--------------|--------------|
| SPIRE2       | -1.9652419871 | 0.4566429162 | 0.9999763851 |
| LOC105371419 | 3.2353357581  | 0.554787377  | 0.9999763851 |
| TCF25        | -1.0452663996 | 0.7443533772 | 0.9999763851 |
| MC1R         | 1.1805116415  | 0.8039812948 | 0.9999763851 |
| TUBB3        | 1.1202669996  | 0.6967485496 | 0.9999763851 |
| DEF8         | 1.0034782893  | 0.9863238104 | 0.9999763851 |
| CENPBD1      | 1.6049013466  | 0.4086307377 | 0.9999763851 |
| DBNDD1       | 1.6703467261  | 0.4625480201 | 0.9999763851 |
| GAS8         | 1.8750770526  | 0.25604441   | 0.9999763851 |
| RPH3AL       | -2.1310892017 | 0.1502195489 | 0.9999763851 |
| C17orf97     | -1.3155492632 | 0.8260459548 | 0.9999763851 |
| FAM101B      | 1.2449563557  | 0.0848566964 | 0.9999763851 |
| VPS53        | -1.0357656165 | 0.8557482009 | 0.9999763851 |
| FAM57A       | 1.166470252   | 0.4854253603 | 0.9999763851 |
| GEMIN4       | 1.4043185766  | 0.0531386179 | 0.9999763851 |
| GLOD4        | -1.0378436564 | 0.8799919122 | 0.9999763851 |
| MRM3         | 1.4163066528  | 0.2780719106 | 0.9999763851 |
| NXN          | -1.0356702413 | 0.8705022513 | 0.9999763851 |
| TIMM22       | 1.1659395787  | 0.5507184626 | 0.9999763851 |
| ABR          | 1.2889550051  | 0.1144442003 | 0.9999763851 |
| TUSC5        | 0             | 0            | 0            |
| YWHAЕ        | 1.1377347436  | 0.3268336829 | 0.9999763851 |
| CRK          | 1.2938234034  | 0.2997366351 | 0.9999763851 |
| MYO1C        | 1.2382051676  | 0.610298108  | 0.9999763851 |
| INPP5K       | 1.4795907957  | 0.3450579579 | 0.9999763851 |
| PITPNA       | -1.2016837152 | 0.2384417492 | 0.9999763851 |
| SLC43A2      | 1.3417513497  | 0.1007281925 | 0.9999763851 |
| SCARF1       | 1.2910285137  | 0.5964736895 | 0.9999763851 |
| RILP         | -3.9975329737 | 0.1323617233 | 0.9999763851 |
| PRPF8        | -1.0898250667 | 0.5755031603 | 0.9999763851 |
| TLCD2        | 3.2353357581  | 0.554787377  | 0.9999763851 |
| WDR81        | 2.4020525162  | 0.0450870124 | 0.9999763851 |
| SERPINF1     | 1.5509282945  | 0.6031372669 | 0.9999763851 |
| SMYD4        | -1.0469642615 | 0.9029572353 | 0.9999763851 |
| RPA1         | 1.1043769593  | 0.4875694741 | 0.9999763851 |
| RTN4RL1      | -2.2967284599 | 0.279282876  | 0.9999763851 |
| DPH1         | 1.8136231599  | 0.5627419009 | 0.9999763851 |
| OVCA2        | 1.6213132362  | 0.004871     | 0.9999763851 |
| HIC1         | 1.0295394469  | 0.9676292791 | 0.9999763851 |
| SMG6         | 1.1884806434  | 0.4201353894 | 0.9999763851 |
| LOC107984987 | 5.4784711963  | 0.3745358536 | 0.9999763851 |
| SRR          | 1.1220936442  | 0.4406922342 | 0.9999763851 |
| TSR1         | -1.6616773163 | 0.0659998913 | 0.9999763851 |
| SGSM2        | 1.2062089301  | 0.3646613886 | 0.9999763851 |
| MNT          | 1.5047239003  | 0.1228827216 | 0.9999763851 |
| METTL16      | 1.0307646113  | 0.91040169   | 0.9999763851 |
| PAFAH1B1     | 1.0055129112  | 0.9691172034 | 0.9999763851 |
| CLUH         | -1.0873310146 | 0.6014845777 | 0.9999763851 |
| RAP1GAP2     | -1.0400675265 | 0.8700522583 | 0.9999763851 |

gene\_expression\_table

|              |               |              |              |
|--------------|---------------|--------------|--------------|
| OR3A2        | 0             | 0            | 0            |
| OR3A1        | -4.2849908816 | 0.4028453076 | 0.9999763851 |
| TRPV3        | 7.7192231741  | 0.2782707334 | 0.9999763851 |
| TRPV1        | 2.3578986999  | 0.3419975027 | 0.9999763851 |
| SHPK         | -1.7263681129 | 0.3312162762 | 0.9999763851 |
| CTNS         | 1.2726668757  | 0.5634864189 | 0.9999763851 |
| TAX1BP3      | -1.0623828521 | 0.8352751541 | 0.9999763851 |
| EMC6         | 1.1224892719  | 0.4445429565 | 0.9999763851 |
| P2RX5        | 1.9045919035  | 0.0182425713 | 0.9999763851 |
| ITGAE        | -1.0371829675 | 0.8363048652 | 0.9999763851 |
| GSG2         | 25.650992429  | 0.0841903384 | 0.9999763851 |
| NCBP3        | 1.1467551549  | 0.5236532407 | 0.9999763851 |
| CAMKK1       | -1.3608741329 | 0.3253583551 | 0.9999763851 |
| P2RX1        | -1.1599215708 | 0.5869484827 | 0.9999763851 |
| ATP2A3       | 1.3184397896  | 0.0806087399 | 0.9999763851 |
| ZZEF1        | -1.0322618059 | 0.9097578017 | 0.9999763851 |
| CYB5D2       | 1.7806067509  | 0.2556717637 | 0.9999763851 |
| ANKFY1       | -1.2710074703 | 0.1573456451 | 0.9999763851 |
| UBE2G1       | 1.3458858674  | 0.0435697936 | 0.9999763851 |
| SPNS3        | -1.3332616972 | 0.2529690736 | 0.9999763851 |
| SPNS2        | -1.587874259  | 0.1841104925 | 0.9999763851 |
| MYBBP1A      | 1.5177144553  | 0.021705639  | 0.9999763851 |
| GGT6         | 0             | 0            | 0            |
| ALOX15       | 0             | 0            | 0            |
| PELP1        | 1.2444255102  | 0.3915263939 | 0.9999763851 |
| ARRB2        | 1.067660055   | 0.6437414324 | 0.9999763851 |
| MED11        | 2.7752654288  | 0.0358051927 | 0.9999763851 |
| CXCL16       | -4.3450459626 | 0.0778003224 | 0.9999763851 |
| VMO1         | 2.2182046909  | 0.3722715638 | 0.9999763851 |
| GLTPD2       | 0             | 0            | 0            |
| PSMB6        | 1.3700853553  | 0.0620544435 | 0.9999763851 |
| LOC107984973 | 3.2356557963  | 0.5547505991 | 0.9999763851 |
| PLD2         | -1.1962473193 | 0.7840961715 | 0.9999763851 |
| MINK1        | -1.4168415622 | 0.6037121917 | 0.9999763851 |
| CHRNE        | 3.2356557963  | 0.5547505991 | 0.9999763851 |
| GP1BA        | 0             | 0            | 0            |
| SLC25A11     | 1.4034914671  | 0.0709150967 | 0.9999763851 |
| RNF167       | -1.1076181067 | 0.6567974638 | 0.9999763851 |
| PFN1         | -1.1117907055 | 0.3985500119 | 0.9999763851 |
| ENO3         | -1.2573057306 | 0.7191499136 | 0.9999763851 |
| SPAG7        | -1.494661231  | 0.007849     | 0.9999763851 |
| CAMTA2       | -1.315575163  | 0.3235854627 | 0.9999763851 |
| INCA1        | -1.7867779362 | 0.2303716025 | 0.9999763851 |
| KIF1C        | -1.1943066477 | 0.2027356947 | 0.9999763851 |
| RABEP1       | 1.1063010599  | 0.6249159724 | 0.9999763851 |
| NUP88        | 1.1182429931  | 0.5858219518 | 0.9999763851 |
| RPAIN        | 1.001790201   | 0.9929530304 | 0.9999763851 |
| C1QBP        | 1.0748440441  | 0.656471164  | 0.9999763851 |
| DHX33        | -1.208778901  | 0.3953986611 | 0.9999763851 |

gene\_expression\_table

|              |                |              |              |
|--------------|----------------|--------------|--------------|
| DERL2        | 1.2309232496   | 0.4047618484 | 0.9999763851 |
| MIS12        | 1.8154932902   | 0.0428756917 | 0.9999763851 |
| LOC728392    | 0              | 0            | 0            |
| NLRP1        | -7.5622178268  | 0.2177145568 | 0.9999763851 |
| FAM64A       | 1.0251087726   | 0.9030937961 | 0.9999763851 |
| PITPNM3      | 3.2353357581   | 0.554787377  | 0.9999763851 |
| KIAA0753     | -2.2682534019  | 0.0752763358 | 0.9999763851 |
| TXNDC17      | 1.149510245    | 0.3435900249 | 0.9999763851 |
| MED31        | 2.3487446974   | 0.0230111655 | 0.9999763851 |
| C17orf100    | -1.3158816768  | 0.8203229797 | 0.9999763851 |
| XAF1         | -4.2864494036  | 0.4027150576 | 0.9999763851 |
| ALOX12       | 1.6252006195   | 0.2416235007 | 0.9999763851 |
| RNASEK       | -1.0839492302  | 0.6334789237 | 0.9999763851 |
| C17orf49     | 1.2299905445   | 0.3179648694 | 0.9999763851 |
| SLC16A13     | 3.2356557963   | 0.5547505991 | 0.9999763851 |
| CLEC10A      | 0              | 0            | 0            |
| ASGR2        | 1.028107434    | 0.9764144245 | 0.9999763851 |
| ASGR1        | -10.8385246611 | 0.1451600336 | 0.9999763851 |
| DLG4         | -1.26626789    | 0.2478183086 | 0.9999763851 |
| ACADVL       | -1.1007634179  | 0.528710155  | 0.9999763851 |
| DVL2         | -1.09493033    | 0.6965881004 | 0.9999763851 |
| PHF23        | 1.1559790358   | 0.5260044895 | 0.9999763851 |
| GABARAP      | -1.0007085033  | 0.9960303032 | 0.9999763851 |
| CTDNEP1      | -1.0314894316  | 0.8097361546 | 0.9999763851 |
| ELP5         | -1.6351635971  | 0.0392673368 | 0.9999763851 |
| CLDN7        | 3.2356557963   | 0.5547505991 | 0.9999763851 |
| SLC2A4       | 2.8674942058   | 0.3049740122 | 0.9999763851 |
| EIF5A        | 1.1361544233   | 0.3698292759 | 0.9999763851 |
| GPS2         | 1.6250860079   | 0.0426969959 | 0.9999763851 |
| NEURL4       | -1.1431502971  | 0.7678763112 | 0.9999763851 |
| ACAP1        | -1.058631225   | 0.806391799  | 0.9999763851 |
| KCTD11       | 1.1334473729   | 0.8684459396 | 0.9999763851 |
| TNK1         | 3.2361532718   | 0.5546934395 | 0.9999763851 |
| PLSCR3       | 1.2315392431   | 0.2426822386 | 0.9999763851 |
| TMEM256      | -1.1798269106  | 0.3714173155 | 0.9999763851 |
| NLGN2        | -3.0813597757  | 0.123465347  | 0.9999763851 |
| TMEM102      | 0              | 0            | 0            |
| FGF11        | 3.3950799507   | 0.2318810884 | 0.9999763851 |
| CHRNA1       | -1.276380235   | 0.6853195504 | 0.9999763851 |
| ZBTB4        | -1.2535687009  | 0.4368303274 | 0.9999763851 |
| POLR2A       | -1.185551348   | 0.2570515677 | 0.9999763851 |
| TNFSF12      | 0              | 0            | 0            |
| TNFSF13      | 1.6148394316   | 0.0505309222 | 0.9999763851 |
| SENP3        | -1.4499772591  | 0.5897886748 | 0.9999763851 |
| EIF4A1       | 1.180118723    | 0.186423255  | 0.9999763851 |
| CD68         | 1.5778108037   | 0.4331455547 | 0.9999763851 |
| LOC100996842 | -4.2864494036  | 0.4027150576 | 0.9999763851 |
| MPDU1        | -1.0978650545  | 0.6488320838 | 0.9999763851 |
| SOX15        | -2.3225701307  | 0.4434167901 | 0.9999763851 |

gene\_expression\_table

|          |               |              |              |
|----------|---------------|--------------|--------------|
| FXR2     | -1.3334910313 | 0.168964667  | 0.9999763851 |
| SHBG     | -4.2864494036 | 0.4027150576 | 0.9999763851 |
| SAT2     | 1.031218952   | 0.8633971849 | 0.9999763851 |
| TP53     | 1.5604866468  | 0.2706534128 | 0.9999763851 |
| WRAP53   | -1.0813907267 | 0.924225171  | 0.9999763851 |
| DNAH2    | 0             | 0            | 0            |
| KDM6B    | 1.1452440163  | 0.6895147262 | 0.9999763851 |
| NAA38    | 1.019950292   | 0.8835780975 | 0.9999763851 |
| CYB5D1   | 1.2609309139  | 0.4475463014 | 0.9999763851 |
| CHD3     | -1.0186765896 | 0.9077291841 | 0.9999763851 |
| KCNAB3   | 1.2872739558  | 0.8230180306 | 0.9999763851 |
| TRAPPC1  | 1.5540792477  | 0.11862788   | 0.9999763851 |
| CNTROB   | 1.633055077   | 0.1360843272 | 0.9999763851 |
| GUCY2D   | 7.7488609396  | 0.3059167339 | 0.9999763851 |
| ALOX12B  | 1.9234638322  | 0.4260239582 | 0.9999763851 |
| HES7     | 1.0115359816  | 0.9884109369 | 0.9999763851 |
| PER1     | 1.0520225176  | 0.8433671935 | 0.9999763851 |
| VAMP2    | -2.5355197317 | 0.0120780553 | 0.9999763851 |
| TMEM107  | -1.0760002437 | 0.8180053101 | 0.9999763851 |
| BORCS6   | 1.3356309462  | 0.2582181506 | 0.9999763851 |
| AURKB    | -1.0056498774 | 0.9712301663 | 0.9999763851 |
| CTC1     | 1.4674853957  | 0.4791134648 | 0.9999763851 |
| PFAS     | 1.7213613948  | 0.004664     | 0.9999763851 |
| RANGRF   | -1.0959549601 | 0.5375995608 | 0.9999763851 |
| SLC25A35 | -2.0606615507 | 0.2983602424 | 0.9999763851 |
| KRBA2    | -1.3158816768 | 0.8203229797 | 0.9999763851 |
| RPL26    | -1.0349100946 | 0.7844978127 | 0.9999763851 |
| NDEL1    | 1.1545372228  | 0.5135332867 | 0.9999763851 |
| MYH10    | -1.8146129166 | 0.140684327  | 0.9999763851 |
| CCDC42   | 3.2361532718  | 0.5546934395 | 0.9999763851 |
| PIK3R6   | -2.387886984  | 0.2112259006 | 0.9999763851 |
| PIK3R5   | -1.0036279234 | 0.9844814841 | 0.9999763851 |
| NTN1     | -1.6698105334 | 0.2616609649 | 0.9999763851 |
| STX8     | 1.3310953909  | 0.2114730191 | 0.9999763851 |
| CFAP52   | 0             | 0            | 0            |
| DHRS7C   | 0             | 0            | 0            |
| GSG1L2   | 3.2353357581  | 0.554787377  | 0.9999763851 |
| GAS7     | -1.1341222204 | 0.4394662756 | 0.9999763851 |
| MYH4     | 0             | 0            | 0            |
| MYH3     | -1.0156237173 | 0.9578991223 | 0.9999763851 |
| SCO1     | 1.2228422576  | 0.2454025338 | 0.9999763851 |
| ADPRM    | -1.5708165304 | 0.3885522438 | 0.9999763851 |
| TMEM220  | -1.1957366748 | 0.804418173  | 0.9999763851 |
| SHISA6   | 1.2869488883  | 0.8211494027 | 0.9999763851 |
| DNAH9    | -3.3264391549 | 0.2738511788 | 0.9999763851 |
| ZNF18    | 1.4229779878  | 0.3967872523 | 0.9999763851 |
| MAP2K4   | -1.0739578835 | 0.732437054  | 0.9999763851 |
| ARHGAP44 | -1.3944153431 | 0.6946124935 | 0.9999763851 |
| ELAC2    | 1.138559278   | 0.5309129731 | 0.9999763851 |

gene\_expression\_table

|              |               |              |              |
|--------------|---------------|--------------|--------------|
| COX10        | 1.0567705373  | 0.8390352295 | 0.9999763851 |
| CDRT4        | 0             | 0            | 0            |
| CDRT1        | -7.5622178268 | 0.2177145568 | 0.9999763851 |
| TRIM16       | 1.2718294823  | 0.4389567361 | 0.9999763851 |
| ZNF286A      | 1.2174484142  | 0.2092501952 | 0.9999763851 |
| ADORA2B      | 1.9228097209  | 0.4268417327 | 0.9999763851 |
| ZSWIM7       | -1.0091597961 | 0.9656406783 | 0.9999763851 |
| TTC19        | -1.121568196  | 0.4223356804 | 0.9999763851 |
| NCOR1        | -1.0308489887 | 0.8830282425 | 0.9999763851 |
| PIGL         | -1.1963614536 | 0.5297679889 | 0.9999763851 |
| CENPV        | -1.1244193605 | 0.4593569342 | 0.9999763851 |
| UBB          | 1.0497786882  | 0.6972290186 | 0.9999763851 |
| TRPV2        | 1.3261522439  | 0.3097807283 | 0.9999763851 |
| LRRC75A      | -3.2225510108 | 0.001582     | 0.9999763851 |
| ZNF287       | 0             | 0            | 0            |
| CCDC144A     | -1.0118618877 | 0.9600691232 | 0.9999763851 |
| MPRIIP       | 1.0836002603  | 0.6652340073 | 0.9999763851 |
| PLD6         | 1.3620430594  | 0.137892508  | 0.9999763851 |
| FLCN         | -1.302442452  | 0.1543508838 | 0.9999763851 |
| COPS3        | -1.1043562603 | 0.5361168892 | 0.9999763851 |
| NT5M         | 1.2786230139  | 0.4325388468 | 0.9999763851 |
| MED9         | 1.0598196992  | 0.7919596393 | 0.9999763851 |
| PEMT         | 1.016846405   | 0.9624176122 | 0.9999763851 |
| RAI1         | 1.258116452   | 0.2899616324 | 0.9999763851 |
| SREBF1       | 1.0468481076  | 0.8490145467 | 0.9999763851 |
| TOM1L2       | -1.414491976  | 0.3141241806 | 0.9999763851 |
| DRC3         | 1.2355274324  | 0.7159989804 | 0.9999763851 |
| ATPAF2       | 1.2800234422  | 0.4857267176 | 0.9999763851 |
| GID4         | -2.7035192643 | 0.0410183252 | 0.9999763851 |
| DRG2         | 2.1110724278  | 0.0131352871 | 0.9999763851 |
| MYO15A       | -1.3716482783 | 0.7378342759 | 0.9999763851 |
| ALKBH5       | 1.036729118   | 0.8332761405 | 0.9999763851 |
| LLGL1        | -1.4162370021 | 0.1292888555 | 0.9999763851 |
| FLII         | 1.3033011074  | 0.1700273162 | 0.9999763851 |
| MIEF2        | 3.4224740954  | 0.0615853663 | 0.9999763851 |
| TOP3A        | 1.2667035848  | 0.3674613794 | 0.9999763851 |
| SMCR8        | 1.6827913576  | 0.0890406028 | 0.9999763851 |
| SHMT1        | -1.854712782  | 0.0531111933 | 0.9999763851 |
| LGALS9C      | 1.3585372872  | 0.569561054  | 0.9999763851 |
| ZNF286B      | 1.5964182648  | 0.3573082571 | 0.9999763851 |
| TRIM16L      | -1.1934908034 | 0.51785316   | 0.9999763851 |
| FBXW10       | 3.2353357581  | 0.554787377  | 0.9999763851 |
| TVP23B       | -1.1860931861 | 0.5867283512 | 0.9999763851 |
| LOC101929141 | 3.2356557963  | 0.5547505991 | 0.9999763851 |
| PRPSAP2      | -1.9491322084 | 0.006352     | 0.9999763851 |
| FAM83G       | -1.4082372984 | 0.500276742  | 0.9999763851 |
| GRAP         | 7.7199860138  | 0.2831153382 | 0.9999763851 |
| B9D1         | 1.0019491055  | 0.9965746579 | 0.9999763851 |
| MAPK7        | 2.1739784176  | 0.2850503355 | 0.9999763851 |

gene\_expression\_table

|              |               |              |              |
|--------------|---------------|--------------|--------------|
| MFAP4        | -1.3154339304 | 0.8205576571 | 0.9999763851 |
| RNF112       | 3.2356557963  | 0.5547505991 | 0.9999763851 |
| ALDH3A2      | 3.2353357581  | 0.554787377  | 0.9999763851 |
| SLC47A2      | -4.2849908816 | 0.4028453076 | 0.9999763851 |
| AKAP10       | 1.0869995648  | 0.8147815169 | 0.9999763851 |
| SPECC1       | -1.3904212186 | 0.3233314668 | 0.9999763851 |
| LGALS9B      | 0             | 0            | 0            |
| CDRT15L2     | -4.2849908816 | 0.4028453076 | 0.9999763851 |
| LOC105369205 | -1.1501339038 | 0.2929746317 | 0.9999763851 |
| USP22        | -1.6196855671 | 0.4334704695 | 0.9999763851 |
| DHRS7B       | 1.530068871   | 0.1011956651 | 0.9999763851 |
| TMEM11       | 1.0282854549  | 0.8619597267 | 0.9999763851 |
| NATD1        | -1.8172198407 | 0.4513898593 | 0.9999763851 |
| MAP2K3       | -1.3054097359 | 0.0493622288 | 0.9999763851 |
| C17orf51     | 2.34099053    | 0.3997152508 | 0.9999763851 |
| MTRNR2L1     | -1.4490890341 | 0.006544     | 0.9999763851 |
| WSB1         | -1.1169360047 | 0.4942771814 | 0.9999763851 |
| KSR1         | -1.1454514418 | 0.7172311881 | 0.9999763851 |
| LGALS9       | 1.1221804086  | 0.499802388  | 0.9999763851 |
| LYRM9        | 2.4683190578  | 0.1241697105 | 0.9999763851 |
| NLK          | 1.0998128519  | 0.7715430396 | 0.9999763851 |
| LOC105371930 | 3.2356557963  | 0.5547505991 | 0.9999763851 |
| TMEM97       | 1.1299880241  | 0.5083016692 | 0.9999763851 |
| IFT20        | -1.5445282614 | 0.3855316116 | 0.9999763851 |
| TNFAIP1      | 1.8995141861  | 0.2648648392 | 0.9999763851 |
| POLDIP2      | 1.0399044543  | 0.8303986863 | 0.9999763851 |
| TMEM199      | -1.0697739241 | 0.8160846839 | 0.9999763851 |
| SARM1        | 1.1336585844  | 0.8771625718 | 0.9999763851 |
| SLC46A1      | -1.4267084394 | 0.623413526  | 0.9999763851 |
| UNC119       | 1.1090242499  | 0.6163488351 | 0.9999763851 |
| PIGS         | 1.1134395574  | 0.4493189701 | 0.9999763851 |
| ALDOC        | -1.0499879077 | 0.9360410035 | 0.9999763851 |
| SPAG5        | -1.0906009033 | 0.735093317  | 0.9999763851 |
| SGK494       | 1.09599993    | 0.8958262722 | 0.9999763851 |
| KIAA0100     | 1.266002603   | 0.167246694  | 0.9999763851 |
| SDF2         | -1.1400302879 | 0.4891071303 | 0.9999763851 |
| SUPT6H       | 1.0035345536  | 0.9894233975 | 0.9999763851 |
| PROCA1       | -1.6376683773 | 0.2791192326 | 0.9999763851 |
| RPL23A       | -1.2672124045 | 0.1601284757 | 0.9999763851 |
| TLCD1        | 2.8676515213  | 0.2915201778 | 0.9999763851 |
| NEK8         | 1.508933517   | 0.5739834686 | 0.9999763851 |
| TRAF4        | -1.0694967919 | 0.8116685143 | 0.9999763851 |
| FAM222B      | -1.0271989054 | 0.9309187743 | 0.9999763851 |
| ERAL1        | 1.2206570197  | 0.5027602187 | 0.9999763851 |
| FLOT2        | -1.0211215605 | 0.9185266363 | 0.9999763851 |
| DHRS13       | -1.5030417283 | 0.223833105  | 0.9999763851 |
| PHF12        | 1.2438927194  | 0.5906089796 | 0.9999763851 |
| PIPOX        | -7.5647903763 | 0.2176246281 | 0.9999763851 |
| MYO18A       | -1.2944792306 | 0.6141463268 | 0.9999763851 |



gene\_expression\_table

|              |                |              |              |
|--------------|----------------|--------------|--------------|
| TIAF1        | 1.0031999999   | 0.9886334311 | 0.9999763851 |
| CRYBA1       | 0              | 0            | 0            |
| NUFIP2       | 1.0551027384   | 0.7651691101 | 0.9999763851 |
| TAOK1        | 1.0519294002   | 0.7753879062 | 0.9999763851 |
| ABHD15       | 1.7034063944   | 0.1955093224 | 0.9999763851 |
| TP53I13      | 1.1639313698   | 0.6520939686 | 0.9999763851 |
| GIT1         | 1.369503506    | 0.259641286  | 0.9999763851 |
| ANKRD13B     | 1.3615191234   | 0.5601183957 | 0.9999763851 |
| CORO6        | 1.8136032532   | 0.5927398692 | 0.9999763851 |
| SSH2         | -1.3777067009  | 0.0892763601 | 0.9999763851 |
| NSRP1        | 1.3089906873   | 0.2554373386 | 0.9999763851 |
| SLC6A4       | 0              | 0            | 0            |
| CPD          | -1.0073353425  | 0.9606768812 | 0.9999763851 |
| GOSR1        | -1.0526190304  | 0.8197410088 | 0.9999763851 |
| TBC1D29      | -1.3714374731  | 0.7332684715 | 0.9999763851 |
| CRLF3        | -1.2656425068  | 0.3582812988 | 0.9999763851 |
| ATAD5        | -1.0351154379  | 0.8976354938 | 0.9999763851 |
| TEFM         | 1.0818349382   | 0.7936794896 | 0.9999763851 |
| RNF135       | 1.036671475    | 0.8654883948 | 0.9999763851 |
| LOC107984974 | 1.3253731754   | 0.7579223892 | 0.9999763851 |
| NF1          | 1.4440222127   | 0.1564929694 | 0.9999763851 |
| EVI2B        | 1.6339767567   | 0.2552096059 | 0.9999763851 |
| EVI2A        | -2.0785652782  | 0.0130283404 | 0.9999763851 |
| RAB11FIP4    | -1.0339674486  | 0.8737993194 | 0.9999763851 |
| COPRS        | 1.2267026038   | 0.1659983693 | 0.9999763851 |
| UTP6         | 1.0941886947   | 0.6533387653 | 0.9999763851 |
| SUZ12        | 1.1358684156   | 0.3797163899 | 0.9999763851 |
| LOC105371727 | 0              | 0            | 0            |
| LRRC37B      | 1.1122687244   | 0.6688190726 | 0.9999763851 |
| LOC107985082 | -4.2849908816  | 0.4028453076 | 0.9999763851 |
| RHOT1        | -1.0403633808  | 0.8460095901 | 0.9999763851 |
| RHBDL3       | -2.3225701307  | 0.443414764  | 0.9999763851 |
| C17orf75     | 1.4337164916   | 0.4195789468 | 0.9999763851 |
| ZNF207       | 1.1681281935   | 0.2881130147 | 0.9999763851 |
| PSMD11       | -1.1434687784  | 0.4314210548 | 0.9999763851 |
| CDK5R1       | 1.0036282455   | 0.986925407  | 0.9999763851 |
| MYO1D        | 1.6249017024   | 0.5572207845 | 0.9999763851 |
| SPACA3       | 0              | 0            | 0            |
| ASIC2        | -1.467826005   | 0.6619417583 | 0.9999763851 |
| CCL2         | -1.2431650002  | 0.1158390549 | 0.9999763851 |
| CCL7         | -12.9532379654 | 3.51E-11     | 2.64E-07     |
| CCL8         | -14.164430006  | 0.0118012851 | 0.9999763851 |
| CCL1         | -13.9077333422 | 2.28E-09     | 9.43E-06     |
| CCT6B        | 1.0259413652   | 0.9598924492 | 0.9999763851 |
| ZNF830       | 1.1835489739   | 0.5825606899 | 0.9999763851 |
| LIG3         | -1.3586906184  | 0.1481826135 | 0.9999763851 |
| RFFL         | -1.1800351275  | 0.5292762177 | 0.9999763851 |
| RAD51D       | -1.4372601129  | 0.4195901531 | 0.9999763851 |
| FNDC8        | -1.7348876098  | 0.4534177332 | 0.9999763851 |

gene\_expression\_table

|              |                |              |              |
|--------------|----------------|--------------|--------------|
| NLE1         | 1.6324231799   | 0.094434495  | 0.9999763851 |
| LOC105371932 | -2.3235904983  | 0.4581477541 | 0.9999763851 |
| SLFN5        | -3.166158432   | 0.1247178772 | 0.9999763851 |
| SLFN11       | 1.0573998774   | 0.7811898902 | 0.9999763851 |
| LOC105371933 | -2.3214980365  | 0.4373473522 | 0.9999763851 |
| SLFN12       | -1.2494129491  | 0.5649197672 | 0.9999763851 |
| SLFN13       | -1.7868207301  | 0.1977253734 | 0.9999763851 |
| PEX12        | 1.8129446953   | 0.5691176486 | 0.9999763851 |
| AP2B1        | 1.2247064781   | 0.3074840832 | 0.9999763851 |
| C17orf50     | -1.3154339304  | 0.8205576571 | 0.9999763851 |
| TAF15        | 1.4418883205   | 0.0137563014 | 0.9999763851 |
| HEATR9       | 3.3940373312   | 0.2270373552 | 0.9999763851 |
| CCL5         | -1.1008057266  | 0.5450032139 | 0.9999763851 |
| RDM1         | -1.6049296996  | 0.2582909529 | 0.9999763851 |
| CCL23        | 2.3398344857   | 0.4133791656 | 0.9999763851 |
| CCL18        | 0              | 0            | 0            |
| CCL3         | -17.6103194045 | 2.57E-12     | 3.46E-08     |
| CCL4         | -5.4163258644  | 0.001709     | 0.9999763851 |
| CCL3L3       | -12.9839108308 | 1.06E-08     | 3.57E-05     |
| CCL4L2       | -14.7252461469 | 0.0977604827 | 0.9999763851 |
| TBC1D3H      | 3.2361532718   | 0.5546934395 | 0.9999763851 |
| ZNHIT3       | 1.1059604441   | 0.5283470985 | 0.9999763851 |
| MYO19        | -1.4488052739  | 0.118354408  | 0.9999763851 |
| PIGW         | 1.0742851968   | 0.7351507398 | 0.9999763851 |
| GGNBP2       | 1.1005958916   | 0.5800821903 | 0.9999763851 |
| DHRS11       | 1.3718703568   | 0.413193369  | 0.9999763851 |
| MRM1         | 1.0733799428   | 0.8218783912 | 0.9999763851 |
| AATF         | -1.048396059   | 0.7483766532 | 0.9999763851 |
| ACACA        | 1.4011565592   | 0.0775677589 | 0.9999763851 |
| TADA2A       | 1.1799018915   | 0.5626929604 | 0.9999763851 |
| DUSP14       | -1.1003088294  | 0.7330855418 | 0.9999763851 |
| SYNRG        | 1.0209056748   | 0.9166391119 | 0.9999763851 |
| DDX52        | 1.9499859725   | 0.005227     | 0.9999763851 |
| HNF1B        | 0              | 0            | 0            |
| LOC101929950 | -2.6922490556  | 0.2893715837 | 0.9999763851 |
| TBC1D3E      | 1.4698296658   | 0.3354510495 | 0.9999763851 |
| TBC1D3       | 0              | 0            | 0            |
| MRPL45       | -1.207217016   | 0.3464195062 | 0.9999763851 |
| SOCS7        | -1.1815679737  | 0.4217915766 | 0.9999763851 |
| ARHGAP23     | -1.0707153004  | 0.8626449646 | 0.9999763851 |
| SRCIN1       | 2.8679346912   | 0.2849286157 | 0.9999763851 |
| C17orf96     | 1.0100106634   | 0.9509923982 | 0.9999763851 |
| LOC105371763 | 1.1889819001   | 0.6619838725 | 0.9999763851 |
| MLLT6        | -1.1346159767  | 0.5502563098 | 0.9999763851 |
| CISD3        | 1.0148091922   | 0.9372065718 | 0.9999763851 |
| PCGF2        | 5.4770877341   | 0.3746135179 | 0.9999763851 |
| PSMB3        | 1.1557818862   | 0.5369166203 | 0.9999763851 |
| PIP4K2B      | 1.2610997688   | 0.2073659094 | 0.9999763851 |
| CWC25        | 1.0791614234   | 0.7629704486 | 0.9999763851 |

gene\_expression\_table

|          |                |              |              |
|----------|----------------|--------------|--------------|
| C17orf98 | 0              | 0            | 0            |
| RPL23    | -1.0215666948  | 0.8696214561 | 0.9999763851 |
| LASP1    | -1.2708239979  | 0.0533396306 | 0.9999763851 |
| FBXO47   | 3.2356557963   | 0.5547505991 | 0.9999763851 |
| PLXDC1   | 1.0045143155   | 0.9957708879 | 0.9999763851 |
| ARL5C    | 5.4770877341   | 0.3746135179 | 0.9999763851 |
| CACNB1   | -10.8458971147 | 0.1433027679 | 0.9999763851 |
| RPL19    | 1.0764230667   | 0.5414152114 | 0.9999763851 |
| FBXL20   | 1.1700961976   | 0.6048180548 | 0.9999763851 |
| MED1     | -1.2324529637  | 0.2071331913 | 0.9999763851 |
| CDK12    | 1.0352802988   | 0.8722802606 | 0.9999763851 |
| NEUROD2  | 0              | 0            | 0            |
| STARD3   | 1.0499909904   | 0.7675908889 | 0.9999763851 |
| TCAP     | 0              | 0            | 0            |
| PGAP3    | -1.6609687825  | 0.225525288  | 0.9999763851 |
| MIEN1    | 1.1091700675   | 0.6840660913 | 0.9999763851 |
| GRB7     | 0              | 0            | 0            |
| IKZF3    | -4.2849908816  | 0.4028453076 | 0.9999763851 |
| GSDMB    | -14.1139127893 | 0.1033851165 | 0.9999763851 |
| ORMDL3   | 1.1076665828   | 0.6293113138 | 0.9999763851 |
| LRRC3C   | -4.287394647   | 0.4026306792 | 0.9999763851 |
| GSDMA    | 3.2356557963   | 0.5547505991 | 0.9999763851 |
| PSMD3    | 1.0395211043   | 0.7777450577 | 0.9999763851 |
| CSF3     | 0              | 0            | 0            |
| MED24    | 1.0435275421   | 0.7618615459 | 0.9999763851 |
| THRA     | -1.2365090914  | 0.1320108594 | 0.9999763851 |
| MSL1     | -1.0751710674  | 0.6470181117 | 0.9999763851 |
| CASC3    | -1.0960367898  | 0.6103525429 | 0.9999763851 |
| RAPGEFL1 | -1.315303824   | 0.8206171563 | 0.9999763851 |
| WIPF2    | -1.3628222188  | 0.0752083329 | 0.9999763851 |
| CDC6     | -1.003623917   | 0.9844097    | 0.9999763851 |
| RARA     | 1.1169451538   | 0.7702722309 | 0.9999763851 |
| TOP2A    | -1.0640367134  | 0.6071274505 | 0.9999763851 |
| IGFBP4   | -2.3401094535  | 0.2609856653 | 0.9999763851 |
| TNS4     | 0              | 0            | 0            |
| CCR7     | 1.2869488883   | 0.8212066554 | 0.9999763851 |
| SMARCE1  | -1.3833508898  | 0.0500687425 | 0.9999763851 |
| KRT22    | 0              | 0            | 0            |
| KRT25    | 0              | 0            | 0            |
| KRT10    | 1.0237809329   | 0.8768576682 | 0.9999763851 |
| TMEM99   | -1.7952455218  | 0.1427630397 | 0.9999763851 |
| KRT19    | 0              | 0            | 0            |
| KRT9     | -1.2461435291  | 0.4620754759 | 0.9999763851 |
| KRT17    | -2.06231313    | 0.3313568767 | 0.9999763851 |
| EIF1     | 1.0399823804   | 0.7502798809 | 0.9999763851 |
| JUP      | -1.0399161003  | 0.8452131433 | 0.9999763851 |
| P3H4     | 1.0542635479   | 0.7848359029 | 0.9999763851 |
| FKBP10   | 0              | 0            | 0            |
| NT5C3B   | 1.4119559467   | 0.1997901694 | 0.9999763851 |

gene\_expression\_table

|                |                |              |              |
|----------------|----------------|--------------|--------------|
| KLHL10         | 6.368054416    | 0.3492169917 | 0.9999763851 |
| KLHL11         | -1.170772176   | 0.5645557816 | 0.9999763851 |
| ACLY           | 1.1987262702   | 0.1727408773 | 0.9999763851 |
| TTC25          | -1.7358601187  | 0.4443221278 | 0.9999763851 |
| CNP            | 1.0357298083   | 0.8188519096 | 0.9999763851 |
| DNAJC7         | 1.0886084528   | 0.8452955492 | 0.9999763851 |
| NKIRAS2        | 1.0646073048   | 0.802415491  | 0.9999763851 |
| DHX58          | 0              | 0            | 0            |
| KAT2A          | 1.1054298992   | 0.6218793988 | 0.9999763851 |
| HSPB9          | 0              | 0            | 0            |
| RAB5C          | -1.2256506757  | 0.1603709551 | 0.9999763851 |
| KCNH4          | 0              | 0            | 0            |
| HCRT           | -4.2849908816  | 0.4028453076 | 0.9999763851 |
| GHDC           | 1.4202922713   | 0.3947032046 | 0.9999763851 |
| STAT5B         | -1.3123575227  | 0.2752368204 | 0.9999763851 |
| STAT5A         | -1.2743490152  | 0.244807045  | 0.9999763851 |
| STAT3          | -1.1752124293  | 0.5042935906 | 0.9999763851 |
| ATP6V0A1       | 7.7488609396   | 0.3058954712 | 0.9999763851 |
| NAGLU          | 1.3416512829   | 0.1501168336 | 0.9999763851 |
| HSD17B1        | 1.3012534193   | 0.4826225785 | 0.9999763851 |
| COASY          | 1.3066405269   | 0.1443738879 | 0.9999763851 |
| MLX            | -1.1340166139  | 0.6741374227 | 0.9999763851 |
| PSMC3IP        | 1.1526628378   | 0.8652492972 | 0.9999763851 |
| FAM134C        | -1.1945402121  | 0.5431208618 | 0.9999763851 |
| TUBG1          | 1.1397126095   | 0.626047407  | 0.9999763851 |
| TUBG2          | 0              | 0            | 0            |
| PLEKHH3        | 1.1450830729   | 0.756697014  | 0.9999763851 |
| CCR10          | -14.1139127893 | 0.1035179751 | 0.9999763851 |
| CNTNAP1        | 1.1095153459   | 0.8982805878 | 0.9999763851 |
| EZH1           | -1.2571363067  | 0.5678241157 | 0.9999763851 |
| VPS25          | 1.0203774656   | 0.9168909617 | 0.9999763851 |
| WNK4           | 2.3408621302   | 0.428191081  | 0.9999763851 |
| COA3           | 1.5335957987   | 0.0354154381 | 0.9999763851 |
| CNTD1          | -1.191042134   | 0.3739164963 | 0.9999763851 |
| BECN1          | 95.2169782749  | 0.020473733  | 0.9999763851 |
| PSME3          | 1.1723721653   | 0.306301255  | 0.9999763851 |
| AOC2           | 7.7204093521   | 0.287657111  | 0.9999763851 |
| AOC3           | -1.9652419871  | 0.4561425173 | 0.9999763851 |
| G6PC           | 0              | 0            | 0            |
| AARSD1         | -1.3767562248  | 0.1640118821 | 0.9999763851 |
| PTGES3L-AARSD1 | 3.2361532718   | 0.5546934395 | 0.9999763851 |
| PTGES3L        | -1.4166067094  | 0.6341659675 | 0.9999763851 |
| RUNDC1         | -1.1754889166  | 0.5789881894 | 0.9999763851 |
| RPL27          | 1.0589976191   | 0.6396559735 | 0.9999763851 |
| IFI35          | -10.8422096127 | 0.1421302158 | 0.9999763851 |
| VAT1           | -1.05767269    | 0.6506037656 | 0.9999763851 |
| BRCA1          | 1.0894002801   | 0.6109947754 | 0.9999763851 |
| NBR1           | -1.3802187527  | 0.1525368497 | 0.9999763851 |
| TMEM106A       | 1.1166943097   | 0.7788160019 | 0.9999763851 |

gene\_expression\_table

|                |               |              |              |
|----------------|---------------|--------------|--------------|
| ARL4D          | -2.0102635635 | 0.2120053943 | 0.9999763851 |
| DHX8           | -1.3079890236 | 0.3410844044 | 0.9999763851 |
| ETV4           | 1.6192525572  | 0.1267673744 | 0.9999763851 |
| DUSP3          | -1.3382225061 | 0.196368155  | 0.9999763851 |
| C17orf105      | -4.2849908816 | 0.4028453076 | 0.9999763851 |
| MPP3           | -3.3269505881 | 0.2608501707 | 0.9999763851 |
| PYY            | -1.5455442631 | 0.3604848352 | 0.9999763851 |
| TMEM101        | -1.0233608878 | 0.9332403775 | 0.9999763851 |
| LSM12          | -1.5960709051 | 0.004057     | 0.9999763851 |
| G6PC3          | 1.2564042319  | 0.594724224  | 0.9999763851 |
| HDAC5          | -2.6440243018 | 0.0142538131 | 0.9999763851 |
| C17orf53       | 1.3319720943  | 0.5089082667 | 0.9999763851 |
| ASB16          | -1.1241910911 | 0.8432827727 | 0.9999763851 |
| TMUB2          | -1.0897317093 | 0.7907810642 | 0.9999763851 |
| ATXN7L3        | -1.3374394544 | 0.069450966  | 0.9999763851 |
| UBTF           | 1.0367267784  | 0.8113230865 | 0.9999763851 |
| RUNDC3A        | 0             | 0            | 0            |
| SLC25A39       | 1.0804394103  | 0.6201121307 | 0.9999763851 |
| GRN            | -1.0024513187 | 0.9881060716 | 0.9999763851 |
| FAM171A2       | 1.222945565   | 0.5694149912 | 0.9999763851 |
| GPATCH8        | 1.3501414444  | 0.1338150361 | 0.9999763851 |
| FZD2           | -2.5587132929 | 0.0933655759 | 0.9999763851 |
| MEIOC          | 2.8186446591  | 0.1926593969 | 0.9999763851 |
| CCDC43         | -1.2875371507 | 0.3032849826 | 0.9999763851 |
| DBF4B          | 1.3153052107  | 0.3508845456 | 0.9999763851 |
| ADAM11         | -1.8150683874 | 0.5018445411 | 0.9999763851 |
| GJC1           | 0             | 0            | 0            |
| HIGD1B         | 3.4162861017  | 0.1308425662 | 0.9999763851 |
| EFTUD2         | 1.0326193658  | 0.8369687972 | 0.9999763851 |
| CCDC103        | 1.6246521587  | 0.5738699216 | 0.9999763851 |
| GFAP           | 0             | 0            | 0            |
| KIF18B         | -1.1903616839 | 0.4151608807 | 0.9999763851 |
| C1QL1          | -1.3157515262 | 0.8224985603 | 0.9999763851 |
| LOC107987243   | 1.523256191   | 0.5847125344 | 0.9999763851 |
| DCAKD          | -1.1094327092 | 0.7763014869 | 0.9999763851 |
| NMT1           | 1.2712449208  | 0.1504294082 | 0.9999763851 |
| PLCD3          | -1.2887895783 | 0.5908308782 | 0.9999763851 |
| ACBD4          | -1.406518047  | 0.6841405251 | 0.9999763851 |
| HEXIM1         | -1.2788649105 | 0.2356832065 | 0.9999763851 |
| HEXIM2         | 1.2865109866  | 0.8338841024 | 0.9999763851 |
| FMNL1          | -1.0948916497 | 0.7261203456 | 0.9999763851 |
| SPATA32        | 0             | 0            | 0            |
| MAP3K14        | 1.3585694454  | 0.5622502806 | 0.9999763851 |
| ARHGAP27       | 1.3000097871  | 0.2265919269 | 0.9999763851 |
| PLEKHM1        | -1.1585461795 | 0.719978444  | 0.9999763851 |
| MGC57346-CRHR1 | -1.0802533536 | 0.7829779462 | 0.9999763851 |
| MAPT           | 1.0615241038  | 0.8137644691 | 0.9999763851 |
| KANSL1         | -1.196791613  | 0.3631340361 | 0.9999763851 |
| LRRC37A        | -1.3103107816 | 0.272793767  | 0.9999763851 |

gene\_expression\_table

|          |                |              |              |
|----------|----------------|--------------|--------------|
| ARL17B   | -10.7322924268 | 4.82E-05     | 0.0927102426 |
| ARL17A   | 1.5503523123   | 0.0356333545 | 0.9999763851 |
| LRRC37A2 | -66.4111511063 | 0.007734     | 0.9999763851 |
| NSF      | 1.0152855734   | 0.9000823576 | 0.9999763851 |
| WNT3     | 1.2868359435   | 0.8210197937 | 0.9999763851 |
| GOSR2    | 1.0159371566   | 0.9385881466 | 0.9999763851 |
| RPRML    | 0              | 0            | 0            |
| CDC27    | -1.1683393756  | 0.3334248928 | 0.9999763851 |
| ITGB3    | 3.2356557963   | 0.5547505991 | 0.9999763851 |
| EFCAB13  | -1.0873921633  | 0.8201629532 | 0.9999763851 |
| NPEPPS   | 1.1075626917   | 0.5334323518 | 0.9999763851 |
| KPNB1    | 1.0036295374   | 0.9763370992 | 0.9999763851 |
| TBKBP1   | -1.5558662382  | 0.2038210095 | 0.9999763851 |
| TBX21    | 5.4770877341   | 0.3746135179 | 0.9999763851 |
| OSBPL7   | -1.0599217033  | 0.8801588024 | 0.9999763851 |
| MRPL10   | -1.2697754829  | 0.3495224202 | 0.9999763851 |
| LRRC46   | -1.3154339304  | 0.8205576571 | 0.9999763851 |
| SCRN2    | -1.1188213207  | 0.7006464392 | 0.9999763851 |
| SP2      | 1.0867964178   | 0.820319231  | 0.9999763851 |
| PNPO     | -1.1913010768  | 0.2529779258 | 0.9999763851 |
| CDK5RAP3 | -1.1426043575  | 0.4527221952 | 0.9999763851 |
| NFE2L1   | -1.0451053376  | 0.8224873622 | 0.9999763851 |
| CBX1     | 1.2252250926   | 0.2602942312 | 0.9999763851 |
| SNX11    | 1.4359829547   | 0.2102083709 | 0.9999763851 |
| SKAP1    | 5.4790129495   | 0.3768260133 | 0.9999763851 |
| HOXB3    | 3.2356557963   | 0.5547505991 | 0.9999763851 |
| HOXB4    | 0              | 0            | 0            |
| HOXB6    | 0              | 0            | 0            |
| TTLL6    | -4.2849908816  | 0.4028453076 | 0.9999763851 |
| CALCOCO2 | 1.0321021876   | 0.8580290964 | 0.9999763851 |
| ATP5G1   | -1.0438725929  | 0.7516376007 | 0.9999763851 |
| UBE2Z    | -1.0034275075  | 0.9866267474 | 0.9999763851 |
| SNF8     | -1.3350818357  | 0.1477940669 | 0.9999763851 |
| GIP      | 0              | 0            | 0            |
| IGF2BP1  | 3.2353357581   | 0.554787377  | 0.9999763851 |
| B4GALNT2 | 0              | 0            | 0            |
| GNGT2    | 0              | 0            | 0            |
| ABI3     | -1.7526708531  | 0.4695612548 | 0.9999763851 |
| PHOSPHO1 | 0              | 0            | 0            |
| ZNF652   | -1.0841997218  | 0.5347893593 | 0.9999763851 |
| PHB      | 1.1572248427   | 0.3422185415 | 0.9999763851 |
| SPOP     | -1.4701792421  | 0.0156184295 | 0.9999763851 |
| SLC35B1  | 1.1517103588   | 0.5151933111 | 0.9999763851 |
| FAM117A  | -1.6421689323  | 0.1126963516 | 0.9999763851 |
| KAT7     | 1.4238860596   | 0.1457870429 | 0.9999763851 |
| TAC4     | 0              | 0            | 0            |
| FLJ45513 | 3.2356557963   | 0.5547505991 | 0.9999763851 |
| DLX4     | -1.3471391661  | 0.527115492  | 0.9999763851 |
| ITGA3    | -2.5593586246  | 0.2687178723 | 0.9999763851 |

gene\_expression\_table

|           |               |              |              |
|-----------|---------------|--------------|--------------|
| PDK2      | 1.4166727518  | 0.3927535453 | 0.9999763851 |
| SAMD14    | -1.3157515262 | 0.8225209718 | 0.9999763851 |
| PPP1R9B   | 1.4728802061  | 0.1859053176 | 0.9999763851 |
| SGCA      | 3.2361532718  | 0.5546934395 | 0.9999763851 |
| COL1A1    | 1.0277462901  | 0.9757606161 | 0.9999763851 |
| TMEM92    | -1.4076805062 | 0.6614174686 | 0.9999763851 |
| XYLT2     | -1.1596625696 | 0.5741192914 | 0.9999763851 |
| MRPL27    | 1.0791781399  | 0.6374391291 | 0.9999763851 |
| EME1      | 1.4194606792  | 0.1208147082 | 0.9999763851 |
| LRRC59    | 1.0792194461  | 0.6986870827 | 0.9999763851 |
| ACSF2     | -1.3618862658 | 0.2957116187 | 0.9999763851 |
| RSAD1     | 1.0424672271  | 0.8357512347 | 0.9999763851 |
| EPN3      | 0             | 0            | 0            |
| SPATA20   | 1.5338540238  | 0.3341716736 | 0.9999763851 |
| ABCC3     | -4.439622732  | 0.1608087207 | 0.9999763851 |
| ANKRD40   | -1.0761702759 | 0.8158323987 | 0.9999763851 |
| LUC7L3    | -1.1791702156 | 0.2627328648 | 0.9999763851 |
| TOB1      | 1.0194321817  | 0.9740724285 | 0.9999763851 |
| SPAG9     | -1.1166419185 | 0.5957712143 | 0.9999763851 |
| NME1-NME2 | 3.6490389733  | 0.005738     | 0.9999763851 |
| NME1      | 1.031271857   | 0.8227417022 | 0.9999763851 |
| NME2      | -1.0390559375 | 0.7557857132 | 0.9999763851 |
| MBTD1     | -1.6335310538 | 0.0786078153 | 0.9999763851 |
| UTP18     | 1.1488545714  | 0.4994847656 | 0.9999763851 |
| CA10      | 3.2353357581  | 0.554787377  | 0.9999763851 |
| COX11     | 1.0635918753  | 0.728393867  | 0.9999763851 |
| STXBP4    | -1.8159051241 | 0.1283322844 | 0.9999763851 |
| HLF       | 14.4518735001 | 0.1558556665 | 0.9999763851 |
| MMD       | 1.1213013009  | 0.6953673088 | 0.9999763851 |
| TMEM100   | 0             | 0            | 0            |
| PCTP      | -1.1958756174 | 0.4285990759 | 0.9999763851 |
| ANKFN1    | 3.2353357581  | 0.554787377  | 0.9999763851 |
| NOG       | 1.0625615059  | 0.8992436519 | 0.9999763851 |
| C17orf67  | -1.4388607299 | 0.4662668392 | 0.9999763851 |
| DGKE      | -1.3460110406 | 0.2035289537 | 0.9999763851 |
| TRIM25    | -1.2574523527 | 0.1327616845 | 0.9999763851 |
| COIL      | -1.3955957376 | 0.0751667733 | 0.9999763851 |
| SCPEP1    | 1.8085324452  | 0.1811903705 | 0.9999763851 |
| AKAP1     | 1.2116960743  | 0.2739390077 | 0.9999763851 |
| MSI2      | -1.7304294588 | 0.003928     | 0.9999763851 |
| MRPS23    | 1.2320422494  | 0.2025225315 | 0.9999763851 |
| CUEDC1    | 1.3357167892  | 0.5014721262 | 0.9999763851 |
| VEZF1     | 1.2194007659  | 0.26652107   | 0.9999763851 |
| SRSF1     | -1.385474219  | 0.013870896  | 0.9999763851 |
| DYNLL2    | -1.0807084955 | 0.7965937641 | 0.9999763851 |
| EPX       | -1.3943388833 | 0.6974268411 | 0.9999763851 |
| MKS1      | 1.0037564108  | 0.9931419805 | 0.9999763851 |
| LPO       | 5.4784711963  | 0.3745358536 | 0.9999763851 |
| MPO       | -4.2849908816 | 0.4028453076 | 0.9999763851 |

gene\_expression\_table

|          |               |              |              |
|----------|---------------|--------------|--------------|
| TSPOAP1  | -4.2849908816 | 0.4028453076 | 0.9999763851 |
| SUPT4H1  | -1.2170614071 | 0.1335504044 | 0.9999763851 |
| RNF43    | 1.0738836724  | 0.7664621396 | 0.9999763851 |
| HSF5     | 0             | 0            | 0            |
| MTMR4    | -1.170513748  | 0.3151713619 | 0.9999763851 |
| TEX14    | -4.2864494036 | 0.4027150576 | 0.9999763851 |
| RAD51C   | -1.1091664288 | 0.6191959388 | 0.9999763851 |
| PPM1E    | 3.2353357581  | 0.554787377  | 0.9999763851 |
| TRIM37   | 1.1416446224  | 0.5484804353 | 0.9999763851 |
| SKA2     | 1.0027181747  | 0.9873525805 | 0.9999763851 |
| PRR11    | 1.0009019956  | 0.9951755513 | 0.9999763851 |
| SMG8     | -1.2863920245 | 0.1722477791 | 0.9999763851 |
| GDPD1    | -1.4076293613 | 0.6576393166 | 0.9999763851 |
| YPEL2    | -3.3900767704 | 0.0006754    | 0.6376579103 |
| DHX40    | 1.1721161655  | 0.4458883532 | 0.9999763851 |
| CLTC     | -1.0763256042 | 0.5504841057 | 0.9999763851 |
| PTRH2    | 1.5378949554  | 0.072808     | 0.9999763851 |
| VMP1     | -1.0413773281 | 0.8774799168 | 0.9999763851 |
| TUBD1    | 1.1411653845  | 0.5554011251 | 0.9999763851 |
| RPS6KB1  | 1.0620306757  | 0.813678936  | 0.9999763851 |
| RNFT1    | 1.6681561475  | 0.4996074955 | 0.9999763851 |
| HEATR6   | 1.1146484645  | 0.6933103203 | 0.9999763851 |
| USP32    | -1.3048347316 | 0.2244717033 | 0.9999763851 |
| C17orf64 | -1.4281695322 | 0.5302130795 | 0.9999763851 |
| APPBP2   | -1.1322703841 | 0.6624606562 | 0.9999763851 |
| PPM1D    | 1.3257277328  | 0.2966120482 | 0.9999763851 |
| BCAS3    | 1.0314357805  | 0.8675629671 | 0.9999763851 |
| TBX4     | 0             | 0            | 0            |
| NACA2    | 1.0500641291  | 0.7410342079 | 0.9999763851 |
| BRIP1    | 1.0783690276  | 0.7851707421 | 0.9999763851 |
| INTS2    | 1.611485542   | 0.2537316629 | 0.9999763851 |
| MED13    | 1.1438871918  | 0.5825867542 | 0.9999763851 |
| EFCAB3   | 3.2353357581  | 0.554787377  | 0.9999763851 |
| METTL2A  | -1.007937192  | 0.9780050303 | 0.9999763851 |
| TLK2     | -1.1872516466 | 0.3546495846 | 0.9999763851 |
| MRC2     | -1.2706018552 | 0.1609364621 | 0.9999763851 |
| TANC2    | 1.1450832573  | 0.7437900081 | 0.9999763851 |
| KCNH6    | 0             | 0            | 0            |
| DCAF7    | -1.1685069018 | 0.3381330906 | 0.9999763851 |
| TACO1    | -1.0507861217 | 0.8173164314 | 0.9999763851 |
| MAP3K3   | -1.5395862987 | 0.1816499329 | 0.9999763851 |
| LIMD2    | 1.2764977549  | 0.2569277466 | 0.9999763851 |
| STRADA   | 1.7466959631  | 0.1068332325 | 0.9999763851 |
| CCDC47   | 1.261568972   | 0.1591795738 | 0.9999763851 |
| DDX42    | 1.3351148823  | 0.1764650744 | 0.9999763851 |
| FTSJ3    | -1.181734384  | 0.538495871  | 0.9999763851 |
| PSMC5    | 1.1056608389  | 0.5703133009 | 0.9999763851 |
| SMARCD2  | 1.0082469566  | 0.9561715307 | 0.9999763851 |
| CD79B    | 1.094680312   | 0.9298789058 | 0.9999763851 |



gene\_expression\_table

|              |               |              |              |
|--------------|---------------|--------------|--------------|
| PRR29        | -2.4384604498 | 0.004352     | 0.9999763851 |
| ICAM2        | 2.8677508622  | 0.0260718734 | 0.9999763851 |
| ERN1         | -1.7163870119 | 0.0573970097 | 0.9999763851 |
| TEX2         | 1.2859765675  | 0.2162367541 | 0.9999763851 |
| PECAM1       | -2.4085187422 | 0.0002638    | 0.3301211415 |
| MILR1        | -1.9665787608 | 0.450663293  | 0.9999763851 |
| POLG2        | -2.5014873462 | 0.0658656921 | 0.9999763851 |
| DDX5         | 1.1752632563  | 0.2169227488 | 0.9999763851 |
| CEP95        | 1.0985384731  | 0.748821251  | 0.9999763851 |
| SMURF2       | -1.4800104493 | 0.1651715063 | 0.9999763851 |
| LRRC37A3     | -1.5778537154 | 0.1526225869 | 0.9999763851 |
| GNA13        | -1.3101417765 | 0.2005730372 | 0.9999763851 |
| RGS9         | 1.8139617088  | 0.5798476583 | 0.9999763851 |
| AXIN2        | 12.2012745411 | 0.1883263981 | 0.9999763851 |
| PRKCA        | -4.2849908816 | 0.4028453076 | 0.9999763851 |
| CACNG1       | 0             | 0            | 0            |
| HELZ         | -1.1156903389 | 0.6127510599 | 0.9999763851 |
| PSMD12       | 1.2573073716  | 0.1823343025 | 0.9999763851 |
| PITPNC1      | -1.2593300907 | 0.1526737039 | 0.9999763851 |
| NOL11        | 1.1244027211  | 0.449704627  | 0.9999763851 |
| BPTF         | -1.1588585304 | 0.4248513281 | 0.9999763851 |
| C17orf58     | 1.2185643604  | 0.450905043  | 0.9999763851 |
| KPNA2        | 1.2242515848  | 0.1151816203 | 0.9999763851 |
| AMZ2         | -1.1086294121 | 0.5285429094 | 0.9999763851 |
| ARSG         | 1.3631350465  | 0.5236987364 | 0.9999763851 |
| SLC16A6      | -1.2785467372 | 0.6689930072 | 0.9999763851 |
| PRKAR1A      | -1.167505528  | 0.3208269551 | 0.9999763851 |
| WIPI1        | 1.4169878943  | 0.3696390264 | 0.9999763851 |
| FAM20A       | 0             | 0            | 0            |
| ABCA8        | 0             | 0            | 0            |
| ABCA9        | 0             | 0            | 0            |
| MAP2K6       | -3.0838658458 | 0.1375299849 | 0.9999763851 |
| SLC39A11     | -1.1386598353 | 0.3613927247 | 0.9999763851 |
| SSTR2        | 1.8139019215  | 0.5824613813 | 0.9999763851 |
| COG1         | 1.2515691339  | 0.6278785591 | 0.9999763851 |
| FAM104A      | -1.135602     | 0.5350106964 | 0.9999763851 |
| C17orf80     | 1.0694478451  | 0.8833536893 | 0.9999763851 |
| CPSF4L       | -1.5229205493 | 0.4617274286 | 0.9999763851 |
| CDC42EP4     | 2.3029443907  | 0.1002902997 | 0.9999763851 |
| SDK2         | 0             | 0            | 0            |
| RPL38        | -1.0143018709 | 0.9098905487 | 0.9999763851 |
| TTYH2        | -6.3450869775 | 0.0583047746 | 0.9999763851 |
| KIF19        | 3.2353357581  | 0.554787377  | 0.9999763851 |
| GPRC5C       | 1.1293468666  | 0.6309874511 | 0.9999763851 |
| CD300A       | 1.1012193558  | 0.7145045659 | 0.9999763851 |
| CD300LB      | 1.3676001091  | 0.4638766938 | 0.9999763851 |
| CD300C       | -1.8805051931 | 0.066916264  | 0.9999763851 |
| LOC100130520 | 3.2353357581  | 0.554787377  | 0.9999763851 |
| CD300E       | 0             | 0            | 0            |

gene\_expression\_table

|          |               |              |              |
|----------|---------------|--------------|--------------|
| RAB37    | 1.3621691     | 0.1164686567 | 0.9999763851 |
| CD300LF  | -1.2384709082 | 0.2280057426 | 0.9999763851 |
| SLC9A3R1 | 1.0936977062  | 0.5309851788 | 0.9999763851 |
| NAT9     | -1.1720017138 | 0.6901013187 | 0.9999763851 |
| TMEM104  | 1.139610238   | 0.4889235223 | 0.9999763851 |
| GRIN2C   | 1.7554673993  | 0.479297055  | 0.9999763851 |
| FDXR     | -1.119831722  | 0.6801991635 | 0.9999763851 |
| CDR2L    | -1.450325375  | 0.1052699842 | 0.9999763851 |
| ICT1     | 1.2047320057  | 0.3297505937 | 0.9999763851 |
| KCTD2    | -1.1216682835 | 0.6518896821 | 0.9999763851 |
| ATP5H    | 1.0051076379  | 0.9785483619 | 0.9999763851 |
| SLC16A5  | -1.1258156018 | 0.7808757233 | 0.9999763851 |
| ARMC7    | 1.1275157128  | 0.7666537206 | 0.9999763851 |
| NT5C     | -1.2201487575 | 0.4844217624 | 0.9999763851 |
| HN1      | 1.3178170654  | 0.0387620258 | 0.9999763851 |
| SUMO2    | 1.2155486113  | 0.1495463053 | 0.9999763851 |
| NUP85    | -1.5784688329 | 0.1951245379 | 0.9999763851 |
| GGA3     | -1.0219114763 | 0.8977765063 | 0.9999763851 |
| MRPS7    | 1.1631272425  | 0.3079149475 | 0.9999763851 |
| MIF4GD   | -1.0781049508 | 0.7448054521 | 0.9999763851 |
| SLC25A19 | 1.0368491199  | 0.876805636  | 0.9999763851 |
| GRB2     | 1.2279305246  | 0.1102982332 | 0.9999763851 |
| TMEM94   | -1.6545598694 | 0.0760921455 | 0.9999763851 |
| CASKIN2  | -2.481317684  | 0.1590172943 | 0.9999763851 |
| TSEN54   | 1.0356058542  | 0.8559899728 | 0.9999763851 |
| LLGL2    | -1.4393973942 | 0.4211652208 | 0.9999763851 |
| MYO15B   | -1.0470082974 | 0.9199051466 | 0.9999763851 |
| RECQL5   | -1.5856285156 | 0.3670025194 | 0.9999763851 |
| SMIM5    | 0             | 0            | 0            |
| SMIM6    | 1.2865109866  | 0.8339574889 | 0.9999763851 |
| SAP30BP  | -1.2436491145 | 0.3468366601 | 0.9999763851 |
| ITGB4    | -10.371672165 | 0.0142517641 | 0.9999763851 |
| GALK1    | -1.248361254  | 0.3579667898 | 0.9999763851 |
| H3F3B    | 1.0022949672  | 0.9841393382 | 0.9999763851 |
| UNK      | -1.248061582  | 0.2977937211 | 0.9999763851 |
| UNC13D   | -1.2346984267 | 0.3622146135 | 0.9999763851 |
| WBP2     | 1.0074425751  | 0.9628863593 | 0.9999763851 |
| TRIM47   | 0             | 0            | 0            |
| TRIM65   | 1.432567934   | 0.0829948425 | 0.9999763851 |
| MRPL38   | -1.7987138531 | 0.0144475727 | 0.9999763851 |
| FBF1     | -2.2143932241 | 0.24856486   | 0.9999763851 |
| ACOX1    | -1.115204261  | 0.6066359367 | 0.9999763851 |
| TEN1     | 1.1756185533  | 0.6547039784 | 0.9999763851 |
| CDK3     | 1.0324501895  | 0.9523751626 | 0.9999763851 |
| SRP68    | 1.0229648789  | 0.8944932124 | 0.9999763851 |
| GALR2    | -1.3161718537 | 0.8292852722 | 0.9999763851 |
| ZACN     | -1.0656213907 | 0.7332831655 | 0.9999763851 |
| EXOC7    | -1.4401565523 | 0.3983523357 | 0.9999763851 |
| RNF157   | -1.8129967537 | 0.4216496909 | 0.9999763851 |

gene\_expression\_table

|              |               |              |              |
|--------------|---------------|--------------|--------------|
| UBALD2       | -1.2313785434 | 0.1381059307 | 0.9999763851 |
| QRICH2       | 1.5602490925  | 0.6804593908 | 0.9999763851 |
| PRPSAP1      | 1.1646300979  | 0.4438327987 | 0.9999763851 |
| SPHK1        | -1.0857981264 | 0.8001436871 | 0.9999763851 |
| UBE2O        | 1.0509444478  | 0.8166301874 | 0.9999763851 |
| AANAT        | 3.2353357581  | 0.554787377  | 0.9999763851 |
| RHBDF2       | 1.0132034058  | 0.9568305091 | 0.9999763851 |
| CYGB         | 0             | 0            | 0            |
| PRCD         | 2.3408621302  | 0.4283701132 | 0.9999763851 |
| ST6GALNAC2   | -1.3344418569 | 0.7451003495 | 0.9999763851 |
| MXRA7        | -1.294055056  | 0.6171079393 | 0.9999763851 |
| JMJD6        | -1.6554357091 | 0.0130886671 | 0.9999763851 |
| METTL23      | 1.1090294691  | 0.6625603247 | 0.9999763851 |
| SRSF2        | 1.1650504353  | 0.2155742584 | 0.9999763851 |
| MFSD11       | -1.134041525  | 0.7130988011 | 0.9999763851 |
| MGAT5B       | 0             | 0            | 0            |
| SEC14L1      | 1.2179077413  | 0.5425987287 | 0.9999763851 |
| SEPT9        | 1.010028779   | 0.9492735519 | 0.9999763851 |
| TNRC6C       | 1.4004060892  | 0.2361249462 | 0.9999763851 |
| TMC6         | 1.1883889727  | 0.4044046286 | 0.9999763851 |
| TMC8         | 1.2540889313  | 0.2759664525 | 0.9999763851 |
| C17orf99     | 1.3406186202  | 0.7024074684 | 0.9999763851 |
| SYNGR2       | 1.0007922426  | 0.9962191031 | 0.9999763851 |
| TK1          | 1.5988984277  | 0.0481773985 | 0.9999763851 |
| AFMID        | 1.0540431582  | 0.8983311216 | 0.9999763851 |
| BIRC5        | -1.2664221316 | 0.1486772135 | 0.9999763851 |
| SOCS3        | 5.4790129495  | 0.3770544328 | 0.9999763851 |
| PGS1         | 1.0592807813  | 0.8490445845 | 0.9999763851 |
| DNAH17       | 3.3937024411  | 0.2365744837 | 0.9999763851 |
| CYTH1        | -1.4837669675 | 0.1794407997 | 0.9999763851 |
| USP36        | 1.5747810022  | 0.0491538128 | 0.9999763851 |
| TIMP2        | -1.3715658618 | 0.0636813925 | 0.9999763851 |
| LGALS3BP     | 0             | 0            | 0            |
| CANT1        | 1.5073404876  | 0.1093228765 | 0.9999763851 |
| ENGASE       | 1.3417868536  | 0.3539514453 | 0.9999763851 |
| RBFOX3       | -2.5587422769 | 0.2939152544 | 0.9999763851 |
| CBX2         | -1.2167281174 | 0.2464040924 | 0.9999763851 |
| CBX8         | 1.027554661   | 0.9756499449 | 0.9999763851 |
| CBX4         | 1.4818259365  | 0.0194434151 | 0.9999763851 |
| TBC1D16      | -1.4318010494 | 0.1293841081 | 0.9999763851 |
| CCDC40       | -1.1494135484 | 0.8479372539 | 0.9999763851 |
| GAA          | -1.2228681114 | 0.2674177744 | 0.9999763851 |
| EIF4A3       | -1.0747790408 | 0.5812168489 | 0.9999763851 |
| SGSH         | -4.2849908816 | 0.4028453076 | 0.9999763851 |
| SLC26A11     | -2.3220580825 | 0.4361528034 | 0.9999763851 |
| RNF213       | -1.2988776157 | 0.1424568851 | 0.9999763851 |
| ENDOV        | 1.031881869   | 0.9342107461 | 0.9999763851 |
| RPTOR        | 1.7213189457  | 0.0237191973 | 0.9999763851 |
| LOC105371921 | 3.7137105359  | 0.127513383  | 0.9999763851 |

gene\_expression\_table

|              |               |              |              |
|--------------|---------------|--------------|--------------|
| CHMP6        | 1.0502262877  | 0.9153431807 | 0.9999763851 |
| BAIAP2       | -1.4160477835 | 0.6149260578 | 0.9999763851 |
| AATK         | 5.4770877341  | 0.3746135179 | 0.9999763851 |
| CEP131       | 1.0983992073  | 0.8445066911 | 0.9999763851 |
| ENTHD2       | 1.0524293328  | 0.8249979255 | 0.9999763851 |
| C17orf89     | -1.0511468366 | 0.6997333266 | 0.9999763851 |
| SLC38A10     | 1.1989902512  | 0.1724453134 | 0.9999763851 |
| TMEM105      | -3.3269505881 | 0.2614707944 | 0.9999763851 |
| LOC100130370 | 1.7659093218  | 0.1645744979 | 0.9999763851 |
| BAHCC1       | -1.3105086293 | 0.1641695256 | 0.9999763851 |
| ACTG1        | -1.1965139403 | 0.1387789246 | 0.9999763851 |
| FSCN2        | 6.368054416   | 0.3491635634 | 0.9999763851 |
| FAAP100      | 1.311894018   | 0.3445888282 | 0.9999763851 |
| NPLOC4       | -1.2326254162 | 0.2720037118 | 0.9999763851 |
| TSPAN10      | -1.9740380889 | 0.280981329  | 0.9999763851 |
| PDE6G        | -1.3158816768 | 0.8203229796 | 0.9999763851 |
| OXLD1        | 1.7530922662  | 0.0522775349 | 0.9999763851 |
| CCDC137      | 1.3913813201  | 0.1438165004 | 0.9999763851 |
| ARL16        | 1.0694712425  | 0.8224209407 | 0.9999763851 |
| HGS          | 1.1379232316  | 0.5454124149 | 0.9999763851 |
| MRPL12       | 1.0377233846  | 0.8583253283 | 0.9999763851 |
| SLC25A10     | -1.0445055821 | 0.8559792649 | 0.9999763851 |
| GCGR         | 0             | 0            | 0            |
| MCRIP1       | -1.1638773997 | 0.5146295439 | 0.9999763851 |
| PPP1R27      | -1.1862097654 | 0.6911970683 | 0.9999763851 |
| P4HB         | 1.1816681558  | 0.1722579276 | 0.9999763851 |
| ARHGDI1A     | 1.109153248   | 0.5297948035 | 0.9999763851 |
| ALYREF       | 1.2291377558  | 0.2354199433 | 0.9999763851 |
| ANAPC11      | 1.23351879    | 0.1267009386 | 0.9999763851 |
| PCYT2        | -1.0057481359 | 0.9782906303 | 0.9999763851 |
| SIRT7        | 1.2490378222  | 0.2785227466 | 0.9999763851 |
| MAFG         | -1.0785559128 | 0.6068514886 | 0.9999763851 |
| MYADML2      | 0             | 0            | 0            |
| NOTUM        | 0             | 0            | 0            |
| ASPSCR1      | 1.5237627223  | 0.27691641   | 0.9999763851 |
| STRA13       | 1.0903504173  | 0.6824079806 | 0.9999763851 |
| LRRC45       | -1.3409801979 | 0.4893586368 | 0.9999763851 |
| RAC3         | -1.0195222327 | 0.9715494501 | 0.9999763851 |
| DCXR         | 1.1505292304  | 0.4123407491 | 0.9999763851 |
| RFNG         | 1.0778949265  | 0.8632727738 | 0.9999763851 |
| GPS1         | 1.1056930974  | 0.6638533059 | 0.9999763851 |
| DUS1L        | 1.5196477277  | 0.011241128  | 0.9999763851 |
| FASN         | -1.0190819804 | 0.8908694471 | 0.9999763851 |
| CCDC57       | -1.2537635832 | 0.3659778794 | 0.9999763851 |
| SLC16A3      | 1.007412379   | 0.9636829309 | 0.9999763851 |
| CSNK1D       | 1.2293362349  | 0.1987391202 | 0.9999763851 |
| TEX19        | 1.1427172643  | 0.7752356948 | 0.9999763851 |
| OGFOD3       | 1.4492553209  | 0.1934123457 | 0.9999763851 |
| HEXDC        | 1.4950776813  | 0.2107898692 | 0.9999763851 |

gene\_expression\_table

|              |               |              |              |
|--------------|---------------|--------------|--------------|
| C17orf62     | 1.2184108832  | 0.4295393158 | 0.9999763851 |
| NARF         | 1.1729331475  | 0.5131037997 | 0.9999763851 |
| FOXK2        | -1.0753705697 | 0.6522633226 | 0.9999763851 |
| WDR45B       | -1.1889874864 | 0.2852939405 | 0.9999763851 |
| RAB40B       | 1.190830385   | 0.7249087679 | 0.9999763851 |
| FN3KRP       | -1.0708183273 | 0.7729172705 | 0.9999763851 |
| FN3K         | 0             | 0            | 0            |
| TBCD         | -1.9158695132 | 0.0801179606 | 0.9999763851 |
| LOC105371944 | 3.2356557963  | 0.5547505991 | 0.9999763851 |
| B3GNTL1      | 1.1602988526  | 0.4118026422 | 0.9999763851 |
| METRNL       | -1.6699253022 | 0.0168594392 | 0.9999763851 |
| USP14        | 1.268719576   | 0.1617850482 | 0.9999763851 |
| THOC1        | -1.1850965868 | 0.486945675  | 0.9999763851 |
| COLEC12      | -4.2849908816 | 0.4028453076 | 0.9999763851 |
| CLUL1        | 4.9761319165  | 0.1044956469 | 0.9999763851 |
| TYMSOS       | -1.0030965355 | 0.9882143083 | 0.9999763851 |
| TYMS         | 1.3445571224  | 0.133731681  | 0.9999763851 |
| ENOSF1       | 1.2594240891  | 0.2226723187 | 0.9999763851 |
| YES1         | -1.1266057749 | 0.7238896945 | 0.9999763851 |
| METTL4       | 1.4276679728  | 0.4182629513 | 0.9999763851 |
| NDC80        | 1.5368360324  | 0.0666069778 | 0.9999763851 |
| SMCHD1       | 1.222222408   | 0.2418909853 | 0.9999763851 |
| EMILIN2      | -1.7376472043 | 0.0246840727 | 0.9999763851 |
| LPIN2        | -1.2305055086 | 0.5110075629 | 0.9999763851 |
| MYL12A       | -1.039244956  | 0.8229916289 | 0.9999763851 |
| MYL12B       | -1.2767519225 | 0.1330881155 | 0.9999763851 |
| TGIF1        | -1.1113430264 | 0.8259028597 | 0.9999763851 |
| DLGAP1       | 2.3833649494  | 0.2136734025 | 0.9999763851 |
| ZBTB14       | -1.5731112195 | 0.1155256579 | 0.9999763851 |
| EPB41L3      | 1.3858577527  | 0.1166141524 | 0.9999763851 |
| ARHGAP28     | 3.2356557963  | 0.5547505991 | 0.9999763851 |
| LAMA1        | -4.2864494036 | 0.4027150576 | 0.9999763851 |
| RAB12        | -1.0857545116 | 0.6997866977 | 0.9999763851 |
| MTCL1        | -1.4265959713 | 0.5889879194 | 0.9999763851 |
| NDUFV2       | 1.0985417743  | 0.5927695475 | 0.9999763851 |
| ANKRD12      | -1.7024590316 | 0.0150631528 | 0.9999763851 |
| TWSG1        | -1.1989352035 | 0.4643356999 | 0.9999763851 |
| RALBP1       | 1.0625244586  | 0.6946807271 | 0.9999763851 |
| PPP4R1       | 1.1750457763  | 0.3638509778 | 0.9999763851 |
| RAB31        | -1.3123459729 | 0.0559937365 | 0.9999763851 |
| TXNDC2       | 0             | 0            | 0            |
| VAPA         | 1.1434807562  | 0.2976169952 | 0.9999763851 |
| APCDD1       | 7.722359209   | 0.2874240873 | 0.9999763851 |
| NAPG         | 1.0844005072  | 0.7240639501 | 0.9999763851 |
| GNAL         | -1.4073673926 | 0.6744285455 | 0.9999763851 |
| CHMP1B       | -1.472549039  | 0.1532825515 | 0.9999763851 |
| MPPE1        | 1.0538144491  | 0.8651115928 | 0.9999763851 |
| IMPA2        | 1.2467875593  | 0.1314080006 | 0.9999763851 |
| CIDEA        | -1.9661045084 | 0.4534996017 | 0.9999763851 |

gene\_expression\_table

|              |               |              |              |
|--------------|---------------|--------------|--------------|
| TUBB6        | 1.0528456853  | 0.7054818371 | 0.9999763851 |
| AFG3L2       | -2.2613004035 | 0.0180473284 | 0.9999763851 |
| PRELID3A     | 2.011636301   | 0.1831048152 | 0.9999763851 |
| SPIRE1       | 2.2799218304  | 0.0424500369 | 0.9999763851 |
| PSMG2        | 1.1289216452  | 0.5260274705 | 0.9999763851 |
| CEP76        | -1.125788792  | 0.8101302279 | 0.9999763851 |
| PTPN2        | -1.1066674826 | 0.6447097725 | 0.9999763851 |
| SEH1L        | 1.1553499034  | 0.4350136921 | 0.9999763851 |
| CEP192       | -1.6465320858 | 0.1210643586 | 0.9999763851 |
| LDLRAD4      | 1.1785905591  | 0.577841858  | 0.9999763851 |
| FAM210A      | 1.0415522553  | 0.8450658861 | 0.9999763851 |
| RNMT         | 1.0393627572  | 0.8248916887 | 0.9999763851 |
| ZNF519       | 1.4145351204  | 0.4102711148 | 0.9999763851 |
| ANKRD30B     | 0             | 0            | 0            |
| ROCK1        | 1.1302097523  | 0.4852404621 | 0.9999763851 |
| ESCO1        | 1.013979731   | 0.9590659246 | 0.9999763851 |
| SNRPD1       | -1.0301930549 | 0.8146288958 | 0.9999763851 |
| ABHD3        | 1.0076240997  | 0.9807605031 | 0.9999763851 |
| MIB1         | -1.4842623491 | 0.0641970462 | 0.9999763851 |
| GATA6        | -2.3227998731 | 0.4423442872 | 0.9999763851 |
| CTAGE1       | -4.2864494036 | 0.4027150576 | 0.9999763851 |
| RBBP8        | 1.0316188723  | 0.8978489437 | 0.9999763851 |
| LOC105372022 | 0             | 0            | 0            |
| CABLES1      | -1.4049149076 | 0.4270897107 | 0.9999763851 |
| TMEM241      | 1.1313222753  | 0.6266838642 | 0.9999763851 |
| RIOK3        | -1.1719432075 | 0.5624205679 | 0.9999763851 |
| C18orf8      | 1.0530606975  | 0.8285526709 | 0.9999763851 |
| NPC1         | -1.5368605507 | 0.1620602488 | 0.9999763851 |
| ANKRD29      | -4.2849908816 | 0.4028453076 | 0.9999763851 |
| LAMA3        | 0             | 0            | 0            |
| TTC39C       | -1.0644101204 | 0.7436789616 | 0.9999763851 |
| OSBPL1A      | 1.3583153059  | 0.2177960888 | 0.9999763851 |
| IMPACT       | 1.8331084374  | 0.0784332203 | 0.9999763851 |
| SS18         | 1.0320900741  | 0.8759787169 | 0.9999763851 |
| PSMA8        | 4.337646665   | 0.005906     | 0.9999763851 |
| TAF4B        | -1.2941113162 | 0.4923770922 | 0.9999763851 |
| KCTD1        | 1.1314940385  | 0.748535491  | 0.9999763851 |
| DSG3         | 0             | 0            | 0            |
| DSG2         | 0             | 0            | 0            |
| SLC25A52     | -1.3178224963 | 0.7617796282 | 0.9999763851 |
| TRAPPC8      | 1.0051706883  | 0.9871178963 | 0.9999763851 |
| RNF125       | 1.294438746   | 0.4097490779 | 0.9999763851 |
| RNF138       | -1.1097586732 | 0.6715422085 | 0.9999763851 |
| GAREM1       | 4.6124114429  | 0.0497052645 | 0.9999763851 |
| DTNA         | 0             | 0            | 0            |
| MAPRE2       | 1.4182977911  | 0.2135128463 | 0.9999763851 |
| ZNF397       | -1.0390719457 | 0.9459961495 | 0.9999763851 |
| ZSCAN30      | -1.7384828959 | 0.2722560013 | 0.9999763851 |
| ZNF24        | 1.0615050333  | 0.734345652  | 0.9999763851 |

gene\_expression\_table

|                |               |              |              |
|----------------|---------------|--------------|--------------|
| ZNF396         | 0             | 0            | 0            |
| INO80C         | 1.1763088418  | 0.7037208211 | 0.9999763851 |
| GALNT1         | 1.2587168859  | 0.1740068173 | 0.9999763851 |
| C18orf21       | -1.0772491272 | 0.8038099843 | 0.9999763851 |
| RPRD1A         | 1.3277535968  | 0.1740396859 | 0.9999763851 |
| SLC39A6        | -1.0099910827 | 0.9599779856 | 0.9999763851 |
| ELP2           | -1.2623910018 | 0.2748664257 | 0.9999763851 |
| FHOD3          | 1.2869488883  | 0.8212647797 | 0.9999763851 |
| TPGS2          | 1.1570498     | 0.3686347809 | 0.9999763851 |
| KIAA1328       | -1.0106205677 | 0.979228462  | 0.9999763851 |
| PIK3C3         | 1.3099658605  | 0.2022104335 | 0.9999763851 |
| SLC14A2        | -1.4211113077 | 0.5992730278 | 0.9999763851 |
| SLC14A1        | 1.1393200909  | 0.836754531  | 0.9999763851 |
| EPG5           | -1.1871152842 | 0.3221336632 | 0.9999763851 |
| SIGLEC15       | -1.2347505946 | 0.7212635075 | 0.9999763851 |
| PSTPIP2        | 1.3531784651  | 0.0886505475 | 0.9999763851 |
| ATP5A1         | 1.1623316224  | 0.2073866185 | 0.9999763851 |
| HAUS1          | 1.347668138   | 0.1522736807 | 0.9999763851 |
| C18orf25       | -1.1680439785 | 0.4908845841 | 0.9999763851 |
| RNF165         | -1.5911835926 | 0.2688940412 | 0.9999763851 |
| LOXHD1         | 0             | 0            | 0            |
| PIAS2          | -1.046240234  | 0.8520608296 | 0.9999763851 |
| KATNAL2        | -1.677905058  | 0.1789147043 | 0.9999763851 |
| HDHD2          | -1.0564198249 | 0.8278121123 | 0.9999763851 |
| IER3IP1        | 1.0116081812  | 0.9435816828 | 0.9999763851 |
| SMAD2          | 1.1129968444  | 0.4112374721 | 0.9999763851 |
| ZBTB7C         | 1.8137824633  | 0.5650708093 | 0.9999763851 |
| CTIF           | -1.6263145503 | 0.2845371714 | 0.9999763851 |
| SMAD7          | 1.5931922204  | 0.475646022  | 0.9999763851 |
| DYM            | 1.3021913696  | 0.1918979724 | 0.9999763851 |
| C18orf32       | -1.5045639136 | 0.6135235448 | 0.9999763851 |
| RPL17-C18orf32 | -1.046758537  | 0.9431787071 | 0.9999763851 |
| RPL17          | -1.0680504711 | 0.6098631586 | 0.9999763851 |
| LIPG           | 0             | 0            | 0            |
| ACAA2          | 1.3473501545  | 0.1604902033 | 0.9999763851 |
| MYO5B          | -1.3157515262 | 0.8225431686 | 0.9999763851 |
| CFAP53         | -1.1960912581 | 0.7932911701 | 0.9999763851 |
| MBD1           | -1.1366589468 | 0.5274264358 | 0.9999763851 |
| CXXC1          | 1.290381635   | 0.2956972014 | 0.9999763851 |
| SKA1           | 1.0758157455  | 0.6904055391 | 0.9999763851 |
| MRO            | 1.2869488883  | 0.8213966802 | 0.9999763851 |
| ME2            | 1.3162081797  | 0.1377623823 | 0.9999763851 |
| ELAC1          | -1.2501416505 | 0.6234664112 | 0.9999763851 |
| SMAD4          | -1.1840754211 | 0.3995692433 | 0.9999763851 |
| MEX3C          | 1.0956963208  | 0.7198710167 | 0.9999763851 |
| DCC            | -1.3157515262 | 0.8226406568 | 0.9999763851 |
| MBD2           | 1.1496545935  | 0.4344302282 | 0.9999763851 |
| POLI           | -1.4275443527 | 0.5508169969 | 0.9999763851 |
| STARD6         | 0             | 0            | 0            |

gene\_expression\_table

|              |               |              |              |
|--------------|---------------|--------------|--------------|
| C18orf54     | -1.0613861353 | 0.8766861319 | 0.9999763851 |
| RAB27B       | 1.1809081663  | 0.431212455  | 0.9999763851 |
| CCDC68       | 0             | 0            | 0            |
| TCF4         | 1.460070465   | 0.1651055916 | 0.9999763851 |
| TXNL1        | 1.4664524438  | 0.0192607815 | 0.9999763851 |
| WDR7         | 1.1649170552  | 0.5869194555 | 0.9999763851 |
| BOD1L2       | 3.2353357581  | 0.554787377  | 0.9999763851 |
| ONECUT2      | 1.5665550185  | 0.1461142335 | 0.9999763851 |
| FECH         | 1.0079974426  | 0.9689864487 | 0.9999763851 |
| NARS         | 1.0834630824  | 0.5637073624 | 0.9999763851 |
| LOC100505549 | 1.0316918329  | 0.9422244948 | 0.9999763851 |
| ATP8B1       | 1.0959397657  | 0.8987293012 | 0.9999763851 |
| NEDD4L       | -1.4490644074 | 0.177761689  | 0.9999763851 |
| LOC101927322 | 3.2353357581  | 0.554787377  | 0.9999763851 |
| MALT1        | -1.0002638517 | 0.9991526872 | 0.9999763851 |
| ZNF532       | 0             | 0            | 0            |
| SEC11C       | -1.4603990861 | 0.0575076048 | 0.9999763851 |
| LMAN1        | -1.4232019761 | 0.0456366823 | 0.9999763851 |
| PMAIP1       | -1.1675544153 | 0.632017776  | 0.9999763851 |
| CDH20        | 3.2356557963  | 0.5547505991 | 0.9999763851 |
| PIGN         | 1.3981943276  | 0.2234987455 | 0.9999763851 |
| KIAA1468     | -1.6410991858 | 0.1216969411 | 0.9999763851 |
| TNFRSF11A    | -1.3157515262 | 0.8227364894 | 0.9999763851 |
| ZCCHC2       | 1.0943213612  | 0.6805532992 | 0.9999763851 |
| PHLPP1       | -1.2210442353 | 0.5416895447 | 0.9999763851 |
| BCL2         | 1.3574611945  | 0.1219747567 | 0.9999763851 |
| KDSR         | 1.4319835927  | 0.1120552441 | 0.9999763851 |
| VPS4B        | 1.0191525346  | 0.9163300125 | 0.9999763851 |
| SERPINB13    | 0             | 0            | 0            |
| SERPINB4     | 5.4781708352  | 0.3745527127 | 0.9999763851 |
| SERPINB2     | -1.2487160765 | 0.2249693702 | 0.9999763851 |
| SERPINB10    | -1.1487065491 | 0.8497509362 | 0.9999763851 |
| HMSD         | -4.2849908816 | 0.4028453076 | 0.9999763851 |
| SERPINB8     | 1.1662324787  | 0.660964801  | 0.9999763851 |
| TMX3         | 1.038674887   | 0.8440882348 | 0.9999763851 |
| CCDC102B     | -4.7674026393 | 0.0254957192 | 0.9999763851 |
| DOK6         | 0             | 0            | 0            |
| CD226        | 0             | 0            | 0            |
| RTTN         | -1.431094597  | 0.3617603982 | 0.9999763851 |
| SOCS6        | 1.2649613881  | 0.4833458416 | 0.9999763851 |
| CBLN2        | 0             | 0            | 0            |
| FBXO15       | -1.3151016298 | 0.8212997976 | 0.9999763851 |
| TIMM21       | 1.2615674681  | 0.2687467046 | 0.9999763851 |
| CYB5A        | -1.1806901819 | 0.7419498692 | 0.9999763851 |
| CNDP2        | 1.43710671    | 0.0785497062 | 0.9999763851 |
| CNDP1        | 0             | 0            | 0            |
| ZNF407       | 1.3806944824  | 0.3061357917 | 0.9999763851 |
| ZADH2        | 1.605074042   | 0.0205974713 | 0.9999763851 |
| TSHZ1        | -1.0058215633 | 0.9805488346 | 0.9999763851 |



gene\_expression\_table

|              |               |              |              |
|--------------|---------------|--------------|--------------|
| SMIM21       | 0             | 0            | 0            |
| ZNF516       | 1.1029598534  | 0.6378174891 | 0.9999763851 |
| C18orf65     | 0             | 0            | 0            |
| ZNF236       | 2.2652956169  | 0.0436937484 | 0.9999763851 |
| MBP          | -1.1565182767 | 0.2359212865 | 0.9999763851 |
| LOC107987260 | -4.3498975359 | 0.0551187273 | 0.9999763851 |
| ATP9B        | 1.4461746901  | 0.3026275879 | 0.9999763851 |
| LOC100996274 | -4.2849908816 | 0.4028453076 | 0.9999763851 |
| NFATC1       | 1.2991507835  | 0.2754794045 | 0.9999763851 |
| CTDP1        | 1.0170868483  | 0.9361862445 | 0.9999763851 |
| LOC105376875 | 0             | 0            | 0            |
| KCNG2        | 1.7333395294  | 0.2445560354 | 0.9999763851 |
| PQLC1        | -1.0916230486 | 0.5315989856 | 0.9999763851 |
| HSBP1L1      | -1.4740283994 | 0.4768688405 | 0.9999763851 |
| TXNL4A       | 1.3412242596  | 0.0248043144 | 0.9999763851 |
| RBFA         | -1.1952419538 | 0.3053420021 | 0.9999763851 |
| ADNP2        | -1.2341261477 | 0.3627906561 | 0.9999763851 |
| PARD6G       | 1.1796097153  | 0.7225421517 | 0.9999763851 |
| PLPP2        | 0             | 0            | 0            |
| LOC101929060 | 0             | 0            | 0            |
| MIER2        | 1.290970743   | 0.4946227036 | 0.9999763851 |
| C2CD4C       | -1.3151016298 | 0.8212381876 | 0.9999763851 |
| ODF3L2       | -1.3154339304 | 0.8205576571 | 0.9999763851 |
| MADCAM1      | 1.8139617088  | 0.5800559797 | 0.9999763851 |
| TPGS1        | -1.3943229106 | 0.7064421931 | 0.9999763851 |
| CDC34        | 1.2772717163  | 0.1456358752 | 0.9999763851 |
| BSG          | -1.1266048093 | 0.4916397366 | 0.9999763851 |
| HCN2         | 5.4790129495  | 0.3772418585 | 0.9999763851 |
| POLRMT       | 1.413178442   | 0.3283936249 | 0.9999763851 |
| RNF126       | 1.0364439616  | 0.7970954411 | 0.9999763851 |
| FSTL3        | -1.231512585  | 0.5748721099 | 0.9999763851 |
| PRSS57       | -1.1495398408 | 0.8598004411 | 0.9999763851 |
| PALM         | -1.0192343692 | 0.9691073227 | 0.9999763851 |
| PTBP1        | 1.131922505   | 0.3209385984 | 0.9999763851 |
| PLPPR3       | -1.0358048925 | 0.9599204069 | 0.9999763851 |
| AZU1         | -2.0972707676 | 0.0146336224 | 0.9999763851 |
| PRTN3        | -2.7315023848 | 0.002801     | 0.9999763851 |
| ELANE        | -2.1559272076 | 0.008335     | 0.9999763851 |
| CFD          | -1.8839942601 | 0.0006626    | 0.6368063985 |
| MED16        | 1.2786596453  | 0.4722063616 | 0.9999763851 |
| R3HDM4       | 1.2088484948  | 0.5032060441 | 0.9999763851 |
| ARID3A       | -1.0714448023 | 0.645970121  | 0.9999763851 |
| WDR18        | -1.1125770258 | 0.5322724397 | 0.9999763851 |
| GRIN3B       | 1.7666556068  | 0.007222     | 0.9999763851 |
| TMEM259      | -1.1613439262 | 0.3946440167 | 0.9999763851 |
| CNN2         | 1.2475563951  | 0.2287581546 | 0.9999763851 |
| ABCA7        | 1.1367329528  | 0.6845222225 | 0.9999763851 |
| HMHA1        | -1.1482188025 | 0.3292999748 | 0.9999763851 |
| POLR2E       | 1.1010004561  | 0.4868334108 | 0.9999763851 |

gene\_expression\_table

|              |               |              |              |
|--------------|---------------|--------------|--------------|
| GPX4         | -1.0317008389 | 0.8395631037 | 0.9999763851 |
| SBNO2        | 1.0209730818  | 0.9207863291 | 0.9999763851 |
| LOC102725180 | -3.3272796812 | 0.2422722016 | 0.9999763851 |
| STK11        | 1.4167691791  | 0.1564333106 | 0.9999763851 |
| CBARP        | 1.1833354309  | 0.6986106397 | 0.9999763851 |
| ATP5D        | 1.0671525712  | 0.7385254444 | 0.9999763851 |
| MIDN         | 1.3387894598  | 0.0886668652 | 0.9999763851 |
| CIRBP        | 1.035292992   | 0.8057141232 | 0.9999763851 |
| C19orf24     | -1.05909459   | 0.7524654517 | 0.9999763851 |
| MUM1         | 1.2512259867  | 0.2673091583 | 0.9999763851 |
| NDUFS7       | -1.0454754495 | 0.8339337701 | 0.9999763851 |
| GAMT         | -1.0936291488 | 0.6504607401 | 0.9999763851 |
| DAZAP1       | -1.1454902037 | 0.2527936722 | 0.9999763851 |
| RPS15        | 1.1976131177  | 0.1265152381 | 0.9999763851 |
| APC2         | 1.1829955191  | 0.4173601781 | 0.9999763851 |
| C19orf25     | 1.2238657423  | 0.5731691936 | 0.9999763851 |
| PCSK4        | -1.1080029864 | 0.8633017572 | 0.9999763851 |
| REEP6        | 1.0786099006  | 0.8879346195 | 0.9999763851 |
| ADAMTSL5     | 1.6233493708  | 0.594412743  | 0.9999763851 |
| PLK5         | 3.2353357581  | 0.554787377  | 0.9999763851 |
| MEX3D        | -1.1860170558 | 0.3976578489 | 0.9999763851 |
| MBD3         | 1.0816737879  | 0.697655724  | 0.9999763851 |
| UQCR11       | 1.2165253877  | 0.1154014256 | 0.9999763851 |
| TCF3         | -1.0484094273 | 0.7397398038 | 0.9999763851 |
| ATP8B3       | 1.1517721744  | 0.6032066345 | 0.9999763851 |
| REXO1        | -1.1777373612 | 0.6950323536 | 0.9999763851 |
| KLF16        | 1.0037582097  | 0.9833317709 | 0.9999763851 |
| ABHD17A      | -1.07702174   | 0.7362004703 | 0.9999763851 |
| ADAT3        | 5.9192858611  | 0.1688273823 | 0.9999763851 |
| SCAMP4       | 2.814770943   | 0.0765236739 | 0.9999763851 |
| CSNK1G2      | -1.0266551666 | 0.8691250895 | 0.9999763851 |
| BTBD2        | 1.1577339402  | 0.6058809204 | 0.9999763851 |
| MKNK2        | 1.3208484269  | 0.2400526405 | 0.9999763851 |
| MOB3A        | 1.182977171   | 0.4092961741 | 0.9999763851 |
| IZUMO4       | 1.1352686914  | 0.7008053866 | 0.9999763851 |
| AP3D1        | 1.1605087322  | 0.385082447  | 0.9999763851 |
| DOT1L        | 1.0322896598  | 0.9103597557 | 0.9999763851 |
| PLEKHJ1      | 1.1479919186  | 0.339120879  | 0.9999763851 |
| SF3A2        | -1.4282645744 | 0.5366645992 | 0.9999763851 |
| AMH          | 1.4570861054  | 0.4848855715 | 0.9999763851 |
| JSRP1        | 0             | 0            | 0            |
| OAZ1         | 1.0384096329  | 0.7585799008 | 0.9999763851 |
| C19orf35     | -1.9659101454 | 0.4336378235 | 0.9999763851 |
| LINGO3       | 1.0637644931  | 0.8356010693 | 0.9999763851 |
| LSM7         | 1.0879769411  | 0.5705777505 | 0.9999763851 |
| SPPL2B       | -1.2361579023 | 0.2926920122 | 0.9999763851 |
| TMPRSS9      | -4.3357248284 | 0.1409480754 | 0.9999763851 |
| TIMM13       | -1.1606820567 | 0.294971482  | 0.9999763851 |
| LMNB2        | -1.1248319312 | 0.4387481828 | 0.9999763851 |

gene\_expression\_table

|              |               |              |              |
|--------------|---------------|--------------|--------------|
| GADD45B      | -1.1858930738 | 0.3094010067 | 0.9999763851 |
| LOC101929097 | -1.4010538105 | 0.179624853  | 0.9999763851 |
| GNG7         | -1.4533319337 | 0.1285468438 | 0.9999763851 |
| DIRAS1       | 1.1729244398  | 0.7554942151 | 0.9999763851 |
| SLC39A3      | 2.1659783213  | 0.0009005    | 0.734233805  |
| SGTA         | 1.0814295429  | 0.6759542052 | 0.9999763851 |
| THOP1        | 1.1248383721  | 0.4361454396 | 0.9999763851 |
| ZNF554       | 1.7226814704  | 0.2677187242 | 0.9999763851 |
| ZNF555       | -1.2382563075 | 0.6308946879 | 0.9999763851 |
| ZNF556       | -4.2849908816 | 0.4028453076 | 0.9999763851 |
| ZNF57        | 3.3957503398  | 0.239352767  | 0.9999763851 |
| ZNF77        | 2.8184855207  | 0.1996329781 | 0.9999763851 |
| TLE6         | -1.0049708175 | 0.9922834184 | 0.9999763851 |
| TLE2         | 1.478582848   | 0.5996274859 | 0.9999763851 |
| AES          | 1.0509218159  | 0.7448172235 | 0.9999763851 |
| GNA11        | -1.3297681187 | 0.6010806461 | 0.9999763851 |
| GNA15        | -1.0462218838 | 0.8122999357 | 0.9999763851 |
| S1PR4        | -1.2386892921 | 0.2310374059 | 0.9999763851 |
| NCLN         | -1.0977440504 | 0.556341226  | 0.9999763851 |
| CELF5        | 5.4781708352  | 0.3745527127 | 0.9999763851 |
| NFIC         | 1.0934320093  | 0.5678219705 | 0.9999763851 |
| SMIM24       | -1.6887668142 | 0.1688496532 | 0.9999763851 |
| DOHH         | -1.5228866999 | 0.1204790783 | 0.9999763851 |
| FZR1         | -1.2032459726 | 0.5815483738 | 0.9999763851 |
| MFSD12       | -1.2002212613 | 0.2216139358 | 0.9999763851 |
| HMG20B       | -1.1246151404 | 0.470963387  | 0.9999763851 |
| GIPC3        | -1.3160416743 | 0.8270099247 | 0.9999763851 |
| TBXA2R       | 1.1232485485  | 0.4547549211 | 0.9999763851 |
| CACTIN       | 1.0685418362  | 0.7862644062 | 0.9999763851 |
| PIP5K1C      | 1.1317338022  | 0.7210439827 | 0.9999763851 |
| TJP3         | 1.287203384   | 0.8320172331 | 0.9999763851 |
| APBA3        | 1.3288018935  | 0.417699301  | 0.9999763851 |
| MRPL54       | -1.1073647831 | 0.5648144307 | 0.9999763851 |
| MATK         | -2.2387936332 | 0.3206210108 | 0.9999763851 |
| ZFR2         | -1.7352105782 | 0.4494410497 | 0.9999763851 |
| ATCAY        | -2.3220580825 | 0.4353552009 | 0.9999763851 |
| DAPK3        | -1.2242067767 | 0.3826988383 | 0.9999763851 |
| EEF2         | 1.0680643246  | 0.5814156193 | 0.9999763851 |
| PIAS4        | 1.1874204229  | 0.5241937705 | 0.9999763851 |
| ZBTB7A       | -1.0054081079 | 0.9724444475 | 0.9999763851 |
| MAP2K2       | 1.028587371   | 0.8371433472 | 0.9999763851 |
| CREB3L3      | 0             | 0            | 0            |
| SIRT6        | 1.0312790402  | 0.8901782785 | 0.9999763851 |
| ANKRD24      | -4.2849908816 | 0.4028453076 | 0.9999763851 |
| EBI3         | 0             | 0            | 0            |
| CCDC94       | -1.0328207578 | 0.9052833085 | 0.9999763851 |
| TMIGD2       | -4.2849908816 | 0.4028453076 | 0.9999763851 |
| FSD1         | -4.2849908816 | 0.4028453076 | 0.9999763851 |
| STAP2        | 1.8134025452  | 0.5839701294 | 0.9999763851 |

gene\_expression\_table

|              |               |              |              |
|--------------|---------------|--------------|--------------|
| MPND         | -1.1745625425 | 0.5847105787 | 0.9999763851 |
| SH3GL1       | 1.3625725331  | 0.0659705702 | 0.9999763851 |
| CHAF1A       | 1.1875376103  | 0.2359816683 | 0.9999763851 |
| UBXN6        | 1.0719831242  | 0.6449033605 | 0.9999763851 |
| HDGFRP2      | -1.1384030018 | 0.4773255691 | 0.9999763851 |
| PLIN4        | -1.9661492502 | 0.4738452784 | 0.9999763851 |
| PLIN5        | -2.5608228084 | 0.2884816449 | 0.9999763851 |
| LRG1         | -1.1144840443 | 0.4936927508 | 0.9999763851 |
| SEMA6B       | -2.011562566  | 0.2172147759 | 0.9999763851 |
| TNFAIP8L1    | 1.170567477   | 0.4898465667 | 0.9999763851 |
| MYDGF        | 1.0103185382  | 0.9393700802 | 0.9999763851 |
| DPP9         | 1.2911107955  | 0.2503707114 | 0.9999763851 |
| FEM1A        | 1.2106712876  | 0.5211185411 | 0.9999763851 |
| TICAM1       | -1.3380251034 | 0.3209490074 | 0.9999763851 |
| PLIN3        | -1.1070113067 | 0.4377086886 | 0.9999763851 |
| ARRDC5       | 0             | 0            | 0            |
| UHRF1        | 1.2429191645  | 0.2356182332 | 0.9999763851 |
| KDM4B        | 1.0180068408  | 0.9156153488 | 0.9999763851 |
| PTPRS        | 3.2353357581  | 0.554787377  | 0.9999763851 |
| SAFB2        | -1.5592662614 | 0.0311889825 | 0.9999763851 |
| SAFB         | -1.1755084641 | 0.3731025313 | 0.9999763851 |
| LOC107985320 | 3.2361532718  | 0.5546934395 | 0.9999763851 |
| C19orf70     | 1.1281916477  | 0.4789422159 | 0.9999763851 |
| HSD11B1L     | -1.2955873989 | 0.6211568569 | 0.9999763851 |
| RPL36        | 1.1167669333  | 0.3595710433 | 0.9999763851 |
| LONP1        | 1.1654789411  | 0.336149732  | 0.9999763851 |
| CATSPERD     | 0             | 0            | 0            |
| PRR22        | 5.4784711963  | 0.3745358536 | 0.9999763851 |
| DUS3L        | 1.1602605742  | 0.5932537302 | 0.9999763851 |
| NRTN         | -1.816422855  | 0.4360212244 | 0.9999763851 |
| FUT6         | 0             | 0            | 0            |
| FUT5         | 0             | 0            | 0            |
| NDUFA11      | 1.2405297017  | 0.1624475673 | 0.9999763851 |
| VMAC         | 1.0156708     | 0.9843174313 | 0.9999763851 |
| CAPS         | 1.9083992729  | 0.0863873725 | 0.9999763851 |
| RANBP3       | 1.026674448   | 0.9010747607 | 0.9999763851 |
| RFX2         | -1.2460230533 | 0.3258045947 | 0.9999763851 |
| ACSBG2       | -1.1716993339 | 0.6820520076 | 0.9999763851 |
| MLLT1        | 1.4801516776  | 0.027575056  | 0.9999763851 |
| ACER1        | -7.5647903763 | 0.2176246281 | 0.9999763851 |
| CLPP         | 1.0564096296  | 0.6836389937 | 0.9999763851 |
| ALKBH7       | -1.3360448093 | 0.214090064  | 0.9999763851 |
| PSPN         | 0             | 0            | 0            |
| GTF2F1       | 1.2075004634  | 0.3388979875 | 0.9999763851 |
| KHSRP        | -1.060771175  | 0.6908056133 | 0.9999763851 |
| SLC25A41     | -1.6975288129 | 0.2822628035 | 0.9999763851 |
| SLC25A23     | 1.2303930058  | 0.290532441  | 0.9999763851 |
| CRB3         | 0             | 0            | 0            |
| DENND1C      | 1.3736469229  | 0.2725320222 | 0.9999763851 |

gene\_expression\_table

|              |                |              |              |
|--------------|----------------|--------------|--------------|
| TNFSF9       | -5.4150770802  | 0.002095     | 0.9999763851 |
| CD70         | -1.3190802586  | 0.2023685913 | 0.9999763851 |
| TNFSF14      | -1.3783209169  | 0.2941263468 | 0.9999763851 |
| C3           | -3.3614101997  | 0.002049     | 0.9999763851 |
| GPR108       | 1.2443704681   | 0.3561351474 | 0.9999763851 |
| TRIP10       | -1.9893343261  | 0.144428183  | 0.9999763851 |
| SH2D3A       | -1.5725867351  | 0.3749408036 | 0.9999763851 |
| VAV1         | -1.0433573602  | 0.7871238427 | 0.9999763851 |
| ADGRE1       | 1.8309908604   | 0.2318677919 | 0.9999763851 |
| MBD3L2       | 0              | 0            | 0            |
| ZNF557       | 1.0956619805   | 0.6776500152 | 0.9999763851 |
| INSR         | 1.0207636983   | 0.9051154068 | 0.9999763851 |
| LOC107985283 | -1.3157515262  | 0.822831887  | 0.9999763851 |
| ARHGEF18     | 1.1051313581   | 0.5479029135 | 0.9999763851 |
| PEX11G       | -1.4150863318  | 0.6298602669 | 0.9999763851 |
| C19orf45     | 0              | 0            | 0            |
| ZNF358       | 0              | 0            | 0            |
| PNPLA6       | -1.4319521272  | 0.50340234   | 0.9999763851 |
| XAB2         | -1.3158816768  | 0.8203229797 | 0.9999763851 |
| PET100       | 1.2761522657   | 0.1958612507 | 0.9999763851 |
| PCP2         | -2.5596117216  | 0.2621352285 | 0.9999763851 |
| STXBP2       | -1.1910501548  | 0.621473838  | 0.9999763851 |
| RETN         | 1.2066055503   | 0.3030269637 | 0.9999763851 |
| MCEMP1       | -1.2671942003  | 0.0842823326 | 0.9999763851 |
| TRAPPC5      | 1.1048722787   | 0.5167319418 | 0.9999763851 |
| FCER2        | -3.3693112949  | 0.0664786679 | 0.9999763851 |
| CLEC4G       | 0              | 0            | 0            |
| CD209        | -10.7444032429 | 0.016846655  | 0.9999763851 |
| CLEC4M       | 0              | 0            | 0            |
| EVI5L        | 1.0065551119   | 0.9854709919 | 0.9999763851 |
| LRRC8E       | 0              | 0            | 0            |
| MAP2K7       | 1.0997097912   | 0.6742067383 | 0.9999763851 |
| TGFBR3L      | 3.2353357581   | 0.554787377  | 0.9999763851 |
| SNAPC2       | 1.1753816022   | 0.4974522329 | 0.9999763851 |
| CTXN1        | 3.6309026086   | 0.0492490545 | 0.9999763851 |
| TIMM44       | -1.0300544651  | 0.899763472  | 0.9999763851 |
| ELAVL1       | 1.2558480381   | 0.0857132023 | 0.9999763851 |
| FBN3         | 3.2353357581   | 0.554787377  | 0.9999763851 |
| CERS4        | -1.0856424323  | 0.8747587319 | 0.9999763851 |
| CD320        | 1.2384680585   | 0.4061169286 | 0.9999763851 |
| NDUFA7       | 1.2000714918   | 0.3031412615 | 0.9999763851 |
| RPS28        | -1.0949611177  | 0.5270022575 | 0.9999763851 |
| KANK3        | 3.7612496746   | 0.008217     | 0.9999763851 |
| ANGPTL4      | 1.2868359435   | 0.8210199768 | 0.9999763851 |
| RAB11B       | 1.0751482894   | 0.662666647  | 0.9999763851 |
| MARCH2       | 1.2746699714   | 0.6347625844 | 0.9999763851 |
| HNRNPM       | -1.0876045946  | 0.4975784655 | 0.9999763851 |
| PRAM1        | 1.5530451128   | 0.0288885423 | 0.9999763851 |
| ZNF414       | 1.6418746427   | 0.3227716463 | 0.9999763851 |

gene\_expression\_table

|               |                |              |              |
|---------------|----------------|--------------|--------------|
| MYO1F         | 1.2321566976   | 0.2492267318 | 0.9999763851 |
| ZNF558        | -1.3077795393  | 0.6073560301 | 0.9999763851 |
| ZNF317        | 1.8437472423   | 0.0200195762 | 0.9999763851 |
| OR7D2         | 3.2353357581   | 0.554787377  | 0.9999763851 |
| ZNF699        | -1.3154339304  | 0.8205576571 | 0.9999763851 |
| ZNF559        | -1.9412937271  | 0.1535158704 | 0.9999763851 |
| ZNF559-ZNF177 | 0              | 0            | 0            |
| ZNF177        | -1.395165126   | 0.7000541941 | 0.9999763851 |
| ZNF266        | -1.5855899351  | 0.1208081883 | 0.9999763851 |
| LOC105372269  | 3.2361532718   | 0.5546934395 | 0.9999763851 |
| ZNF560        | 0              | 0            | 0            |
| ZNF121        | 2.3097697104   | 0.1647584067 | 0.9999763851 |
| ZNF561        | -1.3625760305  | 0.4332846605 | 0.9999763851 |
| ZNF562        | 1.0278478563   | 0.9759411348 | 0.9999763851 |
| ZNF846        | 1.3489007316   | 0.6910545606 | 0.9999763851 |
| FBXL12        | -2.0146318623  | 0.0314833149 | 0.9999763851 |
| UBL5          | 1.1453890918   | 0.3043822708 | 0.9999763851 |
| PIN1          | -1.0113289418  | 0.9481848371 | 0.9999763851 |
| COL5A3        | 5.4770877341   | 0.3746135179 | 0.9999763851 |
| RDH8          | 0              | 0            | 0            |
| C19orf66      | -3.9563917548  | 0.006909     | 0.9999763851 |
| PPAN          | -1.0434661196  | 0.9034271688 | 0.9999763851 |
| P2RY11        | 1.3088342267   | 0.293462589  | 0.9999763851 |
| EIF3G         | 1.3807552255   | 0.0630799767 | 0.9999763851 |
| DNMT1         | -1.0341768888  | 0.799917453  | 0.9999763851 |
| S1PR2         | 1.1701717412   | 0.6593832046 | 0.9999763851 |
| MRPL4         | 1.3778703189   | 0.0608340738 | 0.9999763851 |
| ICAM1         | 1.1042375223   | 0.7878914631 | 0.9999763851 |
| ICAM4         | 1.1596047671   | 0.7293259112 | 0.9999763851 |
| ICAM5         | -2.3217011239  | 0.4355938696 | 0.9999763851 |
| ZGLP1         | 1.6254723588   | 0.5800651146 | 0.9999763851 |
| FDX1L         | 1.277141552    | 0.463559857  | 0.9999763851 |
| RAVER1        | 1.209729158    | 0.5925394386 | 0.9999763851 |
| ICAM3         | 1.2560548125   | 0.1061860828 | 0.9999763851 |
| TYK2          | -1.172192962   | 0.5083594564 | 0.9999763851 |
| CDC37         | -1.0583853697  | 0.6754962068 | 0.9999763851 |
| PDE4A         | -10.8385246611 | 0.1451469791 | 0.9999763851 |
| KEAP1         | 1.0024246813   | 0.987380383  | 0.9999763851 |
| ATG4D         | -3.6710485044  | 0.006046     | 0.9999763851 |
| KRI1          | 1.9514877687   | 0.000978     | 0.7855409274 |
| CDKN2D        | -1.0176416257  | 0.9228580931 | 0.9999763851 |
| AP1M2         | -17.4476623799 | 0.0923403128 | 0.9999763851 |
| SLC44A2       | -1.6013360249  | 0.0529265119 | 0.9999763851 |
| ILF3          | -1.1506875844  | 0.2699617103 | 0.9999763851 |
| QTRT1         | 1.2255213      | 0.7789922607 | 0.9999763851 |
| DNM2          | 1.0783684779   | 0.6418444086 | 0.9999763851 |
| TMED1         | 1.1600511197   | 0.4801875769 | 0.9999763851 |
| C19orf38      | -1.0031126323  | 0.9878742355 | 0.9999763851 |
| CARM1         | -4.3338228569  | 0.1410030633 | 0.9999763851 |

gene\_expression\_table

|          |               |              |              |
|----------|---------------|--------------|--------------|
| YIPF2    | -1.0838099088 | 0.5363923334 | 0.9999763851 |
| C19orf52 | 1.1815738793  | 0.43406435   | 0.9999763851 |
| SMARCA4  | 1.2931038207  | 0.0756208693 | 0.9999763851 |
| LDLR     | -1.1245609235 | 0.4149174191 | 0.9999763851 |
| SPC24    | -1.0396375606 | 0.8393911704 | 0.9999763851 |
| KANK2    | 1.5438777797  | 0.1118546573 | 0.9999763851 |
| DOCK6    | 1.2432087164  | 0.5809991689 | 0.9999763851 |
| TSPAN16  | 1.8239500745  | 0.2601331824 | 0.9999763851 |
| RAB3D    | 1.0344029654  | 0.8288713433 | 0.9999763851 |
| TMEM205  | 1.266972032   | 0.2214455334 | 0.9999763851 |
| CCDC159  | 1.1331614061  | 0.8698784785 | 0.9999763851 |
| PLPPR2   | -1.0255207638 | 0.9242784129 | 0.9999763851 |
| SWSAP1   | 1.8944409591  | 0.0741989658 | 0.9999763851 |
| EPOR     | -1.1030553504 | 0.8681350083 | 0.9999763851 |
| RGL3     | 0             | 0            | 0            |
| CCDC151  | 3.2353357581  | 0.554787377  | 0.9999763851 |
| PRKCSH   | 1.7086746023  | 0.0809371027 | 0.9999763851 |
| ELAVL3   | 3.2353357581  | 0.554787377  | 0.9999763851 |
| ZNF653   | 2.3408621302  | 0.4285500168 | 0.9999763851 |
| ECSIT    | -1.2447180094 | 0.3320723652 | 0.9999763851 |
| ELOF1    | -1.1749043917 | 0.4502472849 | 0.9999763851 |
| ZNF627   | 1.3673111203  | 0.4519520586 | 0.9999763851 |
| ZNF823   | 0             | 0            | 0            |
| ZNF491   | 0             | 0            | 0            |
| ZNF440   | 1.7348614386  | 0.2550741511 | 0.9999763851 |
| ZNF439   | 0             | 0            | 0            |
| ZNF69    | -1.5616830306 | 0.3459208614 | 0.9999763851 |
| ZNF700   | -1.2394518952 | 0.4439605209 | 0.9999763851 |
| ZNF763   | -4.2864494036 | 0.4027150576 | 0.9999763851 |
| ZNF433   | 0             | 0            | 0            |
| ZNF878   | 0             | 0            | 0            |
| ZNF136   | 1.4848975885  | 0.5142317695 | 0.9999763851 |
| ZNF442   | 0             | 0            | 0            |
| ZNF799   | 1.2798565264  | 0.6274032214 | 0.9999763851 |
| ZNF443   | -1.1237477727 | 0.8346766123 | 0.9999763851 |
| ZNF709   | 0             | 0            | 0            |
| ZNF564   | 1.1953634879  | 0.7390137721 | 0.9999763851 |
| ZNF490   | -2.7526009596 | 0.1364593139 | 0.9999763851 |
| ZNF791   | 1.6406834893  | 0.0765534114 | 0.9999763851 |
| MAN2B1   | -1.2473871228 | 0.1554489174 | 0.9999763851 |
| WDR83    | 2.2534767074  | 0.3736000139 | 0.9999763851 |
| WDR83OS  | 1.1213011145  | 0.4683338982 | 0.9999763851 |
| DHPS     | -1.1374078352 | 0.5531377708 | 0.9999763851 |
| FBXW9    | 1.4641838996  | 0.2172858013 | 0.9999763851 |
| TNPO2    | -1.0068922956 | 0.9723402126 | 0.9999763851 |
| C19orf43 | 1.188518324   | 0.3187821323 | 0.9999763851 |
| ASNA1    | 1.044930903   | 0.8414235456 | 0.9999763851 |
| HOOK2    | -1.236041506  | 0.5072788673 | 0.9999763851 |
| JUNB     | -1.2871882981 | 0.1950891011 | 0.9999763851 |

gene\_expression\_table

|            |               |              |              |
|------------|---------------|--------------|--------------|
| PRDX2      | 1.5911808653  | 0.0175541418 | 0.9999763851 |
| RNASEH2A   | 1.0491006103  | 0.7682562439 | 0.9999763851 |
| RTBDN      | 7.7488609396  | 0.3058742041 | 0.9999763851 |
| MAST1      | -1.203182252  | 0.5063658999 | 0.9999763851 |
| DNASE2     | 1.1011143421  | 0.5434091808 | 0.9999763851 |
| KLF1       | -1.4282479823 | 0.5509849511 | 0.9999763851 |
| GCDH       | -1.4401864441 | 0.0272734717 | 0.9999763851 |
| SYCE2      | -2.3209115874 | 0.459126456  | 0.9999763851 |
| FARSA      | 1.1962938132  | 0.2495377331 | 0.9999763851 |
| CALR       | -1.0665205261 | 0.5879431423 | 0.9999763851 |
| RAD23A     | 1.0564124502  | 0.7454474222 | 0.9999763851 |
| GADD45GIP1 | 1.2748575742  | 0.0935895955 | 0.9999763851 |
| DAND5      | 1.2869631997  | 0.8237304791 | 0.9999763851 |
| NFIX       | 1.7539848782  | 0.002223     | 0.9999763851 |
| LYL1       | -1.14176961   | 0.4342653465 | 0.9999763851 |
| TRMT1      | 1.1820551979  | 0.5101565895 | 0.9999763851 |
| NACC1      | 1.179963469   | 0.4371382585 | 0.9999763851 |
| STX10      | -1.2654641634 | 0.1215484044 | 0.9999763851 |
| IER2       | 1.1068412426  | 0.443562674  | 0.9999763851 |
| CACNA1A    | -5.8625844673 | 0.1006263162 | 0.9999763851 |
| CCDC130    | -1.329968573  | 0.3901617482 | 0.9999763851 |
| MRI1       | 1.2276033781  | 0.3161152738 | 0.9999763851 |
| C19orf53   | 1.0875709451  | 0.5955944596 | 0.9999763851 |
| ZSWIM4     | -2.0977020549 | 0.2415937482 | 0.9999763851 |
| NANOS3     | 0             | 0            | 0            |
| C19orf57   | -1.3142040285 | 0.6183104986 | 0.9999763851 |
| CC2D1A     | -1.4329683871 | 0.4727581532 | 0.9999763851 |
| PODNL1     | -6.3477930347 | 0.0669450725 | 0.9999763851 |
| DCAF15     | 1.0299222035  | 0.9650667014 | 0.9999763851 |
| RFX1       | 1.1232814079  | 0.6696878922 | 0.9999763851 |
| RLN3       | -4.2864494036 | 0.4027150576 | 0.9999763851 |
| IL27RA     | -1.1665910418 | 0.3793536522 | 0.9999763851 |
| LOC113230  | -1.3154339304 | 0.8205576571 | 0.9999763851 |
| C19orf67   | 0             | 0            | 0            |
| SAMD1      | 1.350674756   | 0.681377295  | 0.9999763851 |
| PRKACA     | 1.0771122766  | 0.6877791902 | 0.9999763851 |
| ASF1B      | 1.0409118144  | 0.7898115151 | 0.9999763851 |
| ADGRL1     | 1.2204170136  | 0.2161385347 | 0.9999763851 |
| ADGRE5     | 1.1371801064  | 0.3738363588 | 0.9999763851 |
| DDX39A     | 1.4214963773  | 0.0156647105 | 0.9999763851 |
| PKN1       | 1.2652342951  | 0.5624099629 | 0.9999763851 |
| GIPC1      | 1.9447136431  | 0.00812      | 0.9999763851 |
| DNAJB1     | -1.3798612032 | 0.0380106382 | 0.9999763851 |
| TECR       | -1.4904620976 | 0.2746231921 | 0.9999763851 |
| NDUFB7     | -1.0527236871 | 0.7684223425 | 0.9999763851 |
| CLEC17A    | -4.2849908816 | 0.4028453076 | 0.9999763851 |
| ADGRE3     | -1.8803545563 | 0.1642579369 | 0.9999763851 |
| ZNF333     | 1.3185653742  | 0.3728589747 | 0.9999763851 |
| ADGRE2     | 1.0144236072  | 0.9599128542 | 0.9999763851 |



gene\_expression\_table

|              |               |              |              |
|--------------|---------------|--------------|--------------|
| OR7A5        | 0             | 0            | 0            |
| SYDE1        | 3.2353357581  | 0.554787377  | 0.9999763851 |
| ILVBL        | 1.1800650254  | 0.494192187  | 0.9999763851 |
| NOTCH3       | 3.2353357581  | 0.554787377  | 0.9999763851 |
| EPHX3        | 0             | 0            | 0            |
| BRD4         | -1.1031183158 | 0.5316358708 | 0.9999763851 |
| AKAP8        | 1.0434406395  | 0.827607578  | 0.9999763851 |
| AKAP8L       | -1.4132215589 | 0.3460136155 | 0.9999763851 |
| WIZ          | 1.2040232924  | 0.3609816264 | 0.9999763851 |
| RASAL3       | -1.08690536   | 0.6076477091 | 0.9999763851 |
| PGLYRP2      | 0             | 0            | 0            |
| CYP4F22      | 0             | 0            | 0            |
| CYP4F3       | 3.2353357581  | 0.554787377  | 0.9999763851 |
| CYP4F12      | 0             | 0            | 0            |
| LOC102724279 | 0             | 0            | 0            |
| TPM4         | 1.0047475783  | 0.9794641917 | 0.9999763851 |
| RAB8A        | -1.2147621074 | 0.318678006  | 0.9999763851 |
| HSH2D        | 1.0000956864  | 0.9996720747 | 0.9999763851 |
| CIB3         | 1.1331739081  | 0.8751456835 | 0.9999763851 |
| FAM32A       | 1.0449403751  | 0.7430281327 | 0.9999763851 |
| AP1M1        | 1.0957025428  | 0.5918646668 | 0.9999763851 |
| KLF2         | -1.3716482783 | 0.7377357014 | 0.9999763851 |
| EPS15L1      | -1.104850146  | 0.7032618746 | 0.9999763851 |
| CALR3        | 0             | 0            | 0            |
| C19orf44     | 1.2060563862  | 0.3770068219 | 0.9999763851 |
| CHERP        | -1.2840865018 | 0.3432705245 | 0.9999763851 |
| SLC35E1      | -1.1171876943 | 0.5338398185 | 0.9999763851 |
| MED26        | 1.0920421038  | 0.6579561913 | 0.9999763851 |
| SMIM7        | 1.2710635424  | 0.1292625443 | 0.9999763851 |
| TMEM38A      | 1.1853704077  | 0.6685983586 | 0.9999763851 |
| NWD1         | 1.3418641175  | 0.4166434705 | 0.9999763851 |
| SIN3B        | 1.0651272837  | 0.7300792166 | 0.9999763851 |
| F2RL3        | -1.4588494716 | 0.1731350692 | 0.9999763851 |
| CPAMD8       | 1.1163773708  | 0.8392195656 | 0.9999763851 |
| HAUS8        | 1.4539838934  | 0.0949511196 | 0.9999763851 |
| MYO9B        | 1.0575862861  | 0.7597026515 | 0.9999763851 |
| USE1         | -1.2589321822 | 0.4099483841 | 0.9999763851 |
| OCEL1        | -1.0360786651 | 0.9201574857 | 0.9999763851 |
| NR2F6        | -1.0434390209 | 0.7778087456 | 0.9999763851 |
| USHBP1       | -1.315303824  | 0.8206171563 | 0.9999763851 |
| BABAM1       | 1.0023535744  | 0.9878339644 | 0.9999763851 |
| ANKLE1       | 1.1928462817  | 0.413396744  | 0.9999763851 |
| ABHD8        | 1.2164115278  | 0.7007122607 | 0.9999763851 |
| MRPL34       | 1.168192583   | 0.3066185549 | 0.9999763851 |
| DDA1         | -1.0342436049 | 0.8390360265 | 0.9999763851 |
| ANO8         | -2.0965536249 | 0.2332674201 | 0.9999763851 |
| GTPBP3       | -1.0696056131 | 0.7130433817 | 0.9999763851 |
| BST2         | -1.3682671155 | 0.0351949524 | 0.9999763851 |
| MVB12A       | 1.0221977985  | 0.918086836  | 0.9999763851 |

gene\_expression\_table

|          |               |              |              |
|----------|---------------|--------------|--------------|
| TMEM221  | 0             | 0            | 0            |
| SLC27A1  | -1.4155138243 | 0.205309565  | 0.9999763851 |
| PGLS     | 1.1772694094  | 0.4346931168 | 0.9999763851 |
| FAM129C  | 1.8133444484  | 0.5820708689 | 0.9999763851 |
| COLGALT1 | -1.1645773907 | 0.2105388261 | 0.9999763851 |
| UNC13A   | -4.2849908816 | 0.4028453076 | 0.9999763851 |
| MAP1S    | 1.1152142222  | 0.6120908768 | 0.9999763851 |
| FCHO1    | -1.4825300559 | 0.3569365986 | 0.9999763851 |
| B3GNT3   | 0             | 0            | 0            |
| INSL3    | -1.3158816768 | 0.8203229797 | 0.9999763851 |
| JAK3     | 1.2479568125  | 0.2852848647 | 0.9999763851 |
| RPL18A   | 1.0362622849  | 0.7655787262 | 0.9999763851 |
| SLC5A5   | 1.3931546432  | 0.7807621158 | 0.9999763851 |
| CCDC124  | -1.7573998886 | 0.1404676335 | 0.9999763851 |
| KCNN1    | -4.2849908816 | 0.4028453076 | 0.9999763851 |
| ARRDC2   | -1.0420578029 | 0.8290474805 | 0.9999763851 |
| IL12RB1  | -1.3304326759 | 0.4803856778 | 0.9999763851 |
| MAST3    | -1.3902431567 | 0.2202203948 | 0.9999763851 |
| PIK3R2   | 1.1391041232  | 0.503317144  | 0.9999763851 |
| IFI30    | 1.2213401507  | 0.1093755748 | 0.9999763851 |
| MPV17L2  | 2.006731798   | 0.0374239167 | 0.9999763851 |
| RAB3A    | 3.393068638   | 0.2345545336 | 0.9999763851 |
| PDE4C    | 0             | 0            | 0            |
| JUND     | -1.2975605905 | 0.1754813527 | 0.9999763851 |
| LSM4     | 1.2314882538  | 0.1507983672 | 0.9999763851 |
| PGPEP1   | -1.0672426289 | 0.7225522779 | 0.9999763851 |
| GDF15    | -11.974701451 | 9.30E-10     | 4.17E-06     |
| LRRC25   | 3.2353357581  | 0.554787377  | 0.9999763851 |
| SSBP4    | 1.3691595692  | 0.123852906  | 0.9999763851 |
| ISYNA1   | -1.0850039112 | 0.7070786812 | 0.9999763851 |
| ELL      | -1.0851973974 | 0.6523613288 | 0.9999763851 |
| FKBP8    | 1.2327525168  | 0.6438618149 | 0.9999763851 |
| KXD1     | 0             | 0            | 0            |
| UBA52    | 1.258996948   | 0.0603720892 | 0.9999763851 |
| C19orf60 | 1.0678509819  | 0.7346196341 | 0.9999763851 |
| CRLF1    | -7.5622178268 | 0.2177145568 | 0.9999763851 |
| TMEM59L  | -1.3938490178 | 0.711903528  | 0.9999763851 |
| KLHL26   | -1.7743705246 | 0.0716707166 | 0.9999763851 |
| CRTC1    | 1.3715789216  | 0.3429331257 | 0.9999763851 |
| UPF1     | 1.7209669239  | 0.002821     | 0.9999763851 |
| GDF1     | -2.2884562891 | 0.1044500762 | 0.9999763851 |
| CERS1    | 1.2663175364  | 0.6611603511 | 0.9999763851 |
| COPE     | -1.118457215  | 0.6186259207 | 0.9999763851 |
| DDX49    | 1.5584694926  | 0.0337442047 | 0.9999763851 |
| HOMER3   | 1.1356334013  | 0.3498093619 | 0.9999763851 |
| SUGP2    | -1.220507883  | 0.2297594156 | 0.9999763851 |
| ARMC6    | 1.2359134521  | 0.2974950734 | 0.9999763851 |
| SLC25A42 | 1.1334971085  | 0.6441541083 | 0.9999763851 |
| TMEM161A | 1.0323564321  | 0.8817325157 | 0.9999763851 |

gene\_expression\_table

|              |               |              |              |
|--------------|---------------|--------------|--------------|
| MEF2B        | -1.4284672166 | 0.4088004202 | 0.9999763851 |
| BORCS8-MEF2B | 2.1483330058  | 0.3686913481 | 0.9999763851 |
| BORCS8       | -1.5426848551 | 0.1903027911 | 0.9999763851 |
| RFXANK       | 1.974984593   | 0.2028549091 | 0.9999763851 |
| NR2C2AP      | 1.2679337948  | 0.1847407279 | 0.9999763851 |
| HAPLN4       | -4.2849908816 | 0.4028453076 | 0.9999763851 |
| SUGP1        | -1.0161600208 | 0.9586017219 | 0.9999763851 |
| MAU2         | -1.2724378149 | 0.1797417092 | 0.9999763851 |
| GATAD2A      | 1.0414624372  | 0.7734147895 | 0.9999763851 |
| TSSK6        | 0             | 0            | 0            |
| NDUFA13      | -1.036523514  | 0.8005878088 | 0.9999763851 |
| YJEFN3       | -4.3420972042 | 0.0743571444 | 0.9999763851 |
| CILP2        | 1.0308468109  | 0.9442482056 | 0.9999763851 |
| PBX4         | -1.4083241465 | 0.6552973937 | 0.9999763851 |
| LPAR2        | -1.9932034713 | 0.0716191759 | 0.9999763851 |
| GMIP         | -1.0000082075 | 0.9999763851 | 0.9999763851 |
| ATP13A1      | 1.1508529835  | 0.5603698158 | 0.9999763851 |
| ZNF101       | 1.0968099086  | 0.7165769868 | 0.9999763851 |
| ZNF14        | 0             | 0            | 0            |
| ZNF506       | -1.6383542693 | 0.0609889926 | 0.9999763851 |
| ZNF253       | -1.174829898  | 0.8464488482 | 0.9999763851 |
| ZNF93        | 0             | 0            | 0            |
| ZNF486       | 0             | 0            | 0            |
| ZNF430       | -1.0050487102 | 0.9848865971 | 0.9999763851 |
| ZNF714       | 1.1450199936  | 0.7659512768 | 0.9999763851 |
| ZNF431       | -1.3508186367 | 0.5022449639 | 0.9999763851 |
| ZNF708       | 1.0588106662  | 0.8515586677 | 0.9999763851 |
| ZNF493       | 0             | 0            | 0            |
| ZNF429       | 0             | 0            | 0            |
| ZNF100       | -1.1844868221 | 0.700286769  | 0.9999763851 |
| ZNF43        | 3.2353357581  | 0.554787377  | 0.9999763851 |
| ZNF729       | 0             | 0            | 0            |
| ZNF730       | 1.287203384   | 0.8324480351 | 0.9999763851 |
| ZNF675       | -1.0152663785 | 0.9641430436 | 0.9999763851 |
| ZNF254       | -1.0200593627 | 0.9586956875 | 0.9999763851 |
| UQCRFS1      | 1.1772909376  | 0.1689067453 | 0.9999763851 |
| VSTM2B       | 0             | 0            | 0            |
| POP4         | -1.1287755297 | 0.4340563848 | 0.9999763851 |
| PLEKHF1      | -1.1529109595 | 0.4840961211 | 0.9999763851 |
| C19orf12     | 1.3028919319  | 0.1954862848 | 0.9999763851 |
| CCNE1        | 1.2599541703  | 0.3200018237 | 0.9999763851 |
| URI1         | -1.0612629508 | 0.6993543851 | 0.9999763851 |
| ZNF536       | 1.7605129081  | 0.0739351419 | 0.9999763851 |
| TSHZ3        | -1.1778040165 | 0.5042247148 | 0.9999763851 |
| ZNF507       | -1.4210999367 | 0.1800575937 | 0.9999763851 |
| DPY19L3      | 1.0458725953  | 0.8575604443 | 0.9999763851 |
| PDCD5        | 1.1122836288  | 0.4877638429 | 0.9999763851 |
| ANKRD27      | -1.0550973845 | 0.7256109675 | 0.9999763851 |
| RGS9BP       | -5.5346559238 | 0.0330569473 | 0.9999763851 |

gene\_expression\_table

|          |               |              |              |
|----------|---------------|--------------|--------------|
| NUDT19   | 1.5375750441  | 0.0296016008 | 0.9999763851 |
| TDRD12   | 3.2353357581  | 0.554787377  | 0.9999763851 |
| CEP89    | 1.550549155   | 0.2040435653 | 0.9999763851 |
| FAAP24   | 1.2712477602  | 0.5291976717 | 0.9999763851 |
| RHPN2    | 2.5210001938  | 0.2515222021 | 0.9999763851 |
| GPATCH1  | 1.0620510624  | 0.8793102262 | 0.9999763851 |
| WDR88    | 1.4731942122  | 0.5491208182 | 0.9999763851 |
| LRP3     | 1.1183780443  | 0.5624901374 | 0.9999763851 |
| CEBPA    | -1.0187671465 | 0.8758094332 | 0.9999763851 |
| CEBPG    | -1.126382668  | 0.506193469  | 0.9999763851 |
| PEPD     | 1.1744697588  | 0.3271218182 | 0.9999763851 |
| KCTD15   | 1.7165250546  | 0.1627603716 | 0.9999763851 |
| LSM14A   | -1.4114598045 | 0.0347094855 | 0.9999763851 |
| KIAA0355 | -1.4409190307 | 0.4015704955 | 0.9999763851 |
| GPI      | 1.1169672958  | 0.3933933461 | 0.9999763851 |
| PDCD2L   | -1.0521270905 | 0.8432000573 | 0.9999763851 |
| UBA2     | 1.140056611   | 0.3031816718 | 0.9999763851 |
| WTIP     | -1.3708355312 | 0.7472226321 | 0.9999763851 |
| ZNF302   | -1.3065945973 | 0.6074229245 | 0.9999763851 |
| ZNF181   | -1.0852370907 | 0.9019261501 | 0.9999763851 |
| ZNF792   | -7.5622178268 | 0.2177145568 | 0.9999763851 |
| GRAMD1A  | 1.1988354147  | 0.3962738541 | 0.9999763851 |
| SCN1B    | 1.7450428903  | 0.6326558576 | 0.9999763851 |
| LGI4     | 0             | 0            | 0            |
| FXYP7    | 5.4776292235  | 0.3745831165 | 0.9999763851 |
| FXYP5    | 1.3897175581  | 0.0440841643 | 0.9999763851 |
| LSR      | -1.6780739121 | 0.4519648594 | 0.9999763851 |
| USF2     | 1.018900114   | 0.8874526422 | 0.9999763851 |
| CD22     | 1.1262394215  | 0.7189758098 | 0.9999763851 |
| FFAR3    | -17.404035928 | 0.0706253351 | 0.9999763851 |
| FFAR2    | 2.1587484894  | 0.0613231554 | 0.9999763851 |
| SBSN     | 3.2353357581  | 0.554787377  | 0.9999763851 |
| GAPDHS   | 2.7870243652  | 0.0983219931 | 0.9999763851 |
| TMEM147  | 1.2486827984  | 0.1181700194 | 0.9999763851 |
| ATP4A    | 0             | 0            | 0            |
| HAUS5    | -1.0607880166 | 0.826834255  | 0.9999763851 |
| RBM42    | 1.1316878188  | 0.4859249812 | 0.9999763851 |
| ETV2     | 2.3404251821  | 0.4104012847 | 0.9999763851 |
| COX6B1   | 1.2649078108  | 0.0803501159 | 0.9999763851 |
| UPK1A    | 0             | 0            | 0            |
| ZBTB32   | -1.9663843334 | 0.4762692525 | 0.9999763851 |
| KMT2B    | 1.2401084497  | 0.258106832  | 0.9999763851 |
| IGFLR1   | -1.3392406917 | 0.2349802551 | 0.9999763851 |
| U2AF1L4  | -2.3871793711 | 0.2311721631 | 0.9999763851 |
| PSENEN   | 1.7168524355  | 0.0226245132 | 0.9999763851 |
| LIN37    | 4.770728625   | 0.1333582974 | 0.9999763851 |
| HSPB6    | 0             | 0            | 0            |
| PROSER3  | -1.9656080095 | 0.4359316876 | 0.9999763851 |
| ARHGAP33 | -1.1607449466 | 0.6901124672 | 0.9999763851 |

gene\_expression\_table

|              |               |              |              |
|--------------|---------------|--------------|--------------|
| KIRREL2      | 2.1108802346  | 0.1328099687 | 0.9999763851 |
| APLP1        | 1.8888297566  | 0.5936992478 | 0.9999763851 |
| NFKBID       | 1.4591297179  | 0.3162321115 | 0.9999763851 |
| HCST         | 1.2162778238  | 0.1773945926 | 0.9999763851 |
| TYROBP       | -1.0698344336 | 0.8759333206 | 0.9999763851 |
| LRFN3        | 2.782915368   | 0.0598035455 | 0.9999763851 |
| SDHAF1       | -1.0812139872 | 0.7547851136 | 0.9999763851 |
| SYNE4        | 5.4790129495  | 0.3774309405 | 0.9999763851 |
| ALKBH6       | 1.0854964152  | 0.7792558418 | 0.9999763851 |
| LOC101927572 | -1.0273204946 | 0.9450611489 | 0.9999763851 |
| CLIP3        | 15.3448820323 | 0.1557484147 | 0.9999763851 |
| THAP8        | -1.1087957893 | 0.8313746422 | 0.9999763851 |
| WDR62        | 1.5228955501  | 0.1205806125 | 0.9999763851 |
| OVOL3        | 0             | 0            | 0            |
| POLR2I       | 1.0813004963  | 0.680927184  | 0.9999763851 |
| TBCB         | 1.008595631   | 0.9566565273 | 0.9999763851 |
| CAPNS1       | 1.0059641127  | 0.9706914368 | 0.9999763851 |
| COX7A1       | 0             | 0            | 0            |
| ZNF565       | 1.1716150989  | 0.7789193114 | 0.9999763851 |
| ZNF146       | -1.282320363  | 0.2028167784 | 0.9999763851 |
| ZFP14        | -1.942139423  | 0.1365790865 | 0.9999763851 |
| ZFP82        | 3.2353357581  | 0.554787377  | 0.9999763851 |
| ZNF566       | -1.1576370621 | 0.746501348  | 0.9999763851 |
| ZNF260       | 1.3021448763  | 0.3474622915 | 0.9999763851 |
| ZNF529       | 1.0454950652  | 0.8789054797 | 0.9999763851 |
| ZNF461       | -2.0611818492 | 0.296684002  | 0.9999763851 |
| ZNF567       | -1.0030988635 | 0.9907191506 | 0.9999763851 |
| ZNF850       | 1.2311394327  | 0.4950012034 | 0.9999763851 |
| LOC728485    | 0             | 0            | 0            |
| ZNF790       | 0             | 0            | 0            |
| ZNF345       | 2.3412218143  | 0.4038852691 | 0.9999763851 |
| ZNF829       | -2.3214980365 | 0.437464777  | 0.9999763851 |
| ZNF568       | 0             | 0            | 0            |
| ZNF420       | -1.4428110141 | 0.297842089  | 0.9999763851 |
| ZNF585A      | 24.0213517934 | 0.0971698279 | 0.9999763851 |
| ZNF585B      | 5.4784711963  | 0.3745358536 | 0.9999763851 |
| ZNF383       | -1.087491429  | 0.8275230563 | 0.9999763851 |
| HKR1         | -1.9857123279 | 0.1461566059 | 0.9999763851 |
| ZNF527       | 1.9110845344  | 0.2046502702 | 0.9999763851 |
| ZNF569       | -1.0537249313 | 0.9204722266 | 0.9999763851 |
| ZNF570       | 1.9661194815  | 0.3814700456 | 0.9999763851 |
| ZNF793       | 0             | 0            | 0            |
| ZNF540       | 3.2356557963  | 0.5547505991 | 0.9999763851 |
| ZNF571       | 5.4790129495  | 0.3776249757 | 0.9999763851 |
| ZFP30        | 0             | 0            | 0            |
| ZNF607       | 0             | 0            | 0            |
| SIPA1L3      | -1.194843005  | 0.5213605425 | 0.9999763851 |
| DPF1         | 1.2120222182  | 0.5137053162 | 0.9999763851 |
| SPINT2       | 1.624741281   | 0.5893738657 | 0.9999763851 |

gene\_expression\_table

|          |               |              |              |
|----------|---------------|--------------|--------------|
| YIF1B    | 1.0025147799  | 0.9921767598 | 0.9999763851 |
| C19orf33 | 0             | 0            | 0            |
| KCNK6    | -1.039143791  | 0.8670370476 | 0.9999763851 |
| CATSPERG | -2.8431696679 | 0.2709621775 | 0.9999763851 |
| PSMD8    | -1.0192178655 | 0.8945608085 | 0.9999763851 |
| SPRED3   | 1.1536776807  | 0.8524553733 | 0.9999763851 |
| FAM98C   | 1.022245923   | 0.9501898781 | 0.9999763851 |
| RASGRP4  | 2.2027818203  | 0.3663459935 | 0.9999763851 |
| RYR1     | -7.5622178268 | 0.2177145568 | 0.9999763851 |
| MAP4K1   | 1.1209913177  | 0.6223630361 | 0.9999763851 |
| EIF3K    | 1.0383768195  | 0.7603377663 | 0.9999763851 |
| ACTN4    | 1.2976809049  | 0.1145552614 | 0.9999763851 |
| CAPN12   | -1.3796902431 | 0.012665087  | 0.9999763851 |
| LGALS4   | 0             | 0            | 0            |
| ECH1     | 1.1721289439  | 0.2799094086 | 0.9999763851 |
| HNRNPL   | -1.2733889453 | 0.0931311678 | 0.9999763851 |
| RINL     | 1.0802422362  | 0.8512795235 | 0.9999763851 |
| SIRT2    | -1.1697994047 | 0.3073362798 | 0.9999763851 |
| NFKBIB   | 1.0200362961  | 0.924682609  | 0.9999763851 |
| CCER2    | -2.5616934468 | 0.2769879973 | 0.9999763851 |
| SARS2    | -1.3222868533 | 0.2987108518 | 0.9999763851 |
| MRPS12   | 1.1190552069  | 0.4674276995 | 0.9999763851 |
| FBXO17   | 0             | 0            | 0            |
| ACP7     | 0             | 0            | 0            |
| PAK4     | -7.5622178268 | 0.2177145568 | 0.9999763851 |
| LRFN1    | -3.9243769581 | 0.0578185971 | 0.9999763851 |
| GMFG     | 1.1419539468  | 0.2943796043 | 0.9999763851 |
| SAMD4B   | 1.4744681007  | 0.0652897265 | 0.9999763851 |
| PAF1     | -1.0365571328 | 0.877355226  | 0.9999763851 |
| MED29    | 1.1056219059  | 0.7161951057 | 0.9999763851 |
| ZFP36    | -1.0677426957 | 0.9246624071 | 0.9999763851 |
| PLEKHG2  | 1.1732088536  | 0.6045118843 | 0.9999763851 |
| RPS16    | 1.1132725498  | 0.3724981715 | 0.9999763851 |
| SUPT5H   | -1.0265546878 | 0.8641094878 | 0.9999763851 |
| TIMM50   | 1.3030867946  | 0.2430070654 | 0.9999763851 |
| DLL3     | -1.0182668643 | 0.9338421726 | 0.9999763851 |
| EID2B    | -1.5846035454 | 0.3623022762 | 0.9999763851 |
| EID2     | 1.0050574537  | 0.9831775339 | 0.9999763851 |
| CLC      | 0             | 0            | 0            |
| DYRK1B   | 1.2870761236  | 0.8160709833 | 0.9999763851 |
| FBL      | 1.2141608841  | 0.1396279423 | 0.9999763851 |
| FCGBP    | 3.2353357581  | 0.554787377  | 0.9999763851 |
| PSMC4    | 1.1812636775  | 0.4169669492 | 0.9999763851 |
| ZNF546   | -1.3438516515 | 0.5337433512 | 0.9999763851 |
| ZNF780B  | 1.0312722972  | 0.9328013402 | 0.9999763851 |
| ZNF780A  | -1.3748759807 | 0.4110451153 | 0.9999763851 |
| MAP3K10  | 1.0274983165  | 0.9757178065 | 0.9999763851 |
| TTC9B    | 0             | 0            | 0            |
| AKT2     | -1.0366528986 | 0.7824341187 | 0.9999763851 |

gene\_expression\_table

|           |               |              |              |
|-----------|---------------|--------------|--------------|
| C19orf47  | 1.3953182585  | 0.0790198063 | 0.9999763851 |
| PLD3      | 1.1743261678  | 0.5845949101 | 0.9999763851 |
| HIPK4     | 3.2356557963  | 0.5547505991 | 0.9999763851 |
| PRX       | 1.0617559242  | 0.8941938323 | 0.9999763851 |
| SERTAD1   | -1.1190427674 | 0.6521815279 | 0.9999763851 |
| SERTAD3   | -1.9475004969 | 0.3568459862 | 0.9999763851 |
| BLVRB     | -1.103208099  | 0.5474918928 | 0.9999763851 |
| SPTBN4    | -3.1553169002 | 0.1652074601 | 0.9999763851 |
| SHKBP1    | 1.3015885853  | 0.1676048204 | 0.9999763851 |
| LTBP4     | -1.0873265326 | 0.8073260356 | 0.9999763851 |
| NUMBL     | -1.1144198402 | 0.6051521208 | 0.9999763851 |
| ADCK4     | 1.3541179499  | 0.6294672651 | 0.9999763851 |
| ITPKC     | 1.0765594593  | 0.8962739866 | 0.9999763851 |
| C19orf54  | 1.3673573351  | 0.4965025997 | 0.9999763851 |
| SNRPA     | -1.0429569508 | 0.8030501225 | 0.9999763851 |
| MIA       | -4.2849908816 | 0.4028453076 | 0.9999763851 |
| RAB4B     | 1.3303015586  | 0.4237052938 | 0.9999763851 |
| EGLN2     | -1.0672456891 | 0.6909986646 | 0.9999763851 |
| CYP2A6    | -7.5647903763 | 0.2176246281 | 0.9999763851 |
| CYP2F1    | 0             | 0            | 0            |
| CYP2S1    | -2.3560083799 | 0.0641377222 | 0.9999763851 |
| AXL       | 0             | 0            | 0            |
| HNRNPUL1  | 1.109375286   | 0.4258483918 | 0.9999763851 |
| CCDC97    | 1.4894233582  | 0.1695499826 | 0.9999763851 |
| TGFB1     | 1.2275260648  | 0.4393872213 | 0.9999763851 |
| B9D2      | 1.4262436006  | 0.2773051974 | 0.9999763851 |
| TMEM91    | -1.4336294793 | 0.4716756365 | 0.9999763851 |
| EXOSC5    | 1.2381162237  | 0.327317703  | 0.9999763851 |
| BCKDHA    | -1.0446883288 | 0.7808739272 | 0.9999763851 |
| B3GNT8    | 2.1044296444  | 0.1878333908 | 0.9999763851 |
| ATP5SL    | 1.0180386352  | 0.9356427133 | 0.9999763851 |
| CEACAM21  | -1.0674131201 | 0.8158938724 | 0.9999763851 |
| CEACAM4   | -1.0988817322 | 0.741850741  | 0.9999763851 |
| CEACAM5   | 3.9201049863  | 0.1888099258 | 0.9999763851 |
| CEACAM6   | 1.366958711   | 0.0159119563 | 0.9999763851 |
| CEACAM3   | 3.2356557963  | 0.5547505991 | 0.9999763851 |
| LYPD4     | 3.2353357581  | 0.554787377  | 0.9999763851 |
| RPS19     | -1.1704762672 | 0.1862745414 | 0.9999763851 |
| CD79A     | 1.0381604432  | 0.8810816681 | 0.9999763851 |
| ARHGEF1   | 1.0595436806  | 0.797740665  | 0.9999763851 |
| LOC390937 | -2.6249844518 | 0.2433007306 | 0.9999763851 |
| RABAC1    | 1.0887455155  | 0.6769241019 | 0.9999763851 |
| GRIK5     | 3.2361532718  | 0.5546934395 | 0.9999763851 |
| ZNF574    | -1.2596555089 | 0.5258323709 | 0.9999763851 |
| POU2F2    | 1.1864798477  | 0.5293596068 | 0.9999763851 |
| DEDD2     | 1.3836654999  | 0.1331275035 | 0.9999763851 |
| ZNF526    | 3.7495951467  | 0.0246731341 | 0.9999763851 |
| GSK3A     | 1.2241412544  | 0.3701637809 | 0.9999763851 |
| ERF       | -1.0657115305 | 0.7837117845 | 0.9999763851 |

gene\_expression\_table

|          |               |              |              |
|----------|---------------|--------------|--------------|
| CIC      | 1.5005838045  | 0.2791406121 | 0.9999763851 |
| PAFAH1B3 | 1.2248115336  | 0.2011585062 | 0.9999763851 |
| PRR19    | 2.2305031351  | 0.3590599981 | 0.9999763851 |
| TMEM145  | 1.6242600155  | 0.5618938402 | 0.9999763851 |
| MEGF8    | 1.0140526777  | 0.9698364098 | 0.9999763851 |
| CNFN     | 1.455553068   | 0.4718050591 | 0.9999763851 |
| LIPE     | 1.0763878196  | 0.9030624767 | 0.9999763851 |
| CXCL17   | -4.2849908816 | 0.4028453076 | 0.9999763851 |
| CEACAM1  | 1.2869488883  | 0.821524196  | 0.9999763851 |
| CEACAM8  | 0             | 0            | 0            |
| TEX101   | 1.1427172643  | 0.7752940779 | 0.9999763851 |
| LYPD3    | 1.0277462901  | 0.9757639819 | 0.9999763851 |
| PHLDB3   | 2.0209619459  | 0.1693862273 | 0.9999763851 |
| ETHE1    | 1.2030676682  | 0.3063933712 | 0.9999763851 |
| ZNF575   | -1.4420864275 | 0.3613565856 | 0.9999763851 |
| XRCC1    | -1.5486171134 | 0.4223561277 | 0.9999763851 |
| PINLYP   | -4.0879703482 | 0.0149316273 | 0.9999763851 |
| IRGQ     | -1.4980248305 | 0.2369980283 | 0.9999763851 |
| ZNF576   | -1.1802836473 | 0.4536333322 | 0.9999763851 |
| ZNF428   | -1.1463823201 | 0.4346741804 | 0.9999763851 |
| CADM4    | 1.0273967864  | 0.9753772823 | 0.9999763851 |
| PLAUR    | -2.5494303999 | 5.84E-08     | 0.0001849    |
| SMG9     | 1.0643686479  | 0.8602521217 | 0.9999763851 |
| KCNN4    | -1.3414473019 | 0.0782650218 | 0.9999763851 |
| LYPD5    | 0             | 0            | 0            |
| ZNF283   | 0             | 0            | 0            |
| ZNF45    | -1.0416330641 | 0.9063517637 | 0.9999763851 |
| ZNF221   | -4.2849908816 | 0.4028453076 | 0.9999763851 |
| ZNF155   | -1.5437509479 | 0.349932048  | 0.9999763851 |
| ZNF230   | -1.063351306  | 0.8895821798 | 0.9999763851 |
| ZNF222   | 5.4770877341  | 0.3746135179 | 0.9999763851 |
| ZNF284   | 0             | 0            | 0            |
| ZNF224   | -1.0099162218 | 0.9847656349 | 0.9999763851 |
| ZNF225   | 1.225293246   | 0.7587253944 | 0.9999763851 |
| ZNF226   | -1.7095938638 | 0.0699030905 | 0.9999763851 |
| ZNF227   | -1.2068284073 | 0.4516690809 | 0.9999763851 |
| ZNF233   | 2.3412218143  | 0.403714452  | 0.9999763851 |
| ZNF235   | 16.6918753579 | 0.1319658723 | 0.9999763851 |
| ZNF229   | 0             | 0            | 0            |
| ZNF180   | 1.1121894999  | 0.7504108903 | 0.9999763851 |
| CEACAM20 | 0             | 0            | 0            |
| PVR      | -1.1416513844 | 0.4669493586 | 0.9999763851 |
| CEACAM19 | 2.3390875834  | 0.423386324  | 0.9999763851 |
| BCL3     | 1.8670053592  | 0.0541134572 | 0.9999763851 |
| BCAM     | 0             | 0            | 0            |
| NECTIN2  | 1.3272955974  | 0.4503217028 | 0.9999763851 |
| TOMM40   | 1.2365766771  | 0.2393519921 | 0.9999763851 |
| APOE     | -1.3151016298 | 0.8211851345 | 0.9999763851 |
| APOC4    | 0             | 0            | 0            |



gene\_expression\_table

|              |                |              |              |
|--------------|----------------|--------------|--------------|
| APOC2        | -1.068702738   | 0.8808334266 | 0.9999763851 |
| CLPTM1       | 1.4290402066   | 0.4325616374 | 0.9999763851 |
| RELB         | 1.0026756297   | 0.9904703416 | 0.9999763851 |
| CLASRP       | -1.002857596   | 0.9914675148 | 0.9999763851 |
| ZNF296       | 1.9583043179   | 0.1676626037 | 0.9999763851 |
| GEMIN7       | 1.1834480789   | 0.6448037116 | 0.9999763851 |
| PPP1R37      | -1.01653746    | 0.9690241408 | 0.9999763851 |
| NKPD1        | -1.9649399627  | 0.4616023013 | 0.9999763851 |
| TRAPPC6A     | -1.1606377885  | 0.3749032272 | 0.9999763851 |
| BLOC1S3      | 1.0689667084   | 0.8563521145 | 0.9999763851 |
| MARK4        | -1.5635414544  | 0.0708552079 | 0.9999763851 |
| KLC3         | -1.5912207724  | 0.2297503593 | 0.9999763851 |
| ERCC2        | 1.2457882067   | 0.5862528268 | 0.9999763851 |
| PPP1R13L     | 1.5485442135   | 0.4096446861 | 0.9999763851 |
| CD3EAP       | 1.1013421799   | 0.5666060588 | 0.9999763851 |
| ERCC1        | -1.0111807915  | 0.9752343262 | 0.9999763851 |
| FOSB         | 1.8535308482   | 0.2746503873 | 0.9999763851 |
| RTN2         | -1.2692341856  | 0.5758578917 | 0.9999763851 |
| PPM1N        | -1.5528893325  | 0.6370113367 | 0.9999763851 |
| VASP         | -1.4327478803  | 0.0125423453 | 0.9999763851 |
| OPA3         | 1.5617030755   | 0.0391911105 | 0.9999763851 |
| GPR4         | -4.2864494036  | 0.4027150576 | 0.9999763851 |
| EML2         | -1.0687677289  | 0.7416380977 | 0.9999763851 |
| GIPR         | -1.3944153431  | 0.6946684156 | 0.9999763851 |
| SNRPD2       | 1.113381032    | 0.3721558782 | 0.9999763851 |
| QPCTL        | -1.2932039271  | 0.6293083934 | 0.9999763851 |
| FBXO46       | -1.2590527892  | 0.2699124358 | 0.9999763851 |
| BHMG1        | 0              | 0            | 0            |
| SIX5         | -1.3939868197  | 0.7079482006 | 0.9999763851 |
| DMPK         | 0              | 0            | 0            |
| DMWD         | -1.1490733186  | 0.858679221  | 0.9999763851 |
| SYMPK        | -1.0767178987  | 0.7216211299 | 0.9999763851 |
| FOXA3        | 0              | 0            | 0            |
| MYPOP        | -1.3960016768  | 0.1607620593 | 0.9999763851 |
| NANOS2       | 0              | 0            | 0            |
| CCDC61       | 1.4538178923   | 0.4747774916 | 0.9999763851 |
| HIF3A        | 3.2353357581   | 0.554787377  | 0.9999763851 |
| PPP5C        | 1.0740835145   | 0.8202663644 | 0.9999763851 |
| PPP5D1       | -4.3494677458  | 0.0470903699 | 0.9999763851 |
| CALM3        | -1.0411206757  | 0.7552019338 | 0.9999763851 |
| PTGIR        | -1.3161718537  | 0.8295213067 | 0.9999763851 |
| GNG8         | 0              | 0            | 0            |
| DACT3        | -14.1139127893 | 0.1036616799 | 0.9999763851 |
| PRKD2        | -1.0583648998  | 0.8091138058 | 0.9999763851 |
| LOC107987269 | 0              | 0            | 0            |
| STRN4        | 1.3423800262   | 0.2162409437 | 0.9999763851 |
| FKRP         | 2.6298086381   | 0.0977192164 | 0.9999763851 |
| SLC1A5       | -1.1994240326  | 0.1760075585 | 0.9999763851 |
| AP2S1        | 1.0393096086   | 0.8169524361 | 0.9999763851 |

gene\_expression\_table

|          |               |              |              |
|----------|---------------|--------------|--------------|
| ARHGAP35 | 1.1967377613  | 0.3890986999 | 0.9999763851 |
| NPAS1    | -1.6524072588 | 0.2843434323 | 0.9999763851 |
| TMEM160  | 1.1249404561  | 0.623597631  | 0.9999763851 |
| ZC3H4    | 1.0812500535  | 0.6385480359 | 0.9999763851 |
| SAE1     | 1.0464893113  | 0.7145275517 | 0.9999763851 |
| BBC3     | -1.661239928  | 0.0209794549 | 0.9999763851 |
| CCDC9    | -2.5516036663 | 0.1117933054 | 0.9999763851 |
| INAFM1   | 2.0227082105  | 0.0683638421 | 0.9999763851 |
| C5AR1    | -1.3951494284 | 0.6924416979 | 0.9999763851 |
| C5AR2    | 3.2353357581  | 0.554787377  | 0.9999763851 |
| DHX34    | 1.3096884437  | 0.3858037405 | 0.9999763851 |
| MEIS3    | -5.3420894951 | 0.1069892491 | 0.9999763851 |
| SLC8A2   | 0             | 0            | 0            |
| KPTN     | -1.1095493821 | 0.8171788564 | 0.9999763851 |
| NAPA     | 1.4176889383  | 0.0627529124 | 0.9999763851 |
| ZNF541   | 1.321204212   | 0.6513570406 | 0.9999763851 |
| GLTSCR1  | 1.1671718     | 0.7542152158 | 0.9999763851 |
| EHD2     | -1.1712402541 | 0.7053738199 | 0.9999763851 |
| GLTSCR2  | 1.1616039842  | 0.6158765615 | 0.9999763851 |
| SEPW1    | -1.1272745011 | 0.5108096469 | 0.9999763851 |
| SULT2A1  | 0             | 0            | 0            |
| BSPH1    | 0             | 0            | 0            |
| ELSPBP1  | 0             | 0            | 0            |
| PLA2G4C  | 3.2353357581  | 0.554787377  | 0.9999763851 |
| LIG1     | -1.0675033587 | 0.7061260964 | 0.9999763851 |
| C19orf68 | -1.0723377799 | 0.8278574481 | 0.9999763851 |
| CARD8    | -1.1064731205 | 0.5296619953 | 0.9999763851 |
| ZNF114   | -1.136490973  | 0.7996290466 | 0.9999763851 |
| CCDC114  | 1.8888297566  | 0.5936560099 | 0.9999763851 |
| EMP3     | 1.0400848455  | 0.8336817388 | 0.9999763851 |
| TMEM143  | -1.2216551083 | 0.6572253979 | 0.9999763851 |
| SYNGR4   | -1.3161718537 | 0.8297458114 | 0.9999763851 |
| KDELRL1  | -1.1123007939 | 0.5025335538 | 0.9999763851 |
| GRIN2D   | -1.3751873623 | 0.3821126918 | 0.9999763851 |
| GRWD1    | 1.0279248939  | 0.8519975167 | 0.9999763851 |
| KCNJ14   | 1.0477755851  | 0.8933885045 | 0.9999763851 |
| CYTH2    | 1.1145325251  | 0.6188708424 | 0.9999763851 |
| LMTK3    | 1.0308108187  | 0.9549662693 | 0.9999763851 |
| SULT2B1  | -4.287394647  | 0.4026306792 | 0.9999763851 |
| FAM83E   | 1.2872739558  | 0.8230399183 | 0.9999763851 |
| RPL18    | 1.0198195528  | 0.8788417354 | 0.9999763851 |
| SPHK2    | -1.3493136485 | 0.3861514809 | 0.9999763851 |
| DBP      | -1.0785712517 | 0.7543578431 | 0.9999763851 |
| CA11     | -1.6023531879 | 0.1434093561 | 0.9999763851 |
| NTN5     | -7.5664585246 | 0.2254051562 | 0.9999763851 |
| FUT2     | -1.4081078364 | 0.6612397999 | 0.9999763851 |
| MAMSTR   | -2.5591355727 | 0.2872197658 | 0.9999763851 |
| RASIP1   | -1.0343869119 | 0.9624580852 | 0.9999763851 |
| IZUMO1   | 0             | 0            | 0            |

gene\_expression\_table

|          |               |              |              |
|----------|---------------|--------------|--------------|
| FUT1     | 0             | 0            | 0            |
| BCAT2    | 1.0105452535  | 0.9599240277 | 0.9999763851 |
| HSD17B14 | -4.3352959826 | 0.1432739397 | 0.9999763851 |
| PLEKHA4  | -7.5977820511 | 0.002836     | 0.9999763851 |
| PPP1R15A | -1.2745292358 | 0.1461808215 | 0.9999763851 |
| TULP2    | -4.287394647  | 0.4026306792 | 0.9999763851 |
| NUCB1    | 1.3190344221  | 0.2414531077 | 0.9999763851 |
| DHDH     | 5.4790129495  | 0.3778264384 | 0.9999763851 |
| BAX      | -1.629117792  | 0.3238138062 | 0.9999763851 |
| FTL      | -1.0051865821 | 0.9647772864 | 0.9999763851 |
| GYS1     | 1.1448717847  | 0.4899095965 | 0.9999763851 |
| RUVBL2   | -1.1077362151 | 0.5325007457 | 0.9999763851 |
| CGB7     | -4.287394647  | 0.4026306792 | 0.9999763851 |
| SNRNP70  | 1.1732365625  | 0.2275842871 | 0.9999763851 |
| LIN7B    | 1.2887116085  | 0.6524852855 | 0.9999763851 |
| C19orf73 | 7.7204093521  | 0.2874544417 | 0.9999763851 |
| PPFIA3   | -1.4417878993 | 0.4169973529 | 0.9999763851 |
| TRPM4    | -1.1262199596 | 0.567473403  | 0.9999763851 |
| SLC6A16  | 1.0605024554  | 0.9032518638 | 0.9999763851 |
| CD37     | -1.0431939783 | 0.7776884927 | 0.9999763851 |
| TEAD2    | -2.2372730517 | 0.3101430576 | 0.9999763851 |
| DKKL1    | -1.9496368441 | 0.3265476433 | 0.9999763851 |
| CCDC155  | 1.287203384   | 0.8328960235 | 0.9999763851 |
| SLC17A7  | 0             | 0            | 0            |
| PIH1D1   | -1.0011084901 | 0.9951409641 | 0.9999763851 |
| ALDH16A1 | 1.1355003882  | 0.4593998874 | 0.9999763851 |
| FLT3LG   | -1.3968316357 | 0.6231752741 | 0.9999763851 |
| RPL13A   | -1.0518943864 | 0.6629629285 | 0.9999763851 |
| RPS11    | 1.1678348468  | 0.2146361635 | 0.9999763851 |
| FCGRT    | -1.0356988155 | 0.8341891284 | 0.9999763851 |
| RCN3     | 5.4776292235  | 0.3745831165 | 0.9999763851 |
| NOSIP    | 1.3080638019  | 0.2155709172 | 0.9999763851 |
| PRRG2    | 2.3396033966  | 0.4194162393 | 0.9999763851 |
| PRR12    | 1.0728812783  | 0.8309405961 | 0.9999763851 |
| RRAS     | -1.3871978116 | 0.3767950736 | 0.9999763851 |
| SCAF1    | -2.6584638529 | 0.2215162537 | 0.9999763851 |
| IRF3     | 1.049196881   | 0.8252494282 | 0.9999763851 |
| BCL2L12  | 1.0591129027  | 0.7106976928 | 0.9999763851 |
| PRMT1    | -1.0998424179 | 0.546788991  | 0.9999763851 |
| ADM5     | 1.4251505961  | 0.4231625047 | 0.9999763851 |
| TSKS     | -1.3154339304 | 0.8205576571 | 0.9999763851 |
| AP2A1    | -1.6388669327 | 0.2788528738 | 0.9999763851 |
| FUZ      | 1.5105242113  | 0.5630238503 | 0.9999763851 |
| MED25    | -1.7854938727 | 0.003728     | 0.9999763851 |
| PTOV1    | 1.1442499687  | 0.4675560649 | 0.9999763851 |
| PNKP     | 1.2255983844  | 0.5128723529 | 0.9999763851 |
| AKT1S1   | -2.4060941143 | 0.0543292565 | 0.9999763851 |
| TBC1D17  | -1.2770352695 | 0.6501125273 | 0.9999763851 |
| IL4I1    | -1.1513118791 | 0.7190317952 | 0.9999763851 |

gene\_expression\_table

|          |               |              |              |
|----------|---------------|--------------|--------------|
| NUP62    | 1.1903578148  | 0.1943777625 | 0.9999763851 |
| ATF5     | -1.0057960537 | 0.9748064755 | 0.9999763851 |
| VRK3     | -1.2229879211 | 0.3565817158 | 0.9999763851 |
| ZNF473   | 1.2067235764  | 0.4878643051 | 0.9999763851 |
| MYH14    | -1.315303824  | 0.8206171563 | 0.9999763851 |
| NAPSA    | 0             | 0            | 0            |
| NR1H2    | 2.1303847456  | 0.0203213037 | 0.9999763851 |
| POLD1    | 1.0289925255  | 0.8999166998 | 0.9999763851 |
| FAM71E1  | -4.2849908816 | 0.4028453076 | 0.9999763851 |
| EMC10    | 1.1349048304  | 0.5110679374 | 0.9999763851 |
| JOSD2    | -1.2556552222 | 0.7305609006 | 0.9999763851 |
| ASPDH    | 0             | 0            | 0            |
| LRRC4B   | 5.4784711963  | 0.3745358536 | 0.9999763851 |
| SYT3     | 14.4482274128 | 0.150899916  | 0.9999763851 |
| C19orf81 | 1.3262316595  | 0.7525282844 | 0.9999763851 |
| SHANK1   | 1.178525712   | 0.6299590747 | 0.9999763851 |
| CLEC11A  | 1.0727650825  | 0.6812810122 | 0.9999763851 |
| ACPT     | 2.5187299588  | 0.2457619387 | 0.9999763851 |
| C19orf48 | 1.0717669009  | 0.7770421264 | 0.9999763851 |
| KLK1     | 0             | 0            | 0            |
| KLK6     | 3.2353357581  | 0.554787377  | 0.9999763851 |
| CTU1     | 1.9904122338  | 0.287607171  | 0.9999763851 |
| SIGLEC9  | 1.8144198156  | 0.5860132782 | 0.9999763851 |
| SIGLEC7  | -1.443902089  | 0.3292552504 | 0.9999763851 |
| CD33     | 1.049246854   | 0.7644264115 | 0.9999763851 |
| SIGLECL1 | 0             | 0            | 0            |
| IGLON5   | 0             | 0            | 0            |
| VSIG10L  | -2.461315534  | 0.2088619118 | 0.9999763851 |
| ETFB     | 1.2487341727  | 0.1826772009 | 0.9999763851 |
| CLDND2   | -2.156860942  | 0.0197790359 | 0.9999763851 |
| NKG7     | 1.079839729   | 0.6225749946 | 0.9999763851 |
| SIGLEC10 | 1.2033077928  | 0.4789055168 | 0.9999763851 |
| SIGLEC8  | -2.4274267559 | 0.4444039917 | 0.9999763851 |
| SIGLEC12 | 1.0869683407  | 0.7276379404 | 0.9999763851 |
| SIGLEC6  | -1.2763103583 | 0.1994636503 | 0.9999763851 |
| ZNF175   | 2.3109853843  | 0.1780900813 | 0.9999763851 |
| SIGLEC5  | 1.0715381111  | 0.6991735065 | 0.9999763851 |
| SIGLEC14 | 1.1985595417  | 0.4650412219 | 0.9999763851 |
| SPACA6   | -1.1907355565 | 0.533735572  | 0.9999763851 |
| HAS1     | 0             | 0            | 0            |
| FPR1     | -4.3342515471 | 0.1410261823 | 0.9999763851 |
| FPR2     | -1.0944884231 | 0.7128019938 | 0.9999763851 |
| FPR3     | -4.2849908816 | 0.4028453076 | 0.9999763851 |
| ZNF577   | 2.9478558986  | 0.0691812863 | 0.9999763851 |
| ZNF649   | -2.2030645698 | 0.1688809464 | 0.9999763851 |
| ZNF613   | 3.3935897477  | 0.2591478647 | 0.9999763851 |
| ZNF614   | -1.5930784051 | 0.2579458416 | 0.9999763851 |
| ZNF432   | 3.6398918228  | 0.0416544689 | 0.9999763851 |
| ZNF616   | 1.5493902735  | 0.3957245407 | 0.9999763851 |

gene\_expression\_table

|                |                |              |              |
|----------------|----------------|--------------|--------------|
| PPP2R1A        | 1.0748334908   | 0.6200826654 | 0.9999763851 |
| ZNF766         | -1.2626839641  | 0.538898979  | 0.9999763851 |
| ZNF480         | 1.174316906    | 0.4675532091 | 0.9999763851 |
| ZNF528         | 0              | 0            | 0            |
| ZNF578         | 0              | 0            | 0            |
| ZNF808         | -4.2864494036  | 0.4027150576 | 0.9999763851 |
| ZNF701         | -4.2849908816  | 0.4028453076 | 0.9999763851 |
| ZNF83          | 1.2196138221   | 0.4346787527 | 0.9999763851 |
| ZNF611         | 1.07432532     | 0.8555485013 | 0.9999763851 |
| ZNF28          | 1.0296736943   | 0.9675240215 | 0.9999763851 |
| ZNF468         | 1.4334329897   | 0.4259407477 | 0.9999763851 |
| ZNF320         | -4.2864494036  | 0.4027150576 | 0.9999763851 |
| ZNF888         | 1.1341380884   | 0.6968534675 | 0.9999763851 |
| ZNF816-ZNF321P | -1.0853248114  | 0.8761045508 | 0.9999763851 |
| ZNF816         | 3.2353357581   | 0.554787377  | 0.9999763851 |
| ZNF160         | -1.0571636065  | 0.8736442425 | 0.9999763851 |
| ZNF415         | 3.2353357581   | 0.554787377  | 0.9999763851 |
| ZNF347         | 0              | 0            | 0            |
| ZNF665         | -1.3154339304  | 0.8205576571 | 0.9999763851 |
| ZNF677         | 0              | 0            | 0            |
| ZNF845         | 1.6724224215   | 0.3465125467 | 0.9999763851 |
| ZNF761         | -1.2058523068  | 0.6360230421 | 0.9999763851 |
| ZNF813         | 0              | 0            | 0            |
| ZNF331         | 0              | 0            | 0            |
| NLRP12         | 1.9656449183   | 0.36154752   | 0.9999763851 |
| MYADM          | -1.0236776646  | 0.8771176713 | 0.9999763851 |
| CACNG6         | 0              | 0            | 0            |
| OSCAR          | 1.6411409338   | 0.0360841278 | 0.9999763851 |
| NDUFA3         | -1.1704791342  | 0.3323736151 | 0.9999763851 |
| TFPT           | 1.0755760503   | 0.737005642  | 0.9999763851 |
| PRPF31         | 1.3970834559   | 0.060304803  | 0.9999763851 |
| CNOT3          | 1.0615476676   | 0.8537583953 | 0.9999763851 |
| LENG1          | 1.339639958    | 0.6059754243 | 0.9999763851 |
| TMC4           | -20.6829910744 | 0.0563788217 | 0.9999763851 |
| MBOAT7         | -1.0718011147  | 0.7027683832 | 0.9999763851 |
| TSEN34         | 1.0371678772   | 0.8136438245 | 0.9999763851 |
| RPS9           | -1.106439253   | 0.4327492923 | 0.9999763851 |
| LILRB3         | -1.8163232553  | 0.4523888332 | 0.9999763851 |
| LILRB2         | 1.6933529607   | 0.2997621671 | 0.9999763851 |
| LILRA5         | 0              | 0            | 0            |
| LILRA4         | 0              | 0            | 0            |
| LAIR1          | -1.09273269    | 0.5987598898 | 0.9999763851 |
| TTYH1          | -6.0681194476  | 0.0987663897 | 0.9999763851 |
| LENG8          | 1.3410024408   | 0.7175063525 | 0.9999763851 |
| LENG9          | -1.0590040249  | 0.8394594159 | 0.9999763851 |
| LAIR2          | -2.3214980365  | 0.4375012815 | 0.9999763851 |
| LILRA2         | 1.2596261728   | 0.1273875514 | 0.9999763851 |
| LILRA1         | 1.2872739558   | 0.8230618026 | 0.9999763851 |
| LILRB1         | -4.3497596498  | 0.0424561003 | 0.9999763851 |

gene\_expression\_table

|              |               |              |              |
|--------------|---------------|--------------|--------------|
| LILRB4       | -4.2864494036 | 0.4027150576 | 0.9999763851 |
| KIR2DL3      | -4.2864494036 | 0.4027150576 | 0.9999763851 |
| KIR2DL1      | 0             | 0            | 0            |
| KIR2DL4      | 7.7488609396  | 0.3058529326 | 0.9999763851 |
| KIR3DL2      | 1.6245986645  | 0.5891121414 | 0.9999763851 |
| FCAR         | 1.3987124065  | 0.058184229  | 0.9999763851 |
| NCR1         | -1.7405372638 | 0.3492323171 | 0.9999763851 |
| NLRP7        | 1.2335574408  | 0.4277296328 | 0.9999763851 |
| NLRP2        | -1.4204723584 | 0.6090314739 | 0.9999763851 |
| GP6          | -1.817658111  | 0.4899045682 | 0.9999763851 |
| RDH13        | -1.0610519349 | 0.7618954391 | 0.9999763851 |
| EPS8L1       | -2.0459777417 | 0.1652741858 | 0.9999763851 |
| PPP1R12C     | -1.0332644239 | 0.8711410271 | 0.9999763851 |
| TNNT1        | -1.1123683504 | 0.5554711241 | 0.9999763851 |
| TNNI3        | 1.4680150042  | 0.4822226802 | 0.9999763851 |
| DNAAF3       | 1.4352142164  | 0.2459729858 | 0.9999763851 |
| SYT5         | -1.3161718537 | 0.8299542244 | 0.9999763851 |
| PTPRH        | -1.3946909469 | 0.7145899032 | 0.9999763851 |
| TMEM86B      | 1.4728639419  | 0.256351474  | 0.9999763851 |
| PPP6R1       | 1.022828758   | 0.8732357292 | 0.9999763851 |
| HSPBP1       | 1.1403359424  | 0.545350267  | 0.9999763851 |
| BRSK1        | 0             | 0            | 0            |
| TMEM150B     | -1.0552520483 | 0.9183054086 | 0.9999763851 |
| KMT5C        | -1.4424774004 | 0.0865423284 | 0.9999763851 |
| COX6B2       | 0             | 0            | 0            |
| IL11         | -1.5420290394 | 0.6711533512 | 0.9999763851 |
| TMEM238      | -1.0854185322 | 0.8773319942 | 0.9999763851 |
| RPL28        | -1.0069314725 | 0.9582969321 | 0.9999763851 |
| UBE2S        | -1.2228123551 | 0.2270779935 | 0.9999763851 |
| ISOC2        | 1.6565793297  | 0.1624366642 | 0.9999763851 |
| ZNF628       | -1.2489704587 | 0.5602733251 | 0.9999763851 |
| NAT14        | 1.1994236376  | 0.6790810627 | 0.9999763851 |
| SBK2         | 0             | 0            | 0            |
| ZNF579       | 1.0457585792  | 0.8944063195 | 0.9999763851 |
| FIZ1         | 1.0312908337  | 0.9224493132 | 0.9999763851 |
| ZNF524       | 1.6222611763  | 0.1741476053 | 0.9999763851 |
| ZNF865       | 1.2505247135  | 0.5434864404 | 0.9999763851 |
| ZNF784       | 1.2371469701  | 0.5696714321 | 0.9999763851 |
| LOC107983998 | -1.3711818216 | 0.7361262837 | 0.9999763851 |
| ZNF581       | -1.1358401809 | 0.5545121912 | 0.9999763851 |
| ZNF580       | -1.1333762761 | 0.6534102773 | 0.9999763851 |
| CCDC106      | 3.3942235682  | 0.2227323437 | 0.9999763851 |
| U2AF2        | -1.1546023052 | 0.3280070159 | 0.9999763851 |
| EPN1         | 1.3485884002  | 0.1818976801 | 0.9999763851 |
| NLRP9        | -2.3212684229 | 0.4489510253 | 0.9999763851 |
| NLRP5        | 0             | 0            | 0            |
| ZNF787       | -1.0417738745 | 0.8614618061 | 0.9999763851 |
| ZNF444       | -1.2681082708 | 0.2830006094 | 0.9999763851 |
| ZSCAN5A      | -1.008604596  | 0.9643922311 | 0.9999763851 |

gene\_expression\_table

|          |               |              |              |
|----------|---------------|--------------|--------------|
| ZNF583   | -1.3962845548 | 0.7156673328 | 0.9999763851 |
| ZNF667   | 0             | 0            | 0            |
| ZNF471   | 0             | 0            | 0            |
| ZNF470   | 1.6243491221  | 0.5675493249 | 0.9999763851 |
| ZNF71    | -1.4897297417 | 0.2193031866 | 0.9999763851 |
| ZIM2     | 0             | 0            | 0            |
| DUXA     | 0             | 0            | 0            |
| ZNF805   | -1.1000773412 | 0.7917505987 | 0.9999763851 |
| ZNF460   | 1.3942139156  | 0.1134600985 | 0.9999763851 |
| ZNF547   | -1.2730325932 | 0.584169862  | 0.9999763851 |
| ZNF548   | -1.4714438827 | 0.4307362296 | 0.9999763851 |
| ZNF17    | -1.2518413874 | 0.6243462905 | 0.9999763851 |
| ZNF749   | 1.2910602585  | 0.408323903  | 0.9999763851 |
| VN1R1    | -4.2864494036 | 0.4027150576 | 0.9999763851 |
| ZNF772   | 0             | 0            | 0            |
| ZNF419   | -1.2721074713 | 0.3475195954 | 0.9999763851 |
| ZNF773   | 1.1042539188  | 0.6749893818 | 0.9999763851 |
| ZNF549   | -1.4392727316 | 0.4399516201 | 0.9999763851 |
| ZNF550   | 1.0338216758  | 0.9015762845 | 0.9999763851 |
| ZNF416   | 3.1161214639  | 0.1563424467 | 0.9999763851 |
| ZNF530   | -1.0880053136 | 0.8594853871 | 0.9999763851 |
| ZNF134   | 1.1436909671  | 0.7539542115 | 0.9999763851 |
| ZNF211   | -2.3251540141 | 0.0862439704 | 0.9999763851 |
| ZNF551   | 3.0394080913  | 0.0469339881 | 0.9999763851 |
| ZNF154   | 3.9208783318  | 0.1839380568 | 0.9999763851 |
| ZNF671   | 9.9614219348  | 0.2209163234 | 0.9999763851 |
| ZNF776   | 3.4241220592  | 0.0665997038 | 0.9999763851 |
| ZNF586   | 3.2353357581  | 0.554787377  | 0.9999763851 |
| ZNF552   | 1.4324468288  | 0.4169058051 | 0.9999763851 |
| ZNF587B  | -1.1006912859 | 0.7868786466 | 0.9999763851 |
| ZNF587   | -1.0103676967 | 0.978955517  | 0.9999763851 |
| ZNF814   | -1.7069221799 | 0.3519969811 | 0.9999763851 |
| ZNF417   | -1.3948129396 | 0.6826169491 | 0.9999763851 |
| C19orf18 | 0             | 0            | 0            |
| ZNF606   | 0             | 0            | 0            |
| ZNF135   | 3.2361532718  | 0.5546934395 | 0.9999763851 |
| ZSCAN18  | 0             | 0            | 0            |
| ZNF274   | -1.2473340862 | 0.5298238395 | 0.9999763851 |
| ZNF544   | -1.4430036527 | 0.3345368996 | 0.9999763851 |
| ZNF8     | 2.2219096964  | 0.3519102996 | 0.9999763851 |
| ZSCAN22  | 1.35901596    | 0.6150212849 | 0.9999763851 |
| A1BG     | -1.4906022544 | 0.1757249258 | 0.9999763851 |
| ZNF497   | -1.5528755355 | 0.3187380754 | 0.9999763851 |
| ZNF837   | 0             | 0            | 0            |
| RPS5     | 1.1272394736  | 0.3247648756 | 0.9999763851 |
| RNF225   | 0             | 0            | 0            |
| ZNF584   | 1.3715279496  | 0.2177673837 | 0.9999763851 |
| ZNF132   | 1.2869488883  | 0.8215749962 | 0.9999763851 |
| ZNF324B  | -3.5020254147 | 0.0785511656 | 0.9999763851 |

gene\_expression\_table

|              |                |              |              |
|--------------|----------------|--------------|--------------|
| ZNF324       | 1.0121024616   | 0.9756497553 | 0.9999763851 |
| ZNF446       | -1.5299337314  | 0.4579746563 | 0.9999763851 |
| SLC27A5      | 1.2133349159   | 0.5104526526 | 0.9999763851 |
| ZBTB45       | 2.0283988866   | 0.0206459548 | 0.9999763851 |
| TRIM28       | 1.1694042773   | 0.2976039341 | 0.9999763851 |
| CHMP2A       | -1.061457915   | 0.674060491  | 0.9999763851 |
| UBE2M        | -1.1966910128  | 0.2538782382 | 0.9999763851 |
| MZF1         | 1.0953709777   | 0.7953458226 | 0.9999763851 |
| C20orf96     | 1.0256422978   | 0.937069879  | 0.9999763851 |
| ZCCHC3       | 1.0784531001   | 0.623441848  | 0.9999763851 |
| SOX12        | -1.0366341859  | 0.8128296771 | 0.9999763851 |
| LOC101929937 | 3.2356557963   | 0.5547505991 | 0.9999763851 |
| NRSN2        | -4.2864494036  | 0.4027150576 | 0.9999763851 |
| TRIB3        | 1.116888451    | 0.4577910289 | 0.9999763851 |
| RBCK1        | 1.1017473261   | 0.5508620874 | 0.9999763851 |
| TBC1D20      | -1.4286529559  | 0.0449845336 | 0.9999763851 |
| CSNK2A1      | -1.2219251045  | 0.2591121791 | 0.9999763851 |
| SRXN1        | -1.0726498826  | 0.7283908537 | 0.9999763851 |
| SCRT2        | 0              | 0            | 0            |
| FAM110A      | -1.0191324298  | 0.9351060089 | 0.9999763851 |
| ANGPT4       | -1.3716482783  | 0.7374997556 | 0.9999763851 |
| PSMF1        | 1.1571878611   | 0.2996215233 | 0.9999763851 |
| TMEM74B      | -2.3220580825  | 0.4349418702 | 0.9999763851 |
| C20orf202    | 3.2353357581   | 0.554787377  | 0.9999763851 |
| SNPH         | 3.2353357581   | 0.554787377  | 0.9999763851 |
| SDCBP2       | -1.0054744133  | 0.9910361459 | 0.9999763851 |
| FKBP1A       | -1.0612378916  | 0.6560949646 | 0.9999763851 |
| NSFL1C       | 1.2049561558   | 0.2304930763 | 0.9999763851 |
| SIRPB2       | -2.8635001401  | 0.2946223333 | 0.9999763851 |
| SIRPD        | 1.7501499392   | 0.0303892363 | 0.9999763851 |
| SIRPB1       | 1.22555435     | 0.6127810454 | 0.9999763851 |
| SIRPG        | 1.5892415096   | 0.4866236646 | 0.9999763851 |
| LOC107984104 | 1.3583656505   | 0.6871858489 | 0.9999763851 |
| SIRPA        | 1.0446830517   | 0.7677106636 | 0.9999763851 |
| PDYN         | -26.1866591561 | 0.0435410495 | 0.9999763851 |
| STK35        | 1.0015682699   | 0.9919422365 | 0.9999763851 |
| LOC388780    | 1.0451823316   | 0.8975258825 | 0.9999763851 |
| TGM3         | 1.3974818312   | 0.2716342407 | 0.9999763851 |
| TGM6         | 0              | 0            | 0            |
| SNRNPB       | 1.0840197895   | 0.5229016055 | 0.9999763851 |
| ZNF343       | 1.0554341485   | 0.9046100388 | 0.9999763851 |
| NOP56        | 1.0411506962   | 0.7537898185 | 0.9999763851 |
| IDH3B        | -1.2437448903  | 0.1412179723 | 0.9999763851 |
| EBF4         | -1.2296063424  | 0.7622382116 | 0.9999763851 |
| CPXM1        | 0              | 0            | 0            |
| PCED1A       | -1.0916357762  | 0.7085210892 | 0.9999763851 |
| VPS16        | -1.062309553   | 0.8223844034 | 0.9999763851 |
| PTPRA        | -1.0111486878  | 0.9562062612 | 0.9999763851 |
| GNRH2        | 5.4781708352   | 0.3745527127 | 0.9999763851 |



gene\_expression\_table

|           |                |              |              |
|-----------|----------------|--------------|--------------|
| MRPS26    | 1.3269750954   | 0.1118834174 | 0.9999763851 |
| UBOX5     | 1.1614912412   | 0.6158719692 | 0.9999763851 |
| FASTKD5   | 1.2957928355   | 0.0968531147 | 0.9999763851 |
| LZTS3     | -1.0810230665  | 0.9183369404 | 0.9999763851 |
| DDRGK1    | 1.1965780279   | 0.3746792109 | 0.9999763851 |
| ITPA      | 1.0009770077   | 0.9942557113 | 0.9999763851 |
| SLC4A11   | -2.8024905865  | 0.0364495397 | 0.9999763851 |
| C20orf194 | -1.2918426844  | 0.511986203  | 0.9999763851 |
| ATRNL1    | -1.080288086   | 0.7005342013 | 0.9999763851 |
| SIGLEC1   | -14.2871033531 | 0.0106283846 | 0.9999763851 |
| HSPA12B   | 3.9191576211   | 0.181765289  | 0.9999763851 |
| C20orf27  | 1.3899390486   | 0.0438140024 | 0.9999763851 |
| SPEF1     | 3.2356557963   | 0.5547505991 | 0.9999763851 |
| CENPB     | 1.3159185192   | 0.0788341143 | 0.9999763851 |
| CDC25B    | 1.3171512711   | 0.0997053685 | 0.9999763851 |
| AP5S1     | -1.407612475   | 0.2383897358 | 0.9999763851 |
| MAVS      | 1.0303869215   | 0.8396320527 | 0.9999763851 |
| PANK2     | 1.200549583    | 0.2700036359 | 0.9999763851 |
| RNF24     | 1.0572840473   | 0.7358725403 | 0.9999763851 |
| SMOX      | 1.07406911     | 0.8180216435 | 0.9999763851 |
| ADRA1D    | 3.2356557963   | 0.5547505991 | 0.9999763851 |
| PRNP      | 1.0670917926   | 0.6793827102 | 0.9999763851 |
| RASSF2    | 1.4166075663   | 0.013662753  | 0.9999763851 |
| SLC23A2   | -1.3527418065  | 0.1389924147 | 0.9999763851 |
| TMEM230   | 1.1108441324   | 0.4572856505 | 0.9999763851 |
| PCNA      | 1.4489432893   | 0.0129445846 | 0.9999763851 |
| CDS2      | 1.0130674744   | 0.9525234843 | 0.9999763851 |
| GPCPD1    | 1.0685866958   | 0.7087445891 | 0.9999763851 |
| C20orf196 | 1.7838351596   | 0.0709210323 | 0.9999763851 |
| CHGB      | -7.5622178268  | 0.2177145568 | 0.9999763851 |
| TRMT6     | 1.1376079985   | 0.4947552548 | 0.9999763851 |
| MCM8      | 1.1989709456   | 0.3519837345 | 0.9999763851 |
| CRLS1     | 1.0986725977   | 0.547173851  | 0.9999763851 |
| FERMT1    | 1.4099229642   | 0.1654068036 | 0.9999763851 |
| TMX4      | 1.215319382    | 0.2769394075 | 0.9999763851 |
| PLCB1     | -1.1596074999  | 0.509645488  | 0.9999763851 |
| PLCB4     | 0              | 0            | 0            |
| LAMP5     | -1.5257315481  | 0.1164897177 | 0.9999763851 |
| ANKEF1    | 5.4781708352   | 0.3745527127 | 0.9999763851 |
| SNAP25    | 0              | 0            | 0            |
| MKKS      | 1.1881064672   | 0.2908156771 | 0.9999763851 |
| SLX4IP    | 1.4784574538   | 0.1633205261 | 0.9999763851 |
| JAG1      | -1.0879031548  | 0.8007426145 | 0.9999763851 |
| BTBD3     | -4.2849908816  | 0.4028453076 | 0.9999763851 |
| SPTLC3    | 5.4770877341   | 0.3746135179 | 0.9999763851 |
| TASP1     | 1.4883386233   | 0.334512757  | 0.9999763851 |
| ISM1      | 0              | 0            | 0            |
| ESF1      | 1.0302504836   | 0.9018399481 | 0.9999763851 |
| NDUFAF5   | -1.3090423502  | 0.5914447829 | 0.9999763851 |

gene\_expression\_table

|              |               |              |              |
|--------------|---------------|--------------|--------------|
| SEL1L2       | 3.2356557963  | 0.5547505991 | 0.9999763851 |
| MACROD2      | 1.0954104339  | 0.8960124723 | 0.9999763851 |
| KIF16B       | 1.2157962998  | 0.6812111224 | 0.9999763851 |
| SNRBP2       | -1.0708924923 | 0.5995085938 | 0.9999763851 |
| PCSK2        | -7.5622178268 | 0.2177145568 | 0.9999763851 |
| BFSP1        | -3.1523782906 | 0.1933609522 | 0.9999763851 |
| DSTN         | -1.0355869681 | 0.8023879703 | 0.9999763851 |
| RRBP1        | 1.0358863196  | 0.9021231549 | 0.9999763851 |
| SNX5         | 1.0304607309  | 0.856974194  | 0.9999763851 |
| MGME1        | 1.0534674235  | 0.8236855672 | 0.9999763851 |
| OVOL2        | 0             | 0            | 0            |
| PET117       | -1.1556427038 | 0.7845857376 | 0.9999763851 |
| KAT14        | -1.0208707959 | 0.9466423894 | 0.9999763851 |
| ZNF133       | 1.4463480413  | 0.4529675933 | 0.9999763851 |
| DZANK1       | -7.5622178268 | 0.2177145568 | 0.9999763851 |
| POLR3F       | 1.2789709507  | 0.5242367122 | 0.9999763851 |
| RBBP9        | 1.0620746528  | 0.8961151778 | 0.9999763851 |
| SEC23B       | 1.5661772776  | 0.0173458118 | 0.9999763851 |
| DTD1         | -1.4298969304 | 0.0456113532 | 0.9999763851 |
| C20orf78     | 0             | 0            | 0            |
| SLC24A3      | 1.5335035479  | 0.3134676029 | 0.9999763851 |
| RIN2         | 1.0316990044  | 0.9492598485 | 0.9999763851 |
| NAA20        | 1.0460663147  | 0.7787468358 | 0.9999763851 |
| CRNKL1       | 1.1675028992  | 0.5870344399 | 0.9999763851 |
| CFAP61       | -1.0808570019 | 0.9213873901 | 0.9999763851 |
| INSM1        | 3.3950799507  | 0.2315706881 | 0.9999763851 |
| RALGAPA2     | 1.3021022452  | 0.1568302323 | 0.9999763851 |
| KIZ          | -1.0042382655 | 0.9852303231 | 0.9999763851 |
| XRN2         | 1.3171858897  | 0.1821054418 | 0.9999763851 |
| THBD         | 1.1118569034  | 0.8274124065 | 0.9999763851 |
| CD93         | 1.0389040775  | 0.7576888968 | 0.9999763851 |
| NXT1         | 1.0853299105  | 0.5918975948 | 0.9999763851 |
| GZF1         | 1.6360339425  | 0.1163372759 | 0.9999763851 |
| NAPB         | 1.4995000169  | 0.3604758121 | 0.9999763851 |
| CST3         | -1.0653081877 | 0.7308630639 | 0.9999763851 |
| GGTLC1       | -2.3214980365 | 0.4375379017 | 0.9999763851 |
| SYNDIG1      | -4.2864494036 | 0.4027150576 | 0.9999763851 |
| CST7         | 1.0556368149  | 0.6636173989 | 0.9999763851 |
| APMAP        | 1.0235598933  | 0.8596327074 | 0.9999763851 |
| ACSS1        | -1.2777479351 | 0.0583911194 | 0.9999763851 |
| ENTPD6       | -1.430063291  | 0.1322543628 | 0.9999763851 |
| PYGB         | 1.6164170941  | 0.2317298459 | 0.9999763851 |
| ABHD12       | 1.1940108392  | 0.2609348743 | 0.9999763851 |
| GIN51        | 1.230499516   | 0.1490164818 | 0.9999763851 |
| NINL         | -1.3157515262 | 0.8229277089 | 0.9999763851 |
| NANP         | -1.0039427715 | 0.9854289261 | 0.9999763851 |
| ZNF337       | -1.1006548278 | 0.6840985452 | 0.9999763851 |
| HM13         | 1.0725757393  | 0.6287624317 | 0.9999763851 |
| LOC107985416 | 3.3940373312  | 0.2264967686 | 0.9999763851 |

gene\_expression\_table

|              |               |              |              |
|--------------|---------------|--------------|--------------|
| ID1          | -1.988561407  | 0.1904042371 | 0.9999763851 |
| COX4I2       | 3.2353357581  | 0.554787377  | 0.9999763851 |
| BCL2L1       | 1.1368774686  | 0.6475552384 | 0.9999763851 |
| TPX2         | -1.0006839168 | 0.9963313624 | 0.9999763851 |
| MYLK2        | -1.3943388833 | 0.6971518111 | 0.9999763851 |
| DUSP15       | 0             | 0            | 0            |
| TTLL9        | 14.1936656463 | 0.168558271  | 0.9999763851 |
| PDRG1        | 1.1385815663  | 0.4555346055 | 0.9999763851 |
| XKR7         | 0             | 0            | 0            |
| CCM2L        | -3.3294360969 | 0.2408463107 | 0.9999763851 |
| HCK          | -1.3568889329 | 0.069900331  | 0.9999763851 |
| TM9SF4       | -1.4499037543 | 0.1203715588 | 0.9999763851 |
| PLAGL2       | 1.6385235135  | 0.0567128116 | 0.9999763851 |
| POFUT1       | 1.0228900071  | 0.8997446512 | 0.9999763851 |
| KIF3B        | 1.5876959961  | 0.0712535843 | 0.9999763851 |
| ASXL1        | -1.1499791126 | 0.4038358742 | 0.9999763851 |
| NOL4L        | 1.2180183377  | 0.3894944596 | 0.9999763851 |
| COMMD7       | 1.2889595363  | 0.0799404458 | 0.9999763851 |
| DNMT3B       | -1.1855578399 | 0.6515370995 | 0.9999763851 |
| MAPRE1       | 1.033997266   | 0.839878763  | 0.9999763851 |
| BPIFB4       | 0             | 0            | 0            |
| CDK5RAP1     | 1.1376729952  | 0.5058799588 | 0.9999763851 |
| SNTA1        | -1.1947172969 | 0.5155327608 | 0.9999763851 |
| CBFA2T2      | -1.471044569  | 0.1780424858 | 0.9999763851 |
| NECAB3       | 1.1355685265  | 0.829331427  | 0.9999763851 |
| ACTL10       | 3.3962720959  | 0.248861434  | 0.9999763851 |
| E2F1         | -1.3220817815 | 0.2718403798 | 0.9999763851 |
| PXMP4        | 1.4097521379  | 0.3608655966 | 0.9999763851 |
| ZNF341       | 1.0790800989  | 0.6090245382 | 0.9999763851 |
| CHMP4B       | 1.0950306294  | 0.5385479998 | 0.9999763851 |
| RALY         | 1.0523149088  | 0.7908923464 | 0.9999763851 |
| EIF2S2       | 1.0307326447  | 0.7974595655 | 0.9999763851 |
| ASIP         | -1.0384617903 | 0.8842878605 | 0.9999763851 |
| AHCY         | -1.2108400369 | 0.2246609137 | 0.9999763851 |
| ITCH         | -1.9328035682 | 0.0850308536 | 0.9999763851 |
| LOC107985381 | 1.0002576586  | 0.9997940293 | 0.9999763851 |
| DYNLRB1      | 1.3718734691  | 0.0927620699 | 0.9999763851 |
| MAP1LC3A     | 1.8685954806  | 0.5481434699 | 0.9999763851 |
| PIGU         | -1.5343845509 | 0.0934089445 | 0.9999763851 |
| TP53INP2     | -1.4413164169 | 0.3310309941 | 0.9999763851 |
| NCOA6        | 1.4323329492  | 0.1143867707 | 0.9999763851 |
| ACSS2        | -1.1707536276 | 0.677090725  | 0.9999763851 |
| GSS          | 1.0232916298  | 0.9267478192 | 0.9999763851 |
| TRPC4AP      | -1.1308297127 | 0.5292549112 | 0.9999763851 |
| EDEM2        | -1.4826249465 | 0.1669351594 | 0.9999763851 |
| PROCR        | -1.76987712   | 0.0653950088 | 0.9999763851 |
| MMP24        | -1.0533860414 | 0.8847040156 | 0.9999763851 |
| EIF6         | 1.1256319169  | 0.4325214836 | 0.9999763851 |
| UQCC1        | 1.0355552074  | 0.8702827928 | 0.9999763851 |

gene\_expression\_table

|          |               |              |              |
|----------|---------------|--------------|--------------|
| GDF5     | 3.2356557963  | 0.5547505991 | 0.9999763851 |
| CEP250   | -1.0857485418 | 0.7060900175 | 0.9999763851 |
| ERGIC3   | -1.0174397783 | 0.9242972359 | 0.9999763851 |
| SPAG4    | -2.4272000607 | 0.2274781555 | 0.9999763851 |
| CPNE1    | -1.0074795398 | 0.9598025715 | 0.9999763851 |
| RBM12    | -1.2587402587 | 0.4678005783 | 0.9999763851 |
| NFS1     | -1.0479299084 | 0.8208008865 | 0.9999763851 |
| ROMO1    | -1.040362966  | 0.7599323551 | 0.9999763851 |
| RBM39    | -1.0880061346 | 0.5475084317 | 0.9999763851 |
| PHF20    | 1.0683529549  | 0.6829303654 | 0.9999763851 |
| SCAND1   | -1.0132667933 | 0.9591188074 | 0.9999763851 |
| CNBD2    | -2.3214980365 | 0.4375930761 | 0.9999763851 |
| EPB41L1  | 1.0317869295  | 0.9593518629 | 0.9999763851 |
| AAR2     | 1.2412696033  | 0.2937144985 | 0.9999763851 |
| DLGAP4   | -1.0805706915 | 0.7851856618 | 0.9999763851 |
| TGIF2    | -1.092567478  | 0.6706215333 | 0.9999763851 |
| C20orf24 | 1.4484483818  | 0.003656     | 0.9999763851 |
| SLA2     | -1.1160928733 | 0.7724379585 | 0.9999763851 |
| NDRG3    | -1.1173695294 | 0.509890285  | 0.9999763851 |
| DSN1     | -1.133609719  | 0.4360390472 | 0.9999763851 |
| SOGA1    | 1.0298836313  | 0.9358147356 | 0.9999763851 |
| TLDC2    | -1.2789550668 | 0.6662995471 | 0.9999763851 |
| SAMHD1   | -1.3154339304 | 0.8205576571 | 0.9999763851 |
| RBL1     | -1.0745700941 | 0.7314424875 | 0.9999763851 |
| MROH8    | -2.7748204488 | 0.1723035535 | 0.9999763851 |
| RPN2     | 1.2028409537  | 0.1765718693 | 0.9999763851 |
| MANBAL   | 1.4056374044  | 0.4824275485 | 0.9999763851 |
| BLCAP    | 1.0985607688  | 0.6343437099 | 0.9999763851 |
| CTNNBL1  | 1.2661914927  | 0.2754819065 | 0.9999763851 |
| VSTM2L   | -4.2849908816 | 0.4028453076 | 0.9999763851 |
| TTI1     | 1.060209841   | 0.8667985886 | 0.9999763851 |
| RPRD1B   | 1.0789847674  | 0.7734304457 | 0.9999763851 |
| TGM2     | -4.2864494036 | 0.4027150576 | 0.9999763851 |
| KIAA1755 | 0             | 0            | 0            |
| BPI      | 1.0313773182  | 0.9285585262 | 0.9999763851 |
| LBP      | 0             | 0            | 0            |
| RALGAPB  | -1.1443901739 | 0.6146783214 | 0.9999763851 |
| ACTR5    | -1.4088516573 | 0.3861805437 | 0.9999763851 |
| PPP1R16B | -1.0159689854 | 0.97668512   | 0.9999763851 |
| FAM83D   | 1.3074494948  | 0.1557222086 | 0.9999763851 |
| DHX35    | -1.0290561094 | 0.9402925561 | 0.9999763851 |
| MAFB     | -2.6885892031 | 0.0346890225 | 0.9999763851 |
| TOP1     | 1.2205880993  | 0.2507078017 | 0.9999763851 |
| PLCG1    | 1.2198907174  | 0.4967548468 | 0.9999763851 |
| ZHX3     | -1.3476313236 | 0.2225587741 | 0.9999763851 |
| CHD6     | -1.055131914  | 0.8462298464 | 0.9999763851 |
| SRSF6    | 1.1735274425  | 0.2321975923 | 0.9999763851 |
| L3MBTL1  | -1.075487785  | 0.8806084986 | 0.9999763851 |
| SGK2     | -4.2864494036 | 0.4027150576 | 0.9999763851 |

gene\_expression\_table

|              |               |              |              |
|--------------|---------------|--------------|--------------|
| IFT52        | -1.2178827002 | 0.506527468  | 0.9999763851 |
| MYBL2        | 1.1493453876  | 0.4929544872 | 0.9999763851 |
| TOX2         | 1.9664421512  | 0.3428506238 | 0.9999763851 |
| JPH2         | -1.9650476918 | 0.4868473848 | 0.9999763851 |
| OSER1        | -1.0215415652 | 0.9461052224 | 0.9999763851 |
| GDAP1L1      | -8.342239448  | 0.2145009236 | 0.9999763851 |
| FITM2        | -1.9661045084 | 0.4536538719 | 0.9999763851 |
| HNF4A        | 0             | 0            | 0            |
| TTPAL        | 1.057088054   | 0.8858669249 | 0.9999763851 |
| SERINC3      | -1.0375895714 | 0.8577233098 | 0.9999763851 |
| PKIG         | -2.2015243791 | 0.1346705763 | 0.9999763851 |
| ADA          | -1.1577290956 | 0.3343739689 | 0.9999763851 |
| WISP2        | 0             | 0            | 0            |
| YWHAB        | 1.2971550882  | 0.0377864355 | 0.9999763851 |
| PABPC1L      | 5.4776292235  | 0.3745831165 | 0.9999763851 |
| TOMM34       | -1.0634129928 | 0.7080758565 | 0.9999763851 |
| STK4         | 1.10847478    | 0.5256344995 | 0.9999763851 |
| SLPI         | -1.3808899025 | 0.2173360256 | 0.9999763851 |
| MATN4        | -1.9652419871 | 0.4557873831 | 0.9999763851 |
| SDC4         | -1.0825129847 | 0.7110844884 | 0.9999763851 |
| SYS1         | -1.0190651418 | 0.939760473  | 0.9999763851 |
| TP53TG5      | -1.3157515262 | 0.8230246091 | 0.9999763851 |
| DBNDD2       | 3.3951164687  | 0.250814793  | 0.9999763851 |
| PIGT         | -1.0005435824 | 0.9973709744 | 0.9999763851 |
| WFDC8        | 0             | 0            | 0            |
| WFDC11       | 0             | 0            | 0            |
| WFDC3        | 0             | 0            | 0            |
| DNTTIP1      | 1.0423402332  | 0.839044261  | 0.9999763851 |
| UBE2C        | -1.8913295165 | 0.223853939  | 0.9999763851 |
| SNX21        | 1.0352194987  | 0.9042103676 | 0.9999763851 |
| ACOT8        | 1.3648471011  | 0.5034311008 | 0.9999763851 |
| ZSWIM3       | -1.0417840134 | 0.9051070896 | 0.9999763851 |
| ZSWIM1       | -1.278603095  | 0.3089307697 | 0.9999763851 |
| NEURL2       | 0             | 0            | 0            |
| CTSA         | 1.1501739715  | 0.4237781181 | 0.9999763851 |
| PLTP         | -2.5222693939 | 0.1001615339 | 0.9999763851 |
| LOC107985388 | -7.5622178268 | 0.2177145568 | 0.9999763851 |
| PCIF1        | 1.3220696995  | 0.3781846522 | 0.9999763851 |
| ZNF335       | -1.2580875227 | 0.4449435508 | 0.9999763851 |
| MMP9         | -7.515816106  | 0            | 0            |
| SLC12A5      | 1.2196928187  | 0.5868763933 | 0.9999763851 |
| NCOA5        | -1.0255741017 | 0.9171644381 | 0.9999763851 |
| CD40         | 0             | 0            | 0            |
| CDH22        | 3.2356557963  | 0.5547505991 | 0.9999763851 |
| SLC35C2      | 1.2188030094  | 0.2366815023 | 0.9999763851 |
| ELMO2        | -1.7836060192 | 0.1060817513 | 0.9999763851 |
| OCSTAMP      | -3.5359384325 | 0.1861728921 | 0.9999763851 |
| SLC13A3      | 4.607561061   | 0.0514509885 | 0.9999763851 |
| TP53RK       | 1.293202823   | 0.2499456712 | 0.9999763851 |

gene\_expression\_table

|                |                |              |              |
|----------------|----------------|--------------|--------------|
| EYA2           | -1.8170402834  | 0.4617275345 | 0.9999763851 |
| ZMYND8         | -1.1741161294  | 0.4148906947 | 0.9999763851 |
| NCOA3          | -1.2778458906  | 0.5560304168 | 0.9999763851 |
| SULF2          | 1.9461790648   | 0.422502182  | 0.9999763851 |
| PREX1          | -1.6706232709  | 0.003913     | 0.9999763851 |
| ARFGEF2        | -1.1228736987  | 0.7300216397 | 0.9999763851 |
| CSE1L          | 1.2266119642   | 0.1600706383 | 0.9999763851 |
| STAU1          | 1.0842553943   | 0.5715264743 | 0.9999763851 |
| DDX27          | 1.245343101    | 0.1353144034 | 0.9999763851 |
| ZNFX1          | -1.3063804818  | 0.2170648607 | 0.9999763851 |
| KCNB1          | 0              | 0            | 0            |
| B4GALT5        | 1.334312072    | 0.0704176141 | 0.9999763851 |
| SLC9A8         | 1.0541480648   | 0.8431050993 | 0.9999763851 |
| SPATA2         | 1.4154915891   | 0.3707018573 | 0.9999763851 |
| RNF114         | -1.0554330156  | 0.7419161538 | 0.9999763851 |
| SNAI1          | 1.257031282    | 0.5160393245 | 0.9999763851 |
| UBE2V1         | -1.1475927864  | 0.4355118933 | 0.9999763851 |
| TMEM189-UBE2V1 | -1.0545930339  | 0.8480191659 | 0.9999763851 |
| TMEM189        | -1.3070874458  | 0.6188949756 | 0.9999763851 |
| CEBPB          | -1.2340630687  | 0.2871778085 | 0.9999763851 |
| LINC01272      | -4.3357248284  | 0.1410436389 | 0.9999763851 |
| PTPN1          | -1.2455608123  | 0.1526214449 | 0.9999763851 |
| FAM65C         | 7.7204093521   | 0.2872553038 | 0.9999763851 |
| PARD6B         | 1.7588469196   | 0.4594883115 | 0.9999763851 |
| BCAS4          | -1.3158816768  | 0.820532939  | 0.9999763851 |
| ADNP           | -1.0051021492  | 0.9747203598 | 0.9999763851 |
| DPM1           | -1.1551731281  | 0.4579438118 | 0.9999763851 |
| MOCS3          | 1.3533910037   | 0.6436402884 | 0.9999763851 |
| NFATC2         | -1.0836376607  | 0.646534018  | 0.9999763851 |
| ATP9A          | -1.4872724642  | 0.1542745197 | 0.9999763851 |
| SALL4          | 0              | 0            | 0            |
| ZFP64          | 1.1805583337   | 0.5591178466 | 0.9999763851 |
| TSHZ2          | -1.3158816768  | 0.820532939  | 0.9999763851 |
| ZNF217         | -1.1867922133  | 0.529066932  | 0.9999763851 |
| CYP24A1        | 0              | 0            | 0            |
| PFDN4          | -1.39304807    | 0.1176612983 | 0.9999763851 |
| FAM210B        | 1.5224020367   | 0.1074926087 | 0.9999763851 |
| AURKA          | -1.0186839686  | 0.9171622059 | 0.9999763851 |
| CSTF1          | 1.0843707723   | 0.7389716391 | 0.9999763851 |
| CASS4          | -1.0540706169  | 0.9535654663 | 0.9999763851 |
| RTFDC1         | 1.5002365221   | 0.5923684537 | 0.9999763851 |
| GCNT7          | -1.1237631643  | 0.4685298653 | 0.9999763851 |
| FAM209A        | -10.8422096127 | 0.1418941141 | 0.9999763851 |
| FAM209B        | 0              | 0            | 0            |
| BMP7           | -3.7194282732  | 0.1374523325 | 0.9999763851 |
| RAE1           | -1.1773640812  | 0.2952765814 | 0.9999763851 |
| RBM38          | -1.0264348637  | 0.8322773352 | 0.9999763851 |
| CTCFL          | 0              | 0            | 0            |
| PMEPA1         | 1.6188017753   | 0.3109079449 | 0.9999763851 |

gene\_expression\_table

|              |               |              |              |
|--------------|---------------|--------------|--------------|
| RAB22A       | -1.1878104357 | 0.4637705007 | 0.9999763851 |
| VAPB         | -1.2302677144 | 0.2633824892 | 0.9999763851 |
| STX16        | -1.329955166  | 0.180029792  | 0.9999763851 |
| NPEPL1       | 1.2558075435  | 0.2708324772 | 0.9999763851 |
| GNAS         | -1.0636438486 | 0.7488884005 | 0.9999763851 |
| NELFCD       | 1.3329703122  | 0.110678819  | 0.9999763851 |
| CTS2         | 1.031779777   | 0.9463482361 | 0.9999763851 |
| TUBB1        | -3.1542453588 | 0.1721503405 | 0.9999763851 |
| ATP5E        | 1.2773622546  | 0.045895283  | 0.9999763851 |
| PRELID3B     | 1.3171909144  | 0.2649934396 | 0.9999763851 |
| ZNF831       | 3.2361532718  | 0.5546934395 | 0.9999763851 |
| PHACTR3      | 1.0867698084  | 0.6815501374 | 0.9999763851 |
| SYCP2        | 1.360595239   | 0.5391119927 | 0.9999763851 |
| FAM217B      | 1.2206321529  | 0.2351384296 | 0.9999763851 |
| PPP1R3D      | 1.9261319652  | 0.199694235  | 0.9999763851 |
| CDH26        | 1.2872739558  | 0.8230836847 | 0.9999763851 |
| C20orf197    | -1.4072456792 | 0.2330339439 | 0.9999763851 |
| CDH4         | 3.2361532718  | 0.5546934395 | 0.9999763851 |
| TAF4         | 1.0325951904  | 0.9229895065 | 0.9999763851 |
| LSM14B       | -1.0123107948 | 0.955580793  | 0.9999763851 |
| PSMA7        | 1.0557480938  | 0.670826388  | 0.9999763851 |
| SS18L1       | 1.132487444   | 0.7751963279 | 0.9999763851 |
| MTG2         | 1.0328236685  | 0.9126370522 | 0.9999763851 |
| OSBPL2       | -1.0590068471 | 0.8483254192 | 0.9999763851 |
| ADRM1        | 1.2409078837  | 0.1896510143 | 0.9999763851 |
| LAMA5        | -2.5616934468 | 0.2771584414 | 0.9999763851 |
| RPS21        | 1.0889440024  | 0.4936244383 | 0.9999763851 |
| CABLES2      | 1.9041578618  | 0.0390924499 | 0.9999763851 |
| SLCO4A1      | 1.1142963709  | 0.5537064495 | 0.9999763851 |
| NTSR1        | -1.3158816768 | 0.820532939  | 0.9999763851 |
| LOC107987285 | -1.7345857276 | 0.4906929473 | 0.9999763851 |
| LOC107985428 | -1.3715126673 | 0.7505409261 | 0.9999763851 |
| MRGBP        | -1.1011310344 | 0.6301788725 | 0.9999763851 |
| OGFR         | -1.0457825007 | 0.8483560572 | 0.9999763851 |
| COL9A3       | -1.4098410659 | 0.2179733166 | 0.9999763851 |
| TCFL5        | 1.025678665   | 0.874569862  | 0.9999763851 |
| DPH3P1       | -4.287394647  | 0.4026306792 | 0.9999763851 |
| DIDO1        | -1.2541308198 | 0.3202283377 | 0.9999763851 |
| GID8         | -1.331103818  | 0.0290034687 | 0.9999763851 |
| SLC17A9      | 1.1599235797  | 0.3439333349 | 0.9999763851 |
| YTHDF1       | 1.1601027661  | 0.3833997709 | 0.9999763851 |
| BIRC7        | 1.4010222013  | 0.0786425879 | 0.9999763851 |
| NKAIN4       | 1.0311943882  | 0.9508738918 | 0.9999763851 |
| ARFGAP1      | 1.543529674   | 0.0749499097 | 0.9999763851 |
| KCNQ2        | -4.2849908816 | 0.4028453076 | 0.9999763851 |
| PPDPF        | -1.1038034742 | 0.5793328199 | 0.9999763851 |
| PTK6         | -1.2296063424 | 0.7622194614 | 0.9999763851 |
| C20orf195    | -4.2849908816 | 0.4028453076 | 0.9999763851 |
| HELZ2        | -1.1399034669 | 0.648278145  | 0.9999763851 |

gene\_expression\_table

|               |                |              |              |
|---------------|----------------|--------------|--------------|
| GMEB2         | -1.2141623974  | 0.3192112308 | 0.9999763851 |
| STMN3         | 1.4069142603   | 0.0447093106 | 0.9999763851 |
| RTEL1         | -8.3586475111  | 0.0312400138 | 0.9999763851 |
| TNFRSF6B      | 1.3645396519   | 0.5215317269 | 0.9999763851 |
| ARFRP1        | 1.1579167623   | 0.4989001583 | 0.9999763851 |
| ZGPAT         | -1.9647456674  | 0.4666595891 | 0.9999763851 |
| LIME1         | 1.397925865    | 0.2336542961 | 0.9999763851 |
| SLC2A4RG      | -1.165811203   | 0.3093951913 | 0.9999763851 |
| ZBTB46        | -2.2867821077  | 0.1388049159 | 0.9999763851 |
| ABHD16B       | -1.4069959864  | 0.6661843062 | 0.9999763851 |
| TPD52L2       | 1.0238634633   | 0.8902381226 | 0.9999763851 |
| DNAJC5        | -1.1533740954  | 0.3604125784 | 0.9999763851 |
| UCKL1         | -1.1288593904  | 0.7017024739 | 0.9999763851 |
| ZNF512B       | 3.2356557963   | 0.5547505991 | 0.9999763851 |
| SAMD10        | 1.1283065639   | 0.706449465  | 0.9999763851 |
| PRPF6         | -1.0108270299  | 0.9487806427 | 0.9999763851 |
| TCEA2         | -2.5759987075  | 0.0346611161 | 0.9999763851 |
| RGS19         | 1.180907932    | 0.3365904544 | 0.9999763851 |
| OPRL1         | -1.1959917806  | 0.5228072037 | 0.9999763851 |
| MYT1          | 1.0582319078   | 0.9023674713 | 0.9999763851 |
| PCMTD2        | -1.8459111238  | 0.0392992975 | 0.9999763851 |
| LOC102723996  | -1.1220082471  | 0.8898761875 | 0.9999763851 |
| LOC102724023  | -1.0324117823  | 0.8431342162 | 0.9999763851 |
| LOC102724159  | 1.3774830511   | 0.1757310753 | 0.9999763851 |
| LOC102724200  | 1.1516136901   | 0.5703676768 | 0.9999763851 |
| LOC102724219  | 1.6246521587   | 0.5734298714 | 0.9999763851 |
| LOC102724334  | -14.1139127893 | 0.1038075351 | 0.9999763851 |
| CH507-42P11.6 | 3.2361532718   | 0.5546934395 | 0.9999763851 |
| LOC102724428  | -4.3342515471  | 0.1408338982 | 0.9999763851 |
| LOC102724843  | -1.1961689377  | 0.3566200864 | 0.9999763851 |
| LOC107987290  | 1.8134025452   | 0.5842204249 | 0.9999763851 |
| U2AF1L5       | -2.1539887829  | 0.0523423104 | 0.9999763851 |
| LOC102724951  | 1.6254723588   | 0.5801222467 | 0.9999763851 |
| LOC102723360  | 3.7829747665   | 0.1145712259 | 0.9999763851 |
| SMIM11B       | -1.5334266392  | 0.3112532932 | 0.9999763851 |
| KCNE1B        | -13.1048806834 | 0.1324873564 | 0.9999763851 |
| LOC101927345  | 0              | 0            | 0            |
| LIP1          | 2.341581609    | 0.4128010673 | 0.9999763851 |
| HSPA13        | -1.0055793843  | 0.9787250768 | 0.9999763851 |
| SAMSN1        | -1.11035574    | 0.6065388383 | 0.9999763851 |
| NRIP1         | -4.2849908816  | 0.4028453076 | 0.9999763851 |
| USP25         | 1.1825933735   | 0.6286268408 | 0.9999763851 |
| C21orf91      | 2.1611354447   | 0.004407     | 0.9999763851 |
| CHODL         | 1.3931546432   | 0.7809653897 | 0.9999763851 |
| MRPL39        | -1.1570162597  | 0.6622522899 | 0.9999763851 |
| ATP5J         | 1.2754837142   | 0.0488674881 | 0.9999763851 |
| GABPA         | -1.4815908761  | 0.1655130883 | 0.9999763851 |
| APP           | -1.0476791637  | 0.7848585187 | 0.9999763851 |
| CYYR1         | 0              | 0            | 0            |



gene\_expression\_table

|           |               |              |              |
|-----------|---------------|--------------|--------------|
| N6AMT1    | 1.7588469196  | 0.4594325773 | 0.9999763851 |
| LTN1      | -1.1537916894 | 0.5728466639 | 0.9999763851 |
| RWDD2B    | -1.3258492561 | 0.4692371946 | 0.9999763851 |
| USP16     | -1.1805467293 | 0.3753239492 | 0.9999763851 |
| CCT8      | 1.0284058661  | 0.8226240061 | 0.9999763851 |
| MAP3K7CL  | 0             | 0            | 0            |
| BACH1     | 1.3224351089  | 0.3884551295 | 0.9999763851 |
| GRIK1     | 1.6245986645  | 0.5892525377 | 0.9999763851 |
| TIAM1     | 1.2869488883  | 0.8216243495 | 0.9999763851 |
| SOD1      | 1.1536618555  | 0.2328843825 | 0.9999763851 |
| SCAF4     | -1.0154604628 | 0.9618775074 | 0.9999763851 |
| MIS18A    | -1.233642533  | 0.199604931  | 0.9999763851 |
| MRAP      | 1.1698689513  | 0.5257570165 | 0.9999763851 |
| URB1      | 1.2581017049  | 0.6547290519 | 0.9999763851 |
| EVA1C     | -1.3717838846 | 0.7496266785 | 0.9999763851 |
| TCP10L    | -1.1967195072 | 0.8052198585 | 0.9999763851 |
| C21orf59  | 1.0731868423  | 0.7052539411 | 0.9999763851 |
| SYNJ1     | -1.5173134124 | 0.2966770655 | 0.9999763851 |
| PAXBP1    | 1.03195848    | 0.9039927485 | 0.9999763851 |
| C21orf62  | 11.9390382099 | 0.2001680618 | 0.9999763851 |
| OLIG1     | -1.1251191584 | 0.4633262155 | 0.9999763851 |
| IFNAR2    | -1.2566195273 | 0.2496207451 | 0.9999763851 |
| IL10RB    | 1.0942674598  | 0.549184108  | 0.9999763851 |
| IFNAR1    | 1.2306496411  | 0.2336590993 | 0.9999763851 |
| IFNGR2    | -1.2665026552 | 0.1555169615 | 0.9999763851 |
| TMEM50B   | 1.1623646707  | 0.4800180909 | 0.9999763851 |
| GART      | 1.0782239703  | 0.6433105957 | 0.9999763851 |
| SON       | 1.151474296   | 0.2815044595 | 0.9999763851 |
| DONSON    | 1.242926043   | 0.3648895161 | 0.9999763851 |
| CRYZL1    | 1.2249261486  | 0.4960839847 | 0.9999763851 |
| ITSN1     | -1.3896472144 | 0.1504948208 | 0.9999763851 |
| ATP5O     | 1.0662572636  | 0.6028727549 | 0.9999763851 |
| MRPS6     | -1.0276074985 | 0.8466813976 | 0.9999763851 |
| KCNE2     | 1.8136032532  | 0.5922712384 | 0.9999763851 |
| SMIM11A   | -1.1093913073 | 0.6959843054 | 0.9999763851 |
| LOC388820 | 0             | 0            | 0            |
| KCNE1     | -2.0111262383 | 0.2195294197 | 0.9999763851 |
| RCAN1     | -1.0847871666 | 0.6248114469 | 0.9999763851 |
| RUNX1     | -1.3516027245 | 0.0885977207 | 0.9999763851 |
| SETD4     | -1.2368303279 | 0.4872744417 | 0.9999763851 |
| CBR1      | 1.2796825913  | 0.2423757922 | 0.9999763851 |
| CBR3      | 0             | 0            | 0            |
| DOPEY2    | 1.0159123018  | 0.929363298  | 0.9999763851 |
| MORC3     | -1.7958863753 | 0.0261246072 | 0.9999763851 |
| CHAF1B    | 1.3867343779  | 0.1029179278 | 0.9999763851 |
| CLDN14    | 0             | 0            | 0            |
| SIM2      | 21.1691860784 | 0.1051441446 | 0.9999763851 |
| HLCS      | -1.0655137537 | 0.8232026858 | 0.9999763851 |
| PIGP      | 1.1448191152  | 0.686778718  | 0.9999763851 |

gene\_expression\_table

|              |                |              |              |
|--------------|----------------|--------------|--------------|
| TTC3         | 1.0165320361   | 0.9037221903 | 0.9999763851 |
| DSCR3        | -1.6417419452  | 0.0440783505 | 0.9999763851 |
| DYRK1A       | 1.5954539035   | 0.007749     | 0.9999763851 |
| LOC105372798 | 1.2872739558   | 0.8231055655 | 0.9999763851 |
| KCNJ6        | 0              | 0            | 0            |
| KCNJ15       | -1.2791513211  | 0.6735153603 | 0.9999763851 |
| ERG          | 1.0332411218   | 0.9299948202 | 0.9999763851 |
| ETS2         | -1.3343600057  | 0.0555350586 | 0.9999763851 |
| PSMG1        | 1.0049782818   | 0.9759802125 | 0.9999763851 |
| BRWD1        | -1.0782803538  | 0.6671705655 | 0.9999763851 |
| HMGNI        | 1.1658637217   | 0.2167850472 | 0.9999763851 |
| WRB          | 1.3685450424   | 0.0993869812 | 0.9999763851 |
| LCA5L        | 1.3412806227   | 0.6979357883 | 0.9999763851 |
| SH3BGR       | 1.8138024348   | 0.5774527952 | 0.9999763851 |
| IGSF5        | 3.2356557963   | 0.5547505991 | 0.9999763851 |
| DSCAM        | -1.0806434532  | 0.9277094092 | 0.9999763851 |
| MX2          | -1.2607263966  | 0.1452225198 | 0.9999763851 |
| MX1          | -3.3302773804  | 0.2305772477 | 0.9999763851 |
| TMPRSS2      | 0              | 0            | 0            |
| PRDM15       | 1.373208934    | 0.3894483419 | 0.9999763851 |
| C2CD2        | 1.0954045989   | 0.6593166633 | 0.9999763851 |
| ZBTB21       | -1.1547200932  | 0.6393713624 | 0.9999763851 |
| UMODL1       | -2.3882538214  | 0.204206133  | 0.9999763851 |
| ABCG1        | -1.9040212742  | 0.18967379   | 0.9999763851 |
| TFF3         | 1.4301853332   | 0.034562222  | 0.9999763851 |
| TFF1         | -4.2864494036  | 0.4027150576 | 0.9999763851 |
| UBASH3A      | 3.2353357581   | 0.554787377  | 0.9999763851 |
| SLC37A1      | 1.0849477094   | 0.741429701  | 0.9999763851 |
| LOC101928212 | 1.1342454438   | 0.7257525569 | 0.9999763851 |
| PDE9A        | 1.176424468    | 0.4157050996 | 0.9999763851 |
| WDR4         | -1.0207179885  | 0.8922757868 | 0.9999763851 |
| NDUFV3       | 1.3309263306   | 0.1462744326 | 0.9999763851 |
| ERVH48-1     | 0              | 0            | 0            |
| PKNOX1       | 1.2114370586   | 0.3114319325 | 0.9999763851 |
| CBS          | 1.6544532591   | 0.0876159115 | 0.9999763851 |
| U2AF1        | 1.7695738058   | 0.018485891  | 0.9999763851 |
| SIK1         | -13.3922837871 | 0.00611      | 0.9999763851 |
| HSF2BP       | 1.0965527729   | 0.8946753135 | 0.9999763851 |
| RRP1B        | -1.0015620478  | 0.991440235  | 0.9999763851 |
| PDXK         | 1.0433335781   | 0.7759724306 | 0.9999763851 |
| CSTB         | -1.1198149861  | 0.3353180891 | 0.9999763851 |
| RRP1         | 1.1219841073   | 0.5387692471 | 0.9999763851 |
| AGPAT3       | 1.3217407808   | 0.05389175   | 0.9999763851 |
| TRAPPC10     | 1.8249407711   | 0.0224357858 | 0.9999763851 |
| PWP2         | 1.2061491632   | 0.3142083008 | 0.9999763851 |
| ICOSLG       | 1.5837920266   | 0.0906188721 | 0.9999763851 |
| DNMT3L       | 2.3404251821   | 0.4098945743 | 0.9999763851 |
| PFKL         | 1.0109228692   | 0.9416829029 | 0.9999763851 |
| C21orf2      | -1.1105690639  | 0.6387702414 | 0.9999763851 |

gene\_expression\_table

|              |               |              |              |
|--------------|---------------|--------------|--------------|
| TRPM2        | 1.0210379017  | 0.8990319483 | 0.9999763851 |
| LRRC3        | 1.1404564402  | 0.821417007  | 0.9999763851 |
| TSPEAR       | -1.1235515614 | 0.852529858  | 0.9999763851 |
| KRTAP10-11   | 0             | 0            | 0            |
| UBE2G2       | 1.1878490596  | 0.2297451872 | 0.9999763851 |
| SUMO3        | -1.0202440932 | 0.8797889868 | 0.9999763851 |
| PTTG1IP      | 1.2978916291  | 0.0914339077 | 0.9999763851 |
| ITGB2        | -1.0669645412 | 0.581032251  | 0.9999763851 |
| FAM207A      | 1.0670824278  | 0.7304797413 | 0.9999763851 |
| LOC105372836 | 14.4540940263 | 0.1606114182 | 0.9999763851 |
| ADARB1       | -1.1316611385 | 0.5062115624 | 0.9999763851 |
| POFUT2       | -1.5201577695 | 0.1302765052 | 0.9999763851 |
| COL18A1      | -2.2370783531 | 0.3352356858 | 0.9999763851 |
| SLC19A1      | 1.1159079845  | 0.5151687785 | 0.9999763851 |
| PCBP3        | -1.3868448209 | 0.2512103113 | 0.9999763851 |
| COL6A1       | -1.3157515262 | 0.8232237083 | 0.9999763851 |
| SPATC1L      | 1.4856971374  | 0.5241682844 | 0.9999763851 |
| LSS          | 1.2691254053  | 0.2636540069 | 0.9999763851 |
| MCM3AP       | -1.0244878678 | 0.8839471721 | 0.9999763851 |
| YBEY         | -3.3198541437 | 0.0123775863 | 0.9999763851 |
| C21orf58     | 1.4368933492  | 0.1991026849 | 0.9999763851 |
| PCNT         | 1.019927783   | 0.934381039  | 0.9999763851 |
| DIP2A        | -1.0073484616 | 0.9700458138 | 0.9999763851 |
| S100B        | 1.7616937791  | 0.2136840547 | 0.9999763851 |
| PRMT2        | -1.0281121354 | 0.8484078682 | 0.9999763851 |
| POTEH        | 0             | 0            | 0            |
| IL17RA       | 1.1621180655  | 0.3313259784 | 0.9999763851 |
| CECR6        | 2.5928204807  | 0.1892694029 | 0.9999763851 |
| CECR5        | -1.2918033289 | 0.1186873312 | 0.9999763851 |
| CECR1        | 1.1961053826  | 0.4022162446 | 0.9999763851 |
| CECR2        | 0             | 0            | 0            |
| SLC25A18     | 1.0280058166  | 0.9750429901 | 0.9999763851 |
| LOC101929372 | 5.4770877341  | 0.3746135179 | 0.9999763851 |
| ATP6V1E1     | 1.0336797504  | 0.8157284294 | 0.9999763851 |
| BCL2L13      | -1.0631368843 | 0.766618491  | 0.9999763851 |
| BID          | 1.2813878356  | 0.1122085109 | 0.9999763851 |
| MICAL3       | -1.6226762749 | 0.1346566479 | 0.9999763851 |
| PEX26        | 1.1100595557  | 0.5558816994 | 0.9999763851 |
| TUBA8        | -3.0655574101 | 0.2538022597 | 0.9999763851 |
| USP18        | -1.2775602755 | 0.2639765813 | 0.9999763851 |
| LOC100996401 | 0             | 0            | 0            |
| TMEM191B     | -4.2849908816 | 0.4028453076 | 0.9999763851 |
| DGCR6        | 1.1103525767  | 0.8045197664 | 0.9999763851 |
| PRODH        | -4.3331566429 | 0.1396076612 | 0.9999763851 |
| DGCR2        | -1.0066336582 | 0.9684138072 | 0.9999763851 |
| DGCR14       | -1.5166423721 | 0.2736089451 | 0.9999763851 |
| SLC25A1      | 1.02951383    | 0.8832063722 | 0.9999763851 |
| CLTCL1       | 1.225991271   | 0.2869385855 | 0.9999763851 |
| HIRA         | 1.3386261381  | 0.4973719322 | 0.9999763851 |

gene\_expression\_table

|              |               |              |              |
|--------------|---------------|--------------|--------------|
| MRPL40       | 1.4198884904  | 0.1388794262 | 0.9999763851 |
| C22orf39     | 1.1715041281  | 0.3568604322 | 0.9999763851 |
| UFD1L        | 1.242368087   | 0.2481952816 | 0.9999763851 |
| CDC45        | -1.1427825327 | 0.6101251141 | 0.9999763851 |
| CLDN5        | -1.0496579118 | 0.8781381517 | 0.9999763851 |
| SEPT5        | -1.3151016298 | 0.8211380418 | 0.9999763851 |
| GP1BB        | -2.3209115874 | 0.4585844086 | 0.9999763851 |
| TBX1         | 1.6249017024  | 0.5574533205 | 0.9999763851 |
| GNB1L        | -1.2327202297 | 0.3708768376 | 0.9999763851 |
| C22orf29     | 4.0460575546  | 0.0003538    | 0.4231276475 |
| TXNRD2       | 1.5922095737  | 0.2057621794 | 0.9999763851 |
| COMT         | 1.332032552   | 0.0806837995 | 0.9999763851 |
| ARVCF        | -1.4196636908 | 0.3002805286 | 0.9999763851 |
| TANGO2       | -1.0867034227 | 0.8417134414 | 0.9999763851 |
| DGCR8        | -1.1160460844 | 0.6977643515 | 0.9999763851 |
| TRMT2A       | -1.0333830348 | 0.9204827412 | 0.9999763851 |
| RANBP1       | 1.2816208413  | 0.1333792794 | 0.9999763851 |
| ZDHHC8       | -1.0080160342 | 0.9755248585 | 0.9999763851 |
| CCDC188      | 0             | 0            | 0            |
| RTN4R        | 1.0849786238  | 0.7049234604 | 0.9999763851 |
| DGCR6L       | -1.0501057288 | 0.8557900637 | 0.9999763851 |
| USP41        | -1.5420290394 | 0.6710947271 | 0.9999763851 |
| ZNF74        | -1.3052610132 | 0.4390029348 | 0.9999763851 |
| SCARF2       | 1.2872739558  | 0.8230839604 | 0.9999763851 |
| KLHL22       | -1.4238553434 | 0.2101465195 | 0.9999763851 |
| MED15        | 1.4434210903  | 0.2860976023 | 0.9999763851 |
| PI4KA        | 1.3751756206  | 0.033094635  | 0.9999763851 |
| SNAP29       | -1.1041047545 | 0.7483112989 | 0.9999763851 |
| CRKL         | -1.262028694  | 0.3076036479 | 0.9999763851 |
| AIFM3        | 3.2353357581  | 0.554787377  | 0.9999763851 |
| LZTR1        | 1.0012007891  | 0.9971231092 | 0.9999763851 |
| THAP7        | 1.5803548206  | 0.0643356451 | 0.9999763851 |
| P2RX6        | 0             | 0            | 0            |
| RIMBP3B      | 1.3540269312  | 0.6268938733 | 0.9999763851 |
| HIC2         | -1.0180678453 | 0.9407902102 | 0.9999763851 |
| TMEM191C     | 9.9654679573  | 0.2182826153 | 0.9999763851 |
| RIMBP3C      | 0             | 0            | 0            |
| UBE2L3       | 1.1512595308  | 0.3480360927 | 0.9999763851 |
| YDJC         | 1.416167499   | 0.0807881266 | 0.9999763851 |
| CCDC116      | 9.9629524019  | 0.2191087173 | 0.9999763851 |
| SDF2L1       | -1.0225419001 | 0.9026703595 | 0.9999763851 |
| LOC107985532 | 1.6856724774  | 0.3227139203 | 0.9999763851 |
| PPIL2        | 1.1728787543  | 0.5076821275 | 0.9999763851 |
| YPEL1        | -1.0109314135 | 0.9847491886 | 0.9999763851 |
| MAPK1        | 1.0443695456  | 0.7992524031 | 0.9999763851 |
| PPM1F        | 1.0850500344  | 0.5623520503 | 0.9999763851 |
| TOP3B        | 1.0005367574  | 0.9991274089 | 0.9999763851 |
| ZNF280B      | -1.440961515  | 0.3787440936 | 0.9999763851 |
| ZNF280A      | 3.2353357581  | 0.554787377  | 0.9999763851 |

gene\_expression\_table

|              |               |              |              |
|--------------|---------------|--------------|--------------|
| PRAME        | 1.3575838719  | 0.4688216522 | 0.9999763851 |
| GGTLC2       | -1.176860274  | 0.6031774786 | 0.9999763851 |
| GNAZ         | 1.5103258976  | 0.5452528327 | 0.9999763851 |
| RAB36        | 3.3952287445  | 0.2427003854 | 0.9999763851 |
| BCR          | 1.589439761   | 0.1268157977 | 0.9999763851 |
| IGLL1        | -4.3327792956 | 0.165617213  | 0.9999763851 |
| DRICH1       | 1.1905633731  | 0.8015533761 | 0.9999763851 |
| RGL4         | 1.28729267    | 0.1632989598 | 0.9999763851 |
| ZNF70        | 3.2353357581  | 0.554787377  | 0.9999763851 |
| VPREB3       | 3.2356557963  | 0.5547505991 | 0.9999763851 |
| C22orf15     | -4.2864494036 | 0.4027150576 | 0.9999763851 |
| CHCHD10      | 1.0847786614  | 0.5634093838 | 0.9999763851 |
| MMP11        | 0             | 0            | 0            |
| SMARCB1      | 1.053464371   | 0.8092436238 | 0.9999763851 |
| DERL3        | -1.2354893189 | 0.6320368895 | 0.9999763851 |
| SLC2A11      | 1.2681733251  | 0.5754041855 | 0.9999763851 |
| MIF          | 1.224671875   | 0.1048315514 | 0.9999763851 |
| DDTL         | 0             | 0            | 0            |
| DDT          | 1.1024885098  | 0.4392928165 | 0.9999763851 |
| CABIN1       | 1.0664386336  | 0.7300427552 | 0.9999763851 |
| SUSD2        | 0             | 0            | 0            |
| GGT5         | 1.6711160385  | 0.4628395196 | 0.9999763851 |
| SPECC1L      | 1.0753361728  | 0.7953969655 | 0.9999763851 |
| ADORA2A      | 1.2613917301  | 0.174480077  | 0.9999763851 |
| UPB1         | -1.228925712  | 0.5134987392 | 0.9999763851 |
| GUCD1        | 1.0655988812  | 0.6986782554 | 0.9999763851 |
| SNRPD3       | -1.0620943846 | 0.6529606522 | 0.9999763851 |
| GGT1         | -1.1864535933 | 0.6577945118 | 0.9999763851 |
| LRRC75B      | -1.0821042168 | 0.9291660534 | 0.9999763851 |
| SGSM1        | -1.0379770968 | 0.9645627254 | 0.9999763851 |
| TMEM211      | 0             | 0            | 0            |
| KIAA1671     | -4.2864494036 | 0.4027150576 | 0.9999763851 |
| LOC100652901 | -1.4853639298 | 0.6492324819 | 0.9999763851 |
| LRP5L        | -1.740998567  | 0.298355622  | 0.9999763851 |
| GRK3         | -1.0571630207 | 0.8103972169 | 0.9999763851 |
| MYO18B       | 0             | 0            | 0            |
| SEZ6L        | -4.2864494036 | 0.4027150576 | 0.9999763851 |
| ASPHD2       | -1.5754456673 | 0.352421028  | 0.9999763851 |
| HPS4         | -1.2930344642 | 0.2051108142 | 0.9999763851 |
| SRRD         | 1.210352153   | 0.3199767214 | 0.9999763851 |
| TFIP11       | -2.486429952  | 0.1376534043 | 0.9999763851 |
| TPST2        | 1.0051892445  | 0.9705981581 | 0.9999763851 |
| CRYBA4       | 0             | 0            | 0            |
| LOC105372977 | 0             | 0            | 0            |
| MN1          | -3.3284109188 | 0.2432170002 | 0.9999763851 |
| PITPNB       | 1.12431465    | 0.4023267585 | 0.9999763851 |
| TTC28        | -1.1961292548 | 0.7881574773 | 0.9999763851 |
| CHEK2        | -1.6071211529 | 0.007679     | 0.9999763851 |
| HSCB         | 1.0568582013  | 0.9025496521 | 0.9999763851 |

gene\_expression\_table

|              |               |              |              |
|--------------|---------------|--------------|--------------|
| CCDC117      | 1.1693011825  | 0.4312848402 | 0.9999763851 |
| XBP1         | 1.0166377545  | 0.9056491539 | 0.9999763851 |
| ZNRF3        | -1.105669915  | 0.6432252193 | 0.9999763851 |
| KREMEN1      | 1.1397793504  | 0.7462971379 | 0.9999763851 |
| EMID1        | -1.5712347939 | 0.2148007785 | 0.9999763851 |
| RHBDD3       | 1.3720115748  | 0.3582141635 | 0.9999763851 |
| EWSR1        | 1.2219120443  | 0.2709789689 | 0.9999763851 |
| GAS2L1       | -1.0661499473 | 0.8694831307 | 0.9999763851 |
| AP1B1        | 1.063711204   | 0.6556796011 | 0.9999763851 |
| RFPL1        | 0             | 0            | 0            |
| THOC5        | -1.4482233792 | 0.1757426109 | 0.9999763851 |
| NIPSNAP1     | -2.5598805278 | 0.0007501    | 0.6510516988 |
| NF2          | 1.1968970453  | 0.3835758366 | 0.9999763851 |
| CABP7        | -1.0039253265 | 0.9900222704 | 0.9999763851 |
| ZMAT5        | -10.844600477 | 0.1421279131 | 0.9999763851 |
| UQCR10       | 1.5087757119  | 0.0133115864 | 0.9999763851 |
| ASCC2        | -1.0530745232 | 0.8381953766 | 0.9999763851 |
| MTMR3        | -1.1571307401 | 0.6077219702 | 0.9999763851 |
| HORMAD2      | 3.2356557963  | 0.5547505991 | 0.9999763851 |
| OSM          | 1.6708777748  | 0.4564705348 | 0.9999763851 |
| GATSL3       | -1.5839258669 | 0.2683865757 | 0.9999763851 |
| TBC1D10A     | 1.0573616162  | 0.8985497238 | 0.9999763851 |
| SF3A1        | 1.0568313029  | 0.6884028828 | 0.9999763851 |
| CCDC157      | -2.5593885838 | 0.3089102914 | 0.9999763851 |
| RNF215       | 0             | 0            | 0            |
| SEC14L2      | 1.0775103844  | 0.9223202328 | 0.9999763851 |
| MTFP1        | -1.1719786845 | 0.325927273  | 0.9999763851 |
| SEC14L3      | -4.2864494036 | 0.4027150576 | 0.9999763851 |
| SEC14L6      | 5.4770877341  | 0.3746135179 | 0.9999763851 |
| PES1         | 1.6448674626  | 0.0678102288 | 0.9999763851 |
| TCN2         | -1.4075675212 | 0.657907102  | 0.9999763851 |
| SLC35E4      | 1.3502901104  | 0.656953267  | 0.9999763851 |
| DUSP18       | 1.0308701261  | 0.9416535156 | 0.9999763851 |
| OSBP2        | -1.6834103876 | 0.4266347168 | 0.9999763851 |
| LOC107985544 | -1.3983009058 | 0.6830199456 | 0.9999763851 |
| MORC2        | 1.1593247404  | 0.6006386107 | 0.9999763851 |
| SMTN         | -2.5599229866 | 0.2927760335 | 0.9999763851 |
| SELM         | -1.6490543479 | 0.4721736735 | 0.9999763851 |
| RNF185       | 1.3482172868  | 0.3687080386 | 0.9999763851 |
| LIMK2        | 1.1627482163  | 0.4514885285 | 0.9999763851 |
| PIK3IP1      | -2.7791015202 | 0.003956     | 0.9999763851 |
| PATZ1        | -1.1060868578 | 0.7306235546 | 0.9999763851 |
| DRG1         | 1.0339579293  | 0.8363106962 | 0.9999763851 |
| EIF4ENIF1    | -1.1055176445 | 0.6740892965 | 0.9999763851 |
| SFI1         | 1.2337801177  | 0.5940542865 | 0.9999763851 |
| PISD         | 1.1009230701  | 0.6629571519 | 0.9999763851 |
| PRR14L       | -1.527465681  | 0.1033867687 | 0.9999763851 |
| DEPDC5       | -1.1282581934 | 0.7204868691 | 0.9999763851 |
| C22orf24     | 0             | 0            | 0            |

gene\_expression\_table

|              |               |              |              |
|--------------|---------------|--------------|--------------|
| YWHAH        | 1.2712772621  | 0.1364472651 | 0.9999763851 |
| C22orf42     | 0             | 0            | 0            |
| RFPL2        | 1.3262752232  | 0.7419297927 | 0.9999763851 |
| SLC5A4       | -1.8933556971 | 0.1856677614 | 0.9999763851 |
| RTCB         | 1.0735168783  | 0.607729719  | 0.9999763851 |
| FBXO7        | 1.1260305787  | 0.4046334418 | 0.9999763851 |
| SYN3         | -3.5008381699 | 0.0885110757 | 0.9999763851 |
| TIMP3        | 3.2353357581  | 0.554787377  | 0.9999763851 |
| LARGE        | -1.966276531  | 0.4563825937 | 0.9999763851 |
| HMGXB4       | -1.0711530789 | 0.7768493216 | 0.9999763851 |
| TOM1         | -1.1993015321 | 0.5528693809 | 0.9999763851 |
| HMOX1        | -1.5548498442 | 0.1631854599 | 0.9999763851 |
| MCM5         | 1.1533589205  | 0.314600495  | 0.9999763851 |
| RASD2        | 4.9068606068  | 0.1990447136 | 0.9999763851 |
| MB           | 0             | 0            | 0            |
| APOL6        | -1.0216426756 | 0.9155711207 | 0.9999763851 |
| APOL5        | 0             | 0            | 0            |
| RBFOX2       | 1.2080915232  | 0.3004552883 | 0.9999763851 |
| APOL2        | -1.4294980372 | 0.5308157876 | 0.9999763851 |
| APOL1        | -4.2849908816 | 0.4028453076 | 0.9999763851 |
| MYH9         | 1.0944786979  | 0.5287318245 | 0.9999763851 |
| TXN2         | -1.0867480293 | 0.6041605125 | 0.9999763851 |
| FOXRED2      | 1.3151366651  | 0.1270580259 | 0.9999763851 |
| EIF3D        | -1.0398701271 | 0.7707063741 | 0.9999763851 |
| IFT27        | -1.1153189913 | 0.6928890073 | 0.9999763851 |
| NCF4         | 1.2221616177  | 0.1286259626 | 0.9999763851 |
| CSF2RB       | -1.3346926667 | 0.3192625075 | 0.9999763851 |
| TST          | 1.1559244369  | 0.3488014528 | 0.9999763851 |
| MPST         | 1.0681536231  | 0.6546621002 | 0.9999763851 |
| KCTD17       | -1.0681864798 | 0.8802635065 | 0.9999763851 |
| C1QTNF6      | -2.3222877795 | 0.4514842962 | 0.9999763851 |
| RAC2         | 1.0686070718  | 0.6119330422 | 0.9999763851 |
| CYTH4        | 1.4682328874  | 0.1116309835 | 0.9999763851 |
| ELFN2        | -3.1531745435 | 0.2210901857 | 0.9999763851 |
| MFNG         | -1.0911124916 | 0.5330970695 | 0.9999763851 |
| LGALS2       | 0             | 0            | 0            |
| GGA1         | -1.2378036562 | 0.2351874891 | 0.9999763851 |
| SH3BP1       | 1.0426616343  | 0.8074303692 | 0.9999763851 |
| PDXP         | -1.0203738825 | 0.9252842105 | 0.9999763851 |
| LGALS1       | 1.2208778044  | 0.1357541363 | 0.9999763851 |
| NOL12        | -1.0553736989 | 0.7832424084 | 0.9999763851 |
| TRIOBP       | -1.3910046339 | 0.1207861289 | 0.9999763851 |
| LOC102724378 | 7.4933530102  | 0.2984419804 | 0.9999763851 |
| H1FO         | 1.1334835159  | 0.6774454371 | 0.9999763851 |
| GCAT         | 1.2286469138  | 0.3679031864 | 0.9999763851 |
| GALR3        | 0             | 0            | 0            |
| ANKRD54      | 1.1751885467  | 0.6107314678 | 0.9999763851 |
| EIF3L        | -1.031332557  | 0.8137159737 | 0.9999763851 |
| MICALL1      | 1.9443929147  | 0.0995067197 | 0.9999763851 |

gene\_expression\_table

|                  |               |              |              |
|------------------|---------------|--------------|--------------|
| C22orf23         | 1.0313900409  | 0.9427220287 | 0.9999763851 |
| POLR2F           | -1.0279214349 | 0.8579823038 | 0.9999763851 |
| PICK1            | 3.2356557963  | 0.5547505991 | 0.9999763851 |
| BAIAP2L2         | 0             | 0            | 0            |
| PLA2G6           | -2.2395803318 | 0.3062314467 | 0.9999763851 |
| MAFF             | 1.0621674542  | 0.8956921362 | 0.9999763851 |
| TMEM184B         | -1.3812835672 | 0.2222454904 | 0.9999763851 |
| CSNK1E           | -1.4804530749 | 0.0723734828 | 0.9999763851 |
| LOC400927-CSNK1E | 1.1889211165  | 0.6679673895 | 0.9999763851 |
| KCNJ4            | 0             | 0            | 0            |
| KDELRL3          | -1.3157515262 | 0.8233267857 | 0.9999763851 |
| DDX17            | -1.0432079039 | 0.7309838838 | 0.9999763851 |
| DMC1             | 1.6800044611  | 0.1906206682 | 0.9999763851 |
| FAM227A          | 7.4933530102  | 0.2983904924 | 0.9999763851 |
| CBY1             | -1.3020121131 | 0.5131236587 | 0.9999763851 |
| TOMM22           | -1.3264968198 | 0.0338067359 | 0.9999763851 |
| JOSD1            | 1.2485112258  | 0.4074223837 | 0.9999763851 |
| GTPBP1           | 1.4335777985  | 0.0377936253 | 0.9999763851 |
| SUN2             | -1.1155761924 | 0.4783362558 | 0.9999763851 |
| DNAL4            | -1.2910873964 | 0.3160716536 | 0.9999763851 |
| NPTXR            | -1.0601026445 | 0.6507103748 | 0.9999763851 |
| CBX6             | -1.0346953986 | 0.7905961016 | 0.9999763851 |
| APOBEC3A         | 0             | 0            | 0            |
| APOBEC3B         | 1.0212074832  | 0.9205277089 | 0.9999763851 |
| APOBEC3C         | 1.1840645706  | 0.412945062  | 0.9999763851 |
| APOBEC3F         | -1.1056047606 | 0.8033358193 | 0.9999763851 |
| APOBEC3D         | -1.9503202885 | 0.2950377969 | 0.9999763851 |
| APOBEC3G         | -1.23791485   | 0.6360466842 | 0.9999763851 |
| APOBEC3H         | -1.3948129396 | 0.6828350831 | 0.9999763851 |
| CBX7             | -1.3628298901 | 0.2512550173 | 0.9999763851 |
| PDGFB            | 0             | 0            | 0            |
| RPL3             | 1.1172886736  | 0.3669239743 | 0.9999763851 |
| SYNGR1           | -1.0413103756 | 0.8411846811 | 0.9999763851 |
| TAB1             | 1.0676863702  | 0.7945622493 | 0.9999763851 |
| MGAT3            | -1.0469262829 | 0.917570701  | 0.9999763851 |
| MIEF1            | -1.0086618248 | 0.9526795762 | 0.9999763851 |
| ATF4             | -1.0516629968 | 0.7232804805 | 0.9999763851 |
| RPS19BP1         | -1.0433803243 | 0.772921139  | 0.9999763851 |
| CACNA1I          | 1.1896618529  | 0.8096233854 | 0.9999763851 |
| ENTHD1           | 2.8686586245  | 0.3031425829 | 0.9999763851 |
| GRAP2            | 1.2355372155  | 0.458658358  | 0.9999763851 |
| FAM83F           | 2.5158674433  | 0.157762887  | 0.9999763851 |
| TNRC6B           | 1.007383414   | 0.9703379696 | 0.9999763851 |
| ADSL             | 1.4337817249  | 0.0178858648 | 0.9999763851 |
| SGSM3            | 1.6805963267  | 0.1672597429 | 0.9999763851 |
| MKL1             | -1.0366126104 | 0.8675734786 | 0.9999763851 |
| SLC25A17         | -1.0950505939 | 0.7002368511 | 0.9999763851 |
| ST13             | -1.0165098397 | 0.9086444847 | 0.9999763851 |
| XPNPEP3          | 1.4738212105  | 0.1235664607 | 0.9999763851 |



gene\_expression\_table

|              |               |              |              |
|--------------|---------------|--------------|--------------|
| RBX1         | 1.0879696103  | 0.5543935494 | 0.9999763851 |
| EP300        | 1.2458920932  | 0.4853699538 | 0.9999763851 |
| L3MBTL2      | 1.1425429394  | 0.8468216772 | 0.9999763851 |
| CHADL        | 1.675672972   | 0.1992527799 | 0.9999763851 |
| RANGAP1      | -1.0449684496 | 0.8165412017 | 0.9999763851 |
| ZC3H7B       | 1.1074712133  | 0.5713951209 | 0.9999763851 |
| TEF          | 1.6062903958  | 0.6462291901 | 0.9999763851 |
| LOC100996598 | 0             | 0            | 0            |
| TOB2         | -1.0163866231 | 0.9379008137 | 0.9999763851 |
| PHF5A        | 1.1192951819  | 0.5165027058 | 0.9999763851 |
| ACO2         | -1.1310533061 | 0.6637395659 | 0.9999763851 |
| POLR3H       | -1.059536567  | 0.6736770758 | 0.9999763851 |
| CSDC2        | 7.4933530102  | 0.2983388468 | 0.9999763851 |
| PMM1         | -1.3180690451 | 0.2954619332 | 0.9999763851 |
| DESI1        | 1.4704692409  | 0.2121482623 | 0.9999763851 |
| XRCC6        | 1.1541600817  | 0.2874148707 | 0.9999763851 |
| SNU13        | 1.2473872153  | 0.0909433768 | 0.9999763851 |
| C22orf46     | -2.4822462884 | 0.1569326898 | 0.9999763851 |
| MEI1         | 1.8863723168  | 0.0959387322 | 0.9999763851 |
| CCDC134      | 1.1679003387  | 0.6388780108 | 0.9999763851 |
| SREBF2       | -1.1988116812 | 0.2666975686 | 0.9999763851 |
| SHISA8       | -1.262094928  | 0.2295584231 | 0.9999763851 |
| TNFRSF13C    | -7.5647903763 | 0.2176246281 | 0.9999763851 |
| CENPM        | 1.4431448518  | 0.0564245271 | 0.9999763851 |
| SEPT3        | 1.5214888853  | 0.0564992374 | 0.9999763851 |
| WBP2NL       | -1.8155268442 | 0.4542227514 | 0.9999763851 |
| NAGA         | 1.1385810305  | 0.6428075238 | 0.9999763851 |
| SMDT1        | 1.2025671134  | 0.3763004298 | 0.9999763851 |
| NDUFA6       | 1.017206874   | 0.9033584437 | 0.9999763851 |
| CYP2D6       | -1.3158816768 | 0.8205329391 | 0.9999763851 |
| LOC102723722 | -2.3230035206 | 0.462320266  | 0.9999763851 |
| TCF20        | 1.3282486672  | 0.2837281499 | 0.9999763851 |
| NFAM1        | 1.1672834816  | 0.5410858652 | 0.9999763851 |
| RRP7A        | 1.0391021844  | 0.8501169727 | 0.9999763851 |
| SERHL2       | -1.1196180126 | 0.76905871   | 0.9999763851 |
| POLDIP3      | -1.132217337  | 0.452088566  | 0.9999763851 |
| CYB5R3       | 1.1934246816  | 0.3088881027 | 0.9999763851 |
| A4GALT       | 0             | 0            | 0            |
| ARFGAP3      | -1.1060582033 | 0.6818267113 | 0.9999763851 |
| PACSIN2      | 1.1911388687  | 0.3600545686 | 0.9999763851 |
| TTLL1        | 1.3494005179  | 0.6621559438 | 0.9999763851 |
| BIK          | -1.0881697047 | 0.8423426344 | 0.9999763851 |
| MCAT         | 2.1009570993  | 0.0902992804 | 0.9999763851 |
| TSPO         | 1.3767377756  | 0.0574725303 | 0.9999763851 |
| TTLL12       | 1.5340128447  | 0.105066722  | 0.9999763851 |
| EFCAB6       | 1.0881489642  | 0.8452895084 | 0.9999763851 |
| SAMM50       | 1.2278546593  | 0.36851581   | 0.9999763851 |
| PARVB        | -1.3638422295 | 0.2555882281 | 0.9999763851 |
| PARVG        | 1.1959420702  | 0.4492195362 | 0.9999763851 |

gene\_expression\_table

|              |               |              |              |
|--------------|---------------|--------------|--------------|
| LDOC1L       | 1.2146725126  | 0.4874343753 | 0.9999763851 |
| PRR5         | -1.149117102  | 0.7163947097 | 0.9999763851 |
| PRR5-ARHGAP8 | -4.2864494036 | 0.4027150576 | 0.9999763851 |
| ARHGAP8      | -2.3214980365 | 0.4376484453 | 0.9999763851 |
| NUP50        | 1.1313848445  | 0.5102161154 | 0.9999763851 |
| KIAA0930     | 1.0095036664  | 0.9457634885 | 0.9999763851 |
| FAM118A      | -1.4358159967 | 0.4502072849 | 0.9999763851 |
| SMC1B        | -1.7406929207 | 0.1883844221 | 0.9999763851 |
| RIBC2        | 1.6249017024  | 0.5574174975 | 0.9999763851 |
| ATXN10       | 1.2931446075  | 0.1183895626 | 0.9999763851 |
| WNT7B        | 0             | 0            | 0            |
| PPARA        | -1.1675397055 | 0.6042606352 | 0.9999763851 |
| CDPF1        | 1.2503531424  | 0.6998770054 | 0.9999763851 |
| PKDREJ       | 7.7488609396  | 0.3058740553 | 0.9999763851 |
| TTC38        | -1.2799544286 | 0.490546675  | 0.9999763851 |
| GTSE1        | -1.0564668116 | 0.7844519175 | 0.9999763851 |
| TRMU         | -1.5080411851 | 0.2716472836 | 0.9999763851 |
| CELSR1       | 3.2361532718  | 0.5546934395 | 0.9999763851 |
| GRAMD4       | 1.3972470118  | 0.2479953678 | 0.9999763851 |
| CERK         | 1.0575377111  | 0.8384601251 | 0.9999763851 |
| TBC1D22A     | -1.3365054582 | 0.3857800219 | 0.9999763851 |
| FAM19A5      | 0             | 0            | 0            |
| C22orf34     | -1.0536799076 | 0.9207877986 | 0.9999763851 |
| BRD1         | -3.1534488363 | 0.1726148086 | 0.9999763851 |
| ZBED4        | 1.0947078904  | 0.872092506  | 0.9999763851 |
| ALG12        | -1.1250614384 | 0.6398282793 | 0.9999763851 |
| CRELD2       | 1.0396072898  | 0.8145817295 | 0.9999763851 |
| PIM3         | -1.1492299585 | 0.3071829584 | 0.9999763851 |
| MLC1         | 1.3259325514  | 0.0636234178 | 0.9999763851 |
| MOV10L1      | 10.4285443305 | 0.2413352043 | 0.9999763851 |
| PANX2        | 3.2356557963  | 0.5547505991 | 0.9999763851 |
| TRABD        | 1.2171461068  | 0.193906849  | 0.9999763851 |
| SELO         | 1.5114898576  | 0.1473539696 | 0.9999763851 |
| TUBGCP6      | -2.5225832327 | 0.0714787553 | 0.9999763851 |
| HDAC10       | -1.0634814851 | 0.8910740731 | 0.9999763851 |
| MAPK12       | 1.2477316029  | 0.2910394858 | 0.9999763851 |
| MAPK11       | -1.1463904141 | 0.7409911536 | 0.9999763851 |
| DENND6B      | 1.6136604673  | 0.3343111555 | 0.9999763851 |
| PPP6R2       | 1.0187412987  | 0.9311301651 | 0.9999763851 |
| SBF1         | -1.1597014588 | 0.510354082  | 0.9999763851 |
| ADM2         | 3.2356557963  | 0.5547505991 | 0.9999763851 |
| LMF2         | 1.4950048559  | 0.215327416  | 0.9999763851 |
| NCAPH2       | -1.2852096485 | 0.3384142635 | 0.9999763851 |
| SCO2         | 1.4389747352  | 0.0750882995 | 0.9999763851 |
| TYMP         | -2.8684846696 | 0.0818181769 | 0.9999763851 |
| ODF3B        | -2.5598350099 | 0.3143812462 | 0.9999763851 |
| SYCE3        | 0             | 0            | 0            |
| CPT1B        | -1.2084536663 | 0.5627729793 | 0.9999763851 |
| CHKB         | 2.3039938442  | 0.0989903022 | 0.9999763851 |

gene\_expression\_table

|                |                |              |              |
|----------------|----------------|--------------|--------------|
| MAPK8IP2       | -1.3711818216  | 0.7361521743 | 0.9999763851 |
| ARSA           | -1.0720105362  | 0.8577050025 | 0.9999763851 |
| RABL2B         | 1.03619961     | 0.8724541221 | 0.9999763851 |
| PLCXD1_1       | 1.1311294149   | 0.6518213332 | 0.9999763851 |
| GTPBP6_1       | -1.4867671956  | 0.160446421  | 0.9999763851 |
| PPP2R3B_1      | -1.0539454417  | 0.9183616523 | 0.9999763851 |
| CRLF2_1        | 0              | 0            | 0            |
| CSF2RA_1       | 1.1446563693   | 0.7083051758 | 0.9999763851 |
| IL3RA_1        | -2.097264704   | 0.2347984707 | 0.9999763851 |
| SLC25A6_1      | -1.0571640456  | 0.6811821107 | 0.9999763851 |
| LOC105373102_1 | 0              | 0            | 0            |
| ASMTL_1        | 1.6073771667   | 0.1314342295 | 0.9999763851 |
| P2RY8_1        | 1.0095074247   | 0.9570299003 | 0.9999763851 |
| AKAP17A_1      | -1.0760820216  | 0.7888689209 | 0.9999763851 |
| ASMT_1         | -4.2849908816  | 0.4028453076 | 0.9999763851 |
| DHRX_1         | 1.134000037    | 0.7541445376 | 0.9999763851 |
| ZBED1_1        | 1.822945724    | 0.0794997653 | 0.9999763851 |
| CD99_1         | 1.042613259    | 0.8058234196 | 0.9999763851 |
| ARSD           | 1.2455307469   | 0.3117246051 | 0.9999763851 |
| ARSE           | 3.2356557963   | 0.5547505991 | 0.9999763851 |
| ARSF           | 0              | 0            | 0            |
| MXRA5          | 0              | 0            | 0            |
| PRKX           | 1.0833955382   | 0.660523238  | 0.9999763851 |
| NLGN4X         | 3.2353357581   | 0.554787377  | 0.9999763851 |
| VCX3A          | 0              | 0            | 0            |
| PUDP           | 1.128515276    | 0.5686320015 | 0.9999763851 |
| STS            | 1.3155286451   | 0.5176698159 | 0.9999763851 |
| VCX            | -1.9660821036  | 0.4630669119 | 0.9999763851 |
| PNPLA4         | -4.2849908816  | 0.4028453076 | 0.9999763851 |
| VCX3B          | -10.8385246611 | 0.1452076922 | 0.9999763851 |
| ANOS1          | 1.5505881706   | 0.5541323877 | 0.9999763851 |
| FAM9B          | -4.2849908816  | 0.4028453076 | 0.9999763851 |
| TBL1X          | 1.3809138387   | 0.0717732399 | 0.9999763851 |
| GPR143         | -1.0842744172  | 0.8974869046 | 0.9999763851 |
| SHROOM2        | 1.2859100748   | 0.2742592518 | 0.9999763851 |
| CLDN34         | -4.2849908816  | 0.4028453076 | 0.9999763851 |
| WWC3           | -1.0460646669  | 0.7897701338 | 0.9999763851 |
| CLCN4          | 3.2353357581   | 0.554787377  | 0.9999763851 |
| MID1           | -1.4326576759  | 0.4756486663 | 0.9999763851 |
| HCCS           | -1.1607103098  | 0.4526398879 | 0.9999763851 |
| MSL3           | 1.7045734286   | 0.0192832661 | 0.9999763851 |
| FRMPD4         | -10.8385246611 | 0.1452685011 | 0.9999763851 |
| PRPS2          | 1.2494007127   | 0.1747641272 | 0.9999763851 |
| TLR8           | 0              | 0            | 0            |
| TMSB4X         | -1.5056544639  | 0.002174     | 0.9999763851 |
| FAM9C          | 0              | 0            | 0            |
| LOC105373133   | 5.4776292235   | 0.3745831165 | 0.9999763851 |
| TCEANC         | -2.0689192087  | 0.1013965962 | 0.9999763851 |
| RAB9A          | -1.7162371334  | 0.1148952661 | 0.9999763851 |

gene\_expression\_table

|         |               |              |              |
|---------|---------------|--------------|--------------|
| TRAPPC2 | 1.119416785   | 0.5839056537 | 0.9999763851 |
| OFD1    | -1.3598335189 | 0.260084491  | 0.9999763851 |
| GPM6B   | -1.1489598494 | 0.8503578071 | 0.9999763851 |
| GEMIN8  | 1.0066443544  | 0.9804165752 | 0.9999763851 |
| GLRA2   | -1.318394896  | 0.60246829   | 0.9999763851 |
| FANCB   | -1.0589551369 | 0.7932186849 | 0.9999763851 |
| MOSPD2  | -1.3837692955 | 0.2431220168 | 0.9999763851 |
| PIGA    | -1.1038372572 | 0.7356939141 | 0.9999763851 |
| FIGF    | 15.5019390839 | 0.1629420389 | 0.9999763851 |
| PIR     | -1.1018674108 | 0.6496071707 | 0.9999763851 |
| ACE2    | 3.2353357581  | 0.554787377  | 0.9999763851 |
| BMX     | -1.1157749871 | 0.668282009  | 0.9999763851 |
| TMEM27  | -1.0249053994 | 0.957183673  | 0.9999763851 |
| CA5B    | -1.1474192383 | 0.614553273  | 0.9999763851 |
| ZRSR2   | -1.2094954552 | 0.5406004034 | 0.9999763851 |
| AP1S2   | 1.0213235579  | 0.8888782926 | 0.9999763851 |
| CTPS2   | -1.3389300992 | 0.3987070039 | 0.9999763851 |
| S100G   | 3.2353357581  | 0.554787377  | 0.9999763851 |
| SYAP1   | -1.0320918397 | 0.8735467269 | 0.9999763851 |
| TXLNG   | -1.0385063033 | 0.8270516867 | 0.9999763851 |
| RBBP7   | 1.0017946772  | 0.9890855247 | 0.9999763851 |
| REPS2   | -2.983726772  | 0.0354693453 | 0.9999763851 |
| NHS     | -1.3717838846 | 0.7496003097 | 0.9999763851 |
| SCML1   | -1.9790947981 | 0.0515532886 | 0.9999763851 |
| BEND2   | 0             | 0            | 0            |
| SCML2   | 1.0952111839  | 0.837065563  | 0.9999763851 |
| CDKL5   | -1.4348551497 | 0.4400003091 | 0.9999763851 |
| RS1     | 0             | 0            | 0            |
| PHKA2   | -1.0034718473 | 0.9855471784 | 0.9999763851 |
| ADGRG2  | 1.5436836647  | 0.5637612112 | 0.9999763851 |
| PDHA1   | -1.0848299514 | 0.5704497557 | 0.9999763851 |
| MAP3K15 | 1.5292328987  | 0.2305004082 | 0.9999763851 |
| SH3KBP1 | 1.2086968483  | 0.1581233116 | 0.9999763851 |
| CXorf23 | -1.5993594647 | 0.181695333  | 0.9999763851 |
| MAP7D2  | 0             | 0            | 0            |
| EIF1AX  | 1.094668985   | 0.4817197775 | 0.9999763851 |
| RPS6KA3 | -1.0990299475 | 0.6083335724 | 0.9999763851 |
| MBTPS2  | 1.2890041542  | 0.2873325522 | 0.9999763851 |
| YY2     | -1.1984126895 | 0.7609390165 | 0.9999763851 |
| SMS     | -1.3570592004 | 0.0382322825 | 0.9999763851 |
| PHEX    | -1.6282722959 | 0.2526250928 | 0.9999763851 |
| PRDX4   | -1.075865927  | 0.7127671848 | 0.9999763851 |
| ACOT9   | 1.1180930905  | 0.6374854616 | 0.9999763851 |
| SAT1    | -1.6624997722 | 0.0005321    | 0.5206160142 |
| APOO    | -1.0055907798 | 0.9643834886 | 0.9999763851 |
| CXorf58 | 3.2353357581  | 0.554787377  | 0.9999763851 |
| KLHL15  | -1.4455952043 | 0.2681444881 | 0.9999763851 |
| EIF2S3  | 1.1202569008  | 0.3657615292 | 0.9999763851 |
| ZFX     | -1.2867418298 | 0.1268163096 | 0.9999763851 |

gene\_expression\_table

|              |                |              |              |
|--------------|----------------|--------------|--------------|
| PDK3         | 1.0573199452   | 0.7613061534 | 0.9999763851 |
| PCYT1B       | -7.5622178268  | 0.2177145568 | 0.9999763851 |
| POLA1        | -1.1017919972  | 0.4178851601 | 0.9999763851 |
| ARX          | 3.9195442002   | 0.1876409732 | 0.9999763851 |
| IL1RAPL1     | -2.3860318298  | 0.2391398476 | 0.9999763851 |
| CXorf21      | -2.1609178192  | 0.1196034727 | 0.9999763851 |
| GK           | -1.1022660321  | 0.7220627014 | 0.9999763851 |
| TAB3         | -1.0251334554  | 0.9407856827 | 0.9999763851 |
| DMD          | 1.7826260038   | 0.0484565649 | 0.9999763851 |
| CFAP47       | 0              | 0            | 0            |
| XK           | -1.4464778568  | 0.2106237091 | 0.9999763851 |
| CYBB         | -4.4381516454  | 0.003279     | 0.9999763851 |
| DYNLT3       | 1.2917773094   | 0.6056405669 | 0.9999763851 |
| SYTL5        | 0              | 0            | 0            |
| SRPX         | -7.5647903763  | 0.2176246281 | 0.9999763851 |
| RPGR         | 1.4729385521   | 0.3315413034 | 0.9999763851 |
| MID1IP1      | -1.0927733793  | 0.6278044557 | 0.9999763851 |
| BCOR         | -1.1986675416  | 0.274819153  | 0.9999763851 |
| LOC107985687 | 3.2356557963   | 0.5547505991 | 0.9999763851 |
| ATP6AP2      | -1.0063039776  | 0.9600119427 | 0.9999763851 |
| CXorf38      | -1.285420026   | 0.3244092484 | 0.9999763851 |
| MED14        | 1.2098211433   | 0.3297304702 | 0.9999763851 |
| MED14OS      | 1.813344484    | 0.5819972383 | 0.9999763851 |
| USP9X        | 1.1373338302   | 0.5275548472 | 0.9999763851 |
| DDX3X        | -1.0194013297  | 0.9092170139 | 0.9999763851 |
| CASK         | -1.5814483139  | 0.1178729032 | 0.9999763851 |
| GPR34        | 3.9208783318   | 0.1835694973 | 0.9999763851 |
| GPR82        | -56.6417269775 | 0.0116180255 | 0.9999763851 |
| MAOA         | 0              | 0            | 0            |
| EFHC2        | 3.2356557963   | 0.5547505991 | 0.9999763851 |
| FUNDC1       | -1.0057623416  | 0.9855317908 | 0.9999763851 |
| KDM6A        | -1.3043012555  | 0.4121862023 | 0.9999763851 |
| KRBOX4       | -1.0100414917  | 0.9740026485 | 0.9999763851 |
| ZNF674       | -1.1898705397  | 0.7496636016 | 0.9999763851 |
| CHST7        | -2.1905898287  | 0.0537971722 | 0.9999763851 |
| SLC9A7       | -1.5313558062  | 0.3457396277 | 0.9999763851 |
| RP2          | 1.1516625217   | 0.4851378572 | 0.9999763851 |
| JADE3        | -1.1668940991  | 0.61819947   | 0.9999763851 |
| RGN          | 3.2356557963   | 0.5547505991 | 0.9999763851 |
| NDUFB11      | 1.1666773004   | 0.2859619363 | 0.9999763851 |
| RBM10        | 1.4681982282   | 0.016592973  | 0.9999763851 |
| UBA1         | 1.0822906735   | 0.5820354218 | 0.9999763851 |
| CDK16        | 1.0371381181   | 0.8819394442 | 0.9999763851 |
| USP11        | -1.9734077647  | 0.0150664542 | 0.9999763851 |
| ZNF157       | 0              | 0            | 0            |
| ZNF41        | 1.2710064579   | 0.3951267144 | 0.9999763851 |
| ARAF         | 1.1873113369   | 0.3779878685 | 0.9999763851 |
| SYN1         | 0              | 0            | 0            |
| TIMP1        | -2.9292922021  | 9.26E-11     | 4.98E-07     |

gene\_expression\_table

|          |                |              |              |
|----------|----------------|--------------|--------------|
| CFP      | 1.7327347029   | 0.1944854808 | 0.9999763851 |
| ELK1     | -1.1034538003  | 0.5317006375 | 0.9999763851 |
| UXT      | 1.1365976374   | 0.4566229418 | 0.9999763851 |
| ZNF81    | 1.265515385    | 0.5275979612 | 0.9999763851 |
| ZNF182   | 1.1726118417   | 0.6762422962 | 0.9999763851 |
| FTSJ1    | -1.1228139951  | 0.53275104   | 0.9999763851 |
| PORCN    | 1.1937721849   | 0.5072892414 | 0.9999763851 |
| EBP      | 1.0532635744   | 0.6930512132 | 0.9999763851 |
| TBC1D25  | 1.0801640314   | 0.772598819  | 0.9999763851 |
| RBM3     | -1.1456664847  | 0.3479583121 | 0.9999763851 |
| WDR13    | 1.1894999221   | 0.4483517272 | 0.9999763851 |
| WAS      | 1.0113940998   | 0.9417965002 | 0.9999763851 |
| SUV39H1  | 1.1084857721   | 0.6563537554 | 0.9999763851 |
| HDAC6    | -1.4740248466  | 0.1216141712 | 0.9999763851 |
| ERAS     | 0              | 0            | 0            |
| TIMM17B  | -1.0439968087  | 0.8364343658 | 0.9999763851 |
| PQBP1    | 1.7308642843   | 0.0291387859 | 0.9999763851 |
| SLC35A2  | -1.5296575463  | 0.0160544618 | 0.9999763851 |
| PIM2     | -1.4242351556  | 0.0243578384 | 0.9999763851 |
| OTUD5    | -1.2019691455  | 0.3707584189 | 0.9999763851 |
| KCND1    | 1.813344484    | 0.5819236562 | 0.9999763851 |
| GRIPAP1  | -1.0757115787  | 0.7129901085 | 0.9999763851 |
| TFE3     | -1.3229023523  | 0.2577149599 | 0.9999763851 |
| PRAF2    | -1.2498178925  | 0.5783042473 | 0.9999763851 |
| WDR45    | 1.030183431    | 0.9306181922 | 0.9999763851 |
| GPLOW    | 1.6752798993   | 0.0680289676 | 0.9999763851 |
| MAGIX    | 3.2361532718   | 0.5546934395 | 0.9999763851 |
| PLP2     | 1.0175007395   | 0.8966206179 | 0.9999763851 |
| PRICKLE3 | 1.3493579391   | 0.6657471906 | 0.9999763851 |
| SYP      | -14.1187086092 | 0.0981884247 | 0.9999763851 |
| CACNA1F  | 0              | 0            | 0            |
| CCDC22   | -1.2095485068  | 0.3528383372 | 0.9999763851 |
| FOXP3    | -1.1443525594  | 0.88651452   | 0.9999763851 |
| PPP1R3F  | 1.2630745238   | 0.5564103824 | 0.9999763851 |
| GAGE10   | 0              | 0            | 0            |
| GAGE2A   | 3.2353357581   | 0.554787377  | 0.9999763851 |
| GAGE1    | -4.287394647   | 0.4026306792 | 0.9999763851 |
| USP27X   | 1.3130800431   | 0.5193394846 | 0.9999763851 |
| CLCN5    | -1.270340952   | 0.4306348779 | 0.9999763851 |
| MAGED1   | -1.3652157337  | 0.1777369426 | 0.9999763851 |
| XAGE1B   | -1.1153322386  | 0.498682315  | 0.9999763851 |
| XAGE1E   | 1.0331815147   | 0.8529676334 | 0.9999763851 |
| FAM156B  | 1.1411003116   | 0.5302311957 | 0.9999763851 |
| GPR173   | 0              | 0            | 0            |
| TSPYL2   | 1.3046067945   | 0.4726343397 | 0.9999763851 |
| KDM5C    | 1.0654156949   | 0.7868026413 | 0.9999763851 |
| IQSEC2   | 1.2158504019   | 0.6836004413 | 0.9999763851 |
| SMC1A    | 1.3480668306   | 0.0271862024 | 0.9999763851 |
| RIBC1    | 3.2356557963   | 0.5547505991 | 0.9999763851 |

gene\_expression\_table

|           |                |              |              |
|-----------|----------------|--------------|--------------|
| HSD17B10  | 1.1447236157   | 0.4257266926 | 0.9999763851 |
| HUWE1     | 1.1568384718   | 0.3121167377 | 0.9999763851 |
| PHF8      | -1.3728106496  | 0.0921834502 | 0.9999763851 |
| FAM120C   | 1.1062009175   | 0.7236563425 | 0.9999763851 |
| WNK3      | 7.4933530102   | 0.2982870353 | 0.9999763851 |
| TSR2      | 1.5511434682   | 0.0618220748 | 0.9999763851 |
| FGD1      | -1.7174926864  | 0.0232842252 | 0.9999763851 |
| GNL3L     | 1.4559428502   | 0.0324699126 | 0.9999763851 |
| MAGED2    | -1.0984728665  | 0.6307774502 | 0.9999763851 |
| PFKFB1    | -4.2849908816  | 0.4028453076 | 0.9999763851 |
| APEX2     | -1.4637539616  | 0.1202832486 | 0.9999763851 |
| PAGE2B    | -4.2849908816  | 0.4028453076 | 0.9999763851 |
| PAGE2     | 0              | 0            | 0            |
| FAM104B   | 1.1792692551   | 0.4812955265 | 0.9999763851 |
| MTRNR2L10 | -1.4397976359  | 0.4306287756 | 0.9999763851 |
| MAGEH1    | -2.2671808911  | 0.0902515536 | 0.9999763851 |
| USP51     | -1.8168761427  | 0.3007818583 | 0.9999763851 |
| RRAGB     | -1.5918761572  | 0.231940438  | 0.9999763851 |
| UBQLN2    | 1.2341421734   | 0.3128576808 | 0.9999763851 |
| SPIN2B    | -1.1129358595  | 0.7040360096 | 0.9999763851 |
| FAAH2     | 1.3490603578   | 0.6657647894 | 0.9999763851 |
| ZXDB      | -1.1689839273  | 0.6495162263 | 0.9999763851 |
| ZXDA      | 2.2216198074   | 0.3240427491 | 0.9999763851 |
| SPIN4     | -1.2438403447  | 0.1681593589 | 0.9999763851 |
| ARHGEF9   | 1.4725467939   | 0.3296874274 | 0.9999763851 |
| AMER1     | 1.2790370317   | 0.4608373594 | 0.9999763851 |
| MTMR8     | 0              | 0            | 0            |
| ZC3H12B   | 1.7458374716   | 0.3348613795 | 0.9999763851 |
| LAS1L     | 1.0196799831   | 0.9067297654 | 0.9999763851 |
| MSN       | -1.2843222569  | 0.0664172284 | 0.9999763851 |
| VSIG4     | -20.6875548266 | 0.0567446204 | 0.9999763851 |
| YIPF6     | -1.0715462119  | 0.7232305364 | 0.9999763851 |
| STARD8    | 1.3436913572   | 0.3301168171 | 0.9999763851 |
| EFNB1     | -1.075653075   | 0.831742049  | 0.9999763851 |
| PJA1      | 1.1419432367   | 0.7760394597 | 0.9999763851 |
| EDA       | -2.0621569129  | 0.3088988963 | 0.9999763851 |
| IGBP1     | -1.0680588629  | 0.6835952361 | 0.9999763851 |
| DGAT2L6   | 0              | 0            | 0            |
| ARR3      | 1.491541136    | 0.6993320602 | 0.9999763851 |
| RAB41     | 0              | 0            | 0            |
| PDZD11    | -1.1721434719  | 0.555027666  | 0.9999763851 |
| KIF4A     | 1.1765063059   | 0.282560093  | 0.9999763851 |
| TEX11     | 3.2356557963   | 0.5547505991 | 0.9999763851 |
| SNX12     | 1.0167372062   | 0.9163847774 | 0.9999763851 |
| FOXO4     | -1.266255247   | 0.4512138479 | 0.9999763851 |
| CXorf65   | 1.3267411246   | 0.7616152189 | 0.9999763851 |
| IL2RG     | -1.1559770095  | 0.3870204995 | 0.9999763851 |
| MED12     | 1.06119807     | 0.8616004195 | 0.9999763851 |
| NLGN3     | -1.0534934212  | 0.9209994765 | 0.9999763851 |

gene\_expression\_table

|              |               |              |              |
|--------------|---------------|--------------|--------------|
| ZMYM3        | -1.083841854  | 0.6298970506 | 0.9999763851 |
| NONO         | 1.1247539228  | 0.3372949029 | 0.9999763851 |
| ITGB1BP2     | 2.1857290676  | 0.3706467231 | 0.9999763851 |
| TAF1         | -1.2744307092 | 0.1151573619 | 0.9999763851 |
| OGT          | -1.4144525282 | 0.0355723334 | 0.9999763851 |
| ACRC         | 1.0947156806  | 0.8968067763 | 0.9999763851 |
| CXCR3        | 1.464733964   | 0.3322664835 | 0.9999763851 |
| LOC101059915 | 0             | 0            | 0            |
| NHSL2        | 1.0903512237  | 0.794042671  | 0.9999763851 |
| RGAG4        | -8.342239448  | 0.2143036092 | 0.9999763851 |
| FLJ44635     | 1.0871322184  | 0.6078940919 | 0.9999763851 |
| PIN4         | 1.2117683575  | 0.2423115497 | 0.9999763851 |
| ERCC6L       | 1.2603768829  | 0.3627645311 | 0.9999763851 |
| RPS4X        | 1.0537926544  | 0.6794475115 | 0.9999763851 |
| CITED1       | 2.5183171819  | 0.2738196453 | 0.9999763851 |
| HDAC8        | -1.1476311659 | 0.4822478769 | 0.9999763851 |
| SLC16A2      | 0             | 0            | 0            |
| RLIM         | 1.0939646876  | 0.5616057234 | 0.9999763851 |
| ABCB7        | -1.2146369422 | 0.325065146  | 0.9999763851 |
| UPRT         | 1.1042699293  | 0.6957662062 | 0.9999763851 |
| ZDHHC15      | -1.3714374731 | 0.7327118287 | 0.9999763851 |
| PBDC1        | 1.0766307602  | 0.6011759312 | 0.9999763851 |
| MAGEE1       | -1.3154339304 | 0.8205576571 | 0.9999763851 |
| ATRX         | 1.00824822    | 0.9539055808 | 0.9999763851 |
| MAGT1        | 1.3640202715  | 0.0563202957 | 0.9999763851 |
| COX7B        | 1.1326327774  | 0.3287217994 | 0.9999763851 |
| ATP7A        | -1.7917981288 | 0.2394004801 | 0.9999763851 |
| PGAM4        | -2.4563440357 | 0.001106     | 0.8381590036 |
| PGK1         | 1.3155914723  | 0.0175422094 | 0.9999763851 |
| TAF9B        | 1.1628145501  | 0.4293903183 | 0.9999763851 |
| CYSLTR1      | 1.2320939056  | 0.4115800563 | 0.9999763851 |
| LPAR4        | 1.6637897627  | 0.5538972415 | 0.9999763851 |
| P2RY10       | 0             | 0            | 0            |
| BRWD3        | 1.1575592079  | 0.6660558757 | 0.9999763851 |
| HMG5         | -1.0635429505 | 0.8509476692 | 0.9999763851 |
| SH3BGR1      | -1.0465589908 | 0.7740906806 | 0.9999763851 |
| APOOL        | -1.1709556645 | 0.5662046408 | 0.9999763851 |
| SATL1        | -1.3969420996 | 0.1931312729 | 0.9999763851 |
| CHM          | -1.0494133147 | 0.8522243885 | 0.9999763851 |
| DACH2        | 3.2353357581  | 0.554787377  | 0.9999763851 |
| PCDH11X      | -1.1936051126 | 0.7086869192 | 0.9999763851 |
| DIAPH2       | -1.1970875105 | 0.3345913465 | 0.9999763851 |
| RPA4         | -3.3272796812 | 0.2416806948 | 0.9999763851 |
| TSPAN6       | 0             | 0            | 0            |
| SRPX2        | 0             | 0            | 0            |
| CSTF2        | 1.2221953461  | 0.4478723682 | 0.9999763851 |
| NOX1         | -1.4379838511 | 0.2130291302 | 0.9999763851 |
| XKRX         | 2.9232244853  | 0.2442102849 | 0.9999763851 |
| ARL13A       | -4.2849908816 | 0.4028453076 | 0.9999763851 |



gene\_expression\_table

|                |               |              |              |
|----------------|---------------|--------------|--------------|
| TRMT2B         | 1.6303232337  | 0.0342620234 | 0.9999763851 |
| CENPI          | -1.0919815161 | 0.6201048971 | 0.9999763851 |
| DRP2           | 3.2353357581  | 0.554787377  | 0.9999763851 |
| TAF7L          | 9.0182935529  | 0.2609657796 | 0.9999763851 |
| TIMM8A         | 1.2812091185  | 0.2272376241 | 0.9999763851 |
| BTK            | -1.3888691604 | 0.3330595002 | 0.9999763851 |
| RPL36A         | -1.0420715634 | 0.7363288338 | 0.9999763851 |
| RPL36A-HNRNPH2 | 2.544562497   | 0.0387463177 | 0.9999763851 |
| GLA            | -1.1422652531 | 0.6335434355 | 0.9999763851 |
| HNRNPH2        | 1.0411480659  | 0.7862114063 | 0.9999763851 |
| ZMAT1          | 1.3264789913  | 0.7365132275 | 0.9999763851 |
| NXF2           | 3.2353357581  | 0.554787377  | 0.9999763851 |
| ARMCX5         | -1.6284449418 | 0.1078910947 | 0.9999763851 |
| ARMCX5-GPRASP2 | -1.545717287  | 0.473734045  | 0.9999763851 |
| GPRASP1        | 3.2356557963  | 0.5547505991 | 0.9999763851 |
| GPRASP2        | 2.2221563097  | 0.3483409618 | 0.9999763851 |
| BHLHB9         | 2.2210080778  | 0.3400283051 | 0.9999763851 |
| BEX1           | 1.1959576961  | 0.1321389594 | 0.9999763851 |
| NXF3           | 1.1844904925  | 0.3044025267 | 0.9999763851 |
| TCEAL8         | -1.0090719407 | 0.9741041649 | 0.9999763851 |
| MORF4L2        | -1.1498286819 | 0.2537412253 | 0.9999763851 |
| TMEM31         | 7.7204093521  | 0.2871636946 | 0.9999763851 |
| SLC25A53       | 1.1539476483  | 0.6061023964 | 0.9999763851 |
| FAM199X        | 1.1701032242  | 0.4467382393 | 0.9999763851 |
| NRK            | 0             | 0            | 0            |
| RNF128         | 1.5203268921  | 0.0428728861 | 0.9999763851 |
| CLDN2          | 0             | 0            | 0            |
| RBM41          | -1.8993910992 | 0.018435713  | 0.9999763851 |
| NUP62CL        | -1.3709710942 | 0.7479558959 | 0.9999763851 |
| FRMPD3         | 0             | 0            | 0            |
| PRPS1          | 1.0170642475  | 0.8949629157 | 0.9999763851 |
| TSC22D3        | -1.3625562525 | 0.1711797479 | 0.9999763851 |
| MID2           | 0             | 0            | 0            |
| PSMD10         | -1.2786988487 | 0.172711177  | 0.9999763851 |
| ATG4A          | 1.2363127965  | 0.4536382615 | 0.9999763851 |
| GUCY2F         | 0             | 0            | 0            |
| NXT2           | -1.0074371304 | 0.9726342134 | 0.9999763851 |
| KCNE5          | -1.3154339304 | 0.8205576571 | 0.9999763851 |
| ACSL4          | -1.3531337689 | 0.0534029084 | 0.9999763851 |
| LOC105373311   | 0             | 0            | 0            |
| TMEM164        | -2.3256462279 | 0.0279298985 | 0.9999763851 |
| LOC101928589   | 1.0128923067  | 0.9405360741 | 0.9999763851 |
| AMMECR1        | 1.1163284952  | 0.4706754767 | 0.9999763851 |
| PAK3           | 0             | 0            | 0            |
| ALG13          | 1.2832457643  | 0.3277979776 | 0.9999763851 |
| TRPC5          | -4.2849908816 | 0.4028453076 | 0.9999763851 |
| ZCCHC16        | 0             | 0            | 0            |
| AMOT           | 0             | 0            | 0            |
| HTR2C          | 0             | 0            | 0            |

gene\_expression\_table

|              |               |              |              |
|--------------|---------------|--------------|--------------|
| SLC6A14      | 0             | 0            | 0            |
| KLHL13       | -7.5622178268 | 0.2177145568 | 0.9999763851 |
| WDR44        | -1.2867962094 | 0.4216882584 | 0.9999763851 |
| DOCK11       | 1.0252970311  | 0.8907222698 | 0.9999763851 |
| IL13RA1      | -1.140370259  | 0.7119758921 | 0.9999763851 |
| LONRF3       | 1.0549477691  | 0.8449792278 | 0.9999763851 |
| KIAA1210     | 3.2353357581  | 0.554787377  | 0.9999763851 |
| PGRMC1       | 1.1265560212  | 0.4379595853 | 0.9999763851 |
| LOC107985692 | 1.028107434   | 0.9764068387 | 0.9999763851 |
| SLC25A43     | 1.1844585705  | 0.5170993692 | 0.9999763851 |
| SLC25A5      | 1.0670132311  | 0.6288575696 | 0.9999763851 |
| CXorf56      | -1.0144012522 | 0.9369106824 | 0.9999763851 |
| UBE2A        | 1.2553873273  | 0.1365634671 | 0.9999763851 |
| NKRF         | 1.1989286777  | 0.4182014241 | 0.9999763851 |
| SEPT6        | 1.0542922729  | 0.7479085908 | 0.9999763851 |
| SOWAHD       | -1.5574413096 | 0.1094395301 | 0.9999763851 |
| RPL39        | -1.2206888271 | 0.0903692017 | 0.9999763851 |
| UPF3B        | -1.1147038553 | 0.5051723384 | 0.9999763851 |
| RNF113A      | -1.1380165846 | 0.5922713725 | 0.9999763851 |
| NDUFA1       | -1.0640445523 | 0.6382188041 | 0.9999763851 |
| NKAP         | -1.290596591  | 0.2886927211 | 0.9999763851 |
| RHOXF2B      | 1.0931859836  | 0.6239408594 | 0.9999763851 |
| RHOXF1       | -2.3212684229 | 0.4490660804 | 0.9999763851 |
| RHOXF2       | 1.0356249387  | 0.8658316457 | 0.9999763851 |
| ZBTB33       | -1.0534764424 | 0.7911118114 | 0.9999763851 |
| TMEM255A     | -1.421366223  | 0.7027283292 | 0.9999763851 |
| LAMP2        | -1.2294740586 | 0.0886505595 | 0.9999763851 |
| CUL4B        | -1.5418605154 | 0.009505     | 0.9999763851 |
| MCTS1        | 1.0320054111  | 0.8377654909 | 0.9999763851 |
| C1GALT1C1    | -1.2815186629 | 0.2053470938 | 0.9999763851 |
| GLUD2        | 0             | 0            | 0            |
| GRIA3        | 0             | 0            | 0            |
| THOC2        | -1.0780940073 | 0.62766397   | 0.9999763851 |
| XIAP         | -1.030253522  | 0.885780927  | 0.9999763851 |
| STAG2        | -1.2475689796 | 0.1254940216 | 0.9999763851 |
| SH2D1A       | 0             | 0            | 0            |
| TENM1        | 0             | 0            | 0            |
| SMARCA1      | -4.2849908816 | 0.4028453076 | 0.9999763851 |
| OCRL         | 1.1667515589  | 0.6057142129 | 0.9999763851 |
| APLN         | 1.0739483694  | 0.8527518242 | 0.9999763851 |
| SASH3        | -1.1955019714 | 0.5180133536 | 0.9999763851 |
| ZDHHC9       | -1.4522850717 | 0.2901047194 | 0.9999763851 |
| UTP14A       | 1.0636156443  | 0.7935158949 | 0.9999763851 |
| BCORL1       | -1.5857351591 | 0.1498111938 | 0.9999763851 |
| ELF4         | -1.0208225032 | 0.93052989   | 0.9999763851 |
| RAB33A       | -1.3636445218 | 0.2348444116 | 0.9999763851 |
| AIFM1        | 1.0638062388  | 0.7269319748 | 0.9999763851 |
| ZNF280C      | -1.0159473794 | 0.9785897534 | 0.9999763851 |
| SLC25A14     | 1.6753475703  | 0.3450928518 | 0.9999763851 |

gene\_expression\_table

|              |               |              |              |
|--------------|---------------|--------------|--------------|
| RBMX2        | -1.2748094198 | 0.2547520794 | 0.9999763851 |
| ENOX2        | -2.132117667  | 0.007662     | 0.9999763851 |
| STK26        | 1.2177057538  | 0.3532860046 | 0.9999763851 |
| RAP2C        | -1.0959609813 | 0.7825573475 | 0.9999763851 |
| MBNL3        | 1.4759716183  | 0.1791659182 | 0.9999763851 |
| HS6ST2       | 3.2356557963  | 0.5547505991 | 0.9999763851 |
| USP26        | 0             | 0            | 0            |
| GPC4         | 0             | 0            | 0            |
| GPC3         | -1.196198281  | 0.3323894559 | 0.9999763851 |
| PHF6         | -1.1200584376 | 0.5596286482 | 0.9999763851 |
| HPRT1        | -1.0944752509 | 0.5993886396 | 0.9999763851 |
| PLAC1        | -4.2849908816 | 0.4028453076 | 0.9999763851 |
| FAM122B      | -1.1834007807 | 0.4315408975 | 0.9999763851 |
| FAM122C      | 1.5501971516  | 0.5514360035 | 0.9999763851 |
| MOSPD1       | -1.0389294895 | 0.8903987234 | 0.9999763851 |
| ZNF75D       | 1.0656407304  | 0.8623107089 | 0.9999763851 |
| ZNF449       | 1.3625577098  | 0.5439964944 | 0.9999763851 |
| INTS6L       | -1.1792156438 | 0.6405103661 | 0.9999763851 |
| MMGT1        | -1.379267999  | 0.0470949682 | 0.9999763851 |
| SLC9A6       | -1.1118685855 | 0.6594975818 | 0.9999763851 |
| FHL1         | -2.5596117216 | 0.2622579937 | 0.9999763851 |
| MAP7D3       | 1.2140077333  | 0.3476429432 | 0.9999763851 |
| HTATSF1      | 1.1878277556  | 0.3271124364 | 0.9999763851 |
| CD40LG       | 0             | 0            | 0            |
| ARHGEF6      | 1.3823840123  | 0.0663173568 | 0.9999763851 |
| RBMX         | 1.1894441661  | 0.212235094  | 0.9999763851 |
| ATP11C       | -1.1623857971 | 0.6491903299 | 0.9999763851 |
| FMR1         | 1.0531286057  | 0.8070604233 | 0.9999763851 |
| AFF2         | -1.2496200521 | 0.1576433464 | 0.9999763851 |
| IDS          | -1.1600717323 | 0.3504041917 | 0.9999763851 |
| CXorf40A     | 1.0650515411  | 0.6562378832 | 0.9999763851 |
| LOC101928917 | -1.2440466269 | 0.8062696907 | 0.9999763851 |
| HSFX2        | 0             | 0            | 0            |
| TMEM185A     | -1.0836737653 | 0.7482294461 | 0.9999763851 |
| CXorf40B     | 1.1605570989  | 0.7098520795 | 0.9999763851 |
| LOC101927685 | 10.4285443305 | 0.2412517111 | 0.9999763851 |
| MAMLD1       | -1.2505104404 | 0.6167819305 | 0.9999763851 |
| MTM1         | -1.0979035237 | 0.7888241439 | 0.9999763851 |
| MTMR1        | 1.0798575008  | 0.7011637079 | 0.9999763851 |
| CD99L2       | -1.1589734621 | 0.3935521396 | 0.9999763851 |
| HMGB3        | 1.0968298592  | 0.5834890602 | 0.9999763851 |
| VMA21        | -1.072787977  | 0.5599800554 | 0.9999763851 |
| CETN2        | 1.2244124268  | 0.3564465786 | 0.9999763851 |
| NSDHL        | 1.3420805834  | 0.0867692213 | 0.9999763851 |
| ZNF185       | -1.1480107667 | 0.7088226083 | 0.9999763851 |
| PNMA5        | -3.5025636081 | 0.0814357562 | 0.9999763851 |
| PNMA6A       | -1.035933364  | 0.9119548403 | 0.9999763851 |
| LOC105373377 | 0             | 0            | 0            |
| ZNF275       | 1.1667838182  | 0.3709045723 | 0.9999763851 |

gene\_expression\_table

|              |               |              |              |
|--------------|---------------|--------------|--------------|
| ZFP92        | -1.1006359229 | 0.8004925966 | 0.9999763851 |
| TREX2        | 0             | 0            | 0            |
| HAUS7        | 1.0447737834  | 0.8115390768 | 0.9999763851 |
| ATP2B3       | 1.6016752259  | 0.048130337  | 0.9999763851 |
| FAM58A       | -1.089243938  | 0.5875825455 | 0.9999763851 |
| DUSP9        | 0             | 0            | 0            |
| PNCK         | 0             | 0            | 0            |
| SLC6A8       | 1.0690172838  | 0.8559098113 | 0.9999763851 |
| BCAP31       | -1.1792743487 | 0.2009318969 | 0.9999763851 |
| ABCD1        | -1.190711552  | 0.7392376829 | 0.9999763851 |
| PLXNB3       | -4.2849908816 | 0.4028453076 | 0.9999763851 |
| SRPK3        | 3.2353357581  | 0.554787377  | 0.9999763851 |
| IDH3G        | 1.1346603404  | 0.5355827764 | 0.9999763851 |
| SSR4         | -1.0155381757 | 0.9059964588 | 0.9999763851 |
| L1CAM        | -4.2849908816 | 0.4028453076 | 0.9999763851 |
| ARHGAP4      | 1.0471879359  | 0.7858131542 | 0.9999763851 |
| NAA10        | 1.0864836414  | 0.6338615596 | 0.9999763851 |
| RENBP        | -1.3478377477 | 0.70763595   | 0.9999763851 |
| HCFC1        | -1.087419549  | 0.5290397413 | 0.9999763851 |
| TMEM187      | -1.1766249893 | 0.5839295293 | 0.9999763851 |
| IRAK1        | -1.0701854491 | 0.5928609473 | 0.9999763851 |
| MECP2        | 1.0386967751  | 0.8373976116 | 0.9999763851 |
| OPN1MW3      | 0             | 0            | 0            |
| TEX28        | -4.2864494036 | 0.4027150576 | 0.9999763851 |
| TKTL1        | 0             | 0            | 0            |
| FLNA         | 1.113066242   | 0.4517748001 | 0.9999763851 |
| EMD          | -1.1266188698 | 0.3739418889 | 0.9999763851 |
| LOC107987332 | -1.0805489166 | 0.9266273402 | 0.9999763851 |
| RPL10        | 1.007566759   | 0.9508925814 | 0.9999763851 |
| DNASE1L1     | 25.7318302623 | 0.086611497  | 0.9999763851 |
| TAZ          | 1.3416866188  | 0.250956068  | 0.9999763851 |
| ATP6AP1      | -1.290725549  | 0.0931001185 | 0.9999763851 |
| GDI1         | -1.0578991638 | 0.8141885679 | 0.9999763851 |
| FAM50A       | -1.0997381288 | 0.6697718491 | 0.9999763851 |
| PLXNA3       | -1.7100795486 | 0.2800622542 | 0.9999763851 |
| LAGE3        | 1.1097842427  | 0.4491767082 | 0.9999763851 |
| UBL4A        | 1.117272202   | 0.4908774701 | 0.9999763851 |
| SLC10A3      | 1.0102115797  | 0.9712896597 | 0.9999763851 |
| FAM3A        | -1.1759623533 | 0.5227866729 | 0.9999763851 |
| G6PD         | 1.061669991   | 0.791531188  | 0.9999763851 |
| IKBK         | 1.1892372608  | 0.3855290077 | 0.9999763851 |
| CTAG1A       | 0             | 0            | 0            |
| CTAG2        | 0             | 0            | 0            |
| GAB3         | -1.126520263  | 0.7606676546 | 0.9999763851 |
| DKC1         | -1.019636857  | 0.8746029938 | 0.9999763851 |
| MPP1         | -1.0174105478 | 0.9204934252 | 0.9999763851 |
| F8           | -1.6000763874 | 0.1136264493 | 0.9999763851 |
| F8A1         | 1.1705011255  | 0.3793251097 | 0.9999763851 |
| FUNDC2       | 1.3538261043  | 0.0450860948 | 0.9999763851 |

gene\_expression\_table

|                |                |              |              |
|----------------|----------------|--------------|--------------|
| CMC4           | -1.1608255751  | 0.5863480437 | 0.9999763851 |
| BRCC3          | 1.3096431394   | 0.0551580228 | 0.9999763851 |
| VBP1           | 1.235780371    | 0.1441397678 | 0.9999763851 |
| RAB39B         | -10.8385246611 | 0.1454069559 | 0.9999763851 |
| CLIC2          | 5.4776292235   | 0.3745831165 | 0.9999763851 |
| H2AFB3         | 0              | 0            | 0            |
| TMLHE          | -1.5706816925  | 0.0753798139 | 0.9999763851 |
| VAMP7_1        | -1.141054452   | 0.5454661057 | 0.9999763851 |
| IL9R_1         | 1.6938437942   | 0.6481572941 | 0.9999763851 |
| PLCXD1_2       | 1.2905586889   | 0.3873702766 | 0.9999763851 |
| GTPBP6_2       | -1.3046636917  | 0.3468079464 | 0.9999763851 |
| PPP2R3B_2      | 1.5771203822   | 0.4036766773 | 0.9999763851 |
| CRLF2_2        | 3.2361532718   | 0.5546934395 | 0.9999763851 |
| CSF2RA_2       | 1.2803114561   | 0.5266534532 | 0.9999763851 |
| IL3RA_2        | -3.6968212056  | 0.0403926302 | 0.9999763851 |
| SLC25A6_2      | -1.0665690999  | 0.6273739961 | 0.9999763851 |
| LOC105373102_2 | 0              | 0            | 0            |
| ASMTL_2        | 1.0643864794   | 0.846950869  | 0.9999763851 |
| P2RY8_2        | 1.1317377513   | 0.4851385916 | 0.9999763851 |
| AKAP17A_2      | -1.4204208174  | 0.1312113196 | 0.9999763851 |
| DHRX_2         | 1.6720530332   | 0.2414991074 | 0.9999763851 |
| ZBED1_2        | 1.3579048027   | 0.3925305766 | 0.9999763851 |
| CD99_2         | 1.3642399858   | 0.0567801736 | 0.9999763851 |
| PCDH11Y        | 1.2978756447   | 0.6533023971 | 0.9999763851 |
| TBL1Y          | 3.2356557963   | 0.5547505991 | 0.9999763851 |
| UTY            | -1.0446740863  | 0.8391423821 | 0.9999763851 |
| VAMP7_2        | -1.0257561175  | 0.9060544063 | 0.9999763851 |
| IL9R_2         | -4.2864494036  | 0.4027150576 | 0.9999763851 |

gene\_expression\_table

| LZ vs. C 2H - Fold change | LZ vs. C 2H - P-value | LZ vs. C 2H - FDR p-value | LZ vs. C 24H - Fold change |
|---------------------------|-----------------------|---------------------------|----------------------------|
| 1.10528199                | 0.9276332648          | 0.9999537652              | 1.8767838835               |
| -1.5860648294             | 0.2531574376          | 0.9999537652              | 1.0136550264               |
| -2.6446103845             | 0.1562354099          | 0.9999537652              | 3.0003884395               |
| -5.4085287896             | 0.1678820504          | 0.9999537652              | 2.6680086435               |
| -1.1605807802             | 0.5166447141          | 0.9999537652              | -1.2193980307              |
| -1.8463159225             | 0.3754329048          | 0.9999537652              | 1.9767548276               |
| -1.1614998763             | 0.8765266921          | 0.9999537652              | -7.959096917               |
| 43.1761895246             | 0.138814462           | 0.9999537652              | -1.4457524838              |
| 1.3831342462              | 0.1347081514          | 0.9999537652              | 1.3681076502               |
| 2.0510528871              | 0.014024137           | 0.9999537652              | -1.720458724               |
| -2.2358596109             | 0.3474892464          | 0.9999537652              | -1.7815563324              |
| 1.4934216573              | 0.322078157           | 0.9999537652              | -1.4542840694              |
| 2.7933974408              | 0.6948713406          | 0.9999537652              | 2.996475627                |
| 1.1516354134              | 0.2960876305          | 0.9999537652              | -1.0196853503              |
| -1.1773928401             | 0.3695770411          | 0.9999537652              | -1.0465296466              |
| 6.3130691196              | 0.4797718667          | 0.9999537652              | -2.579624099               |
| 1.2399533326              | 0.150158816           | 0.9999537652              | -1.4706241177              |
| 1.6505943575              | 0.3275001729          | 0.9999537652              | -1.076260814               |
| 1.9844400563              | 0.0837345008          | 0.9999537652              | 1.198439035                |
| 1.3482604893              | 0.3884706256          | 0.9999537652              | 1.1773892926               |
| -1.1914214817             | 0.3862039382          | 0.9999537652              | -1.2309828877              |
| -1.0385845306             | 0.9212851175          | 0.9999537652              | -1.1931526885              |
| 0                         | 0                     | 0                         | 4.9527501949               |
| -1.1029431029             | 0.6938649941          | 0.9999537652              | -1.5093905438              |
| 2.7957660672              | 0.7053686484          | 0.9999537652              | -2.2688699986              |
| -1.0305638735             | 0.8451673338          | 0.9999537652              | -1.1442878229              |
| 1.1365504914              | 0.4660309926          | 0.9999537652              | -1.373255798               |
| -1.3692914198             | 0.0129226026          | 0.9999537652              | -1.0358353977              |
| 0                         | 0                     | 0                         | 0                          |
| -1.1906603306             | 0.3566322876          | 0.9999537652              | -1.0552255407              |
| 1.1094478586              | 0.5676066705          | 0.9999537652              | 1.1828806805               |
| 4.5545995984              | 0.5696849358          | 0.9999537652              | 15.9659633994              |
| 1.1381578178              | 0.4220729377          | 0.9999537652              | -1.0934581933              |
| -2.045920934              | 0.2680651636          | 0.9999537652              | 1.194084372                |
| 2.4053922493              | 0.072197911           | 0.9999537652              | 1.0603766475               |
| 4.5505976667              | 0.5602947896          | 0.9999537652              | 2.0426682045               |
| -1.0303073468             | 0.9092333091          | 0.9999537652              | 1.0525858406               |
| -1.3668253196             | 0.6211065807          | 0.9999537652              | -1.5695393714              |
| 1.6383451237              | 0.1764597898          | 0.9999537652              | -1.1745673469              |
| -1.0958096873             | 0.6506193145          | 0.9999537652              | -1.3134652331              |
| 1.1496401381              | 0.3645879395          | 0.9999537652              | 1.1582559275               |
| 1.0562323577              | 0.6839483801          | 0.9999537652              | -1.0596568104              |
| 0                         | 0                     | 0                         | 0                          |
| 0                         | 0                     | 0                         | 2.996475627                |
| 1.8448460942              | 0.5998814491          | 0.9999537652              | -1.1444432957              |
| 9.8205505243              | 0.3808420729          | 0.9999537652              | -2.1294907556              |
| 3.4733637305              | 0.1323277297          | 0.9999537652              | -4.1628315719              |
| -1.3161399115             | 0.6818520939          | 0.9999537652              | -2.7336138579              |

gene\_expression\_table

|               |              |              |               |
|---------------|--------------|--------------|---------------|
| 1.2331805204  | 0.3514761239 | 0.9999537652 | 1.1099148212  |
| 1.2203996378  | 0.3274799992 | 0.9999537652 | 1.0600268824  |
| 1.0808480048  | 0.9081655184 | 0.9999537652 | 1.1856012743  |
| -1.1292443617 | 0.4351211423 | 0.9999537652 | 1.0374261822  |
| -1.0573626032 | 0.9485462547 | 0.9999537652 | 1.2648328658  |
| 2.7933974408  | 0.6948713406 | 0.9999537652 | 2.996475627   |
| -9.978837909  | 0.0402225068 | 0.9999537652 | 4.3673319332  |
| 1.464268315   | 0.1950663647 | 0.9999537652 | -1.2477442156 |
| 1.0052819665  | 0.9854632738 | 0.9999537652 | -1.3577034746 |
| 3.9205610751  | 0.3357966134 | 0.9999537652 | -2.2890929548 |
| 11.5766527773 | 0.3453182652 | 0.9999537652 | -1.0416326979 |
| -1.110189331  | 0.5774271764 | 0.9999537652 | 1.0930564242  |
| 1.1575446714  | 0.3998498426 | 0.9999537652 | -1.101093941  |
| -1.3400297652 | 0.6616825679 | 0.9999537652 | 1.1651206374  |
| 0             | 0            | 0            | 1.4002700172  |
| 1.172424593   | 0.3590082646 | 0.9999537652 | 1.1175147103  |
| -1.7351800694 | 0.1234754864 | 0.9999537652 | 1.4313839154  |
| -1.6349152306 | 0.0389941583 | 0.9999537652 | -1.2850581633 |
| -1.2060989687 | 0.3846621475 | 0.9999537652 | 1.2070699866  |
| 1.2346183256  | 0.5355491746 | 0.9999537652 | -1.3840773989 |
| 1.0608210445  | 0.6741671183 | 0.9999537652 | -1.1317017104 |
| 8.064174035   | 0.4217332484 | 0.9999537652 | 8.8639046058  |
| 1.0332721989  | 0.7796012859 | 0.9999537652 | 1.1051144085  |
| 0             | 0            | 0            | -1.8579915692 |
| -1.0279853933 | 0.8620338982 | 0.9999537652 | -1.2607518155 |
| 1.6090500367  | 0.3625909589 | 0.9999537652 | -1.0678039382 |
| -1.2532594199 | 0.1940100651 | 0.9999537652 | -1.1878739819 |
| -1.0015629939 | 0.9929026379 | 0.9999537652 | -1.0560370856 |
| 0             | 0            | 0            | 2.996475627   |
| -1.0470191668 | 0.9220269612 | 0.9999537652 | -1.4349942283 |
| -1.0708604909 | 0.7170251155 | 0.9999537652 | -1.0960965781 |
| -1.20855776   | 0.4169736539 | 0.9999537652 | -1.4736426865 |
| 1.0841005925  | 0.6635011713 | 0.9999537652 | -1.1848744921 |
| 2.6978201187  | 0.2074092412 | 0.9999537652 | 1.2941165299  |
| 1.1196684085  | 0.5745829099 | 0.9999537652 | 1.1240225664  |
| -1.0370558735 | 0.8737506926 | 0.9999537652 | -1.2077559626 |
| -1.5820364396 | 0.0373170244 | 0.9999537652 | 1.2640773099  |
| -4.7509653312 | 0.0676923003 | 0.9999537652 | 5.5797416422  |
| -1.474256113  | 0.6746833091 | 0.9999537652 | -2.1299895658 |
| 1.1296005396  | 0.3323816266 | 0.9999537652 | -1.0167862486 |
| 1.2673417318  | 0.6154243016 | 0.9999537652 | -1.0470597281 |
| -1.0983845365 | 0.5738426571 | 0.9999537652 | -1.1525448434 |
| 1.0206140979  | 0.8581335656 | 0.9999537652 | -1.1767681806 |
| 11.5766527773 | 0.3453795744 | 0.9999537652 | -1.2612704763 |
| 4.5505976667  | 0.5602519568 | 0.9999537652 | 1.8368734345  |
| 1.0763770131  | 0.7359935714 | 0.9999537652 | -1.2326808857 |
| -2.1325963601 | 0.4603080994 | 0.9999537652 | 1.3143074801  |
| -1.0726620988 | 0.8037005364 | 0.9999537652 | -1.0191594585 |
| -1.1189982814 | 0.8120281354 | 0.9999537652 | 1.1860886022  |

gene\_expression\_table

|               |              |              |               |
|---------------|--------------|--------------|---------------|
| 1.3118920539  | 0.34727647   | 0.9999537652 | 1.4880588297  |
| 1.0914623784  | 0.7930215925 | 0.9999537652 | -1.5205147039 |
| 1.5291298825  | 0.3532551279 | 0.9999537652 | -1.1537126741 |
| -1.2015263683 | 0.2364451284 | 0.9999537652 | -1.2282585625 |
| 1.0637999368  | 0.741521951  | 0.9999537652 | -1.2000274238 |
| 1.1704047011  | 0.4190084799 | 0.9999537652 | 1.0368675479  |
| 1.0034416048  | 0.9848842656 | 0.9999537652 | 1.0392791098  |
| 1.044734083   | 0.9162329306 | 0.9999537652 | 1.7317352387  |
| 0             | 0            | 0            | 4.9527501949  |
| -1.0993527828 | 0.6900911222 | 0.9999537652 | 1.137517165   |
| 1.2564260193  | 0.3591803667 | 0.9999537652 | -1.1771672068 |
| 1.0855263342  | 0.6130272174 | 0.9999537652 | -1.1258264514 |
| 1.1048804532  | 0.6482951209 | 0.9999537652 | 1.8265018786  |
| 16.8433158146 | 0.2732521726 | 0.9999537652 | 1.1908762699  |
| 1.8176665782  | 0.2803966492 | 0.9999537652 | 1.1917871104  |
| 1.0818727716  | 0.782196633  | 0.9999537652 | -1.3224092277 |
| 1.3064529969  | 0.3466226355 | 0.9999537652 | -1.0220704003 |
| -1.2931976772 | 0.4084820216 | 0.9999537652 | -1.3262834747 |
| -1.2019892207 | 0.1829553932 | 0.9999537652 | -1.0139778938 |
| -6.9764533263 | 0.2589868856 | 0.9999537652 | 10.8262784008 |
| 1.1126634716  | 0.4317679094 | 0.9999537652 | 1.0143094048  |
| 1.2796759192  | 0.2868486277 | 0.9999537652 | 1.205614606   |
| 1.4342270601  | 0.0959307236 | 0.9999537652 | -1.1242533918 |
| -1.2647715161 | 0.2021858668 | 0.9999537652 | 1.1426264459  |
| 1.0737844037  | 0.9174636831 | 0.9999537652 | -1.0755220967 |
| -4.8154268017 | 0.1712535923 | 0.9999537652 | 1.401081723   |
| -1.1760439694 | 0.7322879508 | 0.9999537652 | 1.9159733225  |
| -1.1675671268 | 0.4305517183 | 0.9999537652 | -1.0775371582 |
| 1.1168108737  | 0.9283095311 | 0.9999537652 | -2.2407182823 |
| 1.5217239176  | 0.065183155  | 0.9999537652 | -1.4261172168 |
| 1.5129672515  | 0.2592466998 | 0.9999537652 | -1.641094014  |
| 1.0813404924  | 0.8356929949 | 0.9999537652 | -1.5563677034 |
| 1.0717488148  | 0.6398508845 | 0.9999537652 | -1.1509258264 |
| 1.4597061306  | 0.11471059   | 0.9999537652 | -1.1890517545 |
| 1.0269468359  | 0.8816704934 | 0.9999537652 | 1.1342587074  |
| -1.8964662446 | 0.0626215067 | 0.9999537652 | -1.1429488648 |
| 1.4322794364  | 0.0121417135 | 0.9999537652 | -1.2295595384 |
| -1.1897798958 | 0.5568564682 | 0.9999537652 | 1.0043705722  |
| 1.3115617248  | 0.6180786908 | 0.9999537652 | -1.1773184466 |
| -7.8036543138 | 0.0001877    | 0.9999537652 | -1.537349674  |
| -1.0310062934 | 0.8832622147 | 0.9999537652 | 1.1414587399  |
| -1.4596913105 | 0.2218197026 | 0.9999537652 | -1.1037459052 |
| 1.3048687591  | 0.7280138725 | 0.9999537652 | -1.4238795843 |
| 0             | 0            | 0            | 2.996475627   |
| -1.0744629625 | 0.703009882  | 0.9999537652 | -1.1382543897 |
| 0             | 0            | 0            | -5.3589986948 |
| 2.7933974408  | 0.6948713406 | 0.9999537652 | -1.1517639145 |
| 2.2973085201  | 0.3347705566 | 0.9999537652 | -1.0001429436 |
| -1.3015793855 | 0.6212406659 | 0.9999537652 | 1.0473903176  |



gene\_expression\_table

|               |              |              |               |
|---------------|--------------|--------------|---------------|
| 1.5529110445  | 0.3265626359 | 0.9999537652 | -1.4669246696 |
| 4.5505976667  | 0.5601667107 | 0.9999537652 | -2.0477227478 |
| -1.7258641834 | 0.4572354644 | 0.9999537652 | -1.7043700168 |
| 1.1260783533  | 0.874823167  | 0.9999537652 | 1.2400291296  |
| -1.1411794826 | 0.6103272282 | 0.9999537652 | -1.1000749884 |
| 0             | 0            | 0            | 4.9561842702  |
| 0             | 0            | 0            | 2.996475627   |
| 0             | 0            | 0            | 10.818785458  |
| -1.6975052657 | 0.004311     | 0.9999537652 | -1.4734484598 |
| -1.1620087829 | 0.465133506  | 0.9999537652 | -1.2963520819 |
| -1.0464740425 | 0.9164900533 | 0.9999537652 | 1.0218716297  |
| 1.7746691972  | 0.0920574714 | 0.9999537652 | 1.177682036   |
| -1.5881166222 | 0.7258793166 | 0.9999537652 | -2.8769815942 |
| 0             | 0            | 0            | -4.1123558411 |
| 1.551024778   | 0.2155505763 | 0.9999537652 | 1.0389279812  |
| -1.0971375911 | 0.5913987171 | 0.9999537652 | 1.0588529503  |
| -1.0957145392 | 0.6815053152 | 0.9999537652 | -1.2452416615 |
| 9.8205505243  | 0.3808419294 | 0.9999537652 | 0             |
| -1.0419294728 | 0.8643541431 | 0.9999537652 | -1.1981180197 |
| -1.1614010521 | 0.8859841055 | 0.9999537652 | -1.859280336  |
| 1.5692454894  | 0.3144870947 | 0.9999537652 | -1.272799313  |
| 2.4246765564  | 0.3289726365 | 0.9999537652 | -1.6166104906 |
| -1.7991827318 | 0.1599768416 | 0.9999537652 | 1.6631648689  |
| 1.1721069104  | 0.4231487407 | 0.9999537652 | 1.5818326671  |
| -1.0116689235 | 0.981072017  | 0.9999537652 | -1.1184437609 |
| 11.5864583426 | 0.3448356866 | 0.9999537652 | -9.7598809705 |
| 1.1158583321  | 0.9297364246 | 0.9999537652 | 4.9527501949  |
| -1.0570844474 | 0.7048086156 | 0.9999537652 | 1.1865151013  |
| -1.2654738527 | 0.4412787449 | 0.9999537652 | -1.5584993668 |
| 1.0678890188  | 0.8326439865 | 0.9999537652 | 4.5786566845  |
| 0             | 0            | 0            | 4.9527501949  |
| 1.0750163095  | 0.7314637246 | 0.9999537652 | 1.1198036744  |
| 1.2056652288  | 0.5924413045 | 0.9999537652 | -1.5260706903 |
| -1.0154268928 | 0.9222589647 | 0.9999537652 | -1.229336511  |
| -1.1331646408 | 0.5215903731 | 0.9999537652 | -1.209742527  |
| 1.1994744877  | 0.215167938  | 0.9999537652 | 1.3527275514  |
| 1.403011356   | 0.5100676788 | 0.9999537652 | -1.0175257376 |
| 1.0762862679  | 0.7100499246 | 0.9999537652 | -1.318299503  |
| -1.1218301713 | 0.7886031365 | 0.9999537652 | 1.4979993531  |
| -1.1764280082 | 0.2798347826 | 0.9999537652 | -1.0561374651 |
| 1.1448492661  | 0.2887277473 | 0.9999537652 | 1.0527462452  |
| 0             | 0            | 0            | 6.908559683   |
| 9.8205505243  | 0.3808417859 | 0.9999537652 | 0             |
| 1.6993243546  | 0.1953859618 | 0.9999537652 | -1.2411843512 |
| -1.7534006362 | 0.3972637108 | 0.9999537652 | -1.3017571381 |
| 0             | 0            | 0            | -1.859280336  |
| -1.2944263568 | 0.7117037764 | 0.9999537652 | 1.0391615581  |
| 1.2489712975  | 0.5694639771 | 0.9999537652 | -1.1788432134 |
| 9.8205505243  | 0.3808416424 | 0.9999537652 | -1.2450158522 |

gene\_expression\_table

|               |              |              |               |
|---------------|--------------|--------------|---------------|
| -1.2009319295 | 0.702008548  | 0.9999537652 | -1.0661298805 |
| 1.6470826326  | 0.1223015051 | 0.9999537652 | 1.3581885365  |
| 1.1320933008  | 0.684023517  | 0.9999537652 | 1.061240163   |
| -1.0049166968 | 0.9823524039 | 0.9999537652 | -1.1797894605 |
| -1.1496649418 | 0.3198611941 | 0.9999537652 | -1.0360183373 |
| 2.4133372013  | 0.2023508426 | 0.9999537652 | -1.3071878875 |
| -1.19172018   | 0.2315250344 | 0.9999537652 | 1.0446619467  |
| -1.3434418218 | 0.1583998081 | 0.9999537652 | 1.0484512629  |
| 1.3732135791  | 0.2617531941 | 0.9999537652 | -1.1576880251 |
| 1.3937045222  | 0.4388371092 | 0.9999537652 | 1.0053122895  |
| 0             | 0            | 0            | -1.4671686592 |
| -1.2218032769 | 0.2053928402 | 0.9999537652 | -1.1103354284 |
| 2.8197560167  | 0.3542734986 | 0.9999537652 | -2.4486849086 |
| 2.7933974408  | 0.6948713406 | 0.9999537652 | -2.763189328  |
| 0             | 0            | 0            | 0             |
| 1.0672621842  | 0.6327788678 | 0.9999537652 | 1.2169611695  |
| -1.590255273  | 0.1879166969 | 0.9999537652 | -1.1405754084 |
| 0             | 0            | 0            | 1.0667457716  |
| -3.4373511952 | 0.0248626078 | 0.9999537652 | -1.2771771246 |
| 0             | 0            | 0            | 2.9985540909  |
| 8.064174035   | 0.4218818154 | 0.9999537652 | 8.8761957907  |
| -1.0791207813 | 0.7440224237 | 0.9999537652 | -1.2810451512 |
| 1.4965788567  | 0.2852845556 | 0.9999537652 | 1.1254891831  |
| 1.0750942371  | 0.6200566068 | 0.9999537652 | 1.3066423756  |
| 1.2537376893  | 0.8095955294 | 0.9999537652 | 1.1040524007  |
| -1.9361116524 | 0.2794128531 | 0.9999537652 | -1.0667363766 |
| -1.1447852916 | 0.915393807  | 0.9999537652 | -1.5086090391 |
| -1.3400152954 | 0.1900421589 | 0.9999537652 | -1.1868502474 |
| 2.5569228903  | 0.2905718207 | 0.9999537652 | -1.2376612364 |
| -1.141509172  | 0.263860757  | 0.9999537652 | 1.0430214279  |
| -1.2429792146 | 0.4555557552 | 0.9999537652 | -1.2236459029 |
| 1.0181442537  | 0.9193517276 | 0.9999537652 | 1.0139763625  |
| 1.5261191208  | 0.0201939316 | 0.9999537652 | -1.2672325335 |
| 1.3039775859  | 0.2559723514 | 0.9999537652 | 1.4952908799  |
| 1.8332330904  | 0.0594152722 | 0.9999537652 | -1.1496850827 |
| 1.0277663838  | 0.8580232464 | 0.9999537652 | -1.1057368774 |
| 1.4016970427  | 0.1746374643 | 0.9999537652 | -1.0260127158 |
| 1.0218616277  | 0.9130820929 | 0.9999537652 | 1.3753063988  |
| -1.1288878214 | 0.3808223911 | 0.9999537652 | 1.0738389115  |
| 29.8698312703 | 0.2177267878 | 0.9999537652 | 0             |
| 0             | 0            | 0            | 2.996475627   |
| 0             | 0            | 0            | 6.908559683   |
| -2.5849372227 | 0.5263317694 | 0.9999537652 | 1.1566640911  |
| 32.6858196958 | 0.1751819618 | 0.9999537652 | -14.149476906 |
| -1.0184593498 | 0.9668655544 | 0.9999537652 | -1.2561727436 |
| 3.1790945967  | 0.1209938425 | 0.9999537652 | 1.0675523501  |
| 0             | 0            | 0            | -1.8577842586 |
| -1.3447452208 | 0.0387185886 | 0.9999537652 | 1.1200722131  |
| 1.0665167775  | 0.7412067047 | 0.9999537652 | 1.1528263681  |

gene\_expression\_table

|               |              |              |               |
|---------------|--------------|--------------|---------------|
| -1.1354078557 | 0.350677279  | 0.9999537652 | -1.2444105602 |
| -1.0524246233 | 0.7887770687 | 0.9999537652 | 1.3386813366  |
| 1.1155148055  | 0.5701359842 | 0.9999537652 | 1.2266753676  |
| 1.2477586312  | 0.2155490651 | 0.9999537652 | 1.3979704468  |
| -2.9523355565 | 0.3410999344 | 0.9999537652 | 1.1381503565  |
| 1.3149096804  | 0.3082638591 | 0.9999537652 | -1.3075866405 |
| 1.5808525587  | 0.0449636379 | 0.9999537652 | -1.1278235195 |
| 1.3092729054  | 0.6816045262 | 0.9999537652 | -1.5035806696 |
| 1.2283025042  | 0.4718104648 | 0.9999537652 | -1.202902615  |
| -4.3600564455 | 0.1220241376 | 0.9999537652 | -1.1706134134 |
| 1.0339753574  | 0.875351026  | 0.9999537652 | 1.548465534   |
| -1.0076821978 | 0.9935464972 | 0.9999537652 | -6.5476410741 |
| -1.1314437449 | 0.2611415892 | 0.9999537652 | -1.0046649058 |
| 1.543349394   | 0.3251748101 | 0.9999537652 | -1.2209089991 |
| -1.4982318958 | 0.3290218254 | 0.9999537652 | 1.2518282786  |
| -1.1325176624 | 0.8544192897 | 0.9999537652 | -2.9099961801 |
| 1.0204847908  | 0.9060053277 | 0.9999537652 | -1.0554711626 |
| 0             | 0            | 0            | -5.3589986948 |
| 0             | 0            | 0            | 2.9985540909  |
| -1.1289689692 | 0.7157749477 | 0.9999537652 | 1.0063338304  |
| -1.0229372541 | 0.880544896  | 0.9999537652 | -1.2601794007 |
| -2.1280553469 | 0.2609296482 | 0.9999537652 | -1.6419022999 |
| -1.0860630806 | 0.6751624839 | 0.9999537652 | 1.3340777614  |
| 0             | 0            | 0            | 6.908559683   |
| -1.0447383068 | 0.880831421  | 0.9999537652 | -1.2223702414 |
| -1.3009386067 | 0.0208704337 | 0.9999537652 | -1.1377342995 |
| 1.0032331827  | 0.98524775   | 0.9999537652 | -1.376033252  |
| -1.0437177504 | 0.8484588017 | 0.9999537652 | -1.0149433916 |
| -1.0096484376 | 0.9873212096 | 0.9999537652 | 1.2389534888  |
| 1.5024583949  | 0.1887806579 | 0.9999537652 | -1.1483432976 |
| -5.6856811034 | 0.0707662592 | 0.9999537652 | -1.859280336  |
| -1.789269507  | 0.1059902484 | 0.9999537652 | -1.4988235641 |
| 1.0730433706  | 0.8369116387 | 0.9999537652 | 1.0545907089  |
| 1.1714077321  | 0.3400891644 | 0.9999537652 | 1.3070615412  |
| 2.7933974408  | 0.6948713406 | 0.9999537652 | 0             |
| -1.0100340266 | 0.9887471041 | 0.9999537652 | -1.0989904503 |
| 1.6704883732  | 0.3479647645 | 0.9999537652 | 1.8969815978  |
| 1.604666205   | 0.3082122442 | 0.9999537652 | -1.2613931533 |
| -1.2242279135 | 0.5269571422 | 0.9999537652 | -1.248448714  |
| -1.7618136108 | 0.1949034723 | 0.9999537652 | -1.6606015239 |
| -1.562511822  | 0.373223776  | 0.9999537652 | 1.5393291474  |
| -1.5881570201 | 0.7146301739 | 0.9999537652 | 0             |
| 0             | 0            | 0            | 0             |
| -1.1545963256 | 0.3370611736 | 0.9999537652 | -1.3559302201 |
| -1.3227196977 | 0.4984757332 | 0.9999537652 | 1.1792892539  |
| -1.1088351144 | 0.5955295795 | 0.9999537652 | 1.1536883034  |
| 3.2033390901  | 5.05E-05     | 0.4532897791 | 1.3419260067  |
| -1.5912011739 | 0.2421582398 | 0.9999537652 | 1.2540059547  |
| -1.0751790306 | 0.8180323213 | 0.9999537652 | 1.0203647951  |

gene\_expression\_table

|               |              |              |               |
|---------------|--------------|--------------|---------------|
| 1.1438931627  | 0.4516663143 | 0.9999537652 | 1.1980908138  |
| 1.0856236913  | 0.6891805068 | 0.9999537652 | 1.3373138363  |
| 1.1427767498  | 0.3570358765 | 0.9999537652 | -1.1329318032 |
| 11.5766527773 | 0.3454410623 | 0.9999537652 | -1.2787310716 |
| 1.1365121976  | 0.767701082  | 0.9999537652 | -1.270468274  |
| 1.2254326777  | 0.2857157666 | 0.9999537652 | 1.1232950943  |
| 1.3741714424  | 0.1038410379 | 0.9999537652 | -1.1627235497 |
| -1.1497536519 | 0.2915725961 | 0.9999537652 | -1.3279684207 |
| -1.1207502931 | 0.382197607  | 0.9999537652 | 1.0223549505  |
| 1.1496921257  | 0.6873342003 | 0.9999537652 | -1.1303011748 |
| 1.1443001377  | 0.5328957798 | 0.9999537652 | 1.0911481205  |
| 1.3978582255  | 0.1147921926 | 0.9999537652 | -1.2111656156 |
| -1.0766524571 | 0.5890138713 | 0.9999537652 | 1.0948628877  |
| 1.0273494929  | 0.8966956411 | 0.9999537652 | -1.0214419977 |
| -1.0607912724 | 0.7598743747 | 0.9999537652 | -1.1333879622 |
| -1.1967624622 | 0.6007272064 | 0.9999537652 | -1.2272270493 |
| 1.0714346035  | 0.6355078051 | 0.9999537652 | 1.2043980651  |
| 0             | 0            | 0            | 2.9985540909  |
| -1.3548532324 | 0.2887876617 | 0.9999537652 | 1.0907258221  |
| 1.2171458216  | 0.2944296163 | 0.9999537652 | 1.1681252601  |
| 1.1051145612  | 0.6637526669 | 0.9999537652 | 1.2098581886  |
| -1.1185944805 | 0.7185550791 | 0.9999537652 | -1.0593186558 |
| -1.5799266646 | 0.3938777432 | 0.9999537652 | -1.1569776719 |
| 2.2857336825  | 0.2833602445 | 0.9999537652 | -2.1545257517 |
| 1.0332333907  | 0.8094728176 | 0.9999537652 | -1.0207763969 |
| -1.1073437342 | 0.6042753505 | 0.9999537652 | -1.1423640102 |
| 0             | 0            | 0            | 8.8639046058  |
| 2.3442980505  | 0.00678      | 0.9999537652 | 2.201778415   |
| 1.7979931789  | 0.0944765429 | 0.9999537652 | 1.1609100073  |
| -1.038894833  | 0.888402065  | 0.9999537652 | -1.1696206489 |
| 1.1040648097  | 0.7883568421 | 0.9999537652 | -1.3353650969 |
| 18.5983228161 | 0.2580928751 | 0.9999537652 | 2.2945277226  |
| 4.5505976667  | 0.5601242665 | 0.9999537652 | 0             |
| 1.1254792007  | 0.6211463848 | 0.9999537652 | -1.0753446658 |
| 0             | 0            | 0            | 10.818785458  |
| 0             | 0            | 0            | -1.1254032646 |
| 55.4372391663 | 0.1147996924 | 0.9999537652 | 1.1338344759  |
| 1.0144837009  | 0.9168845455 | 0.9999537652 | -1.1454522933 |
| 1.0243749863  | 0.8503847803 | 0.9999537652 | 1.2949812292  |
| 1.1872085626  | 0.5238286834 | 0.9999537652 | 1.2110972878  |
| 1.0781358157  | 0.677317153  | 0.9999537652 | 1.0248871388  |
| 1.4406217787  | 0.1031887252 | 0.9999537652 | -1.2466835892 |
| 1.4466893048  | 0.1039928749 | 0.9999537652 | 1.0285208533  |
| 11.5766527773 | 0.3454528878 | 0.9999537652 | 4.9529970125  |
| -2.4387448463 | 0.3485738865 | 0.9999537652 | 1.4541273836  |
| -6.9736190158 | 0.2250321147 | 0.9999537652 | 2.9988886918  |
| 1.2900400603  | 0.0877242979 | 0.9999537652 | 1.189817362   |
| 2.7957660672  | 0.7053709654 | 0.9999537652 | -5.3583704783 |
| 1.2533830106  | 0.142365015  | 0.9999537652 | -1.175992956  |

gene\_expression\_table

|               |              |              |               |
|---------------|--------------|--------------|---------------|
| -1.3614238431 | 0.2480889334 | 0.9999537652 | -1.1189333769 |
| -1.1457555741 | 0.9107267231 | 0.9999537652 | -1.9566789748 |
| 1.3594099105  | 0.7971743526 | 0.9999537652 | -2.173958308  |
| 1.2259155854  | 0.5337441509 | 0.9999537652 | 1.0911177817  |
| -1.5320841189 | 0.24150329   | 0.9999537652 | 1.3911553586  |
| 1.4423177973  | 0.1062936902 | 0.9999537652 | 1.2017934321  |
| -1.7227220134 | 0.0807320056 | 0.9999537652 | -1.2254275527 |
| 1.3032749865  | 0.1319847735 | 0.9999537652 | 1.5729208749  |
| -2.4906115235 | 0.156990793  | 0.9999537652 | -1.1551081672 |
| 1.12057142    | 0.4635478989 | 0.9999537652 | 1.0784595307  |
| -1.0043704115 | 0.9854537652 | 0.9999537652 | -1.3371247115 |
| 0             | 0            | 0            | 6.908559683   |
| 1.0711012009  | 0.9181830574 | 0.9999537652 | -1.1397615944 |
| -1.3685209014 | 0.2178779165 | 0.9999537652 | -1.265422587  |
| 1.1134695966  | 0.4014261559 | 0.9999537652 | 1.1724782094  |
| 3.9929885588  | 0.117094833  | 0.9999537652 | -1.3490488064 |
| -1.5354924971 | 0.6039487219 | 0.9999537652 | -3.8549258508 |
| -1.1280025391 | 0.773650983  | 0.9999537652 | -1.0928761359 |
| 0             | 0            | 0            | 2.996475627   |
| 1.0420087918  | 0.8664534931 | 0.9999537652 | -1.3763380209 |
| -1.5875118025 | 0.720728186  | 0.9999537652 | 7.2225086035  |
| 0             | 0            | 0            | 1.8381437152  |
| 1.0926154152  | 0.6231511643 | 0.9999537652 | -1.0232628409 |
| 4.5505976667  | 0.5600819198 | 0.9999537652 | -5.3583704783 |
| 1.0794045774  | 0.8424035836 | 0.9999537652 | 1.4482711617  |
| 1.6330634729  | 0.0927260061 | 0.9999537652 | 1.223678401   |
| 1.044906612   | 0.9071823808 | 0.9999537652 | -1.1100066722 |
| -1.3279488045 | 0.0299032448 | 0.9999537652 | 1.0338097128  |
| 1.2475158226  | 0.0869075837 | 0.9999537652 | 1.0902649432  |
| 1.2396532016  | 0.2434787162 | 0.9999537652 | 1.0545114666  |
| 2.0450110053  | 0.2143930889 | 0.9999537652 | -1.7084103116 |
| 1.1713242174  | 0.5403593713 | 0.9999537652 | -1.2957489773 |
| 1.1261680185  | 0.3943093522 | 0.9999537652 | -1.0089336775 |
| 1.1797801492  | 0.6227367526 | 0.9999537652 | 1.4777834233  |
| 1.3473079473  | 0.1031447121 | 0.9999537652 | 1.0576756121  |
| -1.2045611581 | 0.5317745731 | 0.9999537652 | 1.2305376207  |
| -1.3451777133 | 0.2621448914 | 0.9999537652 | -1.0010144402 |
| -1.2318295872 | 0.4112273969 | 0.9999537652 | -1.1568211817 |
| -1.0393161861 | 0.8395802028 | 0.9999537652 | -1.2343426546 |
| 0             | 0            | 0            | 2.9985540909  |
| -1.1115581008 | 0.4755648918 | 0.9999537652 | -1.3980882715 |
| -1.4181452512 | 0.0469945874 | 0.9999537652 | -1.1004426199 |
| -1.1006844411 | 0.4688745958 | 0.9999537652 | -1.0285751786 |
| -1.008417887  | 0.9935361022 | 0.9999537652 | 1.3117500655  |
| 20.3702769952 | 0.2388376207 | 0.9999537652 | 3.3380115123  |
| -1.0583085622 | 0.7502207169 | 0.9999537652 | 1.0530619383  |
| 1.3080531364  | 0.1782914917 | 0.9999537652 | -1.1920628602 |
| 1.1212430665  | 0.9127384187 | 0.9999537652 | 1.6203860779  |
| 1.2687304249  | 0.2900395142 | 0.9999537652 | 1.0874274909  |

gene\_expression\_table

|               |              |              |               |
|---------------|--------------|--------------|---------------|
| -1.035902411  | 0.9039002051 | 0.9999537652 | -1.0780384492 |
| 1.9974748864  | 0.2104286387 | 0.9999537652 | -1.1628609811 |
| -1.0139359282 | 0.9416100496 | 0.9999537652 | -1.0868570947 |
| -1.1570114275 | 0.4345759868 | 0.9999537652 | 1.064483668   |
| 1.5856903433  | 0.1504032706 | 0.9999537652 | 1.3255064867  |
| 4.5505976667  | 0.5600396528 | 0.9999537652 | 2.996475627   |
| 1.1002538735  | 0.5686891582 | 0.9999537652 | 1.0656291512  |
| 1.0286795814  | 0.9375929988 | 0.9999537652 | 1.0450332033  |
| -1.3171866006 | 0.0791307732 | 0.9999537652 | -1.3755108522 |
| 0             | 0            | 0            | 2.9936870021  |
| -1.172656166  | 0.641383722  | 0.9999537652 | -1.4127324621 |
| -1.2416590917 | 0.3215959406 | 0.9999537652 | -1.000767484  |
| 1.1450755216  | 0.4266514545 | 0.9999537652 | -1.1910688372 |
| -1.1679888826 | 0.625579704  | 0.9999537652 | -1.1716453936 |
| 1.0675496976  | 0.7670807905 | 0.9999537652 | -1.1795037312 |
| -1.1420896173 | 0.3481934473 | 0.9999537652 | -1.1526321072 |
| 1.5530248508  | 0.0909486209 | 0.9999537652 | -1.224470308  |
| -1.2254108314 | 0.221572877  | 0.9999537652 | 1.1774012103  |
| 8.064174035   | 0.4220879833 | 0.9999537652 | -5.3583704783 |
| 1.1548106548  | 0.3772606293 | 0.9999537652 | -1.0853578586 |
| 1.220469677   | 0.2516044354 | 0.9999537652 | 1.2547296735  |
| -1.1605169044 | 0.87724665   | 0.9999537652 | 22.5539272529 |
| 1.3832388859  | 0.7303129975 | 0.9999537652 | 2.6927776414  |
| 1.1038170718  | 0.6220664145 | 0.9999537652 | 1.431180021   |
| 1.0477021779  | 0.7251321517 | 0.9999537652 | 1.1145577554  |
| -1.269291824  | 0.1712494738 | 0.9999537652 | -1.0730936685 |
| -1.3668802709 | 0.7626139546 | 0.9999537652 | 1.7753008822  |
| 1.0809129028  | 0.6625002902 | 0.9999537652 | -1.0300908234 |
| 6.3075231393  | 0.4870565495 | 0.9999537652 | -2.9512799199 |
| 0             | 0            | 0            | 1.2400291296  |
| 1.1908963242  | 0.3754914071 | 0.9999537652 | -1.3050063441 |
| -6.9764533263 | 0.259011687  | 0.9999537652 | -5.3589986948 |
| 3.8622037496  | 0.6197833075 | 0.9999537652 | 0             |
| 1.1279421177  | 0.5948685733 | 0.9999537652 | 1.2853061507  |
| 1.452960249   | 0.6330455447 | 0.9999537652 | -1.4474945519 |
| -1.2223452557 | 0.3896042942 | 0.9999537652 | -1.2425261009 |
| 1.0263353284  | 0.8369840022 | 0.9999537652 | -1.0721422223 |
| -1.0685789358 | 0.6156289222 | 0.9999537652 | 1.0660829201  |
| 1.3259854412  | 0.1474313202 | 0.9999537652 | -1.1009279041 |
| 1.1803283106  | 0.5624303581 | 0.9999537652 | -1.0146938145 |
| 1.3442080467  | 0.4379190427 | 0.9999537652 | -1.212009577  |
| -1.0151320554 | 0.9378540944 | 0.9999537652 | -1.0111186892 |
| 1.1236950163  | 0.8892568623 | 0.9999537652 | -1.2310805544 |
| 1.2269824241  | 0.6860838188 | 0.9999537652 | 1.1284441498  |
| -1.2353103691 | 0.613909627  | 0.9999537652 | 1.067496081   |
| 1.8122239907  | 0.3026711123 | 0.9999537652 | -1.3616350993 |
| 1.6277441819  | 0.3379156267 | 0.9999537652 | 1.0452464871  |
| -1.4228319157 | 0.1225655692 | 0.9999537652 | -1.2826769754 |
| 0             | 0            | 0            | 4.9527501949  |

gene\_expression\_table

|               |              |              |               |
|---------------|--------------|--------------|---------------|
| 1.270931815   | 0.2810925714 | 0.9999537652 | -1.0733539803 |
| 1.0872001045  | 0.6275433545 | 0.9999537652 | 1.0731629585  |
| 0             | 0            | 0            | -5.3583704783 |
| -1.2690293214 | 0.2143339979 | 0.9999537652 | -1.2140979582 |
| 2.650087649   | 0.2276274606 | 0.9999537652 | 1.0662842542  |
| -1.0409426418 | 0.9348906388 | 0.9999537652 | 1.6551813817  |
| -1.075154381  | 0.7086016326 | 0.9999537652 | 1.1466305304  |
| 0             | 0            | 0            | -1.1441751338 |
| 2.7933974408  | 0.6948713406 | 0.9999537652 | 1.1396966605  |
| 1.2951345093  | 0.1642799924 | 0.9999537652 | 1.1277171289  |
| 1.6455794001  | 0.5875096234 | 0.9999537652 | -1.5809021445 |
| -1.2183641759 | 0.2048828625 | 0.9999537652 | -1.409190966  |
| 1.0398978461  | 0.7786895577 | 0.9999537652 | 1.4443700226  |
| -1.2146479491 | 0.4365184718 | 0.9999537652 | -1.2963167315 |
| 1.1565716118  | 0.7656411555 | 0.9999537652 | -1.0160919311 |
| 0             | 0            | 0            | 1.2681859003  |
| -1.0495582422 | 0.8967050307 | 0.9999537652 | 1.02194066    |
| -1.4557262146 | 0.4433082788 | 0.9999537652 | -1.0323778846 |
| 25.6372777234 | 0.20637664   | 0.9999537652 | -1.5694163036 |
| 1.1997782402  | 0.3658540217 | 0.9999537652 | -1.1822331645 |
| -1.028547072  | 0.8374286041 | 0.9999537652 | 1.2281193937  |
| 4.5505976667  | 0.5599974468 | 0.9999537652 | -3.382249888  |
| 2.7957660672  | 0.7053732832 | 0.9999537652 | 0             |
| 2.7933974408  | 0.6948713406 | 0.9999537652 | 0             |
| 4.5505976667  | 0.559955282  | 0.9999537652 | 1.5908108123  |
| -1.1528972112 | 0.4614226755 | 0.9999537652 | 1.242496389   |
| 2.0222242291  | 0.0522194841 | 0.9999537652 | 1.3950796117  |
| -1.2169205422 | 0.3215619449 | 0.9999537652 | -1.1211764494 |
| -1.5015849846 | 0.4870187897 | 0.9999537652 | 1.8439942031  |
| -1.374129716  | 0.2142538533 | 0.9999537652 | -1.6992005533 |
| -2.5145521224 | 0.2123343195 | 0.9999537652 | -1.248570001  |
| 1.110865361   | 0.6351870135 | 0.9999537652 | -1.2007690487 |
| -1.0877084206 | 0.836841528  | 0.9999537652 | 1.1388267452  |
| -1.022930803  | 0.9356959145 | 0.9999537652 | -1.1965536073 |
| 1.1737643413  | 0.5257982872 | 0.9999537652 | 1.6395947974  |
| -1.1750224663 | 0.2181997378 | 0.9999537652 | -1.1450381121 |
| -1.2562244706 | 0.1913821449 | 0.9999537652 | -1.3259678528 |
| 2.5559496274  | 0.2823303722 | 0.9999537652 | -1.412904361  |
| 2.7933974408  | 0.6948713406 | 0.9999537652 | 0             |
| -1.3032890847 | 0.2283528612 | 0.9999537652 | -1.3823684937 |
| -1.0466496129 | 0.9269454828 | 0.9999537652 | -1.6804592274 |
| 1.1944930214  | 0.561824779  | 0.9999537652 | 1.2531283311  |
| 1.1208167739  | 0.4310563753 | 0.9999537652 | -1.0912911915 |
| 2.2667759576  | 0.1565270749 | 0.9999537652 | -1.1440764699 |
| 1.1400871961  | 0.486887258  | 0.9999537652 | 1.1171236468  |
| -1.0484758332 | 0.7404669371 | 0.9999537652 | -1.158712681  |
| 1.2024692751  | 0.11488698   | 0.9999537652 | 1.1012093621  |
| -1.586167124  | 0.7106933692 | 0.9999537652 | -1.9383054326 |
| 1.5208253654  | 0.2188386781 | 0.9999537652 | -1.7889873273 |

gene\_expression\_table

|               |              |              |               |
|---------------|--------------|--------------|---------------|
| 0             | 0            | 0            | 0             |
| 2.7933974408  | 0.6948713406 | 0.9999537652 | 4.9527501949  |
| 1.1262768711  | 0.8820374785 | 0.9999537652 | 2.4214437991  |
| -1.0971760565 | 0.7240935216 | 0.9999537652 | 1.0002705924  |
| -1.3302776424 | 0.5715852522 | 0.9999537652 | 1.0812629779  |
| 1.0476525566  | 0.7661785389 | 0.9999537652 | -1.2516077308 |
| 0             | 0            | 0            | 20.5862458385 |
| -2.5838710423 | 0.5189022168 | 0.9999537652 | 12.7732027325 |
| -2.1702133002 | 0.2400058676 | 0.9999537652 | -1.0178965903 |
| -1.5381976543 | 0.0248062011 | 0.9999537652 | -1.2029817889 |
| -1.8543734073 | 0.327231276  | 0.9999537652 | -1.0655113791 |
| 1.9813161731  | 0.1878091287 | 0.9999537652 | -1.0010652393 |
| 1.1173036187  | 0.3838712762 | 0.9999537652 | -1.1383641311 |
| 1.3099269631  | 0.1614494217 | 0.9999537652 | 1.0211011786  |
| -1.0412221126 | 0.7492152322 | 0.9999537652 | -1.1574600751 |
| 1.0891709124  | 0.6429823572 | 0.9999537652 | 1.1310125259  |
| 1.1112840053  | 0.7419993669 | 0.9999537652 | -1.0393822825 |
| 1.2450906471  | 0.7134929081 | 0.9999537652 | -1.2573486479 |
| -1.2208413918 | 0.5088838225 | 0.9999537652 | -2.3103658431 |
| 1.1791628127  | 0.5775372983 | 0.9999537652 | -1.7749289475 |
| 4.5505976667  | 0.5599131367 | 0.9999537652 | -6.4329947745 |
| -1.1927063612 | 0.6486131355 | 0.9999537652 | -1.6373785342 |
| -1.3102553506 | 0.2911977325 | 0.9999537652 | -1.059205827  |
| 1.2837029658  | 0.2452452891 | 0.9999537652 | 1.0131599781  |
| -1.0217868365 | 0.8505900797 | 0.9999537652 | 1.0014588759  |
| 1.3124976847  | 0.3256530702 | 0.9999537652 | -1.0257219525 |
| 1.0178731443  | 0.9716553156 | 0.9999537652 | -1.2930061459 |
| 8.064174035   | 0.4222958674 | 0.9999537652 | -3.3849925178 |
| 1.2580470129  | 0.3730274099 | 0.9999537652 | -1.0192383179 |
| -1.1431736341 | 0.7926921836 | 0.9999537652 | -1.2007824255 |
| -2.1526207025 | 0.009106     | 0.9999537652 | 1.2158092611  |
| 4.5505976667  | 0.5598588711 | 0.9999537652 | 1.6293799659  |
| -1.2033988235 | 0.4615907512 | 0.9999537652 | 1.1024083936  |
| 2.7933974408  | 0.6948713406 | 0.9999537652 | 4.7563522994  |
| -1.1537703343 | 0.4412044283 | 0.9999537652 | -1.1555825015 |
| -1.2590448765 | 0.2134816883 | 0.9999537652 | 1.0937933066  |
| 0             | 0            | 0            | 0             |
| 1.8608089771  | 0.2514551438 | 0.9999537652 | -1.1223546752 |
| 0             | 0            | 0            | 1.2400291296  |
| 1.569331264   | 0.5622617354 | 0.9999537652 | 1.5212920711  |
| 2.7933974408  | 0.6948713406 | 0.9999537652 | -1.4289359629 |
| 2.7957660672  | 0.705375602  | 0.9999537652 | -1.0503901552 |
| -1.4167725316 | 0.1108109033 | 0.9999537652 | -1.0253319425 |
| -1.0664434244 | 0.8017966411 | 0.9999537652 | 1.0715429283  |
| 1.2252166591  | 0.3519119722 | 0.9999537652 | 1.4412840417  |
| 2.7957660672  | 0.7053779218 | 0.9999537652 | 1.64586198    |
| -1.2632342045 | 0.1912828238 | 0.9999537652 | 1.2232620225  |
| -1.0725350922 | 0.7075375353 | 0.9999537652 | 1.3341992583  |
| -1.007893027  | 0.9634127891 | 0.9999537652 | -1.1284028615 |



gene\_expression\_table

|               |              |              |                |
|---------------|--------------|--------------|----------------|
| 2.7933974408  | 0.6948713406 | 0.9999537652 | 1.4519459565   |
| 1.0176403375  | 0.9014011939 | 0.9999537652 | 1.1104674798   |
| -1.2537904993 | 0.4492640358 | 0.9999537652 | -1.1309414623  |
| 1.3212001599  | 0.1271431747 | 0.9999537652 | 1.1729183131   |
| -2.4874599804 | 0.0985140367 | 0.9999537652 | -1.1127358558  |
| 1.147804498   | 0.7481271203 | 0.9999537652 | 1.3282167267   |
| -1.0469105869 | 0.8214398455 | 0.9999537652 | 1.3425712678   |
| 1.4382653442  | 0.0412710827 | 0.9999537652 | -1.1858911589  |
| -1.1180612904 | 0.6580019736 | 0.9999537652 | -1.1473667065  |
| 8.0712632467  | 0.4224823202 | 0.9999537652 | -14.1527912683 |
| -1.3963189647 | 0.2797786231 | 0.9999537652 | -1.0903061024  |
| 1.1029877261  | 0.4859699052 | 0.9999537652 | 1.2700656458   |
| -1.276159903  | 0.6660435593 | 0.9999537652 | 1.2107640399   |
| 1.8760194999  | 0.3716979044 | 0.9999537652 | -1.3224225408  |
| 1.302434794   | 0.2099218319 | 0.9999537652 | 2.2528915636   |
| 0             | 0            | 0            | 10.818785458   |
| -1.5890368905 | 0.1561935953 | 0.9999537652 | -1.1105438951  |
| 1.1823230351  | 0.4804014385 | 0.9999537652 | 1.2614173336   |
| 1.1016992685  | 0.5982343613 | 0.9999537652 | 1.2210499789   |
| -1.3393078441 | 0.1083477069 | 0.9999537652 | 1.1315225758   |
| 9.8291821523  | 0.3811038069 | 0.9999537652 | 1.9220782632   |
| -1.0140128546 | 0.9248168754 | 0.9999537652 | -1.0445368591  |
| -1.0194394823 | 0.9535232858 | 0.9999537652 | -1.0005203963  |
| 11.5766527773 | 0.3454647247 | 0.9999537652 | -1.8664768557  |
| -1.1298429156 | 0.5422616178 | 0.9999537652 | -1.2990942919  |
| 1.4874702342  | 0.0354925444 | 0.9999537652 | 1.0848162035   |
| -1.1304640754 | 0.4530955876 | 0.9999537652 | 1.2689520799   |
| -1.015023794  | 0.9617424478 | 0.9999537652 | -1.071818415   |
| -1.2518750322 | 0.5895440668 | 0.9999537652 | -1.2489737278  |
| -1.2066482828 | 0.1977150416 | 0.9999537652 | -1.1795680277  |
| -1.1680330631 | 0.3161034777 | 0.9999537652 | 1.1945559699   |
| 1.8649006196  | 0.620506401  | 0.9999537652 | 1.2040945368   |
| 1.1614348574  | 0.7337831187 | 0.9999537652 | 1.0130851806   |
| 1.3799976028  | 0.0844200459 | 0.9999537652 | 1.2311569557   |
| -1.1615355103 | 0.8156655765 | 0.9999537652 | 1.3253294644   |
| 0             | 0            | 0            | 2.9988886918   |
| 4.5505976667  | 0.5598045854 | 0.9999537652 | 1.0266237419   |
| -1.4199866313 | 0.009704     | 0.9999537652 | -1.6156900919  |
| 0             | 0            | 0            | 6.914120153    |
| -1.2836946567 | 0.3876729156 | 0.9999537652 | 1.051284174    |
| 13.0741687784 | 0.0107627561 | 0.9999537652 | 1.5297892232   |
| 0             | 0            | 0            | 2.996475627    |
| 4.5544554512  | 0.5691573201 | 0.9999537652 | 1.6460628488   |
| 29.1226294179 | 0.1908491632 | 0.9999537652 | 1.2349846686   |
| 1.0085580205  | 0.9719014407 | 0.9999537652 | -1.0211049779  |
| 1.2432971499  | 0.4441913921 | 0.9999537652 | 1.7959624207   |
| 1.0783948971  | 0.6653394751 | 0.9999537652 | -1.3531986202  |
| 1.006042197   | 0.9872041664 | 0.9999537652 | -1.2786189483  |
| -2.587194901  | 0.5008071247 | 0.9999537652 | 0              |

gene\_expression\_table

|               |              |              |               |
|---------------|--------------|--------------|---------------|
| -1.2414788382 | 0.5283065092 | 0.9999537652 | -1.1212858988 |
| -1.0755885071 | 0.7603678095 | 0.9999537652 | 1.0859322026  |
| -1.1670984831 | 0.8533071017 | 0.9999537652 | -1.1427246333 |
| 1.7803338323  | 0.2993613603 | 0.9999537652 | -1.3205536323 |
| 1.0479669741  | 0.7275551741 | 0.9999537652 | -1.0087746951 |
| -1.1736612603 | 0.7212980005 | 0.9999537652 | -1.0416271711 |
| -1.7093706328 | 0.2551301996 | 0.9999537652 | 1.0985139818  |
| -1.1747320085 | 0.5771403015 | 0.9999537652 | -1.3375701837 |
| -1.110274191  | 0.6839699653 | 0.9999537652 | 1.1559901259  |
| 1.0260974091  | 0.9540061191 | 0.9999537652 | 1.4652110309  |
| 1.4726411111  | 0.015535084  | 0.9999537652 | -1.06727129   |
| 6.3075231393  | 0.4870548453 | 0.9999537652 | 2.996475627   |
| 0             | 0            | 0            | 1.5919129963  |
| 2.8260140473  | 0.18078623   | 0.9999537652 | 2.8650010279  |
| -1.3144441883 | 0.1866894606 | 0.9999537652 | -1.2337913027 |
| 1.3821044394  | 0.7594382286 | 0.9999537652 | -1.2450880572 |
| -1.0790260414 | 0.7381417187 | 0.9999537652 | -1.0581826463 |
| 1.5149376505  | 0.6512923256 | 0.9999537652 | 1.082190931   |
| 1.2827463514  | 0.3970537723 | 0.9999537652 | 1.3313894322  |
| 1.4765643835  | 0.2267293522 | 0.9999537652 | -1.0124565469 |
| 2.7933974408  | 0.6948713406 | 0.9999537652 | 1.5908108123  |
| 2.2953539498  | 0.3499733738 | 0.9999537652 | -1.8255939325 |
| 1.030874123   | 0.9031610281 | 0.9999537652 | -1.4270185394 |
| -1.2682498223 | 0.5784049935 | 0.9999537652 | 1.4132821047  |
| 1.3826309223  | 0.7323555863 | 0.9999537652 | -1.2199128373 |
| 1.0537173575  | 0.6503272345 | 0.9999537652 | 1.1467844088  |
| 1.2984446767  | 0.5053935968 | 0.9999537652 | 1.1011764849  |
| 1.6921527638  | 0.0934683774 | 0.9999537652 | -1.8626091451 |
| 4.5505976667  | 0.559750219  | 0.9999537652 | 0             |
| 1.0619127924  | 0.8439416306 | 0.9999537652 | -1.1273830213 |
| 13.3441949841 | 0.3177049549 | 0.9999537652 | 1.6285845991  |
| 1.8436995528  | 0.0169463878 | 0.9999537652 | 1.4672774015  |
| 1.032470546   | 0.8174750124 | 0.9999537652 | 1.0444101517  |
| -1.1557546193 | 0.5610505449 | 0.9999537652 | 1.0202904168  |
| 2.2828048949  | 0.2761585922 | 0.9999537652 | -1.1323477624 |
| -2.4356048515 | 0.0424513725 | 0.9999537652 | 1.6033706197  |
| 1.3617152416  | 0.8015870432 | 0.9999537652 | 0             |
| -1.0481376142 | 0.7351715364 | 0.9999537652 | 1.0325833828  |
| -1.5106136434 | 0.304074111  | 0.9999537652 | -1.0589727686 |
| 2.7616190797  | 0.1168811574 | 0.9999537652 | -1.1172080901 |
| -4.8154268017 | 0.1712456043 | 0.9999537652 | -1.3406866991 |
| 0             | 0            | 0            | 0             |
| 0             | 0            | 0            | 6.908559683   |
| 1.2092875995  | 0.7354335025 | 0.9999537652 | 1.4431959468  |
| -1.026130559  | 0.9086434867 | 0.9999537652 | 1.0916197813  |
| -1.0045671267 | 0.9794658065 | 0.9999537652 | 1.2874756047  |
| -1.0658187115 | 0.8343305658 | 0.9999537652 | 2.6558491542  |
| -1.1614998763 | 0.877263814  | 0.9999537652 | -1.3460625967 |
| -1.0619892888 | 0.8547593956 | 0.9999537652 | 1.0508833362  |

gene\_expression\_table

|               |              |              |               |
|---------------|--------------|--------------|---------------|
| 1.3098888734  | 0.0310859266 | 0.9999537652 | 1.5811779411  |
| 1.1953624891  | 0.8063911122 | 0.9999537652 | 1.0028935245  |
| 1.1964050001  | 0.3551592326 | 0.9999537652 | 1.0995627442  |
| 1.6189298858  | 0.007904     | 0.9999537652 | 1.1241562773  |
| 1.3954871691  | 0.3158928431 | 0.9999537652 | 1.2532053475  |
| 23.8818846228 | 0.2168921793 | 0.9999537652 | 1.0850143694  |
| -1.0739118031 | 0.6291266811 | 0.9999537652 | 1.0805055683  |
| 1.2497322474  | 0.6610116033 | 0.9999537652 | -1.287783599  |
| 0             | 0            | 0            | 2.996475627   |
| -2.587194901  | 0.5007977106 | 0.9999537652 | 2.996475627   |
| 0             | 0            | 0            | 2.9985540909  |
| 6.3075231393  | 0.4870531411 | 0.9999537652 | 1.0673595208  |
| 2.4919468484  | 0.1073556459 | 0.9999537652 | 1.1687969718  |
| 1.6448587922  | 0.5768369835 | 0.9999537652 | -1.2169768823 |
| 1.0409914384  | 0.8170632415 | 0.9999537652 | -1.0784019888 |
| -1.0319370591 | 0.8437590749 | 0.9999537652 | 1.2431826382  |
| 2.204523133   | 0.0941049187 | 0.9999537652 | -1.0589575765 |
| 1.4619973739  | 0.2420335956 | 0.9999537652 | 1.5346385069  |
| -1.1089990494 | 0.7578364363 | 0.9999537652 | 1.2528476294  |
| 0             | 0            | 0            | 4.9527501949  |
| 1.1584236488  | 0.7979322158 | 0.9999537652 | -1.2550752451 |
| 1.1465825723  | 0.4454769103 | 0.9999537652 | 1.0269561388  |
| 1.1834575741  | 0.6054658473 | 0.9999537652 | 1.2470262599  |
| -6.9736190158 | 0.2250321147 | 0.9999537652 | 24.5408193011 |
| -1.084625365  | 0.6566362132 | 0.9999537652 | 1.2689613162  |
| 2.7933974408  | 0.6948713406 | 0.9999537652 | -5.3583704783 |
| -1.4446988347 | 0.3958219378 | 0.9999537652 | -1.0374074348 |
| 6.3075231393  | 0.4870514369 | 0.9999537652 | 2.996475627   |
| 1.4935445839  | 0.0576373984 | 0.9999537652 | -1.0849732258 |
| 1.41861628    | 0.0676243914 | 0.9999537652 | 1.5218081115  |
| 1.1846288744  | 0.3558529695 | 0.9999537652 | 1.0662368354  |
| -1.0270975892 | 0.9060033342 | 0.9999537652 | 1.3078443889  |
| -1.2897101956 | 0.4485967688 | 0.9999537652 | 1.0024869783  |
| 1.3607552436  | 0.2140643887 | 0.9999537652 | 1.4048944916  |
| -1.2856389565 | 0.3258523473 | 0.9999537652 | 1.1971273964  |
| -1.7024984242 | 0.1940920662 | 0.9999537652 | -9.7565542884 |
| -1.3050033308 | 0.7824877417 | 0.9999537652 | -1.5084403566 |
| 2.7933974408  | 0.6948713406 | 0.9999537652 | 0             |
| 2.7933974408  | 0.6948713406 | 0.9999537652 | 14.7271569203 |
| -2.4915576559 | 0.1318344601 | 0.9999537652 | 1.6945134434  |
| 1.6142330545  | 0.2135737425 | 0.9999537652 | 2.5413342366  |
| -1.7279722953 | 0.0640447823 | 0.9999537652 | 1.1307280711  |
| -1.2318853072 | 0.4318401572 | 0.9999537652 | 1.4703966859  |
| -1.280251943  | 0.2995270005 | 0.9999537652 | 1.0181675417  |
| -1.0168196879 | 0.9312519871 | 0.9999537652 | 1.5591512593  |
| 1.1695753773  | 0.6659147485 | 0.9999537652 | 1.3731133983  |
| 1.0711768141  | 0.8051215872 | 0.9999537652 | 1.1204654083  |
| 1.5144001303  | 0.3007443421 | 0.9999537652 | 1.2645869512  |
| 2.7933974408  | 0.6948713406 | 0.9999537652 | -1.1248877899 |

gene\_expression\_table

|               |              |              |               |
|---------------|--------------|--------------|---------------|
| 0             | 0            | 0            | 0             |
| 7.4739040237  | 0.1008834747 | 0.9999537652 | 1.4385379898  |
| 2.7957660672  | 0.705382564  | 0.9999537652 | 2.996475627   |
| 1.1354804683  | 0.4678744308 | 0.9999537652 | 1.1849753758  |
| 1.5942609845  | 0.6106378183 | 0.9999537652 | -1.414059405  |
| -1.0257731718 | 0.8506330264 | 0.9999537652 | 1.018622023   |
| 1.6428845456  | 0.6267602266 | 0.9999537652 | 1.0586381389  |
| 1.0694480413  | 0.5489916955 | 0.9999537652 | 1.1008047072  |
| 1.6759772247  | 0.3694953536 | 0.9999537652 | 1.6298275237  |
| -1.115698638  | 0.5350801453 | 0.9999537652 | -1.0726029878 |
| 1.2014721249  | 0.3256934717 | 0.9999537652 | 1.2227983415  |
| -1.2145611367 | 0.4411336854 | 0.9999537652 | -1.0425735623 |
| 1.0879572536  | 0.6210504912 | 0.9999537652 | 1.4424972597  |
| 2.1954222178  | 0.2920136428 | 0.9999537652 | 1.4794741436  |
| -1.7146188266 | 0.4972625953 | 0.9999537652 | -2.1976334226 |
| 1.0410102632  | 0.8230558291 | 0.9999537652 | -1.050878895  |
| 1.2221108119  | 0.2390877421 | 0.9999537652 | 1.4841516106  |
| -1.0784794388 | 0.7736953054 | 0.9999537652 | 1.1381874685  |
| 1.4552917288  | 0.3968888521 | 0.9999537652 | 2.1180141103  |
| 0             | 0            | 0            | 0             |
| 1.4679613063  | 0.4730028445 | 0.9999537652 | 1.5086458818  |
| 0             | 0            | 0            | 8.8639046058  |
| -1.2483357725 | 0.4737498379 | 0.9999537652 | 2.5023645444  |
| 1.0141721246  | 0.9650035863 | 0.9999537652 | 1.0777669409  |
| 1.1958263013  | 0.5048745871 | 0.9999537652 | 1.1374552277  |
| 0             | 0            | 0            | 14.7271569203 |
| -1.030824928  | 0.9252365898 | 0.9999537652 | 1.6709039948  |
| -1.2397868203 | 0.4499344227 | 0.9999537652 | 1.7624090547  |
| -1.2531250398 | 0.5262415523 | 0.9999537652 | 1.1339915098  |
| -1.1672564259 | 0.5168900938 | 0.9999537652 | 1.4812202009  |
| -1.184478038  | 0.6535250826 | 0.9999537652 | 2.0485684246  |
| 1.4798117838  | 0.4940719948 | 0.9999537652 | -2.7981159234 |
| -1.4898977885 | 0.0286162544 | 0.9999537652 | 1.0925445727  |
| -1.0340229824 | 0.8661478714 | 0.9999537652 | 1.2094198834  |
| -1.2663866006 | 0.5706163133 | 0.9999537652 | 1.2987140329  |
| 1.7095073648  | 0.1045661774 | 0.9999537652 | -1.0391483365 |
| -1.1118107884 | 0.6112349489 | 0.9999537652 | 1.2383859598  |
| 1.5895477496  | 0.3448386985 | 0.9999537652 | 1.1172165601  |
| 2.7933974408  | 0.6948713406 | 0.9999537652 | 0             |
| 0             | 0            | 0            | 0             |
| 2.2227236654  | 0.5576122896 | 0.9999537652 | 0             |
| 2.8768322695  | 0.0291807398 | 0.9999537652 | -1.2255416612 |
| -2.5976911622 | 0.1594346616 | 0.9999537652 | 1.3516549241  |
| 0             | 0            | 0            | 2.996475627   |
| -1.2978421103 | 0.2894903171 | 0.9999537652 | 1.1495916509  |
| 4.5505976667  | 0.559695704  | 0.9999537652 | -5.3583704783 |
| -1.1747706321 | 0.3898511878 | 0.9999537652 | -1.1894732148 |
| 1.0758834867  | 0.6972059346 | 0.9999537652 | 1.340161908   |
| 2.5517619419  | 0.2269258556 | 0.9999537652 | 1.0272257233  |

gene\_expression\_table

|                |              |              |               |
|----------------|--------------|--------------|---------------|
| -1.0303494681  | 0.8884525785 | 0.9999537652 | -1.0368403734 |
| -1.0361955495  | 0.8319243115 | 0.9999537652 | 1.2208108843  |
| 0              | 0            | 0            | 2.9985540909  |
| 1.1871740561   | 0.5158939589 | 0.9999537652 | 1.4654860365  |
| 2.7933974408   | 0.6948713406 | 0.9999537652 | 0             |
| -1.6557166718  | 0.1237841544 | 0.9999537652 | 1.0612621008  |
| -1.2583961502  | 0.3373695513 | 0.9999537652 | -1.0160670569 |
| -1.0368692941  | 0.9058106607 | 0.9999537652 | 2.5600627597  |
| 2.8173722589   | 0.3577669978 | 0.9999537652 | 3.2657224158  |
| 1.292117439    | 0.3895562168 | 0.9999537652 | -1.0873510868 |
| -1.0579833113  | 0.8032974766 | 0.9999537652 | -1.316764095  |
| 1.3463065368   | 0.6532398128 | 0.9999537652 | 1.0299959472  |
| -1.6551555364  | 0.0376752247 | 0.9999537652 | -1.2919935564 |
| 4.5505976667   | 0.5596409618 | 0.9999537652 | 8.8639046058  |
| 1.0818835795   | 0.6677691656 | 0.9999537652 | 1.8421840903  |
| -1.7229869003  | 0.4597035638 | 0.9999537652 | -2.6858283977 |
| 1.0827232528   | 0.8634039461 | 0.9999537652 | 1.3893212658  |
| 0              | 0            | 0            | 0             |
| 1.0093397137   | 0.9537317867 | 0.9999537652 | -1.0217636661 |
| 2.3315363418   | 0.4580941801 | 0.9999537652 | 2.4453271239  |
| 1.0868403168   | 0.7234174556 | 0.9999537652 | -1.2757967611 |
| 0              | 0            | 0            | -1.859280336  |
| 0              | 0            | 0            | 2.996475627   |
| 1.1155984297   | 0.472272975  | 0.9999537652 | -1.1354989886 |
| -1.3199211939  | 0.2972133226 | 0.9999537652 | -1.078347745  |
| 3.0589901989   | 0.3341132581 | 0.9999537652 | -1.3488041533 |
| 1.1572993515   | 0.7071639474 | 0.9999537652 | -1.1346529096 |
| -1.382285147   | 0.0787101672 | 0.9999537652 | -1.3001581672 |
| -1.1422376038  | 0.8030979454 | 0.9999537652 | 1.1632513483  |
| -1.1267842075  | 0.4323671983 | 0.9999537652 | 1.3593533866  |
| 4.5544554512   | 0.5691553252 | 0.9999537652 | 1.0358397119  |
| -1.1604425563  | 0.6587895713 | 0.9999537652 | 1.7214224153  |
| -1.1838720538  | 0.3588832457 | 0.9999537652 | -1.0654018702 |
| 1.2690034822   | 0.2546383057 | 0.9999537652 | 1.0968004623  |
| 1.389810412    | 0.2593260076 | 0.9999537652 | 1.0281511403  |
| 1.1684024639   | 0.4104425792 | 0.9999537652 | -1.0478873443 |
| 2.7957660672   | 0.7053848865 | 0.9999537652 | 10.818785458  |
| 2.7933974408   | 0.6948713406 | 0.9999537652 | 6.9133480437  |
| -15.9195842901 | 0.1130415848 | 0.9999537652 | -1.6167962027 |
| 1.0327599746   | 0.8531335432 | 0.9999537652 | -1.016293876  |
| -1.194665787   | 0.1308004239 | 0.9999537652 | -1.0239909659 |
| 1.1044813232   | 0.7122981519 | 0.9999537652 | -1.1346351671 |
| 8.064174035    | 0.4225054603 | 0.9999537652 | 2.9992223802  |
| 0              | 0            | 0            | 0             |
| -1.1219188376  | 0.4504998474 | 0.9999537652 | 1.1542105478  |
| 2.7933974408   | 0.6948713406 | 0.9999537652 | 0             |
| -1.7511065395  | 0.2293591058 | 0.9999537652 | -1.960470516  |
| -1.1395341593  | 0.5365984201 | 0.9999537652 | 1.3024494827  |
| -2.6355394971  | 0.2445686686 | 0.9999537652 | 1.4629057285  |

gene\_expression\_table

|               |              |              |               |
|---------------|--------------|--------------|---------------|
| 9.8205505243  | 0.3808413552 | 0.9999537652 | -1.1522914685 |
| -1.1430737555 | 0.6687740403 | 0.9999537652 | 1.4717456185  |
| 1.1736721022  | 0.2398222703 | 0.9999537652 | 1.115669794   |
| -1.2022466431 | 0.5416265927 | 0.9999537652 | -1.4135047979 |
| -1.0895171574 | 0.8001718146 | 0.9999537652 | -1.0909179045 |
| 23.8818846228 | 0.2168824291 | 0.9999537652 | 4.1512667769  |
| 2.7933974408  | 0.6948713406 | 0.9999537652 | -2.9690502285 |
| -1.1709096732 | 0.3311014877 | 0.9999537652 | 1.1314176841  |
| 1.6399788653  | 0.3024962241 | 0.9999537652 | -1.2676948642 |
| -1.2510739195 | 0.5808061699 | 0.9999537652 | -1.0545601298 |
| -1.0088863782 | 0.9692620277 | 0.9999537652 | 1.0019225444  |
| -1.5602271121 | 0.1472201228 | 0.9999537652 | 1.0845924443  |
| 1.4675489498  | 0.2685988532 | 0.9999537652 | 1.4115718519  |
| 15.1008094413 | 0.2915509966 | 0.9999537652 | -2.2054639418 |
| -1.0938584153 | 0.7165638662 | 0.9999537652 | -1.0145832446 |
| -1.2943981539 | 0.4663898718 | 0.9999537652 | 1.1915601161  |
| -1.0214154392 | 0.9189433686 | 0.9999537652 | 1.0852678531  |
| 15.0880352532 | 0.2955162311 | 0.9999537652 | -1.6597328868 |
| -1.2270945    | 0.2026598256 | 0.9999537652 | 1.0185318626  |
| -1.088957945  | 0.6606867548 | 0.9999537652 | 1.3566278423  |
| -2.5838710423 | 0.5188528616 | 0.9999537652 | 2.0319787781  |
| -1.4800942427 | 0.0736094667 | 0.9999537652 | -1.0540937473 |
| -1.1119527526 | 0.4396828756 | 0.9999537652 | -1.1525763939 |
| -1.6371610311 | 0.0550098302 | 0.9999537652 | 1.1773357628  |
| 2.6918713088  | 0.2731993713 | 0.9999537652 | 4.1560582013  |
| 1.0923581991  | 0.6955364554 | 0.9999537652 | 1.4620188002  |
| -1.5310262465 | 0.0520589563 | 0.9999537652 | -1.0507591584 |
| -1.1005046685 | 0.7965256409 | 0.9999537652 | 1.2106318225  |
| -3.1152970666 | 0.2480298036 | 0.9999537652 | 1.5350521141  |
| 1.2344205867  | 0.1914179599 | 0.9999537652 | -1.1569312494 |
| 1.167723567   | 0.5308868582 | 0.9999537652 | 1.1592070029  |
| 1.9272397791  | 0.3803191445 | 0.9999537652 | -1.3645532167 |
| 2.3315363418  | 0.4567770889 | 0.9999537652 | -1.1248877899 |
| 1.9059795869  | 0.473972393  | 0.9999537652 | -1.2595285394 |
| -1.5873039391 | 0.0218276461 | 0.9999537652 | -1.1106016836 |
| 2.3698151166  | 0.2853082968 | 0.9999537652 | -1.4853269632 |
| 1.6976262464  | 0.009697     | 0.9999537652 | 1.0353252981  |
| 1.1703747636  | 0.3398281469 | 0.9999537652 | 1.3329693463  |
| 1.238159275   | 0.5551768418 | 0.9999537652 | 1.2532777712  |
| -1.328381226  | 0.1224988626 | 0.9999537652 | 1.175568096   |
| 1.3511752896  | 0.5440306657 | 0.9999537652 | -1.6015263356 |
| 2.7933974408  | 0.6948713406 | 0.9999537652 | 0             |
| -1.0667442002 | 0.8033340283 | 0.9999537652 | 1.2413603202  |
| 1.6606903217  | 0.4967398022 | 0.9999537652 | 1.5872604488  |
| -1.0073036916 | 0.9689431355 | 0.9999537652 | 1.1771766201  |
| -1.2419142083 | 0.3819559565 | 0.9999537652 | -1.0388671897 |
| 1.1513292902  | 0.4312894332 | 0.9999537652 | 1.245949871   |
| -1.0933774438 | 0.8895755447 | 0.9999537652 | -1.0678306391 |
| -1.0685380045 | 0.9372864963 | 0.9999537652 | 1.3057138888  |

gene\_expression\_table

|                |              |              |               |
|----------------|--------------|--------------|---------------|
| 1.0341361492   | 0.9526081129 | 0.9999537652 | -2.0885294094 |
| 112.9073396958 | 0.0649398267 | 0.9999537652 | -1.8985187394 |
| -3.2098360912  | 0.2200962863 | 0.9999537652 | -1.2278585504 |
| 3.7919141877   | 0.228766703  | 0.9999537652 | 1.2373582818  |
| -1.1594970587  | 0.8783085982 | 0.9999537652 | 1.6466246098  |
| -2.4044862812  | 0.2648188345 | 0.9999537652 | -3.7220275797 |
| 23.8826459185  | 0.2176242361 | 0.9999537652 | -1.2906233813 |
| 1.1707538763   | 0.6226017438 | 0.9999537652 | 1.1378819462  |
| -1.011833847   | 0.9616682405 | 0.9999537652 | -1.1017259164 |
| 1.2048227046   | 0.7536216831 | 0.9999537652 | -1.8697075327 |
| -1.325824447   | 0.5096375692 | 0.9999537652 | 1.2994531956  |
| 0              | 0            | 0            | -4.9108225367 |
| -1.1437325324  | 0.6574904458 | 0.9999537652 | 1.17009039    |
| 0              | 0            | 0            | -1.8594983184 |
| 1.2321987391   | 0.4591366571 | 0.9999537652 | 1.4796091919  |
| 1.2971825433   | 0.5670604537 | 0.9999537652 | -1.1941032272 |
| 11.5766527773  | 0.3454765732 | 0.9999537652 | -2.0119450672 |
| 11.5864583426  | 0.3448684039 | 0.9999537652 | 1.5859005182  |
| 1.0747047708   | 0.8914319431 | 0.9999537652 | -1.4266907893 |
| 1.0394940749   | 0.8290192082 | 0.9999537652 | 1.0148320803  |
| -2.3428050596  | 0.1474409311 | 0.9999537652 | -1.718491221  |
| -1.3143853396  | 0.6624878778 | 0.9999537652 | 1.9983008022  |
| -1.3961564483  | 0.0767240403 | 0.9999537652 | -1.0914937607 |
| 1.0478408518   | 0.839768706  | 0.9999537652 | -1.1628200171 |
| -1.1728577642  | 0.5775496791 | 0.9999537652 | -1.4629399511 |
| -1.0361505987  | 0.9017837679 | 0.9999537652 | -1.1315328619 |
| -3.120470419   | 0.2651849967 | 0.9999537652 | 9.7116702472  |
| 1.017951084    | 0.9418471051 | 0.9999537652 | -1.0020795099 |
| -1.0081523277  | 0.9537078973 | 0.9999537652 | -1.135210397  |
| -1.2318260166  | 0.403425163  | 0.9999537652 | 1.0618776247  |
| 1.5827734148   | 0.1191105714 | 0.9999537652 | -1.0643980444 |
| -1.3691511916  | 0.766059705  | 0.9999537652 | 1.6253455238  |
| 1.5935386712   | 0.0117085857 | 0.9999537652 | -1.0147370719 |
| 6.3075231393   | 0.4870497328 | 0.9999537652 | 1.3991459716  |
| 6.3075231393   | 0.4870480286 | 0.9999537652 | 15.7262184124 |
| 0              | 0            | 0            | -5.3608259368 |
| -1.8340501382  | 0.1459517743 | 0.9999537652 | -1.6536525323 |
| 1.0535144626   | 0.8961220952 | 0.9999537652 | -1.1542382793 |
| -1.0043977703  | 0.9769109598 | 0.9999537652 | 1.0190413348  |
| -1.8204008393  | 0.2668342798 | 0.9999537652 | -2.5827393065 |
| 1.0101997367   | 0.9762612135 | 0.9999537652 | -1.3356925267 |
| -1.02842598    | 0.9337745143 | 0.9999537652 | 1.0303129129  |
| -1.2792313791  | 0.6879427774 | 0.9999537652 | 1.3671110933  |
| 1.092247477    | 0.6463548061 | 0.9999537652 | -1.0156153632 |
| 1.0938517453   | 0.9120019487 | 0.9999537652 | 1.4272116761  |
| -2.6401633109  | 0.1672261647 | 0.9999537652 | 2.1787326106  |
| 1.1786656655   | 0.7285781898 | 0.9999537652 | -1.0305682403 |
| 2.9933797697   | 0.1706009253 | 0.9999537652 | 1.2743776568  |
| -1.1785641661  | 0.6995857337 | 0.9999537652 | -1.3583915205 |

gene\_expression\_table

|               |              |              |               |
|---------------|--------------|--------------|---------------|
| 1.0420921493  | 0.9687392597 | 0.9999537652 | 3.3963062689  |
| 1.2723625174  | 0.4909201602 | 0.9999537652 | -1.3772097969 |
| -1.3215743889 | 0.4783728684 | 0.9999537652 | -1.2469959719 |
| 9.8205505243  | 0.3808412115 | 0.9999537652 | -2.2636076395 |
| 1.0291362451  | 0.9155229121 | 0.9999537652 | -1.0987470635 |
| -1.7421110952 | 0.3631793379 | 0.9999537652 | -1.5395536011 |
| -1.5347763257 | 0.5933331253 | 0.9999537652 | 0             |
| 1.2542903488  | 0.8053864093 | 0.9999537652 | 0             |
| 1.1172293767  | 0.9254265261 | 0.9999537652 | 4.9527501949  |
| -1.2491488311 | 0.5574291752 | 0.9999537652 | -1.1842014001 |
| -1.126648491  | 0.7431041456 | 0.9999537652 | -1.3677157312 |
| -3.119124118  | 0.2337220357 | 0.9999537652 | 4.9527501949  |
| -1.4756779277 | 0.644761308  | 0.9999537652 | 2.9985540909  |
| 1.5422760074  | 0.4459778168 | 0.9999537652 | -1.2092759065 |
| -1.8321015168 | 0.1420815492 | 0.9999537652 | -1.2888749872 |
| 11.5766527773 | 0.3455074627 | 0.9999537652 | 8.8700459102  |
| 1.3265655997  | 0.6051157694 | 0.9999537652 | -1.17020599   |
| 1.0668745317  | 0.7743134951 | 0.9999537652 | -1.1966071074 |
| 1.7745951127  | 0.53884114   | 0.9999537652 | 1.3243823553  |
| -1.1780799409 | 0.7732742336 | 0.9999537652 | 2.0989270987  |
| -1.2320688955 | 0.5270123505 | 0.9999537652 | -1.010720354  |
| 1.2091276469  | 0.1795445599 | 0.9999537652 | -1.0853110265 |
| -1.0882457414 | 0.4934019698 | 0.9999537652 | 1.2248373959  |
| 30.8757261591 | 0.1833375354 | 0.9999537652 | 1.4455173915  |
| 1.4672043133  | 0.005657     | 0.9999537652 | -1.2704860016 |
| 20.3530564257 | 0.2435958385 | 0.9999537652 | 1.1417431999  |
| 0             | 0            | 0            | -1.6585837467 |
| -1.0941118227 | 0.5832828179 | 0.9999537652 | -1.0703149415 |
| 1.0765250201  | 0.7319412868 | 0.9999537652 | -1.5799490508 |
| -1.1865218343 | 0.3772879949 | 0.9999537652 | 1.0950008656  |
| -1.2994208831 | 0.4773778757 | 0.9999537652 | -1.0940315701 |
| 2.0381335646  | 0.4031621962 | 0.9999537652 | -1.762193025  |
| 20.3709255077 | 0.2404988473 | 0.9999537652 | -1.272423596  |
| 2.7933974408  | 0.6948713406 | 0.9999537652 | 0             |
| -1.0840364949 | 0.5515923564 | 0.9999537652 | -1.4468182126 |
| 1.1620873508  | 0.3028411669 | 0.9999537652 | 1.183621985   |
| 1.3481381979  | 0.3097278649 | 0.9999537652 | 1.1128731016  |
| 1.1216193189  | 0.6526605599 | 0.9999537652 | 1.5932899643  |
| 2.0885615936  | 0.5182581982 | 0.9999537652 | 2.1115841666  |
| 1.0143250012  | 0.9604728342 | 0.9999537652 | -1.1943810977 |
| 1.207641835   | 0.4533883125 | 0.9999537652 | -1.4676183345 |
| -1.1477894728 | 0.6750100443 | 0.9999537652 | 1.4093216918  |
| 4.528904208   | 0.0699050533 | 0.9999537652 | 2.5265852226  |
| -1.1727457626 | 0.813025756  | 0.9999537652 | -1.8226439191 |
| -1.3926047059 | 0.1506739222 | 0.9999537652 | 1.050923712   |
| -3.2671212482 | 0.1585469027 | 0.9999537652 | -1.1025970582 |
| 1.3276900376  | 0.1359833624 | 0.9999537652 | -1.0093255066 |
| 1.1655980979  | 0.6097461559 | 0.9999537652 | 1.6285133308  |
| 8.064174035   | 0.4227167532 | 0.9999537652 | -5.3608259368 |



gene\_expression\_table

|               |              |              |                |
|---------------|--------------|--------------|----------------|
| -1.2859869419 | 0.3146373523 | 0.9999537652 | 1.0608129519   |
| -2.10905182   | 0.4746266164 | 0.9999537652 | -1.1627130392  |
| 1.7732441546  | 0.5688915525 | 0.9999537652 | -27.7543447711 |
| 1.3039771927  | 0.649634093  | 0.9999537652 | -1.4333628253  |
| 0             | 0            | 0            | 83.9572092248  |
| 1.1206202914  | 0.6547322374 | 0.9999537652 | 1.11154671     |
| 1.6018473574  | 0.6931155549 | 0.9999537652 | -9.7542681481  |
| 1.1783339214  | 0.3175377245 | 0.9999537652 | -1.171675518   |
| -1.189138865  | 0.4224313395 | 0.9999537652 | 1.1288834106   |
| 1.0335374958  | 0.8379910159 | 0.9999537652 | 1.0963315098   |
| -1.0089574802 | 0.9821922527 | 0.9999537652 | -1.0692080637  |
| -1.4955709411 | 0.0962424356 | 0.9999537652 | -1.4392652199  |
| -1.2555610833 | 0.5051807848 | 0.9999537652 | -1.065818815   |
| 0             | 0            | 0            | 4.9527501949   |
| 1.3133995489  | 0.0470352353 | 0.9999537652 | 1.0467710429   |
| 1.0558685248  | 0.8227057087 | 0.9999537652 | -1.2838626807  |
| 6.3075231393  | 0.4870463245 | 0.9999537652 | 1.569400479    |
| 1.8471118167  | 0.5844285823 | 0.9999537652 | 1.1338167742   |
| -1.0751526887 | 0.7380383325 | 0.9999537652 | -1.0425585607  |
| 0             | 0            | 0            | 2.996475627    |
| 1.3294970916  | 0.0735333983 | 0.9999537652 | -1.1636290812  |
| -5.5280856191 | 0.0261108481 | 0.9999537652 | -2.7485376566  |
| -1.0468430487 | 0.9362589568 | 0.9999537652 | -1.0013269045  |
| 0             | 0            | 0            | 2.996475627    |
| 2.7957660672  | 0.7053872099 | 0.9999537652 | 0              |
| 1.051061108   | 0.804894     | 0.9999537652 | -1.0390227343  |
| -1.1782328014 | 0.3651811946 | 0.9999537652 | -1.0338955768  |
| 1.1015508841  | 0.4355816496 | 0.9999537652 | -1.1880585484  |
| 0             | 0            | 0            | -3.3849925178  |
| 0             | 0            | 0            | 9.7116702472   |
| -1.3917747917 | 0.6964805593 | 0.9999537652 | 6.1630209487   |
| -1.3425706498 | 0.025780769  | 0.9999537652 | 1.1330308067   |
| 0             | 0            | 0            | 4.9527501949   |
| 1.0790848001  | 0.6737138597 | 0.9999537652 | 1.8534401227   |
| 1.0359384084  | 0.773673456  | 0.9999537652 | -1.019125305   |
| 1.3826309223  | 0.7327639894 | 0.9999537652 | -2.7873245155  |
| 1.0647461547  | 0.5992467491 | 0.9999537652 | -1.2752052612  |
| 25.6380955075 | 0.2075470826 | 0.9999537652 | 1.9281410065   |
| 9.8291821523  | 0.3810915107 | 0.9999537652 | -1.5098301937  |
| -2.5861438062 | 0.4446475004 | 0.9999537652 | 1.2400291296   |
| 1.5089100509  | 0.4338951187 | 0.9999537652 | 1.1864416124   |
| -1.9040183652 | 0.3839748904 | 0.9999537652 | -1.0017830005  |
| -1.3327742757 | 0.0387306432 | 0.9999537652 | -1.3467134356  |
| -1.0341074793 | 0.853337016  | 0.9999537652 | -1.3965668626  |
| 1.0003591822  | 0.997883287  | 0.9999537652 | 1.2600550135   |
| 3.0794952153  | 0.1796259702 | 0.9999537652 | -2.0354068982  |
| 1.1345301145  | 0.844341838  | 0.9999537652 | -1.0496824516  |
| 1.1255502721  | 0.5301552925 | 0.9999537652 | 1.0852503975   |
| -1.2300867032 | 0.3726619362 | 0.9999537652 | -1.2389420537  |

gene\_expression\_table

|               |              |              |               |
|---------------|--------------|--------------|---------------|
| 1.0788623646  | 0.8794621638 | 0.9999537652 | 2.2980242085  |
| 1.3394887056  | 0.1102020151 | 0.9999537652 | 1.1391669937  |
| -1.1415884534 | 0.7675508606 | 0.9999537652 | -1.1328333233 |
| 1.0794225454  | 0.5672117116 | 0.9999537652 | 1.0064095132  |
| 1.6522734637  | 0.057183709  | 0.9999537652 | 1.0858691071  |
| 1.084383624   | 0.5121245755 | 0.9999537652 | 1.2692455646  |
| -1.4153881263 | 0.1975966584 | 0.9999537652 | 1.0222409221  |
| -1.0218756188 | 0.8556216969 | 0.9999537652 | 1.0039705875  |
| 11.5766527773 | 0.3455384703 | 0.9999537652 | 18.6336779883 |
| 1.0390043702  | 0.7710857835 | 0.9999537652 | -1.0031324896 |
| -1.0628412383 | 0.7264332049 | 0.9999537652 | -1.048172647  |
| 1.0166008243  | 0.9282972033 | 0.9999537652 | 1.0325175065  |
| -1.5855465301 | 0.3180011641 | 0.9999537652 | 1.1942361679  |
| 1.0409391126  | 0.768374111  | 0.9999537652 | 1.0453074768  |
| 1.579545244   | 0.2498326164 | 0.9999537652 | 1.0564115018  |
| -2.5861438062 | 0.4501841952 | 0.9999537652 | 2.996475627   |
| -1.0563241977 | 0.7591747823 | 0.9999537652 | -1.155524654  |
| 0             | 0            | 0            | 2.9985540909  |
| -1.0573600669 | 0.6662488922 | 0.9999537652 | -1.1510141561 |
| 2.7957660672  | 0.7053895343 | 0.9999537652 | -2.5807221064 |
| -1.1107000559 | 0.4644028316 | 0.9999537652 | -1.2892288294 |
| 1.3443356233  | 0.346104978  | 0.9999537652 | 1.105497907   |
| -1.004909125  | 0.9835643911 | 0.9999537652 | -1.3076347655 |
| 1.3484562641  | 0.2026024793 | 0.9999537652 | -1.0983995869 |
| 1.8364642969  | 0.2597307992 | 0.9999537652 | -1.452826495  |
| 1.2160518684  | 0.1192874401 | 0.9999537652 | 1.0476557467  |
| 1.2138738476  | 0.3051518693 | 0.9999537652 | -1.338622924  |
| -1.7812510556 | 0.0830064742 | 0.9999537652 | -1.1225022772 |
| 2.7933974408  | 0.6948713406 | 0.9999537652 | -3.7629410475 |
| 1.342790253   | 0.6796736288 | 0.9999537652 | -1.4216390073 |
| 1.4284792189  | 0.0315027693 | 0.9999537652 | -1.3989947955 |
| 1.2991846931  | 0.6306880951 | 0.9999537652 | -1.0879012925 |
| 1.9981836368  | 0.1976536902 | 0.9999537652 | 1.0508398566  |
| -3.1179374904 | 0.257589356  | 0.9999537652 | 1.0665314776  |
| 1.2618189434  | 0.3041374506 | 0.9999537652 | 1.2072502091  |
| 1.0970898789  | 0.5180068888 | 0.9999537652 | -1.1744185741 |
| 1.1551208739  | 0.3288301413 | 0.9999537652 | 1.1924035104  |
| -1.5367922295 | 0.6209588228 | 0.9999537652 | 1.3364870474  |
| 1.1946467681  | 0.680873746  | 0.9999537652 | -1.2001404617 |
| 1.7475447163  | 0.468448536  | 0.9999537652 | -1.5028658085 |
| -1.1197848744 | 0.6104874384 | 0.9999537652 | -1.1217392901 |
| 1.3390279474  | 0.4319407938 | 0.9999537652 | -1.323104021  |
| -1.0577719468 | 0.890274283  | 0.9999537652 | -1.1567552283 |
| -1.0272066817 | 0.8812683978 | 0.9999537652 | -1.3622086292 |
| -1.2636756559 | 0.3907945023 | 0.9999537652 | -1.1097801682 |
| 1.7343571244  | 0.4255056415 | 0.9999537652 | -1.1299049042 |
| -1.2701996041 | 0.2045269255 | 0.9999537652 | -1.4568672711 |
| 1.0352042491  | 0.8553562721 | 0.9999537652 | 1.0187834857  |
| 1.423187655   | 0.2793290155 | 0.9999537652 | -1.1708696749 |

gene\_expression\_table

|               |              |              |               |
|---------------|--------------|--------------|---------------|
| -1.1205933125 | 0.5379368142 | 0.9999537652 | -1.0318918388 |
| -1.0018218711 | 0.9929438781 | 0.9999537652 | 1.0236265405  |
| -1.0474194693 | 0.7766556501 | 0.9999537652 | -1.2597779457 |
| -1.1136379061 | 0.4812646927 | 0.9999537652 | 1.0414318029  |
| -1.1027274396 | 0.6936229977 | 0.9999537652 | -1.0119300714 |
| 0             | 0            | 0            | -2.0425384369 |
| -1.0517744207 | 0.8718434304 | 0.9999537652 | 1.6527729294  |
| -1.0887237807 | 0.6593208013 | 0.9999537652 | -1.0007070338 |
| -1.0787425903 | 0.6930038455 | 0.9999537652 | 1.0947865009  |
| 1.0206564818  | 0.8822022119 | 0.9999537652 | -1.0244041443 |
| 1.0853228233  | 0.7939559592 | 0.9999537652 | -1.1100074999 |
| -1.1766524626 | 0.3728594536 | 0.9999537652 | 1.3536092118  |
| -1.2805460531 | 0.7218219266 | 0.9999537652 | 1.1535823687  |
| 1.1156383778  | 0.4293971664 | 0.9999537652 | -1.185562208  |
| 1.1289659924  | 0.8076712967 | 0.9999537652 | -1.0676368212 |
| -1.1066845452 | 0.6769625052 | 0.9999537652 | -1.3386629358 |
| -1.0730234155 | 0.7481589473 | 0.9999537652 | 1.0175085635  |
| -1.6659978101 | 0.6171778111 | 0.9999537652 | -1.3272544584 |
| -1.2658245094 | 0.5610923058 | 0.9999537652 | 1.1141524631  |
| -1.0649744804 | 0.7913926884 | 0.9999537652 | -1.5631736917 |
| 1.1928884055  | 0.7919968788 | 0.9999537652 | 1.2554401713  |
| 1.0048203054  | 0.986131674  | 0.9999537652 | -1.7854834287 |
| -1.277130025  | 0.0613503549 | 0.9999537652 | -1.1772301363 |
| -1.5023225118 | 0.48592112   | 0.9999537652 | 1.402380423   |
| 2.5592477755  | 0.2796920273 | 0.9999537652 | -1.4581849019 |
| 1.011238394   | 0.9599371787 | 0.9999537652 | -1.1343988689 |
| 1.2131456072  | 0.678409366  | 0.9999537652 | -1.2917506888 |
| -1.1473356941 | 0.3283676764 | 0.9999537652 | 1.163987552   |
| -1.2525738931 | 0.6840686714 | 0.9999537652 | 46.0227597074 |
| 13.3441949841 | 0.3177140183 | 0.9999537652 | -1.9672204454 |
| -1.1026217154 | 0.8826320874 | 0.9999537652 | -1.0588964999 |
| 1.2516202231  | 0.8309576897 | 0.9999537652 | -3.6575338339 |
| -1.1354652942 | 0.3872190737 | 0.9999537652 | 1.1339114455  |
| 1.4883588481  | 0.3864822928 | 0.9999537652 | -1.4035149583 |
| -1.0094207738 | 0.9608138064 | 0.9999537652 | -1.0804410877 |
| 1.0330887906  | 0.7934589992 | 0.9999537652 | 1.0072904498  |
| -1.4146200267 | 0.2632389392 | 0.9999537652 | 1.1059138662  |
| 1.662563624   | 0.1222070965 | 0.9999537652 | 1.122450923   |
| 4.5505976667  | 0.5595859049 | 0.9999537652 | -4.9102474202 |
| 0             | 0            | 0            | 6.914120153   |
| 0             | 0            | 0            | 1.2400291296  |
| 1.0169427395  | 0.979217399  | 0.9999537652 | -1.6992246588 |
| -2.0880518127 | 0.1338014647 | 0.9999537652 | 1.9068523787  |
| 3.8622037496  | 0.6197859473 | 0.9999537652 | 0             |
| 2.7933974408  | 0.6948713406 | 0.9999537652 | 0             |
| 2.0171694328  | 0.3557744633 | 0.9999537652 | 3.3948931521  |
| 13.3324809638 | 0.3187265067 | 0.9999537652 | 0             |
| -2.5861438062 | 0.4554367588 | 0.9999537652 | -1.859280336  |
| 1.1706961862  | 0.8143413385 | 0.9999537652 | 2.6430925766  |

gene\_expression\_table

|               |              |              |               |
|---------------|--------------|--------------|---------------|
| 0             | 0            | 0            | 0             |
| 1.1346775939  | 0.4071429061 | 0.9999537652 | 1.0740490608  |
| 1.1791283763  | 0.8306029758 | 0.9999537652 | -1.8657462831 |
| -1.0103033074 | 0.955704898  | 0.9999537652 | 1.2490703609  |
| 1.1612873439  | 0.7871092903 | 0.9999537652 | -2.0479626835 |
| -1.0184855781 | 0.9218813    | 0.9999537652 | -1.3112054494 |
| 6.3128691894  | 0.4820668695 | 0.9999537652 | 2.9985540909  |
| 1.0963928122  | 0.8798714834 | 0.9999537652 | 1.1516208978  |
| 0             | 0            | 0            | 4.3957515041  |
| -6.9764533263 | 0.2590282316 | 0.9999537652 | -1.3598304575 |
| 1.3125770724  | 0.0462317594 | 0.9999537652 | -1.443872876  |
| 0             | 0            | 0            | 2.9985540909  |
| 1.2117843243  | 0.4198468967 | 0.9999537652 | 1.0756332046  |
| -1.2378656322 | 0.6962665807 | 0.9999537652 | -1.3364717659 |
| 1.8447991669  | 0.6001207281 | 0.9999537652 | 8.8700459102  |
| 1.3747331495  | 0.1762744558 | 0.9999537652 | 1.0901315896  |
| 1.2382880807  | 0.2810921441 | 0.9999537652 | -1.2362746027 |
| -1.0944189448 | 0.6562795995 | 0.9999537652 | -1.1160305038 |
| 1.1245065018  | 0.4359400628 | 0.9999537652 | -1.0164026202 |
| -1.0021713262 | 0.9951149022 | 0.9999537652 | -1.1564485764 |
| 4.5505976667  | 0.5595304294 | 0.9999537652 | 8.8700459102  |
| 2.7933974408  | 0.6948713406 | 0.9999537652 | 1.4541197941  |
| 0             | 0            | 0            | 0             |
| 1.0057156055  | 0.9822925788 | 0.9999537652 | 1.3023085789  |
| -1.0112984464 | 0.9875882006 | 0.9999537652 | -2.0479626835 |
| -1.1148499669 | 0.8711329204 | 0.9999537652 | 1.3444140054  |
| -1.4229953559 | 0.2073983311 | 0.9999537652 | -1.4021527887 |
| 2.7933974408  | 0.6948713406 | 0.9999537652 | 1.2601780493  |
| -1.2436857194 | 0.2052434452 | 0.9999537652 | -1.1391719477 |
| 4.5505976667  | 0.5594744114 | 0.9999537652 | 6.9133480437  |
| 11.5766527773 | 0.3455460644 | 0.9999537652 | 1.3991459716  |
| 1.0318399266  | 0.8402705031 | 0.9999537652 | 1.0579212841  |
| 0             | 0            | 0            | 2.996475627   |
| -1.059627023  | 0.7093473883 | 0.9999537652 | -1.0000316058 |
| 1.0500736843  | 0.858235831  | 0.9999537652 | 1.0803778267  |
| 13.3324809638 | 0.3187058729 | 0.9999537652 | -1.9381826991 |
| 1.1371033445  | 0.4406018367 | 0.9999537652 | -1.0679430452 |
| 1.6152476451  | 0.4916310712 | 0.9999537652 | -1.2158215885 |
| -1.5587785782 | 0.0871970404 | 0.9999537652 | -1.5496897635 |
| -1.2228034435 | 0.7432463395 | 0.9999537652 | -1.4649359741 |
| 0             | 0            | 0            | 6.908559683   |
| 1.0052680514  | 0.9693836211 | 0.9999537652 | -1.1977998706 |
| 1.4500104838  | 0.0374818495 | 0.9999537652 | 1.0783949697  |
| 1.0119014143  | 0.9521912004 | 0.9999537652 | 1.1497717777  |
| -1.2644619883 | 0.6569145987 | 0.9999537652 | 2.4392766943  |
| 8.064174035   | 0.4229297384 | 0.9999537652 | 2.0329095384  |
| 1.7396072511  | 0.0807668753 | 0.9999537652 | -1.0058986185 |
| -1.4078332045 | 0.025262738  | 0.9999537652 | -1.1012156767 |
| -9.7926713908 | 0.0108577287 | 0.9999537652 | 2.0326275696  |

gene\_expression\_table

|               |              |              |               |
|---------------|--------------|--------------|---------------|
| 1.1504373392  | 0.5800249174 | 0.9999537652 | 1.0724442482  |
| -2.3844120755 | 0.1843655285 | 0.9999537652 | -1.4904107309 |
| 2.5734927579  | 0.4062055419 | 0.9999537652 | 8.8639046058  |
| 2.7957660672  | 0.7053918596 | 0.9999537652 | 0             |
| 1.4368859147  | 0.4772524049 | 0.9999537652 | 1.4141517698  |
| 16.9336769091 | 0.005624     | 0.9999537652 | 1.1633733544  |
| 3.1354156389  | 0.0431357447 | 0.9999537652 | -2.8421015892 |
| 1.0545963744  | 0.7689896114 | 0.9999537652 | -1.0642290523 |
| -1.3018941027 | 0.386927218  | 0.9999537652 | -1.1202970205 |
| 8.064174035   | 0.4232543184 | 0.9999537652 | 2.1856030494  |
| 1.1168392827  | 0.9281787834 | 0.9999537652 | -1.964996944  |
| 2.7957660672  | 0.7053941858 | 0.9999537652 | -1.1402057619 |
| -1.0973129919 | 0.6668285208 | 0.9999537652 | 1.1880946258  |
| -1.1018711685 | 0.7155771109 | 0.9999537652 | 1.3313386303  |
| -3.8687254972 | 0.006959     | 0.9999537652 | 1.5218211422  |
| 1.425927401   | 0.0663130207 | 0.9999537652 | 1.2070870155  |
| 0             | 0            | 0            | 2.996475627   |
| 1.0284858559  | 0.8360404789 | 0.9999537652 | -1.058857779  |
| 1.0561456518  | 0.7056800171 | 0.9999537652 | 1.0046529216  |
| -1.1337240081 | 0.3712719252 | 0.9999537652 | 1.0021269717  |
| -1.0800277357 | 0.6681371988 | 0.9999537652 | -1.1256368387 |
| 0             | 0            | 0            | 1.591370391   |
| 1.0559250984  | 0.7956381467 | 0.9999537652 | 1.1451393879  |
| -1.0490628311 | 0.8067449726 | 0.9999537652 | 1.3898089786  |
| 1.0226610922  | 0.9126645797 | 0.9999537652 | -1.0314978039 |
| 2.087766184   | 0.5276159126 | 0.9999537652 | 1.6092914501  |
| 1.1963486671  | 0.2976563017 | 0.9999537652 | 1.7685341113  |
| -1.0687311449 | 0.6470331988 | 0.9999537652 | -1.133353719  |
| -1.2490618236 | 0.2010915935 | 0.9999537652 | 1.0185248653  |
| -1.668044468  | 0.613200015  | 0.9999537652 | -1.0927947264 |
| 1.1803348591  | 0.2352286547 | 0.9999537652 | 1.442199925   |
| -1.2036744258 | 0.3598586213 | 0.9999537652 | 1.1262490607  |
| 0             | 0            | 0            | 1.6443474089  |
| -1.0357934313 | 0.8007612818 | 0.9999537652 | 1.2378541571  |
| 1.3007682274  | 0.6023285611 | 0.9999537652 | 1.3580474398  |
| 1.1929187497  | 0.7982408975 | 0.9999537652 | -1.2509190994 |
| 1.3410567367  | 0.6064094859 | 0.9999537652 | 1.5897129105  |
| -1.6410854145 | 0.1823609159 | 0.9999537652 | -1.3437600795 |
| 1.0409285013  | 0.9282642155 | 0.9999537652 | -1.0356815745 |
| 29.1965962496 | 0.1897407744 | 0.9999537652 | -2.2219274269 |
| 1.2358806825  | 0.7447341246 | 0.9999537652 | 1.739826308   |
| 1.2513710769  | 0.7428089476 | 0.9999537652 | -1.1301634184 |
| 1.3034912742  | 0.5835830106 | 0.9999537652 | 1.079071812   |
| -1.1270718913 | 0.5500786548 | 0.9999537652 | 1.029856939   |
| 1.1267577468  | 0.8244880558 | 0.9999537652 | 1.2162076516  |
| -1.497969427  | 0.2137848981 | 0.9999537652 | -1.3210047164 |
| -1.2891465825 | 0.5834743189 | 0.9999537652 | 1.7565333715  |
| 0             | 0            | 0            | 2.9985540909  |
| 0             | 0            | 0            | 2.9985540909  |

gene\_expression\_table

|               |              |              |               |
|---------------|--------------|--------------|---------------|
| 1.1049592869  | 0.8324870811 | 0.9999537652 | 1.3886271106  |
| 1.067189349   | 0.7121315897 | 0.9999537652 | -1.2688692667 |
| -1.1081466031 | 0.4300357093 | 0.9999537652 | 1.0396543764  |
| 0             | 0            | 0            | 0             |
| -1.5194868928 | 0.3647504582 | 0.9999537652 | -1.0867326727 |
| -1.1804987656 | 0.3811697061 | 0.9999537652 | -1.0812785503 |
| 1.2493564472  | 0.5957487921 | 0.9999537652 | 1.7142160183  |
| 1.8455489546  | 0.5921421893 | 0.9999537652 | -1.7280477862 |
| 1.261593916   | 0.3665502443 | 0.9999537652 | 1.164525062   |
| 1.7935303623  | 0.0117736816 | 0.9999537652 | 1.2667641637  |
| 0             | 0            | 0            | 0             |
| 3.7646374853  | 0.0228507284 | 0.9999537652 | 1.3884398102  |
| -1.0239344554 | 0.8611718804 | 0.9999537652 | 1.0477135298  |
| 0             | 0            | 0            | -1.8582093966 |
| 0             | 0            | 0            | -2.9704130837 |
| -1.3561169077 | 0.1909000903 | 0.9999537652 | 1.1625223099  |
| -1.45316555   | 0.2230144151 | 0.9999537652 | -1.0550896307 |
| 1.0405262485  | 0.864440244  | 0.9999537652 | 1.1744377388  |
| -3.1152970666 | 0.2481088807 | 0.9999537652 | -2.126356481  |
| -1.3596094348 | 0.2510083855 | 0.9999537652 | -1.2121928516 |
| -1.3211693577 | 0.2254660564 | 0.9999537652 | -1.0124749309 |
| -1.1106440131 | 0.403672345  | 0.9999537652 | 1.2363968483  |
| 1.0152238342  | 0.930706727  | 0.9999537652 | 1.074633242   |
| 1.7202185701  | 0.0267598672 | 0.9999537652 | -1.0236147659 |
| 1.6032449232  | 0.6828998797 | 0.9999537652 | 2.158131531   |
| 1.2815614752  | 0.2297176104 | 0.9999537652 | 1.0666457282  |
| 4.5505976667  | 0.5594177039 | 0.9999537652 | -4.9096724685 |
| 2.7933974408  | 0.6948713406 | 0.9999537652 | 21.234349681  |
| -1.174138964  | 0.7443801568 | 0.9999537652 | -1.1739024285 |
| 0             | 0            | 0            | 4.9527501949  |
| 1.6327986643  | 0.2113466903 | 0.9999537652 | -1.4967026339 |
| -1.1768475501 | 0.3861180789 | 0.9999537652 | -1.2480001491 |
| 1.4573148427  | 0.0119265638 | 0.9999537652 | 1.016715098   |
| 1.2829850977  | 0.2081285342 | 0.9999537652 | 1.1000268711  |
| -1.0928106607 | 0.77875253   | 0.9999537652 | 1.2572757741  |
| 1.6024984014  | 0.6863389077 | 0.9999537652 | 14.7271569203 |
| 2.7933974408  | 0.6948713406 | 0.9999537652 | 0             |
| -1.1172314123 | 0.4462109268 | 0.9999537652 | -1.0008887706 |
| -1.0422849782 | 0.8476450124 | 0.9999537652 | 1.4078357959  |
| -1.0798572356 | 0.6440905994 | 0.9999537652 | 1.0860257805  |
| -1.0670711847 | 0.6100400886 | 0.9999537652 | -1.3875733375 |
| 2.2993099004  | 0.3149778893 | 0.9999537652 | 1.9620527532  |
| -1.1244190149 | 0.4391001937 | 0.9999537652 | 1.1887751235  |
| -1.4230508496 | 0.2104815481 | 0.9999537652 | 1.1437272898  |
| 2.0894806265  | 0.5159631706 | 0.9999537652 | -1.2906260171 |
| -1.2636213218 | 0.4424650338 | 0.9999537652 | -1.1569063145 |
| 1.5585739867  | 0.1947005617 | 0.9999537652 | -1.0584967635 |
| 1.2941502612  | 0.090144737  | 0.9999537652 | 1.1751665493  |
| 4.5505976667  | 0.5593601265 | 0.9999537652 | 1.6439796197  |

gene\_expression\_table

|                |              |              |               |
|----------------|--------------|--------------|---------------|
| 6.3075231393   | 0.4870446204 | 0.9999537652 | -1.1541540815 |
| -1.0422566822  | 0.7946377073 | 0.9999537652 | 1.0659886612  |
| 13.3324809638  | 0.3186935307 | 0.9999537652 | 1.1187149872  |
| 1.149325511    | 0.7880674963 | 0.9999537652 | 1.2114560929  |
| 1.408607799    | 0.1251693305 | 0.9999537652 | -1.1848550849 |
| -1.1366402845  | 0.7689165733 | 0.9999537652 | 1.2224788667  |
| -1.2070536782  | 0.1931908174 | 0.9999537652 | -1.0636135027 |
| -2.4674846869  | 0.2524478057 | 0.9999537652 | 3.7626699959  |
| 1.0538545495   | 0.8564552798 | 0.9999537652 | -1.0548883304 |
| -12.9849514806 | 0.1056623725 | 0.9999537652 | 8.8639046058  |
| -6.9762758667  | 0.2487223524 | 0.9999537652 | 1.2739728139  |
| -1.1550077361  | 0.3809793112 | 0.9999537652 | -1.3102806234 |
| 3.1856931818   | 4.95E-05     | 0.4532897791 | 1.0340636297  |
| 1.1208685561   | 0.3809518414 | 0.9999537652 | 1.3430540455  |
| 1.6598659682   | 0.4911540959 | 0.9999537652 | -1.5368923423 |
| -2.4938987347  | 0.1900181964 | 0.9999537652 | -1.3720581997 |
| 1.3005599152   | 0.1114667188 | 0.9999537652 | 1.2568193482  |
| -1.21945187    | 0.3471125125 | 0.9999537652 | -1.4808978312 |
| 1.0526092736   | 0.7268632801 | 0.9999537652 | 1.507783976   |
| -1.2750105366  | 0.190210922  | 0.9999537652 | -1.1727837651 |
| 1.0439653084   | 0.8158204993 | 0.9999537652 | 1.2720516154  |
| 1.006476955    | 0.9710736628 | 0.9999537652 | -1.1863717922 |
| -1.3801390768  | 0.4196278878 | 0.9999537652 | -1.2981728992 |
| 1.1355300996   | 0.4037350801 | 0.9999537652 | 1.1581439775  |
| 2.7933974408   | 0.6948713406 | 0.9999537652 | 0             |
| -1.261175982   | 0.2460875047 | 0.9999537652 | 2.0867795204  |
| -1.0638676528  | 0.7391276928 | 0.9999537652 | 1.1085906144  |
| 1.2441481942   | 0.4908510853 | 0.9999537652 | -1.0443582197 |
| 2.5837563296   | 0.0838860998 | 0.9999537652 | 2.2373565916  |
| 1.1182324784   | 0.75942276   | 0.9999537652 | 1.3657420951  |
| 1.0810172347   | 0.6884191059 | 0.9999537652 | 1.0196237367  |
| 2.136620456    | 0.0284153628 | 0.9999537652 | 2.3075221479  |
| 2.7933974408   | 0.6948713406 | 0.9999537652 | 0             |
| -1.1296634247  | 0.8370702167 | 0.9999537652 | 1.0152345338  |
| -1.0145556489  | 0.9245938269 | 0.9999537652 | 1.2370613877  |
| -1.0851115432  | 0.5857613118 | 0.9999537652 | 1.1250065588  |
| 1.3297997404   | 0.1295369639 | 0.9999537652 | 1.4866181668  |
| 1.0815398013   | 0.6978904345 | 0.9999537652 | 1.236723965   |
| 0              | 0            | 0            | 2.9988886918  |
| -1.1258242841  | 0.5590668938 | 0.9999537652 | 1.1936991856  |
| 3.0057842914   | 0.1568636952 | 0.9999537652 | 1.6440299384  |
| 2.7933974408   | 0.6948713406 | 0.9999537652 | -4.9102474202 |
| -1.1762225355  | 0.4981442106 | 0.9999537652 | 1.1721607493  |
| 2.225750868    | 0.0701005595 | 0.9999537652 | -1.0614997003 |
| 1.2216323643   | 0.3871081962 | 0.9999537652 | 1.2126315391  |
| -1.0185075916  | 0.9083503427 | 0.9999537652 | 1.0625430295  |
| 1.0792890732   | 0.6656008124 | 0.9999537652 | -1.0664860119 |
| -1.0186712293  | 0.9079175572 | 0.9999537652 | 1.2788524217  |
| 1.4469190838   | 0.5669759403 | 0.9999537652 | -1.620066493  |

gene\_expression\_table

|                |              |              |               |
|----------------|--------------|--------------|---------------|
| -1.1107856505  | 0.8176201251 | 0.9999537652 | -1.5197168271 |
| -1.1827407426  | 0.5091782206 | 0.9999537652 | -1.2084761666 |
| -1.1076099558  | 0.6739548388 | 0.9999537652 | 1.1596928614  |
| 9.8205505243   | 0.3808410679 | 0.9999537652 | 1.9416545697  |
| 2.7933974408   | 0.6948713406 | 0.9999537652 | -5.3583704783 |
| 1.5407610335   | 0.0631060003 | 0.9999537652 | -1.302835756  |
| 2.7933974408   | 0.6948713406 | 0.9999537652 | -5.3608259368 |
| -1.5875118025  | 0.7206459959 | 0.9999537652 | 1.0718708003  |
| 1.0306349546   | 0.8576504014 | 0.9999537652 | 1.1029027173  |
| 13.3324809638  | 0.3186812994 | 0.9999537652 | -2.2244958821 |
| -1.0419927409  | 0.858571396  | 0.9999537652 | 1.125590994   |
| -1.0651429566  | 0.7125848956 | 0.9999537652 | -1.1954732047 |
| -12.9800088947 | 0.1123772008 | 0.9999537652 | 6.9133480437  |
| 20.3530564257  | 0.2435949783 | 0.9999537652 | -1.3598304575 |
| -1.0556179016  | 0.6795225303 | 0.9999537652 | 1.1625581206  |
| 1.0781105086   | 0.7215327017 | 0.9999537652 | -1.3654618481 |
| 8.064174035    | 0.4235795291 | 0.9999537652 | 2.996475627   |
| 4.5505976667   | 0.559241397  | 0.9999537652 | 8.8639046058  |
| 1.0243225506   | 0.8677372128 | 0.9999537652 | -1.8532649194 |
| -1.1025173972  | 0.5059909083 | 0.9999537652 | -1.3520766929 |
| 0              | 0            | 0            | 2.996475627   |
| -1.5029932233  | 0.0239355884 | 0.9999537652 | -1.1768184713 |
| -1.0853641679  | 0.5351329194 | 0.9999537652 | 1.0232030332  |
| 9.8205505243   | 0.3808409242 | 0.9999537652 | -1.4828709862 |
| -1.2157703387  | 0.3179375665 | 0.9999537652 | -1.2630399486 |
| 1.0264063574   | 0.9098886297 | 0.9999537652 | 1.0825252848  |
| 1.2396217867   | 0.3467601674 | 0.9999537652 | -1.2436261599 |
| 1.8878043233   | 0.0431065753 | 0.9999537652 | 1.33978059    |
| -1.504767939   | 0.2675219121 | 0.9999537652 | -1.4267790697 |
| 1.7115283675   | 0.0264729974 | 0.9999537652 | 1.0794498339  |
| 1.8455489546   | 0.5921541081 | 0.9999537652 | 1.0399956057  |
| 18.5983228161  | 0.2580273756 | 0.9999537652 | -1.7010011802 |
| 1.0748166427   | 0.6332530978 | 0.9999537652 | -1.2423043616 |
| 4.152684212    | 0.0471604651 | 0.9999537652 | 2.13786569    |
| -1.0795123299  | 0.8266873523 | 0.9999537652 | -1.1899547796 |
| 1.1993246541   | 0.3273008897 | 0.9999537652 | 1.0794365166  |
| 1.500470071    | 0.1706460039 | 0.9999537652 | -1.0186073977 |
| 1.0860005437   | 0.6382465296 | 0.9999537652 | 1.0319343329  |
| 2.1792111666   | 0.1674743493 | 0.9999537652 | -1.1714044472 |
| 1.0596729611   | 0.6561800966 | 0.9999537652 | 1.2326305898  |
| 1.6449006282   | 0.5760768301 | 0.9999537652 | -1.0742189171 |
| 0              | 0            | 0            | 2.996475627   |
| 0              | 0            | 0            | 9.7116702472  |
| 6.3075231393   | 0.4870429164 | 0.9999537652 | -4.3143133277 |
| -1.0681823752  | 0.7736434411 | 0.9999537652 | 1.4690948575  |
| -1.1624994961  | 0.4300467313 | 0.9999537652 | 1.1507467722  |
| 1.257679243    | 0.2079784935 | 0.9999537652 | 1.0612141566  |
| 13.3324809638  | 0.3186715236 | 0.9999537652 | 0             |
| -2.4710767924  | 0.5444392205 | 0.9999537652 | -2.0465436769 |



gene\_expression\_table

|                 |              |              |               |
|-----------------|--------------|--------------|---------------|
| 1.1933821756    | 0.817979771  | 0.9999537652 | -1.922437777  |
| -1.1739623639   | 0.4151120079 | 0.9999537652 | 1.0203718815  |
| 1.2020281895    | 0.3980168969 | 0.9999537652 | -1.2217034509 |
| 1.5440317143    | 0.421825462  | 0.9999537652 | -1.2662240385 |
| -1.1295275404   | 0.3670295432 | 0.9999537652 | -1.1925801034 |
| -1.5875118025   | 0.7205638289 | 0.9999537652 | -1.6091899336 |
| -1.9064656256   | 0.3786759995 | 0.9999537652 | 1.1948314323  |
| -1.5875118025   | 0.7204816854 | 0.9999537652 | -1.3220707163 |
| -1.0465704874   | 0.8798522357 | 0.9999537652 | 1.1494551386  |
| 1.1382423994    | 0.6960768051 | 0.9999537652 | 1.3029181405  |
| 1.0251145015    | 0.8359169443 | 0.9999537652 | 1.040202433   |
| 1.0171245116    | 0.9292754456 | 0.9999537652 | 1.1101676875  |
| 1.4194152128    | 0.1391069198 | 0.9999537652 | 1.1650664198  |
| -6.9736190158   | 0.2250321147 | 0.9999537652 | -2.0479626835 |
| -1.0881151135   | 0.6238823682 | 0.9999537652 | -1.0774266526 |
| 1.0680000096    | 0.8358806912 | 0.9999537652 | -1.0891785648 |
| -1.735240127    | 0.4420027122 | 0.9999537652 | 1.7042814026  |
| -104.7921208189 | 0.0106389139 | 0.9999537652 | 1.6515976785  |
| 1.1949787423    | 0.3151964271 | 0.9999537652 | -1.3243542427 |
| -1.1438485333   | 0.5208537995 | 0.9999537652 | -1.7926358938 |
| -3.1427187605   | 0.0438436144 | 0.9999537652 | 1.8561987564  |
| 1.1233786522    | 0.4211661078 | 0.9999537652 | 1.0298615413  |
| 1.0168678129    | 0.9416708699 | 0.9999537652 | 1.140742452   |
| 1.0475297386    | 0.7155264822 | 0.9999537652 | -1.3853640178 |
| -3.4796602944   | 0.1973678641 | 0.9999537652 | -1.8594983184 |
| 1.846361394     | 0.588821929  | 0.9999537652 | -1.859280336  |
| 15.1012892518   | 0.291421393  | 0.9999537652 | 1.7969381251  |
| 1.0420664329    | 0.8359187983 | 0.9999537652 | -1.072040457  |
| 4.5505976667    | 0.5591795733 | 0.9999537652 | -2.7915177751 |
| 1.057806085     | 0.8505958429 | 0.9999537652 | -1.059822702  |
| 1.0862892331    | 0.697961073  | 0.9999537652 | 1.3508032289  |
| 1.2717623111    | 0.6271412318 | 0.9999537652 | -1.0506119921 |
| -1.0730744975   | 0.6857444107 | 0.9999537652 | 1.6237898951  |
| 0               | 0            | 0            | 6.908559683   |
| 0               | 0            | 0            | 8.8639046058  |
| 2.7933974408    | 0.6948713406 | 0.9999537652 | 0             |
| 5.7340522642    | 0.0946843495 | 0.9999537652 | 1.0674845818  |
| 0               | 0            | 0            | 4.9527501949  |
| 4.2587446027    | 0.0814831998 | 0.9999537652 | -1.1200150326 |
| -1.0761109553   | 0.7246465142 | 0.9999537652 | -1.1839516159 |
| -1.1953172574   | 0.562616778  | 0.9999537652 | 1.2294152116  |
| 4.5505976667    | 0.559115459  | 0.9999537652 | -5.3608259368 |
| 2.0743013645    | 0.2947599427 | 0.9999537652 | 1.1151016283  |
| -1.2217923647   | 0.3869602341 | 0.9999537652 | 1.0676160259  |
| 1.3314867457    | 0.5355407435 | 0.9999537652 | 1.1139889608  |
| -1.0831636347   | 0.7915740255 | 0.9999537652 | 1.2039835117  |
| 1.1847101141    | 0.5213245331 | 0.9999537652 | 1.538629966   |
| -1.0122937504   | 0.9520723841 | 0.9999537652 | 1.0645409019  |
| -1.2397204368   | 0.2746178139 | 0.9999537652 | -1.0019502581 |

gene\_expression\_table

|               |              |              |               |
|---------------|--------------|--------------|---------------|
| -1.000750819  | 0.9954228661 | 0.9999537652 | 1.1549713914  |
| -1.319714631  | 0.0924761322 | 0.9999537652 | 1.1439418427  |
| 1.0961472636  | 0.6651310615 | 0.9999537652 | 1.3363538012  |
| 1.1975410153  | 0.1902726246 | 0.9999537652 | 1.0359424051  |
| -1.0079213105 | 0.9894727047 | 0.9999537652 | 1.0462989978  |
| -1.0857238964 | 0.7296807432 | 0.9999537652 | -1.243849799  |
| 1.1137677492  | 0.5392602992 | 0.9999537652 | 1.269742836   |
| 1.2150139978  | 0.5360984406 | 0.9999537652 | 1.1634117828  |
| -1.25015895   | 0.2482011699 | 0.9999537652 | 1.4038076113  |
| -1.1457847193 | 0.9109354302 | 0.9999537652 | -1.3185744328 |
| -1.1514399217 | 0.623922185  | 0.9999537652 | -1.0136007675 |
| -1.70011302   | 0.3157002504 | 0.9999537652 | -1.2836563634 |
| 2.7933974408  | 0.6948713406 | 0.9999537652 | 0             |
| 1.1586479412  | 0.4254666531 | 0.9999537652 | 1.3205928426  |
| 4.6434843517  | 0.076244974  | 0.9999537652 | 1.2147889987  |
| -1.0674124218 | 0.6010678542 | 0.9999537652 | -1.0134345348 |
| -1.5045637226 | 0.1532677429 | 0.9999537652 | 1.193086555   |
| 2.7933974408  | 0.6948713406 | 0.9999537652 | 1.5327000992  |
| 0             | 0            | 0            | -1.1241083699 |
| -1.4831540626 | 0.1744514667 | 0.9999537652 | -1.1681097405 |
| 0             | 0            | 0            | 20.5862458385 |
| -1.1284624793 | 0.484233811  | 0.9999537652 | -1.0725899598 |
| -1.1457555741 | 0.9107270194 | 0.9999537652 | -2.6872709087 |
| 1.0911651902  | 0.7123611077 | 0.9999537652 | 1.353574307   |
| 2.7933974408  | 0.6948713406 | 0.9999537652 | 0             |
| 1.0356243286  | 0.7938883712 | 0.9999537652 | 1.1702757359  |
| 1.390432632   | 0.1671388614 | 0.9999537652 | 1.1991832054  |
| -1.0158067418 | 0.9145872113 | 0.9999537652 | 1.3397861551  |
| -1.0630360144 | 0.6860847327 | 0.9999537652 | 1.0209415656  |
| 1.8448460942  | 0.5998187605 | 0.9999537652 | 2.0331135065  |
| 0             | 0            | 0            | 4.9561842702  |
| 1.0264895578  | 0.9140608961 | 0.9999537652 | -1.1111104911 |
| 1.2927487333  | 0.7024828618 | 0.9999537652 | 1.5215976716  |
| -1.7155763775 | 0.5431827862 | 0.9999537652 | 2.0330936321  |
| 1.1907640094  | 0.6155005824 | 0.9999537652 | 1.0770235919  |
| -1.027307705  | 0.9043358628 | 0.9999537652 | 1.0845826962  |
| 1.0399448041  | 0.8406668766 | 0.9999537652 | -1.0317603866 |
| -1.1285144383 | 0.498439232  | 0.9999537652 | 1.3691497691  |
| 2.087766184   | 0.5275423011 | 0.9999537652 | 24.5069156959 |
| 1.1489836539  | 0.7747280855 | 0.9999537652 | -1.1207946905 |
| 1.0580357993  | 0.6995053861 | 0.9999537652 | 1.2495884702  |
| 1.0903297719  | 0.6523250313 | 0.9999537652 | 1.2931686431  |
| 8.0710074692  | 0.4203428021 | 0.9999537652 | 1.1669991985  |
| 1.0293890928  | 0.8864893973 | 0.9999537652 | -1.0162846839 |
| 1.0194166936  | 0.9328802858 | 0.9999537652 | 1.6459334029  |
| -1.1348424908 | 0.6087669905 | 0.9999537652 | 1.1915928618  |
| 1.1011815539  | 0.4892771649 | 0.9999537652 | 1.027994439   |
| 1.0295433344  | 0.8774264894 | 0.9999537652 | -1.0132431938 |
| 1.1250986691  | 0.7314635333 | 0.9999537652 | 1.0325259814  |

gene\_expression\_table

|               |              |              |               |
|---------------|--------------|--------------|---------------|
| -1.3165740693 | 0.3272788854 | 0.9999537652 | 1.1796960653  |
| -1.2235251948 | 0.1296392655 | 0.9999537652 | -1.2809927463 |
| 1.1583474915  | 0.6457917244 | 0.9999537652 | 1.2583079248  |
| 1.1392945479  | 0.3460640593 | 0.9999537652 | 1.6824702242  |
| 2.3338728054  | 0.0155652264 | 0.9999537652 | 1.0919614762  |
| 1.2139465006  | 0.5893642353 | 0.9999537652 | -1.5555619072 |
| -1.0127924418 | 0.9226695326 | 0.9999537652 | -1.1659442745 |
| 1.696766011   | 0.0202283509 | 0.9999537652 | 1.1233584612  |
| 1.0476006043  | 0.6779968627 | 0.9999537652 | 1.1613988312  |
| 1.2378168121  | 0.2480250112 | 0.9999537652 | -1.0225512667 |
| -1.0041580036 | 0.9820951024 | 0.9999537652 | 1.0019678055  |
| -1.2382693302 | 0.298825916  | 0.9999537652 | -1.1299082346 |
| 1.0880616693  | 0.7911812044 | 0.9999537652 | -1.0163915095 |
| -1.0204329064 | 0.9281675221 | 0.9999537652 | -1.0052037536 |
| -1.1706813018 | 0.3686538719 | 0.9999537652 | -1.2386701626 |
| 1.0353934819  | 0.9655076958 | 0.9999537652 | -1.4671686592 |
| 2.7933974408  | 0.6948713406 | 0.9999537652 | -5.3608259368 |
| -1.5019578083 | 0.0820173058 | 0.9999537652 | -1.6832006208 |
| -1.3871019527 | 0.2168771481 | 0.9999537652 | -1.1781799406 |
| 2.7933974408  | 0.6948713406 | 0.9999537652 | 0             |
| 0             | 0            | 0            | 2.996475627   |
| 2.7933974408  | 0.6948713406 | 0.9999537652 | 12.7820459093 |
| 1.1599020496  | 0.2218310044 | 0.9999537652 | 1.1032553757  |
| 1.0427352324  | 0.8159871845 | 0.9999537652 | -1.2850605774 |
| 1.0018182841  | 0.9928716262 | 0.9999537652 | -1.3683431323 |
| 1.055403819   | 0.7320478228 | 0.9999537652 | 1.0621316994  |
| -1.5875118025 | 0.720509259  | 0.9999537652 | -1.1250196696 |
| -1.8295228655 | 0.0497775693 | 0.9999537652 | -1.2126524817 |
| -1.5307492972 | 0.4898296704 | 0.9999537652 | 1.3825160561  |
| 2.7933974408  | 0.6948713406 | 0.9999537652 | -2.0075801108 |
| 1.0080763077  | 0.9615534062 | 0.9999537652 | -1.741928766  |
| -1.1453192235 | 0.9088481354 | 0.9999537652 | -1.2441497291 |
| 18.9318466825 | 0.2781668755 | 0.9999537652 | -3.3853891979 |
| 1.062468148   | 0.6761067646 | 0.9999537652 | 1.1038681736  |
| -1.1680566799 | 0.8561027567 | 0.9999537652 | 3.2952516161  |
| 1.0007513483  | 0.9959043742 | 0.9999537652 | -1.0920277825 |
| 1.7468796346  | 0.487334085  | 0.9999537652 | 1.3291630813  |
| -1.0837115097 | 0.6534274825 | 0.9999537652 | 1.0536154066  |
| -1.2008922436 | 0.6849233221 | 0.9999537652 | 1.4872367092  |
| 1.3221510186  | 0.2326967356 | 0.9999537652 | 1.2153938578  |
| 2.7957660672  | 0.7053965129 | 0.9999537652 | -9.7542681481 |
| -1.0586237724 | 0.7165771191 | 0.9999537652 | 1.0967139971  |
| 1.4925902484  | 0.0365036776 | 0.9999537652 | 1.3399624403  |
| -1.3326607281 | 0.1716659141 | 0.9999537652 | 1.0404692053  |
| -1.3664432468 | 0.2227248695 | 0.9999537652 | 1.0944410148  |
| -1.0103424929 | 0.9513153457 | 0.9999537652 | 1.0529068814  |
| -1.0319676128 | 0.9360625401 | 0.9999537652 | -1.1621647533 |
| -1.1865280291 | 0.491946888  | 0.9999537652 | 1.020720748   |
| 0             | 0            | 0            | 2.9985540909  |

gene\_expression\_table

|               |              |              |               |
|---------------|--------------|--------------|---------------|
| 1.180155548   | 0.5892672801 | 0.9999537652 | -1.2842682395 |
| -1.0590676079 | 0.9086161652 | 0.9999537652 | -1.2107375927 |
| -1.1155695121 | 0.6239147974 | 0.9999537652 | 1.0036041841  |
| 1.189950996   | 0.3773186703 | 0.9999537652 | 1.0339615657  |
| 2.7933974408  | 0.6948713406 | 0.9999537652 | 0             |
| -1.1378228505 | 0.5203688277 | 0.9999537652 | 1.0597303391  |
| 1.1113891643  | 0.6307656027 | 0.9999537652 | -1.102938353  |
| 1.0518185424  | 0.8222868357 | 0.9999537652 | -1.2736473028 |
| 1.3109319137  | 0.2900199645 | 0.9999537652 | 1.1531328016  |
| 1.1038430652  | 0.682704485  | 0.9999537652 | 1.0888098614  |
| 1.2081853085  | 0.187725366  | 0.9999537652 | 1.3830564903  |
| -1.4892185071 | 0.2498597357 | 0.9999537652 | -1.2149661469 |
| 1.2692991505  | 0.5549790002 | 0.9999537652 | 1.061137471   |
| 1.053110248   | 0.8972447585 | 0.9999537652 | -1.1165539028 |
| 1.5046268894  | 0.0987964606 | 0.9999537652 | 1.01880287    |
| -1.2562680862 | 0.5608898904 | 0.9999537652 | -1.0469148155 |
| -1.5985141516 | 0.2600369468 | 0.9999537652 | -1.1826445195 |
| 1.2662502143  | 0.6544549948 | 0.9999537652 | 7.2042928012  |
| 1.0048199391  | 0.9806344077 | 0.9999537652 | 1.7843249597  |
| -1.5338379945 | 0.1647777463 | 0.9999537652 | 1.0366400567  |
| -1.0419257066 | 0.7612193159 | 0.9999537652 | 1.0981208618  |
| 1.0371672258  | 0.7763549621 | 0.9999537652 | 1.2027667053  |
| 1.417833254   | 0.0794363432 | 0.9999537652 | 1.1271571482  |
| -1.0398491032 | 0.8288781938 | 0.9999537652 | 1.2387278832  |
| -1.0005954443 | 0.9980832029 | 0.9999537652 | 1.2078214629  |
| 1.530834222   | 0.4654560206 | 0.9999537652 | -1.692973547  |
| -1.0854686404 | 0.5717702772 | 0.9999537652 | 1.1153998112  |
| -2.5871290907 | 0.4897520312 | 0.9999537652 | 2.0633900066  |
| -1.029383396  | 0.8397245778 | 0.9999537652 | 1.1386900021  |
| -5.6905011588 | 0.0697469629 | 0.9999537652 | -2.5700155719 |
| 1.0653610172  | 0.9019323902 | 0.9999537652 | -1.2999171773 |
| 1.2028657005  | 0.7012058367 | 0.9999537652 | -1.0911032105 |
| 1.0067174661  | 0.9882976783 | 0.9999537652 | -1.4550176959 |
| -1.0050957921 | 0.9722358152 | 0.9999537652 | -1.0529688048 |
| -1.3904787857 | 0.3342694355 | 0.9999537652 | -1.1647876254 |
| 0             | 0            | 0            | 9.7116702472  |
| -1.0999155919 | 0.594486437  | 0.9999537652 | 1.001536589   |
| 1.0156970969  | 0.9746146524 | 0.9999537652 | 1.7985228477  |
| -2.1317846121 | 0.4669919408 | 0.9999537652 | 1.4559140589  |
| -1.3149940926 | 0.6578399284 | 0.9999537652 | 1.0037832326  |
| -1.390716754  | 0.2347941135 | 0.9999537652 | 1.08068827    |
| 1.0861017494  | 0.6119790961 | 0.9999537652 | 1.1558320785  |
| -2.1133488124 | 0.274544293  | 0.9999537652 | -2.1076057036 |
| 1.0040153316  | 0.9881994885 | 0.9999537652 | -1.0769998477 |
| 1.1047411091  | 0.7066467487 | 0.9999537652 | 3.0847523153  |
| -1.1891753494 | 0.4693327568 | 0.9999537652 | -1.1354529759 |
| 9.8205505243  | 0.3808407804 | 0.9999537652 | -3.3849925178 |
| 1.3425821795  | 0.1295773693 | 0.9999537652 | 1.0958572906  |
| 1.0596930067  | 0.8067757227 | 0.9999537652 | 1.1148004664  |

gene\_expression\_table

|               |              |              |               |
|---------------|--------------|--------------|---------------|
| -1.0649522349 | 0.8441457685 | 0.9999537652 | -1.5171865159 |
| 1.8480785336  | 0.1117186477 | 0.9999537652 | -1.0432953382 |
| 1.1216701798  | 0.9025715021 | 0.9999537652 | 0             |
| -1.0911287448 | 0.5824191102 | 0.9999537652 | 1.1544815395  |
| -7.0533847096 | 0.0431407853 | 0.9999537652 | 3.0951743987  |
| -1.2132422548 | 0.2991238748 | 0.9999537652 | 1.1763814727  |
| -1.4964478785 | 0.00722      | 0.9999537652 | 1.010300601   |
| -1.0565749157 | 0.6466841917 | 0.9999537652 | 1.0349235454  |
| 1.0430970519  | 0.8798872452 | 0.9999537652 | -1.1781087501 |
| -1.4551235062 | 0.4379783324 | 0.9999537652 | -1.8207449568 |
| 1.051464295   | 0.7641018888 | 0.9999537652 | 1.0465980141  |
| 1.1175790356  | 0.5747015969 | 0.9999537652 | 1.604209852   |
| -1.2405205283 | 0.319274142  | 0.9999537652 | 1.3125232669  |
| 1.1115529823  | 0.415954332  | 0.9999537652 | 1.1689826805  |
| -1.1349126235 | 0.5069756597 | 0.9999537652 | 1.0534576444  |
| 1.1954292806  | 0.5443823914 | 0.9999537652 | -1.0984163235 |
| -1.6562690281 | 0.4326602367 | 0.9999537652 | -1.5397188061 |
| -1.050090966  | 0.8044453571 | 0.9999537652 | -1.5978340446 |
| 3.8758796457  | 0.1141530164 | 0.9999537652 | -1.2216347795 |
| 0             | 0            | 0            | 1.6477648168  |
| 1.028906392   | 0.9392655355 | 0.9999537652 | 1.0965589323  |
| 8.064174035   | 0.4240401907 | 0.9999537652 | 4.9527501949  |
| 1.2616406433  | 0.7593024676 | 0.9999537652 | 5.1169828535  |
| -6.9736190158 | 0.2250321147 | 0.9999537652 | 2.9985540909  |
| 0             | 0            | 0            | 2.9988886918  |
| 1.4611417641  | 0.0398133249 | 0.9999537652 | -1.6681219016 |
| -1.0144075024 | 0.9594694852 | 0.9999537652 | -1.0916567783 |
| 2.408291804   | 0.1235001808 | 0.9999537652 | -1.2991127731 |
| 1.2817804908  | 0.7138329158 | 0.9999537652 | 2.9461161017  |
| 1.1131917049  | 0.806142385  | 0.9999537652 | 1.1723221187  |
| 1.0559562349  | 0.69771185   | 0.9999537652 | 1.1769551818  |
| 9.8288704632  | 0.3801944294 | 0.9999537652 | -1.3588677454 |
| -1.1453192235 | 0.9088592382 | 0.9999537652 | -1.4624596198 |
| 1.2286551847  | 0.2488486281 | 0.9999537652 | 1.2872391788  |
| 2.7933974408  | 0.6948713406 | 0.9999537652 | 0             |
| 2.7933974408  | 0.6948713406 | 0.9999537652 | 4.9527501949  |
| 0             | 0            | 0            | 4.9527501949  |
| 1.0166443047  | 0.9432815558 | 0.9999537652 | -1.261237475  |
| 1.0802482415  | 0.7762235705 | 0.9999537652 | -1.1385484184 |
| -1.0665916386 | 0.6446559446 | 0.9999537652 | 1.013004461   |
| 1.1667175549  | 0.3939179647 | 0.9999537652 | 1.1577785237  |
| 1.1415403797  | 0.2415299997 | 0.9999537652 | 1.1966245047  |
| -1.6582973663 | 0.4208402466 | 0.9999537652 | -1.2147197311 |
| 6.3075231393  | 0.4870288231 | 0.9999537652 | 0             |
| 2.2844548067  | 0.0992600529 | 0.9999537652 | 1.4049865365  |
| 37.9815106936 | 0.1535136995 | 0.9999537652 | 1.2756108885  |
| 1.1044295112  | 0.6532091714 | 0.9999537652 | 1.0036338694  |
| 1.0272517307  | 0.8575189846 | 0.9999537652 | 1.1995238457  |
| 1.0976267088  | 0.6687072457 | 0.9999537652 | -1.1352596594 |

gene\_expression\_table

|               |              |              |               |
|---------------|--------------|--------------|---------------|
| 0             | 0            | 0            | 6.908559683   |
| -1.0337139684 | 0.8149369268 | 0.9999537652 | -1.01294458   |
| -1.117086213  | 0.5258611403 | 0.9999537652 | -1.181915085  |
| 1.2784040264  | 0.2323748443 | 0.9999537652 | -1.0961327023 |
| 1.1851317683  | 0.2482257728 | 0.9999537652 | -1.0994918423 |
| 1.0976785224  | 0.4234822196 | 0.9999537652 | 1.2862529429  |
| 1.1156994743  | 0.6799390204 | 0.9999537652 | -1.0771135169 |
| 1.4815638907  | 0.6277785519 | 0.9999537652 | -2.2046899968 |
| 0             | 0            | 0            | 2.9985540909  |
| -1.0482500809 | 0.7073671371 | 0.9999537652 | -1.0505827324 |
| -1.2195193132 | 0.4614762358 | 0.9999537652 | -1.1028528742 |
| -1.0629426453 | 0.6573503697 | 0.9999537652 | -1.4202076863 |
| -1.3275847878 | 0.0396141043 | 0.9999537652 | -1.2133072679 |
| -1.0725723485 | 0.7242401022 | 0.9999537652 | -1.1874291173 |
| -1.9882162322 | 0.2289444813 | 0.9999537652 | 1.2161260858  |
| 1.0936755407  | 0.4713842591 | 0.9999537652 | 1.0857371991  |
| 0             | 0            | 0            | 14.7475552392 |
| 1.0446736572  | 0.8994266017 | 0.9999537652 | 1.1738267509  |
| -1.2508553793 | 0.3129076794 | 0.9999537652 | -1.0223256556 |
| 1.2111997716  | 0.2894834368 | 0.9999537652 | -1.0911071078 |
| -1.2461965714 | 0.4856020931 | 0.9999537652 | -1.0451356757 |
| -1.1070325457 | 0.5717995717 | 0.9999537652 | -1.0074196187 |
| 1.4460508616  | 0.0969432314 | 0.9999537652 | -1.4453283606 |
| 1.1646788163  | 0.5425968321 | 0.9999537652 | 1.0306227887  |
| 1.0701732095  | 0.6538342866 | 0.9999537652 | 1.3238369069  |
| -1.0322955143 | 0.9316792366 | 0.9999537652 | 1.0100047459  |
| 3.8622037496  | 0.6197885868 | 0.9999537652 | 0             |
| 2.7933974408  | 0.6948713406 | 0.9999537652 | -9.7554110723 |
| -1.2836554294 | 0.2230596134 | 0.9999537652 | 1.4305497067  |
| 1.1665586926  | 0.4982843779 | 0.9999537652 | -1.1426381184 |
| -1.1382805948 | 0.5853501149 | 0.9999537652 | -1.0175284655 |
| 0             | 0            | 0            | 8.8639046058  |
| 1.9825471683  | 0.1667754613 | 0.9999537652 | 1.3283001114  |
| 1.1122087721  | 0.4135418043 | 0.9999537652 | 1.1330939217  |
| 1.0101964742  | 0.9431976813 | 0.9999537652 | 1.0575990195  |
| 1.0505262422  | 0.9641113376 | 0.9999537652 | -2.7915177751 |
| -1.1345273227 | 0.5279269254 | 0.9999537652 | -1.447371804  |
| 1.159734916   | 0.5593021392 | 0.9999537652 | 1.0744819519  |
| -1.5875118025 | 0.7205368862 | 0.9999537652 | 0             |
| 2.5734272962  | 0.4089959982 | 0.9999537652 | 0             |
| -1.10880233   | 0.6195276406 | 0.9999537652 | -1.041718219  |
| 1.0956092405  | 0.7739516499 | 0.9999537652 | 1.1724711819  |
| 2.0346773175  | 0.4381573916 | 0.9999537652 | -1.1200974951 |
| 1.3295349533  | 0.2063689986 | 0.9999537652 | -1.2779481972 |
| 1.4808270106  | 0.6343642752 | 0.9999537652 | 5.1060810775  |
| 1.2071571     | 0.1589138045 | 0.9999537652 | 1.2186107439  |
| 1.0770732551  | 0.8461116863 | 0.9999537652 | 1.2573415003  |
| -2.4941151816 | 0.4492553881 | 0.9999537652 | 0             |
| 16.8433158146 | 0.2732251893 | 0.9999537652 | -2.6352978387 |

gene\_expression\_table

|               |              |              |               |
|---------------|--------------|--------------|---------------|
| 1.1995245564  | 0.3185432324 | 0.9999537652 | 1.0794746026  |
| -1.4737854567 | 0.1979946162 | 0.9999537652 | -1.0562020033 |
| 1.1110412466  | 0.6296773011 | 0.9999537652 | 1.0175331845  |
| -1.7127326186 | 0.001336     | 0.9999537652 | -1.5632827783 |
| -1.6775581998 | 0.0527380129 | 0.9999537652 | -1.5594645273 |
| 1.4388088249  | 0.4949045114 | 0.9999537652 | -1.1159525223 |
| -1.001548889  | 0.9971040176 | 0.9999537652 | -1.2423539692 |
| 1.0821115005  | 0.8268815401 | 0.9999537652 | 1.1845130728  |
| 1.423446877   | 0.1496932697 | 0.9999537652 | -1.2675406798 |
| -1.0284896134 | 0.8794509328 | 0.9999537652 | 1.117063615   |
| -1.0033956753 | 0.993151457  | 0.9999537652 | 1.0692854103  |
| 1.0271125191  | 0.8364209498 | 0.9999537652 | 1.4398725432  |
| 1.0416399656  | 0.776998151  | 0.9999537652 | 1.3085993496  |
| -1.0102775895 | 0.964357671  | 0.9999537652 | -1.2215158908 |
| -1.0711593783 | 0.6143655579 | 0.9999537652 | 1.2387940297  |
| -4.098385977  | 0.1622357015 | 0.9999537652 | 1.671192618   |
| -1.0037185932 | 0.986610555  | 0.9999537652 | -1.0052956664 |
| 2.0885615936  | 0.5182136312 | 0.9999537652 | -1.859280336  |
| 0             | 0            | 0            | 0             |
| 1.0242836376  | 0.9050904545 | 0.9999537652 | 1.2513219298  |
| -1.0282648099 | 0.886268229  | 0.9999537652 | 1.0144701543  |
| -1.6652199227 | 0.6285563437 | 0.9999537652 | -4.5793149393 |
| -2.8969127737 | 0.339811129  | 0.9999537652 | -2.5775354782 |
| 1.5404849439  | 0.0761548279 | 0.9999537652 | -1.1499873756 |
| 1.2605254131  | 0.30961344   | 0.9999537652 | 1.0448706416  |
| -1.0878753682 | 0.583920027  | 0.9999537652 | -1.0083171846 |
| -1.0387419901 | 0.9527659097 | 0.9999537652 | -6.4360166533 |
| 1.2802242621  | 0.5367765405 | 0.9999537652 | 1.7469894978  |
| -3.8068935632 | 0.0377057973 | 0.9999537652 | -1.2221582574 |
| -1.2402015004 | 0.1520226315 | 0.9999537652 | -1.1352138982 |
| -1.1747327298 | 0.305095714  | 0.9999537652 | -1.2030856568 |
| 1.0862608685  | 0.6772201657 | 0.9999537652 | -1.1158007863 |
| -1.081974055  | 0.7310334017 | 0.9999537652 | -1.8715902532 |
| 2.7933974408  | 0.6948713406 | 0.9999537652 | 14.7373490367 |
| 2.9819103542  | 0.0646749425 | 0.9999537652 | -1.0418570551 |
| 1.0844353317  | 0.7228765396 | 0.9999537652 | -1.0185562526 |
| 1.0756929012  | 0.7031239524 | 0.9999537652 | -1.2350535412 |
| -1.0354432274 | 0.8703592214 | 0.9999537652 | 1.1048572939  |
| -1.3227553882 | 0.1327159698 | 0.9999537652 | -1.149866961  |
| -4.8154268017 | 0.1712376447 | 0.9999537652 | 6.9133480437  |
| -1.1634417496 | 0.2527358457 | 0.9999537652 | -1.4051817751 |
| 1.6507269804  | 0.00334      | 0.9999537652 | -1.4126926335 |
| -7.0403382421 | 0.1013299562 | 0.9999537652 | 1.0283954772  |
| 4.5505976667  | 0.5590482994 | 0.9999537652 | 4.9561842702  |
| 0             | 0            | 0            | -5.3583704783 |
| 1.4988385415  | 0.1000765999 | 0.9999537652 | -1.0829831093 |
| 3.7885904228  | 0.2339824168 | 0.9999537652 | -1.337530768  |
| 1.6527716635  | 0.007363     | 0.9999537652 | 1.0941081457  |
| -1.2997076887 | 0.1891313776 | 0.9999537652 | -1.0020501253 |

gene\_expression\_table

|               |              |              |               |
|---------------|--------------|--------------|---------------|
| -1.1858615939 | 0.3360574621 | 0.9999537652 | 1.1511255918  |
| -1.129950963  | 0.482216618  | 0.9999537652 | 1.1199725611  |
| -1.3407975671 | 0.6539496193 | 0.9999537652 | 1.2166702826  |
| -1.1470209572 | 0.5672248431 | 0.9999537652 | -1.0595430673 |
| -1.1213329976 | 0.6273172022 | 0.9999537652 | 1.0651971243  |
| -2.9548384089 | 0.3317424324 | 0.9999537652 | 1.0845613577  |
| -1.2366999846 | 0.1711900534 | 0.9999537652 | 1.259269689   |
| -1.1767385784 | 0.7912839162 | 0.9999537652 | 1.1651752551  |
| 1.446336875   | 0.1393446943 | 0.9999537652 | 1.1478439863  |
| 1.1367761803  | 0.3825506238 | 0.9999537652 | 1.2240473471  |
| 1.6108138003  | 0.6452806171 | 0.9999537652 | 1.1031068191  |
| -1.5881166222 | 0.7249115844 | 0.9999537652 | 14.759428837  |
| 2.7957660672  | 0.705398841  | 0.9999537652 | -2.7336138579 |
| 1.5087199967  | 0.1529632749 | 0.9999537652 | 1.2073350352  |
| 3.7917931577  | 0.2239176224 | 0.9999537652 | -1.0663370569 |
| 1.0672244872  | 0.7763311143 | 0.9999537652 | 1.1760313725  |
| -4.2249492059 | 0.1250400043 | 0.9999537652 | 4.4079224032  |
| 1.4482995658  | 0.1186906269 | 0.9999537652 | 1.0379317943  |
| 0             | 0            | 0            | -1.1250196696 |
| 4.5505976667  | 0.558976936  | 0.9999537652 | 0             |
| 1.1824783045  | 0.2907449004 | 0.9999537652 | 1.0666270089  |
| -1.1011091173 | 0.6736130095 | 0.9999537652 | 1.2608174091  |
| 1.4926310182  | 0.091016644  | 0.9999537652 | 1.1389471866  |
| -1.147880094  | 0.5297789204 | 0.9999537652 | 1.0098298752  |
| 2.0381854033  | 0.4032758863 | 0.9999537652 | 1.3119335805  |
| 1.4203878116  | 0.129538662  | 0.9999537652 | 1.3239181054  |
| -1.1219739905 | 0.4891565813 | 0.9999537652 | -1.1381751718 |
| -1.2825267982 | 0.4198945116 | 0.9999537652 | -1.1699896178 |
| -1.1618692829 | 0.7343507238 | 0.9999537652 | -1.2584883793 |
| 29.5568947391 | 0.1882827705 | 0.9999537652 | 1.8520499819  |
| 1.1924441742  | 0.3044727206 | 0.9999537652 | -1.0881018621 |
| 1.1248274988  | 0.8663597643 | 0.9999537652 | -1.237232726  |
| 1.0945334741  | 0.6191673329 | 0.9999537652 | 1.0766039014  |
| -1.0809392341 | 0.8804092977 | 0.9999537652 | -1.075323797  |
| -1.0157496634 | 0.9444382047 | 0.9999537652 | 1.0539842754  |
| -1.0595232108 | 0.8732730153 | 0.9999537652 | -1.0082503917 |
| 1.0983740647  | 0.6764925561 | 0.9999537652 | 1.1395831622  |
| 1.1258669626  | 0.5202517206 | 0.9999537652 | 1.0143336599  |
| 1.1346597241  | 0.3577530268 | 0.9999537652 | 1.3885942677  |
| -1.2975783546 | 0.2530639977 | 0.9999537652 | -1.0642416929 |
| 2.3382720325  | 0.007936     | 0.9999537652 | 1.2479541116  |
| 1.5836224273  | 0.424393935  | 0.9999537652 | -1.374499486  |
| -1.1758687306 | 0.2461257478 | 0.9999537652 | 1.0250175212  |
| 4.5505976667  | 0.5588994102 | 0.9999537652 | 2.996475627   |
| 1.2844709255  | 0.6663174317 | 0.9999537652 | 10.818785458  |
| 1.0974495954  | 0.6514484385 | 0.9999537652 | 1.0972806759  |
| 20.3530564257 | 0.2435350409 | 0.9999537652 | -1.1248877899 |
| 4.0331711848  | 0.2059780192 | 0.9999537652 | 1.2240749939  |
| -1.081658322  | 0.5043968781 | 0.9999537652 | 1.1709029152  |



gene\_expression\_table

|               |              |              |               |
|---------------|--------------|--------------|---------------|
| 1.0177249572  | 0.9481907009 | 0.9999537652 | 1.0307535348  |
| 1.2392631105  | 0.510749715  | 0.9999537652 | 1.0839194019  |
| -1.6410314086 | 0.1765155094 | 0.9999537652 | -1.1808627664 |
| -1.0150276475 | 0.9409864798 | 0.9999537652 | 1.0511396578  |
| 4.5505976667  | 0.5588175533 | 0.9999537652 | 2.2924151284  |
| 1.1941395572  | 0.6812722468 | 0.9999537652 | 1.3268903746  |
| 0             | 0            | 0            | 1.590997316   |
| -1.0799225403 | 0.7947625901 | 0.9999537652 | 1.5621846161  |
| 1.8448460942  | 0.5998237605 | 0.9999537652 | 1.2408886006  |
| -1.4605535668 | 0.0338895755 | 0.9999537652 | 1.1924577423  |
| -1.1414441294 | 0.3058758729 | 0.9999537652 | 1.1295273274  |
| 1.6052154301  | 0.6856306879 | 0.9999537652 | 2.9999087555  |
| 1.4796429016  | 0.1079417343 | 0.9999537652 | -1.2017351532 |
| -4.7471147536 | 0.100390451  | 0.9999537652 | -2.3087357349 |
| -1.3934705832 | 0.7156183074 | 0.9999537652 | -1.4335125437 |
| -1.0196336813 | 0.8694049631 | 0.9999537652 | 1.1018112104  |
| -1.193840142  | 0.420532216  | 0.9999537652 | -1.0125776662 |
| 4.3358068607  | 0.0480613054 | 0.9999537652 | 1.7313438286  |
| -1.1550920675 | 0.2965004508 | 0.9999537652 | 1.1471454071  |
| -1.0676606513 | 0.6574594499 | 0.9999537652 | -1.1745329622 |
| -1.192568278  | 0.3278033392 | 0.9999537652 | -1.0062679703 |
| -1.1713471254 | 0.4584900772 | 0.9999537652 | 1.156139105   |
| 1.2216084395  | 0.5113503136 | 0.9999537652 | -1.2269109072 |
| -2.9548384089 | 0.3317265812 | 0.9999537652 | 2.5959757848  |
| 1.081613075   | 0.7482593112 | 0.9999537652 | -1.073185368  |
| 1.138991558   | 0.8093688082 | 0.9999537652 | -1.673676791  |
| -1.5631133972 | 0.082691569  | 0.9999537652 | 1.1101290999  |
| -1.3853586434 | 0.489141958  | 0.9999537652 | -2.4582849266 |
| -1.0434215101 | 0.8359922231 | 0.9999537652 | 1.1106114347  |
| 1.5802084855  | 0.0442204743 | 0.9999537652 | 1.1550894851  |
| 1.3350543109  | 0.2141469026 | 0.9999537652 | -1.030322181  |
| -1.1284395444 | 0.4249747513 | 0.9999537652 | 1.1370132042  |
| 1.0363695661  | 0.8493418368 | 0.9999537652 | -1.0858768016 |
| 2.2953539498  | 0.349495545  | 0.9999537652 | 1.304860287   |
| -1.0806091882 | 0.5768849485 | 0.9999537652 | -1.0245944544 |
| 1.1882223702  | 0.2820198657 | 0.9999537652 | 1.5083170857  |
| 9.8205505243  | 0.3808406367 | 0.9999537652 | 1.588935368   |
| 1.0238002172  | 0.8680757698 | 0.9999537652 | 1.0417738994  |
| -1.0383368576 | 0.8350030578 | 0.9999537652 | -1.0459739401 |
| -1.2009583878 | 0.4579088607 | 0.9999537652 | -1.0703613529 |
| 1.3968621473  | 0.3075018376 | 0.9999537652 | -1.2659218438 |
| 2.0913709129  | 0.5137428426 | 0.9999537652 | -5.3430506873 |
| -6.9736190158 | 0.2250321147 | 0.9999537652 | 4.9527501949  |
| 1.11528193    | 0.7704660283 | 0.9999537652 | 1.0897539889  |
| 1.1535694891  | 0.6820466608 | 0.9999537652 | -1.0225040408 |
| 2.2621823855  | 0.0506747972 | 0.9999537652 | 1.9509380862  |
| 1.1164814744  | 0.6148923367 | 0.9999537652 | 1.1595196511  |
| 1.2758024572  | 0.138113074  | 0.9999537652 | 1.0422618977  |
| 1.2903280591  | 0.4852696395 | 0.9999537652 | 1.363905278   |

gene\_expression\_table

|               |              |              |               |
|---------------|--------------|--------------|---------------|
| -1.1504170339 | 0.4602796512 | 0.9999537652 | -1.1055976923 |
| -1.2477064495 | 0.7454992784 | 0.9999537652 | -1.0081791187 |
| -1.0023783034 | 0.9848097252 | 0.9999537652 | 1.056564502   |
| -1.0107771541 | 0.9816254756 | 0.9999537652 | 1.0056130278  |
| 1.0776947607  | 0.5283350487 | 0.9999537652 | -1.0250974795 |
| -1.1080247849 | 0.5699907126 | 0.9999537652 | 1.1935116032  |
| -1.1006309869 | 0.6101853279 | 0.9999537652 | 1.0938472463  |
| 1.4084382019  | 0.176157438  | 0.9999537652 | 1.1866769623  |
| -1.0469015548 | 0.7456748563 | 0.9999537652 | -1.0912954657 |
| -1.0083824309 | 0.9631793812 | 0.9999537652 | 1.4614030989  |
| 2.7933974408  | 0.6948713406 | 0.9999537652 | -5.3589986948 |
| -1.4331761012 | 0.1422959565 | 0.9999537652 | 1.3571316467  |
| 22.1637147731 | 0.2320658758 | 0.9999537652 | -2.7873245155 |
| 1.4302608385  | 0.1841225353 | 0.9999537652 | 1.1222410032  |
| -1.0672495073 | 0.6588876572 | 0.9999537652 | -1.1490553244 |
| -1.0423102182 | 0.8719911666 | 0.9999537652 | 1.0973775433  |
| 1.2348966906  | 0.3381613159 | 0.9999537652 | -1.0790081451 |
| -1.0924641211 | 0.6345656442 | 0.9999537652 | -1.1898109537 |
| 1.046147328   | 0.8865917895 | 0.9999537652 | 1.461601044   |
| -1.1043731566 | 0.8176763872 | 0.9999537652 | -1.353566927  |
| 1.0044815238  | 0.9830250119 | 0.9999537652 | -1.1959066293 |
| -1.2640901764 | 0.4178413883 | 0.9999537652 | -1.0513578167 |
| 1.1863311226  | 0.1858902285 | 0.9999537652 | 1.2489553775  |
| -1.2792349814 | 0.5762420891 | 0.9999537652 | 1.4812228128  |
| 1.0008312617  | 0.9944426877 | 0.9999537652 | 1.2087635659  |
| 1.1276684763  | 0.5282196151 | 0.9999537652 | -1.1144856634 |
| 1.1833883571  | 0.4085164661 | 0.9999537652 | 1.1163350546  |
| -1.6674095463 | 0.6216697131 | 0.9999537652 | -1.0352055009 |
| -1.09519984   | 0.7014669087 | 0.9999537652 | 1.0242726638  |
| 1.1287717835  | 0.8170883049 | 0.9999537652 | -1.1112342004 |
| -1.4162789898 | 0.1422618517 | 0.9999537652 | 1.0635636782  |
| 1.2827259419  | 0.0554044628 | 0.9999537652 | 1.1975018884  |
| -1.3445734548 | 0.0589631521 | 0.9999537652 | 1.3880366718  |
| -1.2616007393 | 0.4543924045 | 0.9999537652 | 1.0807937202  |
| -1.0174112379 | 0.9304315041 | 0.9999537652 | 1.2112235551  |
| -1.0062813162 | 0.9738032556 | 0.9999537652 | 1.0569285196  |
| -1.0225532015 | 0.875315734  | 0.9999537652 | -1.1221491258 |
| 1.6733267759  | 0.3535639994 | 0.9999537652 | -1.0803902304 |
| -1.0457166013 | 0.7114214317 | 0.9999537652 | 1.2072968312  |
| -1.1392184577 | 0.3315872055 | 0.9999537652 | 1.4657776848  |
| -1.4766751143 | 0.1289481382 | 0.9999537652 | -1.1071880313 |
| -1.0641133638 | 0.7224596679 | 0.9999537652 | 1.0051893968  |
| -1.0960247838 | 0.8188635375 | 0.9999537652 | 1.2183690585  |
| 1.0689288608  | 0.6810744377 | 0.9999537652 | 1.7082023842  |
| 1.2179721842  | 0.5210174987 | 0.9999537652 | -1.2014138954 |
| 1.1559047076  | 0.4712539334 | 0.9999537652 | 1.0366002214  |
| -1.0074619145 | 0.953649892  | 0.9999537652 | -1.1205297027 |
| -1.1609514984 | 0.8759353054 | 0.9999537652 | 1.0314779617  |
| -1.0136156507 | 0.9227786195 | 0.9999537652 | 1.0537178219  |

gene\_expression\_table

|               |              |              |               |
|---------------|--------------|--------------|---------------|
| 1.6310542149  | 0.447638661  | 0.9999537652 | 1.1013488662  |
| 1.8572566386  | 0.2746114019 | 0.9999537652 | -1.4143716384 |
| 1.1745681     | 0.4975919024 | 0.9999537652 | -1.0052617088 |
| -5.2081415539 | 0.1200752094 | 0.9999537652 | 31.6482701458 |
| -1.0012328548 | 0.9955505496 | 0.9999537652 | -1.1855146152 |
| 1.631109999   | 0.0132764326 | 0.9999537652 | 1.1749259263  |
| 1.0316496749  | 0.8579940459 | 0.9999537652 | -1.069568083  |
| -1.0703032235 | 0.7132170751 | 0.9999537652 | 1.4473744106  |
| -1.1830558853 | 0.3693552596 | 0.9999537652 | 1.2588187514  |
| 1.0921987811  | 0.6419548404 | 0.9999537652 | 1.1699783717  |
| 1.1182309188  | 0.7210196154 | 0.9999537652 | -1.1448969378 |
| -1.1594602839 | 0.8873224608 | 0.9999537652 | -1.0132535059 |
| 1.1299883427  | 0.3184330125 | 0.9999537652 | 1.369590135   |
| -1.1344497867 | 0.8239755572 | 0.9999537652 | 1.0331293307  |
| -1.0947947183 | 0.6021771455 | 0.9999537652 | 1.2340083662  |
| 1.163060446   | 0.3906541211 | 0.9999537652 | 1.004047103   |
| -1.0567489886 | 0.6625260327 | 0.9999537652 | -1.0008897953 |
| 1.005861914   | 0.9739146685 | 0.9999537652 | 1.1040274674  |
| 1.906705352   | 0.4815058269 | 0.9999537652 | -1.7637225952 |
| 0             | 0            | 0            | 6.9133480437  |
| 1.6024984014  | 0.6863390106 | 0.9999537652 | -1.1609740856 |
| -1.1737692886 | 0.8014790843 | 0.9999537652 | -1.4059521531 |
| 1.1292730045  | 0.5123858395 | 0.9999537652 | 1.2470851628  |
| 2.1619312741  | 0.0309488162 | 0.9999537652 | -1.2460067808 |
| -1.0551173092 | 0.88942853   | 0.9999537652 | 1.9672049126  |
| -1.0860194698 | 0.6733001923 | 0.9999537652 | 1.1393348467  |
| -1.0591106575 | 0.7534166064 | 0.9999537652 | 1.1804450321  |
| 1.2811235259  | 0.3297026695 | 0.9999537652 | -1.0327783131 |
| -1.3679958882 | 0.7463894949 | 0.9999537652 | -1.0340216643 |
| 0             | 0            | 0            | 2.996475627   |
| -1.0742417884 | 0.784719014  | 0.9999537652 | -1.0424642958 |
| -1.0307385525 | 0.8876769475 | 0.9999537652 | -1.6237020337 |
| 2.7933974408  | 0.6948713406 | 0.9999537652 | 0             |
| -1.3188045192 | 0.6344491193 | 0.9999537652 | -1.3196481246 |
| 1.3664122026  | 0.2727582128 | 0.9999537652 | 1.6146658147  |
| 1.0201549666  | 0.8762936608 | 0.9999537652 | -1.183172489  |
| 1.186255622   | 0.7061639179 | 0.9999537652 | -1.003224592  |
| 1.1271331023  | 0.7232675099 | 0.9999537652 | 1.3803649771  |
| 1.7201856284  | 0.003523     | 0.9999537652 | 1.4778087278  |
| -1.1608369906 | 0.496090571  | 0.9999537652 | 1.1449693265  |
| 1.0338075662  | 0.9025661541 | 0.9999537652 | -1.0273104736 |
| 0             | 0            | 0            | 1.6470015103  |
| 1.6806509228  | 0.0110255051 | 0.9999537652 | -1.0494927142 |
| -1.5431926863 | 0.1381518764 | 0.9999537652 | -1.0493105259 |
| 1.0746905425  | 0.6998849347 | 0.9999537652 | -1.0677043653 |
| 1.0974242985  | 0.5711580141 | 0.9999537652 | 1.2515995961  |
| 1.1587010925  | 0.3399954314 | 0.9999537652 | 1.1170163834  |
| -1.4106347582 | 0.1480537988 | 0.9999537652 | 1.351539716   |
| -1.6168919992 | 0.0322781001 | 0.9999537652 | -1.4913938484 |

gene\_expression\_table

|               |              |              |               |
|---------------|--------------|--------------|---------------|
| -2.4397350298 | 0.3113408283 | 0.9999537652 | -1.0534454052 |
| 1.6252975995  | 0.0876175722 | 0.9999537652 | -1.0402281654 |
| 3.8622037496  | 0.6197912269 | 0.9999537652 | 0             |
| 2.0108427018  | 0.1261005778 | 0.9999537652 | 1.1403259038  |
| 1.6321617407  | 0.1248286651 | 0.9999537652 | -1.0264356825 |
| 1.4407939588  | 0.0845190214 | 0.9999537652 | -1.0104538447 |
| -1.1268728768 | 0.4870888507 | 0.9999537652 | -1.1896248241 |
| 3.3385228807  | 0.1727008687 | 0.9999537652 | 1.0691812528  |
| -1.1287920639 | 0.7941713956 | 0.9999537652 | -1.3834448758 |
| -1.369198268  | 0.7570901059 | 0.9999537652 | 3.3816577698  |
| 2.0464985585  | 0.2111223347 | 0.9999537652 | 1.1305037387  |
| 0             | 0            | 0            | 2.996475627   |
| 1.3611047324  | 0.0410826256 | 0.9999537652 | 1.3696797105  |
| 1.4481777514  | 0.1509118261 | 0.9999537652 | 1.1684759897  |
| -5.0934378954 | 0.0661078826 | 0.9999537652 | 14.7271569203 |
| -1.1516369802 | 0.3249971728 | 0.9999537652 | -1.1220629068 |
| -1.1027145204 | 0.8889519758 | 0.9999537652 | 1.5745525552  |
| 2.7957660672  | 0.7054035    | 0.9999537652 | 0             |
| 1.012313686   | 0.9336752872 | 0.9999537652 | 1.0767276024  |
| 1.0013296842  | 0.9925106306 | 0.9999537652 | -1.1018588721 |
| -2.4640383069 | 0.1675453282 | 0.9999537652 | -1.2592400625 |
| -1.136454091  | 0.5865725953 | 0.9999537652 | -1.2143172274 |
| 1.7587380237  | 0.0840270217 | 0.9999537652 | -1.3228951124 |
| 4.5545995984  | 0.5696828575 | 0.9999537652 | 1.7042814026  |
| 8.064174035   | 0.4240385553 | 0.9999537652 | -3.3838184763 |
| 1.0506030245  | 0.7550296352 | 0.9999537652 | -1.2045333701 |
| -2.5871290907 | 0.4901557076 | 0.9999537652 | 2.0101122192  |
| 0             | 0            | 0            | 1.590997316   |
| 1.0953061359  | 0.5044578433 | 0.9999537652 | 1.1542655677  |
| -1.2248076078 | 0.2538596766 | 0.9999537652 | 1.0038060405  |
| 1.3588576256  | 0.8005871795 | 0.9999537652 | -2.4446009962 |
| 1.1148127239  | 0.4386243598 | 0.9999537652 | 1.1586081984  |
| 1.3485758094  | 0.1556083153 | 0.9999537652 | -1.1871464056 |
| 1.2335007002  | 0.6050764947 | 0.9999537652 | -1.1292070952 |
| 1.0775890912  | 0.6480678701 | 0.9999537652 | -1.2757278192 |
| -2.5861438062 | 0.4593544485 | 0.9999537652 | -1.0582880019 |
| -1.2865014513 | 0.04741445   | 0.9999537652 | -1.2722630121 |
| 1.8157951106  | 0.0524022788 | 0.9999537652 | -1.1501541157 |
| 1.228785314   | 0.1366613878 | 0.9999537652 | 1.0595736936  |
| -1.0503494032 | 0.9230439891 | 0.9999537652 | -1.482390217  |
| 1.4768617964  | 0.1122135864 | 0.9999537652 | -1.2294717239 |
| 1.9093672774  | 0.2765822602 | 0.9999537652 | 1.1142549194  |
| -1.0484551083 | 0.8079858041 | 0.9999537652 | -1.4580823973 |
| 1.9188725267  | 0.0706903846 | 0.9999537652 | -1.0311814116 |
| -4.815549291  | 0.172666663  | 0.9999537652 | 1.0674541829  |
| 1.0496155734  | 0.9014219216 | 0.9999537652 | 1.4774479455  |
| -1.3483457532 | 0.4814624825 | 0.9999537652 | -1.0345039466 |
| -1.2679667006 | 0.1459203165 | 0.9999537652 | -1.124919753  |
| -1.0190276476 | 0.9036923916 | 0.9999537652 | -1.0848463094 |

gene\_expression\_table

|               |              |              |               |
|---------------|--------------|--------------|---------------|
| 1.0023830937  | 0.9890161277 | 0.9999537652 | 1.3469223651  |
| 1.1663801151  | 0.5185778634 | 0.9999537652 | 1.0627811335  |
| 1.1266417136  | 0.4774726759 | 0.9999537652 | -1.0514001977 |
| -1.268557881  | 0.7787183379 | 0.9999537652 | -1.2591665984 |
| -2.0663635347 | 0.1296821437 | 0.9999537652 | -1.001857738  |
| -1.0381611335 | 0.8267893531 | 0.9999537652 | 1.3710339796  |
| 2.7933974408  | 0.6948713406 | 0.9999537652 | 0             |
| 0             | 0            | 0            | 10.818785458  |
| -6.9736190158 | 0.2250321147 | 0.9999537652 | -2.9955485583 |
| -2.3849174722 | 0.1969103805 | 0.9999537652 | -1.1614920563 |
| 1.3708516524  | 0.6090811611 | 0.9999537652 | -1.3128566056 |
| -1.53365015   | 0.1686510024 | 0.9999537652 | 1.4580296131  |
| 1.4513002414  | 0.2443454839 | 0.9999537652 | 1.2789673914  |
| -1.1887483584 | 0.4582806237 | 0.9999537652 | 1.0179006565  |
| 1.325095935   | 0.6330361996 | 0.9999537652 | -1.2262611854 |
| 0             | 0            | 0            | -3.4711016225 |
| -1.1821937148 | 0.2429865594 | 0.9999537652 | -1.3273704064 |
| 2.1650257591  | 0.3956668774 | 0.9999537652 | -1.0791732097 |
| 1.2163510872  | 0.7697170192 | 0.9999537652 | 1.2014591601  |
| -6.9762758667 | 0.2509338461 | 0.9999537652 | 9.7116702472  |
| -1.1222587459 | 0.6567889369 | 0.9999537652 | -1.1828036329 |
| -1.4055454552 | 0.2669334127 | 0.9999537652 | 1.2362136219  |
| 2.7957660672  | 0.7054058308 | 0.9999537652 | 22.5539272529 |
| 5.2531489146  | 0.1114715711 | 0.9999537652 | 1.6027802519  |
| 11.5766527773 | 0.345553673  | 0.9999537652 | -3.3834218841 |
| 1.4377166642  | 0.1465003402 | 0.9999537652 | -1.8131571573 |
| -1.165837361  | 0.2284741822 | 0.9999537652 | -1.0715002114 |
| -1.0686488677 | 0.7820309837 | 0.9999537652 | -1.0255458428 |
| 1.0532083082  | 0.7311186762 | 0.9999537652 | 1.1721017748  |
| -1.0674006543 | 0.6187641486 | 0.9999537652 | -1.1382260012 |
| 1.1445165456  | 0.4866412192 | 0.9999537652 | -1.0121601074 |
| 1.1738583558  | 0.3499054667 | 0.9999537652 | 1.1536593207  |
| 1.305101859   | 0.1939792897 | 0.9999537652 | -1.0715946945 |
| 0             | 0            | 0            | 1.4519459565  |
| 1.317944786   | 0.4035688708 | 0.9999537652 | 1.0327485006  |
| 1.2838219277  | 0.5319545894 | 0.9999537652 | 1.2131821607  |
| -1.0291193109 | 0.8909520609 | 0.9999537652 | -1.0318940327 |
| 2.4788672036  | 0.2123416138 | 0.9999537652 | -1.2776942159 |
| 1.1771929735  | 0.4434471529 | 0.9999537652 | 1.0448125546  |
| -1.0116973132 | 0.9426813799 | 0.9999537652 | 1.1130988947  |
| 4.5505976667  | 0.5587384693 | 0.9999537652 | -1.1433829476 |
| 1.1186366265  | 0.6847109418 | 0.9999537652 | 1.0512404652  |
| 2.510672768   | 0.031400241  | 0.9999537652 | -1.1121086812 |
| -1.0345420863 | 0.8569486449 | 0.9999537652 | 1.3602123097  |
| -1.0012147382 | 0.9923340503 | 0.9999537652 | -1.1624628605 |
| 1.1275963333  | 0.3940734482 | 0.9999537652 | -1.2827398931 |
| -4.3250226376 | 0.1726258036 | 0.9999537652 | -2.7918445703 |
| -1.2901173657 | 0.1627769905 | 0.9999537652 | -1.0101971699 |
| 0             | 0            | 0            | 0             |

gene\_expression\_table

|                |              |              |               |
|----------------|--------------|--------------|---------------|
| -1.2710677205  | 0.224891964  | 0.9999537652 | -1.1457991715 |
| 1.3044750886   | 0.1610519568 | 0.9999537652 | 1.1309671479  |
| 1.1455330763   | 0.5092854207 | 0.9999537652 | 1.5155070745  |
| -1.0428047338  | 0.835711037  | 0.9999537652 | -1.129949082  |
| -1.0512817794  | 0.877079614  | 0.9999537652 | -1.1122942121 |
| 1.5773324614   | 0.1255865088 | 0.9999537652 | 1.0371418293  |
| 46.8021225725  | 0.1292814098 | 0.9999537652 | 2.0042248033  |
| 104.2166042209 | 0.06765071   | 0.9999537652 | 5.8017888001  |
| -1.3728449527  | 0.0825086113 | 0.9999537652 | 1.0794942816  |
| 1.3245600169   | 0.0692156514 | 0.9999537652 | 1.0275992757  |
| 23.8818846228  | 0.2168908833 | 0.9999537652 | -2.5819763794 |
| 1.0376345914   | 0.842092064  | 0.9999537652 | 1.3473560483  |
| -1.0483745719  | 0.7211899931 | 0.9999537652 | 1.0434600974  |
| -1.187908183   | 0.40707579   | 0.9999537652 | 1.0985327076  |
| 3.5488407019   | 0.2472528439 | 0.9999537652 | -1.2845492958 |
| 9.8288704632   | 0.3801844595 | 0.9999537652 | -1.859280336  |
| 1.4997045445   | 0.2117943172 | 0.9999537652 | -1.1105671173 |
| -1.3515702809  | 0.3170017616 | 0.9999537652 | 1.4144924728  |
| 0              | 0            | 0            | -1.1250196696 |
| -1.0759947022  | 0.5026798888 | 0.9999537652 | 1.178005267   |
| -2.1395079434  | 0.2271274032 | 0.9999537652 | -1.172852367  |
| -1.0789109711  | 0.6083221091 | 0.9999537652 | -1.2043065154 |
| 1.2839510277   | 0.2225916562 | 0.9999537652 | -1.1992656708 |
| 3.446135261    | 0.0885500567 | 0.9999537652 | -1.013911182  |
| -1.3397986347  | 0.4386969039 | 0.9999537652 | 1.3664789483  |
| -1.0064379636  | 0.9666535515 | 0.9999537652 | 1.0137731937  |
| 4.5505976667   | 0.5586621239 | 0.9999537652 | -1.1248877899 |
| 2.575670643    | 0.3941663361 | 0.9999537652 | 0             |
| -1.0186884041  | 0.947520079  | 0.9999537652 | -1.2021560064 |
| -1.5569501361  | 0.2680036825 | 0.9999537652 | -1.3884544962 |
| 11.5766527773  | 0.3455612973 | 0.9999537652 | 0             |
| 2.7933974408   | 0.6948713406 | 0.9999537652 | 3.0482656807  |
| -1.0353751356  | 0.9229757744 | 0.9999537652 | 1.0364045702  |
| -1.8294672119  | 0.1881205748 | 0.9999537652 | -1.1557875368 |
| 1.1817900243   | 0.3795437847 | 0.9999537652 | 1.0914552284  |
| 1.382415244    | 0.0862349607 | 0.9999537652 | 1.0031106257  |
| 1.005424923    | 0.9824966244 | 0.9999537652 | -1.1373502947 |
| 8.064174035    | 0.4240369201 | 0.9999537652 | 1.6470015103  |
| 1.1217899267   | 0.5723623488 | 0.9999537652 | 1.1629107527  |
| -1.1457555741  | 0.9107273157 | 0.9999537652 | -1.7494930838 |
| 1.2920645114   | 0.2086048738 | 0.9999537652 | -1.0011836516 |
| 4.5505976667   | 0.5585883533 | 0.9999537652 | 0             |
| 4.5505976667   | 0.5585170036 | 0.9999537652 | 26.0746223853 |
| 6.3075231393   | 0.4870147668 | 0.9999537652 | 17.8369746551 |
| -1.0144267182  | 0.9637982862 | 0.9999537652 | 1.1168832909  |
| 1.1842625607   | 0.2010796008 | 0.9999537652 | 1.1735734856  |
| -1.1974308496  | 0.1898139472 | 0.9999537652 | -1.0448176821 |
| 1.3373994913   | 0.1343966613 | 0.9999537652 | 1.5699530952  |
| 0              | 0            | 0            | 2.9985540909  |

gene\_expression\_table

|               |              |              |                |
|---------------|--------------|--------------|----------------|
| 1.2923908691  | 0.4077268937 | 0.9999537652 | -1.4525757749  |
| 1.0230433426  | 0.9558263749 | 0.9999537652 | 2.5681060545   |
| 1.517710517   | 0.2956100222 | 0.9999537652 | 1.85994496     |
| 36.2262387855 | 0.1571274218 | 0.9999537652 | 1.5880461882   |
| 3.8622037496  | 0.6197938668 | 0.9999537652 | 0              |
| 4.5505976667  | 0.5584479292 | 0.9999537652 | 0              |
| 2.7957660672  | 0.7054081626 | 0.9999537652 | -1.3243569371  |
| 2.7933974408  | 0.6948713406 | 0.9999537652 | -2.8128331331  |
| 2.2076065015  | 0.2812119945 | 0.9999537652 | 3.1614536713   |
| -1.0661223841 | 0.7136107442 | 0.9999537652 | 1.2699702945   |
| -1.0639540243 | 0.8836502861 | 0.9999537652 | 1.1031211226   |
| 1.0276995588  | 0.8811142018 | 0.9999537652 | -1.0876854922  |
| 1.0106616082  | 0.9451560717 | 0.9999537652 | 1.1292748305   |
| 1.2160807835  | 0.410684846  | 0.9999537652 | 1.728947716    |
| 1.4022354684  | 0.1189204562 | 0.9999537652 | 1.1521163836   |
| 1.5918525205  | 0.1754832731 | 0.9999537652 | -1.0982471667  |
| -1.2156742938 | 0.3437797691 | 0.9999537652 | -1.2924883707  |
| 1.7911605773  | 0.2065499534 | 0.9999537652 | 1.9237392568   |
| -4.5265719391 | 0.1070176165 | 0.9999537652 | 2.8725186868   |
| 1.0324918925  | 0.8383634528 | 0.9999537652 | -1.0200286386  |
| -1.2006203594 | 0.33783475   | 0.9999537652 | 1.2166111376   |
| 1.101472639   | 0.8451646504 | 0.9999537652 | 1.3212038641   |
| -1.0044315522 | 0.9724543502 | 0.9999537652 | -1.0358592993  |
| -1.063392902  | 0.9063452941 | 0.9999537652 | -1.7592853085  |
| 1.0360591358  | 0.860578447  | 0.9999537652 | -1.0218909763  |
| 2.5092975614  | 0.001741     | 0.9999537652 | 1.0022032551   |
| 2.7933974408  | 0.6948713406 | 0.9999537652 | -1.5065200998  |
| 6.3075231393  | 0.4870049067 | 0.9999537652 | 0              |
| 2.7933974408  | 0.6948713406 | 0.9999537652 | 0              |
| 0             | 0            | 0            | 2.996475627    |
| 3.230418959   | 0.0004293    | 0.9999537652 | -1.0038932274  |
| -1.3839218068 | 0.0441088945 | 0.9999537652 | -1.1337820137  |
| 3.2070037624  | 0.1842513972 | 0.9999537652 | 2.8611270168   |
| -1.1015288048 | 0.757551012  | 0.9999537652 | 1.4848438361   |
| 2.5581903582  | 0.2693857439 | 0.9999537652 | -14.1559579336 |
| 1.3925460243  | 0.4701448106 | 0.9999537652 | -1.2804657245  |
| 1.222500971   | 0.4176775896 | 0.9999537652 | 1.5757387169   |
| 1.0764438128  | 0.5763053497 | 0.9999537652 | 1.1931625413   |
| -1.1748712185 | 0.2851947396 | 0.9999537652 | 1.0296425567   |
| 3.899557091   | 0.0454346083 | 0.9999537652 | -1.179601593   |
| -1.1166055497 | 0.5923615733 | 0.9999537652 | -1.0467335517  |
| 1.2453719422  | 0.5866162136 | 0.9999537652 | 1.3022507594   |
| 1.3072022755  | 0.3815946085 | 0.9999537652 | -1.2469968636  |
| 1.2275955918  | 0.4802504768 | 0.9999537652 | -2.0159686276  |
| -1.4926346254 | 0.3717455876 | 0.9999537652 | 1.9980400577   |
| -1.0677893158 | 0.5928114977 | 0.9999537652 | -1.2062845609  |
| 4.5545995984  | 0.5696807792 | 0.9999537652 | 0              |
| 2.7933974408  | 0.6948713406 | 0.9999537652 | 0              |
| 1.1187569927  | 0.6751923738 | 0.9999537652 | 1.0759626672   |

gene\_expression\_table

|               |              |              |               |
|---------------|--------------|--------------|---------------|
| -1.0843112546 | 0.7887559903 | 0.9999537652 | -1.299373743  |
| 0             | 0            | 0            | 1.5920996292  |
| -1.2619015472 | 0.1901100734 | 0.9999537652 | -1.0827480763 |
| 1.3112536333  | 0.0796239317 | 0.9999537652 | 1.1935826794  |
| 8.064174035   | 0.4240352852 | 0.9999537652 | -3.4501420467 |
| 2.7933974408  | 0.6948713406 | 0.9999537652 | 1.590997316   |
| -1.0602949127 | 0.6997599954 | 0.9999537652 | -1.2214960137 |
| -1.0488959901 | 0.7048196682 | 0.9999537652 | 1.2312389026  |
| -1.1423603746 | 0.3435165941 | 0.9999537652 | 1.1958946217  |
| -6.9736190158 | 0.2250321147 | 0.9999537652 | -1.4739994041 |
| -1.0182291284 | 0.8769334005 | 0.9999537652 | -1.1915465113 |
| -1.0380199861 | 0.8952084827 | 0.9999537652 | 1.0940970007  |
| 1.0202256494  | 0.9166452923 | 0.9999537652 | 1.1316997244  |
| 1.1458270613  | 0.5176624813 | 0.9999537652 | 1.108333056   |
| 0             | 0            | 0            | 2.294258748   |
| -1.1726092784 | 0.3727005891 | 0.9999537652 | -1.2508200746 |
| 1.1707605808  | 0.5379476895 | 0.9999537652 | -1.4970747678 |
| 11.5766527773 | 0.3455689347 | 0.9999537652 | -9.7542681481 |
| 1.2064361531  | 0.5350547081 | 0.9999537652 | 1.297983153   |
| -1.435120256  | 0.0339141526 | 0.9999537652 | -1.0139773506 |
| 1.0395434765  | 0.8432792198 | 0.9999537652 | 1.1210523177  |
| -1.3434978242 | 0.4073829945 | 0.9999537652 | 1.3154989745  |
| -1.051491947  | 0.8420411988 | 0.9999537652 | -1.0440636349 |
| 1.0327559126  | 0.8697011307 | 0.9999537652 | -1.0908243304 |
| 1.2719903785  | 0.1700499159 | 0.9999537652 | -1.3628983638 |
| 1.0407302421  | 0.8036513922 | 0.9999537652 | 1.2691815865  |
| 1.4870011197  | 0.6638762022 | 0.9999537652 | -1.3526296379 |
| 0             | 0            | 0            | -2.1991066392 |
| -1.4062733228 | 0.0544880716 | 0.9999537652 | -1.2358178488 |
| 1.0604986262  | 0.7362959231 | 0.9999537652 | -1.1009587873 |
| 0             | 0            | 0            | 0             |
| -1.1962616753 | 0.3415749422 | 0.9999537652 | -1.0229274783 |
| -1.1926591704 | 0.3326831606 | 0.9999537652 | -1.0185507825 |
| -1.0196766622 | 0.9348522408 | 0.9999537652 | -1.0337380773 |
| -1.1175060453 | 0.4578610681 | 0.9999537652 | -1.233058625  |
| -1.1671519505 | 0.377727764  | 0.9999537652 | -1.0012186838 |
| -1.0115710622 | 0.9364327486 | 0.9999537652 | 1.0641310171  |
| 2.5571932577  | 0.2303310822 | 0.9999537652 | -1.174998263  |
| 1.2931887438  | 0.0675507649 | 0.9999537652 | -1.1337382177 |
| 16.8433158146 | 0.2733719414 | 0.9999537652 | -1.3501019658 |
| -1.4096239266 | 0.1047920512 | 0.9999537652 | 1.3368117001  |
| -1.0018414411 | 0.9910663511 | 0.9999537652 | -1.1589935475 |
| 1.087187886   | 0.5765108995 | 0.9999537652 | 1.0674459458  |
| -4.1886437672 | 0.0186117221 | 0.9999537652 | -1.0276765506 |
| 1.0110399122  | 0.9627302231 | 0.9999537652 | 1.1629265409  |
| 1.2179883202  | 0.2890981602 | 0.9999537652 | 1.0432374177  |
| -1.3544063599 | 0.1796142567 | 0.9999537652 | -1.1258047693 |
| 1.0700335683  | 0.7334322846 | 0.9999537652 | -1.0970126568 |
| 6.3075231393  | 0.486995049  | 0.9999537652 | 0             |



gene\_expression\_table

|               |              |              |               |
|---------------|--------------|--------------|---------------|
| 1.2063715897  | 0.3024298548 | 0.9999537652 | 1.1439629319  |
| -6.3379683005 | 0.1119058386 | 0.9999537652 | 1.0709925636  |
| 1.0717281897  | 0.5901231216 | 0.9999537652 | 1.1060222317  |
| 1.0197735878  | 0.8929436831 | 0.9999537652 | 1.418619578   |
| 1.0625917309  | 0.6358574856 | 0.9999537652 | -1.0111699819 |
| -2.1334087267 | 0.5175405488 | 0.9999537652 | 15.7262184124 |
| 2.3664678756  | 0.1245201961 | 0.9999537652 | 1.7623374623  |
| 1.0113135824  | 0.9638160788 | 0.9999537652 | 1.2321844265  |
| 0             | 0            | 0            | 2.9985540909  |
| -1.1623826462 | 0.3336722447 | 0.9999537652 | -1.0038493808 |
| -1.2105057064 | 0.5220780342 | 0.9999537652 | 1.0064153785  |
| 1.413444022   | 0.0509080291 | 0.9999537652 | -1.0542288639 |
| 1.6866556362  | 0.6359287998 | 0.9999537652 | 28.6068612613 |
| -1.091376919  | 0.6388241446 | 0.9999537652 | 1.157579215   |
| 1.2902169021  | 0.3383846177 | 0.9999537652 | 1.096361896   |
| 1.0324564755  | 0.8574344515 | 0.9999537652 | 1.0018070987  |
| 1.0206510335  | 0.9073675912 | 0.9999537652 | -1.171422604  |
| 1.478101785   | 0.433673781  | 0.9999537652 | 1.1699817492  |
| 1.088666893   | 0.6414089663 | 0.9999537652 | 1.359646203   |
| 3.5613076969  | 0.0440183865 | 0.9999537652 | 1.545158595   |
| -1.1214471766 | 0.4754548331 | 0.9999537652 | 1.2549748625  |
| 6.3075231393  | 0.4869851934 | 0.9999537652 | 16.0748987101 |
| 1.0285995067  | 0.8470265337 | 0.9999537652 | 1.114013196   |
| -1.7160826635 | 0.5343625296 | 0.9999537652 | -1.4270110243 |
| -1.0764497303 | 0.6376082386 | 0.9999537652 | 1.2465702795  |
| 1.0616140053  | 0.8518166904 | 0.9999537652 | 1.0494761943  |
| 1.2130956915  | 0.49783033   | 0.9999537652 | 1.3675882005  |
| 1.3872634786  | 0.4583705084 | 0.9999537652 | -1.0258745523 |
| -1.0257181198 | 0.8443252306 | 0.9999537652 | 1.0853660913  |
| -1.0382490483 | 0.8590962711 | 0.9999537652 | 1.3286203085  |
| 4.5505976667  | 0.5583809928 | 0.9999537652 | -3.7211335265 |
| 0             | 0            | 0            | 9.7116702472  |
| 16.872391439  | 0.2715769208 | 0.9999537652 | -2.5339008304 |
| -1.4332997873 | 0.369601374  | 0.9999537652 | -1.1258049891 |
| 0             | 0            | 0            | 2.996475627   |
| 2.7933974408  | 0.6948713406 | 0.9999537652 | 2.996475627   |
| -1.2423868056 | 0.6262708475 | 0.9999537652 | 2.0080890125  |
| 1.1250627958  | 0.8657063046 | 0.9999537652 | 1.2291839564  |
| 6.3128691894  | 0.4819949873 | 0.9999537652 | 3.9094828033  |
| -1.2414140907 | 0.449320062  | 0.9999537652 | -1.0900809808 |
| -1.8357405856 | 0.3301157908 | 0.9999537652 | -1.3999527387 |
| 1.4611506879  | 0.218634201  | 0.9999537652 | 1.1002582051  |
| 1.2965216442  | 0.5197173903 | 0.9999537652 | 1.5567359402  |
| 1.3029210265  | 0.1346135097 | 0.9999537652 | 1.0692392968  |
| 1.6342333843  | 0.2478608519 | 0.9999537652 | 1.2255247796  |
| 0             | 0            | 0            | -1.2959348192 |
| -1.4392737333 | 0.3642851052 | 0.9999537652 | 2.4815633475  |
| 0             | 0            | 0            | 2.996475627   |
| 1.0202468338  | 0.8999714141 | 0.9999537652 | -1.0022339759 |

gene\_expression\_table

|               |              |              |               |
|---------------|--------------|--------------|---------------|
| -1.1985756519 | 0.4249861985 | 0.9999537652 | 1.4631802027  |
| 1.0805576243  | 0.5644574288 | 0.9999537652 | 1.0659289352  |
| 9.8205505243  | 0.3808404929 | 0.9999537652 | 0             |
| 2.0660567426  | 0.2013704182 | 0.9999537652 | 1.5103206593  |
| -1.0887621021 | 0.6399977841 | 0.9999537652 | 1.1428374642  |
| -1.139075093  | 0.692583422  | 0.9999537652 | 1.0506932347  |
| -1.0218515284 | 0.9043628656 | 0.9999537652 | 1.6373966832  |
| 0             | 0            | 0            | 2.996475627   |
| 3.8622037496  | 0.6197965079 | 0.9999537652 | -3.3849925178 |
| 2.4010450491  | 0.0168777931 | 0.9999537652 | 1.3457310933  |
| -1.0063159556 | 0.9837631252 | 0.9999537652 | 1.3508439475  |
| 13.3324809638 | 0.3187168751 | 0.9999537652 | -1.3092040421 |
| -1.2357865481 | 0.1543328556 | 0.9999537652 | -1.027808602  |
| -1.0254318685 | 0.8947088978 | 0.9999537652 | -1.049373127  |
| 1.2922974312  | 0.623436882  | 0.9999537652 | -1.5327036042 |
| -1.096157347  | 0.6561527158 | 0.9999537652 | -1.132448702  |
| 1.5689162209  | 0.2706849998 | 0.9999537652 | 1.1019812351  |
| 4.5505976667  | 0.5583160638 | 0.9999537652 | -3.3741193575 |
| -1.4839996981 | 0.4042717683 | 0.9999537652 | -2.0484795942 |
| 2.3335098933  | 0.4437782776 | 0.9999537652 | -1.7407464071 |
| 1.0619456367  | 0.7550902428 | 0.9999537652 | 1.1704445585  |
| 1.1752277064  | 0.2063495906 | 0.9999537652 | 1.2961039209  |
| -2.1738281006 | 0.1445763008 | 0.9999537652 | -1.2070737822 |
| -1.1658031207 | 0.7514658487 | 0.9999537652 | -1.3864382837 |
| 1.3868844561  | 0.0792359634 | 0.9999537652 | 1.4978801849  |
| -1.0154374517 | 0.9170280963 | 0.9999537652 | 1.304002562   |
| -1.1523625851 | 0.5059877632 | 0.9999537652 | 1.2252125759  |
| -1.2444688318 | 0.2489349744 | 0.9999537652 | -1.1877098512 |
| 2.0215345212  | 0.3443233919 | 0.9999537652 | 1.0748763975  |
| 3.6433090331  | 0.0212075534 | 0.9999537652 | 1.2329802688  |
| -1.0307866248 | 0.9620463197 | 0.9999537652 | 1.0281463992  |
| 1.0295170701  | 0.8495341074 | 0.9999537652 | 1.0733745753  |
| -1.0818792194 | 0.6664256033 | 0.9999537652 | 1.0942609207  |
| 1.1363165238  | 0.4993429781 | 0.9999537652 | -1.1847139903 |
| -1.272585976  | 0.4460948253 | 0.9999537652 | 1.1589797287  |
| -1.051463187  | 0.814624741  | 0.9999537652 | 1.1024264461  |
| -1.2274198939 | 0.1098533592 | 0.9999537652 | -1.0867782361 |
| -1.0304210628 | 0.8546703948 | 0.9999537652 | 1.2230812928  |
| -1.000156736  | 0.9990642158 | 0.9999537652 | 1.4921326223  |
| 1.7634848916  | 0.0780312672 | 0.9999537652 | -1.0275493049 |
| -1.2517429193 | 0.114674507  | 0.9999537652 | -1.3831684571 |
| 1.5320677021  | 0.2882698089 | 0.9999537652 | 1.7378131584  |
| 1.0001757323  | 0.9990483488 | 0.9999537652 | 1.0947110595  |
| -1.0229584176 | 0.8463992578 | 0.9999537652 | 1.0239969943  |
| 13.3324809638 | 0.3187276287 | 0.9999537652 | -1.3099965392 |
| -1.030375307  | 0.8672486983 | 0.9999537652 | 1.059753782   |
| -1.097664026  | 0.5502596136 | 0.9999537652 | 1.1736949744  |
| -1.6411031698 | 0.0147356282 | 0.9999537652 | 1.1924288531  |
| 1.1973641932  | 0.1853613335 | 0.9999537652 | 1.2505805198  |

gene\_expression\_table

|               |              |              |               |
|---------------|--------------|--------------|---------------|
| -1.2885050132 | 0.178517828  | 0.9999537652 | 1.0009128106  |
| 1.6853566275  | 0.2021282027 | 0.9999537652 | 1.7321858005  |
| 1.5403995586  | 0.4942526665 | 0.9999537652 | -1.2656159229 |
| 1.0311205031  | 0.8235790876 | 0.9999537652 | 1.0218920299  |
| 3.3088597104  | 0.2907670152 | 0.9999537652 | 1.6471944927  |
| -1.005190037  | 0.9786400993 | 0.9999537652 | 1.1801881468  |
| -1.1911833595 | 0.1360568632 | 0.9999537652 | -1.045717365  |
| -1.003225651  | 0.9863250408 | 0.9999537652 | 1.2984302006  |
| -1.5875118025 | 0.7205923019 | 0.9999537652 | -1.1254032646 |
| 1.0482732744  | 0.7956280461 | 0.9999537652 | 1.442581964   |
| 4.5505976667  | 0.5582530147 | 0.9999537652 | 1.2593062028  |
| 1.0765326296  | 0.544855869  | 0.9999537652 | 1.2494807965  |
| 1.223819637   | 0.2291349325 | 0.9999537652 | 1.0911408377  |
| 1.0413081868  | 0.8287865988 | 0.9999537652 | -1.0855091452 |
| -1.161430603  | 0.8784010043 | 0.9999537652 | -1.1562397956 |
| -6.9736190158 | 0.2250321147 | 0.9999537652 | -5.3583704783 |
| 9.8205505243  | 0.380840349  | 0.9999537652 | 1.5311196755  |
| 1.267115312   | 0.4711718241 | 0.9999537652 | 1.0103916121  |
| -1.1525214631 | 0.4649789513 | 0.9999537652 | 1.2031386065  |
| 1.2791605412  | 0.5723921011 | 0.9999537652 | -1.0348230647 |
| 1.3898813682  | 0.4008838065 | 0.9999537652 | 1.0383384988  |
| 1.1056911288  | 0.6254564422 | 0.9999537652 | 1.1825045398  |
| 1.251621044   | 0.6633633619 | 0.9999537652 | 1.0768129053  |
| -1.0199071928 | 0.9641599725 | 0.9999537652 | 1.1296795182  |
| 1.0552787177  | 0.7617154161 | 0.9999537652 | 1.107176084   |
| 1.0453452172  | 0.8040567394 | 0.9999537652 | 1.1067505722  |
| 1.0361536905  | 0.8096831687 | 0.9999537652 | 1.0893051629  |
| -1.1540333603 | 0.6980171334 | 0.9999537652 | 1.3341877854  |
| -1.0794534027 | 0.8622227259 | 0.9999537652 | 1.2395256026  |
| 2.9455692854  | 0.2506589786 | 0.9999537652 | 1.1649025164  |
| 1.0359855881  | 0.8054575669 | 0.9999537652 | 1.2196941538  |
| 8.064174035   | 0.4240336506 | 0.9999537652 | 12.7732027325 |
| -1.2380953167 | 0.375752925  | 0.9999537652 | 1.2516896556  |
| 3.3030568913  | 0.2924051351 | 0.9999537652 | 1.3524832521  |
| -2.6939394783 | 0.055964976  | 0.9999537652 | -1.9134251124 |
| 0             | 0            | 0            | 1.590997316   |
| 1.1677076967  | 0.2363691601 | 0.9999537652 | -1.1803723473 |
| 1.1141438549  | 0.7739256145 | 0.9999537652 | -1.0269431281 |
| 2.7957660672  | 0.7054104954 | 0.9999537652 | 0             |
| -6.9736190158 | 0.2250321147 | 0.9999537652 | 6.9133480437  |
| 1.0101562266  | 0.9563857453 | 0.9999537652 | 1.172226521   |
| 1.1258807493  | 0.8274596914 | 0.9999537652 | 1.1904333214  |
| 1.2569286632  | 0.4708436512 | 0.9999537652 | 1.6437272007  |
| -3.9215158983 | 0.008582     | 0.9999537652 | 1.0718602436  |
| 1.066045755   | 0.8628794928 | 0.9999537652 | 1.3262779288  |
| -1.0733333034 | 0.6209825436 | 0.9999537652 | 1.0668806596  |
| -1.078395208  | 0.758988149  | 0.9999537652 | 1.0297715698  |
| 1.1210965818  | 0.615269012  | 0.9999537652 | -1.0588590735 |
| 1.045800646   | 0.7980389604 | 0.9999537652 | 1.189909816   |

gene\_expression\_table

|               |              |              |               |
|---------------|--------------|--------------|---------------|
| -1.2123808693 | 0.634676617  | 0.9999537652 | -1.3033454715 |
| -3.5762417122 | 0.0565212365 | 0.9999537652 | -1.9669634371 |
| -1.0322777638 | 0.8837704544 | 0.9999537652 | 1.2300622311  |
| 1.5801796798  | 0.152917217  | 0.9999537652 | -1.0198510119 |
| -1.0824110166 | 0.570533428  | 0.9999537652 | 1.1302993515  |
| 1.14839599    | 0.3737651183 | 0.9999537652 | 1.0409062867  |
| 0             | 0            | 0            | 2.996475627   |
| 1.2640282506  | 0.3076123179 | 0.9999537652 | 1.0441811362  |
| 1.2810033213  | 0.3919221315 | 0.9999537652 | 1.0453848234  |
| 50.1857468784 | 0.1243843017 | 0.9999537652 | 2.1222754974  |
| 1.8630879566  | 0.6335231072 | 0.9999537652 | 1.2397607065  |
| -1.1395639687 | 0.4888899096 | 0.9999537652 | 1.1972295133  |
| 27.3932715777 | 0.197482392  | 0.9999537652 | 2.6940349656  |
| -1.3813923947 | 0.4839809798 | 0.9999537652 | -1.3657603362 |
| 1.1788909975  | 0.3836650913 | 0.9999537652 | -1.1434333717 |
| -1.3391564615 | 0.6615202665 | 0.9999537652 | 1.2783607527  |
| 1.3092955734  | 0.1839755236 | 0.9999537652 | 1.0251623935  |
| -1.0545696323 | 0.6901013043 | 0.9999537652 | 1.2377892869  |
| 1.3569373401  | 0.3223644107 | 0.9999537652 | -1.0833288836 |
| 1.030004704   | 0.7938435542 | 0.9999537652 | 1.2340058613  |
| -1.0583197908 | 0.6553839162 | 0.9999537652 | 1.1280225449  |
| -1.1037584049 | 0.4819030095 | 0.9999537652 | 1.3240350194  |
| 1.3551194596  | 0.6392288335 | 0.9999537652 | -1.5222509939 |
| -1.1167245966 | 0.6358810949 | 0.9999537652 | 1.0706614599  |
| -1.0667502471 | 0.8601191448 | 0.9999537652 | 1.0575599908  |
| 1.1303461451  | 0.5106746627 | 0.9999537652 | 1.2202302902  |
| -1.1859709831 | 0.5771238034 | 0.9999537652 | 1.3473969921  |
| 1.058219814   | 0.7688706394 | 0.9999537652 | 1.1851543742  |
| -1.0074216738 | 0.9789079253 | 0.9999537652 | -1.6743503122 |
| -1.3172599084 | 0.4594814912 | 0.9999537652 | 1.7769750169  |
| -1.0092908548 | 0.9572458139 | 0.9999537652 | 1.2590998485  |
| -1.1371677032 | 0.3594311832 | 0.9999537652 | 1.157767079   |
| 1.2287729562  | 0.4484940492 | 0.9999537652 | 1.0170875148  |
| 1.5090449182  | 0.3503203014 | 0.9999537652 | 1.2348393609  |
| 1.3150692508  | 0.1676436074 | 0.9999537652 | 1.1086181017  |
| 1.0138213848  | 0.944721706  | 0.9999537652 | 1.2202682297  |
| 1.0841390398  | 0.7912039592 | 0.9999537652 | 1.0132218493  |
| -1.161001029  | 0.5451100332 | 0.9999537652 | 1.7401841879  |
| -1.0329658574 | 0.8824878845 | 0.9999537652 | -1.1727110236 |
| 1.0260370961  | 0.9581725913 | 0.9999537652 | -1.3133336704 |
| 1.2039644173  | 0.4821575665 | 0.9999537652 | 1.1873279498  |
| -1.1619717093 | 0.8742377907 | 0.9999537652 | -1.1446993292 |
| -1.6118021191 | 0.1271792192 | 0.9999537652 | -1.1600083213 |
| -1.2152885933 | 0.5840786338 | 0.9999537652 | -1.1107648757 |
| 2.7933974408  | 0.6948713406 | 0.9999537652 | -2.2257756135 |
| -1.0998935066 | 0.7943292286 | 0.9999537652 | 1.6977523584  |
| 0             | 0            | 0            | -1.1248877899 |
| 1.2226446453  | 0.6279738043 | 0.9999537652 | 1.5917227281  |
| -5.4573937553 | 0.0302926077 | 0.9999537652 | -1.3657600172 |

gene\_expression\_table

|               |              |              |               |
|---------------|--------------|--------------|---------------|
| -1.3253156225 | 0.1065876722 | 0.9999537652 | 1.2623357232  |
| -1.0116548238 | 0.9350114087 | 0.9999537652 | 1.0812438028  |
| 1.1567773451  | 0.561829627  | 0.9999537652 | 1.1737626996  |
| 1.0481015402  | 0.9024854325 | 0.9999537652 | -1.0381057738 |
| -1.9095359099 | 0.109736308  | 0.9999537652 | 1.4158562612  |
| 1.3354181433  | 0.1757843497 | 0.9999537652 | -1.2267145309 |
| -1.1332932171 | 0.8338881712 | 0.9999537652 | -1.7032006509 |
| 1.003883175   | 0.9755488749 | 0.9999537652 | 1.1167538524  |
| -1.0758170349 | 0.7634161678 | 0.9999537652 | 1.1874743817  |
| 1.1277691601  | 0.7674569686 | 0.9999537652 | -1.2025447152 |
| 1.8400912182  | 0.3191027864 | 0.9999537652 | 1.3176900479  |
| -1.4208363008 | 0.1579929172 | 0.9999537652 | 1.1505900379  |
| 1.1125683164  | 0.6295560649 | 0.9999537652 | 1.5340625254  |
| 1.1738319622  | 0.2047657435 | 0.9999537652 | 1.216866972   |
| 1.7002236452  | 0.281275669  | 0.9999537652 | 1.0309277703  |
| 6.3075231393  | 0.4869753402 | 0.9999537652 | -1.3095105362 |
| 1.0860562686  | 0.6925009202 | 0.9999537652 | 1.1017263253  |
| -1.0439858303 | 0.9249190988 | 0.9999537652 | 1.4103835193  |
| -2.2249719371 | 0.0108973053 | 0.9999537652 | -1.2731411559 |
| 1.2986022509  | 0.1515148823 | 0.9999537652 | 1.3544323277  |
| 1.8506577326  | 0.043698759  | 0.9999537652 | -1.1037129679 |
| 1.0596933394  | 0.8779706269 | 0.9999537652 | -1.2767601004 |
| 1.4820785793  | 0.6115468577 | 0.9999537652 | -2.0137065482 |
| -1.1940150405 | 0.3587783604 | 0.9999537652 | 1.1539226643  |
| 1.140553923   | 0.6227044993 | 0.9999537652 | 1.1734390491  |
| 0             | 0            | 0            | 12.7732027325 |
| -1.0531838867 | 0.8162927034 | 0.9999537652 | 1.0366246806  |
| 1.4580514267  | 0.4302251493 | 0.9999537652 | -1.0843710368 |
| 1.0105397644  | 0.9556398671 | 0.9999537652 | 1.3204262674  |
| -1.1162443808 | 0.8322481261 | 0.9999537652 | 1.1758729474  |
| -1.1757141981 | 0.8163603748 | 0.9999537652 | 1.5535398187  |
| 1.2045695872  | 0.3520233776 | 0.9999537652 | -1.0579234063 |
| 1.3026120258  | 0.7419394862 | 0.9999537652 | 1.4921254839  |
| 1.0207704433  | 0.8971301718 | 0.9999537652 | -1.1116659376 |
| -1.1414188877 | 0.8119548858 | 0.9999537652 | -1.3413401502 |
| 1.2765725207  | 0.4460767873 | 0.9999537652 | 1.9175744387  |
| -1.3465581125 | 0.552974065  | 0.9999537652 | -1.0766624679 |
| 0             | 0            | 0            | 0             |
| 1.03027242    | 0.8144767173 | 0.9999537652 | 1.0619488531  |
| -6.9736190158 | 0.2250321147 | 0.9999537652 | 4.9527501949  |
| -1.0271646873 | 0.948943424  | 0.9999537652 | 1.9870000726  |
| -1.0135973112 | 0.9048691625 | 0.9999537652 | 1.0460668524  |
| 1.3903023218  | 0.1934120009 | 0.9999537652 | -1.3897039857 |
| 4.5505976667  | 0.5581917296 | 0.9999537652 | 0             |
| 6.3128691894  | 0.4819234968 | 0.9999537652 | -1.4728350147 |
| -1.0727609084 | 0.8156721765 | 0.9999537652 | 1.0278217942  |
| 1.1282078904  | 0.3648449436 | 0.9999537652 | 1.1209291596  |
| 0             | 0            | 0            | -1.4671767304 |
| -1.2147312824 | 0.1369595011 | 0.9999537652 | 1.0331078259  |

gene\_expression\_table

|               |              |              |               |
|---------------|--------------|--------------|---------------|
| 1.0095636091  | 0.9502098008 | 0.9999537652 | -1.1143538443 |
| 1.1087515229  | 0.8129797173 | 0.9999537652 | 1.038863527   |
| 4.0401294047  | 0.1919830592 | 0.9999537652 | -2.5054827272 |
| 27.3923972417 | 0.1964503009 | 0.9999537652 | -1.9178288323 |
| 1.035192206   | 0.8551984834 | 0.9999537652 | 1.1385985186  |
| 0             | 0            | 0            | -2.1685158072 |
| -1.2561586628 | 0.2892683759 | 0.9999537652 | 1.1787864514  |
| 1.0554694455  | 0.7464126477 | 0.9999537652 | 1.0280072859  |
| 1.1254904498  | 0.868834698  | 0.9999537652 | 1.3740474488  |
| -1.2985324355 | 0.5416642819 | 0.9999537652 | -1.0947578512 |
| 1.2958082392  | 0.3716357545 | 0.9999537652 | -1.1288486095 |
| 1.5130808007  | 0.6581389655 | 0.9999537652 | 2.9978319446  |
| 1.2240090143  | 0.5382183742 | 0.9999537652 | -1.7191465338 |
| -1.2631157829 | 0.3151974122 | 0.9999537652 | -1.2646640326 |
| 2.7933974408  | 0.6948713406 | 0.9999537652 | -5.4409910544 |
| -1.4094813119 | 0.4085009965 | 0.9999537652 | -2.4330476915 |
| -2.1317846121 | 0.464748747  | 0.9999537652 | -1.5243363277 |
| -4.1053393351 | 0.1096088376 | 0.9999537652 | -1.7948605068 |
| 1.0817237071  | 0.8551786859 | 0.9999537652 | 1.2718037447  |
| 2.7933974408  | 0.6948713406 | 0.9999537652 | 0             |
| 1.1032793086  | 0.5968085246 | 0.9999537652 | -1.2772393174 |
| -1.0418792254 | 0.8418212978 | 0.9999537652 | -1.1256928502 |
| -1.1558758044 | 0.430189498  | 0.9999537652 | -1.2114550843 |
| 2.9944437113  | 0.1614341308 | 0.9999537652 | -1.1788803767 |
| 1.4860705144  | 0.1576785593 | 0.9999537652 | -1.4926140709 |
| 2.3097704908  | 0.020711205  | 0.9999537652 | 1.0865197787  |
| 3.3114514989  | 0.2937601664 | 0.9999537652 | 1.8474131398  |
| 1.1204373452  | 0.6567437196 | 0.9999537652 | 1.0801961346  |
| -1.0491370297 | 0.707772094  | 0.9999537652 | -1.2229886814 |
| -1.6733656555 | 0.1187970193 | 0.9999537652 | -1.010526951  |
| 0             | 0            | 0            | 3.1913304638  |
| 1.1402567378  | 0.4912097448 | 0.9999537652 | -1.2236670793 |
| 0             | 0            | 0            | 2.9988886918  |
| -1.5875118025 | 0.7206200909 | 0.9999537652 | 0             |
| -6.9764533263 | 0.259053074  | 0.9999537652 | -1.5763711172 |
| 1.1750989557  | 0.7277280591 | 0.9999537652 | -2.0649908954 |
| 9.8205505243  | 0.3808402052 | 0.9999537652 | -1.144309199  |
| -1.2893763188 | 0.3840196263 | 0.9999537652 | 1.1326198253  |
| -1.0568432489 | 0.9498385621 | 0.9999537652 | -2.5663005569 |
| 2.7933974408  | 0.6948713406 | 0.9999537652 | 0             |
| -1.0260851178 | 0.9393087011 | 0.9999537652 | -1.1445768905 |
| -3.9839141918 | 0.0994854876 | 0.9999537652 | 1.9432271302  |
| -1.1411720019 | 0.3984779253 | 0.9999537652 | -1.1580868739 |
| 1.003274034   | 0.9868547831 | 0.9999537652 | 1.300981969   |
| -1.2252746757 | 0.5669367796 | 0.9999537652 | 1.4159900243  |
| 1.3137214689  | 0.2660352841 | 0.9999537652 | 1.0407557179  |
| 1.2321037674  | 0.3502609252 | 0.9999537652 | 1.4126742545  |
| 1.0673525149  | 0.7268465479 | 0.9999537652 | -1.0461598799 |
| 1.0632895484  | 0.7168778537 | 0.9999537652 | 1.1548697487  |

gene\_expression\_table

|               |              |              |               |
|---------------|--------------|--------------|---------------|
| 1.8494309744  | 0.0124988136 | 0.9999537652 | 1.0585565708  |
| 0             | 0            | 0            | -3.1516923425 |
| -1.8773533293 | 0.2045219025 | 0.9999537652 | -3.2889322436 |
| -1.3972192265 | 0.2512087309 | 0.9999537652 | 1.2490339579  |
| 0             | 0            | 0            | -4.3195903374 |
| 20.4048055231 | 0.246079472  | 0.9999537652 | -2.579624099  |
| -1.0348720175 | 0.8426920372 | 0.9999537652 | 1.1864169507  |
| -1.5014101828 | 0.0931797002 | 0.9999537652 | 1.2147010314  |
| -1.2863901983 | 0.5895187731 | 0.9999537652 | 1.8978804472  |
| 0             | 0            | 0            | 2.996475627   |
| 2.4216796225  | 0.4425859126 | 0.9999537652 | -5.3583704783 |
| 1.0933476234  | 0.5766174706 | 0.9999537652 | 1.1038848703  |
| 0             | 0            | 0            | -5.0960079851 |
| -1.0265069324 | 0.9366443631 | 0.9999537652 | -1.1264295403 |
| 2.5766519373  | 0.3876342521 | 0.9999537652 | -1.1613446338 |
| 1.0482613331  | 0.9171305993 | 0.9999537652 | -1.7224004393 |
| 1.1262386404  | 0.5701295562 | 0.9999537652 | 1.1930563997  |
| -1.1295449742 | 0.5760775667 | 0.9999537652 | 1.2501801898  |
| 1.2647301303  | 0.4768291636 | 0.9999537652 | -1.1654303074 |
| -1.1745200145 | 0.5143347864 | 0.9999537652 | 1.1660617042  |
| -1.080358607  | 0.5984886236 | 0.9999537652 | 1.0090087368  |
| 1.0580476554  | 0.6408378458 | 0.9999537652 | -1.2894960279 |
| 0             | 0            | 0            | 6.908559683   |
| 1.0100314058  | 0.9347893395 | 0.9999537652 | -1.0160970018 |
| -1.0237573864 | 0.8409906768 | 0.9999537652 | 1.079085824   |
| 1.1869395158  | 0.5858755113 | 0.9999537652 | 1.0178076744  |
| -1.0011733583 | 0.9960520473 | 0.9999537652 | -1.1211876898 |
| -2.2920785558 | 0.0304938839 | 0.9999537652 | -1.0036376062 |
| 0             | 0            | 0            | 2.996475627   |
| -1.369107775  | 0.7698015353 | 0.9999537652 | 1.1933100121  |
| -1.0720169699 | 0.6876417036 | 0.9999537652 | 1.1470758138  |
| 6.3075231393  | 0.4869556403 | 0.9999537652 | 1.2400291296  |
| -1.2013925844 | 0.4362888778 | 0.9999537652 | 1.098002369   |
| 0             | 0            | 0            | -1.3617381988 |
| 1.0967049244  | 0.5128419913 | 0.9999537652 | -1.1643787204 |
| -1.0506428809 | 0.8924886902 | 0.9999537652 | -1.0455086903 |
| 2.3315363418  | 0.4566542164 | 0.9999537652 | -3.382249888  |
| 1.2802408629  | 0.2017579673 | 0.9999537652 | -1.1216823014 |
| -1.0187949736 | 0.9569466613 | 0.9999537652 | -1.3378731131 |
| 0             | 0            | 0            | 2.996475627   |
| 1.1885220664  | 0.3587791553 | 0.9999537652 | -1.0155038661 |
| 2.7933974408  | 0.6948713406 | 0.9999537652 | 0             |
| -1.0651579331 | 0.679000415  | 0.9999537652 | 1.0353632944  |
| 2.7933974408  | 0.6948713406 | 0.9999537652 | -5.3589986948 |
| 1.3826309223  | 0.7324947448 | 0.9999537652 | 1.0669823991  |
| 2.7933974408  | 0.6948713406 | 0.9999537652 | -5.3589986948 |
| -2.9545470831 | 0.1381910896 | 0.9999537652 | -2.2056994995 |
| -1.0191619084 | 0.9357712783 | 0.9999537652 | 1.1468336262  |
| 2.3306483975  | 0.4666935134 | 0.9999537652 | 1.2763409465  |

gene\_expression\_table

|               |              |              |               |
|---------------|--------------|--------------|---------------|
| 1.3212876093  | 0.4589448151 | 0.9999537652 | 1.1469441772  |
| 1.2346032743  | 0.769881264  | 0.9999537652 | 1.5745887665  |
| 1.1426619303  | 0.281657303  | 0.9999537652 | 1.2945900793  |
| -5.6856811034 | 0.0708024766 | 0.9999537652 | 1.0222616753  |
| -1.3846532604 | 0.0390506095 | 0.9999537652 | -1.0067949779 |
| -1.1518064782 | 0.5433812731 | 0.9999537652 | 1.2336874045  |
| -6.9764533263 | 0.2590613606 | 0.9999537652 | 1.9409927546  |
| 2.7933974408  | 0.6948713406 | 0.9999537652 | -2.5222250873 |
| 1.0702762257  | 0.8655447696 | 0.9999537652 | -1.3324877564 |
| -1.1009757193 | 0.6143019146 | 0.9999537652 | -1.1981424176 |
| -1.16556239   | 0.2548259605 | 0.9999537652 | -1.7839917098 |
| -1.0055348611 | 0.9858555724 | 0.9999537652 | -1.0540126521 |
| -1.0503749378 | 0.8865261346 | 0.9999537652 | 1.7006901418  |
| 1.4626324078  | 0.1631155282 | 0.9999537652 | -1.4027096298 |
| -1.4730496058 | 0.6732334461 | 0.9999537652 | -3.0614198881 |
| 0             | 0            | 0            | 14.7373490367 |
| -1.0692287614 | 0.7633988418 | 0.9999537652 | -1.2546382484 |
| -1.0117429258 | 0.9349354386 | 0.9999537652 | -1.1014096766 |
| 1.4445739763  | 0.381073472  | 0.9999537652 | -1.1648456324 |
| -1.076896491  | 0.8708644127 | 0.9999537652 | -1.0890762164 |
| 1.2481337696  | 0.6688274541 | 0.9999537652 | -1.8727008913 |
| -1.0041911222 | 0.989330489  | 0.9999537652 | -1.242686304  |
| 1.723299787   | 0.326882136  | 0.9999537652 | -1.2662973836 |
| 1.1635326013  | 0.7271969569 | 0.9999537652 | 1.114585203   |
| 0             | 0            | 0            | 14.7475552392 |
| 2.7933974408  | 0.6948713406 | 0.9999537652 | -5.3819632848 |
| 1.3477725595  | 0.4399269373 | 0.9999537652 | -1.1879753381 |
| -1.4925372765 | 0.465824438  | 0.9999537652 | 2.2593124731  |
| 1.1496195342  | 0.6033705128 | 0.9999537652 | -1.4150328943 |
| 0             | 0            | 0            | 1.4387127179  |
| -1.0435404671 | 0.8176269062 | 0.9999537652 | -1.1798832126 |
| 1.8471118167  | 0.5852930979 | 0.9999537652 | -1.8588429871 |
| -1.3490631423 | 0.0978929328 | 0.9999537652 | -1.2049946809 |
| -1.2069889858 | 0.612065593  | 0.9999537652 | 1.3255711295  |
| -1.3350370223 | 0.1253098265 | 0.9999537652 | -1.2048231468 |
| 1.2874792726  | 0.3086108591 | 0.9999537652 | 1.0529403468  |
| -1.2472792498 | 0.2521246042 | 0.9999537652 | -1.6047681636 |
| 1.101516099   | 0.6396713219 | 0.9999537652 | -1.3332393553 |
| -1.1804683847 | 0.5356429508 | 0.9999537652 | -1.2983501761 |
| 1.0300692006  | 0.9020707217 | 0.9999537652 | -1.3337744313 |
| 27.5316084765 | 0.2201932174 | 0.9999537652 | -1.4680135518 |
| 0             | 0            | 0            | 2.996475627   |
| -6.9764533263 | 0.2590696501 | 0.9999537652 | 4.9527501949  |
| 4.5544554512  | 0.5691533303 | 0.9999537652 | -3.8916086545 |
| 1.3309197109  | 0.1757473688 | 0.9999537652 | -1.188297243  |
| 1.2633807446  | 0.1966684808 | 0.9999537652 | 1.5401176291  |
| 2.7957660672  | 0.705412829  | 0.9999537652 | -1.859280336  |
| -1.1548762608 | 0.5225638973 | 0.9999537652 | 1.2488812764  |
| 1.3243506448  | 0.5320346529 | 0.9999537652 | -1.2247309377 |



gene\_expression\_table

|               |              |              |               |
|---------------|--------------|--------------|---------------|
| 1.533161959   | 0.0491946337 | 0.9999537652 | 1.1977619604  |
| -1.0717904323 | 0.7889708395 | 0.9999537652 | -1.064035082  |
| -1.237796356  | 0.1126891461 | 0.9999537652 | -1.015724449  |
| -1.188360529  | 0.6232964391 | 0.9999537652 | 1.3461492645  |
| -1.5875118025 | 0.7206479341 | 0.9999537652 | -1.1441751338 |
| 0             | 0            | 0            | 6.9133480437  |
| -2.0024109583 | 0.4495787895 | 0.9999537652 | -1.4622935059 |
| -1.1947261676 | 0.3466229975 | 0.9999537652 | -1.0233594013 |
| -1.1021391198 | 0.8877864867 | 0.9999537652 | 1.2747132884  |
| 1.1449402332  | 0.4824849835 | 0.9999537652 | 1.1188752579  |
| -1.0051533246 | 0.9725527122 | 0.9999537652 | -1.3630846845 |
| 4.5505976667  | 0.5581320915 | 0.9999537652 | -6.0051456121 |
| 1.1295538257  | 0.4850482306 | 0.9999537652 | -1.0983976852 |
| 1.1246169603  | 0.8844676345 | 0.9999537652 | -1.391616432  |
| 1.1242038379  | 0.5457442046 | 0.9999537652 | -1.0803109059 |
| 1.5578828389  | 0.0220292604 | 0.9999537652 | -1.1843267308 |
| -1.5881570201 | 0.7143327638 | 0.9999537652 | 0             |
| -1.1717840466 | 0.4515170202 | 0.9999537652 | 1.3173342465  |
| -1.0256145833 | 0.8499474304 | 0.9999537652 | -1.3345891775 |
| 15.0880352532 | 0.2953486088 | 0.9999537652 | -1.7798895855 |
| -1.1157917445 | 0.7450228049 | 0.9999537652 | -1.5048451516 |
| 1.0140479765  | 0.9434313142 | 0.9999537652 | -1.437422123  |
| 0             | 0            | 0            | 6.908559683   |
| 1.3706606753  | 0.0598083558 | 0.9999537652 | 1.0923047088  |
| -1.9066285216 | 0.4112774978 | 0.9999537652 | -1.2777730283 |
| -6.7517740937 | 0.0419513922 | 0.9999537652 | 2.5722386983  |
| 1.1319091165  | 0.7831001171 | 0.9999537652 | -1.3777696496 |
| 4.5505976667  | 0.5580739888 | 0.9999537652 | 1.2400291296  |
| 1.0909783654  | 0.6274446261 | 0.9999537652 | 1.0670688866  |
| 1.4975734907  | 0.3458065418 | 0.9999537652 | -1.5285117081 |
| 1.6829190363  | 0.1390886019 | 0.9999537652 | -1.1919250463 |
| -1.0869804889 | 0.6819309838 | 0.9999537652 | 1.1525254813  |
| 1.33173066    | 0.028576996  | 0.9999537652 | -1.2691742637 |
| -1.1747670113 | 0.2540224687 | 0.9999537652 | -1.0663451385 |
| -1.4275159746 | 0.2759763719 | 0.9999537652 | 1.18892017    |
| 1.1696360235  | 0.3088325449 | 0.9999537652 | -1.2025900524 |
| -1.1722508884 | 0.8428824786 | 0.9999537652 | 1.2713908921  |
| 1.0555799377  | 0.7241720264 | 0.9999537652 | -1.0901859096 |
| 2.0147014689  | 0.3721795711 | 0.9999537652 | -1.1556233835 |
| 2.7933974408  | 0.6948713406 | 0.9999537652 | 4.9527501949  |
| -1.1380651639 | 0.6066000933 | 0.9999537652 | -1.0496882456 |
| 1.062412966   | 0.7447679072 | 0.9999537652 | 1.0380839978  |
| -1.0627347782 | 0.7600386745 | 0.9999537652 | -1.1898303489 |
| 1.0519687938  | 0.8082980864 | 0.9999537652 | -1.1414733898 |
| 9.8205505243  | 0.3808400613 | 0.9999537652 | 0             |
| -1.0278953273 | 0.9000976283 | 0.9999537652 | -1.0018371968 |
| -1.4630808444 | 0.1782572544 | 0.9999537652 | 1.3181249798  |
| 1.2516520703  | 0.8156421472 | 0.9999537652 | 1.0400262591  |
| 1.2995690157  | 0.171542552  | 0.9999537652 | 1.1865783268  |

gene\_expression\_table

|               |              |              |               |
|---------------|--------------|--------------|---------------|
| -1.0882400522 | 0.7076339672 | 0.9999537652 | 1.075252377   |
| 0             | 0            | 0            | 2.996475627   |
| 20.4054563206 | 0.2419036965 | 0.9999537652 | 2.1558362933  |
| 1.0801248131  | 0.491649292  | 0.9999537652 | 1.2768987782  |
| -1.1738833733 | 0.5226578916 | 0.9999537652 | 1.0336256636  |
| 1.0878396345  | 0.5273168526 | 0.9999537652 | 1.0513353475  |
| 1.8432954066  | 0.2236075826 | 0.9999537652 | -1.3442663154 |
| 2.7933974408  | 0.6948713406 | 0.9999537652 | 0             |
| -1.2143691758 | 0.3544002851 | 0.9999537652 | -1.1655745862 |
| 1.1662222053  | 0.4562854682 | 0.9999537652 | 1.2436089475  |
| -1.401904019  | 0.2472442398 | 0.9999537652 | 1.0794803462  |
| -1.0186711384 | 0.8971204062 | 0.9999537652 | 1.1264869246  |
| -1.0069789698 | 0.9695716553 | 0.9999537652 | -1.0317026069 |
| 1.255213919   | 0.4875133401 | 0.9999537652 | -1.3362378512 |
| -1.1017553008 | 0.8828498074 | 0.9999537652 | -1.0717919967 |
| 2.7933974408  | 0.6948713406 | 0.9999537652 | 8.8710369702  |
| 1.1007577316  | 0.7192817647 | 0.9999537652 | -1.0395103963 |
| -1.074889252  | 0.6327375011 | 0.9999537652 | -1.0638087584 |
| 1.0874974211  | 0.7221844391 | 0.9999537652 | -1.1641973137 |
| 1.1835739482  | 0.4941725174 | 0.9999537652 | 1.1899200692  |
| -1.3053434151 | 0.1550000765 | 0.9999537652 | -1.1238045626 |
| -1.0442477743 | 0.8885048732 | 0.9999537652 | 1.0859108159  |
| -1.27257017   | 0.3013612787 | 0.9999537652 | 1.0769881468  |
| 1.1686557743  | 0.7253217997 | 0.9999537652 | -1.081402095  |
| 1.3567051147  | 0.2934434383 | 0.9999537652 | 1.3529685916  |
| 1.2353666622  | 0.5651499799 | 0.9999537652 | -1.0273076086 |
| -1.24184085   | 0.1357825302 | 0.9999537652 | 1.0678206553  |
| 0             | 0            | 0            | 2.9985540909  |
| 1.6093235429  | 0.0132432862 | 0.9999537652 | 1.4655468751  |
| -1.0787980506 | 0.6666700524 | 0.9999537652 | -1.1044661758 |
| -1.1798239495 | 0.7428940477 | 0.9999537652 | 1.0089175415  |
| -1.3127867632 | 0.6062290758 | 0.9999537652 | 1.1626468016  |
| -1.1914071896 | 0.3957176394 | 0.9999537652 | -1.1015222444 |
| 1.2599271245  | 0.6972195229 | 0.9999537652 | 1.0786082953  |
| 1.3983587352  | 0.0576265418 | 0.9999537652 | 1.2213058754  |
| 1.1543733253  | 0.4741066448 | 0.9999537652 | 1.2213990352  |
| 8.064174035   | 0.4240320162 | 0.9999537652 | 1.1562511914  |
| -1.3650719983 | 0.2778900758 | 0.9999537652 | 1.4806806294  |
| -1.3675201086 | 0.0800610462 | 0.9999537652 | -1.0172407608 |
| 22.1075168104 | 0.2294608814 | 0.9999537652 | -2.1739698775 |
| -1.1445309719 | 0.7097940718 | 0.9999537652 | -1.2262159896 |
| -2.1075975357 | 0.0321670009 | 0.9999537652 | -1.4281142667 |
| 1.0920083237  | 0.530870447  | 0.9999537652 | 1.2753754649  |
| 1.0802548627  | 0.4878635771 | 0.9999537652 | 1.1535898994  |
| -1.4423423054 | 0.2431163149 | 0.9999537652 | 1.3167123989  |
| 1.1914277133  | 0.8117858645 | 0.9999537652 | -2.6746008127 |
| -1.227317217  | 0.1188376775 | 0.9999537652 | -1.2176496266 |
| 1.1739489549  | 0.3704706621 | 0.9999537652 | 1.1727729024  |
| 1.3185287977  | 0.4225721752 | 0.9999537652 | 1.24422459    |

gene\_expression\_table

|               |              |              |               |
|---------------|--------------|--------------|---------------|
| -3.4177105345 | 0.0721308729 | 0.9999537652 | -1.102767722  |
| 1.2921120854  | 0.2339903854 | 0.9999537652 | 1.2267060643  |
| 9.8205505243  | 0.3808399173 | 0.9999537652 | 0             |
| 1.3516771602  | 0.1607729428 | 0.9999537652 | 1.3293516924  |
| 1.0096129644  | 0.9562403855 | 0.9999537652 | 1.1304867999  |
| 2.5978004522  | 0.277637291  | 0.9999537652 | -1.0841692731 |
| 1.0788599929  | 0.774192317  | 0.9999537652 | -1.0163230861 |
| 1.2685621488  | 0.0863134473 | 0.9999537652 | 1.1718520249  |
| -2.9572400577 | 0.3881281056 | 0.9999537652 | 1.2400291296  |
| -1.440762573  | 0.0863682673 | 0.9999537652 | 1.3046555537  |
| -1.2124067144 | 0.6333881725 | 0.9999537652 | 1.2092416821  |
| 1.1492128484  | 0.4478258965 | 0.9999537652 | -1.0837443005 |
| 1.0998136985  | 0.4725090168 | 0.9999537652 | -1.0782430267 |
| 1.1158451632  | 0.5531193435 | 0.9999537652 | 1.3819985049  |
| -1.0012407479 | 0.9958769486 | 0.9999537652 | -1.0616573598 |
| -1.1290947109 | 0.8331932331 | 0.9999537652 | 1.1305195109  |
| 1.1244438725  | 0.4036630742 | 0.9999537652 | -1.0784962119 |
| -1.1466990632 | 0.3550906332 | 0.9999537652 | -1.1604670357 |
| 4.7614107123  | 0.1436014112 | 0.9999537652 | -4.7163364444 |
| -1.1645887681 | 0.283792707  | 0.9999537652 | 1.0506505876  |
| -1.1215916118 | 0.5345978191 | 0.9999537652 | -1.0678385594 |
| 1.0453445941  | 0.7560709922 | 0.9999537652 | 1.4176145398  |
| 1.2768593149  | 0.6323521332 | 0.9999537652 | 1.317164407   |
| 1.0113371931  | 0.9552229391 | 0.9999537652 | 1.0483733949  |
| -1.0683830416 | 0.7239610195 | 0.9999537652 | -1.199627656  |
| 1.0442984967  | 0.8634975451 | 0.9999537652 | -1.0345958421 |
| 1.1037494409  | 0.4771034464 | 0.9999537652 | 1.0778311073  |
| 6.2246906171  | 0.0773126051 | 0.9999537652 | -1.3718108746 |
| 1.0564165883  | 0.92058328   | 0.9999537652 | -1.0370232947 |
| -1.081012484  | 0.7021624299 | 0.9999537652 | -1.0460724035 |
| -1.6377847339 | 0.3273846753 | 0.9999537652 | -1.592297434  |
| 1.6246623472  | 0.6510231429 | 0.9999537652 | -1.4429295936 |
| 2.3326953621  | 0.4514643039 | 0.9999537652 | 3.1865842129  |
| 1.0638877532  | 0.7576345508 | 0.9999537652 | 1.0612499777  |
| 1.1794321532  | 0.4258584282 | 0.9999537652 | -1.0073229861 |
| -1.1368516183 | 0.5569782897 | 0.9999537652 | 1.0147499216  |
| 0             | 0            | 0            | 2.2924151284  |
| -1.2597567125 | 0.2704320998 | 0.9999537652 | -1.0347217198 |
| 1.922991318   | 0.1255960091 | 0.9999537652 | 1.362158545   |
| 1.3553688224  | 0.2661285345 | 0.9999537652 | 1.2032425627  |
| -1.4756779277 | 0.6448525036 | 0.9999537652 | 1.394244722   |
| 2.7933974408  | 0.6948713406 | 0.9999537652 | -1.8594983184 |
| 2.7933974408  | 0.6948713406 | 0.9999537652 | -1.6599272513 |
| 1.5051934407  | 0.1804255097 | 0.9999537652 | 1.1916968684  |
| -1.0693000945 | 0.8288362771 | 0.9999537652 | -1.1998618237 |
| 6.3075231393  | 0.4869457937 | 0.9999537652 | -1.2686400182 |
| -1.3445680738 | 0.372349338  | 0.9999537652 | -1.1268479345 |
| 2.7933974408  | 0.6948713406 | 0.9999537652 | 2.996475627   |
| -1.9092068046 | 0.2147738672 | 0.9999537652 | 1.9531401374  |

gene\_expression\_table

|               |              |              |               |
|---------------|--------------|--------------|---------------|
| -1.031455842  | 0.8546947883 | 0.9999537652 | -1.250079026  |
| 1.1616975475  | 0.2269343045 | 0.9999537652 | 1.0861474191  |
| -2.1307903719 | 0.4720844383 | 0.9999537652 | 1.3545358667  |
| 1.0871941419  | 0.6866437355 | 0.9999537652 | 1.2317975363  |
| 0             | 0            | 0            | -1.7821643145 |
| -1.0807774387 | 0.5366111533 | 0.9999537652 | 1.0709330902  |
| 2.4330469542  | 0.3069239716 | 0.9999537652 | 1.4413839312  |
| 1.3588576256  | 0.8006552884 | 0.9999537652 | 2.0824386352  |
| 1.0016019147  | 0.9962278894 | 0.9999537652 | 1.4080056231  |
| -1.107492687  | 0.4839843171 | 0.9999537652 | 1.0933086642  |
| -1.1293058762 | 0.7122271104 | 0.9999537652 | 1.2596904875  |
| -1.10949614   | 0.5902593743 | 0.9999537652 | -1.0535176252 |
| 1.2221798058  | 0.3318411053 | 0.9999537652 | 1.2158060398  |
| -1.0790790138 | 0.690051948  | 0.9999537652 | 1.131597295   |
| 1.1930433859  | 0.3104405349 | 0.9999537652 | 1.1410183531  |
| 1.3180633219  | 0.4151269929 | 0.9999537652 | 1.0933396906  |
| 41.4235246733 | 0.1435027196 | 0.9999537652 | 1.3236157985  |
| 1.1362156476  | 0.3349083945 | 0.9999537652 | 1.4850410783  |
| 1.7343571244  | 0.4255612591 | 0.9999537652 | 1.8954581254  |
| -1.0085170112 | 0.991234555  | 0.9999537652 | -2.377796608  |
| 1.3302832209  | 0.1780130593 | 0.9999537652 | -1.0616604374 |
| 1.2414529377  | 0.3941776292 | 0.9999537652 | 1.0357921779  |
| -1.2065250574 | 0.5754375187 | 0.9999537652 | -1.2032930043 |
| -1.5844926328 | 0.2928898311 | 0.9999537652 | -1.0037720183 |
| 4.5544554512  | 0.5691513355 | 0.9999537652 | 2.996475627   |
| 1.066114904   | 0.7790125986 | 0.9999537652 | 1.1878512321  |
| -1.4218851597 | 0.2021505194 | 0.9999537652 | -1.3619244823 |
| 1.4125493175  | 0.47515701   | 0.9999537652 | 1.3870656775  |
| 8.064174035   | 0.4240303822 | 0.9999537652 | 4.126189409   |
| 1.0400521022  | 0.9177764795 | 0.9999537652 | 1.2276228864  |
| -2.5802899275 | 0.1924459151 | 0.9999537652 | 1.2763856823  |
| 1.2527770819  | 0.1066714357 | 0.9999537652 | 1.1312379668  |
| 1.1224328358  | 0.5916307399 | 0.9999537652 | 1.0107264157  |
| 1.3713677664  | 0.3053737283 | 0.9999537652 | -1.1459184691 |
| 0             | 0            | 0            | 2.2217890137  |
| -1.1604679895 | 0.2940377987 | 0.9999537652 | -1.1506336998 |
| -1.1921357948 | 0.2759612186 | 0.9999537652 | -1.1100726194 |
| 1.3941900765  | 0.6650574701 | 0.9999537652 | 2.2834391572  |
| 3.0768986443  | 0.1959607209 | 0.9999537652 | 1.0382391686  |
| -1.1555924555 | 0.4341371267 | 0.9999537652 | -1.184213977  |
| 1.0216276708  | 0.9346436078 | 0.9999537652 | -1.0535711679 |
| 1.3457117447  | 0.2805936965 | 0.9999537652 | -1.000820421  |
| 1.0267631725  | 0.8452280229 | 0.9999537652 | -1.1514684104 |
| 0             | 0            | 0            | 8.8639046058  |
| -1.1601290564 | 0.516889599  | 0.9999537652 | -1.1278152979 |
| 1.3885632347  | 0.4929415852 | 0.9999537652 | 1.0063324498  |
| 2.2471394157  | 0.0189373217 | 0.9999537652 | 1.4150427547  |
| 2.7957660672  | 0.7054151637 | 0.9999537652 | 1.2588770129  |
| -2.0025825252 | 0.4567145214 | 0.9999537652 | 15.7262184124 |

gene\_expression\_table

|                |              |              |               |
|----------------|--------------|--------------|---------------|
| -2.0033446699  | 0.4339646293 | 0.9999537652 | -1.144309199  |
| 2.5603529545   | 0.2532101709 | 0.9999537652 | -1.8594983184 |
| -1.5881166222  | 0.7239157085 | 0.9999537652 | 1.4517758292  |
| 2.7933974408   | 0.6948713406 | 0.9999537652 | 0             |
| 0              | 0            | 0            | -1.7246537898 |
| 1.2647653865   | 0.1570837287 | 0.9999537652 | 1.0510027534  |
| 1.17415232     | 0.4340552989 | 0.9999537652 | -1.1272227054 |
| -1.1453283303  | 0.4586340933 | 0.9999537652 | 1.001533894   |
| -1.0109410966  | 0.9645016042 | 0.9999537652 | 1.3736676544  |
| 1.0854325391   | 0.7432343103 | 0.9999537652 | -1.1825488267 |
| 1.0157484293   | 0.9584759501 | 0.9999537652 | -1.4315187639 |
| -1.0584868311  | 0.7109160884 | 0.9999537652 | -1.0332508069 |
| -1.066643349   | 0.7879640303 | 0.9999537652 | 1.2679822722  |
| -17.0527724669 | 0.1064674885 | 0.9999537652 | 23.5244756139 |
| -1.0771318433  | 0.5961924429 | 0.9999537652 | -1.1969186018 |
| -1.0806525169  | 0.6186272643 | 0.9999537652 | -1.1376608345 |
| -1.0670395817  | 0.6906317793 | 0.9999537652 | -1.0384683378 |
| -1.0923861226  | 0.5300534522 | 0.9999537652 | -1.2921474481 |
| 1.1162834585   | 0.9271558935 | 0.9999537652 | -1.1635587355 |
| 1.0279946931   | 0.9485359441 | 0.9999537652 | -1.2218815242 |
| -1.2262938314  | 0.5088047563 | 0.9999537652 | -1.3316817021 |
| 4.5505976667   | 0.5580173132 | 0.9999537652 | -9.7554110723 |
| 0              | 0            | 0            | 1.5908108123  |
| -1.0379260793  | 0.9585357071 | 0.9999537652 | -1.3078946307 |
| 1.1185766111   | 0.5261353187 | 0.9999537652 | 1.2652835739  |
| -1.0610340974  | 0.6352119047 | 0.9999537652 | 1.165299022   |
| 1.1183928359   | 0.7551947418 | 0.9999537652 | -1.6297897138 |
| 1.3952142421   | 0.3136682314 | 0.9999537652 | -1.1019946937 |
| -1.0776652847  | 0.6300458984 | 0.9999537652 | -1.4437596553 |
| 1.7532109063   | 0.115603547  | 0.9999537652 | -1.238353717  |
| -3.1291666749  | 0.0323045313 | 0.9999537652 | -1.1738675494 |
| -1.1761859055  | 0.2807690586 | 0.9999537652 | -1.237028424  |
| -6.9762758667  | 0.253866474  | 0.9999537652 | 0             |
| 1.2571214932   | 0.5072000291 | 0.9999537652 | -1.1059553934 |
| 1.9050337421   | 0.4951423099 | 0.9999537652 | -1.5885342441 |
| -1.7667103191  | 0.0516754793 | 0.9999537652 | -1.229096511  |
| 1.108572056    | 0.6372818569 | 0.9999537652 | -1.2760778257 |
| -1.0073959536  | 0.9552518798 | 0.9999537652 | -1.1140168664 |
| -1.0927147006  | 0.8102482266 | 0.9999537652 | 1.6895558503  |
| -1.3917747917  | 0.6966176058 | 0.9999537652 | 1.2763409465  |
| -1.1162201988  | 0.4428337072 | 0.9999537652 | -1.2254009866 |
| 0              | 0            | 0            | 1.6460548351  |
| 74.7406392012  | 0.0902614905 | 0.9999537652 | -2.331907554  |
| 1.121447126    | 0.5192161512 | 0.9999537652 | -1.1111108703 |
| 1.7635124906   | 0.008027     | 0.9999537652 | -1.13989203   |
| -1.121495293   | 0.504863659  | 0.9999537652 | -1.1147231155 |
| 1.0254725855   | 0.9116949242 | 0.9999537652 | -1.041905817  |
| 1.0225186495   | 0.8799908906 | 0.9999537652 | 1.1147364043  |
| -1.3365311834  | 0.2589043729 | 0.9999537652 | -1.1252678765 |

gene\_expression\_table

|               |              |              |               |
|---------------|--------------|--------------|---------------|
| 1.5708934584  | 0.0639454711 | 0.9999537652 | -1.0607646103 |
| 0             | 0            | 0            | -1.1508383804 |
| 2.7933974408  | 0.6948713406 | 0.9999537652 | 4.9527501949  |
| 22.1075168104 | 0.2294502413 | 0.9999537652 | -1.5297710554 |
| 1.3149506351  | 0.6126934083 | 0.9999537652 | 1.9360947879  |
| -1.1202350469 | 0.5247359333 | 0.9999537652 | 1.1210033521  |
| 1.096561783   | 0.9223104206 | 0.9999537652 | 1.0991765388  |
| -1.0032480039 | 0.9808188243 | 0.9999537652 | 1.089455734   |
| 1.0960528897  | 0.454923575  | 0.9999537652 | -1.1091269249 |
| 1.1751994235  | 0.604872244  | 0.9999537652 | -1.5168971076 |
| 2.3849251739  | 0.1342034118 | 0.9999537652 | -1.8602423201 |
| 1.3865458338  | 0.3120228366 | 0.9999537652 | -1.0956757346 |
| -1.0687261513 | 0.8067809387 | 0.9999537652 | -1.2195832731 |
| 1.1487009072  | 0.3427191929 | 0.9999537652 | -1.2315562255 |
| 1.8883256627  | 0.2298542657 | 0.9999537652 | -1.0781260401 |
| 1.3533738682  | 0.2072420923 | 0.9999537652 | -1.2497470341 |
| 3.7523729726  | 0.0228427497 | 0.9999537652 | -1.037692948  |
| 1.1297591131  | 0.7740804817 | 0.9999537652 | 1.1531578644  |
| -1.0957129989 | 0.6679741783 | 0.9999537652 | -1.1184962775 |
| 0             | 0            | 0            | 2.996475627   |
| -1.2690039376 | 0.3510550613 | 0.9999537652 | -1.564877706  |
| 1.3671044512  | 0.5766577112 | 0.9999537652 | -1.3150685428 |
| -1.4054122033 | 0.2746591465 | 0.9999537652 | 1.0105456338  |
| -1.1614998763 | 0.8773192096 | 0.9999537652 | 1.4044603321  |
| 4.5505976667  | 0.5579619574 | 0.9999537652 | 2.996475627   |
| 2.034148039   | 0.0298009468 | 0.9999537652 | 1.8925242337  |
| -1.0560631224 | 0.7876252281 | 0.9999537652 | -1.4243489174 |
| -1.0257731938 | 0.8832127477 | 0.9999537652 | -1.396063674  |
| -1.0819600142 | 0.9162018126 | 0.9999537652 | 1.8800448668  |
| -1.059763157  | 0.6562260482 | 0.9999537652 | -1.2091630533 |
| 2.7933974408  | 0.6948713406 | 0.9999537652 | 9.7116702472  |
| -1.1665877442 | 0.3067627174 | 0.9999537652 | -1.2715614061 |
| -1.1736489462 | 0.5486352989 | 0.9999537652 | -1.0066599369 |
| 5.3380256565  | 0.0156260469 | 0.9999537652 | -1.2497649194 |
| -7.9898319344 | 0.1016094332 | 0.9999537652 | -1.6583880401 |
| -1.3943722837 | 0.2810161615 | 0.9999537652 | -1.3430625169 |
| 1.0923252707  | 0.6273565521 | 0.9999537652 | -1.14433415   |
| 1.2295632006  | 0.2271871332 | 0.9999537652 | -1.258471424  |
| 1.8448460942  | 0.5998287668 | 0.9999537652 | 1.1432021086  |
| 1.3739897277  | 0.068115637  | 0.9999537652 | -1.0352370402 |
| 1.158980172   | 0.5161906027 | 0.9999537652 | -1.1968846508 |
| -1.2476608323 | 0.4103709005 | 0.9999537652 | 1.1698301311  |
| 1.0349118986  | 0.9686502377 | 0.9999537652 | 2.0333774675  |
| -1.1282287082 | 0.809946751  | 0.9999537652 | 1.1754629295  |
| 1.7269704105  | 0.0883616283 | 0.9999537652 | 1.0253547832  |
| -1.0219105051 | 0.9393650362 | 0.9999537652 | 1.007761306   |
| -1.0952452944 | 0.5299035712 | 0.9999537652 | -1.2113266497 |
| -1.2001233705 | 0.2622684935 | 0.9999537652 | -1.042434304  |
| -1.0183979066 | 0.9260254173 | 0.9999537652 | 1.1566994192  |

gene\_expression\_table

|                |              |              |               |
|----------------|--------------|--------------|---------------|
| -1.198195383   | 0.4959201598 | 0.9999537652 | -1.0606110772 |
| -1.4030428403  | 0.0724612686 | 0.9999537652 | -1.2136864031 |
| 1.2296435103   | 0.3851019127 | 0.9999537652 | -1.1438542276 |
| 1.3690053512   | 0.111283279  | 0.9999537652 | -1.0525401628 |
| 1.3864669654   | 0.3394864491 | 0.9999537652 | 1.0642466534  |
| 1.0008393685   | 0.9982239774 | 0.9999537652 | -1.3758941261 |
| 1.1270368536   | 0.5878964781 | 0.9999537652 | -1.3781556017 |
| -1.1413158663  | 0.5920147714 | 0.9999537652 | -1.1157738555 |
| 37.88539235    | 0.1565996658 | 0.9999537652 | 26.4411849241 |
| 1.2156533336   | 0.5248574419 | 0.9999537652 | -1.6081792972 |
| -1.0619382556  | 0.6125019144 | 0.9999537652 | -1.0643066081 |
| -1.4577097056  | 0.1143646838 | 0.9999537652 | -1.0517559564 |
| 1.1905159456   | 0.3655253456 | 0.9999537652 | -1.1385879714 |
| -1.1092580418  | 0.5965093906 | 0.9999537652 | -1.354750432  |
| 2.9119618468   | 0.1763896963 | 0.9999537652 | 6.707469253   |
| -1.0011916999  | 0.9949560529 | 0.9999537652 | -1.0495031741 |
| 1.0479923404   | 0.9389039023 | 0.9999537652 | -1.4906613952 |
| -1.0677096669  | 0.609517423  | 0.9999537652 | 1.0663484326  |
| 1.0095442985   | 0.9845388759 | 0.9999537652 | -1.5880330355 |
| 1.4429296921   | 0.5032933253 | 0.9999537652 | -1.767251894  |
| 1.0554462378   | 0.7825083483 | 0.9999537652 | -1.0443113605 |
| 1.0453838347   | 0.8271625761 | 0.9999537652 | 1.0328079488  |
| -1.72984743    | 0.164721529  | 0.9999537652 | -1.0523531675 |
| -1.0874203217  | 0.6907193161 | 0.9999537652 | -1.2412605831 |
| 1.1076035217   | 0.7647017847 | 0.9999537652 | -1.265919561  |
| -1.1762678581  | 0.2620300614 | 0.9999537652 | 1.0163970146  |
| 1.0061021724   | 0.9705245818 | 0.9999537652 | 1.0584477901  |
| 1.0990216257   | 0.4967736937 | 0.9999537652 | 1.2905892642  |
| 1.288858212    | 0.2150198825 | 0.9999537652 | 1.201666433   |
| -1.085738098   | 0.5301478823 | 0.9999537652 | 1.1119377878  |
| 1.0394195103   | 0.8609192306 | 0.9999537652 | 1.2256613922  |
| 3.4767359435   | 0.0267163168 | 0.9999537652 | 1.3864139466  |
| -12.9852817769 | 0.1147836011 | 0.9999537652 | -1.8253078054 |
| -1.1395883354  | 0.5081418135 | 0.9999537652 | 1.0399149366  |
| 1.270881016    | 0.4249577277 | 0.9999537652 | -1.3025507027 |
| -1.008469205   | 0.9935810449 | 0.9999537652 | -6.0729310777 |
| 1.1398257343   | 0.5036738    | 0.9999537652 | 1.0034738992  |
| 1.0444695573   | 0.8610315331 | 0.9999537652 | 1.3187975868  |
| 1.5363100135   | 0.0008527    | 0.9999537652 | -1.0181838004 |
| -1.1459811318  | 0.5203393478 | 0.9999537652 | 1.1909725355  |
| 4.5505976667   | 0.5579078161 | 0.9999537652 | 10.8262784008 |
| -1.2396398271  | 0.6548980824 | 0.9999537652 | 1.2080752003  |
| -1.1435108721  | 0.4851994266 | 0.9999537652 | 1.4973084741  |
| 1.0473636192   | 0.8147014548 | 0.9999537652 | 1.380553022   |
| -1.009681737   | 0.957387029  | 0.9999537652 | 1.1437374984  |
| 0              | 0            | 0            | 4.9527501949  |
| 1.3243004386   | 0.1840623748 | 0.9999537652 | 1.0620776654  |
| -1.0016468537  | 0.9945574887 | 0.9999537652 | -1.1331938418 |
| 1.4862493016   | 0.1305295567 | 0.9999537652 | 1.2167195052  |

gene\_expression\_table

|               |              |              |               |
|---------------|--------------|--------------|---------------|
| 1.2606170699  | 0.7467425389 | 0.9999537652 | -1.2762710378 |
| -1.0085355311 | 0.9930274221 | 0.9999537652 | 6.7469554847  |
| -1.279760684  | 0.4417888989 | 0.9999537652 | -1.1120738424 |
| -1.1732230158 | 0.3698777128 | 0.9999537652 | 1.1294203839  |
| 1.1301468848  | 0.4878364901 | 0.9999537652 | 1.0509668345  |
| -1.2783650587 | 0.0823788055 | 0.9999537652 | 1.1126129626  |
| 2.1376103502  | 0.2145050301 | 0.9999537652 | 1.8671030839  |
| -1.1926358913 | 0.3914649458 | 0.9999537652 | 1.1601003761  |
| 1.1806192557  | 0.2654571496 | 0.9999537652 | -1.2399849193 |
| 2.7933974408  | 0.6948713406 | 0.9999537652 | 0             |
| 2.7957660672  | 0.7054174994 | 0.9999537652 | 2.996475627   |
| -1.0565714786 | 0.8363427098 | 0.9999537652 | 1.0828596188  |
| 1.0856152202  | 0.7281121749 | 0.9999537652 | -1.1120640616 |
| -1.1614097668 | 0.3485184741 | 0.9999537652 | 1.0631226698  |
| -1.3621920484 | 0.0405352221 | 0.9999537652 | 1.3013555217  |
| -2.1245975834 | 0.207144066  | 0.9999537652 | 1.1381268463  |
| -1.0202683945 | 0.964543078  | 0.9999537652 | 1.0185827607  |
| 0             | 0            | 0            | 2.996475627   |
| 2.7933974408  | 0.6948713406 | 0.9999537652 | -3.041999427  |
| 8.064174035   | 0.4240287484 | 0.9999537652 | 2.996475627   |
| 1.4007542765  | 0.6400421221 | 0.9999537652 | 1.5431835469  |
| -1.2403987282 | 0.1333629274 | 0.9999537652 | 1.0755240756  |
| 1.1158583321  | 0.9297250264 | 0.9999537652 | 1.4067915718  |
| 0             | 0            | 0            | 0             |
| -1.0160526977 | 0.9120035799 | 0.9999537652 | 1.3734949884  |
| 1.331919152   | 0.2319828673 | 0.9999537652 | 1.2423153014  |
| 1.1997507743  | 0.3364210972 | 0.9999537652 | 1.3706479508  |
| 8.064174035   | 0.4240271148 | 0.9999537652 | 10.8337816869 |
| -1.5467714784 | 0.4110922294 | 0.9999537652 | -1.3808948998 |
| -1.3673139529 | 0.7635965496 | 0.9999537652 | -1.5073881707 |
| -1.4106961981 | 0.1051859254 | 0.9999537652 | -1.0003425849 |
| 2.3737552332  | 0.2446495601 | 0.9999537652 | 1.7808322773  |
| -1.0969197434 | 0.8159830747 | 0.9999537652 | -1.0754168758 |
| 1.1904657605  | 0.3641545068 | 0.9999537652 | 1.3632184647  |
| -1.391716287  | 0.3433888257 | 0.9999537652 | 1.160111376   |
| 1.9471359044  | 0.0148763596 | 0.9999537652 | 1.2568111805  |
| 1.0890761302  | 0.5985788091 | 0.9999537652 | 1.4249006961  |
| 1.1628621834  | 0.340014116  | 0.9999537652 | 1.3225988361  |
| -1.3050140938 | 0.4739802318 | 0.9999537652 | 1.0285858458  |
| -1.5743983764 | 0.3044546883 | 0.9999537652 | 1.4674995293  |
| -1.1536291367 | 0.3713029403 | 0.9999537652 | -1.1515336279 |
| -1.0462278488 | 0.7965403152 | 0.9999537652 | 1.114382676   |
| -1.2475151308 | 0.4540136069 | 0.9999537652 | 1.3834546127  |
| -1.1155159907 | 0.5753425947 | 0.9999537652 | 1.05589636    |
| -1.2856821655 | 0.1783973495 | 0.9999537652 | -1.0006069154 |
| -1.0142477981 | 0.9835465205 | 0.9999537652 | -1.299636469  |
| -1.037087901  | 0.7882868401 | 0.9999537652 | 1.1207970828  |
| 2.7933974408  | 0.6948713406 | 0.9999537652 | 2.996475627   |
| 1.603906631   | 0.6805122765 | 0.9999537652 | 1.9347708844  |



gene\_expression\_table

|               |              |              |               |
|---------------|--------------|--------------|---------------|
| 9.8205505243  | 0.3808397734 | 0.9999537652 | -1.701433652  |
| -1.0552948741 | 0.7089127195 | 0.9999537652 | 1.2113283328  |
| -1.0089452257 | 0.9925445593 | 0.9999537652 | -1.2358596711 |
| 1.0028817055  | 0.9883552948 | 0.9999537652 | -1.0504011122 |
| 0             | 0            | 0            | 2.996475627   |
| 2.7933974408  | 0.6948713406 | 0.9999537652 | -1.4686861114 |
| -1.2190851278 | 0.2844719609 | 0.9999537652 | -1.025860876  |
| -1.4190701167 | 0.1412615685 | 0.9999537652 | 1.0628214622  |
| -1.0410255504 | 0.8429548836 | 0.9999537652 | 1.2871328815  |
| 0             | 0            | 0            | 4.9527501949  |
| 1.5773769852  | 0.2543259556 | 0.9999537652 | 1.0041611919  |
| 1.4508486595  | 0.2584518573 | 0.9999537652 | 1.8984175443  |
| -1.6425083755 | 0.1718528299 | 0.9999537652 | -1.5635062569 |
| -1.026120188  | 0.956984998  | 0.9999537652 | 1.1177948481  |
| 1.4358565683  | 0.4882930092 | 0.9999537652 | -2.289224136  |
| 1.8841048031  | 0.3818416655 | 0.9999537652 | -1.2810613201 |
| 1.153523318   | 0.7748544789 | 0.9999537652 | 1.4680647468  |
| -1.0732711947 | 0.7150019683 | 0.9999537652 | 1.198283077   |
| 0             | 0            | 0            | 0             |
| -1.0369526723 | 0.8794477607 | 0.9999537652 | 1.2378159073  |
| 1.1366214264  | 0.6229028616 | 0.9999537652 | 1.3233448108  |
| -1.124642383  | 0.5898544516 | 0.9999537652 | 1.1127106533  |
| -1.2443703945 | 0.3713577277 | 0.9999537652 | -1.0861542894 |
| 0             | 0            | 0            | 9.7116702472  |
| 1.0523998499  | 0.7040782092 | 0.9999537652 | 1.2034554223  |
| 1.0936472057  | 0.7459326692 | 0.9999537652 | 1.2207818039  |
| 1.2469835681  | 0.2648557894 | 0.9999537652 | 1.4962757462  |
| -1.1144665121 | 0.4828094965 | 0.9999537652 | 1.0525164226  |
| 8.064174035   | 0.4240254816 | 0.9999537652 | -3.6579608117 |
| 11.5766527773 | 0.3455597772 | 0.9999537652 | -1.0101500723 |
| 2.7933974408  | 0.6948713406 | 0.9999537652 | 6.914120153   |
| 1.0506286177  | 0.7301171223 | 0.9999537652 | 1.2546702541  |
| 4.5505976667  | 0.5578027471 | 0.9999537652 | 2.996475627   |
| -1.0239566571 | 0.9304545966 | 0.9999537652 | 1.2083115563  |
| 1.1025661277  | 0.5327864216 | 0.9999537652 | 1.6175594145  |
| 1.0546290961  | 0.6357355779 | 0.9999537652 | -1.0018920057 |
| 1.1042168676  | 0.628219332  | 0.9999537652 | 1.2848202536  |
| 1.3243181014  | 0.0323560678 | 0.9999537652 | 1.3574533881  |
| 1.570657352   | 0.541554012  | 0.9999537652 | -2.858326524  |
| -1.3784114725 | 0.4127458278 | 0.9999537652 | 1.1852540552  |
| 1.097881638   | 0.5072593192 | 0.9999537652 | 1.194308948   |
| 1.1457000343  | 0.6482659151 | 0.9999537652 | -1.2269769112 |
| -1.178850416  | 0.7079512524 | 0.9999537652 | -1.0834206278 |
| 1.6097021916  | 0.374518625  | 0.9999537652 | -1.1164222069 |
| 1.085205972   | 0.6741413386 | 0.9999537652 | 1.0545249725  |
| 1.0616020983  | 0.647917281  | 0.9999537652 | 1.0557093976  |
| 1.2521045812  | 0.2335091981 | 0.9999537652 | 1.3200420653  |
| -1.3468525069 | 0.450839795  | 0.9999537652 | 1.0578168979  |
| -1.3820549165 | 0.3129754329 | 0.9999537652 | 1.8628875485  |

gene\_expression\_table

|                |              |              |               |
|----------------|--------------|--------------|---------------|
| -1.4047168188  | 0.6308422194 | 0.9999537652 | 1.9460841409  |
| 6.3075231393   | 0.4869314728 | 0.9999537652 | 6.908559683   |
| 0              | 0            | 0            | 2.9988886918  |
| 0              | 0            | 0            | 8.8639046058  |
| 0              | 0            | 0            | 2.9988886918  |
| 0              | 0            | 0            | 2.9985540909  |
| 1.4374492998   | 0.0479566374 | 0.9999537652 | 1.1306146945  |
| 13.3324809638  | 0.3187921671 | 0.9999537652 | -6.43677014   |
| 6.3075231393   | 0.4869171328 | 0.9999537652 | 0             |
| 1.1172990819   | 0.6234749095 | 0.9999537652 | -1.0820055751 |
| -1.4768020436  | 0.6834230519 | 0.9999537652 | -2.1290021891 |
| 1.3588921917   | 0.7999879612 | 0.9999537652 | 8.8639046058  |
| 1.1668522709   | 0.341842075  | 0.9999537652 | 1.3626947754  |
| -1.2617840437  | 0.4076763673 | 0.9999537652 | -1.0745562869 |
| -1.2112341051  | 0.5188011103 | 0.9999537652 | -1.1550769623 |
| 1.0249910597   | 0.8913507876 | 0.9999537652 | -1.3156221067 |
| 0              | 0            | 0            | -5.3608259368 |
| -1.8388155927  | 0.3031935442 | 0.9999537652 | 1.0540033075  |
| 1.2750541257   | 0.7269643024 | 0.9999537652 | 1.2872098348  |
| 2.7957660672   | 0.7054198357 | 0.9999537652 | -1.0487016324 |
| -1.4184563758  | 0.2966975136 | 0.9999537652 | -1.117146965  |
| -1.2192458286  | 0.1190536578 | 0.9999537652 | 1.1503829113  |
| -1.1054711699  | 0.5191917061 | 0.9999537652 | 1.028452815   |
| 1.1272506675   | 0.8145911962 | 0.9999537652 | -1.4475676167 |
| 23.8617041368  | 0.2201356    | 0.9999537652 | -2.0460434872 |
| -1.805355848   | 0.0886677608 | 0.9999537652 | -1.0581841245 |
| 8.064174035    | 0.4240238486 | 0.9999537652 | 0             |
| -1.3509108602  | 0.53397695   | 0.9999537652 | -1.0292208205 |
| 0              | 0            | 0            | -1.1241083699 |
| -1.6604569504  | 0.125188802  | 0.9999537652 | -1.2048913056 |
| -1.2826793645  | 0.5782811392 | 0.9999537652 | -1.0565679627 |
| -1.0934532261  | 0.6656456822 | 0.9999537652 | 1.0230531569  |
| -1.5611997839  | 0.0468219528 | 0.9999537652 | -1.1323269197 |
| -1.4994755676  | 0.008111     | 0.9999537652 | -1.0598687636 |
| 2.7933974408   | 0.6948713406 | 0.9999537652 | -1.8579915692 |
| -1.1202106492  | 0.4403463424 | 0.9999537652 | 1.3192202191  |
| -12.9849514806 | 0.1075631758 | 0.9999537652 | 2.996475627   |
| 1.0046736267   | 0.9783308205 | 0.9999537652 | 1.0758365074  |
| -4.7472651917  | 0.1001644684 | 0.9999537652 | 9.7116702472  |
| -1.0346083795  | 0.8758056174 | 0.9999537652 | 1.1640706073  |
| 1.2907921107   | 0.1348007733 | 0.9999537652 | 1.0196228717  |
| -1.1619717093  | 0.874250091  | 0.9999537652 | 1.1094441646  |
| -1.1001857288  | 0.6578223073 | 0.9999537652 | -1.0557292257 |
| 1.2336408201   | 0.4454709972 | 0.9999537652 | -1.0515965497 |
| 1.0835518633   | 0.8597856819 | 0.9999537652 | 1.2940082969  |
| -1.1650017951  | 0.4580178901 | 0.9999537652 | -1.3198935578 |
| 0              | 0            | 0            | 14.7271569203 |
| 2.7933974408   | 0.6948713406 | 0.9999537652 | -1.4680135518 |
| -1.0018973682  | 0.9915574558 | 0.9999537652 | -1.3619766871 |

gene\_expression\_table

|               |              |              |               |
|---------------|--------------|--------------|---------------|
| -1.1639879069 | 0.5000166322 | 0.9999537652 | 1.0328289677  |
| -1.4958408987 | 0.1268256912 | 0.9999537652 | 1.3841568482  |
| 1.2636997902  | 0.4769312577 | 0.9999537652 | 1.7028332523  |
| 1.3555910646  | 0.6328180489 | 0.9999537652 | -1.0168197456 |
| -1.5881570201 | 0.7141169061 | 0.9999537652 | 2.7978679986  |
| 0             | 0            | 0            | 8.8700459102  |
| 9.8205505243  | 0.3808396294 | 0.9999537652 | -1.8680077128 |
| 1.4002317187  | 0.0349336644 | 0.9999537652 | 1.2377837467  |
| -1.3186764966 | 0.1372763265 | 0.9999537652 | 1.0361673413  |
| 1.0308103059  | 0.876649923  | 0.9999537652 | 1.1261121939  |
| 2.2235544392  | 0.1676839488 | 0.9999537652 | 1.0722064199  |
| 1.1882440599  | 0.4368395155 | 0.9999537652 | 1.3034883583  |
| -1.0633740706 | 0.8867774259 | 0.9999537652 | 1.1941105127  |
| 1.3881753996  | 0.0970312347 | 0.9999537652 | 1.0067252044  |
| 1.2621193273  | 0.4185580758 | 0.9999537652 | -1.4367042876 |
| -1.7518156055 | 0.2450454017 | 0.9999537652 | 1.3317722472  |
| -1.369113427  | 0.5520806069 | 0.9999537652 | -1.0746435454 |
| 1.7564707436  | 0.0926236485 | 0.9999537652 | 1.3362107554  |
| -1.0518597919 | 0.8643254424 | 0.9999537652 | 1.0763732538  |
| 6.3075231393  | 0.4869027739 | 0.9999537652 | -5.3583704783 |
| 1.2769351731  | 0.3728681407 | 0.9999537652 | 1.8632032351  |
| -1.7279819296 | 0.4990673139 | 0.9999537652 | 1.2560473231  |
| -1.1646731514 | 0.4898019399 | 0.9999537652 | 1.0147508311  |
| 1.1348984553  | 0.9169119154 | 0.9999537652 | -1.5226286376 |
| -1.6934349257 | 0.004637     | 0.9999537652 | -1.3002035426 |
| 1.1898218348  | 0.7383238351 | 0.9999537652 | -1.0868937382 |
| 1.6341257697  | 0.1918959912 | 0.9999537652 | -1.1521491098 |
| 2.8197560167  | 0.354326402  | 0.9999537652 | 2.9983256599  |
| 1.0611819785  | 0.739021242  | 0.9999537652 | 1.043761478   |
| -1.1490354002 | 0.4436559828 | 0.9999537652 | -1.0718542709 |
| -1.3417312931 | 0.470349407  | 0.9999537652 | -1.4754797778 |
| -2.4114503608 | 0.2961651996 | 0.9999537652 | -2.314898282  |
| 2.8235674082  | 0.0978681259 | 0.9999537652 | -1.6773238966 |
| -1.4752136658 | 0.2658112389 | 0.9999537652 | -1.454395254  |
| -1.7063800139 | 0.4441716791 | 0.9999537652 | 4.1926556018  |
| -1.7316657157 | 0.4577741195 | 0.9999537652 | 1.4584010041  |
| -1.5875118025 | 0.7206758318 | 0.9999537652 | -1.3884544962 |
| 0             | 0            | 0            | 6.908559683   |
| 1.0434520965  | 0.8234402572 | 0.9999537652 | 1.1458319212  |
| 1.7298869115  | 0.1577178278 | 0.9999537652 | -1.5886586298 |
| -1.0812271213 | 0.7826111778 | 0.9999537652 | -1.1502930532 |
| 0             | 0            | 0            | 22.424363668  |
| 1.1033117594  | 0.7595856256 | 0.9999537652 | -1.3296540485 |
| -1.4920566811 | 0.5136528766 | 0.9999537652 | 1.241384699   |
| 1.2882164802  | 0.4132820401 | 0.9999537652 | 1.0373448136  |
| 1.0018615075  | 0.9952056803 | 0.9999537652 | -1.143948355  |
| -1.02760247   | 0.9101577628 | 0.9999537652 | -1.3832648534 |
| -1.19001074   | 0.2063291628 | 0.9999537652 | -1.2700122278 |
| 1.5217013145  | 0.449353971  | 0.9999537652 | -1.3959796701 |

gene\_expression\_table

|                |              |              |               |
|----------------|--------------|--------------|---------------|
| -1.2321249909  | 0.7350882853 | 0.9999537652 | 1.1898778424  |
| -1.1097332106  | 0.5128270969 | 0.9999537652 | -1.0932120778 |
| 1.2915813014   | 0.2099713613 | 0.9999537652 | 1.2503345085  |
| -1.0808922345  | 0.5831084768 | 0.9999537652 | -1.0902816092 |
| -1.2658372721  | 0.5601823836 | 0.9999537652 | -1.1643439296 |
| 4.6415988335   | 0.0733894789 | 0.9999537652 | 2.0936238317  |
| 1.0488816194   | 0.8088733406 | 0.9999537652 | -1.1246437894 |
| -1.016615192   | 0.8994712105 | 0.9999537652 | -1.0221184396 |
| 1.2670445632   | 0.2363032287 | 0.9999537652 | -1.1770564973 |
| 1.0396384317   | 0.9173510855 | 0.9999537652 | 1.4194920823  |
| -4.3251326698  | 0.1491179034 | 0.9999537652 | -1.2074994903 |
| -1.7020144588  | 0.3674739902 | 0.9999537652 | -1.4855934874 |
| 325.0013340373 | 0.0217669979 | 0.9999537652 | -1.9213028425 |
| 1.0383140723   | 0.8375300453 | 0.9999537652 | 1.3960268977  |
| -1.0015038314  | 0.9912287402 | 0.9999537652 | 1.2376295816  |
| 1.2299264923   | 0.5370080757 | 0.9999537652 | 1.081433166   |
| 1.0532901703   | 0.8749556871 | 0.9999537652 | 1.2596920488  |
| 1.0712863643   | 0.6864735673 | 0.9999537652 | -1.2906536651 |
| -1.1448144121  | 0.9147526127 | 0.9999537652 | -1.1592847852 |
| 1.5018264344   | 0.0423761195 | 0.9999537652 | 1.1118717605  |
| -1.2368292141  | 0.5978223739 | 0.9999537652 | -1.2641822333 |
| 0              | 0            | 0            | 4.9527501949  |
| 0              | 0            | 0            | 0             |
| -1.1815702935  | 0.5122585302 | 0.9999537652 | 1.0159277583  |
| 1.1428524152   | 0.6448369303 | 0.9999537652 | -1.5199923942 |
| 4.2494730656   | 0.1149727218 | 0.9999537652 | 1.1511394531  |
| 2.7933974408   | 0.6948713406 | 0.9999537652 | 6.908559683   |
| 1.514788658    | 0.2764513638 | 0.9999537652 | 1.1169723904  |
| -1.1473244287  | 0.4876515394 | 0.9999537652 | -1.1111702606 |
| -1.1941506748  | 0.7699414064 | 0.9999537652 | -1.0959134036 |
| -1.0109137605  | 0.9884181605 | 0.9999537652 | -1.1366231445 |
| 2.1372951012   | 0.0437574031 | 0.9999537652 | 1.245932158   |
| 1.1515629863   | 0.3141757134 | 0.9999537652 | 1.1586941576  |
| 1.1162834585   | 0.9271703652 | 0.9999537652 | -1.6213283288 |
| 1.5719856594   | 0.5411479595 | 0.9999537652 | -1.3582894632 |
| -1.2846434244  | 0.3426871819 | 0.9999537652 | 1.2896108775  |
| -1.0980091122  | 0.8297371405 | 0.9999537652 | -1.1224899608 |
| 1.0466477925   | 0.8392974151 | 0.9999537652 | 1.3896430926  |
| 1.1754033384   | 0.7228069388 | 0.9999537652 | 1.1885750115  |
| 2.7933974408   | 0.6948713406 | 0.9999537652 | 4.9527501949  |
| -1.0990278222  | 0.4786336867 | 0.9999537652 | 1.1717634946  |
| 1.1394224315   | 0.4648059622 | 0.9999537652 | 1.1897179107  |
| -1.13806285    | 0.3440926076 | 0.9999537652 | -1.0380334123 |
| 1.5727245322   | 0.5727884888 | 0.9999537652 | -1.626869178  |
| 1.0629395588   | 0.8294812321 | 0.9999537652 | 1.1349667763  |
| 1.2396156377   | 0.4521721018 | 0.9999537652 | 1.1565809603  |
| 1.4857799254   | 0.1165239995 | 0.9999537652 | 1.1748773187  |
| 6.3130691196   | 0.479781225  | 0.9999537652 | 4.9527501949  |
| 2.7933974408   | 0.6948713406 | 0.9999537652 | 1.9416545697  |

gene\_expression\_table

|                |              |              |               |
|----------------|--------------|--------------|---------------|
| 1.2526375214   | 0.8112063186 | 0.9999537652 | -1.5093307449 |
| 1.0395601932   | 0.8613372028 | 0.9999537652 | -1.0576656324 |
| 1.5355940002   | 0.1361021634 | 0.9999537652 | 1.1064187527  |
| -1.274390642   | 0.2293124134 | 0.9999537652 | 1.3072621753  |
| -1.1746950837  | 0.7151220353 | 0.9999537652 | 1.0574694687  |
| 1.3092285135   | 0.3107915979 | 0.9999537652 | 1.0621093729  |
| 2.6478843491   | 0.4839523426 | 0.9999537652 | 1.6620430936  |
| -1.5374498673  | 0.3643932466 | 0.9999537652 | -1.3143165521 |
| -1.1723855247  | 0.5330615417 | 0.9999537652 | -1.0141056811 |
| -1.4220832417  | 0.2374696045 | 0.9999537652 | 1.2471804733  |
| 1.1398230858   | 0.7799197742 | 0.9999537652 | 2.7532875246  |
| -1.2013589017  | 0.6009400267 | 0.9999537652 | -1.0425223956 |
| -10.2105791297 | 0.0964986804 | 0.9999537652 | 1.2594537582  |
| 1.2526375214   | 0.8110779782 | 0.9999537652 | 1.1891564272  |
| 4.5505976667   | 0.5577515992 | 0.9999537652 | 1.2400291296  |
| -1.1376671745  | 0.5399309518 | 0.9999537652 | -1.0564385649 |
| -1.8189146456  | 0.1019639261 | 0.9999537652 | 1.1966582884  |
| 1.2640003427   | 0.1546602684 | 0.9999537652 | -1.0294899909 |
| 2.7933974408   | 0.6948713406 | 0.9999537652 | 0             |
| 1.4629074171   | 0.4454622236 | 0.9999537652 | 1.1466012146  |
| -6.9762758667  | 0.2543312413 | 0.9999537652 | 1.9418822056  |
| 1.0519783983   | 0.8202323084 | 0.9999537652 | 1.1612218985  |
| -1.4753668421  | 0.3068409055 | 0.9999537652 | 2.0690108874  |
| -1.1556447285  | 0.7563453294 | 0.9999537652 | 1.1522248271  |
| 1.1209573618   | 0.6209824743 | 0.9999537652 | 1.2357807983  |
| 1.0618958585   | 0.7377986777 | 0.9999537652 | 1.6018531497  |
| -1.0958421877  | 0.4865456432 | 0.9999537652 | 1.1540524872  |
| 1.1268625863   | 0.6209213197 | 0.9999537652 | -1.0391478797 |
| -1.5558976288  | 0.2829234496 | 0.9999537652 | 1.4741193153  |
| -1.2592595272  | 0.4134185621 | 0.9999537652 | -1.0796345363 |
| -1.0218048715  | 0.9248445829 | 0.9999537652 | -1.0427121652 |
| 1.362534054    | 0.5750086336 | 0.9999537652 | 1.5405640381  |
| 2.2962279822   | 0.3617930293 | 0.9999537652 | 1.7829918158  |
| -1.6275497791  | 0.0722699822 | 0.9999537652 | -1.5852382832 |
| -1.1221013894  | 0.4199814739 | 0.9999537652 | 1.0176218088  |
| 1.0358097786   | 0.8694949735 | 0.9999537652 | 1.44015355    |
| 1.4660614269   | 0.1339236684 | 0.9999537652 | 1.5201318652  |
| 2.5206824432   | 0.007425     | 0.9999537652 | 1.6450331597  |
| 0              | 0            | 0            | 12.7732027325 |
| 1.2348958965   | 0.5147007124 | 0.9999537652 | 1.1535080144  |
| 0              | 0            | 0            | 8.8700459102  |
| -1.0932906587  | 0.6225172159 | 0.9999537652 | 1.0140834814  |
| 1.3956385608   | 0.1717235821 | 0.9999537652 | 1.9714425293  |
| -1.0844287504  | 0.7915575097 | 0.9999537652 | 1.1836091821  |
| 0              | 0            | 0            | 0             |
| 30.8757261591  | 0.1833133149 | 0.9999537652 | -3.8929589845 |
| -1.2923085997  | 0.6023372515 | 0.9999537652 | -2.2694112962 |
| -1.2099761873  | 0.2539006431 | 0.9999537652 | -1.0416233259 |
| 0              | 0            | 0            | 2.9985540909  |

gene\_expression\_table

|               |              |              |               |
|---------------|--------------|--------------|---------------|
| 1.0873127571  | 0.702340663  | 0.9999537652 | -1.0845273753 |
| 2.7933974408  | 0.6948713406 | 0.9999537652 | -4.7285781921 |
| -1.0128697188 | 0.9344790928 | 0.9999537652 | -1.0588573523 |
| -1.1511075236 | 0.5650664003 | 0.9999537652 | 1.0535317752  |
| -1.0202071497 | 0.8795091522 | 0.9999537652 | 1.1351622757  |
| 1.0856187283  | 0.7112721406 | 0.9999537652 | 1.1808059798  |
| -1.0345898309 | 0.7935053102 | 0.9999537652 | 1.0240564198  |
| 2.7933974408  | 0.6948713406 | 0.9999537652 | -9.7542681481 |
| -1.4657265584 | 0.0930455844 | 0.9999537652 | -1.068127751  |
| 3.6196822224  | 0.0814577471 | 0.9999537652 | -1.8355489271 |
| 4.5505976667  | 0.5577012236 | 0.9999537652 | 0             |
| -2.5839527681 | 0.5183071693 | 0.9999537652 | 3.3441984921  |
| -1.1253178567 | 0.6937263196 | 0.9999537652 | 1.3816692393  |
| 2.7933974408  | 0.6948713406 | 0.9999537652 | -1.859280336  |
| -1.1489611607 | 0.3693466201 | 0.9999537652 | -1.0049356411 |
| 1.0562407945  | 0.6757795175 | 0.9999537652 | 1.1468341032  |
| -1.0074064571 | 0.9619366858 | 0.9999537652 | 1.0750687188  |
| -1.0892055415 | 0.6605419792 | 0.9999537652 | 1.5048172557  |
| 2.7933974408  | 0.6948713406 | 0.9999537652 | -5.3583704783 |
| -1.6498401319 | 0.2277349388 | 0.9999537652 | -1.0107962671 |
| 1.2617131479  | 0.4309540234 | 0.9999537652 | 1.1188164018  |
| -1.0287317069 | 0.8603258463 | 0.9999537652 | 1.1242181891  |
| 1.0821648394  | 0.818452559  | 0.9999537652 | 1.2486609772  |
| -1.1437638024 | 0.285305938  | 0.9999537652 | 1.1685717749  |
| -1.2266252847 | 0.3801539858 | 0.9999537652 | 1.1968610544  |
| 1.6485917849  | 0.1704046002 | 0.9999537652 | -1.1212667352 |
| 1.1592313424  | 0.5102221654 | 0.9999537652 | 1.4169816582  |
| 11.5970171551 | 0.3502937215 | 0.9999537652 | 1.1696208368  |
| 1.309390581   | 0.665934907  | 0.9999537652 | -1.130838319  |
| 1.6477221914  | 0.1991199259 | 0.9999537652 | -1.0141886587 |
| 1.045400384   | 0.8420370358 | 0.9999537652 | 1.2202850714  |
| 6.3075231393  | 0.4868883961 | 0.9999537652 | 0             |
| -1.1451704697 | 0.4880472376 | 0.9999537652 | 1.0138252452  |
| -1.0978575892 | 0.5177003087 | 0.9999537652 | 1.1722033645  |
| -1.716438562  | 0.2228354232 | 0.9999537652 | -1.3306211756 |
| -1.1600049263 | 0.8812951992 | 0.9999537652 | -5.0960079851 |
| -1.1291460463 | 0.6006015934 | 0.9999537652 | 1.4645561749  |
| 1.76873066    | 0.0753943829 | 0.9999537652 | 1.2264102027  |
| 1.0720580179  | 0.5478826827 | 0.9999537652 | 1.2254413111  |
| 1.1405427003  | 0.5022528838 | 0.9999537652 | 1.6475738629  |
| 1.158795471   | 0.3662614082 | 0.9999537652 | 1.1756952739  |
| -2.3677331735 | 0.0169723416 | 0.9999537652 | -1.224979783  |
| -1.0670771203 | 0.7297574629 | 0.9999537652 | 1.0631299404  |
| 6.3128691894  | 0.481861816  | 0.9999537652 | 1.4534231615  |
| -1.2528594162 | 0.3123764475 | 0.9999537652 | 1.2600320081  |
| -1.9073536712 | 0.3866237965 | 0.9999537652 | 1.1380586761  |
| -1.3737409188 | 0.1239436417 | 0.9999537652 | 1.5352045503  |
| 1.0253956216  | 0.878370439  | 0.9999537652 | -1.0036749067 |
| -1.011324172  | 0.9882060702 | 0.9999537652 | -1.859280336  |

gene\_expression\_table

|               |              |              |                |
|---------------|--------------|--------------|----------------|
| 1.0511680412  | 0.8722168973 | 0.9999537652 | 1.5928924857   |
| -3.211138696  | 0.1796576764 | 0.9999537652 | 4.398765428    |
| 0             | 0            | 0            | 2.996475627    |
| 1.0916003691  | 0.517450196  | 0.9999537652 | 1.2710171101   |
| -1.0642455518 | 0.6833214822 | 0.9999537652 | 1.4841496024   |
| 1.1012257078  | 0.6561440393 | 0.9999537652 | -1.3346958976  |
| 1.5868795429  | 0.314446012  | 0.9999537652 | -1.1403455413  |
| 1.4551873183  | 0.1666428635 | 0.9999537652 | 1.8251029429   |
| -1.2273289242 | 0.1280516413 | 0.9999537652 | 1.0166666861   |
| -1.3127136138 | 0.4319534894 | 0.9999537652 | 1.0210994733   |
| -1.1486265126 | 0.5266175683 | 0.9999537652 | -1.1597153584  |
| 1.0643300638  | 0.8323213297 | 0.9999537652 | 1.1825391065   |
| 2.7957660672  | 0.7054221731 | 0.9999537652 | 0              |
| 1.00230527    | 0.9895414565 | 0.9999537652 | 1.0275549918   |
| 1.5908598212  | 0.3202414594 | 0.9999537652 | 1.8941137294   |
| -1.4785983583 | 0.3579900557 | 0.9999537652 | -1.1524390841  |
| 1.0413955461  | 0.8497535317 | 0.9999537652 | -1.0829274777  |
| 8.064174035   | 0.4240222159 | 0.9999537652 | 1.0669957455   |
| 18.6146543426 | 0.2563481578 | 0.9999537652 | -13.0161175857 |
| 1.0896909925  | 0.5737125951 | 0.9999537652 | 1.1512446747   |
| 1.7101327785  | 0.324666804  | 0.9999537652 | 1.0907555042   |
| -1.3140713878 | 0.4094078676 | 0.9999537652 | -1.0791316819  |
| 1.0337486417  | 0.9598947756 | 0.9999537652 | 1.1650284134   |
| -1.0501977401 | 0.8537055785 | 0.9999537652 | 1.375868489    |
| 1.020806471   | 0.9494662306 | 0.9999537652 | 1.9824465554   |
| -1.0085989693 | 0.9616334718 | 0.9999537652 | -1.1903487432  |
| 1.328223045   | 0.1024179437 | 0.9999537652 | 1.815249296    |
| -1.442184797  | 0.1088475838 | 0.9999537652 | -1.1143071197  |
| 1.0568838     | 0.7297254104 | 0.9999537652 | 1.6527969371   |
| -1.2740858477 | 0.2176388607 | 0.9999537652 | 1.3876787987   |
| -1.1453192235 | 0.9088286671 | 0.9999537652 | -1.3786406679  |
| 1.1170173403  | 0.6453146386 | 0.9999537652 | 1.6278305962   |
| 1.2034750756  | 0.3245807335 | 0.9999537652 | 1.1015874304   |
| 1.3115064824  | 0.1413113992 | 0.9999537652 | 1.0386673647   |
| 1.3553887312  | 0.1309610636 | 0.9999537652 | 1.309697898    |
| 1.0983482417  | 0.6590568401 | 0.9999537652 | 1.217504941    |
| 1.4996200024  | 0.1045064697 | 0.9999537652 | -1.3002625694  |
| 8.064174035   | 0.4240205835 | 0.9999537652 | 0              |
| 1.0942194321  | 0.8686328358 | 0.9999537652 | 2.1544981479   |
| 1.0874334999  | 0.6834874152 | 0.9999537652 | 1.14041084     |
| 1.150984149   | 0.7760120724 | 0.9999537652 | 1.2597234857   |
| 1.505135715   | 0.3819904603 | 0.9999537652 | 1.0226831506   |
| -1.0847830821 | 0.7751841997 | 0.9999537652 | 1.0481962118   |
| -1.2421272489 | 0.6912872228 | 0.9999537652 | -1.0266179774  |
| 1.0917258909  | 0.6335093651 | 0.9999537652 | 1.0150594856   |
| -1.8938020412 | 0.0167804608 | 0.9999537652 | -1.3088023773  |
| 1.0385910948  | 0.8256296728 | 0.9999537652 | -1.0948424424  |
| -1.4629126083 | 0.1049551923 | 0.9999537652 | -1.0247038044  |
| 1.1746975725  | 0.2741743233 | 0.9999537652 | -1.2357106507  |

gene\_expression\_table

|               |              |              |               |
|---------------|--------------|--------------|---------------|
| -1.0511723584 | 0.9209357802 | 0.9999537652 | 1.1538557337  |
| 1.1429949461  | 0.4820282082 | 0.9999537652 | -1.1672257916 |
| -1.0248800347 | 0.90584246   | 0.9999537652 | 1.0814155746  |
| 1.4513773693  | 0.362124465  | 0.9999537652 | -1.6040917952 |
| -1.169745712  | 0.2782519686 | 0.9999537652 | -1.1516564529 |
| -1.1744398787 | 0.355121647  | 0.9999537652 | -1.3302832635 |
| 1.4958687715  | 0.496904432  | 0.9999537652 | -1.4629673466 |
| 1.1900002326  | 0.375305214  | 0.9999537652 | -1.1144918816 |
| 0             | 0            | 0            | 9.7116702472  |
| 2.7933974408  | 0.6948713406 | 0.9999537652 | -1.356070459  |
| 1.1766425009  | 0.5973362274 | 0.9999537652 | 1.076505587   |
| 1.0352399375  | 0.8985544878 | 0.9999537652 | -1.153757751  |
| 2.7933974408  | 0.6948713406 | 0.9999537652 | 0             |
| 1.035374331   | 0.9606271499 | 0.9999537652 | 1.0112222041  |
| -1.2020669635 | 0.4071065797 | 0.9999537652 | -1.2136313295 |
| -1.3052296421 | 0.2417564777 | 0.9999537652 | 1.0002975092  |
| 1.3164602335  | 0.3885740171 | 0.9999537652 | 1.352532263   |
| 1.519717953   | 0.1903331694 | 0.9999537652 | 1.0622908449  |
| -1.1901517603 | 0.2053590623 | 0.9999537652 | -1.1167649501 |
| -1.189279638  | 0.3315082153 | 0.9999537652 | -1.1032339807 |
| 1.2588461709  | 0.5601081094 | 0.9999537652 | -1.0252542254 |
| 8.064174035   | 0.4239978731 | 0.9999537652 | 1.8383591193  |
| 1.3050983867  | 0.4831923024 | 0.9999537652 | 1.1080762564  |
| 1.1133075268  | 0.5432715388 | 0.9999537652 | 1.1400503692  |
| 0             | 0            | 0            | 2.996475627   |
| 6.3075231393  | 0.4868739992 | 0.9999537652 | 0             |
| -1.08031947   | 0.6063059469 | 0.9999537652 | 1.24651194    |
| 1.2021764012  | 0.4843033549 | 0.9999537652 | 1.2662555378  |
| -1.4019663325 | 0.0476335002 | 0.9999537652 | -1.0215834625 |
| -1.1427526036 | 0.6458042671 | 0.9999537652 | -1.0177894517 |
| 2.4059761043  | 0.0402225208 | 0.9999537652 | -1.0177868458 |
| 1.2986112034  | 0.3301623758 | 0.9999537652 | -1.0353147614 |
| 6.3075231393  | 0.4868595833 | 0.9999537652 | 2.996475627   |
| 0             | 0            | 0            | 2.996475627   |
| 0             | 0            | 0            | 2.996475627   |
| -1.1726921613 | 0.6262713869 | 0.9999537652 | 1.3445786505  |
| 0             | 0            | 0            | 2.996475627   |
| 0             | 0            | 0            | 3.3371876641  |
| 1.076994809   | 0.8787522402 | 0.9999537652 | -1.6060544264 |
| -2.1317846121 | 0.465033729  | 0.9999537652 | -2.4832891211 |
| 1.1637651383  | 0.4530262829 | 0.9999537652 | 1.0199462791  |
| 3.7228204944  | 0.0195702251 | 0.9999537652 | 3.9136979278  |
| -1.1104037121 | 0.59655728   | 0.9999537652 | 1.3240641201  |
| 1.6173170138  | 0.4881951629 | 0.9999537652 | 1.0477796599  |
| 1.0444164156  | 0.8358964811 | 0.9999537652 | -1.1665378568 |
| -1.1227911744 | 0.4681672298 | 0.9999537652 | -1.3609204707 |
| 1.1870754472  | 0.4787749581 | 0.9999537652 | 1.0184224455  |
| -1.2496447372 | 0.1495007075 | 0.9999537652 | 1.2097408287  |
| 1.073848037   | 0.7386670365 | 0.9999537652 | 1.4840125295  |



gene\_expression\_table

|               |              |              |               |
|---------------|--------------|--------------|---------------|
| -1.1457847193 | 0.9109214482 | 0.9999537652 | 1.3626105447  |
| -1.1264997606 | 0.6055307391 | 0.9999537652 | -1.38164978   |
| 2.7933974408  | 0.6948713406 | 0.9999537652 | -1.6016888038 |
| -1.2441412193 | 0.087827701  | 0.9999537652 | -1.175019344  |
| -1.5023747081 | 0.5454951764 | 0.9999537652 | -1.7099509994 |
| 1.6141510062  | 0.2508927353 | 0.9999537652 | -1.0198881406 |
| -1.226319784  | 0.4191284192 | 0.9999537652 | 1.2203332304  |
| 1.1497233216  | 0.8135557954 | 0.9999537652 | 4.7695885622  |
| 1.0713278051  | 0.7401835915 | 0.9999537652 | -1.2230686499 |
| -1.1549283906 | 0.5699118603 | 0.9999537652 | 1.0598025085  |
| 0             | 0            | 0            | 0             |
| -1.0626935003 | 0.8749974338 | 0.9999537652 | 1.0431939855  |
| -1.1180346051 | 0.5212107105 | 0.9999537652 | 1.0942593694  |
| -1.0161374203 | 0.9559898734 | 0.9999537652 | 1.0159652145  |
| 1.2803598908  | 0.5980381504 | 0.9999537652 | 1.1908574208  |
| -1.0562791674 | 0.7936647094 | 0.9999537652 | 1.3988993153  |
| 1.0068397368  | 0.9663845186 | 0.9999537652 | 1.0652516359  |
| 1.0582337724  | 0.8090665533 | 0.9999537652 | -1.1538988809 |
| -1.33324794   | 0.1210635042 | 0.9999537652 | 1.0133581482  |
| -1.1213600596 | 0.8125948082 | 0.9999537652 | -1.1636699835 |
| -1.3198880592 | 0.2495391052 | 0.9999537652 | -1.3663208889 |
| -1.1748137342 | 0.488164946  | 0.9999537652 | 1.1396986193  |
| 1.0458462643  | 0.7656018246 | 0.9999537652 | -1.076296232  |
| -1.2374155669 | 0.4552737317 | 0.9999537652 | 1.0449121576  |
| -1.0259719857 | 0.8956232325 | 0.9999537652 | -1.1480129737 |
| 1.1324974701  | 0.6557070921 | 0.9999537652 | -1.0539486489 |
| -1.6388358136 | 0.131036403  | 0.9999537652 | -1.1570501672 |
| 1.0160046865  | 0.8872339051 | 0.9999537652 | 1.1588879339  |
| -1.1562840158 | 0.7699589651 | 0.9999537652 | 1.1457929503  |
| 1.2195533953  | 0.723759516  | 0.9999537652 | -1.4910734584 |
| 2.7957660672  | 0.7054245114 | 0.9999537652 | 0             |
| 0             | 0            | 0            | 2.9985540909  |
| 1.1005825568  | 0.4459436823 | 0.9999537652 | 1.006683691   |
| 1.2889988575  | 0.5738423145 | 0.9999537652 | 1.07862799    |
| -1.2084036764 | 0.4276486206 | 0.9999537652 | 1.2761736378  |
| 0             | 0            | 0            | 6.9189162209  |
| 1.0064752338  | 0.963208787  | 0.9999537652 | 1.2436561265  |
| -1.5240520637 | 0.3496825185 | 0.9999537652 | -1.7567895333 |
| 0             | 0            | 0            | 7.1143876568  |
| -1.4015448726 | 0.0778871131 | 0.9999537652 | -1.2757129396 |
| 0             | 0            | 0            | 4.9527501949  |
| 1.0174016281  | 0.9211170119 | 0.9999537652 | -1.1772047529 |
| 1.5991448424  | 0.5357957999 | 0.9999537652 | 1.1688090495  |
| -1.9021540937 | 0.037850383  | 0.9999537652 | -1.2302364531 |
| -2.0589994115 | 0.1862728649 | 0.9999537652 | -1.0186071408 |
| -1.7155763775 | 0.5432257671 | 0.9999537652 | -2.0281652258 |
| -1.2475563626 | 0.491694841  | 0.9999537652 | -1.1771584984 |
| 1.498009066   | 0.0579485092 | 0.9999537652 | -1.1040047039 |
| 1.2776773713  | 0.0671941206 | 0.9999537652 | 1.1319182604  |

gene\_expression\_table

|               |              |              |               |
|---------------|--------------|--------------|---------------|
| 1.0589267387  | 0.7599175222 | 0.9999537652 | -1.0806326085 |
| 1.0538600751  | 0.9221992369 | 0.9999537652 | 1.0200923869  |
| -1.4420675885 | 0.5481285907 | 0.9999537652 | -1.207672864  |
| 2.2285006183  | 0.0986211377 | 0.9999537652 | 1.1632254461  |
| 1.0520850385  | 0.7294734493 | 0.9999537652 | 1.3786566794  |
| 1.037067994   | 0.844140845  | 0.9999537652 | -1.1965148367 |
| 1.0560121516  | 0.7167480839 | 0.9999537652 | -1.0061261619 |
| 1.1230473096  | 0.8987510784 | 0.9999537652 | 4.9527501949  |
| -1.3239989074 | 0.1129322713 | 0.9999537652 | -1.0002932914 |
| 1.1108432409  | 0.4768303412 | 0.9999537652 | 1.0210580016  |
| 1.204311661   | 0.3383383836 | 0.9999537652 | -1.080425513  |
| 1.869534062   | 0.061134213  | 0.9999537652 | 1.0682839776  |
| -1.4998778653 | 0.186608436  | 0.9999537652 | 1.0710804526  |
| -1.3388995872 | 0.4526404876 | 0.9999537652 | 1.2105488934  |
| 1.0979970564  | 0.8179310374 | 0.9999537652 | 1.482011877   |
| 1.1744022705  | 0.6197450195 | 0.9999537652 | -1.2584238334 |
| 1.2210507869  | 0.5452191408 | 0.9999537652 | 1.3417930919  |
| 0             | 0            | 0            | -1.9327627911 |
| -1.0442858003 | 0.8838833313 | 0.9999537652 | 1.3706649725  |
| 1.0247762442  | 0.9175730921 | 0.9999537652 | -1.1781224712 |
| -1.4037437325 | 0.158080739  | 0.9999537652 | -2.477109613  |
| -1.1210727303 | 0.5472728228 | 0.9999537652 | -1.0756686032 |
| -1.1536798624 | 0.4261263735 | 0.9999537652 | -1.2344310368 |
| 1.2761421706  | 0.0710486915 | 0.9999537652 | -1.2804465838 |
| -1.1534283699 | 0.3789090504 | 0.9999537652 | -1.0537584906 |
| 1.5539296366  | 0.3024131654 | 0.9999537652 | -1.0189838092 |
| -1.0627566641 | 0.7397392911 | 0.9999537652 | -1.1568202852 |
| 4.6439223933  | 0.0923159429 | 0.9999537652 | -1.4933246322 |
| 1.4109285177  | 0.2142267401 | 0.9999537652 | -1.1195209627 |
| -1.0733798751 | 0.5732282514 | 0.9999537652 | 1.0199562944  |
| 1.6455269788  | 0.5819748549 | 0.9999537652 | -1.5238166904 |
| 1.2150155835  | 0.6083540341 | 0.9999537652 | 1.5335812826  |
| 1.2024834744  | 0.3160057651 | 0.9999537652 | 1.2470352738  |
| -2.1522508354 | 0.0723138508 | 0.9999537652 | -2.2069756414 |
| -6.9736190158 | 0.2250321147 | 0.9999537652 | 6.908559683   |
| 1.1633389219  | 0.6642141551 | 0.9999537652 | -1.0220830109 |
| -1.2381922417 | 0.4943169404 | 0.9999537652 | -1.1289441484 |
| 1.6024607202  | 0.5296952292 | 0.9999537652 | 1.4392655202  |
| 1.1158583321  | 0.9297136342 | 0.9999537652 | -2.2019778712 |
| 2.7933974408  | 0.6948713406 | 0.9999537652 | 0             |
| -1.0072378423 | 0.9939316374 | 0.9999537652 | 24.5069156959 |
| 0             | 0            | 0            | 2.996475627   |
| -1.2131496116 | 0.6906057536 | 0.9999537652 | 1.3568020981  |
| 1.1915864663  | 0.377519174  | 0.9999537652 | 1.1089859259  |
| -1.4202916206 | 0.023254002  | 0.9999537652 | -1.1822845528 |
| -1.0703118558 | 0.6036248977 | 0.9999537652 | 1.0198138373  |
| 1.3013038034  | 0.0874813483 | 0.9999537652 | -1.47417274   |
| -1.0249684676 | 0.899436258  | 0.9999537652 | -1.0031616923 |
| 1.1195202445  | 0.7316821184 | 0.9999537652 | -1.0246191345 |

gene\_expression\_table

|               |              |              |                |
|---------------|--------------|--------------|----------------|
| -1.0493385585 | 0.7987195472 | 0.9999537652 | -1.0703107444  |
| 9.8205505243  | 0.3808394853 | 0.9999537652 | -18.8248240915 |
| -1.375810396  | 0.3341088348 | 0.9999537652 | -1.1753126331  |
| -1.1411275992 | 0.4433807929 | 0.9999537652 | -1.2222093388  |
| -1.4310782011 | 0.1708376939 | 0.9999537652 | -1.4219545387  |
| 8.064174035   | 0.4239752387 | 0.9999537652 | 0              |
| -3.0103959855 | 0.113018508  | 0.9999537652 | -1.3676887997  |
| 1.2292952208  | 0.6486208657 | 0.9999537652 | 1.0184491269   |
| 4.5505976667  | 0.5576922483 | 0.9999537652 | -9.7542681481  |
| -1.2034535928 | 0.5285939162 | 0.9999537652 | -1.23587814    |
| -1.3609572986 | 0.5044044733 | 0.9999537652 | -1.5900728097  |
| 0             | 0            | 0            | 0              |
| -2.9570895726 | 0.3902706139 | 0.9999537652 | 2.996475627    |
| 1.3477216605  | 0.4557063625 | 0.9999537652 | -1.1585435023  |
| 1.1119615774  | 0.5092568092 | 0.9999537652 | 1.1211907233   |
| 1.5701097546  | 0.5500352572 | 0.9999537652 | 1.0537060663   |
| 0             | 0            | 0            | 6.908559683    |
| 1.1504647989  | 0.5620110266 | 0.9999537652 | 1.1433916657   |
| 0             | 0            | 0            | 6.908559683    |
| -1.1613472761 | 0.4303450321 | 0.9999537652 | 1.398498165    |
| 1.1937906519  | 0.6881194648 | 0.9999537652 | -1.1757086358  |
| 1.5694218508  | 0.5760214204 | 0.9999537652 | -1.2102801718  |
| -1.3998169344 | 0.6019956971 | 0.9999537652 | 1.191977693    |
| 1.5911703288  | 0.0184098181 | 0.9999537652 | -1.0355545636  |
| 2.3210078398  | 0.0138403392 | 0.9999537652 | 1.0602090509   |
| -1.0248974411 | 0.9010802185 | 0.9999537652 | 1.2473309637   |
| 1.0688350535  | 0.790826852  | 0.9999537652 | 1.200383551    |
| 1.3461558519  | 0.261825581  | 0.9999537652 | -1.228241807   |
| 2.9970436837  | 0.1412286185 | 0.9999537652 | 1.1337017128   |
| 1.1418395671  | 0.4718124864 | 0.9999537652 | -1.128011257   |
| -1.0879922278 | 0.725174544  | 0.9999537652 | 1.0447083638   |
| 1.0725526372  | 0.780284787  | 0.9999537652 | 1.3400239211   |
| -1.0467415704 | 0.7678274088 | 0.9999537652 | 1.1828803552   |
| 1.0904709062  | 0.888954656  | 0.9999537652 | -1.6841458174  |
| -1.5516098154 | 0.008209     | 0.9999537652 | -1.2704449498  |
| 1.3773841198  | 0.0750974533 | 0.9999537652 | 1.1870741418   |
| 1.0649437907  | 0.7691497218 | 0.9999537652 | -1.0691890671  |
| -1.4072265381 | 0.4084547954 | 0.9999537652 | -1.9274193478  |
| -1.0760180298 | 0.8728234071 | 0.9999537652 | -1.1838610992  |
| 1.173620467   | 0.5484838813 | 0.9999537652 | -1.1021055527  |
| 1.0138924925  | 0.9172152722 | 0.9999537652 | 1.2198315865   |
| 1.0160501577  | 0.9818068531 | 0.9999537652 | -2.6257240681  |
| -1.2056234393 | 0.7216619522 | 0.9999537652 | 1.6363955728   |
| 1.3873670102  | 0.095139037  | 0.9999537652 | 1.2644536509   |
| -1.0745764919 | 0.8779335339 | 0.9999537652 | 1.0645142396   |
| 1.3057821641  | 0.322197175  | 0.9999537652 | 1.136305171    |
| -1.7960963046 | 0.0353999668 | 0.9999537652 | -1.6383799161  |
| -1.0824508832 | 0.8070829465 | 0.9999537652 | 1.1684426858   |
| -1.0987247164 | 0.4891451095 | 0.9999537652 | 1.0130217641   |

gene\_expression\_table

|               |              |              |               |
|---------------|--------------|--------------|---------------|
| -1.3133154702 | 0.6767621103 | 0.9999537652 | -1.1606819021 |
| -1.7439958368 | 0.0181843813 | 0.9999537652 | -1.005234379  |
| -2.5871290907 | 0.4905598287 | 0.9999537652 | 2.9985540909  |
| 1.1453117903  | 0.750102408  | 0.9999537652 | -1.5011800753 |
| 4.5505976667  | 0.5576832976 | 0.9999537652 | 6.908559683   |
| -1.8902736666 | 0.2230740538 | 0.9999537652 | -1.457796445  |
| 1.2178229098  | 0.396837049  | 0.9999537652 | 1.0582750014  |
| 1.0390670679  | 0.8607139937 | 0.9999537652 | 1.2289441646  |
| -1.171237928  | 0.4192912667 | 0.9999537652 | -1.2667167793 |
| -4.8113172456 | 0.1956605724 | 0.9999537652 | -1.11577527   |
| 1.1286193068  | 0.7085293488 | 0.9999537652 | 1.6473660147  |
| -2.770555493  | 0.2449195082 | 0.9999537652 | 2.996475627   |
| 1.1232102074  | 0.8949390203 | 0.9999537652 | 1.0327700015  |
| 1.3967109867  | 0.6231176573 | 0.9999537652 | 1.3928979747  |
| 1.1265794196  | 0.6559015827 | 0.9999537652 | 1.0249543837  |
| -1.7001055654 | 0.2974767457 | 0.9999537652 | -1.250150973  |
| -1.2711181053 | 0.1671672404 | 0.9999537652 | -1.0893427877 |
| 13.3324809638 | 0.3188556925 | 0.9999537652 | -1.1248877899 |
| -1.080766331  | 0.5207966622 | 0.9999537652 | 1.2629406651  |
| -1.1653373542 | 0.6252658568 | 0.9999537652 | 1.6169019773  |
| 1.2991215087  | 0.2723357714 | 0.9999537652 | 1.1424057438  |
| -1.1094275927 | 0.8535992931 | 0.9999537652 | 1.0615361821  |
| -1.1214545535 | 0.3874840679 | 0.9999537652 | 1.076893704   |
| -1.0243470512 | 0.8701255507 | 0.9999537652 | 1.1253801282  |
| 1.5626555917  | 0.2452518179 | 0.9999537652 | -1.0390755631 |
| 1.499792306   | 0.2428020631 | 0.9999537652 | 1.0612790076  |
| -1.1205725737 | 0.7069996167 | 0.9999537652 | -1.1965830081 |
| 4.5545995984  | 0.569676623  | 0.9999537652 | -1.1242401582 |
| 1.1427607173  | 0.6205412318 | 0.9999537652 | 1.4138937627  |
| 4.5505976667  | 0.5576743707 | 0.9999537652 | 0             |
| -1.0680746196 | 0.6551967471 | 0.9999537652 | 1.1422735879  |
| -2.6335352531 | 0.2724653065 | 0.9999537652 | 1.4735607458  |
| 1.1193653536  | 0.5990796234 | 0.9999537652 | 1.1666476618  |
| 1.2012386498  | 0.6891067262 | 0.9999537652 | 1.2666808338  |
| 0             | 0            | 0            | 4.9527501949  |
| 1.0697937879  | 0.8125693604 | 0.9999537652 | 1.300168505   |
| 2.1676257531  | 0.2057616268 | 0.9999537652 | 1.3034669708  |
| 6.3075231393  | 0.4868451483 | 0.9999537652 | 0             |
| 1.2401865025  | 0.365918224  | 0.9999537652 | 1.4903777703  |
| 1.1281260175  | 0.8393942768 | 0.9999537652 | -1.0519534482 |
| 32.6837273262 | 0.1727736902 | 0.9999537652 | -1.5278961905 |
| 1.1545303195  | 0.6541583145 | 0.9999537652 | 1.0341801366  |
| 1.1172293767  | 0.9254380029 | 0.9999537652 | -1.1177863553 |
| -1.312693991  | 0.6755329729 | 0.9999537652 | 1.2175748555  |
| 1.1250293197  | 0.6723403968 | 0.9999537652 | 1.2952947879  |
| 1.0248763208  | 0.9177075708 | 0.9999537652 | -1.0743713943 |
| -1.1266512601 | 0.379196072  | 0.9999537652 | -1.1264753873 |
| 1.289655948   | 0.3729279532 | 0.9999537652 | -1.1655942033 |
| -1.4528331939 | 0.442685151  | 0.9999537652 | 1.3146074947  |

gene\_expression\_table

|                |              |              |               |
|----------------|--------------|--------------|---------------|
| -15.9195842901 | 0.1128472012 | 0.9999537652 | 14.7271569203 |
| -1.2895053411  | 0.2849709007 | 0.9999537652 | -1.2578047364 |
| -1.115795443   | 0.5888669656 | 0.9999537652 | 1.034521005   |
| 1.9435125307   | 0.30513947   | 0.9999537652 | 1.2348501603  |
| -1.0426529243  | 0.8842622733 | 0.9999537652 | -1.0057370137 |
| 2.1641462884   | 0.4097159943 | 0.9999537652 | -1.9838489833 |
| 2.7933974408   | 0.6948713406 | 0.9999537652 | 0             |
| -1.0403321647  | 0.8055030261 | 0.9999537652 | 1.2005352496  |
| 1.1704806069   | 0.452253772  | 0.9999537652 | -1.0140817857 |
| 72.2737389183  | 0.0952283593 | 0.9999537652 | 1.0174335377  |
| -1.0749487437  | 0.7485943297 | 0.9999537652 | -1.3106851597 |
| 1.5475388881   | 0.2232908411 | 0.9999537652 | 1.2133852125  |
| 1.7034428179   | 0.1369328297 | 0.9999537652 | 1.2076177368  |
| 1.153390097    | 0.4712070511 | 0.9999537652 | 1.1314184705  |
| -1.0627924055  | 0.6513445754 | 0.9999537652 | 1.1838317375  |
| 1.0454070479   | 0.7356454641 | 0.9999537652 | 1.2114212094  |
| 22.1637147731  | 0.232069292  | 0.9999537652 | -2.9704130837 |
| -1.0283793853  | 0.8848980537 | 0.9999537652 | 1.1838802961  |
| -1.0653372444  | 0.8335414035 | 0.9999537652 | -1.0381388704 |
| -1.1140565098  | 0.4362450579 | 0.9999537652 | 1.0711807146  |
| 1.0798613785   | 0.7318149218 | 0.9999537652 | 1.4716633007  |
| -1.8332588124  | 0.0520307048 | 0.9999537652 | -1.6838698083 |
| 1.0343611962   | 0.8175589165 | 0.9999537652 | 1.1705276959  |
| -1.3991734392  | 0.3044553083 | 0.9999537652 | -1.1829732968 |
| 2.5433021181   | 0.1134282609 | 0.9999537652 | -2.3029868242 |
| 1.5521007833   | 0.0240623009 | 0.9999537652 | 1.3236194061  |
| 2.7933974408   | 0.6948713406 | 0.9999537652 | 0             |
| 0              | 0            | 0            | -1.0084773122 |
| 4.5505976667   | 0.5576654668 | 0.9999537652 | -1.8577842586 |
| 1.0618073657   | 0.7329934494 | 0.9999537652 | 1.1956408773  |
| 0              | 0            | 0            | 2.4169633444  |
| 2.8162992884   | 0.3665164546 | 0.9999537652 | 0             |
| -1.0711601088  | 0.6732498314 | 0.9999537652 | 1.168470637   |
| 1.176334431    | 0.6721143261 | 0.9999537652 | 1.1772574461  |
| 1.0003454956   | 0.9980277424 | 0.9999537652 | 1.1663109764  |
| -1.1106270444  | 0.7898148094 | 0.9999537652 | 1.0011056049  |
| 1.6137547008   | 0.0339682191 | 0.9999537652 | 1.8510705847  |
| 0              | 0            | 0            | -1.1246234874 |
| 1.3366122163   | 0.197512625  | 0.9999537652 | 1.1164893671  |
| 1.1730876003   | 0.4123037573 | 0.9999537652 | -1.2132780891 |
| 1.013596976    | 0.9556122211 | 0.9999537652 | 2.6011217741  |
| -1.1453192235  | 0.9087980493 | 0.9999537652 | 4.9527501949  |
| 0              | 0            | 0            | 0             |
| 7.441072047    | 0.0613606596 | 0.9999537652 | 1.0675791322  |
| 4.5505976667   | 0.557656585  | 0.9999537652 | 0             |
| 0              | 0            | 0            | 2.996475627   |
| -1.1189664609  | 0.7970761536 | 0.9999537652 | 1.6656146362  |
| -1.0066229223  | 0.9825912206 | 0.9999537652 | -1.404547562  |
| 1.0031116066   | 0.9901061168 | 0.9999537652 | 1.4338063522  |

gene\_expression\_table

|               |              |              |               |
|---------------|--------------|--------------|---------------|
| -1.0479970231 | 0.942250377  | 0.9999537652 | -1.005481025  |
| 4.5505976667  | 0.5576477246 | 0.9999537652 | 0             |
| 1.8455489546  | 0.5922034177 | 0.9999537652 | 2.9985540909  |
| -1.1159721327 | 0.4908292075 | 0.9999537652 | 1.2804490154  |
| 1.0140986119  | 0.9588003633 | 0.9999537652 | 1.0751211944  |
| -1.0761763568 | 0.7194503308 | 0.9999537652 | -1.0177688911 |
| 1.5442117167  | 0.091630784  | 0.9999537652 | 1.1849556214  |
| 1.6768394119  | 0.3631543028 | 0.9999537652 | 1.1061451365  |
| -1.0445990748 | 0.8807280632 | 0.9999537652 | 1.371246993   |
| 4.5505976667  | 0.5576388846 | 0.9999537652 | 4.9527501949  |
| -1.1475554583 | 0.6474593633 | 0.9999537652 | -1.1488224766 |
| 1.5415125877  | 0.1158102842 | 0.9999537652 | 1.1053272374  |
| -1.1453192235 | 0.9087673816 | 0.9999537652 | 1.400113184   |
| -1.392221459  | 0.6739064548 | 0.9999537652 | 1.1687602177  |
| 1.1330532184  | 0.7750234861 | 0.9999537652 | -1.0320814787 |
| 16.296263041  | 0.296224819  | 0.9999537652 | -3.4788333565 |
| 2.7933974408  | 0.6948713406 | 0.9999537652 | -2.0482026754 |
| 1.1465841484  | 0.6592560474 | 0.9999537652 | 1.0503291133  |
| 1.022428299   | 0.8648394789 | 0.9999537652 | 1.0131308351  |
| 1.0054097483  | 0.9899836708 | 0.9999537652 | 1.2263068423  |
| -2.1317846121 | 0.4678509562 | 0.9999537652 | 16.6940563684 |
| 1.03746342    | 0.8722212938 | 0.9999537652 | 1.4745605849  |
| 1.1467689727  | 0.4019675033 | 0.9999537652 | 1.0051312602  |
| -1.3037508243 | 0.084212867  | 0.9999537652 | -1.3475445171 |
| 1.1347840865  | 0.610457031  | 0.9999537652 | -1.1185136845 |
| 1.0180521385  | 0.9252341466 | 0.9999537652 | -1.1304977299 |
| 1.1435506627  | 0.4162041729 | 0.9999537652 | 1.1906304787  |
| -1.1140468122 | 0.6581012245 | 0.9999537652 | -1.0119064276 |
| 1.0763501624  | 0.7435351129 | 0.9999537652 | 1.1031915719  |
| 0             | 0            | 0            | 6.908559683   |
| -1.0869274837 | 0.532008322  | 0.9999537652 | 1.025240004   |
| -1.0489830583 | 0.6894234885 | 0.9999537652 | 1.0230216711  |
| -1.2351182932 | 0.2734582121 | 0.9999537652 | 1.4707706705  |
| 9.1990164803  | 1.06E-06     | 0.0189773051 | 24.143356737  |
| -1.63410696   | 0.03723209   | 0.9999537652 | 1.3616638938  |
| 1.0179460471  | 0.9296751333 | 0.9999537652 | 1.3070137565  |
| -2.2365969411 | 0.3843373066 | 0.9999537652 | 1.2335551469  |
| -1.2193405642 | 0.3643378554 | 0.9999537652 | 1.469956191   |
| 1.0684375289  | 0.7748364665 | 0.9999537652 | 1.5714037494  |
| -1.0269328778 | 0.9276292786 | 0.9999537652 | 1.2198405611  |
| 1.2490174178  | 0.1567640689 | 0.9999537652 | 1.586305387   |
| 1.2395265977  | 0.6640853447 | 0.9999537652 | -1.7644830068 |
| -1.3350320065 | 0.4914023021 | 0.9999537652 | 1.0594513172  |
| 1.1268391856  | 0.393344045  | 0.9999537652 | -1.1750601984 |
| 1.1323967673  | 0.7017700152 | 0.9999537652 | 1.1232183178  |
| -1.1900524362 | 0.5588072892 | 0.9999537652 | 1.2558227783  |
| 1.1220972931  | 0.9041283662 | 0.9999537652 | -4.8176145137 |
| -1.0391534682 | 0.9257707764 | 0.9999537652 | -1.2230392117 |
| -1.0798958047 | 0.8799381257 | 0.9999537652 | -2.1736017414 |

gene\_expression\_table

|               |              |              |               |
|---------------|--------------|--------------|---------------|
| 0             | 0            | 0            | 8.8639046058  |
| -2.6343761231 | 0.2907424951 | 0.9999537652 | -1.5086090391 |
| -1.1092422741 | 0.5596935199 | 0.9999537652 | 1.0538815882  |
| 1.5212036067  | 0.1434326634 | 0.9999537652 | 1.2055304698  |
| 6.3075231393  | 0.4868306943 | 0.9999537652 | -1.2504304605 |
| 1.583406222   | 0.0408111628 | 0.9999537652 | 1.3796263994  |
| 1.035792188   | 0.9120676382 | 0.9999537652 | 1.6417851307  |
| -1.5875118025 | 0.7207317913 | 0.9999537652 | 0             |
| 4.6453887007  | 0.0002512    | 0.9999537652 | 1.6929027962  |
| 1.5221698053  | 0.3377984522 | 0.9999537652 | 1.0640697182  |
| 1.0197307873  | 0.943631204  | 0.9999537652 | 1.0454720013  |
| 1.4581308732  | 0.7062389653 | 0.9999537652 | -1.9277963491 |
| -1.1238167931 | 0.8141386403 | 0.9999537652 | 1.0167624289  |
| -1.0965061948 | 0.6512540573 | 0.9999537652 | -1.0656734804 |
| -1.0033260952 | 0.9851993224 | 0.9999537652 | -1.0379887263 |
| -2.0643077486 | 0.0965713158 | 0.9999537652 | 1.1065197263  |
| 3.5328411982  | 0.3047710221 | 0.9999537652 | -1.0743752856 |
| -1.4605783765 | 0.4748944014 | 0.9999537652 | -1.2346788625 |
| 3.0602334741  | 0.328531917  | 0.9999537652 | -1.1226656213 |
| 1.3699340379  | 0.0183804665 | 0.9999537652 | 1.3179373629  |
| 1.5130808007  | 0.6579655594 | 0.9999537652 | 1.2407431382  |
| 1.183461603   | 0.5515206837 | 0.9999537652 | 1.2773148379  |
| 0             | 0            | 0            | 4.9527501949  |
| -1.0909766278 | 0.6783225896 | 0.9999537652 | -1.0214064203 |
| 1.2793127563  | 0.5638582298 | 0.9999537652 | -1.1498444917 |
| -3.7593785559 | 0.002431     | 0.9999537652 | -2.1285134593 |
| 1.0820344243  | 0.6759707952 | 0.9999537652 | 1.0820014852  |
| -1.1779626091 | 0.594980742  | 0.9999537652 | 1.1423135253  |
| -1.0230814332 | 0.8772607162 | 0.9999537652 | 1.3822325221  |
| 1.1153789105  | 0.5468932214 | 0.9999537652 | 1.4291118044  |
| -1.0244254994 | 0.889177542  | 0.9999537652 | -1.0177733019 |
| 1.3025382023  | 0.5397017064 | 0.9999537652 | -1.0356082651 |
| 1.1285469221  | 0.8431951108 | 0.9999537652 | 1.0238096781  |
| -1.1575422179 | 0.5369490546 | 0.9999537652 | 1.2182949399  |
| -1.7015132167 | 0.0137077438 | 0.9999537652 | 1.4735783319  |
| -1.0507148122 | 0.655743744  | 0.9999537652 | 1.1172664846  |
| 0             | 0            | 0            | 4.9527501949  |
| -1.0835132333 | 0.5995928735 | 0.9999537652 | 1.0936003835  |
| 2.7957660672  | 0.705429191  | 0.9999537652 | 16.6806485101 |
| -1.1216939351 | 0.5592132271 | 0.9999537652 | 1.1862172136  |
| -1.1472085644 | 0.4614650073 | 0.9999537652 | 1.0353645359  |
| 1.4332074867  | 0.0998365847 | 0.9999537652 | 1.0828006422  |
| -1.1214254558 | 0.3507938952 | 0.9999537652 | -1.0243099247 |
| 1.0378161503  | 0.8417225015 | 0.9999537652 | -1.0599889274 |
| 26.4578430969 | 0.207636342  | 0.9999537652 | -1.0153549098 |
| 1.1060075337  | 0.6879695557 | 0.9999537652 | 1.181449813   |
| -1.1679931418 | 0.6864116387 | 0.9999537652 | 1.519456354   |
| -1.2145271299 | 0.2814843107 | 0.9999537652 | 1.1158347271  |
| 0             | 0            | 0            | 8.8700459102  |

gene\_expression\_table

|               |              |              |               |
|---------------|--------------|--------------|---------------|
| -1.2008500321 | 0.6659626727 | 0.9999537652 | 1.2748737516  |
| 1.4382672885  | 0.0467766931 | 0.9999537652 | 1.1649330407  |
| 2.7933974408  | 0.6948713406 | 0.9999537652 | -1.1248877899 |
| 2.0902635436  | 0.0265428439 | 0.9999537652 | 1.005803903   |
| -1.2390439306 | 0.4507496108 | 0.9999537652 | -1.1661798093 |
| 8.064174035   | 0.4239556197 | 0.9999537652 | -5.3583704783 |
| 2.4292825457  | 0.0264783623 | 0.9999537652 | -1.1585884938 |
| 1.113905848   | 0.5513491    | 0.9999537652 | 1.0018916725  |
| 0             | 0            | 0            | 2.996475627   |
| 1.3442212242  | 0.2458128722 | 0.9999537652 | 1.0863823731  |
| 2.4323134639  | 0.1518615326 | 0.9999537652 | 1.2786917525  |
| 2.7933974408  | 0.6948713406 | 0.9999537652 | 1.0704119569  |
| 1.0032989227  | 0.9822772737 | 0.9999537652 | 1.0681764334  |
| 0             | 0            | 0            | 6.908559683   |
| 1.1826141087  | 0.1275385942 | 0.9999537652 | 1.3718561716  |
| 1.0514685567  | 0.7329685116 | 0.9999537652 | 1.246988131   |
| -1.2679518858 | 0.2883421052 | 0.9999537652 | -1.1005419295 |
| 1.3147725167  | 0.2579142622 | 0.9999537652 | 1.0116122557  |
| 1.3306804405  | 0.1681169142 | 0.9999537652 | 1.3020017707  |
| -1.2930855193 | 0.2201536123 | 0.9999537652 | 1.3563068377  |
| -1.1750347589 | 0.2544426577 | 0.9999537652 | 1.0290303943  |
| -6.9736190158 | 0.2250321147 | 0.9999537652 | 12.7820459093 |
| 0             | 0            | 0            | 2.9985540909  |
| 1.1158583321  | 0.9297022482 | 0.9999537652 | 2.7252039655  |
| 1.0135290913  | 0.9713416216 | 0.9999537652 | -1.1000511018 |
| -1.1260619216 | 0.591917528  | 0.9999537652 | 1.2361896133  |
| -1.2845289784 | 0.4457821375 | 0.9999537652 | -1.1157700333 |
| 1.1753506509  | 0.7378354607 | 0.9999537652 | -1.1988273335 |
| -1.0601803977 | 0.8727029628 | 0.9999537652 | 1.2723442537  |
| 1.0435800517  | 0.823711467  | 0.9999537652 | 1.119711375   |
| -1.0630902122 | 0.7678207553 | 0.9999537652 | -1.1005816045 |
| 1.0209414833  | 0.9659715487 | 0.9999537652 | -1.1112031805 |
| -2.5929763269 | 0.3852067027 | 0.9999537652 | 1.6675282515  |
| 8.064174035   | 0.4239360593 | 0.9999537652 | -2.1302390584 |
| -1.0886845112 | 0.8947382894 | 0.9999537652 | -1.6542599977 |
| 1.055579126   | 0.8632089637 | 0.9999537652 | 1.4458781219  |
| 1.592047446   | 0.0507986798 | 0.9999537652 | 1.3093189581  |
| 8.064174035   | 0.4239165559 | 0.9999537652 | 5.0990322208  |
| 2.7933974408  | 0.6948713406 | 0.9999537652 | 0             |
| 1.6802698771  | 0.3095147362 | 0.9999537652 | 1.6474778295  |
| -1.0424941752 | 0.821415831  | 0.9999537652 | 1.2145507737  |
| -1.4337129396 | 0.3344601427 | 0.9999537652 | 1.1004698731  |
| 1.2052221669  | 0.228430723  | 0.9999537652 | 1.5048241012  |
| 1.0256765964  | 0.8781535785 | 0.9999537652 | 1.3863659661  |
| 1.3186512428  | 0.127507528  | 0.9999537652 | 1.1538928234  |
| -1.0230304326 | 0.882520738  | 0.9999537652 | 1.473978586   |
| -1.9648206137 | 0.156022751  | 0.9999537652 | -1.183151052  |
| 0             | 0            | 0            | 4.9527501949  |
| -1.048658627  | 0.8708153037 | 0.9999537652 | 1.035728673   |



gene\_expression\_table

|               |              |              |               |
|---------------|--------------|--------------|---------------|
| -1.5490672502 | 0.6602358917 | 0.9999537652 | -1.5322468652 |
| -1.3767560855 | 0.6774317336 | 0.9999537652 | 1.9917172127  |
| 1.7129231458  | 0.2434027398 | 0.9999537652 | -1.0636121131 |
| -1.6229167897 | 0.0665915856 | 0.9999537652 | 1.0498462618  |
| 1.9273015337  | 0.3884096762 | 0.9999537652 | 2.3378233432  |
| 2.7322393205  | 0.1855349669 | 0.9999537652 | -1.5672193861 |
| 0             | 0            | 0            | -1.859280336  |
| 8.064174035   | 0.4238971112 | 0.9999537652 | 2.996475627   |
| 0             | 0            | 0            | 2.996475627   |
| -1.3787811241 | 0.1454603146 | 0.9999537652 | 1.2907842745  |
| -2.6298987489 | 0.0002685    | 0.9999537652 | 1.3331994943  |
| 1.0894495432  | 0.8597628417 | 0.9999537652 | -1.0500316379 |
| -1.0027759582 | 0.9904631883 | 0.9999537652 | 1.4781412465  |
| -1.2000073527 | 0.3468350275 | 0.9999537652 | -1.2288659474 |
| 1.2296406719  | 0.1783954715 | 0.9999537652 | -1.085396602  |
| -1.0585723933 | 0.7687145374 | 0.9999537652 | 1.102835841   |
| -1.0475941333 | 0.8135417484 | 0.9999537652 | 1.1554697286  |
| -1.4873781733 | 0.3400315784 | 0.9999537652 | 1.3122152917  |
| 1.1251728234  | 0.6014551014 | 0.9999537652 | 1.082641593   |
| -1.132931259  | 0.786759906  | 0.9999537652 | -1.111189816  |
| -1.3328887579 | 0.1145849329 | 0.9999537652 | 1.1268232115  |
| 0             | 0            | 0            | -2.7870276542 |
| 1.0868111736  | 0.5348770754 | 0.9999537652 | 1.6578317416  |
| -1.1096700401 | 0.5519943915 | 0.9999537652 | -1.0643715305 |
| -1.3721203041 | 0.4409845728 | 0.9999537652 | 1.2058456617  |
| 1.2174591383  | 0.4086053811 | 0.9999537652 | 1.1110207582  |
| -1.0590565585 | 0.6538576352 | 0.9999537652 | -1.0647810106 |
| 1.5539708133  | 0.2807540937 | 0.9999537652 | -1.0866002666 |
| 1.1344686964  | 0.5993021364 | 0.9999537652 | 1.1312329064  |
| 5.9742368043  | 0.0914512158 | 0.9999537652 | 1.4482006908  |
| -1.2625255738 | 0.5773559197 | 0.9999537652 | 1.3022980794  |
| 2.7933974408  | 0.6948713406 | 0.9999537652 | 1.1335799376  |
| 1.0140684473  | 0.9487466178 | 0.9999537652 | 1.1338761835  |
| -1.4768639477 | 0.0468497868 | 0.9999537652 | -1.1153379709 |
| -1.0521485075 | 0.8315491341 | 0.9999537652 | 1.2783074523  |
| 2.5884057377  | 0.0986538822 | 0.9999537652 | -1.1260106122 |
| 1.2351741356  | 0.1740716067 | 0.9999537652 | 1.1730835714  |
| 2.7933974408  | 0.6948713406 | 0.9999537652 | -5.3589986948 |
| 9.8205505243  | 0.3808393413 | 0.9999537652 | -2.0465550316 |
| 1.0103406333  | 0.9743154328 | 0.9999537652 | 1.2324852636  |
| 1.07852598    | 0.5913526644 | 0.9999537652 | 1.4015804368  |
| -1.3795667895 | 0.1106669476 | 0.9999537652 | 1.1409265097  |
| 0             | 0            | 0            | 8.8639046058  |
| 3.0168480578  | 0.1701374261 | 0.9999537652 | 1.5581596264  |
| 0             | 0            | 0            | 0             |
| -1.0342337483 | 0.8569130339 | 0.9999537652 | 1.3897990347  |
| -1.0216578084 | 0.9716443017 | 0.9999537652 | 1.2706722081  |
| 1.0922951157  | 0.8216377349 | 0.9999537652 | 1.4720681524  |
| -1.0612751512 | 0.817353751  | 0.9999537652 | 1.4756100212  |

gene\_expression\_table

|               |              |              |                |
|---------------|--------------|--------------|----------------|
| -1.2468662972 | 0.8025491941 | 0.9999537652 | 8.9512754559   |
| 0             | 0            | 0            | 12.7732027325  |
| -1.5881166222 | 0.7228901076 | 0.9999537652 | 2.9985540909   |
| 1.1603377009  | 0.6262942504 | 0.9999537652 | -1.125885481   |
| 1.0802573526  | 0.5139091549 | 0.9999537652 | 1.2559570221   |
| -1.0093295716 | 0.9924640716 | 0.9999537652 | -12.8832386883 |
| 1.0359781225  | 0.9271223662 | 0.9999537652 | 1.1415232136   |
| -1.2084217749 | 0.3012527754 | 0.9999537652 | 1.107680005    |
| 1.2524620043  | 0.5894540632 | 0.9999537652 | 1.4721443024   |
| 2.7933974408  | 0.6948713406 | 0.9999537652 | 6.908559683    |
| -1.0689372098 | 0.8489196481 | 0.9999537652 | -1.3579476032  |
| -1.4604501748 | 0.5443773721 | 0.9999537652 | 2.5840758705   |
| 1.2404159697  | 0.2544008467 | 0.9999537652 | 1.3294948616   |
| -1.2321943066 | 0.353306342  | 0.9999537652 | 1.0572857182   |
| 1.3335143304  | 0.5939529995 | 0.9999537652 | 1.2896621072   |
| 2.7933974408  | 0.6948713406 | 0.9999537652 | 15.9061931258  |
| 6.3075231393  | 0.4867863046 | 0.9999537652 | 10.818785458   |
| 1.206749803   | 0.4132470242 | 0.9999537652 | 1.1683770586   |
| -7.0403382421 | 0.1010692775 | 0.9999537652 | 2.9988886918   |
| 0             | 0            | 0            | 0              |
| 9.8288704632  | 0.3801744934 | 0.9999537652 | 2.996475627    |
| 11.2816220699 | 0.001898     | 0.9999537652 | -1.4779643456  |
| -1.1457279534 | 0.755679655  | 0.9999537652 | 1.6221650026   |
| 9.8205505243  | 0.3808391972 | 0.9999537652 | 0              |
| 2.7933974408  | 0.6948713406 | 0.9999537652 | 0              |
| -1.4759347606 | 0.424165953  | 0.9999537652 | -4.5467268531  |
| 0             | 0            | 0            | -1.1250196696  |
| 1.1412592751  | 0.5132094973 | 0.9999537652 | 1.1130848926   |
| 1.3870101328  | 0.3998358273 | 0.9999537652 | 1.2190380209   |
| -1.1046576488 | 0.6026013242 | 0.9999537652 | 1.1163328357   |
| 1.2658813585  | 0.2136408311 | 0.9999537652 | -1.3261640779  |
| 1.1498219992  | 0.8550109014 | 0.9999537652 | 1.2574761276   |
| -1.5565512955 | 0.3702761191 | 0.9999537652 | -1.1455657765  |
| 0             | 0            | 0            | 1.5460384014   |
| -1.1969021862 | 0.3155990084 | 0.9999537652 | 1.2522493324   |
| -1.2188171528 | 0.3014042843 | 0.9999537652 | -1.0832473793  |
| 2.0181702238  | 0.3286473557 | 0.9999537652 | 1.5988002519   |
| -2.9522421189 | 0.3515372342 | 0.9999537652 | 6.1594296767   |
| 2.7933974408  | 0.6948713406 | 0.9999537652 | 0              |
| 1.0025811227  | 0.9905442596 | 0.9999537652 | 1.4169396562   |
| -1.215335218  | 0.5392183488 | 0.9999537652 | -1.3957459304  |
| -1.0051359782 | 0.9786553861 | 0.9999537652 | 1.4020060926   |
| -2.6367689659 | 0.2378468441 | 0.9999537652 | 1.5066785066   |
| 6.3075231393  | 0.4867420163 | 0.9999537652 | 1.2408886006   |
| -1.507949153  | 0.462181297  | 0.9999537652 | 1.0701872957   |
| 1.0294181858  | 0.9213171184 | 0.9999537652 | -1.0259995933  |
| -1.2234021823 | 0.381420419  | 0.9999537652 | 1.0797672603   |
| 1.4309282923  | 0.2891186569 | 0.9999537652 | -1.0199599076  |
| -1.0207037322 | 0.9516214767 | 0.9999537652 | -1.169289888   |

gene\_expression\_table

|               |              |              |               |
|---------------|--------------|--------------|---------------|
| -1.2078158201 | 0.4644528997 | 0.9999537652 | 1.2113001521  |
| 1.0963707767  | 0.6215070788 | 0.9999537652 | 1.5153802379  |
| -1.0845813758 | 0.9233789719 | 0.9999537652 | 4.0583010578  |
| -2.9572400577 | 0.3880473155 | 0.9999537652 | 1.0151959523  |
| -1.114021433  | 0.6488179502 | 0.9999537652 | -1.1999202249 |
| -1.3442764818 | 0.1095764648 | 0.9999537652 | 2.0014830204  |
| 1.068981042   | 0.8119307497 | 0.9999537652 | 1.2759049989  |
| 27.4155731128 | 0.1963840634 | 0.9999537652 | -1.4585845073 |
| 9.8205505243  | 0.380839053  | 0.9999537652 | 0             |
| -1.3933996626 | 0.6833647949 | 0.9999537652 | -1.4745350277 |
| 1.1340135027  | 0.6502305977 | 0.9999537652 | 1.1232837734  |
| 4.5505976667  | 0.5576212623 | 0.9999537652 | 2.9985540909  |
| 0             | 0            | 0            | 2.996475627   |
| -1.3958938496 | 0.009899     | 0.9999537652 | -1.2229252019 |
| 1.052430575   | 0.8669026662 | 0.9999537652 | 1.0884938645  |
| -1.0604967947 | 0.8058871106 | 0.9999537652 | -1.1242890554 |
| -2.2709544313 | 0.3092339471 | 0.9999537652 | -1.7204385276 |
| 2.087766184   | 0.5274687709 | 0.9999537652 | -3.1733746603 |
| -1.2250923551 | 0.2954035657 | 0.9999537652 | 1.1482472774  |
| -1.0103950142 | 0.98738051   | 0.9999537652 | 1.0589992167  |
| 1.2904566672  | 0.7268769739 | 0.9999537652 | 2.9156790983  |
| 0             | 0            | 0            | 4.9527501949  |
| 1.2953449135  | 0.2561067794 | 0.9999537652 | 1.2577862402  |
| -1.1439240384 | 0.4924180072 | 0.9999537652 | -1.1809097479 |
| -1.1044242564 | 0.5792495377 | 0.9999537652 | 1.0607869006  |
| 1.1309803324  | 0.6763667569 | 0.9999537652 | 1.076027501   |
| -1.1937159529 | 0.4553479776 | 0.9999537652 | 1.2324196296  |
| 0             | 0            | 0            | -1.0560956114 |
| 2.7143120644  | 0.0837077054 | 0.9999537652 | 1.3525144016  |
| 1.4458709654  | 0.0932827305 | 0.9999537652 | 1.4944598535  |
| -1.0084499073 | 0.9933947082 | 0.9999537652 | 2.2979606844  |
| 1.2761324148  | 0.1598173547 | 0.9999537652 | 1.1040489325  |
| 1.0614674141  | 0.7317133577 | 0.9999537652 | 1.1130194387  |
| 1.0722062209  | 0.7944033552 | 0.9999537652 | 1.0845877786  |
| -2.1244367526 | 0.1391519762 | 0.9999537652 | -1.3209139133 |
| -1.2309701968 | 0.7621578392 | 0.9999537652 | 1.3825660474  |
| 2.2335761138  | 0.1422037167 | 0.9999537652 | -1.3253616166 |
| 1.4216110432  | 0.3219195352 | 0.9999537652 | 1.0050815742  |
| 6.3128691894  | 0.4817622099 | 0.9999537652 | -1.1359208141 |
| 0             | 0            | 0            | 2.9985540909  |
| -1.1541081848 | 0.505860272  | 0.9999537652 | 1.132394351   |
| 1.2133599992  | 0.8165072914 | 0.9999537652 | -1.0145369899 |
| 4.5505976667  | 0.5576124784 | 0.9999537652 | 2.996475627   |
| 0             | 0            | 0            | 2.996475627   |
| 0             | 0            | 0            | 8.8639046058  |
| -1.0340849837 | 0.8236148257 | 0.9999537652 | -1.1510236116 |
| -1.224738827  | 0.6172814904 | 0.9999537652 | 1.1519216724  |
| 1.3009747194  | 0.0848805232 | 0.9999537652 | 1.0160184385  |
| -1.1232444378 | 0.3736792655 | 0.9999537652 | 1.0397722754  |

gene\_expression\_table

|                |              |              |               |
|----------------|--------------|--------------|---------------|
| 1.0850169905   | 0.69459103   | 0.9999537652 | 1.053243598   |
| -1.107335893   | 0.6092259068 | 0.9999537652 | -1.1753083041 |
| 1.1407743692   | 0.7300957571 | 0.9999537652 | -1.1130280866 |
| -1.2617574407  | 0.4128257321 | 0.9999537652 | -1.1190893491 |
| 1.9015109615   | 0.6236751871 | 0.9999537652 | -1.3581071904 |
| -2.2969122905  | 0.2159289273 | 0.9999537652 | 1.1354053555  |
| 1.0212342466   | 0.9210393278 | 0.9999537652 | -1.218924531  |
| -1.0523487265  | 0.8425083109 | 0.9999537652 | -1.0873506494 |
| -2.2765895442  | 0.2462975649 | 0.9999537652 | 1.1497024471  |
| 25.6156185703  | 0.2096921881 | 0.9999537652 | -1.1948316779 |
| -1.1953989914  | 0.2466577335 | 0.9999537652 | -1.1524727856 |
| 1.0331640127   | 0.8454565489 | 0.9999537652 | -1.0305428753 |
| 1.0808397513   | 0.6670436583 | 0.9999537652 | -1.1570412398 |
| -1.1506708574  | 0.2998208212 | 0.9999537652 | 1.0023214339  |
| 4.5505976667   | 0.5575511101 | 0.9999537652 | 1.6443474089  |
| -1.45767569    | 0.0913714901 | 0.9999537652 | 1.0908194723  |
| -1.2784842915  | 0.1527671027 | 0.9999537652 | -1.0711461857 |
| -1.1732921553  | 0.3394118716 | 0.9999537652 | 1.05509979    |
| 1.0714859567   | 0.849976859  | 0.9999537652 | -1.2399569449 |
| -1.7101749736  | 0.0822708948 | 0.9999537652 | -1.0556161299 |
| -12.9800088947 | 0.1123482096 | 0.9999537652 | 2.7994779515  |
| 1.0831038628   | 0.8428060021 | 0.9999537652 | 1.9430798386  |
| 1.0769378425   | 0.7710405733 | 0.9999537652 | 1.5734048295  |
| -2.5871290907  | 0.4928985963 | 0.9999537652 | -1.8601323346 |
| 1.1372688736   | 0.649009526  | 0.9999537652 | -1.3293842842 |
| 1.0312051686   | 0.8090924854 | 0.9999537652 | 1.1695103465  |
| 1.0901963832   | 0.6530645632 | 0.9999537652 | -1.0026139604 |
| -2.5920268585  | 0.1101910039 | 0.9999537652 | -1.795534612  |
| 0              | 0            | 0            | 2.996475627   |
| -1.0842628572  | 0.7234045828 | 0.9999537652 | 1.2413255809  |
| -1.055527626   | 0.716366754  | 0.9999537652 | 1.0029527295  |
| 2.7933974408   | 0.6948713406 | 0.9999537652 | 2.996475627   |
| -2.0384167005  | 0.0395000183 | 0.9999537652 | -1.2530192101 |
| -1.6740570647  | 0.3668076726 | 0.9999537652 | -1.0650092079 |
| -1.1052957679  | 0.6848931253 | 0.9999537652 | 1.0730819615  |
| -1.2323182674  | 0.6864795118 | 0.9999537652 | 1.1106407039  |
| 0              | 0            | 0            | -2.0463152328 |
| 1.258140575    | 0.4398816245 | 0.9999537652 | -1.2917716631 |
| -1.0272464238  | 0.8830105017 | 0.9999537652 | 1.255679041   |
| -1.794017352   | 0.0967672381 | 0.9999537652 | -1.3933343071 |
| -1.1204616853  | 0.4658533482 | 0.9999537652 | 1.0022793449  |
| -2.587194901   | 0.5007694689 | 0.9999537652 | 2.6095282774  |
| -1.2432283984  | 0.5440013819 | 0.9999537652 | -1.0917020994 |
| 0              | 0            | 0            | -5.3583704783 |
| 0              | 0            | 0            | 2.9985540909  |
| 1.2752591223   | 0.3301134063 | 0.9999537652 | 1.2937849956  |
| -1.272582491   | 0.2850708423 | 0.9999537652 | 1.3516044956  |
| -1.0836885942  | 0.847314717  | 0.9999537652 | -1.0732972824 |
| -1.1340529312  | 0.4095814907 | 0.9999537652 | 1.0179353422  |

gene\_expression\_table

|               |              |              |               |
|---------------|--------------|--------------|---------------|
| 1.0933374333  | 0.7809873883 | 0.9999537652 | 1.319874764   |
| 1.2510248049  | 0.2874277814 | 0.9999537652 | 1.3297704096  |
| 1.2061157042  | 0.1238133703 | 0.9999537652 | 1.2673923685  |
| 0             | 0            | 0            | 6.908559683   |
| 1.1023805338  | 0.5116524054 | 0.9999537652 | 1.4200470431  |
| -1.0449919058 | 0.9092414739 | 0.9999537652 | 2.0350233904  |
| 0             | 0            | 0            | -1.1254032646 |
| -1.1631557214 | 0.5038406697 | 0.9999537652 | 1.1719373443  |
| 1.1795201921  | 0.6920312472 | 0.9999537652 | 1.8169626502  |
| 0             | 0            | 0            | 8.9512754559  |
| 1.1230473096  | 0.8987290504 | 0.9999537652 | 1.0675068228  |
| -1.0608818821 | 0.7584672387 | 0.9999537652 | 1.0467540526  |
| 1.2740923875  | 0.2056797158 | 0.9999537652 | 1.2251074635  |
| 1.1968571056  | 0.3599671827 | 0.9999537652 | 1.0777197968  |
| 2.7933974408  | 0.6948713406 | 0.9999537652 | 4.9527501949  |
| 0             | 0            | 0            | -1.8601323346 |
| 0             | 0            | 0            | 2.9985540909  |
| 4.5505976667  | 0.5574896519 | 0.9999537652 | -1.4683576122 |
| 1.999501975   | 0.0455063022 | 0.9999537652 | 1.154760806   |
| -1.1937981845 | 0.3933044161 | 0.9999537652 | -1.0961097638 |
| 1.1006473838  | 0.6220474703 | 0.9999537652 | 1.4595436118  |
| 0             | 0            | 0            | 14.7271569203 |
| 1.0522221262  | 0.8989149056 | 0.9999537652 | 1.1884963553  |
| -1.0201255269 | 0.9180314718 | 0.9999537652 | 1.0835182101  |
| 1.0106047485  | 0.9564398959 | 0.9999537652 | -1.1705539547 |
| 1.7200622607  | 0.1460245339 | 0.9999537652 | -1.2671891773 |
| -1.4362615507 | 0.1150457108 | 0.9999537652 | -1.1857709912 |
| 0             | 0            | 0            | 2.996475627   |
| -1.1007163838 | 0.7447713359 | 0.9999537652 | -1.3932485676 |
| -1.0492674615 | 0.816901669  | 0.9999537652 | 1.3109830036  |
| 0             | 0            | 0            | 2.9985540909  |
| 1.1593172687  | 0.8154114746 | 0.9999537652 | -1.0648790285 |
| 1.4933961252  | 0.2617123731 | 0.9999537652 | 1.068944881   |
| 1.6723076668  | 0.4779983403 | 0.9999537652 | 2.1360046216  |
| -1.1076902759 | 0.6317857831 | 0.9999537652 | 1.0112953478  |
| 1.1107076023  | 0.3727902666 | 0.9999537652 | 1.1710321067  |
| -1.2032766627 | 0.6669104148 | 0.9999537652 | 1.0756319973  |
| 0             | 0            | 0            | 10.818785458  |
| 0             | 0            | 0            | 2.9985540909  |
| 1.0223251278  | 0.9206302712 | 0.9999537652 | 1.5565371331  |
| -1.4830351086 | 0.2886312421 | 0.9999537652 | 1.0703354919  |
| 1.4096764265  | 0.2480422075 | 0.9999537652 | 1.2624921042  |
| 3.3030568913  | 0.2922814234 | 0.9999537652 | 1.1337017128  |
| 2.7933974408  | 0.6948713406 | 0.9999537652 | 0             |
| 1.0329791895  | 0.8534836298 | 0.9999537652 | -1.1955907641 |
| 1.1250409692  | 0.5260561978 | 0.9999537652 | -1.008736381  |
| 11.5864583426 | 0.3448989522 | 0.9999537652 | -1.1525615042 |
| -1.0261571745 | 0.8559028342 | 0.9999537652 | -1.0360406632 |
| -1.1645046325 | 0.5275660774 | 0.9999537652 | 1.2981566449  |

gene\_expression\_table

|                |              |              |               |
|----------------|--------------|--------------|---------------|
| 2.9559514325   | 0.0497245117 | 0.9999537652 | 1.3298332913  |
| -1.1014485384  | 0.6525217147 | 0.9999537652 | 1.1734590987  |
| -1.0231405271  | 0.9014242143 | 0.9999537652 | 1.3085234465  |
| 1.4597150658   | 0.0606350298 | 0.9999537652 | 1.5993323501  |
| 0              | 0            | 0            | 4.9567375629  |
| -1.068706652   | 0.718524576  | 0.9999537652 | 1.0860494603  |
| 1.6826048407   | 0.2145934198 | 0.9999537652 | 1.2014173431  |
| 1.3374001555   | 0.2433790531 | 0.9999537652 | -1.0718400703 |
| -1.1370538804  | 0.795723457  | 0.9999537652 | 1.6450849506  |
| 0              | 0            | 0            | 0             |
| -1.5841803933  | 0.2569454649 | 0.9999537652 | 1.5301103929  |
| 1.3025872973   | 0.7465578565 | 0.9999537652 | -1.6601216613 |
| 1.1016605519   | 0.6212140596 | 0.9999537652 | 1.1022734496  |
| 1.1599572917   | 0.6982256017 | 0.9999537652 | -1.0428302909 |
| 1.0088184708   | 0.9752998498 | 0.9999537652 | -1.14709072   |
| 2.7933974408   | 0.6948713406 | 0.9999537652 | 0             |
| -2.1275749471  | 0.3790741644 | 0.9999537652 | 1.5181428274  |
| 1.6158500465   | 0.0416262393 | 0.9999537652 | 1.3404073402  |
| -1.0201114532  | 0.9023577941 | 0.9999537652 | -1.0218252842 |
| -2.1645000652  | 0.0641189666 | 0.9999537652 | 1.7057482666  |
| -1.0644408749  | 0.8404809776 | 0.9999537652 | 1.1325541061  |
| 0              | 0            | 0            | 4.048242769   |
| 2.2176218575   | 0.1893310212 | 0.9999537652 | -1.0896495823 |
| -1.7123365171  | 0.120720105  | 0.9999537652 | -1.7662436608 |
| 2.3950619229   | 0.0506639864 | 0.9999537652 | 1.0843294558  |
| -1.1034081465  | 0.7203818659 | 0.9999537652 | 1.1685706957  |
| 0              | 0            | 0            | 1.4521160839  |
| 1.112475741    | 0.5055515338 | 0.9999537652 | 1.1686664851  |
| -18.9917210433 | 0.0490903146 | 0.9999537652 | 8.8700459102  |
| 1.0520335119   | 0.8321579136 | 0.9999537652 | 1.3516959922  |
| 1.010772682    | 0.9866084536 | 0.9999537652 | -1.6806212191 |
| -1.010254736   | 0.9639574161 | 0.9999537652 | -1.0049208546 |
| -1.1563128528  | 0.5087571193 | 0.9999537652 | 1.2893508596  |
| 1.0375432383   | 0.967468043  | 0.9999537652 | 1.0149761046  |
| 1.2519085621   | 0.5730684305 | 0.9999537652 | 1.2281292061  |
| 1.4536812284   | 0.0380408905 | 0.9999537652 | 1.0904750919  |
| 1.122949656    | 0.5676134548 | 0.9999537652 | 1.2794108582  |
| -1.1181108671  | 0.6405192867 | 0.9999537652 | -1.0020865701 |
| -1.0862647357  | 0.6929761604 | 0.9999537652 | 1.1219709539  |
| 1.0248273979   | 0.8698455441 | 0.9999537652 | -1.0420899896 |
| 1.0140672623   | 0.9495446152 | 0.9999537652 | -1.0645575112 |
| -2.223376117   | 0.587910807  | 0.9999537652 | 2.4158463203  |
| 9.8205505243   | 0.3808389089 | 0.9999537652 | 0             |
| 0              | 0            | 0            | 14.7271569203 |
| -1.0598109345  | 0.7335471395 | 0.9999537652 | 1.1641161013  |
| 1.1289041984   | 0.5480571118 | 0.9999537652 | 1.3790612785  |
| 9.8288704632   | 0.3801645309 | 0.9999537652 | -1.5231115313 |
| 1.0580157395   | 0.8332065448 | 0.9999537652 | 1.4956275721  |
| 1.1726872759   | 0.6624370035 | 0.9999537652 | 1.144168923   |

gene\_expression\_table

|               |              |              |                |
|---------------|--------------|--------------|----------------|
| -1.4148364358 | 0.4118970207 | 0.9999537652 | 1.8437445921   |
| 1.2014766201  | 0.4653826523 | 0.9999537652 | 1.3119257997   |
| -1.3654573513 | 0.5142709449 | 0.9999537652 | 1.0234215401   |
| -1.1026704902 | 0.6680694212 | 0.9999537652 | 1.0348685957   |
| -1.0573589437 | 0.8132744249 | 0.9999537652 | -1.0482857127  |
| 1.221084889   | 0.2433360042 | 0.9999537652 | 1.2255914072   |
| 1.790983262   | 0.5810154013 | 0.9999537652 | 1.6031258163   |
| -1.115172402  | 0.4822504437 | 0.9999537652 | -1.1293715415  |
| 1.2406045165  | 0.314761841  | 0.9999537652 | 1.3716954177   |
| 1.0897697681  | 0.6282163481 | 0.9999537652 | 1.2166761858   |
| 1.0796615964  | 0.7462807995 | 0.9999537652 | -1.2041599944  |
| 1.0787918696  | 0.7468563173 | 0.9999537652 | 1.2528440139   |
| -1.3373886055 | 0.6533220837 | 0.9999537652 | -1.1154666261  |
| -1.2099276495 | 0.4450813128 | 0.9999537652 | 1.3028914884   |
| 1.6970882876  | 0.00214      | 0.9999537652 | 1.6598573373   |
| 1.2642861534  | 0.1719467817 | 0.9999537652 | 1.1760239978   |
| -1.0497044992 | 0.8161384067 | 0.9999537652 | -1.0956264652  |
| 0             | 0            | 0            | 5.5821463171   |
| 1.2246332021  | 0.7285532155 | 0.9999537652 | -1.6431786337  |
| 1.3804849695  | 0.5835847231 | 0.9999537652 | -1.5871952362  |
| -1.9204725526 | 0.2581709262 | 0.9999537652 | 2.0108391727   |
| 9.8205505243  | 0.3808387647 | 0.9999537652 | -15.1852849638 |
| -1.4446620174 | 0.3865038973 | 0.9999537652 | -1.0357939207  |
| 1.3559615247  | 0.5271371005 | 0.9999537652 | 1.7397737319   |
| -1.2408513535 | 0.4696579109 | 0.9999537652 | 1.1942738533   |
| 1.0158675054  | 0.9430582274 | 0.9999537652 | 1.136827562    |
| 1.8455489546  | 0.5921428704 | 0.9999537652 | -1.0913262364  |
| -1.3680392696 | 0.7427855011 | 0.9999537652 | -4.3763505365  |
| -1.1948629276 | 0.4760149092 | 0.9999537652 | 1.052206256    |
| -1.0467864486 | 0.7971432371 | 0.9999537652 | 1.2175123118   |
| 2.7933974408  | 0.6948713406 | 0.9999537652 | 8.8700459102   |
| -1.1263817155 | 0.4887588236 | 0.9999537652 | 1.0119477924   |
| -1.5504587635 | 0.3024925725 | 0.9999537652 | 1.5442891328   |
| 1.2130196921  | 0.1608944659 | 0.9999537652 | -1.0140759481  |
| 29.1226294179 | 0.1908174588 | 0.9999537652 | 1.1534465819   |
| -1.0868595418 | 0.8422012011 | 0.9999537652 | 1.1531984169   |
| -1.0794237853 | 0.5959415775 | 0.9999537652 | 1.2048665088   |
| -1.714960605  | 0.2395394467 | 0.9999537652 | 1.0655248182   |
| -1.0876985364 | 0.6680540713 | 0.9999537652 | 1.1949098724   |
| 1.0892577239  | 0.8827742006 | 0.9999537652 | 1.2519252348   |
| 3.2124200058  | 0.1554806876 | 0.9999537652 | -1.7615977248  |
| -1.2636266608 | 0.0897353188 | 0.9999537652 | 1.0199796051   |
| -1.1897443838 | 0.5000550479 | 0.9999537652 | 1.0169991694   |
| -1.0846068082 | 0.5299013838 | 0.9999537652 | -1.0386373114  |
| 1.2537728225  | 0.817040096  | 0.9999537652 | 2.8014102743   |
| 4.5505976667  | 0.5574276376 | 0.9999537652 | -1.1606221547  |
| 1.0597806836  | 0.7574972691 | 0.9999537652 | -1.1429791198  |
| 1.2734725309  | 0.1879772344 | 0.9999537652 | 1.2781978555   |
| 1.412667931   | 0.2690367016 | 0.9999537652 | 1.0380307731   |

gene\_expression\_table

|               |              |              |               |
|---------------|--------------|--------------|---------------|
| 2.7933974408  | 0.6948713406 | 0.9999537652 | -2.6915507987 |
| -1.0438861455 | 0.9233280057 | 0.9999537652 | 1.5377922323  |
| 2.9454946803  | 0.2263687608 | 0.9999537652 | -1.1978482939 |
| -1.0175223485 | 0.9346644876 | 0.9999537652 | 1.0728472883  |
| 1.8005303146  | 0.4603884802 | 0.9999537652 | 1.3007017019  |
| 2.7933974408  | 0.6948713406 | 0.9999537652 | 6.908559683   |
| 1.2550639593  | 0.3156236213 | 0.9999537652 | 1.3922420879  |
| 1.3912288555  | 0.4889987277 | 0.9999537652 | 1.2307849316  |
| 4.9998594995  | 0.1457418858 | 0.9999537652 | 1.0508512607  |
| -1.1718367359 | 0.5194161077 | 0.9999537652 | 1.3592049979  |
| 4.5505976667  | 0.5573644116 | 0.9999537652 | 0             |
| -1.1204980277 | 0.3659792872 | 0.9999537652 | -1.0629265317 |
| -1.3124071691 | 0.159373337  | 0.9999537652 | -1.055219354  |
| 1.1245174259  | 0.5218494635 | 0.9999537652 | 1.0624286957  |
| -1.0505312761 | 0.8532306115 | 0.9999537652 | 1.2520490625  |
| 1.1177795791  | 0.493950889  | 0.9999537652 | 1.226161162   |
| 1.1764408742  | 0.7468931854 | 0.9999537652 | 1.4532048688  |
| 1.2075578353  | 0.5581308423 | 0.9999537652 | 1.201183604   |
| 8.064174035   | 0.423894446  | 0.9999537652 | -2.1297401315 |
| -4.3180711894 | 0.1823926288 | 0.9999537652 | 2.6434024479  |
| -1.9371601608 | 0.4342629151 | 0.9999537652 | -1.7730044157 |
| 1.2661052625  | 0.3295038039 | 0.9999537652 | 1.0461907738  |
| 1.2611184766  | 0.4857720203 | 0.9999537652 | -1.0341266844 |
| -1.2687815271 | 0.7062232209 | 0.9999537652 | 1.0602346496  |
| 1.0631140495  | 0.6036503397 | 0.9999537652 | 1.1206146427  |
| 1.2078834908  | 0.2333369125 | 0.9999537652 | 1.5402573373  |
| 1.0038742847  | 0.9880852996 | 0.9999537652 | 1.2589181996  |
| 2.3315363418  | 0.4564183025 | 0.9999537652 | -2.9984907247 |
| 23.2549975817 | 8.81E-12     | 4.74E-07     | 14.1962620371 |
| -1.2303138128 | 0.3440796534 | 0.9999537652 | 1.3216696079  |
| 0             | 0            | 0            | -1.7024124862 |
| 1.0365898415  | 0.912901337  | 0.9999537652 | 1.2575504785  |
| 1.3482326958  | 0.1306069852 | 0.9999537652 | 1.2646827089  |
| -1.0411631314 | 0.7130224907 | 0.9999537652 | 1.1009305386  |
| 1.2894344649  | 0.7055208293 | 0.9999537652 | -1.0719017482 |
| 1.3911022238  | 0.052133966  | 0.9999537652 | 1.205545871   |
| 1.2724276903  | 0.5123459585 | 0.9999537652 | 1.2165655949  |
| 0             | 0            | 0            | 8.8639046058  |
| -1.2239085157 | 0.0746252929 | 0.9999537652 | 1.0048988569  |
| 1.0429821129  | 0.9104894848 | 0.9999537652 | -1.3006417976 |
| 1.1529839918  | 0.5288032838 | 0.9999537652 | 1.0918123237  |
| -1.7393750388 | 0.2117571489 | 0.9999537652 | 1.0306529987  |
| -2.0760544151 | 0.009533     | 0.9999537652 | 1.6416773698  |
| 1.0166182688  | 0.9239272062 | 0.9999537652 | -1.2827400313 |
| 1.068973822   | 0.8596566038 | 0.9999537652 | -1.252720257  |
| 1.6191925625  | 0.1643804894 | 0.9999537652 | 1.6097966628  |
| 1.5101534214  | 0.2108339425 | 0.9999537652 | 1.0697537821  |
| 3.2874587288  | 0.0700612812 | 0.9999537652 | 1.7034812636  |
| 20.3875267508 | 0.2406688262 | 0.9999537652 | -1.9046013323 |



gene\_expression\_table

|               |              |              |                |
|---------------|--------------|--------------|----------------|
| 1.1783184722  | 0.3538727321 | 0.9999537652 | 1.1518532945   |
| 1.725353503   | 0.3636004044 | 0.9999537652 | -1.7244260891  |
| 1.000233608   | 0.999359058  | 0.9999537652 | 1.5114386081   |
| 1.0555534884  | 0.8090891909 | 0.9999537652 | 1.0957379155   |
| 0             | 0            | 0            | 1.2587294573   |
| 1.2137459782  | 0.4037685777 | 0.9999537652 | 1.2762699538   |
| -1.8867485977 | 0.0377061994 | 0.9999537652 | 1.1033222553   |
| 2.1669248089  | 0.3744490528 | 0.9999537652 | 2.585368765    |
| 0             | 0            | 0            | 16.7037438866  |
| 2.7933974408  | 0.6948713406 | 0.9999537652 | 2.996475627    |
| -1.1100297124 | 0.5741887904 | 0.9999537652 | 1.2194962493   |
| 1.1162834585  | 0.927170544  | 0.9999537652 | 5.3031285132   |
| -1.5487724841 | 0.4732183263 | 0.9999537652 | -1.3233173658  |
| 2.6669428532  | 0.1713276099 | 0.9999537652 | -1.0489576146  |
| -1.1458534393 | 0.5523751271 | 0.9999537652 | 1.0259801231   |
| -1.172755391  | 0.8035177642 | 0.9999537652 | -1.022317512   |
| 0             | 0            | 0            | -13.9030117058 |
| -1.2736522378 | 0.5225162932 | 0.9999537652 | -1.1146097401  |
| -2.9548384089 | 0.3317107331 | 0.9999537652 | 1.0009299851   |
| 1.6064145452  | 0.0519553099 | 0.9999537652 | 1.4298725333   |
| -1.0197053463 | 0.9147021669 | 0.9999537652 | -1.0569142754  |
| 0             | 0            | 0            | 1.5932034817   |
| 1.2626610726  | 0.558966444  | 0.9999537652 | 2.1141100707   |
| 1.1930586531  | 0.349163639  | 0.9999537652 | 1.1882020292   |
| 1.4551284208  | 0.4274154188 | 0.9999537652 | 2.1559839166   |
| 1.6443787287  | 0.2073011806 | 0.9999537652 | 1.2424369576   |
| 1.2385263514  | 0.773184025  | 0.9999537652 | 1.1741127097   |
| 1.4462436411  | 0.0402867675 | 0.9999537652 | 1.2474923818   |
| -1.1831553223 | 0.6571225578 | 0.9999537652 | 1.0557707978   |
| 1.1172647827  | 0.9265701192 | 0.9999537652 | -2.549728253   |
| -1.1625448402 | 0.511822214  | 0.9999537652 | 1.3761837342   |
| -1.8940726907 | 0.1684731647 | 0.9999537652 | -1.1336296567  |
| -1.1880616166 | 0.4344902106 | 0.9999537652 | 1.2034913241   |
| -1.0118462754 | 0.9614286429 | 0.9999537652 | 1.068901338    |
| 1.1158583321  | 0.9296908682 | 0.9999537652 | 10.818785458   |
| -1.0117844224 | 0.9525671991 | 0.9999537652 | 1.0414976458   |
| -1.0570999302 | 0.7677317076 | 0.9999537652 | 1.3488766665   |
| 1.4533569907  | 0.2610890653 | 0.9999537652 | 1.5760573592   |
| 1.0692681437  | 0.6416608804 | 0.9999537652 | -1.0917727204  |
| 1.1253337357  | 0.5284151147 | 0.9999537652 | 1.1919489117   |
| -1.3368462221 | 0.2179361397 | 0.9999537652 | 1.2961450191   |
| 1.0716600511  | 0.6308363791 | 0.9999537652 | 1.3341437171   |
| -1.82919341   | 0.1679343834 | 0.9999537652 | -1.1008827529  |
| -1.1641900256 | 0.3907313538 | 0.9999537652 | 1.1516989021   |
| 1.3600088454  | 0.794960303  | 0.9999537652 | -2.1774581292  |
| -1.0995721568 | 0.701073456  | 0.9999537652 | 1.2509746019   |
| 2.4133372013  | 0.2012359494 | 0.9999537652 | -1.0396253615  |
| 1.6709396412  | 0.4771291076 | 0.9999537652 | -1.140745521   |
| -1.1168880873 | 0.647764417  | 0.9999537652 | 1.0386585445   |

gene\_expression\_table

|               |              |              |               |
|---------------|--------------|--------------|---------------|
| -1.8216877188 | 0.0938769386 | 0.9999537652 | 1.553087122   |
| 1.6180171572  | 0.2244162569 | 0.9999537652 | 1.8461714854  |
| 0             | 0            | 0            | 65.3692964857 |
| -1.4579253281 | 0.2242832179 | 0.9999537652 | -2.9273712752 |
| 1.1174132796  | 0.610350854  | 0.9999537652 | 2.1215282689  |
| 1.1566874978  | 0.4612140025 | 0.9999537652 | 1.3585124789  |
| 1.1001378475  | 0.5630071992 | 0.9999537652 | 1.1094847396  |
| 0             | 0            | 0            | -1.8594983184 |
| 1.2969713468  | 0.0388403627 | 0.9999537652 | 1.3938865503  |
| 1.046546455   | 0.8087380518 | 0.9999537652 | 1.6214163674  |
| -2.7962024446 | 0.1324034876 | 0.9999537652 | -1.0364027614 |
| 1.3864061192  | 0.0122430718 | 0.9999537652 | 1.0257783546  |
| 1.1437875311  | 0.6676054201 | 0.9999537652 | 1.2695698098  |
| 1.2007224403  | 0.2953454688 | 0.9999537652 | -1.002306183  |
| -1.0016946171 | 0.9957930074 | 0.9999537652 | 1.402481867   |
| 4.5505976667  | 0.5572989648 | 0.9999537652 | 4.9527501949  |
| -1.2671957211 | 0.3881923883 | 0.9999537652 | 1.7495193904  |
| 3.8622037496  | 0.6197991502 | 0.9999537652 | -5.3583704783 |
| 0             | 0            | 0            | 9.7116702472  |
| 1.240772164   | 0.2341844335 | 0.9999537652 | 1.2365655841  |
| 3.0589901989  | 0.3339458584 | 0.9999537652 | -2.0201197513 |
| 2.7933974408  | 0.6948713406 | 0.9999537652 | 0             |
| -1.3156526862 | 0.3059800019 | 0.9999537652 | -1.1737729783 |
| 1.4314051501  | 0.1437222088 | 0.9999537652 | 1.2009705444  |
| 0             | 0            | 0            | 4.9527501949  |
| 1.0943928865  | 0.7395724313 | 0.9999537652 | -1.239640147  |
| 0             | 0            | 0            | 6.9133480437  |
| 1.5353475041  | 0.002633     | 0.9999537652 | -1.1328500552 |
| -1.6652083331 | 0.0746765145 | 0.9999537652 | 1.2265076099  |
| 6.3075231393  | 0.4866978291 | 0.9999537652 | -5.3608259368 |
| 1.1576311514  | 0.4255179187 | 0.9999537652 | 1.3419675087  |
| -1.4922515188 | 0.4388240763 | 0.9999537652 | 1.2757385288  |
| -1.1544072534 | 0.6168554253 | 0.9999537652 | 1.403195266   |
| -1.4027130419 | 0.121962089  | 0.9999537652 | 1.1696068105  |
| 0             | 0            | 0            | 2.996475627   |
| -1.0810826794 | 0.4886952822 | 0.9999537652 | -1.1803354873 |
| -1.0315208323 | 0.8827043884 | 0.9999537652 | 1.1297417728  |
| -1.1873835869 | 0.4532487137 | 0.9999537652 | 1.0115470235  |
| -1.007641984  | 0.9705733442 | 0.9999537652 | 1.2320200731  |
| 1.8528871235  | 0.623566799  | 0.9999537652 | -1.3005386984 |
| 0             | 0            | 0            | 2.996475627   |
| -1.4103611906 | 0.2448005634 | 0.9999537652 | -1.236048459  |
| 1.2617955178  | 0.5675397955 | 0.9999537652 | -1.2915690998 |
| -1.113103362  | 0.7164743959 | 0.9999537652 | 1.0758616108  |
| 1.0105618114  | 0.9709214026 | 0.9999537652 | 1.3654235692  |
| 0             | 0            | 0            | 4.9527501949  |
| 1.7196588555  | 0.3209604026 | 0.9999537652 | 1.3337261284  |
| 0             | 0            | 0            | 42.778784484  |
| -1.1289125015 | 0.6175221819 | 0.9999537652 | -1.5285283537 |

gene\_expression\_table

|               |              |              |               |
|---------------|--------------|--------------|---------------|
| 0             | 0            | 0            | -1.1248877899 |
| -1.0692899082 | 0.6078224755 | 0.9999537652 | 1.0178781618  |
| 20.3888260912 | 0.2437822987 | 0.9999537652 | 2.9917767413  |
| -1.2155057891 | 0.4364392793 | 0.9999537652 | -1.0474323635 |
| -1.0809529152 | 0.7523951116 | 0.9999537652 | 1.1290111144  |
| 1.1652657636  | 0.4491461466 | 0.9999537652 | -1.0343391894 |
| -1.1000310811 | 0.6125337027 | 0.9999537652 | 1.0398383468  |
| -1.0880283862 | 0.6225071869 | 0.9999537652 | -1.0281557023 |
| 0             | 0            | 0            | 2.996475627   |
| 1.0570167493  | 0.6589692863 | 0.9999537652 | 1.0624738029  |
| -1.0625134934 | 0.6798114583 | 0.9999537652 | -1.042159486  |
| 3.0361007025  | 0.0585367725 | 0.9999537652 | -1.4198061614 |
| 1.0956682475  | 0.5923060717 | 0.9999537652 | 1.147316181   |
| -1.1894823918 | 0.4803817728 | 0.9999537652 | 1.0131404587  |
| -1.0342567252 | 0.9028969232 | 0.9999537652 | -1.2650080359 |
| -1.2504331937 | 0.3411905857 | 0.9999537652 | 1.1039507496  |
| 1.0483321523  | 0.8504863069 | 0.9999537652 | 1.1162593019  |
| 1.4809743415  | 0.0272652229 | 0.9999537652 | 1.2361365672  |
| 1.0031854705  | 0.9842674442 | 0.9999537652 | 1.2744221307  |
| 1.1078305751  | 0.6232202496 | 0.9999537652 | 1.377938166   |
| -1.0881705995 | 0.6354225458 | 0.9999537652 | -1.0461723246 |
| -1.0507575627 | 0.7279786309 | 0.9999537652 | -1.1869734717 |
| -1.3728063405 | 0.5755811112 | 0.9999537652 | -1.1294728419 |
| -1.0678530174 | 0.7910048701 | 0.9999537652 | -1.2475589188 |
| -1.3666809895 | 0.5073919575 | 0.9999537652 | -1.0372370362 |
| -1.1607408997 | 0.2743559979 | 0.9999537652 | -1.0206781456 |
| 0             | 0            | 0            | 8.8639046058  |
| 4.7592049098  | 0.1553248345 | 0.9999537652 | -1.3639210451 |
| 2.7933974408  | 0.6948713406 | 0.9999537652 | 2.9985540909  |
| -2.0529408058 | 0.0006611    | 0.9999537652 | -1.0956770117 |
| 1.2302735751  | 0.7079163224 | 0.9999537652 | -1.2458876685 |
| 11.5766527773 | 0.3455506293 | 0.9999537652 | -1.8005840097 |
| -1.1117907406 | 0.4249044388 | 0.9999537652 | -1.0507437192 |
| 2.2973669506  | 0.3345846111 | 0.9999537652 | -1.0867028168 |
| -2.6954260115 | 0.0133172062 | 0.9999537652 | 1.1467439722  |
| 1.3836650888  | 0.3222165281 | 0.9999537652 | -1.030170223  |
| 0             | 0            | 0            | -2.0489010529 |
| 1.0761798764  | 0.7225600451 | 0.9999537652 | 1.0617376153  |
| -1.185328559  | 0.5965075092 | 0.9999537652 | -1.1159401933 |
| 1.0464340592  | 0.8311958812 | 0.9999537652 | -1.2188554536 |
| 0             | 0            | 0            | 2.9988886918  |
| 1.7184007083  | 0.1276413844 | 0.9999537652 | -1.3921181425 |
| 1.5402932757  | 0.0725975952 | 0.9999537652 | 1.0300175353  |
| 1.2078168898  | 0.6058998415 | 0.9999537652 | -1.1431917398 |
| 1.3558346831  | 0.3360136566 | 0.9999537652 | -1.6302697327 |
| 1.0848119754  | 0.5892831947 | 0.9999537652 | 1.5590080317  |
| 1.1157762506  | 0.4500693975 | 0.9999537652 | -1.0939329145 |
| 1.1840269212  | 0.4406232453 | 0.9999537652 | 1.0390981295  |
| 1.0264851248  | 0.9163896212 | 0.9999537652 | -1.0022600174 |

gene\_expression\_table

|               |              |              |               |
|---------------|--------------|--------------|---------------|
| 1.0180392536  | 0.8924319417 | 0.9999537652 | 1.2515340388  |
| -1.3482051264 | 0.3390167359 | 0.9999537652 | 1.2090345282  |
| 1.047189223   | 0.8474981941 | 0.9999537652 | 1.5603054901  |
| 1.1929843318  | 0.7247799011 | 0.9999537652 | -1.7983697847 |
| 1.0781067776  | 0.9185802503 | 0.9999537652 | 1.0454933714  |
| 2.9544506384  | 0.2198890622 | 0.9999537652 | -1.0152221464 |
| 25.6156185703 | 0.2096755115 | 0.9999537652 | 2.6430925766  |
| 1.1352263809  | 0.5985792834 | 0.9999537652 | -1.0595678782 |
| -1.0644133438 | 0.6339380818 | 0.9999537652 | 1.1460701641  |
| 1.1365971553  | 0.4154548489 | 0.9999537652 | -1.3521778748 |
| 9.8205505243  | 0.3808386205 | 0.9999537652 | 1.2398837679  |
| -1.3697196358 | 0.7436289251 | 0.9999537652 | -4.813150031  |
| 1.0967951028  | 0.6504743755 | 0.9999537652 | -1.0302140091 |
| 2.3879510836  | 0.1223916363 | 0.9999537652 | -1.2265242384 |
| 1.4938176592  | 0.5512187069 | 0.9999537652 | 1.2229210119  |
| 1.4042366201  | 0.0697548182 | 0.9999537652 | 1.1767129854  |
| 1.8682428625  | 0.0301557381 | 0.9999537652 | 1.2911772256  |
| -1.135518731  | 0.4414149602 | 0.9999537652 | 1.0295811709  |
| 1.0944887125  | 0.9047793702 | 0.9999537652 | -1.5497287574 |
| 1.3713640768  | 0.3651222943 | 0.9999537652 | -1.0589411484 |
| 1.4179537639  | 0.285991108  | 0.9999537652 | -1.2147376262 |
| 1.6441361883  | 0.5983009715 | 0.9999537652 | -1.5124381096 |
| 1.4581319152  | 0.1044767013 | 0.9999537652 | -1.2403745322 |
| 1.4007280226  | 0.5493936643 | 0.9999537652 | -1.3259396095 |
| 23.9020991723 | 0.2167736487 | 0.9999537652 | 1.2408886006  |
| -1.1979104008 | 0.2496866858 | 0.9999537652 | -1.0068689533 |
| 1.0206413031  | 0.9183163186 | 0.9999537652 | -1.0318383234 |
| 1.4862234682  | 0.2813589782 | 0.9999537652 | -1.4173314434 |
| -1.1276934383 | 0.7214944388 | 0.9999537652 | 1.295020922   |
| -1.0495316972 | 0.8624702881 | 0.9999537652 | -1.2547138577 |
| -1.3578642254 | 0.411711825  | 0.9999537652 | -1.101386667  |
| -1.1319652264 | 0.4393482736 | 0.9999537652 | -1.1880943607 |
| 0             | 0            | 0            | 2.9985540909  |
| -9.2619917135 | 0.0528587024 | 0.9999537652 | 1.0384669137  |
| 2.7933974408  | 0.6948713406 | 0.9999537652 | 0             |
| 6.3075231393  | 0.4866537428 | 0.9999537652 | 0             |
| 0             | 0            | 0            | 2.996475627   |
| 0             | 0            | 0            | 15.7262184124 |
| -1.5875118025 | 0.7207598535 | 0.9999537652 | 0             |
| -1.0572952983 | 0.7606357168 | 0.9999537652 | -1.0932825359 |
| 0             | 0            | 0            | 14.7271569203 |
| 8.064174035   | 0.4238931132 | 0.9999537652 | -9.7542681481 |
| 17.3472938331 | 0.2975186309 | 0.9999537652 | 20.5862458385 |
| -2.5838710423 | 0.5188035227 | 0.9999537652 | 52.5265523658 |
| -1.4746252544 | 0.0166083758 | 0.9999537652 | -1.4023610203 |
| -1.1110347733 | 0.5816380193 | 0.9999537652 | -1.453449175  |
| -1.2153250435 | 0.7039222965 | 0.9999537652 | 1.2194341811  |
| 3.0807666776  | 0.1934544642 | 0.9999537652 | -1.7929361642 |
| -1.9485415231 | 0.1182328296 | 0.9999537652 | -1.2727247161 |

gene\_expression\_table

|               |              |              |               |
|---------------|--------------|--------------|---------------|
| 1.1128591252  | 0.5877177857 | 0.9999537652 | -1.1435111005 |
| -1.1744040886 | 0.7846187136 | 0.9999537652 | 1.088442107   |
| 1.1225773715  | 0.6163209519 | 0.9999537652 | 1.3237792469  |
| 1.2473794605  | 0.1596811256 | 0.9999537652 | -1.3766318986 |
| 1.4088786693  | 0.0277483684 | 0.9999537652 | 1.0919926119  |
| 9.8205505243  | 0.3808384762 | 0.9999537652 | -1.1428585529 |
| 2.7933974408  | 0.6948713406 | 0.9999537652 | 0             |
| 1.0230073464  | 0.9178722265 | 0.9999537652 | -1.1438602843 |
| 1.4986288452  | 0.0336209611 | 0.9999537652 | 1.0040404844  |
| 1.2836725962  | 0.2051284299 | 0.9999537652 | 1.2947317965  |
| -1.5875118025 | 0.7207879709 | 0.9999537652 | 1.9445739043  |
| 0             | 0            | 0            | 4.9567375629  |
| 6.3075231393  | 0.4866097571 | 0.9999537652 | 0             |
| -1.6674095463 | 0.6215916509 | 0.9999537652 | 1.2593062028  |
| -1.2010889248 | 0.2018095525 | 0.9999537652 | -1.020603936  |
| -1.1576191994 | 0.5166553177 | 0.9999537652 | 1.1346327327  |
| -1.0706122399 | 0.6286314075 | 0.9999537652 | 1.1081851589  |
| 2.464775932   | 0.241721847  | 0.9999537652 | -2.1246849375 |
| 37.88539235   | 0.1565225563 | 0.9999537652 | -1.0279151802 |
| 2.7957660672  | 0.7054338742 | 0.9999537652 | 0             |
| 0             | 0            | 0            | 4.9527501949  |
| -1.0230767376 | 0.9402903993 | 0.9999537652 | 1.2030700015  |
| 2.7933974408  | 0.6948713406 | 0.9999537652 | -1.859280336  |
| 1.0341241413  | 0.9263340948 | 0.9999537652 | -1.0179158912 |
| 1.0475771934  | 0.8254654265 | 0.9999537652 | -1.0323515718 |
| 1.2619027659  | 0.3281694584 | 0.9999537652 | -1.1421431227 |
| 11.5962805185 | 0.3474878338 | 0.9999537652 | 4.3982723415  |
| 1.0505987295  | 0.7806694734 | 0.9999537652 | 1.1810618133  |
| 6.3075231393  | 0.4865658718 | 0.9999537652 | -2.9687025352 |
| -1.630148962  | 0.0793599071 | 0.9999537652 | 1.285164444   |
| 1.603855737   | 0.6771202434 | 0.9999537652 | 2.989954611   |
| -1.1428820038 | 0.4799547132 | 0.9999537652 | 1.2856926805  |
| 1.3982968057  | 0.6380473753 | 0.9999537652 | 3.6032308871  |
| -1.0989390372 | 0.775979211  | 0.9999537652 | 1.1572726584  |
| 1.045801626   | 0.7163432158 | 0.9999537652 | 1.092421817   |
| 0             | 0            | 0            | 2.996475627   |
| 0             | 0            | 0            | 9.7116702472  |
| 0             | 0            | 0            | 8.8639046058  |
| -1.4834522794 | 0.1602756224 | 0.9999537652 | -1.0449047584 |
| 1.4915752377  | 0.1893045585 | 0.9999537652 | -1.2791983259 |
| 1.201660483   | 0.1197035248 | 0.9999537652 | -1.2582723471 |
| 1.307662308   | 0.0558844005 | 0.9999537652 | -1.3214829101 |
| 0             | 0            | 0            | 12.7820459093 |
| 1.2651060306  | 0.2042493533 | 0.9999537652 | 1.3260780833  |
| -1.8798796919 | 0.0239084044 | 0.9999537652 | -1.0300176988 |
| 1.1812966876  | 0.3464581067 | 0.9999537652 | 1.1330419982  |
| 2.7933974408  | 0.6948713406 | 0.9999537652 | 1.5908108123  |
| 2.7933974408  | 0.6948713406 | 0.9999537652 | 23.4460379037 |
| -1.2007127004 | 0.3525953124 | 0.9999537652 | -1.1333660957 |

gene\_expression\_table

|               |              |              |               |
|---------------|--------------|--------------|---------------|
| -1.0914503499 | 0.4726861003 | 0.9999537652 | -1.5005808652 |
| 1.2620379849  | 0.1983927198 | 0.9999537652 | -1.1218436865 |
| 11.5766527773 | 0.34554149   | 0.9999537652 | -5.3583704783 |
| -1.0000124842 | 0.9999510716 | 0.9999537652 | -1.1128095414 |
| 8.064174035   | 0.4238917803 | 0.9999537652 | 1.2593062028  |
| 1.3686888135  | 0.4442228891 | 0.9999537652 | -1.6615004578 |
| 0             | 0            | 0            | 16.7056146828 |
| 1.1088986585  | 0.5971083209 | 0.9999537652 | -1.0685185035 |
| 1.0632552373  | 0.7138776134 | 0.9999537652 | 1.1009716393  |
| 4.5505976667  | 0.5572295569 | 0.9999537652 | 1.9418822056  |
| -1.5927776507 | 0.3470359586 | 0.9999537652 | 1.5473527806  |
| -1.5978100653 | 0.1624820466 | 0.9999537652 | -1.1312478619 |
| 1.015233579   | 0.955898366  | 0.9999537652 | -1.3752204598 |
| -1.1715242538 | 0.4957059291 | 0.9999537652 | 1.1041800899  |
| -1.0671475729 | 0.6081123672 | 0.9999537652 | 1.0009250626  |
| 2.5214230046  | 0.0226527795 | 0.9999537652 | 2.6015290694  |
| 1.1203602583  | 0.6278355195 | 0.9999537652 | 1.2627491082  |
| 1.1087202775  | 0.7312191126 | 0.9999537652 | 1.2586670818  |
| 1.163807901   | 0.4023228062 | 0.9999537652 | -1.0688480653 |
| -1.6526009432 | 0.4830169255 | 0.9999537652 | -1.9650340611 |
| 6.3128691894  | 0.4816632907 | 0.9999537652 | -2.0465436769 |
| 0             | 0            | 0            | 4.9527501949  |
| 11.5864583426 | 0.3448799196 | 0.9999537652 | -1.4287688341 |
| -1.9021571549 | 0.2382410969 | 0.9999537652 | 1.1629965089  |
| -1.2400178896 | 0.2582180547 | 0.9999537652 | 1.0399748301  |
| 8.064174035   | 0.4238904473 | 0.9999537652 | 0             |
| 1.1173386658  | 0.6113111419 | 0.9999537652 | -1.2945052945 |
| 1.2479835075  | 0.5600170758 | 0.9999537652 | -1.0562313793 |
| -1.2981663134 | 0.1785567034 | 0.9999537652 | 1.4605405247  |
| 7.4603922969  | 0.0630497486 | 0.9999537652 | 1.5522360599  |
| -1.1066390797 | 0.5924795738 | 0.9999537652 | -1.0577386521 |
| 1.2843183796  | 0.2721112948 | 0.9999537652 | 1.9177846405  |
| -1.413531519  | 0.0513771193 | 0.9999537652 | -1.3539224495 |
| 1.0876776269  | 0.6430444424 | 0.9999537652 | -1.2570679864 |
| -1.2706465183 | 0.2259442406 | 0.9999537652 | 1.0247510359  |
| 0             | 0            | 0            | -2.3124617434 |
| -1.0094167007 | 0.9589879991 | 0.9999537652 | -1.0036945121 |
| 1.5136569565  | 0.6634036298 | 0.9999537652 | 5.4963641385  |
| -1.2272463128 | 0.3017957955 | 0.9999537652 | 1.0125876117  |
| 1.6850765316  | 0.0005041    | 0.9999537652 | 1.1868317555  |
| -1.5875118025 | 0.7206984509 | 0.9999537652 | 1.4531133406  |
| 0             | 0            | 0            | 12.7732027325 |
| -1.0237695497 | 0.8785019532 | 0.9999537652 | 1.3786817672  |
| -1.2462090013 | 0.2460552055 | 0.9999537652 | 1.1639645484  |
| 1.201227144   | 0.4184330786 | 0.9999537652 | -1.0581579587 |
| -1.1270573621 | 0.5848386097 | 0.9999537652 | -1.0162217574 |
| 2.8162992884  | 0.366711651  | 0.9999537652 | 1.0674845818  |
| 1.0192274061  | 0.9277706475 | 0.9999537652 | -1.1806977151 |
| 1.9330108539  | 0.0469266979 | 0.9999537652 | -1.0139243548 |

gene\_expression\_table

|               |              |              |               |
|---------------|--------------|--------------|---------------|
| 2.7933974408  | 0.6948713406 | 0.9999537652 | 8.8639046058  |
| 1.2192329692  | 0.284085464  | 0.9999537652 | -1.0561222345 |
| -1.1973802577 | 0.2954295151 | 0.9999537652 | 1.0100969024  |
| 3.1790945967  | 0.1208827335 | 0.9999537652 | 1.3604797255  |
| -1.1110973787 | 0.5364931328 | 0.9999537652 | 1.1212896775  |
| 3.5458425332  | 0.2611345469 | 0.9999537652 | -1.1360245985 |
| 1.0145797596  | 0.9783905603 | 0.9999537652 | -1.0770459476 |
| -1.1457555741 | 0.9107279124 | 0.9999537652 | 9.7116702472  |
| 1.0459648406  | 0.7030373068 | 0.9999537652 | 1.1630923518  |
| 4.5505976667  | 0.5571525373 | 0.9999537652 | -1.8588429871 |
| 1.1217075242  | 0.5961942016 | 0.9999537652 | 1.3662981026  |
| 1.0987495796  | 0.6044009343 | 0.9999537652 | -1.0639913339 |
| -1.0085355311 | 0.9930286747 | 0.9999537652 | 3.7005872492  |
| -1.4207399578 | 0.2102207842 | 0.9999537652 | -1.1876845416 |
| 1.1533888548  | 0.7389699071 | 0.9999537652 | 1.0699633757  |
| -1.1734800276 | 0.2544550374 | 0.9999537652 | -1.1307002395 |
| -5.2162291127 | 0.0147190029 | 0.9999537652 | 1.9764541971  |
| 1.049812312   | 0.8279994571 | 0.9999537652 | 1.2087333127  |
| 1.0033015556  | 0.9846064691 | 0.9999537652 | 1.0435541647  |
| 1.04645314    | 0.7796204264 | 0.9999537652 | -1.0329867966 |
| 1.5614767778  | 0.4210866863 | 0.9999537652 | -1.5770365571 |
| 1.5920970871  | 0.1660608162 | 0.9999537652 | 1.0532462097  |
| 9.8205505243  | 0.3808383319 | 0.9999537652 | 2.996475627   |
| 1.1795618635  | 0.551770623  | 0.9999537652 | 1.0779819142  |
| -1.0362977598 | 0.9298507188 | 0.9999537652 | -1.6083927275 |
| 4.5505976667  | 0.5570582932 | 0.9999537652 | 0             |
| 1.0786153018  | 0.6993284315 | 0.9999537652 | 1.1694072278  |
| -1.0960753358 | 0.7575774429 | 0.9999537652 | -1.0923038235 |
| -3.3110661094 | 0.2931365506 | 0.9999537652 | 1.135404339   |
| 1.1119531472  | 0.6248940358 | 0.9999537652 | 1.3089997572  |
| 2.7933974408  | 0.6948713406 | 0.9999537652 | 0             |
| 1.0773205754  | 0.8153941806 | 0.9999537652 | 1.0136158815  |
| -1.111148269  | 0.6671250447 | 0.9999537652 | -1.0299332478 |
| 2.3790091494  | 0.2089509541 | 0.9999537652 | 1.7988939724  |
| -1.1501724092 | 0.3240144388 | 0.9999537652 | -1.0919011508 |
| 1.2991018857  | 0.088124634  | 0.9999537652 | 1.1488115036  |
| -1.167348377  | 0.498502891  | 0.9999537652 | -2.036936333  |
| 1.1743582038  | 0.5442372801 | 0.9999537652 | -1.0861035764 |
| -1.4092459178 | 0.1491112736 | 0.9999537652 | 1.0547377881  |
| 1.643510367   | 0.5932005263 | 0.9999537652 | 6.1502733747  |
| 0             | 0            | 0            | 0             |
| 1.2794027342  | 0.3245397678 | 0.9999537652 | -1.3635732    |
| -2.5006943961 | 0.2204003117 | 0.9999537652 | -1.0787540783 |
| 1.5561082845  | 0.4495036593 | 0.9999537652 | -2.2662643201 |
| -1.336888917  | 0.344325085  | 0.9999537652 | 1.0476271914  |
| 1.1921859122  | 0.6162769501 | 0.9999537652 | -1.0834843518 |
| 0             | 0            | 0            | 1.2400291296  |
| 1.262522021   | 0.3584304408 | 0.9999537652 | 1.115410668   |
| 1.2214173095  | 0.3886719093 | 0.9999537652 | -1.0599570888 |

gene\_expression\_table

|               |              |              |               |
|---------------|--------------|--------------|---------------|
| 1.1321960974  | 0.3384355703 | 0.9999537652 | -1.0937456196 |
| 1.1228908358  | 0.7092998575 | 0.9999537652 | 1.1732317338  |
| -1.0263983145 | 0.8419186948 | 0.9999537652 | -1.2779217837 |
| -2.0029042714 | 0.0148460932 | 0.9999537652 | -1.4008374892 |
| 0             | 0            | 0            | 1.6447327969  |
| 1.5281694116  | 0.148045007  | 0.9999537652 | -1.3052482672 |
| 1.0266084653  | 0.8864352549 | 0.9999537652 | -1.450069903  |
| 1.2895507939  | 0.370531601  | 0.9999537652 | -1.0779759069 |
| -1.0640418707 | 0.8208771626 | 0.9999537652 | -1.3361678085 |
| 1.2877273268  | 0.5595665879 | 0.9999537652 | 1.1449820521  |
| -1.1690605878 | 0.4282251654 | 0.9999537652 | -1.0088598524 |
| 1.1618755293  | 0.5070219505 | 0.9999537652 | -1.5060201569 |
| -1.3910428484 | 0.548974263  | 0.9999537652 | -1.2615639262 |
| -1.1121733088 | 0.3779759811 | 0.9999537652 | -1.3383494434 |
| -1.1560239903 | 0.5337387881 | 0.9999537652 | -1.0206054289 |
| -4.9246171726 | 0.0160367423 | 0.9999537652 | 1.1283576093  |
| 8.064174035   | 0.4238891141 | 0.9999537652 | -5.2664224014 |
| 1.2004471468  | 0.6384308557 | 0.9999537652 | -1.7754312169 |
| 1.0119907617  | 0.9299615634 | 0.9999537652 | 1.0054194995  |
| 1.0851757923  | 0.6166899583 | 0.9999537652 | 1.1959947667  |
| 1.4005015264  | 0.4156323712 | 0.9999537652 | -1.2504232996 |
| -1.0309904128 | 0.9164295386 | 0.9999537652 | -1.0464917544 |
| -1.1020098136 | 0.7842688625 | 0.9999537652 | 1.3825778496  |
| 0             | 0            | 0            | 0             |
| 1.2435605641  | 0.7150506791 | 0.9999537652 | -1.4391975388 |
| 13.3324809638 | 0.318861735  | 0.9999537652 | 2.0162086657  |
| 0             | 0            | 0            | 8.8639046058  |
| -2.0444867044 | 0.2889852069 | 0.9999537652 | -1.0829866837 |
| -1.1615046801 | 0.4666954903 | 0.9999537652 | -1.1340186059 |
| 1.0723185921  | 0.5797536219 | 0.9999537652 | 1.0738192242  |
| 1.0893016951  | 0.5287689342 | 0.9999537652 | -1.0708010149 |
| -1.1363553669 | 0.5655825258 | 0.9999537652 | 1.0074689419  |
| -1.1619421561 | 0.8738173294 | 0.9999537652 | 1.3826538357  |
| 1.0285359703  | 0.8265079464 | 0.9999537652 | -1.0654882021 |
| -1.0128933798 | 0.9184869252 | 0.9999537652 | -1.0514476481 |
| -3.2135835145 | 0.1883770604 | 0.9999537652 | 1.336777274   |
| -1.0221660434 | 0.9018416527 | 0.9999537652 | -1.4393627314 |
| -1.0318248652 | 0.8976434066 | 0.9999537652 | 1.494926664   |
| -1.0532227046 | 0.8370985413 | 0.9999537652 | 1.087661788   |
| -1.2755405754 | 0.1657315287 | 0.9999537652 | 1.0310755018  |
| 1.0682731901  | 0.6530677214 | 0.9999537652 | 1.032892103   |
| 1.0993426524  | 0.7609479835 | 0.9999537652 | 1.0669598816  |
| 2.6861488177  | 0.2572639209 | 0.9999537652 | 1.6021060248  |
| 8.064174035   | 0.4238877808 | 0.9999537652 | -3.382249888  |
| 0             | 0            | 0            | 2.996475627   |
| -1.0427325085 | 0.9275374657 | 0.9999537652 | 1.4517793168  |
| -1.3061638095 | 0.4139376104 | 0.9999537652 | 1.2304521604  |
| 1.1659257209  | 0.1768059953 | 0.9999537652 | 1.1759280256  |
| -1.2901514672 | 0.6027253403 | 0.9999537652 | -1.1292156252 |



gene\_expression\_table

|               |              |              |               |
|---------------|--------------|--------------|---------------|
| 0             | 0            | 0            | 0             |
| 1.3035690226  | 0.1877054737 | 0.9999537652 | -1.0582720996 |
| 0             | 0            | 0            | 2.996475627   |
| -1.1187955526 | 0.6207354082 | 0.9999537652 | -1.1868304815 |
| -6.9736190158 | 0.2250321147 | 0.9999537652 | 8.8700459102  |
| 1.1184618766  | 0.4695960748 | 0.9999537652 | -1.0067434559 |
| -1.0825658782 | 0.6483631256 | 0.9999537652 | -1.1612836244 |
| 1.385663464   | 0.7405957135 | 0.9999537652 | 1.5337599584  |
| -1.1502575669 | 0.464086414  | 0.9999537652 | 1.0745711763  |
| 1.0079681429  | 0.9480144504 | 0.9999537652 | 1.0960060476  |
| -6.9764533263 | 0.2591527081 | 0.9999537652 | 2.996475627   |
| -1.1075853887 | 0.6403206776 | 0.9999537652 | -1.0314963485 |
| -1.190013612  | 0.4069965635 | 0.9999537652 | -1.0209271148 |
| -1.2078453842 | 0.4229067126 | 0.9999537652 | -1.0826481551 |
| 2.637098445   | 0.0966374395 | 0.9999537652 | -1.1202893487 |
| 1.097906629   | 0.6663708067 | 0.9999537652 | -1.2134214314 |
| 1.3061023617  | 0.0952456961 | 0.9999537652 | 1.1627686083  |
| -1.0158729707 | 0.9157053863 | 0.9999537652 | 1.2937215116  |
| 0             | 0            | 0            | 4.9527501949  |
| 0             | 0            | 0            | -1.4683576122 |
| -1.1981038122 | 0.3166691958 | 0.9999537652 | 1.0628253109  |
| -1.0048017054 | 0.982109323  | 0.9999537652 | -1.1171765848 |
| 1.1514532867  | 0.6458006393 | 0.9999537652 | 1.4168598407  |
| -1.2115650054 | 0.3060469981 | 0.9999537652 | -1.1804667828 |
| -1.2101335528 | 0.3904605532 | 0.9999537652 | -1.3684132159 |
| -1.3222955607 | 0.5926978433 | 0.9999537652 | -1.0725053996 |
| 1.1071458299  | 0.6334904392 | 0.9999537652 | 1.2634355722  |
| -1.1030068143 | 0.4911369511 | 0.9999537652 | -1.028598447  |
| -1.9998864941 | 0.2337115107 | 0.9999537652 | -1.8579406165 |
| 1.0353919069  | 0.8747778288 | 0.9999537652 | -1.0980714093 |
| -1.0127004261 | 0.9578286179 | 0.9999537652 | 1.1584793983  |
| -1.0720413622 | 0.7359160667 | 0.9999537652 | 1.0956177841  |
| 1.5410453821  | 0.1325034642 | 0.9999537652 | 1.460984529   |
| -1.4200868943 | 0.064751511  | 0.9999537652 | 1.0060084609  |
| 1.2252048389  | 0.5931262283 | 0.9999537652 | 1.0759551413  |
| 9.8205505243  | 0.3808381876 | 0.9999537652 | -1.3598304575 |
| 2.1456333787  | 0.2686698026 | 0.9999537652 | -1.5553070134 |
| 1.6032957979  | 0.6856291136 | 0.9999537652 | -3.8938703542 |
| 1.0339032799  | 0.8858133141 | 0.9999537652 | 2.0909603275  |
| 1.0053488917  | 0.9763241364 | 0.9999537652 | 1.1386988599  |
| -1.0071406522 | 0.9646468584 | 0.9999537652 | 1.1093031277  |
| 1.5094197345  | 0.5421031518 | 0.9999537652 | -1.051661731  |
| 8.0712632467  | 0.4228070877 | 0.9999537652 | 6.8557843057  |
| 1.1194713798  | 0.6182158685 | 0.9999537652 | -1.352185903  |
| -1.7791703059 | 0.0189865663 | 0.9999537652 | -1.4144082985 |
| -1.3922626495 | 0.2908124458 | 0.9999537652 | -1.0677157328 |
| 30.9018162087 | 0.1808244771 | 0.9999537652 | 2.4624880301  |
| 1.1686731033  | 0.7287411549 | 0.9999537652 | -1.2070914674 |
| -1.668764792  | 0.6524660488 | 0.9999537652 | 1.9418822056  |

gene\_expression\_table

|                |              |              |               |
|----------------|--------------|--------------|---------------|
| -1.0160612632  | 0.9727557129 | 0.9999537652 | 1.2135193374  |
| -2.9254107669  | 0.0742978173 | 0.9999537652 | 2.2865482986  |
| -1.0733763588  | 0.8487857752 | 0.9999537652 | 1.0660970169  |
| 1.4498325328   | 0.2114994516 | 0.9999537652 | 1.205209037   |
| -1.0921302295  | 0.6916131318 | 0.9999537652 | -1.237865632  |
| -1.2130208078  | 0.5486735336 | 0.9999537652 | -1.1307495516 |
| 1.0605394327   | 0.6843551447 | 0.9999537652 | 1.5063914963  |
| -1.0197299234  | 0.9592503149 | 0.9999537652 | 1.166233864   |
| 1.0381523107   | 0.8948682286 | 0.9999537652 | 1.2214458812  |
| -1.2493308946  | 0.3030913026 | 0.9999537652 | -1.303419522  |
| -1.1086614441  | 0.4970131044 | 0.9999537652 | -1.3218553704 |
| 1.0188456169   | 0.9222381186 | 0.9999537652 | 1.0250114612  |
| 1.3590871487   | 0.2067824681 | 0.9999537652 | -1.2863860476 |
| -1.0278977896  | 0.9389399672 | 0.9999537652 | -1.0124132194 |
| -1.37106644    | 0.1813753108 | 0.9999537652 | 1.0510366557  |
| 6.3075231393   | 0.4865220867 | 0.9999537652 | 1.2591586474  |
| 1.0709594809   | 0.8759281669 | 0.9999537652 | 1.0841218071  |
| 1.0789024281   | 0.6299049109 | 0.9999537652 | 1.1806563242  |
| -1.2232107561  | 0.5290477151 | 0.9999537652 | 1.0471119896  |
| -1.3527263764  | 0.264584807  | 0.9999537652 | 1.1800981769  |
| 1.0863825424   | 0.5263542355 | 0.9999537652 | 1.4996420382  |
| -1.1279436419  | 0.6584387789 | 0.9999537652 | 1.058339823   |
| -1.0080753521  | 0.9707702803 | 0.9999537652 | 1.1899518177  |
| -1.2746918797  | 0.3149053553 | 0.9999537652 | 1.2959766283  |
| -1.0365821876  | 0.8703971439 | 0.9999537652 | -1.0756392781 |
| 1.5283877156   | 0.2078925759 | 0.9999537652 | -1.0404628629 |
| 9.8205505243   | 0.3808380432 | 0.9999537652 | -1.6435965623 |
| -1.0837489199  | 0.7239104456 | 0.9999537652 | 1.0552917305  |
| 0              | 0            | 0            | 3.6255745018  |
| -1.0536697353  | 0.7787692181 | 0.9999537652 | 1.2410901277  |
| 1.185023511    | 0.3644652508 | 0.9999537652 | 1.2016746579  |
| 1.065339183    | 0.7452987136 | 0.9999537652 | -1.0636268881 |
| -1.0466247305  | 0.7675908831 | 0.9999537652 | 1.2325282921  |
| -2.4086999574  | 0.2737576869 | 0.9999537652 | 5.8001127949  |
| -1.5423955481  | 0.328942826  | 0.9999537652 | 1.1192883622  |
| 0              | 0            | 0            | 4.9527501949  |
| 1.586170423    | 0.2209403175 | 0.9999537652 | -1.0154949376 |
| 0              | 0            | 0            | -5.3608259368 |
| 6.3130691196   | 0.4797905908 | 0.9999537652 | 10.818785458  |
| 0              | 0            | 0            | 12.7820459093 |
| 4.7573924101   | 0.1600870481 | 0.9999537652 | 4.9561842702  |
| -12.9852817769 | 0.1147570896 | 0.9999537652 | 0             |
| -1.1722807207  | 0.8571676859 | 0.9999537652 | 20.5862458385 |
| 1.1632726083   | 0.5051878508 | 0.9999537652 | -1.2447273879 |
| -1.1888187072  | 0.2580843085 | 0.9999537652 | -1.374663208  |
| 2.7933974408   | 0.6948713406 | 0.9999537652 | 2.9985540909  |
| -6.9736190158  | 0.2250321147 | 0.9999537652 | 4.9527501949  |
| -1.3933642051  | 0.7077473685 | 0.9999537652 | -1.462791692  |
| -1.3472167972  | 0.5063197174 | 0.9999537652 | -1.0455160135 |

gene\_expression\_table

|               |              |              |               |
|---------------|--------------|--------------|---------------|
| -25.00673561  | 0.030469531  | 0.9999537652 | 0             |
| 1.9059187914  | 0.4671380118 | 0.9999537652 | -1.8075300459 |
| 0             | 0            | 0            | 0             |
| 0             | 0            | 0            | 2.9985540909  |
| 3.2403799754  | 0.0189785748 | 0.9999537652 | 1.7597763749  |
| -6.9736190158 | 0.2250321147 | 0.9999537652 | 6.908559683   |
| 2.0896001704  | 0.5218039645 | 0.9999537652 | 2.9985540909  |
| 9.8205505243  | 0.3808108655 | 0.9999537652 | 14.7271569203 |
| 1.4997369472  | 0.3164335185 | 0.9999537652 | 1.009365708   |
| -2.2367676968 | 0.3913890677 | 0.9999537652 | 1.3152290032  |
| 3.2652031108  | 0.1135577923 | 0.9999537652 | 1.0201618369  |
| 1.3282415411  | 0.7111199514 | 0.9999537652 | -1.6830699048 |
| -1.5731601222 | 0.128622098  | 0.9999537652 | 1.4198708893  |
| 1.2785460571  | 0.2288957227 | 0.9999537652 | 1.0019917518  |
| 1.5513190246  | 0.003117     | 0.9999537652 | 1.1317263111  |
| 2.7933974408  | 0.6948713406 | 0.9999537652 | 9.7116702472  |
| 0             | 0            | 0            | 2.996475627   |
| -2.956038745  | 0.3205463475 | 0.9999537652 | 3.6950602847  |
| 1.0597826207  | 0.8150868337 | 0.9999537652 | -1.7191746425 |
| -5.7694389001 | 0.1064318809 | 0.9999537652 | 0             |
| -2.5435664515 | 0.2868407697 | 0.9999537652 | 0             |
| 9.8205505243  | 0.3807837837 | 0.9999537652 | -1.0828846244 |
| 1.0835184344  | 0.8653904195 | 0.9999537652 | 1.2114093143  |
| 4.0347077664  | 0.2007388651 | 0.9999537652 | 2.9985540909  |
| 2.9478137269  | 0.2171695007 | 0.9999537652 | 2.996475627   |
| 2.0885615936  | 0.5184501642 | 0.9999537652 | -5.3608259368 |
| 1.1256551335  | 0.8550932486 | 0.9999537652 | 2.9985540909  |
| -6.9736190158 | 0.2250321147 | 0.9999537652 | 0             |
| -1.4067833083 | 0.5016335852 | 0.9999537652 | 49.3647206798 |
| 2.3585309934  | 0.2363096842 | 0.9999537652 | -2.3893631603 |
| -6.9764533263 | 0.2591610297 | 0.9999537652 | 2.9985540909  |
| 0             | 0            | 0            | -4.9108225367 |
| -2.0025825252 | 0.4565366416 | 0.9999537652 | 4.9561842702  |
| -4.3986109171 | 0.0647848049 | 0.9999537652 | -5.3589986948 |
| 1.1172293767  | 0.9254471598 | 0.9999537652 | 2.9985540909  |
| 1.0362439076  | 0.9657000127 | 0.9999537652 | -1.4145214232 |
| -3.8100204382 | 0.0433819871 | 0.9999537652 | -1.859280336  |
| 0             | 0            | 0            | 0             |
| 0             | 0            | 0            | -1.3076992656 |
| -1.0950954595 | 0.8432534259 | 0.9999537652 | -1.1039775761 |
| 1.6463457326  | 0.5770783364 | 0.9999537652 | 1.1487875235  |
| 1.1821296961  | 0.6067513781 | 0.9999537652 | -1.0241995621 |
| 1.1289037299  | 0.7578127575 | 0.9999537652 | 1.0843261094  |
| 1.1682841801  | 0.6940597841 | 0.9999537652 | -1.0668168928 |
| 6.3075231393  | 0.4864784014 | 0.9999537652 | 0             |
| 1.8028740077  | 0.4327252229 | 0.9999537652 | -1.39839735   |
| 1.0481614378  | 0.9224812408 | 0.9999537652 | -1.7793027384 |
| -1.4507123533 | 0.5771189461 | 0.9999537652 | -1.0535935422 |
| -1.5077992302 | 0.4103352239 | 0.9999537652 | -1.4743534501 |

gene\_expression\_table

|               |              |              |               |
|---------------|--------------|--------------|---------------|
| 0             | 0            | 0            | 2.996475627   |
| -1.0556351465 | 0.7401574136 | 0.9999537652 | -1.0965162164 |
| -6.9736190158 | 0.2250321147 | 0.9999537652 | 8.8639046058  |
| -1.0254840392 | 0.9630956218 | 0.9999537652 | -1.770694404  |
| 2.7933974408  | 0.6948713406 | 0.9999537652 | 0             |
| -1.4751643279 | 0.4023864197 | 0.9999537652 | 1.0921666199  |
| 2.7933974408  | 0.6948713406 | 0.9999537652 | 0             |
| 1.1840195478  | 0.1996679028 | 0.9999537652 | -1.0674789927 |
| -1.1607833186 | 0.4971058233 | 0.9999537652 | -1.1590401749 |
| 1.3040410104  | 0.2505478845 | 0.9999537652 | 1.0490292685  |
| -1.3034475687 | 0.7660079242 | 0.9999537652 | -1.0547761065 |
| 0             | 0            | 0            | 8.8639046058  |
| -1.005295052  | 0.9797974733 | 0.9999537652 | 1.0574546485  |
| -3.4215393891 | 0.1594796204 | 0.9999537652 | 1.0545339774  |
| 1.7340816349  | 0.456979915  | 0.9999537652 | 33.3754495834 |
| -1.4007421347 | 0.2446117861 | 0.9999537652 | 1.1526333825  |
| 1.3068443743  | 0.0769983581 | 0.9999537652 | 1.0982129056  |
| -1.0859085205 | 0.6521095782 | 0.9999537652 | -1.4173032361 |
| 1.1681004938  | 0.5278603723 | 0.9999537652 | -1.1786414434 |
| -1.1173354264 | 0.4789760151 | 0.9999537652 | -1.0468180094 |
| -1.136341756  | 0.4842657152 | 0.9999537652 | 1.3778975001  |
| 1.0092984939  | 0.9439961935 | 0.9999537652 | -1.1658213379 |
| 6.3075231393  | 0.4864348159 | 0.9999537652 | 1.4307087091  |
| -1.0623230887 | 0.8946225583 | 0.9999537652 | -1.1311590874 |
| -1.4150256844 | 0.2172770523 | 0.9999537652 | -1.2893654143 |
| 1.0147290952  | 0.9178855089 | 0.9999537652 | -1.0741600643 |
| -1.3329838577 | 0.2307030686 | 0.9999537652 | -1.1203943854 |
| -1.0048249416 | 0.9802525692 | 0.9999537652 | -1.1590845563 |
| -1.0342635618 | 0.780208478  | 0.9999537652 | -1.2233396533 |
| 1.0011886599  | 0.9958371418 | 0.9999537652 | -1.1872591097 |
| 1.7140509772  | 0.0233540187 | 0.9999537652 | 1.1399696131  |
| 2.7933974408  | 0.6948713406 | 0.9999537652 | 8.8639046058  |
| 1.678527217   | 0.0269993884 | 0.9999537652 | -1.2099214114 |
| 1.0903560025  | 0.7011811117 | 0.9999537652 | -1.1419323411 |
| -6.9762758667 | 0.2574789448 | 0.9999537652 | 0             |
| 1.2987672615  | 0.5563426288 | 0.9999537652 | 1.4365560648  |
| -1.2669294153 | 0.1885299475 | 0.9999537652 | -1.0037164875 |
| -1.5875118025 | 0.7206089826 | 0.9999537652 | 3.1840303018  |
| 1.0687364382  | 0.5873093811 | 0.9999537652 | -1.0112879402 |
| 1.1590517798  | 0.2176231676 | 0.9999537652 | -1.009716291  |
| 1.3324604159  | 0.5979840553 | 0.9999537652 | 1.0289648288  |
| 1.0741875757  | 0.8167989425 | 0.9999537652 | -1.2710342057 |
| 1.1161480477  | 0.6165957258 | 0.9999537652 | 1.2356293295  |
| 1.1158583321  | 0.9296794942 | 0.9999537652 | 1.4875735439  |
| 2.5591644743  | 0.2765005285 | 0.9999537652 | 1.2315827612  |
| 8.064174035   | 0.4238851146 | 0.9999537652 | -2.1734470428 |
| -1.0254259049 | 0.9292244373 | 0.9999537652 | 1.1229749837  |
| -1.610091706  | 0.0997622898 | 0.9999537652 | -1.1109219045 |
| 1.3183638953  | 0.1153806567 | 0.9999537652 | 1.2215749773  |

gene\_expression\_table

|               |              |              |               |
|---------------|--------------|--------------|---------------|
| 2.7933974408  | 0.6948713406 | 0.9999537652 | -1.1248877899 |
| 1.0259887574  | 0.8389620022 | 0.9999537652 | 1.2281404994  |
| 1.1595950732  | 0.5937345789 | 0.9999537652 | 1.2697639665  |
| 1.2913910109  | 0.1705841776 | 0.9999537652 | -1.2611234932 |
| 1.278891521   | 0.6736448536 | 0.9999537652 | 1.9682972556  |
| 1.0458377827  | 0.8849353392 | 0.9999537652 | -1.1351719003 |
| 1.1444741366  | 0.5029663632 | 0.9999537652 | -1.1957596544 |
| -1.0899268619 | 0.6262674875 | 0.9999537652 | 1.149928073   |
| 1.8471118167  | 0.5853667708 | 0.9999537652 | -2.2389069466 |
| -1.0066196254 | 0.971880842  | 0.9999537652 | -1.373431707  |
| 0             | 0            | 0            | 9.7116702472  |
| 0             | 0            | 0            | 2.9988886918  |
| 0             | 0            | 0            | 2.996475627   |
| 0             | 0            | 0            | 4.9527501949  |
| 1.8194592678  | 0.0678513817 | 0.9999537652 | 1.3596326619  |
| 1.399194136   | 0.0205077282 | 0.9999537652 | -1.0421982907 |
| -1.8302136322 | 0.2181223483 | 0.9999537652 | 1.0300536047  |
| -1.0256316245 | 0.9616368238 | 0.9999537652 | -1.710761321  |
| 4.5544554512  | 0.5691493408 | 0.9999537652 | 2.9988886918  |
| 1.0415128524  | 0.8293254855 | 0.9999537652 | -1.1557755125 |
| 1.1801090485  | 0.2585825597 | 0.9999537652 | -1.0804762147 |
| -1.5561044836 | 0.4814137536 | 0.9999537652 | 3.3933901003  |
| -1.2772483432 | 0.229684108  | 0.9999537652 | -1.4508343673 |
| -1.1286633091 | 0.7943127178 | 0.9999537652 | 1.2132260292  |
| 1.0494886587  | 0.7105243268 | 0.9999537652 | 1.0206936996  |
| 1.0349698144  | 0.8098355697 | 0.9999537652 | 1.0238649754  |
| 1.3600434408  | 0.7948580329 | 0.9999537652 | 1.8289353302  |
| 1.292993688   | 0.2514867306 | 0.9999537652 | -1.2723778944 |
| 1.8746187661  | 0.1363966058 | 0.9999537652 | 1.0105988956  |
| -6.0768340904 | 0.0391945461 | 0.9999537652 | -1.363546436  |
| 1.3257589065  | 0.1489058121 | 0.9999537652 | 1.0597719093  |
| -1.3093027525 | 0.2076543837 | 0.9999537652 | -1.2627050234 |
| 2.3677225249  | 0.0954742241 | 0.9999537652 | -1.3555674202 |
| -1.7236237864 | 0.0512494097 | 0.9999537652 | -1.42560978   |
| 2.7957660672  | 0.7054362173 | 0.9999537652 | -1.3601489831 |
| 2.7933974408  | 0.6948713406 | 0.9999537652 | -1.1250196696 |
| 2.7957660672  | 0.7054385613 | 0.9999537652 | 0             |
| -2.4416556705 | 0.3741597953 | 0.9999537652 | -1.6785798811 |
| 2.3638535568  | 0.00335      | 0.9999537652 | -1.5800538106 |
| -1.1767301283 | 0.7356508434 | 0.9999537652 | -1.2431995102 |
| 0             | 0            | 0            | -1.4426061733 |
| -1.0514502364 | 0.8521875302 | 0.9999537652 | -1.2511268014 |
| 1.4398079274  | 0.6076968255 | 0.9999537652 | -1.0661031289 |
| -1.1574050327 | 0.5009366663 | 0.9999537652 | -1.1390484015 |
| 1.0678935042  | 0.7082410069 | 0.9999537652 | -1.1456049027 |
| 1.0621646818  | 0.8255575251 | 0.9999537652 | -1.4128809283 |
| 2.2253482524  | 0.168155229  | 0.9999537652 | -1.119419279  |
| -2.0795578895 | 0.2303025552 | 0.9999537652 | 2.3464201963  |
| 2.7933974408  | 0.6948713406 | 0.9999537652 | 0             |

gene\_expression\_table

|               |              |              |               |
|---------------|--------------|--------------|---------------|
| 3.1394606969  | 0.0208986664 | 0.9999537652 | -1.1377627016 |
| 3.6937166632  | 0.1516359407 | 0.9999537652 | -1.0019440938 |
| 2.0461586227  | 0.0498893726 | 0.9999537652 | -1.0038926288 |
| 0             | 0            | 0            | 1.5560296184  |
| 2.7933974408  | 0.6948713406 | 0.9999537652 | -1.0952583848 |
| 0             | 0            | 0            | 9.7116702472  |
| -1.7435834966 | 0.3751438191 | 0.9999537652 | -1.0599737366 |
| 1.0271041699  | 0.8604223939 | 0.9999537652 | 1.1169811054  |
| 1.0674653943  | 0.6421591476 | 0.9999537652 | 1.0374757509  |
| 1.057075147   | 0.7685421702 | 0.9999537652 | -1.0208487261 |
| 1.1126440841  | 0.6287412745 | 0.9999537652 | -1.137428435  |
| 1.643510367   | 0.5932811336 | 0.9999537652 | -2.2269755185 |
| 1.6024984014  | 0.6862123674 | 0.9999537652 | 1.0751932413  |
| -1.112649727  | 0.5453055882 | 0.9999537652 | -1.1804856425 |
| 1.6024984014  | 0.6863020091 | 0.9999537652 | 1.3224475497  |
| 18.5983228161 | 0.2579912666 | 0.9999537652 | -1.0422531512 |
| 15.0880352532 | 0.2954313143 | 0.9999537652 | 1.1356707315  |
| 1.0588081849  | 0.8076807353 | 0.9999537652 | 1.0502267737  |
| 1.1268789908  | 0.6209917575 | 0.9999537652 | -1.1763909563 |
| 2.7933974408  | 0.6948713406 | 0.9999537652 | 1.590997316   |
| -1.0756177415 | 0.8277185279 | 0.9999537652 | -1.2238171391 |
| -1.3808293235 | 0.2507868229 | 0.9999537652 | -1.0386188186 |
| -1.1171933108 | 0.3383807421 | 0.9999537652 | -1.0533887887 |
| -1.1868411067 | 0.3373531855 | 0.9999537652 | -1.1004635847 |
| 1.374894702   | 0.4249801248 | 0.9999537652 | 1.656499278   |
| 1.4659701501  | 0.2466513768 | 0.9999537652 | 1.2209111776  |
| 1.1331613376  | 0.3948453618 | 0.9999537652 | -1.161147529  |
| 1.8531875067  | 0.2370570258 | 0.9999537652 | -1.4584988872 |
| -1.1394252305 | 0.4821147396 | 0.9999537652 | -1.4222473021 |
| 1.1374046657  | 0.3826585234 | 0.9999537652 | -1.2974135692 |
| -1.3090139168 | 0.5492284828 | 0.9999537652 | -1.2073079744 |
| 1.0204921805  | 0.8828548032 | 0.9999537652 | 1.1198468788  |
| 2.1658501647  | 0.4036988285 | 0.9999537652 | 1.1401808029  |
| -1.334767918  | 0.5625675086 | 0.9999537652 | -1.0576354638 |
| 1.3371354523  | 0.2455078369 | 0.9999537652 | 1.1314061565  |
| -1.129145102  | 0.5679877426 | 0.9999537652 | -1.0598062483 |
| 1.0010854785  | 0.9953532227 | 0.9999537652 | -1.3977221883 |
| 1.4233266177  | 0.1624503722 | 0.9999537652 | 1.0955094207  |
| 2.7933974408  | 0.6948713406 | 0.9999537652 | 1.5318210718  |
| 1.0521732606  | 0.6591520173 | 0.9999537652 | -1.6239152791 |
| 1.0791230727  | 0.7325999065 | 0.9999537652 | -1.2126413694 |
| -1.0444653896 | 0.8168363725 | 0.9999537652 | -1.102248457  |
| -1.5646820981 | 0.3843686079 | 0.9999537652 | -1.4970321636 |
| 1.293233992   | 0.0481091914 | 0.9999537652 | 1.1042075406  |
| -2.5871290907 | 0.4950945092 | 0.9999537652 | 4.9527501949  |
| 1.2121185951  | 0.2159519009 | 0.9999537652 | -1.1392761998 |
| 1.0473634717  | 0.7153294189 | 0.9999537652 | 1.1147109755  |
| 1.2780162304  | 0.3191860887 | 0.9999537652 | 1.3098872242  |
| -1.2273076528 | 0.2075118121 | 0.9999537652 | 1.0504211725  |

gene\_expression\_table

|                |              |              |               |
|----------------|--------------|--------------|---------------|
| 1.0336671984   | 0.8024098427 | 0.9999537652 | 1.0656090756  |
| -1.1717451824  | 0.842242725  | 0.9999537652 | -1.0363457245 |
| 1.5916509819   | 0.1687566686 | 0.9999537652 | -1.0202639665 |
| -1.3395903204  | 0.1040614364 | 0.9999537652 | 1.1809623962  |
| 1.0374602287   | 0.9152758405 | 0.9999537652 | -1.0238013002 |
| 1.2611060645   | 0.2336393493 | 0.9999537652 | 1.0666556075  |
| -1.0208090526  | 0.8537385697 | 0.9999537652 | -1.0092038547 |
| 1.5815875305   | 0.6773602241 | 0.9999537652 | 2.5355690913  |
| 2.7933974408   | 0.6948713406 | 0.9999537652 | 1.1705662818  |
| -1.2797682501  | 0.1744049023 | 0.9999537652 | 1.1639941059  |
| -4.8135938501  | 0.1784471282 | 0.9999537652 | 6.9059398214  |
| 4.5545995984   | 0.5696724671 | 0.9999537652 | -1.1613446338 |
| 0              | 0            | 0            | 0             |
| -1.0381732196  | 0.8047062221 | 0.9999537652 | -1.155280022  |
| 15.0880352532  | 0.2955141276 | 0.9999537652 | -1.5088059915 |
| -1.0493965567  | 0.7652737093 | 0.9999537652 | -1.196490283  |
| 1.7512805614   | 0.4586763835 | 0.9999537652 | -1.5377948106 |
| -1.5748119492  | 0.1638121189 | 0.9999537652 | 1.1142934311  |
| -2.3309889016  | 0.0582592716 | 0.9999537652 | -1.1460036793 |
| 1.3629585105   | 0.4891027116 | 0.9999537652 | -1.3645279797 |
| 0              | 0            | 0            | 1.4537866576  |
| 1.0012234717   | 0.9939819803 | 0.9999537652 | 1.0616512271  |
| 1.1988901647   | 0.3944443032 | 0.9999537652 | -1.0669827063 |
| -1.0212657651  | 0.8570355903 | 0.9999537652 | 1.1472153602  |
| 1.7496094965   | 0.0465398404 | 0.9999537652 | 1.0335171055  |
| -1.0551684694  | 0.7902791308 | 0.9999537652 | -1.0181945116 |
| 1.1887725976   | 0.7459692189 | 0.9999537652 | -1.167242164  |
| -1.1399317987  | 0.4036820198 | 0.9999537652 | -1.0864216024 |
| -1.0048262473  | 0.9785013941 | 0.9999537652 | 1.2069716752  |
| -6.9764533263  | 0.2591693543 | 0.9999537652 | -2.5408482902 |
| -1.1279672712  | 0.3647144041 | 0.9999537652 | -1.0842108578 |
| -1.0638626403  | 0.7433583271 | 0.9999537652 | -1.0123878144 |
| 1.4744829524   | 0.4679304542 | 0.9999537652 | 2.0125565823  |
| -1.444237639   | 0.2134880837 | 0.9999537652 | -1.0378827035 |
| -1.0474416127  | 0.8090311684 | 0.9999537652 | 1.0809946696  |
| -28.7225758273 | 0.0587692404 | 0.9999537652 | 0             |
| -1.0349725645  | 0.8924276428 | 0.9999537652 | -1.2406667354 |
| 1.1169928711   | 0.5592902785 | 0.9999537652 | 1.2551218789  |
| 3.5444019705   | 0.2680766623 | 0.9999537652 | -2.2893450003 |
| -1.4828085853  | 0.0222864868 | 0.9999537652 | -1.0189585148 |
| -1.0685222725  | 0.861801674  | 0.9999537652 | -1.7000936341 |
| 1.1841787841   | 0.1448514514 | 0.9999537652 | 1.2317474762  |
| -1.1623847729  | 0.887198882  | 0.9999537652 | 2.1874714972  |
| -1.4090706138  | 0.1499911461 | 0.9999537652 | -1.1504541598 |
| -1.4927097311  | 0.0583006136 | 0.9999537652 | 1.1023356584  |
| 6.3075231393   | 0.4863913298 | 0.9999537652 | 0             |
| 0              | 0            | 0            | 12.7732027325 |
| 4.5505976667   | 0.556961481  | 0.9999537652 | 2.996475627   |
| 0              | 0            | 0            | 1.3687080685  |

gene\_expression\_table

|               |              |              |               |
|---------------|--------------|--------------|---------------|
| 2.5626013909  | 0.2583666894 | 0.9999537652 | 1.0386350901  |
| -1.0583306168 | 0.8346524598 | 0.9999537652 | 1.3049298416  |
| -1.0897087179 | 0.7013952254 | 0.9999537652 | 1.2890853677  |
| 2.7933974408  | 0.6948713406 | 0.9999537652 | 6.908559683   |
| -1.3112478436 | 0.5797092353 | 0.9999537652 | -3.0890541028 |
| 2.7933974408  | 0.6948713406 | 0.9999537652 | 0             |
| -1.075354506  | 0.8812920875 | 0.9999537652 | -1.3619468048 |
| 1.2187593053  | 0.646450408  | 0.9999537652 | -2.1420558366 |
| -1.1688020512 | 0.5543746649 | 0.9999537652 | -1.0505422135 |
| -1.119170163  | 0.5558366868 | 0.9999537652 | -1.2361720544 |
| 1.0719361517  | 0.9204580613 | 0.9999537652 | 2.7558973556  |
| 15.2205810263 | 0.3052951562 | 0.9999537652 | 1.9307645037  |
| 1.0829215919  | 0.5234163166 | 0.9999537652 | 1.1523433234  |
| 1.0392987413  | 0.8614009226 | 0.9999537652 | -1.01416649   |
| -1.1141213666 | 0.5802525906 | 0.9999537652 | -1.339061348  |
| -1.0473748842 | 0.7587590104 | 0.9999537652 | -1.0491877748 |
| -1.0887426178 | 0.5074536948 | 0.9999537652 | -1.0904939959 |
| -1.0120882276 | 0.9554535527 | 0.9999537652 | 1.2867793222  |
| 0             | 0            | 0            | -1.8579915692 |
| 0             | 0            | 0            | 4.9527501949  |
| -2.5388858734 | 0.0182615408 | 0.9999537652 | 1.2359037312  |
| -1.2172862773 | 0.1333151906 | 0.9999537652 | -1.1949743817 |
| 1.1902886668  | 0.3171223424 | 0.9999537652 | -1.0173166018 |
| -2.0113664731 | 0.3218543358 | 0.9999537652 | 1.0235501953  |
| 1.1170390388  | 0.5307952327 | 0.9999537652 | 1.028231189   |
| -6.9764533263 | 0.2591776818 | 0.9999537652 | 20.5862458385 |
| 1.0404306232  | 0.7984801853 | 0.9999537652 | 1.1330523478  |
| -1.0872200494 | 0.6782048461 | 0.9999537652 | 1.0433514422  |
| 1.0882474284  | 0.4908888412 | 0.9999537652 | 1.302918515   |
| 1.5301326131  | 0.5572343884 | 0.9999537652 | -1.1045292627 |
| 4.5505976667  | 0.556872722  | 0.9999537652 | 2.996475627   |
| -1.1825442559 | 0.4389861437 | 0.9999537652 | -1.9465370399 |
| -1.0487971014 | 0.7291124127 | 0.9999537652 | 1.039390121   |
| 1.3218378061  | 0.186107566  | 0.9999537652 | -1.0156737093 |
| 1.0290969881  | 0.8258427175 | 0.9999537652 | -1.1129489101 |
| 1.5030896757  | 0.3450820806 | 0.9999537652 | -1.1406774814 |
| 1.1929259108  | 0.1952989603 | 0.9999537652 | -1.0695304886 |
| 1.1142649762  | 0.5396595954 | 0.9999537652 | -1.1388724317 |
| 1.4596322495  | 0.2606154363 | 0.9999537652 | -1.3129548488 |
| -1.0867987676 | 0.6710401397 | 0.9999537652 | -1.0528894191 |
| 1.0675221527  | 0.8038050871 | 0.9999537652 | -1.2347594907 |
| -1.3845458221 | 0.0187676015 | 0.9999537652 | -1.3395646568 |
| 1.4311344656  | 0.2948198056 | 0.9999537652 | 1.2660913732  |
| -1.0514867521 | 0.7114250838 | 0.9999537652 | -1.0228056829 |
| 2.7933974408  | 0.6948713406 | 0.9999537652 | 4.0953564288  |
| 2.0520648891  | 0.0005044    | 0.9999537652 | 1.1155998797  |
| -1.0113174282 | 0.9470273042 | 0.9999537652 | 1.0748613072  |
| 1.0227628079  | 0.9517928594 | 0.9999537652 | 1.4152745727  |
| 4.2550171442  | 0.0859870266 | 0.9999537652 | -1.5790138432 |



gene\_expression\_table

|                |              |              |               |
|----------------|--------------|--------------|---------------|
| -1.1405421203  | 0.565995331  | 0.9999537652 | -1.3460667863 |
| 11.5766527773  | 0.3455323591 | 0.9999537652 | -1.1248877899 |
| -1.255307045   | 0.1493450762 | 0.9999537652 | -1.2945666078 |
| -1.1529341132  | 0.2656618028 | 0.9999537652 | -1.1723540339 |
| 2.7946088374   | 0.1756383905 | 0.9999537652 | -6.3801224602 |
| -1.1642275307  | 0.4107069602 | 0.9999537652 | 1.0584521356  |
| -1.0521391104  | 0.8303109305 | 0.9999537652 | 1.3302431142  |
| -1.1064269778  | 0.5627949537 | 0.9999537652 | 1.0110815331  |
| -1.0085355311  | 0.9930349942 | 0.9999537652 | -1.2862623659 |
| 1.029457602    | 0.851337824  | 0.9999537652 | -1.0660772917 |
| -1.071649735   | 0.6894258955 | 0.9999537652 | 1.2376018931  |
| 1.1420472463   | 0.6879630567 | 0.9999537652 | -1.3519027108 |
| 1.0594591997   | 0.6424424004 | 0.9999537652 | -1.1263534136 |
| -1.1272314551  | 0.6374508254 | 0.9999537652 | -1.2767128556 |
| 0              | 0            | 0            | 0             |
| -1.2739485345  | 0.0721671183 | 0.9999537652 | -1.2598417836 |
| 1.0515587552   | 0.6458967168 | 0.9999537652 | -1.046876222  |
| -1.0308932783  | 0.8543778769 | 0.9999537652 | 1.0457109906  |
| 1.0587348009   | 0.7227233673 | 0.9999537652 | -1.2965418811 |
| 3.3058503755   | 0.2782186392 | 0.9999537652 | -1.4505064176 |
| 1.9281341265   | 0.3667314513 | 0.9999537652 | -1.0505510228 |
| 1.0978374414   | 0.6529629789 | 0.9999537652 | -1.0044429769 |
| -17.0527724669 | 0.106444846  | 0.9999537652 | 30.2246886723 |
| -1.309833681   | 0.0356913756 | 0.9999537652 | -1.0975098507 |
| 1.0038035562   | 0.9896145132 | 0.9999537652 | -1.0532964828 |
| -1.0235213271  | 0.8978928968 | 0.9999537652 | 1.0364307717  |
| 2.7933974408   | 0.6948713406 | 0.9999537652 | -5.3583704783 |
| 0              | 0            | 0            | 0             |
| 2.7957660672   | 0.7054409062 | 0.9999537652 | 4.9527501949  |
| 4.5505976667   | 0.5567907887 | 0.9999537652 | 4.9527501949  |
| 2.3294952774   | 0.0008986    | 0.9999537652 | 1.2335327471  |
| -1.0186316221  | 0.9220811648 | 0.9999537652 | 1.7422701847  |
| -3.9838128634  | 0.0782031329 | 0.9999537652 | -1.6441794863 |
| 2.8499419597   | 0.1545766515 | 0.9999537652 | 1.5473225268  |
| 1.2443104586   | 0.3574086148 | 0.9999537652 | 1.4778927474  |
| 1.3171203617   | 0.2812537184 | 0.9999537652 | 1.514223496   |
| 0              | 0            | 0            | 4.9527501949  |
| 0              | 0            | 0            | 2.996475627   |
| 2.7933974408   | 0.6948713406 | 0.9999537652 | 15.9061931258 |
| -1.0215828419  | 0.8612448068 | 0.9999537652 | -1.0640829976 |
| -1.2652071252  | 0.3200745781 | 0.9999537652 | -1.3161997844 |
| 2.7489196894   | 0.1407602186 | 0.9999537652 | -1.2539651059 |
| -1.3677102863  | 0.0691775063 | 0.9999537652 | -1.0174432075 |
| -1.1458750359  | 0.4833158468 | 0.9999537652 | 1.4135717602  |
| 0              | 0            | 0            | 0             |
| 1.0000375767   | 0.999903597  | 0.9999537652 | -1.0369015529 |
| -1.0566585585  | 0.8604175972 | 0.9999537652 | 1.0421433702  |
| 1.0398470077   | 0.8048263006 | 0.9999537652 | -1.1242384842 |
| -1.2504644039  | 0.6603823288 | 0.9999537652 | -1.1485257488 |

gene\_expression\_table

|               |              |              |               |
|---------------|--------------|--------------|---------------|
| 1.111316199   | 0.4134558422 | 0.9999537652 | 1.2413793697  |
| -1.0115631292 | 0.9482760309 | 0.9999537652 | 1.3293785687  |
| -1.0197059834 | 0.9552087155 | 0.9999537652 | -1.0711934072 |
| 0             | 0            | 0            | 4.9527501949  |
| 29.8698312703 | 0.2177565601 | 0.9999537652 | 0             |
| 2.7933974408  | 0.6948713406 | 0.9999537652 | 0             |
| 4.5545995984  | 0.5696703893 | 0.9999537652 | 0             |
| 0             | 0            | 0            | 2.996475627   |
| 2.7933974408  | 0.6948713406 | 0.9999537652 | -2.1280158161 |
| -1.2855530795 | 0.1781343428 | 0.9999537652 | 1.1047955909  |
| -1.0185848716 | 0.923356326  | 0.9999537652 | 1.3012202595  |
| 1.0304768702  | 0.8848312396 | 0.9999537652 | 1.2979368764  |
| -1.052528547  | 0.7138151094 | 0.9999537652 | 1.0126705463  |
| 1.0376118341  | 0.8674868797 | 0.9999537652 | -1.0460513082 |
| 1.5673682763  | 0.1384135688 | 0.9999537652 | 1.2029516336  |
| -1.1213619883 | 0.5950546312 | 0.9999537652 | -1.2153482059 |
| 1.1005503536  | 0.6646906634 | 0.9999537652 | 1.0246983759  |
| 1.0294957231  | 0.8293850167 | 0.9999537652 | 1.3264387446  |
| -1.0792592098 | 0.6548938358 | 0.9999537652 | 1.1601827896  |
| 1.1156288919  | 0.7252031668 | 0.9999537652 | 1.5809792956  |
| 9.1195404325  | 0.0465133478 | 0.9999537652 | -1.3118256695 |
| 0             | 0            | 0            | 1.4537866576  |
| 1.0954236713  | 0.7783717327 | 0.9999537652 | 1.8059698302  |
| -1.6432252404 | 0.1338463006 | 0.9999537652 | 1.0704358607  |
| 1.2022589705  | 0.6620120933 | 0.9999537652 | 1.8734568509  |
| -1.0403556337 | 0.8442048573 | 0.9999537652 | 1.1344855898  |
| 1.1454289347  | 0.5429727711 | 0.9999537652 | 1.2297170892  |
| 4.5505976667  | 0.5567145673 | 0.9999537652 | -1.3579552885 |
| -1.1682472802 | 0.4615953888 | 0.9999537652 | 1.1760157523  |
| 4.5505976667  | 0.5566836989 | 0.9999537652 | 0             |
| -1.1817849279 | 0.6099194748 | 0.9999537652 | -1.0541182149 |
| -1.1447852916 | 0.9153207121 | 0.9999537652 | -4.0167610368 |
| -1.0052890785 | 0.986167464  | 0.9999537652 | 1.3082928694  |
| 1.9183025552  | 0.1044001112 | 0.9999537652 | 1.0537189289  |
| -1.0262163333 | 0.8205748844 | 0.9999537652 | 1.2350319696  |
| -1.1196564798 | 0.5467823594 | 0.9999537652 | -1.0930472912 |
| 11.5864583426 | 0.3448609145 | 0.9999537652 | -1.5255688471 |
| -1.0148144681 | 0.9169069979 | 0.9999537652 | 1.1200680908  |
| 1.1855043684  | 0.2293123565 | 0.9999537652 | 1.0304883745  |
| -4.3234865661 | 0.150015522  | 0.9999537652 | 12.7732027325 |
| 1.11360368    | 0.5694735292 | 0.9999537652 | 1.1669498724  |
| 0             | 0            | 0            | 6.9133480437  |
| 2.7933974408  | 0.6948713406 | 0.9999537652 | -6.4352633827 |
| 4.7592049098  | 0.1553546697 | 0.9999537652 | -1.166228783  |
| 1.3835687086  | 0.0787709866 | 0.9999537652 | -1.0247952108 |
| 1.0371707186  | 0.8658934414 | 0.9999537652 | 1.1386081413  |
| 1.6141448781  | 0.1595822383 | 0.9999537652 | 1.084872138   |
| 1.0897630839  | 0.6412362873 | 0.9999537652 | -1.0928615833 |
| 1.0579973875  | 0.7798809306 | 0.9999537652 | -1.0262823766 |

gene\_expression\_table

|               |              |              |               |
|---------------|--------------|--------------|---------------|
| -2.4710767924 | 0.5445220763 | 0.9999537652 | 0             |
| -1.3150087148 | 0.3961402037 | 0.9999537652 | 1.045554902   |
| 1.3025325442  | 0.6131002717 | 0.9999537652 | 1.1353089796  |
| 1.194738735   | 0.5850453649 | 0.9999537652 | 1.0205162228  |
| 24.3870295947 | 0.2290228206 | 0.9999537652 | -2.2935209839 |
| -2.0942274998 | 0.046788865  | 0.9999537652 | -1.8811465506 |
| 1.0145668119  | 0.9661089919 | 0.9999537652 | 1.3107735704  |
| 54.5793006814 | 0.1214851    | 0.9999537652 | 2.996475627   |
| 1.8957557082  | 0.4627928026 | 0.9999537652 | -1.1611062701 |
| 1.1302840871  | 0.5038563542 | 0.9999537652 | 1.1030282654  |
| -1.0872029594 | 0.5090928015 | 0.9999537652 | 1.0471350312  |
| -2.6368360135 | 0.2392545506 | 0.9999537652 | 2.3077201453  |
| 1.103931787   | 0.6641471502 | 0.9999537652 | 1.1324635149  |
| 0             | 0            | 0            | 2.9985540909  |
| 2.9591626092  | 0.0108162484 | 0.9999537652 | 1.569417442   |
| -1.1670613769 | 0.8550003358 | 0.9999537652 | -4.7399721888 |
| 1.0280366057  | 0.9066135725 | 0.9999537652 | 1.3443231479  |
| 1.4706009574  | 0.2037058681 | 0.9999537652 | 1.1309302511  |
| 1.1901283357  | 0.4452666418 | 0.9999537652 | 1.355174895   |
| 1.4529708599  | 0.2207114612 | 0.9999537652 | 1.2560288234  |
| -1.2733479599 | 0.3646705959 | 0.9999537652 | 1.1268172095  |
| 2.018188514   | 0.0372783068 | 0.9999537652 | 1.358659433   |
| 1.4208057684  | 0.0528385048 | 0.9999537652 | 1.235364176   |
| 6.3075231393  | 0.4863782724 | 0.9999537652 | 2.996475627   |
| -1.034418822  | 0.8495020495 | 0.9999537652 | -1.0781829996 |
| -1.0815397743 | 0.7130259269 | 0.9999537652 | -1.0576180928 |
| 2.1947124478  | 0.3162270937 | 0.9999537652 | -1.0193908853 |
| -1.1323086324 | 0.5141112952 | 0.9999537652 | -1.0590834607 |
| -1.2399604201 | 0.2380271471 | 0.9999537652 | -1.0593257701 |
| -1.2407663199 | 0.490270913  | 0.9999537652 | 1.3112449963  |
| -1.0579755669 | 0.9334067448 | 0.9999537652 | -1.5830173904 |
| 1.1244691651  | 0.579623143  | 0.9999537652 | -1.2927168785 |
| 2.7933974408  | 0.6948713406 | 0.9999537652 | 0             |
| 1.2802584115  | 0.4810185133 | 0.9999537652 | 2.1539920158  |
| 1.1621627331  | 0.6143733589 | 0.9999537652 | 1.3155744671  |
| -1.6575837066 | 0.4541293519 | 0.9999537652 | 1.2008979237  |
| 1.0186672449  | 0.9423122656 | 0.9999537652 | 1.0746233485  |
| 2.4277111557  | 0.2920079741 | 0.9999537652 | 2.9707177548  |
| -1.0993267572 | 0.7808434325 | 0.9999537652 | 1.4401814165  |
| 1.6314647197  | 0.2169904676 | 0.9999537652 | 1.0260604864  |
| 1.5965657362  | 0.1136941818 | 0.9999537652 | 2.2018816799  |
| 1.3225465194  | 0.066854768  | 0.9999537652 | 1.1902884253  |
| 1.3387611711  | 0.4715960368 | 0.9999537652 | -1.0084351443 |
| -2.0908000446 | 0.4356910554 | 0.9999537652 | -1.3783411646 |
| -1.2162857015 | 0.1785273158 | 0.9999537652 | 1.101900263   |
| 2.7957660672  | 0.7054432521 | 0.9999537652 | -3.3853891979 |
| 1.1175388732  | 0.6564915258 | 0.9999537652 | 1.0433462964  |
| -2.8080850154 | 0.3318381258 | 0.9999537652 | -5.5994415605 |
| 4.5505976667  | 0.5566538964 | 0.9999537652 | 10.8262784008 |

gene\_expression\_table

|               |              |              |               |
|---------------|--------------|--------------|---------------|
| 1.081436306   | 0.8487979596 | 0.9999537652 | 1.0096506788  |
| 2.7933974408  | 0.6948713406 | 0.9999537652 | -1.1250196696 |
| -2.5838710423 | 0.5187542002 | 0.9999537652 | 2.9985540909  |
| -1.1680276447 | 0.3902595839 | 0.9999537652 | 1.018006364   |
| -1.6422116369 | 0.4178088296 | 0.9999537652 | -1.4035964637 |
| -1.2391589495 | 0.3556718585 | 0.9999537652 | 1.5688532466  |
| 1.4725798242  | 0.0798828039 | 0.9999537652 | 1.0119272205  |
| -1.0457369147 | 0.8574225033 | 0.9999537652 | -1.0987906769 |
| 1.3003719044  | 0.4421645438 | 0.9999537652 | 1.0092712287  |
| -1.4686464794 | 0.3913540107 | 0.9999537652 | 1.3753245199  |
| -1.0433958077 | 0.8343560122 | 0.9999537652 | -1.1488420713 |
| -1.3922070018 | 0.4422614556 | 0.9999537652 | 1.6706106163  |
| 1.2319435881  | 0.3469881434 | 0.9999537652 | -1.4656942709 |
| -1.4137177797 | 0.398621742  | 0.9999537652 | -1.027479335  |
| 6.3075231393  | 0.4863597406 | 0.9999537652 | 1.4537866576  |
| -1.0758544827 | 0.6550740464 | 0.9999537652 | -1.0418103549 |
| 1.0418460307  | 0.8641500961 | 0.9999537652 | 1.5841593768  |
| 1.0228776005  | 0.9000546292 | 0.9999537652 | 1.4612263206  |
| -1.1097311508 | 0.8347230881 | 0.9999537652 | -1.0466177644 |
| 1.202091047   | 0.3296256592 | 0.9999537652 | 1.059622733   |
| -1.0250895366 | 0.9297349637 | 0.9999537652 | -1.155975356  |
| -1.5347269239 | 0.2658884195 | 0.9999537652 | 1.5107602448  |
| 2.6134824879  | 0.0171696081 | 0.9999537652 | 1.2938186044  |
| 3.859400354   | 0.1173269063 | 0.9999537652 | -1.1280370244 |
| -1.4762397703 | 0.6421141941 | 0.9999537652 | 16.6806485101 |
| 1.1552692485  | 0.3785925423 | 0.9999537652 | 1.0280880059  |
| 1.0844487454  | 0.8707989975 | 0.9999537652 | -1.1662003378 |
| -1.1994367768 | 0.6709214158 | 0.9999537652 | 1.321803727   |
| -1.4263849482 | 0.1003895749 | 0.9999537652 | -1.193849186  |
| -1.8172508579 | 0.3615251308 | 0.9999537652 | 2.1851140688  |
| 1.0074744043  | 0.9912150162 | 0.9999537652 | 1.0386658977  |
| 2.0852494071  | 0.203685478  | 0.9999537652 | 1.0712963309  |
| 1.0473973226  | 0.8358952645 | 0.9999537652 | 1.3456319557  |
| 1.1307159098  | 0.6319491641 | 0.9999537652 | 1.0566125318  |
| -5.855397775  | 0.1779668514 | 0.9999537652 | 6.908559683   |
| 1.4273126267  | 0.4333625821 | 0.9999537652 | 2.1612032567  |
| -1.0492162905 | 0.8654427389 | 0.9999537652 | -1.169586205  |
| 1.271436232   | 0.2602352117 | 0.9999537652 | 1.1475277752  |
| 1.0570403596  | 0.7140650462 | 0.9999537652 | 1.2503054055  |
| -1.0647557993 | 0.6901321504 | 0.9999537652 | 1.131988253   |
| 1.2674088665  | 0.159934602  | 0.9999537652 | 1.2721374381  |
| 1.3640422474  | 0.3026206717 | 0.9999537652 | 1.3683146205  |
| -3.2727308847 | 0.1982147524 | 0.9999537652 | -1.4602971429 |
| 1.1156982492  | 0.7238181458 | 0.9999537652 | 1.2854220982  |
| 1.7114087897  | 0.0696450289 | 0.9999537652 | -1.0364925567 |
| -1.9041828432 | 0.1375057486 | 0.9999537652 | -1.2468680136 |
| 1.3450284088  | 0.4646567808 | 0.9999537652 | 1.1560248777  |
| 2.9792351324  | 0.0743767023 | 0.9999537652 | 1.0300568638  |
| 1.0155282432  | 0.9077373176 | 0.9999537652 | 1.4089260639  |

gene\_expression\_table

|               |              |              |               |
|---------------|--------------|--------------|---------------|
| -1.212233978  | 0.3270041685 | 0.9999537652 | 1.2680305681  |
| -1.1453192235 | 0.908736665  | 0.9999537652 | 1.0674788249  |
| 1.0129420433  | 0.9674476493 | 0.9999537652 | -1.362787283  |
| 0             | 0            | 0            | 2.9988886918  |
| 1.05232932    | 0.9175943991 | 0.9999537652 | 1.302851463   |
| -1.6413044039 | 0.0385866709 | 0.9999537652 | 1.0441388886  |
| -1.2299936391 | 0.3123070881 | 0.9999537652 | 1.0510593525  |
| 0             | 0            | 0            | 2.996475627   |
| -1.1254649332 | 0.4924379603 | 0.9999537652 | 1.1171769112  |
| 1.846408361   | 0.5882299327 | 0.9999537652 | 2.9985540909  |
| 1.5051828897  | 0.4676346508 | 0.9999537652 | 1.4940516767  |
| 1.0385208736  | 0.9226902176 | 0.9999537652 | 1.2176542164  |
| 18.5983228161 | 0.2579759179 | 0.9999537652 | -1.0469500538 |
| 1.2020388661  | 0.651531815  | 0.9999537652 | -1.3763386703 |
| -1.0833740364 | 0.6913476011 | 0.9999537652 | -1.1335219385 |
| 1.0632335311  | 0.6713514206 | 0.9999537652 | 1.4066496785  |
| 1.7938786006  | 0.007712     | 0.9999537652 | -1.7181032845 |
| -1.2734834919 | 0.5805362738 | 0.9999537652 | -1.3501592245 |
| 0             | 0            | 0            | 2.996475627   |
| -1.4645225255 | 0.2887272322 | 0.9999537652 | 2.3222187522  |
| 1.3386362079  | 0.1616077745 | 0.9999537652 | 1.8358521658  |
| -1.0877948079 | 0.8945772997 | 0.9999537652 | -1.1093538102 |
| 0             | 0            | 0            | 2.9985540909  |
| -1.0996825855 | 0.7348599497 | 0.9999537652 | -1.0838017905 |
| 1.120080119   | 0.6034885487 | 0.9999537652 | 1.5156845621  |
| -1.5875118025 | 0.7205195663 | 0.9999537652 | 2.3413262342  |
| 6.3075231393  | 0.4863412791 | 0.9999537652 | 0             |
| -1.1309816678 | 0.8547260639 | 0.9999537652 | -1.1544184423 |
| -1.171252603  | 0.8507580726 | 0.9999537652 | 1.0682347371  |
| 2.7957660672  | 0.7054455989 | 0.9999537652 | -1.1242401582 |
| 8.064174035   | 0.4238837802 | 0.9999537652 | -1.8594983184 |
| -6.9764533263 | 0.2592026819 | 0.9999537652 | 20.6004768562 |
| 1.0555020791  | 0.7096491587 | 0.9999537652 | 1.3446520506  |
| -1.1348674605 | 0.6200995173 | 0.9999537652 | -1.0655129099 |
| 1.4757537288  | 0.1303870459 | 0.9999537652 | 1.3839536241  |
| 2.0224217452  | 0.0542198543 | 0.9999537652 | 1.9047163923  |
| 1.0304230289  | 0.8147039122 | 0.9999537652 | 1.1782068679  |
| 4.5505976667  | 0.5566250533 | 0.9999537652 | 8.8700459102  |
| 1.1593773706  | 0.5267973225 | 0.9999537652 | 1.107856765   |
| -1.1761541094 | 0.5060071174 | 0.9999537652 | 1.135571024   |
| 3.7902526731  | 0.2288683402 | 0.9999537652 | 1.2482398711  |
| -1.6973123489 | 0.5505981895 | 0.9999537652 | 4.1864221648  |
| 0             | 0            | 0            | 2.9985540909  |
| -1.854982839  | 0.669500012  | 0.9999537652 | 4.2599323069  |
| -1.0382088849 | 0.8629596625 | 0.9999537652 | -1.1261879802 |
| -1.3784666702 | 0.5533441515 | 0.9999537652 | -1.0624205355 |
| 4.5505976667  | 0.5565970628 | 0.9999537652 | 0             |
| 1.3588576256  | 0.8007235826 | 0.9999537652 | 0             |
| -3.3110661094 | 0.2931306503 | 0.9999537652 | 5.9722067269  |

gene\_expression\_table

|               |              |              |               |
|---------------|--------------|--------------|---------------|
| 1.0797125592  | 0.8027923246 | 0.9999537652 | 1.5342866731  |
| 6.3075231393  | 0.4863228875 | 0.9999537652 | 1.2394611522  |
| 0             | 0            | 0            | 2.9985540909  |
| 4.5505976667  | 0.5565698204 | 0.9999537652 | 2.2253832076  |
| 1.1058644643  | 0.7071044163 | 0.9999537652 | 1.0448231237  |
| 0             | 0            | 0            | 2.996475627   |
| 2.7933974408  | 0.6948713406 | 0.9999537652 | 6.908559683   |
| 1.0613198825  | 0.6001880255 | 0.9999537652 | 1.0654411492  |
| 0             | 0            | 0            | 1.3166104106  |
| -1.669821626  | 0.1178436899 | 0.9999537652 | 1.6154009151  |
| -1.8455979539 | 0.3270696906 | 0.9999537652 | 1.087618212   |
| -1.0210365629 | 0.963173373  | 0.9999537652 | -1.0445158578 |
| -2.5861438062 | 0.4665546927 | 0.9999537652 | 2.387778404   |
| 1.1156751249  | 0.5148974932 | 0.9999537652 | 1.4169368365  |
| -1.1509029955 | 0.3076581429 | 0.9999537652 | -1.2838067469 |
| -1.5564897538 | 0.1292289349 | 0.9999537652 | -1.0664889667 |
| -2.587194901  | 0.5007506416 | 0.9999537652 | 1.2593062028  |
| 1.0246710853  | 0.9222381925 | 0.9999537652 | 1.452217877   |
| -1.0573992956 | 0.6743936028 | 0.9999537652 | 1.118998532   |
| -1.0949486505 | 0.781349341  | 0.9999537652 | 1.0367247291  |
| -1.1581634302 | 0.4101430556 | 0.9999537652 | -1.0147651787 |
| 1.3999031749  | 0.4019305723 | 0.9999537652 | 1.6450014292  |
| 1.0892911075  | 0.7405101077 | 0.9999537652 | 1.6072123027  |
| -1.0104114485 | 0.9763773132 | 0.9999537652 | 1.5692729976  |
| 1.071066925   | 0.9164818364 | 0.9999537652 | 1.6860091478  |
| 1.3408749081  | 0.0381423508 | 0.9999537652 | 1.1739008283  |
| -1.4571852392 | 0.3087031755 | 0.9999537652 | 1.0291548006  |
| -1.1619421561 | 0.8737038912 | 0.9999537652 | -2.044605925  |
| 1.6778054259  | 0.0179542736 | 0.9999537652 | -1.0827464978 |
| 2.3306483975  | 0.4665651467 | 0.9999537652 | -2.0901136056 |
| 1.1813435872  | 0.4619124265 | 0.9999537652 | 1.0676588949  |
| -1.1292995288 | 0.3564097569 | 0.9999537652 | 1.2222969848  |
| 1.0898301836  | 0.6840130732 | 0.9999537652 | 1.1327328324  |
| 34.3811030879 | 0.1695431793 | 0.9999537652 | 2.0643077124  |
| -1.0177924513 | 0.9263518423 | 0.9999537652 | 1.4387781797  |
| 0             | 0            | 0            | -6.6628455824 |
| -1.1345373546 | 0.4669317304 | 0.9999537652 | 1.1411328699  |
| -1.2892908447 | 0.2419779638 | 0.9999537652 | -1.1654630419 |
| 1.1008317228  | 0.5728724564 | 0.9999537652 | 1.0180949097  |
| -1.3869431146 | 0.1763327198 | 0.9999537652 | -1.275711308  |
| -1.0007130659 | 0.9971624001 | 0.9999537652 | 1.6269911157  |
| 1.0194266775  | 0.9297249356 | 0.9999537652 | 1.014555652   |
| -1.8199241288 | 0.0434154809 | 0.9999537652 | -1.0808400157 |
| -1.2189276647 | 0.3953523009 | 0.9999537652 | 1.1083496351  |
| -1.027205394  | 0.9267001476 | 0.9999537652 | 1.1835915972  |
| 1.1919268115  | 0.2016712203 | 0.9999537652 | -1.1354744873 |
| -1.4940676537 | 0.3401568431 | 0.9999537652 | -1.0744014923 |
| 1.1925582499  | 0.4779455974 | 0.9999537652 | -1.0111001095 |
| -1.9736273861 | 0.2288237199 | 0.9999537652 | 1.5462826785  |

gene\_expression\_table

|               |              |              |               |
|---------------|--------------|--------------|---------------|
| 1.2356860561  | 0.5617708085 | 0.9999537652 | -1.1925159819 |
| -1.5498131543 | 0.1001118269 | 0.9999537652 | 1.1434776067  |
| 2.7933974408  | 0.6948713406 | 0.9999537652 | 0             |
| 1.0880934088  | 0.6332809855 | 0.9999537652 | 1.0755730762  |
| 1.334054837   | 0.5906041102 | 0.9999537652 | 1.8861877352  |
| -1.0645813667 | 0.6873220823 | 0.9999537652 | -1.0197153102 |
| -1.8277288365 | 0.1747969359 | 0.9999537652 | 1.3830625852  |
| -2.1053066666 | 0.3146010489 | 0.9999537652 | 1.124343984   |
| 1.2707804646  | 0.3225906659 | 0.9999537652 | 1.2280067376  |
| 2.1141085505  | 0.1259521107 | 0.9999537652 | -1.0301015622 |
| -1.0135297804 | 0.954795723  | 0.9999537652 | -1.0140608132 |
| -2.0649459568 | 0.1648036282 | 0.9999537652 | -1.2475746038 |
| -1.094053711  | 0.6240083282 | 0.9999537652 | -1.0744302441 |
| -1.019770079  | 0.9419569073 | 0.9999537652 | 1.3352977848  |
| 1.0096552952  | 0.9592991208 | 0.9999537652 | -1.0603835776 |
| -1.0603878335 | 0.6512323981 | 0.9999537652 | 1.0689983623  |
| 1.0941338387  | 0.7012486721 | 0.9999537652 | 1.3292208293  |
| -1.1453192235 | 0.9087196086 | 0.9999537652 | -6.4352633827 |
| 1.643510367   | 0.5933618518 | 0.9999537652 | 12.7732027325 |
| 25.6156185703 | 0.2096653013 | 0.9999537652 | 2.1590507919  |
| 0             | 0            | 0            | 1.6470100299  |
| 0             | 0            | 0            | 0             |
| -1.2171598465 | 0.387757276  | 0.9999537652 | -1.2406306012 |
| 1.6270711323  | 0.5959701078 | 0.9999537652 | -1.2180148517 |
| -1.0748031098 | 0.6534606546 | 0.9999537652 | 1.0560712212  |
| 4.5544554512  | 0.5691473461 | 0.9999537652 | -1.1250196696 |
| 1.1136602091  | 0.7303514282 | 0.9999537652 | -1.7477970174 |
| 1.0833043499  | 0.7895153765 | 0.9999537652 | 1.5828434909  |
| -1.0188106624 | 0.9445074881 | 0.9999537652 | 1.3209354107  |
| -2.3601138181 | 0.4328865573 | 0.9999537652 | 0             |
| 8.0710074692  | 0.4203286965 | 0.9999537652 | 1.3973764147  |
| 0             | 0            | 0            | 2.9985540909  |
| -1.0878470573 | 0.6684904877 | 0.9999537652 | 1.3506488583  |
| -1.5876922998 | 0.0262284393 | 0.9999537652 | -1.0774886362 |
| 2.7933974408  | 0.6948713406 | 0.9999537652 | -2.9704130837 |
| -1.2374416969 | 0.3777445303 | 0.9999537652 | 1.2197661357  |
| -2.1805032503 | 0.047195031  | 0.9999537652 | 1.5847701151  |
| -1.213640762  | 0.3241754139 | 0.9999537652 | -1.0633959938 |
| 1.4185591585  | 0.1484039155 | 0.9999537652 | -1.0718646352 |
| 0             | 0            | 0            | 1.0015079005  |
| 1.2103350963  | 0.3581476865 | 0.9999537652 | 1.0935701428  |
| -1.0290766315 | 0.9193074995 | 0.9999537652 | 1.1786408586  |
| -1.2068050655 | 0.2668208025 | 0.9999537652 | -1.5304899078 |
| 1.1893568102  | 0.7037017453 | 0.9999537652 | 1.2340294199  |
| 1.0175625897  | 0.9309805471 | 0.9999537652 | 1.0398389702  |
| 1.0676227971  | 0.8827466108 | 0.9999537652 | -1.2310789416 |
| -1.2586068636 | 0.258780112  | 0.9999537652 | -1.0152481348 |
| -1.2540680512 | 0.3219385889 | 0.9999537652 | 1.0071704479  |
| 1.2160018552  | 0.4044533403 | 0.9999537652 | 1.3676474441  |

gene\_expression\_table

|               |              |              |               |
|---------------|--------------|--------------|---------------|
| 1.2642169253  | 0.1829870753 | 0.9999537652 | -1.0898259795 |
| 2.0849718726  | 0.2968429513 | 0.9999537652 | -1.3034241767 |
| -1.0048342918 | 0.9754252246 | 0.9999537652 | -1.2103983862 |
| -2.0008239305 | 0.4558475686 | 0.9999537652 | 3.3511460746  |
| -1.5726195369 | 0.1944030852 | 0.9999537652 | 1.3602978882  |
| 1.2563615157  | 0.2248972152 | 0.9999537652 | 1.3007454686  |
| 1.2001438777  | 0.1954563871 | 0.9999537652 | 1.0845293682  |
| -1.032472774  | 0.8117670889 | 0.9999537652 | -1.2110270751 |
| -1.0525647226 | 0.8710276927 | 0.9999537652 | -1.2986493178 |
| 1.0015906331  | 0.9892091757 | 0.9999537652 | 1.0887731188  |
| 1.2598784428  | 0.1315734194 | 0.9999537652 | 1.2119768401  |
| -1.7000974549 | 0.5642294185 | 0.9999537652 | 2.3312237541  |
| 1.0275650038  | 0.8983695841 | 0.9999537652 | 1.0112621194  |
| 3.3030568913  | 0.2924636484 | 0.9999537652 | -2.1744673066 |
| 4.5505976667  | 0.5565432176 | 0.9999537652 | 2.996475627   |
| 1.0929659304  | 0.6845021347 | 0.9999537652 | -1.3948548231 |
| 1.1343245663  | 0.5981105235 | 0.9999537652 | 1.1199751632  |
| -1.4750790135 | 0.6599060967 | 0.9999537652 | -1.3945395231 |
| -1.5881570201 | 0.7139018484 | 0.9999537652 | 1.9418822056  |
| -1.0728948619 | 0.6417138291 | 0.9999537652 | 1.081137687   |
| 2.7957660672  | 0.7054479467 | 0.9999537652 | -5.3589986948 |
| -1.1448144121 | 0.9147429026 | 0.9999537652 | 39.208884251  |
| 2.7957660672  | 0.7054502954 | 0.9999537652 | 0             |
| -1.203782886  | 0.2093480875 | 0.9999537652 | 1.1240571972  |
| 1.1674063569  | 0.4173859578 | 0.9999537652 | 1.5939666485  |
| 1.2867504688  | 0.4415127097 | 0.9999537652 | -1.2729731543 |
| 1.0766311068  | 0.5998913689 | 0.9999537652 | 1.1442314663  |
| 1.0312883198  | 0.9260052049 | 0.9999537652 | 1.0405263134  |
| 0             | 0            | 0            | 2.996475627   |
| 34.4112440562 | 0.1677827362 | 0.9999537652 | 1.0206439538  |
| 1.0543870454  | 0.8777768431 | 0.9999537652 | -1.3927131448 |
| 1.1731864831  | 0.4355602875 | 0.9999537652 | 1.5080072099  |
| -1.0535398293 | 0.8201277133 | 0.9999537652 | -1.0815428652 |
| 1.1286582069  | 0.8387514599 | 0.9999537652 | -1.4857481814 |
| -1.4090963591 | 0.2149387121 | 0.9999537652 | 1.5182472669  |
| -1.1704736049 | 0.7124119409 | 0.9999537652 | 1.2233825687  |
| 1.0228019496  | 0.9241732804 | 0.9999537652 | 1.0197650366  |
| -1.4753878392 | 0.004148     | 0.9999537652 | -1.0778831524 |
| -1.0730247126 | 0.8030696181 | 0.9999537652 | 1.3896895945  |
| -1.1064940004 | 0.5009196079 | 0.9999537652 | 1.311422293   |
| 0             | 0            | 0            | 1.2601712954  |
| -2.587194901  | 0.5007412281 | 0.9999537652 | -2.7908644137 |
| 1.4648506267  | 0.0768711658 | 0.9999537652 | 1.1290124242  |
| -1.6481429995 | 0.3099147217 | 0.9999537652 | -1.1420150361 |
| -1.1654633928 | 0.484681861  | 0.9999537652 | 1.0196647181  |
| 1.0203077888  | 0.9132529633 | 0.9999537652 | 1.0589277392  |
| -1.5579775407 | 0.055264417  | 0.9999537652 | 1.3555671242  |
| 1.0844515221  | 0.6498784618 | 0.9999537652 | -1.0500287798 |
| 1.1225079038  | 0.5377579969 | 0.9999537652 | -1.4708376147 |



gene\_expression\_table

|               |              |              |               |
|---------------|--------------|--------------|---------------|
| -1.179607106  | 0.3615426294 | 0.9999537652 | -1.1313166983 |
| -1.0753295372 | 0.6793817299 | 0.9999537652 | -1.0225487295 |
| -1.2528462971 | 0.5855036262 | 0.9999537652 | -1.028198607  |
| -5.692811393  | 0.0769573318 | 0.9999537652 | -2.1754645223 |
| 1.3708361697  | 0.3174635236 | 0.9999537652 | -1.1446198957 |
| 3.3046967148  | 0.286112132  | 0.9999537652 | 1.9366867128  |
| 4.3339220787  | 0.0345006863 | 0.9999537652 | -1.8825220281 |
| -1.3849169173 | 0.4227693234 | 0.9999537652 | -1.270907783  |
| 1.0193491865  | 0.9480614523 | 0.9999537652 | -1.6291921415 |
| -1.0478190319 | 0.728785053  | 0.9999537652 | -1.3145183095 |
| 1.5246050946  | 0.1820668124 | 0.9999537652 | 1.1566053577  |
| 1.0877270743  | 0.5485091464 | 0.9999537652 | -1.1606695365 |
| 1.0065937959  | 0.98287441   | 0.9999537652 | 1.1123850928  |
| 1.0882764953  | 0.6039652676 | 0.9999537652 | -1.2451937783 |
| -1.1077631395 | 0.5427945262 | 0.9999537652 | -1.394327004  |
| -1.1728665519 | 0.288987112  | 0.9999537652 | -1.1780960275 |
| 1.5139120855  | 0.1227803056 | 0.9999537652 | -1.253593396  |
| 1.0394465243  | 0.9000030707 | 0.9999537652 | 1.3013077265  |
| 1.1433277037  | 0.5408728708 | 0.9999537652 | 1.0878402497  |
| 1.2644283007  | 0.4797334785 | 0.9999537652 | -1.2651508969 |
| 1.0617714076  | 0.7650167901 | 0.9999537652 | -1.1068137173 |
| -1.199620006  | 0.5663163458 | 0.9999537652 | 1.2708100605  |
| -1.1266305634 | 0.4092020898 | 0.9999537652 | -1.0362496051 |
| -1.0729553632 | 0.7472553945 | 0.9999537652 | -1.0844668862 |
| 3.8622037496  | 0.6198017915 | 0.9999537652 | 0             |
| 1.0016714953  | 0.9929517886 | 0.9999537652 | -1.0407167934 |
| 1.1982230535  | 0.261515817  | 0.9999537652 | -1.3259104505 |
| 1.6758188804  | 0.349901153  | 0.9999537652 | 1.1008237951  |
| -1.4885847327 | 0.2426288145 | 0.9999537652 | 6.763601952   |
| 55.3905770121 | 0.1166692559 | 0.9999537652 | -2.4419375169 |
| -1.3724562175 | 0.091724715  | 0.9999537652 | -1.5847649862 |
| 2.3335098933  | 0.4432059046 | 0.9999537652 | -1.8812654885 |
| 1.0981607799  | 0.5502859248 | 0.9999537652 | -1.1719801697 |
| 1.1301002015  | 0.6527775333 | 0.9999537652 | -1.4775736169 |
| 1.0606233766  | 0.6046784824 | 0.9999537652 | 1.018277346   |
| 74.4187556167 | 0.101011951  | 0.9999537652 | 3.9786486669  |
| -1.1974130486 | 0.6991505805 | 0.9999537652 | -1.1843678061 |
| -1.1676089869 | 0.3780243873 | 0.9999537652 | -1.0200488649 |
| 1.8816453506  | 0.5620798186 | 0.9999537652 | -3.384595918  |
| 1.0898155678  | 0.5884080913 | 0.9999537652 | 1.4212368995  |
| -1.0846110904 | 0.7899066679 | 0.9999537652 | -1.1218684868 |
| 1.5578739567  | 0.1936445217 | 0.9999537652 | -1.2752320921 |
| -1.0693354128 | 0.6483007491 | 0.9999537652 | -1.0564174525 |
| -1.1088272453 | 0.6603549313 | 0.9999537652 | -1.3029571861 |
| 1.1484131946  | 0.5783625936 | 0.9999537652 | -1.1167341643 |
| 1.0028996321  | 0.9886672405 | 0.9999537652 | 1.2822660794  |
| -1.0854147188 | 0.4976614732 | 0.9999537652 | -1.1353172254 |
| -1.283806923  | 0.294694549  | 0.9999537652 | 1.0839349136  |
| 1.037224176   | 0.7982783218 | 0.9999537652 | 1.0345324313  |

gene\_expression\_table

|               |              |              |               |
|---------------|--------------|--------------|---------------|
| -1.5881570201 | 0.7136875907 | 0.9999537652 | 1.6458706287  |
| 1.2123375468  | 0.5161955262 | 0.9999537652 | -1.4082057682 |
| -1.3734734207 | 0.138372106  | 0.9999537652 | -1.3353081179 |
| -6.9736190158 | 0.2250321147 | 0.9999537652 | 1.2152209729  |
| -1.3067013344 | 0.0829150461 | 0.9999537652 | -1.6614124678 |
| -1.0122485522 | 0.9507474156 | 0.9999537652 | -1.0664409132 |
| 0             | 0            | 0            | 8.8639046058  |
| -1.1279291834 | 0.476394892  | 0.9999537652 | 1.3744633733  |
| 1.3645322244  | 0.1640759156 | 0.9999537652 | 1.3057408509  |
| 1.1605171257  | 0.5577796385 | 0.9999537652 | 1.1793720802  |
| 1.0388568099  | 0.7899181207 | 0.9999537652 | 1.2140419356  |
| 1.2203853078  | 0.4626421935 | 0.9999537652 | 1.0651595895  |
| -1.096520927  | 0.6501523335 | 0.9999537652 | 1.0757465337  |
| -1.0703225841 | 0.8739244647 | 0.9999537652 | -1.1105104235 |
| 2.7957660672  | 0.705452645  | 0.9999537652 | 9.7116702472  |
| -1.0350587619 | 0.7930749776 | 0.9999537652 | 1.1901910042  |
| 1.0645242292  | 0.6608678193 | 0.9999537652 | 1.2170316649  |
| 1.8816453506  | 0.5619963272 | 0.9999537652 | -2.9683549234 |
| 1.8198190335  | 0.1794672747 | 0.9999537652 | 1.3469801082  |
| -1.4427560727 | 0.0407454827 | 0.9999537652 | -1.0894493391 |
| 0             | 0            | 0            | 1.2587294573  |
| 1.0551495721  | 0.8332035447 | 0.9999537652 | 1.0396465114  |
| 1.0561276962  | 0.7636455676 | 0.9999537652 | 1.1490189803  |
| 0             | 0            | 0            | 1.2408886006  |
| -1.1859130246 | 0.5676390436 | 0.9999537652 | 1.7707295391  |
| -1.0998722319 | 0.7800692623 | 0.9999537652 | -1.0254122857 |
| 4.5505976667  | 0.5565171389 | 0.9999537652 | 2.6083962368  |
| 1.0969812451  | 0.5380722762 | 0.9999537652 | 1.318832555   |
| -1.6975651946 | 0.2544664462 | 0.9999537652 | 1.2680438217  |
| -1.3354993644 | 0.493516444  | 0.9999537652 | 1.0783678942  |
| 1.7848781972  | 0.2092172409 | 0.9999537652 | -1.2438746902 |
| -1.1971456387 | 0.2135096655 | 0.9999537652 | -1.2104349233 |
| 0             | 0            | 0            | 2.996475627   |
| -1.1418375965 | 0.29140335   | 0.9999537652 | -1.1158265266 |
| -1.3548635538 | 0.1153136988 | 0.9999537652 | 1.2411446349  |
| -1.1222860487 | 0.6667349904 | 0.9999537652 | 1.151303861   |
| 1.1861556027  | 0.4387432074 | 0.9999537652 | 1.3314618789  |
| 1.5889344781  | 0.007328     | 0.9999537652 | 1.1641477471  |
| 1.1392832044  | 0.4030831611 | 0.9999537652 | 1.0791187773  |
| 1.0387730132  | 0.8532050008 | 0.9999537652 | -1.0340036787 |
| -1.0411822654 | 0.769797375  | 0.9999537652 | 1.1388171606  |
| -1.2352651412 | 0.5884145319 | 0.9999537652 | -1.0148517306 |
| 0             | 0            | 0            | 4.9567375629  |
| 0             | 0            | 0            | 2.996475627   |
| -2.5871290907 | 0.4971685309 | 0.9999537652 | 2.9988886918  |
| -1.022950828  | 0.9568648422 | 0.9999537652 | 1.3610449496  |
| 4.5505976667  | 0.5564914553 | 0.9999537652 | 2.9957580451  |
| 1.0196170288  | 0.9331251824 | 0.9999537652 | -1.0570531772 |
| -1.0132488865 | 0.9139421382 | 0.9999537652 | 1.6039616802  |

gene\_expression\_table

|                |              |              |               |
|----------------|--------------|--------------|---------------|
| 5.5633222739   | 0.0326492049 | 0.9999537652 | -1.448424821  |
| -1.1240657836  | 0.8422577978 | 0.9999537652 | -1.1113313989 |
| 1.1465573442   | 0.6607578092 | 0.9999537652 | 1.2877910214  |
| -1.09011441    | 0.5423613771 | 0.9999537652 | 1.3622659139  |
| -1.0245189834  | 0.8386898558 | 0.9999537652 | 1.0613079565  |
| 1.2793077919   | 0.0995763078 | 0.9999537652 | 1.1082217927  |
| 17.3472938331  | 0.2975374064 | 0.9999537652 | -5.3583704783 |
| -1.0002863038  | 0.9986568707 | 0.9999537652 | 1.20634567    |
| 1.0834633305   | 0.8769565316 | 0.9999537652 | -1.6327386627 |
| 2.7933974408   | 0.6948713406 | 0.9999537652 | 5.4461692489  |
| 3.909066224    | 0.0443781561 | 0.9999537652 | 1.0713899155  |
| 3.3017989522   | 0.3007889978 | 0.9999537652 | -1.0884300027 |
| -1.0505456648  | 0.9100035885 | 0.9999537652 | -1.1452805869 |
| 0              | 0            | 0            | 2.9985540909  |
| 1.6416093931   | 0.295188787  | 0.9999537652 | -1.594099409  |
| 1.079659181    | 0.6757728699 | 0.9999537652 | -1.0057445251 |
| -1.1314343639  | 0.3971569952 | 0.9999537652 | 1.1203584451  |
| 1.3477925422   | 0.0874824933 | 0.9999537652 | 1.1698066237  |
| -1.5872046595  | 0.2188016656 | 0.9999537652 | 1.0654521669  |
| 0              | 0            | 0            | -1.5077410611 |
| -1.0334204232  | 0.9072798662 | 0.9999537652 | 1.7675108519  |
| 1.0854333409   | 0.5216915842 | 0.9999537652 | 1.0995806642  |
| -1.2903209516  | 0.2347076566 | 0.9999537652 | -1.065971545  |
| 1.3588576256   | 0.800792063  | 0.9999537652 | 2.2955915087  |
| -1.1587451003  | 0.5224638276 | 0.9999537652 | 1.2070573104  |
| 1.1102687236   | 0.7943688868 | 0.9999537652 | -1.1201968599 |
| 8.064174035    | 0.4238824465 | 0.9999537652 | -1.1164993979 |
| 0              | 0            | 0            | 1.7042814026  |
| 0              | 0            | 0            | 1.6293799659  |
| 1.056991956    | 0.9097113347 | 0.9999537652 | 1.1904503086  |
| -1.6405494181  | 0.2724949146 | 0.9999537652 | -1.0825975059 |
| 1.0339902911   | 0.8531700152 | 0.9999537652 | 1.1103543664  |
| 1.1232098075   | 0.6453651812 | 0.9999537652 | 1.1815223025  |
| 1.2695653613   | 0.4164423688 | 0.9999537652 | -1.0737322285 |
| -12.9800088947 | 0.1123076381 | 0.9999537652 | -4.711036837  |
| -1.1718672023  | 0.2647642012 | 0.9999537652 | 1.2157852356  |
| -1.0028037445  | 0.9841422526 | 0.9999537652 | 1.0631525517  |
| 0              | 0            | 0            | 4.9527501949  |
| -2.4710767924  | 0.5445182174 | 0.9999537652 | -5.3583704783 |
| 1.0190498317   | 0.8861396084 | 0.9999537652 | 1.148231535   |
| -1.2429119773  | 0.202055106  | 0.9999537652 | -1.0223254671 |
| -1.5161100861  | 0.0710077428 | 0.9999537652 | -1.230765576  |
| -2.6366769527  | 0.252572612  | 0.9999537652 | 1.0674788249  |
| -1.1133089272  | 0.5476939577 | 0.9999537652 | 1.1258672774  |
| 1.4313972465   | 0.1423857367 | 0.9999537652 | -1.0719928885 |
| 1.175793432    | 0.7443422654 | 0.9999537652 | -1.0520061228 |
| 1.1910830518   | 0.3691458832 | 0.9999537652 | 1.0390730893  |
| 0              | 0            | 0            | -5.3583704783 |
| 1.6496991901   | 0.0408504948 | 0.9999537652 | 1.6193994924  |

gene\_expression\_table

|               |              |              |               |
|---------------|--------------|--------------|---------------|
| -1.0591807507 | 0.6480967425 | 0.9999537652 | 1.0710890116  |
| 1.2160198636  | 0.3337278084 | 0.9999537652 | -1.1820115946 |
| -1.0192337537 | 0.9832892044 | 0.9999537652 | 1.0004347069  |
| -1.2713391982 | 0.4422648508 | 0.9999537652 | 1.1906441422  |
| 1.2142668303  | 0.6267114526 | 0.9999537652 | -1.0145941688 |
| -1.3162509082 | 0.2139251457 | 0.9999537652 | -1.1254134366 |
| -1.1851309897 | 0.658443918  | 0.9999537652 | 1.1308273013  |
| -2.4376693931 | 0.323587534  | 0.9999537652 | -4.8159020612 |
| 9.8288704632  | 0.3801545722 | 0.9999537652 | 4.9527501949  |
| -1.2143331251 | 0.2497001133 | 0.9999537652 | -1.0287425445 |
| -1.096301567  | 0.6201226385 | 0.9999537652 | -1.0920498285 |
| -1.5679960926 | 0.1121056864 | 0.9999537652 | 1.06381961    |
| -1.5301288162 | 0.5118136775 | 0.9999537652 | -1.6786831267 |
| 1.3006914835  | 0.3423029556 | 0.9999537652 | -1.2693689896 |
| 2.7933974408  | 0.6948713406 | 0.9999537652 | -1.1241083699 |
| -1.0115392237 | 0.9675010015 | 0.9999537652 | 1.1345066285  |
| -1.0512864146 | 0.7782188972 | 0.9999537652 | -1.100838278  |
| -1.1188424386 | 0.6179152342 | 0.9999537652 | -1.0550419797 |
| -1.0186938213 | 0.9033218228 | 0.9999537652 | 1.3095173403  |
| -1.068668045  | 0.8828973018 | 0.9999537652 | 1.3543104828  |
| 5.2576341863  | 0.0005838    | 0.9999537652 | 2.5976142664  |
| -1.1457555741 | 0.9107282109 | 0.9999537652 | 10.8274885115 |
| -1.1100034067 | 0.7940801804 | 0.9999537652 | 1.9637256609  |
| -1.018666339  | 0.8863356846 | 0.9999537652 | 1.2502871892  |
| 1.0753946936  | 0.7034258603 | 0.9999537652 | 1.5642467132  |
| 11.5766527773 | 0.3455232366 | 0.9999537652 | -1.7821607506 |
| 1.1310215839  | 0.6841290759 | 0.9999537652 | -1.0959998497 |
| -1.0368041366 | 0.8040193041 | 0.9999537652 | 1.1629226657  |
| 1.2140337697  | 0.311182045  | 0.9999537652 | 1.1147215251  |
| -1.1736759301 | 0.2340185621 | 0.9999537652 | -1.1939652751 |
| 3.0266471183  | 0.2195043824 | 0.9999537652 | -1.491016894  |
| -1.1497558295 | 0.6556228587 | 0.9999537652 | -1.5080084849 |
| -8.4262209803 | 0.0176813917 | 0.9999537652 | -1.1555570895 |
| -1.227781611  | 0.5052396273 | 0.9999537652 | 1.304390149   |
| 4.0330685933  | 0.2055801456 | 0.9999537652 | 1.227177999   |
| -1.3155434431 | 0.2280107278 | 0.9999537652 | 1.0460298302  |
| -1.5875118025 | 0.7203408911 | 0.9999537652 | -1.0179604803 |
| -1.1441752206 | 0.7518955569 | 0.9999537652 | -1.3235543942 |
| -1.0643374939 | 0.6797563259 | 0.9999537652 | -1.2575597267 |
| 3.8622037496  | 0.6197712208 | 0.9999537652 | 0             |
| 1.2584736431  | 0.1498803748 | 0.9999537652 | 1.1522446748  |
| -1.0904723968 | 0.4734250269 | 0.9999537652 | 1.205086186   |
| 0             | 0            | 0            | 2.996475627   |
| -1.0424897253 | 0.8314324814 | 0.9999537652 | 1.1261918462  |
| -1.0626556027 | 0.7275872025 | 0.9999537652 | -1.067671253  |
| -1.3062073106 | 0.2022991167 | 0.9999537652 | -1.3480922959 |
| -1.2984065896 | 0.2539048728 | 0.9999537652 | -1.5584173753 |
| 1.1123634008  | 0.3459287975 | 0.9999537652 | -1.0900407533 |
| 1.15516252    | 0.2592501606 | 0.9999537652 | 1.0870052084  |

gene\_expression\_table

|               |              |              |               |
|---------------|--------------|--------------|---------------|
| -1.1378737193 | 0.5056482981 | 0.9999537652 | 1.0009451735  |
| 1.1036508172  | 0.7181471271 | 0.9999537652 | -1.3286757515 |
| 1.2043349655  | 0.3048964761 | 0.9999537652 | -1.0834119567 |
| 2.7933974408  | 0.6948713406 | 0.9999537652 | 0             |
| -1.183701252  | 0.448589428  | 0.9999537652 | -1.3721612747 |
| -1.2431207827 | 0.4936304287 | 0.9999537652 | 1.5300205048  |
| 1.0242029872  | 0.9125172391 | 0.9999537652 | -1.0986698231 |
| -1.1932732931 | 0.726725701  | 0.9999537652 | 1.1165002124  |
| 1.0311996087  | 0.8994213472 | 0.9999537652 | 1.3283916125  |
| 16.8575730017 | 0.2721091126 | 0.9999537652 | -1.0506331478 |
| 1.2061829176  | 0.5081781343 | 0.9999537652 | 1.0614006349  |
| -2.4358985765 | 0.0649923735 | 0.9999537652 | 1.5193243617  |
| -1.0418968141 | 0.7622517752 | 0.9999537652 | -1.1034680751 |
| 1.0528083966  | 0.792875035  | 0.9999537652 | -1.0528685767 |
| 8.064174035   | 0.4238811127 | 0.9999537652 | -2.9704130837 |
| -1.0386108215 | 0.8058503938 | 0.9999537652 | -1.0134400192 |
| 6.9558210435  | 0.0673521558 | 0.9999537652 | -1.1511018589 |
| -1.177447641  | 0.330929195  | 0.9999537652 | 1.0757654896  |
| -1.0819620975 | 0.8063563272 | 0.9999537652 | -1.3202915744 |
| -1.0122036701 | 0.9577190665 | 0.9999537652 | -1.0437846675 |
| 3.8622037496  | 0.6197406321 | 0.9999537652 | 0             |
| 2.7933974408  | 0.6948713406 | 0.9999537652 | 6.908559683   |
| -1.9975604569 | 0.2291259617 | 0.9999537652 | 1.1509395518  |
| 1.0836803219  | 0.6764368243 | 0.9999537652 | 1.4906387176  |
| -1.0851416252 | 0.5941926214 | 0.9999537652 | 1.0313984331  |
| -1.3515355345 | 0.1264184095 | 0.9999537652 | 1.4301329544  |
| 1.0150293136  | 0.9069332185 | 0.9999537652 | 1.2288493997  |
| -1.0798002724 | 0.8319227147 | 0.9999537652 | -1.0208195549 |
| 1.1053671313  | 0.5642732598 | 0.9999537652 | -1.0930555456 |
| 1.0896463341  | 0.5676539534 | 0.9999537652 | -1.1273394934 |
| 0             | 0            | 0            | 4.9527501949  |
| 0             | 0            | 0            | 2.9988886918  |
| 11.5766527773 | 0.3455141227 | 0.9999537652 | 2.3505428635  |
| 2.7933974408  | 0.6948713406 | 0.9999537652 | 0             |
| 0             | 0            | 0            | 4.9527501949  |
| 0             | 0            | 0            | 2.996475627   |
| -1.3015602086 | 0.3499684268 | 0.9999537652 | -1.0535739124 |
| 1.3011205276  | 0.3788507886 | 0.9999537652 | -1.0134862908 |
| 1.1260948192  | 0.7265886182 | 0.9999537652 | 1.1821192204  |
| 1.7000556252  | 0.1610844117 | 0.9999537652 | 1.0167574856  |
| 8.064174035   | 0.4238797786 | 0.9999537652 | 1.2701719397  |
| -1.5770193234 | 0.5220861338 | 0.9999537652 | 1.2582332362  |
| 1.8803596835  | 0.0410285348 | 0.9999537652 | 1.4944551242  |
| 1.2196511139  | 0.6729192742 | 0.9999537652 | 1.4575709774  |
| -1.1243032004 | 0.4592279177 | 0.9999537652 | -1.0325860981 |
| 1.304143254   | 0.0551809802 | 0.9999537652 | 1.0520267141  |
| -1.124626603  | 0.6094313749 | 0.9999537652 | 1.2212572633  |
| 1.0997068575  | 0.6307950294 | 0.9999537652 | -1.1065497994 |
| 1.4033096916  | 0.4546085013 | 0.9999537652 | -1.2457309108 |

gene\_expression\_table

|               |              |              |                |
|---------------|--------------|--------------|----------------|
| 1.1579584104  | 0.4542404874 | 0.9999537652 | -1.2846706518  |
| -1.0738293836 | 0.6928813637 | 0.9999537652 | -1.1209634421  |
| -1.1653805024 | 0.3369306773 | 0.9999537652 | -1.1289732603  |
| -1.1426973033 | 0.6390844966 | 0.9999537652 | 2.09026542     |
| -1.2768053901 | 0.1885157817 | 0.9999537652 | 1.0911970977   |
| 1.8447991669  | 0.5995956551 | 0.9999537652 | 1.2603257066   |
| -1.2721835448 | 0.7612041976 | 0.9999537652 | -1.1429632564  |
| 1.4230954532  | 0.4399067959 | 0.9999537652 | -1.4471458091  |
| -1.008919192  | 0.9465163914 | 0.9999537652 | 1.1420669117   |
| -1.1707332864 | 0.2503597835 | 0.9999537652 | -1.1954364983  |
| -1.0395607898 | 0.9548034713 | 0.9999537652 | -14.6584086407 |
| 1.0511705165  | 0.7160685638 | 0.9999537652 | -1.061530527   |
| 0             | 0            | 0            | 9.7116702472   |
| -1.3917747917 | 0.6970232734 | 0.9999537652 | 1.2400291296   |
| 1.008701994   | 0.951683209  | 0.9999537652 | 1.1064822986   |
| 1.4599072921  | 0.1104263299 | 0.9999537652 | -1.0681921999  |
| 1.1749168429  | 0.4720964737 | 0.9999537652 | 1.1937907387   |
| 1.5156048348  | 0.6493157554 | 0.9999537652 | 2.0065549998   |
| 1.6823381434  | 0.27876534   | 0.9999537652 | -1.7201879373  |
| -1.0659956562 | 0.6591275295 | 0.9999537652 | 1.030361141    |
| 1.8471704681  | 0.5865330365 | 0.9999537652 | -1.4289359629  |
| -1.1762843017 | 0.6812149389 | 0.9999537652 | 1.0010073177   |
| -1.1453192235 | 0.908702506  | 0.9999537652 | -1.3890024963  |
| 0             | 0            | 0            | 2.0802791138   |
| 1.1314234599  | 0.5689214246 | 0.9999537652 | -1.6425175533  |
| 1.0199039242  | 0.8731982539 | 0.9999537652 | 1.2894149211   |
| 1.1288210825  | 0.3472512723 | 0.9999537652 | -1.1173975184  |
| -1.1683691627 | 0.3134341259 | 0.9999537652 | 1.3600498468   |
| -2.1259516533 | 0.2002071903 | 0.9999537652 | -1.4357827083  |
| -1.0889712648 | 0.50662197   | 0.9999537652 | -1.0224559251  |
| 1.0904713562  | 0.6908440813 | 0.9999537652 | 1.2646493422   |
| -1.1771668443 | 0.5939389089 | 0.9999537652 | -1.6038905579  |
| 2.1589187397  | 0.1886471966 | 0.9999537652 | -1.2301428514  |
| 1.0473340934  | 0.770959458  | 0.9999537652 | -1.3287136988  |
| 1.5546442448  | 0.2971793516 | 0.9999537652 | 2.1173625742   |
| -1.4283007528 | 0.4417574616 | 0.9999537652 | 1.0030454184   |
| -1.2483094716 | 0.1531559889 | 0.9999537652 | -1.4800010719  |
| -1.5367922295 | 0.6205377515 | 0.9999537652 | 1.9794217644   |
| -1.2637872473 | 0.2391554306 | 0.9999537652 | -1.4932072141  |
| 6.3075231393  | 0.4863045655 | 0.9999537652 | 2.6452318482   |
| 8.064174035   | 0.4238784445 | 0.9999537652 | 2.996475627    |
| 1.0914985981  | 0.7708717765 | 0.9999537652 | -1.5575025402  |
| 1.2530475337  | 0.2341075695 | 0.9999537652 | -1.3590789545  |
| -1.2037557411 | 0.3401294702 | 0.9999537652 | -1.4252299804  |
| 1.7436048685  | 0.0227335717 | 0.9999537652 | 1.4096118677   |
| -1.0188434964 | 0.884338135  | 0.9999537652 | -1.1128226793  |
| 0             | 0            | 0            | 1.3757378992   |
| -1.1030694751 | 0.8869158163 | 0.9999537652 | 1.1651145108   |
| 1.2257124861  | 0.1263379164 | 0.9999537652 | -1.0974260901  |

gene\_expression\_table

|               |              |              |               |
|---------------|--------------|--------------|---------------|
| -1.2219701176 | 0.1198705479 | 0.9999537652 | -1.1090759583 |
| -1.7148207449 | 0.4982811351 | 0.9999537652 | -2.2064515952 |
| -9.5927824577 | 0.0627300928 | 0.9999537652 | 1.8242145631  |
| -1.2992327108 | 0.2485973151 | 0.9999537652 | -1.4235023404 |
| -1.6979583136 | 0.52708405   | 0.9999537652 | -2.288586236  |
| -6.9736190158 | 0.2250321147 | 0.9999537652 | -1.3629566786 |
| 1.1561466881  | 0.4129033313 | 0.9999537652 | -1.1087769401 |
| 3.4702345718  | 0.132094998  | 0.9999537652 | 5.1298002698  |
| 2.7933974408  | 0.6948713406 | 0.9999537652 | -9.7542681481 |
| 1.2543302685  | 0.815380382  | 0.9999537652 | -1.1712158574 |
| -1.1457847193 | 0.9108794384 | 0.9999537652 | -1.1428585529 |
| -1.0245505194 | 0.9213534784 | 0.9999537652 | 1.0662883779  |
| 1.1011276872  | 0.5234153629 | 0.9999537652 | -1.0035642263 |
| -1.2309398501 | 0.3916807678 | 0.9999537652 | 1.1619574673  |
| 1.0780282601  | 0.7318162467 | 0.9999537652 | 1.3895796599  |
| -1.1913290417 | 0.3692893047 | 0.9999537652 | 1.0479866055  |
| -1.224757981  | 0.1652006614 | 0.9999537652 | 1.2041752613  |
| 0             | 0            | 0            | 6.908559683   |
| 0             | 0            | 0            | 2.9985540909  |
| -1.5881570201 | 0.7123844934 | 0.9999537652 | 4.9527501949  |
| 4.5505976667  | 0.5564660232 | 0.9999537652 | -1.3607721321 |
| -1.384480384  | 0.4810037456 | 0.9999537652 | 1.748177722   |
| 1.7666151886  | 0.1578934708 | 0.9999537652 | 1.2945704833  |
| 0             | 0            | 0            | 2.996475627   |
| 2.7933974408  | 0.6948713406 | 0.9999537652 | 0             |
| 1.2081164684  | 0.3330701469 | 0.9999537652 | 1.1465227234  |
| 1.0046300162  | 0.9799202937 | 0.9999537652 | 1.1518011246  |
| -2.4860479092 | 0.0127385304 | 0.9999537652 | 1.1168613791  |
| 1.0212820148  | 0.8857722916 | 0.9999537652 | 1.0000525651  |
| 4.5505976667  | 0.556440658  | 0.9999537652 | -5.3583704783 |
| 2.0531936747  | 0.2756311904 | 0.9999537652 | 2.1987962985  |
| 0             | 0            | 0            | -1.0736853543 |
| -1.2567122496 | 0.3784351985 | 0.9999537652 | 1.1187960119  |
| 1.1160662736  | 0.9014358996 | 0.9999537652 | -1.5895292203 |
| 0             | 0            | 0            | 15.7262184124 |
| -1.172762946  | 0.5171201453 | 0.9999537652 | 1.2134830475  |
| -1.207469403  | 0.6947648395 | 0.9999537652 | 1.0679265502  |
| -1.3496490808 | 0.4935816941 | 0.9999537652 | 3.5378193056  |
| -1.1300378481 | 0.5251245248 | 0.9999537652 | 1.4782955468  |
| -1.2668701426 | 0.1444536657 | 0.9999537652 | 1.1240481985  |
| -1.0451994804 | 0.8189126304 | 0.9999537652 | 1.0252393679  |
| -1.1311287411 | 0.581547565  | 0.9999537652 | -1.0126481109 |
| 1.7370284568  | 0.0631395562 | 0.9999537652 | -1.1229324119 |
| 0             | 0            | 0            | -1.1248877899 |
| -1.0450419984 | 0.9176623542 | 0.9999537652 | 1.2676096077  |
| 1.5377935878  | 0.2805114482 | 0.9999537652 | 1.6015907506  |
| -1.1970027991 | 0.2701321857 | 0.9999537652 | -1.1328238368 |
| 1.0009753821  | 0.9942472877 | 0.9999537652 | 1.179766711   |
| 1.0304023397  | 0.9338371855 | 0.9999537652 | 1.805145171   |

gene\_expression\_table

|               |              |              |               |
|---------------|--------------|--------------|---------------|
| -1.3911622898 | 0.6714764518 | 0.9999537652 | 1.2664395295  |
| -1.0473198237 | 0.8921360615 | 0.9999537652 | 1.2190466787  |
| -1.1448325836 | 0.6215951369 | 0.9999537652 | 1.949571098   |
| -1.11834697   | 0.7687480154 | 0.9999537652 | 1.5103995078  |
| 0             | 0            | 0            | 4.9527501949  |
| 3.8622037496  | 0.619710026  | 0.9999537652 | 0             |
| 1.781465944   | 0.0425618473 | 0.9999537652 | 1.027718802   |
| -1.1723373306 | 0.810906083  | 0.9999537652 | -1.4793168818 |
| -1.1172887652 | 0.6379113812 | 0.9999537652 | -1.0277124968 |
| -1.0597147941 | 0.6681975472 | 0.9999537652 | 1.1005643961  |
| 1.3243942908  | 0.3815867471 | 0.9999537652 | 1.2568189063  |
| 1.2387774014  | 0.5127373226 | 0.9999537652 | 1.0653716404  |
| -1.3165593074 | 0.5880561172 | 0.9999537652 | 1.099518226   |
| 0             | 0            | 0            | 2.996475627   |
| -1.2476752529 | 0.6099551648 | 0.9999537652 | 1.1449032728  |
| 1.4406035338  | 0.3106454122 | 0.9999537652 | 1.1727776509  |
| -1.0210282393 | 0.8682649295 | 0.9999537652 | 1.0193911459  |
| -1.1941256282 | 0.1917251978 | 0.9999537652 | 1.0534461771  |
| 15.0880352532 | 0.2955487272 | 0.9999537652 | 1.1907369359  |
| -1.8083367302 | 0.0515238741 | 0.9999537652 | -1.1170164808 |
| -1.3439150003 | 0.4321137333 | 0.9999537652 | -1.3005596012 |
| 2.7933974408  | 0.6948713406 | 0.9999537652 | 1.0664958154  |
| -1.1041393144 | 0.604397662  | 0.9999537652 | -1.0530450836 |
| -1.6124745138 | 0.0006538    | 0.9999537652 | -1.4719586316 |
| 1.0058857643  | 0.9679414999 | 0.9999537652 | -1.1327934145 |
| 1.0223680143  | 0.8985487572 | 0.9999537652 | -1.1838591443 |
| 2.7957660672  | 0.7054549956 | 0.9999537652 | -1.1128220641 |
| -1.1445321534 | 0.8756977135 | 0.9999537652 | 0             |
| -1.1787770555 | 0.3919854824 | 0.9999537652 | -1.5097430549 |
| 1.4852169389  | 0.007731     | 0.9999537652 | 1.5087426035  |
| -1.2849485054 | 0.562643994  | 0.9999537652 | 1.0396202231  |
| -1.1327613453 | 0.6815177044 | 0.9999537652 | -1.1481564361 |
| 1.0047371945  | 0.9889418886 | 0.9999537652 | -1.2309930785 |
| 1.4630570633  | 0.4300756164 | 0.9999537652 | 1.2490640241  |
| 1.0520250133  | 0.7738111329 | 0.9999537652 | -1.2032167281 |
| 13.3324809638 | 0.3189346423 | 0.9999537652 | 1.0057660328  |
| -1.1681084276 | 0.5904905481 | 0.9999537652 | 1.0100011738  |
| -1.2402457461 | 0.6563399383 | 0.9999537652 | -1.9356832214 |
| 1.4803117167  | 0.6260913293 | 0.9999537652 | -1.0327071416 |
| 0             | 0            | 0            | 6.908559683   |
| -1.0759873204 | 0.761246365  | 0.9999537652 | 1.0656479607  |
| 1.0159569092  | 0.9217857373 | 0.9999537652 | 1.0095540101  |
| 55.4875632021 | 0.1159952502 | 0.9999537652 | 1.2646703209  |
| 1.8453597646  | 0.0653890279 | 0.9999537652 | -1.2720427236 |
| 1.1951394496  | 0.2587389114 | 0.9999537652 | -1.0793834675 |
| -1.0963287703 | 0.4868547234 | 0.9999537652 | -1.3643027023 |
| -1.7111605567 | 0.0842292393 | 0.9999537652 | 1.0773138365  |
| -1.2231043212 | 0.7362276127 | 0.9999537652 | -1.3960345991 |
| 1.9232789128  | 0.0611466815 | 0.9999537652 | -1.0366979705 |



gene\_expression\_table

|               |              |              |               |
|---------------|--------------|--------------|---------------|
| 5.0103795884  | 0.1210739592 | 0.9999537652 | -1.3101103507 |
| -1.2266851314 | 0.1450589395 | 0.9999537652 | -1.0705475559 |
| 1.231849859   | 0.7189619079 | 0.9999537652 | -1.9794191391 |
| -1.369107775  | 0.7698226973 | 0.9999537652 | -1.5412153521 |
| 1.3974052255  | 0.6321454276 | 0.9999537652 | -1.8808194447 |
| -1.0856837069 | 0.8004074795 | 0.9999537652 | -1.6268402151 |
| -1.4750790135 | 0.6599462029 | 0.9999537652 | 1.7812319687  |
| -1.4010002881 | 0.6116338218 | 0.9999537652 | 1.4660883411  |
| 1.6241136236  | 0.0275915967 | 0.9999537652 | -1.1302308369 |
| 2.4296591599  | 0.0795045123 | 0.9999537652 | 1.4787198019  |
| 4.9036720728  | 0.0655346047 | 0.9999537652 | -1.4802387149 |
| -1.0195332935 | 0.9239511993 | 0.9999537652 | -1.0232755734 |
| 1.0671731396  | 0.7541551974 | 0.9999537652 | -1.1747023109 |
| -1.8560826477 | 0.3459363187 | 0.9999537652 | -2.5905422285 |
| -1.1548350992 | 0.4122764219 | 0.9999537652 | -1.0453770166 |
| -1.1785142458 | 0.7485871462 | 0.9999537652 | -1.483227323  |
| 2.3447569417  | 0.211893034  | 0.9999537652 | -1.1281171991 |
| 1.600024502   | 0.0559755806 | 0.9999537652 | -1.6107187353 |
| -1.2741168816 | 0.3853552221 | 0.9999537652 | 1.30571158    |
| 15.0880352532 | 0.2955600906 | 0.9999537652 | -1.0276776463 |
| -2.4917271213 | 0.1783393312 | 0.9999537652 | -1.5507301391 |
| -1.0855442704 | 0.694693508  | 0.9999537652 | 1.1963188704  |
| 1.4951917803  | 0.2991770236 | 0.9999537652 | -1.0963303551 |
| 1.0576655399  | 0.7194098387 | 0.9999537652 | 1.0738183103  |
| -1.3957712427 | 0.2187335414 | 0.9999537652 | -1.5016583053 |
| 1.0917681293  | 0.5456829517 | 0.9999537652 | -1.1276070041 |
| 0             | 0            | 0            | -9.7565542884 |
| -1.0740254072 | 0.7022667466 | 0.9999537652 | -1.0203384344 |
| 1.8863176825  | 0.0301314684 | 0.9999537652 | -1.0706120454 |
| -1.6055270944 | 0.4698831675 | 0.9999537652 | -2.1778575467 |
| -1.0095045255 | 0.9511063252 | 0.9999537652 | 1.0041787085  |
| -3.5027997556 | 0.1273933372 | 0.9999537652 | 1.2705806872  |
| 6.3130691196  | 0.479799964  | 0.9999537652 | 0             |
| 2.7933974408  | 0.6948713406 | 0.9999537652 | 0             |
| -1.0804946554 | 0.658974673  | 0.9999537652 | -1.2668288827 |
| 2.6592735212  | 0.0727705408 | 0.9999537652 | -1.2099923075 |
| 2.4790046106  | 0.1844937023 | 0.9999537652 | 2.4531065135  |
| -1.4431547835 | 0.5561860446 | 0.9999537652 | 1.9342142049  |
| 0             | 0            | 0            | 2.996475627   |
| -1.0826230524 | 0.6666958115 | 0.9999537652 | -1.3007591385 |
| 1.0665844857  | 0.7084999517 | 0.9999537652 | 1.0770915898  |
| 1.116787235   | 0.7667984927 | 0.9999537652 | 1.1264776792  |
| -1.1402367979 | 0.4901071377 | 0.9999537652 | -1.1704618356 |
| -1.3755764767 | 0.5062039731 | 0.9999537652 | -1.0094872375 |
| -7.7746186387 | 0.1018018517 | 0.9999537652 | 8.8639046058  |
| -1.1562864818 | 0.4035291097 | 0.9999537652 | -1.2073873292 |
| 4.5505976667  | 0.5564151234 | 0.9999537652 | 0             |
| 1.3996890452  | 0.632749889  | 0.9999537652 | 1.5316961476  |
| 1.0301390511  | 0.9310250303 | 0.9999537652 | -1.2050386107 |

gene\_expression\_table

|               |              |              |               |
|---------------|--------------|--------------|---------------|
| 1.009623329   | 0.9567392518 | 0.9999537652 | 1.0165083298  |
| -1.2078980119 | 0.4861840134 | 0.9999537652 | -1.1544563199 |
| -1.668044468  | 0.6126052646 | 0.9999537652 | -2.0479626835 |
| 1.3662536087  | 0.1148607852 | 0.9999537652 | -1.0954655284 |
| 9.8205505243  | 0.3807567972 | 0.9999537652 | -1.5811963396 |
| 3.8622037496  | 0.6196794023 | 0.9999537652 | -5.337186734  |
| -2.6501620673 | 0.0926256257 | 0.9999537652 | -1.0247191477 |
| 2.7630567166  | 0.08160757   | 0.9999537652 | -1.1977486937 |
| 2.1680013163  | 0.413998897  | 0.9999537652 | 1.1438154581  |
| 1.3772588142  | 0.5212922706 | 0.9999537652 | -2.0786680745 |
| -50.755668691 | 0.0155594238 | 0.9999537652 | 1.6789724392  |
| 1.0464592107  | 0.8636451492 | 0.9999537652 | -1.2617601037 |
| 1.0514999876  | 0.8741497758 | 0.9999537652 | 1.1009329645  |
| 1.6152065649  | 0.510513336  | 0.9999537652 | -1.016338285  |
| 1.0789562771  | 0.6435735229 | 0.9999537652 | 1.1981993159  |
| -1.7852186777 | 0.1739996562 | 0.9999537652 | -1.3016934637 |
| -1.0496273246 | 0.7863986757 | 0.9999537652 | 1.1261132019  |
| 1.507205829   | 0.0953040282 | 0.9999537652 | -1.0310224425 |
| -1.1182593331 | 0.3319595477 | 0.9999537652 | -1.0987925845 |
| 15.0880352532 | 0.2955199564 | 0.9999537652 | -5.3583704783 |
| 0             | 0            | 0            | 1.5920908625  |
| -2.0683719388 | 0.0530594441 | 0.9999537652 | -1.0085837439 |
| -1.4609312109 | 0.3012801124 | 0.9999537652 | -1.3070546205 |
| -1.3634739279 | 0.1221888448 | 0.9999537652 | 1.1740249651  |
| 1.0699971675  | 0.7380353785 | 0.9999537652 | -1.0751659649 |
| -1.5732704371 | 0.0190437976 | 0.9999537652 | 1.0318671678  |
| 1.598158932   | 0.1453509655 | 0.9999537652 | 1.2470860643  |
| 1.0024679426  | 0.9952977543 | 0.9999537652 | -1.2113577925 |
| 1.0363099496  | 0.966677396  | 0.9999537652 | 2.3290926981  |
| 1.0936518072  | 0.5410906016 | 0.9999537652 | 1.1615393661  |
| 1.0635937345  | 0.6839506103 | 0.9999537652 | 1.382616823   |
| 1.0756524821  | 0.8533867135 | 0.9999537652 | 1.0891191519  |
| -1.1795068457 | 0.3620421941 | 0.9999537652 | 1.4317855033  |
| -1.0528998347 | 0.8661375089 | 0.9999537652 | 1.3277698325  |
| 1.0211288116  | 0.9491113539 | 0.9999537652 | 1.0984583154  |
| 1.1352411167  | 0.6761924187 | 0.9999537652 | -1.0904472788 |
| -6.9736190158 | 0.2250321147 | 0.9999537652 | 33.3754495834 |
| 1.3501637095  | 0.4315723369 | 0.9999537652 | 1.3991327592  |
| 1.1463129501  | 0.6626928205 | 0.9999537652 | 1.0897949512  |
| 2.7933974408  | 0.6948713406 | 0.9999537652 | 2.996475627   |
| -1.0332846416 | 0.8837205328 | 0.9999537652 | 1.1813173288  |
| 1.0856276127  | 0.5825951275 | 0.9999537652 | -1.0311500697 |
| -1.1453192235 | 0.9086853641 | 0.9999537652 | 9.7116702472  |
| -1.820792799  | 0.2644391974 | 0.9999537652 | 1.4041776103  |
| 1.7191537344  | 0.0267261684 | 0.9999537652 | 1.5772587999  |
| 1.0015043352  | 0.9959331681 | 0.9999537652 | -1.1283021243 |
| -1.1802121107 | 0.5965296325 | 0.9999537652 | 1.0286673153  |
| 1.0240838787  | 0.9687325862 | 0.9999537652 | 2.251432921   |
| -1.0846500161 | 0.8176478469 | 0.9999537652 | 1.482012642   |

gene\_expression\_table

|               |              |              |               |
|---------------|--------------|--------------|---------------|
| 1.3505284097  | 0.1646632732 | 0.9999537652 | 1.2641313492  |
| 29.1472433471 | 0.1877726381 | 0.9999537652 | 1.900054964   |
| 1.0690140949  | 0.8633591762 | 0.9999537652 | 1.2697899088  |
| 1.3670587466  | 0.4856641668 | 0.9999537652 | 1.0949825209  |
| -1.0158172782 | 0.9495523606 | 0.9999537652 | 1.4531489341  |
| 1.5124661612  | 0.6687868988 | 0.9999537652 | 1.7125218959  |
| -1.0378653972 | 0.8795136902 | 0.9999537652 | 1.0313696213  |
| -1.0976720675 | 0.6312026761 | 0.9999537652 | 1.1618212163  |
| 1.1286899667  | 0.7985722824 | 0.9999537652 | -1.4619975468 |
| 0             | 0            | 0            | 2.9985540909  |
| 4.5545995984  | 0.5696683115 | 0.9999537652 | -1.859280336  |
| 1.2095848585  | 0.2063690438 | 0.9999537652 | 1.2312613508  |
| -1.0736458315 | 0.7406031379 | 0.9999537652 | 1.6080621847  |
| 4.5544554512  | 0.5691453516 | 0.9999537652 | 1.5210253981  |
| 1.3114512769  | 0.3771622845 | 0.9999537652 | 1.4339703196  |
| 1.6018473574  | 0.6931423568 | 0.9999537652 | 1.372315235   |
| 1.1072783692  | 0.6434680238 | 0.9999537652 | 1.5355739057  |
| 0             | 0            | 0            | 2.9985540909  |
| -1.4666797245 | 0.5200574061 | 0.9999537652 | -1.1317444999 |
| 1.0817078961  | 0.766093447  | 0.9999537652 | 1.1604822459  |
| -1.0753395146 | 0.7634871323 | 0.9999537652 | 1.3936406129  |
| -1.4337007867 | 0.1081440698 | 0.9999537652 | -1.6515493947 |
| 1.1166829721  | 0.570827938  | 0.9999537652 | -1.0094428686 |
| 1.1617402047  | 0.3642226376 | 0.9999537652 | 1.0141235504  |
| -1.548632686  | 0.021702788  | 0.9999537652 | -1.0294756193 |
| 1.5744786829  | 0.3168739475 | 0.9999537652 | -1.1614572515 |
| 1.1845873495  | 0.3842763811 | 0.9999537652 | 1.0204915949  |
| -1.1062047527 | 0.6455117653 | 0.9999537652 | -1.2173196102 |
| -1.3834317179 | 0.4349621548 | 0.9999537652 | -1.2778114429 |
| 1.1232387835  | 0.8893374972 | 0.9999537652 | -2.5494282815 |
| 2.7933974408  | 0.6948713406 | 0.9999537652 | -2.0477227478 |
| 1.0923445629  | 0.6286873067 | 0.9999537652 | 1.2364199616  |
| -3.7261776128 | 0.1087236379 | 0.9999537652 | 0             |
| 1.0227578616  | 0.9399987838 | 0.9999537652 | -1.2160210349 |
| -1.0140895429 | 0.9272405751 | 0.9999537652 | -1.1074043328 |
| 1.7745951127  | 0.5416997886 | 0.9999537652 | -1.9769471573 |
| 1.5898914244  | 0.1238882968 | 0.9999537652 | -1.1081625653 |
| -1.0560883693 | 0.7572902809 | 0.9999537652 | -1.0949187445 |
| 2.2637293736  | 0.080991002  | 0.9999537652 | -1.4437589708 |
| -2.6345204407 | 0.2430372092 | 0.9999537652 | -4.739411962  |
| -1.1095165555 | 0.8082433599 | 0.9999537652 | 1.0846813027  |
| 1.1286060605  | 0.866816283  | 0.9999537652 | 1.0136522632  |
| 4.5545995984  | 0.5696662339 | 0.9999537652 | 1.0682244185  |
| -1.037914349  | 0.8957161684 | 0.9999537652 | -1.0046999324 |
| 1.0109046375  | 0.962223729  | 0.9999537652 | -1.3139605064 |
| -1.0675553957 | 0.7538023248 | 0.9999537652 | -1.1690697673 |
| 1.0032481056  | 0.9907056763 | 0.9999537652 | -1.2601852059 |
| 1.0469217539  | 0.8461962137 | 0.9999537652 | 1.4343588247  |
| 13.3324809638 | 0.3190079485 | 0.9999537652 | 2.9985540909  |

gene\_expression\_table

|               |              |              |               |
|---------------|--------------|--------------|---------------|
| -1.2616259486 | 0.4479022907 | 0.9999537652 | -1.2875982219 |
| 6.3075231393  | 0.4862681283 | 0.9999537652 | 6.908559683   |
| 2.8816679996  | 0.0400107684 | 0.9999537652 | 1.0661970817  |
| 2.7933974408  | 0.6948713406 | 0.9999537652 | 0             |
| 1.3095754617  | 0.0877227163 | 0.9999537652 | 1.0065666535  |
| -1.1058199357 | 0.6669196392 | 0.9999537652 | 1.0546700183  |
| 2.7933974408  | 0.6948713406 | 0.9999537652 | 1.2400291296  |
| -1.1890004485 | 0.246389918  | 0.9999537652 | 1.0649335629  |
| -1.2609714585 | 0.2279981695 | 0.9999537652 | 1.006775724   |
| 2.7933974408  | 0.6948713406 | 0.9999537652 | 3.9269887543  |
| -1.1946935256 | 0.3814918957 | 0.9999537652 | -1.0332654698 |
| 0             | 0            | 0            | 2.9985540909  |
| -1.2111814081 | 0.6467568602 | 0.9999537652 | 1.4112067783  |
| 4.5505976667  | 0.5563619862 | 0.9999537652 | 4.3937380937  |
| -1.3639673362 | 0.5907306055 | 0.9999537652 | -1.405957898  |
| -1.5481079555 | 0.0840867137 | 0.9999537652 | -1.2780476548 |
| 1.2687506623  | 0.7467517407 | 0.9999537652 | 1.0415785031  |
| 1.4586470775  | 0.3940631694 | 0.9999537652 | -1.0742973591 |
| 1.0009605121  | 0.9972645157 | 0.9999537652 | -1.1572065783 |
| 1.1825768591  | 0.4614877039 | 0.9999537652 | 1.0441213776  |
| 1.337664844   | 0.0707673575 | 0.9999537652 | 1.1754041321  |
| -1.0833161037 | 0.914876947  | 0.9999537652 | -1.0254529169 |
| -1.2027291607 | 0.1946461226 | 0.9999537652 | 1.0670616049  |
| -1.0691633897 | 0.6437424374 | 0.9999537652 | -1.0597808712 |
| 0             | 0            | 0            | 2.9985540909  |
| 0             | 0            | 0            | -5.3589986948 |
| -1.2659472121 | 0.0806765858 | 0.9999537652 | -1.0838379999 |
| -1.0376846293 | 0.8579295013 | 0.9999537652 | 1.0676458229  |
| 0             | 0            | 0            | 6.908559683   |
| 0             | 0            | 0            | 6.908559683   |
| 1.4515847663  | 0.0869404399 | 0.9999537652 | 1.065203236   |
| 2.7933974408  | 0.6948713406 | 0.9999537652 | -2.7915177751 |
| 0             | 0            | 0            | -1.1254032646 |
| -3.0110183514 | 0.1138533899 | 0.9999537652 | -1.2187323585 |
| -1.0226571002 | 0.901094485  | 0.9999537652 | 1.0897990373  |
| -1.2052254439 | 0.6721566646 | 0.9999537652 | -2.0131438349 |
| 1.0612749977  | 0.8740271148 | 0.9999537652 | 1.0059581563  |
| -1.246467954  | 0.1309427953 | 0.9999537652 | 1.0334418698  |
| -1.03892764   | 0.8717901581 | 0.9999537652 | 1.0265208468  |
| -1.48121844   | 0.5565015108 | 0.9999537652 | 0             |
| 1.0635656281  | 0.7811427267 | 0.9999537652 | 1.0673691188  |
| 1.0004886944  | 0.9974822022 | 0.9999537652 | 1.1406433644  |
| 1.8169036893  | 0.0896755479 | 0.9999537652 | -1.254583778  |
| 1.4755590332  | 0.5146767055 | 0.9999537652 | 1.2076110237  |
| -1.0677148635 | 0.8741103012 | 0.9999537652 | -1.2743617254 |
| 0             | 0            | 0            | 4.9527501949  |
| 1.1636836978  | 0.5121444977 | 0.9999537652 | -1.1484397129 |
| -1.1421973186 | 0.5529506241 | 0.9999537652 | 1.1087985085  |
| -1.4844123711 | 0.00662      | 0.9999537652 | -1.3163544464 |

gene\_expression\_table

|               |              |              |               |
|---------------|--------------|--------------|---------------|
| -1.1578795329 | 0.5914802508 | 0.9999537652 | 1.0661666444  |
| 1.5127636079  | 0.0216998541 | 0.9999537652 | 1.3003119651  |
| 2.7933974408  | 0.6948713406 | 0.9999537652 | -1.8594983184 |
| 1.0765769989  | 0.8446830992 | 0.9999537652 | -1.0682552474 |
| -1.0188463246 | 0.9373302005 | 0.9999537652 | 1.0467757178  |
| 3.8622037496  | 0.61964876   | 0.9999537652 | 23.4460379037 |
| 1.1050578775  | 0.4538444757 | 0.9999537652 | 1.2666576723  |
| 2.7933974408  | 0.6948713406 | 0.9999537652 | 8.8710369702  |
| 1.0457737398  | 0.7996206691 | 0.9999537652 | 1.0459149273  |
| -1.6746616296 | 0.3278246771 | 0.9999537652 | -1.0004315405 |
| 2.7933974408  | 0.6948713406 | 0.9999537652 | 0             |
| -1.5570528664 | 0.4131140951 | 0.9999537652 | 1.039747066   |
| -2.1334087267 | 0.5175577046 | 0.9999537652 | -1.1514942629 |
| 4.2566373836  | 0.0885984513 | 0.9999537652 | -1.2219141927 |
| 0             | 0            | 0            | 4.9527501949  |
| 0             | 0            | 0            | 1.438718359   |
| -1.1016476186 | 0.5821501123 | 0.9999537652 | -1.0428418294 |
| -1.1287383113 | 0.4935577196 | 0.9999537652 | -1.2685780432 |
| 2.7933974408  | 0.6948713406 | 0.9999537652 | 0             |
| 1.8464669901  | 0.5922227875 | 0.9999537652 | 2.6421916756  |
| -1.1017337822 | 0.8478287174 | 0.9999537652 | -1.927029328  |
| -1.0020289441 | 0.9900933782 | 0.9999537652 | -1.3371155224 |
| -1.6089495277 | 0.1284887215 | 0.9999537652 | 1.271682445   |
| 8.064174035   | 0.4238771103 | 0.9999537652 | 1.5655879817  |
| -1.8209982108 | 0.2153860755 | 0.9999537652 | -1.171774559  |
| 1.223681156   | 0.5781187171 | 0.9999537652 | 1.0843122041  |
| 1.1668597755  | 0.7359621063 | 0.9999537652 | 1.0819688052  |
| -2.9497018331 | 0.0588564237 | 0.9999537652 | 1.2438563437  |
| 1.229695584   | 0.2556650593 | 0.9999537652 | 1.2243668844  |
| 1.1704029766  | 0.4610561196 | 0.9999537652 | 1.1128827805  |
| 1.1435182     | 0.4181017698 | 0.9999537652 | 1.1441005545  |
| 1.1263324535  | 0.8145382651 | 0.9999537652 | -1.1015031859 |
| -6.288827244  | 0.0293435012 | 0.9999537652 | 3.9571433256  |
| -1.1509628501 | 0.6136349518 | 0.9999537652 | 1.2209759256  |
| 1.0725249281  | 0.7997717423 | 0.9999537652 | -1.1711687769 |
| -1.1641924398 | 0.6558513434 | 0.9999537652 | 1.0385141526  |
| 1.8388612766  | 0.4315161138 | 0.9999537652 | 3.0008703834  |
| 1.021212418   | 0.935518301  | 0.9999537652 | -1.0359193237 |
| -1.254909014  | 0.4853647431 | 0.9999537652 | -1.023007165  |
| 1.1806772154  | 0.7495727328 | 0.9999537652 | -1.1278975984 |
| 11.5868260078 | 0.3461772737 | 0.9999537652 | -1.2898906004 |
| -6.9736190158 | 0.2250321147 | 0.9999537652 | 3.8534174358  |
| -1.0538695212 | 0.9091950398 | 0.9999537652 | -1.3749993982 |
| 1.0865066769  | 0.7974904048 | 0.9999537652 | 1.0870661597  |
| 2.0354228963  | 0.4861596009 | 0.9999537652 | -1.5086090391 |
| -1.2756389503 | 0.1833985031 | 0.9999537652 | -1.0340256646 |
| 1.0479097225  | 0.9147663298 | 0.9999537652 | -1.2240318791 |
| 0             | 0            | 0            | 2.996475627   |
| 15.1008094413 | 0.2915612232 | 0.9999537652 | -1.01313437   |

gene\_expression\_table

|               |              |              |               |
|---------------|--------------|--------------|---------------|
| 1.2153735694  | 0.8151665331 | 0.9999537652 | -1.4240498189 |
| 53.6412760632 | 0.1197313309 | 0.9999537652 | 1.3012351799  |
| 4.5505976667  | 0.5563328301 | 0.9999537652 | 0             |
| 15.1919090446 | 0.3045457497 | 0.9999537652 | 2.9988886918  |
| 1.1535167817  | 0.7551108836 | 0.9999537652 | -1.0509912817 |
| -1.4010359172 | 0.6071843271 | 0.9999537652 | 1.1234461737  |
| 1.2526375214  | 0.8109284803 | 0.9999537652 | -3.8998793135 |
| -1.1568399326 | 0.5421961816 | 0.9999537652 | 1.210836571   |
| -2.9163669278 | 0.006007     | 0.9999537652 | -1.4551559136 |
| 20.3530564257 | 0.2434848478 | 0.9999537652 | -1.3789635973 |
| 1.0509548006  | 0.9032023597 | 0.9999537652 | 1.2901207628  |
| -1.2611741857 | 0.4399681334 | 0.9999537652 | -1.9291724354 |
| 1.2443472443  | 0.386778837  | 0.9999537652 | -1.660034509  |
| -1.1611298266 | 0.674847426  | 0.9999537652 | 1.8021226464  |
| 1.0174541181  | 0.9233412317 | 0.9999537652 | -1.2092420544 |
| -2.5861438062 | 0.4672283668 | 0.9999537652 | 0             |
| -1.1615474484 | 0.4773204886 | 0.9999537652 | -1.1672696386 |
| -2.3882871517 | 0.0007052    | 0.9999537652 | -2.5201094407 |
| -1.4976958482 | 0.0645417815 | 0.9999537652 | -1.1966726182 |
| 1.1515210251  | 0.5210981896 | 0.9999537652 | -1.3302470611 |
| 0             | 0            | 0            | 3.2466971401  |
| 6.3075231393  | 0.4862237795 | 0.9999537652 | -1.4669967683 |
| 1.0434219265  | 0.7671692197 | 0.9999537652 | 1.2458202433  |
| 1.1031767962  | 0.7815083378 | 0.9999537652 | 1.1567313963  |
| 1.1158583321  | 0.9296681264 | 0.9999537652 | 9.7116702472  |
| 1.3147542662  | 0.4058335228 | 0.9999537652 | 1.4980847037  |
| 1.1378846384  | 0.472466636  | 0.9999537652 | 1.0036504876  |
| -1.5269106325 | 0.4137696294 | 0.9999537652 | -1.0699391644 |
| 1.3750192721  | 0.4273948217 | 0.9999537652 | -1.4577791134 |
| 0             | 0            | 0            | 1.6439796197  |
| -1.1866539258 | 0.5374691994 | 0.9999537652 | 1.2924138922  |
| 1.188489195   | 0.1920217629 | 0.9999537652 | 1.0143999945  |
| 2.7933974408  | 0.6948713406 | 0.9999537652 | 4.9527501949  |
| 1.2437817305  | 0.326058723  | 0.9999537652 | 1.0153595794  |
| -1.6062238006 | 0.4515764407 | 0.9999537652 | 2.0954037025  |
| -1.3458534658 | 0.4020030831 | 0.9999537652 | -1.0131114019 |
| -1.1179872155 | 0.6193269101 | 0.9999537652 | 1.047013589   |
| -1.3180319268 | 0.2605711556 | 0.9999537652 | -1.0637928876 |
| 0             | 0            | 0            | 6.908559683   |
| -1.2044052565 | 0.3546926418 | 0.9999537652 | -1.1611494096 |
| -1.2269838739 | 0.1477034055 | 0.9999537652 | -1.0714700564 |
| 1.1628464825  | 0.3789673533 | 0.9999537652 | 1.077508691   |
| -1.0878810912 | 0.6161405332 | 0.9999537652 | -1.0787609747 |
| 1.0633715935  | 0.6621042142 | 0.9999537652 | -1.1551527277 |
| 1.2380436037  | 0.5087171542 | 0.9999537652 | -1.04155603   |
| -1.0094714013 | 0.9758225653 | 0.9999537652 | -1.0944955585 |
| 1.030307896   | 0.9667510464 | 0.9999537652 | 1.5539805427  |
| -1.0370202165 | 0.8577820542 | 0.9999537652 | -1.0812845764 |
| -1.0597883439 | 0.7127534379 | 0.9999537652 | -1.005060256  |

gene\_expression\_table

|               |              |              |               |
|---------------|--------------|--------------|---------------|
| 18.9318466825 | 0.2781664069 | 0.9999537652 | 0             |
| -1.1626817313 | 0.4257088267 | 0.9999537652 | -1.0637726403 |
| -1.1111459599 | 0.5071111552 | 0.9999537652 | -1.0311822316 |
| -1.0196283351 | 0.8797351657 | 0.9999537652 | -1.0969027356 |
| 1.3561507449  | 0.629398347  | 0.9999537652 | 1.4542066119  |
| 3.2110135335  | 0.1652033293 | 0.9999537652 | 1.2800255125  |
| 1.0068767682  | 0.9786578183 | 0.9999537652 | -1.1344181147 |
| 1.0357179724  | 0.8418230468 | 0.9999537652 | 1.0671621789  |
| 1.35645026    | 0.5176296782 | 0.9999537652 | 1.1229679312  |
| 0             | 0            | 0            | -2.2358187773 |
| 6.3128691894  | 0.4814674928 | 0.9999537652 | -5.3589986948 |
| 0             | 0            | 0            | -5.3608259368 |
| 15.2205810263 | 0.3051907401 | 0.9999537652 | -1.1248877899 |
| -1.3245325997 | 0.422692457  | 0.9999537652 | -1.0100398867 |
| 1.2494505312  | 0.2603502817 | 0.9999537652 | -1.5119983952 |
| 1.066111387   | 0.7388063229 | 0.9999537652 | 1.105018084   |
| -1.0810971762 | 0.849058129  | 0.9999537652 | 1.0284042522  |
| 1.2917344047  | 0.3133937127 | 0.9999537652 | -1.0457065855 |
| -1.1814667754 | 0.3423587163 | 0.9999537652 | -1.1276417639 |
| 4.5505976667  | 0.5562991171 | 0.9999537652 | 0             |
| 2.7933974408  | 0.6948713406 | 0.9999537652 | 2.0626766153  |
| 0             | 0            | 0            | 4.9527501949  |
| 1.3594099105  | 0.7971568125 | 0.9999537652 | 1.4521160839  |
| 1.0819921721  | 0.7095507835 | 0.9999537652 | -1.134031787  |
| 4.5505976667  | 0.5562571852 | 0.9999537652 | -4.9774159092 |
| 1.0064665989  | 0.9768981976 | 0.9999537652 | 1.1714076481  |
| 2.7933974408  | 0.6948713406 | 0.9999537652 | 2.9985540909  |
| 2.7933974408  | 0.6948713406 | 0.9999537652 | -6.3473723183 |
| 1.0511544362  | 0.7969562445 | 0.9999537652 | 1.1933507799  |
| -1.0960739249 | 0.4602576868 | 0.9999537652 | -1.033388119  |
| -1.2286854188 | 0.1466160924 | 0.9999537652 | -1.0232625697 |
| 0             | 0            | 0            | -2.0467835026 |
| 1.4008305856  | 0.6299599604 | 0.9999537652 | -2.4599066101 |
| -1.1233419277 | 0.6945016606 | 0.9999537652 | -1.1643220052 |
| 6.3075231393  | 0.4861796293 | 0.9999537652 | 1.6470100299  |
| -2.0025825252 | 0.456359036  | 0.9999537652 | 1.5919129963  |
| 1.0994820275  | 0.5779163587 | 0.9999537652 | 1.4370261445  |
| 1.1469711324  | 0.344959478  | 0.9999537652 | 1.1666741801  |
| 1.1459153227  | 0.6017347741 | 0.9999537652 | 1.1973645778  |
| -1.4776048529 | 0.4065393083 | 0.9999537652 | -1.6364712014 |
| 3.0602334741  | 0.3285759071 | 0.9999537652 | 0             |
| -1.3596770852 | 0.7810203465 | 0.9999537652 | -1.0958850627 |
| -2.3181698201 | 0.1836451987 | 0.9999537652 | -1.2386335486 |
| 2.3808533718  | 0.153601287  | 0.9999537652 | -1.2344071947 |
| 1.3256146221  | 0.0700660036 | 0.9999537652 | -1.1073780404 |
| 1.1736749605  | 0.2414473385 | 0.9999537652 | 1.1764158184  |
| 1.7022866271  | 0.1750107412 | 0.9999537652 | 1.4970505639  |
| 1.6054143334  | 0.5414357928 | 0.9999537652 | 1.0338956323  |
| 4.5505976667  | 0.5561869329 | 0.9999537652 | 1.1226213608  |

gene\_expression\_table

|               |              |              |               |
|---------------|--------------|--------------|---------------|
| 1.0287239533  | 0.8546577586 | 0.9999537652 | -1.0104170195 |
| -1.0020339672 | 0.9880688053 | 0.9999537652 | -1.049171694  |
| 1.953521676   | 0.2100934579 | 0.9999537652 | -1.1676567136 |
| 2.7933974408  | 0.6948713406 | 0.9999537652 | 2.996475627   |
| -1.0000938499 | 0.9996105876 | 0.9999537652 | -1.0191372757 |
| -1.0557017092 | 0.7665945745 | 0.9999537652 | -1.1032338365 |
| 4.5505976667  | 0.5561580072 | 0.9999537652 | 6.908559683   |
| 0             | 0            | 0            | 0             |
| 0             | 0            | 0            | 6.908559683   |
| 1.4391923523  | 0.3770548623 | 0.9999537652 | -1.1146602513 |
| -1.251751213  | 0.6788034812 | 0.9999537652 | -1.0998368348 |
| 1.3203746378  | 0.1870717086 | 0.9999537652 | -1.3081460647 |
| 1.1822500266  | 0.5915448618 | 0.9999537652 | -1.2758565713 |
| 2.7957660672  | 0.7054573471 | 0.9999537652 | 12.7732027325 |
| 1.5721822191  | 0.1606232785 | 0.9999537652 | 1.0236515308  |
| -2.223376117  | 0.5879069091 | 0.9999537652 | 2.046451628   |
| -1.1035861323 | 0.6503800652 | 0.9999537652 | 1.2373775498  |
| -1.0869970173 | 0.8275762782 | 0.9999537652 | -1.4494702798 |
| -1.0653719869 | 0.7788560702 | 0.9999537652 | 1.1292924556  |
| 1.1945489934  | 0.3486330812 | 0.9999537652 | -1.1242721237 |
| 1.2637355251  | 0.7540419027 | 0.9999537652 | -1.4566656456 |
| -1.121196012  | 0.66498757   | 0.9999537652 | 1.1253364549  |
| 1.4325240009  | 0.2069964187 | 0.9999537652 | -1.1733158479 |
| -1.0085355311 | 0.9930346205 | 0.9999537652 | 1.2398837679  |
| 1.0362702605  | 0.9655851499 | 0.9999537652 | 1.6418498278  |
| -1.6994504307 | 0.5419668182 | 0.9999537652 | 1.3547781079  |
| 1.3317767424  | 0.1992633387 | 0.9999537652 | -1.7747551607 |
| -1.0517171444 | 0.8251395003 | 0.9999537652 | 1.0105238852  |
| 6.2299503085  | 0.0751870433 | 0.9999537652 | 1.1395888107  |
| 3.4578336419  | 0.004319     | 0.9999537652 | 1.3630456425  |
| 2.5552811191  | 0.2419329475 | 0.9999537652 | -4.3692038192 |
| -1.1038391045 | 0.6717451347 | 0.9999537652 | -1.0318603456 |
| 1.3360869003  | 0.3330402362 | 0.9999537652 | -1.1064766672 |
| 3.2736636389  | 0.0978249605 | 0.9999537652 | 1.127103216   |
| 1.5021571103  | 0.2069953103 | 0.9999537652 | 1.2468284343  |
| 1.1293956656  | 0.3532611304 | 0.9999537652 | -1.374673629  |
| -1.8908250111 | 0.5555239461 | 0.9999537652 | -4.9108225367 |
| 2.7933974408  | 0.6948713406 | 0.9999537652 | -2.5071004691 |
| 2.0813661621  | 0.3172021396 | 0.9999537652 | 1.0164363995  |
| 1.1832039436  | 0.4341537957 | 0.9999537652 | 1.0829567717  |
| 1.3923292999  | 0.713350935  | 0.9999537652 | -1.1412590179 |
| 1.4162196156  | 0.1286446983 | 0.9999537652 | -1.0078804636 |
| 1.1070641608  | 0.5584639263 | 0.9999537652 | -1.0783708852 |
| -1.0415260168 | 0.7842709791 | 0.9999537652 | 1.1305699783  |
| 1.1124051152  | 0.5950574551 | 0.9999537652 | 1.5524058421  |
| 2.7933974408  | 0.6948713406 | 0.9999537652 | 1.9292743022  |
| 1.0523610038  | 0.7493744866 | 0.9999537652 | 1.0571043664  |
| 0             | 0            | 0            | 2.9985540909  |
| -1.2836417843 | 0.2574505269 | 0.9999537652 | -1.9426625187 |



gene\_expression\_table

|               |              |              |               |
|---------------|--------------|--------------|---------------|
| -1.223172313  | 0.3180919263 | 0.9999537652 | -1.547840244  |
| 0             | 0            | 0            | 2.996475627   |
| 1.1397030765  | 0.5073985606 | 0.9999537652 | 1.0597429399  |
| -2.0400392671 | 0.0865915992 | 0.9999537652 | -1.0861980088 |
| 1.263979281   | 0.1005763855 | 0.9999537652 | 1.0167207218  |
| -1.1765350641 | 0.5848332895 | 0.9999537652 | 1.0584041868  |
| -1.0142452712 | 0.9342523881 | 0.9999537652 | 1.387787332   |
| 1.0037516139  | 0.9871352156 | 0.9999537652 | 1.1001295429  |
| 0             | 0            | 0            | -1.9403006466 |
| 1.2351468843  | 0.1112755147 | 0.9999537652 | -1.0280863348 |
| 2.7933974408  | 0.6948713406 | 0.9999537652 | 0             |
| 1.2246548654  | 0.6157074648 | 0.9999537652 | -1.0130248265 |
| -1.2431005095 | 0.4816230389 | 0.9999537652 | -1.0430145029 |
| -1.1356228087 | 0.6491735257 | 0.9999537652 | -1.0655924886 |
| 1.0282459458  | 0.9687926839 | 0.9999537652 | -1.5462126468 |
| 1.0913024785  | 0.686817292  | 0.9999537652 | 1.1655150126  |
| 1.0431845699  | 0.7474082564 | 0.9999537652 | 1.4737622543  |
| -1.253267676  | 0.1034114353 | 0.9999537652 | 1.010286565   |
| 2.3273576668  | 0.167482631  | 0.9999537652 | -1.715175694  |
| 1.0275436744  | 0.9019313437 | 0.9999537652 | 1.2298834542  |
| -1.1997001219 | 0.3037766307 | 0.9999537652 | -1.1841176034 |
| -1.0581474895 | 0.6957958183 | 0.9999537652 | 1.0937817986  |
| -1.0464981522 | 0.8171357685 | 0.9999537652 | 1.2279497699  |
| 1.0395710976  | 0.8463473807 | 0.9999537652 | 1.4866411378  |
| 2.7933974408  | 0.6948713406 | 0.9999537652 | 1.2698746349  |
| -1.1979632149 | 0.429775155  | 0.9999537652 | -1.1193617104 |
| 1.6462932404  | 0.5843296474 | 0.9999537652 | -2.7463406416 |
| -1.0024905434 | 0.9933822734 | 0.9999537652 | -1.1447899711 |
| -1.6124601893 | 0.0384199601 | 0.9999537652 | -1.0931172792 |
| 2.189053179   | 0.0153209584 | 0.9999537652 | 1.7028255667  |
| 3.5444921315  | 0.2673911736 | 0.9999537652 | 1.1120558165  |
| 0             | 0            | 0            | 16.0748987101 |
| 8.064174035   | 0.4238757759 | 0.9999537652 | -3.7211335265 |
| 1.2242429853  | 0.3120906136 | 0.9999537652 | -1.5626631862 |
| 1.1598817343  | 0.4692331533 | 0.9999537652 | 1.2997348813  |
| 1.1691438373  | 0.3737364535 | 0.9999537652 | 1.1769727091  |
| 1.2180425134  | 0.1944775843 | 0.9999537652 | -1.0041810378 |
| 1.5303596704  | 0.0207133392 | 0.9999537652 | 1.3463368731  |
| -1.3669830632 | 0.109907973  | 0.9999537652 | 1.0673610223  |
| 1.0573525321  | 0.7135563237 | 0.9999537652 | -1.1469809416 |
| 1.2115978667  | 0.312891221  | 0.9999537652 | 1.2276273407  |
| 1.0191377156  | 0.9602924614 | 0.9999537652 | -1.0102528506 |
| 1.2668413654  | 0.207412658  | 0.9999537652 | 1.2523444325  |
| -1.0256289156 | 0.9086093884 | 0.9999537652 | 1.2458120923  |
| -1.2279344853 | 0.3577981705 | 0.9999537652 | -1.180160306  |
| 1.3515500654  | 0.3003658593 | 0.9999537652 | 1.0382087646  |
| -1.0982242123 | 0.6078529122 | 0.9999537652 | -1.1937344346 |
| 2.0032022457  | 0.3619618067 | 0.9999537652 | 1.2273613936  |
| -1.9924022667 | 0.0906760315 | 0.9999537652 | 1.1303568222  |

gene\_expression\_table

|               |              |              |               |
|---------------|--------------|--------------|---------------|
| -1.3100198367 | 0.0370012693 | 0.9999537652 | -1.1389167008 |
| -1.0467643843 | 0.7403727899 | 0.9999537652 | -1.1201074723 |
| -1.276202567  | 0.2481802831 | 0.9999537652 | 1.213143819   |
| 1.2078564839  | 0.5676101056 | 0.9999537652 | 1.0051370783  |
| -1.9751371463 | 0.1529716611 | 0.9999537652 | -1.6408646877 |
| 4.5505976667  | 0.556132005  | 0.9999537652 | 0             |
| 4.5505976667  | 0.5561082901 | 0.9999537652 | -5.1739447884 |
| 2.7933974408  | 0.6948713406 | 0.9999537652 | 2.2955915087  |
| -1.4002029808 | 0.0580088814 | 0.9999537652 | -1.1009278353 |
| 1.3801211037  | 0.2826357677 | 0.9999537652 | -1.1938750561 |
| 1.0280692272  | 0.8647011676 | 0.9999537652 | -1.3357442966 |
| -1.2620409198 | 0.6225761548 | 0.9999537652 | -1.0641213227 |
| -1.2788125598 | 0.1432637523 | 0.9999537652 | -1.381729217  |
| -1.2348596062 | 0.5229224908 | 0.9999537652 | 1.0858980158  |
| 8.064174035   | 0.4238744414 | 0.9999537652 | -2.0448962242 |
| -1.0122239484 | 0.9560546715 | 0.9999537652 | -1.2875781996 |
| 1.0200819327  | 0.9466776035 | 0.9999537652 | 1.15141394    |
| 0             | 0            | 0            | 10.818785458  |
| 1.0109184602  | 0.9303589463 | 0.9999537652 | -1.087377481  |
| -1.0973160202 | 0.6306645382 | 0.9999537652 | -1.0301650575 |
| -1.0604024991 | 0.79561619   | 0.9999537652 | -1.0591944152 |
| -1.1423160089 | 0.6824108333 | 0.9999537652 | 1.1069621951  |
| -1.2978773206 | 0.2129267365 | 0.9999537652 | 1.1265041036  |
| -1.092139102  | 0.6399378859 | 0.9999537652 | 1.0464983022  |
| 1.1571172166  | 0.3601129168 | 0.9999537652 | 1.1458014355  |
| -2.236788418  | 0.3266929719 | 0.9999537652 | -1.1200409105 |
| -1.4178743856 | 0.1287345727 | 0.9999537652 | -1.1600137412 |
| -1.5554675182 | 0.0163030502 | 0.9999537652 | -1.1247692664 |
| 4.5505976667  | 0.5560863595 | 0.9999537652 | -4.6920174118 |
| -1.0272368189 | 0.8797232709 | 0.9999537652 | -1.2751749469 |
| 1.0719128465  | 0.584535402  | 0.9999537652 | 1.453161514   |
| -1.3245004224 | 0.0307969155 | 0.9999537652 | 1.1886705827  |
| 4.5544554512  | 0.5691433571 | 0.9999537652 | -4.3722641122 |
| 1.1241226732  | 0.8926902791 | 0.9999537652 | -1.1708308502 |
| 1.7647165815  | 0.0597468529 | 0.9999537652 | 1.2825358522  |
| 0             | 0            | 0            | -5.3583704783 |
| 0             | 0            | 0            | 2.996475627   |
| -1.0392708541 | 0.8458751301 | 0.9999537652 | 1.253018982   |
| 1.3612474801  | 0.3750878438 | 0.9999537652 | -1.3542976344 |
| 1.2323865332  | 0.2800221673 | 0.9999537652 | 1.3827196778  |
| -1.1680863849 | 0.8568284088 | 0.9999537652 | 1.3387790497  |
| -1.5208575531 | 0.0746295657 | 0.9999537652 | 1.1380775944  |
| -1.3329960572 | 0.1193763663 | 0.9999537652 | 1.3819189474  |
| 1.2498120241  | 0.1170317475 | 0.9999537652 | 1.0266614246  |
| 0             | 0            | 0            | 10.8262784008 |
| 1.4834137528  | 0.2112356808 | 0.9999537652 | -1.0013772798 |
| -1.1512865013 | 0.3785281582 | 0.9999537652 | 1.010529564   |
| -1.233588922  | 0.1636553884 | 0.9999537652 | -1.0599868972 |
| 1.0594228089  | 0.6268420638 | 0.9999537652 | 1.0811375866  |

gene\_expression\_table

|               |              |              |               |
|---------------|--------------|--------------|---------------|
| 1.2702545883  | 0.4401717939 | 0.9999537652 | 1.1037062644  |
| 1.1681770476  | 0.2600413715 | 0.9999537652 | 1.051679934   |
| 1.0037640145  | 0.980765678  | 0.9999537652 | 1.0867500154  |
| -1.0662897099 | 0.7266335214 | 0.9999537652 | 1.2130735705  |
| -1.5326271468 | 0.2938516578 | 0.9999537652 | -1.0785343651 |
| -1.2155605447 | 0.1891699723 | 0.9999537652 | -1.3132139096 |
| 4.5544554512  | 0.5691413627 | 0.9999537652 | 1.5908108123  |
| -1.0591089595 | 0.7028910207 | 0.9999537652 | 1.0013146358  |
| -1.842677928  | 0.4680134363 | 0.9999537652 | -1.1242401582 |
| 2.7933974408  | 0.6948713406 | 0.9999537652 | -1.8601323346 |
| -1.5288655916 | 0.5023053785 | 0.9999537652 | -3.0224955488 |
| 1.1140457014  | 0.6784957406 | 0.9999537652 | -1.2041068002 |
| -1.2583336287 | 0.8351114694 | 0.9999537652 | 1.440358797   |
| -1.202939207  | 0.3143302746 | 0.9999537652 | -1.1779462793 |
| 2.7957660672  | 0.7054596996 | 0.9999537652 | 0             |
| 1.0722775422  | 0.6556950068 | 0.9999537652 | 1.1543073472  |
| -1.1786859467 | 0.3667046044 | 0.9999537652 | -1.0901705567 |
| -1.802154181  | 0.1425967086 | 0.9999537652 | 1.1095113765  |
| -1.1457555741 | 0.9107285115 | 0.9999537652 | 1.0606581302  |
| 8.064174035   | 0.4238731068 | 0.9999537652 | -7.959096917  |
| -1.1358678147 | 0.4180873187 | 0.9999537652 | 1.3202505372  |
| -1.5881570201 | 0.7110208511 | 0.9999537652 | 1.9416545697  |
| -2.0390556158 | 0.0556320943 | 0.9999537652 | -1.2495268798 |
| 1.0459683271  | 0.8555993664 | 0.9999537652 | 1.188497982   |
| -1.505965599  | 0.529615042  | 0.9999537652 | -1.1297098826 |
| 1.4652402235  | 0.3490070957 | 0.9999537652 | 1.2082749083  |
| -1.9289169832 | 0.1905518369 | 0.9999537652 | -1.3574402742 |
| 1.0852187741  | 0.5125551742 | 0.9999537652 | 1.1498771274  |
| 2.7933974408  | 0.6948713406 | 0.9999537652 | -3.3826461929 |
| -1.1427037524 | 0.4763009816 | 0.9999537652 | 1.3430349324  |
| 1.1704229895  | 0.4645420883 | 0.9999537652 | 1.147577427   |
| 1.0625660793  | 0.7893754683 | 0.9999537652 | -1.1412760187 |
| -2.5871290907 | 0.4991362671 | 0.9999537652 | 1.8445572683  |
| 4.5544554512  | 0.5691393684 | 0.9999537652 | 12.7732027325 |
| 4.5505976667  | 0.5560657957 | 0.9999537652 | 6.908559683   |
| -1.096920501  | 0.6892125686 | 0.9999537652 | -1.0570735447 |
| 1.0559411056  | 0.7551192743 | 0.9999537652 | 1.0592181781  |
| 1.2893973291  | 0.2926371768 | 0.9999537652 | 1.5726447983  |
| -1.5875118025 | 0.720251633  | 0.9999537652 | 3.7001724876  |
| 0             | 0            | 0            | 0             |
| 1.204998764   | 0.3010833591 | 0.9999537652 | 1.417651017   |
| -1.392339597  | 0.6755381597 | 0.9999537652 | 2.4345137645  |
| 0             | 0            | 0            | 2.9985540909  |
| -1.2173029028 | 0.0902143968 | 0.9999537652 | 1.0370998287  |
| -1.131171467  | 0.7648067589 | 0.9999537652 | 1.5264438305  |
| -1.2930181341 | 0.0956381807 | 0.9999537652 | -1.0896796757 |
| -1.2572750762 | 0.4052101402 | 0.9999537652 | 1.4040927879  |
| -1.0991276914 | 0.5516200718 | 0.9999537652 | 1.3293577153  |
| 1.0741436455  | 0.6128534745 | 0.9999537652 | 1.2375014729  |

gene\_expression\_table

|               |              |              |               |
|---------------|--------------|--------------|---------------|
| 1.3026120258  | 0.7423968732 | 0.9999537652 | -1.4281216211 |
| 1.3823751836  | 0.5608616322 | 0.9999537652 | 1.0286352509  |
| 0             | 0            | 0            | 2.996475627   |
| 1.1193074263  | 0.6072481997 | 0.9999537652 | 1.0590215726  |
| 13.3324809638 | 0.3193640946 | 0.9999537652 | 2.9940379764  |
| 3.8622037496  | 0.6196181007 | 0.9999537652 | 0             |
| -1.3842138473 | 0.5497909944 | 0.9999537652 | -1.7724539785 |
| 1.0971336136  | 0.721275385  | 0.9999537652 | 1.3570002307  |
| 1.1879709748  | 0.4662950507 | 0.9999537652 | 1.4611233905  |
| 4.5505976667  | 0.5560462223 | 0.9999537652 | -1.1520337027 |
| -1.1208016402 | 0.473577852  | 0.9999537652 | 1.0247423279  |
| 1.0392068921  | 0.7682938924 | 0.9999537652 | 1.2969007265  |
| -1.0461124926 | 0.8234169422 | 0.9999537652 | 1.2341202131  |
| 2.7933974408  | 0.6948713406 | 0.9999537652 | 2.996475627   |
| 1.092409221   | 0.8382741486 | 0.9999537652 | 1.245516455   |
| -1.7956491197 | 0.1167857588 | 0.9999537652 | 1.1088050775  |
| 1.1399992826  | 0.6331216595 | 0.9999537652 | 1.3380476217  |
| -2.0695649939 | 0.2615065035 | 0.9999537652 | 1.8007532435  |
| 1.1742141824  | 0.3744016908 | 0.9999537652 | 1.3402133879  |
| 11.5766527773 | 0.3455050172 | 0.9999537652 | 1.2593062028  |
| 0             | 0            | 0            | 2.9985540909  |
| 2.7933974408  | 0.6948713406 | 0.9999537652 | 4.9527501949  |
| 1.8984965231  | 0.3733514763 | 0.9999537652 | 1.1041736379  |
| -1.1068338728 | 0.615198139  | 0.9999537652 | 1.1687219536  |
| -1.1203230916 | 0.4426459321 | 0.9999537652 | 1.1049617158  |
| 6.3075231393  | 0.4861356763 | 0.9999537652 | -1.358587248  |
| 0             | 0            | 0            | 1.590997316   |
| 2.8674152405  | 0.0540694617 | 0.9999537652 | -1.095747511  |
| -1.0792445099 | 0.8001475681 | 0.9999537652 | 1.1543048025  |
| -1.1798309713 | 0.3777268943 | 0.9999537652 | 1.3203855356  |
| 1.3966050591  | 0.1303197189 | 0.9999537652 | 1.0347583869  |
| 2.7933974408  | 0.6948713406 | 0.9999537652 | 0             |
| -1.1836454075 | 0.6002404187 | 0.9999537652 | 1.2625261472  |
| 6.3075231393  | 0.4860919192 | 0.9999537652 | 10.818785458  |
| 11.5766527773 | 0.345492614  | 0.9999537652 | 4.9527501949  |
| 2.0707589375  | 0.069546204  | 0.9999537652 | 1.2182278002  |
| -1.1984339434 | 0.5246452917 | 0.9999537652 | 1.0695058583  |
| 1.4714168225  | 0.4767765058 | 0.9999537652 | 1.2400674234  |
| 4.5505976667  | 0.5560272763 | 0.9999537652 | 0             |
| 0             | 0            | 0            | 0             |
| 2.2819357465  | 0.3099613476 | 0.9999537652 | 1.2947771782  |
| -1.0546187585 | 0.8496444247 | 0.9999537652 | 1.4420993255  |
| 1.332233652   | 0.6933826263 | 0.9999537652 | 1.0260196848  |
| -1.4364779627 | 0.0997278458 | 0.9999537652 | 1.5245109895  |
| 0             | 0            | 0            | 22.5851407947 |
| 1.9925935006  | 0.0619633288 | 0.9999537652 | 1.304595304   |
| 1.3480788142  | 0.7449357005 | 0.9999537652 | 3.63273905    |
| -1.1212262383 | 0.5153069526 | 0.9999537652 | -1.0658168347 |
| -1.125291708  | 0.6343934928 | 0.9999537652 | 1.2532564108  |

gene\_expression\_table

|               |              |              |               |
|---------------|--------------|--------------|---------------|
| -1.0511738413 | 0.843379991  | 0.9999537652 | 1.3041555449  |
| 1.2406255197  | 0.5479456661 | 0.9999537652 | 3.8452636367  |
| -1.5087575773 | 0.0263021649 | 0.9999537652 | 1.106995005   |
| 1.0079285648  | 0.9591159418 | 0.9999537652 | 1.3150992382  |
| -1.1314980094 | 0.8432613978 | 0.9999537652 | 1.2022796328  |
| 1.0519812542  | 0.6921062325 | 0.9999537652 | 1.2166961959  |
| -1.0249860165 | 0.9391489357 | 0.9999537652 | 1.1340447181  |
| 1.0290698449  | 0.828839208  | 0.9999537652 | -1.2183943128 |
| 2.0852096246  | 0.0005036    | 0.9999537652 | 1.0619816487  |
| -1.0588471763 | 0.635560031  | 0.9999537652 | 1.0048277686  |
| 4.5505976667  | 0.5560085526 | 0.9999537652 | 0             |
| 4.5505976667  | 0.5559558646 | 0.9999537652 | -1.9771482009 |
| -1.0032839687 | 0.9813634982 | 0.9999537652 | 1.2160179625  |
| 0             | 0            | 0            | 6.9133480437  |
| 1.156559555   | 0.5167778306 | 0.9999537652 | 1.7661304954  |
| -1.1411681157 | 0.6272034293 | 0.9999537652 | -1.3865388198 |
| -1.2447511482 | 0.4525099718 | 0.9999537652 | 1.5677035527  |
| -1.0748325078 | 0.7892516418 | 0.9999537652 | 1.0949964284  |
| 1.1671034383  | 0.5180434207 | 0.9999537652 | -1.0960325565 |
| -1.0359450606 | 0.756812221  | 0.9999537652 | 1.136315332   |
| 0             | 0            | 0            | 3.0002604593  |
| -1.2430627591 | 0.6053999059 | 0.9999537652 | 1.3478082381  |
| -1.0247494686 | 0.8689405362 | 0.9999537652 | 1.152265706   |
| 1.9989289019  | 0.2187844789 | 0.9999537652 | -1.4683302163 |
| 1.0638984996  | 0.8108554386 | 0.9999537652 | 1.0760100827  |
| 1.1332113201  | 0.6534093832 | 0.9999537652 | 1.2460833343  |
| 1.0789600992  | 0.5241258421 | 0.9999537652 | 1.4156396796  |
| -1.0347070303 | 0.7634790813 | 0.9999537652 | 1.1334731983  |
| 1.0543450169  | 0.6867875909 | 0.9999537652 | 1.043364822   |
| 1.1162834585  | 0.9271775215 | 0.9999537652 | 1.8396312969  |
| 1.1757527805  | 0.5136398178 | 0.9999537652 | -1.1070711108 |
| -1.5293553469 | 0.1726570613 | 0.9999537652 | 1.1305594983  |
| -1.0317755932 | 0.8669683763 | 0.9999537652 | 1.105575701   |
| -1.294675136  | 0.2289338838 | 0.9999537652 | 1.0815198275  |
| 2.7933974408  | 0.6948713406 | 0.9999537652 | 1.590997316   |
| -1.4848828492 | 0.5184831105 | 0.9999537652 | -1.1668348393 |
| 1.0144764616  | 0.9174454092 | 0.9999537652 | 1.6042374236  |
| 1.3177384511  | 0.2167116969 | 0.9999537652 | -1.1973886373 |
| 4.5505976667  | 0.5559322269 | 0.9999537652 | 24.4899985757 |
| -2.770555493  | 0.2451776615 | 0.9999537652 | 1.1519219883  |
| 1.3763731265  | 0.0862569354 | 0.9999537652 | 1.8254317785  |
| -1.0377743758 | 0.8141039036 | 0.9999537652 | 1.1601852501  |
| 5.743746418   | 0.0979203093 | 0.9999537652 | 1.0675791322  |
| 2.7933974408  | 0.6948713406 | 0.9999537652 | 0             |
| 1.1162834585  | 0.9271695543 | 0.9999537652 | 1.1692101602  |
| 2.0903962787  | 0.5155815843 | 0.9999537652 | -1.0342584907 |
| 3.8622037496  | 0.6195874233 | 0.9999537652 | 0             |
| 9.8205505243  | 0.3807299055 | 0.9999537652 | -2.0479626835 |
| -1.0008217171 | 0.9952338996 | 0.9999537652 | 1.4218960869  |

gene\_expression\_table

|               |              |              |               |
|---------------|--------------|--------------|---------------|
| -1.1554181492 | 0.5064426488 | 0.9999537652 | 1.2531440909  |
| 0             | 0            | 0            | 1.4524478337  |
| 1.118812399   | 0.6352956877 | 0.9999537652 | 1.471276757   |
| -1.026165804  | 0.8651524742 | 0.9999537652 | -1.0986846103 |
| 6.3075231393  | 0.4860483568 | 0.9999537652 | 6.908559683   |
| -1.0299520986 | 0.9189704341 | 0.9999537652 | 1.4105733886  |
| -2.5871290907 | 0.5001526277 | 0.9999537652 | 1.0010497037  |
| 0             | 0            | 0            | 14.7271569203 |
| -1.0440298828 | 0.7467999051 | 0.9999537652 | 1.2748936662  |
| 1.2244062091  | 0.4469566494 | 0.9999537652 | 1.2161760926  |
| 1.0998914838  | 0.4759839691 | 0.9999537652 | 1.2223179451  |
| 2.7933974408  | 0.6948713406 | 0.9999537652 | -5.3589986948 |
| 1.3853136987  | 0.2104107263 | 0.9999537652 | 1.2120683062  |
| -2.956038745  | 0.3205445351 | 0.9999537652 | 1.2407431382  |
| 0             | 0            | 0            | -1.1248877899 |
| 0             | 0            | 0            | 2.9985540909  |
| 1.1004172696  | 0.7633299299 | 0.9999537652 | 1.3076031106  |
| -1.4848615221 | 0.0895956076 | 0.9999537652 | -1.0953182414 |
| -1.0211615507 | 0.921903176  | 0.9999537652 | 1.2048793088  |
| -1.0578723963 | 0.8950454676 | 0.9999537652 | -1.1996932824 |
| -1.5875118025 | 0.7201624284 | 0.9999537652 | 2.996475627   |
| 1.0020230375  | 0.9880315615 | 0.9999537652 | 1.3560981859  |
| 1.9109421781  | 0.1038210115 | 0.9999537652 | -1.1149624023 |
| 1.2472630397  | 0.1768121081 | 0.9999537652 | 1.0691555635  |
| -1.4882495476 | 0.3279660734 | 0.9999537652 | -1.0604946197 |
| -1.3441341749 | 0.0403719052 | 0.9999537652 | -1.0737421053 |
| 1.0930933484  | 0.7610281373 | 0.9999537652 | 1.2564317896  |
| 1.1153938333  | 0.5645442986 | 0.9999537652 | -1.1471673829 |
| -3.8398244263 | 0.1426434157 | 0.9999537652 | -1.6150741373 |
| -1.0527716198 | 0.7810666485 | 0.9999537652 | 1.3010135507  |
| -1.0694171877 | 0.7207843454 | 0.9999537652 | 1.0008115873  |
| 1.1200130315  | 0.7178601348 | 0.9999537652 | 1.2497045511  |
| 4.0084683418  | 0.0108545582 | 0.9999537652 | -1.1303199936 |
| 4.5505976667  | 0.5559322269 | 0.9999537652 | 0             |
| -1.0931432807 | 0.6353510769 | 0.9999537652 | 1.1612153826  |
| 0             | 0            | 0            | -1.0338466263 |
| 1.0403528193  | 0.7881957561 | 0.9999537652 | 1.1473384245  |
| 3.9737398722  | 0.006509     | 0.9999537652 | 1.4776466071  |
| -1.028698786  | 0.8823688146 | 0.9999537652 | 1.0824540407  |
| -1.1000448055 | 0.5056013103 | 0.9999537652 | -1.0263852321 |
| 1.1289026269  | 0.3134861446 | 0.9999537652 | 1.0666040466  |
| 2.6183639153  | 0.1357369211 | 0.9999537652 | 1.4132245309  |
| 1.1762411247  | 0.247933662  | 0.9999537652 | 1.1687659061  |
| 1.1844918384  | 0.3708548278 | 0.9999537652 | 1.0484333805  |
| 1.0497214602  | 0.7910595133 | 0.9999537652 | -1.1124285129 |
| 1.815284058   | 0.3121519927 | 0.9999537652 | 1.1897884937  |
| -1.0188647301 | 0.9230170338 | 0.9999537652 | 1.4848968124  |
| 6.3075231393  | 0.4860366635 | 0.9999537652 | 0             |
| 1.0593319107  | 0.6710588382 | 0.9999537652 | 1.0339039494  |

gene\_expression\_table

|               |              |              |               |
|---------------|--------------|--------------|---------------|
| 1.4673678633  | 0.0900579715 | 0.9999537652 | 1.0516310446  |
| -1.1961569164 | 0.3289804901 | 0.9999537652 | -1.1002693383 |
| 0             | 0            | 0            | 2.9985540909  |
| -1.2520757133 | 0.7407098251 | 0.9999537652 | 1.2398837679  |
| 2.7933974408  | 0.6948713406 | 0.9999537652 | 6.9133480437  |
| 1.0469036191  | 0.9171043411 | 0.9999537652 | 1.0650049364  |
| -1.1442445428 | 0.5576090232 | 0.9999537652 | 1.0743030847  |
| 1.3869904012  | 0.44401117   | 0.9999537652 | 1.0901934502  |
| 1.4922545969  | 0.0236609616 | 0.9999537652 | 1.3611385554  |
| 6.3075231393  | 0.4860250059 | 0.9999537652 | 0             |
| 1.1469777922  | 0.3037710611 | 0.9999537652 | -1.0891166814 |
| -1.014058902  | 0.9221479262 | 0.9999537652 | -1.2977693598 |
| -1.9778106374 | 0.0339813794 | 0.9999537652 | -1.5076686263 |
| -1.7379985875 | 0.4182179352 | 0.9999537652 | -1.8659789582 |
| 7.0692834839  | 0.00156      | 0.9999537652 | -1.0685193139 |
| -1.3950582798 | 0.0732387555 | 0.9999537652 | -1.142810852  |
| -1.0574046063 | 0.842697829  | 0.9999537652 | -1.0429569403 |
| -1.1545729319 | 0.396872709  | 0.9999537652 | -1.0676728044 |
| 1.0477127772  | 0.7469147306 | 0.9999537652 | -1.2437031779 |
| -1.2945287741 | 0.1500995226 | 0.9999537652 | -1.3494181631 |
| 0             | 0            | 0            | 2.996475627   |
| -1.0625772242 | 0.8570383349 | 0.9999537652 | -1.4208519446 |
| 1.093033967   | 0.7004447746 | 0.9999537652 | 1.1511588411  |
| -1.0127601346 | 0.9849704122 | 0.9999537652 | 1.4392443705  |
| -1.2105448354 | 0.628782535  | 0.9999537652 | 1.0763998677  |
| 34.3811030879 | 0.1695345472 | 0.9999537652 | -1.2057326182 |
| 6.3075231393  | 0.4860133837 | 0.9999537652 | 0             |
| -1.1609777944 | 0.5414065951 | 0.9999537652 | -1.1547648734 |
| -1.504262006  | 0.5482599376 | 0.9999537652 | -1.230881042  |
| -1.1582067332 | 0.3579625886 | 0.9999537652 | -1.0510331066 |
| 0             | 0            | 0            | 2.9985540909  |
| 0             | 0            | 0            | 4.9527501949  |
| -1.7955716613 | 0.0978281245 | 0.9999537652 | -1.0099746571 |
| -2.6334517422 | 0.2822155674 | 0.9999537652 | 1.4854894758  |
| 1.0326847566  | 0.8992595069 | 0.9999537652 | 1.039177202   |
| -1.0466032624 | 0.7933392625 | 0.9999537652 | -1.1075571388 |
| 1.0766281756  | 0.7603579762 | 0.9999537652 | 1.0273873026  |
| 1.9493977999  | 0.0009916    | 0.9999537652 | -1.0169382921 |
| 1.2782678456  | 0.604721955  | 0.9999537652 | -1.1385829569 |
| -1.2306946963 | 0.359160313  | 0.9999537652 | 1.2016520959  |
| -1.090368761  | 0.5389862364 | 0.9999537652 | -1.2888330094 |
| -1.0906176713 | 0.8531565178 | 0.9999537652 | -1.2954034602 |
| -1.136183371  | 0.8057549443 | 0.9999537652 | -2.1111702588 |
| 1.5211587958  | 0.0523829531 | 0.9999537652 | -1.070741648  |
| 1.4238667314  | 0.6195250225 | 0.9999537652 | 1.2047455501  |
| -1.2389914222 | 0.6635972442 | 0.9999537652 | 1.8306186492  |
| 1.2619151399  | 0.3652198033 | 0.9999537652 | -1.5168094574 |
| 1.0252520669  | 0.8760344029 | 0.9999537652 | -1.5150083371 |
| -1.1512781114 | 0.7854255457 | 0.9999537652 | 1.0544109503  |

gene\_expression\_table

|                |              |              |               |
|----------------|--------------|--------------|---------------|
| -1.1794425288  | 0.4031272578 | 0.9999537652 | -1.1037921198 |
| -1.0312044602  | 0.9596472616 | 0.9999537652 | 1.589769722   |
| 1.0842093679   | 0.5412480899 | 0.9999537652 | -1.4272870349 |
| -2.7335321369  | 0.2490565315 | 0.9999537652 | -1.3380993941 |
| -1.6073007454  | 0.0202466001 | 0.9999537652 | -1.3506333614 |
| 1.3495521868   | 0.0874030743 | 0.9999537652 | -1.1286733321 |
| -1.2450467244  | 0.0947016616 | 0.9999537652 | -1.2368045235 |
| 1.2659104578   | 0.4785111008 | 0.9999537652 | 1.008280716   |
| -1.0108515467  | 0.9508273126 | 0.9999537652 | -1.1431987952 |
| 8.064174035    | 0.4238717721 | 0.9999537652 | 2.8664963163  |
| -1.1865676628  | 0.5690576636 | 0.9999537652 | 1.3496298223  |
| -1.1300516051  | 0.6663988981 | 0.9999537652 | -1.2363877643 |
| 1.0878907018   | 0.5982231518 | 0.9999537652 | -1.3063999561 |
| -15.9195842901 | 0.1126921344 | 0.9999537652 | -1.2400060274 |
| 1.2234935363   | 0.2381893954 | 0.9999537652 | -1.1656804666 |
| -1.7534510083  | 0.0213841044 | 0.9999537652 | -1.4211325518 |
| 0              | 0            | 0            | -5.3583704783 |
| -4.082259813   | 0.0865030055 | 0.9999537652 | 1.8579562448  |
| 1.2753356422   | 0.5434358999 | 0.9999537652 | 1.5756519876  |
| 1.1521671675   | 0.3673954124 | 0.9999537652 | 1.1350579548  |
| -1.0555448873  | 0.9030301231 | 0.9999537652 | -1.1726476675 |
| -1.4779519502  | 0.2659872162 | 0.9999537652 | -1.5241488866 |
| 1.0203497736   | 0.9264745777 | 0.9999537652 | -1.1535949179 |
| 1.2652283139   | 0.2289003875 | 0.9999537652 | -1.2572718305 |
| -1.3063736302  | 0.3626238901 | 0.9999537652 | -1.0449589771 |
| -1.1787484764  | 0.4365212228 | 0.9999537652 | -1.6772522202 |
| 2.7957660672   | 0.7054620531 | 0.9999537652 | -3.384595918  |
| -1.573893529   | 0.2356637856 | 0.9999537652 | -1.2586486911 |
| 1.2753463182   | 0.5162378043 | 0.9999537652 | -1.714471873  |
| 1.3956459719   | 0.1865325055 | 0.9999537652 | -1.1059237123 |
| -1.0245499429  | 0.8788103643 | 0.9999537652 | -1.0248500214 |
| -1.4822156075  | 0.2061356705 | 0.9999537652 | -2.5095924535 |
| 1.597327124    | 0.1280737435 | 0.9999537652 | 1.0912384513  |
| -1.8640511245  | 0.1065080695 | 0.9999537652 | -1.9005143595 |
| 2.7957660672   | 0.7054644074 | 0.9999537652 | -1.3480816769 |
| -1.4512821826  | 0.2370805236 | 0.9999537652 | 1.2932948092  |
| 2.4268643346   | 0.3294885846 | 0.9999537652 | -3.1966011202 |
| 1.0950595181   | 0.4211459173 | 0.9999537652 | -1.043473629  |
| 1.2910557943   | 0.704145754  | 0.9999537652 | 1.5870215946  |
| -1.4352458527  | 0.2366549231 | 0.9999537652 | -1.1244734224 |
| 1.0119574961   | 0.9473068488 | 0.9999537652 | 1.0034723554  |
| 1.0537087738   | 0.8868394946 | 0.9999537652 | 1.1580671904  |
| 1.4611545842   | 0.2881040191 | 0.9999537652 | 1.4529814156  |
| 0              | 0            | 0            | 2.9940379764  |
| -1.2636369764  | 0.1957768282 | 0.9999537652 | -1.0192254213 |
| 2.5744732225   | 0.3974207695 | 0.9999537652 | 12.7732027325 |
| 1.0639635919   | 0.7892627316 | 0.9999537652 | -1.0134503259 |
| 27.993011587   | 0.2236144496 | 0.9999537652 | 15.9659633994 |
| -1.1502960954  | 0.4127922158 | 0.9999537652 | 1.4008042313  |



gene\_expression\_table

|               |              |              |               |
|---------------|--------------|--------------|---------------|
| -1.2503735004 | 0.3271451624 | 0.9999537652 | 1.0307693933  |
| 1.846361394   | 0.5888000048 | 0.9999537652 | 3.7228836277  |
| 1.1025078533  | 0.6905610816 | 0.9999537652 | 1.2033064354  |
| 2.7933974408  | 0.6948713406 | 0.9999537652 | 1.6002511223  |
| -1.4188646248 | 0.0622726091 | 0.9999537652 | -1.0351980454 |
| -1.1166060857 | 0.7845538891 | 0.9999537652 | 1.0633590063  |
| 1.2268003525  | 0.2413132626 | 0.9999537652 | 1.098599093   |
| -1.8115085429 | 0.2692387521 | 0.9999537652 | -1.0185380321 |
| 2.7933974408  | 0.6948713406 | 0.9999537652 | -3.3865434896 |
| -1.7495393231 | 0.2946621704 | 0.9999537652 | 2.0660460667  |
| 1.1111689845  | 0.7746968261 | 0.9999537652 | 1.2874037577  |
| 1.0498311458  | 0.8306714879 | 0.9999537652 | 1.0788718564  |
| -1.2877681807 | 0.3773172709 | 0.9999537652 | -1.4292611129 |
| 2.1181846932  | 0.2873564908 | 0.9999537652 | 1.0974312001  |
| -3.810840035  | 0.0393067864 | 0.9999537652 | -1.0118063622 |
| 6.3075231393  | 0.485991399  | 0.9999537652 | -5.3589986948 |
| -1.1253908775 | 0.7699914311 | 0.9999537652 | 1.2289396219  |
| 2.7933974408  | 0.6948713406 | 0.9999537652 | -2.9680235826 |
| 0             | 0            | 0            | 0             |
| -1.507422654  | 0.2480063086 | 0.9999537652 | 1.1764844331  |
| -1.1790661357 | 0.4941561938 | 0.9999537652 | -1.0048754531 |
| 1.0763637626  | 0.7989155489 | 0.9999537652 | 1.2006482502  |
| -4.1032936321 | 0.1311326696 | 0.9999537652 | 1.3191741898  |
| 1.0903220495  | 0.7194056375 | 0.9999537652 | 1.3785947705  |
| 1.6413775565  | 0.0435328636 | 0.9999537652 | 1.1577567294  |
| 2.7933974408  | 0.6948713406 | 0.9999537652 | -2.2219162835 |
| -1.2891893615 | 0.1195691436 | 0.9999537652 | -1.167270675  |
| 1.3070686944  | 0.1888778973 | 0.9999537652 | 1.0473379371  |
| -1.7985323208 | 0.1473844049 | 0.9999537652 | -1.2556088491 |
| 1.3594099105  | 0.7971167452 | 0.9999537652 | 1.2518582418  |
| 0             | 0            | 0            | 2.996475627   |
| 2.0903298609  | 0.5114050435 | 0.9999537652 | 1.0987070368  |
| -1.576892299  | 0.0477677988 | 0.9999537652 | 1.1261796796  |
| 1.3395236905  | 0.1215756857 | 0.9999537652 | 1.2017641724  |
| -1.8528058048 | 0.3376652504 | 0.9999537652 | 1.4371102393  |
| -1.3309434275 | 0.3375674134 | 0.9999537652 | -1.1984855355 |
| -1.0145301364 | 0.9514000841 | 0.9999537652 | -1.0186730775 |
| 2.7933974408  | 0.6948713406 | 0.9999537652 | -2.9683711557 |
| -2.5871290907 | 0.5001433169 | 0.9999537652 | 63.4727107264 |
| 2.2818443854  | 0.1549935697 | 0.9999537652 | -1.4331129499 |
| -1.1401584779 | 0.5056831895 | 0.9999537652 | -1.2342067931 |
| -1.1152158598 | 0.7252519352 | 0.9999537652 | 1.0542313768  |
| 1.2244113984  | 0.2244684982 | 0.9999537652 | -1.167532326  |
| 1.146608954   | 0.6076381521 | 0.9999537652 | 1.0764068009  |
| -1.0009808156 | 0.992937265  | 0.9999537652 | 1.1503546051  |
| 1.0565915369  | 0.9283513222 | 0.9999537652 | -1.0393789722 |
| 1.9280222804  | 0.3895230563 | 0.9999537652 | -1.069803044  |
| -1.926212649  | 0.1054881872 | 0.9999537652 | -1.1839994128 |
| -1.0279795459 | 0.8967156292 | 0.9999537652 | 1.0064885048  |

gene\_expression\_table

|               |              |              |               |
|---------------|--------------|--------------|---------------|
| -1.3942756209 | 0.3552817278 | 0.9999537652 | 1.6896352024  |
| 1.0269306994  | 0.9011584917 | 0.9999537652 | -1.0841658469 |
| 1.0217259552  | 0.9233721563 | 0.9999537652 | 1.2499588597  |
| 1.2925565279  | 0.0918533018 | 0.9999537652 | 1.1228198908  |
| 3.3414463545  | 0.157992645  | 0.9999537652 | -1.3978714673 |
| -1.0289093964 | 0.9379985024 | 0.9999537652 | 1.2121282152  |
| 1.0522322073  | 0.8774307068 | 0.9999537652 | -1.0154986484 |
| 1.2731181768  | 0.6677270521 | 0.9999537652 | 1.1245963244  |
| 2.7933974408  | 0.6948713406 | 0.9999537652 | 1.3564862013  |
| 1.1664424503  | 0.8015890884 | 0.9999537652 | 1.4223160585  |
| 2.7933974408  | 0.6948713406 | 0.9999537652 | 0             |
| -1.0545936768 | 0.8933447844 | 0.9999537652 | 1.0815742139  |
| 1.044334363   | 0.8636652493 | 0.9999537652 | -1.0195416024 |
| 1.3307714562  | 0.5811271186 | 0.9999537652 | -1.1383960977 |
| -1.3401808496 | 0.2027921056 | 0.9999537652 | -1.2541169899 |
| 1.0754769463  | 0.7144143202 | 0.9999537652 | 1.5372642173  |
| 9.8205505243  | 0.3807094839 | 0.9999537652 | 1.9445634487  |
| -1.1218098909 | 0.5510443206 | 0.9999537652 | -1.1723859301 |
| 1.0086997665  | 0.9452979865 | 0.9999537652 | 1.0878462848  |
| -1.168257259  | 0.3873156049 | 0.9999537652 | -1.0272218532 |
| 1.1568397069  | 0.3320958117 | 0.9999537652 | -1.1572145347 |
| -4.815549291  | 0.1726839831 | 0.9999537652 | 12.7909013375 |
| 1.0155688328  | 0.9216307978 | 0.9999537652 | 1.0018024777  |
| -1.0763806691 | 0.7034134232 | 0.9999537652 | 1.2490382867  |
| 1.1113887432  | 0.5961317206 | 0.9999537652 | 1.0301623611  |
| -3.1138217608 | 0.2426045889 | 0.9999537652 | -1.0951294003 |
| -1.2360491754 | 0.3323501145 | 0.9999537652 | 1.235598801   |
| 1.0630168449  | 0.6667778791 | 0.9999537652 | -1.5330591469 |
| -1.3897388782 | 0.1920912332 | 0.9999537652 | -1.1992680067 |
| 1.1473113052  | 0.4128970649 | 0.9999537652 | 1.3837522387  |
| -1.1570244643 | 0.411176445  | 0.9999537652 | -1.0716331651 |
| -1.1685311166 | 0.8553789326 | 0.9999537652 | -1.8145313785 |
| 1.2110976757  | 0.469937239  | 0.9999537652 | 1.4937060641  |
| 1.0596691157  | 0.9162025465 | 0.9999537652 | 1.0527870164  |
| 1.2037990876  | 0.6685036296 | 0.9999537652 | 1.0697707471  |
| 2.193145556   | 0.2487130696 | 0.9999537652 | -1.5933224346 |
| -3.1061883819 | 0.0592126439 | 0.9999537652 | 1.8941069248  |
| -1.0020447937 | 0.9928147199 | 0.9999537652 | -1.1896693447 |
| -1.22580301   | 0.2650886501 | 0.9999537652 | -1.4632960373 |
| 9.8205505243  | 0.3806891435 | 0.9999537652 | 1.3244668493  |
| -1.1289485505 | 0.5936017327 | 0.9999537652 | -1.4951366118 |
| 1.1006672117  | 0.8627356357 | 0.9999537652 | 1.0210230038  |
| 1.4808896861  | 0.3575772774 | 0.9999537652 | -1.2605642381 |
| 0             | 0            | 0            | 2.9985540909  |
| -1.0574320632 | 0.9501087726 | 0.9999537652 | 1.9327676833  |
| -2.0033956173 | 0.4335773407 | 0.9999537652 | -1.2571784464 |
| 0             | 0            | 0            | 2.996475627   |
| -1.6247284074 | 0.4493301657 | 0.9999537652 | 1.2471219592  |
| 1.0497795381  | 0.711217781  | 0.9999537652 | -1.0045056863 |

gene\_expression\_table

|               |              |              |               |
|---------------|--------------|--------------|---------------|
| -1.3534502364 | 0.1832207657 | 0.9999537652 | -1.7148677428 |
| -1.4414944684 | 0.4705294826 | 0.9999537652 | -1.2889369249 |
| -1.0364095484 | 0.7905543985 | 0.9999537652 | -1.1901727524 |
| 2.8246852305  | 0.2266224563 | 0.9999537652 | -1.4682504234 |
| -1.5432214039 | 0.2661914512 | 0.9999537652 | -1.0957832685 |
| -1.0228241935 | 0.9602350711 | 0.9999537652 | -1.1700961977 |
| 15.0880352532 | 0.2955018616 | 0.9999537652 | 1.591370391   |
| 1.2658068701  | 0.6067999709 | 0.9999537652 | -1.0240583004 |
| 1.253220623   | 0.8068932382 | 0.9999537652 | -1.4512547171 |
| -1.5875118025 | 0.7200732777 | 0.9999537652 | 0             |
| -1.4448063006 | 0.2143597854 | 0.9999537652 | -1.1081185463 |
| 2.1143085312  | 0.1114830517 | 0.9999537652 | -1.0479589688 |
| -4.5982967254 | 0.0124434125 | 0.9999537652 | -1.9999284011 |
| 1.0810578719  | 0.678556242  | 0.9999537652 | -1.0880880289 |
| -2.0320138873 | 0.0930608594 | 0.9999537652 | -1.0817072662 |
| 2.6954181122  | 0.2367403917 | 0.9999537652 | 1.1267022694  |
| -2.5861438062 | 0.4675226193 | 0.9999537652 | -1.6597328868 |
| -1.3173381128 | 0.3391587294 | 0.9999537652 | -1.125215004  |
| -1.1447781567 | 0.9152681835 | 0.9999537652 | -1.3811818004 |
| 1.0915963427  | 0.6802608014 | 0.9999537652 | -1.1119809211 |
| 4.0453524072  | 0.2056884022 | 0.9999537652 | 1.1706814519  |
| 1.009463014   | 0.9792213211 | 0.9999537652 | 1.2086552941  |
| 1.3725069946  | 0.0832907945 | 0.9999537652 | 1.2569250149  |
| 1.1264410515  | 0.3561063146 | 0.9999537652 | -1.0213636867 |
| -2.0532004703 | 0.0154317799 | 0.9999537652 | -1.0385191309 |
| -1.7189596186 | 0.1058617469 | 0.9999537652 | 1.0076725025  |
| -1.0976433342 | 0.6342565354 | 0.9999537652 | -1.001185251  |
| -1.8600491373 | 0.2257549986 | 0.9999537652 | -1.1078871114 |
| -1.212605086  | 0.3802659823 | 0.9999537652 | -1.3068264348 |
| 1.0566204755  | 0.7478124161 | 0.9999537652 | -1.0374470196 |
| -1.2429321377 | 0.5164974185 | 0.9999537652 | -1.3708072673 |
| 1.04061447    | 0.8736794877 | 0.9999537652 | 1.1447998     |
| 1.1035001105  | 0.676398495  | 0.9999537652 | 1.0605789544  |
| -1.0719079882 | 0.5798726295 | 0.9999537652 | 1.1259718757  |
| 1.5699684466  | 0.5805343008 | 0.9999537652 | 1.3761875318  |
| 1.0085798906  | 0.9777182187 | 0.9999537652 | -1.2486117439 |
| -1.0407362297 | 0.8441974483 | 0.9999537652 | 1.7779445197  |
| 1.1460770273  | 0.37607337   | 0.9999537652 | 1.4457781222  |
| 1.0581484739  | 0.9223492423 | 0.9999537652 | -1.7727302113 |
| 1.219049643   | 0.6885407647 | 0.9999537652 | 1.2266238482  |
| 1.1033131165  | 0.6314903479 | 0.9999537652 | -1.1885843862 |
| 0             | 0            | 0            | 0             |
| 0             | 0            | 0            | 18.6465640159 |
| 0             | 0            | 0            | 2.996475627   |
| -1.1007046215 | 0.8698864199 | 0.9999537652 | -1.0681555454 |
| -1.2497070439 | 0.6734562488 | 0.9999537652 | 1.7307122593  |
| 3.7966717237  | 0.2366051744 | 0.9999537652 | 1.4955638825  |
| 0             | 0            | 0            | 2.996475627   |
| 3.6149509319  | 0.1140712314 | 0.9999537652 | 1.1390495699  |

gene\_expression\_table

|                |              |              |               |
|----------------|--------------|--------------|---------------|
| 1.3588921917   | 0.7999455877 | 0.9999537652 | 1.9336600182  |
| 23.8818846228  | 0.2167826056 | 0.9999537652 | -1.1425907537 |
| 0              | 0            | 0            | 2.0298295761  |
| -12.9800088947 | 0.1122844628 | 0.9999537652 | -2.6251364651 |
| 2.7933974408   | 0.6948713406 | 0.9999537652 | 1.590997316   |
| -1.0475589205  | 0.7527919323 | 0.9999537652 | 1.3065869813  |
| 15.1008094413  | 0.2915777161 | 0.9999537652 | 1.0016199422  |
| 4.5505976667   | 0.5559322269 | 0.9999537652 | -1.2372152196 |
| 1.3743046583   | 0.2409983979 | 0.9999537652 | -1.304906384  |
| -1.4112989661  | 0.3404876228 | 0.9999537652 | 1.0535612495  |
| -1.0566429381  | 0.9038839394 | 0.9999537652 | -1.1955905928 |
| -1.3357204881  | 0.1896387441 | 0.9999537652 | -1.1278623083 |
| 1.0823298706   | 0.7111396715 | 0.9999537652 | 1.0276174696  |
| 1.1621179655   | 0.5798447438 | 0.9999537652 | 1.3531114857  |
| 2.7933974408   | 0.6948713406 | 0.9999537652 | 0             |
| 1.091399163    | 0.4805486489 | 0.9999537652 | 1.0341130834  |
| 1.295601917    | 0.1753415098 | 0.9999537652 | 1.2500381549  |
| 1.092276421    | 0.8341616745 | 0.9999537652 | 1.1982824004  |
| 0              | 0            | 0            | -1.5938156117 |
| -1.6313316116  | 0.2422214045 | 0.9999537652 | 1.7472081796  |
| 1.5678164322   | 0.1556384442 | 0.9999537652 | -1.0425779404 |
| 1.0605311687   | 0.8895960801 | 0.9999537652 | -1.0490519171 |
| 30.8757261591  | 0.1832943425 | 0.9999537652 | -1.4616280167 |
| -1.2708533643  | 0.09547662   | 0.9999537652 | -1.1013958298 |
| 8.064174035    | 0.4238704373 | 0.9999537652 | 1.068847327   |
| -4.106901512   | 0.1170163158 | 0.9999537652 | -1.9284645673 |
| 1.3279637572   | 0.2942346659 | 0.9999537652 | 1.0681631963  |
| -1.5388920234  | 0.3158148164 | 0.9999537652 | -1.2404363517 |
| -1.038726441   | 0.844375877  | 0.9999537652 | 1.0094346068  |
| 1.0240877952   | 0.8961172321 | 0.9999537652 | 1.1803447211  |
| 1.3457288891   | 0.5101850067 | 0.9999537652 | 1.1600311244  |
| 1.2769191345   | 0.238090548  | 0.9999537652 | 1.1939839096  |
| -1.061093121   | 0.9294961056 | 0.9999537652 | -1.7783606855 |
| -1.0808186081  | 0.6197637795 | 0.9999537652 | 1.0017925203  |
| 1.0391365057   | 0.8834706393 | 0.9999537652 | 1.1891245151  |
| 3.8642518105   | 0.1099984244 | 0.9999537652 | -1.1570571525 |
| -1.0986633164  | 0.7169141894 | 0.9999537652 | 1.3295985143  |
| 1.0145970138   | 0.9398449132 | 0.9999537652 | 1.4191004167  |
| 1.447287437    | 0.1674448088 | 0.9999537652 | 1.3007438884  |
| -1.0461188494  | 0.7576998821 | 0.9999537652 | -1.2173661349 |
| -1.0308384324  | 0.9014046532 | 0.9999537652 | -1.2872956686 |
| 1.2052118164   | 0.34705998   | 0.9999537652 | -1.0732024144 |
| 1.2013528007   | 0.7147127837 | 0.9999537652 | -1.218964211  |
| -1.0220191719  | 0.8809019342 | 0.9999537652 | 1.0936175418  |
| 1.1706663721   | 0.822718875  | 0.9999537652 | 1.1600958952  |
| -3.6992054516  | 0.044078034  | 0.9999537652 | -1.3139186076 |
| 1.3960272491   | 0.6396304397 | 0.9999537652 | 1.0849152546  |
| -1.1678729089  | 0.2035507808 | 0.9999537652 | -1.2169606565 |
| -1.004428369   | 0.9890608458 | 0.9999537652 | 1.1243694001  |

gene\_expression\_table

|               |              |              |               |
|---------------|--------------|--------------|---------------|
| 11.5864583426 | 0.3448419367 | 0.9999537652 | 1.6497435219  |
| 0             | 0            | 0            | 2.9988886918  |
| 1.1106251637  | 0.577611259  | 0.9999537652 | 1.0590561925  |
| 1.2841195985  | 0.183965972  | 0.9999537652 | 1.6647317967  |
| -1.8333841838 | 0.001901     | 0.9999537652 | -1.2619277852 |
| 8.064174035   | 0.4238691023 | 0.9999537652 | -2.1280158161 |
| -1.076467528  | 0.7579663242 | 0.9999537652 | -1.0346836915 |
| -1.0018529039 | 0.9940583616 | 0.9999537652 | 1.1077664645  |
| 3.5489539037  | 0.2511918332 | 0.9999537652 | 1.2598894344  |
| 1.0387687032  | 0.7650831154 | 0.9999537652 | 1.3689652967  |
| 0             | 0            | 0            | 0             |
| 3.5960636654  | 0.1474944966 | 0.9999537652 | -1.2953919252 |
| 1.1552997158  | 0.4348268248 | 0.9999537652 | 1.1014453572  |
| 2.7933974408  | 0.6948713406 | 0.9999537652 | 22.5383525416 |
| 1.0737250852  | 0.8693777771 | 0.9999537652 | -1.2860626306 |
| -1.4077513013 | 0.5501177934 | 0.9999537652 | 1.4508492545  |
| -1.1848011449 | 0.3829665343 | 0.9999537652 | 1.5054409163  |
| -1.0105176837 | 0.9686074788 | 0.9999537652 | 1.1383936692  |
| -1.1137354681 | 0.6002069911 | 0.9999537652 | -1.2740358222 |
| 1.048251778   | 0.7563389677 | 0.9999537652 | -1.0673659507 |
| 1.4356941257  | 0.2367973614 | 0.9999537652 | 1.0465092838  |
| -1.006733681  | 0.9782568669 | 0.9999537652 | 1.128710771   |
| -1.5875118025 | 0.7199841812 | 0.9999537652 | 1.2408817092  |
| -1.0403101673 | 0.8408340842 | 0.9999537652 | -1.0297007448 |
| 1.1614847191  | 0.3197575454 | 0.9999537652 | 1.4621666189  |
| 1.0718891308  | 0.7408486934 | 0.9999537652 | 1.0121009571  |
| -1.0589827385 | 0.7852811984 | 0.9999537652 | 1.0355300217  |
| -2.6323048902 | 0.2848454558 | 0.9999537652 | 16.6806485101 |
| 0             | 0            | 0            | 2.9988886918  |
| -1.7230380909 | 0.4807061583 | 0.9999537652 | -1.0084773122 |
| 1.1256551335  | 0.8550518516 | 0.9999537652 | -1.1318456363 |
| -1.25597146   | 0.7318578767 | 0.9999537652 | -2.0695691574 |
| 1.0339887618  | 0.9113568278 | 0.9999537652 | -1.1720042837 |
| 1.1220972931  | 0.9044459033 | 0.9999537652 | -1.4815080994 |
| 1.7063326825  | 0.2289866938 | 0.9999537652 | -1.2434072884 |
| 1.2384773505  | 0.3311233539 | 0.9999537652 | -1.1141726526 |
| -1.7116772754 | 0.2997934832 | 0.9999537652 | -1.3907876095 |
| 0             | 0            | 0            | 6.908559683   |
| -1.1168538378 | 0.6458542468 | 0.9999537652 | 1.1630421116  |
| 1.0958696246  | 0.5045933177 | 0.9999537652 | -1.077447239  |
| -1.1488518303 | 0.6360611566 | 0.9999537652 | 1.4926264968  |
| -1.3916562724 | 0.6735294436 | 0.9999537652 | -1.2614130545 |
| -1.6939279844 | 0.3358654739 | 0.9999537652 | -1.3201193671 |
| -1.6288497936 | 0.3018033233 | 0.9999537652 | 1.1704511594  |
| 0             | 0            | 0            | 0             |
| -1.1108685222 | 0.7869336239 | 0.9999537652 | -1.7525097836 |
| 1.1171887656  | 0.5243188342 | 0.9999537652 | 1.0577120806  |
| 2.7933974408  | 0.6948713406 | 0.9999537652 | -2.1742127776 |
| -1.0949580351 | 0.7514253296 | 0.9999537652 | -1.0930242284 |

gene\_expression\_table

|               |              |              |               |
|---------------|--------------|--------------|---------------|
| -1.5986721877 | 0.2447369266 | 0.9999537652 | 1.3741257856  |
| 1.1598292034  | 0.7461209495 | 0.9999537652 | -1.0312306261 |
| 1.1798769658  | 0.5765123279 | 0.9999537652 | 1.2333945589  |
| 0             | 0            | 0            | 1.2400291296  |
| 2.8186104398  | 0.3599094617 | 0.9999537652 | -1.4681855619 |
| 1.2999552563  | 0.2689069769 | 0.9999537652 | 1.2473603292  |
| -1.5268522869 | 0.3929657622 | 0.9999537652 | 1.1758749769  |
| 4.6478057571  | 0.0671942008 | 0.9999537652 | -1.1850833597 |
| 2.0696758576  | 0.1134780009 | 0.9999537652 | 1.3426877329  |
| -1.5250111891 | 0.4794794888 | 0.9999537652 | 1.2031505617  |
| 1.4410568594  | 0.4982444019 | 0.9999537652 | -1.2524825119 |
| 1.5130423174  | 0.6605360433 | 0.9999537652 | 1.5332372248  |
| 18.9318466825 | 0.2781659383 | 0.9999537652 | 1.3519637633  |
| -1.9819824477 | 0.0276984416 | 0.9999537652 | 1.2745666404  |
| -2.5350664449 | 0.2508352746 | 0.9999537652 | -1.4082032739 |
| -1.2104022412 | 0.633281577  | 0.9999537652 | 1.0260595922  |
| 1.8339360555  | 0.4052989868 | 0.9999537652 | -1.3066863121 |
| 1.0308307773  | 0.8690367741 | 0.9999537652 | 1.12602269    |
| -1.4783387508 | 0.1034739872 | 0.9999537652 | 1.0171727476  |
| 1.029151863   | 0.8060412711 | 0.9999537652 | 1.1374080322  |
| -1.0854731597 | 0.6068533113 | 0.9999537652 | 1.0443905908  |
| 1.1220094372  | 0.5633418191 | 0.9999537652 | 1.0281111761  |
| 1.1023960321  | 0.6689542414 | 0.9999537652 | 1.0469897944  |
| 1.0063516441  | 0.9778275755 | 0.9999537652 | -1.0594502797 |
| -1.7350961946 | 0.173713048  | 0.9999537652 | -1.3416256734 |
| 1.0877650195  | 0.6873262057 | 0.9999537652 | 1.0930709454  |
| -1.1693119757 | 0.8274881304 | 0.9999537652 | 5.1102118714  |
| -1.1030763619 | 0.4414850722 | 0.9999537652 | 1.1376795205  |
| -1.0304384993 | 0.8969704243 | 0.9999537652 | 1.4307888251  |
| 1.0412174444  | 0.7741667929 | 0.9999537652 | 1.0349889941  |
| 2.7933974408  | 0.6948713406 | 0.9999537652 | 1.6084809026  |
| 1.344859198   | 0.3329254107 | 0.9999537652 | 1.0947777858  |
| 1.4739980805  | 0.0914015398 | 0.9999537652 | 1.3704533304  |
| 1.2986471813  | 0.4244327623 | 0.9999537652 | 1.183499942   |
| 1.0635879733  | 0.7428145126 | 0.9999537652 | -1.2658071704 |
| -1.1111315061 | 0.6326504051 | 0.9999537652 | 1.2519081987  |
| -1.0942315875 | 0.8474463318 | 0.9999537652 | 1.0173729967  |
| 2.7933974408  | 0.6948713406 | 0.9999537652 | 0             |
| 1.8455489546  | 0.5921514806 | 0.9999537652 | -2.1287636007 |
| -1.0796202809 | 0.714464129  | 0.9999537652 | 1.3863297551  |
| -1.0418464933 | 0.9422936924 | 0.9999537652 | 1.1533206359  |
| 0             | 0            | 0            | 6.908559683   |
| -1.1060987006 | 0.6297382056 | 0.9999537652 | 1.0313370881  |
| 2.0381854033  | 0.4031762039 | 0.9999537652 | 1.2770715033  |
| 1.0578565016  | 0.694881995  | 0.9999537652 | 1.2905866165  |
| 1.1641828182  | 0.345711248  | 0.9999537652 | 1.2492547373  |
| 1.0999313655  | 0.8886048549 | 0.9999537652 | 1.1092933382  |
| 2.7933974408  | 0.6948713406 | 0.9999537652 | 1.4153476291  |
| -1.270073807  | 0.1682105864 | 0.9999537652 | 1.086495382   |

gene\_expression\_table

|               |              |              |               |
|---------------|--------------|--------------|---------------|
| -1.3993360498 | 0.414411543  | 0.9999537652 | -1.0181367411 |
| -1.0821537024 | 0.7728961148 | 0.9999537652 | -1.2731019667 |
| 2.7933974408  | 0.6948713406 | 0.9999537652 | 2.996475627   |
| -1.1053878178 | 0.6114781005 | 0.9999537652 | 1.4257087606  |
| 0             | 0            | 0            | 9.7116702472  |
| 1.0706404744  | 0.6042819245 | 0.9999537652 | 1.4373529563  |
| -1.4184453654 | 0.589065749  | 0.9999537652 | -1.1918339622 |
| -1.0951850746 | 0.6701207609 | 0.9999537652 | -1.0761290116 |
| -1.1645364823 | 0.4456261933 | 0.9999537652 | 1.2566704155  |
| 1.1190584955  | 0.7579520687 | 0.9999537652 | 1.0282292718  |
| -1.0708660819 | 0.7392447224 | 0.9999537652 | 1.2156986192  |
| 0             | 0            | 0            | 8.8639046058  |
| 1.9639779619  | 0.052618044  | 0.9999537652 | -1.3268664848 |
| -1.1455442151 | 0.370616596  | 0.9999537652 | 1.0370579544  |
| 2.7933974408  | 0.6948713406 | 0.9999537652 | -1.1248877899 |
| -1.0465958371 | 0.7614841456 | 0.9999537652 | 1.5775453375  |
| 1.5107816438  | 0.5277967288 | 0.9999537652 | -1.6188562449 |
| -1.0941791399 | 0.8326624322 | 0.9999537652 | 1.153202049   |
| 0             | 0            | 0            | 2.9985540909  |
| -1.2551248324 | 0.7718555006 | 0.9999537652 | 3.5599780551  |
| -1.0888109777 | 0.64212423   | 0.9999537652 | 1.1411285374  |
| 2.7933974408  | 0.6948713406 | 0.9999537652 | -5.3589986948 |
| -1.2356160979 | 0.5925386194 | 0.9999537652 | 1.3608233581  |
| 40.1750348981 | 0.1540444008 | 0.9999537652 | -1.043334644  |
| 1.1616785196  | 0.3334451874 | 0.9999537652 | 1.4277516352  |
| 1.5850121741  | 0.614255278  | 0.9999537652 | -1.103904595  |
| 1.449543962   | 0.2689705894 | 0.9999537652 | 1.3348814661  |
| -1.8291042549 | 0.3288463316 | 0.9999537652 | 1.7973499494  |
| 1.1512427029  | 0.402377106  | 0.9999537652 | 1.2196166457  |
| -1.0404439214 | 0.8601749669 | 0.9999537652 | 1.1688052862  |
| -1.0785200063 | 0.7616358561 | 0.9999537652 | 1.1177868022  |
| 1.0129847243  | 0.972796173  | 0.9999537652 | -1.7278744164 |
| 2.8258092867  | 0.0936218368 | 0.9999537652 | -1.0961030106 |
| 8.064174035   | 0.4238677672 | 0.9999537652 | 9.7116702472  |
| 0             | 0            | 0            | 2.996475627   |
| 1.1606463124  | 0.7515893335 | 0.9999537652 | 1.296751669   |
| 1.1781241293  | 0.6326897435 | 0.9999537652 | 1.3359680858  |
| 1.4584356027  | 0.0670056386 | 0.9999537652 | 1.1707478655  |
| -1.1611368092 | 0.634725221  | 0.9999537652 | 1.4042658999  |
| -1.2481294663 | 0.377436053  | 0.9999537652 | 1.1439442108  |
| 0             | 0            | 0            | -2.5811097865 |
| 2.5553461028  | 0.2410261947 | 0.9999537652 | -1.012946855  |
| -1.3909491861 | 0.3568755199 | 0.9999537652 | -1.064948932  |
| -1.1006122314 | 0.9019770859 | 0.9999537652 | -1.5460290334 |
| 1.6550710735  | 0.1780854368 | 0.9999537652 | 1.3611868973  |
| -1.0857729511 | 0.5335592033 | 0.9999537652 | 1.0324929133  |
| 1.1158299481  | 0.929746046  | 0.9999537652 | 9.7116702472  |
| -1.6674095463 | 0.621582587  | 0.9999537652 | -3.2376885507 |
| -1.3059708017 | 0.4653832042 | 0.9999537652 | -1.2883867929 |

gene\_expression\_table

|               |              |              |               |
|---------------|--------------|--------------|---------------|
| 3.1603610665  | 0.1649230892 | 0.9999537652 | -1.1286538667 |
| 4.5505976667  | 0.5559322269 | 0.9999537652 | 0             |
| 0             | 0            | 0            | -2.2835167025 |
| -1.1482113318 | 0.4245226284 | 0.9999537652 | 1.1902838709  |
| 1.7745951127  | 0.5409014838 | 0.9999537652 | 1.8687602882  |
| 1.0833861825  | 0.5729949902 | 0.9999537652 | 1.2357168875  |
| 1.4157529189  | 0.286445013  | 0.9999537652 | -1.2984561635 |
| 20.3702769952 | 0.2388209961 | 0.9999537652 | -1.1441751338 |
| 8.064174035   | 0.423866432  | 0.9999537652 | 2.7698355275  |
| 0             | 0            | 0            | 1.3590242562  |
| 1.5455319377  | 0.1539990451 | 0.9999537652 | 1.3426714575  |
| 1.014581964   | 0.9760622325 | 0.9999537652 | -1.3548721631 |
| -1.4167537021 | 0.2264839923 | 0.9999537652 | -1.2412346122 |
| 2.7933974408  | 0.6948713406 | 0.9999537652 | 0             |
| 1.147612444   | 0.5407701274 | 0.9999537652 | -1.2217589246 |
| -1.0820588842 | 0.7373639026 | 0.9999537652 | 1.2789637166  |
| -1.2829786572 | 0.1133567415 | 0.9999537652 | 1.0388610836  |
| 1.2764410314  | 0.2924118055 | 0.9999537652 | 1.028952031   |
| 1.1532607844  | 0.4237974371 | 0.9999537652 | -1.0267349849 |
| -1.4525887343 | 0.6066334026 | 0.9999537652 | 1.6794517025  |
| -1.0940903919 | 0.8717737776 | 0.9999537652 | 1.1612416843  |
| -1.2010406794 | 0.3369651085 | 0.9999537652 | 1.0722677181  |
| -1.0953113997 | 0.5711100319 | 0.9999537652 | -1.1010527962 |
| -1.0411448639 | 0.9135167724 | 0.9999537652 | 1.0384366776  |
| 1.1111013903  | 0.5218915104 | 0.9999537652 | 1.1207263412  |
| 2.3306483975  | 0.4663384686 | 0.9999537652 | -1.1609385688 |
| 1.0893367869  | 0.8043651126 | 0.9999537652 | -1.1202346993 |
| -1.0158906208 | 0.9314642622 | 0.9999537652 | 1.0009789548  |
| 2.7933974408  | 0.6948713406 | 0.9999537652 | 0             |
| 1.4071312909  | 0.1778004688 | 0.9999537652 | 1.3520653248  |
| -1.1754324206 | 0.4895897462 | 0.9999537652 | -1.3254583465 |
| 1.1636085994  | 0.4726357022 | 0.9999537652 | -1.1405278035 |
| 0             | 0            | 0            | 8.8639046058  |
| -1.0708192035 | 0.7824938013 | 0.9999537652 | 1.1936270727  |
| 1.1482020948  | 0.7418551716 | 0.9999537652 | -1.0893265677 |
| 1.6801292393  | 0.3282897238 | 0.9999537652 | -1.1137192611 |
| -1.5875118025 | 0.7198951394 | 0.9999537652 | -1.7599945182 |
| -1.1119337941 | 0.6866871992 | 0.9999537652 | -1.1963869325 |
| -1.0901170013 | 0.6643147754 | 0.9999537652 | 1.0783336115  |
| 3.8622037496  | 0.6195567277 | 0.9999537652 | 0             |
| -1.2523216303 | 0.2408153777 | 0.9999537652 | -1.1756772207 |
| -1.2151457163 | 0.6220485729 | 0.9999537652 | 1.2626933414  |
| 1.2344006896  | 0.1573453413 | 0.9999537652 | -1.1062185136 |
| -1.0126987429 | 0.9216957817 | 0.9999537652 | -1.0140335333 |
| -3.1189360224 | 0.2743918909 | 0.9999537652 | 1.9436832203  |
| -1.4219873594 | 0.2320822619 | 0.9999537652 | 1.0757511929  |
| 2.4587508136  | 0.2702720672 | 0.9999537652 | 1.3541249348  |
| -6.9764533263 | 0.2592694791 | 0.9999537652 | -1.4669967683 |
| 1.0207027716  | 0.8695666741 | 0.9999537652 | 1.2182628762  |



gene\_expression\_table

|               |              |              |               |
|---------------|--------------|--------------|---------------|
| -1.1974527407 | 0.257502758  | 0.9999537652 | -1.0550211508 |
| -1.6046546692 | 0.260603418  | 0.9999537652 | -1.2231446266 |
| -1.0881591482 | 0.7915221762 | 0.9999537652 | -1.2146980268 |
| 1.0089010158  | 0.9591236466 | 0.9999537652 | -1.0730989171 |
| 1.156844776   | 0.4347248191 | 0.9999537652 | 1.317456715   |
| 1.0585140261  | 0.6394322503 | 0.9999537652 | -1.132134325  |
| -1.0605621337 | 0.8252935405 | 0.9999537652 | -1.0463899295 |
| 1.3229080008  | 0.1988401024 | 0.9999537652 | -1.1463205742 |
| -1.2167526382 | 0.3409430204 | 0.9999537652 | -1.0698093515 |
| 1.1270659728  | 0.5478299287 | 0.9999537652 | -1.0889557914 |
| -1.3928314061 | 0.1648584757 | 0.9999537652 | -1.3150453135 |
| 1.3016944098  | 0.4900993804 | 0.9999537652 | -1.0036472585 |
| 2.6411140541  | 0.2007194274 | 0.9999537652 | -1.0087487564 |
| 2.742474689   | 0.3003314193 | 0.9999537652 | -1.039502375  |
| -1.5347274833 | 0.5806692429 | 0.9999537652 | -1.7447180438 |
| 1.0606078301  | 0.6295335762 | 0.9999537652 | 1.1318091391  |
| -1.4642045296 | 0.4189758615 | 0.9999537652 | -1.3350390061 |
| 1.3711214614  | 0.0726913575 | 0.9999537652 | 1.0357712178  |
| 1.0822804758  | 0.7437741173 | 0.9999537652 | -1.1894510845 |
| 1.0158628881  | 0.9716510127 | 0.9999537652 | -1.2902916507 |
| 0             | 0            | 0            | 2.996475627   |
| 1.0185610549  | 0.952371563  | 0.9999537652 | 1.0440513158  |
| 1.9248811335  | 0.3952618035 | 0.9999537652 | -1.1166512338 |
| 1.5910953944  | 0.2540128413 | 0.9999537652 | -1.0754604452 |
| 1.1110392875  | 0.6047586363 | 0.9999537652 | -1.5791252518 |
| -1.0374819907 | 0.8524690098 | 0.9999537652 | -1.0081027032 |
| -2.6433596742 | 0.1901298008 | 0.9999537652 | -1.0722259357 |
| -1.2251734364 | 0.5974753695 | 0.9999537652 | 1.3124962221  |
| 1.9990747151  | 0.074391473  | 0.9999537652 | -1.5719257782 |
| 2.1100562021  | 0.31657602   | 0.9999537652 | -1.7745242306 |
| -1.371793711  | 0.2890631759 | 0.9999537652 | -1.5792661484 |
| 1.4571151306  | 0.3543625551 | 0.9999537652 | 1.0882451886  |
| -1.435761442  | 0.3168623884 | 0.9999537652 | 1.0579309345  |
| -1.0514662236 | 0.8406139757 | 0.9999537652 | -1.4865846104 |
| -1.1652153337 | 0.5891544167 | 0.9999537652 | -1.1542236544 |
| -1.2896983043 | 0.3641559989 | 0.9999537652 | 1.0663827807  |
| 1.0598994939  | 0.8207454928 | 0.9999537652 | 1.1549746327  |
| 2.619441909   | 0.133660075  | 0.9999537652 | -1.522993704  |
| 1.6467991421  | 0.0519032617 | 0.9999537652 | -1.6107934925 |
| -1.0761052163 | 0.8648282534 | 0.9999537652 | 1.2490906314  |
| -1.2008401404 | 0.4275212993 | 0.9999537652 | 1.1972164375  |
| 1.2559979691  | 0.3943660374 | 0.9999537652 | 1.0139152933  |
| -1.1165524262 | 0.7681066337 | 0.9999537652 | 1.1168533891  |
| -1.1271921681 | 0.514220206  | 0.9999537652 | -1.6047619248 |
| -1.0565061249 | 0.8673474745 | 0.9999537652 | -1.1097224503 |
| -1.1069002784 | 0.7019939324 | 0.9999537652 | 1.1125646572  |
| -1.1103196421 | 0.5089352844 | 0.9999537652 | -1.1768202822 |
| -1.3031004414 | 0.3674264822 | 0.9999537652 | -1.2454695162 |
| 1.1284049452  | 0.5012112146 | 0.9999537652 | 1.112108123   |

gene\_expression\_table

|               |              |              |               |
|---------------|--------------|--------------|---------------|
| -1.0887279855 | 0.4501810693 | 0.9999537652 | -1.059544632  |
| -1.1253818319 | 0.7781121163 | 0.9999537652 | -1.7571611943 |
| 1.1022331828  | 0.7156102858 | 0.9999537652 | 1.3137723608  |
| 1.2862555804  | 0.5083174217 | 0.9999537652 | 1.1236804887  |
| -1.2641819991 | 0.4794356482 | 0.9999537652 | 1.1259524955  |
| 1.0152567708  | 0.9379784134 | 0.9999537652 | -1.1091810613 |
| 1.7065721245  | 0.2107842254 | 0.9999537652 | 1.014412612   |
| 2.1626092017  | 0.1210414063 | 0.9999537652 | -1.4863113326 |
| 1.1066835057  | 0.70311146   | 0.9999537652 | -1.5253353008 |
| 0             | 0            | 0            | 2.996475627   |
| 1.0040836887  | 0.993035111  | 0.9999537652 | 1.3289914258  |
| 1.4506359903  | 0.0564139672 | 0.9999537652 | 1.0269653906  |
| 1.788517704   | 0.1948077929 | 0.9999537652 | 1.1748799717  |
| 1.425492918   | 0.2660452955 | 0.9999537652 | -1.3747487991 |
| 1.8890496501  | 0.3349073956 | 0.9999537652 | -1.5939286483 |
| -2.174440844  | 0.0636193077 | 0.9999537652 | 1.0999253806  |
| -1.1929460989 | 0.4619645944 | 0.9999537652 | -1.1398616187 |
| 1.3043818864  | 0.2632416019 | 0.9999537652 | 1.2395197325  |
| -1.5995099286 | 0.5378398129 | 0.9999537652 | 2.111849768   |
| 1.0230076711  | 0.9100952272 | 0.9999537652 | 1.0065284046  |
| 2.7933974408  | 0.6948713406 | 0.9999537652 | -1.1250196696 |
| 57.2359413924 | 0.1117674303 | 0.9999537652 | 1.1248329925  |
| -1.3081518616 | 0.3275169635 | 0.9999537652 | -1.1499642333 |
| 1.2329064426  | 0.2620198184 | 0.9999537652 | 1.0104511416  |
| -1.1877134683 | 0.207395582  | 0.9999537652 | -1.0753494029 |
| 1.2158337748  | 0.4219218799 | 0.9999537652 | -1.2006901719 |
| -1.1087164534 | 0.4225259939 | 0.9999537652 | -1.095960283  |
| 1.1585745804  | 0.5500519141 | 0.9999537652 | 1.0829819728  |
| 1.2037205439  | 0.5771569664 | 0.9999537652 | 1.0823152594  |
| 2.7933974408  | 0.6948713406 | 0.9999537652 | -2.7895993146 |
| 1.3028917047  | 0.4170923226 | 0.9999537652 | 1.1420012663  |
| 1.2965726617  | 0.198338116  | 0.9999537652 | 1.7389445271  |
| -3.1203910316 | 0.2340291776 | 0.9999537652 | 1.1343531566  |
| -1.3295600488 | 0.1644345473 | 0.9999537652 | 1.021463623   |
| -1.0451567036 | 0.8125759175 | 0.9999537652 | -1.003083654  |
| 8.064174035   | 0.4238650967 | 0.9999537652 | 1.9445739043  |
| 1.2654175061  | 0.5989933662 | 0.9999537652 | -1.2167237019 |
| 2.7933974408  | 0.6948713406 | 0.9999537652 | 0             |
| -1.5334315236 | 0.1001742286 | 0.9999537652 | -1.0387746769 |
| 1.1627056682  | 0.5680227559 | 0.9999537652 | -1.510363508  |
| -1.2354566191 | 0.4171502442 | 0.9999537652 | -1.1854456149 |
| 3.8622037496  | 0.6195260146 | 0.9999537652 | -11.020251207 |
| 2.056870118   | 0.1288674367 | 0.9999537652 | 1.054088584   |
| 3.8622037496  | 0.6194952821 | 0.9999537652 | 2.996475627   |
| 1.0829272869  | 0.6775905493 | 0.9999537652 | -1.0442754885 |
| -1.2360773048 | 0.3711161069 | 0.9999537652 | -1.1148506659 |
| -1.4699883509 | 0.1885375407 | 0.9999537652 | 1.0014873875  |
| -1.134616971  | 0.6213710471 | 0.9999537652 | -1.140872062  |
| -1.0002388629 | 0.9991329261 | 0.9999537652 | 1.0443058412  |

gene\_expression\_table

|               |              |              |               |
|---------------|--------------|--------------|---------------|
| 9.8205505243  | 0.3806688837 | 0.9999537652 | 1.2594537582  |
| -1.0749307647 | 0.7323675029 | 0.9999537652 | 1.1081541973  |
| -1.0254490023 | 0.8837746619 | 0.9999537652 | 1.0826092289  |
| -2.1307903719 | 0.4720123032 | 0.9999537652 | 1.4383632232  |
| 1.0745938652  | 0.9014687322 | 0.9999537652 | 1.6861441184  |
| 1.6019886574  | 0.2060696122 | 0.9999537652 | 1.0031742143  |
| 1.0676282763  | 0.7269570757 | 0.9999537652 | -1.2976395421 |
| 1.1220972931  | 0.9043779706 | 0.9999537652 | -2.571072022  |
| 1.2219253713  | 0.1750134259 | 0.9999537652 | 1.0899821364  |
| -1.4000115989 | 0.6273829366 | 0.9999537652 | -1.2516975794 |
| -1.0511078004 | 0.7830639643 | 0.9999537652 | 1.0281125392  |
| 1.1538095722  | 0.6857883874 | 0.9999537652 | -1.7411139195 |
| 1.0803905107  | 0.4817877791 | 0.9999537652 | 1.0145691859  |
| 1.7016447663  | 0.1432214776 | 0.9999537652 | 1.1615051618  |
| 1.0282705766  | 0.9421894502 | 0.9999537652 | 1.0663266754  |
| -1.0212229596 | 0.8763574417 | 0.9999537652 | -1.1896778076 |
| 18.6298281873 | 0.2553876104 | 0.9999537652 | 1.6121286294  |
| -1.0851943957 | 0.6887850228 | 0.9999537652 | -1.1639282742 |
| -1.1457555741 | 0.9107288121 | 0.9999537652 | -2.1244020028 |
| 1.1292505485  | 0.8261096965 | 0.9999537652 | -1.7259376803 |
| -1.6665793788 | 0.615338868  | 0.9999537652 | 3.3805014133  |
| 0             | 0            | 0            | 2.996475627   |
| 0             | 0            | 0            | 9.7116702472  |
| -1.0118967847 | 0.9656726138 | 0.9999537652 | -1.2001396971 |
| -1.0212400919 | 0.9088694736 | 0.9999537652 | -1.4505596806 |
| -1.0492606289 | 0.7631740095 | 0.9999537652 | -1.1369679014 |
| -1.1289722653 | 0.3904933134 | 0.9999537652 | -1.2431883019 |
| 2.7933974408  | 0.6948713406 | 0.9999537652 | -4.9096724685 |
| 1.039301144   | 0.9050882099 | 0.9999537652 | -1.4530997693 |
| 2.0346255682  | 0.4403503446 | 0.9999537652 | 1.7773414401  |
| -1.3632719965 | 0.5614381347 | 0.9999537652 | 1.4719994882  |
| -1.3162005453 | 0.0676402926 | 0.9999537652 | -1.104455951  |
| 0             | 0            | 0            | 2.996475627   |
| 4.5505976667  | 0.5559322269 | 0.9999537652 | 0             |
| -1.3410082413 | 0.2349450075 | 0.9999537652 | 1.0295440894  |
| 1.2107601343  | 0.2219062987 | 0.9999537652 | 1.0890781806  |
| 1.0676107444  | 0.7626809375 | 0.9999537652 | -1.2174384006 |
| -1.163602196  | 0.3108059748 | 0.9999537652 | -2.0464238628 |
| -3.0158565881 | 0.0779952364 | 0.9999537652 | -2.1027358968 |
| 6.3075231393  | 0.4859694426 | 0.9999537652 | 0             |
| 1.0853991643  | 0.8004228275 | 0.9999537652 | 1.2472184753  |
| 0             | 0            | 0            | 6.908559683   |
| 0             | 0            | 0            | 2.996475627   |
| 1.2694197581  | 0.395852337  | 0.9999537652 | 1.1341074152  |
| -1.538941015  | 0.4082459815 | 0.9999537652 | -1.4374227175 |
| 1.1176897722  | 0.7958229846 | 0.9999537652 | -1.5010016565 |
| 1.1432003108  | 0.5789067491 | 0.9999537652 | -1.654661594  |
| -1.0965268463 | 0.6409837436 | 0.9999537652 | -1.1986188038 |
| -1.3188875    | 0.4132715104 | 0.9999537652 | -1.5751482835 |

gene\_expression\_table

|               |              |              |               |
|---------------|--------------|--------------|---------------|
| 1.0944487429  | 0.6634349848 | 0.9999537652 | -1.3034694167 |
| -1.2563315302 | 0.2230536694 | 0.9999537652 | 1.3754908429  |
| 1.8701557858  | 0.2822176734 | 0.9999537652 | 1.0824224094  |
| -1.1890534012 | 0.3901858811 | 0.9999537652 | 1.0024089826  |
| 1.3801180903  | 0.155505533  | 0.9999537652 | 1.2888818387  |
| 2.7933974408  | 0.6948713406 | 0.9999537652 | 3.8529287492  |
| 0             | 0            | 0            | -1.3028722362 |
| 1.3491087878  | 0.1331782059 | 0.9999537652 | -1.1292991519 |
| 1.6163318864  | 0.369388035  | 0.9999537652 | 1.6232125136  |
| -1.139089678  | 0.3955054731 | 0.9999537652 | -1.0605908685 |
| -1.3512997623 | 0.1668158066 | 0.9999537652 | -1.305422755  |
| 2.8197560167  | 0.3544979278 | 0.9999537652 | -2.2620268691 |
| 1.0055167866  | 0.9726019633 | 0.9999537652 | 1.0399116487  |
| -1.5838701797 | 0.1344105548 | 0.9999537652 | -1.2955667527 |
| -1.0963620756 | 0.6582927364 | 0.9999537652 | -1.091742223  |
| 1.3820692738  | 0.7413995037 | 0.9999537652 | -1.3935735413 |
| -1.4405954658 | 0.2710961575 | 0.9999537652 | -1.7352578558 |
| 2.7933974408  | 0.6948713406 | 0.9999537652 | 0             |
| 1.3867633649  | 0.729366044  | 0.9999537652 | 1.1929411067  |
| 2.0885615936  | 0.5185910451 | 0.9999537652 | -1.2016883181 |
| -2.2048955514 | 0.009441     | 0.9999537652 | 1.3858998812  |
| -1.2513614036 | 0.4594351232 | 0.9999537652 | -1.032460741  |
| 0             | 0            | 0            | 22.5383525416 |
| 1.3024294952  | 0.0759416517 | 0.9999537652 | 1.1561718903  |
| -1.215331919  | 0.4542432368 | 0.9999537652 | -1.2181494227 |
| -1.0050652613 | 0.9834027609 | 0.9999537652 | -1.309677357  |
| 1.1800813261  | 0.3120312452 | 0.9999537652 | 1.1716308631  |
| 2.7957660672  | 0.7054667628 | 0.9999537652 | 1.0004741777  |
| 2.7933974408  | 0.6948713406 | 0.9999537652 | 8.8639046058  |
| 1.1164747255  | 0.4603069422 | 0.9999537652 | -1.3054881918 |
| -1.5693576097 | 0.0886871753 | 0.9999537652 | 1.2408328152  |
| 1.1626253702  | 0.5401018226 | 0.9999537652 | -1.0416062523 |
| -1.0428136733 | 0.9314271245 | 0.9999537652 | 1.1917166734  |
| -2.4387448463 | 0.3485651706 | 0.9999537652 | -9.4780054324 |
| 4.5544554512  | 0.5691373742 | 0.9999537652 | 4.7454169068  |
| 0             | 0            | 0            | 6.908559683   |
| -1.0846416503 | 0.5092354065 | 0.9999537652 | -1.372762448  |
| 8.064174035   | 0.4238637612 | 0.9999537652 | -1.2237070081 |
| -1.2154453731 | 0.1819855523 | 0.9999537652 | -1.3384500142 |
| 1.1058106324  | 0.639797151  | 0.9999537652 | 1.1608341375  |
| -1.2002678735 | 0.5020519077 | 0.9999537652 | -1.5290373432 |
| -1.2954797492 | 0.4721370518 | 0.9999537652 | -1.3377156923 |
| 3.805366741   | 0.0556202137 | 0.9999537652 | 1.0959591624  |
| -1.0688853093 | 0.8346067582 | 0.9999537652 | -1.1842238291 |
| 2.2953539498  | 0.3493867201 | 0.9999537652 | -1.6167032484 |
| -1.1615123054 | 0.3507972791 | 0.9999537652 | 1.0846668876  |
| 1.3598134657  | 0.1325174384 | 0.9999537652 | 1.1251755294  |
| 1.1287258111  | 0.6271472623 | 0.9999537652 | 1.2080475268  |
| -1.4726528313 | 0.1813130955 | 0.9999537652 | -1.3478140877 |

gene\_expression\_table

|               |              |              |               |
|---------------|--------------|--------------|---------------|
| -1.245744448  | 0.2994658374 | 0.9999537652 | -1.1313370293 |
| -1.1624006362 | 0.6690673847 | 0.9999537652 | 1.1124073272  |
| -1.0221298433 | 0.900002509  | 0.9999537652 | 1.0651244454  |
| -1.0085355311 | 0.9930350584 | 0.9999537652 | 1.4048704932  |
| -1.4390360156 | 0.0315297573 | 0.9999537652 | -1.297070476  |
| -1.2590130964 | 0.1064008215 | 0.9999537652 | 1.3362064066  |
| 1.1026647921  | 0.8029550943 | 0.9999537652 | -1.3211476307 |
| 1.0546895876  | 0.7099874082 | 0.9999537652 | 1.7778818184  |
| -1.0576001765 | 0.8520942831 | 0.9999537652 | 1.0164603399  |
| 1.8357201582  | 0.2612683768 | 0.9999537652 | -1.7597223057 |
| 16.8433158146 | 0.2735193915 | 0.9999537652 | 2.3074450707  |
| -1.0012547714 | 0.9946659375 | 0.9999537652 | -1.0237264886 |
| -1.0272985149 | 0.8841848917 | 0.9999537652 | -1.0186915418 |
| -1.2518477289 | 0.2603834682 | 0.9999537652 | -1.0387899273 |
| 0             | 0            | 0            | 0             |
| 8.064174035   | 0.4238624257 | 0.9999537652 | 2.996475627   |
| 15.0880352532 | 0.2955455083 | 0.9999537652 | 4.0583010578  |
| -1.2755409506 | 0.2251135518 | 0.9999537652 | 1.3164769935  |
| 1.3732671858  | 0.3072769239 | 0.9999537652 | -1.2683976535 |
| -1.1758878956 | 0.530086972  | 0.9999537652 | -1.0204649236 |
| -1.0436077749 | 0.7399851693 | 0.9999537652 | 1.0327520313  |
| 1.6304649079  | 0.1664505331 | 0.9999537652 | -1.0869018319 |
| -1.3699107418 | 0.396262722  | 0.9999537652 | -1.2493820533 |
| -1.0920094712 | 0.864296452  | 0.9999537652 | -1.0693685302 |
| -2.587194901  | 0.5007129884 | 0.9999537652 | 12.7732027325 |
| -1.0874839212 | 0.6490775161 | 0.9999537652 | 1.0698424135  |
| -1.1684806514 | 0.3976482294 | 0.9999537652 | 1.2357540451  |
| -1.0042266312 | 0.989734773  | 0.9999537652 | 1.0532066797  |
| -1.2840992906 | 0.255428276  | 0.9999537652 | -1.0630620986 |
| 1.2273488568  | 0.543381251  | 0.9999537652 | 1.042245821   |
| 1.1333548398  | 0.4740079546 | 0.9999537652 | 1.1585263912  |
| -1.2418696748 | 0.4039874247 | 0.9999537652 | 1.0130335143  |
| 0             | 0            | 0            | 2.996475627   |
| 1.0035792769  | 0.9776690134 | 0.9999537652 | 1.0482762038  |
| -1.1026914183 | 0.8465221463 | 0.9999537652 | -1.5939521358 |
| -1.586167124  | 0.7107512635 | 0.9999537652 | -3.2324675423 |
| 0             | 0            | 0            | -1.4868621173 |
| 1.1435785632  | 0.7491532359 | 0.9999537652 | 1.0357004166  |
| -1.3475836462 | 0.1455669338 | 0.9999537652 | -1.1640857245 |
| 1.1547207742  | 0.6000385449 | 0.9999537652 | -1.1185952314 |
| 1.2168577454  | 0.5614103567 | 0.9999537652 | 1.1838092576  |
| -1.1528061049 | 0.5195061817 | 0.9999537652 | -1.0748267717 |
| 1.0446178272  | 0.7894504274 | 0.9999537652 | 1.0763986179  |
| -1.1693039948 | 0.565907182  | 0.9999537652 | 1.1635318451  |
| 2.7933974408  | 0.6948713406 | 0.9999537652 | 12.7820459093 |
| 1.4049428145  | 0.1175643402 | 0.9999537652 | -1.0752873441 |
| -1.2963709085 | 0.2407431275 | 0.9999537652 | 1.460144486   |
| -1.0539580642 | 0.8732019188 | 0.9999537652 | -1.2242110047 |
| -1.0642209066 | 0.7053681004 | 0.9999537652 | 1.3973405727  |

gene\_expression\_table

|               |              |              |               |
|---------------|--------------|--------------|---------------|
| 0             | 0            | 0            | 4.9527501949  |
| -1.0005546727 | 0.9984975432 | 0.9999537652 | -1.0292619808 |
| -1.6533121528 | 0.4727785747 | 0.9999537652 | 1.7805692956  |
| -1.1619124208 | 0.2916893882 | 0.9999537652 | -1.0068448899 |
| 2.7933974408  | 0.6948713406 | 0.9999537652 | -4.1147445994 |
| 1.1789135104  | 0.3228883288 | 0.9999537652 | 1.0527034979  |
| 1.3703758797  | 0.5584653486 | 0.9999537652 | 2.191689061   |
| -1.0475667213 | 0.7932577381 | 0.9999537652 | 1.046257844   |
| 8.064174035   | 0.42386109   | 0.9999537652 | -7.5938938218 |
| -1.0271839745 | 0.9301494863 | 0.9999537652 | -1.4794014745 |
| 1.0129071158  | 0.9595136548 | 0.9999537652 | 1.1502256127  |
| -1.036065864  | 0.9311263257 | 0.9999537652 | 1.2382459797  |
| 1.1082980069  | 0.7051440002 | 0.9999537652 | 1.2653659748  |
| 1.2221484578  | 0.7268243913 | 0.9999537652 | 1.3237138559  |
| 1.0608805067  | 0.6856390815 | 0.9999537652 | 1.2203688867  |
| -1.6400934886 | 0.2993572224 | 0.9999537652 | -1.1136140278 |
| 1.810938637   | 0.0662692265 | 0.9999537652 | 1.630642421   |
| -1.2982596652 | 0.3439343602 | 0.9999537652 | 1.4833674591  |
| 1.1222763882  | 0.6938345701 | 0.9999537652 | 1.3056043564  |
| 0             | 0            | 0            | 2.9988886918  |
| 2.7933974408  | 0.6948713406 | 0.9999537652 | 2.9985540909  |
| -1.3509517562 | 0.4401965018 | 0.9999537652 | -1.2073222441 |
| -1.0938933423 | 0.8347800059 | 0.9999537652 | -1.042636332  |
| -1.2826950936 | 0.407151505  | 0.9999537652 | 1.024124714   |
| 11.5766527773 | 0.3454613255 | 0.9999537652 | -2.0931946048 |
| 2.7933974408  | 0.6948713406 | 0.9999537652 | 4.9527501949  |
| -1.5753956458 | 0.1311730696 | 0.9999537652 | -1.0878695743 |
| 1.0247747451  | 0.8935151706 | 0.9999537652 | 1.3029291222  |
| 1.1938444774  | 0.1690282715 | 0.9999537652 | -1.0249770519 |
| 67.3679493299 | 0.1028771372 | 0.9999537652 | -5.0778270227 |
| 1.0273911124  | 0.8358511828 | 0.9999537652 | 1.2749466445  |
| -1.0069658003 | 0.9769681719 | 0.9999537652 | 1.0707892536  |
| -1.001828667  | 0.9919310936 | 0.9999537652 | -1.0514611088 |
| -1.5861169239 | 0.7128681534 | 0.9999537652 | 2.9957580451  |
| 1.5619956449  | 0.0948722527 | 0.9999537652 | 1.0141229612  |
| -1.6050134504 | 0.4757254636 | 0.9999537652 | -1.5446056776 |
| -1.8682422788 | 0.3275403123 | 0.9999537652 | 1.039905587   |
| -1.3811511599 | 0.1454242764 | 0.9999537652 | -1.0267481182 |
| 1.2547599433  | 0.8138366009 | 0.9999537652 | 1.2738997544  |
| 6.3075231393  | 0.4859256145 | 0.9999537652 | 3.9269887543  |
| 1.0174686303  | 0.9217625864 | 0.9999537652 | -1.4714835237 |
| 1.9416585923  | 0.1335241641 | 0.9999537652 | 1.5320730211  |
| 1.1329612377  | 0.5043927977 | 0.9999537652 | 1.2131818071  |
| 1.1297615884  | 0.707570459  | 0.9999537652 | -1.1224417065 |
| 1.0717966888  | 0.6188062913 | 0.9999537652 | 1.2609005158  |
| 1.3195866646  | 0.4814139981 | 0.9999537652 | 1.4848434056  |
| 1.2109021666  | 0.5262919175 | 0.9999537652 | 1.3347974597  |
| -1.0117921347 | 0.9419769677 | 0.9999537652 | 1.1096622562  |
| 20.3888260912 | 0.2437331429 | 0.9999537652 | 0             |

gene\_expression\_table

|               |              |              |               |
|---------------|--------------|--------------|---------------|
| 23.8617041368 | 0.2201079761 | 0.9999537652 | -1.5807630514 |
| -1.1576464446 | 0.5788150279 | 0.9999537652 | 1.0769117024  |
| 1.0715997868  | 0.6112170917 | 0.9999537652 | -1.0625987566 |
| 1.3857529974  | 0.1798595595 | 0.9999537652 | 1.2143594491  |
| -1.577011236  | 0.0307774968 | 0.9999537652 | 1.2211677395  |
| -1.0950953076 | 0.8492594781 | 0.9999537652 | -1.5365812802 |
| -1.1229879161 | 0.6105105193 | 0.9999537652 | 1.3160688149  |
| -1.0065573028 | 0.9745287714 | 0.9999537652 | 1.0886217538  |
| -1.1579609705 | 0.3841237465 | 0.9999537652 | -1.0187390657 |
| -2.6527850164 | 0.1212889734 | 0.9999537652 | 2.2155898126  |
| 1.0006941223  | 0.9982326477 | 0.9999537652 | -1.1318963538 |
| -1.1111645146 | 0.4379274766 | 0.9999537652 | 1.099736946   |
| 1.1478933566  | 0.4971537616 | 0.9999537652 | -1.1603037568 |
| 1.163695605   | 0.6435938542 | 0.9999537652 | -1.1666745609 |
| 1.0446357697  | 0.7528137897 | 0.9999537652 | -1.0046334623 |
| 1.2969735684  | 0.6703765071 | 0.9999537652 | 1.2760891251  |
| 9.8205505243  | 0.3806487041 | 0.9999537652 | 8.8700459102  |
| -2.7750113771 | 0.2108651016 | 0.9999537652 | 1.0691759863  |
| -1.0569269529 | 0.8537995955 | 0.9999537652 | 2.0172653658  |
| 1.3570059574  | 0.3154784907 | 0.9999537652 | -1.0632972084 |
| 1.2309640129  | 0.1867046242 | 0.9999537652 | 1.1316806538  |
| 0             | 0            | 0            | -1.8577842586 |
| 1.0789731544  | 0.8018443088 | 0.9999537652 | 1.0144843107  |
| 1.1510341203  | 0.6487660506 | 0.9999537652 | -1.2416069402 |
| 1.0857901371  | 0.6691006808 | 0.9999537652 | 1.1203497392  |
| -1.1565394511 | 0.4147635069 | 0.9999537652 | 1.161097447   |
| -1.7043575086 | 0.1781022047 | 0.9999537652 | -1.1669506304 |
| 1.0676138738  | 0.7599465362 | 0.9999537652 | -1.2067495424 |
| 2.7933974408  | 0.6948713406 | 0.9999537652 | -1.144309199  |
| -1.1765647297 | 0.3710578576 | 0.9999537652 | 1.1270844352  |
| 8.0710074692  | 0.4203544835 | 0.9999537652 | -2.1294907556 |
| 1.1144134358  | 0.3852903689 | 0.9999537652 | 1.1700548017  |
| -1.5764197779 | 0.5243565684 | 0.9999537652 | -1.1409720983 |
| -1.3734234034 | 0.7176110162 | 0.9999537652 | -1.2800522501 |
| 1.2565136616  | 0.2676040844 | 0.9999537652 | -1.1738191879 |
| 6.3130691196  | 0.4798093448 | 0.9999537652 | 1.1089257718  |
| 1.1953956413  | 0.3666069872 | 0.9999537652 | -1.3085633241 |
| -1.6674095463 | 0.6213810348 | 0.9999537652 | 1.3993098199  |
| -1.266144156  | 0.3101608069 | 0.9999537652 | 1.1397712861  |
| 2.5539148516  | 0.2217371432 | 0.9999537652 | 1.5445547046  |
| 1.3650039897  | 0.2214565666 | 0.9999537652 | -1.1406814698 |
| 0             | 0            | 0            | 0             |
| -1.4276209478 | 0.4180243489 | 0.9999537652 | -1.2006774845 |
| 1.1793006604  | 0.3680148579 | 0.9999537652 | -1.0930814734 |
| 1.0915702994  | 0.4983809035 | 0.9999537652 | -1.0202528275 |
| 0             | 0            | 0            | 0             |
| -1.0761238566 | 0.9086825963 | 0.9999537652 | -2.6795343993 |
| -2.9570895726 | 0.3896766718 | 0.9999537652 | -2.2394303886 |
| 1.113704751   | 0.6849583912 | 0.9999537652 | 1.2233404731  |

gene\_expression\_table

|               |              |              |               |
|---------------|--------------|--------------|---------------|
| -2.1885668332 | 0.2435777519 | 0.9999537652 | -1.634520667  |
| 6.3075231393  | 0.4859037428 | 0.9999537652 | 0             |
| -1.0040545829 | 0.9865051117 | 0.9999537652 | -1.2278647161 |
| -1.3385641172 | 0.1735909755 | 0.9999537652 | 1.0921562182  |
| -6.3038745744 | 0.1139519388 | 0.9999537652 | 1.7251428509  |
| 0             | 0            | 0            | 2.996475627   |
| -1.1113356286 | 0.6074706298 | 0.9999537652 | 1.1853940771  |
| -1.0955076328 | 0.7841971966 | 0.9999537652 | 1.0105552642  |
| 4.3467773692  | 0.0673462832 | 0.9999537652 | -4.4703372671 |
| 0             | 0            | 0            | 2.9985540909  |
| 6.3075231393  | 0.4858818993 | 0.9999537652 | 0             |
| 1.3594099105  | 0.7970662522 | 0.9999537652 | 1.2801191671  |
| -1.0048792563 | 0.9908938539 | 0.9999537652 | -1.1925183839 |
| 1.2639004223  | 0.3996167215 | 0.9999537652 | -1.3460629855 |
| 1.1597199062  | 0.7028182189 | 0.9999537652 | -1.0852357393 |
| 1.0006990062  | 0.9976372662 | 0.9999537652 | -1.0044369005 |
| -1.0212402807 | 0.9590351587 | 0.9999537652 | 1.2379270009  |
| 22.1449503561 | 0.2295716029 | 0.9999537652 | 1.2684830807  |
| -1.3060742329 | 0.2587590986 | 0.9999537652 | 1.6275105309  |
| -1.2396428094 | 0.230178226  | 0.9999537652 | 1.0574725337  |
| -1.3443523415 | 0.3689394867 | 0.9999537652 | 1.0563275471  |
| 1.3840729079  | 0.1109745055 | 0.9999537652 | 1.4026074125  |
| -1.0155800036 | 0.9597684715 | 0.9999537652 | -1.2830241381 |
| -1.092657348  | 0.5884466162 | 0.9999537652 | 1.293138654   |
| 1.818286487   | 0.1964195738 | 0.9999537652 | 1.1710990071  |
| 2.7933974408  | 0.6948713406 | 0.9999537652 | 0             |
| 1.3009616064  | 0.54913202   | 0.9999537652 | 1.1038691503  |
| 1.2257351007  | 0.2637844861 | 0.9999537652 | -1.0518619644 |
| 1.1913178689  | 0.1614046946 | 0.9999537652 | 1.3952440532  |
| 1.8206313854  | 0.5988534815 | 0.9999537652 | -1.1365331554 |
| 2.7957660672  | 0.7054691191 | 0.9999537652 | 0             |
| -2.587194901  | 0.5007035754 | 0.9999537652 | 4.9561842702  |
| -1.1969229065 | 0.3820913358 | 0.9999537652 | 1.2960340598  |
| 2.1974038942  | 0.2946197239 | 0.9999537652 | -4.2387878395 |
| 1.167995342   | 0.5273750092 | 0.9999537652 | 1.1077642929  |
| 1.3589992143  | 0.3718181318 | 0.9999537652 | 1.6019209384  |
| 2.7933974408  | 0.6948713406 | 0.9999537652 | -5.3583704783 |
| -2.1283838037 | 0.3362356889 | 0.9999537652 | 1.3060086369  |
| 1.1341637742  | 0.6703154468 | 0.9999537652 | 1.0071658635  |
| -1.1767472282 | 0.4582170488 | 0.9999537652 | 1.1303148419  |
| 16.8433158146 | 0.2735542479 | 0.9999537652 | -1.1241083699 |
| -1.6980553762 | 0.5271226607 | 0.9999537652 | -3.1944206015 |
| -1.1417631068 | 0.4876767788 | 0.9999537652 | -1.0149720939 |
| -1.0188478837 | 0.966084823  | 0.9999537652 | 1.1710846984  |
| -1.3361026929 | 0.2930825977 | 0.9999537652 | 1.1144917184  |
| 1.3216805319  | 0.496272292  | 0.9999537652 | -1.425776575  |
| -2.0984085497 | 0.010798083  | 0.9999537652 | 1.071563557   |
| 1.0056468924  | 0.9656377788 | 0.9999537652 | 1.1330933982  |
| 1.3959372098  | 0.666362328  | 0.9999537652 | -1.939200616  |



gene\_expression\_table

|               |              |              |               |
|---------------|--------------|--------------|---------------|
| 1.0736533958  | 0.712426287  | 0.9999537652 | 1.0196583691  |
| -1.2634569391 | 0.0514299564 | 0.9999537652 | 1.1381452304  |
| 1.0517529507  | 0.9033218549 | 0.9999537652 | 1.529869622   |
| 1.004601693   | 0.9672273473 | 0.9999537652 | 1.2227969234  |
| 1.0578173942  | 0.715384528  | 0.9999537652 | 1.115678269   |
| 1.0233172702  | 0.9456582211 | 0.9999537652 | -1.0409672658 |
| -1.5867714314 | 0.7160997034 | 0.9999537652 | 4.7486936474  |
| 1.0274942246  | 0.8650940633 | 0.9999537652 | -1.2482403885 |
| -1.7256502905 | 0.4947510749 | 0.9999537652 | -1.9869457057 |
| 3.3386254244  | 0.1676165176 | 0.9999537652 | -1.056751263  |
| 0             | 0            | 0            | 2.9985540909  |
| 1.2527115433  | 0.8123164945 | 0.9999537652 | -1.3426678013 |
| 1.4737523755  | 0.2987734418 | 0.9999537652 | -1.147633542  |
| 1.0549201187  | 0.7119897323 | 0.9999537652 | -1.0292305634 |
| 1.0035498141  | 0.9781159802 | 0.9999537652 | 1.296709659   |
| 1.8222329048  | 0.2466093308 | 0.9999537652 | -1.0760516321 |
| -1.3423111503 | 0.0416840044 | 0.9999537652 | 1.0316461212  |
| 2.7933974408  | 0.6948713406 | 0.9999537652 | 6.908559683   |
| 1.5108760492  | 0.5271608029 | 0.9999537652 | -2.6216240642 |
| 2.7933974408  | 0.6948713406 | 0.9999537652 | 0             |
| 18.6310147587 | 0.2581002427 | 0.9999537652 | 1.1562656392  |
| -1.5587684445 | 0.1886260818 | 0.9999537652 | 1.0733574289  |
| 1.084985329   | 0.6668810927 | 0.9999537652 | -1.4079773046 |
| -1.5462358792 | 0.2329640599 | 0.9999537652 | 1.3134190914  |
| 6.6960780981  | 0.0826914313 | 0.9999537652 | -2.0013472884 |
| 1.8259740378  | 0.6336148297 | 0.9999537652 | 1.5932034817  |
| 1.1298260652  | 0.5921353139 | 0.9999537652 | 1.1592797979  |
| -1.0003821381 | 0.9976141232 | 0.9999537652 | -1.4178967317 |
| 0             | 0            | 0            | 2.996475627   |
| 1.2321761132  | 0.4085661547 | 0.9999537652 | 1.1453665421  |
| -1.1004181912 | 0.618196992  | 0.9999537652 | 1.1480633927  |
| 1.0894645231  | 0.6047534975 | 0.9999537652 | -1.2384278976 |
| 1.5913841917  | 0.1619632532 | 0.9999537652 | 1.2651347039  |
| -1.0692150516 | 0.77823473   | 0.9999537652 | -1.0555202004 |
| -1.483866215  | 0.0422730952 | 0.9999537652 | 1.0480245844  |
| 1.582154632   | 0.4526798258 | 0.9999537652 | 3.5481057558  |
| 1.0533757214  | 0.7688068226 | 0.9999537652 | 1.1894738143  |
| 1.1558796531  | 0.7482223541 | 0.9999537652 | -1.1869442514 |
| 1.527204761   | 0.2377096856 | 0.9999537652 | 1.1735922103  |
| -1.0533280245 | 0.8722013693 | 0.9999537652 | 1.0208349995  |
| -1.1885359807 | 0.2299149989 | 0.9999537652 | -1.2241671362 |
| 1.0917375443  | 0.5495066697 | 0.9999537652 | -1.1570429423 |
| 1.1962825574  | 0.7550432886 | 0.9999537652 | -1.4035206294 |
| 1.1318726633  | 0.477037499  | 0.9999537652 | 1.1828599125  |
| 2.7933974408  | 0.6948713406 | 0.9999537652 | 1.067171975   |
| 1.0435514625  | 0.8304428519 | 0.9999537652 | -1.0827113432 |
| 1.6380746162  | 0.0656004594 | 0.9999537652 | -1.1000722403 |
| 1.2990400075  | 0.7578358812 | 0.9999537652 | 2.488271085   |
| -1.1475589774 | 0.5773714107 | 0.9999537652 | -1.1781946077 |

gene\_expression\_table

|               |              |              |               |
|---------------|--------------|--------------|---------------|
| 1.0131896226  | 0.9694602283 | 0.9999537652 | 1.1797462473  |
| -1.1117455455 | 0.4541391175 | 0.9999537652 | 1.1233748327  |
| -1.4285873355 | 0.4428723042 | 0.9999537652 | -1.3363898156 |
| 1.1873139295  | 0.5683578041 | 0.9999537652 | 1.1293134239  |
| 1.3640571596  | 0.1440051915 | 0.9999537652 | 1.20762297    |
| -1.0580014703 | 0.7948883319 | 0.9999537652 | 1.1533013759  |
| 0             | 0            | 0            | 26.4411849241 |
| 1.1206203515  | 0.6211767423 | 0.9999537652 | 1.1036417695  |
| -1.4032564076 | 0.0748251115 | 0.9999537652 | 1.1562766256  |
| -1.1541146099 | 0.3140595719 | 0.9999537652 | 1.1138478762  |
| -1.1978530251 | 0.6479976791 | 0.9999537652 | 1.7788094936  |
| 1.0999421972  | 0.7755602905 | 0.9999537652 | -1.0767359799 |
| 4.5505976667  | 0.5559322269 | 0.9999537652 | 0             |
| -1.4104128618 | 0.4813729915 | 0.9999537652 | -1.046235579  |
| 1.040281569   | 0.7717415595 | 0.9999537652 | 1.1262364093  |
| 1.0933258334  | 0.6623162228 | 0.9999537652 | -1.1309441773 |
| -1.0363788903 | 0.8541371186 | 0.9999537652 | 1.2809675336  |
| 1.2072800896  | 0.2868797883 | 0.9999537652 | -1.0528733751 |
| -2.4941151816 | 0.4484109485 | 0.9999537652 | 2.0650565302  |
| -1.2132060652 | 0.4376724878 | 0.9999537652 | -1.0816359856 |
| 1.2084842145  | 0.5532965621 | 0.9999537652 | -1.1369054259 |
| 1.1529343388  | 0.2175435991 | 0.9999537652 | 1.1506986909  |
| 1.0510635703  | 0.8105905001 | 0.9999537652 | 1.2375999683  |
| -1.199133825  | 0.1601378376 | 0.9999537652 | -1.2375603839 |
| -1.1086651739 | 0.7456900635 | 0.9999537652 | -1.0105082838 |
| 1.7180264605  | 0.0320375034 | 0.9999537652 | 1.4303847056  |
| 2.7957660672  | 0.7054714763 | 0.9999537652 | 0             |
| 2.5375363294  | 0.0601863413 | 0.9999537652 | -1.0087239788 |
| 2.3407960637  | 0.2629337289 | 0.9999537652 | 1.4144911607  |
| -1.0702036118 | 0.6448920995 | 0.9999537652 | -1.292096712  |
| 5.9693523789  | 0.102919379  | 0.9999537652 | 2.3749818327  |
| -1.3031268977 | 0.0931774419 | 0.9999537652 | 1.2140734742  |
| 2.9108875149  | 0.4212749072 | 0.9999537652 | 14.7271569203 |
| 1.0588673556  | 0.6599676411 | 0.9999537652 | 1.2601331836  |
| 0             | 0            | 0            | -1.8582093966 |
| -1.1400524203 | 0.6925582319 | 0.9999537652 | 1.079045435   |
| 4.5505976667  | 0.5559322269 | 0.9999537652 | 6.9133480437  |
| -1.0641924796 | 0.7180478335 | 0.9999537652 | 1.0015309038  |
| 1.1216701798  | 0.9025855133 | 0.9999537652 | -1.3140344109 |
| 1.275282393   | 0.6534106613 | 0.9999537652 | 1.027333951   |
| -1.0974096956 | 0.6455469974 | 0.9999537652 | 1.3238635508  |
| 1.0226902024  | 0.896031783  | 0.9999537652 | 1.020298758   |
| -1.6674095463 | 0.6211804098 | 0.9999537652 | -5.3589986948 |
| 1.7438374005  | 0.1731885952 | 0.9999537652 | 1.5617427513  |
| 8.064174035   | 0.4238597542 | 0.9999537652 | -1.6597328868 |
| -1.1154820314 | 0.586544898  | 0.9999537652 | 1.2643983124  |
| 1.3025788871  | 0.7332127736 | 0.9999537652 | -2.0448877535 |
| 1.0676074109  | 0.6430257067 | 0.9999537652 | 1.3876185589  |
| -1.208510781  | 0.6367113156 | 0.9999537652 | 1.0559626811  |

gene\_expression\_table

|               |              |              |               |
|---------------|--------------|--------------|---------------|
| -3.1179374904 | 0.2575007764 | 0.9999537652 | 2.9985540909  |
| 0             | 0            | 0            | 0             |
| 1.3001586758  | 0.7288997037 | 0.9999537652 | -2.8215558128 |
| -1.1338812575 | 0.7219653432 | 0.9999537652 | 1.7839566788  |
| 1.2057613658  | 0.7517614146 | 0.9999537652 | 1.0176694598  |
| -1.1423326412 | 0.7403754276 | 0.9999537652 | 1.0651798039  |
| 1.0305243997  | 0.8819815336 | 0.9999537652 | 1.1070215658  |
| 1.9987268311  | 0.2978721628 | 0.9999537652 | -1.4616100759 |
| 1.3979934472  | 0.455177279  | 0.9999537652 | 1.7206577206  |
| 8.1372627563  | 0.0117647212 | 0.9999537652 | 2.2447949745  |
| 5.9768568161  | 0.0923150692 | 0.9999537652 | 1.4519459565  |
| -1.501078988  | 0.1905055824 | 0.9999537652 | -1.2427586638 |
| -1.0597710429 | 0.7545630442 | 0.9999537652 | 1.4479778851  |
| 0             | 0            | 0            | 0             |
| -1.2040232458 | 0.5712705945 | 0.9999537652 | -1.2217930755 |
| 0             | 0            | 0            | 4.9527501949  |
| 1.115591456   | 0.6802342081 | 0.9999537652 | 1.2692838438  |
| 1.1612439625  | 0.5084913285 | 0.9999537652 | 1.5218344384  |
| -1.1042647991 | 0.826840717  | 0.9999537652 | 1.0268360662  |
| 1.1789008325  | 0.5674901112 | 0.9999537652 | 1.0468029632  |
| -1.5312189421 | 0.1829520875 | 0.9999537652 | -1.0217750814 |
| -1.107708211  | 0.6272875538 | 0.9999537652 | 1.1213051659  |
| 1.4946040872  | 0.1614007054 | 0.9999537652 | 1.3286410706  |
| 1.0746305754  | 0.7400616157 | 0.9999537652 | 1.2336525653  |
| -1.239744256  | 0.3440573251 | 0.9999537652 | 1.050575786   |
| -1.5581362771 | 0.0844734608 | 0.9999537652 | -1.1205799622 |
| 0             | 0            | 0            | 4.9527501949  |
| 1.1261405279  | 0.8542542807 | 0.9999537652 | 1.0387126023  |
| -1.135379807  | 0.5269209686 | 0.9999537652 | 1.0693425341  |
| 1.3366571197  | 0.386755597  | 0.9999537652 | -1.074393129  |
| -1.9598615693 | 0.1611947422 | 0.9999537652 | 1.0126931411  |
| -1.0995135404 | 0.6425324968 | 0.9999537652 | 1.5617682385  |
| 4.5544554512  | 0.56913538   | 0.9999537652 | 4.9527501949  |
| 1.0367599971  | 0.8640604535 | 0.9999537652 | 1.3636664298  |
| 0             | 0            | 0            | 2.9985540909  |
| 2.7933974408  | 0.6948713406 | 0.9999537652 | 2.996475627   |
| 0             | 0            | 0            | 0             |
| 2.7933974408  | 0.6948713406 | 0.9999537652 | 0             |
| -1.1858184564 | 0.2698575895 | 0.9999537652 | 1.1676215024  |
| 1.0822052743  | 0.7233600657 | 0.9999537652 | -1.1161410024 |
| 1.1401644591  | 0.5857501715 | 0.9999537652 | -1.0899350295 |
| 0             | 0            | 0            | 2.9936870021  |
| 1.603906631   | 0.6805260368 | 0.9999537652 | -1.4365753027 |
| 1.827667131   | 0.0256572699 | 0.9999537652 | 1.1926821055  |
| 1.0637894227  | 0.7691452458 | 0.9999537652 | 1.0929704504  |
| -1.2053946388 | 0.7439060599 | 0.9999537652 | -1.3178205855 |
| 29.1226294179 | 0.1908912554 | 0.9999537652 | 1.5563914108  |
| 2.7933974408  | 0.6948713406 | 0.9999537652 | 1.8589547811  |
| -1.2242387651 | 0.1255177788 | 0.9999537652 | -1.1063754375 |

gene\_expression\_table

|               |              |              |               |
|---------------|--------------|--------------|---------------|
| -1.057635161  | 0.7385740007 | 0.9999537652 | -1.2230162314 |
| -1.0998297781 | 0.6789652972 | 0.9999537652 | 1.1254295224  |
| 1.7847110014  | 0.3579393046 | 0.9999537652 | -1.1287447286 |
| 3.7917931577  | 0.2238250833 | 0.9999537652 | -1.6103932565 |
| -1.1516964145 | 0.4122310289 | 0.9999537652 | -1.013115112  |
| -1.2308837349 | 0.5339858947 | 0.9999537652 | -1.3139663928 |
| -1.0473752886 | 0.7816109512 | 0.9999537652 | -1.185074891  |
| 1.3377809008  | 0.2080360016 | 0.9999537652 | -1.367649661  |
| -1.7141251245 | 0.5217296346 | 0.9999537652 | -1.5413176099 |
| 1.0181666844  | 0.8827655577 | 0.9999537652 | 1.135308509   |
| 1.3326456572  | 0.2667891461 | 0.9999537652 | -1.3834464205 |
| -1.2089981555 | 0.5336352155 | 0.9999537652 | 1.0062326897  |
| 1.2467380137  | 0.1813207875 | 0.9999537652 | -1.3319030788 |
| 1.1463368891  | 0.4874612654 | 0.9999537652 | 1.0146647071  |
| 4.5544554512  | 0.569133386  | 0.9999537652 | 3.0014231918  |
| 9.8205505243  | 0.3806255368 | 0.9999537652 | -1.8582093966 |
| 1.1714652592  | 0.5584838141 | 0.9999537652 | -1.0846414195 |
| -1.3183497373 | 0.6678653454 | 0.9999537652 | 1.4370312972  |
| 4.5505976667  | 0.5559322269 | 0.9999537652 | -4.8186929849 |
| -1.2711474135 | 0.2128653532 | 0.9999537652 | -1.2062856952 |
| 17.3472938331 | 0.2975561866 | 0.9999537652 | 8.8639046058  |
| 1.2204962623  | 0.5811143316 | 0.9999537652 | 1.0494835949  |
| -1.0033878781 | 0.9931124794 | 0.9999537652 | -1.0719699378 |
| 0             | 0            | 0            | 9.7116702472  |
| 1.0954599379  | 0.6004848573 | 0.9999537652 | -1.1999649533 |
| 1.0356595745  | 0.8092380975 | 0.9999537652 | -1.1567566972 |
| -2.956038745  | 0.3205427223 | 0.9999537652 | 2.226401313   |
| -1.0745696932 | 0.7142976782 | 0.9999537652 | 1.0590138039  |
| 1.0070737681  | 0.9823908948 | 0.9999537652 | -1.009204357  |
| 2.0363455658  | 0.4191792472 | 0.9999537652 | 1.8159392373  |
| -1.2653006465 | 0.1746380865 | 0.9999537652 | -1.3587366354 |
| 1.1478914847  | 0.499518718  | 0.9999537652 | 1.1067607569  |
| 1.3670871454  | 0.4772640638 | 0.9999537652 | 1.5578544735  |
| 1.6512577839  | 0.1957128114 | 0.9999537652 | 1.2080900011  |
| 0             | 0            | 0            | 2.996475627   |
| 1.0442905078  | 0.7655283163 | 0.9999537652 | 1.1066304142  |
| -1.6217625998 | 0.0628059593 | 0.9999537652 | 1.3592808127  |
| -1.0806024826 | 0.7649858096 | 0.9999537652 | -1.155288339  |
| -1.0942188966 | 0.627498364  | 0.9999537652 | 1.0201860177  |
| -1.1026115964 | 0.4138929342 | 0.9999537652 | 1.0420067715  |
| 2.1937664026  | 0.2878393251 | 0.9999537652 | 1.0004317752  |
| -1.1780987613 | 0.6880432174 | 0.9999537652 | -2.0406098627 |
| 1.2579508034  | 0.0750652361 | 0.9999537652 | 1.0928037111  |
| -1.0919905267 | 0.63727033   | 0.9999537652 | -1.2420607509 |
| 0             | 0            | 0            | 20.5862458385 |
| -1.1902317392 | 0.5163879322 | 0.9999537652 | -1.2207647944 |
| 1.2879691289  | 0.092152991  | 0.9999537652 | 1.1263895777  |
| -1.0281465907 | 0.8875102938 | 0.9999537652 | -1.2693078548 |
| -1.3095088252 | 0.5260063579 | 0.9999537652 | 1.1632391783  |

gene\_expression\_table

|                |              |              |               |
|----------------|--------------|--------------|---------------|
| 1.5313852055   | 0.5216372602 | 0.9999537652 | 1.6984478315  |
| -1.1813031634  | 0.4835621879 | 0.9999537652 | -1.1660328546 |
| 1.0794889877   | 0.7293482269 | 0.9999537652 | -1.6752775289 |
| 1.4071079349   | 0.2722577121 | 0.9999537652 | 1.0878127162  |
| 1.170178844    | 0.6928356326 | 0.9999537652 | -1.0190639033 |
| -1.101183384   | 0.8491448233 | 0.9999537652 | -1.0927247289 |
| 1.6152058699   | 0.0792962622 | 0.9999537652 | 1.0708335229  |
| -1.3304241061  | 0.0176016343 | 0.9999537652 | -1.5482134169 |
| -1.2668558963  | 0.098952339  | 0.9999537652 | 1.0178462262  |
| 4.5505976667   | 0.5559322269 | 0.9999537652 | 1.1554536166  |
| 1.1464431389   | 0.6035377383 | 0.9999537652 | -1.0017159662 |
| 1.2607159044   | 0.1863536795 | 0.9999537652 | -1.1712914944 |
| 1.4089461712   | 0.3760047958 | 0.9999537652 | -1.1534884442 |
| -1.1242717848  | 0.6044713935 | 0.9999537652 | -1.2345256645 |
| -1.0982503828  | 0.4968893589 | 0.9999537652 | -1.1025862244 |
| 1.1413431861   | 0.7393987324 | 0.9999537652 | -1.2115914115 |
| 4.5505976667   | 0.5557790267 | 0.9999537652 | 0             |
| 1.2884369719   | 0.2827133749 | 0.9999537652 | 1.1714801535  |
| -1.0622050082  | 0.9006742497 | 0.9999537652 | 1.0074664906  |
| -1.6674095463  | 0.6211992247 | 0.9999537652 | -3.383799441  |
| 1.0998091457   | 0.7325809517 | 0.9999537652 | -1.2756099766 |
| 1.3616604306   | 0.2379741322 | 0.9999537652 | -1.1551584353 |
| -2.956038745   | 0.3205409092 | 0.9999537652 | 14.759428837  |
| -1.6818365992  | 0.2867264494 | 0.9999537652 | -1.1105052602 |
| -1.4356824791  | 0.2646209381 | 0.9999537652 | -1.2202715628 |
| 1.1434339733   | 0.6327686631 | 0.9999537652 | 1.0551440262  |
| -1.052220172   | 0.8298448144 | 0.9999537652 | -1.0371440844 |
| -1.361720732   | 0.1555506708 | 0.9999537652 | 1.0149559728  |
| -1.1101170285  | 0.7725636825 | 0.9999537652 | -1.1824957367 |
| 1.0047743529   | 0.9776543066 | 0.9999537652 | -1.2331665558 |
| 1.0785588582   | 0.9501492552 | 0.9999537652 | 1.1361852165  |
| 1.4194596463   | 0.112338496  | 0.9999537652 | 1.0563023374  |
| 2.330589113    | 0.4664509828 | 0.9999537652 | -1.3019789167 |
| -1.1762648374  | 0.5443130387 | 0.9999537652 | -1.1773596301 |
| -1.1362981735  | 0.4738861131 | 0.9999537652 | 1.0847698528  |
| -18.9917210433 | 0.0490947718 | 0.9999537652 | 6.908559683   |
| 1.1094201658   | 0.6714636741 | 0.9999537652 | 1.7672763476  |
| 1.695813492    | 0.054888381  | 0.9999537652 | 1.0108673835  |
| 1.0040159103   | 0.9754157117 | 0.9999537652 | 1.2534187913  |
| -1.2047793594  | 0.314102676  | 0.9999537652 | -1.1322125239 |
| -1.1326255481  | 0.7004223503 | 0.9999537652 | -1.3139335181 |
| 2.7957660672   | 0.7054761936 | 0.9999537652 | 0             |
| 1.3989923272   | 0.6140065661 | 0.9999537652 | 1.0688925511  |
| -1.3139750984  | 0.1563628748 | 0.9999537652 | -1.1191460601 |
| -1.1953747446  | 0.5870574125 | 0.9999537652 | -1.0421476012 |
| 1.1395594238   | 0.3632852134 | 0.9999537652 | 1.0307453602  |
| -1.3679958882  | 0.7463109286 | 0.9999537652 | 28.0550019808 |
| 2.2535802584   | 0.1210621813 | 0.9999537652 | 1.6102150583  |
| 6.3075231393   | 0.4858600839 | 0.9999537652 | -1.4601750349 |

gene\_expression\_table

|               |              |              |               |
|---------------|--------------|--------------|---------------|
| 1.0206341456  | 0.8892512256 | 0.9999537652 | 1.0186785036  |
| 1.1431700605  | 0.7331157731 | 0.9999537652 | 1.3794708826  |
| 1.4373613941  | 0.1377940692 | 0.9999537652 | -1.5026553489 |
| 18.6146543426 | 0.2564041956 | 0.9999537652 | 1.1103074297  |
| 11.5868260078 | 0.3461944637 | 0.9999537652 | -1.2800515331 |
| 1.0541531647  | 0.74765511   | 0.9999537652 | -1.0581891681 |
| 1.2170565251  | 0.3327737042 | 0.9999537652 | 1.4487726995  |
| 0             | 0            | 0            | -9.235035142  |
| -1.0882761374 | 0.6427155507 | 0.9999537652 | 1.1321537748  |
| -1.0488508938 | 0.7535619601 | 0.9999537652 | 1.1645070833  |
| 1.1716043256  | 0.7139429453 | 0.9999537652 | -1.1091443276 |
| 1.1129205313  | 0.4757461081 | 0.9999537652 | 1.3211181481  |
| 18.5983228161 | 0.2580172642 | 0.9999537652 | -3.0053232    |
| 1.0817075216  | 0.651137536  | 0.9999537652 | 1.2999016271  |
| 1.0448451532  | 0.8921609784 | 0.9999537652 | -1.2200625877 |
| 1.1033108693  | 0.5628923532 | 0.9999537652 | 1.0299122555  |
| 1.0156369479  | 0.9527773212 | 0.9999537652 | -1.2274391494 |
| 1.1211860098  | 0.9130175902 | 0.9999537652 | -2.0741723538 |
| 1.2441716671  | 0.2449727246 | 0.9999537652 | 1.1106239848  |
| 1.2486503609  | 0.4200857934 | 0.9999537652 | 1.0659305893  |
| 1.0118450101  | 0.9704482605 | 0.9999537652 | 1.0192311602  |
| 6.3075231393  | 0.4858382966 | 0.9999537652 | 16.6806485101 |
| -1.4206868771 | 0.36708337   | 0.9999537652 | 1.4141596021  |
| 1.1504832506  | 0.7836895831 | 0.9999537652 | 1.0876005687  |
| 1.2677054258  | 0.4416059492 | 0.9999537652 | 1.3037891306  |
| 1.5130423174  | 0.6604211772 | 0.9999537652 | -1.1574174841 |
| 1.4619130493  | 0.4058424493 | 0.9999537652 | 1.2941134052  |
| 0             | 0            | 0            | -5.3583704783 |
| 2.7933974408  | 0.6948713406 | 0.9999537652 | 0             |
| -1.1314771982 | 0.6015570579 | 0.9999537652 | -1.2080818548 |
| -1.0512102387 | 0.8469507909 | 0.9999537652 | -1.0469954452 |
| -1.2194299046 | 0.300401329  | 0.9999537652 | 1.193100327   |
| 0             | 0            | 0            | 2.9985540909  |
| -4.3234865661 | 0.1504192763 | 0.9999537652 | 18.6594677739 |
| 1.1158583321  | 0.9296598684 | 0.9999537652 | 0             |
| -1.0494046033 | 0.8623624356 | 0.9999537652 | 1.5307245327  |
| -1.170046239  | 0.4580758095 | 0.9999537652 | 1.0959183498  |
| 0             | 0            | 0            | 2.9988886918  |
| -1.3951142566 | 0.3557604348 | 0.9999537652 | 1.8688548069  |
| 1.2735141212  | 0.2148657585 | 0.9999537652 | 1.0686226752  |
| -1.0895214978 | 0.6746398157 | 0.9999537652 | 1.0398471179  |
| -1.0413817275 | 0.775616009  | 0.9999537652 | 1.0535259259  |
| 1.1220518419  | 0.6490142141 | 0.9999537652 | 1.1982798319  |
| 1.0817709416  | 0.6138071626 | 0.9999537652 | -1.3108942584 |
| 1.0229607066  | 0.8708518377 | 0.9999537652 | 1.516796602   |
| -1.1977369949 | 0.6648609941 | 0.9999537652 | -1.0504978146 |
| 1.0564691958  | 0.7658738235 | 0.9999537652 | 1.136316392   |
| 1.2417456347  | 0.1625214344 | 0.9999537652 | 1.1780957443  |
| 1.1781413431  | 0.720601728  | 0.9999537652 | -1.0143339149 |

gene\_expression\_table

|               |              |              |               |
|---------------|--------------|--------------|---------------|
| 1.0811893466  | 0.8294479986 | 0.9999537652 | 1.0755583371  |
| 1.0703944827  | 0.6994561201 | 0.9999537652 | 1.2993964164  |
| 1.0994968002  | 0.6752103993 | 0.9999537652 | -1.0348995782 |
| 0             | 0            | 0            | 8.8639046058  |
| -1.3429809541 | 0.3881069219 | 0.9999537652 | 1.418735717   |
| -1.0602621373 | 0.8170639411 | 0.9999537652 | 1.1861614471  |
| 1.2098822613  | 0.4281127395 | 0.9999537652 | 1.4163597087  |
| -2.5861438062 | 0.4681199623 | 0.9999537652 | -3.7211335265 |
| 0             | 0            | 0            | 4.9561842702  |
| -2.4652347606 | 0.1804051    | 0.9999537652 | 1.0203837698  |
| -1.1718543992 | 0.8302025312 | 0.9999537652 | 1.0824394533  |
| 0             | 0            | 0            | 4.9527501949  |
| 1.5298977121  | 0.3526169069 | 0.9999537652 | 1.4479895097  |
| -1.6249640116 | 0.2755372466 | 0.9999537652 | 1.3602858602  |
| 1.0462261817  | 0.9444120098 | 0.9999537652 | 1.6930547015  |
| 1.9579430518  | 0.0196436142 | 0.9999537652 | 1.4930660957  |
| -1.21815506   | 0.3842988946 | 0.9999537652 | -1.0119304616 |
| -1.3714431973 | 0.0163889198 | 0.9999537652 | -1.4272116474 |
| 4.5505976667  | 0.5557790267 | 0.9999537652 | 0             |
| 1.087701826   | 0.6402075148 | 0.9999537652 | 1.7759163954  |
| 1.0472633739  | 0.9151780431 | 0.9999537652 | 1.2494841749  |
| 0             | 0            | 0            | -1.2590868438 |
| 1.2177824976  | 0.4004620562 | 0.9999537652 | -1.4276032567 |
| 1.0576409478  | 0.7953233081 | 0.9999537652 | 1.2560455907  |
| 1.2683633881  | 0.4504040727 | 0.9999537652 | -1.160926583  |
| -1.0180629367 | 0.9535611799 | 0.9999537652 | 1.2002708548  |
| 1.2873325466  | 0.1977813971 | 0.9999537652 | -1.2257853903 |
| 2.7933974408  | 0.6948713406 | 0.9999537652 | 4.9527501949  |
| 1.261710384   | 0.4957689909 | 0.9999537652 | 1.0448392655  |
| 1.0522316591  | 0.7805385813 | 0.9999537652 | -1.1110122708 |
| -1.0948072995 | 0.5427091485 | 0.9999537652 | 1.1294282135  |
| 3.0590680122  | 0.3357191982 | 0.9999537652 | -1.1322464845 |
| 0             | 0            | 0            | 4.9527501949  |
| 6.3130691196  | 0.4798187332 | 0.9999537652 | 1.5908108123  |
| 1.2357313159  | 0.3667894967 | 0.9999537652 | 1.164264678   |
| -1.0784119283 | 0.5865033119 | 0.9999537652 | -1.1233592427 |
| 0             | 0            | 0            | 2.996475627   |
| 1.0320276904  | 0.9160923415 | 0.9999537652 | -1.2510297534 |
| 1.1574744424  | 0.3690516452 | 0.9999537652 | 1.1485223264  |
| -1.1142215085 | 0.5859968392 | 0.9999537652 | -1.2128413625 |
| 1.5666957508  | 0.0953541449 | 0.9999537652 | 1.1950963994  |
| 1.3725931849  | 0.063533509  | 0.9999537652 | -1.1753659791 |
| -2.1121758979 | 0.3451523316 | 0.9999537652 | -1.4474064009 |
| 1.1189859225  | 0.6384529674 | 0.9999537652 | -1.0986220743 |
| 6.3075231393  | 0.4858165373 | 0.9999537652 | -9.7565542884 |
| -1.3702762656 | 0.7549819127 | 0.9999537652 | 16.6921882404 |
| -1.2766380543 | 0.5456278554 | 0.9999537652 | 1.0955482217  |
| -1.1443444191 | 0.5835726082 | 0.9999537652 | -1.3837886538 |
| 3.4552788346  | 0.0790731748 | 0.9999537652 | 1.0071225085  |

gene\_expression\_table

|               |              |              |               |
|---------------|--------------|--------------|---------------|
| 3.3249364486  | 0.0383976571 | 0.9999537652 | -1.0424478359 |
| 1.2793527168  | 0.2325080685 | 0.9999537652 | -1.062738616  |
| -1.0600785361 | 0.7422583466 | 0.9999537652 | -1.1892100792 |
| 6.3075231393  | 0.4857948061 | 0.9999537652 | 2.9985540909  |
| 1.3350618227  | 0.4408872704 | 0.9999537652 | -1.2259965384 |
| 1.21207844    | 0.2366915329 | 0.9999537652 | -1.1990482093 |
| -1.1456095562 | 0.6377567175 | 0.9999537652 | 1.0082282879  |
| 16.8575730017 | 0.2720678674 | 0.9999537652 | -2.7895842989 |
| 6.3075231393  | 0.485772013  | 0.9999537652 | 1.6755843638  |
| 0             | 0            | 0            | 4.9527501949  |
| 1.1887778888  | 0.3630892764 | 0.9999537652 | -1.0721096281 |
| 1.3516764085  | 0.0973390111 | 0.9999537652 | 1.0231425108  |
| -1.1154984609 | 0.769374728  | 0.9999537652 | 1.0685248398  |
| -1.0860203881 | 0.5216212366 | 0.9999537652 | -1.3477391635 |
| 2.7933974408  | 0.6948713406 | 0.9999537652 | -2.2683615775 |
| 1.6539935729  | 0.2846857903 | 0.9999537652 | -1.4621772559 |
| 1.0359217103  | 0.7858907891 | 0.9999537652 | -1.3516611555 |
| -1.1250888319 | 0.4856502038 | 0.9999537652 | -1.3191935704 |
| -1.5881570201 | 0.709587026  | 0.9999537652 | 1.9432271302  |
| -1.2373495548 | 0.3656485584 | 0.9999537652 | -1.3998623464 |
| 0             | 0            | 0            | -1.2732083991 |
| 1.0015539757  | 0.9944860413 | 0.9999537652 | -1.0531191994 |
| 1.2059832928  | 0.2076238796 | 0.9999537652 | 1.1068014826  |
| -7.2100360446 | 0.1268521202 | 0.9999537652 | 4.4079008263  |
| -1.5243343774 | 0.07402306   | 0.9999537652 | -1.746687833  |
| 1.2359285705  | 0.761332809  | 0.9999537652 | -1.4429435179 |
| 1.0134399309  | 0.9638557854 | 0.9999537652 | -1.1535880637 |
| -1.1664808483 | 0.4108594489 | 0.9999537652 | -1.3149373974 |
| 2.9527141659  | 0.0925620315 | 0.9999537652 | 1.7231940929  |
| 0             | 0            | 0            | 2.996475627   |
| 0             | 0            | 0            | 1.2043966325  |
| -1.090373429  | 0.6172043238 | 0.9999537652 | -1.3812927695 |
| -1.029574592  | 0.9055146177 | 0.9999537652 | -1.2932473294 |
| 13.355081045  | 0.3178957903 | 0.9999537652 | -14.149476906 |
| 1.211821937   | 0.1248525386 | 0.9999537652 | 1.0731678115  |
| 1.0830180545  | 0.7393428987 | 0.9999537652 | 1.0757038205  |
| 1.671787244   | 0.1572450681 | 0.9999537652 | 1.2462690465  |
| 11.5766527773 | 0.3454301478 | 0.9999537652 | 3.7700212082  |
| 1.9021910848  | 0.2909239508 | 0.9999537652 | 1.135702533   |
| 1.1338209709  | 0.2892004555 | 0.9999537652 | -1.0832718725 |
| 1.1818857488  | 0.4815842885 | 0.9999537652 | 1.2205861525  |
| -1.4310703425 | 0.3727322015 | 0.9999537652 | -1.2145671933 |
| 1.0141365239  | 0.9420252643 | 0.9999537652 | -1.1242826323 |
| 1.0950284989  | 0.5014780399 | 0.9999537652 | 1.0081225511  |
| -1.2664954471 | 0.4993698719 | 0.9999537652 | -1.1791482154 |
| -1.0560213696 | 0.702268602  | 0.9999537652 | -1.159581567  |
| -1.2274688783 | 0.3690940286 | 0.9999537652 | -1.2005920631 |
| 2.7933974408  | 0.6948713406 | 0.9999537652 | 0             |
| 0             | 0            | 0            | 4.9527501949  |



gene\_expression\_table

|               |              |              |               |
|---------------|--------------|--------------|---------------|
| 2.7933974408  | 0.6948713406 | 0.9999537652 | -4.2377976271 |
| 1.5360039748  | 0.0262141626 | 0.9999537652 | -1.0073240153 |
| 0             | 0            | 0            | 2.9936870021  |
| 1.698659425   | 0.1139921075 | 0.9999537652 | -1.1958875504 |
| -1.1453192235 | 0.9086509514 | 0.9999537652 | -1.859280336  |
| 5.4939478721  | 0.1042652041 | 0.9999537652 | -1.610613801  |
| 1.1193342077  | 0.3320228204 | 0.9999537652 | -1.5561498901 |
| 1.9330420755  | 0.3731032652 | 0.9999537652 | -1.6009476582 |
| -1.1529188894 | 0.4669409468 | 0.9999537652 | -1.3141911837 |
| 0             | 0            | 0            | 4.9561842702  |
| 1.3829044638  | 0.1887349303 | 0.9999537652 | 1.3546802486  |
| 9.8205505243  | 0.3806024432 | 0.9999537652 | 1.2557686318  |
| 1.2239099077  | 0.5212192095 | 0.9999537652 | -1.1299298918 |
| 11.5864583426 | 0.3448229864 | 0.9999537652 | 2.4647648096  |
| 1.1974158141  | 0.5624993542 | 0.9999537652 | -1.3271516535 |
| -1.0163188705 | 0.9406390613 | 0.9999537652 | 1.0383885303  |
| 0             | 0            | 0            | 8.8639046058  |
| 1.0017929882  | 0.9924908703 | 0.9999537652 | 1.1246913783  |
| 1.7003370297  | 0.1768923331 | 0.9999537652 | 1.0606784486  |
| 4.2795716544  | 0.1764467898 | 0.9999537652 | 4.0080058676  |
| 2.0177191975  | 0.1476193755 | 0.9999537652 | 1.0575324125  |
| 1.1088914292  | 0.5732352172 | 0.9999537652 | -1.1899818251 |
| -1.1925736325 | 0.1557065228 | 0.9999537652 | -1.5514463085 |
| -1.0068955241 | 0.9692178285 | 0.9999537652 | -1.3966090852 |
| 1.1073681766  | 0.670428013  | 0.9999537652 | -1.5444051283 |
| 1.3249062187  | 0.3582319533 | 0.9999537652 | 1.3224980685  |
| -1.5861169239 | 0.7133179947 | 0.9999537652 | -1.4281141693 |
| 0             | 0            | 0            | 8.8639046058  |
| -1.4743450296 | 0.64499366   | 0.9999537652 | 2.0633900066  |
| -1.3219599047 | 0.1719399484 | 0.9999537652 | 1.1305881595  |
| 1.0955901317  | 0.7962107869 | 0.9999537652 | 1.0553953832  |
| -1.0049649224 | 0.9748129406 | 0.9999537652 | -1.0122406022 |
| -1.1030525978 | 0.5716164103 | 0.9999537652 | -1.2696773997 |
| -1.0716117245 | 0.5871358438 | 0.9999537652 | 1.0767997954  |
| -1.2416211531 | 0.588348796  | 0.9999537652 | 1.2494843587  |
| -2.0846733449 | 0.2553367603 | 0.9999537652 | -14.159275343 |
| 1.3671081636  | 0.4876913826 | 0.9999537652 | 1.3682078064  |
| -1.5881570201 | 0.708069387  | 0.9999537652 | 1.0023136832  |
| 1.3346379155  | 0.5901172668 | 0.9999537652 | 1.5153496654  |
| 25.6156185703 | 0.2096817295 | 0.9999537652 | -1.0403091835 |
| 1.542581106   | 0.1595200882 | 0.9999537652 | -1.0557556442 |
| 1.6018473574  | 0.6931691698 | 0.9999537652 | -2.0941712051 |
| -1.7149555905 | 0.0414629273 | 0.9999537652 | -1.8646014246 |
| 4.5505976667  | 0.5557790267 | 0.9999537652 | -2.1294907556 |
| 4.5505976667  | 0.5557790267 | 0.9999537652 | -1.1241083699 |
| -1.586167124  | 0.7107802378 | 0.9999537652 | -1.9205861372 |
| 1.4964917328  | 0.422854103  | 0.9999537652 | -1.3717250396 |
| 1.2788907567  | 0.2392539024 | 0.9999537652 | -1.073611821  |
| 1.202277345   | 0.6367563718 | 0.9999537652 | -1.3815630528 |

gene\_expression\_table

|               |              |              |               |
|---------------|--------------|--------------|---------------|
| -1.3452181228 | 0.2595387621 | 0.9999537652 | -1.6696939021 |
| 1.0318886281  | 0.8614279811 | 0.9999537652 | -1.4465061341 |
| -1.2247725479 | 0.5480855007 | 0.9999537652 | -1.0551473674 |
| 1.0340314084  | 0.8490308378 | 0.9999537652 | -1.027620123  |
| 4.5505976667  | 0.5557790267 | 0.9999537652 | 1.0024362396  |
| 1.1312357379  | 0.4727872663 | 0.9999537652 | 1.0583470253  |
| 2.7933974408  | 0.6948713406 | 0.9999537652 | 4.9527501949  |
| 4.5505976667  | 0.5557790267 | 0.9999537652 | -2.1128552243 |
| -5.855397775  | 0.1784713162 | 0.9999537652 | 1.0948274935  |
| 1.226418828   | 0.6030418361 | 0.9999537652 | 1.0388350981  |
| 0             | 0            | 0            | 2.996475627   |
| 1.2277185342  | 0.1824188169 | 0.9999537652 | 1.1514036385  |
| 2.7933974408  | 0.6948713406 | 0.9999537652 | 0             |
| -3.2098360912 | 0.2194561564 | 0.9999537652 | -3.2100972269 |
| 1.5666754327  | 0.2073705481 | 0.9999537652 | 1.0000053717  |
| 0             | 0            | 0            | 1.6293799659  |
| 1.4541620227  | 0.4030079103 | 0.9999537652 | -1.0396375821 |
| 1.2282270925  | 0.1069261984 | 0.9999537652 | -1.2059614783 |
| 1.1216701798  | 0.9024905083 | 0.9999537652 | -2.5242480573 |
| 1.4966853826  | 0.0406323051 | 0.9999537652 | 1.4904357197  |
| 2.7933974408  | 0.6948713406 | 0.9999537652 | -4.9085166009 |
| 1.0630169038  | 0.7980352334 | 0.9999537652 | -1.0290824579 |
| 1.1657570779  | 0.6380548572 | 0.9999537652 | -1.0194787956 |
| 2.7933974408  | 0.6948713406 | 0.9999537652 | -1.4678409108 |
| 1.0953696186  | 0.6994629566 | 0.9999537652 | -1.0086132003 |
| -1.1066536636 | 0.637159935  | 0.9999537652 | 1.1294841325  |
| 1.0780589231  | 0.6102839093 | 0.9999537652 | 1.2824743169  |
| -1.1914891517 | 0.6440303917 | 0.9999537652 | 1.2894061787  |
| 1.0341662743  | 0.8682172256 | 0.9999537652 | -1.235209575  |
| 1.0958036305  | 0.6962249736 | 0.9999537652 | 1.1250879518  |
| 1.1648845007  | 0.6782502087 | 0.9999537652 | -1.0059845002 |
| 2.3176808751  | 0.1511361171 | 0.9999537652 | -1.1004010026 |
| 1.2296514654  | 0.3854503751 | 0.9999537652 | 1.0183366278  |
| 1.0502031099  | 0.7081473763 | 0.9999537652 | 1.182052162   |
| -1.1660606425 | 0.4806484571 | 0.9999537652 | 1.0640205517  |
| -1.257252732  | 0.5578208053 | 0.9999537652 | 1.1641030491  |
| 1.019709227   | 0.9120835078 | 0.9999537652 | 1.2810625488  |
| -1.181058058  | 0.1602913154 | 0.9999537652 | -1.4777514356 |
| -1.0775866517 | 0.7626560154 | 0.9999537652 | 1.5384267179  |
| 1.0482883457  | 0.9108513709 | 0.9999537652 | 1.9089640068  |
| -1.1247627666 | 0.5129949217 | 0.9999537652 | -1.1916722484 |
| -1.2937681179 | 0.3523178786 | 0.9999537652 | -1.2552645749 |
| 9.8288704632  | 0.3801446171 | 0.9999537652 | 20.6004768562 |
| 8.064174035   | 0.4238584183 | 0.9999537652 | 2.996475627   |
| -1.1973885425 | 0.6223115057 | 0.9999537652 | -1.1245623719 |
| -1.0320811722 | 0.9163865328 | 0.9999537652 | 1.6864724442  |
| 1.2243477866  | 0.3989164383 | 0.9999537652 | 1.4400275153  |
| -1.3595888537 | 0.286470943  | 0.9999537652 | 1.2337887463  |
| -1.1453192235 | 0.90863368   | 0.9999537652 | 2.996475627   |

gene\_expression\_table

|               |              |              |               |
|---------------|--------------|--------------|---------------|
| 1.0097610764  | 0.9489873233 | 0.9999537652 | 1.1942304835  |
| 1.0671227974  | 0.6142070784 | 0.9999537652 | 1.1407309908  |
| 4.8358890185  | 0.1515497563 | 0.9999537652 | 1.2122205562  |
| 1.0147943183  | 0.9628263527 | 0.9999537652 | 1.0097637779  |
| -4.8113470503 | 0.1909570135 | 0.9999537652 | 2.996475627   |
| 0             | 0            | 0            | 2.996475627   |
| 4.5505976667  | 0.5557790267 | 0.9999537652 | 2.996475627   |
| 1.2386230889  | 0.1255224854 | 0.9999537652 | 1.2641887055  |
| 1.093864445   | 0.4587785786 | 0.9999537652 | 1.0640091118  |
| -1.1282172077 | 0.319867596  | 0.9999537652 | 1.172517253   |
| 1.0721415024  | 0.797889512  | 0.9999537652 | 1.0480093295  |
| 1.159951194   | 0.2441759415 | 0.9999537652 | 1.2409294568  |
| -1.024945222  | 0.961405319  | 0.9999537652 | 1.2662202225  |
| -2.7401415473 | 0.0335946413 | 0.9999537652 | -1.0288598893 |
| 0             | 0            | 0            | 2.9985540909  |
| -1.5977194628 | 0.0619682956 | 0.9999537652 | -1.1394805455 |
| -1.0200960129 | 0.9264959218 | 0.9999537652 | -1.072360123  |
| 0             | 0            | 0            | 8.8700459102  |
| 0             | 0            | 0            | 2.996475627   |
| -1.1591181112 | 0.7315349917 | 0.9999537652 | 1.43688214    |
| -1.1470525509 | 0.4967696843 | 0.9999537652 | 1.2511869557  |
| -1.0120874203 | 0.9143754091 | 0.9999537652 | 1.2144656448  |
| -3.7889870009 | 0.1877974708 | 0.9999537652 | -1.7179436304 |
| -1.0945545484 | 0.7276537763 | 0.9999537652 | -1.005141972  |
| -1.1479586872 | 0.6540800855 | 0.9999537652 | 1.0718275142  |
| -1.0649032174 | 0.7950463902 | 0.9999537652 | -1.1037874173 |
| 0             | 0            | 0            | 2.996475627   |
| 0             | 0            | 0            | 6.9133480437  |
| 1.4121692786  | 0.4598497303 | 0.9999537652 | 1.251589115   |
| -1.2503937844 | 0.4855207819 | 0.9999537652 | 1.3295911183  |
| -1.0277332158 | 0.9045850826 | 0.9999537652 | 1.0360637903  |
| 1.072315984   | 0.7130219035 | 0.9999537652 | 1.0366931672  |
| -1.0935358825 | 0.7047760561 | 0.9999537652 | 1.0083136811  |
| -1.3999679996 | 0.619842988  | 0.9999537652 | 1.8828397305  |
| 1.2873581838  | 0.6012741898 | 0.9999537652 | -1.060449365  |
| -1.1457555741 | 0.9107036899 | 0.9999537652 | -3.384595918  |
| 4.5505976667  | 0.5557790267 | 0.9999537652 | 2.2926838869  |
| -1.0291509029 | 0.8649364559 | 0.9999537652 | 1.3985036623  |
| 2.7957660672  | 0.7054785537 | 0.9999537652 | 4.9527501949  |
| -1.3534658719 | 0.3649693136 | 0.9999537652 | 1.2428621427  |
| 1.3284240629  | 0.2412215355 | 0.9999537652 | 1.190883589   |
| -1.090127928  | 0.6367899306 | 0.9999537652 | 1.505970108   |
| 8.064174035   | 0.4238570822 | 0.9999537652 | 0             |
| 0             | 0            | 0            | 2.9988886918  |
| 1.0426434256  | 0.9178859138 | 0.9999537652 | -3.9149299287 |
| -1.1117491132 | 0.5960620239 | 0.9999537652 | 1.0664326982  |
| -1.1667189197 | 0.5734744125 | 0.9999537652 | 1.5156054808  |
| -1.4939074423 | 0.5814653819 | 0.9999537652 | 1.9724641275  |
| 1.581938964   | 0.1725918725 | 0.9999537652 | -1.0167228594 |

gene\_expression\_table

|               |              |              |               |
|---------------|--------------|--------------|---------------|
| -1.3265913034 | 0.25642191   | 0.9999537652 | 1.0226245303  |
| 1.274835312   | 0.0825801787 | 0.9999537652 | 1.3572240672  |
| 5.830173951   | 0.0008693    | 0.9999537652 | 7.0047613637  |
| -1.2128930081 | 0.5810114982 | 0.9999537652 | 1.7792401468  |
| 1.0128253901  | 0.9544725541 | 0.9999537652 | -1.0394286676 |
| 1.4970843977  | 0.3800284172 | 0.9999537652 | -1.2380128721 |
| -1.0963785573 | 0.6561807771 | 0.9999537652 | 1.1726758889  |
| -1.1472577241 | 0.56832836   | 0.9999537652 | 1.1669034067  |
| -1.5781637505 | 0.0544758363 | 0.9999537652 | -1.4700185722 |
| -1.1701353796 | 0.4270914334 | 0.9999537652 | 1.0184828998  |
| -1.1554329234 | 0.4236991902 | 0.9999537652 | 1.0455699803  |
| -1.0225240938 | 0.9033163355 | 0.9999537652 | -1.3573965955 |
| -1.5897551395 | 0.5041519522 | 0.9999537652 | -1.03536236   |
| 1.1301085744  | 0.3428300293 | 0.9999537652 | 1.2781979416  |
| -1.7296889495 | 0.0899361334 | 0.9999537652 | 1.4608079493  |
| -1.3971220169 | 0.1464404855 | 0.9999537652 | 1.1648647615  |
| 1.1721379156  | 0.3124550372 | 0.9999537652 | 1.0068375466  |
| 2.7933974408  | 0.6948713406 | 0.9999537652 | -2.0477227478 |
| -1.5772041867 | 0.5821342937 | 0.9999537652 | -4.9096724685 |
| 1.0525005316  | 0.7321242631 | 0.9999537652 | 1.071049518   |
| -1.2746701478 | 0.3290082184 | 0.9999537652 | 1.6100948227  |
| 1.5416925639  | 0.1359844447 | 0.9999537652 | 1.1813723778  |
| 1.8724948748  | 0.1823530709 | 0.9999537652 | -1.3782542405 |
| -1.0593100271 | 0.8983578218 | 0.9999537652 | -1.3186193604 |
| 2.3853098311  | 0.0925239217 | 0.9999537652 | 1.1914259774  |
| -1.0345674465 | 0.8450774607 | 0.9999537652 | -1.0221789233 |
| -1.1915933216 | 0.4198020976 | 0.9999537652 | 1.0617305525  |
| 1.0622651212  | 0.8967139571 | 0.9999537652 | -1.0250247976 |
| -1.4554833063 | 0.0878411101 | 0.9999537652 | -1.3414801701 |
| 11.5966493128 | 0.3442703122 | 0.9999537652 | 1.2444904498  |
| -1.208950374  | 0.6757330523 | 0.9999537652 | -1.4864452136 |
| 1.3009698924  | 0.3538392612 | 0.9999537652 | -1.4662129266 |
| 6.3130691196  | 0.479828129  | 0.9999537652 | -1.1237570386 |
| 1.9210510653  | 0.0007126    | 0.9999537652 | 1.0070932263  |
| -1.0459972533 | 0.8893730994 | 0.9999537652 | -1.3435578132 |
| -1.2134586322 | 0.4514421661 | 0.9999537652 | -1.3303007737 |
| 2.3345973606  | 0.4597015139 | 0.9999537652 | 1.9439006421  |
| 1.2526375214  | 0.8109072595 | 0.9999537652 | -1.5161065424 |
| -1.0735266303 | 0.7655820726 | 0.9999537652 | -1.2092469414 |
| 1.3599527681  | 0.427986488  | 0.9999537652 | -1.5424785877 |
| -1.0573424428 | 0.947401199  | 0.9999537652 | -2.0477227478 |
| -1.407159314  | 0.5131905984 | 0.9999537652 | 1.1840049923  |
| 3.1464506577  | 0.007356     | 0.9999537652 | -1.1851503263 |
| -7.0341510274 | 0.112856345  | 0.9999537652 | 1.2418880989  |
| 1.5817184657  | 0.0333022222 | 0.9999537652 | -1.5568004726 |
| 3.1789916386  | 0.1149607365 | 0.9999537652 | -1.4858477425 |
| 1.0363156376  | 0.7462348157 | 0.9999537652 | 1.0216825372  |
| -1.4738309326 | 0.6574410295 | 0.9999537652 | 1.4032791701  |
| -1.3628220697 | 0.2264860216 | 0.9999537652 | -1.4938691548 |

gene\_expression\_table

|               |              |              |               |
|---------------|--------------|--------------|---------------|
| -1.2985700899 | 0.1496637568 | 0.9999537652 | -1.3084929511 |
| 1.4988051422  | 0.4265082377 | 0.9999537652 | 1.3667968135  |
| 2.7957660672  | 0.7054809147 | 0.9999537652 | -1.8594983184 |
| -1.1540270862 | 0.4719495155 | 0.9999537652 | 1.1544734553  |
| 2.7933974408  | 0.6948713406 | 0.9999537652 | 1.0119943569  |
| -1.2934488892 | 0.5817496794 | 0.9999537652 | -1.0012214379 |
| -1.3568049148 | 0.178599515  | 0.9999537652 | -1.2578852935 |
| -1.2075832828 | 0.4309250967 | 0.9999537652 | -1.0028055611 |
| 1.0881828735  | 0.6583465298 | 0.9999537652 | -1.2907676159 |
| -1.1527550849 | 0.7616373463 | 0.9999537652 | 1.093627361   |
| 1.4900947652  | 0.5701339147 | 0.9999537652 | 1.2360867785  |
| 1.2150491088  | 0.6025413176 | 0.9999537652 | -1.1554641156 |
| -1.7008315477 | 0.5854966472 | 0.9999537652 | -1.346567469  |
| 1.4584001952  | 0.0877356483 | 0.9999537652 | 1.0996443532  |
| 1.4539789531  | 0.3227438796 | 0.9999537652 | -1.5668184312 |
| -1.3095454841 | 0.1184677885 | 0.9999537652 | -1.117737687  |
| 0             | 0            | 0            | 2.9940379764  |
| -1.0284544651 | 0.8873635267 | 0.9999537652 | -1.2831222052 |
| -1.2958290233 | 0.1153035106 | 0.9999537652 | -1.0958692865 |
| -2.8772495082 | 0.1550334452 | 0.9999537652 | -5.4365958443 |
| -1.2341761556 | 0.1341893058 | 0.9999537652 | -1.2730833474 |
| 1.8447991669  | 0.5983745009 | 0.9999537652 | -1.525284329  |
| 0             | 0            | 0            | 10.818785458  |
| 1.0276173005  | 0.8508859163 | 0.9999537652 | -1.1515558926 |
| -1.1457555741 | 0.9106870632 | 0.9999537652 | -2.2425086765 |
| -1.5741996781 | 0.0237035578 | 0.9999537652 | -1.1296531448 |
| 1.0725856843  | 0.6949095112 | 0.9999537652 | 1.265458727   |
| -1.6171481755 | 0.1412947611 | 0.9999537652 | 1.0520866134  |
| -1.3799140705 | 0.5648061566 | 0.9999537652 | -1.3121459758 |
| 1.0335265875  | 0.8121779914 | 0.9999537652 | -1.3453573596 |
| 0             | 0            | 0            | 6.908559683   |
| -2.4387448463 | 0.3504473173 | 0.9999537652 | 1.8126139092  |
| 1.165055936   | 0.2640011957 | 0.9999537652 | 1.2998936869  |
| -1.251442232  | 0.598584382  | 0.9999537652 | -1.0472475037 |
| -1.034919673  | 0.8191217985 | 0.9999537652 | 1.0666477789  |
| -1.1923384106 | 0.312266677  | 0.9999537652 | 1.0016431758  |
| 1.0739475427  | 0.7639988624 | 0.9999537652 | 1.0219576039  |
| 1.0769451168  | 0.8200466101 | 0.9999537652 | 1.1995024763  |
| -1.4213039175 | 0.0436527595 | 0.9999537652 | -1.4438451596 |
| 1.5422457228  | 0.0864568713 | 0.9999537652 | -1.5958934884 |
| -1.1605962485 | 0.3000556362 | 0.9999537652 | -1.1120629771 |
| 1.0635603534  | 0.6249434992 | 0.9999537652 | 1.1230512765  |
| -3.8493430216 | 0.0701681674 | 0.9999537652 | -1.146612601  |
| -1.804850317  | 0.1863408573 | 0.9999537652 | -1.112478096  |
| 2.7933974408  | 0.6948713406 | 0.9999537652 | -1.1248877899 |
| 1.0223047989  | 0.9006774765 | 0.9999537652 | -1.0194559099 |
| -1.1201877812 | 0.4768445197 | 0.9999537652 | -1.0604886123 |
| 2.7933974408  | 0.6948713406 | 0.9999537652 | 0             |
| 1.3005825753  | 0.1004791369 | 0.9999537652 | 1.0837383107  |

gene\_expression\_table

|               |              |              |               |
|---------------|--------------|--------------|---------------|
| 1.0679551318  | 0.8780915913 | 0.9999537652 | -1.1527470941 |
| 0             | 0            | 0            | 2.9988886918  |
| 1.2092841404  | 0.6107975243 | 0.9999537652 | -1.1007348853 |
| -1.4577546906 | 0.0943985855 | 0.9999537652 | 1.0189001421  |
| 1.0582294747  | 0.6900225722 | 0.9999537652 | 1.0683064326  |
| -1.0230998976 | 0.8775689152 | 0.9999537652 | 1.0206674925  |
| -1.5875118025 | 0.719861829  | 0.9999537652 | 6.9133480437  |
| 1.6018881045  | 0.6925672651 | 0.9999537652 | 0             |
| 1.081716247   | 0.7850048533 | 0.9999537652 | 1.2537202461  |
| 0             | 0            | 0            | 1.2398837679  |
| 1.8388612766  | 0.4313999445 | 0.9999537652 | 1.6020963591  |
| 0             | 0            | 0            | 4.9527501949  |
| 9.8205505243  | 0.3805794228 | 0.9999537652 | 1.2610511029  |
| -1.359568862  | 0.2013058479 | 0.9999537652 | -1.0224986581 |
| 2.7957660672  | 0.7054832767 | 0.9999537652 | 0             |
| -1.4590969081 | 0.2785047582 | 0.9999537652 | -1.219770326  |
| 2.3721824376  | 0.1382318609 | 0.9999537652 | 2.3873555128  |
| 9.8205505243  | 0.3805564752 | 0.9999537652 | 0             |
| -1.0426167916 | 0.7869568888 | 0.9999537652 | 1.0237213529  |
| 1.0080615151  | 0.9554696698 | 0.9999537652 | -1.3476380248 |
| 0             | 0            | 0            | 6.908559683   |
| 20.3530564257 | 0.2434367    | 0.9999537652 | -1.8961334203 |
| 2.8173722589  | 0.3578436447 | 0.9999537652 | 1.2776901668  |
| 1.6032957979  | 0.6855260959 | 0.9999537652 | -2.78893139   |
| 1.1559682557  | 0.5290365509 | 0.9999537652 | -1.0749183568 |
| -6.6831020251 | 0.0205660771 | 0.9999537652 | 1.1594663864  |
| -1.2360019544 | 0.0998451874 | 0.9999537652 | -1.5170309296 |
| 1.0622188426  | 0.8508685919 | 0.9999537652 | -1.3165243928 |
| -1.0714436087 | 0.7269613943 | 0.9999537652 | -1.1648210908 |
| 1.328316327   | 0.2183756282 | 0.9999537652 | -1.0821626065 |
| 1.0181583546  | 0.9622829065 | 0.9999537652 | 1.7993897083  |
| -1.2901307454 | 0.268381033  | 0.9999537652 | -1.0876534639 |
| 1.0162977585  | 0.9413699657 | 0.9999537652 | 1.1130722193  |
| 1.3594099105  | 0.7970234108 | 0.9999537652 | -1.5186976953 |
| 1.3588576256  | 0.8008310861 | 0.9999537652 | -1.8649865122 |
| -1.3836247056 | 0.4729035472 | 0.9999537652 | -2.4343626033 |
| -1.0352915919 | 0.8211469486 | 0.9999537652 | -1.0920870391 |
| -1.2934004406 | 0.124654583  | 0.9999537652 | 1.0089312664  |
| 1.0170091418  | 0.9342706739 | 0.9999537652 | -1.0671527287 |
| -1.0667613964 | 0.7116011844 | 0.9999537652 | -1.2343447624 |
| 1.803487669   | 0.1804835454 | 0.9999537652 | 1.0523155062  |
| -1.5251975786 | 0.3791708341 | 0.9999537652 | -2.2366824481 |
| 9.8205505243  | 0.3805494011 | 0.9999537652 | -1.3582733839 |
| 1.7849205255  | 0.001992     | 0.9999537652 | 1.1368261123  |
| -1.2470641064 | 0.1720962981 | 0.9999537652 | -1.1491488305 |
| 0             | 0            | 0            | 2.9985540909  |
| 1.487629049   | 0.1165691285 | 0.9999537652 | 1.2021067438  |
| -1.262385007  | 0.3200298605 | 0.9999537652 | -1.3239437915 |
| -1.0632333232 | 0.5983990699 | 0.9999537652 | 1.0078447486  |

gene\_expression\_table

|               |              |              |               |
|---------------|--------------|--------------|---------------|
| -1.3131980863 | 0.4572652733 | 0.9999537652 | -1.276629097  |
| -1.1990671425 | 0.3559144233 | 0.9999537652 | -1.0735665224 |
| 1.3590426899  | 0.3761537995 | 0.9999537652 | -1.2980233679 |
| 6.4674395546  | 0.070478346  | 0.9999537652 | 1.8680940039  |
| -1.0726072054 | 0.8100611604 | 0.9999537652 | -1.1744467349 |
| 1.3150458572  | 0.1022277307 | 0.9999537652 | -1.1286400813 |
| -1.3186076808 | 0.4265578473 | 0.9999537652 | -2.8193076484 |
| -1.1396208367 | 0.544703296  | 0.9999537652 | 1.2787018343  |
| 23.8818846228 | 0.2167390634 | 0.9999537652 | 1.7563703072  |
| -1.5211372542 | 0.3665068344 | 0.9999537652 | -1.4506341495 |
| -1.1335575491 | 0.4941690353 | 0.9999537652 | 1.12339959    |
| -1.0182486212 | 0.9147780646 | 0.9999537652 | -1.1241980094 |
| 6.3075231393  | 0.4857492078 | 0.9999537652 | 0             |
| 1.7158683406  | 0.3360161316 | 0.9999537652 | -1.0497978916 |
| 1.0920240419  | 0.62215233   | 0.9999537652 | 1.1422894243  |
| 1.4469375885  | 0.4025877709 | 0.9999537652 | 1.1218054119  |
| 1.1216416516  | 0.901210313  | 0.9999537652 | -1.5838380262 |
| 1.0893117919  | 0.6576163512 | 0.9999537652 | -1.2865437113 |
| -1.3154333204 | 0.6439373177 | 0.9999537652 | 1.3233841675  |
| -1.3894082558 | 0.1666911894 | 0.9999537652 | -1.3309752956 |
| 1.1693375575  | 0.4579439293 | 0.9999537652 | -1.1578602813 |
| -1.0693351968 | 0.7865455634 | 0.9999537652 | -1.6695905654 |
| 1.2406947549  | 0.6664970513 | 0.9999537652 | -1.7505240547 |
| 1.4884660645  | 0.025441515  | 0.9999537652 | -1.5205260412 |
| 1.1698595601  | 0.3888229725 | 0.9999537652 | -1.3292850387 |
| 6.3075231393  | 0.4857263905 | 0.9999537652 | 2.996475627   |
| -1.1165792233 | 0.5418866877 | 0.9999537652 | -1.025219763  |
| 1.3600088454  | 0.7955072923 | 0.9999537652 | -2.1727063722 |
| 1.32927784    | 0.0995955705 | 0.9999537652 | -1.0906901074 |
| 1.1399586414  | 0.3576059174 | 0.9999537652 | 1.1838622933  |
| 1.4222577311  | 0.1942158082 | 0.9999537652 | 1.5004387955  |
| 1.3366365121  | 0.3625361118 | 0.9999537652 | 1.0847390348  |
| -1.1066010742 | 0.7141809449 | 0.9999537652 | -1.0567885824 |
| 2.7933974408  | 0.6948713406 | 0.9999537652 | -9.7554110723 |
| 1.8642987684  | 0.2497673143 | 0.9999537652 | 1.7999600779  |
| 1.0117578102  | 0.9281820982 | 0.9999537652 | -1.1964733969 |
| 1.0717622344  | 0.720230473  | 0.9999537652 | -1.0306774712 |
| 1.1059891928  | 0.6371327211 | 0.9999537652 | 1.0680966286  |
| 9.1237371271  | 0.0400749476 | 0.9999537652 | -1.47512839   |
| 1.6012712676  | 0.002076     | 0.9999537652 | -1.1473529684 |
| -1.3040401656 | 0.1204523164 | 0.9999537652 | -1.4761737229 |
| 3.7983224081  | 0.0271273739 | 0.9999537652 | 2.2286307361  |
| 1.1224886231  | 0.6927056118 | 0.9999537652 | -1.2345037938 |
| 5.3460178673  | 0.0491827768 | 0.9999537652 | 1.0024930783  |
| 13.3324809638 | 0.3194026856 | 0.9999537652 | 1.0485154464  |
| -1.0623931073 | 0.7766317106 | 0.9999537652 | -1.0302681103 |
| 1.2127056579  | 0.1569705905 | 0.9999537652 | -1.2231189272 |
| -1.3357532129 | 0.2566369982 | 0.9999537652 | -1.773248014  |
| -1.2470493566 | 0.4600096806 | 0.9999537652 | -1.5713887581 |

gene\_expression\_table

|               |              |              |                |
|---------------|--------------|--------------|----------------|
| -1.1761764882 | 0.796154256  | 0.9999537652 | 1.0417527966   |
| 0             | 0            | 0            | 9.7116702472   |
| 15.2205810263 | 0.3049327708 | 0.9999537652 | -18.5461680391 |
| -1.719523697  | 0.1597657386 | 0.9999537652 | -1.4430717011  |
| -1.0459359664 | 0.7393024577 | 0.9999537652 | -1.2587157308  |
| 1.1304253447  | 0.5593153775 | 0.9999537652 | -1.105511541   |
| -1.4523386343 | 0.2552905152 | 0.9999537652 | -1.1224285761  |
| -1.0235715085 | 0.9403831093 | 0.9999537652 | -1.2798035639  |
| 1.1331001403  | 0.4993180178 | 0.9999537652 | -1.0167621156  |
| 15.0880352532 | 0.2955892438 | 0.9999537652 | 1.2661429145   |
| -1.4845108143 | 0.004804     | 0.9999537652 | -1.0570591659  |
| 2.551628948   | 0.0212107716 | 0.9999537652 | -1.2359445222  |
| 1.6380420288  | 0.0162382303 | 0.9999537652 | -1.1069850529  |
| 1.0546898215  | 0.6857088037 | 0.9999537652 | 1.1628932732   |
| 1.104017262   | 0.7319083332 | 0.9999537652 | -1.7981194791  |
| 2.9491984565  | 0.2037967334 | 0.9999537652 | 1.8700278501   |
| 0             | 0            | 0            | -5.3608259368  |
| 20.3530564257 | 0.2433991055 | 0.9999537652 | 1.5320004571   |
| -1.0405986745 | 0.8795818362 | 0.9999537652 | 1.0923007845   |
| 1.0472330956  | 0.8774829467 | 0.9999537652 | 1.2640989948   |
| -1.4521928607 | 0.040412784  | 0.9999537652 | -1.0797982511  |
| 4.5505976667  | 0.5557790267 | 0.9999537652 | -1.9282391141  |
| -1.0835233486 | 0.6348122059 | 0.9999537652 | -1.1591135058  |
| -1.7980431703 | 0.0721008648 | 0.9999537652 | -1.4046391392  |
| 0             | 0            | 0            | -1.4683576122  |
| 1.0863607976  | 0.7979072626 | 0.9999537652 | -1.20600614    |
| 4.3306479182  | 0.1259977229 | 0.9999537652 | -1.4734213639  |
| -1.0288673451 | 0.9635854798 | 0.9999537652 | 1.3864346485   |
| 1.0448267999  | 0.7163906599 | 0.9999537652 | -1.2959607117  |
| 1.0939814099  | 0.6994922539 | 0.9999537652 | 1.287732095    |
| 1.1034701615  | 0.766625649  | 0.9999537652 | 1.2532707225   |
| 1.1070542251  | 0.6067476999 | 0.9999537652 | 1.0580775672   |
| -1.1453192235 | 0.9086163647 | 0.9999537652 | 1.6033828985   |
| -1.1866217015 | 0.453124199  | 0.9999537652 | -1.1553644184  |
| -1.4738309326 | 0.657352028  | 0.9999537652 | -7.059407508   |
| 1.5527095675  | 0.0578129006 | 0.9999537652 | -1.3741477036  |
| 1.1236950163  | 0.8892660819 | 0.9999537652 | -1.239649121   |
| 5.2421556375  | 0.1294811357 | 0.9999537652 | -1.4903968027  |
| -1.3368210118 | 0.1112946434 | 0.9999537652 | -1.7405947593  |
| -1.4311420977 | 0.4698846268 | 0.9999537652 | -1.0565165766  |
| -1.0495538285 | 0.8734987538 | 0.9999537652 | -1.0540403849  |
| 2.2292907561  | 0.1350976065 | 0.9999537652 | -1.3886635535  |
| -1.0623578347 | 0.8174313755 | 0.9999537652 | 1.927155001    |
| 1.2161583754  | 0.4521825624 | 0.9999537652 | -1.1494026898  |
| 4.4194285245  | 0.0343611582 | 0.9999537652 | 1.0034864765   |
| 1.0377531271  | 0.8857993072 | 0.9999537652 | 1.2124048895   |
| -1.8043832832 | 0.1834550445 | 0.9999537652 | 1.1771673362   |
| -1.286542464  | 0.552696716  | 0.9999537652 | -1.0145744028  |
| -1.25679892   | 0.1932593429 | 0.9999537652 | -1.0238543449  |



gene\_expression\_table

|               |              |              |               |
|---------------|--------------|--------------|---------------|
| -1.7061631951 | 0.512245813  | 0.9999537652 | 2.015179835   |
| 1.1137797095  | 0.4690510281 | 0.9999537652 | -1.0131434984 |
| -1.0578275344 | 0.7694535403 | 0.9999537652 | -1.0725094354 |
| 1.3600088454  | 0.7960314898 | 0.9999537652 | -4.7721736557 |
| 0             | 0            | 0            | 1.8383591193  |
| 1.1477192382  | 0.2576752983 | 0.9999537652 | 1.0643932097  |
| 1.0431215243  | 0.8584058197 | 0.9999537652 | -1.2314243146 |
| 9.8291821523  | 0.3810792211 | 0.9999537652 | 1.1113292551  |
| 0             | 0            | 0            | -1.6173574324 |
| -1.2291604513 | 0.2864529338 | 0.9999537652 | -1.0996644369 |
| 1.0374523201  | 0.9211744551 | 0.9999537652 | 1.2410887995  |
| 2.4311635089  | 0.061472287  | 0.9999537652 | 1.2829621228  |
| -1.0295564388 | 0.9447503079 | 0.9999537652 | -1.1722893862 |
| 1.1936037065  | 0.4672240491 | 0.9999537652 | -1.1334585605 |
| 0             | 0            | 0            | 0             |
| -1.2403103001 | 0.6468437841 | 0.9999537652 | -1.6164179914 |
| -1.3533560557 | 0.1822975248 | 0.9999537652 | 1.2060550334  |
| 1.2004094194  | 0.3690636639 | 0.9999537652 | 1.3335506904  |
| 0             | 0            | 0            | 1.266587837   |
| -1.0490138295 | 0.7628811996 | 0.9999537652 | -1.1003804534 |
| 1.1242072872  | 0.8664818374 | 0.9999537652 | 1.1334361866  |
| 1.1251860686  | 0.8659175242 | 0.9999537652 | -1.1703505369 |
| 1.145590572   | 0.411043483  | 0.9999537652 | -1.0439053235 |
| 6.3128691894  | 0.481370604  | 0.9999537652 | 21.8277395785 |
| -1.3136730568 | 0.3696628686 | 0.9999537652 | -1.8047914737 |
| 0             | 0            | 0            | 0             |
| 1.1762937518  | 0.6378251229 | 0.9999537652 | 1.1216960639  |
| -1.0520168673 | 0.8514154958 | 0.9999537652 | -1.4206729006 |
| -1.0129021342 | 0.9710579648 | 0.9999537652 | 1.0244662873  |
| 0             | 0            | 0            | 22.9814455074 |
| -4.3267800353 | 0.196360431  | 0.9999537652 | -4.1081049688 |
| 1.2376801656  | 0.2302393292 | 0.9999537652 | 1.1417793181  |
| -1.5170894827 | 0.2534339765 | 0.9999537652 | -1.042069914  |
| 1.3637911166  | 0.1707045677 | 0.9999537652 | 1.2241968907  |
| 1.3036454842  | 0.7494629913 | 0.9999537652 | 4.8885934785  |
| 1.9936796515  | 0.0714485827 | 0.9999537652 | -1.38196012   |
| 0             | 0            | 0            | 2.996475627   |
| -1.5073464892 | 0.3210055756 | 0.9999537652 | 1.0302658554  |
| 1.1650335588  | 0.5902805278 | 0.9999537652 | -1.1055173815 |
| 1.6807324819  | 0.4288357994 | 0.9999537652 | 1.0352991504  |
| -1.1946343414 | 0.263872796  | 0.9999537652 | -1.5006053242 |
| -1.2354060772 | 0.3580659043 | 0.9999537652 | 1.0784520948  |
| 4.20605194    | 0.2970301065 | 0.9999537652 | -1.2130610766 |
| -2.0240465997 | 0.1687931397 | 0.9999537652 | 1.5123239872  |
| -1.0086708751 | 0.9900522166 | 0.9999537652 | -1.4126903528 |
| 1.2883472386  | 0.7181160133 | 0.9999537652 | -1.4102941558 |
| -1.3306718218 | 0.1051930339 | 0.9999537652 | -1.2347059899 |
| -4.3214691297 | 0.1498731208 | 0.9999537652 | 4.0161574689  |
| -1.3685167982 | 0.7411237957 | 0.9999537652 | 2.6421916756  |

gene\_expression\_table

|               |              |              |               |
|---------------|--------------|--------------|---------------|
| -1.120333337  | 0.5927805309 | 0.9999537652 | -1.0710698321 |
| 1.0470307226  | 0.743670398  | 0.9999537652 | -1.463306182  |
| -1.2682791024 | 0.3070792828 | 0.9999537652 | -1.3630524875 |
| 55.3905770121 | 0.1165454776 | 0.9999537652 | 1.6447327969  |
| -1.311903025  | 0.380659926  | 0.9999537652 | -1.106327684  |
| -1.1300927121 | 0.8385744323 | 0.9999537652 | 1.0085110121  |
| 1.9875802815  | 0.1403839349 | 0.9999537652 | -1.1791410574 |
| -1.1383391077 | 0.3801249348 | 0.9999537652 | 1.0578530355  |
| -1.3272048102 | 0.2123362942 | 0.9999537652 | 1.1137995697  |
| 0             | 0            | 0            | 2.9985540909  |
| 1.1281050728  | 0.4115895632 | 0.9999537652 | -1.2412266682 |
| 4.5505976667  | 0.5557790267 | 0.9999537652 | 4.9527501949  |
| 1.0358891855  | 0.9686167954 | 0.9999537652 | 1.08782678    |
| 0             | 0            | 0            | 2.996475627   |
| 1.0004930433  | 0.998993079  | 0.9999537652 | -1.2559840346 |
| 1.0167789469  | 0.9443360871 | 0.9999537652 | -1.5497537206 |
| 3.3087541388  | 0.2716723318 | 0.9999537652 | 1.5500113516  |
| -1.0515537329 | 0.8044856143 | 0.9999537652 | -1.1308884522 |
| 1.2614216143  | 0.0601372921 | 0.9999537652 | -1.293448118  |
| -1.2746614738 | 0.1606763397 | 0.9999537652 | -1.343514666  |
| -1.4083859417 | 0.1219964968 | 0.9999537652 | -1.0150048583 |
| 0             | 0            | 0            | 4.9527501949  |
| 1.1843584263  | 0.4939920952 | 0.9999537652 | -1.0187531996 |
| 1.1662839454  | 0.5812564947 | 0.9999537652 | -1.1073929618 |
| 1.8511995871  | 0.001362     | 0.9999537652 | 1.1387724476  |
| -1.2885166979 | 0.2097972531 | 0.9999537652 | -1.5979015063 |
| 1.1485985637  | 0.463638587  | 0.9999537652 | -1.2338173939 |
| 1.2474504541  | 0.2814024272 | 0.9999537652 | 1.0274012556  |
| 1.4033976605  | 0.1585237062 | 0.9999537652 | -1.0264917348 |
| -1.1791115305 | 0.6931894239 | 0.9999537652 | 1.6457190488  |
| -1.0959611736 | 0.544670553  | 0.9999537652 | -1.268436564  |
| 1.3640825792  | 0.4394251463 | 0.9999537652 | -1.0725835009 |
| -1.2702086188 | 0.5106842361 | 0.9999537652 | 1.0639511794  |
| 1.0517213946  | 0.7251277381 | 0.9999537652 | 1.1020028167  |
| 1.6071434688  | 0.0321082374 | 0.9999537652 | 1.4847501504  |
| 1.1719379916  | 0.7833002549 | 0.9999537652 | -1.2480287389 |
| -1.3012101317 | 0.3635409955 | 0.9999537652 | -1.2585399598 |
| 2.6895092879  | 0.2385949016 | 0.9999537652 | 1.4524556074  |
| 1.8705325496  | 0.4019540183 | 0.9999537652 | -1.892635601  |
| 1.179616791   | 0.509223424  | 0.9999537652 | 1.0724299226  |
| 8.064174035   | 0.423855746  | 0.9999537652 | 0             |
| 1.1200919063  | 0.4592957806 | 0.9999537652 | -1.3477369094 |
| -1.2595693104 | 0.287632038  | 0.9999537652 | -1.161452869  |
| 1.9059187914  | 0.4672046374 | 0.9999537652 | -1.1140665736 |
| -1.1457555741 | 0.9106704818 | 0.9999537652 | -1.2697820089 |
| 1.0282505514  | 0.8757687512 | 0.9999537652 | -1.0851625246 |
| -1.3137997922 | 0.2059123605 | 0.9999537652 | 1.0281362136  |
| 0             | 0            | 0            | 0             |
| 3.3080470333  | 0.0608573319 | 0.9999537652 | -2.3074879621 |

gene\_expression\_table

|               |              |              |               |
|---------------|--------------|--------------|---------------|
| 0             | 0            | 0            | 2.9972756496  |
| 9.8372048419  | 0.3843062409 | 0.9999537652 | 4.0566323706  |
| -1.1301523119 | 0.6636493577 | 0.9999537652 | -1.1704766606 |
| -1.7345363658 | 0.4193767725 | 0.9999537652 | 1.1376282384  |
| -1.0586229118 | 0.7711485084 | 0.9999537652 | -1.8139138372 |
| 2.6488226131  | 0.1941596219 | 0.9999537652 | 2.207345736   |
| 1.3473071656  | 0.0748946907 | 0.9999537652 | -1.0057254017 |
| 1.0826140142  | 0.8001200143 | 0.9999537652 | 1.5016244389  |
| 2.7933974408  | 0.6948713406 | 0.9999537652 | 0             |
| 0             | 0            | 0            | 12.7732027325 |
| 1.0459041815  | 0.7933892395 | 0.9999537652 | -1.58328359   |
| 0             | 0            | 0            | 2.9985540909  |
| 1.5326933747  | 0.4164263986 | 0.9999537652 | -1.2236066266 |
| 1.6046040403  | 0.6917707948 | 0.9999537652 | -2.1769706842 |
| 1.122660888   | 0.4718890446 | 0.9999537652 | -1.4579593921 |
| 39.7041008618 | 0.1475991552 | 0.9999537652 | -2.1312910006 |
| 1.3028815963  | 0.1823035632 | 0.9999537652 | -1.5651416058 |
| 1.3723866226  | 0.2145749054 | 0.9999537652 | -1.0285542219 |
| -1.2614698103 | 0.5023397603 | 0.9999537652 | -1.1135315466 |
| -1.0132266269 | 0.9585522246 | 0.9999537652 | -1.0098569271 |
| 1.1283570835  | 0.8121235041 | 0.9999537652 | -1.0581769348 |
| 1.2923449892  | 0.4693123496 | 0.9999537652 | -1.1155336866 |
| -1.2521622905 | 0.5918397809 | 0.9999537652 | -1.0139659426 |
| 2.7957660672  | 0.7054856396 | 0.9999537652 | 0             |
| 1.1396036817  | 0.5664677148 | 0.9999537652 | -1.0620047471 |
| 1.1881984225  | 0.4683083382 | 0.9999537652 | -1.057108781  |
| -1.2976669841 | 0.1058410483 | 0.9999537652 | -1.0947358968 |
| 1.0554825372  | 0.8714353228 | 0.9999537652 | 1.2517152158  |
| -3.2071184374 | 0.2125790761 | 0.9999537652 | -2.2054639418 |
| -1.6888941245 | 0.0595993437 | 0.9999537652 | -1.5459255313 |
| -4.1003030613 | 0.1495902562 | 0.9999537652 | 16.7153157555 |
| 1.1010789506  | 0.849421635  | 0.9999537652 | -1.0951465634 |
| 1.7563124292  | 0.0750090928 | 0.9999537652 | -1.1621660762 |
| 1.244365816   | 0.627586769  | 0.9999537652 | 1.4081574407  |
| 1.2944710075  | 0.3033174    | 0.9999537652 | 1.239900045   |
| 2.1937105913  | 0.315831261  | 0.9999537652 | 1.2253415563  |
| 1.1658942226  | 0.8143072371 | 0.9999537652 | 1.1001459919  |
| -1.3633704643 | 0.1651451195 | 0.9999537652 | -1.008350153  |
| 2.7933974408  | 0.6948713406 | 0.9999537652 | 8.8639046058  |
| 1.1176349168  | 0.6745296837 | 0.9999537652 | -1.1535515591 |
| -1.2924310654 | 0.421361771  | 0.9999537652 | -1.0035198717 |
| -1.1756105772 | 0.2821831644 | 0.9999537652 | -1.0321947226 |
| 1.2838351741  | 0.6937459471 | 0.9999537652 | -1.0646292152 |
| -1.5875118025 | 0.7198285331 | 0.9999537652 | 1.2400291296  |
| -1.2364669196 | 0.1702432465 | 0.9999537652 | -1.3865126451 |
| 1.2657827949  | 0.0458097196 | 0.9999537652 | -1.3449928239 |
| 2.8188879029  | 0.1115304891 | 0.9999537652 | -1.1485760228 |
| -1.1082002784 | 0.8140595727 | 0.9999537652 | -1.2161300368 |
| 8.064174035   | 0.4238544098 | 0.9999537652 | -1.3188442921 |

gene\_expression\_table

|               |              |              |               |
|---------------|--------------|--------------|---------------|
| -1.0726198358 | 0.8440422844 | 0.9999537652 | -1.2263715504 |
| -1.214909249  | 0.2806375652 | 0.9999537652 | -1.1537940212 |
| 1.1608701596  | 0.3962550227 | 0.9999537652 | 1.9530523656  |
| 1.3965847999  | 0.6273554772 | 0.9999537652 | 1.3160484734  |
| -1.4285065007 | 0.1823650738 | 0.9999537652 | 1.185016327   |
| 2.7933974408  | 0.6948713406 | 0.9999537652 | 0             |
| 1.1426607954  | 0.7138442235 | 0.9999537652 | -1.2979840495 |
| -1.1423811041 | 0.6040181185 | 0.9999537652 | 1.2963173426  |
| 1.3588921917  | 0.7999082067 | 0.9999537652 | 1.2307342269  |
| -1.3819104686 | 0.4575578992 | 0.9999537652 | 1.0632770748  |
| -1.0961023794 | 0.6309564832 | 0.9999537652 | -1.2428521456 |
| 2.3808946632  | 0.1196842596 | 0.9999537652 | 1.0591380176  |
| 1.1212430665  | 0.9123543124 | 0.9999537652 | 1.2197594041  |
| -1.1688282056 | 0.3046970341 | 0.9999537652 | -1.1669492991 |
| -1.0165452602 | 0.9322961596 | 0.9999537652 | 1.2216942647  |
| 1.0719363028  | 0.8021190726 | 0.9999537652 | 1.0149268118  |
| 4.5135922652  | 0.0252168205 | 0.9999537652 | -1.1395652107 |
| 8.885375379   | 0.0450586252 | 0.9999537652 | -1.9069868573 |
| 1.325537838   | 0.0311560868 | 0.9999537652 | 1.2043603349  |
| -1.0846227732 | 0.69933287   | 0.9999537652 | -1.6060557994 |
| -2.2639689735 | 0.1175515285 | 0.9999537652 | -1.2555829581 |
| 2.0591268911  | 0.0081       | 0.9999537652 | -1.3581570118 |
| -1.0659362063 | 0.8861765174 | 0.9999537652 | -1.2044940791 |
| -1.1075535652 | 0.7166205661 | 0.9999537652 | 1.5088721074  |
| 1.0525803912  | 0.7827430016 | 0.9999537652 | 1.0227684358  |
| 1.4472430402  | 0.1968863502 | 0.9999537652 | 1.5302836452  |
| 2.0146502341  | 0.3727411799 | 0.9999537652 | 2.5921936947  |
| -1.0712832442 | 0.7331085269 | 0.9999537652 | 1.4854659655  |
| -1.2927168086 | 0.5077315697 | 0.9999537652 | -1.3287293093 |
| 1.0168454914  | 0.9421374219 | 0.9999537652 | 1.3552929062  |
| 1.3619023403  | 0.0975713433 | 0.9999537652 | 1.2869908174  |
| 1.1486721533  | 0.5292648487 | 0.9999537652 | 1.5763814567  |
| -1.1608398396 | 0.4630036979 | 0.9999537652 | 1.1509275924  |
| 6.3075231393  | 0.4857035612 | 0.9999537652 | -2.8188010609 |
| -1.0809832252 | 0.6392738664 | 0.9999537652 | 1.0181345881  |
| -1.0567421345 | 0.7525498655 | 0.9999537652 | -1.0801969844 |
| 1.4947645522  | 0.2206917176 | 0.9999537652 | 1.421428663   |
| 0             | 0            | 0            | 2.6434024479  |
| -1.6658819164 | 0.4333457971 | 0.9999537652 | 1.1687933144  |
| 9.8205505243  | 0.3805423413 | 0.9999537652 | 1.5337522997  |
| -1.0654590622 | 0.848148443  | 0.9999537652 | -1.2353970623 |
| 18.5983228161 | 0.2579893867 | 0.9999537652 | 1.0281495543  |
| -1.0025611851 | 0.9887195812 | 0.9999537652 | 1.5395556125  |
| 6.3075231393  | 0.4856807199 | 0.9999537652 | 2.8230593868  |
| 0             | 0            | 0            | 1.6293799659  |
| 2.7933974408  | 0.6948713406 | 0.9999537652 | 2.9985540909  |
| 2.6385886072  | 0.234634825  | 0.9999537652 | -5.1602685354 |
| -1.0025576653 | 0.9898298049 | 0.9999537652 | 2.1215014107  |
| 15.0880352532 | 0.2953123792 | 0.9999537652 | -1.1241083699 |

gene\_expression\_table

|               |              |              |               |
|---------------|--------------|--------------|---------------|
| 1.4165391913  | 0.4168444074 | 0.9999537652 | 1.1963816205  |
| -1.0966804838 | 0.7781248117 | 0.9999537652 | 1.0738289762  |
| -1.0030849643 | 0.990485157  | 0.9999537652 | 1.1828444467  |
| -1.2840126527 | 0.2064140148 | 0.9999537652 | 1.5502778448  |
| 1.7731057898  | 0.2467864476 | 0.9999537652 | 1.826300294   |
| -1.301307353  | 0.3526377344 | 0.9999537652 | -1.1743862213 |
| 0             | 0            | 0            | 2.996475627   |
| 1.0202654252  | 0.9471846565 | 0.9999537652 | -1.1004435788 |
| 1.0997561902  | 0.7065568568 | 0.9999537652 | 1.1430204839  |
| 1.4922045073  | 0.1721897354 | 0.9999537652 | 1.2682682166  |
| 1.1162834585  | 0.9272419326 | 0.9999537652 | -2.2257756135 |
| 1.0233315722  | 0.8984237065 | 0.9999537652 | -1.0066325084 |
| 4.5122462652  | 0.0159171321 | 0.9999537652 | 1.0531903154  |
| -1.7073157204 | 0.1543298723 | 0.9999537652 | -1.1032944191 |
| 1.254032753   | 0.2421399241 | 0.9999537652 | 1.2295953012  |
| -1.4927489467 | 0.0499075931 | 0.9999537652 | 1.2796089419  |
| 1.168006364   | 0.6600949886 | 0.9999537652 | -1.4624495673 |
| 1.193935423   | 0.7914697934 | 0.9999537652 | 1.2273656619  |
| -1.2552570644 | 0.3679937521 | 0.9999537652 | 1.5137526073  |
| -1.1530470734 | 0.4376346138 | 0.9999537652 | 1.1240373259  |
| 1.0970727976  | 0.7737662306 | 0.9999537652 | 1.4164151306  |
| -1.0097465734 | 0.9844020815 | 0.9999537652 | -1.175553458  |
| 1.2765905664  | 0.5564131676 | 0.9999537652 | 1.1886228911  |
| 1.4514413853  | 0.5194901015 | 0.9999537652 | 1.2946642925  |
| -1.5881570201 | 0.7077577411 | 0.9999537652 | 2.9985540909  |
| -1.586167124  | 0.7108092302 | 0.9999537652 | -3.3826461929 |
| 2.7933974408  | 0.6948713406 | 0.9999537652 | 6.908559683   |
| 0             | 0            | 0            | 2.9985540909  |
| 2.7933974408  | 0.6948713406 | 0.9999537652 | 2.996475627   |
| 1.2707369491  | 0.5336904993 | 0.9999537652 | -1.1280160395 |
| -1.1892662586 | 0.3612950794 | 0.9999537652 | 1.0213588522  |
| -1.1575124287 | 0.3546859617 | 0.9999537652 | 1.3582638358  |
| 1.8447991669  | 0.5971013514 | 0.9999537652 | 4.9527501949  |
| 8.064174035   | 0.4238530733 | 0.9999537652 | 0             |
| -1.5739807169 | 0.4890192501 | 0.9999537652 | 15.9061931258 |
| 9.8205505243  | 0.3804768107 | 0.9999537652 | 1.2398837679  |
| 2.6785550839  | 0.0002617    | 0.9999537652 | 1.6052999973  |
| 5.0040817115  | 0.1271426994 | 0.9999537652 | 2.6071338396  |
| -1.1153600471 | 0.4629429261 | 0.9999537652 | 1.0742892442  |
| -1.477038777  | 0.3702340459 | 0.9999537652 | 1.2827232261  |
| 1.4689054779  | 0.3802040161 | 0.9999537652 | -1.4259261512 |
| -1.0506650712 | 0.9120194616 | 0.9999537652 | 2.4592702872  |
| 1.2893688746  | 0.7076926618 | 0.9999537652 | -1.019441536  |
| 1.0512666838  | 0.8891775199 | 0.9999537652 | 1.3192582085  |
| 1.6571181455  | 0.5555300284 | 0.9999537652 | 1.3055636456  |
| -1.0338647544 | 0.8794896999 | 0.9999537652 | 1.5598415203  |
| 1.3368672143  | 0.3757451387 | 0.9999537652 | 1.0195338947  |
| -1.5118183191 | 0.131020967  | 0.9999537652 | -1.1685149838 |
| 2.4930331421  | 0.1076191604 | 0.9999537652 | 2.6831117316  |

gene\_expression\_table

|               |              |              |               |
|---------------|--------------|--------------|---------------|
| -1.1189442889 | 0.7151141203 | 0.9999537652 | 1.7164978104  |
| 2.7933974408  | 0.6948713406 | 0.9999537652 | 4.9527501949  |
| 1.128245903   | 0.5500772122 | 0.9999537652 | 1.2959250467  |
| -1.4276018648 | 0.0584723328 | 0.9999537652 | -1.1164029876 |
| 1.0952012099  | 0.7716644543 | 0.9999537652 | 1.0927825172  |
| 1.2329510555  | 0.3608389314 | 0.9999537652 | 1.0458716648  |
| -1.2920422915 | 0.5687702546 | 0.9999537652 | 1.2098319596  |
| -2.0574409626 | 0.3046858164 | 0.9999537652 | 1.1527804599  |
| -1.0038011802 | 0.9850343491 | 0.9999537652 | 1.0217813369  |
| 1.3475167769  | 0.4483815813 | 0.9999537652 | 1.0191573106  |
| -1.1169034937 | 0.5605936878 | 0.9999537652 | 1.5926577405  |
| -1.0837104855 | 0.6274159951 | 0.9999537652 | 1.4286121917  |
| 4.5505976667  | 0.5557790267 | 0.9999537652 | 1.1414910892  |
| 1.1258459376  | 0.8229052205 | 0.9999537652 | -1.0290718605 |
| -1.1853870477 | 0.3570105659 | 0.9999537652 | 1.0335562564  |
| -1.0867616237 | 0.8051038887 | 0.9999537652 | -1.2748562641 |
| -1.6015602529 | 0.2157162929 | 0.9999537652 | -1.002102582  |
| 1.5116429066  | 0.2807435933 | 0.9999537652 | 1.4665139098  |
| 0             | 0            | 0            | 2.996475627   |
| 0             | 0            | 0            | 2.9985540909  |
| 6.3075231393  | 0.4856578666 | 0.9999537652 | 1.26863809    |
| 2.375760489   | 0.2568951151 | 0.9999537652 | 2.0817128167  |
| -1.2001894462 | 0.3218514376 | 0.9999537652 | 1.3357143938  |
| 1.0985261247  | 0.6780779652 | 0.9999537652 | 1.3199288051  |
| 1.0734694883  | 0.5939941365 | 0.9999537652 | 1.088456562   |
| -1.0973034006 | 0.705984831  | 0.9999537652 | 1.3851160313  |
| 2.7149220237  | 0.3431876162 | 0.9999537652 | -1.0439154738 |
| -4.8095156671 | 0.2070002691 | 0.9999537652 | 0             |
| 18.5983228161 | 0.2580226347 | 0.9999537652 | -1.6622355843 |
| 1.2217604276  | 0.4192622078 | 0.9999537652 | 1.3874055683  |
| 0             | 0            | 0            | 2.996475627   |
| 2.5569228903  | 0.2910472058 | 0.9999537652 | 1.1434777493  |
| 1.1241786901  | 0.8746946646 | 0.9999537652 | -1.2129116771 |
| -6.9764533263 | 0.2593113237 | 0.9999537652 | 12.7732027325 |
| 1.1453538527  | 0.5868607512 | 0.9999537652 | 1.1715936728  |
| 1.7223668512  | 0.2043971082 | 0.9999537652 | -1.1449270845 |
| 0             | 0            | 0            | 1.9432271302  |
| 1.3014784288  | 0.7466097159 | 0.9999537652 | -1.3375799456 |
| 1.277202723   | 0.6580279331 | 0.9999537652 | -1.099788524  |
| 1.384485804   | 0.3194854382 | 0.9999537652 | 1.4777590678  |
| -1.054141025  | 0.791556286  | 0.9999537652 | 1.0967061151  |
| 8.0781087093  | 0.4256693294 | 0.9999537652 | -3.3826461929 |
| 1.1036431645  | 0.7504142811 | 0.9999537652 | -1.3360055468 |
| -1.3374992129 | 0.2467680636 | 0.9999537652 | -1.0330152676 |
| 1.0564364664  | 0.8361101924 | 0.9999537652 | 1.1511899953  |
| -1.3016661117 | 0.0427920737 | 0.9999537652 | -1.1656863606 |
| 1.4282553643  | 0.3752054851 | 0.9999537652 | -1.205290762  |
| 3.5458425332  | 0.2619565568 | 0.9999537652 | -1.0582880019 |
| 1.0525913883  | 0.8841841245 | 0.9999537652 | 1.3646401747  |

gene\_expression\_table

|               |              |              |               |
|---------------|--------------|--------------|---------------|
| 1.2603880587  | 0.5336691305 | 0.9999537652 | -1.1308094393 |
| 2.087766184   | 0.5276959119 | 0.9999537652 | 1.1729977978  |
| 1.233187847   | 0.6143792904 | 0.9999537652 | -1.4705270114 |
| 6.3075231393  | 0.4856350014 | 0.9999537652 | 0             |
| 9.8288704632  | 0.3801346658 | 0.9999537652 | 2.6930891478  |
| 1.2451745823  | 0.4931042106 | 0.9999537652 | -1.1251704249 |
| 0             | 0            | 0            | 16.6921882404 |
| 2.7933974408  | 0.6948713406 | 0.9999537652 | 0             |
| 4.5505976667  | 0.5557790267 | 0.9999537652 | -5.3583704783 |
| 4.5505976667  | 0.5557790267 | 0.9999537652 | 0             |
| 1.5096749162  | 0.0906418615 | 0.9999537652 | -1.2300293279 |
| -1.1535860236 | 0.2573459755 | 0.9999537652 | -1.0528838308 |
| -1.8046806307 | 0.005882     | 0.9999537652 | -1.0477872221 |
| -1.3759108811 | 0.4737600891 | 0.9999537652 | -1.3213877873 |
| 41.1815769185 | 0.1509716372 | 0.9999537652 | 2.6746613342  |
| 1.1334417217  | 0.6264088654 | 0.9999537652 | 1.2138833754  |
| -2.587194901  | 0.5006847496 | 0.9999537652 | -2.0714095881 |
| 1.0101987241  | 0.9392972628 | 0.9999537652 | -1.0053744114 |
| 1.3240315559  | 0.5504599042 | 0.9999537652 | -2.3359348394 |
| 1.7498891159  | 0.456032818  | 0.9999537652 | -1.9178478095 |
| 2.7933974408  | 0.6948713406 | 0.9999537652 | 0             |
| 0             | 0            | 0            | 6.9133480437  |
| -1.0907974023 | 0.8464360189 | 0.9999537652 | 1.2631811856  |
| -1.0669022223 | 0.671507895  | 0.9999537652 | 1.4759401581  |
| -1.2034385477 | 0.2859629469 | 0.9999537652 | -1.1601433853 |
| -1.2764424044 | 0.3707513532 | 0.9999537652 | -1.0200578279 |
| 1.367060712   | 0.0617729359 | 0.9999537652 | 1.1255925107  |
| -1.0470651298 | 0.9033337993 | 0.9999537652 | 1.1840172299  |
| 1.5401242945  | 0.0662567996 | 0.9999537652 | -1.0677041408 |
| -1.0959123468 | 0.5978645791 | 0.9999537652 | -1.1482094461 |
| 1.2979308881  | 0.3638972584 | 0.9999537652 | 1.0354676769  |
| 1.0717588054  | 0.8565093837 | 0.9999537652 | -1.3403308597 |
| 1.4647892141  | 0.4952985584 | 0.9999537652 | 1.0252934474  |
| -1.3073678212 | 0.5824949814 | 0.9999537652 | -1.3425058873 |
| 1.0798498775  | 0.7188689027 | 0.9999537652 | -1.3442141121 |
| -1.3365524418 | 0.3160480326 | 0.9999537652 | -1.2530812186 |
| -2.1293015853 | 0.3365392143 | 0.9999537652 | 1.1239199258  |
| -1.2455119556 | 0.4837074263 | 0.9999537652 | 1.0808254817  |
| -1.0962031519 | 0.6348632801 | 0.9999537652 | -1.2451599711 |
| 2.7933974408  | 0.6948713406 | 0.9999537652 | 0             |
| -1.0941301256 | 0.8501844533 | 0.9999537652 | 1.389359736   |
| -1.0077008142 | 0.9743676258 | 0.9999537652 | 1.1676660251  |
| 1.2013224142  | 0.3416661239 | 0.9999537652 | 1.0038000571  |
| 1.0428108136  | 0.7744666013 | 0.9999537652 | -1.1274505155 |
| 3.0602334741  | 0.3286200346 | 0.9999537652 | 0             |
| 2.614036232   | 0.1497598131 | 0.9999537652 | 1.3464022699  |
| 1.1365752596  | 0.2585398368 | 0.9999537652 | 1.3206932155  |
| 1.1339005076  | 0.574440775  | 0.9999537652 | -1.2869957595 |
| -2.5861438062 | 0.4687294343 | 0.9999537652 | 4.9527501949  |

gene\_expression\_table

|               |              |              |               |
|---------------|--------------|--------------|---------------|
| 1.091863293   | 0.8475944358 | 0.9999537652 | -1.3306765214 |
| 1.7057258576  | 0.2354668158 | 0.9999537652 | 1.0563444999  |
| 0             | 0            | 0            | 0             |
| 1.0694044834  | 0.801499651  | 0.9999537652 | -1.0204507389 |
| 1.0111288402  | 0.9822893092 | 0.9999537652 | -1.2323826996 |
| 2.2962279822  | 0.3617210307 | 0.9999537652 | 1.1248592401  |
| 1.9889507548  | 0.0244790145 | 0.9999537652 | -1.2090681484 |
| -1.7505776912 | 0.4855268788 | 0.9999537652 | 1.840905247   |
| 16.8581089812 | 0.2737927009 | 0.9999537652 | -2.0456148517 |
| -1.1512122706 | 0.7742336184 | 0.9999537652 | -1.0320395109 |
| 1.0918330848  | 0.873110139  | 0.9999537652 | -1.4306553732 |
| 2.3253723069  | 0.1077908736 | 0.9999537652 | -1.0461084318 |
| 1.089873767   | 0.7935337567 | 0.9999537652 | -1.2936428674 |
| -1.0610809001 | 0.7869883638 | 0.9999537652 | 1.061315052   |
| 9.8205505243  | 0.3804117652 | 0.9999537652 | -1.8438619278 |
| 2.7933974408  | 0.6948713406 | 0.9999537652 | -1.3092040421 |
| -1.0824588844 | 0.5438907228 | 0.9999537652 | -1.095329875  |
| 1.0288019279  | 0.857141477  | 0.9999537652 | 1.119630364   |
| -1.0026864056 | 0.9909828381 | 0.9999537652 | 1.0696324998  |
| 5.5687238427  | 0.0418949521 | 0.9999537652 | -4.1578342229 |
| 2.7933974408  | 0.6948713406 | 0.9999537652 | 0             |
| 1.1202036844  | 0.8945170799 | 0.9999537652 | -1.1230580054 |
| -1.2314081917 | 0.326162262  | 0.9999537652 | 1.0664169111  |
| -2.2171247351 | 0.0896581548 | 0.9999537652 | 1.1914030435  |
| 0             | 0            | 0            | 4.0583010578  |
| -1.3769796102 | 0.2384897627 | 0.9999537652 | 1.1205589412  |
| 3.0654152135  | 0.31441189   | 0.9999537652 | -1.1698173577 |
| -1.1485172546 | 0.4578692467 | 0.9999537652 | 1.2301513321  |
| 1.3656652675  | 0.2506135958 | 0.9999537652 | -1.2687612391 |
| 1.1256336023  | 0.8815811281 | 0.9999537652 | 1.1021486217  |
| 1.075295779   | 0.7274758405 | 0.9999537652 | -1.1283010443 |
| -1.1414561101 | 0.4911634641 | 0.9999537652 | 1.0764623523  |
| 1.0719638578  | 0.7272870224 | 0.9999537652 | 1.6039923611  |
| 1.0036584035  | 0.9834417829 | 0.9999537652 | 1.1641662271  |
| 3.857717517   | 0.1263654983 | 0.9999537652 | 1.0441854119  |
| 1.0948276309  | 0.8697849337 | 0.9999537652 | 1.7255265328  |
| -1.4178951235 | 0.1833840602 | 0.9999537652 | -1.0735789564 |
| 2.7933974408  | 0.6948713406 | 0.9999537652 | 0             |
| 1.1240347019  | 0.8993767546 | 0.9999537652 | 1.6011715681  |
| 1.361463763   | 0.2709169206 | 0.9999537652 | -1.4730549859 |
| 1.8996613299  | 0.1525785602 | 0.9999537652 | 1.186876449   |
| 1.20323409    | 0.1586628689 | 0.9999537652 | 1.0393344568  |
| 0             | 0            | 0            | 14.7373490367 |
| -1.0155063475 | 0.9297137652 | 0.9999537652 | 1.0574108242  |
| -1.0241779203 | 0.9450431611 | 0.9999537652 | -1.0286221032 |
| 1.2547148158  | 0.480972848  | 0.9999537652 | 1.1526808356  |
| -1.0652308948 | 0.740151293  | 0.9999537652 | 1.0429885079  |
| 1.3577288541  | 0.0928306361 | 0.9999537652 | -1.3057352681 |
| 1.0669316331  | 0.8444982579 | 0.9999537652 | -1.182886298  |



gene\_expression\_table

|               |              |              |               |
|---------------|--------------|--------------|---------------|
| -2.0921616211 | 0.4099979478 | 0.9999537652 | -1.3783320433 |
| -4.8135938501 | 0.1785433054 | 0.9999537652 | 2.996475627   |
| 0             | 0            | 0            | 2.996475627   |
| -1.3487089989 | 0.1851800659 | 0.9999537652 | -1.0623795456 |
| 1.9758702874  | 0.0909947869 | 0.9999537652 | 1.7216300277  |
| 3.3101061658  | 0.3001735128 | 0.9999537652 | -2.2790859482 |
| -1.308886814  | 0.3794972507 | 0.9999537652 | 1.2334916476  |
| -1.1300770692 | 0.5036448098 | 0.9999537652 | -1.1079122308 |
| -1.1233545595 | 0.6912390092 | 0.9999537652 | -1.0337037416 |
| -1.2254908816 | 0.3804892175 | 0.9999537652 | -1.0144695311 |
| -1.0220720069 | 0.929956001  | 0.9999537652 | 1.2543863681  |
| 8.064174035   | 0.4238517368 | 0.9999537652 | -9.7542681481 |
| -1.0014866836 | 0.9922884507 | 0.9999537652 | -1.0406740712 |
| 1.0551311209  | 0.835728015  | 0.9999537652 | -1.043378998  |
| 1.2266013804  | 0.7027208519 | 0.9999537652 | -1.2363407481 |
| -1.6062758565 | 0.3081292775 | 0.9999537652 | -1.5876369064 |
| 1.118076533   | 0.4769363522 | 0.9999537652 | -1.1376943547 |
| -1.5701247492 | 0.2556389836 | 0.9999537652 | -1.0210562873 |
| -1.7280698657 | 0.4641170891 | 0.9999537652 | -1.1617246056 |
| 0             | 0            | 0            | -1.859280336  |
| -1.7184794315 | 0.007938     | 0.9999537652 | -1.2409760363 |
| -1.2169981524 | 0.5097245994 | 0.9999537652 | 1.2216468823  |
| 1.637293124   | 0.2381534342 | 0.9999537652 | -1.2846156591 |
| 4.5505976667  | 0.5557790267 | 0.9999537652 | 1.2400291296  |
| -1.0197370871 | 0.8655374487 | 0.9999537652 | 1.069599718   |
| -1.7329433723 | 0.1811641231 | 0.9999537652 | -1.1815807982 |
| 1.3045611542  | 0.498670192  | 0.9999537652 | 1.0387679491  |
| -1.2812453468 | 0.1580630315 | 0.9999537652 | -1.1068047103 |
| 1.1123641806  | 0.7591573151 | 0.9999537652 | -1.3543574793 |
| 1.0275816656  | 0.9173327923 | 0.9999537652 | 1.055996581   |
| 1.1425966877  | 0.494547478  | 0.9999537652 | 1.2039997795  |
| 1.8094157661  | 0.0600136193 | 0.9999537652 | 1.1667470542  |
| 9.8205505243  | 0.380401755  | 0.9999537652 | -1.8677891537 |
| -1.082876609  | 0.6760678528 | 0.9999537652 | -1.3763058259 |
| 9.8205505243  | 0.3804054104 | 0.9999537652 | -1.4769135829 |
| 9.8288704632  | 0.3801247182 | 0.9999537652 | -1.1248877899 |
| -2.1684921399 | 0.00255      | 0.9999537652 | -1.0472178763 |
| 4.5505976667  | 0.5557790267 | 0.9999537652 | -1.5096535101 |
| -1.3778945252 | 0.0493259228 | 0.9999537652 | -1.4099440408 |
| 1.2354125676  | 0.2570531061 | 0.9999537652 | 1.2309295889  |
| 2.8612976293  | 0.0720659659 | 0.9999537652 | 1.014511427   |
| -1.0383470747 | 0.9549513126 | 0.9999537652 | -4.2646994388 |
| 1.7487353185  | 0.2407377046 | 0.9999537652 | -1.4384357174 |
| -1.1403285666 | 0.3312190561 | 0.9999537652 | -1.1037515255 |
| -1.2894344198 | 0.2654411135 | 0.9999537652 | 1.014648994   |
| 1.0290346229  | 0.8076122934 | 0.9999537652 | -1.1508101262 |
| 1.106085976   | 0.7481836812 | 0.9999537652 | -1.1933853856 |
| 1.1276320247  | 0.5426791216 | 0.9999537652 | 1.1587921414  |
| -1.1470586676 | 0.4175020133 | 0.9999537652 | -1.0842399285 |

gene\_expression\_table

|               |              |              |               |
|---------------|--------------|--------------|---------------|
| 2.7933974408  | 0.6948713406 | 0.9999537652 | 2.996475627   |
| 1.4788179842  | 0.3420423134 | 0.9999537652 | -1.267857559  |
| -1.3740558324 | 0.5049392843 | 0.9999537652 | 1.2380305836  |
| 2.7933974408  | 0.6948713406 | 0.9999537652 | -2.1267898759 |
| -1.117698697  | 0.5690507809 | 0.9999537652 | 1.1937717607  |
| -1.0873223526 | 0.6927162132 | 0.9999537652 | -1.1296675489 |
| 1.3082061     | 0.5362974685 | 0.9999537652 | 1.2211966497  |
| -1.0849522591 | 0.7365466994 | 0.9999537652 | 1.1294786692  |
| -1.4929695772 | 0.5413232483 | 0.9999537652 | 2.4125708505  |
| 2.7933974408  | 0.6948713406 | 0.9999537652 | 2.9985540909  |
| -1.2331744635 | 0.7458071816 | 0.9999537652 | 1.3937797673  |
| 1.5126786731  | 0.0819851339 | 0.9999537652 | -1.2386555983 |
| -1.0620863923 | 0.8376757312 | 0.9999537652 | -1.0609190868 |
| -1.0043322012 | 0.9724442932 | 0.9999537652 | -1.2184562983 |
| 1.6311623189  | 0.2678415774 | 0.9999537652 | -1.4330613149 |
| -1.956097916  | 0.1350849269 | 0.9999537652 | 1.1796488974  |
| -1.310422014  | 0.5460323993 | 0.9999537652 | -1.2791063678 |
| -3.0591167494 | 0.0163456428 | 0.9999537652 | 1.1132302063  |
| -1.2673036399 | 0.1437885922 | 0.9999537652 | -1.2430462331 |
| -1.2710069817 | 0.2652799692 | 0.9999537652 | -1.231625545  |
| 1.0644333303  | 0.6165930774 | 0.9999537652 | -1.2591569783 |
| -1.1656652265 | 0.4213411688 | 0.9999537652 | 1.2646064717  |
| 1.1615706976  | 0.5039451499 | 0.9999537652 | -1.1779260488 |
| -2.0016488794 | 0.4274993691 | 0.9999537652 | -1.8939673643 |
| 1.5569214008  | 0.382177694  | 0.9999537652 | 1.1495705254  |
| 8.064174035   | 0.4238504002 | 0.9999537652 | 0             |
| -1.3697544738 | 0.7454504647 | 0.9999537652 | -3.8916278711 |
| -1.2078348623 | 0.7082024422 | 0.9999537652 | -1.0000250282 |
| -1.2883540559 | 0.4246241569 | 0.9999537652 | 1.0881665884  |
| -2.4710767924 | 0.5445143636 | 0.9999537652 | 15.9659633994 |
| -1.5875118025 | 0.7196666679 | 0.9999537652 | 8.8639046058  |
| 1.6428427448  | 0.6033101941 | 0.9999537652 | 1.2133621807  |
| 1.3515265142  | 0.2122719189 | 0.9999537652 | 1.0531083219  |
| -1.4239425349 | 0.4362473181 | 0.9999537652 | -1.3191372433 |
| 1.1887590105  | 0.7346304275 | 0.9999537652 | 1.3072984098  |
| -1.3477987541 | 0.357201161  | 0.9999537652 | -1.1067590415 |
| 0             | 0            | 0            | 1.8236985283  |
| 1.6441361883  | 0.5981320653 | 0.9999537652 | 1.8779844073  |
| 2.7957660672  | 0.7054880037 | 0.9999537652 | -1.859280336  |
| 18.5983228161 | 0.2584132187 | 0.9999537652 | 14.7373490367 |
| 4.5505976667  | 0.5557790267 | 0.9999537652 | 2.996475627   |
| 0             | 0            | 0            | 2.996475627   |
| -1.2821668115 | 0.6635126359 | 0.9999537652 | -1.168696175  |
| -3.0642309448 | 0.0992832356 | 0.9999537652 | -1.4298575296 |
| -1.3117714304 | 0.1662613683 | 0.9999537652 | -1.0322634167 |
| 4.3889698241  | 0.074209006  | 0.9999537652 | 1.3699481043  |
| 15.0880352532 | 0.2953064644 | 0.9999537652 | 1.2204357003  |
| 1.0353671495  | 0.9657588963 | 0.9999537652 | 1.2577820161  |
| 15.0880352532 | 0.2953005413 | 0.9999537652 | 1.5332902179  |

gene\_expression\_table

|               |              |              |               |
|---------------|--------------|--------------|---------------|
| 2.9491038969  | 0.1957929575 | 0.9999537652 | -1.3958000578 |
| -1.8702016042 | 0.0201329983 | 0.9999537652 | 1.2600569355  |
| 1.0690438635  | 0.6392806216 | 0.9999537652 | 1.2269577252  |
| 1.0946757017  | 0.5953256372 | 0.9999537652 | 1.5987313339  |
| -3.9015340979 | 0.1462907409 | 0.9999537652 | -2.2622910849 |
| 1.1085725316  | 0.4299362639 | 0.9999537652 | 1.1112629289  |
| 6.3075231393  | 0.4856121243 | 0.9999537652 | -1.2751409182 |
| 1.0521655196  | 0.7728725581 | 0.9999537652 | 1.0493568883  |
| 1.0189249425  | 0.9205782109 | 0.9999537652 | 1.0743829913  |
| 1.6492074161  | 0.2360295935 | 0.9999537652 | 1.2700924697  |
| -1.0584956639 | 0.9291524755 | 0.9999537652 | 1.0888652996  |
| 2.7933974408  | 0.6948713406 | 0.9999537652 | 2.996475627   |
| 8.0710074692  | 0.4203803387 | 0.9999537652 | -1.8601323346 |
| 20.3530564257 | 0.2433615517 | 0.9999537652 | 1.590997316   |
| 9.8205505243  | 0.3808303912 | 0.9999537652 | 2.2945277226  |
| 5.4106480174  | 0.0151664645 | 0.9999537652 | 1.148750386   |
| -1.0492751378 | 0.8162375214 | 0.9999537652 | 1.3064153756  |
| 0             | 0            | 0            | 2.996475627   |
| -1.7148207449 | 0.4983920312 | 0.9999537652 | -1.5570092418 |
| 1.17668772    | 0.8040260077 | 0.9999537652 | -1.0609851856 |
| 1.1168392827  | 0.9281799885 | 0.9999537652 | -1.8579915692 |
| -2.9295608969 | 0.1082219532 | 0.9999537652 | -1.0038186338 |
| -2.6456414501 | 0.164437227  | 0.9999537652 | 1.0903282479  |
| 1.1442822167  | 0.5478726398 | 0.9999537652 | 1.4567424265  |
| 0             | 0            | 0            | 0             |
| 0             | 0            | 0            | 8.8639046058  |
| -1.4127809275 | 0.2019263621 | 0.9999537652 | -1.1698269913 |
| -2.9571648132 | 0.3435095545 | 0.9999537652 | 2.0875246791  |
| 1.3588875466  | 0.0289937107 | 0.9999537652 | -1.1281762101 |
| 2.7933974408  | 0.6948713406 | 0.9999537652 | 4.9527501949  |
| 1.4951656018  | 0.5018182406 | 0.9999537652 | 1.5954154423  |
| 1.0156213372  | 0.9431218968 | 0.9999537652 | 1.1243927921  |
| -1.9223741003 | 0.0844857395 | 0.9999537652 | 1.0532522203  |
| -1.171238167  | 0.8105875596 | 0.9999537652 | 1.1329884493  |
| 1.112445692   | 0.4744461319 | 0.9999537652 | 1.0235590997  |
| 1.138525766   | 0.6089528842 | 0.9999537652 | -1.0600875003 |
| -1.3718565692 | 0.2709999251 | 0.9999537652 | 1.193923766   |
| 1.4230726096  | 0.4330574073 | 0.9999537652 | -1.1111137588 |
| 0             | 0            | 0            | 1.7042814026  |
| -1.0294339927 | 0.889138731  | 0.9999537652 | 1.3822694431  |
| 29.1718985747 | 0.1883076951 | 0.9999537652 | 1.2544258963  |
| -1.0128493486 | 0.9596399182 | 0.9999537652 | 1.4239148743  |
| -6.9736190158 | 0.2250321147 | 0.9999537652 | 6.908559683   |
| -1.3806066288 | 0.2113251362 | 0.9999537652 | -1.1106373648 |
| 1.042993087   | 0.9384910311 | 0.9999537652 | -1.2161032218 |
| 1.034946767   | 0.9678218098 | 0.9999537652 | -2.5413313201 |
| -1.0632421733 | 0.7797828587 | 0.9999537652 | 1.1131026493  |
| 0             | 0            | 0            | 33.3754495834 |
| 0             | 0            | 0            | 6.908559683   |

gene\_expression\_table

|               |              |              |               |
|---------------|--------------|--------------|---------------|
| 1.3076730811  | 0.7003855501 | 0.9999537652 | 1.3035051167  |
| -1.0540886962 | 0.6469794344 | 0.9999537652 | 1.0713034019  |
| 0             | 0            | 0            | 2.2916337562  |
| 0             | 0            | 0            | 6.908559683   |
| 9.8288704632  | 0.3801147743 | 0.9999537652 | -2.4308917764 |
| 1.2495745759  | 0.1538558033 | 0.9999537652 | -1.0243446133 |
| -1.4284000021 | 0.2092816681 | 0.9999537652 | 1.3479636082  |
| 0             | 0            | 0            | 1.2408886006  |
| -1.0419869759 | 0.7838499062 | 0.9999537652 | 1.1318848164  |
| 1.5849862528  | 0.0524436549 | 0.9999537652 | -1.224508663  |
| -1.3250439852 | 0.2948037819 | 0.9999537652 | -1.0989763394 |
| 1.7327292703  | 0.0607831301 | 0.9999537652 | 1.1255907232  |
| 0             | 0            | 0            | 0             |
| 6.3128691894  | 0.481274382  | 0.9999537652 | -5.3589986948 |
| -1.3024238841 | 0.1869568499 | 0.9999537652 | 1.2996440128  |
| 2.9775254962  | 0.169925526  | 0.9999537652 | -2.3208801577 |
| 1.072825034   | 0.8033885682 | 0.9999537652 | 1.178401873   |
| 0             | 0            | 0            | 8.8700459102  |
| -1.1400073919 | 0.2631404661 | 0.9999537652 | 1.1253673007  |
| -1.1453192235 | 0.9085990052 | 0.9999537652 | -2.0477227478 |
| -1.4297107459 | 0.0501835856 | 0.9999537652 | 1.0967066077  |
| 0             | 0            | 0            | 4.9527501949  |
| -1.4091072755 | 0.3233553755 | 0.9999537652 | 1.4120950102  |
| 1.2562592993  | 0.1948358925 | 0.9999537652 | 1.3230566745  |
| 4.5505976667  | 0.5557790267 | 0.9999537652 | 2.9940379764  |
| -1.1911871978 | 0.2471919701 | 0.9999537652 | 1.1837766398  |
| 1.3352461464  | 0.5281449701 | 0.9999537652 | 1.0166578596  |
| 1.6018473574  | 0.6931959937 | 0.9999537652 | -1.647337401  |
| 2.3712151217  | 0.0508543821 | 0.9999537652 | -1.024486205  |
| 1.0285771544  | 0.8650263558 | 0.9999537652 | -1.2876243038 |
| 2.7933974408  | 0.6948713406 | 0.9999537652 | 2.9985540909  |
| 1.2654778301  | 0.7439324913 | 0.9999537652 | 1.042293684   |
| 8.064174035   | 0.4238490634 | 0.9999537652 | 2.2926838869  |
| -1.2998132716 | 0.2489585701 | 0.9999537652 | -1.0721200822 |
| -1.2003975041 | 0.4923755249 | 0.9999537652 | 1.6971277165  |
| 1.2793831669  | 0.2483831017 | 0.9999537652 | 1.3855836392  |
| -1.1543560772 | 0.3255422625 | 0.9999537652 | -1.1144600223 |
| 1.0533573211  | 0.8143680358 | 0.9999537652 | 1.1872501192  |
| 0             | 0            | 0            | -1.8580020618 |
| -1.1223548879 | 0.7204905026 | 0.9999537652 | 1.3996422181  |
| -1.1306967923 | 0.7366957589 | 0.9999537652 | -1.131004236  |
| 4.5505976667  | 0.5557790267 | 0.9999537652 | 4.0435942789  |
| -1.4287639136 | 0.4229136721 | 0.9999537652 | -1.119768208  |
| 6.3075231393  | 0.4855892354 | 0.9999537652 | 0             |
| 1.0689462721  | 0.6915874293 | 0.9999537652 | 1.0786632952  |
| -1.0966119323 | 0.6229844159 | 0.9999537652 | -1.2395964149 |
| -1.3349844652 | 0.189647185  | 0.9999537652 | -1.1366945333 |
| 1.2266035464  | 0.5164652771 | 0.9999537652 | 1.4555414363  |
| -1.1085504689 | 0.6120702808 | 0.9999537652 | 1.1382013097  |

gene\_expression\_table

|               |              |              |               |
|---------------|--------------|--------------|---------------|
| -1.004056509  | 0.9838261743 | 0.9999537652 | 1.1428178105  |
| -1.9565971794 | 0.316289567  | 0.9999537652 | -1.2860103139 |
| 1.4427365624  | 0.2644898552 | 0.9999537652 | -1.7893016924 |
| 0             | 0            | 0            | -4.5547427608 |
| 1.0244936248  | 0.9070447078 | 0.9999537652 | -1.0976858444 |
| -2.587194901  | 0.5006659243 | 0.9999537652 | 1.2400291296  |
| -1.0582641688 | 0.9461292521 | 0.9999537652 | -3.4826854224 |
| -1.047053245  | 0.9219428316 | 0.9999537652 | 1.3890960004  |
| 4.5505976667  | 0.5557790267 | 0.9999537652 | -1.1441751338 |
| 1.3950834493  | 0.2742635434 | 0.9999537652 | 1.0094745326  |
| -1.2940353524 | 0.3153248544 | 0.9999537652 | -1.007270923  |
| 1.1706394892  | 0.4637956757 | 0.9999537652 | 1.0038322139  |
| -1.0255608151 | 0.8754939508 | 0.9999537652 | 1.1110728548  |
| 1.0536947701  | 0.8410262914 | 0.9999537652 | 1.2995231007  |
| 2.7933974408  | 0.6948713406 | 0.9999537652 | 0             |
| -1.2320855018 | 0.7463975051 | 0.9999537652 | 2.4996798995  |
| -1.7594313246 | 0.0810843924 | 0.9999537652 | 1.1310888701  |
| -2.0621799935 | 0.0729633202 | 0.9999537652 | -1.1563505327 |
| -1.6059557345 | 0.1831838661 | 0.9999537652 | 1.7621960242  |
| 1.2754968928  | 0.5717023483 | 0.9999537652 | -1.0501821802 |
| 8.064174035   | 0.4238477265 | 0.9999537652 | 6.9133480437  |
| 2.087766184   | 0.5276475732 | 0.9999537652 | -5.3583704783 |
| 2.7933974408  | 0.6948713406 | 0.9999537652 | -1.8579915692 |
| -1.088499798  | 0.7883941811 | 0.9999537652 | 1.151003842   |
| -1.1112656296 | 0.6269553922 | 0.9999537652 | 1.1855393277  |
| 1.1275648389  | 0.5704676811 | 0.9999537652 | 1.176068578   |
| 1.3722203124  | 0.1057161897 | 0.9999537652 | 1.1650509656  |
| 1.0490364922  | 0.7655056393 | 0.9999537652 | 1.1651703861  |
| -1.0569400349 | 0.9456846761 | 0.9999537652 | -2.1621926629 |
| 2.7933974408  | 0.6948713406 | 0.9999537652 | 2.996475627   |
| -1.3756816316 | 0.324618767  | 0.9999537652 | -1.1003610056 |
| -1.0498950284 | 0.8801245528 | 0.9999537652 | -1.3554279662 |
| -1.2492485229 | 0.5079679933 | 0.9999537652 | -1.0330045512 |
| -1.0594879394 | 0.9344088818 | 0.9999537652 | -1.2917079836 |
| 0             | 0            | 0            | 8.8761957907  |
| -1.1145013669 | 0.7128146604 | 0.9999537652 | 1.528902924   |
| -1.5455376716 | 0.0689078381 | 0.9999537652 | 1.0408824842  |
| 1.375774979   | 0.0236515179 | 0.9999537652 | 1.1583227683  |
| -1.0690784395 | 0.7002528458 | 0.9999537652 | -1.0632210722 |
| 1.0161963097  | 0.9147921241 | 0.9999537652 | -1.0737041693 |
| 4.5505976667  | 0.5557790267 | 0.9999537652 | -1.3091649629 |
| 0             | 0            | 0            | 0             |
| -1.2321666424 | 0.7531198898 | 0.9999537652 | 3.0021266318  |
| 1.0003414108  | 0.998543502  | 0.9999537652 | 1.1630962963  |
| -2.5838710423 | 0.5186063303 | 0.9999537652 | 18.6465640159 |
| 6.3130691196  | 0.4798375324 | 0.9999537652 | -1.1675888632 |
| -1.1131075046 | 0.760750158  | 0.9999537652 | 1.1570205107  |
| -1.0108355311 | 0.9496326115 | 0.9999537652 | -1.1503674174 |
| -1.1311962502 | 0.5191300878 | 0.9999537652 | -1.3138199896 |

gene\_expression\_table

|               |              |              |               |
|---------------|--------------|--------------|---------------|
| 1.3529236751  | 0.1103307464 | 0.9999537652 | 1.0268048798  |
| -1.1648887085 | 0.5560267957 | 0.9999537652 | 1.173346655   |
| -1.6988038983 | 0.5663993685 | 0.9999537652 | 4.1474746992  |
| 1.3811117964  | 0.201195657  | 0.9999537652 | -1.2057598588 |
| 1.1267368185  | 0.8331796727 | 0.9999537652 | -3.0819949543 |
| 4.5505976667  | 0.5557790267 | 0.9999537652 | -1.9294790029 |
| 0             | 0            | 0            | 6.908559683   |
| 1.0380810992  | 0.8450469696 | 0.9999537652 | 1.128168511   |
| 1.0421780655  | 0.898547273  | 0.9999537652 | 1.0778269598  |
| -1.4481035132 | 0.3122006393 | 0.9999537652 | -1.4137017696 |
| 1.2840920884  | 0.1423998664 | 0.9999537652 | -1.0536972927 |
| -1.3023449467 | 0.7650510272 | 0.9999537652 | 1.4210023469  |
| 11.5864583426 | 0.3448040633 | 0.9999537652 | 22.5383525416 |
| -1.0767130032 | 0.9147691222 | 0.9999537652 | 1.6825587615  |
| -1.267384496  | 0.0886053391 | 0.9999537652 | -1.2408505123 |
| 2.134585765   | 0.1895772602 | 0.9999537652 | 1.6532738136  |
| 0             | 0            | 0            | 2.996475627   |
| 22.1075168104 | 0.2294704866 | 0.9999537652 | 2.9985540909  |
| 1.2642357763  | 0.2445884501 | 0.9999537652 | -1.3348312138 |
| 1.1310632311  | 0.6231638158 | 0.9999537652 | -1.0512959964 |
| -1.0741528283 | 0.8255087862 | 0.9999537652 | -1.0087419526 |
| 2.0363406704  | 0.2085629925 | 0.9999537652 | 1.1245508853  |
| -1.2129541886 | 0.1035138234 | 0.9999537652 | -1.2743037316 |
| -1.2004233957 | 0.2463642315 | 0.9999537652 | -1.1402840221 |
| -1.1317480949 | 0.317941875  | 0.9999537652 | -1.2055539496 |
| -2.587194901  | 0.5006565118 | 0.9999537652 | -1.2587469952 |
| 1.0499984748  | 0.890047509  | 0.9999537652 | 1.1503195285  |
| 4.5505976667  | 0.5557790267 | 0.9999537652 | -3.4533081742 |
| -1.0979377978 | 0.7368350662 | 0.9999537652 | -1.0012516009 |
| -1.4174042178 | 0.158124906  | 0.9999537652 | 1.1783662659  |
| 1.3271639342  | 0.7054760304 | 0.9999537652 | -1.0768314905 |
| 1.6078341906  | 0.3434634415 | 0.9999537652 | -2.3512245222 |
| 1.6590470498  | 0.3449488471 | 0.9999537652 | -1.304203355  |
| 1.1803715905  | 0.1931987383 | 0.9999537652 | 1.2859548321  |
| -1.1713292595 | 0.8400442214 | 0.9999537652 | 1.2777403726  |
| -2.1727943578 | 0.2333624615 | 0.9999537652 | -1.3961350135 |
| 2.7933974408  | 0.6948713406 | 0.9999537652 | -5.3583704783 |
| -1.5875118025 | 0.7195054915 | 0.9999537652 | 1.4527805491  |
| 1.2327920787  | 0.2869515815 | 0.9999537652 | 1.4249281136  |
| 1.2438594783  | 0.4591142321 | 0.9999537652 | -1.21395642   |
| -1.2448621872 | 0.5070532887 | 0.9999537652 | -1.771137395  |
| -1.2452657089 | 0.2060281587 | 0.9999537652 | 1.008517653   |
| -1.0434490867 | 0.8583724218 | 0.9999537652 | 1.0036670813  |
| 1.0286450495  | 0.8999889121 | 0.9999537652 | -1.1074016197 |
| -1.2272193196 | 0.2945943695 | 0.9999537652 | 1.01960193    |
| -1.1362180401 | 0.6651493904 | 0.9999537652 | -1.3109359951 |
| -1.1046564951 | 0.6076603089 | 0.9999537652 | 1.0600874595  |
| 0             | 0            | 0            | 2.9985540909  |
| -1.1156222656 | 0.7371852264 | 0.9999537652 | 1.6329466628  |

gene\_expression\_table

|               |              |              |               |
|---------------|--------------|--------------|---------------|
| 23.8818846228 | 0.2166833328 | 0.9999537652 | -1.4343305899 |
| 1.6104718537  | 0.13869931   | 0.9999537652 | 1.1701719039  |
| -1.0617218639 | 0.8060529643 | 0.9999537652 | 1.0465406692  |
| -1.241468104  | 0.6742428708 | 0.9999537652 | 2.8841694169  |
| 1.0868129703  | 0.6625358094 | 0.9999537652 | -1.0275312004 |
| -1.3145475858 | 0.505971823  | 0.9999537652 | 1.1964580069  |
| -1.0169075041 | 0.8942007642 | 0.9999537652 | 1.1101812288  |
| -1.6281541418 | 0.4632033365 | 0.9999537652 | -3.0221818452 |
| 1.0611950459  | 0.755334131  | 0.9999537652 | -1.0810770921 |
| 4.7740047566  | 0.0654749582 | 0.9999537652 | 1.6822227324  |
| -1.0475891277 | 0.8023459609 | 0.9999537652 | 1.011720277   |
| -1.4577150681 | 0.4289542046 | 0.9999537652 | -2.1142207014 |
| -1.1798199945 | 0.7411459637 | 0.9999537652 | -1.5435055503 |
| 3.0602334741  | 0.3287128565 | 0.9999537652 | 16.6921882404 |
| 34.4101428749 | 0.1668302055 | 0.9999537652 | 2.1977572987  |
| -1.026712666  | 0.9294622645 | 0.9999537652 | -1.2057338269 |
| 6.3075231393  | 0.4855663346 | 0.9999537652 | -1.1501702336 |
| -1.0405404381 | 0.9251368905 | 0.9999537652 | -1.2609802176 |
| -1.1271224648 | 0.4737585822 | 0.9999537652 | -1.3875253667 |
| 15.0880352532 | 0.2952932902 | 0.9999537652 | 0             |
| 3.3416364815  | 0.1499628427 | 0.9999537652 | 2.8026883955  |
| -1.2426004229 | 0.1979303413 | 0.9999537652 | 1.1097581076  |
| -2.1299772349 | 0.2680379039 | 0.9999537652 | 8.8761957907  |
| 5.0144569961  | 0.1273718317 | 0.9999537652 | -1.0197861124 |
| 64.4037956254 | 0.1028474157 | 0.9999537652 | -1.1595553882 |
| 4.5505976667  | 0.5557790267 | 0.9999537652 | -5.3589986948 |
| 22.1075168104 | 0.2294964054 | 0.9999537652 | 1.0666207935  |
| 2.7933974408  | 0.6948713406 | 0.9999537652 | 0             |
| 4.5505976667  | 0.5557790267 | 0.9999537652 | 0             |
| 2.0885615936  | 0.5186564193 | 0.9999537652 | 8.8639046058  |
| 1.2026698536  | 0.1883299928 | 0.9999537652 | 1.1596263765  |
| 8.064174035   | 0.4238463895 | 0.9999537652 | 2.2220493756  |
| -1.1252718821 | 0.7338087055 | 0.9999537652 | -1.5294284081 |
| -1.314797679  | 0.6945494065 | 0.9999537652 | -2.4566346185 |
| 1.643510367   | 0.5934426812 | 0.9999537652 | 18.6336779883 |
| 22.1075168104 | 0.2295064027 | 0.9999537652 | -2.5486515888 |
| 1.3449903122  | 0.4727310305 | 0.9999537652 | -1.2575300799 |
| 2.2912132526  | 0.0863481466 | 0.9999537652 | 1.4280854913  |
| -2.5690229276 | 0.0275845055 | 0.9999537652 | 1.0581757898  |
| 1.1561298099  | 0.4594618891 | 0.9999537652 | 1.3176576144  |
| -1.5238876418 | 0.219922476  | 0.9999537652 | -1.8502779685 |
| 1.0850113403  | 0.5852836289 | 0.9999537652 | -1.1363029532 |
| -1.1959441372 | 0.6778579601 | 0.9999537652 | 1.2014543902  |
| -1.634512723  | 0.15573538   | 0.9999537652 | -1.623448388  |
| -1.2190746751 | 0.4398547275 | 0.9999537652 | 1.1363723895  |
| 1.0400230889  | 0.78302448   | 0.9999537652 | -1.2136329964 |
| 1.1890672481  | 0.1737416104 | 0.9999537652 | 1.1989776832  |
| 27.3284152947 | 0.2046641326 | 0.9999537652 | 1.3341676396  |
| 2.0867996709  | 0.0536616897 | 0.9999537652 | 1.0143682105  |

gene\_expression\_table

|               |              |              |                |
|---------------|--------------|--------------|----------------|
| -1.0586941874 | 0.951323742  | 0.9999537652 | 2.996475627    |
| -1.5204346711 | 0.1685758205 | 0.9999537652 | -1.0816512457  |
| -1.0086225336 | 0.9454264467 | 0.9999537652 | -1.248061277   |
| 4.0297652987  | 0.2233339799 | 0.9999537652 | -1.6203746953  |
| 2.7933974408  | 0.6948713406 | 0.9999537652 | -1.6578228316  |
| 1.3786208238  | 0.3785569584 | 0.9999537652 | 1.0414885467   |
| 3.5458425332  | 0.2599220283 | 0.9999537652 | -1.3268884013  |
| 0             | 0            | 0            | -1.1242401582  |
| -7.4805414887 | 0.00433      | 0.9999537652 | 1.5226566128   |
| 1.543329787   | 0.2931995739 | 0.9999537652 | 1.0541995306   |
| -1.3685516055 | 0.7424185057 | 0.9999537652 | -1.5732602273  |
| 3.9579785606  | 0.009576     | 0.9999537652 | -1.1217609558  |
| -1.013887414  | 0.9667781909 | 0.9999537652 | -1.219812684   |
| 1.1124880746  | 0.6047242813 | 0.9999537652 | -1.4958717391  |
| -1.2194928882 | 0.1102687733 | 0.9999537652 | 1.1563416585   |
| -1.1436175851 | 0.565637718  | 0.9999537652 | -1.0402675051  |
| 1.2533792806  | 0.2496521796 | 0.9999537652 | -1.0117747809  |
| -1.0314801103 | 0.9251565668 | 0.9999537652 | 1.5539400434   |
| 1.3588921917  | 0.7998708465 | 0.9999537652 | -3.0826861089  |
| -1.0846468307 | 0.6943718498 | 0.9999537652 | -1.1710879165  |
| -1.1267770838 | 0.567546349  | 0.9999537652 | 1.1210320192   |
| -1.1947641352 | 0.1595766842 | 0.9999537652 | -1.1875683811  |
| -1.0517525283 | 0.8931964324 | 0.9999537652 | -1.4800500403  |
| 6.3075231393  | 0.4855434221 | 0.9999537652 | -1.2808959382  |
| 1.798150741   | 0.3208122302 | 0.9999537652 | -1.3473061746  |
| -1.0141273035 | 0.9393866092 | 0.9999537652 | 1.0577806092   |
| 1.0349118986  | 0.9686744453 | 0.9999537652 | -10.0604019451 |
| 1.0328743166  | 0.7998167006 | 0.9999537652 | -1.1270267627  |
| 1.448697666   | 0.3132607351 | 0.9999537652 | 1.0391386154   |
| 1.0693056355  | 0.6657084771 | 0.9999537652 | -1.2229503236  |
| -1.066453755  | 0.8087817707 | 0.9999537652 | -1.2004980257  |
| -1.1732329994 | 0.7434360732 | 0.9999537652 | -1.2635192949  |
| 1.1282390015  | 0.8381743829 | 0.9999537652 | -1.0530499944  |
| 1.2494524772  | 0.4023406698 | 0.9999537652 | -1.0511706383  |
| 1.4052010358  | 0.4979007365 | 0.9999537652 | 1.0263559879   |
| 0             | 0            | 0            | 1.4660736959   |
| 1.1369014154  | 0.5510298796 | 0.9999537652 | -1.7082347022  |
| 1.004248794   | 0.9831048067 | 0.9999537652 | -1.3232780297  |
| 1.3588576256  | 0.801333561  | 0.9999537652 | -1.3911859456  |
| 3.0602334741  | 0.3283646902 | 0.9999537652 | 1.225766291    |
| -1.6578780139 | 0.0293951705 | 0.9999537652 | 1.0030081543   |
| 1.0007212244  | 0.995152847  | 0.9999537652 | -1.1278473391  |
| -1.0534933443 | 0.6594171605 | 0.9999537652 | -1.0373683498  |
| 1.5444112962  | 0.4900009618 | 0.9999537652 | -1.937154584   |
| -1.2204596224 | 0.287426221  | 0.9999537652 | -1.1467661453  |
| 0             | 0            | 0            | 4.9527501949   |
| -1.3802230046 | 0.2198866406 | 0.9999537652 | -1.2758594071  |
| 1.1800112458  | 0.2222136777 | 0.9999537652 | 1.2478356974   |
| 1.0044600286  | 0.9866590041 | 0.9999537652 | 1.2100862909   |



gene\_expression\_table

|               |              |              |               |
|---------------|--------------|--------------|---------------|
| 1.0152588784  | 0.9625737593 | 0.9999537652 | 1.650829719   |
| -1.2976100564 | 0.1441133758 | 0.9999537652 | 1.0942912258  |
| -1.0463856551 | 0.8654047423 | 0.9999537652 | -1.0487768568 |
| 1.0774268281  | 0.8745501458 | 0.9999537652 | -2.3585094137 |
| 1.0539822683  | 0.7347968499 | 0.9999537652 | 1.0027323621  |
| -1.0674298248 | 0.6934955123 | 0.9999537652 | 1.2370956292  |
| -1.4084943164 | 0.4738527555 | 0.9999537652 | -1.5804454321 |
| 1.3278895178  | 0.7144850349 | 0.9999537652 | 1.1309268147  |
| 1.1381955878  | 0.6772976558 | 0.9999537652 | 1.0651851045  |
| -1.2296385908 | 0.3146892754 | 0.9999537652 | -1.3380741914 |
| -1.6304332292 | 0.2224171118 | 0.9999537652 | -1.41474025   |
| -1.0562596574 | 0.9403962757 | 0.9999537652 | -1.2222893883 |
| 1.4125564959  | 0.2658861148 | 0.9999537652 | 1.1247802543  |
| -1.0142202953 | 0.9060087045 | 0.9999537652 | 1.0288953166  |
| -1.0660011546 | 0.6157656914 | 0.9999537652 | 1.1168594444  |
| 1.0264331092  | 0.8347672192 | 0.9999537652 | 1.0040677072  |
| -1.0192531122 | 0.9587621597 | 0.9999537652 | -1.1397943437 |
| 3.0768203874  | 0.1975714249 | 0.9999537652 | 1.430803866   |
| 2.7933974408  | 0.6948713406 | 0.9999537652 | -2.9683711557 |
| 0             | 0            | 0            | 14.7271569203 |
| 1.7624255387  | 0.2485580472 | 0.9999537652 | 1.4885956851  |
| 2.7933974408  | 0.6948713406 | 0.9999537652 | 1.6447327969  |
| 4.5505976667  | 0.5557790267 | 0.9999537652 | 6.908559683   |
| -1.624667929  | 0.0572377131 | 0.9999537652 | 1.1351714646  |
| 1.1167126147  | 0.7285233563 | 0.9999537652 | -1.9781707549 |
| 1.1010872447  | 0.6617123439 | 0.9999537652 | -1.1726406249 |
| 2.7933974408  | 0.6948713406 | 0.9999537652 | -1.1444432957 |
| -1.4407619125 | 0.5746492808 | 0.9999537652 | -1.0946293968 |
| -1.0115911681 | 0.9478124883 | 0.9999537652 | -1.0265730725 |
| -2.1325963601 | 0.4603116315 | 0.9999537652 | -1.1241146656 |
| 1.6442324412  | 0.5883483586 | 0.9999537652 | 1.8286071118  |
| -1.4741597973 | 0.1986069956 | 0.9999537652 | -1.1330519708 |
| -1.0089195645 | 0.9925509949 | 0.9999537652 | 5.0955150726  |
| 1.9042601795  | 0.4860487474 | 0.9999537652 | 1.1109046993  |
| -1.2081320805 | 0.3686231979 | 0.9999537652 | -1.2164041945 |
| 1.2092357838  | 0.2707930716 | 0.9999537652 | -1.0038680276 |
| -1.2399772406 | 0.6419157246 | 0.9999537652 | -1.1206822297 |
| -1.1105747506 | 0.819543664  | 0.9999537652 | -1.5534881544 |
| -1.050760015  | 0.7505836271 | 0.9999537652 | -1.3416287432 |
| 0             | 0            | 0            | 2.996475627   |
| -1.2403707278 | 0.3735240934 | 0.9999537652 | -1.2787752906 |
| 0             | 0            | 0            | 0             |
| 1.9292309639  | 0.1737350981 | 0.9999537652 | 2.4776447593  |
| 1.1309621929  | 0.7935518966 | 0.9999537652 | 2.2620415671  |
| 1.3632564722  | 0.0883427924 | 0.9999537652 | 1.0099167801  |
| -1.2093406112 | 0.6157336263 | 0.9999537652 | -1.1745635889 |
| 2.0057180274  | 0.3367799306 | 0.9999537652 | -1.6211394957 |
| -1.0101239827 | 0.9473414413 | 0.9999537652 | 1.0314024837  |
| 1.0808920899  | 0.7990051241 | 0.9999537652 | -1.340205331  |

gene\_expression\_table

|               |              |              |               |
|---------------|--------------|--------------|---------------|
| 1.1261854259  | 0.8630528928 | 0.9999537652 | -1.6496636245 |
| -1.3707945296 | 0.3287138139 | 0.9999537652 | -1.4588926513 |
| 1.1547555504  | 0.6485578592 | 0.9999537652 | 1.2251321024  |
| -1.2954004139 | 0.265103961  | 0.9999537652 | -1.235560175  |
| -1.0771708963 | 0.9336949682 | 0.9999537652 | 1.6178683885  |
| -1.0826054966 | 0.6941613103 | 0.9999537652 | -1.1907002272 |
| 1.4278875705  | 0.2168362539 | 0.9999537652 | 1.0336326672  |
| 1.3485163287  | 0.3195688868 | 0.9999537652 | -1.0918387842 |
| 1.1197784385  | 0.5377572468 | 0.9999537652 | 1.3232123774  |
| -1.0830409898 | 0.7708933966 | 0.9999537652 | 1.0071986158  |
| -1.1394164215 | 0.7434932528 | 0.9999537652 | -1.3448684038 |
| 1.1165478033  | 0.8009628298 | 0.9999537652 | -1.3958347093 |
| -1.2815515061 | 0.693910851  | 0.9999537652 | -1.0338518335 |
| -1.3794059984 | 0.4715813603 | 0.9999537652 | 1.397936197   |
| 1.0013465097  | 0.9941381854 | 0.9999537652 | 1.4220544204  |
| -1.762709422  | 0.2480356749 | 0.9999537652 | 1.151609159   |
| -1.0711456263 | 0.7658346104 | 0.9999537652 | 1.2725231676  |
| -1.1508399632 | 0.4242552298 | 0.9999537652 | -1.0503787856 |
| 1.7746986793  | 0.5317345774 | 0.9999537652 | 1.1670818081  |
| 0             | 0            | 0            | 2.996475627   |
| 1.4876413039  | 0.1180594066 | 0.9999537652 | 1.6167217615  |
| 1.1537490598  | 0.414228245  | 0.9999537652 | 1.1326271949  |
| 8.064174035   | 0.4230822908 | 0.9999537652 | 0             |
| 0             | 0            | 0            | 2.996475627   |
| -1.1082079634 | 0.4909291308 | 0.9999537652 | 1.1079480482  |
| 1.2607334053  | 0.1503900462 | 0.9999537652 | 1.2369525042  |
| 1.0679308554  | 0.7080485759 | 0.9999537652 | 1.0720842872  |
| -1.2407940756 | 0.7394963901 | 0.9999537652 | 1.0768907588  |
| -1.3518561167 | 0.4071500171 | 0.9999537652 | 1.0949409705  |
| 1.0274043788  | 0.8572208762 | 0.9999537652 | 1.0409909572  |
| -1.283216297  | 0.3614019816 | 0.9999537652 | 1.0255901679  |
| 1.132483306   | 0.6859277074 | 0.9999537652 | -1.2593349746 |
| -1.3174384883 | 0.0301448463 | 0.9999537652 | -1.1902269235 |
| -1.0102340433 | 0.9658227431 | 0.9999537652 | 1.1821339936  |
| -1.0350037612 | 0.895520583  | 0.9999537652 | -1.36884812   |
| 1.2390581437  | 0.2951079932 | 0.9999537652 | 1.0360320951  |
| 1.0966528316  | 0.7796804844 | 0.9999537652 | -1.170069719  |
| -1.0854549056 | 0.5954311189 | 0.9999537652 | 1.1283577779  |
| 1.2423197598  | 0.2289392579 | 0.9999537652 | 1.6260534691  |
| 1.0166980697  | 0.9264862972 | 0.9999537652 | 1.0940871915  |
| 1.0257818063  | 0.9518450434 | 0.9999537652 | -1.3106272376 |
| 1.0548459601  | 0.6802568136 | 0.9999537652 | 1.1693797239  |
| 0             | 0            | 0            | 0             |
| 1.5037044015  | 0.2051142352 | 0.9999537652 | 1.1178065896  |
| 2.0885615936  | 0.518797066  | 0.9999537652 | -3.3853891979 |
| -1.0452744086 | 0.8077719723 | 0.9999537652 | -1.044331215  |
| 18.5983228161 | 0.2583766021 | 0.9999537652 | 1.0203343598  |
| -1.0104631551 | 0.9794834163 | 0.9999537652 | -1.0658053623 |
| 0             | 0            | 0            | 8.9512754559  |

gene\_expression\_table

|               |              |              |               |
|---------------|--------------|--------------|---------------|
| 1.3239809969  | 0.3592204012 | 0.9999537652 | -1.1078196195 |
| 2.0294079422  | 0.2451825376 | 0.9999537652 | -1.0225109693 |
| -1.6871513697 | 0.1997833382 | 0.9999537652 | 2.5761588337  |
| 1.1004912796  | 0.5992325848 | 0.9999537652 | 1.2579034211  |
| 1.0799672643  | 0.6808785732 | 0.9999537652 | 1.1699608222  |
| 0             | 0            | 0            | 12.7732027325 |
| 4.5544554512  | 0.569131392  | 0.9999537652 | -1.6223462933 |
| -1.6661685285 | 0.0287119198 | 0.9999537652 | -1.4427483555 |
| -1.1531088649 | 0.4420758648 | 0.9999537652 | 1.3894342228  |
| 2.6809644128  | 0.0341068952 | 0.9999537652 | -1.1032473644 |
| 1.0746073568  | 0.8608106679 | 0.9999537652 | 1.303743597   |
| -1.0655087673 | 0.6015098561 | 0.9999537652 | 1.2030600629  |
| -1.3446989983 | 0.6591269618 | 0.9999537652 | 3.0555055251  |
| -1.0454457482 | 0.8089870806 | 0.9999537652 | 1.0920644179  |
| 1.3309330294  | 0.5164433806 | 0.9999537652 | 1.043939591   |
| 4.5505976667  | 0.5557790267 | 0.9999537652 | -1.7799057205 |
| 0             | 0            | 0            | -1.859280336  |
| 4.5505976667  | 0.5557790267 | 0.9999537652 | 0             |
| -1.1631691103 | 0.4671441117 | 0.9999537652 | 1.0505402061  |
| -6.9764533263 | 0.2593448532 | 0.9999537652 | -9.3613041355 |
| 0             | 0            | 0            | 8.8639046058  |
| 4.5505976667  | 0.5557790267 | 0.9999537652 | 1.590997316   |
| 0             | 0            | 0            | 2.996475627   |
| 1.1265982105  | 0.5421478705 | 0.9999537652 | 1.4280025521  |
| -1.6342415317 | 0.3450846104 | 0.9999537652 | -1.0689684185 |
| -2.0160710885 | 0.0353183263 | 0.9999537652 | -1.0157605017 |
| 6.3075231393  | 0.4855204978 | 0.9999537652 | -1.144309199  |
| -1.5875118025 | 0.7193450002 | 0.9999537652 | -3.2026060843 |
| 4.5505976667  | 0.5557790267 | 0.9999537652 | -5.3583704783 |
| 1.2509256148  | 0.4312690751 | 0.9999537652 | 1.0272792754  |
| -1.0064087013 | 0.9870883774 | 0.9999537652 | 1.0245179551  |
| 1.7061363611  | 0.1789216697 | 0.9999537652 | 1.5391423279  |
| -1.0379579947 | 0.810440888  | 0.9999537652 | 1.2918323555  |
| -1.4867681804 | 0.1193185681 | 0.9999537652 | -1.0053902956 |
| 2.4568497219  | 0.1117023542 | 0.9999537652 | 5.5152075473  |
| -1.1593805716 | 0.446115096  | 0.9999537652 | -1.1405917756 |
| 2.7933974408  | 0.6948713406 | 0.9999537652 | 0             |
| 1.9420462371  | 0.001995     | 0.9999537652 | 1.0803534395  |
| 0             | 0            | 0            | 8.8639046058  |
| 6.3075231393  | 0.4854975618 | 0.9999537652 | 2.9985540909  |
| 1.0417868618  | 0.8617129038 | 0.9999537652 | 1.2152490113  |
| 1.0887847388  | 0.5281571983 | 0.9999537652 | 1.0659933659  |
| 1.0192651553  | 0.9025108916 | 0.9999537652 | 1.1246350243  |
| -1.1089217961 | 0.5827326393 | 0.9999537652 | 1.3272444605  |
| -1.3918702637 | 0.514375824  | 0.9999537652 | 1.5456239127  |
| 1.4291786189  | 0.4117526825 | 0.9999537652 | 1.0942284709  |
| 1.5498541366  | 0.1631715231 | 0.9999537652 | 1.1423141742  |
| -1.0209534506 | 0.9315434961 | 0.9999537652 | 1.356879688   |
| 1.0652606154  | 0.6596537803 | 0.9999537652 | 1.0439114393  |

gene\_expression\_table

|               |              |              |               |
|---------------|--------------|--------------|---------------|
| 1.538652413   | 0.242278366  | 0.9999537652 | 1.1107108221  |
| 1.1991686279  | 0.7044214231 | 0.9999537652 | 1.1671637511  |
| 1.173142651   | 0.535301655  | 0.9999537652 | 1.2479693568  |
| -1.0567980975 | 0.6519866831 | 0.9999537652 | 1.0001891078  |
| 1.0685224318  | 0.7199837631 | 0.9999537652 | -1.0266244299 |
| 0             | 0            | 0            | -5.3608259368 |
| -1.0276200717 | 0.84682801   | 0.9999537652 | 1.2386456352  |
| 1.2516839175  | 0.8280427789 | 0.9999537652 | 1.5920996292  |
| -4.815549291  | 0.1727012834 | 0.9999537652 | 2.1977572987  |
| 2.1668004892  | 0.367901064  | 0.9999537652 | 1.2415266768  |
| -1.1458640337 | 0.4954787361 | 0.9999537652 | 1.0051154334  |
| -1.2415015851 | 0.2299812511 | 0.9999537652 | 1.2475593172  |
| -1.4789398964 | 0.2682894628 | 0.9999537652 | 1.3774512377  |
| 1.5506685089  | 0.0618684239 | 0.9999537652 | -1.0204024776 |
| 1.0744385771  | 0.5605973839 | 0.9999537652 | 1.3416696856  |
| 1.0552907781  | 0.6670060077 | 0.9999537652 | 1.2630976334  |
| 1.2230661395  | 0.2842104379 | 0.9999537652 | 1.295446323   |
| -1.7127500346 | 0.1372780796 | 0.9999537652 | 1.3341508472  |
| 4.0102736869  | 0.1096386666 | 0.9999537652 | 1.3829372939  |
| -1.2711633669 | 0.3058401175 | 0.9999537652 | 1.0117841599  |
| 1.4557577282  | 0.1916362645 | 0.9999537652 | 1.1903405418  |
| 18.6298281873 | 0.2553727058 | 0.9999537652 | -2.0711873351 |
| -1.1297167925 | 0.5970954469 | 0.9999537652 | 1.3064385098  |
| 2.7933974408  | 0.6948713406 | 0.9999537652 | 0             |
| 1.4946456017  | 0.4821253923 | 0.9999537652 | 1.5789238278  |
| -1.1437750147 | 0.6016572077 | 0.9999537652 | -1.413049955  |
| 1.056477578   | 0.7694882132 | 0.9999537652 | 1.0841796687  |
| -1.1304205482 | 0.5963441401 | 0.9999537652 | -1.150996288  |
| 62.6505509376 | 0.103692165  | 0.9999537652 | 2.5408539857  |
| 1.0337578361  | 0.8877987527 | 0.9999537652 | -1.0479370285 |
| 1.6118933969  | 0.047463019  | 0.9999537652 | -1.0846800531 |
| 1.5614986311  | 0.299657901  | 0.9999537652 | 1.0586805782  |
| -1.2355073246 | 0.3424270136 | 0.9999537652 | 1.1910527014  |
| -1.3088126937 | 0.4809509356 | 0.9999537652 | -1.1657167669 |
| -1.2592873974 | 0.1933788344 | 0.9999537652 | 1.0424240632  |
| 0             | 0            | 0            | 0             |
| 16.8718544959 | 0.273791704  | 0.9999537652 | 1.0328466942  |
| -1.2515854966 | 0.562744126  | 0.9999537652 | -1.0753748677 |
| 1.16869238    | 0.3343981204 | 0.9999537652 | 1.0651517019  |
| 1.1666718464  | 0.6233652523 | 0.9999537652 | 1.0876825954  |
| -1.2429397535 | 0.1865254158 | 0.9999537652 | 1.1251392141  |
| -1.7565904216 | 0.3101139973 | 0.9999537652 | 1.4455555239  |
| 1.3001100676  | 0.5447669592 | 0.9999537652 | 1.3487781182  |
| -1.0747394431 | 0.7182856785 | 0.9999537652 | 1.2554072967  |
| 1.0467462673  | 0.7431890982 | 0.9999537652 | 1.1355191417  |
| -1.0363967531 | 0.8703711937 | 0.9999537652 | 1.082871836   |
| -2.1848178259 | 0.233224138  | 0.9999537652 | 1.1150142848  |
| 1.0972497395  | 0.7349194724 | 0.9999537652 | 1.0322038001  |
| 0             | 0            | 0            | 10.818785458  |

gene\_expression\_table

|               |              |              |               |
|---------------|--------------|--------------|---------------|
| -1.0220081257 | 0.9301172406 | 0.9999537652 | 1.3777480177  |
| 1.0669763156  | 0.8490335031 | 0.9999537652 | -1.0394306235 |
| -1.0993782959 | 0.6431045274 | 0.9999537652 | 1.1108473335  |
| -1.0706629432 | 0.6634078    | 0.9999537652 | -1.0247731042 |
| 6.3075231393  | 0.4854746142 | 0.9999537652 | -1.644923008  |
| -1.0790444073 | 0.7958185359 | 0.9999537652 | 1.0556136998  |
| 0             | 0            | 0            | 10.818785458  |
| -1.7876739331 | 0.1247089462 | 0.9999537652 | -1.1509528927 |
| 1.3587238604  | 0.3404096172 | 0.9999537652 | 1.4780545859  |
| -1.1796427531 | 0.7653407601 | 0.9999537652 | -1.1587803058 |
| -1.1295198141 | 0.603071559  | 0.9999537652 | 1.0766404706  |
| 1.1048689607  | 0.8505313588 | 0.9999537652 | 1.2221663107  |
| 1.0150539717  | 0.9384518653 | 0.9999537652 | 1.0484235394  |
| -1.0622324628 | 0.82995295   | 0.9999537652 | 1.3945451975  |
| 4.5505976667  | 0.5557790267 | 0.9999537652 | 0             |
| 1.1158299481  | 0.9297544265 | 0.9999537652 | -5.3583704783 |
| -1.0128503736 | 0.9497058067 | 0.9999537652 | 1.1173731884  |
| 1.1648707746  | 0.2979450526 | 0.9999537652 | 1.5225268256  |
| -1.1905004323 | 0.3217563702 | 0.9999537652 | -1.0924134472 |
| 1.5540529377  | 0.0279148803 | 0.9999537652 | 1.0214143824  |
| -1.0835619942 | 0.8462909724 | 0.9999537652 | 1.3384261804  |
| -1.1202797683 | 0.8316176596 | 0.9999537652 | -1.3738644509 |
| 1.1309455813  | 0.6969503953 | 0.9999537652 | -1.3023084422 |
| -1.1512918491 | 0.4686967453 | 0.9999537652 | 1.2736300536  |
| -1.1635825669 | 0.6493943547 | 0.9999537652 | -1.2327461774 |
| 1.1162834585  | 0.9273215157 | 0.9999537652 | -1.5836401754 |
| 2.7957660672  | 0.7054927342 | 0.9999537652 | -3.3826461929 |
| -1.3824661695 | 0.1349791714 | 0.9999537652 | -1.1227668843 |
| -1.0830484303 | 0.7807021881 | 0.9999537652 | -1.1770282279 |
| -1.0375253331 | 0.8443322405 | 0.9999537652 | 1.218295698   |
| 1.745558548   | 0.0542390908 | 0.9999537652 | 1.0154090202  |
| -1.034876915  | 0.9178545218 | 0.9999537652 | 1.6131054446  |
| 1.0781948674  | 0.7137832768 | 0.9999537652 | 1.1266282556  |
| 1.04354676    | 0.8863017949 | 0.9999537652 | -1.0745724722 |
| -1.1782938534 | 0.4960141001 | 0.9999537652 | -1.1348631108 |
| 1.1323539498  | 0.5147386672 | 0.9999537652 | -1.1405072718 |
| 1.3576258306  | 0.5361849952 | 0.9999537652 | 1.7383233151  |
| 1.5221533183  | 0.4489640482 | 0.9999537652 | 1.1188264007  |
| -1.0717148199 | 0.6391404241 | 0.9999537652 | -1.1478648967 |
| 1.209185672   | 0.3515169797 | 0.9999537652 | 1.3349795879  |
| 1.4213868285  | 0.008038     | 0.9999537652 | 1.3883810677  |
| 1.0944874443  | 0.6923275418 | 0.9999537652 | 1.4182092655  |
| -1.2060533122 | 0.2015882754 | 0.9999537652 | 1.1293585279  |
| 1.2509474775  | 0.2403779911 | 0.9999537652 | 1.066375584   |
| -1.0018516575 | 0.9932470045 | 0.9999537652 | 1.7570094758  |
| -1.6715479992 | 0.4280290348 | 0.9999537652 | -1.0386110167 |
| -1.2359990247 | 0.7441983326 | 0.9999537652 | 1.3961512712  |
| 2.937871377   | 0.1850196146 | 0.9999537652 | -7.2920271422 |
| 1.0709201901  | 0.5905464157 | 0.9999537652 | 1.420401534   |

gene\_expression\_table

|               |              |              |               |
|---------------|--------------|--------------|---------------|
| 0             | 0            | 0            | 8.8639046058  |
| -1.338866394  | 0.3029460418 | 0.9999537652 | 1.046744      |
| -1.0680335458 | 0.8908708817 | 0.9999537652 | -1.1655607995 |
| 1.0558829496  | 0.820916409  | 0.9999537652 | -1.3381489201 |
| -1.229329195  | 0.2522684767 | 0.9999537652 | -1.4093158561 |
| -1.4311207211 | 0.2770849861 | 0.9999537652 | 1.5596372938  |
| -1.3820084251 | 0.4313420627 | 0.9999537652 | -1.2511030064 |
| 2.8173722589  | 0.3577970311 | 0.9999537652 | -2.1857541833 |
| 1.0802249044  | 0.727447586  | 0.9999537652 | -1.0763868485 |
| 1.1863520868  | 0.7087842864 | 0.9999537652 | -1.4509645408 |
| 1.081122909   | 0.5379086846 | 0.9999537652 | -1.0198725621 |
| -1.0481861033 | 0.8345290903 | 0.9999537652 | -1.119814806  |
| -2.3806508789 | 0.009308     | 0.9999537652 | -1.7856288627 |
| -1.2817155393 | 0.4040066693 | 0.9999537652 | 1.0422816754  |
| 1.0854457506  | 0.492498634  | 0.9999537652 | 1.2032809525  |
| 1.0251691845  | 0.9018014232 | 0.9999537652 | -1.0212221562 |
| 2.2773894756  | 0.2153016587 | 0.9999537652 | -1.5790810514 |
| 1.1877419666  | 0.5848380683 | 0.9999537652 | 1.5767164782  |
| 4.6455089981  | 0.0683620362 | 0.9999537652 | -1.9880884458 |
| 4.5505976667  | 0.5557790267 | 0.9999537652 | 2.2924151284  |
| -1.1546110864 | 0.3900088611 | 0.9999537652 | -1.1776300108 |
| 2.1327820026  | 0.1200348994 | 0.9999537652 | -1.4023913842 |
| 1.4349404381  | 0.1376994937 | 0.9999537652 | -1.3961347544 |
| -1.8643763152 | 0.3172154085 | 0.9999537652 | 2.8690209402  |
| -1.12188679   | 0.7748143959 | 0.9999537652 | -1.4032646471 |
| -1.1896169234 | 0.4632072937 | 0.9999537652 | -1.1036267434 |
| -1.8300986908 | 0.0295515815 | 0.9999537652 | 1.1213854033  |
| -1.0312044602 | 0.9596494834 | 0.9999537652 | -1.4834735767 |
| 1.1448177787  | 0.6335810666 | 0.9999537652 | -1.103850241  |
| -1.3148677635 | 0.1795795964 | 0.9999537652 | 1.1138600596  |
| -1.6048757093 | 0.4641308228 | 0.9999537652 | 1.0396888355  |
| -1.1580927871 | 0.3846371341 | 0.9999537652 | 1.0801528659  |
| 2.4666232931  | 0.1125361989 | 0.9999537652 | -1.0757422118 |
| -1.3321793584 | 0.5610167475 | 0.9999537652 | 1.2807032682  |
| -1.0026391872 | 0.9930050146 | 0.9999537652 | -1.2204291542 |
| 1.0512601692  | 0.6973919727 | 0.9999537652 | -1.0949041184 |
| 1.2565162416  | 0.5438276699 | 0.9999537652 | 1.6450139622  |
| 0             | 0            | 0            | 24.4899985757 |
| -1.0733599254 | 0.7084793963 | 0.9999537652 | 1.0215576509  |
| -1.1741964346 | 0.7426649952 | 0.9999537652 | -1.1556892707 |
| 1.4537616364  | 0.2586164218 | 0.9999537652 | 1.1129507202  |
| -1.1157067995 | 0.3432303171 | 0.9999537652 | 1.0544170741  |
| -1.0797696345 | 0.5396684314 | 0.9999537652 | -1.2168962231 |
| -1.6484285107 | 0.0975063659 | 0.9999537652 | 1.0084493247  |
| 2.7933974408  | 0.6948713406 | 0.9999537652 | 0             |
| 0             | 0            | 0            | 2.9985540909  |
| 1.1846865074  | 0.4912512751 | 0.9999537652 | 1.3346182716  |
| -1.6388132474 | 0.0848115375 | 0.9999537652 | -1.440812958  |
| -1.8448851181 | 0.178493205  | 0.9999537652 | -1.4975431842 |

gene\_expression\_table

|               |              |              |               |
|---------------|--------------|--------------|---------------|
| 1.0209353182  | 0.9024932957 | 0.9999537652 | -1.0677626705 |
| -1.3390154077 | 0.0980515113 | 0.9999537652 | -1.3305629498 |
| 1.2126112857  | 0.0989912877 | 0.9999537652 | 1.0984966068  |
| 1.2783179019  | 0.2827663672 | 0.9999537652 | -1.1614810519 |
| -1.1711631892 | 0.8483989027 | 0.9999537652 | -1.4612021112 |
| 0             | 0            | 0            | 9.7116702472  |
| 0             | 0            | 0            | 2.996475627   |
| 1.1404558615  | 0.3429807867 | 0.9999537652 | 1.1142776485  |
| 1.1169155339  | 0.488606985  | 0.9999537652 | -1.1106993851 |
| -1.4796889536 | 0.2264786651 | 0.9999537652 | -1.6741145203 |
| 1.0267652648  | 0.8421715857 | 0.9999537652 | -1.0306931434 |
| -1.1024469748 | 0.4062594339 | 0.9999537652 | 1.0424777432  |
| 1.5086084868  | 0.0934143043 | 0.9999537652 | -1.1080454004 |
| 1.1878746775  | 0.2602436572 | 0.9999537652 | -1.1508122759 |
| 1.2821370521  | 0.2908481204 | 0.9999537652 | -1.0082575728 |
| -2.0008873798 | 0.4500303958 | 0.9999537652 | 2.0652983605  |
| 1.1803952659  | 0.2679343967 | 0.9999537652 | -1.2118892371 |
| 1.4170626427  | 0.3518691427 | 0.9999537652 | -1.1853570569 |
| 1.0512003843  | 0.8055335044 | 0.9999537652 | 1.1774011007  |
| -1.6477115577 | 0.0213987352 | 0.9999537652 | -1.1319145048 |
| -4.8095156671 | 0.2070202161 | 0.9999537652 | -2.0161248892 |
| 1.285893423   | 0.4443181069 | 0.9999537652 | 1.2321043478  |
| 25.6372777234 | 0.2064852657 | 0.9999537652 | 1.0276899286  |
| 1.5682964138  | 0.3323734601 | 0.9999537652 | 1.0746656978  |
| -1.5432722588 | 0.1414819278 | 0.9999537652 | -1.146838775  |
| 1.0892812652  | 0.6385055809 | 0.9999537652 | -1.3366127715 |
| 1.0934204149  | 0.5200798167 | 0.9999537652 | -1.026803823  |
| -1.1808999578 | 0.3792454212 | 0.9999537652 | -1.2147492053 |
| -1.0180216044 | 0.9118720303 | 0.9999537652 | -1.1329786063 |
| -1.1055798886 | 0.6052894442 | 0.9999537652 | 1.0428533419  |
| 16.8718544959 | 0.2737628052 | 0.9999537652 | 1.9345442849  |
| -1.3594371598 | 0.2798749983 | 0.9999537652 | -1.2331972257 |
| 1.5185950608  | 0.0641564166 | 0.9999537652 | -1.0949068645 |
| -1.19568794   | 0.3859153684 | 0.9999537652 | -1.2008199468 |
| -1.1693119757 | 0.8275585751 | 0.9999537652 | 1.9684343355  |
| 1.1268458263  | 0.4237910281 | 0.9999537652 | -1.201390655  |
| -1.0095897015 | 0.9888202879 | 0.9999537652 | -1.6589722521 |
| -1.0278408125 | 0.9199837187 | 0.9999537652 | 1.0176587704  |
| -1.3793873385 | 0.1587678539 | 0.9999537652 | -1.2159132428 |
| 2.3335098933  | 0.4417206775 | 0.9999537652 | 1.6652336982  |
| 1.1757625339  | 0.4751544317 | 0.9999537652 | 1.0485705888  |
| 1.0729136782  | 0.9152272869 | 0.9999537652 | -1.4136515635 |
| -1.2940180539 | 0.3632567577 | 0.9999537652 | 1.1423389803  |
| -1.0673171705 | 0.7880248873 | 0.9999537652 | 1.170939493   |
| 1.063316061   | 0.8482216421 | 0.9999537652 | -1.2529808255 |
| -1.0956944243 | 0.6631790322 | 0.9999537652 | 1.144403713   |
| 1.2555709875  | 0.4837661996 | 0.9999537652 | -1.1078295401 |
| 6.3075231393  | 0.485451655  | 0.9999537652 | -5.3589986948 |
| 1.0236618924  | 0.8667492069 | 0.9999537652 | 1.0435443979  |

gene\_expression\_table

|               |              |              |               |
|---------------|--------------|--------------|---------------|
| 2.0354520887  | 0.4477839505 | 0.9999537652 | -1.4741963843 |
| -1.4954848333 | 0.3220237192 | 0.9999537652 | -1.4080908716 |
| -1.2947942833 | 0.4876979208 | 0.9999537652 | -1.1796174106 |
| 1.1844825577  | 0.7200917106 | 0.9999537652 | -1.0673606747 |
| 1.4740649528  | 0.2400143728 | 0.9999537652 | -1.1800734146 |
| -1.1266715125 | 0.5004467097 | 0.9999537652 | 1.1720587512  |
| -1.5774890195 | 0.3221730134 | 0.9999537652 | -1.0839550431 |
| -1.2771433826 | 0.2857400526 | 0.9999537652 | -1.1327104837 |
| 1.0586498351  | 0.8053405735 | 0.9999537652 | 1.0501301114  |
| 1.3614856847  | 0.1297233268 | 0.9999537652 | 1.346270077   |
| -1.1751153768 | 0.2857504191 | 0.9999537652 | 1.0806789664  |
| 1.8398140613  | 0.1602465916 | 0.9999537652 | -1.6800294987 |
| -1.1614465172 | 0.2807127974 | 0.9999537652 | -1.1871333144 |
| -1.0118448434 | 0.9747685652 | 0.9999537652 | -1.4235410716 |
| -1.5305812311 | 0.5675869828 | 0.9999537652 | -1.1248044011 |
| 1.0894712817  | 0.5860976452 | 0.9999537652 | 1.0588171768  |
| -1.0851687587 | 0.6866542388 | 0.9999537652 | -1.0414462143 |
| 1.0525931057  | 0.7825188426 | 0.9999537652 | 1.0561233115  |
| 1.1148751653  | 0.6499725722 | 0.9999537652 | 1.3845512285  |
| -1.0840217463 | 0.7015254254 | 0.9999537652 | 1.044661462   |
| -1.0666211761 | 0.8838656895 | 0.9999537652 | -1.3466975077 |
| -1.2168919617 | 0.5346917371 | 0.9999537652 | 1.1095080702  |
| -1.0202735182 | 0.884604801  | 0.9999537652 | -1.0187378039 |
| 1.1408589403  | 0.7384613792 | 0.9999537652 | -1.1723473927 |
| -1.3107841951 | 0.1542406985 | 0.9999537652 | -1.104755264  |
| -1.0427069939 | 0.838677402  | 0.9999537652 | 1.1534174888  |
| 1.1614433121  | 0.3640398309 | 0.9999537652 | -1.1456664312 |
| 1.0899709362  | 0.7207030753 | 0.9999537652 | -1.0503446426 |
| -1.0400531458 | 0.8012921758 | 0.9999537652 | -1.2164433954 |
| -1.0758055436 | 0.8083040755 | 0.9999537652 | -1.208198232  |
| 4.517455539   | 0.0856145041 | 0.9999537652 | -1.1533365725 |
| 0             | 0            | 0            | 2.9988886918  |
| 2.7933974408  | 0.6948713406 | 0.9999537652 | 0             |
| 4.5505976667  | 0.5557790267 | 0.9999537652 | 8.8639046058  |
| 1.1033573704  | 0.6527281908 | 0.9999537652 | 1.1387938929  |
| 4.5505976667  | 0.5557790267 | 0.9999537652 | -1.123982892  |
| 16.8433158146 | 0.2735409335 | 0.9999537652 | -1.3095105362 |
| 0             | 0            | 0            | 2.996475627   |
| -1.2772694893 | 0.4578141867 | 0.9999537652 | 1.0662961519  |
| -1.138183167  | 0.2560100613 | 0.9999537652 | -1.0266970013 |
| -1.1190894018 | 0.5289090516 | 0.9999537652 | -1.0901198025 |
| -1.9430018564 | 0.4087251328 | 0.9999537652 | -1.7195161403 |
| 1.4745789114  | 0.0939880414 | 0.9999537652 | -1.1232796119 |
| 1.0055567739  | 0.9749202939 | 0.9999537652 | -1.3455722467 |
| 1.0424767751  | 0.8581046647 | 0.9999537652 | -1.0292777891 |
| -1.0225224938 | 0.916925319  | 0.9999537652 | 1.0296299222  |
| -1.2000893308 | 0.6151023203 | 0.9999537652 | 1.1151943287  |
| 1.1923737832  | 0.8182828534 | 0.9999537652 | -1.1923833604 |
| 0             | 0            | 0            | -1.3598304575 |



gene\_expression\_table

|               |              |              |               |
|---------------|--------------|--------------|---------------|
| -1.1073785092 | 0.6543001307 | 0.9999537652 | -1.1058459266 |
| 0             | 0            | 0            | 0             |
| 6.3075231393  | 0.4854286841 | 0.9999537652 | 0             |
| -1.1611015106 | 0.6273847581 | 0.9999537652 | -1.371131225  |
| -1.3036560105 | 0.2257855002 | 0.9999537652 | -1.2496770151 |
| 1.0705253491  | 0.7088324696 | 0.9999537652 | 1.3539301635  |
| -1.1427689666 | 0.4837608878 | 0.9999537652 | -1.0514115431 |
| -1.3894979293 | 0.0496627431 | 0.9999537652 | -1.0318761021 |
| -1.2278711531 | 0.6688413342 | 0.9999537652 | 1.9055543429  |
| -1.3381928736 | 0.4309516453 | 0.9999537652 | -1.2369910878 |
| -1.2682216478 | 0.2792008333 | 0.9999537652 | -1.1226690661 |
| 2.4905122517  | 0.0478835288 | 0.9999537652 | 1.528295012   |
| 34.3811030879 | 0.1695019447 | 0.9999537652 | 1.2594537582  |
| 1.2164420184  | 0.8053222086 | 0.9999537652 | -4.1152258145 |
| 1.124746803   | 0.8556409972 | 0.9999537652 | 1.2803733205  |
| 11.5766527773 | 0.3453990803 | 0.9999537652 | 3.7052803395  |
| 1.1177441048  | 0.5172746255 | 0.9999537652 | -1.0015936301 |
| 1.0236878871  | 0.8958923763 | 0.9999537652 | 1.0722987225  |
| -1.4375831168 | 0.3579012916 | 0.9999537652 | -1.1243689986 |
| -1.1860795505 | 0.4719125662 | 0.9999537652 | -1.0330433139 |
| 3.9744797554  | 0.2836205177 | 0.9999537652 | -1.7268642166 |
| -1.0355492915 | 0.9338307841 | 0.9999537652 | 1.6088862186  |
| 15.0880352532 | 0.2950942573 | 0.9999537652 | 0             |
| 1.4817259234  | 0.1642098823 | 0.9999537652 | -1.0376791732 |
| 1.3571423233  | 0.512346602  | 0.9999537652 | 1.640937024   |
| 1.180297178   | 0.6635480006 | 0.9999537652 | -1.0946237578 |
| -1.4286094458 | 0.2443124005 | 0.9999537652 | -1.011994059  |
| -1.3893577805 | 0.2415178869 | 0.9999537652 | 1.1658742097  |
| -1.2035404978 | 0.5419977471 | 0.9999537652 | -1.0635714687 |
| -1.095292568  | 0.4860024217 | 0.9999537652 | 1.1222777452  |
| -1.3605514786 | 0.1864663462 | 0.9999537652 | 1.3116128299  |
| -1.0626175961 | 0.6743609828 | 0.9999537652 | 1.0398862079  |
| 0             | 0            | 0            | -1.3593668272 |
| 1.149120046   | 0.4510631356 | 0.9999537652 | -1.0975474177 |
| -1.2704982263 | 0.1752926778 | 0.9999537652 | 1.3251084227  |
| 0             | 0            | 0            | 6.908559683   |
| -4.8135938501 | 0.1785914488 | 0.9999537652 | 2.996475627   |
| -1.1323079957 | 0.5214140509 | 0.9999537652 | -1.0084975503 |
| -3.2699928362 | 0.1576323278 | 0.9999537652 | 1.2694869116  |
| -1.1256611836 | 0.6992458483 | 0.9999537652 | -1.3226887462 |
| 9.8291821523  | 0.3810402025 | 0.9999537652 | -2.2391686371 |
| -1.3567700241 | 0.473666366  | 0.9999537652 | -1.3886093898 |
| -1.1527571892 | 0.5558245207 | 0.9999537652 | 1.3395347413  |
| 2.7933974408  | 0.6948713406 | 0.9999537652 | 2.996475627   |
| 4.5505976667  | 0.5557790267 | 0.9999537652 | 8.8639046058  |
| -1.5941542392 | 0.0427012111 | 0.9999537652 | -1.087340296  |
| -1.0316109055 | 0.8817592361 | 0.9999537652 | 1.0955409103  |
| 1.1093756627  | 0.5468701266 | 0.9999537652 | 1.1673522149  |
| 1.1012619464  | 0.6696795862 | 0.9999537652 | 1.247117995   |

gene\_expression\_table

|               |              |              |               |
|---------------|--------------|--------------|---------------|
| 1.2905235246  | 0.7076099484 | 0.9999537652 | -1.2144502384 |
| 1.6025907098  | 0.1040205866 | 0.9999537652 | 1.0023957238  |
| 1.2589114534  | 0.3234820826 | 0.9999537652 | 1.4813495611  |
| -1.0964929497 | 0.7502190531 | 0.9999537652 | -1.0536964612 |
| 2.7933974408  | 0.6948713406 | 0.9999537652 | -1.14351692   |
| 0             | 0            | 0            | 4.9527501949  |
| 1.0073836995  | 0.9696680003 | 0.9999537652 | -1.0639745363 |
| 1.1492445044  | 0.2962706452 | 0.9999537652 | 1.1594244152  |
| 4.5505976667  | 0.5557790267 | 0.9999537652 | 2.2942711679  |
| -1.0439086777 | 0.7695204926 | 0.9999537652 | 1.004009655   |
| 1.1529146634  | 0.5295431579 | 0.9999537652 | -1.0820034817 |
| -1.0944022099 | 0.7299593215 | 0.9999537652 | 1.0602051576  |
| 1.1756050889  | 0.2743302296 | 0.9999537652 | 1.1513338266  |
| 0             | 0            | 0            | 0             |
| 0             | 0            | 0            | -1.1250196696 |
| 1.124070454   | 0.906249133  | 0.9999537652 | 1.2132629184  |
| 1.0877342563  | 0.6628109982 | 0.9999537652 | 1.1046539493  |
| 1.7747100951  | 0.5596991323 | 0.9999537652 | 34.3398315517 |
| 1.2147901705  | 0.1277642646 | 0.9999537652 | 1.1334330353  |
| 2.7933974408  | 0.6948713406 | 0.9999537652 | 0             |
| 16.8581089812 | 0.2738184187 | 0.9999537652 | 1.5894490894  |
| -1.7140366854 | 0.003483     | 0.9999537652 | -1.1395921295 |
| -1.0889509227 | 0.6923877787 | 0.9999537652 | 1.1527555071  |
| -1.0993038336 | 0.8296585186 | 0.9999537652 | 1.0162973402  |
| -1.1668466258 | 0.1699008283 | 0.9999537652 | 1.0324186039  |
| -1.0216541814 | 0.9525307393 | 0.9999537652 | -1.1047225461 |
| 1.2594687841  | 0.1415731094 | 0.9999537652 | -1.1082165781 |
| 0             | 0            | 0            | -2.0460754901 |
| -1.1038659669 | 0.500230957  | 0.9999537652 | 1.0033619365  |
| 1.007459388   | 0.9856189388 | 0.9999537652 | -1.1913063346 |
| 1.2338638161  | 0.4980471597 | 0.9999537652 | 1.2109312597  |
| 2.7933974408  | 0.6948713406 | 0.9999537652 | 0             |
| -1.1087694416 | 0.7962939824 | 0.9999537652 | 1.4990238903  |
| 2.006385497   | 0.0827066108 | 0.9999537652 | 1.1119771722  |
| 1.4668223311  | 0.0369563131 | 0.9999537652 | -1.0118582916 |
| 1.141683967   | 0.5250382192 | 0.9999537652 | 1.1044345067  |
| -1.5875118025 | 0.7191851908 | 0.9999537652 | 0             |
| -1.7126738456 | 0.5348532116 | 0.9999537652 | -1.9220666281 |
| -1.2521293745 | 0.1831818193 | 0.9999537652 | -1.0134922782 |
| 2.0354520887  | 0.4478716725 | 0.9999537652 | 1.4539570206  |
| 4.5505976667  | 0.5557790267 | 0.9999537652 | -1.2784318804 |
| 1.4677303914  | 0.6422486858 | 0.9999537652 | 1.1165417891  |
| -1.7150903924 | 0.5020348074 | 0.9999537652 | -1.3741916786 |
| 1.2508079663  | 0.1466628114 | 0.9999537652 | 1.4236733801  |
| 1.2416511195  | 0.3610062985 | 0.9999537652 | -1.1162347094 |
| 1.2029614     | 0.609061269  | 0.9999537652 | -1.4860455187 |
| -3.8978654675 | 0.0774219164 | 0.9999537652 | 1.1738496605  |
| 1.2680916436  | 0.1631572271 | 0.9999537652 | 1.2362264076  |
| 1.3661459224  | 0.0901914307 | 0.9999537652 | -1.1900631644 |

gene\_expression\_table

|               |              |              |               |
|---------------|--------------|--------------|---------------|
| 1.26726803    | 0.632118024  | 0.9999537652 | 1.1825900946  |
| 1.0310457355  | 0.8680004628 | 0.9999537652 | 1.5392411207  |
| 1.2516860341  | 0.3525443409 | 0.9999537652 | 1.2617972731  |
| 1.7099471466  | 0.2534456358 | 0.9999537652 | 1.2941181437  |
| 1.2982841569  | 0.628969465  | 0.9999537652 | -1.5836391682 |
| 1.5238592065  | 0.3266642932 | 0.9999537652 | 1.1199539848  |
| 1.1112880642  | 0.7359754549 | 0.9999537652 | -1.2198910671 |
| -1.2421080709 | 0.3379924788 | 0.9999537652 | 1.3037080462  |
| -1.1233792384 | 0.7039295413 | 0.9999537652 | -1.062454328  |
| -1.0676775145 | 0.7434664942 | 0.9999537652 | 1.4330129612  |
| -1.1464182068 | 0.5671317924 | 0.9999537652 | 1.1973787615  |
| 1.0297943064  | 0.8876284578 | 0.9999537652 | 1.6862654468  |
| 3.5302237986  | 0.0121905177 | 0.9999537652 | -1.1330944388 |
| -1.0772256662 | 0.8716325634 | 0.9999537652 | 1.0137498297  |
| -1.1075691371 | 0.7576132878 | 0.9999537652 | 1.1569523817  |
| -1.0159785761 | 0.964462702  | 0.9999537652 | 1.5766577618  |
| -1.328502012  | 0.3365850117 | 0.9999537652 | 1.2248634774  |
| 1.0884461353  | 0.7726432075 | 0.9999537652 | -1.2361179311 |
| 1.2496769766  | 0.4952852787 | 0.9999537652 | 1.1168570711  |
| 0             | 0            | 0            | 2.996475627   |
| -1.0189614409 | 0.9618229175 | 0.9999537652 | 1.3452097851  |
| 1.6018473574  | 0.693917909  | 0.9999537652 | 8.8639046058  |
| 1.3952070747  | 0.6767646104 | 0.9999537652 | 2.0089640792  |
| -1.16505023   | 0.6108144604 | 0.9999537652 | -1.014166157  |
| 2.7933974408  | 0.6948713406 | 0.9999537652 | 0             |
| -1.181565353  | 0.488518357  | 0.9999537652 | 1.2863765844  |
| 1.0114183383  | 0.9633928542 | 0.9999537652 | -1.0603336318 |
| 1.2396186463  | 0.2701981128 | 0.9999537652 | -1.0167170124 |
| 1.194447843   | 0.2734036408 | 0.9999537652 | 1.266549411   |
| 1.0538310802  | 0.6446619435 | 0.9999537652 | 1.1177040158  |
| -1.5200323825 | 0.1349310678 | 0.9999537652 | 1.1373076228  |
| -1.0929237384 | 0.6672455936 | 0.9999537652 | -1.1521827216 |
| -1.0186716739 | 0.9019037425 | 0.9999537652 | 1.2278441686  |
| 9.8205505243  | 0.3808440684 | 0.9999537652 | 1.7769408362  |
| 1.0985653498  | 0.4301505877 | 0.9999537652 | 1.026693314   |
| -1.9370249802 | 0.3050917988 | 0.9999537652 | -1.1368943321 |
| -1.3184660385 | 0.2700227623 | 0.9999537652 | 1.1329284071  |
| 1.0809755048  | 0.5490760881 | 0.9999537652 | 1.3359047412  |
| 1.0623709753  | 0.7626878612 | 0.9999537652 | 1.2378963413  |
| 1.0336048792  | 0.8720139777 | 0.9999537652 | 1.2352826647  |
| -1.0797577441 | 0.5842578716 | 0.9999537652 | 1.2374267913  |
| 1.0707806375  | 0.6205358691 | 0.9999537652 | 1.5370034658  |
| -1.1516975413 | 0.2717871967 | 0.9999537652 | 1.0391274319  |
| 1.0097571943  | 0.9447296052 | 0.9999537652 | 1.5122308347  |
| 0             | 0            | 0            | 4.9527501949  |
| -1.2839015029 | 0.1805765691 | 0.9999537652 | -1.1427614548 |
| 1.0182947114  | 0.939739388  | 0.9999537652 | 1.0387785861  |
| 1.6869826229  | 0.0143497632 | 0.9999537652 | 1.173749672   |
| 1.1168637133  | 0.6259076265 | 0.9999537652 | 1.0815119824  |

gene\_expression\_table

|               |              |              |               |
|---------------|--------------|--------------|---------------|
| 0             | 0            | 0            | 36.3443360834 |
| 1.3990463717  | 0.0897346325 | 0.9999537652 | 1.0126625903  |
| 1.1369777985  | 0.5987380087 | 0.9999537652 | 1.1374388297  |
| 1.3845416171  | 0.4033059594 | 0.9999537652 | 1.0315740338  |
| 1.070345413   | 0.6077962166 | 0.9999537652 | 1.3422463993  |
| -1.0421333985 | 0.7939308726 | 0.9999537652 | 1.253430513   |
| -1.026203725  | 0.885839766  | 0.9999537652 | 1.2459959983  |
| -1.0472308498 | 0.8153839882 | 0.9999537652 | 1.0829484399  |
| -2.0879819015 | 0.1714065322 | 0.9999537652 | -1.5174351876 |
| -1.2143283383 | 0.538169455  | 0.9999537652 | -1.4505459521 |
| 1.0100880939  | 0.9490736331 | 0.9999537652 | 1.2933245531  |
| -1.3970752264 | 0.4291431202 | 0.9999537652 | -1.3216462151 |
| 18.5983228161 | 0.2583489815 | 0.9999537652 | 4.9178905533  |
| 1.1093446212  | 0.5429038998 | 0.9999537652 | 1.2446208157  |
| 1.017707045   | 0.9171895947 | 0.9999537652 | -1.198899296  |
| -1.4194804336 | 0.3044234307 | 0.9999537652 | 1.8974404564  |
| 0             | 0            | 0            | 1.7042814026  |
| -4.3884604323 | 0.0126324025 | 0.9999537652 | -1.181329099  |
| -3.140785573  | 0.001264     | 0.9999537652 | -1.444469972  |
| 1.04912148    | 0.7961039067 | 0.9999537652 | 1.3016380803  |
| 1.1270986227  | 0.8600806696 | 0.9999537652 | -1.2785952114 |
| -1.166524873  | 0.860779544  | 0.9999537652 | 1.576587674   |
| 1.3227096637  | 0.400671865  | 0.9999537652 | -1.5735506893 |
| -1.4288788366 | 0.5987652662 | 0.9999537652 | -2.2203993938 |
| 1.0012832251  | 0.9942563745 | 0.9999537652 | 1.2829118309  |
| 1.0283302552  | 0.879513622  | 0.9999537652 | 1.2780404681  |
| 1.1188037212  | 0.6282817788 | 0.9999537652 | -1.027034897  |
| -1.047199372  | 0.7719144965 | 0.9999537652 | 1.2284220271  |
| 0             | 0            | 0            | -1.1248877899 |
| 0             | 0            | 0            | 2.996475627   |
| -1.1429576332 | 0.4380556582 | 0.9999537652 | 1.0096768151  |
| 1.1302581055  | 0.6202606752 | 0.9999537652 | 1.2488862235  |
| -1.0091741698 | 0.949578719  | 0.9999537652 | 1.3181271265  |
| -1.1954252144 | 0.4940107287 | 0.9999537652 | -1.0565164767 |
| -1.035202297  | 0.8128492469 | 0.9999537652 | 1.1231014417  |
| -1.0820310994 | 0.6640628498 | 0.9999537652 | -1.3459739525 |
| -1.2237499106 | 0.7441372579 | 0.9999537652 | 2.3524535037  |
| 4.5505976667  | 0.5557790267 | 0.9999537652 | -3.3841961096 |
| -1.4498385823 | 0.1105566022 | 0.9999537652 | -1.1619056393 |
| 1.0058544808  | 0.9636617449 | 0.9999537652 | 1.1582769028  |
| 1.0474354718  | 0.742956304  | 0.9999537652 | 1.3200009309  |
| -1.0721992114 | 0.7659324767 | 0.9999537652 | -1.0344306034 |
| 2.7933974408  | 0.6948713406 | 0.9999537652 | 0             |
| 0             | 0            | 0            | 8.8639046058  |
| -1.075820225  | 0.6999965317 | 0.9999537652 | 1.0495168842  |
| 1.2762043335  | 0.1271720537 | 0.9999537652 | 1.2978543044  |
| -1.0380856761 | 0.7799799112 | 0.9999537652 | 1.0992341518  |
| 2.7933974408  | 0.6948713406 | 0.9999537652 | 2.2926838869  |
| 1.0900886499  | 0.8895462733 | 0.9999537652 | 1.1127752407  |

gene\_expression\_table

|               |              |              |               |
|---------------|--------------|--------------|---------------|
| -2.0411599594 | 0.2377865367 | 0.9999537652 | -1.1307727859 |
| 1.3505325057  | 0.6953045765 | 0.9999537652 | 2.9988886918  |
| -1.1854717225 | 0.1940370141 | 0.9999537652 | -1.0627580213 |
| -1.0427400921 | 0.7632897574 | 0.9999537652 | 1.3438184196  |
| 5.0059881963  | 0.1255547862 | 0.9999537652 | 12.801795161  |
| 1.2694556548  | 0.3949727424 | 0.9999537652 | 1.4702705073  |
| 15.0880352532 | 0.2948920595 | 0.9999537652 | -1.5255688471 |
| 6.3075231393  | 0.4854057018 | 0.9999537652 | -1.3601489831 |
| 1.7423697864  | 0.1004776416 | 0.9999537652 | 1.3010908179  |
| 1.0327732145  | 0.8872965433 | 0.9999537652 | 1.0340505057  |
| -1.0597204291 | 0.7505854911 | 0.9999537652 | 1.4994133365  |
| 8.0712632467  | 0.4228920926 | 0.9999537652 | 3.8090921162  |
| 3.7984577094  | 0.2220478677 | 0.9999537652 | 2.0131819221  |
| 1.0222993647  | 0.8935020036 | 0.9999537652 | -1.0281449369 |
| -1.0647587572 | 0.8154719438 | 0.9999537652 | -1.0389380136 |
| 4.5505976667  | 0.5557790267 | 0.9999537652 | -1.5100069453 |
| 2.8162276504  | 0.3669573302 | 0.9999537652 | -1.1451545078 |
| -1.2605653319 | 0.2427719424 | 0.9999537652 | -1.0718841671 |
| -1.1112163725 | 0.4887193022 | 0.9999537652 | 1.3003759484  |
| -5.692811393  | 0.076858607  | 0.9999537652 | 2.6107368452  |
| -1.0823609808 | 0.5743824003 | 0.9999537652 | -1.0446859488 |
| 9.8205505243  | 0.3809193616 | 0.9999537652 | 2.996475627   |
| 1.1397146838  | 0.6935032981 | 0.9999537652 | 1.5864914288  |
| -1.149802149  | 0.343812271  | 0.9999537652 | 1.0067476133  |
| 1.5869633341  | 0.2897162818 | 0.9999537652 | 1.0472842668  |
| 1.5325809924  | 0.2261985587 | 0.9999537652 | 1.0333966667  |
| 1.044127911   | 0.7646311458 | 0.9999537652 | 1.205305723   |
| -1.2159646883 | 0.4730642701 | 0.9999537652 | -1.1563072121 |
| -1.1774067813 | 0.3927347504 | 0.9999537652 | -1.0380361536 |
| 1.5021386016  | 0.001302     | 0.9999537652 | 1.3466271437  |
| 1.0925853437  | 0.7457817768 | 0.9999537652 | -1.0736265352 |
| 18.6140621435 | 0.2552147836 | 0.9999537652 | 1.2603257066  |
| 6.3075231393  | 0.4853827079 | 0.9999537652 | -1.4683576122 |
| 1.1769892637  | 0.4082943246 | 0.9999537652 | 1.0281442147  |
| 1.3896688665  | 0.0785759688 | 0.9999537652 | 1.5067871232  |
| 4.5544554512  | 0.5691293981 | 0.9999537652 | -14.149476906 |
| 1.2079525956  | 0.4204395495 | 0.9999537652 | -1.1108688054 |
| 1.4643107975  | 0.586147239  | 0.9999537652 | 2.767147042   |
| -1.0296811672 | 0.824512758  | 0.9999537652 | -1.2185767031 |
| 4.7592049098  | 0.1554062325 | 0.9999537652 | -1.0728752675 |
| 1.312793133   | 0.5878123954 | 0.9999537652 | 1.851411927   |
| 1.0193705161  | 0.9477470752 | 0.9999537652 | 1.4358215607  |
| 1.143668494   | 0.3131867028 | 0.9999537652 | 1.0820291482  |
| -1.3565263824 | 0.6051338741 | 0.9999537652 | -1.1987244464 |
| -1.1638388551 | 0.2395762942 | 0.9999537652 | -1.0312762123 |
| -2.8699603703 | 0.1713714843 | 0.9999537652 | -2.1379338358 |
| 1.3118119729  | 0.1785752981 | 0.9999537652 | -1.0412639393 |
| -1.0929209539 | 0.5829118826 | 0.9999537652 | -1.0169992171 |
| -1.2040857698 | 0.5455875109 | 0.9999537652 | 1.2014730137  |

gene\_expression\_table

|               |              |              |               |
|---------------|--------------|--------------|---------------|
| -1.1075595053 | 0.5086236562 | 0.9999537652 | -1.31003991   |
| -1.6674095463 | 0.6210110914 | 0.9999537652 | 1.5902685827  |
| 1.0537889709  | 0.8103712791 | 0.9999537652 | 1.2075530448  |
| 17.3472938331 | 0.2975749715 | 0.9999537652 | 1.9416545697  |
| 1.0814547753  | 0.6892352385 | 0.9999537652 | 1.164383578   |
| 1.1445045483  | 0.5861189161 | 0.9999537652 | -1.2184354277 |
| 27.7226916631 | 0.2128547262 | 0.9999537652 | -1.582751021  |
| 0             | 0            | 0            | -4.5547427608 |
| 1.1364349707  | 0.3859972904 | 0.9999537652 | -1.0092656345 |
| 0             | 0            | 0            | 0             |
| 1.1180519408  | 0.6268002499 | 0.9999537652 | -1.0913554344 |
| 4.5505976667  | 0.5557790267 | 0.9999537652 | -3.2022480197 |
| 11.5766527773 | 0.3453898319 | 0.9999537652 | -1.2898805803 |
| 16.8433158146 | 0.2735276478 | 0.9999537652 | 8.8639046058  |
| 3.0590680122  | 0.3355942233 | 0.9999537652 | 12.7820459093 |
| 1.1949607999  | 0.4285244635 | 0.9999537652 | -1.0349120057 |
| -1.2453533991 | 0.1431774087 | 0.9999537652 | -1.023401472  |
| -1.1047735058 | 0.4346912562 | 0.9999537652 | -1.0500406904 |
| 1.0244986373  | 0.9705256529 | 0.9999537652 | 1.0401486537  |
| 1.8447991669  | 0.5967896241 | 0.9999537652 | -2.9707609366 |
| -1.174661995  | 0.7906572339 | 0.9999537652 | 1.2181218538  |
| -1.1007256046 | 0.8228118355 | 0.9999537652 | 1.3811522028  |
| -1.0743517271 | 0.7630609126 | 0.9999537652 | 1.1643351917  |
| -1.0804386955 | 0.5862978887 | 0.9999537652 | -1.0673268355 |
| 0             | 0            | 0            | -2.1292399642 |
| -6.9736190158 | 0.2250321147 | 0.9999537652 | -3.1664209003 |
| 1.0142654541  | 0.9685053513 | 0.9999537652 | 1.0565165854  |
| -1.0600956368 | 0.9084150813 | 0.9999537652 | 1.181478472   |
| 2.7957660672  | 0.7054951009 | 0.9999537652 | 0             |
| -1.2192482365 | 0.2320886472 | 0.9999537652 | -1.0212113906 |
| 0             | 0            | 0            | 1.0667457716  |
| -1.0835637166 | 0.6958731352 | 0.9999537652 | 1.2070098446  |
| 1.1071476644  | 0.5655334153 | 0.9999537652 | 1.101474769   |
| 1.0043259449  | 0.9818605619 | 0.9999537652 | 1.0098069768  |
| 1.7036365097  | 0.2379812747 | 0.9999537652 | 1.5744428501  |
| -1.1298056631 | 0.6416280193 | 0.9999537652 | 1.1274721957  |
| 1.464469179   | 0.2485461267 | 0.9999537652 | -1.1036344046 |
| 1.0894889315  | 0.8408469235 | 0.9999537652 | 1.0307841522  |
| 2.7933974408  | 0.6948713406 | 0.9999537652 | 0             |
| -1.0306164867 | 0.9232654324 | 0.9999537652 | -1.1793380639 |
| -1.0979527679 | 0.6282465591 | 0.9999537652 | 1.2861463346  |
| 1.2500688203  | 0.4447039177 | 0.9999537652 | 1.0912702922  |
| 1.1465309051  | 0.2744730672 | 0.9999537652 | 1.0946903038  |
| -1.5875118025 | 0.7196340801 | 0.9999537652 | 1.5217746204  |
| 13.3324809638 | 0.3193939983 | 0.9999537652 | -9.7542681481 |
| -1.1022674273 | 0.8986954579 | 0.9999537652 | 1.0104093403  |
| -6.9736190158 | 0.2250321147 | 0.9999537652 | 2.6430925766  |
| 0             | 0            | 0            | 6.9133480437  |
| 1.343460578   | 0.2052263881 | 0.9999537652 | -1.129135943  |

gene\_expression\_table

|               |              |              |               |
|---------------|--------------|--------------|---------------|
| -1.0577155866 | 0.6856516963 | 0.9999537652 | 1.1611084543  |
| 1.0427158284  | 0.8522246407 | 0.9999537652 | -1.1818136925 |
| 0             | 0            | 0            | 6.908559683   |
| 1.5203463218  | 0.3459694307 | 0.9999537652 | 1.1823781632  |
| 1.5788290836  | 0.3215338341 | 0.9999537652 | -1.7454312517 |
| 0             | 0            | 0            | 6.914120153   |
| -1.0482281847 | 0.6865803834 | 0.9999537652 | 1.1464280239  |
| -2.2458766151 | 0.19216844   | 0.9999537652 | 2.8313672951  |
| -1.0209798996 | 0.8850227394 | 0.9999537652 | 1.0311852217  |
| -1.1583321592 | 0.5392011826 | 0.9999537652 | -1.386949342  |
| 1.1131573272  | 0.8148101776 | 0.9999537652 | -1.2483010586 |
| 1.496328291   | 0.0743668191 | 0.9999537652 | -1.1091387947 |
| -2.6929317699 | 0.0112540573 | 0.9999537652 | 1.1319496294  |
| 1.1456471223  | 0.4867548765 | 0.9999537652 | -1.0886608589 |
| -2.1263939687 | 0.204551414  | 0.9999537652 | -1.3804393286 |
| 1.1077115801  | 0.6003899004 | 0.9999537652 | -1.0736581053 |
| 2.237850947   | 0.0886800987 | 0.9999537652 | 1.564098443   |
| -1.0196623059 | 0.8917567879 | 0.9999537652 | 1.5107441105  |
| 11.5864583426 | 0.3448177155 | 0.9999537652 | 10.818785458  |
| 1.2604470262  | 0.3031533674 | 0.9999537652 | 1.3406360957  |
| 0             | 0            | 0            | -1.6597328868 |
| -1.0801223135 | 0.814623867  | 0.9999537652 | 1.2176057957  |
| 1.1470270058  | 0.461487662  | 0.9999537652 | -1.1741455177 |
| -1.0789960003 | 0.7197221612 | 0.9999537652 | 1.038129561   |
| -1.022384353  | 0.961989132  | 0.9999537652 | -1.0024134507 |
| -1.5567356743 | 0.4801670548 | 0.9999537652 | -2.3154224155 |
| 1.0134901939  | 0.9262237882 | 0.9999537652 | -1.1395113775 |
| 1.1212145381  | 0.9050256353 | 0.9999537652 | -1.0737434018 |
| 4.5505976667  | 0.5557790267 | 0.9999537652 | 0             |
| -1.4166339314 | 0.0849724764 | 0.9999537652 | 1.0236954255  |
| 1.1112993539  | 0.5472571239 | 0.9999537652 | 1.0304297882  |
| -1.1453231638 | 0.4050469004 | 0.9999537652 | -1.7470191562 |
| 1.4318390876  | 0.4198837708 | 0.9999537652 | 1.448689926   |
| 3.3030568913  | 0.2925089316 | 0.9999537652 | -2.2485377414 |
| 1.7591019097  | 0.2579019412 | 0.9999537652 | 1.1303443867  |
| -1.0222492834 | 0.9518980533 | 0.9999537652 | -1.0171224643 |
| 1.1639684027  | 0.8286960727 | 0.9999537652 | 1.366248638   |
| 13.355081045  | 0.3179414131 | 0.9999537652 | -3.2847784345 |
| 1.1639417098  | 0.2671624503 | 0.9999537652 | -1.0083642169 |
| -1.1141622118 | 0.5109920465 | 0.9999537652 | -1.1646942619 |
| -4.5432040502 | 0.0756781999 | 0.9999537652 | 1.3313172299  |
| 3.0628221549  | 0.312101358  | 0.9999537652 | 1.5870799612  |
| 1.5016491002  | 0.2721995741 | 0.9999537652 | -1.1198849425 |
| 1.6692870837  | 0.1423457017 | 0.9999537652 | -1.0606229546 |
| -1.5844901692 | 0.1002629122 | 0.9999537652 | -1.6056492038 |
| 6.3075231393  | 0.4853597026 | 0.9999537652 | 1.2431398771  |
| -1.5547694709 | 0.4954473292 | 0.9999537652 | -1.1279694059 |
| 1.1800404199  | 0.4974495111 | 0.9999537652 | -1.1253404591 |
| -1.2852554392 | 0.1075441737 | 0.9999537652 | -1.2096082349 |

gene\_expression\_table

|               |              |              |               |
|---------------|--------------|--------------|---------------|
| 0             | 0            | 0            | 1.4803181279  |
| -1.1347286286 | 0.4161906141 | 0.9999537652 | 1.3453385346  |
| -1.0662583978 | 0.8671585953 | 0.9999537652 | -1.7936363489 |
| 1.3024576124  | 0.1407146023 | 0.9999537652 | 1.1651630734  |
| -1.6650408433 | 0.3908878953 | 0.9999537652 | -1.4137706238 |
| 1.6024984014  | 0.6863056391 | 0.9999537652 | -1.3092040421 |
| -1.6261259292 | 0.5848320959 | 0.9999537652 | 3.1670230084  |
| -1.3746425094 | 0.4007011966 | 0.9999537652 | -8.0515593985 |
| -1.1188315859 | 0.6842166205 | 0.9999537652 | -1.2144594074 |
| 0             | 0            | 0            | 4.9527501949  |
| -1.1750986341 | 0.4841420198 | 0.9999537652 | -1.2306339465 |
| 2.1610197243  | 0.2916162694 | 0.9999537652 | 1.3312219541  |
| -2.5905607418 | 0.0973772776 | 0.9999537652 | 43.2296245206 |
| 1.270421642   | 0.102669523  | 0.9999537652 | -1.3189983627 |
| 1.386423469   | 0.1103996374 | 0.9999537652 | 1.1609931314  |
| 1.0041291717  | 0.9884729546 | 0.9999537652 | 1.0284012339  |
| 20.3709255077 | 0.240489183  | 0.9999537652 | 14.7475552392 |
| 1.4093534306  | 0.3580348173 | 0.9999537652 | -1.5693334717 |
| 1.1722488518  | 0.3536499462 | 0.9999537652 | -1.6454014177 |
| -1.2009907539 | 0.5731856972 | 0.9999537652 | 1.3816017983  |
| -1.0085126764 | 0.9674741655 | 0.9999537652 | 1.1390330146  |
| 1.1976693016  | 0.2878494987 | 0.9999537652 | -1.1142365549 |
| 8.4228148819  | 0.0442145594 | 0.9999537652 | -2.6201438026 |
| -1.4756243598 | 0.5433632425 | 0.9999537652 | 1.080343006   |
| 1.0625902878  | 0.8863953164 | 0.9999537652 | -1.4535543675 |
| -3.8981079135 | 0.1326283676 | 0.9999537652 | -1.0941138562 |
| 1.1914602592  | 0.3627065558 | 0.9999537652 | -1.1336367724 |
| 1.8447991669  | 0.5967824527 | 0.9999537652 | -1.0581652744 |
| 1.229529627   | 0.1625618535 | 0.9999537652 | 1.0358171438  |
| 13.3324809638 | 0.3193853126 | 0.9999537652 | 4.9527501949  |
| 0             | 0            | 0            | 0             |
| -6.9736190158 | 0.2250321147 | 0.9999537652 | 4.9527501949  |
| -1.1272725815 | 0.563741911  | 0.9999537652 | -1.1227862798 |
| -1.1955728427 | 0.3572090417 | 0.9999537652 | 1.4100211527  |
| 6.3075231393  | 0.4853366858 | 0.9999537652 | -1.4680135518 |
| -1.049396749  | 0.8455164725 | 0.9999537652 | -1.6460911629 |
| 1.4797261816  | 0.4834765546 | 0.9999537652 | 1.0132811597  |
| -1.2923745811 | 0.1893206296 | 0.9999537652 | -1.0319453723 |
| 1.0188399558  | 0.9623852445 | 0.9999537652 | 1.2633273242  |
| 1.0471365914  | 0.8092486596 | 0.9999537652 | 1.3899103597  |
| 1.2672497572  | 0.4238195182 | 0.9999537652 | -1.0103219526 |
| 1.6220063926  | 0.2336785013 | 0.9999537652 | 1.3628564202  |
| -1.2414433923 | 0.7398211739 | 0.9999537652 | 1.1346215583  |
| -1.1567926223 | 0.4880813222 | 0.9999537652 | 1.3328463923  |
| 1.322335606   | 0.3730068283 | 0.9999537652 | 1.2417108583  |
| 1.2038538633  | 0.1875600249 | 0.9999537652 | 1.273542703   |
| 1.4224320209  | 0.417595321  | 0.9999537652 | -1.4180425176 |
| -1.0027836106 | 0.9879458144 | 0.9999537652 | 1.8492853581  |
| -1.3981186001 | 0.0789106088 | 0.9999537652 | 1.1432867529  |



gene\_expression\_table

|               |              |              |               |
|---------------|--------------|--------------|---------------|
| -1.2263960989 | 0.3995316732 | 0.9999537652 | 1.2093557034  |
| 1.1485389377  | 0.4477027142 | 0.9999537652 | 1.173531842   |
| 1.1955604706  | 0.464322743  | 0.9999537652 | 1.0742605181  |
| 1.221805472   | 0.1667195927 | 0.9999537652 | 1.3859930266  |
| 1.0864708467  | 0.5840330441 | 0.9999537652 | -1.1043921972 |
| -1.0029694647 | 0.99247297   | 0.9999537652 | 1.1467698557  |
| -1.205655428  | 0.553875664  | 0.9999537652 | 1.630299082   |
| -1.5225759426 | 0.2877456912 | 0.9999537652 | 1.0408043491  |
| 1.0063316484  | 0.9742185617 | 0.9999537652 | 1.1618705071  |
| -1.1294640322 | 0.7719368238 | 0.9999537652 | 1.5265536804  |
| 1.9158642511  | 0.1390056266 | 0.9999537652 | 2.0229936606  |
| -1.1110929768 | 0.4721393467 | 0.9999537652 | 1.0436023954  |
| 0             | 0            | 0            | 2.9985540909  |
| 1.3661434872  | 0.2282654102 | 0.9999537652 | 1.0880269019  |
| 1.338277756   | 0.1431578718 | 0.9999537652 | -1.0500557846 |
| -1.5875118025 | 0.7200716995 | 0.9999537652 | 0             |
| 5.9843348305  | 0.0892649912 | 0.9999537652 | 3.1668299586  |
| 1.0635210123  | 0.8716494314 | 0.9999537652 | 1.5179334301  |
| -1.2366111617 | 0.6802445842 | 0.9999537652 | 1.1660774039  |
| 1.2620661248  | 0.238329277  | 0.9999537652 | 1.0471036173  |
| 1.0601682245  | 0.7494128605 | 0.9999537652 | -1.0692399349 |
| 1.6153845695  | 0.3526556207 | 0.9999537652 | 1.0343427953  |
| 1.1076354351  | 0.5859625956 | 0.9999537652 | 1.1459832143  |
| 0             | 0            | 0            | 2.996475627   |
| 1.0278927117  | 0.8062560011 | 0.9999537652 | 1.1031580594  |
| 1.2181904606  | 0.1979556593 | 0.9999537652 | 1.1894915044  |
| -1.0367108132 | 0.7748942372 | 0.9999537652 | 1.1357612808  |
| 1.1712788023  | 0.448544156  | 0.9999537652 | 1.1190533384  |
| 1.1847522967  | 0.529325654  | 0.9999537652 | 1.7838137732  |
| -1.2630572068 | 0.3963821605 | 0.9999537652 | -1.0374832999 |
| -1.7273247423 | 0.4757529256 | 0.9999537652 | 1.899154088   |
| -1.0373643103 | 0.8911391489 | 0.9999537652 | 1.9268931499  |
| -1.1161406883 | 0.6856540102 | 0.9999537652 | 1.1411752257  |
| -1.0664931696 | 0.6157412751 | 0.9999537652 | 1.1435636088  |
| -1.5800919873 | 0.2165924087 | 0.9999537652 | 1.4589382486  |
| 1.0970578367  | 0.8131231029 | 0.9999537652 | -1.421780825  |
| -1.2703108722 | 0.450818258  | 0.9999537652 | 1.3293906638  |
| -1.1930284735 | 0.4993493788 | 0.9999537652 | 2.2968992123  |
| 1.0508109119  | 0.9163795976 | 0.9999537652 | -1.2032318277 |
| -1.0629755097 | 0.8356483978 | 0.9999537652 | 1.4002849445  |
| 1.5707075507  | 0.5527715905 | 0.9999537652 | 2.3843565867  |
| 1.1047381258  | 0.7904938338 | 0.9999537652 | 2.2223039899  |
| -1.1337429989 | 0.5096982934 | 0.9999537652 | 1.0395829044  |
| 1.6175850298  | 0.6135732969 | 0.9999537652 | -2.225399492  |
| 1.0517703627  | 0.7809389694 | 0.9999537652 | 1.1215434217  |
| -1.4336299357 | 0.4561288407 | 0.9999537652 | -1.044632029  |
| 1.2409028678  | 0.1354022209 | 0.9999537652 | 1.2722886121  |
| 3.8622037496  | 0.6194645299 | 0.9999537652 | 2.719037262   |
| 1.346591354   | 0.1118672443 | 0.9999537652 | 1.3432864832  |

gene\_expression\_table

|               |              |              |               |
|---------------|--------------|--------------|---------------|
| -1.0731179781 | 0.6628058369 | 0.9999537652 | 1.081187033   |
| -3.7721528137 | 0.034595666  | 0.9999537652 | 4.5410297837  |
| 1.0469822222  | 0.8546887483 | 0.9999537652 | 1.143743146   |
| 1.0349597892  | 0.9371831907 | 0.9999537652 | -1.071202464  |
| 1.9042601795  | 0.4857971403 | 0.9999537652 | -1.2779826415 |
| 1.108582374   | 0.4736578487 | 0.9999537652 | 1.0746868286  |
| 1.1769915264  | 0.2672716477 | 0.9999537652 | 1.3445445725  |
| -1.0191824441 | 0.9511598066 | 0.9999537652 | 1.0413611366  |
| -1.4123278392 | 0.0557332298 | 0.9999537652 | 1.1040275     |
| -1.0313543946 | 0.9267516344 | 0.9999537652 | -1.0434166215 |
| -1.0060206103 | 0.9725821843 | 0.9999537652 | 1.3529064741  |
| 1.307470285   | 0.0601549708 | 0.9999537652 | 1.459239867   |
| -1.0780766494 | 0.7342025656 | 0.9999537652 | 1.2372933796  |
| 1.5950355194  | 0.2370865165 | 0.9999537652 | -1.1878985118 |
| 1.8447991669  | 0.5962138556 | 0.9999537652 | -1.0597351848 |
| -1.0506933818 | 0.7848519371 | 0.9999537652 | -1.3227504982 |
| -1.5066460521 | 0.2338319023 | 0.9999537652 | 1.207216514   |
| 1.13469086    | 0.6367260158 | 0.9999537652 | -1.0917463776 |
| -1.0325789148 | 0.8328090182 | 0.9999537652 | 1.2341242213  |
| -1.0168813118 | 0.9347955731 | 0.9999537652 | -1.0997922981 |
| -1.0690801504 | 0.8105778621 | 0.9999537652 | 1.5416487068  |
| -1.0951686159 | 0.81806383   | 0.9999537652 | 1.2463798261  |
| 1.3081855134  | 0.5433589281 | 0.9999537652 | 1.3903161209  |
| 0             | 0            | 0            | 0             |
| 1.2890103725  | 0.0829647326 | 0.9999537652 | 1.2550870371  |
| -1.2135779811 | 0.6138261942 | 0.9999537652 | -1.0050453798 |
| -1.6044090876 | 0.2248180855 | 0.9999537652 | 1.1169595848  |
| 1.3144208192  | 0.1577335197 | 0.9999537652 | 1.3263114485  |
| 1.5956389477  | 0.0392846676 | 0.9999537652 | 1.1558040718  |
| -1.0104578462 | 0.966204329  | 0.9999537652 | 1.0767467946  |
| 2.7957660672  | 0.7054974687 | 0.9999537652 | 2.996475627   |
| 1.3998044119  | 0.0563819532 | 0.9999537652 | 1.1545606783  |
| -1.0343543478 | 0.8134596441 | 0.9999537652 | -1.0521291579 |
| 1.2386449094  | 0.3781672837 | 0.9999537652 | -1.0145827841 |
| 1.049401216   | 0.9114587428 | 0.9999537652 | 1.8296666597  |
| -1.0121961358 | 0.9760891688 | 0.9999537652 | 1.1710513718  |
| 1.0037567808  | 0.9885811225 | 0.9999537652 | 1.0525990101  |
| -1.854982839  | 0.6694971359 | 0.9999537652 | -1.8582093966 |
| 1.1108134048  | 0.8092673189 | 0.9999537652 | 1.6323443946  |
| -2.0049727571 | 0.4873925634 | 0.9999537652 | -1.1597631554 |
| -1.0335985921 | 0.943810092  | 0.9999537652 | -1.3017482893 |
| 1.1020291412  | 0.7628199992 | 0.9999537652 | 1.1981087661  |
| 2.7933974408  | 0.6948713406 | 0.9999537652 | 12.7909013375 |
| -1.3942835591 | 0.2026501885 | 0.9999537652 | 1.153944849   |
| 1.1169355694  | 0.6462479617 | 0.9999537652 | 1.1607139985  |
| 1.0049860966  | 0.9823780311 | 0.9999537652 | 1.1533018321  |
| 0             | 0            | 0            | 8.8639046058  |
| 1.4298393692  | 0.4055482656 | 0.9999537652 | 1.2028167091  |
| 1.0809311942  | 0.822193759  | 0.9999537652 | -1.2968981054 |

gene\_expression\_table

|                |              |              |               |
|----------------|--------------|--------------|---------------|
| 1.1723002888   | 0.7755492984 | 0.9999537652 | 1.2584485193  |
| 0              | 0            | 0            | 4.9527501949  |
| -1.1146306381  | 0.7224277023 | 0.9999537652 | 1.1314939616  |
| 1.2310686261   | 0.6065656306 | 0.9999537652 | 1.3482609657  |
| 0              | 0            | 0            | 2.2924151284  |
| 2.7933974408   | 0.6948713406 | 0.9999537652 | 0             |
| 11.5766527773  | 0.345362513  | 0.9999537652 | 0             |
| -1.0311616413  | 0.8737358736 | 0.9999537652 | 1.2836234747  |
| 1.008818647    | 0.9641574001 | 0.9999537652 | -1.0925167214 |
| -2.1004794521  | 0.1140863462 | 0.9999537652 | 1.2123204254  |
| 2.1881200327   | 0.2125230807 | 0.9999537652 | 1.0483600032  |
| 1.0620987388   | 0.695432061  | 0.9999537652 | 1.226991701   |
| -1.0637461542  | 0.7935483252 | 0.9999537652 | -1.0272174654 |
| -2.1334630094  | 0.4839493564 | 0.9999537652 | -14.149476906 |
| 0              | 0            | 0            | 4.9527501949  |
| -1.5799022448  | 0.5967477828 | 0.9999537652 | -1.2021592749 |
| -1.3164847373  | 0.5305101405 | 0.9999537652 | -1.153587748  |
| 1.1093907672   | 0.5761776071 | 0.9999537652 | 1.0012044607  |
| -1.4476378234  | 0.515261142  | 0.9999537652 | -1.6746323835 |
| 4.5505976667   | 0.5557790267 | 0.9999537652 | 0             |
| -17.0527724669 | 0.1063772664 | 0.9999537652 | 1.0490376413  |
| -1.0071249919  | 0.960616034  | 0.9999537652 | -1.1683296871 |
| -1.2613224469  | 0.598119673  | 0.9999537652 | -1.0010455891 |
| -1.1246002998  | 0.6069520815 | 0.9999537652 | 1.024409277   |
| -1.2162776307  | 0.536136465  | 0.9999537652 | 1.2507550533  |
| 1.0616364134   | 0.7706767992 | 0.9999537652 | -1.231484353  |
| 1.1934306586   | 0.2079402082 | 0.9999537652 | 1.1638087086  |
| 1.5700030029   | 0.0702062927 | 0.9999537652 | -1.0900414669 |
| -4.1203521956  | 0.03258327   | 0.9999537652 | 2.0679121385  |
| 1.3279689902   | 0.4163517252 | 0.9999537652 | 1.3429089002  |
| -1.0453550858  | 0.8306909358 | 0.9999537652 | 1.0436755596  |
| 1.0521854961   | 0.8190653786 | 0.9999537652 | -1.0174301226 |
| 1.0116229213   | 0.9428882902 | 0.9999537652 | 1.1650180223  |
| 0              | 0            | 0            | 0             |
| -1.0418583109  | 0.8414265238 | 0.9999537652 | -1.234243132  |
| 1.3767654965   | 0.2401189146 | 0.9999537652 | 1.0250709488  |
| 2.8256295203   | 0.0876726021 | 0.9999537652 | -1.0605276563 |
| 1.2019298597   | 0.1711736834 | 0.9999537652 | -1.1479730021 |
| -1.8105080737  | 0.0211818987 | 0.9999537652 | -1.0163270948 |
| -1.2938717281  | 0.687251086  | 0.9999537652 | 2.0225373915  |
| -3.4222690496  | 0.2994818546 | 0.9999537652 | 4.1560398863  |
| 1.1566482891   | 0.2518375702 | 0.9999537652 | -1.1466207482 |
| 1.2692032851   | 0.3283732647 | 0.9999537652 | 1.0555183433  |
| 1.1039120407   | 0.7054029048 | 0.9999537652 | 1.2021853784  |
| 1.0585637429   | 0.667752531  | 0.9999537652 | -1.132745483  |
| -1.1711577976  | 0.1943509975 | 0.9999537652 | -1.0667380786 |
| 0              | 0            | 0            | 1.260030389   |
| 1.0170424609   | 0.941452401  | 0.9999537652 | -1.1806607509 |
| 0              | 0            | 0            | 6.908559683   |

gene\_expression\_table

|               |              |              |               |
|---------------|--------------|--------------|---------------|
| 8.0710074692  | 0.4204062628 | 0.9999537652 | -1.420807078  |
| 1.2404356038  | 0.3941941101 | 0.9999537652 | 1.1978546347  |
| 1.3228796398  | 0.2634363733 | 0.9999537652 | -1.116176739  |
| -3.0771439936 | 0.0405164484 | 0.9999537652 | 2.2026102564  |
| 1.1103672411  | 0.632890972  | 0.9999537652 | 1.0456058944  |
| -1.1392831724 | 0.6706716072 | 0.9999537652 | -1.5572884298 |
| 2.7933974408  | 0.6948713406 | 0.9999537652 | 0             |
| 1.0819131344  | 0.8560233292 | 0.9999537652 | 1.0227701733  |
| 1.5635972403  | 0.3004749494 | 0.9999537652 | -1.5327178342 |
| -1.122875753  | 0.4807521998 | 0.9999537652 | 1.0325514248  |
| 1.0778072992  | 0.7285317151 | 0.9999537652 | -1.2836897126 |
| 1.2303693658  | 0.6754356443 | 0.9999537652 | -1.0854573451 |
| -1.3633757889 | 0.1496354067 | 0.9999537652 | -1.028651198  |
| 1.0807141003  | 0.90751728   | 0.9999537652 | -1.7221998916 |
| 1.4556800965  | 0.0920771429 | 0.9999537652 | 1.4551228482  |
| 0             | 0            | 0            | 12.7732027325 |
| 0             | 0            | 0            | 2.996475627   |
| 1.1755982974  | 0.7552796319 | 0.9999537652 | 1.3437952164  |
| 1.0445159967  | 0.9279536782 | 0.9999537652 | 1.1823907463  |
| -1.1593391779 | 0.5518276892 | 0.9999537652 | 1.021371221   |
| -1.0484216212 | 0.9381883126 | 0.9999537652 | 1.1963620661  |
| -2.0288012188 | 0.2226599793 | 0.9999537652 | -1.5746344992 |
| 1.8993989353  | 0.0845766511 | 0.9999537652 | -1.1521524629 |
| 1.7949800932  | 0.2806698722 | 0.9999537652 | -2.0756169608 |
| -1.4127194569 | 0.4928967744 | 0.9999537652 | 1.0570586743  |
| -1.7413885129 | 0.3946726132 | 0.9999537652 | 1.8448324843  |
| 1.3837390216  | 0.4604357121 | 0.9999537652 | 1.2982922721  |
| -1.6255754634 | 0.0426127442 | 0.9999537652 | -1.3990777792 |
| -1.025896251  | 0.9477053077 | 0.9999537652 | -1.1655552762 |
| 11.5766527773 | 0.3453729851 | 0.9999537652 | -1.0931530667 |
| -1.1029785928 | 0.5788676233 | 0.9999537652 | -1.1356617337 |
| -1.1634848613 | 0.5710168884 | 0.9999537652 | -1.0940235868 |
| -2.4084168057 | 0.2472137932 | 0.9999537652 | 1.7585914753  |
| 1.0030120122  | 0.9914984035 | 0.9999537652 | -1.1885298623 |
| 1.0454929694  | 0.7720673323 | 0.9999537652 | 1.2249918822  |
| -1.0358108118 | 0.8680303025 | 0.9999537652 | 1.2271603724  |
| -1.0404315745 | 0.956800981  | 0.9999537652 | -1.5200437261 |
| 1.8997719676  | 0.0165238457 | 0.9999537652 | -1.1186551763 |
| 0             | 0            | 0            | 4.9527501949  |
| 4.5505976667  | 0.5557790267 | 0.9999537652 | -2.2049479182 |
| 1.141719395   | 0.5709505107 | 0.9999537652 | -1.0810232217 |
| -1.1923561156 | 0.5378501573 | 0.9999537652 | 1.3408938512  |
| 3.3030568913  | 0.2923090227 | 0.9999537652 | 1.5762331035  |
| -1.0953312734 | 0.6445886497 | 0.9999537652 | 1.0558976974  |
| -1.2097854419 | 0.1895125059 | 0.9999537652 | 1.1141685225  |
| 1.0909697259  | 0.7877855123 | 0.9999537652 | -1.0303647856 |
| 1.0524126307  | 0.7821868917 | 0.9999537652 | 1.0656804465  |
| -1.1344589861 | 0.4229985513 | 0.9999537652 | -1.1969739175 |
| -1.1017238568 | 0.4614971942 | 0.9999537652 | 1.1185268517  |

gene\_expression\_table

|               |              |              |               |
|---------------|--------------|--------------|---------------|
| -1.0892590523 | 0.6466924552 | 0.9999537652 | 1.1152295502  |
| 1.0713018552  | 0.8306544224 | 0.9999537652 | -1.4398459869 |
| 1.0349118986  | 0.96866929   | 0.9999537652 | 1.70049381    |
| -1.1708143936 | 0.8368412765 | 0.9999537652 | 1.3560121951  |
| -1.0167048523 | 0.9313869939 | 0.9999537652 | 1.0493948245  |
| 16.8581089812 | 0.2738049063 | 0.9999537652 | -2.1752099359 |
| 1.2905180359  | 0.3931371891 | 0.9999537652 | -1.5866582948 |
| -1.0143489742 | 0.9768810865 | 0.9999537652 | 1.1246972007  |
| 0             | 0            | 0            | 4.9527501949  |
| -1.4540659285 | 0.1175072252 | 0.9999537652 | -1.6380064068 |
| 1.7777127261  | 0.5426913471 | 0.9999537652 | -2.0451275073 |
| 13.3441949841 | 0.3177230898 | 0.9999537652 | 4.398765428   |
| -1.5732382151 | 0.0653873188 | 0.9999537652 | 1.5248238359  |
| 0             | 0            | 0            | 0             |
| 1.2225264535  | 0.7082255851 | 0.9999537652 | 1.0134225724  |
| 1.6560510752  | 0.1363434874 | 0.9999537652 | -1.5269385376 |
| 1.2022733572  | 0.7147355263 | 0.9999537652 | 1.259119136   |
| -1.1354041114 | 0.545249206  | 0.9999537652 | -1.0772316405 |
| 0             | 0            | 0            | 4.9527501949  |
| -1.3045064545 | 0.7717955884 | 0.9999537652 | 1.1490503071  |
| 1.7775859945  | 0.2286185605 | 0.9999537652 | -1.1666805438 |
| 1.3264454653  | 0.0996002051 | 0.9999537652 | -1.2923929199 |
| -1.0084662653 | 0.958163175  | 0.9999537652 | 1.0319762474  |
| 1.7330527012  | 0.2137272843 | 0.9999537652 | 1.3178864572  |
| -1.0888977827 | 0.4909023804 | 0.9999537652 | -1.0929777658 |
| -1.1698447291 | 0.4025330229 | 0.9999537652 | -1.1606639723 |
| -2.9523355565 | 0.3410275525 | 0.9999537652 | 3.6975953223  |
| 1.0882534344  | 0.8474813457 | 0.9999537652 | -1.0245128851 |
| 0             | 0            | 0            | 0             |
| -1.1692788994 | 0.6710113129 | 0.9999537652 | 1.0729673733  |
| 6.5591783221  | 0.1221769227 | 0.9999537652 | 1.0468043088  |
| -1.5554802511 | 0.0202089415 | 0.9999537652 | -1.2094762063 |
| 1.1123900346  | 0.5430608154 | 0.9999537652 | 1.1928207466  |
| 2.7933974408  | 0.6948713406 | 0.9999537652 | 0             |
| 1.2901571405  | 0.5274507438 | 0.9999537652 | -1.0116744335 |
| -2.4076384939 | 0.261806788  | 0.9999537652 | 1.3454879954  |
| -2.9548384089 | 0.3320364738 | 0.9999537652 | 1.1075715118  |
| 4.5505976667  | 0.5557790267 | 0.9999537652 | 0             |
| -1.1897399587 | 0.4908028593 | 0.9999537652 | 1.2188167332  |
| 1.0012418124  | 0.9979944043 | 0.9999537652 | 6.4574967663  |
| 1.4381425725  | 0.4704268886 | 0.9999537652 | -1.1614254091 |
| -1.0369407296 | 0.8158419845 | 0.9999537652 | -1.039504396  |
| 1.6102122309  | 0.2510982009 | 0.9999537652 | -1.1551840315 |
| -1.2192096094 | 0.4000317338 | 0.9999537652 | -1.314799552  |
| 1.0139488168  | 0.9186419636 | 0.9999537652 | -1.0968945811 |
| -2.606596754  | 0.004068     | 0.9999537652 | -1.3800523585 |
| -1.0825892839 | 0.5698532677 | 0.9999537652 | -1.0588478572 |
| -1.217629373  | 0.129732958  | 0.9999537652 | -1.077886714  |
| 1.1155246223  | 0.6647937502 | 0.9999537652 | -1.0446292135 |

gene\_expression\_table

|               |              |              |               |
|---------------|--------------|--------------|---------------|
| -1.4315318565 | 0.1232567893 | 0.9999537652 | -1.2045274738 |
| -1.3032274429 | 0.2599483305 | 0.9999537652 | 1.7602086529  |
| -1.2730640585 | 0.2581881774 | 0.9999537652 | -1.2737942327 |
| 1.0497175022  | 0.7907591056 | 0.9999537652 | 1.1565049455  |
| 8.064174035   | 0.4222712946 | 0.9999537652 | -1.2567496987 |
| -1.0279577398 | 0.9591477357 | 0.9999537652 | 1.1962074888  |
| -1.0397128837 | 0.8711281519 | 0.9999537652 | -1.579571179  |
| 1.1577629587  | 0.5279802488 | 0.9999537652 | 1.0590887738  |
| -1.0752763322 | 0.5783875662 | 0.9999537652 | 1.0707166822  |
| -1.035257715  | 0.8402878745 | 0.9999537652 | -1.1270095525 |
| -1.5881570201 | 0.7074470251 | 0.9999537652 | 1.4836175613  |
| -1.0196035013 | 0.9499469485 | 0.9999537652 | -1.4578345401 |
| 0             | 0            | 0            | -2.1294907556 |
| 1.4215568538  | 0.4385950049 | 0.9999537652 | 1.16387152    |
| 1.9164640685  | 0.0141726048 | 0.9999537652 | -1.0661164068 |
| -1.2333517567 | 0.3787896165 | 0.9999537652 | -1.1381043479 |
| -1.0442260389 | 0.9103650259 | 0.9999537652 | 1.3556242168  |
| -1.4162966763 | 0.1182381061 | 0.9999537652 | 1.7452237084  |
| 1.4517602532  | 0.0334107145 | 0.9999537652 | 1.2595647504  |
| -1.4116799472 | 0.0604303746 | 0.9999537652 | -1.1915942714 |
| 1.181347916   | 0.4744948084 | 0.9999537652 | -1.0009216603 |
| -1.0008213246 | 0.9964135212 | 0.9999537652 | -1.1612819369 |
| 1.4663278119  | 0.156134944  | 0.9999537652 | -1.6435212058 |
| -1.2660139623 | 0.4542647454 | 0.9999537652 | -1.8328251143 |
| 1.1278195782  | 0.4727355824 | 0.9999537652 | -1.2061965622 |
| 1.3690635889  | 0.1573380805 | 0.9999537652 | -1.1752471352 |
| 3.7950012782  | 0.2233498707 | 0.9999537652 | 1.6777099281  |
| 1.2185752416  | 0.2837202748 | 0.9999537652 | -1.1421709287 |
| -1.1107449644 | 0.885408535  | 0.9999537652 | 1.6944665328  |
| -1.0216657614 | 0.969455364  | 0.9999537652 | 1.0811651952  |
| 1.2236077574  | 0.3909402183 | 0.9999537652 | 1.0658180481  |
| 1.3549988344  | 0.4899782337 | 0.9999537652 | 1.0866621179  |
| 1.0821298481  | 0.9047336486 | 0.9999537652 | -1.3319334118 |
| 0             | 0            | 0            | 2.9985540909  |
| -1.3372457995 | 0.0437376303 | 0.9999537652 | -1.0364107525 |
| -1.1531996456 | 0.6700293704 | 0.9999537652 | -1.1423667136 |
| -1.0345660389 | 0.8884461592 | 0.9999537652 | 1.7831051404  |
| 4.5505976667  | 0.5557790267 | 0.9999537652 | -1.5100069453 |
| -1.0668050857 | 0.6138377127 | 0.9999537652 | 1.0710860867  |
| -1.1244953179 | 0.4456959952 | 0.9999537652 | 1.2170575577  |
| 11.5766527773 | 0.3453834666 | 0.9999537652 | 1.3574283852  |
| -1.1227231237 | 0.494563338  | 0.9999537652 | 1.0559602783  |
| -1.6001912718 | 0.0338141264 | 0.9999537652 | -1.1883124001 |
| 1.154207681   | 0.6248566768 | 0.9999537652 | -1.4118498049 |
| 4.5505976667  | 0.5557790267 | 0.9999537652 | 2.2825222368  |
| 1.1262065255  | 0.7043547904 | 0.9999537652 | 1.0808569045  |
| -7.8342489948 | 0.0136573932 | 0.9999537652 | 1.5842650109  |
| 1.0629048358  | 0.7460915252 | 0.9999537652 | 1.0661001028  |
| 0             | 0            | 0            | 1.1700186664  |

gene\_expression\_table

|               |              |              |               |
|---------------|--------------|--------------|---------------|
| 1.0869907045  | 0.5825344441 | 0.9999537652 | 1.1379604044  |
| 1.7391982989  | 0.0257888344 | 0.9999537652 | -1.5369179689 |
| -1.0933042691 | 0.7082032224 | 0.9999537652 | -1.0678348956 |
| -1.1066761544 | 0.6643157542 | 0.9999537652 | 1.0315091038  |
| 1.0349994282  | 0.9675313124 | 0.9999537652 | -1.3269334757 |
| 1.221981633   | 0.7018225786 | 0.9999537652 | -1.6284361991 |
| 0             | 0            | 0            | 2.996475627   |
| 1.109848328   | 0.5394180148 | 0.9999537652 | 1.1130275869  |
| -1.0234269768 | 0.8790014282 | 0.9999537652 | -1.2856167514 |
| 1.002632797   | 0.9812588525 | 0.9999537652 | 1.1126210608  |
| 1.0952316116  | 0.7158993795 | 0.9999537652 | -1.4723183875 |
| 1.9491018051  | 0.3202018509 | 0.9999537652 | 1.7141474805  |
| -1.2644984285 | 0.4652834071 | 0.9999537652 | -1.972375129  |
| -1.2717055773 | 0.4875279292 | 0.9999537652 | 1.0859797898  |
| 1.1482262978  | 0.6957543752 | 0.9999537652 | 1.1685800277  |
| 1.5327931967  | 0.2345172935 | 0.9999537652 | -1.3469064259 |
| -1.0251835228 | 0.8944765121 | 0.9999537652 | 1.033414963   |
| -1.2336678355 | 0.3267077319 | 0.9999537652 | 1.0413508965  |
| -2.3052484641 | 0.2776253318 | 0.9999537652 | 1.2507078744  |
| -1.3027577835 | 0.1401717335 | 0.9999537652 | -1.0314141135 |
| -2.587194901  | 0.5006470995 | 0.9999537652 | -1.8582093966 |
| 1.0095657304  | 0.9439216259 | 0.9999537652 | -1.0205323068 |
| 1.0407237678  | 0.7801667772 | 0.9999537652 | -1.1523577522 |
| 2.330589113   | 0.4664892188 | 0.9999537652 | -1.5705467174 |
| -1.0001753882 | 0.999358114  | 0.9999537652 | -1.1367806427 |
| -1.0401261452 | 0.8278088685 | 0.9999537652 | -1.2423304861 |
| 1.0734173562  | 0.7186913917 | 0.9999537652 | 1.2275169558  |
| -1.0678286543 | 0.6722408651 | 0.9999537652 | -1.1856729112 |
| -1.8319526048 | 0.0618747103 | 0.9999537652 | 1.0869205685  |
| 1.1833286525  | 0.3788698012 | 0.9999537652 | -1.0070319458 |
| -2.6228880748 | 0.0202922465 | 0.9999537652 | -1.5057213597 |
| 1.0839546126  | 0.580310108  | 0.9999537652 | -1.0120983611 |
| 1.2521963851  | 0.5775405818 | 0.9999537652 | 1.0711962509  |
| -1.5863269394 | 0.0464677276 | 0.9999537652 | -1.0959859932 |
| 2.7933974408  | 0.6948713406 | 0.9999537652 | 1.5756933516  |
| 1.0182112369  | 0.9060000298 | 0.9999537652 | -1.0904500673 |
| -1.2738619992 | 0.2045482531 | 0.9999537652 | -1.1058163778 |
| 1.4309845342  | 0.4068681391 | 0.9999537652 | -1.0027200464 |
| 0             | 0            | 0            | 0             |
| 4.5505976667  | 0.5557790267 | 0.9999537652 | 1.2603189694  |
| -1.4963644574 | 0.6151081976 | 0.9999537652 | 1.897906693   |
| 1.0283194864  | 0.8471230877 | 0.9999537652 | -1.0350044613 |
| -1.3718088005 | 0.3061485935 | 0.9999537652 | -1.3356371379 |
| 1.3826309223  | 0.7329052215 | 0.9999537652 | -1.5384306948 |
| 1.776015977   | 0.0778270529 | 0.9999537652 | -1.237305892  |
| 1.0013845877  | 0.9959051746 | 0.9999537652 | 1.1018310916  |
| -1.0200504634 | 0.9176229043 | 0.9999537652 | -1.3618678517 |
| 1.0841638385  | 0.6911425732 | 0.9999537652 | -1.1098137413 |
| 1.0475940189  | 0.9393601759 | 0.9999537652 | 1.079650584   |

gene\_expression\_table

|               |              |              |               |
|---------------|--------------|--------------|---------------|
| -1.0343284833 | 0.8467169807 | 0.9999537652 | 1.1445304789  |
| -6.9764533263 | 0.2593700317 | 0.9999537652 | 8.8639046058  |
| -1.2618517205 | 0.5872110544 | 0.9999537652 | 1.03963227    |
| -1.268795569  | 0.3429782844 | 0.9999537652 | -1.0812747137 |
| 2.258038479   | 0.0776225326 | 0.9999537652 | 1.5262115505  |
| 3.8622037496  | 0.6194337597 | 0.9999537652 | 0             |
| -6.9762758667 | 0.257419656  | 0.9999537652 | -5.3583704783 |
| 1.0549349563  | 0.7350195196 | 0.9999537652 | 1.1084324612  |
| -1.1340167542 | 0.4922289578 | 0.9999537652 | 1.1427608641  |
| 1.225993467   | 0.3843798377 | 0.9999537652 | 1.1091584351  |
| 2.108863471   | 0.0002225    | 0.9999537652 | 1.4861586109  |
| 1.8696685518  | 0.0114358782 | 0.9999537652 | 1.1592213224  |
| -1.0417605612 | 0.7824791725 | 0.9999537652 | 1.0070508378  |
| -1.5875118025 | 0.7203177862 | 0.9999537652 | -1.1248877899 |
| 1.8366107518  | 0.4261058267 | 0.9999537652 | -1.3519310275 |
| -6.9736190158 | 0.2250321147 | 0.9999537652 | 16.6921882404 |
| -1.0518570978 | 0.7745174959 | 0.9999537652 | -1.0804291815 |
| 9.8205505243  | 0.380994976  | 0.9999537652 | -1.1567178131 |
| 2.4449452442  | 0.0215423507 | 0.9999537652 | -1.0522487344 |
| 1.1266438642  | 0.8181125702 | 0.9999537652 | 1.0595894297  |
| -1.6686798736 | 0.6491343639 | 0.9999537652 | 1.5517968762  |
| -1.1833028368 | 0.4789037669 | 0.9999537652 | 1.4410760795  |
| 1.3261654664  | 0.0872907158 | 0.9999537652 | 1.4328268746  |
| 1.0912415555  | 0.6737259844 | 0.9999537652 | 1.3999637636  |
| 3.899881088   | 0.0395998217 | 0.9999537652 | 1.1223406437  |
| 1.203940792   | 0.8610436641 | 0.9999537652 | 2.0098769534  |
| -1.5487651399 | 0.3334051318 | 0.9999537652 | 1.0241324626  |
| 0             | 0            | 0            | 0             |
| 1.7703819676  | 0.0132340253 | 0.9999537652 | 1.088456437   |
| -4.0807853644 | 0.001071     | 0.9999537652 | -1.1190444854 |
| 0             | 0            | 0            | 0             |
| 0             | 0            | 0            | 4.7454169068  |
| 1.0563236658  | 0.7258605568 | 0.9999537652 | 1.4528650933  |
| 1.8618500038  | 0.2598939419 | 0.9999537652 | 1.7266774322  |
| 58.8883703784 | 0.1122314687 | 0.9999537652 | -7.8899638767 |
| -4.7800108543 | 0.0395153498 | 0.9999537652 | 1.4019884908  |
| 15.0880352532 | 0.2942883058 | 0.9999537652 | 0             |
| -1.1969567826 | 0.3780434493 | 0.9999537652 | 1.340017756   |
| 1.1072800056  | 0.4275938339 | 0.9999537652 | 1.1490828701  |
| 1.2127039295  | 0.5586538638 | 0.9999537652 | -1.2838220281 |
| -2.5861438062 | 0.4709545055 | 0.9999537652 | 23.7230095966 |
| -1.6952918056 | 0.270858941  | 0.9999537652 | -1.7028105906 |
| 1.322151751   | 0.2360467642 | 0.9999537652 | -1.8831980752 |
| 1.0084102709  | 0.9528638825 | 0.9999537652 | 1.0375158742  |
| 4.5505976667  | 0.5557790267 | 0.9999537652 | 1.029347285   |
| -1.0262533566 | 0.9035952524 | 0.9999537652 | -1.2346007941 |
| 1.0965971874  | 0.522694675  | 0.9999537652 | -1.0721736523 |
| -1.176304255  | 0.6774066005 | 0.9999537652 | 1.0835576938  |
| -1.1082147911 | 0.4372816266 | 0.9999537652 | 1.1018351959  |



gene\_expression\_table

|                |              |              |               |
|----------------|--------------|--------------|---------------|
| 0              | 0            | 0            | 6.908559683   |
| -2.3117555798  | 0.1522936756 | 0.9999537652 | 4.1809571314  |
| -1.0561176895  | 0.8168034366 | 0.9999537652 | 1.0264222519  |
| 1.1571624393   | 0.5980152062 | 0.9999537652 | -1.1642035708 |
| -1.0288870077  | 0.8865309765 | 0.9999537652 | 1.1596997932  |
| -1.1502223204  | 0.3250046162 | 0.9999537652 | 1.197561258   |
| 1.0989601209   | 0.764622033  | 0.9999537652 | -1.1322601057 |
| -1.7490652112  | 0.0437536281 | 0.9999537652 | -1.5603081777 |
| 1.3152430872   | 0.4651088869 | 0.9999537652 | 1.1660875283  |
| 1.6810466894   | 0.2926172386 | 0.9999537652 | -1.0144415291 |
| 1.1172067747   | 0.5476592311 | 0.9999537652 | 1.2532169093  |
| 1.3019739475   | 0.7507211223 | 0.9999537652 | -1.0841536928 |
| -6.9736190158  | 0.2250321147 | 0.9999537652 | 0             |
| 0              | 0            | 0            | -1.3582894632 |
| -1.7136183137  | 0.5421628711 | 0.9999537652 | -1.69406917   |
| 1.0615648937   | 0.755256969  | 0.9999537652 | 1.1436958289  |
| 1.0582141412   | 0.6343580778 | 0.9999537652 | 1.1066544677  |
| 1.1535052054   | 0.6496127013 | 0.9999537652 | -1.0494973352 |
| -1.209246437   | 0.4901255202 | 0.9999537652 | 1.1566072698  |
| 1.0951169398   | 0.7674747484 | 0.9999537652 | 1.0938062629  |
| -1.509769767   | 0.4059804021 | 0.9999537652 | -1.3682707861 |
| -1.3717433714  | 0.1270905411 | 0.9999537652 | -1.2640603123 |
| -1.2326413295  | 0.2714532241 | 0.9999537652 | -1.016319789  |
| 1.8360797651   | 0.4045793112 | 0.9999537652 | -1.4560556818 |
| 1.7489762908   | 0.4445069032 | 0.9999537652 | -1.4786786349 |
| 1.2597970535   | 0.2145553382 | 0.9999537652 | 1.1343796609  |
| 1.2827647554   | 0.3226362006 | 0.9999537652 | -1.0107226662 |
| -1.1010106894  | 0.5496910579 | 0.9999537652 | 1.0307400844  |
| 1.3868418181   | 0.3165465187 | 0.9999537652 | 1.1679263073  |
| -1.3878172573  | 0.1604975778 | 0.9999537652 | -1.0817782228 |
| -1.2386169288  | 0.2432868612 | 0.9999537652 | -1.3545773447 |
| -1.2221310789  | 0.2623640485 | 0.9999537652 | 1.0632928544  |
| -1.2781903416  | 0.1262303852 | 0.9999537652 | 1.0055383814  |
| 1.3654685218   | 0.1234162627 | 0.9999537652 | 1.1746727176  |
| -1.2962040907  | 0.199680731  | 0.9999537652 | -1.2946693566 |
| 1.7357216427   | 0.2492998457 | 0.9999537652 | -1.2398497886 |
| -25.0060995147 | 0.0343971431 | 0.9999537652 | 20.7721997036 |
| -1.1165787947  | 0.6401239183 | 0.9999537652 | -1.0746148657 |
| 0              | 0            | 0            | 4.9527501949  |
| -1.4282571996  | 0.5267196929 | 0.9999537652 | -1.187405001  |
| -1.1585090632  | 0.6996725321 | 0.9999537652 | -1.2937703852 |
| -1.2639097136  | 0.3072641927 | 0.9999537652 | 1.489517965   |
| 0              | 0            | 0            | -5.3583704783 |
| -1.1426437232  | 0.7806691147 | 0.9999537652 | -1.0223056695 |
| -1.1391240281  | 0.483221687  | 0.9999537652 | -1.1486155181 |
| -1.0370090734  | 0.8439378658 | 0.9999537652 | 1.2620746671  |
| 1.1031473388   | 0.4938834645 | 0.9999537652 | 1.1866843141  |
| -1.0330311243  | 0.8109069692 | 0.9999537652 | 1.1948141904  |
| 1.0028853506   | 0.9887016687 | 0.9999537652 | 1.0662845969  |

gene\_expression\_table

|               |              |              |               |
|---------------|--------------|--------------|---------------|
| 1.0097518039  | 0.9504063144 | 0.9999537652 | -1.225855303  |
| 1.1995078124  | 0.4707496883 | 0.9999537652 | 1.1617347337  |
| -1.1475384184 | 0.598530024  | 0.9999537652 | -1.2262105064 |
| 1.2673362162  | 0.1436364791 | 0.9999537652 | 1.0481369425  |
| -1.0111076367 | 0.9709130324 | 0.9999537652 | 1.5826570617  |
| 1.1782560174  | 0.7375192819 | 0.9999537652 | -1.2503926932 |
| 1.5640503221  | 0.0446669114 | 0.9999537652 | -1.0130902147 |
| 1.2516955386  | 0.6520906508 | 0.9999537652 | -1.1899815703 |
| 6.3075231393  | 0.4853175467 | 0.9999537652 | 20.6004768562 |
| 1.1291914808  | 0.7776980625 | 0.9999537652 | -1.0371777014 |
| 4.5505976667  | 0.5557790267 | 0.9999537652 | 1.638122109   |
| 0             | 0            | 0            | 2.996475627   |
| 1.1787197499  | 0.492011671  | 0.9999537652 | -1.1853831376 |
| -1.2246495388 | 0.183827773  | 0.9999537652 | -1.0005561089 |
| 1.3159568783  | 0.4587586164 | 0.9999537652 | -1.2779765113 |
| 2.105568983   | 0.3166905972 | 0.9999537652 | -1.3659900625 |
| 1.0206943064  | 0.9003158103 | 0.9999537652 | -1.0630506289 |
| 1.404100928   | 0.5399065217 | 0.9999537652 | -1.4923018149 |
| -1.1584416479 | 0.4151841532 | 0.9999537652 | 1.5163406239  |
| -1.0734104392 | 0.6731296183 | 0.9999537652 | 1.1336496883  |
| -1.7539180866 | 0.0979197859 | 0.9999537652 | -1.08115216   |
| -1.9360854345 | 0.0799603983 | 0.9999537652 | -1.3503849507 |
| -1.1940646118 | 0.6014726154 | 0.9999537652 | 1.0242826737  |
| -1.1377318032 | 0.5681149026 | 0.9999537652 | -1.0498149866 |
| 1.0285673021  | 0.9106824305 | 0.9999537652 | -1.2379061598 |
| -1.2873988025 | 0.1637503722 | 0.9999537652 | 1.1398926157  |
| 0             | 0            | 0            | 2.9985540909  |
| 1.5466895784  | 0.078383864  | 0.9999537652 | 1.0127880788  |
| 0             | 0            | 0            | 4.9527501949  |
| -1.3496643058 | 0.3674543041 | 0.9999537652 | -1.1549830464 |
| 1.1024663542  | 0.7910956373 | 0.9999537652 | 1.3727647869  |
| 1.0706053958  | 0.8178919106 | 0.9999537652 | 1.1859144042  |
| -1.0011881979 | 0.9946789894 | 0.9999537652 | -1.0899245251 |
| -1.0258778433 | 0.9636814017 | 0.9999537652 | -1.1865010949 |
| 1.6052664222  | 0.6760285368 | 0.9999537652 | 1.7791803399  |
| 1.3766983443  | 0.5400571722 | 0.9999537652 | -1.0743277914 |
| -1.0879481565 | 0.831282769  | 0.9999537652 | -1.0785973397 |
| 1.2600240288  | 0.7499892903 | 0.9999537652 | 2.2942711679  |
| 1.7069561144  | 0.001074     | 0.9999537652 | -1.4889190041 |
| 1.2335124016  | 0.647802239  | 0.9999537652 | -1.4464184743 |
| 1.0059559074  | 0.9585892938 | 0.9999537652 | -1.6048774281 |
| 0             | 0            | 0            | -1.4671767304 |
| -1.2288827784 | 0.1669511509 | 0.9999537652 | -1.0917155773 |
| -1.1636046933 | 0.372816801  | 0.9999537652 | 1.1182547331  |
| -1.0361672725 | 0.8602886397 | 0.9999537652 | -1.0408898903 |
| -1.8651323557 | 0.3127928859 | 0.9999537652 | -1.0127291587 |
| -1.4796663775 | 0.0497421794 | 0.9999537652 | 1.30273875    |
| 1.2314285161  | 0.3424146738 | 0.9999537652 | 1.0461096814  |
| -1.1729715571 | 0.2271969892 | 0.9999537652 | 1.0761216497  |

gene\_expression\_table

|               |              |              |               |
|---------------|--------------|--------------|---------------|
| -1.2310998671 | 0.3172221803 | 0.9999537652 | 1.1740418899  |
| 1.1262528854  | 0.8590423635 | 0.9999537652 | 1.9614046585  |
| -1.1573470393 | 0.2221345091 | 0.9999537652 | 1.1171416851  |
| 1.2134129531  | 0.1733906627 | 0.9999537652 | -1.3860873617 |
| 0             | 0            | 0            | 8.8700459102  |
| 16.8433158146 | 0.2736437241 | 0.9999537652 | 6.5010535319  |
| 9.8288704632  | 0.3801048341 | 0.9999537652 | 1.4360713397  |
| 0             | 0            | 0            | 8.8639046058  |
| 6.3075231393  | 0.4853079883 | 0.9999537652 | 8.8639046058  |
| 1.0412916276  | 0.9039008571 | 0.9999537652 | 1.0581464647  |
| 4.5204235356  | 0.1568737007 | 0.9999537652 | -2.7911910562 |
| 4.5505976667  | 0.5557790267 | 0.9999537652 | 4.4018286016  |
| 16.8433158146 | 0.2736906085 | 0.9999537652 | 6.1460359069  |
| -1.2891641163 | 0.1475777902 | 0.9999537652 | 1.108808396   |
| 1.0330362255  | 0.8074522675 | 0.9999537652 | 1.0690440539  |
| -1.5081216981 | 0.0568957111 | 0.9999537652 | -1.3608350649 |
| 2.7933974408  | 0.6948713406 | 0.9999537652 | 0             |
| 11.5766527773 | 0.3453939576 | 0.9999537652 | 15.7262184124 |
| 1.1749178842  | 0.2009720376 | 0.9999537652 | 1.4546797915  |
| 1.8486773713  | 0.597508024  | 0.9999537652 | -1.4884129525 |
| 1.216076899   | 0.3069245115 | 0.9999537652 | 1.0982195965  |
| 1.3129275726  | 0.0364746685 | 0.9999537652 | 1.1838181617  |
| -1.2325232486 | 0.4298024991 | 0.9999537652 | 1.0902899402  |
| 1.156027552   | 0.3062320368 | 0.9999537652 | 1.4292753205  |
| 1.1450658693  | 0.4301942297 | 0.9999537652 | 1.1893173501  |
| -1.4712611897 | 0.5100694128 | 0.9999537652 | -1.1386107712 |
| 1.2159527821  | 0.4864124209 | 0.9999537652 | 1.4973186614  |
| 1.0403016984  | 0.7873473631 | 0.9999537652 | 1.0249232295  |
| -1.134323779  | 0.7470397286 | 0.9999537652 | 1.6751022027  |
| 2.7933974408  | 0.6948713406 | 0.9999537652 | 9.7116702472  |
| 1.1423122415  | 0.4728638022 | 0.9999537652 | -1.0480617211 |
| 1.1901748577  | 0.3118724281 | 0.9999537652 | 1.0701405656  |
| 1.0883303231  | 0.8915836888 | 0.9999537652 | -1.6149407038 |
| -1.0137948708 | 0.9203764222 | 0.9999537652 | 1.0006690711  |
| 1.0313582086  | 0.8740827071 | 0.9999537652 | 1.2616895519  |
| -1.5007506109 | 0.0250431019 | 0.9999537652 | -1.0386324788 |
| 1.8528871235  | 0.6236356389 | 0.9999537652 | -1.859280336  |
| 2.7933974408  | 0.6948713406 | 0.9999537652 | 16.6921882404 |
| 1.1197165763  | 0.4388440347 | 0.9999537652 | 1.3207729249  |
| 13.3324809638 | 0.3193766287 | 0.9999537652 | 0             |
| 1.0858146959  | 0.5883987354 | 0.9999537652 | 1.287777361   |
| 1.2232587176  | 0.4107987945 | 0.9999537652 | 1.6561638413  |
| 1.0093087785  | 0.9536238723 | 0.9999537652 | 1.2808469015  |
| 1.0861679403  | 0.6878299526 | 0.9999537652 | 1.1673314828  |
| -1.0302490502 | 0.8312355715 | 0.9999537652 | 1.146732109   |
| -1.0155812503 | 0.9531816976 | 0.9999537652 | -1.1569322354 |
| 1.2601694192  | 0.7476173472 | 0.9999537652 | 2.3697912034  |
| 1.1684700032  | 0.5149452709 | 0.9999537652 | -1.3326501422 |
| 1.1063683457  | 0.4990587707 | 0.9999537652 | 1.4798701681  |

gene\_expression\_table

|               |              |              |               |
|---------------|--------------|--------------|---------------|
| 2.0853648548  | 0.0823910824 | 0.9999537652 | 1.1795011917  |
| -1.0670702872 | 0.909462178  | 0.9999537652 | 1.0057694371  |
| 1.2741030728  | 0.8384358611 | 0.9999537652 | -3.3853891979 |
| 1.0189640423  | 0.8839145995 | 0.9999537652 | 1.124765166   |
| -1.0282707113 | 0.8368056055 | 0.9999537652 | 1.1617344316  |
| -1.0025725449 | 0.9888566129 | 0.9999537652 | 1.1697201952  |
| 1.119365539   | 0.8084500976 | 0.9999537652 | 2.0676325407  |
| -1.0406519715 | 0.8174761295 | 0.9999537652 | 1.0397483482  |
| 1.0812231057  | 0.9007032907 | 0.9999537652 | 2.9644643681  |
| 1.6179314394  | 0.4722136221 | 0.9999537652 | -1.4439334837 |
| 2.7933974408  | 0.6948713406 | 0.9999537652 | 0             |
| 1.9066445334  | 0.474201645  | 0.9999537652 | -1.1626441795 |
| -1.133504523  | 0.5795744495 | 0.9999537652 | 1.1355210512  |
| -1.2584520901 | 0.2543569632 | 0.9999537652 | -1.0946926513 |
| 1.4451058543  | 0.6003003127 | 0.9999537652 | 1.3716738948  |
| -1.3204799705 | 0.5579101894 | 0.9999537652 | -1.1081534871 |
| 1.8049120379  | 0.0503598636 | 0.9999537652 | 1.1008357584  |
| -1.257961459  | 0.1243358169 | 0.9999537652 | 1.0691522129  |
| 4.5225226171  | 0.1563080352 | 0.9999537652 | -1.6798913749 |
| -1.0087761577 | 0.9636760491 | 0.9999537652 | -1.0729288431 |
| -1.1457555741 | 0.910637459  | 0.9999537652 | 1.9418822056  |
| 6.3075231393  | 0.4852984374 | 0.9999537652 | 4.9527501949  |
| 7.6803712917  | 0.054587146  | 0.9999537652 | 2.9959081515  |
| 4.5545995984  | 0.5696641564 | 0.9999537652 | -1.4636323788 |
| 1.04961577    | 0.7749579842 | 0.9999537652 | 1.1791889236  |
| 1.2501272441  | 0.2435927604 | 0.9999537652 | 1.0457081085  |
| -1.2783158092 | 0.0567139491 | 0.9999537652 | -1.0239170922 |
| -1.191441802  | 0.6261704539 | 0.9999537652 | -1.0781736232 |
| 1.0907959547  | 0.5153641616 | 0.9999537652 | -1.0205163277 |
| 1.4717207227  | 0.3853329745 | 0.9999537652 | -1.1419570229 |
| -1.739818287  | 0.1178543278 | 0.9999537652 | 1.029751722   |
| 1.00113172    | 0.9940597631 | 0.9999537652 | 1.4186025385  |
| -1.085804469  | 0.5575951198 | 0.9999537652 | 1.0683421565  |
| 1.0190376465  | 0.8805015969 | 0.9999537652 | 1.0282617854  |
| -1.3773314892 | 0.0903210022 | 0.9999537652 | 1.052258108   |
| 2.2149242497  | 0.2789824949 | 0.9999537652 | 1.3889218671  |
| 1.0737726678  | 0.743192988  | 0.9999537652 | 1.2145355146  |
| 0             | 0            | 0            | 4.9561842702  |
| -1.0556202517 | 0.8726793543 | 0.9999537652 | -1.2512643744 |
| -1.2369993804 | 0.2999961627 | 0.9999537652 | 1.1579741585  |
| 1.1518919277  | 0.4709444805 | 0.9999537652 | 1.4374095615  |
| 1.0371154324  | 0.8027753852 | 0.9999537652 | 1.2393289546  |
| -1.0346176087 | 0.8514213405 | 0.9999537652 | 1.127784666   |
| 1.1412238519  | 0.5729779811 | 0.9999537652 | -1.1054368451 |
| 0             | 0            | 0            | 0             |
| -1.0509333268 | 0.8082713418 | 0.9999537652 | 1.0629854896  |
| -1.189834497  | 0.5590894187 | 0.9999537652 | -1.0234766648 |
| 1.0142015787  | 0.9502130125 | 0.9999537652 | 1.0679898826  |
| 1.4001944622  | 0.6032346081 | 0.9999537652 | -1.1826872882 |

gene\_expression\_table

|               |              |              |               |
|---------------|--------------|--------------|---------------|
| 1.0952324259  | 0.509838899  | 0.9999537652 | 1.2645066367  |
| 1.0368295037  | 0.8109061463 | 0.9999537652 | 1.1798228814  |
| 1.037193117   | 0.8457949755 | 0.9999537652 | 1.036693899   |
| 0             | 0            | 0            | 3.8462080177  |
| -1.2370238115 | 0.3063886647 | 0.9999537652 | -1.3644004332 |
| 1.001916372   | 0.9876381379 | 0.9999537652 | 1.2504847939  |
| -1.1858870587 | 0.4590701844 | 0.9999537652 | -1.0709649066 |
| -1.1790190163 | 0.3849271386 | 0.9999537652 | -1.200390781  |
| 1.2607522837  | 0.2247859503 | 0.9999537652 | -1.0484652732 |
| 0             | 0            | 0            | 0             |
| 1.5101610281  | 0.0817550697 | 0.9999537652 | 1.223564641   |
| 1.1558590933  | 0.4533574964 | 0.9999537652 | -1.5430149474 |
| 1.4609539587  | 0.2305983618 | 0.9999537652 | 1.4419663777  |
| -1.2808770493 | 0.0779807784 | 0.9999537652 | -1.0889296854 |
| -1.0205125782 | 0.9221898151 | 0.9999537652 | -1.2142507046 |
| 2.7933974408  | 0.6948713406 | 0.9999537652 | 0             |
| -1.4014416871 | 0.6352188282 | 0.9999537652 | -1.2525304726 |
| 1.1649166714  | 0.4022488339 | 0.9999537652 | 1.2937604524  |
| 1.1123661974  | 0.5142449221 | 0.9999537652 | 1.2400663375  |
| 1.0107914197  | 0.9696120089 | 0.9999537652 | 1.1526272851  |
| 9.8205505243  | 0.3811471738 | 0.9999537652 | 0             |
| -2.1299793114 | 0.480283682  | 0.9999537652 | -1.1511079519 |
| 1.0429903551  | 0.7895968919 | 0.9999537652 | 1.0576421303  |
| -1.0182908362 | 0.9015594701 | 0.9999537652 | 1.1231024891  |
| -1.0601416404 | 0.7813744265 | 0.9999537652 | -1.1228478116 |
| 1.2921049422  | 0.486219074  | 0.9999537652 | 1.2263795356  |
| -1.2599085795 | 0.2888474391 | 0.9999537652 | -1.0155895798 |
| -1.1581909615 | 0.3343729654 | 0.9999537652 | 1.118292821   |
| 6.3075231393  | 0.4852888938 | 0.9999537652 | -1.4300917892 |
| 1.1839827621  | 0.3239695423 | 0.9999537652 | 1.0502090721  |
| 1.0301143907  | 0.8696522723 | 0.9999537652 | 1.2372278502  |
| -1.3419168111 | 0.4064397771 | 0.9999537652 | 1.3665428263  |
| -1.1514009361 | 0.4170346049 | 0.9999537652 | 1.4287525201  |
| 1.0408060511  | 0.7595131532 | 0.9999537652 | 1.1617337459  |
| -1.0358883782 | 0.9062269986 | 0.9999537652 | 1.5700225911  |
| -1.3204010827 | 0.0492185365 | 0.9999537652 | 1.1096429173  |
| 1.2254893424  | 0.5201549692 | 0.9999537652 | 1.2693924856  |
| 1.1869733253  | 0.4714744076 | 0.9999537652 | -1.2172887378 |
| -1.3668636763 | 0.0284117852 | 0.9999537652 | -1.5135978667 |
| 1.5862555348  | 0.3505256261 | 0.9999537652 | -1.2628336924 |
| 1.1805131425  | 0.2398295273 | 0.9999537652 | 1.3628917046  |
| -1.1422124923 | 0.4747343514 | 0.9999537652 | -1.3797540929 |
| 2.608128111   | 0.1517316786 | 0.9999537652 | -1.007834096  |
| -1.2351432639 | 0.2033373895 | 0.9999537652 | -1.0091761166 |
| -1.0170434563 | 0.9341478144 | 0.9999537652 | 1.2045720219  |
| 1.0788786704  | 0.6935874055 | 0.9999537652 | 1.1921238009  |
| 1.0183109303  | 0.9033082635 | 0.9999537652 | 1.1357876156  |
| 1.392975024   | 0.6538178206 | 0.9999537652 | 1.0399499187  |
| -2.462078324  | 0.1593858769 | 0.9999537652 | -1.3326161485 |

gene\_expression\_table

|               |              |              |               |
|---------------|--------------|--------------|---------------|
| -1.0758793808 | 0.6117621954 | 0.9999537652 | 1.0219298287  |
| 4.5505976667  | 0.5557790267 | 0.9999537652 | 8.8639046058  |
| 1.1162834585  | 0.9273004279 | 0.9999537652 | 1.4067915718  |
| -1.496681452  | 0.3663965517 | 0.9999537652 | 1.0441887571  |
| -1.9991287888 | 0.4535404311 | 0.9999537652 | 2.4613556948  |
| -1.0773189521 | 0.6249833341 | 0.9999537652 | 1.196120886   |
| 1.0902237227  | 0.4593817391 | 0.9999537652 | -1.0280400571 |
| 1.0536087347  | 0.7226105676 | 0.9999537652 | -1.1948776026 |
| 1.0425056794  | 0.8447769683 | 0.9999537652 | -1.1741182728 |
| 2.7933974408  | 0.6948713406 | 0.9999537652 | -3.89071692   |
| 4.5505976667  | 0.5557790267 | 0.9999537652 | 2.9926666006  |
| 15.0880352532 | 0.2938366616 | 0.9999537652 | 1.5358840667  |
| -1.2792892569 | 0.1084352128 | 0.9999537652 | 1.224686176   |
| -1.0046076372 | 0.9854240271 | 0.9999537652 | -1.0486446503 |
| -4.3180711894 | 0.1805808777 | 0.9999537652 | 1.1717762073  |
| 0             | 0            | 0            | 2.996475627   |
| 1.0936437502  | 0.4311215515 | 0.9999537652 | 1.0182812038  |
| 1.0644387145  | 0.8010036853 | 0.9999537652 | -1.0444671123 |
| -1.17745997   | 0.7906672588 | 0.9999537652 | -1.0844141669 |
| -1.0800754572 | 0.6280606658 | 0.9999537652 | -1.2136942245 |
| -1.0027327021 | 0.9863721284 | 0.9999537652 | -1.1411363747 |
| 2.7933974408  | 0.6948713406 | 0.9999537652 | 28.4311330788 |
| -1.0384172509 | 0.9041286727 | 0.9999537652 | 1.1034777787  |
| -1.0754234039 | 0.6682237042 | 0.9999537652 | 1.1513396866  |
| -1.2176930367 | 0.535300904  | 0.9999537652 | -1.3069515244 |
| 4.5505976667  | 0.5557790267 | 0.9999537652 | -2.0482026754 |
| 3.0669619516  | 0.3204959524 | 0.9999537652 | 1.2765689895  |
| 1.1033812008  | 0.4762483444 | 0.9999537652 | 1.4641257906  |
| 1.2464313046  | 0.6241137858 | 0.9999537652 | 1.003137417   |
| -1.0238030823 | 0.9488510949 | 0.9999537652 | -1.1881433652 |
| -1.2481677054 | 0.2785206721 | 0.9999537652 | -1.0750450585 |
| 4.5505976667  | 0.5557790267 | 0.9999537652 | -2.0482026754 |
| 1.7776560069  | 0.5215716221 | 0.9999537652 | -2.2414820712 |
| 1.4808270106  | 0.6341451449 | 0.9999537652 | 2.9940379764  |
| 1.279335829   | 0.5184088515 | 0.9999537652 | 1.2831155513  |
| 1.3170135462  | 0.3959600609 | 0.9999537652 | -1.2399123282 |
| 1.4439128375  | 0.3433176638 | 0.9999537652 | 1.0461823352  |
| 1.3408411056  | 0.3366347447 | 0.9999537652 | 1.0898533637  |
| 1.4414670849  | 0.1240803287 | 0.9999537652 | -1.2071277023 |
| 1.2053536902  | 0.3079633689 | 0.9999537652 | 1.0848956048  |
| 1.1849377253  | 0.377771704  | 0.9999537652 | -1.1321345132 |
| 0             | 0            | 0            | 12.7732027325 |
| 1.080827404   | 0.6106914443 | 0.9999537652 | -1.6158166159 |
| -1.0650190283 | 0.6874634849 | 0.9999537652 | -1.436698616  |
| 1.0724482025  | 0.7828197758 | 0.9999537652 | -1.1726098556 |
| 1.4477315328  | 0.1115638052 | 0.9999537652 | -1.2524137015 |
| 1.0564719306  | 0.6431833498 | 0.9999537652 | 1.2904210235  |
| 1.1496313829  | 0.5150173415 | 0.9999537652 | -1.2919083016 |
| -1.2331909292 | 0.5002820743 | 0.9999537652 | -1.4260185799 |

gene\_expression\_table

|                |              |              |               |
|----------------|--------------|--------------|---------------|
| -1.0065576531  | 0.9840958227 | 0.9999537652 | -1.2749165084 |
| -1.3143326454  | 0.1587908787 | 0.9999537652 | -1.1102358527 |
| 0              | 0            | 0            | 3.6950602847  |
| 1.1208663544   | 0.5363983716 | 0.9999537652 | 1.0895719508  |
| 1.1919115821   | 0.8106792912 | 0.9999537652 | -1.4212516787 |
| -1.620580577   | 0.2071852641 | 0.9999537652 | -1.2274746622 |
| -1.4768937254  | 0.0363728585 | 0.9999537652 | -1.2431811024 |
| -1.1283833943  | 0.5320557533 | 0.9999537652 | -1.1484194329 |
| 1.1355024823   | 0.4638317706 | 0.9999537652 | 1.0174361434  |
| -1.1653900061  | 0.2019984449 | 0.9999537652 | -1.2240867834 |
| -1.9573783405  | 0.3068429304 | 0.9999537652 | -1.0194881681 |
| -1.176033766   | 0.3708136688 | 0.9999537652 | -1.012661497  |
| -1.2861044151  | 0.1512273023 | 0.9999537652 | 1.3201863476  |
| -1.5788392377  | 0.2074983811 | 0.9999537652 | 1.0249738366  |
| -1.1021300171  | 0.889345452  | 0.9999537652 | -1.0552131742 |
| 1.1221358527   | 0.3626763492 | 0.9999537652 | 1.133132161   |
| -3.2687501303  | 0.1999864487 | 0.9999537652 | 2.4267255252  |
| 1.2144087327   | 0.4392190551 | 0.9999537652 | -1.0030325481 |
| 1.1514307313   | 0.3560100412 | 0.9999537652 | 1.6160368437  |
| -1.4475713225  | 0.0801206975 | 0.9999537652 | -1.7002491637 |
| 1.070695326    | 0.5858369091 | 0.9999537652 | 1.2493779425  |
| -1.1885556815  | 0.4444202248 | 0.9999537652 | 1.0426272218  |
| -1.1142715925  | 0.6083026473 | 0.9999537652 | -1.0603883324 |
| 0              | 0            | 0            | 2.2924151284  |
| 1.0476021643   | 0.8011595106 | 0.9999537652 | -1.2117215963 |
| 1.9930986705   | 0.172670644  | 0.9999537652 | -1.4621109275 |
| -1.1114526659  | 0.5716308958 | 0.9999537652 | -1.0033620637 |
| 2.0921011564   | 0.5214604309 | 0.9999537652 | -1.201159017  |
| -1.420925217   | 0.3569845371 | 0.9999537652 | 1.0836096588  |
| 1.061466329    | 0.6665607231 | 0.9999537652 | 1.0950060094  |
| 1.0274746218   | 0.851801736  | 0.9999537652 | -1.0421745334 |
| 11.5868260078  | 0.3462116853 | 0.9999537652 | 1.444719916   |
| 1.1734634941   | 0.199484792  | 0.9999537652 | 1.2479336915  |
| 1.5010626463   | 0.0959575148 | 0.9999537652 | -1.4261946974 |
| -1.0604045157  | 0.9242752064 | 0.9999537652 | 1.491272219   |
| 0              | 0            | 0            | 1.4852334646  |
| -2.390262974   | 0.1348411085 | 0.9999537652 | -1.1641740884 |
| -1.0696248962  | 0.5777242672 | 0.9999537652 | -1.338743615  |
| 1.276455514    | 0.2192436583 | 0.9999537652 | -1.1022170303 |
| -2.9543499299  | 0.1230730753 | 0.9999537652 | -1.0958923887 |
| 2.7933974408   | 0.6948713406 | 0.9999537652 | 4.9527501949  |
| 1.2480242908   | 0.0933434972 | 0.9999537652 | -1.0646658001 |
| -1.5516840448  | 0.3133003026 | 0.9999537652 | -1.185643086  |
| 1.1395128077   | 0.3854036518 | 0.9999537652 | 1.3974587146  |
| 163.3929613609 | 0.0594282054 | 0.9999537652 | -1.6566762511 |
| 1.0032252867   | 0.9874475114 | 0.9999537652 | -1.0445372312 |
| 1.0072200856   | 0.9531689866 | 0.9999537652 | 1.1109014696  |
| 1.0106558672   | 0.9413529666 | 0.9999537652 | 1.1593674353  |
| -1.0207830004  | 0.8786705405 | 0.9999537652 | -1.1194294931 |

gene\_expression\_table

|               |              |              |               |
|---------------|--------------|--------------|---------------|
| 2.3315363418  | 0.4563813059 | 0.9999537652 | -4.7721736557 |
| -1.2738098317 | 0.0921966616 | 0.9999537652 | -1.1403928992 |
| 1.3187056891  | 0.6037270261 | 0.9999537652 | 1.2658484952  |
| -1.0271529872 | 0.8322865268 | 0.9999537652 | -1.045640536  |
| -1.3209007499 | 0.0634732078 | 0.9999537652 | -1.1761276231 |
| 0             | 0            | 0            | -1.1441751338 |
| 1.0668323481  | 0.7310445531 | 0.9999537652 | -1.0450284483 |
| 1.7949800932  | 0.281175186  | 0.9999537652 | 1.1851182321  |
| 1.5088458739  | 0.5301360532 | 0.9999537652 | 1.078186748   |
| 1.0034913121  | 0.9950884065 | 0.9999537652 | 1.1053359433  |
| -1.0702652931 | 0.785381122  | 0.9999537652 | 1.0802537033  |
| 0             | 0            | 0            | 1.5330591177  |
| 4.5544554512  | 0.5691274043 | 0.9999537652 | 18.6336779883 |
| 2.2288449002  | 0.1532415988 | 0.9999537652 | -1.3046729605 |
| 1.0766432389  | 0.5198885541 | 0.9999537652 | 1.1496877388  |
| -1.1453192235 | 0.908573838  | 0.9999537652 | 4.0953564288  |
| -1.0113497253 | 0.9679593465 | 0.9999537652 | 1.3930303767  |
| 1.281913786   | 0.4072643493 | 0.9999537652 | -1.13545812   |
| 1.2267996097  | 0.6446976357 | 0.9999537652 | -1.0969319908 |
| -1.3659192566 | 0.1132507936 | 0.9999537652 | 1.2490883855  |
| -1.0148871416 | 0.9503655321 | 0.9999537652 | -1.0249961351 |
| -2.0778932133 | 0.0167958493 | 0.9999537652 | 1.6479171331  |
| 1.2225112655  | 0.482732512  | 0.9999537652 | 1.3116947587  |
| 1.7976377322  | 0.2367499927 | 0.9999537652 | 1.0438412248  |
| 0             | 0            | 0            | 1.2398837679  |
| 0             | 0            | 0            | 2.030756821   |
| 0             | 0            | 0            | 3.346511156   |
| -2.5423404596 | 0.2378375033 | 0.9999537652 | 1.2515306702  |
| 0             | 0            | 0            | 2.1335943382  |
| -1.1712303027 | 0.8330358523 | 0.9999537652 | -1.8405281286 |
| -1.0961218072 | 0.806364673  | 0.9999537652 | 1.0481594651  |
| 1.1027768967  | 0.7076901306 | 0.9999537652 | 1.0729973941  |
| 1.2234272733  | 0.2613933662 | 0.9999537652 | -1.0205609736 |
| -1.1454518545 | 0.345376664  | 0.9999537652 | -1.0699973383 |
| -1.1993148188 | 0.3097456646 | 0.9999537652 | -1.6846525605 |
| -1.5875118025 | 0.7201667036 | 0.9999537652 | -1.8579915692 |
| 1.4913242644  | 0.328940737  | 0.9999537652 | -1.2063557801 |
| 4.5505976667  | 0.5557790267 | 0.9999537652 | 22.5383525416 |
| 1.0930960888  | 0.6154668543 | 0.9999537652 | -1.0831407003 |
| -1.2982700168 | 0.3959742743 | 0.9999537652 | 1.1499777115  |
| 1.0065992309  | 0.977603212  | 0.9999537652 | -1.1276577668 |
| 1.122276038   | 0.5473335858 | 0.9999537652 | 1.1274089389  |
| -1.301951197  | 0.1649974471 | 0.9999537652 | -1.1725946021 |
| 1.7352723816  | 0.4566627418 | 0.9999537652 | -1.6653783823 |
| 1.238780517   | 0.1345003182 | 0.9999537652 | -1.4539417389 |
| 3.978377481   | 0.04964647   | 0.9999537652 | 1.0479736847  |
| 0             | 0            | 0            | 12.7732027325 |
| 0             | 0            | 0            | -3.3849925178 |
| 1.3362904775  | 0.3985053506 | 0.9999537652 | -1.4404670446 |



gene\_expression\_table

|               |              |              |               |
|---------------|--------------|--------------|---------------|
| -1.0552675813 | 0.7356897401 | 0.9999537652 | 1.332986139   |
| -1.0881540529 | 0.7657828591 | 0.9999537652 | -1.2394469978 |
| 1.0146182305  | 0.9282096046 | 0.9999537652 | -1.0667450714 |
| -1.2388965854 | 0.4753773976 | 0.9999537652 | -1.303725964  |
| -3.0628606717 | 0.0688520139 | 0.9999537652 | 3.3549728814  |
| 0             | 0            | 0            | -1.4680135518 |
| -2.5861438062 | 0.4715339839 | 0.9999537652 | -1.1533929684 |
| 4.5505976667  | 0.5557790267 | 0.9999537652 | 1.3742147816  |
| 4.5505976667  | 0.5557790267 | 0.9999537652 | -1.8882538771 |
| -1.3668368923 | 0.752155156  | 0.9999537652 | 1.4660688402  |
| 1.0023346655  | 0.9871842868 | 0.9999537652 | -1.1616033336 |
| -1.1153765637 | 0.7406784552 | 0.9999537652 | -1.2877952779 |
| 86.7434081177 | 0.1021564713 | 0.9999537652 | 46.2964317397 |
| -1.1206475287 | 0.660887213  | 0.9999537652 | -1.3867524638 |
| -1.011714451  | 0.9298183269 | 0.9999537652 | -1.1878966615 |
| 1.403141125   | 0.4756625939 | 0.9999537652 | -1.26159545   |
| 1.1793849535  | 0.2605442279 | 0.9999537652 | -1.0008406411 |
| 9.8205505243  | 0.381195962  | 0.9999537652 | -1.7821643145 |
| 1.1709835065  | 0.3131703811 | 0.9999537652 | 1.088898973   |
| 6.3128691894  | 0.4811788216 | 0.9999537652 | 1.0017424929  |
| -1.0197828113 | 0.8984853793 | 0.9999537652 | -1.089488292  |
| -1.2121682788 | 0.1127446768 | 0.9999537652 | 1.0972380172  |
| -1.0975717723 | 0.6653579502 | 0.9999537652 | -1.1322962376 |
| 1.3102067608  | 0.126632553  | 0.9999537652 | -1.170805725  |
| 1.1595709269  | 0.5868398847 | 0.9999537652 | -1.5254591311 |
| 1.3430439783  | 0.2080054387 | 0.9999537652 | 1.2716612353  |
| 1.2001615273  | 0.3722857192 | 0.9999537652 | -1.1508310948 |
| 1.3935918612  | 0.1376433155 | 0.9999537652 | -1.2621074912 |
| 1.0002829396  | 0.9989758165 | 0.9999537652 | -1.0845502872 |
| 1.0642219571  | 0.6689493875 | 0.9999537652 | -1.2619727673 |
| -1.1421477292 | 0.7764694598 | 0.9999537652 | -1.5319065574 |
| -1.1811567651 | 0.5738484929 | 0.9999537652 | -1.2700203908 |
| -1.029366635  | 0.8714707725 | 0.9999537652 | -1.2851424412 |
| 0             | 0            | 0            | 15.7262184124 |
| -1.5784038767 | 0.5480897108 | 0.9999537652 | -1.2549309907 |
| 1.1623934731  | 0.4806897707 | 0.9999537652 | -1.1356712697 |
| 6.3075231393  | 0.4852793576 | 0.9999537652 | 1.2652798573  |
| -1.0622467421 | 0.9027296244 | 0.9999537652 | 1.0250681692  |
| 1.5418133296  | 0.1461429737 | 0.9999537652 | 1.2316690629  |
| 1.0382351538  | 0.8424447844 | 0.9999537652 | 1.0957510336  |
| 1.2766807249  | 0.4771435226 | 0.9999537652 | 1.4675935119  |
| -1.179223437  | 0.5506992706 | 0.9999537652 | -1.0665617039 |
| 1.3959912071  | 0.2818483116 | 0.9999537652 | -1.2810036924 |
| -1.1441984695 | 0.7215879425 | 0.9999537652 | 1.334661317   |
| 11.5970171551 | 0.3502565327 | 0.9999537652 | -4.9942401165 |
| -1.467251024  | 0.3090767033 | 0.9999537652 | 1.4427656689  |
| -1.1144290208 | 0.7296363678 | 0.9999537652 | -1.0045981937 |
| -1.0089195645 | 0.9925492641 | 0.9999537652 | -1.1562874686 |
| 1.1416604346  | 0.7698209476 | 0.9999537652 | -1.0699489612 |

gene\_expression\_table

|               |              |              |               |
|---------------|--------------|--------------|---------------|
| -1.063259948  | 0.664569217  | 0.9999537652 | -1.0124206043 |
| 1.0310504732  | 0.8519609457 | 0.9999537652 | -1.2795683456 |
| -1.2962696481 | 0.0721442438 | 0.9999537652 | -1.1310783008 |
| 1.0746051196  | 0.6996006238 | 0.9999537652 | 1.1890296401  |
| -1.0366685029 | 0.8987350354 | 0.9999537652 | 1.07289715    |
| -1.1238061404 | 0.8691664385 | 0.9999537652 | -1.1839629195 |
| -1.1146022967 | 0.4579055839 | 0.9999537652 | -1.2098771003 |
| -1.0966013797 | 0.5917026805 | 0.9999537652 | -1.4176928308 |
| 1.1162834585  | 0.9273200307 | 0.9999537652 | -1.3582894632 |
| 1.0839946656  | 0.5978934935 | 0.9999537652 | -1.0238367717 |
| -1.1996097823 | 0.5603170819 | 0.9999537652 | -1.1968632117 |
| -1.115339507  | 0.5721341751 | 0.9999537652 | -1.3550695459 |
| -1.0432557936 | 0.9172425976 | 0.9999537652 | -1.4211405633 |
| 0             | 0            | 0            | 1.590997316   |
| 0             | 0            | 0            | 2.996475627   |
| -1.0089918016 | 0.9630493776 | 0.9999537652 | -1.2844973678 |
| -1.0307006845 | 0.8912048702 | 0.9999537652 | 1.085702139   |
| -1.0153746423 | 0.9541483597 | 0.9999537652 | -1.0538386981 |
| 1.3646178857  | 0.0896101281 | 0.9999537652 | -1.0334460543 |
| 1.7025203179  | 0.0553956047 | 0.9999537652 | -1.2266672543 |
| -1.3358438138 | 0.4174168903 | 0.9999537652 | -1.5249679375 |
| 1.2146174525  | 0.4825614304 | 0.9999537652 | -1.2881620534 |
| -2.1317846121 | 0.4677383323 | 0.9999537652 | 1.3513892501  |
| -1.5939280118 | 0.30764496   | 0.9999537652 | -1.2396413123 |
| 1.0847631898  | 0.7578361709 | 0.9999537652 | -1.4871304102 |
| -1.5875118025 | 0.7201623664 | 0.9999537652 | -2.6399253151 |
| -1.060373497  | 0.7464753048 | 0.9999537652 | 1.0328223823  |
| 1.2408466135  | 0.3265428068 | 0.9999537652 | -1.0882611118 |
| 1.4313016951  | 0.0779835604 | 0.9999537652 | -1.6246443134 |
| 1.0190507135  | 0.9188778209 | 0.9999537652 | -1.2937368251 |
| -1.524960239  | 0.5499517931 | 0.9999537652 | -1.5037428056 |
| 1.1629956299  | 0.762629821  | 0.9999537652 | 1.1886566977  |
| 1.0980661343  | 0.8282987727 | 0.9999537652 | -2.8371299626 |
| 3.2200264641  | 0.0825417824 | 0.9999537652 | 1.3384228545  |
| 1.6506720326  | 0.2190550538 | 0.9999537652 | 1.5532508978  |
| 2.2720949076  | 0.0905094517 | 0.9999537652 | 1.0704248589  |
| -1.108086402  | 0.7401774572 | 0.9999537652 | 1.2180576921  |
| 0             | 0            | 0            | 2.9985540909  |
| 1.4350458055  | 0.2349488621 | 0.9999537652 | 1.3094226511  |
| -1.0605920868 | 0.8801062604 | 0.9999537652 | -1.493436693  |
| 1.0267233535  | 0.9172140989 | 0.9999537652 | 1.0023670513  |
| 1.1085999121  | 0.6955649555 | 0.9999537652 | -1.4896479148 |
| 13.3324809638 | 0.3193679464 | 0.9999537652 | -2.1341400956 |
| -2.3043460049 | 0.0681501233 | 0.9999537652 | 1.1518828513  |
| 8.064174035   | 0.4213973314 | 0.9999537652 | -1.5377740926 |
| 2.7933974408  | 0.6948713406 | 0.9999537652 | 0             |
| 0             | 0            | 0            | 0             |
| 1.3011715182  | 0.0422767619 | 0.9999537652 | 1.0299919617  |
| -1.3009825858 | 0.0538006183 | 0.9999537652 | -1.1529378602 |

gene\_expression\_table

|               |              |              |               |
|---------------|--------------|--------------|---------------|
| -1.0224729808 | 0.8835265774 | 0.9999537652 | -1.0818694527 |
| -1.0651939987 | 0.7288641112 | 0.9999537652 | -1.0231595854 |
| 1.1332589726  | 0.7367023341 | 0.9999537652 | 1.3258994869  |
| -1.3256856079 | 0.2914585742 | 0.9999537652 | -1.0034265665 |
| 1.6725583551  | 0.478550357  | 0.9999537652 | 1.4443863998  |
| 1.1743806988  | 0.3674200402 | 0.9999537652 | -1.4191417118 |
| -1.4217598579 | 0.1864941783 | 0.9999537652 | -1.4416838718 |
| -2.746603376  | 0.022292897  | 0.9999537652 | -1.4956854776 |
| 2.7933974408  | 0.6948713406 | 0.9999537652 | -1.3607721321 |
| -1.2085881694 | 0.5110035563 | 0.9999537652 | 1.0629368176  |
| -1.0782708489 | 0.6312734216 | 0.9999537652 | -1.1147629222 |
| -1.1254842338 | 0.6972783045 | 0.9999537652 | 1.0265146123  |
| -1.2061735959 | 0.8458929999 | 0.9999537652 | -1.5210032613 |
| -1.0077148126 | 0.9569884028 | 0.9999537652 | 1.0207724382  |
| 0             | 0            | 0            | -1.859280336  |
| 1.455540275   | 0.1369661356 | 0.9999537652 | -1.2306475908 |
| 1.1991419323  | 0.3354179737 | 0.9999537652 | -1.0758646414 |
| 1.0149585581  | 0.9597758053 | 0.9999537652 | -1.4626267296 |
| -1.0996816679 | 0.7125321622 | 0.9999537652 | 1.1008365997  |
| 0             | 0            | 0            | 10.818785458  |
| 0             | 0            | 0            | 2.6434024479  |
| 1.0323451371  | 0.8160553632 | 0.9999537652 | -1.013676705  |
| 0             | 0            | 0            | 2.996475627   |
| 1.1023938338  | 0.518033941  | 0.9999537652 | 1.0098568406  |
| 1.01941503    | 0.8636952273 | 0.9999537652 | 1.0101975904  |
| -1.2178409995 | 0.6365481041 | 0.9999537652 | -1.3381435203 |
| -7.0403382421 | 0.1005520082 | 0.9999537652 | 2.996475627   |
| 1.04021894    | 0.9359842482 | 0.9999537652 | 1.2393612499  |
| -1.3920087874 | 0.0118500244 | 0.9999537652 | -1.2220602595 |
| 2.7933974408  | 0.6948713406 | 0.9999537652 | 2.996475627   |
| 1.0609526506  | 0.8048598116 | 0.9999537652 | 1.005993897   |
| 1.1310210172  | 0.7846483202 | 0.9999537652 | -1.1639181098 |
| -1.2665504101 | 0.4992310607 | 0.9999537652 | -1.3128330878 |
| -1.3398763835 | 0.3523885417 | 0.9999537652 | -1.1217575351 |
| -1.4406913797 | 0.1216484179 | 0.9999537652 | -1.2024502442 |
| 2.216996837   | 0.1055252038 | 0.9999537652 | -2.2858367088 |
| 1.1043648176  | 0.5043500236 | 0.9999537652 | 1.1880243167  |
| -1.1495672    | 0.5834173794 | 0.9999537652 | -1.3278807112 |
| 1.3588576256  | 0.8014139255 | 0.9999537652 | -7.9636855069 |
| 1.3334492853  | 0.1174231658 | 0.9999537652 | -1.0236343959 |
| -1.3033801392 | 0.0744993417 | 0.9999537652 | -1.1974406179 |
| -1.5914616654 | 0.1349086511 | 0.9999537652 | -1.6692265356 |
| -1.0688445283 | 0.7450211495 | 0.9999537652 | -1.3609191796 |
| -1.0549588096 | 0.8562923255 | 0.9999537652 | -1.0024446427 |
| -1.182724755  | 0.4392620349 | 0.9999537652 | 1.4362682927  |
| 1.0028190338  | 0.9820715817 | 0.9999537652 | -1.2998889922 |
| 1.7913882976  | 0.0580516687 | 0.9999537652 | -1.0557446667 |
| 1.7114119638  | 0.0725190321 | 0.9999537652 | 1.1241622155  |
| -1.1936903692 | 0.4614611172 | 0.9999537652 | -1.0261834446 |

gene\_expression\_table

|                |              |              |               |
|----------------|--------------|--------------|---------------|
| -1.1816673994  | 0.46975339   | 0.9999537652 | 1.2114753243  |
| 1.6018473574   | 0.6946381432 | 0.9999537652 | -1.7691190357 |
| -1.2906676756  | 0.1177595692 | 0.9999537652 | -1.4193791171 |
| 1.0648765994   | 0.6592635019 | 0.9999537652 | 1.030012374   |
| 6.3075231393   | 0.4852698288 | 0.9999537652 | -3.384595918  |
| 6.3128691894   | 0.4810839179 | 0.9999537652 | 1.9991325461  |
| 0              | 0            | 0            | 2.996475627   |
| -1.229535285   | 0.7400584302 | 0.9999537652 | -1.4851550121 |
| 2.0880127507   | 0.0992959266 | 0.9999537652 | -1.3207364426 |
| -1.2434792443  | 0.51523504   | 0.9999537652 | -1.0356316362 |
| -1.1113919897  | 0.5523724823 | 0.9999537652 | -1.1832784401 |
| 1.6374475495   | 0.5960750779 | 0.9999537652 | -3.1881123249 |
| -1.5881570201  | 0.7075125057 | 0.9999537652 | -1.4727509169 |
| 1.0604339708   | 0.8279524541 | 0.9999537652 | -1.1925380155 |
| 1.1642522676   | 0.6217144243 | 0.9999537652 | -1.0268092547 |
| 3.7338262809   | 0.117354566  | 0.9999537652 | 4.7163908587  |
| 4.5505976667   | 0.5557790267 | 0.9999537652 | 4.9561842702  |
| 1.0622483758   | 0.652141234  | 0.9999537652 | 1.0441035748  |
| 1.1719648111   | 0.243966056  | 0.9999537652 | 1.1209781731  |
| 1.8366741697   | 0.2506314126 | 0.9999537652 | 1.4128084833  |
| 1.2516202231   | 0.8303779394 | 0.9999537652 | -1.4292703376 |
| -1.185242554   | 0.6483593386 | 0.9999537652 | 1.1080863171  |
| 11.5766527773  | 0.3453712281 | 0.9999537652 | 1.1331826089  |
| 1.1029209479   | 0.813679922  | 0.9999537652 | -1.1293435299 |
| 2.7602715418   | 0.0419577259 | 0.9999537652 | -1.4934746286 |
| -1.0065650977  | 0.9831861734 | 0.9999537652 | 1.1577816025  |
| 1.5807620463   | 0.292709029  | 0.9999537652 | 1.2303360356  |
| -1.317283144   | 0.5030840096 | 0.9999537652 | -1.0107054234 |
| 2.1474619702   | 0.2589394284 | 0.9999537652 | 1.139398705   |
| -1.1887732262  | 0.5053289167 | 0.9999537652 | -1.3283731709 |
| 1.0382517226   | 0.9389806192 | 0.9999537652 | 1.1235729759  |
| 1.3273898611   | 0.2133726424 | 0.9999537652 | -1.1090925543 |
| -1.3509716065  | 0.5573946263 | 0.9999537652 | 1.1409731457  |
| 1.1682520285   | 0.3080899486 | 0.9999537652 | -1.1663582912 |
| -1.1749245553  | 0.749565706  | 0.9999537652 | -1.7095238164 |
| -1.4768386434  | 0.045964824  | 0.9999537652 | 1.0816888936  |
| -1.674537298   | 0.1547306803 | 0.9999537652 | -1.2992982656 |
| -1.1547091666  | 0.5900948974 | 0.9999537652 | 1.7334646473  |
| 1.2312715047   | 0.6447041921 | 0.9999537652 | 1.061274526   |
| -1.0026462193  | 0.9911034792 | 0.9999537652 | -1.3983026337 |
| 120.6208104207 | 0.0659056338 | 0.9999537652 | -7.9984306033 |
| -1.7153371014  | 0.0345016687 | 0.9999537652 | 1.3746297624  |
| -1.0814913541  | 0.6531431544 | 0.9999537652 | 1.0398887409  |
| 1.0669322604   | 0.8122686818 | 0.9999537652 | 1.334517701   |
| -1.1920634676  | 0.3479499331 | 0.9999537652 | -1.2695498817 |
| -1.5850657366  | 0.167170501  | 0.9999537652 | -1.0991019002 |
| 1.2011626653   | 0.4592169276 | 0.9999537652 | 1.6390895238  |
| 1.0105955832   | 0.9775822554 | 0.9999537652 | -1.0391495954 |
| 1.3356053654   | 0.3430918386 | 0.9999537652 | 1.2299044262  |

gene\_expression\_table

|               |              |              |               |
|---------------|--------------|--------------|---------------|
| -1.216643898  | 0.2117024219 | 0.9999537652 | -1.2373214694 |
| 2.3799893397  | 0.1267530901 | 0.9999537652 | 1.2203978783  |
| 2.0225469564  | 0.1497012721 | 0.9999537652 | -1.199039625  |
| 18.5983228161 | 0.2588461094 | 0.9999537652 | 6.9133480437  |
| 2.7933974408  | 0.6948713406 | 0.9999537652 | 0             |
| -1.2537514618 | 0.3674217225 | 0.9999537652 | -1.0749180509 |
| -1.3149356864 | 0.1384091604 | 0.9999537652 | 1.6025092553  |
| 1.0732956812  | 0.6241685609 | 0.9999537652 | -1.1340129937 |
| 2.7933974408  | 0.6948713406 | 0.9999537652 | 4.9527501949  |
| 1.1416508574  | 0.6535294448 | 0.9999537652 | 1.0809739446  |
| -6.9762758667 | 0.2573781562 | 0.9999537652 | 8.8639046058  |
| 41.9731433602 | 0.1493503109 | 0.9999537652 | 1.2196199025  |
| -1.2507415237 | 0.3257180448 | 0.9999537652 | -1.3449449566 |
| 0             | 0            | 0            | 4.9527501949  |
| 1.6666137657  | 0.3753116338 | 0.9999537652 | -1.2266184861 |
| -1.2645490621 | 0.6880962475 | 0.9999537652 | -1.3762789529 |
| -1.0994028975 | 0.7496066711 | 0.9999537652 | -1.0899302059 |
| 1.17556746    | 0.546263497  | 0.9999537652 | -1.5591088157 |
| 1.5728474279  | 0.0238177211 | 0.9999537652 | -1.1519498403 |
| -1.0519973377 | 0.7314473492 | 0.9999537652 | -1.1496597598 |
| -1.1213192715 | 0.5474489997 | 0.9999537652 | -1.0360642734 |
| 1.0043858916  | 0.9847648623 | 0.9999537652 | 1.0161826057  |
| -1.1989647349 | 0.4332987735 | 0.9999537652 | 1.019045855   |
| 0             | 0            | 0            | 18.6723895103 |
| -1.347364702  | 0.2159324122 | 0.9999537652 | -1.1541963532 |
| 0             | 0            | 0            | 1.0376348451  |
| 1.7745951127  | 0.5408978315 | 0.9999537652 | -1.4239685954 |
| 1.098835743   | 0.5479559891 | 0.9999537652 | -1.1536379666 |
| 1.0374892852  | 0.8987215732 | 0.9999537652 | 1.3895637335  |
| 6.3075231393  | 0.4852603074 | 0.9999537652 | -1.8692819149 |
| 1.8557422296  | 0.3218735126 | 0.9999537652 | 1.1059318362  |
| -1.1299110903 | 0.5199862739 | 0.9999537652 | 1.064996907   |
| -1.1476861652 | 0.77577207   | 0.9999537652 | -1.8922915264 |
| -1.0535876328 | 0.6865203557 | 0.9999537652 | 1.2054761848  |
| 1.0842927461  | 0.7273563016 | 0.9999537652 | 1.3672566925  |
| 1.2504025925  | 0.5370461157 | 0.9999537652 | 1.2152158153  |
| 1.4500051737  | 0.1038829653 | 0.9999537652 | 1.1818304912  |
| 1.2505200867  | 0.1011303288 | 0.9999537652 | 1.2699948056  |
| 1.065744814   | 0.6348848711 | 0.9999537652 | 1.0883030932  |
| 1.4267642224  | 0.4092481147 | 0.9999537652 | 1.0062187336  |
| 1.1669563645  | 0.5995411504 | 0.9999537652 | 1.102566814   |
| -1.0108880557 | 0.9883912163 | 0.9999537652 | 1.110588605   |
| 1.6560364947  | 0.3027477056 | 0.9999537652 | -1.4818633664 |
| 1.8920098155  | 0.1680897107 | 0.9999537652 | 1.4664814702  |
| 1.1172132586  | 0.6411663374 | 0.9999537652 | -1.2152334541 |
| 1.0576665918  | 0.7819331153 | 0.9999537652 | -1.0906933583 |
| -1.1656372969 | 0.862770482  | 0.9999537652 | 1.7984806365  |
| 1.6168475804  | 0.0184634012 | 0.9999537652 | 1.1185341135  |
| 1.7291298651  | 0.3372900039 | 0.9999537652 | -1.4802940734 |

gene\_expression\_table

|               |              |              |               |
|---------------|--------------|--------------|---------------|
| 1.0074940527  | 0.9577649925 | 0.9999537652 | 1.0798445923  |
| 1.6470167447  | 0.0641387979 | 0.9999537652 | -1.222806565  |
| -1.2341931486 | 0.1852023319 | 0.9999537652 | 1.3248324547  |
| 6.3075231393  | 0.4852507934 | 0.9999537652 | -1.4206411224 |
| 1.6056477681  | 0.3928289718 | 0.9999537652 | -1.3840469295 |
| -1.4604704138 | 0.2849420459 | 0.9999537652 | -1.0680493131 |
| -1.0293826085 | 0.8747053315 | 0.9999537652 | 1.1078828286  |
| -1.5699952994 | 0.4903036441 | 0.9999537652 | -1.265426292  |
| 1.1016736637  | 0.5712695439 | 0.9999537652 | 1.1423039461  |
| -1.944524113  | 0.0270179523 | 0.9999537652 | 1.1037273925  |
| 2.3729118478  | 0.3017562155 | 0.9999537652 | 5.8001127949  |
| 1.7846532622  | 0.3772603986 | 0.9999537652 | 2.1070894252  |
| -1.4750076826 | 0.1067363279 | 0.9999537652 | -1.2546737464 |
| -2.4710767924 | 0.5445105149 | 0.9999537652 | 1.2915363004  |
| -1.1625858476 | 0.2663644869 | 0.9999537652 | -1.2232876672 |
| 2.8173722589  | 0.3577504083 | 0.9999537652 | -7.4219176587 |
| 1.0999141952  | 0.3999280148 | 0.9999537652 | 1.1017037515  |
| 1.0373288779  | 0.8152836268 | 0.9999537652 | 1.6047165983  |
| -1.0736334663 | 0.7094059054 | 0.9999537652 | 1.0195324497  |
| -1.2155863658 | 0.6382431193 | 0.9999537652 | 2.115793706   |
| 2.1077739145  | 0.2653502674 | 0.9999537652 | -1.3953149115 |
| 8.064174035   | 0.4204298929 | 0.9999537652 | -1.1427246333 |
| -1.6288558071 | 0.4355686581 | 0.9999537652 | 2.7242954019  |
| 1.2225946172  | 0.2087631903 | 0.9999537652 | 1.0024361165  |
| 1.1219535594  | 0.6819914903 | 0.9999537652 | -1.0149234793 |
| 1.0446300955  | 0.8579968748 | 0.9999537652 | -1.3072752469 |
| -1.0466090104 | 0.8079593721 | 0.9999537652 | 1.152710562   |
| -1.2700754765 | 0.7499062125 | 0.9999537652 | -2.1715390799 |
| -4.1037783439 | 0.1457766854 | 0.9999537652 | 1.5128265653  |
| 0             | 0            | 0            | 2.996475627   |
| 0             | 0            | 0            | 4.9527501949  |
| -1.083525836  | 0.7322417554 | 0.9999537652 | 1.1793779674  |
| 2.7957660672  | 0.7054998373 | 0.9999537652 | -1.9814915788 |
| 1.086270844   | 0.7919651292 | 0.9999537652 | 1.3490826275  |
| 2.0265793637  | 0.0748231802 | 0.9999537652 | -1.296615928  |
| -2.3726635459 | 0.054564454  | 0.9999537652 | 1.0772757219  |
| -1.2203912745 | 0.5227693207 | 0.9999537652 | 1.3391630313  |
| 1.7398053282  | 0.2210854143 | 0.9999537652 | 1.1750198675  |
| 2.7933974408  | 0.6948713406 | 0.9999537652 | 0             |
| 144.262103935 | 0.0663267197 | 0.9999537652 | -1.7465907299 |
| -1.1081430555 | 0.5067063754 | 0.9999537652 | 1.2815258762  |
| 6.0689445799  | 0.0357017211 | 0.9999537652 | -1.8676422841 |
| 1.087219878   | 0.5420142803 | 0.9999537652 | 1.0210939364  |
| 0             | 0            | 0            | 16.6806485101 |
| -1.3230608984 | 0.4066449336 | 0.9999537652 | -1.3644127141 |
| 2.7933974408  | 0.6948713406 | 0.9999537652 | 3.7005385664  |
| 0             | 0            | 0            | 2.996475627   |
| -1.0480960432 | 0.8302340345 | 0.9999537652 | -1.1183978181 |
| 1.0372981855  | 0.8717814736 | 0.9999537652 | -1.26429544   |

gene\_expression\_table

|                |              |              |               |
|----------------|--------------|--------------|---------------|
| -1.0967589153  | 0.705261475  | 0.9999537652 | 1.1564774017  |
| -1.9445493603  | 0.1943987684 | 0.9999537652 | 4.0965603855  |
| 1.6024984014   | 0.6862231608 | 0.9999537652 | 3.6551704795  |
| 1.2050101121   | 0.5495819501 | 0.9999537652 | 1.1446861974  |
| 1.1592231455   | 0.6330590559 | 0.9999537652 | -1.1442222517 |
| 1.1145776833   | 0.8149442952 | 0.9999537652 | 1.0533536468  |
| -1.0834038168  | 0.701873703  | 0.9999537652 | 1.005989477   |
| -1.1201924633  | 0.7219318388 | 0.9999537652 | -1.5326892303 |
| 1.3129587976   | 0.2996248014 | 0.9999537652 | -1.0791404304 |
| 1.0205020034   | 0.8851024489 | 0.9999537652 | 1.1858288221  |
| 1.0170015816   | 0.9679978787 | 0.9999537652 | 1.2503965669  |
| -1.1164535624  | 0.6135616211 | 0.9999537652 | -1.7039376089 |
| 1.1604970644   | 0.4267951748 | 0.9999537652 | -1.2288978001 |
| 1.0216567631   | 0.8717761847 | 0.9999537652 | -1.0117599554 |
| 1.2168974893   | 0.1554291357 | 0.9999537652 | 1.0053116326  |
| -1.1452962001  | 0.5084154124 | 0.9999537652 | -1.2313167565 |
| -2.955963562   | 0.318889966  | 0.9999537652 | 2.1230226627  |
| -1.033080645   | 0.9154758944 | 0.9999537652 | -1.2507143103 |
| 1.430204995    | 0.2099873154 | 0.9999537652 | -1.0357021453 |
| -1.4741942417  | 0.5298175828 | 0.9999537652 | 1.1899349411  |
| -4.8154268017  | 0.171205961  | 0.9999537652 | 8.8639046058  |
| 1.2910574909   | 0.7068915691 | 0.9999537652 | -1.3513401684 |
| 1.0135240894   | 0.9417247475 | 0.9999537652 | -1.1924526816 |
| 1.3145865926   | 0.1456307322 | 0.9999537652 | -1.2442361461 |
| 1.7286784756   | 0.4071607084 | 0.9999537652 | -1.1025258849 |
| -1.7180507824  | 0.0863407843 | 0.9999537652 | -1.0731035797 |
| 1.1833138015   | 0.8256586683 | 0.9999537652 | -1.6576187027 |
| 8.064174035    | 0.4192990295 | 0.9999537652 | -1.9821566108 |
| -1.0677326935  | 0.7451562835 | 0.9999537652 | -1.1364621289 |
| 2.2592667537   | 0.1577237699 | 0.9999537652 | -1.4377981263 |
| -18.9844959609 | 0.0576182292 | 0.9999537652 | -2.6856242212 |
| -1.6863530946  | 0.0148886783 | 0.9999537652 | -1.2503763775 |
| -1.0606604912  | 0.7818516508 | 0.9999537652 | -1.1775397349 |
| 1.3577059233   | 0.2512336728 | 0.9999537652 | 1.351884749   |
| 1.8455489546   | 0.5920717501 | 0.9999537652 | -9.7565542884 |
| -6.9762758667  | 0.2573366588 | 0.9999537652 | 1.2439599102  |
| -1.44703975    | 0.3739847266 | 0.9999537652 | -1.1001301261 |
| 8.064174035    | 0.4193050961 | 0.9999537652 | 1.5185018078  |
| 1.3487618019   | 0.0373581617 | 0.9999537652 | 1.1575893131  |
| 0              | 0            | 0            | 14.7271569203 |
| 2.1416353779   | 0.0676610987 | 0.9999537652 | -1.0637216495 |
| 15.2790678492  | 0.007011     | 0.9999537652 | -1.3415412517 |
| 1.1176600764   | 0.6752130527 | 0.9999537652 | -1.0750180715 |
| 1.2329089224   | 0.1099236272 | 0.9999537652 | -1.1853444352 |
| -1.0553653563  | 0.8151604788 | 0.9999537652 | -1.2473979577 |
| -1.1163043415  | 0.8073292412 | 0.9999537652 | 1.6199771783  |
| 2.3981407703   | 0.0306761543 | 0.9999537652 | 1.000000614   |
| 1.0471237689   | 0.9400144864 | 0.9999537652 | -1.283870632  |
| -1.2551604504  | 0.2263184232 | 0.9999537652 | 1.0216483988  |

gene\_expression\_table

|               |              |              |               |
|---------------|--------------|--------------|---------------|
| 1.3297177015  | 0.430919211  | 0.9999537652 | -1.1976936839 |
| 1.4549753547  | 0.122361653  | 0.9999537652 | -1.3767581111 |
| 3.1966312975  | 0.0550392658 | 0.9999537652 | 1.1103578518  |
| -1.2549682299 | 0.7046813256 | 0.9999537652 | -1.6681632674 |
| 1.1361581687  | 0.4747101408 | 0.9999537652 | 1.9067922888  |
| 1.2967522927  | 0.2381812178 | 0.9999537652 | 1.0055563268  |
| 1.1681724717  | 0.5980109893 | 0.9999537652 | -1.0032494006 |
| -2.0933030754 | 0.4311045288 | 0.9999537652 | 2.5555207059  |
| 1.2923978463  | 0.0757224131 | 0.9999537652 | -1.0625136382 |
| -1.001352875  | 0.9939349192 | 0.9999537652 | 1.027873894   |
| 1.1376235531  | 0.7266645076 | 0.9999537652 | -1.3775874542 |
| -1.5098119052 | 0.0239249045 | 0.9999537652 | -1.0564896624 |
| -1.1808819591 | 0.2991964767 | 0.9999537652 | -1.1639347019 |
| -2.5839527681 | 0.5182093244 | 0.9999537652 | -7.9600406939 |
| -1.2772426758 | 0.2173335418 | 0.9999537652 | 1.0632855752  |
| 1.2904993165  | 0.7067137628 | 0.9999537652 | -1.3344270248 |
| -1.083958991  | 0.7150263865 | 0.9999537652 | -1.3273707385 |
| 1.5186643114  | 0.126521503  | 0.9999537652 | -1.0960387582 |
| 2.063730313   | 0.2434517488 | 0.9999537652 | 1.184649269   |
| -1.3938591781 | 0.4112724619 | 0.9999537652 | 1.0791122804  |
| -1.0311247665 | 0.8835681629 | 0.9999537652 | -1.0682180894 |
| 1.0905362733  | 0.8214881044 | 0.9999537652 | 1.0523237315  |
| 1.3138925203  | 0.3987977175 | 0.9999537652 | -1.1787733872 |
| 1.4562834313  | 0.4031274025 | 0.9999537652 | 1.1000534772  |
| 1.2520825157  | 0.3686714579 | 0.9999537652 | -1.1998053226 |
| 9.8205505243  | 0.3812413623 | 0.9999537652 | 1.1896492559  |
| 1.2782066758  | 0.0579197463 | 0.9999537652 | -1.1769873521 |
| -1.2269614418 | 0.5097569439 | 0.9999537652 | -1.2419776884 |
| 13.3324809638 | 0.3193592658 | 0.9999537652 | -2.1478925545 |
| 2.1927369676  | 0.3100396102 | 0.9999537652 | -1.4227651232 |
| -1.4752476881 | 0.3249836121 | 0.9999537652 | 1.1338579197  |
| 1.2277912236  | 0.4827626121 | 0.9999537652 | -1.0715795887 |
| 1.1181639381  | 0.3712795204 | 0.9999537652 | 1.0313640661  |
| -1.1540709157 | 0.5083055084 | 0.9999537652 | -1.1775945909 |
| 1.2278372524  | 0.4547177853 | 0.9999537652 | -1.1823374258 |
| 1.3104819349  | 0.5977979388 | 0.9999537652 | -1.6828571806 |
| -3.0420574223 | 0.0200169586 | 0.9999537652 | 1.1628701098  |
| 1.1548620047  | 0.4365212256 | 0.9999537652 | 1.1659094826  |
| -1.2578696146 | 0.4794039733 | 0.9999537652 | -1.5848247986 |
| -1.703673415  | 0.2500601166 | 0.9999537652 | -2.016360435  |
| 2.5757525888  | 0.4024060953 | 0.9999537652 | 1.3226394782  |
| -1.1697024363 | 0.5690672907 | 0.9999537652 | -1.3625971749 |
| -1.4112279528 | 0.452090802  | 0.9999537652 | 1.0491203044  |
| -1.1028662803 | 0.5116989564 | 0.9999537652 | 1.0033204842  |
| 1.2078320701  | 0.2040808514 | 0.9999537652 | 1.3252215312  |
| 1.4119895969  | 0.1351538328 | 0.9999537652 | -1.1087349309 |
| 1.234880122   | 0.3371095467 | 0.9999537652 | -1.0235070363 |
| 1.1820042162  | 0.6881403305 | 0.9999537652 | 1.0949608177  |
| 1.2625201345  | 0.7166896632 | 0.9999537652 | -1.2869062722 |



gene\_expression\_table

|               |              |              |               |
|---------------|--------------|--------------|---------------|
| -1.5474820895 | 0.4986612739 | 0.9999537652 | -1.3645986872 |
| 1.1883762882  | 0.7489324124 | 0.9999537652 | 1.3519574459  |
| 1.0634737655  | 0.8098414562 | 0.9999537652 | -1.0468073545 |
| -1.3662673861 | 0.4330921379 | 0.9999537652 | -1.6884599034 |
| -1.4797035191 | 0.1926787505 | 0.9999537652 | -1.2304213428 |
| 1.9050337421  | 0.4949709275 | 0.9999537652 | -1.0946813431 |
| -1.7633461612 | 0.0828048363 | 0.9999537652 | -1.6947161979 |
| 2.3275623066  | 0.1421970963 | 0.9999537652 | 1.1210043915  |
| -3.0095759667 | 0.0133438297 | 0.9999537652 | -1.0851531775 |
| 1.5853476499  | 0.2340964662 | 0.9999537652 | -1.0713435126 |
| 1.3681812834  | 0.1597829151 | 0.9999537652 | -1.0999016363 |
| 1.0216203554  | 0.9617310435 | 0.9999537652 | -1.3544732753 |
| 1.1796703259  | 0.4674396698 | 0.9999537652 | -1.161603061  |
| 2.7933974408  | 0.6948713406 | 0.9999537652 | 1.1360578751  |
| -1.008016201  | 0.9679791712 | 0.9999537652 | -1.0340513362 |
| 1.301673237   | 0.2878222209 | 0.9999537652 | -1.2157198662 |
| -1.0590929665 | 0.8395130035 | 0.9999537652 | -1.0050191535 |
| 1.7357769655  | 0.4589461362 | 0.9999537652 | -1.8319376845 |
| 1.0938187138  | 0.6619564189 | 0.9999537652 | -1.3433466815 |
| 1.258269974   | 0.5405133883 | 0.9999537652 | -1.2276245095 |
| 1.6164264405  | 0.2885611186 | 0.9999537652 | -1.4107422155 |
| 16.8433158146 | 0.2737407497 | 0.9999537652 | 1.5887280788  |
| 1.131919818   | 0.5175381532 | 0.9999537652 | 1.00310556    |
| -1.3646799224 | 0.247198007  | 0.9999537652 | -1.2449300023 |
| -1.0325602145 | 0.8861054924 | 0.9999537652 | -1.023933547  |
| 20.3530564257 | 0.243041495  | 0.9999537652 | -1.0585261291 |
| -1.0230076016 | 0.8580295474 | 0.9999537652 | -1.0469732088 |
| -1.7700702233 | 0.006406     | 0.9999537652 | -1.21365965   |
| 1.438522744   | 0.33551139   | 0.9999537652 | 1.6627054478  |
| 2.9980508928  | 0.0772277407 | 0.9999537652 | -1.1386918785 |
| 6.3128691894  | 0.4809896669 | 0.9999537652 | -1.4680135518 |
| -1.2121435816 | 0.3236440173 | 0.9999537652 | 1.0323700801  |
| -3.414177408  | 0.0821008145 | 0.9999537652 | 1.326842897   |
| 1.4869359056  | 0.192161553  | 0.9999537652 | -1.5665347228 |
| -2.3629710095 | 0.4005336112 | 0.9999537652 | -1.1838291283 |
| 1.0435402836  | 0.9225519067 | 0.9999537652 | 1.4821423524  |
| 1.3007249239  | 0.4220272917 | 0.9999537652 | 1.5307690468  |
| 1.2207004539  | 0.3401405687 | 0.9999537652 | 1.1564218995  |
| -1.0696482273 | 0.6590707059 | 0.9999537652 | -1.0550947353 |
| 1.0825557215  | 0.6859748582 | 0.9999537652 | 1.0726541443  |
| -1.3647999079 | 0.431033001  | 0.9999537652 | 1.2733598154  |
| 1.078475595   | 0.6424906223 | 0.9999537652 | -1.1703720322 |
| 1.0773330201  | 0.7038892221 | 0.9999537652 | 1.3338616035  |
| 1.0762510692  | 0.7508030278 | 0.9999537652 | 1.0529602153  |
| -1.2117665196 | 0.3085119919 | 0.9999537652 | 1.1541777298  |
| 1.1184146532  | 0.5963791382 | 0.9999537652 | -1.0624029909 |
| 8.064174035   | 0.419311172  | 0.9999537652 | -1.1393408151 |
| -1.0157803324 | 0.9440684254 | 0.9999537652 | -1.1242781646 |
| -1.6076590535 | 0.0694281927 | 0.9999537652 | 1.0983259251  |

gene\_expression\_table

|               |              |              |               |
|---------------|--------------|--------------|---------------|
| -1.0099323877 | 0.9704815666 | 0.9999537652 | -1.3750266236 |
| -1.1341438159 | 0.8230593928 | 0.9999537652 | 2.2750730938  |
| 1.2041125841  | 0.3233374273 | 0.9999537652 | 1.0878277235  |
| -1.1421017849 | 0.5166545102 | 0.9999537652 | -1.1481724641 |
| -1.141788231  | 0.5457253625 | 0.9999537652 | -1.2539258591 |
| -1.0078760438 | 0.9608345575 | 0.9999537652 | 1.2337773377  |
| 1.7564675364  | 0.3066856983 | 0.9999537652 | -1.6498312408 |
| -1.0535827059 | 0.9227654106 | 0.9999537652 | 1.0539138314  |
| -1.5115068889 | 0.3922956888 | 0.9999537652 | -1.0553376913 |
| -1.0577205428 | 0.8175032406 | 0.9999537652 | -1.2855289153 |
| -1.1731722061 | 0.5162539436 | 0.9999537652 | -1.0714926283 |
| -4.5414764708 | 0.0895972986 | 0.9999537652 | -14.149476906 |
| 1.3705463739  | 0.3942624787 | 0.9999537652 | 1.3564311356  |
| -1.0067597911 | 0.9859314309 | 0.9999537652 | 2.3110468829  |
| 1.2646652142  | 0.5932615042 | 0.9999537652 | -1.4894136055 |
| -1.0521480798 | 0.8160056237 | 0.9999537652 | -1.0008534458 |
| -1.1419238385 | 0.5555155639 | 0.9999537652 | -1.1499512687 |
| 1.0262167194  | 0.8831107799 | 0.9999537652 | 1.2752038196  |
| -1.5935758472 | 0.2820162251 | 0.9999537652 | 1.8169692298  |
| 1.2044284456  | 0.6620473463 | 0.9999537652 | 1.027221941   |
| -1.0351324722 | 0.859210317  | 0.9999537652 | 1.112950593   |
| 1.2015997872  | 0.2626275289 | 0.9999537652 | -1.1611403584 |
| 1.05723955    | 0.8679302659 | 0.9999537652 | 1.4394000994  |
| -1.1603390474 | 0.3691974075 | 0.9999537652 | 1.2906927264  |
| 1.1274281612  | 0.5934347976 | 0.9999537652 | 1.1066493571  |
| 1.1063168623  | 0.7106320016 | 0.9999537652 | 1.1251025723  |
| -1.418833986  | 0.006299     | 0.9999537652 | -1.1130761234 |
| -1.0997522348 | 0.5656251359 | 0.9999537652 | 1.1701654835  |
| -1.0610145345 | 0.7837553448 | 0.9999537652 | -1.112646512  |
| -1.3178027369 | 0.0682141086 | 0.9999537652 | -1.0930913189 |
| 1.1779948772  | 0.534737708  | 0.9999537652 | -1.1511919005 |
| 1.0913090539  | 0.5422445268 | 0.9999537652 | -1.2545732017 |
| -1.7774568645 | 0.001742     | 0.9999537652 | 1.0778027527  |
| 11.5766527773 | 0.3453485698 | 0.9999537652 | -2.2833428939 |
| 1.0915254028  | 0.6970863701 | 0.9999537652 | -1.472049282  |
| -1.2077069657 | 0.3958757779 | 0.9999537652 | -1.4026183768 |
| 1.3000853227  | 0.1643933317 | 0.9999537652 | -1.0900508808 |
| 1.141365169   | 0.7160474507 | 0.9999537652 | -1.0386549784 |
| 1.1352638971  | 0.5805056095 | 0.9999537652 | -1.0555960324 |
| 0             | 0            | 0            | -5.3589986948 |
| 0             | 0            | 0            | 2.9985540909  |
| 1.036534056   | 0.8580524046 | 0.9999537652 | -1.103061949  |
| 1.7364753052  | 0.0871315304 | 0.9999537652 | -1.3851369611 |
| 1.0869018671  | 0.6078320992 | 0.9999537652 | -1.0247322805 |
| 1.8541209205  | 0.1889969472 | 0.9999537652 | 1.1593389183  |
| 1.9053972733  | 0.2675957788 | 0.9999537652 | -1.1633625896 |
| 1.2894430397  | 0.7031643746 | 0.9999537652 | -3.4537504656 |
| 16.8433158146 | 0.2737706906 | 0.9999537652 | -3.3853891979 |
| 1.4681234004  | 0.5952711777 | 0.9999537652 | 1.0949809192  |

gene\_expression\_table

|               |              |              |               |
|---------------|--------------|--------------|---------------|
| -1.0333474347 | 0.9033506267 | 0.9999537652 | -1.2251517201 |
| 2.0894806265  | 0.51754937   | 0.9999537652 | -2.9704130837 |
| 0             | 0            | 0            | 2.3208796036  |
| -1.1832445801 | 0.6579223784 | 0.9999537652 | 2.0756676815  |
| -1.5311983595 | 0.0526218433 | 0.9999537652 | -1.2764452543 |
| 1.0452318965  | 0.9282077995 | 0.9999537652 | 1.7397796038  |
| -1.5174748936 | 0.0195303105 | 0.9999537652 | -1.0388425823 |
| -1.044149981  | 0.8118945345 | 0.9999537652 | 1.0480642143  |
| -3.2699928362 | 0.157555617  | 0.9999537652 | 2.1856030494  |
| -1.6988038983 | 0.5664473099 | 0.9999537652 | 3.0768011901  |
| -1.0265103462 | 0.9037288313 | 0.9999537652 | -1.0813960616 |
| 1.1268373502  | 0.8033495904 | 0.9999537652 | -2.1500229021 |
| -1.582236944  | 0.0325235808 | 0.9999537652 | 1.1783122745  |
| -1.3121336108 | 0.1453815808 | 0.9999537652 | -1.119345894  |
| -1.0773179943 | 0.8652964544 | 0.9999537652 | -1.0444522523 |
| 1.0310185201  | 0.8327062783 | 0.9999537652 | 1.1022102698  |
| 2.7933974408  | 0.6948713406 | 0.9999537652 | 1.0451154953  |
| 1.0068522111  | 0.9856706857 | 0.9999537652 | -1.2255966104 |
| -1.0409774945 | 0.8005864942 | 0.9999537652 | -1.0701630811 |
| -1.0191717191 | 0.9559911016 | 0.9999537652 | -1.2273917056 |
| 3.2097096617  | 0.1617537627 | 0.9999537652 | 2.9985540909  |
| -1.4493251305 | 0.3160794559 | 0.9999537652 | -1.1898078549 |
| -1.0820757546 | 0.6173418949 | 0.9999537652 | 1.1338001755  |
| -1.124952368  | 0.6095409709 | 0.9999537652 | -1.1118872995 |
| -1.1457847193 | 0.9108654146 | 0.9999537652 | 0             |
| 1.149287899   | 0.3479711581 | 0.9999537652 | 1.1404333934  |
| -1.1208614982 | 0.5414584093 | 0.9999537652 | -1.0330868012 |
| -6.9736190158 | 0.2250321147 | 0.9999537652 | 4.9527501949  |
| -1.0089529604 | 0.9628142328 | 0.9999537652 | 1.0364739072  |
| 1.3140592355  | 0.3492277092 | 0.9999537652 | 1.1751789433  |
| 1.0990733552  | 0.8707054707 | 0.9999537652 | -1.2363104227 |
| 0             | 0            | 0            | 0             |
| -1.028889346  | 0.8779122485 | 0.9999537652 | 1.452138451   |
| -1.3823233029 | 0.5185918578 | 0.9999537652 | 1.5179413665  |
| 4.2373079572  | 0.0230508341 | 0.9999537652 | -1.7352264768 |
| -1.5681585861 | 0.211200835  | 0.9999537652 | 1.1343479444  |
| 2.0877130777  | 0.5300403745 | 0.9999537652 | -6.4360166533 |
| 1.2293721557  | 0.6959236393 | 0.9999537652 | 1.0395649746  |
| 45.0425653048 | 0.1352731676 | 0.9999537652 | -2.3907756185 |
| 2.7933974408  | 0.6948713406 | 0.9999537652 | 8.8639046058  |
| -1.0909523832 | 0.5793684984 | 0.9999537652 | -1.0375097263 |
| -1.3012163181 | 0.728507528  | 0.9999537652 | -3.8919672371 |
| 0             | 0            | 0            | -2.4271384939 |
| 4.5505976667  | 0.5557790267 | 0.9999537652 | 2.9985540909  |
| -1.4471406585 | 0.0426840013 | 0.9999537652 | 1.159041731   |
| 1.040479317   | 0.784806039  | 0.9999537652 | 1.0149923097  |
| -2.1326506013 | 0.4633398779 | 0.9999537652 | -2.4941652249 |
| 1.3499426524  | 0.3196502706 | 0.9999537652 | 1.0634879949  |
| 1.6018881045  | 0.6925466852 | 0.9999537652 | 2.7192563323  |

gene\_expression\_table

|               |              |              |               |
|---------------|--------------|--------------|---------------|
| 0             | 0            | 0            | -3.3818725041 |
| 0             | 0            | 0            | 4.9527501949  |
| 1.1750291162  | 0.5665007466 | 0.9999537652 | -1.1140069997 |
| 4.5505976667  | 0.5557790267 | 0.9999537652 | -5.3583704783 |
| -1.1698447024 | 0.6168365705 | 0.9999537652 | -1.1359253675 |
| 4.5505976667  | 0.5557790267 | 0.9999537652 | 2.9926666006  |
| -1.054860168  | 0.7801687934 | 0.9999537652 | 1.1204924391  |
| 0             | 0            | 0            | 23.4460379037 |
| 1.2090200984  | 0.5476080637 | 0.9999537652 | 1.2201694775  |
| -2.4065148764 | 0.2679247363 | 0.9999537652 | -1.1659848296 |
| 1.196795406   | 0.666702689  | 0.9999537652 | -1.503716555  |
| 4.5505976667  | 0.5557790267 | 0.9999537652 | -2.0739144097 |
| 1.066664157   | 0.8089606899 | 0.9999537652 | 1.0463856997  |
| -1.0547082242 | 0.8398104898 | 0.9999537652 | 1.3844485411  |
| 1.2807758528  | 0.09940768   | 0.9999537652 | -1.0550311545 |
| 1.1059787706  | 0.800710731  | 0.9999537652 | -1.6084213994 |
| -1.0783617518 | 0.6159981459 | 0.9999537652 | 1.0225263947  |
| 1.3828243429  | 0.0738805779 | 0.9999537652 | 1.4979416122  |
| -1.0202039148 | 0.9078109579 | 0.9999537652 | -1.3554312836 |
| -2.1334087267 | 0.5175748664 | 0.9999537652 | -1.163826152  |
| -1.2749274555 | 0.455207495  | 0.9999537652 | -1.3518525677 |
| 1.5544407955  | 0.4128654436 | 0.9999537652 | 1.4831017011  |
| 1.3224892896  | 0.0877943224 | 0.9999537652 | -1.0231727389 |
| 4.5545995984  | 0.5696620789 | 0.9999537652 | -2.5434338259 |
| -1.8808773671 | 0.4103619195 | 0.9999537652 | -1.3567146076 |
| 2.5558846201  | 0.2829688636 | 0.9999537652 | -1.5298940734 |
| 1.0627685541  | 0.7270799872 | 0.9999537652 | -1.4150565051 |
| -1.9462569054 | 0.1354184304 | 0.9999537652 | -1.0225687453 |
| -1.3451090191 | 0.1421091587 | 0.9999537652 | -1.1111161498 |
| 1.3021826629  | 0.2447494622 | 0.9999537652 | -1.2376004066 |
| -1.9661648673 | 0.0750283716 | 0.9999537652 | -1.2862490202 |
| -1.0285793351 | 0.9460080061 | 0.9999537652 | 1.0653364133  |
| -1.0509965722 | 0.8456837929 | 0.9999537652 | -1.0066055205 |
| 1.1665046315  | 0.6050333634 | 0.9999537652 | 1.2168600965  |
| 2.6885716491  | 0.2434112801 | 0.9999537652 | -2.1542132939 |
| 1.0644272711  | 0.8963168609 | 0.9999537652 | -1.4373790352 |
| -7.0430176546 | 0.0829686738 | 0.9999537652 | 1.6681061489  |
| 4.5544554512  | 0.5691254106 | 0.9999537652 | 1.0677352434  |
| 1.2641867543  | 0.6656874377 | 0.9999537652 | 1.3511424844  |
| 1.2525465648  | 0.1724654616 | 0.9999537652 | -1.2957631809 |
| 0             | 0            | 0            | -4.03997453   |
| -1.2657442334 | 0.2930423311 | 0.9999537652 | -1.4856263691 |
| 1.2311598771  | 0.7102269607 | 0.9999537652 | -1.0970546077 |
| -1.0435087147 | 0.8100922284 | 0.9999537652 | -1.1774188036 |
| 1.0085464844  | 0.9655318649 | 0.9999537652 | -1.1454528563 |
| -2.7379437534 | 0.0490319505 | 0.9999537652 | -1.9579945106 |
| 1.041242241   | 0.8291282997 | 0.9999537652 | 1.3481756778  |
| 1.5601465308  | 0.5281513061 | 0.9999537652 | -1.6896885141 |
| 1.0208805207  | 0.9118801733 | 0.9999537652 | -1.0881509333 |

gene\_expression\_table

|               |              |              |               |
|---------------|--------------|--------------|---------------|
| 1.3258696851  | 0.1773089864 | 0.9999537652 | 1.0468359481  |
| -1.3314639657 | 0.2965478945 | 0.9999537652 | -1.0232789571 |
| 1.2098037704  | 0.3496633119 | 0.9999537652 | 1.0920564403  |
| 1.0492989766  | 0.7555626724 | 0.9999537652 | 1.1017664314  |
| -1.3510764862 | 0.099041564  | 0.9999537652 | -1.1481053473 |
| 1.039650522   | 0.8757422377 | 0.9999537652 | -1.1642788485 |
| 0             | 0            | 0            | 2.9985540909  |
| -1.0191902011 | 0.9579402026 | 0.9999537652 | 1.6349942807  |
| -1.0599491199 | 0.7435217596 | 0.9999537652 | 1.3341478871  |
| -1.3390129686 | 0.2472838794 | 0.9999537652 | -1.3416941806 |
| 1.1585815174  | 0.8070043188 | 0.9999537652 | 1.2674474087  |
| -1.1688076322 | 0.4064516576 | 0.9999537652 | 1.0064794219  |
| 1.4268563215  | 0.1629241824 | 0.9999537652 | -1.0272175701 |
| 1.1505026035  | 0.7779726307 | 0.9999537652 | -1.3167013681 |
| 1.5565153735  | 0.3314984628 | 0.9999537652 | -1.6300855198 |
| -1.1334978809 | 0.5320079577 | 0.9999537652 | -1.0886989388 |
| 11.5864583426 | 0.3448001076 | 0.9999537652 | -4.3749565696 |
| 1.6032449232  | 0.6828897941 | 0.9999537652 | 12.7820459093 |
| -1.2498624805 | 0.5553175663 | 0.9999537652 | -1.1741762696 |
| 1.5699684466  | 0.580659408  | 0.9999537652 | 1.4842910408  |
| -1.1260678553 | 0.6737426764 | 0.9999537652 | 1.1702446062  |
| -1.9568017681 | 0.2893502982 | 0.9999537652 | 1.634708435   |
| 0             | 0            | 0            | 4.9527501949  |
| -2.1334087267 | 0.5175920343 | 0.9999537652 | 6.908559683   |
| -2.4479441787 | 0.0367044062 | 0.9999537652 | -1.5447133649 |
| -1.1607129013 | 0.4045394488 | 0.9999537652 | 1.1175385527  |
| 1.3896916952  | 0.5611214357 | 0.9999537652 | 1.7414311168  |
| -1.3361116832 | 0.5027236386 | 0.9999537652 | -1.2442071513 |
| 1.2314060088  | 0.2559164327 | 0.9999537652 | -1.123540661  |
| 0             | 0            | 0            | -2.0460754901 |
| 1.6610722823  | 0.0897734859 | 0.9999537652 | -1.1214982781 |
| 1.1504236229  | 0.7212534383 | 0.9999537652 | 1.1867348035  |
| 3.0834316129  | 0.137675855  | 0.9999537652 | 22.5564546887 |
| 0             | 0            | 0            | 4.9527501949  |
| 1.1615082715  | 0.4539279899 | 0.9999537652 | -1.079940441  |
| 22.1644218026 | 0.2281090536 | 0.9999537652 | -1.7614958461 |
| 2.3315363418  | 0.4569932801 | 0.9999537652 | 1.2149795761  |
| 1.4047998333  | 0.0931232281 | 0.9999537652 | 1.1530409265  |
| -1.0370298509 | 0.7981590775 | 0.9999537652 | -1.1384650592 |
| 4.5545995984  | 0.5696600016 | 0.9999537652 | -1.6826577865 |
| 8.064174035   | 0.4193172572 | 0.9999537652 | 6.908559683   |
| -1.2100887496 | 0.2178547784 | 0.9999537652 | -1.1269152667 |
| 1.0570789238  | 0.7791166667 | 0.9999537652 | -1.2021564776 |
| 1.1691161268  | 0.6180153317 | 0.9999537652 | -1.0026289606 |
| -2.5871290907 | 0.5001060748 | 0.9999537652 | -1.8601323346 |
| -1.067068821  | 0.8485929164 | 0.9999537652 | -1.0767938797 |
| 1.1545761986  | 0.6071043638 | 0.9999537652 | 1.0962904631  |
| 0             | 0            | 0            | -2.2697679462 |
| -1.2449724804 | 0.6767191729 | 0.9999537652 | -1.039597507  |

gene\_expression\_table

|               |              |              |               |
|---------------|--------------|--------------|---------------|
| -1.0619428552 | 0.7844663098 | 0.9999537652 | -1.1150022829 |
| -1.2600796688 | 0.3597958047 | 0.9999537652 | 1.1116180045  |
| 16.8433158146 | 0.2737918885 | 0.9999537652 | 24.5435744105 |
| -1.0198297051 | 0.9636339738 | 0.9999537652 | -1.1106100071 |
| -1.1192700412 | 0.5531385307 | 0.9999537652 | 1.0969084742  |
| 1.2907686534  | 0.4444380185 | 0.9999537652 | -1.0048258875 |
| 1.2575084836  | 0.107962923  | 0.9999537652 | 1.2492845102  |
| 1.0273907875  | 0.8583568005 | 0.9999537652 | 1.0293785551  |
| 1.0236395102  | 0.9367361632 | 0.9999537652 | -1.1680054244 |
| -1.5378473775 | 0.4463996633 | 0.9999537652 | 1.0054017569  |
| 1.0428454802  | 0.8235387148 | 0.9999537652 | -1.1018746942 |
| 9.8205505243  | 0.3812562769 | 0.9999537652 | -1.8601323346 |
| 1.7193609644  | 0.3057486486 | 0.9999537652 | -1.0676303356 |
| -2.5871290907 | 0.5000967645 | 0.9999537652 | 1.4007535733  |
| -1.1770676473 | 0.4819150643 | 0.9999537652 | -1.2732049116 |
| 2.7933974408  | 0.6948713406 | 0.9999537652 | 0             |
| 1.032981085   | 0.8989489842 | 0.9999537652 | 1.0292637479  |
| -1.2470248275 | 0.3876231124 | 0.9999537652 | -1.0424269105 |
| -1.1467684078 | 0.5770087193 | 0.9999537652 | 1.4589831901  |
| 1.2815359084  | 0.1931513171 | 0.9999537652 | 1.3429042969  |
| -1.5778038045 | 0.5472260021 | 0.9999537652 | 1.2773413674  |
| 1.2264638687  | 0.1579185969 | 0.9999537652 | 1.2790406341  |
| -1.9290774189 | 0.6162844244 | 0.9999537652 | 12.7732027325 |
| 0             | 0            | 0            | 0             |
| 1.1857008507  | 0.7275479954 | 0.9999537652 | 1.0722232032  |
| -1.3038112768 | 0.2521719475 | 0.9999537652 | 1.0594211181  |
| -1.4647167555 | 0.0532515948 | 0.9999537652 | -1.3558857238 |
| 2.7933974408  | 0.6948713406 | 0.9999537652 | 0             |
| -1.0308401072 | 0.8401489039 | 0.9999537652 | 1.05872405    |
| -1.0859522881 | 0.5263838918 | 0.9999537652 | -1.0354184459 |
| 1.4709947928  | 0.1546581448 | 0.9999537652 | 1.0396699623  |
| -1.5881166222 | 0.7196088008 | 0.9999537652 | -4.7557826338 |
| 1.2048594181  | 0.6745238692 | 0.9999537652 | -1.3946366495 |
| -1.5867714314 | 0.7161394982 | 0.9999537652 | -2.5808051651 |
| -1.0965736598 | 0.6284010207 | 0.9999537652 | -1.0217300038 |
| 1.0234232714  | 0.934991721  | 0.9999537652 | 1.0862156339  |
| 0             | 0            | 0            | 1.2398837679  |
| 1.2131929555  | 0.3553808445 | 0.9999537652 | -1.109124632  |
| 0             | 0            | 0            | 2.996475627   |
| 2.481077056   | 0.1991577997 | 0.9999537652 | 1.1597107703  |
| -1.8837873194 | 0.3490819291 | 0.9999537652 | -1.2222390237 |
| 1.0464198275  | 0.9215490832 | 0.9999537652 | -1.8186334012 |
| -1.2651992128 | 0.1316702361 | 0.9999537652 | -1.3104582613 |
| -1.0349920834 | 0.8755716003 | 0.9999537652 | -1.0081220711 |
| -1.0425976033 | 0.7787105059 | 0.9999537652 | 1.2433218081  |
| -1.3906298771 | 0.0353257539 | 0.9999537652 | -1.2707902954 |
| -1.0877321833 | 0.8925972361 | 0.9999537652 | -1.1891771074 |
| -1.0158491591 | 0.9406491422 | 0.9999537652 | 1.0415100212  |
| 1.1943767543  | 0.3294204005 | 0.9999537652 | -1.2247525511 |

gene\_expression\_table

|               |              |              |               |
|---------------|--------------|--------------|---------------|
| 1.5014581463  | 0.0293894415 | 0.9999537652 | -1.3031882664 |
| 1.2231451982  | 0.2310652934 | 0.9999537652 | 1.1646150158  |
| -1.0345852564 | 0.7798145022 | 0.9999537652 | 1.0660679311  |
| 1.3064100778  | 0.4689158932 | 0.9999537652 | -1.0747216812 |
| 2.1077739145  | 0.2653322096 | 0.9999537652 | -1.0355383115 |
| -1.4793459569 | 0.2178485357 | 0.9999537652 | -1.0690524939 |
| 0             | 0            | 0            | 9.7116702472  |
| 1.8816342439  | 0.216566109  | 0.9999537652 | 1.228767494   |
| 1.0530778882  | 0.8456091488 | 0.9999537652 | -1.3774005225 |
| 1.2209655098  | 0.213487925  | 0.9999537652 | -1.036112813  |
| 1.0435945408  | 0.87820214   | 0.9999537652 | -1.3109588781 |
| -1.0849393848 | 0.7154511402 | 0.9999537652 | -1.0485371829 |
| -2.9548384089 | 0.3320356365 | 0.9999537652 | 0             |
| -1.0156822469 | 0.9490469311 | 0.9999537652 | -1.9543770932 |
| 8.064174035   | 0.4193233519 | 0.9999537652 | -2.1302390584 |
| 1.0441365929  | 0.8774567076 | 0.9999537652 | 1.263520793   |
| 0             | 0            | 0            | 9.7116702472  |
| -1.2742713741 | 0.741750854  | 0.9999537652 | -1.0595590983 |
| 2.2827468184  | 0.2949241459 | 0.9999537652 | -4.0137283111 |
| 1.3766897199  | 0.1378843191 | 0.9999537652 | 1.2162449357  |
| 2.1527660067  | 0.001218     | 0.9999537652 | 1.0279068361  |
| -1.2041079789 | 0.323304076  | 0.9999537652 | -1.7669610497 |
| -1.6479062862 | 0.2504451174 | 0.9999537652 | -1.1149655531 |
| 1.2792732586  | 0.2044816439 | 0.9999537652 | 1.1272415695  |
| 1.1907196182  | 0.4883574483 | 0.9999537652 | 1.9569263205  |
| -1.1353647453 | 0.6163608574 | 0.9999537652 | -1.3315481694 |
| 1.2955970728  | 0.1914148741 | 0.9999537652 | -1.1989476149 |
| 1.2984791627  | 0.1331481461 | 0.9999537652 | 1.1777778501  |
| -1.207347084  | 0.4103218259 | 0.9999537652 | -1.3236435604 |
| -1.0315434734 | 0.8371232326 | 0.9999537652 | -1.3110157555 |
| -6.9762758667 | 0.2572951647 | 0.9999537652 | 6.908559683   |
| 1.1316185042  | 0.7110613521 | 0.9999537652 | -1.2399398533 |
| -1.1457847193 | 0.9113769398 | 0.9999537652 | 9.7116702472  |
| 1.2096399056  | 0.5646164549 | 0.9999537652 | 1.0727372764  |
| 6.3075231393  | 0.4852412867 | 0.9999537652 | -4.8059548358 |
| -1.4102132064 | 0.4886247623 | 0.9999537652 | -1.3938181653 |
| -1.0606362831 | 0.6956012866 | 0.9999537652 | -1.1298364197 |
| 2.1650257591  | 0.3957180379 | 0.9999537652 | 2.9985540909  |
| 1.2479349758  | 0.2949638421 | 0.9999537652 | -1.0380379978 |
| 1.0499381996  | 0.6673164377 | 0.9999537652 | 1.0912322027  |
| -1.0225789549 | 0.9445092791 | 0.9999537652 | -1.0222204389 |
| 1.043101863   | 0.8638792068 | 0.9999537652 | 1.0222708069  |
| -1.3369663034 | 0.1304068318 | 0.9999537652 | -1.25017036   |
| -1.0044497915 | 0.9907702844 | 0.9999537652 | 1.1823257365  |
| -1.0455798076 | 0.8420779    | 0.9999537652 | -1.6023426764 |
| 1.8686704283  | 0.4506424113 | 0.9999537652 | 1.4195464433  |
| -1.5880958314 | 0.3400877239 | 0.9999537652 | 1.0132271448  |
| -1.270562122  | 0.2753244788 | 0.9999537652 | -1.1795331513 |
| -1.3204269266 | 0.4200643299 | 0.9999537652 | -1.5265388131 |

gene\_expression\_table

|                |              |              |                |
|----------------|--------------|--------------|----------------|
| -3.7785697044  | 0.0502111918 | 0.9999537652 | 2.0230057879   |
| 3.8622037496   | 0.6194029705 | 0.9999537652 | 0              |
| -1.2196401939  | 0.1320431036 | 0.9999537652 | -1.1539340775  |
| -1.2607293934  | 0.6736917417 | 0.9999537652 | -1.0763957721  |
| -2.4377475547  | 0.0160115123 | 0.9999537652 | 1.1330996428   |
| 1.2498870213   | 0.2745204609 | 0.9999537652 | -1.2776170875  |
| 2.4143254621   | 0.1247846832 | 0.9999537652 | 1.8081208762   |
| -1.7293265403  | 0.4355204193 | 0.9999537652 | -1.2809257219  |
| 3.0189841269   | 0.1037183763 | 0.9999537652 | -1.5470541076  |
| 1.0066570173   | 0.9923896849 | 0.9999537652 | -1.5719718188  |
| -17.0527724669 | 0.1063660528 | 0.9999537652 | -1.859280336   |
| -1.2356571081  | 0.0969574853 | 0.9999537652 | -1.0685616283  |
| -1.1418633071  | 0.5237493171 | 0.9999537652 | 1.1783204451   |
| 1.0102613121   | 0.9643936247 | 0.9999537652 | -1.1448643895  |
| 1.1611759353   | 0.4829989044 | 0.9999537652 | -1.0937265607  |
| -1.0268470296  | 0.8868303152 | 0.9999537652 | -1.0211322999  |
| 1.334958699    | 0.3352230142 | 0.9999537652 | -1.378565536   |
| 1.3417664133   | 0.2180465002 | 0.9999537652 | 1.0041849578   |
| -1.3120680583  | 0.3374807224 | 0.9999537652 | 1.0386943992   |
| -1.0132111758  | 0.9430237477 | 0.9999537652 | -1.2018986942  |
| 0              | 0            | 0            | 4.9527501949   |
| -1.0199370498  | 0.8752249717 | 0.9999537652 | 1.1711170835   |
| -1.1451054031  | 0.5255906467 | 0.9999537652 | 1.0156013297   |
| 1.5616557332   | 0.3263259699 | 0.9999537652 | -1.2363599305  |
| -1.010378892   | 0.9810184155 | 0.9999537652 | 1.1279243293   |
| -1.164088214   | 0.3256578925 | 0.9999537652 | -1.2346462956  |
| 1.392424055    | 0.0917604727 | 0.9999537652 | 1.0757666433   |
| -1.2110226476  | 0.6911343772 | 0.9999537652 | 1.6764330611   |
| -1.3044732667  | 0.7563770174 | 0.9999537652 | 1.1591954369   |
| 1.0590049173   | 0.6984952954 | 0.9999537652 | -1.0510870327  |
| 4.5505976667   | 0.5557790267 | 0.9999537652 | 6.908559683    |
| -2.4799918249  | 0.0124168696 | 0.9999537652 | -1.5771444742  |
| 16.8433158146  | 0.2737488288 | 0.9999537652 | 1.2753124274   |
| -2.0066854809  | 0.0726506836 | 0.9999537652 | -1.10558782    |
| -1.2543756335  | 0.0844492408 | 0.9999537652 | -1.3557101564  |
| -3.7442675911  | 0.0497470251 | 0.9999537652 | 1.4856749753   |
| 9.8205505243   | 0.381261333  | 0.9999537652 | -15.5945848976 |
| -1.1284709041  | 0.5380490346 | 0.9999537652 | -1.0869786006  |
| -2.6399157167  | 0.3173634304 | 0.9999537652 | -1.8673517833  |
| 1.1771203451   | 0.395979467  | 0.9999537652 | -1.1316576448  |
| 0              | 0            | 0            | -2.222435925   |
| -1.0085765745  | 0.9587260141 | 0.9999537652 | -1.0768202987  |
| -1.2577124827  | 0.2581963069 | 0.9999537652 | -1.8162844319  |
| 1.0927010352   | 0.6995298987 | 0.9999537652 | -1.1068774857  |
| 1.1001460438   | 0.7460478559 | 0.9999537652 | 1.2671511582   |
| 1.1029820449   | 0.6932844392 | 0.9999537652 | -1.1847361501  |
| -1.0157131754  | 0.9230344106 | 0.9999537652 | -1.0550119014  |
| -1.015161324   | 0.9178886146 | 0.9999537652 | -1.7219734033  |
| 1.4098308678   | 0.3478319002 | 0.9999537652 | -1.0411656692  |



gene\_expression\_table

|               |              |              |               |
|---------------|--------------|--------------|---------------|
| 0             | 0            | 0            | 10.818785458  |
| 0             | 0            | 0            | 4.9527501949  |
| 0             | 0            | 0            | -5.3583704783 |
| 1.3765758161  | 0.544052857  | 0.9999537652 | -1.1256227609 |
| -1.1532512476 | 0.7985494227 | 0.9999537652 | 2.0636487513  |
| 1.8761040358  | 0.2582301484 | 0.9999537652 | -1.393553444  |
| -1.0481751604 | 0.8867066185 | 0.9999537652 | -1.2237436856 |
| -1.1104845875 | 0.4697769365 | 0.9999537652 | 1.0523998732  |
| 1.345923943   | 0.3844384625 | 0.9999537652 | -1.1753043794 |
| 1.1135180875  | 0.5339761643 | 0.9999537652 | 1.1416410478  |
| 1.8373097308  | 0.4508328576 | 0.9999537652 | -2.5401817516 |
| -1.2895081652 | 0.193663793  | 0.9999537652 | 1.0959337861  |
| -1.0330319854 | 0.9253703569 | 0.9999537652 | 1.0366893556  |
| -1.0406514179 | 0.8530789912 | 0.9999537652 | 1.081990147   |
| -1.144585995  | 0.4545167067 | 0.9999537652 | -1.045769983  |
| -1.214822317  | 0.6581178543 | 0.9999537652 | 1.2066463783  |
| 1.6642583336  | 0.2097999134 | 0.9999537652 | -1.1332909573 |
| -1.1361797731 | 0.4710123443 | 0.9999537652 | 1.0772114024  |
| -1.2411090088 | 0.1521071615 | 0.9999537652 | 1.081070195   |
| -1.0593151771 | 0.8215478746 | 0.9999537652 | -1.567703606  |
| -1.5407794824 | 0.1503315494 | 0.9999537652 | -1.2997421261 |
| 1.208704874   | 0.3307084104 | 0.9999537652 | -1.0711267175 |
| 0             | 0            | 0            | 2.9985540909  |
| 0             | 0            | 0            | 1.2400291296  |
| 1.1025279052  | 0.7411250533 | 0.9999537652 | -1.092829959  |
| -1.1039276934 | 0.571996538  | 0.9999537652 | -1.4673057872 |
| 1.1264249507  | 0.7874515889 | 0.9999537652 | 1.5283555043  |
| -2.3929677766 | 0.1709044729 | 0.9999537652 | -1.2860377464 |
| 3.7985791816  | 0.2499436608 | 0.9999537652 | -2.1744673066 |
| 0             | 0            | 0            | 6.908559683   |
| -1.0670788264 | 0.6665896935 | 0.9999537652 | -1.2411495764 |
| 4.5505976667  | 0.5557790267 | 0.9999537652 | -1.3587293308 |
| -1.713314385  | 0.4942542716 | 0.9999537652 | -1.1192843301 |
| -4.5374012562 | 0.0439028396 | 0.9999537652 | -1.1726268366 |
| -2.9548384089 | 0.3320347989 | 0.9999537652 | 3.6971811836  |
| 2.7933974408  | 0.6948713406 | 0.9999537652 | 2.9985540909  |
| 1.1250543471  | 0.6041301734 | 0.9999537652 | 1.0756585411  |
| 1.4899610928  | 0.1469978645 | 0.9999537652 | -1.4322353    |
| 1.029417669   | 0.8207619124 | 0.9999537652 | -1.1229442873 |
| 1.9257237851  | 0.4119406519 | 0.9999537652 | -1.4602762239 |
| -1.1573970448 | 0.3884279219 | 0.9999537652 | -1.1712273957 |
| 1.1394226192  | 0.7235795986 | 0.9999537652 | -1.2385059546 |
| 2.3256471815  | 0.1785262566 | 0.9999537652 | -1.1070345832 |
| -1.2228679769 | 0.1931591571 | 0.9999537652 | -1.3114339991 |
| 1.2043597123  | 0.4011839477 | 0.9999537652 | -1.0129665659 |
| 1.1259226368  | 0.5733641573 | 0.9999537652 | -1.1523081806 |
| 1.1922709584  | 0.290010515  | 0.9999537652 | 1.0738134296  |
| 1.0317763013  | 0.8426344875 | 0.9999537652 | 1.6562393951  |
| -1.2114213602 | 0.4043430392 | 0.9999537652 | 1.0162490856  |

gene\_expression\_table

|               |              |              |               |
|---------------|--------------|--------------|---------------|
| 1.9839653328  | 0.0219418958 | 0.9999537652 | 1.0052110797  |
| 1.2349787261  | 0.3828078129 | 0.9999537652 | 1.3086932652  |
| 0             | 0            | 0            | 1.1354046367  |
| 2.7933974408  | 0.6948713406 | 0.9999537652 | 1.3101765491  |
| -1.0455686368 | 0.875573689  | 0.9999537652 | -1.1125800587 |
| 2.7957660672  | 0.705502207  | 0.9999537652 | -2.6248262166 |
| 1.4029703146  | 0.5259625967 | 0.9999537652 | 1.5010337023  |
| 1.1225627191  | 0.4037246196 | 0.9999537652 | 1.2631810827  |
| 1.1811480828  | 0.5805774794 | 0.9999537652 | -1.6102876173 |
| 8.064174035   | 0.4193294559 | 0.9999537652 | 1.4357352596  |
| 1.3588921917  | 0.799737259  | 0.9999537652 | 10.818785458  |
| -1.2202318239 | 0.7324022135 | 0.9999537652 | -1.0461018666 |
| 1.1236237983  | 0.4259764678 | 0.9999537652 | -1.2619607446 |
| -1.0488824431 | 0.8053778574 | 0.9999537652 | -1.1917520062 |
| 2.7933974408  | 0.6948713406 | 0.9999537652 | -9.7554110723 |
| 2.7933974408  | 0.6948713406 | 0.9999537652 | 0             |
| 6.3128691894  | 0.4808960613 | 0.9999537652 | 0             |
| 11.5766527773 | 0.3453604812 | 0.9999537652 | -2.1294907556 |
| 1.2319279711  | 0.37693661   | 0.9999537652 | -1.6832496079 |
| 1.3154794667  | 0.1498239394 | 0.9999537652 | -1.2384697077 |
| 1.7065609388  | 0.0826933768 | 0.9999537652 | -1.3153603421 |
| -1.1318243716 | 0.5119257692 | 0.9999537652 | 1.0466384416  |
| -1.2393765322 | 0.1751305958 | 0.9999537652 | -1.3043577061 |
| -1.1002525041 | 0.5207087799 | 0.9999537652 | -1.2353178773 |
| -1.4772849924 | 0.1422745918 | 0.9999537652 | -1.1062512672 |
| -1.7155763775 | 0.5413192404 | 0.9999537652 | 2.2942711679  |
| 4.5505976667  | 0.5557790267 | 0.9999537652 | -1.9072087437 |
| -1.0659181843 | 0.6261836128 | 0.9999537652 | -1.1438406256 |
| 1.1763867606  | 0.5431205597 | 0.9999537652 | 1.1258456249  |
| 1.7385979073  | 0.3109535202 | 0.9999537652 | -1.8122170016 |
| 1.0174927746  | 0.9415196219 | 0.9999537652 | -1.1587235065 |
| 1.1162834585  | 0.9273396232 | 0.9999537652 | 10.8337816869 |
| 8.064174035   | 0.4193355693 | 0.9999537652 | 1.590997316   |
| -1.5473884214 | 0.1316467169 | 0.9999537652 | -1.4665734572 |
| 1.4051186348  | 0.0768603959 | 0.9999537652 | 1.2093502298  |
| -1.3137642683 | 0.6668299424 | 0.9999537652 | -1.2102268229 |
| 4.5505976667  | 0.5557790267 | 0.9999537652 | 33.3754495834 |
| -1.5783503792 | 0.5297238837 | 0.9999537652 | -1.616488444  |
| -2.065175426  | 0.2150273517 | 0.9999537652 | -1.0466447002 |
| -1.9702891638 | 0.0798160463 | 0.9999537652 | 1.0039139339  |
| -1.1011409245 | 0.5697092134 | 0.9999537652 | -1.2278578401 |
| 0             | 0            | 0            | 1.7042814026  |
| 1.8357580406  | 0.0278021424 | 0.9999537652 | 1.2575807613  |
| 7.6841730958  | 0.0528755818 | 0.9999537652 | -1.1618546036 |
| -1.1139243258 | 0.3756516541 | 0.9999537652 | -1.1283332336 |
| 1.2342967253  | 0.7628312814 | 0.9999537652 | -1.1088878398 |
| 6.3130691196  | 0.4798469433 | 0.9999537652 | -2.1294907556 |
| 1.17757233    | 0.3600702569 | 0.9999537652 | 1.1092867724  |
| 4.5545995984  | 0.5696579243 | 0.9999537652 | 9.7116702472  |

gene\_expression\_table

|               |              |              |               |
|---------------|--------------|--------------|---------------|
| 1.3154484946  | 0.2316375261 | 0.9999537652 | 1.0199059729  |
| 4.5505976667  | 0.5557790267 | 0.9999537652 | -3.3822687648 |
| 1.5797041712  | 0.0206424265 | 0.9999537652 | 1.0316867166  |
| -1.5749738312 | 0.284495083  | 0.9999537652 | -1.8436572032 |
| 2.3077154233  | 0.2685512486 | 0.9999537652 | 1.2283827455  |
| 0             | 0            | 0            | 1.4514511122  |
| -1.4431747638 | 0.3202592949 | 0.9999537652 | -1.4159530023 |
| -1.3129493191 | 0.1060663274 | 0.9999537652 | -1.1002063844 |
| -1.3070344795 | 0.3699780667 | 0.9999537652 | -1.0828575686 |
| 1.1041992656  | 0.5426916107 | 0.9999537652 | -1.0814952784 |
| -2.5861438062 | 0.4721076244 | 0.9999537652 | -2.6399253151 |
| 1.6200274653  | 0.1445362676 | 0.9999537652 | 1.0032699964  |
| 1.0220442395  | 0.9630983943 | 0.9999537652 | -1.366228589  |
| 0             | 0            | 0            | 0             |
| -1.0089195645 | 0.9925494358 | 0.9999537652 | 1.3561873216  |
| -1.8237103933 | 0.5664269327 | 0.9999537652 | -1.649233751  |
| -1.7569468604 | 0.0933338279 | 0.9999537652 | -1.3266223117 |
| -1.5437484553 | 0.2083675897 | 0.9999537652 | 1.0706429242  |
| -1.003882893  | 0.9883992714 | 0.9999537652 | -1.0846844381 |
| -1.4574462276 | 0.3272496935 | 0.9999537652 | -1.7240293712 |
| 1.2386374862  | 0.1880530826 | 0.9999537652 | -1.2275731672 |
| -1.3611809183 | 0.660749763  | 0.9999537652 | -1.0296106127 |
| -1.0048668959 | 0.9812028488 | 0.9999537652 | 1.1431506756  |
| 1.3347485961  | 0.0698637007 | 0.9999537652 | 1.0928060342  |
| -1.3917747917 | 0.6970489516 | 0.9999537652 | -1.4706174584 |
| 2.0885615936  | 0.5188097351 | 0.9999537652 | 1.4527805491  |
| 1.1812385199  | 0.1425927911 | 0.9999537652 | 1.2212962458  |
| -1.040046278  | 0.8633741762 | 0.9999537652 | -1.0293235933 |
| 3.6560415165  | 0.0350336184 | 0.9999537652 | 1.0075827047  |
| 0             | 0            | 0            | 0             |
| 1.3832036905  | 0.7447508225 | 0.9999537652 | -1.1204482161 |
| 1.1168981342  | 0.6024939848 | 0.9999537652 | 1.0371481598  |
| -1.2125935268 | 0.7139683215 | 0.9999537652 | 1.5070950561  |
| 1.1057535685  | 0.6980353007 | 0.9999537652 | 1.0965873212  |
| 2.7933974408  | 0.6948713406 | 0.9999537652 | -2.2275543816 |
| 0             | 0            | 0            | 6.908559683   |
| 0             | 0            | 0            | 2.996475627   |
| -1.070697391  | 0.7101742083 | 0.9999537652 | -1.2380109474 |
| 0             | 0            | 0            | 12.7820459093 |
| 1.8900501345  | 0.0637304322 | 0.9999537652 | 1.7863340122  |
| 1.2152319459  | 0.2921953334 | 0.9999537652 | -1.021906891  |
| -1.261684088  | 0.6951476887 | 0.9999537652 | 1.3066084358  |
| 27.4155731128 | 0.1963476416 | 0.9999537652 | -1.3876714084 |
| 9.8205505243  | 0.3812663801 | 0.9999537652 | 0             |
| -4.3214691297 | 0.1498150591 | 0.9999537652 | 12.7820459093 |
| 1.5618236382  | 0.4052027396 | 0.9999537652 | 1.0090123198  |
| -1.0274047275 | 0.9108363187 | 0.9999537652 | -1.0773432321 |
| 3.0602334741  | 0.3280640279 | 0.9999537652 | 3.1847673229  |
| 1.1350793029  | 0.5036453881 | 0.9999537652 | 1.046744879   |

gene\_expression\_table

|               |              |              |               |
|---------------|--------------|--------------|---------------|
| -1.1342259121 | 0.6632388034 | 0.9999537652 | -1.1325438164 |
| 2.7933974408  | 0.6948713406 | 0.9999537652 | 0             |
| 3.0590680122  | 0.3354937932 | 0.9999537652 | 22.424363668  |
| 1.0785304702  | 0.7400926007 | 0.9999537652 | 1.1072320158  |
| 1.8615850356  | 0.0007879    | 0.9999537652 | -1.2057380758 |
| 2.3315363418  | 0.4571079906 | 0.9999537652 | -1.5289664635 |
| 1.1225440058  | 0.5933175895 | 0.9999537652 | -1.3082795106 |
| -1.1378669652 | 0.4633405051 | 0.9999537652 | -1.017279228  |
| 1.0358174347  | 0.8707262662 | 0.9999537652 | 1.1132979619  |
| 1.1271822705  | 0.696000932  | 0.9999537652 | 1.2273233034  |
| -1.2874099099 | 0.2156395149 | 0.9999537652 | -1.0958479888 |
| -1.0025664452 | 0.9828788022 | 0.9999537652 | 1.0179357948  |
| 1.1132252094  | 0.7570251326 | 0.9999537652 | -1.0764252542 |
| 2.0539087089  | 0.1034438612 | 0.9999537652 | 1.0520849078  |
| 0             | 0            | 0            | 10.818785458  |
| 1.6783510795  | 0.0331886958 | 0.9999537652 | 1.0493849037  |
| 1.0217691486  | 0.9051516279 | 0.9999537652 | -1.366962936  |
| 1.1007449551  | 0.6637639136 | 0.9999537652 | 1.1286045855  |
| 1.3278551105  | 0.1755529553 | 0.9999537652 | -1.1212516947 |
| -1.4479386307 | 0.044979365  | 0.9999537652 | 1.0662499599  |
| 1.1059703615  | 0.7632206757 | 0.9999537652 | -1.1425153632 |
| -1.1343361967 | 0.5506079848 | 0.9999537652 | -1.3697880257 |
| 1.0455120441  | 0.8935559769 | 0.9999537652 | 1.1412925518  |
| -1.3632333972 | 0.1976959166 | 0.9999537652 | -1.000491132  |
| -1.0518507437 | 0.8714302116 | 0.9999537652 | -1.0162859083 |
| 1.3473247044  | 0.5156250212 | 0.9999537652 | -1.4097915498 |
| -1.8462877751 | 0.3514459803 | 0.9999537652 | -1.106512183  |
| -1.7135297713 | 0.2033277488 | 0.9999537652 | -1.3261191407 |
| 2.8279434874  | 0.0884588012 | 0.9999537652 | 1.0014601474  |
| 1.0794086068  | 0.8103717937 | 0.9999537652 | -1.3406927006 |
| 6.3075231393  | 0.4852317874 | 0.9999537652 | 4.0510214676  |
| -1.1004355672 | 0.6384500706 | 0.9999537652 | 1.1344998886  |
| -1.0513856881 | 0.8410598082 | 0.9999537652 | -1.0595443462 |
| -1.1880775569 | 0.5391318769 | 0.9999537652 | 1.0122145576  |
| -1.4531411845 | 0.6040252215 | 0.9999537652 | 1.3988325769  |
| -1.0272270355 | 0.9188219939 | 0.9999537652 | 1.189863323   |
| -1.0911433338 | 0.7392100051 | 0.9999537652 | 1.4941039635  |
| 1.0184031377  | 0.9544259811 | 0.9999537652 | 1.3274266497  |
| 1.6754456997  | 0.4292795127 | 0.9999537652 | -1.3590484476 |
| -1.0681648186 | 0.8667077161 | 0.9999537652 | -2.7352741074 |
| -1.5069259724 | 0.1708941601 | 0.9999537652 | -1.6119944413 |
| -1.1457847193 | 0.9115501622 | 0.9999537652 | 2.996475627   |
| -2.0058375128 | 0.1046722166 | 0.9999537652 | 1.7148712287  |
| -1.5881166222 | 0.7196052286 | 0.9999537652 | -2.2809262314 |
| -1.0465915848 | 0.8435670874 | 0.9999537652 | 1.3985782511  |
| -1.0619267211 | 0.9009311065 | 0.9999537652 | 1.2811802077  |
| 2.0354520887  | 0.4471243048 | 0.9999537652 | -2.0467835026 |
| 2.2186454522  | 0.2011907431 | 0.9999537652 | -1.2524890471 |
| -1.0469169629 | 0.9634396732 | 0.9999537652 | -1.3307652929 |

gene\_expression\_table

|               |              |              |               |
|---------------|--------------|--------------|---------------|
| -2.1307903719 | 0.4719402534 | 0.9999537652 | 1.4127221338  |
| 4.5505976667  | 0.5557790267 | 0.9999537652 | 4.9561842702  |
| 0             | 0            | 0            | 2.996475627   |
| 0             | 0            | 0            | 2.9988886918  |
| -1.346787305  | 0.4562749508 | 0.9999537652 | 1.1800101661  |
| -1.968160983  | 0.0310227399 | 0.9999537652 | 1.1300568683  |
| 0             | 0            | 0            | 33.3754495834 |
| 1.1162834585  | 0.9274601222 | 0.9999537652 | 0             |
| -1.0478369715 | 0.7479754904 | 0.9999537652 | -1.2742820457 |
| -1.7432752692 | 0.4032918419 | 0.9999537652 | -1.2500975743 |
| 1.054362661   | 0.8383353599 | 0.9999537652 | 1.0405332398  |
| 1.1683700158  | 0.4441430442 | 0.9999537652 | -1.0709738031 |
| 46.6807036647 | 0.1309531656 | 0.9999537652 | 1.6303647068  |
| 1.1418371148  | 0.4430620805 | 0.9999537652 | -1.1583004765 |
| 2.2760937505  | 0.2561300108 | 0.9999537652 | 1.2071735423  |
| -1.2265853195 | 0.1045778743 | 0.9999537652 | -1.1376221827 |
| 1.3407294023  | 0.1134917926 | 0.9999537652 | 1.2958251832  |
| -1.953078177  | 0.1020444953 | 0.9999537652 | -1.4078044981 |
| -1.0045532804 | 0.9813349354 | 0.9999537652 | -1.322048517  |
| 3.3058503755  | 0.2779758097 | 0.9999537652 | -1.3069793515 |
| 2.0642641853  | 0.0476652242 | 0.9999537652 | 1.007250981   |
| 0             | 0            | 0            | 0             |
| -1.1285043416 | 0.4844812468 | 0.9999537652 | -1.2549749233 |
| -2.0435859602 | 0.2729222297 | 0.9999537652 | 1.1119016458  |
| 1.3057267165  | 0.6334500042 | 0.9999537652 | -1.8758407561 |
| 1.0947414544  | 0.6152839268 | 0.9999537652 | -1.1005854725 |
| -1.1511107936 | 0.6526280022 | 0.9999537652 | 1.0183472457  |
| 1.6017137321  | 0.5052569949 | 0.9999537652 | -2.1800718368 |
| 1.0345456238  | 0.9701489939 | 0.9999537652 | -1.4229595386 |
| -1.1052756593 | 0.6403761198 | 0.9999537652 | -1.3662487148 |
| -1.2732611382 | 0.1456586417 | 0.9999537652 | -1.2342315982 |
| 1.8464200217  | 0.5964582209 | 0.9999537652 | 1.1256010339  |
| -1.1948881021 | 0.4745291684 | 0.9999537652 | -1.2907313712 |
| 1.4650376402  | 0.5859643184 | 0.9999537652 | -1.5052536245 |
| 1.0970968203  | 0.6482464744 | 0.9999537652 | 1.1803377277  |
| -1.1337697354 | 0.5702200452 | 0.9999537652 | -1.0483733223 |
| -1.2101741221 | 0.4250470731 | 0.9999537652 | -1.4170877758 |
| 3.6274675349  | 0.062661038  | 0.9999537652 | -1.3365115701 |
| -1.1170265702 | 0.5481868017 | 0.9999537652 | 1.3486513305  |
| 1.1242358844  | 0.8721387441 | 0.9999537652 | 1.191154938   |
| -3.2724810761 | 0.1892285141 | 0.9999537652 | -1.047728856  |
| 1.0450406427  | 0.8917247236 | 0.9999537652 | -1.3244605112 |
| 1.0402380815  | 0.9149863326 | 0.9999537652 | -1.0168547654 |
| -1.0222894065 | 0.9447608703 | 0.9999537652 | -1.0558263916 |
| 1.3498440135  | 0.1933889798 | 0.9999537652 | 1.0542836883  |
| 1.0513712786  | 0.8884915418 | 0.9999537652 | 1.1368268503  |
| -1.7856811462 | 0.0816335863 | 0.9999537652 | -1.1526541247 |
| 0             | 0            | 0            | 20.6004768562 |
| -2.4619996563 | 0.1413460529 | 0.9999537652 | -1.4090385426 |

gene\_expression\_table

|               |              |              |               |
|---------------|--------------|--------------|---------------|
| 1.63824064    | 0.1288061846 | 0.9999537652 | -1.3224177195 |
| 2.7933974408  | 0.6948713406 | 0.9999537652 | 0             |
| -1.0213574992 | 0.8912072113 | 0.9999537652 | -1.018355381  |
| -1.0113316251 | 0.9513295426 | 0.9999537652 | -1.0940162591 |
| 2.0123068682  | 0.095779085  | 0.9999537652 | 1.2866242178  |
| 1.1537725945  | 0.7050030658 | 0.9999537652 | -1.1828579189 |
| -1.0681293201 | 0.8042453782 | 0.9999537652 | -1.0309690345 |
| -1.7562484372 | 0.2082375399 | 0.9999537652 | 1.0088782704  |
| 1.383157405   | 0.7358556793 | 0.9999537652 | 1.0666207935  |
| 1.0190248587  | 0.9233308807 | 0.9999537652 | -1.0724420454 |
| 1.1384004922  | 0.5270511873 | 0.9999537652 | 1.2020665003  |
| 2.7933974408  | 0.6948713406 | 0.9999537652 | -2.7911910562 |
| -1.0540356878 | 0.7082080483 | 0.9999537652 | 1.0131547836  |
| 1.0469035417  | 0.8210274951 | 0.9999537652 | -1.0209863603 |
| 1.1222280161  | 0.9093250984 | 0.9999537652 | -1.7642364482 |
| 1.2300465216  | 0.408886445  | 0.9999537652 | 1.1981906556  |
| -1.01501261   | 0.9505199001 | 0.9999537652 | -1.0553460161 |
| -1.0904097914 | 0.7306392535 | 0.9999537652 | 1.0800630199  |
| -1.02571069   | 0.9167627597 | 0.9999537652 | -1.147805551  |
| 2.9503019035  | 0.2026001842 | 0.9999537652 | -1.6731571458 |
| -1.3377354311 | 0.3157103065 | 0.9999537652 | 1.017263506   |
| 2.1324144008  | 0.1810798079 | 0.9999537652 | 1.1498623554  |
| -1.1427778392 | 0.6932194056 | 0.9999537652 | 1.2895122884  |
| 1.1543555604  | 0.5186048315 | 0.9999537652 | -1.7172902327 |
| -1.046888968  | 0.7477368737 | 0.9999537652 | -1.0870376858 |
| -1.1053764341 | 0.599254403  | 0.9999537652 | -1.0932685909 |
| 1.0887865237  | 0.5546575928 | 0.9999537652 | 1.1228074594  |
| 0             | 0            | 0            | 2.996475627   |
| 1.0199396468  | 0.9460299257 | 0.9999537652 | -1.0800440071 |
| 0             | 0            | 0            | 0             |
| 1.3159538127  | 0.1190906353 | 0.9999537652 | 1.0950264229  |
| 4.5505976667  | 0.5557790267 | 0.9999537652 | -1.6624136632 |
| 1.2754757452  | 0.6085797021 | 0.9999537652 | 1.5893507858  |
| 1.1134440428  | 0.3954590699 | 0.9999537652 | 1.0177269216  |
| -1.3806680149 | 0.0765388777 | 0.9999537652 | -1.3130578669 |
| 1.1086291888  | 0.673056313  | 0.9999537652 | -1.2945775116 |
| 11.5864583426 | 0.3447824979 | 0.9999537652 | -1.9360727542 |
| 0             | 0            | 0            | -1.1242401582 |
| 2.701471957   | 0.2702272836 | 0.9999537652 | -1.4346156636 |
| 1.0273120224  | 0.8612440592 | 0.9999537652 | 2.0203657024  |
| 3.1209897832  | 0.0161429559 | 0.9999537652 | 1.9326334757  |
| 15.1008094413 | 0.2915801219 | 0.9999537652 | 8.8639046058  |
| 2.9458943806  | 0.0139292031 | 0.9999537652 | 1.4181845008  |
| 1.6962523591  | 0.4352556217 | 0.9999537652 | -1.2846638916 |
| -1.1298702821 | 0.650858824  | 0.9999537652 | 1.0571239172  |
| -1.1050841704 | 0.738800059  | 0.9999537652 | 1.089851134   |
| 1.3747748923  | 0.1479652789 | 0.9999537652 | 1.1059389326  |
| 2.4994474338  | 0.1264476835 | 0.9999537652 | -1.2389082909 |
| -1.2717832802 | 0.7774354067 | 0.9999537652 | 2.4881108915  |

gene\_expression\_table

|               |              |              |               |
|---------------|--------------|--------------|---------------|
| -1.6844643939 | 0.1141540222 | 0.9999537652 | 1.1588655246  |
| 18.5983228161 | 0.2588999519 | 0.9999537652 | 1.2125664034  |
| 1.7371865656  | 0.4486353557 | 0.9999537652 | 1.2776901668  |
| 1.0457666265  | 0.8411081061 | 0.9999537652 | -1.0463267697 |
| 1.3588921917  | 0.7996041584 | 0.9999537652 | -2.7864308214 |
| -1.4841110134 | 0.3734004535 | 0.9999537652 | -1.2414239924 |
| -1.5990709095 | 0.3460143768 | 0.9999537652 | 1.0257700707  |
| 1.80267916    | 0.4093718283 | 0.9999537652 | 2.1548787182  |
| -1.5102607004 | 0.0351109537 | 0.9999537652 | -1.1135364169 |
| 11.5766527773 | 0.3453724053 | 0.9999537652 | -1.6210814782 |
| 1.1612717392  | 0.3350069669 | 0.9999537652 | 1.03514426    |
| 1.3069608346  | 0.73779073   | 0.9999537652 | 2.4810553188  |
| 1.06078406    | 0.7024707728 | 0.9999537652 | -1.0229287615 |
| 1.9156018173  | 0.300588126  | 0.9999537652 | 1.1126092251  |
| 9.8205505243  | 0.3816478295 | 0.9999537652 | -1.221605188  |
| 2.7957660672  | 0.7055045776 | 0.9999537652 | 2.996475627   |
| 2.5705379464  | 0.0188934062 | 0.9999537652 | 1.1927603811  |
| 5.6954555782  | 0.003474     | 0.9999537652 | 3.3172145292  |
| 4.2651728822  | 0.001788     | 0.9999537652 | 1.3615461777  |
| 2.8162276504  | 0.366827699  | 0.9999537652 | -2.9704130837 |
| -6.9762758667 | 0.2572121796 | 0.9999537652 | 2.2926838869  |
| -1.1273035988 | 0.4250441749 | 0.9999537652 | -1.0273124493 |
| 1.1600132444  | 0.6069677958 | 0.9999537652 | -1.0168943843 |
| -1.03975212   | 0.8525472231 | 0.9999537652 | 1.0044624578  |
| 1.0990780746  | 0.5780759642 | 0.9999537652 | 1.221395586   |
| 1.737981082   | 0.161613865  | 0.9999537652 | 1.0430641248  |
| -1.8590077338 | 0.0870649945 | 0.9999537652 | -1.2120560827 |
| 1.0599363666  | 0.7130139276 | 0.9999537652 | -1.1992998236 |
| -1.0860286715 | 0.7018497481 | 0.9999537652 | 1.1177445677  |
| -1.3306509057 | 0.2407273136 | 0.9999537652 | -1.0255575343 |
| 1.4465266046  | 0.2016454056 | 0.9999537652 | -1.2372447455 |
| 1.002202007   | 0.9922829549 | 0.9999537652 | 1.2057107994  |
| -1.1440835562 | 0.5228302509 | 0.9999537652 | 1.0730330732  |
| 0             | 0            | 0            | 2.996475627   |
| -2.0042093694 | 0.4615758655 | 0.9999537652 | -1.1636261403 |
| 1.1621704408  | 0.7343927337 | 0.9999537652 | -1.3287663901 |
| 0             | 0            | 0            | 16.7037438866 |
| 1.1041811368  | 0.6349566373 | 0.9999537652 | 1.1627002836  |
| 1.0067443913  | 0.9758270117 | 0.9999537652 | -1.1546099183 |
| -1.5419520715 | 0.3264857969 | 0.9999537652 | -1.2001233495 |
| 20.3530564257 | 0.2430051447 | 0.9999537652 | -1.0008261553 |
| -1.5159463026 | 0.0205505456 | 0.9999537652 | -1.1626627647 |
| 1.8004822351  | 0.2735802704 | 0.9999537652 | -1.5633885455 |
| -1.0532663664 | 0.8158126567 | 0.9999537652 | -1.0796574466 |
| -1.2514084948 | 0.2267340049 | 0.9999537652 | -1.0485520336 |
| 16.296263041  | 0.2962347823 | 0.9999537652 | -1.466151735  |
| -1.1763671393 | 0.4339658541 | 0.9999537652 | 1.3306437674  |
| 1.0466181378  | 0.8120309901 | 0.9999537652 | 1.2876608444  |
| -1.0155937669 | 0.9480379185 | 0.9999537652 | 1.063304543   |

gene\_expression\_table

|               |              |              |                |
|---------------|--------------|--------------|----------------|
| 0             | 0            | 0            | 1.1333153721   |
| 1.1543216269  | 0.2541522921 | 0.9999537652 | 1.1655530138   |
| -1.0899107906 | 0.5111774664 | 0.9999537652 | -1.3047129738  |
| 2.3306483975  | 0.4661126935 | 0.9999537652 | 1.0666207935   |
| -1.1457555741 | 0.9106210146 | 0.9999537652 | -1.8290769175  |
| 0             | 0            | 0            | 4.9527501949   |
| 16.8433158146 | 0.2737655673 | 0.9999537652 | -1.4683576122  |
| 1.0536604232  | 0.6576492353 | 0.9999537652 | 1.1142435764   |
| 2.0056634044  | 0.1423428125 | 0.9999537652 | 1.1490567045   |
| -1.3751395195 | 0.0774366041 | 0.9999537652 | 1.0148236347   |
| -1.7787002326 | 0.001825     | 0.9999537652 | -1.0315227857  |
| 0             | 0            | 0            | 2.996475627    |
| 1.4063986972  | 0.0606552986 | 0.9999537652 | -1.3119566425  |
| 2.3335098933  | 0.4401826908 | 0.9999537652 | -1.1241083699  |
| 1.839484446   | 0.2645089588 | 0.9999537652 | -1.1387671852  |
| 1.0876049784  | 0.7711459915 | 0.9999537652 | -1.0759801931  |
| 0             | 0            | 0            | 2.9985540909   |
| 6.3075231393  | 0.4852222955 | 0.9999537652 | -1.7809308717  |
| 2.8162992884  | 0.3667120061 | 0.9999537652 | -1.0942329492  |
| 1.1677464601  | 0.6392231997 | 0.9999537652 | -1.3407836056  |
| -2.5861438062 | 0.4732359327 | 0.9999537652 | 44.0115004274  |
| 0             | 0            | 0            | 0              |
| 1.0557507578  | 0.6751093692 | 0.9999537652 | -1.2821701016  |
| 4.5505976667  | 0.5557790267 | 0.9999537652 | 0              |
| 1.5969197685  | 0.0121216223 | 0.9999537652 | -1.4763747302  |
| -1.1114910845 | 0.5807251282 | 0.9999537652 | 1.069876727    |
| -1.2177113287 | 0.1859984715 | 0.9999537652 | 1.0253324604   |
| -1.0908276674 | 0.6718033531 | 0.9999537652 | -1.1396370742  |
| 8.064174035   | 0.4193416922 | 0.9999537652 | 22.5383525416  |
| 1.0194909176  | 0.9152168645 | 0.9999537652 | -1.0471259868  |
| 1.0369656959  | 0.8340166371 | 0.9999537652 | -1.0000012186  |
| -1.2377843894 | 0.6093826736 | 0.9999537652 | -1.3350229505  |
| -1.0230277198 | 0.857115768  | 0.9999537652 | -1.0057990478  |
| 1.2911318369  | 0.6968318206 | 0.9999537652 | 1.1159520636   |
| 4.5505976667  | 0.5557790267 | 0.9999537652 | 3.7228836277   |
| -1.3697196358 | 0.7436595474 | 0.9999537652 | 2.996475627    |
| -1.1848732952 | 0.281527617  | 0.9999537652 | -1.0519660874  |
| 0             | 0            | 0            | 6.908559683    |
| 2.7957660672  | 0.7055069491 | 0.9999537652 | 0              |
| -1.0543047174 | 0.7599053367 | 0.9999537652 | -1.1702006067  |
| -2.4409066979 | 0.0157049425 | 0.9999537652 | 1.1014119819   |
| 0             | 0            | 0            | 2.996475627    |
| -1.2689832482 | 0.3359471239 | 0.9999537652 | 3.2731217557   |
| -2.8606942226 | 0.1090460506 | 0.9999537652 | -12.0476907974 |
| 1.0524988558  | 0.6770562046 | 0.9999537652 | 1.1106426934   |
| 1.2154426353  | 0.5667666207 | 0.9999537652 | -1.16496205    |
| -1.0899406675 | 0.6910372511 | 0.9999537652 | -1.136175307   |
| 0             | 0            | 0            | 1.2277336482   |
| 1.6692396298  | 0.1212130209 | 0.9999537652 | 1.2003199654   |



gene\_expression\_table

|                |              |              |               |
|----------------|--------------|--------------|---------------|
| 2.7933974408   | 0.6948713406 | 0.9999537652 | 4.9567375629  |
| -1.5989325897  | 0.1096827162 | 0.9999537652 | 1.0456781294  |
| -1.2217199882  | 0.1245797247 | 0.9999537652 | -1.1576683914 |
| -3.1190154029  | 0.2770687298 | 0.9999537652 | -1.1599986346 |
| -1.0301002711  | 0.8433618254 | 0.9999537652 | -1.1797958323 |
| -1.0052760915  | 0.9894664973 | 0.9999537652 | -1.2585898004 |
| -1.0656346646  | 0.8147681085 | 0.9999537652 | -1.1695895831 |
| 2.7933974408   | 0.6948713406 | 0.9999537652 | 2.996475627   |
| 1.5259976099   | 0.0680113431 | 0.9999537652 | -1.546339139  |
| 0              | 0            | 0            | 2.996475627   |
| 1.4210838424   | 0.0348187149 | 0.9999537652 | -1.7060576568 |
| -1.5875118025  | 0.7201580292 | 0.9999537652 | 20.6027844127 |
| 2.7933974408   | 0.6948713406 | 0.9999537652 | -1.1606649125 |
| 1.1812620667   | 0.6386954592 | 0.9999537652 | -1.1010701503 |
| -1.7239935755  | 0.0972538552 | 0.9999537652 | 1.1045138456  |
| 1.1028881939   | 0.6981415636 | 0.9999537652 | -1.223676494  |
| 1.2559353002   | 0.35037501   | 0.9999537652 | -1.1473970482 |
| 1.1162834585   | 0.9277159244 | 0.9999537652 | -1.8594983184 |
| -1.1039491595  | 0.6726255246 | 0.9999537652 | -1.1470625326 |
| 3.1875904576   | 0.0323072714 | 0.9999537652 | -1.1088528593 |
| -1.190387193   | 0.3312486124 | 0.9999537652 | -1.0978619391 |
| 1.2949104594   | 0.365808996  | 0.9999537652 | 1.5963482859  |
| 0              | 0            | 0            | -2.4096087603 |
| -1.5650679954  | 0.1541124997 | 0.9999537652 | -1.1641581635 |
| 1.2992021391   | 0.2371721661 | 0.9999537652 | 1.1745119525  |
| 3.8622037496   | 0.619341334  | 0.9999537652 | 0             |
| -1.387029126   | 0.5046458487 | 0.9999537652 | 1.0506525768  |
| -1.161430603   | 0.8783984966 | 0.9999537652 | 1.3961707382  |
| 2.3326360255   | 0.4521370209 | 0.9999537652 | -1.316866097  |
| 2.2674233494   | 0.1898486642 | 0.9999537652 | 1.0948982875  |
| -1.0121266589  | 0.9503324809 | 0.9999537652 | 1.0097969468  |
| -4.3217318489  | 0.1708182022 | 0.9999537652 | -1.158117308  |
| 1.0438066479   | 0.8664921502 | 0.9999537652 | -1.2028165095 |
| -1.0195651651  | 0.9279617129 | 0.9999537652 | -1.2738053713 |
| 1.5659221626   | 0.3961885671 | 0.9999537652 | 1.314719452   |
| 1.058142182    | 0.7209152455 | 0.9999537652 | -1.0776164224 |
| -17.0527724669 | 0.1063548552 | 0.9999537652 | -1.3590484476 |
| -2.1326506013  | 0.4631645182 | 0.9999537652 | -1.0338466263 |
| 0              | 0            | 0            | 4.9561842702  |
| 1.0168611786   | 0.93290619   | 0.9999537652 | -1.1013467357 |
| 22.1075168104  | 0.2295008652 | 0.9999537652 | -1.9620219724 |
| -1.7176229898  | 0.5174147387 | 0.9999537652 | 3.4611114442  |
| -1.2649652647  | 0.4310966757 | 0.9999537652 | -1.4932385963 |
| 1.0367300283   | 0.7764224752 | 0.9999537652 | 1.0282268827  |
| 11.5766527773  | 0.3453843422 | 0.9999537652 | -1.4286012664 |
| -1.0937621337  | 0.4891450831 | 0.9999537652 | -1.2078102484 |
| -1.0299628598  | 0.8629764745 | 0.9999537652 | 1.3082566609  |
| 1.0080937575   | 0.9697128826 | 0.9999537652 | 1.1600397245  |
| -1.0754922775  | 0.8699612824 | 0.9999537652 | 1.2696468831  |

gene\_expression\_table

|               |              |              |               |
|---------------|--------------|--------------|---------------|
| -1.0663320497 | 0.8897806168 | 0.9999537652 | -1.2235634669 |
| -1.2438524431 | 0.5002728272 | 0.9999537652 | -1.3512838194 |
| -1.3047656289 | 0.4847595586 | 0.9999537652 | 1.5875171767  |
| 1.4218452648  | 0.1483491389 | 0.9999537652 | -1.0152102617 |
| 0             | 0            | 0            | 2.9985540909  |
| 18.5983228161 | 0.2588803694 | 0.9999537652 | -1.3445118518 |
| -1.8012851692 | 0.2031318419 | 0.9999537652 | -1.2595893966 |
| 1.0900268301  | 0.7331241983 | 0.9999537652 | 1.0557461212  |
| -1.3451228325 | 0.3171990737 | 0.9999537652 | 1.0091017354  |
| -1.211949769  | 0.6069438586 | 0.9999537652 | 1.085874827   |
| -1.468246697  | 0.2989237541 | 0.9999537652 | 1.7249496821  |
| -1.6322470252 | 0.3724814928 | 0.9999537652 | -1.9313985451 |
| 2.2885357703  | 0.2771135587 | 0.9999537652 | 1.3106201703  |
| 1.118417687   | 0.7504042898 | 0.9999537652 | -1.1199226122 |
| -1.1060323543 | 0.6099505415 | 0.9999537652 | -1.811449099  |
| 1.2531151052  | 0.1265882593 | 0.9999537652 | -1.2157291683 |
| 13.3324809638 | 0.3193505869 | 0.9999537652 | 2.6452318482  |
| 1.2393646862  | 0.2826186877 | 0.9999537652 | 1.0792247985  |
| 1.2565549207  | 0.2408121205 | 0.9999537652 | -1.2193996967 |
| -1.2922465961 | 0.3812300655 | 0.9999537652 | -1.1845953322 |
| 1.1224466517  | 0.5808666328 | 0.9999537652 | -1.0001468923 |
| -1.6006511709 | 0.3244533117 | 0.9999537652 | -1.3860350062 |
| 1.3025788871  | 0.7330718572 | 0.9999537652 | 1.4012418682  |
| -1.2054828867 | 0.3685891572 | 0.9999537652 | 1.4459939108  |
| -1.1778378824 | 0.6248772099 | 0.9999537652 | -1.5801387112 |
| -6.5296045739 | 0.1275936128 | 0.9999537652 | -1.4371079004 |
| 0             | 0            | 0            | -1.1124408841 |
| -1.884506258  | 0.3396400481 | 0.9999537652 | -1.7284443593 |
| -1.1930553883 | 0.3393180569 | 0.9999537652 | 1.0254753524  |
| -1.1594602839 | 0.8874951963 | 0.9999537652 | 1.6659944801  |
| 0             | 0            | 0            | 2.996475627   |
| -1.014102456  | 0.9466434524 | 0.9999537652 | -1.0893504391 |
| 4.5505976667  | 0.5557790267 | 0.9999537652 | 3.3469034948  |
| 1.4796250031  | 0.6369429881 | 0.9999537652 | 1.4118490176  |
| 1.0643403978  | 0.8614155696 | 0.9999537652 | -1.0805393413 |
| -1.1890288123 | 0.2979574003 | 0.9999537652 | -1.1160985872 |
| -1.1317263623 | 0.7724208764 | 0.9999537652 | 1.4601248216  |
| 5.0059881963  | 0.1255295171 | 0.9999537652 | -1.3850093291 |
| -1.3236385671 | 0.2274943763 | 0.9999537652 | -1.1393812462 |
| 23.8818846228 | 0.2166969769 | 0.9999537652 | -1.0450563444 |
| -1.1709862367 | 0.5865384144 | 0.9999537652 | -1.1051436399 |
| 2.7933974408  | 0.6948713406 | 0.9999537652 | 0             |
| -1.1376883721 | 0.821009146  | 0.9999537652 | 1.0061446883  |
| -1.1638905218 | 0.495493245  | 0.9999537652 | 1.0809047125  |
| -1.1960205762 | 0.6317515885 | 0.9999537652 | -1.2345870015 |
| -1.4154799939 | 0.2528628    | 0.9999537652 | -1.3519777413 |
| 1.1020620886  | 0.7426996882 | 0.9999537652 | 1.354993556   |
| -1.1966477219 | 0.3992123191 | 0.9999537652 | 1.1559025492  |
| -1.8175467381 | 0.1636194653 | 0.9999537652 | -1.0287589877 |

gene\_expression\_table

|                |              |              |               |
|----------------|--------------|--------------|---------------|
| -1.4228647442  | 0.4770381833 | 0.9999537652 | -1.3267336889 |
| 1.2603303963   | 0.3595705509 | 0.9999537652 | -1.3585846682 |
| 130.8067674395 | 0.0542346844 | 0.9999537652 | 1.6972074939  |
| -1.0218604174  | 0.8501676115 | 0.9999537652 | 1.1071593411  |
| 2.0877130777   | 0.5308629928 | 0.9999537652 | -1.6574346079 |
| 1.0898819289   | 0.7438062779 | 0.9999537652 | -1.0293650637 |
| 0              | 0            | 0            | 2.996475627   |
| 1.1594390706   | 0.4799729835 | 0.9999537652 | -1.1888758789 |
| 1.6018881045   | 0.6925261145 | 0.9999537652 | 4.9567375629  |
| -1.4137205962  | 0.384366144  | 0.9999537652 | 1.1975499493  |
| -1.0604282475  | 0.6707851286 | 0.9999537652 | -1.2925926736 |
| -1.0731789005  | 0.5605700415 | 0.9999537652 | -1.17764975   |
| 1.8986710575   | 0.1957800346 | 0.9999537652 | 1.0261034196  |
| 0              | 0            | 0            | 2.996475627   |
| 1.1991423283   | 0.6692854827 | 0.9999537652 | 1.0795303638  |
| -1.069299774   | 0.7851731037 | 0.9999537652 | -1.2190727012 |
| 9.8205505243   | 0.3816603866 | 0.9999537652 | 6.908559683   |
| 1.4851550397   | 0.2509385523 | 0.9999537652 | -1.1787998522 |
| 1.0202390615   | 0.9535426111 | 0.9999537652 | -1.3563068967 |
| 1.0953279185   | 0.6561554564 | 0.9999537652 | 1.0898749356  |
| 1.1065498649   | 0.5965777103 | 0.9999537652 | -1.4429187773 |
| 1.1412291911   | 0.5355483972 | 0.9999537652 | 1.1668477171  |
| -1.0117579392  | 0.9514941669 | 0.9999537652 | 1.0132655071  |
| 1.1041551707   | 0.7432042715 | 0.9999537652 | -1.1141218681 |
| 9.8205505243   | 0.3816729323 | 0.9999537652 | 1.1330498456  |
| -6.9736190158  | 0.2250321147 | 0.9999537652 | 4.9567375629  |
| 0              | 0            | 0            | 1.0666207935  |
| 2.7933974408   | 0.6948713406 | 0.9999537652 | -5.3589986948 |
| 2.7933974408   | 0.6948713406 | 0.9999537652 | -2.0477227478 |
| 1.0011405924   | 0.9955618512 | 0.9999537652 | 1.1656591249  |
| -1.0538156238  | 0.6787151398 | 0.9999537652 | -1.2151614857 |
| 1.1146826657   | 0.6206701915 | 0.9999537652 | -1.0985877053 |
| -1.3101654085  | 0.1512173926 | 0.9999537652 | -1.0148378174 |
| 0              | 0            | 0            | 1.2408886006  |
| -3.1179374904  | 0.2575217728 | 0.9999537652 | 2.4147444764  |
| 0              | 0            | 0            | 2.996475627   |
| 9.8205505243   | 0.3816873261 | 0.9999537652 | 10.818785458  |
| -1.4346235745  | 0.5723253943 | 0.9999537652 | -1.4943570592 |
| 1.1162834585   | 0.9279619253 | 0.9999537652 | 0             |
| -1.1330468105  | 0.3518649723 | 0.9999537652 | -1.1613274798 |
| -1.0001811849  | 0.9989670012 | 0.9999537652 | -1.0793454031 |
| 1.3366597161   | 0.0983213379 | 0.9999537652 | -1.0888440415 |
| 1.1366182375   | 0.4864976137 | 0.9999537652 | -1.3416467371 |
| 1.3920227785   | 0.3377244458 | 0.9999537652 | 1.1178573431  |
| -1.5101047647  | 0.0626453437 | 0.9999537652 | 1.2449438635  |
| 2.7933974408   | 0.6948713406 | 0.9999537652 | 0             |
| 0              | 0            | 0            | -2.0477227478 |
| -1.7495015986  | 0.2655124854 | 0.9999537652 | -1.0247784186 |
| -1.5783001323  | 0.5359474909 | 0.9999537652 | 1.7460170926  |

gene\_expression\_table

|               |              |              |               |
|---------------|--------------|--------------|---------------|
| -1.5351801594 | 0.3581393837 | 0.9999537652 | -1.160895632  |
| 9.8205505243  | 0.3819497662 | 0.9999537652 | -1.1242401582 |
| -1.7293496257 | 0.1449292804 | 0.9999537652 | -1.2089304571 |
| 2.7933974408  | 0.6948713406 | 0.9999537652 | -1.3598304575 |
| 4.5505976667  | 0.5557790267 | 0.9999537652 | 5.0961124596  |
| 1.1246813911  | 0.8864180307 | 0.9999537652 | 2.9979638378  |
| 1.0428711823  | 0.8923404686 | 0.9999537652 | -1.24274376   |
| 1.1091496219  | 0.5107663111 | 0.9999537652 | -1.0344127523 |
| -1.0831716006 | 0.7284964134 | 0.9999537652 | 1.1968509925  |
| -1.1109620866 | 0.6210817043 | 0.9999537652 | 1.0525092926  |
| 1.2949597239  | 0.5716948647 | 0.9999537652 | -1.5882223759 |
| -1.0065930739 | 0.9741559938 | 0.9999537652 | -1.26094063   |
| 0             | 0            | 0            | 1.6646597813  |
| 1.3180723625  | 0.5517009827 | 0.9999537652 | -1.7185362769 |
| 1.9015109615  | 0.6235981582 | 0.9999537652 | 0             |
| -1.3249168377 | 0.4171919463 | 0.9999537652 | 1.1293016654  |
| -1.0057145646 | 0.9666187499 | 0.9999537652 | 1.0145992937  |
| 1.8771369955  | 0.1724053618 | 0.9999537652 | 1.3807731526  |
| -1.0339643056 | 0.8538999336 | 0.9999537652 | 1.1656438395  |
| 1.577312308   | 0.1838344341 | 0.9999537652 | -1.4394758639 |
| -1.043681335  | 0.7500802766 | 0.9999537652 | -1.0419488348 |
| -1.093713204  | 0.4448763622 | 0.9999537652 | -1.1140643091 |
| 1.5471365957  | 0.2334479395 | 0.9999537652 | 1.1063191396  |
| -1.1603883193 | 0.431085157  | 0.9999537652 | 1.3591083287  |
| 2.7933974408  | 0.6948713406 | 0.9999537652 | 0             |
| 1.0969178476  | 0.6111636108 | 0.9999537652 | 1.3784304799  |
| -1.108777061  | 0.8167940475 | 0.9999537652 | 1.2973624736  |
| -1.0578614036 | 0.9471368289 | 0.9999537652 | -2.5802143578 |
| -1.2729458826 | 0.5000478898 | 0.9999537652 | -1.1058541929 |
| 0             | 0            | 0            | -1.8582093966 |
| 1.179144353   | 0.46942354   | 0.9999537652 | 1.2997451959  |
| -1.3702762656 | 0.7548902156 | 0.9999537652 | 0             |
| 1.8979370239  | 0.310236851  | 0.9999537652 | 1.0304724424  |
| 1.0408170904  | 0.934351684  | 0.9999537652 | 1.3367792425  |
| 1.787649606   | 0.055313161  | 0.9999537652 | 1.1341696424  |
| -1.1006929295 | 0.6262047786 | 0.9999537652 | -1.180850851  |
| -1.1779033249 | 0.3662004469 | 0.9999537652 | -1.2007516509 |
| -1.0620447609 | 0.8977311612 | 0.9999537652 | 1.1175283869  |
| -1.1866782852 | 0.3418936627 | 0.9999537652 | -1.035551104  |
| -1.0604409414 | 0.812932722  | 0.9999537652 | 1.1873582987  |
| 1.0025315868  | 0.9858919404 | 0.9999537652 | 1.3325167164  |
| 1.2844507971  | 0.5727032843 | 0.9999537652 | -1.5377004024 |
| -1.1268404068 | 0.515711227  | 0.9999537652 | 1.0101204026  |
| -1.0942202955 | 0.516972304  | 0.9999537652 | 1.0555222416  |
| 1.6258890912  | 0.2063538032 | 0.9999537652 | -1.1100608804 |
| 18.5983228161 | 0.2585399858 | 0.9999537652 | 1.811806509   |
| 1.0885861526  | 0.8530176513 | 0.9999537652 | -1.1401632482 |
| -5.3600263521 | 0.1948035092 | 0.9999537652 | 1.1353985409  |
| 1.3594099105  | 0.7968739818 | 0.9999537652 | -3.3853891979 |

gene\_expression\_table

|               |              |              |               |
|---------------|--------------|--------------|---------------|
| 6.3075231393  | 0.4852128108 | 0.9999537652 | -1.6597328868 |
| -1.0233993854 | 0.8621432498 | 0.9999537652 | -1.0017388608 |
| 1.5752480734  | 0.1685669564 | 0.9999537652 | 1.1790408691  |
| 0             | 0            | 0            | 14.7475552392 |
| 1.4188013253  | 0.0515677387 | 0.9999537652 | -1.0750340929 |
| 13.3324809638 | 0.3193419097 | 0.9999537652 | -3.6852522302 |
| -1.0470886977 | 0.831074909  | 0.9999537652 | 1.1881344766  |
| -2.8969127737 | 0.3395250449 | 0.9999537652 | -1.1883486959 |
| -1.186831757  | 0.5027649271 | 0.9999537652 | -1.0430599337 |
| 1.0047906714  | 0.9792737114 | 0.9999537652 | 1.2633335371  |
| 1.1091391926  | 0.45096475   | 0.9999537652 | 1.0320865728  |
| -1.1699825231 | 0.4717546029 | 0.9999537652 | -1.3261010268 |
| 1.5156531293  | 0.6413221364 | 0.9999537652 | 1.0918431289  |
| 1.0003373048  | 0.9995270402 | 0.9999537652 | -1.1354697632 |
| 1.0636295337  | 0.8133816572 | 0.9999537652 | -1.006844365  |
| -1.081586986  | 0.5320533455 | 0.9999537652 | 1.048929634   |
| -1.105155594  | 0.6264372286 | 0.9999537652 | -1.1521768735 |
| 1.1130728543  | 0.6344712728 | 0.9999537652 | 1.1376625313  |
| -1.4657664736 | 0.083114812  | 0.9999537652 | -1.1770987899 |
| 1.6367259986  | 0.0374841545 | 0.9999537652 | 1.3059307161  |
| 1.4334654888  | 0.4505777825 | 0.9999537652 | 1.345112118   |
| 1.6009138193  | 0.1460147534 | 0.9999537652 | -1.2057336972 |
| -1.0228649836 | 0.9003864998 | 0.9999537652 | 1.1613307944  |
| 1.3020070582  | 0.7501040856 | 0.9999537652 | -1.19176092   |
| -1.26535817   | 0.4535473157 | 0.9999537652 | 1.0592249325  |
| 1.2710188429  | 0.4230682784 | 0.9999537652 | 1.0492733557  |
| 1.6154121672  | 0.0004657    | 0.9999537652 | 1.7735800293  |
| 0             | 0            | 0            | 2.996475627   |
| -1.1056546381 | 0.4934039425 | 0.9999537652 | 1.010776676   |
| 1.0160348504  | 0.9553901325 | 0.9999537652 | 1.3010502522  |
| 1.3275131029  | 0.5399991186 | 0.9999537652 | 1.0351854796  |
| -1.0637253167 | 0.7677919161 | 0.9999537652 | -1.1386820616 |
| 1.1162834585  | 0.9279861599 | 0.9999537652 | 5.3812467488  |
| 1.1661684552  | 0.6964289986 | 0.9999537652 | 1.2503386741  |
| 1.068067219   | 0.7334770771 | 0.9999537652 | -1.159070428  |
| -1.0206955143 | 0.9094414725 | 0.9999537652 | -1.1553282619 |
| 1.9235077106  | 0.2042999889 | 0.9999537652 | -1.2032064744 |
| 2.7933974408  | 0.6948713406 | 0.9999537652 | 8.9512754559  |
| -1.0286637554 | 0.8445033628 | 0.9999537652 | -1.1861786165 |
| 1.0382033736  | 0.8833349349 | 0.9999537652 | 1.2304326688  |
| 2.7762553073  | 0.0445748132 | 0.9999537652 | -1.1929975499 |
| -1.1111932047 | 0.5774848728 | 0.9999537652 | -1.2231115995 |
| -1.5077326167 | 0.3876487356 | 0.9999537652 | -1.516837928  |
| -1.4432991877 | 0.0783940072 | 0.9999537652 | 1.3363618797  |
| -1.0829983138 | 0.715997839  | 0.9999537652 | 1.0640214169  |
| -1.3320202714 | 0.1954118996 | 0.9999537652 | 1.0953594386  |
| -1.0136562041 | 0.9396461931 | 0.9999537652 | 1.0088289106  |
| 1.2015200298  | 0.3685698079 | 0.9999537652 | -1.4257010169 |
| 1.9936126395  | 0.5572200094 | 0.9999537652 | -1.1267047693 |

gene\_expression\_table

|                |              |              |                |
|----------------|--------------|--------------|----------------|
| -2.5875654693  | 0.0710707148 | 0.9999537652 | 1.0593796655   |
| 1.5191296774   | 0.3035382768 | 0.9999537652 | -1.1679838252  |
| 1.0582401461   | 0.8873948484 | 0.9999537652 | -1.5468046935  |
| 1.1029763937   | 0.6445973007 | 0.9999537652 | -1.1028656347  |
| 1.8651774762   | 0.0316594066 | 0.9999537652 | -1.0931641773  |
| 1.4630658602   | 0.5984399874 | 0.9999537652 | -1.6434190706  |
| 1.4953186627   | 0.4274120244 | 0.9999537652 | 1.1445467728   |
| 1.0982265381   | 0.4707024162 | 0.9999537652 | 1.3768668301   |
| -1.0463589702  | 0.8977149277 | 0.9999537652 | 1.2586681921   |
| -1.1075405885  | 0.6839215187 | 0.9999537652 | 1.1422341192   |
| -1.0578962542  | 0.8600898611 | 0.9999537652 | -1.2064904094  |
| 1.1352054359   | 0.4792593869 | 0.9999537652 | 1.3679992151   |
| 2.0885615936   | 0.5186626856 | 0.9999537652 | 5.3165033614   |
| 3.3071401144   | 0.3245208179 | 0.9999537652 | 1.2400291296   |
| 20.3530564257  | 0.2429739469 | 0.9999537652 | -16.5082395846 |
| 0              | 0            | 0            | 4.9527501949   |
| -1.0412515922  | 0.8307617642 | 0.9999537652 | 1.0937406329   |
| 1.0167791595   | 0.9175341461 | 0.9999537652 | 1.0849073187   |
| 1.0833826809   | 0.6390380444 | 0.9999537652 | -1.0859817795  |
| -1.0714934623  | 0.645128514  | 0.9999537652 | 1.0974142947   |
| -1.460992866   | 0.0384207436 | 0.9999537652 | -1.1151679694  |
| 1.481754914    | 0.1795419133 | 0.9999537652 | 1.3160700047   |
| -1.1167430974  | 0.382155197  | 0.9999537652 | -1.0473051514  |
| 1.308402725    | 0.1300234957 | 0.9999537652 | 1.2814245214   |
| -1.2307312453  | 0.7053299484 | 0.9999537652 | -1.1079134319  |
| -1.6560320481  | 0.3939888644 | 0.9999537652 | 8.6426265779   |
| -1.0728063956  | 0.6522624829 | 0.9999537652 | 1.1137553525   |
| 1.7090181294   | 0.2900528811 | 0.9999537652 | 1.0051882092   |
| 2.7933974408   | 0.6948713406 | 0.9999537652 | -1.1541475958  |
| 9.8205505243   | 0.3822070427 | 0.9999537652 | 2.996475627    |
| 8.064174035    | 0.4193478245 | 0.9999537652 | 0              |
| 37.9506346044  | 0.1516488587 | 0.9999537652 | -1.321583129   |
| -1.1204523193  | 0.4985095794 | 0.9999537652 | -1.1264119773  |
| -1.1457555741  | 0.9106046164 | 0.9999537652 | -9.7542681481  |
| 249.5637219222 | 0.028511351  | 0.9999537652 | -2.5964422649  |
| -1.1375146148  | 0.5318922948 | 0.9999537652 | 1.2107812615   |
| -1.3706824165  | 0.637970541  | 0.9999537652 | 1.0287051083   |
| -1.3385478755  | 0.7110003247 | 0.9999537652 | -1.1246693829  |
| 2.1598265017   | 0.1702870737 | 0.9999537652 | -1.1757242868  |
| 0              | 0            | 0            | 1.0667457716   |
| 1.1875125807   | 0.1336346302 | 0.9999537652 | 1.2155856694   |
| 2.6862171381   | 0.2568232491 | 0.9999537652 | 1.8624192744   |
| 0              | 0            | 0            | 0              |
| -1.1998967319  | 0.5490387246 | 0.9999537652 | -1.4586789856  |
| 1.166715855    | 0.55486977   | 0.9999537652 | 1.1432838632   |
| 1.1550777531   | 0.7907732768 | 0.9999537652 | 2.6071338396   |
| 1.2379410704   | 0.5719919778 | 0.9999537652 | 1.1689131253   |
| -1.5875118025  | 0.7201536922 | 0.9999537652 | 2.9985540909   |
| 2.7933974408   | 0.6948713406 | 0.9999537652 | 0              |

gene\_expression\_table

|               |              |              |               |
|---------------|--------------|--------------|---------------|
| 1.2145433703  | 0.3691555874 | 0.9999537652 | -1.0176923122 |
| -1.1739092263 | 0.4658680995 | 0.9999537652 | -1.3510363071 |
| 1.0900370194  | 0.5290219369 | 0.9999537652 | 1.0885681808  |
| -1.3306046939 | 0.4984053163 | 0.9999537652 | 1.0165393545  |
| 1.1839179914  | 0.4719483696 | 0.9999537652 | -1.04004813   |
| -1.3039767968 | 0.7557538898 | 0.9999537652 | -2.5918501576 |
| 1.1318814021  | 0.6903968921 | 0.9999537652 | -1.688975049  |
| -1.4878781745 | 0.166091953  | 0.9999537652 | -1.2673951642 |
| 1.0302248064  | 0.8689379041 | 0.9999537652 | -1.0881380904 |
| -1.253858095  | 0.4634060959 | 0.9999537652 | -1.0337605262 |
| 1.2911522073  | 0.1920092053 | 0.9999537652 | 1.3705116092  |
| -1.0391283302 | 0.9365673212 | 0.9999537652 | -1.077387845  |
| -1.021220323  | 0.9608697004 | 0.9999537652 | -1.1994448092 |
| -1.5256790713 | 0.0836425367 | 0.9999537652 | 1.28358692    |
| 1.0513272264  | 0.7063721572 | 0.9999537652 | 1.0460781052  |
| -1.0215098318 | 0.8801195233 | 0.9999537652 | 1.2327952832  |
| 1.298973715   | 0.2575337718 | 0.9999537652 | -1.0381339434 |
| 1.366474448   | 0.1009585378 | 0.9999537652 | -1.0725450289 |
| -1.0357309229 | 0.8205681392 | 0.9999537652 | 1.0625298633  |
| 1.5915109622  | 0.068814288  | 0.9999537652 | -1.1260856715 |
| 1.162565591   | 0.5672224773 | 0.9999537652 | -1.2450889704 |
| 1.2117865278  | 0.1122545043 | 0.9999537652 | 1.8213282266  |
| -1.1171876296 | 0.7058825058 | 0.9999537652 | -1.3241170447 |
| 1.2173850991  | 0.7722437285 | 0.9999537652 | -2.0184868898 |
| -1.2683659373 | 0.2106354716 | 0.9999537652 | -1.0855365705 |
| 2.1097000422  | 0.1161793699 | 0.9999537652 | -1.7088382807 |
| -1.1231451824 | 0.8623471835 | 0.9999537652 | -1.3967867798 |
| -1.2830789759 | 0.7153793686 | 0.9999537652 | 1.0737757585  |
| 4.5505976667  | 0.5557790267 | 0.9999537652 | 4.048242769   |
| 16.296263041  | 0.2962447536 | 0.9999537652 | 1.0301713759  |
| -1.8932786066 | 0.007712     | 0.9999537652 | 1.1648018121  |
| 1.5137073316  | 0.6728341611 | 0.9999537652 | 1.1969806455  |
| 1.1018875973  | 0.6112305696 | 0.9999537652 | -1.1018557963 |
| -1.1471330499 | 0.2378934886 | 0.9999537652 | -1.1474313514 |
| -1.4615349616 | 0.1225041063 | 0.9999537652 | 1.102047612   |
| -1.1265831123 | 0.5968698212 | 0.9999537652 | -1.342678224  |
| 1.1463819113  | 0.4860299451 | 0.9999537652 | 1.0020840939  |
| 0             | 0            | 0            | 8.8639046058  |
| 1.0535076598  | 0.7744756521 | 0.9999537652 | 1.2081305367  |
| -1.091840392  | 0.6915627046 | 0.9999537652 | -1.4874014749 |
| 1.3041775569  | 0.7306542437 | 0.9999537652 | -2.123711531  |
| -1.0806523375 | 0.7074681211 | 0.9999537652 | -1.1907578771 |
| -1.0545652153 | 0.8978771021 | 0.9999537652 | -1.2129588215 |
| 1.4043101181  | 0.5331759938 | 0.9999537652 | -1.4649193108 |
| -1.0846660344 | 0.6678563399 | 0.9999537652 | 1.0481972831  |
| 4.5505976667  | 0.5557790267 | 0.9999537652 | 2.8664963163  |
| 1.0916880155  | 0.7561540434 | 0.9999537652 | -1.3295338654 |
| -1.0872008538 | 0.8714047984 | 0.9999537652 | -1.3338035496 |
| -1.6994504307 | 0.5420730382 | 0.9999537652 | -1.156904861  |

gene\_expression\_table

|               |              |              |               |
|---------------|--------------|--------------|---------------|
| 1.0606444597  | 0.70348711   | 0.9999537652 | 1.035991718   |
| -1.1453192235 | 0.9085486745 | 0.9999537652 | 3.3469034948  |
| -1.0316180608 | 0.9045644615 | 0.9999537652 | -1.2528263223 |
| 1.0546059095  | 0.8686883958 | 0.9999537652 | -1.2870901931 |
| -1.0519015254 | 0.8269683051 | 0.9999537652 | 1.0295092211  |
| 2.7933974408  | 0.6948713406 | 0.9999537652 | -5.3583704783 |
| 1.2557228731  | 0.3836584167 | 0.9999537652 | 1.2551410583  |
| 11.5766527773 | 0.345396292  | 0.9999537652 | 1.1693470523  |
| -1.369198268  | 0.7571957905 | 0.9999537652 | 1.6086304467  |
| 1.3923627432  | 0.6684487346 | 0.9999537652 | 1.4776337576  |
| 3.4895363975  | 0.0659379287 | 0.9999537652 | 1.1779489798  |
| 1.3251114985  | 0.2629720175 | 0.9999537652 | 1.1404164435  |
| 1.1024976244  | 0.7133188087 | 0.9999537652 | 1.2660124944  |
| -1.1165838431 | 0.3768395667 | 0.9999537652 | -1.1235660869 |
| -1.8551455303 | 0.0891583013 | 0.9999537652 | 1.031274069   |
| 4.5505976667  | 0.5557790267 | 0.9999537652 | 1.2394611522  |
| -1.6004705264 | 0.1875727412 | 0.9999537652 | 1.0240173192  |
| 1.1041313795  | 0.5540151932 | 0.9999537652 | 1.0166388614  |
| -1.1394705898 | 0.6493510759 | 0.9999537652 | -1.0756807151 |
| 1.3733524417  | 0.1191731845 | 0.9999537652 | -1.1943457761 |
| -1.445711632  | 0.1134836418 | 0.9999537652 | -1.1738169746 |
| -7.0431967789 | 0.0842904904 | 0.9999537652 | 1.7206366659  |
| -1.1951129036 | 0.2862695494 | 0.9999537652 | -1.1089455233 |
| 1.0434932533  | 0.8399646648 | 0.9999537652 | -1.0643543443 |
| 1.5700882646  | 0.1942977849 | 0.9999537652 | 1.4377975579  |
| 1.1658912736  | 0.3767258147 | 0.9999537652 | -1.0790187384 |
| -2.5838710423 | 0.5185078317 | 0.9999537652 | 18.6336779883 |
| 1.0325262642  | 0.9172727503 | 0.9999537652 | -1.1740530274 |
| -3.0678798337 | 0.0757237567 | 0.9999537652 | -1.5197744168 |
| -1.042035903  | 0.9013750862 | 0.9999537652 | 1.263050618   |
| -1.0612709526 | 0.8294984142 | 0.9999537652 | -1.2941225636 |
| 1.0420401189  | 0.8310753722 | 0.9999537652 | -1.1285233218 |
| 1.1162834585  | 0.9279846283 | 0.9999537652 | -1.859280336  |
| -1.0302089517 | 0.9260647018 | 0.9999537652 | -1.0486995939 |
| -1.3172130908 | 0.620143246  | 0.9999537652 | -1.7412494823 |
| -1.1453192235 | 0.9085235142 | 0.9999537652 | 1.2707518347  |
| 1.2702608995  | 0.2018156466 | 0.9999537652 | -1.1257580444 |
| -1.2789806116 | 0.7307715535 | 0.9999537652 | -1.595141759  |
| -1.1261857203 | 0.5400832343 | 0.9999537652 | 1.0514331165  |
| -1.2698571935 | 0.3534367721 | 0.9999537652 | -1.1620773296 |
| 20.3709255077 | 0.2404319414 | 0.9999537652 | -1.1060913839 |
| -1.1384613128 | 0.5705852226 | 0.9999537652 | -1.3661551712 |
| -1.0243262586 | 0.8600566589 | 0.9999537652 | -1.1107166296 |
| 0             | 0            | 0            | 2.996475627   |
| -1.0833231221 | 0.9095558675 | 0.9999537652 | -1.1625772141 |
| 1.1366232902  | 0.5726422419 | 0.9999537652 | -1.1547175111 |
| 1.4621934254  | 0.3643637361 | 0.9999537652 | -1.2334713253 |
| 1.045679119   | 0.8441753272 | 0.9999537652 | -1.2349830164 |
| 2.1113088034  | 0.3083341341 | 0.9999537652 | 1.7344154021  |



gene\_expression\_table

|               |              |              |               |
|---------------|--------------|--------------|---------------|
| -1.5907083418 | 0.1219693751 | 0.9999537652 | -1.8457250557 |
| -1.2503888487 | 0.7722447878 | 0.9999537652 | -1.4900431113 |
| 6.3075231393  | 0.4852033336 | 0.9999537652 | 2.2924151284  |
| -1.7570926671 | 0.2361343164 | 0.9999537652 | -1.3862454905 |
| -1.4608166475 | 0.1148087149 | 0.9999537652 | -2.0291577155 |
| -1.0073447772 | 0.9625281972 | 0.9999537652 | 1.0017775406  |
| -1.1109153622 | 0.4289138107 | 0.9999537652 | -1.207194092  |
| -1.1604800797 | 0.8777239625 | 0.9999537652 | 1.7013955871  |
| 1.2835061594  | 0.6333964541 | 0.9999537652 | -1.2687078362 |
| -1.4235027739 | 0.0357163621 | 0.9999537652 | -1.3455779303 |
| -1.118569044  | 0.3752532761 | 0.9999537652 | -1.0878914258 |
| 18.9318466825 | 0.2781654697 | 0.9999537652 | 1.1932077424  |
| 1.4644578187  | 0.2488858225 | 0.9999537652 | -1.1851156955 |
| 1.284971304   | 0.2932571328 | 0.9999537652 | -1.2613335294 |
| 1.2059010171  | 0.7416994671 | 0.9999537652 | 1.2208336453  |
| 2.1642013532  | 0.4347886977 | 0.9999537652 | 1.3742147816  |
| 1.305406083   | 0.3160370004 | 0.9999537652 | -1.1874311862 |
| 1.2135155632  | 0.442327709  | 0.9999537652 | 1.31124185    |
| -1.3322384505 | 0.2752819251 | 0.9999537652 | 1.3295579631  |
| 1.1126605832  | 0.6639006367 | 0.9999537652 | -1.290457686  |
| 1.210568601   | 0.2896311487 | 0.9999537652 | 1.0852405163  |
| -1.0840753248 | 0.6981678725 | 0.9999537652 | -1.2937795303 |
| 2.7933974408  | 0.6948713406 | 0.9999537652 | 0             |
| 1.1337133962  | 0.5334844757 | 0.9999537652 | -1.4329560052 |
| 1.9460988524  | 0.3011783504 | 0.9999537652 | -1.1661979027 |
| 1.1770305358  | 0.1437481902 | 0.9999537652 | 1.0156602461  |
| 1.1358528676  | 0.4017677189 | 0.9999537652 | 1.0181585099  |
| -1.1821041638 | 0.3154368339 | 0.9999537652 | 2.1226998443  |
| -1.0498296191 | 0.7186400677 | 0.9999537652 | -1.086234982  |
| -1.0465508746 | 0.8324754989 | 0.9999537652 | -1.2306736155 |
| 1.4223548157  | 0.0758640097 | 0.9999537652 | -1.1955589914 |
| -1.0257428536 | 0.8855254371 | 0.9999537652 | -1.1263156728 |
| -1.5881166222 | 0.7196016486 | 0.9999537652 | 0             |
| 0             | 0            | 0            | 4.9527501949  |
| -1.0755225977 | 0.863470302  | 0.9999537652 | 1.1270777255  |
| 1.222021874   | 0.3218208175 | 0.9999537652 | -1.2953708004 |
| 1.4355993469  | 0.4794033111 | 0.9999537652 | -1.4089567536 |
| 2.5098097939  | 0.0673873726 | 0.9999537652 | 1.3211861918  |
| -1.2541628693 | 0.2603365557 | 0.9999537652 | -1.3838679458 |
| -1.137995001  | 0.7709791043 | 0.9999537652 | -1.3106989976 |
| -1.0818260504 | 0.7401925756 | 0.9999537652 | -1.2904701699 |
| -1.0768309153 | 0.6486691656 | 0.9999537652 | -1.1431252668 |
| -1.1093901949 | 0.4517532237 | 0.9999537652 | -1.3209835976 |
| -1.3396553218 | 0.2651248864 | 0.9999537652 | -1.326290048  |
| 1.0915569585  | 0.5745927661 | 0.9999537652 | 1.0981070904  |
| 1.1033726586  | 0.5796693699 | 0.9999537652 | -1.1681120152 |
| 1.4317593632  | 0.4965345408 | 0.9999537652 | -1.4608953882 |
| -1.2808524125 | 0.3359447726 | 0.9999537652 | -1.3153546415 |
| -1.0423082512 | 0.9232268939 | 0.9999537652 | -1.4492133135 |

gene\_expression\_table

|               |              |              |               |
|---------------|--------------|--------------|---------------|
| 1.131572734   | 0.675060469  | 0.9999537652 | -1.255807597  |
| -1.05521984   | 0.7934638153 | 0.9999537652 | -1.0818027296 |
| -1.1640062011 | 0.3865162115 | 0.9999537652 | -1.068716784  |
| 1.0816388297  | 0.6814303659 | 0.9999537652 | -1.1903179823 |
| -1.1170938003 | 0.8003732321 | 0.9999537652 | 1.0178100145  |
| 1.1320671704  | 0.6040319583 | 0.9999537652 | 1.0666018029  |
| 2.7933974408  | 0.6948713406 | 0.9999537652 | 0             |
| 1.4071828944  | 0.4614613059 | 0.9999537652 | -1.2018945272 |
| -1.1453192235 | 0.9084983564 | 0.9999537652 | 0             |
| 1.1119690798  | 0.5609410252 | 0.9999537652 | 1.0829165078  |
| 1.1651448872  | 0.4540678169 | 0.9999537652 | 1.0204043333  |
| 1.0521689726  | 0.736278478  | 0.9999537652 | 1.3437074937  |
| 1.0432030485  | 0.8634497154 | 0.9999537652 | -1.0967444021 |
| 4.5544554512  | 0.569123417  | 0.9999537652 | 2.9985540909  |
| -3.424263505  | 0.0465987074 | 0.9999537652 | -2.3110607932 |
| 1.0913731451  | 0.6764752229 | 0.9999537652 | -1.0015868663 |
| -1.3927039579 | 0.0132439592 | 0.9999537652 | 1.0787984963  |
| 1.2682896538  | 0.2019142095 | 0.9999537652 | 1.1115301823  |
| -1.6410956547 | 0.1571233863 | 0.9999537652 | -1.366295336  |
| 1.4672515657  | 0.2995099256 | 0.9999537652 | -1.0493288913 |
| -1.2698360685 | 0.241014012  | 0.9999537652 | 1.0561548556  |
| 1.025986051   | 0.8973852058 | 0.9999537652 | 1.1142755139  |
| 1.1218124863  | 0.6562977421 | 0.9999537652 | 1.117205035   |
| 1.2473203314  | 0.4642442354 | 0.9999537652 | -1.0192052879 |
| -1.1064153886 | 0.5385122363 | 0.9999537652 | 1.2251928726  |
| 1.0109738374  | 0.9472051686 | 0.9999537652 | 1.2678122748  |
| -1.5191908506 | 0.3897159669 | 0.9999537652 | -1.2471775178 |
| -1.865641096  | 0.3849939666 | 0.9999537652 | 1.4370974628  |
| -1.5088679904 | 0.2014484135 | 0.9999537652 | 1.1240370032  |
| -1.2250402764 | 0.2986874549 | 0.9999537652 | 1.0519472581  |
| 6.3075231393  | 0.4851938636 | 0.9999537652 | 0             |
| 0             | 0            | 0            | 1.9429993325  |
| 1.6748770634  | 0.0234879429 | 0.9999537652 | 1.2183004394  |
| -2.0616778935 | 0.3664784239 | 0.9999537652 | -1.5929518064 |
| 1.0075604803  | 0.9674390732 | 0.9999537652 | 1.1540236101  |
| 1.0904523195  | 0.6563168241 | 0.9999537652 | 1.6664365568  |
| 1.0947945491  | 0.7484234679 | 0.9999537652 | 1.3488251881  |
| -1.1378168294 | 0.3699761982 | 0.9999537652 | -1.0084322429 |
| -1.6525426056 | 0.0104542961 | 0.9999537652 | 1.0551841528  |
| 1.0956548455  | 0.5800393441 | 0.9999537652 | -1.1268760924 |
| 9.8205505243  | 0.3829068144 | 0.9999537652 | -5.3589986948 |
| -1.2287947425 | 0.106419117  | 0.9999537652 | 1.0216749559  |
| 2.7957660672  | 0.7055093216 | 0.9999537652 | 18.6465640159 |
| 1.037646073   | 0.871825649  | 0.9999537652 | 1.2494719046  |
| -1.6547859728 | 0.428407077  | 0.9999537652 | -1.0620681059 |
| -1.0427054911 | 0.9119865299 | 0.9999537652 | 1.1845895774  |
| -1.3761467853 | 0.3162957501 | 0.9999537652 | 1.0057495425  |
| -1.1435642915 | 0.3094494395 | 0.9999537652 | -1.1379883492 |
| -1.3697544738 | 0.7454660002 | 0.9999537652 | 1.9418822056  |

gene\_expression\_table

|               |              |              |               |
|---------------|--------------|--------------|---------------|
| 1.0577003822  | 0.6572666087 | 0.9999537652 | 1.0240003973  |
| 1.5957586408  | 0.29268491   | 0.9999537652 | -1.0537536839 |
| 1.1827519787  | 0.7608843561 | 0.9999537652 | -1.474672455  |
| -1.0158202826 | 0.9718679118 | 0.9999537652 | 1.2914350297  |
| 1.452030427   | 0.0412905405 | 0.9999537652 | 1.3304209264  |
| -1.2863564238 | 0.4587775529 | 0.9999537652 | 1.1673138225  |
| 1.078010753   | 0.6883812638 | 0.9999537652 | 1.1554331924  |
| -1.2824570106 | 0.1569812672 | 0.9999537652 | 1.1309397348  |
| 1.0570433333  | 0.8666098854 | 0.9999537652 | -1.0530204883 |
| -1.001808101  | 0.9945267834 | 0.9999537652 | -1.0992927125 |
| 1.0534549393  | 0.7850132192 | 0.9999537652 | 1.3902250691  |
| -1.1471526808 | 0.4689631683 | 0.9999537652 | -1.0314138285 |
| 2.1104313265  | 0.1376727097 | 0.9999537652 | 1.0108534739  |
| 4.5544554512  | 0.5691214234 | 0.9999537652 | -1.8579915692 |
| 1.1074829774  | 0.5320456439 | 0.9999537652 | 1.2444713338  |
| 1.1764388862  | 0.5267520452 | 0.9999537652 | -1.0568255457 |
| 1.1398761875  | 0.2929886175 | 0.9999537652 | -1.0096106204 |
| 1.2498624507  | 0.4695516531 | 0.9999537652 | 1.3852494711  |
| -1.1903487778 | 0.302195048  | 0.9999537652 | 1.2857916302  |
| -1.1619717093 | 0.8743568181 | 0.9999537652 | -1.0324473817 |
| 9.8291821523  | 0.3810532719 | 0.9999537652 | -3.8929589845 |
| -1.0852237286 | 0.6950456669 | 0.9999537652 | 1.1941255412  |
| 0             | 0            | 0            | 6.908559683   |
| 1.793573223   | 0.2310303635 | 0.9999537652 | -1.5747310857 |
| -1.0032978663 | 0.9886196825 | 0.9999537652 | -1.7730500579 |
| 1.434690516   | 0.1880357941 | 0.9999537652 | -1.0840269184 |
| 2.1419513341  | 0.0103498366 | 0.9999537652 | 1.2392317369  |
| -1.4279215627 | 0.3036384895 | 0.9999537652 | -1.0539750881 |
| 0             | 0            | 0            | 2.996475627   |
| 17.3472938331 | 0.297593761  | 0.9999537652 | 10.8337816869 |
| 1.445516321   | 0.0879057859 | 0.9999537652 | -1.0578711082 |
| -1.1343868507 | 0.6436410492 | 0.9999537652 | 1.1115686962  |
| -1.1658955302 | 0.700708192  | 0.9999537652 | 1.2112783616  |
| 1.0848793797  | 0.6628822603 | 0.9999537652 | 1.3174707932  |
| -1.206383623  | 0.679279939  | 0.9999537652 | 2.4850917429  |
| 1.0933195059  | 0.780591948  | 0.9999537652 | 1.3857265732  |
| -1.2088847843 | 0.6168540632 | 0.9999537652 | 1.29058679    |
| 6.3075231393  | 0.485184401  | 0.9999537652 | 2.9988886918  |
| 2.7933974408  | 0.6948713406 | 0.9999537652 | 0             |
| 2.5603529545  | 0.2533448675 | 0.9999537652 | -3.2960765574 |
| -1.1273264967 | 0.6734540551 | 0.9999537652 | 1.5152163339  |
| -1.0552900301 | 0.8299308523 | 0.9999537652 | -1.2669986972 |
| 1.117210085   | 0.56850067   | 0.9999537652 | 1.4991880385  |
| 1.9059311107  | 0.4748393818 | 0.9999537652 | 1.2775595037  |
| 9.8205505243  | 0.3834204237 | 0.9999537652 | 0             |
| 1.431746495   | 0.2482106738 | 0.9999537652 | -1.1855556174 |
| 2.382293359   | 0.0341921925 | 0.9999537652 | 1.1606269066  |
| 1.0349547516  | 0.9587074483 | 0.9999537652 | -1.0025721281 |
| 1.0120824699  | 0.9497876596 | 0.9999537652 | -1.1650277482 |

gene\_expression\_table

|               |              |              |                 |
|---------------|--------------|--------------|-----------------|
| 0             | 0            | 0            | 15.9061931258   |
| 1.0980537363  | 0.7761736383 | 0.9999537652 | 1.1486103331    |
| 1.0084917111  | 0.9588856549 | 0.9999537652 | 1.020535448     |
| 1.0507500623  | 0.8518208642 | 0.9999537652 | 1.3058568606    |
| -1.1971512532 | 0.3909110707 | 0.9999537652 | 1.089320051     |
| -1.5405413639 | 0.0235519751 | 0.9999537652 | 1.0777048372    |
| 1.0715941098  | 0.744095118  | 0.9999537652 | -1.0357292731   |
| -1.1599754231 | 0.8809246774 | 0.9999537652 | -1.5335264323   |
| 1.0209446956  | 0.9069626208 | 0.9999537652 | -1.057812912    |
| -1.2124534043 | 0.6001277472 | 0.9999537652 | -1.4326822578   |
| -1.0183766977 | 0.9482440068 | 0.9999537652 | 1.2899072685    |
| -1.8806546573 | 0.2161173175 | 0.9999537652 | -1.0494562787   |
| 1.0358561766  | 0.966566142  | 0.9999537652 | -1.0162949722   |
| -1.1000361821 | 0.5938461815 | 0.9999537652 | 1.0570774796    |
| -2.4156082583 | 0.3145552024 | 0.9999537652 | 0               |
| -1.6167995859 | 0.0100472812 | 0.9999537652 | 1.1469168166    |
| -1.0141188946 | 0.905982832  | 0.9999537652 | 1.0483600866    |
| -1.0275168639 | 0.9170862329 | 0.9999537652 | 1.1055823132    |
| -1.0342452756 | 0.9023586959 | 0.9999537652 | -1.1970335872   |
| 1.2221260278  | 0.695659622  | 0.9999537652 | -1.1212533501   |
| 0             | 0            | 0            | 2.9985540909    |
| 1.1579497658  | 0.5432283642 | 0.9999537652 | -1.2315692271   |
| 1.5954008     | 0.3509687722 | 0.9999537652 | -1.1700467391   |
| -1.0831077593 | 0.7647360585 | 0.9999537652 | -1.1082536133   |
| 1.0174830237  | 0.905877466  | 0.9999537652 | 1.0234883342    |
| -1.2243823421 | 0.0903323627 | 0.9999537652 | -1.1496406173   |
| -1.668044468  | 0.6115623291 | 0.9999537652 | -1.7689121852   |
| -1.1717020419 | 0.7816799213 | 0.9999537652 | 1.2025112422    |
| -1.0432294284 | 0.942614894  | 0.9999537652 | 1.6428693505    |
| 1.2058113856  | 0.315642274  | 0.9999537652 | 1.1271831837    |
| 1.7832225176  | 0.3957663894 | 0.9999537652 | -137.3174062836 |
| -1.8162185293 | 0.3282390241 | 0.9999537652 | 2.1803770037    |
| -1.0579303901 | 0.6732502445 | 0.9999537652 | 1.1009642278    |
| 24.3870295947 | 0.2290259672 | 0.9999537652 | 0               |
| 1.4067138366  | 0.1158823064 | 0.9999537652 | 1.2561081415    |
| 4.5505976667  | 0.5557790267 | 0.9999537652 | 1.7534505922    |
| 55.4857722906 | 0.1140953786 | 0.9999537652 | 1.2076073882    |
| 1.1555817374  | 0.5110236142 | 0.9999537652 | 1.1042430807    |
| 1.2247772049  | 0.4431972123 | 0.9999537652 | -1.259435987    |
| -1.3386471893 | 0.1200329769 | 0.9999537652 | -1.3388648871   |
| 4.5544554512  | 0.5691194299 | 0.9999537652 | 0               |
| -1.0659183645 | 0.7277037495 | 0.9999537652 | 1.4828053352    |
| 1.2480005421  | 0.6196435355 | 0.9999537652 | -1.2127671684   |
| 1.1387802751  | 0.4553588377 | 0.9999537652 | 1.2510988699    |
| 1.0872153021  | 0.7043579325 | 0.9999537652 | 1.2281780708    |
| 1.2741030728  | 0.8382550595 | 0.9999537652 | -4.2406870258   |
| 1.0039655521  | 0.9837517676 | 0.9999537652 | 1.5304376115    |
| 1.1874655834  | 0.6879300426 | 0.9999537652 | 1.3515664869    |
| -1.1453192235 | 0.9084480465 | 0.9999537652 | 0               |

gene\_expression\_table

|                |              |              |               |
|----------------|--------------|--------------|---------------|
| -1.3342296605  | 0.4152711407 | 0.9999537652 | 1.4245270644  |
| 1.1951212749   | 0.3946343301 | 0.9999537652 | -1.1844520008 |
| 0              | 0            | 0            | 4.9527501949  |
| 1.0041643949   | 0.9886306612 | 0.9999537652 | 1.0799804531  |
| -1.0200823636  | 0.9202562835 | 0.9999537652 | 1.5712644739  |
| -1.030324962   | 0.920956554  | 0.9999537652 | -1.3574022302 |
| 4.5505976667   | 0.5557790267 | 0.9999537652 | -3.384595918  |
| -1.5512850017  | 0.2538545585 | 0.9999537652 | 1.0957553385  |
| 1.3129421727   | 0.1997029771 | 0.9999537652 | 1.3190749324  |
| 1.0364864658   | 0.8045989142 | 0.9999537652 | 1.1341170545  |
| -1.4830986381  | 0.507101195  | 0.9999537652 | 1.3089286093  |
| 1.1791813282   | 0.7395802764 | 0.9999537652 | 1.080055544   |
| -1.2601749205  | 0.4466249394 | 0.9999537652 | 1.2057134772  |
| -12.9852817769 | 0.1145723811 | 0.9999537652 | 18.6336779883 |
| 1.3519214764   | 0.2291674868 | 0.9999537652 | 1.2297879018  |
| 2.7933974408   | 0.6948713406 | 0.9999537652 | 0             |
| -1.0988764368  | 0.5557819776 | 0.9999537652 | 1.4382201485  |
| -1.1577729869  | 0.4790174805 | 0.9999537652 | 1.185358789   |
| -1.0335865813  | 0.91920921   | 0.9999537652 | 1.2468505536  |
| 0              | 0            | 0            | -1.3592076145 |
| 1.2442439145   | 0.4821989253 | 0.9999537652 | -1.1940834369 |
| -1.0101874558  | 0.9739407161 | 0.9999537652 | 1.1056624323  |
| 3.0642477781   | 0.3208985299 | 0.9999537652 | -1.5086083432 |
| -1.0550219132  | 0.8424033721 | 0.9999537652 | -1.1531118541 |
| 1.3242201799   | 0.5571784961 | 0.9999537652 | -1.1316682221 |
| 1.1490921787   | 0.544016473  | 0.9999537652 | -1.0638934517 |
| -1.4427833345  | 0.1596014047 | 0.9999537652 | -1.009168882  |
| 1.1899003621   | 0.334224868  | 0.9999537652 | 1.2343873872  |
| 3.8622037496   | 0.619279619  | 0.9999537652 | 0             |
| -6.9762758667  | 0.257129201  | 0.9999537652 | 0             |
| 1.2368337997   | 0.1867771456 | 0.9999537652 | 1.531463071   |
| -1.0488806479  | 0.9448345571 | 0.9999537652 | 2.0176725665  |
| 4.5505976667   | 0.5557790267 | 0.9999537652 | 16.7037438866 |
| 1.3553237329   | 0.4450800821 | 0.9999537652 | 1.4085994299  |
| -1.4113237029  | 0.108512766  | 0.9999537652 | 1.24781523    |
| 1.3626371084   | 0.6287186377 | 0.9999537652 | -1.0313954446 |
| 4.5505976667   | 0.5557790267 | 0.9999537652 | -5.3583704783 |
| -3.1203116482  | 0.2603638239 | 0.9999537652 | 16.6921882404 |
| -1.1251425411  | 0.7582654172 | 0.9999537652 | -1.3544123384 |
| -1.0739359402  | 0.8138175097 | 0.9999537652 | 1.3186573404  |
| 0              | 0            | 0            | 2.996475627   |
| 4.5505976667   | 0.5557790267 | 0.9999537652 | 1.438718359   |
| -1.107412991   | 0.6087562491 | 0.9999537652 | 1.3203319014  |
| 1.6373443238   | 0.3525638553 | 0.9999537652 | 1.1416445229  |
| -1.127938319   | 0.5493274252 | 0.9999537652 | 1.2983882762  |
| 0              | 0            | 0            | 12.7732027325 |
| -1.6937362394  | 0.0394929285 | 0.9999537652 | -1.3823718316 |
| 1.0164849475   | 0.944218865  | 0.9999537652 | 1.1720170648  |
| 1.043043508    | 0.8826961489 | 0.9999537652 | 1.1816476191  |

gene\_expression\_table

|               |              |              |               |
|---------------|--------------|--------------|---------------|
| 0             | 0            | 0            | 2.996475627   |
| -1.0821575717 | 0.7610075121 | 0.9999537652 | -1.1122593874 |
| 1.1168038901  | 0.9276262293 | 0.9999537652 | 6.9133480437  |
| -2.0284297556 | 0.0527920993 | 0.9999537652 | 1.0340558087  |
| 1.1038218769  | 0.4563641756 | 0.9999537652 | -1.2487588538 |
| -1.9182044808 | 0.3932826021 | 0.9999537652 | 1.089503369   |
| 1.0628622838  | 0.8591795761 | 0.9999537652 | 1.0744087558  |
| 2.7933974408  | 0.6948713406 | 0.9999537652 | 1.4809662823  |
| -1.7329739058 | 0.083202991  | 0.9999537652 | -1.0526731925 |
| 1.0549469795  | 0.8470773317 | 0.9999537652 | -1.2223015012 |
| 0             | 0            | 0            | -1.8594983184 |
| -1.2017692044 | 0.673867422  | 0.9999537652 | 1.3615494687  |
| 1.1095500384  | 0.4622691028 | 0.9999537652 | -1.3111951279 |
| 1.9475083768  | 0.253088899  | 0.9999537652 | 1.2260009445  |
| -1.1105845616 | 0.4113894703 | 0.9999537652 | -1.0374441436 |
| -1.2355728683 | 0.3192775803 | 0.9999537652 | -1.8654886106 |
| -1.4611854053 | 0.1221374522 | 0.9999537652 | 1.0437952688  |
| -1.4700854183 | 0.2876580917 | 0.9999537652 | -1.078184316  |
| 0             | 0            | 0            | 6.908559683   |
| 2.7933974408  | 0.6948713406 | 0.9999537652 | -4.9124967738 |
| -1.1332131568 | 0.7706845748 | 0.9999537652 | -1.4143284498 |
| 0             | 0            | 0            | 1.590997316   |
| -2.5861438062 | 0.4737924651 | 0.9999537652 | -1.3540113423 |
| 8.064174035   | 0.4193539664 | 0.9999537652 | -2.0479626835 |
| 1.1239887064  | 0.8172081433 | 0.9999537652 | 2.0814691733  |
| 1.076325972   | 0.6218672132 | 0.9999537652 | -1.3047161295 |
| -1.0924021824 | 0.5849504373 | 0.9999537652 | 1.2225706684  |
| -1.7140706619 | 0.5280304655 | 0.9999537652 | 1.1108484856  |
| 1.1791841738  | 0.6266625135 | 0.9999537652 | -1.0357036706 |
| 1.4049480419  | 0.0281712698 | 0.9999537652 | 1.1500886859  |
| -1.060194812  | 0.8870212164 | 0.9999537652 | -1.5109779539 |
| 1.1221352547  | 0.9083204107 | 0.9999537652 | 1.8731367028  |
| 1.4538216685  | 0.4524110102 | 0.9999537652 | 1.0474919068  |
| -1.0299913959 | 0.8216556834 | 0.9999537652 | -1.2439754529 |
| 1.3456038051  | 0.6620606422 | 0.9999537652 | -1.0745375958 |
| 1.3254494764  | 0.4007581604 | 0.9999537652 | 1.7115999035  |
| 1.5293196826  | 0.3631019115 | 0.9999537652 | -1.2255202261 |
| 1.6852529786  | 0.0393589994 | 0.9999537652 | -1.0517316153 |
| 1.574033549   | 0.0988894235 | 0.9999537652 | 1.0584205644  |
| 1.2679783476  | 0.583214252  | 0.9999537652 | 1.5561795548  |
| 1.1647323104  | 0.6316243108 | 0.9999537652 | -1.247228855  |
| -1.012173367  | 0.9337569888 | 0.9999537652 | 1.1991308885  |
| 1.2443382777  | 0.2032815398 | 0.9999537652 | -1.2682668164 |
| -2.2584811166 | 0.2304468642 | 0.9999537652 | -1.3904070108 |
| 1.1102031215  | 0.4697882284 | 0.9999537652 | -1.1607173895 |
| 1.1819055871  | 0.2616148325 | 0.9999537652 | 1.0084096069  |
| -1.5359824943 | 0.1723885928 | 0.9999537652 | -1.1720381847 |
| -1.0255285461 | 0.8505252435 | 0.9999537652 | -1.630840201  |
| 1.3988806434  | 0.009168     | 0.9999537652 | -1.0551735063 |

gene\_expression\_table

|                |              |              |               |
|----------------|--------------|--------------|---------------|
| -1.0235213228  | 0.8668677782 | 0.9999537652 | 1.1681414929  |
| 1.1857677205   | 0.4890078628 | 0.9999537652 | 1.0505029141  |
| 2.3346865743   | 0.4712405372 | 0.9999537652 | 1.3417940918  |
| -1.259045832   | 0.2862559366 | 0.9999537652 | -2.2592526017 |
| 1.2966439193   | 0.4492315966 | 0.9999537652 | -1.4074073802 |
| -1.4749363527  | 0.0299002497 | 0.9999537652 | 1.2055394099  |
| -1.1159649051  | 0.6176142688 | 0.9999537652 | -1.5774951867 |
| -1.1816462225  | 0.2130860698 | 0.9999537652 | -1.3006247567 |
| -1.2412985235  | 0.2067028541 | 0.9999537652 | -1.2416710747 |
| 1.0213036022   | 0.9341192925 | 0.9999537652 | 1.1228726229  |
| 1.1776698887   | 0.4463078782 | 0.9999537652 | 1.319640004   |
| 1.319104928    | 0.1757534243 | 0.9999537652 | -1.0313678912 |
| -1.2225352262  | 0.1216022462 | 0.9999537652 | -1.4331020139 |
| 1.1268989761   | 0.2924369112 | 0.9999537652 | 1.040921958   |
| 1.2484788586   | 0.2707464202 | 0.9999537652 | -1.0182502969 |
| 1.9990319965   | 0.0371575639 | 0.9999537652 | 1.1768538732  |
| 1.1242358844   | 0.8720335654 | 0.9999537652 | -1.1077831536 |
| 1.5353839104   | 0.4124099276 | 0.9999537652 | -1.1277926517 |
| 4.5505976667   | 0.5557790267 | 0.9999537652 | 1.41016296    |
| -2.5871290907  | 0.5000874544 | 0.9999537652 | -1.1566816905 |
| 1.3397973953   | 0.118935355  | 0.9999537652 | 1.2727136518  |
| -1.2446995364  | 0.2015562286 | 0.9999537652 | -1.5807004474 |
| -1.2106520858  | 0.1763623154 | 0.9999537652 | -1.0142536285 |
| -1.0554656727  | 0.6836848426 | 0.9999537652 | -1.1560170508 |
| -1.1996181251  | 0.7035874525 | 0.9999537652 | -1.0295962437 |
| -1.0412679261  | 0.9263938144 | 0.9999537652 | -1.1530500699 |
| -1.2019245538  | 0.3474947059 | 0.9999537652 | -1.2953335051 |
| 1.702429257    | 0.00172      | 0.9999537652 | 1.933921747   |
| -20.3937810938 | 0.005648     | 0.9999537652 | 0             |
| 2.8204370028   | 0.1259364259 | 0.9999537652 | 1.0473264101  |
| -1.0553982292  | 0.7475491601 | 0.9999537652 | 1.1247693461  |
| 1.3788650953   | 0.2326408704 | 0.9999537652 | 1.1762737506  |
| 1.1558667666   | 0.4682730715 | 0.9999537652 | 1.047296754   |
| -1.0641993194  | 0.7875772109 | 0.9999537652 | 1.1504131496  |
| 1.906929619    | 0.2287373946 | 0.9999537652 | -1.8076940847 |
| 1.2185613789   | 0.3171824383 | 0.9999537652 | 1.1110018251  |
| -1.2868191341  | 0.3743962017 | 0.9999537652 | -1.2050129896 |
| -1.1416409003  | 0.416250177  | 0.9999537652 | -1.120534752  |
| 1.2476907627   | 0.7138964939 | 0.9999537652 | -1.013822428  |
| -1.1124710649  | 0.8695624557 | 0.9999537652 | 1.8032167839  |
| 2.7933974408   | 0.6948713406 | 0.9999537652 | -3.3826461929 |
| -1.0743494351  | 0.55228298   | 0.9999537652 | 1.1245661604  |
| 2.3335098933   | 0.4402988569 | 0.9999537652 | -1.4609057566 |
| -1.0782624345  | 0.8291134416 | 0.9999537652 | -1.1084308424 |
| -1.0063461039  | 0.9676709442 | 0.9999537652 | 1.2055330357  |
| 1.3653240897   | 0.1135225939 | 0.9999537652 | -1.5081863564 |
| -1.3441069402  | 0.6689428982 | 0.9999537652 | -1.3565062967 |
| -1.0516577135  | 0.6809218519 | 0.9999537652 | -1.2517600711 |
| 1.0151744851   | 0.9265961412 | 0.9999537652 | -1.0470911945 |

gene\_expression\_table

|               |              |              |               |
|---------------|--------------|--------------|---------------|
| 1.4475824847  | 0.0476381873 | 0.9999537652 | -1.4763839802 |
| 1.7463566065  | 0.0830853989 | 0.9999537652 | 1.0494342308  |
| 1.3177878897  | 0.3820750638 | 0.9999537652 | -1.2054035958 |
| -1.9559533151 | 0.2734561958 | 0.9999537652 | 1.5313660668  |
| 1.4196256229  | 0.2526398297 | 0.9999537652 | -1.26713777   |
| -1.2639957703 | 0.208777656  | 0.9999537652 | 1.0987073359  |
| 1.3666903992  | 0.0254134835 | 0.9999537652 | 1.0213041724  |
| -1.2925019483 | 0.5775165415 | 0.9999537652 | -1.1850676391 |
| 1.1823716234  | 0.7716266879 | 0.9999537652 | 1.9394623409  |
| 2.7933974408  | 0.6948713406 | 0.9999537652 | -1.7829804346 |
| 18.5983228161 | 0.2580521535 | 0.9999537652 | -1.7622084838 |
| 1.7482661688  | 0.4628829324 | 0.9999537652 | 1.2242146434  |
| 1.0484510524  | 0.9375957026 | 0.9999537652 | 1.8970550837  |
| -1.1755560667 | 0.8214953964 | 0.9999537652 | 1.0012045069  |
| 1.2458528047  | 0.1553644419 | 0.9999537652 | 1.1270686261  |
| 1.2690129842  | 0.5886625791 | 0.9999537652 | 1.0253827829  |
| 1.2916350336  | 0.1743918669 | 0.9999537652 | -1.3227652287 |
| 1.1722727737  | 0.4102416559 | 0.9999537652 | 1.0954701246  |
| -1.1927418657 | 0.2338604041 | 0.9999537652 | -1.2908309235 |
| -4.8154268017 | 0.1711980838 | 0.9999537652 | -1.4688582794 |
| -1.2985839753 | 0.1002733076 | 0.9999537652 | -1.1255768705 |
| 1.4320838073  | 0.3460680139 | 0.9999537652 | -1.6583240028 |
| -1.7472607057 | 0.0402400421 | 0.9999537652 | 1.2411684383  |
| 1.0985483363  | 0.7720239733 | 0.9999537652 | -1.5442375212 |
| 1.0310635756  | 0.8353097527 | 0.9999537652 | -1.0166134526 |
| 1.1242912857  | 0.4668436377 | 0.9999537652 | -1.5054888918 |
| 4.5544554512  | 0.5691174365 | 0.9999537652 | -3.1944206015 |
| -1.0068830088 | 0.9621735952 | 0.9999537652 | 1.0046624951  |
| 1.1111136264  | 0.7647554886 | 0.9999537652 | 1.5070956666  |
| -1.1752136988 | 0.6250345101 | 0.9999537652 | -1.4957532113 |
| 9.8205505243  | 0.3837505727 | 0.9999537652 | 1.1910156039  |
| -1.0151329301 | 0.9615319037 | 0.9999537652 | 1.0102007223  |
| 1.0216665371  | 0.8987596314 | 0.9999537652 | 1.0164888743  |
| 2.7345456454  | 0.1996468189 | 0.9999537652 | 2.0314603002  |
| 4.2722366566  | 0.2006421097 | 0.9999537652 | -1.3794335919 |
| 2.7933974408  | 0.6948713406 | 0.9999537652 | 0             |
| -1.2954243326 | 0.2628456139 | 0.9999537652 | -1.5710435718 |
| 1.1023024147  | 0.3873336606 | 0.9999537652 | 1.003950646   |
| 1.0290098953  | 0.9055964291 | 0.9999537652 | 1.1297657117  |
| -1.1015308523 | 0.5702507305 | 0.9999537652 | 1.044204672   |
| 1.1540124325  | 0.3110621586 | 0.9999537652 | -1.1730916061 |
| 2.7933974408  | 0.6948713406 | 0.9999537652 | 0             |
| 1.1092861353  | 0.6160730988 | 0.9999537652 | 1.0331513001  |
| 4.5505976667  | 0.5557790267 | 0.9999537652 | -1.2375740166 |
| 0             | 0            | 0            | 20.5862458385 |
| 1.0190257003  | 0.9522403606 | 0.9999537652 | -1.2875554414 |
| 0             | 0            | 0            | 4.9527501949  |
| 0             | 0            | 0            | 1.2400291296  |
| 3.8622037496  | 0.6192487316 | 0.9999537652 | 1.066768139   |



gene\_expression\_table

|                |              |              |               |
|----------------|--------------|--------------|---------------|
| 1.5080610755   | 0.2870358661 | 0.9999537652 | 1.2085064706  |
| 1.0051455705   | 0.9789580781 | 0.9999537652 | -1.2493646909 |
| -1.3134657905  | 0.078067684  | 0.9999537652 | -1.2279633221 |
| 1.4971426362   | 0.007404     | 0.9999537652 | -1.0638698069 |
| 1.4232493793   | 0.0584489606 | 0.9999537652 | 1.0105417796  |
| -2.5838710423  | 0.5184586067 | 0.9999537652 | 1.0679531163  |
| 2.1462288065   | 0.5693449697 | 0.9999537652 | -1.0281427069 |
| 1.0369596019   | 0.8354600279 | 0.9999537652 | -1.2835066516 |
| -1.3160085985  | 0.6486525711 | 0.9999537652 | -1.2892848175 |
| -1.0973540167  | 0.6866493543 | 0.9999537652 | -1.0685467739 |
| 1.2303320746   | 0.1199768546 | 0.9999537652 | 1.063137466   |
| 1.1204342736   | 0.6700261411 | 0.9999537652 | -1.0695890564 |
| 1.1851804944   | 0.5281572802 | 0.9999537652 | 1.1480253285  |
| -1.3665054091  | 0.3354449374 | 0.9999537652 | -1.2765901538 |
| 1.0736659873   | 0.5838239078 | 0.9999537652 | -1.1067404018 |
| 0              | 0            | 0            | -1.7811487064 |
| 1.3040940818   | 0.1427049689 | 0.9999537652 | 1.4520261279  |
| 1.2521099466   | 0.2337016339 | 0.9999537652 | -1.1559341711 |
| -1.5867212121  | 0.7194021882 | 0.9999537652 | -1.1432552104 |
| -1.06423776    | 0.7463907327 | 0.9999537652 | -1.2261460066 |
| 1.032915085    | 0.8612954169 | 0.9999537652 | 1.0272469439  |
| 29.8698312703  | 0.2177863823 | 0.9999537652 | 1.0729559622  |
| -1.2252227094  | 0.2868897168 | 0.9999537652 | -1.1347568438 |
| -1.4420309206  | 0.5598383811 | 0.9999537652 | -1.1124754531 |
| -1.1045488064  | 0.40026188   | 0.9999537652 | 1.1002203095  |
| -1.0630634165  | 0.6777411347 | 0.9999537652 | -1.4084144008 |
| -1.6687223317  | 0.6215950954 | 0.9999537652 | 0             |
| -1.6973662086  | 0.5474133501 | 0.9999537652 | 0             |
| -1.0280584149  | 0.9214690687 | 0.9999537652 | -1.3682891857 |
| -1.8650254067  | 0.3015269972 | 0.9999537652 | -1.0569502624 |
| 0              | 0            | 0            | -1.8588429871 |
| -1.5875118025  | 0.7201493553 | 0.9999537652 | 9.7116702472  |
| -1.0293606601  | 0.829107166  | 0.9999537652 | 1.1793600402  |
| -1.0085355311  | 0.9930374939 | 0.9999537652 | 2.2253832076  |
| 1.0690082471   | 0.8628931491 | 0.9999537652 | 1.9620588819  |
| 1.2571062983   | 0.2923318567 | 0.9999537652 | 1.3068231642  |
| 1.4509590208   | 0.189029105  | 0.9999537652 | -1.0060823977 |
| 2.0259070874   | 0.1623554539 | 0.9999537652 | 1.7292704494  |
| -1.1380592839  | 0.4477371455 | 0.9999537652 | 1.0500446226  |
| 2.7933974408   | 0.6948713406 | 0.9999537652 | 2.7983193256  |
| -1.0010583562  | 0.9949979653 | 0.9999537652 | -1.1393596982 |
| -1.436108247   | 0.2084486858 | 0.9999537652 | 1.0852330837  |
| 0              | 0            | 0            | 2.9988886918  |
| 1.1576166872   | 0.4582439296 | 0.9999537652 | -1.0389598578 |
| -1.0018962327  | 0.987862453  | 0.9999537652 | -1.4583331983 |
| 1.2065683536   | 0.7159980484 | 0.9999537652 | -1.2538296023 |
| 1.0815467883   | 0.6905557318 | 0.9999537652 | -1.0221428959 |
| -17.0527724669 | 0.1064209713 | 0.9999537652 | 18.6465640159 |
| -1.0036777173  | 0.990590593  | 0.9999537652 | 1.1326136241  |

gene\_expression\_table

|               |              |              |               |
|---------------|--------------|--------------|---------------|
| -3.2640787972 | 0.0865176329 | 0.9999537652 | 1.0091255776  |
| 1.8267262185  | 0.065227085  | 0.9999537652 | -1.1938784617 |
| 1.7550025421  | 0.0848264417 | 0.9999537652 | -1.1364730368 |
| 10.3257158514 | 0.0003955    | 0.9999537652 | -1.3273865216 |
| -1.0139376956 | 0.9494443371 | 0.9999537652 | -1.2606363892 |
| 2.0363455658  | 0.4192599304 | 0.9999537652 | -1.0648363021 |
| -1.4267571933 | 0.5004994825 | 0.9999537652 | 1.207055345   |
| -1.2732762498 | 0.1088317454 | 0.9999537652 | -1.0881085736 |
| 1.0525190758  | 0.9170460597 | 0.9999537652 | -1.1193114299 |
| 0             | 0            | 0            | 4.9527501949  |
| -1.9467268757 | 0.00405      | 0.9999537652 | -1.1931768843 |
| 1.1950571358  | 0.5081226889 | 0.9999537652 | -1.1943853152 |
| 0             | 0            | 0            | 5.7130160159  |
| -1.0979248749 | 0.6095719606 | 0.9999537652 | -1.1212242689 |
| 2.6872400047  | 0.26362364   | 0.9999537652 | -1.1601340508 |
| 2.7933974408  | 0.6948713406 | 0.9999537652 | -1.658786914  |
| 0             | 0            | 0            | 6.908559683   |
| 1.7166879814  | 0.3015433011 | 0.9999537652 | -1.3820107225 |
| -2.4397350298 | 0.3123038017 | 0.9999537652 | -1.379117529  |
| 1.1535037484  | 0.3675774058 | 0.9999537652 | 1.2094013101  |
| -3.1179374904 | 0.2574432025 | 0.9999537652 | 3.7631108754  |
| 1.0614263706  | 0.8889007518 | 0.9999537652 | 1.3462221558  |
| 1.1207661674  | 0.5416247967 | 0.9999537652 | -1.0835401821 |
| 1.0782959684  | 0.5770187908 | 0.9999537652 | -1.1044786833 |
| -1.0719128329 | 0.6735832334 | 0.9999537652 | 1.3061091306  |
| -1.1761764882 | 0.7959563116 | 0.9999537652 | -1.0330277526 |
| 0             | 0            | 0            | 9.7116702472  |
| 6.2167132833  | 0.0849912995 | 0.9999537652 | 2.8014102743  |
| 0             | 0            | 0            | -1.0084773122 |
| -1.93731553   | 0.1230901383 | 0.9999537652 | -1.0229163268 |
| 1.6024984014  | 0.686210146  | 0.9999537652 | 2.329086775   |
| 1.0973831338  | 0.6560755214 | 0.9999537652 | 1.2786506033  |
| -1.1453192235 | 0.9084228918 | 0.9999537652 | -1.5933216452 |
| 1.1402754382  | 0.6505659793 | 0.9999537652 | -1.534652146  |
| -1.0709734459 | 0.8932928065 | 0.9999537652 | 1.9907660386  |
| 1.0927017526  | 0.7268980104 | 0.9999537652 | 1.4039691797  |
| -1.0719888271 | 0.6203771366 | 0.9999537652 | -1.2377895624 |
| 0             | 0            | 0            | -1.8577842586 |
| 2.0351796303  | 0.1185950445 | 0.9999537652 | 1.048864024   |
| -1.1641919713 | 0.5551718631 | 0.9999537652 | -1.1611543717 |
| 1.177090287   | 0.3509968983 | 0.9999537652 | 1.1192150025  |
| 1.1879887589  | 0.1531499514 | 0.9999537652 | -1.3964218786 |
| -1.7540719944 | 0.2121022615 | 0.9999537652 | -1.1485866433 |
| 1.603906631   | 0.6805398061 | 0.9999537652 | 1.1360578751  |
| -1.0929418997 | 0.5728940492 | 0.9999537652 | -1.0336966669 |
| 1.471195557   | 0.4657860859 | 0.9999537652 | -1.3065878424 |
| -1.2276362296 | 0.1224673987 | 0.9999537652 | -1.1158007982 |
| -1.1266634304 | 0.5275220039 | 0.9999537652 | -1.2141472478 |
| 1.0909679987  | 0.8809229433 | 0.9999537652 | 1.0561583085  |

gene\_expression\_table

|               |              |              |               |
|---------------|--------------|--------------|---------------|
| 1.4709411218  | 0.018013412  | 0.9999537652 | -1.3422603268 |
| -1.3510151174 | 0.5756497845 | 0.9999537652 | 1.0144898042  |
| -1.1894962702 | 0.6595292809 | 0.9999537652 | -1.2764153756 |
| 2.7933974408  | 0.6948713406 | 0.9999537652 | -1.0601741034 |
| 0             | 0            | 0            | -1.3808714259 |
| 1.1281416946  | 0.7374502938 | 0.9999537652 | -1.2102430893 |
| 3.8622037496  | 0.619217824  | 0.9999537652 | 1.115697704   |
| 9.8205505243  | 0.383964091  | 0.9999537652 | 1.1257491784  |
| -1.2666655769 | 0.4597281813 | 0.9999537652 | -1.0338148364 |
| 0             | 0            | 0            | 1.9432165124  |
| 2.7933974408  | 0.6948713406 | 0.9999537652 | 0             |
| -1.07307118   | 0.8883734348 | 0.9999537652 | 1.0096073434  |
| 2.6239526374  | 0.1313100907 | 0.9999537652 | -1.0003629227 |
| 1.6476882037  | 0.596576655  | 0.9999537652 | 1.2747352577  |
| -1.0894773671 | 0.8938770878 | 0.9999537652 | -1.493761877  |
| 1.0138193575  | 0.9706121908 | 0.9999537652 | 1.0689012739  |
| -1.0873687295 | 0.5648046501 | 0.9999537652 | 1.1418789822  |
| -1.0787763667 | 0.7008960567 | 0.9999537652 | -1.1010982524 |
| 0             | 0            | 0            | 0             |
| 2.7933974408  | 0.6948713406 | 0.9999537652 | 0             |
| 1.5987470131  | 0.3780539628 | 0.9999537652 | -1.5314170113 |
| -1.1635738407 | 0.6665308741 | 0.9999537652 | 1.1110286957  |
| 1.2655060468  | 0.2766468799 | 0.9999537652 | 1.5327504982  |
| 1.1449704735  | 0.4554874515 | 0.9999537652 | 1.1247855206  |
| -1.3888213571 | 0.0120867815 | 0.9999537652 | -1.3035805716 |
| 1.1861573905  | 0.7272933958 | 0.9999537652 | -1.3288093709 |
| 1.1442220107  | 0.3872763964 | 0.9999537652 | -1.21328781   |
| -1.0818367621 | 0.8541655733 | 0.9999537652 | -1.3164998192 |
| 1.055285734   | 0.8870423753 | 0.9999537652 | 1.153500395   |
| 4.5544554512  | 0.5691154432 | 0.9999537652 | -1.5002047937 |
| -1.1718047967 | 0.8443104731 | 0.9999537652 | -2.9687025352 |
| 1.2669793002  | 0.3655763652 | 0.9999537652 | 1.2205689728  |
| 1.5345406962  | 0.2685594143 | 0.9999537652 | 1.3428761373  |
| 1.1929726634  | 0.2563076318 | 0.9999537652 | -1.1142674056 |
| 1.1399460543  | 0.575533989  | 0.9999537652 | -1.3603715413 |
| 1.0263927084  | 0.8361054328 | 0.9999537652 | -1.4364937229 |
| 2.8162992884  | 0.3665312    | 0.9999537652 | -1.2384158616 |
| -1.2462075393 | 0.1511559927 | 0.9999537652 | -1.0718958087 |
| 1.3322071085  | 0.6205680367 | 0.9999537652 | -1.5371931092 |
| -1.1426563294 | 0.5050162828 | 0.9999537652 | -1.7663278549 |
| -1.16596854   | 0.5348960718 | 0.9999537652 | -1.3948278289 |
| 15.1008094413 | 0.2915047567 | 0.9999537652 | -5.0960079851 |
| -1.4504451984 | 0.1404386498 | 0.9999537652 | -1.364605108  |
| -1.1128693633 | 0.3943221213 | 0.9999537652 | 1.1276960565  |
| 2.0372378093  | 0.4352795618 | 0.9999537652 | 2.1074774138  |
| 1.1224138006  | 0.5624427143 | 0.9999537652 | -1.1394339584 |
| 1.1234480071  | 0.5927726365 | 0.9999537652 | 1.0429606645  |
| 1.1414955553  | 0.688348978  | 0.9999537652 | -1.0129551596 |
| 18.6298281873 | 0.2553026637 | 0.9999537652 | -1.3123873953 |

gene\_expression\_table

|               |              |              |               |
|---------------|--------------|--------------|---------------|
| 1.1268507337  | 0.353393727  | 0.9999537652 | -1.0449177474 |
| -1.4162636112 | 0.169824119  | 0.9999537652 | 1.1490009265  |
| -1.233298793  | 0.2094907544 | 0.9999537652 | -1.1592534993 |
| -1.2099540125 | 0.273001395  | 0.9999537652 | -1.1264145318 |
| 1.4366050279  | 0.0856662037 | 0.9999537652 | -1.2273667388 |
| -1.2132688221 | 0.5852036512 | 0.9999537652 | -1.1208182977 |
| 2.5976061076  | 0.1040264891 | 0.9999537652 | -1.3345403183 |
| -1.0685380045 | 0.9372568069 | 0.9999537652 | -1.6770957387 |
| -1.4580288226 | 0.1251923031 | 0.9999537652 | -1.1139850457 |
| 1.1966118699  | 0.3664719812 | 0.9999537652 | 1.0200838671  |
| -2.0049217286 | 0.4846480013 | 0.9999537652 | -1.0005722444 |
| -1.3806165014 | 0.3922009695 | 0.9999537652 | -1.572077592  |
| -1.1132667401 | 0.744901039  | 0.9999537652 | -1.3595718051 |
| -1.6568408305 | 0.4210319385 | 0.9999537652 | -1.338149107  |
| 0             | 0            | 0            | 6.908559683   |
| 2.2227236654  | 0.5576798218 | 0.9999537652 | -2.0477227478 |
| 1.1332615238  | 0.7051276106 | 0.9999537652 | -1.0229460566 |
| 2.7933974408  | 0.6948713406 | 0.9999537652 | -2.0482026754 |
| 1.3820692738  | 0.7418794899 | 0.9999537652 | -1.2790173198 |
| -1.1236546327 | 0.5159860458 | 0.9999537652 | -1.1870418109 |
| -1.0219825914 | 0.924742867  | 0.9999537652 | 1.2396646562  |
| 1.7039322442  | 0.2510657094 | 0.9999537652 | -1.0657726067 |
| 0             | 0            | 0            | 2.996475627   |
| 0             | 0            | 0            | 2.996475627   |
| -3.0586831592 | 0.0112522695 | 0.9999537652 | -1.1235708981 |
| 0             | 0            | 0            | 21.234349681  |
| 1.5800944083  | 0.4969428548 | 0.9999537652 | -1.289762344  |
| -1.1371645363 | 0.674019683  | 0.9999537652 | 1.3100732482  |
| 2.7957660672  | 0.7055116951 | 0.9999537652 | 4.3967731856  |
| 2.7933974408  | 0.6948713406 | 0.9999537652 | -5.3583704783 |
| 0             | 0            | 0            | 1.2410271878  |
| -1.2459100936 | 0.6630945225 | 0.9999537652 | 1.2801203073  |
| 0             | 0            | 0            | 2.996475627   |
| 1.009065489   | 0.9845214742 | 0.9999537652 | 1.8000199784  |
| 57.187733295  | 0.1123556626 | 0.9999537652 | -3.4230273045 |
| 0             | 0            | 0            | -1.8580020618 |
| -1.467185214  | 0.4062869535 | 0.9999537652 | 1.3662600626  |
| 1.2610885254  | 0.7418548403 | 0.9999537652 | -1.7236068244 |
| -1.2148704852 | 0.4850438186 | 0.9999537652 | -1.1797502881 |
| 1.3336520419  | 0.0819193623 | 0.9999537652 | -1.2540981758 |
| 5.5083463532  | 0.0701864284 | 0.9999537652 | 1.8715612428  |
| 1.2096219116  | 0.2042829636 | 0.9999537652 | -1.4630395478 |
| 1.0025878864  | 0.9912681226 | 0.9999537652 | -1.1857382596 |
| -1.1938303351 | 0.5794445479 | 0.9999537652 | -1.4178250262 |
| -1.0370189999 | 0.8057155715 | 0.9999537652 | -1.0451859915 |
| -1.026119763  | 0.8848562237 | 0.9999537652 | -1.1396437199 |
| 1.395501518   | 0.1314970435 | 0.9999537652 | 1.2400867901  |
| 1.3076659969  | 0.4808092242 | 0.9999537652 | -1.0971436643 |
| 1.2354572624  | 0.3340771775 | 0.9999537652 | -1.1628088682 |

gene\_expression\_table

|               |              |              |               |
|---------------|--------------|--------------|---------------|
| -1.0862235581 | 0.6449499584 | 0.9999537652 | -1.0494848713 |
| -1.1500823788 | 0.4379295734 | 0.9999537652 | -1.1066781983 |
| 2.7933974408  | 0.6948713406 | 0.9999537652 | -1.1250196696 |
| 1.1470858769  | 0.7815227573 | 0.9999537652 | 1.1223813354  |
| 1.001038249   | 0.9947860259 | 0.9999537652 | 1.1695399364  |
| 2.0057237411  | 0.2464624472 | 0.9999537652 | 1.3630917942  |
| -1.1873725306 | 0.3392017972 | 0.9999537652 | 1.0951827936  |
| 16.8433158146 | 0.2737823561 | 0.9999537652 | 1.7462448558  |
| 1.0712193836  | 0.667849089  | 0.9999537652 | -1.3737945697 |
| 1.2184218866  | 0.087700567  | 0.9999537652 | -1.1081969004 |
| 1.0340248443  | 0.8575274954 | 0.9999537652 | -1.3565382948 |
| -1.1745894864 | 0.3095283838 | 0.9999537652 | -1.0865234307 |
| 4.5544554512  | 0.56911345   | 0.9999537652 | 2.9302599816  |
| 1.1057812314  | 0.6081386661 | 0.9999537652 | 1.3263697254  |
| -1.1649408325 | 0.2855274374 | 0.9999537652 | -1.1535871194 |
| 1.0257391298  | 0.8955622162 | 0.9999537652 | -1.1491347225 |
| 1.8723258494  | 0.009106     | 0.9999537652 | 1.3227579242  |
| -1.0525632343 | 0.7536432774 | 0.9999537652 | -1.3327032796 |
| 1.1338604475  | 0.3796128015 | 0.9999537652 | -1.3234144172 |
| 11.5766527773 | 0.3454082547 | 0.9999537652 | -1.2402444264 |
| 1.1410834531  | 0.7558440573 | 0.9999537652 | -1.0441383663 |
| -1.0605156096 | 0.7671190227 | 0.9999537652 | 1.1358557182  |
| 1.131099688   | 0.4455767943 | 0.9999537652 | -1.0723378931 |
| -3.0930401431 | 0.1225336416 | 0.9999537652 | -1.0418572178 |
| 0             | 0            | 0            | 2.9988886918  |
| -1.6267638816 | 0.4445153888 | 0.9999537652 | -1.861834348  |
| -1.4218047209 | 0.5194881691 | 0.9999537652 | -1.4905881959 |
| -1.5763646825 | 0.5009531945 | 0.9999537652 | 1.2536187606  |
| 4.0347077664  | 0.2015377033 | 0.9999537652 | -1.5805867929 |
| -1.2365301525 | 0.6187436842 | 0.9999537652 | 1.1979151226  |
| 0             | 0            | 0            | 0             |
| 1.1263768786  | 0.4953153322 | 0.9999537652 | 1.1994469857  |
| 2.5734927579  | 0.4060790046 | 0.9999537652 | -1.3436666544 |
| 2.7933974408  | 0.6948713406 | 0.9999537652 | 1.2398837679  |
| 1.0587017639  | 0.9181531174 | 0.9999537652 | -1.4054675939 |
| 1.1949616849  | 0.3671841622 | 0.9999537652 | -1.3913625158 |
| 1.4755277565  | 0.007468     | 0.9999537652 | 1.2707775723  |
| -1.035281337  | 0.8453948225 | 0.9999537652 | -1.1040211784 |
| -1.077841221  | 0.6360926516 | 0.9999537652 | -1.0783846538 |
| 1.0929080844  | 0.5775855807 | 0.9999537652 | 1.07672512    |
| -1.1772887308 | 0.7533021757 | 0.9999537652 | -1.303877636  |
| -1.0223357772 | 0.9373761128 | 0.9999537652 | -1.4638354216 |
| 1.053261896   | 0.7312630396 | 0.9999537652 | -1.2437038296 |
| -1.1346812318 | 0.7474540794 | 0.9999537652 | 1.5931238094  |
| 1.0291290148  | 0.8366993142 | 0.9999537652 | 1.1088192833  |
| 4.5505976667  | 0.5557790267 | 0.9999537652 | 16.6806485101 |
| 1.7916349996  | 0.3105003687 | 0.9999537652 | -1.0172517022 |
| 1.1454331778  | 0.6836879932 | 0.9999537652 | -1.1028188337 |
| 1.6719641693  | 0.1808932908 | 0.9999537652 | 1.1231736035  |

gene\_expression\_table

|               |              |              |               |
|---------------|--------------|--------------|---------------|
| 2.7933974408  | 0.6948713406 | 0.9999537652 | 0             |
| 0             | 0            | 0            | 8.9512754559  |
| 1.1542967725  | 0.4986015926 | 0.9999537652 | -1.2428113881 |
| -7.0403382421 | 0.1005442596 | 0.9999537652 | 14.7373490367 |
| -1.9290774189 | 0.6162740647 | 0.9999537652 | 0             |
| -1.1309592246 | 0.4183687682 | 0.9999537652 | -1.2271183541 |
| -1.2779195599 | 0.1841567712 | 0.9999537652 | -1.4064907524 |
| 1.1046260832  | 0.7418420231 | 0.9999537652 | 1.0143323519  |
| -1.4986982513 | 0.0797381862 | 0.9999537652 | -1.4022422059 |
| -1.0879166553 | 0.5777995377 | 0.9999537652 | -1.1096927001 |
| 6.3075231393  | 0.4851654977 | 0.9999537652 | -1.4680135518 |
| 18.5983228161 | 0.2580535817 | 0.9999537652 | 5.2143761525  |
| 0             | 0            | 0            | 0             |
| 4.5505976667  | 0.5557790267 | 0.9999537652 | 1.9432271302  |
| 0             | 0            | 0            | 2.996475627   |
| 1.2523812163  | 0.2185934968 | 0.9999537652 | 1.1631657223  |
| -1.0375894658 | 0.8586634434 | 0.9999537652 | 1.2787147993  |
| 1.1506613189  | 0.5388169716 | 0.9999537652 | 1.0188388352  |
| -7.0458783659 | 0.0842665862 | 0.9999537652 | 1.4239170092  |
| 1.0433630444  | 0.7561994395 | 0.9999537652 | -1.2416065854 |
| 1.0003654271  | 0.9982515557 | 0.9999537652 | -1.5099916317 |
| 4.5505976667  | 0.5557790267 | 0.9999537652 | 1.5740434553  |
| 1.0569659205  | 0.8362623647 | 0.9999537652 | -1.0586187108 |
| 0             | 0            | 0            | 6.908559683   |
| 1.3164896658  | 0.349665885  | 0.9999537652 | 2.5975288819  |
| -1.0913409447 | 0.8107263823 | 0.9999537652 | -1.1743577437 |
| -1.085408551  | 0.652071967  | 0.9999537652 | -1.0476977684 |
| 1.0321393073  | 0.8626602276 | 0.9999537652 | -1.160044071  |
| 1.263371817   | 0.2035082129 | 0.9999537652 | 1.0027886176  |
| 1.2995518875  | 0.4519143484 | 0.9999537652 | -1.0337214812 |
| 1.2578299656  | 0.4954577645 | 0.9999537652 | -1.4092705524 |
| -1.0040890011 | 0.9829905955 | 0.9999537652 | -1.3401748293 |
| 1.2689653878  | 0.3053835969 | 0.9999537652 | 1.0972667659  |
| -1.6631765169 | 0.4183763937 | 0.9999537652 | -1.1962298278 |
| 1.2363480637  | 0.3202040232 | 0.9999537652 | -1.0254072819 |
| -1.1503649434 | 0.3798858903 | 0.9999537652 | -1.2407701073 |
| 1.1177376122  | 0.7209603172 | 0.9999537652 | -1.0359795774 |
| 1.2401278409  | 0.6359609104 | 0.9999537652 | -1.0450950344 |
| -1.209275812  | 0.2579939967 | 0.9999537652 | -1.1168873591 |
| 0             | 0            | 0            | 1.2394611522  |
| -1.0468894492 | 0.7509938438 | 0.9999537652 | -1.2967486027 |
| -1.1280813984 | 0.5824659127 | 0.9999537652 | 1.1019241375  |
| -1.2206505016 | 0.6585729013 | 0.9999537652 | 1.2982156351  |
| -1.1292691121 | 0.4051571655 | 0.9999537652 | -1.1207564135 |
| 1.0226734087  | 0.9062388152 | 0.9999537652 | -1.0133870332 |
| 2.6517750321  | 0.1137899357 | 0.9999537652 | 1.38408839    |
| 1.058939053   | 0.7565235258 | 0.9999537652 | 1.0264611055  |
| 1.1223268592  | 0.4311710026 | 0.9999537652 | -1.1980028151 |
| -1.011363348  | 0.9614125468 | 0.9999537652 | -1.0204186667 |

gene\_expression\_table

|               |              |              |               |
|---------------|--------------|--------------|---------------|
| 2.7933974408  | 0.6948713406 | 0.9999537652 | 6.908559683   |
| 1.5373481529  | 0.2488226969 | 0.9999537652 | -1.0443588544 |
| -1.1767280502 | 0.3867672578 | 0.9999537652 | -1.1829846796 |
| 2.7933974408  | 0.6948713406 | 0.9999537652 | 12.7909013375 |
| -1.096363092  | 0.4381520923 | 0.9999537652 | -1.5078135119 |
| 2.7933974408  | 0.6948713406 | 0.9999537652 | 12.7732027325 |
| -1.228774061  | 0.4245989417 | 0.9999537652 | -1.4253833756 |
| 1.0578046988  | 0.8627365462 | 0.9999537652 | -1.373482463  |
| 9.8205505243  | 0.3838938042 | 0.9999537652 | 0             |
| 2.6478843491  | 0.4841251341 | 0.9999537652 | 1.2400291296  |
| 1.0075921245  | 0.9753178566 | 0.9999537652 | -1.2147172582 |
| 1.1340072463  | 0.2962197846 | 0.9999537652 | 1.1229859791  |
| 0             | 0            | 0            | 8.8639046058  |
| -1.0158784018 | 0.9580962615 | 0.9999537652 | -1.5051103498 |
| 2.7933974408  | 0.6948713406 | 0.9999537652 | 10.8262784008 |
| -1.0193890362 | 0.9159097666 | 0.9999537652 | -1.1582453594 |
| 1.182633619   | 0.6391293015 | 0.9999537652 | 1.1188571753  |
| 1.0124323008  | 0.970400032  | 0.9999537652 | 1.393395795   |
| 1.2866053758  | 0.3178883358 | 0.9999537652 | -1.0079769229 |
| -1.0455899786 | 0.7167943151 | 0.9999537652 | 1.1167550107  |
| 1.2976630662  | 0.3484942625 | 0.9999537652 | 2.5451612408  |
| 1.6024984014  | 0.6868416379 | 0.9999537652 | 1.6354495038  |
| 4.5505976667  | 0.5557790267 | 0.9999537652 | 2.6979916739  |
| -1.8031291404 | 0.005258     | 0.9999537652 | -1.3594899797 |
| 1.075052797   | 0.5793106644 | 0.9999537652 | 1.0242667762  |
| -1.5000103367 | 0.0378717179 | 0.9999537652 | -1.1129408141 |
| 2.3232499608  | 0.0759825089 | 0.9999537652 | 2.2894864996  |
| 2.7933974408  | 0.6948713406 | 0.9999537652 | 1.109951066   |
| 1.0742663477  | 0.6986155493 | 0.9999537652 | -1.4030457436 |
| -1.0857698111 | 0.7650941046 | 0.9999537652 | -1.1308726791 |
| -1.5992043474 | 0.0292797251 | 0.9999537652 | -1.045857399  |
| 1.0498805782  | 0.9153925553 | 0.9999537652 | -1.0711605254 |
| -7.3545033058 | 0.0461451899 | 0.9999537652 | 1.0962558674  |
| 1.1367523693  | 0.2583196913 | 0.9999537652 | 1.1221138119  |
| -1.0775719903 | 0.7233708187 | 0.9999537652 | -1.0011542077 |
| 4.5505976667  | 0.5557790267 | 0.9999537652 | -1.1241083699 |
| -1.5881570201 | 0.7077423276 | 0.9999537652 | -1.6580718273 |
| -1.7095355717 | 0.1246906798 | 0.9999537652 | 1.0934734729  |
| 1.1104162823  | 0.7391088992 | 0.9999537652 | -1.3877206036 |
| -1.0465422522 | 0.8167737468 | 0.9999537652 | -1.242747704  |
| 1.0582372718  | 0.9167360602 | 0.9999537652 | 1.1746426066  |
| 1.1705908586  | 0.7466496761 | 0.9999537652 | -1.4381901012 |
| -1.0031946337 | 0.9866699521 | 0.9999537652 | -1.3424261703 |
| 1.1258393082  | 0.5475827881 | 0.9999537652 | 1.1353958728  |
| 1.0064785949  | 0.9665446248 | 0.9999537652 | -1.4493212981 |
| 1.0556465585  | 0.7757672672 | 0.9999537652 | -1.5364602838 |
| 1.1228311004  | 0.5454087816 | 0.9999537652 | 1.083947944   |
| 1.0235618423  | 0.95161708   | 0.9999537652 | 1.0982353058  |
| 1.2889858652  | 0.4360421881 | 0.9999537652 | -1.0034674522 |

gene\_expression\_table

|               |              |              |               |
|---------------|--------------|--------------|---------------|
| 14.82452558   | 0.0121449648 | 0.9999537652 | -2.5782436629 |
| -1.6741932226 | 0.2456607751 | 0.9999537652 | 2.1358250889  |
| 1.2291170595  | 0.5661657579 | 0.9999537652 | -1.2036944082 |
| -1.3118702523 | 0.5274168221 | 0.9999537652 | -1.9495375127 |
| 1.1094173088  | 0.5540296474 | 0.9999537652 | -1.4131486317 |
| 6.3075231393  | 0.485156057  | 0.9999537652 | 1.2657113394  |
| 1.1871337559  | 0.6251749007 | 0.9999537652 | -1.161938699  |
| -1.1463369772 | 0.478542075  | 0.9999537652 | -1.3309772441 |
| -1.1859740966 | 0.286882304  | 0.9999537652 | -1.3719877269 |
| 0             | 0            | 0            | 4.9527501949  |
| -1.022961404  | 0.8709906034 | 0.9999537652 | -1.0010809753 |
| -2.8761557559 | 0.1800622315 | 0.9999537652 | -1.5146989318 |
| 3.5995952878  | 0.0123621257 | 0.9999537652 | -1.5535897272 |
| -2.4056861539 | 0.2979252185 | 0.9999537652 | -1.6233324417 |
| -1.4139821599 | 0.4696351681 | 0.9999537652 | -1.5391150511 |
| 1.1482117586  | 0.6705865546 | 0.9999537652 | 1.0348962827  |
| -1.041369009  | 0.8972527596 | 0.9999537652 | 1.2165094772  |
| -1.0315532783 | 0.8858593104 | 0.9999537652 | 1.1730053244  |
| 2.7933974408  | 0.6948713406 | 0.9999537652 | -5.3608259368 |
| -1.1814159946 | 0.5917033152 | 0.9999537652 | 1.2648504152  |
| 1.5136569565  | 0.663621509  | 0.9999537652 | 1.0672344538  |
| 1.3594099105  | 0.7967251991 | 0.9999537652 | 1.782653648   |
| 0             | 0            | 0            | 4.9561842702  |
| 1.4405757815  | 0.1855593607 | 0.9999537652 | 1.2232242095  |
| 1.6316072287  | 0.2591807405 | 0.9999537652 | -1.0284201167 |
| 1.6520799496  | 0.3222463328 | 0.9999537652 | 1.1550303116  |
| -1.1225725447 | 0.7345970144 | 0.9999537652 | 1.1249691142  |
| 2.7933974408  | 0.6948713406 | 0.9999537652 | 0             |
| 0             | 0            | 0            | 2.9985540909  |
| -1.3526707021 | 0.434671712  | 0.9999537652 | 1.4528714662  |
| 2.7933974408  | 0.6948713406 | 0.9999537652 | 0             |
| 2.7933974408  | 0.6948713406 | 0.9999537652 | 0             |
| 4.5505976667  | 0.5557790267 | 0.9999537652 | -1.859280336  |
| -1.109326109  | 0.7652812065 | 0.9999537652 | 1.3398488739  |
| 1.6117727667  | 0.2758460632 | 0.9999537652 | 1.193363803   |
| -1.1294930875 | 0.3154847956 | 0.9999537652 | 1.1191816572  |
| -2.587194901  | 0.5006282751 | 0.9999537652 | 2.996475627   |
| 1.3490258238  | 0.0786177907 | 0.9999537652 | -1.0697205926 |
| 1.5967362629  | 0.0209120421 | 0.9999537652 | 1.2693740616  |
| -1.0675527747 | 0.7757677745 | 0.9999537652 | 1.1312572492  |
| -1.5573027356 | 0.1096838255 | 0.9999537652 | -1.4632233352 |
| -1.1624006169 | 0.3172283933 | 0.9999537652 | -1.0558039249 |
| 1.1719869208  | 0.6294469485 | 0.9999537652 | 1.5611255112  |
| -1.5452790953 | 0.0718196266 | 0.9999537652 | -1.0516392973 |
| -1.1640194144 | 0.6179363249 | 0.9999537652 | 1.1958631106  |
| -1.0504458159 | 0.8434366637 | 0.9999537652 | 1.4551075882  |
| 1.1237069365  | 0.4081851676 | 0.9999537652 | 1.2750825638  |
| 1.0223194374  | 0.8948396545 | 0.9999537652 | -1.01323961   |
| 1.2935952465  | 0.7175409253 | 0.9999537652 | 1.1540898154  |



gene\_expression\_table

|               |              |              |               |
|---------------|--------------|--------------|---------------|
| 1.239470163   | 0.2268006772 | 0.9999537652 | 1.5232282048  |
| 0             | 0            | 0            | -1.8582093966 |
| -1.7864429677 | 0.1444320758 | 0.9999537652 | -1.0329950039 |
| 1.0902790324  | 0.8273722316 | 0.9999537652 | -1.410084982  |
| -1.7323125616 | 0.4238959165 | 0.9999537652 | 1.4892730691  |
| 1.7090046434  | 0.1760065813 | 0.9999537652 | -1.1450397395 |
| -2.3113168502 | 0.1942861307 | 0.9999537652 | 1.2798415061  |
| 1.0632120177  | 0.8024801714 | 0.9999537652 | -1.2104646259 |
| -1.0100849333 | 0.9325857124 | 0.9999537652 | -1.2798197453 |
| -1.0166484871 | 0.9250288939 | 0.9999537652 | 1.2009468591  |
| -1.0493327012 | 0.7997777324 | 0.9999537652 | 1.3067000269  |
| -1.096028251  | 0.7632270094 | 0.9999537652 | 1.2184805412  |
| -1.1761637688 | 0.3459219346 | 0.9999537652 | 1.049184107   |
| 2.6239154224  | 0.1607521775 | 0.9999537652 | -1.077264645  |
| 1.0726209006  | 0.5690020452 | 0.9999537652 | 1.0316130586  |
| -1.1703501368 | 0.455105873  | 0.9999537652 | -1.0841726273 |
| -1.0096470273 | 0.9423582173 | 0.9999537652 | 1.1124971368  |
| -1.9398321751 | 0.4439852018 | 0.9999537652 | -1.0369932741 |
| 1.1287178186  | 0.7940283367 | 0.9999537652 | 1.3310925361  |
| 1.2629828152  | 0.7087132151 | 0.9999537652 | 1.9043397705  |
| 0             | 0            | 0            | 5.0196635897  |
| -1.1471550932 | 0.5877606531 | 0.9999537652 | -1.0553164576 |
| -4.8135938501 | 0.1786396346 | 0.9999537652 | -3.1776407877 |
| 0             | 0            | 0            | 1.4531210393  |
| -6.9736190158 | 0.2250321147 | 0.9999537652 | 12.7732027325 |
| -1.1030814387 | 0.5669685688 | 0.9999537652 | 1.3807147261  |
| 1.5364576902  | 0.4988590638 | 0.9999537652 | -2.2200956212 |
| 1.0042861411  | 0.9760134219 | 0.9999537652 | -1.2722745309 |
| 2.0844878286  | 0.1186410286 | 0.9999537652 | 1.2896809982  |
| -6.9762758667 | 0.2571161994 | 0.9999537652 | 0             |
| -1.8034168983 | 0.1925407177 | 0.9999537652 | 1.2398105102  |
| 0             | 0            | 0            | 0             |
| -2.3755481719 | 0.0888315432 | 0.9999537652 | 1.9125410629  |
| 1.1504905576  | 0.3148087744 | 0.9999537652 | 1.026249466   |
| 0             | 0            | 0            | 2.9985540909  |
| -1.4503791503 | 0.0970538506 | 0.9999537652 | 1.1107027101  |
| 1.0237370269  | 0.8921997631 | 0.9999537652 | -1.1485374493 |
| 1.5143610053  | 0.6457699058 | 0.9999537652 | -2.6631453939 |
| -1.0020094292 | 0.9886481287 | 0.9999537652 | -1.0078073856 |
| -6.9762758667 | 0.257123944  | 0.9999537652 | 8.8639046058  |
| -4.8154268017 | 0.1712411542 | 0.9999537652 | -1.7606748791 |
| 1.0284143981  | 0.912840579  | 0.9999537652 | -1.259337601  |
| 1.1611327203  | 0.6749962601 | 0.9999537652 | -1.2401750591 |
| 1.3954064265  | 0.6466040402 | 0.9999537652 | -1.3416682102 |
| 1.0293152054  | 0.9071517752 | 0.9999537652 | 1.0635387767  |
| 1.0366976783  | 0.9655652907 | 0.9999537652 | 1.106644687   |
| 2.7933974408  | 0.6948713406 | 0.9999537652 | 6.908559683   |
| -1.5875118025 | 0.7201406819 | 0.9999537652 | -1.8393168198 |
| -1.8767924498 | 0.2022052213 | 0.9999537652 | -1.1925389909 |

gene\_expression\_table

|               |              |              |               |
|---------------|--------------|--------------|---------------|
| -1.1222971227 | 0.7908495522 | 0.9999537652 | -1.2559844064 |
| -1.4768396305 | 0.6824825744 | 0.9999537652 | -1.3628769604 |
| -1.1202018389 | 0.7482467981 | 0.9999537652 | 1.1685462677  |
| -1.016035328  | 0.9109619303 | 0.9999537652 | 1.0058733591  |
| 1.8244386635  | 0.20278243   | 0.9999537652 | 1.146043406   |
| -1.1746456801 | 0.7610213283 | 0.9999537652 | 1.1787001477  |
| 1.2886625128  | 0.2982560495 | 0.9999537652 | 1.0943595005  |
| 6.3075231393  | 0.4851466235 | 0.9999537652 | -1.859280336  |
| 1.7856493071  | 0.1634627446 | 0.9999537652 | 1.1762778563  |
| -1.7978430642 | 0.3905726788 | 0.9999537652 | -1.4066818868 |
| 1.6565751183  | 0.6570178588 | 0.9999537652 | -6.0629655178 |
| 1.7064255976  | 0.2607080521 | 0.9999537652 | 1.0048788457  |
| -1.1744739978 | 0.5334841777 | 0.9999537652 | -1.0074490986 |
| 1.1162834585  | 0.928075067  | 0.9999537652 | 2.996475627   |
| -1.2295894174 | 0.2793843153 | 0.9999537652 | -1.1939503566 |
| 1.1708542901  | 0.3156639245 | 0.9999537652 | -1.1420555567 |
| 1.0175079716  | 0.9001862145 | 0.9999537652 | -1.4401746456 |
| 2.7933974408  | 0.6948713406 | 0.9999537652 | 0             |
| 1.2199723318  | 0.7302383051 | 0.9999537652 | -1.411296211  |
| -1.3575061074 | 0.2360726128 | 0.9999537652 | 1.3268929248  |
| -1.2277171428 | 0.6123856021 | 0.9999537652 | 1.3706605491  |
| 2.7933974408  | 0.6948713406 | 0.9999537652 | 4.9527501949  |
| 1.1900847293  | 0.7146819542 | 0.9999537652 | 1.1435880799  |
| 1.0415427222  | 0.8657156359 | 0.9999537652 | 1.3165446469  |
| 1.0203895018  | 0.9508330417 | 0.9999537652 | -1.1433807021 |
| 2.1966379029  | 0.3073143036 | 0.9999537652 | -1.1689146499 |
| -1.0438016879 | 0.8671588789 | 0.9999537652 | 1.0548551032  |
| -1.3891045615 | 0.3098036488 | 0.9999537652 | -1.0010964566 |
| 26.2649513705 | 0.2127166708 | 0.9999537652 | -2.0338104344 |
| 2.7933974408  | 0.6948713406 | 0.9999537652 | 1.5908108123  |
| -2.955963562  | 0.3188880279 | 0.9999537652 | 7.9160069202  |
| 2.7933974408  | 0.6948713406 | 0.9999537652 | -1.1554448798 |
| 0             | 0            | 0            | -1.4680135518 |
| 1.1120467753  | 0.7967618205 | 0.9999537652 | 1.0500298609  |
| 1.5667419971  | 0.4960075137 | 0.9999537652 | 1.5848797111  |
| 4.5505976667  | 0.5557790267 | 0.9999537652 | -2.0463039075 |
| -1.0724904296 | 0.8773014093 | 0.9999537652 | 1.2941465606  |
| -2.0380285376 | 0.1282113529 | 0.9999537652 | -1.2062349717 |
| -1.3666719636 | 0.5113910877 | 0.9999537652 | 1.4109581402  |
| 1.0240467077  | 0.9668185573 | 0.9999537652 | 1.61720377    |
| -1.7365671102 | 0.4033500878 | 0.9999537652 | 2.4865368686  |
| 2.7933974408  | 0.6948713406 | 0.9999537652 | -2.2056994995 |
| 4.5505976667  | 0.5557790267 | 0.9999537652 | -2.8891109792 |
| -2.587194901  | 0.500618863  | 0.9999537652 | -3.382249888  |
| 0             | 0            | 0            | 2.996475627   |
| 2.7933974408  | 0.6948713406 | 0.9999537652 | 0             |
| -1.7778717557 | 0.0493320958 | 0.9999537652 | -1.1598130679 |
| -1.8860846276 | 0.0565457086 | 0.9999537652 | 1.0617640928  |
| -1.7353594011 | 0.4459321111 | 0.9999537652 | 1.9673405098  |

gene\_expression\_table

|               |              |              |               |
|---------------|--------------|--------------|---------------|
| 1.3616660934  | 0.2159349163 | 0.9999537652 | -1.0067872208 |
| 0             | 0            | 0            | -5.3608259368 |
| 1.1096169563  | 0.669335692  | 0.9999537652 | -1.0092471301 |
| -1.7000974549 | 0.5642783408 | 0.9999537652 | 1.088279459   |
| 1.0609220037  | 0.6401979008 | 0.9999537652 | 1.084279428   |
| -3.2110570455 | 0.1789959947 | 0.9999537652 | -1.2370590979 |
| 1.9005950367  | 0.0676868115 | 0.9999537652 | -1.1034362219 |
| -1.1074481279 | 0.8575875992 | 0.9999537652 | -1.4326840837 |
| 4.5545995984  | 0.5696558471 | 0.9999537652 | -1.6201500558 |
| 1.7104175053  | 0.1048652315 | 0.9999537652 | -1.1337878997 |
| -1.04162631   | 0.7623370174 | 0.9999537652 | 1.0097261542  |
| 1.0504091041  | 0.7977776268 | 0.9999537652 | 1.0022104146  |
| 1.0480590319  | 0.7770635761 | 0.9999537652 | -1.5833562462 |
| 2.7933974408  | 0.6948713406 | 0.9999537652 | -5.3583704783 |
| 1.1319366373  | 0.4016992381 | 0.9999537652 | -1.1185267595 |
| 1.0807983733  | 0.6595218413 | 0.9999537652 | -1.3133215998 |
| 1.1469125055  | 0.6615525102 | 0.9999537652 | -1.3494901439 |
| 1.0090502171  | 0.9637981776 | 0.9999537652 | -1.0885622665 |
| 1.5652133061  | 0.0441764519 | 0.9999537652 | -1.1202116347 |
| 1.7746986793  | 0.5317851422 | 0.9999537652 | -3.4525384698 |
| 1.667743132   | 0.1421869887 | 0.9999537652 | -1.1762989642 |
| 1.0044022912  | 0.9785734695 | 0.9999537652 | -1.0958918134 |
| 2.7933974408  | 0.6948713406 | 0.9999537652 | -3.8965260884 |
| 0             | 0            | 0            | 2.996475627   |
| 1.2390654071  | 0.82520923   | 0.9999537652 | -1.2071759626 |
| 1.1212615905  | 0.8764301599 | 0.9999537652 | -2.0441288174 |
| 1.2511402761  | 0.084499103  | 0.9999537652 | 1.1897330799  |
| 1.0576704962  | 0.7970535945 | 0.9999537652 | -1.0545433632 |
| 1.0345591585  | 0.8953535086 | 0.9999537652 | -1.1228954974 |
| -1.3033478886 | 0.1811560729 | 0.9999537652 | -1.0126558696 |
| -1.0183719031 | 0.9694454293 | 0.9999537652 | 1.4616084642  |
| 1.5829254006  | 0.3506506439 | 0.9999537652 | -1.2468159874 |
| 1.1217848564  | 0.3227532836 | 0.9999537652 | 1.0473343274  |
| 1.1235175252  | 0.5041935744 | 0.9999537652 | -1.3338143901 |
| -1.1314791281 | 0.5485688363 | 0.9999537652 | 1.0761231729  |
| 1.3222882774  | 0.2424777075 | 0.9999537652 | -1.3392239908 |
| -1.4936192846 | 0.5621758208 | 0.9999537652 | -1.1122457742 |
| 1.1203334982  | 0.5531498837 | 0.9999537652 | 1.3008388436  |
| 0             | 0            | 0            | -1.8594983184 |
| -1.6973123489 | 0.5505433209 | 0.9999537652 | 1.2398837679  |
| 1.1590274252  | 0.258582843  | 0.9999537652 | 1.0120533717  |
| 0             | 0            | 0            | 0             |
| 1.1022883385  | 0.5764268934 | 0.9999537652 | -1.2667201877 |
| -1.7453178439 | 0.3376090411 | 0.9999537652 | 1.2762114499  |
| -2.0093413255 | 0.0262037283 | 0.9999537652 | -1.0760758998 |
| -1.1384406097 | 0.7514674975 | 0.9999537652 | -1.027217425  |
| -1.370241401  | 0.7724693238 | 0.9999537652 | 1.9173151254  |
| 0             | 0            | 0            | -1.3168181252 |
| 1.1235032197  | 0.3723083576 | 0.9999537652 | -1.7925361789 |

gene\_expression\_table

|               |              |              |               |
|---------------|--------------|--------------|---------------|
| 1.0664480948  | 0.722310812  | 0.9999537652 | 1.0120021558  |
| 1.07253336    | 0.78580353   | 0.9999537652 | 1.0528558492  |
| 0             | 0            | 0            | -5.3583704783 |
| 1.1888190984  | 0.7349761105 | 0.9999537652 | 1.0923689292  |
| 1.6112484302  | 0.1204637404 | 0.9999537652 | -1.304117013  |
| -1.4626255649 | 0.5298368492 | 0.9999537652 | -2.1669390485 |
| 1.0695794985  | 0.7348037136 | 0.9999537652 | -1.0855762624 |
| 13.3437712784 | 0.3162651917 | 0.9999537652 | -1.4244561168 |
| 1.0151793847  | 0.9341432929 | 0.9999537652 | -1.1920154691 |
| 1.3137838062  | 0.5886536884 | 0.9999537652 | 1.037533173   |
| -1.173197598  | 0.4643320777 | 0.9999537652 | -1.1359129716 |
| -1.9766940606 | 0.358620074  | 0.9999537652 | 1.1401665501  |
| -1.0406410007 | 0.9183476414 | 0.9999537652 | -1.2003308242 |
| 1.5277506613  | 0.4225277507 | 0.9999537652 | -1.0180890767 |
| 1.2452683054  | 0.1555964138 | 0.9999537652 | -1.1620149005 |
| 2.7933974408  | 0.6948713406 | 0.9999537652 | 1.2398837679  |
| 1.8268037885  | 0.1322238752 | 0.9999537652 | -1.2335121207 |
| 1.2178405026  | 0.3203198634 | 0.9999537652 | -1.2853404188 |
| 2.7933974408  | 0.6948713406 | 0.9999537652 | 2.996475627   |
| 0             | 0            | 0            | -1.1441751338 |
| 1.3266178201  | 0.6219441398 | 0.9999537652 | 1.5481620213  |
| 0             | 0            | 0            | 9.7116702472  |
| -1.0475131665 | 0.7377653509 | 0.9999537652 | -1.20410622   |
| 1.6709804649  | 0.120079398  | 0.9999537652 | -1.5652617164 |
| 1.1273856946  | 0.6700853015 | 0.9999537652 | -1.1091176957 |
| -1.1510763739 | 0.6303626785 | 0.9999537652 | 1.1316339569  |
| -2.2948394972 | 0.1846483075 | 0.9999537652 | -1.2197693063 |
| 1.3514036244  | 0.1486181482 | 0.9999537652 | -1.0159562467 |
| 1.2015914834  | 0.2277435442 | 0.9999537652 | -1.2086785014 |
| -2.3829585738 | 0.098072766  | 0.9999537652 | 5.8490850601  |
| -1.0499779563 | 0.8284179728 | 0.9999537652 | -1.3051684383 |
| 1.096886693   | 0.7642162676 | 0.9999537652 | 1.4399278316  |
| -1.0186547096 | 0.9468371288 | 0.9999537652 | -1.0090980532 |
| 4.7632247429  | 0.1405638546 | 0.9999537652 | 8.8700459102  |
| 1.3093074791  | 0.0287623083 | 0.9999537652 | 1.3319353735  |
| -2.437607402  | 0.3171545822 | 0.9999537652 | 2.9985540909  |
| 2.7933974408  | 0.6948713406 | 0.9999537652 | -1.1248877899 |
| -1.0833990771 | 0.4754774016 | 0.9999537652 | -1.0746473234 |
| -1.3899054936 | 0.2338941641 | 0.9999537652 | 1.1359236223  |
| 1.0765801366  | 0.7958610846 | 0.9999537652 | -1.2479152962 |
| 1.2883472386  | 0.71816335   | 0.9999537652 | -1.2289559961 |
| 1.2374309422  | 0.3306815259 | 0.9999537652 | -1.010237061  |
| 2.7933974408  | 0.6948713406 | 0.9999537652 | 6.908559683   |
| -1.2352812073 | 0.5583451453 | 0.9999537652 | -1.2873276747 |
| 1.39402103    | 0.2962550526 | 0.9999537652 | 1.5268412227  |
| 1.2880427605  | 0.2057183098 | 0.9999537652 | 1.0495946676  |
| 1.0853741222  | 0.8439081188 | 0.9999537652 | -1.4331260173 |
| 1.1189781175  | 0.5423272372 | 0.9999537652 | -1.2053580476 |
| 1.2669247997  | 0.3880510013 | 0.9999537652 | 1.4682927717  |

gene\_expression\_table

|               |              |              |               |
|---------------|--------------|--------------|---------------|
| -1.7880842793 | 0.1137152489 | 0.9999537652 | -1.3071773515 |
| 1.0085080113  | 0.962533812  | 0.9999537652 | -1.2140724594 |
| -2.6364591566 | 0.3036774825 | 0.9999537652 | 2.8094823151  |
| -2.587194901  | 0.5006094511 | 0.9999537652 | 2.2220493756  |
| -1.3845834311 | 0.4624602056 | 0.9999537652 | -1.3828467394 |
| -1.388693665  | 0.4732958489 | 0.9999537652 | -1.1348003577 |
| 1.1807437876  | 0.8018084931 | 0.9999537652 | -1.2943066969 |
| 8.064174035   | 0.4193601177 | 0.9999537652 | 1.569740882   |
| -1.3012009203 | 0.7634629305 | 0.9999537652 | 2.9953398646  |
| 0             | 0            | 0            | 8.8639046058  |
| 1.4845631328  | 0.4657901969 | 0.9999537652 | 1.4194142339  |
| -2.9548384089 | 0.3320339612 | 0.9999537652 | 1.4237450586  |
| 1.1783722105  | 0.8234975571 | 0.9999537652 | -1.3274509342 |
| 1.1957414578  | 0.2930410887 | 0.9999537652 | 1.0707406718  |
| -1.2652441392 | 0.6240302144 | 0.9999537652 | 1.248996885   |
| -2.7990579126 | 0.1560453052 | 0.9999537652 | -1.144718392  |
| 5.9744286098  | 0.0963038725 | 0.9999537652 | 2.6071338396  |
| 1.2963066726  | 0.5604264013 | 0.9999537652 | -1.4531353517 |
| -1.1096937514 | 0.6678099544 | 0.9999537652 | 1.076133164   |
| 1.3575806046  | 0.027183372  | 0.9999537652 | -1.2967010744 |
| -1.3921860315 | 0.6958702853 | 0.9999537652 | 1.5101393617  |
| 1.6596734241  | 0.0364216404 | 0.9999537652 | 1.0348982307  |
| -1.144260977  | 0.6721072073 | 0.9999537652 | -1.1490768115 |
| 1.0434844666  | 0.8212904973 | 0.9999537652 | -1.1367935523 |
| 0             | 0            | 0            | 2.996475627   |
| 0             | 0            | 0            | 2.9985540909  |
| -1.7646548859 | 0.1000204027 | 0.9999537652 | -1.1422619559 |
| 0             | 0            | 0            | 1.6447327969  |
| -1.1470703565 | 0.8069994196 | 0.9999537652 | -1.000766043  |
| 2.228825771   | 0.1229087545 | 0.9999537652 | 1.0739898918  |
| 2.7933974408  | 0.6948713406 | 0.9999537652 | 0             |
| 0             | 0            | 0            | 2.9985540909  |
| 1.1300026147  | 0.8581974193 | 0.9999537652 | -1.1766397111 |
| 1.3446238497  | 0.6536590721 | 0.9999537652 | 1.0363829803  |
| 1.0145384288  | 0.9641826977 | 0.9999537652 | 1.3582219674  |
| -1.3541337391 | 0.3176787827 | 0.9999537652 | 1.266896433   |
| -1.1013365972 | 0.8919881044 | 0.9999537652 | -1.0988634516 |
| 8.1275610652  | 0.0739418969 | 0.9999537652 | 1.5197241324  |
| 2.7933974408  | 0.6948713406 | 0.9999537652 | 0             |
| 1.2179411049  | 0.5346476273 | 0.9999537652 | 1.4550617181  |
| -1.5875118025 | 0.7199976905 | 0.9999537652 | 0             |
| -1.4230926939 | 0.1010844731 | 0.9999537652 | 1.0074617456  |
| 1.3941100335  | 0.6692274679 | 0.9999537652 | -2.9208553059 |
| 2.6834556635  | 0.0388636945 | 0.9999537652 | 1.0981765084  |
| 0             | 0            | 0            | 4.9527501949  |
| -1.0505287927 | 0.9048217003 | 0.9999537652 | -1.192855091  |
| -1.2496138974 | 0.1472685176 | 0.9999537652 | 1.2032028901  |
| 1.3825957569  | 0.7338372779 | 0.9999537652 | -1.1522914685 |
| 2.7933974408  | 0.6948713406 | 0.9999537652 | 0             |

gene\_expression\_table

|               |              |              |               |
|---------------|--------------|--------------|---------------|
| -1.1257976117 | 0.8135004768 | 0.9999537652 | 1.0342570616  |
| -1.4360591638 | 0.4556670856 | 0.9999537652 | 1.4946811679  |
| -1.269726979  | 0.2358504639 | 0.9999537652 | -1.0706078211 |
| 1.7140555608  | 0.0620104312 | 0.9999537652 | -1.11911955   |
| -1.1767198936 | 0.7061023112 | 0.9999537652 | -1.6239558842 |
| -1.0774949743 | 0.8364460793 | 0.9999537652 | 1.01754714    |
| 1.3057186386  | 0.56524369   | 0.9999537652 | -1.8138060591 |
| 2.7933974408  | 0.6948713406 | 0.9999537652 | -1.028941223  |
| 1.26183282    | 0.1475013716 | 0.9999537652 | -1.1777037613 |
| 1.2078192865  | 0.7219347201 | 0.9999537652 | -2.2828512392 |
| 1.4047673854  | 0.3095935217 | 0.9999537652 | -1.4401421966 |
| -1.1200597572 | 0.8287560869 | 0.9999537652 | -1.6240518608 |
| -1.0502073271 | 0.911448515  | 0.9999537652 | 1.1903887318  |
| 1.0038911202  | 0.9939709317 | 0.9999537652 | 1.1582963538  |
| 1.1420308345  | 0.4067854983 | 0.9999537652 | -1.2004190879 |
| -1.0295620502 | 0.9261914817 | 0.9999537652 | -1.155215744  |
| -1.946370632  | 0.1857990005 | 0.9999537652 | 1.7624065711  |
| -1.1749547935 | 0.7201653657 | 0.9999537652 | -1.3254236684 |
| 1.8358183613  | 0.4505177299 | 0.9999537652 | 1.5010966111  |
| -1.0454265369 | 0.7503460939 | 0.9999537652 | -1.2179168766 |
| -1.0320459637 | 0.8910176413 | 0.9999537652 | -1.4584524744 |
| 2.7933974408  | 0.6948713406 | 0.9999537652 | 2.996475627   |
| 1.5634126039  | 0.0298508151 | 0.9999537652 | -1.3081825729 |
| 22.1262177703 | 0.2270345719 | 0.9999537652 | -1.2304078955 |
| 1.0125121839  | 0.9161591969 | 0.9999537652 | -1.0603586012 |
| -2.0776099901 | 0.1202710567 | 0.9999537652 | -1.1908228585 |
| -1.5540946092 | 0.1255678557 | 0.9999537652 | -1.3153942783 |
| 0             | 0            | 0            | -1.1248877899 |
| 1.8455489546  | 0.5920200474 | 0.9999537652 | -2.5258795711 |
| 6.3075231393  | 0.4851371974 | 0.9999537652 | -2.856452037  |
| 1.0103673638  | 0.98726175   | 0.9999537652 | 2.4547373682  |
| -1.0546659807 | 0.8124345292 | 0.9999537652 | -1.3852550781 |
| 4.5505976667  | 0.5557790267 | 0.9999537652 | -5.3583704783 |
| 1.0627195518  | 0.8345296817 | 0.9999537652 | -1.1874473805 |
| 0             | 0            | 0            | 2.996475627   |
| 1.403089636   | 0.5620043494 | 0.9999537652 | 1.1862018982  |
| 2.7933974408  | 0.6948713406 | 0.9999537652 | -5.3589986948 |
| 2.3191715895  | 0.0182156275 | 0.9999537652 | 1.263054002   |
| 1.8746911302  | 0.4092150565 | 0.9999537652 | -2.4225156659 |
| 1.0114023889  | 0.9273043938 | 0.9999537652 | -1.2273960838 |
| -6.9736190158 | 0.2250321147 | 0.9999537652 | 1.4832922388  |
| 0             | 0            | 0            | 1.2398837679  |
| 1.9050337421  | 0.494542025  | 0.9999537652 | -1.3110578867 |
| 1.214708255   | 0.5522071292 | 0.9999537652 | -1.0398068364 |
| 0             | 0            | 0            | 1.6293799659  |
| 1.2159455323  | 0.3959793839 | 0.9999537652 | -1.1942166979 |
| -1.2137025022 | 0.7120570405 | 0.9999537652 | -1.0924895181 |
| -1.2416227775 | 0.0982055852 | 0.9999537652 | -1.2488202409 |
| 1.0833905814  | 0.6304476746 | 0.9999537652 | 1.0574714368  |

gene\_expression\_table

|               |              |              |               |
|---------------|--------------|--------------|---------------|
| 1.0104602496  | 0.9584720489 | 0.9999537652 | -1.0245370182 |
| 1.3359180976  | 0.5596858167 | 0.9999537652 | -1.1468148148 |
| 1.0111888127  | 0.9635469083 | 0.9999537652 | 1.208889498   |
| 1.0134049843  | 0.9405641432 | 0.9999537652 | -1.0203406468 |
| -1.0616337161 | 0.6410566288 | 0.9999537652 | -1.3507383662 |
| -1.2059865214 | 0.4434670841 | 0.9999537652 | -1.098463088  |
| -1.1575686555 | 0.7320651848 | 0.9999537652 | 1.7404963396  |
| 1.1528946509  | 0.8113509344 | 0.9999537652 | -3.0025255606 |
| 15.1008094413 | 0.2914268618 | 0.9999537652 | -1.1716875133 |
| 3.8622037496  | 0.6191868959 | 0.9999537652 | 1.2398837679  |
| 1.2351282506  | 0.4944373567 | 0.9999537652 | -1.0001951152 |
| 4.0296627938  | 0.2233024732 | 0.9999537652 | -1.0970754137 |
| 8.064174035   | 0.4193662786 | 0.9999537652 | 1.9432271302  |
| -1.0906160707 | 0.8545465731 | 0.9999537652 | -1.0791142638 |
| 1.1536178917  | 0.5387970744 | 0.9999537652 | -1.5573397007 |
| 1.3462952915  | 0.5705306309 | 0.9999537652 | 1.0674845818  |
| -1.8528879937 | 0.3353298801 | 0.9999537652 | 1.2077225187  |
| -1.0556971843 | 0.9068945786 | 0.9999537652 | -1.3282920366 |
| -1.1418666168 | 0.6684034137 | 0.9999537652 | -1.1739369598 |
| 1.191852872   | 0.2616196642 | 0.9999537652 | -1.3773643697 |
| 0             | 0            | 0            | 2.996475627   |
| 0             | 0            | 0            | 2.996475627   |
| 0             | 0            | 0            | 2.9985540909  |
| 8.064174035   | 0.419372449  | 0.9999537652 | 6.9133480437  |
| 1.5446975432  | 0.004168     | 0.9999537652 | -1.6739771507 |
| -1.0034984703 | 0.9930568932 | 0.9999537652 | -1.6840977205 |
| -1.1358958929 | 0.4695770407 | 0.9999537652 | 1.0213832943  |
| -1.0135764785 | 0.9800334332 | 0.9999537652 | 2.0963273302  |
| 11.5766527773 | 0.3454202303 | 0.9999537652 | -1.973750035  |
| -1.2714855078 | 0.1777945064 | 0.9999537652 | -1.2468811214 |
| 2.0174668837  | 0.3674430785 | 0.9999537652 | -1.1503912392 |
| 8.064174035   | 0.419378629  | 0.9999537652 | 1.8398374193  |
| 1.3379068959  | 0.0223798189 | 0.9999537652 | -1.2951345953 |
| 1.5345316606  | 0.5327294726 | 0.9999537652 | -1.1238239289 |
| -1.2630168054 | 0.1547334515 | 0.9999537652 | -1.1448861352 |
| 1.2263937571  | 0.4663331051 | 0.9999537652 | 1.0598382063  |
| 1.0151088999  | 0.9515109293 | 0.9999537652 | -1.221851512  |
| 1.8876737135  | 0.3715147966 | 0.9999537652 | 1.1995439467  |
| 8.064174035   | 0.4193848186 | 0.9999537652 | -1.8666954137 |
| -2.8713019239 | 0.220522412  | 0.9999537652 | 2.7467800943  |
| 1.0703740035  | 0.5463030357 | 0.9999537652 | -1.1430760337 |
| -1.2028952075 | 0.6594774492 | 0.9999537652 | 1.06377116    |
| -1.372650131  | 0.3151606867 | 0.9999537652 | -1.3457634457 |
| 1.6884354984  | 0.1767018446 | 0.9999537652 | -1.4624787082 |
| -1.5881166222 | 0.7193210141 | 0.9999537652 | -1.3534814645 |
| 22.1449503561 | 0.2294584327 | 0.9999537652 | 1.006929937   |
| -3.2106792237 | 0.2294793867 | 0.9999537652 | 2.4534858631  |
| 16.8575730017 | 0.2723402166 | 0.9999537652 | -1.5524433849 |
| 0             | 0            | 0            | -1.4681855619 |

gene\_expression\_table

|               |              |              |               |
|---------------|--------------|--------------|---------------|
| 0             | 0            | 0            | 2.996475627   |
| 1.1808340954  | 0.4745945147 | 0.9999537652 | -1.1855155006 |
| -2.6706739834 | 0.3784198081 | 0.9999537652 | -1.3740676439 |
| 2.3649792899  | 0.2792305176 | 0.9999537652 | 1.1256490283  |
| 1.2660358196  | 0.2182619771 | 0.9999537652 | 1.0356929584  |
| 17.3472938331 | 0.2976125552 | 0.9999537652 | -3.8938703542 |
| 1.6342376016  | 0.0965907016 | 0.9999537652 | -1.3176835538 |
| 4.5545995984  | 0.56965377   | 0.9999537652 | 6.908559683   |
| -1.1735894744 | 0.7690124446 | 0.9999537652 | 1.0018943605  |
| 1.0431844248  | 0.7228243872 | 0.9999537652 | 1.0599028768  |
| -1.0625536321 | 0.8030798572 | 0.9999537652 | -1.0219813262 |
| 1.1482250997  | 0.4167131705 | 0.9999537652 | -1.1333440103 |
| 0             | 0            | 0            | 0             |
| -1.2274037453 | 0.1116278091 | 0.9999537652 | -1.3500171451 |
| -1.9081560885 | 0.2284524764 | 0.9999537652 | -1.4813754993 |
| -3.9058478335 | 0.1063239579 | 0.9999537652 | 2.4178802295  |
| 1.1146344094  | 0.8260558799 | 0.9999537652 | 1.0465029305  |
| 1.349774274   | 0.2177212472 | 0.9999537652 | 1.2184911367  |
| -1.0833031695 | 0.8538565791 | 0.9999537652 | -1.4499747611 |
| 1.0811396674  | 0.7124205788 | 0.9999537652 | -1.118580505  |
| 1.5149858802  | 0.654746019  | 0.9999537652 | -1.5745581423 |
| 3.3030568913  | 0.292043189  | 0.9999537652 | -1.2941221818 |
| 16.8575730017 | 0.2723530244 | 0.9999537652 | -1.6606876536 |
| 4.5505976667  | 0.5557790267 | 0.9999537652 | 1.2701719397  |
| -1.087032714  | 0.6489355241 | 0.9999537652 | -1.0010582136 |
| -1.0925649741 | 0.7196320232 | 0.9999537652 | -1.0656730143 |
| 1.2041884279  | 0.7892803866 | 0.9999537652 | 1.0684139388  |
| 1.0619058455  | 0.5899662472 | 0.9999537652 | 1.0214091119  |
| 1.0988575367  | 0.410735665  | 0.9999537652 | -1.0211450882 |
| 1.472645704   | 0.0506770442 | 0.9999537652 | -1.2159228596 |
| 1.6024984014  | 0.6872458504 | 0.9999537652 | 6.9133480437  |
| 1.0791547746  | 0.7194642476 | 0.9999537652 | -1.1138592499 |
| 1.034946767   | 0.9678872064 | 0.9999537652 | 1.7671414969  |
| 2.1152390369  | 0.1043860678 | 0.9999537652 | 1.1251537086  |
| -1.053450369  | 0.8857010664 | 0.9999537652 | -1.228582504  |
| 3.0628221549  | 0.3120234743 | 0.9999537652 | -1.986027526  |
| -1.3341494051 | 0.1741476301 | 0.9999537652 | -1.4612467315 |
| 1.3786410676  | 0.035938852  | 0.9999537652 | -1.2724516274 |
| 1.2760040591  | 0.15144539   | 0.9999537652 | -1.5292905358 |
| 1.2416309862  | 0.7533444088 | 0.9999537652 | 1.0056391713  |
| 6.3075231393  | 0.4851277785 | 0.9999537652 | -1.1629386999 |
| 2.0482638049  | 0.2100977941 | 0.9999537652 | 1.1177297064  |
| -1.4750790135 | 0.6603393192 | 0.9999537652 | 1.01694521    |
| 1.2147136981  | 0.4773590211 | 0.9999537652 | 1.0506234898  |
| 1.0895583843  | 0.6845624392 | 0.9999537652 | -1.2154636547 |
| -1.6580866023 | 0.2005178564 | 0.9999537652 | -1.0905508353 |
| 1.8131227004  | 0.33088475   | 0.9999537652 | 1.5599463705  |
| -1.1794522573 | 0.7359752204 | 0.9999537652 | 1.6316059346  |
| 1.0162548412  | 0.9686288465 | 0.9999537652 | 1.7603231865  |



gene\_expression\_table

|               |              |              |               |
|---------------|--------------|--------------|---------------|
| 1.0042347517  | 0.9748071447 | 0.9999537652 | -1.0696040602 |
| -1.3457716089 | 0.1051554557 | 0.9999537652 | -1.0749133662 |
| 1.1473122003  | 0.5354836739 | 0.9999537652 | -1.2368306743 |
| 1.1072399635  | 0.7041248674 | 0.9999537652 | 1.0368273147  |
| 4.5505976667  | 0.5557790267 | 0.9999537652 | 10.818785458  |
| 2.7933974408  | 0.6948713406 | 0.9999537652 | 26.4594426731 |
| 1.5232415062  | 0.2494938683 | 0.9999537652 | -1.286466914  |
| -1.058716223  | 0.8021355877 | 0.9999537652 | 1.3182158476  |
| 2.7933974408  | 0.6948713406 | 0.9999537652 | 1.4539570206  |
| -1.0821001117 | 0.7554446584 | 0.9999537652 | 1.1238234418  |
| -1.2591700515 | 0.6875137367 | 0.9999537652 | 2.4197893354  |
| 4.5545995984  | 0.569651693  | 0.9999537652 | -5.3589986948 |
| 1.1158299481  | 0.9297712578 | 0.9999537652 | -1.0368675441 |
| -1.368560196  | 0.7386883633 | 0.9999537652 | -1.9748749398 |
| 2.4609030837  | 0.2530777529 | 0.9999537652 | 2.8349310674  |
| -1.0671293958 | 0.8608734643 | 0.9999537652 | 1.2547898049  |
| 1.0124541275  | 0.9326895418 | 0.9999537652 | -1.2597507555 |
| 34.4101428749 | 0.1668536206 | 0.9999537652 | 2.3408023448  |
| -1.1444309547 | 0.4575339    | 0.9999537652 | 1.2058662082  |
| 0             | 0            | 0            | 1.0031259015  |
| 9.8205505243  | 0.3838237526 | 0.9999537652 | 2.030756821   |
| 1.6740429925  | 0.425398107  | 0.9999537652 | -1.1330359562 |
| -3.9820556893 | 0.0983103654 | 0.9999537652 | 4.9561842702  |
| 1.2815750993  | 0.6476708528 | 0.9999537652 | -1.0251004176 |
| -1.0699381068 | 0.720306221  | 0.9999537652 | 1.1022438407  |
| 6.3075231393  | 0.4851183669 | 0.9999537652 | -3.3826461929 |
| 0             | 0            | 0            | -1.1558452152 |
| 1.6681177207  | 0.454544333  | 0.9999537652 | 1.716905782   |
| 1.0678877326  | 0.6533519617 | 0.9999537652 | 1.0955843554  |
| 2.0765723329  | 0.1342061663 | 0.9999537652 | -1.5303069064 |
| 1.0328500538  | 0.8353845588 | 0.9999537652 | 1.0580628577  |
| -1.351636497  | 0.4106203445 | 0.9999537652 | -1.0589605593 |
| 8.064174035   | 0.4193910179 | 0.9999537652 | -3.384595918  |
| -1.1374032486 | 0.6752078934 | 0.9999537652 | 1.0890568721  |
| 1.418815938   | 0.1040220559 | 0.9999537652 | 1.3021853207  |
| -1.8466138227 | 0.3718389628 | 0.9999537652 | 1.278693586   |
| 1.3681518085  | 0.0921915721 | 0.9999537652 | -1.0152952664 |
| -1.1643625881 | 0.5267268735 | 0.9999537652 | 1.5139994866  |
| 1.0148519638  | 0.9659559366 | 0.9999537652 | 1.2343188059  |
| -2.5871290907 | 0.5000781443 | 0.9999537652 | 2.9940379764  |
| 2.0389656363  | 0.4520656635 | 0.9999537652 | -1.7020755295 |
| 1.1128663284  | 0.6957180392 | 0.9999537652 | 1.3128693803  |
| 4.5505976667  | 0.5557790267 | 0.9999537652 | -1.1632104493 |
| 1.050720514   | 0.9329313325 | 0.9999537652 | -1.5282263687 |
| -1.2396734609 | 0.7406910918 | 0.9999537652 | 2.9972756496  |
| -1.010418368  | 0.9884526747 | 0.9999537652 | 1.4002700172  |
| 1.5170591203  | 0.3314241187 | 0.9999537652 | 2.2232514773  |
| -1.2793488238 | 0.6762444968 | 0.9999537652 | 1.5101339254  |
| 2.6814021431  | 0.1540617049 | 0.9999537652 | -1.2307795458 |

gene\_expression\_table

|               |              |              |               |
|---------------|--------------|--------------|---------------|
| -1.0290366928 | 0.8498063274 | 0.9999537652 | -1.2681670258 |
| 1.6837314654  | 0.2969691608 | 0.9999537652 | -1.0216214608 |
| -1.1045603102 | 0.6255779581 | 0.9999537652 | 1.2064761473  |
| 0             | 0            | 0            | 2.9985540909  |
| 11.5766527773 | 0.3454186666 | 0.9999537652 | -5.3583704783 |
| 4.5505976667  | 0.5557790267 | 0.9999537652 | 1.2676116495  |
| 4.5545995984  | 0.5696496161 | 0.9999537652 | -2.5900575084 |
| 1.1701996185  | 0.4989884039 | 0.9999537652 | -1.1769058092 |
| -1.2436434669 | 0.606668197  | 0.9999537652 | -1.222629269  |
| 1.2215679218  | 0.759946732  | 0.9999537652 | -1.0363551544 |
| -1.258552828  | 0.6727634901 | 0.9999537652 | 1.8167613353  |
| 2.7933974408  | 0.6948713406 | 0.9999537652 | -3.384595918  |
| -1.1091397827 | 0.7635448436 | 0.9999537652 | -1.8842864578 |
| -1.3197821904 | 0.6507559826 | 0.9999537652 | -1.7033379786 |
| 5.8024455297  | 0.2158134709 | 0.9999537652 | 0             |
| 1.2350972138  | 0.6116303428 | 0.9999537652 | 1.1637628085  |
| 0             | 0            | 0            | -2.2890929548 |
| 0             | 0            | 0            | 1.0682244185  |
| -1.586167124  | 0.7108672696 | 0.9999537652 | 6.1545167512  |
| 2.7933974408  | 0.6948713406 | 0.9999537652 | -5.3589986948 |
| 1.1272401212  | 0.8389811038 | 0.9999537652 | 1.2815412708  |
| 1.4696819851  | 0.3458444478 | 0.9999537652 | 1.3052581491  |
| 2.7933974408  | 0.6948713406 | 0.9999537652 | 0             |
| 0             | 0            | 0            | 12.3846842502 |
| 1.1305291038  | 0.8399998973 | 0.9999537652 | 3.6976146343  |
| 1.2100129772  | 0.212838484  | 0.9999537652 | -1.0124907198 |
| 6.3075231393  | 0.4851089626 | 0.9999537652 | 0             |
| -1.1134398134 | 0.7427416875 | 0.9999537652 | 1.0634834426  |
| 1.037711622   | 0.8338821169 | 0.9999537652 | -1.1947369696 |
| 1.3575279261  | 0.1970311382 | 0.9999537652 | -1.2021903268 |
| -1.1617983164 | 0.3785074407 | 0.9999537652 | -1.1148147701 |
| 1.9664475558  | 0.1117751963 | 0.9999537652 | -1.2107413166 |
| -1.0409763036 | 0.9352214459 | 0.9999537652 | 1.1836307135  |
| -1.7140706619 | 0.5271586641 | 0.9999537652 | -1.0625358683 |
| -1.034717661  | 0.8544063116 | 0.9999537652 | -1.1623795131 |
| 1.180187422   | 0.2983911583 | 0.9999537652 | -1.1314673151 |
| -1.0197466857 | 0.882047514  | 0.9999537652 | -1.2037086373 |
| 15.0880352532 | 0.2935756102 | 0.9999537652 | -1.1503049253 |
| -1.5428233137 | 0.4119504765 | 0.9999537652 | -1.373027903  |
| 0             | 0            | 0            | 6.908559683   |
| 0             | 0            | 0            | 2.996475627   |
| 1.3826895979  | 0.0539450536 | 0.9999537652 | -1.1488026002 |
| -1.393435122  | 0.6849930345 | 0.9999537652 | -1.647673557  |
| 3.3045913726  | 0.283082629  | 0.9999537652 | 1.0165948208  |
| -1.1878405995 | 0.6481791441 | 0.9999537652 | -1.4369273505 |
| 1.3594099105  | 0.7965814627 | 0.9999537652 | 1.3448856344  |
| -1.4026939728 | 0.0530130199 | 0.9999537652 | -1.2313618149 |
| -1.5875118025 | 0.7198552203 | 0.9999537652 | -2.839009059  |
| 2.1973466799  | 0.2904785797 | 0.9999537652 | 1.1103092415  |

gene\_expression\_table

|                |              |              |               |
|----------------|--------------|--------------|---------------|
| 8.064174035    | 0.4193972267 | 0.9999537652 | 6.9133480437  |
| 3.8622037496   | 0.6191559473 | 0.9999537652 | 0             |
| 2.7933974408   | 0.6948713406 | 0.9999537652 | 4.9527501949  |
| 4.5505976667   | 0.5557790267 | 0.9999537652 | 0             |
| -3.8114682973  | 0.0471558261 | 0.9999537652 | 3.1880366645  |
| -1.1443156703  | 0.3480868913 | 0.9999537652 | 1.1260203733  |
| -20.4075039392 | 0.0218955863 | 0.9999537652 | 24.9357983742 |
| 1.234311755    | 0.4790701567 | 0.9999537652 | -1.0006916416 |
| -1.2301913722  | 0.7670414376 | 0.9999537652 | -1.9665272784 |
| 1.1958895821   | 0.8153214677 | 0.9999537652 | -1.5275589953 |
| -1.3187888541  | 0.1348769593 | 0.9999537652 | -1.5827577202 |
| -1.6424310402  | 0.4233747791 | 0.9999537652 | -1.230245554  |
| 1.2529672008   | 0.2358517993 | 0.9999537652 | -1.279781972  |
| 1.0188924992   | 0.9296854887 | 0.9999537652 | 1.099545523   |
| -1.1708143936  | 0.8340608861 | 0.9999537652 | 1.3324118025  |
| 1.5426605882   | 0.2026257795 | 0.9999537652 | 1.8627466464  |
| 0              | 0            | 0            | -1.1102514825 |
| -3.1203910316  | 0.2339919831 | 0.9999537652 | -1.4978192929 |
| -1.0575035506  | 0.8875768674 | 0.9999537652 | -1.4887243938 |
| -1.0534540998  | 0.6781889754 | 0.9999537652 | -1.3790135508 |
| 1.0443783564   | 0.8441914576 | 0.9999537652 | 1.3213255487  |
| 16.8433158146  | 0.2737991955 | 0.9999537652 | 39.4416233421 |
| -1.2619381918  | 0.6777884501 | 0.9999537652 | -1.3086774402 |
| -1.1460379741  | 0.5969353735 | 0.9999537652 | -1.4044603147 |
| 0              | 0            | 0            | 8.8761957907  |
| -1.6994504307  | 0.5419238448 | 0.9999537652 | 2.4596721034  |
| -1.0583261614  | 0.9255582372 | 0.9999537652 | 1.6669149077  |
| 1.0828767608   | 0.5112206895 | 0.9999537652 | 1.0774153077  |
| -1.3444413857  | 0.0519313115 | 0.9999537652 | -1.1574012797 |
| 1.0702722079   | 0.8551624179 | 0.9999537652 | 1.1318700978  |
| 1.143529603    | 0.7243918451 | 0.9999537652 | -1.3121044357 |
| 2.044883541    | 0.1864114465 | 0.9999537652 | -2.2138120489 |
| 0              | 0            | 0            | 33.3754495834 |
| 1.2302887969   | 0.5310426177 | 0.9999537652 | -1.4416799564 |
| -1.343917123   | 0.3988303718 | 0.9999537652 | -1.5448580467 |
| -1.4662362166  | 0.1433122262 | 0.9999537652 | -1.5492751053 |
| 1.7682213732   | 0.3139689864 | 0.9999537652 | 1.6362770216  |
| 1.6180778276   | 0.2487375003 | 0.9999537652 | 1.0790227481  |
| -1.1447852916  | 0.9152929442 | 0.9999537652 | 18.6486518258 |
| -1.0463517569  | 0.8554793608 | 0.9999537652 | 1.0651198214  |
| 1.3007488027   | 0.3993948277 | 0.9999537652 | -1.1411165095 |
| 1.9058703168   | 0.4679276633 | 0.9999537652 | 1.9844330535  |
| 1.0468975627   | 0.7464121219 | 0.9999537652 | -1.2154533569 |
| 1.0631479972   | 0.7851098446 | 0.9999537652 | 1.0571125433  |
| -1.3685950045  | 0.7393763031 | 0.9999537652 | 1.2398837679  |
| -1.5861169239  | 0.7137687045 | 0.9999537652 | 0             |
| 1.1451126686   | 0.5005121455 | 0.9999537652 | -1.1039793627 |
| -1.250682192   | 0.3186708398 | 0.9999537652 | 1.0416843349  |
| 1.3241821346   | 0.1993293329 | 0.9999537652 | 1.0036840783  |

gene\_expression\_table

|               |              |              |               |
|---------------|--------------|--------------|---------------|
| 1.6626752525  | 0.5077518681 | 0.9999537652 | -2.0129022119 |
| 0             | 0            | 0            | 15.7262184124 |
| 0             | 0            | 0            | 2.996475627   |
| 1.1162834585  | 0.9281644509 | 0.9999537652 | 12.7909013375 |
| -1.7819050662 | 0.0779101934 | 0.9999537652 | 1.2384480575  |
| 2.7933974408  | 0.6948713406 | 0.9999537652 | 2.996475627   |
| -1.5875118025 | 0.7201250889 | 0.9999537652 | 1.1034199328  |
| -1.2429919493 | 0.5566467392 | 0.9999537652 | 1.0393772297  |
| -1.3116175838 | 0.1950619506 | 0.9999537652 | -1.3102788073 |
| -1.4622790761 | 0.3932923345 | 0.9999537652 | 1.0897767381  |
| 1.0561264997  | 0.8875920417 | 0.9999537652 | -1.5045819864 |
| -1.0228110582 | 0.9555325496 | 0.9999537652 | 1.1982721806  |
| 1.1141578549  | 0.7726968874 | 0.9999537652 | -1.1926011489 |
| 2.7933974408  | 0.6948713406 | 0.9999537652 | 0             |
| 8.064174035   | 0.4194034453 | 0.9999537652 | 10.8337816869 |
| 1.5031431015  | 0.2194430396 | 0.9999537652 | 1.0670865011  |
| 1.438563165   | 0.2491635166 | 0.9999537652 | 1.0491812593  |
| -1.8846957778 | 0.1771403868 | 0.9999537652 | -2.0193672047 |
| -1.4227986927 | 0.2954201233 | 0.9999537652 | -1.1060533884 |
| -1.6056235628 | 0.4468273523 | 0.9999537652 | 1.2740027272  |
| -1.4962412698 | 0.3576504131 | 0.9999537652 | 1.0183769815  |
| -1.1589122199 | 0.71798473   | 0.9999537652 | -1.2095148632 |
| -1.5287863393 | 0.4981532473 | 0.9999537652 | -1.1682882678 |
| 1.2777749361  | 0.677384887  | 0.9999537652 | 1.5744318196  |
| 1.1260260935  | 0.8880845748 | 0.9999537652 | -1.7076891067 |
| 1.7936180972  | 0.6488788917 | 0.9999537652 | -5.7442173985 |
| 2.3466011022  | 0.2311108724 | 0.9999537652 | 1.0930472557  |
| 1.6024984014  | 0.6872276041 | 0.9999537652 | 1.590997316   |
| -1.7164821341 | 0.1942706    | 0.9999537652 | 1.4244023721  |
| -1.0552135611 | 0.8731965347 | 0.9999537652 | 2.5459274337  |
| 1.0619782594  | 0.8731530096 | 0.9999537652 | -1.0249966481 |
| -1.0102815366 | 0.9857996617 | 0.9999537652 | 1.1454461625  |
| -2.1299793114 | 0.4794574753 | 0.9999537652 | -5.3583704783 |
| 2.7957660672  | 0.7055140695 | 0.9999537652 | 0             |
| 4.5505976667  | 0.5557790267 | 0.9999537652 | 14.7475552392 |
| 0             | 0            | 0            | 0             |
| 6.3128691894  | 0.4808030983 | 0.9999537652 | 0             |
| 1.1871343615  | 0.4870818116 | 0.9999537652 | 1.3924284007  |
| 1.6827116179  | 0.2817949364 | 0.9999537652 | -1.5267058412 |
| 1.1230829931  | 0.9008178848 | 0.9999537652 | -1.6856836243 |
| 2.7558710195  | 0.1132540706 | 0.9999537652 | 1.2176277036  |
| 1.4900223999  | 0.2338840004 | 0.9999537652 | -1.5686003931 |
| -1.1276081398 | 0.8489218316 | 0.9999537652 | 1.0967635494  |
| 0             | 0            | 0            | -2.4867043709 |
| 1.0123914647  | 0.915927378  | 0.9999537652 | 1.0132432847  |
| 0             | 0            | 0            | 2.996475627   |
| -1.2204550169 | 0.4715208525 | 0.9999537652 | -1.3859533801 |
| -4.815549291  | 0.1727185641 | 0.9999537652 | -1.313384656  |
| -2.3372359995 | 0.2552173964 | 0.9999537652 | 2.8644035913  |

gene\_expression\_table

|                |              |              |               |
|----------------|--------------|--------------|---------------|
| 3.5991848458   | 0.0150765676 | 0.9999537652 | -1.0503184456 |
| 1.022832683    | 0.9685671225 | 0.9999537652 | -1.1440555758 |
| -1.0985917701  | 0.7321182608 | 0.9999537652 | -1.2190139265 |
| 1.1526842441   | 0.6560572327 | 0.9999537652 | -1.3018392326 |
| 1.0996862317   | 0.5283122123 | 0.9999537652 | -1.0151132918 |
| -1.1253017056  | 0.4644358313 | 0.9999537652 | -1.1764330945 |
| 1.1403316133   | 0.4457765861 | 0.9999537652 | 1.2664733768  |
| 1.9075275807   | 0.1947299963 | 0.9999537652 | -1.1016246679 |
| 1.1264016939   | 0.7479180542 | 0.9999537652 | -1.0503566672 |
| 1.0974854953   | 0.5252282463 | 0.9999537652 | 1.1020293836  |
| 1.1970988109   | 0.3704267018 | 0.9999537652 | -1.2146438781 |
| 8.0710074692   | 0.4204322566 | 0.9999537652 | 6.908559683   |
| 0              | 0            | 0            | 1.6293799659  |
| -1.0574860508  | 0.7014151972 | 0.9999537652 | -1.0843215192 |
| 1.2196782492   | 0.1926009716 | 0.9999537652 | 1.0426769517  |
| 1.0516386376   | 0.7615483051 | 0.9999537652 | 1.0441694229  |
| 1.1278567131   | 0.5110405008 | 0.9999537652 | 1.0063939625  |
| 1.2462745639   | 0.2399338997 | 0.9999537652 | 1.0730767346  |
| 2.7957660672   | 0.7055164449 | 0.9999537652 | 0             |
| 1.3199290799   | 0.3353047644 | 0.9999537652 | 1.0242896905  |
| 9.8205505243   | 0.3838105254 | 0.9999537652 | 1.3346184872  |
| 1.1198932801   | 0.4470728356 | 0.9999537652 | 1.0507527637  |
| 8.064174035    | 0.4194096735 | 0.9999537652 | -3.466758885  |
| -15.9195842901 | 0.1124602651 | 0.9999537652 | 1.591370391   |
| 17.3472938331  | 0.297631354  | 0.9999537652 | -1.8594983184 |
| 1.0763924171   | 0.8875330403 | 0.9999537652 | 1.0150552869  |
| -1.0455811674  | 0.7204028955 | 0.9999537652 | -1.1559676665 |
| 1.0650141675   | 0.6777655347 | 0.9999537652 | -1.0939699307 |
| 1.6032041415   | 0.6834392951 | 0.9999537652 | 1.4861911385  |
| 1.1286287893   | 0.6240548072 | 0.9999537652 | -1.11180564   |
| 1.1582396193   | 0.6922576739 | 0.9999537652 | -3.2663345239 |
| 1.5385036419   | 0.4656340502 | 0.9999537652 | -1.4597659263 |
| -2.2763224034  | 0.2504844353 | 0.9999537652 | -1.1460915129 |
| -1.0276953307  | 0.8515367388 | 0.9999537652 | -1.0805217072 |
| 1.3588921917   | 0.7999684864 | 0.9999537652 | 1.0931805911  |
| -1.1447836674  | 0.4429012246 | 0.9999537652 | -1.1317327102 |
| 1.6240583657   | 0.2682060611 | 0.9999537652 | -1.3452041151 |
| 1.063401246    | 0.8425790836 | 0.9999537652 | 2.0339270487  |
| 9.8205505243   | 0.3837972826 | 0.9999537652 | 0             |
| 1.1746478082   | 0.2217223423 | 0.9999537652 | -1.0537513329 |
| -1.6215746016  | 0.1442955364 | 0.9999537652 | -1.2351710175 |
| -1.0901760975  | 0.4968462079 | 0.9999537652 | -1.0196289272 |
| -1.0770850968  | 0.6209982721 | 0.9999537652 | -1.224794066  |
| 1.9363887703   | 0.3827482325 | 0.9999537652 | -1.2625853971 |
| 2.7933974408   | 0.6948713406 | 0.9999537652 | 0             |
| 2.503478678    | 0.001207     | 0.9999537652 | -1.5857625604 |
| -1.2130974397  | 0.6180421296 | 0.9999537652 | -1.5062569855 |
| -1.0761575667  | 0.7038195067 | 0.9999537652 | -1.0644282598 |
| -6.9762758667  | 0.2571471921 | 0.9999537652 | -1.2195867056 |

gene\_expression\_table

|               |              |              |               |
|---------------|--------------|--------------|---------------|
| -1.0074268848 | 0.9707523111 | 0.9999537652 | -1.128215671  |
| -1.9189881436 | 0.0576963724 | 0.9999537652 | -1.4176445132 |
| 1.2223195987  | 0.2488037169 | 0.9999537652 | 1.4528456691  |
| -1.5756849726 | 0.5089496494 | 0.9999537652 | -1.6404518061 |
| -1.3969646988 | 0.0744918133 | 0.9999537652 | -1.2880112974 |
| 1.0000079996  | 0.9999537652 | 0.9999537652 | -1.4941378965 |
| 1.7202565997  | 0.3014390102 | 0.9999537652 | -2.6671091064 |
| -1.2817623199 | 0.5548950806 | 0.9999537652 | -1.2983560702 |
| -1.5092651006 | 0.0305964462 | 0.9999537652 | -1.0820260997 |
| 9.8035423414  | 0.0452593727 | 0.9999537652 | 1.1350054982  |
| -1.3027991995 | 0.755731467  | 0.9999537652 | -1.8225907301 |
| 1.0635479941  | 0.7178648941 | 0.9999537652 | -1.2017437107 |
| 2.7957660672  | 0.7055188213 | 0.9999537652 | 2.996475627   |
| 1.2067548981  | 0.2185227984 | 0.9999537652 | -1.0061288284 |
| -1.0748561648 | 0.6285007671 | 0.9999537652 | -1.1042055875 |
| 1.8100377663  | 0.0773764102 | 0.9999537652 | 1.0199227096  |
| 1.0230551597  | 0.8875242695 | 0.9999537652 | -1.0649719987 |
| 1.2092843852  | 0.1475182035 | 0.9999537652 | 1.2365590694  |
| -1.1553756775 | 0.402176897  | 0.9999537652 | -1.2651583243 |
| -1.1300185227 | 0.7420936806 | 0.9999537652 | -1.1417751321 |
| 0             | 0            | 0            | 0             |
| 1.1540990034  | 0.3339886906 | 0.9999537652 | 1.1509487343  |
| -1.1101003444 | 0.429584814  | 0.9999537652 | -1.0976867685 |
| -1.5884256519 | 0.0315694733 | 0.9999537652 | 1.0427096745  |
| 1.0746557004  | 0.5757493135 | 0.9999537652 | 1.0859390291  |
| 1.0826469763  | 0.556653833  | 0.9999537652 | 1.3791914575  |
| 1.0018197503  | 0.9926551943 | 0.9999537652 | -1.1782355431 |
| 1.0858476403  | 0.6543052954 | 0.9999537652 | -1.1853810054 |
| -1.3057742179 | 0.3886432643 | 0.9999537652 | 1.014076988   |
| 1.1172293767  | 0.9254364973 | 0.9999537652 | 1.4542901762  |
| -1.4276367323 | 0.0931856606 | 0.9999537652 | -1.121967289  |
| -1.0300139697 | 0.8909425105 | 0.9999537652 | 1.1532207259  |
| 1.235610588   | 0.1352873566 | 0.9999537652 | 1.2708917827  |
| 1.0671862706  | 0.814487559  | 0.9999537652 | 1.0695119091  |
| -1.0836475261 | 0.6480208417 | 0.9999537652 | 1.1046062877  |
| -1.032302797  | 0.883744751  | 0.9999537652 | -1.1501726585 |
| -2.5861438062 | 0.4748939165 | 0.9999537652 | 1.2593062028  |
| 2.2179001574  | 0.0375169104 | 0.9999537652 | -1.1771623374 |
| 0             | 0            | 0            | 0             |
| 0             | 0            | 0            | 2.996475627   |
| -1.2011850916 | 0.1966889454 | 0.9999537652 | 1.0606288651  |
| 1.2995020274  | 0.4206388496 | 0.9999537652 | 1.253332609   |
| 1.2992150871  | 0.506780862  | 0.9999537652 | -1.2679466736 |
| 8.0710074692  | 0.4204583208 | 0.9999537652 | 0             |
| 0             | 0            | 0            | 1.4542901762  |
| -1.5121416779 | 0.3398933898 | 0.9999537652 | -1.1888310928 |
| -1.369198268  | 0.7561307866 | 0.9999537652 | 15.9061931258 |
| 1.0290859244  | 0.8704116947 | 0.9999537652 | 1.363360292   |
| -1.0487872257 | 0.9298568754 | 0.9999537652 | 1.4604703382  |

gene\_expression\_table

|               |              |              |               |
|---------------|--------------|--------------|---------------|
| 0             | 0            | 0            | -1.1242401582 |
| -2.4110939284 | 0.0688889082 | 0.9999537652 | -1.3806498298 |
| -1.1494001102 | 0.775929489  | 0.9999537652 | 1.111601668   |
| -1.1351150408 | 0.3332621682 | 0.9999537652 | 1.1186276713  |
| 0             | 0            | 0            | 8.8639046058  |
| -1.1118908168 | 0.8887540616 | 0.9999537652 | 1.5233400822  |
| -1.0681040278 | 0.6401932637 | 0.9999537652 | 1.1447909569  |
| 1.1329956281  | 0.7164308121 | 0.9999537652 | 1.0463220163  |
| 1.4607525075  | 0.0414051065 | 0.9999537652 | -1.0725439861 |
| -1.2589896649 | 0.3160518102 | 0.9999537652 | 1.0108182692  |
| 0             | 0            | 0            | 4.9527501949  |
| -2.7245308968 | 0.0490546101 | 0.9999537652 | 1.5015099363  |
| -1.3002840432 | 0.5211566511 | 0.9999537652 | -1.3926400799 |
| 2.0602460006  | 0.2287587571 | 0.9999537652 | -1.0705926724 |
| 23.8818846228 | 0.2167080871 | 0.9999537652 | -1.1002339347 |
| -1.4015977922 | 0.3500050829 | 0.9999537652 | 1.9672458041  |
| 1.5203380125  | 0.4686723305 | 0.9999537652 | -1.3247783493 |
| 1.1035024722  | 0.59597711   | 0.9999537652 | 1.2672161823  |
| -1.2707862961 | 0.1236107298 | 0.9999537652 | -1.0881618889 |
| 0             | 0            | 0            | 2.996475627   |
| -1.0490673243 | 0.922034677  | 0.9999537652 | -1.044213841  |
| -3.4472269618 | 0.076553139  | 0.9999537652 | -1.0624502046 |
| 1.0932997774  | 0.5445347426 | 0.9999537652 | 1.162616109   |
| 1.6351118749  | 0.0866004483 | 0.9999537652 | -1.131412753  |
| -1.0404989372 | 0.953295809  | 0.9999537652 | 1.411790598   |
| 9.8288704632  | 0.3801114215 | 0.9999537652 | 4.0976538475  |
| -1.3248480218 | 0.1669545853 | 0.9999537652 | -1.0383220698 |
| 1.577928447   | 0.0757006282 | 0.9999537652 | 1.0518861416  |
| -1.063334962  | 0.7829991275 | 0.9999537652 | 1.2034762313  |
| 3.20757305    | 0.0408121082 | 0.9999537652 | 2.4244866223  |
| -1.0137378958 | 0.9116254718 | 0.9999537652 | -1.0162274382 |
| -1.1217386794 | 0.43260323   | 0.9999537652 | 1.0436080625  |
| -1.0033742971 | 0.9905676432 | 0.9999537652 | 1.1051263322  |
| -1.0713263371 | 0.906127381  | 0.9999537652 | -1.35243166   |
| 1.2234698515  | 0.3239584882 | 0.9999537652 | -1.3790493137 |
| -1.2999419354 | 0.8180884024 | 0.9999537652 | -5.6211326582 |
| 4.5545995984  | 0.5696475393 | 0.9999537652 | 8.9512754559  |
| 1.1035339639  | 0.4296512037 | 0.9999537652 | 1.012733769   |
| -1.074051266  | 0.5664675074 | 0.9999537652 | -1.3345315783 |
| -1.1317616859 | 0.4327208937 | 0.9999537652 | -1.4438309328 |
| -1.216923946  | 0.3694527347 | 0.9999537652 | -1.1913658023 |
| 1.3773829257  | 0.5420393207 | 0.9999537652 | 1.0603226543  |
| 1.0975231782  | 0.5621739622 | 0.9999537652 | -1.3701244318 |
| -1.1407223098 | 0.3640964219 | 0.9999537652 | 1.0288423649  |
| 8.064174035   | 0.4194159115 | 0.9999537652 | 2.0149727286  |
| -1.4368650953 | 0.0914893129 | 0.9999537652 | -1.2626240279 |
| 1.7226500049  | 0.202782067  | 0.9999537652 | -1.6367727885 |
| -1.1099831564 | 0.4985317761 | 0.9999537652 | 1.2152624187  |
| 2.0382505185  | 0.4245727514 | 0.9999537652 | -2.0725678067 |

gene\_expression\_table

|               |              |              |               |
|---------------|--------------|--------------|---------------|
| 2.5912735708  | 0.1170578798 | 0.9999537652 | -1.7801628221 |
| 6.3128691894  | 0.4807107715 | 0.9999537652 | 0             |
| -1.4297904902 | 0.1796939141 | 0.9999537652 | 1.5193693651  |
| -1.0109448648 | 0.936742971  | 0.9999537652 | -1.0673048431 |
| -3.8588403224 | 0.1581097392 | 0.9999537652 | 8.8639046058  |
| 0             | 0            | 0            | 2.996475627   |
| 1.2526375214  | 0.8108859998 | 0.9999537652 | -3.0936259592 |
| -1.1134750962 | 0.5236329628 | 0.9999537652 | -1.496047969  |
| 0             | 0            | 0            | 2.9985540909  |
| -1.5881570201 | 0.7078287578 | 0.9999537652 | -5.0090574362 |
| 1.2482257223  | 0.2179162198 | 0.9999537652 | 1.1009373405  |
| 1.1948778953  | 0.5569393931 | 0.9999537652 | -1.0167790123 |
| -1.0723427307 | 0.7541048601 | 0.9999537652 | -1.0449644252 |
| -1.6869835841 | 0.004008     | 0.9999537652 | -1.1410506349 |
| 1.0989597165  | 0.7507606093 | 0.9999537652 | -1.0704217672 |
| -1.1484450308 | 0.4246489156 | 0.9999537652 | -1.2171499378 |
| 1.0552506149  | 0.8690707636 | 0.9999537652 | -1.1257715842 |
| 1.0010482845  | 0.9942844235 | 0.9999537652 | -1.0308539013 |
| -1.8701378137 | 0.0784795006 | 0.9999537652 | -1.2507755863 |
| 1.0205474525  | 0.8942602419 | 0.9999537652 | -1.0708880499 |
| 6.3075231393  | 0.4850995655 | 0.9999537652 | -3.3853891979 |
| 1.5753996545  | 0.0407950023 | 0.9999537652 | -1.0224425695 |
| -1.0690912086 | 0.8763022403 | 0.9999537652 | -1.6361884696 |
| -1.1766116099 | 0.5390035096 | 0.9999537652 | -1.0800969431 |
| -1.2326976539 | 0.7443243936 | 0.9999537652 | 1.0595374479  |
| -2.5839527681 | 0.5181115426 | 0.9999537652 | 1.7042814026  |
| 1.1601436399  | 0.4882118628 | 0.9999537652 | -1.4476027836 |
| -1.2961143902 | 0.6360027832 | 0.9999537652 | -1.3668316439 |
| 1.276248929   | 0.1140034765 | 0.9999537652 | 1.4988080172  |
| 1.0858800109  | 0.5718292522 | 0.9999537652 | -1.0573232475 |
| 1.0903986127  | 0.6587323632 | 0.9999537652 | -1.383011595  |
| -1.0433941465 | 0.7256760764 | 0.9999537652 | -1.0366553349 |
| 1.2014276949  | 0.5011945733 | 0.9999537652 | 1.2969643111  |
| -1.1241198887 | 0.3991304618 | 0.9999537652 | 1.0845090638  |
| 1.164250034   | 0.6797559362 | 0.9999537652 | -1.0970976532 |
| 0             | 0            | 0            | -1.0727505572 |
| -1.1620890089 | 0.4695622473 | 0.9999537652 | -1.1906504097 |
| 4.5545995984  | 0.5696454625 | 0.9999537652 | 1.8468806494  |
| -1.2975978325 | 0.4275321118 | 0.9999537652 | -1.4397922351 |
| -1.7044043661 | 0.1989076531 | 0.9999537652 | 1.2371045246  |
| -1.0338564951 | 0.8646373666 | 0.9999537652 | 1.1907047903  |
| 1.1699151473  | 0.6464590602 | 0.9999537652 | 1.0386707371  |
| -1.0819818974 | 0.7771607755 | 0.9999537652 | 1.2395491944  |
| -1.1029907237 | 0.6497798995 | 0.9999537652 | -1.0176857649 |
| -1.0040388734 | 0.9904739495 | 0.9999537652 | 1.0176928704  |
| -1.3363021608 | 0.3522081585 | 0.9999537652 | -1.0339503721 |
| 1.2951200919  | 0.4931517382 | 0.9999537652 | 1.0825176271  |
| 1.0583880499  | 0.7068505961 | 0.9999537652 | -1.1565164157 |
| -1.0786812601 | 0.72602947   | 0.9999537652 | -1.0449164364 |



gene\_expression\_table

|               |              |              |               |
|---------------|--------------|--------------|---------------|
| 2.7933974408  | 0.6948713406 | 0.9999537652 | 8.8700459102  |
| 1.0804595421  | 0.7378009485 | 0.9999537652 | -1.0979409177 |
| 1.0795517636  | 0.6744844578 | 0.9999537652 | -1.1121025595 |
| 1.6046550712  | 0.6810120677 | 0.9999537652 | -1.2749878971 |
| 1.1212392628  | 0.5421465795 | 0.9999537652 | -1.0023651245 |
| -1.5394092355 | 0.0271733208 | 0.9999537652 | -1.6158088087 |
| -1.1390108139 | 0.6186677603 | 0.9999537652 | -1.275526239  |
| -1.007454716  | 0.9530442058 | 0.9999537652 | -1.071930311  |
| -1.0224441726 | 0.8606037291 | 0.9999537652 | 1.0578255187  |
| -1.1184676139 | 0.5109886106 | 0.9999537652 | -1.0140341426 |
| 1.1170153023  | 0.6233778091 | 0.9999537652 | -1.0005956804 |
| 0             | 0            | 0            | 6.908559683   |
| -1.7491145644 | 0.2767222645 | 0.9999537652 | 1.1338940997  |
| 1.1883473308  | 0.4316586356 | 0.9999537652 | 1.196382233   |
| 1.0541171147  | 0.8781912007 | 0.9999537652 | -1.0711004689 |
| -1.1264949047 | 0.6473203794 | 0.9999537652 | -1.4706253601 |
| -1.1387882964 | 0.3425324947 | 0.9999537652 | 1.1119624704  |
| 1.6368695344  | 0.2654456881 | 0.9999537652 | 1.1553495621  |
| 1.0285188052  | 0.8789907155 | 0.9999537652 | -1.2387413167 |
| -1.0143615881 | 0.9367861037 | 0.9999537652 | 1.0320238442  |
| -1.103045968  | 0.8197984048 | 0.9999537652 | 1.2541909535  |
| 2.4683706953  | 0.2710146482 | 0.9999537652 | -1.3712612654 |
| 1.1221638072  | 0.9024799169 | 0.9999537652 | 2.2717261431  |
| -1.0537456786 | 0.7911024955 | 0.9999537652 | -1.0435090838 |
| 1.4030593221  | 0.5131397053 | 0.9999537652 | -1.3213352774 |
| 1.0331225636  | 0.823902041  | 0.9999537652 | 1.1432365567  |
| 1.2384590172  | 0.6360278263 | 0.9999537652 | 1.2690896005  |
| -1.2168566013 | 0.3846209613 | 0.9999537652 | 1.3330102335  |
| -1.2457534506 | 0.3163792637 | 0.9999537652 | -1.1473129108 |
| 0             | 0            | 0            | 4.9527501949  |
| 1.4785821667  | 0.2954671978 | 0.9999537652 | -1.1001091216 |
| -1.2272625392 | 0.5431415494 | 0.9999537652 | 1.4343081104  |
| 6.3075231393  | 0.4850901757 | 0.9999537652 | -1.859280336  |
| 4.5505976667  | 0.5557790267 | 0.9999537652 | 14.7271569203 |
| 1.1249057005  | 0.754500404  | 0.9999537652 | 1.2179128543  |
| 0             | 0            | 0            | 1.590997316   |
| 1.4268022358  | 0.2422845296 | 0.9999537652 | -1.2652214082 |
| -1.2182878375 | 0.5590720069 | 0.9999537652 | 1.2350889974  |
| -1.2296455092 | 0.7706709362 | 0.9999537652 | -4.7716407405 |
| -1.2262293166 | 0.2877521498 | 0.9999537652 | -1.0866535397 |
| 1.1854845115  | 0.6763969274 | 0.9999537652 | -1.2421176396 |
| 2.204523133   | 0.0938901638 | 0.9999537652 | -1.0956458214 |
| 1.0551815701  | 0.7465789438 | 0.9999537652 | 1.289175658   |
| 1.3136596018  | 0.4583011223 | 0.9999537652 | -1.3277209335 |
| -1.0435274445 | 0.8922441435 | 0.9999537652 | -1.1127572418 |
| 1.4742536511  | 0.376944677  | 0.9999537652 | -1.0420566599 |
| -1.010457517  | 0.9368049184 | 0.9999537652 | -1.1573771318 |
| 1.6386722747  | 0.3726583339 | 0.9999537652 | -1.1249021223 |
| 16.8433158146 | 0.2738688772 | 0.9999537652 | -1.9435868636 |

gene\_expression\_table

|               |              |              |                |
|---------------|--------------|--------------|----------------|
| -1.1758790375 | 0.5376095513 | 0.9999537652 | 1.0474221133   |
| 1.237653776   | 0.1451258348 | 0.9999537652 | -1.6910220418  |
| -2.2765895442 | 0.2466976634 | 0.9999537652 | -1.4504059134  |
| 15.0880352532 | 0.2934043377 | 0.9999537652 | -2.0131031796  |
| -1.0933012256 | 0.777593082  | 0.9999537652 | -1.0690661743  |
| 4.5505976667  | 0.5557790267 | 0.9999537652 | 26.4777255918  |
| -1.0085355311 | 0.9930378932 | 0.9999537652 | 1.9432271302   |
| 29.8698312703 | 0.2178162544 | 0.9999537652 | -2.0477227478  |
| -1.5381739117 | 0.237480494  | 0.9999537652 | -1.4741003796  |
| -1.2383574185 | 0.2519178174 | 0.9999537652 | -1.1485322747  |
| 1.5389507255  | 0.4921199992 | 0.9999537652 | -1.2721024789  |
| 1.132735359   | 0.4839367451 | 0.9999537652 | 1.0004381978   |
| 0             | 0            | 0            | 1.5908108123   |
| 1.0846676983  | 0.4905809627 | 0.9999537652 | 1.1825084201   |
| -1.668764792  | 0.6521049629 | 0.9999537652 | 1.4380982837   |
| -1.0556403821 | 0.7527330003 | 0.9999537652 | -1.1992166791  |
| -1.0317298804 | 0.8696656408 | 0.9999537652 | -1.1374369046  |
| 1.4163115192  | 0.2636769146 | 0.9999537652 | 1.0062753509   |
| 1.9066445334  | 0.4740584396 | 0.9999537652 | 1.5537663683   |
| 1.3400712069  | 0.1854412337 | 0.9999537652 | -1.3590216973  |
| -1.4270565985 | 0.2158159237 | 0.9999537652 | 1.0926621754   |
| -1.1447490371 | 0.9152039999 | 0.9999537652 | -17.3329126105 |
| 4.5166078038  | 0.1766694351 | 0.9999537652 | 2.996475627    |
| 1.1209420802  | 0.4093111056 | 0.9999537652 | -1.1120096618  |
| 2.7933974408  | 0.6948713406 | 0.9999537652 | 0              |
| 0             | 0            | 0            | 2.996475627    |
| 0             | 0            | 0            | 1.590997316    |
| 1.8844843324  | 0.005516     | 0.9999537652 | -1.0394786074  |
| 4.5115277415  | 0.079829615  | 0.9999537652 | 1.1904248789   |
| -1.1123231904 | 0.7564494424 | 0.9999537652 | -1.3226713131  |
| 1.8585605296  | 0.1812392074 | 0.9999537652 | 1.2565167478   |
| 1.4956507458  | 0.4398248268 | 0.9999537652 | -1.4244126558  |
| 1.276812955   | 0.4812003383 | 0.9999537652 | -1.3176374119  |
| 2.7933974408  | 0.6948713406 | 0.9999537652 | -1.1503049253  |
| -1.1048877431 | 0.5739081598 | 0.9999537652 | 1.2346315359   |
| 2.7520178873  | 0.1481642386 | 0.9999537652 | -1.2587979171  |
| -2.5871290907 | 0.5000688344 | 0.9999537652 | 3.3445905597   |
| -1.7652571835 | 0.0659506084 | 0.9999537652 | -1.176385356   |
| -1.0653664483 | 0.8465143199 | 0.9999537652 | -1.0018310437  |
| 4.6654312047  | 0.0004305    | 0.9999537652 | 1.594530159    |
| 1.3208497255  | 0.518052141  | 0.9999537652 | -1.0846843115  |
| -1.4149785476 | 0.1218778756 | 0.9999537652 | -1.3994497245  |
| 0             | 0            | 0            | 2.996475627    |
| 2.7957660672  | 0.7055235769 | 0.9999537652 | -1.2214576418  |
| 1.0408601071  | 0.8297347817 | 0.9999537652 | -1.1990449332  |
| 1.0566150785  | 0.8640192865 | 0.9999537652 | 1.0499867029   |
| 1.7738745164  | 0.5343515944 | 0.9999537652 | 18.6336779883  |
| -1.0391372056 | 0.9528707401 | 0.9999537652 | 1.3234054731   |
| 1.2491784013  | 0.3297271378 | 0.9999537652 | 1.2046928615   |

gene\_expression\_table

|               |              |              |               |
|---------------|--------------|--------------|---------------|
| 2.0885615936  | 0.5185160385 | 0.9999537652 | -1.0601718512 |
| -1.0245769117 | 0.9195673649 | 0.9999537652 | -1.097279382  |
| -1.3912856256 | 0.4180925669 | 0.9999537652 | 1.007010439   |
| 85.6500119782 | 0.0835799918 | 0.9999537652 | 2.5233586594  |
| 1.3172108461  | 0.1425652383 | 0.9999537652 | -1.1218893772 |
| 2.3461886365  | 0.008532     | 0.9999537652 | -1.3304834327 |
| -1.2410216542 | 0.1174367276 | 0.9999537652 | -1.090670444  |
| -1.11819709   | 0.4550548529 | 0.9999537652 | 1.0494952079  |
| 1.1916669781  | 0.2585188334 | 0.9999537652 | -1.3234395348 |
| 1.3024093443  | 0.2726204517 | 0.9999537652 | 1.0119529652  |
| 0             | 0            | 0            | 2.9985540909  |
| -1.4034442924 | 0.0328407811 | 0.9999537652 | -1.0236311959 |
| -1.0103773406 | 0.9733064539 | 0.9999537652 | -1.4859171843 |
| -1.2477568887 | 0.5447656874 | 0.9999537652 | -1.3326624714 |
| -1.0362145677 | 0.8452332041 | 0.9999537652 | -1.1686962495 |
| 1.4205746494  | 0.476038906  | 0.9999537652 | -1.0425181343 |
| 1.1317396891  | 0.5333938925 | 0.9999537652 | 1.132326217   |
| -1.8332325169 | 0.2547506675 | 0.9999537652 | -1.0432965625 |
| 2.2198211934  | 0.0917975693 | 0.9999537652 | 1.2049119316  |
| -1.0466832537 | 0.8303413964 | 0.9999537652 | 1.1808107261  |
| 1.1167754821  | 0.9277512034 | 0.9999537652 | -1.5087935345 |
| 1.1939731432  | 0.2851455618 | 0.9999537652 | -1.4982330779 |
| -2.7740269098 | 0.2151947459 | 0.9999537652 | -2.5763095902 |
| 1.6710714369  | 0.4504946823 | 0.9999537652 | 1.2268431205  |
| 1.8455489546  | 0.5920264881 | 0.9999537652 | -1.0953721119 |
| -1.0887021823 | 0.5646330745 | 0.9999537652 | -1.0636099664 |
| -1.0542443527 | 0.7967303187 | 0.9999537652 | 1.5211085816  |
| 1.2316932874  | 0.6543414355 | 0.9999537652 | 1.2806145297  |
| -1.0820712914 | 0.6980781435 | 0.9999537652 | -1.1421430704 |
| 1.1902735921  | 0.6836860152 | 0.9999537652 | -1.5242622678 |
| 2.7933974408  | 0.6948713406 | 0.9999537652 | 2.996475627   |
| 1.0484842868  | 0.8777552251 | 0.9999537652 | -1.1450238802 |
| -1.1605169044 | 0.8770226491 | 0.9999537652 | 1.6464401882  |
| 1.5385690594  | 0.0558287068 | 0.9999537652 | 1.35499568    |
| 2.7933974408  | 0.6948713406 | 0.9999537652 | 0             |
| 1.3215409268  | 0.1721006838 | 0.9999537652 | 1.3363100178  |
| 1.416057543   | 0.1690519695 | 0.9999537652 | 1.067283092   |
| 1.0774360859  | 0.7019347639 | 0.9999537652 | -1.015007029  |
| -1.4354957421 | 0.2144268943 | 0.9999537652 | -1.1506170694 |
| 11.5766527773 | 0.3454083239 | 0.9999537652 | 1.2698746349  |
| -6.6829003845 | 8.30E-05     | 0.6382149566 | -2.0277560291 |
| 1.7785996228  | 0.003753     | 0.9999537652 | 1.0415475608  |
| 11.5966493128 | 0.3442508969 | 0.9999537652 | 3.9662067717  |
| 0             | 0            | 0            | -2.6269410807 |
| 30.8757261591 | 0.1832471885 | 0.9999537652 | -1.8686445933 |
| -1.0102577328 | 0.9453702519 | 0.9999537652 | -1.1344574504 |
| -1.1222924563 | 0.3584395646 | 0.9999537652 | -1.0222572477 |
| 0             | 0            | 0            | 6.908559683   |
| -1.0942568408 | 0.8334457746 | 0.9999537652 | -1.7104086043 |

gene\_expression\_table

|               |              |              |               |
|---------------|--------------|--------------|---------------|
| -1.1154970392 | 0.6175770483 | 0.9999537652 | 1.1882547662  |
| -1.1365734422 | 0.5062325472 | 0.9999537652 | -1.1544245831 |
| 1.1736492426  | 0.5731223124 | 0.9999537652 | -1.2093051167 |
| 1.034927222   | 0.8565418249 | 0.9999537652 | -1.3219532138 |
| -1.037288508  | 0.8107260933 | 0.9999537652 | 1.5944967176  |
| 1.0633911734  | 0.7359435553 | 0.9999537652 | 1.047425354   |
| -1.0112420483 | 0.9844098963 | 0.9999537652 | 1.130545974   |
| -1.1457555741 | 0.9105882642 | 0.9999537652 | 1.3730979101  |
| -1.1207926898 | 0.3352555101 | 0.9999537652 | 1.0579882161  |
| -1.1579031467 | 0.4778520844 | 0.9999537652 | 1.0277782216  |
| 1.8471118167  | 0.5851526856 | 0.9999537652 | -5.3589986948 |
| -1.0399132936 | 0.8308670093 | 0.9999537652 | -1.1159147497 |
| 1.1484783125  | 0.7717381669 | 0.9999537652 | -1.0614166346 |
| 1.0597727521  | 0.7466420066 | 0.9999537652 | 1.0411535348  |
| -1.1017436422 | 0.8220930162 | 0.9999537652 | 1.0863300677  |
| 13.3324809638 | 0.3193495606 | 0.9999537652 | -1.9860002794 |
| 1.1116123432  | 0.7564539241 | 0.9999537652 | -1.0542036433 |
| 0             | 0            | 0            | -1.3581071904 |
| -1.777015156  | 0.0644868647 | 0.9999537652 | -1.1514320004 |
| -1.1025616656 | 0.5850605966 | 0.9999537652 | 1.2196308063  |
| 1.0792696037  | 0.5596759373 | 0.9999537652 | 1.1052620368  |
| 1.2919142292  | 0.4960480957 | 0.9999537652 | -1.1790000723 |
| 1.6355379708  | 0.2094580072 | 0.9999537652 | -1.0094237983 |
| 1.7087130193  | 0.1839423524 | 0.9999537652 | 1.0826144763  |
| 1.0187259402  | 0.8969119777 | 0.9999537652 | -1.0199712567 |
| -1.4016400111 | 0.6413973278 | 0.9999537652 | -1.3906070606 |
| -1.0241857312 | 0.8449569374 | 0.9999537652 | 1.0143769034  |
| -1.07837959   | 0.8616430252 | 0.9999537652 | -1.0414679626 |
| -1.0452438    | 0.8442350749 | 0.9999537652 | -1.320279003  |
| 1.3588921917  | 0.7998497015 | 0.9999537652 | 3.6030199429  |
| 1.3271976949  | 0.6908059814 | 0.9999537652 | -1.8695625541 |
| 1.1158299481  | 0.9297797086 | 0.9999537652 | -2.0477227478 |
| 1.1457972302  | 0.5094256825 | 0.9999537652 | 1.1168954247  |
| 1.2830731733  | 0.2308670626 | 0.9999537652 | -1.2832244625 |
| -1.4169132951 | 0.2396679734 | 0.9999537652 | 1.0881070491  |
| -1.1422351649 | 0.4611257055 | 0.9999537652 | -1.1942345597 |
| 2.7957660672  | 0.7055259561 | 0.9999537652 | 0             |
| -1.1024234553 | 0.6583122988 | 0.9999537652 | 1.0973577609  |
| -1.1670800354 | 0.4041696507 | 0.9999537652 | -1.2126523643 |
| 1.0688368103  | 0.7053589304 | 0.9999537652 | -1.3292742281 |
| 1.032552319   | 0.8461585508 | 0.9999537652 | -1.0103944828 |
| 1.0662554746  | 0.7453543402 | 0.9999537652 | 1.1185365673  |
| -1.5643710553 | 0.3804847966 | 0.9999537652 | 5.1481919969  |
| -1.1161721852 | 0.6100510396 | 0.9999537652 | -1.4090632666 |
| 0             | 0            | 0            | 4.9527501949  |
| 1.3924641813  | 0.0563094902 | 0.9999537652 | 1.1513599417  |
| 1.671629292   | 0.465334768  | 0.9999537652 | 1.125794308   |
| 0             | 0            | 0            | 2.996475627   |
| 1.7048355104  | 0.16358517   | 0.9999537652 | -1.3161992606 |

gene\_expression\_table

|               |              |              |               |
|---------------|--------------|--------------|---------------|
| 1.1503991893  | 0.543535535  | 0.9999537652 | -1.170947106  |
| 1.2276521349  | 0.2247827111 | 0.9999537652 | -1.1465581773 |
| 1.0794343821  | 0.9113761966 | 0.9999537652 | 1.5247400379  |
| 1.343879998   | 0.6998249381 | 0.9999537652 | -1.071402865  |
| -1.0092422658 | 0.9697902258 | 0.9999537652 | 1.0518885104  |
| -5.1764559054 | 0.0358969429 | 0.9999537652 | 1.0701803436  |
| 1.0772326823  | 0.8240633841 | 0.9999537652 | 1.2382065883  |
| 1.101152236   | 0.4919868085 | 0.9999537652 | -1.2818319516 |
| -1.1776184739 | 0.746468579  | 0.9999537652 | -1.6302923146 |
| -1.1457555741 | 0.910571956  | 0.9999537652 | -2.6181175393 |
| 1.2281238208  | 0.1437525755 | 0.9999537652 | -1.1795906443 |
| -1.1608106207 | 0.3085970267 | 0.9999537652 | -1.082740225  |
| -1.0534822785 | 0.8385756062 | 0.9999537652 | 1.0693662477  |
| 0             | 0            | 0            | 2.2217890137  |
| -1.3886329778 | 0.3101969502 | 0.9999537652 | -1.5130485783 |
| 1.121795781   | 0.5205782298 | 0.9999537652 | -1.102257063  |
| 1.5256842953  | 0.4013624821 | 0.9999537652 | -1.3769722583 |
| 1.0584154638  | 0.7651746629 | 0.9999537652 | 1.0056528517  |
| -1.0656835295 | 0.8749174417 | 0.9999537652 | -1.6422376232 |
| 1.0397361931  | 0.9294787113 | 0.9999537652 | -1.4266768545 |
| -1.1777127504 | 0.5425376769 | 0.9999537652 | 1.1234612537  |
| -1.7936922955 | 0.4660695729 | 0.9999537652 | -3.1688506665 |
| 1.253661757   | 0.1699072903 | 0.9999537652 | -1.2739212131 |
| 1.2609036704  | 0.3550098983 | 0.9999537652 | -1.2303135515 |
| -1.2435663335 | 0.2408037564 | 0.9999537652 | 1.1915912749  |
| 3.0643454819  | 0.3120649314 | 0.9999537652 | 1.0138718302  |
| 0             | 0            | 0            | -5.3583704783 |
| 0             | 0            | 0            | 0             |
| 2.4307668446  | 0.2876836765 | 0.9999537652 | -1.0751015612 |
| -1.1772599164 | 0.4482316707 | 0.9999537652 | -1.061072143  |
| 0             | 0            | 0            | 2.5938834885  |
| -1.0824631274 | 0.8358621057 | 0.9999537652 | 1.2086543503  |
| 27.369260276  | 0.2000494026 | 0.9999537652 | -1.1411969817 |
| -1.7438320327 | 0.5074107466 | 0.9999537652 | 1.399968965   |
| -6.5577136368 | 0.001583     | 0.9999537652 | -1.0462859193 |
| 2.7933974408  | 0.6948713406 | 0.9999537652 | 10.818785458  |
| 2.7933974408  | 0.6948713406 | 0.9999537652 | 0             |
| 27.7226916631 | 0.2128734045 | 0.9999537652 | 1.3467382728  |
| -1.2397660874 | 0.3458735515 | 0.9999537652 | 1.1039377613  |
| 1.2157816924  | 0.3316256424 | 0.9999537652 | 1.1277834379  |
| -6.9736190158 | 0.2250321147 | 0.9999537652 | 12.3846842502 |
| 1.2289869031  | 0.6574568792 | 0.9999537652 | -2.0852514066 |
| 1.6483580263  | 0.0402941117 | 0.9999537652 | -1.0712719774 |
| 1.1177865052  | 0.9286373457 | 0.9999537652 | 1.9418822056  |
| 1.0113931203  | 0.972066166  | 0.9999537652 | 1.0050125339  |
| 1.0791087817  | 0.5539625938 | 0.9999537652 | 1.1981755059  |
| -1.122767557  | 0.6951389334 | 0.9999537652 | 1.1299525771  |
| -1.034157361  | 0.8405519423 | 0.9999537652 | 1.0747380576  |
| -1.1457555741 | 0.9105755498 | 0.9999537652 | 2.996475627   |

gene\_expression\_table

|               |              |              |                |
|---------------|--------------|--------------|----------------|
| 1.6746256188  | 0.4287305743 | 0.9999537652 | 3.18554147     |
| -1.2154673509 | 0.3712458678 | 0.9999537652 | 1.1843346827   |
| 1.1880119602  | 0.6701998571 | 0.9999537652 | -1.0864953517  |
| -1.1145487473 | 0.5130493877 | 0.9999537652 | 1.0987144999   |
| 1.0492483407  | 0.6945871742 | 0.9999537652 | 1.1150380916   |
| -1.586811795  | 0.716742255  | 0.9999537652 | 1.9305383734   |
| -1.1828551405 | 0.5710218691 | 0.9999537652 | 1.1952558649   |
| -2.8782708378 | 0.1779564275 | 0.9999537652 | 1.0674845818   |
| 1.1216701798  | 0.9024721268 | 0.9999537652 | -1.6635832525  |
| 1.015350556   | 0.8996277398 | 0.9999537652 | 1.1343325924   |
| -1.3636173358 | 0.3399330952 | 0.9999537652 | 1.5942285498   |
| 1.2902250022  | 0.0840760414 | 0.9999537652 | 1.3442549415   |
| -1.2134962926 | 0.484998831  | 0.9999537652 | -1.0206294124  |
| 1.0558087725  | 0.8867881084 | 0.9999537652 | -1.2301065239  |
| 9.8372048419  | 0.3843085791 | 0.9999537652 | 1.1001085314   |
| 43.2519505013 | 0.1383053945 | 0.9999537652 | -1.4354930872  |
| 1.0213667383  | 0.9002253275 | 0.9999537652 | -1.1173924018  |
| 1.1893183402  | 0.6003368428 | 0.9999537652 | -1.1894568553  |
| -1.0039312271 | 0.9889525391 | 0.9999537652 | 1.1224258875   |
| -1.5881570201 | 0.7104954826 | 0.9999537652 | 1.4367288239   |
| 1.7927701543  | 0.003629     | 0.9999537652 | -1.0771653991  |
| -1.078505798  | 0.6839680568 | 0.9999537652 | -1.0847921732  |
| 1.3153276664  | 0.0828340704 | 0.9999537652 | 1.2159413622   |
| -1.1385017487 | 0.4777225355 | 0.9999537652 | 1.0154229768   |
| 1.1391083023  | 0.5752644496 | 0.9999537652 | -1.0280150033  |
| 1.0204515276  | 0.9024349976 | 0.9999537652 | -1.0215679756  |
| 1.0077278019  | 0.9569012455 | 0.9999537652 | -1.1315347652  |
| 1.1036803303  | 0.4874676167 | 0.9999537652 | 1.1789544506   |
| 1.3946258785  | 0.107662583  | 0.9999537652 | 1.1868450122   |
| 1.338776268   | 0.4097951244 | 0.9999537652 | -1.0253718085  |
| -1.0597738355 | 0.8149616692 | 0.9999537652 | 1.0342991795   |
| 1.1053606867  | 0.4206638598 | 0.9999537652 | 1.081129869    |
| -1.0646509197 | 0.6601503787 | 0.9999537652 | 1.0057982041   |
| -2.7739563827 | 0.2141457904 | 0.9999537652 | -6.262381099   |
| 1.9992276705  | 0.0188216276 | 0.9999537652 | 1.6105563021   |
| 4.5544554512  | 0.5691114569 | 0.9999537652 | -1.1441751338  |
| 2.5560713637  | 0.2244365447 | 0.9999537652 | 1.0102910746   |
| 1.3970678716  | 0.0562074453 | 0.9999537652 | -1.021132696   |
| 1.0245802971  | 0.885707349  | 0.9999537652 | -1.2063358888  |
| 1.2683954833  | 0.5238426255 | 0.9999537652 | -1.7820707453  |
| -1.25001277   | 0.3023648867 | 0.9999537652 | 1.1171763061   |
| 13.3324809638 | 0.3193572283 | 0.9999537652 | -14.4562307049 |
| 1.0466162917  | 0.8062307767 | 0.9999537652 | 1.2334460931   |
| -1.3823836963 | 0.2093859926 | 0.9999537652 | 1.6238763338   |
| 1.074999585   | 0.7083689571 | 0.9999537652 | 1.0671453893   |
| 0             | 0            | 0            | 4.9527501949   |
| -1.6666745839 | 0.6134564792 | 0.9999537652 | 1.532480552    |
| 1.0542464528  | 0.851462818  | 0.9999537652 | -1.0062619915  |
| 1.3843118609  | 0.2871718928 | 0.9999537652 | -1.1031146131  |

gene\_expression\_table

|               |              |              |               |
|---------------|--------------|--------------|---------------|
| 1.0197104916  | 0.8870177396 | 0.9999537652 | 1.1071579151  |
| 1.0217638108  | 0.9275922459 | 0.9999537652 | 1.0177837522  |
| -1.087734772  | 0.6378202589 | 0.9999537652 | 1.199923851   |
| -18.664869065 | 0.0419427805 | 0.9999537652 | 9.7116702472  |
| -6.9736190158 | 0.2250321147 | 0.9999537652 | 24.4899985757 |
| 1.3911069039  | 0.6824958828 | 0.9999537652 | -4.4401050878 |
| -2.0766225707 | 0.0650572093 | 0.9999537652 | -1.3591196342 |
| -1.1905930305 | 0.2551984552 | 0.9999537652 | -1.2646849194 |
| 1.246980349   | 0.1272828037 | 0.9999537652 | 1.3236358918  |
| 1.2173697394  | 0.3380293835 | 0.9999537652 | 1.1577041964  |
| -1.1371386432 | 0.263782006  | 0.9999537652 | 1.0784877285  |
| -1.102162793  | 0.5633734177 | 0.9999537652 | 1.2213281979  |
| 1.7476005214  | 0.4809986477 | 0.9999537652 | -1.7402957735 |
| -1.5875118025 | 0.7210671248 | 0.9999537652 | -3.0249801457 |
| 0             | 0            | 0            | 0             |
| 1.3826309223  | 0.7329507267 | 0.9999537652 | 3.9589389566  |
| 1.0021669913  | 0.9912472332 | 0.9999537652 | -1.1013804027 |
| 8.064174035   | 0.4194221592 | 0.9999537652 | 1.2674637396  |
| 0             | 0            | 0            | 2.9985540909  |
| -1.4017655923 | 0.402386176  | 0.9999537652 | -1.0755112179 |
| -1.0162042674 | 0.9541742894 | 0.9999537652 | -1.2073356628 |
| -1.4685406098 | 0.1384957579 | 0.9999537652 | 1.273494796   |
| 2.6532911141  | 0.1038819751 | 0.9999537652 | -1.0137170537 |
| -1.17513703   | 0.7528126867 | 0.9999537652 | 2.0848300342  |
| 1.0318295738  | 0.8802273096 | 0.9999537652 | 1.0729654707  |
| -1.2721916713 | 0.7569555928 | 0.9999537652 | -1.5440473325 |
| 1.1167754821  | 0.9277522878 | 0.9999537652 | -2.1285142809 |
| -1.1013045071 | 0.7504155434 | 0.9999537652 | -1.7565101817 |
| 1.0563667559  | 0.9343995892 | 0.9999537652 | 1.0254869434  |
| -1.271448481  | 0.305182213  | 0.9999537652 | -1.130130951  |
| -1.1734992811 | 0.2832060493 | 0.9999537652 | -1.222879627  |
| -1.3125418099 | 0.2025065884 | 0.9999537652 | -1.0587156129 |
| 0             | 0            | 0            | -1.0736853543 |
| -1.0537663165 | 0.7875406635 | 0.9999537652 | -1.1785874642 |
| 1.6026102837  | 0.0959362612 | 0.9999537652 | -1.179973074  |
| -1.2803144096 | 0.1954813188 | 0.9999537652 | -1.9594929259 |
| -1.6062706965 | 0.4071429856 | 0.9999537652 | -1.1640071036 |
| 2.6206366172  | 0.1455366619 | 0.9999537652 | 1.5580155169  |
| -1.4428391683 | 0.0204007428 | 0.9999537652 | -1.1816805323 |
| -1.0165584389 | 0.9006997208 | 0.9999537652 | -1.466780655  |
| 1.2122901119  | 0.1142854112 | 0.9999537652 | 1.1214755013  |
| -1.0475832478 | 0.8254290455 | 0.9999537652 | -1.1907308559 |
| -1.0317350572 | 0.8223023426 | 0.9999537652 | -1.028943166  |
| 1.0785123831  | 0.7675217623 | 0.9999537652 | 1.0727703548  |
| -1.2749535851 | 0.1742982058 | 0.9999537652 | -1.0418246644 |
| 1.6081277835  | 0.181921397  | 0.9999537652 | 2.10295626    |
| -1.9429524323 | 0.4335406868 | 0.9999537652 | -2.0718935183 |
| 1.1070112236  | 0.4822276274 | 0.9999537652 | -1.3220035147 |
| 1.2218501334  | 0.33400344   | 0.9999537652 | -1.2258814027 |

gene\_expression\_table

|               |              |              |               |
|---------------|--------------|--------------|---------------|
| -1.1528956697 | 0.4420305933 | 0.9999537652 | 1.0236279578  |
| -1.4041359274 | 0.5989398136 | 0.9999537652 | 1.6026084528  |
| 2.6791577165  | 0.1814540818 | 0.9999537652 | -1.323124154  |
| 0             | 0            | 0            | 2.996475627   |
| -1.1916821274 | 0.1758406931 | 0.9999537652 | -1.2194501867 |
| 1.0990335097  | 0.4861099775 | 0.9999537652 | -1.2532832654 |
| 1.0317023194  | 0.8110996527 | 0.9999537652 | -1.1478004577 |
| -1.1709147062 | 0.1762768936 | 0.9999537652 | -1.425451599  |
| 1.0714411381  | 0.7391351348 | 0.9999537652 | 1.0673294167  |
| 11.5766527773 | 0.3453979996 | 0.9999537652 | -1.619960364  |
| 1.118472422   | 0.6064879063 | 0.9999537652 | -1.2909867644 |
| -1.2710840668 | 0.4888601359 | 0.9999537652 | -1.073933606  |
| -2.4387448463 | 0.350320906  | 0.9999537652 | 1.8775765352  |
| -1.044265872  | 0.7915801916 | 0.9999537652 | -1.3597456187 |
| 1.0969890895  | 0.7618913834 | 0.9999537652 | -1.7689304763 |
| 15.0880352532 | 0.2933962091 | 0.9999537652 | -2.2267949004 |
| -1.6267789228 | 0.4332034012 | 0.9999537652 | -1.1146012341 |
| 1.2179071343  | 0.3245571665 | 0.9999537652 | -1.5631120287 |
| 1.0748593979  | 0.6945648695 | 0.9999537652 | -1.4137569598 |
| -1.3181038637 | 0.660883906  | 0.9999537652 | -1.3338590027 |
| 1.7770533563  | 0.1559966928 | 0.9999537652 | -1.4713629668 |
| -1.4374007791 | 0.1368363757 | 0.9999537652 | 1.235105271   |
| -1.0752136643 | 0.7409241885 | 0.9999537652 | 1.1247584868  |
| 1.1561297187  | 0.6994753453 | 0.9999537652 | 1.4123528595  |
| 1.0771240962  | 0.6043945373 | 0.9999537652 | -1.3676352739 |
| 0             | 0            | 0            | -1.1248877899 |
| 1.0063866681  | 0.9646263483 | 0.9999537652 | 1.0673656124  |
| -2.1848874448 | 0.2485164924 | 0.9999537652 | 2.2266622154  |
| -1.3727891389 | 0.1434621015 | 0.9999537652 | -1.1077010752 |
| 1.0929869337  | 0.7496665471 | 0.9999537652 | -1.3360782943 |
| 1.8447991669  | 0.5955682701 | 0.9999537652 | -3.2520699103 |
| 4.2332151529  | 0.1683009855 | 0.9999537652 | -1.1345231394 |
| 8.064174035   | 0.4194284167 | 0.9999537652 | 0             |
| 1.0588714969  | 0.6950353352 | 0.9999537652 | -1.1870673991 |
| -1.356320743  | 0.1186748243 | 0.9999537652 | -1.0146697206 |
| -1.0350598224 | 0.8240623864 | 0.9999537652 | -1.0778236326 |
| -1.4144052759 | 0.4358234851 | 0.9999537652 | -1.2705771923 |
| 1.0563036173  | 0.7793106249 | 0.9999537652 | 1.1171219355  |
| -1.7169693606 | 0.5214600757 | 0.9999537652 | -6.7496343228 |
| -1.0662991483 | 0.8072802465 | 0.9999537652 | -1.8034001629 |
| 2.7933974408  | 0.6948713406 | 0.9999537652 | 14.7271569203 |
| 1.4271180501  | 0.6554148992 | 0.9999537652 | 2.9666211993  |
| 1.1059952251  | 0.8326433367 | 0.9999537652 | 1.3336511346  |
| 8.064174035   | 0.419434684  | 0.9999537652 | 1.6778989432  |
| -1.0756344936 | 0.7540173594 | 0.9999537652 | -1.1078604286 |
| 1.1574430789  | 0.7666234673 | 0.9999537652 | -1.6569452998 |
| -1.6246276659 | 0.0119974418 | 0.9999537652 | -1.3875954909 |
| 1.2031295302  | 0.4088581153 | 0.9999537652 | -1.019488001  |
| -1.9866409174 | 0.2172263406 | 0.9999537652 | -1.0929796937 |



gene\_expression\_table

|               |              |              |               |
|---------------|--------------|--------------|---------------|
| 1.0084785312  | 0.9732918891 | 0.9999537652 | -1.043895419  |
| -1.1384365954 | 0.4711946492 | 0.9999537652 | -1.0279632609 |
| 1.1334661355  | 0.5297372697 | 0.9999537652 | 1.2676452832  |
| -1.0735894262 | 0.7648240361 | 0.9999537652 | -1.2213622781 |
| -1.1559908397 | 0.6622902392 | 0.9999537652 | -1.7612825391 |
| 9.8205505243  | 0.383784024  | 0.9999537652 | -1.6175548097 |
| 6.3075231393  | 0.4850807931 | 0.9999537652 | -9.4802220615 |
| -1.084779055  | 0.9219811384 | 0.9999537652 | -1.7016325867 |
| -1.1918212237 | 0.4648087453 | 0.9999537652 | -1.0702105065 |
| -1.1907399532 | 0.7138687965 | 0.9999537652 | -1.0862742596 |
| -1.412233084  | 0.341777579  | 0.9999537652 | -1.3404035038 |
| 1.1141052312  | 0.5882125836 | 0.9999537652 | 1.0088356667  |
| 1.5571829811  | 0.2769052371 | 0.9999537652 | 3.0459701107  |
| -1.281885198  | 0.5548494491 | 0.9999537652 | -1.1080340654 |
| 1.9939828875  | 0.0379051981 | 0.9999537652 | -1.0082432596 |
| 1.2082216971  | 0.4695881418 | 0.9999537652 | 1.2342699425  |
| -1.030324871  | 0.8465714442 | 0.9999537652 | -1.0072952154 |
| -1.1452457414 | 0.663730053  | 0.9999537652 | -1.1802054568 |
| -2.5871290907 | 0.5000502148 | 0.9999537652 | 0             |
| 1.4696851973  | 0.1313032563 | 0.9999537652 | 1.2191300171  |
| -1.2009321264 | 0.473658251  | 0.9999537652 | -1.0943385619 |
| 6.3075231393  | 0.4850714177 | 0.9999537652 | -1.3710897962 |
| 1.0705399723  | 0.8375389707 | 0.9999537652 | -1.0486878052 |
| -2.2386052964 | 0.3387938717 | 0.9999537652 | -1.4377224945 |
| -1.2072938767 | 0.5135982983 | 0.9999537652 | -1.1257733271 |
| -1.7355837304 | 0.0925576965 | 0.9999537652 | -1.0731192448 |
| 1.1285974849  | 0.4411537941 | 0.9999537652 | -1.123174573  |
| 1.372384133   | 0.2506231166 | 0.9999537652 | 1.2303622764  |
| -1.1347432124 | 0.6059977813 | 0.9999537652 | -1.078956744  |
| 13.3437712784 | 0.3162721485 | 0.9999537652 | 1.135271392   |
| 1.4534338257  | 0.4590033119 | 0.9999537652 | -1.188556735  |
| -1.4016425072 | 0.1302699873 | 0.9999537652 | 1.1448141725  |
| 0             | 0            | 0            | -1.8579915692 |
| 2.1697122316  | 0.3609426919 | 0.9999537652 | -2.3138943259 |
| -1.4625285412 | 0.099940496  | 0.9999537652 | -1.4958846435 |
| 1.3594099105  | 0.7964383549 | 0.9999537652 | -4.5809105665 |
| 0             | 0            | 0            | 24.561035655  |
| 1.1060299692  | 0.5257268307 | 0.9999537652 | -1.0271786283 |
| -1.0560157548 | 0.791967046  | 0.9999537652 | -1.37088054   |
| -2.223376117  | 0.5879030156 | 0.9999537652 | -4.9102474202 |
| 1.1128931333  | 0.5557622729 | 0.9999537652 | 1.0906180392  |
| 1.3505011552  | 0.5370674842 | 0.9999537652 | -1.2994393007 |
| -1.0862101524 | 0.7720871917 | 0.9999537652 | 1.0272036295  |
| 1.125498098   | 0.8624041203 | 0.9999537652 | -1.3946376339 |
| 1.0563636447  | 0.7820543877 | 0.9999537652 | 1.2182563991  |
| -1.2441281711 | 0.2224801575 | 0.9999537652 | -1.2938241057 |
| 1.6310488281  | 0.392878117  | 0.9999537652 | 1.4433324361  |
| -1.3968764843 | 0.4599725671 | 0.9999537652 | 1.0805292111  |
| 0             | 0            | 0            | 2.9985540909  |

gene\_expression\_table

|               |              |              |               |
|---------------|--------------|--------------|---------------|
| 1.0880792593  | 0.8210100698 | 0.9999537652 | 1.1227859182  |
| 1.3881051374  | 0.3623642669 | 0.9999537652 | -1.194038978  |
| 1.0333223267  | 0.9629933284 | 0.9999537652 | -1.2914682514 |
| 0             | 0            | 0            | -5.3583704783 |
| -1.6583999534 | 0.1153597364 | 0.9999537652 | 1.0537539781  |
| 2.3315363418  | 0.45714549   | 0.9999537652 | -1.4119507574 |
| 1.8487361328  | 0.5872310539 | 0.9999537652 | -1.3813421161 |
| 1.1560468193  | 0.5544445762 | 0.9999537652 | 1.2406010386  |
| -1.0075959136 | 0.9942997012 | 0.9999537652 | 2.1744801732  |
| -9.2663780788 | 0.0598432968 | 0.9999537652 | 1.0260351662  |
| 0             | 0            | 0            | 4.9527501949  |
| 1.0794355559  | 0.6145634596 | 0.9999537652 | 1.0299533271  |
| 0             | 0            | 0            | 4.9527501949  |
| 1.3627340806  | 0.1910210818 | 0.9999537652 | 1.2484105522  |
| 1.2989158155  | 0.5406470413 | 0.9999537652 | -1.3744760131 |
| 3.8032158502  | 0.0183179672 | 0.9999537652 | 1.0881165141  |
| 1.0616945401  | 0.6240458428 | 0.9999537652 | 1.2609642525  |
| 0             | 0            | 0            | -1.5263022474 |
| 1.0235529464  | 0.85345965   | 0.9999537652 | -1.1195832156 |
| 1.1012443766  | 0.6167391889 | 0.9999537652 | -1.1394805828 |
| 0             | 0            | 0            | 2.996475627   |
| 1.1935114622  | 0.8110705715 | 0.9999537652 | -3.3143315952 |
| -1.0396471216 | 0.8668130759 | 0.9999537652 | -1.1017901241 |
| -1.4615661169 | 0.068051964  | 0.9999537652 | -1.1576052068 |
| -1.0793000367 | 0.804628345  | 0.9999537652 | 1.3066335416  |
| 1.3784816619  | 0.0267768282 | 0.9999537652 | -1.1327215861 |
| 1.0438980096  | 0.7414770303 | 0.9999537652 | -1.0216080367 |
| 1.7982279591  | 0.2054164982 | 0.9999537652 | -1.2272441027 |
| 5.9743887745  | 0.0914295122 | 0.9999537652 | -1.2486442955 |
| 3.7902526731  | 0.2291175146 | 0.9999537652 | -2.7991461852 |
| 0             | 0            | 0            | 2.996475627   |
| 30.9018162087 | 0.1808215217 | 0.9999537652 | 1.037875072   |
| -1.4490984494 | 0.618297102  | 0.9999537652 | -2.1425023034 |
| 1.0658546113  | 0.8991248444 | 0.9999537652 | 1.7903935568  |
| -1.176697247  | 0.5491582032 | 0.9999537652 | -1.6193623533 |
| 0             | 0            | 0            | 1.5932034817  |
| 0             | 0            | 0            | 4.9527501949  |
| 1.2635663613  | 0.6025959559 | 0.9999537652 | -1.1747970282 |
| -1.162773861  | 0.485479953  | 0.9999537652 | -1.1066950409 |
| -1.5284995321 | 0.0167114835 | 0.9999537652 | -1.5148592367 |
| 1.7574703403  | 0.5562381998 | 0.9999537652 | -2.051809064  |
| 1.0459602339  | 0.7600439303 | 0.9999537652 | 1.314784731   |
| 9.8205505243  | 0.383743098  | 0.9999537652 | 2.996475627   |
| 2.7933974408  | 0.6948713406 | 0.9999537652 | 2.996475627   |
| 0             | 0            | 0            | 32.2919870527 |
| 1.0164767859  | 0.9161627851 | 0.9999537652 | -1.0450307281 |
| 1.2138837193  | 0.8081441496 | 0.9999537652 | -1.2403739705 |
| -1.3750557215 | 0.0797287469 | 0.9999537652 | -1.2625249227 |
| 1.2404371515  | 0.5072041498 | 0.9999537652 | 1.4875701876  |

gene\_expression\_table

|               |              |              |               |
|---------------|--------------|--------------|---------------|
| 1.0265362329  | 0.8899256977 | 0.9999537652 | -1.0779250193 |
| 1.0231930422  | 0.885460746  | 0.9999537652 | -1.1752732696 |
| 1.0011937922  | 0.9957661729 | 0.9999537652 | -1.0026228014 |
| 1.2509843358  | 0.6510319379 | 0.9999537652 | 1.3452580731  |
| -1.1928398557 | 0.6315069795 | 0.9999537652 | -1.0527538873 |
| 1.0144029994  | 0.960122021  | 0.9999537652 | 1.012267099   |
| -1.2969402738 | 0.0951873738 | 0.9999537652 | 1.1484021494  |
| -1.1790596572 | 0.6860832106 | 0.9999537652 | 1.4766739315  |
| 1.0492503333  | 0.770530771  | 0.9999537652 | -1.2343301    |
| -1.5881570201 | 0.7105610915 | 0.9999537652 | -2.0477227478 |
| -1.0471386134 | 0.8788781686 | 0.9999537652 | 1.0567957067  |
| 1.4010597526  | 0.2399335576 | 0.9999537652 | -1.247118865  |
| -1.2203312105 | 0.3464417067 | 0.9999537652 | 1.0644238673  |
| 1.3281567871  | 0.428635688  | 0.9999537652 | -1.0172198358 |
| -1.7001839609 | 0.5686067077 | 0.9999537652 | 16.6921882404 |
| -1.212625285  | 0.2164154523 | 0.9999537652 | -1.0419225158 |
| 1.1663478342  | 0.630998264  | 0.9999537652 | 1.3207646882  |
| -1.7000524918 | 0.1034609448 | 0.9999537652 | -1.2278753683 |
| 0             | 0            | 0            | 4.9527501949  |
| 5.9490049147  | 0.0348114593 | 0.9999537652 | -1.780940241  |
| 1.1717813462  | 0.8080329042 | 0.9999537652 | -1.0197524619 |
| -1.5047828104 | 0.4916459184 | 0.9999537652 | -1.004326321  |
| -1.1510363467 | 0.306701964  | 0.9999537652 | 1.0820230352  |
| -5.0913719412 | 0.0687285425 | 0.9999537652 | 1.0700419808  |
| 0             | 0            | 0            | -1.1250196696 |
| 3.3773576537  | 0.1414725456 | 0.9999537652 | 1.2651833566  |
| 1.1678481523  | 0.3624616199 | 0.9999537652 | -1.1305258256 |
| 2.7933974408  | 0.6948713406 | 0.9999537652 | 8.8639046058  |
| 0             | 0            | 0            | 0             |
| -1.2081688639 | 0.505103209  | 0.9999537652 | -1.3986503759 |
| 12.8276037884 | 0.0241645172 | 0.9999537652 | -1.3027260822 |
| -1.6639105903 | 0.4552489134 | 0.9999537652 | 5.2702039024  |
| 2.2243819093  | 0.147497346  | 0.9999537652 | -2.779971155  |
| 1.7747552523  | 0.5382375344 | 0.9999537652 | 1.5461710487  |
| 8.064174035   | 0.419440961  | 0.9999537652 | 1.4285818179  |
| 1.1617842091  | 0.7301827238 | 0.9999537652 | -1.1921032166 |
| -1.4762397703 | 0.6421324097 | 0.9999537652 | 2.1094903549  |
| -1.0753058266 | 0.9061169492 | 0.9999537652 | -1.3845395584 |
| 1.136825298   | 0.6782332913 | 0.9999537652 | -1.271456937  |
| -1.2012183    | 0.3356836914 | 0.9999537652 | -1.2648386692 |
| 1.5618741434  | 0.2429377662 | 0.9999537652 | 1.2384884805  |
| 1.2781742471  | 0.4320247114 | 0.9999537652 | -1.1615529137 |
| 1.3489110337  | 0.1045940494 | 0.9999537652 | -1.0040453842 |
| -1.4135960926 | 0.1838760885 | 0.9999537652 | -1.3620064009 |
| 1.3171799933  | 0.5237054096 | 0.9999537652 | -1.3753110137 |
| -1.267587539  | 0.3074902029 | 0.9999537652 | -1.1068007261 |
| 1.055665269   | 0.8573598545 | 0.9999537652 | -1.0416175866 |
| -1.3254846731 | 0.3831951394 | 0.9999537652 | -1.424438756  |
| -4.8154268017 | 0.1712842889 | 0.9999537652 | 1.6293799659  |

gene\_expression\_table

|               |              |              |                |
|---------------|--------------|--------------|----------------|
| 1.0301371532  | 0.8432304465 | 0.9999537652 | 1.1108422422   |
| 4.5505976667  | 0.5557790267 | 0.9999537652 | 10.818785458   |
| -2.4105941946 | 0.2544345395 | 0.9999537652 | 3.346511156    |
| -1.806116959  | 0.2388346274 | 0.9999537652 | 1.0791114358   |
| -1.1801563466 | 0.2804392575 | 0.9999537652 | -1.0938523839  |
| -1.0212577444 | 0.8905414794 | 0.9999537652 | -1.1624157212  |
| 2.4298416015  | 0.2822957211 | 0.9999537652 | 1.069558106    |
| 0             | 0            | 0            | 0              |
| 18.5983228161 | 0.2580166151 | 0.9999537652 | -5.4378051094  |
| -1.3569909963 | 0.1435217181 | 0.9999537652 | 1.0189906049   |
| 1.2890025947  | 0.4471845627 | 0.9999537652 | -1.2879677397  |
| 1.0673376449  | 0.8286744568 | 0.9999537652 | 1.4482720026   |
| 1.0048337711  | 0.9757705383 | 0.9999537652 | -1.0405154475  |
| -2.4366028299 | 0.3448880053 | 0.9999537652 | -1.27586727    |
| 9.8205505243  | 0.3834791406 | 0.9999537652 | 12.7820459093  |
| -1.1250701949 | 0.5765240371 | 0.9999537652 | 1.3309170284   |
| 0             | 0            | 0            | -1.783797305   |
| 1.2918684994  | 0.3065640001 | 0.9999537652 | 1.9231337463   |
| -1.2938353722 | 0.6925444678 | 0.9999537652 | -1.2542924597  |
| 4.5505976667  | 0.5557790267 | 0.9999537652 | 8.9512754559   |
| -1.078780888  | 0.5875836863 | 0.9999537652 | -1.0338521436  |
| 1.145033321   | 0.5212725013 | 0.9999537652 | -1.2390817472  |
| -1.2520819365 | 0.2343634681 | 0.9999537652 | 1.0978733519   |
| 1.3071135433  | 0.0363668756 | 0.9999537652 | -1.250560334   |
| 1.2019322441  | 0.5447644618 | 0.9999537652 | -1.0257987911  |
| -1.0168784051 | 0.9033265967 | 0.9999537652 | -1.1360957679  |
| 1.210538481   | 0.5108700744 | 0.9999537652 | 1.4099628362   |
| -1.0852976242 | 0.6591075975 | 0.9999537652 | -1.2215101234  |
| -1.2205009789 | 0.2341121108 | 0.9999537652 | -1.053799295   |
| 1.5402842257  | 0.2785541672 | 0.9999537652 | 1.773442696    |
| 25.6372777234 | 0.2064866588 | 0.9999537652 | 2.0501017816   |
| 1.0530578414  | 0.7028038341 | 0.9999537652 | -1.0349191979  |
| 1.1123436412  | 0.6973014257 | 0.9999537652 | -1.0407860647  |
| 6.3075231393  | 0.4850526886 | 0.9999537652 | -1.4789049904  |
| 1.1558054485  | 0.3223017618 | 0.9999537652 | 1.0327059119   |
| 0             | 0            | 0            | -1.8577842586  |
| -1.045486109  | 0.8043288179 | 0.9999537652 | -1.5171560264  |
| 1.118603212   | 0.5386021884 | 0.9999537652 | 1.1279073823   |
| 1.444159585   | 0.0912430859 | 0.9999537652 | -1.4274858485  |
| -1.0860596516 | 0.5596414582 | 0.9999537652 | 1.0280001368   |
| 1.4024244579  | 0.0842961447 | 0.9999537652 | -1.1258731094  |
| 1.0273242406  | 0.8864750818 | 0.9999537652 | -1.1927378547  |
| 1.1158299481  | 0.9297700246 | 0.9999537652 | -18.5505103377 |
| -1.1372178321 | 0.5542245606 | 0.9999537652 | 1.3268195762   |
| -1.1624491312 | 0.4689861471 | 0.9999537652 | -1.2828888516  |
| 0             | 0            | 0            | 12.7732027325  |
| -1.8932679072 | 0.0375664401 | 0.9999537652 | -1.286185604   |
| -1.0077665341 | 0.9548072135 | 0.9999537652 | -1.0278867501  |
| 2.0551347362  | 0.0771231753 | 0.9999537652 | -1.1415967226  |

gene\_expression\_table

|               |              |              |               |
|---------------|--------------|--------------|---------------|
| -1.0340663196 | 0.9432285308 | 0.9999537652 | 1.3625539832  |
| -1.2743531835 | 0.1740886959 | 0.9999537652 | -1.1046940635 |
| -1.1453192235 | 0.9083725834 | 0.9999537652 | -1.6585837467 |
| -2.4710767924 | 0.5445066715 | 0.9999537652 | 2.8664963163  |
| -2.9531134474 | 0.1065868873 | 0.9999537652 | -1.292009265  |
| 1.1548920694  | 0.7899023326 | 0.9999537652 | -1.2387664314 |
| -1.3362100218 | 0.2798665508 | 0.9999537652 | 1.4496745044  |
| 1.1170046682  | 0.6375265172 | 0.9999537652 | 1.1161019094  |
| 1.1755664601  | 0.7676777761 | 0.9999537652 | -1.3401925228 |
| 0             | 0            | 0            | 9.7116702472  |
| 1.3911422814  | 0.6812316109 | 0.9999537652 | -1.1172627069 |
| -1.0992971271 | 0.4642693738 | 0.9999537652 | -1.1273488767 |
| 1.1965287697  | 0.6460277568 | 0.9999537652 | -1.0408241761 |
| 4.5505976667  | 0.5557790267 | 0.9999537652 | -1.3465212658 |
| 1.404315049   | 0.5321816099 | 0.9999537652 | -1.5222523012 |
| -1.0172976377 | 0.8918401746 | 0.9999537652 | -1.1441166703 |
| -1.0121114565 | 0.9688055823 | 0.9999537652 | -1.0537061719 |
| 1.373254683   | 0.1805985577 | 0.9999537652 | -1.2176158191 |
| -1.5521182934 | 0.0143472286 | 0.9999537652 | -1.5105895643 |
| -1.0695394047 | 0.8362497034 | 0.9999537652 | -1.0679530314 |
| 1.3022993228  | 0.0808330785 | 0.9999537652 | -1.4368336078 |
| 1.0166077861  | 0.9023734741 | 0.9999537652 | -1.299134679  |
| 6.3128691894  | 0.4806190757 | 0.9999537652 | 0             |
| 1.134419041   | 0.5085529512 | 0.9999537652 | 1.4976518284  |
| 1.2186845019  | 0.411706872  | 0.9999537652 | 1.1424378048  |
| 1.5372566733  | 0.5059855362 | 0.9999537652 | 1.0593994383  |
| 1.0466770734  | 0.9466484957 | 0.9999537652 | -1.7594595112 |
| 1.7165647286  | 0.3113521217 | 0.9999537652 | 1.529843838   |
| 15.1136055058 | 0.2931870683 | 0.9999537652 | 1.6443474089  |
| -1.1324485602 | 0.68086442   | 0.9999537652 | 1.1818790531  |
| 2.7933974408  | 0.6948713406 | 0.9999537652 | 0             |
| 1.0502013436  | 0.6725169898 | 0.9999537652 | -1.025340689  |
| 1.5343375215  | 0.0603198468 | 0.9999537652 | -1.059950513  |
| 1.8209565278  | 0.0379128593 | 0.9999537652 | 1.1935454681  |
| -1.26502287   | 0.6550082736 | 0.9999537652 | 1.2833153249  |
| -1.0694258459 | 0.6620659212 | 0.9999537652 | -1.0274939451 |
| 1.2254792116  | 0.1304833389 | 0.9999537652 | -1.2161943526 |
| -1.1259191861 | 0.4291303433 | 0.9999537652 | 1.0598989714  |
| -3.8100204382 | 0.0432887753 | 0.9999537652 | 1.9418822056  |
| 1.0345181807  | 0.9675034178 | 0.9999537652 | 2.3314895061  |
| 1.0563012871  | 0.7939397975 | 0.9999537652 | -1.0048660842 |
| -1.0378596797 | 0.9605695181 | 0.9999537652 | -1.6695388296 |
| -1.0497523855 | 0.8199846321 | 0.9999537652 | -1.2214344583 |
| 1.0748985771  | 0.6226264326 | 0.9999537652 | 1.0706384193  |
| 1.7445826814  | 0.1454413654 | 0.9999537652 | 1.1561486813  |
| 1.0206733293  | 0.9422085254 | 0.9999537652 | -1.1559190362 |
| 1.3016203124  | 0.284268227  | 0.9999537652 | -1.0407730845 |
| 1.1559268405  | 0.3401589682 | 0.9999537652 | 1.1318754747  |
| 1.4423222949  | 0.2736078997 | 0.9999537652 | 1.0740134352  |

gene\_expression\_table

|               |              |              |               |
|---------------|--------------|--------------|---------------|
| 1.1246252399  | 0.4254114348 | 0.9999537652 | -1.0481332576 |
| 1.1030675442  | 0.7174529418 | 0.9999537652 | 1.2121788465  |
| -1.9032106646 | 0.1955507858 | 0.9999537652 | 2.5726413682  |
| -1.0482410655 | 0.9007698246 | 0.9999537652 | -2.3345897784 |
| 1.0346377397  | 0.8290283341 | 0.9999537652 | -1.3614604753 |
| -1.1887908385 | 0.3785554058 | 0.9999537652 | -1.0182023229 |
| 5.4845415866  | 0.1224906324 | 0.9999537652 | -1.061752755  |
| 0             | 0            | 0            | 8.8639046058  |
| -1.0239893699 | 0.9270020461 | 0.9999537652 | -1.0188866158 |
| 1.2031525807  | 0.2594995301 | 0.9999537652 | -1.0076098181 |
| 1.1494558174  | 0.7273537161 | 0.9999537652 | -1.176113658  |
| -1.1382157344 | 0.3660248158 | 0.9999537652 | -1.3328321118 |
| 0             | 0            | 0            | 0             |
| 1.1527994666  | 0.5497651792 | 0.9999537652 | -1.1403723214 |
| -1.0446110432 | 0.8852149608 | 0.9999537652 | 1.0537363514  |
| 1.086292769   | 0.5172187702 | 0.9999537652 | -1.0999393553 |
| 1.02058654    | 0.8744485888 | 0.9999537652 | -1.1123752535 |
| 1.3600088454  | 0.7959330601 | 0.9999537652 | -2.1459038996 |
| -1.0127495209 | 0.9797283576 | 0.9999537652 | 1.081313546   |
| 1.9681797508  | 0.1647896757 | 0.9999537652 | -1.1215245158 |
| 1.0924809279  | 0.653854552  | 0.9999537652 | -1.177014691  |
| 1.2185229758  | 0.4179645716 | 0.9999537652 | -1.272283359  |
| -6.9762758667 | 0.2572015215 | 0.9999537652 | 10.818785458  |
| 1.2067917127  | 0.3099352323 | 0.9999537652 | 1.0999951056  |
| 1.0185684971  | 0.9403162359 | 0.9999537652 | 1.073816778   |
| -2.2202518712 | 0.2391289597 | 0.9999537652 | 1.3789201524  |
| -1.1063899099 | 0.6642680603 | 0.9999537652 | -1.0689461864 |
| -1.0214729369 | 0.9186883513 | 0.9999537652 | -1.146641679  |
| 1.1840785337  | 0.1912944118 | 0.9999537652 | 1.0868676621  |
| 1.3605615982  | 0.7922944487 | 0.9999537652 | 10.818785458  |
| 1.536236782   | 0.7286300615 | 0.9999537652 | 18.6723895103 |
| -1.6202196427 | 0.0895636446 | 0.9999537652 | -1.361786319  |
| 1.2058527351  | 0.5650362783 | 0.9999537652 | -1.1157108887 |
| -1.0236791058 | 0.9044592128 | 0.9999537652 | -1.165006881  |
| 1.220427997   | 0.6251875197 | 0.9999537652 | 1.128463338   |
| 1.1594020585  | 0.4001454866 | 0.9999537652 | -1.3320609556 |
| -1.1009292492 | 0.662447975  | 0.9999537652 | -1.0206310658 |
| 2.7957660672  | 0.7055283363 | 0.9999537652 | 0             |
| 1.1049558507  | 0.6738593205 | 0.9999537652 | 1.7820635533  |
| 1.1252402684  | 0.4875709804 | 0.9999537652 | -1.0483672394 |
| 3.0589901989  | 0.3336403716 | 0.9999537652 | -1.2052463201 |
| 1.011645593   | 0.9769609383 | 0.9999537652 | 1.6939652145  |
| 1.1426624059  | 0.744225699  | 0.9999537652 | -1.7978773859 |
| 1.1192151057  | 0.4186828696 | 0.9999537652 | -1.0385522696 |
| 1.1242920327  | 0.6488434153 | 0.9999537652 | -1.6950361864 |
| 1.3819288708  | 0.4745008631 | 0.9999537652 | 1.5518947271  |
| -1.1523079009 | 0.5700685447 | 0.9999537652 | -1.243328708  |
| -1.0786021403 | 0.8322874244 | 0.9999537652 | -1.0415387195 |
| 1.158407971   | 0.5065510149 | 0.9999537652 | -1.1590769815 |

gene\_expression\_table

|               |              |              |               |
|---------------|--------------|--------------|---------------|
| -1.4257970267 | 0.2494606856 | 0.9999537652 | 1.1878951287  |
| 1.5715463549  | 0.3301591465 | 0.9999537652 | -1.2436835366 |
| 6.3075231393  | 0.4850433349 | 0.9999537652 | -3.1575868765 |
| 0             | 0            | 0            | 1.5746361775  |
| 1.1173553606  | 0.5920244542 | 0.9999537652 | -1.1970299896 |
| 1.0908127517  | 0.5354841444 | 0.9999537652 | -1.2004474802 |
| 1.8627733224  | 0.2522587133 | 0.9999537652 | -1.0060504437 |
| 1.0829303747  | 0.8614820266 | 0.9999537652 | -1.1319899092 |
| 5.729217422   | 0.1066646443 | 0.9999537652 | 9.3351613897  |
| 1.251864346   | 0.200701416  | 0.9999537652 | 1.2919866582  |
| 2.7933974408  | 0.6948713406 | 0.9999537652 | 0             |
| 1.1512845273  | 0.7192823605 | 0.9999537652 | -1.2151679374 |
| 1.526526342   | 0.4270015733 | 0.9999537652 | -1.6785389006 |
| 0             | 0            | 0            | 0             |
| -1.1758575684 | 0.6694227587 | 0.9999537652 | -1.3483185415 |
| -1.3055155248 | 0.2682253761 | 0.9999537652 | 1.2453709858  |
| 1.234944745   | 0.6149935156 | 0.9999537652 | -1.3984039662 |
| 2.8173722589  | 0.3575164131 | 0.9999537652 | -3.0470159237 |
| -1.030714772  | 0.9316625803 | 0.9999537652 | 1.5183919491  |
| -1.1955637999 | 0.4569734941 | 0.9999537652 | 1.0339015345  |
| 1.0082473734  | 0.9835181967 | 0.9999537652 | -1.2485901673 |
| 2.7933974408  | 0.6948713406 | 0.9999537652 | 0             |
| -4.8180649265 | 0.003264     | 0.9999537652 | 1.0214404941  |
| -2.5065115073 | 0.1191177972 | 0.9999537652 | -1.0532424745 |
| -1.1982698859 | 0.6101677384 | 0.9999537652 | -3.6847346575 |
| 1.1867487184  | 0.5533270761 | 0.9999537652 | 1.5633351639  |
| 1.2931157656  | 0.1091851041 | 0.9999537652 | 1.1472425825  |
| -1.0805508967 | 0.6296727196 | 0.9999537652 | -1.2609591373 |
| -1.2414129464 | 0.1462939016 | 0.9999537652 | -1.0799107093 |
| 2.7933974408  | 0.6948713406 | 0.9999537652 | -1.0283826769 |
| -4.8095156671 | 0.2071263266 | 0.9999537652 | -2.0465550316 |
| 1.0864783405  | 0.6723037584 | 0.9999537652 | -1.2003120059 |
| 1.0485779015  | 0.8812930874 | 0.9999537652 | -1.5255527176 |
| 3.4279118306  | 0.0486421236 | 0.9999537652 | -2.0658636651 |
| 1.5306759421  | 0.5559626481 | 0.9999537652 | 1.1387229202  |
| 1.010638708   | 0.9675956833 | 0.9999537652 | -1.6248908522 |
| 2.1450382405  | 0.1065054933 | 0.9999537652 | -1.0635163472 |
| 3.6225051582  | 0.0828145505 | 0.9999537652 | -1.0699611471 |
| 1.0035261346  | 0.9881345005 | 0.9999537652 | -1.2524040825 |
| 1.4927666537  | 0.1325807218 | 0.9999537652 | -1.2782739264 |
| 18.5983228161 | 0.2580245272 | 0.9999537652 | 1.0317044844  |
| -1.480037784  | 0.306583018  | 0.9999537652 | -1.3711714557 |
| 1.2424936042  | 0.4744106804 | 0.9999537652 | -1.0659471312 |
| -1.1344408063 | 0.4986598315 | 0.9999537652 | -1.1244329736 |
| 1.3009829077  | 0.7685772033 | 0.9999537652 | -1.3464555531 |
| 15.0880352532 | 0.2933880806 | 0.9999537652 | -1.417057339  |
| 0             | 0            | 0            | -1.1507047539 |
| 1.7536570027  | 0.2260547586 | 0.9999537652 | -1.1683224195 |
| 1.4581289787  | 0.4553578527 | 0.9999537652 | -1.4211366135 |

gene\_expression\_table

|                |              |              |               |
|----------------|--------------|--------------|---------------|
| -1.0565379405  | 0.9482502772 | 0.9999537652 | 3.7898935296  |
| 1.4233225829   | 0.4490143599 | 0.9999537652 | 1.4461950822  |
| 1.1986398919   | 0.4657517974 | 0.9999537652 | -1.3637989963 |
| -1.1558483247  | 0.623544999  | 0.9999537652 | -1.2709502879 |
| 1.2033945198   | 0.5688300182 | 0.9999537652 | -1.1010539694 |
| -1.1764906816  | 0.7338307591 | 0.9999537652 | 1.0396988814  |
| 2.7933974408   | 0.6948713406 | 0.9999537652 | -2.9500562616 |
| 1.308800742    | 0.4843659154 | 0.9999537652 | 1.2080202757  |
| -1.9836846783  | 0.2996519325 | 0.9999537652 | -1.5335805844 |
| 1.3386370254   | 0.0292941635 | 0.9999537652 | -1.0791586371 |
| 0              | 0            | 0            | 4.9527501949  |
| -1.1935357527  | 0.6034810118 | 0.9999537652 | -1.2889115685 |
| -1.0609413011  | 0.7317991207 | 0.9999537652 | -1.1384679068 |
| -1.4951938362  | 0.126579483  | 0.9999537652 | -1.2970744973 |
| 2.7933974408   | 0.6948713406 | 0.9999537652 | -1.6177358982 |
| 1.1186563498   | 0.7686555885 | 0.9999537652 | -1.0859278153 |
| -1.5403203254  | 0.1725270786 | 0.9999537652 | 1.2012722187  |
| 1.0170309763   | 0.9231621064 | 0.9999537652 | 1.1564702098  |
| -1.1581330352  | 0.6041721781 | 0.9999537652 | 1.199592174   |
| -6.9764533263  | 0.2594457297 | 0.9999537652 | -1.1250196696 |
| 0              | 0            | 0            | 8.8700459102  |
| 0              | 0            | 0            | 4.9527501949  |
| -1.1416943838  | 0.474426536  | 0.9999537652 | -1.1480784159 |
| 0              | 0            | 0            | -1.5094768143 |
| 4.5505976667   | 0.5557790267 | 0.9999537652 | -1.8638252835 |
| -1.1377112569  | 0.5047532425 | 0.9999537652 | -1.2091405908 |
| -1.2012337684  | 0.6512216385 | 0.9999537652 | -1.1124839237 |
| -12.9800088947 | 0.1122149734 | 0.9999537652 | 1.0071007236  |
| 4.5505976667   | 0.5557790267 | 0.9999537652 | -2.0486608969 |
| 11.5766527773  | 0.3453876938 | 0.9999537652 | -1.8099040113 |
| -1.7140208703  | 0.492732186  | 0.9999537652 | -1.380387871  |
| 2.7933974408   | 0.6948713406 | 0.9999537652 | -2.1287636007 |
| 1.0924427605   | 0.6397859973 | 0.9999537652 | -1.2123245883 |
| -1.722233171   | 0.4472985861 | 0.9999537652 | -1.2574134143 |
| 1.0794100206   | 0.7487065438 | 0.9999537652 | 1.0176022321  |
| 3.8622037496   | 0.6191249779 | 0.9999537652 | 16.6806485101 |
| -1.3167984204  | 0.1196188046 | 0.9999537652 | -1.0487482802 |
| 0              | 0            | 0            | -5.3589986948 |
| -1.0258142164  | 0.9592317531 | 0.9999537652 | -1.1534670955 |
| -1.0141055286  | 0.9409898378 | 0.9999537652 | 1.2777132603  |
| 1.1228403073   | 0.6852984785 | 0.9999537652 | 1.0864517801  |
| 6.3075231393   | 0.4850339883 | 0.9999537652 | 2.996475627   |
| -1.1565935919  | 0.4010721525 | 0.9999537652 | 1.1278955887  |
| 0              | 0            | 0            | 2.996475627   |
| -1.0110308297  | 0.9357535516 | 0.9999537652 | 1.0470438807  |
| 9.8205505243   | 0.3832114642 | 0.9999537652 | 4.9527501949  |
| -3.2084199394  | 0.1755607384 | 0.9999537652 | 1.4645753428  |
| 1.2510834545   | 0.7543523389 | 0.9999537652 | 1.1395310869  |
| -1.0029687624  | 0.9930033276 | 0.9999537652 | 1.205308698   |



gene\_expression\_table

|               |              |              |               |
|---------------|--------------|--------------|---------------|
| 1.4293980703  | 0.1772713472 | 0.9999537652 | 1.1786059235  |
| 1.6794784813  | 0.0633133448 | 0.9999537652 | 1.0315507091  |
| -2.6346039855 | 0.2373772989 | 0.9999537652 | 1.1286185336  |
| 1.3049036967  | 0.3083795    | 0.9999537652 | -1.0190699707 |
| -1.0395856478 | 0.9559926493 | 0.9999537652 | -1.5213869822 |
| -1.1830030697 | 0.424900887  | 0.9999537652 | -1.401061249  |
| 1.057547026   | 0.8624918725 | 0.9999537652 | 1.6035971241  |
| -1.2348617235 | 0.4429230787 | 0.9999537652 | 1.1893335829  |
| -1.1614998763 | 0.8771943156 | 0.9999537652 | 1.590997316   |
| -1.2648530332 | 0.3838028312 | 0.9999537652 | 1.300634885   |
| 0             | 0            | 0            | 6.908559683   |
| -1.4305171946 | 0.216227946  | 0.9999537652 | -1.4772967103 |
| -1.0391547537 | 0.937290952  | 0.9999537652 | -1.2847094215 |
| -1.0892345993 | 0.7810756218 | 0.9999537652 | -1.0243291121 |
| 1.184711193   | 0.5664053213 | 0.9999537652 | 1.3986726513  |
| -1.0466702521 | 0.7806818862 | 0.9999537652 | 1.1821646714  |
| 1.0950484463  | 0.8377363143 | 0.9999537652 | 1.0875791768  |
| 0             | 0            | 0            | 0             |
| -1.2267866072 | 0.3654564023 | 0.9999537652 | 1.2305504307  |
| -1.0573270666 | 0.7510154222 | 0.9999537652 | 1.0934442567  |
| -1.054993213  | 0.6888434304 | 0.9999537652 | -1.0226480527 |
| -1.0091800042 | 0.9894803742 | 0.9999537652 | 1.2978163757  |
| 1.2516520703  | 0.8155283669 | 0.9999537652 | 1.3122322072  |
| -1.0294245193 | 0.9274764095 | 0.9999537652 | -1.0338450591 |
| 0             | 0            | 0            | 2.996475627   |
| 1.3381879427  | 0.4696927068 | 0.9999537652 | 1.4776267496  |
| -1.3193843665 | 0.6368582348 | 0.9999537652 | -1.1109452766 |
| -1.3691163547 | 0.7485465961 | 0.9999537652 | 26.4836696502 |
| 1.0326264856  | 0.8582294438 | 0.9999537652 | -1.1589555837 |
| 1.1923348135  | 0.8094831065 | 0.9999537652 | -1.1138754971 |
| 1.1508419291  | 0.329386538  | 0.9999537652 | -1.1051170833 |
| -1.0110479264 | 0.981462493  | 0.9999537652 | -1.1873903297 |
| -1.066225041  | 0.6087240011 | 0.9999537652 | -1.0926434679 |
| 1.6078998043  | 0.2129207506 | 0.9999537652 | 1.0329513553  |
| 6.3075231393  | 0.485024649  | 0.9999537652 | 1.1113570682  |
| -1.04443861   | 0.7348901094 | 0.9999537652 | 1.2101040626  |
| -1.2333718185 | 0.2249906788 | 0.9999537652 | 1.1141662159  |
| -1.0809880189 | 0.7808653855 | 0.9999537652 | 1.0599674536  |
| 1.8105142317  | 0.2118058633 | 0.9999537652 | 5.9093030807  |
| 1.0135429035  | 0.9204590547 | 0.9999537652 | 1.2181348458  |
| 1.7636638943  | 0.2360964154 | 0.9999537652 | -1.1386266738 |
| 1.0650909735  | 0.7360574537 | 0.9999537652 | 1.2135849789  |
| 1.5282990302  | 0.0992296747 | 0.9999537652 | -1.4640290775 |
| 1.1623893453  | 0.3614432423 | 0.9999537652 | -1.0714554815 |
| 1.0839352039  | 0.5181761681 | 0.9999537652 | 1.2494185662  |
| 2.7933974408  | 0.6948713406 | 0.9999537652 | -2.0482026754 |
| -1.5204530206 | 0.2241585596 | 0.9999537652 | 1.5825303983  |
| -1.0577236681 | 0.6404184192 | 0.9999537652 | 1.1610759594  |
| -1.2452728949 | 0.2086214036 | 0.9999537652 | -1.0923730245 |

gene\_expression\_table

|               |              |              |               |
|---------------|--------------|--------------|---------------|
| -1.0525508171 | 0.7802100798 | 0.9999537652 | 1.0719033462  |
| 1.3594099105  | 0.7963857293 | 0.9999537652 | 1.03027813    |
| -1.1169422023 | 0.3787224548 | 0.9999537652 | -1.0414571035 |
| 18.6146543426 | 0.2564103496 | 0.9999537652 | 1.7647064373  |
| 2.5559496274  | 0.2821600258 | 0.9999537652 | -1.4614455774 |
| 3.0847820696  | 0.0845495183 | 0.9999537652 | 1.1818535     |
| 1.5043500252  | 0.0762851799 | 0.9999537652 | 1.1092263452  |
| 1.1038300958  | 0.7595932124 | 0.9999537652 | 1.0162474349  |
| 1.2434999203  | 0.4606656211 | 0.9999537652 | 1.1233092449  |
| 4.5505976667  | 0.5557790267 | 0.9999537652 | 2.3306887369  |
| 2.0488142106  | 0.0864135954 | 0.9999537652 | 1.1214479884  |
| 4.2863366418  | 0.009618     | 0.9999537652 | 1.234596048   |
| -1.2658340445 | 0.5071918883 | 0.9999537652 | 1.1051794994  |
| -6.9764533263 | 0.2594541557 | 0.9999537652 | 12.7732027325 |
| 1.1162834585  | 0.9283005435 | 0.9999537652 | -1.8319388746 |
| 1.3987841508  | 0.2942672787 | 0.9999537652 | -1.118893955  |
| 1.6316572466  | 0.0112249733 | 0.9999537652 | 1.2298525014  |
| -1.1309194187 | 0.4483743129 | 0.9999537652 | 1.1821615247  |
| 0             | 0            | 0            | 0             |
| 1.2429956471  | 0.0947007811 | 0.9999537652 | 1.1846917128  |
| -1.3265546466 | 0.3201852035 | 0.9999537652 | 1.2627285698  |
| -1.0022969468 | 0.9916830218 | 0.9999537652 | 1.1609174153  |
| 2.1063705725  | 0.3260900467 | 0.9999537652 | 2.7252039655  |
| 1.0386897236  | 0.8503483764 | 0.9999537652 | 1.0270180789  |
| 1.0862402122  | 0.5593188864 | 0.9999537652 | 1.0722439628  |
| 1.1358328801  | 0.6883537094 | 0.9999537652 | -1.0949246265 |
| 1.0173947989  | 0.9798950047 | 0.9999537652 | -2.2049479182 |
| 4.5096948998  | 0.0955483879 | 0.9999537652 | 1.2593062028  |
| 2.7933974408  | 0.6948713406 | 0.9999537652 | 1.6293799659  |
| 0             | 0            | 0            | 1.590997316   |
| 1.4019107883  | 0.2853816598 | 0.9999537652 | 1.7110593438  |
| -1.2859315764 | 0.4086132609 | 0.9999537652 | -1.1641384423 |
| 2.4081512873  | 0.015889705  | 0.9999537652 | 1.1358029341  |
| 1.8514811731  | 0.2419713149 | 0.9999537652 | 1.0887530024  |
| 1.9568571513  | 0.13604572   | 0.9999537652 | 1.5478811278  |
| -1.4598916326 | 0.3905566585 | 0.9999537652 | 1.8932975474  |
| -1.1961439546 | 0.4131510851 | 0.9999537652 | 1.4842686482  |
| 1.1531921971  | 0.7307403067 | 0.9999537652 | -1.0539493995 |
| 0             | 0            | 0            | -1.1242401582 |
| -1.0329924429 | 0.8105179622 | 0.9999537652 | -1.1135262281 |
| -1.1215690563 | 0.5562090087 | 0.9999537652 | -1.1702633418 |
| -1.0473609764 | 0.7692406106 | 0.9999537652 | -1.4120905621 |
| 1.5290360293  | 0.0823151218 | 0.9999537652 | -1.2989424385 |
| -1.1778371941 | 0.6194565994 | 0.9999537652 | -1.4140486124 |
| -2.587194901  | 0.5006000393 | 0.9999537652 | 2.9985540909  |
| 1.3251991125  | 0.4160211183 | 0.9999537652 | 1.025082739   |
| -1.4977878883 | 0.1004715367 | 0.9999537652 | -1.2856784969 |
| 8.064174035   | 0.419447248  | 0.9999537652 | 2.996475627   |
| 1.812364286   | 0.001195     | 0.9999537652 | 1.0569154473  |

gene\_expression\_table

|               |              |              |               |
|---------------|--------------|--------------|---------------|
| 3.2873517405  | 0.0641098434 | 0.9999537652 | 1.5553899964  |
| -1.3904208954 | 0.0789278164 | 0.9999537652 | -1.2582030796 |
| -1.0223205347 | 0.9114483754 | 0.9999537652 | 1.1367478743  |
| -1.8747432512 | 0.1776903576 | 0.9999537652 | -1.0817301948 |
| 1.718615226   | 0.2109332789 | 0.9999537652 | -1.1750887277 |
| 1.1478931101  | 0.4509326238 | 0.9999537652 | 1.2462134155  |
| 1.9436827332  | 0.0309632824 | 0.9999537652 | -1.2182511759 |
| 1.105252454   | 0.4447350908 | 0.9999537652 | 1.1402788272  |
| -1.2935404951 | 0.383049112  | 0.9999537652 | -1.2716154218 |
| 1.0311519106  | 0.810892828  | 0.9999537652 | 1.3435096171  |
| -1.1193092232 | 0.6692193614 | 0.9999537652 | -1.6504736728 |
| 1.0235019997  | 0.9049780812 | 0.9999537652 | 1.1235723754  |
| 1.0720230937  | 0.7720032263 | 0.9999537652 | -1.3030832063 |
| 1.1521390299  | 0.6154937469 | 0.9999537652 | -1.0924083554 |
| 3.8622037496  | 0.6190939875 | 0.9999537652 | 0             |
| -1.0725217753 | 0.7699070756 | 0.9999537652 | -1.1874510179 |
| -1.0922108267 | 0.662918313  | 0.9999537652 | 1.0229090235  |
| -1.1494578057 | 0.602570806  | 0.9999537652 | -1.4050945683 |
| -1.0277153659 | 0.8773118627 | 0.9999537652 | -1.2168712931 |
| 1.1849524885  | 0.3624634567 | 0.9999537652 | -1.0508470223 |
| -3.9806836591 | 0.1367776348 | 0.9999537652 | -1.4037934311 |
| -1.0010472983 | 0.9952860046 | 0.9999537652 | -1.4369823081 |
| 1.2580167088  | 0.359952157  | 0.9999537652 | -1.0771964528 |
| -1.2342136154 | 0.6438732923 | 0.9999537652 | -1.1078460497 |
| -1.0810587326 | 0.8357773496 | 0.9999537652 | 1.4754630712  |
| -1.0811804713 | 0.730017097  | 0.9999537652 | -1.0635320465 |
| 4.5505976667  | 0.5557790267 | 0.9999537652 | 10.8262784008 |
| 1.0501731349  | 0.7158974838 | 0.9999537652 | 1.0109157302  |
| -1.0594179852 | 0.9284605946 | 0.9999537652 | -1.4780730704 |
| -1.104077235  | 0.8400353081 | 0.9999537652 | -1.7588602022 |
| 0             | 0            | 0            | 2.9985540909  |
| 1.2109003063  | 0.446889576  | 0.9999537652 | -1.0090949702 |
| 29.8698312703 | 0.2178461767 | 0.9999537652 | 4.6668957481  |
| 1.1660180084  | 0.7597234221 | 0.9999537652 | 1.2398622434  |
| 18.5983228161 | 0.2580324448 | 0.9999537652 | -5.3583704783 |
| 0             | 0            | 0            | 0             |
| 0             | 0            | 0            | 0             |
| -1.3202757318 | 0.4464955961 | 0.9999537652 | 1.0141839657  |
| -1.1643105413 | 0.675404011  | 0.9999537652 | -1.3323208868 |
| -1.576381917  | 0.1182924784 | 0.9999537652 | -1.064823008  |
| -1.1080920104 | 0.4918357272 | 0.9999537652 | -1.4182031104 |
| -1.0735852446 | 0.6438749396 | 0.9999537652 | 4.7906608684  |
| -1.2213734706 | 0.3482951064 | 0.9999537652 | -1.1207717034 |
| 2.7933974408  | 0.6948713406 | 0.9999537652 | -1.8601323346 |
| -1.1572314773 | 0.7103575172 | 0.9999537652 | -1.1615957223 |
| 1.2771987714  | 0.3803432774 | 0.9999537652 | 1.006149901   |
| 1.7132142193  | 0.3174288178 | 0.9999537652 | -1.7987039554 |
| -1.008890327  | 0.9505146367 | 0.9999537652 | 1.0839832223  |
| -2.5861438062 | 0.4759835951 | 0.9999537652 | 2.0298295761  |

gene\_expression\_table

|               |              |              |               |
|---------------|--------------|--------------|---------------|
| -1.0227354494 | 0.8796437018 | 0.9999537652 | -1.117798263  |
| 1.2186578499  | 0.2230578661 | 0.9999537652 | 1.3781625467  |
| 1.0781818837  | 0.7410022047 | 0.9999537652 | -1.1363978585 |
| -1.087028354  | 0.7860508775 | 0.9999537652 | 1.1489603668  |
| 0             | 0            | 0            | -2.6884253381 |
| -1.2666659704 | 0.3747691866 | 0.9999537652 | -1.3471614313 |
| 1.0797723979  | 0.7757195769 | 0.9999537652 | 1.1393691335  |
| -1.203878637  | 0.2498597283 | 0.9999537652 | 1.1017265882  |
| 1.1135349126  | 0.5839624546 | 0.9999537652 | 1.0174114462  |
| 4.5505976667  | 0.5557790267 | 0.9999537652 | 2.6434024479  |
| -1.0318054181 | 0.8868974491 | 0.9999537652 | -1.6895485678 |
| 2.7933974408  | 0.6948713406 | 0.9999537652 | -2.2519168774 |
| 0             | 0            | 0            | 6.0076339951  |
| 1.0694330635  | 0.8359191578 | 0.9999537652 | 1.3369382744  |
| -1.6283093982 | 0.2088898022 | 0.9999537652 | -1.0249803451 |
| -1.1017949057 | 0.7991396757 | 0.9999537652 | 1.0968353938  |
| -1.988371896  | 0.3509003474 | 0.9999537652 | -1.4377113732 |
| 1.2497824691  | 0.6297590601 | 0.9999537652 | -1.4668835758 |
| -1.2575819565 | 0.2227733406 | 0.9999537652 | 1.7301041123  |
| 1.0970003946  | 0.7660480017 | 0.9999537652 | -1.146501125  |
| 2.3437339069  | 0.2413758611 | 0.9999537652 | 1.4957399208  |
| -1.0844560842 | 0.8245079197 | 0.9999537652 | 1.4630083089  |
| 50.353918894  | 0.1257610872 | 0.9999537652 | 1.5704032366  |
| 1.1021665157  | 0.5613410312 | 0.9999537652 | -1.220146069  |
| 1.100014683   | 0.8441380715 | 0.9999537652 | -1.6486130817 |
| -1.4964533459 | 0.240918103  | 0.9999537652 | 1.243911249   |
| 0             | 0            | 0            | 4.9527501949  |
| -1.0646727325 | 0.8903564567 | 0.9999537652 | 3.1950411467  |
| -1.2433492998 | 0.2105056105 | 0.9999537652 | -1.4366725925 |
| 1.0007280239  | 0.995642041  | 0.9999537652 | 1.0274992894  |
| 6.952600375   | 0.0636929868 | 0.9999537652 | 2.4627764693  |
| 1.2457924947  | 0.3641242111 | 0.9999537652 | 1.3412167313  |
| 1.0191212541  | 0.9509178499 | 0.9999537652 | 1.6325280088  |
| -1.0843974846 | 0.8008114114 | 0.9999537652 | 1.4500952851  |
| 1.2559996159  | 0.6354174253 | 0.9999537652 | -1.1191567661 |
| 1.8384783622  | 0.3350415769 | 0.9999537652 | 32.2919870527 |
| 1.3305963343  | 0.0873031979 | 0.9999537652 | 1.0689989011  |
| 0             | 0            | 0            | 8.8639046058  |
| 1.3611966861  | 0.805568733  | 0.9999537652 | -4.1128151248 |
| 2.7933974408  | 0.6948713406 | 0.9999537652 | -3.4501471538 |
| 1.0757937148  | 0.8109443621 | 0.9999537652 | 1.1159516421  |
| -1.2628687322 | 0.1299836875 | 0.9999537652 | -1.0612391732 |
| -7.0431967789 | 0.0843517916 | 0.9999537652 | 1.1696208368  |
| 1.0375972768  | 0.8229954645 | 0.9999537652 | 1.0421521756  |
| 1.5237790209  | 0.3179726548 | 0.9999537652 | 1.4262322601  |
| -2.6365262476 | 0.2553458373 | 0.9999537652 | 1.7067971001  |
| 1.1247725537  | 0.4826707244 | 0.9999537652 | -1.1349212475 |
| 1.1422707648  | 0.7240415672 | 0.9999537652 | -1.2687374905 |
| 2.0750906843  | 0.2910129601 | 0.9999537652 | 1.5872627531  |

gene\_expression\_table

|               |              |              |               |
|---------------|--------------|--------------|---------------|
| -1.1169753243 | 0.5540566302 | 0.9999537652 | -1.2394105526 |
| 1.1322498903  | 0.3300484125 | 0.9999537652 | 1.1858160467  |
| 8.064174035   | 0.4194535447 | 0.9999537652 | -1.260546903  |
| 1.3744821631  | 0.0330168603 | 0.9999537652 | 1.0041009675  |
| -1.2487542434 | 0.2385973341 | 0.9999537652 | -1.0794081971 |
| 1.9050337421  | 0.4943882978 | 0.9999537652 | -1.0061411197 |
| -2.0040326722 | 0.1036249358 | 0.9999537652 | 8.9512754559  |
| 0             | 0            | 0            | 6.9133480437  |
| 2.3027622606  | 0.0302704266 | 0.9999537652 | 2.1992263377  |
| 0             | 0            | 0            | -4.4136565172 |
| -1.3487785294 | 0.0782859655 | 0.9999537652 | -1.4052923717 |
| -1.01865071   | 0.9117438789 | 0.9999537652 | 1.3553611791  |
| -1.1387126306 | 0.5414619043 | 0.9999537652 | -1.1983103027 |
| 1.2096348278  | 0.1052795573 | 0.9999537652 | -1.0346466493 |
| -3.1022113581 | 0.1973670708 | 0.9999537652 | 2.4838166037  |
| 1.0831090224  | 0.7054776263 | 0.9999537652 | 1.0188192245  |
| -1.5881166222 | 0.7191987762 | 0.9999537652 | 3.6950602847  |
| -1.0561997538 | 0.70305254   | 0.9999537652 | 1.0362603879  |
| -1.1211441156 | 0.6561588418 | 0.9999537652 | -1.0635596181 |
| -1.5366091256 | 0.1730146082 | 0.9999537652 | 1.2800845618  |
| 9.8205505243  | 0.3829399466 | 0.9999537652 | -2.2617017545 |
| 1.2180613568  | 0.2105186041 | 0.9999537652 | 1.3082623578  |
| -1.5875118025 | 0.720994624  | 0.9999537652 | -1.2438634229 |
| -1.0364965506 | 0.7968992663 | 0.9999537652 | 1.2010246808  |
| -1.0096132336 | 0.9497448591 | 0.9999537652 | 1.2231330123  |
| 1.1203537902  | 0.3814406257 | 0.9999537652 | 1.2586473613  |
| -1.0985513382 | 0.8319975091 | 0.9999537652 | 1.2160325514  |
| -2.0427176335 | 0.2138588308 | 0.9999537652 | -3.7217691978 |
| -1.0695859759 | 0.5538396605 | 0.9999537652 | 1.1636059612  |
| 1.0299297453  | 0.8767442686 | 0.9999537652 | -1.0795901453 |
| -1.0970387217 | 0.7672191647 | 0.9999537652 | 1.1702978149  |
| 2.4256002084  | 0.3111574991 | 0.9999537652 | 1.7794382074  |
| -2.9572400577 | 0.3878857582 | 0.9999537652 | 0             |
| 1.0791464579  | 0.8141688455 | 0.9999537652 | 1.1707410023  |
| 1.1927285864  | 0.5049995088 | 0.9999537652 | 1.9889272489  |
| 1.5054915967  | 0.007358     | 0.9999537652 | 1.3072022281  |
| 1.4538097815  | 0.2477994009 | 0.9999537652 | -1.1010504481 |
| -1.2100472527 | 0.4874443214 | 0.9999537652 | 1.0521458817  |
| -1.0242721031 | 0.9264006896 | 0.9999537652 | 1.1039865205  |
| 4.5505976667  | 0.5557790267 | 0.9999537652 | -9.7554110723 |
| -1.3018440751 | 0.4781047576 | 0.9999537652 | 1.0496990134  |
| -1.1316156217 | 0.4775419005 | 0.9999537652 | 1.0099235848  |
| 9.8205505243  | 0.3829094471 | 0.9999537652 | 1.1085489246  |
| -6.9762758667 | 0.2572248416 | 0.9999537652 | 2.996475627   |
| 3.8622037496  | 0.6190629756 | 0.9999537652 | 0             |
| -1.0088218013 | 0.9694672454 | 0.9999537652 | -1.2160514908 |
| 1.0340900316  | 0.9148846869 | 0.9999537652 | -1.0911447612 |
| -2.852289864  | 0.046902447  | 0.9999537652 | 1.0644477251  |
| 1.1158299481  | 0.9297603423 | 0.9999537652 | -2.9737541292 |

gene\_expression\_table

|               |              |              |               |
|---------------|--------------|--------------|---------------|
| -1.0199742319 | 0.9369845466 | 0.9999537652 | 1.3018095446  |
| 1.0059913159  | 0.9800285316 | 0.9999537652 | -1.0728637588 |
| -4.3217318489 | 0.1760789903 | 0.9999537652 | -4.7001646681 |
| 1.3588921917  | 0.7998744661 | 0.9999537652 | -1.1248877899 |
| 1.1043826186  | 0.6101279153 | 0.9999537652 | 1.0891406389  |
| -1.6026225251 | 0.0904292434 | 0.9999537652 | 1.2070459566  |
| 1.0151750387  | 0.9023195996 | 0.9999537652 | 1.1230752933  |
| 3.8118921289  | 0.0144439053 | 0.9999537652 | 3.7181029888  |
| -1.190347565  | 0.4340579067 | 0.9999537652 | -1.2289660045 |
| 1.1015849128  | 0.5388692572 | 0.9999537652 | 1.1231048904  |
| 25.6156185703 | 0.2096981958 | 0.9999537652 | -1.2506145038 |
| 0             | 0            | 0            | 0             |
| 1.3586480118  | 0.3496560499 | 0.9999537652 | 2.0243635915  |
| -1.1761465577 | 0.7993710594 | 0.9999537652 | 1.1503685294  |
| 0             | 0            | 0            | 1.4537866576  |
| 8.0781087093  | 0.4256311478 | 0.9999537652 | -2.5509215507 |
| -1.9066285216 | 0.4111062421 | 0.9999537652 | -1.7161531777 |
| -1.0185885583 | 0.8795100617 | 0.9999537652 | 1.0710413422  |
| 1.2002190147  | 0.2761338964 | 0.9999537652 | -1.1130577991 |
| 1.3190010683  | 0.4531182914 | 0.9999537652 | 1.1271017689  |
| 1.0103587518  | 0.9339506655 | 0.9999537652 | 1.0265557581  |
| 6.3075231393  | 0.4850153168 | 0.9999537652 | 0             |
| 1.2971957717  | 0.4539322691 | 0.9999537652 | 1.1920992849  |
| 1.1805207632  | 0.4057274343 | 0.9999537652 | 1.2149219869  |
| 0             | 0            | 0            | 2.9988886918  |
| 1.7749775399  | 0.0313955292 | 0.9999537652 | 1.8681634265  |
| 2.7933974408  | 0.6948713406 | 0.9999537652 | 0             |
| -1.2302888673 | 0.4998259205 | 0.9999537652 | -1.3025324162 |
| -1.1453192235 | 0.9083222695 | 0.9999537652 | 2.6430925766  |
| 2.7933974408  | 0.6948713406 | 0.9999537652 | 2.9988886918  |
| -1.1538633603 | 0.2689735591 | 0.9999537652 | -1.1249474547 |
| 1.6070119312  | 0.003297     | 0.9999537652 | -1.3557332248 |
| 0             | 0            | 0            | 4.9527501949  |
| 1.0993526806  | 0.6083911617 | 0.9999537652 | 1.44181622    |
| 1.546724015   | 0.1843755706 | 0.9999537652 | 1.4025537326  |
| 0             | 0            | 0            | 4.9567375629  |
| 1.1406129562  | 0.5212537832 | 0.9999537652 | 1.0245837828  |
| 2.8234781609  | 0.3571958561 | 0.9999537652 | -1.9178632647 |
| -1.1741413282 | 0.3305162079 | 0.9999537652 | 1.0881178296  |
| -6.9736190158 | 0.2254964479 | 0.9999537652 | 8.8639046058  |
| -2.0110266953 | 0.0651236858 | 0.9999537652 | -1.2353900146 |
| -1.4997668867 | 0.0226380024 | 0.9999537652 | -1.2392981261 |
| 1.1836698478  | 0.3479135599 | 0.9999537652 | 1.2341637126  |
| 2.7957660672  | 0.7055307175 | 0.9999537652 | 2.9985540909  |
| -1.7705309934 | 0.0150085158 | 0.9999537652 | 1.1261916202  |
| 2.7933974408  | 0.6948713406 | 0.9999537652 | -1.859280336  |
| 4.5505976667  | 0.5557790267 | 0.9999537652 | 0             |
| 0             | 0            | 0            | 4.9527501949  |
| 0             | 0            | 0            | 2.9985540909  |

gene\_expression\_table

|               |              |              |               |
|---------------|--------------|--------------|---------------|
| 2.7957660672  | 0.7055330996 | 0.9999537652 | 0             |
| 8.064174035   | 0.4194598514 | 0.9999537652 | -1.1248877899 |
| 1.2646874733  | 0.5420003543 | 0.9999537652 | -1.2118554381 |
| -1.1914319791 | 0.2747370425 | 0.9999537652 | 1.3083925536  |
| 1.2627085493  | 0.5224240771 | 0.9999537652 | 1.1038342177  |
| -1.0658619679 | 0.8195425626 | 0.9999537652 | 1.0240496877  |
| 0             | 0            | 0            | 0             |
| 1.0259251803  | 0.8572350105 | 0.9999537652 | 1.5047155275  |
| -6.9762758667 | 0.2572326198 | 0.9999537652 | 1.135271392   |
| -1.2189036438 | 0.4522662017 | 0.9999537652 | 1.0843189304  |
| 1.0242314081  | 0.8571543901 | 0.9999537652 | 1.4181281865  |
| 1.2725088739  | 0.1592831115 | 0.9999537652 | 1.0492433912  |
| 1.2221011652  | 0.1391762293 | 0.9999537652 | 1.3735903825  |
| -1.0202208064 | 0.908381675  | 0.9999537652 | -1.0683469055 |
| 1.0455504623  | 0.8155550973 | 0.9999537652 | -1.023263208  |
| 1.1956521695  | 0.5535803264 | 0.9999537652 | -1.714633041  |
| 1.062424187   | 0.619663238  | 0.9999537652 | 1.1234947518  |
| 1.0101032125  | 0.9536084731 | 0.9999537652 | -1.0658960682 |
| 1.2649711727  | 0.3810131816 | 0.9999537652 | -1.1692845124 |
| -1.2444974294 | 0.0727550052 | 0.9999537652 | 1.130548589   |
| -1.0887934452 | 0.7574178257 | 0.9999537652 | 1.1141791921  |
| 1.0106051247  | 0.9586312195 | 0.9999537652 | 1.0371546229  |
| 4.5505976667  | 0.5557790267 | 0.9999537652 | -1.038722389  |
| -1.1923137678 | 0.3646740422 | 0.9999537652 | 1.1510564855  |
| 1.0926627905  | 0.6662972764 | 0.9999537652 | -1.0031410517 |
| 18.5983228161 | 0.2581151183 | 0.9999537652 | -1.2173989672 |
| -1.1819800889 | 0.2671767659 | 0.9999537652 | -1.2131018739 |
| -1.0516197387 | 0.7866504625 | 0.9999537652 | -1.1687738634 |
| 1.0715889046  | 0.6588098112 | 0.9999537652 | 1.1672366879  |
| -1.2506369357 | 0.2184955976 | 0.9999537652 | 1.4683307042  |
| -2.5861438062 | 0.4765251449 | 0.9999537652 | 0             |
| 0             | 0            | 0            | 2.996475627   |
| -1.0326333469 | 0.8215401045 | 0.9999537652 | 1.0393627243  |
| -1.3908389207 | 0.1165262648 | 0.9999537652 | 1.3327427712  |
| -1.0232004376 | 0.8806709779 | 0.9999537652 | 1.2327716394  |
| 0             | 0            | 0            | 1.2400291296  |
| -2.5871290907 | 0.5000409052 | 0.9999537652 | 2.9985540909  |
| 0             | 0            | 0            | 6.908559683   |
| -1.1004235189 | 0.7427304309 | 0.9999537652 | 1.227584173   |
| 1.017643433   | 0.9691037721 | 0.9999537652 | 1.131914333   |
| -1.2686505191 | 0.3624838625 | 0.9999537652 | 1.0529721961  |
| 1.7671539795  | 0.2255620168 | 0.9999537652 | 1.0929207328  |
| 1.1848870568  | 0.453215803  | 0.9999537652 | 1.4646192864  |
| -1.3448588931 | 0.4231443981 | 0.9999537652 | -1.2783396637 |
| -1.1615920107 | 0.5714238967 | 0.9999537652 | -1.293213934  |
| -1.0425902303 | 0.8999243487 | 0.9999537652 | 1.0379497197  |
| 1.378012146   | 0.0680404732 | 0.9999537652 | 1.0833667551  |
| -1.8122989227 | 0.2782924859 | 0.9999537652 | 1.0709421595  |
| 1.8027371112  | 0.4190916331 | 0.9999537652 | 1.233775198   |

gene\_expression\_table

|               |              |              |               |
|---------------|--------------|--------------|---------------|
| 1.0153502276  | 0.9500399995 | 0.9999537652 | 1.1087992865  |
| -1.1041574634 | 0.7684901006 | 0.9999537652 | -1.3887172398 |
| 1.0966499769  | 0.6858960062 | 0.9999537652 | 1.5279350235  |
| -1.4456334055 | 0.1795798304 | 0.9999537652 | 1.8672258446  |
| 1.593132356   | 0.1211717136 | 0.9999537652 | 1.866659274   |
| 4.5544554512  | 0.5691094638 | 0.9999537652 | -9.7598809705 |
| 0             | 0            | 0            | 2.9988886918  |
| 15.0880352532 | 0.2933799524 | 0.9999537652 | -3.384595918  |
| -1.2835526175 | 0.1136805105 | 0.9999537652 | 1.2097061402  |
| -1.0558461694 | 0.777060492  | 0.9999537652 | 1.1366901367  |
| 1.2557671782  | 0.2109364175 | 0.9999537652 | 1.6438635573  |
| 9.8205505243  | 0.3828660831 | 0.9999537652 | -3.8938703542 |
| 1.5275932178  | 0.0326822203 | 0.9999537652 | 1.4378724457  |
| -1.4437979634 | 0.5749443101 | 0.9999537652 | -1.3853788118 |
| -1.0294818433 | 0.9279215917 | 0.9999537652 | 1.0795020561  |
| 1.2633691172  | 0.5669080621 | 0.9999537652 | 1.2217787389  |
| -1.5884336587 | 0.3201788247 | 0.9999537652 | 1.1747922332  |
| -1.2143676553 | 0.5233401533 | 0.9999537652 | 1.1079584868  |
| -1.2350179012 | 0.3000777022 | 0.9999537652 | 1.0411610528  |
| -1.9893749934 | 0.0237469629 | 0.9999537652 | -1.1145736255 |
| 13.3324809638 | 0.3193649127 | 0.9999537652 | -1.1446993292 |
| -1.0830481592 | 0.6881189843 | 0.9999537652 | 1.2978699048  |
| -1.2080529024 | 0.2043157132 | 0.9999537652 | 1.2594668575  |
| 0             | 0            | 0            | 2.996475627   |
| 1.0740170126  | 0.6904840167 | 0.9999537652 | 1.0302075238  |
| 1.0489179834  | 0.7067076026 | 0.9999537652 | 1.0077437993  |
| 1.0954049491  | 0.7605116269 | 0.9999537652 | 1.0524499689  |
| 1.0211054721  | 0.9148878452 | 0.9999537652 | -1.0756176935 |
| -1.1837761897 | 0.2392677938 | 0.9999537652 | -1.0575660145 |
| -1.0622491751 | 0.7799125861 | 0.9999537652 | -1.1166815526 |
| -1.2225269604 | 0.1919387424 | 0.9999537652 | -1.1392479275 |
| 59.0891363577 | 0.1085514315 | 0.9999537652 | 2.6488015607  |
| 0             | 0            | 0            | 8.8710369702  |
| 1.9569338339  | 0.0288546728 | 0.9999537652 | 1.0973153205  |
| -2.3908639205 | 0.0117484481 | 0.9999537652 | -3.3722286371 |
| 0             | 0            | 0            | 6.908559683   |
| -2.0677479284 | 0.0926159638 | 0.9999537652 | -1.1381418077 |
| -1.2677335371 | 0.4116307622 | 0.9999537652 | 1.1027421869  |
| -1.1391927021 | 0.5074026462 | 0.9999537652 | 1.0482609427  |
| 1.0167565324  | 0.9246484751 | 0.9999537652 | -1.1340411268 |
| 1.0925830294  | 0.6196738349 | 0.9999537652 | 1.3124275979  |
| -1.2697946181 | 0.0523828467 | 0.9999537652 | -1.0366395676 |
| 1.0253551658  | 0.9160412453 | 0.9999537652 | -1.1287794271 |
| 1.5745683148  | 0.007292     | 0.9999537652 | 1.1345386682  |
| 2.417047608   | 0.1687344085 | 0.9999537652 | -1.0081408879 |
| 15.1008094413 | 0.2914548718 | 0.9999537652 | 1.1381128106  |
| 2.5670947518  | 0.0290037763 | 0.9999537652 | 1.5324445939  |
| 6.3075231393  | 0.4850059918 | 0.9999537652 | 0             |
| -1.2455951775 | 0.2013552927 | 0.9999537652 | -1.3257163779 |



gene\_expression\_table

|               |              |              |               |
|---------------|--------------|--------------|---------------|
| -1.197576325  | 0.6623620233 | 0.9999537652 | -1.1865364646 |
| 2.7933974408  | 0.6948713406 | 0.9999537652 | -5.3589986948 |
| -1.1959606133 | 0.3530227076 | 0.9999537652 | 1.0692639063  |
| -1.6671991184 | 0.0448815724 | 0.9999537652 | -1.2640384552 |
| -1.1077836192 | 0.5143282245 | 0.9999537652 | -1.1763800783 |
| 2.7933974408  | 0.6948713406 | 0.9999537652 | 0             |
| 0             | 0            | 0            | 6.908559683   |
| -1.0857945282 | 0.8711902386 | 0.9999537652 | 1.5123051406  |
| -1.0130402092 | 0.9187989799 | 0.9999537652 | -1.1249871506 |
| 1.0988560272  | 0.818465598  | 0.9999537652 | -1.0094721103 |
| 4.5505976667  | 0.5557790267 | 0.9999537652 | -3.20894012   |
| 0             | 0            | 0            | 0             |
| -1.0825391702 | 0.7172610732 | 0.9999537652 | -1.3173815964 |
| 1.0975512742  | 0.5165143285 | 0.9999537652 | 1.103672028   |
| 11.5766527773 | 0.345372235  | 0.9999537652 | 33.3754495834 |
| 1.2185387303  | 0.2116757194 | 0.9999537652 | -1.3716623699 |
| -1.1254592709 | 0.4217652485 | 0.9999537652 | 1.1872285251  |
| 2.0570832917  | 0.1751146452 | 0.9999537652 | 2.4808300066  |
| -1.4021492508 | 0.0389210208 | 0.9999537652 | -1.2995589273 |
| 1.4462181475  | 0.2775525965 | 0.9999537652 | -1.3205774937 |
| 1.0397146958  | 0.7360116622 | 0.9999537652 | 1.0398318525  |
| 1.0285866397  | 0.8754624479 | 0.9999537652 | -1.1562757244 |
| 0             | 0            | 0            | 2.996475627   |
| 2.7933974408  | 0.6948713406 | 0.9999537652 | 2.0426682045  |
| 0             | 0            | 0            | -1.5087935345 |
| 1.3079063983  | 0.0501264509 | 0.9999537652 | -1.1940289567 |
| -1.158439708  | 0.2835288814 | 0.9999537652 | -1.4005988103 |
| -2.8760826119 | 0.1553805544 | 0.9999537652 | -2.2511269746 |
| 1.0829616751  | 0.5108588824 | 0.9999537652 | 1.0468957885  |
| 2.9313230887  | 0.0632300451 | 0.9999537652 | 1.7346310769  |
| -1.0108728944 | 0.9635058103 | 0.9999537652 | -1.1572161701 |
| 1.2356088368  | 0.1875473958 | 0.9999537652 | 1.0019706692  |
| 1.1391698979  | 0.6399915339 | 0.9999537652 | -1.1659764659 |
| 1.1919080759  | 0.4569336392 | 0.9999537652 | 1.1204931101  |
| 5.496040989   | 0.1012496507 | 0.9999537652 | -1.283611481  |
| 1.0028347771  | 0.9851256821 | 0.9999537652 | -1.1084524378 |
| 1.0434550088  | 0.7835112812 | 0.9999537652 | -1.2061968396 |
| -1.418412925  | 0.3259607511 | 0.9999537652 | -1.3914488087 |
| 1.0809853157  | 0.7527577596 | 0.9999537652 | 1.0881480925  |
| -1.2465935171 | 0.2873358005 | 0.9999537652 | -1.3073503178 |
| -1.1270828252 | 0.5697084709 | 0.9999537652 | 1.1620755807  |
| 2.7933974408  | 0.6948713406 | 0.9999537652 | 0             |
| 0             | 0            | 0            | 6.908559683   |
| 4.4401862342  | 0.0345830526 | 0.9999537652 | -1.3580827111 |
| -1.1880058961 | 0.1894267359 | 0.9999537652 | -1.4114785674 |
| 1.0248488197  | 0.9101584263 | 0.9999537652 | -1.1847961128 |
| 1.0003784265  | 0.9992134816 | 0.9999537652 | -1.0969187291 |
| -1.0075197723 | 0.9684314815 | 0.9999537652 | -1.0656795983 |
| 1.0336868444  | 0.8314678021 | 0.9999537652 | -1.2094196508 |

gene\_expression\_table

|               |              |              |               |
|---------------|--------------|--------------|---------------|
| 1.0338424695  | 0.887545736  | 0.9999537652 | -1.1570730669 |
| -1.0412872224 | 0.7600874351 | 0.9999537652 | 1.0260560303  |
| 1.136013751   | 0.3160499214 | 0.9999537652 | 1.2627590312  |
| 0             | 0            | 0            | 1.6601562553  |
| -1.6994504307 | 0.542122934  | 0.9999537652 | 1.791511063   |
| 0             | 0            | 0            | 2.996475627   |
| 1.2379676245  | 0.4612616912 | 0.9999537652 | 1.1838852129  |
| 1.7141897291  | 0.009923     | 0.9999537652 | 1.3480408936  |
| 6.3075231393  | 0.484996674  | 0.9999537652 | -1.6396378201 |
| 1.0676357032  | 0.8385135872 | 0.9999537652 | -1.5109058578 |
| -1.2028374646 | 0.5527646301 | 0.9999537652 | -1.2918748817 |
| 1.1943111976  | 0.7386871802 | 0.9999537652 | -1.1105035059 |
| 2.7933974408  | 0.6948713406 | 0.9999537652 | 1.0675791322  |
| 1.0146958614  | 0.971023082  | 0.9999537652 | 1.0969125818  |
| -1.1572711259 | 0.8283974137 | 0.9999537652 | -1.1845093957 |
| 1.1277902631  | 0.3932117799 | 0.9999537652 | -1.0636997129 |
| 0             | 0            | 0            | 2.996475627   |
| -1.3062078421 | 0.4273097615 | 0.9999537652 | -1.0058955941 |
| 1.1119208683  | 0.6351603186 | 0.9999537652 | -1.2197776484 |
| -1.1282426787 | 0.6001528702 | 0.9999537652 | -1.1398488343 |
| -1.0491282329 | 0.8974337407 | 0.9999537652 | -1.0780915189 |
| -1.2508804687 | 0.5573146363 | 0.9999537652 | -1.0256555556 |
| 1.4666339935  | 0.0313181681 | 0.9999537652 | 1.0826045061  |
| 1.5847055173  | 0.4398070576 | 0.9999537652 | 1.4302724714  |
| 0             | 0            | 0            | 0             |
| -1.0908430523 | 0.6839889892 | 0.9999537652 | -1.1721388968 |
| 1.2117886498  | 0.3825788676 | 0.9999537652 | 1.3031671303  |
| 6.3075231393  | 0.4850126447 | 0.9999537652 | -1.0834689998 |

gene\_expression\_table

| LZ vs. C 24H - P-value | LZ vs. C 24H - FDR p-value | C1_U937_0H_R1_001 (GE) - TPM |
|------------------------|----------------------------|------------------------------|
| 0.4506277405           | 0.9999986525               | 0                            |
| 0.9634256918           | 0.9999986525               | 1.4585853856                 |
| 0.2259641952           | 0.9999986525               | 0                            |
| 0.1185994695           | 0.9999986525               | 0                            |
| 0.4130863814           | 0.9999986525               | 17.4915275307                |
| 0.1272623854           | 0.9999986525               | 37.6100539265                |
| 0.0674732874           | 0.9999986525               | 0                            |
| 0.571066625            | 0.9999986525               | 0                            |
| 0.1330005216           | 0.9999986525               | 1475.2491124668              |
| 0.0486760051           | 0.9999986525               | 10.264240868                 |
| 0.5151446629           | 0.9999986525               | 0                            |
| 0.211727368            | 0.9999986525               | 6.1151992388                 |
| 0.6312664098           | 0.9999986525               | 0                            |
| 0.9157910673           | 0.9999986525               | 107.9967984839               |
| 0.8468849379           | 0.9999986525               | 132.3657098404               |
| 0.2161354344           | 0.9999986525               | 0                            |
| 0.0862692722           | 0.9999986525               | 103.2814927958               |
| 0.7351839838           | 0.9999986525               | 4.5470441865                 |
| 0.5429585224           | 0.9999986525               | 6.7962833903                 |
| 0.5569763241           | 0.9999986525               | 84.7463386173                |
| 0.3115315717           | 0.9999986525               | 36.276063805                 |
| 0.6050312545           | 0.9999986525               | 25.5078088512                |
| 0.4729816619           | 0.9999986525               | 0                            |
| 0.0233257409           | 0.9999986525               | 19.0457692846                |
| 0.2248214915           | 0.9999986525               | 0                            |
| 0.4814039658           | 0.9999986525               | 370.8408535493               |
| 0.0398367704           | 0.9999986525               | 46.5047709653                |
| 0.838654829            | 0.9999986525               | 311.9315952827               |
| 0                      | 0                          | 0                            |
| 0.8560159159           | 0.9999986525               | 5.598401296                  |
| 0.3835753132           | 0.9999986525               | 16.3982003808                |
| 0.2266986865           | 0.9999986525               | 9.4597739972                 |
| 0.5778832954           | 0.9999986525               | 31.8060332588                |
| 0.6751120977           | 0.9999986525               | 25.2819139427                |
| 0.8418079538           | 0.9999986525               | 0                            |
| 0.5694449709           | 0.9999986525               | 0                            |
| 0.7780577599           | 0.9999986525               | 12.8741167367                |
| 0.2834629282           | 0.9999986525               | 3.3717826939                 |
| 0.5998253505           | 0.9999986525               | 2.3808284825                 |
| 0.1387183735           | 0.9999986525               | 29.9483517019                |
| 0.4147841635           | 0.9999986525               | 25.2499694419                |
| 0.7311715355           | 0.9999986525               | 13.4738294493                |
| 0                      | 0                          | 0                            |
| 0.6312664098           | 0.9999986525               | 0                            |
| 0.9068866046           | 0.9999986525               | 0                            |
| 0.4874497034           | 0.9999986525               | 0                            |
| 0.0330299741           | 0.9999986525               | 0                            |
| 0.3299717062           | 0.9999986525               | 0                            |

gene\_expression\_table

|              |              |                |
|--------------|--------------|----------------|
| 0.6622446636 | 0.9999986525 | 7.4751662328   |
| 0.7918445591 | 0.9999986525 | 3.8872349926   |
| 0.7377822442 | 0.9999986525 | 0.749144218    |
| 0.8163586565 | 0.9999986525 | 59.7992139     |
| 0.7449896062 | 0.9999986525 | 0              |
| 0.6312664098 | 0.9999986525 | 0              |
| 0.0189955297 | 0.9999986525 | 0              |
| 0.2662910164 | 0.9999986525 | 21.4342200594  |
| 0.3341139676 | 0.9999986525 | 22.3787789095  |
| 0.5073272766 | 0.9999986525 | 0              |
| 0.9446520117 | 0.9999986525 | 0              |
| 0.6148601643 | 0.9999986525 | 30.825244101   |
| 0.6024143212 | 0.9999986525 | 21.8453723081  |
| 0.72751791   | 0.9999986525 | 0.6314659568   |
| 0.7023495176 | 0.9999986525 | 0              |
| 0.537350719  | 0.9999986525 | 55.132736251   |
| 0.2332801701 | 0.9999986525 | 2.3313800616   |
| 0.3897704795 | 0.9999986525 | 11.2024431491  |
| 0.3502688179 | 0.9999986525 | 9.4640118675   |
| 0.177195026  | 0.9999986525 | 1.2219221282   |
| 0.46598719   | 0.9999986525 | 11.6398585571  |
| 0.3371199317 | 0.9999986525 | 0              |
| 0.5316072528 | 0.9999986525 | 604.1044071092 |
| 0.6718319089 | 0.9999986525 | 0              |
| 0.3408234741 | 0.9999986525 | 53.5565693209  |
| 0.7852254468 | 0.9999986525 | 3.8748289234   |
| 0.3293281315 | 0.9999986525 | 7.3412141633   |
| 0.7999534346 | 0.9999986525 | 31.7658596333  |
| 0.6312664098 | 0.9999986525 | 0              |
| 0.3644843651 | 0.9999986525 | 0              |
| 0.6868158828 | 0.9999986525 | 47.7168871039  |
| 0.0345378896 | 0.9999986525 | 40.8697374551  |
| 0.3646074104 | 0.9999986525 | 48.2671524642  |
| 0.4627647269 | 0.9999986525 | 0              |
| 0.505065311  | 0.9999986525 | 0.1073035967   |
| 0.3936513486 | 0.9999986525 | 15.5885236795  |
| 0.2395309877 | 0.9999986525 | 4.3363316934   |
| 0.2064416691 | 0.9999986525 | 0              |
| 0.4564667208 | 0.9999986525 | 0              |
| 0.9234882051 | 0.9999986525 | 183.2807691632 |
| 0.8875281597 | 0.9999986525 | 0              |
| 0.4482922011 | 0.9999986525 | 1.783414253    |
| 0.3482502561 | 0.9999986525 | 878.6265067219 |
| 0.7624875438 | 0.9999986525 | 0              |
| 0.5615640939 | 0.9999986525 | 0              |
| 0.2243977175 | 0.9999986525 | 3.7412235979   |
| 0.5772687741 | 0.9999986525 | 0              |
| 0.9264203483 | 0.9999986525 | 5.7765900004   |
| 0.6307937915 | 0.9999986525 | 0              |

gene\_expression\_table

|              |              |                |
|--------------|--------------|----------------|
| 0.1212827366 | 0.9999986525 | 2.4391602922   |
| 0.0694075232 | 0.9999986525 | 10.1428688739  |
| 0.7018160942 | 0.9999986525 | 0              |
| 0.249589136  | 0.9999986525 | 30.8710142213  |
| 0.2611516293 | 0.9999986525 | 6.0828963677   |
| 0.8218483791 | 0.9999986525 | 9.3631134541   |
| 0.8355935438 | 0.9999986525 | 4.9555635211   |
| 0.0399138881 | 0.9999986525 | 0.9813612469   |
| 0.4729816619 | 0.9999986525 | 0              |
| 0.5288006053 | 0.9999986525 | 0.7124644128   |
| 0.408166978  | 0.9999986525 | 1.2361506449   |
| 0.5285116491 | 0.9999986525 | 78.5337073997  |
| 0.0224847831 | 0.9999986525 | 8.3079940579   |
| 0.8147085498 | 0.9999986525 | 0              |
| 0.6839962716 | 0.9999986525 | 0              |
| 0.3127086061 | 0.9999986525 | 26.3498677331  |
| 0.9287501179 | 0.9999986525 | 0.3389570718   |
| 0.4284809222 | 0.9999986525 | 0.6598646663   |
| 0.9355755708 | 0.9999986525 | 112.0751042944 |
| 0.2920446467 | 0.9999986525 | 0              |
| 0.934330816  | 0.9999986525 | 386.773476575  |
| 0.3580399981 | 0.9999986525 | 4.7582964346   |
| 0.5843089519 | 0.9999986525 | 2.7080415188   |
| 0.5183818903 | 0.9999986525 | 6.0059040476   |
| 0.8371741487 | 0.9999986525 | 0              |
| 0.6902524954 | 0.9999986525 | 0              |
| 0.0759865039 | 0.9999986525 | 0              |
| 0.6754746348 | 0.9999986525 | 24.4099223416  |
| 0.30753857   | 0.9999986525 | 1.5032995055   |
| 0.0728228538 | 0.9999986525 | 39.555600224   |
| 0.0127526944 | 0.9999986525 | 7.776664115    |
| 0.0757593414 | 0.9999986525 | 0              |
| 0.4743912191 | 0.9999986525 | 262.4869492318 |
| 0.3465642132 | 0.9999986525 | 15.504624198   |
| 0.4713682857 | 0.9999986525 | 9.5060299792   |
| 0.6522807607 | 0.9999986525 | 12.3705305027  |
| 0.2876054532 | 0.9999986525 | 67.4618943636  |
| 0.9834089352 | 0.9999986525 | 1.4982193682   |
| 0.4615238273 | 0.9999986525 | 0              |
| 0.3283924407 | 0.9999986525 | 38.2709552365  |
| 0.4564100194 | 0.9999986525 | 1.6739089014   |
| 0.7136040962 | 0.9999986525 | 0.1725012068   |
| 0.3588599846 | 0.9999986525 | 0              |
| 0.6312664098 | 0.9999986525 | 0              |
| 0.4769688016 | 0.9999986525 | 20.6617118593  |
| 0.3075114912 | 0.9999986525 | 0              |
| 0.887686936  | 0.9999986525 | 0              |
| 0.9997772097 | 0.9999986525 | 0              |
| 0.9195725661 | 0.9999986525 | 3.1519406915   |

gene\_expression\_table

|              |              |                |
|--------------|--------------|----------------|
| 0.3680775443 | 0.9999986525 | 0              |
| 0.5400503825 | 0.9999986525 | 0              |
| 0.5507284732 | 0.9999986525 | 1.2113283997   |
| 0.8624853065 | 0.9999986525 | 0              |
| 0.667486048  | 0.9999986525 | 4.9577499086   |
| 0.4870574405 | 0.9999986525 | 0              |
| 0.6312664098 | 0.9999986525 | 0              |
| 0.3047359984 | 0.9999986525 | 0              |
| 0.0157178781 | 0.9999986525 | 883.5042082468 |
| 0.219536839  | 0.9999986525 | 1.7111819021   |
| 0.9413685068 | 0.9999986525 | 1.541382157    |
| 0.573738744  | 0.9999986525 | 14.2317214299  |
| 0.2754251837 | 0.9999986525 | 0              |
| 0.1204457024 | 0.9999986525 | 0              |
| 0.8629812278 | 0.9999986525 | 1.4996569367   |
| 0.7828576125 | 0.9999986525 | 6.7886395098   |
| 0.3166916357 | 0.9999986525 | 24.4773296275  |
| 0            | 0            | 0              |
| 0.4126362447 | 0.9999986525 | 1.0319450991   |
| 0.6098761915 | 0.9999986525 | 0              |
| 0.3360834124 | 0.9999986525 | 10.7269052963  |
| 0.1065378049 | 0.9999986525 | 0              |
| 0.3523102098 | 0.9999986525 | 0              |
| 0.008737     | 0.9999986525 | 13.4087072706  |
| 0.8094366416 | 0.9999986525 | 1.0022947683   |
| 0.1880955406 | 0.9999986525 | 0              |
| 0.4729816619 | 0.9999986525 | 0              |
| 0.5020686701 | 0.9999986525 | 105.6278364526 |
| 0.0223511299 | 0.9999986525 | 1.1889737837   |
| 0.0477135024 | 0.9999986525 | 2.9442889006   |
| 0.4729816619 | 0.9999986525 | 0              |
| 0.6017159452 | 0.9999986525 | 10.1014826062  |
| 0.2475265649 | 0.9999986525 | 1.0080338638   |
| 0.1930727657 | 0.9999986525 | 8.5541835763   |
| 0.3393823594 | 0.9999986525 | 17.6556446043  |
| 0.1788520882 | 0.9999986525 | 18.5355351754  |
| 0.9503183601 | 0.9999986525 | 0              |
| 0.1994606277 | 0.9999986525 | 123.0963238668 |
| 0.2281222615 | 0.9999986525 | 2.5932396262   |
| 0.7957967009 | 0.9999986525 | 22.2951264735  |
| 0.7756127722 | 0.9999986525 | 67.5349235958  |
| 0.4071957235 | 0.9999986525 | 0              |
| 0            | 0            | 3.4682110734   |
| 0.4170868729 | 0.9999986525 | 0.4469203475   |
| 0.465462121  | 0.9999986525 | 1.6908569946   |
| 0.6098761915 | 0.9999986525 | 0              |
| 0.9268829827 | 0.9999986525 | 0              |
| 0.4730788793 | 0.9999986525 | 4.0767208202   |
| 0.750799056  | 0.9999986525 | 0              |

gene\_expression\_table

|              |              |                 |
|--------------|--------------|-----------------|
| 0.858220382  | 0.9999986525 | 0               |
| 0.3187440932 | 0.9999986525 | 5.8448338011    |
| 0.7686138325 | 0.9999986525 | 3.5258640915    |
| 0.4222684215 | 0.9999986525 | 11.6993782414   |
| 0.8625459366 | 0.9999986525 | 81.0195104719   |
| 0.4986738748 | 0.9999986525 | 0               |
| 0.8105190729 | 0.9999986525 | 24.5738657468   |
| 0.8131244057 | 0.9999986525 | 0.8540666885    |
| 0.5389206123 | 0.9999986525 | 2.0582999426    |
| 0.9823558256 | 0.9999986525 | 1.0974092637    |
| 0.7252613376 | 0.9999986525 | 0               |
| 0.5618134639 | 0.9999986525 | 5.5159186549    |
| 0.007867     | 0.9999986525 | 0               |
| 0.0629929562 | 0.9999986525 | 0               |
| 0            | 0            | 0               |
| 0.248556393  | 0.9999986525 | 44.5388600267   |
| 0.5556468149 | 0.9999986525 | 0.5161641734    |
| 0.9516558556 | 0.9999986525 | 0               |
| 0.6343729656 | 0.9999986525 | 0               |
| 0.640379247  | 0.9999986525 | 0               |
| 0.3460793044 | 0.9999986525 | 0               |
| 0.1750541701 | 0.9999986525 | 0.8220193034    |
| 0.6920704993 | 0.9999986525 | 2.2523847759    |
| 0.1141394891 | 0.9999986525 | 29.0745489823   |
| 0.7958425602 | 0.9999986525 | 0               |
| 0.8508147212 | 0.9999986525 | 2.3563440884    |
| 0.6292476793 | 0.9999986525 | 0               |
| 0.4689847935 | 0.9999986525 | 22.719217101    |
| 0.6646523436 | 0.9999986525 | 0               |
| 0.8136369685 | 0.9999986525 | 1500.2016797661 |
| 0.4130623505 | 0.9999986525 | 11.3007207075   |
| 0.9398460025 | 0.9999986525 | 42.9076211852   |
| 0.2826233433 | 0.9999986525 | 222.3275867241  |
| 0.0856348148 | 0.9999986525 | 50.7240858877   |
| 0.4873057326 | 0.9999986525 | 0               |
| 0.5573912876 | 0.9999986525 | 47.6148320419   |
| 0.9250293643 | 0.9999986525 | 3.7017371777    |
| 0.0539059284 | 0.9999986525 | 85.9961450533   |
| 0.6842953402 | 0.9999986525 | 79.6301764464   |
| 0            | 0            | 0               |
| 0.6312664098 | 0.9999986525 | 0               |
| 0.4072384421 | 0.9999986525 | 0               |
| 0.8415546651 | 0.9999986525 | 0               |
| 0.1113097011 | 0.9999986525 | 0               |
| 0.2612097461 | 0.9999986525 | 1.7715657529    |
| 0.8755585025 | 0.9999986525 | 0               |
| 0.6748018463 | 0.9999986525 | 0               |
| 0.5225600898 | 0.9999986525 | 27.9161774569   |
| 0.4059433862 | 0.9999986525 | 0.533172329     |

gene\_expression\_table

|              |              |                 |
|--------------|--------------|-----------------|
| 0.243973771  | 0.9999986525 | 26.5485513872   |
| 0.1040132575 | 0.9999986525 | 77.3112885132   |
| 0.242846765  | 0.9999986525 | 3.8502929407    |
| 0.0541537344 | 0.9999986525 | 10.9736365995   |
| 0.8223960475 | 0.9999986525 | 0               |
| 0.1931476407 | 0.9999986525 | 3.046136707     |
| 0.5201550731 | 0.9999986525 | 7.8959746179    |
| 0.3736891372 | 0.9999986525 | 0               |
| 0.368278062  | 0.9999986525 | 8.7793957267    |
| 0.482222045  | 0.9999986525 | 0               |
| 0.1124512159 | 0.9999986525 | 3.834597998     |
| 0.0382475638 | 0.9999986525 | 0               |
| 0.9772740273 | 0.9999986525 | 698.2273694647  |
| 0.5678846271 | 0.9999986525 | 1.375326638     |
| 0.535957178  | 0.9999986525 | 0               |
| 0.0157103331 | 0.9999986525 | 0               |
| 0.7747697331 | 0.9999986525 | 667.0405719519  |
| 0.3075114913 | 0.9999986525 | 0               |
| 0.6403713668 | 0.9999986525 | 0               |
| 0.9790695191 | 0.9999986525 | 2.3652612399    |
| 0.1797579448 | 0.9999986525 | 410.5468379613  |
| 0.4552680037 | 0.9999986525 | 0               |
| 0.1203660109 | 0.9999986525 | 385.3550100998  |
| 0.4072698906 | 0.9999986525 | 0               |
| 0.3622138515 | 0.9999986525 | 4.060006526     |
| 0.4582577267 | 0.9999986525 | 3007.5978952128 |
| 0.0882024129 | 0.9999986525 | 41.9972843291   |
| 0.9377380765 | 0.9999986525 | 4.9083567125    |
| 0.5995967067 | 0.9999986525 | 0               |
| 0.5665597555 | 0.9999986525 | 5.4614372024    |
| 0.6098761915 | 0.9999986525 | 0               |
| 0.16828652   | 0.9999986525 | 9.605150173     |
| 0.8907647941 | 0.9999986525 | 5.2898555916    |
| 0.1499152499 | 0.9999986525 | 17.7307245612   |
| 0            | 0            | 0               |
| 0.8841889965 | 0.9999986525 | 0               |
| 0.1582566073 | 0.9999986525 | 1.8754276562    |
| 0.4186354209 | 0.9999986525 | 0.7125653448    |
| 0.5266496436 | 0.9999986525 | 3.7046800103    |
| 0.0617216597 | 0.9999986525 | 4.4229058057    |
| 0.4517787603 | 0.9999986525 | 0               |
| 0            | 0            | 0               |
| 0            | 0            | 0               |
| 0.0674244865 | 0.9999986525 | 15.3596700363   |
| 0.5660525099 | 0.9999986525 | 0.7551965886    |
| 0.5982406329 | 0.9999986525 | 6.8079643655    |
| 0.1072110811 | 0.9999986525 | 154.5019548307  |
| 0.6237611602 | 0.9999986525 | 1.429837784     |
| 0.9364804364 | 0.9999986525 | 4.1204539283    |



gene\_expression\_table

|              |              |                |
|--------------|--------------|----------------|
| 0.3370539183 | 0.9999986525 | 17.6618300967  |
| 0.2200976837 | 0.9999986525 | 14.9244558746  |
| 0.4468279444 | 0.9999986525 | 27.2306874072  |
| 0.7618760922 | 0.9999986525 | 0              |
| 0.425216001  | 0.9999986525 | 0              |
| 0.5559263079 | 0.9999986525 | 2.2316745921   |
| 0.3446318237 | 0.9999986525 | 11.2920224554  |
| 0.0893537083 | 0.9999986525 | 38.6986028403  |
| 0.8952792282 | 0.9999986525 | 969.7841063888 |
| 0.6639819905 | 0.9999986525 | 4.5845415127   |
| 0.6973159579 | 0.9999986525 | 7.5816707187   |
| 0.3005072878 | 0.9999986525 | 2.0189424075   |
| 0.6229053388 | 0.9999986525 | 36.5285415049  |
| 0.9221338831 | 0.9999986525 | 20.687813164   |
| 0.5046863539 | 0.9999986525 | 4.6315810073   |
| 0.4520587775 | 0.9999986525 | 3.3800186594   |
| 0.2438062878 | 0.9999986525 | 19.115277295   |
| 0.6403634807 | 0.9999986525 | 0              |
| 0.7093091139 | 0.9999986525 | 0.6801359685   |
| 0.376427148  | 0.9999986525 | 70.6795282007  |
| 0.3033692161 | 0.9999986525 | 12.2865925849  |
| 0.8043208143 | 0.9999986525 | 5.515525897    |
| 0.6158538344 | 0.9999986525 | 0              |
| 0.0538342385 | 0.9999986525 | 0              |
| 0.9034463357 | 0.9999986525 | 120.7270428064 |
| 0.405427986  | 0.9999986525 | 3.1480891858   |
| 0.3370713275 | 0.9999986525 | 0              |
| 0.0192835558 | 0.9999986525 | 4.2557548933   |
| 0.6141191168 | 0.9999986525 | 3.0713355467   |
| 0.4329422654 | 0.9999986525 | 37.7026829143  |
| 0.3653766082 | 0.9999986525 | 6.3083992148   |
| 0.4858717369 | 0.9999986525 | 0              |
| 0            | 0            | 0              |
| 0.6974381111 | 0.9999986525 | 20.608969131   |
| 0.3047473685 | 0.9999986525 | 0              |
| 0.9318415258 | 0.9999986525 | 0              |
| 0.8978638139 | 0.9999986525 | 4.1212577625   |
| 0.4145250353 | 0.9999986525 | 99.1283227572  |
| 0.1342951761 | 0.9999986525 | 31.4899641616  |
| 0.4551008589 | 0.9999986525 | 3.4254714117   |
| 0.8736424672 | 0.9999986525 | 6.165708575    |
| 0.3162242032 | 0.9999986525 | 2.8368651354   |
| 0.8816504087 | 0.9999986525 | 116.0745455523 |
| 0.0949940599 | 0.9999986525 | 0              |
| 0.7080007137 | 0.9999986525 | 0              |
| 0.6397342202 | 0.9999986525 | 0              |
| 0.3387051196 | 0.9999986525 | 47.4329172774  |
| 0.30755387   | 0.9999986525 | 0              |
| 0.4112661233 | 0.9999986525 | 34.3393486517  |

gene\_expression\_table

|              |              |                |
|--------------|--------------|----------------|
| 0.6831591816 | 0.9999986525 | 240.9593946451 |
| 0.1062507322 | 0.9999986525 | 0              |
| 0.3825614801 | 0.9999986525 | 0              |
| 0.6908209882 | 0.9999986525 | 1.7705561107   |
| 0.3110228613 | 0.9999986525 | 0.7905565103   |
| 0.383385698  | 0.9999986525 | 5.2474582592   |
| 0.3176196955 | 0.9999986525 | 0              |
| 0.007017     | 0.9999986525 | 18.4866044984  |
| 0.7747537202 | 0.9999986525 | 0              |
| 0.6924349683 | 0.9999986525 | 22.2135369678  |
| 0.116702404  | 0.9999986525 | 5.0164004679   |
| 0.4073013259 | 0.9999986525 | 0              |
| 0.7533613327 | 0.9999986525 | 7.7202043892   |
| 0.284274112  | 0.9999986525 | 4.8351110708   |
| 0.3355987706 | 0.9999986525 | 116.667498498  |
| 0.5439839741 | 0.9999986525 | 0              |
| 0.0856550969 | 0.9999986525 | 2.6293895363   |
| 0.7269323251 | 0.9999986525 | 1.1891544869   |
| 0.6312664098 | 0.9999986525 | 0              |
| 0.1177570616 | 0.9999986525 | 5.9012711832   |
| 0.0707117235 | 0.9999986525 | 0              |
| 0.532794195  | 0.9999986525 | 0              |
| 0.9245462844 | 0.9999986525 | 61.418025213   |
| 0.30755387   | 0.9999986525 | 0              |
| 0.1022579231 | 0.9999986525 | 13.81839828    |
| 0.2745679642 | 0.9999986525 | 1.153041617    |
| 0.7094206677 | 0.9999986525 | 1.8638123348   |
| 0.8641842077 | 0.9999986525 | 393.3821819979 |
| 0.6419319204 | 0.9999986525 | 9.6496509601   |
| 0.7498330569 | 0.9999986525 | 4.678276874    |
| 0.3570275522 | 0.9999986525 | 5.8760478667   |
| 0.2668367678 | 0.9999986525 | 6.4604181317   |
| 0.9555576649 | 0.9999986525 | 31.210948271   |
| 0.1661533338 | 0.9999986525 | 9.9386372274   |
| 0.8179323728 | 0.9999986525 | 7.4654677326   |
| 0.2713237761 | 0.9999986525 | 2.1015864478   |
| 0.9959190878 | 0.9999986525 | 2.6493947574   |
| 0.4521095247 | 0.9999986525 | 1.4386793306   |
| 0.3522627872 | 0.9999986525 | 187.0991001916 |
| 0.6403555884 | 0.9999986525 | 0              |
| 0.0597950727 | 0.9999986525 | 113.8406243523 |
| 0.6192182591 | 0.9999986525 | 14.856235788   |
| 0.8703432821 | 0.9999986525 | 18.921300973   |
| 0.6233722125 | 0.9999986525 | 0              |
| 0.1462408097 | 0.9999986525 | 0              |
| 0.7844005642 | 0.9999986525 | 10.2642092042  |
| 0.3663674881 | 0.9999986525 | 151.2292812648 |
| 0.2804437999 | 0.9999986525 | 0              |
| 0.6719097504 | 0.9999986525 | 6.0852538572   |

gene\_expression\_table

|              |              |                |
|--------------|--------------|----------------|
| 0.7307116682 | 0.9999986525 | 9.1733299374   |
| 0.4919359015 | 0.9999986525 | 0              |
| 0.7400241978 | 0.9999986525 | 42.8510492708  |
| 0.727695324  | 0.9999986525 | 42.489073392   |
| 0.2035119645 | 0.9999986525 | 2.6544993077   |
| 0.6312664098 | 0.9999986525 | 0              |
| 0.7171034182 | 0.9999986525 | 9.0515387376   |
| 0.934373702  | 0.9999986525 | 14.7154968588  |
| 0.2321752268 | 0.9999986525 | 125.0286187008 |
| 0.3551554379 | 0.9999986525 | 0              |
| 0.246602392  | 0.9999986525 | 33.8941844605  |
| 0.9972987842 | 0.9999986525 | 60.3357786287  |
| 0.4399946605 | 0.9999986525 | 191.586160434  |
| 0.5281129983 | 0.9999986525 | 0              |
| 0.3607544229 | 0.9999986525 | 3.0564317592   |
| 0.4034495718 | 0.9999986525 | 43.034035252   |
| 0.2487253046 | 0.9999986525 | 24.1407465324  |
| 0.3700012234 | 0.9999986525 | 65.3961345051  |
| 0.30755387   | 0.9999986525 | 0              |
| 0.6256058169 | 0.9999986525 | 58.6088702747  |
| 0.2053839859 | 0.9999986525 | 43.6518747394  |
| 0.1643863901 | 0.9999986525 | 0              |
| 0.1930391795 | 0.9999986525 | 0              |
| 0.1203824212 | 0.9999986525 | 24.9424792595  |
| 0.5212598977 | 0.9999986525 | 367.2029797562 |
| 0.6922058901 | 0.9999986525 | 1.8348541714   |
| 0.500591718  | 0.9999986525 | 0              |
| 0.9076415054 | 0.9999986525 | 72.4515932518  |
| 0.4069532021 | 0.9999986525 | 0              |
| 0.8624143192 | 0.9999986525 | 0              |
| 0.1066403629 | 0.9999986525 | 27.3865551233  |
| 0.3075114913 | 0.9999986525 | 0              |
| 0            | 0            | 0              |
| 0.198214479  | 0.9999986525 | 4.9729449143   |
| 0.56576422   | 0.9999986525 | 0              |
| 0.3054290442 | 0.9999986525 | 7.1096342769   |
| 0.6984869757 | 0.9999986525 | 64.8421341023  |
| 0.7101248559 | 0.9999986525 | 51.1907450196  |
| 0.6048968113 | 0.9999986525 | 4.6471839853   |
| 0.9597323569 | 0.9999986525 | 2.9231447752   |
| 0.3946922803 | 0.9999986525 | 3.0764791883   |
| 0.9513392532 | 0.9999986525 | 9.5791149722   |
| 0.782217035  | 0.9999986525 | 0              |
| 0.7926335687 | 0.9999986525 | 2.7616564645   |
| 0.9296354279 | 0.9999986525 | 13.4763761741  |
| 0.4613241911 | 0.9999986525 | 3.1397609076   |
| 0.8851573384 | 0.9999986525 | 0              |
| 0.261436769  | 0.9999986525 | 1.3197870462   |
| 0.4729816619 | 0.9999986525 | 0              |

gene\_expression\_table

|              |              |                 |
|--------------|--------------|-----------------|
| 0.7001891865 | 0.9999986525 | 122.7279277141  |
| 0.8054555569 | 0.9999986525 | 15.8757682467   |
| 0.30755387   | 0.9999986525 | 0               |
| 0.273765018  | 0.9999986525 | 2.2112574331    |
| 0.8810479534 | 0.9999986525 | 4.876406281     |
| 0.2448357755 | 0.9999986525 | 0.2991967903    |
| 0.44347263   | 0.9999986525 | 1.6572815891    |
| 0.904996925  | 0.9999986525 | 0               |
| 0.7773454679 | 0.9999986525 | 0               |
| 0.4640361131 | 0.9999986525 | 3.0992264671    |
| 0.1985906326 | 0.9999986525 | 0               |
| 0.064490339  | 0.9999986525 | 58.4070926722   |
| 0.1007612426 | 0.9999986525 | 154.2619893485  |
| 0.1465190801 | 0.9999986525 | 7.6357472134    |
| 0.9611923278 | 0.9999986525 | 6.2148644653    |
| 0.7804070177 | 0.9999986525 | 0               |
| 0.9396104387 | 0.9999986525 | 0               |
| 0.9361376845 | 0.9999986525 | 3.7877088411    |
| 0.3033010284 | 0.9999986525 | 0               |
| 0.374126427  | 0.9999986525 | 14.0620455605   |
| 0.3060346534 | 0.9999986525 | 75.4754101126   |
| 0.3410865114 | 0.9999986525 | 0               |
| 0            | 0            | 0               |
| 0            | 0            | 0               |
| 0.7033868751 | 0.9999986525 | 0               |
| 0.2278685735 | 0.9999986525 | 87.0081025145   |
| 0.2449368409 | 0.9999986525 | 33.8695499527   |
| 0.4763504063 | 0.9999986525 | 98.3832515647   |
| 0.2903516429 | 0.9999986525 | 0               |
| 0.007049     | 0.9999986525 | 116.2342079259  |
| 0.3087536661 | 0.9999986525 | 1.5620028065    |
| 0.2593850616 | 0.9999986525 | 8.5797235436    |
| 0.5546980174 | 0.9999986525 | 0.708376014     |
| 0.5440740112 | 0.9999986525 | 2.48922648      |
| 0.0878994065 | 0.9999986525 | 46.6966562567   |
| 0.5693285527 | 0.9999986525 | 1272.2761576554 |
| 0.1276143382 | 0.9999986525 | 35.2975226241   |
| 0.4843644183 | 0.9999986525 | 19.9976971701   |
| 0            | 0            | 0               |
| 0.2186993699 | 0.9999986525 | 1.1580221945    |
| 0.2056017556 | 0.9999986525 | 0               |
| 0.3860963202 | 0.9999986525 | 1.5738452414    |
| 0.6181946527 | 0.9999986525 | 5.351236157     |
| 0.6269897914 | 0.9999986525 | 0               |
| 0.5518060966 | 0.9999986525 | 13.4898800877   |
| 0.4187680111 | 0.9999986525 | 37.6381971396   |
| 0.556099491  | 0.9999986525 | 6787.2638832043 |
| 0.3234421057 | 0.9999986525 | 0               |
| 0.1828504385 | 0.9999986525 | 18.3032120001   |

gene\_expression\_table

|              |              |                |
|--------------|--------------|----------------|
| 0            | 0            | 0              |
| 0.4729816619 | 0.9999986525 | 0              |
| 0.1857285465 | 0.9999986525 | 0              |
| 0.9991381713 | 0.9999986525 | 1.1632936225   |
| 0.8570359306 | 0.9999986525 | 0              |
| 0.2652809746 | 0.9999986525 | 268.7731207446 |
| 0.1835087902 | 0.9999986525 | 0              |
| 0.2701757466 | 0.9999986525 | 0              |
| 0.9625339662 | 0.9999986525 | 0              |
| 0.5235343277 | 0.9999986525 | 35.0379820166  |
| 0.8319106678 | 0.9999986525 | 0              |
| 0.9966126035 | 0.9999986525 | 0              |
| 0.4923631264 | 0.9999986525 | 445.4615235013 |
| 0.9148634706 | 0.9999986525 | 30.1433663929  |
| 0.4206886897 | 0.9999986525 | 60.4987751382  |
| 0.4753063306 | 0.9999986525 | 8.8930285961   |
| 0.85793303   | 0.9999986525 | 42.1701678588  |
| 0.5529206873 | 0.9999986525 | 0.9349250881   |
| 0.0009277    | 0.9999986525 | 0.2119908572   |
| 0.1206685035 | 0.9999986525 | 1.1619712714   |
| 0.1390495836 | 0.9999986525 | 0              |
| 0.186815333  | 0.9999986525 | 1.6700053194   |
| 0.7706346193 | 0.9999986525 | 8.5784228675   |
| 0.9541020489 | 0.9999986525 | 4.2306979794   |
| 0.9931675261 | 0.9999986525 | 577.6835719399 |
| 0.9124875608 | 0.9999986525 | 0              |
| 0.2514646832 | 0.9999986525 | 0              |
| 0.3355210908 | 0.9999986525 | 0              |
| 0.9270581493 | 0.9999986525 | 5.3096391027   |
| 0.6143104157 | 0.9999986525 | 0              |
| 0.3894274584 | 0.9999986525 | 1.5817759809   |
| 0.7189290499 | 0.9999986525 | 0              |
| 0.6463390272 | 0.9999986525 | 4.811544502    |
| 0.1544292614 | 0.9999986525 | 0              |
| 0.4786564218 | 0.9999986525 | 6.5354660677   |
| 0.6388357637 | 0.9999986525 | 12.8977443885  |
| 0            | 0            | 0              |
| 0.7949282995 | 0.9999986525 | 11.2970948078  |
| 0.8623434941 | 0.9999986525 | 0              |
| 0.5546077001 | 0.9999986525 | 0              |
| 0.6587773694 | 0.9999986525 | 0              |
| 0.9384108176 | 0.9999986525 | 0              |
| 0.8888177542 | 0.9999986525 | 0.2035210586   |
| 0.7557287784 | 0.9999986525 | 35.5469750808  |
| 0.0449470888 | 0.9999986525 | 1.4206837452   |
| 0.607944535  | 0.9999986525 | 0              |
| 0.2163416833 | 0.9999986525 | 1.5995299053   |
| 0.0982087439 | 0.9999986525 | 3.6772946208   |
| 0.5124952471 | 0.9999986525 | 4.707857128    |

gene\_expression\_table

|              |              |                |
|--------------|--------------|----------------|
| 0.7054169577 | 0.9999986525 | 0              |
| 0.5776538437 | 0.9999986525 | 19.0499968631  |
| 0.5934498605 | 0.9999986525 | 31.1402819731  |
| 0.4415361606 | 0.9999986525 | 16.8236157908  |
| 0.658865423  | 0.9999986525 | 0.2555545147   |
| 0.3688572167 | 0.9999986525 | 5.9158687456   |
| 0.1212939141 | 0.9999986525 | 4.7919717723   |
| 0.375749911  | 0.9999986525 | 31.318789223   |
| 0.4069913918 | 0.9999986525 | 0.405671126    |
| 0.0948808174 | 0.9999986525 | 0              |
| 0.757756129  | 0.9999986525 | 0              |
| 0.2128048764 | 0.9999986525 | 12.0401641329  |
| 0.6715356757 | 0.9999986525 | 1.0143842932   |
| 0.6899524879 | 0.9999986525 | 0              |
| 4.54E-06     | 0.0407058325 | 0.8491734515   |
| 0.3047587416 | 0.9999986525 | 0              |
| 0.7395121592 | 0.9999986525 | 2.9722504489   |
| 0.2223344251 | 0.9999986525 | 56.5200164477  |
| 0.3661245927 | 0.9999986525 | 58.5869900966  |
| 0.5025755316 | 0.9999986525 | 11.0816511794  |
| 0.2116622849 | 0.9999986525 | 0              |
| 0.8265626471 | 0.9999986525 | 13.0060406342  |
| 0.9985712836 | 0.9999986525 | 1.3863376267   |
| 0.4654335785 | 0.9999986525 | 0              |
| 0.1537643425 | 0.9999986525 | 14.938476951   |
| 0.7165071559 | 0.9999986525 | 33.4688962144  |
| 0.1817955974 | 0.9999986525 | 19.63853725    |
| 0.779299769  | 0.9999986525 | 2.7006043171   |
| 0.4860110914 | 0.9999986525 | 3.8080552474   |
| 0.3663491982 | 0.9999986525 | 60.4827085481  |
| 0.2549654881 | 0.9999986525 | 3.6510746504   |
| 0.67714376   | 0.9999986525 | 0              |
| 0.9623721001 | 0.9999986525 | 3.6801559631   |
| 0.3256808776 | 0.9999986525 | 9.8401248745   |
| 0.4818048973 | 0.9999986525 | 6.8983696743   |
| 0.6397203658 | 0.9999986525 | 0              |
| 0.9751629192 | 0.9999986525 | 0              |
| 0.0565350529 | 0.9999986525 | 221.8010493795 |
| 0.4081785001 | 0.9999986525 | 0              |
| 0.7891405437 | 0.9999986525 | 0.3544177687   |
| 0.3715804129 | 0.9999986525 | 0.622526677    |
| 0.6312664098 | 0.9999986525 | 0              |
| 0.6082681169 | 0.9999986525 | 0              |
| 0.7042490002 | 0.9999986525 | 0              |
| 0.9309463343 | 0.9999986525 | 0.799230009    |
| 0.0193968536 | 0.9999986525 | 2.3290154224   |
| 0.0939207155 | 0.9999986525 | 190.7213417742 |
| 0.3351267446 | 0.9999986525 | 0.1132553583   |
| 0            | 0            | 0              |

gene\_expression\_table

|              |              |                |
|--------------|--------------|----------------|
| 0.6674082526 | 0.9999986525 | 0.4108274142   |
| 0.6871652938 | 0.9999986525 | 9.5209533274   |
| 0.8979104298 | 0.9999986525 | 0              |
| 0.2461578326 | 0.9999986525 | 1.9032042604   |
| 0.9599061563 | 0.9999986525 | 88.5853734523  |
| 0.8985579538 | 0.9999986525 | 0.4520907387   |
| 0.650543462  | 0.9999986525 | 0              |
| 0.2486417829 | 0.9999986525 | 0.7441409864   |
| 0.4294688278 | 0.9999986525 | 3.829500524    |
| 0.3189578376 | 0.9999986525 | 0.8504656719   |
| 0.7191730753 | 0.9999986525 | 9.4634465987   |
| 0.6312664098 | 0.9999986525 | 0              |
| 0.7079684115 | 0.9999986525 | 0              |
| 0.0105637372 | 0.9999986525 | 0              |
| 0.1825681224 | 0.9999986525 | 1.3511773181   |
| 0.7648639571 | 0.9999986525 | 0              |
| 0.7719352838 | 0.9999986525 | 1.8683287897   |
| 0.8576692991 | 0.9999986525 | 0              |
| 0.1632502447 | 0.9999986525 | 10.1826320488  |
| 0.9542873749 | 0.9999986525 | 0.1814693017   |
| 0.7034331269 | 0.9999986525 | 0              |
| 0.182104656  | 0.9999986525 | 0              |
| 0.1199022358 | 0.9999986525 | 2.4863358914   |
| 0.3954779182 | 0.9999986525 | 1.9182042722   |
| 0.6437008393 | 0.9999986525 | 0              |
| 0.4065652646 | 0.9999986525 | 305.7144309861 |
| 0.6831720888 | 0.9999986525 | 0              |
| 0.0823935333 | 0.9999986525 | 1.1974678014   |
| 0            | 0            | 0              |
| 0.5960726121 | 0.9999986525 | 0              |
| 0.5649852868 | 0.9999986525 | 0              |
| 0.0482337233 | 0.9999986525 | 2.6026537884   |
| 0.8045402245 | 0.9999986525 | 33.0521510728  |
| 0.9267415074 | 0.9999986525 | 1.1005651043   |
| 0.786101268  | 0.9999986525 | 0              |
| 0.114994151  | 0.9999986525 | 5.1555952974   |
| 0            | 0            | 0              |
| 0.8634275808 | 0.9999986525 | 41.0797741635  |
| 0.8328280138 | 0.9999986525 | 0.060022023    |
| 0.8229458629 | 0.9999986525 | 0              |
| 0.7026058656 | 0.9999986525 | 0              |
| 0            | 0            | 0              |
| 0.4073327479 | 0.9999986525 | 0              |
| 0.2468302822 | 0.9999986525 | 0              |
| 0.6473371618 | 0.9999986525 | 4.7246683966   |
| 0.1453477485 | 0.9999986525 | 6.7136905685   |
| 0.002527     | 0.9999986525 | 0              |
| 0.6928329146 | 0.9999986525 | 0              |
| 0.833088655  | 0.9999986525 | 0.0946151954   |

gene\_expression\_table

|              |              |               |
|--------------|--------------|---------------|
| 0.007505     | 0.9999986525 | 21.4547561145 |
| 0.9941409674 | 0.9999986525 | 0             |
| 0.6066338885 | 0.9999986525 | 2.5992167441  |
| 0.5404797186 | 0.9999986525 | 6.6127955458  |
| 0.3193766118 | 0.9999986525 | 0             |
| 0.840139363  | 0.9999986525 | 0             |
| 0.6441042217 | 0.9999986525 | 20.863285981  |
| 0.5059410814 | 0.9999986525 | 0             |
| 0.6312664098 | 0.9999986525 | 0             |
| 0.6312664098 | 0.9999986525 | 3.4018626877  |
| 0.64034769   | 0.9999986525 | 0             |
| 0.9479756671 | 0.9999986525 | 0             |
| 0.5661134227 | 0.9999986525 | 0             |
| 0.6406654988 | 0.9999986525 | 1.0072648566  |
| 0.7119565445 | 0.9999986525 | 11.0524051954 |
| 0.2294506921 | 0.9999986525 | 95.9438989215 |
| 0.7789728056 | 0.9999986525 | 1.0521748825  |
| 0.0447793403 | 0.9999986525 | 4.9451234294  |
| 0.3231952833 | 0.9999986525 | 0             |
| 0.4729816619 | 0.9999986525 | 0             |
| 0.5786112196 | 0.9999986525 | 0             |
| 0.8839728645 | 0.9999986525 | 38.034714772  |
| 0.4029305119 | 0.9999986525 | 18.9824488189 |
| 0.1533102981 | 0.9999986525 | 0             |
| 0.2089832458 | 0.9999986525 | 7.1581761255  |
| 0.30755387   | 0.9999986525 | 0             |
| 0.9096023179 | 0.9999986525 | 1.0664738546  |
| 0.6312664098 | 0.9999986525 | 0             |
| 0.6186450893 | 0.9999986525 | 2.4218236032  |
| 0.0188212649 | 0.9999986525 | 9.1443875344  |
| 0.7075933834 | 0.9999986525 | 1.3517975251  |
| 0.2199274035 | 0.9999986525 | 7.7454905494  |
| 0.9904358696 | 0.9999986525 | 1.0416124611  |
| 0.0925444959 | 0.9999986525 | 2.687252562   |
| 0.3474737978 | 0.9999986525 | 2.7705419787  |
| 0.1954151179 | 0.9999986525 | 3.9106936858  |
| 0.6386618606 | 0.9999986525 | 0             |
| 0            | 0            | 0             |
| 0.2417500713 | 0.9999986525 | 0             |
| 0.3637326082 | 0.9999986525 | 3.7962850939  |
| 0.0518873822 | 0.9999986525 | 2.1059580605  |
| 0.6602663737 | 0.9999986525 | 1.0183351952  |
| 0.0473638989 | 0.9999986525 | 1.8303370581  |
| 0.9356814824 | 0.9999986525 | 3.9182371264  |
| 0.0216432315 | 0.9999986525 | 1.9748688713  |
| 0.3995448932 | 0.9999986525 | 0.3586854263  |
| 0.6055575796 | 0.9999986525 | 4.2334109436  |
| 0.2916818947 | 0.9999986525 | 0.2340420022  |
| 0.9297314549 | 0.9999986525 | 0             |



gene\_expression\_table

|              |              |                |
|--------------|--------------|----------------|
| 0            | 0            | 0              |
| 0.6023669343 | 0.9999986525 | 0              |
| 0.6312664098 | 0.9999986525 | 0              |
| 0.3951852412 | 0.9999986525 | 2.1540106643   |
| 0.3955611155 | 0.9999986525 | 0.5920112792   |
| 0.9138366331 | 0.9999986525 | 110.7129990287 |
| 0.870890766  | 0.9999986525 | 0              |
| 0.5535758736 | 0.9999986525 | 849.2529326439 |
| 0.2566437612 | 0.9999986525 | 0              |
| 0.6532321245 | 0.9999986525 | 6.1757250319   |
| 0.2449526119 | 0.9999986525 | 15.3588362426  |
| 0.8145494387 | 0.9999986525 | 2.1288209209   |
| 0.0637381866 | 0.9999986525 | 9.5034641722   |
| 0.3783674557 | 0.9999986525 | 0              |
| 0.0679421649 | 0.9999986525 | 0              |
| 0.8185476769 | 0.9999986525 | 10.8347355065  |
| 0.0480360382 | 0.9999986525 | 2.1645048453   |
| 0.5487824559 | 0.9999986525 | 1.9771903677   |
| 0.0647379053 | 0.9999986525 | 0              |
| 0            | 0            | 0              |
| 0.404245426  | 0.9999986525 | 0.5851892857   |
| 0.3370229016 | 0.9999986525 | 0              |
| 0.00593      | 0.9999986525 | 0              |
| 0.6967305144 | 0.9999986525 | 0.5651872034   |
| 0.515079977  | 0.9999986525 | 0.2505056496   |
| 0.2418267268 | 0.9999986525 | 0              |
| 0.1265334072 | 0.9999986525 | 0              |
| 0.0165928699 | 0.9999986525 | 0.9167014081   |
| 0.7617799981 | 0.9999986525 | 1.1658701595   |
| 0.0324370337 | 0.9999986525 | 4.1862649197   |
| 0.0977684646 | 0.9999986525 | 0              |
| 0.0578672091 | 0.9999986525 | 0              |
| 0.6467343928 | 0.9999986525 | 5.87352728     |
| 0.2929181318 | 0.9999986525 | 3.9691806874   |
| 0.3505327708 | 0.9999986525 | 0              |
| 0.8942355544 | 0.9999986525 | 4.5845415127   |
| 0.357534671  | 0.9999986525 | 2.6187507798   |
| 0.6220866265 | 0.9999986525 | 0              |
| 0            | 0            | 0              |
| 0            | 0            | 0              |
| 0            | 0            | 0              |
| 0.4058804319 | 0.9999986525 | 0              |
| 0.4456832924 | 0.9999986525 | 0              |
| 0.6312664098 | 0.9999986525 | 0              |
| 0.7433189725 | 0.9999986525 | 0              |
| 0.30755387   | 0.9999986525 | 0              |
| 0.334467179  | 0.9999986525 | 0.4023774512   |
| 0.0778827212 | 0.9999986525 | 8.0463638232   |
| 0.9199698486 | 0.9999986525 | 0.6687083684   |

gene\_expression\_table

|              |              |                |
|--------------|--------------|----------------|
| 0.8529886324 | 0.9999986525 | 7.9785358753   |
| 0.2112605292 | 0.9999986525 | 33.3140779392  |
| 0.6403397854 | 0.9999986525 | 0              |
| 0.1132335663 | 0.9999986525 | 0.8401297758   |
| 0            | 0            | 0              |
| 0.8115531521 | 0.9999986525 | 0.8953636155   |
| 0.9311735919 | 0.9999986525 | 17.0908772796  |
| 3.75E-06     | 0.0404027443 | 1.4666866124   |
| 0.1330296611 | 0.9999986525 | 0              |
| 0.6817644178 | 0.9999986525 | 8.5266254805   |
| 0.1465448262 | 0.9999986525 | 15.2201493448  |
| 0.9438011139 | 0.9999986525 | 0              |
| 0.2500243367 | 0.9999986525 | 0              |
| 0.3369746529 | 0.9999986525 | 0              |
| 0.008085     | 0.9999986525 | 3.847167703    |
| 0.0447520527 | 0.9999986525 | 0              |
| 0.2962808969 | 0.9999986525 | 6.9382446435   |
| 0            | 0            | 0              |
| 0.9029030402 | 0.9999986525 | 14.5215934209  |
| 0.1327505984 | 0.9999986525 | 0              |
| 0.2425974947 | 0.9999986525 | 51.7656635396  |
| 0.6098761915 | 0.9999986525 | 0              |
| 0.6312664098 | 0.9999986525 | 0              |
| 0.4519536033 | 0.9999986525 | 66.3525458461  |
| 0.7294663952 | 0.9999986525 | 18.3182894347  |
| 0.5750463239 | 0.9999986525 | 0              |
| 0.6892948998 | 0.9999986525 | 2.2025377374   |
| 0.1729574571 | 0.9999986525 | 64.5910129144  |
| 0.5638746735 | 0.9999986525 | 1.8136647743   |
| 0.1249991371 | 0.9999986525 | 87.0733064283  |
| 0.9480606913 | 0.9999986525 | 0              |
| 0.3155612349 | 0.9999986525 | 0              |
| 0.7001255887 | 0.9999986525 | 4.8591331517   |
| 0.5762735484 | 0.9999986525 | 2.3077962957   |
| 0.890077009  | 0.9999986525 | 5.8067901999   |
| 0.8100369647 | 0.9999986525 | 14.0290915971  |
| 0.3047701176 | 0.9999986525 | 0              |
| 0.4031083728 | 0.9999986525 | 0              |
| 0.5523075659 | 0.9999986525 | 0              |
| 0.9554647406 | 0.9999986525 | 16.8215049027  |
| 0.8851221672 | 0.9999986525 | 445.6870736397 |
| 0.6384876182 | 0.9999986525 | 10.0159147025  |
| 0.3422339338 | 0.9999986525 | 0              |
| 0            | 0            | 0              |
| 0.3982360831 | 0.9999986525 | 4.2378755175   |
| 0            | 0            | 0              |
| 0.234247603  | 0.9999986525 | 0              |
| 0.3042706813 | 0.9999986525 | 8.7949905456   |
| 0.3900990534 | 0.9999986525 | 0              |

gene\_expression\_table

|              |              |                |
|--------------|--------------|----------------|
| 0.8842513052 | 0.9999986525 | 0              |
| 0.258162169  | 0.9999986525 | 1.0215952072   |
| 0.4993119259 | 0.9999986525 | 28.3472254555  |
| 0.0893279    | 0.9999986525 | 11.2906545057  |
| 0.7045613178 | 0.9999986525 | 8.4138789591   |
| 0.1387580276 | 0.9999986525 | 0              |
| 0.3170977094 | 0.9999986525 | 0              |
| 0.4426572746 | 0.9999986525 | 18.986287362   |
| 0.3875832304 | 0.9999986525 | 1.7875452514   |
| 0.8679074176 | 0.9999986525 | 0.3575151005   |
| 0.9940924505 | 0.9999986525 | 1.6850038517   |
| 0.705666328  | 0.9999986525 | 0              |
| 0.0617222822 | 0.9999986525 | 1.8227094693   |
| 0.3892758046 | 0.9999986525 | 0              |
| 0.9493511461 | 0.9999986525 | 28.7840411807  |
| 0.4391490329 | 0.9999986525 | 5.5781493691   |
| 0.6207895474 | 0.9999986525 | 4.340305157    |
| 0.6305365023 | 0.9999986525 | 18.4406139058  |
| 0.9050847504 | 0.9999986525 | 2.6767427132   |
| 0.1462769727 | 0.9999986525 | 18.7442923858  |
| 0.2433871874 | 0.9999986525 | 0              |
| 0.8524412373 | 0.9999986525 | 29.7399587792  |
| 0.4501914175 | 0.9999986525 | 130.9499649736 |
| 0.3820287698 | 0.9999986525 | 18.8469687666  |
| 0.1078278587 | 0.9999986525 | 0              |
| 0.0283859267 | 0.9999986525 | 2.5458011726   |
| 0.8247478143 | 0.9999986525 | 5.6312821538   |
| 0.3330716111 | 0.9999986525 | 1.6935318007   |
| 0.4992899402 | 0.9999986525 | 0              |
| 0.4372153018 | 0.9999986525 | 31.753194301   |
| 0.453427394  | 0.9999986525 | 1.2581632376   |
| 0.4995890981 | 0.9999986525 | 0              |
| 0.9297102699 | 0.9999986525 | 0              |
| 0.7470079268 | 0.9999986525 | 0              |
| 0.5889932685 | 0.9999986525 | 5.5987277092   |
| 0.3402152744 | 0.9999986525 | 0              |
| 0.8407626413 | 0.9999986525 | 2.001715092    |
| 0.1042893014 | 0.9999986525 | 21.2123020366  |
| 0.3676274705 | 0.9999986525 | 2.2694189681   |
| 0.5002028914 | 0.9999986525 | 10.3293405489  |
| 0.2409078862 | 0.9999986525 | 0.2280777775   |
| 0            | 0            | 0              |
| 0.309050792  | 0.9999986525 | 0.4823805621   |
| 0.4453279771 | 0.9999986525 | 0              |
| 0.3863757695 | 0.9999986525 | 21.1320694657  |
| 0.8093903492 | 0.9999986525 | 2.6097540153   |
| 0.2103611826 | 0.9999986525 | 15.3944379589  |
| 0.7740588541 | 0.9999986525 | 0              |
| 0.3555793722 | 0.9999986525 | 0              |

gene\_expression\_table

|              |              |                |
|--------------|--------------|----------------|
| 0.0357995102 | 0.9999986525 | 0              |
| 0.215229913  | 0.9999986525 | 5.7633521458   |
| 0.7479445006 | 0.9999986525 | 0              |
| 0.6300503422 | 0.9999986525 | 0              |
| 0.6318611188 | 0.9999986525 | 2.9122645838   |
| 0.1264408692 | 0.9999986525 | 0              |
| 0.7132822282 | 0.9999986525 | 0              |
| 0.7351597178 | 0.9999986525 | 35.6646894677  |
| 0.603003061  | 0.9999986525 | 1.7786485044   |
| 0.1179761067 | 0.9999986525 | 6.9611069232   |
| 0.3521223914 | 0.9999986525 | 0              |
| 0.1933826462 | 0.9999986525 | 0              |
| 0.4738263135 | 0.9999986525 | 4.160869631    |
| 0.6264316288 | 0.9999986525 | 0              |
| 0.0518777466 | 0.9999986525 | 1.2803312039   |
| 0.3630310715 | 0.9999986525 | 0              |
| 0.3341083308 | 0.9999986525 | 0              |
| 0.3124784153 | 0.9999986525 | 0              |
| 0.2244967319 | 0.9999986525 | 3.4662762594   |
| 0.9407364286 | 0.9999986525 | 4.1903835592   |
| 0.2360184628 | 0.9999986525 | 0              |
| 0.173144363  | 0.9999986525 | 2.643736208    |
| 0.6252812617 | 0.9999986525 | 2.6507688329   |
| 0.5359618573 | 0.9999986525 | 2.488874563    |
| 0.0811921772 | 0.9999986525 | 119.7292856516 |
| 0.5414763012 | 0.9999986525 | 16.4128818231  |
| 0.3420264268 | 0.9999986525 | 0              |
| 0.9915675797 | 0.9999986525 | 27.8811763106  |
| 0.4862396544 | 0.9999986525 | 538.6472181583 |
| 0.8112152279 | 0.9999986525 | 25.7461414818  |
| 0.7539450509 | 0.9999986525 | 7.9972619967   |
| 0.3566945135 | 0.9999986525 | 0              |
| 0.9443362153 | 0.9999986525 | 62.784020716   |
| 0.7089408035 | 0.9999986525 | 0              |
| 0.2469025541 | 0.9999986525 | 0              |
| 0.3257710105 | 0.9999986525 | 0              |
| 0.0675764563 | 0.9999986525 | 2.7531626037   |
| 0.5573188289 | 0.9999986525 | 9.0620999016   |
| 0.9102396415 | 0.9999986525 | 6.8721704222   |
| 0.0435147719 | 0.9999986525 | 0              |
| 0.2979398545 | 0.9999986525 | 2.4326627056   |
| 0.8955782234 | 0.9999986525 | 2.1064480298   |
| 0.6043888669 | 0.9999986525 | 0              |
| 0.9352659065 | 0.9999986525 | 4.8483636834   |
| 0.2088281818 | 0.9999986525 | 0              |
| 0.253760786  | 0.9999986525 | 0              |
| 0.9039201331 | 0.9999986525 | 0.4344839865   |
| 0.4555145    | 0.9999986525 | 0              |
| 0.2714389319 | 0.9999986525 | 0              |

|              | gene_expression_table |                |
|--------------|-----------------------|----------------|
| 0.2292341018 | 0.9999986525          | 0              |
| 0.1161091319 | 0.9999986525          | 0.5981597643   |
| 0.4942972795 | 0.9999986525          | 0              |
| 0.4020224867 | 0.9999986525          | 0              |
| 0.719607977  | 0.9999986525          | 16.0985322779  |
| 0.5480387591 | 0.9999986525          | 0              |
| 0            | 0                     | 115.5665606703 |
| 0            | 0                     | 0              |
| 0.4729816619 | 0.9999986525          | 0              |
| 0.4640687041 | 0.9999986525          | 296.7074057658 |
| 0.1634764402 | 0.9999986525          | 0              |
| 0.4729816619 | 0.9999986525          | 0              |
| 0.6403318746 | 0.9999986525          | 133.3684803695 |
| 0.4008551543 | 0.9999986525          | 0              |
| 0.6210566055 | 0.9999986525          | 120.8556481151 |
| 0.3350762033 | 0.9999986525          | 0              |
| 0.5957680215 | 0.9999986525          | 0              |
| 0.3609789227 | 0.9999986525          | 42.7989612855  |
| 0.6051435013 | 0.9999986525          | 0              |
| 0.1208765209 | 0.9999986525          | 3.7490181457   |
| 0.9636729116 | 0.9999986525          | 0.6767978244   |
| 0.6428882271 | 0.9999986525          | 134.1211241639 |
| 0.2812086487 | 0.9999986525          | 175.6494461867 |
| 0.4465268932 | 0.9999986525          | 0              |
| 0.3367340473 | 0.9999986525          | 412.6820106478 |
| 0.7527485916 | 0.9999986525          | 0              |
| 0.6209341691 | 0.9999986525          | 0              |
| 0.6733033719 | 0.9999986525          | 45.3547983183  |
| 0.0248140912 | 0.9999986525          | 11.6440134672  |
| 0.5954200674 | 0.9999986525          | 5.1660480587   |
| 0.7286665691 | 0.9999986525          | 2.6086100082   |
| 0.127060821  | 0.9999986525          | 0              |
| 0.6408676262 | 0.9999986525          | 0              |
| 0            | 0                     | 0              |
| 0.0870828969 | 0.9999986525          | 661.7009800906 |
| 0.3255355584 | 0.9999986525          | 112.6696922161 |
| 0.5353412149 | 0.9999986525          | 7.2529511807   |
| 0.0267054372 | 0.9999986525          | 4.4304500497   |
| 0.1990608982 | 0.9999986525          | 0              |
| 0.4202778218 | 0.9999986525          | 8.6626670119   |
| 0.0756329515 | 0.9999986525          | 8.2309542938   |
| 0.2532083734 | 0.9999986525          | 16.1165450797  |
| 0.0710252116 | 0.9999986525          | 0              |
| 0.1370143484 | 0.9999986525          | 0              |
| 0.810905397  | 0.9999986525          | 11.597683613   |
| 0.8455826455 | 0.9999986525          | 0              |
| 0.9656037028 | 0.9999986525          | 174.2075367553 |
| 0.1996872809 | 0.9999986525          | 6.0852538572   |
| 0.3256485882 | 0.9999986525          | 0              |

gene\_expression\_table

|              |              |                 |
|--------------|--------------|-----------------|
| 0.7863950567 | 0.9999986525 | 3.8156210112    |
| 0.8282674635 | 0.9999986525 | 0               |
| 0.001328     | 0.9999986525 | 0               |
| 0.5779101282 | 0.9999986525 | 0               |
| 0.0480938665 | 0.9999986525 | 0               |
| 0.6767591993 | 0.9999986525 | 74.1074624317   |
| 0.1894920339 | 0.9999986525 | 0               |
| 0.4156117    | 0.9999986525 | 49.3446124006   |
| 0.5117127747 | 0.9999986525 | 9.2235274583    |
| 0.6056852955 | 0.9999986525 | 107.446156016   |
| 0.7541187257 | 0.9999986525 | 40.8184084446   |
| 0.067757672  | 0.9999986525 | 1.4703615977    |
| 0.7648350374 | 0.9999986525 | 15.8125503672   |
| 0.4729816619 | 0.9999986525 | 0               |
| 0.801668901  | 0.9999986525 | 489.8424118798  |
| 0.2284490699 | 0.9999986525 | 6.515410588     |
| 0.3305037841 | 0.9999986525 | 1.8974605959    |
| 0.7528918336 | 0.9999986525 | 0               |
| 0.8114801862 | 0.9999986525 | 4.8532725204    |
| 0.6312664098 | 0.9999986525 | 0               |
| 0.3519887641 | 0.9999986525 | 197.7123752038  |
| 0.1305451842 | 0.9999986525 | 0               |
| 0.9972177788 | 0.9999986525 | 0               |
| 0.6312664098 | 0.9999986525 | 0               |
| 0            | 0            | 0               |
| 0.8832925677 | 0.9999986525 | 9.4745624701    |
| 0.8341821637 | 0.9999986525 | 13.9855022225   |
| 0.346785013  | 0.9999986525 | 466.3480638085  |
| 0.335034503  | 0.9999986525 | 0               |
| 0.3420313646 | 0.9999986525 | 0               |
| 0.0944131067 | 0.9999986525 | 2.820502976     |
| 0.5666890955 | 0.9999986525 | 532.4654641594  |
| 0.4729816619 | 0.9999986525 | 0               |
| 0.1831689936 | 0.9999986525 | 14.6020294924   |
| 0.9169990031 | 0.9999986525 | 3600.2184061757 |
| 0.2994182121 | 0.9999986525 | 0               |
| 0.2812654717 | 0.9999986525 | 6541.3948077377 |
| 0.6221171804 | 0.9999986525 | 0               |
| 0.6382889573 | 0.9999986525 | 0               |
| 0.8622728307 | 0.9999986525 | 0               |
| 0.6593552957 | 0.9999986525 | 0               |
| 0.9972261752 | 0.9999986525 | 0               |
| 0.0811501642 | 0.9999986525 | 59.9914689792   |
| 0.1120728721 | 0.9999986525 | 181.604595339   |
| 0.2285315232 | 0.9999986525 | 114.3034698113  |
| 0.0952462998 | 0.9999986525 | 1.1294920385    |
| 0.8803635686 | 0.9999986525 | 43.414647124    |
| 0.6054485315 | 0.9999986525 | 4.0196299738    |
| 0.2966255536 | 0.9999986525 | 33.8136953896   |

gene\_expression\_table

|              |              |                 |
|--------------|--------------|-----------------|
| 0.0425712523 | 0.9999986525 | 0               |
| 0.4763061874 | 0.9999986525 | 40.6886889263   |
| 0.5672041143 | 0.9999986525 | 0               |
| 0.9715942792 | 0.9999986525 | 1424.7078021664 |
| 0.6015773991 | 0.9999986525 | 52.6501178596   |
| 0.2666639544 | 0.9999986525 | 3222.6726843046 |
| 0.9166343292 | 0.9999986525 | 0.3249387407    |
| 0.9815084842 | 0.9999986525 | 140.5235660887  |
| 0.1973664543 | 0.9999986525 | 0               |
| 0.9861705847 | 0.9999986525 | 112.3939523863  |
| 0.810161631  | 0.9999986525 | 11.3160190204   |
| 0.8613872445 | 0.9999986525 | 350.7111986051  |
| 0.5202336508 | 0.9999986525 | 6.1490183055    |
| 0.8105701263 | 0.9999986525 | 31.2323585017   |
| 0.8529920687 | 0.9999986525 | 0               |
| 0.6312664098 | 0.9999986525 | 0               |
| 0.416596058  | 0.9999986525 | 20.9787162766   |
| 0.6403239576 | 0.9999986525 | 0               |
| 0.4445750527 | 0.9999986525 | 48.2633717473   |
| 0.2759028692 | 0.9999986525 | 0               |
| 0.1249702835 | 0.9999986525 | 61.8947643704   |
| 0.5533677611 | 0.9999986525 | 13.1116976729   |
| 0.2422464287 | 0.9999986525 | 55.5117912826   |
| 0.6457950968 | 0.9999986525 | 228.6316806334  |
| 0.3202754017 | 0.9999986525 | 0               |
| 0.829045351  | 0.9999986525 | 962.7537176671  |
| 0.2130237439 | 0.9999986525 | 43.0343599318   |
| 0.6044304734 | 0.9999986525 | 3.3220479448    |
| 0.1636473192 | 0.9999986525 | 3.4588983055    |
| 0.489092423  | 0.9999986525 | 0               |
| 0.1847119089 | 0.9999986525 | 183.6207500263  |
| 0.8142657574 | 0.9999986525 | 0               |
| 0.8588610868 | 0.9999986525 | 0               |
| 0.888505362  | 0.9999986525 | 0               |
| 0.255561553  | 0.9999986525 | 29.2922452725   |
| 0.3353073152 | 0.9999986525 | 2474.4441921551 |
| 0.3474584626 | 0.9999986525 | 228.981537834   |
| 0.5158067125 | 0.9999986525 | 0               |
| 0.3999046673 | 0.9999986525 | 14.8939419702   |
| 0.2541657083 | 0.9999986525 | 0               |
| 0.5307568397 | 0.9999986525 | 51.3654135638   |
| 0.3023797833 | 0.9999986525 | 25.3547375066   |
| 0.5132025384 | 0.9999986525 | 12.7585259636   |
| 0.0799545238 | 0.9999986525 | 102.0938196196  |
| 0.6286261041 | 0.9999986525 | 24.7673598885   |
| 0.8133012253 | 0.9999986525 | 0               |
| 0.025339143  | 0.9999986525 | 57.6039044334   |
| 0.9257760266 | 0.9999986525 | 28.640953485    |
| 0.5029300237 | 0.9999986525 | 30.8552589443   |

gene\_expression\_table

|              |              |                |
|--------------|--------------|----------------|
| 0.8407280613 | 0.9999986525 | 2.3174163329   |
| 0.918860048  | 0.9999986525 | 88.0598886641  |
| 0.2120985064 | 0.9999986525 | 24.9871533631  |
| 0.8180987111 | 0.9999986525 | 22.8240949374  |
| 0.9576821281 | 0.9999986525 | 2.8875054387   |
| 0.3004012757 | 0.9999986525 | 0              |
| 0.0167559588 | 0.9999986525 | 11.6544137314  |
| 0.9970764644 | 0.9999986525 | 9.8717604161   |
| 0.6160519669 | 0.9999986525 | 3.5664998239   |
| 0.891461767  | 0.9999986525 | 163.5927144725 |
| 0.6556425067 | 0.9999986525 | 22.7990149909  |
| 0.1016890845 | 0.9999986525 | 97.6743533908  |
| 0.6241710589 | 0.9999986525 | 5.2887961372   |
| 0.3153474239 | 0.9999986525 | 23.8628158259  |
| 0.7845787814 | 0.9999986525 | 9.4045226373   |
| 0.256917669  | 0.9999986525 | 8.3014646693   |
| 0.9270830015 | 0.9999986525 | 19.4957247052  |
| 0.6473030989 | 0.9999986525 | 0              |
| 0.6433495833 | 0.9999986525 | 0              |
| 0.052246338  | 0.9999986525 | 8.7450603805   |
| 0.6340069719 | 0.9999986525 | 0              |
| 0.0541927982 | 0.9999986525 | 123.1093664949 |
| 0.357559696  | 0.9999986525 | 91.4449101864  |
| 0.7039703373 | 0.9999986525 | 0              |
| 0.4589309121 | 0.9999986525 | 0              |
| 0.5170354479 | 0.9999986525 | 9.958984634    |
| 0.2871153574 | 0.9999986525 | 1.1189389455   |
| 0.4003935642 | 0.9999986525 | 117.9906327508 |
| 0.0834840512 | 0.9999986525 | 0              |
| 0.3301098732 | 0.9999986525 | 0              |
| 0.9422505447 | 0.9999986525 | 0              |
| 0.0789954175 | 0.9999986525 | 0              |
| 0.4665969982 | 0.9999986525 | 149.5698980921 |
| 0.2230152133 | 0.9999986525 | 12.4414412783  |
| 0.6864593209 | 0.9999986525 | 279.6500965084 |
| 0.9662041    | 0.9999986525 | 536.2078334715 |
| 0.6786700859 | 0.9999986525 | 3.1683915188   |
| 0.7599378019 | 0.9999986525 | 24.8746788933  |
| 0.1902447646 | 0.9999986525 | 0              |
| 0.4083142083 | 0.9999986525 | 0              |
| 0.8622023284 | 0.9999986525 | 0              |
| 0.2674981673 | 0.9999986525 | 0              |
| 0.074906931  | 0.9999986525 | 0              |
| 0            | 0            | 0              |
| 0            | 0            | 0              |
| 0.1427959265 | 0.9999986525 | 0              |
| 0            | 0            | 0              |
| 0.6098761915 | 0.9999986525 | 0              |
| 0.4274397564 | 0.9999986525 | 0              |



gene\_expression\_table

|              |              |                 |
|--------------|--------------|-----------------|
| 0            | 0            | 0               |
| 0.6988889454 | 0.9999986525 | 46.6785997692   |
| 0.102510938  | 0.9999986525 | 0               |
| 0.2000626373 | 0.9999986525 | 17.2256745683   |
| 0.5257323429 | 0.9999986525 | 2.2676325611    |
| 0.2574863455 | 0.9999986525 | 131.9523253624  |
| 0.6403160343 | 0.9999986525 | 0               |
| 0.8035396371 | 0.9999986525 | 4.8685396595    |
| 0.2096048762 | 0.9999986525 | 0               |
| 0.7593428708 | 0.9999986525 | 0               |
| 0.1026070483 | 0.9999986525 | 1967.3823761011 |
| 0.6403081047 | 0.9999986525 | 0               |
| 0.7813096581 | 0.9999986525 | 48.8791469008   |
| 0.350459501  | 0.9999986525 | 6.5170185373    |
| 0.335166057  | 0.9999986525 | 0               |
| 0.6891496274 | 0.9999986525 | 21.0037455662   |
| 0.2850480166 | 0.9999986525 | 11.273944035    |
| 0.563076021  | 0.9999986525 | 31.6516350391   |
| 0.9316346287 | 0.9999986525 | 15.3701970174   |
| 0.575694419  | 0.9999986525 | 9.9667707542    |
| 0.3352558168 | 0.9999986525 | 9.1405189038    |
| 0.6923773878 | 0.9999986525 | 0               |
| 0            | 0            | 0               |
| 0.2007315439 | 0.9999986525 | 4.7858924267    |
| 0.527285758  | 0.9999986525 | 0               |
| 0.663587728  | 0.9999986525 | 0               |
| 0.0652049094 | 0.9999986525 | 3.2259669686    |
| 0.807449067  | 0.9999986525 | 0               |
| 0.472558091  | 0.9999986525 | 24.2515983131   |
| 0.4030513474 | 0.9999986525 | 0               |
| 0.7090970231 | 0.9999986525 | 0               |
| 0.7115871701 | 0.9999986525 | 18.3461287803   |
| 0.6312664098 | 0.9999986525 | 0               |
| 0.9998761962 | 0.9999986525 | 84.4009879765   |
| 0.6978227218 | 0.9999986525 | 35.8060462551   |
| 0.4281512695 | 0.9999986525 | 0               |
| 0.7384622321 | 0.9999986525 | 62.7219654835   |
| 0.6448427365 | 0.9999986525 | 0               |
| 0.0339443063 | 0.9999986525 | 63.1242050514   |
| 0.3094057404 | 0.9999986525 | 0               |
| 0.4073641567 | 0.9999986525 | 0               |
| 0.4464961756 | 0.9999986525 | 257.5683185136  |
| 0.6629903015 | 0.9999986525 | 240.5492226907  |
| 0.5985528881 | 0.9999986525 | 0               |
| 0.0613958316 | 0.9999986525 | 29.4786326336   |
| 0.2537470584 | 0.9999986525 | 0               |
| 0.9839115973 | 0.9999986525 | 24.8341308274   |
| 0.6538354735 | 0.9999986525 | 35.6454109039   |
| 0.442457911  | 0.9999986525 | 0               |

gene\_expression\_table

|              |              |                |
|--------------|--------------|----------------|
| 0.6932350948 | 0.9999986525 | 14.1713851632  |
| 0.2733388544 | 0.9999986525 | 0              |
| 0.3368786822 | 0.9999986525 | 5.9575767881   |
| 0            | 0            | 0              |
| 0.2620969569 | 0.9999986525 | 0              |
| 0.8507698661 | 0.9999986525 | 7.1553879185   |
| 0.0169602151 | 0.9999986525 | 0              |
| 0.7551133781 | 0.9999986525 | 42.4037882186  |
| 0.6061251423 | 0.9999986525 | 1.8687915582   |
| 0.2863172618 | 0.9999986525 | 0              |
| 0.1731144663 | 0.9999986525 | 0              |
| 0.8116660277 | 0.9999986525 | 0              |
| 0.449978893  | 0.9999986525 | 4.8817400382   |
| 0.160015244  | 0.9999986525 | 2.7504384036   |
| 0.2733641246 | 0.9999986525 | 0              |
| 0.3371604181 | 0.9999986525 | 12.4885122313  |
| 0.6312664098 | 0.9999986525 | 0              |
| 0.805481544  | 0.9999986525 | 135.8812810604 |
| 0.9800742498 | 0.9999986525 | 26.0795162974  |
| 0.9908388129 | 0.9999986525 | 20.1164323769  |
| 0.5161148466 | 0.9999986525 | 8.7893449571   |
| 0.7141503441 | 0.9999986525 | 0              |
| 0.5721469803 | 0.9999986525 | 37.4102484337  |
| 0.0628764823 | 0.9999986525 | 7.9586977436   |
| 0.8512615133 | 0.9999986525 | 1.5344185193   |
| 0.3983256703 | 0.9999986525 | 0              |
| 0.003081     | 0.9999986525 | 16.4953285629  |
| 0.4716051222 | 0.9999986525 | 14.1278442213  |
| 0.9070426844 | 0.9999986525 | 5.2836562467   |
| 0.8524830549 | 0.9999986525 | 0              |
| 0.0445044323 | 0.9999986525 | 46.6119405773  |
| 0.4742661212 | 0.9999986525 | 3.4049819411   |
| 0.6372216083 | 0.9999986525 | 0              |
| 0.245091171  | 0.9999986525 | 40.8530523452  |
| 0.5625565014 | 0.9999986525 | 0              |
| 0.6020353216 | 0.9999986525 | 0              |
| 0.1812552361 | 0.9999986525 | 2.0302113564   |
| 0.2153252607 | 0.9999986525 | 0.2241877172   |
| 0.9171112969 | 0.9999986525 | 0              |
| 0.3137846545 | 0.9999986525 | 0              |
| 0.2925473203 | 0.9999986525 | 0              |
| 0.8095536552 | 0.9999986525 | 0              |
| 0.8373645272 | 0.9999986525 | 0              |
| 0.8819498609 | 0.9999986525 | 4.449286299    |
| 0.5848518692 | 0.9999986525 | 6.4103896473   |
| 0.233479945  | 0.9999986525 | 0.3442597317   |
| 0.244297269  | 0.9999986525 | 0              |
| 0.6403001687 | 0.9999986525 | 0              |
| 0.6402922262 | 0.9999986525 | 0              |

gene\_expression\_table

|              |              |                |
|--------------|--------------|----------------|
| 0.4555576695 | 0.9999986525 | 0              |
| 0.1702696067 | 0.9999986525 | 34.0076743247  |
| 0.8276730606 | 0.9999986525 | 15.6462504003  |
| 0            | 0            | 0              |
| 0.6880105509 | 0.9999986525 | 0              |
| 0.7112066796 | 0.9999986525 | 8.7071628532   |
| 0.0525586479 | 0.9999986525 | 0              |
| 0.407977789  | 0.9999986525 | 1.050605097    |
| 0.4439305308 | 0.9999986525 | 200.5084215122 |
| 0.2130990224 | 0.9999986525 | 3.9867083017   |
| 0            | 0            | 0              |
| 0.3651754684 | 0.9999986525 | 0              |
| 0.7786970695 | 0.9999986525 | 105.9872715474 |
| 0.6728680225 | 0.9999986525 | 0              |
| 0.355775883  | 0.9999986525 | 0              |
| 0.4591844069 | 0.9999986525 | 1.468787269    |
| 0.8223608363 | 0.9999986525 | 6.3149364161   |
| 0.4104587167 | 0.9999986525 | 7.7928817545   |
| 0.2396959147 | 0.9999986525 | 0              |
| 0.4027121381 | 0.9999986525 | 2.55596565     |
| 0.9423976894 | 0.9999986525 | 0.1263649579   |
| 0.1886534088 | 0.9999986525 | 192.9198950536 |
| 0.6802701349 | 0.9999986525 | 55.3394075528  |
| 0.8918416691 | 0.9999986525 | 0.6584537674   |
| 0.2034737987 | 0.9999986525 | 0.1248786259   |
| 0.7257447906 | 0.9999986525 | 1.0061557116   |
| 0.2237017344 | 0.9999986525 | 0              |
| 0.2004334085 | 0.9999986525 | 0              |
| 0.5396226041 | 0.9999986525 | 0.27379904     |
| 0.4729816619 | 0.9999986525 | 0              |
| 0.1336759182 | 0.9999986525 | 0              |
| 0.2482829048 | 0.9999986525 | 9.3621410655   |
| 0.9455265072 | 0.9999986525 | 94.176031074   |
| 0.6348338519 | 0.9999986525 | 4.8617424225   |
| 0.2732566303 | 0.9999986525 | 2.4388036184   |
| 0.2416762507 | 0.9999986525 | 0              |
| 0            | 0            | 0              |
| 0.9955703328 | 0.9999986525 | 19.1315166417  |
| 0.0867216339 | 0.9999986525 | 8.3311470543   |
| 0.6452772173 | 0.9999986525 | 1.6493216525   |
| 0.1385663282 | 0.9999986525 | 110.0239026056 |
| 0.2900481445 | 0.9999986525 | 3.1305794131   |
| 0.3680252162 | 0.9999986525 | 1.9681808247   |
| 0.6088857229 | 0.9999986525 | 0.2044911071   |
| 0.7053624616 | 0.9999986525 | 0              |
| 0.5214475827 | 0.9999986525 | 2.8768884533   |
| 0.7993309361 | 0.9999986525 | 3.6984536573   |
| 0.4146047929 | 0.9999986525 | 383.3631980561 |
| 0.6280620131 | 0.9999986525 | 0              |

gene\_expression\_table

|              |              |                |
|--------------|--------------|----------------|
| 0.8710287649 | 0.9999986525 | 0              |
| 0.7393554165 | 0.9999986525 | 138.4522441812 |
| 0.881957567  | 0.9999986525 | 0              |
| 0.4026834602 | 0.9999986525 | 3.3798744545   |
| 0.497646772  | 0.9999986525 | 91.1999969372  |
| 0.4795526219 | 0.9999986525 | 1.2901582525   |
| 0.7696306011 | 0.9999986525 | 22.7837934788  |
| 0.1450622162 | 0.9999986525 | 0              |
| 0.7869860509 | 0.9999986525 | 2.1621477498   |
| 0.336830958  | 0.9999986525 | 0              |
| 0.7303097298 | 0.9999986525 | 0              |
| 0.1290361262 | 0.9999986525 | 10.9183360474  |
| 0.904650437  | 0.9999986525 | 8.9616377081   |
| 0.0942666597 | 0.9999986525 | 157.1036648439 |
| 0.5126534258 | 0.9999986525 | 0              |
| 0.4112815837 | 0.9999986525 | 0              |
| 0.2330628872 | 0.9999986525 | 10.4146639798  |
| 0.088546908  | 0.9999986525 | 2.1823392076   |
| 0.009774     | 0.9999986525 | 4.919252827    |
| 0.3143393042 | 0.9999986525 | 5.4504119663   |
| 0.2557318937 | 0.9999986525 | 2.7704450897   |
| 0.4426345019 | 0.9999986525 | 31.1354928796  |
| 0.5181383129 | 0.9999986525 | 0              |
| 0.3657684939 | 0.9999986525 | 44.4045434901  |
| 0            | 0            | 0              |
| 0.008566     | 0.9999986525 | 0              |
| 0.5976164309 | 0.9999986525 | 7.4649820027   |
| 0.848824863  | 0.9999986525 | 1.1577429573   |
| 0.1829737027 | 0.9999986525 | 18.3892472933  |
| 0.1583893584 | 0.9999986525 | 1.3121714871   |
| 0.9322356637 | 0.9999986525 | 9.1975058734   |
| 0.0861524929 | 0.9999986525 | 12.2737434874  |
| 0            | 0            | 0              |
| 0.9592048558 | 0.9999986525 | 0              |
| 0.1942838943 | 0.9999986525 | 11.054718624   |
| 0.4973172685 | 0.9999986525 | 11.4259311282  |
| 0.0456202291 | 0.9999986525 | 20.9766331948  |
| 0.2863819254 | 0.9999986525 | 2.3851293062   |
| 0.6397064999 | 0.9999986525 | 0              |
| 0.4713262799 | 0.9999986525 | 7.5969387552   |
| 0.1322610391 | 0.9999986525 | 0              |
| 0.1899322775 | 0.9999986525 | 0              |
| 0.5013402711 | 0.9999986525 | 0.1903952119   |
| 0.8995657924 | 0.9999986525 | 0              |
| 0.273086892  | 0.9999986525 | 1.5961363801   |
| 0.739793467  | 0.9999986525 | 5.3478387187   |
| 0.7242297459 | 0.9999986525 | 9.4001227487   |
| 0.1757662562 | 0.9999986525 | 8.3837665126   |
| 0.3106695852 | 0.9999986525 | 0              |

gene\_expression\_table

|              |              |                |
|--------------|--------------|----------------|
| 0.2561562745 | 0.9999986525 | 0              |
| 0.493440265  | 0.9999986525 | 8.5656924504   |
| 0.5358667631 | 0.9999986525 | 3.8894536114   |
| 0.5996807121 | 0.9999986525 | 0              |
| 0.30755387   | 0.9999986525 | 0              |
| 0.1597306321 | 0.9999986525 | 8.5981144854   |
| 0.325406586  | 0.9999986525 | 0              |
| 0.9281527853 | 0.9999986525 | 0              |
| 0.6547951782 | 0.9999986525 | 31.1586538208  |
| 0.3556623687 | 0.9999986525 | 0              |
| 0.592847263  | 0.9999986525 | 1.4781145076   |
| 0.3826235796 | 0.9999986525 | 9.5790184504   |
| 0.4029945366 | 0.9999986525 | 9.8995160687   |
| 0.7583116531 | 0.9999986525 | 0              |
| 0.3665552566 | 0.9999986525 | 73.1060762476  |
| 0.1669998051 | 0.9999986525 | 44.9288968323  |
| 0.6312664098 | 0.9999986525 | 0              |
| 0.3367834063 | 0.9999986525 | 0              |
| 0.0276934687 | 0.9999986525 | 358.6130249935 |
| 0.0737447542 | 0.9999986525 | 39.8540920964  |
| 0.6312664098 | 0.9999986525 | 0              |
| 0.3743723527 | 0.9999986525 | 56.348506352   |
| 0.9074697241 | 0.9999986525 | 11.4493127377  |
| 0.5605873726 | 0.9999986525 | 0              |
| 0.2005620503 | 0.9999986525 | 12.5320737077  |
| 0.739618158  | 0.9999986525 | 28.8705821208  |
| 0.3302234128 | 0.9999986525 | 23.9110658033  |
| 0.1301505133 | 0.9999986525 | 5.9515346209   |
| 0.2442982102 | 0.9999986525 | 9.773115882    |
| 0.6823326083 | 0.9999986525 | 15.1052277275  |
| 0.9359106179 | 0.9999986525 | 0              |
| 0.3139335438 | 0.9999986525 | 6.598440558    |
| 0.2214197736 | 0.9999986525 | 161.181846062  |
| 0.3501041357 | 0.9999986525 | 7.7360360665   |
| 0.5107486803 | 0.9999986525 | 51.9438585948  |
| 0.6745404679 | 0.9999986525 | 4.052391526    |
| 0.9372608894 | 0.9999986525 | 4.0489051078   |
| 0.8436490951 | 0.9999986525 | 4.5069222954   |
| 0.6339125286 | 0.9999986525 | 17.9639177641  |
| 0.2152989418 | 0.9999986525 | 193.1947259533 |
| 0.8623905352 | 0.9999986525 | 1.9328765271   |
| 0.6312664098 | 0.9999986525 | 0              |
| 0.3420507072 | 0.9999986525 | 0              |
| 0.0526661864 | 0.9999986525 | 0              |
| 0.0415094285 | 0.9999986525 | 16.0078557934  |
| 0.5254024089 | 0.9999986525 | 8.0480023895   |
| 0.7169234279 | 0.9999986525 | 2.5304929436   |
| 0            | 0            | 0              |
| 0.5357625584 | 0.9999986525 | 0              |

gene\_expression\_table

|              |              |                |
|--------------|--------------|----------------|
| 0.3558315282 | 0.9999986525 | 39.6500887585  |
| 0.9285971793 | 0.9999986525 | 11.7753503473  |
| 0.3760848427 | 0.9999986525 | 7.6427822564   |
| 0.5357495767 | 0.9999986525 | 4.6497264803   |
| 0.4151866428 | 0.9999986525 | 90.4261892965  |
| 0.6416830087 | 0.9999986525 | 0              |
| 0.6421916577 | 0.9999986525 | 0              |
| 0.6155838911 | 0.9999986525 | 0              |
| 0.5928112764 | 0.9999986525 | 0              |
| 0.390335954  | 0.9999986525 | 6.9946033321   |
| 0.818755852  | 0.9999986525 | 107.2478433495 |
| 0.5641793685 | 0.9999986525 | 35.1998921796  |
| 0.442801036  | 0.9999986525 | 4.282151719    |
| 0.5271398503 | 0.9999986525 | 0              |
| 0.6665420151 | 0.9999986525 | 15.622851735   |
| 0.6999859506 | 0.9999986525 | 19.7605111783  |
| 0.6958726301 | 0.9999986525 | 0              |
| 0.3834770345 | 0.9999986525 | 0              |
| 0.1004881053 | 0.9999986525 | 2.2260445264   |
| 0.030829513  | 0.9999986525 | 35.6743668596  |
| 0.0716729021 | 0.9999986525 | 0              |
| 0.8818349347 | 0.9999986525 | 66.876685427   |
| 0.4955363401 | 0.9999986525 | 10.7657174186  |
| 0.1125519425 | 0.9999986525 | 65.249909098   |
| 0.6286029672 | 0.9999986525 | 0              |
| 0.6098761915 | 0.9999986525 | 0              |
| 0.2299239591 | 0.9999986525 | 0              |
| 0.6769317461 | 0.9999986525 | 14.0822094247  |
| 0.2858880917 | 0.9999986525 | 0              |
| 0.8356568867 | 0.9999986525 | 0              |
| 0.0878648143 | 0.9999986525 | 8.0233829436   |
| 0.8343800232 | 0.9999986525 | 0              |
| 0.011771458  | 0.9999986525 | 4.8587978773   |
| 0.4073955524 | 0.9999986525 | 0              |
| 0.336823401  | 0.9999986525 | 0              |
| 0            | 0            | 0              |
| 0.9500390055 | 0.9999986525 | 0              |
| 0.4729816619 | 0.9999986525 | 0              |
| 0.7116709906 | 0.9999986525 | 0              |
| 0.3810611079 | 0.9999986525 | 219.9384608374 |
| 0.4072754761 | 0.9999986525 | 3.56862855     |
| 0.3250505084 | 0.9999986525 | 0              |
| 0.6837244543 | 0.9999986525 | 0.1515785797   |
| 0.7269656123 | 0.9999986525 | 0.9259264403   |
| 0.6780636109 | 0.9999986525 | 0              |
| 0.6115964775 | 0.9999986525 | 14.2011073478  |
| 0.0654599187 | 0.9999986525 | 12.1585998794  |
| 0.7333254341 | 0.9999986525 | 4.8388765611   |
| 0.9930975242 | 0.9999986525 | 3.3239645176   |

gene\_expression\_table

|              |              |                |
|--------------|--------------|----------------|
| 0.4544042258 | 0.9999986525 | 33.4582947268  |
| 0.4518840872 | 0.9999986525 | 13.1469132325  |
| 0.2029191476 | 0.9999986525 | 4.1394273127   |
| 0.8340380864 | 0.9999986525 | 101.7684631945 |
| 0.9154110355 | 0.9999986525 | 1.9051265503   |
| 0.617355369  | 0.9999986525 | 0              |
| 0.2111596803 | 0.9999986525 | 5.0818912903   |
| 0.4999700131 | 0.9999986525 | 2.1127257471   |
| 0.1046372315 | 0.9999986525 | 5.1389153934   |
| 0.7803585972 | 0.9999986525 | 0              |
| 0.9559024345 | 0.9999986525 | 4.4579993438   |
| 0.5322073549 | 0.9999986525 | 0              |
| 0            | 0            | 0              |
| 0.1401403229 | 0.9999986525 | 8.5011583002   |
| 0.6793289897 | 0.9999986525 | 0              |
| 0.9364877517 | 0.9999986525 | 30.1085959201  |
| 0.491700142  | 0.9999986525 | 3.8665313415   |
| 0.6175997957 | 0.9999986525 | 0              |
| 0.9299591526 | 0.9999986525 | 0              |
| 0.568344124  | 0.9999986525 | 0.7754550667   |
| 0.1835143875 | 0.9999986525 | 0              |
| 0.7454571034 | 0.9999986525 | 4.0075819119   |
| 0.2627804206 | 0.9999986525 | 0              |
| 0.1820610837 | 0.9999986525 | 2.1050627058   |
| 0            | 0            | 0              |
| 0.4103779563 | 0.9999986525 | 12.8552049898  |
| 0.4167826258 | 0.9999986525 | 4.8849007146   |
| 0.1302007952 | 0.9999986525 | 22.5244324798  |
| 0.9081683546 | 0.9999986525 | 10.6279114869  |
| 0.4591241284 | 0.9999986525 | 0.3875539771   |
| 0.4870351814 | 0.9999986525 | 0              |
| 0.5768253012 | 0.9999986525 | 65.3291089564  |
| 0.2658932005 | 0.9999986525 | 0              |
| 0.4911975377 | 0.9999986525 | 0              |
| 0.8034755738 | 0.9999986525 | 1.6404385223   |
| 0.6680176829 | 0.9999986525 | 1.0515882808   |
| 0.8578081725 | 0.9999986525 | 8.3059408579   |
| 0.1007812073 | 0.9999986525 | 2.3323581623   |
| 0.1525822971 | 0.9999986525 | 0              |
| 0.7085253963 | 0.9999986525 | 0.275816621    |
| 0.2518623644 | 0.9999986525 | 7.8057815883   |
| 0.2370112181 | 0.9999986525 | 5.5939328418   |
| 0.8114276142 | 0.9999986525 | 0              |
| 0.9401584986 | 0.9999986525 | 3.3035540268   |
| 0.0335092083 | 0.9999986525 | 5.1606330102   |
| 0.4507498627 | 0.9999986525 | 1.540243367    |
| 0.8713699993 | 0.9999986525 | 62.9792329348  |
| 0.9402413663 | 0.9999986525 | 3.2231778725   |
| 0.883119105  | 0.9999986525 | 0.8639465775   |

gene\_expression\_table

|              |              |                 |
|--------------|--------------|-----------------|
| 0.4452391258 | 0.9999986525 | 0               |
| 0.2373267649 | 0.9999986525 | 119.7069141636  |
| 0.3803307162 | 0.9999986525 | 0.3049055979    |
| 0.003284     | 0.9999986525 | 66.7790968564   |
| 0.6828934338 | 0.9999986525 | 10.4169463957   |
| 0.1551721283 | 0.9999986525 | 1.4201489211    |
| 0.4932880138 | 0.9999986525 | 307.6079466586  |
| 0.5501062497 | 0.9999986525 | 9.508026565     |
| 0.3567262747 | 0.9999986525 | 1147.6346258299 |
| 0.9023511392 | 0.9999986525 | 12.5615826816   |
| 0.9926344783 | 0.9999986525 | 2.6763583868    |
| 0.6508871974 | 0.9999986525 | 73.5228559995   |
| 0.9430517405 | 0.9999986525 | 0               |
| 0.9861911039 | 0.9999986525 | 10.342691177    |
| 0.2673480246 | 0.9999986525 | 26.2935681007   |
| 0.7252620589 | 0.9999986525 | 0               |
| 0.3249336053 | 0.9999986525 | 0               |
| 0.0202667207 | 0.9999986525 | 2.9858615008    |
| 0.5868592284 | 0.9999986525 | 74.8249136618   |
| 0            | 0            | 0               |
| 0.6312664098 | 0.9999986525 | 0               |
| 0.2631973682 | 0.9999986525 | 0               |
| 0.562440646  | 0.9999986525 | 191.4356970687  |
| 0.1892578266 | 0.9999986525 | 193.0333268505  |
| 0.0885044215 | 0.9999986525 | 79.2406875113   |
| 0.7128243654 | 0.9999986525 | 102.0777974953  |
| 0.9298208943 | 0.9999986525 | 0               |
| 0.7125328266 | 0.9999986525 | 3.2105725366    |
| 0.4648704373 | 0.9999986525 | 0.3045451665    |
| 0.1859193043 | 0.9999986525 | 0               |
| 0.032222513  | 0.9999986525 | 219.85812159    |
| 0.7695804736 | 0.9999986525 | 0               |
| 0.367547977  | 0.9999986525 | 0               |
| 0.5586440061 | 0.9999986525 | 179.5984523679  |
| 0.0916676751 | 0.9999986525 | 0               |
| 0.6041285217 | 0.9999986525 | 41.0010578829   |
| 0.362533399  | 0.9999986525 | 0               |
| 0.7539880367 | 0.9999986525 | 12.1296283929   |
| 0.1342279442 | 0.9999986525 | 188.1172510287  |
| 0.3302168005 | 0.9999986525 | 9.6301077132    |
| 0.1895095998 | 0.9999986525 | 0               |
| 0.5717878512 | 0.9999986525 | 7.0896452239    |
| 0.1224964435 | 0.9999986525 | 2.5081406766    |
| 0.8537978587 | 0.9999986525 | 0               |
| 0.8144485154 | 0.9999986525 | 4.6621084207    |
| 0.7903750074 | 0.9999986525 | 2.3541698936    |
| 0.6176563209 | 0.9999986525 | 0               |
| 0.9430746306 | 0.9999986525 | 2.0498318737    |
| 0.6402763203 | 0.9999986525 | 0               |



gene\_expression\_table

|              |              |                |
|--------------|--------------|----------------|
| 0.2808699766 | 0.9999986525 | 3.2529899434   |
| 0.5747218245 | 0.9999986525 | 0              |
| 0.9856976962 | 0.9999986525 | 2.4386534712   |
| 0.8730716598 | 0.9999986525 | 4.9609166096   |
| 0            | 0            | 0              |
| 0.7818882525 | 0.9999986525 | 15.1546393763  |
| 0.623848747  | 0.9999986525 | 4.3053654705   |
| 0.2858524976 | 0.9999986525 | 10.2710848359  |
| 0.6037469751 | 0.9999986525 | 0              |
| 0.599198204  | 0.9999986525 | 1.7232981442   |
| 0.0525008676 | 0.9999986525 | 32.0743588721  |
| 0.2972125256 | 0.9999986525 | 0.7645732725   |
| 0.8782512169 | 0.9999986525 | 0              |
| 0.7632282998 | 0.9999986525 | 29.0452345883  |
| 0.9132867326 | 0.9999986525 | 9.4818524643   |
| 0.8706173979 | 0.9999986525 | 0.1694899576   |
| 0.4745335078 | 0.9999986525 | 1.8396613625   |
| 0.068766282  | 0.9999986525 | 0.1258052348   |
| 0.001266     | 0.9999986525 | 54.7397626015  |
| 0.8622359358 | 0.9999986525 | 0.6011076385   |
| 0.5711313291 | 0.9999986525 | 492.2735387273 |
| 0.287601432  | 0.9999986525 | 113.1669080917 |
| 0.4900516676 | 0.9999986525 | 15.6182317157  |
| 0.1738160143 | 0.9999986525 | 2.2913330828   |
| 0.4163345187 | 0.9999986525 | 9.8441599676   |
| 0.0941199656 | 0.9999986525 | 0              |
| 0.5008989401 | 0.9999986525 | 11.5841770879  |
| 0.3820454685 | 0.9999986525 | 0              |
| 0.4432791036 | 0.9999986525 | 2.6089380203   |
| 0.2521777785 | 0.9999986525 | 0              |
| 0.5556705964 | 0.9999986525 | 0              |
| 0.6962754943 | 0.9999986525 | 0              |
| 0.1267306016 | 0.9999986525 | 1.1693679378   |
| 0.7779015821 | 0.9999986525 | 37.9759536257  |
| 0.5803482044 | 0.9999986525 | 6.6567770601   |
| 0.3420700529 | 0.9999986525 | 0              |
| 0.9924472143 | 0.9999986525 | 1.4446083506   |
| 0.2139629809 | 0.9999986525 | 0              |
| 0.6933155805 | 0.9999986525 | 0              |
| 0.9947188185 | 0.9999986525 | 0              |
| 0.6858415324 | 0.9999986525 | 0.2721515861   |
| 0.3687639701 | 0.9999986525 | 35.6385250526  |
| 0.1409166936 | 0.9999986525 | 0              |
| 0.7445253282 | 0.9999986525 | 8.9420390648   |
| 0.0710601937 | 0.9999986525 | 7.4733151587   |
| 0.5658617507 | 0.9999986525 | 3.7748494194   |
| 0.3345458639 | 0.9999986525 | 0              |
| 0.5919770381 | 0.9999986525 | 2.8111948808   |
| 0.514651096  | 0.9999986525 | 1.9419658204   |

gene\_expression\_table

|              |              |                 |
|--------------|--------------|-----------------|
| 0.0433879111 | 0.9999986525 | 0.145554237     |
| 0.8712829565 | 0.9999986525 | 6.1857482111    |
| 0            | 0            | 0               |
| 0.4380106515 | 0.9999986525 | 19.362158688    |
| 0.0998921416 | 0.9999986525 | 0               |
| 0.4095133158 | 0.9999986525 | 10.3765713557   |
| 0.9542889748 | 0.9999986525 | 54.1237120581   |
| 0.847431982  | 0.9999986525 | 313.172185252   |
| 0.3990876431 | 0.9999986525 | 1.018983566     |
| 0.1046366913 | 0.9999986525 | 0               |
| 0.7932841877 | 0.9999986525 | 0.696750781     |
| 0.0513011803 | 0.9999986525 | 6.1643292487    |
| 0.1837408903 | 0.9999986525 | 1.0330249724    |
| 0.3543891552 | 0.9999986525 | 38.3560751496   |
| 0.7686938273 | 0.9999986525 | 1.1372383636    |
| 0.7207049893 | 0.9999986525 | 1.1955341866    |
| 0.5318981456 | 0.9999986525 | 0               |
| 0.0665371228 | 0.9999986525 | 3.1434361297    |
| 0.701872499  | 0.9999986525 | 0               |
| 0.6220080861 | 0.9999986525 | 0               |
| 0.7179273913 | 0.9999986525 | 9.6162264242    |
| 0.4729816619 | 0.9999986525 | 0               |
| 0.0739229291 | 0.9999986525 | 0               |
| 0.6402683596 | 0.9999986525 | 0               |
| 0.6396926222 | 0.9999986525 | 0               |
| 0.0932476764 | 0.9999986525 | 63.3500281755   |
| 0.7153552678 | 0.9999986525 | 4.6573120129    |
| 0.232478635  | 0.9999986525 | 5.6000337426    |
| 0.0515640592 | 0.9999986525 | 0               |
| 0.4514339034 | 0.9999986525 | 1.1301688007    |
| 0.3572973655 | 0.9999986525 | 55.1170223756   |
| 0.5544967195 | 0.9999986525 | 0               |
| 0.4068997721 | 0.9999986525 | 0               |
| 0.1185635055 | 0.9999986525 | 11.1574771789   |
| 0            | 0            | 0               |
| 0.4729816619 | 0.9999986525 | 0               |
| 0.4729816619 | 0.9999986525 | 0               |
| 0.2274646749 | 0.9999986525 | 3.3547734098    |
| 0.5718576373 | 0.9999986525 | 3.6849245725    |
| 0.9383787239 | 0.9999986525 | 73.1460942149   |
| 0.5041031226 | 0.9999986525 | 54.8512503834   |
| 0.2760898598 | 0.9999986525 | 1699.1573479209 |
| 0.7482891501 | 0.9999986525 | 0               |
| 0            | 0            | 0               |
| 0.5272524189 | 0.9999986525 | 4.1804660804    |
| 0.7299164391 | 0.9999986525 | 0               |
| 0.9837815677 | 0.9999986525 | 0.3311321247    |
| 0.2910664892 | 0.9999986525 | 555.7109971202  |
| 0.4617984186 | 0.9999986525 | 4.3700435238    |

gene\_expression\_table

|              |              |                |
|--------------|--------------|----------------|
| 0.4074269349 | 0.9999986525 | 0              |
| 0.9375364213 | 0.9999986525 | 38.3800624374  |
| 0.3610331654 | 0.9999986525 | 9.5881967168   |
| 0.555739782  | 0.9999986525 | 10.5719459985  |
| 0.6607591252 | 0.9999986525 | 21.9616798149  |
| 0.1424311344 | 0.9999986525 | 71.7808992861  |
| 0.7641717345 | 0.9999986525 | 0.5805322146   |
| 0.3730663846 | 0.9999986525 | 0              |
| 0.6402603911 | 0.9999986525 | 0              |
| 0.778169528  | 0.9999986525 | 238.6530421433 |
| 0.6073690266 | 0.9999986525 | 3.7537078158   |
| 0.1035480477 | 0.9999986525 | 19.3590150797  |
| 0.3092438634 | 0.9999986525 | 271.0391697831 |
| 0.3319426782 | 0.9999986525 | 3.986758459    |
| 0.623340901  | 0.9999986525 | 0              |
| 0.6603244793 | 0.9999986525 | 84.1740869747  |
| 0.2332149223 | 0.9999986525 | 0              |
| 0.4047091174 | 0.9999986525 | 4.49422782     |
| 0.8985697102 | 0.9999986525 | 2.2318120096   |
| 0.7074677131 | 0.9999986525 | 26.6455579732  |
| 0.8847506732 | 0.9999986525 | 0.4859893279   |
| 0.9672327112 | 0.9999986525 | 4.5812988733   |
| 0.1632811133 | 0.9999986525 | 18.3785819138  |
| 0.8680582842 | 0.9999986525 | 0.3750442459   |
| 0.0953370249 | 0.9999986525 | 8.0241956233   |
| 0.9586830788 | 0.9999986525 | 0.4536966379   |
| 0            | 0            | 0              |
| 0.1748141985 | 0.9999986525 | 0              |
| 0.0796905399 | 0.9999986525 | 2.3467637514   |
| 0.5815636575 | 0.9999986525 | 1.6384537515   |
| 0.935861932  | 0.9999986525 | 61.9154961621  |
| 0.3368634269 | 0.9999986525 | 0              |
| 0.4954020587 | 0.9999986525 | 19.7214033705  |
| 0.4882441653 | 0.9999986525 | 136.2658502149 |
| 0.7515047793 | 0.9999986525 | 12.2193155191  |
| 0.285588017  | 0.9999986525 | 0              |
| 0.0214397484 | 0.9999986525 | 5.9401550136   |
| 0.7144973367 | 0.9999986525 | 1.8980606869   |
| 0            | 0            | 0              |
| 0            | 0            | 0              |
| 0.8486854513 | 0.9999986525 | 1.1180624982   |
| 0.5609261256 | 0.9999986525 | 0              |
| 0.8781438649 | 0.9999986525 | 0              |
| 0.2889176024 | 0.9999986525 | 11.6773905757  |
| 0.1394324843 | 0.9999986525 | 0              |
| 0.2455250806 | 0.9999986525 | 119.2053227092 |
| 0.1863324762 | 0.9999986525 | 1.1386604479   |
| 0            | 0            | 0              |
| 0.1740801304 | 0.9999986525 | 0              |

gene\_expression\_table

|              |              |                |
|--------------|--------------|----------------|
| 0.6166995041 | 0.9999986525 | 4.6897170241   |
| 0.8004712694 | 0.9999986525 | 0.7581317011   |
| 0.9276921644 | 0.9999986525 | 203.3912126816 |
| 0.003937     | 0.9999986525 | 16.2437722656  |
| 0.0263642021 | 0.9999986525 | 3.6658511992   |
| 0.7360792634 | 0.9999986525 | 0              |
| 0.4528894085 | 0.9999986525 | 1.8050794889   |
| 0.5178565957 | 0.9999986525 | 0.4817469509   |
| 0.264277852  | 0.9999986525 | 0.3563632073   |
| 0.4690650058 | 0.9999986525 | 1.8245922775   |
| 0.8117658766 | 0.9999986525 | 4.7164548596   |
| 0.0462360421 | 0.9999986525 | 8.1569833643   |
| 0.1835283788 | 0.9999986525 | 21.6192058235  |
| 0.3395278632 | 0.9999986525 | 8.7873486659   |
| 0.2501854383 | 0.9999986525 | 20.7937908061  |
| 0.2715420473 | 0.9999986525 | 0              |
| 0.982017077  | 0.9999986525 | 4.2415707526   |
| 0.6098761915 | 0.9999986525 | 0              |
| 0            | 0            | 0              |
| 0.319141334  | 0.9999986525 | 40.487140992   |
| 0.9383286056 | 0.9999986525 | 30.7916967271  |
| 0.1632111141 | 0.9999986525 | 0              |
| 0.2247769315 | 0.9999986525 | 0              |
| 0.4406069417 | 0.9999986525 | 30.0352128221  |
| 0.8204902933 | 0.9999986525 | 13.7536245381  |
| 0.9645795307 | 0.9999986525 | 559.1049975098 |
| 0.1075453136 | 0.9999986525 | 0              |
| 0.2031184247 | 0.9999986525 | 0              |
| 0.7345862433 | 0.9999986525 | 0              |
| 0.4664629713 | 0.9999986525 | 161.7165140892 |
| 0.3584199631 | 0.9999986525 | 141.1581809366 |
| 0.544048751  | 0.9999986525 | 112.8502526203 |
| 0.00155      | 0.9999986525 | 61.6985026008  |
| 0.2321091095 | 0.9999986525 | 0              |
| 0.8839977518 | 0.9999986525 | 50.491317616   |
| 0.9244094697 | 0.9999986525 | 15.5209516498  |
| 0.3020736155 | 0.9999986525 | 5.0805410979   |
| 0.6603600781 | 0.9999986525 | 25.9485349949  |
| 0.3779807311 | 0.9999986525 | 90.0493064387  |
| 0.4029379392 | 0.9999986525 | 0              |
| 0.0854263045 | 0.9999986525 | 140.9112791013 |
| 0.1121465848 | 0.9999986525 | 91.2472671498  |
| 0.972951525  | 0.9999986525 | 0              |
| 0.4870129515 | 0.9999986525 | 0              |
| 0.30755387   | 0.9999986525 | 0              |
| 0.6876964891 | 0.9999986525 | 6.5612242187   |
| 0.5414986626 | 0.9999986525 | 0              |
| 0.6089129592 | 0.9999986525 | 30.9284624056  |
| 0.9922152531 | 0.9999986525 | 12.1579001442  |

gene\_expression\_table

|              |              |                |
|--------------|--------------|----------------|
| 0.4324843803 | 0.9999986525 | 10.056601376   |
| 0.6582421856 | 0.9999986525 | 118.4611249936 |
| 0.6411270632 | 0.9999986525 | 0.4843847113   |
| 0.7410162964 | 0.9999986525 | 1.1781273654   |
| 0.7708594424 | 0.9999986525 | 8.6037172316   |
| 0.9169923191 | 0.9999986525 | 0              |
| 0.2365552834 | 0.9999986525 | 22.6965835364  |
| 0.776003589  | 0.9999986525 | 0              |
| 0.4769044793 | 0.9999986525 | 10.3106873398  |
| 0.2500800109 | 0.9999986525 | 21.6862555709  |
| 0.9098775993 | 0.9999986525 | 0.7445606167   |
| 0.2346063186 | 0.9999986525 | 0.6131314661   |
| 0.3294364203 | 0.9999986525 | 0              |
| 0.3016110819 | 0.9999986525 | 30.2528530582  |
| 0.9079198662 | 0.9999986525 | 1.852924893    |
| 0.4295023236 | 0.9999986525 | 0.5361819109   |
| 0.1919613537 | 0.9999986525 | 0.2678652416   |
| 0.8542018053 | 0.9999986525 | 0.9254964598   |
| 0.9298432236 | 0.9999986525 | 0              |
| 0            | 0            | 0              |
| 0.7002747706 | 0.9999986525 | 1.4684299371   |
| 0.1791770317 | 0.9999986525 | 7.4934617234   |
| 0.4893720127 | 0.9999986525 | 1.6839919934   |
| 0.9589897771 | 0.9999986525 | 5.3740038218   |
| 0.5764377773 | 0.9999986525 | 0              |
| 0.1109544764 | 0.9999986525 | 1.7580612572   |
| 0.391273335  | 0.9999986525 | 2.4190227171   |
| 0.4529242107 | 0.9999986525 | 1.0944075226   |
| 0.4271736524 | 0.9999986525 | 0.3502396314   |
| 0.4062080027 | 0.9999986525 | 0              |
| 0.6648192233 | 0.9999986525 | 26.9081229022  |
| 0.6812204228 | 0.9999986525 | 0              |
| 0.6826057102 | 0.9999986525 | 9.1948237429   |
| 0.8030174764 | 0.9999986525 | 0.4471587353   |
| 0.7304505256 | 0.9999986525 | 3.2775684261   |
| 0.967851867  | 0.9999986525 | 1.0216841396   |
| 0.578256546  | 0.9999986525 | 17.8497763371  |
| 0.9412722154 | 0.9999986525 | 6.3899583031   |
| 0.1017980406 | 0.9999986525 | 43.4810264727  |
| 0.757715678  | 0.9999986525 | 3.5245699374   |
| 0.3198238669 | 0.9999986525 | 6.0255468598   |
| 0.3881085074 | 0.9999986525 | 0              |
| 0.8779852649 | 0.9999986525 | 27.5664739225  |
| 0.6312664098 | 0.9999986525 | 0              |
| 0.3047814966 | 0.9999986525 | 0              |
| 0.6049711272 | 0.9999986525 | 2.4964332735   |
| 0.9296678184 | 0.9999986525 | 0              |
| 0.7457045837 | 0.9999986525 | 0.7669975635   |
| 0.3612705579 | 0.9999986525 | 387.9441815003 |

gene\_expression\_table

|              |              |                 |
|--------------|--------------|-----------------|
| 0.8886969685 | 0.9999986525 | 13.9682407369   |
| 0.7683403102 | 0.9999986525 | 0.675758662     |
| 0.6481766509 | 0.9999986525 | 0               |
| 0.7620766958 | 0.9999986525 | 3.3144268155    |
| 0.4919424505 | 0.9999986525 | 0               |
| 0.321213027  | 0.9999986525 | 0.2808548832    |
| 0.7048108694 | 0.9999986525 | 0               |
| 0.0876000027 | 0.9999986525 | 2.4441269975    |
| 0.864146911  | 0.9999986525 | 0               |
| 0.3285455631 | 0.9999986525 | 5.8246719159    |
| 0.4648698926 | 0.9999986525 | 55.3488977429   |
| 0.3467677428 | 0.9999986525 | 0               |
| 0.3366665081 | 0.9999986525 | 0.6038659903    |
| 0.0736833116 | 0.9999986525 | 0               |
| 0.3846361408 | 0.9999986525 | 0               |
| 0.5804123148 | 0.9999986525 | 1142.9409176205 |
| 0.9431602288 | 0.9999986525 | 0.4338362061    |
| 0.0422594126 | 0.9999986525 | 0               |
| 0.4555638821 | 0.9999986525 | 5.7729593077    |
| 0.3204017756 | 0.9999986525 | 11.4333309119   |
| 0.9701879642 | 0.9999986525 | 5.9668653094    |
| 0.4226392316 | 0.9999986525 | 0.8958561279    |
| 0.3600786575 | 0.9999986525 | 2.3724223877    |
| 0.2486488642 | 0.9999986525 | 0               |
| 0.6833215979 | 0.9999986525 | 0.3936372651    |
| 0.0745295985 | 0.9999986525 | 0.5914080113    |
| 0.6726805141 | 0.9999986525 | 5.1571055782    |
| 0.0006092    | 0.9999986525 | 21.2354921913   |
| 0.4991563621 | 0.9999986525 | 0               |
| 0.4514739311 | 0.9999986525 | 8.1220943062    |
| 0.8889454948 | 0.9999986525 | 1.6548565143    |
| 0.4836077737 | 0.9999986525 | 7.9248614354    |
| 0.6047145229 | 0.9999986525 | 2.6373003871    |
| 0.7147986222 | 0.9999986525 | 0               |
| 0.9077560703 | 0.9999986525 | 238.1404796915  |
| 0.0130110768 | 0.9999986525 | 4.5779278149    |
| 0.4074667026 | 0.9999986525 | 0               |
| 0.8167265398 | 0.9999986525 | 59.7342406212   |
| 0.7783182187 | 0.9999986525 | 3.2049225212    |
| 0.7338676699 | 0.9999986525 | 4.0842240648    |
| 0.2625771148 | 0.9999986525 | 0               |
| 0.0104471159 | 0.9999986525 | 0               |
| 0.4729816619 | 0.9999986525 | 0               |
| 0.6465834634 | 0.9999986525 | 2.2564264815    |
| 0.9464515504 | 0.9999986525 | 0               |
| 0.5535716608 | 0.9999986525 | 0               |
| 0.4396775402 | 0.9999986525 | 3.9612419291    |
| 0.7936781248 | 0.9999986525 | 6.4302258691    |
| 0.1072265688 | 0.9999986525 | 0.1579066092    |

gene\_expression\_table

|              |              |                  |
|--------------|--------------|------------------|
| 0.571627785  | 0.9999986525 | 2.9459722899     |
| 0.9786769726 | 0.9999986525 | 0                |
| 0.7539435317 | 0.9999986525 | 21.3621450763    |
| 0.9835985842 | 0.9999986525 | 0                |
| 0.8890129954 | 0.9999986525 | 17992.2890236935 |
| 0.3002008416 | 0.9999986525 | 7.8291556563     |
| 0.6069461537 | 0.9999986525 | 5.9968114257     |
| 0.3196045074 | 0.9999986525 | 0                |
| 0.6393618846 | 0.9999986525 | 12.741415858     |
| 0.0542108683 | 0.9999986525 | 2.6474026647     |
| 0.3075114913 | 0.9999986525 | 0                |
| 0.1276114079 | 0.9999986525 | 0.4120598595     |
| 0.2996721301 | 0.9999986525 | 7.1389454212     |
| 0.6859256077 | 0.9999986525 | 4.5009304778     |
| 0.4444232944 | 0.9999986525 | 15.9992130029    |
| 0.6799162358 | 0.9999986525 | 0                |
| 0.7058292614 | 0.9999986525 | 13.5777153355    |
| 0.3226688543 | 0.9999986525 | 7.268091634      |
| 0.1351543022 | 0.9999986525 | 1.5391361609     |
| 0.4162601179 | 0.9999986525 | 0                |
| 0.2809718268 | 0.9999986525 | 30.6323023135    |
| 0.827501959  | 0.9999986525 | 0.7458012882     |
| 0.2128166536 | 0.9999986525 | 21.7918756814    |
| 0.1555414922 | 0.9999986525 | 0                |
| 0.2518924647 | 0.9999986525 | 272.4884561688   |
| 0.6112767204 | 0.9999986525 | 1.9216863045     |
| 0.6062640353 | 0.9999986525 | 16.6168594315    |
| 0.9574867041 | 0.9999986525 | 0                |
| 0.8896056888 | 0.9999986525 | 0.4251906136     |
| 0.763929942  | 0.9999986525 | 0                |
| 0.7357261785 | 0.9999986525 | 0.2200362946     |
| 0.3067582631 | 0.9999986525 | 88.0752845777    |
| 0.0686776571 | 0.9999986525 | 7.3043966488     |
| 0.7304931084 | 0.9999986525 | 0.8346859409     |
| 0.2912615633 | 0.9999986525 | 6.1500028502     |
| 0.7204634501 | 0.9999986525 | 3.5365180321     |
| 0.5217078676 | 0.9999986525 | 46.2220565488    |
| 0.7355101883 | 0.9999986525 | 0                |
| 0.2747662473 | 0.9999986525 | 44.9759476702    |
| 0.0240211501 | 0.9999986525 | 60.623428254     |
| 0.6450887636 | 0.9999986525 | 1.2657619707     |
| 0.976009037  | 0.9999986525 | 3.4533697375     |
| 0.5265052212 | 0.9999986525 | 4.0309813942     |
| 0.002364     | 0.9999986525 | 22.8214549662    |
| 0.4499949908 | 0.9999986525 | 5.780014398      |
| 0.8853638964 | 0.9999986525 | 14.5999663367    |
| 0.4987791544 | 0.9999986525 | 43.0180021663    |
| 0.9494796008 | 0.9999986525 | 1.4719187934     |
| 0.759312863  | 0.9999986525 | 32.7386053969    |

gene\_expression\_table

|              |              |                 |
|--------------|--------------|-----------------|
| 0.7467754899 | 0.9999986525 | 0               |
| 0.3820994228 | 0.9999986525 | 0               |
| 0.9774898819 | 0.9999986525 | 3.1780332298    |
| 0.1252613693 | 0.9999986525 | 0               |
| 0.3688349367 | 0.9999986525 | 3.1303629331    |
| 0.3591003786 | 0.9999986525 | 10.0571599298   |
| 0.675198663  | 0.9999986525 | 3.4100812948    |
| 0.045900331  | 0.9999986525 | 0.5782345308    |
| 0.1416762428 | 0.9999986525 | 17.3357650914   |
| 0.3737338608 | 0.9999986525 | 32.7339673795   |
| 0.5130317271 | 0.9999986525 | 3.7852655959    |
| 0.9817435518 | 0.9999986525 | 0               |
| 0.049778994  | 0.9999986525 | 2684.4310234961 |
| 0.9561446739 | 0.9999986525 | 0               |
| 0.1977142212 | 0.9999986525 | 8.0529481412    |
| 0.9839518709 | 0.9999986525 | 25.163646229    |
| 0.9961040937 | 0.9999986525 | 429.831244227   |
| 0.5863549166 | 0.9999986525 | 60.4772497275   |
| 0.3308674799 | 0.9999986525 | 0               |
| 0.4028998823 | 0.9999986525 | 0               |
| 0.7338279081 | 0.9999986525 | 0               |
| 0.4047727846 | 0.9999986525 | 0               |
| 0.2755763759 | 0.9999986525 | 59.1156461006   |
| 0.26420985   | 0.9999986525 | 14.9149726705   |
| 0.0148998376 | 0.9999986525 | 2.5621655376    |
| 0.5177690125 | 0.9999986525 | 13.3442615156   |
| 0.3660899479 | 0.9999986525 | 3.3317090208    |
| 0.897669336  | 0.9999986525 | 1.356469611     |
| 0.9686345848 | 0.9999986525 | 0               |
| 0.6312664098 | 0.9999986525 | 0               |
| 0.8864512353 | 0.9999986525 | 1.2169199048    |
| 0.0502600666 | 0.9999986525 | 45.3029548072   |
| 0            | 0            | 0               |
| 0.5341368    | 0.9999986525 | 8.131473168     |
| 0.1927901652 | 0.9999986525 | 60.6707848665   |
| 0.3348484403 | 0.9999986525 | 215.6550356321  |
| 0.9911482746 | 0.9999986525 | 0               |
| 0.2573229324 | 0.9999986525 | 0.235606027     |
| 0.0662643275 | 0.9999986525 | 35.8790205342   |
| 0.6305852333 | 0.9999986525 | 5.8812826533    |
| 0.8822866751 | 0.9999986525 | 7.0818287525    |
| 0.5928480632 | 0.9999986525 | 0               |
| 0.7841214995 | 0.9999986525 | 11.5041519661   |
| 0.8457198223 | 0.9999986525 | 1.6747581905    |
| 0.7439252537 | 0.9999986525 | 29.5474286752   |
| 0.2188002815 | 0.9999986525 | 14.0196218272   |
| 0.5749127555 | 0.9999986525 | 72.581269073    |
| 0.2391349529 | 0.9999986525 | 1.2459443144    |
| 0.0550341526 | 0.9999986525 | 29.0242648816   |



gene\_expression\_table

|              |              |                 |
|--------------|--------------|-----------------|
| 0.9149876743 | 0.9999986525 | 0               |
| 0.8215212407 | 0.9999986525 | 0               |
| 0            | 0            | 0               |
| 0.6381789318 | 0.9999986525 | 17.9761464351   |
| 0.887704547  | 0.9999986525 | 63.5801583784   |
| 0.9614520608 | 0.9999986525 | 72.7798597515   |
| 0.3257672725 | 0.9999986525 | 307.7734162372  |
| 0.9339905179 | 0.9999986525 | 15.2362491277   |
| 0.290995031  | 0.9999986525 | 13.7381214497   |
| 0.2130469037 | 0.9999986525 | 0               |
| 0.7270574796 | 0.9999986525 | 0               |
| 0.6312664098 | 0.9999986525 | 0               |
| 0.0763050049 | 0.9999986525 | 162.5043637733  |
| 0.4109187201 | 0.9999986525 | 63.6005758987   |
| 0.2415250718 | 0.9999986525 | 0               |
| 0.5788620653 | 0.9999986525 | 99.0415719199   |
| 0.3274006339 | 0.9999986525 | 0               |
| 0            | 0            | 0               |
| 0.686700488  | 0.9999986525 | 11.3110533269   |
| 0.5927164383 | 0.9999986525 | 47.6444909574   |
| 0.7482936882 | 0.9999986525 | 0.3450604561    |
| 0.3356953908 | 0.9999986525 | 30.8132545078   |
| 0.3060469822 | 0.9999986525 | 1.0938635149    |
| 0.6959553527 | 0.9999986525 | 0               |
| 0.3569154611 | 0.9999986525 | 0               |
| 0.2862266804 | 0.9999986525 | 26.4510441868   |
| 0.303146489  | 0.9999986525 | 0               |
| 0.7044811495 | 0.9999986525 | 0               |
| 0.4125877146 | 0.9999986525 | 1426.0267216361 |
| 0.9823790916 | 0.9999986525 | 2.9883957577    |
| 0.1271661593 | 0.9999986525 | 0               |
| 0.4175030136 | 0.9999986525 | 143.8651338006  |
| 0.3331310407 | 0.9999986525 | 33.1537465325   |
| 0.6832852788 | 0.9999986525 | 1.4136866144    |
| 0.1991001882 | 0.9999986525 | 238.241536687   |
| 0.9452615649 | 0.9999986525 | 0               |
| 0.2275957366 | 0.9999986525 | 452.475263243   |
| 0.4867280906 | 0.9999986525 | 3.1408812504    |
| 0.7350523989 | 0.9999986525 | 406.8868892628  |
| 0.1563639472 | 0.9999986525 | 0               |
| 0.3236135809 | 0.9999986525 | 346.1788986567  |
| 0.8117411193 | 0.9999986525 | 0               |
| 0.1435852523 | 0.9999986525 | 4.548708587     |
| 0.8879494597 | 0.9999986525 | 30.9713638624   |
| 0.9385840532 | 0.9999986525 | 0               |
| 0.1818029411 | 0.9999986525 | 3.1760128827    |
| 0.9308394777 | 0.9999986525 | 1.9847892303    |
| 0.4658078916 | 0.9999986525 | 19.0844156366   |
| 0.6330117631 | 0.9999986525 | 18.3385198031   |

gene\_expression\_table

|              |              |                 |
|--------------|--------------|-----------------|
| 0.1651338486 | 0.9999986525 | 29.259788491    |
| 0.7671689308 | 0.9999986525 | 11.1571557613   |
| 0.7768406911 | 0.9999986525 | 10.5508260424   |
| 0.6595914375 | 0.9999986525 | 0.2426073334    |
| 0.9953925618 | 0.9999986525 | 2.5781751636    |
| 0.0697242568 | 0.9999986525 | 10.9741306422   |
| 0            | 0            | 0               |
| 0.3047928786 | 0.9999986525 | 0               |
| 0.2359621579 | 0.9999986525 | 0               |
| 0.5829227479 | 0.9999986525 | 1.5818707349    |
| 0.4772343571 | 0.9999986525 | 0               |
| 0.2093921927 | 0.9999986525 | 7.3868202701    |
| 0.2718504771 | 0.9999986525 | 1.4911393262    |
| 0.9206951349 | 0.9999986525 | 15.1462028045   |
| 0.595513197  | 0.9999986525 | 6.7056777839    |
| 0.2193419182 | 0.9999986525 | 0               |
| 0.1137345703 | 0.9999986525 | 44.6879238206   |
| 0.8700472958 | 0.9999986525 | 0               |
| 0.6375920911 | 0.9999986525 | 0               |
| 0.3420894015 | 0.9999986525 | 0               |
| 0.4366694034 | 0.9999986525 | 11.3075759834   |
| 0.3499316066 | 0.9999986525 | 0.7398306154    |
| 0.1643371827 | 0.9999986525 | 0               |
| 0.3755390941 | 0.9999986525 | 0               |
| 0.3528820973 | 0.9999986525 | 0               |
| 0.0399166461 | 0.9999986525 | 22.9326609754   |
| 0.6964981329 | 0.9999986525 | 204.7563112826  |
| 0.9120267575 | 0.9999986525 | 18.1065944436   |
| 0.3555668591 | 0.9999986525 | 98.6070168527   |
| 0.4418719607 | 0.9999986525 | 39.9785747119   |
| 0.9586851194 | 0.9999986525 | 10.2166931643   |
| 0.458420163  | 0.9999986525 | 23.2222002251   |
| 0.6694725155 | 0.9999986525 | 11.6780360921   |
| 0.7053778279 | 0.9999986525 | 0               |
| 0.8777245229 | 0.9999986525 | 12.3671509721   |
| 0.3762127543 | 0.9999986525 | 3.1073103487    |
| 0.8698421695 | 0.9999986525 | 22.4040942702   |
| 0.6004258064 | 0.9999986525 | 0               |
| 0.8310129869 | 0.9999986525 | 42.1037713812   |
| 0.5877241541 | 0.9999986525 | 61.2581135744   |
| 0.8997079313 | 0.9999986525 | 0.4770086275    |
| 0.826466209  | 0.9999986525 | 11.2012551912   |
| 0.5978030894 | 0.9999986525 | 0.6979689991    |
| 0.1105647143 | 0.9999986525 | 4.3297638504    |
| 0.371797558  | 0.9999986525 | 2001.8377989383 |
| 0.2298912173 | 0.9999986525 | 174.7519353076  |
| 0.3075673608 | 0.9999986525 | 0               |
| 0.9507566392 | 0.9999986525 | 1.7615869526    |
| 0            | 0            | 0               |

gene\_expression\_table

|              |              |                |
|--------------|--------------|----------------|
| 0.4512516202 | 0.9999986525 | 3.8865978518   |
| 0.4266236515 | 0.9999986525 | 28.715701515   |
| 0.0610679402 | 0.9999986525 | 21.2381293762  |
| 0.6122142588 | 0.9999986525 | 0.4714644417   |
| 0.7966433457 | 0.9999986525 | 2.5966274343   |
| 0.8522177168 | 0.9999986525 | 0              |
| 0.0689532768 | 0.9999986525 | 0              |
| 0.0001594    | 0.6597988509 | 0              |
| 0.6407724408 | 0.9999986525 | 8.0644248322   |
| 0.8768648504 | 0.9999986525 | 28.5805066434  |
| 0.2323279398 | 0.9999986525 | 0              |
| 0.1868028974 | 0.9999986525 | 12.2359643736  |
| 0.8025558853 | 0.9999986525 | 73.0552648969  |
| 0.6478078777 | 0.9999986525 | 2.356475509    |
| 0.5362452139 | 0.9999986525 | 0              |
| 0.6098761915 | 0.9999986525 | 0              |
| 0.6929768369 | 0.9999986525 | 6.1390117664   |
| 0.251353868  | 0.9999986525 | 7.2761477201   |
| 0.9298655101 | 0.9999986525 | 0              |
| 0.3607185031 | 0.9999986525 | 925.3397639422 |
| 0.5342418312 | 0.9999986525 | 0.2795984913   |
| 0.4154259415 | 0.9999986525 | 145.4094341438 |
| 0.3350332156 | 0.9999986525 | 8.5901897411   |
| 0.9627639712 | 0.9999986525 | 0              |
| 0.2074792601 | 0.9999986525 | 0.6785281647   |
| 0.9422684686 | 0.9999986525 | 8.5794331799   |
| 0.929646552  | 0.9999986525 | 0              |
| 0            | 0            | 0              |
| 0.6263790473 | 0.9999986525 | 6.1467282217   |
| 0.750962754  | 0.9999986525 | 0              |
| 0            | 0            | 0              |
| 0.3849240223 | 0.9999986525 | 0              |
| 0.8721989101 | 0.9999986525 | 4.7445463977   |
| 0.5044099171 | 0.9999986525 | 1.4816918508   |
| 0.6053820367 | 0.9999986525 | 8.5271761538   |
| 0.9875191267 | 0.9999986525 | 7.2337923882   |
| 0.4889054872 | 0.9999986525 | 4.6564907623   |
| 0.5930845808 | 0.9999986525 | 0              |
| 0.4127252809 | 0.9999986525 | 2.8237829375   |
| 0.2926310095 | 0.9999986525 | 0              |
| 0.9953972547 | 0.9999986525 | 8.3634974477   |
| 0            | 0            | 0              |
| 0.1511460907 | 0.9999986525 | 0              |
| 0.2143943011 | 0.9999986525 | 0              |
| 0.5789485442 | 0.9999986525 | 2.6043222111   |
| 0.3864321976 | 0.9999986525 | 11.0538509748  |
| 0.8002085379 | 0.9999986525 | 1.2699542881   |
| 0.0392719541 | 0.9999986525 | 2.2881245238   |
| 0.640252416  | 0.9999986525 | 0              |

| gene_expression_table |              |                 |
|-----------------------|--------------|-----------------|
| 0.0805498198          | 0.9999986525 | 0.1407627925    |
| 0.0111422342          | 0.9999986525 | 0.7391627581    |
| 0.116796008           | 0.9999986525 | 34.0442102877   |
| 0.384484247           | 0.9999986525 | 0               |
| 0                     | 0            | 0               |
| 0                     | 0            | 0               |
| 0.6280995674          | 0.9999986525 | 0               |
| 0.3034512409          | 0.9999986525 | 0               |
| 0.0655466818          | 0.9999986525 | 0               |
| 0.1518417986          | 0.9999986525 | 5.2278068029    |
| 0.725251546           | 0.9999986525 | 0.273623852     |
| 0.6354443696          | 0.9999986525 | 12.2223575799   |
| 0.478765912           | 0.9999986525 | 6.7107901177    |
| 0.007492              | 0.9999986525 | 1.866638329     |
| 0.3662454128          | 0.9999986525 | 5.7678705003    |
| 0.7128567224          | 0.9999986525 | 1.0438667884    |
| 0.1960615814          | 0.9999986525 | 4.0202419294    |
| 0.002239              | 0.9999986525 | 0.8192014616    |
| 0.1403656745          | 0.9999986525 | 0               |
| 0.9139697916          | 0.9999986525 | 13.5902798286   |
| 0.3815199535          | 0.9999986525 | 5.9949394962    |
| 0.3618159443          | 0.9999986525 | 0               |
| 0.8528888429          | 0.9999986525 | 88.1750540814   |
| 0.4425266535          | 0.9999986525 | 0               |
| 0.9111489541          | 0.9999986525 | 9.321528862     |
| 0.9949052332          | 0.9999986525 | 260.9015014708  |
| 0.6503012672          | 0.9999986525 | 0               |
| 0                     | 0            | 0               |
| 0                     | 0            | 0               |
| 0.6312664098          | 0.9999986525 | 0               |
| 0.9904500416          | 0.9999986525 | 18.2894787809   |
| 0.5099502919          | 0.9999986525 | 11.5236233611   |
| 0.2020935816          | 0.9999986525 | 0               |
| 0.2120950449          | 0.9999986525 | 0               |
| 0.1052392806          | 0.9999986525 | 25.5510005933   |
| 0.4721134215          | 0.9999986525 | 16.3197324721   |
| 0.0165720581          | 0.9999986525 | 3.9015212829    |
| 0.2897072739          | 0.9999986525 | 29.4963310908   |
| 0.862585264           | 0.9999986525 | 59.6801155165   |
| 0.6334523602          | 0.9999986525 | 7.7781911968    |
| 0.8214123454          | 0.9999986525 | 1.6055140008    |
| 0.1766796199          | 0.9999986525 | 4.887010107     |
| 0.2925313503          | 0.9999986525 | 0               |
| 0.0287478505          | 0.9999986525 | 2.4463912836    |
| 0.0256674561          | 0.9999986525 | 1.6335632986    |
| 0.3308141064          | 0.9999986525 | 1069.7915205756 |
| 0                     | 0            | 0               |
| 0                     | 0            | 0               |
| 0.8072961307          | 0.9999986525 | 71.5635748324   |

gene\_expression\_table

|              |              |                |
|--------------|--------------|----------------|
| 0.2442015783 | 0.9999986525 | 0.7033446887   |
| 0.7064531854 | 0.9999986525 | 0              |
| 0.7240095775 | 0.9999986525 | 88.9422671376  |
| 0.3079532715 | 0.9999986525 | 17.3977989106  |
| 0.2048042856 | 0.9999986525 | 0              |
| 0.70415309   | 0.9999986525 | 0              |
| 0.247655751  | 0.9999986525 | 2.8804418653   |
| 0.2199270684 | 0.9999986525 | 105.8077095589 |
| 0.2805344758 | 0.9999986525 | 68.6507995468  |
| 0.6883328714 | 0.9999986525 | 0              |
| 0.2833893365 | 0.9999986525 | 175.0050062726 |
| 0.6675323582 | 0.9999986525 | 1.7789052587   |
| 0.4757386327 | 0.9999986525 | 7.1588795817   |
| 0.5567143681 | 0.9999986525 | 4.7408198403   |
| 0.488063005  | 0.9999986525 | 0              |
| 0.2140827264 | 0.9999986525 | 13.7536245381  |
| 0.115190485  | 0.9999986525 | 12.1786464572  |
| 0.189518388  | 0.9999986525 | 0              |
| 0.3634854441 | 0.9999986525 | 37.576604928   |
| 0.9305654787 | 0.9999986525 | 3.9504024703   |
| 0.5902926637 | 0.9999986525 | 22.2093852928  |
| 0.3355852802 | 0.9999986525 | 5.4865902998   |
| 0.8602222333 | 0.9999986525 | 0              |
| 0.6493035308 | 0.9999986525 | 7.9029079842   |
| 0.2188114417 | 0.9999986525 | 5.5594662146   |
| 0.2180059989 | 0.9999986525 | 10.9370288883  |
| 0.6444393339 | 0.9999986525 | 0              |
| 0.5158940821 | 0.9999986525 | 0              |
| 0.3202203529 | 0.9999986525 | 121.7471605033 |
| 0.6169422637 | 0.9999986525 | 236.4259424732 |
| 0            | 0            | 0              |
| 0.9322177019 | 0.9999986525 | 133.4527308309 |
| 0.9278158468 | 0.9999986525 | 165.7051643844 |
| 0.8743914872 | 0.9999986525 | 19.0536219958  |
| 0.3146464501 | 0.9999986525 | 1.3156027128   |
| 0.9947401083 | 0.9999986525 | 11.5837778225  |
| 0.7254520306 | 0.9999986525 | 10.5613754619  |
| 0.7084239142 | 0.9999986525 | 43.2074596888  |
| 0.5187127862 | 0.9999986525 | 59.7130750515  |
| 0.4978796723 | 0.9999986525 | 0              |
| 0.205123654  | 0.9999986525 | 3.5276696504   |
| 0.4117685501 | 0.9999986525 | 5.8384074526   |
| 0.7031419873 | 0.9999986525 | 2.1908208152   |
| 0.9617266459 | 0.9999986525 | 0              |
| 0.4772918281 | 0.9999986525 | 1.3028892398   |
| 0.8182676445 | 0.9999986525 | 2.9977006461   |
| 0.483565296  | 0.9999986525 | 1.1524503459   |
| 0.6217087436 | 0.9999986525 | 2.1796687292   |
| 0            | 0            | 0              |

gene\_expression\_table

|              |              |                |
|--------------|--------------|----------------|
| 0.4056943048 | 0.9999986525 | 10.9408508237  |
| 0.9160131338 | 0.9999986525 | 0              |
| 0.5635830527 | 0.9999986525 | 61.6248367451  |
| 0.0455176629 | 0.9999986525 | 19.1054016486  |
| 0.948445741  | 0.9999986525 | 957.2262562688 |
| 0.2469458927 | 0.9999986525 | 0.0579004115   |
| 0.0410848007 | 0.9999986525 | 1.0098842807   |
| 0.3182065304 | 0.9999986525 | 5.1737772557   |
| 0.6402444342 | 0.9999986525 | 0              |
| 0.9822925771 | 0.9999986525 | 0.7573190832   |
| 0.9804176403 | 0.9999986525 | 0.4090867549   |
| 0.748826278  | 0.9999986525 | 4.2711800767   |
| 0.1390087064 | 0.9999986525 | 1.2238050359   |
| 0.4024148491 | 0.9999986525 | 3.4742951206   |
| 0.6595189924 | 0.9999986525 | 0.212996708    |
| 0.9920116389 | 0.9999986525 | 2.9399865412   |
| 0.351330502  | 0.9999986525 | 26.1391202609  |
| 0.6381940782 | 0.9999986525 | 0              |
| 0.0524785925 | 0.9999986525 | 40.6618376137  |
| 0.053636078  | 0.9999986525 | 0              |
| 0.1437867028 | 0.9999986525 | 35.2961616771  |
| 0.2321581877 | 0.9999986525 | 0              |
| 0.5125367423 | 0.9999986525 | 8.7670081438   |
| 0.4626077076 | 0.9999986525 | 0.2119729895   |
| 0.2465375659 | 0.9999986525 | 42.2050926618  |
| 0.8068242776 | 0.9999986525 | 0.5929306958   |
| 0.2714622506 | 0.9999986525 | 1.7844951421   |
| 0.9106463321 | 0.9999986525 | 0.5035251924   |
| 0.6413187541 | 0.9999986525 | 18.2898459566  |
| 0.0751489872 | 0.9999986525 | 2.4360101578   |
| 0.2981426416 | 0.9999986525 | 0              |
| 0.3421087532 | 0.9999986525 | 0              |
| 0.0254350892 | 0.9999986525 | 5.1515722031   |
| 0.529374271  | 0.9999986525 | 0              |
| 0.6312664098 | 0.9999986525 | 0              |
| 0.6312664098 | 0.9999986525 | 0              |
| 0.0619197912 | 0.9999986525 | 1.6866989725   |
| 0.6466041563 | 0.9999986525 | 0              |
| 0.2704113639 | 0.9999986525 | 0              |
| 0.6967999652 | 0.9999986525 | 1.8815913864   |
| 0.3934232485 | 0.9999986525 | 0              |
| 0.6940820034 | 0.9999986525 | 1.0354249069   |
| 0.1041417498 | 0.9999986525 | 0.5319586453   |
| 0.6754996766 | 0.9999986525 | 4.7048584662   |
| 0.3252098327 | 0.9999986525 | 1.7825677814   |
| 0.7351208838 | 0.9999986525 | 0              |
| 0.2236215253 | 0.9999986525 | 0.5208370469   |
| 0.6312664098 | 0.9999986525 | 0              |
| 0.9896541348 | 0.9999986525 | 2.382160078    |

gene\_expression\_table

|              |              |                |
|--------------|--------------|----------------|
| 0.0649190897 | 0.9999986525 | 2.6614016159   |
| 0.7192738394 | 0.9999986525 | 16.8484991877  |
| 0            | 0            | 0              |
| 0.4620965616 | 0.9999986525 | 0.7249480896   |
| 0.4632550118 | 0.9999986525 | 8.1834465584   |
| 0.800620942  | 0.9999986525 | 0.9995442338   |
| 0.0133449111 | 0.9999986525 | 5.3040359762   |
| 0.6312664098 | 0.9999986525 | 0              |
| 0.334517053  | 0.9999986525 | 0              |
| 0.3118284891 | 0.9999986525 | 1.0878252982   |
| 0.1897924239 | 0.9999986525 | 0.6562610215   |
| 0.7767837355 | 0.9999986525 | 0              |
| 0.8692981566 | 0.9999986525 | 2.6984793491   |
| 0.7985966442 | 0.9999986525 | 2.6499209486   |
| 0.1226100411 | 0.9999986525 | 0.6702188833   |
| 0.5813281068 | 0.9999986525 | 16.6349598728  |
| 0.8225212909 | 0.9999986525 | 7.2514218551   |
| 0.284552576  | 0.9999986525 | 0              |
| 0.0914600105 | 0.9999986525 | 0              |
| 0.4966435242 | 0.9999986525 | 3.189053694    |
| 0.4072217228 | 0.9999986525 | 3.4411692261   |
| 0.119664874  | 0.9999986525 | 17.5839705311  |
| 0.7173090477 | 0.9999986525 | 7.2796579223   |
| 0.2749198624 | 0.9999986525 | 0.9195744298   |
| 0.0434354648 | 0.9999986525 | 5.8548770275   |
| 0.1215348395 | 0.9999986525 | 119.5516144865 |
| 0.245406672  | 0.9999986525 | 52.112405081   |
| 0.3815865922 | 0.9999986525 | 0.6172999259   |
| 0.7631395035 | 0.9999986525 | 0              |
| 0.478284036  | 0.9999986525 | 0              |
| 0.9304791276 | 0.9999986525 | 1.1016210885   |
| 0.6741431531 | 0.9999986525 | 17.7420263823  |
| 0.5575983614 | 0.9999986525 | 1.3176467798   |
| 0.4169588609 | 0.9999986525 | 1.7743929253   |
| 0.6344424305 | 0.9999986525 | 0.9287759958   |
| 0.5736417582 | 0.9999986525 | 4.4150181035   |
| 0.6170071093 | 0.9999986525 | 58.9159247146  |
| 0.216280995  | 0.9999986525 | 4.7622151292   |
| 0.0339102582 | 0.9999986525 | 16.3798838807  |
| 0.899570655  | 0.9999986525 | 1.2798099747   |
| 0.0986431745 | 0.9999986525 | 390.2816364757 |
| 0.0460650664 | 0.9999986525 | 47.8242543552  |
| 0.6140687057 | 0.9999986525 | 40.7277820005  |
| 0.8894781004 | 0.9999986525 | 122.4705714811 |
| 0.5205009143 | 0.9999986525 | 0              |
| 0.7528323068 | 0.9999986525 | 1.0970046626   |
| 0.4257363109 | 0.9999986525 | 88.1642598596  |
| 0.3021965208 | 0.9999986525 | 8.9146442216   |
| 0.2604497209 | 0.9999986525 | 5.3955680374   |

gene\_expression\_table

|              |              |                 |
|--------------|--------------|-----------------|
| 0.9954052811 | 0.9999986525 | 6.6619751368    |
| 0.0299343025 | 0.9999986525 | 3.0756729596    |
| 0.4859671558 | 0.9999986525 | 0.8459566277    |
| 0.8987539146 | 0.9999986525 | 12.8473926568   |
| 0.6056937452 | 0.9999986525 | 0               |
| 0.2974469855 | 0.9999986525 | 3.3023490663    |
| 0.8007351851 | 0.9999986525 | 4681.7787637492 |
| 0.1354609348 | 0.9999986525 | 6.0137305673    |
| 0.9319019276 | 0.9999986525 | 0               |
| 0.0206870937 | 0.9999986525 | 6.1562755287    |
| 0.8201020831 | 0.9999986525 | 0               |
| 0.191402431  | 0.9999986525 | 389.0959713105  |
| 0.6298555339 | 0.9999986525 | 7.5818884014    |
| 0.6953717586 | 0.9999986525 | 1.3981738051    |
| 0.8529902776 | 0.9999986525 | 0               |
| 0.30755387   | 0.9999986525 | 0               |
| 0.6359590311 | 0.9999986525 | 0               |
| 0.9776710939 | 0.9999986525 | 0               |
| 0.2762077418 | 0.9999986525 | 31.9648468611   |
| 0.8716423226 | 0.9999986525 | 19.5625217988   |
| 0.8829491567 | 0.9999986525 | 3.2571025733    |
| 0.3772403883 | 0.9999986525 | 1.4705253578    |
| 0.7775782203 | 0.9999986525 | 0               |
| 0.7523416556 | 0.9999986525 | 0.3239481711    |
| 0.5853818646 | 0.9999986525 | 5.0714344369    |
| 0.5684803832 | 0.9999986525 | 9.5392822546    |
| 0.643368529  | 0.9999986525 | 14.1631971059   |
| 0.3312766572 | 0.9999986525 | 0.4385226861    |
| 0.4557424349 | 0.9999986525 | 0               |
| 0.8416280353 | 0.9999986525 | 0               |
| 0.2683091781 | 0.9999986525 | 9.0795202077    |
| 0.2701626553 | 0.9999986525 | 0               |
| 0.3138100846 | 0.9999986525 | 1.195020211     |
| 0.4875000033 | 0.9999986525 | 0               |
| 0.1246560888 | 0.9999986525 | 0.154824134     |
| 0.7041524778 | 0.9999986525 | 0               |
| 0.4266849286 | 0.9999986525 | 143.3923827037  |
| 0.9329737585 | 0.9999986525 | 0               |
| 0            | 0            | 0               |
| 0.4028619226 | 0.9999986525 | 0               |
| 0.3932646681 | 0.9999986525 | 21.6640742798   |
| 0.5352051999 | 0.9999986525 | 0               |
| 0.04058154   | 0.9999986525 | 11.1976928286   |
| 0.8803082107 | 0.9999986525 | 1.1899314669    |
| 0.2151884411 | 0.9999986525 | 3.1932957389    |
| 0.7094193785 | 0.9999986525 | 34.7784129241   |
| 0.8677985727 | 0.9999986525 | 1.6937490478    |
| 0.7862039431 | 0.9999986525 | 0.4890087056    |
| 0.3119892835 | 0.9999986525 | 5.9489562346    |



gene\_expression\_table

|              |              |                |
|--------------|--------------|----------------|
| 0.3863468213 | 0.9999986525 | 3.7461993351   |
| 0.0430931527 | 0.9999986525 | 0              |
| 0.2964169703 | 0.9999986525 | 1.7255052054   |
| 0.9455476117 | 0.9999986525 | 1.2028587293   |
| 0.5162485151 | 0.9999986525 | 17.4525528766  |
| 0.8040005502 | 0.9999986525 | 25.6973615167  |
| 0.6312664098 | 0.9999986525 | 0              |
| 0.857377728  | 0.9999986525 | 30.3208792802  |
| 0.8380716544 | 0.9999986525 | 0.6530152976   |
| 0.0406846295 | 0.9999986525 | 0              |
| 0.8108693696 | 0.9999986525 | 0              |
| 0.2731294157 | 0.9999986525 | 11.0744219388  |
| 0.1868642777 | 0.9999986525 | 0              |
| 0.3803395633 | 0.9999986525 | 1.1232582542   |
| 0.4639259143 | 0.9999986525 | 5.7504878707   |
| 0.506351628  | 0.9999986525 | 0.5634806912   |
| 0.8802082716 | 0.9999986525 | 1.2264515886   |
| 0.2035987904 | 0.9999986525 | 28.1706892209  |
| 0.7289584846 | 0.9999986525 | 14.4781609795  |
| 0.1995741636 | 0.9999986525 | 516.9136690034 |
| 0.487440191  | 0.9999986525 | 974.9324391358 |
| 0.1567294689 | 0.9999986525 | 27.7027555017  |
| 0.298845877  | 0.9999986525 | 0              |
| 0.8007927381 | 0.9999986525 | 136.867944869  |
| 0.7990979912 | 0.9999986525 | 0.5235139366   |
| 0.2722846561 | 0.9999986525 | 12.4136604128  |
| 0.21164553   | 0.9999986525 | 5.9062758025   |
| 0.4126276672 | 0.9999986525 | 29.9772495325  |
| 0.0899852328 | 0.9999986525 | 0.2994274858   |
| 0.0447868135 | 0.9999986525 | 0              |
| 0.1411059579 | 0.9999986525 | 5.7174936508   |
| 0.3927596983 | 0.9999986525 | 60.0840935453  |
| 0.9422033231 | 0.9999986525 | 13.5004903441  |
| 0.388353111  | 0.9999986525 | 2.8661159291   |
| 0.6145050447 | 0.9999986525 | 7.2318113414   |
| 0.3098139308 | 0.9999986525 | 2.8955528186   |
| 0.9493318581 | 0.9999986525 | 0.539170613    |
| 0.0104448203 | 0.9999986525 | 37.6919199446  |
| 0.3727733943 | 0.9999986525 | 13.0464561381  |
| 0.3385522482 | 0.9999986525 | 0              |
| 0.506169185  | 0.9999986525 | 9.7318760667   |
| 0.9036159699 | 0.9999986525 | 0              |
| 0.6104618156 | 0.9999986525 | 2.129879751    |
| 0.7268083006 | 0.9999986525 | 3.6194989018   |
| 0.3418933198 | 0.9999986525 | 0              |
| 0.2378852355 | 0.9999986525 | 2.262225573    |
| 0.9296252584 | 0.9999986525 | 0              |
| 0.149937576  | 0.9999986525 | 0              |
| 0.6767703994 | 0.9999986525 | 0              |

gene\_expression\_table

|              |              |                 |
|--------------|--------------|-----------------|
| 0.2025467388 | 0.9999986525 | 9.7743216952    |
| 0.6899427013 | 0.9999986525 | 19.4854491954   |
| 0.4383530836 | 0.9999986525 | 0.5517485006    |
| 0.9309974588 | 0.9999986525 | 0               |
| 0.365362511  | 0.9999986525 | 1.0687182449    |
| 0.2871194658 | 0.9999986525 | 4.4923801264    |
| 0.1671045143 | 0.9999986525 | 0               |
| 0.5747135679 | 0.9999986525 | 15.8012112221   |
| 0.5268268215 | 0.9999986525 | 5.4851250383    |
| 0.4017679844 | 0.9999986525 | 1.5190964015    |
| 0.4894667681 | 0.9999986525 | 0.4565360657    |
| 0.5071389258 | 0.9999986525 | 2.2847837263    |
| 0.0287895344 | 0.9999986525 | 12.6587995429   |
| 0.226230859  | 0.9999986525 | 2469.7156005109 |
| 0.9105249294 | 0.9999986525 | 1.3270495559    |
| 0.7506187165 | 0.9999986525 | 0               |
| 0.6189487284 | 0.9999986525 | 12.0023838577   |
| 0.1986526311 | 0.9999986525 | 0               |
| 0.4433654219 | 0.9999986525 | 0               |
| 0.1647516519 | 0.9999986525 | 11.6592163509   |
| 0.7508461819 | 0.9999986525 | 4.7329600741    |
| 0.505174295  | 0.9999986525 | 15.4562242395   |
| 0.0589227122 | 0.9999986525 | 0.2584002888    |
| 0.430647704  | 0.9999986525 | 53.045643934    |
| 0.4185496395 | 0.9999986525 | 1.7115146227    |
| 0.2701403448 | 0.9999986525 | 0               |
| 0.8559043163 | 0.9999986525 | 3.9726141056    |
| 0.8277471336 | 0.9999986525 | 0               |
| 0.0738227452 | 0.9999986525 | 4.5558695904    |
| 0.6384392345 | 0.9999986525 | 0               |
| 0.5044143924 | 0.9999986525 | 0               |
| 0.7530723097 | 0.9999986525 | 3.1411801436    |
| 0.3631855443 | 0.9999986525 | 0               |
| 0.5382547781 | 0.9999986525 | 27.6281221104   |
| 0.623820945  | 0.9999986525 | 0.6974159918    |
| 0.2020850842 | 0.9999986525 | 0.743512427     |
| 0.8501568443 | 0.9999986525 | 0               |
| 0            | 0            | 0               |
| 0.7207684542 | 0.9999986525 | 23.9575698419   |
| 0.4729816619 | 0.9999986525 | 0.4626063646    |
| 0.008531     | 0.9999986525 | 1.495297798     |
| 0.7880595897 | 0.9999986525 | 3598.7020281499 |
| 0.2473648789 | 0.9999986525 | 70.1757273405   |
| 0            | 0            | 0               |
| 0.4866915687 | 0.9999986525 | 0.2949427204    |
| 0.923503451  | 0.9999986525 | 8.8288061228    |
| 0.512496811  | 0.9999986525 | 82.2227152631   |
| 0.7476472381 | 0.9999986525 | 0               |
| 0.8864418026 | 0.9999986525 | 425.5684908879  |

gene\_expression\_table

|              |              |                |
|--------------|--------------|----------------|
| 0.5340427193 | 0.9999986525 | 11.0602169004  |
| 0.9041470937 | 0.9999986525 | 0              |
| 0.1839489771 | 0.9999986525 | 0              |
| 0.2431637491 | 0.9999986525 | 0              |
| 0.5124905588 | 0.9999986525 | 97.2376190384  |
| 0.5237281467 | 0.9999986525 | 0              |
| 0.474153324  | 0.9999986525 | 1.7881353352   |
| 0.8564435533 | 0.9999986525 | 11.3753637993  |
| 0.6740643902 | 0.9999986525 | 0              |
| 0.7967595684 | 0.9999986525 | 0              |
| 0.5989515587 | 0.9999986525 | 55.7697130162  |
| 0.3380400809 | 0.9999986525 | 0              |
| 0.1016579924 | 0.9999986525 | 1.7207714788   |
| 0.3271605724 | 0.9999986525 | 7.9249180618   |
| 0.0573496857 | 0.9999986525 | 0              |
| 0.0212216359 | 0.9999986525 | 0              |
| 0.5722926921 | 0.9999986525 | 0              |
| 0.3307151646 | 0.9999986525 | 0              |
| 0.4847010514 | 0.9999986525 | 0              |
| 0            | 0            | 0              |
| 0.1856588125 | 0.9999986525 | 84.1253874264  |
| 0.4851969382 | 0.9999986525 | 21.7460547185  |
| 0.236141343  | 0.9999986525 | 294.6383164648 |
| 0.6579582619 | 0.9999986525 | 0              |
| 0.0545228247 | 0.9999986525 | 30.738530348   |
| 0.6526757145 | 0.9999986525 | 15.2795944529  |
| 0.3098441517 | 0.9999986525 | 0              |
| 0.6854718342 | 0.9999986525 | 65.0818462431  |
| 0.2690045097 | 0.9999986525 | 668.5306104596 |
| 0.9798115605 | 0.9999986525 | 6.9647788773   |
| 0.2396154249 | 0.9999986525 | 0              |
| 0.2933242188 | 0.9999986525 | 9.4330782      |
| 0.6396787323 | 0.9999986525 | 0              |
| 0            | 0            | 0              |
| 0.6379896282 | 0.9999986525 | 0              |
| 0.015575885  | 0.9999986525 | 45.462054548   |
| 0.8999905877 | 0.9999986525 | 0              |
| 0.5831733149 | 0.9999986525 | 43.838072817   |
| 0.2658851386 | 0.9999986525 | 0              |
| 0            | 0            | 0              |
| 0.5809361901 | 0.9999986525 | 2.8393053183   |
| 0.5826903655 | 0.9999986525 | 0              |
| 0.4004284377 | 0.9999986525 | 16.1713974761  |
| 0.1956051656 | 0.9999986525 | 5.1283117179   |
| 0.3609594602 | 0.9999986525 | 1.2838699993   |
| 0.8054896004 | 0.9999986525 | 0.7539998319   |
| 0.0760775287 | 0.9999986525 | 4.312924603    |
| 0.8321280831 | 0.9999986525 | 9.0389765448   |
| 0.5003758129 | 0.9999986525 | 1.8330528331   |

gene\_expression\_table

|              |              |                 |
|--------------|--------------|-----------------|
| 0.7658269443 | 0.9999986525 | 0.1902518668    |
| 0.3307033456 | 0.9999986525 | 0               |
| 0.1057075396 | 0.9999986525 | 0.7827299141    |
| 0.3868027149 | 0.9999986525 | 0.2653339072    |
| 0.0938901856 | 0.9999986525 | 0               |
| 0.2163232473 | 0.9999986525 | 0               |
| 0.2974218863 | 0.9999986525 | 9.6947778669    |
| 0.3732732783 | 0.9999986525 | 1.7791649413    |
| 0.1549174167 | 0.9999986525 | 85.1150978667   |
| 0.6312664098 | 0.9999986525 | 0               |
| 0.30755387   | 0.9999986525 | 0               |
| 0.51815559   | 0.9999986525 | 1.6566681585    |
| 0.2249541274 | 0.9999986525 | 0               |
| 0.6085975006 | 0.9999986525 | 0.8763759164    |
| 0.8272302533 | 0.9999986525 | 0               |
| 0.0792444571 | 0.9999986525 | 0               |
| 0.3116021851 | 0.9999986525 | 1.6319858545    |
| 0.2176872221 | 0.9999986525 | 1.4638815407    |
| 0.4890391389 | 0.9999986525 | 10.809971664    |
| 0.5225915892 | 0.9999986525 | 6.8523396275    |
| 0.9550830263 | 0.9999986525 | 6.3760723601    |
| 0.1786179964 | 0.9999986525 | 36.5631923214   |
| 0.4074583044 | 0.9999986525 | 0               |
| 0.9379466272 | 0.9999986525 | 547.2664143693  |
| 0.6873410114 | 0.9999986525 | 3273.8944724701 |
| 0.9412897335 | 0.9999986525 | 2.159945943     |
| 0.6186389753 | 0.9999986525 | 5.7441813682    |
| 0.989610685  | 0.9999986525 | 0.4143503023    |
| 0.6312664098 | 0.9999986525 | 0               |
| 0.7530578338 | 0.9999986525 | 0               |
| 0.411444301  | 0.9999986525 | 33.5488757298   |
| 0.8621319865 | 0.9999986525 | 0               |
| 0.6047843933 | 0.9999986525 | 1.9408200337    |
| 0.651050696  | 0.9999986525 | 0               |
| 0.3682136659 | 0.9999986525 | 12.8520995839   |
| 0.9057033829 | 0.9999986525 | 0               |
| 0.341183732  | 0.9999986525 | 0               |
| 0.5257839836 | 0.9999986525 | 3.1438994794    |
| 0.3489498941 | 0.9999986525 | 0.5786494968    |
| 0.6312664098 | 0.9999986525 | 0               |
| 0.9319105682 | 0.9999986525 | 20.6927923197   |
| 0            | 0            | 0               |
| 0.8573536375 | 0.9999986525 | 315.8569741917  |
| 0.3075114913 | 0.9999986525 | 0               |
| 0.8956936127 | 0.9999986525 | 0               |
| 0.3075114913 | 0.9999986525 | 0               |
| 0.3583390589 | 0.9999986525 | 2.3354522962    |
| 0.4928527741 | 0.9999986525 | 27.5770123515   |
| 0.7938869082 | 0.9999986525 | 0               |

gene\_expression\_table

|              |              |                 |
|--------------|--------------|-----------------|
| 0.7390940963 | 0.9999986525 | 1.5328598072    |
| 0.5664485855 | 0.9999986525 | 3.1427502664    |
| 0.1403942771 | 0.9999986525 | 16.7959215014   |
| 0.9470965805 | 0.9999986525 | 0               |
| 0.9706968387 | 0.9999986525 | 10.4460662649   |
| 0.3984746622 | 0.9999986525 | 9.6050253984    |
| 0.6048370941 | 0.9999986525 | 0               |
| 0.196344736  | 0.9999986525 | 0               |
| 0.3421550737 | 0.9999986525 | 16.0317469067   |
| 0.4381563375 | 0.9999986525 | 23.7943405237   |
| 0.002533     | 0.9999986525 | 2643.5384257518 |
| 0.8602743846 | 0.9999986525 | 2.2930171812    |
| 0.0564368571 | 0.9999986525 | 1.9703745048    |
| 0.1001084326 | 0.9999986525 | 10.3516107852   |
| 0.1056095389 | 0.9999986525 | 0               |
| 0.2321844724 | 0.9999986525 | 0               |
| 0.3140836434 | 0.9999986525 | 5.4342494978    |
| 0.593073845  | 0.9999986525 | 41.2005212882   |
| 0.7221439096 | 0.9999986525 | 3.2620313286    |
| 0.8316954308 | 0.9999986525 | 0.5710909312    |
| 0.1328762934 | 0.9999986525 | 13.3334809963   |
| 0.3218074329 | 0.9999986525 | 41.3942731273   |
| 0.6879300813 | 0.9999986525 | 4.2612488483    |
| 0.8009792394 | 0.9999986525 | 4.0858671071    |
| 0.2332001744 | 0.9999986525 | 0               |
| 0.1217213949 | 0.9999986525 | 0               |
| 0.6635760155 | 0.9999986525 | 1.6927537893    |
| 0.0838851056 | 0.9999986525 | 0               |
| 0.1223637333 | 0.9999986525 | 6.1991804949    |
| 0.6399542429 | 0.9999986525 | 0               |
| 0.276647005  | 0.9999986525 | 4.1736464352    |
| 0.6801971683 | 0.9999986525 | 0               |
| 0.2450146115 | 0.9999986525 | 9.5182262965    |
| 0.3645567655 | 0.9999986525 | 0.3810692976    |
| 0.3474050342 | 0.9999986525 | 59.7601577374   |
| 0.7895214822 | 0.9999986525 | 3.9755297033    |
| 0.0124371952 | 0.9999986525 | 8.7425787496    |
| 0.1120268044 | 0.9999986525 | 75.2670073591   |
| 0.2751094723 | 0.9999986525 | 3.7311139687    |
| 0.1319160057 | 0.9999986525 | 4.6276580022    |
| 0.7328109259 | 0.9999986525 | 0               |
| 0.6312664098 | 0.9999986525 | 0               |
| 0.4729816619 | 0.9999986525 | 0               |
| 0.2213241584 | 0.9999986525 | 0               |
| 0.5725962674 | 0.9999986525 | 3.9829500925    |
| 0.0864367801 | 0.9999986525 | 15.2211241206   |
| 0.6098761915 | 0.9999986525 | 0               |
| 0.3199999237 | 0.9999986525 | 0.8546553904    |
| 0.6625636537 | 0.9999986525 | 3.0447318244    |

gene\_expression\_table

|              |              |                |
|--------------|--------------|----------------|
| 0.2911088539 | 0.9999986525 | 0.893906253    |
| 0.7679611904 | 0.9999986525 | 9.153192067    |
| 0.9268145983 | 0.9999986525 | 19.803419024   |
| 0.2074405066 | 0.9999986525 | 4.9065327226   |
| 0.9050342072 | 0.9999986525 | 0              |
| 0.4029074108 | 0.9999986525 | 0              |
| 0.6042459725 | 0.9999986525 | 0              |
| 0.9053690899 | 0.9999986525 | 3.4423654524   |
| 0.4172075807 | 0.9999986525 | 0              |
| 0.5514829093 | 0.9999986525 | 8.8206961547   |
| 0.0890530489 | 0.9999986525 | 25.601178433   |
| 0.1085918974 | 0.9999986525 | 0              |
| 0.5889230582 | 0.9999986525 | 14.9580599939  |
| 0.5747710117 | 0.9999986525 | 0              |
| 0.6855615347 | 0.9999986525 | 38.9124466578  |
| 0.3608824411 | 0.9999986525 | 16.5461456992  |
| 0            | 0            | 0              |
| 0.3197354476 | 0.9999986525 | 4.0476638739   |
| 0.1163375812 | 0.9999986525 | 159.0454042815 |
| 0.3450290083 | 0.9999986525 | 0              |
| 0.0568614886 | 0.9999986525 | 10.0037728201  |
| 0.0816344006 | 0.9999986525 | 154.0762606278 |
| 0.4075210043 | 0.9999986525 | 0              |
| 0.6225004472 | 0.9999986525 | 140.3505666391 |
| 0.6722196461 | 0.9999986525 | 0              |
| 0.0876881127 | 0.9999986525 | 3.1904022125   |
| 0.1599078476 | 0.9999986525 | 13.6282259314  |
| 0.862110046  | 0.9999986525 | 0              |
| 0.7310613716 | 0.9999986525 | 23.9227943952  |
| 0.0607002902 | 0.9999986525 | 11.2898499842  |
| 0.4256013894 | 0.9999986525 | 1.3980997797   |
| 0.4282139732 | 0.9999986525 | 13.5499716898  |
| 0.1920464287 | 0.9999986525 | 219.6385440013 |
| 0.6934740044 | 0.9999986525 | 114.0878924796 |
| 0.544483723  | 0.9999986525 | 0.6696749918   |
| 0.2724400104 | 0.9999986525 | 38.726979451   |
| 0.6507223095 | 0.9999986525 | 0              |
| 0.5983358728 | 0.9999986525 | 52.1361482984  |
| 0.8763292496 | 0.9999986525 | 0              |
| 0.4729816619 | 0.9999986525 | 0              |
| 0.8384331653 | 0.9999986525 | 2.5117390426   |
| 0.8419074595 | 0.9999986525 | 3.2514100714   |
| 0.3489167702 | 0.9999986525 | 3.2066349058   |
| 0.4866907299 | 0.9999986525 | 1.6897209568   |
| 0            | 0            | 0              |
| 0.9925989497 | 0.9999986525 | 1.153110848    |
| 0.3082608235 | 0.9999986525 | 1.9137904526   |
| 0.9541468754 | 0.9999986525 | 0              |
| 0.2927117016 | 0.9999986525 | 9.8902468589   |

gene\_expression\_table

|              |              |                 |
|--------------|--------------|-----------------|
| 0.7400301486 | 0.9999986525 | 1.965754205     |
| 0.6312664098 | 0.9999986525 | 0               |
| 0.380484263  | 0.9999986525 | 0               |
| 0.188059993  | 0.9999986525 | 1957.2497565038 |
| 0.8840718967 | 0.9999986525 | 0.2736784412    |
| 0.7586455575 | 0.9999986525 | 26.8915137477   |
| 0.5175057302 | 0.9999986525 | 2.0116522521    |
| 0            | 0            | 0               |
| 0.3821153699 | 0.9999986525 | 49.5323969297   |
| 0.2684475617 | 0.9999986525 | 14.090474955    |
| 0.697557198  | 0.9999986525 | 6.3012489681    |
| 0.4880330522 | 0.9999986525 | 80.664776845    |
| 0.8658807962 | 0.9999986525 | 4.8691007192    |
| 0.1635694897 | 0.9999986525 | 2.4560043818    |
| 0.887625862  | 0.9999986525 | 0               |
| 0.3406974235 | 0.9999986525 | 0               |
| 0.8554328194 | 0.9999986525 | 2.0773252921    |
| 0.7430335412 | 0.9999986525 | 50.2212463818   |
| 0.3954411234 | 0.9999986525 | 1.8152231733    |
| 0.3469230127 | 0.9999986525 | 2.262274024     |
| 0.4825633681 | 0.9999986525 | 2.4270544439    |
| 0.6875191774 | 0.9999986525 | 5.7027078809    |
| 0.7403952036 | 0.9999986525 | 17.5379950277   |
| 0.6853391589 | 0.9999986525 | 0.7374288698    |
| 0.116870352  | 0.9999986525 | 10.2678399429   |
| 0.9035144217 | 0.9999986525 | 2.0174154179    |
| 0.7103644028 | 0.9999986525 | 5.2106639161    |
| 0.6402364457 | 0.9999986525 | 0               |
| 0.0682480435 | 0.9999986525 | 46.6259840565   |
| 0.5896324016 | 0.9999986525 | 6.9366499066    |
| 0.9815844464 | 0.9999986525 | 0               |
| 0.5611157653 | 0.9999986525 | 0.1834351624    |
| 0.5722582572 | 0.9999986525 | 0.6313376315    |
| 0.7184781373 | 0.9999986525 | 0.1723967548    |
| 0.2195935511 | 0.9999986525 | 8.9603557833    |
| 0.2904313318 | 0.9999986525 | 15.2497138936   |
| 0.7909325438 | 0.9999986525 | 0               |
| 0.1066431599 | 0.9999986525 | 1.385307325     |
| 0.9209837385 | 0.9999986525 | 13.4186573113   |
| 0.3886154996 | 0.9999986525 | 0               |
| 0.347877458  | 0.9999986525 | 0.2723777948    |
| 0.0623700467 | 0.9999986525 | 1.8477603522    |
| 0.1652431071 | 0.9999986525 | 71.0303142152   |
| 0.3975462285 | 0.9999986525 | 2053.4063665532 |
| 0.2805761639 | 0.9999986525 | 1.4936485259    |
| 0.1236353934 | 0.9999986525 | 0               |
| 0.2699501675 | 0.9999986525 | 53.5765968402   |
| 0.3661127807 | 0.9999986525 | 6.685682233     |
| 0.2816028513 | 0.9999986525 | 0               |

gene\_expression\_table

|              |              |                |
|--------------|--------------|----------------|
| 0.8352233675 | 0.9999986525 | 0.2014837128   |
| 0.2049888825 | 0.9999986525 | 2.3640966082   |
| 0            | 0            | 0              |
| 0.1244728026 | 0.9999986525 | 2.5988863275   |
| 0.479115223  | 0.9999986525 | 17.7512515979  |
| 0.8397728092 | 0.9999986525 | 0              |
| 0.9405799556 | 0.9999986525 | 3.6152043781   |
| 0.3224218507 | 0.9999986525 | 11.0529308896  |
| 0.862124168  | 0.9999986525 | 0              |
| 0.1769762104 | 0.9999986525 | 6.7922409101   |
| 0.408808695  | 0.9999986525 | 0.8023565782   |
| 0.6065120229 | 0.9999986525 | 10.7516824351  |
| 0.7207208076 | 0.9999986525 | 119.8093515319 |
| 0.1195562579 | 0.9999986525 | 7.0569105059   |
| 0.8008474417 | 0.9999986525 | 0.5952138286   |
| 0.797837979  | 0.9999986525 | 0              |
| 0.6862765083 | 0.9999986525 | 16.2709466525  |
| 0.4473238863 | 0.9999986525 | 82.7755401583  |
| 0.0526475576 | 0.9999986525 | 0              |
| 0.8026012283 | 0.9999986525 | 18.257163973   |
| 0.726657638  | 0.9999986525 | 2.8533668542   |
| 0.0545259477 | 0.9999986525 | 11.136381537   |
| 0.2583941678 | 0.9999986525 | 0.6304144745   |
| 0.7848076987 | 0.9999986525 | 42.5975950205  |
| 0.3199443832 | 0.9999986525 | 3.6742034003   |
| 0.8543838607 | 0.9999986525 | 2.5515613675   |
| 0.6503976174 | 0.9999986525 | 7.6858130317   |
| 0.2910039747 | 0.9999986525 | 0              |
| 0.9199542703 | 0.9999986525 | 0.1437234657   |
| 0.8029214661 | 0.9999986525 | 2.5906531284   |
| 0.044176545  | 0.9999986525 | 13.7428879069  |
| 0.5767441608 | 0.9999986525 | 0              |
| 0.2295743333 | 0.9999986525 | 0              |
| 0.7377862736 | 0.9999986525 | 32.7066169433  |
| 0.9785656    | 0.9999986525 | 46.4808961288  |
| 0.9352198022 | 0.9999986525 | 5.2558135301   |
| 0.4918162454 | 0.9999986525 | 0              |
| 0.8607118864 | 0.9999986525 | 3.9753800814   |
| 0.2370501614 | 0.9999986525 | 2.7192831957   |
| 0.5777078448 | 0.9999986525 | 8.7501107105   |
| 0.4679333154 | 0.9999986525 | 0              |
| 0.6328691481 | 0.9999986525 | 0              |
| 0.6032233915 | 0.9999986525 | 0              |
| 0.3672245978 | 0.9999986525 | 1.1818895902   |
| 0.4607003034 | 0.9999986525 | 8.9781416449   |
| 0.7680320963 | 0.9999986525 | 0              |
| 0.6559132507 | 0.9999986525 | 8.2832368611   |
| 0.6312664098 | 0.9999986525 | 0              |
| 0.223055804  | 0.9999986525 | 2.8951824485   |



gene\_expression\_table

|              |              |                 |
|--------------|--------------|-----------------|
| 0.2695186919 | 0.9999986525 | 67.8793665172   |
| 0.6256429045 | 0.9999986525 | 2183.2880442035 |
| 0.4290520649 | 0.9999986525 | 0               |
| 0.2866949103 | 0.9999986525 | 115.5244292227  |
| 0.5638078667 | 0.9999986525 | 0               |
| 0.7500842004 | 0.9999986525 | 634.0580617605  |
| 0.4389505442 | 0.9999986525 | 4.0239175791    |
| 0.3381491972 | 0.9999986525 | 0               |
| 0.2120317452 | 0.9999986525 | 0               |
| 0.6187861001 | 0.9999986525 | 33.4933868453   |
| 0.2914354243 | 0.9999986525 | 0               |
| 0.7435754042 | 0.9999986525 | 1.9921417226    |
| 0.3372404885 | 0.9999986525 | 3.9774009283    |
| 0.4731492401 | 0.9999986525 | 56.1892890925   |
| 0.4733134029 | 0.9999986525 | 7.688095069     |
| 0.8039027841 | 0.9999986525 | 15.2015307552   |
| 0.6043899202 | 0.9999986525 | 0               |
| 0.0146070496 | 0.9999986525 | 36.6288502587   |
| 0.2248985095 | 0.9999986525 | 0               |
| 0.0612380154 | 0.9999986525 | 1.3464522996    |
| 0.7729579035 | 0.9999986525 | 15.7277898232   |
| 0.8411123684 | 0.9999986525 | 4.0857406723    |
| 0.3464940326 | 0.9999986525 | 0.3247379461    |
| 0.9893271704 | 0.9999986525 | 3.31714463      |
| 0.6312664098 | 0.9999986525 | 0               |
| 0.4158758995 | 0.9999986525 | 2.9616665205    |
| 0.1999993251 | 0.9999986525 | 2.7869406204    |
| 0.1742810695 | 0.9999986525 | 0               |
| 0.1864612853 | 0.9999986525 | 0               |
| 0.4497516829 | 0.9999986525 | 6.7551376968    |
| 0.700908611  | 0.9999986525 | 0               |
| 0.4931431269 | 0.9999986525 | 110.2160915219  |
| 0.9524663685 | 0.9999986525 | 4.0377172331    |
| 0.517727176  | 0.9999986525 | 28.0999830946   |
| 0.4403485792 | 0.9999986525 | 1.3200179512    |
| 0.4921534662 | 0.9999986525 | 31.2046784203   |
| 0.5442485017 | 0.9999986525 | 23.1926085253   |
| 0.2801521536 | 0.9999986525 | 0               |
| 0.9578706979 | 0.9999986525 | 0               |
| 0.4122659121 | 0.9999986525 | 795.4759065824  |
| 0.8199891111 | 0.9999986525 | 0.9885187025    |
| 0.9969512288 | 0.9999986525 | 1.2129558749    |
| 0.4593973331 | 0.9999986525 | 39.4800136247   |
| 0.3369034842 | 0.9999986525 | 0               |
| 0.5184192152 | 0.9999986525 | 2.2782541536    |
| 0.97746975   | 0.9999986525 | 0.6777445041    |
| 0.3130310307 | 0.9999986525 | 15.924594671    |
| 0.8227542088 | 0.9999986525 | 0.9429709725    |
| 0.246989225  | 0.9999986525 | 0               |

gene\_expression\_table

|              |              |                 |
|--------------|--------------|-----------------|
| 0.9000029518 | 0.9999986525 | 0               |
| 0.6339387232 | 0.9999986525 | 1.0727994765    |
| 0.7245398346 | 0.9999986525 | 0               |
| 0            | 0            | 0               |
| 0.4259135275 | 0.9999986525 | 0               |
| 0.7679182435 | 0.9999986525 | 7.4122485698    |
| 0.5341316916 | 0.9999986525 | 7.0366955201    |
| 0.99295094   | 0.9999986525 | 3.5777424316    |
| 0.1005804162 | 0.9999986525 | 4.8168543857    |
| 0.5769907651 | 0.9999986525 | 2.4765424243    |
| 0.0821162656 | 0.9999986525 | 6.5081846243    |
| 0.8384734968 | 0.9999986525 | 18.31446362     |
| 0.3242106037 | 0.9999986525 | 26.3017521047   |
| 0.1616312564 | 0.9999986525 | 2.9336176319    |
| 0.3139366892 | 0.9999986525 | 20.2065208387   |
| 0.4094767299 | 0.9999986525 | 24.5708467471   |
| 0.8412137595 | 0.9999986525 | 3.3203771046    |
| 0.1203897433 | 0.9999986525 | 20.1317308445   |
| 0.781674993  | 0.9999986525 | 0               |
| 0.3641892685 | 0.9999986525 | 4.6230670716    |
| 0.2494929326 | 0.9999986525 | 4.0969605326    |
| 0.1748192544 | 0.9999986525 | 0               |
| 0.7034794153 | 0.9999986525 | 0               |
| 0.5621564548 | 0.9999986525 | 0               |
| 0.1610937921 | 0.9999986525 | 36.4661452919   |
| 0.3742622288 | 0.9999986525 | 1521.1066225014 |
| 0.174867894  | 0.9999986525 | 2.7876025666    |
| 0.6374828126 | 0.9999986525 | 149.0515095757  |
| 0.0595790601 | 0.9999986525 | 62.7565530249   |
| 0.2460302368 | 0.9999986525 | 1.1815194234    |
| 0.5193727467 | 0.9999986525 | 1.691127705     |
| 0.2433158402 | 0.9999986525 | 84.1695518747   |
| 0            | 0            | 0               |
| 0.6863325541 | 0.9999986525 | 21.6206808827   |
| 0.2732873873 | 0.9999986525 | 1.9965190423    |
| 0.3344514563 | 0.9999986525 | 9.546984495     |
| 0.2709365199 | 0.9999986525 | 32.4720087469   |
| 0.5094757829 | 0.9999986525 | 28.1333220576   |
| 0.0956389819 | 0.9999986525 | 2.5107042013    |
| 0.7943973561 | 0.9999986525 | 0               |
| 0.2564871489 | 0.9999986525 | 27.7043124894   |
| 0.6213309744 | 0.9999986525 | 0               |
| 0.3477924387 | 0.9999986525 | 0               |
| 0.5044583564 | 0.9999986525 | 97.01955586     |
| 0.4710839257 | 0.9999986525 | 174.8226356382  |
| 0.5694011191 | 0.9999986525 | 204.4032957524  |
| 0.8336841471 | 0.9999986525 | 4.0835293292    |
| 0.5482396104 | 0.9999986525 | 86.1283728413   |
| 0.6155816848 | 0.9999986525 | 36.8669250009   |

gene\_expression\_table

|              |              |                 |
|--------------|--------------|-----------------|
| 0.8097510705 | 0.9999986525 | 110.6630030934  |
| 0.8872066994 | 0.9999986525 | 9.8386583879    |
| 0.4729816619 | 0.9999986525 | 0               |
| 0.5417415433 | 0.9999986525 | 0               |
| 0.1106967109 | 0.9999986525 | 18.6863727655   |
| 0.5481913378 | 0.9999986525 | 5.871941353     |
| 0.8964599972 | 0.9999986525 | 0               |
| 0.6268290412 | 0.9999986525 | 4509.0496541482 |
| 0.5581243912 | 0.9999986525 | 155.5638239361  |
| 0.1260420109 | 0.9999986525 | 24.731406334    |
| 0.0291434562 | 0.9999986525 | 0               |
| 0.7358710469 | 0.9999986525 | 22.6604340216   |
| 0.3649428668 | 0.9999986525 | 1.5785139048    |
| 0.2580361021 | 0.9999986525 | 187.7692874386  |
| 0.7246095901 | 0.9999986525 | 0               |
| 0.3025533294 | 0.9999986525 | 9.6678618958    |
| 0.9725896724 | 0.9999986525 | 35.5409947687   |
| 0.776247363  | 0.9999986525 | 0               |
| 0.6130727425 | 0.9999986525 | 4.2423543863    |
| 0.6312664098 | 0.9999986525 | 0               |
| 0.1334423998 | 0.9999986525 | 111.1287074725  |
| 0.3114750242 | 0.9999986525 | 0               |
| 0.965501452  | 0.9999986525 | 5.6606557584    |
| 0.4400830676 | 0.9999986525 | 0               |
| 0.6312664098 | 0.9999986525 | 0               |
| 0.0903210908 | 0.9999986525 | 12.4891028723   |
| 0.0361650911 | 0.9999986525 | 1.9245371479    |
| 0.0646428402 | 0.9999986525 | 31.628257247    |
| 0.1592772996 | 0.9999986525 | 0               |
| 0.2667328841 | 0.9999986525 | 88.9204855802   |
| 0.3421281079 | 0.9999986525 | 0               |
| 0.2287154669 | 0.9999986525 | 130.2974956241  |
| 0.9760573865 | 0.9999986525 | 0               |
| 0.280547     | 0.9999986525 | 87.4402619641   |
| 0.5975123224 | 0.9999986525 | 0               |
| 0.5058680394 | 0.9999986525 | 62.6128254017   |
| 0.5254178171 | 0.9999986525 | 111.0202485238  |
| 0.2962110604 | 0.9999986525 | 47.3624950465   |
| 0.8029003861 | 0.9999986525 | 0               |
| 0.8548712358 | 0.9999986525 | 44.3938791479   |
| 0.4815257734 | 0.9999986525 | 15.6485683634   |
| 0.5248231721 | 0.9999986525 | 122.0489706911  |
| 0.2379190473 | 0.9999986525 | 0               |
| 0.6179959085 | 0.9999986525 | 0               |
| 0.9113539391 | 0.9999986525 | 2.6540991118    |
| 0.9751104279 | 0.9999986525 | 19.6407282359   |
| 0.2627009244 | 0.9999986525 | 26.8047987579   |
| 0.8462197083 | 0.9999986525 | 431.5484786577  |
| 0.4762041896 | 0.9999986525 | 87.4797621577   |

gene\_expression\_table

|              |              |                 |
|--------------|--------------|-----------------|
| 0.8396087526 | 0.9999986525 | 5.7744320819    |
| 0.2882391242 | 0.9999986525 | 4.0632967292    |
| 0.5745681101 | 0.9999986525 | 3.1864561963    |
| 0.8478124718 | 0.9999986525 | 31.0086415138   |
| 0.7903854133 | 0.9999986525 | 24.0573572243   |
| 0.2045674417 | 0.9999986525 | 5.2745349272    |
| 0.08452164   | 0.9999986525 | 69.0265227594   |
| 0.630566946  | 0.9999986525 | 25.6585837537   |
| 0.148354904  | 0.9999986525 | 0               |
| 0.0178438652 | 0.9999986525 | 71.3822175723   |
| 0.7366171597 | 0.9999986525 | 2600.7717830667 |
| 0.8656545245 | 0.9999986525 | 42.0995761071   |
| 0.5660871394 | 0.9999986525 | 26.587086625    |
| 0.1294244094 | 0.9999986525 | 32.5108761011   |
| 0.0978944206 | 0.9999986525 | 0               |
| 0.7853055575 | 0.9999986525 | 70.0317157765   |
| 0.1400238533 | 0.9999986525 | 43.3344970062   |
| 0.7423968055 | 0.9999986525 | 47.9690447105   |
| 0.5025458882 | 0.9999986525 | 0               |
| 0.1975830717 | 0.9999986525 | 0.603670426     |
| 0.8161963326 | 0.9999986525 | 87.0367802016   |
| 0.8680368489 | 0.9999986525 | 36.1904419093   |
| 0.873982947  | 0.9999986525 | 8.9697551335    |
| 0.2956317759 | 0.9999986525 | 11.2474736007   |
| 0.4639019509 | 0.9999986525 | 0               |
| 0.922900878  | 0.9999986525 | 195.8204165425  |
| 0.7176793474 | 0.9999986525 | 4.8838467012    |
| 0.1909344452 | 0.9999986525 | 98.5104560062   |
| 0.3261700738 | 0.9999986525 | 18.2116959401   |
| 0.5307791649 | 0.9999986525 | 563.769408906   |
| 0.3923872746 | 0.9999986525 | 3.3525196449    |
| 0.4611449974 | 0.9999986525 | 5.963631236     |
| 0.4163819221 | 0.9999986525 | 0               |
| 0.8764278413 | 0.9999986525 | 17.365573349    |
| 0.2725434572 | 0.9999986525 | 1.0745675034    |
| 0.0514199524 | 0.9999986525 | 0               |
| 0.9880249568 | 0.9999986525 | 18.6970832744   |
| 0.1645062503 | 0.9999986525 | 11.7323292686   |
| 0.940120378  | 0.9999986525 | 80.7140879669   |
| 0.3544576774 | 0.9999986525 | 4.1129131864    |
| 0.2920077405 | 0.9999986525 | 0               |
| 0.6167852831 | 0.9999986525 | 7.9090378215    |
| 0.0190502035 | 0.9999986525 | 2.7641135828    |
| 0.080722219  | 0.9999986525 | 46.8485377525   |
| 0.5443356336 | 0.9999986525 | 0.832183542     |
| 0.4729816619 | 0.9999986525 | 0               |
| 0.734515319  | 0.9999986525 | 7.3451279347    |
| 0.5199958159 | 0.9999986525 | 0.8368417269    |
| 0.2435014321 | 0.9999986525 | 0.7504300796    |

gene\_expression\_table

|              |              |                |
|--------------|--------------|----------------|
| 0.4889185709 | 0.9999986525 | 3.313918443    |
| 0.1098042291 | 0.9999986525 | 0              |
| 0.597216584  | 0.9999986525 | 2.3095624019   |
| 0.5011328367 | 0.9999986525 | 10.6923752331  |
| 0.7735374203 | 0.9999986525 | 10.0112182124  |
| 0.5948500298 | 0.9999986525 | 58.6237322423  |
| 0.031923136  | 0.9999986525 | 0              |
| 0.4286731759 | 0.9999986525 | 0              |
| 0.2071773087 | 0.9999986525 | 4.8347864796   |
| 0            | 0            | 0              |
| 0.6312664098 | 0.9999986525 | 0              |
| 0.7536648131 | 0.9999986525 | 0.9227556255   |
| 0.6463823723 | 0.9999986525 | 12.8830145692  |
| 0.7426760496 | 0.9999986525 | 15.2903258858  |
| 0.1454666034 | 0.9999986525 | 152.7640250801 |
| 0.7945212519 | 0.9999986525 | 0              |
| 0.9776240297 | 0.9999986525 | 1.6469865664   |
| 0.6312664098 | 0.9999986525 | 0              |
| 0.1533092014 | 0.9999986525 | 0              |
| 0.6312664098 | 0.9999986525 | 0              |
| 0.0844539369 | 0.9999986525 | 0              |
| 0.7102440155 | 0.9999986525 | 1.435080878    |
| 0.7968557811 | 0.9999986525 | 0              |
| 0            | 0            | 0              |
| 0.109683566  | 0.9999986525 | 13.8035004675  |
| 0.3058711981 | 0.9999986525 | 1.1406401068   |
| 0.094292042  | 0.9999986525 | 35.3086661742  |
| 0.300464568  | 0.9999986525 | 0              |
| 0.4231571972 | 0.9999986525 | 0              |
| 0.6569545214 | 0.9999986525 | 0              |
| 0.9985266795 | 0.9999986525 | 0.645862736    |
| 0.4740001081 | 0.9999986525 | 0.4317402249   |
| 0.8493543873 | 0.9999986525 | 8.1831295671   |
| 0.1754184371 | 0.9999986525 | 1.4044285388   |
| 0.7235819191 | 0.9999986525 | 1.3629398252   |
| 0.1955853451 | 0.9999986525 | 1.6215012811   |
| 0.0624014975 | 0.9999986525 | 22.6545429921  |
| 0.1503417234 | 0.9999986525 | 24.9711197288  |
| 0.901272575  | 0.9999986525 | 0.7087993878   |
| 0.1875212784 | 0.9999986525 | 0              |
| 0.4022339735 | 0.9999986525 | 1.2589210035   |
| 0.5071689719 | 0.9999986525 | 2.7964956767   |
| 0.1992645381 | 0.9999986525 | 15.5885236795  |
| 0.7552063759 | 0.9999986525 | 6.5988985858   |
| 0.9975592913 | 0.9999986525 | 4.2592298895   |
| 0.4743018806 | 0.9999986525 | 0.8326790573   |
| 0.5104777699 | 0.9999986525 | 10.2043204456  |
| 0.6312664098 | 0.9999986525 | 0              |
| 0.4305836387 | 0.9999986525 | 0              |

gene\_expression\_table

|              |              |                |
|--------------|--------------|----------------|
| 0.5013448755 | 0.9999986525 | 0              |
| 0.2636687656 | 0.9999986525 | 2.9114511648   |
| 0.7442831809 | 0.9999986525 | 0              |
| 0.7855636976 | 0.9999986525 | 14.9371189214  |
| 0.6312664098 | 0.9999986525 | 0              |
| 0.7387217527 | 0.9999986525 | 0              |
| 0.8821895497 | 0.9999986525 | 4.3149947998   |
| 0.7479543767 | 0.9999986525 | 1.8542476673   |
| 0.2836540982 | 0.9999986525 | 19.1980800532  |
| 0.4729816619 | 0.9999986525 | 0              |
| 0.9889422913 | 0.9999986525 | 1.0452613103   |
| 0.0369854788 | 0.9999986525 | 0              |
| 0.1190952279 | 0.9999986525 | 9.2090528729   |
| 0.7104970854 | 0.9999986525 | 1.6562317557   |
| 0.2730303261 | 0.9999986525 | 0              |
| 0.5096498109 | 0.9999986525 | 1.3814061055   |
| 0.2006715808 | 0.9999986525 | 0              |
| 0.3635151487 | 0.9999986525 | 5.171919526    |
| 0            | 0            | 0              |
| 0.2739330327 | 0.9999986525 | 13.9093806232  |
| 0.2078163277 | 0.9999986525 | 12.0140851288  |
| 0.6065998814 | 0.9999986525 | 3.3211078904   |
| 0.7215997553 | 0.9999986525 | 0.4995641149   |
| 0.3421474656 | 0.9999986525 | 0.3339736068   |
| 0.3153100896 | 0.9999986525 | 2.4884675674   |
| 0.3025449122 | 0.9999986525 | 3.2785348703   |
| 0.0551899558 | 0.9999986525 | 20.1994237133  |
| 0.7752023115 | 0.9999986525 | 61.2496679483  |
| 0.0759070723 | 0.9999986525 | 0.9579192191   |
| 0.9720816252 | 0.9999986525 | 0              |
| 0.4083083226 | 0.9999986525 | 0              |
| 0.1834205627 | 0.9999986525 | 33.2715440898  |
| 0.6312664098 | 0.9999986525 | 0.5387526087   |
| 0.348168911  | 0.9999986525 | 0.5587207632   |
| 0.0181727    | 0.9999986525 | 80.1772777237  |
| 0.990788078  | 0.9999986525 | 954.0311165954 |
| 0.1964806418 | 0.9999986525 | 1.9062267461   |
| 0.08819886   | 0.9999986525 | 562.8481516125 |
| 0.0423567863 | 0.9999986525 | 0              |
| 0.4296214442 | 0.9999986525 | 3.4099161666   |
| 0.2513249291 | 0.9999986525 | 12.9216265769  |
| 0.4522868367 | 0.9999986525 | 3.1973555047   |
| 0.7226634084 | 0.9999986525 | 0.2512543624   |
| 0.5888474023 | 0.9999986525 | 0.2466879576   |
| 0.748397815  | 0.9999986525 | 1.2819178887   |
| 0.7461614398 | 0.9999986525 | 8.2671913008   |
| 0.2207505486 | 0.9999986525 | 0.8551614862   |
| 0.8698111861 | 0.9999986525 | 0.3123346673   |
| 0.006379     | 0.9999986525 | 2.4064847801   |

| gene_expression_table |              |               |
|-----------------------|--------------|---------------|
| 0.1898724759          | 0.9999986525 | 0             |
| 0.4075523348          | 0.9999986525 | 0             |
| 0.63966483            | 0.9999986525 | 0             |
| 0.3369435736          | 0.9999986525 | 0             |
| 0.6396509149          | 0.9999986525 | 0             |
| 0.6402284505          | 0.9999986525 | 0             |
| 0.5440709492          | 0.9999986525 | 2.3945157473  |
| 0.1204530446          | 0.9999986525 | 0             |
| 0                     | 0            | 0             |
| 0.6880575644          | 0.9999986525 | 14.5763936318 |
| 0.4496410712          | 0.9999986525 | 0             |
| 0.336983693           | 0.9999986525 | 0             |
| 0.1043446725          | 0.9999986525 | 10.7574942919 |
| 0.7652522307          | 0.9999986525 | 6.9702940776  |
| 0.5205228879          | 0.9999986525 | 15.2026247053 |
| 0.1982604702          | 0.9999986525 | 18.3275598241 |
| 0.3248174816          | 0.9999986525 | 0             |
| 0.8857941866          | 0.9999986525 | 0.6674280868  |
| 0.3479065373          | 0.9999986525 | 1.4575387947  |
| 0.9362981606          | 0.9999986525 | 0             |
| 0.6898210256          | 0.9999986525 | 1.0940674544  |
| 0.4324287494          | 0.9999986525 | 28.318454813  |
| 0.8639959446          | 0.9999986525 | 8.9322432425  |
| 0.3040887331          | 0.9999986525 | 1.7141810525  |
| 0.1599035211          | 0.9999986525 | 0             |
| 0.8149253012          | 0.9999986525 | 6.6667404981  |
| 0                     | 0            | 0             |
| 0.9098354548          | 0.9999986525 | 0             |
| 0.9299395264          | 0.9999986525 | 0             |
| 0.4444917421          | 0.9999986525 | 0             |
| 0.8434841888          | 0.9999986525 | 0.421876843   |
| 0.892743037           | 0.9999986525 | 9.1260406462  |
| 0.6492362319          | 0.9999986525 | 8.1974185288  |
| 0.7092335903          | 0.9999986525 | 30.7522523735 |
| 0.6717845605          | 0.9999986525 | 0             |
| 0.1532072713          | 0.9999986525 | 174.436213654 |
| 0.6312664098          | 0.9999986525 | 0             |
| 0.6904490321          | 0.9999986525 | 0.9669443133  |
| 0.3421668262          | 0.9999986525 | 0             |
| 0.46630262            | 0.9999986525 | 8.5837906995  |
| 0.916788802           | 0.9999986525 | 43.0712104276 |
| 0.9011794336          | 0.9999986525 | 0             |
| 0.8138811388          | 0.9999986525 | 4.7276006791  |
| 0.8193314785          | 0.9999986525 | 5.2259962623  |
| 0.2800420966          | 0.9999986525 | 0.1022417928  |
| 0.097315241           | 0.9999986525 | 2.7654403149  |
| 0.2414833665          | 0.9999986525 | 0             |
| 0.733331793           | 0.9999986525 | 0             |
| 0.0880271947          | 0.9999986525 | 14.2977004437 |

gene\_expression\_table

|              |              |                |
|--------------|--------------|----------------|
| 0.8384460798 | 0.9999986525 | 1.2181736415   |
| 0.0635869631 | 0.9999986525 | 5.6598758031   |
| 0.007123     | 0.9999986525 | 5.1428436156   |
| 0.946499737  | 0.9999986525 | 0              |
| 0.3053863099 | 0.9999986525 | 0              |
| 0.3353454842 | 0.9999986525 | 0              |
| 0.4875988974 | 0.9999986525 | 0              |
| 0.2468537739 | 0.9999986525 | 31.4256326469  |
| 0.8662139466 | 0.9999986525 | 15.6023392101  |
| 0.5502894667 | 0.9999986525 | 38.6855486449  |
| 0.88375122   | 0.9999986525 | 12.6258470539  |
| 0.2199712614 | 0.9999986525 | 1.1353070911   |
| 0.6563030618 | 0.9999986525 | 5.7457957654   |
| 0.9751499193 | 0.9999986525 | 14.5814241376  |
| 0.1164988471 | 0.9999986525 | 5.2692724959   |
| 0.4544341077 | 0.9999986525 | 0.9810695712   |
| 0.8574261761 | 0.9999986525 | 0              |
| 0.1733909888 | 0.9999986525 | 0.5553630805   |
| 0.7571935859 | 0.9999986525 | 2.925573645    |
| 0.30755387   | 0.9999986525 | 0              |
| 0.0419748884 | 0.9999986525 | 0.5645769806   |
| 0.6186133179 | 0.9999986525 | 0              |
| 0.9321171422 | 0.9999986525 | 1.4268247528   |
| 0.6724232991 | 0.9999986525 | 0              |
| 0.2657499032 | 0.9999986525 | 44.6912783806  |
| 0.8143018505 | 0.9999986525 | 0.7573842458   |
| 0.6551284047 | 0.9999986525 | 1.1704045081   |
| 0.2344229483 | 0.9999986525 | 0.4058550544   |
| 0.8040420391 | 0.9999986525 | 4.2339765824   |
| 0.7145514961 | 0.9999986525 | 8.614359173    |
| 0.3975477066 | 0.9999986525 | 0              |
| 0.072509454  | 0.9999986525 | 0              |
| 0.1353388074 | 0.9999986525 | 0.818046781    |
| 0.1041972454 | 0.9999986525 | 3.328818091    |
| 0.0603001158 | 0.9999986525 | 0              |
| 0.6007705189 | 0.9999986525 | 3.5784211821   |
| 0.7508280551 | 0.9999986525 | 0              |
| 0.4075836524 | 0.9999986525 | 0              |
| 0.419931398  | 0.9999986525 | 20.5283297503  |
| 0.1198134726 | 0.9999986525 | 1.4426484806   |
| 0.6072361761 | 0.9999986525 | 8.3372845022   |
| 0.178368634  | 0.9999986525 | 0              |
| 0.2690136485 | 0.9999986525 | 2.8721167157   |
| 0.5347680086 | 0.9999986525 | 0              |
| 0.8911597328 | 0.9999986525 | 0.824570056    |
| 0.6639461952 | 0.9999986525 | 1.9109859329   |
| 0.1112778812 | 0.9999986525 | 18.8838450613  |
| 0.2797391073 | 0.9999986525 | 100.8903753493 |
| 0.4739265164 | 0.9999986525 | 0              |



gene\_expression\_table

|              |              |                 |
|--------------|--------------|-----------------|
| 0.6113865004 | 0.9999986525 | 6.6025650989    |
| 0.5948410704 | 0.9999986525 | 6.2972575369    |
| 0.2940683231 | 0.9999986525 | 43.749556905    |
| 0.6245155327 | 0.9999986525 | 12.4194291653   |
| 0.5155937021 | 0.9999986525 | 0.7745736674    |
| 0.1921302228 | 0.9999986525 | 0               |
| 0.5908226309 | 0.9999986525 | 35.884824886    |
| 0.8924210752 | 0.9999986525 | 20.8484614543   |
| 0.3973174829 | 0.9999986525 | 14.1360673319   |
| 0.1469361871 | 0.9999986525 | 0.432029827     |
| 0.7168353078 | 0.9999986525 | 0               |
| 0.0821735053 | 0.9999986525 | 0               |
| 0.1039778705 | 0.9999986525 | 5.0188350518    |
| 0.0734699944 | 0.9999986525 | 10.9329418183   |
| 0.2704383531 | 0.9999986525 | 49.0440644707   |
| 0.7003317177 | 0.9999986525 | 3.7458007891    |
| 0.4027066871 | 0.9999986525 | 9.9694046788    |
| 0.1669154086 | 0.9999986525 | 1436.8750147835 |
| 0.8397106565 | 0.9999986525 | 0               |
| 0.5624614017 | 0.9999986525 | 45.7461396503   |
| 0.276985505  | 0.9999986525 | 2.6252071889    |
| 0.4729816619 | 0.9999986525 | 0               |
| 0            | 0            | 4.4114532431    |
| 0.9262827591 | 0.9999986525 | 7.1748292659    |
| 0.0793357692 | 0.9999986525 | 0.6445595234    |
| 0.730598634  | 0.9999986525 | 3.1892462697    |
| 0.4076149571 | 0.9999986525 | 0               |
| 0.7045488625 | 0.9999986525 | 0.7776015287    |
| 0.5179828437 | 0.9999986525 | 2.859735785     |
| 0.8280370806 | 0.9999986525 | 0               |
| 0.7819359687 | 0.9999986525 | 0               |
| 0.3297625125 | 0.9999986525 | 0               |
| 0.4159643785 | 0.9999986525 | 37.5245890965   |
| 0.4397957059 | 0.9999986525 | 0               |
| 0.7969796785 | 0.9999986525 | 0               |
| 0.278856124  | 0.9999986525 | 0.4346609898    |
| 0.5597662107 | 0.9999986525 | 0               |
| 0.087645632  | 0.9999986525 | 6.6960423751    |
| 0.4695648409 | 0.9999986525 | 2.523902331     |
| 0.4729816619 | 0.9999986525 | 0               |
| 0.3816922075 | 0.9999986525 | 218.0565077558  |
| 0.3165335081 | 0.9999986525 | 5.1295569373    |
| 0.8157777671 | 0.9999986525 | 35.2468754847   |
| 0.4179903467 | 0.9999986525 | 0               |
| 0.6198935583 | 0.9999986525 | 1.1283578649    |
| 0.5512847257 | 0.9999986525 | 38.0869602594   |
| 0.4489020364 | 0.9999986525 | 2.3661884713    |
| 0.4729816619 | 0.9999986525 | 0               |
| 0.5994635789 | 0.9999986525 | 0               |

gene\_expression\_table

|              |              |               |
|--------------|--------------|---------------|
| 0.4227970536 | 0.9999986525 | 0             |
| 0.8071510605 | 0.9999986525 | 7.6410604465  |
| 0.5781741608 | 0.9999986525 | 2.6457559195  |
| 0.1805918766 | 0.9999986525 | 0.1269022347  |
| 0.8371135758 | 0.9999986525 | 1.4322806917  |
| 0.7730666607 | 0.9999986525 | 0.5907398882  |
| 0.2895021255 | 0.9999986525 | 0             |
| 0.3685129153 | 0.9999986525 | 0             |
| 0.9567214113 | 0.9999986525 | 3.782690032   |
| 0.4282477163 | 0.9999986525 | 0             |
| 0.0597979199 | 0.9999986525 | 0.7507415632  |
| 0.848464512  | 0.9999986525 | 0             |
| 0.8282919605 | 0.9999986525 | 0             |
| 0.6534144009 | 0.9999986525 | 0             |
| 0.8621383263 | 0.9999986525 | 0             |
| 0.7235703246 | 0.9999986525 | 3.1878287569  |
| 0.5524894377 | 0.9999986525 | 0             |
| 0.8706719585 | 0.9999986525 | 21.6920394053 |
| 0            | 0            | 0             |
| 0.583892405  | 0.9999986525 | 0.8961308248  |
| 0.5989145388 | 0.9999986525 | 0             |
| 0.3628436093 | 0.9999986525 | 8.3119166236  |
| 0.0641687803 | 0.9999986525 | 0.837266257   |
| 0.7363465655 | 0.9999986525 | 0             |
| 0.3334212837 | 0.9999986525 | 1.2347682277  |
| 0.005492     | 0.9999986525 | 36.8683547828 |
| 0.390308787  | 0.9999986525 | 31.7435847733 |
| 0.8225618436 | 0.9999986525 | 1.0299276652  |
| 0.3067801289 | 0.9999986525 | 1.5515024229  |
| 0.6593769335 | 0.9999986525 | 1.4934373438  |
| 0.8722978992 | 0.9999986525 | 0.8150799158  |
| 0.4095118833 | 0.9999986525 | 0             |
| 0.1443580291 | 0.9999986525 | 0             |
| 0.0229516241 | 0.9999986525 | 2.9610853457  |
| 0.9192094596 | 0.9999986525 | 16.9498403145 |
| 0.1334340453 | 0.9999986525 | 62.2952562235 |
| 0.037220037  | 0.9999986525 | 0.1810835344  |
| 0.0572320378 | 0.9999986525 | 2.5673967345  |
| 0.270118021  | 0.9999986525 | 0             |
| 0.6707045418 | 0.9999986525 | 1.780404471   |
| 0.3354350609 | 0.9999986525 | 0             |
| 0.9367571956 | 0.9999986525 | 16.0209889275 |
| 0.0007786    | 0.9999986525 | 0             |
| 0.4284635889 | 0.9999986525 | 4.8438693258  |
| 0            | 0            | 0             |
| 0.226168082  | 0.9999986525 | 0             |
| 0.0309253425 | 0.9999986525 | 0.7633944499  |
| 0.8482551812 | 0.9999986525 | 30.1148500221 |
| 0.6402204484 | 0.9999986525 | 0             |

gene\_expression\_table

|              |              |                |
|--------------|--------------|----------------|
| 0.6854492929 | 0.9999986525 | 1.4135352682   |
| 0.0235571304 | 0.9999986525 | 0              |
| 0.7360355875 | 0.9999986525 | 495.3239692972 |
| 0.8209728892 | 0.9999986525 | 1.0185512271   |
| 0.452405527  | 0.9999986525 | 37.9800997296  |
| 0.3630270237 | 0.9999986525 | 8.0551999125   |
| 0.8927356408 | 0.9999986525 | 62.2049167523  |
| 0.1895447745 | 0.9999986525 | 0              |
| 0.7079984933 | 0.9999986525 | 25.9887760799  |
| 0.1944166885 | 0.9999986525 | 0.1504614308   |
| 0            | 0            | 0              |
| 0.3113178116 | 0.9999986525 | 0              |
| 0.1483358952 | 0.9999986525 | 0.8570163498   |
| 0.6098761915 | 0.9999986525 | 0              |
| 0.9800852517 | 0.9999986525 | 91.4151814066  |
| 0.4098531013 | 0.9999986525 | 9.5106661972   |
| 0.7232431763 | 0.9999986525 | 62.7765579773  |
| 0.095197367  | 0.9999986525 | 1.0815875123   |
| 0.30755387   | 0.9999986525 | 0              |
| 0.9761026242 | 0.9999986525 | 1.209220584    |
| 0.6314459079 | 0.9999986525 | 1.8896532336   |
| 0.4450314324 | 0.9999986525 | 4.9790899338   |
| 0.2353428903 | 0.9999986525 | 0              |
| 0.3558684967 | 0.9999986525 | 239.6337036086 |
| 0.4641863378 | 0.9999986525 | 4.8969789732   |
| 0.6859660336 | 0.9999986525 | 0.4748769802   |
| 0.0823414023 | 0.9999986525 | 14.8156022796  |
| 0.8450237622 | 0.9999986525 | 0              |
| 0.6652789507 | 0.9999986525 | 0              |
| 0.9499686477 | 0.9999986525 | 5.1768200575   |
| 0.2929390438 | 0.9999986525 | 0.1214716232   |
| 0            | 0            | 0              |
| 0.938875334  | 0.9999986525 | 9.8869553215   |
| 0.4095900097 | 0.9999986525 | 15.2015307552  |
| 0.5776223461 | 0.9999986525 | 0.1692428322   |
| 0.2250388788 | 0.9999986525 | 0              |
| 0.1126632057 | 0.9999986525 | 61.4591755931  |
| 0.2844607647 | 0.9999986525 | 0.370501787    |
| 0.2058901968 | 0.9999986525 | 185.1353032415 |
| 0.004552     | 0.9999986525 | 22.1040394362  |
| 0.3930318658 | 0.9999986525 | 3.7406803855   |
| 0.4559372552 | 0.9999986525 | 0.3266409271   |
| 0.7223940716 | 0.9999986525 | 13.0926015869  |
| 0.5817209682 | 0.9999986525 | 0              |
| 0.2306037001 | 0.9999986525 | 3.0587211328   |
| 0.8009379691 | 0.9999986525 | 0.5852930484   |
| 0.0553855258 | 0.9999986525 | 2.4211574587   |
| 0.9842608338 | 0.9999986525 | 2.3663658489   |
| 0.6098761915 | 0.9999986525 | 0              |

gene\_expression\_table

|              |              |                |
|--------------|--------------|----------------|
| 0.0807323966 | 0.9999986525 | 0              |
| 0.2011866943 | 0.9999986525 | 0              |
| 0.6312664098 | 0.9999986525 | 0              |
| 0.1770112877 | 0.9999986525 | 35.1178608939  |
| 0.0212823117 | 0.9999986525 | 6.5889736419   |
| 0.0830722241 | 0.9999986525 | 4.4852584481   |
| 0.6947822424 | 0.9999986525 | 0              |
| 0.1653944385 | 0.9999986525 | 2.6965137459   |
| 0.9542598521 | 0.9999986525 | 363.0834214741 |
| 0.9432368715 | 0.9999986525 | 0              |
| 0.3379817236 | 0.9999986525 | 0.9196567808   |
| 0.4018206955 | 0.9999986525 | 1.256929574    |
| 0            | 0            | 0              |
| 0.8716351978 | 0.9999986525 | 1.4626814916   |
| 0.1067879654 | 0.9999986525 | 2.9341065681   |
| 0.7045355922 | 0.9999986525 | 0              |
| 0.729265519  | 0.9999986525 | 2.6880047957   |
| 0.9499679505 | 0.9999986525 | 0              |
| 0.0001033    | 0.4631572217 | 0              |
| 0.431854887  | 0.9999986525 | 3.560428862    |
| 0.887314885  | 0.9999986525 | 0              |
| 0.7464010622 | 0.9999986525 | 2.8709457614   |
| 0.7333333469 | 0.9999986525 | 0              |
| 0.2074920061 | 0.9999986525 | 8.3658986577   |
| 0.0193910308 | 0.9999986525 | 1.117683919    |
| 0.3060975032 | 0.9999986525 | 15.2267315054  |
| 0.004374     | 0.9999986525 | 10.3451222726  |
| 0.7050032593 | 0.9999986525 | 13.0549791685  |
| 0.007869     | 0.9999986525 | 26.7900569272  |
| 0.1008314136 | 0.9999986525 | 0.3876051742   |
| 0.6634823787 | 0.9999986525 | 0              |
| 0.0495812278 | 0.9999986525 | 6.5130001512   |
| 0.5476103862 | 0.9999986525 | 6.0094348554   |
| 0.8277776401 | 0.9999986525 | 52.2392860794  |
| 0.1509395628 | 0.9999986525 | 0              |
| 0.3919764697 | 0.9999986525 | 2.1911306751   |
| 0.1268241014 | 0.9999986525 | 1.8779394889   |
| 0            | 0            | 0              |
| 0.0584182415 | 0.9999986525 | 0              |
| 0.578601822  | 0.9999986525 | 10.4659733914  |
| 0.3895137294 | 0.9999986525 | 0              |
| 0.8984782526 | 0.9999986525 | 4.2761709391   |
| 0.7927767378 | 0.9999986525 | 1.3798061002   |
| 0.9665248656 | 0.9999986525 | 0              |
| 0.9304800992 | 0.9999986525 | 10.8482740575  |
| 0.2256970871 | 0.9999986525 | 1.6154832905   |
| 0.5792961955 | 0.9999986525 | 82.1207669214  |
| 0.8984423846 | 0.9999986525 | 20.1976304406  |
| 0.2164490723 | 0.9999986525 | 131.3779060356 |

gene\_expression\_table

|              |              |                |
|--------------|--------------|----------------|
| 0.6936779789 | 0.9999986525 | 6.6533028756   |
| 0.3688101855 | 0.9999986525 | 51.3682683874  |
| 0.765311989  | 0.9999986525 | 3.6528358427   |
| 0.16955775   | 0.9999986525 | 70.4498686878  |
| 0.4316930762 | 0.9999986525 | 185.6469958743 |
| 0.176698876  | 0.9999986525 | 106.3163614602 |
| 0.3911909225 | 0.9999986525 | 0              |
| 0.5191149283 | 0.9999986525 | 115.0462929705 |
| 0.3421861899 | 0.9999986525 | 0              |
| 0.7507377807 | 0.9999986525 | 0              |
| 0.704532793  | 0.9999986525 | 125.5979030352 |
| 0.375403928  | 0.9999986525 | 0.6588617449   |
| 0            | 0            | 0              |
| 0.9702354136 | 0.9999986525 | 0              |
| 0.2768214732 | 0.9999986525 | 0.7685489927   |
| 0.9991011507 | 0.9999986525 | 16.7539129406  |
| 0.2652920118 | 0.9999986525 | 3.5308141614   |
| 0.7690187394 | 0.9999986525 | 0.582587842    |
| 0.5266543701 | 0.9999986525 | 69.465461624   |
| 0.7033768324 | 0.9999986525 | 22.7080672672  |
| 0.8870843936 | 0.9999986525 | 0.7368218732   |
| 0.5146637233 | 0.9999986525 | 8.8972234209   |
| 0.8156611794 | 0.9999986525 | 4.3153914472   |
| 0.5235221104 | 0.9999986525 | 34.9182930422  |
| 0.6312664098 | 0.9999986525 | 0              |
| 0            | 0            | 0              |
| 0.2010518249 | 0.9999986525 | 150.2767195817 |
| 0.194229574  | 0.9999986525 | 6.2858745806   |
| 0.8958861397 | 0.9999986525 | 4.9887987745   |
| 0.9316158321 | 0.9999986525 | 0              |
| 0.9328972871 | 0.9999986525 | 4.3380769827   |
| 0.853998785  | 0.9999986525 | 0.2148007444   |
| 0.6312664098 | 0.9999986525 | 0              |
| 0.6312664098 | 0.9999986525 | 0              |
| 0.6312664098 | 0.9999986525 | 0              |
| 0.3252043939 | 0.9999986525 | 1.1068464912   |
| 0.6312664098 | 0.9999986525 | 0              |
| 0.2608115176 | 0.9999986525 | 0              |
| 0.3365476807 | 0.9999986525 | 0.8704610452   |
| 0.1833732319 | 0.9999986525 | 0.2889812169   |
| 0.9096714452 | 0.9999986525 | 1.5137554427   |
| 0.0420852605 | 0.9999986525 | 106.8674994462 |
| 0.1230924507 | 0.9999986525 | 5.6362902308   |
| 0.8806643307 | 0.9999986525 | 0              |
| 0.5186227357 | 0.9999986525 | 9.9994796263   |
| 0.1396762839 | 0.9999986525 | 218.3087239879 |
| 0.9342980695 | 0.9999986525 | 0.7809205666   |
| 0.2652476463 | 0.9999986525 | 3.4490005432   |
| 0.0418827068 | 0.9999986525 | 7.2897057593   |

gene\_expression\_table

|              |              |                 |
|--------------|--------------|-----------------|
| 0.5534676122 | 0.9999986525 | 0               |
| 0.0663515347 | 0.9999986525 | 3.4710983367    |
| 0.5087542927 | 0.9999986525 | 0               |
| 0.3763936588 | 0.9999986525 | 59.4353359199   |
| 0.2789238807 | 0.9999986525 | 3.1215744563    |
| 0.9512557043 | 0.9999986525 | 0               |
| 0.445800429  | 0.9999986525 | 9.7529026123    |
| 0.006992     | 0.9999986525 | 7.101031022     |
| 0.3025997336 | 0.9999986525 | 5.9416586389    |
| 0.7795088692 | 0.9999986525 | 4.528718764     |
| 0            | 0            | 0               |
| 0.8914734043 | 0.9999986525 | 7.3582609859    |
| 0.6397230378 | 0.9999986525 | 13.0688701936   |
| 0.9392712365 | 0.9999986525 | 18.9390535573   |
| 0.6355637525 | 0.9999986525 | 17.5403248842   |
| 0.1100983411 | 0.9999986525 | 6.7039754032    |
| 0.6876490605 | 0.9999986525 | 7.3992190723    |
| 0.4625864655 | 0.9999986525 | 3.1597193034    |
| 0.9408620992 | 0.9999986525 | 14.684809739    |
| 0.5982237227 | 0.9999986525 | 2.2893891467    |
| 0.0967195774 | 0.9999986525 | 18.8103850932   |
| 0.4844436018 | 0.9999986525 | 0.8229254962    |
| 0.6697727713 | 0.9999986525 | 11.6365001364   |
| 0.8605012547 | 0.9999986525 | 1.9894995502    |
| 0.4716445927 | 0.9999986525 | 13.6219769598   |
| 0.788870377  | 0.9999986525 | 0.5362254622    |
| 0.5193006987 | 0.9999986525 | 1.4888693559    |
| 0.4030261235 | 0.9999986525 | 1434.1991547966 |
| 0.6162842046 | 0.9999986525 | 0               |
| 0.2798618676 | 0.9999986525 | 0               |
| 0            | 0            | 0               |
| 0.6402124395 | 0.9999986525 | 0               |
| 0.9693206949 | 0.9999986525 | 72.4796143036   |
| 0.7770706918 | 0.9999986525 | 0.8923078703    |
| 0.3315847795 | 0.9999986525 | 3.8908146623    |
| 0.4005836465 | 0.9999986525 | 0               |
| 0.236984625  | 0.9999986525 | 610.5655286279  |
| 0.0267731459 | 0.9999986525 | 13.4815362416   |
| 0.0830810005 | 0.9999986525 | 0               |
| 0.2591624927 | 0.9999986525 | 17.0001882703   |
| 0.4729816619 | 0.9999986525 | 0               |
| 0.3041133887 | 0.9999986525 | 12.0730598958   |
| 0.7383451545 | 0.9999986525 | 2.0104270356    |
| 0.471607397  | 0.9999986525 | 3.5984137239    |
| 0.9700242336 | 0.9999986525 | 3.6758016583    |
| 0.2343640409 | 0.9999986525 | 0               |
| 0.5560058303 | 0.9999986525 | 7.0058921836    |
| 0.620813172  | 0.9999986525 | 16.3351082996   |
| 0.4745374291 | 0.9999986525 | 46.1731349883   |

gene\_expression\_table

|              |              |                 |
|--------------|--------------|-----------------|
| 0.7239396665 | 0.9999986525 | 7.3501417071    |
| 0.9521182426 | 0.9999986525 | 0               |
| 0.516527052  | 0.9999986525 | 0               |
| 0.5318359699 | 0.9999986525 | 0.9579974102    |
| 0.0568935189 | 0.9999986525 | 21.1139546155   |
| 0.3831942481 | 0.9999986525 | 68.3865015879   |
| 0.9756907128 | 0.9999986525 | 71.0222467323   |
| 0.4729816619 | 0.9999986525 | 0               |
| 0.9988033578 | 0.9999986525 | 25.9533650736   |
| 0.913082918  | 0.9999986525 | 5.7172873381    |
| 0.6992617668 | 0.9999986525 | 17.4373698242   |
| 0.8680123087 | 0.9999986525 | 6.3166987473    |
| 0.8483577081 | 0.9999986525 | 5.5140862629    |
| 0.4852789058 | 0.9999986525 | 0               |
| 0.1545247053 | 0.9999986525 | 0               |
| 0.3435114756 | 0.9999986525 | 10.7724880799   |
| 0.1715764081 | 0.9999986525 | 1.0625545199    |
| 0.5076229825 | 0.9999986525 | 0               |
| 0.2096528404 | 0.9999986525 | 1.1286954656    |
| 0.4112940087 | 0.9999986525 | 0.3875170098    |
| 0.003046     | 0.9999986525 | 3.5886334325    |
| 0.6965107156 | 0.9999986525 | 8.7887703501    |
| 0.1990483812 | 0.9999986525 | 7.3399388351    |
| 0.206152538  | 0.9999986525 | 663.2445544699  |
| 0.7697763739 | 0.9999986525 | 61.9615011845   |
| 0.9414377398 | 0.9999986525 | 0               |
| 0.4334277537 | 0.9999986525 | 1.8700598365    |
| 0.5263431386 | 0.9999986525 | 0               |
| 0.5780944872 | 0.9999986525 | 1.0783045318    |
| 0.9101794364 | 0.9999986525 | 107.8170712208  |
| 0.5992315295 | 0.9999986525 | 0               |
| 0.1487517609 | 0.9999986525 | 0               |
| 0.2228800971 | 0.9999986525 | 18.8041900312   |
| 0.0231290255 | 0.9999986525 | 0               |
| 0.407646249  | 0.9999986525 | 0               |
| 0.9232032489 | 0.9999986525 | 0.8561804351    |
| 0.7536479445 | 0.9999986525 | 12.3628085736   |
| 0.2523220433 | 0.9999986525 | 0               |
| 0.2805171312 | 0.9999986525 | 0               |
| 0            | 0            | 0               |
| 0.1525907332 | 0.9999986525 | 0               |
| 0.6312664098 | 0.9999986525 | 0               |
| 0.6728785301 | 0.9999986525 | 0.4346413156    |
| 0.527133231  | 0.9999986525 | 8.9458256576    |
| 0.3317059432 | 0.9999986525 | 1253.2116189294 |
| 0.9168981113 | 0.9999986525 | 1268.041253933  |
| 0.0721317499 | 0.9999986525 | 484.753723968   |
| 0.9871280039 | 0.9999986525 | 204.9699284333  |
| 0.9319593894 | 0.9999986525 | 0.5206368059    |

gene\_expression\_table

|              |              |                |
|--------------|--------------|----------------|
| 0.6894635128 | 0.9999986525 | 4.6974174287   |
| 0.0872461572 | 0.9999986525 | 0              |
| 0.5873962289 | 0.9999986525 | 0              |
| 0.2856173862 | 0.9999986525 | 96.3757631867  |
| 0.0540394442 | 0.9999986525 | 0.6718949452   |
| 0            | 0            | 0              |
| 0.4915465875 | 0.9999986525 | 0              |
| 0.9338215657 | 0.9999986525 | 1.7893318277   |
| 0.1895579799 | 0.9999986525 | 0              |
| 0.3285693438 | 0.9999986525 | 2.1277917178   |
| 0.2360439607 | 0.9999986525 | 0              |
| 0            | 0            | 0              |
| 0.6312664098 | 0.9999986525 | 0              |
| 0.4503748411 | 0.9999986525 | 0.7849752267   |
| 0.4626177266 | 0.9999986525 | 18.5768266712  |
| 0.8986637475 | 0.9999986525 | 0              |
| 0.4076775281 | 0.9999986525 | 0              |
| 0.5556920494 | 0.9999986525 | 0.5533526979   |
| 0.4077087944 | 0.9999986525 | 0              |
| 0.0524268178 | 0.9999986525 | 3.5815759003   |
| 0.6239791298 | 0.9999986525 | 0.7800823926   |
| 0.717317951  | 0.9999986525 | 0              |
| 0.8144615874 | 0.9999986525 | 0              |
| 0.8430737802 | 0.9999986525 | 3.4222750983   |
| 0.8001443175 | 0.9999986525 | 0              |
| 0.2026594927 | 0.9999986525 | 1.8039388676   |
| 0.3580771924 | 0.9999986525 | 3.5219140177   |
| 0.2688605205 | 0.9999986525 | 52.8667850113  |
| 0.889908796  | 0.9999986525 | 0              |
| 0.5492270709 | 0.9999986525 | 7.9979886462   |
| 0.8437637684 | 0.9999986525 | 12.2623446079  |
| 0.2055209223 | 0.9999986525 | 1.7223427546   |
| 0.336203994  | 0.9999986525 | 105.6182347949 |
| 0.1102635265 | 0.9999986525 | 0              |
| 0.2133199066 | 0.9999986525 | 37.9470911733  |
| 0.3621145674 | 0.9999986525 | 4.6527987161   |
| 0.707110302  | 0.9999986525 | 1.7402671735   |
| 0.0980482412 | 0.9999986525 | 0              |
| 0.5412309668 | 0.9999986525 | 0              |
| 0.5623612163 | 0.9999986525 | 0.3877930129   |
| 0.251691686  | 0.9999986525 | 17.5744237329  |
| 0.2963045737 | 0.9999986525 | 0              |
| 0.0939109382 | 0.9999986525 | 1.3015406926   |
| 0.2279734612 | 0.9999986525 | 1.1689926343   |
| 0.8499939008 | 0.9999986525 | 0.8743591912   |
| 0.5473350299 | 0.9999986525 | 3.8388717728   |
| 0.062139791  | 0.9999986525 | 0.9092600991   |
| 0.43762035   | 0.9999986525 | 0              |
| 0.9371907325 | 0.9999986525 | 3.4996319731   |



gene\_expression\_table

|              |              |               |
|--------------|--------------|---------------|
| 0.7674747231 | 0.9999986525 | 0             |
| 0.986223577  | 0.9999986525 | 0.6413698165  |
| 0.6402044238 | 0.9999986525 | 0             |
| 0.3876191428 | 0.9999986525 | 0             |
| 0.407740048  | 0.9999986525 | 0             |
| 0.5290796118 | 0.9999986525 | 0             |
| 0.8034115639 | 0.9999986525 | 0.5525740048  |
| 0.3167668427 | 0.9999986525 | 11.6461684669 |
| 0.1366430046 | 0.9999986525 | 1.7030430075  |
| 0.845212751  | 0.9999986525 | 0             |
| 0.2341989814 | 0.9999986525 | 4.2432178543  |
| 0.6312664098 | 0.9999986525 | 0             |
| 0.9033670037 | 0.9999986525 | 0.6769973623  |
| 0.6209908391 | 0.9999986525 | 0             |
| 0.8998918472 | 0.9999986525 | 3.2234401701  |
| 0.5146519711 | 0.9999986525 | 0.5107383274  |
| 0.6453583151 | 0.9999986525 | 8.0291768806  |
| 0.9296039376 | 0.9999986525 | 1.1820218488  |
| 0.2522302334 | 0.9999986525 | 733.374615785 |
| 0.0306992015 | 0.9999986525 | 2.8345812702  |
| 0.4880570237 | 0.9999986525 | 0             |
| 0.7789139524 | 0.9999986525 | 0.5759298404  |
| 0.6815114273 | 0.9999986525 | 22.4344954648 |
| 0.526645818  | 0.9999986525 | 8.8537394992  |
| 0.8970023618 | 0.9999986525 | 0             |
| 0.7869085846 | 0.9999986525 | 0.982511408   |
| 0.4486262039 | 0.9999986525 | 0.7629974173  |
| 0.9301263448 | 0.9999986525 | 0.8696798549  |
| 0.0930674853 | 0.9999986525 | 0.6493173911  |
| 0            | 0            | 0             |
| 0.4673058806 | 0.9999986525 | 32.895620197  |
| 0.6467435598 | 0.9999986525 | 11.0674598127 |
| 0.3969401806 | 0.9999986525 | 1.6323599588  |
| 0.3418718889 | 0.9999986525 | 0.4246140345  |
| 0.4729816619 | 0.9999986525 | 0             |
| 0.2653121842 | 0.9999986525 | 0             |
| 0.5304715882 | 0.9999986525 | 0             |
| 0            | 0            | 0             |
| 0.0530639824 | 0.9999986525 | 0             |
| 0.8896978238 | 0.9999986525 | 0             |
| 0.344751813  | 0.9999986525 | 0             |
| 0.8837798298 | 0.9999986525 | 0.783182594   |
| 0.8128373253 | 0.9999986525 | 0.7661964054  |
| 0.5978086352 | 0.9999986525 | 0             |
| 0.1912104049 | 0.9999986525 | 1.2468022103  |
| 0.6745455413 | 0.9999986525 | 1.1199275821  |
| 0.6000498194 | 0.9999986525 | 72.0774838507 |
| 0.4871611084 | 0.9999986525 | 0             |
| 0.6004639995 | 0.9999986525 | 0             |

gene\_expression\_table

|              |              |                |
|--------------|--------------|----------------|
| 0.2417986326 | 0.9999986525 | 0              |
| 0.318900713  | 0.9999986525 | 0.6425962918   |
| 0.8599669833 | 0.9999986525 | 5.5894316091   |
| 0.8049247515 | 0.9999986525 | 0.2718709274   |
| 0.9818232926 | 0.9999986525 | 0.7731053404   |
| 0.4239878518 | 0.9999986525 | 0              |
| 0            | 0            | 0              |
| 0.3965994611 | 0.9999986525 | 9.7850665554   |
| 0.9481452127 | 0.9999986525 | 4.5937129883   |
| 0.9529032794 | 0.9999986525 | 0              |
| 0.1690559584 | 0.9999986525 | 3.0787508439   |
| 0.5333735815 | 0.9999986525 | 1.2492056915   |
| 0.4319569566 | 0.9999986525 | 2.1129370577   |
| 0.5247728369 | 0.9999986525 | 11.2436490606  |
| 0.3657134283 | 0.9999986525 | 59.7815623951  |
| 0.2814449443 | 0.9999986525 | 31.56924877    |
| 0.3554704444 | 0.9999986525 | 0              |
| 0.4794073011 | 0.9999986525 | 5.6642983941   |
| 0.8528228421 | 0.9999986525 | 11.0666867835  |
| 0.7530544483 | 0.9999986525 | 17.0941608409  |
| 0.0750602447 | 0.9999986525 | 1.9976266113   |
| 0.0365995987 | 0.9999986525 | 0              |
| 0.3693602974 | 0.9999986525 | 1.9545341468   |
| 0.4167454375 | 0.9999986525 | 0              |
| 0.0815697826 | 0.9999986525 | 0              |
| 0.1243482727 | 0.9999986525 | 3.0917515441   |
| 0            | 0            | 0              |
| 0.9945511043 | 0.9999986525 | 0              |
| 0.6747228694 | 0.9999986525 | 0              |
| 0.3400584376 | 0.9999986525 | 10.6372443558  |
| 0.3451220914 | 0.9999986525 | 0              |
| 0            | 0            | 0              |
| 0.4009346331 | 0.9999986525 | 203.8163752101 |
| 0.4711796353 | 0.9999986525 | 1.0115767863   |
| 0.4026805036 | 0.9999986525 | 36.4989068599  |
| 0.996225501  | 0.9999986525 | 0              |
| 0.002949     | 0.9999986525 | 1.4133839545   |
| 0.9285887586 | 0.9999986525 | 0              |
| 0.5504548264 | 0.9999986525 | 10.517907241   |
| 0.2248421472 | 0.9999986525 | 4.8485319983   |
| 0.0274826208 | 0.9999986525 | 131.5824807881 |
| 0.4729816619 | 0.9999986525 | 0              |
| 0            | 0            | 0              |
| 0.9398258172 | 0.9999986525 | 30.1449304945  |
| 0            | 0            | 0              |
| 0.6312664098 | 0.9999986525 | 0              |
| 0.5455442171 | 0.9999986525 | 0              |
| 0.2479042708 | 0.9999986525 | 0.5874087223   |
| 0.1149432075 | 0.9999986525 | 4.3985940057   |

gene\_expression\_table

|              |              |                |
|--------------|--------------|----------------|
| 0.9914455128 | 0.9999986525 | 0              |
| 0            | 0            | 0              |
| 0.6401964011 | 0.9999986525 | 0              |
| 0.1680315942 | 0.9999986525 | 5.813878494    |
| 0.6751501549 | 0.9999986525 | 2.3533516721   |
| 0.9207765693 | 0.9999986525 | 3.47929235     |
| 0.4644564078 | 0.9999986525 | 2.5727119968   |
| 0.7799232056 | 0.9999986525 | 0              |
| 0.2969132395 | 0.9999986525 | 65.4447561664  |
| 0.4729816619 | 0.9999986525 | 0              |
| 0.6295451873 | 0.9999986525 | 1.5599113396   |
| 0.5642301847 | 0.9999986525 | 3.8296625076   |
| 0.6920274438 | 0.9999986525 | 0              |
| 0.7296430576 | 0.9999986525 | 0              |
| 0.9047109196 | 0.9999986525 | 41.3821102655  |
| 0.0762202891 | 0.9999986525 | 0.9701129338   |
| 0.5574057876 | 0.9999986525 | 0              |
| 0.8197386407 | 0.9999986525 | 0.5839599101   |
| 0.9416704986 | 0.9999986525 | 62.2222952872  |
| 0.389097026  | 0.9999986525 | 8.2155896751   |
| 0.2166860532 | 0.9999986525 | 0              |
| 0.0685579249 | 0.9999986525 | 1.9770867453   |
| 0.9822470153 | 0.9999986525 | 5.8142056262   |
| 0.0700360895 | 0.9999986525 | 0.9761334684   |
| 0.5976749661 | 0.9999986525 | 0.7545492217   |
| 0.5325281103 | 0.9999986525 | 13.0803066688  |
| 0.3266061153 | 0.9999986525 | 3.4009266985   |
| 0.9535921607 | 0.9999986525 | 2.1512046573   |
| 0.7468351218 | 0.9999986525 | 2.5255316673   |
| 0.407771289  | 0.9999986525 | 0              |
| 0.8773486045 | 0.9999986525 | 125.121210322  |
| 0.8914649446 | 0.9999986525 | 599.6881865947 |
| 0.0346587507 | 0.9999986525 | 5.1616417344   |
| 0            | 0            | 0              |
| 0.1236384677 | 0.9999986525 | 0.3119159362   |
| 0.1203619048 | 0.9999986525 | 1.2871554349   |
| 0.6334530009 | 0.9999986525 | 0              |
| 0.0870748437 | 0.9999986525 | 2.9889369561   |
| 0.0177695255 | 0.9999986525 | 2.5931759618   |
| 0.2604393944 | 0.9999986525 | 4.2745269901   |
| 0.0185317633 | 0.9999986525 | 5.405428386    |
| 0.1556995537 | 0.9999986525 | 1.2370627088   |
| 0.8577403587 | 0.9999986525 | 0              |
| 0.3392251546 | 0.9999986525 | 118.5395264057 |
| 0.5487921102 | 0.9999986525 | 0              |
| 0.5417083513 | 0.9999986525 | 0.7518851716   |
| 0.1248326356 | 0.9999986525 | 0.7717158588   |
| 0.4426695906 | 0.9999986525 | 0.1779114996   |
| 0.0458532823 | 0.9999986525 | 0.1001135804   |

|              | gene_expression_table |                 |
|--------------|-----------------------|-----------------|
| 0.3370238446 | 0.9999986525          | 0               |
| 0.6290281078 | 0.9999986525          | 0               |
| 0.7743139697 | 0.9999986525          | 5.3825582872    |
| 0.3985799625 | 0.9999986525          | 2.6186122811    |
| 0.5287011691 | 0.9999986525          | 0               |
| 0.0937568526 | 0.9999986525          | 1.9281485972    |
| 0.1042349905 | 0.9999986525          | 2.6773080996    |
| 0            | 0                     | 0               |
| 0.1589546151 | 0.9999986525          | 347.0123459858  |
| 0.8338056859 | 0.9999986525          | 0               |
| 0.8213767655 | 0.9999986525          | 1.9400476886    |
| 0.4091039983 | 0.9999986525          | 0.8185412453    |
| 0.947346974  | 0.9999986525          | 3.1965169302    |
| 0.7573768895 | 0.9999986525          | 56.1054372093   |
| 0.8300786706 | 0.9999986525          | 149.6144992247  |
| 0.7159173173 | 0.9999986525          | 0               |
| 0.8759488519 | 0.9999986525          | 0               |
| 0.5827379899 | 0.9999986525          | 50.660832831    |
| 0.7540747041 | 0.9999986525          | 0               |
| 0.1416226127 | 0.9999986525          | 0.5729643305    |
| 0.8647829937 | 0.9999986525          | 0               |
| 0.3597388735 | 0.9999986525          | 0               |
| 0.4729816619 | 0.9999986525          | 0               |
| 0.9293179079 | 0.9999986525          | 1.2204481706    |
| 0.5342591604 | 0.9999986525          | 0.1365734735    |
| 0.0567241169 | 0.9999986525          | 0               |
| 0.6545604761 | 0.9999986525          | 2.3153082747    |
| 0.5615816343 | 0.9999986525          | 0.5609699485    |
| 0.053148337  | 0.9999986525          | 10.1214868199   |
| 0.0287546044 | 0.9999986525          | 3.9311865055    |
| 0.9175641583 | 0.9999986525          | 32.6176576548   |
| 0.9239951149 | 0.9999986525          | 0               |
| 0.9313834372 | 0.9999986525          | 0.9521682843    |
| 0.4090986638 | 0.9999986525          | 6.5166164756    |
| 0.0843780722 | 0.9999986525          | 1.0462552393    |
| 0.5288486808 | 0.9999986525          | 6866.5076583347 |
| 0.4729816619 | 0.9999986525          | 0               |
| 0.5993979306 | 0.9999986525          | 1.4668631351    |
| 0.2174128014 | 0.9999986525          | 0               |
| 0.3216613238 | 0.9999986525          | 1.6773778259    |
| 0.8508358386 | 0.9999986525          | 3.1877612877    |
| 0.6843895102 | 0.9999986525          | 2.4468068579    |
| 0.8946305028 | 0.9999986525          | 65.2102438139   |
| 0.7558818131 | 0.9999986525          | 19.9465070934   |
| 0.9808580833 | 0.9999986525          | 0               |
| 0.4633745435 | 0.9999986525          | 0.8900372137    |
| 0.1426504439 | 0.9999986525          | 4.7473184923    |
| 0.5653206405 | 0.9999986525          | 3.9922403739    |
| 0.3353901781 | 0.9999986525          | 0               |

gene\_expression\_table

|              |              |                 |
|--------------|--------------|-----------------|
| 0.465027245  | 0.9999986525 | 0.3943426609    |
| 0.3995761129 | 0.9999986525 | 4.0241475304    |
| 0.9295825896 | 0.9999986525 | 0               |
| 0.9791552432 | 0.9999986525 | 4.0473536843    |
| 0.5778480876 | 0.9999986525 | 1.137854981     |
| 0.30755387   | 0.9999986525 | 0               |
| 0.5033477409 | 0.9999986525 | 0.1938922354    |
| 0.9917440899 | 0.9999986525 | 9.4265679842    |
| 0.6312664098 | 0.9999986525 | 0               |
| 0.6464189418 | 0.9999986525 | 3.9635954315    |
| 0.6234591257 | 0.9999986525 | 0.5778138379    |
| 0.9343730525 | 0.9999986525 | 0               |
| 0.7218727761 | 0.9999986525 | 13.9405881553   |
| 0.4078025173 | 0.9999986525 | 0               |
| 0.0590979714 | 0.9999986525 | 1149.1695715607 |
| 0.2535268951 | 0.9999986525 | 39.8295009248   |
| 0.6889322894 | 0.9999986525 | 1.4843014163    |
| 0.9557923879 | 0.9999986525 | 0.8218721956    |
| 0.2671495831 | 0.9999986525 | 10.6730720565   |
| 0.1983415344 | 0.9999986525 | 10.5112783812   |
| 0.8480070439 | 0.9999986525 | 51.5090229775   |
| 0.2630739786 | 0.9999986525 | 0               |
| 0.6401883714 | 0.9999986525 | 2.188361574     |
| 0.4106484708 | 0.9999986525 | 0               |
| 0.7463571633 | 0.9999986525 | 1.2089714599    |
| 0.3441254844 | 0.9999986525 | 3.8285751662    |
| 0.6380995433 | 0.9999986525 | 5.1385403995    |
| 0.3442901522 | 0.9999986525 | 1.3524777553    |
| 0.3934337293 | 0.9999986525 | 0.5407771441    |
| 0.5916401166 | 0.9999986525 | 12.8008915183   |
| 0.708606037  | 0.9999986525 | 0.4676156843    |
| 0.6445212261 | 0.9999986525 | 0               |
| 0.5660835127 | 0.9999986525 | 0               |
| 0.5017639653 | 0.9999986525 | 0               |
| 0.2117161571 | 0.9999986525 | 0.723428782     |
| 0.0946993004 | 0.9999986525 | 5.889809103     |
| 0.1002593351 | 0.9999986525 | 2.2791930946    |
| 0.1469254    | 0.9999986525 | 0.2508259794    |
| 0            | 0            | 0               |
| 0.2109677488 | 0.9999986525 | 0               |
| 0.3127990667 | 0.9999986525 | 13.1590677031   |
| 0.7355497083 | 0.9999986525 | 0               |
| 0.01075055   | 0.9999986525 | 42.6090506061   |
| 0.0567871762 | 0.9999986525 | 9.1071041223    |
| 0.5009241657 | 0.9999986525 | 20.1490118495   |
| 0.0396349319 | 0.9999986525 | 91.6663467212   |
| 0.660751586  | 0.9999986525 | 0               |
| 0.4729816619 | 0.9999986525 | 0               |
| 0.8664363829 | 0.9999986525 | 0.501969027     |

gene\_expression\_table

|              |              |               |
|--------------|--------------|---------------|
| 0.5545353365 | 0.9999986525 | 0             |
| 0.1694308529 | 0.9999986525 | 0             |
| 0.846066832  | 0.9999986525 | 5.2185947327  |
| 0.8332486335 | 0.9999986525 | 0.2664805741  |
| 0.1554496043 | 0.9999986525 | 0             |
| 0.2973767577 | 0.9999986525 | 0             |
| 0.6098761915 | 0.9999986525 | 0             |
| 0.6312664098 | 0.9999986525 | 0             |
| 0.6312664098 | 0.9999986525 | 0             |
| 0.2553963621 | 0.9999986525 | 3.0322039821  |
| 0.3001182767 | 0.9999986525 | 0             |
| 0.8651700082 | 0.9999986525 | 1.0961792907  |
| 0.0384185282 | 0.9999986525 | 2.8373223502  |
| 0.2724589569 | 0.9999986525 | 0.9763660573  |
| 0.707134123  | 0.9999986525 | 45.8243561398 |
| 0.5750283271 | 0.9999986525 | 5.6354597053  |
| 0.4105174559 | 0.9999986525 | 0.9672790217  |
| 0.3403728153 | 0.9999986525 | 5.5549743073  |
| 0.7158957402 | 0.9999986525 | 10.114379488  |
| 0.697574777  | 0.9999986525 | 0             |
| 0.5136676341 | 0.9999986525 | 2.2097503902  |
| 0.3143112668 | 0.9999986525 | 0             |
| 0.008559     | 0.9999986525 | 54.3396071976 |
| 0.7424113489 | 0.9999986525 | 5.3218973749  |
| 0.4925506896 | 0.9999986525 | 0             |
| 0.5904035797 | 0.9999986525 | 5.2088156578  |
| 0.7463404315 | 0.9999986525 | 52.3434222378 |
| 0.7062876975 | 0.9999986525 | 0.1206653999  |
| 0.5620421723 | 0.9999986525 | 2.1079866141  |
| 0.4990239626 | 0.9999986525 | 0             |
| 0.3658650425 | 0.9999986525 | 3.5654965891  |
| 0.8939814383 | 0.9999986525 | 0             |
| 0.4785897153 | 0.9999986525 | 10.9998441182 |
| 0.67842572   | 0.9999986525 | 0.4490019476  |
| 0.2743725125 | 0.9999986525 | 8.1339778571  |
| 0.6226451458 | 0.9999986525 | 0             |
| 0.4230688526 | 0.9999986525 | 14.3949626074 |
| 0.3075114913 | 0.9999986525 | 0             |
| 0.5636404013 | 0.9999986525 | 0             |
| 0.4231349984 | 0.9999986525 | 0             |
| 0.0708632788 | 0.9999986525 | 18.4306684588 |
| 0.5992214711 | 0.9999986525 | 3.4169021928  |
| 0.3369929686 | 0.9999986525 | 0             |
| 0.3968474474 | 0.9999986525 | 0             |
| 0            | 0            | 0             |
| 0.0913256639 | 0.9999986525 | 11.0189689602 |
| 0.3320885215 | 0.9999986525 | 0.3935932617  |
| 0.3457795072 | 0.9999986525 | 0             |
| 0.1168396065 | 0.9999986525 | 1.0865943468  |

gene\_expression\_table

|              |              |                 |
|--------------|--------------|-----------------|
| 0.349401901  | 0.9999986525 | 0               |
| 0.2700956838 | 0.9999986525 | 0               |
| 0.6401722909 | 0.9999986525 | 0               |
| 0.625888406  | 0.9999986525 | 0               |
| 0.2135261465 | 0.9999986525 | 2193.6489656991 |
| 0.0313250251 | 0.9999986525 | 0               |
| 0.6598145893 | 0.9999986525 | 1.1575526455    |
| 0.6066443031 | 0.9999986525 | 0.7374940871    |
| 0.1793333931 | 0.9999986525 | 0.9770946168    |
| 0.4077258632 | 0.9999986525 | 0               |
| 0.2720388534 | 0.9999986525 | 1.2005346023    |
| 0.0667901054 | 0.9999986525 | 0               |
| 0.1052023056 | 0.9999986525 | 3.748379553     |
| 0.7765259997 | 0.9999986525 | 1.541895162     |
| 0.4914278533 | 0.9999986525 | 5.964529238     |
| 0.2385277028 | 0.9999986525 | 0               |
| 0.3048042636 | 0.9999986525 | 0               |
| 0.4705685641 | 0.9999986525 | 13.6850212415   |
| 0.6396369867 | 0.9999986525 | 0               |
| 0            | 0            | 0               |
| 0.6312664098 | 0.9999986525 | 0               |
| 0.6207182181 | 0.9999986525 | 9.4795832643    |
| 0.3512447805 | 0.9999986525 | 1.7735289374    |
| 0            | 0            | 0               |
| 0            | 0            | 0               |
| 0.001422     | 0.9999986525 | 0               |
| 0.9298877536 | 0.9999986525 | 0               |
| 0.5942626249 | 0.9999986525 | 58.9441051633   |
| 0.4564298853 | 0.9999986525 | 0               |
| 0.5941475786 | 0.9999986525 | 14.8000331305   |
| 0.1054783199 | 0.9999986525 | 5.3172452477    |
| 0.6887134913 | 0.9999986525 | 0               |
| 0.6815169832 | 0.9999986525 | 0               |
| 0.6780593293 | 0.9999986525 | 0               |
| 0.2570043813 | 0.9999986525 | 2.3054289118    |
| 0.6352625631 | 0.9999986525 | 6.0894636488    |
| 0.2993081989 | 0.9999986525 | 0               |
| 0.1005454516 | 0.9999986525 | 0               |
| 0            | 0            | 0               |
| 0.1015107468 | 0.9999986525 | 1.4337582318    |
| 0.2622164696 | 0.9999986525 | 0               |
| 0.0552157428 | 0.9999986525 | 10.2227082185   |
| 0.4832812877 | 0.9999986525 | 0               |
| 0.8641127168 | 0.9999986525 | 0               |
| 0.8973785469 | 0.9999986525 | 0               |
| 0.906715496  | 0.9999986525 | 0               |
| 0.6624040143 | 0.9999986525 | 2.735669228     |
| 0.9539230583 | 0.9999986525 | 0.8959458654    |
| 0.4738730589 | 0.9999986525 | 0               |

gene\_expression\_table

|              |              |                |
|--------------|--------------|----------------|
| 0.3811153447 | 0.9999986525 | 3.0865176674   |
| 0.0242728729 | 0.9999986525 | 11.1237936377  |
| 0.3154750705 | 0.9999986525 | 1.2157620273   |
| 0.9859858413 | 0.9999986525 | 0              |
| 0.4235705412 | 0.9999986525 | 1.3610519145   |
| 0.004539     | 0.9999986525 | 344.1767235341 |
| 0.2736182781 | 0.9999986525 | 24.0391070671  |
| 0.3252834078 | 0.9999986525 | 0              |
| 0            | 0            | 0              |
| 0.3458178621 | 0.9999986525 | 0              |
| 0.5148208292 | 0.9999986525 | 2.084252579    |
| 0.64016424   | 0.9999986525 | 0              |
| 0.6312664098 | 0.9999986525 | 0              |
| 0.3466303828 | 0.9999986525 | 334.727035155  |
| 0.6426098434 | 0.9999986525 | 3.9782997421   |
| 0.5456838608 | 0.9999986525 | 54.0295838632  |
| 0.1623781174 | 0.9999986525 | 0.2270472642   |
| 0.1269726797 | 0.9999986525 | 0              |
| 0.4662248344 | 0.9999986525 | 13.4990114866  |
| 0.8855851795 | 0.9999986525 | 0              |
| 0.0813315402 | 0.9999986525 | 0              |
| 0.4729816619 | 0.9999986525 | 0              |
| 0.2331531389 | 0.9999986525 | 23.6092616121  |
| 0.3734322625 | 0.9999986525 | 50.1012911755  |
| 0.7661041877 | 0.9999986525 | 16.1799085707  |
| 0.7046882025 | 0.9999986525 | 1.9442614573   |
| 0.4978717813 | 0.9999986525 | 0.232455626    |
| 0.9441523358 | 0.9999986525 | 0              |
| 0.3244532946 | 0.9999986525 | 1.216195973    |
| 0.0722973272 | 0.9999986525 | 4.8497629225   |
| 0.1012900469 | 0.9999986525 | 1.1646617908   |
| 0.5756269024 | 0.9999986525 | 11.8629645612  |
| 0.5312008499 | 0.9999986525 | 6.6948163219   |
| 0.678566024  | 0.9999986525 | 2.0879192815   |
| 0.5374224049 | 0.9999986525 | 0              |
| 0.5328629419 | 0.9999986525 | 0              |
| 0.2737402004 | 0.9999986525 | 0              |
| 0.9772414636 | 0.9999986525 | 1.9970475016   |
| 0.7909035916 | 0.9999986525 | 0              |
| 0.6401561819 | 0.9999986525 | 0              |
| 0.5240339034 | 0.9999986525 | 14.4405536528  |
| 0.9799955734 | 0.9999986525 | 0              |
| 0.6312664098 | 0.9999986525 | 0              |
| 0.6312664098 | 0.9999986525 | 0              |
| 0.3369622054 | 0.9999986525 | 0              |
| 0.4249670767 | 0.9999986525 | 58.9809682685  |
| 0.5915898874 | 0.9999986525 | 0              |
| 0.9248561608 | 0.9999986525 | 17.0023774176  |
| 0.8543436762 | 0.9999986525 | 24.3640347955  |



gene\_expression\_table

|              |              |                |
|--------------|--------------|----------------|
| 0.7498950781 | 0.9999986525 | 3.1503425826   |
| 0.3712488152 | 0.9999986525 | 16.5301778486  |
| 0.6318992309 | 0.9999986525 | 3.0208727465   |
| 0.6504562201 | 0.9999986525 | 0              |
| 0.7409728805 | 0.9999986525 | 0              |
| 0.8056218116 | 0.9999986525 | 0              |
| 0.3251115015 | 0.9999986525 | 18.155351745   |
| 0.6973233015 | 0.9999986525 | 7.9734166033   |
| 0.7689641145 | 0.9999986525 | 0              |
| 0.7293518013 | 0.9999986525 | 0              |
| 0.5232014694 | 0.9999986525 | 96.6332166471  |
| 0.8596159084 | 0.9999986525 | 10.1345969252  |
| 0.4890661022 | 0.9999986525 | 103.9644059573 |
| 0.9894901888 | 0.9999986525 | 158.4057533713 |
| 0.6373882077 | 0.9999986525 | 0              |
| 0.7217265067 | 0.9999986525 | 2.3451312081   |
| 0.6897991985 | 0.9999986525 | 24.0026896953  |
| 0.7938186689 | 0.9999986525 | 18.5735601288  |
| 0.412287192  | 0.9999986525 | 1.457297487    |
| 0.8325487663 | 0.9999986525 | 2.4509324652   |
| 0.3081697637 | 0.9999986525 | 0              |
| 0.0964214305 | 0.9999986525 | 0              |
| 0.0974497003 | 0.9999986525 | 3.2987051139   |
| 0.6576899294 | 0.9999986525 | 0              |
| 0.4571560206 | 0.9999986525 | 4.3284775008   |
| 0.3412354089 | 0.9999986525 | 201.7509609664 |
| 0.9886445251 | 0.9999986525 | 3.6528358427   |
| 0.2210890015 | 0.9999986525 | 0              |
| 0.6312664098 | 0.9999986525 | 0              |
| 0.2790016521 | 0.9999986525 | 2.2595639603   |
| 0.9876299413 | 0.9999986525 | 18.6676209512  |
| 0.6312664098 | 0.9999986525 | 0              |
| 0.3702883525 | 0.9999986525 | 0              |
| 0.8065259641 | 0.9999986525 | 0              |
| 0.7068233016 | 0.9999986525 | 4.7359097389   |
| 0.7089298194 | 0.9999986525 | 1.5814539022   |
| 0.5388924942 | 0.9999986525 | 0              |
| 0.279244827  | 0.9999986525 | 11.1054709945  |
| 0.1381259339 | 0.9999986525 | 2.93367874     |
| 0.2431680421 | 0.9999986525 | 0              |
| 0.9887906194 | 0.9999986525 | 7.0391574198   |
| 0.3021174273 | 0.9999986525 | 0              |
| 0.6932649208 | 0.9999986525 | 0.1914532775   |
| 0.30755387   | 0.9999986525 | 0              |
| 0.6401481166 | 0.9999986525 | 0              |
| 0.211122979  | 0.9999986525 | 0.8021433184   |
| 0.1838182513 | 0.9999986525 | 4.5979121775   |
| 0.7871558702 | 0.9999986525 | 0.1120018624   |
| 0.9085080089 | 0.9999986525 | 18.0982605948  |

gene\_expression\_table

|              |              |                 |
|--------------|--------------|-----------------|
| 0.28523072   | 0.9999986525 | 0               |
| 0.1119448789 | 0.9999986525 | 0.5842958571    |
| 0.1409195819 | 0.9999986525 | 33.6012868027   |
| 0.4076493308 | 0.9999986525 | 0               |
| 0.052324907  | 0.9999986525 | 30.8447471025   |
| 0.2630703198 | 0.9999986525 | 0               |
| 0.9319618931 | 0.9999986525 | 0               |
| 0.4515338104 | 0.9999986525 | 17.4963288019   |
| 0.160773871  | 0.9999986525 | 2.0785516245    |
| 0.34926081   | 0.9999986525 | 0               |
| 0.9338071492 | 0.9999986525 | 0               |
| 0.831250352  | 0.9999986525 | 30.4227639552   |
| 0.2925851165 | 0.9999986525 | 37.0884257207   |
| 0.6660053686 | 0.9999986525 | 5.3845965906    |
| 0.4729816619 | 0.9999986525 | 0               |
| 0.6587071082 | 0.9999986525 | 0               |
| 0.640140044  | 0.9999986525 | 0               |
| 0.744808918  | 0.9999986525 | 0               |
| 0.5198564268 | 0.9999986525 | 0.9896918939    |
| 0.6428190642 | 0.9999986525 | 12.9433188477   |
| 0.0634247586 | 0.9999986525 | 4.2513870299    |
| 0.2416030038 | 0.9999986525 | 0               |
| 0.55458796   | 0.9999986525 | 0               |
| 0.6153149235 | 0.9999986525 | 2.2347884853    |
| 0.4502433516 | 0.9999986525 | 0.610219855     |
| 0.2880286059 | 0.9999986525 | 1.9849135547    |
| 0.3811601262 | 0.9999986525 | 0.7072162337    |
| 0.6312664098 | 0.9999986525 | 0               |
| 0.1502765297 | 0.9999986525 | 0.7738189657    |
| 0.1597437977 | 0.9999986525 | 0.312006228     |
| 0.6401319642 | 0.9999986525 | 0               |
| 0.8656253785 | 0.9999986525 | 0               |
| 0.6955474227 | 0.9999986525 | 0.8657593598    |
| 0.1307874024 | 0.9999986525 | 1.163558454     |
| 0.958072439  | 0.9999986525 | 4.0817619775    |
| 0.3801616339 | 0.9999986525 | 1240.9536116844 |
| 0.9305149036 | 0.9999986525 | 0               |
| 0.3048156515 | 0.9999986525 | 0               |
| 0.6401238769 | 0.9999986525 | 0               |
| 0.1029543884 | 0.9999986525 | 0.3755656407    |
| 0.7986427631 | 0.9999986525 | 6.0971967474    |
| 0.4878856944 | 0.9999986525 | 0               |
| 0.8899148224 | 0.9999986525 | 0               |
| 0            | 0            | 0               |
| 0.3003406441 | 0.9999986525 | 667.4744799534  |
| 0.9655097321 | 0.9999986525 | 4.7599832567    |
| 0.8862785342 | 0.9999986525 | 0               |
| 0.8334650404 | 0.9999986525 | 22.307456917    |
| 0.2906376853 | 0.9999986525 | 1.3069840438    |

gene\_expression\_table

|              |              |               |
|--------------|--------------|---------------|
| 0.3158217601 | 0.9999986525 | 1.8380927236  |
| 0.3793723739 | 0.9999986525 | 5.0859228543  |
| 0.1354399289 | 0.9999986525 | 3.0767480252  |
| 0.003893     | 0.9999986525 | 40.0712581383 |
| 0.4954747799 | 0.9999986525 | 0             |
| 0.6057173799 | 0.9999986525 | 3.3633725626  |
| 0.514390578  | 0.9999986525 | 0             |
| 0.7457583584 | 0.9999986525 | 10.794505701  |
| 0.3684906551 | 0.9999986525 | 0             |
| 0            | 0            | 0             |
| 0.2575038881 | 0.9999986525 | 3.7472625391  |
| 0.6075927142 | 0.9999986525 | 7.7701807012  |
| 0.5557338238 | 0.9999986525 | 3.4425524379  |
| 0.8642701251 | 0.9999986525 | 0.3713632393  |
| 0.5242656507 | 0.9999986525 | 1.1798828968  |
| 0            | 0            | 0             |
| 0.5920268579 | 0.9999986525 | 0             |
| 0.2061282397 | 0.9999986525 | 2.053059077   |
| 0.8865660454 | 0.9999986525 | 3.5856488434  |
| 0.2046122862 | 0.9999986525 | 0             |
| 0.6500419882 | 0.9999986525 | 0             |
| 0.2105508754 | 0.9999986525 | 0             |
| 0.8173506822 | 0.9999986525 | 0             |
| 0.0447800905 | 0.9999986525 | 0             |
| 0.6892875342 | 0.9999986525 | 0.6513803432  |
| 0.5755448684 | 0.9999986525 | 2.6889627935  |
| 0.7172380133 | 0.9999986525 | 0             |
| 0.4017388179 | 0.9999986525 | 5.8130537154  |
| 0.3355477794 | 0.9999986525 | 0             |
| 0.4030840826 | 0.9999986525 | 21.4516320984 |
| 0.2357890584 | 0.9999986525 | 0             |
| 0.9820725853 | 0.9999986525 | 0.1390699076  |
| 0.1467412076 | 0.9999986525 | 4.091921416   |
| 0.9792455376 | 0.9999986525 | 0             |
| 0.4950828964 | 0.9999986525 | 0             |
| 0.615886604  | 0.9999986525 | 2.0321936319  |
| 0.3255128664 | 0.9999986525 | 55.3953411226 |
| 0.9932313978 | 0.9999986525 | 0.7407281659  |
| 0.5814327319 | 0.9999986525 | 1.9555157755  |
| 0.7968883856 | 0.9999986525 | 17.1284679984 |
| 0.7819041965 | 0.9999986525 | 0.4893711961  |
| 0.3618603554 | 0.9999986525 | 0             |
| 0            | 0            | 0             |
| 0.2414074257 | 0.9999986525 | 0             |
| 0.378837473  | 0.9999986525 | 7.2915748409  |
| 0.0710388961 | 0.9999986525 | 1.9024729795  |
| 0.5667713348 | 0.9999986525 | 0             |
| 0.0435838066 | 0.9999986525 | 1.4220991498  |
| 0.6807989836 | 0.9999986525 | 6.516482466   |

gene\_expression\_table

|              |              |                |
|--------------|--------------|----------------|
| 0.0388134419 | 0.9999986525 | 1.522848771    |
| 0.2834528827 | 0.9999986525 | 2.5510273017   |
| 0.9396799582 | 0.9999986525 | 0.9282862556   |
| 0.8558603359 | 0.9999986525 | 3.9454593027   |
| 0.8009121168 | 0.9999986525 | 2.051411005    |
| 0.1819348279 | 0.9999986525 | 12.0643991989  |
| 0.3248409387 | 0.9999986525 | 0              |
| 0.5192418976 | 0.9999986525 | 8.5891253432   |
| 0.1046613379 | 0.9999986525 | 4.2679063323   |
| 0.1909808473 | 0.9999986525 | 56.4050390455  |
| 0.4050808925 | 0.9999986525 | 5.0758210693   |
| 0.1348522624 | 0.9999986525 | 55.3114425958  |
| 0.7156842751 | 0.9999986525 | 2.4774330719   |
| 0.2412226728 | 0.9999986525 | 2.6414443205   |
| 0.001954     | 0.9999986525 | 34.6548019858  |
| 0.3906523031 | 0.9999986525 | 80.1577207001  |
| 0.5987285854 | 0.9999986525 | 5.8030895755   |
| 0.239153929  | 0.9999986525 | 0              |
| 0.1235908805 | 0.9999986525 | 11.2822701289  |
| 0.2748229099 | 0.9999986525 | 2.9574374637   |
| 0.0561749712 | 0.9999986525 | 1.8813065303   |
| 0.0002033    | 0.7627450395 | 0              |
| 0.9496559219 | 0.9999986525 | 0              |
| 0.1490345368 | 0.9999986525 | 0              |
| 0.327120852  | 0.9999986525 | 1.8651616834   |
| 0.4918897418 | 0.9999986525 | 0              |
| 0.8359325125 | 0.9999986525 | 0              |
| 0.0319540623 | 0.9999986525 | 0              |
| 0.8017304308 | 0.9999986525 | 1.291567526    |
| 0.2985612705 | 0.9999986525 | 2.9579757894   |
| 0.3357046437 | 0.9999986525 | 0              |
| 0.9476539081 | 0.9999986525 | 7.8553954268   |
| 0.1278134927 | 0.9999986525 | 1.354654583    |
| 0.9357387693 | 0.9999986525 | 10.2605824894  |
| 0.8219382485 | 0.9999986525 | 0              |
| 0.6404773781 | 0.9999986525 | 0              |
| 0.2737550012 | 0.9999986525 | 322.796555349  |
| 0.7415342472 | 0.9999986525 | 0              |
| 0.561803081  | 0.9999986525 | 5.9889911239   |
| 0.5297864684 | 0.9999986525 | 0              |
| 0.2735609655 | 0.9999986525 | 0              |
| 0.913801376  | 0.9999986525 | 15.5973474446  |
| 0.9397011518 | 0.9999986525 | 4.575803       |
| 0.8202824153 | 0.9999986525 | 142.5663066018 |
| 0.274951909  | 0.9999986525 | 0              |
| 0.8477026452 | 0.9999986525 | 0              |
| 0.43047794   | 0.9999986525 | 22.5455254769  |
| 0.1746262855 | 0.9999986525 | 1.4722060051   |
| 0.8393330229 | 0.9999986525 | 2.3280144681   |

gene\_expression\_table

|              |              |                 |
|--------------|--------------|-----------------|
| 0.2658409545 | 0.9999986525 | 0               |
| 0.1533625861 | 0.9999986525 | 0               |
| 0.8030652525 | 0.9999986525 | 0.1042770318    |
| 0.6937227417 | 0.9999986525 | 0.346459359     |
| 0.516481838  | 0.9999986525 | 0               |
| 0.4075729196 | 0.9999986525 | 0               |
| 0.146379629  | 0.9999986525 | 7.5773196881    |
| 0.5459381306 | 0.9999986525 | 5.0303760574    |
| 0.9273355307 | 0.9999986525 | 0               |
| 0.1201695966 | 0.9999986525 | 1.1113338431    |
| 0            | 0            | 0               |
| 0.7608596999 | 0.9999986525 | 69.4324515083   |
| 0.7610625239 | 0.9999986525 | 1.264225379     |
| 0.7579898833 | 0.9999986525 | 7.0279755119    |
| 0.2828193076 | 0.9999986525 | 0               |
| 0.3019191213 | 0.9999986525 | 6.3761123482    |
| 0.3782144051 | 0.9999986525 | 0.7504908626    |
| 0.3309845876 | 0.9999986525 | 0               |
| 0.4512325928 | 0.9999986525 | 0               |
| 0.4246361708 | 0.9999986525 | 0               |
| 0.1079120122 | 0.9999986525 | 0               |
| 0.8345210796 | 0.9999986525 | 0.7291920007    |
| 0.9062934251 | 0.9999986525 | 2.1928137109    |
| 0.8990252742 | 0.9999986525 | 0.9675891436    |
| 0.5327267496 | 0.9999986525 | 101.0142405914  |
| 0.0165924724 | 0.9999986525 | 2497.9555917849 |
| 0.3586897792 | 0.9999986525 | 0.2377206359    |
| 0.1114133531 | 0.9999986525 | 0               |
| 0            | 0            | 1.5965996018    |
| 0.161201617  | 0.9999986525 | 13.7001084893   |
| 0.5446031964 | 0.9999986525 | 0               |
| 0.3043052433 | 0.9999986525 | 0.9490542189    |
| 0.2428233285 | 0.9999986525 | 0.553060069     |
| 0.554105595  | 0.9999986525 | 4631.7091322661 |
| 0.799919427  | 0.9999986525 | 0.8044770484    |
| 0.2275574795 | 0.9999986525 | 34.3393486517   |
| 0.5078360649 | 0.9999986525 | 0.1802984321    |
| 0.3369315541 | 0.9999986525 | 0               |
| 0.9788380809 | 0.9999986525 | 2018.2461607911 |
| 0.2145237088 | 0.9999986525 | 1.276459039     |
| 0.6535403016 | 0.9999986525 | 9.5738091591    |
| 0.9166435085 | 0.9999986525 | 0               |
| 0.1592953438 | 0.9999986525 | 1.7049122178    |
| 0.2343787841 | 0.9999986525 | 57.7832803351   |
| 0.4250188673 | 0.9999986525 | 6.3761823284    |
| 0.1164782674 | 0.9999986525 | 2.5998138387    |
| 0.780937621  | 0.9999986525 | 18.8742470968   |
| 0.2009301372 | 0.9999986525 | 0               |
| 0.3388189177 | 0.9999986525 | 4.6833305158    |

gene\_expression\_table

|              |              |               |
|--------------|--------------|---------------|
| 0.451761582  | 0.9999986525 | 0.8508595884  |
| 0.2006156025 | 0.9999986525 | 0.1129096025  |
| 0.0601253596 | 0.9999986525 | 3.134096765   |
| 0.5611787308 | 0.9999986525 | 0.3636783687  |
| 0.8245034343 | 0.9999986525 | 0             |
| 0.2674148366 | 0.9999986525 | 0.5796656631  |
| 0.7439764253 | 0.9999986525 | 4.2255360117  |
| 0.2211316849 | 0.9999986525 | 0             |
| 0.2100793644 | 0.9999986525 | 0             |
| 0.6312664098 | 0.9999986525 | 0             |
| 0.2168820396 | 0.9999986525 | 40.9637038874 |
| 0.0626862108 | 0.9999986525 | 0             |
| 0.5132523822 | 0.9999986525 | 0             |
| 0.8440983964 | 0.9999986525 | 1.4065332825  |
| 0.8857502974 | 0.9999986525 | 0.2988243581  |
| 0.9620486344 | 0.9999986525 | 0             |
| 0.0203697157 | 0.9999986525 | 0             |
| 0.7156514658 | 0.9999986525 | 0             |
| 0.9987907069 | 0.9999986525 | 0             |
| 0.0731854378 | 0.9999986525 | 0             |
| 0.7715767406 | 0.9999986525 | 2.1465872929  |
| 0.7154064949 | 0.9999986525 | 0             |
| 0.009922     | 0.9999986525 | 1.0267690228  |
| 0.3113389925 | 0.9999986525 | 2.7407042079  |
| 0.1373370704 | 0.9999986525 | 2.5324748206  |
| 0.2415986349 | 0.9999986525 | 0.7645243896  |
| 0.7613130938 | 0.9999986525 | 0             |
| 0.1804180935 | 0.9999986525 | 3.17124524    |
| 0.8452883217 | 0.9999986525 | 0             |
| 0.1974741823 | 0.9999986525 | 0             |
| 0.1035065409 | 0.9999986525 | 0.4038795733  |
| 0.6636999573 | 0.9999986525 | 0             |
| 0.274736305  | 0.9999986525 | 4.2101813483  |
| 0.7121098598 | 0.9999986525 | 1.1719498109  |
| 0.3048270423 | 0.9999986525 | 0             |
| 0.8563428645 | 0.9999986525 | 9.7709461678  |
| 0.1305367552 | 0.9999986525 | 5.5113530277  |
| 0.0356369513 | 0.9999986525 | 9.564850871   |
| 0.6149203647 | 0.9999986525 | 2.5593408636  |
| 0.3528806933 | 0.9999986525 | 0.7608375395  |
| 0.2342350983 | 0.9999986525 | 0.7613640138  |
| 0.0766169933 | 0.9999986525 | 8.2801201283  |
| 0.8262271051 | 0.9999986525 | 4.5974118715  |
| 0.4117126917 | 0.9999986525 | 2.3222054358  |
| 0.4248009951 | 0.9999986525 | 0             |
| 0.3123085494 | 0.9999986525 | 2.5887589352  |
| 0.8400581978 | 0.9999986525 | 0             |
| 0.7652825623 | 0.9999986525 | 0             |
| 0.8725486876 | 0.9999986525 | 4.2156030576  |

gene\_expression\_table

|              |              |                 |
|--------------|--------------|-----------------|
| 0.0531353976 | 0.9999986525 | 5.3574678663    |
| 0.0256474446 | 0.9999986525 | 2.199480186     |
| 0.0762088556 | 0.9999986525 | 0               |
| 0.0154236748 | 0.9999986525 | 2.2151630831    |
| 0.000246     | 0.8275161028 | 20.3568910832   |
| 0.0526692147 | 0.9999986525 | 19.3372576986   |
| 0.5521356273 | 0.9999986525 | 6.5583815889    |
| 0.6359317515 | 0.9999986525 | 0               |
| 0.0555151235 | 0.9999986525 | 374.5246339777  |
| 0.009872     | 0.9999986525 | 0.9596877154    |
| 0.8995357772 | 0.9999986525 | 0.8040361451    |
| 0.9035632541 | 0.9999986525 | 33.2950967923   |
| 0.2664996153 | 0.9999986525 | 0               |
| 0.990658009  | 0.9999986525 | 5.4528200975    |
| 0.06130192   | 0.9999986525 | 2.3500792376    |
| 0.4729816619 | 0.9999986525 | 0               |
| 0.0745690378 | 0.9999986525 | 0.4644696787    |
| 0.30755387   | 0.9999986525 | 0               |
| 0.3422055565 | 0.9999986525 | 0               |
| 0.2367291597 | 0.9999986525 | 7.0957837198    |
| 0.1083164583 | 0.9999986525 | 0.2872600989    |
| 0            | 0            | 0               |
| 0.4002990937 | 0.9999986525 | 0.6710108023    |
| 0.3998440872 | 0.9999986525 | 1.5097311469    |
| 0.4729816619 | 0.9999986525 | 0               |
| 0.4068414848 | 0.9999986525 | 4.010472946     |
| 0.4029529639 | 0.9999986525 | 0               |
| 0.5768417186 | 0.9999986525 | 21.8607893582   |
| 0.2696944033 | 0.9999986525 | 0.9620664081    |
| 0.3244745913 | 0.9999986525 | 0.2279370154    |
| 0.092486174  | 0.9999986525 | 14.0908508915   |
| 0.739822201  | 0.9999986525 | 0.2206998614    |
| 0.088074177  | 0.9999986525 | 1.4961732486    |
| 0.4457838019 | 0.9999986525 | 5.4786222226    |
| 0.6312664098 | 0.9999986525 | 0               |
| 0.3722082826 | 0.9999986525 | 1253.7428659065 |
| 0.4794085293 | 0.9999986525 | 3.0605231783    |
| 0.9497290657 | 0.9999986525 | 0.404140725     |
| 0.3114510542 | 0.9999986525 | 1.3598691529    |
| 0.6004152944 | 0.9999986525 | 0               |
| 0.6312664098 | 0.9999986525 | 0               |
| 0.4258593473 | 0.9999986525 | 5.3001543691    |
| 0.2951570122 | 0.9999986525 | 4.0773502838    |
| 0.7827359258 | 0.9999986525 | 0               |
| 0.2046079482 | 0.9999986525 | 1.8066746639    |
| 0.4729816619 | 0.9999986525 | 0               |
| 0.4532983454 | 0.9999986525 | 0               |
| 0.0978568878 | 0.9999986525 | 0               |
| 0.0502937768 | 0.9999986525 | 13.4926068461   |

gene\_expression\_table

|              |              |                 |
|--------------|--------------|-----------------|
| 0.9295612144 | 0.9999986525 | 0               |
| 0.9161243593 | 0.9999986525 | 1000.0832125812 |
| 0.2719775265 | 0.9999986525 | 0               |
| 0.8270505589 | 0.9999986525 | 1.7946825549    |
| 0.6038059062 | 0.9999986525 | 7.1281058442    |
| 0.8799411139 | 0.9999986525 | 5.9735241547    |
| 0.8867079817 | 0.9999986525 | 23.989969669    |
| 0.8879179898 | 0.9999986525 | 8.5258512165    |
| 0.6312664098 | 0.9999986525 | 0               |
| 0.7118944851 | 0.9999986525 | 107.4545640413  |
| 0.7973660954 | 0.9999986525 | 28.3536117713   |
| 0.2562644528 | 0.9999986525 | 0               |
| 0.5053737405 | 0.9999986525 | 20.1839844174   |
| 0.956693996  | 0.9999986525 | 4.2045950343    |
| 0.3106401717 | 0.9999986525 | 4.4699221547    |
| 0.6299454035 | 0.9999986525 | 6.665268115     |
| 0.5965449856 | 0.9999986525 | 0               |
| 0.2108458666 | 0.9999986525 | 25.9728416175   |
| 0.1360211961 | 0.9999986525 | 9.4825072432    |
| 0.1120570879 | 0.9999986525 | 6.0628995783    |
| 0.8013107742 | 0.9999986525 | 11.372506078    |
| 0.3229921216 | 0.9999986525 | 107.4144042359  |
| 0.7541152566 | 0.9999986525 | 2.4114843261    |
| 0.4598814265 | 0.9999986525 | 16.1485761279   |
| 0.9409150273 | 0.9999986525 | 0.5088029733    |
| 0.9188764315 | 0.9999986525 | 37.8929603956   |
| 0.3369010142 | 0.9999986525 | 0               |
| 0.4689868422 | 0.9999986525 | 0               |
| 0.6401157822 | 0.9999986525 | 0               |
| 0.6558474016 | 0.9999986525 | 5.2930365029    |
| 0.4564352626 | 0.9999986525 | 0.1007837655    |
| 0.5828055134 | 0.9999986525 | 0               |
| 0.7754615365 | 0.9999986525 | 1352.833766498  |
| 0.8649826175 | 0.9999986525 | 0               |
| 0.6451843357 | 0.9999986525 | 0.9903600027    |
| 0.8999180697 | 0.9999986525 | 0               |
| 0.5549084083 | 0.9999986525 | 0               |
| 0.7610179686 | 0.9999986525 | 1.3575446799    |
| 0.5643889046 | 0.9999986525 | 23.504191467    |
| 0.295583973  | 0.9999986525 | 4.1106723402    |
| 0.6396230452 | 0.9999986525 | 0               |
| 0.1614640488 | 0.9999986525 | 11.9373720351   |
| 0.8680680942 | 0.9999986525 | 25.9847076144   |
| 0.5229916751 | 0.9999986525 | 1.2510403218    |
| 0.1065211837 | 0.9999986525 | 0               |
| 0.0108873439 | 0.9999986525 | 25.5496271789   |
| 0.6007726905 | 0.9999986525 | 43.2734051401   |
| 0.8316217084 | 0.9999986525 | 2.3259767233    |
| 0.9901399828 | 0.9999986525 | 0.4197293795    |



gene\_expression\_table

|              |              |                |
|--------------|--------------|----------------|
| 0.1945168272 | 0.9999986525 | 20.058457359   |
| 0.4132608238 | 0.9999986525 | 0              |
| 0.0839114668 | 0.9999986525 | 12.1705077143  |
| 0.1692807861 | 0.9999986525 | 44.9671504694  |
| 0.9191765082 | 0.9999986525 | 0              |
| 0.9551438997 | 0.9999986525 | 0              |
| 0.4274140088 | 0.9999986525 | 0              |
| 0.7401805232 | 0.9999986525 | 50.9014770183  |
| 0.4296751243 | 0.9999986525 | 19.6278814262  |
| 0.0794033294 | 0.9999986525 | 12.9916435903  |
| 0.8628978763 | 0.9999986525 | 0              |
| 0.1024690122 | 0.9999986525 | 0              |
| 0.8739146059 | 0.9999986525 | 59.8571041477  |
| 0.3517538236 | 0.9999986525 | 36.7913049295  |
| 0.4045086625 | 0.9999986525 | 0              |
| 0.3640783493 | 0.9999986525 | 10.0005697943  |
| 0.3484954967 | 0.9999986525 | 26.865593168   |
| 0.8906852437 | 0.9999986525 | 3.4433130549   |
| 0.3255656878 | 0.9999986525 | 0              |
| 0.8009139111 | 0.9999986525 | 27.6079028888  |
| 0.4692566675 | 0.9999986525 | 13.1590677031  |
| 0.3507215365 | 0.9999986525 | 0              |
| 0.3082649839 | 0.9999986525 | 81.4311514503  |
| 0.3894786461 | 0.9999986525 | 0              |
| 0.8640786018 | 0.9999986525 | 0              |
| 0.9690295288 | 0.9999986525 | 196.1722096726 |
| 0.8495360638 | 0.9999986525 | 32.3746944583  |
| 0.1203738306 | 0.9999986525 | 22.6644858819  |
| 0.322476351  | 0.9999986525 | 0              |
| 0.3058908329 | 0.9999986525 | 8.8892366853   |
| 0.6120327074 | 0.9999986525 | 6.691235047    |
| 0.42586574   | 0.9999986525 | 175.4337682304 |
| 0.6401076801 | 0.9999986525 | 0              |
| 0.9587394074 | 0.9999986525 | 19.0389034702  |
| 0            | 0            | 0              |
| 0            | 0            | 0              |
| 0.6312664098 | 0.9999986525 | 0              |
| 0.2470325519 | 0.9999986525 | 0              |
| 0            | 0            | 0              |
| 0.5925826907 | 0.9999986525 | 299.1638069464 |
| 0.2413704323 | 0.9999986525 | 0              |
| 0.1895976449 | 0.9999986525 | 0              |
| 0.1833991689 | 0.9999986525 | 0              |
| 0.0911333331 | 0.9999986525 | 0              |
| 0.0580611904 | 0.9999986525 | 10.6607611165  |
| 0.1088732698 | 0.9999986525 | 118.9725959669 |
| 0.4709465467 | 0.9999986525 | 0              |
| 0.0339667068 | 0.9999986525 | 0              |
| 0.3987123375 | 0.9999986525 | 1.8317177618   |

gene\_expression\_table

|              |              |                 |
|--------------|--------------|-----------------|
| 0.4338943948 | 0.9999986525 | 5.7837067542    |
| 0.8627729229 | 0.9999986525 | 3.4121926752    |
| 0.1843151824 | 0.9999986525 | 4.7609057964    |
| 0.1684415707 | 0.9999986525 | 89.5367952493   |
| 0.6430764004 | 0.9999986525 | 8.0923153679    |
| 0.9037202029 | 0.9999986525 | 0               |
| 0            | 0            | 0               |
| 0.4439895897 | 0.9999986525 | 0.3454637232    |
| 0.9798677291 | 0.9999986525 | 3.016367758     |
| 0.143128609  | 0.9999986525 | 16.8250774853   |
| 0.5806817339 | 0.9999986525 | 0.1676823962    |
| 0.4961996958 | 0.9999986525 | 0               |
| 0            | 0            | 0               |
| 0.820012529  | 0.9999986525 | 0               |
| 0.9041038105 | 0.9999986525 | 20.4405807189   |
| 0.483584649  | 0.9999986525 | 6.164521118     |
| 0.563494321  | 0.9999986525 | 9.8433954914    |
| 0.0120235524 | 0.9999986525 | 0.4428877242    |
| 0.9628979499 | 0.9999986525 | 0.535068317     |
| 0            | 0            | 0               |
| 0.4729816619 | 0.9999986525 | 0               |
| 0.500167256  | 0.9999986525 | 2.6899214743    |
| 0.6098761915 | 0.9999986525 | 0               |
| 0.9111724591 | 0.9999986525 | 129.3190945796  |
| 0.8656546451 | 0.9999986525 | 40.3159681117   |
| 0.4450443753 | 0.9999986525 | 18.1304216362   |
| 0.1888559741 | 0.9999986525 | 0               |
| 0.3200866848 | 0.9999986525 | 8.5399533595    |
| 0.3126650582 | 0.9999986525 | 0               |
| 0.4665921558 | 0.9999986525 | 0.4138697455    |
| 0.1750387815 | 0.9999986525 | 0               |
| 0.2123519788 | 0.9999986525 | 15.8410072664   |
| 0.0523534773 | 0.9999986525 | 0               |
| 0.5597803815 | 0.9999986525 | 5.0262589199    |
| 0.6418903261 | 0.9999986525 | 229.4269940592  |
| 0.6312664098 | 0.9999986525 | 0               |
| 0.3422249262 | 0.9999986525 | 0               |
| 0.3368705857 | 0.9999986525 | 0               |
| 0.8261457534 | 0.9999986525 | 6.1886475541    |
| 0.1268440672 | 0.9999986525 | 4.6737980731    |
| 0.2412548801 | 0.9999986525 | 4901.0407813021 |
| 0.2210825803 | 0.9999986525 | 45.2092798469   |
| 0.2629495218 | 0.9999986525 | 0               |
| 0.1048731431 | 0.9999986525 | 40.9489577254   |
| 0.8915375808 | 0.9999986525 | 3.1468699414    |
| 0.5025475507 | 0.9999986525 | 28.1059646779   |
| 0.7033416276 | 0.9999986525 | 0               |
| 0.1658550729 | 0.9999986525 | 0               |
| 0.4432928027 | 0.9999986525 | 9.1503375422    |

gene\_expression\_table

|              |              |                |
|--------------|--------------|----------------|
| 0.0192162689 | 0.9999986525 | 85.9033246768  |
| 0.570442617  | 0.9999986525 | 6.1351607995   |
| 0.30755387   | 0.9999986525 | 0              |
| 0.5360715775 | 0.9999986525 | 36.5431020421  |
| 0.819923128  | 0.9999986525 | 0              |
| 0.1094771314 | 0.9999986525 | 0.3642967286   |
| 0.2081758634 | 0.9999986525 | 0              |
| 0.6891698646 | 0.9999986525 | 36.704138267   |
| 0.6002015931 | 0.9999986525 | 25.4441007734  |
| 0.5986769327 | 0.9999986525 | 0              |
| 0.126375793  | 0.9999986525 | 1.0820750333   |
| 0.6640401546 | 0.9999986525 | 2.8554237795   |
| 0.158065926  | 0.9999986525 | 0.9175056369   |
| 0.5858002378 | 0.9999986525 | 31.4847495553  |
| 0.9956937972 | 0.9999986525 | 5.4792312066   |
| 0.0445591306 | 0.9999986525 | 0              |
| 0.2182395469 | 0.9999986525 | 11.2125509742  |
| 0.3108284719 | 0.9999986525 | 2.0792471891   |
| 0.6774889367 | 0.9999986525 | 13.0455353959  |
| 0.1815459149 | 0.9999986525 | 0              |
| 0.5355707751 | 0.9999986525 | 0              |
| 0.4729816619 | 0.9999986525 | 0              |
| 0.6884020113 | 0.9999986525 | 2.2564264815   |
| 0.6800170837 | 0.9999986525 | 0              |
| 0.8482660634 | 0.9999986525 | 2.8543876002   |
| 0            | 0            | 0              |
| 0.2840626648 | 0.9999986525 | 26.246853308   |
| 0.8319679722 | 0.9999986525 | 0              |
| 0.0463890224 | 0.9999986525 | 1.4384246381   |
| 0.3417122305 | 0.9999986525 | 0.5231068939   |
| 0.8002995394 | 0.9999986525 | 17.0545466777  |
| 0.0377817115 | 0.9999986525 | 6.9007732874   |
| 0.1096286357 | 0.9999986525 | 17.4897415235  |
| 0.2734960291 | 0.9999986525 | 12.1635002824  |
| 0.8995645681 | 0.9999986525 | 8.8967622576   |
| 0.1556380941 | 0.9999986525 | 0              |
| 0.9824224401 | 0.9999986525 | 1.7264246025   |
| 0.0526890107 | 0.9999986525 | 0              |
| 0.9417589119 | 0.9999986525 | 21.1002469941  |
| 0.3147141952 | 0.9999986525 | 144.6330997838 |
| 0.7040856192 | 0.9999986525 | 0.1441852899   |
| 0.2700733332 | 0.9999986525 | 0              |
| 0.1052341109 | 0.9999986525 | 35.4646241111  |
| 0.3887458042 | 0.9999986525 | 32.2134298422  |
| 0.7627592115 | 0.9999986525 | 1.680099196    |
| 0.9294003206 | 0.9999986525 | 12.9684268205  |
| 0.9500282014 | 0.9999986525 | 0              |
| 0.367423032  | 0.9999986525 | 27.3322356798  |
| 0.9524430709 | 0.9999986525 | 4.4035451058   |

gene\_expression\_table

|              |              |                |
|--------------|--------------|----------------|
| 0.3368402657 | 0.9999986525 | 0              |
| 0.7880442098 | 0.9999986525 | 22.4793220164  |
| 0.9483684886 | 0.9999986525 | 0.710284553    |
| 0.5114603678 | 0.9999986525 | 3.6418368657   |
| 0.4674805583 | 0.9999986525 | 13.8047840945  |
| 0.7890873647 | 0.9999986525 | 0              |
| 0.8395181269 | 0.9999986525 | 0              |
| 0.3422442988 | 0.9999986525 | 0              |
| 0.3533972588 | 0.9999986525 | 402.2921859989 |
| 0.6801958069 | 0.9999986525 | 0              |
| 0.1264171166 | 0.9999986525 | 0.3634193582   |
| 0.7268806457 | 0.9999986525 | 3.249576231    |
| 0.2375303082 | 0.9999986525 | 0              |
| 0.4596122643 | 0.9999986525 | 1.4244580321   |
| 0.8258107939 | 0.9999986525 | 0.8166490375   |
| 0.6017888796 | 0.9999986525 | 21.0100122233  |
| 0.041963544  | 0.9999986525 | 50.9295257727  |
| 0.3070429266 | 0.9999986525 | 0.4458149868   |
| 0.822660106  | 0.9999986525 | 29.5324799029  |
| 0.8432614305 | 0.9999986525 | 14.4588144857  |
| 0.0649075771 | 0.9999986525 | 1.2735451706   |
| 0.8451382378 | 0.9999986525 | 10.5913803723  |
| 0.6312664098 | 0.9999986525 | 0              |
| 0.6996982913 | 0.9999986525 | 21.2680633147  |
| 0.0926836426 | 0.9999986525 | 2.1804711367   |
| 0            | 0            | 0              |
| 0.3638439939 | 0.9999986525 | 9.2755442294   |
| 0.6650525365 | 0.9999986525 | 4.982915202    |
| 0.8894102602 | 0.9999986525 | 0              |
| 0.334397409  | 0.9999986525 | 4.9047751587   |
| 0            | 0            | 0              |
| 0.9444415618 | 0.9999986525 | 0.4906851823   |
| 0.876333893  | 0.9999986525 | 6.6831911707   |
| 0.0687223028 | 0.9999986525 | 1.0644104604   |
| 0.6429426533 | 0.9999986525 | 116.4001403505 |
| 0.4323674923 | 0.9999986525 | 491.0384959058 |
| 0.001444     | 0.9999986525 | 15.3020458437  |
| 0.6592082737 | 0.9999986525 | 0.8553969458   |
| 0.7981809663 | 0.9999986525 | 12.60625808    |
| 0.1003984416 | 0.9999986525 | 0              |
| 0            | 0            | 0              |
| 0.2717575636 | 0.9999986525 | 18.0993551153  |
| 0.8238584751 | 0.9999986525 | 0.7508376205   |
| 0.21482118   | 0.9999986525 | 0              |
| 0.8218256301 | 0.9999986525 | 0.8979210144   |
| 0.7738137113 | 0.9999986525 | 1.8052954444   |
| 0.8621525211 | 0.9999986525 | 0              |
| 0.6207479874 | 0.9999986525 | 0.6319911237   |
| 0.7881808183 | 0.9999986525 | 82.6832379277  |

gene\_expression\_table

|              |              |                 |
|--------------|--------------|-----------------|
| 0.6012087755 | 0.9999986525 | 776.1895424129  |
| 0.5945137046 | 0.9999986525 | 54.4313055925   |
| 0.1964936846 | 0.9999986525 | 142.9299563277  |
| 0.1199323801 | 0.9999986525 | 10.6115969914   |
| 0.6335850058 | 0.9999986525 | 0               |
| 0.3096934709 | 0.9999986525 | 21.2987975103   |
| 0.0760302919 | 0.9999986525 | 51.6707039025   |
| 0.7591711568 | 0.9999986525 | 39.2449698877   |
| 0.4473756357 | 0.9999986525 | 15.5616208942   |
| 0.7037915421 | 0.9999986525 | 3.7161496078    |
| 0.9613732343 | 0.9999986525 | 49.1063860775   |
| 0.0868047172 | 0.9999986525 | 137.7754388512  |
| 0.4008325526 | 0.9999986525 | 1.5177721708    |
| 0.1283949581 | 0.9999986525 | 1762.2713987218 |
| 0.9297453084 | 0.9999986525 | 46.4638576771   |
| 0.7708802216 | 0.9999986525 | 0               |
| 0.036496703  | 0.9999986525 | 0               |
| 0.1049625906 | 0.9999986525 | 11.7110523258   |
| 0.976342528  | 0.9999986525 | 410.9575673457  |
| 0.3184259492 | 0.9999986525 | 276.8439625462  |
| 0.4097668878 | 0.9999986525 | 2.1690384914    |
| 0.8143689091 | 0.9999986525 | 0.1496399338    |
| 0.1476887201 | 0.9999986525 | 2.1653923012    |
| 0            | 0            | 0               |
| 0.4551080169 | 0.9999986525 | 2.7533061321    |
| 0.2123195545 | 0.9999986525 | 0               |
| 0.336818305  | 0.9999986525 | 0               |
| 0.8139883232 | 0.9999986525 | 0               |
| 0.5202122082 | 0.9999986525 | 6.2159094018    |
| 0.7230255719 | 0.9999986525 | 238.3507737685  |
| 0.6982513209 | 0.9999986525 | 67.7471928352   |
| 0.969747201  | 0.9999986525 | 11.8851223589   |
| 0.5768478192 | 0.9999986525 | 20.8915815769   |
| 0.7596702259 | 0.9999986525 | 191.9274497322  |
| 0.7742695735 | 0.9999986525 | 39.9966563829   |
| 0.6466866522 | 0.9999986525 | 0               |
| 0.0298860014 | 0.9999986525 | 6.9209694963    |
| 0.0810324952 | 0.9999986525 | 2.6327975188    |
| 0.7156539194 | 0.9999986525 | 5.4188499839    |
| 0.8457245836 | 0.9999986525 | 6.9133923636    |
| 0.8465716157 | 0.9999986525 | 39.9595590276   |
| 0.7736199556 | 0.9999986525 | 0               |
| 0.6036127077 | 0.9999986525 | 0               |
| 0.3412808243 | 0.9999986525 | 2.9533030379    |
| 0.6312664098 | 0.9999986525 | 0               |
| 0.165586671  | 0.9999986525 | 0               |
| 0.4239714367 | 0.9999986525 | 21.0481102448   |
| 0.3318677571 | 0.9999986525 | 1036.7540904147 |
| 0.6384005035 | 0.9999986525 | 0               |

gene\_expression\_table

|              |              |                |
|--------------|--------------|----------------|
| 0            | 0            | 0              |
| 0.7764014086 | 0.9999986525 | 11.5782886211  |
| 0.6312664098 | 0.9999986525 | 0              |
| 0.445678097  | 0.9999986525 | 1.5234491133   |
| 0.335860788  | 0.9999986525 | 0              |
| 0.9684106664 | 0.9999986525 | 260.0917178005 |
| 0.4883606041 | 0.9999986525 | 0.9342560333   |
| 0.6112644115 | 0.9999986525 | 0              |
| 0.7182348945 | 0.9999986525 | 10.3531327079  |
| 0.575420113  | 0.9999986525 | 461.9451583902 |
| 0.6312664098 | 0.9999986525 | 0              |
| 0.8648300803 | 0.9999986525 | 8.7997531097   |
| 0.9304280452 | 0.9999986525 | 7.8979988375   |
| 0.774094233  | 0.9999986525 | 5.1475553827   |
| 0.6844757672 | 0.9999986525 | 0              |
| 0.4711323033 | 0.9999986525 | 40.7934486815  |
| 0.5031264478 | 0.9999986525 | 5.8791003591   |
| 0.1706366002 | 0.9999986525 | 11.5865732584  |
| 0.4729816619 | 0.9999986525 | 0              |
| 0.7455515425 | 0.9999986525 | 0              |
| 0.711681918  | 0.9999986525 | 18.5730935737  |
| 0.5205715091 | 0.9999986525 | 0.8846601861   |
| 0.2571055314 | 0.9999986525 | 10.0502223076  |
| 0.3276766108 | 0.9999986525 | 3.2158508328   |
| 0.0865171817 | 0.9999986525 | 0.7240564435   |
| 0.824618667  | 0.9999986525 | 0              |
| 0.122581746  | 0.9999986525 | 0.7315757733   |
| 0.8627206082 | 0.9999986525 | 44.3235046659  |
| 0.060165929  | 0.9999986525 | 0              |
| 0.6787706888 | 0.9999986525 | 11.2282442548  |
| 0.4012936766 | 0.9999986525 | 2.4261067677   |
| 0.6378787426 | 0.9999986525 | 7.1454650061   |
| 0.0537908357 | 0.9999986525 | 2.0773252921   |
| 0.9755804334 | 0.9999986525 | 10.838812059   |
| 0.7582564202 | 0.9999986525 | 4.6862394167   |
| 0.7582164464 | 0.9999986525 | 0              |
| 0.2603890577 | 0.9999986525 | 0.4886286682   |
| 0.1723092051 | 0.9999986525 | 0              |
| 0.0303087689 | 0.9999986525 | 2.7917284188   |
| 0.4829186361 | 0.9999986525 | 51.4316915168  |
| 0.5371391743 | 0.9999986525 | 39.5576950763  |
| 0.8553102866 | 0.9999986525 | 0.6928050979   |
| 0.0764535728 | 0.9999986525 | 0              |
| 0.2858296997 | 0.9999986525 | 2.362721703    |
| 0.0540439213 | 0.9999986525 | 0.7959857257   |
| 0.8152841669 | 0.9999986525 | 1.1659216351   |
| 0.2901193172 | 0.9999986525 | 0              |
| 0.5615505089 | 0.9999986525 | 0.3242027097   |
| 0.5984393818 | 0.9999986525 | 1.2966516468   |

gene\_expression\_table

|              |              |                 |
|--------------|--------------|-----------------|
| 0.6112731323 | 0.9999986525 | 0.0920343613    |
| 0.2649268485 | 0.9999986525 | 5.9588251118    |
| 0.8097121582 | 0.9999986525 | 0               |
| 0.4529215519 | 0.9999986525 | 4.4695060489    |
| 0.2916505459 | 0.9999986525 | 1.2205854391    |
| 0.5849654122 | 0.9999986525 | 2.5802534737    |
| 0.0179134606 | 0.9999986525 | 21.5642456594   |
| 0.5760734516 | 0.9999986525 | 1.7588028493    |
| 0.4769536998 | 0.9999986525 | 3.7704028718    |
| 0.2520920589 | 0.9999986525 | 8.0578627208    |
| 0.109330846  | 0.9999986525 | 7.4609980542    |
| 0.8964466585 | 0.9999986525 | 3.7654834823    |
| 0.1468219729 | 0.9999986525 | 24.0829540476   |
| 0.9574086261 | 0.9999986525 | 3.7081915553    |
| 0.7697732631 | 0.9999986525 | 0.4568885544    |
| 0.8311004902 | 0.9999986525 | 0               |
| 0.7210154348 | 0.9999986525 | 4.6194278165    |
| 0.3815805044 | 0.9999986525 | 5.1778351202    |
| 0.8384494899 | 0.9999986525 | 5.8998977724    |
| 0.4176057685 | 0.9999986525 | 0.7713777181    |
| 0.0255582586 | 0.9999986525 | 33.9891552942   |
| 0.7710820096 | 0.9999986525 | 0               |
| 0.3659191347 | 0.9999986525 | 4.5835965438    |
| 0.1878670551 | 0.9999986525 | 0.3783513831    |
| 0.6872736883 | 0.9999986525 | 64.9484544697   |
| 0.8828473767 | 0.9999986525 | 6.8038714596    |
| 0.4616758549 | 0.9999986525 | 0               |
| 0.7673814295 | 0.9999986525 | 6.2517955238    |
| 0.3413045023 | 0.9999986525 | 0               |
| 0.2566679808 | 0.9999986525 | 12.4922046541   |
| 0.3139074885 | 0.9999986525 | 4.1656830466    |
| 0.7632178126 | 0.9999986525 | 19.7079115217   |
| 0.2670846616 | 0.9999986525 | 56.7433985778   |
| 0.1252850474 | 0.9999986525 | 0               |
| 0.8305929454 | 0.9999986525 | 0               |
| 0.4729816619 | 0.9999986525 | 0               |
| 0.9448924112 | 0.9999986525 | 6.0522462538    |
| 0.3243619244 | 0.9999986525 | 0               |
| 0.3048384362 | 0.9999986525 | 0               |
| 0.2629837647 | 0.9999986525 | 0               |
| 0.4870143658 | 0.9999986525 | 0               |
| 0            | 0            | 0               |
| 0.1833516434 | 0.9999986525 | 0               |
| 0.2630990778 | 0.9999986525 | 216.4504845341  |
| 0.0674617366 | 0.9999986525 | 5823.0730352085 |
| 0.6400995704 | 0.9999986525 | 0               |
| 0.4729816619 | 0.9999986525 | 96.7287879603   |
| 0.5975326213 | 0.9999986525 | 0               |
| 0.8934875116 | 0.9999986525 | 0               |

gene\_expression\_table

|              |              |                |
|--------------|--------------|----------------|
| 0            | 0            | 0              |
| 0.5574487432 | 0.9999986525 | 42.0828033676  |
| 0            | 0            | 0              |
| 0.6400914532 | 0.9999986525 | 0              |
| 0.2671262295 | 0.9999986525 | 0              |
| 0.4074966293 | 0.9999986525 | 0              |
| 0.6400833283 | 0.9999986525 | 0              |
| 0.2410278045 | 0.9999986525 | 141.2136850971 |
| 0.9639059797 | 0.9999986525 | 3.051451844    |
| 0.5784344017 | 0.9999986525 | 4.4070359001   |
| 0.9417926013 | 0.9999986525 | 0              |
| 0.1017914574 | 0.9999986525 | 0              |
| 0.1563169283 | 0.9999986525 | 2.821557764    |
| 0.991323263  | 0.9999986525 | 30.7272039948  |
| 0.4894512186 | 0.9999986525 | 220.9076373687 |
| 0.3422566312 | 0.9999986525 | 0              |
| 0.6312664098 | 0.9999986525 | 0              |
| 0.2681120625 | 0.9999986525 | 0              |
| 0.0102590286 | 0.9999986525 | 6.1655286279   |
| 0            | 0            | 142.7403195306 |
| 0            | 0            | 0              |
| 0.8623129952 | 0.9999986525 | 0              |
| 0.5127389705 | 0.9999986525 | 0              |
| 0.6400751957 | 0.9999986525 | 0              |
| 0.6312664098 | 0.9999986525 | 0              |
| 0.3242500671 | 0.9999986525 | 0              |
| 0.6400670554 | 0.9999986525 | 0              |
| 0            | 0            | 0              |
| 0.083035169  | 0.9999986525 | 741.7685144145 |
| 0.0653642809 | 0.9999986525 | 0              |
| 0.6400589073 | 0.9999986525 | 0              |
| 0.1924179352 | 0.9999986525 | 0              |
| 0.4870157798 | 0.9999986525 | 0              |
| 0.3075114913 | 0.9999986525 | 0              |
| 0.6400507514 | 0.9999986525 | 0              |
| 0.675240439  | 0.9999986525 | 0              |
| 0.6098761915 | 0.9999986525 | 0              |
| 0            | 0            | 0              |
| 0.7477376201 | 0.9999986525 | 0              |
| 0.8237959601 | 0.9999986525 | 0              |
| 0.7572756953 | 0.9999986525 | 0              |
| 0.9038891727 | 0.9999986525 | 8.8867437702   |
| 0.8048070591 | 0.9999986525 | 12.0222896031  |
| 0.7827532512 | 0.9999986525 | 11.9922611776  |
| 0            | 0            | 0              |
| 0.4663675365 | 0.9999986525 | 0              |
| 0.1077411884 | 0.9999986525 | 2.384913896    |
| 0.9043314264 | 0.9999986525 | 1.5781365633   |
| 0.1705997813 | 0.9999986525 | 2.7414439775   |



| gene_expression_table |              |                 |
|-----------------------|--------------|-----------------|
| 0.6312664098          | 0.9999986525 | 0               |
| 0.6114011817          | 0.9999986525 | 47.8067863888   |
| 0.3367964154          | 0.9999986525 | 0               |
| 0.0375623163          | 0.9999986525 | 0               |
| 0                     | 0            | 0               |
| 0.7795173107          | 0.9999986525 | 0               |
| 0                     | 0            | 0               |
| 0.692934467           | 0.9999986525 | 479.42356223    |
| 0.4442132617          | 0.9999986525 | 129.5164207185  |
| 0.8041181558          | 0.9999986525 | 106.3877489451  |
| 0.9191561881          | 0.9999986525 | 0               |
| 0.3367745977          | 0.9999986525 | 0               |
| 0.8121565378          | 0.9999986525 | 5.4556075573    |
| 0.8989038215          | 0.9999986525 | 6.255349784     |
| 0.152518963           | 0.9999986525 | 0               |
| 0.5279430513          | 0.9999986525 | 244.2262114511  |
| 0.5696177683          | 0.9999986525 | 209.0550929791  |
| 0.1140175576          | 0.9999986525 | 39.0780009074   |
| 0.4842299487          | 0.9999986525 | 6.6116572642    |
| 0.7903359401          | 0.9999986525 | 70.8031674335   |
| 0.1165170815          | 0.9999986525 | 52.2105957861   |
| 0.4064562349          | 0.9999986525 | 243.130018305   |
| 0.5088664245          | 0.9999986525 | 0               |
| 0.6576109298          | 0.9999986525 | 0               |
| 0.3125369941          | 0.9999986525 | 10.5972246253   |
| 0.6660936419          | 0.9999986525 | 151.4607892125  |
| 0.5669277132          | 0.9999986525 | 15.6532063504   |
| 0.3348455007          | 0.9999986525 | 23.2378916407   |
| 0.243690603           | 0.9999986525 | 3203.5997087142 |
| 0.3034471939          | 0.9999986525 | 20.9260720701   |
| 0.5935462032          | 0.9999986525 | 1328.1606654545 |
| 0.3367979258          | 0.9999986525 | 0               |
| 0.4319661379          | 0.9999986525 | 80.5090216864   |
| 0.5293936932          | 0.9999986525 | 8.621272972     |
| 0                     | 0            | 0               |
| 0.1128181129          | 0.9999986525 | 16.7132652615   |
| 0.9864280424          | 0.9999986525 | 92.7862231664   |
| 0.2450265474          | 0.9999986525 | 8.3079940579    |
| 0.9465694067          | 0.9999986525 | 1402.9671311594 |
| 0.9514095858          | 0.9999986525 | 3562.5956673369 |
| 0.9223465747          | 0.9999986525 | 6.8006590557    |
| 0.2969472546          | 0.9999986525 | 6.5025755019    |
| 0.3041262027          | 0.9999986525 | 12.926634142    |
| 0.4535601143          | 0.9999986525 | 0               |
| 0.5815644304          | 0.9999986525 | 0               |
| 0.4019178729          | 0.9999986525 | 0               |
| 0.7336417674          | 0.9999986525 | 57.1991894148   |
| 0.6977441357          | 0.9999986525 | 56.5459509918   |
| 0.2808442824          | 0.9999986525 | 96.6933691437   |

gene\_expression\_table

|              |              |                |
|--------------|--------------|----------------|
| 0.9295398119 | 0.9999986525 | 0              |
| 0.209000459  | 0.9999986525 | 610.3975138979 |
| 0.2099309777 | 0.9999986525 | 3.0870889775   |
| 0.165432723  | 0.9999986525 | 28.9748556995  |
| 0.1559593411 | 0.9999986525 | 0              |
| 0.6489277269 | 0.9999986525 | 85.3558274365  |
| 0.3693452273 | 0.9999986525 | 41.7914288635  |
| 0.4309005724 | 0.9999986525 | 88.2122232365  |
| 0.278845883  | 0.9999986525 | 0              |
| 0.1624662765 | 0.9999986525 | 51.4880996601  |
| 0.3422689655 | 0.9999986525 | 0              |
| 0.6396090899 | 0.9999986525 | 0              |
| 0.6312664098 | 0.9999986525 | 0              |
| 0.4729816619 | 0.9999986525 | 0              |
| 0.1396467944 | 0.9999986525 | 32.7122441786  |
| 0.875969564  | 0.9999986525 | 172.440813443  |
| 0.898776222  | 0.9999986525 | 4.6468627184   |
| 0.0484934732 | 0.9999986525 | 56.9422298936  |
| 0.6395951205 | 0.9999986525 | 0              |
| 0.4724616049 | 0.9999986525 | 22.9401317087  |
| 0.7020456398 | 0.9999986525 | 137.6366054058 |
| 0.1313463706 | 0.9999986525 | 9.7084408504   |
| 0.1254465051 | 0.9999986525 | 195.6876344326 |
| 0.5429239325 | 0.9999986525 | 62.8737121742  |
| 0.8997764996 | 0.9999986525 | 402.7442239022 |
| 0.8936749751 | 0.9999986525 | 272.1665458712 |
| 0.3341744274 | 0.9999986525 | 0              |
| 0.1643222828 | 0.9999986525 | 14.7122174568  |
| 0.9682951831 | 0.9999986525 | 2.2056345052   |
| 0.7986858854 | 0.9999986525 | 0              |
| 0.7198946882 | 0.9999986525 | 113.1565166969 |
| 0.3025496341 | 0.9999986525 | 19.289232369   |
| 0.422831259  | 0.9999986525 | 63.887804306   |
| 0.1248520745 | 0.9999986525 | 16.5422587888  |
| 0.7407721787 | 0.9999986525 | 0              |
| 0.9299099546 | 0.9999986525 | 0              |
| 0            | 0            | 0              |
| 0.2694039052 | 0.9999986525 | 0              |
| 0.1126708459 | 0.9999986525 | 36.639579437   |
| 0.4451595761 | 0.9999986525 | 66.6842401847  |
| 0.5663729164 | 0.9999986525 | 0              |
| 0.2799449745 | 0.9999986525 | 20.650603412   |
| 0.8301052909 | 0.9999986525 | 0              |
| 0.5210726387 | 0.9999986525 | 47.9835719803  |
| 0.4753884256 | 0.9999986525 | 153.4651006991 |
| 0.2773981242 | 0.9999986525 | 74.038203121   |
| 0.659470576  | 0.9999986525 | 0              |
| 0.1015055748 | 0.9999986525 | 0              |
| 0            | 0            | 0              |

gene\_expression\_table

|              |              |                 |
|--------------|--------------|-----------------|
| 0.4682443963 | 0.9999986525 | 30.4402986895   |
| 0.9907446101 | 0.9999986525 | 0               |
| 0.9824907806 | 0.9999986525 | 9.5435341934    |
| 0.3910664435 | 0.9999986525 | 0               |
| 0.8871936137 | 0.9999986525 | 0               |
| 0.3422813017 | 0.9999986525 | 0               |
| 0.9095301223 | 0.9999986525 | 12.3224260911   |
| 0.6320516478 | 0.9999986525 | 49.7335466789   |
| 0.8178267826 | 0.9999986525 | 438.1339506805  |
| 0.895403794  | 0.9999986525 | 96.4307533517   |
| 0.503925128  | 0.9999986525 | 55.6815163166   |
| 0.1441817869 | 0.9999986525 | 0               |
| 0.8509977861 | 0.9999986525 | 0               |
| 0.32673388   | 0.9999986525 | 65.7809973238   |
| 0.3255194095 | 0.9999986525 | 0               |
| 0.9099202824 | 0.9999986525 | 0               |
| 0.8902606355 | 0.9999986525 | 0               |
| 0.7877451832 | 0.9999986525 | 42.7469997785   |
| 0.4930282767 | 0.9999986525 | 102.3525547022  |
| 0.7046815568 | 0.9999986525 | 0               |
| 0.3989555586 | 0.9999986525 | 37.5988976457   |
| 0.866168519  | 0.9999986525 | 7.3034827454    |
| 0.7724720705 | 0.9999986525 | 2491.6724400223 |
| 0.5681924403 | 0.9999986525 | 59.3525958715   |
| 0.0879969158 | 0.9999986525 | 39.4722856699   |
| 0.4359177176 | 0.9999986525 | 20.4837433328   |
| 0.4033106751 | 0.9999986525 | 136.581522567   |
| 0.2362816933 | 0.9999986525 | 0               |
| 0.0479538054 | 0.9999986525 | 130.2877552118  |
| 0.1558353016 | 0.9999986525 | 115.7766479858  |
| 0.5616530502 | 0.9999986525 | 0               |
| 0.5555387546 | 0.9999986525 | 755.7801692374  |
| 0.7100912261 | 0.9999986525 | 0               |
| 0.9045688578 | 0.9999986525 | 0               |
| 0.6526020449 | 0.9999986525 | 54.5316656957   |
| 0.7907117964 | 0.9999986525 | 4.2115242731    |
| 0.1200594084 | 0.9999986525 | 28.1843336542   |
| 0.6182694603 | 0.9999986525 | 13.7405042649   |
| 0.6345291764 | 0.9999986525 | 0               |
| 0.0146967225 | 0.9999986525 | 2564.5435271045 |
| 0.3077084378 | 0.9999986525 | 154.8227723747  |
| 0.6054639115 | 0.9999986525 | 6.0080106432    |
| 0.1759958556 | 0.9999986525 | 0               |
| 0.5988905907 | 0.9999986525 | 1693.0661055021 |
| 0.4729816619 | 0.9999986525 | 0               |
| 0.5603810076 | 0.9999986525 | 6.7480889576    |
| 0.5156465887 | 0.9999986525 | 163.8227002964  |
| 0.2040876823 | 0.9999986525 | 1.2354421911    |
| 0.7737030665 | 0.9999986525 | 51.3055354831   |

gene\_expression\_table

|              |              |                 |
|--------------|--------------|-----------------|
| 0.7616491716 | 0.9999986525 | 13.9161109472   |
| 0.9427075729 | 0.9999986525 | 0               |
| 0.9266259698 | 0.9999986525 | 2.8927245366    |
| 0.4035844757 | 0.9999986525 | 11.0240290194   |
| 0.9215958751 | 0.9999986525 | 1.8502201775    |
| 0.7013652122 | 0.9999986525 | 21.4574423996   |
| 0.9581498735 | 0.9999986525 | 8717.2909966148 |
| 0.2358864528 | 0.9999986525 | 0               |
| 0.8421690438 | 0.9999986525 | 0               |
| 0.4451486533 | 0.9999986525 | 4.7703201644    |
| 0.0954067445 | 0.9999986525 | 0               |
| 0.8273992052 | 0.9999986525 | 0               |
| 0            | 0            | 0               |
| 0.4332664227 | 0.9999986525 | 6.590730263     |
| 0.6264550159 | 0.9999986525 | 0               |
| 0.2599620064 | 0.9999986525 | 9.4181958444    |
| 0.3958838451 | 0.9999986525 | 0               |
| 0.6961873218 | 0.9999986525 | 4.398960372     |
| 0.6279067352 | 0.9999986525 | 0               |
| 0.5133642284 | 0.9999986525 | 0               |
| 0.7110428847 | 0.9999986525 | 0               |
| 0.7067934683 | 0.9999986525 | 15.2840162715   |
| 0.766018097  | 0.9999986525 | 7.8775304523    |
| 0.445640383  | 0.9999986525 | 379.65692078    |
| 0.9221730054 | 0.9999986525 | 33.9795429765   |
| 0.9050518658 | 0.9999986525 | 19.4080997553   |
| 0.7114205502 | 0.9999986525 | 3.2114835957    |
| 0.6021342873 | 0.9999986525 | 10.666189546    |
| 0.331771886  | 0.9999986525 | 44.4561601232   |
| 0.4740950624 | 0.9999986525 | 0               |
| 0.6476223782 | 0.9999986525 | 103.2361978687  |
| 0.9724737277 | 0.9999986525 | 189.9421628431  |
| 0.2953037741 | 0.9999986525 | 0               |
| 0.8713327841 | 0.9999986525 | 2.1050627058    |
| 0.6509616039 | 0.9999986525 | 5.1820264652    |
| 0            | 0            | 0               |
| 0.2519797557 | 0.9999986525 | 7.4364852473    |
| 0.1508955705 | 0.9999986525 | 31.0578760519   |
| 0.1305728296 | 0.9999986525 | 1.6130573806    |
| 0.9081415075 | 0.9999986525 | 2.2062992315    |
| 0.0714034426 | 0.9999986525 | 0               |
| 0.1956472467 | 0.9999986525 | 197.6742866242  |
| 0.2613887988 | 0.9999986525 | 0               |
| 0.5519199731 | 0.9999986525 | 42.7297073028   |
| 0.6335300217 | 0.9999986525 | 6.5194319499    |
| 0            | 0            | 0               |
| 0.2700509692 | 0.9999986525 | 0               |
| 0.6312664098 | 0.9999986525 | 0               |
| 0.6201159739 | 0.9999986525 | 0               |

gene\_expression\_table

|              |              |                 |
|--------------|--------------|-----------------|
| 0.9332162408 | 0.9999986525 | 0               |
| 0.2462165674 | 0.9999986525 | 28.0031379779   |
| 0.2078415166 | 0.9999986525 | 1.7939510267    |
| 0.4074204595 | 0.9999986525 | 0               |
| 0.0817929279 | 0.9999986525 | 13.7955380652   |
| 0            | 0            | 0               |
| 0.4462943287 | 0.9999986525 | 8.1835522276    |
| 0.0963498628 | 0.9999986525 | 6.9182497022    |
| 0.8410216597 | 0.9999986525 | 1.8875933532    |
| 0.2315529376 | 0.9999986525 | 19.1933064209   |
| 0.0451799796 | 0.9999986525 | 0               |
| 0.428253236  | 0.9999986525 | 0               |
| 0.3996627299 | 0.9999986525 | 4110.6187372556 |
| 0.9394205604 | 0.9999986525 | 2.5038362233    |
| 0.1916318797 | 0.9999986525 | 23.4059783213   |
| 0.7801769099 | 0.9999986525 | 142.9818429139  |
| 0.6559060406 | 0.9999986525 | 45.880011797    |
| 0.20212796   | 0.9999986525 | 3.2240961007    |
| 0.6716427874 | 0.9999986525 | 0               |
| 0.4729816619 | 0.9999986525 | 0               |
| 0.5062089909 | 0.9999986525 | 4.5244511459    |
| 0.3473329164 | 0.9999986525 | 199.7105037819  |
| 0.9187276249 | 0.9999986525 | 2.7884365759    |
| 0.95666384   | 0.9999986525 | 0               |
| 0.8636351028 | 0.9999986525 | 2.0375582837    |
| 0.1832126967 | 0.9999986525 | 0               |
| 0.4645206821 | 0.9999986525 | 383.8685758423  |
| 0.8448306999 | 0.9999986525 | 5.6460855155    |
| 0.1607921167 | 0.9999986525 | 369.0184336662  |
| 0.8506696006 | 0.9999986525 | 0               |
| 0.6312664098 | 0.9999986525 | 0               |
| 0.006722     | 0.9999986525 | 124.7818505052  |
| 0.8432103149 | 0.9999986525 | 25.8362812537   |
| 0.9396674585 | 0.9999986525 | 6.8718909929    |
| 0.5250134956 | 0.9999986525 | 69.3721937132   |
| 0.6436816114 | 0.9999986525 | 1.8965747918    |
| 0.7090698258 | 0.9999986525 | 212.8409711733  |
| 0.5138011687 | 0.9999986525 | 139.4558383946  |
| 0.1838157636 | 0.9999986525 | 6.4667464462    |
| 0.8296976079 | 0.9999986525 | 126.7171988292  |
| 0.2489938165 | 0.9999986525 | 13.6241243973   |
| 0.191467057  | 0.9999986525 | 791.2778582673  |
| 0.201300466  | 0.9999986525 | 6.2254135304    |
| 0.8938757837 | 0.9999986525 | 755.4656703373  |
| 0.258785772  | 0.9999986525 | 0               |
| 0.6515402091 | 0.9999986525 | 50.4623717049   |
| 0.7007955928 | 0.9999986525 | 16.5959730469   |
| 0.362683073  | 0.9999986525 | 0               |
| 0.4094058881 | 0.9999986525 | 0               |

gene\_expression\_table

|              |              |                |
|--------------|--------------|----------------|
| 0.1108434937 | 0.9999986525 | 12.7332585102  |
| 0.9295183821 | 0.9999986525 | 0              |
| 0.1547620062 | 0.9999986525 | 112.5006004046 |
| 0.3480022535 | 0.9999986525 | 108.2323967089 |
| 6.95E-05     | 0.3402364001 | 0              |
| 0.7077215466 | 0.9999986525 | 15.4694576063  |
| 0.4276235625 | 0.9999986525 | 30.124297414   |
| 0.9622006496 | 0.9999986525 | 46.2833390819  |
| 0.7668600238 | 0.9999986525 | 0              |
| 0.701596014  | 0.9999986525 | 69.9269499867  |
| 0.3251539598 | 0.9999986525 | 19.4657847139  |
| 0.0759962877 | 0.9999986525 | 26.0777277997  |
| 0.4884984835 | 0.9999986525 | 218.2082388607 |
| 0.2677751326 | 0.9999986525 | 12.7958406335  |
| 0            | 0            | 0              |
| 0.1872702779 | 0.9999986525 | 137.0197919437 |
| 0.806158703  | 0.9999986525 | 6099.963104735 |
| 0.8212281066 | 0.9999986525 | 83.6104246327  |
| 0.1971129115 | 0.9999986525 | 83.1387929576  |
| 0.5852222    | 0.9999986525 | 0              |
| 0.9189723866 | 0.9999986525 | 0              |
| 0.9818326254 | 0.9999986525 | 13.6214890003  |
| 0.1536453212 | 0.9999986525 | 0              |
| 0.6242684492 | 0.9999986525 | 5.8765148795   |
| 0.7911442975 | 0.9999986525 | 0.0957950494   |
| 0.8282802719 | 0.9999986525 | 1.1006470182   |
| 0.30755387   | 0.9999986525 | 0              |
| 0            | 0            | 0              |
| 0.4729816619 | 0.9999986525 | 0              |
| 0.4729816619 | 0.9999986525 | 0              |
| 0.4202028298 | 0.9999986525 | 0.6732175682   |
| 0.0133870022 | 0.9999986525 | 0.7064556539   |
| 0.493637188  | 0.9999986525 | 0              |
| 0.3646889839 | 0.9999986525 | 0              |
| 0.0351452006 | 0.9999986525 | 8.0096330229   |
| 0.0564237847 | 0.9999986525 | 0              |
| 0.4729816619 | 0.9999986525 | 0              |
| 0.6312664098 | 0.9999986525 | 0              |
| 0.2385324977 | 0.9999986525 | 0              |
| 0.7174858682 | 0.9999986525 | 161.974830673  |
| 0.1589977413 | 0.9999986525 | 5.7846569799   |
| 0.5300704547 | 0.9999986525 | 0.6986892211   |
| 0.941648024  | 0.9999986525 | 16.574168129   |
| 0.0558197071 | 0.9999986525 | 30.6602118323  |
| 0            | 0            | 0              |
| 0.8828790939 | 0.9999986525 | 6.0590739662   |
| 0.8891028345 | 0.9999986525 | 1.7440120935   |
| 0.5084557729 | 0.9999986525 | 20.847437942   |
| 0.7222724768 | 0.9999986525 | 0.3850533554   |

|              | gene_expression_table |                 |
|--------------|-----------------------|-----------------|
| 0.2128564132 | 0.9999986525          | 19.3736708174   |
| 0.1402016068 | 0.9999986525          | 4.420592038     |
| 0.8027364336 | 0.9999986525          | 0.4074236338    |
| 0.4729816619 | 0.9999986525          | 0               |
| 0            | 0                     | 0               |
| 0            | 0                     | 0               |
| 0            | 0                     | 0               |
| 0.6312664098 | 0.9999986525          | 0               |
| 0.4708228508 | 0.9999986525          | 0               |
| 0.5978527655 | 0.9999986525          | 0.7443297615    |
| 0.1484458587 | 0.9999986525          | 5.0867859267    |
| 0.1401178825 | 0.9999986525          | 22.9426230349   |
| 0.9415703124 | 0.9999986525          | 15.1280277873   |
| 0.8480178454 | 0.9999986525          | 4.0909309238    |
| 0.5502216301 | 0.9999986525          | 1.4951708016    |
| 0.2773439149 | 0.9999986525          | 0.3181101421    |
| 0.9170016869 | 0.9999986525          | 501.0808180864  |
| 0.1094290886 | 0.9999986525          | 27.5626912713   |
| 0.3961676117 | 0.9999986525          | 9.2747814901    |
| 0.0999018688 | 0.9999986525          | 0.0265764371    |
| 0.5373586799 | 0.9999986525          | 0               |
| 0.7111259648 | 0.9999986525          | 0               |
| 0.008644     | 0.9999986525          | 1.7400330528    |
| 0.7994482517 | 0.9999986525          | 0.3574038088    |
| 0.0448837175 | 0.9999986525          | 0               |
| 0.5091947972 | 0.9999986525          | 2.7189332146    |
| 0.3275329881 | 0.9999986525          | 12.7176647626   |
| 0.7362389705 | 0.9999986525          | 0               |
| 0.4834097331 | 0.9999986525          | 0.3661219719    |
| 0            | 0                     | 0               |
| 0.8558447059 | 0.9999986525          | 1.5330155359    |
| 0.1213683924 | 0.9999986525          | 0               |
| 0.3527794056 | 0.9999986525          | 0               |
| 0.831785732  | 0.9999986525          | 2.6586417431    |
| 0.2979520136 | 0.9999986525          | 8907.2877417456 |
| 0.6232583387 | 0.9999986525          | 9.5808351417    |
| 0.5902208908 | 0.9999986525          | 0               |
| 0.5190685553 | 0.9999986525          | 304.0136002794  |
| 0.8715183435 | 0.9999986525          | 21.4590072493   |
| 0.2699644066 | 0.9999986525          | 0               |
| 0.3800263622 | 0.9999986525          | 2.2613150803    |
| 0.4029985819 | 0.9999986525          | 0               |
| 0.1137472132 | 0.9999986525          | 0               |
| 0.7333025124 | 0.9999986525          | 0.7750226462    |
| 0.885474691  | 0.9999986525          | 5.8732706749    |
| 0.4567908393 | 0.9999986525          | 1.3394009339    |
| 0.7212376384 | 0.9999986525          | 0.4407385284    |
| 0.5759063627 | 0.9999986525          | 90.7715581088   |
| 0.8762477976 | 0.9999986525          | 3.3721917445    |

gene\_expression\_table

|              |              |               |
|--------------|--------------|---------------|
| 0            | 0            | 0             |
| 0.8654204851 | 0.9999986525 | 1.1418731779  |
| 0.6894750864 | 0.9999986525 | 0             |
| 0.9161280232 | 0.9999986525 | 5.4514779342  |
| 0.0962919658 | 0.9999986525 | 0             |
| 0.0331786336 | 0.9999986525 | 0.4783197851  |
| 0.3697387786 | 0.9999986525 | 0             |
| 0.6312664098 | 0.9999986525 | 0             |
| 0.7134073247 | 0.9999986525 | 0.509545854   |
| 0.6007944363 | 0.9999986525 | 5.956837643   |
| 0.7957329055 | 0.9999986525 | 64.4090025211 |
| 0.1591596016 | 0.9999986525 | 83.0407519282 |
| 0.4561688235 | 0.9999986525 | 2.4310875433  |
| 0.6400425875 | 0.9999986525 | 0             |
| 0.1081991237 | 0.9999986525 | 5.3506831697  |
| 0.0437834568 | 0.9999986525 | 0             |
| 0.1245783066 | 0.9999986525 | 8.0396678766  |
| 0.587603424  | 0.9999986525 | 0             |
| 0.2134028242 | 0.9999986525 | 1.2036262956  |
| 0.2104674619 | 0.9999986525 | 11.5617158989 |
| 0.5541739852 | 0.9999986525 | 0.7463387913  |
| 0.0717034125 | 0.9999986525 | 35.5968893909 |
| 0.1822399813 | 0.9999986525 | 8.457484976   |
| 0.6312664098 | 0.9999986525 | 0             |
| 0.6540449529 | 0.9999986525 | 16.0693471955 |
| 0.7267806592 | 0.9999986525 | 5.3933579333  |
| 0.947663769  | 0.9999986525 | 0.2632049628  |
| 0.7869424838 | 0.9999986525 | 40.4270653906 |
| 0.7436391458 | 0.9999986525 | 3.1360999125  |
| 0.2730523585 | 0.9999986525 | 3.5575309221  |
| 0.3788472074 | 0.9999986525 | 0.1425919468  |
| 0.1977459506 | 0.9999986525 | 7.8795738514  |
| 0            | 0            | 0             |
| 0.012790629  | 0.9999986525 | 0             |
| 0.147169562  | 0.9999986525 | 0             |
| 0.6202596649 | 0.9999986525 | 0             |
| 0.795434514  | 0.9999986525 | 6.1547509878  |
| 0.1814821998 | 0.9999986525 | 0             |
| 0.1043683498 | 0.9999986525 | 0             |
| 0.8983822611 | 0.9999986525 | 3.3228003716  |
| 0.0218059143 | 0.9999986525 | 2.1276202806  |
| 0.3064933093 | 0.9999986525 | 25.1540918462 |
| 0.9717890975 | 0.9999986525 | 0.4875190916  |
| 0.7786863224 | 0.9999986525 | 1.2655344929  |
| 0.563488417  | 0.9999986525 | 17.8781082498 |
| 0.3663864948 | 0.9999986525 | 0             |
| 0.8310504755 | 0.9999986525 | 0.5660974302  |
| 0.0291500092 | 0.9999986525 | 0             |
| 0.2919709353 | 0.9999986525 | 0             |



gene\_expression\_table

|              |              |                |
|--------------|--------------|----------------|
| 0.9740736439 | 0.9999986525 | 0.4006305099   |
| 0.9299321133 | 0.9999986525 | 0              |
| 0.6400344157 | 0.9999986525 | 0              |
| 0.9184573176 | 0.9999986525 | 4.6269700098   |
| 0.3603303561 | 0.9999986525 | 0              |
| 0.0566478538 | 0.9999986525 | 0.3736525397   |
| 0.9488639996 | 0.9999986525 | 0.755772959    |
| 0.7452797789 | 0.9999986525 | 18.2623747798  |
| 0.9758614514 | 0.9999986525 | 1.3593616346   |
| 0.2745631932 | 0.9999986525 | 0              |
| 0.5204622894 | 0.9999986525 | 6.7666775434   |
| 0.3211738513 | 0.9999986525 | 0              |
| 0.0327023566 | 0.9999986525 | 1.0317670194   |
| 0.9226307129 | 0.9999986525 | 1.2339268069   |
| 0.7110379166 | 0.9999986525 | 0              |
| 0.8243067661 | 0.9999986525 | 5.2508783849   |
| 0.207833914  | 0.9999986525 | 1.5846235479   |
| 0.0489978395 | 0.9999986525 | 7.3874475978   |
| 0.8676599942 | 0.9999986525 | 0.2287198021   |
| 0.728544482  | 0.9999986525 | 5.4949773659   |
| 0.5289736622 | 0.9999986525 | 0.3710692707   |
| 0.1681874456 | 0.9999986525 | 0              |
| 0.2244601913 | 0.9999986525 | 0              |
| 0.762872261  | 0.9999986525 | 0              |
| 0.217316655  | 0.9999986525 | 0              |
| 0.8691196401 | 0.9999986525 | 39.496885125   |
| 0.5701636471 | 0.9999986525 | 0              |
| 0.5199398437 | 0.9999986525 | 49.5905335458  |
| 0.408775356  | 0.9999986525 | 7.2324715698   |
| 0.3100706595 | 0.9999986525 | 2.548688265    |
| 0.9203586528 | 0.9999986525 | 0              |
| 0.7912874304 | 0.9999986525 | 0.3934994205   |
| 0.0938953807 | 0.9999986525 | 0.5864433834   |
| 0.7918722432 | 0.9999986525 | 5.0978685547   |
| 0.4073444098 | 0.9999986525 | 0              |
| 0.3477510548 | 0.9999986525 | 0              |
| 0.5149632824 | 0.9999986525 | 1.014579161    |
| 0.3778809758 | 0.9999986525 | 0.7670718295   |
| 0.2013244533 | 0.9999986525 | 13.6767943318  |
| 0.5147778082 | 0.9999986525 | 124.547775858  |
| 0.1935417148 | 0.9999986525 | 4.5679865268   |
| 0.1737119261 | 0.9999986525 | 0.3782635847   |
| 0.5008482439 | 0.9999986525 | 0              |
| 0.2517634046 | 0.9999986525 | 1.429837784    |
| 0.8655934977 | 0.9999986525 | 5.1278635868   |
| 0.4298936585 | 0.9999986525 | 0.9912475678   |
| 0.6412039942 | 0.9999986525 | 3.126563949    |
| 0.9334755424 | 0.9999986525 | 0              |
| 0.0501284355 | 0.9999986525 | 240.8060104766 |

gene\_expression\_table

|              |              |                |
|--------------|--------------|----------------|
| 0.1645744785 | 0.9999986525 | 16.579711772   |
| 0.9495894789 | 0.9999986525 | 0              |
| 0.300130697  | 0.9999986525 | 0.729181933    |
| 0.6395831326 | 0.9999986525 | 0              |
| 0.4949566078 | 0.9999986525 | 12.7724106956  |
| 0.8452486826 | 0.9999986525 | 2.2580906729   |
| 0.8102760018 | 0.9999986525 | 80.3406247976  |
| 0.6312664098 | 0.9999986525 | 0              |
| 0.4741507213 | 0.9999986525 | 30.8783870898  |
| 0.6400262358 | 0.9999986525 | 0              |
| 0.2810466741 | 0.9999986525 | 1.5911161458   |
| 0.3607196289 | 0.9999986525 | 1.7378144262   |
| 0.9517498788 | 0.9999986525 | 0              |
| 0.3199216881 | 0.9999986525 | 0              |
| 0.4650088846 | 0.9999986525 | 11.2439150314  |
| 0.0482757707 | 0.9999986525 | 7.4862389049   |
| 0.0442335238 | 0.9999986525 | 1.9300934177   |
| 0.2790480516 | 0.9999986525 | 0.423646719    |
| 0.6312664098 | 0.9999986525 | 0              |
| 0.0993653075 | 0.9999986525 | 0              |
| 0.0113123707 | 0.9999986525 | 0              |
| 0.7133493916 | 0.9999986525 | 0              |
| 0.6400180479 | 0.9999986525 | 0              |
| 0.7671100876 | 0.9999986525 | 11.0130604899  |
| 0.0320070675 | 0.9999986525 | 7.4036473297   |
| 0.1862354901 | 0.9999986525 | 0              |
| 0            | 0            | 0              |
| 0.8617391408 | 0.9999986525 | 0              |
| 0.9260539133 | 0.9999986525 | 0              |
| 0.9301033979 | 0.9999986525 | 0              |
| 0.6376177446 | 0.9999986525 | 0              |
| 0.1777016672 | 0.9999986525 | 0              |
| 0.1235702735 | 0.9999986525 | 21.6878747336  |
| 0.7523032132 | 0.9999986525 | 2.7965512057   |
| 0.0661784037 | 0.9999986525 | 11.2226770562  |
| 0.0302943126 | 0.9999986525 | 2.9981220254   |
| 0.3355404835 | 0.9999986525 | 103.5567024045 |
| 0.336016224  | 0.9999986525 | 0              |
| 0.5735351357 | 0.9999986525 | 15.6957386255  |
| 0.4956967019 | 0.9999986525 | 10.5824092041  |
| 0.5725564692 | 0.9999986525 | 2.5167461628   |
| 0.0702662752 | 0.9999986525 | 0              |
| 0.6400098519 | 0.9999986525 | 0              |
| 0.1824997133 | 0.9999986525 | 0              |
| 0.4995666018 | 0.9999986525 | 1.1816868511   |
| 0.892855747  | 0.9999986525 | 0              |
| 0            | 0            | 0              |
| 0            | 0            | 0              |
| 0.1436477944 | 0.9999986525 | 0              |

gene\_expression\_table

|              |              |                 |
|--------------|--------------|-----------------|
| 0.0465410097 | 0.9999986525 | 2.9192938549    |
| 0.8668971272 | 0.9999986525 | 0               |
| 0.6400016476 | 0.9999986525 | 0               |
| 0.3954852269 | 0.9999986525 | 0               |
| 0.8279263705 | 0.9999986525 | 6.6402771007    |
| 0.6312664098 | 0.9999986525 | 0               |
| 0.4072684798 | 0.9999986525 | 0               |
| 0.7031949911 | 0.9999986525 | 4442.2921872597 |
| 0.7944008835 | 0.9999986525 | 0               |
| 0.1028170411 | 0.9999986525 | 1.49483225      |
| 0.8628550101 | 0.9999986525 | 0               |
| 0.9216786301 | 0.9999986525 | 0               |
| 0.2367416561 | 0.9999986525 | 1.6134762541    |
| 0.0482080241 | 0.9999986525 | 1.1175065483    |
| 0.1313048191 | 0.9999986525 | 72.5408422771   |
| 0.7894770578 | 0.9999986525 | 0.7410607598    |
| 0.819853337  | 0.9999986525 | 0               |
| 0.0611120615 | 0.9999986525 | 9.3352042822    |
| 0.5402289693 | 0.9999986525 | 51.5898322076   |
| 0.9236186666 | 0.9999986525 | 0.2530189869    |
| 0.9308750547 | 0.9999986525 | 1.7899003436    |
| 0.088838108  | 0.9999986525 | 0.5758482061    |
| 0.0506940381 | 0.9999986525 | 2.3095119042    |
| 0.0301215291 | 0.9999986525 | 3.1070666094    |
| 0.167842804  | 0.9999986525 | 0               |
| 0.3683594168 | 0.9999986525 | 119.9277987405  |
| 0.8990150598 | 0.9999986525 | 0.1951921405    |
| 0.354876457  | 0.9999986525 | 0               |
| 0.6826247084 | 0.9999986525 | 8.0008965651    |
| 0.1007774333 | 0.9999986525 | 0               |
| 0.7533921271 | 0.9999986525 | 4.387162714     |
| 0.293568253  | 0.9999986525 | 368.4439955601  |
| 0.4835619501 | 0.9999986525 | 5.7785809255    |
| 0.0665643683 | 0.9999986525 | 0               |
| 0.1543004219 | 0.9999986525 | 110.2126841117  |
| 0.0456801163 | 0.9999986525 | 0               |
| 0.419233124  | 0.9999986525 | 6.4418564793    |
| 0.4317058991 | 0.9999986525 | 2.1808725621    |
| 0.9234377919 | 0.9999986525 | 1.3006889709    |
| 0.2265898437 | 0.9999986525 | 15.1334698883   |
| 0.0171314522 | 0.9999986525 | 2.6515673374    |
| 0.9392570223 | 0.9999986525 | 9.2807963144    |
| 0.7289538604 | 0.9999986525 | 0               |
| 0.6676213708 | 0.9999986525 | 5.1687138605    |
| 0.4297875911 | 0.9999986525 | 1.6995629357    |
| 0.5099273713 | 0.9999986525 | 3368.0517729126 |
| 0.8214976662 | 0.9999986525 | 0               |
| 0.9502745756 | 0.9999986525 | 0.3718766246    |
| 0.3943562063 | 0.9999986525 | 0               |

gene\_expression\_table

|              |              |               |
|--------------|--------------|---------------|
| 0.5779190979 | 0.9999986525 | 1.5937810102  |
| 0.5263780442 | 0.9999986525 | 0             |
| 0            | 0            | 0             |
| 0.6800399336 | 0.9999986525 | 23.4415970823 |
| 0.2537183485 | 0.9999986525 | 0.2439464486  |
| 0.9223035161 | 0.9999986525 | 2.8349920945  |
| 0.3634944499 | 0.9999986525 | 0.2945479391  |
| 0.6575960336 | 0.9999986525 | 0             |
| 0.2634068591 | 0.9999986525 | 1.0906896221  |
| 0.9067447748 | 0.9999986525 | 2.8255580465  |
| 0.9513724691 | 0.9999986525 | 3.8079637252  |
| 0.4878342846 | 0.9999986525 | 2.1521564069  |
| 0.6995351654 | 0.9999986525 | 10.7293816808 |
| 0.1813401885 | 0.9999986525 | 0             |
| 0.7078735562 | 0.9999986525 | 16.6096427165 |
| 0.685395212  | 0.9999986525 | 33.3685876655 |
| 0.1679618187 | 0.9999986525 | 3.4755907315  |
| 0.1136596022 | 0.9999986525 | 0             |
| 0.2698779482 | 0.9999986525 | 0             |
| 0.1722780911 | 0.9999986525 | 0             |
| 0.6102093498 | 0.9999986525 | 0             |
| 0            | 0            | 0             |
| 0.3454940176 | 0.9999986525 | 4.9201999447  |
| 0.73679161   | 0.9999986525 | 0             |
| 0.7893078479 | 0.9999986525 | 1.5651284565  |
| 0.92995423   | 0.9999986525 | 0             |
| 0.0426685116 | 0.9999986525 | 3.8283438967  |
| 0.0625222522 | 0.9999986525 | 2.2274485239  |
| 0.4002783735 | 0.9999986525 | 2.9597578024  |
| 0            | 0            | 0             |
| 0.5070999324 | 0.9999986525 | 0             |
| 0.6399934351 | 0.9999986525 | 0             |
| 0.2435650824 | 0.9999986525 | 12.1105063578 |
| 0.7341491417 | 0.9999986525 | 15.8814969858 |
| 0.355485408  | 0.9999986525 | 0             |
| 0.5863659889 | 0.9999986525 | 1.5659858928  |
| 0.12044948   | 0.9999986525 | 0.5014566727  |
| 0.7381279711 | 0.9999986525 | 1.5707987219  |
| 0.7113265836 | 0.9999986525 | 5.4965421883  |
| 0.9986424141 | 0.9999986525 | 0             |
| 0.5917437099 | 0.9999986525 | 1.0979187635  |
| 0.4689936359 | 0.9999986525 | 2.9975548116  |
| 0.0255310718 | 0.9999986525 | 3.0271978484  |
| 0.4838081795 | 0.9999986525 | 0.2305962408  |
| 0.8192353834 | 0.9999986525 | 2.700995639   |
| 0.5963149222 | 0.9999986525 | 0.8985473608  |
| 0.9360845898 | 0.9999986525 | 6.808330043   |
| 0.976962578  | 0.9999986525 | 1.1331959267  |
| 0.1751266841 | 0.9999986525 | 1.6003571035  |

gene\_expression\_table

|              |              |                |
|--------------|--------------|----------------|
| 0.6603104399 | 0.9999986525 | 31.7658596333  |
| 0.6062408911 | 0.9999986525 | 0              |
| 0.301206545  | 0.9999986525 | 14.7568879628  |
| 0.2938785647 | 0.9999986525 | 1.0945662935   |
| 0.2064692091 | 0.9999986525 | 1.9161859889   |
| 0.2473403391 | 0.9999986525 | 19.7712375204  |
| 0.6613681845 | 0.9999986525 | 12.6551933066  |
| 0.2836168631 | 0.9999986525 | 57.0190750082  |
| 0.2442064603 | 0.9999986525 | 33.8629692521  |
| 0.6278787962 | 0.9999986525 | 433.5963302535 |
| 0.2920059191 | 0.9999986525 | 125.6844246368 |
| 0.3564747569 | 0.9999986525 | 0              |
| 0.9646122157 | 0.9999986525 | 7.7882412451   |
| 0.3980754827 | 0.9999986525 | 0              |
| 0.6312664098 | 0.9999986525 | 0              |
| 0.1042751976 | 0.9999986525 | 3.7764689472   |
| 0.5963220314 | 0.9999986525 | 0.7328701126   |
| 0.4850384193 | 0.9999986525 | 0              |
| 0.5981669036 | 0.9999986525 | 0              |
| 0.6485779051 | 0.9999986525 | 4.5086151807   |
| 0.3079313236 | 0.9999986525 | 0              |
| 0.1073911564 | 0.9999986525 | 0              |
| 0            | 0            | 0              |
| 0.4925841324 | 0.9999986525 | 32.3176211884  |
| 0.0241605753 | 0.9999986525 | 14.5935115298  |
| 0.3405115533 | 0.9999986525 | 0.3496159534   |
| 0.4467800107 | 0.9999986525 | 44.8550688381  |
| 0.8352267386 | 0.9999986525 | 2.4506481475   |
| 0.6312664098 | 0.9999986525 | 0              |
| 0.9677896046 | 0.9999986525 | 0              |
| 0.1289178185 | 0.9999986525 | 0.1915963542   |
| 0.0650469077 | 0.9999986525 | 87.0490764267  |
| 0.8075980241 | 0.9999986525 | 13.1064915193  |
| 0.2998264729 | 0.9999986525 | 0              |
| 0.1359265004 | 0.9999986525 | 0              |
| 0.497714726  | 0.9999986525 | 11.9003871623  |
| 0.9175410652 | 0.9999986525 | 0.9024472127   |
| 0.6484675983 | 0.9999986525 | 223.2717526862 |
| 0.1456156208 | 0.9999986525 | 2.8489544841   |
| 0.1243722829 | 0.9999986525 | 138.96875753   |
| 0.8241968538 | 0.9999986525 | 0              |
| 0.3442314228 | 0.9999986525 | 0              |
| 0.5024292345 | 0.9999986525 | 7.7855295457   |
| 0.7582961404 | 0.9999986525 | 2.2546925472   |
| 0.9439893233 | 0.9999986525 | 1.183558215    |
| 0.7733974871 | 0.9999986525 | 13.2522921661  |
| 0.1768875511 | 0.9999986525 | 3.5586495672   |
| 0.7938582725 | 0.9999986525 | 31.8780251856  |
| 0.073557232  | 0.9999986525 | 9.1837515174   |

gene\_expression\_table

|              |              |                 |
|--------------|--------------|-----------------|
| 0.4817015056 | 0.9999986525 | 58.9550715084   |
| 0.8954271926 | 0.9999986525 | 7.2706840187    |
| 0.9368258704 | 0.9999986525 | 0               |
| 0.3933638262 | 0.9999986525 | 0               |
| 0.6199748465 | 0.9999986525 | 0               |
| 0.6223452818 | 0.9999986525 | 0               |
| 0.0533197547 | 0.9999986525 | 6.1271416017    |
| 0.4599577615 | 0.9999986525 | 0               |
| 0.1688007831 | 0.9999986525 | 12.8688884567   |
| 0.2175163368 | 0.9999986525 | 1290.5289163038 |
| 0.6030327866 | 0.9999986525 | 1.290032199     |
| 0.3727849069 | 0.9999986525 | 3.418130764     |
| 0.6416011123 | 0.9999986525 | 33.3927151153   |
| 0.288462436  | 0.9999986525 | 65.100078495    |
| 0.0715465804 | 0.9999986525 | 3.5993596423    |
| 0.3552305115 | 0.9999986525 | 106.8128545369  |
| 0.2972607917 | 0.9999986525 | 8.4857993872    |
| 0.3841967155 | 0.9999986525 | 6.3443952461    |
| 0.7148845522 | 0.9999986525 | 14.7122174568   |
| 0.5420678191 | 0.9999986525 | 1.8942280088    |
| 0.7007998554 | 0.9999986525 | 41.821339888    |
| 0.2899021415 | 0.9999986525 | 0.6003969559    |
| 0.8411284826 | 0.9999986525 | 12.5966189159   |
| 0.6248607638 | 0.9999986525 | 0.163755117     |
| 0            | 0            | 0               |
| 0.847376904  | 0.9999986525 | 4.5833479325    |
| 0.1503080738 | 0.9999986525 | 44.9982795474   |
| 0.8307007428 | 0.9999986525 | 0               |
| 0.0180300407 | 0.9999986525 | 0               |
| 0.0261253817 | 0.9999986525 | 3.85460849      |
| 0.003287     | 0.9999986525 | 21.7779375074   |
| 0.284795121  | 0.9999986525 | 1.7744823515    |
| 0.4732702312 | 0.9999986525 | 6.643037327     |
| 0.2184003423 | 0.9999986525 | 2.668897259     |
| 0.9109050764 | 0.9999986525 | 7492.4203621575 |
| 0.0236084885 | 0.9999986525 | 0               |
| 0.5548807357 | 0.9999986525 | 4.0613594453    |
| 0.9165431016 | 0.9999986525 | 3.9196426416    |
| 0.3598499873 | 0.9999986525 | 0               |
| 0.0570921892 | 0.9999986525 | 19.370591684    |
| 0.5621762866 | 0.9999986525 | 5.5328603244    |
| 0.5089599221 | 0.9999986525 | 25.3321520888   |
| 0.765675698  | 0.9999986525 | 37.1295425975   |
| 0.3651390424 | 0.9999986525 | 3.8260789326    |
| 0.5317113576 | 0.9999986525 | 0               |
| 0.1566986199 | 0.9999986525 | 8.1040230515    |
| 0.4576965066 | 0.9999986525 | 211.449202684   |
| 0.7097096873 | 0.9999986525 | 9.5045229088    |
| 0.8461932056 | 0.9999986525 | 47.9338007932   |

gene\_expression\_table

|              |              |                |
|--------------|--------------|----------------|
| 0.6089582975 | 0.9999986525 | 0              |
| 0.1174616989 | 0.9999986525 | 22.7960627703  |
| 0.2521532582 | 0.9999986525 | 16.3687953592  |
| 0.8463498905 | 0.9999986525 | 0              |
| 0.0161785427 | 0.9999986525 | 88.1995962363  |
| 0.7174116871 | 0.9999986525 | 14.2717176205  |
| 0.3368211778 | 0.9999986525 | 0              |
| 0.0737240949 | 0.9999986525 | 28.9539407695  |
| 0.1813119101 | 0.9999986525 | 3.9946992078   |
| 0.4538206859 | 0.9999986525 | 2.4988842312   |
| 0.2771190428 | 0.9999986525 | 8.3683458705   |
| 0.753529848  | 0.9999986525 | 0.4427206584   |
| 0.6461572079 | 0.9999986525 | 2.6332788426   |
| 0.6685644226 | 0.9999986525 | 0.3532609042   |
| 0.3422936397 | 0.9999986525 | 0              |
| 0.4287973293 | 0.9999986525 | 288.6356959174 |
| 0.2465524274 | 0.9999986525 | 1.9676217136   |
| 0.3487206576 | 0.9999986525 | 0              |
| 0.2816379341 | 0.9999986525 | 4.0559012576   |
| 0.7088383495 | 0.9999986525 | 51.4254315738  |
| 0.824517722  | 0.9999986525 | 0              |
| 0.807270377  | 0.9999986525 | 1.147081322    |
| 0.4319549086 | 0.9999986525 | 11.3691163594  |
| 0.8640445658 | 0.9999986525 | 0              |
| 0.0103162315 | 0.9999986525 | 1.1118719627   |
| 0.917712536  | 0.9999986525 | 0.3526617491   |
| 0.2554233407 | 0.9999986525 | 0              |
| 0.1829236001 | 0.9999986525 | 62.2438635549  |
| 0.7822040976 | 0.9999986525 | 0.6383426589   |
| 0.8215988652 | 0.9999986525 | 2.4368812553   |
| 0.2882239396 | 0.9999986525 | 0              |
| 0.2806431955 | 0.9999986525 | 28.1511579406  |
| 0.6312664098 | 0.9999986525 | 0              |
| 0.4999196684 | 0.9999986525 | 423.710135462  |
| 0.3132964626 | 0.9999986525 | 0.4462594909   |
| 0.468890209  | 0.9999986525 | 1.5157248946   |
| 0.2364880554 | 0.9999986525 | 19.0124673481  |
| 0.411476053  | 0.9999986525 | 18.271551021   |
| 0.6779476705 | 0.9999986525 | 63.3962083972  |
| 0.8535800783 | 0.9999986525 | 1.6456420122   |
| 0.4611551913 | 0.9999986525 | 67.8045315062  |
| 0.967362207  | 0.9999986525 | 2.2295642615   |
| 0.4968881934 | 0.9999986525 | 0              |
| 0.6312664098 | 0.9999986525 | 0              |
| 0.6395711862 | 0.9999986525 | 0              |
| 0.281569868  | 0.9999986525 | 0.4374149479   |
| 0.3365342242 | 0.9999986525 | 0              |
| 0.8283849696 | 0.9999986525 | 0.5750581791   |
| 0.008366     | 0.9999986525 | 424.9667090181 |

gene\_expression\_table

|              |              |                |
|--------------|--------------|----------------|
| 0.3208092107 | 0.9999986525 | 0              |
| 0.6143638592 | 0.9999986525 | 0              |
| 0.2795304025 | 0.9999986525 | 4.5384479012   |
| 0.1007522785 | 0.9999986525 | 296.4616740411 |
| 0.7210715505 | 0.9999986525 | 362.1185003821 |
| 0.5297455039 | 0.9999986525 | 7.6879884846   |
| 0.30755387   | 0.9999986525 | 0              |
| 0.2414997354 | 0.9999986525 | 2.5152838581   |
| 0.3310382233 | 0.9999986525 | 0              |
| 0.1473764774 | 0.9999986525 | 0              |
| 0.8046033353 | 0.9999986525 | 0              |
| 0.7804730093 | 0.9999986525 | 0              |
| 0.6428688994 | 0.9999986525 | 0              |
| 0.6399769851 | 0.9999986525 | 0              |
| 0.3357235662 | 0.9999986525 | 17.8304923114  |
| 0.9721781619 | 0.9999986525 | 119.5271346861 |
| 0.4995790015 | 0.9999986525 | 281.9750038778 |
| 0.3727878338 | 0.9999986525 | 78.0501254576  |
| 0.7510586141 | 0.9999986525 | 16.3662591343  |
| 0.6245749788 | 0.9999986525 | 0              |
| 0.008664     | 0.9999986525 | 0.3839281068   |
| 0.5878588946 | 0.9999986525 | 24.5387971183  |
| 0.7409335523 | 0.9999986525 | 0.4523727742   |
| 0.488259013  | 0.9999986525 | 0.1002972388   |
| 0.3726436419 | 0.9999986525 | 1.3998971089   |
| 0.6495808848 | 0.9999986525 | 0              |
| 0.8384233905 | 0.9999986525 | 0              |
| 0.6960531945 | 0.9999986525 | 0              |
| 0.7190406122 | 0.9999986525 | 0              |
| 0.425113516  | 0.9999986525 | 0              |
| 0.8128759137 | 0.9999986525 | 1.0343197561   |
| 0.5871875893 | 0.9999986525 | 11.3863999051  |
| 0.3462753291 | 0.9999986525 | 3.1668336547   |
| 0.7256575535 | 0.9999986525 | 3.889525222    |
| 0.0108690837 | 0.9999986525 | 0              |
| 0.2332916707 | 0.9999986525 | 224.8494268241 |
| 0.7643172224 | 0.9999986525 | 24.1901963936  |
| 0.4729816619 | 0.9999986525 | 0              |
| 0.30755387   | 0.9999986525 | 0              |
| 0.4080896095 | 0.9999986525 | 170.2644955916 |
| 0.8918410791 | 0.9999986525 | 3.395811108    |
| 0.4005689208 | 0.9999986525 | 17.6200569586  |
| 0.9494628378 | 0.9999986525 | 1.0663446581   |
| 0.4528226283 | 0.9999986525 | 6.5088530216   |
| 0.7050098457 | 0.9999986525 | 25.3321520888  |
| 0.8705924279 | 0.9999986525 | 0              |
| 0.8418886527 | 0.9999986525 | 1.935266926    |
| 0.30755387   | 0.9999986525 | 0              |
| 0.0248096448 | 0.9999986525 | 3.3785231318   |



gene\_expression\_table

|              |              |                 |
|--------------|--------------|-----------------|
| 0.6769574328 | 0.9999986525 | 15.6447509078   |
| 0.4050550325 | 0.9999986525 | 1.0677027843    |
| 0.9993203995 | 0.9999986525 | 0.8005019738    |
| 0.4845669345 | 0.9999986525 | 4.1267966546    |
| 0.9422353826 | 0.9999986525 | 0               |
| 0.545454642  | 0.9999986525 | 0.2656172543    |
| 0.7903975421 | 0.9999986525 | 0               |
| 0.0504620273 | 0.9999986525 | 0               |
| 0.4729816619 | 0.9999986525 | 0               |
| 0.8746869024 | 0.9999986525 | 13.4639223036   |
| 0.6350421984 | 0.9999986525 | 10.066313084    |
| 0.8706308722 | 0.9999986525 | 4.2631980271    |
| 0.1930514496 | 0.9999986525 | 0.2130675998    |
| 0.2201148416 | 0.9999986525 | 1.140332255     |
| 0.9299198869 | 0.9999986525 | 0               |
| 0.6794138949 | 0.9999986525 | 1.1553116819    |
| 0.5483565878 | 0.9999986525 | 7.4412001728    |
| 0.7668961619 | 0.9999986525 | 2.5041482828    |
| 0.0869984651 | 0.9999986525 | 193.5588626095  |
| 0.2714182374 | 0.9999986525 | 0.0727583698    |
| 0.0463339364 | 0.9999986525 | 37.3800931139   |
| 0.2964671667 | 0.9999986525 | 0               |
| 0.1835029244 | 0.9999986525 | 27.1606676402   |
| 0.1901528641 | 0.9999986525 | 134.2201753438  |
| 0.0116114119 | 0.9999986525 | 47.856033188    |
| 0.2765428872 | 0.9999986525 | 0.1164785084    |
| 0.6866856173 | 0.9999986525 | 5.9626886249    |
| 0.4062528265 | 0.9999986525 | 2.1807712539    |
| 0.5758546106 | 0.9999986525 | 4.2946873939    |
| 0.2942813692 | 0.9999986525 | 1395.8847574033 |
| 0.5107856256 | 0.9999986525 | 0               |
| 0.1539579913 | 0.9999986525 | 3.1363425844    |
| 0.7969109485 | 0.9999986525 | 0               |
| 0.3539760949 | 0.9999986525 | 0               |
| 0.7553391059 | 0.9999986525 | 0               |
| 0.8672940747 | 0.9999986525 | 21.6488509448   |
| 0.9836589314 | 0.9999986525 | 18.4599504461   |
| 0.311693834  | 0.9999986525 | 0               |
| 0.2007590221 | 0.9999986525 | 299.6451028526  |
| 0            | 0            | 0               |
| 0.4231307756 | 0.9999986525 | 51.5180413403   |
| 0.3752153494 | 0.9999986525 | 45.7516202495   |
| 0.6312664098 | 0.9999986525 | 0               |
| 0.5929347068 | 0.9999986525 | 69.4767615343   |
| 0.6976901431 | 0.9999986525 | 155.9702264748  |
| 0.1596597116 | 0.9999986525 | 2.5750576908    |
| 0.0181882512 | 0.9999986525 | 19.803672173    |
| 0.5889435107 | 0.9999986525 | 3020.0313905612 |
| 0.6515897622 | 0.9999986525 | 179.0470907004  |

gene\_expression\_table

|              |              |                 |
|--------------|--------------|-----------------|
| 0.9960315213 | 0.9999986525 | 29.0409756001   |
| 0.183208467  | 0.9999986525 | 16.0577434559   |
| 0.650585018  | 0.9999986525 | 9.0004448821    |
| 0            | 0            | 0               |
| 0.0811658415 | 0.9999986525 | 58.9441051633   |
| 0.2503502727 | 0.9999986525 | 0               |
| 0.5997990923 | 0.9999986525 | 1.2026591659    |
| 0.6790737057 | 0.9999986525 | 0.2870009685    |
| 0.2083913121 | 0.9999986525 | 0               |
| 0.9410717474 | 0.9999986525 | 0               |
| 0.8735117859 | 0.9999986525 | 18.0993551153   |
| 0.3224119953 | 0.9999986525 | 0               |
| 0.5890232686 | 0.9999986525 | 17.6654292683   |
| 0.8090945968 | 0.9999986525 | 52.5551850078   |
| 0.3556026623 | 0.9999986525 | 0               |
| 0.9328345879 | 0.9999986525 | 2.8562099336    |
| 0.8748627852 | 0.9999986525 | 0               |
| 0.789585328  | 0.9999986525 | 203.7108274443  |
| 0.3359278293 | 0.9999986525 | 2.3199612663    |
| 0.8410253062 | 0.9999986525 | 4.5886907194    |
| 0            | 0            | 0               |
| 0.4071457558 | 0.9999986525 | 0               |
| 0.7627565222 | 0.9999986525 | 0               |
| 0.1058565746 | 0.9999986525 | 77.123128251    |
| 0.8490908098 | 0.9999986525 | 14.8328703663   |
| 0.1454805395 | 0.9999986525 | 6.4029288379    |
| 0.2128070945 | 0.9999986525 | 188.8510688304  |
| 0.9393028999 | 0.9999986525 | 0               |
| 0.565906017  | 0.9999986525 | 19.5259975696   |
| 0.5626190186 | 0.9999986525 | 7730.8990577869 |
| 0.4729816619 | 0.9999986525 | 0               |
| 0.6395592809 | 0.9999986525 | 0               |
| 0.2682369802 | 0.9999986525 | 0               |
| 0            | 0            | 0               |
| 0.4729816619 | 0.9999986525 | 0               |
| 0.6312664098 | 0.9999986525 | 0               |
| 0.8052584862 | 0.9999986525 | 1.2208770019    |
| 0.9503741735 | 0.9999986525 | 5.6702581248    |
| 0.5459106281 | 0.9999986525 | 4.0322124161    |
| 0.9371898735 | 0.9999986525 | 1.926671466     |
| 0.7941705448 | 0.9999986525 | 0               |
| 0.4255445408 | 0.9999986525 | 2.3060832341    |
| 0.0532634512 | 0.9999986525 | 0               |
| 0.1895370918 | 0.9999986525 | 0               |
| 0.8547965604 | 0.9999986525 | 4.6946463821    |
| 0.7813730876 | 0.9999986525 | 31.740600848    |
| 0.4557321667 | 0.9999986525 | 9.0254488567    |
| 0.5984456088 | 0.9999986525 | 10.6289488519   |
| 0.28631197   | 0.9999986525 | 1.3613588923    |

gene\_expression\_table

|              |              |                 |
|--------------|--------------|-----------------|
| 0.1195052767 | 0.9999986525 | 25.7646823879   |
| 0.4582713183 | 0.9999986525 | 3.2658134232    |
| 0.4661393733 | 0.9999986525 | 36.7784945866   |
| 0.001553     | 0.9999986525 | 40.116914718    |
| 0.6143057484 | 0.9999986525 | 1.7407642916    |
| 0.813739167  | 0.9999986525 | 0               |
| 0.7488100631 | 0.9999986525 | 0               |
| 0.2539233117 | 0.9999986525 | 0.4163034291    |
| 0.4661639393 | 0.9999986525 | 32.2277258752   |
| 0.3411417934 | 0.9999986525 | 21.7094480652   |
| 0.003683     | 0.9999986525 | 0               |
| 0.7535834202 | 0.9999986525 | 291.0086804032  |
| 0.3422387866 | 0.9999986525 | 0               |
| 0.8621667525 | 0.9999986525 | 0               |
| 0.5816804083 | 0.9999986525 | 18.0558199575   |
| 0.8079207606 | 0.9999986525 | 4.9398043517    |
| 0.3823797534 | 0.9999986525 | 16.2671206036   |
| 0.2070733565 | 0.9999986525 | 0               |
| 0.2072487387 | 0.9999986525 | 62.5263435986   |
| 0.8553102999 | 0.9999986525 | 50.4568619604   |
| 0.6587356268 | 0.9999986525 | 0               |
| 0.9980771668 | 0.9999986525 | 19.0389034702   |
| 0.6595366255 | 0.9999986525 | 0               |
| 0.3418474269 | 0.9999986525 | 0               |
| 0.0306644445 | 0.9999986525 | 1.3629749987    |
| 0.1630135946 | 0.9999986525 | 88.3098166241   |
| 0.507580262  | 0.9999986525 | 194.6523532596  |
| 0.1171804199 | 0.9999986525 | 23.0055835807   |
| 0.1886393725 | 0.9999986525 | 0               |
| 0.9028901657 | 0.9999986525 | 27.1687081764   |
| 0.6213911013 | 0.9999986525 | 13.7045522482   |
| 0.0247908661 | 0.9999986525 | 4.7637614982    |
| 0.5718301909 | 0.9999986525 | 1.5803087441    |
| 0.1102448693 | 0.9999986525 | 18.0703267887   |
| 0.0977807096 | 0.9999986525 | 0.9223205307    |
| 0.9968020164 | 0.9999986525 | 0               |
| 0.0129948158 | 0.9999986525 | 8.3580753365    |
| 0.4053143547 | 0.9999986525 | 0               |
| 0.0267199663 | 0.9999986525 | 3.85167554      |
| 0.3984911129 | 0.9999986525 | 0               |
| 0.6312664098 | 0.9999986525 | 0               |
| 0.0622330059 | 0.9999986525 | 5.3196936167    |
| 0.1522568123 | 0.9999986525 | 6.6243730529    |
| 0.141750896  | 0.9999986525 | 114.5491974799  |
| 0.0863747225 | 0.9999986525 | 1.9971230186    |
| 0.56221904   | 0.9999986525 | 260.1403873641  |
| 0.7250967773 | 0.9999986525 | 0               |
| 0.739828725  | 0.9999986525 | 0               |
| 0.5965587716 | 0.9999986525 | 1214.1130626738 |

gene\_expression\_table

|              |              |                |
|--------------|--------------|----------------|
| 0.536898178  | 0.9999986525 | 104.8577870788 |
| 0.4114962586 | 0.9999986525 | 0              |
| 0.50214658   | 0.9999986525 | 0              |
| 0.1440880612 | 0.9999986525 | 5.9554270569   |
| 0.1261602021 | 0.9999986525 | 0              |
| 0.7340149004 | 0.9999986525 | 0              |
| 0.6116455576 | 0.9999986525 | 39.6455096975  |
| 0.0195045238 | 0.9999986525 | 0              |
| 0.1896152973 | 0.9999986525 | 0              |
| 0.6121599926 | 0.9999986525 | 0              |
| 0.9037568328 | 0.9999986525 | 0              |
| 0.7289961201 | 0.9999986525 | 0.9995158589   |
| 0.9834057416 | 0.9999986525 | 5.6451444      |
| 0.463465638  | 0.9999986525 | 1.2668550031   |
| 0.1301583696 | 0.9999986525 | 0              |
| 0.8115974832 | 0.9999986525 | 2.6621092526   |
| 0.4265019426 | 0.9999986525 | 6.1658485411   |
| 0.4070845659 | 0.9999986525 | 0              |
| 0.6399687474 | 0.9999986525 | 0              |
| 0.4729816619 | 0.9999986525 | 0              |
| 0.7568250341 | 0.9999986525 | 0              |
| 0.1240148457 | 0.9999986525 | 1.2010806474   |
| 0.3327060685 | 0.9999986525 | 0              |
| 0.6312664098 | 0.9999986525 | 0              |
| 0            | 0            | 0              |
| 0.4570010397 | 0.9999986525 | 6.3055371697   |
| 0.4562049808 | 0.9999986525 | 4.7561538942   |
| 0.5985680651 | 0.9999986525 | 0.3930381975   |
| 0.9997635868 | 0.9999986525 | 67.5894561148  |
| 0.30755387   | 0.9999986525 | 0              |
| 0.1515714138 | 0.9999986525 | 0              |
| 0.9544632035 | 0.9999986525 | 0              |
| 0.6369450152 | 0.9999986525 | 2.3582379597   |
| 0.5126359087 | 0.9999986525 | 0              |
| 0.2470758724 | 0.9999986525 | 0              |
| 0.3510959979 | 0.9999986525 | 0.4296630005   |
| 0.8991768821 | 0.9999986525 | 0              |
| 0.0263742184 | 0.9999986525 | 0              |
| 0.0204051376 | 0.9999986525 | 2.4881856803   |
| 0.5767107736 | 0.9999986525 | 35.0581392837  |
| 0.8919490153 | 0.9999986525 | 5.5994400155   |
| 0.9386094755 | 0.9999986525 | 1.3580508422   |
| 0.5281025252 | 0.9999986525 | 12.5548141584  |
| 0.9294754406 | 0.9999986525 | 0              |
| 0.4301674295 | 0.9999986525 | 1.2723486046   |
| 0.1130841827 | 0.9999986525 | 0              |
| 0.4971577321 | 0.9999986525 | 3.5640529221   |
| 0.3155704634 | 0.9999986525 | 7.0659559919   |
| 0.197848822  | 0.9999986525 | 17.1186596812  |

gene\_expression\_table

|              |              |                |
|--------------|--------------|----------------|
| 0.7932016426 | 0.9999986525 | 0              |
| 0.4504777535 | 0.9999986525 | 0.4100968927   |
| 0.003111     | 0.9999986525 | 9.481001387    |
| 0.192017961  | 0.9999986525 | 0.427269418    |
| 0.4729816619 | 0.9999986525 | 0              |
| 0            | 0            | 0              |
| 0.9225036484 | 0.9999986525 | 1.7481684892   |
| 0.5899661918 | 0.9999986525 | 0.1563388409   |
| 0.8977374343 | 0.9999986525 | 2.6154826585   |
| 0.5570799434 | 0.9999986525 | 90.002416859   |
| 0.2362639757 | 0.9999986525 | 2.4311696104   |
| 0.7567204605 | 0.9999986525 | 0              |
| 0.8527009984 | 0.9999986525 | 0              |
| 0.6312664098 | 0.9999986525 | 0              |
| 0.656809971  | 0.9999986525 | 1.5417721297   |
| 0.5664525457 | 0.9999986525 | 2.8696198335   |
| 0.9149183542 | 0.9999986525 | 68.7208500932  |
| 0.7970635305 | 0.9999986525 | 12.5441860841  |
| 0.8241082904 | 0.9999986525 | 0              |
| 0.624295257  | 0.9999986525 | 0.3919283897   |
| 0.2570352428 | 0.9999986525 | 0              |
| 0.9530630304 | 0.9999986525 | 0              |
| 0.792133439  | 0.9999986525 | 13.0759886671  |
| 0.1416472026 | 0.9999986525 | 335.8762623823 |
| 0.504930701  | 0.9999986525 | 113.0919019835 |
| 0.3572793591 | 0.9999986525 | 76.8412013841  |
| 0.8411361276 | 0.9999986525 | 0              |
| 0            | 0            | 0              |
| 0.0826301229 | 0.9999986525 | 22.8904185616  |
| 0.0242336779 | 0.9999986525 | 124.7934891556 |
| 0.8858110438 | 0.9999986525 | 3.5728533504   |
| 0.5521813798 | 0.9999986525 | 7.6630757728   |
| 0.3718281029 | 0.9999986525 | 1.6096406152   |
| 0.6615099293 | 0.9999986525 | 6.2509075898   |
| 0.423162128  | 0.9999986525 | 19.7403581581  |
| 0.9936739479 | 0.9999986525 | 0              |
| 0.9648794129 | 0.9999986525 | 0.9718623967   |
| 0.2864271649 | 0.9999986525 | 0              |
| 0.9690914711 | 0.9999986525 | 0              |
| 0.4069625223 | 0.9999986525 | 0              |
| 0.7358865974 | 0.9999986525 | 3.6181351118   |
| 0.9595542334 | 0.9999986525 | 19.3961371691  |
| 0.5556539018 | 0.9999986525 | 0              |
| 0.3228635304 | 0.9999986525 | 14.1198583644  |
| 0.672318722  | 0.9999986525 | 211.8423131571 |
| 0.0812701961 | 0.9999986525 | 280.8946046987 |
| 0.7281141317 | 0.9999986525 | 0              |
| 0.2344511068 | 0.9999986525 | 8.2592725352   |
| 0.9087854602 | 0.9999986525 | 18.0037219111  |

gene\_expression\_table

|              |              |                 |
|--------------|--------------|-----------------|
| 0.7567051535 | 0.9999986525 | 0               |
| 0.7111738963 | 0.9999986525 | 47.7152074838   |
| 0.1595241698 | 0.9999986525 | 12.2765965194   |
| 0.4689159432 | 0.9999986525 | 0               |
| 0.1442034895 | 0.9999986525 | 0               |
| 0.0918670679 | 0.9999986525 | 5.057351166     |
| 0.4418668332 | 0.9999986525 | 0               |
| 0.4411038781 | 0.9999986525 | 0               |
| 0.4930187986 | 0.9999986525 | 26.8663741104   |
| 0.1001908339 | 0.9999986525 | 0               |
| 0.1528437244 | 0.9999986525 | 1.8587287332    |
| 0.9099817962 | 0.9999986525 | 89.0622567054   |
| 0.3833385795 | 0.9999986525 | 197.9532167403  |
| 0.0333837622 | 0.9999986525 | 0               |
| 0.8137034411 | 0.9999986525 | 37.2482770972   |
| 0.3445547933 | 0.9999986525 | 0               |
| 0.7686404212 | 0.9999986525 | 32.2036086746   |
| 0.0794931022 | 0.9999986525 | 52.04196245     |
| 0.326002344  | 0.9999986525 | 528.8947461862  |
| 0.9526936719 | 0.9999986525 | 0               |
| 0.2231631965 | 0.9999986525 | 8.9257931767    |
| 0.3007427974 | 0.9999986525 | 112.7470044477  |
| 0.7293179667 | 0.9999986525 | 2.3614539784    |
| 0.7316634432 | 0.9999986525 | 408.5054448444  |
| 0.0733292421 | 0.9999986525 | 21.445824943    |
| 0.5798732421 | 0.9999986525 | 2006.0535237894 |
| 0.1951227671 | 0.9999986525 | 0               |
| 0.9196155675 | 0.9999986525 | 19.0457692846   |
| 0.7823785524 | 0.9999986525 | 22.1689876422   |
| 0.1201081472 | 0.9999986525 | 0               |
| 0.9820494535 | 0.9999986525 | 96.4179900437   |
| 0.7787109233 | 0.9999986525 | 0               |
| 0            | 0            | 0               |
| 0            | 0            | 0               |
| 0.172690281  | 0.9999986525 | 50.5235187114   |
| 0.5324771632 | 0.9999986525 | 21.6805904049   |
| 0.0697390156 | 0.9999986525 | 7.6853780888    |
| 0.2648662305 | 0.9999986525 | 7.09102017      |
| 0.6312664098 | 0.9999986525 | 0               |
| 0.1668838817 | 0.9999986525 | 76.3856227537   |
| 0.6926533894 | 0.9999986525 | 105.8232023647  |
| 0.654821815  | 0.9999986525 | 31.3948094673   |
| 0.4481326231 | 0.9999986525 | 77.1146825717   |
| 0.9833766283 | 0.9999986525 | 0               |
| 0.3368674518 | 0.9999986525 | 0               |
| 0.2865802249 | 0.9999986525 | 1.8053918698    |
| 0            | 0            | 0               |
| 0.2766944735 | 0.9999986525 | 3.1487460935    |
| 0.4560629902 | 0.9999986525 | 3.4830784295    |

gene\_expression\_table

|              |              |                |
|--------------|--------------|----------------|
| 0.9317239415 | 0.9999986525 | 24.9421732994  |
| 0.5601175697 | 0.9999986525 | 6.1021280446   |
| 0.5267040439 | 0.9999986525 | 0              |
| 0.6276945538 | 0.9999986525 | 152.1756965843 |
| 0.4389528929 | 0.9999986525 | 0              |
| 0.1579307172 | 0.9999986525 | 0              |
| 0.9200732415 | 0.9999986525 | 15.2017495326  |
| 0.3537663061 | 0.9999986525 | 0              |
| 0.6974905102 | 0.9999986525 | 0              |
| 0.1198753067 | 0.9999986525 | 0              |
| 0.2259295023 | 0.9999986525 | 0              |
| 0.2301763719 | 0.9999986525 | 0.2001467289   |
| 0.7378014351 | 0.9999986525 | 0.9634646074   |
| 0.9589422865 | 0.9999986525 | 0              |
| 0.2658761836 | 0.9999986525 | 4.2188695312   |
| 0.2562613299 | 0.9999986525 | 3.1697860294   |
| 0.4568752578 | 0.9999986525 | 8.1274688724   |
| 0.9027691104 | 0.9999986525 | 6.4232926786   |
| 0.6685695693 | 0.9999986525 | 268.3913254668 |
| 0.30755387   | 0.9999986525 | 0              |
| 0.71531788   | 0.9999986525 | 0              |
| 0.9744761676 | 0.9999986525 | 1.9391454181   |
| 0.2448408099 | 0.9999986525 | 0.091073711    |
| 0.3370729722 | 0.9999986525 | 1.5860670565   |
| 0.6641525639 | 0.9999986525 | 2.0329678845   |
| 0.9138518348 | 0.9999986525 | 1.6060184956   |
| 0.3849321829 | 0.9999986525 | 0              |
| 0.3548863302 | 0.9999986525 | 0.1938417091   |
| 0.3264664501 | 0.9999986525 | 0.3307919893   |
| 0.3932441747 | 0.9999986525 | 26.0750942769  |
| 0.0587225987 | 0.9999986525 | 12.6929412529  |
| 0.8310485059 | 0.9999986525 | 11.9380466154  |
| 0.0455759267 | 0.9999986525 | 9.6682306082   |
| 0.3191669193 | 0.9999986525 | 0              |
| 0.5566379105 | 0.9999986525 | 7.8664717785   |
| 0.710337604  | 0.9999986525 | 0              |
| 0.1524887164 | 0.9999986525 | 0              |
| 0.2238221711 | 0.9999986525 | 7.2511729562   |
| 0.7094149473 | 0.9999986525 | 6.0928356783   |
| 0.6312664098 | 0.9999986525 | 1.8474479484   |
| 0.4234541747 | 0.9999986525 | 7.3690411925   |
| 0.8507194778 | 0.9999986525 | 24.571143665   |
| 0.3421840084 | 0.9999986525 | 0              |
| 0.1879819872 | 0.9999986525 | 4.5734255478   |
| 0.0285136737 | 0.9999986525 | 34.6320775254  |
| 0.5616557481 | 0.9999986525 | 31.0305042458  |
| 0.8860593522 | 0.9999986525 | 0.1173790003   |
| 0.3605294393 | 0.9999986525 | 0              |
| 0.0715214321 | 0.9999986525 | 1.1535872984   |

gene\_expression\_table

|              |              |                |
|--------------|--------------|----------------|
| 0.2753968619 | 0.9999986525 | 3.9078000907   |
| 0.3246525948 | 0.9999986525 | 0              |
| 0.4471562367 | 0.9999986525 | 0              |
| 0.6986464351 | 0.9999986525 | 0.4374511785   |
| 0.0892934459 | 0.9999986525 | 0.540223993    |
| 0.2738006077 | 0.9999986525 | 0              |
| 0.9304858619 | 0.9999986525 | 2.1871834276   |
| 0.5325745944 | 0.9999986525 | 4.6531266609   |
| 0.2876748507 | 0.9999986525 | 0.1908727533   |
| 0.6399605013 | 0.9999986525 | 0              |
| 0.6098761915 | 0.9999986525 | 0              |
| 0.2090127879 | 0.9999986525 | 15.8378403318  |
| 0.1004596157 | 0.9999986525 | 6.3623561289   |
| 0.735783533  | 0.9999986525 | 0              |
| 0.127021059  | 0.9999986525 | 3.3342821751   |
| 0.684141227  | 0.9999986525 | 0              |
| 0.0110116893 | 0.9999986525 | 10.6191468091  |
| 0.6399522465 | 0.9999986525 | 0              |
| 0.7842758518 | 0.9999986525 | 0              |
| 0.5468192984 | 0.9999986525 | 1.4725343843   |
| 0.130643658  | 0.9999986525 | 2.1153913535   |
| 0.0089       | 0.9999986525 | 95.5811912401  |
| 0.9719047343 | 0.9999986525 | 125.972375018  |
| 0.9359948725 | 0.9999986525 | 2.8775611591   |
| 0.890906284  | 0.9999986525 | 3.986758459    |
| 0.5876169979 | 0.9999986525 | 8.994961803    |
| 0.9157602696 | 0.9999986525 | 20.8727093261  |
| 0.4854370708 | 0.9999986525 | 183.5941537415 |
| 0.5517736115 | 0.9999986525 | 0              |
| 0.2102963838 | 0.9999986525 | 0              |
| 0.543712117  | 0.9999986525 | 0              |
| 0.2195048353 | 0.9999986525 | 10.8314024254  |
| 0            | 0            | 0              |
| 0.2919741185 | 0.9999986525 | 5.1569377255   |
| 0.5311375683 | 0.9999986525 | 814.655121968  |
| 0.3896935123 | 0.9999986525 | 9.3674917039   |
| 0.6099728088 | 0.9999986525 | 0              |
| 0.6444136691 | 0.9999986525 | 6.7982349144   |
| 0.1984250215 | 0.9999986525 | 4.2286655372   |
| 0.042833308  | 0.9999986525 | 0              |
| 0.773285972  | 0.9999986525 | 0.5147605554   |
| 0.9755064739 | 0.9999986525 | 0.9786335766   |
| 0.9503648516 | 0.9999986525 | 0              |
| 0.983371746  | 0.9999986525 | 1.4531174838   |
| 0.1264105631 | 0.9999986525 | 4.3208991505   |
| 0.4247417345 | 0.9999986525 | 12.7392916182  |
| 0.2558549354 | 0.9999986525 | 3.2395214517   |
| 0.189192496  | 0.9999986525 | 3.8847093287   |
| 0.6399439832 | 0.9999986525 | 0              |



gene\_expression\_table

|              |              |               |
|--------------|--------------|---------------|
| 0.3964508665 | 0.9999986525 | 3.3398346265  |
| 0.4069016698 | 0.9999986525 | 0             |
| 0.8159399992 | 0.9999986525 | 0.9749001955  |
| 0            | 0            | 0             |
| 0.9711882795 | 0.9999986525 | 2.595990227   |
| 0.8019222491 | 0.9999986525 | 8.4343328845  |
| 0.8621810206 | 0.9999986525 | 0             |
| 0.74806378   | 0.9999986525 | 3.7305868635  |
| 0.9679601841 | 0.9999986525 | 0.3249307442  |
| 0.2319726405 | 0.9999986525 | 0             |
| 0.8774671819 | 0.9999986525 | 6.8210801364  |
| 0.6399357111 | 0.9999986525 | 0             |
| 0.3808654804 | 0.9999986525 | 0             |
| 0.2205746486 | 0.9999986525 | 0.2760544971  |
| 0.4828992323 | 0.9999986525 | 0             |
| 0.3258594054 | 0.9999986525 | 2.0177494101  |
| 0.9298269027 | 0.9999986525 | 8.7046343632  |
| 0.7289084631 | 0.9999986525 | 0             |
| 0.4977035196 | 0.9999986525 | 0             |
| 0.8226109377 | 0.9999986525 | 2.9069748033  |
| 0.3189966154 | 0.9999986525 | 30.3092787525 |
| 0.9569093051 | 0.9999986525 | 0             |
| 0.7136976814 | 0.9999986525 | 36.4578742046 |
| 0.742975146  | 0.9999986525 | 29.1662993637 |
| 0.6399274303 | 0.9999986525 | 0             |
| 0.3079313236 | 0.9999986525 | 0             |
| 0.6994903007 | 0.9999986525 | 3.9960204632  |
| 0.686297574  | 0.9999986525 | 2.9081867765  |
| 0.4068409297 | 0.9999986525 | 0             |
| 0.4067803018 | 0.9999986525 | 0             |
| 0.7290190311 | 0.9999986525 | 0.8433023548  |
| 0.2857631491 | 0.9999986525 | 0             |
| 0.9320214295 | 0.9999986525 | 0             |
| 0.589030418  | 0.9999986525 | 0.3515069433  |
| 0.6057493603 | 0.9999986525 | 7.9776922489  |
| 0.0514940742 | 0.9999986525 | 0.9067856777  |
| 0.9790634322 | 0.9999986525 | 1.0577910057  |
| 0.8715523472 | 0.9999986525 | 17.7955175193 |
| 0.8982763539 | 0.9999986525 | 61.0800904699 |
| 0            | 0            | 0             |
| 0.705949684  | 0.9999986525 | 1.7089907666  |
| 0.4089408376 | 0.9999986525 | 3.4907042012  |
| 0.5867752109 | 0.9999986525 | 2.6421490933  |
| 0.6242051031 | 0.9999986525 | 0             |
| 0.4951533907 | 0.9999986525 | 0             |
| 0.4729816619 | 0.9999986525 | 0             |
| 0.3938780349 | 0.9999986525 | 17.9165195641 |
| 0.6163674508 | 0.9999986525 | 21.423593277  |
| 0.267536928  | 0.9999986525 | 90.0899668721 |

gene\_expression\_table

|              |              |                |
|--------------|--------------|----------------|
| 0.7234453455 | 0.9999986525 | 0.2570846025   |
| 0.1831740105 | 0.9999986525 | 29.9364687826  |
| 0.6391292475 | 0.9999986525 | 0              |
| 0.8418068752 | 0.9999986525 | 0              |
| 0.8198896713 | 0.9999986525 | 4.6505453464   |
| 0.1658997533 | 0.9999986525 | 0              |
| 0.2007431219 | 0.9999986525 | 112.7390701054 |
| 0.3409720412 | 0.9999986525 | 0              |
| 0.8792869546 | 0.9999986525 | 24.1846577815  |
| 0.9995379596 | 0.9999986525 | 0              |
| 0            | 0            | 0              |
| 0.9340755774 | 0.9999986525 | 0              |
| 0.878625452  | 0.9999986525 | 0              |
| 0.6033217694 | 0.9999986525 | 0              |
| 0.4729816619 | 0.9999986525 | 0              |
| 0.7106720935 | 0.9999986525 | 0              |
| 0.8153442425 | 0.9999986525 | 101.9037187317 |
| 0.2046166809 | 0.9999986525 | 54.2181687982  |
| 0            | 0            | 0              |
| 0.4360833008 | 0.9999986525 | 0              |
| 0.2220472467 | 0.9999986525 | 0              |
| 0.1043565325 | 0.9999986525 | 47.8290666167  |
| 0.5724646553 | 0.9999986525 | 17.5267427742  |
| 0.5864511964 | 0.9999986525 | 0              |
| 0.61076353   | 0.9999986525 | 0.4731370054   |
| 0.718898592  | 0.9999986525 | 1.0383971653   |
| 0.7794790015 | 0.9999986525 | 0.2747262213   |
| 0.496962418  | 0.9999986525 | 0              |
| 0.2738646449 | 0.9999986525 | 4.1047219629   |
| 0.6282571468 | 0.9999986525 | 4.0998759152   |
| 0.5406953062 | 0.9999986525 | 20.6006624123  |
| 0.8726019896 | 0.9999986525 | 0              |
| 0.138300169  | 0.9999986525 | 0              |
| 0.5018328273 | 0.9999986525 | 0.9326631859   |
| 0.4605668205 | 0.9999986525 | 13.723693306   |
| 0.8743251087 | 0.9999986525 | 0              |
| 0.1949701701 | 0.9999986525 | 4.6279283409   |
| 0.8867188532 | 0.9999986525 | 5.3527619824   |
| 0.9488383945 | 0.9999986525 | 2.1091820378   |
| 0.7807036528 | 0.9999986525 | 2.6903325468   |
| 0.7165721416 | 0.9999986525 | 0              |
| 0.2196906855 | 0.9999986525 | 0              |
| 0.1715729412 | 0.9999986525 | 1.8174094366   |
| 0.7711738546 | 0.9999986525 | 6.8182182063   |
| 0.6293176171 | 0.9999986525 | 0              |
| 0.8377389095 | 0.9999986525 | 81.7131277354  |
| 0.3895168493 | 0.9999986525 | 5.4686946131   |
| 0.6312664098 | 0.9999986525 | 0              |
| 0.9794213619 | 0.9999986525 | 0              |

| gene_expression_table |              |                |
|-----------------------|--------------|----------------|
| 0.5859790763          | 0.9999986525 | 0              |
| 0.5410902541          | 0.9999986525 | 0              |
| 0                     | 0            | 0              |
| 0.6395474163          | 0.9999986525 | 0              |
| 0.9384070544          | 0.9999986525 | 1.4502545027   |
| 0.8400064021          | 0.9999986525 | 0              |
| 0.0557716644          | 0.9999986525 | 0              |
| 0.5242217432          | 0.9999986525 | 20.5242079962  |
| 0.4631112105          | 0.9999986525 | 0              |
| 0.6566453363          | 0.9999986525 | 0              |
| 0.3711957821          | 0.9999986525 | 12.7139909067  |
| 0.005403              | 0.9999986525 | 14.4174269017  |
| 0.0216048488          | 0.9999986525 | 173.4447232391 |
| 0.0454987436          | 0.9999986525 | 43.1310071264  |
| 0.245842887           | 0.9999986525 | 18.023382666   |
| 0                     | 0            | 0              |
| 0.5734673091          | 0.9999986525 | 13.5156920428  |
| 0.0008276             | 0.9999986525 | 49.9895108626  |
| 0.3087594433          | 0.9999986525 | 6.8653699857   |
| 0.2571262155          | 0.9999986525 | 5.746420937    |
| 0.136531563           | 0.9999986525 | 0              |
| 0.7355239076          | 0.9999986525 | 0              |
| 0.2010278798          | 0.9999986525 | 19.5922757874  |
| 0.5078988933          | 0.9999986525 | 0              |
| 0.3421293051          | 0.9999986525 | 0              |
| 0.1613218852          | 0.9999986525 | 0              |
| 0.9837343672          | 0.9999986525 | 1.4003518047   |
| 0.8766929947          | 0.9999986525 | 0              |
| 0.188031312           | 0.9999986525 | 0.1696936302   |
| 0.6280800817          | 0.9999986525 | 0.0460731814   |
| 0.2870691614          | 0.9999986525 | 0              |
| 0.9330293765          | 0.9999986525 | 55.1028039279  |
| 0.4729816619          | 0.9999986525 | 0              |
| 0.9287239443          | 0.9999986525 | 2.6986789563   |
| 0.2668006089          | 0.9999986525 | 0              |
| 0.9642759867          | 0.9999986525 | 1.3880865808   |
| 0.830929826           | 0.9999986525 | 0.497463119    |
| 0.8328521325          | 0.9999986525 | 6.7536979829   |
| 0.4068058149          | 0.9999986525 | 0              |
| 0.4134605463          | 0.9999986525 | 6.479191937    |
| 0.6911753359          | 0.9999986525 | 13.1319106436  |
| 0.6870769918          | 0.9999986525 | 0.8561008379   |
| 0.7303619296          | 0.9999986525 | 8.6036004333   |
| 0.445113188           | 0.9999986525 | 25.7025486395  |
| 0.8796573497          | 0.9999986525 | 0.9877022007   |
| 0.7035024093          | 0.9999986525 | 1.4518591745   |
| 0.3083211076          | 0.9999986525 | 0              |
| 0.6396469928          | 0.9999986525 | 3.7109273627   |
| 0.9767105334          | 0.9999986525 | 4.5332668023   |

gene\_expression\_table

|              |              |               |
|--------------|--------------|---------------|
| 0            | 0            | 0             |
| 0.7369380543 | 0.9999986525 | 8.5756370322  |
| 0.8570181068 | 0.9999986525 | 5.4905830363  |
| 0.5868582631 | 0.9999986525 | 40.8212253723 |
| 0.3156333433 | 0.9999986525 | 0.5259617008  |
| 0.6380575653 | 0.9999986525 | 0.0256417702  |
| 0.5275686568 | 0.9999986525 | 0             |
| 0.717384407  | 0.9999986525 | 8.9435953871  |
| 0.5573600678 | 0.9999986525 | 0             |
| 0.2847272194 | 0.9999986525 | 0             |
| 0.3079812825 | 0.9999986525 | 0             |
| 0.3236980505 | 0.9999986525 | 0             |
| 0.9294539288 | 0.9999986525 | 0             |
| 0.9752221589 | 0.9999986525 | 0.7686049164  |
| 0.0616359926 | 0.9999986525 | 4.8394086322  |
| 0.6155040326 | 0.9999986525 | 0.5077333778  |
| 0.9068444929 | 0.9999986525 | 3.4319265856  |
| 0.7781702221 | 0.9999986525 | 0.6976186594  |
| 0.5198562946 | 0.9999986525 | 1.6915429626  |
| 0            | 0            | 0             |
| 0.4251873458 | 0.9999986525 | 1.0831624567  |
| 0.4729816619 | 0.9999986525 | 0             |
| 0.717555775  | 0.9999986525 | 7.7587657156  |
| 0.6367653312 | 0.9999986525 | 2.1142763405  |
| 0.194462142  | 0.9999986525 | 0             |
| 0.4548897097 | 0.9999986525 | 4.8390982432  |
| 0.6399191406 | 0.9999986525 | 0             |
| 0.122812834  | 0.9999986525 | 0             |
| 0.333408265  | 0.9999986525 | 23.8922950583 |
| 0.8451190675 | 0.9999986525 | 56.754101942  |
| 0.8977764661 | 0.9999986525 | 61.8261032032 |
| 0.5606488889 | 0.9999986525 | 0             |
| 0.1387327164 | 0.9999986525 | 0             |
| 0.5586821891 | 0.9999986525 | 6.2894302571  |
| 0.6102604878 | 0.9999986525 | 0             |
| 0.7079082536 | 0.9999986525 | 0             |
| 0.062097408  | 0.9999986525 | 5.2978909688  |
| 0.4058360077 | 0.9999986525 | 83.4702730588 |
| 0.390159987  | 0.9999986525 | 1.2191437824  |
| 0.373501383  | 0.9999986525 | 0.4524141087  |
| 0            | 0            | 0             |
| 0.9050426315 | 0.9999986525 | 0             |
| 0.6170342111 | 0.9999986525 | 0             |
| 0.5138625046 | 0.9999986525 | 0             |
| 0.5715498215 | 0.9999986525 | 9.8546299379  |
| 0.3675753853 | 0.9999986525 | 38.6443304095 |
| 0.206959101  | 0.9999986525 | 0.9914196885  |
| 0.9219037096 | 0.9999986525 | 0.0943768006  |
| 0.8611849804 | 0.9999986525 | 0             |

gene\_expression\_table

|              |              |               |
|--------------|--------------|---------------|
| 0.953901124  | 0.9999986525 | 21.1679030967 |
| 0.8049885224 | 0.9999986525 | 73.2808202618 |
| 0.7417866402 | 0.9999986525 | 0.9134669427  |
| 0.6312664098 | 0.9999986525 | 0             |
| 0.926892066  | 0.9999986525 | 76.3049386139 |
| 0.5517277566 | 0.9999986525 | 12.7603608357 |
| 0.4068313092 | 0.9999986525 | 0             |
| 0            | 0            | 0             |
| 0.4068567846 | 0.9999986525 | 0             |
| 0.6124460062 | 0.9999986525 | 3.4743713063  |
| 0.8295061845 | 0.9999986525 | 0             |
| 0.2090117399 | 0.9999986525 | 53.6454222715 |
| 0.2643435604 | 0.9999986525 | 5.5962360636  |
| 0.2697915952 | 0.9999986525 | 0             |
| 0.9043081336 | 0.9999986525 | 17.42458536   |
| 0.4541753567 | 0.9999986525 | 0             |
| 0.3382238514 | 0.9999986525 | 4.7380199064  |
| 0.2085871616 | 0.9999986525 | 1.051054623   |
| 0.5099123831 | 0.9999986525 | 15.581369699  |
| 0.5822799996 | 0.9999986525 | 41.0790133987 |
| 0.5127658181 | 0.9999986525 | 0             |
| 0.6620791434 | 0.9999986525 | 6.6684240185  |
| 0.5502620519 | 0.9999986525 | 3.25135447    |
| 0.8627706067 | 0.9999986525 | 0             |
| 0.6682536824 | 0.9999986525 | 0             |
| 0.6876434776 | 0.9999986525 | 0             |
| 0.0747641669 | 0.9999986525 | 8.0528662824  |
| 0.9574101076 | 0.9999986525 | 3.2298798222  |
| 0.8283489874 | 0.9999986525 | 0             |
| 0.1322652984 | 0.9999986525 | 5.5705008149  |
| 0.0382063458 | 0.9999986525 | 0             |
| 0.8787240734 | 0.9999986525 | 8.6278454955  |
| 0.7422415283 | 0.9999986525 | 12.9003219898 |
| 0.8408446287 | 0.9999986525 | 0.4921483718  |
| 0.3259400542 | 0.9999986525 | 3.6958655162  |
| 0.0908843187 | 0.9999986525 | 44.1351391893 |
| 0.1922087256 | 0.9999986525 | 0             |
| 0.4417414744 | 0.9999986525 | 0             |
| 0.9428927952 | 0.9999986525 | 2.4305728854  |
| 0.6446426908 | 0.9999986525 | 0.2286376193  |
| 0.7483847997 | 0.9999986525 | 0             |
| 0.9708301933 | 0.9999986525 | 3.4494101121  |
| 0.6685342021 | 0.9999986525 | 8.0112124727  |
| 0.4901563582 | 0.9999986525 | 15.6119477452 |
| 0.018731007  | 0.9999986525 | 12.2733360197 |
| 0.3429185534 | 0.9999986525 | 0             |
| 0.7467647162 | 0.9999986525 | 4.4016183541  |
| 0.6399108421 | 0.9999986525 | 0             |
| 0.0147064002 | 0.9999986525 | 9.9897704143  |

gene\_expression\_table

|              |              |                |
|--------------|--------------|----------------|
| 0.081865968  | 0.9999986525 | 4.2848152168   |
| 0.6312664098 | 0.9999986525 | 0              |
| 0.7780670381 | 0.9999986525 | 10.6689395942  |
| 0.8657603858 | 0.9999986525 | 0.5262289711   |
| 0.9299769722 | 0.9999986525 | 24.1662140443  |
| 0.8331727714 | 0.9999986525 | 2.8890059749   |
| 0.0757200086 | 0.9999986525 | 7.418987635    |
| 0.6183923695 | 0.9999986525 | 1.5699271195   |
| 0.4965728809 | 0.9999986525 | 0              |
| 0.8883215721 | 0.9999986525 | 40.0536125114  |
| 0            | 0            | 0              |
| 0.9716367649 | 0.9999986525 | 4.045648491    |
| 0.8845525089 | 0.9999986525 | 3.0162392414   |
| 0.7576158992 | 0.9999986525 | 1.5126859777   |
| 0.1573122727 | 0.9999986525 | 0.5386234885   |
| 0.5753496596 | 0.9999986525 | 8.9570781095   |
| 0.028265189  | 0.9999986525 | 59.4082319756  |
| 0.9552092238 | 0.9999986525 | 32.4616882316  |
| 0.4388784512 | 0.9999986525 | 0              |
| 0.299945741  | 0.9999986525 | 1.9315334172   |
| 0.302899849  | 0.9999986525 | 7.286688497    |
| 0.6410802102 | 0.9999986525 | 22.2222902233  |
| 0.4515416414 | 0.9999986525 | 2.7887801366   |
| 0.0413071435 | 0.9999986525 | 9.6988133519   |
| 0.7727756778 | 0.9999986525 | 0              |
| 0.5523628768 | 0.9999986525 | 0.3758997739   |
| 0.1482196169 | 0.9999986525 | 0              |
| 0.6060168261 | 0.9999986525 | 0.9579829294   |
| 0.8030244916 | 0.9999986525 | 0              |
| 0.0724854095 | 0.9999986525 | 10.4976979182  |
| 0.7775695099 | 0.9999986525 | 0              |
| 0.2321174487 | 0.9999986525 | 0              |
| 0.2988035893 | 0.9999986525 | 0              |
| 0.0497925676 | 0.9999986525 | 296.7768760083 |
| 0.1696461161 | 0.9999986525 | 17.419659218   |
| 0.3329624377 | 0.9999986525 | 23.4520063172  |
| 0.9806924321 | 0.9999986525 | 32.5153623591  |
| 0.0718719456 | 0.9999986525 | 96.2799304755  |
| 0.7065907312 | 0.9999986525 | 9.1125814046   |
| 0.4647866261 | 0.9999986525 | 10.61088633    |
| 0.316648859  | 0.9999986525 | 21.0557824117  |
| 0.9608313407 | 0.9999986525 | 0              |
| 0.2730725253 | 0.9999986525 | 15.7535923121  |
| 0.2033368579 | 0.9999986525 | 4.3155677583   |
| 0.4408925509 | 0.9999986525 | 8.6900729291   |
| 0.8538388036 | 0.9999986525 | 0              |
| 0.3485716609 | 0.9999986525 | 0.9850494396   |
| 0.6741551038 | 0.9999986525 | 0              |
| 0.6739769211 | 0.9999986525 | 1.8307335988   |

gene\_expression\_table

|              |              |                 |
|--------------|--------------|-----------------|
| 0.4770479016 | 0.9999986525 | 17.3447501845   |
| 0.4982711624 | 0.9999986525 | 13.8069903726   |
| 0.3979312878 | 0.9999986525 | 19.01605313     |
| 0.9832385482 | 0.9999986525 | 0.4877712349    |
| 0.0572850379 | 0.9999986525 | 0               |
| 0            | 0            | 0               |
| 0.1678279206 | 0.9999986525 | 0               |
| 0.4878255919 | 0.9999986525 | 0               |
| 0.6542644185 | 0.9999986525 | 46.5571540268   |
| 0.5840496156 | 0.9999986525 | 6.6680030587    |
| 0.0803305198 | 0.9999986525 | 21.4351357778   |
| 0.8684223182 | 0.9999986525 | 0.2168610986    |
| 0.0514494741 | 0.9999986525 | 8.1883380088    |
| 0.7261875957 | 0.9999986525 | 8.6874522798    |
| 0.5435148547 | 0.9999986525 | 0               |
| 0.2135229565 | 0.9999986525 | 3.4433379988    |
| 0.4974639145 | 0.9999986525 | 4.7491683556    |
| 0.3048498329 | 0.9999986525 | 0               |
| 0.6248608476 | 0.9999986525 | 169.7247616606  |
| 0.9001991773 | 0.9999986525 | 3.7798624597    |
| 0.7893319488 | 0.9999986525 | 0               |
| 0.7120156397 | 0.9999986525 | 23.7971995613   |
| 0.5479643824 | 0.9999986525 | 5.5445354763    |
| 0.7702011477 | 0.9999986525 | 3.9516586776    |
| 0.4407406961 | 0.9999986525 | 28.654550411    |
| 0.830198682  | 0.9999986525 | 0               |
| 0.4905477094 | 0.9999986525 | 4.2333091446    |
| 0.4974209181 | 0.9999986525 | 0.5557908907    |
| 0.1387825445 | 0.9999986525 | 0               |
| 0.1600987076 | 0.9999986525 | 3.1054389686    |
| 0.0222121572 | 0.9999986525 | 91.1700336906   |
| 0.3068697066 | 0.9999986525 | 33.5991845606   |
| 0.0968167509 | 0.9999986525 | 0               |
| 0.8094065336 | 0.9999986525 | 0               |
| 0.153696991  | 0.9999986525 | 0               |
| 0.30755387   | 0.9999986525 | 0               |
| 0.6312664098 | 0.9999986525 | 0               |
| 0.1743256927 | 0.9999986525 | 5.7400817557    |
| 0.2287840015 | 0.9999986525 | 6.0981354276    |
| 0.1445998942 | 0.9999986525 | 1.6534188489    |
| 0.6547943035 | 0.9999986525 | 0               |
| 0.5976437137 | 0.9999986525 | 6.6131947764    |
| 0.086997064  | 0.9999986525 | 9.4902011152    |
| 0.8718790038 | 0.9999986525 | 103.2064542566  |
| 0.2919342304 | 0.9999986525 | 0               |
| 0.9951536167 | 0.9999986525 | 4.5707868301    |
| 0.9577781652 | 0.9999986525 | 9.9248164442    |
| 0.733491312  | 0.9999986525 | 7.816005006     |
| 0.6466595264 | 0.9999986525 | 2969.8548205985 |

gene\_expression\_table

|              |              |                |
|--------------|--------------|----------------|
| 0.6077192254 | 0.9999986525 | 2.0950006238   |
| 0.7762307163 | 0.9999986525 | 132.7538790774 |
| 0.6400533129 | 0.9999986525 | 14.6937980208  |
| 0.237475479  | 0.9999986525 | 5.2492402262   |
| 0.7976550249 | 0.9999986525 | 1.7787255229   |
| 0.1921120265 | 0.9999986525 | 24.9050464508  |
| 0.7032729126 | 0.9999986525 | 0              |
| 0.9936081929 | 0.9999986525 | 15.8340317913  |
| 0.9300804343 | 0.9999986525 | 0              |
| 0.6597141694 | 0.9999986525 | 0              |
| 0.0501097273 | 0.9999986525 | 0.1188196717   |
| 0.4387498428 | 0.9999986525 | 0.4933920473   |
| 0.6087525604 | 0.9999986525 | 0              |
| 0.4410372471 | 0.9999986525 | 44.1747665787  |
| 0            | 0            | 0              |
| 0.4474270598 | 0.9999986525 | 24.9420305206  |
| 0.5873422352 | 0.9999986525 | 1.2438511123   |
| 0.6572947229 | 0.9999986525 | 2.0727434724   |
| 0.9195976952 | 0.9999986525 | 0              |
| 0.0675785384 | 0.9999986525 | 0              |
| 0.22038433   | 0.9999986525 | 650.1127097025 |
| 0.5991642757 | 0.9999986525 | 0              |
| 0.4299890388 | 0.9999986525 | 0              |
| 0.3932075131 | 0.9999986525 | 2.8575094401   |
| 0.6871093688 | 0.9999986525 | 0              |
| 0.3366447609 | 0.9999986525 | 1.0863093875   |
| 0.5548056842 | 0.9999986525 | 0.3530224139   |
| 0.400699983  | 0.9999986525 | 36.9871931265  |
| 0.3162406439 | 0.9999986525 | 0              |
| 0.1623623007 | 0.9999986525 | 19.2060588905  |
| 0.4664540439 | 0.9999986525 | 3.5419698061   |
| 0.5163379471 | 0.9999986525 | 1.5567387321   |
| 0.435027103  | 0.9999986525 | 0              |
| 0.2697334328 | 0.9999986525 | 0              |
| 0.4068822413 | 0.9999986525 | 0              |
| 0.78858353   | 0.9999986525 | 0.893246573    |
| 0.7278537637 | 0.9999986525 | 14.9860729318  |
| 0.0848508051 | 0.9999986525 | 1.6531730124   |
| 0.2418508356 | 0.9999986525 | 0              |
| 0            | 0            | 0              |
| 0.0438881598 | 0.9999986525 | 12.2219861674  |
| 0.184316768  | 0.9999986525 | 0              |
| 0.6399025346 | 0.9999986525 | 0              |
| 0.864979928  | 0.9999986525 | 1712.069444577 |
| 0.2783577595 | 0.9999986525 | 3.4424402442   |
| 0.606705507  | 0.9999986525 | 1.77476966     |
| 0.0886039499 | 0.9999986525 | 1.0689561849   |
| 0.1401837118 | 0.9999986525 | 29.178960346   |
| 0.2382094153 | 0.9999986525 | 143.1271496648 |



| gene_expression_table |              |               |
|-----------------------|--------------|---------------|
| 0.6486827223          | 0.9999986525 | 0             |
| 0.9697007488          | 0.9999986525 | 0             |
| 0.6312664098          | 0.9999986525 | 0             |
| 0.8045343905          | 0.9999986525 | 7.6221558993  |
| 0.3504668415          | 0.9999986525 | 0             |
| 0                     | 0            | 0             |
| 0.4610683086          | 0.9999986525 | 0.407345074   |
| 0.167352207           | 0.9999986525 | 1.896166238   |
| 0.099607911           | 0.9999986525 | 1.5443569281  |
| 0.8792934625          | 0.9999986525 | 0             |
| 0.876066859           | 0.9999986525 | 8.0536365658  |
| 0.1827667308          | 0.9999986525 | 245.932098842 |
| 0.2949505569          | 0.9999986525 | 5.3820358938  |
| 0.6312664098          | 0.9999986525 | 0             |
| 0.475993444           | 0.9999986525 | 0             |
| 0.7118833661          | 0.9999986525 | 0             |
| 0.1483985533          | 0.9999986525 | 0             |
| 0.2722622148          | 0.9999986525 | 0             |
| 0.1237117385          | 0.9999986525 | 58.0372727762 |
| 0.8197845654          | 0.9999986525 | 0             |
| 0.639894218           | 0.9999986525 | 0             |
| 0.4729816619          | 0.9999986525 | 0             |
| 0.8262207127          | 0.9999986525 | 0.4210897468  |
| 0.4979464658          | 0.9999986525 | 6.7089430982  |
| 0.5905997776          | 0.9999986525 | 17.9501803811 |
| 0.7013481496          | 0.9999986525 | 0             |
| 0.7048516408          | 0.9999986525 | 0             |
| 0.7851998887          | 0.9999986525 | 1.5851467143  |
| 0.4365769985          | 0.9999986525 | 10.148326011  |
| 0.1687800025          | 0.9999986525 | 4.1101924765  |
| 0.8499512785          | 0.9999986525 | 3.127057604   |
| 0                     | 0            | 0             |
| 0.3053039353          | 0.9999986525 | 4.4175415688  |
| 0.3048612327          | 0.9999986525 | 0             |
| 0.4729816619          | 0.9999986525 | 0             |
| 0.4077071439          | 0.9999986525 | 2.2615958988  |
| 0.8018928363          | 0.9999986525 | 25.0006713497 |
| 0.5621131896          | 0.9999986525 | 0.9057592863  |
| 0                     | 0            | 0             |
| 0                     | 0            | 0             |
| 0.3912508237          | 0.9999986525 | 0             |
| 0.0844808903          | 0.9999986525 | 13.3267520127 |
| 0.9522363178          | 0.9999986525 | 1.6693191171  |
| 0.177846988           | 0.9999986525 | 17.1957623919 |
| 0.163651345           | 0.9999986525 | 0             |
| 0.3502606661          | 0.9999986525 | 0             |
| 0.032424202           | 0.9999986525 | 5.7151734906  |
| 0.6906955386          | 0.9999986525 | 8.8368638084  |
| 0.313388752           | 0.9999986525 | 1.424688586   |

gene\_expression\_table

|              |              |                 |
|--------------|--------------|-----------------|
| 0.2895468483 | 0.9999986525 | 2.9597992701    |
| 0.0414455815 | 0.9999986525 | 0               |
| 0.5929768901 | 0.9999986525 | 2.3278349007    |
| 0.0945428834 | 0.9999986525 | 6.899270833     |
| 0.7192976287 | 0.9999986525 | 0               |
| 0.2900054443 | 0.9999986525 | 654.3525977364  |
| 0.7189712006 | 0.9999986525 | 2.3772919619    |
| 0.2557206298 | 0.9999986525 | 43.6076223537   |
| 0.7847086861 | 0.9999986525 | 1.0599308864    |
| 0.9777104068 | 0.9999986525 | 48.9646821507   |
| 0            | 0            | 0               |
| 0.369545403  | 0.9999986525 | 0               |
| 0.3131260816 | 0.9999986525 | 1510.5243295853 |
| 0.4030442649 | 0.9999986525 | 0               |
| 0.001621     | 0.9999986525 | 10.6680416563   |
| 0.3827395088 | 0.9999986525 | 7.4474960483    |
| 0.1304705834 | 0.9999986525 | 0.5001223294    |
| 0.623352637  | 0.9999986525 | 0.6157226507    |
| 0.609997693  | 0.9999986525 | 0.1819970924    |
| 0.4338493407 | 0.9999986525 | 332.9716442483  |
| 0.3464562211 | 0.9999986525 | 0               |
| 0.190981919  | 0.9999986525 | 3.0687924594    |
| 0.5160178016 | 0.9999986525 | 46.7104229596   |
| 0.3607190604 | 0.9999986525 | 0               |
| 0.7356128745 | 0.9999986525 | 0.6671793611    |
| 0.3225726815 | 0.9999986525 | 4.2221579475    |
| 0.03640233   | 0.9999986525 | 218.2719321209  |
| 0.4364254432 | 0.9999986525 | 184.5131676686  |
| 0.8141424463 | 0.9999986525 | 93.6105784448   |
| 0.5094571166 | 0.9999986525 | 0               |
| 0.656613775  | 0.9999986525 | 0.4819161908    |
| 0.6513113396 | 0.9999986525 | 3.0512402927    |
| 0.5723064597 | 0.9999986525 | 0.9875021327    |
| 0.7209110256 | 0.9999986525 | 29.6457581961   |
| 0.7046700602 | 0.9999986525 | 0               |
| 0.6183268671 | 0.9999986525 | 0               |
| 0.0170875374 | 0.9999986525 | 23.690245385    |
| 0.3560248882 | 0.9999986525 | 4.0596424326    |
| 0.1590124704 | 0.9999986525 | 0               |
| 0.7485816677 | 0.9999986525 | 0               |
| 0.0124868786 | 0.9999986525 | 15.8144443126   |
| 0.4125837767 | 0.9999986525 | 22.0517403868   |
| 0.9400166925 | 0.9999986525 | 5.9381513634    |
| 0            | 0            | 0               |
| 0.8612741097 | 0.9999986525 | 0               |
| 0.9667517541 | 0.9999986525 | 0.1094550414    |
| 0            | 0            | 0               |
| 0.5268056785 | 0.9999986525 | 0               |
| 0.0408404091 | 0.9999986525 | 42.6461728134   |

gene\_expression\_table

|              |              |                |
|--------------|--------------|----------------|
| 0.2023636652 | 0.9999986525 | 8.5412029291   |
| 0.7154182679 | 0.9999986525 | 0              |
| 0.0849060113 | 0.9999986525 | 1.6984333796   |
| 0.5782808921 | 0.9999986525 | 63.5328110645  |
| 0.4069076791 | 0.9999986525 | 0              |
| 0.1326636588 | 0.9999986525 | 2.0083628637   |
| 0.9991532756 | 0.9999986525 | 0              |
| 0.240680563  | 0.9999986525 | 0              |
| 0.2184349367 | 0.9999986525 | 8.0880351853   |
| 0.4194923764 | 0.9999986525 | 12.9097820157  |
| 0.2794134512 | 0.9999986525 | 74.8408615518  |
| 0.3085983118 | 0.9999986525 | 0              |
| 0.451768979  | 0.9999986525 | 8.0357942222   |
| 0.8647685969 | 0.9999986525 | 0              |
| 0.9294323897 | 0.9999986525 | 0              |
| 0.6398858924 | 0.9999986525 | 0              |
| 0.2683598949 | 0.9999986525 | 6.4985749017   |
| 0.7170993657 | 0.9999986525 | 5.1735238504   |
| 0.3490866283 | 0.9999986525 | 21.6155190558  |
| 0.3493883869 | 0.9999986525 | 0.8679457166   |
| 0.6312664098 | 0.9999986525 | 0              |
| 0.0930936768 | 0.9999986525 | 20.2458325861  |
| 0.6554532466 | 0.9999986525 | 1.3500835458   |
| 0.7376052436 | 0.9999986525 | 2.8669457103   |
| 0.7907332164 | 0.9999986525 | 0.2734106666   |
| 0.7018497102 | 0.9999986525 | 30.6847781903  |
| 0.3434297571 | 0.9999986525 | 0.4286530872   |
| 0.4469845176 | 0.9999986525 | 22.166919929   |
| 0.5003008606 | 0.9999986525 | 0              |
| 0.169942875  | 0.9999986525 | 10.1417002508  |
| 0.9959088092 | 0.9999986525 | 3.4231179904   |
| 0.3702382278 | 0.9999986525 | 1.0395826669   |
| 0.677257631  | 0.9999986525 | 4.8713462519   |
| 0            | 0            | 0              |
| 0.4224577832 | 0.9999986525 | 7.8635603774   |
| 0.9739374862 | 0.9999986525 | 0              |
| 0.4068627897 | 0.9999986525 | 11.9109436544  |
| 0.3086680007 | 0.9999986525 | 23.7900532551  |
| 0.6593072569 | 0.9999986525 | 22.8763723186  |
| 0.8782217932 | 0.9999986525 | 28.1841247576  |
| 0.6989438288 | 0.9999986525 | 320.2313829064 |
| 0.4773189296 | 0.9999986525 | 0.2971447762   |
| 0.3736883341 | 0.9999986525 | 22.1851290542  |
| 0.8235849838 | 0.9999986525 | 3.1269341756   |
| 0.5797542181 | 0.9999986525 | 4.0285508694   |
| 0.8262132576 | 0.9999986525 | 0              |
| 0.0483257019 | 0.9999986525 | 39.3693016968  |
| 0            | 0            | 0              |
| 0.8734477414 | 0.9999986525 | 17.5942021702  |

gene\_expression\_table

|              |              |                |
|--------------|--------------|----------------|
| 0.764908729  | 0.9999986525 | 1.0785366649   |
| 0.6436134927 | 0.9999986525 | 2.8924604934   |
| 0.6398775575 | 0.9999986525 | 0              |
| 0.8626429317 | 0.9999986525 | 0              |
| 0.4031904844 | 0.9999986525 | 0              |
| 0.8627989384 | 0.9999986525 | 0              |
| 0.7319694984 | 0.9999986525 | 3.595229287    |
| 0.7592719436 | 0.9999986525 | 0.1970962764   |
| 0.0707864227 | 0.9999986525 | 8.7186994506   |
| 0            | 0            | 0              |
| 0.6311445471 | 0.9999986525 | 40.2112027808  |
| 0.1645618061 | 0.9999986525 | 12.5739939828  |
| 0.2190607627 | 0.9999986525 | 0.673469386    |
| 0.1494340391 | 0.9999986525 | 0              |
| 0.8985950722 | 0.9999986525 | 0.3241579376   |
| 0.4880906547 | 0.9999986525 | 0.2167895885   |
| 0.849987592  | 0.9999986525 | 18.0375403778  |
| 0.6898496984 | 0.9999986525 | 2.1600961246   |
| 0.2212713801 | 0.9999986525 | 19.651836749   |
| 0.1187920488 | 0.9999986525 | 4.6989329752   |
| 0.6312664098 | 0.9999986525 | 0              |
| 0.3715177148 | 0.9999986525 | 2.6105441267   |
| 0.4814337289 | 0.9999986525 | 1.1048243463   |
| 0.5096284341 | 0.9999986525 | 0              |
| 0.7961450205 | 0.9999986525 | 8.5037438106   |
| 0.7105837129 | 0.9999986525 | 0              |
| 0            | 0            | 0              |
| 0.4642967325 | 0.9999986525 | 65.135356497   |
| 0.4862603763 | 0.9999986525 | 4.3843531651   |
| 0.7649013359 | 0.9999986525 | 242.1422639006 |
| 0.6398692135 | 0.9999986525 | 0              |
| 0.4729816619 | 0.9999986525 | 0              |
| 0.9878662278 | 0.9999986525 | 3.3247666494   |
| 0.545504561  | 0.9999986525 | 5.5622873329   |
| 0.911854226  | 0.9999986525 | 6.1669684991   |
| 0.5317459824 | 0.9999986525 | 12.5116875018  |
| 0.9199507532 | 0.9999986525 | 2.3561864031   |
| 0.9269613175 | 0.9999986525 | 49.1241488256  |
| 0.6910874009 | 0.9999986525 | 24.1159443956  |
| 0.3538734441 | 0.9999986525 | 73.4400928852  |
| 0.1353807337 | 0.9999986525 | 123.3764150122 |
| 0.56602673   | 0.9999986525 | 21.8963176726  |
| 0.268986823  | 0.9999986525 | 9.2623497415   |
| 0.7358006489 | 0.9999986525 | 87.6014124653  |
| 0.5918147342 | 0.9999986525 | 5.9616117199   |
| 0.3419366141 | 0.9999986525 | 4.7231191403   |
| 0.1023655029 | 0.9999986525 | 4.3183906972   |
| 0.0480904854 | 0.9999986525 | 80.9843107051  |
| 0.8786427525 | 0.9999986525 | 0              |

gene\_expression\_table

|              |              |                 |
|--------------|--------------|-----------------|
| 0.6686795107 | 0.9999986525 | 8.5661787112    |
| 0.4173882275 | 0.9999986525 | 17.0001882703   |
| 0.0687162472 | 0.9999986525 | 1148.1286570937 |
| 0.6171158189 | 0.9999986525 | 0               |
| 0.2089996067 | 0.9999986525 | 51.0371861823   |
| 0.4554044798 | 0.9999986525 | 308.4238828566  |
| 0.2238719595 | 0.9999986525 | 868.5802837059  |
| 0.9762686234 | 0.9999986525 | 18.7516130752   |
| 0.451542098  | 0.9999986525 | 174.2510799308  |
| 0.4257910135 | 0.9999986525 | 0               |
| 0.4312907055 | 0.9999986525 | 51.5257738793   |
| 0.337076529  | 0.9999986525 | 1.8543398982    |
| 0.2644332521 | 0.9999986525 | 19.7650154965   |
| 0.5312825543 | 0.9999986525 | 30.8492513004   |
| 0.3260717955 | 0.9999986525 | 36.5257268909   |
| 0.054957016  | 0.9999986525 | 51.3712424995   |
| 0.30755387   | 0.9999986525 | 0               |
| 0.5205358835 | 0.9999986525 | 22.1534891889   |
| 0.3143042905 | 0.9999986525 | 0               |
| 0.5870762626 | 0.9999986525 | 289.1272895601  |
| 0.7338030332 | 0.9999986525 | 5.4220951929    |
| 0.0992487681 | 0.9999986525 | 6.5323337324    |
| 0.5203354367 | 0.9999986525 | 47.1342420583   |
| 0.1693392999 | 0.9999986525 | 191.5475575405  |
| 0.8883525967 | 0.9999986525 | 6.7240331309    |
| 0.0191612185 | 0.9999986525 | 32.78127877     |
| 0.3602097011 | 0.9999986525 | 0               |
| 0.3388057848 | 0.9999986525 | 81.1273705473   |
| 0.0513394126 | 0.9999986525 | 10.9413545114   |
| 0.694189409  | 0.9999986525 | 50.3309258828   |
| 0.8936689295 | 0.9999986525 | 169.3529214769  |
| 0.0982440009 | 0.9999986525 | 14.6420621642   |
| 0.7063659384 | 0.9999986525 | 45.3727819814   |
| 0.0113159084 | 0.9999986525 | 18.4922682865   |
| 0.6937805563 | 0.9999986525 | 0               |
| 0.256902087  | 0.9999986525 | 4.5667028298    |
| 0.0380199695 | 0.9999986525 | 0               |
| 0.7919803464 | 0.9999986525 | 5927.289107427  |
| 0.2680018761 | 0.9999986525 | 0               |
| 0.6317177064 | 0.9999986525 | 7.7021902036    |
| 0.9858365275 | 0.9999986525 | 201.1664040264  |
| 0.5249044148 | 0.9999986525 | 4.1649712729    |
| 0.1027461815 | 0.9999986525 | 0               |
| 0.3501510933 | 0.9999986525 | 0               |
| 0.9242905064 | 0.9999986525 | 205.7876023291  |
| 0.2696753809 | 0.9999986525 | 0               |
| 0.9383228655 | 0.9999986525 | 32.9819010968   |
| 0.2267691656 | 0.9999986525 | 0               |
| 0.0540607086 | 0.9999986525 | 0               |

gene\_expression\_table

|              |              |                 |
|--------------|--------------|-----------------|
| 0.8702161007 | 0.9999986525 | 0.4159165726    |
| 0.339161753  | 0.9999986525 | 0               |
| 0.2994068291 | 0.9999986525 | 1.7233606249    |
| 0.7116783842 | 0.9999986525 | 0               |
| 0.8529894635 | 0.9999986525 | 3.8484184217    |
| 0.7809478687 | 0.9999986525 | 4.6152564719    |
| 0.5544405596 | 0.9999986525 | 21.1366640391   |
| 0.9332937337 | 0.9999986525 | 0               |
| 0.3378728042 | 0.9999986525 | 0               |
| 0.0770356906 | 0.9999986525 | 17.7168461007   |
| 0.3428860936 | 0.9999986525 | 1.8308287942    |
| 0.6730915763 | 0.9999986525 | 9.7538632528    |
| 0.1447114982 | 0.9999986525 | 4.6433900322    |
| 0.7335332555 | 0.9999986525 | 0.7381503337    |
| 0.9782832609 | 0.9999986525 | 0               |
| 0.3091866526 | 0.9999986525 | 0               |
| 0.5718715154 | 0.9999986525 | 0               |
| 0.3575599096 | 0.9999986525 | 0               |
| 0            | 0            | 0               |
| 0.5014490848 | 0.9999986525 | 0.3562802689    |
| 0.9773167614 | 0.9999986525 | 3.2000677549    |
| 0.3986743574 | 0.9999986525 | 0.4522320352    |
| 0.6911310044 | 0.9999986525 | 5.5846376469    |
| 0.1517965816 | 0.9999986525 | 22.7548118166   |
| 0.4099973746 | 0.9999986525 | 3.3744397048    |
| 0.3426284411 | 0.9999986525 | 0               |
| 0.3521531602 | 0.9999986525 | 0.8129041518    |
| 0.809091464  | 0.9999986525 | 31.8443884391   |
| 0.5280249505 | 0.9999986525 | 0               |
| 0.652277887  | 0.9999986525 | 0               |
| 0.6312664098 | 0.9999986525 | 0               |
| 0.8978742349 | 0.9999986525 | 0               |
| 0.4692214102 | 0.9999986525 | 2.3975811797    |
| 0.2842211412 | 0.9999986525 | 8.9984100569    |
| 0.356519626  | 0.9999986525 | 0               |
| 0.4280835565 | 0.9999986525 | 0.3434411246    |
| 0.9242289711 | 0.9999986525 | 0.7041311235    |
| 0.3213755118 | 0.9999986525 | 0               |
| 0.0762246345 | 0.9999986525 | 0               |
| 0.4900512299 | 0.9999986525 | 0.8679718678    |
| 0.2075825021 | 0.9999986525 | 351.66652572    |
| 0.7931274989 | 0.9999986525 | 5.3019634408    |
| 0.4501276024 | 0.9999986525 | 123.6795545475  |
| 0.7121847904 | 0.9999986525 | 1.8401549165    |
| 0.4123893117 | 0.9999986525 | 3408.6330949678 |
| 0.9317231264 | 0.9999986525 | 0               |
| 0.9074789761 | 0.9999986525 | 0.0659813555    |
| 0.5394715269 | 0.9999986525 | 0.1880308539    |
| 0.9693871621 | 0.9999986525 | 0.7820877755    |

gene\_expression\_table

|              |              |                |
|--------------|--------------|----------------|
| 0.0527524744 | 0.9999986525 | 3.7600682206   |
| 0.7033405507 | 0.9999986525 | 119.7051637042 |
| 0.2218974681 | 0.9999986525 | 6.6709508938   |
| 0.5210295095 | 0.9999986525 | 25.1568568424  |
| 0.460294576  | 0.9999986525 | 0              |
| 0.3977568139 | 0.9999986525 | 2.0256949304   |
| 0.9448079651 | 0.9999986525 | 3.5924577063   |
| 0.6440759525 | 0.9999986525 | 0.8869506214   |
| 0.7075908808 | 0.9999986525 | 0              |
| 0.4728797914 | 0.9999986525 | 0.2580770422   |
| 0            | 0            | 0              |
| 0.7587820318 | 0.9999986525 | 1.9330887678   |
| 0.9185732126 | 0.9999986525 | 6.3790703538   |
| 0.7042045085 | 0.9999986525 | 0              |
| 0.2414017569 | 0.9999986525 | 8.7404084777   |
| 0.0327960721 | 0.9999986525 | 16.1190044945  |
| 0.5780773363 | 0.9999986525 | 0              |
| 0.4002932538 | 0.9999986525 | 0.7477653404   |
| 0.6706396544 | 0.9999986525 | 96.9721721938  |
| 0.8765836621 | 0.9999986525 | 10.6036835676  |
| 0.4670259626 | 0.9999986525 | 23.2656333044  |
| 0.2650026715 | 0.9999986525 | 0              |
| 0.9922826766 | 0.9999986525 | 107.4239651499 |
| 0.345977696  | 0.9999986525 | 36.8662101516  |
| 0.8780373177 | 0.9999986525 | 1.3081332613   |
| 0.8987792644 | 0.9999986525 | 0              |
| 0.4540598555 | 0.9999986525 | 16.0858655985  |
| 0.0185515314 | 0.9999986525 | 19.9510152153  |
| 0.3947316573 | 0.9999986525 | 2.0750889235   |
| 0.1432412169 | 0.9999986525 | 20.921063891   |
| 0.718900735  | 0.9999986525 | 17.9592752303  |
| 0.3304414768 | 0.9999986525 | 0              |
| 0.0267841617 | 0.9999986525 | 3.7171958211   |
| 0.9028447761 | 0.9999986525 | 0              |
| 0.815506198  | 0.9999986525 | 7.2629729397   |
| 0.3127686522 | 0.9999986525 | 0              |
| 0.1916005796 | 0.9999986525 | 0              |
| 0.3638691525 | 0.9999986525 | 324.2106705114 |
| 0.031820719  | 0.9999986525 | 37.8377405261  |
| 0.6258688001 | 0.9999986525 | 0              |
| 0.0605202475 | 0.9999986525 | 136.0745075074 |
| 0.9419498707 | 0.9999986525 | 26.3411063473  |
| 0.3286650125 | 0.9999986525 | 10.8692978445  |
| 0.6398608601 | 0.9999986525 | 0              |
| 0.4371757463 | 0.9999986525 | 0              |
| 0.5904747806 | 0.9999986525 | 0              |
| 0.6312664098 | 0.9999986525 | 0              |
| 0.435199549  | 0.9999986525 | 0              |
| 0.97837326   | 0.9999986525 | 133.0245616495 |

gene\_expression\_table

|              |              |                |
|--------------|--------------|----------------|
| 0.0387098117 | 0.9999986525 | 68.3785961823  |
| 0.3835603041 | 0.9999986525 | 4.7554401428   |
| 0.4070928321 | 0.9999986525 | 540.4933151815 |
| 0.2836439151 | 0.9999986525 | 4.3183906972   |
| 0.7361406069 | 0.9999986525 | 0.4340322992   |
| 0.6065112158 | 0.9999986525 | 0.7146673644   |
| 0.7141650021 | 0.9999986525 | 0              |
| 0.9502271251 | 0.9999986525 | 0              |
| 0.4401619287 | 0.9999986525 | 1.4320088454   |
| 0            | 0            | 0              |
| 0.8541509155 | 0.9999986525 | 16.3916568052  |
| 0.8733809256 | 0.9999986525 | 26.6826801413  |
| 0.1125215984 | 0.9999986525 | 0              |
| 0.6323631054 | 0.9999986525 | 10.545007775   |
| 0.7327660479 | 0.9999986525 | 67.580189669   |
| 0.7750039706 | 0.9999986525 | 12.783746545   |
| 0.6307927463 | 0.9999986525 | 0              |
| 0.6387269284 | 0.9999986525 | 3.7201414568   |
| 0.6774815591 | 0.9999986525 | 0              |
| 0.5770431815 | 0.9999986525 | 101.2730934349 |
| 0.6801073256 | 0.9999986525 | 1.3303589064   |
| 0.3883474049 | 0.9999986525 | 0.6032360364   |
| 0.1899762161 | 0.9999986525 | 34.7231546524  |
| 0.9049473473 | 0.9999986525 | 141.9528145848 |
| 0.8521885278 | 0.9999986525 | 1.68691447     |
| 0.9730979603 | 0.9999986525 | 0.3497911623   |
| 0.9951848731 | 0.9999986525 | 2.5192191633   |
| 0.7244627322 | 0.9999986525 | 0              |
| 0.1756275412 | 0.9999986525 | 0.2219249361   |
| 0.8202860567 | 0.9999986525 | 27.9494175968  |
| 0.1627583842 | 0.9999986525 | 1.9339381972   |
| 0.4917825035 | 0.9999986525 | 5.9465088359   |
| 0.7151322454 | 0.9999986525 | 6.3497346831   |
| 0.5219520892 | 0.9999986525 | 362.3382135233 |
| 0.5041075335 | 0.9999986525 | 0              |
| 0.373386551  | 0.9999986525 | 11.6261927413  |
| 0.0170760223 | 0.9999986525 | 58.9112305926  |
| 0.0350192864 | 0.9999986525 | 5.5083352343   |
| 0.2056248422 | 0.9999986525 | 0              |
| 0.5626269935 | 0.9999986525 | 0              |
| 0.5124323193 | 0.9999986525 | 35.1975463021  |
| 0            | 0            | 0              |
| 0.1918417116 | 0.9999986525 | 0              |
| 0.6312664098 | 0.9999986525 | 0              |
| 0.8324023086 | 0.9999986525 | 0              |
| 0.2746270988 | 0.9999986525 | 0              |
| 0.6817342746 | 0.9999986525 | 0              |
| 0.6312664098 | 0.9999986525 | 0              |
| 0.7299918745 | 0.9999986525 | 0              |



gene\_expression\_table

|              |              |                 |
|--------------|--------------|-----------------|
| 0.4149230916 | 0.9999986525 | 0               |
| 0.9023685261 | 0.9999986525 | 0               |
| 0.4828932893 | 0.9999986525 | 0               |
| 0.2466180115 | 0.9999986525 | 0               |
| 0.7041998364 | 0.9999986525 | 0               |
| 0.1459773385 | 0.9999986525 | 7.0243728799    |
| 0.9985841367 | 0.9999986525 | 0               |
| 0.8507461597 | 0.9999986525 | 0               |
| 0.2545558254 | 0.9999986525 | 10.9379555196   |
| 0.8647617929 | 0.9999986525 | 0.1737528564    |
| 0.5641257468 | 0.9999986525 | 0               |
| 0.5723036299 | 0.9999986525 | 6.5388037918    |
| 0.8592488259 | 0.9999986525 | 2.0404341822    |
| 0.1307115615 | 0.9999986525 | 1.0452199376    |
| 0            | 0            | 0               |
| 0.8546564764 | 0.9999986525 | 10.6517981313   |
| 0.234455113  | 0.9999986525 | 2.7532487189    |
| 0.4317338855 | 0.9999986525 | 1.7568915946    |
| 0.6258340642 | 0.9999986525 | 0               |
| 0.142336853  | 0.9999986525 | 1.2258502263    |
| 0.8520867015 | 0.9999986525 | 2.0397380796    |
| 0.8510965796 | 0.9999986525 | 2.5506576947    |
| 0.5021351588 | 0.9999986525 | 0               |
| 0.6015918989 | 0.9999986525 | 68.7730975963   |
| 0.9228978443 | 0.9999986525 | 0               |
| 0.4123496102 | 0.9999986525 | 0               |
| 0.8286164921 | 0.9999986525 | 16.9792374944   |
| 0.4640666743 | 0.9999986525 | 0.2781641696    |
| 0.959844764  | 0.9999986525 | 50.2670541494   |
| 0.4648321648 | 0.9999986525 | 7.756486742     |
| 0.6688822966 | 0.9999986525 | 0               |
| 0.4676630026 | 0.9999986525 | 5.3963337311    |
| 0.2422406195 | 0.9999986525 | 0               |
| 0.992770849  | 0.9999986525 | 52.7435934351   |
| 0.3803837521 | 0.9999986525 | 1.6064825851    |
| 0.6137874426 | 0.9999986525 | 0               |
| 0.1414833857 | 0.9999986525 | 0.440044478     |
| 0.0307826867 | 0.9999986525 | 1.1729872439    |
| 0.3283686753 | 0.9999986525 | 3.739479695     |
| 0.2798975157 | 0.9999986525 | 44.7860235118   |
| 0.1519639079 | 0.9999986525 | 1.3619732635    |
| 0.6524578896 | 0.9999986525 | 0.8324520005    |
| 0.4686221523 | 0.9999986525 | 0               |
| 0.60892684   | 0.9999986525 | 31.7161298909   |
| 0.6359827147 | 0.9999986525 | 1.3470017528    |
| 0.4825520422 | 0.9999986525 | 0               |
| 0.8212094637 | 0.9999986525 | 0               |
| 0.3271622394 | 0.9999986525 | 1118.6570081006 |
| 0.5930344048 | 0.9999986525 | 2.2615474768    |

gene\_expression\_table

|              |              |               |
|--------------|--------------|---------------|
| 0.4033394695 | 0.9999986525 | 0             |
| 0.6395355923 | 0.9999986525 | 0             |
| 0.7139340357 | 0.9999986525 | 1.5985567815  |
| 0.005003     | 0.9999986525 | 5.5780184481  |
| 0.2508453488 | 0.9999986525 | 5.7049100851  |
| 0.470872166  | 0.9999986525 | 0             |
| 0.8765787203 | 0.9999986525 | 11.716898109  |
| 0.6133201956 | 0.9999986525 | 5.5372939053  |
| 0.8197822817 | 0.9999986525 | 0             |
| 0.1205104399 | 0.9999986525 | 5.2462420012  |
| 0            | 0            | 8.7541717597  |
| 0.5504798237 | 0.9999986525 | 6.3326041039  |
| 0.5324086143 | 0.9999986525 | 8.1857568077  |
| 0.1707194184 | 0.9999986525 | 0             |
| 0.401423877  | 0.9999986525 | 0             |
| 0.3485500105 | 0.9999986525 | 0             |
| 0.0302153696 | 0.9999986525 | 57.5210581517 |
| 0.512103345  | 0.9999986525 | 6.0715423432  |
| 0.1639715517 | 0.9999986525 | 6.1556925268  |
| 0.7180805998 | 0.9999986525 | 13.6285541609 |
| 0.8191721043 | 0.9999986525 | 0             |
| 0.5793093601 | 0.9999986525 | 9.8908642661  |
| 0.8693771448 | 0.9999986525 | 0             |
| 0.883061881  | 0.9999986525 | 6.8881457475  |
| 0.0624444511 | 0.9999986525 | 4.4248644834  |
| 0.9562193706 | 0.9999986525 | 3.7407598701  |
| 0.8717277808 | 0.9999986525 | 1.8230051716  |
| 0.2172206051 | 0.9999986525 | 0             |
| 0.6395238085 | 0.9999986525 | 0             |
| 0.9945527571 | 0.9999986525 | 0             |
| 0.8060334024 | 0.9999986525 | 0             |
| 0.0925974589 | 0.9999986525 | 1.8504578756  |
| 0.56824672   | 0.9999986525 | 0.9875636834  |
| 0.5385626271 | 0.9999986525 | 1.5918355002  |
| 0.3921019829 | 0.9999986525 | 1.7818861724  |
| 0.5928352088 | 0.9999986525 | 21.5278301744 |
| 0.4118711597 | 0.9999986525 | 12.3628085736 |
| 0.4069330981 | 0.9999986525 | 0             |
| 0.6146423746 | 0.9999986525 | 29.7836843233 |
| 0.707838028  | 0.9999986525 | 24.0021302899 |
| 0.1036480023 | 0.9999986525 | 1.5388521351  |
| 0.5910053919 | 0.9999986525 | 0             |
| 0.2774388625 | 0.9999986525 | 0             |
| 0.6648321212 | 0.9999986525 | 0             |
| 0            | 0            | 0             |
| 0.0965579354 | 0.9999986525 | 52.9197577418 |
| 0.7894634044 | 0.9999986525 | 3.0495137207  |
| 0.3790682952 | 0.9999986525 | 0             |
| 0.6891714805 | 0.9999986525 | 0             |

gene\_expression\_table

|              |              |                |
|--------------|--------------|----------------|
| 0.33506773   | 0.9999986525 | 0.4830313039   |
| 0.9091379889 | 0.9999986525 | 0.7138559449   |
| 0.4783248179 | 0.9999986525 | 0              |
| 0.8621953256 | 0.9999986525 | 0              |
| 0.7247972528 | 0.9999986525 | 0              |
| 0.2524675641 | 0.9999986525 | 6.4598254871   |
| 0.45754575   | 0.9999986525 | 3.8473545403   |
| 0.6445594043 | 0.9999986525 | 0              |
| 0.3144883577 | 0.9999986525 | 3.7507221239   |
| 0.6823651753 | 0.9999986525 | 2.2004882391   |
| 0.5451468814 | 0.9999986525 | 0              |
| 0.6104802026 | 0.9999986525 | 3.9748564933   |
| 0.5700342595 | 0.9999986525 | 0              |
| 0.5177842143 | 0.9999986525 | 0.6279447153   |
| 0.3164701903 | 0.9999986525 | 0              |
| 0.9291844004 | 0.9999986525 | 3.1435920494   |
| 0.511959707  | 0.9999986525 | 0              |
| 0.5469264813 | 0.9999986525 | 13.5067678901  |
| 0.9584444948 | 0.9999986525 | 5.6811558205   |
| 0.4378109456 | 0.9999986525 | 151.6482363464 |
| 0.7896835911 | 0.9999986525 | 27.9999566467  |
| 0.8883406633 | 0.9999986525 | 11.1410016299  |
| 0.8169173206 | 0.9999986525 | 2.2097873735   |
| 0.77426323   | 0.9999986525 | 5.5864097976   |
| 0.4550435389 | 0.9999986525 | 0              |
| 0.7061798235 | 0.9999986525 | 2.4551671162   |
| 0.1413304869 | 0.9999986525 | 0              |
| 0.4639657243 | 0.9999986525 | 34.749462695   |
| 0.0978781737 | 0.9999986525 | 57.1991894148  |
| 0.8623937078 | 0.9999986525 | 133.1123719098 |
| 0.6611175213 | 0.9999986525 | 0              |
| 0.6982499557 | 0.9999986525 | 1.5555236942   |
| 0.0664192057 | 0.9999986525 | 1.3217357782   |
| 0.3876844844 | 0.9999986525 | 1.0407144795   |
| 0.2409608932 | 0.9999986525 | 9.3378634665   |
| 0.3795294479 | 0.9999986525 | 2.1537361645   |
| 0.967493688  | 0.9999986525 | 0              |
| 0            | 0            | 0              |
| 0.4838543539 | 0.9999986525 | 0              |
| 0.221868534  | 0.9999986525 | 12.1817364148  |
| 0.724707554  | 0.9999986525 | 0              |
| 0.4069584982 | 0.9999986525 | 0              |
| 0.8571521079 | 0.9999986525 | 21.4865411824  |
| 0.6113522276 | 0.9999986525 | 0              |
| 0.1598773034 | 0.9999986525 | 14.4203338852  |
| 0.1998364512 | 0.9999986525 | 59.4607844928  |
| 0.6707142825 | 0.9999986525 | 0              |
| 0.5682048876 | 0.9999986525 | 0              |
| 0.7233414714 | 0.9999986525 | 7.0819139743   |

gene\_expression\_table

|              |              |                |
|--------------|--------------|----------------|
| 0.950331098  | 0.9999986525 | 0.4790334621   |
| 0.3763589764 | 0.9999986525 | 2.1593277685   |
| 0.6312664098 | 0.9999986525 | 0              |
| 0.0363985612 | 0.9999986525 | 4.5037268701   |
| 0.3420201226 | 0.9999986525 | 0              |
| 0.0460740423 | 0.9999986525 | 24.810966711   |
| 0.550923814  | 0.9999986525 | 0              |
| 0.702570583  | 0.9999986525 | 4.742842102    |
| 0.2686861065 | 0.9999986525 | 16.1480823783  |
| 0.9037840505 | 0.9999986525 | 0              |
| 0.2991280906 | 0.9999986525 | 1.0076203765   |
| 0.3368702551 | 0.9999986525 | 0              |
| 0.260848468  | 0.9999986525 | 1.6230260915   |
| 0.840652386  | 0.9999986525 | 5.1145302725   |
| 0.9294108232 | 0.9999986525 | 0              |
| 0.0770122044 | 0.9999986525 | 131.7363304421 |
| 0.5472709787 | 0.9999986525 | 0              |
| 0.7887972103 | 0.9999986525 | 0.2460661605   |
| 0.6398524973 | 0.9999986525 | 0              |
| 0.1276629786 | 0.9999986525 | 0.3181408018   |
| 0.46271102   | 0.9999986525 | 4.6831039998   |
| 0.3103158083 | 0.9999986525 | 0              |
| 0.2787982871 | 0.9999986525 | 2.2962573142   |
| 0.9641850171 | 0.9999986525 | 0              |
| 0.0423914691 | 0.9999986525 | 79.1356543271  |
| 0.7405431276 | 0.9999986525 | 0              |
| 0.24856022   | 0.9999986525 | 1.367917279    |
| 0.2081506145 | 0.9999986525 | 0.3919691126   |
| 0.2831170366 | 0.9999986525 | 4.0993985687   |
| 0.4279014293 | 0.9999986525 | 2.2686634619   |
| 0.5508838458 | 0.9999986525 | 1.1845403989   |
| 0.1080736279 | 0.9999986525 | 3.3424415054   |
| 0.7449108084 | 0.9999986525 | 0.422406589    |
| 0.3419656432 | 0.9999986525 | 0              |
| 0.6312664098 | 0.9999986525 | 0              |
| 0.3613378695 | 0.9999986525 | 8.0112124727   |
| 0.4184424298 | 0.9999986525 | 0.9376472362   |
| 0.4067357476 | 0.9999986525 | 4.9169247738   |
| 0.2922728399 | 0.9999986525 | 12.3080676361  |
| 0.542125351  | 0.9999986525 | 12.2311065832  |
| 0.2288621114 | 0.9999986525 | 0              |
| 0.9726790924 | 0.9999986525 | 1.9474876738   |
| 0.7636478773 | 0.9999986525 | 2.4335968218   |
| 0.4730970736 | 0.9999986525 | 0              |
| 0.2915108211 | 0.9999986525 | 3.5146015989   |
| 0.8525754148 | 0.9999986525 | 796.3407300126 |
| 0.3419112382 | 0.9999986525 | 0              |
| 0.0797447889 | 0.9999986525 | 0              |
| 0.2585419053 | 0.9999986525 | 0.8786991286   |

| gene_expression_table |              |                 |
|-----------------------|--------------|-----------------|
| 0.7046536483          | 0.9999986525 | 0               |
| 0                     | 0            | 0               |
| 0.2184879093          | 0.9999986525 | 0               |
| 0.3448064682          | 0.9999986525 | 4.2337842482    |
| 0.282668908           | 0.9999986525 | 1.0212297592    |
| 0.2197686467          | 0.9999986525 | 170.3827454205  |
| 0.2555233538          | 0.9999986525 | 6.2094573126    |
| 0.905071528           | 0.9999986525 | 2.4571470283    |
| 0.3956910373          | 0.9999986525 | 0               |
| 0.6008253812          | 0.9999986525 | 0               |
| 0.1460357505          | 0.9999986525 | 0.2667868148    |
| 0.3618081293          | 0.9999986525 | 0               |
| 0.4093190019          | 0.9999986525 | 7.9318041941    |
| 0                     | 0            | 0               |
| 0.268301557           | 0.9999986525 | 2.7607614257    |
| 0.3914129405          | 0.9999986525 | 0.4650340603    |
| 0.8339051841          | 0.9999986525 | 13.0240372654   |
| 0.8799134753          | 0.9999986525 | 11.8141370406   |
| 0.8802612271          | 0.9999986525 | 6.8416242278    |
| 0.5212433244          | 0.9999986525 | 0               |
| 0.5990864635          | 0.9999986525 | 0               |
| 0.7094228215          | 0.9999986525 | 1.5407676007    |
| 0.6618937306          | 0.9999986525 | 37.4863934636   |
| 0.8904180862          | 0.9999986525 | 0.4008251044    |
| 0.4624760823          | 0.9999986525 | 10.1185780681   |
| 0.8242290199          | 0.9999986525 | 0.241547685     |
| 0.7012231009          | 0.9999986525 | 0.3800478405    |
| 0.995578436           | 0.9999986525 | 30.8921068809   |
| 0                     | 0            | 0               |
| 0.149630902           | 0.9999986525 | 12.5200912429   |
| 0.2650122493          | 0.9999986525 | 0.8972498085    |
| 0.4606009042          | 0.9999986525 | 8.1888391699    |
| 0.3368687627          | 0.9999986525 | 0               |
| 0.4394756567          | 0.9999986525 | 20.9595675158   |
| 0.7667774036          | 0.9999986525 | 0.9459604561    |
| 0.6919692517          | 0.9999986525 | 0               |
| 0.3932654765          | 0.9999986525 | 0               |
| 0.3533397775          | 0.9999986525 | 1.5243695803    |
| 0.6892627996          | 0.9999986525 | 1.4341086221    |
| 0                     | 0            | 0               |
| 0.3547091322          | 0.9999986525 | 1.3431210528    |
| 0.4854103928          | 0.9999986525 | 0               |
| 0.5925097331          | 0.9999986525 | 14.479178737    |
| 0.9343801294          | 0.9999986525 | 34.9202639501   |
| 0.5862468318          | 0.9999986525 | 0               |
| 0.7082433124          | 0.9999986525 | 1.2473960752    |
| 0.5412895526          | 0.9999986525 | 1.3996374152    |
| 0.7356553307          | 0.9999986525 | 0               |
| 0.3515926008          | 0.9999986525 | 1448.7285920516 |

gene\_expression\_table

|              |              |                 |
|--------------|--------------|-----------------|
| 0.7908506525 | 0.9999986525 | 64.258737596    |
| 0.5000834963 | 0.9999986525 | 0               |
| 0.369644987  | 0.9999986525 | 1.0512742989    |
| 0.6685094608 | 0.9999986525 | 12.1783656297   |
| 0.1532284504 | 0.9999986525 | 6.2748588501    |
| 0.5070248526 | 0.9999986525 | 1356.6878076483 |
| 0.8227340813 | 0.9999986525 | 1.0233470563    |
| 0.5386690087 | 0.9999986525 | 0.5871670898    |
| 0.6853406139 | 0.9999986525 | 1.9201569979    |
| 0.6173309287 | 0.9999986525 | 3.8101473765    |
| 0.2906764722 | 0.9999986525 | 1.5470259301    |
| 0.9897285126 | 0.9999986525 | 2.0946267243    |
| 0.9842684804 | 0.9999986525 | 0.1712552432    |
| 0.914096047  | 0.9999986525 | 0               |
| 0.4146895838 | 0.9999986525 | 0               |
| 0.5029978495 | 0.9999986525 | 899.1994590274  |
| 0.3143353428 | 0.9999986525 | 1.0153398613    |
| 0.8599482279 | 0.9999986525 | 4.3013914668    |
| 0.3630288428 | 0.9999986525 | 3.2799601432    |
| 0.5226607261 | 0.9999986525 | 2.4348309541    |
| 0.6312664098 | 0.9999986525 | 0               |
| 0.8772026847 | 0.9999986525 | 27.3363965975   |
| 0.6293796193 | 0.9999986525 | 0               |
| 0.8526918986 | 0.9999986525 | 22.2047165131   |
| 0.0372694256 | 0.9999986525 | 49.8800635777   |
| 0.9709242289 | 0.9999986525 | 11.9542594446   |
| 0.8747404524 | 0.9999986525 | 0               |
| 0.3768513583 | 0.9999986525 | 2.4673636172    |
| 0.155112397  | 0.9999986525 | 28.8065442491   |
| 0.2126946451 | 0.9999986525 | 4.7696124109    |
| 0.1300424467 | 0.9999986525 | 46.7379807312   |
| 0.8196742132 | 0.9999986525 | 3.9658028304    |
| 0.8330409734 | 0.9999986525 | 8.6750851226    |
| 0.1802214546 | 0.9999986525 | 5.145173358     |
| 0.6169273234 | 0.9999986525 | 47.5801065102   |
| 0.8217222139 | 0.9999986525 | 35.1780094758   |
| 0.470283115  | 0.9999986525 | 6.8913487077    |
| 0.1706907406 | 0.9999986525 | 0               |
| 0.0719578231 | 0.9999986525 | 31.4072559946   |
| 0.3522218874 | 0.9999986525 | 15.5209516498   |
| 0.5249282638 | 0.9999986525 | 0               |
| 0.9569300453 | 0.9999986525 | 13.6740963734   |
| 0.8384628692 | 0.9999986525 | 0               |
| 0.0501065568 | 0.9999986525 | 71.4460194384   |
| 0.5498819539 | 0.9999986525 | 0               |
| 0.6178778387 | 0.9999986525 | 8.0128620136    |
| 0.4747316799 | 0.9999986525 | 50.5530724846   |
| 0.3134635335 | 0.9999986525 | 0.6511554745    |
| 0.5975281972 | 0.9999986525 | 18.2132660492   |

gene\_expression\_table

|              |              |                |
|--------------|--------------|----------------|
| 0.7179504586 | 0.9999986525 | 798.4209774282 |
| 0.1072144119 | 0.9999986525 | 2.8665826219   |
| 0.3506865148 | 0.9999986525 | 48.4531359874  |
| 0.6569332275 | 0.9999986525 | 6.1811149087   |
| 0.6416178419 | 0.9999986525 | 2.273913641    |
| 0.5954627677 | 0.9999986525 | 49.4165316737  |
| 0.9727466193 | 0.9999986525 | 11.5998063313  |
| 0.1919578757 | 0.9999986525 | 2.1291642099   |
| 0.0493733417 | 0.9999986525 | 4.4096116078   |
| 0.6312664098 | 0.9999986525 | 0              |
| 0.7644173067 | 0.9999986525 | 47.9255156319  |
| 0.9048210836 | 0.9999986525 | 12.4468866603  |
| 0.6788357278 | 0.9999986525 | 5.1370409713   |
| 0.2516395498 | 0.9999986525 | 4.4659156288   |
| 0.528870357  | 0.9999986525 | 11.3152476114  |
| 0.7165032115 | 0.9999986525 | 6.6025650989   |
| 0.5549117533 | 0.9999986525 | 6.9495655332   |
| 0.5030281013 | 0.9999986525 | 58.4655921324  |
| 0.1504839981 | 0.9999986525 | 1.8957578602   |
| 0.9770657501 | 0.9999986525 | 69.8042799713  |
| 0.9299983383 | 0.9999986525 | 0              |
| 0.8020604336 | 0.9999986525 | 0              |
| 0.5324969173 | 0.9999986525 | 31.8847610639  |
| 0.9628281789 | 0.9999986525 | 14.1201100329  |
| 0.7042468279 | 0.9999986525 | 375.8763065176 |
| 0.2888879889 | 0.9999986525 | 3.4130747206   |
| 0.5941735774 | 0.9999986525 | 12.358951223   |
| 0.6394896617 | 0.9999986525 | 6.1081974262   |
| 0.7687271314 | 0.9999986525 | 1.6318976077   |
| 0.2872021064 | 0.9999986525 | 0              |
| 0.4816657423 | 0.9999986525 | 2.8009078397   |
| 0.005653     | 0.9999986525 | 5.3904587718   |
| 0.8834636894 | 0.9999986525 | 0              |
| 0.926957038  | 0.9999986525 | 4.743055072    |
| 0.9876128769 | 0.9999986525 | 2.431090341    |
| 0.5818937218 | 0.9999986525 | 0              |
| 0.5060456771 | 0.9999986525 | 0              |
| 0            | 0            | 0              |
| 0.8544331852 | 0.9999986525 | 2.4202143812   |
| 0.030886599  | 0.9999986525 | 8.8565661722   |
| 0.3775725673 | 0.9999986525 | 3.7669337698   |
| 0.0276761258 | 0.9999986525 | 0              |
| 0.8536198172 | 0.9999986525 | 7.0606842549   |
| 0.6312664098 | 0.9999986525 | 0              |
| 0.8099584209 | 0.9999986525 | 2.9107665328   |
| 0.6239179613 | 0.9999986525 | 2.4030575502   |
| 0.9957009334 | 0.9999986525 | 1.9020390473   |
| 0.4869400389 | 0.9999986525 | 1.6627845842   |
| 0.8074907184 | 0.9999986525 | 5.0613900677   |

gene\_expression\_table

|              |              |                 |
|--------------|--------------|-----------------|
| 0.8282397234 | 0.9999986525 | 0               |
| 0.6872866611 | 0.9999986525 | 2.729154636     |
| 0.6529640647 | 0.9999986525 | 25.431042844    |
| 0.6338578233 | 0.9999986525 | 0.3446528813    |
| 0.1560385707 | 0.9999986525 | 4.4029944332    |
| 0.988996023  | 0.9999986525 | 1.9589005685    |
| 0.2014824137 | 0.9999986525 | 32.2626256728   |
| 0.3025326533 | 0.9999986525 | 0               |
| 0.7042274973 | 0.9999986525 | 18.4588751301   |
| 0.4910602497 | 0.9999986525 | 0               |
| 0.8841981505 | 0.9999986525 | 124.7421760432  |
| 0.0824745788 | 0.9999986525 | 43.671927971    |
| 0.9324609449 | 0.9999986525 | 6429.0915400022 |
| 0.5270387038 | 0.9999986525 | 45.1304577879   |
| 0.9013129023 | 0.9999986525 | 22.8582203966   |
| 0.3683279565 | 0.9999986525 | 54.4110423518   |
| 0.2641048877 | 0.9999986525 | 0               |
| 0.4641805431 | 0.9999986525 | 56.6719716832   |
| 0.1967586123 | 0.9999986525 | 0               |
| 0.3373383809 | 0.9999986525 | 0               |
| 0.1708834054 | 0.9999986525 | 0               |
| 0.6312664098 | 0.9999986525 | 0               |
| 0.3418569075 | 0.9999986525 | 0               |
| 0.4490098348 | 0.9999986525 | 1.6040256142    |
| 0.0742220521 | 0.9999986525 | 38.6824062972   |
| 0.4392757457 | 0.9999986525 | 45.6529300548   |
| 0.2369361196 | 0.9999986525 | 10.1810854945   |
| 0.223887471  | 0.9999986525 | 0               |
| 0.1699016321 | 0.9999986525 | 6.3053866077    |
| 0.285860054  | 0.9999986525 | 4.6966579125    |
| 0.3722153038 | 0.9999986525 | 11.1515874633   |
| 0.5447466164 | 0.9999986525 | 225.459629568   |
| 0.6312664098 | 0.9999986525 | 0               |
| 0            | 0            | 0               |
| 0.9020141505 | 0.9999986525 | 2.1324955626    |
| 0.6362639813 | 0.9999986525 | 29.7417531895   |
| 0.4206101865 | 0.9999986525 | 2.9754655391    |
| 0.00379      | 0.9999986525 | 441.6494903942  |
| 0.1520856173 | 0.9999986525 | 0               |
| 0            | 0            | 0               |
| 0.4797193973 | 0.9999986525 | 2.6735132869    |
| 0.4069838796 | 0.9999986525 | 0               |
| 0.6312664098 | 0.9999986525 | 0               |
| 0.7494795087 | 0.9999986525 | 55.2446843371   |
| 0.4019121666 | 0.9999986525 | 0               |
| 0.2439577842 | 0.9999986525 | 4.2851049271    |
| 0.0843040613 | 0.9999986525 | 66.922370751    |
| 0.3820004342 | 0.9999986525 | 32.0351312314   |
| 0.2170963883 | 0.9999986525 | 0               |



gene\_expression\_table

|              |              |                 |
|--------------|--------------|-----------------|
| 0.1535870111 | 0.9999986525 | 17.8196633465   |
| 0.2470471983 | 0.9999986525 | 5.142142601     |
| 0.8064493475 | 0.9999986525 | 7.6414552885    |
| 0.9891692847 | 0.9999986525 | 62.7112251063   |
| 0.1779670293 | 0.9999986525 | 39.1310829042   |
| 0.2443923954 | 0.9999986525 | 0               |
| 0.6809019917 | 0.9999986525 | 0               |
| 0.599465419  | 0.9999986525 | 185.4979566403  |
| 0.3007306145 | 0.9999986525 | 4.6311748708    |
| 0.750860685  | 0.9999986525 | 17.4638700321   |
| 0.1623565163 | 0.9999986525 | 142.2277869649  |
| 0.2582677415 | 0.9999986525 | 0               |
| 0.8376377266 | 0.9999986525 | 225.1126043272  |
| 0.3572929235 | 0.9999986525 | 1.1778304689    |
| 0.6364561056 | 0.9999986525 | 182.4525042364  |
| 0.4710672114 | 0.9999986525 | 0               |
| 0.1861784708 | 0.9999986525 | 33.8767916782   |
| 0            | 0            | 0               |
| 0.8263904841 | 0.9999986525 | 0               |
| 0.6963347182 | 0.9999986525 | 0               |
| 0.5840456511 | 0.9999986525 | 39.6054879837   |
| 0.8728450337 | 0.9999986525 | 46.8208494914   |
| 0.1709010412 | 0.9999986525 | 0               |
| 0.5289544668 | 0.9999986525 | 37.5010070246   |
| 0.3483775414 | 0.9999986525 | 29.9059559605   |
| 0.188474754  | 0.9999986525 | 11.8278953297   |
| 0.3485352324 | 0.9999986525 | 42.586145593    |
| 0.9995870086 | 0.9999986525 | 0               |
| 0.3368672726 | 0.9999986525 | 0               |
| 0.1560767576 | 0.9999986525 | 477.6838279372  |
| 0.4323294906 | 0.9999986525 | 5.8069178918    |
| 0.8495000475 | 0.9999986525 | 271.3624571679  |
| 0.7370535031 | 0.9999986525 | 3.8564379866    |
| 0.0513810461 | 0.9999986525 | 0               |
| 0.1861908144 | 0.9999986525 | 0               |
| 0.4070092421 | 0.9999986525 | 0               |
| 0.0508348485 | 0.9999986525 | 2738.8189525281 |
| 0.757374142  | 0.9999986525 | 0               |
| 0.0881605718 | 0.9999986525 | 92.6103010161   |
| 0.5075793495 | 0.9999986525 | 76.7963081812   |
| 0.3277469958 | 0.9999986525 | 40.3005862086   |
| 0.2343739446 | 0.9999986525 | 1.3615460705    |
| 0.8528695859 | 0.9999986525 | 0               |
| 0.5648490208 | 0.9999986525 | 17.9212481257   |
| 0.2822013198 | 0.9999986525 | 0               |
| 0.6778040912 | 0.9999986525 | 1511.1278462464 |
| 0.5796147661 | 0.9999986525 | 19.7747332877   |
| 0.4603702075 | 0.9999986525 | 18.846408312    |
| 0.2350847795 | 0.9999986525 | 27.16485867     |

gene\_expression\_table

|              |              |               |
|--------------|--------------|---------------|
| 0.5209590203 | 0.9999986525 | 1.459351153   |
| 0.6927933713 | 0.9999986525 | 1.7609628804  |
| 0.7409701399 | 0.9999986525 | 6.1463603316  |
| 0.3969874205 | 0.9999986525 | 0             |
| 0.2408810251 | 0.9999986525 | 6.760884665   |
| 0.0606979894 | 0.9999986525 | 39.5744618862 |
| 0.5400731111 | 0.9999986525 | 0             |
| 0.00277      | 0.9999986525 | 21.372264284  |
| 0.9302032194 | 0.9999986525 | 0.6998743504  |
| 0.2483243333 | 0.9999986525 | 0.0942829568  |
| 0.1586932153 | 0.9999986525 | 0             |
| 0.8832367934 | 0.9999986525 | 11.4264726226 |
| 0.9289741414 | 0.9999986525 | 7.5201364412  |
| 0.844419816  | 0.9999986525 | 62.5622550602 |
| 0            | 0            | 0             |
| 0.6312664098 | 0.9999986525 | 0             |
| 0.3153383123 | 0.9999986525 | 0             |
| 0.1402280567 | 0.9999986525 | 9.0850932312  |
| 0.4307141508 | 0.9999986525 | 3.8079179658  |
| 0.9171282003 | 0.9999986525 | 2.6747318744  |
| 0.8532154313 | 0.9999986525 | 51.3626501539 |
| 0.8066743063 | 0.9999986525 | 0             |
| 0.3137124787 | 0.9999986525 | 2.199480186   |
| 0.7588181541 | 0.9999986525 | 0             |
| 0.2697286363 | 0.9999986525 | 0             |
| 0.7125719905 | 0.9999986525 | 37.09624094   |
| 0.2593730198 | 0.9999986525 | 4.3271574466  |
| 0.8395449516 | 0.9999986525 | 1.4075528953  |
| 0.753509887  | 0.9999986525 | 0.8354550603  |
| 0.9092311386 | 0.9999986525 | 1.4248615504  |
| 0.3601710733 | 0.9999986525 | 21.4494540466 |
| 0.9515948985 | 0.9999986525 | 0.7995849445  |
| 0.6312664098 | 0.9999986525 | 0             |
| 0.7802057575 | 0.9999986525 | 1.5104173667  |
| 0.2346820651 | 0.9999986525 | 0.3491136847  |
| 0.085981805  | 0.9999986525 | 0             |
| 0.7421161922 | 0.9999986525 | 0             |
| 0.8872120102 | 0.9999986525 | 2.1584452756  |
| 0.4069662402 | 0.9999986525 | 2.5731715999  |
| 0.5892016238 | 0.9999986525 | 5.8345026763  |
| 0.5943692368 | 0.9999986525 | 0             |
| 0.785473975  | 0.9999986525 | 20.5655001692 |
| 0.660382378  | 0.9999986525 | 14.5016158706 |
| 0.4630417763 | 0.9999986525 | 0.4346538354  |
| 0.2629316312 | 0.9999986525 | 0             |
| 0.666141592  | 0.9999986525 | 13.8274429183 |
| 0.1002752261 | 0.9999986525 | 4.2628825979  |
| 0.2831013051 | 0.9999986525 | 2.364625844   |
| 0.0724422957 | 0.9999986525 | 15.397145024  |

gene\_expression\_table

|              |              |                |
|--------------|--------------|----------------|
| 0.4729816619 | 0.9999986525 | 0              |
| 0.9297723355 | 0.9999986525 | 2.2272606527   |
| 0.193088481  | 0.9999986525 | 0              |
| 0.9685306707 | 0.9999986525 | 2.2663292274   |
| 0.1133110731 | 0.9999986525 | 0              |
| 0.7753658221 | 0.9999986525 | 18.8722237721  |
| 0.2376937032 | 0.9999986525 | 0              |
| 0.8043441258 | 0.9999986525 | 2.8003137978   |
| 0.0413384418 | 0.9999986525 | 0              |
| 0.1714888816 | 0.9999986525 | 14.9234015898  |
| 0.4965007972 | 0.9999986525 | 1.6467041305   |
| 0.4218810247 | 0.9999986525 | 0              |
| 0.2584127591 | 0.9999986525 | 1.3753087308   |
| 0.5735424187 | 0.9999986525 | 0              |
| 0.2681911931 | 0.9999986525 | 2.5601444571   |
| 0.85303971   | 0.9999986525 | 0.8089499935   |
| 0.0226284571 | 0.9999986525 | 43.7427627923  |
| 0.159155566  | 0.9999986525 | 1.9263903643   |
| 0.2586737413 | 0.9999986525 | 0.7264637995   |
| 0.6395120645 | 0.9999986525 | 0              |
| 0.639844125  | 0.9999986525 | 0              |
| 0.4436508696 | 0.9999986525 | 0              |
| 0.8835969582 | 0.9999986525 | 0              |
| 0.9117553486 | 0.9999986525 | 2.3678062419   |
| 0.3068962215 | 0.9999986525 | 0              |
| 0.4729816619 | 0.9999986525 | 0              |
| 0.714376115  | 0.9999986525 | 0              |
| 0.1756238409 | 0.9999986525 | 1.9226734947   |
| 0.881418352  | 0.9999986525 | 335.5395058851 |
| 0.0006292    | 0.9999986525 | 0              |
| 0.1306981733 | 0.9999986525 | 364.9073758338 |
| 0.7137147449 | 0.9999986525 | 0              |
| 0.7747947712 | 0.9999986525 | 4.7014136778   |
| 0.336484017  | 0.9999986525 | 0              |
| 0.9392015858 | 0.9999986525 | 5.9753263946   |
| 0.4438442904 | 0.9999986525 | 0              |
| 0.9536518769 | 0.9999986525 | 0              |
| 0.9083786293 | 0.9999986525 | 1.4896777651   |
| 0.7007817031 | 0.9999986525 | 0              |
| 0.2319016736 | 0.9999986525 | 0              |
| 0.01815353   | 0.9999986525 | 4.0765320191   |
| 0.299455622  | 0.9999986525 | 4.2785959069   |
| 0.2302066493 | 0.9999986525 | 2.3064457878   |
| 0.6217165113 | 0.9999986525 | 0.3254012115   |
| 0.2048173524 | 0.9999986525 | 11.8173091887  |
| 0.0997519023 | 0.9999986525 | 6.3087759931   |
| 0.2169025797 | 0.9999986525 | 0              |
| 0.5713496927 | 0.9999986525 | 15.2625341659  |
| 0            | 0            | 0              |

gene\_expression\_table

|              |              |                |
|--------------|--------------|----------------|
| 0.4099843565 | 0.9999986525 | 0              |
| 0.7443432812 | 0.9999986525 | 0.6285525468   |
| 0.7086443461 | 0.9999986525 | 23.2950337871  |
| 0.4686800015 | 0.9999986525 | 116.3943101406 |
| 0.3326830721 | 0.9999986525 | 0.5665432615   |
| 0.2431215694 | 0.9999986525 | 0              |
| 0.1328120571 | 0.9999986525 | 6.6788808521   |
| 0.6695057466 | 0.9999986525 | 1.8988932595   |
| 0.9077103588 | 0.9999986525 | 0.8437941274   |
| 0.1298976836 | 0.9999986525 | 0              |
| 0.5628162533 | 0.9999986525 | 1.2831473747   |
| 0.5827855742 | 0.9999986525 | 21.1549615529  |
| 0.4415863365 | 0.9999986525 | 1.901782207    |
| 0.5018315189 | 0.9999986525 | 0.6045784546   |
| 0.98011302   | 0.9999986525 | 10.00815016    |
| 0.692542587  | 0.9999986525 | 0.671015065    |
| 0.3360669815 | 0.9999986525 | 0              |
| 0.9332567613 | 0.9999986525 | 0              |
| 0.0188034656 | 0.9999986525 | 1.7850228807   |
| 0.8210715438 | 0.9999986525 | 0.6132738594   |
| 0.4274858306 | 0.9999986525 | 1.6216008544   |
| 0.6746834632 | 0.9999986525 | 0              |
| 0.9448797969 | 0.9999986525 | 3.7282167321   |
| 0.412008428  | 0.9999986525 | 5.8500130955   |
| 0.5629330331 | 0.9999986525 | 6.3878789154   |
| 0.4147131084 | 0.9999986525 | 5.6619706141   |
| 0.5990952698 | 0.9999986525 | 0              |
| 0.3492154261 | 0.9999986525 | 22.1602494846  |
| 0.9000153205 | 0.9999986525 | 0              |
| 0.4555848647 | 0.9999986525 | 5.6348069122   |
| 0.4895090187 | 0.9999986525 | 0              |
| 0.4104452258 | 0.9999986525 | 223.484758913  |
| 0.7766538853 | 0.9999986525 | 0              |
| 0.755722215  | 0.9999986525 | 0              |
| 0.3925935806 | 0.9999986525 | 16.6119495736  |
| 0.8261020683 | 0.9999986525 | 0              |
| 0.1244286477 | 0.9999986525 | 46.8936010888  |
| 0.7278931336 | 0.9999986525 | 0              |
| 0.5217852133 | 0.9999986525 | 1.1291217739   |
| 0.317734465  | 0.9999986525 | 0              |
| 0.5879880153 | 0.9999986525 | 0.8027041299   |
| 0            | 0            | 0              |
| 0.7298011663 | 0.9999986525 | 3.2068685546   |
| 0.6468407562 | 0.9999986525 | 11.8151942341  |
| 0.8996965585 | 0.9999986525 | 65.9478434168  |
| 0            | 0            | 0              |
| 0.0167420138 | 0.9999986525 | 0.1050569569   |
| 0.3030454714 | 0.9999986525 | 0              |
| 0.326618375  | 0.9999986525 | 0.1008116602   |

gene\_expression\_table

|              |              |                |
|--------------|--------------|----------------|
| 0.6503511544 | 0.9999986525 | 0              |
| 0            | 0            | 0              |
| 0.3700734422 | 0.9999986525 | 1.193786672    |
| 0.6996850614 | 0.9999986525 | 0.8857175142   |
| 0.5481889872 | 0.9999986525 | 0              |
| 0.6312664098 | 0.9999986525 | 0              |
| 0.4093837052 | 0.9999986525 | 1.5599113396   |
| 0.9620927176 | 0.9999986525 | 0.6209092304   |
| 0.014805319  | 0.9999986525 | 0              |
| 0.6398273518 | 0.9999986525 | 0              |
| 0            | 0            | 0              |
| 0.6895643234 | 0.9999986525 | 0              |
| 0.545711     | 0.9999986525 | 0.4267687913   |
| 0.1826665978 | 0.9999986525 | 1.1566273537   |
| 0.7706448343 | 0.9999986525 | 3.603569748    |
| 0.9838689634 | 0.9999986525 | 1.6096406152   |
| 0.445249854  | 0.9999986525 | 0              |
| 0.7900921204 | 0.9999986525 | 0              |
| 0.0636750405 | 0.9999986525 | 38.5503052747  |
| 0.7825032158 | 0.9999986525 | 130.5336584931 |
| 0.8150931455 | 0.9999986525 | 2.0229792096   |
| 0.1335305643 | 0.9999986525 | 14.7717466604  |
| 0.4144172395 | 0.9999986525 | 0              |
| 0.1421705406 | 0.9999986525 | 26.2420093402  |
| 0.7160085406 | 0.9999986525 | 0.3316748824   |
| 0            | 0            | 0              |
| 0.7222020317 | 0.9999986525 | 0.890382329    |
| 0.749081834  | 0.9999986525 | 3.1354204697   |
| 0.0359451504 | 0.9999986525 | 63.9316284061  |
| 0.8752010282 | 0.9999986525 | 0              |
| 0            | 0            | 0              |
| 0.4870171935 | 0.9999986525 | 0              |
| 0.2634659854 | 0.9999986525 | 141.8204034004 |
| 0.0902974251 | 0.9999986525 | 7.3639038241   |
| 0.6558878915 | 0.9999986525 | 7.2729747385   |
| 0.0378468582 | 0.9999986525 | 0.2976647827   |
| 0.30755387   | 0.9999986525 | 0              |
| 0.3682328758 | 0.9999986525 | 0              |
| 0.9773880138 | 0.9999986525 | 7.8307808295   |
| 0.4762533447 | 0.9999986525 | 3.0975905118   |
| 0.929900234  | 0.9999986525 | 0              |
| 0.203402674  | 0.9999986525 | 0              |
| 0.9422691491 | 0.9999986525 | 114.2112512588 |
| 0.5545690148 | 0.9999986525 | 0.8281028933   |
| 0.6946409525 | 0.9999986525 | 1.8069013044   |
| 0.3842704358 | 0.9999986525 | 1.1103992226   |
| 0.7438862911 | 0.9999986525 | 1.1282212745   |
| 0.4589276008 | 0.9999986525 | 20.0181906409  |
| 0.3447733189 | 0.9999986525 | 0              |

gene\_expression\_table

|              |              |                |
|--------------|--------------|----------------|
| 0.9051987392 | 0.9999986525 | 11.5157085258  |
| 0.4546815676 | 0.9999986525 | 204.3444516305 |
| 0.1473678474 | 0.9999986525 | 1.8686593152   |
| 0.2195218831 | 0.9999986525 | 148.604788104  |
| 0.5449176458 | 0.9999986525 | 9.456574567    |
| 0.872115966  | 0.9999986525 | 3.6555748902   |
| 0.1651240443 | 0.9999986525 | 0              |
| 0.1476955947 | 0.9999986525 | 5.606445525    |
| 0.2614603286 | 0.9999986525 | 0              |
| 0.9294773649 | 0.9999986525 | 0              |
| 0.6398105398 | 0.9999986525 | 0              |
| 0.6471840166 | 0.9999986525 | 0              |
| 0.5474737213 | 0.9999986525 | 36.1739165934  |
| 0.8628483753 | 0.9999986525 | 44.1718296688  |
| 0.2196755313 | 0.9999986525 | 75.9291750354  |
| 0.7988412922 | 0.9999986525 | 0.631133928    |
| 0.8731218907 | 0.9999986525 | 36.6254634024  |
| 0.4069883814 | 0.9999986525 | 0              |
| 0.0942260233 | 0.9999986525 | 0.9610481075   |
| 0            | 0            | 0              |
| 0.7760191379 | 0.9999986525 | 0              |
| 0.8423732642 | 0.9999986525 | 6.4732855188   |
| 0.0608570783 | 0.9999986525 | 24.3494321007  |
| 0.2785181718 | 0.9999986525 | 1.1965634652   |
| 0.3358449838 | 0.9999986525 | 0              |
| 0.7154104474 | 0.9999986525 | 0              |
| 0.4819644665 | 0.9999986525 | 12.1761194758  |
| 0.0914353925 | 0.9999986525 | 203.1709731443 |
| 0.6312664098 | 0.9999986525 | 0              |
| 0.5084797278 | 0.9999986525 | 0.4386173759   |
| 0.4089071717 | 0.9999986525 | 31.9101263137  |
| 0.2587506737 | 0.9999986525 | 448.2086412417 |
| 0.460952246  | 0.9999986525 | 0              |
| 0.7628832858 | 0.9999986525 | 1.8361826738   |
| 0.8067559013 | 0.9999986525 | 1.8904165776   |
| 0.009269     | 0.9999986525 | 0              |
| 0.3296570674 | 0.9999986525 | 3.530420791    |
| 0.5813912451 | 0.9999986525 | 2.4617282664   |
| 0.5287608034 | 0.9999986525 | 1.5731537658   |
| 0.9290095376 | 0.9999986525 | 0.7128153947   |
| 0.2403359038 | 0.9999986525 | 98.2036411795  |
| 0.4091751074 | 0.9999986525 | 260.5724347702 |
| 0.3670064036 | 0.9999986525 | 0              |
| 0.3707240406 | 0.9999986525 | 16.25668895    |
| 0.9288192709 | 0.9999986525 | 0              |
| 0.6663713434 | 0.9999986525 | 4.4309208707   |
| 0.6980469521 | 0.9999986525 | 0.4098677456   |
| 0.2509366464 | 0.9999986525 | 2.2452987937   |
| 0.3927942307 | 0.9999986525 | 5.6562100057   |

gene\_expression\_table

|              |              |                |
|--------------|--------------|----------------|
| 0.4604708313 | 0.9999986525 | 0              |
| 0.5012581703 | 0.9999986525 | 594.5281601461 |
| 0.4070628564 | 0.9999986525 | 3.255697092    |
| 0.6862429433 | 0.9999986525 | 15.9703411631  |
| 0.2606315063 | 0.9999986525 | 5.9541226198   |
| 0.581406359  | 0.9999986525 | 19.0434801297  |
| 0.1483431508 | 0.9999986525 | 0              |
| 0.6235138653 | 0.9999986525 | 0.43273426     |
| 0.4773418832 | 0.9999986525 | 6.8524983913   |
| 0.5251906308 | 0.9999986525 | 0.9462841836   |
| 0.1188798494 | 0.9999986525 | 0              |
| 0.7739328907 | 0.9999986525 | 1.1141941779   |
| 0            | 0            | 0              |
| 0.9057589697 | 0.9999986525 | 0.6399204942   |
| 0.485863833  | 0.9999986525 | 59.5226126993  |
| 0.6166520002 | 0.9999986525 | 181.0467324114 |
| 0.2558135371 | 0.9999986525 | 77.9541228433  |
| 0.7687393831 | 0.9999986525 | 0.0469152623   |
| 0.3702663368 | 0.9999986525 | 0              |
| 0.6983594836 | 0.9999986525 | 2.7222867337   |
| 0.6034398973 | 0.9999986525 | 2.9129606317   |
| 0.4175022523 | 0.9999986525 | 279.48720498   |
| 0.2151293488 | 0.9999986525 | 1.0667969828   |
| 0.2759778169 | 0.9999986525 | 275.1074383533 |
| 0.9701355278 | 0.9999986525 | 1.668607119    |
| 0.1843056134 | 0.9999986525 | 123.7826208429 |
| 0            | 0            | 0              |
| 0.971713706  | 0.9999986525 | 3.7976499767   |
| 0.3741872446 | 0.9999986525 | 4.2160068832   |
| 0.1413969746 | 0.9999986525 | 19.3999892953  |
| 0.0616962481 | 0.9999986525 | 0              |
| 0.2306737203 | 0.9999986525 | 13.9055149283  |
| 0.240591648  | 0.9999986525 | 0.4860519444   |
| 0.1864474543 | 0.9999986525 | 145.801855371  |
| 0.6727734277 | 0.9999986525 | 0              |
| 0.7357274593 | 0.9999986525 | 0.5560413365   |
| 0.4033358126 | 0.9999986525 | 0              |
| 0.99334836   | 0.9999986525 | 7.321623118    |
| 0.6010100773 | 0.9999986525 | 0              |
| 0.9266527712 | 0.9999986525 | 0              |
| 0.1463014093 | 0.9999986525 | 3.5330186567   |
| 0.9127711543 | 0.9999986525 | 7.6233346926   |
| 0.3114112721 | 0.9999986525 | 0              |
| 0.1021759511 | 0.9999986525 | 2.0846227838   |
| 0.6319096759 | 0.9999986525 | 0              |
| 0.2188269454 | 0.9999986525 | 2.3516226919   |
| 0.2875824087 | 0.9999986525 | 0              |
| 0.0581202503 | 0.9999986525 | 18.4982339192  |
| 0.9113075435 | 0.9999986525 | 0.1296355653   |

| gene_expression_table |              |               |
|-----------------------|--------------|---------------|
| 0.6398021191          | 0.9999986525 | 0             |
| 0                     | 0            | 0             |
| 0.3800156094          | 0.9999986525 | 0             |
| 0.1126264935          | 0.9999986525 | 0             |
| 0.9698350696          | 0.9999986525 | 0             |
| 0.8353110555          | 0.9999986525 | 1.0859687502  |
| 0.5857971278          | 0.9999986525 | 6.8641207957  |
| 0.6124931888          | 0.9999986525 | 0             |
| 0.1506841345          | 0.9999986525 | 16.0650701829 |
| 0.0410328732          | 0.9999986525 | 7.5762327107  |
| 0.7053374491          | 0.9999986525 | 0             |
| 0.5198686894          | 0.9999986525 | 3.1971619484  |
| 0.0867298508          | 0.9999986525 | 3.599934443   |
| 0                     | 0            | 0             |
| 0.4964586203          | 0.9999986525 | 7.4690875727  |
| 0.4729816619          | 0.9999986525 | 0             |
| 0.2193181405          | 0.9999986525 | 1.7326121998  |
| 0.031070075           | 0.9999986525 | 2.3619116108  |
| 0.9318364431          | 0.9999986525 | 18.1241998031 |
| 0.8393152822          | 0.9999986525 | 0.9850586259  |
| 0.9261768828          | 0.9999986525 | 0             |
| 0.5126318135          | 0.9999986525 | 4.2047958844  |
| 0.3933216553          | 0.9999986525 | 0             |
| 0.3702586551          | 0.9999986525 | 2.5420638345  |
| 0.8263272532          | 0.9999986525 | 18.4406139058 |
| 0.6203888315          | 0.9999986525 | 0.2269965196  |
| 0.4729816619          | 0.9999986525 | 0             |
| 0.9545304697          | 0.9999986525 | 0.5998991143  |
| 0.7451917742          | 0.9999986525 | 3.2517882108  |
| 0.730325233           | 0.9999986525 | 9.1347220916  |
| 0.9809294333          | 0.9999986525 | 0.157437774   |
| 0.0470860324          | 0.9999986525 | 5.3255942549  |
| 0.4729816619          | 0.9999986525 | 0             |
| 0.1614666614          | 0.9999986525 | 3.7501228925  |
| 0.6397936884          | 0.9999986525 | 0             |
| 0.6312664098          | 0.9999986525 | 0             |
| 0                     | 0            | 0             |
| 0                     | 0            | 0             |
| 0.4951076992          | 0.9999986525 | 30.101089355  |
| 0.6093786801          | 0.9999986525 | 8.5881875612  |
| 0.7039041661          | 0.9999986525 | 0.6349124007  |
| 0.3548843914          | 0.9999986525 | 0             |
| 0.5218683824          | 0.9999986525 | 0             |
| 0.500083171           | 0.9999986525 | 2.9303622164  |
| 0.6083413344          | 0.9999986525 | 4.365628487   |
| 0.3012392684          | 0.9999986525 | 0             |
| 0.2418085103          | 0.9999986525 | 0             |
| 0.511533562           | 0.9999986525 | 0             |
| 0.6011985578          | 0.9999986525 | 49.0273235351 |



gene\_expression\_table

|              |              |                |
|--------------|--------------|----------------|
| 0.2526704012 | 0.9999986525 | 7.8881892784   |
| 0.5535886536 | 0.9999986525 | 1.9976215742   |
| 0.8099997624 | 0.9999986525 | 11.6202240322  |
| 0.3675420803 | 0.9999986525 | 0              |
| 0.9489443145 | 0.9999986525 | 8.2403526261   |
| 0.3753988602 | 0.9999986525 | 39.8445252556  |
| 0.3474914356 | 0.9999986525 | 191.6151228165 |
| 0.1847428013 | 0.9999986525 | 7.0938775321   |
| 0.4743046041 | 0.9999986525 | 0              |
| 0.4476782866 | 0.9999986525 | 324.6757268011 |
| 0.1431541562 | 0.9999986525 | 5.2244453681   |
| 0.9835158302 | 0.9999986525 | 4.6987471732   |
| 0.1619002377 | 0.9999986525 | 40.4544356457  |
| 0.9527492666 | 0.9999986525 | 13.1434214226  |
| 0.2499534443 | 0.9999986525 | 0              |
| 0.6727261991 | 0.9999986525 | 0              |
| 0.7340778099 | 0.9999986525 | 4.4320611676   |
| 0.460148864  | 0.9999986525 | 0              |
| 0.0963867944 | 0.9999986525 | 0              |
| 0.4047262285 | 0.9999986525 | 11.1014247754  |
| 0.3368825518 | 0.9999986525 | 0              |
| 0.9157372514 | 0.9999986525 | 0              |
| 0.7645294352 | 0.9999986525 | 0.957728139    |
| 0.341802651  | 0.9999986525 | 0              |
| 0.3667548929 | 0.9999986525 | 15.0148549779  |
| 0.4232641607 | 0.9999986525 | 41.1991821306  |
| 0.408733513  | 0.9999986525 | 0              |
| 0.7819136582 | 0.9999986525 | 7.7887444293   |
| 0.9729916178 | 0.9999986525 | 0              |
| 0.3076777365 | 0.9999986525 | 0              |
| 0.0829687483 | 0.9999986525 | 20.9164032579  |
| 0.5565636176 | 0.9999986525 | 8.8254866067   |
| 0.2260794894 | 0.9999986525 | 1.4847047742   |
| 0.4307264497 | 0.9999986525 | 1.1790312367   |
| 0.6312664098 | 0.9999986525 | 0              |
| 0.5885941009 | 0.9999986525 | 46.9874717316  |
| 0.1990657235 | 0.9999986525 | 7.6703098143   |
| 0.5848499328 | 0.9999986525 | 2.9850177034   |
| 0.9121243363 | 0.9999986525 | 31.4485556986  |
| 0.8196057245 | 0.9999986525 | 296.4243039025 |
| 0.9991673216 | 0.9999986525 | 0              |
| 0.0121632608 | 0.9999986525 | 4.7733484373   |
| 0.6165044973 | 0.9999986525 | 571.1916902603 |
| 0.3102833537 | 0.9999986525 | 35.1292621648  |
| 0.1831175483 | 0.9999986525 | 0              |
| 0.337934731  | 0.9999986525 | 3.8476581897   |
| 0.5029592461 | 0.9999986525 | 81.6878504222  |
| 0.2980452614 | 0.9999986525 | 61.4383227876  |
| 0.6869253521 | 0.9999986525 | 4.9028888067   |

gene\_expression\_table

|              |              |                 |
|--------------|--------------|-----------------|
| 0.3406082665 | 0.9999986525 | 0               |
| 0.4621159996 | 0.9999986525 | 47.5182709224   |
| 0.0316158863 | 0.9999986525 | 7.5437677798    |
| 0.7071709561 | 0.9999986525 | 0               |
| 0.9245795163 | 0.9999986525 | 11.2501689693   |
| 0.7493132806 | 0.9999986525 | 4.9539366125    |
| 0.7406416854 | 0.9999986525 | 1.8721258469    |
| 0.0770082518 | 0.9999986525 | 7837.3933222384 |
| 0.9169443683 | 0.9999986525 | 27.7424498227   |
| 0.7889894946 | 0.9999986525 | 0               |
| 0.993181156  | 0.9999986525 | 0.752195722     |
| 0.5685418027 | 0.9999986525 | 39.5313759179   |
| 0.6265984827 | 0.9999986525 | 3.4611650977    |
| 0.455929951  | 0.9999986525 | 6.0915707297    |
| 0.589696782  | 0.9999986525 | 149.0132781693  |
| 0.5575399347 | 0.9999986525 | 54.7521441285   |
| 0            | 0            | 0               |
| 0.3961119274 | 0.9999986525 | 1.5375007125    |
| 0.9794820657 | 0.9999986525 | 0               |
| 0.3469142262 | 0.9999986525 | 0               |
| 0.4069215553 | 0.9999986525 | 0               |
| 0.4357960148 | 0.9999986525 | 5.6053829576    |
| 0.2344884461 | 0.9999986525 | 0               |
| 0.7308299872 | 0.9999986525 | 0               |
| 0.5541258295 | 0.9999986525 | 11.2241080942   |
| 0.7821615841 | 0.9999986525 | 1.6178256464    |
| 0.9010265918 | 0.9999986525 | 0               |
| 0.9349870136 | 0.9999986525 | 7.7844967538    |
| 0.6637848712 | 0.9999986525 | 4.2812839029    |
| 0.219555539  | 0.9999986525 | 8.6156473452    |
| 0.8824915358 | 0.9999986525 | 0               |
| 0.8318566433 | 0.9999986525 | 34.3840613453   |
| 0.6842639858 | 0.9999986525 | 0               |
| 0.4069197331 | 0.9999986525 | 0.9884385332    |
| 0.6508918192 | 0.9999986525 | 6.0192517686    |
| 0.4069675129 | 0.9999986525 | 24.7952667729   |
| 0.052229941  | 0.9999986525 | 2.1851473231    |
| 0.9620381275 | 0.9999986525 | 7.5044642959    |
| 0.230362307  | 0.9999986525 | 219.3504106398  |
| 0.5515268143 | 0.9999986525 | 8.5044855339    |
| 0.2283522162 | 0.9999986525 | 18.7449576668   |
| 0            | 0            | 0               |
| 0.9234954322 | 0.9999986525 | 0               |
| 0.5315886155 | 0.9999986525 | 1.6161053321    |
| 0.8411284051 | 0.9999986525 | 0               |
| 0.8691062166 | 0.9999986525 | 16.1690022123   |
| 0.1584359313 | 0.9999986525 | 0               |
| 0.0996155513 | 0.9999986525 | 0               |
| 0.6328104448 | 0.9999986525 | 0               |

gene\_expression\_table

|              |              |                |
|--------------|--------------|----------------|
| 0.9082161299 | 0.9999986525 | 111.4301642933 |
| 0.3516094716 | 0.9999986525 | 1.4150501896   |
| 0.2162493868 | 0.9999986525 | 12.8376077361  |
| 0.8488759742 | 0.9999986525 | 0.0846184333   |
| 0.7694510823 | 0.9999986525 | 0              |
| 0.7492499617 | 0.9999986525 | 20.6627223108  |
| 0.0203147865 | 0.9999986525 | 2.2762003603   |
| 0.1001704454 | 0.9999986525 | 0              |
| 0.4414249448 | 0.9999986525 | 5.9593694166   |
| 0.3394509012 | 0.9999986525 | 39.8428553258  |
| 0.8188205626 | 0.9999986525 | 3.8612310445   |
| 0.1121112418 | 0.9999986525 | 21.4435029611  |
| 0.3669101718 | 0.9999986525 | 0              |
| 0.1314725521 | 0.9999986525 | 22.4644484161  |
| 0.3115785614 | 0.9999986525 | 0              |
| 0.8524565404 | 0.9999986525 | 2.8003731906   |
| 0.5033860854 | 0.9999986525 | 0.8059256276   |
| 0.1487789171 | 0.9999986525 | 0              |
| 0.5916318054 | 0.9999986525 | 13.2448697746  |
| 0.7586166697 | 0.9999986525 | 0.7172571902   |
| 0.9472968593 | 0.9999986525 | 1.2143363889   |
| 0.2171200074 | 0.9999986525 | 0              |
| 0.3200781835 | 0.9999986525 | 2.0411964994   |
| 0.833538562  | 0.9999986525 | 0              |
| 0.2750496379 | 0.9999986525 | 0              |
| 0.8434584851 | 0.9999986525 | 0              |
| 0.3962922064 | 0.9999986525 | 0              |
| 0.30755387   | 0.9999986525 | 0              |
| 0            | 0            | 0              |
| 0.3097287388 | 0.9999986525 | 0.9466459453   |
| 0.8191642191 | 0.9999986525 | 3.3818655695   |
| 0.4081334392 | 0.9999986525 | 1.3374675402   |
| 0.6397852478 | 0.9999986525 | 0              |
| 0.1918586339 | 0.9999986525 | 0              |
| 0            | 0            | 0              |
| 0.0558264476 | 0.9999986525 | 1.3768684036   |
| 0.5753965319 | 0.9999986525 | 8.3408834942   |
| 0.6395003602 | 0.9999986525 | 0              |
| 0.0659493622 | 0.9999986525 | 2.5145892599   |
| 0.7139326667 | 0.9999986525 | 11.5950313074  |
| 0.8065134173 | 0.9999986525 | 2.8446195773   |
| 0.7693705684 | 0.9999986525 | 44.9784428271  |
| 0.4226605012 | 0.9999986525 | 7.7850704933   |
| 0.197542228  | 0.9999986525 | 21.3131227709  |
| 0.0149560344 | 0.9999986525 | 37.8357075141  |
| 0.8656813788 | 0.9999986525 | 0.2130151783   |
| 0.4753389375 | 0.9999986525 | 9.8395748908   |
| 0.3988226972 | 0.9999986525 | 19.9859254105  |
| 0.9550838593 | 0.9999986525 | 1.9950106987   |

gene\_expression\_table

|              |              |                |
|--------------|--------------|----------------|
| 0.7971416113 | 0.9999986525 | 1.2700029231   |
| 0.1621622503 | 0.9999986525 | 3.5826287095   |
| 0.8536254581 | 0.9999986525 | 5.069876572    |
| 0.3368892087 | 0.9999986525 | 0              |
| 0.1494904659 | 0.9999986525 | 0.9050918259   |
| 0.4132720269 | 0.9999986525 | 0.5607138536   |
| 0.2066929164 | 0.9999986525 | 2.911301374    |
| 0.2991381238 | 0.9999986525 | 0              |
| 0.487018607  | 0.9999986525 | 0              |
| 0.9646227886 | 0.9999986525 | 0              |
| 0.7916108526 | 0.9999986525 | 0.9893211117   |
| 0.4729816619 | 0.9999986525 | 0              |
| 0.1723718922 | 0.9999986525 | 0              |
| 0.4596128639 | 0.9999986525 | 2.2473051456   |
| 0.5370950148 | 0.9999986525 | 0              |
| 0.0532748379 | 0.9999986525 | 2.9308500681   |
| 0.9554579807 | 0.9999986525 | 3.2087519681   |
| 0.0432090794 | 0.9999986525 | 166.1262818299 |
| 0            | 0            | 0              |
| 0.004245     | 0.9999986525 | 12.1837035679  |
| 0.4618823832 | 0.9999986525 | 0              |
| 0.7797677737 | 0.9999986525 | 0              |
| 0.060732515  | 0.9999986525 | 2.111408123    |
| 0.2244518208 | 0.9999986525 | 7.7414790282   |
| 0.5025364935 | 0.9999986525 | 3.027800162    |
| 0.4288112846 | 0.9999986525 | 2.2264312669   |
| 0.2934408849 | 0.9999986525 | 1.8294441489   |
| 0.4729816619 | 0.9999986525 | 0              |
| 0.8628300669 | 0.9999986525 | 1.1833990953   |
| 0.6798972215 | 0.9999986525 | 13.7934963635  |
| 0.4709075154 | 0.9999986525 | 21.0127986047  |
| 0.805298433  | 0.9999986525 | 0              |
| 0.4729816619 | 0.9999986525 | 0              |
| 0.7032043166 | 0.9999986525 | 0              |
| 0.4319721171 | 0.9999986525 | 1.4769405807   |
| 0.5413412903 | 0.9999986525 | 37.2841726141  |
| 0.6312664098 | 0.9999986525 | 0              |
| 0.3414453718 | 0.9999986525 | 0.4092737942   |
| 0.4767919268 | 0.9999986525 | 13.6285189927  |
| 0.2927094609 | 0.9999986525 | 4.4699473757   |
| 0.3212738012 | 0.9999986525 | 0              |
| 0.4332004989 | 0.9999986525 | 3.8002307683   |
| 0.4082960114 | 0.9999986525 | 0              |
| 0.661466077  | 0.9999986525 | 15.3320838667  |
| 0.1949953277 | 0.9999986525 | 0              |
| 0.2122535024 | 0.9999986525 | 0              |
| 0.6863520745 | 0.9999986525 | 0.6448533373   |
| 0.121961943  | 0.9999986525 | 184.9874543829 |
| 0.9849577567 | 0.9999986525 | 0              |

gene\_expression\_table

|              |              |                 |
|--------------|--------------|-----------------|
| 0.9127903829 | 0.9999986525 | 3.6453560344    |
| 0.7592160758 | 0.9999986525 | 17.3007233683   |
| 0.4632433038 | 0.9999986525 | 49.4280938009   |
| 0.639776797  | 0.9999986525 | 0               |
| 0.4816711336 | 0.9999986525 | 30.1277342991   |
| 0.3370696086 | 0.9999986525 | 96.7110753091   |
| 0.9767596117 | 0.9999986525 | 17.9003262799   |
| 0.2581214155 | 0.9999986525 | 0               |
| 0.5031207153 | 0.9999986525 | 0               |
| 0.4729816619 | 0.9999986525 | 0               |
| 0.7109035611 | 0.9999986525 | 46.9561397878   |
| 0.9240048156 | 0.9999986525 | 41.3416189638   |
| 0.7789872793 | 0.9999986525 | 0               |
| 0.0979814357 | 0.9999986525 | 168.3828171532  |
| 0.2199267015 | 0.9999986525 | 0               |
| 0.1563644298 | 0.9999986525 | 6.6608548652    |
| 0.0791344102 | 0.9999986525 | 3361.622095693  |
| 0.1527865298 | 0.9999986525 | 329.5720326135  |
| 0.5824313215 | 0.9999986525 | 0               |
| 0.1082712662 | 0.9999986525 | 22.4950669675   |
| 0.7966869188 | 0.9999986525 | 0               |
| 0.777317387  | 0.9999986525 | 1.2243582675    |
| 0.5248982092 | 0.9999986525 | 78.567526331    |
| 0.1827401473 | 0.9999986525 | 0               |
| 0.1594875937 | 0.9999986525 | 0               |
| 0.3189345842 | 0.9999986525 | 0               |
| 0.5487189791 | 0.9999986525 | 99.4144343083   |
| 0.1832841417 | 0.9999986525 | 7.3803686733    |
| 0.2607139725 | 0.9999986525 | 15.330600356    |
| 0.6312664098 | 0.9999986525 | 0               |
| 0.810055941  | 0.9999986525 | 0               |
| 0.0778568861 | 0.9999986525 | 27.670045447    |
| 0.2237720479 | 0.9999986525 | 0               |
| 0.1105911955 | 0.9999986525 | 0               |
| 0.6813850088 | 0.9999986525 | 192.1270258901  |
| 0.7239111731 | 0.9999986525 | 25.6852048567   |
| 0.5713537941 | 0.9999986525 | 0               |
| 0.1420376186 | 0.9999986525 | 0               |
| 0.6944306499 | 0.9999986525 | 5.114654099     |
| 0.6260105742 | 0.9999986525 | 4040.5071747432 |
| 0.2975842109 | 0.9999986525 | 15.8149178698   |
| 0.6004721424 | 0.9999986525 | 16.4171334244   |
| 0.5364832568 | 0.9999986525 | 89.7585285967   |
| 0.9641364034 | 0.9999986525 | 620.455429501   |
| 0.5821501882 | 0.9999986525 | 0               |
| 0.3964816474 | 0.9999986525 | 48.1143746553   |
| 0.321289052  | 0.9999986525 | 8.5541475892    |
| 0            | 0            | 0               |
| 0.4729816619 | 0.9999986525 | 0               |

gene\_expression\_table

|              |              |                 |
|--------------|--------------|-----------------|
| 0.0838007373 | 0.9999986525 | 0               |
| 0.9737849156 | 0.9999986525 | 22.4453541123   |
| 0.355589967  | 0.9999986525 | 0               |
| 0.506914259  | 0.9999986525 | 9.1415736602    |
| 0.6098761915 | 0.9999986525 | 0               |
| 0.2833433477 | 0.9999986525 | 2.9042572574    |
| 0.0617424929 | 0.9999986525 | 1334.3254849455 |
| 0.5048444321 | 0.9999986525 | 0               |
| 0.1042877685 | 0.9999986525 | 14.7847788591   |
| 0.4870200202 | 0.9999986525 | 0               |
| 0.112098803  | 0.9999986525 | 6.4109148898    |
| 0.6134556311 | 0.9999986525 | 0               |
| 0.6604952196 | 0.9999986525 | 21.5127976482   |
| 0.2536252358 | 0.9999986525 | 0               |
| 0.1389901845 | 0.9999986525 | 22.5676394515   |
| 0.9088867613 | 0.9999986525 | 45.6604480343   |
| 0.337283462  | 0.9999986525 | 0               |
| 0.4908686366 | 0.9999986525 | 1.0455096155    |
| 0.7997557249 | 0.9999986525 | 61.2453632311   |
| 0.2531748917 | 0.9999986525 | 0               |
| 0.8339947581 | 0.9999986525 | 2.0690244545    |
| 0.529512383  | 0.9999986525 | 644.0721734916  |
| 0.010418569  | 0.9999986525 | 93.6260751071   |
| 0.0324984533 | 0.9999986525 | 12.1454260913   |
| 0.0280465935 | 0.9999986525 | 10.1257560156   |
| 0.240755632  | 0.9999986525 | 4.9599848071    |
| 0.6982143791 | 0.9999986525 | 0               |
| 0.3373185288 | 0.9999986525 | 0               |
| 0.3814364171 | 0.9999986525 | 0               |
| 0.6280838559 | 0.9999986525 | 2.5808418866    |
| 0.8311326743 | 0.9999986525 | 0               |
| 0.9464630949 | 0.9999986525 | 116.8950067839  |
| 0.2474817552 | 0.9999986525 | 4.6697049478    |
| 0.6723573749 | 0.9999986525 | 68.0453276124   |
| 0.4432228427 | 0.9999986525 | 6.0015816166    |
| 0.1136728009 | 0.9999986525 | 0               |
| 0.2905394184 | 0.9999986525 | 2.6627971275    |
| 0.997877321  | 0.9999986525 | 0               |
| 0.3087531492 | 0.9999986525 | 0               |
| 0.9294889776 | 0.9999986525 | 0               |
| 0.8480841491 | 0.9999986525 | 0               |
| 0.2860618657 | 0.9999986525 | 4.7362495046    |
| 0.0134620718 | 0.9999986525 | 101.1760885561  |
| 0.4883632727 | 0.9999986525 | 0               |
| 0.9298805678 | 0.9999986525 | 0               |
| 0.3537907378 | 0.9999986525 | 0               |
| 0.2761654111 | 0.9999986525 | 7.7701807012    |
| 0.7092379498 | 0.9999986525 | 32.6515723192   |
| 0.2543113544 | 0.9999986525 | 1.4134596073    |

gene\_expression\_table

|              |              |                 |
|--------------|--------------|-----------------|
| 0.0196743534 | 0.9999986525 | 0               |
| 0.0264719308 | 0.9999986525 | 51.5832883472   |
| 0.8139372326 | 0.9999986525 | 73.9690731461   |
| 0.8825561334 | 0.9999986525 | 173.5224314484  |
| 0.9979189854 | 0.9999986525 | 1.5296854031    |
| 0.732574532  | 0.9999986525 | 70.0217676186   |
| 0.4729816619 | 0.9999986525 | 0               |
| 0.2606406267 | 0.9999986525 | 0               |
| 0.9293321949 | 0.9999986525 | 0               |
| 0.8615802846 | 0.9999986525 | 1.0317569412    |
| 0.6312664098 | 0.9999986525 | 0               |
| 0.398713836  | 0.9999986525 | 107.3938689645  |
| 0            | 0            | 0               |
| 0.047793568  | 0.9999986525 | 0               |
| 0.9999819331 | 0.9999986525 | 2.3826544359    |
| 0.7191513778 | 0.9999986525 | 0               |
| 0.8640725763 | 0.9999986525 | 5.9357320888    |
| 0.3604807154 | 0.9999986525 | 4324.6952567807 |
| 0.0299422301 | 0.9999986525 | 0               |
| 0.0396011972 | 0.9999986525 | 17.6773128059   |
| 0.2047607229 | 0.9999986525 | 0               |
| 0.8965924211 | 0.9999986525 | 26.6871744448   |
| 0.9207176108 | 0.9999986525 | 4.4997800312    |
| 0.7362415949 | 0.9999986525 | 0               |
| 0.9594155064 | 0.9999986525 | 1.6698601142    |
| 0.5007965372 | 0.9999986525 | 7.7405713361    |
| 0.1679998655 | 0.9999986525 | 11.6429133494   |
| 0.2671229543 | 0.9999986525 | 2.3452006317    |
| 0.2687101272 | 0.9999986525 | 13.1320739047   |
| 0.5438767442 | 0.9999986525 | 0.5939820978    |
| 0.9739564838 | 0.9999986525 | 0.2048837871    |
| 0.7442505581 | 0.9999986525 | 21.7969121858   |
| 0.931783104  | 0.9999986525 | 4.6118442713    |
| 0.4484988566 | 0.9999986525 | 736.9383938555  |
| 0.7274762908 | 0.9999986525 | 14.2981842914   |
| 0.5927120277 | 0.9999986525 | 0.4368469141    |
| 0.1672591868 | 0.9999986525 | 16.5221336868   |
| 0.0360753344 | 0.9999986525 | 1123.2317887998 |
| 0.1755370298 | 0.9999986525 | 0               |
| 0.0938237336 | 0.9999986525 | 0               |
| 0.2809380008 | 0.9999986525 | 4.0314942286    |
| 0.5064606205 | 0.9999986525 | 1.2394578385    |
| 0.1777594564 | 0.9999986525 | 0.7310390785    |
| 0.6312664098 | 0.9999986525 | 0               |
| 0.6722727635 | 0.9999986525 | 0               |
| 0.0214235405 | 0.9999986525 | 0               |
| 0.0705963531 | 0.9999986525 | 63.9238903732   |
| 0.2542097053 | 0.9999986525 | 0.8292601153    |
| 0.6312664098 | 0.9999986525 | 0               |

gene\_expression\_table

|              |              |                 |
|--------------|--------------|-----------------|
| 0.3320073089 | 0.9999986525 | 6.2290847813    |
| 0.4163081298 | 0.9999986525 | 5.709242452     |
| 0.4514895792 | 0.9999986525 | 0.2312657069    |
| 0.9681706947 | 0.9999986525 | 2.5258940278    |
| 0.6312664098 | 0.9999986525 | 0               |
| 0.6312664098 | 0.9999986525 | 0               |
| 0.6312664098 | 0.9999986525 | 0               |
| 0.1750049713 | 0.9999986525 | 26.7358095709   |
| 0.7038895986 | 0.9999986525 | 66.9263058163   |
| 0.3882177062 | 0.9999986525 | 1222.9914031687 |
| 0.828559309  | 0.9999986525 | 1.7398037711    |
| 0.261929224  | 0.9999986525 | 16.2408962704   |
| 0.577513889  | 0.9999986525 | 4.1325444622    |
| 0.9330530803 | 0.9999986525 | 12.9255795953   |
| 0.6397683361 | 0.9999986525 | 1.0946797294    |
| 0.4885800668 | 0.9999986525 | 1.1730430719    |
| 0.7567673571 | 0.9999986525 | 12.3066336307   |
| 0.3360455431 | 0.9999986525 | 0               |
| 0.6312664098 | 0.9999986525 | 0               |
| 0.3522861506 | 0.9999986525 | 1.2049993891    |
| 0.2269263712 | 0.9999986525 | 5.8977016445    |
| 0.3383027691 | 0.9999986525 | 309.3222976378  |
| 0.4156259374 | 0.9999986525 | 2.2214990421    |
| 0.9851453928 | 0.9999986525 | 2.264456469     |
| 0.7549616229 | 0.9999986525 | 0.8916901894    |
| 0.6925071328 | 0.9999986525 | 5.5744205284    |
| 0.6312664098 | 0.9999986525 | 0               |
| 0.4034800762 | 0.9999986525 | 0               |
| 0.4391502279 | 0.9999986525 | 0               |
| 0.2997449283 | 0.9999986525 | 6.0039695591    |
| 0.8510144488 | 0.9999986525 | 0.3401196688    |
| 0.8169193815 | 0.9999986525 | 28.9045773665   |
| 0.9752514699 | 0.9999986525 | 0.4335868893    |
| 0.4055678273 | 0.9999986525 | 0               |
| 0.9012939942 | 0.9999986525 | 0               |
| 0.3605667237 | 0.9999986525 | 0               |
| 0.4966108096 | 0.9999986525 | 0               |
| 0.1166400808 | 0.9999986525 | 25.6336765376   |
| 0.4729816619 | 0.9999986525 | 0               |
| 0.5092727218 | 0.9999986525 | 1.8090262454    |
| 0.3383637396 | 0.9999986525 | 0.7033790351    |
| 0.0432789932 | 0.9999986525 | 6.8656377285    |
| 0            | 0            | 0               |
| 0.6394886951 | 0.9999986525 | 0               |
| 0.0376223618 | 0.9999986525 | 0               |
| 0.7439575538 | 0.9999986525 | 7.5214995079    |
| 0.0431657154 | 0.9999986525 | 0.3843849695    |
| 0.2247690925 | 0.9999986525 | 0               |
| 0.9428993224 | 0.9999986525 | 3.5694727106    |



gene\_expression\_table

|              |              |               |
|--------------|--------------|---------------|
| 0.9482333445 | 0.9999986525 | 3.3173877155  |
| 0.0825525265 | 0.9999986525 | 44.2258173246 |
| 7.18E-07     | 0.0128849742 | 0.8227364078  |
| 0.0482581436 | 0.9999986525 | 0             |
| 0.851313452  | 0.9999986525 | 1.2079345469  |
| 0.4773886349 | 0.9999986525 | 0             |
| 0.3992189835 | 0.9999986525 | 3.4335776659  |
| 0.3985744286 | 0.9999986525 | 1.0525733065  |
| 0.1562763316 | 0.9999986525 | 3.1441534887  |
| 0.9276848993 | 0.9999986525 | 9.3991667959  |
| 0.7845617807 | 0.9999986525 | 15.5554660186 |
| 0.0774507331 | 0.9999986525 | 14.0503313459 |
| 0.9411146609 | 0.9999986525 | 0.2551125882  |
| 0.1377033916 | 0.9999986525 | 27.0955036772 |
| 0.2153279943 | 0.9999986525 | 4.6440705419  |
| 0.4427442574 | 0.9999986525 | 0.6577075744  |
| 0.9680242149 | 0.9999986525 | 12.422419905  |
| 0.5451402219 | 0.9999986525 | 0             |
| 0.2239246346 | 0.9999986525 | 0             |
| 0.7056713446 | 0.9999986525 | 4.2717610892  |
| 0.0854426917 | 0.9999986525 | 1.0996942953  |
| 0.4706723618 | 0.9999986525 | 21.5466504012 |
| 0.3253360723 | 0.9999986525 | 0.3124529269  |
| 0.3402688017 | 0.9999986525 | 1.9894495885  |
| 0.5038074938 | 0.9999986525 | 0             |
| 0.9066570314 | 0.9999986525 | 11.3487668094 |
| 0.7135806036 | 0.9999986525 | 1.1645933059  |
| 0.9283853037 | 0.9999986525 | 0.300033053   |
| 0.1452479547 | 0.9999986525 | 10.7048910743 |
| 0.8209318637 | 0.9999986525 | 0             |
| 0.2413556786 | 0.9999986525 | 79.5390334734 |
| 0.0872832363 | 0.9999986525 | 1.0571099577  |
| 0.8217386525 | 0.9999986525 | 0             |
| 0.9774687383 | 0.9999986525 | 21.2131196206 |
| 0.2573595221 | 0.9999986525 | 1.0291098641  |
| 0.1153636183 | 0.9999986525 | 36.2139847535 |
| 0.5793763703 | 0.9999986525 | 0             |
| 0.422055989  | 0.9999986525 | 0             |
| 0.4072416013 | 0.9999986525 | 29.5214746933 |
| 0.1102531784 | 0.9999986525 | 4.3852025872  |
| 0.5474280854 | 0.9999986525 | 0             |
| 0.7014213864 | 0.9999986525 | 0             |
| 0.40323737   | 0.9999986525 | 0.549812803   |
| 0.8659704143 | 0.9999986525 | 0             |
| 0.0441543765 | 0.9999986525 | 8.8669747284  |
| 0.3363342885 | 0.9999986525 | 17.2933589477 |
| 0.8965189403 | 0.9999986525 | 120.239318428 |
| 0.7055462792 | 0.9999986525 | 0             |
| 0.0478554143 | 0.9999986525 | 4.4952606416  |

gene\_expression\_table

|              |              |                |
|--------------|--------------|----------------|
| 0.0835041278 | 0.9999986525 | 26.8647797345  |
| 0.2909277404 | 0.9999986525 | 30.765389258   |
| 0.643078944  | 0.9999986525 | 0              |
| 0.3568610757 | 0.9999986525 | 1.0277580779   |
| 0.982709041  | 0.9999986525 | 0              |
| 0.996442141  | 0.9999986525 | 0              |
| 0.2592720735 | 0.9999986525 | 55.9893120679  |
| 0.9898093852 | 0.9999986525 | 17.7267570686  |
| 0.1059130561 | 0.9999986525 | 15.2282995256  |
| 0.8538186963 | 0.9999986525 | 0              |
| 0.6454111177 | 0.9999986525 | 0              |
| 0.5606167934 | 0.9999986525 | 2.6121365517   |
| 0.7473063055 | 0.9999986525 | 0              |
| 0.6781389444 | 0.9999986525 | 0              |
| 0.0832735583 | 0.9999986525 | 5.6370923499   |
| 0.6030296836 | 0.9999986525 | 68.5449944534  |
| 0.3499464436 | 0.9999986525 | 0              |
| 0.124533831  | 0.9999986525 | 7.4211842981   |
| 0.5720654191 | 0.9999986525 | 111.7824464451 |
| 0.0569915518 | 0.9999986525 | 0              |
| 0.1739674207 | 0.9999986525 | 437.4217209957 |
| 0.2507090536 | 0.9999986525 | 0              |
| 0.3048726354 | 0.9999986525 | 0              |
| 0.4812644098 | 0.9999986525 | 61.9784676416  |
| 0.3163050476 | 0.9999986525 | 0              |
| 0.5153673924 | 0.9999986525 | 4.1447874768   |
| 0.2114802796 | 0.9999986525 | 1.4990751959   |
| 0.8181216886 | 0.9999986525 | 0.277548746    |
| 0.4072379415 | 0.9999986525 | 4.171056565    |
| 0.1120774242 | 0.9999986525 | 672.6527541206 |
| 0.4069466367 | 0.9999986525 | 0              |
| 0.3193646022 | 0.9999986525 | 0              |
| 0.1107555214 | 0.9999986525 | 104.9774881116 |
| 0.8865667032 | 0.9999986525 | 6.212305855    |
| 0.7224891802 | 0.9999986525 | 33.6137463253  |
| 0.9928694661 | 0.9999986525 | 321.8958881882 |
| 0.8956656796 | 0.9999986525 | 15.8353076956  |
| 0.559264052  | 0.9999986525 | 25.6253848745  |
| 0.0967880445 | 0.9999986525 | 28.5035538521  |
| 0.0359256378 | 0.9999986525 | 18.3913818548  |
| 0.5067351    | 0.9999986525 | 61.2582791982  |
| 0.5340848548 | 0.9999986525 | 641.5573580636 |
| 0.775032972  | 0.9999986525 | 0              |
| 0.7680471082 | 0.9999986525 | 0              |
| 0.9293892295 | 0.9999986525 | 0              |
| 0.9183525292 | 0.9999986525 | 14.3937949964  |
| 0.7168788401 | 0.9999986525 | 19.9124040724  |
| 0            | 0            | 0              |
| 0.6316593856 | 0.9999986525 | 90.2141111723  |

gene\_expression\_table

|              |              |                 |
|--------------|--------------|-----------------|
| 0.7169990815 | 0.9999986525 | 1.4213337162    |
| 0.6394770691 | 0.9999986525 | 0               |
| 0.6582500514 | 0.9999986525 | 1.2650949344    |
| 0.9178125406 | 0.9999986525 | 27.7753011554   |
| 0.7135284321 | 0.9999986525 | 16.6264499375   |
| 0.9117106253 | 0.9999986525 | 122.6156818255  |
| 0.4036233067 | 0.9999986525 | 0               |
| 0            | 0            | 0               |
| 0.3243286149 | 0.9999986525 | 10.935313319    |
| 0.8625148484 | 0.9999986525 | 5.1742841409    |
| 0.314524413  | 0.9999986525 | 0               |
| 0.4729816619 | 0.9999986525 | 0               |
| 0.810300763  | 0.9999986525 | 0               |
| 0.9236461713 | 0.9999986525 | 12.0924827078   |
| 0            | 0            | 0               |
| 0.5816867306 | 0.9999986525 | 17.3482705222   |
| 0.1579325048 | 0.9999986525 | 0               |
| 0            | 0            | 0               |
| 0.8988865283 | 0.9999986525 | 36.2122483631   |
| 0.0718684693 | 0.9999986525 | 105.1298529387  |
| 0.4069257526 | 0.9999986525 | 0               |
| 0.2824437436 | 0.9999986525 | 0               |
| 0.6415273325 | 0.9999986525 | 1.0836513989    |
| 0.3145588914 | 0.9999986525 | 0               |
| 0.7226672687 | 0.9999986525 | 15.2401572361   |
| 0.8282401329 | 0.9999986525 | 0               |
| 0.0330636821 | 0.9999986525 | 82.8981124798   |
| 0.1121419418 | 0.9999986525 | 2.6087388603    |
| 0.5562870411 | 0.9999986525 | 15.5885236795   |
| 0.7328675248 | 0.9999986525 | 10.9255105971   |
| 0.0888114808 | 0.9999986525 | 7.3587736138    |
| 0.7151758457 | 0.9999986525 | 15.4511371662   |
| 0.6451004011 | 0.9999986525 | 12.6933649525   |
| 0.4216098411 | 0.9999986525 | 0               |
| 0.4468201889 | 0.9999986525 | 0.7904027032    |
| 0.0209933224 | 0.9999986525 | 4.4131734911    |
| 0.6338105617 | 0.9999986525 | 227.3848373693  |
| 0.9691311484 | 0.9999986525 | 550.1449815241  |
| 0.709943807  | 0.9999986525 | 24.2362958648   |
| 0.2542349193 | 0.9999986525 | 6.1949387973    |
| 0.8774949413 | 0.9999986525 | 0               |
| 0.0821100029 | 0.9999986525 | 0               |
| 0.7599392257 | 0.9999986525 | 0               |
| 0.4655834689 | 0.9999986525 | 6664.3155107844 |
| 0.4598623752 | 0.9999986525 | 16.7652587856   |
| 0.6397598648 | 0.9999986525 | 0               |
| 0.4765447187 | 0.9999986525 | 4.9437347399    |
| 0.1347466885 | 0.9999986525 | 6.0588333549    |
| 0.9666807441 | 0.9999986525 | 899.3195694639  |

gene\_expression\_table

|              |              |                 |
|--------------|--------------|-----------------|
| 0.3762337051 | 0.9999986525 | 9.5487105815    |
| 0.7354151858 | 0.9999986525 | 42.7989612855   |
| 0.2950426666 | 0.9999986525 | 9.7776392162    |
| 0.318853545  | 0.9999986525 | 0               |
| 0.5450949837 | 0.9999986525 | 46.058649616    |
| 0.6515261512 | 0.9999986525 | 156.7464811977  |
| 0.0115307175 | 0.9999986525 | 49.0911710856   |
| 0.4105416142 | 0.9999986525 | 132.0347955658  |
| 0.3933041973 | 0.9999986525 | 0               |
| 0.2286483525 | 0.9999986525 | 24.0063264665   |
| 0.5307062792 | 0.9999986525 | 155.5638239361  |
| 0.4700590538 | 0.9999986525 | 221.7378246143  |
| 0            | 0            | 0               |
| 0.8846585901 | 0.9999986525 | 3.027279504     |
| 0.4227164131 | 0.9999986525 | 21.4676180041   |
| 0.6901818805 | 0.9999986525 | 9.9988485851    |
| 0.4367820705 | 0.9999986525 | 16.3916568052   |
| 0.2309271077 | 0.9999986525 | 204.0329079633  |
| 0.6013549332 | 0.9999986525 | 0               |
| 0.1444691015 | 0.9999986525 | 188.6211365225  |
| 0.4967403528 | 0.9999986525 | 31.0670107214   |
| 0.0574559075 | 0.9999986525 | 11.8532022652   |
| 0.0396133356 | 0.9999986525 | 2.0931324598    |
| 0.0819898737 | 0.9999986525 | 29.6540809805   |
| 0.1297461079 | 0.9999986525 | 12.8532290646   |
| 0.6312664098 | 0.9999986525 | 0               |
| 0.9291482782 | 0.9999986525 | 24.6264656469   |
| 0.4012251996 | 0.9999986525 | 0               |
| 0.6534723535 | 0.9999986525 | 12.1302298977   |
| 0.3297213672 | 0.9999986525 | 11.4262011765   |
| 0.220189979  | 0.9999986525 | 30.1793818436   |
| 0.7735298062 | 0.9999986525 | 14.7267809624   |
| 0.8309525369 | 0.9999986525 | 1.4651607847    |
| 0.1748268428 | 0.9999986525 | 9.3908104954    |
| 0.3363333849 | 0.9999986525 | 0               |
| 0.3169523475 | 0.9999986525 | 1826.8108008068 |
| 0.8774329004 | 0.9999986525 | 33.6180256055   |
| 0.7429988974 | 0.9999986525 | 1.5709170854    |
| 0.7074975526 | 0.9999986525 | 0.6346758746    |
| 0.5011848107 | 0.9999986525 | 52.0550109612   |
| 0.1752101831 | 0.9999986525 | 119.5648000712  |
| 0.008534     | 0.9999986525 | 43.0080767315   |
| 0.4108684205 | 0.9999986525 | 0               |
| 0.9928103513 | 0.9999986525 | 13.2001795117   |
| 0.9392999517 | 0.9999986525 | 0               |
| 0.8796323721 | 0.9999986525 | 49.5905335458   |
| 0.4444661414 | 0.9999986525 | 879.1598243113  |
| 0.0367805856 | 0.9999986525 | 41.2378614149   |
| 0.0876163429 | 0.9999986525 | 14.2001527798   |

gene\_expression\_table

|              |              |                 |
|--------------|--------------|-----------------|
| 0.9449840656 | 0.9999986525 | 2.7558922055    |
| 0.3418332311 | 0.9999986525 | 0               |
| 0.0652651138 | 0.9999986525 | 0               |
| 0.4708766933 | 0.9999986525 | 0               |
| 0.3191324279 | 0.9999986525 | 2287.6085107441 |
| 0.6068879891 | 0.9999986525 | 42.4094632438   |
| 0.7484355433 | 0.9999986525 | 9.1421011297    |
| 0.3666961366 | 0.9999986525 | 12.1290480501   |
| 0.9295162806 | 0.9999986525 | 19.9340789164   |
| 0.8146522785 | 0.9999986525 | 0               |
| 0.7552395268 | 0.9999986525 | 117.0391539641  |
| 0.4649752088 | 0.9999986525 | 9.7749247134    |
| 0.6438507829 | 0.9999986525 | 81.4505871631   |
| 0.3839069621 | 0.9999986525 | 107.6357321098  |
| 0.0467746481 | 0.9999986525 | 18.5972686214   |
| 0.1995608576 | 0.9999986525 | 0               |
| 0.3234206977 | 0.9999986525 | 0               |
| 0.6567434416 | 0.9999986525 | 5.8030895755    |
| 0.6456711678 | 0.9999986525 | 85.0465671921   |
| 0.3013559081 | 0.9999986525 | 12.0350744154   |
| 0.6843995529 | 0.9999986525 | 148.0135287871  |
| 0.4335691843 | 0.9999986525 | 0               |
| 0.3535469313 | 0.9999986525 | 13.6971475841   |
| 0.140739134  | 0.9999986525 | 0               |
| 0.746564093  | 0.9999986525 | 0               |
| 0.3944311618 | 0.9999986525 | 13.4164659536   |
| 0.3397761542 | 0.9999986525 | 0               |
| 0.611831792  | 0.9999986525 | 0               |
| 0.2201266291 | 0.9999986525 | 8556.2574000693 |
| 0.2850989984 | 0.9999986525 | 20.6062888125   |
| 0.2718305203 | 0.9999986525 | 40.1118366276   |
| 0.748812166  | 0.9999986525 | 18.8670141754   |
| 0.5151849845 | 0.9999986525 | 1.8044319323    |
| 0.4994513046 | 0.9999986525 | 5.9451031368    |
| 0.0525810883 | 0.9999986525 | 6.8580597619    |
| 0.1944800013 | 0.9999986525 | 16.4811727965   |
| 0.6549247327 | 0.9999986525 | 0               |
| 0.3966374956 | 0.9999986525 | 0               |
| 0.0762825625 | 0.9999986525 | 82.2890846381   |
| 0.8640990927 | 0.9999986525 | 8.3811661075    |
| 0.8528752252 | 0.9999986525 | 27.0900144782   |
| 0.3025448048 | 0.9999986525 | 0               |
| 0.0393797108 | 0.9999986525 | 36.9328099485   |
| 0.6067850302 | 0.9999986525 | 57.0961278122   |
| 0.9928160903 | 0.9999986525 | 6.3566128936    |
| 0.4862604587 | 0.9999986525 | 12.8072551019   |
| 0.7523570112 | 0.9999986525 | 0               |
| 0.9613123148 | 0.9999986525 | 0               |
| 0.903621637  | 0.9999986525 | 67.5873966851   |

gene\_expression\_table

|              |              |                 |
|--------------|--------------|-----------------|
| 0.306701153  | 0.9999986525 | 0               |
| 0.9485851685 | 0.9999986525 | 274.9040446562  |
| 0.7905031774 | 0.9999986525 | 78.8973980076   |
| 0.0796329051 | 0.9999986525 | 0               |
| 0.5168917699 | 0.9999986525 | 0               |
| 0.7396799076 | 0.9999986525 | 1843.9148287925 |
| 0.3921079833 | 0.9999986525 | 8.5183739075    |
| 0.8270575602 | 0.9999986525 | 0               |
| 0.5605078243 | 0.9999986525 | 0               |
| 0.5944777831 | 0.9999986525 | 176.0463940877  |
| 0.6941162281 | 0.9999986525 | 42.8684401188   |
| 0.654195449  | 0.9999986525 | 6.294114912     |
| 0.4826305714 | 0.9999986525 | 0               |
| 0.5927862383 | 0.9999986525 | 22.7548118166   |
| 0            | 0            | 0               |
| 0.2125612602 | 0.9999986525 | 0               |
| 0.4427058004 | 0.9999986525 | 0               |
| 0.0989893242 | 0.9999986525 | 280.5181557168  |
| 0.8066294465 | 0.9999986525 | 0               |
| 0.5833787455 | 0.9999986525 | 43.1385563109   |
| 0.9007475664 | 0.9999986525 | 0               |
| 0.828244314  | 0.9999986525 | 0               |
| 0.7825673927 | 0.9999986525 | 88.3471365445   |
| 0.1894777754 | 0.9999986525 | 0               |
| 0.008041     | 0.9999986525 | 92.0905287294   |
| 0            | 0            | 0               |
| 0.5726593378 | 0.9999986525 | 10.2095337766   |
| 0.2994890162 | 0.9999986525 | 47.5250581803   |
| 0.9297278851 | 0.9999986525 | 0               |
| 0.1717173937 | 0.9999986525 | 0               |
| 0.1152547587 | 0.9999986525 | 0               |
| 0.4047812161 | 0.9999986525 | 167.3975221119  |
| 0.87702599   | 0.9999986525 | 9.592937649     |
| 0.4286314582 | 0.9999986525 | 7.125701518     |
| 0.0008115    | 0.9999986525 | 0               |
| 0.1127922703 | 0.9999986525 | 4.2554119915    |
| 0.6312664098 | 0.9999986525 | 0               |
| 0.8961268288 | 0.9999986525 | 12.3772951081   |
| 0.659399138  | 0.9999986525 | 3.9552099323    |
| 0.9089917025 | 0.9999986525 | 8.8341225455    |
| 0.0395649061 | 0.9999986525 | 33.7083693204   |
| 0.7634181689 | 0.9999986525 | 12.255705034    |
| 0.7408803896 | 0.9999986525 | 0               |
| 0.1778967854 | 0.9999986525 | 0.5346566468    |
| 0.5223619138 | 0.9999986525 | 0               |
| 0.4399761522 | 0.9999986525 | 0               |
| 0.3691170625 | 0.9999986525 | 62.3356957525   |
| 0.0268000923 | 0.9999986525 | 0               |
| 0.4357967602 | 0.9999986525 | 0               |

gene\_expression\_table

|              |              |                 |
|--------------|--------------|-----------------|
| 0.7236441466 | 0.9999986525 | 4.1833408977    |
| 0.0332021495 | 0.9999986525 | 136.4632918146  |
| 0.1557119373 | 0.9999986525 | 16.0114955969   |
| 0.6336440247 | 0.9999986525 | 5.7657115968    |
| 0.6191494252 | 0.9999986525 | 55.9469472736   |
| 0.9852605379 | 0.9999986525 | 0               |
| 0.5549495116 | 0.9999986525 | 0               |
| 0.7453732261 | 0.9999986525 | 609.6640224782  |
| 0.6848717164 | 0.9999986525 | 16.5742721564   |
| 0.6397513833 | 0.9999986525 | 0               |
| 0.1786635783 | 0.9999986525 | 228.1378757076  |
| 0.4729816619 | 0.9999986525 | 0               |
| 0.8509804463 | 0.9999986525 | 0               |
| 0.6312664098 | 0.9999986525 | 0               |
| 0.2800101128 | 0.9999986525 | 10.7127623177   |
| 0.0207283939 | 0.9999986525 | 19.6091280543   |
| 0.5029027589 | 0.9999986525 | 0               |
| 0.5285860222 | 0.9999986525 | 566.1161399872  |
| 0.1831401648 | 0.9999986525 | 9668.4518492101 |
| 0.0915904736 | 0.9999986525 | 46.4094184765   |
| 0.9507836637 | 0.9999986525 | 48.5868612938   |
| 0.4729816619 | 0.9999986525 | 0               |
| 0.9256760125 | 0.9999986525 | 24.3270005649   |
| 0.5825645088 | 0.9999986525 | 5.0939350141    |
| 0.4902238578 | 0.9999986525 | 78.8136733604   |
| 0.1314141731 | 0.9999986525 | 146.6258563975  |
| 0.2656183046 | 0.9999986525 | 3.8531742537    |
| 0.8960449201 | 0.9999986525 | 1.7890287669    |
| 0.9161085666 | 0.9999986525 | 34.6580507719   |
| 0.098464939  | 0.9999986525 | 1.7556651229    |
| 0.1492610207 | 0.9999986525 | 8.8807090399    |
| 0.733694978  | 0.9999986525 | 7.8814980191    |
| 0.7348209939 | 0.9999986525 | 2.3529847063    |
| 0.5799786123 | 0.9999986525 | 15.2928675912   |
| 0.0884315001 | 0.9999986525 | 16.8223979061   |
| 0.384461507  | 0.9999986525 | 1.4370743171    |
| 0.4562692641 | 0.9999986525 | 5.0625625561    |
| 0.7033049474 | 0.9999986525 | 0               |
| 0.2624288915 | 0.9999986525 | 0               |
| 0.7687338781 | 0.9999986525 | 22.5571974201   |
| 0            | 0            | 0               |
| 0.1014564107 | 0.9999986525 | 62.2805639461   |
| 0.3725524264 | 0.9999986525 | 2.3201651024    |
| 0.8267938026 | 0.9999986525 | 0               |
| 0.615079039  | 0.9999986525 | 0               |
| 0.6400418947 | 0.9999986525 | 45.2012708591   |
| 0.8768785032 | 0.9999986525 | 1.0919185872    |
| 0            | 0            | 0               |
| 0.1060051474 | 0.9999986525 | 0               |

gene\_expression\_table

|              |              |                |
|--------------|--------------|----------------|
| 0.2325179124 | 0.9999986525 | 0              |
| 0.2110856904 | 0.9999986525 | 0              |
| 0.4772846246 | 0.9999986525 | 2.299690185    |
| 0.8343081845 | 0.9999986525 | 21.2274590942  |
| 0.009256     | 0.9999986525 | 10.8572875706  |
| 0.1267904334 | 0.9999986525 | 0              |
| 0.9750654622 | 0.9999986525 | 147.2829084395 |
| 0.2268879662 | 0.9999986525 | 8.0755226646   |
| 0            | 0            | 0              |
| 0.2697818395 | 0.9999986525 | 0              |
| 0.0154839361 | 0.9999986525 | 44.912732187   |
| 0.6397428913 | 0.9999986525 | 0              |
| 0.5062675345 | 0.9999986525 | 0.7424984989   |
| 0.4418006913 | 0.9999986525 | 0              |
| 0.1131143911 | 0.9999986525 | 18.0437028447  |
| 0.1054930237 | 0.9999986525 | 0              |
| 0.0565008459 | 0.9999986525 | 41.4085603956  |
| 0.8736497935 | 0.9999986525 | 0.3459170164   |
| 0.5996931988 | 0.9999986525 | 5.028460271    |
| 0.9722661054 | 0.9999986525 | 4.6432539542   |
| 0.8532947038 | 0.9999986525 | 0              |
| 0.7130406163 | 0.9999986525 | 15.0075069551  |
| 0.9583130402 | 0.9999986525 | 0.2671255069   |
| 0            | 0            | 0              |
| 0.7754992252 | 0.9999986525 | 7.4108328993   |
| 0.7804761177 | 0.9999986525 | 2.0646566938   |
| 0.6224041824 | 0.9999986525 | 63.5929177921  |
| 0.2928261762 | 0.9999986525 | 2.0695919992   |
| 0.3888933674 | 0.9999986525 | 2.6447953441   |
| 0.0164974775 | 0.9999986525 | 12.9224169871  |
| 0.2122923483 | 0.9999986525 | 0              |
| 0.8158996952 | 0.9999986525 | 0.3329314722   |
| 0.5052097623 | 0.9999986525 | 3.7808395996   |
| 0.2179342819 | 0.9999986525 | 1.5498406029   |
| 0.2505223741 | 0.9999986525 | 4.0975962624   |
| 0.7364191578 | 0.9999986525 | 0              |
| 0.8400008261 | 0.9999986525 | 0              |
| 0.9676793616 | 0.9999986525 | 4.125442761    |
| 0.3373677012 | 0.9999986525 | 0              |
| 0.4796136394 | 0.9999986525 | 1.6935136993   |
| 0.9912113643 | 0.9999986525 | 1.951048901    |
| 0.8594456773 | 0.9999986525 | 37.2366050949  |
| 0.8689389581 | 0.9999986525 | 0              |
| 0.8622096676 | 0.9999986525 | 0              |
| 0.0538179994 | 0.9999986525 | 12.6693512265  |
| 0.0871911808 | 0.9999986525 | 328.7557596062 |
| 0.7487157597 | 0.9999986525 | 4.344321644    |
| 0.5031578117 | 0.9999986525 | 0.5786114599   |
| 0.5706266305 | 0.9999986525 | 0              |



gene\_expression\_table

|              |              |                |
|--------------|--------------|----------------|
| 0.3540606729 | 0.9999986525 | 3.2199681884   |
| 0.4557378877 | 0.9999986525 | 0.6413600807   |
| 0.00179      | 0.9999986525 | 13.6250030897  |
| 0.4828712588 | 0.9999986525 | 0              |
| 0.4741801185 | 0.9999986525 | 0.9782710324   |
| 0            | 0            | 0              |
| 0.3887442319 | 0.9999986525 | 3.333791076    |
| 0.3030555212 | 0.9999986525 | 0.6365998882   |
| 0.6710479948 | 0.9999986525 | 0              |
| 0.8373785342 | 0.9999986525 | 0.6067078487   |
| 0.2277922772 | 0.9999986525 | 2.7787841144   |
| 0.87146622   | 0.9999986525 | 0              |
| 0.6909489532 | 0.9999986525 | 0              |
| 0.4499249152 | 0.9999986525 | 56.0916198377  |
| 0.2434018497 | 0.9999986525 | 1.2442965505   |
| 0.9370604257 | 0.9999986525 | 0.6587905177   |
| 0.7307734814 | 0.9999986525 | 0.8776064644   |
| 0.3519302776 | 0.9999986525 | 0              |
| 0.2794034761 | 0.9999986525 | 115.6541627124 |
| 0.039666138  | 0.9999986525 | 13.6427769752  |
| 0.6064138103 | 0.9999986525 | 2.9987462086   |
| 0.1751021675 | 0.9999986525 | 3.5334914068   |
| 0.420503999  | 0.9999986525 | 0.5215339547   |
| 0.1179028283 | 0.9999986525 | 0.3802188434   |
| 0.8962234779 | 0.9999986525 | 11.3937210168  |
| 0.1587538371 | 0.9999986525 | 0              |
| 0.1812064955 | 0.9999986525 | 0              |
| 0.0247820658 | 0.9999986525 | 9.2010310499   |
| 0.3009398522 | 0.9999986525 | 0.846906211    |
| 0.0920577058 | 0.9999986525 | 1.9335133892   |
| 0.1672926947 | 0.9999986525 | 19.8872542587  |
| 0.0373104904 | 0.9999986525 | 0              |
| 0.4563032922 | 0.9999986525 | 48.7405969129  |
| 0.3914027877 | 0.9999986525 | 0              |
| 0.9191908125 | 0.9999986525 | 6.5600948902   |
| 0.6573647925 | 0.9999986525 | 10.295863387   |
| 0.1367585085 | 0.9999986525 | 4.8305781196   |
| 0.4248669417 | 0.9999986525 | 0              |
| 0.719842224  | 0.9999986525 | 0              |
| 0.6340797999 | 0.9999986525 | 5.4312955807   |
| 0.3738585644 | 0.9999986525 | 0.1814967412   |
| 0.9624345605 | 0.9999986525 | 0.1442940151   |
| 0.0308449225 | 0.9999986525 | 11.9499317192  |
| 0.4041547558 | 0.9999986525 | 0              |
| 0.7191650588 | 0.9999986525 | 0              |
| 0.6397343888 | 0.9999986525 | 0              |
| 0.0376876965 | 0.9999986525 | 0              |
| 0.00163      | 0.9999986525 | 4.6053294582   |
| 0.9298608883 | 0.9999986525 | 0              |

gene\_expression\_table

|              |              |                |
|--------------|--------------|----------------|
| 0.5283974524 | 0.9999986525 | 0              |
| 0.7344923564 | 0.9999986525 | 1.4618420877   |
| 0.381892207  | 0.9999986525 | 3.0736145159   |
| 0.0299007272 | 0.9999986525 | 28.2477722729  |
| 0.0118149047 | 0.9999986525 | 0              |
| 0.5934824329 | 0.9999986525 | 0              |
| 0.6312664098 | 0.9999986525 | 0              |
| 0.7476671617 | 0.9999986525 | 7.4557755706   |
| 0.5217513202 | 0.9999986525 | 1.1071868142   |
| 0.3230023674 | 0.9999986525 | 18.8890980781  |
| 0.3417432679 | 0.9999986525 | 0              |
| 0.9686337122 | 0.9999986525 | 96.0570602661  |
| 0.845195946  | 0.9999986525 | 0              |
| 0.7249614376 | 0.9999986525 | 0.3100572881   |
| 0.2300791797 | 0.9999986525 | 33.6363777258  |
| 0.2429791038 | 0.9999986525 | 72.8300412222  |
| 0.1871610756 | 0.9999986525 | 2.4655206679   |
| 0.5933128307 | 0.9999986525 | 1.5758527869   |
| 0.0833497921 | 0.9999986525 | 12.3080676361  |
| 0.5169694172 | 0.9999986525 | 6.2526837102   |
| 0.1369108948 | 0.9999986525 | 0              |
| 0.582267158  | 0.9999986525 | 0.1440433277   |
| 0.492397312  | 0.9999986525 | 2.8412910602   |
| 0.4046172726 | 0.9999986525 | 0              |
| 0.6397258757 | 0.9999986525 | 0              |
| 0.3161285155 | 0.9999986525 | 0              |
| 0.4069048608 | 0.9999986525 | 0              |
| 0.6397173519 | 0.9999986525 | 0              |
| 0.6312664098 | 0.9999986525 | 0              |
| 0.6770356521 | 0.9999986525 | 0              |
| 0.9070162259 | 0.9999986525 | 15.0949621784  |
| 0.1205631345 | 0.9999986525 | 13.0358754437  |
| 0.4729816619 | 0.9999986525 | 5.1545889348   |
| 0            | 0            | 0              |
| 0.2383982485 | 0.9999986525 | 4.0092551603   |
| 0.862386354  | 0.9999986525 | 0              |
| 0.176648756  | 0.9999986525 | 164.9245584775 |
| 0.3485880122 | 0.9999986525 | 0              |
| 0.6914758066 | 0.9999986525 | 22.8895918346  |
| 0.4444957623 | 0.9999986525 | 0.2851469401   |
| 0.2606725488 | 0.9999986525 | 4.1047618409   |
| 0.033438255  | 0.9999986525 | 10.4747953642  |
| 0.9771832206 | 0.9999986525 | 0              |
| 0.3172504865 | 0.9999986525 | 11.0274049749  |
| 0.4790173559 | 0.9999986525 | 0              |
| 0.0278144669 | 0.9999986525 | 4.9994242925   |
| 0.9644216034 | 0.9999986525 | 0.1533353799   |
| 0.4006739162 | 0.9999986525 | 2.4097238776   |
| 0.0592247297 | 0.9999986525 | 0              |

gene\_expression\_table

|              |              |                 |
|--------------|--------------|-----------------|
| 0.1383965071 | 0.9999986525 | 0               |
| 0.4729816619 | 0.9999986525 | 0               |
| 0.1429025485 | 0.9999986525 | 3.1980976874    |
| 0.6158071808 | 0.9999986525 | 33.7051058581   |
| 0.7345886063 | 0.9999986525 | 1.5681324909    |
| 0.8209934827 | 0.9999986525 | 0.3602119659    |
| 0.6009250611 | 0.9999986525 | 0               |
| 0.6516988212 | 0.9999986525 | 0               |
| 0.9054334987 | 0.9999986525 | 1.3399397896    |
| 0.9464847657 | 0.9999986525 | 0               |
| 0.0240042579 | 0.9999986525 | 2.1674717944    |
| 0.0630525166 | 0.9999986525 | 16.6233575738   |
| 0.8840245327 | 0.9999986525 | 0               |
| 0.9192905772 | 0.9999986525 | 0.848232403     |
| 0.8508373579 | 0.9999986525 | 9.8781517436    |
| 0.3741873828 | 0.9999986525 | 2.3633825154    |
| 0.9953153228 | 0.9999986525 | 9.7767342144    |
| 0.1351287953 | 0.9999986525 | 10.7915648194   |
| 0.6312664098 | 0.9999986525 | 0               |
| 0.6397088173 | 0.9999986525 | 0               |
| 0.7921520191 | 0.9999986525 | 0               |
| 0.3258727884 | 0.9999986525 | 0               |
| 0.1465659419 | 0.9999986525 | 16.7072228662   |
| 0.1663556394 | 0.9999986525 | 14.5266117795   |
| 0.5999051341 | 0.9999986525 | 1003.9664295146 |
| 0.0948729744 | 0.9999986525 | 5.8825928076    |
| 0.9136516474 | 0.9999986525 | 0               |
| 0            | 0            | 0               |
| 0.4750916133 | 0.9999986525 | 0               |
| 0.1728613791 | 0.9999986525 | 27.7639207393   |
| 0.6312664098 | 0.9999986525 | 0               |
| 0.7213586756 | 0.9999986525 | 0               |
| 0.7312878112 | 0.9999986525 | 0               |
| 0.2698349898 | 0.9999986525 | 0               |
| 0.4271235726 | 0.9999986525 | 13.0144447466   |
| 0.5690361551 | 0.9999986525 | 0.6796633236    |
| 0.582419006  | 0.9999986525 | 0               |
| 0.2885219122 | 0.9999986525 | 0.267833998     |
| 0.7351637336 | 0.9999986525 | 5.8018145915    |
| 0.0987059067 | 0.9999986525 | 5.2384366422    |
| 0.6401146293 | 0.9999986525 | 24.239911064    |
| 0.316016644  | 0.9999986525 | 0               |
| 0.3612776354 | 0.9999986525 | 4.25421227      |
| 0.8846928841 | 0.9999986525 | 21.4472764371   |
| 0.5575145363 | 0.9999986525 | 0.6212135356    |
| 0.4093332588 | 0.9999986525 | 63.1609828225   |
| 0.5380546335 | 0.9999986525 | 5.796402154     |
| 0.9453075485 | 0.9999986525 | 0               |
| 0.3322631865 | 0.9999986525 | 5.7709617439    |

| gene_expression_table |              |                 |
|-----------------------|--------------|-----------------|
| 0.6486397873          | 0.9999986525 | 3.9811486677    |
| 0.6724683854          | 0.9999986525 | 0               |
| 0.2170372155          | 0.9999986525 | 1.0898343646    |
| 0                     | 0            | 0               |
| 0.1701069243          | 0.9999986525 | 0               |
| 0.5973084006          | 0.9999986525 | 0               |
| 0.212202328           | 0.9999986525 | 0               |
| 0                     | 0            | 0               |
| 0.30755387            | 0.9999986525 | 0               |
| 0                     | 0            | 0               |
| 0.3219542066          | 0.9999986525 | 6.6632078709    |
| 0.7796738948          | 0.9999986525 | 886.5795470074  |
| 0.8104064769          | 0.9999986525 | 1.1691867267    |
| 0.3646096651          | 0.9999986525 | 0               |
| 0.0291229584          | 0.9999986525 | 0               |
| 0.3207670562          | 0.9999986525 | 13.7755973333   |
| 0.267638213           | 0.9999986525 | 0               |
| 0.9764555348          | 0.9999986525 | 41.2788951908   |
| 0.2845379744          | 0.9999986525 | 0               |
| 0.2221170101          | 0.9999986525 | 0               |
| 0                     | 0            | 0               |
| 0.4037655335          | 0.9999986525 | 0               |
| 0.5633070233          | 0.9999986525 | 0               |
| 0.1123801238          | 0.9999986525 | 440.7838395216  |
| 0.4295746912          | 0.9999986525 | 121.7378061306  |
| 0.9189894157          | 0.9999986525 | 24.1674427515   |
| 0.6084657736          | 0.9999986525 | 68.7365342097   |
| 0.5392991358          | 0.9999986525 | 3.7122315475    |
| 0.7780527733          | 0.9999986525 | 24.3410154286   |
| 0.4493323934          | 0.9999986525 | 198.7976846662  |
| 0.8889155174          | 0.9999986525 | 26.8000261636   |
| 0.3636933816          | 0.9999986525 | 14.0375436058   |
| 0.9315552984          | 0.9999986525 | 0               |
| 0.4794758207          | 0.9999986525 | 0               |
| 0.245843569           | 0.9999986525 | 1.5552717541    |
| 0.2472318303          | 0.9999986525 | 131.3312353763  |
| 0.793888256           | 0.9999986525 | 0               |
| 0.7472523737          | 0.9999986525 | 1.1655099578    |
| 0.2472819135          | 0.9999986525 | 19.5576060723   |
| 0                     | 0            | 0               |
| 0.4529506314          | 0.9999986525 | 0.3437041164    |
| 0.4413491472          | 0.9999986525 | 0               |
| 0.9813627838          | 0.9999986525 | 3.1997857485    |
| 0.4751799376          | 0.9999986525 | 4.3238298189    |
| 0                     | 0            | 0               |
| 0.5840287416          | 0.9999986525 | 0               |
| 0.1069629832          | 0.9999986525 | 1820.0488742605 |
| 0.0943301267          | 0.9999986525 | 1.3719275311    |
| 0.4729816619          | 0.9999986525 | 0               |

| gene_expression_table |              |                |
|-----------------------|--------------|----------------|
| 0.5935585772          | 0.9999986525 | 0              |
| 0.876275586           | 0.9999986525 | 0              |
| 0                     | 0            | 0              |
| 0.9243827695          | 0.9999986525 | 19.8131445927  |
| 0.4665197995          | 0.9999986525 | 1.3035645619   |
| 0.8290212545          | 0.9999986525 | 0              |
| 0.5018956527          | 0.9999986525 | 14.5212862871  |
| 0.52466826            | 0.9999986525 | 0              |
| 0.3340718016          | 0.9999986525 | 0              |
| 0.9398713556          | 0.9999986525 | 0              |
| 0.215172353           | 0.9999986525 | 3.2873097365   |
| 0.8579720362          | 0.9999986525 | 0              |
| 0.2697984162          | 0.9999986525 | 25.0576984285  |
| 0.7616480138          | 0.9999986525 | 9.1089890007   |
| 0.4088467286          | 0.9999986525 | 0              |
| 0.7768427368          | 0.9999986525 | 0              |
| 0.6262859845          | 0.9999986525 | 150.1752877057 |
| 0.556093855           | 0.9999986525 | 7.0500808578   |
| 0.7038199046          | 0.9999986525 | 3.0855258944   |
| 0.2926216373          | 0.9999986525 | 0              |
| 0                     | 0            | 0              |
| 0.8007381907          | 0.9999986525 | 0              |
| 0.7690577301          | 0.9999986525 | 10.2650958652  |
| 0.6264344709          | 0.9999986525 | 0              |
| 0.3152016616          | 0.9999986525 | 0              |
| 0.5952122875          | 0.9999986525 | 5.5020229426   |
| 0.8586876429          | 0.9999986525 | 0              |
| 0.275840106           | 0.9999986525 | 34.3641746701  |
| 0.3503110749          | 0.9999986525 | 34.8491707201  |
| 0.8706527906          | 0.9999986525 | 0              |
| 0.6102608634          | 0.9999986525 | 9.9522152403   |
| 0.690714721           | 0.9999986525 | 4.5723257119   |
| 0.0204604566          | 0.9999986525 | 3.2795273401   |
| 0.3558432951          | 0.9999986525 | 5.7762966694   |
| 0.9430329444          | 0.9999986525 | 0              |
| 0.1492380573          | 0.9999986525 | 0              |
| 0.7303714912          | 0.9999986525 | 0.6725553006   |
| 0                     | 0            | 0              |
| 0.5142429718          | 0.9999986525 | 0              |
| 0.1466029528          | 0.9999986525 | 16.5956253853  |
| 0.5836271028          | 0.9999986525 | 0              |
| 0.8183710873          | 0.9999986525 | 28.8750736392  |
| 0.2321204002          | 0.9999986525 | 0              |
| 0.7475944998          | 0.9999986525 | 9.5772813902   |
| 0.9470205782          | 0.9999986525 | 1.2751902799   |
| 0.5978978116          | 0.9999986525 | 0.7326007161   |
| 0.8098863403          | 0.9999986525 | 11.3882004111  |
| 0.1883170907          | 0.9999986525 | 206.1433186039 |
| 0.5911398144          | 0.9999986525 | 4.2844096882   |

gene\_expression\_table

|              |              |                 |
|--------------|--------------|-----------------|
| 0.6903339272 | 0.9999986525 | 0               |
| 0.6312664098 | 0.9999986525 | 0               |
| 0.6312664098 | 0.9999986525 | 0               |
| 0.7169370366 | 0.9999986525 | 3.3793492407    |
| 0.03249767   | 0.9999986525 | 1.9820208367    |
| 0.2120741048 | 0.9999986525 | 0               |
| 0.4328886483 | 0.9999986525 | 0.5310813731    |
| 0.5492751787 | 0.9999986525 | 2.9913295954    |
| 0.830215853  | 0.9999986525 | 9.9104141186    |
| 0.9422402251 | 0.9999986525 | 0.7307370822    |
| 0.3013763945 | 0.9999986525 | 7.492132954     |
| 0.1896727677 | 0.9999986525 | 0               |
| 0.8247133576 | 0.9999986525 | 11.8927133438   |
| 0.8095077651 | 0.9999986525 | 4.4466368197    |
| 0.4717975607 | 0.9999986525 | 0               |
| 0.1082658803 | 0.9999986525 | 0               |
| 0.4171227852 | 0.9999986525 | 60.462413539    |
| 0.9569153048 | 0.9999986525 | 3.8899549404    |
| 0.7370411023 | 0.9999986525 | 0               |
| 0.6098761915 | 0.9999986525 | 0               |
| 0.272467691  | 0.9999986525 | 48.8138910436   |
| 0.3114883438 | 0.9999986525 | 17.1376387528   |
| 0.2262731177 | 0.9999986525 | 3.15156452      |
| 0.8622161784 | 0.9999986525 | 0               |
| 0.7356462253 | 0.9999986525 | 62.3537966727   |
| 0.5492540032 | 0.9999986525 | 1.1329325831    |
| 0.9071819682 | 0.9999986525 | 0               |
| 0.5672972398 | 0.9999986525 | 6.6808662884    |
| 0.473103606  | 0.9999986525 | 0               |
| 0.8491437852 | 0.9999986525 | 2.0801480229    |
| 0.2881945108 | 0.9999986525 | 4.9674490431    |
| 0.4481298926 | 0.9999986525 | 2.2174882742    |
| 0.4604435391 | 0.9999986525 | 0               |
| 0.0774715926 | 0.9999986525 | 28.8398024483   |
| 0.5032116705 | 0.9999986525 | 0               |
| 0.9293676082 | 0.9999986525 | 0               |
| 0.8882639275 | 0.9999986525 | 10.9948825286   |
| 0.6516088794 | 0.9999986525 | 0               |
| 0.1095579147 | 0.9999986525 | 122.5380933325  |
| 0.310636844  | 0.9999986525 | 26.0745091219   |
| 0.9761805246 | 0.9999986525 | 15.4156211986   |
| 0.0122742128 | 0.9999986525 | 0               |
| 0.2173109243 | 0.9999986525 | 6.096492927     |
| 0.5790346578 | 0.9999986525 | 1599.0373165405 |
| 0.9323220117 | 0.9999986525 | 5.5836044114    |
| 0.4161601425 | 0.9999986525 | 1835.3867326192 |
| 0.4366967023 | 0.9999986525 | 12.7454402959   |
| 0.6472390588 | 0.9999986525 | 41.4660441452   |
| 0.6872739372 | 0.9999986525 | 45.2391825912   |

gene\_expression\_table

|              |              |                 |
|--------------|--------------|-----------------|
| 0.6312664098 | 0.9999986525 | 0               |
| 0.1935195961 | 0.9999986525 | 8.3791715415    |
| 0.6592592855 | 0.9999986525 | 0               |
| 0.4672206068 | 0.9999986525 | 0               |
| 0.4187672578 | 0.9999986525 | 20.0762486922   |
| 0.4998761517 | 0.9999986525 | 85.7891057483   |
| 0.5807402784 | 0.9999986525 | 0               |
| 0.5271897777 | 0.9999986525 | 8.426229016     |
| 0.0790367417 | 0.9999986525 | 0               |
| 0.6397002719 | 0.9999986525 | 0               |
| 0.4524801007 | 0.9999986525 | 0               |
| 0.3247975079 | 0.9999986525 | 79.092352267    |
| 0.800462984  | 0.9999986525 | 7.2786546618    |
| 0.2528257683 | 0.9999986525 | 1677.1076953067 |
| 0.5156893311 | 0.9999986525 | 21.7969121858   |
| 0.5467200614 | 0.9999986525 | 5.5535140091    |
| 0.3156600699 | 0.9999986525 | 5.7114651483    |
| 0.8291381984 | 0.9999986525 | 0               |
| 0.2630680243 | 0.9999986525 | 349.8973537986  |
| 0.2789240844 | 0.9999986525 | 17.9139536756   |
| 0.2451654708 | 0.9999986525 | 1398.0729926624 |
| 0.419126785  | 0.9999986525 | 131.4533672108  |
| 0.4119591051 | 0.9999986525 | 6.2348205868    |
| 0.2529939133 | 0.9999986525 | 0               |
| 0.6365032419 | 0.9999986525 | 0               |
| 0            | 0            | 0               |
| 0.1932896973 | 0.9999986525 | 0               |
| 0.9999259287 | 0.9999986525 | 1.7314335713    |
| 0.8035089146 | 0.9999986525 | 0               |
| 0.2268010977 | 0.9999986525 | 0               |
| 0.3374169017 | 0.9999986525 | 0               |
| 0.7824123807 | 0.9999986525 | 0.6712069419    |
| 0.7844025198 | 0.9999986525 | 21.6589974565   |
| 0.3306099423 | 0.9999986525 | 2.3120394968    |
| 0.6128361486 | 0.9999986525 | 0               |
| 0.7185454152 | 0.9999986525 | 0               |
| 0.3561412738 | 0.9999986525 | 0               |
| 0.2029226461 | 0.9999986525 | 0               |
| 0.6098761915 | 0.9999986525 | 0               |
| 0.2322698201 | 0.9999986525 | 0               |
| 0.6312664098 | 0.9999986525 | 0               |
| 0.6312664098 | 0.9999986525 | 0               |
| 0.6694723061 | 0.9999986525 | 0               |
| 0.2716072055 | 0.9999986525 | 0               |
| 0.8730848161 | 0.9999986525 | 11.2358085792   |
| 0.4609464761 | 0.9999986525 | 0               |
| 0.7290892974 | 0.9999986525 | 0               |
| 0.6234330454 | 0.9999986525 | 0               |
| 0.3684913725 | 0.9999986525 | 0               |

gene\_expression\_table

|              |              |                 |
|--------------|--------------|-----------------|
| 0.5137951924 | 0.9999986525 | 8.0978102156    |
| 0.2416824814 | 0.9999986525 | 3.5388580961    |
| 0.2557383994 | 0.9999986525 | 57.0928792842   |
| 0.0220603559 | 0.9999986525 | 18.8262541206   |
| 0.2564387635 | 0.9999986525 | 0               |
| 0.5246059004 | 0.9999986525 | 250.6177584348  |
| 0.6703886366 | 0.9999986525 | 0               |
| 0.7654935332 | 0.9999986525 | 8.5015764379    |
| 0.6528368918 | 0.9999986525 | 16.8450096863   |
| 0.5057654736 | 0.9999986525 | 0               |
| 0.7921863421 | 0.9999986525 | 4.1707271757    |
| 0.6312664098 | 0.9999986525 | 0               |
| 0.6606889417 | 0.9999986525 | 0               |
| 0.7037699882 | 0.9999986525 | 0               |
| 0.4860288364 | 0.9999986525 | 0               |
| 0.7040997111 | 0.9999986525 | 0               |
| 0.3152589361 | 0.9999986525 | 11.2131461202   |
| 0.6312664098 | 0.9999986525 | 0               |
| 0.4569067441 | 0.9999986525 | 0               |
| 0.8480851176 | 0.9999986525 | 0               |
| 0.6715484981 | 0.9999986525 | 0               |
| 0.9907519025 | 0.9999986525 | 0.2254894702    |
| 0.8536509985 | 0.9999986525 | 0               |
| 0.0729128025 | 0.9999986525 | 0               |
| 0            | 0            | 0               |
| 0.3374661302 | 0.9999986525 | 0               |
| 0.3659702302 | 0.9999986525 | 1.0743183177    |
| 0.203194741  | 0.9999986525 | 0               |
| 0.5252188961 | 0.9999986525 | 1698.6932762848 |
| 0.4729816619 | 0.9999986525 | 0.3497679969    |
| 0.2037715531 | 0.9999986525 | 0.4695196535    |
| 0.5197503429 | 0.9999986525 | 3.5383048902    |
| 0.8135148724 | 0.9999986525 | 1.5871474404    |
| 0.8066295407 | 0.9999986525 | 0.9328608713    |
| 0.8985289938 | 0.9999986525 | 175.5644524535  |
| 0.7525193043 | 0.9999986525 | 2.4171129623    |
| 0.4887194638 | 0.9999986525 | 0               |
| 0.7145201824 | 0.9999986525 | 1.3562025609    |
| 0.6961508576 | 0.9999986525 | 0               |
| 0.0399987706 | 0.9999986525 | 8.3021171463    |
| 0.5420435365 | 0.9999986525 | 0               |
| 0.4458078384 | 0.9999986525 | 10.5065734772   |
| 0.4068839613 | 0.9999986525 | 0               |
| 0.6641945709 | 0.9999986525 | 1.1539485716    |
| 0.6112362835 | 0.9999986525 | 0               |
| 0.0255319073 | 0.9999986525 | 0               |
| 0.5062257693 | 0.9999986525 | 43.5194146656   |
| 0.1524853956 | 0.9999986525 | 0               |
| 0.406863054  | 0.9999986525 | 0               |



gene\_expression\_table

|              |              |                |
|--------------|--------------|----------------|
| 0.6608045157 | 0.9999986525 | 0              |
| 0.6791027053 | 0.9999986525 | 470.5026122611 |
| 0.5017148566 | 0.9999986525 | 0              |
| 0.406842139  | 0.9999986525 | 0              |
| 0.0959640589 | 0.9999986525 | 0              |
| 0.8774145497 | 0.9999986525 | 25.0006713497  |
| 0.150527241  | 0.9999986525 | 2.0923032337   |
| 0.8640106084 | 0.9999986525 | 0              |
| 0.5890744698 | 0.9999986525 | 35.1530339632  |
| 0.4664608832 | 0.9999986525 | 4.2375889199   |
| 0.6369896532 | 0.9999986525 | 2.6822938179   |
| 0.6695851011 | 0.9999986525 | 0              |
| 0            | 0            | 0              |
| 0.3142344794 | 0.9999986525 | 0              |
| 0.1667817441 | 0.9999986525 | 6.2785886678   |
| 0.0390014132 | 0.9999986525 | 1.612146466    |
| 0.3676185095 | 0.9999986525 | 6.3482082128   |
| 0.3359956036 | 0.9999986525 | 0              |
| 0.4966812615 | 0.9999986525 | 240.3815102656 |
| 0.5491984714 | 0.9999986525 | 0              |
| 0.5979419812 | 0.9999986525 | 35.2074733061  |
| 0.4729816619 | 0.9999986525 | 0              |
| 0.1445429037 | 0.9999986525 | 0.5501392509   |
| 0.0826080868 | 0.9999986525 | 5.6413933069   |
| 0.349780566  | 0.9999986525 | 0              |
| 0.2937093745 | 0.9999986525 | 8.3328996886   |
| 0.9523107781 | 0.9999986525 | 0              |
| 0.6023311038 | 0.9999986525 | 0              |
| 0.9421505073 | 0.9999986525 | 0              |
| 0.1855045388 | 0.9999986525 | 16.9637852975  |
| 0.6396917154 | 0.9999986525 | 0              |
| 0.8522331939 | 0.9999986525 | 0              |
| 0.4944229035 | 0.9999986525 | 0              |
| 0.7207531986 | 0.9999986525 | 0.2121628814   |
| 0.007534     | 0.9999986525 | 4.7786751924   |
| 0.1196621098 | 0.9999986525 | 9.3386706911   |
| 0.5941993156 | 0.9999986525 | 30.8692142853  |
| 0.4535035936 | 0.9999986525 | 45.3505185947  |
| 0.6762872277 | 0.9999986525 | 0              |
| 0.2426163205 | 0.9999986525 | 1.2910255381   |
| 0.6665031294 | 0.9999986525 | 0              |
| 0.2381609281 | 0.9999986525 | 0              |
| 0.6856884839 | 0.9999986525 | 0.6160745887   |
| 0            | 0            | 0              |
| 0.6281079649 | 0.9999986525 | 5.799648404    |
| 0.3330254973 | 0.9999986525 | 27.4548180002  |
| 0.550921871  | 0.9999986525 | 0.4404340765   |
| 0.1491962041 | 0.9999986525 | 0.5660231089   |
| 0.5037337691 | 0.9999986525 | 3.9058734051   |

gene\_expression\_table

|              |              |               |
|--------------|--------------|---------------|
| 0.5007292672 | 0.9999986525 | 2.3642729938  |
| 0.4532931024 | 0.9999986525 | 0             |
| 0.0109343169 | 0.9999986525 | 3.3826886714  |
| 0.23242845   | 0.9999986525 | 0             |
| 0.6403408119 | 0.9999986525 | 11.5713417962 |
| 0.8622227047 | 0.9999986525 | 0             |
| 0.0176073476 | 0.9999986525 | 2.409064372   |
| 0.2668882528 | 0.9999986525 | 0             |
| 0.9051088874 | 0.9999986525 | 0             |
| 0.9624187151 | 0.9999986525 | 3.0788106696  |
| 0.9750248682 | 0.9999986525 | 0.5721943311  |
| 0.9837800854 | 0.9999986525 | 1.7138820549  |
| 0.5062757413 | 0.9999986525 | 6.3582390906  |
| 0.3864824421 | 0.9999986525 | 16.8375934834 |
| 0            | 0            | 0             |
| 0.1169709508 | 0.9999986525 | 0             |
| 0.5773973165 | 0.9999986525 | 12.1429916216 |
| 0.6213759412 | 0.9999986525 | 0.4119746814  |
| 0.0596086488 | 0.9999986525 | 0.7033087847  |
| 0.8789650298 | 0.9999986525 | 0.1504391444  |
| 0.403906786  | 0.9999986525 | 0             |
| 0.30755387   | 0.9999986525 | 0             |
| 0.6715014211 | 0.9999986525 | 0             |
| 0.6087916266 | 0.9999986525 | 0.5470918103  |
| 0.3963854872 | 0.9999986525 | 4.1897851894  |
| 0.3419316018 | 0.9999986525 | 8.4486671623  |
| 0.3958625599 | 0.9999986525 | 30.082687491  |
| 0.3438893861 | 0.9999986525 | 7.7606658836  |
| 0.1348089036 | 0.9999986525 | 0             |
| 0.6312664098 | 0.9999986525 | 0             |
| 0.7375869277 | 0.9999986525 | 12.0697821608 |
| 0.1662508969 | 0.9999986525 | 3.4483966065  |
| 0.9131503127 | 0.9999986525 | 12.5220702346 |
| 0.535992493  | 0.9999986525 | 0.0889187571  |
| 0.3460852182 | 0.9999986525 | 0             |
| 0.0697558935 | 0.9999986525 | 0.470674529   |
| 0.8548209181 | 0.9999986525 | 0.888350507   |
| 0.4190609925 | 0.9999986525 | 13.7630564573 |
| 0.7866404632 | 0.9999986525 | 4.8918195437  |
| 0.7152821203 | 0.9999986525 | 71.9780827616 |
| 0.7103130386 | 0.9999986525 | 0             |
| 0            | 0            | 0             |
| 0.2450392257 | 0.9999986525 | 0.3362637334  |
| 0.4620102334 | 0.9999986525 | 3.5903411439  |
| 0.1918215194 | 0.9999986525 | 0             |
| 0.7393692079 | 0.9999986525 | 0             |
| 0.5943523742 | 0.9999986525 | 0             |
| 0.5044943329 | 0.9999986525 | 45.9820938044 |
| 0.2055932259 | 0.9999986525 | 4.9906844532  |

gene\_expression\_table

|              |              |                 |
|--------------|--------------|-----------------|
| 0.8884608123 | 0.9999986525 | 128.7661172059  |
| 0.5182824739 | 0.9999986525 | 1.6656338535    |
| 0.1236724505 | 0.9999986525 | 0               |
| 0.38635462   | 0.9999986525 | 10.7695591815   |
| 0.0663977566 | 0.9999986525 | 0               |
| 0.4997422627 | 0.9999986525 | 0               |
| 0.4068002859 | 0.9999986525 | 0               |
| 0.6006422142 | 0.9999986525 | 5.4556075573    |
| 0.7001402402 | 0.9999986525 | 9.2522893778    |
| 0.3097106086 | 0.9999986525 | 18.1966366546   |
| 0.7332131745 | 0.9999986525 | 30.6249581579   |
| 0.4422958135 | 0.9999986525 | 0               |
| 0.1708626259 | 0.9999986525 | 0               |
| 0.4676372296 | 0.9999986525 | 0               |
| 0.2369634709 | 0.9999986525 | 27.6117518872   |
| 0.2570094825 | 0.9999986525 | 0               |
| 0.6312664098 | 0.9999986525 | 0               |
| 0.6396831479 | 0.9999986525 | 0               |
| 0.2631082602 | 0.9999986525 | 72.7203136497   |
| 0.8038737624 | 0.9999986525 | 1.2609568863    |
| 0.96834604   | 0.9999986525 | 26.3761868951   |
| 0.6598945497 | 0.9999986525 | 0               |
| 0.2429687966 | 0.9999986525 | 7399.5970990873 |
| 0.5040253387 | 0.9999986525 | 268.1501366899  |
| 0.3042563248 | 0.9999986525 | 255.853214053   |
| 0.6674125837 | 0.9999986525 | 0               |
| 0.5305908703 | 0.9999986525 | 5.5031695557    |
| 0.1890412097 | 0.9999986525 | 0               |
| 0.9956304202 | 0.9999986525 | 1.315931361     |
| 0.4649162623 | 0.9999986525 | 38.0942860836   |
| 0.8706113399 | 0.9999986525 | 0               |
| 0.0279783868 | 0.9999986525 | 0               |
| 0.6038557093 | 0.9999986525 | 1.4894782059    |
| 0.1239541958 | 0.9999986525 | 78.9108703488   |
| 0.6207679462 | 0.9999986525 | 1.404177343     |
| 0.4769977884 | 0.9999986525 | 0               |
| 0.30755387   | 0.9999986525 | 0               |
| 0.7092953169 | 0.9999986525 | 0               |
| 0.0384197412 | 0.9999986525 | 6.0049935448    |
| 0.412686966  | 0.9999986525 | 10.1619945791   |
| 0.1514890767 | 0.9999986525 | 13.6188546226   |
| 0.960623904  | 0.9999986525 | 112.1446889316  |
| 0.9851157066 | 0.9999986525 | 9.670854546     |
| 0.6258122287 | 0.9999986525 | 2.9397956171    |
| 0.9247727775 | 0.9999986525 | 5.3349412959    |
| 0.1383174864 | 0.9999986525 | 0.6501961757    |
| 0.7580870367 | 0.9999986525 | 1.8376130626    |
| 0.6396745693 | 0.9999986525 | 0               |
| 0.0119437258 | 0.9999986525 | 6.0656848773    |

gene\_expression\_table

|              |              |                |
|--------------|--------------|----------------|
| 0.7028813312 | 0.9999986525 | 0              |
| 0.5440747457 | 0.9999986525 | 1.0877580835   |
| 0.7699031298 | 0.9999986525 | 5.0892718117   |
| 0.0709405701 | 0.9999986525 | 2.3507329962   |
| 0.9047637908 | 0.9999986525 | 4.6568426914   |
| 0.7337291927 | 0.9999986525 | 0              |
| 0.5203114197 | 0.9999986525 | 184.9874543829 |
| 0.0609011453 | 0.9999986525 | 0              |
| 0.6813409687 | 0.9999986525 | 15.731753934   |
| 0.4238131464 | 0.9999986525 | 0              |
| 0.9549495256 | 0.9999986525 | 5.2700611911   |
| 0.1210452044 | 0.9999986525 | 0.424388842    |
| 0.2701558873 | 0.9999986525 | 0.4738650489   |
| 0.212203976  | 0.9999986525 | 0              |
| 0.3253265965 | 0.9999986525 | 3.21076772     |
| 0.4817700102 | 0.9999986525 | 4.6518766191   |
| 0.8841503816 | 0.9999986525 | 0              |
| 0.6375960003 | 0.9999986525 | 1.4400130392   |
| 0.1028012124 | 0.9999986525 | 91.276380875   |
| 0            | 0            | 0              |
| 0.2674640464 | 0.9999986525 | 0              |
| 0.7733692194 | 0.9999986525 | 30.0568125043  |
| 0.3460780911 | 0.9999986525 | 9.4260071794   |
| 0.9663401151 | 0.9999986525 | 0              |
| 0.8488343114 | 0.9999986525 | 0              |
| 0.3151624683 | 0.9999986525 | 0              |
| 0.9494524923 | 0.9999986525 | 0              |
| 0            | 0            | 0              |
| 0            | 0            | 0              |
| 0.337515387  | 0.9999986525 | 0              |
| 0.3723172782 | 0.9999986525 | 24.9732034337  |
| 0.4180580662 | 0.9999986525 | 0              |
| 0.1295516696 | 0.9999986525 | 0              |
| 0.1564245203 | 0.9999986525 | 0              |
| 0.1969148835 | 0.9999986525 | 0              |
| 0.1413359764 | 0.9999986525 | 2.2718595185   |
| 0.5234537875 | 0.9999986525 | 10.4005352947  |
| 0.4985435165 | 0.9999986525 | 13.1549706025  |
| 0.8969680247 | 0.9999986525 | 0              |
| 0.2073477345 | 0.9999986525 | 83.672240536   |
| 0.004877     | 0.9999986525 | 4.161197465    |
| 0.5438908177 | 0.9999986525 | 224.4591524618 |
| 0.5130408283 | 0.9999986525 | 28.182453696   |
| 0.0751681481 | 0.9999986525 | 7.4527507551   |
| 0.5031250983 | 0.9999986525 | 2.913710594    |
| 0.2966985677 | 0.9999986525 | 898.7353451925 |
| 0.2681160428 | 0.9999986525 | 65.4244883572  |
| 0.6897242533 | 0.9999986525 | 0              |
| 0.9605708744 | 0.9999986525 | 19.1667277178  |

gene\_expression\_table

|              |              |                  |
|--------------|--------------|------------------|
| 0.6312664098 | 0.9999986525 | 0                |
| 0.8065186155 | 0.9999986525 | 0                |
| 0.1975468482 | 0.9999986525 | 298.4559841642   |
| 0.1698176418 | 0.9999986525 | 3.2191831175     |
| 0.5998592726 | 0.9999986525 | 0                |
| 0.8656239337 | 0.9999986525 | 41.2769974414    |
| 0.5743609637 | 0.9999986525 | 0                |
| 0.9300574536 | 0.9999986525 | 0                |
| 0.417250549  | 0.9999986525 | 14.4379218771    |
| 0.8137989693 | 0.9999986525 | 7.5599653917     |
| 0.3300695299 | 0.9999986525 | 22.8236465974    |
| 0.5806109113 | 0.9999986525 | 1.3480159837     |
| 0.4901028074 | 0.9999986525 | 9.2224537066     |
| 0.0156983357 | 0.9999986525 | 15.032628292     |
| 0.4289486849 | 0.9999986525 | 520.0495230162   |
| 0.8321121614 | 0.9999986525 | 35.4813021339    |
| 0.9428899719 | 0.9999986525 | 13.814267528     |
| 0.5223688201 | 0.9999986525 | 18.9978123116    |
| 0.0549859217 | 0.9999986525 | 0                |
| 0.3705981586 | 0.9999986525 | 19.8002692675    |
| 0.5462700892 | 0.9999986525 | 29.9212045925    |
| 0.2994978717 | 0.9999986525 | 58.1587030352    |
| 0.1073339586 | 0.9999986525 | 5.3084649941     |
| 0.6879503717 | 0.9999986525 | 0                |
| 0.2821995535 | 0.9999986525 | 0                |
| 0.7535117907 | 0.9999986525 | 115.0003663066   |
| 0.00374      | 0.9999986525 | 0                |
| 0.5455830136 | 0.9999986525 | 1185.8478448356  |
| 0.8633785134 | 0.9999986525 | 7.5898423836     |
| 0.301026616  | 0.9999986525 | 15.7166089916    |
| 0.5605700087 | 0.9999986525 | 33.4901193572    |
| 0.5946735413 | 0.9999986525 | 6.0866564742     |
| 0.8906493469 | 0.9999986525 | 13.9830336845    |
| 0.8269939785 | 0.9999986525 | 7.9716113696     |
| 0.9299202401 | 0.9999986525 | 9.2058424658     |
| 0.6785810202 | 0.9999986525 | 0                |
| 0.0360564218 | 0.9999986525 | 114.0310474908   |
| 0.3136959587 | 0.9999986525 | 51.0256993974    |
| 0.4866334259 | 0.9999986525 | 0                |
| 0.7338153795 | 0.9999986525 | 0                |
| 0.9904651656 | 0.9999986525 | 90.9800486241    |
| 0.4858494499 | 0.9999986525 | 468.0132453332   |
| 0.8262750834 | 0.9999986525 | 18482.7469255389 |
| 0.1291542537 | 0.9999986525 | 0                |
| 0.4896759193 | 0.9999986525 | 38.4684078128    |
| 0.4729816619 | 0.9999986525 | 0                |
| 0.2091263076 | 0.9999986525 | 28.4557749064    |
| 0.178689074  | 0.9999986525 | 731.3185546087   |
| 0.3500764562 | 0.9999986525 | 3.8110779497     |

gene\_expression\_table

|              |              |                |
|--------------|--------------|----------------|
| 0.024655762  | 0.9999986525 | 13.5566297619  |
| 0.6957092893 | 0.9999986525 | 33.7684899145  |
| 0.865124373  | 0.9999986525 | 7.6969518911   |
| 0.0195537077 | 0.9999986525 | 0              |
| 0.9880086642 | 0.9999986525 | 23.9285169533  |
| 0.1929300128 | 0.9999986525 | 98.1837249433  |
| 0.0476018759 | 0.9999986525 | 5.9238313304   |
| 0.7079952134 | 0.9999986525 | 0              |
| 0.774026713  | 0.9999986525 | 5.6615659781   |
| 0.1134033389 | 0.9999986525 | 20.777779232   |
| 0.2300727056 | 0.9999986525 | 0              |
| 0.7399458053 | 0.9999986525 | 0              |
| 0.5071704127 | 0.9999986525 | 6.406190804    |
| 0.8734601233 | 0.9999986525 | 495.0886684503 |
| 0.5287022404 | 0.9999986525 | 99.8796600961  |
| 0.9817445923 | 0.9999986525 | 179.2370681375 |
| 0.7015068496 | 0.9999986525 | 2.5412076325   |
| 0.3362607235 | 0.9999986525 | 0              |
| 0.3218835097 | 0.9999986525 | 0              |
| 0.2403349178 | 0.9999986525 | 0              |
| 0.3753859216 | 0.9999986525 | 0              |
| 0.6336119674 | 0.9999986525 | 0              |
| 0.4067793477 | 0.9999986525 | 0              |
| 0.5371733175 | 0.9999986525 | 1.5974688674   |
| 0.0137941172 | 0.9999986525 | 16.0455470838  |
| 0.3891726679 | 0.9999986525 | 23.062846387   |
| 0.9068908329 | 0.9999986525 | 0              |
| 0.8892935447 | 0.9999986525 | 0              |
| 0.879211285  | 0.9999986525 | 305.2827643139 |
| 0.9287637588 | 0.9999986525 | 0              |
| 0.3711191803 | 0.9999986525 | 0              |
| 0.5362691251 | 0.9999986525 | 1.4899320179   |
| 0.1674337726 | 0.9999986525 | 0              |
| 0.8471364362 | 0.9999986525 | 0              |
| 0.213029692  | 0.9999986525 | 60.5956791244  |
| 0.9858051209 | 0.9999986525 | 20.2401526143  |
| 0.6063284047 | 0.9999986525 | 13.4386560372  |
| 0.1056714004 | 0.9999986525 | 27.9764372425  |
| 0.1425303576 | 0.9999986525 | 58.0641387744  |
| 0.6312664098 | 0.9999986525 | 0              |
| 0.426123111  | 0.9999986525 | 30.1301896972  |
| 0            | 0            | 0              |
| 0.0130077273 | 0.9999986525 | 0              |
| 0.1205306069 | 0.9999986525 | 0              |
| 0.9573233405 | 0.9999986525 | 22.9600774813  |
| 0.6615687203 | 0.9999986525 | 2.8645613834   |
| 0.4334395559 | 0.9999986525 | 12.7139909067  |
| 0.8670650812 | 0.9999986525 | 335.6105797054 |
| 0.1389895785 | 0.9999986525 | 39.7620314145  |

gene\_expression\_table

|              |              |                |
|--------------|--------------|----------------|
| 0.3299931933 | 0.9999986525 | 0              |
| 0.2848484809 | 0.9999986525 | 114.7505013065 |
| 0.3593695161 | 0.9999986525 | 15.9366077931  |
| 0.3934744554 | 0.9999986525 | 15.7559421916  |
| 0.4762860568 | 0.9999986525 | 2.4756910995   |
| 0.4057351494 | 0.9999986525 | 48.8330481418  |
| 0.8884079064 | 0.9999986525 | 0              |
| 0.6641246615 | 0.9999986525 | 0.2179727203   |
| 0.2182033414 | 0.9999986525 | 1.7677470588   |
| 0.9685813848 | 0.9999986525 | 0.3996815364   |
| 0.1835181145 | 0.9999986525 | 0.5441853956   |
| 0.3857654787 | 0.9999986525 | 5.3246993776   |
| 0.9489812912 | 0.9999986525 | 0.1740207921   |
| 0.2256699892 | 0.9999986525 | 1.4676648111   |
| 0.0591263084 | 0.9999986525 | 2.2592739814   |
| 0.6407272854 | 0.9999986525 | 1.0550123497   |
| 0.2371246046 | 0.9999986525 | 4.8533840194   |
| 0.7931088501 | 0.9999986525 | 12.6280426147  |
| 0.7942684115 | 0.9999986525 | 0              |
| 0.6312664098 | 0.9999986525 | 0              |
| 0.0667310096 | 0.9999986525 | 0              |
| 0.4854980794 | 0.9999986525 | 3.0858263644   |
| 0            | 0            | 0              |
| 0.6312664098 | 0.9999986525 | 0              |
| 0.6096604796 | 0.9999986525 | 75.5957189967  |
| 0.1962403776 | 0.9999986525 | 14.3442455273  |
| 0.6903918617 | 0.9999986525 | 4.0362184353   |
| 0.8239329924 | 0.9999986525 | 0              |
| 0.6296860131 | 0.9999986525 | 0.073166192    |
| 0.7967621581 | 0.9999986525 | 12.7929424049  |
| 0.9099580232 | 0.9999986525 | 0              |
| 0.4989223283 | 0.9999986525 | 0              |
| 0.3291001118 | 0.9999986525 | 25.4693680035  |
| 0.3846046018 | 0.9999986525 | 4.7372690944   |
| 0.1791802833 | 0.9999986525 | 2.3441597082   |
| 0.8688182667 | 0.9999986525 | 8.4737273868   |
| 0.459032816  | 0.9999986525 | 0              |
| 0.5635394879 | 0.9999986525 | 16.6835075668  |
| 0.0104281175 | 0.9999986525 | 53.8917532922  |
| 0.6228429754 | 0.9999986525 | 15.253851418   |
| 0.360303682  | 0.9999986525 | 0              |
| 0.3516076379 | 0.9999986525 | 137.348889505  |
| 0            | 0            | 0              |
| 0.7166987567 | 0.9999986525 | 1.2397924418   |
| 0.3686322292 | 0.9999986525 | 0              |
| 0.809935203  | 0.9999986525 | 2.8292917863   |
| 0.9607664283 | 0.9999986525 | 0              |
| 0.8173198326 | 0.9999986525 | 0              |
| 0.3491187423 | 0.9999986525 | 0              |

gene\_expression\_table

|              |              |                |
|--------------|--------------|----------------|
| 0.6367049064 | 0.9999986525 | 0              |
| 0.9408045093 | 0.9999986525 | 0              |
| 0.0505653049 | 0.9999986525 | 5.8803004205   |
| 0.2220204227 | 0.9999986525 | 8.2064409115   |
| 0.3370030201 | 0.9999986525 | 1.8181810895   |
| 0.269888089  | 0.9999986525 | 0              |
| 0.5740191428 | 0.9999986525 | 0              |
| 0.126025649  | 0.9999986525 | 114.7505013065 |
| 0.0890341423 | 0.9999986525 | 12.4537630226  |
| 0.768614706  | 0.9999986525 | 3.7724227305   |
| 0.5443456088 | 0.9999986525 | 16.6868619988  |
| 0.2547951309 | 0.9999986525 | 113.2173980287 |
| 0.0353303035 | 0.9999986525 | 0              |
| 0.5970722666 | 0.9999986525 | 2.0311775986   |
| 0.8928874419 | 0.9999986525 | 0              |
| 0.5196794201 | 0.9999986525 | 0              |
| 0.6098761914 | 0.9999986525 | 0              |
| 0            | 0            | 0              |
| 0.7756816713 | 0.9999986525 | 4.2409550564   |
| 0.0743364223 | 0.9999986525 | 0              |
| 0.3375646718 | 0.9999986525 | 0              |
| 0.7031937008 | 0.9999986525 | 0              |
| 0.6312664098 | 0.9999986525 | 0              |
| 0.0531301771 | 0.9999986525 | 77.7056177925  |
| 0.8865650887 | 0.9999986525 | 0              |
| 0.969349189  | 0.9999986525 | 0.2358201105   |
| 0.900027694  | 0.9999986525 | 0              |
| 0.1828629573 | 0.9999986525 | 0              |
| 0.30755387   | 0.9999986525 | 0              |
| 0.9275328761 | 0.9999986525 | 3.6001307584   |
| 0.9265860171 | 0.9999986525 | 0.5666486227   |
| 0.1603980651 | 0.9999986525 | 0              |
| 0.1590258733 | 0.9999986525 | 167.8297302127 |
| 0.9830076243 | 0.9999986525 | 1.982783546    |
| 0.0198304285 | 0.9999986525 | 9.7894195044   |
| 0.5249562115 | 0.9999986525 | 3.0476685016   |
| 0            | 0            | 0              |
| 0.6745603502 | 0.9999986525 | 206.744875619  |
| 0.3376139849 | 0.9999986525 | 0              |
| 0.6396659793 | 0.9999986525 | 0              |
| 0.3241047342 | 0.9999986525 | 0.5210528633   |
| 0.7350206628 | 0.9999986525 | 33.3658174059  |
| 0.5384890457 | 0.9999986525 | 16.3662591343  |
| 0.0896487957 | 0.9999986525 | 14.5561056766  |
| 0.3230126424 | 0.9999986525 | 0              |
| 0.7460805667 | 0.9999986525 | 0.242823729    |
| 0.6290490596 | 0.9999986525 | 0              |
| 0.150259557  | 0.9999986525 | 1.8034460723   |
| 0.8126482094 | 0.9999986525 | 9.7845831334   |



gene\_expression\_table

|              |              |                |
|--------------|--------------|----------------|
| 0.7080677    | 0.9999986525 | 0.9890246859   |
| 0.6893371051 | 0.9999986525 | 0              |
| 0.2482698129 | 0.9999986525 | 1.2420228873   |
| 0.9992051493 | 0.9999986525 | 70.7656462811  |
| 0.9221459222 | 0.9999986525 | 12.0821088307  |
| 0.3233112137 | 0.9999986525 | 0              |
| 0.2567898621 | 0.9999986525 | 105.2070084189 |
| 0.7063597035 | 0.9999986525 | 0.6926052171   |
| 0.3250374834 | 0.9999986525 | 0              |
| 0.4363132687 | 0.9999986525 | 2.2280593244   |
| 0.9795077052 | 0.9999986525 | 13.5838267043  |
| 0.2286445448 | 0.9999986525 | 2.0998456633   |
| 0.152648056  | 0.9999986525 | 0.8634804497   |
| 0.9169372873 | 0.9999986525 | 11.3651642407  |
| 0.0939089505 | 0.9999986525 | 104.6961920767 |
| 0.2156607212 | 0.9999986525 | 372.0178098558 |
| 0.1819239432 | 0.9999986525 | 10.0127499165  |
| 0.2482963607 | 0.9999986525 | 1.1698341671   |
| 0.4968134597 | 0.9999986525 | 0              |
| 0.9509330611 | 0.9999986525 | 1.3586855324   |
| 0.464806971  | 0.9999986525 | 8.6797186781   |
| 0.2840443263 | 0.9999986525 | 0              |
| 0.2919181384 | 0.9999986525 | 2.1242258095   |
| 0            | 0            | 0              |
| 0.1352166275 | 0.9999986525 | 0.9667920888   |
| 0.2089509932 | 0.9999986525 | 0.4959379323   |
| 0.6098388555 | 0.9999986525 | 28.7403132991  |
| 0.4485543157 | 0.9999986525 | 3.3600915019   |
| 0.3363760981 | 0.9999986525 | 0              |
| 0.7953284202 | 0.9999986525 | 1.2372800653   |
| 0.6578391674 | 0.9999986525 | 9.1261063527   |
| 0.8117406688 | 0.9999986525 | 1.0716022771   |
| 0.4850026355 | 0.9999986525 | 5.7477655167   |
| 0.5632129838 | 0.9999986525 | 1.3655828889   |
| 0.814769891  | 0.9999986525 | 85.6812430667  |
| 0            | 0            | 0              |
| 0.9236658972 | 0.9999986525 | 0              |
| 0.7155526258 | 0.9999986525 | 2.2983891534   |
| 0.7639891158 | 0.9999986525 | 159.0690268793 |
| 0.6933449488 | 0.9999986525 | 0              |
| 0.5865228708 | 0.9999986525 | 16.029198213   |
| 0.5326362069 | 0.9999986525 | 0              |
| 0.2999271784 | 0.9999986525 | 2.3738192789   |
| 0.2135414486 | 0.9999986525 | 2.4932218395   |
| 0.5088431514 | 0.9999986525 | 20.4143623142  |
| 0.611979128  | 0.9999986525 | 1.5579275848   |
| 0.8044644143 | 0.9999986525 | 0              |
| 0.8914026532 | 0.9999986525 | 25.1255557689  |
| 0.3048840411 | 0.9999986525 | 0              |

gene\_expression\_table

|              |              |                |
|--------------|--------------|----------------|
| 0.1304602629 | 0.9999986525 | 1.7197348863   |
| 0.8588253254 | 0.9999986525 | 3.3567812773   |
| 0.6098251438 | 0.9999986525 | 3.8754923728   |
| 0.8979565564 | 0.9999986525 | 210.100122233  |
| 0.4821741073 | 0.9999986525 | 0              |
| 0.8943927586 | 0.9999986525 | 0.3462276911   |
| 0.3048954497 | 0.9999986525 | 0              |
| 0.5921642963 | 0.9999986525 | 0.9182474134   |
| 0.0424658647 | 0.9999986525 | 8.5630305723   |
| 0.6963223867 | 0.9999986525 | 5.3477033441   |
| 0.7879955252 | 0.9999986525 | 0.5152125006   |
| 0.4664223509 | 0.9999986525 | 0.1542124775   |
| 0.8026115336 | 0.9999986525 | 5.7760108884   |
| 0.2295282344 | 0.9999986525 | 1.8680644534   |
| 0            | 0            | 0              |
| 0.30755387   | 0.9999986525 | 0              |
| 0.5669873573 | 0.9999986525 | 6.7383600279   |
| 0.0358965824 | 0.9999986525 | 53.3339239852  |
| 0.6574983291 | 0.9999986525 | 101.2266766004 |
| 0.9082266076 | 0.9999986525 | 3.6658511992   |
| 0.3957391176 | 0.9999986525 | 0.7049657384   |
| 0.2553646127 | 0.9999986525 | 1.6265951593   |
| 0.222876495  | 0.9999986525 | 29.1039226082  |
| 0.2292312025 | 0.9999986525 | 47.2960461728  |
| 0.2665296535 | 0.9999986525 | 3.0555554672   |
| 0.4632174099 | 0.9999986525 | 0              |
| 0.3161318768 | 0.9999986525 | 0              |
| 0.5757976071 | 0.9999986525 | 18.2810378077  |
| 0.425336195  | 0.9999986525 | 3.9878220923   |
| 0.2831130266 | 0.9999986525 | 13.3106301291  |
| 0.9419978066 | 0.9999986525 | 4.4037286939   |
| 0.4733579286 | 0.9999986525 | 0              |
| 0.5344078259 | 0.9999986525 | 7.1500600049   |
| 0.7777232634 | 0.9999986525 | 1.412023587    |
| 0.508884297  | 0.9999986525 | 1.5860511795   |
| 0.4140805159 | 0.9999986525 | 5.2467631856   |
| 0.0127520658 | 0.9999986525 | 1.9915501424   |
| 0.7143469689 | 0.9999986525 | 0              |
| 0.4012311414 | 0.9999986525 | 14.3624951164  |
| 0.2444421951 | 0.9999986525 | 3.4260269356   |
| 0.0649872652 | 0.9999986525 | 85.0630044877  |
| 0.0620502317 | 0.9999986525 | 9.6906271975   |
| 0.4944010522 | 0.9999986525 | 48.0913478659  |
| 0.7219385581 | 0.9999986525 | 39.7919896224  |
| 0.025307985  | 0.9999986525 | 4.8670441322   |
| 0.931909542  | 0.9999986525 | 0              |
| 0.2197430732 | 0.9999986525 | 1.5044985821   |
| 0.0384223761 | 0.9999986525 | 0              |
| 0.0532206708 | 0.9999986525 | 59.5129387699  |

gene\_expression\_table

|              |              |                |
|--------------|--------------|----------------|
| 0.3376633263 | 0.9999986525 | 0              |
| 0.8221512297 | 0.9999986525 | 0.1668512232   |
| 0.7218887158 | 0.9999986525 | 12.4693467657  |
| 0.3029926597 | 0.9999986525 | 5.6767184989   |
| 0.0489444849 | 0.9999986525 | 3.2233527328   |
| 0.1167682765 | 0.9999986525 | 0              |
| 0.4027524224 | 0.9999986525 | 0              |
| 0.058331801  | 0.9999986525 | 0              |
| 0.7406409199 | 0.9999986525 | 3.5210452499   |
| 0.2012705192 | 0.9999986525 | 0.4465009488   |
| 0.910611681  | 0.9999986525 | 315.3548401328 |
| 0.7018770313 | 0.9999986525 | 1.9288527894   |
| 0.0487065237 | 0.9999986525 | 5.6465343791   |
| 0.8457251443 | 0.9999986525 | 0.2380023804   |
| 0.2940721088 | 0.9999986525 | 695.4283307049 |
| 0.9020633893 | 0.9999986525 | 3.475285795    |
| 0.3925459838 | 0.9999986525 | 4.1562853723   |
| 0.2839026325 | 0.9999986525 | 0              |
| 0.2429808155 | 0.9999986525 | 0              |
| 0.4916740117 | 0.9999986525 | 0              |
| 0.2934546741 | 0.9999986525 | 88.7628877753  |
| 0.4749998418 | 0.9999986525 | 0              |
| 0.1715039834 | 0.9999986525 | 92.6153761093  |
| 0.1823368995 | 0.9999986525 | 2.0388325443   |
| 0.0908328703 | 0.9999986525 | 0.6844638901   |
| 0.6575824935 | 0.9999986525 | 8.7110951799   |
| 0.6411255086 | 0.9999986525 | 3.1991954585   |
| 0.5193205416 | 0.9999986525 | 0              |
| 0.6491560715 | 0.9999986525 | 1.0588619878   |
| 0.496804415  | 0.9999986525 | 1.1602208973   |
| 0.9362337429 | 0.9999986525 | 9.0990498294   |
| 0.7064864269 | 0.9999986525 | 23.4719041853  |
| 0.8329412588 | 0.9999986525 | 0.4578937084   |
| 0.6117766445 | 0.9999986525 | 2.088827647    |
| 0.3296209267 | 0.9999986525 | 2.607043327    |
| 0.6701011469 | 0.9999986525 | 27.9032720784  |
| 0.1077684635 | 0.9999986525 | 1.1230313478   |
| 0.1589501161 | 0.9999986525 | 0              |
| 0.9066470806 | 0.9999986525 | 37.5721495563  |
| 0.747646919  | 0.9999986525 | 1.7756158629   |
| 0.7165910404 | 0.9999986525 | 3.8824247655   |
| 0.7439809232 | 0.9999986525 | 881.5924526185 |
| 0.2730659745 | 0.9999986525 | 22.4840790119  |
| 0.9711373952 | 0.9999986525 | 0              |
| 0            | 0            | 0              |
| 0.639657378  | 0.9999986525 | 0              |
| 0.2862124015 | 0.9999986525 | 0              |
| 0.0722369433 | 0.9999986525 | 0.8272468121   |
| 0.6328699918 | 0.9999986525 | 0.5044791119   |

gene\_expression\_table

|              |              |                 |
|--------------|--------------|-----------------|
| 0.700392415  | 0.9999986525 | 19.4293822225   |
| 0.0780004266 | 0.9999986525 | 16.430753363    |
| 0.5675062163 | 0.9999986525 | 4588.4432501581 |
| 0.5122105815 | 0.9999986525 | 8.5902673637    |
| 0.4274582905 | 0.9999986525 | 0               |
| 0.3418638096 | 0.9999986525 | 0               |
| 0.6312664098 | 0.9999986525 | 0               |
| 0.5061223334 | 0.9999986525 | 716.6607825658  |
| 0.5754532282 | 0.9999986525 | 430.7823672619  |
| 0.0621211481 | 0.9999986525 | 9.1500204827    |
| 0.8726821216 | 0.9999986525 | 509.3330392745  |
| 0.7991207149 | 0.9999986525 | 160.4389428992  |
| 0.5689351785 | 0.9999986525 | 20.3969869178   |
| 0.524062546  | 0.9999986525 | 32.9431176849   |
| 0.9771900935 | 0.9999986525 | 175.4615223465  |
| 0.3924625268 | 0.9999986525 | 0               |
| 0.2638986168 | 0.9999986525 | 64.490233232    |
| 0.5382069791 | 0.9999986525 | 0               |
| 0.3404096028 | 0.9999986525 | 37.0078608551   |
| 0.5460153784 | 0.9999986525 | 1.1170220221    |
| 0.3488532055 | 0.9999986525 | 0               |
| 0.5610882672 | 0.9999986525 | 7.5014442478    |
| 0.9751042517 | 0.9999986525 | 0               |
| 0.7198112163 | 0.9999986525 | 0               |
| 0.5079483197 | 0.9999986525 | 13.0695170073   |
| 0.0598312043 | 0.9999986525 | 6.9701790885    |
| 0.8823350489 | 0.9999986525 | 28.7250724607   |
| 0.2733286628 | 0.9999986525 | 13.0565928866   |
| 0.4942725583 | 0.9999986525 | 2.347546093     |
| 0.8148524746 | 0.9999986525 | 10.2279875204   |
| 0.4564192021 | 0.9999986525 | 0               |
| 0.5206390168 | 0.9999986525 | 0               |
| 0.6968772671 | 0.9999986525 | 13.2573374901   |
| 0.3551587699 | 0.9999986525 | 21.860065491    |
| 0.2250099514 | 0.9999986525 | 0               |
| 0.2893540736 | 0.9999986525 | 48.9437375016   |
| 0.5971016442 | 0.9999986525 | 0               |
| 0.9375484639 | 0.9999986525 | 2.6302407045    |
| 0.3346449147 | 0.9999986525 | 5.387604599     |
| 0.5732680306 | 0.9999986525 | 0               |
| 0.7911004392 | 0.9999986525 | 47.4199041314   |
| 0.2666676275 | 0.9999986525 | 2.6575714903    |
| 0.6717833372 | 0.9999986525 | 4.530143093     |
| 0.614775947  | 0.9999986525 | 0.3485492046    |
| 0.4077359873 | 0.9999986525 | 3.5836416099    |
| 0.4193525563 | 0.9999986525 | 23.6082062609   |
| 0.6161428933 | 0.9999986525 | 0.5318836431    |
| 0.315862212  | 0.9999986525 | 0               |
| 0.7964343721 | 0.9999986525 | 43.4229759589   |

gene\_expression\_table

|              |              |                 |
|--------------|--------------|-----------------|
| 0.3489217626 | 0.9999986525 | 0.9824017527    |
| 0.2350844073 | 0.9999986525 | 9.2773184068    |
| 0.4590103155 | 0.9999986525 | 5.1378738789    |
| 0.8270556088 | 0.9999986525 | 0.9742467852    |
| 0.4495600386 | 0.9999986525 | 9.8920993119    |
| 0.381969536  | 0.9999986525 | 351.599315452   |
| 0.7774685871 | 0.9999986525 | 0               |
| 0.4530677972 | 0.9999986525 | 4.0319925356    |
| 0.7486249327 | 0.9999986525 | 8.5656924504    |
| 0.2147140729 | 0.9999986525 | 14.1833098808   |
| 0.6434002888 | 0.9999986525 | 9.7166060656    |
| 0.1672718137 | 0.9999986525 | 2.0647374106    |
| 0.3663325418 | 0.9999986525 | 56.2508448464   |
| 0.3001370401 | 0.9999986525 | 12.0703732662   |
| 0.82873217   | 0.9999986525 | 0               |
| 0.7411222701 | 0.9999986525 | 34.9093172765   |
| 0.8156147274 | 0.9999986525 | 47.5876721178   |
| 0.7706086618 | 0.9999986525 | 24.845813812    |
| 0.1923938583 | 0.9999986525 | 5.4888711522    |
| 0.846912534  | 0.9999986525 | 3.2048576941    |
| 0.2906670396 | 0.9999986525 | 0               |
| 0.6818492658 | 0.9999986525 | 7.2195530287    |
| 0.9151046789 | 0.9999986525 | 15.009284043    |
| 0.5087710282 | 0.9999986525 | 0.3081235566    |
| 0.5231804042 | 0.9999986525 | 0.8691717598    |
| 0.4091903176 | 0.9999986525 | 1.8349634572    |
| 0.4915658842 | 0.9999986525 | 1648.0056909005 |
| 0.8560349711 | 0.9999986525 | 8.7394786909    |
| 0.3242093741 | 0.9999986525 | 22.6871706185   |
| 0.3898723593 | 0.9999986525 | 2.032164309     |
| 0.5432608121 | 0.9999986525 | 0.2220807784    |
| 0.6394654817 | 0.9999986525 | 0               |
| 0            | 0            | 0               |
| 0.337712696  | 0.9999986525 | 0               |
| 0.4785726975 | 0.9999986525 | 8.5728530056    |
| 0.9290978092 | 0.9999986525 | 0               |
| 0.7505487248 | 0.9999986525 | 0               |
| 0.6312664098 | 0.9999986525 | 0               |
| 0.7967052356 | 0.9999986525 | 3.1895672809    |
| 0.8790409121 | 0.9999986525 | 2012.3924013818 |
| 0.6259828217 | 0.9999986525 | 2.9787211922    |
| 0.4494100979 | 0.9999986525 | 2.2590323892    |
| 0.5466487942 | 0.9999986525 | 16.7197321058   |
| 0.1734652047 | 0.9999986525 | 82.8481870962   |
| 0.8688916968 | 0.9999986525 | 4.0455865111    |
| 0.9183450659 | 0.9999986525 | 40.9304455383   |
| 0.7828355308 | 0.9999986525 | 6.5591055919    |
| 0.8071887112 | 0.9999986525 | 0               |
| 0.7581357866 | 0.9999986525 | 0               |

gene\_expression\_table

|              |              |                |
|--------------|--------------|----------------|
| 0.6613170187 | 0.9999986525 | 1.1148174277   |
| 0            | 0            | 0              |
| 0            | 0            | 0              |
| 0.1662657054 | 0.9999986525 | 4.9697082847   |
| 0.3146991494 | 0.9999986525 | 6.0754536094   |
| 0.1643590202 | 0.9999986525 | 8.8532257525   |
| 0.7849826099 | 0.9999986525 | 16.0386809257  |
| 0.8690235318 | 0.9999986525 | 21.0473413385  |
| 0.1161375419 | 0.9999986525 | 1.5144210078   |
| 0.5822776033 | 0.9999986525 | 4.0283679666   |
| 0.5796614075 | 0.9999986525 | 4.0596424326   |
| 0.2080200626 | 0.9999986525 | 1.6965601743   |
| 0.8282936105 | 0.9999986525 | 0              |
| 0.1263143063 | 0.9999986525 | 0              |
| 0.58513972   | 0.9999986525 | 0              |
| 0.2506008007 | 0.9999986525 | 0              |
| 0.9923925927 | 0.9999986525 | 7.9592974495   |
| 0.7437998586 | 0.9999986525 | 1.4630434612   |
| 0.6971497128 | 0.9999986525 | 1.3152513567   |
| 0.861494355  | 0.9999986525 | 0.3928613165   |
| 0.3549096519 | 0.9999986525 | 0              |
| 0.0449786442 | 0.9999986525 | 0              |
| 0            | 0            | 0              |
| 0.8552896312 | 0.9999986525 | 1.7286708037   |
| 0.167670384  | 0.9999986525 | 0.4225383883   |
| 0.7379323655 | 0.9999986525 | 2.5983429217   |
| 0.9591512963 | 0.9999986525 | 3.5187384445   |
| 0.516569095  | 0.9999986525 | 0.421009185    |
| 0.7425023625 | 0.9999986525 | 0.5964439426   |
| 0.4688510523 | 0.9999986525 | 190.9976044115 |
| 0.237872561  | 0.9999986525 | 9.1818355748   |
| 0.8482543896 | 0.9999986525 | 314.8094704934 |
| 0.7561676801 | 0.9999986525 | 0              |
| 0.604549955  | 0.9999986525 | 7.3014633493   |
| 0.1857582414 | 0.9999986525 | 1.4206455301   |
| 0.4067584018 | 0.9999986525 | 0              |
| 0.6312664098 | 0.9999986525 | 0              |
| 0.9650222667 | 0.9999986525 | 2.5172019821   |
| 0.4291322585 | 0.9999986525 | 0              |
| 0.2050961605 | 0.9999986525 | 0.3316207348   |
| 0.284487512  | 0.9999986525 | 0              |
| 0.2331018305 | 0.9999986525 | 0.1612889892   |
| 0.2399681773 | 0.9999986525 | 1.1473305141   |
| 0.6312664098 | 0.9999986525 | 0              |
| 0.3377212756 | 0.9999986525 | 0              |
| 0.6447920486 | 0.9999986525 | 6.5016149087   |
| 0.6275627082 | 0.9999986525 | 391.2142090838 |
| 0.5535745455 | 0.9999986525 | 6.3837352205   |
| 0.2479441314 | 0.9999986525 | 3.2571695313   |

gene\_expression\_table

|              |              |                |
|--------------|--------------|----------------|
| 0.7306335618 | 0.9999986525 | 0.2423245937   |
| 0.99310284   | 0.9999986525 | 0              |
| 0.0949265379 | 0.9999986525 | 0              |
| 0.804086961  | 0.9999986525 | 0              |
| 0.8945779507 | 0.9999986525 | 0              |
| 0.4729816619 | 0.9999986525 | 0              |
| 0.7585653992 | 0.9999986525 | 4.9943656299   |
| 0.4386446115 | 0.9999986525 | 737.3303302437 |
| 0.4744561302 | 0.9999986525 | 0              |
| 0.9832830335 | 0.9999986525 | 156.0862709536 |
| 0.7170392311 | 0.9999986525 | 3.4604847482   |
| 0.7968950857 | 0.9999986525 | 3.5118439122   |
| 0.3949621945 | 0.9999986525 | 16.9710534146  |
| 0            | 0            | 0              |
| 0.9299372692 | 0.9999986525 | 0              |
| 0.7346054775 | 0.9999986525 | 0.5426886654   |
| 0.564331663  | 0.9999986525 | 1.0075146552   |
| 0.1103374233 | 0.9999986525 | 0              |
| 0.4610626004 | 0.9999986525 | 179.9812789109 |
| 0            | 0            | 0              |
| 0.4107492291 | 0.9999986525 | 0              |
| 0.4974916578 | 0.9999986525 | 6.1193796754   |
| 0.4678964553 | 0.9999986525 | 1.8364522541   |
| 0.9460714633 | 0.9999986525 | 0              |
| 0.858123089  | 0.9999986525 | 121.7139183332 |
| 0.7429114561 | 0.9999986525 | 1.21764002     |
| 0.5290239266 | 0.9999986525 | 18.6581328742  |
| 0.5595387416 | 0.9999986525 | 0              |
| 0.9865948537 | 0.9999986525 | 31.9105988715  |
| 0.7102565252 | 0.9999986525 | 0.3991921379   |
| 0.4204885547 | 0.9999986525 | 0.7842263296   |
| 0            | 0            | 0              |
| 0.2405048432 | 0.9999986525 | 0              |
| 0.6420776752 | 0.9999986525 | 0              |
| 0.9411061313 | 0.9999986525 | 3.3540860581   |
| 0.5915786606 | 0.9999986525 | 2.2052430964   |
| 0            | 0            | 0              |
| 0.178282429  | 0.9999986525 | 0              |
| 0.9451852668 | 0.9999986525 | 1.0163167884   |
| 0.6977597983 | 0.9999986525 | 0              |
| 0.7480856172 | 0.9999986525 | 0              |
| 0.6504080829 | 0.9999986525 | 0              |
| 0.7761348006 | 0.9999986525 | 0              |
| 0.0501667413 | 0.9999986525 | 10.0167914585  |
| 0.5676996852 | 0.9999986525 | 29.8263354243  |
| 0.2161508218 | 0.9999986525 | 5.077284967    |
| 0.7628149822 | 0.9999986525 | 0              |
| 0.163991297  | 0.9999986525 | 14.9077554572  |
| 0.3732320829 | 0.9999986525 | 40.001885694   |

gene\_expression\_table

|              |              |                |
|--------------|--------------|----------------|
| 0.5939339509 | 0.9999986525 | 0              |
| 0.0158142382 | 0.9999986525 | 31.9189654612  |
| 0.3388803119 | 0.9999986525 | 7.4778122157   |
| 0.4182344417 | 0.9999986525 | 4.4761351154   |
| 0.146749556  | 0.9999986525 | 0              |
| 0.6083856502 | 0.9999986525 | 0.3882263044   |
| 0.4005886972 | 0.9999986525 | 0.9521682843   |
| 0.2377633222 | 0.9999986525 | 3.7799826958   |
| 0.8192565733 | 0.9999986525 | 9.1651051152   |
| 0.0339936515 | 0.9999986525 | 0.4078420818   |
| 0.4664259991 | 0.9999986525 | 7.058796876    |
| 0.0134630422 | 0.9999986525 | 40.4085066766  |
| 0.7294689    | 0.9999986525 | 35.3034212743  |
| 0.960747827  | 0.9999986525 | 1.1069083526   |
| 0.5883652336 | 0.9999986525 | 3.2093044223   |
| 0.058856906  | 0.9999986525 | 0              |
| 0.416957324  | 0.9999986525 | 0.2678958131   |
| 0.2934695744 | 0.9999986525 | 1.0413762701   |
| 0.6791693338 | 0.9999986525 | 3.0588392347   |
| 0.6312664098 | 0.9999986525 | 0              |
| 0.361202302  | 0.9999986525 | 0              |
| 0.3377298607 | 0.9999986525 | 0              |
| 0.3215135924 | 0.9999986525 | 0              |
| 0.9735211057 | 0.9999986525 | 3.4978421237   |
| 0            | 0            | 0              |
| 0.2857639714 | 0.9999986525 | 0.3656891093   |
| 0.773110179  | 0.9999986525 | 6.3086503953   |
| 0.9152716449 | 0.9999986525 | 4.7926602896   |
| 0.1671981751 | 0.9999986525 | 4.1794354437   |
| 0.5112783216 | 0.9999986525 | 3690.350569691 |
| 0.5981171647 | 0.9999986525 | 0              |
| 0.5366794072 | 0.9999986525 | 2.2065867456   |
| 0.2271600375 | 0.9999986525 | 5.3717992032   |
| 0.4595827705 | 0.9999986525 | 1.017785709    |
| 0.8755791796 | 0.9999986525 | 126.4118109385 |
| 0.6945236648 | 0.9999986525 | 0.8137236261   |
| 0.5311904687 | 0.9999986525 | 0.7925892162   |
| 0.1278834372 | 0.9999986525 | 29.9783839172  |
| 0.3451046274 | 0.9999986525 | 1.1081741605   |
| 0.3167771088 | 0.9999986525 | 16.3984428357  |
| 0.2234712377 | 0.9999986525 | 78.8917084868  |
| 0.0103897307 | 0.9999986525 | 45.5936999088  |
| 0.8376178927 | 0.9999986525 | 8.5975594382   |
| 0.022430824  | 0.9999986525 | 14.5978554832  |
| 0.4729816619 | 0.9999986525 | 0              |
| 0.4072610751 | 0.9999986525 | 2.2518181721   |
| 0.8537595214 | 0.9999986525 | 1.1578952518   |
| 0.3467384647 | 0.9999986525 | 2.3348500163   |
| 0.6571555913 | 0.9999986525 | 4.1658747196   |



gene\_expression\_table

|              |              |                |
|--------------|--------------|----------------|
| 0.1136053668 | 0.9999986525 | 0              |
| 0.9424977917 | 0.9999986525 | 14.2385424928  |
| 0.5276008525 | 0.9999986525 | 3.9367100778   |
| 0.8753586251 | 0.9999986525 | 18.9500962419  |
| 0.0780888177 | 0.9999986525 | 39.4236050631  |
| 0.2391282189 | 0.9999986525 | 6.2057693798   |
| 0.2987059027 | 0.9999986525 | 4.4381443888   |
| 0.6537774549 | 0.9999986525 | 31.9920291199  |
| 0.3680287757 | 0.9999986525 | 0              |
| 0.1838884722 | 0.9999986525 | 0              |
| 0.107013909  | 0.9999986525 | 9.5575076168   |
| 0.5332082175 | 0.9999986525 | 2.5590618387   |
| 0.0784996526 | 0.9999986525 | 0              |
| 0.2523955396 | 0.9999986525 | 2.6389542015   |
| 0.2524050177 | 0.9999986525 | 0.2892233455   |
| 0.0498987059 | 0.9999986525 | 3.2105074807   |
| 0.6962396253 | 0.9999986525 | 0              |
| 0.5670615054 | 0.9999986525 | 0.6646437068   |
| 0.4022751416 | 0.9999986525 | 3.0602571692   |
| 0.1714159352 | 0.9999986525 | 17.7824640493  |
| 0.6231574602 | 0.9999986525 | 2.0260057629   |
| 0.5471851089 | 0.9999986525 | 0              |
| 0.0437153605 | 0.9999986525 | 3.8806655811   |
| 0.0516282902 | 0.9999986525 | 0              |
| 0.2111892239 | 0.9999986525 | 9.7092057563   |
| 0.1191606673 | 0.9999986525 | 29.7934852725  |
| 0.8959033253 | 0.9999986525 | 4.0139782045   |
| 0.2183931317 | 0.9999986525 | 25.2719202597  |
| 0.9293459594 | 0.9999986525 | 0              |
| 0.6312664098 | 0.9999986525 | 0              |
| 0.9536363632 | 0.9999986525 | 0.9536966351   |
| 0.304592487  | 0.9999986525 | 0.5953446647   |
| 0.1117779333 | 0.9999986525 | 51.6079225622  |
| 0.7620538123 | 0.9999986525 | 7.4228978533   |
| 0.5318255564 | 0.9999986525 | 43.4731245923  |
| 0.1275893328 | 0.9999986525 | 0.6759720069   |
| 0.2994702514 | 0.9999986525 | 0              |
| 0.3515674547 | 0.9999986525 | 0              |
| 0.4496128289 | 0.9999986525 | 1.6005591862   |
| 0.4267575849 | 0.9999986525 | 119.9028111305 |
| 0.1418394105 | 0.9999986525 | 12.1430632097  |
| 0.8648017186 | 0.9999986525 | 0.6617262774   |
| 0            | 0            | 0              |
| 0.3377467591 | 0.9999986525 | 0              |
| 0.8484181121 | 0.9999986525 | 14.9558008947  |
| 0.2333359402 | 0.9999986525 | 9.1584829294   |
| 0.5783557036 | 0.9999986525 | 6.1713795597   |
| 0.4923749826 | 0.9999986525 | 0              |
| 0.7022563746 | 0.9999986525 | 0              |

gene\_expression\_table

|              |              |               |
|--------------|--------------|---------------|
| 0.7099817607 | 0.9999986525 | 31.7454928229 |
| 0.6394539327 | 0.9999986525 | 0             |
| 0.7126121989 | 0.9999986525 | 28.2339296439 |
| 0.0907849957 | 0.9999986525 | 10.6255301973 |
| 0.0176713973 | 0.9999986525 | 0             |
| 0.1659088942 | 0.9999986525 | 30.825244101  |
| 0.5901995679 | 0.9999986525 | 0             |
| 0.7406562032 | 0.9999986525 | 0             |
| 0.3025439409 | 0.9999986525 | 0             |
| 0.8747686864 | 0.9999986525 | 4.8311304634  |
| 0.0661686669 | 0.9999986525 | 0.3749364141  |
| 0.3045583883 | 0.9999986525 | 0             |
| 0.1465429081 | 0.9999986525 | 0             |
| 0.8651117467 | 0.9999986525 | 3.136990162   |
| 0.8462505729 | 0.9999986525 | 0             |
| 0.6522457559 | 0.9999986525 | 0             |
| 0.6342688116 | 0.9999986525 | 0.2092958268  |
| 0.7353671241 | 0.9999986525 | 6.2542386437  |
| 0.1438273446 | 0.9999986525 | 17.1920306726 |
| 0.3026116726 | 0.9999986525 | 0             |
| 0.7988141069 | 0.9999986525 | 9.9842779409  |
| 0.6312664098 | 0.9999986525 | 0             |
| 0.1049785783 | 0.9999986525 | 0.7212060389  |
| 0.9661445758 | 0.9999986525 | 5.392795627   |
| 0.9129263924 | 0.9999986525 | 0             |
| 0.8853373863 | 0.9999986525 | 11.9822850094 |
| 0.3479902413 | 0.9999986525 | 17.6959279258 |
| 0.4246591808 | 0.9999986525 | 0.1744254007  |
| 0.8562978427 | 0.9999986525 | 1.0768022147  |
| 0.1111830953 | 0.9999986525 | 33.3301774612 |
| 0.72303122   | 0.9999986525 | 3.7093635501  |
| 0.8138992048 | 0.9999986525 | 0             |
| 0.7463982768 | 0.9999986525 | 0             |
| 0.8741569811 | 0.9999986525 | 6.4220039429  |
| 0.0691224167 | 0.9999986525 | 6.6566572002  |
| 0.1102752919 | 0.9999986525 | 0             |
| 0.5397033537 | 0.9999986525 | 7.0042662016  |
| 0.4108907352 | 0.9999986525 | 0             |
| 0.268838254  | 0.9999986525 | 34.0008325603 |
| 0.9251788613 | 0.9999986525 | 0             |
| 0.1516493428 | 0.9999986525 | 0             |
| 0.1963384522 | 0.9999986525 | 3.1019569028  |
| 0.6809291806 | 0.9999986525 | 129.126061136 |
| 0.6135578198 | 0.9999986525 | 0             |
| 0.8584156295 | 0.9999986525 | 59.7022692363 |
| 0.1698186029 | 0.9999986525 | 0             |
| 0.812933811  | 0.9999986525 | 2.0535779698  |
| 0.9160903698 | 0.9999986525 | 20.4853323695 |
| 0.5477079546 | 0.9999986525 | 2.1524195389  |

gene\_expression\_table

|              |              |                |
|--------------|--------------|----------------|
| 0.0907813178 | 0.9999986525 | 10.2525701651  |
| 0.7120629043 | 0.9999986525 | 0              |
| 0.3658501434 | 0.9999986525 | 24.9947554313  |
| 0.5991133891 | 0.9999986525 | 0              |
| 0.3287559574 | 0.9999986525 | 11.5541278115  |
| 0.2775708483 | 0.9999986525 | 1.9344137989   |
| 0.4736928057 | 0.9999986525 | 0              |
| 0.2322334949 | 0.9999986525 | 0              |
| 0.9620765795 | 0.9999986525 | 12.6094235258  |
| 0            | 0            | 0              |
| 0.6205217823 | 0.9999986525 | 1.6074441847   |
| 0.1714962661 | 0.9999986525 | 0              |
| 0.6808672554 | 0.9999986525 | 0              |
| 0.3377636812 | 0.9999986525 | 0              |
| 0.2629303392 | 0.9999986525 | 0              |
| 0.878116715  | 0.9999986525 | 6.6166271895   |
| 0.9057338844 | 0.9999986525 | 20.4251696547  |
| 0.784783849  | 0.9999986525 | 180.8833488229 |
| 0.9556494784 | 0.9999986525 | 0              |
| 0.3165248995 | 0.9999986525 | 0              |
| 0.7625003487 | 0.9999986525 | 1.6721202541   |
| 0.2638223575 | 0.9999986525 | 2.9155603647   |
| 0.393889476  | 0.9999986525 | 3.5662790638   |
| 0.6982173982 | 0.9999986525 | 48.3669492923  |
| 0.4390912398 | 0.9999986525 | 0              |
| 0.113668929  | 0.9999986525 | 0              |
| 0.8233446811 | 0.9999986525 | 3.8704983951   |
| 0.5372353559 | 0.9999986525 | 2.4251598313   |
| 0            | 0            | 0              |
| 0.9016655542 | 0.9999986525 | 5.7984423366   |
| 0.9516839005 | 0.9999986525 | 0              |
| 0.3805430829 | 0.9999986525 | 8.3762921773   |
| 0.5771314565 | 0.9999986525 | 13.0759886671  |
| 0.9609466517 | 0.9999986525 | 8.2271077539   |
| 0.1401030191 | 0.9999986525 | 15.6587755652  |
| 0.473283242  | 0.9999986525 | 4.8132985397   |
| 0.6953951517 | 0.9999986525 | 14.2125721815  |
| 0.9387808992 | 0.9999986525 | 0              |
| 0            | 0            | 0              |
| 0.5603284901 | 0.9999986525 | 32.758912186   |
| 0.2260739842 | 0.9999986525 | 79.9605120762  |
| 0.7054736676 | 0.9999986525 | 56.1850193897  |
| 0.6558128419 | 0.9999986525 | 373.394646709  |
| 0.5334400971 | 0.9999986525 | 0              |
| 0.1896949126 | 0.9999986525 | 0              |
| 0.9649124579 | 0.9999986525 | 0              |
| 0.4275738762 | 0.9999986525 | 0              |
| 0.4040470878 | 0.9999986525 | 0              |
| 0.4897069867 | 0.9999986525 | 669.9439944141 |

gene\_expression\_table

|              |              |                |
|--------------|--------------|----------------|
| 0.4322443382 | 0.9999986525 | 875.6711830269 |
| 0.436653247  | 0.9999986525 | 43.8289777812  |
| 0.4067374483 | 0.9999986525 | 0              |
| 0.5046442352 | 0.9999986525 | 3.6457334916   |
| 0.070848044  | 0.9999986525 | 7.2056645373   |
| 0.4080869697 | 0.9999986525 | 0              |
| 0.4094396782 | 0.9999986525 | 112.0274017793 |
| 0.094793386  | 0.9999986525 | 0              |
| 0.8732645294 | 0.9999986525 | 46.7023518391  |
| 0.1214362873 | 0.9999986525 | 1.01360557     |
| 0.4064456244 | 0.9999986525 | 2.9416240518   |
| 0.5612755749 | 0.9999986525 | 31.205387553   |
| 0.6884649651 | 0.9999986525 | 3.9874607947   |
| 0.6448714691 | 0.9999986525 | 17.3651451157  |
| 0.2346850621 | 0.9999986525 | 0              |
| 0.6543381096 | 0.9999986525 | 80.2033686049  |
| 0.3994281624 | 0.9999986525 | 5.6679457208   |
| 0.0402867559 | 0.9999986525 | 173.3944785337 |
| 0.3049288305 | 0.9999986525 | 0              |
| 0.2165786373 | 0.9999986525 | 15.8950395946  |
| 0.6328903539 | 0.9999986525 | 0              |
| 0.5632636154 | 0.9999986525 | 5.6963725639   |
| 0.4420077254 | 0.9999986525 | 81.4760170984  |
| 0.813951503  | 0.9999986525 | 9.6773097987   |
| 0.9942003353 | 0.9999986525 | 0              |
| 0.0535880063 | 0.9999986525 | 0              |
| 0.4655503314 | 0.9999986525 | 67.8624069725  |
| 0.9215079999 | 0.9999986525 | 0              |
| 0            | 0            | 0              |
| 0.8974391941 | 0.9999986525 | 8.552630411    |
| 0.874004459  | 0.9999986525 | 63.5929177921  |
| 0.003857     | 0.9999986525 | 297.7367462888 |
| 0.1791719375 | 0.9999986525 | 0              |
| 0.2707036299 | 0.9999986525 | 0.5934014767   |
| 0.6526266542 | 0.9999986525 | 4.236637111    |
| 0.9390178142 | 0.9999986525 | 0              |
| 0.4981499256 | 0.9999986525 | 0              |
| 0.1787304289 | 0.9999986525 | 0              |
| 0.9620340226 | 0.9999986525 | 281.7681532581 |
| 0.4285056437 | 0.9999986525 | 99.3559896086  |
| 0.6290922228 | 0.9999986525 | 14.6705328406  |
| 0.5742876355 | 0.9999986525 | 0              |
| 0.6294868555 | 0.9999986525 | 11.1257464138  |
| 0.7848930317 | 0.9999986525 | 20.3849153656  |
| 0.0417613058 | 0.9999986525 | 0              |
| 0.6689652118 | 0.9999986525 | 2.3806675033   |
| 0.8056667926 | 0.9999986525 | 0              |
| 0.5353262145 | 0.9999986525 | 36.9623502884  |
| 0.3243815649 | 0.9999986525 | 210.3342087526 |

gene\_expression\_table

|              |              |                |
|--------------|--------------|----------------|
| 0.7199817529 | 0.9999986525 | 0              |
| 0.1240670412 | 0.9999986525 | 187.9498869264 |
| 0.0675295437 | 0.9999986525 | 15.2070020807  |
| 0.4468704073 | 0.9999986525 | 133.6384570504 |
| 0.344847994  | 0.9999986525 | 0              |
| 0.7757581019 | 0.9999986525 | 0              |
| 0.0226338363 | 0.9999986525 | 55.55461244    |
| 6.77E-05     | 0.3402364001 | 0              |
| 0.4387380765 | 0.9999986525 | 24.0281702576  |
| 0.4729816619 | 0.9999986525 | 0              |
| 0.283454496  | 0.9999986525 | 149.1216514625 |
| 0.577789682  | 0.9999986525 | 0              |
| 0.0954069473 | 0.9999986525 | 0              |
| 0.1613285607 | 0.9999986525 | 248.415981348  |
| 0.3841736096 | 0.9999986525 | 46.4230163138  |
| 0.9068472996 | 0.9999986525 | 52.2220681209  |
| 0.2331854482 | 0.9999986525 | 0              |
| 0.1308946948 | 0.9999986525 | 26.0167084859  |
| 0.0112350297 | 0.9999986525 | 120.0836165821 |
| 0.3126130998 | 0.9999986525 | 56.9545111898  |
| 0.590144854  | 0.9999986525 | 0              |
| 0.569379529  | 0.9999986525 | 153.4818669777 |
| 0.0621743531 | 0.9999986525 | 0              |
| 0.9058315253 | 0.9999986525 | 13.1508760524  |
| 0.4362057    | 0.9999986525 | 0              |
| 0.9041277296 | 0.9999986525 | 0              |
| 0.4763126467 | 0.9999986525 | 84.0985959018  |
| 0.9394824875 | 0.9999986525 | 0              |
| 0.8370994789 | 0.9999986525 | 596.8762176506 |
| 0.4729816619 | 0.9999986525 | 0              |
| 0            | 0            | 0              |
| 0.4729816619 | 0.9999986525 | 0              |
| 0.5321368017 | 0.9999986525 | 2.5998778294   |
| 0.068192181  | 0.9999986525 | 0              |
| 0.7345456219 | 0.9999986525 | 0              |
| 0.0319571952 | 0.9999986525 | 3.1832392512   |
| 0.9811778188 | 0.9999986525 | 0              |
| 0.8567838328 | 0.9999986525 | 2.4463119628   |
| 0.409262767  | 0.9999986525 | 0.4100618675   |
| 0.1452482925 | 0.9999986525 | 18.4680193116  |
| 0.9575545607 | 0.9999986525 | 0.8804990552   |
| 0.2679172705 | 0.9999986525 | 1.2638385734   |
| 0.8037014778 | 0.9999986525 | 0              |
| 0.1177718768 | 0.9999986525 | 14.4078890302  |
| 0.2927264161 | 0.9999986525 | 4.4364667333   |
| 0.2374608904 | 0.9999986525 | 12.2908815979  |
| 0.3402321535 | 0.9999986525 | 0              |
| 0.003159     | 0.9999986525 | 2.1483569493   |
| 0.5026359203 | 0.9999986525 | 5.6277218237   |

gene\_expression\_table

|              |              |                 |
|--------------|--------------|-----------------|
| 0.40257118   | 0.9999986525 | 0               |
| 0.4168155495 | 0.9999986525 | 5.6977552905    |
| 0.7324761741 | 0.9999986525 | 0.693897391     |
| 0.0947636296 | 0.9999986525 | 10.8553349214   |
| 0.6046805701 | 0.9999986525 | 292.9585602692  |
| 0.6217406427 | 0.9999986525 | 0.5847573368    |
| 0.2405246644 | 0.9999986525 | 0               |
| 0.9130190202 | 0.9999986525 | 2.3877172669    |
| 0.3400827575 | 0.9999986525 | 3.6876077522    |
| 0.2723073919 | 0.9999986525 | 0               |
| 0.0137326402 | 0.9999986525 | 0               |
| 0.8016596251 | 0.9999986525 | 92.0103104988   |
| 0.6396487653 | 0.9999986525 | 0               |
| 0.7427925637 | 0.9999986525 | 2.4584623869    |
| 0.8247269494 | 0.9999986525 | 4.3855667261    |
| 0            | 0            | 0               |
| 0.0293373705 | 0.9999986525 | 0               |
| 0.1215532049 | 0.9999986525 | 0               |
| 0.5611001991 | 0.9999986525 | 0               |
| 0.8157933208 | 0.9999986525 | 8.3823633029    |
| 0.7494136233 | 0.9999986525 | 22.3184906138   |
| 0.9013243727 | 0.9999986525 | 0.8131222784    |
| 0.4291902881 | 0.9999986525 | 5.2589885315    |
| 0.6312664098 | 0.9999986525 | 0               |
| 0.5978569286 | 0.9999986525 | 2070.2839161057 |
| 0.2859972039 | 0.9999986525 | 39.6699435851   |
| 0.4713953899 | 0.9999986525 | 1083.7690927321 |
| 0.6173783619 | 0.9999986525 | 97.4067101186   |
| 0.05575802   | 0.9999986525 | 5.2514585091    |
| 0.8690973601 | 0.9999986525 | 2.3542958243    |
| 0.2529518751 | 0.9999986525 | 0               |
| 0.00062      | 0.9999986525 | 0               |
| 0.5420078009 | 0.9999986525 | 5.951618456     |
| 0.437599792  | 0.9999986525 | 601.793470005   |
| 0.2704250367 | 0.9999986525 | 3.2754848813    |
| 0.0882767193 | 0.9999986525 | 0.4622500589    |
| 0.3153248267 | 0.9999986525 | 0               |
| 0.006674     | 0.9999986525 | 10.588195314    |
| 0.5080015583 | 0.9999986525 | 0.7766638465    |
| 0.1585133021 | 0.9999986525 | 0.3702757984    |
| 0.158288742  | 0.9999986525 | 0               |
| 0.0339607153 | 0.9999986525 | 0               |
| 0.8064871086 | 0.9999986525 | 3.7941373918    |
| 0.0977724962 | 0.9999986525 | 0               |
| 0.4958099061 | 0.9999986525 | 6.7169352173    |
| 0.9058501509 | 0.9999986525 | 0               |
| 0.1289721959 | 0.9999986525 | 36.2401085725   |
| 0.0791126646 | 0.9999986525 | 0               |
| 0.2387783407 | 0.9999986525 | 1.2916096411    |

gene\_expression\_table

|              |              |               |
|--------------|--------------|---------------|
| 0.6678216619 | 0.9999986525 | 79.9526176005 |
| 0.0868049151 | 0.9999986525 | 0             |
| 0.4633773546 | 0.9999986525 | 22.1457480857 |
| 0.7983597251 | 0.9999986525 | 0             |
| 0.7552381254 | 0.9999986525 | 0             |
| 0.664791523  | 0.9999986525 | 10.3710141652 |
| 0.0675451141 | 0.9999986525 | 10.1462788966 |
| 0.8551724208 | 0.9999986525 | 1.1782246119  |
| 0.6569759744 | 0.9999986525 | 12.8220243327 |
| 0.8371394981 | 0.9999986525 | 0.9059845822  |
| 0.1127743894 | 0.9999986525 | 15.8804736935 |
| 0.0416389582 | 0.9999986525 | 36.418368657  |
| 0.4790011379 | 0.9999986525 | 7.2666370702  |
| 0.6628929536 | 0.9999986525 | 1.7938291633  |
| 0.9237471705 | 0.9999986525 | 0             |
| 0.3219337109 | 0.9999986525 | 1.7367286493  |
| 0.3775059515 | 0.9999986525 | 2.3960583534  |
| 0.7432928275 | 0.9999986525 | 7.0846787104  |
| 0.2227101013 | 0.9999986525 | 22.7315513967 |
| 0.6045233919 | 0.9999986525 | 13.0292138217 |
| 0.045484976  | 0.9999986525 | 6.0617861748  |
| 0.3339972928 | 0.9999986525 | 0             |
| 0.3215929346 | 0.9999986525 | 1.1615623785  |
| 0            | 0            | 0             |
| 0.2108460673 | 0.9999986525 | 7.0838189577  |
| 0.9792964222 | 0.9999986525 | 0.2881959119  |
| 0.6528581185 | 0.9999986525 | 0             |
| 0.1332929215 | 0.9999986525 | 1.5902058963  |
| 0.547388962  | 0.9999986525 | 3.5380283521  |
| 0.7312809148 | 0.9999986525 | 0             |
| 0.6312664098 | 0.9999986525 | 0             |
| 0.413564616  | 0.9999986525 | 10.4075622877 |
| 0.7475489349 | 0.9999986525 | 23.2959756925 |
| 0.9395506155 | 0.9999986525 | 0.7009239436  |
| 0.0979876471 | 0.9999986525 | 0             |
| 0.4486840738 | 0.9999986525 | 11.0483590244 |
| 0.7705456406 | 0.9999986525 | 0.8697443037  |
| 0.6728245421 | 0.9999986525 | 0             |
| 0.0777736377 | 0.9999986525 | 0.2889243044  |
| 0.7591897027 | 0.9999986525 | 0             |
| 0.4823264683 | 0.9999986525 | 0             |
| 0.437545299  | 0.9999986525 | 2.5191470654  |
| 0.2648971625 | 0.9999986525 | 0             |
| 0.4748345278 | 0.9999986525 | 4.0861041934  |
| 0.3504103614 | 0.9999986525 | 8.205378424   |
| 0.4919366604 | 0.9999986525 | 5.941268737   |
| 0.3377806273 | 0.9999986525 | 0             |
| 0.491714364  | 0.9999986525 | 0.2245995834  |
| 0.3511013628 | 0.9999986525 | 21.711785499  |

gene\_expression\_table

|              |              |                |
|--------------|--------------|----------------|
| 0.4807987756 | 0.9999986525 | 0.5146552156   |
| 0.4729816619 | 0.9999986525 | 0              |
| 0.5377570011 | 0.9999986525 | 0.9991471315   |
| 0.2162524961 | 0.9999986525 | 3.1001360781   |
| 0.4915319558 | 0.9999986525 | 0              |
| 0            | 0            | 0              |
| 0            | 0            | 0              |
| 0.2115716963 | 0.9999986525 | 3.1164169603   |
| 0.6331344452 | 0.9999986525 | 3.5299488622   |
| 0.7080599806 | 0.9999986525 | 0              |
| 0.8858587807 | 0.9999986525 | 0.7338629959   |
| 0.2141153046 | 0.9999986525 | 8.1893329664   |
| 0.8934252974 | 0.9999986525 | 1.8138516408   |
| 0.1101966388 | 0.9999986525 | 0              |
| 0.4729816619 | 0.9999986525 | 0              |
| 0.6148955497 | 0.9999986525 | 0              |
| 0.6933729028 | 0.9999986525 | 1.1858525161   |
| 0.9940126839 | 0.9999986525 | 32.6818800905  |
| 0.1430181839 | 0.9999986525 | 0              |
| 0            | 0            | 0              |
| 0.9092063505 | 0.9999986525 | 0              |
| 0.4198170566 | 0.9999986525 | 27.9282260124  |
| 0.9971838328 | 0.9999986525 | 0              |
| 0.9105813292 | 0.9999986525 | 0.0429931972   |
| 0.330621211  | 0.9999986525 | 1.6719085196   |
| 0.3345845565 | 0.9999986525 | 11.9272624721  |
| 0.3701223603 | 0.9999986525 | 36.2843713005  |
| 0.6905387327 | 0.9999986525 | 1.648245868    |
| 0.3727789367 | 0.9999986525 | 0              |
| 0.3932706146 | 0.9999986525 | 9.605150173    |
| 0.8362175388 | 0.9999986525 | 6.6309574345   |
| 0.9305072723 | 0.9999986525 | 13.3497707949  |
| 0.4545949647 | 0.9999986525 | 19.4639058431  |
| 0            | 0            | 0              |
| 0.2816958064 | 0.9999986525 | 5.3768609764   |
| 0.8891981908 | 0.9999986525 | 0              |
| 0.8688760497 | 0.9999986525 | 6.1490183055   |
| 0.4833514106 | 0.9999986525 | 37.6367666278  |
| 0.9384033929 | 0.9999986525 | 2.5769423574   |
| 0.1768080432 | 0.9999986525 | 1.0051369943   |
| 0.0972537264 | 0.9999986525 | 0              |
| 0.540255593  | 0.9999986525 | 267.2357538676 |
| 0.7695593593 | 0.9999986525 | 6.6005021841   |
| 0.5943281849 | 0.9999986525 | 1.5300694789   |
| 0.5592479747 | 0.9999986525 | 418.7320209039 |
| 0.74100418   | 0.9999986525 | 21.404656391   |
| 0.8173446487 | 0.9999986525 | 0              |
| 0.5370423873 | 0.9999986525 | 3.0483344334   |
| 0.406716487  | 0.9999986525 | 0              |



gene\_expression\_table

|              |              |                |
|--------------|--------------|----------------|
| 0.6264692362 | 0.9999986525 | 0              |
| 0.3975228442 | 0.9999986525 | 18.1387240617  |
| 0.6185490873 | 0.9999986525 | 11.0114203724  |
| 0.1027126008 | 0.9999986525 | 0              |
| 0.8004956178 | 0.9999986525 | 1.5236395646   |
| 0.1428103888 | 0.9999986525 | 0.2510095635   |
| 0            | 0            | 0.0754076268   |
| 0.9420204002 | 0.9999986525 | 5.9064409345   |
| 0.0637396242 | 0.9999986525 | 0              |
| 0.8431072276 | 0.9999986525 | 3.3584889655   |
| 0.1803074402 | 0.9999986525 | 4.2368798788   |
| 0.7408040624 | 0.9999986525 | 1.3612185424   |
| 0.8682471038 | 0.9999986525 | 2.0161172027   |
| 0.2219631112 | 0.9999986525 | 0              |
| 0.128221319  | 0.9999986525 | 106.9974032138 |
| 0.2699411363 | 0.9999986525 | 0              |
| 0.6312664098 | 0.9999986525 | 0              |
| 0.525928632  | 0.9999986525 | 0              |
| 0.5577593661 | 0.9999986525 | 39.9651291913  |
| 0.9344246725 | 0.9999986525 | 1.4052982339   |
| 0.5991640012 | 0.9999986525 | 0              |
| 0.1128436901 | 0.9999986525 | 0              |
| 0.6102714005 | 0.9999986525 | 5.7456394937   |
| 0.040564841  | 0.9999986525 | 4.0074298677   |
| 0.9042887662 | 0.9999986525 | 0              |
| 0.2837787995 | 0.9999986525 | 0              |
| 0.1626454412 | 0.9999986525 | 1.9683183597   |
| 0.1545535196 | 0.9999986525 | 0.9072607812   |
| 0.5145117137 | 0.9999986525 | 2.9690756817   |
| 0.8460155305 | 0.9999986525 | 0              |
| 0.542447018  | 0.9999986525 | 136.5608110166 |
| 0.6755709567 | 0.9999986525 | 57.1270072756  |
| 0.3758515685 | 0.9999986525 | 0.4626752598   |
| 0.5374479303 | 0.9999986525 | 4.0730266432   |
| 0.2030129713 | 0.9999986525 | 16.5671233114  |
| 0.2821035349 | 0.9999986525 | 3.569038521    |
| 0.241118902  | 0.9999986525 | 2.2349421618   |
| 0.7048338239 | 0.9999986525 | 7.2490165475   |
| 0.4729816619 | 0.9999986525 | 0              |
| 0.35618628   | 0.9999986525 | 0              |
| 0.6897478237 | 0.9999986525 | 15.8054521102  |
| 0.1793957653 | 0.9999986525 | 6.4949785681   |
| 0.5854188083 | 0.9999986525 | 0              |
| 0.7546101617 | 0.9999986525 | 7.047963999    |
| 0.5086966787 | 0.9999986525 | 35.0697790298  |
| 0.8982341471 | 0.9999986525 | 137.4964605255 |
| 0.7478096791 | 0.9999986525 | 16.067863076   |
| 0.3289214989 | 0.9999986525 | 58.0798220964  |
| 0.5189514279 | 0.9999986525 | 13.6640726729  |

gene\_expression\_table

|              |              |                |
|--------------|--------------|----------------|
| 0.4797579607 | 0.9999986525 | 56.3703765272  |
| 0.0627912251 | 0.9999986525 | 0.3594311747   |
| 0.4140862983 | 0.9999986525 | 0              |
| 0.4632489513 | 0.9999986525 | 0              |
| 0.7670378099 | 0.9999986525 | 4.2191054519   |
| 0.4434152756 | 0.9999986525 | 0              |
| 0.1184668635 | 0.9999986525 | 9.9983753564   |
| 0.6719129477 | 0.9999986525 | 5.984579969    |
| 0.4729816619 | 0.9999986525 | 0              |
| 0.01320769   | 0.9999986525 | 50.8192621855  |
| 0.3018161943 | 0.9999986525 | 0              |
| 0.2012748793 | 0.9999986525 | 0              |
| 0.1206546288 | 0.9999986525 | 2.7719476317   |
| 0            | 0            | 0              |
| 0.9762441986 | 0.9999986525 | 0              |
| 0.1598972669 | 0.9999986525 | 4.599714181    |
| 0.426853433  | 0.9999986525 | 4.9308111499   |
| 0.6626504876 | 0.9999986525 | 7.4800186328   |
| 0.4729816619 | 0.9999986525 | 0              |
| 0.7561853408 | 0.9999986525 | 0              |
| 0.5140435611 | 0.9999986525 | 1.7055453797   |
| 0.2069504    | 0.9999986525 | 104.7533735085 |
| 0.8783905283 | 0.9999986525 | 5.2446317221   |
| 0.3215094305 | 0.9999986525 | 1.4832037246   |
| 0.6022300375 | 0.9999986525 | 343.6673939999 |
| 0.3504202195 | 0.9999986525 | 10.8964573847  |
| 0.259908615  | 0.9999986525 | 0              |
| 0.9558918303 | 0.9999986525 | 0.7888855928   |
| 0            | 0            | 0              |
| 0.7338903188 | 0.9999986525 | 0              |
| 0.9389556137 | 0.9999986525 | 0.2760588259   |
| 0.3728928972 | 0.9999986525 | 4.6145843798   |
| 0.3497128008 | 0.9999986525 | 2.5424717526   |
| 0            | 0            | 0              |
| 0.9697003699 | 0.9999986525 | 0              |
| 0.6719684286 | 0.9999986525 | 5.4514779342   |
| 0.8079919713 | 0.9999986525 | 0              |
| 0            | 0            | 0              |
| 0.3619983458 | 0.9999986525 | 5.0966878548   |
| 0.002504     | 0.9999986525 | 0              |
| 0.6101143571 | 0.9999986525 | 0              |
| 0.8352797776 | 0.9999986525 | 1.4829634539   |
| 0.565495983  | 0.9999986525 | 0.6610250476   |
| 0.1360892536 | 0.9999986525 | 8.8189777735   |
| 0.6191450346 | 0.9999986525 | 141.2663898813 |
| 0.2903677583 | 0.9999986525 | 1.8255130561   |
| 0.7501931324 | 0.9999986525 | 102.8872931    |
| 0.6526310884 | 0.9999986525 | 13.208648158   |
| 0.8175049386 | 0.9999986525 | 0.8229543478   |

gene\_expression\_table

|              |              |                |
|--------------|--------------|----------------|
| 0.3247331383 | 0.9999986525 | 1.8966429012   |
| 0.2249481799 | 0.9999986525 | 6.5914406523   |
| 0.2361613804 | 0.9999986525 | 1.0765461399   |
| 0.403249938  | 0.9999986525 | 7.9607971099   |
| 0.792129294  | 0.9999986525 | 0              |
| 0.6180768187 | 0.9999986525 | 0              |
| 0.009827     | 0.9999986525 | 1.4260734781   |
| 0.7515015504 | 0.9999986525 | 9.8881893912   |
| 0.6896688948 | 0.9999986525 | 334.3240823188 |
| 0.5531883847 | 0.9999986525 | 12.5015192507  |
| 0.6848454189 | 0.9999986525 | 0              |
| 0.131568399  | 0.9999986525 | 1.2056458259   |
| 0.4886267275 | 0.9999986525 | 0              |
| 0.5051104229 | 0.9999986525 | 2.3096634039   |
| 0.7717217834 | 0.9999986525 | 1.1801663244   |
| 0.5380606355 | 0.9999986525 | 58.4871741155  |
| 0.2893118119 | 0.9999986525 | 0              |
| 0.0624729831 | 0.9999986525 | 25.0125115919  |
| 0.192093695  | 0.9999986525 | 0              |
| 0.3760221102 | 0.9999986525 | 8.8444228423   |
| 0.995721625  | 0.9999986525 | 0.419985831    |
| 0.4045974932 | 0.9999986525 | 362.9822558509 |
| 0.0334278522 | 0.9999986525 | 2.4769683063   |
| 0.0371156586 | 0.9999986525 | 3.2153613726   |
| 0.2596236755 | 0.9999986525 | 17.4355149141  |
| 0.3531143923 | 0.9999986525 | 14.7924334496  |
| 0.5190887788 | 0.9999986525 | 0              |
| 0.436979617  | 0.9999986525 | 229.6257314187 |
| 0.3944109367 | 0.9999986525 | 0.500966746    |
| 0.7776265971 | 0.9999986525 | 0              |
| 0.7658748097 | 0.9999986525 | 3.6787204649   |
| 0.7027657586 | 0.9999986525 | 0.3827927682   |
| 0.5022731018 | 0.9999986525 | 0              |
| 0.639640141  | 0.9999986525 | 0              |
| 0.8401054457 | 0.9999986525 | 119.3780130462 |
| 0.6239672728 | 0.9999986525 | 0.6434130674   |
| 0.0764076056 | 0.9999986525 | 0              |
| 0.652271709  | 0.9999986525 | 0              |
| 0.6916021622 | 0.9999986525 | 23.6573983807  |
| 0.2889427888 | 0.9999986525 | 7.5174604265   |
| 0.670260698  | 0.9999986525 | 0              |
| 0.7739219214 | 0.9999986525 | 6.5486805822   |
| 0.374632953  | 0.9999986525 | 0              |
| 0.2057159918 | 0.9999986525 | 1.1342586465   |
| 0.1337666906 | 0.9999986525 | 0              |
| 0.6652961094 | 0.9999986525 | 4.906076937    |
| 0.3376694807 | 0.9999986525 | 0              |
| 0.7246509973 | 0.9999986525 | 2.1396632052   |
| 0.8576096373 | 0.9999986525 | 0              |

gene\_expression\_table

|              |              |                |
|--------------|--------------|----------------|
| 0.4317161008 | 0.9999986525 | 9.1804675338   |
| 0.068366218  | 0.9999986525 | 20.5275318623  |
| 0.7552143123 | 0.9999986525 | 7.446271016    |
| 0.8927006539 | 0.9999986525 | 1.029551215    |
| 0.6296878219 | 0.9999986525 | 0              |
| 0.2701510071 | 0.9999986525 | 4.6491125199   |
| 0.6312664098 | 0.9999986525 | 0              |
| 0.5674444676 | 0.9999986525 | 3.470034049    |
| 0.2039698934 | 0.9999986525 | 28.772752798   |
| 0.554248713  | 0.9999986525 | 145.8799679877 |
| 0.0991380987 | 0.9999986525 | 0              |
| 0.1935364829 | 0.9999986525 | 1.308068463    |
| 0.0106928115 | 0.9999986525 | 10.2360489624  |
| 0.7063825521 | 0.9999986525 | 3.6087405689   |
| 0.5252001352 | 0.9999986525 | 1.8920225774   |
| 0.3666137678 | 0.9999986525 | 0              |
| 0.8428785807 | 0.9999986525 | 2.2976225682   |
| 0.8417058328 | 0.9999986525 | 1.1822070606   |
| 0.6310488399 | 0.9999986525 | 0.4224201031   |
| 0.8816463106 | 0.9999986525 | 22.7296297316  |
| 0.6728973682 | 0.9999986525 | 0              |
| 0.9094036734 | 0.9999986525 | 95.8162522248  |
| 0.4221112419 | 0.9999986525 | 11.1451865116  |
| 0.1089214712 | 0.9999986525 | 16.4940406703  |
| 0.7089979672 | 0.9999986525 | 46.7852983528  |
| 0.3392056312 | 0.9999986525 | 67.3754338719  |
| 0.2890633505 | 0.9999986525 | 12.647443727   |
| 0.330438641  | 0.9999986525 | 17.5160858636  |
| 0.6686980728 | 0.9999986525 | 5.9089190229   |
| 0.9748965775 | 0.9999986525 | 23.5710653172  |
| 0.3004342168 | 0.9999986525 | 0              |
| 0.9478655859 | 0.9999986525 | 443.9579288342 |
| 0.8629584734 | 0.9999986525 | 1.6992211776   |
| 0.6505385037 | 0.9999986525 | 21.1220469494  |
| 0.4406043053 | 0.9999986525 | 2.2834501373   |
| 0.6563397529 | 0.9999986525 | 547.105506488  |
| 0.5622336597 | 0.9999986525 | 32.0144986407  |
| 0.9956241433 | 0.9999986525 | 12.8313698315  |
| 0            | 0            | 0              |
| 0.8126071206 | 0.9999986525 | 0              |
| 0.4638338946 | 0.9999986525 | 3.6398289612   |
| 0.8910253576 | 0.9999986525 | 119.2394819281 |
| 0.3157833598 | 0.9999986525 | 3.2677835804   |
| 0.2367361512 | 0.9999986525 | 0              |
| 0.4377522189 | 0.9999986525 | 6.2971167553   |
| 0.6541105442 | 0.9999986525 | 0              |
| 0.10669186   | 0.9999986525 | 144.8657631599 |
| 0.585589821  | 0.9999986525 | 3.7981181625   |
| 0.8472490407 | 0.9999986525 | 0              |

gene\_expression\_table

|              |              |                 |
|--------------|--------------|-----------------|
| 0.5252609988 | 0.9999986525 | 17.6458129724   |
| 0.3377975973 | 0.9999986525 | 0               |
| 0.8815294998 | 0.9999986525 | 56.4854740388   |
| 0.7998054722 | 0.9999986525 | 44.976724059    |
| 0.1557207747 | 0.9999986525 | 44.171105291    |
| 0            | 0            | 0               |
| 0.30755387   | 0.9999986525 | 0               |
| 0.6589724076 | 0.9999986525 | 23.0830062178   |
| 0.461185945  | 0.9999986525 | 2.8434836898    |
| 0.7363695858 | 0.9999986525 | 1.8630233778    |
| 0.0124324191 | 0.9999986525 | 2.7243504988    |
| 0.4312185611 | 0.9999986525 | 17.729484529    |
| 0.9653250202 | 0.9999986525 | 5.1853080642    |
| 0.9293242832 | 0.9999986525 | 0               |
| 0.37459487   | 0.9999986525 | 0               |
| 0.2122056253 | 0.9999986525 | 0               |
| 0.6208256983 | 0.9999986525 | 3.0016861977    |
| 0.8545920513 | 0.9999986525 | 0               |
| 0.8062252863 | 0.9999986525 | 0               |
| 0.8246125154 | 0.9999986525 | 0               |
| 0.5188177462 | 0.9999986525 | 0.1172412896    |
| 0.1276901948 | 0.9999986525 | 0               |
| 0.0558053416 | 0.9999986525 | 3.5267666399    |
| 0.0781574109 | 0.9999986525 | 26.2475986925   |
| 0.6831456208 | 0.9999986525 | 0               |
| 0.3131568796 | 0.9999986525 | 0               |
| 0.924814951  | 0.9999986525 | 0               |
| 0            | 0            | 0               |
| 0.6932614969 | 0.9999986525 | 10.7198291422   |
| 0.598251519  | 0.9999986525 | 0               |
| 0            | 0            | 0               |
| 0.1865096783 | 0.9999986525 | 0               |
| 0.0810610129 | 0.9999986525 | 1.9414918795    |
| 0.1800053735 | 0.9999986525 | 0.613352204     |
| 0.0256385558 | 0.9999986525 | 15.411122914    |
| 0.3279250074 | 0.9999986525 | 3.6650880102    |
| 0            | 0            | 0               |
| 0.1479735131 | 0.9999986525 | 41.9309347159   |
| 0.4240162976 | 0.9999986525 | 44.7106459225   |
| 0.238923872  | 0.9999986525 | 1.9056421089    |
| 0.162367444  | 0.9999986525 | 0               |
| 0.483187126  | 0.9999986525 | 0               |
| 0.0197567327 | 0.9999986525 | 0.7593625464    |
| 0.8298393888 | 0.9999986525 | 17.7714939912   |
| 0.9698956479 | 0.9999986525 | 0               |
| 0.2782044585 | 0.9999986525 | 1.52041565      |
| 0.6732029651 | 0.9999986525 | 102.1743436377  |
| 0.836111129  | 0.9999986525 | 0.9774110656    |
| 0.5753106915 | 0.9999986525 | 1972.3040001527 |

gene\_expression\_table

|              |              |                |
|--------------|--------------|----------------|
| 0.4066955181 | 0.9999986525 | 0              |
| 0.002521     | 0.9999986525 | 6.3562303799   |
| 0.8942821655 | 0.9999986525 | 0              |
| 0.4133405306 | 0.9999986525 | 4.5235985873   |
| 0.4965705512 | 0.9999986525 | 0.4655505644   |
| 0.2896556432 | 0.9999986525 | 58.352059109   |
| 0.6720860674 | 0.9999986525 | 0              |
| 0.0658816377 | 0.9999986525 | 0.4579413524   |
| 0.5200282761 | 0.9999986525 | 0.2511611632   |
| 0.9737102643 | 0.9999986525 | 1.0044201521   |
| 0.3019355107 | 0.9999986525 | 6.2903666301   |
| 0.8828015954 | 0.9999986525 | 0              |
| 0            | 0            | 0              |
| 0.797096709  | 0.9999986525 | 0              |
| 0.5114890716 | 0.9999986525 | 0.286726738    |
| 0.4608761192 | 0.9999986525 | 4.1628374104   |
| 0.583946562  | 0.9999986525 | 2179.908381103 |
| 0.8281325806 | 0.9999986525 | 0              |
| 0.4167143667 | 0.9999986525 | 3.513432559    |
| 0.7617796418 | 0.9999986525 | 4.3967630891   |
| 0.572084325  | 0.9999986525 | 0              |
| 0.2466415936 | 0.9999986525 | 21.1462436176  |
| 0.9407081457 | 0.9999986525 | 196.8465084842 |
| 0.3500955766 | 0.9999986525 | 11.1000248479  |
| 0.3670085038 | 0.9999986525 | 2.1647710057   |
| 0.5118137658 | 0.9999986525 | 41.0896666698  |
| 0.9558580499 | 0.9999986525 | 8.6682507593   |
| 0.8696567605 | 0.9999986525 | 20.3685961885  |
| 0.5582769022 | 0.9999986525 | 168.1971918035 |
| 0.6418008556 | 0.9999986525 | 6.2655536645   |
| 0.1571545862 | 0.9999986525 | 185.3462220724 |
| 0.7420925044 | 0.9999986525 | 6.758403322    |
| 0.9728282775 | 0.9999986525 | 22.4937496106  |
| 0.4538293089 | 0.9999986525 | 16.2896987281  |
| 0.1109054179 | 0.9999986525 | 131.0519062688 |
| 0.5138723097 | 0.9999986525 | 2.6386509568   |
| 0.1981977549 | 0.9999986525 | 0              |
| 0.6963866041 | 0.9999986525 | 28.1899750341  |
| 0.4729816619 | 0.9999986525 | 0              |
| 0.5836412478 | 0.9999986525 | 0              |
| 0.5329219466 | 0.9999986525 | 50.880460719   |
| 0.2234873452 | 0.9999986525 | 27.6050168442  |
| 0.30755387   | 0.9999986525 | 0              |
| 0.9595986228 | 0.9999986525 | 3.6714576452   |
| 0.4933784168 | 0.9999986525 | 1.1464505194   |
| 0.220290428  | 0.9999986525 | 11.4498334711  |
| 0.2946674566 | 0.9999986525 | 49.7519140609  |
| 0.3020795422 | 0.9999986525 | 31.6728421648  |
| 0.7457498213 | 0.9999986525 | 30.9738866178  |

gene\_expression\_table

|              |              |                 |
|--------------|--------------|-----------------|
| 0.2600803118 | 0.9999986525 | 18.27746192     |
| 0.5487261674 | 0.9999986525 | 21.7744457746   |
| 0.2643540979 | 0.9999986525 | 21.4358018039   |
| 0.7730514327 | 0.9999986525 | 51.9898786497   |
| 0.053007675  | 0.9999986525 | 0.7098406401    |
| 0.4270384679 | 0.9999986525 | 1.9772347807    |
| 0.9492699212 | 0.9999986525 | 88.9216764833   |
| 0.6564092711 | 0.9999986525 | 5.6570178049    |
| 0.1777627242 | 0.9999986525 | 1.1498284034    |
| 0.9325186212 | 0.9999986525 | 1.4446215221    |
| 0.4144873461 | 0.9999986525 | 0               |
| 0.6312664098 | 0.9999986525 | 0               |
| 0.4216264284 | 0.9999986525 | 1.0641316561    |
| 0.9977660401 | 0.9999986525 | 18.4041024659   |
| 0.2441130937 | 0.9999986525 | 0               |
| 0.4458707176 | 0.9999986525 | 0               |
| 0.7005142778 | 0.9999986525 | 7.3761519088    |
| 0.147847231  | 0.9999986525 | 0               |
| 0.019194632  | 0.9999986525 | 20.637490637    |
| 0.4618589154 | 0.9999986525 | 32.4134140753   |
| 0.731254228  | 0.9999986525 | 1.8167467554    |
| 0.2901491512 | 0.9999986525 | 7.7309402366    |
| 0.9028144079 | 0.9999986525 | 0.2901512906    |
| 0.7922695934 | 0.9999986525 | 3.2363055926    |
| 0.3862080206 | 0.9999986525 | 4.0600325352    |
| 0.4266580055 | 0.9999986525 | 70.5832518895   |
| 0.6396315051 | 0.9999986525 | 0               |
| 0.9463772032 | 0.9999986525 | 12.33141715     |
| 0.4729816619 | 0.9999986525 | 0               |
| 0.7637296375 | 0.9999986525 | 74.2029058325   |
| 0.2063411709 | 0.9999986525 | 4.3638850011    |
| 0.5003951902 | 0.9999986525 | 8.2130344804    |
| 0.5920307323 | 0.9999986525 | 13.642424567    |
| 0.5429681068 | 0.9999986525 | 0.9830783505    |
| 0.4936593564 | 0.9999986525 | 0               |
| 0.8213777324 | 0.9999986525 | 0               |
| 0.7332129557 | 0.9999986525 | 2.8885319529    |
| 0.474460972  | 0.9999986525 | 0               |
| 0.128539487  | 0.9999986525 | 54.3954145379   |
| 0.2820251124 | 0.9999986525 | 33.6751869668   |
| 0.0322284883 | 0.9999986525 | 1006.5619878869 |
| 0.7474187478 | 0.9999986525 | 0               |
| 0.6545298673 | 0.9999986525 | 316.5426173085  |
| 0.5264607579 | 0.9999986525 | 15.6725609258   |
| 0.8396857729 | 0.9999986525 | 10.1795245461   |
| 0.9792061212 | 0.9999986525 | 0.1627377046    |
| 0.1687481096 | 0.9999986525 | 1.2461403007    |
| 0.7931437115 | 0.9999986525 | 2.628970702     |
| 0.6736556879 | 0.9999986525 | 77.9813837659   |

gene\_expression\_table

|              |              |                |
|--------------|--------------|----------------|
| 0.4521943643 | 0.9999986525 | 2.0919924433   |
| 0.1539202038 | 0.9999986525 | 1.1567286834   |
| 0.6184181648 | 0.9999986525 | 3450.752037565 |
| 0.1292717957 | 0.9999986525 | 37.5892543064  |
| 0.3361079313 | 0.9999986525 | 0              |
| 0.0992359945 | 0.9999986525 | 0              |
| 0.6420515052 | 0.9999986525 | 0              |
| 0.3378145912 | 0.9999986525 | 0              |
| 0.3378316093 | 0.9999986525 | 1.2820779295   |
| 0.8636977554 | 0.9999986525 | 5.5305427746   |
| 0.2965755051 | 0.9999986525 | 0              |
| 0.181773245  | 0.9999986525 | 0              |
| 0.1183165147 | 0.9999986525 | 1.1983281879   |
| 0.5712613252 | 0.9999986525 | 32.7252746379  |
| 0.6781856287 | 0.9999986525 | 26.3424201837  |
| 0.1140192386 | 0.9999986525 | 0.8054681211   |
| 0            | 0            | 0              |
| 0.2471191892 | 0.9999986525 | 0              |
| 0.0256880226 | 0.9999986525 | 279.6891546937 |
| 0.1947291238 | 0.9999986525 | 0.222390311    |
| 0.6195536248 | 0.9999986525 | 5.6604535272   |
| 0.3069462142 | 0.9999986525 | 833.505165695  |
| 0.6141683097 | 0.9999986525 | 8.205732556    |
| 0.0680367528 | 0.9999986525 | 24.3350070816  |
| 0.3541308313 | 0.9999986525 | 1.9917848544   |
| 0.6325404846 | 0.9999986525 | 0.5390367077   |
| 0.0357128748 | 0.9999986525 | 9.4679706402   |
| 0.8868347302 | 0.9999986525 | 2.6092302256   |
| 0.1553596993 | 0.9999986525 | 0              |
| 0.3418943863 | 0.9999986525 | 0              |
| 0.7541109287 | 0.9999986525 | 3.3752088644   |
| 0.7000047868 | 0.9999986525 | 13.7670689414  |
| 0.2098282086 | 0.9999986525 | 0              |
| 0.9972909906 | 0.9999986525 | 10.5906451888  |
| 0.235379478  | 0.9999986525 | 2.4971906865   |
| 0.8420725296 | 0.9999986525 | 2.170464728    |
| 0.6098761914 | 0.9999986525 | 0              |
| 0.2122072758 | 0.9999986525 | 0              |
| 0.0968910774 | 0.9999986525 | 5.1272720567   |
| 0            | 0            | 0              |
| 0.2348282763 | 0.9999986525 | 22.3236005183  |
| 0.0598145129 | 0.9999986525 | 4.0749593558   |
| 0.179417907  | 0.9999986525 | 6.4008336133   |
| 0.3867403439 | 0.9999986525 | 1.5635596609   |
| 0.4183848885 | 0.9999986525 | 10.2218838199  |
| 0.5200366092 | 0.9999986525 | 0.7497397644   |
| 0.3312587845 | 0.9999986525 | 0              |
| 0.2203013426 | 0.9999986525 | 0              |
| 0.0207020901 | 0.9999986525 | 21.217983396   |



gene\_expression\_table

|              |              |                |
|--------------|--------------|----------------|
| 0.464369221  | 0.9999986525 | 0.8220257006   |
| 0.9841167438 | 0.9999986525 | 0.1263784137   |
| 0.3680747012 | 0.9999986525 | 0              |
| 0.5635437719 | 0.9999986525 | 161.2638724467 |
| 0.3881042328 | 0.9999986525 | 17.959234517   |
| 0.4608339643 | 0.9999986525 | 52.5250305582  |
| 0.003396     | 0.9999986525 | 8.6311355166   |
| 0.8319806636 | 0.9999986525 | 13.8754476649  |
| 0.2870143333 | 0.9999986525 | 0              |
| 0.4255020404 | 0.9999986525 | 0              |
| 0            | 0            | 0              |
| 0.7620355911 | 0.9999986525 | 0              |
| 0.5538144959 | 0.9999986525 | 0.6331465351   |
| 0.6111102538 | 0.9999986525 | 2.0167991074   |
| 0.562664099  | 0.9999986525 | 0              |
| 0.7778340206 | 0.9999986525 | 0              |
| 0.5975633479 | 0.9999986525 | 0              |
| 0.7087992871 | 0.9999986525 | 1.9813781719   |
| 0.1667149918 | 0.9999986525 | 0              |
| 0.6988556655 | 0.9999986525 | 23.9258486121  |
| 0.5982204778 | 0.9999986525 | 0              |
| 0.4729816619 | 0.9999986525 | 0              |
| 0.2278190209 | 0.9999986525 | 1.1062128108   |
| 0.5868239419 | 0.9999986525 | 0              |
| 0.3939868876 | 0.9999986525 | 4.0947634871   |
| 0.8079241555 | 0.9999986525 | 2.3289383954   |
| 0.8953422964 | 0.9999986525 | 28.6673821996  |
| 0.7595467267 | 0.9999986525 | 0              |
| 0.9031525661 | 0.9999986525 | 87.3132258638  |
| 0.6887471503 | 0.9999986525 | 0.2229338391   |
| 0.8980899706 | 0.9999986525 | 0.8525661973   |
| 0.1213262975 | 0.9999986525 | 29.8230544399  |
| 0.7152681712 | 0.9999986525 | 38.2344335443  |
| 0.8780606506 | 0.9999986525 | 33.2195652726  |
| 0.7659167233 | 0.9999986525 | 8.8685381224   |
| 0.2951698175 | 0.9999986525 | 0              |
| 0.2374049907 | 0.9999986525 | 1.7767337456   |
| 0.4870384255 | 0.9999986525 | 0              |
| 0.2411919882 | 0.9999986525 | 0.116303318    |
| 0.5374929182 | 0.9999986525 | 7.1081989537   |
| 0.0380189028 | 0.9999986525 | 18.2422494614  |
| 0.2471504701 | 0.9999986525 | 188.4865033059 |
| 0.4713682113 | 0.9999986525 | 4.7246885235   |
| 0.5934750459 | 0.9999986525 | 8.354517563    |
| 0            | 0            | 0              |
| 0.7301451729 | 0.9999986525 | 4.101824338    |
| 0.9081142045 | 0.9999986525 | 12.5013219725  |
| 0.7421176701 | 0.9999986525 | 0.9374683173   |
| 0.5539132265 | 0.9999986525 | 0              |

gene\_expression\_table

|              |              |                 |
|--------------|--------------|-----------------|
| 0.1475455769 | 0.9999986525 | 88.6387438763   |
| 0.3770956629 | 0.9999986525 | 28.4262776515   |
| 0.8841904304 | 0.9999986525 | 191.7517777926  |
| 0.0811208883 | 0.9999986525 | 0               |
| 0.1236886545 | 0.9999986525 | 2.4921760634    |
| 0.1713643211 | 0.9999986525 | 278.186770339   |
| 0.7405473676 | 0.9999986525 | 1.5648568363    |
| 0.3004408674 | 0.9999986525 | 0.9359233069    |
| 0.78736089   | 0.9999986525 | 47.0712283657   |
| 0            | 0            | 0               |
| 0.2993390948 | 0.9999986525 | 13.7250307241   |
| 0.0994571251 | 0.9999986525 | 22.2416960371   |
| 0.2274674095 | 0.9999986525 | 2.25705328      |
| 0.650891003  | 0.9999986525 | 68.6506401961   |
| 0.3244068702 | 0.9999986525 | 18.7762792329   |
| 0            | 0            | 0               |
| 0.650482881  | 0.9999986525 | 3.8003826888    |
| 0.1409979366 | 0.9999986525 | 32.0901192285   |
| 0.2034408865 | 0.9999986525 | 9.9375686142    |
| 0.4014757064 | 0.9999986525 | 5.0372849919    |
| 0            | 0            | 0               |
| 0.8787555021 | 0.9999986525 | 0               |
| 0.7346002971 | 0.9999986525 | 10.5275514398   |
| 0.5318515538 | 0.9999986525 | 20.9635959283   |
| 0.5763590362 | 0.9999986525 | 8.1169763358    |
| 0.3720727497 | 0.9999986525 | 3.1949699478    |
| 0.9205116818 | 0.9999986525 | 1.5863489266    |
| 0.5137794201 | 0.9999986525 | 51.5646474495   |
| 0.6645505801 | 0.9999986525 | 0               |
| 0.8062526182 | 0.9999986525 | 6.4974556157    |
| 0.3630154659 | 0.9999986525 | 4.0773502838    |
| 0.2273700188 | 0.9999986525 | 3.5319610553    |
| 0.0617485765 | 0.9999986525 | 91.7766257107   |
| 0.4159429915 | 0.9999986525 | 1134.2458525412 |
| 0.260853308  | 0.9999986525 | 1.1894222964    |
| 0.51527896   | 0.9999986525 | 56.9176831839   |
| 0.3303187085 | 0.9999986525 | 2.6518003252    |
| 0.2876284941 | 0.9999986525 | 2.447014698     |
| 0.0324940525 | 0.9999986525 | 53.2749890406   |
| 0.4211833184 | 0.9999986525 | 0.2137929678    |
| 0.0621921645 | 0.9999986525 | 129.4458780057  |
| 0.0907940405 | 0.9999986525 | 1.3976584336    |
| 0.9787917441 | 0.9999986525 | 7.1091557715    |
| 0.9537513111 | 0.9999986525 | 3.4622996084    |
| 0.3224581774 | 0.9999986525 | 6.8562791414    |
| 0.4562046649 | 0.9999986525 | 20.8924998478   |
| 0.4695342107 | 0.9999986525 | 20.4671110881   |
| 0.9276529538 | 0.9999986525 | 0.3915622644    |
| 0.3557205108 | 0.9999986525 | 0               |

gene\_expression\_table

|              |              |                  |
|--------------|--------------|------------------|
| 0.8977173871 | 0.9999986525 | 66.0360872415    |
| 0.3378486515 | 0.9999986525 | 0                |
| 0.7967109693 | 0.9999986525 | 0                |
| 0.9021608827 | 0.9999986525 | 0                |
| 0.2950560979 | 0.9999986525 | 0                |
| 0.3309490943 | 0.9999986525 | 4.6352394441     |
| 0.8631074593 | 0.9999986525 | 14104.3772812743 |
| 0.2761272846 | 0.9999986525 | 21.0640602346    |
| 0.4656181215 | 0.9999986525 | 2.9749531471     |
| 0.1828353418 | 0.9999986525 | 0                |
| 0.3639419675 | 0.9999986525 | 0                |
| 0.6203917486 | 0.9999986525 | 0                |
| 0.3456069453 | 0.9999986525 | 1.0281728638     |
| 0.7763329127 | 0.9999986525 | 0.7130078603     |
| 0.8482983241 | 0.9999986525 | 0                |
| 0.6312664098 | 0.9999986525 | 0                |
| 0.9148306275 | 0.9999986525 | 200.9119480937   |
| 0.82699059   | 0.9999986525 | 6.7289591625     |
| 0.8390311789 | 0.9999986525 | 0                |
| 0.251183001  | 0.9999986525 | 30.3721192015    |
| 0.5470390426 | 0.9999986525 | 14.111055617     |
| 0.1334750074 | 0.9999986525 | 0                |
| 0.666006837  | 0.9999986525 | 1.0098649705     |
| 0.3794356413 | 0.9999986525 | 9.774623195      |
| 0.3604798546 | 0.9999986525 | 0.4166910058     |
| 0.557502068  | 0.9999986525 | 0                |
| 0.7023995814 | 0.9999986525 | 0.4519495304     |
| 0.0181963373 | 0.9999986525 | 15.1081907472    |
| 0.9908051719 | 0.9999986525 | 0                |
| 0.588784017  | 0.9999986525 | 4.6307688055     |
| 0.6563139519 | 0.9999986525 | 11.9247938494    |
| 0.5575982554 | 0.9999986525 | 0                |
| 0.2937800423 | 0.9999986525 | 0                |
| 0.351012393  | 0.9999986525 | 0                |
| 0.4993573347 | 0.9999986525 | 8.5611798065     |
| 0.2876039523 | 0.9999986525 | 10.4155768261    |
| 0.8697036205 | 0.9999986525 | 0.9272920415     |
| 0.6286426529 | 0.9999986525 | 3.3293776856     |
| 0.3041244455 | 0.9999986525 | 3.2258684477     |
| 0.8200792922 | 0.9999986525 | 34.8089755982    |
| 0.4649204685 | 0.9999986525 | 42.4810319303    |
| 0.2699941318 | 0.9999986525 | 0                |
| 0.0358747487 | 0.9999986525 | 349.8103377447   |
| 0.1596157065 | 0.9999986525 | 85.4997664372    |
| 0.4195234339 | 0.9999986525 | 5.590549193      |
| 0.1789013351 | 0.9999986525 | 37.4832634679    |
| 0.1482989545 | 0.9999986525 | 233.350086123    |
| 0.2517904809 | 0.9999986525 | 181.1021627992   |
| 0.0734644785 | 0.9999986525 | 14.240492569     |

gene\_expression\_table

|              |              |                 |
|--------------|--------------|-----------------|
| 0.4318935654 | 0.9999986525 | 4.3233397369    |
| 0.6017489127 | 0.9999986525 | 71.8556710562   |
| 0.2680937777 | 0.9999986525 | 0               |
| 0.6591683833 | 0.9999986525 | 222.0108659677  |
| 0.5082406964 | 0.9999986525 | 0               |
| 0.3541642566 | 0.9999986525 | 16.3903850497   |
| 0.2688354447 | 0.9999986525 | 3.0549113399    |
| 0.4720072463 | 0.9999986525 | 2.8250038723    |
| 0.9233934854 | 0.9999986525 | 14.9318400414   |
| 0.2572976241 | 0.9999986525 | 7161.2092510251 |
| 0.9496560369 | 0.9999986525 | 16.4683249848   |
| 0.9369154406 | 0.9999986525 | 2.7430101915    |
| 0.1450903485 | 0.9999986525 | 18.8312886262   |
| 0.9421812802 | 0.9999986525 | 0.413228579     |
| 0.9057136526 | 0.9999986525 | 0               |
| 0.5322026814 | 0.9999986525 | 40.5053006369   |
| 0.1686140292 | 0.9999986525 | 0               |
| 0.9849606314 | 0.9999986525 | 0.5686344873    |
| 0.003013     | 0.9999986525 | 14.1668235586   |
| 0.0217279069 | 0.9999986525 | 8.6385977097    |
| 0.1925479966 | 0.9999986525 | 56.2841257005   |
| 0.8196398392 | 0.9999986525 | 1.1579242648    |
| 0.7222917656 | 0.9999986525 | 7.6336450048    |
| 0.4913900773 | 0.9999986525 | 0               |
| 0.3074132462 | 0.9999986525 | 10.2149641171   |
| 0.2582505154 | 0.9999986525 | 1.9295574961    |
| 0.9868474281 | 0.9999986525 | 17.42458536     |
| 0.7869615537 | 0.9999986525 | 0               |
| 0.7578330382 | 0.9999986525 | 5.8513093537    |
| 0.5874448067 | 0.9999986525 | 92.8582289659   |
| 0.8158955873 | 0.9999986525 | 19.1956530271   |
| 0.5956746153 | 0.9999986525 | 0               |
| 0.2333639439 | 0.9999986525 | 383.4041250549  |
| 0.2695271609 | 0.9999986525 | 7.101031022     |
| 0.4504710576 | 0.9999986525 | 0               |
| 0.7396233663 | 0.9999986525 | 0               |
| 0.7453591426 | 0.9999986525 | 0               |
| 0.1918226825 | 0.9999986525 | 423.2054026709  |
| 0.5622966111 | 0.9999986525 | 40.7148283898   |
| 0.8957731729 | 0.9999986525 | 0               |
| 0.4729816619 | 0.9999986525 | 0               |
| 0.7272759992 | 0.9999986525 | 26.6937960856   |
| 0.6842442451 | 0.9999986525 | 0               |
| 0.0637800552 | 0.9999986525 | 10.810642187    |
| 0.5797421376 | 0.9999986525 | 0               |
| 0.7842321321 | 0.9999986525 | 17.2573355312   |
| 0.5649363667 | 0.9999986525 | 213.0411607285  |
| 0.4021250008 | 0.9999986525 | 10.0500948088   |
| 0.5089902261 | 0.9999986525 | 64.269578751    |

gene\_expression\_table

|              |              |                 |
|--------------|--------------|-----------------|
| 0.0795702792 | 0.9999986525 | 0               |
| 0.6006496191 | 0.9999986525 | 67.4283580678   |
| 0.4067108667 | 0.9999986525 | 0.6129749098    |
| 0.8001284885 | 0.9999986525 | 141.9829425256  |
| 0.5067235335 | 0.9999986525 | 536.6212602477  |
| 0.9051164335 | 0.9999986525 | 0               |
| 0.8023600063 | 0.9999986525 | 2.4344942485    |
| 0.4190926531 | 0.9999986525 | 0               |
| 0.794291572  | 0.9999986525 | 1.2677673066    |
| 0.8107824783 | 0.9999986525 | 0               |
| 0.6834646241 | 0.9999986525 | 0.7969265787    |
| 0.63298459   | 0.9999986525 | 0               |
| 0.197165601  | 0.9999986525 | 0               |
| 0.2632601068 | 0.9999986525 | 5.2682212695    |
| 0.3888262802 | 0.9999986525 | 2839.0090429953 |
| 0.2589464364 | 0.9999986525 | 0               |
| 0.1183205852 | 0.9999986525 | 5.0458514757    |
| 0.5123359159 | 0.9999986525 | 3.9586192127    |
| 0.7523575135 | 0.9999986525 | 0               |
| 0.2064159874 | 0.9999986525 | 76.1477708721   |
| 0.9166783934 | 0.9999986525 | 2.2003965597    |
| 0.1049735521 | 0.9999986525 | 0               |
| 0.2144890043 | 0.9999986525 | 0               |
| 0.9166507814 | 0.9999986525 | 1.6628892925    |
| 0.8622574456 | 0.9999986525 | 0               |
| 0.4704424805 | 0.9999986525 | 0               |
| 0.2874566068 | 0.9999986525 | 0               |
| 0.5451821123 | 0.9999986525 | 0               |
| 0.4464179273 | 0.9999986525 | 0               |
| 0.1547348997 | 0.9999986525 | 0               |
| 0.8648837348 | 0.9999986525 | 6.9702940776    |
| 0.7971892167 | 0.9999986525 | 8.2207048372    |
| 0.9083034003 | 0.9999986525 | 197.1234386856  |
| 0.7657064734 | 0.9999986525 | 64.154661557    |
| 0.0842378591 | 0.9999986525 | 18.2503993733   |
| 0.6714074023 | 0.9999986525 | 0               |
| 0.3387189844 | 0.9999986525 | 1.3317258887    |
| 0.1709402094 | 0.9999986525 | 0               |
| 0.6334928103 | 0.9999986525 | 0.8593614234    |
| 0.7467864808 | 0.9999986525 | 7.4108155679    |
| 0.6682721078 | 0.9999986525 | 0.6650822851    |
| 0.540592239  | 0.9999986525 | 66.6421681089   |
| 0.406498459  | 0.9999986525 | 23.7989868087   |
| 0.3205752142 | 0.9999986525 | 1.5431836789    |
| 0.1779897191 | 0.9999986525 | 34.3430702675   |
| 0.9351996292 | 0.9999986525 | 2.5475817966    |
| 0.269965087  | 0.9999986525 | 0               |
| 0.3352210936 | 0.9999986525 | 0               |
| 0.1257284708 | 0.9999986525 | 10.7149357327   |

gene\_expression\_table

|              |              |                |
|--------------|--------------|----------------|
| 0.0638485753 | 0.9999986525 | 6.4739373192   |
| 0.340479609  | 0.9999986525 | 2.8868346507   |
| 0.7495941206 | 0.9999986525 | 74.2610931742  |
| 0.2128842149 | 0.9999986525 | 3.0215640612   |
| 0.166568851  | 0.9999986525 | 0              |
| 0.7361173917 | 0.9999986525 | 0              |
| 0.8063121231 | 0.9999986525 | 0              |
| 0.7013027923 | 0.9999986525 | 0              |
| 0.1876048216 | 0.9999986525 | 0              |
| 0.3964827263 | 0.9999986525 | 0              |
| 0.3881229861 | 0.9999986525 | 52.8879613722  |
| 0.1677847001 | 0.9999986525 | 4.1398653508   |
| 0.0886424749 | 0.9999986525 | 0              |
| 0.0759968404 | 0.9999986525 | 2.6174659014   |
| 0.347686177  | 0.9999986525 | 142.1486736995 |
| 0.4535910816 | 0.9999986525 | 0              |
| 0.9964442041 | 0.9999986525 | 374.9607657403 |
| 0.5642914726 | 0.9999986525 | 0              |
| 0.6402790344 | 0.9999986525 | 96.7730979868  |
| 0.9985134094 | 0.9999986525 | 0              |
| 0.6261678388 | 0.9999986525 | 13.4347660023  |
| 0.6248545567 | 0.9999986525 | 16.9246057022  |
| 0.4983271145 | 0.9999986525 | 6.4580482057   |
| 0.5006880774 | 0.9999986525 | 67.4960951301  |
| 0.0407299139 | 0.9999986525 | 23.2537505399  |
| 0.1930659923 | 0.9999986525 | 2.5929849875   |
| 0.4339311703 | 0.9999986525 | 30.6624722223  |
| 0.2834167384 | 0.9999986525 | 191.8181049382 |
| 0.630161503  | 0.9999986525 | 57.6151835196  |
| 0.1888236793 | 0.9999986525 | 22.1488438777  |
| 0.1267405007 | 0.9999986525 | 2.18185236     |
| 0.5720037523 | 0.9999986525 | 1.0472614435   |
| 0.1218647866 | 0.9999986525 | 2.3198302476   |
| 0.2471624996 | 0.9999986525 | 0              |
| 0.6360635078 | 0.9999986525 | 1.3770119994   |
| 0.43273306   | 0.9999986525 | 2.8953411669   |
| 0.8174274783 | 0.9999986525 | 0              |
| 0.9132861539 | 0.9999986525 | 0              |
| 0.3352698784 | 0.9999986525 | 3.6840065727   |
| 0.6057648151 | 0.9999986525 | 1.3370950714   |
| 0.1137541736 | 0.9999986525 | 2.2736689079   |
| 0.74730471   | 0.9999986525 | 1.3987292458   |
| 0.2904157214 | 0.9999986525 | 5.7660263362   |
| 0.3553972445 | 0.9999986525 | 0.4265068621   |
| 0.0941501707 | 0.9999986525 | 0              |
| 0.1026652889 | 0.9999986525 | 3.1798373307   |
| 0.9869669873 | 0.9999986525 | 1.074501917    |
| 0.8712368847 | 0.9999986525 | 0              |
| 0.8096125591 | 0.9999986525 | 0.3478696506   |

gene\_expression\_table

|              |              |                |
|--------------|--------------|----------------|
| 0.9401185192 | 0.9999986525 | 15.2461120716  |
| 0.1706902073 | 0.9999986525 | 135.7889609569 |
| 0.5125405115 | 0.9999986525 | 69.0227639638  |
| 0.3226225315 | 0.9999986525 | 32.6431634672  |
| 0.6850628938 | 0.9999986525 | 2.2362038965   |
| 0.6605607559 | 0.9999986525 | 0              |
| 0.310184525  | 0.9999986525 | 182.5548721378 |
| 0.0736027845 | 0.9999986525 | 151.2504817728 |
| 0.7970862043 | 0.9999986525 | 0              |
| 0.8931119689 | 0.9999986525 | 107.624875815  |
| 0.4133529485 | 0.9999986525 | 0.9984104924   |
| 0.121477328  | 0.9999986525 | 6.5179836879   |
| 0.1400386692 | 0.9999986525 | 8.3619249883   |
| 0.7024329523 | 0.9999986525 | 0              |
| 0.6312664098 | 0.9999986525 | 0              |
| 0.1464850521 | 0.9999986525 | 7.0120416014   |
| 0.7649663005 | 0.9999986525 | 66.307493065   |
| 0.8491541434 | 0.9999986525 | 18.9043107745  |
| 0.8587034022 | 0.9999986525 | 158.4417546789 |
| 0.3516521369 | 0.9999986525 | 9.936767305    |
| 0.121932057  | 0.9999986525 | 0.545237841    |
| 0.3626616378 | 0.9999986525 | 3.9351701234   |
| 0.51859937   | 0.9999986525 | 0              |
| 0.6754687958 | 0.9999986525 | 0              |
| 0.0352382952 | 0.9999986525 | 1.3230933744   |
| 0.3551115375 | 0.9999986525 | 0              |
| 0.8764038348 | 0.9999986525 | 272.2366918882 |
| 0.6707582209 | 0.9999986525 | 63.7656724737  |
| 0.0187770546 | 0.9999986525 | 31.4521737042  |
| 0.1457249057 | 0.9999986525 | 182.0571705109 |
| 0.486900061  | 0.9999986525 | 40.5325542796  |
| 0.5597032683 | 0.9999986525 | 238.4375540691 |
| 0.0959961578 | 0.9999986525 | 0              |
| 0.5583355702 | 0.9999986525 | 0              |
| 0.1302323364 | 0.9999986525 | 3.96322364     |
| 0.8967444962 | 0.9999986525 | 23.5618640314  |
| 0.5021362003 | 0.9999986525 | 72.8970575933  |
| 0.6396228574 | 0.9999986525 | 0              |
| 0.3609146335 | 0.9999986525 | 18.788302464   |
| 0.2409005473 | 0.9999986525 | 9.3591916049   |
| 0.9949583571 | 0.9999986525 | 15.487952559   |
| 0.0820865936 | 0.9999986525 | 5.5870007644   |
| 0.2023435848 | 0.9999986525 | 0              |
| 0.654125641  | 0.9999986525 | 1.2380003022   |
| 0.5356248422 | 0.9999986525 | 0              |
| 0            | 0            | 0              |
| 0            | 0            | 0              |
| 0.8750603099 | 0.9999986525 | 590.5709705817 |
| 0.4120120854 | 0.9999986525 | 38.4294714509  |

gene\_expression\_table

|              |              |                 |
|--------------|--------------|-----------------|
| 0.6992608851 | 0.9999986525 | 340.9937751034  |
| 0.9248988651 | 0.9999986525 | 27.6681663632   |
| 0.5121495141 | 0.9999986525 | 0               |
| 0.9888891526 | 0.9999986525 | 49.9658639795   |
| 0.4926608441 | 0.9999986525 | 5.228065554     |
| 0.0347291033 | 0.9999986525 | 22.770659888    |
| 0.3134174392 | 0.9999986525 | 15.4282303769   |
| 0.2650682723 | 0.9999986525 | 0.5194028267    |
| 0.7571109026 | 0.9999986525 | 0               |
| 0.7879588082 | 0.9999986525 | 1.6695038084    |
| 0.5422644622 | 0.9999986525 | 57.70557547     |
| 0.9136712135 | 0.9999986525 | 0.8234804432    |
| 0.5810405339 | 0.9999986525 | 0               |
| 0.9072074948 | 0.9999986525 | 961.7736494102  |
| 0.6098761915 | 0.9999986525 | 0               |
| 0.2756668095 | 0.9999986525 | 44.8031203141   |
| 0.7086270283 | 0.9999986525 | 84.2461608332   |
| 0.1331589056 | 0.9999986525 | 14.5927050802   |
| 0.723763583  | 0.9999986525 | 20.338076951    |
| 0.3049621922 | 0.9999986525 | 0               |
| 0.4248804569 | 0.9999986525 | 0               |
| 0.9369694231 | 0.9999986525 | 281.7577143075  |
| 0.6312664098 | 0.9999986525 | 0               |
| 0.9556383792 | 0.9999986525 | 343.5051591955  |
| 0.9574588803 | 0.9999986525 | 4315.2369917375 |
| 0.5236504605 | 0.9999986525 | 0               |
| 0.6312664098 | 0.9999986525 | 0               |
| 0.5133979653 | 0.9999986525 | 14.6664588243   |
| 0.2537483044 | 0.9999986525 | 86.7936207499   |
| 0.6312664098 | 0.9999986525 | 0               |
| 0.9814921405 | 0.9999986525 | 19.6626650135   |
| 0.6105702256 | 0.9999986525 | 3.8722720307    |
| 0.2661629689 | 0.9999986525 | 0               |
| 0.5581822663 | 0.9999986525 | 21.2407392992   |
| 0.4069382107 | 0.9999986525 | 62.2658785974   |
| 0.0595170353 | 0.9999986525 | 0               |
| 0.4623175362 | 0.9999986525 | 114.8128657094  |
| 0.3228418513 | 0.9999986525 | 12.9287437519   |
| 0.0625433724 | 0.9999986525 | 0               |
| 0.89552751   | 0.9999986525 | 13.5073959658   |
| 0.281240294  | 0.9999986525 | 55.2410728653   |
| 0.0805306109 | 0.9999986525 | 1.6283253396    |
| 0.0842528931 | 0.9999986525 | 25.2841833464   |
| 0.9945971612 | 0.9999986525 | 43.5309443448   |
| 0.164124506  | 0.9999986525 | 6.8970183776    |
| 0.1737059376 | 0.9999986525 | 796.5164644781  |
| 0.8967883504 | 0.9999986525 | 14.3204767425   |
| 0.7899339627 | 0.9999986525 | 38.4380773117   |
| 0.9004527342 | 0.9999986525 | 4.0484705894    |



gene\_expression\_table

|              |              |                |
|--------------|--------------|----------------|
| 0.4249952123 | 0.9999986525 | 21.8921920522  |
| 0.429515253  | 0.9999986525 | 0              |
| 0.0514203637 | 0.9999986525 | 154.9769136802 |
| 0.8726891937 | 0.9999986525 | 197.5023289102 |
| 0.3611860253 | 0.9999986525 | 0              |
| 0.4348136617 | 0.9999986525 | 0              |
| 0.6312664098 | 0.9999986525 | 0              |
| 0.3769252439 | 0.9999986525 | 0              |
| 0.3305668389 | 0.9999986525 | 1.3426357084   |
| 0.9055270271 | 0.9999986525 | 0              |
| 0.3992365597 | 0.9999986525 | 174.180177896  |
| 0.243579299  | 0.9999986525 | 0              |
| 0.6188053619 | 0.9999986525 | 0              |
| 0.7164403032 | 0.9999986525 | 25.4893427733  |
| 0.8994988722 | 0.9999986525 | 95.0460435986  |
| 0.0377629101 | 0.9999986525 | 0              |
| 0.4870568396 | 0.9999986525 | 0              |
| 0.8029782915 | 0.9999986525 | 103.7179947561 |
| 0.5341887328 | 0.9999986525 | 445.1927445874 |
| 0.4925199036 | 0.9999986525 | 6.8155785555   |
| 0.6527849127 | 0.9999986525 | 0              |
| 0.7416839311 | 0.9999986525 | 0              |
| 0.8896767782 | 0.9999986525 | 0              |
| 0.6327809443 | 0.9999986525 | 5.79767476     |
| 0.4326331989 | 0.9999986525 | 15.9269958463  |
| 0.6734045551 | 0.9999986525 | 3.001814154    |
| 0.6463118044 | 0.9999986525 | 0              |
| 0.9732439245 | 0.9999986525 | 0              |
| 0.7559681982 | 0.9999986525 | 0              |
| 0.2080979688 | 0.9999986525 | 3.6546895181   |
| 0.6655377216 | 0.9999986525 | 0              |
| 0.6316952789 | 0.9999986525 | 2.6339792642   |
| 0.7684635552 | 0.9999986525 | 1.7362718859   |
| 0.3834741743 | 0.9999986525 | 24.5563895934  |
| 0.1614106062 | 0.9999986525 | 0              |
| 0.7083155097 | 0.9999986525 | 1.0177791711   |
| 0.2633239362 | 0.9999986525 | 0.6488236196   |
| 0.0668014633 | 0.9999986525 | 0              |
| 0.8079030988 | 0.9999986525 | 2.1264209939   |
| 0.126633786  | 0.9999986525 | 4.7485990133   |
| 0.0189556329 | 0.9999986525 | 0              |
| 0.5092838724 | 0.9999986525 | 5.0766342416   |
| 0.8408617318 | 0.9999986525 | 15.347430307   |
| 0.2669134703 | 0.9999986525 | 3.6065226869   |
| 0.2594282457 | 0.9999986525 | 8.8884886639   |
| 0.6989687642 | 0.9999986525 | 3.7535210708   |
| 0.0865374274 | 0.9999986525 | 0              |
| 0.9021278024 | 0.9999986525 | 8.738239283    |
| 0.3269461589 | 0.9999986525 | 4.2544978566   |

gene\_expression\_table

|              |              |               |
|--------------|--------------|---------------|
| 0.311817434  | 0.9999986525 | 432.326321764 |
| 0.5657537832 | 0.9999986525 | 1.3946846474  |
| 0.5530500822 | 0.9999986525 | 0             |
| 0.4040384532 | 0.9999986525 | 0             |
| 0            | 0            | 0             |
| 0.7554200216 | 0.9999986525 | 26.4554607913 |
| 0.0277612192 | 0.9999986525 | 8.3668453262  |
| 0.5138585119 | 0.9999986525 | 19.2120473722 |
| 0.4729816619 | 0.9999986525 | 0             |
| 0.7479150245 | 0.9999986525 | 34.8300186148 |
| 0.3378657178 | 0.9999986525 | 0             |
| 0.8112677832 | 0.9999986525 | 0             |
| 0.203155181  | 0.9999986525 | 50.7713478475 |
| 0.4729816619 | 0.9999986525 | 0             |
| 0.5287774152 | 0.9999986525 | 1.0170996847  |
| 0.2959150803 | 0.9999986525 | 0             |
| 0.6668239001 | 0.9999986525 | 64.1724401292 |
| 0.0225026838 | 0.9999986525 | 6.1500923699  |
| 0.4237253451 | 0.9999986525 | 52.58059185   |
| 0.4549860195 | 0.9999986525 | 30.1503870463 |
| 0.8516028672 | 0.9999986525 | 29.7857839838 |
| 0.9435489307 | 0.9999986525 | 1.0824076861  |
| 0.9196856494 | 0.9999986525 | 10.0992290327 |
| 0.1942149466 | 0.9999986525 | 0             |
| 0.4821513596 | 0.9999986525 | 2.0167220951  |
| 0.9602485548 | 0.9999986525 | 0             |
| 0.2199924133 | 0.9999986525 | 0             |
| 0.3728261727 | 0.9999986525 | 82.3054615697 |
| 0.1512344283 | 0.9999986525 | 0.8887416719  |
| 0.489216361  | 0.9999986525 | 0             |
| 0.8398319108 | 0.9999986525 | 0             |
| 0.6922610182 | 0.9999986525 | 66.7896531474 |
| 0.0978983251 | 0.9999986525 | 0.3478925653  |
| 0.2768180941 | 0.9999986525 | 25.0201291002 |
| 0.2797954675 | 0.9999986525 | 4.9234565327  |
| 0.4644708459 | 0.9999986525 | 1.6556346722  |
| 0.3882209056 | 0.9999986525 | 2.263146497   |
| 0.153986587  | 0.9999986525 | 94.1478703287 |
| 0.6170030423 | 0.9999986525 | 20.675068431  |
| 0.9830624911 | 0.9999986525 | 0.265149634   |
| 0.7292753284 | 0.9999986525 | 0             |
| 0.8872019211 | 0.9999986525 | 0             |
| 0.2774124391 | 0.9999986525 | 0             |
| 0.1872710681 | 0.9999986525 | 0.2698663197  |
| 0.2964874293 | 0.9999986525 | 1.628568026   |
| 0.629851525  | 0.9999986525 | 8.6993770757  |
| 0.3193355041 | 0.9999986525 | 0             |
| 0.5462095753 | 0.9999986525 | 6.7740547972  |
| 0.301473605  | 0.9999986525 | 0             |

gene\_expression\_table

|              |              |                 |
|--------------|--------------|-----------------|
| 0.6652178353 | 0.9999986525 | 7.3699800947    |
| 0.2828103765 | 0.9999986525 | 26.0780854796   |
| 0.228651422  | 0.9999986525 | 16.9304977703   |
| 0.6280816301 | 0.9999986525 | 0               |
| 0.4024864861 | 0.9999986525 | 0.3299756221    |
| 0.7987311941 | 0.9999986525 | 4.3291871164    |
| 0.551069052  | 0.9999986525 | 5.0851679061    |
| 0.6278246152 | 0.9999986525 | 0.3431748186    |
| 0.4301266988 | 0.9999986525 | 23.0316681463   |
| 0.6975445382 | 0.9999986525 | 1.3647148349    |
| 0.1252614513 | 0.9999986525 | 0               |
| 0.0611470889 | 0.9999986525 | 0               |
| 0.226356214  | 0.9999986525 | 0.4298345808    |
| 0.7620097704 | 0.9999986525 | 0               |
| 0.2186053026 | 0.9999986525 | 127.0001468857  |
| 0.0150867343 | 0.9999986525 | 0               |
| 0.5860322981 | 0.9999986525 | 1109.2354099022 |
| 0.0109789999 | 0.9999986525 | 73.8508644795   |
| 0.9201406502 | 0.9999986525 | 1.7378001308    |
| 0.1291642336 | 0.9999986525 | 8.4495509521    |
| 0.4433176161 | 0.9999986525 | 6.8598413075    |
| 0.8978856766 | 0.9999986525 | 0               |
| 0.0504896707 | 0.9999986525 | 0               |
| 0.9892444495 | 0.9999986525 | 49.0619687234   |
| 0.9455002353 | 0.9999986525 | 3.5743041572    |
| 0.1943645226 | 0.9999986525 | 0               |
| 0.4748608769 | 0.9999986525 | 26.6422994247   |
| 0.1217048229 | 0.9999986525 | 0               |
| 0.5181295014 | 0.9999986525 | 0               |
| 0.6312664098 | 0.9999986525 | 0               |
| 0.4729816619 | 0.9999986525 | 0               |
| 0.378637387  | 0.9999986525 | 31.5710868987   |
| 0.2983651258 | 0.9999986525 | 0               |
| 0.2062171967 | 0.9999986525 | 6.0287566941    |
| 0.3317653602 | 0.9999986525 | 1.221413465     |
| 0.8266345983 | 0.9999986525 | 0               |
| 0.197104167  | 0.9999986525 | 2.0808446565    |
| 0.4702549713 | 0.9999986525 | 7.115221604     |
| 0            | 0            | 0               |
| 0.5107751952 | 0.9999986525 | 0               |
| 0.1659995887 | 0.9999986525 | 11.3949668389   |
| 0.1375836794 | 0.9999986525 | 0               |
| 0.9011457058 | 0.9999986525 | 29.3439425384   |
| 0.217386376  | 0.9999986525 | 0               |
| 0.1739206014 | 0.9999986525 | 2.0705927167    |
| 0.3317436171 | 0.9999986525 | 0               |
| 0.6312664098 | 0.9999986525 | 0               |
| 0.5187947346 | 0.9999986525 | 8.3240093225    |
| 0.3814602476 | 0.9999986525 | 6.9974453106    |

gene\_expression\_table

|              |              |                |
|--------------|--------------|----------------|
| 0.5263312475 | 0.9999986525 | 9.2068053529   |
| 0.003106     | 0.9999986525 | 2.2963571558   |
| 0.1543836809 | 0.9999986525 | 0              |
| 0.4806829728 | 0.9999986525 | 3.1013193709   |
| 0.6043274489 | 0.9999986525 | 1.8026253448   |
| 0.8265164691 | 0.9999986525 | 0              |
| 0.9739781843 | 0.9999986525 | 19.1220286211  |
| 0.1248785592 | 0.9999986525 | 7.4673978772   |
| 0.7013379303 | 0.9999986525 | 12.5307356845  |
| 0.2894070259 | 0.9999986525 | 96.5393465424  |
| 0.3281205913 | 0.9999986525 | 1.3827080905   |
| 0.0221022276 | 0.9999986525 | 14.6786876671  |
| 0.2495186283 | 0.9999986525 | 22.7724725019  |
| 0.9469802627 | 0.9999986525 | 8.3759038143   |
| 0.9765308344 | 0.9999986525 | 25.3935959257  |
| 0.2382043884 | 0.9999986525 | 1.2227255479   |
| 0.3380000051 | 0.9999986525 | 0              |
| 0.2986949808 | 0.9999986525 | 2.1955940978   |
| 0.8694323302 | 0.9999986525 | 1.5878393406   |
| 0.7193835942 | 0.9999986525 | 7.2206058734   |
| 0.3378828083 | 0.9999986525 | 0              |
| 0.468307774  | 0.9999986525 | 2.8049242247   |
| 0.2644082821 | 0.9999986525 | 14.4639527744  |
| 0.2729773312 | 0.9999986525 | 9.2998623396   |
| 0.734506058  | 0.9999986525 | 0              |
| 0.7110994271 | 0.9999986525 | 3.5478124158   |
| 0.0981092263 | 0.9999986525 | 0.2293823866   |
| 0.5498594539 | 0.9999986525 | 0              |
| 0.4303628416 | 0.9999986525 | 6.025652624    |
| 0.2377166238 | 0.9999986525 | 0              |
| 0.321153571  | 0.9999986525 | 0              |
| 0.2056668593 | 0.9999986525 | 69.5348851365  |
| 0.3315580129 | 0.9999986525 | 32.9443544492  |
| 0.18374627   | 0.9999986525 | 158.8572274276 |
| 0.1949869367 | 0.9999986525 | 0              |
| 0.6734816246 | 0.9999986525 | 0              |
| 0.6666219942 | 0.9999986525 | 4.1831702049   |
| 0.6058392922 | 0.9999986525 | 0              |
| 0.4461135264 | 0.9999986525 | 73.3526642032  |
| 0.2405482157 | 0.9999986525 | 0              |
| 0.7703831795 | 0.9999986525 | 2.2391587657   |
| 0.2402056895 | 0.9999986525 | 0              |
| 0.7870093746 | 0.9999986525 | 7.4438221602   |
| 0.320545442  | 0.9999986525 | 203.2251983988 |
| 0.2560439668 | 0.9999986525 | 3.8251552275   |
| 0.2140956152 | 0.9999986525 | 0              |
| 0.9999986525 | 0.9999986525 | 10.1609192874  |
| 0.2727737257 | 0.9999986525 | 6.9373332755   |
| 0.917488124  | 0.9999986525 | 23.8992454318  |

gene\_expression\_table

|              |              |                |
|--------------|--------------|----------------|
| 0.5771951307 | 0.9999986525 | 15.8394236408  |
| 0.0861005518 | 0.9999986525 | 79.7793326681  |
| 0.6862955818 | 0.9999986525 | 0.7934664177   |
| 0.1719785494 | 0.9999986525 | 0              |
| 0.001404     | 0.9999986525 | 8.758527069    |
| 0.981797825  | 0.9999986525 | 230.1260053434 |
| 0.9892018206 | 0.9999986525 | 14.18204034    |
| 0.0505270942 | 0.9999986525 | 20.7316656433  |
| 0.7615977066 | 0.9999986525 | 111.8050663695 |
| 0.8751619721 | 0.9999986525 | 61.996987104   |
| 0.2675342476 | 0.9999986525 | 14.8478825489  |
| 0.7538458856 | 0.9999986525 | 14.3975787436  |
| 0.4546849015 | 0.9999986525 | 93.4208459192  |
| 0.0683630697 | 0.9999986525 | 0              |
| 0.7293289603 | 0.9999986525 | 260.3325592329 |
| 0.3613584658 | 0.9999986525 | 3.8207276442   |
| 0.154044601  | 0.9999986525 | 74.9437315192  |
| 0.5674881899 | 0.9999986525 | 13.0106432372  |
| 0.6245670845 | 0.9999986525 | 9.3228452297   |
| 0.7867000416 | 0.9999986525 | 5.3047326463   |
| 0.6833170663 | 0.9999986525 | 43.1212250782  |
| 0.8777835857 | 0.9999986525 | 0              |
| 0.4752441925 | 0.9999986525 | 41.9602104552  |
| 0.820493354  | 0.9999986525 | 0              |
| 0.3598140717 | 0.9999986525 | 11.8903401196  |
| 0.8219469433 | 0.9999986525 | 0              |
| 0.3756398477 | 0.9999986525 | 353.4945770153 |
| 0.4817005929 | 0.9999986525 | 44.9384541385  |
| 0.1593004408 | 0.9999986525 | 0              |
| 0.2315678207 | 0.9999986525 | 0              |
| 0.6399948167 | 0.9999986525 | 0              |
| 0.6958070994 | 0.9999986525 | 40.1626754573  |
| 0.8588460653 | 0.9999986525 | 624.4101854884 |
| 0.4704103982 | 0.9999986525 | 191.7716711195 |
| 0.4613669917 | 0.9999986525 | 42.5461210201  |
| 0.0514481781 | 0.9999986525 | 10.3516107852  |
| 0.7126786602 | 0.9999986525 | 0              |
| 0.4143667539 | 0.9999986525 | 91.9302318996  |
| 0.040468008  | 0.9999986525 | 12.0414770238  |
| 0.3592961522 | 0.9999986525 | 7.4828447473   |
| 0.4895846801 | 0.9999986525 | 22.3882654626  |
| 0.2677191064 | 0.9999986525 | 4.8459804768   |
| 0.9071923684 | 0.9999986525 | 4.7231191403   |
| 0.9841057068 | 0.9999986525 | 149.5909564239 |
| 0.1277293594 | 0.9999986525 | 359.431174658  |
| 0.5499586614 | 0.9999986525 | 8.3625870044   |
| 0.9050455397 | 0.9999986525 | 50.4973521944  |
| 0.8482241696 | 0.9999986525 | 0              |
| 0.5250047207 | 0.9999986525 | 0              |

gene\_expression\_table

|              |              |                |
|--------------|--------------|----------------|
| 0.4502852609 | 0.9999986525 | 0              |
| 0.2969580493 | 0.9999986525 | 6.8786035721   |
| 0.8729519866 | 0.9999986525 | 26.9837364804  |
| 0.0267343812 | 0.9999986525 | 18.4052685925  |
| 0.2724235143 | 0.9999986525 | 16.6750077279  |
| 0.859693627  | 0.9999986525 | 0              |
| 0.1939643616 | 0.9999986525 | 0              |
| 0.8216339728 | 0.9999986525 | 0              |
| 0.7591691674 | 0.9999986525 | 20.5054815291  |
| 0.8034766641 | 0.9999986525 | 10.4540614066  |
| 0.6632649563 | 0.9999986525 | 1.3675276599   |
| 0.2955755734 | 0.9999986525 | 5.9515346209   |
| 0.4776186948 | 0.9999986525 | 0.8728130594   |
| 0.8862498367 | 0.9999986525 | 0              |
| 0.9074422179 | 0.9999986525 | 2.0526999971   |
| 0.3311701938 | 0.9999986525 | 63.1421737975  |
| 0.9846852903 | 0.9999986525 | 15.0644042433  |
| 0.4288872082 | 0.9999986525 | 0              |
| 0.1467115995 | 0.9999986525 | 67.1932801861  |
| 0.5833111832 | 0.9999986525 | 7.8370556798   |
| 0.2034126307 | 0.9999986525 | 16.2671206036  |
| 0.4530238162 | 0.9999986525 | 0              |
| 0.9859397774 | 0.9999986525 | 152.4211204223 |
| 0.2545639797 | 0.9999986525 | 22.5748742151  |
| 0.9067617929 | 0.9999986525 | 11.5398218994  |
| 0.9417543267 | 0.9999986525 | 0              |
| 0.8144554761 | 0.9999986525 | 222.5113225765 |
| 0.3005508038 | 0.9999986525 | 695.4582570467 |
| 0.1862441505 | 0.9999986525 | 0.7242124651   |
| 0.7011197732 | 0.9999986525 | 9.4770883983   |
| 0.7368712465 | 0.9999986525 | 0              |
| 0.9227450011 | 0.9999986525 | 35.6249026822  |
| 0.4286959586 | 0.9999986525 | 0              |
| 0.008937     | 0.9999986525 | 19.237706979   |
| 0.6767868874 | 0.9999986525 | 0              |
| 0.1012356801 | 0.9999986525 | 0              |
| 0.0338214916 | 0.9999986525 | 4.7801890054   |
| 0.4394005314 | 0.9999986525 | 4.5585238958   |
| 0.758934791  | 0.9999986525 | 40.5558980429  |
| 0.6950659359 | 0.9999986525 | 30.18283131    |
| 0.3750390851 | 0.9999986525 | 1.8139139383   |
| 0.4219707328 | 0.9999986525 | 25.8902791936  |
| 0.1675901529 | 0.9999986525 | 14.3883610925  |
| 0.8457866877 | 0.9999986525 | 4.2247078861   |
| 0.4158937047 | 0.9999986525 | 1.5488558172   |
| 0.7241922574 | 0.9999986525 | 0.878792947    |
| 0.7702274831 | 0.9999986525 | 0              |
| 0.5609806981 | 0.9999986525 | 2.4047206718   |
| 0.6621508308 | 0.9999986525 | 1.2015451763   |

gene\_expression\_table

|              |              |                 |
|--------------|--------------|-----------------|
| 0.1537056375 | 0.9999986525 | 0.7387698559    |
| 0.0660479314 | 0.9999986525 | 0               |
| 0.7749857967 | 0.9999986525 | 8.9517283127    |
| 0.5581781225 | 0.9999986525 | 3.8460003806    |
| 0.3284874293 | 0.9999986525 | 2.201252531     |
| 0.2421225297 | 0.9999986525 | 23.8306577836   |
| 0.3845180884 | 0.9999986525 | 0               |
| 0.8453434237 | 0.9999986525 | 0               |
| 0.9026721309 | 0.9999986525 | 0               |
| 0.2819027487 | 0.9999986525 | 6.1708801132    |
| 0.7123887429 | 0.9999986525 | 0.3876080189    |
| 0.1099614439 | 0.9999986525 | 0               |
| 0.1753257315 | 0.9999986525 | 1.845704738     |
| 0.0009863    | 0.9999986525 | 11.8381466437   |
| 0.2172617133 | 0.9999986525 | 0               |
| 0.9962331658 | 0.9999986525 | 0.2573119364    |
| 0.4802374088 | 0.9999986525 | 152.0700208071  |
| 0.1597420118 | 0.9999986525 | 63.2249619629   |
| 0.0536430158 | 0.9999986525 | 16.0675139113   |
| 0.9340043765 | 0.9999986525 | 0               |
| 0.5867427642 | 0.9999986525 | 4.0798700831    |
| 0.5557032367 | 0.9999986525 | 27.8554421025   |
| 0.1468327551 | 0.9999986525 | 0.8240972151    |
| 0.2084225469 | 0.9999986525 | 35.662589961    |
| 0.7268564387 | 0.9999986525 | 8.1202211295    |
| 0.5393972096 | 0.9999986525 | 2.125565188     |
| 0.6156676982 | 0.9999986525 | 3683.3741252255 |
| 0.3554051014 | 0.9999986525 | 330.0869889144  |
| 0.5659112993 | 0.9999986525 | 38.8052301442   |
| 0.7203632723 | 0.9999986525 | 595.1981768555  |
| 0.5563558777 | 0.9999986525 | 30.5813076006   |
| 0.3186112885 | 0.9999986525 | 26.2124352516   |
| 0.6594252157 | 0.9999986525 | 26.8727535073   |
| 0.3599734494 | 0.9999986525 | 0               |
| 0.0487449666 | 0.9999986525 | 1.1239634431    |
| 0.0919168415 | 0.9999986525 | 0.9529070119    |
| 0.6194561239 | 0.9999986525 | 6.2544238063    |
| 0.8885663226 | 0.9999986525 | 0.9745703836    |
| 0.7850097349 | 0.9999986525 | 6.2061008492    |
| 0.3175935387 | 0.9999986525 | 0               |
| 0.6396021585 | 0.9999986525 | 0               |
| 0.6249707979 | 0.9999986525 | 30.0079080831   |
| 0.1635383713 | 0.9999986525 | 7.6260079743    |
| 0.8840459725 | 0.9999986525 | 45.0871140551   |
| 0.5992049705 | 0.9999986525 | 3.6383244851    |
| 0.7253871429 | 0.9999986525 | 0               |
| 0.2057264391 | 0.9999986525 | 0               |
| 0.3669473568 | 0.9999986525 | 0               |
| 0.8345925843 | 0.9999986525 | 4.9855022633    |

gene\_expression\_table

|              |              |                |
|--------------|--------------|----------------|
| 0.3622882078 | 0.9999986525 | 0              |
| 0.3552872768 | 0.9999986525 | 0              |
| 0.4655306247 | 0.9999986525 | 0              |
| 0.0420478503 | 0.9999986525 | 8.7672507016   |
| 0.2970139007 | 0.9999986525 | 16.7861163996  |
| 0.2658543476 | 0.9999986525 | 2.475342999    |
| 0.8572772256 | 0.9999986525 | 26.7395320429  |
| 0.7898074146 | 0.9999986525 | 11.8210709783  |
| 0.2864212604 | 0.9999986525 | 0              |
| 0.2556330909 | 0.9999986525 | 0              |
| 0.7565592417 | 0.9999986525 | 19.2036645431  |
| 0.2475759405 | 0.9999986525 | 0              |
| 0.4316908839 | 0.9999986525 | 41.7914288635  |
| 0.4575116179 | 0.9999986525 | 6.7253786592   |
| 0.9224961216 | 0.9999986525 | 2.6851348938   |
| 0.5613748266 | 0.9999986525 | 46.554304089   |
| 0.9447901483 | 0.9999986525 | 0              |
| 0.5085749464 | 0.9999986525 | 1.2453175719   |
| 0.7317461921 | 0.9999986525 | 138.5283101018 |
| 0.4966818088 | 0.9999986525 | 8.2877863046   |
| 0.6395814036 | 0.9999986525 | 0              |
| 0.426849972  | 0.9999986525 | 1.6080559695   |
| 0.5210439573 | 0.9999986525 | 70.6504359891  |
| 0.5394401416 | 0.9999986525 | 10.2431959322  |
| 0            | 0            | 0              |
| 0.4590558808 | 0.9999986525 | 35.710478516   |
| 0.8548618797 | 0.9999986525 | 19.7342991971  |
| 0.4729816619 | 0.9999986525 | 0              |
| 0.8268396124 | 0.9999986525 | 289.8188843149 |
| 0.5363376539 | 0.9999986525 | 19.8306273261  |
| 0.4751960303 | 0.9999986525 | 7.586026749    |
| 0            | 0            | 0              |
| 0.0666851321 | 0.9999986525 | 8.0786669887   |
| 0.2970652523 | 0.9999986525 | 0              |
| 0.0604503941 | 0.9999986525 | 18.2242643983  |
| 0.6546176586 | 0.9999986525 | 18.4502771096  |
| 0.1072887104 | 0.9999986525 | 0              |
| 0.8897363869 | 0.9999986525 | 0              |
| 0.0284170122 | 0.9999986525 | 12.60625808    |
| 0.3378999232 | 0.9999986525 | 0              |
| 0.8434810613 | 0.9999986525 | 86.016153463   |
| 0.0718164342 | 0.9999986525 | 0              |
| 0.1136910623 | 0.9999986525 | 0              |
| 0.6395605914 | 0.9999986525 | 0              |
| 0.4460854765 | 0.9999986525 | 268.0909554635 |
| 0.9459878294 | 0.9999986525 | 107.7597316849 |
| 0.0622428768 | 0.9999986525 | 0              |
| 0.78418917   | 0.9999986525 | 4.5213524721   |
| 0.3381163965 | 0.9999986525 | 0              |



gene\_expression\_table

|              |              |                |
|--------------|--------------|----------------|
| 0.3521917849 | 0.9999986525 | 0              |
| 0.4729816619 | 0.9999986525 | 0              |
| 0.7345357267 | 0.9999986525 | 8.5631628005   |
| 0.30755387   | 0.9999986525 | 0              |
| 0.5540886688 | 0.9999986525 | 17.6291243036  |
| 0.3637626043 | 0.9999986525 | 0              |
| 0.5567922796 | 0.9999986525 | 2.7514772647   |
| 0.1658947244 | 0.9999986525 | 0              |
| 0.447970965  | 0.9999986525 | 15.9848420782  |
| 0.7751077157 | 0.9999986525 | 0              |
| 0.1520149854 | 0.9999986525 | 41.9268998886  |
| 0.1648611548 | 0.9999986525 | 0              |
| 0.8476721099 | 0.9999986525 | 2.3557660121   |
| 0.1392508689 | 0.9999986525 | 1.8955310596   |
| 0.7427083535 | 0.9999986525 | 49.138368279   |
| 0.0701432224 | 0.9999986525 | 2.7361889041   |
| 0.9058319585 | 0.9999986525 | 280.0313797789 |
| 0.0169621818 | 0.9999986525 | 20.4419872373  |
| 0.0688951217 | 0.9999986525 | 64.3399630324  |
| 0.7377243738 | 0.9999986525 | 0              |
| 0.1958869293 | 0.9999986525 | 10.1545699339  |
| 0.4041654827 | 0.9999986525 | 91.6113065504  |
| 0.8846850679 | 0.9999986525 | 222.4680632953 |
| 0.0801120595 | 0.9999986525 | 0              |
| 0.4316574317 | 0.9999986525 | 6.282136104    |
| 0.1318548335 | 0.9999986525 | 0              |
| 0.1803148174 | 0.9999986525 | 183.2402714097 |
| 0.9280717973 | 0.9999986525 | 0              |
| 0.5836194841 | 0.9999986525 | 7.340669969    |
| 0.2656642825 | 0.9999986525 | 20.6116501469  |
| 0.2403567656 | 0.9999986525 | 13.439510968   |
| 0.8219975864 | 0.9999986525 | 1.3900594364   |
| 0.9765833331 | 0.9999986525 | 10.2046021112  |
| 0.3944218612 | 0.9999986525 | 3.3105947613   |
| 0.0688615573 | 0.9999986525 | 0              |
| 0.1374188253 | 0.9999986525 | 1.240083548    |
| 0.5285663539 | 0.9999986525 | 0              |
| 0.9495918284 | 0.9999986525 | 0              |
| 0.3137580221 | 0.9999986525 | 0              |
| 0.2662225904 | 0.9999986525 | 40.1443586396  |
| 0.1082164229 | 0.9999986525 | 0              |
| 0.1196621946 | 0.9999986525 | 10.145652394   |
| 0.6301625675 | 0.9999986525 | 0.4332347729   |
| 0.3573687154 | 0.9999986525 | 96.6579762561  |
| 0.5480330152 | 0.9999986525 | 267.4122441838 |
| 0.1931483627 | 0.9999986525 | 4.7999562143   |
| 0.225023449  | 0.9999986525 | 44.0115985219  |
| 0.4123302534 | 0.9999986525 | 6.1669684991   |
| 0.6301082358 | 0.9999986525 | 26.0218359412  |

gene\_expression\_table

|              |              |                |
|--------------|--------------|----------------|
| 0.8052930705 | 0.9999986525 | 6.3371632141   |
| 0.9074083038 | 0.9999986525 | 0.3807368938   |
| 0.6637412133 | 0.9999986525 | 45.8772743453  |
| 0.5638347698 | 0.9999986525 | 36.242871829   |
| 0.471031235  | 0.9999986525 | 2.3543745378   |
| 0.4617725252 | 0.9999986525 | 5.2808637363   |
| 0.6395397205 | 0.9999986525 | 0              |
| 0.0347845372 | 0.9999986525 | 2.6052643166   |
| 0.2040753959 | 0.9999986525 | 124.2680428854 |
| 0.111938216  | 0.9999986525 | 12.8064787164  |
| 0.456448253  | 0.9999986525 | 1.1620991094   |
| 0.9745528195 | 0.9999986525 | 9.9442512194   |
| 0.9120962929 | 0.9999986525 | 0.8853374162   |
| 0.3105852727 | 0.9999986525 | 6.1283265521   |
| 0.0982734279 | 0.9999986525 | 1.2286306757   |
| 0.62226566   | 0.9999986525 | 13.7227381669  |
| 0.2435321935 | 0.9999986525 | 0              |
| 0.2627606167 | 0.9999986525 | 0              |
| 0.7104291339 | 0.9999986525 | 0.4643757483   |
| 0.5556941946 | 0.9999986525 | 0.1232130493   |
| 0.5608951992 | 0.9999986525 | 6.7031245369   |
| 0.4260806756 | 0.9999986525 | 0              |
| 0.4729816619 | 0.9999986525 | 0              |
| 0.4066535573 | 0.9999986525 | 0              |
| 0.3493458166 | 0.9999986525 | 0              |
| 0.5425400971 | 0.9999986525 | 2.638255525    |
| 0.1630697058 | 0.9999986525 | 4.6560802456   |
| 0.5031706774 | 0.9999986525 | 3.9791989622   |
| 0.5261389717 | 0.9999986525 | 20.4072326995  |
| 0.559141708  | 0.9999986525 | 0              |
| 0.6426628772 | 0.9999986525 | 8.3760707697   |
| 0.6282979221 | 0.9999986525 | 1.0550966563   |
| 0.1681526992 | 0.9999986525 | 8.1692062222   |
| 0.4729816619 | 0.9999986525 | 0              |
| 0.6813810494 | 0.9999986525 | 27.4386524451  |
| 0.3105119494 | 0.9999986525 | 0              |
| 0.6952330483 | 0.9999986525 | 0              |
| 0.3551654668 | 0.9999986525 | 0.9576378368   |
| 0.3895363527 | 0.9999986525 | 61.0629704109  |
| 0.3514716428 | 0.9999986525 | 0              |
| 0.4066325653 | 0.9999986525 | 0              |
| 0.5026268182 | 0.9999986525 | 4.9600469164   |
| 0.3738116067 | 0.9999986525 | 11.6082199324  |
| 0.9946467562 | 0.9999986525 | 5.4014848355   |
| 0.6628012943 | 0.9999986525 | 0              |
| 0.7339509932 | 0.9999986525 | 1.8933621885   |
| 0.6300561077 | 0.9999986525 | 1.4149364579   |
| 0.2109584938 | 0.9999986525 | 0              |
| 0.9231684938 | 0.9999986525 | 0              |

gene\_expression\_table

|              |              |                |
|--------------|--------------|----------------|
| 0.5419963583 | 0.9999986525 | 1.8888692741   |
| 0.571211134  | 0.9999986525 | 7.3021363572   |
| 0.1517190432 | 0.9999986525 | 0              |
| 0.7614446484 | 0.9999986525 | 2.9066548281   |
| 0.6457977782 | 0.9999986525 | 50.3818489714  |
| 0.9877647774 | 0.9999986525 | 0              |
| 0.2412011909 | 0.9999986525 | 60.8455279105  |
| 0.8753055362 | 0.9999986525 | 103.3859928189 |
| 0.4345230762 | 0.9999986525 | 0.5532300072   |
| 0.9910746224 | 0.9999986525 | 0              |
| 0.5793201917 | 0.9999986525 | 27.1277830631  |
| 0.6645921367 | 0.9999986525 | 0              |
| 0.8256947454 | 0.9999986525 | 0              |
| 0.7124584613 | 0.9999986525 | 0              |
| 0.2391643086 | 0.9999986525 | 0.4269689011   |
| 0            | 0            | 0              |
| 0.933593123  | 0.9999986525 | 0.2549611056   |
| 0.8502142038 | 0.9999986525 | 3.3804152864   |
| 0.1829252913 | 0.9999986525 | 5.9542185148   |
| 0.1495858219 | 0.9999986525 | 27.5694718425  |
| 0.5970501473 | 0.9999986525 | 2.2217794046   |
| 0.1913265642 | 0.9999986525 | 10.9807855485  |
| 0.2698913199 | 0.9999986525 | 0              |
| 0            | 0            | 0              |
| 0.8576036647 | 0.9999986525 | 0              |
| 0.7789238005 | 0.9999986525 | 0.7924276815   |
| 0.1385937788 | 0.9999986525 | 4.8945496514   |
| 0            | 0            | 0              |
| 0.750099287  | 0.9999986525 | 35.9066660651  |
| 0.8387257663 | 0.9999986525 | 269.2474262518 |
| 0.8979964578 | 0.9999986525 | 9.2884133356   |
| 0.0475835991 | 0.9999986525 | 0              |
| 0.657096788  | 0.9999986525 | 0              |
| 0.2196808847 | 0.9999986525 | 0              |
| 0.9014689391 | 0.9999986525 | 5.8512167448   |
| 0.7154255535 | 0.9999986525 | 2.2905806578   |
| 0.8621737408 | 0.9999986525 | 0              |
| 0.5736788071 | 0.9999986525 | 11.4514133188  |
| 0.6312664098 | 0.9999986525 | 0              |
| 0.5772712568 | 0.9999986525 | 0              |
| 0.6608078501 | 0.9999986525 | 0              |
| 0.0667832312 | 0.9999986525 | 5.5793279343   |
| 0.2615631768 | 0.9999986525 | 100.596023364  |
| 0.9649986718 | 0.9999986525 | 2.7541676171   |
| 0.1927520674 | 0.9999986525 | 11.8869948743  |
| 0.2011910094 | 0.9999986525 | 36.8406587579  |
| 0.6844543113 | 0.9999986525 | 1.58786321     |
| 0.8615787254 | 0.9999986525 | 0.4169286709   |
| 0.2494344408 | 0.9999986525 | 51.370863957   |

gene\_expression\_table

|              |              |                 |
|--------------|--------------|-----------------|
| 0.2278142601 | 0.9999986525 | 9.6979674022    |
| 0.3857229155 | 0.9999986525 | 30.0064873214   |
| 0.723630855  | 0.9999986525 | 916.094588032   |
| 0.7967215269 | 0.9999986525 | 6.759748909     |
| 0.9030419982 | 0.9999986525 | 0               |
| 0.811546044  | 0.9999986525 | 6.3224961963    |
| 0.3419249618 | 0.9999986525 | 0               |
| 0.5388464203 | 0.9999986525 | 10.8351059754   |
| 0.2613169778 | 0.9999986525 | 4.0550604434    |
| 0.8211183072 | 0.9999986525 | 67.1719150732   |
| 0.4733399767 | 0.9999986525 | 0.6091359956    |
| 0.8211868659 | 0.9999986525 | 0.728859914     |
| 0            | 0            | 0               |
| 0.009674     | 0.9999986525 | 6.6890316412    |
| 0.500097546  | 0.9999986525 | 0               |
| 0.3179062822 | 0.9999986525 | 2.4736618921    |
| 0.3419555354 | 0.9999986525 | 0               |
| 0.9193622047 | 0.9999986525 | 3.3105947613    |
| 0.063418304  | 0.9999986525 | 0.6333743266    |
| 0.3785504114 | 0.9999986525 | 4.2879577671    |
| 0.9107758292 | 0.9999986525 | 13.5489785085   |
| 0.004657     | 0.9999986525 | 32.9527968254   |
| 0.7241296524 | 0.9999986525 | 12.012718805    |
| 0.5827682409 | 0.9999986525 | 69.1629834736   |
| 0.1354786613 | 0.9999986525 | 11.8363779082   |
| 0.1703156284 | 0.9999986525 | 10.580468142    |
| 0.3335515318 | 0.9999986525 | 154.1730873237  |
| 0.3061440543 | 0.9999986525 | 321.2525439557  |
| 0.2202875941 | 0.9999986525 | 19.5439714046   |
| 0.1735065592 | 0.9999986525 | 273.451817276   |
| 0.4066115658 | 0.9999986525 | 7.0138005613    |
| 0.4367073385 | 0.9999986525 | 1.0320862625    |
| 0.3419861074 | 0.9999986525 | 0               |
| 0.8103384832 | 0.9999986525 | 0               |
| 0.2107296598 | 0.9999986525 | 0               |
| 0.4049434619 | 0.9999986525 | 3.2659648894    |
| 0.4960029404 | 0.9999986525 | 2.3689426547    |
| 0.6395187893 | 0.9999986525 | 0               |
| 0.8315456732 | 0.9999986525 | 10.6932411878   |
| 0.6098112011 | 0.9999986525 | 1950.6841658187 |
| 0.9496481313 | 0.9999986525 | 2.458862993     |
| 0.9364408188 | 0.9999986525 | 13.0945144896   |
| 0.2455432974 | 0.9999986525 | 67.228499427    |
| 0.6108897012 | 0.9999986525 | 4.1536703285    |
| 0.0262804501 | 0.9999986525 | 5.415145927     |
| 0.7515740818 | 0.9999986525 | 0               |
| 0.9773745138 | 0.9999986525 | 7.5914788309    |
| 0.4303358726 | 0.9999986525 | 34.4306171677   |
| 0.0524792518 | 0.9999986525 | 3.3380895881    |

gene\_expression\_table

|              |              |                |
|--------------|--------------|----------------|
| 0.1779107686 | 0.9999986525 | 0              |
| 0            | 0            | 0              |
| 0.398766588  | 0.9999986525 | 47.5020691946  |
| 0.8646526829 | 0.9999986525 | 0              |
| 0.7613365569 | 0.9999986525 | 7.4971847862   |
| 0.2535063556 | 0.9999986525 | 16.3645687543  |
| 0.160442721  | 0.9999986525 | 17.2707384651  |
| 0.77778252   | 0.9999986525 | 0              |
| 0.3200880716 | 0.9999986525 | 0              |
| 0.3122519363 | 0.9999986525 | 0.3037621975   |
| 0.6098761914 | 0.9999986525 | 0              |
| 0.7116470207 | 0.9999986525 | 318.8497494797 |
| 0.4610940064 | 0.9999986525 | 1.7930026703   |
| 0.5622049151 | 0.9999986525 | 10.1341107601  |
| 0.6391655315 | 0.9999986525 | 43.7615326212  |
| 0.9181439364 | 0.9999986525 | 11.4698167542  |
| 0.2272716383 | 0.9999986525 | 20.7499924276  |
| 0.9807097661 | 0.9999986525 | 1.1706898872   |
| 0.8932086348 | 0.9999986525 | 41.8245244318  |
| 0.2330510755 | 0.9999986525 | 0.9339496406   |
| 0.4729816619 | 0.9999986525 | 0              |
| 0.3653520776 | 0.9999986525 | 46.3064451399  |
| 0.9578103536 | 0.9999986525 | 3.0252853058   |
| 0.4505334404 | 0.9999986525 | 1.8516905626   |
| 0.7490606124 | 0.9999986525 | 0              |
| 0.2974086245 | 0.9999986525 | 32.9880813406  |
| 0.7973162329 | 0.9999986525 | 9.5612827388   |
| 0.2671509086 | 0.9999986525 | 0              |
| 0.8186022709 | 0.9999986525 | 13.3739980315  |
| 0.814604275  | 0.9999986525 | 21.585650002   |
| 0.4065905586 | 0.9999986525 | 0              |
| 0.2494724585 | 0.9999986525 | 2.3922597376   |
| 0.7445434185 | 0.9999986525 | 0              |
| 0.709670088  | 0.9999986525 | 0              |
| 0.1257371249 | 0.9999986525 | 38.7132032532  |
| 0.4849763746 | 0.9999986525 | 0              |
| 0.0121482208 | 0.9999986525 | 0              |
| 0.6624168055 | 0.9999986525 | 218.6911727798 |
| 0.4534756378 | 0.9999986525 | 0              |
| 0.5406586083 | 0.9999986525 | 0.8658090349   |
| 0.3176469378 | 0.9999986525 | 0              |
| 0.7199471642 | 0.9999986525 | 33.7669477631  |
| 0.0664692963 | 0.9999986525 | 43.0928822136  |
| 0.6248676823 | 0.9999986525 | 3.6370717049   |
| 0.3740270316 | 0.9999986525 | 6.2483192223   |
| 0.3984280578 | 0.9999986525 | 2.7547997155   |
| 0.7230524553 | 0.9999986525 | 8.5729457774   |
| 0.006722     | 0.9999986525 | 175.6665744672 |
| 0.8415612629 | 0.9999986525 | 0.561762543    |

gene\_expression\_table

|              |              |                 |
|--------------|--------------|-----------------|
| 0.3049955347 | 0.9999986525 | 0               |
| 0.4729816619 | 0.9999986525 | 0               |
| 0.30755387   | 0.9999986525 | 0               |
| 0.7619807069 | 0.9999986525 | 0               |
| 0.2295258852 | 0.9999986525 | 1.8821110519    |
| 0.4766932172 | 0.9999986525 | 1.9770867453    |
| 0.3784808406 | 0.9999986525 | 9.1263034778    |
| 0.746765672  | 0.9999986525 | 1394.2428254042 |
| 0.5278536963 | 0.9999986525 | 2.2786227555    |
| 0.4149530203 | 0.9999986525 | 3.5548171385    |
| 0.3851836878 | 0.9999986525 | 0               |
| 0.6144626341 | 0.9999986525 | 2.673851672     |
| 0.9112633442 | 0.9999986525 | 3.0548583293    |
| 0.657326386  | 0.9999986525 | 13.1534962707   |
| 0.8239214232 | 0.9999986525 | 15.6115631766   |
| 0.4757957184 | 0.9999986525 | 1.143356387     |
| 0.6639708057 | 0.9999986525 | 0               |
| 0.6912965678 | 0.9999986525 | 4.7222745195    |
| 0.6444529558 | 0.9999986525 | 5.4191465274    |
| 0.0506035904 | 0.9999986525 | 6.8108072361    |
| 0.3342595139 | 0.9999986525 | 6.4250508791    |
| 0.7844522486 | 0.9999986525 | 22.4181327745   |
| 0.6394977963 | 0.9999986525 | 0               |
| 0.862168111  | 0.9999986525 | 0               |
| 0.6917774264 | 0.9999986525 | 6.4106230778    |
| 0.0237015161 | 0.9999986525 | 110.358873372   |
| 0.2978359168 | 0.9999986525 | 0               |
| 0.6165777453 | 0.9999986525 | 0               |
| 0.3978854029 | 0.9999986525 | 0               |
| 0.4065695438 | 0.9999986525 | 0               |
| 0.1955031044 | 0.9999986525 | 469.9543570985  |
| 0.7431034579 | 0.9999986525 | 0               |
| 0.814331937  | 0.9999986525 | 0               |
| 0.7698892663 | 0.9999986525 | 0.8160118387    |
| 0.2489480859 | 0.9999986525 | 0               |
| 0.6394718456 | 0.9999986525 | 0               |
| 0.714063915  | 0.9999986525 | 139.0754923668  |
| 0.1230773521 | 0.9999986525 | 70.8775743068   |
| 0.5443289147 | 0.9999986525 | 737.152682426   |
| 0.4168393411 | 0.9999986525 | 0               |
| 0.4961905634 | 0.9999986525 | 134.9171157662  |
| 0.3546814816 | 0.9999986525 | 13.0045105452   |
| 0.7229709571 | 0.9999986525 | 0               |
| 0.2148063063 | 0.9999986525 | 31.2179997397   |
| 0.9451406444 | 0.9999986525 | 3.5521188684    |
| 0.5173236328 | 0.9999986525 | 12.1039145676   |
| 0.7103128027 | 0.9999986525 | 31.5778285359   |
| 0.005325     | 0.9999986525 | 74.5842247037   |
| 0.9425525403 | 0.9999986525 | 9.3811357821    |

gene\_expression\_table

|              |              |                |
|--------------|--------------|----------------|
| 0.984512391  | 0.9999986525 | 3.52562872     |
| 0.3643060372 | 0.9999986525 | 0              |
| 0.8921835502 | 0.9999986525 | 0              |
| 0.5644704559 | 0.9999986525 | 0              |
| 0.6168782603 | 0.9999986525 | 54.68087969    |
| 0.2349567163 | 0.9999986525 | 0              |
| 0.2833212921 | 0.9999986525 | 0.8412940763   |
| 0.1885982987 | 0.9999986525 | 217.6397729106 |
| 0.0838505375 | 0.9999986525 | 18.6577666838  |
| 0.6178450542 | 0.9999986525 | 0              |
| 0.3050288582 | 0.9999986525 | 0              |
| 0.905662729  | 0.9999986525 | 0              |
| 0.1904770852 | 0.9999986525 | 972.953618718  |
| 0.3141290599 | 0.9999986525 | 132.6030945424 |
| 0.1748445702 | 0.9999986525 | 0              |
| 0            | 0            | 0              |
| 0            | 0            | 0              |
| 0.4888902225 | 0.9999986525 | 0              |
| 0.0257592496 | 0.9999986525 | 7.0042662016   |
| 0.1743990352 | 0.9999986525 | 45.4006419728  |
| 0.1509808037 | 0.9999986525 | 11.4725574511  |
| 0.8827860795 | 0.9999986525 | 47.1658122137  |
| 0.119815729  | 0.9999986525 | 785.9214021772 |
| 0.230457946  | 0.9999986525 | 284.4896241542 |
| 0.683390668  | 0.9999986525 | 13.3909528971  |
| 0.4742275464 | 0.9999986525 | 0              |
| 0.334325625  | 0.9999986525 | 0              |
| 0.4475357452 | 0.9999986525 | 531.5215923965 |
| 0.6569140649 | 0.9999986525 | 39.3986708141  |
| 0.2763908535 | 0.9999986525 | 0              |
| 0.4376484228 | 0.9999986525 | 17.6682450911  |
| 0.3004458352 | 0.9999986525 | 0              |
| 0.7019622171 | 0.9999986525 | 0              |
| 0.051898177  | 0.9999986525 | 144.4977242854 |
| 0.3710573135 | 0.9999986525 | 501.6866152758 |
| 0.4907015641 | 0.9999986525 | 0              |
| 0.1524865729 | 0.9999986525 | 0              |
| 0.3611519868 | 0.9999986525 | 0              |
| 0.8766057149 | 0.9999986525 | 0              |
| 0.9862734208 | 0.9999986525 | 6.3672140604   |
| 0.3271081687 | 0.9999986525 | 61.1272201693  |
| 0.6963283923 | 0.9999986525 | 0              |
| 0.3376371699 | 0.9999986525 | 79.6109710978  |
| 0.7408928034 | 0.9999986525 | 0              |
| 0.4994750678 | 0.9999986525 | 729.2193121233 |
| 0.7233717112 | 0.9999986525 | 0              |
| 0.4887973235 | 0.9999986525 | 0              |
| 0.6072597881 | 0.9999986525 | 104.101021471  |
| 0.3420166778 | 0.9999986525 | 26.5263275873  |

gene\_expression\_table

|              |              |                |
|--------------|--------------|----------------|
| 0.9295593986 | 0.9999986525 | 22.3144829417  |
| 0.330045641  | 0.9999986525 | 0              |
| 0.851488965  | 0.9999986525 | 192.6343521932 |
| 0.0331323794 | 0.9999986525 | 0              |
| 0.6643522413 | 0.9999986525 | 0              |
| 0.7173211144 | 0.9999986525 | 0              |
| 0.2003640331 | 0.9999986525 | 2.5649030269   |
| 0.5531893501 | 0.9999986525 | 66.0609796792  |
| 0.8369660503 | 0.9999986525 | 0              |
| 0.6685079691 | 0.9999986525 | 41.5055440801  |
| 0.3556369559 | 0.9999986525 | 0              |
| 0.9887366668 | 0.9999986525 | 63.8234661345  |
| 0.17675605   | 0.9999986525 | 5.9122263771   |
| 0            | 0            | 0              |
| 0.6886955246 | 0.9999986525 | 0              |
| 0.2401310259 | 0.9999986525 | 0              |
| 0.2798829995 | 0.9999986525 | 9.9423791842   |
| 0.7738575757 | 0.9999986525 | 0              |
| 0.6579548307 | 0.9999986525 | 0              |
| 0.0223737706 | 0.9999986525 | 110.3739147885 |
| 0.2993538945 | 0.9999986525 | 463.5868940037 |
| 0.9458818063 | 0.9999986525 | 0              |
| 0.6392844779 | 0.9999986525 | 7.4606467335   |
| 0.6465815533 | 0.9999986525 | 233.3721743515 |
| 0.5248391033 | 0.9999986525 | 0              |
| 0.7094475346 | 0.9999986525 | 0              |
| 0.2759682908 | 0.9999986525 | 1105.664722114 |
| 0.8723653023 | 0.9999986525 | 4.2946291892   |
| 0.9798055817 | 0.9999986525 | 0.3360412193   |
| 0            | 0            | 0              |
| 0.781791789  | 0.9999986525 | 0              |
| 0.8690679182 | 0.9999986525 | 2.4339052376   |
| 0.3425647774 | 0.9999986525 | 0.237409672    |
| 0.6291645585 | 0.9999986525 | 0.4867821692   |
| 0.3612464012 | 0.9999986525 | 0              |
| 0.4065485213 | 0.9999986525 | 0              |
| 0.6312664098 | 0.9999986525 | 0              |
| 0.2389175266 | 0.9999986525 | 1.2839257339   |
| 0.2627233398 | 0.9999986525 | 0              |
| 0.0534684393 | 0.9999986525 | 3.0986809567   |
| 0.9122714643 | 0.9999986525 | 26.7051668092  |
| 0.3967015756 | 0.9999986525 | 3.7862153722   |
| 0.3951488232 | 0.9999986525 | 0              |
| 0            | 0            | 0              |
| 0.2628131958 | 0.9999986525 | 0              |
| 0.974130124  | 0.9999986525 | 1.317778288    |
| 0.6978089846 | 0.9999986525 | 2.1466629094   |
| 0.2088782896 | 0.9999986525 | 0              |
| 0.8468695939 | 0.9999986525 | 11.9791142539  |



gene\_expression\_table

|              |              |                 |
|--------------|--------------|-----------------|
| 0.5807822253 | 0.9999986525 | 1.8959892527    |
| 0            | 0            | 0               |
| 0.1783801001 | 0.9999986525 | 0               |
| 0.6589870706 | 0.9999986525 | 0               |
| 0.5246743947 | 0.9999986525 | 57.2684040925   |
| 0.6030230167 | 0.9999986525 | 0               |
| 0.2002235978 | 0.9999986525 | 20.5474976889   |
| 0.9200328944 | 0.9999986525 | 14.9097903742   |
| 0.5278064956 | 0.9999986525 | 2.2636193675    |
| 0.3535770739 | 0.9999986525 | 0.784718634     |
| 0.6618295035 | 0.9999986525 | 57.7990897142   |
| 0.9104207121 | 0.9999986525 | 4326.7930958574 |
| 0.8010325164 | 0.9999986525 | 7.3824319578    |
| 0.7716264238 | 0.9999986525 | 3.1570278096    |
| 0.3050621626 | 0.9999986525 | 0               |
| 0.8104637568 | 0.9999986525 | 0.4879695305    |
| 0.1210300077 | 0.9999986525 | 3.8675802737    |
| 0.5690738486 | 0.9999986525 | 29.6540809805   |
| 0.6674834905 | 0.9999986525 | 17.4626101793   |
| 0.7372000759 | 0.9999986525 | 13.7060341418   |
| 0.5195153805 | 0.9999986525 | 2.3844831923    |
| 0.1225353958 | 0.9999986525 | 22.7716308952   |
| 0.6447507759 | 0.9999986525 | 0               |
| 0.9983649289 | 0.9999986525 | 1.6240691962    |
| 0.9429210848 | 0.9999986525 | 8.2299923217    |
| 0.1945701882 | 0.9999986525 | 0.8190553605    |
| 0.806059241  | 0.9999986525 | 0               |
| 0.2884463298 | 0.9999986525 | 0               |
| 0.995986072  | 0.9999986525 | 3.6287002801    |
| 0.2842178151 | 0.9999986525 | 2.6250767049    |
| 0.2139818529 | 0.9999986525 | 0               |
| 0.5219105039 | 0.9999986525 | 26.0048836051   |
| 0.8465115573 | 0.9999986525 | 2.7388849363    |
| 0.9524742602 | 0.9999986525 | 11.2354102027   |
| 0.3929231538 | 0.9999986525 | 0               |
| 0.447658337  | 0.9999986525 | 8.1912885823    |
| 0.108331175  | 0.9999986525 | 0               |
| 0.3255492924 | 0.9999986525 | 17.7505886936   |
| 0.7311390005 | 0.9999986525 | 2.9080952715    |
| 0.009417     | 0.9999986525 | 0               |
| 0.0495441386 | 0.9999986525 | 5.5415684619    |
| 0.6312664098 | 0.9999986525 | 0               |
| 0.0223702195 | 0.9999986525 | 2.053498123     |
| 0.2230175412 | 0.9999986525 | 0               |
| 0.0821098336 | 0.9999986525 | 0.7042888721    |
| 0.6168276646 | 0.9999986525 | 1.4138001453    |
| 0.5602607234 | 0.9999986525 | 0               |
| 0.4771622658 | 0.9999986525 | 0               |
| 0.6824364531 | 0.9999986525 | 0               |

gene\_expression\_table

|              |              |                 |
|--------------|--------------|-----------------|
| 0.4768601296 | 0.9999986525 | 0               |
| 0.4870752671 | 0.9999986525 | 0               |
| 0.6312664098 | 0.9999986525 | 0               |
| 0.6394424219 | 0.9999986525 | 0               |
| 0.5135227306 | 0.9999986525 | 1.4389733186    |
| 0.6312649618 | 0.9999986525 | 0.3410363885    |
| 0.1524566073 | 0.9999986525 | 0               |
| 0            | 0            | 0               |
| 0.2930971747 | 0.9999986525 | 350.2028047845  |
| 0.6838465999 | 0.9999986525 | 0               |
| 0.8452875158 | 0.9999986525 | 0.7698373014    |
| 0.6929004804 | 0.9999986525 | 22.2093852928   |
| 0.3092148397 | 0.9999986525 | 0               |
| 0.604515546  | 0.9999986525 | 58.710911221    |
| 0.7839999897 | 0.9999986525 | 0               |
| 0.5219747247 | 0.9999986525 | 1018.9180365204 |
| 0.1436549808 | 0.9999986525 | 24.3108256975   |
| 0.2135470535 | 0.9999986525 | 0.6213475244    |
| 0.1914505491 | 0.9999986525 | 25.8146561688   |
| 0.5304744126 | 0.9999986525 | 3.5045732068    |
| 0.9816630729 | 0.9999986525 | 0.3435386752    |
| 0            | 0            | 0               |
| 0.1765847088 | 0.9999986525 | 60.2336029538   |
| 0.8386764513 | 0.9999986525 | 0               |
| 0.1218052978 | 0.9999986525 | 4.5973118233    |
| 0.5901549401 | 0.9999986525 | 96.3581795773   |
| 0.9511545055 | 0.9999986525 | 43.2688171607   |
| 0.1299535574 | 0.9999986525 | 0               |
| 0.5654627677 | 0.9999986525 | 4.4051979503    |
| 0.1608592208 | 0.9999986525 | 53.4644017813   |
| 0.2567637529 | 0.9999986525 | 31.4334541981   |
| 0.7676113303 | 0.9999986525 | 13.7214648548   |
| 0.2171522015 | 0.9999986525 | 4.9188710279    |
| 0.4560867185 | 0.9999986525 | 0               |
| 0.3828637362 | 0.9999986525 | 17.1920306726   |
| 0.8386020418 | 0.9999986525 | 26.7567075041   |
| 0.0942857056 | 0.9999986525 | 6.5223304056    |
| 0.330051359  | 0.9999986525 | 0               |
| 0.2142235386 | 0.9999986525 | 313.8655711735  |
| 0.8179346372 | 0.9999986525 | 0               |
| 0.9397826975 | 0.9999986525 | 3.3944288339    |
| 0.3495357434 | 0.9999986525 | 15.1851403756   |
| 0.9514995375 | 0.9999986525 | 1.5994685458    |
| 0.8180960374 | 0.9999986525 | 8.6424346631    |
| 0.7754179392 | 0.9999986525 | 17.2312946905   |
| 0.7349732742 | 0.9999986525 | 39.9273621065   |
| 0.6830057152 | 0.9999986525 | 0               |
| 0.1778433306 | 0.9999986525 | 0               |
| 0.4528855667 | 0.9999986525 | 0.494142199     |

gene\_expression\_table

|              |              |                 |
|--------------|--------------|-----------------|
| 0.2343508818 | 0.9999986525 | 126.4095697135  |
| 0            | 0            | 0               |
| 0.9122535928 | 0.9999986525 | 19.298798193    |
| 0.6153649789 | 0.9999986525 | 1.9684650848    |
| 0.5283920673 | 0.9999986525 | 8.2988557867    |
| 0.4726386256 | 0.9999986525 | 41.4959090366   |
| 0.9217847931 | 0.9999986525 | 3.2754848813    |
| 0.985504507  | 0.9999986525 | 2.1131484106    |
| 0.9495041287 | 0.9999986525 | 0               |
| 0.6962813699 | 0.9999986525 | 1.2149030489    |
| 0.3105384048 | 0.9999986525 | 1.488764432     |
| 0.2954986034 | 0.9999986525 | 0               |
| 0.9380461263 | 0.9999986525 | 12.2235576824   |
| 0.9033114045 | 0.9999986525 | 7.2613561877    |
| 0.394172523  | 0.9999986525 | 0               |
| 0.3732742248 | 0.9999986525 | 1.2551730928    |
| 0.7737871183 | 0.9999986525 | 2.4192166289    |
| 0.7504601253 | 0.9999986525 | 6.7770971675    |
| 0.4603082574 | 0.9999986525 | 16.88964446     |
| 0.1193951419 | 0.9999986525 | 0               |
| 0.9303942234 | 0.9999986525 | 0               |
| 0.626473704  | 0.9999986525 | 0               |
| 0.1621636157 | 0.9999986525 | 29.6707405766   |
| 0.0141773788 | 0.9999986525 | 2.1616403765    |
| 0.6219568729 | 0.9999986525 | 113.5325395165  |
| 0.6970050412 | 0.9999986525 | 2.7296130566    |
| 0.5060966242 | 0.9999986525 | 9.897042581     |
| 0.6312664098 | 0.9999986525 | 0               |
| 0.7235943878 | 0.9999986525 | 2.3149277094    |
| 0            | 0            | 0               |
| 0.5919376376 | 0.9999986525 | 1.4284198184    |
| 0.4931565704 | 0.9999986525 | 0.902940935     |
| 0.1780608284 | 0.9999986525 | 0               |
| 0.9238964556 | 0.9999986525 | 84.9419687651   |
| 0.1556254563 | 0.9999986525 | 59.8042155071   |
| 0.2731788421 | 0.9999986525 | 53.0260223156   |
| 0.3214154761 | 0.9999986525 | 0               |
| 0.9300344558 | 0.9999986525 | 0               |
| 0.5279958123 | 0.9999986525 | 0.0461773146    |
| 0.0178823175 | 0.9999986525 | 1617.0322653619 |
| 0.1878987386 | 0.9999986525 | 547.1594882844  |
| 0.3379170624 | 0.9999986525 | 0               |
| 0.4556787548 | 0.9999986525 | 163.56684929    |
| 0.5079266831 | 0.9999986525 | 0               |
| 0.7878586554 | 0.9999986525 | 31.8732155862   |
| 0.7919706496 | 0.9999986525 | 5.5260098591    |
| 0.587240673  | 0.9999986525 | 2.9003231741    |
| 0.6579150686 | 0.9999986525 | 2.6304372062    |
| 0.2402219104 | 0.9999986525 | 0               |

gene\_expression\_table

|              |              |                |
|--------------|--------------|----------------|
| 0.5553525859 | 0.9999986525 | 11.6836335579  |
| 0.8428071511 | 0.9999986525 | 7.1081989537   |
| 0.6406208856 | 0.9999986525 | 0              |
| 0.8096400861 | 0.9999986525 | 8.9477201569   |
| 0.3344899591 | 0.9999986525 | 0              |
| 0.4783719702 | 0.9999986525 | 3.9870092648   |
| 0.9509277941 | 0.9999986525 | 3.8432483064   |
| 0.080137949  | 0.9999986525 | 13.7428879069  |
| 0.5391593277 | 0.9999986525 | 0.7570856762   |
| 0.5781534692 | 0.9999986525 | 0              |
| 0.8498715605 | 0.9999986525 | 13.9763729825  |
| 0.0844704119 | 0.9999986525 | 0              |
| 0.8951647767 | 0.9999986525 | 77.2915610652  |
| 0.6232087695 | 0.9999986525 | 0              |
| 0.7569463139 | 0.9999986525 | 0              |
| 0.6312664098 | 0.9999986525 | 0              |
| 0.7412571059 | 0.9999986525 | 443.5814654178 |
| 0.0778879259 | 0.9999986525 | 147.1139783463 |
| 0.4914664479 | 0.9999986525 | 224.7400775588 |
| 0.3553808213 | 0.9999986525 | 0              |
| 0.4897098231 | 0.9999986525 | 0              |
| 0.8772979951 | 0.9999986525 | 49.9658639795  |
| 0.9458154891 | 0.9999986525 | 6.6344142686   |
| 0.9877772873 | 0.9999986525 | 69.7981298145  |
| 0.2587921195 | 0.9999986525 | 12.9212673315  |
| 0.8855447167 | 0.9999986525 | 5.8590989823   |
| 0.5091637918 | 0.9999986525 | 3.1894388687   |
| 0.3129901259 | 0.9999986525 | 7.8245015289   |
| 0.5813681794 | 0.9999986525 | 0.6564180359   |
| 0.9276280116 | 0.9999986525 | 1.4499558876   |
| 0.4999151395 | 0.9999986525 | 2.1175541569   |
| 0.2904844477 | 0.9999986525 | 3.7403246384   |
| 0.8109583962 | 0.9999986525 | 1.5659704153   |
| 0.6312664098 | 0.9999986525 | 0              |
| 0.7896201096 | 0.9999986525 | 0              |
| 0.3207090782 | 0.9999986525 | 0              |
| 0.2098369341 | 0.9999986525 | 0              |
| 0.3727287362 | 0.9999986525 | 2.0161062081   |
| 0.472211071  | 0.9999986525 | 3.9326794167   |
| 0.5337436557 | 0.9999986525 | 0              |
| 0.9987142453 | 0.9999986525 | 0              |
| 0.5264226883 | 0.9999986525 | 130.7275203622 |
| 0.1368784219 | 0.9999986525 | 0              |
| 0.6847403522 | 0.9999986525 | 15.286860221   |
| 0.8140531027 | 0.9999986525 | 128.3568773494 |
| 0.7369233634 | 0.9999986525 | 0              |
| 0.203605915  | 0.9999986525 | 18.3397580437  |
| 0.1926173259 | 0.9999986525 | 9.2453248536   |
| 0.8110604499 | 0.9999986525 | 6.3587813412   |

gene\_expression\_table

|              |              |                 |
|--------------|--------------|-----------------|
| 0.8948739773 | 0.9999986525 | 0               |
| 0.3574697563 | 0.9999986525 | 1075.2364814357 |
| 0.2079573778 | 0.9999986525 | 78.3377967219   |
| 0.9496190711 | 0.9999986525 | 0               |
| 0.1457410914 | 0.9999986525 | 0               |
| 0.4729816619 | 0.9999986525 | 0               |
| 0.7462550192 | 0.9999986525 | 0               |
| 0.5092711159 | 0.9999986525 | 1093.1114683511 |
| 0.5275780601 | 0.9999986525 | 1.0561657069    |
| 0.9451831486 | 0.9999986525 | 13.4852654151   |
| 0.8869756913 | 0.9999986525 | 3.9831378346    |
| 0.6312664098 | 0.9999986525 | 0               |
| 0.1231097387 | 0.9999986525 | 11.6836335579   |
| 0.9298483422 | 0.9999986525 | 0               |
| 0.6635171064 | 0.9999986525 | 6.2320984396    |
| 0.7702801774 | 0.9999986525 | 51.1762773511   |
| 0.6394197199 | 0.9999986525 | 0               |
| 0.5446390623 | 0.9999986525 | 0               |
| 0.8134790476 | 0.9999986525 | 0               |
| 0.1828899889 | 0.9999986525 | 39.0404481271   |
| 0.0900883842 | 0.9999986525 | 3.062208977     |
| 0            | 0            | 0               |
| 0.2297717947 | 0.9999986525 | 129.0167257317  |
| 0            | 0            | 0               |
| 0.1527496285 | 0.9999986525 | 47.553330986    |
| 0.7366728617 | 0.9999986525 | 26.6779066021   |
| 0.8861709205 | 0.9999986525 | 41.2045392833   |
| 0.4597875801 | 0.9999986525 | 21.5060591055   |
| 0.17091799   | 0.9999986525 | 0               |
| 0.8004057946 | 0.9999986525 | 7.3315327694    |
| 0.9999955801 | 0.9999986525 | 34.1329530319   |
| 0.3095889961 | 0.9999986525 | 0               |
| 0.9723410333 | 0.9999986525 | 165.0995744757  |
| 0.7106554392 | 0.9999986525 | 0               |
| 0.3391790012 | 0.9999986525 | 0               |
| 0.6312664098 | 0.9999986525 | 0               |
| 0.7492339663 | 0.9999986525 | 44.5974870777   |
| 0.4065274913 | 0.9999986525 | 0               |
| 0            | 0            | 0               |
| 0.4593922718 | 0.9999986525 | 93.7872021777   |
| 0.7974378297 | 0.9999986525 | 6.1472290318    |
| 0.6312664098 | 0.9999986525 | 0               |
| 0.1913515583 | 0.9999986525 | 59.4560031496   |
| 0.00237      | 0.9999986525 | 10.1741318101   |
| 0.5380967782 | 0.9999986525 | 1276.5268835364 |
| 0.5424602713 | 0.9999986525 | 11.4645525966   |
| 0.4924547006 | 0.9999986525 | 19.8064572384   |
| 0.7303461245 | 0.9999986525 | 0               |
| 0.4498500591 | 0.9999986525 | 9.4352689998    |

gene\_expression\_table

|              |              |                |
|--------------|--------------|----------------|
| 0.4975462003 | 0.9999986525 | 0              |
| 0.8620767671 | 0.9999986525 | 12.4899889385  |
| 0.4125124374 | 0.9999986525 | 39.012591457   |
| 0.8196772019 | 0.9999986525 | 1.4706072516   |
| 0.2881004833 | 0.9999986525 | 86.4542131751  |
| 0.4960068734 | 0.9999986525 | 0              |
| 0.4569829596 | 0.9999986525 | 13.0954421588  |
| 0.6312664098 | 0.9999986525 | 0              |
| 0.020641623  | 0.9999986525 | 57.3856409558  |
| 0.6312664098 | 0.9999986525 | 0              |
| 0.0429027673 | 0.9999986525 | 61.4748457854  |
| 0.1813659152 | 0.9999986525 | 0              |
| 0.8091164786 | 0.9999986525 | 0              |
| 0.7500464106 | 0.9999986525 | 9.6977448084   |
| 0.6111897103 | 0.9999986525 | 2.0501236308   |
| 0.3979531446 | 0.9999986525 | 15.15339704    |
| 0.4760622343 | 0.9999986525 | 1.4049617788   |
| 0.6457401949 | 0.9999986525 | 0              |
| 0.5501330938 | 0.9999986525 | 18.603000432   |
| 0.7660723696 | 0.9999986525 | 32.5108761011  |
| 0.6402276009 | 0.9999986525 | 37.6525082412  |
| 0.0847521279 | 0.9999986525 | 25.7880460089  |
| 0.1641527135 | 0.9999986525 | 0              |
| 0.4474000974 | 0.9999986525 | 5.2955131911   |
| 0.500877023  | 0.9999986525 | 35.8121161053  |
| 0            | 0            | 0              |
| 0.8526340633 | 0.9999986525 | 0              |
| 0.4338690532 | 0.9999986525 | 0              |
| 0.5820077933 | 0.9999986525 | 0              |
| 0.6798264887 | 0.9999986525 | 2.3566069442   |
| 0.9613388849 | 0.9999986525 | 42.8336725274  |
| 0.8607982078 | 0.9999986525 | 0              |
| 0.3274850863 | 0.9999986525 | 285.9959470739 |
| 0.3598591161 | 0.9999986525 | 40.8744820264  |
| 0.660001618  | 0.9999986525 | 0              |
| 0.7376469053 | 0.9999986525 | 124.3382574308 |
| 0.7308514437 | 0.9999986525 | 0              |
| 0.9739520612 | 0.9999986525 | 0              |
| 0.4870937066 | 0.9999986525 | 0              |
| 0.5774238136 | 0.9999986525 | 45.3565461043  |
| 0.4082846286 | 0.9999986525 | 0              |
| 0.007211     | 0.9999986525 | 0              |
| 0.0753872374 | 0.9999986525 | 12.0186417871  |
| 0.8713820404 | 0.9999986525 | 920.8341513746 |
| 0.6506184288 | 0.9999986525 | 0              |
| 0.2696485138 | 0.9999986525 | 336.9094043526 |
| 0.1360501786 | 0.9999986525 | 9.107081688    |
| 0.4086988142 | 0.9999986525 | 10.2504026253  |
| 0.3757956466 | 0.9999986525 | 12.8579228792  |

gene\_expression\_table

|              |              |                |
|--------------|--------------|----------------|
| 0.6162475552 | 0.9999986525 | 0              |
| 0.2078789925 | 0.9999986525 | 3.4675848679   |
| 0.299121905  | 0.9999986525 | 2.8409853807   |
| 0.9242817754 | 0.9999986525 | 16.4018379585  |
| 0.639393539  | 0.9999986525 | 0              |
| 0.4678409785 | 0.9999986525 | 0              |
| 0.5192476889 | 0.9999986525 | 1.4767340965   |
| 0.7659508353 | 0.9999986525 | 20.1996168539  |
| 0.9763415765 | 0.9999986525 | 24.0172433953  |
| 0.77831091   | 0.9999986525 | 0              |
| 0.0642490987 | 0.9999986525 | 1.1262404194   |
| 0.0442651998 | 0.9999986525 | 0              |
| 0.5662984187 | 0.9999986525 | 0              |
| 0.5648195747 | 0.9999986525 | 33.1745717502  |
| 0.007159     | 0.9999986525 | 213.2720633221 |
| 0.3172698299 | 0.9999986525 | 85.9591170119  |
| 0.3977125254 | 0.9999986525 | 0              |
| 0.6772439276 | 0.9999986525 | 110.7421083663 |
| 0.287277127  | 0.9999986525 | 118.5202004829 |
| 0.5278052214 | 0.9999986525 | 9.9153136631   |
| 0.9993882363 | 0.9999986525 | 1.9501843778   |
| 0.1595448766 | 0.9999986525 | 27.6585065338  |
| 0.5626658078 | 0.9999986525 | 0              |
| 0.0529323259 | 0.9999986525 | 17.0905001946  |
| 0.0964947679 | 0.9999986525 | 1.1961840511   |
| 0.3698010685 | 0.9999986525 | 0              |
| 0.9281770876 | 0.9999986525 | 0              |
| 0.3213331165 | 0.9999986525 | 0              |
| 0.8894866832 | 0.9999986525 | 17.1268710679  |
| 0.5530539869 | 0.9999986525 | 0              |
| 0.6312664098 | 0.9999986525 | 0              |
| 0.6760213822 | 0.9999986525 | 11.4633439456  |
| 0.2860622773 | 0.9999986525 | 0              |
| 0.4438704271 | 0.9999986525 | 0              |
| 0.7725753723 | 0.9999986525 | 0              |
| 0.4982288769 | 0.9999986525 | 7.7462479065   |
| 0.4314481715 | 0.9999986525 | 2.5277073909   |
| 0.4455458238 | 0.9999986525 | 0              |
| 0.5657805794 | 0.9999986525 | 66.2243488731  |
| 0.9228314659 | 0.9999986525 | 0              |
| 0.6475089243 | 0.9999986525 | 2.0634466976   |
| 0            | 0            | 0              |
| 0.9884385416 | 0.9999986525 | 0              |
| 0.7338554404 | 0.9999986525 | 8.1220943062   |
| 0.4734218611 | 0.9999986525 | 0              |
| 0.1617878475 | 0.9999986525 | 0.9803047467   |
| 0.1437149558 | 0.9999986525 | 0.3942720075   |
| 0.4064204682 | 0.9999986525 | 1.8914321038   |
| 0.898783975  | 0.9999986525 | 1.7349410306   |

gene\_expression\_table

|              |              |                |
|--------------|--------------|----------------|
| 0.7060013982 | 0.9999986525 | 2.4091467904   |
| 0.4490070666 | 0.9999986525 | 0.7003105248   |
| 0.0609786979 | 0.9999986525 | 0              |
| 0.5670547312 | 0.9999986525 | 42.1128271907  |
| 0.621557336  | 0.9999986525 | 0              |
| 0.8811233564 | 0.9999986525 | 4.0289825858   |
| 0.6312664098 | 0.9999986525 | 0              |
| 0.3622806118 | 0.9999986525 | 10.321554179   |
| 0.4981781358 | 0.9999986525 | 0              |
| 0.4979774481 | 0.9999986525 | 0              |
| 0.2186057843 | 0.9999986525 | 7.896266941    |
| 0.3347600042 | 0.9999986525 | 142.1871115823 |
| 0.9445355998 | 0.9999986525 | 14.6713479155  |
| 0.6312664098 | 0.9999986525 | 0              |
| 0.787488099  | 0.9999986525 | 0              |
| 0.2841929868 | 0.9999986525 | 44.7034374346  |
| 0.4065064536 | 0.9999986525 | 0              |
| 0.4777413144 | 0.9999986525 | 72.2884180486  |
| 0.3717284003 | 0.9999986525 | 2.9146753988   |
| 0.6364819813 | 0.9999986525 | 61.0487110245  |
| 0.0383237184 | 0.9999986525 | 41.8463660945  |
| 0.40870762   | 0.9999986525 | 15.9775883305  |
| 0.9452880444 | 0.9999986525 | 10.0693838372  |
| 0.7138093512 | 0.9999986525 | 13.6013181113  |
| 0.8962155639 | 0.9999986525 | 0              |
| 0.4981800208 | 0.9999986525 | 0              |
| 0.9495833249 | 0.9999986525 | 0              |
| 0.3174963722 | 0.9999986525 | 0              |
| 0.5493493666 | 0.9999986525 | 0              |
| 0.3519254994 | 0.9999986525 | 10.7915648194  |
| 0.3271666706 | 0.9999986525 | 1334.89488712  |
| 0.6604871728 | 0.9999986525 | 22.9714509973  |
| 0.9420720509 | 0.9999986525 | 68.0453276124  |
| 0.8639970602 | 0.9999986525 | 0              |
| 0.3843336939 | 0.9999986525 | 0              |
| 0.6312664098 | 0.9999986525 | 0              |
| 0.3050954479 | 0.9999986525 | 0              |
| 0.5163502875 | 0.9999986525 | 0              |
| 0            | 0            | 0              |
| 0.4318759913 | 0.9999986525 | 39.6457594372  |
| 0.6760027615 | 0.9999986525 | 150.785730799  |
| 0.6447356253 | 0.9999986525 | 11.9910510605  |
| 0.1472001074 | 0.9999986525 | 87.5368810381  |
| 0.5824158439 | 0.9999986525 | 0              |
| 0.3932015084 | 0.9999986525 | 2.60951224     |
| 0            | 0            | 0              |
| 0.5492392447 | 0.9999986525 | 0              |
| 0.9456608724 | 0.9999986525 | 17.6340294579  |
| 0.3192689103 | 0.9999986525 | 0              |



gene\_expression\_table

|              |              |                 |
|--------------|--------------|-----------------|
| 0.6184391159 | 0.9999986525 | 0               |
| 0.9300038575 | 0.9999986525 | 0               |
| 0.4179566271 | 0.9999986525 | 9.162190174     |
| 0.7580563581 | 0.9999986525 | 0               |
| 0.165541217  | 0.9999986525 | 0               |
| 0.2114022507 | 0.9999986525 | 10.478952029    |
| 0.2724025955 | 0.9999986525 | 3.4851470388    |
| 0.8485896619 | 0.9999986525 | 138.5932249613  |
| 0.3859071742 | 0.9999986525 | 0               |
| 0.7693971611 | 0.9999986525 | 67.9549220484   |
| 0.0407873118 | 0.9999986525 | 1.0847419945    |
| 0.2346422308 | 0.9999986525 | 29.4186983575   |
| 0.5923335087 | 0.9999986525 | 0               |
| 0.1535718961 | 0.9999986525 | 12.0524687874   |
| 0            | 0            | 0               |
| 0.6147184744 | 0.9999986525 | 3.5879020534    |
| 0.9299790361 | 0.9999986525 | 42.6102783558   |
| 0.4210665709 | 0.9999986525 | 9.1754548691    |
| 0.4102378412 | 0.9999986525 | 1.664038459     |
| 0.2715209368 | 0.9999986525 | 0               |
| 0.8297794896 | 0.9999986525 | 315.7320161226  |
| 0.5169639985 | 0.9999986525 | 1297.3307963674 |
| 0.5734403616 | 0.9999986525 | 1.9068002681    |
| 0.1432737589 | 0.9999986525 | 7.0610618517    |
| 0            | 0            | 0               |
| 0.0556912816 | 0.9999986525 | 19.3285631612   |
| 0.3437224306 | 0.9999986525 | 0.5401355938    |
| 0.2391369118 | 0.9999986525 | 0               |
| 0.7682133292 | 0.9999986525 | 5.3926603818    |
| 0.6729841376 | 0.9999986525 | 0               |
| 0.144141923  | 0.9999986525 | 2.1971621184    |
| 0            | 0            | 0               |
| 0.8959800737 | 0.9999986525 | 0               |
| 0.4865323994 | 0.9999986525 | 0               |
| 0.6097649992 | 0.9999986525 | 2.9782004808    |
| 0.3182117437 | 0.9999986525 | 30.3063800074   |
| 0.2970614625 | 0.9999986525 | 30.0446760433   |
| 0.6827534798 | 0.9999986525 | 1.8426459503    |
| 0.8650892204 | 0.9999986525 | 10.2244987993   |
| 0.3542384032 | 0.9999986525 | 0.6157779286    |
| 0.1131341447 | 0.9999986525 | 80.5451341031   |
| 0.2261922687 | 0.9999986525 | 1.1227329264    |
| 0.9551739255 | 0.9999986525 | 25.2879665915   |
| 0.811384845  | 0.9999986525 | 534.0548669431  |
| 0.7910479697 | 0.9999986525 | 38.6123104447   |
| 0.2224844877 | 0.9999986525 | 0               |
| 0.6750822741 | 0.9999986525 | 3.7271643067    |
| 0.8835108051 | 0.9999986525 | 0               |
| 0.3663774027 | 0.9999986525 | 0               |

gene\_expression\_table

|              |              |                |
|--------------|--------------|----------------|
| 0.6336841734 | 0.9999986525 | 0              |
| 0.9923037313 | 0.9999986525 | 254.2006256646 |
| 0.4933427402 | 0.9999986525 | 4.7726295162   |
| 0.2331582026 | 0.9999986525 | 0              |
| 0.6713404586 | 0.9999986525 | 27.7209312546  |
| 0.0229693181 | 0.9999986525 | 0              |
| 0.4137250731 | 0.9999986525 | 10.1067179957  |
| 0.8182862412 | 0.9999986525 | 0              |
| 0.8504481907 | 0.9999986525 | 1.5214230264   |
| 0.1619130452 | 0.9999986525 | 6.9655443553   |
| 0.8484534827 | 0.9999986525 | 20.6260054388  |
| 0.2389373233 | 0.9999986525 | 110.8477581548 |
| 0.8571895459 | 0.9999986525 | 0              |
| 0.5964701949 | 0.9999986525 | 3.0160854462   |
| 0.9696181929 | 0.9999986525 | 9.8653064773   |
| 0.7717145814 | 0.9999986525 | 53.9977680266  |
| 0.5130159799 | 0.9999986525 | 20.5242079962  |
| 0.5050857028 | 0.9999986525 | 1.5872905427   |
| 0.380327228  | 0.9999986525 | 17.3512066331  |
| 0.1997905218 | 0.9999986525 | 3.6816310783   |
| 0.4477149557 | 0.9999986525 | 4.2609050606   |
| 0.3541777372 | 0.9999986525 | 2.8115690184   |
| 0.3680343939 | 0.9999986525 | 1.2921363128   |
| 0.6839813879 | 0.9999986525 | 0              |
| 0.7903954537 | 0.9999986525 | 0.6356077387   |
| 0.8429631486 | 0.9999986525 | 2.3970733559   |
| 0.002244     | 0.9999986525 | 0.8124900011   |
| 0.6312664098 | 0.9999986525 | 0              |
| 0.95096047   | 0.9999986525 | 548.7160335201 |
| 0.2354921819 | 0.9999986525 | 0.856742935    |
| 0.8862032575 | 0.9999986525 | 0.8429994928   |
| 0.5089664707 | 0.9999986525 | 1.7122498392   |
| 0.021717496  | 0.9999986525 | 0              |
| 0.5034617201 | 0.9999986525 | 8.0604247741   |
| 0.3931629791 | 0.9999986525 | 3.8270677913   |
| 0.3897139542 | 0.9999986525 | 15.9556255121  |
| 0.3847496839 | 0.9999986525 | 0.1145181061   |
| 0.34882242   | 0.9999986525 | 0              |
| 0.3014013418 | 0.9999986525 | 13.2501562433  |
| 0.3188669721 | 0.9999986525 | 49.3324563096  |
| 0.4147227846 | 0.9999986525 | 0.7127192009   |
| 0.2708128104 | 0.9999986525 | 39.6054879837  |
| 0.134626818  | 0.9999986525 | 1.3493936541   |
| 0.09194285   | 0.9999986525 | 12.98140481    |
| 0.75091105   | 0.9999986525 | 3.4851470388   |
| 0.6971208471 | 0.9999986525 | 64.1023403645  |
| 0.9639604963 | 0.9999986525 | 114.3653491258 |
| 0.1107895601 | 0.9999986525 | 96.8085752476  |
| 0.882387078  | 0.9999986525 | 0              |

gene\_expression\_table

|              |              |                |
|--------------|--------------|----------------|
| 0.9228487157 | 0.9999986525 | 44.344179871   |
| 0.6647122836 | 0.9999986525 | 0              |
| 0.0898954804 | 0.9999986525 | 1.1521612214   |
| 0.6287709445 | 0.9999986525 | 1.822882475    |
| 0.6308726421 | 0.9999986525 | 6.7115007806   |
| 0.3314383263 | 0.9999986525 | 0              |
| 0.5266695583 | 0.9999986525 | 0              |
| 0.1072172742 | 0.9999986525 | 210.4140168379 |
| 0.2969052772 | 0.9999986525 | 5.0756584661   |
| 0.5339858376 | 0.9999986525 | 0.8803273392   |
| 0.3828889563 | 0.9999986525 | 1.4136235495   |
| 0.0725098688 | 0.9999986525 | 6.6692660975   |
| 0.0561300757 | 0.9999986525 | 0              |
| 0.8621135152 | 0.9999986525 | 0              |
| 0.0331543252 | 0.9999986525 | 0              |
| 0.4729816619 | 0.9999986525 | 0              |
| 0.6008373612 | 0.9999986525 | 1.5042243388   |
| 0.6497741889 | 0.9999986525 | 11.0366226441  |
| 0.6210798338 | 0.9999986525 | 2.6408362057   |
| 0.6341144358 | 0.9999986525 | 58.0680781226  |
| 0.5140334676 | 0.9999986525 | 4.3218701574   |
| 0.1844626727 | 0.9999986525 | 41.406443141   |
| 0.7907887545 | 0.9999986525 | 225.1792569606 |
| 0.183679392  | 0.9999986525 | 12.2635310032  |
| 0.7891438273 | 0.9999986525 | 0.2737720734   |
| 0.0779497716 | 0.9999986525 | 0              |
| 0.5097079145 | 0.9999986525 | 4.9862807162   |
| 0.9842764927 | 0.9999986525 | 2.9143537262   |
| 0.8650660395 | 0.9999986525 | 0              |
| 0.6312664098 | 0.9999986525 | 0              |
| 0            | 0            | 0              |
| 0.5006472777 | 0.9999986525 | 0.7590496878   |
| 0.5292711066 | 0.9999986525 | 2.9553258074   |
| 0.1897170802 | 0.9999986525 | 0              |
| 0.0002126    | 0.7627450395 | 0              |
| 0.2865321273 | 0.9999986525 | 16.8721086898  |
| 0.9360980766 | 0.9999986525 | 0              |
| 0.8973581926 | 0.9999986525 | 7.3913862045   |
| 0.6343287485 | 0.9999986525 | 0              |
| 0.9516567808 | 0.9999986525 | 0              |
| 0.240094099  | 0.9999986525 | 755.0905577737 |
| 0.3083376228 | 0.9999986525 | 0              |
| 0            | 0            | 0              |
| 0.2712346071 | 0.9999986525 | 18.1955619443  |
| 0.6040541161 | 0.9999986525 | 14.2902533217  |
| 0.3455832176 | 0.9999986525 | 0              |
| 0.7004765333 | 0.9999986525 | 13.4124908727  |
| 0.6393672753 | 0.9999986525 | 0              |
| 0            | 0            | 0              |

gene\_expression\_table

|              |              |                |
|--------------|--------------|----------------|
| 0.9193572266 | 0.9999986525 | 4.1575395814   |
| 0.1369100026 | 0.9999986525 | 30.9808607343  |
| 0.653182479  | 0.9999986525 | 96.7241261073  |
| 0.9626279057 | 0.9999986525 | 26.8681964862  |
| 0.8370511276 | 0.9999986525 | 5.0059795162   |
| 0.1233999733 | 0.9999986525 | 0              |
| 0.0923517628 | 0.9999986525 | 10.0263727055  |
| 0.407572193  | 0.9999986525 | 20.3477036482  |
| 0.6512026789 | 0.9999986525 | 73.7109814743  |
| 0.9018705569 | 0.9999986525 | 8.4701034256   |
| 0.061939828  | 0.9999986525 | 13.0083542429  |
| 0.7462930311 | 0.9999986525 | 2.7997200078   |
| 0.6327300983 | 0.9999986525 | 5.1997556588   |
| 0.4186532273 | 0.9999986525 | 91.0061772998  |
| 0.7864068073 | 0.9999986525 | 51.6158863381  |
| 0.2040827357 | 0.9999986525 | 86.4441505603  |
| 0.8826055615 | 0.9999986525 | 8.71229268     |
| 0.7382581022 | 0.9999986525 | 12.8709792591  |
| 0.7468476683 | 0.9999986525 | 112.1552733623 |
| 0.5400403392 | 0.9999986525 | 0              |
| 0.306893182  | 0.9999986525 | 21.7750870293  |
| 0.001606     | 0.9999986525 | 25.9145820541  |
| 0.1376770989 | 0.9999986525 | 9.7978395873   |
| 0.0887003774 | 0.9999986525 | 0              |
| 0.6853655768 | 0.9999986525 | 83.6070308015  |
| 0.0571581069 | 0.9999986525 | 3.1606174881   |
| 0.2223831039 | 0.9999986525 | 0              |
| 0.842900229  | 0.9999986525 | 1.3086356664   |
| 0.2106706998 | 0.9999986525 | 0              |
| 0.9696214775 | 0.9999986525 | 0              |
| 0.4895616503 | 0.9999986525 | 2.579623329    |
| 0.6332417536 | 0.9999986525 | 1.4472738744   |
| 0.6538042146 | 0.9999986525 | 29.0865582962  |
| 0.4210028784 | 0.9999986525 | 2066.107023702 |
| 0.6132047718 | 0.9999986525 | 10.2963651958  |
| 0.1445422178 | 0.9999986525 | 9.0574375281   |
| 0.9910786984 | 0.9999986525 | 70.6213677167  |
| 0.337934226  | 0.9999986525 | 0              |
| 0.3215974113 | 0.9999986525 | 15.8791095088  |
| 0.0711218047 | 0.9999986525 | 49.0683662679  |
| 0.1187528527 | 0.9999986525 | 0              |
| 0.3356879826 | 0.9999986525 | 4.177435       |
| 0.5298367827 | 0.9999986525 | 7.4142140701   |
| 0.2818691795 | 0.9999986525 | 0              |
| 0.7756964286 | 0.9999986525 | 17.2124052053  |
| 0.4257132983 | 0.9999986525 | 7.8592140218   |
| 0.1754048825 | 0.9999986525 | 189.506192918  |
| 0.3534419411 | 0.9999986525 | 4.5472399351   |
| 0.8625644825 | 0.9999986525 | 1.6181395755   |

gene\_expression\_table

|              |              |                |
|--------------|--------------|----------------|
| 0.8955104561 | 0.9999986525 | 147.3312454623 |
| 0.2860133622 | 0.9999986525 | 0              |
| 0.2464994827 | 0.9999986525 | 6.0897445087   |
| 0.4265195111 | 0.9999986525 | 64.881963423   |
| 0.876662164  | 0.9999986525 | 8.2942941855   |
| 0.30755387   | 0.9999986525 | 0              |
| 0.3450445635 | 0.9999986525 | 8.644415056    |
| 0.8478269068 | 0.9999986525 | 0              |
| 0.3450217008 | 0.9999986525 | 0              |
| 0.6148887756 | 0.9999986525 | 2.5528769444   |
| 0.6211773626 | 0.9999986525 | 1.4138001453   |
| 0.5049550979 | 0.9999986525 | 15.1242606605  |
| 0.2067853112 | 0.9999986525 | 6.5951446337   |
| 0.5110052846 | 0.9999986525 | 796.1097109784 |
| 0.9049227047 | 0.9999986525 | 0.7854421889   |
| 0.8674575616 | 0.9999986525 | 0              |
| 0.9260475546 | 0.9999986525 | 0              |
| 0.9196070745 | 0.9999986525 | 4.3371665659   |
| 0.7697685293 | 0.9999986525 | 0.3945695113   |
| 0.3717909156 | 0.9999986525 | 51.4333391235  |
| 0.3749649756 | 0.9999986525 | 7.7252860713   |
| 0.4579493889 | 0.9999986525 | 2.6082235284   |
| 0.5321779009 | 0.9999986525 | 168.6575855767 |
| 0.728462915  | 0.9999986525 | 8.0447704838   |
| 0.2178408676 | 0.9999986525 | 2.3367956385   |
| 0.6579252861 | 0.9999986525 | 50.7826136791  |
| 0.1971776643 | 0.9999986525 | 0              |
| 0.5617209913 | 0.9999986525 | 3.4412439659   |
| 0.377933096  | 0.9999986525 | 0              |
| 0.3999377417 | 0.9999986525 | 1.950724615    |
| 0.3018132374 | 0.9999986525 | 5.921064116    |
| 0.5093813798 | 0.9999986525 | 17.5039914579  |
| 0.6122834041 | 0.9999986525 | 0              |
| 0.8716256024 | 0.9999986525 | 2.9175736508   |
| 0.0295003471 | 0.9999986525 | 7.6586308333   |
| 0.7587895974 | 0.9999986525 | 0              |
| 0.5228437175 | 0.9999986525 | 64.8762705246  |
| 0.3180213506 | 0.9999986525 | 0              |
| 0.7619927806 | 0.9999986525 | 59.0665326065  |
| 0.5054214072 | 0.9999986525 | 6.1214010868   |
| 0.8666492356 | 0.9999986525 | 0.82544963     |
| 0.1041440155 | 0.9999986525 | 8.6311355166   |
| 0.6255473978 | 0.9999986525 | 198.5485647606 |
| 0.6312664098 | 0.9999986525 | 0              |
| 0.8247444028 | 0.9999986525 | 0              |
| 0.4991786097 | 0.9999986525 | 3.8280109176   |
| 0.3945937083 | 0.9999986525 | 4.5985126884   |
| 0.3260282556 | 0.9999986525 | 0.6264268      |
| 0.2184676147 | 0.9999986525 | 0              |

gene\_expression\_table

|              |              |                 |
|--------------|--------------|-----------------|
| 0.1139988734 | 0.9999986525 | 12.7369873933   |
| 0.4054183292 | 0.9999986525 | 0               |
| 0.4918398853 | 0.9999986525 | 0               |
| 0.3840674635 | 0.9999986525 | 3.1627941567    |
| 0.004399     | 0.9999986525 | 43.946492607    |
| 0.9922205055 | 0.9999986525 | 1009.5215757544 |
| 0.2524189114 | 0.9999986525 | 61.5534673044   |
| 0.1783997359 | 0.9999986525 | 0               |
| 0.3184839384 | 0.9999986525 | 6.0528242767    |
| 0.136110766  | 0.9999986525 | 6.7039754032    |
| 0.6612179238 | 0.9999986525 | 6857.0556813165 |
| 0.8199543079 | 0.9999986525 | 0               |
| 0.5540693312 | 0.9999986525 | 8.4374020651    |
| 0.2481095831 | 0.9999986525 | 11.8433084762   |
| 0.47647744   | 0.9999986525 | 4.5588190096    |
| 0.7015254791 | 0.9999986525 | 0               |
| 0.4576456453 | 0.9999986525 | 98.9024685886   |
| 0.305725726  | 0.9999986525 | 29.2963074338   |
| 0.2710328116 | 0.9999986525 | 19.3386738287   |
| 0.1905815566 | 0.9999986525 | 14.5172947296   |
| 0.6708368514 | 0.9999986525 | 88.9337088247   |
| 0.3282773836 | 0.9999986525 | 30.0728380744   |
| 0            | 0            | 0               |
| 0.1860428491 | 0.9999986525 | 19.3209870958   |
| 0.5421021377 | 0.9999986525 | 67.7535833564   |
| 0.9222241087 | 0.9999986525 | 536.8555447595  |
| 0.9176856029 | 0.9999986525 | 329.3709650773  |
| 0.0007156    | 0.9999986525 | 98.5334295267   |
| 0.608836127  | 0.9999986525 | 254.7469372574  |
| 0.3435274684 | 0.9999986525 | 20.0947087325   |
| 0.3304188465 | 0.9999986525 | 93.0418162219   |
| 0.5678721208 | 0.9999986525 | 151.0087675644  |
| 0            | 0            | 0               |
| 0.4729816619 | 0.9999986525 | 0               |
| 0.7735497863 | 0.9999986525 | 0               |
| 0.2299108671 | 0.9999986525 | 149.8975919384  |
| 0.4513886809 | 0.9999986525 | 13.4557753443   |
| 0.5239660129 | 0.9999986525 | 41.4389315232   |
| 0.0812782374 | 0.9999986525 | 145.3327414043  |
| 0.2220853034 | 0.9999986525 | 0               |
| 0.2975910681 | 0.9999986525 | 61.6779158465   |
| 0.4906753308 | 0.9999986525 | 53.146081234    |
| 0.1541872882 | 0.9999986525 | 153.4211788604  |
| 0.2724133921 | 0.9999986525 | 3.3176060267    |
| 0.5614201927 | 0.9999986525 | 71.4087590945   |
| 0.365455257  | 0.9999986525 | 21.4927869068   |
| 0.1703613587 | 0.9999986525 | 0               |
| 0.3184724897 | 0.9999986525 | 5.3840476648    |
| 0.158395296  | 0.9999986525 | 0               |

gene\_expression\_table

|              |              |                |
|--------------|--------------|----------------|
| 0.3073721396 | 0.9999986525 | 6.4047924116   |
| 0.6343648428 | 0.9999986525 | 17.9561445413  |
| 0.7604349725 | 0.9999986525 | 8.7100348117   |
| 0.3779194675 | 0.9999986525 | 37.308943234   |
| 0.9537555794 | 0.9999986525 | 1.2678586092   |
| 0.7555404598 | 0.9999986525 | 14.0065200388  |
| 0            | 0            | 0              |
| 0.5779504373 | 0.9999986525 | 0              |
| 0            | 0            | 0              |
| 0.6215899259 | 0.9999986525 | 7.2217906907   |
| 0.9078871582 | 0.9999986525 | 23.9503386618  |
| 0.1173425898 | 0.9999986525 | 12.4252300513  |
| 0.7046113945 | 0.9999986525 | 4.916398405    |
| 0.6393409256 | 0.9999986525 | 0              |
| 0.0974166454 | 0.9999986525 | 0              |
| 0.9930655785 | 0.9999986525 | 30.2797375452  |
| 0.6988742505 | 0.9999986525 | 59.804386517   |
| 0.5531948185 | 0.9999986525 | 13.7195206161  |
| 0.3579325905 | 0.9999986525 | 0.5820677603   |
| 0.8782935823 | 0.9999986525 | 0              |
| 0.7962870369 | 0.9999986525 | 3.5111746189   |
| 0.5717498386 | 0.9999986525 | 2.4790112558   |
| 0.6270566559 | 0.9999986525 | 2.3625807775   |
| 0.9336543238 | 0.9999986525 | 2.193223489    |
| 0.2762209447 | 0.9999986525 | 102.5395854097 |
| 0.2386537203 | 0.9999986525 | 71.8467846264  |
| 0.4401484668 | 0.9999986525 | 0              |
| 0.3811194845 | 0.9999986525 | 0              |
| 0.6470151314 | 0.9999986525 | 32.8649148888  |
| 0.8295379866 | 0.9999986525 | 0.8865635115   |
| 0            | 0            | 0              |
| 0.5852486663 | 0.9999986525 | 0              |
| 0.3517173881 | 0.9999986525 | 14.1124067541  |
| 0.2789154865 | 0.9999986525 | 0              |
| 0.3618806518 | 0.9999986525 | 28.3086331772  |
| 0.004022     | 0.9999986525 | 3.1851216824   |
| 0.1927157062 | 0.9999986525 | 0.7806473856   |
| 0.9582124616 | 0.9999986525 | 15.1916922843  |
| 0.8090390556 | 0.9999986525 | 4.6271174195   |
| 0.466184219  | 0.9999986525 | 5.8080072571   |
| 0.3173314851 | 0.9999986525 | 0              |
| 0.8981283359 | 0.9999986525 | 48.1544061633  |
| 0.1918071102 | 0.9999986525 | 0              |
| 0.3011050733 | 0.9999986525 | 5.891342109    |
| 0.9084778616 | 0.9999986525 | 0              |
| 0.3642047318 | 0.9999986525 | 17.2594504008  |
| 0.9823816563 | 0.9999986525 | 10.4264062515  |
| 0.509107859  | 0.9999986525 | 23.4923108227  |
| 0.5980622248 | 0.9999986525 | 0              |

gene\_expression\_table

|              |              |                |
|--------------|--------------|----------------|
| 0.9015233864 | 0.9999986525 | 112.0251898473 |
| 0.8426455256 | 0.9999986525 | 2.1839274791   |
| 0.5700732198 | 0.9999986525 | 2.1695731104   |
| 0.4416179424 | 0.9999986525 | 0.2496038027   |
| 0.1257748551 | 0.9999986525 | 5.5177073458   |
| 0.5622886159 | 0.9999986525 | 2.5734641601   |
| 0.476616341  | 0.9999986525 | 2.1366150141   |
| 0.4936759419 | 0.9999986525 | 14.6402172393  |
| 0.8201413835 | 0.9999986525 | 0              |
| 0.7325536185 | 0.9999986525 | 0              |
| 0.0732873073 | 0.9999986525 | 3.3402218781   |
| 0.8763108064 | 0.9999986525 | 23.6833714019  |
| 0.9675627225 | 0.9999986525 | 1.7241138734   |
| 0.6713604604 | 0.9999986525 | 0              |
| 0.1842711443 | 0.9999986525 | 2.6062928458   |
| 0.7697130359 | 0.9999986525 | 1.4728834477   |
| 0.9584805163 | 0.9999986525 | 173.3144877553 |
| 0.1482660614 | 0.9999986525 | 0              |
| 0.1294372063 | 0.9999986525 | 1.6229836969   |
| 0.9778433577 | 0.9999986525 | 1.5959723869   |
| 0.2262587227 | 0.9999986525 | 0              |
| 0.4247762412 | 0.9999986525 | 0.9400337865   |
| 0.4064854083 | 0.9999986525 | 0              |
| 0.1813385177 | 0.9999986525 | 0              |
| 0.0262340124 | 0.9999986525 | 0.7893749174   |
| 0.6913904404 | 0.9999986525 | 3.4839975082   |
| 0.3155676916 | 0.9999986525 | 0              |
| 0.8184655148 | 0.9999986525 | 3.939671151    |
| 0.6312664098 | 0.9999986525 | 0              |
| 0.3004985788 | 0.9999986525 | 0              |
| 0.7306324678 | 0.9999986525 | 3.3197741587   |
| 0.6062595712 | 0.9999986525 | 0.8957660466   |
| 0.4819236377 | 0.9999986525 | 3.9285839422   |
| 0.1511201689 | 0.9999986525 | 2.8180573989   |
| 0.0806935056 | 0.9999986525 | 1.7749892697   |
| 0.1464676255 | 0.9999986525 | 0              |
| 0.3881213789 | 0.9999986525 | 0              |
| 0.6394309488 | 0.9999986525 | 0              |
| 0            | 0            | 0              |
| 0.1067638085 | 0.9999986525 | 0              |
| 0.0715194726 | 0.9999986525 | 1.8523724892   |
| 0.2960414802 | 0.9999986525 | 0.7279758264   |
| 0.0213469284 | 0.9999986525 | 3.9902726139   |
| 0.7046911062 | 0.9999986525 | 0              |
| 0            | 0            | 0              |
| 0.4406377124 | 0.9999986525 | 1.2684752461   |
| 0.6014866572 | 0.9999986525 | 0              |
| 0.9932610827 | 0.9999986525 | 1.3471563674   |
| 0.3331489472 | 0.9999986525 | 30.1547657083  |



gene\_expression\_table

|              |              |                |
|--------------|--------------|----------------|
| 0.2382638544 | 0.9999986525 | 0              |
| 0.7910042226 | 0.9999986525 | 0              |
| 0.9123326945 | 0.9999986525 | 2.8271029646   |
| 0.2399883233 | 0.9999986525 | 15.8528945599  |
| 0.6772156416 | 0.9999986525 | 2.0372858093   |
| 0.7176986741 | 0.9999986525 | 24.813906327   |
| 0.8588849005 | 0.9999986525 | 7.0650920663   |
| 0.2444048203 | 0.9999986525 | 0              |
| 0.7352981504 | 0.9999986525 | 10.2061797256  |
| 0.0907032698 | 0.9999986525 | 0.1327813588   |
| 0.1859726333 | 0.9999986525 | 1.2358758419   |
| 0.8671273995 | 0.9999986525 | 0              |
| 0.9718793964 | 0.9999986525 | 0              |
| 0.7436399388 | 0.9999986525 | 3.1672514678   |
| 0            | 0            | 3.1109099503   |
| 0.3963920492 | 0.9999986525 | 5.9480491741   |
| 0.7728135048 | 0.9999986525 | 207.6804151259 |
| 0.6281242871 | 0.9999986525 | 0              |
| 0.4748086645 | 0.9999986525 | 3.3913046806   |
| 0.6789310149 | 0.9999986525 | 1.2456406572   |
| 0.6393144863 | 0.9999986525 | 0              |
| 0.3033918155 | 0.9999986525 | 1.8064686765   |
| 0.5741651229 | 0.9999986525 | 0.2821346743   |
| 0.5646686988 | 0.9999986525 | 2.4496819604   |
| 0.9014196922 | 0.9999986525 | 32.1493227637  |
| 0.4849862403 | 0.9999986525 | 53.8373665647  |
| 0.4183857854 | 0.9999986525 | 0              |
| 0.6568205981 | 0.9999986525 | 0.1629244582   |
| 0.2867049092 | 0.9999986525 | 0              |
| 0.5125927719 | 0.9999986525 | 0.6298829087   |
| 0.0006874    | 0.9999986525 | 8.6622795188   |
| 0.003484     | 0.9999986525 | 0              |
| 0.5982222229 | 0.9999986525 | 698.1521625999 |
| 0            | 0            | 0              |
| 0.1792645533 | 0.9999986525 | 8.6927905435   |
| 0.3511706155 | 0.9999986525 | 0              |
| 0.6607084371 | 0.9999986525 | 1.3428405346   |
| 0.6323480202 | 0.9999986525 | 14.1848971265  |
| 0.2253874376 | 0.9999986525 | 70.6540712058  |
| 0.1282430047 | 0.9999986525 | 24.8250516549  |
| 0            | 0            | 0              |
| 0.0252019717 | 0.9999986525 | 5.9732426529   |
| 0.7179298864 | 0.9999986525 | 0              |
| 0.2153862613 | 0.9999986525 | 4.81615158     |
| 0.2858971267 | 0.9999986525 | 6.8494619868   |
| 0.0998449237 | 0.9999986525 | 0              |
| 0.0381905751 | 0.9999986525 | 6.4945792211   |
| 0.3326026738 | 0.9999986525 | 0              |
| 0            | 0            | 0              |

gene\_expression\_table

|              |              |               |
|--------------|--------------|---------------|
| 0.2465413249 | 0.9999986525 | 2.1894502208  |
| 0.4984408519 | 0.9999986525 | 0.5945002755  |
| 0.4729816619 | 0.9999986525 | 0             |
| 0.7339295652 | 0.9999986525 | 0.1276737785  |
| 0.0226097763 | 0.9999986525 | 8.7196645508  |
| 0.1515643789 | 0.9999986525 | 0.139548432   |
| 0.3607474593 | 0.9999986525 | 0             |
| 0.772245655  | 0.9999986525 | 0.9451478771  |
| 0.0993869664 | 0.9999986525 | 1.2605656306  |
| 0.481316907  | 0.9999986525 | 27.2876045321 |
| 0.5792310399 | 0.9999986525 | 1.3550716671  |
| 0.863310594  | 0.9999986525 | 0             |
| 0.479880649  | 0.9999986525 | 0.5914560288  |
| 0.1972696116 | 0.9999986525 | 0             |
| 0.4288828951 | 0.9999986525 | 1.3412377334  |
| 0            | 0            | 0             |
| 0.0802014488 | 0.9999986525 | 33.3895484282 |
| 0.3655376455 | 0.9999986525 | 18.4699275288 |
| 0.4173741432 | 0.9999986525 | 0             |
| 0.7331078521 | 0.9999986525 | 0             |
| 0.3788272364 | 0.9999986525 | 1.1087984512  |
| 0.7158596083 | 0.9999986525 | 0.4405602168  |
| 0.6567129258 | 0.9999986525 | 0             |
| 0.5406435009 | 0.9999986525 | 0.9574503404  |
| 0.6191242986 | 0.9999986525 | 0.5978821331  |
| 0.7985929296 | 0.9999986525 | 1.3443239737  |
| 0.9637505434 | 0.9999986525 | 1.3357761704  |
| 0.2193507469 | 0.9999986525 | 6.3383040176  |
| 0            | 0            | 0             |
| 0            | 0            | 0             |
| 0.0300488046 | 0.9999986525 | 81.5734558049 |
| 0.1491996117 | 0.9999986525 | 0             |
| 0.2097004769 | 0.9999986525 | 0             |
| 0.3817370369 | 0.9999986525 | 5.3077181044  |
| 0.2716691837 | 0.9999986525 | 1.2748055282  |
| 0.9459996426 | 0.9999986525 | 0.1058119492  |
| 0.30755387   | 0.9999986525 | 0             |
| 0.212197204  | 0.9999986525 | 0             |
| 0.2486248765 | 0.9999986525 | 0.5231094846  |
| 0.3352273548 | 0.9999986525 | 0             |
| 0.6312664098 | 0.9999986525 | 0             |
| 0.7106161726 | 0.9999986525 | 0             |
| 0.1564018214 | 0.9999986525 | 15.148843549  |
| 0.6923311471 | 0.9999986525 | 0             |
| 0.221049364  | 0.9999986525 | 11.6544137314 |
| 0.2698177257 | 0.9999986525 | 0             |
| 0.2115497248 | 0.9999986525 | 0.1128652048  |
| 0.4445162794 | 0.9999986525 | 14.8343285517 |
| 0.4481408141 | 0.9999986525 | 4.0012564947  |

gene\_expression\_table

|              |              |                |
|--------------|--------------|----------------|
| 0.6312664098 | 0.9999986525 | 0              |
| 0.5795098576 | 0.9999986525 | 1.5355784734   |
| 0.404022386  | 0.9999986525 | 0              |
| 0.896772663  | 0.9999986525 | 0              |
| 0.2721933249 | 0.9999986525 | 23.1885278506  |
| 0.8309494324 | 0.9999986525 | 0              |
| 0.8247598838 | 0.9999986525 | 0.6834165475   |
| 0.636963055  | 0.9999986525 | 0              |
| 0.818121599  | 0.9999986525 | 0.7909116782   |
| 0.3796541453 | 0.9999986525 | 4.9484329753   |
| 0.6457229214 | 0.9999986525 | 0              |
| 0.4326789843 | 0.9999986525 | 1.0163167884   |
| 0.1959189996 | 0.9999986525 | 60.0572517702  |
| 0.3794370701 | 0.9999986525 | 0              |
| 0.8283075285 | 0.9999986525 | 41.5115373571  |
| 0.0199817745 | 0.9999986525 | 19.4323609099  |
| 0.8410641795 | 0.9999986525 | 10.1189011802  |
| 0.7747623745 | 0.9999986525 | 0              |
| 0.4064643555 | 0.9999986525 | 0              |
| 0.1856500822 | 0.9999986525 | 0              |
| 0.1638720963 | 0.9999986525 | 0              |
| 0.701491677  | 0.9999986525 | 0              |
| 0.5389342945 | 0.9999986525 | 0              |
| 0.5270089816 | 0.9999986525 | 0              |
| 0.3226270293 | 0.9999986525 | 0              |
| 0.1029613183 | 0.9999986525 | 66.2147687281  |
| 0.3344179735 | 0.9999986525 | 108.0746464482 |
| 0.8894337302 | 0.9999986525 | 0              |
| 0.9107635482 | 0.9999986525 | 0              |
| 0.4365257835 | 0.9999986525 | 76.9394552321  |
| 0.1437061708 | 0.9999986525 | 0              |
| 0.1035178261 | 0.9999986525 | 5.3127369708   |
| 0.8623541895 | 0.9999986525 | 0              |
| 0.1799341225 | 0.9999986525 | 152.0486397785 |
| 0.896217807  | 0.9999986525 | 0              |
| 0.001936     | 0.9999986525 | 0              |
| 0.2054251464 | 0.9999986525 | 14.6481537169  |
| 0.777370855  | 0.9999986525 | 60.3128110693  |
| 0.7480459698 | 0.9999986525 | 67.5197113607  |
| 0.1425242179 | 0.9999986525 | 2.0901503176   |
| 0.3870398954 | 0.9999986525 | 3.1581605111   |
| 0.359340927  | 0.9999986525 | 18.9365070729  |
| 0.2960615061 | 0.9999986525 | 104.7985608839 |
| 0.155059318  | 0.9999986525 | 39.3462566607  |
| 0.4617723186 | 0.9999986525 | 64.1891531529  |
| 0.9636636422 | 0.9999986525 | 53.6642908349  |
| 0.6048422483 | 0.9999986525 | 2.0735735464   |
| 0.012017641  | 0.9999986525 | 245.8815856079 |
| 0.7940750412 | 0.9999986525 | 401.4672703838 |

gene\_expression\_table

|              |              |                 |
|--------------|--------------|-----------------|
| 0.4484970689 | 0.9999986525 | 405.6935059284  |
| 0.7948110644 | 0.9999986525 | 2.3772206253    |
| 0.6993534999 | 0.9999986525 | 0               |
| 0.0009297    | 0.9999986525 | 0               |
| 0.6210010199 | 0.9999986525 | 30.9880216466   |
| 0.4353702683 | 0.9999986525 | 120.1877202809  |
| 0.0123497478 | 0.9999986525 | 84.7655409599   |
| 0.1502198281 | 0.9999986525 | 304.7872647866  |
| 0.2448537065 | 0.9999986525 | 382.9150891811  |
| 0.5695334048 | 0.9999986525 | 18.0137005249   |
| 0.1837793346 | 0.9999986525 | 26.3652141907   |
| 0.8822479831 | 0.9999986525 | 58.101120161    |
| 0.1348351595 | 0.9999986525 | 202.8487203827  |
| 0.8175477876 | 0.9999986525 | 3539.0769945465 |
| 0.9271060161 | 0.9999986525 | 13.7041712416   |
| 0.6755129262 | 0.9999986525 | 8.3145337258    |
| 0.7304263751 | 0.9999986525 | 0               |
| 0.6791847246 | 0.9999986525 | 0               |
| 0.652568085  | 0.9999986525 | 6.4627897976    |
| 0.8669830882 | 0.9999986525 | 0               |
| 0.3665389323 | 0.9999986525 | 43.3870874152   |
| 0.0336847053 | 0.9999986525 | 65.6440472641   |
| 0.9369591773 | 0.9999986525 | 278.9690758653  |
| 0.4327650955 | 0.9999986525 | 43.908941044    |
| 0.8793155009 | 0.9999986525 | 0               |
| 0.6829530021 | 0.9999986525 | 0               |
| 0.3260791442 | 0.9999986525 | 42.5651709534   |
| 0.002136     | 0.9999986525 | 43.2141937562   |
| 0            | 0            | 0               |
| 0.9146067342 | 0.9999986525 | 0               |
| 0.49579339   | 0.9999986525 | 22.3398011905   |
| 0.3637203576 | 0.9999986525 | 6.9799667252    |
| 0.8268063802 | 0.9999986525 | 15.3372784162   |
| 0.5541954734 | 0.9999986525 | 10.3690890616   |
| 0.0694816412 | 0.9999986525 | 38.5081430742   |
| 0.5498994376 | 0.9999986525 | 13.5599497747   |
| 0.4150621612 | 0.9999986525 | 3.848513337     |
| 0.4783847624 | 0.9999986525 | 116.9657128886  |
| 0.9690323874 | 0.9999986525 | 0               |
| 0.5747747313 | 0.9999986525 | 0               |
| 0.3169924472 | 0.9999986525 | 0               |
| 0.521731571  | 0.9999986525 | 2810.2334704482 |
| 0.5327402361 | 0.9999986525 | 0               |
| 0.6580144365 | 0.9999986525 | 5.7459520455    |
| 0.2616363844 | 0.9999986525 | 156.3202653633  |
| 0.0176318862 | 0.9999986525 | 29.8586150081   |
| 0.5826727068 | 0.9999986525 | 0               |
| 0.2385466902 | 0.9999986525 | 4145.881064429  |
| 0.8051776972 | 0.9999986525 | 51.3397344236   |

gene\_expression\_table

|              |              |                 |
|--------------|--------------|-----------------|
| 0.0721346464 | 0.9999986525 | 222.6347840922  |
| 0.8123397365 | 0.9999986525 | 89.7814164493   |
| 0.3869411907 | 0.9999986525 | 1.1029899906    |
| 0.3525988114 | 0.9999986525 | 0               |
| 0.2749947643 | 0.9999986525 | 13.9848850063   |
| 0.6521952471 | 0.9999986525 | 16.5948142316   |
| 0.9060678528 | 0.9999986525 | 50.6653328161   |
| 0.6024590609 | 0.9999986525 | 3.1321265702    |
| 0.1351544079 | 0.9999986525 | 5.5447683177    |
| 0.5494405224 | 0.9999986525 | 0               |
| 0.3978655474 | 0.9999986525 | 0               |
| 0.7425699877 | 0.9999986525 | 4.4932719267    |
| 0.027444344  | 0.9999986525 | 2.9712471576    |
| 0.9976256795 | 0.9999986525 | 1.0563206174    |
| 0.4728167997 | 0.9999986525 | 77.6827587169   |
| 0.9452363066 | 0.9999986525 | 0               |
| 0.1757859488 | 0.9999986525 | 36.1765248504   |
| 0.6545025253 | 0.9999986525 | 397.3460932387  |
| 0.1298162429 | 0.9999986525 | 71.3129407672   |
| 0.7415337239 | 0.9999986525 | 0               |
| 0.4722425038 | 0.9999986525 | 6.2612825402    |
| 0.0101678526 | 0.9999986525 | 0               |
| 0.4647993072 | 0.9999986525 | 15.6562998695   |
| 0.189348844  | 0.9999986525 | 6.8940923834    |
| 0.9252712942 | 0.9999986525 | 65.5971659386   |
| 0.0400188224 | 0.9999986525 | 189.0507974258  |
| 0.2035021128 | 0.9999986525 | 6.5926748504    |
| 0.9788299235 | 0.9999986525 | 81.5716232083   |
| 0.1013189689 | 0.9999986525 | 19.5752106102   |
| 0.1422341552 | 0.9999986525 | 3.0045464914    |
| 0.8128731906 | 0.9999986525 | 0               |
| 0.9737345321 | 0.9999986525 | 9.6684518492    |
| 0.9271418591 | 0.9999986525 | 75.4638553958   |
| 0.4805876839 | 0.9999986525 | 0               |
| 0.7027745783 | 0.9999986525 | 0               |
| 0            | 0            | 0               |
| 0.0248649907 | 0.9999986525 | 37.5128453979   |
| 0.981666068  | 0.9999986525 | 2447.5837953519 |
| 0.6082082382 | 0.9999986525 | 3.3227794662    |
| 0.7878800486 | 0.9999986525 | 26.8068276252   |
| 0.3840629657 | 0.9999986525 | 56.1452000988   |
| 0            | 0            | 0               |
| 0.8662677786 | 0.9999986525 | 62.1632747485   |
| 0.768245367  | 0.9999986525 | 0               |
| 0.1830923301 | 0.9999986525 | 0               |
| 0.3441006639 | 0.9999986525 | 4.8067274836    |
| 0.4729816619 | 0.9999986525 | 0               |
| 0.8620589175 | 0.9999986525 | 0               |
| 0.9347418409 | 0.9999986525 | 3.5600888592    |

gene\_expression\_table

|              |              |                  |
|--------------|--------------|------------------|
| 0.4564436196 | 0.9999986525 | 6.3784925394     |
| 0.2257087879 | 0.9999986525 | 14.4508507161    |
| 0.2450544208 | 0.9999986525 | 17.6253982111    |
| 0.7475486692 | 0.9999986525 | 65.2782179618    |
| 0.95560097   | 0.9999986525 | 14.071984873     |
| 0.9379886968 | 0.9999986525 | 2.9169290968     |
| 0.9597475327 | 0.9999986525 | 4.1697393199     |
| 0.1909177469 | 0.9999986525 | 432.2847399307   |
| 0.6723772446 | 0.9999986525 | 0                |
| 0.7587811113 | 0.9999986525 | 13.1508760524    |
| 0.7107807515 | 0.9999986525 | 127.3218341252   |
| 0.7749348993 | 0.9999986525 | 5.431519008      |
| 0.676272196  | 0.9999986525 | 54.9572510159    |
| 0.3340820497 | 0.9999986525 | 3.3386382342     |
| 0.5958011236 | 0.9999986525 | 111.2438569741   |
| 0.5108305218 | 0.9999986525 | 0                |
| 0.083306912  | 0.9999986525 | 4.4700734851     |
| 0.4539525513 | 0.9999986525 | 3.1489338318     |
| 0.902441621  | 0.9999986525 | 0                |
| 0.2624625255 | 0.9999986525 | 8.8182415294     |
| 0.8892213368 | 0.9999986525 | 6.9730549546     |
| 0.9532844351 | 0.9999986525 | 0                |
| 0.5581957185 | 0.9999986525 | 297.7828655531   |
| 0.7276758871 | 0.9999986525 | 13.6135889229    |
| 0.6376839884 | 0.9999986525 | 13663.3022277021 |
| 0.0479813687 | 0.9999986525 | 27.6812178411    |
| 0            | 0            | 0                |
| 0            | 0            | 0                |
| 0.2816385062 | 0.9999986525 | 34.6150537285    |
| 0.9473423353 | 0.9999986525 | 0                |
| 0.6803101849 | 0.9999986525 | 0                |
| 0.3420472465 | 0.9999986525 | 0                |
| 0.3362145493 | 0.9999986525 | 240.4778817025   |
| 0.3950918124 | 0.9999986525 | 0                |
| 0.0330460363 | 0.9999986525 | 20.5661675336    |
| 0.2486752283 | 0.9999986525 | 2.5484832909     |
| 0.9748963001 | 0.9999986525 | 1.348555236      |
| 0.2089610332 | 0.9999986525 | 0                |
| 0.7835723828 | 0.9999986525 | 6.8325273694     |
| 0.4211668925 | 0.9999986525 | 0                |
| 0.5046582491 | 0.9999986525 | 354.3131505857   |
| 0.6766121458 | 0.9999986525 | 112.4497904038   |
| 0.6394569773 | 0.9999986525 | 0                |
| 0.8383448595 | 0.9999986525 | 26.9615976943    |
| 0.0442780456 | 0.9999986525 | 1312.6793819488  |
| 0.4529336482 | 0.9999986525 | 15.4864387332    |
| 0.9009744587 | 0.9999986525 | 17.5018162384    |
| 0.1917767845 | 0.9999986525 | 0                |
| 0.5967934364 | 0.9999986525 | 10.8484597521    |

gene\_expression\_table

|              |              |                  |
|--------------|--------------|------------------|
| 0.9779724947 | 0.9999986525 | 10.7127623177    |
| 0.5074170499 | 0.9999986525 | 22.2210658363    |
| 0.7062844085 | 0.9999986525 | 21.0100122233    |
| 0.5283953955 | 0.9999986525 | 3.697763132      |
| 0.2331966595 | 0.9999986525 | 20.5528284705    |
| 0.8328822757 | 0.9999986525 | 0                |
| 0.6744465268 | 0.9999986525 | 3.4397497868     |
| 0.6035738163 | 0.9999986525 | 16.8358043437    |
| 0.8333710753 | 0.9999986525 | 0                |
| 0.4729816619 | 0.9999986525 | 0                |
| 0.4005342211 | 0.9999986525 | 19.9739276884    |
| 0.3300537306 | 0.9999986525 | 2.0296206311     |
| 0.1419745852 | 0.9999986525 | 0                |
| 0.5193788862 | 0.9999986525 | 2.8862317713     |
| 0.8140042417 | 0.9999986525 | 0                |
| 0.6037194304 | 0.9999986525 | 0                |
| 0.4064432951 | 0.9999986525 | 0                |
| 0.3719798204 | 0.9999986525 | 0                |
| 0.670261288  | 0.9999986525 | 0                |
| 0.247211233  | 0.9999986525 | 258.3289478461   |
| 0.1539722013 | 0.9999986525 | 0                |
| 0.3692052285 | 0.9999986525 | 4.9019786733     |
| 0.6945433156 | 0.9999986525 | 154.313858952    |
| 0.5780331931 | 0.9999986525 | 1141.100141728   |
| 0.1768230041 | 0.9999986525 | 413.8211026547   |
| 0.9419067245 | 0.9999986525 | 0                |
| 0.3420778135 | 0.9999986525 | 0                |
| 0.2748044555 | 0.9999986525 | 0                |
| 0.9945544071 | 0.9999986525 | 0                |
| 0.9470737046 | 0.9999986525 | 3.0438544307     |
| 0.3125716355 | 0.9999986525 | 0                |
| 0.2847127019 | 0.9999986525 | 9.8680714175     |
| 0.6478421181 | 0.9999986525 | 0                |
| 0.0638410572 | 0.9999986525 | 107.6736355276   |
| 0.1994178342 | 0.9999986525 | 0                |
| 0.1516155721 | 0.9999986525 | 15.4372495692    |
| 0.221572885  | 0.9999986525 | 79.6590018496    |
| 0.6746441118 | 0.9999986525 | 0                |
| 0.9015893472 | 0.9999986525 | 0                |
| 0.4886895617 | 0.9999986525 | 33.9094178018    |
| 0.4957261704 | 0.9999986525 | 41.9824469208    |
| 0.1291838771 | 0.9999986525 | 65119.5022946475 |
| 0.7282589579 | 0.9999986525 | 0                |
| 0.886256272  | 0.9999986525 | 0                |
| 0.8604089748 | 0.9999986525 | 33.6775729089    |
| 0.4912485216 | 0.9999986525 | 4.1020519011     |
| 0.5906098016 | 0.9999986525 | 148.2071609709   |
| 0.3058412811 | 0.9999986525 | 25.1494848697    |
| 0.9123178512 | 0.9999986525 | 29.4474035274    |

gene\_expression\_table

|              |              |                |
|--------------|--------------|----------------|
| 0.1451054198 | 0.9999986525 | 24.2359750412  |
| 0.9677610846 | 0.9999986525 | 0              |
| 0.3406897404 | 0.9999986525 | 6.8780063674   |
| 0.9283508011 | 0.9999986525 | 0              |
| 0.6768463702 | 0.9999986525 | 0              |
| 0.6408391735 | 0.9999986525 | 0              |
| 0.8376356973 | 0.9999986525 | 0              |
| 0.8259837947 | 0.9999986525 | 0              |
| 0.9141035318 | 0.9999986525 | 9.1243326094   |
| 0.5926210432 | 0.9999986525 | 0              |
| 0            | 0            | 0              |
| 0.9829622142 | 0.9999986525 | 0              |
| 0.9991730185 | 0.9999986525 | 3.7930133745   |
| 0.7413232069 | 0.9999986525 | 0              |
| 0.351553268  | 0.9999986525 | 0              |
| 0.7905280148 | 0.9999986525 | 10.2941074411  |
| 0.4503757168 | 0.9999986525 | 659.5850625944 |
| 0.5713878425 | 0.9999986525 | 36.4661452919  |
| 0            | 0            | 0              |
| 0            | 0            | 0              |
| 0.2849005976 | 0.9999986525 | 0              |
| 0.8148939062 | 0.9999986525 | 20.8051677078  |
| 0.141727995  | 0.9999986525 | 0              |
| 0.4781981551 | 0.9999986525 | 150.5895835373 |
| 0.2301266202 | 0.9999986525 | 66.6669734214  |
| 0.3170978928 | 0.9999986525 | 5.3672681124   |
| 0.3125490737 | 0.9999986525 | 117.4077470759 |
| 0.3184711735 | 0.9999986525 | 10.0438513267  |
| 0.5213341167 | 0.9999986525 | 0              |
| 0.4221165802 | 0.9999986525 | 0              |
| 0.3125686376 | 0.9999986525 | 0              |
| 0.5200880688 | 0.9999986525 | 18.1960097248  |
| 0.3027030151 | 0.9999986525 | 6.061160065    |
| 0.5176574922 | 0.9999986525 | 139.4657025286 |
| 0.2299030299 | 0.9999986525 | 12.3047904005  |
| 0.0582107635 | 0.9999986525 | 385.4721333489 |
| 0.5312110323 | 0.9999986525 | 0              |
| 0.7074288037 | 0.9999986525 | 97.9225553764  |
| 0.1835849932 | 0.9999986525 | 33.2511552317  |
| 0.001851     | 0.9999986525 | 44.8716382551  |
| 0.0887181934 | 0.9999986525 | 167.7964042139 |
| 0.2247522506 | 0.9999986525 | 0              |
| 0.0870083242 | 0.9999986525 | 18.8106084149  |
| 0.5068879588 | 0.9999986525 | 73.3545864932  |
| 0.1802591701 | 0.9999986525 | 0              |
| 0.3890090056 | 0.9999986525 | 7.4217243551   |
| 0.8311985659 | 0.9999986525 | 37.3595271584  |
| 0.9387162974 | 0.9999986525 | 9.5389376688   |
| 0.6795677333 | 0.9999986525 | 0              |



gene\_expression\_table

|              |              |                |
|--------------|--------------|----------------|
| 0.7980351342 | 0.9999986525 | 332.6008324153 |
| 0.4825041476 | 0.9999986525 | 141.4027261749 |
| 0.415164874  | 0.9999986525 | 13.0261930689  |
| 0.533610572  | 0.9999986525 | 27.316110531   |
| 0.2645165979 | 0.9999986525 | 30.1678893143  |
| 0.5803297183 | 0.9999986525 | 3.1719118481   |
| 0.2368086497 | 0.9999986525 | 0.8355442773   |
| 0.1219162179 | 0.9999986525 | 5.134543868    |
| 0.586078515  | 0.9999986525 | 23.9749955065  |
| 0.909303975  | 0.9999986525 | 194.8853071082 |
| 0.9992539177 | 0.9999986525 | 0              |
| 0.1003205192 | 0.9999986525 | 10.2422027007  |
| 0.3889706415 | 0.9999986525 | 0              |
| 0.3238146941 | 0.9999986525 | 0              |
| 0.4064898166 | 0.9999986525 | 0              |
| 0.5490185523 | 0.9999986525 | 0              |
| 0.9155380779 | 0.9999986525 | 6.7227492651   |
| 0.5574256962 | 0.9999986525 | 0              |
| 0.7791728527 | 0.9999986525 | 0              |
| 0.3711407608 | 0.9999986525 | 27.2505920246  |
| 0.2645108194 | 0.9999986525 | 76.7396293246  |
| 0.8190785434 | 0.9999986525 | 0              |
| 0.6312664098 | 0.9999986525 | 0              |
| 0.6312664098 | 0.9999986525 | 0              |
| 0.7564859491 | 0.9999986525 | 0              |
| 0.2004448098 | 0.9999986525 | 0              |
| 0.4093569551 | 0.9999986525 | 1.7138102183   |
| 0.2061837793 | 0.9999986525 | 0              |
| 0.193728841  | 0.9999986525 | 0              |
| 0.30755387   | 0.9999986525 | 0              |
| 0.8672891946 | 0.9999986525 | 0              |
| 0.6000426777 | 0.9999986525 | 1.9410459122   |
| 0.6312664098 | 0.9999986525 | 0              |
| 0.2085683147 | 0.9999986525 | 4.6899847461   |
| 0.0740186353 | 0.9999986525 | 0              |
| 0.6762864932 | 0.9999986525 | 0              |
| 0.5071628923 | 0.9999986525 | 4.0357557961   |
| 0.1229645806 | 0.9999986525 | 1.5218395063   |
| 0.4965158777 | 0.9999986525 | 7.5434086212   |
| 0.1940081046 | 0.9999986525 | 130.2760686391 |
| 0.352201383  | 0.9999986525 | 0              |
| 0.0623656702 | 0.9999986525 | 785.8682455048 |
| 0.4136220841 | 0.9999986525 | 41.6776501155  |
| 0.202044996  | 0.9999986525 | 6.6141412932   |
| 0.8015469599 | 0.9999986525 | 85.1734358365  |
| 0.4393156619 | 0.9999986525 | 155.4874923248 |
| 0.3355507618 | 0.9999986525 | 48.7573100317  |
| 0.681000828  | 0.9999986525 | 27.2887260744  |
| 0.4405205303 | 0.9999986525 | 145.4127704469 |

gene\_expression\_table

|              |              |                 |
|--------------|--------------|-----------------|
| 0.7904946262 | 0.9999986525 | 114.1137498506  |
| 0.5416399845 | 0.9999986525 | 31.8842110896   |
| 0.9299067903 | 0.9999986525 | 0               |
| 0.560930728  | 0.9999986525 | 2.5748442691    |
| 0.403534194  | 0.9999986525 | 108.7911483033  |
| 0.557731628  | 0.9999986525 | 0               |
| 0.7049714339 | 0.9999986525 | 23.9894743564   |
| 0.3992442048 | 0.9999986525 | 0               |
| 0.171892511  | 0.9999986525 | 192.050611732   |
| 0.5793777872 | 0.9999986525 | 1963.3760128267 |
| 0.0596085964 | 0.9999986525 | 40.4704354225   |
| 0.6734010812 | 0.9999986525 | 306.7604156417  |
| 0.2851027154 | 0.9999986525 | 0               |
| 0.1622030305 | 0.9999986525 | 3.0680496622    |
| 0.4306271273 | 0.9999986525 | 255.5718278554  |
| 0.5636284206 | 0.9999986525 | 29.1812635239   |
| 0.2317292326 | 0.9999986525 | 6.5202368181    |
| 0.1164140822 | 0.9999986525 | 217.3756330353  |
| 0.1907784095 | 0.9999986525 | 1070.3113353677 |
| 0.5722487661 | 0.9999986525 | 0               |
| 0.8796509623 | 0.9999986525 | 3.3491181221    |
| 0.4934115461 | 0.9999986525 | 32.3647747276   |
| 0.6467355582 | 0.9999986525 | 195.110295918   |
| 0.9145313911 | 0.9999986525 | 0               |
| 0.6394829529 | 0.9999986525 | 0               |
| 0.2488924198 | 0.9999986525 | 6.6633760063    |
| 0.1742199925 | 0.9999986525 | 0               |
| 0.6099066876 | 0.9999986525 | 0               |
| 0.4080665974 | 0.9999986525 | 5.9089190229    |
| 0.4139373942 | 0.9999986525 | 1.148503169     |
| 0            | 0            | 0               |
| 0.3049076893 | 0.9999986525 | 44.8843497674   |
| 0.6550243909 | 0.9999986525 | 0               |
| 0.8621689402 | 0.9999986525 | 0               |
| 0.4974261428 | 0.9999986525 | 0               |
| 0.1281374572 | 0.9999986525 | 34.4526711377   |
| 0.1882870374 | 0.9999986525 | 86.3779036412   |
| 0.575177086  | 0.9999986525 | 6.318642048     |
| 0.6510691778 | 0.9999986525 | 53.6143031809   |
| 0.6889127163 | 0.9999986525 | 79.8245505026   |
| 0.3892119103 | 0.9999986525 | 2.7425828647    |
| 0.1449041433 | 0.9999986525 | 2.8717262915    |
| 0.1935039363 | 0.9999986525 | 59.6252231271   |
| 0.1350234626 | 0.9999986525 | 2.7636073481    |
| 0.5470823414 | 0.9999986525 | 96.8255167482   |
| 0.2173788221 | 0.9999986525 | 0               |
| 0.964190224  | 0.9999986525 | 13.2503289339   |
| 0.7239711213 | 0.9999986525 | 2.4028170258    |
| 0.7002151622 | 0.9999986525 | 0               |

gene\_expression\_table

|              |              |                |
|--------------|--------------|----------------|
| 0            | 0            | 0              |
| 0.3485251063 | 0.9999986525 | 0              |
| 0.2493450329 | 0.9999986525 | 24.3921661862  |
| 0.2322476301 | 0.9999986525 | 0              |
| 0            | 0            | 0              |
| 0.2604432601 | 0.9999986525 | 19.3138205575  |
| 0.0938356154 | 0.9999986525 | 16.0766845177  |
| 0.9490617538 | 0.9999986525 | 1.3516383843   |
| 0.2061830216 | 0.9999986525 | 11.1382604344  |
| 0.54965322   | 0.9999986525 | 110.1309694247 |
| 0.7376055836 | 0.9999986525 | 0              |
| 0.1653543349 | 0.9999986525 | 0              |
| 0            | 0            | 0              |
| 0.5824066866 | 0.9999986525 | 0              |
| 0.6312664098 | 0.9999986525 | 0              |
| 0.3702962809 | 0.9999986525 | 23.8041266408  |
| 0.1970386698 | 0.9999986525 | 4.8108870674   |
| 0.9209205067 | 0.9999986525 | 10.7572751805  |
| 0.4590597902 | 0.9999986525 | 0              |
| 0.2003694    | 0.9999986525 | 300.1228050162 |
| 0.0412709839 | 0.9999986525 | 26.7647617172  |
| 0.5970926585 | 0.9999986525 | 0              |
| 0.8003924385 | 0.9999986525 | 1.3568820036   |
| 0.4065364366 | 0.9999986525 | 0              |
| 0.1327297372 | 0.9999986525 | 12.6454970014  |
| 0.3528260962 | 0.9999986525 | 17.2004293198  |
| 0.7930852638 | 0.9999986525 | 28.1099538151  |
| 0.3975997946 | 0.9999986525 | 11.8910093946  |
| 0.9869788923 | 0.9999986525 | 45.2367607934  |
| 0.8897132104 | 0.9999986525 | 3.7867583155   |
| 0.4486031207 | 0.9999986525 | 1.0730392374   |
| 0.2023388417 | 0.9999986525 | 9.3257718228   |
| 0.822201328  | 0.9999986525 | 210.904165962  |
| 0.6985990647 | 0.9999986525 | 0              |
| 0.9077892865 | 0.9999986525 | 6.1475868032   |
| 0.1620639793 | 0.9999986525 | 6.9130678695   |
| 0.8633285007 | 0.9999986525 | 39.8295009248  |
| 0.8554868932 | 0.9999986525 | 17.5112460963  |
| 0.5186684345 | 0.9999986525 | 113.8061843188 |
| 0.8675086101 | 0.9999986525 | 0              |
| 0.1354375314 | 0.9999986525 | 127.8680604911 |
| 0.7273277295 | 0.9999986525 | 43.9969328776  |
| 0.411381665  | 0.9999986525 | 0              |
| 0.5035020505 | 0.9999986525 | 156.9896008709 |
| 0.9449429178 | 0.9999986525 | 38.3515490715  |
| 0.492636271  | 0.9999986525 | 0              |
| 0.8917259006 | 0.9999986525 | 54.5175930078  |
| 0.4302604406 | 0.9999986525 | 565.1673906136 |
| 0.9067426813 | 0.9999986525 | 21.4974735835  |

gene\_expression\_table

|              |              |                 |
|--------------|--------------|-----------------|
| 0.4065831532 | 0.9999986525 | 0               |
| 0.8335748875 | 0.9999986525 | 7.0559676989    |
| 0.4337063903 | 0.9999986525 | 21.8487612892   |
| 0.2647551687 | 0.9999986525 | 0               |
| 0.0928439422 | 0.9999986525 | 365.8985955684  |
| 0.2697443049 | 0.9999986525 | 0               |
| 0.1323990737 | 0.9999986525 | 17.4142436779   |
| 0.1517725138 | 0.9999986525 | 0               |
| 0            | 0            | 0               |
| 0.8620043179 | 0.9999986525 | 0               |
| 0.3440837794 | 0.9999986525 | 13.6059900969   |
| 0.4995808275 | 0.9999986525 | 1547.4922369763 |
| 0.3379514141 | 0.9999986525 | 0               |
| 0.3045469529 | 0.9999986525 | 14.4418699005   |
| 0.2920776675 | 0.9999986525 | 0               |
| 0.494355771  | 0.9999986525 | 20.3584604989   |
| 0.6887971227 | 0.9999986525 | 1.319226613     |
| 0.1896571538 | 0.9999986525 | 1.9586463026    |
| 0.9677704097 | 0.9999986525 | 30.4297754242   |
| 0.5326946636 | 0.9999986525 | 777.9265285348  |
| 0.0730811216 | 0.9999986525 | 15.0338509042   |
| 0.4193346749 | 0.9999986525 | 0               |
| 0.401711117  | 0.9999986525 | 0               |
| 0.110145318  | 0.9999986525 | 295.9516558785  |
| 0.8942772567 | 0.9999986525 | 62.273220406    |
| 0.540927366  | 0.9999986525 | 16.1779811455   |
| 0.1491192171 | 0.9999986525 | 87.4692252837   |
| 0.8840117261 | 0.9999986525 | 0               |
| 0.1171376749 | 0.9999986525 | 10.0001107472   |
| 0.5909605786 | 0.9999986525 | 134.9359177984  |
| 0.8346129491 | 0.9999986525 | 6.6460188791    |
| 0.8358812181 | 0.9999986525 | 4.2847572794    |
| 0.9000192075 | 0.9999986525 | 0               |
| 0.4885878328 | 0.9999986525 | 736.5796554381  |
| 0.9951065099 | 0.9999986525 | 72.2884180486   |
| 0.9298357833 | 0.9999986525 | 0               |
| 0.5384998932 | 0.9999986525 | 0               |
| 0.7561234146 | 0.9999986525 | 4.7345511633    |
| 0.1561298396 | 0.9999986525 | 1.0699848707    |
| 0.2352410606 | 0.9999986525 | 23.2743738569   |
| 0.7191691323 | 0.9999986525 | 0               |
| 0.3445842142 | 0.9999986525 | 1.8740301691    |
| 0.0959242904 | 0.9999986525 | 13.23590753     |
| 0.5184403606 | 0.9999986525 | 47.1605475846   |
| 0.0850610281 | 0.9999986525 | 481.7988891105  |
| 0.0287207244 | 0.9999986525 | 14.6820881878   |
| 0.7206927443 | 0.9999986525 | 23.6150197345   |
| 0.6472037997 | 0.9999986525 | 1.076297498     |
| 0.9861858051 | 0.9999986525 | 8.3893759758    |

gene\_expression\_table

|              |              |                |
|--------------|--------------|----------------|
| 0.0774372829 | 0.9999986525 | 6.4086783432   |
| 0.2614572716 | 0.9999986525 | 0              |
| 0.6751245564 | 0.9999986525 | 13.4660678802  |
| 0.0371578297 | 0.9999986525 | 5.4610607203   |
| 0.0546925077 | 0.9999986525 | 258.2587688328 |
| 0.8083304975 | 0.9999986525 | 0              |
| 0.5969118176 | 0.9999986525 | 3.60094897     |
| 0.0962893139 | 0.9999986525 | 12.4858878362  |
| 0.0840749647 | 0.9999986525 | 5.1483917036   |
| 0.4729816619 | 0.9999986525 | 0              |
| 0.9952788799 | 0.9999986525 | 211.3437327939 |
| 0.4739474707 | 0.9999986525 | 0              |
| 0.1463118334 | 0.9999986525 | 6.2911159293   |
| 0.2267067522 | 0.9999986525 | 0              |
| 0.0723434602 | 0.9999986525 | 10.0102195274  |
| 0.9022027821 | 0.9999986525 | 3.7206000864   |
| 0.5457553697 | 0.9999986525 | 11.4210776291  |
| 0.4932946272 | 0.9999986525 | 13.7589991471  |
| 0.3229875728 | 0.9999986525 | 0              |
| 0.336285562  | 0.9999986525 | 7.2743938881   |
| 0.9513867931 | 0.9999986525 | 0              |
| 0.3020452938 | 0.9999986525 | 0              |
| 0.487344826  | 0.9999986525 | 0              |
| 0.3439354463 | 0.9999986525 | 2.6790736412   |
| 0.915171079  | 0.9999986525 | 0              |
| 0.6763073365 | 0.9999986525 | 1.2005073131   |
| 0.6606449059 | 0.9999986525 | 0              |
| 0            | 0            | 0              |
| 0.639287954  | 0.9999986525 | 0              |
| 0.1933521561 | 0.9999986525 | 0              |
| 0            | 0            | 0              |
| 0            | 0            | 0              |
| 0.6160442078 | 0.9999986525 | 0              |
| 0.1665059668 | 0.9999986525 | 0              |
| 0.5176906814 | 0.9999986525 | 0              |
| 0.5327774069 | 0.9999986525 | 884.6552466719 |
| 0.6312664098 | 0.9999986525 | 0              |
| 0.7276562334 | 0.9999986525 | 43.2389033054  |
| 0.2916162956 | 0.9999986525 | 42.0074911325  |
| 0.6216269387 | 0.9999986525 | 24.9947554313  |
| 0.4285882817 | 0.9999986525 | 17.1418105246  |
| 0.7747668668 | 0.9999986525 | 7.3850524039   |
| 0.1092279764 | 0.9999986525 | 0              |
| 0.8045046998 | 0.9999986525 | 1.4208748514   |
| 0.4494155904 | 0.9999986525 | 5.0227216573   |
| 0.095033753  | 0.9999986525 | 1.3179591547   |
| 0.1953200944 | 0.9999986525 | 92.3320248712  |
| 0.9393906722 | 0.9999986525 | 9.453363871    |
| 0.7618362975 | 0.9999986525 | 36.4989068599  |

gene\_expression\_table

|              |              |                 |
|--------------|--------------|-----------------|
| 0.0386231524 | 0.9999986525 | 4.7601548649    |
| 0.6729980316 | 0.9999986525 | 0               |
| 0.9072977679 | 0.9999986525 | 0               |
| 0.2357032899 | 0.9999986525 | 29.9851920286   |
| 0.5012524792 | 0.9999986525 | 0               |
| 0.6320155426 | 0.9999986525 | 1.0662370183    |
| 0.4323107947 | 0.9999986525 | 0               |
| 0.3470007983 | 0.9999986525 | 26.0809472723   |
| 0.1985910027 | 0.9999986525 | 2408.8446169355 |
| 0.3551396275 | 0.9999986525 | 35.1390008159   |
| 0.212285222  | 0.9999986525 | 2.3482419457    |
| 0.6184235991 | 0.9999986525 | 0               |
| 0.8125575991 | 0.9999986525 | 19.4277656031   |
| 0.7974476146 | 0.9999986525 | 0               |
| 0.860547895  | 0.9999986525 | 159.1003561532  |
| 0.7639900301 | 0.9999986525 | 4.8517677852    |
| 0.5429334456 | 0.9999986525 | 43.0431281388   |
| 0.9560775677 | 0.9999986525 | 0               |
| 0.4710748799 | 0.9999986525 | 0               |
| 0.1033040388 | 0.9999986525 | 0               |
| 0.2215522384 | 0.9999986525 | 0               |
| 0.7722163966 | 0.9999986525 | 18.3335363699   |
| 0.3116813915 | 0.9999986525 | 0               |
| 0.7037081968 | 0.9999986525 | 0               |
| 0.2696710553 | 0.9999986525 | 0               |
| 0.1502166415 | 0.9999986525 | 17.4142436779   |
| 0.1550082844 | 0.9999986525 | 2.7351969665    |
| 0.2437245123 | 0.9999986525 | 189.9430847313  |
| 0.4948456753 | 0.9999986525 | 2.9025015512    |
| 0            | 0            | 22.1349196254   |
| 0.7015167619 | 0.9999986525 | 27.7748715363   |
| 0            | 0            | 0               |
| 0.2864904342 | 0.9999986525 | 8.8155430189    |
| 0.8792503076 | 0.9999986525 | 712.220888944   |
| 0.6392613246 | 0.9999986525 | 0               |
| 0.6532105877 | 0.9999986525 | 16.7583430831   |
| 0.436466915  | 0.9999986525 | 66.9995502813   |
| 0.2919478713 | 0.9999986525 | 0               |
| 0.9649235693 | 0.9999986525 | 245.018177721   |
| 0.3379686267 | 0.9999986525 | 0               |
| 0.3524827552 | 0.9999986525 | 0               |
| 0.25314298   | 0.9999986525 | 10.0297048334   |
| 0.3816110603 | 0.9999986525 | 115.4943541344  |
| 0.5220206219 | 0.9999986525 | 0               |
| 0.7365476519 | 0.9999986525 | 100.34309986    |
| 0.8132566087 | 0.9999986525 | 0               |
| 0.4066299678 | 0.9999986525 | 0               |
| 0.3305655104 | 0.9999986525 | 0               |
| 0.5678188019 | 0.9999986525 | 7.9371683538    |

gene\_expression\_table

|              |              |                |
|--------------|--------------|----------------|
| 0.4274666728 | 0.9999986525 | 3.4047136556   |
| 0.5094047783 | 0.9999986525 | 0              |
| 0.6725801168 | 0.9999986525 | 0              |
| 0.9745719026 | 0.9999986525 | 470.8110172246 |
| 0.7220816204 | 0.9999986525 | 13.5108514265  |
| 0.7517113799 | 0.9999986525 | 0              |
| 0.6888793845 | 0.9999986525 | 93.3933125134  |
| 0.6174812237 | 0.9999986525 | 0              |
| 0.5061063923 | 0.9999986525 | 10.2991260192  |
| 0.3287788132 | 0.9999986525 | 0              |
| 0.0892700399 | 0.9999986525 | 0              |
| 0.9870048494 | 0.9999986525 | 5.3342004067   |
| 0.9797206738 | 0.9999986525 | 2.8159913744   |
| 0.6312664098 | 0.9999986525 | 0              |
| 0.3558296096 | 0.9999986525 | 463.2799844413 |
| 0.417131406  | 0.9999986525 | 38.5397560714  |
| 0.0367899969 | 0.9999986525 | 258.2959176776 |
| 0            | 0            | 0              |
| 0.4975750319 | 0.9999986525 | 0              |
| 0.1980425334 | 0.9999986525 | 13.1089856186  |
| 0.2676962429 | 0.9999986525 | 0              |
| 0.4729816619 | 0.9999986525 | 0              |
| 0.6972976515 | 0.9999986525 | 1.179303283    |
| 0.3182947509 | 0.9999986525 | 5.933481432    |
| 0.6168029221 | 0.9999986525 | 0.7446865981   |
| 0.7658509665 | 0.9999986525 | 0              |
| 0.8134729564 | 0.9999986525 | 3.7332238797   |
| 0.9966960235 | 0.9999986525 | 3.6004989076   |
| 0.5069647625 | 0.9999986525 | 0              |
| 0.7034577864 | 0.9999986525 | 0              |
| 0.0507985332 | 0.9999986525 | 0              |
| 0.8487505946 | 0.9999986525 | 0              |
| 0.7377890428 | 0.9999986525 | 0              |
| 0.8638252804 | 0.9999986525 | 0.862211745    |
| 0.2935180125 | 0.9999986525 | 0              |
| 0.5548691642 | 0.9999986525 | 0              |
| 0.3885745874 | 0.9999986525 | 1.6767387843   |
| 0.6162900306 | 0.9999986525 | 4.5376680322   |
| 0.4912771614 | 0.9999986525 | 0              |
| 0.1787346127 | 0.9999986525 | 0              |
| 0.089773194  | 0.9999986525 | 0              |
| 0.3585592993 | 0.9999986525 | 0              |
| 0.2527265763 | 0.9999986525 | 0              |
| 0.3411713367 | 0.9999986525 | 0              |
| 0.6312664098 | 0.9999986525 | 0              |
| 0            | 0            | 0              |
| 0.4920116112 | 0.9999986525 | 0.3502841543   |
| 0.8512468    | 0.9999986525 | 0              |
| 0.2184420572 | 0.9999986525 | 0              |

gene\_expression\_table

|              |              |                 |
|--------------|--------------|-----------------|
| 0.9739113414 | 0.9999986525 | 8.5067114804    |
| 0.3229343126 | 0.9999986525 | 0               |
| 0.9642379648 | 0.9999986525 | 28.7000968516   |
| 0.8759252099 | 0.9999986525 | 0               |
| 0.6306628087 | 0.9999986525 | 318.8764874041  |
| 0.651217752  | 0.9999986525 | 0               |
| 0.6636605851 | 0.9999986525 | 17.7079357004   |
| 0.3789212166 | 0.9999986525 | 0               |
| 0.5654973892 | 0.9999986525 | 0               |
| 0.6086356752 | 0.9999986525 | 8.6876428192    |
| 0.9523745917 | 0.9999986525 | 180.1011299086  |
| 0.9899640742 | 0.9999986525 | 6.36949217      |
| 0.0965581712 | 0.9999986525 | 1002.0704221333 |
| 0.30755387   | 0.9999986525 | 0               |
| 0.506622357  | 0.9999986525 | 118.8923688473  |
| 0.2221666873 | 0.9999986525 | 69.4832904869   |
| 0.1831991383 | 0.9999986525 | 5.05347988      |
| 0.6134543631 | 0.9999986525 | 22.3073617438   |
| 0.5571290717 | 0.9999986525 | 44.986301726    |
| 0.1867696543 | 0.9999986525 | 9.7948661399    |
| 0.4567245645 | 0.9999986525 | 13.5134441825   |
| 0.5946645701 | 0.9999986525 | 822.0065093589  |
| 0.2300151921 | 0.9999986525 | 0               |
| 0.6312664098 | 0.9999986525 | 0               |
| 0.710176868  | 0.9999986525 | 0               |
| 0.0587991523 | 0.9999986525 | 0               |
| 0.2943099702 | 0.9999986525 | 273.293237911   |
| 0.7720833318 | 0.9999986525 | 1.0936822992    |
| 0.660204036  | 0.9999986525 | 56.9217728324   |
| 0.9555955232 | 0.9999986525 | 0               |
| 0.2979849015 | 0.9999986525 | 0               |
| 0.6044073239 | 0.9999986525 | 3.3354754469    |
| 0.7789228564 | 0.9999986525 | 3369.5426330239 |
| 0.0997872357 | 0.9999986525 | 18.6651598551   |
| 0.7199752607 | 0.9999986525 | 37.7002906121   |
| 0.251712612  | 0.9999986525 | 16.5647417333   |
| 0.7371048015 | 0.9999986525 | 0               |
| 0.2877786087 | 0.9999986525 | 113.7413888578  |
| 0.6456883922 | 0.9999986525 | 0               |
| 0.8621575337 | 0.9999986525 | 0               |
| 0.9427162799 | 0.9999986525 | 141.2845162382  |
| 0            | 0            | 0               |
| 0.2010094497 | 0.9999986525 | 63.8086372623   |
| 0.4448743654 | 0.9999986525 | 0               |
| 0.7598399681 | 0.9999986525 | 3.4331535883    |
| 0.9466114625 | 0.9999986525 | 4.6831228753    |
| 0.4475504731 | 0.9999986525 | 0               |
| 0.7547953446 | 0.9999986525 | 0               |
| 0.0132953121 | 0.9999986525 | 263.9978525847  |



gene\_expression\_table

|              |              |                 |
|--------------|--------------|-----------------|
| 0.9491070805 | 0.9999986525 | 7.5739239188    |
| 0.7930493426 | 0.9999986525 | 0               |
| 0.30755387   | 0.9999986525 | 0               |
| 0.7751507184 | 0.9999986525 | 5.0402174191    |
| 0.3478048263 | 0.9999986525 | 59.930687349    |
| 0.0814478192 | 0.9999986525 | 0               |
| 0.6424005215 | 0.9999986525 | 38.0693616269   |
| 0.6166154108 | 0.9999986525 | 0               |
| 0.3259797784 | 0.9999986525 | 25.410504336    |
| 0.9009141554 | 0.9999986525 | 1.4299926414    |
| 0.5731793185 | 0.9999986525 | 21.3355086961   |
| 0.7939124055 | 0.9999986525 | 2.0828141431    |
| 0.4945618224 | 0.9999986525 | 0               |
| 0.943645562  | 0.9999986525 | 0               |
| 0.4500661329 | 0.9999986525 | 69.0188077791   |
| 0.8621461461 | 0.9999986525 | 0               |
| 0.4611752953 | 0.9999986525 | 2.8203523564    |
| 0.1723421344 | 0.9999986525 | 79.5133729614   |
| 0.6312664098 | 0.9999986525 | 0               |
| 0.9050884224 | 0.9999986525 | 0               |
| 0.3099903805 | 0.9999986525 | 7.3695553236    |
| 0.3421083788 | 0.9999986525 | 0               |
| 0.2626265056 | 0.9999986525 | 45.4609078049   |
| 0.1022100073 | 0.9999986525 | 3.5141338896    |
| 0.703365511  | 0.9999986525 | 6.7701471896    |
| 0.6589123317 | 0.9999986525 | 0               |
| 0.5385368682 | 0.9999986525 | 2.6252071889    |
| 0.9330622563 | 0.9999986525 | 9.6182695732    |
| 0.3522097212 | 0.9999986525 | 81.499965665    |
| 0.002523     | 0.9999986525 | 14.4064152281   |
| 0.1190518499 | 0.9999986525 | 15.9993693506   |
| 0.2578488859 | 0.9999986525 | 5.6595942054    |
| 0.9724777625 | 0.9999986525 | 36.5964588779   |
| 0.3361890418 | 0.9999986525 | 0               |
| 0.115388119  | 0.9999986525 | 100.651860118   |
| 0.6392345952 | 0.9999986525 | 0               |
| 0.9293256953 | 0.9999986525 | 0               |
| 0.6703290282 | 0.9999986525 | 2337.7932322108 |
| 0.5478625431 | 0.9999986525 | 86.9262702996   |
| 0.3028124681 | 0.9999986525 | 4.3548891549    |
| 0.6601070718 | 0.9999986525 | 0               |
| 0.9560722648 | 0.9999986525 | 78.3589291192   |
| 0.4066768806 | 0.9999986525 | 0               |
| 0.3171282378 | 0.9999986525 | 4.0343685147    |
| 0.1518116776 | 0.9999986525 | 1.4169103994    |
| 0.7786353364 | 0.9999986525 | 9.7985005986    |
| 0.4465967142 | 0.9999986525 | 0               |
| 0.3061698771 | 0.9999986525 | 51.1143655711   |
| 0.2003231976 | 0.9999986525 | 20.8366326511   |

gene\_expression\_table

|              |              |                |
|--------------|--------------|----------------|
| 0.3357300001 | 0.9999986525 | 3.8748289234   |
| 0.256727756  | 0.9999986525 | 36.6254634024  |
| 0.261729184  | 0.9999986525 | 0              |
| 0.4175865043 | 0.9999986525 | 0              |
| 0.2215868717 | 0.9999986525 | 1.9869422406   |
| 0.6736963935 | 0.9999986525 | 16.0090688773  |
| 0.5629893253 | 0.9999986525 | 0              |
| 0.494739552  | 0.9999986525 | 0              |
| 0.0758012839 | 0.9999986525 | 0              |
| 0.3379858639 | 0.9999986525 | 0              |
| 0.3930753915 | 0.9999986525 | 0              |
| 0.4731051472 | 0.9999986525 | 0              |
| 0.3817162672 | 0.9999986525 | 0              |
| 0.6798571966 | 0.9999986525 | 25.7152197031  |
| 0.5042014464 | 0.9999986525 | 36.5578575632  |
| 0.7446183677 | 0.9999986525 | 0              |
| 0.3451561499 | 0.9999986525 | 7.8756215667   |
| 0.2079582727 | 0.9999986525 | 17.800444296   |
| 0.7369446817 | 0.9999986525 | 91.418750639   |
| 0.3368497904 | 0.9999986525 | 100.2875257086 |
| 0.4668132449 | 0.9999986525 | 0              |
| 0.8891946026 | 0.9999986525 | 102.3525547022 |
| 0.5470822871 | 0.9999986525 | 1.9561434952   |
| 0.469594376  | 0.9999986525 | 60.9118041951  |
| 0.6312664098 | 0.9999986525 | 0              |
| 0.6392077606 | 0.9999986525 | 0              |
| 0.7028378789 | 0.9999986525 | 2.3312256997   |
| 0.6328075842 | 0.9999986525 | 0              |
| 0.9982517065 | 0.9999986525 | 0              |
| 0.7994488175 | 0.9999986525 | 4.8030118431   |
| 0            | 0            | 0              |
| 0.6391808169 | 0.9999986525 | 0              |
| 0.5620260596 | 0.9999986525 | 0              |
| 0.9356460612 | 0.9999986525 | 0              |
| 0.1165639286 | 0.9999986525 | 12.5508360804  |
| 0.3377682375 | 0.9999986525 | 7.1029410566   |
| 0.8530673515 | 0.9999986525 | 0              |
| 0.5531052571 | 0.9999986525 | 0              |
| 0            | 0            | 0              |
| 0.3223808378 | 0.9999986525 | 2.0225918438   |
| 0            | 0            | 0              |
| 0.9727924573 | 0.9999986525 | 23.6155957013  |
| 0.0559433165 | 0.9999986525 | 4.0928330926   |
| 0.7447022421 | 0.9999986525 | 6.0622036532   |
| 0.4729816619 | 0.9999986525 | 0              |
| 0.4944758016 | 0.9999986525 | 0              |
| 0.4359146981 | 0.9999986525 | 29.6469468792  |
| 0.8841995098 | 0.9999986525 | 0              |
| 0            | 0            | 0              |

gene\_expression\_table

|              |              |                |
|--------------|--------------|----------------|
| 0.9102181137 | 0.9999986525 | 14.7360262908  |
| 0.3633580655 | 0.9999986525 | 0              |
| 0.7679460327 | 0.9999986525 | 5.7484536845   |
| 0.6326447704 | 0.9999986525 | 6.6189075698   |
| 0.2066608887 | 0.9999986525 | 0              |
| 0.9559768595 | 0.9999986525 | 0              |
| 0.1302065418 | 0.9999986525 | 2.9279794999   |
| 0.9676963106 | 0.9999986525 | 0              |
| 0.4330340628 | 0.9999986525 | 75.571135023   |
| 0.0629165605 | 0.9999986525 | 34.5527760722  |
| 0.1198099073 | 0.9999986525 | 1.9551296867   |
| 0.2442406775 | 0.9999986525 | 44.0891627898  |
| 0.580653275  | 0.9999986525 | 12.6889429211  |
| 0.6471427131 | 0.9999986525 | 0              |
| 0.3127561203 | 0.9999986525 | 79.7105277241  |
| 0.5450554682 | 0.9999986525 | 0.7383051168   |
| 0.1252358872 | 0.9999986525 | 0              |
| 0.3841443079 | 0.9999986525 | 8.9758528597   |
| 0.3549168611 | 0.9999986525 | 0              |
| 0.4279742937 | 0.9999986525 | 129.6047073038 |
| 0.0839176054 | 0.9999986525 | 0              |
| 0.6312664098 | 0.9999986525 | 0              |
| 0.2619291817 | 0.9999986525 | 13.1283561851  |
| 0.5593505092 | 0.9999986525 | 0              |
| 0.7193544149 | 0.9999986525 | 847.1078802493 |
| 0.7020358644 | 0.9999986525 | 0              |
| 0.3656979916 | 0.9999986525 | 15.6369854112  |
| 0.9293487641 | 0.9999986525 | 0              |
| 0.0674973728 | 0.9999986525 | 0              |
| 0.1641204455 | 0.9999986525 | 0              |
| 0.2558620752 | 0.9999986525 | 5.3908255819   |
| 0.128019257  | 0.9999986525 | 17.6601954403  |
| 0.30755387   | 0.9999986525 | 0              |
| 0.5056158194 | 0.9999986525 | 8.3924866083   |
| 0.6312664098 | 0.9999986525 | 0              |
| 0.6829927566 | 0.9999986525 | 2.2803937058   |
| 0.3169516626 | 0.9999986525 | 0              |
| 0.4384570901 | 0.9999986525 | 1.2008075628   |
| 0.1126832301 | 0.9999986525 | 0              |
| 0.2839715064 | 0.9999986525 | 593.1034057741 |
| 0.517119892  | 0.9999986525 | 11.3553898573  |
| 0.8621101163 | 0.9999986525 | 0              |
| 0.5537097735 | 0.9999986525 | 0              |
| 0.8599359055 | 0.9999986525 | 8.6353692326   |
| 0.7191787183 | 0.9999986525 | 0              |
| 0.4006869155 | 0.9999986525 | 5.8753941736   |
| 0.892213826  | 0.9999986525 | 0              |
| 0.2125384975 | 0.9999986525 | 114.9795026698 |
| 0.7376334641 | 0.9999986525 | 61.7081144567  |

gene\_expression\_table

|              |              |                 |
|--------------|--------------|-----------------|
| 0.8835273698 | 0.9999986525 | 1.4662794144    |
| 0.6389293507 | 0.9999986525 | 0               |
| 0.4038578738 | 0.9999986525 | 38.8623386507   |
| 0.9228614689 | 0.9999986525 | 23.1225114623   |
| 0.0969935031 | 0.9999986525 | 69.444135167    |
| 0.6364222391 | 0.9999986525 | 34.6974908278   |
| 0.2103478138 | 0.9999986525 | 13.6426007688   |
| 0.002754     | 0.9999986525 | 251.7946041779  |
| 0.8508072802 | 0.9999986525 | 0               |
| 0.8620671524 | 0.9999986525 | 0               |
| 0.9994539065 | 0.9999986525 | 3.1602392428    |
| 0.8417168521 | 0.9999986525 | 0               |
| 0.5823943633 | 0.9999986525 | 0               |
| 0.8634074531 | 0.9999986525 | 13.5978162272   |
| 0.0211466596 | 0.9999986525 | 19.1181604439   |
| 0.9499672342 | 0.9999986525 | 0               |
| 0.6606000771 | 0.9999986525 | 0               |
| 0.3121298701 | 0.9999986525 | 1.7728145489    |
| 0.4716647005 | 0.9999986525 | 9.1603361766    |
| 0.1057210977 | 0.9999986525 | 268.4866292253  |
| 0.6312664098 | 0.9999986525 | 0               |
| 0.6312664098 | 0.9999986525 | 0               |
| 0.639126584  | 0.9999986525 | 0               |
| 0.4040063247 | 0.9999986525 | 0               |
| 0.0676763421 | 0.9999986525 | 32.5544919178   |
| 0.0623031952 | 0.9999986525 | 3.917946456     |
| 0.9029162233 | 0.9999986525 | 16.2117775232   |
| 0.2038851977 | 0.9999986525 | 0               |
| 0.3529444592 | 0.9999986525 | 0               |
| 0.1709575017 | 0.9999986525 | 50.9393501411   |
| 0.6135932484 | 0.9999986525 | 1.6565434485    |
| 0.5094907924 | 0.9999986525 | 4.3658690772    |
| 0.2185530269 | 0.9999986525 | 517.3224403289  |
| 0.6648199808 | 0.9999986525 | 1.0549491286    |
| 0.4747585737 | 0.9999986525 | 142.8280517491  |
| 0.882268663  | 0.9999986525 | 5.0763089414    |
| 0.3659418466 | 0.9999986525 | 40.2944367333   |
| 0.6278614472 | 0.9999986525 | 1.8430317639    |
| 0.4700130955 | 0.9999986525 | 1.117612964     |
| 0.341919302  | 0.9999986525 | 0               |
| 0.4451605044 | 0.9999986525 | 3304.0965459275 |
| 0.847847837  | 0.9999986525 | 9.5014695019    |
| 0.1055625816 | 0.9999986525 | 30.2182338586   |
| 0.0875404241 | 0.9999986525 | 6.3091528164    |
| 0.6577762348 | 0.9999986525 | 4.5090001047    |
| 0.9892503672 | 0.9999986525 | 0               |
| 0.1307510215 | 0.9999986525 | 0               |
| 0.3440931694 | 0.9999986525 | 0               |
| 0.7249667239 | 0.9999986525 | 0               |

gene\_expression\_table

|              |              |                  |
|--------------|--------------|------------------|
| 0.6312664098 | 0.9999986525 | 0                |
| 0.3817059147 | 0.9999986525 | 33.0045733198    |
| 0.428677106  | 0.9999986525 | 0                |
| 0.8635694455 | 0.9999986525 | 5.0241550824     |
| 0.8533599441 | 0.9999986525 | 302.1226594259   |
| 0.1724080244 | 0.9999986525 | 2.7278507425     |
| 0.2043173453 | 0.9999986525 | 9.0925227212     |
| 0.4067238921 | 0.9999986525 | 0                |
| 0.9966758046 | 0.9999986525 | 0                |
| 0.7314296451 | 0.9999986525 | 14859.1673176505 |
| 0.902833661  | 0.9999986525 | 6.2801440675     |
| 0.501040655  | 0.9999986525 | 23.4228837264    |
| 0            | 0            | 12.9668348211    |
| 0.1010347696 | 0.9999986525 | 78.7461505462    |
| 0.4447181956 | 0.9999986525 | 12.8126924372    |
| 0.3104577465 | 0.9999986525 | 0                |
| 0.8703533618 | 0.9999986525 | 1.6691080913     |
| 0.2682969754 | 0.9999986525 | 3.9048385964     |
| 0.3167171411 | 0.9999986525 | 2.4743572455     |
| 0.5174007524 | 0.9999986525 | 159.588799173    |
| 0.3646682211 | 0.9999986525 | 0                |
| 0.4795035964 | 0.9999986525 | 0                |
| 0.6066985222 | 0.9999986525 | 0                |
| 0.7946143621 | 0.9999986525 | 0                |
| 0.9947482803 | 0.9999986525 | 208.7506649261   |
| 0.7544151302 | 0.9999986525 | 38.4962678409    |
| 0.886682218  | 0.9999986525 | 0                |
| 0.8991061597 | 0.9999986525 | 3776.3895261715  |
| 0.903213545  | 0.9999986525 | 2429.3140402783  |
| 0.2986849292 | 0.9999986525 | 70.9162152862    |
| 0.4039902661 | 0.9999986525 | 0                |
| 0.5610935777 | 0.9999986525 | 8.4058440596     |
| 0.4100139465 | 0.9999986525 | 0                |
| 0.7404566714 | 0.9999986525 | 1.497714835      |
| 0.323131547  | 0.9999986525 | 10.8849790244    |
| 0.2284138568 | 0.9999986525 | 0                |
| 0.1059901196 | 0.9999986525 | 58.6170013611    |
| 0.2537488535 | 0.9999986525 | 191.0735311749   |
| 0.0848664561 | 0.9999986525 | 640.5595291592   |
| 0.9904925043 | 0.9999986525 | 45.8056532752    |
| 0.845431012  | 0.9999986525 | 0                |
| 0.799316296  | 0.9999986525 | 0                |
| 0.9784850512 | 0.9999986525 | 0                |
| 0.8072060678 | 0.9999986525 | 11.9456071262    |
| 0.2643306847 | 0.9999986525 | 36.8996334549    |
| 0.7802326249 | 0.9999986525 | 8.300160023      |
| 0.3547259916 | 0.9999986525 | 5.6642983941     |
| 0.2442410612 | 0.9999986525 | 0                |
| 0.2291891202 | 0.9999986525 | 5.29648681       |

gene\_expression\_table

|              |              |                 |
|--------------|--------------|-----------------|
| 0.699919767  | 0.9999986525 | 73.7785560415   |
| 0.7437324719 | 0.9999986525 | 60.5317114342   |
| 0.2768046646 | 0.9999986525 | 14.9408918358   |
| 0.8805302462 | 0.9999986525 | 2.2991562503    |
| 0.3051287142 | 0.9999986525 | 0               |
| 0.1441463528 | 0.9999986525 | 0               |
| 0.3813612433 | 0.9999986525 | 7.9948407851    |
| 0.2648451707 | 0.9999986525 | 7.8293877826    |
| 0.6975660089 | 0.9999986525 | 0               |
| 0.5905859871 | 0.9999986525 | 7.1784862858    |
| 0.1613771818 | 0.9999986525 | 0               |
| 0.3169156299 | 0.9999986525 | 0               |
| 0.9561098809 | 0.9999986525 | 0               |
| 0.3592483342 | 0.9999986525 | 0               |
| 0.096251594  | 0.9999986525 | 0               |
| 0.3892475231 | 0.9999986525 | 0               |
| 0.2041305215 | 0.9999986525 | 1599.7484696232 |
| 0.2055455807 | 0.9999986525 | 10.9800245793   |
| 0.4439859536 | 0.9999986525 | 29.5008620172   |
| 0.9971737817 | 0.9999986525 | 0               |
| 0.4702737991 | 0.9999986525 | 0               |
| 0.7819446782 | 0.9999986525 | 0               |
| 0.4875908376 | 0.9999986525 | 0               |
| 0.9366657846 | 0.9999986525 | 9.3833025187    |
| 0.5608149377 | 0.9999986525 | 16.4097653814   |
| 0.3173661867 | 0.9999986525 | 0               |
| 0.8662396268 | 0.9999986525 | 0               |
| 0.1871085451 | 0.9999986525 | 0               |
| 0.6293414305 | 0.9999986525 | 19.8697961724   |
| 0.1630125819 | 0.9999986525 | 63.2249619629   |
| 0.7802917972 | 0.9999986525 | 1016.5832105889 |
| 0.8118173344 | 0.9999986525 | 6.7858047316    |
| 0.3600851404 | 0.9999986525 | 0               |
| 0.6746313533 | 0.9999986525 | 4.9998975884    |
| 0.13298944   | 0.9999986525 | 14.9455728974   |
| 0.5322845677 | 0.9999986525 | 0               |
| 0.9456331844 | 0.9999986525 | 18.9510676432   |
| 0.1290853595 | 0.9999986525 | 21.4052627234   |
| 0.4808168953 | 0.9999986525 | 6.6401975893    |
| 0.3516879619 | 0.9999986525 | 0               |
| 0.5381117045 | 0.9999986525 | 0               |
| 0.563377122  | 0.9999986525 | 11.4186083404   |
| 0.8276278821 | 0.9999986525 | 0               |
| 0.4998964157 | 0.9999986525 | 0               |
| 0.2316534873 | 0.9999986525 | 0               |
| 0.7023096136 | 0.9999986525 | 0               |
| 0.0454427573 | 0.9999986525 | 13.9867368184   |
| 0.4325439363 | 0.9999986525 | 0               |
| 0.4649652624 | 0.9999986525 | 0               |

gene\_expression\_table

|              |              |                |
|--------------|--------------|----------------|
| 0.2391723802 | 0.9999986525 | 24.5149795175  |
| 0.917339065  | 0.9999986525 | 4.4993966797   |
| 0.3805439208 | 0.9999986525 | 1.8364309686   |
| 0.6390992849 | 0.9999986525 | 0              |
| 0.30755387   | 0.9999986525 | 0              |
| 0.7813731813 | 0.9999986525 | 0              |
| 0.0836350046 | 0.9999986525 | 0              |
| 0.4335068084 | 0.9999986525 | 0              |
| 0.4949849787 | 0.9999986525 | 0              |
| 0.94594699   | 0.9999986525 | 2.1752921548   |
| 0.1985702588 | 0.9999986525 | 0              |
| 0.3598625107 | 0.9999986525 | 0              |
| 0.045214126  | 0.9999986525 | 8.5373074522   |
| 0.3326812887 | 0.9999986525 | 1.4761975075   |
| 0            | 0            | 0              |
| 0.4622310623 | 0.9999986525 | 0              |
| 0.5074256589 | 0.9999986525 | 0              |
| 0.9502872723 | 0.9999986525 | 0              |
| 0.0930987177 | 0.9999986525 | 0              |
| 0.3168056145 | 0.9999986525 | 0              |
| 0.5517796838 | 0.9999986525 | 0              |
| 0.3587667714 | 0.9999986525 | 2.0090504499   |
| 0            | 0            | 0              |
| 0.2888534548 | 0.9999986525 | 0              |
| 0.2473221411 | 0.9999986525 | 0              |
| 0.9461643111 | 0.9999986525 | 92.4681576023  |
| 0            | 0            | 0              |
| 0.7492469962 | 0.9999986525 | 19.7582933881  |
| 0.3655586219 | 0.9999986525 | 159.4554356628 |
| 0.3278972033 | 0.9999986525 | 6.096492927    |
| 0.5264646667 | 0.9999986525 | 48.5719664865  |
| 0.4321310659 | 0.9999986525 | 5.8617001361   |
| 0.6796177136 | 0.9999986525 | 12.8657535265  |
| 0.8883478774 | 0.9999986525 | 0              |
| 0.4649376221 | 0.9999986525 | 79.3526026599  |
| 0.5596412406 | 0.9999986525 | 126.2484101027 |
| 0.3180714877 | 0.9999986525 | 1884.349359929 |
| 0.8762240207 | 0.9999986525 | 0              |
| 0.5645881146 | 0.9999986525 | 14.3555091672  |
| 0.4067710027 | 0.9999986525 | 0              |
| 0.6312664098 | 0.9999986525 | 0              |
| 0.4197357611 | 0.9999986525 | 40.546916491   |
| 0.3691169911 | 0.9999986525 | 0              |
| 0.9797342492 | 0.9999986525 | 0              |
| 0.098567488  | 0.9999986525 | 27.5646754835  |
| 0.7002249329 | 0.9999986525 | 0              |
| 0.2347849216 | 0.9999986525 | 65.2739994558  |
| 0.1040946921 | 0.9999986525 | 0              |
| 0.8293905383 | 0.9999986525 | 2.515427616    |

| gene_expression_table |              |                |
|-----------------------|--------------|----------------|
| 0.4040131527          | 0.9999986525 | 0              |
| 0                     | 0            | 0              |
| 0.4729816619          | 0.9999986525 | 0              |
| 0                     | 0            | 0              |
| 0.2124370634          | 0.9999986525 | 0              |
| 0.5903653017          | 0.9999986525 | 30.4789463448  |
| 0.1568491502          | 0.9999986525 | 0              |
| 0.9983017887          | 0.9999986525 | 6.336250867    |
| 0.1394177859          | 0.9999986525 | 0              |
| 0.5059351725          | 0.9999986525 | 0              |
| 0.0268268334          | 0.9999986525 | 20.5235433522  |
| 0.6545694301          | 0.9999986525 | 8.7505456427   |
| 0.253182159           | 0.9999986525 | 17.8104490421  |
| 0.5882395221          | 0.9999986525 | 22.1947185918  |
| 0.5256674283          | 0.9999986525 | 0              |
| 0.0881275085          | 0.9999986525 | 13.1019395253  |
| 0.915195775           | 0.9999986525 | 7.1885011877   |
| 0.2727512939          | 0.9999986525 | 0              |
| 0.1533830043          | 0.9999986525 | 60.2211154234  |
| 0.0647580151          | 0.9999986525 | 157.2060420692 |
| 0.2722337886          | 0.9999986525 | 23.2634812141  |
| 0.1092865828          | 0.9999986525 | 0              |
| 0.4959705634          | 0.9999986525 | 4.196076608    |
| 0.0928799777          | 0.9999986525 | 60.2898609889  |
| 0.3460645961          | 0.9999986525 | 0              |
| 0.306173459           | 0.9999986525 | 0              |
| 0.2922211834          | 0.9999986525 | 0              |
| 0.6657229538          | 0.9999986525 | 566.4151125994 |
| 0.4096690927          | 0.9999986525 | 292.3421547851 |
| 0.6125167865          | 0.9999986525 | 0              |
| 0.4582824204          | 0.9999986525 | 6.4754681494   |
| 0.0883644951          | 0.9999986525 | 0              |
| 0.152478145           | 0.9999986525 | 0              |
| 0.1109235432          | 0.9999986525 | 14.0164326503  |
| 0.1333540305          | 0.9999986525 | 19.0137711123  |
| 0.0402503546          | 0.9999986525 | 31.3714987979  |
| 0.2417435997          | 0.9999986525 | 21.3260319912  |
| 0.7957961175          | 0.9999986525 | 41.3146687559  |
| 0.1953435797          | 0.9999986525 | 0              |
| 0.7731811087          | 0.9999986525 | 34.890281954   |
| 0.5571138466          | 0.9999986525 | 108.0039227532 |
| 0.2314890139          | 0.9999986525 | 0              |
| 0.2349821127          | 0.9999986525 | 68.9977157841  |
| 0.7679819458          | 0.9999986525 | 5.1342942912   |
| 0.8622086297          | 0.9999986525 | 0              |
| 0                     | 0            | 0              |
| 0.6901399381          | 0.9999986525 | 6.2113925761   |
| 0.8503814968          | 0.9999986525 | 13.2412170251  |
| 0.9834261369          | 0.9999986525 | 1.0772414838   |



gene\_expression\_table

|              |              |                |
|--------------|--------------|----------------|
| 0.2578572073 | 0.9999986525 | 2.512794663    |
| 0.2472058034 | 0.9999986525 | 0              |
| 0.6312664098 | 0.9999986525 | 0              |
| 0.2646135424 | 0.9999986525 | 0              |
| 0.4644371866 | 0.9999986525 | 5.4218168798   |
| 0.6312664098 | 0.9999986525 | 0              |
| 0.9397428938 | 0.9999986525 | 0              |
| 0.9001283816 | 0.9999986525 | 2.3947546126   |
| 0.1724303348 | 0.9999986525 | 5.5702070586   |
| 0.7790770734 | 0.9999986525 | 0              |
| 0.2434893933 | 0.9999986525 | 3.8697185101   |
| 0.701678641  | 0.9999986525 | 8.3250186359   |
| 0.5203455673 | 0.9999986525 | 8.5491693023   |
| 0            | 0            | 0              |
| 0.3005511944 | 0.9999986525 | 0              |
| 0.7748054025 | 0.9999986525 | 0              |
| 0.8639546271 | 0.9999986525 | 11.9147055707  |
| 0.2162378755 | 0.9999986525 | 7.7919619691   |
| 0.7074557758 | 0.9999986525 | 2.6840432091   |
| 0.7343379307 | 0.9999986525 | 0              |
| 0.9697949201 | 0.9999986525 | 8.2226246655   |
| 0.6681817172 | 0.9999986525 | 10.0607521147  |
| 0.6921052483 | 0.9999986525 | 19.4168817008  |
| 0.4621797932 | 0.9999986525 | 0              |
| 0.5428454848 | 0.9999986525 | 0              |
| 0.0752862081 | 0.9999986525 | 0              |
| 0.8377068837 | 0.9999986525 | 0              |
| 0.7016306228 | 0.9999986525 | 0              |
| 0.4690494067 | 0.9999986525 | 0              |
| 0.0950225685 | 0.9999986525 | 6.6245115367   |
| 0.9321623829 | 0.9999986525 | 3.4494101121   |
| 0.6921175728 | 0.9999986525 | 5.3629080246   |
| 0.30755387   | 0.9999986525 | 0              |
| 0            | 0            | 0              |
| 0.2331921222 | 0.9999986525 | 0              |
| 0            | 0            | 0              |
| 0            | 0            | 0              |
| 0.251850022  | 0.9999986525 | 1.7274127764   |
| 0.2264981304 | 0.9999986525 | 2.1637510796   |
| 0.439530779  | 0.9999986525 | 3.1182569656   |
| 0.7020636051 | 0.9999986525 | 0              |
| 0.0438861689 | 0.9999986525 | 15.7794796015  |
| 0.8413564238 | 0.9999986525 | 6.2192555613   |
| 0.1732763365 | 0.9999986525 | 0              |
| 0.9365111787 | 0.9999986525 | 1142.339260999 |
| 0.6312664098 | 0.9999986525 | 0              |
| 0.2056444102 | 0.9999986525 | 25.9987782939  |
| 0.7760108466 | 0.9999986525 | 0              |
| 0.1805670284 | 0.9999986525 | 0              |

gene\_expression\_table

|              |              |                |
|--------------|--------------|----------------|
| 0.9115870334 | 0.9999986525 | 8.0829382042   |
| 0.662165823  | 0.9999986525 | 3.8609487701   |
| 0.3697413002 | 0.9999986525 | 19.2288350056  |
| 0.3333453972 | 0.9999986525 | 1.8739636741   |
| 0.9335868974 | 0.9999986525 | 160.6314144869 |
| 0.3662389309 | 0.9999986525 | 312.2774174505 |
| 0.2575397265 | 0.9999986525 | 226.4609051052 |
| 0.6933157423 | 0.9999986525 | 0              |
| 0.812738303  | 0.9999986525 | 7.9555008375   |
| 0.5464087198 | 0.9999986525 | 363.705852229  |
| 0.228718694  | 0.9999986525 | 170.0748762118 |
| 0.4068182128 | 0.9999986525 | 0              |
| 0.7191456347 | 0.9999986525 | 0              |
| 0.6069374758 | 0.9999986525 | 87.3421363379  |
| 0.8181238558 | 0.9999986525 | 28.5006615584  |
| 0.8083866179 | 0.9999986525 | 31.208135747   |
| 0.9725836277 | 0.9999986525 | 5.1824925891   |
| 0.7654925657 | 0.9999986525 | 54.7213480734  |
| 0            | 0            | 0              |
| 0.9000180305 | 0.9999986525 | 29.3807063168  |
| 0.6721468129 | 0.9999986525 | 0              |
| 0.7699825588 | 0.9999986525 | 12.5282939979  |
| 0.2206552562 | 0.9999986525 | 0              |
| 0.714188618  | 0.9999986525 | 0              |
| 0.6456711402 | 0.9999986525 | 0              |
| 0.9615242605 | 0.9999986525 | 0              |
| 0.3757801255 | 0.9999986525 | 227.0064264976 |
| 0.5770682031 | 0.9999986525 | 33.061649189   |
| 0.6184142948 | 0.9999986525 | 0              |
| 0.8186235975 | 0.9999986525 | 4.5049616775   |
| 0.1610088112 | 0.9999986525 | 0              |
| 0.5891053347 | 0.9999986525 | 0              |
| 0.7443861865 | 0.9999986525 | 0.9402513482   |
| 0.6487477962 | 0.9999986525 | 20.7660833149  |
| 0.7517291279 | 0.9999986525 | 3.4007674325   |
| 0.4528445948 | 0.9999986525 | 6.2723126889   |
| 0.3759017477 | 0.9999986525 | 5.2432905778   |
| 0.1365677284 | 0.9999986525 | 4.6828114491   |
| 0            | 0            | 0              |
| 0.7656860021 | 0.9999986525 | 567.1523922773 |
| 0.4433368805 | 0.9999986525 | 0              |
| 0.9236896736 | 0.9999986525 | 567.6009635376 |
| 0.3028255157 | 0.9999986525 | 344.005638087  |
| 0.5074792853 | 0.9999986525 | 0              |
| 0            | 0            | 0              |
| 0.0181517234 | 0.9999986525 | 89.0622567054  |
| 0.0819089366 | 0.9999986525 | 12.1709751635  |
| 0.705343426  | 0.9999986525 | 2.1189134695   |
| 0.8519827601 | 0.9999986525 | 0              |

gene\_expression\_table

|              |              |                |
|--------------|--------------|----------------|
| 0.5074755901 | 0.9999986525 | 332.7609609218 |
| 0.146851617  | 0.9999986525 | 2.018186336    |
| 0.0648117537 | 0.9999986525 | 39.5077186014  |
| 0.3278644304 | 0.9999986525 | 0              |
| 0.1624763494 | 0.9999986525 | 36.8092544092  |
| 0.0843031463 | 0.9999986525 | 153.4792586493 |
| 0.0655608463 | 0.9999986525 | 3.7544549816   |
| 0.2885935743 | 0.9999986525 | 0.3335033135   |
| 0.6604881553 | 0.9999986525 | 1.4661980019   |
| 0.8937421656 | 0.9999986525 | 0              |
| 0.3973066378 | 0.9999986525 | 0              |
| 0.3112668955 | 0.9999986525 | 36.9147397961  |
| 0.6312664098 | 0.9999986525 | 0              |
| 0.9729828675 | 0.9999986525 | 353.332551514  |
| 0.5781043344 | 0.9999986525 | 81.8820437617  |
| 0.9557875288 | 0.9999986525 | 33.1190958777  |
| 0.7125801489 | 0.9999986525 | 28.8157780604  |
| 0.2451833402 | 0.9999986525 | 15.4411611616  |
| 0.1364407512 | 0.9999986525 | 11.9646858911  |
| 0.7511080062 | 0.9999986525 | 1.3552803055   |
| 0            | 0            | 0              |
| 0.402809171  | 0.9999986525 | 61.57860656    |
| 0.6104302945 | 0.9999986525 | 43.5618626254  |
| 0.864001136  | 0.9999986525 | 3.0095687171   |
| 0.645064082  | 0.9999986525 | 29.6008957663  |
| 0.1193640649 | 0.9999986525 | 135.768427317  |
| 0.4019004972 | 0.9999986525 | 2.9701192642   |
| 0.3443789395 | 0.9999986525 | 5.5515959273   |
| 0.9606319408 | 0.9999986525 | 0.4627847236   |
| 0.7023385603 | 0.9999986525 | 0              |
| 0.6207895416 | 0.9999986525 | 45.6472931947  |
| 0.5432078722 | 0.9999986525 | 8.4014982265   |
| 0.2191810371 | 0.9999986525 | 18.5768266712  |
| 0.8042628244 | 0.9999986525 | 2.1689494138   |
| 0.567383958  | 0.9999986525 | 3.7300599072   |
| 0.4808255063 | 0.9999986525 | 0.2105127034   |
| 0.8197048229 | 0.9999986525 | 0              |
| 0.3717557442 | 0.9999986525 | 13.0670917861  |
| 0            | 0            | 0              |
| 0.6312664098 | 0.9999986525 | 0              |
| 0.7095567957 | 0.9999986525 | 21.5127976482  |
| 0.3408948927 | 0.9999986525 | 0              |
| 0.3712299149 | 0.9999986525 | 1.4524081684   |
| 0            | 0            | 0              |
| 0.7022768997 | 0.9999986525 | 0              |
| 0.5362967926 | 0.9999986525 | 0.211638315    |
| 0.2381293156 | 0.9999986525 | 0              |
| 0.0967632691 | 0.9999986525 | 2.9917814664   |
| 0.3570341241 | 0.9999986525 | 1.5814444313   |

gene\_expression\_table

|              |              |                |
|--------------|--------------|----------------|
| 0.9299732415 | 0.9999986525 | 0              |
| 0.4195190152 | 0.9999986525 | 0.0256662067   |
| 0.7239398937 | 0.9999986525 | 0.175255408    |
| 0.5327478271 | 0.9999986525 | 165.4767528473 |
| 0.3380031246 | 0.9999986525 | 0              |
| 0.4288017186 | 0.9999986525 | 0              |
| 0.4714794978 | 0.9999986525 | 24.3319817782  |
| 0.8395777911 | 0.9999986525 | 0.7698148591   |
| 0.7060221295 | 0.9999986525 | 13.4945768574  |
| 0.9566434401 | 0.9999986525 | 2.344263759    |
| 0.4729816619 | 0.9999986525 | 0              |
| 0.3088959974 | 0.9999986525 | 0              |
| 0.2674958908 | 0.9999986525 | 3.4321496118   |
| 0.8153821993 | 0.9999986525 | 0              |
| 0.8844124697 | 0.9999986525 | 0              |
| 0.1388816111 | 0.9999986525 | 3.0599025624   |
| 0.3340536427 | 0.9999986525 | 0              |
| 0.1859179555 | 0.9999986525 | 7.8428746995   |
| 0.7534940568 | 0.9999986525 | 6.9008386264   |
| 0.6312664098 | 0.9999986525 | 0              |
| 0.9405523047 | 0.9999986525 | 0.207011117    |
| 0.8326042867 | 0.9999986525 | 0.2156990738   |
| 0.3841092126 | 0.9999986525 | 29.0896734417  |
| 0.5719419548 | 0.9999986525 | 4.8707846746   |
| 0.6199233233 | 0.9999986525 | 0              |
| 0.0876301711 | 0.9999986525 | 0              |
| 0.8511499523 | 0.9999986525 | 1.3077567106   |
| 0.7785339904 | 0.9999986525 | 0.8755042475   |
| 0.3823834841 | 0.9999986525 | 2.4410768518   |
| 0.1610131278 | 0.9999986525 | 13.0986900363  |
| 0.9276453401 | 0.9999986525 | 612.4448641848 |
| 0.8114954957 | 0.9999986525 | 327.061668481  |
| 0.7330907536 | 0.9999986525 | 18.4052685925  |
| 0.2734712856 | 0.9999986525 | 0              |
| 0.1044723914 | 0.9999986525 | 72.8324325422  |
| 0.2016806394 | 0.9999986525 | 0              |
| 0.3482267956 | 0.9999986525 | 0              |
| 0.9397951664 | 0.9999986525 | 478.8251301946 |
| 0.0865465269 | 0.9999986525 | 139.048841561  |
| 0.0749618594 | 0.9999986525 | 38.6297017035  |
| 0.3758301116 | 0.9999986525 | 16.2975739759  |
| 0.8759333296 | 0.9999986525 | 0              |
| 0.089270718  | 0.9999986525 | 7.6828226846   |
| 0.8597868339 | 0.9999986525 | 15.5008320382  |
| 0.4750125382 | 0.9999986525 | 0              |
| 0.2924312378 | 0.9999986525 | 14.3023790106  |
| 0.0520637275 | 0.9999986525 | 4.4549909934   |
| 0.2834332815 | 0.9999986525 | 22.9800579686  |
| 0.1513227232 | 0.9999986525 | 0              |

| gene_expression_table |              |                |
|-----------------------|--------------|----------------|
| 0.0476537518          | 0.9999986525 | 85.6673450548  |
| 0                     | 0            | 0              |
| 0.1133016576          | 0.9999986525 | 1.7738267692   |
| 0.7038794437          | 0.9999986525 | 37.0612165793  |
| 0.3380204125          | 0.9999986525 | 0              |
| 0.6312664098          | 0.9999986525 | 0              |
| 0.0459719346          | 0.9999986525 | 0              |
| 0.0298753309          | 0.9999986525 | 111.1715932353 |
| 0.6390718575          | 0.9999986525 | 0              |
| 0.0723027508          | 0.9999986525 | 2.4222123567   |
| 0.6016187562          | 0.9999986525 | 11.6964927921  |
| 0.9405771679          | 0.9999986525 | 2.7434376514   |
| 0.829247916           | 0.9999986525 | 17.3274009929  |
| 0.4791249578          | 0.9999986525 | 15.4466808799  |
| 0.7768390448          | 0.9999986525 | 0.9207286872   |
| 0.239694873           | 0.9999986525 | 10.3992553548  |
| 0.4924056499          | 0.9999986525 | 0.7437794349   |
| 0.8553681698          | 0.9999986525 | 26.8428356347  |
| 0.5794071102          | 0.9999986525 | 0              |
| 0.7115754556          | 0.9999986525 | 44.8364746909  |
| 0.3658031652          | 0.9999986525 | 0              |
| 0.9093887077          | 0.9999986525 | 4.8089158412   |
| 0.050188921           | 0.9999986525 | 5.8786640946   |
| 0.6617963663          | 0.9999986525 | 0.9904838256   |
| 0.8897946199          | 0.9999986525 | 0              |
| 0.6964405623          | 0.9999986525 | 0              |
| 0.198776179           | 0.9999986525 | 19.3475293438  |
| 0.2963753272          | 0.9999986525 | 9.0090268197   |
| 0.0468681227          | 0.9999986525 | 32.294083199   |
| 0.7785485308          | 0.9999986525 | 36.7921592697  |
| 0.0600356882          | 0.9999986525 | 3.4733430815   |
| 0.8223645843          | 0.9999986525 | 204.1520593145 |
| 0.1554937782          | 0.9999986525 | 2.5497956948   |
| 0.6436277754          | 0.9999986525 | 20.5862086246  |
| 0.6714728772          | 0.9999986525 | 0.3555559027   |
| 0.9212599907          | 0.9999986525 | 0              |
| 0.2697191742          | 0.9999986525 | 17.1927302466  |
| 0.4317147738          | 0.9999986525 | 0              |
| 0.032958203           | 0.9999986525 | 3.6191268571   |
| 0.4645587152          | 0.9999986525 | 0              |
| 0.3475462471          | 0.9999986525 | 1.9053327402   |
| 0.8504753171          | 0.9999986525 | 2.9880576083   |
| 0.2767005188          | 0.9999986525 | 3.8277889637   |
| 0.919445046           | 0.9999986525 | 4.0880357784   |
| 0.9407241807          | 0.9999986525 | 3.3006635977   |
| 0.8591471603          | 0.9999986525 | 1.1988722272   |
| 0.7232203491          | 0.9999986525 | 0              |
| 0.3683802373          | 0.9999986525 | 160.8273605267 |
| 0.8110508418          | 0.9999986525 | 1.4459398841   |

gene\_expression\_table

|              |              |                |
|--------------|--------------|----------------|
| 0.3362580249 | 0.9999986525 | 0              |
| 0.6917967916 | 0.9999986525 | 1.6929165697   |
| 0.5143985178 | 0.9999986525 | 23.6894417265  |
| 0.6306911256 | 0.9999986525 | 10.0809158668  |
| 0.9888826259 | 0.9999986525 | 10.8542194371  |
| 0.3576180332 | 0.9999986525 | 16.4714066325  |
| 0.2488823208 | 0.9999986525 | 12.050897307   |
| 0.7029800023 | 0.9999986525 | 1704.693116689 |
| 0.7420796527 | 0.9999986525 | 34.0928515714  |
| 0.9288443016 | 0.9999986525 | 4.1450779249   |
| 0.9975317448 | 0.9999986525 | 90.901752541   |
| 0.4068655228 | 0.9999986525 | 0              |
| 0.7598024147 | 0.9999986525 | 0              |
| 0.4276148406 | 0.9999986525 | 12.6919922682  |
| 0.7360407371 | 0.9999986525 | 0.9502537971   |
| 0.1662733083 | 0.9999986525 | 7.7364138027   |
| 0.5475550853 | 0.9999986525 | 286.3591697499 |
| 0.6442099163 | 0.9999986525 | 3.1345431911   |
| 0.2361544983 | 0.9999986525 | 9.5137021166   |
| 0.8561108932 | 0.9999986525 | 21.5694179805  |
| 0.4818246561 | 0.9999986525 | 3.061924923    |
| 0.5727977078 | 0.9999986525 | 2.4967578228   |
| 0.3628161728 | 0.9999986525 | 0              |
| 0.8195837144 | 0.9999986525 | 4.7595828856   |
| 0.4399526551 | 0.9999986525 | 0              |
| 0.5097402621 | 0.9999986525 | 14.3474801024  |
| 0.6289901418 | 0.9999986525 | 5.7379406323   |
| 0.2065689029 | 0.9999986525 | 45.2044949155  |
| 0.4839319223 | 0.9999986525 | 2.0749118989   |
| 0.4729816619 | 0.9999986525 | 0              |
| 0.7029853586 | 0.9999986525 | 1.0466077093   |
| 0.1229697746 | 0.9999986525 | 0              |
| 0.6189785852 | 0.9999986525 | 0              |
| 0.2401162026 | 0.9999986525 | 0              |
| 0.4591374624 | 0.9999986525 | 1.5834358166   |
| 0.7019272262 | 0.9999986525 | 0              |
| 0.364861016  | 0.9999986525 | 0.9959628541   |
| 0.4879476149 | 0.9999986525 | 4.4024438983   |
| 0.0833918297 | 0.9999986525 | 0              |
| 0.6649779672 | 0.9999986525 | 11.8465553612  |
| 0.4757258152 | 0.9999986525 | 2.0474214287   |
| 0.8448152728 | 0.9999986525 | 31.1311041711  |
| 0.1664730065 | 0.9999986525 | 7.728919942    |
| 0.2030053228 | 0.9999986525 | 2.7649094692   |
| 0.5500128423 | 0.9999986525 | 0.3795248439   |
| 0.8436654101 | 0.9999986525 | 0.2440636904   |
| 0.3893423214 | 0.9999986525 | 423.1000066894 |
| 0.6240253077 | 0.9999986525 | 4.6306334662   |
| 0.3401998667 | 0.9999986525 | 0              |

gene\_expression\_table

|              |              |                |
|--------------|--------------|----------------|
| 0.8181275899 | 0.9999986525 | 2.7951759699   |
| 0.0157342974 | 0.9999986525 | 92.8657359976  |
| 0.3757583054 | 0.9999986525 | 0              |
| 0.3231312478 | 0.9999986525 | 0              |
| 0.7177880591 | 0.9999986525 | 4.961149615    |
| 0.1422626236 | 0.9999986525 | 0              |
| 0.5823971455 | 0.9999986525 | 0              |
| 0.5489079812 | 0.9999986525 | 0              |
| 0.3651810057 | 0.9999986525 | 8.464673292    |
| 0.3957255932 | 0.9999986525 | 8.157849587    |
| 0.4161869453 | 0.9999986525 | 0              |
| 0.9982056616 | 0.9999986525 | 14.7433394552  |
| 0.7037109706 | 0.9999986525 | 0              |
| 0.3592843379 | 0.9999986525 | 175.0177808145 |
| 0.6532874235 | 0.9999986525 | 0              |
| 0.327978604  | 0.9999986525 | 40.2041680805  |
| 0.481315482  | 0.9999986525 | 4.1877402033   |
| 0.9738672667 | 0.9999986525 | 45.4117955514  |
| 0.5123937553 | 0.9999986525 | 0              |
| 0.1936497492 | 0.9999986525 | 15.978624177   |
| 0.6967877543 | 0.9999986525 | 24.8686551584  |
| 0.0924236979 | 0.9999986525 | 0              |
| 0.6312664098 | 0.9999986525 | 0              |
| 0.5556744499 | 0.9999986525 | 212.729211836  |
| 0            | 0            | 0              |
| 0.6312664098 | 0.9999986525 | 0              |
| 0.7021977711 | 0.9999986525 | 0              |
| 0.8320674423 | 0.9999986525 | 18.9675967156  |
| 0.4389840454 | 0.9999986525 | 12.0524687874  |
| 0.2359584966 | 0.9999986525 | 0              |
| 0.5754872768 | 0.9999986525 | 6.7326047838   |
| 0.2884249667 | 0.9999986525 | 2.4506481475   |
| 0.1832520882 | 0.9999986525 | 48.5980383955  |
| 0.8761963252 | 0.9999986525 | 0              |
| 0.3187446311 | 0.9999986525 | 79.1265341641  |
| 0.3981417671 | 0.9999986525 | 0              |
| 0.3105098925 | 0.9999986525 | 0              |
| 0.4942163814 | 0.9999986525 | 11.8718533402  |
| 0.993384093  | 0.9999986525 | 17.4174023337  |
| 0.1353965648 | 0.9999986525 | 331.2082669013 |
| 0.7732732956 | 0.9999986525 | 0              |
| 0.2737536094 | 0.9999986525 | 7.2902088793   |
| 0.6312664098 | 0.9999986525 | 0              |
| 0.7419409444 | 0.9999986525 | 0              |
| 0.3153765897 | 0.9999986525 | 35.3648843085  |
| 0.8719264194 | 0.9999986525 | 2.5758489149   |
| 0.1973087362 | 0.9999986525 | 0              |
| 0.6203013843 | 0.9999986525 | 0              |
| 0.3950044981 | 0.9999986525 | 50.0795735125  |

gene\_expression\_table

|              |              |                |
|--------------|--------------|----------------|
| 0.9183983949 | 0.9999986525 | 0              |
| 0.6089117496 | 0.9999986525 | 1.4219555682   |
| 0.9796309339 | 0.9999986525 | 0              |
| 0.3664201557 | 0.9999986525 | 0.799932118    |
| 0.6443073668 | 0.9999986525 | 2.5935962042   |
| 0.2353031076 | 0.9999986525 | 0.9187186248   |
| 0.6131581146 | 0.9999986525 | 32.2829826484  |
| 0.7766093141 | 0.9999986525 | 10.4673809447  |
| 0.087612906  | 0.9999986525 | 42.6210856041  |
| 0.9589752513 | 0.9999986525 | 11.4287568809  |
| 0.6390442957 | 0.9999986525 | 0              |
| 0.8844155445 | 0.9999986525 | 13.7026474271  |
| 0.0776354707 | 0.9999986525 | 1.9922262628   |
| 0.2915732003 | 0.9999986525 | 0              |
| 0.3815198475 | 0.9999986525 | 27.147482097   |
| 0.8602445186 | 0.9999986525 | 8.9348533626   |
| 0.4404756221 | 0.9999986525 | 3.032145954    |
| 0.8498300124 | 0.9999986525 | 7.2671370108   |
| 0.6975959857 | 0.9999986525 | 0              |
| 0.3730215013 | 0.9999986525 | 125.2702045216 |
| 0.6449809275 | 0.9999986525 | 0              |
| 0.1384822133 | 0.9999986525 | 24.1217756064  |
| 0.0810653383 | 0.9999986525 | 0              |
| 0.655760826  | 0.9999986525 | 0              |
| 0.895357658  | 0.9999986525 | 0              |
| 0.7082268383 | 0.9999986525 | 14.9039645938  |
| 0.0200099068 | 0.9999986525 | 13.3649729801  |
| 0.6364420291 | 0.9999986525 | 17.3160387627  |
| 0.4586546533 | 0.9999986525 | 2.1017357922   |
| 0.029549125  | 0.9999986525 | 0.9231212074   |
| 0.6312664098 | 0.9999986525 | 0              |
| 0.5646485149 | 0.9999986525 | 0.4891309861   |
| 0.6034337394 | 0.9999986525 | 0              |
| 0.1608163072 | 0.9999986525 | 1.2603249786   |
| 0            | 0            | 0              |
| 0.0971865189 | 0.9999986525 | 8.8089263992   |
| 0.7167044883 | 0.9999986525 | 32.5442651081  |
| 0.9304354895 | 0.9999986525 | 25.3149636363  |
| 0.5264910292 | 0.9999986525 | 30.4127531741  |
| 0.7724669818 | 0.9999986525 | 0              |
| 0.1345967721 | 0.9999986525 | 0              |
| 0.795457777  | 0.9999986525 | 10.736406679   |
| 0.1227265369 | 0.9999986525 | 0              |
| 0.2801533037 | 0.9999986525 | 0              |
| 0.4742065335 | 0.9999986525 | 1.0789470419   |
| 0.5140428017 | 0.9999986525 | 44.1796733663  |
| 0.8974621748 | 0.9999986525 | 161.9516894763 |
| 0.4069129332 | 0.9999986525 | 0              |
| 0.21183497   | 0.9999986525 | 0.8363911351   |



gene\_expression\_table

|              |              |                 |
|--------------|--------------|-----------------|
| 0.4268583341 | 0.9999986525 | 0.9138462829    |
| 0.4853992378 | 0.9999986525 | 5.9644971619    |
| 0.3343023617 | 0.9999986525 | 18.679323133    |
| 0.1370343121 | 0.9999986525 | 13.8390891512   |
| 0.0160627808 | 0.9999986525 | 8.8618913071    |
| 0.8212267948 | 0.9999986525 | 26.5472804527   |
| 0.7897379026 | 0.9999986525 | 0               |
| 0.6805554646 | 0.9999986525 | 0               |
| 0.7659608046 | 0.9999986525 | 1159.3299122849 |
| 0.8913092968 | 0.9999986525 | 10.8872228873   |
| 0.316535021  | 0.9999986525 | 0               |
| 0.5216070162 | 0.9999986525 | 1.3575197555    |
| 0.8602737432 | 0.9999986525 | 0.74994204      |
| 0.8408699115 | 0.9999986525 | 28.3241500175   |
| 0.7986246881 | 0.9999986525 | 30.4754288669   |
| 0.3889286207 | 0.9999986525 | 0               |
| 0.8058866157 | 0.9999986525 | 0               |
| 0.7408358191 | 0.9999986525 | 0               |
| 0.6299106176 | 0.9999986525 | 0               |
| 0.3109693432 | 0.9999986525 | 24.5208937056   |
| 0.5738104179 | 0.9999986525 | 321.6533938323  |
| 0.517732681  | 0.9999986525 | 0               |
| 0.9800280022 | 0.9999986525 | 5.1415418834    |
| 0.6935441839 | 0.9999986525 | 3.6594375947    |
| 0.9250558141 | 0.9999986525 | 116.3814857345  |
| 0.5419540914 | 0.9999986525 | 0.906536642     |
| 0.9321943251 | 0.9999986525 | 2285.2176155615 |
| 0.8837430239 | 0.9999986525 | 2.8312382452    |
| 0.202680113  | 0.9999986525 | 12.1856713565   |
| 0.250399399  | 0.9999986525 | 0               |
| 0.323598278  | 0.9999986525 | 12.6895526733   |
| 0.5487972651 | 0.9999986525 | 0               |
| 0.5643585806 | 0.9999986525 | 29.7041159878   |
| 0.2580615793 | 0.9999986525 | 80.5792126382   |
| 0.6013228833 | 0.9999986525 | 6.5748923014    |
| 0.321133674  | 0.9999986525 | 30.5429888538   |
| 0            | 0            | 32.480884518    |
| 0.6245631847 | 0.9999986525 | 3.5083562718    |
| 0.4533572296 | 0.9999986525 | 218.6385369916  |
| 0.0981186247 | 0.9999986525 | 33.1100985683   |
| 0.958466811  | 0.9999986525 | 33.0754859303   |
| 0.6074206948 | 0.9999986525 | 34.2576766873   |
| 0.0820559389 | 0.9999986525 | 3.7400976012    |
| 0.0698941566 | 0.9999986525 | 15.5280248813   |
| 0.4729816619 | 0.9999986525 | 0               |
| 0.4097267777 | 0.9999986525 | 189.7051660428  |
| 0.7779031413 | 0.9999986525 | 0               |
| 0.6312664098 | 0.9999986525 | 0               |
| 0.3522092528 | 0.9999986525 | 13.0776075836   |

gene\_expression\_table

|              |              |                |
|--------------|--------------|----------------|
| 0.4201349055 | 0.9999986525 | 6.6839523927   |
| 0.4208895193 | 0.9999986525 | 41.7771537818  |
| 0.370052762  | 0.9999986525 | 1.3737883214   |
| 0.8697831655 | 0.9999986525 | 0              |
| 0.8155900864 | 0.9999986525 | 28.1764395147  |
| 0.9113642138 | 0.9999986525 | 0              |
| 0.5084573899 | 0.9999986525 | 46.5047709653  |
| 0.2144901587 | 0.9999986525 | 692.7654429876 |
| 0.2887385726 | 0.9999986525 | 0.5956568908   |
| 0.1651531913 | 0.9999986525 | 0              |
| 0.4260791745 | 0.9999986525 | 44.1487271441  |
| 0.6401681062 | 0.9999986525 | 47.7428530265  |
| 0.7518935766 | 0.9999986525 | 10.7745026218  |
| 0.4401392407 | 0.9999986525 | 0              |
| 0.1023814068 | 0.9999986525 | 7.9110123167   |
| 0.6034971603 | 0.9999986525 | 15.2254146178  |
| 0.195620317  | 0.9999986525 | 0              |
| 0.9730288091 | 0.9999986525 | 69.6549331824  |
| 0.1115546341 | 0.9999986525 | 2.5685204857   |
| 0.4563419235 | 0.9999986525 | 0              |
| 0.5731088616 | 0.9999986525 | 0              |
| 0.181801897  | 0.9999986525 | 0              |
| 0.2566239572 | 0.9999986525 | 18.5655471203  |
| 0.5511353587 | 0.9999986525 | 0              |
| 0.3974086801 | 0.9999986525 | 10.3021395155  |
| 0.9836291237 | 0.9999986525 | 0              |
| 0.30755387   | 0.9999986525 | 0              |
| 0            | 0            | 0              |
| 0.9242355592 | 0.9999986525 | 0              |
| 0.7340136382 | 0.9999986525 | 0.4808703171   |
| 0.2454597485 | 0.9999986525 | 7.9622973355   |
| 0.578155816  | 0.9999986525 | 46.8272361848  |
| 0.8338757621 | 0.9999986525 | 0              |
| 0.471840052  | 0.9999986525 | 0              |
| 0.8937260037 | 0.9999986525 | 0              |
| 0.3051619615 | 0.9999986525 | 0              |
| 0            | 0            | 0              |
| 0.6712261257 | 0.9999986525 | 0              |
| 0.571601529  | 0.9999986525 | 17.496742828   |
| 0.5651089912 | 0.9999986525 | 0.5379568956   |
| 0.2888948303 | 0.9999986525 | 0              |
| 0.0424585887 | 0.9999986525 | 0.3517972785   |
| 0.8062538016 | 0.9999986525 | 3.4723154652   |
| 0.5979038546 | 0.9999986525 | 0              |
| 0.9860156034 | 0.9999986525 | 0              |
| 0.3035092057 | 0.9999986525 | 226.8517292942 |
| 0.666317411  | 0.9999986525 | 5.6313822281   |
| 0.7025098937 | 0.9999986525 | 1.2722785459   |
| 0.6312664098 | 0.9999986525 | 0              |

gene\_expression\_table

|              |              |                |
|--------------|--------------|----------------|
| 0.0784617367 | 0.9999986525 | 0              |
| 0.3946965806 | 0.9999986525 | 1.6296568201   |
| 0.777308523  | 0.9999986525 | 3.8796678342   |
| 0.6284781141 | 0.9999986525 | 8.8400371964   |
| 0.5294715737 | 0.9999986525 | 142.0378894848 |
| 0.4600341569 | 0.9999986525 | 0              |
| 0.417294995  | 0.9999986525 | 1.1153000428   |
| 0.9499645417 | 0.9999986525 | 0              |
| 0.3598380907 | 0.9999986525 | 0              |
| 0.4408945528 | 0.9999986525 | 408.4427617932 |
| 0.0361274623 | 0.9999986525 | 0              |
| 0.1001879289 | 0.9999986525 | 16.1691759036  |
| 0.9251295645 | 0.9999986525 | 6.8971684955   |
| 0.4749637718 | 0.9999986525 | 0.6441900131   |
| 0.8931560988 | 0.9999986525 | 0              |
| 0.3609663486 | 0.9999986525 | 0              |
| 0.5423836703 | 0.9999986525 | 19.3192202017  |
| 0.549206147  | 0.9999986525 | 0.5314875539   |
| 0.629041537  | 0.9999986525 | 4.1739134531   |
| 0.6554771082 | 0.9999986525 | 0              |
| 0.7051410902 | 0.9999986525 | 278.0899599455 |
| 0.6406390851 | 0.9999986525 | 9.1534564649   |
| 0.2820550521 | 0.9999986525 | 27.3691560039  |
| 0.929433859  | 0.9999986525 | 8.822169586    |
| 0.8770466051 | 0.9999986525 | 16.7779443334  |
| 0.933238693  | 0.9999986525 | 23.337519627   |
| 0.4483257582 | 0.9999986525 | 33.8663645743  |
| 0.3209956418 | 0.9999986525 | 47.4876429218  |
| 0.4345144813 | 0.9999986525 | 14.199834619   |
| 0.903917215  | 0.9999986525 | 2.0114224103   |
| 0.8606410093 | 0.9999986525 | 0.8205314684   |
| 0.6447423226 | 0.9999986525 | 302.3535070205 |
| 0.9739379482 | 0.9999986525 | 25.0727831377  |
| 0.004284     | 0.9999986525 | 0              |
| 0.0204955243 | 0.9999986525 | 1.9325936119   |
| 0.9050604523 | 0.9999986525 | 0              |
| 0.9822431057 | 0.9999986525 | 0.8052375164   |
| 0.8995997157 | 0.9999986525 | 9.0965300235   |
| 0.2287885833 | 0.9999986525 | 2.4232681744   |
| 0.0655664292 | 0.9999986525 | 10.0490749346  |
| 0.5355509675 | 0.9999986525 | 178.5350646864 |
| 0.1156858148 | 0.9999986525 | 0              |
| 0.2083958331 | 0.9999986525 | 1.9206038935   |
| 0.0171318803 | 0.9999986525 | 2.8063649913   |
| 0.7675701424 | 0.9999986525 | 5.7589530002   |
| 0.4729816619 | 0.9999986525 | 0              |
| 0.496988561  | 0.9999986525 | 0              |
| 0.9770600384 | 0.9999986525 | 0.4412798609   |
| 0.6744274773 | 0.9999986525 | 6.7753583356   |

gene\_expression\_table

|              |              |                 |
|--------------|--------------|-----------------|
| 0.5601000165 | 0.9999986525 | 11.3809959621   |
| 0.9176527951 | 0.9999986525 | 1.1815194234    |
| 0.2709582675 | 0.9999986525 | 2.4714542546    |
| 0.3421389424 | 0.9999986525 | 0               |
| 0.1588490018 | 0.9999986525 | 0               |
| 0.0256471175 | 0.9999986525 | 0.7213833555    |
| 0.3059712082 | 0.9999986525 | 0.1791608061    |
| 0.297852298  | 0.9999986525 | 88.6996438225   |
| 0.1415660023 | 0.9999986525 | 52.3622934453   |
| 0.3462573323 | 0.9999986525 | 3.0745986451    |
| 0.6573569274 | 0.9999986525 | 1093.9859659042 |
| 0.2920432207 | 0.9999986525 | 21.0019557794   |
| 0.3861366059 | 0.9999986525 | 1.3219011896    |
| 0.0882190952 | 0.9999986525 | 0               |
| 0            | 0            | 0               |
| 0.1180324756 | 0.9999986525 | 0               |
| 0.5279029032 | 0.9999986525 | 13.4964653247   |
| 0.7952999852 | 0.9999986525 | 1.3581730758    |
| 0.6390165939 | 0.9999986525 | 0               |
| 0.7957266611 | 0.9999986525 | 0.6499534597    |
| 0.3161762916 | 0.9999986525 | 3.8355448398    |
| 0.4244914824 | 0.9999986525 | 4.4780327477    |
| 0.9805504146 | 0.9999986525 | 0               |
| 0.3499833314 | 0.9999986525 | 1.5132783324    |
| 0.6950671589 | 0.9999986525 | 174.702528484   |
| 0.5044586494 | 0.9999986525 | 0               |
| 0.4413704832 | 0.9999986525 | 0               |
| 0.009201     | 0.9999986525 | 1.2911517859    |
| 0.8972018608 | 0.9999986525 | 11.0327800765   |
| 0.5437202059 | 0.9999986525 | 5.6388979528    |
| 0.3167797566 | 0.9999986525 | 37.3233093388   |
| 0.7852305967 | 0.9999986525 | 8.7396852931    |
| 0.9544606777 | 0.9999986525 | 0               |
| 0.4252616642 | 0.9999986525 | 5.332764117     |
| 0.4872207477 | 0.9999986525 | 2.2304116823    |
| 0.005661     | 0.9999986525 | 361.5976404384  |
| 0.8384786812 | 0.9999986525 | 0               |
| 0.3331961438 | 0.9999986525 | 0               |
| 0.3174961243 | 0.9999986525 | 36.1451984905   |
| 0.0355339823 | 0.9999986525 | 70.889524823    |
| 0.5276695171 | 0.9999986525 | 2454.649094989  |
| 0.4874382814 | 0.9999986525 | 43.5100246269   |
| 0.860664349  | 0.9999986525 | 6.9018066045    |
| 0.7754852852 | 0.9999986525 | 2.802453529     |
| 0.8524016873 | 0.9999986525 | 19.8714575266   |
| 0.2001815163 | 0.9999986525 | 8.6339575325    |
| 0.0928986953 | 0.9999986525 | 0               |
| 0.1613561661 | 0.9999986525 | 54.0730477672   |
| 0.3645632248 | 0.9999986525 | 30.2542972463   |

gene\_expression\_table

|              |              |                |
|--------------|--------------|----------------|
| 0.9124291693 | 0.9999986525 | 6.8168981254   |
| 0.3773048325 | 0.9999986525 | 0              |
| 0.5324086245 | 0.9999986525 | 0              |
| 0.6312664098 | 0.9999986525 | 0              |
| 0.295950504  | 0.9999986525 | 47.6416257266  |
| 0.289893718  | 0.9999986525 | 776.6131985648 |
| 0.4419744863 | 0.9999986525 | 39.0908560415  |
| 0.0757049438 | 0.9999986525 | 892.0230801182 |
| 0.7435518353 | 0.9999986525 | 22.6590162127  |
| 0.5622876487 | 0.9999986525 | 0              |
| 0.1487321015 | 0.9999986525 | 1.7374599709   |
| 0.6796806758 | 0.9999986525 | 2.2019561487   |
| 0.2631856998 | 0.9999986525 | 0              |
| 0.0714329891 | 0.9999986525 | 26.1338602733  |
| 0.0330668892 | 0.9999986525 | 1.1419966317   |
| 0.3526823939 | 0.9999986525 | 0              |
| 0.7801426633 | 0.9999986525 | 0              |
| 0.0172348188 | 0.9999986525 | 10.4636406501  |
| 0.1157990125 | 0.9999986525 | 9.2927715354   |
| 0.3348103152 | 0.9999986525 | 0              |
| 0.0706916098 | 0.9999986525 | 6.7496700468   |
| 0.4437743144 | 0.9999986525 | 2.1704290492   |
| 0.5433675177 | 0.9999986525 | 2.3586276327   |
| 0.4294870321 | 0.9999986525 | 7.9719121851   |
| 0.1236352393 | 0.9999986525 | 67.4595621402  |
| 0.9293717861 | 0.9999986525 | 0              |
| 0.7019929104 | 0.9999986525 | 51.5492434536  |
| 0.3890761795 | 0.9999986525 | 0              |
| 0.6586859319 | 0.9999986525 | 28.5295582467  |
| 0.0816915423 | 0.9999986525 | 4.9055073239   |
| 0.2572171488 | 0.9999986525 | 0              |
| 0.8791669576 | 0.9999986525 | 0              |
| 0            | 0            | 0              |
| 0.3327047294 | 0.9999986525 | 31.6707880442  |
| 0.9336489641 | 0.9999986525 | 3.1066706146   |
| 0.6409168282 | 0.9999986525 | 13.032107345   |
| 0.3869771002 | 0.9999986525 | 0.4458545042   |
| 0.585262784  | 0.9999986525 | 24.1674427515  |
| 0.0127296413 | 0.9999986525 | 5.0191416704   |
| 0.004838     | 0.9999986525 | 11.5486537176  |
| 0.2397372358 | 0.9999986525 | 0              |
| 0.1760355844 | 0.9999986525 | 0              |
| 0.4458802453 | 0.9999986525 | 0              |
| 0.4881999538 | 0.9999986525 | 0              |
| 0.6076308211 | 0.9999986525 | 5.5159419312   |
| 0.2719904771 | 0.9999986525 | 7.3108967644   |
| 0.075129713  | 0.9999986525 | 192.6929214703 |
| 0.9207874573 | 0.9999986525 | 1.8821110519   |
| 0.769183151  | 0.9999986525 | 1.0458615832   |

gene\_expression\_table

|              |              |                |
|--------------|--------------|----------------|
| 0.8532902577 | 0.9999986525 | 25.2879665915  |
| 0.8827902622 | 0.9999986525 | 50.3195083142  |
| 0.267734218  | 0.9999986525 | 12.6284347595  |
| 0.4182299828 | 0.9999986525 | 5.1108182631   |
| 0.0214826181 | 0.9999986525 | 58.3966366943  |
| 0.5483163032 | 0.9999986525 | 0              |
| 0.0415446508 | 0.9999986525 | 0              |
| 0.4818203994 | 0.9999986525 | 0              |
| 0.7450573095 | 0.9999986525 | 3.1753922786   |
| 0.7821522534 | 0.9999986525 | 0              |
| 0.2882025207 | 0.9999986525 | 2.3834788218   |
| 0.9621627967 | 0.9999986525 | 29.9271388164  |
| 0.0236080922 | 0.9999986525 | 1.0497280614   |
| 0.7532140833 | 0.9999986525 | 0              |
| 0.9774441896 | 0.9999986525 | 5.0066913569   |
| 0.4318177909 | 0.9999986525 | 19.4168817008  |
| 0.9700572785 | 0.9999986525 | 41.6221772361  |
| 0.492588368  | 0.9999986525 | 6.533545893    |
| 0            | 0            | 0              |
| 0.2947647505 | 0.9999986525 | 5.8946298106   |
| 0.6581934196 | 0.9999986525 | 54.0019613766  |
| 0.5501864517 | 0.9999986525 | 0              |
| 0.8469342302 | 0.9999986525 | 7.3613378251   |
| 0.5393409987 | 0.9999986525 | 0              |
| 0.6233202677 | 0.9999986525 | 2.8949179565   |
| 0.7441851091 | 0.9999986525 | 0              |
| 0.5110903411 | 0.9999986525 | 5.9411376891   |
| 0.3519800592 | 0.9999986525 | 3.2792473519   |
| 0.6969165379 | 0.9999986525 | 4.3619027276   |
| 0.8831874997 | 0.9999986525 | 0              |
| 0.591109925  | 0.9999986525 | 6.2989943618   |
| 0.6435949706 | 0.9999986525 | 112.6576753974 |
| 0.6713135635 | 0.9999986525 | 0              |
| 0.1607505652 | 0.9999986525 | 19.4921270442  |
| 0.0727427402 | 0.9999986525 | 9.3031386694   |
| 0.0725400875 | 0.9999986525 | 0              |
| 0.1598720753 | 0.9999986525 | 0              |
| 0.8710635386 | 0.9999986525 | 16.993806476   |
| 0.0683058689 | 0.9999986525 | 117.993561721  |
| 0.1889254188 | 0.9999986525 | 0              |
| 0.6536428846 | 0.9999986525 | 748.2186754094 |
| 0.3509446465 | 0.9999986525 | 10.412838767   |
| 0.9035529349 | 0.9999986525 | 11.4482218309  |
| 0.2917459785 | 0.9999986525 | 0              |
| 0.2323865587 | 0.9999986525 | 5.8669093786   |
| 0.1804439167 | 0.9999986525 | 18.9410346299  |
| 0.3278332901 | 0.9999986525 | 0              |
| 0.7789350385 | 0.9999986525 | 2.1324309858   |
| 0.6389887457 | 0.9999986525 | 0              |

gene\_expression\_table

|              |              |                 |
|--------------|--------------|-----------------|
| 0.675370173  | 0.9999986525 | 4.3756353129    |
| 0.5084935008 | 0.9999986525 | 64.4268596844   |
| 0.7700002773 | 0.9999986525 | 0               |
| 0.30755387   | 0.9999986525 | 0               |
| 0.8465841633 | 0.9999986525 | 0.3836185616    |
| 0.2253995089 | 0.9999986525 | 0               |
| 0.6718933093 | 0.9999986525 | 0               |
| 0.3082099888 | 0.9999986525 | 57.1579201583   |
| 0.2883806156 | 0.9999986525 | 0               |
| 0.9747920884 | 0.9999986525 | 0               |
| 0.4729816619 | 0.9999986525 | 0               |
| 0.8749809911 | 0.9999986525 | 345.6731440712  |
| 0.4729816619 | 0.9999986525 | 0               |
| 0.3195082205 | 0.9999986525 | 8.8785270617    |
| 0.1378567246 | 0.9999986525 | 32.7223780832   |
| 0.7880597118 | 0.9999986525 | 3.5915619331    |
| 0.2294112342 | 0.9999986525 | 6062.6628023101 |
| 0.6772917921 | 0.9999986525 | 0               |
| 0.5146203386 | 0.9999986525 | 355.6702905127  |
| 0.485798293  | 0.9999986525 | 3.469681734     |
| 0.6312664098 | 0.9999986525 | 0               |
| 0.003547     | 0.9999986525 | 0               |
| 0.6635231276 | 0.9999986525 | 1.7973210036    |
| 0.5851103549 | 0.9999986525 | 33.7756884841   |
| 0.3501917558 | 0.9999986525 | 5.0257487369    |
| 0.5214268782 | 0.9999986525 | 105.5393196039  |
| 0.9024701352 | 0.9999986525 | 87.4991138101   |
| 0.4629538902 | 0.9999986525 | 0               |
| 0.6819161543 | 0.9999986525 | 7.058796876     |
| 0.1300087482 | 0.9999986525 | 0               |
| 0.6312664098 | 0.9999986525 | 0               |
| 0.9577839761 | 0.9999986525 | 0               |
| 0.2172987356 | 0.9999986525 | 0               |
| 0.2116184009 | 0.9999986525 | 1.9563246431    |
| 0.0214945266 | 0.9999986525 | 0.6425089961    |
| 0.7154144043 | 0.9999986525 | 0               |
| 0.4729816619 | 0.9999986525 | 0               |
| 0.5760025899 | 0.9999986525 | 16.8207905683   |
| 0.6034558956 | 0.9999986525 | 7.8726866254    |
| 0.0317531074 | 0.9999986525 | 54.0220476557   |
| 0.2405181231 | 0.9999986525 | 0               |
| 0.1579224669 | 0.9999986525 | 16.7932330379   |
| 0.6312664098 | 0.9999986525 | 0               |
| 0.6312664098 | 0.9999986525 | 0               |
| 0.1256800788 | 0.9999986525 | 0               |
| 0.7927157918 | 0.9999986525 | 12.4933128067   |
| 0.5561950675 | 0.9999986525 | 0               |
| 0.2663422736 | 0.9999986525 | 13.6611273219   |
| 0.1738540259 | 0.9999986525 | 0               |

gene\_expression\_table

|              |              |                |
|--------------|--------------|----------------|
| 0.7267663584 | 0.9999986525 | 12.7048155464  |
| 0.3573184973 | 0.9999986525 | 193.2323633758 |
| 0.9884622939 | 0.9999986525 | 0.8225442036   |
| 0.3298052387 | 0.9999986525 | 0.5544419063   |
| 0.8524141587 | 0.9999986525 | 0              |
| 0.9769302757 | 0.9999986525 | 0              |
| 0.4226774946 | 0.9999986525 | 24.3629108895  |
| 0.3474474659 | 0.9999986525 | 0              |
| 0.3122461567 | 0.9999986525 | 26.0149997831  |
| 0.5485753706 | 0.9999986525 | 0              |
| 0.8101925268 | 0.9999986525 | 4.5837457235   |
| 0.1953131844 | 0.9999986525 | 3.981448792    |
| 0.7846082949 | 0.9999986525 | 3.8897093754   |
| 0.9501130441 | 0.9999986525 | 4.4970979416   |
| 0.2122215339 | 0.9999986525 | 1.4647747456   |
| 0.8485560651 | 0.9999986525 | 346.8894464782 |
| 0.3179933875 | 0.9999986525 | 8.5017475061   |
| 0.3277158479 | 0.9999986525 | 0.3575659307   |
| 0.4729816619 | 0.9999986525 | 0              |
| 0.5188849004 | 0.9999986525 | 0              |
| 0.9450887686 | 0.9999986525 | 0              |
| 0.9892647244 | 0.9999986525 | 3.019922705    |
| 0.6534658777 | 0.9999986525 | 57.130440389   |
| 0.9327170056 | 0.9999986525 | 0              |
| 0.9298763483 | 0.9999986525 | 0              |
| 0.6876845709 | 0.9999986525 | 0              |
| 0.4764296226 | 0.9999986525 | 123.1093664949 |
| 0.3380377238 | 0.9999986525 | 0              |
| 0            | 0            | 0              |
| 0.2077382531 | 0.9999986525 | 5.2137863924   |
| 0.6950080455 | 0.9999986525 | 0              |
| 0.0722783654 | 0.9999986525 | 0              |
| 0.0320953349 | 0.9999986525 | 3.3342120092   |
| 0.5347243412 | 0.9999986525 | 0.2467444309   |
| 0.4792923021 | 0.9999986525 | 9.4058625514   |
| 0.6404227668 | 0.9999986525 | 2.435616963    |
| 0.1655086081 | 0.9999986525 | 2.263874072    |
| 0.3932523009 | 0.9999986525 | 18.9365070729  |
| 0.3987800878 | 0.9999986525 | 3.3805956021   |
| 0.2625403402 | 0.9999986525 | 7.7877107844   |
| 0.3244008868 | 0.9999986525 | 4.8267152464   |
| 0.6178429727 | 0.9999986525 | 7.7439762795   |
| 0.980493454  | 0.9999986525 | 13.7242381485  |
| 0.1826834251 | 0.9999986525 | 3.131755113    |
| 0.2861836753 | 0.9999986525 | 0.8628597279   |
| 0.586104864  | 0.9999986525 | 21.4098906382  |
| 0.8639907769 | 0.9999986525 | 2.3019287328   |
| 0.2037504091 | 0.9999986525 | 1.0349987894   |
| 0.719235589  | 0.9999986525 | 0              |



gene\_expression\_table

|              |              |                |
|--------------|--------------|----------------|
| 0.6215914123 | 0.9999986525 | 76.5360724811  |
| 0.3051142537 | 0.9999986525 | 0              |
| 0.2874182982 | 0.9999986525 | 0              |
| 0.8532943777 | 0.9999986525 | 0.3865328666   |
| 0.5758194186 | 0.9999986525 | 42.7418105663  |
| 0.3660428592 | 0.9999986525 | 26.2429407336  |
| 0.9085329269 | 0.9999986525 | 0              |
| 0            | 0            | 0              |
| 0.052285652  | 0.9999986525 | 0              |
| 0.928730095  | 0.9999986525 | 5.4823188069   |
| 0.2814192894 | 0.9999986525 | 3.2520885607   |
| 0.4181784865 | 0.9999986525 | 12.0506354334  |
| 0.8147693217 | 0.9999986525 | 14.4366063489  |
| 0.6917600049 | 0.9999986525 | 0              |
| 0.2628495573 | 0.9999986525 | 0              |
| 0.1374983584 | 0.9999986525 | 15.770841057   |
| 0.5648319154 | 0.9999986525 | 0              |
| 0.0009321    | 0.9999986525 | 1.0921105104   |
| 0.5979684136 | 0.9999986525 | 0              |
| 0.3479274819 | 0.9999986525 | 0              |
| 0.84457313   | 0.9999986525 | 21.7603768291  |
| 0.1805238717 | 0.9999986525 | 45.8025975278  |
| 0.6674620142 | 0.9999986525 | 39.7775041873  |
| 0.2563134896 | 0.9999986525 | 192.5103379121 |
| 0.9069535734 | 0.9999986525 | 5.8904660078   |
| 0.4468935717 | 0.9999986525 | 217.0859821399 |
| 0.2884442098 | 0.9999986525 | 1.9650959304   |
| 0.2912968014 | 0.9999986525 | 147.2559650278 |
| 0.7655217882 | 0.9999986525 | 114.1249583517 |
| 0.1547557771 | 0.9999986525 | 0              |
| 0.1818529048 | 0.9999986525 | 0              |
| 0.8505381394 | 0.9999986525 | 94.3155218076  |
| 0.8694162916 | 0.9999986525 | 1.6020723845   |
| 0.4042130361 | 0.9999986525 | 0              |
| 0.849481668  | 0.9999986525 | 88.1346316356  |
| 0.6746282237 | 0.9999986525 | 0              |
| 0.0296483841 | 0.9999986525 | 22.0643030949  |
| 0.513016383  | 0.9999986525 | 48.4028089078  |
| 0.1223171191 | 0.9999986525 | 70.8220285858  |
| 0.8847815443 | 0.9999986525 | 490.7655017456 |
| 0.5328123702 | 0.9999986525 | 133.1070467759 |
| 0.4644442936 | 0.9999986525 | 4.6462495141   |
| 0.0701406488 | 0.9999986525 | 0              |
| 0.3580190034 | 0.9999986525 | 22.6669176937  |
| 0.2074994238 | 0.9999986525 | 28.4404513874  |
| 0.2696706086 | 0.9999986525 | 0              |
| 0.3553972791 | 0.9999986525 | 0              |
| 0.8761199904 | 0.9999986525 | 52.8020377678  |
| 0.7707673247 | 0.9999986525 | 2.9089762456   |

gene\_expression\_table

|              |              |                 |
|--------------|--------------|-----------------|
| 0.3967504887 | 0.9999986525 | 4.9730619799    |
| 0.5892276919 | 0.9999986525 | 10.173440108    |
| 0.621162919  | 0.9999986525 | 0               |
| 0.4259809504 | 0.9999986525 | 0               |
| 0.5618628611 | 0.9999986525 | 0               |
| 0.627237929  | 0.9999986525 | 0               |
| 0.2036093187 | 0.9999986525 | 1.8534451036    |
| 0.6286553138 | 0.9999986525 | 11.5676246389   |
| 0.2238019175 | 0.9999986525 | 0.4897796408    |
| 0.3421695043 | 0.9999986525 | 0               |
| 0.7644337651 | 0.9999986525 | 0               |
| 0.4892951692 | 0.9999986525 | 221.3743243124  |
| 0.8809790223 | 0.9999986525 | 0.863918313     |
| 0.7076676636 | 0.9999986525 | 0               |
| 0.2206911466 | 0.9999986525 | 6.1418674528    |
| 0.4936046642 | 0.9999986525 | 1070.5523964793 |
| 0.8556233593 | 0.9999986525 | 13.3066057511   |
| 0.256238212  | 0.9999986525 | 17.237941383    |
| 0.0809490095 | 0.9999986525 | 74.364852473    |
| 0.772194576  | 0.9999986525 | 16.8745345474   |
| 0.1645030822 | 0.9999986525 | 177.6855084681  |
| 0.1569804634 | 0.9999986525 | 532.5936014754  |
| 0            | 0            | 0               |
| 0.0691421432 | 0.9999986525 | 25.4377797063   |
| 0.4577141762 | 0.9999986525 | 92.2715321709   |
| 0.8428134588 | 0.9999986525 | 2.9738403799    |
| 0.0701715794 | 0.9999986525 | 0               |
| 0.4063802868 | 0.9999986525 | 4.9179549517    |
| 0.6363306601 | 0.9999986525 | 0               |
| 0.4544433321 | 0.9999986525 | 14.4761767637   |
| 0            | 0            | 0               |
| 0.8854470878 | 0.9999986525 | 747.3667673534  |
| 0.7536968353 | 0.9999986525 | 13.3368480369   |
| 0.3796699848 | 0.9999986525 | 8.4787154       |
| 0.622758909  | 0.9999986525 | 0               |
| 0.8619987965 | 0.9999986525 | 64.4250735225   |
| 0.2324015399 | 0.9999986525 | 868.9999976794  |
| 0.7169806506 | 0.9999986525 | 392.9815865896  |
| 0.5977898212 | 0.9999986525 | 0.4438703889    |
| 0.318950863  | 0.9999986525 | 0               |
| 0.9844287684 | 0.9999986525 | 0               |
| 0.462317856  | 0.9999986525 | 0               |
| 0.2525246613 | 0.9999986525 | 1.4519689401    |
| 0.6897556792 | 0.9999986525 | 14.2011073478   |
| 0.6078956193 | 0.9999986525 | 2.6566357257    |
| 0.4301998799 | 0.9999986525 | 0.932947385     |
| 0.8501158083 | 0.9999986525 | 2.1223193983    |
| 0.4459084304 | 0.9999986525 | 43.9113072646   |
| 0.7312169421 | 0.9999986525 | 3.4865735108    |

gene\_expression\_table

|              |              |                |
|--------------|--------------|----------------|
| 0.7765041403 | 0.9999986525 | 36.5595446673  |
| 0.4158959081 | 0.9999986525 | 1.2076169165   |
| 0.1046897603 | 0.9999986525 | 0              |
| 0.0150929685 | 0.9999986525 | 8.0821960374   |
| 0.0859044975 | 0.9999986525 | 48.7340506293  |
| 0.9197000912 | 0.9999986525 | 6.3039888752   |
| 0.9219309964 | 0.9999986525 | 0              |
| 0.33805506   | 0.9999986525 | 0              |
| 0.9289541236 | 0.9999986525 | 28.6584376186  |
| 0.9655678901 | 0.9999986525 | 29.3802393337  |
| 0.7009610094 | 0.9999986525 | 0              |
| 0.1569457107 | 0.9999986525 | 95.4739057685  |
| 0            | 0            | 0              |
| 0.4565923288 | 0.9999986525 | 24.4094522691  |
| 0.8189829247 | 0.9999986525 | 0              |
| 0.5982427311 | 0.9999986525 | 66.5007597869  |
| 0.5160146056 | 0.9999986525 | 188.1655299126 |
| 0.1630711635 | 0.9999986525 | 5.7418915228   |
| 0.7811539533 | 0.9999986525 | 0.5283822381   |
| 0.6683434185 | 0.9999986525 | 1.6737099739   |
| 0.3812925443 | 0.9999986525 | 4.268941255    |
| 0.3616864129 | 0.9999986525 | 66.734796849   |
| 0.3050665215 | 0.9999986525 | 0              |
| 0.6556011434 | 0.9999986525 | 10.8793734115  |
| 0.7586108598 | 0.9999986525 | 3.6718405274   |
| 0.4772016051 | 0.9999986525 | 0              |
| 0.7396471468 | 0.9999986525 | 8.4252880635   |
| 0.4665817687 | 0.9999986525 | 0              |
| 0.6581225394 | 0.9999986525 | 206.958813725  |
| 0.3049228424 | 0.9999986525 | 0              |
| 0.1942097912 | 0.9999986525 | 28.1374098169  |
| 0.164722381  | 0.9999986525 | 0.426210856    |
| 0.5756138461 | 0.9999986525 | 1.8290851175   |
| 0.5219719501 | 0.9999986525 | 45.9691167432  |
| 0.6253396915 | 0.9999986525 | 0              |
| 0.1788949714 | 0.9999986525 | 25.3571721847  |
| 0.8977349665 | 0.9999986525 | 10.0406688643  |
| 0            | 0            | 0              |
| 0.005155     | 0.9999986525 | 1.7351025256   |
| 0.7938438707 | 0.9999986525 | 1.4477003454   |
| 0.7303597501 | 0.9999986525 | 1.0581194924   |
| 0.0907356776 | 0.9999986525 | 5.5696196389   |
| 0.1898658211 | 0.9999986525 | 0              |
| 0.8218879874 | 0.9999986525 | 76.5484363413  |
| 0.0213716838 | 0.9999986525 | 23.1752932246  |
| 0.3246334594 | 0.9999986525 | 0.1861874012   |
| 0.3099938696 | 0.9999986525 | 5.1335457063   |
| 0.8573542223 | 0.9999986525 | 0.3106280811   |
| 0.4868490141 | 0.9999986525 | 8.2862692683   |

gene\_expression\_table

|              |              |                |
|--------------|--------------|----------------|
| 0.5639218851 | 0.9999986525 | 19.0114896423  |
| 0.5602036278 | 0.9999986525 | 2.2917734097   |
| 0.1695458958 | 0.9999986525 | 0              |
| 0.4333265875 | 0.9999986525 | 0              |
| 0.4762289856 | 0.9999986525 | 15.2976135881  |
| 0.3502257966 | 0.9999986525 | 39.1794645596  |
| 0.9867457878 | 0.9999986525 | 1.6123433333   |
| 0.5521228414 | 0.9999986525 | 1.517445107    |
| 0.0393343822 | 0.9999986525 | 0              |
| 0.1105863416 | 0.9999986525 | 1.8263126584   |
| 0            | 0            | 0              |
| 0.3757221111 | 0.9999986525 | 1.699599398    |
| 0.2356264452 | 0.9999986525 | 0              |
| 0            | 0            | 0              |
| 0.364533022  | 0.9999986525 | 8.1111796086   |
| 0.3680177405 | 0.9999986525 | 12.5677603458  |
| 0.3318240821 | 0.9999986525 | 2.4071977314   |
| 0.1919262358 | 0.9999986525 | 0              |
| 0.0502528642 | 0.9999986525 | 1.4843848516   |
| 0.8870196233 | 0.9999986525 | 1.9616654246   |
| 0.3140103676 | 0.9999986525 | 0.1278530422   |
| 0            | 0            | 0              |
| 0.9599118054 | 0.9999986525 | 1.226861137    |
| 0.9003803373 | 0.9999986525 | 0              |
| 0.0532020695 | 0.9999986525 | 7.2886997276   |
| 0.0316420892 | 0.9999986525 | 0              |
| 0.5297563987 | 0.9999986525 | 118.5364565735 |
| 0.3294034513 | 0.9999986525 | 870.8835034523 |
| 0.6557359006 | 0.9999986525 | 49.7512323621  |
| 0.9601217925 | 0.9999986525 | 0              |
| 0.5630535714 | 0.9999986525 | 0              |
| 0.2253655523 | 0.9999986525 | 46.223252769   |
| 0.0769035624 | 0.9999986525 | 9.5228846423   |
| 0.1021934222 | 0.9999986525 | 9.6789059536   |
| 0.7425869806 | 0.9999986525 | 16.9737805645  |
| 0.0218216626 | 0.9999986525 | 41.7359931795  |
| 0.8784687825 | 0.9999986525 | 23.7152753598  |
| 0.8087219693 | 0.9999986525 | 0              |
| 0.2730684958 | 0.9999986525 | 0.5189333054   |
| 0.2756510666 | 0.9999986525 | 10.5374936605  |
| 0.9580414944 | 0.9999986525 | 0              |
| 0.2806583717 | 0.9999986525 | 21.5831296389  |
| 0.8462839515 | 0.9999986525 | 15.9414181184  |
| 0.5953710819 | 0.9999986525 | 73.5569891731  |
| 0.4936309138 | 0.9999986525 | 0              |
| 0.6253426382 | 0.9999986525 | 0              |
| 0.8611736583 | 0.9999986525 | 0              |
| 0.554184888  | 0.9999986525 | 16.1559859976  |
| 0.399265911  | 0.9999986525 | 26.132567158   |

gene\_expression\_table

|              |              |                  |
|--------------|--------------|------------------|
| 0.0828788341 | 0.9999986525 | 0                |
| 0.244789775  | 0.9999986525 | 0                |
| 0.149596095  | 0.9999986525 | 26.0584276434    |
| 0.3681709418 | 0.9999986525 | 3.9083784671     |
| 0.7471794011 | 0.9999986525 | 7.5073089163     |
| 0.8972226588 | 0.9999986525 | 0.9960567721     |
| 0.1381458467 | 0.9999986525 | 0                |
| 0.5796808462 | 0.9999986525 | 0.9381135782     |
| 0.2468341571 | 0.9999986525 | 0                |
| 0.6613855294 | 0.9999986525 | 264.2898326588   |
| 0.4729816619 | 0.9999986525 | 0                |
| 0.2651687448 | 0.9999986525 | 4.1703978385     |
| 0.4060978096 | 0.9999986525 | 4.934760169      |
| 0.2122760006 | 0.9999986525 | 0                |
| 0.5526315036 | 0.9999986525 | 0                |
| 0.7793466465 | 0.9999986525 | 0                |
| 0.4889071867 | 0.9999986525 | 10.8864748302    |
| 0.4715723117 | 0.9999986525 | 12.6306279514    |
| 0.4622262422 | 0.9999986525 | 8.3151882589     |
| 0.9298459429 | 0.9999986525 | 0                |
| 0.3363266888 | 0.9999986525 | 0                |
| 0.4729816619 | 0.9999986525 | 0                |
| 0.4007967059 | 0.9999986525 | 7.2485522581     |
| 0.675350827  | 0.9999986525 | 0                |
| 0.4325016936 | 0.9999986525 | 0                |
| 0.3152948914 | 0.9999986525 | 4.256140724      |
| 0.7731699712 | 0.9999986525 | 0                |
| 0.9918811508 | 0.9999986525 | 0                |
| 0.5467984646 | 0.9999986525 | 0                |
| 0.3123682331 | 0.9999986525 | 0                |
| 0.6546998827 | 0.9999986525 | 0                |
| 0.4834708274 | 0.9999986525 | 0                |
| 0.2768789399 | 0.9999986525 | 1.8535101504     |
| 0.645645764  | 0.9999986525 | 0                |
| 0.9211552442 | 0.9999986525 | 3.2393624938     |
| 0.217384768  | 0.9999986525 | 0                |
| 0.7794280057 | 0.9999986525 | 4.5131684883     |
| 0.3164943708 | 0.9999986525 | 0                |
| 0.6593074429 | 0.9999986525 | 0.079305536      |
| 0.2099251058 | 0.9999986525 | 35.8030121016    |
| 0.708154095  | 0.9999986525 | 6.0032870959     |
| 0.6312664098 | 0.9999986525 | 0                |
| 0.4779416008 | 0.9999986525 | 16.066047585     |
| 0.6312664098 | 0.9999986525 | 0                |
| 0.8431543161 | 0.9999986525 | 16558.8192458728 |
| 0.4729816619 | 0.9999986525 | 0                |
| 0.53206264   | 0.9999986525 | 0                |
| 0.7433245737 | 0.9999986525 | 4.2924185815     |
| 0.3489018326 | 0.9999986525 | 2.5507808851     |

gene\_expression\_table

|              |              |                |
|--------------|--------------|----------------|
| 0.4099966453 | 0.9999986525 | 11.7919795986  |
| 0.8897589434 | 0.9999986525 | 6.0970207771   |
| 0.8255178344 | 0.9999986525 | 0.3145501762   |
| 0.9183636222 | 0.9999986525 | 2.260676236    |
| 0.0859608274 | 0.9999986525 | 0              |
| 0.0982187657 | 0.9999986525 | 2.7011337796   |
| 0.071459762  | 0.9999986525 | 0              |
| 0.4890952033 | 0.9999986525 | 3.279552796    |
| 0.7006237045 | 0.9999986525 | 0              |
| 0.212827036  | 0.9999986525 | 2.9127999757   |
| 0.4070557708 | 0.9999986525 | 0              |
| 0.2201016585 | 0.9999986525 | 3.7891355246   |
| 0.6058130744 | 0.9999986525 | 0              |
| 0.9046353916 | 0.9999986525 | 4.2811971406   |
| 0.098549886  | 0.9999986525 | 5.8688652324   |
| 0.3771806075 | 0.9999986525 | 43.3953246407  |
| 0.7143551275 | 0.9999986525 | 0              |
| 0            | 0            | 0              |
| 0.2508195129 | 0.9999986525 | 9.802820023    |
| 0.6052257928 | 0.9999986525 | 8.1828478177   |
| 0.9067639374 | 0.9999986525 | 125.0543052482 |
| 0.4491723987 | 0.9999986525 | 0.21331717     |
| 0.5717198832 | 0.9999986525 | 0              |
| 0.8733335049 | 0.9999986525 | 3.0110557712   |
| 0.6312664098 | 0.9999986525 | 0              |
| 0.1806574216 | 0.9999986525 | 0.4561693447   |
| 0.7296640048 | 0.9999986525 | 0              |
| 0.1487549146 | 0.9999986525 | 0              |
| 0.3731516743 | 0.9999986525 | 2.8682951299   |
| 0.7789895887 | 0.9999986525 | 0              |
| 0.533374596  | 0.9999986525 | 74.1143954902  |
| 0.6153804157 | 0.9999986525 | 0              |
| 0.6055651011 | 0.9999986525 | 4.7787022164   |
| 0.8989632508 | 0.9999986525 | 0              |
| 0.8890028715 | 0.9999986525 | 0              |
| 0.2559000487 | 0.9999986525 | 109.7052135565 |
| 0.5232764432 | 0.9999986525 | 5.3889920302   |
| 0.7674900611 | 0.9999986525 | 1.1509810885   |
| 0.0367723354 | 0.9999986525 | 38.5362409532  |
| 0.2501562072 | 0.9999986525 | 64.2351166117  |
| 0.7844019026 | 0.9999986525 | 0.482611981    |
| 0.3212903801 | 0.9999986525 | 9.5418099777   |
| 0.0895818102 | 0.9999986525 | 5.0017916684   |
| 0.7017268607 | 0.9999986525 | 223.9337693875 |
| 0.2204325084 | 0.9999986525 | 240.7294544655 |
| 0.5588423763 | 0.9999986525 | 0              |
| 0.12599896   | 0.9999986525 | 2.4298460227   |
| 0.3582306959 | 0.9999986525 | 117.3003254408 |
| 0.6693494727 | 0.9999986525 | 8.6371666095   |

gene\_expression\_table

|              |              |                |
|--------------|--------------|----------------|
| 0.6881748527 | 0.9999986525 | 2.4783631265   |
| 0.9604255438 | 0.9999986525 | 0              |
| 0.8067252101 | 0.9999986525 | 13.9371852527  |
| 0.4294959808 | 0.9999986525 | 0              |
| 0.5795137305 | 0.9999986525 | 0              |
| 0.367225485  | 0.9999986525 | 0              |
| 0.6345882983 | 0.9999986525 | 1.3522093894   |
| 0.9517287663 | 0.9999986525 | 0              |
| 0.617611013  | 0.9999986525 | 0.0951434558   |
| 0.2964708694 | 0.9999986525 | 0              |
| 0.640428486  | 0.9999986525 | 4.5563608952   |
| 0.7192958924 | 0.9999986525 | 3.1582549395   |
| 0.8082947955 | 0.9999986525 | 0              |
| 0.2696701629 | 0.9999986525 | 0              |
| 0.101033881  | 0.9999986525 | 0              |
| 0.7082925104 | 0.9999986525 | 0              |
| 0.2013352109 | 0.9999986525 | 51.7682005747  |
| 0.3101866407 | 0.9999986525 | 8.3735254233   |
| 0            | 0            | 0              |
| 0.3346275799 | 0.9999986525 | 86.3980901108  |
| 0.4534852542 | 0.9999986525 | 10.177072594   |
| 0.4058838746 | 0.9999986525 | 3.0500068276   |
| 0.4105821661 | 0.9999986525 | 0              |
| 0.8876295118 | 0.9999986525 | 1.746954162    |
| 0.6878660093 | 0.9999986525 | 108.862611185  |
| 0.6912769194 | 0.9999986525 | 0.3877749801   |
| 0.3561831065 | 0.9999986525 | 0              |
| 0.8196252951 | 0.9999986525 | 17.6605645298  |
| 0.7194435866 | 0.9999986525 | 0              |
| 0.7001342106 | 0.9999986525 | 0              |
| 0.0397669085 | 0.9999986525 | 0              |
| 0.5306832024 | 0.9999986525 | 0.2205745046   |
| 0.5839494033 | 0.9999986525 | 1.9239342183   |
| 0.7677319425 | 0.9999986525 | 0              |
| 0.1574215211 | 0.9999986525 | 4.2574702319   |
| 0.3430127398 | 0.9999986525 | 0.3302479848   |
| 0.0302612956 | 0.9999986525 | 6.9725946566   |
| 0.8337417369 | 0.9999986525 | 0.3545343481   |
| 0.9299426082 | 0.9999986525 | 0              |
| 0.5259885728 | 0.9999986525 | 493.7528248203 |
| 0.3529620677 | 0.9999986525 | 10.1516421386  |
| 0.0490533814 | 0.9999986525 | 54.2705395067  |
| 0.2382114967 | 0.9999986525 | 17.4346515561  |
| 0.1478612031 | 0.9999986525 | 17.1318016823  |
| 0.6389607448 | 0.9999986525 | 0              |
| 0.934424874  | 0.9999986525 | 4.0645892789   |
| 0.2373639939 | 0.9999986525 | 53.682600304   |
| 0.6312664098 | 0.9999986525 | 0              |
| 0.7309770198 | 0.9999986525 | 856.5687692781 |

gene\_expression\_table

|              |              |                |
|--------------|--------------|----------------|
| 0.428289909  | 0.9999986525 | 8.6679662279   |
| 0.3040181261 | 0.9999986525 | 66.5206792376  |
| 0.4618817275 | 0.9999986525 | 71.4764084806  |
| 0.8172614054 | 0.9999986525 | 0              |
| 0.4966246612 | 0.9999986525 | 3.6242180975   |
| 0.2823109493 | 0.9999986525 | 35.740277222   |
| 0.3657615078 | 0.9999986525 | 13.358212181   |
| 0.4246448625 | 0.9999986525 | 327.186065946  |
| 0.2649998145 | 0.9999986525 | 4.6079412142   |
| 0.0879310326 | 0.9999986525 | 224.806051455  |
| 0.020323613  | 0.9999986525 | 34.2813957071  |
| 0.5113101983 | 0.9999986525 | 130.7445532638 |
| 0.2044129258 | 0.9999986525 | 19.6144686275  |
| 0.6193428295 | 0.9999986525 | 11.1865454178  |
| 0            | 0            | 0              |
| 0.3482251511 | 0.9999986525 | 56.2209050738  |
| 0.9166583912 | 0.9999986525 | 19.990128019   |
| 0.1209012722 | 0.9999986525 | 66.175316151   |
| 0.4049047083 | 0.9999986525 | 203.9832274064 |
| 0.7851682968 | 0.9999986525 | 33.4053878724  |
| 0.4602780669 | 0.9999986525 | 0              |
| 0.1325715181 | 0.9999986525 | 40.7043685752  |
| 0.7459206913 | 0.9999986525 | 3.5704379547   |
| 0.71474718   | 0.9999986525 | 18.274712189   |
| 0.2297175428 | 0.9999986525 | 5.9365939031   |
| 0.7759232551 | 0.9999986525 | 9.4623162638   |
| 0.2920697948 | 0.9999986525 | 0              |
| 0.9480906463 | 0.9999986525 | 450.3013734277 |
| 0.297789068  | 0.9999986525 | 0              |
| 0.3468347588 | 0.9999986525 | 0              |
| 0.6389325845 | 0.9999986525 | 0              |
| 0.9604571037 | 0.9999986525 | 17.5345014032  |
| 0.2617485486 | 0.9999986525 | 0              |
| 0.4746097439 | 0.9999986525 | 3.338005197    |
| 0.30755387   | 0.9999986525 | 0              |
| 0            | 0            | 0              |
| 0            | 0            | 5.5331501547   |
| 0.9680841511 | 0.9999986525 | 0              |
| 0.3108141438 | 0.9999986525 | 0.5980480036   |
| 0.7680452988 | 0.9999986525 | 3.1893425663   |
| 0.1030281555 | 0.9999986525 | 143.627594244  |
| 0.0121322217 | 0.9999986525 | 41.0364554983  |
| 0.546547849  | 0.9999986525 | 28.0229491827  |
| 0.6662413254 | 0.9999986525 | 0              |
| 0.5593711871 | 0.9999986525 | 0              |
| 0.9767467887 | 0.9999986525 | 2.1490912808   |
| 0.0662108659 | 0.9999986525 | 0.5526376074   |
| 0.6524388646 | 0.9999986525 | 30.4402986895  |
| 0.4834157868 | 0.9999986525 | 0              |



gene\_expression\_table

|              |              |                |
|--------------|--------------|----------------|
| 0.477029788  | 0.9999986525 | 643.4526747675 |
| 0.0684174569 | 0.9999986525 | 3.0738729131   |
| 0.5906447342 | 0.9999986525 | 9.4095492849   |
| 0.5308519205 | 0.9999986525 | 0.9188385015   |
| 0.2685694701 | 0.9999986525 | 0              |
| 0.2430232666 | 0.9999986525 | 75.7887305421  |
| 0.5734504714 | 0.9999986525 | 3.1242828206   |
| 0.6153767416 | 0.9999986525 | 19.9421435167  |
| 0.9277432054 | 0.9999986525 | 18.8240174265  |
| 0.4248939637 | 0.9999986525 | 0              |
| 0.0131479141 | 0.9999986525 | 62.9486510445  |
| 0.2802921113 | 0.9999986525 | 0              |
| 0.1756919731 | 0.9999986525 | 0              |
| 0.1718566512 | 0.9999986525 | 2.9188636137   |
| 0.9391828831 | 0.9999986525 | 0              |
| 0.7705219059 | 0.9999986525 | 0              |
| 0.2295707982 | 0.9999986525 | 9.8680714175   |
| 0.1528427059 | 0.9999986525 | 0              |
| 0.00273      | 0.9999986525 | 61.8068089249  |
| 0.5609715237 | 0.9999986525 | 111.7163791144 |
| 0.391842174  | 0.9999986525 | 0.1437755032   |
| 0.1276311481 | 0.9999986525 | 18.7217008955  |
| 0.3944115248 | 0.9999986525 | 0              |
| 0.3731238664 | 0.9999986525 | 308.2524410096 |
| 0.0662580932 | 0.9999986525 | 0.3496244396   |
| 0.4933868237 | 0.9999986525 | 5.1206048309   |
| 0.4729816619 | 0.9999986525 | 0              |
| 0.2117929662 | 0.9999986525 | 0              |
| 0.1032421579 | 0.9999986525 | 30.8922806273  |
| 0.8953418243 | 0.9999986525 | 70.1663257451  |
| 0.2622540445 | 0.9999986525 | 2.8721948133   |
| 0.0902254532 | 0.9999986525 | 2.8532640857   |
| 0.0478135455 | 0.9999986525 | 3.3779721024   |
| 0.3254080984 | 0.9999986525 | 4.0107775081   |
| 0.7663602533 | 0.9999986525 | 22.0747829577  |
| 0.1256851781 | 0.9999986525 | 0.1247358758   |
| 0.692369315  | 0.9999986525 | 14.4581233738  |
| 0.338072421  | 0.9999986525 | 0              |
| 0.1157853793 | 0.9999986525 | 0              |
| 0.1854794537 | 0.9999986525 | 0              |
| 0.6411913928 | 0.9999986525 | 43.054824641   |
| 0.7000881567 | 0.9999986525 | 4.8417600134   |
| 0.8449979192 | 0.9999986525 | 0              |
| 0.8226633074 | 0.9999986525 | 70.7661809802  |
| 0.115594451  | 0.9999986525 | 14.3010880656  |
| 0.3281788989 | 0.9999986525 | 0              |
| 0.4531150242 | 0.9999986525 | 212.3549219128 |
| 0.4165742598 | 0.9999986525 | 4.4197596742   |
| 0.3473313164 | 0.9999986525 | 0              |

gene\_expression\_table

|              |              |                 |
|--------------|--------------|-----------------|
| 0.2720197809 | 0.9999986525 | 43.9046512944   |
| 0.3220518827 | 0.9999986525 | 179.2094905604  |
| 0.7564336002 | 0.9999986525 | 12.890875818    |
| 0.9868706507 | 0.9999986525 | 16.407426543    |
| 0.683991682  | 0.9999986525 | 14.7951960668   |
| 0.9891334423 | 0.9999986525 | 0               |
| 0.3476271597 | 0.9999986525 | 40.5481138014   |
| 0.404155981  | 0.9999986525 | 0               |
| 0.0111163023 | 0.9999986525 | 0.2180465135    |
| 0.0329234885 | 0.9999986525 | 0               |
| 0.0302192194 | 0.9999986525 | 48.1028457688   |
| 0.0747965103 | 0.9999986525 | 3.2090509197    |
| 0.3888787229 | 0.9999986525 | 6.1497343067    |
| 0.8531388119 | 0.9999986525 | 3379.0094834491 |
| 0.2479206962 | 0.9999986525 | 9.516021302     |
| 0.9133977633 | 0.9999986525 | 1.300899508     |
| 0.2675025074 | 0.9999986525 | 0               |
| 0.8284331923 | 0.9999986525 | 33.3726695689   |
| 0.7289603778 | 0.9999986525 | 2.0476661876    |
| 0.238268051  | 0.9999986525 | 0               |
| 0.4141207025 | 0.9999986525 | 0               |
| 0.1694150976 | 0.9999986525 | 157.0090471239  |
| 0.7526790586 | 0.9999986525 | 0               |
| 0.2942995921 | 0.9999986525 | 3.1906969987    |
| 0.1976722731 | 0.9999986525 | 4.5789106186    |
| 0.1946206224 | 0.9999986525 | 544.1055584876  |
| 0.4273980459 | 0.9999986525 | 0.3779441694    |
| 0.1021718059 | 0.9999986525 | 2045.8311589453 |
| 0.3707717982 | 0.9999986525 | 452.1779485372  |
| 0.6825244968 | 0.9999986525 | 26.5797273409   |
| 0.4534639726 | 0.9999986525 | 0.9393482895    |
| 0.3330470276 | 0.9999986525 | 0               |
| 0            | 0            | 0               |
| 0.3995414934 | 0.9999986525 | 0.3765725119    |
| 0.0145775071 | 0.9999986525 | 0.598512253     |
| 0.1306359404 | 0.9999986525 | 3.8213990282    |
| 0.6699214067 | 0.9999986525 | 0.5903239021    |
| 0.8280995194 | 0.9999986525 | 0               |
| 0.6732013639 | 0.9999986525 | 0.8500732602    |
| 0.1748386618 | 0.9999986525 | 0               |
| 0.892698194  | 0.9999986525 | 0.1251631805    |
| 0.9547380368 | 0.9999986525 | 0.5189503022    |
| 0.9006590623 | 0.9999986525 | 0               |
| 0.6312664098 | 0.9999986525 | 0               |
| 0            | 0            | 0               |
| 0.4835003922 | 0.9999986525 | 2.4956959752    |
| 0.7930890357 | 0.9999986525 | 5.1073997382    |
| 0.8752800465 | 0.9999986525 | 0               |
| 0.0127103771 | 0.9999986525 | 0               |

gene\_expression\_table

|              |              |                 |
|--------------|--------------|-----------------|
| 0.3511554883 | 0.9999986525 | 2.3328217596    |
| 0.716860987  | 0.9999986525 | 3.7864415796    |
| 0.004821     | 0.9999986525 | 0               |
| 0.9293947617 | 0.9999986525 | 0               |
| 0.6783082938 | 0.9999986525 | 95.6196467586   |
| 0.464578041  | 0.9999986525 | 3.8317232087    |
| 0.5061069607 | 0.9999986525 | 1314.0784971788 |
| 0.002257     | 0.9999986525 | 0               |
| 0.2453425579 | 0.9999986525 | 5.1661858776    |
| 0.5898225476 | 0.9999986525 | 228.5555715519  |
| 0.5054697833 | 0.9999986525 | 0               |
| 0            | 0            | 0               |
| 0.013208043  | 0.9999986525 | 21.1594223663   |
| 0.7902360292 | 0.9999986525 | 0.8922324975    |
| 0.7109554629 | 0.9999986525 | 0               |
| 0.218327334  | 0.9999986525 | 0               |
| 0.4370584874 | 0.9999986525 | 1.6645839078    |
| 0.6929029977 | 0.9999986525 | 3392.3297601282 |
| 0.5700469523 | 0.9999986525 | 45.8613392031   |
| 0.6235630001 | 0.9999986525 | 72.051730186    |
| 0.8790239337 | 0.9999986525 | 275.3114764186  |
| 0            | 0            | 0               |
| 0.4557412286 | 0.9999986525 | 1.827028686     |
| 0.3254064616 | 0.9999986525 | 6.8008341995    |
| 0.639508878  | 0.9999986525 | 0               |
| 0.006657     | 0.9999986525 | 3.5830685274    |
| 0            | 0            | 0               |
| 0.2266164324 | 0.9999986525 | 3.7099498254    |
| 0.4271576648 | 0.9999986525 | 0               |
| 0.6395347551 | 0.9999986525 | 0               |
| 0.4922782583 | 0.9999986525 | 100.4733214056  |
| 0.2334958428 | 0.9999986525 | 18.9477315074   |
| 0.4729816619 | 0.9999986525 | 0               |
| 0.0593590474 | 0.9999986525 | 106.4796738434  |
| 0.1717816017 | 0.9999986525 | 1.6059696596    |
| 0.4981819087 | 0.9999986525 | 0               |
| 0.8961337284 | 0.9999986525 | 29.6108534572   |
| 0.3868696651 | 0.9999986525 | 0               |
| 0.7125511734 | 0.9999986525 | 8.6040442839    |
| 0.338089807  | 0.9999986525 | 0               |
| 0.4447474069 | 0.9999986525 | 0.5802898292    |
| 0.2934404282 | 0.9999986525 | 419.1580811612  |
| 0.2097628806 | 0.9999986525 | 2.146488418     |
| 0.6389042565 | 0.9999986525 | 0               |
| 0.5976790054 | 0.9999986525 | 0               |
| 0.620638912  | 0.9999986525 | 0               |
| 0            | 0            | 0               |
| 0.4729816619 | 0.9999986525 | 0               |
| 0.6388757535 | 0.9999986525 | 0               |

gene\_expression\_table

|              |              |                 |
|--------------|--------------|-----------------|
| 0            | 0            | 0               |
| 0.9294176909 | 0.9999986525 | 0               |
| 0.4639141655 | 0.9999986525 | 0.5079970974    |
| 0.119757679  | 0.9999986525 | 1.9406790985    |
| 0.6627894132 | 0.9999986525 | 1.5630043867    |
| 0.9221649463 | 0.9999986525 | 3.279552796     |
| 0            | 0            | 0               |
| 0.028818051  | 0.9999986525 | 102.7758077865  |
| 0.8831943229 | 0.9999986525 | 0               |
| 0.6844724942 | 0.9999986525 | 2.8711538612    |
| 0.0788323282 | 0.9999986525 | 1638.870335351  |
| 0.7846104881 | 0.9999986525 | 17.4201152253   |
| 0.0616633728 | 0.9999986525 | 63.6120665177   |
| 0.721786791  | 0.9999986525 | 17.4803348057   |
| 0.897760468  | 0.9999986525 | 7.4819774169    |
| 0.003698     | 0.9999986525 | 132.8652030851  |
| 0.4878607087 | 0.9999986525 | 2939.7972325351 |
| 0.7288758512 | 0.9999986525 | 11.0679236821   |
| 0.3752256748 | 0.9999986525 | 244.3203618796  |
| 0.4730638327 | 0.9999986525 | 787.4624245344  |
| 0.5490586203 | 0.9999986525 | 11.2832170542   |
| 0.8398629181 | 0.9999986525 | 77.1146825717   |
| 0.948343335  | 0.9999986525 | 0               |
| 0.4636341448 | 0.9999986525 | 57.5523990842   |
| 0.985160795  | 0.9999986525 | 41.4497723163   |
| 0.8097997561 | 0.9999986525 | 0.8719052751    |
| 0.3612302784 | 0.9999986525 | 156.4784392613  |
| 0.5119216196 | 0.9999986525 | 23.7060189927   |
| 0.3939079226 | 0.9999986525 | 73.3908886244   |
| 0.0585748987 | 0.9999986525 | 35.3901618671   |
| 0            | 0            | 0               |
| 0.6312664098 | 0.9999986525 | 0               |
| 0.8259977367 | 0.9999986525 | 9.1681141728    |
| 0.1630330245 | 0.9999986525 | 6.8250152781    |
| 0.2621480477 | 0.9999986525 | 4.831776441     |
| 0.8620355816 | 0.9999986525 | 0               |
| 0.638847067  | 0.9999986525 | 0               |
| 0.4071035853 | 0.9999986525 | 0               |
| 0.4386155464 | 0.9999986525 | 2.648420471     |
| 0.6879206002 | 0.9999986525 | 5.4458566948    |
| 0.8690696804 | 0.9999986525 | 6.9101031305    |
| 0.6952887953 | 0.9999986525 | 1.2993312723    |
| 0.1898975429 | 0.9999986525 | 8.9356092084    |
| 0.453529012  | 0.9999986525 | 0               |
| 0.287921091  | 0.9999986525 | 2.3065868116    |
| 0.8775850171 | 0.9999986525 | 1.4227887453    |
| 0.6829147061 | 0.9999986525 | 2.8918533771    |
| 0.881847807  | 0.9999986525 | 0               |
| 0.5624127294 | 0.9999986525 | 1.5777594021    |

gene\_expression\_table

|              |              |                |
|--------------|--------------|----------------|
| 0.5472064358 | 0.9999986525 | 13.9289454663  |
| 0.2360083669 | 0.9999986525 | 0.1879579136   |
| 0.0198533561 | 0.9999986525 | 3.0049453729   |
| 0.0430852301 | 0.9999986525 | 3.2092069166   |
| 0.0426871268 | 0.9999986525 | 2.1875095565   |
| 0.1880796127 | 0.9999986525 | 0              |
| 0.6395605865 | 0.9999986525 | 0              |
| 0.3593891183 | 0.9999986525 | 0              |
| 0.3166671984 | 0.9999986525 | 0.4695593105   |
| 0.5222832035 | 0.9999986525 | 0.9519280155   |
| 0.008497     | 0.9999986525 | 11.7294754722  |
| 0.1725068002 | 0.9999986525 | 0              |
| 0.0758134545 | 0.9999986525 | 5.7267414132   |
| 0.3675249032 | 0.9999986525 | 0              |
| 0.7846016999 | 0.9999986525 | 3.8106654805   |
| 0.5685342499 | 0.9999986525 | 1.8110837312   |
| 0.5805637142 | 0.9999986525 | 2.7342057479   |
| 0.6634450278 | 0.9999986525 | 1.7062616944   |
| 0.8246729596 | 0.9999986525 | 48.8031838449  |
| 0.6664757558 | 0.9999986525 | 2.1802011019   |
| 0.9033330835 | 0.9999986525 | 0              |
| 0.2126323087 | 0.9999986525 | 9.766112979    |
| 0.2425554386 | 0.9999986525 | 41.1136567445  |
| 0.6312664098 | 0.9999986525 | 0              |
| 0.8614510808 | 0.9999986525 | 5.9131938415   |
| 0.9661122463 | 0.9999986525 | 104.834738863  |
| 0.8580059721 | 0.9999986525 | 0.7663891238   |
| 0.668381481  | 0.9999986525 | 9.436593603    |
| 0.731739938  | 0.9999986525 | 1.9011299545   |
| 0.5035032699 | 0.9999986525 | 22.3432758229  |
| 0.4352992079 | 0.9999986525 | 61.0399490004  |
| 0.4519447773 | 0.9999986525 | 32.144807198   |
| 0.341247858  | 0.9999986525 | 0              |
| 0.6351355523 | 0.9999986525 | 11.9498641234  |
| 0.002927     | 0.9999986525 | 10.7790839294  |
| 0.4071515035 | 0.9999986525 | 0              |
| 0.7392941778 | 0.9999986525 | 0              |
| 0.6588373372 | 0.9999986525 | 0              |
| 0.8115682595 | 0.9999986525 | 5.1270671028   |
| 0.5151405373 | 0.9999986525 | 10.7636249131  |
| 0.138676319  | 0.9999986525 | 51.4354482142  |
| 0.8357119069 | 0.9999986525 | 408.1637708357 |
| 0.5482185887 | 0.9999986525 | 15.3931559972  |
| 0.4707332219 | 0.9999986525 | 20.632048686   |
| 0.9732347254 | 0.9999986525 | 1.4018292827   |
| 0.850274252  | 0.9999986525 | 0              |
| 0.1737345907 | 0.9999986525 | 20.2662771398  |
| 0            | 0            | 0              |
| 0.1114423472 | 0.9999986525 | 30.9478532117  |

gene\_expression\_table

|              |              |                 |
|--------------|--------------|-----------------|
| 0.6529422942 | 0.9999986525 | 0               |
| 0.3163251725 | 0.9999986525 | 0               |
| 0.7671868155 | 0.9999986525 | 13.7973400687   |
| 0.4163357932 | 0.9999986525 | 3.2374859839    |
| 0.4029920991 | 0.9999986525 | 61.0131464447   |
| 0            | 0            | 0               |
| 0.4071995245 | 0.9999986525 | 0               |
| 0.3757751813 | 0.9999986525 | 6.3654234333    |
| 0.5072771216 | 0.9999986525 | 111.0496734505  |
| 0.9736941237 | 0.9999986525 | 2.6546327332    |
| 0.3702267844 | 0.9999986525 | 0               |
| 0            | 0            | 0               |
| 0.1824378713 | 0.9999986525 | 30.1518144704   |
| 0.5982483306 | 0.9999986525 | 925.2784198247  |
| 0.1525941222 | 0.9999986525 | 0               |
| 0.1414112935 | 0.9999986525 | 106.2710560021  |
| 0.4229130698 | 0.9999986525 | 198.2504437925  |
| 0.0790345996 | 0.9999986525 | 11.0976924199   |
| 0.1884970355 | 0.9999986525 | 69.6122161316   |
| 0.1935406499 | 0.9999986525 | 9.9125221896    |
| 0.8174387995 | 0.9999986525 | 702.2380361971  |
| 0.3656450521 | 0.9999986525 | 2.086626912     |
| 0.6312664098 | 0.9999986525 | 0               |
| 0.569428475  | 0.9999986525 | 0               |
| 0.6447750495 | 0.9999986525 | 0               |
| 0.3784361918 | 0.9999986525 | 224.5248917319  |
| 0.1102271766 | 0.9999986525 | 2263.1237368511 |
| 0.2621816205 | 0.9999986525 | 0               |
| 0.8011796603 | 0.9999986525 | 4101.5721289204 |
| 0.2922810747 | 0.9999986525 | 0               |
| 0.4763443132 | 0.9999986525 | 10.234263778    |
| 0.9906633513 | 0.9999986525 | 107.1547922421  |
| 0.394970741  | 0.9999986525 | 32.2281728307   |
| 0.5923482056 | 0.9999986525 | 40.4456411597   |
| 0.4128647692 | 0.9999986525 | 0               |
| 0.5511949577 | 0.9999986525 | 1312.3673434342 |
| 0.2967126046 | 0.9999986525 | 214.5453685564  |
| 0.2471355973 | 0.9999986525 | 46.8070176304   |
| 0.6743566875 | 0.9999986525 | 20.9350582604   |
| 0.1545254146 | 0.9999986525 | 13.0428889859   |
| 0.4688151847 | 0.9999986525 | 20.8412006856   |
| 0            | 0            | 0               |
| 0.4072476489 | 0.9999986525 | 0               |
| 0.3164003348 | 0.9999986525 | 0               |
| 0.0483826203 | 0.9999986525 | 233.1896309163  |
| 0.2939517545 | 0.9999986525 | 17.7069462091   |
| 0.7250205797 | 0.9999986525 | 0.5650481258    |
| 0.737724677  | 0.9999986525 | 279.274538212   |
| 0.3852930458 | 0.9999986525 | 29.8007371829   |

gene\_expression\_table

|              |              |                |
|--------------|--------------|----------------|
| 0.5166134243 | 0.9999986525 | 10.9447556163  |
| 0.8832774416 | 0.9999986525 | 13.3551559708  |
| 0.1737966975 | 0.9999986525 | 25.8921975663  |
| 0.3306093013 | 0.9999986525 | 0              |
| 0.337031408  | 0.9999986525 | 0              |
| 0.6312664098 | 0.9999986525 | 0              |
| 0.3941207814 | 0.9999986525 | 1.704293275    |
| 0.1191413927 | 0.9999986525 | 5.9161054182   |
| 0.4509617304 | 0.9999986525 | 0              |
| 0.1575894525 | 0.9999986525 | 1.9541892336   |
| 0.3524254763 | 0.9999986525 | 11.2609633745  |
| 0.7441417219 | 0.9999986525 | 0              |
| 0.9399775168 | 0.9999986525 | 0              |
| 0.7902325318 | 0.9999986525 | 0.9381135782   |
| 0.6459339676 | 0.9999986525 | 1.1452654934   |
| 0.7238275977 | 0.9999986525 | 334.7671213678 |
| 0.6312664098 | 0.9999986525 | 0              |
| 0.9807198019 | 0.9999986525 | 2.0851989192   |
| 0.2110850052 | 0.9999986525 | 2.8198629537   |
| 0.5767755496 | 0.9999986525 | 14.4986964384  |
| 0.8045619057 | 0.9999986525 | 0              |
| 0.9278209976 | 0.9999986525 | 3.6288249434   |
| 0.6614172283 | 0.9999986525 | 4.2102093171   |
| 0.4027195567 | 0.9999986525 | 0.0711600453   |
| 0            | 0            | 0              |
| 0.4827414207 | 0.9999986525 | 0.4226787266   |
| 0.2027879779 | 0.9999986525 | 5.9161054182   |
| 0.918482814  | 0.9999986525 | 0              |

gene\_expression\_table

| LZ2_U937_0H_R1_001 trimmed (GE) - TPM | C3_U937_0H_R1_001 trimmed (GE) - TPM |
|---------------------------------------|--------------------------------------|
| 0                                     | 0                                    |
| 3.2235207617                          | 2.5522065813                         |
| 1.2667179986                          | 0                                    |
| 0                                     | 0                                    |
| 23.1941041125                         | 13.9914795717                        |
| 15.584893617                          | 4.7006713346                         |
| 0                                     | 0                                    |
| 13.9551008204                         | 0                                    |
| 298.8652457825                        | 1450.480989121                       |
| 7.6964601101                          | 12.0956346724                        |
| 1.6822388917                          | 4.5665290361                         |
| 1.6893484522                          | 2.2929141626                         |
| 0                                     | 0                                    |
| 127.9998483991                        | 97.5333489219                        |
| 292.5324893784                        | 198.5238412535                       |
| 0                                     | 0                                    |
| 92.1800780412                         | 104.5925888808                       |
| 0                                     | 3.4098584873                         |
| 3.7550013918                          | 4.2471481931                         |
| 32.7761249532                         | 38.1311036554                        |
| 28.9507369001                         | 27.2036599993                        |
| 28.1865402709                         | 12.752316294                         |
| 0                                     | 0                                    |
| 30.5165293418                         | 34.2781158284                        |
| 0                                     | 0                                    |
| 452.4710761326                        | 478.9431231644                       |
| 38.5413915966                         | 43.5927938767                        |
| 312.3748093944                        | 265.596172633                        |
| 0                                     | 0                                    |
| 6.5729689792                          | 5.2478476653                         |
| 38.1820100491                         | 22.2519293346                        |
| 2.6133007178                          | 0                                    |
| 22.8450168986                         | 18.6837177307                        |
| 13.9684613765                         | 31.5984572603                        |
| 1.8919870204                          | 3.4239344987                         |
| 0                                     | 0                                    |
| 15.4116155684                         | 6.9726115529                         |
| 0.4657342838                          | 1.6856814177                         |
| 2.6308538805                          | 5.3561970423                         |
| 30.3356274426                         | 30.568468799                         |
| 24.4139206188                         | 13.97592114                          |
| 19.9895911164                         | 15.2185417033                        |
| 0                                     | 0                                    |
| 0                                     | 0                                    |
| 0                                     | 7.7113524786                         |
| 0                                     | 0                                    |
| 0                                     | 0                                    |
| 18.4996507706                         | 0                                    |



gene\_expression\_table

|                |                |
|----------------|----------------|
| 8.7764404809   | 9.8099339836   |
| 3.0426156409   | 4.0486989056   |
| 0              | 0.1872627334   |
| 78.4689265437  | 70.068477691   |
| 0              | 0              |
| 0              | 0              |
| 2.4185088807   | 1.4589275548   |
| 5.9212897353   | 6.6973597014   |
| 37.0933675621  | 47.5489835884  |
| 0.0394755853   | 0              |
| 0              | 0              |
| 105.0257086744 | 113.0118209159 |
| 28.6656429603  | 30.0336466319  |
| 0              | 0.6313873259   |
| 0              | 0              |
| 49.2756023903  | 63.2326167996  |
| 1.9321594333   | 2.6224759748   |
| 16.5051738625  | 16.801572311   |
| 49.6749574854  | 28.3885001918  |
| 1.462763969    | 0.5090708221   |
| 10.5845446546  | 14.3055445775  |
| 0              | 0              |
| 673.5410294398 | 717.9628316455 |
| 0              | 0              |
| 56.2218294174  | 41.9474219739  |
| 2.1408742344   | 0.9685866063   |
| 4.2814178192   | 3.9759958476   |
| 22.3773894291  | 18.2630948633  |
| 0              | 0              |
| 3.1410243074   | 2.842160483    |
| 39.5459475118  | 43.3735866722  |
| 39.5165042965  | 29.3714659699  |
| 58.6695803273  | 67.5655990521  |
| 0.8615455149   | 1.3642487799   |
| 0.3112520392   | 0.2682255879   |
| 24.4028910303  | 25.9776376296  |
| 3.3542015322   | 5.4197396601   |
| 0.6506544235   | 0              |
| 0.5345322553   | 0              |
| 171.0375403295 | 148.6177251654 |
| 1.9965867818   | 3.6132289958   |
| 1.9091170971   | 1.4767060242   |
| 730.5915251434 | 733.3136915145 |
| 0              | 0              |
| 0              | 0              |
| 6.717932697    | 3.7407577363   |
| 0.5659228854   | 0              |
| 8.3779829937   | 5.7758706925   |
| 0.5710319986   | 0.6889321962   |

gene\_expression\_table

|                |                |
|----------------|----------------|
| 3.0322254051   | 6.0971414125   |
| 8.4060252973   | 9.1274452844   |
| 11.4357083536  | 10.3476175911  |
| 19.4091028946  | 21.686847976   |
| 6.5689327376   | 6.4968302079   |
| 7.9949388184   | 5.7448314499   |
| 23.2729049432  | 14.8648393451  |
| 1.897735016    | 1.2265488083   |
| 0              | 0              |
| 1.1809270044   | 1.2466574678   |
| 1.7074580051   | 1.5449958974   |
| 43.3905067888  | 64.4141599234  |
| 18.3609349162  | 24.9208786094  |
| 0              | 0              |
| 25.5405827707  | 5.7776085091   |
| 20.6245621513  | 23.0532632887  |
| 0.7491060647   | 1.1862020255   |
| 0.8203062388   | 1.2370921859   |
| 118.141419368  | 106.9004377778 |
| 0              | 0              |
| 480.8147973992 | 471.321477747  |
| 12.2686534151  | 7.5330312158   |
| 2.3378355971   | 1.1846206357   |
| 14.3793451955  | 11.5098826882  |
| 0.249705761    | 0              |
| 0              | 2.949142286    |
| 2.8435115782   | 12.8647782531  |
| 31.1879451492  | 24.4068827886  |
| 0.4152925512   | 0              |
| 28.8085844165  | 28.7641270639  |
| 7.8772276914   | 0              |
| 1.9690218235   | 2.1380067656   |
| 211.1410221995 | 229.6474810348 |
| 11.4219065723  | 12.9189112862  |
| 15.3187948634  | 12.6731283692  |
| 7.9739541969   | 6.1844950547   |
| 39.3439763804  | 61.8323694331  |
| 1.2416674283   | 0.7958299293   |
| 0.2891869085   | 0.7850136036   |
| 10.5725057303  | 19.1330948454  |
| 2.3121204243   | 2.3013381384   |
| 0.0119135385   | 0.140139778    |
| 0.2143610759   | 0.3879298721   |
| 0              | 0              |
| 29.9663764549  | 35.5078952215  |
| 1.3501811871   | 0              |
| 0              | 0.8592707266   |
| 0.9535985561   | 0.8628650617   |
| 1.3061044916   | 1.575774104    |

gene\_expression\_table

|                 |                |
|-----------------|----------------|
| 0.9743811073    | 2.3511204903   |
| 0               | 0              |
| 0               | 0.3027943909   |
| 18.8827324086   | 0              |
| 6.3001526712    | 6.4442723327   |
| 0               | 0              |
| 0               | 0              |
| 0               | 0              |
| 1274.5961369222 | 858.8554656458 |
| 2.3636045081    | 1.853549559    |
| 1.2774391117    | 1.5411902222   |
| 3.9315704413    | 6.2256028095   |
| 1.4874154254    | 0              |
| 0               | 0              |
| 1.5190496818    | 0.7497350988   |
| 16.8785013875   | 10.6059284066  |
| 18.0318960701   | 12.9169819982  |
| 0               | 0              |
| 5.131421918     | 4.6431747002   |
| 0               | 0              |
| 8.8900525486    | 6.7034809807   |
| 0.7431521227    | 0.6724422957   |
| 5.6083251615    | 2.5373506522   |
| 18.5210473031   | 13.4070376022  |
| 1.1075518879    | 1.503254942    |
| 0.4150208479    | 0.3755322271   |
| 0               | 0              |
| 139.268734574   | 138.019188726  |
| 0.6569176057    | 0.5944128656   |
| 3.0501438115    | 1.1039708528   |
| 0               | 0              |
| 10.6972053516   | 10.9419101539  |
| 1.9493139418    | 1.0079083422   |
| 5.4781596956    | 5.8316716357   |
| 17.8839577652   | 16.9178858478  |
| 58.0325185849   | 63.3218592861  |
| 0.9691814739    | 1.7539305757   |
| 100.4718470181  | 103.499928256  |
| 2.1491787157    | 5.1858334257   |
| 19.0733995485   | 16.719262693   |
| 76.8482270678   | 63.9090222406  |
| 0               | 0              |
| 0.9581072963    | 0              |
| 0.7407812905    | 0.6702970447   |
| 1.4013181919    | 0.8453232235   |
| 0               | 0              |
| 3.0651382159    | 0.9244982803   |
| 4.5048422718    | 13.2476928417  |
| 0               | 0              |

gene\_expression\_table

|                 |                 |
|-----------------|-----------------|
| 15.1782136882   | 17.1675363373   |
| 25.8345425547   | 8.7661589929    |
| 5.3571879627    | 5.7288157008    |
| 20.2000026413   | 13.8912816871   |
| 102.9570459843  | 129.6150749194  |
| 0.2618271823    | 0.4738294251    |
| 35.8827560269   | 23.6932770016   |
| 1.0617271521    | 0.8183786583    |
| 2.1607319089    | 2.0580436406    |
| 1.2126549398    | 2.194545226     |
| 0               | 0               |
| 8.0345542631    | 7.019385935     |
| 1.1211909558    | 0               |
| 0               | 0               |
| 0               | 0               |
| 60.4345479722   | 53.3744866252   |
| 1.4259243459    | 0.7741498501    |
| 0               | 0               |
| 19.0844446145   | 17.2685878919   |
| 0               | 0               |
| 0               | 0.062647809     |
| 3.4062922165    | 2.8767093061    |
| 1.8666911346    | 2.1113477871    |
| 50.3823034124   | 37.329715114    |
| 1.4006007399    | 2.5346712956    |
| 1.3018991151    | 0.8835190026    |
| 0               | 0               |
| 12.5525507008   | 15.4884464159   |
| 15.6461747      | 7.0787321412    |
| 1541.5791763942 | 1448.8780021759 |
| 20.292152862    | 16.9489702921   |
| 62.2303678405   | 44.2429744725   |
| 165.831009686   | 194.5124144464  |
| 25.2229199327   | 40.5742157306   |
| 3.7120106622    | 3.9186213842    |
| 48.8569319883   | 32.3060413116   |
| 5.4539723967    | 3.3928365468    |
| 145.9345173373  | 116.6945212485  |
| 82.7130717887   | 84.3974764487   |
| 0               | 0               |
| 0               | 0               |
| 0               | 0               |
| 0               | 0.2923282355    |
| 0               | 0               |
| 3.9152174716    | 1.549927011     |
| 0               | 0.7615711245    |
| 0               | 0               |
| 33.257812872    | 32.7101968369   |
| 3.8295661606    | 4.9312299245    |

gene\_expression\_table

|                 |                 |
|-----------------|-----------------|
| 27.5586031648   | 25.1375431151   |
| 56.9534806587   | 43.804274917    |
| 5.4702460443    | 4.812266872     |
| 28.4962068511   | 20.2986997758   |
| 0.429466713     | 0               |
| 4.4179146393    | 2.6650377236    |
| 8.7251793301    | 7.0490994657    |
| 0               | 0.1558768678    |
| 10.5098217322   | 10.9728781321   |
| 0               | 8.1011493094    |
| 14.3008626846   | 6.7097108911    |
| 0               | 0               |
| 671.8936415299  | 620.7631948731  |
| 1.1398185913    | 1.7189442258    |
| 1.8076017974    | 3.2712223114    |
| 8.0853742908    | 3.6580314335    |
| 531.1388094202  | 441.3689412712  |
| 0               | 0               |
| 0               | 0               |
| 3.267064783     | 2.9562083934    |
| 615.6826213153  | 733.028064595   |
| 0.4054595906    | 0.3668807093    |
| 207.3088105171  | 365.0277081112  |
| 0               | 0               |
| 1.1215931768    | 3.7212092217    |
| 3482.0317785502 | 2433.2305401269 |
| 19.9810830156   | 19.5379699307   |
| 8.1357200229    | 7.2082512295    |
| 5.5895251059    | 1.2644225116    |
| 9.5553790027    | 5.9158202325    |
| 0               | 10.0394185881   |
| 9.2871151545    | 10.8044483941   |
| 10.2294075876   | 7.9337953386    |
| 23.2663747969   | 24.0073663781   |
| 0               | 0               |
| 2.0182677974    | 0               |
| 3.1085667216    | 1.64079486      |
| 1.5747924021    | 1.2468340768    |
| 9.2108951438    | 8.3344920728    |
| 4.8873822654    | 3.3167662951    |
| 3.4038551772    | 4.1066445115    |
| 0               | 0               |
| 4.6010904786    | 0               |
| 15.4451416859   | 12.2862059453   |
| 1.4603827231    | 0.5663269129    |
| 8.7767288578    | 10.2106749444   |
| 37.9393672231   | 283.218312778   |
| 1.5799938173    | 3.2167344124    |
| 3.1303030424    | 3.0899556333    |

gene\_expression\_table

|                |                |
|----------------|----------------|
| 27.18384571    | 16.3982286226  |
| 25.7683820342  | 25.1818832194  |
| 44.5086410351  | 46.5132983739  |
| 0              | 0              |
| 11.8274933821  | 12.2309998317  |
| 3.575752817    | 4.9090727428   |
| 5.3030934646   | 12.984208813   |
| 40.0899191457  | 36.2754225408  |
| 948.5347820918 | 786.2135251626 |
| 6.9657394525   | 3.43797798     |
| 18.8502040152  | 15.1614532798  |
| 3.0118013052   | 2.6242983083   |
| 63.1794171743  | 52.4039898515  |
| 9.1441469123   | 10.8597494736  |
| 5.4378449625   | 6.9465064159   |
| 3.7349751449   | 2.2530651836   |
| 36.9647071106  | 27.8729748465  |
| 0              | 0              |
| 1.5031224342   | 1.9834828917   |
| 84.1098664643  | 61.1573599908  |
| 15.6982709837  | 13.4367872664  |
| 3.0473725461   | 4.4808067663   |
| 0.9694605356   | 0.4386088986   |
| 2.3706325303   | 0              |
| 106.3792501058 | 114.9885954748 |
| 4.4570707106   | 4.0329870144   |
| 0              | 0              |
| 2.3513389054   | 2.4822145609   |
| 1.0605860393   | 0.5758037063   |
| 36.4543137329  | 17.9065443621  |
| 6.9708828991   | 6.3076136853   |
| 0              | 0              |
| 0              | 0              |
| 13.2843919555  | 11.1618015585  |
| 0              | 0              |
| 0              | 0              |
| 0              | 3.6056515062   |
| 84.8922567285  | 79.292783343   |
| 65.2442219863  | 50.7275137113  |
| 5.204651608    | 6.8500897358   |
| 15.7555422055  | 7.8988304173   |
| 22.7271676062  | 16.309943342   |
| 69.9623156415  | 73.8564220607  |
| 0.8306323887   | 0              |
| 9.5578499232   | 0              |
| 0              | 0              |
| 77.1652598653  | 73.7753502473  |
| 0              | 0.3779620213   |
| 34.4320588296  | 38.4679980891  |

gene\_expression\_table

|                |                |
|----------------|----------------|
| 242.0581983865 | 334.0157453524 |
| 14.9795255726  | 0              |
| 0              | 0              |
| 4.4021093959   | 3.9832551876   |
| 1.9655498184   | 0.5928435519   |
| 7.2481575351   | 6.5585060492   |
| 7.0736648537   | 3.3885614588   |
| 26.1733701255  | 33.5027983249  |
| 0.8807230416   | 0.7969235448   |
| 33.4102643929  | 32.0822246497  |
| 5.1967532262   | 2.5078879098   |
| 0              | 1.2911330507   |
| 2.132737598    | 1.929810765    |
| 4.0071567997   | 4.0287574974   |
| 120.8620011687 | 139.8924299707 |
| 0              | 0              |
| 0.7263794637   | 0.6572655304   |
| 3.6135959513   | 1.4862580149   |
| 0              | 0              |
| 2.0378124551   | 3.564907378    |
| 0              | 0              |
| 0              | 0              |
| 46.273574081   | 55.8276157875  |
| 0              | 0              |
| 34.3564942883  | 17.2708469955  |
| 3.5038563659   | 3.4586941167   |
| 2.5744283711   | 0.9317901253   |
| 300.8080107306 | 298.9332301558 |
| 11.1390476561  | 9.8207431127   |
| 3.7596883021   | 5.2092505031   |
| 3.2465638424   | 1.4688290435   |
| 11.303204903   | 8.6128182301   |
| 30.694855186   | 28.7104968984  |
| 8.2367658493   | 29.8121989688  |
| 12.0795697627  | 9.3306726544   |
| 2.6125727934   | 2.8893215391   |
| 3.1715926091   | 3.0905756602   |
| 1.1923229017   | 0.7192500923   |
| 80.4018148823  | 124.7172015904 |
| 0.4710725141   | 0              |
| 82.366249415   | 60.3009163181  |
| 18.7615773779  | 17.5069547772  |
| 27.9378718615  | 17.9403787558  |
| 0              | 0              |
| 0              | 6.2126284439   |
| 14.492704739   | 7.9822797386   |
| 112.4784199936 | 110.4999442395 |
| 1.343467579    | 0.8104257485   |
| 23.5350628769  | 25.8591084845  |

gene\_expression\_table

|                |                |
|----------------|----------------|
| 10.1366775644  | 5.3504428036   |
| 0.183355914    | 0.1659098696   |
| 48.8308226121  | 42.8457134064  |
| 27.5837780235  | 21.2418913007  |
| 2.9332645572   | 6.6354219156   |
| 0              | 0              |
| 10.5022011401  | 15.3856997695  |
| 6.7753589244   | 3.6784161168   |
| 121.3100259089 | 112.0543801705 |
| 0              | 0              |
| 24.344853395   | 28.8064693283  |
| 69.4500090811  | 75.4103319308  |
| 317.5586969038 | 359.1793198011 |
| 2.623167549    | 4.4834232797   |
| 4.3906283201   | 2.9032486102   |
| 32.14251048    | 34.6619894849  |
| 36.6793822387  | 31.680784403   |
| 83.1033511338  | 56.6695924595  |
| 0              | 0              |
| 45.8743208825  | 48.2242104788  |
| 54.9354738009  | 31.5224282787  |
| 3.8598036793   | 0              |
| 0.2604204892   | 0              |
| 25.5931389557  | 30.283524833   |
| 288.5830202324 | 345.0012139357 |
| 1.4844514612   | 2.0639539048   |
| 0              | 0              |
| 91.8872512741  | 98.7853247617  |
| 0              | 0              |
| 0              | 0              |
| 21.5329933222  | 14.7447703396  |
| 0              | 0              |
| 0              | 0              |
| 4.8082863094   | 4.0400146127   |
| 4.426595239    | 4.0054112389   |
| 12.7664234234  | 15.9946851976  |
| 78.8167646336  | 74.1539559894  |
| 59.5127760867  | 63.9804633578  |
| 3.1178080579   | 4.8125555021   |
| 10.9016621976  | 9.1336899428   |
| 4.2494489159   | 1.5380480507   |
| 9.1149270498   | 5.853174659    |
| 2.6212824125   | 0              |
| 0              | 0.6903281449   |
| 18.6145163406  | 3.3686745199   |
| 0.8673716133   | 0.7848424852   |
| 0.6128130728   | 1.6635144416   |
| 3.4636666947   | 1.4845755428   |
| 0              | 0              |



gene\_expression\_table

|                 |                 |
|-----------------|-----------------|
| 169.5204249545  | 194.2950220168  |
| 15.7886820176   | 11.1116539638   |
| 3.7181595076    | 1.6821910606    |
| 3.0543439192    | 1.8424850705    |
| 0.6735634508    | 1.8284246494    |
| 0               | 0.1745097281    |
| 1.9228890357    | 1.7399289836    |
| 0               | 0               |
| 0               | 0               |
| 14.5549547815   | 15.4942027385   |
| 0.218700512     | 0.0989457406    |
| 79.139289299    | 82.0378420304   |
| 368.6578682239  | 280.3301327394  |
| 9.1407591711    | 10.1797285346   |
| 12.018169611    | 7.7676132286    |
| 0               | 0               |
| 11.2915220337   | 7.66286279      |
| 1.5695547647    | 0.9468092978    |
| 0               | 13.4142273768   |
| 17.6969520803   | 12.8886033262   |
| 79.9264813334   | 55.0273002879   |
| 0               | 0               |
| 0               | 0               |
| 0               | 0               |
| 0               | 0               |
| 106.446645126   | 111.8536304921  |
| 15.5943329497   | 22.576888317    |
| 76.5947155191   | 42.4783866933   |
| 0.4533678638    | 0.2051152905    |
| 84.2891928646   | 108.956000908   |
| 0.7191826247    | 0.65075346      |
| 11.0608550771   | 8.1020632312    |
| 0.4566140384    | 0.2360959354    |
| 9.6272239576    | 7.4667495556    |
| 51.6005584713   | 31.1272276884   |
| 770.8407271271  | 1004.6838908439 |
| 34.1287904275   | 36.3960375631   |
| 0               | 4.9988017582    |
| 0               | 0               |
| 1.4395873569    | 1.0131432467    |
| 6.0356003479    | 1.8204406293    |
| 0.7608669166    | 0.9835307902    |
| 5.1444859829    | 4.9760299275    |
| 4.09794717      | 3.090027957     |
| 10.0332447888   | 11.9318695063   |
| 52.5084039582   | 39.5151859051   |
| 7057.7735126835 | 8495.5290917456 |
| 0               | 0               |
| 7.5845041974    | 22.8761660776   |

gene\_expression\_table

|                |                |
|----------------|----------------|
| 18.8380347421  | 0              |
| 0              | 0              |
| 0              | 0              |
| 1.8210658103   | 1.4539359597   |
| 6.6258210299   | 7.4942299292   |
| 416.6230841624 | 291.1346238569 |
| 0              | 0              |
| 0              | 0              |
| 3.7461634477   | 4.5196287036   |
| 61.3027643183  | 37.9530872985  |
| 0.0989424787   | 0.4476412398   |
| 9.2150505598   | 38.1177239184  |
| 367.9510217963 | 423.1357513896 |
| 20.4395560374  | 36.3045337258  |
| 78.9690696917  | 73.7237008922  |
| 11.055307568   | 7.335835011    |
| 16.3095505197  | 25.2989500671  |
| 1.0331073045   | 0.467404335    |
| 0.5856332926   | 0.3179466898   |
| 1.2839969997   | 1.5491021084   |
| 0              | 0              |
| 1.3840371138   | 2.5046960525   |
| 4.2656830449   | 4.288677336    |
| 15.1937159291  | 8.9891137316   |
| 662.7310770097 | 536.4969207896 |
| 7.5941204677   | 7.400131975    |
| 2.2352248863   | 3.3709108986   |
| 0              | 0              |
| 3.2269802748   | 3.981733455    |
| 3.1797009715   | 1.4385785598   |
| 5.243663928    | 3.9539475406   |
| 0              | 0              |
| 10.6336685885  | 4.8109453627   |
| 0              | 0              |
| 11.5097364738  | 8.5767310959   |
| 18.1391835098  | 14.068514559   |
| 0              | 0              |
| 6.2417360033   | 0              |
| 0              | 0              |
| 0              | 0.1236323707   |
| 0.0194035434   | 0              |
| 0              | 0.0847504731   |
| 0.4778998625   | 0.6104871477   |
| 66.2849677788  | 77.7493253437  |
| 9.8117403549   | 8.1679143294   |
| 0              | 0              |
| 2.0326323013   | 2.1590964854   |
| 2.8782911635   | 2.9874298347   |
| 9.1039516283   | 7.5022129968   |

gene\_expression\_table

|                |                |
|----------------|----------------|
| 0              | 0              |
| 30.361375741   | 27.4725356747  |
| 189.2578266335 | 46.7046065213  |
| 19.0128751838  | 20.2622865313  |
| 0.211793896    | 0.5749260587   |
| 0              | 3.696957559    |
| 15.0030839845  | 8.3849063728   |
| 49.0276703759  | 50.4517662064  |
| 1.4568877002   | 2.4337236682   |
| 0              | 0              |
| 3.6399312868   | 7.6850601333   |
| 16.6307194976  | 13.2163603542  |
| 0.560455504    | 0              |
| 0              | 0.8434869146   |
| 3.6361076553   | 3.7146712371   |
| 0              | 0              |
| 4.9265770413   | 6.6867307665   |
| 64.6860845933  | 42.3847338802  |
| 49.7996685988  | 70.9715532837  |
| 9.8643526758   | 10.9263786221  |
| 0              | 0.1133501513   |
| 18.5636844215  | 13.3656550259  |
| 6.5106831277   | 3.1188712461   |
| 0.863317036    | 0.7811736949   |
| 11.7908985839  | 11.2024625954  |
| 28.3981753591  | 27.4888842293  |
| 39.6041433557  | 32.3995515287  |
| 2.9842113364   | 1.3501340173   |
| 2.1039812399   | 1.9037905319   |
| 62.801260196   | 58.3898262313  |
| 5.4310528295   | 5.6163384834   |
| 0.168455022    | 0              |
| 4.0666317073   | 1.8398488528   |
| 15.2228954172  | 18.6939091835  |
| 5.7171073306   | 5.1731330107   |
| 0              | 0              |
| 0              | 0.3646714392   |
| 113.6273182438 | 125.9757302686 |
| 0              | 0              |
| 1.9581867595   | 1.1517143177   |
| 0.6879020207   | 0.4668368694   |
| 0              | 0              |
| 0              | 0              |
| 0.0116475027   | 0              |
| 4.1950197522   | 2.5971740858   |
| 3.8603994199   | 2.3287254106   |
| 122.9375929633 | 170.8332603263 |
| 0.3754469939   | 0.0849309417   |
| 0              | 0              |

gene\_expression\_table

|                |                |
|----------------|----------------|
| 0.4918018301   | 0.2396194835   |
| 8.219380483    | 8.329796796    |
| 0.034619209    | 0.0313252424   |
| 0.5257678525   | 0.4757418178   |
| 85.6522333788  | 76.6508734857  |
| 0.2497837797   | 0              |
| 0.719031992    | 0.1626542899   |
| 1.8501475374   | 2.7901812189   |
| 3.7027023742   | 2.7122250995   |
| 1.1747228589   | 1.9133094845   |
| 14.1608744812  | 10.2507905488  |
| 0              | 0              |
| 0              | 0.0593965584   |
| 0.165318942    | 0.5983563552   |
| 2.4262431922   | 2.4205579133   |
| 0.718509697    | 0              |
| 5.1613336309   | 2.8021442147   |
| 0              | 0              |
| 13.1273014594  | 16.1204931506  |
| 0.1754606926   | 0.1360850287   |
| 0              | 0              |
| 0.2605297699   | 0              |
| 4.8080222215   | 3.3147017198   |
| 0.7948674994   | 0.2397456769   |
| 0              | 0              |
| 313.9657196356 | 268.9251972687 |
| 13.8425596848  | 37.5763817173  |
| 0.9924159285   | 0.6984359033   |
| 0              | 0              |
| 3.1621278517   | 4.0057584787   |
| 0              | 0.0225557887   |
| 2.8759744221   | 3.4697729371   |
| 46.2836598209  | 42.1647347939  |
| 1.8242132918   | 1.3755350758   |
| 1.0286278841   | 1.8615109198   |
| 1.8990053244   | 0.8591588861   |
| 0              | 0              |
| 61.605889271   | 52.0767996265  |
| 0.0331626518   | 0.0150036372   |
| 0              | 5.0335851466   |
| 0              | 0              |
| 0              | 0              |
| 0              | 0              |
| 2.6121778042   | 0.4727265887   |
| 6.9611130617   | 6.2987734335   |
| 13.3537254895  | 13.4257091433  |
| 22.9583916723  | 16.322377192   |
| 0              | 0              |
| 0.1306891466   | 0.2128576811   |

gene\_expression\_table

|                |               |
|----------------|---------------|
| 28.5165196293  | 33.2912066719 |
| 0              | 0.0474780281  |
| 3.7098945588   | 4.1149140536  |
| 4.3386771673   | 8.6782133977  |
| 1.4602177715   | 1.0570241655  |
| 0              | 0             |
| 27.1711010697  | 26.0758600743 |
| 1.5038583666   | 0.6803842319  |
| 0              | 0             |
| 0              | 0.8503597709  |
| 0              | 0             |
| 0              | 0.0384565776  |
| 0.5453411792   | 0.1644842571  |
| 0.2782609789   | 0.2517848577  |
| 30.5327150942  | 25.5555044158 |
| 128.9904598844 | 110.321744652 |
| 2.0346728828   | 1.0520438644  |
| 1.366110291    | 8.0348249421  |
| 1.8605416983   | 1.1223426021  |
| 0.2059549965   | 0             |
| 2.3183530146   | 0.8990422067  |
| 51.0351819818  | 42.1046192123 |
| 13.1099451054  | 18.9800851014 |
| 0              | 0             |
| 7.4155313381   | 4.0259726892  |
| 0              | 0             |
| 0.5892354068   | 0             |
| 0              | 0             |
| 8.0284624507   | 7.2645661043  |
| 21.8935074414  | 15.7467063772 |
| 1.6431338796   | 2.2301881761  |
| 15.6913020126  | 7.7445260716  |
| 1.4387482159   | 0.607531609   |
| 7.7948257578   | 6.717294855   |
| 4.8473648361   | 3.2318964854  |
| 2.1606898049   | 5.8653100822  |
| 0              | 0             |
| 0              | 1.0110925514  |
| 0              | 0             |
| 4.1949562702   | 0.948953094   |
| 0.9696323458   | 0.87737326    |
| 1.1252768184   | 2.1636928305  |
| 1.769732979    | 3.202690999   |
| 3.9689056306   | 7.1825402417  |
| 4.22813255     | 3.0853483723  |
| 0.5945297735   | 0.7172815247  |
| 8.7712263483   | 5.8202152169  |
| 0.323275235    | 0.7605417919  |
| 0              | 0             |

gene\_expression\_table

|                 |                |
|-----------------|----------------|
| 0.4347325142    | 0              |
| 14.0694868927   | 0              |
| 0               | 0              |
| 3.5703247986    | 2.6921780553   |
| 0.1635455034    | 0              |
| 125.5036064061  | 98.2932666377  |
| 0.102852274     | 0.1395990481   |
| 1043.2009446579 | 994.6771243224 |
| 0.3398463727    | 0.3075104922   |
| 9.7489654095    | 5.2928194484   |
| 13.2002591902   | 11.5176928063  |
| 2.7934529833    | 1.9955210977   |
| 17.5024686993   | 17.4208481138  |
| 0.3599372865    | 0.2171265235   |
| 0.1022392902    | 0.0462556864   |
| 34.4211028699   | 29.7918124683  |
| 13.1549702447   | 13.5264707411  |
| 1.3108963513    | 1.6804025407   |
| 1.1504540221    | 1.0409900208   |
| 0               | 0              |
| 0.9699654015    | 0.1462791043   |
| 0               | 0              |
| 5.5810794537    | 5.0500479854   |
| 2.3420286652    | 1.4127920641   |
| 0.17300799      | 0.1408918817   |
| 0               | 0              |
| 0.5919127716    | 0.357062097    |
| 3.0389095324    | 3.6663490374   |
| 0.3220763335    | 0.582862492    |
| 12.1429619556   | 6.5402244389   |
| 4.1879723026    | 3.031594338    |
| 1.4675173916    | 0              |
| 4.1723629687    | 3.5656260829   |
| 13.1580260704   | 9.4256302955   |
| 0.2497342553    | 0.4519448194   |
| 7.5989884936    | 2.29198532     |
| 5.0640832501    | 2.4875034553   |
| 0               | 2.5539699343   |
| 0               | 0              |
| 0               | 0.0568765152   |
| 0               | 0              |
| 5.978715165     | 1.803283082    |
| 0               | 1.0607718005   |
| 0               | 0              |
| 71.5738689814   | 44.8364222605  |
| 0               | 0              |
| 1.667375905     | 0.8381819722   |
| 9.3359299195    | 7.6430937862   |
| 0.1847333837    | 0.167156275    |

gene\_expression\_table

|                |                |
|----------------|----------------|
| 27.5512839107  | 26.9242055269  |
| 67.4897548298  | 77.7231691367  |
| 0              | 0              |
| 1.3925354328   | 1.8900566141   |
| 0              | 0              |
| 0.7420434293   | 2.9095694023   |
| 11.5889492677  | 17.088749103   |
| 2.4310685508   | 2.3830689656   |
| 0              | 0              |
| 23.5551467674  | 31.9708640055  |
| 14.4158661913  | 14.6747450379  |
| 0              | 0.5067494029   |
| 56.2857014903  | 72.7574287316  |
| 0              | 0              |
| 12.2221493254  | 13.9442463526  |
| 0              | 1.4831856469   |
| 11.5003083876  | 10.4060710273  |
| 0              | 0              |
| 22.2183622961  | 20.104317934   |
| 0              | 0.7932365225   |
| 23.8341222049  | 24.8012917747  |
| 0              | 0              |
| 0              | 0              |
| 39.6529956982  | 50.0967039028  |
| 14.5489413344  | 15.4541321036  |
| 1.4129438222   | 5.1140172161   |
| 1.0140998879   | 2.0187415185   |
| 65.4262686446  | 46.6432560847  |
| 1.0020644167   | 0              |
| 146.5128716755 | 154.3380042838 |
| 0              | 0              |
| 8.630767083    | 6.4314042803   |
| 1.8457383037   | 4.0993830731   |
| 15.3009128156  | 14.9988080195  |
| 4.491617792    | 4.064246992    |
| 30.2296264359  | 16.1314463793  |
| 0              | 0              |
| 0              | 0              |
| 1.0837152126   | 0              |
| 68.1561256971  | 47.6549957611  |
| 441.1902180261 | 365.1703193427 |
| 13.834684153   | 23.3675575203  |
| 0              | 0.1636807608   |
| 0              | 0              |
| 4.7665443979   | 4.6913493634   |
| 0              | 0              |
| 1.2975091517   | 2.348106144    |
| 21.8668644746  | 18.6870276883  |
| 0.2081914656   | 0.3767647101   |

gene\_expression\_table

|                |                |
|----------------|----------------|
| 0              | 0              |
| 0.9877692863   | 1.1491514966   |
| 61.8092433456  | 51.6260170308  |
| 7.2778739652   | 4.2334682174   |
| 18.594943964   | 27.3417015714  |
| 2.7347812386   | 2.4745708422   |
| 0              | 0              |
| 19.9967091103  | 17.5008041692  |
| 0.7407248773   | 1.7873226641   |
| 0.3456774593   | 0.1787352912   |
| 2.7929346578   | 2.3165917954   |
| 3.1689334976   | 3.6494361972   |
| 2.7694196301   | 2.9615340678   |
| 1.3592377406   | 1.2299082768   |
| 18.5539840774  | 14.3902284785  |
| 12.3278900784  | 18.1267280063  |
| 10.191727834   | 10.5781764488  |
| 0              | 0              |
| 4.4367658187   | 4.1261311613   |
| 30.0334809288  | 15.9306645753  |
| 0              | 0              |
| 71.5946852524  | 38.2323285304  |
| 100.3691571757 | 107.5068032847 |
| 28.6360312223  | 18.8446219193  |
| 0              | 0              |
| 4.5713709672   | 4.7727828119   |
| 4.6669932176   | 4.6921507831   |
| 2.1832766197   | 1.4111007667   |
| 0.2334521322   | 0              |
| 42.0130140372  | 35.0912656554  |
| 2.2592223456   | 2.6732639605   |
| 0.1562807462   | 0.4242325921   |
| 0              | 0              |
| 0              | 1.1221518046   |
| 7.4240213244   | 5.8779320763   |
| 2.072598609    | 0              |
| 1.6589456012   | 2.9188043442   |
| 32.5554665917  | 31.2253337423  |
| 0.4179574283   | 1.8909469811   |
| 13.3164359286  | 12.9100679086  |
| 0.5040592469   | 0.1710370327   |
| 0              | 0              |
| 0.9328170301   | 0.9646409911   |
| 2.0266080366   | 0.9168896373   |
| 26.4947188845  | 22.3484441177  |
| 2.5233427514   | 2.6909737032   |
| 13.3658660825  | 18.6909183874  |
| 6.4857055537   | 1.257557196    |
| 0.1268579345   | 0              |



gene\_expression\_table

|                |                |
|----------------|----------------|
| 0.181103472    | 0              |
| 0.7960746369   | 2.5211525877   |
| 37.172122058   | 33.6352495372  |
| 0              | 0              |
| 0.8045248364   | 0              |
| 6.5309122237   | 11.81901114    |
| 1.8290156585   | 4.9649625586   |
| 40.9258286332  | 18.5158982375  |
| 0.9125235277   | 0.7621830107   |
| 1.9230338616   | 1.7400600294   |
| 0              | 0              |
| 0              | 0              |
| 6.1304374202   | 9.0140949481   |
| 0              | 0              |
| 1.3440473028   | 0.7040944765   |
| 27.8023546834  | 0              |
| 0.8929044007   | 0              |
| 0.2518153921   | 0.1139277647   |
| 2.3939319902   | 0              |
| 4.8619635035   | 5.0278341211   |
| 1.1940793792   | 1.0804644896   |
| 3.651713948    | 0.6608517517   |
| 6.0413560399   | 3.3130484449   |
| 7.5631779918   | 8.0878350972   |
| 36.7507755863  | 59.8571884082  |
| 8.312562127    | 11.6243436338  |
| 0              | 0              |
| 30.8091496006  | 24.3929914487  |
| 461.0468056452 | 421.593474282  |
| 32.5988456665  | 26.8155578554  |
| 5.8914023451   | 9.328977196    |
| 2.8374286091   | 0              |
| 156.0990503682 | 112.9971649931 |
| 0              | 0.1682041031   |
| 0.1891741706   | 0.1711745276   |
| 0              | 5.1309115598   |
| 2.0281927273   | 0.9176065922   |
| 2.5034416451   | 3.7754047825   |
| 8.4244375255   | 7.7302290276   |
| 0.8599991693   | 0.3112686073   |
| 1.5680767277   | 1.2161798938   |
| 2.0367016722   | 2.1061857323   |
| 19.7697261623  | 0              |
| 7.8449401225   | 7.4447742232   |
| 0.3772607866   | 0.6827299597   |
| 7.3523774984   | 0              |
| 0.3600838607   | 0.3801261486   |
| 0              | 0              |
| 0.3876169729   | 0.2104414742   |

gene\_expression\_table

|                |                |
|----------------|----------------|
| 0.1080713009   | 0.0977884762   |
| 1.8176845197   | 2.9904264035   |
| 0.87573275     | 0.1584816144   |
| 0              | 0              |
| 8.8945689338   | 10.7310184461  |
| 0.9829919426   | 1.3341925663   |
| 0              | 0              |
| 0              | 33.3379682913  |
| 0              | 26.0391231624  |
| 109.288823279  | 123.6126914172 |
| 191.2554407383 | 74.1676148503  |
| 0              | 52.0782463249  |
| 73.6871611502  | 33.3379682913  |
| 13.1264578567  | 5.9387473879   |
| 100.1605806024 | 30.210149756   |
| 32.5670935441  | 0              |
| 72.109017666   | 10.8746585201  |
| 97.5429317171  | 56.1666418781  |
| 3.5378413937   | 4.8018315143   |
| 0              | 0.1874275657   |
| 1.6827131565   | 1.6917838718   |
| 64.4970580948  | 105.54514792   |
| 299.3675917937 | 244.8367452573 |
| 0              | 0              |
| 278.1032762857 | 333.6993863916 |
| 0              | 4.5818494135   |
| 0              | 2.8945045918   |
| 41.4435519906  | 39.2444573227  |
| 13.7858814876  | 17.0480394702  |
| 3.3732438074   | 6.5741515333   |
| 2.882556141    | 3.2603564762   |
| 2.5246682657   | 2.2844498085   |
| 0              | 0              |
| 0              | 0              |
| 672.1325828742 | 641.2610893843 |
| 254.839678122  | 177.7847173039 |
| 6.2972077605   | 4.1440274483   |
| 3.6717890825   | 5.906531153    |
| 3.5777483835   | 0              |
| 5.0037476422   | 4.7245027234   |
| 7.2004753434   | 8.572843089    |
| 62.3316480648  | 68.4867874693  |
| 1.0715377429   | 0              |
| 7.5193564204   | 2.2679669203   |
| 11.2136740498  | 13.0457693874  |
| 0              | 1.1949525202   |
| 300.7845912812 | 290.3097403707 |
| 26.8972147164  | 31.9436045985  |
| 0              | 0              |

gene\_expression\_table

|                 |                 |
|-----------------|-----------------|
| 7.6420850219    | 5.4842722103    |
| 0               | 2.3681838274    |
| 2.3528556536    | 6.386954738     |
| 0               | 4.2300017441    |
| 0               | 0               |
| 78.4778605889   | 74.0982344809   |
| 2.3973148057    | 0               |
| 50.3322394403   | 52.1849180239   |
| 5.9454188703    | 7.4291385853    |
| 95.8970942293   | 114.6638289681  |
| 9.8667187087    | 14.0295807049   |
| 9.3424463899    | 8.4535264121    |
| 26.2096848642   | 21.7395493828   |
| 0               | 0               |
| 621.2461419403  | 467.5186244696  |
| 7.9710231423    | 5.8166065011    |
| 0.524181142     | 0.4743060805    |
| 0               | 0.3049627037    |
| 4.3573923476    | 3.0329176157    |
| 0               | 0               |
| 160.4428454993  | 157.5324304191  |
| 0               | 0               |
| 4.8122511122    | 2.4882128716    |
| 0               | 0               |
| 0               | 0               |
| 11.2173689706   | 8.7967124943    |
| 32.1962616024   | 40.7859687984   |
| 383.2708368702  | 504.176055563   |
| 0               | 0               |
| 0               | 0               |
| 0               | 0.7050379409    |
| 781.4460757142  | 819.3955835983  |
| 0               | 0               |
| 16.5836858745   | 15.8168954992   |
| 3996.0596825844 | 3736.3685217044 |
| 0               | 0               |
| 5247.886459505  | 6172.5217817882 |
| 0               | 0               |
| 0               | 2.7952224102    |
| 0               | 0               |
| 1.907945326     | 2.5896107186    |
| 4.0071567997    | 3.6258817477    |
| 111.2750866798  | 63.1974272745   |
| 209.7976441877  | 235.2312035859  |
| 183.1454082133  | 162.8621621624  |
| 0.6240534617    | 0.5646756964    |
| 5.9967356793    | 10.8523102699   |
| 5.7989591772    | 5.3588392596    |
| 14.436353206    | 16.1363450504   |

gene\_expression\_table

|                 |                 |
|-----------------|-----------------|
| 6.6409002766    | 1.2018056844    |
| 35.3270167258   | 52.3075144135   |
| 2.1821803631    | 7.8981964962    |
| 1066.6052584299 | 1114.6950347371 |
| 19.3930765278   | 61.4174887706   |
| 5655.8731300671 | 5383.0886804206 |
| 1.346484564     | 2.1118388133    |
| 176.2754064115  | 181.0090926068  |
| 0               | 0               |
| 162.4912457627  | 121.7449533685  |
| 13.6411457093   | 10.2860090328   |
| 343.5027216433  | 362.6221024284  |
| 3.3973822116    | 3.5864806964    |
| 24.7489232772   | 29.5848657575   |
| 2.249954956     | 2.4430500774    |
| 0               | 0.2874400802    |
| 81.1363696955   | 61.6173054457   |
| 0               | 0               |
| 42.8559142199   | 29.0118664008   |
| 0               | 0.0763919953    |
| 47.2249209582   | 49.3622955915   |
| 12.073864538    | 19.6650974827   |
| 107.3474935403  | 86.0325622754   |
| 214.7454410664  | 217.1730505833  |
| 7.1783802744    | 2.1651226639    |
| 972.037278142   | 827.9796968597  |
| 43.0955061443   | 29.5824383534   |
| 4.5886457126    | 9.9649028381    |
| 0               | 0               |
| 2.5559225532    | 2.3127302966    |
| 158.5186647952  | 216.8750020682  |
| 7.5245270282    | 11.3476323219   |
| 3.3668069477    | 1.5232301192    |
| 2.0730403393    | 0               |
| 93.0591602546   | 102.5100921836  |
| 1452.5972733921 | 1932.9188057621 |
| 238.1442759745  | 259.2556309968  |
| 0               | 0               |
| 10.2862788408   | 11.1690655189   |
| 0               | 0               |
| 73.7874937953   | 59.0628701025   |
| 9.8060878881    | 11.4082111368   |
| 14.0983770095   | 15.9461715707   |
| 67.2552855227   | 88.3394193236   |
| 13.6841661112   | 16.0967792875   |
| 1.1745337231    | 0               |
| 34.2748235101   | 42.0899191918   |
| 284.8384407152  | 261.3161570946  |
| 12.7858345832   | 19.2821355064   |

gene\_expression\_table

|                |                |
|----------------|----------------|
| 1.7925477026   | 1.7957740182   |
| 94.2667351272  | 79.7943367773  |
| 32.0487230578  | 22.7533239029  |
| 25.7941974915  | 26.9705715542  |
| 1.5953700454   | 2.6465503928   |
| 0              | 0.5127722925   |
| 12.8783151815  | 12.6240427189  |
| 23.1804658347  | 16.6565213538  |
| 10.5094395734  | 6.5377688183   |
| 180.7725885598 | 165.7827807872 |
| 6.2983198393   | 7.8361855103   |
| 154.1881945337 | 146.4932862935 |
| 1.4610512625   | 2.644068785    |
| 25.6081580822  | 19.271412784   |
| 2.5980373068   | 3.7613406299   |
| 11.4665654729  | 15.9091593418  |
| 9.1558133788   | 11.6959782444  |
| 10.6419094878  | 9.6293475152   |
| 5.6463072398   | 12.7726736101  |
| 6.5573293967   | 4.6842704116   |
| 10.7214142617  | 1.6168812545   |
| 68.0189179848  | 118.697821169  |
| 103.5247700804 | 69.0233460627  |
| 3.0138520776   | 0              |
| 0              | 0.503906082    |
| 11.3978686311  | 10.6690119956  |
| 1.8546683781   | 1.9578993242   |
| 168.4095054512 | 142.5542613345 |
| 0              | 11.0183631465  |
| 0.5811614383   | 0.5258647856   |
| 0.8296876831   | 0              |
| 1.0974093951   | 0.9929925117   |
| 180.5000456615 | 161.357952952  |
| 8.5924958232   | 6.2199460275   |
| 172.9028546808 | 159.7801566518 |
| 485.3007078191 | 482.526957802  |
| 3.063483273    | 5.9399943503   |
| 6.8717303635   | 13.6793698075  |
| 0              | 0              |
| 0              | 0              |
| 0              | 0              |
| 0.1301939776   | 0.2356124258   |
| 6.707687102    | 5.3107780072   |
| 0              | 0              |
| 0              | 0              |
| 3.4779637444   | 1.5735203151   |
| 2.9353300287   | 0              |
| 0              | 0              |
| 0              | 0              |

gene\_expression\_table

|                 |                 |
|-----------------|-----------------|
| 0               | 0               |
| 84.624431327    | 56.882459514    |
| 1.4746617834    | 1.3343498924    |
| 20.8852390866   | 14.3529413387   |
| 0.2088142134    | 0.5668375482    |
| 173.1487197047  | 140.1818879057  |
| 0               | 0               |
| 5.3798148627    | 12.1698335577   |
| 0               | 0               |
| 0               | 0               |
| 1194.9092611374 | 1420.3158088602 |
| 0               | 0               |
| 70.8910726661   | 88.5824219938   |
| 3.6007053079    | 8.1452587879    |
| 0               | 0               |
| 18.8577006165   | 19.6885595198   |
| 11.523548277    | 14.3724887421   |
| 45.4682375167   | 34.8124631132   |
| 16.453555791    | 24.4932011936   |
| 16.5201637      | 8.3046080665    |
| 5.0502104215    | 2.2848451788    |
| 0               | 0               |
| 0               | 0               |
| 11.0176840359   | 3.987747068     |
| 0.9254714816    | 2.5122427104    |
| 0               | 0               |
| 3.1191523487    | 5.6447392178    |
| 0               | 0               |
| 30.7065084348   | 29.8055443752   |
| 0               | 0               |
| 0               | 1.9619312592    |
| 27.2415323505   | 30.3819921189   |
| 0               | 0               |
| 67.4501849511   | 54.2510217409   |
| 13.8481905565   | 37.5916670251   |
| 0               | 0               |
| 46.9511115294   | 53.1047282516   |
| 0               | 12.6353505599   |
| 19.7634250543   | 33.6620505329   |
| 32.8654255318   | 45.5987708661   |
| 0               | 0               |
| 141.4512929537  | 251.3305531258  |
| 84.9117742607   | 260.5625416452  |
| 33.3799161783   | 13.7290302032   |
| 3.2574364608    | 17.6849771512   |
| 0               | 0.4940067147    |
| 32.0158010515   | 20.6925320429   |
| 48.077449831    | 39.8340278583   |
| 0               | 0               |

gene\_expression\_table

|                |                |
|----------------|----------------|
| 11.744706913   | 9.9187343677   |
| 0              | 5.5987427665   |
| 1.6458046145   | 2.9784174717   |
| 0              | 0              |
| 0              | 2.1014000133   |
| 0              | 17.8862423023  |
| 6.6318445035   | 14.0019466823  |
| 56.6187179613  | 37.0986945417  |
| 0.221254802    | 1.0010136718   |
| 0              | 0              |
| 0              | 0.0879439332   |
| 0              | 0              |
| 6.2934684098   | 9.3555033028   |
| 3.4191886566   | 3.0938579052   |
| 0.2438544886   | 0.2206520941   |
| 13.3687572458  | 12.4869571467  |
| 0              | 0              |
| 128.2058603357 | 139.5222476004 |
| 34.0215879008  | 23.1789056396  |
| 24.1903630842  | 16.5644108449  |
| 8.3248868286   | 8.474384408    |
| 0              | 0.1191092896   |
| 19.8082363425  | 18.7027950322  |
| 16.1232305591  | 10.6102756225  |
| 2.0487983039   | 1.789932027    |
| 0.3317015359   | 0              |
| 67.2142903535  | 60.8189498835  |
| 16.7266026151  | 14.1260850051  |
| 9.1748256101   | 9.4339255705   |
| 0.1370254412   | 0.1239876729   |
| 55.0838175482  | 47.2534438522  |
| 4.3896533029   | 3.3099868945   |
| 0              | 0              |
| 41.3813417237  | 44.25196238    |
| 4.3335089425   | 1.5684727864   |
| 0              | 0.3954184396   |
| 2.2434163001   | 4.0599171041   |
| 0.3096638051   | 0.1120799005   |
| 1.5269020346   | 1.3816195608   |
| 0              | 0              |
| 0.6613207283   | 1.7951911128   |
| 1.3870194798   | 0.6275233123   |
| 5.9478426041   | 10.7638283272  |
| 6.14566642     | 4.6711688819   |
| 0.3541791986   | 1.9228774254   |
| 0.9510313929   | 0.2581626481   |
| 0.6719503481   | 3.0400763237   |
| 0              | 0              |
| 0              | 0              |

gene\_expression\_table

|                |                |
|----------------|----------------|
| 0              | 0.3519738574   |
| 38.622890648   | 33.5311696529  |
| 18.3699440403  | 15.8887443308  |
| 0              | 0              |
| 1.7334447662   | 2.5096160904   |
| 11.6833172911  | 8.7060786268   |
| 0.1770058101   | 0.0686417008   |
| 0.5804677902   | 0.2626185686   |
| 66.4695121082  | 80.1933815845  |
| 3.6711474889   | 3.6540275493   |
| 0              | 0              |
| 0.330637884    | 0.0997260592   |
| 128.5748057484 | 114.0373186364 |
| 0              | 0              |
| 0              | 0              |
| 2.6374296433   | 3.6715109347   |
| 6.9781066119   | 6.3141500725   |
| 10.3335120636  | 6.6231246691   |
| 1.2671580604   | 0              |
| 4.2365749139   | 3.4075298374   |
| 0.22690739     | 0.3158730569   |
| 250.25430859   | 210.7177736929 |
| 45.8632035584  | 52.817402231   |
| 2.5466071227   | 3.1272659355   |
| 0.034498224    | 0              |
| 0.8338637194   | 0.8048243391   |
| 0              | 0              |
| 0              | 0              |
| 0.1890952226   | 0.0684412366   |
| 0              | 0              |
| 0.1483513433   | 0.3355898301   |
| 13.5063859618  | 8.580894007    |
| 49.9516961178  | 60.265154663   |
| 1.6788449394   | 3.6458527744   |
| 3.8177995664   | 2.8449165916   |
| 0.0771834139   | 0              |
| 0              | 0              |
| 25.6707704856  | 23.2282345826  |
| 10.7403938747  | 9.024285454    |
| 4.5563175818   | 4.9473488308   |
| 83.7538623471  | 88.6193296276  |
| 0.2882783962   | 0              |
| 2.9224836612   | 2.3369236965   |
| 0.8473723956   | 0.5622805199   |
| 0              | 0.400942553    |
| 3.9737601884   | 6.1126267169   |
| 6.1302764318   | 2.3112457009   |
| 392.473803667  | 394.5894453608 |
| 0              | 0              |



gene\_expression\_table

|                |                |
|----------------|----------------|
| 0              | 0              |
| 261.5335589245 | 227.295310524  |
| 0              | 0              |
| 12.1381513376  | 5.0691803827   |
| 32.7526770507  | 113.9858007542 |
| 4.9897598864   | 2.2574958008   |
| 50.0531989275  | 33.3578290337  |
| 0.2724363802   | 0.246514461    |
| 1.1946040716   | 2.3780663683   |
| 0              | 0              |
| 0.3427652023   | 0              |
| 10.8229586095  | 10.4353451676  |
| 3.7135328385   | 13.4407826912  |
| 217.0026050491 | 197.7093009262 |
| 0.1995187488   | 0              |
| 0.3589160706   | 0.433020982    |
| 17.5822345514  | 14.7522701054  |
| 1.868928023    | 2.2366191465   |
| 15.401585571   | 16.3954675857  |
| 4.6755894179   | 4.0155929391   |
| 6.6330041196   | 2.7701001105   |
| 18.324520364   | 18.6112920845  |
| 0.3248033432   | 0.1959325231   |
| 35.6325232163  | 31.1850218664  |
| 0              | 0              |
| 15.1564297565  | 10.8270930372  |
| 8.2489255376   | 10.3667395195  |
| 5.1172985778   | 1.7363981906   |
| 1.6933679094   | 12.257971628   |
| 0.8156084969   | 0.8200050587   |
| 18.2941062547  | 11.4954507361  |
| 20.3440268293  | 15.3402689326  |
| 0              | 0              |
| 9.0089891372   | 16.3035942493  |
| 23.2097205858  | 19.343348635   |
| 27.0553676123  | 25.2971256487  |
| 30.4231174722  | 38.0154133509  |
| 3.4043248818   | 2.384832307    |
| 0              | 0              |
| 4.6637443766   | 4.6419955849   |
| 0.9340825396   | 0.2817353218   |
| 0              | 0              |
| 0.5259744515   | 0.3807430073   |
| 15.1474853693  | 0              |
| 2.4692590283   | 1.1969532204   |
| 7.0174695655   | 7.0181642992   |
| 6.3065672769   | 8.3919216376   |
| 14.7384956136  | 12.0025345686  |
| 1.4993893438   | 1.8089662159   |

gene\_expression\_table

|                |                |
|----------------|----------------|
| 0.4791362416   | 0.4335471357   |
| 9.465228339    | 10.7057823001  |
| 5.9096248545   | 5.5903933572   |
| 0              | 0.1807034882   |
| 0              | 0              |
| 9.5010552106   | 10.3880946373  |
| 0              | 0              |
| 0              | 0              |
| 15.3708996078  | 10.5703697187  |
| 1.4227262709   | 1.2873559672   |
| 2.3683435449   | 1.1823443608   |
| 11.3788426595  | 8.6200430935   |
| 1.3673906193   | 0              |
| 0              | 0.2633362345   |
| 98.0941207956  | 62.6545482777  |
| 31.650061816   | 26.953981339   |
| 0              | 0              |
| 0              | 0              |
| 298.4914845324 | 259.6128133923 |
| 45.0403104787  | 55.2453839641  |
| 0              | 0              |
| 108.9655149269 | 61.4634433832  |
| 11.9825962939  | 9.3564461511   |
| 0.1217370016   | 0.1101539057   |
| 12.6364310475  | 9.397884899    |
| 23.9268442365  | 21.6502403408  |
| 18.6509036079  | 14.4151709281  |
| 10.6868803697  | 8.1823411019   |
| 21.5989014178  | 12.2148736523  |
| 20.0298243786  | 12.8378447853  |
| 0.5585138731   | 0              |
| 1.8228458156   | 0              |
| 129.8708104708 | 199.773450885  |
| 0              | 16.4370296277  |
| 7.1748502128   | 25.9686952414  |
| 6.2193861238   | 3.9393345029   |
| 12.3037900173  | 8.0968018665   |
| 9.2134104073   | 10.8152666112  |
| 4.9626047305   | 4.4904202188   |
| 385.7948004452 | 318.7316040359 |
| 0              | 0.4831589607   |
| 0              | 0              |
| 1.2662782423   | 0              |
| 0.0914588086   | 0              |
| 43.116788543   | 43.0157554038  |
| 8.0847022457   | 2.7432955372   |
| 9.437294895    | 9.4881669134   |
| 0              | 0              |
| 0              | 0              |

gene\_expression\_table

|                |                |
|----------------|----------------|
| 0              | 0              |
| 8.9457170639   | 8.0945452957   |
| 5.2783735539   | 5.5403271617   |
| 1.6056321156   | 1.743430309    |
| 52.7368211257  | 74.7178929782  |
| 0              | 0              |
| 0              | 0.4675202013   |
| 0              | 0              |
| 8.3738614355   | 7.0719608267   |
| 3.8645747592   | 3.4968661778   |
| 141.9008464282 | 134.0431108982 |
| 68.0687852268  | 68.6312426407  |
| 14.7870210278  | 5.8872254379   |
| 0              | 0              |
| 20.6202954818  | 14.7530782276  |
| 3.2753525441   | 3.9516101151   |
| 0              | 0.5282953018   |
| 0              | 31.7013124307  |
| 2.459815112    | 2.0234248515   |
| 24.6379692978  | 12.3853905015  |
| 0              | 1.7762851187   |
| 53.7062618078  | 50.9288074409  |
| 8.9222185646   | 10.7643768585  |
| 61.4641723338  | 65.2417841005  |
| 0              | 2.6986581037   |
| 0              | 0              |
| 4.331964937    | 3.9197848704   |
| 34.2343508928  | 23.9367750146  |
| 0              | 0.7356832234   |
| 14.3791635096  | 8.6740048905   |
| 8.1271369533   | 6.0167878967   |
| 0.4007211829   | 0.5438897311   |
| 16.7782813631  | 11.8418450813  |
| 0              | 0              |
| 0              | 0              |
| 0              | 0              |
| 0              | 0.6910508503   |
| 0              | 0              |
| 1.1098477033   | 1.0042473333   |
| 116.2343921675 | 107.5651991582 |
| 6.4080121896   | 0.892046045    |
| 0              | 0              |
| 0.0837483879   | 0.1136697787   |
| 6.3947728343   | 4.8605084996   |
| 1.8101808819   | 0.5459816147   |
| 15.6924527107  | 14.1993390087  |
| 14.2751645716  | 19.7552645483  |
| 7.6863651995   | 6.5014307122   |
| 3.8260775145   | 1.5232940312   |

gene\_expression\_table

|               |               |
|---------------|---------------|
| 31.5101892787 | 23.9501146926 |
| 13.1894872802 | 10.3778496024 |
| 3.1447170958  | 2.845501908   |
| 86.504456579  | 92.9500012687 |
| 0.7894483393  | 2.1430004868  |
| 4.300997246   | 5.8376455642  |
| 7.4205770961  | 5.8071525566  |
| 4.0855430576  | 3.6968096689  |
| 9.2276996668  | 5.7805599256  |
| 0.2603368468  | 0             |
| 8.0050119355  | 7.8005273996  |
| 0.0890938774  | 0.0806167265  |
| 0             | 0             |
| 4.1750742497  | 7.083416438   |
| 0             | 0.130076315   |
| 39.9245810421 | 31.6100890995 |
| 2.6703621919  | 3.8660498763  |
| 0             | 0.016491925   |
| 0             | 0             |
| 0.5712602388  | 0.9691981326  |
| 0             | 0             |
| 7.7497746598  | 7.7637230858  |
| 0.1469498007  | 0.1329677441  |
| 3.489192373   | 3.1572008713  |
| 0             | 0             |
| 15.1397621098 | 12.8536042442 |
| 8.9964901543  | 6.1053655511  |
| 32.7355783871 | 30.3552373487 |
| 10.8044925505 | 6.6947504945  |
| 0.1070633492  | 0             |
| 0             | 0             |
| 51.5640852014 | 37.3262709125 |
| 0.3579767379  | 0             |
| 0             | 0             |
| 2.7190665459  | 2.0502928162  |
| 3.7765715469  | 3.4172363412  |
| 12.7839195327 | 9.4913218195  |
| 11.5978202764 | 10.4943048039 |
| 0             | 0             |
| 0.3047818157  | 0.413673414   |
| 13.722409555  | 7.8048096029  |
| 7.9474963258  | 6.5920284712  |
| 0             | 0             |
| 7.9093744001  | 6.3310234398  |
| 27.0872679546 | 25.7999520097 |
| 1.7019937677  | 2.6950902546  |
| 72.8149696836 | 51.3100220394 |
| 9.7945747494  | 9.1312001358  |
| 0.3341362168  | 0.5614953486  |

gene\_expression\_table

|                 |                 |
|-----------------|-----------------|
| 0.2478809855    | 0.2523324102    |
| 154.6800026777  | 121.139895309   |
| 0.9265454119    | 0.6097352613    |
| 196.0099450227  | 115.8055740645  |
| 3.6999301541    | 4.463849685     |
| 2.3539312013    | 4.9699022885    |
| 444.4999720998  | 289.8252404679  |
| 15.7597841058   | 14.2602639211   |
| 1808.0622536279 | 1469.8687267505 |
| 13.1867139305   | 15.0720221977   |
| 2.7725804928    | 3.3450314043    |
| 86.7833016238   | 79.0829206056   |
| 2.8464967397    | 0.9812025822    |
| 8.5716304487    | 8.7901927987    |
| 25.12031046     | 18.622291579    |
| 0               | 0               |
| 0               | 0               |
| 4.3992335015    | 3.7318621222    |
| 55.1218244449   | 34.2904816711   |
| 0               | 0               |
| 0               | 0               |
| 0               | 0               |
| 333.1747652467  | 271.1668006247  |
| 127.982964103   | 91.6794128011   |
| 169.6518361366  | 168.3654932761  |
| 84.5982097088   | 80.801526927    |
| 0               | 0               |
| 6.2085352799    | 2.4076295641    |
| 0.4206591523    | 0.2283804331    |
| 3.2268180709    | 0               |
| 159.0197047166  | 221.8292059056  |
| 0               | 1.4037039281    |
| 0               | 0               |
| 196.8053605783  | 216.9877736666  |
| 0               | 4.4714091256    |
| 99.4233222386   | 67.1878108478   |
| 0               | 14.1802743752   |
| 11.7280056675   | 12.1281179969   |
| 116.9283358591  | 152.8262339836  |
| 12.6366914458   | 11.4343289157   |
| 0               | 0               |
| 12.8393380052   | 11.4207838872   |
| 15.5898894868   | 10.9717490744   |
| 12.8460903945   | 5.6114915204    |
| 5.1517050138    | 5.4384492043    |
| 6.0482450251    | 4.5900596615    |
| 0.6995415316    | 0.6329811879    |
| 5.3796060595    | 2.818167861     |
| 0               | 0               |

gene\_expression\_table

|                |                |
|----------------|----------------|
| 7.189212729    | 6.0985966447   |
| 0.6026293331   | 1.4541067786   |
| 11.4526935601  | 8.534224325    |
| 17.8161518693  | 5.5803362291   |
| 0              | 0              |
| 26.7937935752  | 17.4256651476  |
| 11.4972875554  | 9.6858660626   |
| 45.3988577448  | 28.2419661371  |
| 14.5098270991  | 6.9507733117   |
| 4.998714655    | 3.2307816695   |
| 38.5246564949  | 40.7851380142  |
| 0.6688520918   | 0.5733585502   |
| 0.5019652052   | 0.5677549465   |
| 21.3969685173  | 12.1006741002  |
| 6.2865599603   | 10.4287389499  |
| 0.4214005589   | 0.2542032787   |
| 0.2541069354   | 1.1496451785   |
| 0.139016814    | 0              |
| 93.481950224   | 46.0254321496  |
| 3.4872265973   | 2.7046475453   |
| 580.0498578503 | 457.0542230722 |
| 127.2843172402 | 134.0322051542 |
| 10.0673988323  | 12.5797866813  |
| 1.8989700151   | 2.3728708977   |
| 16.3169333544  | 16.4048902682  |
| 0.5363400326   | 1.7794629254   |
| 17.1437980679  | 14.6852528119  |
| 0              | 0              |
| 6.421045972    | 5.3950862921   |
| 0              | 0              |
| 0.2128412947   | 0.1925897598   |
| 0.4360577993   | 1.183702631    |
| 1.130649131    | 1.0230695358   |
| 32.3123118643  | 44.8060452806  |
| 1.5762527224   | 3.3279740751   |
| 0              | 0              |
| 5.3210517726   | 3.1295950102   |
| 0.092134428    | 0.0500207839   |
| 0.0275863946   | 0              |
| 0.0948609572   | 0.1430584621   |
| 0.325792884    | 0.4308530209   |
| 45.2883168669  | 36.2279887554  |
| 1.601668711    | 0              |
| 5.5581172982   | 8.6615216665   |
| 26.8389348805  | 7.4723845724   |
| 4.866481088    | 3.1453161421   |
| 0              | 0              |
| 3.9939630343   | 3.011619458    |
| 1.1325602118   | 1.2944826697   |

gene\_expression\_table

|                 |                 |
|-----------------|-----------------|
| 0.2412596699    | 0.1455361124    |
| 18.7972167938   | 4.6387334657    |
| 0.3856335018    | 0               |
| 26.0757628212   | 19.9647398039   |
| 0.0774628902    | 0.0700924106    |
| 13.8116539395   | 9.4320720477    |
| 49.3412493293   | 31.1172591922   |
| 377.0507929075  | 296.1912810771  |
| 1.3136588251    | 1.443380298     |
| 0.0532345922    | 0               |
| 1.1356332581    | 1.1494956343    |
| 21.5703303309   | 9.2453424884    |
| 2.7110844906    | 2.3240167625    |
| 47.682092023    | 35.6547232935   |
| 5.3408336351    | 5.2590724842    |
| 3.6329825467    | 3.5861559517    |
| 3.2867893462    | 8.9221685808    |
| 5.789246055     | 3.9288058815    |
| 0.4056850714    | 0.3670847359    |
| 0               | 0               |
| 3.5420284424    | 3.605635875     |
| 0               | 0               |
| 1.9080284971    | 2.3019765376    |
| 0               | 0               |
| 0               | 0               |
| 48.817744262    | 75.0104286554   |
| 14.1526134908   | 16.2985622757   |
| 0               | 4.1995023147    |
| 0.6303081502    | 1.1406705211    |
| 1.2488547566    | 0.847521053     |
| 95.708169652    | 80.6970187369   |
| 0               | 0               |
| 0               | 3.053506521     |
| 63.1871104064   | 58.5694611409   |
| 0               | 0               |
| 0               | 0               |
| 0               | 0               |
| 1.5446161404    | 2.1663547031    |
| 2.4722256664    | 1.8422328606    |
| 74.7655430386   | 63.9948627281   |
| 41.1292433601   | 33.2983980025   |
| 2419.2105917389 | 2273.0400781029 |
| 0               | 0.2650279133    |
| 0               | 0               |
| 1.7323059217    | 2.6124659523    |
| 0               | 0.8122456974    |
| 1.738055113     | 1.6554544586    |
| 944.7224869444  | 945.6596007584  |
| 3.7558644597    | 3.6412494672    |

gene\_expression\_table

|                |                |
|----------------|----------------|
| 0              | 0.0873940689   |
| 59.5379410401  | 46.4931316972  |
| 9.4178773762   | 10.9185309472  |
| 21.4173132695  | 16.7368301477  |
| 19.93443718    | 21.37075909    |
| 128.8934589739 | 135.9742230675 |
| 3.0471129458   | 2.1767247227   |
| 0.2882157542   | 0              |
| 0              | 0              |
| 365.9052028378 | 331.0898631298 |
| 2.6961399992   | 3.5655783796   |
| 13.8350589751  | 16.9370289128  |
| 263.8475770218 | 204.8671922417 |
| 4.0383130438   | 4.0969915237   |
| 0.4558965693   | 1.6500747359   |
| 97.8247786879  | 97.2234753371  |
| 0              | 0              |
| 8.0700656427   | 9.5490449107   |
| 3.5231261059   | 2.4706270412   |
| 15.3910623253  | 27.2477454915  |
| 2.1481041889   | 1.2148220297   |
| 4.0888689371   | 2.995091649    |
| 30.4629442454  | 21.4390089557  |
| 0.3885280705   | 0.3984348915   |
| 24.7533331599  | 17.7178921399  |
| 0.5013421039   | 1.1341003577   |
| 0.7357197271   | 0              |
| 0              | 0              |
| 5.5105750818   | 3.9596707062   |
| 5.4315534806   | 7.3721237817   |
| 29.3218380327  | 30.9538931849  |
| 0              | 0              |
| 5.4481172172   | 9.8594738188   |
| 113.6848518535 | 113.0865722482 |
| 13.7838437026  | 11.1996444589  |
| 0              | 0              |
| 4.6246131956   | 5.129495065    |
| 2.0973876785   | 1.6131506874   |
| 0              | 0              |
| 0.0451432043   | 0.0408478951   |
| 0.9266078227   | 0.782546293    |
| 2.3723671395   | 1.431093273    |
| 4.3286233631   | 0.7833522485   |
| 16.9361127667  | 14.5949206162  |
| 0.8448454158   | 0              |
| 233.8097531769 | 156.4375038429 |
| 1.2582381638   | 1.7077779908   |
| 0              | 0              |
| 0              | 0              |



gene\_expression\_table

|                |                |
|----------------|----------------|
| 4.1642782761   | 3.2656462346   |
| 0.4712331149   | 0.473773311    |
| 65.5522499064  | 144.0508360315 |
| 38.8908658603  | 27.0695826191  |
| 1.3020508004   | 2.0945112703   |
| 2.0506775231   | 0.4638896463   |
| 1.3713163438   | 0.7896239392   |
| 1.3308453806   | 1.9267478527   |
| 0.7875741857   | 0.6235579569   |
| 4.4356485818   | 2.5541111078   |
| 1.5635276116   | 0.7073801341   |
| 20.1397584904  | 13.1260104316  |
| 34.3412585923  | 31.9744266239  |
| 5.3945344627   | 4.6371898511   |
| 42.7636326969  | 33.4969358115  |
| 0              | 0              |
| 11.4245725094  | 6.3615638807   |
| 0              | 0              |
| 0              | 0              |
| 24.9505648853  | 16.3485401763  |
| 81.6607718717  | 64.6545112664  |
| 0              | 0              |
| 0              | 0              |
| 39.8272736335  | 19.5204573207  |
| 11.3984827404  | 13.7519119202  |
| 807.9185160642 | 903.0571475911 |
| 0              | 1.6845521811   |
| 5.2055294376   | 2.8261385993   |
| 4.1490282689   | 0              |
| 182.4222601377 | 181.9084240728 |
| 80.2848874729  | 76.7970932166  |
| 141.7060791351 | 125.6584958672 |
| 36.2882055288  | 23.8803173531  |
| 0              | 0              |
| 0              | 0              |
| 28.9421470509  | 11.6392642216  |
| 9.3567997869   | 11.006468336   |
| 40.6208621736  | 60.5390423213  |
| 103.6520169633 | 86.2865061657  |
| 0              | 0              |
| 110.6355102009 | 104.7433670422 |
| 46.3816630101  | 69.3392877467  |
| 0              | 0              |
| 0              | 0              |
| 0              | 0              |
| 9.7878491194   | 8.5285293693   |
| 0              | 3.8897570546   |
| 22.3461403155  | 20.2199380636  |
| 13.4346757898  | 18.2345793417  |

gene\_expression\_table

|                |                |
|----------------|----------------|
| 12.038765649   | 12.150213515   |
| 218.1690902093 | 227.0222169699 |
| 0.6690661501   | 0.4843243951   |
| 0.5858323849   | 0.8540359811   |
| 15.4492752953  | 19.3559532443  |
| 0.0937923585   | 0              |
| 29.6401074836  | 23.9831753605  |
| 0.7335926745   | 0.3318962074   |
| 12.8176603221  | 15.4641051608  |
| 19.6066327477  | 18.7267067396  |
| 0.2056878732   | 0              |
| 0.5081401208   | 0              |
| 0              | 0              |
| 11.4915249166  | 18.9056787102  |
| 1.023755949    | 0              |
| 1.5552853607   | 0.6701439311   |
| 0              | 0              |
| 1.0226885181   | 1.0988901938   |
| 0              | 0              |
| 0              | 0              |
| 3.0424476922   | 2.2023706297   |
| 11.9030693771  | 7.0242455892   |
| 3.5666067775   | 2.1047278758   |
| 6.6806560307   | 2.2388894352   |
| 0.3533129412   | 0              |
| 8.7420872254   | 7.031369365    |
| 2.5616816623   | 2.1163813103   |
| 0.9825870985   | 0.8207034343   |
| 0.1290068142   | 0.1167320064   |
| 0              | 0.1028308469   |
| 28.8047252032  | 24.3824498699  |
| 0.0748023969   | 0              |
| 8.2553482101   | 7.4698640188   |
| 0.7411764241   | 0.6706545818   |
| 4.9799282285   | 3.9940391148   |
| 1.5523440019   | 0.3830838443   |
| 15.7794326432  | 4.4618884154   |
| 6.3044705423   | 6.617346997    |
| 74.644812583   | 65.2134182442  |
| 8.2762516077   | 12.3344586878  |
| 8.3229081048   | 6.0247965514   |
| 0.7854463087   | 0.7107122523   |
| 40.4565447302  | 37.0378367629  |
| 0              | 0              |
| 0              | 1.5388548133   |
| 5.3447856391   | 3.9001912729   |
| 0              | 0              |
| 0              | 0              |
| 578.3546257757 | 406.2874889482 |

gene\_expression\_table

|                 |                 |
|-----------------|-----------------|
| 54.0229597219   | 52.3743802302   |
| 0.5600431671    | 1.3513490314    |
| 8.6485227669    | 0               |
| 3.0520792494    | 2.0252308383    |
| 0               | 0               |
| 0.6206983534    | 0.3510248885    |
| 0               | 0               |
| 3.7135996711    | 4.2766896408    |
| 0               | 0.032979277     |
| 6.1681749124    | 8.0888147511    |
| 62.0351595323   | 51.7843052693   |
| 0.2801416622    | 0               |
| 0.6672816609    | 1.2075815924    |
| 0               | 7.488278754     |
| 0               | 0               |
| 1589.1192679544 | 1280.9390870128 |
| 0.8389430112    | 0.7229703072    |
| 0               | 0.4848802822    |
| 17.4099359268   | 13.2280510354   |
| 16.9072849125   | 11.9362560676   |
| 14.5056613327   | 12.2305507316   |
| 0.5303225749    | 0.7037993088    |
| 0.9830868788    | 1.1860634854    |
| 0               | 0               |
| 0.2990456756    | 0.4181875145    |
| 2.1239250274    | 1.6261695133    |
| 10.4475889064   | 4.7267581251    |
| 1.0352453577    | 2.810229872     |
| 27.275701884    | 18.7866181426   |
| 21.3157324296   | 11.1664890332   |
| 3.6572862887    | 2.8956382868    |
| 24.4469034117   | 24.101785309    |
| 1.2749885192    | 2.3073504888    |
| 0               | 0.579129472     |
| 354.9049980526  | 274.1407537926  |
| 4.4263485755    | 4.3321421712    |
| 0.5888192549    | 0.2663969862    |
| 64.173763418    | 47.0072056252   |
| 6.3451715318    | 4.1391761104    |
| 4.0618201302    | 3.2669723938    |
| 1.368599986     | 1.06146833      |
| 0               | 0               |
| 0               | 0               |
| 1.7453713638    | 1.3536873051    |
| 0.6920513815    | 0.139156381     |
| 17.8435278122   | 19.7336852666   |
| 6.9306240374    | 7.2613725625    |
| 10.9315435651   | 7.7894958785    |
| 0.1308670129    | 0.5526043126    |

gene\_expression\_table

|                  |                  |
|------------------|------------------|
| 4.8152006296     | 3.1297057947     |
| 0.2924539153     | 0.2117018857     |
| 25.2790402338    | 19.4466953315    |
| 0.4861975076     | 0.6599047991     |
| 14553.1304010204 | 17031.0694140174 |
| 16.8701194344    | 12.1336801786    |
| 5.1908158031     | 6.5956711651     |
| 6.8696811933     | 5.1800343103     |
| 18.6345927355    | 13.3018805733    |
| 7.0697714096     | 6.8382719346     |
| 0                | 0                |
| 1.1952485793     | 0.5150106867     |
| 0                | 3.5690282356     |
| 2.6644289929     | 2.73236751       |
| 11.2634813618    | 12.7719746403    |
| 3.4998067249     | 2.5910225045     |
| 8.4395218953     | 8.767849235      |
| 4.7458027524     | 5.9458799475     |
| 4.6771182895     | 6.5405141498     |
| 1.1092329494     | 0.8603066334     |
| 52.8893565858    | 36.3713294314    |
| 0.6695994945     | 0.5126745389     |
| 37.3245799683    | 25.7112113142    |
| 1.9920887367     | 3.1544527616     |
| 349.3944264109   | 321.290714124    |
| 1.4746488659     | 2.348435239      |
| 9.6910015818     | 16.61479028      |
| 0                | 0                |
| 0.783070812      | 0.6731346416     |
| 7.5061391165     | 0                |
| 0.2228816839     | 0.1283385223     |
| 109.0977486243   | 91.6152978747    |
| 12.3954812011    | 11.4769082945    |
| 1.3835121447     | 1.1475502566     |
| 7.2205931335     | 9.031691909      |
| 3.7857873052     | 4.4200970757     |
| 45.3094596384    | 60.7520729868    |
| 2.8563151738     | 1.2922705015     |
| 77.2351620047    | 72.9248873689    |
| 87.0868260523    | 78.4975637602    |
| 3.1470466428     | 3.58587901       |
| 5.4060414651     | 5.0834945874     |
| 4.4542994681     | 4.0304794515     |
| 31.522594865     | 22.1847628441    |
| 6.9192599154     | 5.297686775      |
| 28.2330970737    | 24.0869447465    |
| 31.0961960756    | 23.8361743883    |
| 0                | 0.3679338771     |
| 53.3606134737    | 44.1916138074    |

gene\_expression\_table

|                 |                 |
|-----------------|-----------------|
| 1.8452077789    | 0               |
| 0               | 0.2344825307    |
| 2.8846747748    | 1.8157928556    |
| 0               | 0               |
| 4.3238769249    | 5.2818296679    |
| 6.9458274774    | 9.7416604876    |
| 4.160715138     | 4.0489672925    |
| 1.9168754539    | 1.6622172691    |
| 14.0855147687   | 12.4903928622   |
| 31.0041960143   | 29.2231172378   |
| 6.2741693207    | 5.2040920938    |
| 13.4038198509   | 0               |
| 3832.9107010644 | 3400.3585293851 |
| 0.7092537022    | 1.2835385196    |
| 12.2356267079   | 15.0973975845   |
| 39.1815129848   | 45.746386948    |
| 471.4434505243  | 429.7777211213  |
| 78.7619680935   | 92.8642113634   |
| 0.1366929425    | 0.1236868109    |
| 0               | 0               |
| 0               | 0               |
| 0.9870151473    | 0.8931021136    |
| 93.0863331925   | 75.36306331     |
| 12.3609640563   | 8.6993173401    |
| 3.5390428147    | 5.1236929873    |
| 18.4320303044   | 17.3453798336   |
| 4.6019902686    | 3.1647294447    |
| 1.3740107358    | 0.5086127632    |
| 0               | 0.0203086727    |
| 0               | 0               |
| 1.0085370945    | 0.5069868218    |
| 17.6684103129   | 27.3116155702   |
| 0               | 0               |
| 1.1231761284    | 2.0326151568    |
| 47.4882221772   | 27.8039804474   |
| 150.4283226503  | 157.6781080923  |
| 3.9204777396    | 2.6605875541    |
| 1.236655188     | 0.2355766891    |
| 42.4788176662   | 24.3434465667   |
| 8.1236402604    | 11.7611006177   |
| 3.5867035486    | 1.7702367286    |
| 0               | 0               |
| 16.7983614198   | 14.3783993191   |
| 1.156646761     | 1.5698902946    |
| 58.3042595418   | 44.3156240905   |
| 41.4961829003   | 23.0293678572   |
| 76.7163656717   | 67.8392595679   |
| 1.7209857086    | 1.5572364598    |
| 15.0928380762   | 8.9622597889    |

gene\_expression\_table

|                 |                |
|-----------------|----------------|
| 0               | 1.7708699455   |
| 36.1587556574   | 49.0774551798  |
| 0               | 0              |
| 4.9659829502    | 4.4934770059   |
| 52.6928255095   | 95.3583619504  |
| 70.3700542174   | 57.610214383   |
| 612.1702618635  | 569.3099200515 |
| 0               | 0              |
| 13.915775339    | 3.4341026905   |
| 0               | 0              |
| 0               | 14.9342029902  |
| 0               | 0              |
| 215.483932176   | 186.8567478136 |
| 84.3355948425   | 47.6944922087  |
| 0               | 1.6887901386   |
| 107.7324950994  | 128.4285445146 |
| 0               | 0              |
| 0               | 0              |
| 14.9025303176   | 20.0093716769  |
| 65.8099138825   | 64.3120535806  |
| 0.0953243426    | 0.1725087444   |
| 29.3200956269   | 31.6652347598  |
| 3.0218420753    | 2.4608864378   |
| 0.018832904     | 0              |
| 0               | 0              |
| 25.981182696    | 19.1011531178  |
| 0               | 0              |
| 0               | 0              |
| 1280.3233072372 | 1553.157110983 |
| 3.9626706251    | 3.137424821    |
| 0               | 0.1492331437   |
| 130.5852055173  | 160.5437718085 |
| 33.2008536821   | 22.7903625042  |
| 2.3432197716    | 1.4135105804   |
| 155.6190830801  | 207.6005320561 |
| 0               | 0              |
| 381.9386886845  | 423.0954719273 |
| 10.4121733508   | 10.9917155044  |
| 507.4244220612  | 639.3140650535 |
| 3.2490942897    | 2.939947766    |
| 155.4041399432  | 292.0520745355 |
| 14.0525479487   | 9.5366015724   |
| 10.6810922822   | 9.3805432386   |
| 12.833946261    | 29.0320380663  |
| 0.3880540962    | 0              |
| 1.1698484902    | 1.0585391339   |
| 0.9138433825    | 1.6537850683   |
| 17.8441891244   | 20.9168506858  |
| 27.3005964052   | 19.100246113   |

gene\_expression\_table

|                 |                 |
|-----------------|-----------------|
| 40.4156728746   | 21.9421087701   |
| 5.8842177081    | 5.8314233762    |
| 10.9301559208   | 9.6703862207    |
| 0.2680850171    | 0.3032214045    |
| 2.1366938601    | 1.2889270631    |
| 7.3264823003    | 6.8579775814    |
| 0               | 0               |
| 0               | 0               |
| 1.2817410092    | 0               |
| 2.1849908509    | 0.3954184396    |
| 0.1857643757    | 0.3361783393    |
| 10.7133541754   | 9.6939943463    |
| 1.4417663842    | 2.0500612657    |
| 9.5990461622    | 9.3538427177    |
| 1.2349803545    | 1.6762106962    |
| 0               | 0               |
| 45.0003150797   | 25.9445956798   |
| 0               | 0               |
| 0               | 0.6984728556    |
| 0               | 0               |
| 16.660071833    | 10.3639872878   |
| 1.0219059562    | 1.0171404248    |
| 0               | 0               |
| 0               | 0               |
| 1.441491667     | 0               |
| 95.0286012228   | 131.8463808933  |
| 201.3218762491  | 197.5762432952  |
| 23.3427587805   | 13.5782548415   |
| 81.7217582585   | 85.4487730962   |
| 39.8819867952   | 30.257791819    |
| 15.5232147973   | 12.7692762117   |
| 27.4938277156   | 27.3656136703   |
| 8.0652614194    | 11.9684964771   |
| 0               | 0               |
| 6.8329506651    | 3.0914027499    |
| 2.002949703     | 1.5534617113    |
| 7.5646039303    | 14.3119445323   |
| 4.7773601532    | 4.3228013894    |
| 47.9792636727   | 40.782949551    |
| 72.898219382    | 62.4283795947   |
| 0               | 0.1192373074    |
| 15.4719596052   | 14.9331471964   |
| 0.1928167509    | 0               |
| 2.8407724731    | 4.3292247029    |
| 1863.8679498432 | 2094.2546632183 |
| 148.4037752871  | 127.811887258   |
| 0               | 0.4087508652    |
| 2.9198730006    | 2.1466667596    |
| 0               | 0               |

gene\_expression\_table

|                 |                 |
|-----------------|-----------------|
| 3.9043212041    | 3.7977931177    |
| 61.8760611573   | 48.8106138619   |
| 52.8040700391   | 25.2171381747   |
| 2.8653669756    | 2.94628584      |
| 0.9222798868    | 0.927251464     |
| 1.2952328487    | 0.8371381113    |
| 1.4774742185    | 6.6844736422    |
| 10.6717478296   | 0               |
| 17.0800291077   | 31.5817308412   |
| 30.7923728774   | 52.1529296696   |
| 0               | 1.8225768542    |
| 20.281407034    | 14.8561066087   |
| 67.7366548861   | 58.5628760425   |
| 4.2314081094    | 3.3870117369    |
| 0.0244503026    | 0               |
| 0               | 0               |
| 11.8714873131   | 6.1382473292    |
| 3.0150977284    | 6.3658364747    |
| 0               | 0               |
| 1221.3377990911 | 1212.4674521123 |
| 0.3862010542    | 0.3494545942    |
| 80.3398852325   | 85.568854256    |
| 7.9102485336    | 10.0206400936   |
| 2.2096662404    | 0.6664732536    |
| 1.6870152779    | 1.5264982655    |
| 5.9993232609    | 6.4337736439    |
| 0               | 0               |
| 0.1323517322    | 0.1197586604    |
| 7.1318455358    | 3.6875776942    |
| 3.0022460272    | 1.5523352864    |
| 0               | 0               |
| 0               | 0.2880547106    |
| 7.2088504238    | 7.1159334016    |
| 0.5457644659    | 0.4938357829    |
| 6.8314337271    | 7.4603500471    |
| 6.1767624468    | 6.0822043232    |
| 12.2205563502   | 12.2217661925   |
| 0.187176809     | 0.169367212     |
| 2.3402442743    | 2.5587346307    |
| 0               | 0.8880556601    |
| 6.7869465806    | 9.1464362663    |
| 0               | 0               |
| 0               | 0               |
| 0               | 0               |
| 2.3981817134    | 2.6039979178    |
| 9.1610127354    | 14.2473304565   |
| 1.5592444169    | 1.0816782034    |
| 1.2642072553    | 2.0018596533    |
| 0               | 0               |



gene\_expression\_table

|                 |                 |
|-----------------|-----------------|
| 0.2722040239    | 0.2814905291    |
| 0.8167867718    | 0.3695353583    |
| 21.9446509141   | 19.8566497859   |
| 0               | 0               |
| 0               | 0               |
| 0               | 0               |
| 0               | 0               |
| 0               | 0               |
| 0               | 0               |
| 9.3873176343    | 12.0877978571   |
| 0.3023587705    | 0.13679489      |
| 17.49628252     | 9.9988655213    |
| 7.5391235271    | 5.8152938844    |
| 1.4438658263    | 2.7996088395    |
| 4.0973078248    | 5.5611825538    |
| 2.3069792816    | 1.1742039055    |
| 5.923242915     | 7.7045042043    |
| 1.1315385379    | 0.8190994536    |
| 0.4470198663    | 0.2022432931    |
| 13.8622877983   | 14.8951825073   |
| 15.7331990265   | 13.1122971854   |
| 18.7912429355   | 4.8580811199    |
| 115.2979143469  | 138.1237165869  |
| 6.8297520926    | 8.2398816889    |
| 11.3304837435   | 10.2524049474   |
| 20.5928834266   | 318.6328667345  |
| 0               | 0               |
| 0               | 0               |
| 0               | 0               |
| 0               | 2.1617546166    |
| 5.0525422744    | 29.7167021985   |
| 16.2355818833   | 15.8430090852   |
| 0               | 0.4194121245    |
| 0.9973721098    | 3.3842760989    |
| 14.1171339214   | 19.1608642139   |
| 0.9016783825    | 9.7906201916    |
| 4.580696704     | 4.3886648934    |
| 55.6133788807   | 39.9994176458   |
| 69.2448649218   | 85.7794833598   |
| 4.2975133749    | 7.777222647     |
| 3.5482377418    | 4.2808375472    |
| 3.3751406282    | 1.832400589     |
| 0.5558223169    | 2.011746577     |
| 6.7582545836    | 2.446086656     |
| 0.6769176741    | 0               |
| 1156.2128334853 | 1055.5838574111 |
| 0               | 0               |
| 0               | 0               |
| 19.7697261623   | 62.6103306934   |

gene\_expression\_table

|                |                |
|----------------|----------------|
| 0.4533708826   | 0.5274428305   |
| 0              | 0.0794841201   |
| 115.482101998  | 93.377751536   |
| 12.2825420694  | 21.2613286303  |
| 0              | 0              |
| 0              | 0              |
| 3.3233583192   | 2.4565415437   |
| 159.3024453515 | 141.5001895662 |
| 107.8637801288 | 90.0929545245  |
| 0              | 0              |
| 119.2530689792 | 134.8018837151 |
| 2.9485785121   | 2.2233546841   |
| 12.2615500079  | 11.452781039   |
| 7.203188303    | 5.3327581962   |
| 0              | 0              |
| 14.8813524667  | 12.6059192601  |
| 7.7381204602   | 11.2638452106  |
| 0              | 1.9483228222   |
| 57.0937876148  | 51.6613980352  |
| 4.5016727841   | 4.4436493816   |
| 23.3146425776  | 36.640922593   |
| 12.6307724806  | 4.1144303272   |
| 10.0097253494  | 10.1228812068  |
| 5.7099343769   | 5.4705627031   |
| 6.2829203032   | 6.4431243432   |
| 15.6563368489  | 13.1725079728  |
| 0              | 0              |
| 0              | 0              |
| 85.0438072078  | 103.9069574841 |
| 189.6607045515 | 234.6917199598 |
| 2.1721092612   | 0              |
| 119.8172790908 | 141.7758702066 |
| 111.8986487608 | 87.4446133602  |
| 18.7987139975  | 15.6492405915  |
| 1.0401919339   | 1.3494588637   |
| 15.0403071012  | 10.134543472   |
| 25.9344228018  | 17.0134305585  |
| 0              | 0              |
| 53.9291582083  | 59.1315468197  |
| 0              | 0              |
| 6.4968864531   | 5.2908455711   |
| 4.620693571    | 4.5360354825   |
| 3.1361559898   | 3.4351775635   |
| 0.4517885027   | 0.2044007469   |
| 7.1985681408   | 3.9081810075   |
| 3.5491152565   | 3.746659211    |
| 0.9551071676   | 0.9722588974   |
| 3.3117825236   | 2.0431849821   |
| 0              | 0              |

gene\_expression\_table

|                |                |
|----------------|----------------|
| 14.7764425812  | 14.2821099284  |
| 0.2955786533   | 0              |
| 90.6632817995  | 65.5577956728  |
| 30.5756770763  | 27.6664465544  |
| 823.9722748005 | 755.9758672581 |
| 0              | 0              |
| 0.5579692108   | 0              |
| 1.225094428    | 1.6627927534   |
| 0              | 0              |
| 1.464487157    | 1.230490269    |
| 0.5273887074   | 0.2726905433   |
| 3.9688578824   | 3.9794676634   |
| 0              | 0              |
| 4.4790108479   | 5.2107937457   |
| 0.3236265978   | 0.159727639    |
| 2.7411180939   | 2.3884416161   |
| 16.9453677436  | 33.2796685916  |
| 0.4126240952   | 0.2986908175   |
| 53.7579124406  | 37.026705214   |
| 1.0284103692   | 4.6527932062   |
| 37.5027192776  | 33.9343909196  |
| 0              | 0.5878717301   |
| 10.4949925467  | 10.4095258026  |
| 0.1756751797   | 0.1059732972   |
| 59.8865435371  | 35.4862267638  |
| 0.764397648    | 0.4940473862   |
| 2.9578438791   | 2.0073070515   |
| 0.4636695504   | 0.2936864542   |
| 24.8238582184  | 22.461904767   |
| 11.4402797183  | 8.5249738801   |
| 0              | 0.0226726582   |
| 0              | 0              |
| 2.8462851946   | 2.5754653616   |
| 0.6758500559   | 0.5241805039   |
| 0              | 0              |
| 0              | 0              |
| 1.3978721807   | 1.6864889427   |
| 0.2092739686   | 0.3787237191   |
| 0.1034932039   | 0.0936459783   |
| 0.58477186     | 0.7055089081   |
| 0.2210112536   | 0.0999911796   |
| 2.2883224511   | 4.4000078918   |
| 0.1836946514   | 0.2991894779   |
| 7.5384695303   | 8.4676907007   |
| 0.9848830773   | 4.4558645347   |
| 0              | 0              |
| 1.2949500125   | 0.3905791437   |
| 0              | 0              |
| 3.6852554411   | 2.7391429659   |

gene\_expression\_table

|                |                |
|----------------|----------------|
| 2.6468025472   | 2.7941237257   |
| 20.7335296969  | 17.2292739466  |
| 0              | 0              |
| 0              | 1.630930091    |
| 5.3691865243   | 6.3925215201   |
| 2.7612812574   | 2.2486944811   |
| 7.4390190576   | 8.5669912105   |
| 0              | 0              |
| 0              | 0              |
| 0.9015483774   | 1.0876898409   |
| 1.450358031    | 2.6247172123   |
| 0              | 0              |
| 2.7333746114   | 2.158514665    |
| 2.2876604661   | 1.7801939378   |
| 0.5554520085   | 0.5026015702   |
| 12.0631212277  | 10.3955552922  |
| 8.5137467625   | 6.3442040369   |
| 0              | 0              |
| 2.1487566874   | 1.9443056618   |
| 0.8809889444   | 0              |
| 4.4363054255   | 4.0141975155   |
| 33.4921686073  | 23.1339223077  |
| 10.0551742989  | 5.4590635879   |
| 0.2540361449   | 0.6895949425   |
| 25.8789342635  | 26.34366587    |
| 276.3226842862 | 237.0811767538 |
| 14.3962620722  | 29.0590685281  |
| 0.9095018351   | 1.3373166277   |
| 0.0917265644   | 0.0553326115   |
| 0.5043227759   | 1.3690116257   |
| 0.6086545371   | 1.9275968483   |
| 24.5065317072  | 19.7867190996  |
| 1.9413612638   | 2.1409093953   |
| 3.5538282125   | 2.3286007182   |
| 0.7697343438   | 2.3216508588   |
| 9.7573324543   | 8.8289366801   |
| 67.1956451847  | 64.5890594599  |
| 6.1832313364   | 7.0233926454   |
| 50.013257168   | 32.9711864261  |
| 1.2374343344   | 1.4396069376   |
| 452.1352867717 | 248.6162097795 |
| 30.827167327   | 31.8788661476  |
| 56.2560701608  | 53.4068334792  |
| 145.7163400269 | 148.5225431579 |
| 0              | 0              |
| 2.8789936414   | 1.4396393317   |
| 107.1652223459 | 59.9442314469  |
| 7.6343898984   | 7.1308273274   |
| 10.9306811575  | 8.3920607162   |

gene\_expression\_table

|                 |                 |
|-----------------|-----------------|
| 3.6807949984    | 6.1060501147    |
| 2.5490011777    | 3.4597012198    |
| 0.2336989301    | 0.4229256441    |
| 14.7881001449   | 11.7753101436   |
| 0.0708028394    | 0               |
| 5.7778192367    | 3.3019378538    |
| 4656.6270197842 | 4858.6591477272 |
| 9.9679039349    | 8.6854180548    |
| 0               | 0               |
| 11.2671106222   | 7.3096668684    |
| 0               | 0               |
| 638.4607268347  | 502.7150191017  |
| 15.0805961894   | 14.0247469466   |
| 4.6350138296    | 3.494999257     |
| 0               | 4.9912421336    |
| 0               | 2.8275509624    |
| 0               | 0               |
| 1.6917970672    | 0.7654125373    |
| 29.4347261971   | 35.9559748798   |
| 8.1063383134    | 17.1150751187   |
| 4.4989386086    | 0.8141742487    |
| 8.9372483355    | 8.4544679158    |
| 0.2073666446    | 0.2814540219    |
| 0.3579679549    | 0.7287926235    |
| 7.4720224865    | 4.8595194801    |
| 4.0407399651    | 6.0407931274    |
| 14.4056302708   | 12.7131050627   |
| 0.2422873212    | 0.7673191413    |
| 5.2343697488    | 2.706472684     |
| 0               | 0.1033166458    |
| 14.3654551565   | 11.3479870186   |
| 0               | 0               |
| 7.2628413615    | 5.3769213255    |
| 2.7225336644    | 0               |
| 0.0855415828    | 0.0387012138    |
| 0               | 0               |
| 131.4136400069  | 111.5135212419  |
| 0.8030635132    | 1.1626451293    |
| 0               | 0               |
| 0               | 0               |
| 26.0765758093   | 16.2460324823   |
| 5.0504601599    | 1.9585355717    |
| 32.4807819424   | 23.7921342666   |
| 0.8218084168    | 0.7436145595    |
| 5.2929649584    | 5.5875716853    |
| 69.6556570254   | 60.8546439797   |
| 4.367113383     | 2.9636917453    |
| 0.4052718813    | 0.9371499762    |
| 6.5736926074    | 5.147494151     |

gene\_expression\_table

|                 |                |
|-----------------|----------------|
| 6.2094160481    | 2.8092996404   |
| 0.4658334173    | 0.7025167593   |
| 2.5740599684    | 2.8467290666   |
| 2.3260620255    | 3.3074496066   |
| 19.9741150604   | 14.0226265154  |
| 24.5238173391   | 32.1177020628  |
| 0               | 0              |
| 34.9011049367   | 24.0010404195  |
| 0.9019905479    | 1.7139517064   |
| 16.513930852    | 7.471327359    |
| 0               | 0              |
| 6.4586356387    | 13.533719147   |
| 0.0730761632    | 0.0991846113   |
| 0.6206092456    | 0.4211693943   |
| 11.9144659943   | 11.1401828877  |
| 0.4669914404    | 0.1408526315   |
| 1.3552487904    | 1.4562299073   |
| 56.5060220453   | 38.8829568949  |
| 8.665909115     | 9.6509054276   |
| 659.6483708199  | 519.7421155481 |
| 1199.3557841673 | 974.8110393709 |
| 32.5252412116   | 28.0455472452  |
| 0.6765493757    | 0.2448706807   |
| 127.6098359278  | 51.3190882152  |
| 0.2169342545    | 0.5888798416   |
| 27.4345900251   | 28.7030151254  |
| 7.0704075449    | 6.8897970703   |
| 61.2818870004   | 52.453654276   |
| 0.7444624548    | 0.7484755018   |
| 4.1403938631    | 1.8732207506   |
| 7.1076630583    | 4.2875862762   |
| 194.4392570186  | 156.6283093393 |
| 14.9182596194   | 13.4988092468  |
| 4.7506565066    | 2.8657590369   |
| 26.9705301595   | 15.3656855085  |
| 9.0656256303    | 6.5141825869   |
| 1.1915844505    | 2.0216380306   |
| 97.8779220189   | 90.4493436028  |
| 7.4657105432    | 7.6871328939   |
| 0               | 0.8512553482   |
| 14.2488910632   | 7.0547315753   |
| 0               | 0              |
| 2.5496807743    | 1.5972109019   |
| 6.9993081831    | 3.1666671728   |
| 0               | 0.1001945587   |
| 4.3746425664    | 2.2619438779   |
| 0               | 0              |
| 0               | 1.3053353547   |
| 3.7886413679    | 6.856315473    |

gene\_expression\_table

|                 |                 |
|-----------------|-----------------|
| 17.1012399906   | 14.2524441862   |
| 25.3766885024   | 21.2225784548   |
| 0.4572682455    | 1.2412795415    |
| 1.1925296254    | 0.3923862518    |
| 0.1476188626    | 0.2671462917    |
| 11.9967019004   | 8.9836414597    |
| 0               | 0               |
| 14.7583586265   | 14.9215078787   |
| 2.8141061246    | 2.742221012     |
| 0.4196565074    | 1.1391804314    |
| 0.3783597881    | 0.6847188259    |
| 1.8935421567    | 2.4272804237    |
| 12.0453752467   | 11.6024546494   |
| 2838.4135438033 | 2845.3596174378 |
| 1.833013959     | 2.6537686202    |
| 0               | 0               |
| 13.2628277845   | 9.8578733588    |
| 0.4389527526    | 1.3239568213    |
| 0.3834544379    | 1.3878772576    |
| 13.2057127074   | 7.8689910586    |
| 2.2881237897    | 3.2535048701    |
| 14.9444549831   | 13.5225121603   |
| 0.4283047314    | 0.1291840562    |
| 57.0737582689   | 55.1326848879   |
| 2.6792726298    | 2.2817353371    |
| 0               | 0               |
| 9.8770560134    | 11.4198433637   |
| 0.2918984576    | 0.4402079174    |
| 14.473639503    | 10.534136541    |
| 0.0724338363    | 0.1310837275    |
| 0.0125405442    | 0               |
| 6.942109464     | 4.7111835001    |
| 0.1409327014    | 0               |
| 20.4547788202   | 17.1273027304   |
| 0.7706559216    | 0.1743322872    |
| 0.8215932261    | 2.7878244147    |
| 2.0157117927    | 1.2159465282    |
| 0               | 0               |
| 35.0473055095   | 29.6710220589   |
| 0               | 0               |
| 1.6523281889    | 0.1868889502    |
| 4167.8076314531 | 4230.9139421611 |
| 49.3889777003   | 70.1669889741   |
| 0.6223099982    | 0               |
| 0               | 0               |
| 17.072953085    | 15.448486811    |
| 110.4387687555  | 111.2703349675  |
| 0               | 0               |
| 328.7021761818  | 286.5716623126  |

gene\_expression\_table

|                |                |
|----------------|----------------|
| 8.2114668469   | 8.2941297516   |
| 7.9354171151   | 4.308224337    |
| 0              | 1.134470692    |
| 0              | 1.7452356988   |
| 78.6681186504  | 114.5872092664 |
| 0              | 0              |
| 1.2349489947   | 2.9053580959   |
| 28.8061594905  | 23.6957235943  |
| 0              | 0              |
| 3.3121584354   | 4.7952183222   |
| 53.9231284869  | 20.9110381891  |
| 0              | 0              |
| 6.655180852    | 5.1616716187   |
| 5.3168485409   | 6.5089435198   |
| 0              | 0              |
| 3.0374860321   | 1.8323158145   |
| 0              | 0              |
| 0              | 5.222245033    |
| 1.1939211774   | 0.1543316201   |
| 1.6892506551   | 1.5285209498   |
| 76.6919259248  | 82.0120392308  |
| 56.0693962966  | 43.486693747   |
| 208.5747469378 | 170.3165660405 |
| 1.581578093    | 4.293279819    |
| 22.6443812711  | 24.3316396764  |
| 25.3262975398  | 36.2845180708  |
| 4.9558620611   | 1.4947730348   |
| 29.9652041646  | 32.5368710865  |
| 670.2251999271 | 784.3475120491 |
| 3.8480965074   | 10.4458674219  |
| 0              | 0              |
| 19.283851632   | 14.6194505517  |
| 0              | 0              |
| 0              | 0              |
| 0              | 0              |
| 7.1766148095   | 8.1172131354   |
| 0              | 0              |
| 57.5246109664  | 32.8744605354  |
| 2.10443645     | 0              |
| 0              | 0              |
| 4.7062172704   | 3.5486897058   |
| 0              | 0.1905425442   |
| 9.7939455765   | 9.1730158063   |
| 10.0941071605  | 8.0119892723   |
| 1.241359928    | 0.8023188314   |
| 3.332727911    | 4.9003886291   |
| 14.2975537865  | 15.0933564335  |
| 13.166283275   | 16.2270506601  |
| 3.5447176647   | 3.0928914773   |



gene\_expression\_table

|                 |                |
|-----------------|----------------|
| 0.5255784549    | 0.7133556616   |
| 0               | 0              |
| 1.0811614776    | 0.5869743357   |
| 0.2931982478    | 0.6632521688   |
| 0               | 0              |
| 0               | 0.0878786607   |
| 14.7302181654   | 15.3481535473  |
| 4.0958457531    | 2.9649056625   |
| 31.3511854048   | 31.914187212   |
| 0               | 0              |
| 0               | 0              |
| 6.3157253895    | 4.638093231    |
| 0               | 0              |
| 3.1473309571    | 3.9432005506   |
| 0.1283793635    | 0.1161642567   |
| 1.0894200416    | 0.9857633335   |
| 1.5779493593    | 2.753633201    |
| 5.7964455719    | 9.1481203527   |
| 18.913222368    | 12.6100631921  |
| 1.3521331839    | 2.9363512997   |
| 10.4426788171   | 8.3106307765   |
| 31.787589386    | 30.8463520179  |
| 0               | 0              |
| 694.5508227347  | 639.3009468825 |
| 3134.9576289718 | 3894.501984486 |
| 5.3702440002    | 5.1292328369   |
| 8.9921685252    | 9.0938213183   |
| 0.3433978262    | 0.138099569    |
| 0               | 0              |
| 0               | 5.0369459914   |
| 28.6867044981   | 24.7591819924  |
| 0               | 0              |
| 2.0552775528    | 2.0214357921   |
| 1.3554494526    | 0              |
| 9.0733577639    | 10.7087493541  |
| 0.9924309297    | 0.8980025923   |
| 0               | 0              |
| 5.0870159043    | 4.2661894249   |
| 1.2788340575    | 0.5785774427   |
| 0               | 0              |
| 21.2325929476   | 16.995534266   |
| 0               | 0              |
| 276.3130827283  | 243.4427667103 |
| 0               | 0              |
| 0.022878757     | 0.0207018771   |
| 0               | 0              |
| 0.3225890578    | 0.5837903707   |
| 26.1197515878   | 22.6497251378  |
| 0               | 0              |

gene\_expression\_table

|                 |                 |
|-----------------|-----------------|
| 0.6351880556    | 2.1074197837    |
| 1.7363948715    | 3.1423589273    |
| 17.5181447899   | 19.9640938895   |
| 0.9778640719    | 0               |
| 6.9258430428    | 8.3558124065    |
| 9.4765250115    | 8.2318537449    |
| 0               | 0               |
| 0               | 0.9306898444    |
| 11.81022597     | 12.0223129607   |
| 25.4166924566   | 33.7044516335   |
| 2025.9606782555 | 1456.6072475177 |
| 4.1174590861    | 3.1525060214    |
| 1.6329717103    | 1.3134194342    |
| 6.2912833001    | 5.6926769846    |
| 0               | 0.2111719283    |
| 0               | 0               |
| 9.2218619458    | 8.9265839161    |
| 76.8272186269   | 45.057458851    |
| 1.3517239654    | 2.8539219945    |
| 0.3155323459    | 0.1427549546    |
| 11.0502836969   | 13.3318206951   |
| 17.1530023408   | 23.2813792476   |
| 2.3543743598    | 5.3258977906    |
| 1.6931058999    | 3.0640187475    |
| 0               | 0               |
| 0               | 0               |
| 2.8057803669    | 2.1156787569    |
| 0.3297262742    | 0.8950599184    |
| 7.2783316049    | 6.1984085655    |
| 0               | 0               |
| 4.7766590199    | 7.0048912929    |
| 0               | 0               |
| 16.9035968654   | 17.6745048545   |
| 0.8421754424    | 0.1905109232    |
| 38.8446696159   | 26.3614924987   |
| 4.1184604267    | 4.7203536654    |
| 10.0632193261   | 8.0130326037    |
| 36.3874250839   | 32.9252153215   |
| 6.8715685424    | 5.9068614959    |
| 8.0965915137    | 8.4829832278    |
| 0               | 0               |
| 0               | 0               |
| 0               | 0               |
| 0               | 0               |
| 15.4042843672   | 7.9649082615    |
| 10.2786369275   | 11.4144215758   |
| 0               | 0               |
| 0.7083059953    | 0.5798725138    |
| 1.6822388917    | 4.5665290361    |

gene\_expression\_table

|                |                |
|----------------|----------------|
| 0.8643082263   | 0.5586218392   |
| 17.7002435623  | 41.1842353519  |
| 25.8618424871  | 23.6261371958  |
| 3.6145318736   | 2.4529608776   |
| 0              | 0              |
| 0              | 0              |
| 0              | 0              |
| 5.0718258093   | 3.8721789055   |
| 0.0381550147   | 0.0690492428   |
| 23.7583406431  | 18.7416453058  |
| 21.2172863738  | 22.6443762499  |
| 0.2631589392   | 0              |
| 7.9889671713   | 12.7127677884  |
| 1.676889653    | 0.5057786929   |
| 36.728211102   | 38.907601233   |
| 12.9509951926  | 14.476074684   |
| 0              | 0              |
| 21.2454859172  | 33.3890687945  |
| 109.8423359012 | 123.7869725371 |
| 0              | 0              |
| 3.8690156213   | 6.0015162829   |
| 80.3990225062  | 130.5205773168 |
| 0              | 0              |
| 139.5806762368 | 140.3330900171 |
| 3.0572168557   | 1.8442181244   |
| 0.8813614781   | 0.7975012349   |
| 2.509901584    | 1.1355440774   |
| 0              | 0              |
| 17.12271821    | 20.1143903067  |
| 46.7829988491  | 31.0432214359  |
| 0.7724614053   | 2.4463699515   |
| 22.4594059568  | 14.0321517321  |
| 227.5351259222 | 186.4407535321 |
| 90.9151165737  | 71.2960538234  |
| 1.6650037554   | 1.3391832061   |
| 28.9750615339  | 39.5288687274  |
| 6.0808799282   | 3.6681954552   |
| 79.2155167745  | 71.0266566301  |
| 0              | 0.0343851525   |
| 0              | 0              |
| 1.5034024207   | 1.2557131389   |
| 1.646727766    | 2.0770311012   |
| 3.8977216302   | 3.8474827342   |
| 3.1508475453   | 2.006293779    |
| 0              | 2.1008649655   |
| 0.8760166861   | 1.2250277151   |
| 4.2295386466   | 2.6311341996   |
| 0              | 1.2272215146   |
| 22.4042087722  | 7.9112122507   |

gene\_expression\_table

|                 |                 |
|-----------------|-----------------|
| 4.7064119006    | 5.0775660196    |
| 0               | 0               |
| 0               | 0               |
| 2024.3210806019 | 2040.5367828989 |
| 0.5670357984    | 0.4788776343    |
| 26.3515312389   | 22.575912277    |
| 0.5557270476    | 3.5199530778    |
| 0               | 0               |
| 44.4714543495   | 44.3672468983   |
| 31.9189143705   | 26.0641327253   |
| 4.3518636007    | 2.7564531439    |
| 98.0494676623   | 86.0317145275   |
| 6.8936821423    | 6.0856180162    |
| 6.784811155     | 6.7531710322    |
| 0.2932527593    | 0.3980252885    |
| 0               | 0               |
| 1.8650758417    | 2.2068832849    |
| 82.3758172611   | 72.1840521092   |
| 9.5277917253    | 6.8062392731    |
| 5.6246609055    | 5.0894827264    |
| 5.1962477326    | 4.7018324343    |
| 3.4658713123    | 2.5658989978    |
| 29.0696511412   | 21.0429734104   |
| 0.8148707973    | 2.5806796549    |
| 4.2547982914    | 5.7749407757    |
| 2.7865957271    | 1.2607276293    |
| 3.485025178     | 4.3188282883    |
| 0               | 0               |
| 60.7229046482   | 41.625159047    |
| 7.1860406704    | 4.4432380001    |
| 0.2212056023    | 0.6004746476    |
| 0.2533735171    | 0.0458530802    |
| 1.1959513157    | 0.8341637005    |
| 0.1905011951    | 0.3447505755    |
| 8.2996507095    | 7.7734582605    |
| 19.532049383    | 15.9408974799   |
| 1.0835542449    | 0               |
| 1.6583525203    | 1.2697069228    |
| 18.5347909975   | 12.9378083181   |
| 0               | 0               |
| 0.3762273216    | 0.1021289543    |
| 2.0418049971    | 2.4633736891    |
| 81.141320195    | 69.5818450542   |
| 2760.1096056437 | 2380.6588504411 |
| 0.8252528583    | 2.9869250699    |
| 0.0189823941    | 0               |
| 58.1147132917   | 54.5546666937   |
| 10.2608148895   | 7.056230264     |
| 18.7843305783   | 10.9266616691   |

gene\_expression\_table

|                |                |
|----------------|----------------|
| 0.222642753    | 0.050364656    |
| 2.742983134    | 2.4819923394   |
| 2.1560599834   | 0              |
| 3.7692523535   | 3.7354338971   |
| 35.4167294321  | 25.637503942   |
| 0.082328307    | 0.0744948902   |
| 2.163882044    | 1.957991863    |
| 15.5446670123  | 13.940029054   |
| 0              | 0              |
| 5.3946038402   | 4.6690841533   |
| 0.7757898422   | 0.4011283339   |
| 6.8542976171   | 7.6492829623   |
| 112.1272968836 | 128.9623740069 |
| 12.3468332553  | 7.9380357423   |
| 1.8087324271   | 1.3390643517   |
| 0.3656243759   | 0.3308357565   |
| 17.399669548   | 14.8257098784  |
| 67.3068675659  | 59.3411103439  |
| 0.1328252604   | 0              |
| 20.4546615569  | 14.451788367   |
| 2.2333866196   | 1.3670680341   |
| 8.6141168748   | 12.6196607974  |
| 0.6095408937   | 0.0787919968   |
| 47.0710296795  | 60.3390785151  |
| 12.9414222185  | 11.4804558876  |
| 2.4670769137   | 2.6575454625   |
| 5.8978801299   | 7.8983242067   |
| 0              | 0.4682581249   |
| 0.0794083741   | 0.1437055691   |
| 4.1747905196   | 3.9934262447   |
| 3.7965282091   | 5.4964706504   |
| 2.6326340505   | 0              |
| 0              | 0              |
| 31.1217088791  | 29.9773322529  |
| 138.0357513824 | 92.9502165429  |
| 4.5171456845   | 2.7735561758   |
| 0              | 0              |
| 3.981028578    | 3.8506699041   |
| 1.8780323741   | 2.3790765138   |
| 5.3179574202   | 3.4996084544   |
| 0.2871691202   | 0.2598454025   |
| 0              | 0              |
| 0              | 0              |
| 3.5915194241   | 3.2497916546   |
| 13.6413631097  | 6.7327677569   |
| 0              | 0              |
| 19.4503595069  | 22.7760649117  |
| 0              | 2.8065126368   |
| 8.797864104    | 2.8948219369   |

gene\_expression\_table

|                 |                 |
|-----------------|-----------------|
| 45.8380969611   | 38.6487149716   |
| 2150.8746112719 | 2063.4915324001 |
| 0.0969636642    | 0.0292459049    |
| 228.7176412808  | 255.0846804586  |
| 0               | 0               |
| 990.6652190854  | 1002.9341627898 |
| 3.3348703789    | 1.005854129     |
| 1.8107425266    | 0.8192265246    |
| 5.4915217017    | 4.9690115212    |
| 53.0249921522   | 37.9973799287   |
| 0.1018261488    | 0.0921375411    |
| 1.7885958517    | 1.8051536282    |
| 8.7901843779    | 6.7110282971    |
| 38.8062943059   | 34.1106774887   |
| 15.777299711    | 13.4524910417   |
| 11.5485814913   | 6.649841556     |
| 0.4220683264    | 0.1909545742    |
| 72.1812556006   | 50.0531952263   |
| 0               | 0.456716095     |
| 0.371962878     | 0.6731423189    |
| 17.9225696455   | 13.2686702267   |
| 4.5148093538    | 8.5789870129    |
| 0.4485508363    | 0.5682206413    |
| 7.3309966562    | 4.1459144689    |
| 0               | 0               |
| 5.113577004     | 4.071784379     |
| 3.4645661373    | 3.1349177856    |
| 5.000448259     | 3.3934972436    |
| 0               | 0               |
| 3.7322680642    | 3.3771482695    |
| 1.2088870584    | 2.18772648      |
| 128.5567013049  | 111.2227595707  |
| 2.7089151979    | 2.0186072259    |
| 15.5254673134   | 28.0964840508   |
| 0.3646602826    | 0               |
| 21.0721335283   | 25.1339719585   |
| 23.6260029246   | 20.2910054845   |
| 0               | 2.675957321     |
| 0.4548802914    | 0.8231982069    |
| 439.5068546712  | 667.5484301643  |
| 1.4564388174    | 1.2354945137    |
| 0.6701679045    | 1.5160060452    |
| 42.8470153026   | 37.8303017955   |
| 0               | 0               |
| 4.2482940622    | 3.8440751558    |
| 0.936148263     | 0.8470751382    |
| 10.9980837538   | 25.874244047    |
| 0               | 0               |
| 6.0817248469    | 0               |

| gene_expression_table |                 |
|-----------------------|-----------------|
| 0                     | 11.197485533    |
| 0.296365182           | 0.8044994176    |
| 0                     | 0               |
| 0                     | 0               |
| 0                     | 0               |
| 14.7886812732         | 9.2641569846    |
| 15.5513241306         | 15.8305934302   |
| 4.9418288785          | 3.8455941963    |
| 5.5888368914          | 4.5754418559    |
| 2.9646709411          | 2.4762340422    |
| 10.7874734993         | 7.3207959945    |
| 13.3385353338         | 15.8150672062   |
| 10.4952829128         | 20.4543709835   |
| 0                     | 0               |
| 14.5135454732         | 13.4693364656   |
| 24.374356596          | 15.9132257713   |
| 4.1582796334          | 3.2092981924    |
| 31.9784630614         | 38.1616538657   |
| 6.8018917985          | 6.1547018384    |
| 2.9799954877          | 1.1556228504    |
| 12.4498205713         | 9.2170133419    |
| 0                     | 0               |
| 0                     | 0               |
| 0                     | 1.4961847429    |
| 42.3104627581         | 43.7539253802   |
| 1707.3472019704       | 1483.2368310776 |
| 4.6205187082          | 4.8776970391    |
| 89.2148413926         | 31.0485311462   |
| 34.2794846735         | 41.3571231043   |
| 1.6319975288          | 1.1813722992    |
| 0.9343616976          | 1.6909171237    |
| 118.9964411713        | 111.3870057094  |
| 15.9454184784         | 0               |
| 13.4388006519         | 16.2134914871   |
| 0.5515464374          | 1.497202825     |
| 9.2308753935          | 8.3525712313    |
| 22.9246708484         | 20.2924783082   |
| 26.8485327116         | 26.9790535453   |
| 2.774368645           | 3.1379894567    |
| 9.130198941           | 0               |
| 24.9283085262         | 20.1820571209   |
| 0                     | 0               |
| 0                     | 5.9387473879    |
| 99.8985260884         | 94.8027595298   |
| 140.0568286411        | 161.690801524   |
| 137.1347131027        | 133.8188259094  |
| 5.4148389408          | 5.5120781383    |
| 76.1385931259         | 88.9882363001   |
| 35.0804153525         | 41.9821029378   |

gene\_expression\_table

|                |                 |
|----------------|-----------------|
| 91.7133027203  | 110.6492232026  |
| 0              | 0               |
| 0              | 0               |
| 0              | 0               |
| 10.3243716767  | 7.7850191316    |
| 8.1107374011   | 7.5486987923    |
| 0              | 6.337895076     |
| 3798.59495823  | 4117.9013344025 |
| 190.9087672306 | 160.5298520736  |
| 40.992904447   | 40.1835309678   |
| 4.9449442155   | 2.2372200379    |
| 20.8667876255  | 13.2169405182   |
| 3.0524958262   | 3.3539243609    |
| 147.2043893834 | 112.9012543921  |
| 10.455075534   | 18.9205810725   |
| 10.238012383   | 6.847216113     |
| 9.8183431411   | 4.4420711451    |
| 23.353434026   | 58.111320479    |
| 3.9846895292   | 4.2418261232    |
| 0              | 0               |
| 92.099260859   | 118.0595489411  |
| 3.3333465633   | 6.0323671206    |
| 7.818894913    | 1.8866502956    |
| 0              | 0               |
| 0              | 0               |
| 6.9003300737   | 1.8731321571    |
| 4.572285879    | 3.7523801292    |
| 26.6977138412  | 21.5221058896   |
| 0.4287284508   | 0.7758711436    |
| 88.8793437916  | 82.4432739598   |
| 0              | 1.3731886253    |
| 185.9752447122 | 211.7070650867  |
| 30.7575381281  | 11.9275730553   |
| 38.6491600205  | 26.2288121391   |
| 1.11689948     | 0               |
| 28.828409223   | 20.8683429257   |
| 105.1535705063 | 99.1128787039   |
| 44.4858729139  | 61.5635766348   |
| 0              | 0               |
| 122.6398815445 | 99.8737901291   |
| 99.4285427787  | 43.028204408    |
| 64.3679025342  | 61.0168865029   |
| 0              | 0               |
| 6.943100545    | 3.9265467383    |
| 2.9328223343   | 5.9709793955    |
| 29.8420671226  | 34.3669944602   |
| 28.8402683292  | 32.4438738324   |
| 361.1574055511 | 358.5213662819  |
| 107.6513834482 | 117.2878017103  |



gene\_expression\_table

|                 |                 |
|-----------------|-----------------|
| 6.779643141     | 2.8868565213    |
| 4.153257802     | 3.0470930719    |
| 6.1618996262    | 7.1686336837    |
| 30.838544192    | 27.9043022523   |
| 19.9378258685   | 22.049831442    |
| 7.2855577288    | 13.1846953394   |
| 73.8918142689   | 56.0770660884   |
| 37.8041986274   | 53.4487264913   |
| 0               | 0               |
| 34.5093446036   | 42.3779140773   |
| 3044.0595980311 | 2463.5822512007 |
| 85.2879697012   | 75.4190147555   |
| 9.9154663724    | 9.4704701889    |
| 26.0456558525   | 24.3801208557   |
| 8.6093968771    | 7.790225478     |
| 52.5120477831   | 67.5221740804   |
| 5.9856647827    | 8.1242064267    |
| 81.3168944573   | 80.1201308799   |
| 7.5802353073    | 0               |
| 0.5002991693    | 0.150898814     |
| 65.7209815664   | 69.6207538213   |
| 24.4389579694   | 35.1807705587   |
| 7.4337930916    | 6.7264786566    |
| 14.3706147368   | 11.2460730517   |
| 14.9865194682   | 19.7244716681   |
| 190.9276934493  | 138.2089642925  |
| 5.8118624207    | 4.2258795219    |
| 125.8643372783  | 92.3420525299   |
| 28.9285630929   | 27.3141422966   |
| 1108.8942389321 | 766.6309224152  |
| 5.5568824354    | 2.5140766388    |
| 4.1186929505    | 2.2360832391    |
| 0               | 0               |
| 12.9527361164   | 7.3794496609    |
| 0.6926584153    | 0.9848975556    |
| 0               | 0.2682863649    |
| 6.8868595461    | 12.6857266689   |
| 21.2986786759   | 15.5015045985   |
| 72.0026418652   | 85.3277061577   |
| 5.2265607332    | 4.3180210935    |
| 0.0458658293    | 0               |
| 3.641505992     | 2.6360176595    |
| 9.9267678233    | 22.1101551362   |
| 84.1236337082   | 50.7462627923   |
| 1.0115338625    | 0.7211359285    |
| 0               | 0               |
| 5.6364478187    | 2.8560829541    |
| 5.7795225506    | 8.3673752236    |
| 0.4975424063    | 0.9004039621    |

gene\_expression\_table

|                |                |
|----------------|----------------|
| 0.9154833349   | 0.8283764475   |
| 0.4895007015   | 0              |
| 3.5091426038   | 4.3298902733   |
| 26.5843060229  | 22.9857441821  |
| 7.4235584063   | 9.0880005347   |
| 76.5076143827  | 67.7120856392  |
| 0.2156219302   | 0.195105822    |
| 2.0987694999   | 2.5827415665   |
| 7.3904819252   | 5.559312113    |
| 0              | 2.7064033299   |
| 0              | 0              |
| 3.0589795561   | 2.5372619879   |
| 24.9128931221  | 18.5170273934  |
| 16.1138319161  | 15.4299813781  |
| 194.5966264411 | 137.8947941215 |
| 2.8426805471   | 2.5722036909   |
| 1.819946725    | 0              |
| 0              | 0              |
| 0              | 0              |
| 0              | 0              |
| 0.0193991318   | 0.0263299995   |
| 1.5263204888   | 1.4707747345   |
| 0.0305843023   | 0              |
| 0              | 0              |
| 40.9926812397  | 25.0157292206  |
| 1.7856031016   | 2.5661206641   |
| 47.6870114352  | 24.516853817   |
| 0              | 0              |
| 0.169616335    | 0.3836939781   |
| 0              | 0              |
| 0.9515849898   | 1.3453798176   |
| 0.357809935    | 0.215843232    |
| 5.6515563634   | 3.0682914727   |
| 1.0228538535   | 1.2765942342   |
| 1.8825881171   | 1.0220775827   |
| 3.5835701471   | 3.2425987396   |
| 28.4473130318  | 22.1369101569  |
| 62.0853527989  | 56.1780231632  |
| 0.4699408547   | 0.3543555636   |
| 0.3186952095   | 0.1730230986   |
| 2.0171356257   | 1.153867221    |
| 7.5322962869   | 5.5922949074   |
| 8.6127850695   | 11.6899369333  |
| 12.9633589162  | 11.7299144587  |
| 2.7944949067   | 3.4601933641   |
| 0.2300309478   | 0.6244315283   |
| 18.5247564487  | 15.1223773693  |
| 0              | 0              |
| 0.262302607    | 0              |

gene\_expression\_table

|                 |                |
|-----------------|----------------|
| 0               | 0              |
| 4.7721807483    | 4.2210785097   |
| 0.0130799983    | 0              |
| 23.2112213055   | 20.0692541916  |
| 0               | 0              |
| 0               | 0              |
| 6.5561909366    | 4.9885914745   |
| 2.5612169813    | 2.008518172    |
| 42.4283763221   | 23.9946118563  |
| 0               | 0              |
| 0.2887576525    | 0.5225655766   |
| 1.1588608346    | 1.2233630938   |
| 5.0880759922    | 9.2079061506   |
| 0.228770351     | 1.0350159498   |
| 0.0154073891    | 0.0557655951   |
| 0.3816190078    | 1.0359255684   |
| 0               | 0.1073782642   |
| 15.2401453582   | 7.7569132685   |
| 0               | 0              |
| 74.9291886229   | 57.3690505176  |
| 24.0623111536   | 16.5173100406  |
| 4.1286125191    | 4.981041513    |
| 1.2420594133    | 1.4985057257   |
| 0               | 0              |
| 3.8820660787    | 3.1101971255   |
| 3.3964068008    | 2.4585949674   |
| 13.9504306619   | 22.0903686244  |
| 47.3003985939   | 49.063226081   |
| 0.2646290476    | 0.2394499845   |
| 0.1719815867    | 0              |
| 0               | 0              |
| 36.3979370242   | 37.2594892061  |
| 0.1488325809    | 0              |
| 0.7717443208    | 1.3267965778   |
| 196.1794817351  | 125.9771762107 |
| 1085.7317783303 | 988.9063855567 |
| 12.1118650068   | 10.9594389373  |
| 533.8458133208  | 600.2966027529 |
| 1.4868091213    | 2.6906828581   |
| 2.8260092795    | 3.6936158563   |
| 27.0698568639   | 23.4175318281  |
| 4.8580529418    | 5.9942950615   |
| 0.1388200618    | 0.1884173069   |
| 0.0681485432    | 0.3083215497   |
| 1.2647678096    | 1.7395290708   |
| 29.689984198    | 26.8650260455  |
| 5.669803426     | 5.557857503    |
| 0.6039859803    | 0.3903697187   |
| 5.3184090065    | 3.3085045423   |

gene\_expression\_table

|                |                |
|----------------|----------------|
| 0.2769641867   | 0.1253057267   |
| 0              | 0              |
| 0              | 0              |
| 0              | 0              |
| 0              | 0              |
| 0              | 0              |
| 3.1751742348   | 2.7533502162   |
| 0.084938511    | 0.0768567371   |
| 0              | 0              |
| 27.1808158083  | 20.9509566823  |
| 0              | 0              |
| 0              | 0.3222553627   |
| 20.8026082807  | 12.5488472151  |
| 9.6278592502   | 6.9694261282   |
| 22.3988607296  | 17.7341869322  |
| 34.5975924938  | 32.8327891304  |
| 0              | 0              |
| 0.2765695511   | 0              |
| 0.2013254851   | 0.7286786501   |
| 0              | 0              |
| 2.7201649197   | 1.9143796347   |
| 63.0736417594  | 67.2479553415  |
| 13.9081117817  | 11.9758347349  |
| 0.947098858    | 0              |
| 0.1576962593   | 0              |
| 10.5898552095  | 6.2492909508   |
| 0              | 0              |
| 0              | 0.1268216777   |
| 0              | 0              |
| 6.0033155566   | 2.2633787278   |
| 0.5827258966   | 0.9491046985   |
| 5.0422110674   | 3.4218390977   |
| 10.1905646789  | 9.7332223594   |
| 63.4325719369  | 44.0727397278  |
| 0              | 0              |
| 187.1945945989 | 179.4456799338 |
| 0              | 0              |
| 2.0301292233   | 1.7402830348   |
| 0              | 0.3310334693   |
| 17.7848009927  | 17.165443671   |
| 138.0237087994 | 137.810710875  |
| 0              | 0.2426629557   |
| 9.9257425299   | 5.4360637914   |
| 6.8575870831   | 2.9392568521   |
| 0.0847341228   | 0.0511145307   |
| 4.3291295598   | 3.1107329537   |
| 0              | 0              |
| 0              | 0              |
| 11.8493922299  | 20.1036376079  |

gene\_expression\_table

|                |                |
|----------------|----------------|
| 3.3652538133   | 4.1108240915   |
| 6.7009865006   | 2.0211325102   |
| 5.1146326434   | 5.1422032225   |
| 0.5851940441   | 0.529513695    |
| 0.3984612712   | 0.1802741349   |
| 0              | 0.4013813944   |
| 0              | 0.128396295    |
| 54.6931838741  | 43.2048642975  |
| 11.0833949078  | 10.0288262494  |
| 22.4990291187  | 26.9747206329  |
| 6.975882337    | 3.156068717    |
| 4.8613140204   | 2.2703314427   |
| 2.7777736926   | 1.7953375912   |
| 32.2254177973  | 42.523857953   |
| 4.6581048892   | 6.0589088137   |
| 0.813073277    | 1.4714211108   |
| 0.6779294151   | 0.3067127162   |
| 1.5342129075   | 1.2494113335   |
| 2.0205037956   | 2.1939070118   |
| 0              | 0              |
| 2.0275666816   | 0.7056333485   |
| 0.0536385384   | 0.145604732    |
| 2.364996554    | 3.3882868219   |
| 0              | 0              |
| 25.463925902   | 25.1357137699  |
| 0.4184609048   | 1.3252573869   |
| 1.4549803452   | 1.7553881519   |
| 0.1121190956   | 0.6087067752   |
| 2.6317194895   | 1.8521340961   |
| 7.9325048771   | 5.0244171265   |
| 0.8752284288   | 0.3959758681   |
| 0              | 0.3059805183   |
| 2.0338985017   | 1.4314036044   |
| 1.3793991341   | 0.9707843783   |
| 0.374267191    | 0.1693281102   |
| 1.9771065665   | 0              |
| 0              | 0              |
| 5.2939252205   | 0              |
| 10.9639988423  | 14.7101377022  |
| 2.3912247657   | 1.8030860503   |
| 4.6064169357   | 8.3362463334   |
| 0              | 0              |
| 2.7770183907   | 1.0769096536   |
| 0              | 1.6477235176   |
| 0.5125293077   | 0.3607044785   |
| 1.8477114982   | 1.9107479746   |
| 12.1723894983  | 22.5528951597  |
| 137.5391671536 | 107.4568001203 |
| 1.6711786296   | 2.7219032115   |

gene\_expression\_table

|                 |                 |
|-----------------|-----------------|
| 3.6479704732    | 6.6017429395    |
| 6.0887497696    | 8.0673565371    |
| 9.8198681233    | 36.9090921015   |
| 28.9177323233   | 13.7483701133   |
| 0.2674738743    | 0.5324530864    |
| 1.0598618268    | 1.9180350782    |
| 28.7958563553   | 38.0160919681   |
| 33.5694913682   | 28.4397163381   |
| 13.0171520367   | 6.6745339044    |
| 0.4773999283    | 1.9438921354    |
| 0.372775439     | 0               |
| 4.2189745844    | 6.489827151     |
| 0               | 3.0467704181    |
| 9.9237418861    | 8.1986853263    |
| 99.3565510959   | 95.6240170168   |
| 6.2087554485    | 3.7453343575    |
| 17.6261647934   | 15.9490612424   |
| 1055.2862056698 | 1217.6875425524 |
| 0.5338281771    | 0               |
| 36.3329722692   | 41.4522767277   |
| 0.7252240734    | 1.4764951659    |
| 0               | 0               |
| 0               | 0               |
| 7.0788411453    | 8.4549958203    |
| 0.6528946154    | 0.322239631     |
| 0.8810421442    | 2.3916368557    |
| 0               | 0               |
| 1.9333400252    | 1.5550094016    |
| 1.8433649357    | 1.5885442707    |
| 8.9909461764    | 4.0677354624    |
| 0               | 0.040794755     |
| 24.4526110186   | 23.9698129558   |
| 36.1033871198   | 35.5792311537   |
| 0.019397984     | 0.0175522945    |
| 0.2838587892    | 0               |
| 1.0806916627    | 0.4346068653    |
| 1.5735301781    | 0.6471868661    |
| 14.1818667855   | 6.1372745278    |
| 1.3944763956    | 0.6308970129    |
| 0               | 0               |
| 164.1294211738  | 154.042479144   |
| 9.6832487409    | 7.479672373     |
| 34.2745620897   | 23.6124659558   |
| 0.2037347675    | 0.1843497053    |
| 2.8054206976    | 1.6923260407    |
| 38.5794800445   | 22.214626948    |
| 1.961007324     | 0.8872101865    |
| 0               | 0               |
| 0               | 0               |

gene\_expression\_table

|               |               |
|---------------|---------------|
| 0             | 0             |
| 5.4279611091  | 7.094386903   |
| 2.1927022292  | 2.4800873126  |
| 0.8764313532  | 0.7930402042  |
| 2.7697132222  | 0.7160511712  |
| 1.9583313188  | 1.6243324036  |
| 0.8376185038  | 0             |
| 0.2707980606  | 0.49006405    |
| 21.9446509141 | 6.618883262   |
| 0.9189181889  | 1.9005359548  |
| 3.7331169219  | 1.3136341398  |
| 1.2601970968  | 1.5964076856  |
| 0.3215794117  | 0             |
| 0             | 0             |
| 0             | 0             |
| 2.6419516517  | 2.2456905896  |
| 12.2176185281 | 2.0100236668  |
| 23.5420168083 | 20.9147190618 |
| 0             | 0             |
| 0.9902390178  | 0.2240048094  |
| 0             | 0             |
| 11.863702527  | 11.0811754849 |
| 1.3877890811  | 0.6278714997  |
| 0.348544145   | 0.3153806843  |
| 2.842580856   | 2.3663444064  |
| 81.480253586  | 46.0797048634 |
| 44.7233959066 | 40.4680308303 |
| 0.9246954314  | 0.5148997087  |
| 0.4286088015  | 1.3573955744  |
| 1.7534143793  | 1.6799078016  |
| 2.0265220256  | 1.120595329   |
| 0.4976230123  | 0.1125687294  |
| 0             | 0.1581721134  |
| 1.6360235375  | 2.0354926816  |
| 20.2085191114 | 15.6097510394 |
| 58.5116736097 | 87.2024988002 |
| 0.3751879251  | 0.2489588553  |
| 10.6388055328 | 10.2683081568 |
| 0             | 0.1247798739  |
| 1.9673756618  | 2.225228466   |
| 0             | 0             |
| 24.141069838  | 10.9220413463 |
| 5.9402618449  | 4.9076586414  |
| 4.3489499186  | 3.9351537561  |
| 0             | 0             |
| 0             | 3.0127419999  |
| 0.2811877274  | 0.1908248478  |
| 29.1177206997 | 21.6423531858 |
| 0             | 0             |

gene\_expression\_table

|                |                |
|----------------|----------------|
| 1.6596029791   | 0.9716844865   |
| 0              | 0              |
| 846.6680731928 | 603.6009171053 |
| 3.0951677271   | 5.0921219792   |
| 47.9300750095  | 36.8965246517  |
| 7.7884851181   | 6.7118307244   |
| 64.9783579387  | 64.62674791    |
| 0              | 0              |
| 23.4965592144  | 18.8985744917  |
| 0.0831311542   | 0.0752213476   |
| 0              | 0              |
| 0.2175964252   | 0              |
| 0.7102626689   | 0.3570456804   |
| 0              | 0              |
| 151.5228752376 | 127.4842449664 |
| 10.7721755627  | 9.5689161795   |
| 60.6979706135  | 65.9071780127  |
| 5.9758582461   | 5.4072641587   |
| 0              | 0              |
| 0.6681041262   | 1.2090700104   |
| 7.3083405742   | 3.7788358634   |
| 9.6284557236   | 7.2899023997   |
| 0.5181214381   | 0.2500389058   |
| 278.784976637  | 221.0430014161 |
| 13.0771651777  | 10.2007691573  |
| 0.7215267452   | 1.0683401578   |
| 37.8590463978  | 24.0723558123  |
| 0.0598235148   | 0.0541313957   |
| 6.4010198484   | 5.7919722624   |
| 14.3011741891  | 9.0583070088   |
| 1.0738248258   | 0.6072824871   |
| 0              | 0.748000535    |
| 11.5322031886  | 10.7095345347  |
| 36.220551041   | 26.1243775414  |
| 0.2103930673   | 0.1057635987   |
| 2.0309100651   | 0              |
| 118.8484158505 | 112.6611248075 |
| 0.9211735159   | 0.8335252162   |
| 284.7718753692 | 205.4745974666 |
| 43.7620319499  | 22.1012870145  |
| 6.6136194726   | 11.2206437743  |
| 0.0451179367   | 0.2041251584   |
| 14.4675359626  | 16.3637141004  |
| 0              | 0              |
| 8.1681791375   | 5.35209545     |
| 0.1616895651   | 0.4389151253   |
| 6.0196906122   | 4.3878014516   |
| 2.7657304623   | 2.1158136568   |
| 4.9042211455   | 0              |



gene\_expression\_table

|                |                |
|----------------|----------------|
| 5.0108956752   | 3.0227442343   |
| 0              | 0              |
| 0              | 0              |
| 35.5719859064  | 40.5477182574  |
| 20.9326512306  | 12.0782808207  |
| 3.5623283639   | 3.3635249537   |
| 1.396996604    | 0.31601861     |
| 1.8623069932   | 3.3702224659   |
| 515.0707919866 | 299.2612270697 |
| 7.9360449481   | 7.1809419906   |
| 0.8347649396   | 0.8210198786   |
| 1.1805883376   | 0.8169024887   |
| 0              | 0              |
| 1.7779153085   | 2.0109366155   |
| 3.2422350906   | 4.4006118145   |
| 1.0864589998   | 0.8192366919   |
| 3.8985038689   | 2.3517113219   |
| 0              | 0              |
| 0              | 0              |
| 4.8359489253   | 5.8591428236   |
| 0.5299982893   | 1.1989243369   |
| 1.1103544831   | 1.1482353071   |
| 0.5343952058   | 0.9670965822   |
| 12.7111228406  | 10.4560711574  |
| 2.7788822121   | 4.4701789747   |
| 14.7225609564  | 9.7534102129   |
| 19.4335958969  | 13.4469843112  |
| 24.3438118594  | 12.2375189501  |
| 34.7840479692  | 37.5014093958  |
| 2.355704837    | 2.7128983642   |
| 0              | 0.0545314067   |
| 18.8920468654  | 13.8384019322  |
| 6.640522459    | 3.7554290958   |
| 31.2678458293  | 50.0564152979  |
| 1.9151788649   | 1.6310140462   |
| 5.447778172    | 2.4647150619   |
| 2.5939417876   | 3.9118867617   |
| 0              | 0              |
| 0.1153934387   | 0              |
| 41.2005598584  | 25.5076335046  |
| 1.4979086174   | 0.1936264035   |
| 1.4766368346   | 2.6722740407   |
| 1.0164719998   | 1.6095733326   |
| 1.4994920768   | 5.4272704803   |
| 9.4901182878   | 9.0391026811   |
| 2.8264639033   | 2.1537095047   |
| 60.9691438322  | 67.9977918851  |
| 16.7390305978  | 15.8675906771  |
| 108.8810291623 | 108.5160603174 |

gene\_expression\_table

|                |                |
|----------------|----------------|
| 12.8660122643  | 6.6524743983   |
| 66.8989733161  | 56.8649296574  |
| 4.3728127447   | 3.6523809872   |
| 64.8735344942  | 41.0906394413  |
| 158.253113793  | 135.2402546171 |
| 151.7466720658 | 141.1047404078 |
| 3.773209519    | 1.7070971027   |
| 88.9896067565  | 95.8599727226  |
| 0              | 0              |
| 0              | 0              |
| 78.0680863078  | 109.8844805036 |
| 1.3954346422   | 0.9881695539   |
| 0              | 0              |
| 0.1581355246   | 0.143089163    |
| 2.4062339327   | 2.689586522    |
| 15.427786727   | 39.0875956872  |
| 2.6010710715   | 1.7651872501   |
| 0.8047112046   | 0.8737729461   |
| 96.569605567   | 84.5804723131  |
| 15.3344770672  | 17.449397124   |
| 0.4071000281   | 0.7981243002   |
| 0              | 0              |
| 1.7882164368   | 0.5393567612   |
| 51.1254921726  | 51.4980688369  |
| 0              | 0              |
| 0.5383387908   | 0              |
| 186.8154743167 | 196.1701757312 |
| 7.8142419168   | 10.2132742659  |
| 6.9893200333   | 5.7898489574   |
| 4.7260350616   | 5.7018130728   |
| 4.7936450475   | 5.9641131002   |
| 0.3362575742   | 0.375854495    |
| 0              | 0              |
| 0              | 0              |
| 0              | 0              |
| 0.8153888189   | 0.7378057769   |
| 0              | 0              |
| 0              | 0              |
| 0.6011709357   | 0.1087940818   |
| 0.0798322266   | 0.0722363082   |
| 4.5999915061   | 3.6577867912   |
| 0              | 53.427096088   |
| 10.5533247053  | 7.0444854915   |
| 1.8969889147   | 0              |
| 13.3515834435  | 12.4977930988  |
| 245.8737898603 | 268.6542029808 |
| 1.5820380104   | 1.3664408195   |
| 6.3231293288   | 3.3701944542   |
| 11.5794110379  | 12.7553965636  |

gene\_expression\_table

|                 |                 |
|-----------------|-----------------|
| 0               | 0               |
| 8.3105092582    | 7.5197765747    |
| 0               | 0               |
| 89.6402365523   | 65.4510364763   |
| 1.7246950656    | 2.3408893156    |
| 0.2917544774    | 1.055977879     |
| 7.0051245679    | 6.3385973099    |
| 0               | 11.5377385387   |
| 5.3345732752    | 5.4458422117    |
| 7.9234865445    | 3.3961161319    |
| 0               | 0               |
| 8.1309970924    | 6.4376766356    |
| 25.2722966827   | 26.1344856842   |
| 11.117978593    | 10.0601193481   |
| 4.8455854891    | 13.1536055563   |
| 12.3466682811   | 13.4062812321   |
| 7.390077935     | 8.2519474487    |
| 2.4004343018    | 3.7516994484    |
| 54.7659618392   | 45.8843161524   |
| 1.2649059697    | 4.0059321212    |
| 7.794667116     | 18.8080428014   |
| 1.1935165576    | 1.0799552197    |
| 14.9250682867   | 9.3495946704    |
| 1.8320242479    | 2.1550227999    |
| 20.9062559577   | 13.6202807348   |
| 1.1850755722    | 1.4744363997    |
| 1.4395715745    | 1.6747694551    |
| 1283.8016039439 | 1357.1980362328 |
| 1.3974983928    | 0.7903303028    |
| 0.6234534616    | 0.5641327854    |
| 0               | 0               |
| 0               | 0               |
| 84.4597508446   | 71.1529419808   |
| 1.7255255348    | 3.3457378464    |
| 4.6576973823    | 2.5935534489    |
| 0               | 0               |
| 582.6822916389  | 568.8652161614  |
| 5.5864931363    | 13.4798575044   |
| 0               | 0               |
| 9.1691044485    | 10.9273316055   |
| 0               | 0               |
| 11.5855409537   | 9.6890124891    |
| 0               | 1.5076325211    |
| 11.928915643    | 13.4923711692   |
| 0               | 0               |
| 0               | 0               |
| 7.7416238815    | 7.0050198015    |
| 6.94252238      | 8.1665371161    |
| 52.8978700178   | 48.5436479403   |

gene\_expression\_table

|                 |                 |
|-----------------|-----------------|
| 9.5723867938    | 8.3991159527    |
| 0.6884051103    | 0.934356571     |
| 6.5676605482    | 5.9427573456    |
| 0.1323253241    | 0.9578781192    |
| 51.7662341437   | 40.9031931182   |
| 91.761370489    | 90.3566243811   |
| 70.5100293911   | 65.4654808504   |
| 0               | 0               |
| 14.9912364305   | 15.6290575733   |
| 10.3978725921   | 7.9793865162    |
| 24.620956886    | 26.6371088222   |
| 8.7250675205    | 7.8948902304    |
| 15.2328856836   | 15.1618490162   |
| 0.6000364577    | 0.3878170535    |
| 14.1253344058   | 2.5562659393    |
| 8.927829832     | 9.8735511203    |
| 0.9784499046    | 0.3541407364    |
| 0               | 0               |
| 2.8062600695    | 3.9499422168    |
| 0.9634782312    | 1.2592734559    |
| 9.9137445864    | 11.6616063575   |
| 7.2837997626    | 4.1192231071    |
| 7.9417768448    | 5.5042686428    |
| 614.1396468145  | 586.4071092281  |
| 37.087081616    | 29.4280481902   |
| 0.1888509508    | 0.5126461852    |
| 3.9606887168    | 3.3501066625    |
| 0               | 0               |
| 1.290839228     | 1.7071029116    |
| 134.2844677852  | 127.4458353931  |
| 0               | 0               |
| 17.1998482094   | 7.2628770908    |
| 29.8697166655   | 24.6774261703   |
| 3.2329979536    | 0.8358237064    |
| 0               | 0.346768812     |
| 1.5374014379    | 1.070092278     |
| 20.4916543648   | 18.5419037126   |
| 8.9601174459    | 10.8101006701   |
| 0               | 0               |
| 0               | 0               |
| 0.1204078327    | 0.3268536158    |
| 0               | 0               |
| 0.1801071245    | 0.1629701976    |
| 12.9744321856   | 12.0194563638   |
| 983.6611546089  | 830.3979356084  |
| 1217.2977486056 | 1109.3979364164 |
| 622.705546315   | 484.6933618488  |
| 264.2442570614  | 196.4050551081  |
| 1.7259362082    | 2.6028598778    |

gene\_expression\_table

|               |               |
|---------------|---------------|
| 6.960286368   | 3.9496091482  |
| 13.5532353997 | 0             |
| 7.0318373282  | 7.2717353034  |
| 90.8354828949 | 65.1872510084 |
| 0.3977436179  | 0.26392586    |
| 0             | 0             |
| 0.3769592738  | 0.0682184311  |
| 0.9886202675  | 1.7891090179  |
| 0             | 0             |
| 2.7431182024  | 2.6594084532  |
| 1.2231772223  | 0.7378624773  |
| 0             | 0             |
| 0             | 0             |
| 0.4879182874  | 0.5396032679  |
| 25.3174882207 | 24.7660179498 |
| 2.4943112448  | 3.0093082843  |
| 0             | 0             |
| 1.6050921019  | 1.1757280618  |
| 0             | 0             |
| 4.9471239345  | 4.9240536375  |
| 1.0775045351  | 1.5599705116  |
| 0.137186493   | 0             |
| 0.2188858904  | 0.0990296106  |
| 6.239754166   | 4.2773111905  |
| 21.7537278129 | 12.1131647605 |
| 5.1495690034  | 5.110523677   |
| 4.4755375756  | 4.0496967844  |
| 82.7597545651 | 66.0752524692 |
| 0             | 0             |
| 5.5236915482  | 6.9973686361  |
| 20.3251329107 | 19.9238287397 |
| 6.1854537177  | 6.0274490023  |
| 57.028678305  | 58.802830354  |
| 0.4881577191  | 0             |
| 37.2730203615 | 37.9423659557 |
| 12.4250926299 | 9.6921236333  |
| 1.4422674755  | 2.1750630917  |
| 0.8423577788  | 0.38110434    |
| 0.4535123101  | 0.5129516044  |
| 0.3856657816  | 0.4459064332  |
| 32.4518784245 | 20.1155851969 |
| 0             | 0.0758342645  |
| 0             | 0.6506893116  |
| 8.7193511036  | 5.5520235823  |
| 1.9323620228  | 0.6556877362  |
| 6.7165241259  | 3.5185276059  |
| 1.6327140012  | 1.7046503943  |
| 11.1601666811 | 6.7321955346  |
| 5.478462197   | 4.7627948206  |

gene\_expression\_table

|                 |                |
|-----------------|----------------|
| 0               | 0.1532513256   |
| 0.8859049922    | 1.3627411488   |
| 0               | 0.03095941     |
| 0.1939780351    | 0.1755213115   |
| 0               | 0              |
| 0.2044957764    | 0.3700766104   |
| 3.6636191361    | 2.3481470897   |
| 5.6302767637    | 11.6447182719  |
| 1.940699059     | 2.0753252112   |
| 0               | 0              |
| 1.5629413934    | 2.4749021988   |
| 0               | 0.9381634056   |
| 0.9351162583    | 0.3384565309   |
| 0.4377323785    | 0.3960827891   |
| 3.4135386637    | 1.7458126743   |
| 0.2821870455    | 0.3830060473   |
| 11.2753035153   | 11.3732508602  |
| 0               | 0              |
| 1266.9915571702 | 905.6595920727 |
| 4.6983870463    | 7.794127838    |
| 6.5757437526    | 4.1192802313   |
| 1.1137205879    | 1.1517162499   |
| 19.4536400851   | 16.356449298   |
| 7.2435713754    | 10.1294596681  |
| 1.5614240558    | 0.8073467787   |
| 1.8999591724    | 4.1751535241   |
| 0.4918225986    | 0.4450264046   |
| 0               | 0              |
| 0.5381296439    | 0.5193892298   |
| 0               | 0              |
| 44.3017952664   | 32.8915239947  |
| 0               | 8.2995612594   |
| 3.7578835158    | 3.8083656225   |
| 0.469205358     | 0.4245611611   |
| 0               | 0              |
| 9.1633758337    | 3.553497495    |
| 2.3494457178    | 0              |
| 0               | 0              |
| 16.9520424954   | 9.2034484113   |
| 0.4044368096    | 0.1219850815   |
| 0.0597686194    | 0              |
| 1.9472161514    | 1.5661701423   |
| 0.2116648471    | 0.1915252494   |
| 0.1088688424    | 0.0985101328   |
| 2.0666048335    | 1.5583086962   |
| 1.2375380448    | 1.1197881274   |
| 82.0172223571   | 69.0656541472  |
| 1.3831686307    | 1.0727675812   |
| 0.4267596206    | 0.1930770364   |

gene\_expression\_table

|                |                |
|----------------|----------------|
| 0              | 0              |
| 0.4733861791   | 0.2141720916   |
| 7.8920821232   | 5.8992209178   |
| 0.4506326409   | 0.2038778053   |
| 1.2814408093   | 2.7055317535   |
| 0.17623397     | 0.318931136    |
| 0              | 0              |
| 18.381515873   | 11.7406177286  |
| 6.3451586969   | 5.9710832657   |
| 0.4894432281   | 0              |
| 6.2371271393   | 2.3087756056   |
| 2.4156867722   | 0.9367876042   |
| 3.5022443018   | 2.3767581963   |
| 11.3890457943  | 7.1825479645   |
| 109.9094916548 | 84.5082362494  |
| 58.2730203081  | 46.9892798011  |
| 0              | 0              |
| 13.0398772949  | 6.1355591579   |
| 10.1907228524  | 10.1431996841  |
| 25.0005752089  | 24.632634721   |
| 3.8629668545   | 2.4967223306   |
| 0.0998088515   | 0.0903121866   |
| 2.2843951335   | 2.480445972    |
| 2.8481372803   | 1.5462847344   |
| 1.4996462029   | 1.6283484975   |
| 4.2705441652   | 2.7822298999   |
| 0              | 0              |
| 0              | 0              |
| 0              | 0              |
| 12.1216493191  | 13.6272722351  |
| 0              | 0              |
| 0              | 0              |
| 309.6780260207 | 222.8964016003 |
| 1.6767130014   | 0.7585881177   |
| 42.4546114509  | 38.4151178652  |
| 0.5077451856   | 0.7657233016   |
| 10.151778457   | 5.2995298432   |
| 0              | 0              |
| 13.5595333715  | 8.7638312821   |
| 3.4667509893   | 3.2794808772   |
| 86.3317035961  | 201.4605844673 |
| 0              | 5.9872269584   |
| 0              | 0              |
| 0              | 15.0705884057  |
| 0              | 0              |
| 0              | 0              |
| 12.9920373177  | 17.6337962289  |
| 0.7302331285   | 0.4405016831   |
| 9.3159915571   | 5.8640617166   |

gene\_expression\_table

|                |                |
|----------------|----------------|
| 0              | 0.4104793061   |
| 0              | 0              |
| 0              | 0              |
| 9.2797315362   | 10.0115439349  |
| 1.7878379488   | 1.7647939725   |
| 18.2622023286  | 16.9594381334  |
| 4.6196934214   | 5.1447832792   |
| 0.5742817239   | 0.519639666    |
| 30.1322963811  | 21.8122023021  |
| 0              | 5.247152402    |
| 4.3093179868   | 2.7295049208   |
| 8.7281676297   | 6.9403989605   |
| 0              | 0.3785798189   |
| 0.7364872495   | 0.4442743835   |
| 0              | 10.3442393288  |
| 0              | 0              |
| 0              | 0              |
| 3.7103894459   | 3.7952667654   |
| 91.5069989016  | 80.5129435542  |
| 9.0783591244   | 7.1877458274   |
| 0              | 0              |
| 3.9597918553   | 1.482630417    |
| 5.9429316855   | 5.08679643     |
| 1.6179648443   | 1.2742377832   |
| 1.2506835935   | 1.2259898046   |
| 18.0674373496  | 16.8932922787  |
| 4.2705441652   | 3.1686507193   |
| 3.6505707687   | 3.6105010348   |
| 13.2560778619  | 10.1008687401  |
| 0              | 0              |
| 205.2751946601 | 169.7862122483 |
| 550.3167234846 | 551.368747308  |
| 18.061708382   | 11.6122477512  |
| 3.5758562007   | 0              |
| 0.9478483885   | 1.013600562    |
| 7.2894285393   | 5.9523525999   |
| 0              | 0              |
| 4.2936706199   | 2.091995339    |
| 11.4620050831  | 7.1303459051   |
| 5.3138489405   | 2.1369973604   |
| 3.4842999138   | 3.603170197    |
| 1.7087178118   | 0.3092271671   |
| 2.4045747566   | 0.2719728774   |
| 85.6460581601  | 104.8488312145 |
| 5.1247129989   | 8.2437406663   |
| 1.453979177    | 1.879478865    |
| 0              | 0              |
| 0.2948926157   | 0.3557786918   |
| 0.0553135607   | 0.0250252785   |



gene\_expression\_table

|                 |                 |
|-----------------|-----------------|
| 0               | 0               |
| 0.6930485421    | 0               |
| 4.5316676103    | 2.6909440223    |
| 3.6170110174    | 4.1456198298    |
| 0               | 0.6905447977    |
| 5.0602588487    | 2.8918627527    |
| 2.9584686402    | 2.3423528782    |
| 0               | 0               |
| 15.0374211881   | 493.2404378476  |
| 1.0401706691    | 0.941199966     |
| 6.967297976     | 10.1839820854   |
| 0               | 0.8184393195    |
| 0.5887004623    | 1.598059448     |
| 273.8219083253  | 191.6697072159  |
| 278.9883594258  | 215.0440617544  |
| 0.4993132471    | 0.2259021645    |
| 0               | 0.034250893     |
| 13.9952593839   | 6.3318155604    |
| 0               | 0.1876726909    |
| 0.7419548768    | 0.8951452879    |
| 0               | 0               |
| 2.4408294283    | 1.4198066438    |
| 0               | 0               |
| 1.2137534251    | 1.5863850587    |
| 0.3395607557    | 0.2048347008    |
| 0               | 0               |
| 3.1980662424    | 1.4468874811    |
| 0.7748510533    | 1.1218001917    |
| 18.4542702551   | 16.4453680302   |
| 7.1676404352    | 5.8960454841    |
| 27.032278421    | 30.3899417875   |
| 4.2043853114    | 3.8043442578    |
| 0               | 0.7140372894    |
| 9.9013287054    | 9.7737075279    |
| 1.7341933764    | 3.3999061147    |
| 6629.5062595361 | 6551.4617493249 |
| 0               | 0               |
| 2.5214115542    | 2.1592795949    |
| 0               | 0               |
| 6.4873534494    | 3.2145738338    |
| 5.2837914716    | 3.1873643439    |
| 2.4784476289    | 3.0581277232    |
| 58.3516159561   | 58.4692957591   |
| 23.2657238982   | 19.9440233303   |
| 0               | 0.098014993     |
| 3.1963928074    | 3.3372239446    |
| 5.2458635174    | 5.3400682692    |
| 5.6719157345    | 3.5640564779    |
| 0               | 0               |

gene\_expression\_table

|                |                 |
|----------------|-----------------|
| 0.3268162513   | 0.5914403353    |
| 4.0298653192   | 5.2810359508    |
| 0              | 0.1023929905    |
| 3.3542933346   | 3.5409934901    |
| 1.2573481098   | 0.9480944116    |
| 0              | 0               |
| 0.26781756     | 0.3392691605    |
| 20.3989981456  | 18.0653388385   |
| 0              | 0               |
| 4.5167067952   | 1.7338570724    |
| 0.6384936121   | 0.144435472     |
| 0              | 0               |
| 28.8835777506  | 14.5196377671   |
| 0              | 0.108735837     |
| 1531.463719137 | 1486.8189811294 |
| 59.247247566   | 64.3319513425   |
| 2.323584097    | 1.2367638244    |
| 1.7028413148   | 1.5408184783    |
| 22.6050071996  | 25.7900456623   |
| 10.1632406562  | 7.2256040341    |
| 110.6744748095 | 70.1007733772   |
| 0              | 0               |
| 0              | 0               |
| 0              | 0               |
| 1.0019497247   | 1.813231376     |
| 5.9934028714   | 4.466114832     |
| 24.1322226534  | 14.1292264912   |
| 1.0274754447   | 0.4225966697    |
| 0.597567468    | 0.6758872574    |
| 16.2669703756  | 9.5994731519    |
| 1.1410963482   | 0.5649652596    |
| 0.234645314    | 0.0424638318    |
| 0.3655556702   | 0               |
| 0              | 0               |
| 0.3997002372   | 0               |
| 5.4236117274   | 3.4352941565    |
| 2.1407633667   | 2.6207456797    |
| 0              | 0               |
| 0              | 0               |
| 0.7036779159   | 0.1591810003    |
| 78.1577787509  | 55.9190737603   |
| 0.5416323117   | 0.3920774377    |
| 100.0528376086 | 49.7043690216   |
| 19.1206442438  | 22.7649252369   |
| 34.3251823353  | 31.059191925    |
| 128.5639281591 | 125.1442345098  |
| 0.6317136261   | 0.2858035037    |
| 0              | 0               |
| 0.6933548408   | 0.4391682061    |

| gene_expression_table |               |
|-----------------------|---------------|
| 0                     | 0             |
| 0                     | 0             |
| 0.9611052276          | 3.0438011957  |
| 0.2208489999          | 0.5328947833  |
| 10.4663256153         | 5.6822821134  |
| 0                     | 0.2711684388  |
| 0                     | 0             |
| 0                     | 0             |
| 0                     | 0             |
| 4.1882928945          | 2.526522007   |
| 12.7118779418         | 3.5944879774  |
| 2.7254155494          | 1.918074888   |
| 4.8988858882          | 4.2554535651  |
| 1.078900244           | 1.3016593053  |
| 42.445429528          | 53.2304904826 |
| 9.118508189           | 5.8359993271  |
| 1.4696810193          | 1.0276059859  |
| 7.6729202775          | 2.0828559732  |
| 5.4020003744          | 7.4162880244  |
| 1.4502559134          | 2.1871103415  |
| 3.906895726           | 2.9827915597  |
| 1.0292083739          | 0             |
| 144.341688838         | 78.364674179  |
| 5.3907172474          | 5.0256105366  |
| 0                     | 4.6557056886  |
| 5.2761732193          | 5.4251740102  |
| 53.5680291688         | 36.2789905303 |
| 0.5000145506          | 0.3619511236  |
| 1.5140834894          | 1.4754068875  |
| 1.1163297642          | 0.6734084237  |
| 5.4174054679          | 3.5650526092  |
| 0                     | 0             |
| 22.284176199          | 24.7465674098 |
| 0.4429949958          | 0.4649798244  |
| 5.9921178326          | 4.405356044   |
| 0.6355662096          | 0.4792441861  |
| 15.5752770269         | 13.1937392852 |
| 0                     | 0             |
| 0                     | 0             |
| 2.1092722104          | 0.7031603432  |
| 33.3264861317         | 28.8990401825 |
| 7.2368197515          | 3.131770323   |
| 0                     | 0             |
| 0                     | 0.3247843791  |
| 0                     | 0             |
| 21.3082423022         | 20.1989275856 |
| 0.2718293147          | 0.2459651569  |
| 3.2179219029          | 1.4558706929  |
| 4.2024649873          | 3.2593771283  |

gene\_expression\_table

|                |                 |
|----------------|-----------------|
| 0.1284652723   | 0.0774946609    |
| 0              | 0               |
| 0              | 0               |
| 0.1747984537   | 0.070296284     |
| 2076.498399075 | 2552.0083475148 |
| 0              | 0               |
| 0.7994464668   | 0.5787042528    |
| 1.0186785793   | 1.720605258     |
| 1.3496316425   | 2.1981891325    |
| 0              | 0               |
| 0.2211016838   | 0.2000641851    |
| 1.713277603    | 1.7440444903    |
| 4.7633228559   | 5.6218692004    |
| 1.1074823681   | 1.9271289542    |
| 1.0984835046   | 1.9879288425    |
| 0              | 0               |
| 0              | 0               |
| 11.3416269284  | 10.2624878746   |
| 1.4912160576   | 0               |
| 0              | 0               |
| 0              | 0               |
| 2.6187731078   | 20.5365395194   |
| 0.9798890431   | 1.7733080954    |
| 0              | 0               |
| 0              | 0               |
| 0.8152236636   | 0.9835417812    |
| 0              | 0               |
| 48.8506403161  | 78.5823538295   |
| 2.3909635224   | 3.6057781234    |
| 25.5535552539  | 24.9719459836   |
| 2.2033656661   | 5.5064611071    |
| 0.4623154096   | 0               |
| 0.2278824186   | 0.206199743     |
| 0              | 0               |
| 5.0950722772   | 5.1865691333    |
| 21.3083592949  | 23.8474294107   |
| 0.0848502879   | 0.0307107633    |
| 0              | 18.7260077211   |
| 0              | 0               |
| 6.3373039017   | 6.8095035678    |
| 0.883947458    | 0.914104186     |
| 13.1789670758  | 16.1839391847   |
| 0              | 0.2207554043    |
| 0              | 0               |
| 0              | 0.1287770364    |
| 0.2357417662   | 1.5998346393    |
| 3.7786982858   | 3.3051886998    |
| 0.5775202035   | 0.7465285843    |
| 0.3325596715   | 0.4212839538    |

gene\_expression\_table

|                |                |
|----------------|----------------|
| 2.273767876    | 2.3145999979   |
| 9.7311440393   | 9.7321074283   |
| 0.3358591632   | 0.3039026598   |
| 0              | 0              |
| 2.8199706036   | 2.041323652    |
| 817.6897882478 | 735.5861390726 |
| 42.0590350853  | 40.0601894807  |
| 0.4455841203   | 0.5375832657   |
| 0              | 0              |
| 0              | 0.2773844485   |
| 3.1668074939   | 3.1259895681   |
| 0              | 0              |
| 0              | 0              |
| 220.5046535176 | 203.8147992393 |
| 2.7475533704   | 2.4861277246   |
| 22.3888356641  | 18.0076186781  |
| 0.0627227224   | 0.056754748    |
| 0.0107642974   | 0              |
| 18.1130451989  | 9.6409504096   |
| 0              | 0              |
| 5.3877614135   | 4.8751238713   |
| 0              | 0              |
| 58.6993836253  | 44.2618532969  |
| 75.1351403299  | 41.1495074125  |
| 34.2681983026  | 24.940919653   |
| 3.2226604125   | 3.888038711    |
| 1.4769864959   | 0.697280041    |
| 0              | 0              |
| 1.1759266486   | 1.2160445308   |
| 17.4169653628  | 7.2737385363   |
| 0.6434850335   | 0.2911291914   |
| 14.2011644804  | 8.8961155279   |
| 11.7133100571  | 10.0409740129  |
| 7.4983495869   | 3.1314889369   |
| 0.4566957119   | 0.1652967157   |
| 0.4383636664   | 0.7933080217   |
| 16.3933234919  | 11.1251422275  |
| 3.8618469846   | 4.991997067    |
| 0              | 0              |
| 0              | 0              |
| 23.9355671108  | 11.4306814356  |
| 1.0235285222   | 0              |
| 0.5887123394   | 0              |
| 0              | 0              |
| 0              | 0              |
| 48.8811910605  | 49.5378440651  |
| 1.0869446404   | 0.983523463    |
| 20.6666914605  | 20.1169746422  |
| 42.7397092375  | 27.710638588   |

gene\_expression\_table

|                |                |
|----------------|----------------|
| 2.0669502539   | 2.7562065109   |
| 16.2365450547  | 18.3645772121  |
| 1.1127043725   | 1.7619563405   |
| 3.1343378835   | 1.0313128227   |
| 5.3404311522   | 0              |
| 0.2144650582   | 0              |
| 13.0402717635  | 10.4380273358  |
| 18.7228521934  | 13.4534650678  |
| 0.1382760383   | 0              |
| 0              | 0.3109240566   |
| 93.4336053667  | 68.1179345524  |
| 10.4989622747  | 8.2333346493   |
| 201.044105028  | 190.5776770038 |
| 126.307931444  | 120.5893626046 |
| 0              | 0              |
| 5.3987662842   | 4.2988718474   |
| 55.2569985902  | 69.9991274833  |
| 26.5102746111  | 25.1485640882  |
| 2.4155058483   | 3.2785110507   |
| 5.7551798137   | 3.0632840902   |
| 0.1681455647   | 0              |
| 13.2918839123  | 9.3544739451   |
| 9.5684462091   | 5.3597283271   |
| 0              | 0              |
| 4.185157782    | 3.7869461994   |
| 229.1307905716 | 187.316850215  |
| 8.5774403838   | 5.4785714808   |
| 0.7126487524   | 0.644841276    |
| 0              | 0              |
| 2.6529080415   | 1.6944619475   |
| 16.7158111709  | 10.7808177694  |
| 0              | 0              |
| 0.3579357544   | 0.2878921741   |
| 0.8482838401   | 0              |
| 7.0648964922   | 5.6823840212   |
| 0.2621298111   | 0.8696913377   |
| 0              | 0              |
| 15.3396557522  | 6.4773847413   |
| 3.8495927712   | 3.8499738831   |
| 0.3190594724   | 0.2887014348   |
| 17.2582861811  | 12.756884123   |
| 0              | 0              |
| 0.1718916551   | 0.1076790586   |
| 0              | 0              |
| 0              | 0              |
| 3.3239299011   | 2.1053640157   |
| 12.7019178233  | 10.9186816447  |
| 0.2784686958   | 0.0839909369   |
| 15.8814555226  | 9.0480034888   |

gene\_expression\_table

|                 |                 |
|-----------------|-----------------|
| 1.3571831267    | 1.8420737346    |
| 7.9092902619    | 5.6961752237    |
| 37.9371371007   | 34.510067478    |
| 0               | 0               |
| 42.0723673059   | 46.7432485766   |
| 0.1187322627    | 0.1790584388    |
| 0.36420514      | 0               |
| 12.4288235845   | 11.2462393744   |
| 1.1484165381    | 1.0391464004    |
| 0.082764035     | 0               |
| 0               | 0               |
| 23.8124985053   | 27.8840610363   |
| 40.9833087296   | 37.0838074252   |
| 11.4042933518   | 11.665173204    |
| 0               | 0               |
| 0               | 0               |
| 0               | 0               |
| 0               | 0               |
| 1.3670318855    | 2.2265294766    |
| 11.4420609021   | 8.7356523128    |
| 7.0467768768    | 6.9076436684    |
| 0               | 0               |
| 0.711883772     | 1.1272608942    |
| 3.3955313256    | 2.9327946463    |
| 3.9615288545    | 2.1355035437    |
| 1.8278012487    | 2.9769995863    |
| 0.6251882776    | 0.6010589447    |
| 0               | 0               |
| 1.0688530503    | 1.2572992393    |
| 2.2410174488    | 2.2617634804    |
| 0               | 0.1644494257    |
| 0.2724058609    | 0.4929736909    |
| 2.3916951474    | 2.8133675518    |
| 0               | 0.8725601747    |
| 4.1345450958    | 6.4619850432    |
| 1585.0745074106 | 1514.3085627295 |
| 3.0900228537    | 5.5920234847    |
| 0               | 0               |
| 0               | 0               |
| 2.1787819809    | 0.7510377497    |
| 5.8953131698    | 4.5723281379    |
| 2.6646885257    | 1.607431565     |
| 0               | 0.0442860057    |
| 0               | 0               |
| 656.898341818   | 594.3954346534  |
| 5.5228512007    | 2.3796952689    |
| 0               | 0               |
| 43.1376745727   | 42.5816602251   |
| 3.6105961315    | 3.5937585656    |

gene\_expression\_table

|               |               |
|---------------|---------------|
| 1.0155610558  | 0.4594659605  |
| 16.3917448326 | 10.5943532271 |
| 5.2414449777  | 5.7681841965  |
| 68.6330493384 | 70.1159697295 |
| 0             | 0             |
| 15.4857539141 | 8.1271382325  |
| 0.4038792715  | 0.2923606042  |
| 12.9221115139 | 14.3908820748 |
| 0.4411764429  | 0             |
| 0             | 0             |
| 5.1759819454  | 6.5568928696  |
| 0             | 0             |
| 3.8040759789  | 2.7967255608  |
| 0.4445592344  | 0.2475446645  |
| 1.7927107478  | 1.6221369675  |
| 0             | 0             |
| 0             | 0             |
| 4.8209097248  | 5.6452094259  |
| 6.933849677   | 5.0416908104  |
| 0.3960062402  | 0.2388845542  |
| 1.3493695175  | 1.3736013756  |
| 0             | 0             |
| 1.0608250924  | 1.2798522018  |
| 4.1408201211  | 1.7632128007  |
| 1.0796786809  | 1.4654232732  |
| 4.4570208974  | 2.6886279606  |
| 0             | 0             |
| 6.9052819913  | 8.5731865538  |
| 0             | 0             |
| 35.5565992878 | 32.1734413729 |
| 0.1052647149  | 0.0952489327  |
| 0.1440698357  | 0.1303618035  |
| 3.2499281573  | 3.9635552636  |
| 0             | 0.2854327476  |
| 0.4095627299  | 0.3705934409  |
| 1.5438546382  | 1.2064647198  |
| 76.5159319685 | 52.6190210664 |
| 0.6138874295  | 0.8023555903  |
| 5.2221181556  | 3.2587871205  |
| 52.0498919975 | 38.534254067  |
| 0.8787399826  | 0.5504740414  |
| 0             | 4.8643461471  |
| 0             | 0             |
| 0             | 0             |
| 10.6471567707 | 6.5095240047  |
| 1.1095278702  | 1.2153174964  |
| 0             | 0             |
| 5.8929093817  | 4.9767272391  |
| 3.6004091242  | 3.2578355129  |



gene\_expression\_table

|                |                |
|----------------|----------------|
| 2.103465573    | 1.522659144    |
| 4.9331210624   | 2.8695483502   |
| 1.0257712875   | 0.6961279982   |
| 3.1336035025   | 2.4656050059   |
| 1.9834869721   | 1.6238314857   |
| 13.3313557369  | 10.0524141044  |
| 0              | 0              |
| 9.1521534183   | 7.9746232567   |
| 3.5370790101   | 4.9786040353   |
| 70.1195378265  | 75.1973538959  |
| 9.1144042672   | 10.1503780439  |
| 44.6646419475  | 45.732612911   |
| 0.6844008776   | 1.5482028618   |
| 2.675602037    | 1.100464752    |
| 25.5294101623  | 23.1003244853  |
| 174.383162244  | 147.7723944523 |
| 8.9775106344   | 9.2837871484   |
| 0              | 0              |
| 4.0072790884   | 2.0144402227   |
| 3.2680161066   | 0              |
| 6.2366221955   | 8.935093272    |
| 0              | 0              |
| 1.6330935648   | 2.2165606856   |
| 7.7952223906   | 7.5237530577   |
| 2.3186629674   | 2.5642779679   |
| 3.738265798    | 4.6287872905   |
| 0              | 3.7644241355   |
| 0              | 7.5288482711   |
| 1.3082693724   | 1.7218755979   |
| 7.558662857    | 4.8061121204   |
| 0.1426161296   | 0              |
| 8.2463217359   | 8.5089520354   |
| 2.2453727511   | 1.6931073747   |
| 15.8136785846  | 10.1243139763  |
| 0              | 0              |
| 12.8433608343  | 34.8640020511  |
| 498.5628900272 | 451.1253672823 |
| 3.2407947374   | 5.8648758078   |
| 18.1993124664  | 10.4794293931  |
| 0              | 0.0417996538   |
| 2.0814691359   | 1.8834204213   |
| 19.7488047874  | 17.2199266236  |
| 4.1082731069   | 1.7157124558   |
| 196.9225858325 | 174.736937251  |
| 0              | 0.1460040858   |
| 0              | 0.0783022369   |
| 29.4428365105  | 24.0797215864  |
| 3.3552984819   | 2.8520439507   |
| 1.7685893105   | 1.891276222    |

gene\_expression\_table

|                 |                 |
|-----------------|-----------------|
| 0               | 0.2180031613    |
| 0.6740457789    | 1.8297339553    |
| 0               | 0               |
| 1.6270835182    | 1.2990608155    |
| 3.6959311753    | 2.0065612691    |
| 0               | 0.7943342625    |
| 9.6290195661    | 7.5763761511    |
| 4.1689850198    | 1.2574374172    |
| 0               | 0.0532321342    |
| 1.0745365965    | 1.2500948908    |
| 0               | 0               |
| 62.5094918166   | 60.1259745756   |
| 0.9479571188    | 0.7223245464    |
| 5.3391430919    | 5.5997206152    |
| 1.5334037529    | 1.4505709525    |
| 13.7711545983   | 12.0261687754   |
| 0.5183153188    | 0.281399029     |
| 2.3585291567    | 1.2449025111    |
| 0               | 0               |
| 0               | 0               |
| 0               | 0               |
| 1.8129800791    | 1.1847894513    |
| 1.2115472624    | 2.0098289375    |
| 0               | 0.4837343291    |
| 161.345055455   | 158.3889702308  |
| 844.9840487112  | 2663.3046405997 |
| 0.5910415594    | 0.6536503451    |
| 0               | 0               |
| 12.7909452923   | 0               |
| 15.13884089     | 19.4060702583   |
| 0.1713856209    | 0               |
| 0.0873933518    | 0.3163120138    |
| 1.1713522381    | 1.2442302028    |
| 6225.8928682264 | 5568.7553861515 |
| 0.2222400291    | 0.402188437     |
| 20.1585650546   | 27.3607610375   |
| 0.2988490141    | 0.0450689953    |
| 0               | 0               |
| 2501.1527841852 | 2131.1534358559 |
| 0.9403385533    | 1.9144501392    |
| 15.2076194996   | 7.1794627626    |
| 1.4682003958    | 0.166062912     |
| 1.3344684821    | 0.9233791234    |
| 44.3412895324   | 48.1467375761   |
| 3.5228921665    | 4.7815412689    |
| 3.5910452898    | 1.2997450534    |
| 9.3853563841    | 7.5487587411    |
| 1.9974067914    | 0.9036782424    |
| 0               | 1.1706868354    |

gene\_expression\_table

|               |               |
|---------------|---------------|
| 1.0871219417  | 1.4356467647  |
| 0.0311917331  | 0.0564477714  |
| 1.3852909938  | 2.8203358532  |
| 0.7283902165  | 0.6136308277  |
| 0             | 0             |
| 2.8824295896  | 2.1734755589  |
| 3.5019640943  | 2.1125049214  |
| 0             | 0             |
| 0             | 0             |
| 0             | 0             |
| 67.8983304294 | 64.363519059  |
| 0             | 0             |
| 0.1890124225  | 1.5392535268  |
| 0.5180806558  | 0.2343930232  |
| 2.1463372861  | 3.0625682683  |
| 0.6667607124  | 1.2066388304  |
| 0             | 0             |
| 1.0891586366  | 0.9855268007  |
| 0             | 0.2591288092  |
| 6.5032573692  | 6.4729302374  |
| 4.3486915767  | 2.8617599964  |
| 0             | 0             |
| 1.4182454175  | 2.3099426287  |
| 5.4513402526  | 2.8773810787  |
| 1.3992127653  | 0.8440531579  |
| 0.4752066284  | 0.6210987169  |
| 0.4272344922  | 0.7731675223  |
| 5.2564157227  | 5.0733605643  |
| 6.5790130352  | 5.9530296603  |
| 0             | 0             |
| 0.5578668049  | 0.2523933011  |
| 0.0971037027  | 0.0292881429  |
| 6.2030910776  | 6.3144856371  |
| 1.4569013777  | 2.0506567869  |
| 0             | 0             |
| 8.0977898548  | 8.3042700561  |
| 10.2771011325 | 7.2327501059  |
| 2.642328628   | 9.5636598443  |
| 5.4205498044  | 4.1050980666  |
| 1.2611066325  | 1.8543105729  |
| 1.7878039747  | 2.0934903215  |
| 28.3639655801 | 22.7674949638 |
| 0.9525401781  | 2.8730246226  |
| 9.9435385644  | 8.4169464859  |
| 0             | 0             |
| 1.6090989666  | 2.4266592936  |
| 0.1656098016  | 0.0899113641  |
| 0             | 0.4733113003  |
| 3.4937320384  | 2.1075390628  |

gene\_expression\_table

|                 |                 |
|-----------------|-----------------|
| 3.9467256124    | 2.678400374     |
| 7.2913832622    | 2.1992063041    |
| 0               | 0               |
| 1.2238954708    | 3.3223308724    |
| 40.4904474776   | 24.4252274623   |
| 21.3679817044   | 32.8692446598   |
| 12.4811467283   | 10.3828111412   |
| 0               | 0               |
| 472.9780141188  | 509.7061635604  |
| 1.5907056106    | 0.5277625176    |
| 0.1110591139    | 0.1004920032    |
| 29.9643083147   | 34.8353764014   |
| 0.1635372543    | 0.8138730931    |
| 6.8365730032    | 6.9200252497    |
| 4.2199226369    | 4.1121265551    |
| 0               | 0               |
| 1.0264929755    | 0.9288236848    |
| 0               | 0               |
| 0               | 0               |
| 9.3111346314    | 9.7554876983    |
| 0               | 0               |
| 0               | 0               |
| 2.7805416046    | 2.1805135534    |
| 1.3902310602    | 2.1385194673    |
| 0               | 0               |
| 3.8776826393    | 2.5062334732    |
| 0               | 0               |
| 18.1173936733   | 17.9236151256   |
| 0.6201410255    | 0.9619466104    |
| 0               | 0               |
| 13.2350249156   | 15.8502333169   |
| 0.1219384536    | 0.2206723796    |
| 2.8932672578    | 1.4959869433    |
| 18.1618978105   | 10.955880036    |
| 0               | 0               |
| 1087.1589472967 | 1040.3028918437 |
| 6.7638549684    | 3.8251775978    |
| 1.228100557     | 1.6163616037    |
| 3.6627760438    | 2.8043808795    |
| 0.2349597061    | 0.212603637     |
| 0               | 0               |
| 1.4641890199    | 2.3847724744    |
| 3.9423456093    | 4.0768425672    |
| 22.2482094226   | 15.8174697611   |
| 2.1627717029    | 2.1075246437    |
| 0               | 0               |
| 0.8964521715    | 1.0815414282    |
| 0               | 0               |
| 14.9095482269   | 9.636376236     |

gene\_expression\_table

|                 |                 |
|-----------------|-----------------|
| 0               | 0               |
| 1164.3103019257 | 1095.1928411079 |
| 0               | 0               |
| 2.1484159395    | 1.9439973355    |
| 3.938335974     | 2.2272557012    |
| 4.9506304166    | 5.4750486306    |
| 30.9275207371   | 22.9875248086   |
| 13.8373921012   | 14.9183817426   |
| 0               | 0               |
| 114.4983471906  | 79.3018260416   |
| 47.9758975593   | 34.9946314138   |
| 0.8023569021    | 0.3630069139    |
| 32.0614658079   | 26.4881807969   |
| 13.9384360236   | 21.0203573654   |
| 4.4454024805    | 2.9050876105    |
| 5.5239215931    | 7.080965532     |
| 1.4679972741    | 1.6603993766    |
| 46.1256572888   | 36.1719532311   |
| 11.4858545783   | 7.1109948524    |
| 10.0494027605   | 9.093216928     |
| 22.5155214626   | 14.2138624498   |
| 129.8539755031  | 150.7745212906  |
| 0.3330911353    | 1.5069900282    |
| 24.5361010526   | 12.1099239658   |
| 0.3279707045    | 0.0847899361    |
| 65.2584756892   | 61.0645601132   |
| 0               | 0               |
| 0.047120031     | 0               |
| 0               | 0.7560322668    |
| 3.5093344336    | 2.1169509631    |
| 0.1948934518    | 0.1763496277    |
| 0               | 0.1113224059    |
| 1116.2599073335 | 1232.5272726018 |
| 0               | 0               |
| 1.0943637795    | 0.7426775114    |
| 1.279234909     | 1.2732693561    |
| 0               | 0               |
| 5.6254078916    | 5.4295025471    |
| 22.7259468968   | 19.094777566    |
| 15.3304624653   | 8.7340910078    |
| 0               | 0               |
| 1.648873584     | 2.486642829     |
| 21.5351408232   | 29.2291559631   |
| 1.9008271388    | 2.345408514     |
| 26.7077419859   | 41.4283539017   |
| 30.1933578504   | 27.6753161842   |
| 75.9459347425   | 60.4479644842   |
| 1.3654409572    | 0.9448103803    |
| 0.8116635369    | 1.2065717035    |

gene\_expression\_table

|                |                |
|----------------|----------------|
| 35.2623710784  | 26.4374013643  |
| 7.8472110372   | 7.1005604952   |
| 40.3458220747  | 40.3097867553  |
| 18.6335350035  | 16.8605816646  |
| 0              | 2.954752785    |
| 1.4926908476   | 1.3506635177   |
| 0              | 0.9303619058   |
| 44.1940346923  | 45.4420881294  |
| 26.2438419902  | 18.8404198451  |
| 11.963313123   | 12.268357752   |
| 0              | 0              |
| 0              | 0              |
| 66.1430656944  | 82.2932696696  |
| 15.2456195483  | 27.5900427238  |
| 0.636916471    | 0.9605246823   |
| 13.0600256697  | 7.954008134    |
| 10.6024692303  | 38.3746397598  |
| 2.0081503607   | 3.8254269882   |
| 2.2709798117   | 0              |
| 61.0143561223  | 27.6044651194  |
| 10.9057365699  | 11.5127504801  |
| 4.6047208167   | 2.0832942155   |
| 35.3503605694  | 55.2499721198  |
| 0.2867373761   | 0.5189094764   |
| 0              | 0              |
| 337.2031542855 | 348.7071681282 |
| 38.7557729466  | 35.9674034692  |
| 21.9140447064  | 22.6616636727  |
| 5.227537767    | 33.1110168769  |
| 9.0041874431   | 13.3321946802  |
| 12.9393646718  | 15.0534041543  |
| 145.3928579861 | 169.1472114698 |
| 0              | 0              |
| 0              | 0              |
| 0              | 0              |
| 0              | 0              |
| 0              | 0              |
| 0              | 0              |
| 0              | 0              |
| 0              | 0              |
| 0              | 0              |
| 464.0846306168 | 304.8789884522 |
| 0              | 0              |
| 0.0954571845   | 0              |
| 0              | 0              |
| 0              | 0.1900966974   |
| 12.0607966556  | 8.8828613547   |
| 52.9518402259  | 80.9573789781  |
| 3.5309917492   | 12.7800923943  |
| 0              | 1.0863919884   |
| 2.530097095    | 4.1208517667   |

gene\_expression\_table

|                 |                 |
|-----------------|-----------------|
| 10.385520057    | 11.5659731202   |
| 4.7131599392    | 5.9705936234    |
| 3.9456582808    | 5.0578325229    |
| 58.8926209241   | 80.9993940175   |
| 17.2455538365   | 18.2054423319   |
| 0.9973380209    | 0.902442781     |
| 0               | 0.124671465     |
| 0.3817429871    | 0.9499069404    |
| 3.6108962851    | 3.2673248359    |
| 24.4019764306   | 26.2859100099   |
| 0               | 0               |
| 0               | 0               |
| 0               | 0               |
| 0               | 0               |
| 19.2409238197   | 13.4361158866   |
| 7.3227874271    | 1.8491260513    |
| 15.4092403157   | 12.0976670212   |
| 0               | 0.4428325753    |
| 0               | 0.0668752112    |
| 0               | 0               |
| 0               | 0               |
| 1.2385027595    | 1.5689254712    |
| 0               | 0               |
| 100.0297799748  | 96.9772437073   |
| 62.051500371    | 37.4315944959   |
| 35.060214677    | 20.394184516    |
| 0.9747499938    | 0               |
| 12.5823816377   | 9.7248468923    |
| 0.1759534239    | 0               |
| 1.028998677     | 1.0345455249    |
| 0               | 0               |
| 19.6926396475   | 10.8893363735   |
| 0               | 0               |
| 1.3885242974    | 3.0153798264    |
| 235.0650120618  | 215.9948776808  |
| 0               | 0               |
| 0               | 0               |
| 0               | 0               |
| 8.8901219968    | 4.0221200085    |
| 9.0380889694    | 25.7026884738   |
| 3395.2857796782 | 3921.2904272811 |
| 27.5972046192   | 29.7104637268   |
| 0               | 0               |
| 33.9369441545   | 44.7823454659   |
| 3.4773420503    | 5.2441301489    |
| 21.740281061    | 31.6152730004   |
| 0               | 0               |
| 1.7052428597    | 0               |
| 6.572325888     | 5.4895188787    |

gene\_expression\_table

|                |                |
|----------------|----------------|
| 62.0071719674  | 67.6519891723  |
| 8.4743145693   | 8.5881555786   |
| 0              | 0              |
| 26.9204781784  | 24.3590344339  |
| 0.5323090192   | 0              |
| 1.1070228452   | 0.6374398903   |
| 0              | 0.5085648693   |
| 18.43575677    | 35.8654867364  |
| 30.7057864583  | 32.4706637762  |
| 0.2804728594   | 0              |
| 3.5871311034   | 3.5163059491   |
| 8.6770456848   | 3.5688352734   |
| 0.8237600556   | 1.0320653115   |
| 21.2612621031  | 20.1127518843  |
| 14.0554116715  | 11.2505915446  |
| 3.466807154    | 2.3527091796   |
| 26.3288556267  | 15.415337814   |
| 4.5952033725   | 4.4178500923   |
| 20.0787698367  | 16.3048886876  |
| 26.3715461505  | 14.9139577986  |
| 0              | 0              |
| 0              | 0              |
| 0              | 0              |
| 6.5265300415   | 2.952770173    |
| 4.7312165175   | 2.038594406    |
| 0              | 0              |
| 34.8038355815  | 28.8679435199  |
| 5.1448925916   | 5.4312576023   |
| 5.3645032003   | 6.472104857    |
| 0.2167655837   | 0.1961406585   |
| 11.3627576069  | 7.5231278051   |
| 8.2609212892   | 7.4749068277   |
| 11.0724433227  | 8.5616197182   |
| 9.0467354068   | 11.6942169891  |
| 5.8608276984   | 2.9081947149   |
| 0              | 0              |
| 8.3463057838   | 5.178628878    |
| 2.0992889076   | 0              |
| 24.1488316491  | 15.8232146744  |
| 176.6452672601 | 146.5179200257 |
| 0              | 0              |
| 0              | 0              |
| 115.6074961801 | 70.9204160266  |
| 48.944994506   | 62.4057485124  |
| 10.2109519316  | 7.5595049461   |
| 24.1824164217  | 16.2085149704  |
| 0              | 0              |
| 19.0986784996  | 13.6644161184  |
| 4.8659883796   | 2.7518729819   |



gene\_expression\_table

|                |                |
|----------------|----------------|
| 0              | 0              |
| 20.0100108453  | 17.4817400054  |
| 1.4062359685   | 1.3316177017   |
| 2.0121442432   | 3.6413833798   |
| 9.9741021185   | 10.0868552699  |
| 0              | 0              |
| 5.0673119416   | 5.7314558667   |
| 0              | 0              |
| 673.087837376  | 667.5627940759 |
| 0              | 0              |
| 1.405544887    | 1.2718093666   |
| 4.0895611235   | 3.1589168235   |
| 0              | 0              |
| 1.7708052428   | 1.6023157389   |
| 0.4512051803   | 1.224821021    |
| 26.6988628048  | 28.0973921917  |
| 14.0694868927  | 4.2435986639   |
| 2.8326383256   | 2.897436577    |
| 29.007881519   | 31.1692915096  |
| 17.403761046   | 19.3620723973  |
| 0.8795549739   | 0.9550399404   |
| 5.8518230854   | 1.9856365351   |
| 0              | 0              |
| 17.6261647934  | 15.9490612424  |
| 0.6023639453   | 0.9084165091   |
| 0              | 0              |
| 14.805015342   | 14.4268276871  |
| 1.9271705888   | 2.2420326255   |
| 0              | 0              |
| 9.2911811552   | 8.4071389888   |
| 0              | 0              |
| 1.4910913659   | 1.3492162244   |
| 19.3857143981  | 12.5294230718  |
| 1.1761907298   | 0.7982084391   |
| 119.8542124259 | 177.2235974163 |
| 633.0397026089 | 913.7634036207 |
| 12.0778625064  | 13.1144060696  |
| 6.380285114    | 4.704097369    |
| 25.2483398571  | 22.0582045837  |
| 0              | 0              |
| 1.0182188504   | 0              |
| 21.2500843413  | 21.490307867   |
| 1.0371096039   | 0.9384301566   |
| 3.153754749    | 0.7134199105   |
| 1.8604072615   | 1.6833922579   |
| 3.989761178    | 4.2870427863   |
| 0              | 0              |
| 0.6110653385   | 0.8688795876   |
| 79.9455227822  | 62.0047065833  |

gene\_expression\_table

|                 |                 |
|-----------------|-----------------|
| 766.4570758291  | 511.8910553396  |
| 38.6662312043   | 75.8055922101   |
| 119.8907479503  | 148.1089642811  |
| 11.7259858612   | 9.7260859873    |
| 0               | 0               |
| 39.2258580663   | 30.1695392576   |
| 34.7934608293   | 31.4829144118   |
| 18.9727671102   | 35.56132527     |
| 8.5979210636    | 10.5583564181   |
| 4.1064052653    | 3.7156868684    |
| 54.2633487968   | 78.25355737     |
| 73.5846398826   | 61.9912272992   |
| 0.8385813667    | 1.5175831759    |
| 1554.125778161  | 1741.7205898061 |
| 29.9502654998   | 23.2290359707   |
| 0.326867504     | 0.2957665437    |
| 1.0784284062    | 0               |
| 3.2352254355    | 4.3910977693    |
| 311.3929655722  | 316.9849328329  |
| 450.1350799754  | 371.7156003221  |
| 2.3968225238    | 5.4219210002    |
| 0.620079528     | 0.4488639013    |
| 2.990991781     | 5.4128066598    |
| 0               | 0               |
| 2.2818357691    | 3.4412041089    |
| 0               | 0.7075128189    |
| 0               | 0.5229899554    |
| 3.0959678113    | 1.6808346276    |
| 4.1702700994    | 5.1052897841    |
| 198.2441022065  | 185.7879496566  |
| 69.9076551766   | 65.7464404943   |
| 6.2382946699    | 5.3476390841    |
| 0               | 0               |
| 176.2159623317  | 184.8482730953  |
| 49.7215693426   | 64.5698934625   |
| 1.3524966774    | 0.6119043079    |
| 10.8343591679   | 11.2451749943   |
| 4.4548407121    | 2.4679403247    |
| 4.2414409595    | 4.9666606203    |
| 8.854770784     | 7.0696344882    |
| 38.9269624012   | 54.1489746203   |
| 5.7544740452    | 8.1823411019    |
| 0               | 0               |
| 0               | 0.7382338223    |
| 0               | 0               |
| 3.6242588162    | 5.4656932365    |
| 9.3034005469    | 7.365921258     |
| 1277.3356328462 | 1242.8150001841 |
| 16.4766323069   | 11.1816788058   |

gene\_expression\_table

|                |                |
|----------------|----------------|
| 0              | 0              |
| 9.841689005    | 11.7994785493  |
| 0              | 0              |
| 3.1564422119   | 1.9040742644   |
| 0              | 0              |
| 253.5931270176 | 252.4105270166 |
| 0.8681276264   | 0.976600594    |
| 0              | 0              |
| 13.5854496568  | 16.1747555052  |
| 420.3762311349 | 384.4535326682 |
| 0              | 0              |
| 6.0774182146   | 11.5482377769  |
| 21.0912556365  | 11.8455230537  |
| 5.6881317379   | 5.6616058432   |
| 1.2569328812   | 1.5164500983   |
| 41.3209672979  | 47.5864305373  |
| 10.8275012302  | 8.3276884058   |
| 18.8849417875  | 15.0606696296  |
| 0              | 0              |
| 0              | 0              |
| 35.183259461   | 14.5913277947  |
| 2.5253730905   | 1.3268250408   |
| 18.0466938916  | 13.8173349074  |
| 3.0459146127   | 2.8709378492   |
| 0.6286453254   | 0.568830651    |
| 0.4398238875   | 1.1939258823   |
| 1.9199571992   | 2.1944540298   |
| 37.6406442355  | 36.110951107   |
| 0              | 0.6281005191   |
| 10.8564671555  | 12.6302018628  |
| 18.0959880339  | 8.4903163309   |
| 14.8047264411  | 12.5030066773  |
| 4.0170864283   | 3.6348665868   |
| 13.4741949483  | 8.1280967978   |
| 4.5310738844   | 3.5142419104   |
| 0              | 0              |
| 0.6749282011   | 0.1221419559   |
| 0              | 0.5649777654   |
| 5.3985836428   | 5.5827615788   |
| 74.5931140749  | 57.853448078   |
| 61.9251792023  | 45.0462094855  |
| 0.3827804048   | 0.3463594145   |
| 0              | 0              |
| 3.2635569963   | 4.4295515513   |
| 1.3193656015   | 1.1275060288   |
| 3.8650866461   | 2.6229970195   |
| 0              | 0.9985353405   |
| 0.5373738364   | 0.6483246792   |
| 0              | 0              |

gene\_expression\_table

|                 |                 |
|-----------------|-----------------|
| 0.1525491809    | 0.2300572527    |
| 0               | 0.6383660477    |
| 4.477675518     | 1.6206525219    |
| 4.9388762858    | 5.5861868757    |
| 2.6975332012    | 2.3391641131    |
| 1.0692081423    | 3.8698982661    |
| 68.0823980763   | 47.7434552898   |
| 0.4858763803    | 0.8792919205    |
| 8.3327119944    | 6.5973834091    |
| 20.776159356    | 20.8135533105   |
| 8.8258677956    | 6.3123660784    |
| 2.8086209949    | 2.2590087599    |
| 15.3019303182   | 16.2539697661   |
| 2.5610071806    | 2.3173311293    |
| 0.6626408554    | 0.8565593665    |
| 0               | 0               |
| 5.1045422576    | 6.9282788997    |
| 7.1519891705    | 4.8895686827    |
| 5.9761920307    | 3.9327754067    |
| 2.3440582614    | 1.3497429142    |
| 56.3378473665   | 45.7489347047   |
| 1.4230290296    | 2.2240880416    |
| 7.1225832982    | 6.1584409037    |
| 0.2508506291    | 0.3026434163    |
| 98.6824986587   | 100.11639914    |
| 8.7714523429    | 2.8345934305    |
| 0.2104375744    | 0               |
| 7.5991683982    | 3.1255085214    |
| 0               | 0               |
| 20.7061314994   | 16.3939769564   |
| 7.2883160312    | 6.9419405513    |
| 26.314551858    | 25.4528825638   |
| 50.9456762828   | 53.19031202     |
| 0.1226014076    | 0.1109360647    |
| 0.3421853905    | 0.2709235864    |
| 0               | 0               |
| 3.3439148725    | 6.5557836725    |
| 0               | 0               |
| 0               | 0               |
| 0               | 0               |
| 0               | 0               |
| 0               | 0               |
| 0               | 0               |
| 63.5732370708   | 28.7621687219   |
| 239.1812771762  | 180.3529432152  |
| 4227.3757527575 | 4569.8661150076 |
| 0               | 30.1411768113   |
| 0               | 0               |
| 0               | 50.4528743058   |
| 4.3666465867    | 2.9633749592    |

gene\_expression\_table

|                |                |
|----------------|----------------|
| 0              | 0              |
| 5.8127720748   | 0              |
| 0              | 0              |
| 77.4008377069  | 0              |
| 75.1096932188  | 101.9446752383 |
| 0              | 56.6602379543  |
| 102.9886440547 | 0              |
| 0              | 0              |
| 1.3487614054   | 1.8306431241   |
| 1.2174614409   | 1.1016217827   |
| 2.2480828825   | 3.0512716741   |
| 2.2543352762   | 2.0398386037   |
| 3.897333558    | 4.2318096303   |
| 71.3035178177  | 47.6212355997  |
| 300.4387728751 | 314.329415318  |
| 0              | 0              |
| 0              | 27.4466433334  |
| 29.2973050356  | 26.5097097256  |
| 11.9227650425  | 27.7414239996  |
| 0              | 107.0419090002 |
| 30.332760723   | 0              |
| 0              | 0              |
| 4.5640794277   | 1.76992029     |
| 0              | 29.143124599   |
| 93.3265964248  | 56.2978057286  |
| 0              | 27.9108571741  |
| 0              | 0              |
| 0              | 0              |
| 0              | 296.6704594012 |
| 494.5782341609 | 522.1064864604 |
| 0              | 0              |
| 0              | 0              |
| 93.1280291984  | 0              |
| 18.4684277313  | 16.7111841055  |
| 0              | 55.2378052023  |
| 29.9590511453  | 27.1084916701  |
| 0              | 0              |
| 0              | 0              |
| 0              | 0              |
| 1.8593166698   | 0.5608018115   |
| 11.5172544267  | 0              |
| 5.7283305488   | 9.6261069473   |
| 13.2848239542  | 12.0207925731  |
| 11.5951868023  | 5.2459609505   |
| 0              | 0              |
| 0              | 1.1771587555   |
| 0.6588420821   | 1.7884626927   |
| 0              | 0.3944850129   |
| 6.0586796399   | 4.7969295668   |

gene\_expression\_table

|                 |                 |
|-----------------|-----------------|
| 0               | 0               |
| 32.6694960297   | 33.9637500687   |
| 0               | 0               |
| 0.9440958915    | 2.1356664041    |
| 0               | 0               |
| 1.7148634118    | 1.5516966906    |
| 0               | 0               |
| 790.3838105222  | 746.1066590242  |
| 159.0197047166  | 230.2227434264  |
| 71.375822858    | 72.1826973881   |
| 1.4083067479    | 0               |
| 0               | 0               |
| 12.0570687207   | 11.81901114     |
| 0               | 0               |
| 2.4943112448    | 3.7616353554    |
| 92.7691543267   | 137.3601375609  |
| 188.4549146417  | 288.7901503234  |
| 26.9886383791   | 21.978638363    |
| 10.9589819037   | 16.5270849316   |
| 70.2698916113   | 66.861331441    |
| 28.8467753009   | 27.5521609648   |
| 260.2668863737  | 253.7353572379  |
| 0.7301600394    | 1.3213727798    |
| 4.7278217459    | 21.3898824422   |
| 8.0506966133    | 7.9469287846    |
| 168.6345443409  | 133.0853316615  |
| 77.836704902    | 109.5588003598  |
| 23.2709096538   | 25.4132790957   |
| 3020.7506039385 | 2377.1387585529 |
| 23.1236472156   | 29.6415773013   |
| 237.4121848894  | 1396.3479795857 |
| 0               | 0               |
| 37.0682365542   | 64.8464139325   |
| 15.4807992818   | 21.5504986016   |
| 0.5775495965    | 0               |
| 10.1576352522   | 11.6978288739   |
| 120.4730712692  | 97.4134027795   |
| 0               | 6.2302196524    |
| 1718.2506213669 | 1617.1079424417 |
| 3056.1423073033 | 3612.9283387881 |
| 0.9393547455    | 2.549929586     |
| 7.1854508287    | 12.1908108625   |
| 20.2358639497   | 22.6187928784   |
| 0               | 0               |
| 2.4359392116    | 2.2041631928    |
| 1.0591693581    | 0.9583909578    |
| 31.6030135186   | 57.1920669026   |
| 62.4841880417   | 63.6062735494   |
| 192.3259189597  | 164.3582589067  |

gene\_expression\_table

|                |                |
|----------------|----------------|
| 0              | 0              |
| 939.4808889413 | 1133.454226287 |
| 11.0866701427  | 10.0317898506  |
| 28.6825076594  | 15.6927591792  |
| 5.0301871773   | 4.5515722956   |
| 35.3698373521  | 74.6770489725  |
| 49.0664657629  | 31.3396687083  |
| 55.7005312632  | 119.7016814239 |
| 0              | 10.7331995474  |
| 37.3374623523  | 54.6992938184  |
| 0              | 0              |
| 0              | 0              |
| 0              | 4.2765906846   |
| 0              | 0              |
| 67.7766703674  | 44.9737348643  |
| 162.4004664709 | 242.9545258201 |
| 1.2837145667   | 1.1615710214   |
| 31.4610413105  | 35.5844621115  |
| 1.1055586806   | 0              |
| 35.6473344472  | 25.8044345727  |
| 100.3798417504 | 116.97654672   |
| 2.6819959389   | 7.2804239577   |
| 264.2908801733 | 184.7930856624 |
| 17.3691165568  | 20.9552943545  |
| 538.2564644449 | 503.3675921312 |
| 248.1174496035 | 234.7144152516 |
| 0              | 0.8326607028   |
| 21.9472707955  | 12.5038276526  |
| 0.913973141    | 2.481029839    |
| 0              | 0              |
| 43.7639217344  | 69.7711628916  |
| 22.6470949992  | 21.6976842568  |
| 47.0647029282  | 15.9699622299  |
| 19.8027513887  | 17.9185488373  |
| 0.7074310467   | 0              |
| 0              | 0              |
| 0              | 0              |
| 0.21386775     | 0              |
| 20.2436631727  | 30.5291808603  |
| 36.8435805751  | 41.6724603641  |
| 4.0742970979   | 0              |
| 29.9502654998  | 12.9050199837  |
| 0              | 10.7594420891  |
| 38.2941152434  | 22.656087476   |
| 248.3156389446 | 268.530484319  |
| 95.4489769666  | 40.0990328887  |
| 13.3755573045  | 75.0379352299  |
| 0              | 13.8733033242  |
| 0              | 0              |

gene\_expression\_table

|                 |                 |
|-----------------|-----------------|
| 28.0308509275   | 50.7275137113   |
| 1.1245612693    | 6.1053655511    |
| 5.2728796197    | 9.542345821     |
| 0               | 0               |
| 0               | 0               |
| 0               | 0               |
| 3.4041199038    | 3.0802229219    |
| 72.1302374346   | 48.9503638945   |
| 397.6906042643  | 413.0462854996  |
| 76.5882304869   | 72.3140592584   |
| 76.9112172259   | 92.7909713116   |
| 0               | 2.0493380074    |
| 0               | 8.7836563163    |
| 43.1591312856   | 51.3850048395   |
| 0               | 0               |
| 0               | 0               |
| 0.4812341813    | 0.4354454596    |
| 39.363436956    | 62.3316121027   |
| 109.0618946592  | 116.9597824439  |
| 0               | 0               |
| 34.6228237013   | 37.5942157855   |
| 10.0880828163   | 7.3025733069    |
| 2875.1965131971 | 2840.0336743832 |
| 56.0210127568   | 33.3816779332   |
| 76.330646752    | 49.3342131665   |
| 24.5211057273   | 8.5338302801    |
| 118.1582204316  | 142.8536705794  |
| 32.9905209898   | 3.7314402045    |
| 94.8893651771   | 91.7822154618   |
| 70.208266679    | 84.7040717106   |
| 7.6749384049    | 6.9446793495    |
| 893.6097287515  | 1050.4036214232 |
| 0               | 0               |
| 14.7573073915   | 8.9021142572    |
| 15.0645925738   | 27.2624376734   |
| 5.4294359722    | 4.9128331572    |
| 48.6627239936   | 29.9421256136   |
| 10.1223192492   | 12.0214441207   |
| 0               | 0               |
| 1780.4449376396 | 1718.8140293088 |
| 192.4668686988  | 232.2052404841  |
| 4.5642772186    | 7.759380753     |
| 1.3652056603    | 0               |
| 1568.0274411924 | 1721.7799684542 |
| 0               | 0               |
| 6.3914975639    | 7.4701681785    |
| 191.4705762172  | 200.0278097478  |
| 3.412958878     | 1.6985214844    |
| 66.6147971308   | 64.1239335698   |



gene\_expression\_table

|                 |                 |
|-----------------|-----------------|
| 8.5974356006    | 14.1041196157   |
| 0.373787767     | 0               |
| 2.3973804586    | 5.0616375793    |
| 20.099854344    | 14.3294531822   |
| 1.3630154292    | 2.0041556013    |
| 34.5782791692   | 28.6063606573   |
| 8082.4386309612 | 8178.3734896889 |
| 0.6211707215    | 0               |
| 0.9707936594    | 0.8784240763    |
| 6.8714909597    | 4.5993787956    |
| 0               | 0               |
| 0               | 0               |
| 0               | 0               |
| 14.2346872845   | 9.1360110049    |
| 0.179366845     | 0.1623003546    |
| 8.4176354235    | 10.2479368804   |
| 2.0782078068    | 1.8804694029    |
| 3.6456916311    | 0.733068768     |
| 0.8169925893    | 1.1088854263    |
| 1.7379461474    | 0.3931457845    |
| 0               | 0               |
| 27.7463531743   | 20.7400106186   |
| 4.0803741702    | 5.6612699766    |
| 505.7312046802  | 449.8114291877  |
| 17.432973603    | 40.0423317675   |
| 19.7965507568   | 11.1955863665   |
| 0.7393210793    | 1.2041563867    |
| 9.3049827747    | 7.858318911     |
| 45.5126583575   | 27.4547974164   |
| 0               | 0               |
| 87.1426600343   | 86.7362810798   |
| 281.6933383665  | 237.3981387694  |
| 0.6227482727    | 0               |
| 1.7445961865    | 0.5262001452    |
| 9.6630010427    | 9.3912534123    |
| 0               | 0               |
| 6.1630771224    | 5.0455580606    |
| 36.8934131157   | 42.6992619456   |
| 0               | 0.2016070651    |
| 3.395780481     | 2.5211708577    |
| 0.1236508459    | 0.1678284757    |
| 276.7892242149  | 224.778058334   |
| 0               | 0.0418481486    |
| 15.7390052942   | 23.7357703045   |
| 7.2040774757    | 2.9333790641    |
| 0               | 0.033824321     |
| 0               | 0               |
| 0               | 0               |
| 0               | 0               |

gene\_expression\_table

|                 |                 |
|-----------------|-----------------|
| 0               | 0               |
| 51.5731986842   | 30.3329552428   |
| 12.3896551526   | 13.4529573132   |
| 0               | 5.6237850664    |
| 8.8925037313    | 9.1958801521    |
| 0               | 0               |
| 0               | 14.3194331032   |
| 1.9111943814    | 8.6467352917    |
| 3.1287316588    | 3.7747166156    |
| 9.209133372     | 9.5954582236    |
| 0               | 2.7136352402    |
| 2.2069366068    | 0               |
| 4732.5534207689 | 4239.2201831149 |
| 5.1185419243    | 3.1294055533    |
| 49.8805398555   | 30.9254771386   |
| 118.4979322457  | 116.1582813967  |
| 47.6255378256   | 34.869100827    |
| 21.3760692135   | 13.7007021877   |
| 0               | 0               |
| 0               | 0               |
| 6.2494893805    | 0               |
| 249.5823356867  | 216.3261052211  |
| 2.8886881868    | 2.6719189666    |
| 0               | 8.0910125291    |
| 3.4898788986    | 3.157822075     |
| 0               | 0               |
| 379.9954512617  | 495.7685024155  |
| 4.6792616827    | 3.4740815127    |
| 487.9663488803  | 440.3071631005  |
| 0               | 23.9163685568   |
| 0               | 1.3402878623    |
| 63.1977306498   | 70.1810507916   |
| 50.3814839553   | 45.2078621553   |
| 13.2887132072   | 19.7542264782   |
| 70.2692770644   | 80.5628794535   |
| 5.2393643508    | 3.318592599     |
| 245.3303233515  | 231.1605427825  |
| 119.2447836041  | 99.598909418    |
| 8.0390915373    | 6.4659411991    |
| 147.5258640201  | 128.963945205   |
| 10.3502281043   | 5.9598122084    |
| 614.3483059471  | 559.7723018971  |
| 4.4714685464    | 7.1583340845    |
| 884.1309473355  | 803.4407005839  |
| 0.3258454955    | 0               |
| 78.0664287057   | 80.729740911    |
| 16.4285244064   | 16.248200111    |
| 2.3873121014    | 2.7002036005    |
| 9.2915509682    | 4.2037368073    |

gene\_expression\_table

|                 |                |
|-----------------|----------------|
| 21.6082003869   | 16.3692937921  |
| 0               | 7.8140487975   |
| 110.1882762204  | 74.1388899801  |
| 105.1309785116  | 92.5097214911  |
| 0               | 1.4738029372   |
| 13.8066924752   | 12.1955535493  |
| 106.5210707387  | 82.8315023254  |
| 130.4167826299  | 142.3035456606 |
| 0               | 0.5081146734   |
| 67.6116068185   | 73.0963445347  |
| 52.8787650689   | 43.7925618245  |
| 30.6173292719   | 19.5558604271  |
| 238.0056461657  | 176.8018993696 |
| 9.0897494926    | 9.59568546     |
| 0               | 0              |
| 132.4829454312  | 140.6080650757 |
| 5773.3027277063 | 5490.650711389 |
| 234.8267895442  | 191.5833639537 |
| 76.5580895067   | 55.4189602764  |
| 0               | 3.0338585415   |
| 0               | 0              |
| 26.3409389011   | 17.024741045   |
| 0.4228021881    | 0              |
| 20.4085946159   | 17.4174999888  |
| 0.3969565311    | 0.3831324835   |
| 1.824349066     | 1.3363335281   |
| 0               | 0              |
| 0               | 0              |
| 0               | 0              |
| 0               | 0              |
| 2.0457697512    | 3.3656686917   |
| 2.1467734585    | 1.5010313309   |
| 0.3540588698    | 0.6407413824   |
| 2.4866944323    | 0.5625222823   |
| 6.6380802759    | 10.8116581325  |
| 5.8789394209    | 8.8659450276   |
| 0               | 0              |
| 0               | 0              |
| 0               | 0.027832303    |
| 176.1881633483  | 169.5462861232 |
| 7.9901741006    | 4.9163461673   |
| 0.7720628606    | 0              |
| 13.0034534407   | 8.6174942326   |
| 34.8211405913   | 21.2891624901  |
| 0               | 0              |
| 3.3476872386    | 1.5145798707   |
| 0.4817903744    | 0.6539230976   |
| 27.4408407952   | 23.297176346   |
| 0.2127450847    | 0.8662621682   |

gene\_expression\_table

|                  |                 |
|------------------|-----------------|
| 28.7226935407    | 27.4426160447   |
| 9.7696510295     | 9.9450935563    |
| 0.6753145318     | 1.2221187028    |
| 0                | 0.053360153     |
| 0                | 0               |
| 0                | 0               |
| 0                | 0               |
| 0                | 0               |
| 0                | 0               |
| 1.0868702348     | 0.6644973899    |
| 7.6284735476     | 7.8108770751    |
| 30.105462668     | 34.4096492876   |
| 20.5324865943    | 16.4414608989   |
| 7.9109531645     | 13.2938699275   |
| 3.7174226756     | 2.9899692423    |
| 1.0545505161     | 1.0337292245    |
| 221.4809549563   | 776.5785554915  |
| 30.194656266     | 32.3108555337   |
| 10.2487831667    | 5.7960166144    |
| 0.0440510875     | 0.0465029735    |
| 6.2725958331     | 0               |
| 0                | 0               |
| 0.9613822967     | 1.3048622863    |
| 0.0987342436     | 0.7147186088    |
| 0                | 1.8017244259    |
| 2.1782371712     | 1.3592973249    |
| 20.3771758488    | 9.5370608578    |
| 0                | 0               |
| 0.4551420209     | 0.8007920856    |
| 0                | 0               |
| 1.9057577599     | 1.7244277233    |
| 0                | 0               |
| 3.5684977412     | 6.4579209017    |
| 3.305072267      | 3.3228883573    |
| 10668.4447657822 | 9375.9770175032 |
| 9.1432986542     | 6.3138550366    |
| 0                | 0               |
| 363.9349270241   | 306.0866868063  |
| 33.2887709725    | 36.7233428492   |
| 0.1466816589     | 0.0663625578    |
| 2.6237291253     | 2.4871368485    |
| 0                | 0               |
| 0                | 0               |
| 0                | 0.1937315349    |
| 3.6506580992     | 3.6703370801    |
| 9.9904025642     | 9.3746390508    |
| 0.8522905717     | 0.6059400148    |
| 73.1383596063    | 28.3625797265   |
| 4.844224161      | 3.7089490187    |

gene\_expression\_table

|               |               |
|---------------|---------------|
| 0             | 0             |
| 0.9463412117  | 0.2854327476  |
| 0.281384311   | 0.8911385326  |
| 5.0199758835  | 6.813498887   |
| 0             | 0             |
| 0.5285510787  | 0.2989126401  |
| 1.3029810489  | 0.9170033649  |
| 0             | 0             |
| 0.2815281943  | 0.5094824048  |
| 5.2659213527  | 3.7225599315  |
| 91.7969773292 | 60.3759208446 |
| 45.8806852445 | 0             |
| 2.4177518582  | 2.4307848214  |
| 0             | 0             |
| 5.173517317   | 7.3562732322  |
| 0.6491972016  | 0             |
| 7.4033022493  | 5.694055627   |
| 1.912472035   | 2.0766037741  |
| 2.4937996378  | 2.1060837326  |
| 2.6616422044  | 5.7801381101  |
| 0.7422447638  | 0.5223720994  |
| 45.8909931944 | 44.4905710291 |
| 9.7704599403  | 6.3423238798  |
| 0             | 0             |
| 29.9647482987 | 25.6073330396 |
| 6.5557222738  | 5.1230520286  |
| 0             | 0.1315860941  |
| 44.6725594236 | 62.6541486136 |
| 4.0955211755  | 2.993177156   |
| 2.6207527059  | 4.4463599176  |
| 0.0393916004  | 0.2851483822  |
| 12.0711461212 | 9.4901229977  |
| 0             | 0             |
| 3.6525367149  | 2.8918778353  |
| 3.9254587656  | 5.130604788   |
| 0             | 0.6089969298  |
| 27.2043965183 | 15.3849614769 |
| 0.0595836022  | 0             |
| 0.5163635237  | 1.1213575127  |
| 1.6522866062  | 0.4983579919  |
| 9.404218931   | 4.7865495303  |
| 26.7266127638 | 28.0529934316 |
| 0.4040373456  | 0.4874583851  |
| 0.1748045038  | 0             |
| 40.0599626609 | 19.3655388833 |
| 0             | 0             |
| 0.7428368162  | 0.7075336738  |
| 0             | 0             |
| 0             | 0             |

gene\_expression\_table

|                |                |
|----------------|----------------|
| 0.2213515882   | 0.3004354672   |
| 0              | 0              |
| 0              | 0              |
| 3.6022538997   | 2.5234875567   |
| 0.4616303462   | 1.0442672512   |
| 1.3418992734   | 1.2142195392   |
| 2.7142092634   | 2.581902735    |
| 9.6096279711   | 4.9997894847   |
| 2.6287039368   | 2.7183847304   |
| 4.153753141    | 7.5170593272   |
| 9.9697171268   | 9.5849328438   |
| 2.6257902969   | 1.055977879    |
| 1.425149001    | 0.8167138461   |
| 0.6817545136   | 0.3084432892   |
| 0              | 0              |
| 7.4140568006   | 9.9170907962   |
| 4.8153451044   | 6.3377049144   |
| 24.7812909072  | 16.6196873338  |
| 0.5686629098   | 0.1715184912   |
| 5.0211088704   | 3.9094008772   |
| 1.0250938254   | 1.4840922587   |
| 0.1350068744   | 0.7329670179   |
| 1.4073946195   | 1.2734830998   |
| 1.5353915188   | 0.3473253208   |
| 0.2281371931   | 0              |
| 80.0152745782  | 60.0606996987  |
| 1.4316048735   | 0.2590779568   |
| 9.1330565933   | 12.3960896182  |
| 8.6579975716   | 10.244725546   |
| 1.408170824    | 1.9112781744   |
| 0              | 0.0665418447   |
| 0.6522348114   | 0.5901756323   |
| 2.5921175967   | 2.4920740249   |
| 5.6332269914   | 2.0388935048   |
| 0              | 0              |
| 1.2485608581   | 0.5648810681   |
| 3.0830974351   | 3.0433584732   |
| 2.1897024272   | 2.3648436312   |
| 17.6319247649  | 15.3030783381  |
| 121.9878354383 | 107.5505942432 |
| 6.9405858536   | 7.7075173951   |
| 1.671949453    | 0.4727706036   |
| 5.9660837897   | 5.3984197274   |
| 1.2639950539   | 0.9292788302   |
| 8.4995579788   | 4.3581413002   |
| 0.4107542075   | 0.2477810341   |
| 3.4549036012   | 2.3446309691   |
| 3.8094145973   | 2.5852158179   |
| 370.6316615549 | 292.3708875259 |

gene\_expression\_table

|                |                |
|----------------|----------------|
| 27.0648905252  | 21.8523531882  |
| 0              | 0.0826618127   |
| 1.3093564235   | 0.455681959    |
| 0              | 0              |
| 17.642149828   | 6.3854101298   |
| 1.7934441338   | 1.411130933    |
| 74.9061729434  | 52.7169698251  |
| 0              | 0              |
| 31.4964146423  | 24.3433889443  |
| 0              | 0              |
| 0.8791045044   | 0.795459009    |
| 1.4402347314   | 1.0859987696   |
| 0.1056117925   | 0.1911259728   |
| 0              | 1.0323958319   |
| 12.0795767321  | 7.8073020316   |
| 23.9900027967  | 16.8419400961  |
| 0.8531137451   | 1.1900760661   |
| 0.4096194014   | 0.1588477373   |
| 0              | 0              |
| 0.9589731934   | 0.5423301939   |
| 23.1971771968  | 14.8679166967  |
| 0.057017136    | 0              |
| 0              | 0              |
| 6.5194336625   | 5.1125699533   |
| 7.1585060177   | 9.7160771119   |
| 0.0573380096   | 0              |
| 0              | 0              |
| 0              | 1.171362002    |
| 0.1040276972   | 0              |
| 0              | 0.0129200112   |
| 0              | 0              |
| 0              | 0.1190158706   |
| 38.6715239277  | 27.5993125332  |
| 2.3176756471   | 1.3981014879   |
| 11.1611152715  | 10.0991516354  |
| 1.6564866018   | 1.4988743478   |
| 171.6477400911 | 155.3157110983 |
| 0              | 0              |
| 16.1051840707  | 11.7703381298  |
| 5.8468664427   | 6.2524631412   |
| 0              | 0              |
| 0              | 0.1630862933   |
| 0              | 0              |
| 0              | 0              |
| 3.1556423306   | 1.5753862747   |
| 0.8312273056   | 0.3223445378   |
| 0              | 0              |
| 0              | 0              |
| 1.3057148656   | 1.1814780243   |

gene\_expression\_table

|                 |                |
|-----------------|----------------|
| 2.150577869     | 3.1621745359   |
| 0               | 0              |
| 0               | 0              |
| 0               | 0              |
| 3.1446914215    | 3.3197251227   |
| 0               | 0              |
| 0               | 0              |
| 4602.0042466025 | 4983.736944738 |
| 0.1000069087    | 0.0452456995   |
| 1.6518137508    | 2.6156306955   |
| 0.4483179052    | 0              |
| 0.7840586783    | 0.6207745713   |
| 0.8914586447    | 0              |
| 3.5502304449    | 3.4917731095   |
| 66.670541167    | 77.4137581137  |
| 0.6824034119    | 0.740968482    |
| 0               | 0              |
| 19.3416587376   | 9.9174194669   |
| 63.0538571036   | 47.6755742264  |
| 0.6989751555    | 0.8222093121   |
| 2.3487191457    | 2.1811694081   |
| 0.477241168     | 0.719720626    |
| 15.3122874666   | 5.1957547223   |
| 6.0083777712    | 15.5333985685  |
| 0.1596740638    | 0.0722406562   |
| 115.1680609067  | 92.7897171084  |
| 0.2696130801    | 0.3415437112   |
| 0               | 0.2723768892   |
| 17.6822395489   | 17.3331172816  |
| 0               | 0              |
| 4.3284692611    | 4.8566110356   |
| 390.1725355262  | 387.3597842281 |
| 8.3010526851    | 9.8223643283   |
| 0.3475850891    | 0.1572564406   |
| 316.645664108   | 247.947660664  |
| 0               | 0              |
| 14.6321748434   | 10.1983360249  |
| 1.4308777466    | 1.2947318421   |
| 1.5399453166    | 0.9289478625   |
| 8.8839494406    | 5.6743445439   |
| 6.5925555362    | 7.622306838    |
| 19.6562401522   | 19.332584705   |
| 0.9813676252    | 1.1839892598   |
| 32.1272561092   | 16.1502195187  |
| 0.8216444518    | 0.7434661955   |
| 3028.8722657874 | 3475.110008156 |
| 0.843420952     | 1.2719511565   |
| 0.4366127736    | 0.4880272925   |
| 0.1240255693    | 0.1122247195   |



gene\_expression\_table

|               |               |
|---------------|---------------|
| 2.4215863747  | 0.7967912753  |
| 1.2318175702  | 1.6099950353  |
| 0             | 0             |
| 51.8066858686 | 22.266744201  |
| 0.1347823805  | 0.1829370541  |
| 3.6809365981  | 3.3307009165  |
| 0.1220550841  | 0.2945112617  |
| 0.088130824   | 0             |
| 1.4312101825  | 1.9766287772  |
| 0.3902859029  | 1.0594523267  |
| 4.2078613462  | 2.2210355726  |
| 2.3781675481  | 3.2278326267  |
| 3.5029504082  | 6.3392996995  |
| 2.9129624466  | 3.0750981001  |
| 32.1193655081 | 12.4556808478 |
| 41.3637489892 | 38.9251713301 |
| 9.2814109137  | 5.7919299113  |
| 0.429688055   | 0.3888038711  |
| 1.5445752602  | 0             |
| 7.9967431668  | 0             |
| 0             | 0             |
| 0             | 0             |
| 2.8543726634  | 2.7057730015  |
| 0.0598436357  | 0.0541496021  |
| 3.273681651   | 2.8504147074  |
| 0             | 0             |
| 7.4031680877  | 4.306350585   |
| 3.07670819    | 1.9487747644  |
| 17.9881906507 | 6.658625812   |
| 0.2294864166  | 0             |
| 0             | 0.0255990418  |
| 0             | 0             |
| 14.4974969656 | 22.1998302953 |
| 18.280531634  | 9.9246996266  |
| 0             | 0             |
| 0.2884066123  | 0.7828954472  |
| 1.1082354256  | 0.5013942307  |
| 3.3268693614  | 3.5338570293  |
| 4.555325841   | 3.5330514121  |
| 0             | 0             |
| 1.9546289117  | 1.1892638868  |
| 12.4212990871 | 8.6168969634  |
| 1.3773951294  | 1.9585311693  |
| 0.4459219906  | 0.2882094084  |
| 4.8500460992  | 2.4756043654  |
| 1.985818658   | 0.6738266045  |
| 13.165800426  | 15.3168350885 |
| 0.9391498347  | 0.7081592624  |
| 3.3894724645  | 2.6669297086  |

gene\_expression\_table

|                |                |
|----------------|----------------|
| 47.3874129086  | 31.7619041101  |
| 0.3604916382   | 0              |
| 17.9372591817  | 17.7060605007  |
| 0              | 0.8208224976   |
| 3.7054787517   | 3.8318947662   |
| 42.3296017913  | 24.7109694775  |
| 12.9353782998  | 13.2862983399  |
| 57.5923338464  | 50.3308841127  |
| 11.0556512474  | 4.6171026265   |
| 515.5865546554 | 407.6240463503 |
| 127.9188443816 | 77.716215661   |
| 0              | 0              |
| 7.9914084856   | 9.7340893049   |
| 0.3899729481   | 0              |
| 0              | 0              |
| 2.8979577142   | 3.4613321386   |
| 1.619666594    | 1.648752423    |
| 0.0105695493   | 0.009564       |
| 0              | 0              |
| 5.3379562579   | 5.554566243    |
| 0              | 0              |
| 0              | 0              |
| 0              | 0              |
| 48.4655973158  | 38.0838821304  |
| 27.4143116255  | 18.9692026265  |
| 0.1931656342   | 0.1747862094   |
| 42.5617434627  | 30.2246518773  |
| 6.7700143417   | 4.2881002322   |
| 0              | 0              |
| 0              | 0.3443807341   |
| 0.4234341244   | 0.478931241    |
| 106.4967730492 | 77.7127115809  |
| 32.5864902645  | 22.9335040956  |
| 1.1182691736   | 2.0237350262   |
| 7.7909730843   | 5.2872551253   |
| 21.3689446598  | 8.9241789838   |
| 3.6149178898   | 1.8046696777   |
| 173.8246714605 | 165.9833269204 |
| 12.5925626564  | 7.8336492543   |
| 147.1642722851 | 127.3721652248 |
| 0.6062015085   | 0              |
| 0              | 10.3608816853  |
| 3.8714110847   | 6.6168760698   |
| 2.4914716373   | 0.5636029475   |
| 1.9617763809   | 1.0354844823   |
| 5.613532041    | 6.8461650202   |
| 6.6358662406   | 4.6701459523   |
| 25.6854296449  | 30.5459700415  |
| 7.8648500233   | 8.4939123497   |

gene\_expression\_table

|                 |                 |
|-----------------|-----------------|
| 58.360231631    | 47.8950309108   |
| 7.4864351902    | 7.5176120279    |
| 0.9927235427    | 1.7965347273    |
| 0               | 1.8835547786    |
| 14.1152715027   | 10.4500016702   |
| 0               | 0               |
| 2.8210792969    | 2.5526577678    |
| 3.422285324     | 3.8708249116    |
| 20.1454665718   | 10.7227383393   |
| 810.2586768464  | 840.6944451156  |
| 0.5345648965    | 1.4511055079    |
| 3.0426555395    | 2.2468246716    |
| 18.4497444458   | 28.3802734619   |
| 76.8414076271   | 68.0506981616   |
| 4.2614469315    | 3.2133137908    |
| 92.9764050444   | 87.152466294    |
| 9.3769452153    | 6.7877941802    |
| 1.7526647736    | 3.9647532715    |
| 21.9472707955   | 13.2393469263   |
| 2.6164406341    | 0.9469960686    |
| 47.1019716824   | 45.4348359962   |
| 1.1610345632    | 0.7504027422    |
| 9.6208081495    | 11.0206690735   |
| 0.2261900574    | 0.2319575285    |
| 0               | 0               |
| 6.2157355409    | 5.5201634557    |
| 40.4006076576   | 47.8047185765   |
| 0.8623373391    | 0.6242297718    |
| 5.5480193159    | 5.5779260788    |
| 0               | 0               |
| 20.7226150069   | 16.6338529594   |
| 0.490207906     | 0               |
| 5.8725307291    | 5.4244716045    |
| 2.4576454381    | 3.1133257455    |
| 7776.5768987153 | 8328.5464479072 |
| 0               | 0               |
| 3.3659007785    | 2.0304268599    |
| 4.1507988358    | 2.7760678154    |
| 0               | 0.4967764983    |
| 45.485234629    | 26.1470425066   |
| 4.203306191     | 7.6067356281    |
| 17.9951378881   | 32.565854184    |
| 31.9550791047   | 34.269156168    |
| 3.3470708296    | 1.2752008349    |
| 1.974600242     | 1.9058346079    |
| 13.4326143082   | 10.1287674109   |
| 272.2672225176  | 210.5270131435  |
| 4.5011362031    | 7.466909524     |
| 66.8400958692   | 64.4743454533   |

gene\_expression\_table

|                |                |
|----------------|----------------|
| 0              | 0              |
| 16.3735111188  | 19.3742405505  |
| 18.0877829323  | 12.2750678227  |
| 0              | 0              |
| 48.0348313596  | 68.6611348089  |
| 19.7130977514  | 11.4159523912  |
| 0              | 0              |
| 25.0624144463  | 24.6077850814  |
| 4.1934967135   | 4.3936219613   |
| 3.7967976576   | 2.8108947005   |
| 16.8938448563  | 11.263678238   |
| 0.5503651532   | 0.7193314868   |
| 4.8496926682   | 3.510601258    |
| 0.5855384969   | 0.6181296026   |
| 0              | 0              |
| 363.2453086092 | 219.6564799295 |
| 3.3293260319   | 3.3814287083   |
| 0              | 0              |
| 2.8011476995   | 5.0692452649   |
| 49.7226900459  | 67.4874742723  |
| 0              | 0              |
| 4.1195159376   | 4.3010193226   |
| 15.2206267294  | 11.1490910351  |
| 0              | 0              |
| 2.4572729108   | 3.3352005331   |
| 0.4871211524   | 0.7933901293   |
| 0              | 0              |
| 58.0335243826  | 40.8424490734  |
| 1.5871026055   | 0.3191315858   |
| 2.1878943927   | 0.3045722265   |
| 0.081428185    | 0.1473608269   |
| 22.3585038785  | 22.869967676   |
| 0              | 0              |
| 382.5589980703 | 414.6159062046 |
| 2.9587436187   | 1.896366669    |
| 1.6749004601   | 2.4627462513   |
| 10.5045415638  | 13.5786427805  |
| 17.6665638046  | 31.9712326945  |
| 87.5672912284  | 62.169308182   |
| 3.4550758447   | 2.1390682233   |
| 59.9400809063  | 55.6896440461  |
| 2.7716675357   | 1.1146433167   |
| 0              | 0              |
| 0              | 0              |
| 0              | 0              |
| 0.3625129303   | 0.5467006006   |
| 0              | 0              |
| 1.2708971294   | 0.9343531798   |
| 913.1015230597 | 594.0924309184 |

gene\_expression\_table

|                |                |
|----------------|----------------|
| 0.9504510927   | 0.8600170748   |
| 0.1880040965   | 0.6804631373   |
| 3.7612936086   | 3.7815689735   |
| 606.8561860957 | 467.7193931804 |
| 446.0459745935 | 392.9561408888 |
| 12.9200134318  | 10.0892284067  |
| 0              | 0              |
| 3.1268578946   | 2.4520963857   |
| 0              | 13.1405130491  |
| 0              | 0              |
| 0.9434853794   | 0.5691427592   |
| 0              | 0              |
| 33.450648623   | 20.1785792027  |
| 0              | 0              |
| 34.4802178779  | 35.6565440739  |
| 160.3821431825 | 256.0976807634 |
| 373.9043137063 | 366.5218596126 |
| 107.8083096632 | 120.3122934493 |
| 27.1274705443  | 16.3642211879  |
| 0              | 0              |
| 1.5909253182   | 2.1113416478   |
| 36.7999690577  | 31.2538612189  |
| 0.6665056175   | 0.9046328884   |
| 0              | 0              |
| 2.6104087491   | 1.3122401175   |
| 0.277687493    | 0.1435805361   |
| 0              | 0              |
| 0              | 0              |
| 0              | 0              |
| 1.7991316244   | 3.2558938143   |
| 0.428602506    | 0              |
| 15.7276944748  | 15.1799760757  |
| 2.6245517067   | 2.3748294876   |
| 2.6862425724   | 1.7014553909   |
| 6.3656448114   | 1.439990777    |
| 271.5337379741 | 250.5153058221 |
| 21.9042066352  | 25.5309166568  |
| 0              | 0              |
| 0              | 0              |
| 239.5909166797 | 163.5931653771 |
| 6.2540434257   | 6.7907765151   |
| 17.6450927614  | 9.9100478744   |
| 0.2945820124   | 0              |
| 10.1892157515  | 9.4908953583   |
| 20.9943275362  | 21.710569456   |
| 0.0574417382   | 0.0259881208   |
| 1.336563233    | 1.9350259442   |
| 0              | 0              |
| 2.799991922    | 2.5335768255   |

gene\_expression\_table

|                 |                 |
|-----------------|-----------------|
| 19.4486648999   | 16.9080295019   |
| 3.2445292022    | 1.8682472072    |
| 0.2211418987    | 0.4002011472    |
| 4.1041591889    | 4.9515393371    |
| 0.6865651132    | 0.4969915652    |
| 0.4158077472    | 0.5975644035    |
| 2.4201403158    | 1.532907277     |
| 0.2816341648    | 0.2548370899    |
| 0               | 0               |
| 28.8258369803   | 23.1382348996   |
| 5.8398051321    | 5.2841562976    |
| 6.6737786743    | 2.1313335843    |
| 0               | 0.0532602671    |
| 1.1813301915    | 1.1401902595    |
| 0               | 0               |
| 2.5532760918    | 2.3103356422    |
| 10.4496129197   | 6.8202507868    |
| 3.6565570437    | 1.07307277      |
| 603.4631281215  | 262.6543177212  |
| 0.1004989654    | 0.0545619824    |
| 4.0158227963    | 44.123781562    |
| 0               | 0               |
| 15.0064879483   | 13.5786427805   |
| 157.8228602037  | 124.7403974512  |
| 177.1536570894  | 148.3352297006  |
| 0               | 0               |
| 2.6355468481    | 4.4714596078    |
| 10.2415965163   | 8.8310237915    |
| 7.1185482778    | 6.9779979981    |
| 903.031352604   | 821.526059707   |
| 0               | 0               |
| 3.754518247     | 5.7492454126    |
| 2.7058712737    | 0               |
| 6.8772368172    | 2.6669476671    |
| 3.319442873     | 0               |
| 21.3592227964   | 26.2846170331   |
| 0               | 0               |
| 2.7846279049    | 1.2598373359    |
| 194.7721602992  | 179.1772081532  |
| 0               | 0               |
| 42.6962000752   | 50.5210180544   |
| 47.1948237547   | 46.5975760281   |
| 0               | 0               |
| 35.1875985497   | 49.2065780612   |
| 198.8649419502  | 140.9555351744  |
| 4.6950424768    | 2.7034738936    |
| 15.7286773789   | 12.3757538724   |
| 3523.8318035511 | 3239.4146155706 |
| 223.9551218535  | 231.8619747797  |

gene\_expression\_table

|                 |                 |
|-----------------|-----------------|
| 46.5315824617   | 36.2966992284   |
| 12.4208458929   | 16.8585311226   |
| 6.5029163623    | 9.5185159129    |
| 0               | 0               |
| 38.8299961487   | 39.6689766928   |
| 0.7834797537    | 0.4430830076    |
| 1.9459738914    | 1.5460835262    |
| 0.3171407001    | 0.0717413077    |
| 8.9301370472    | 9.6965372335    |
| 0.5985419227    | 0               |
| 2.8571541972    | 12.9265009726   |
| 0.0919398533    | 0               |
| 21.2429888179   | 17.0138461085   |
| 31.2707915965   | 30.3165235227   |
| 0.27264766      | 0               |
| 5.1646222682    | 4.0890640754    |
| 0.0485353232    | 0.0439172589    |
| 245.9466904449  | 337.5897920515  |
| 1.7090630831    | 1.1598361909    |
| 2.2183775554    | 2.3896454844    |
| 0               | 0               |
| 0               | 0               |
| 0.7965599688    | 0.9610246187    |
| 170.444601726   | 92.5362297431   |
| 25.4053696085   | 18.1680036152   |
| 8.8441745719    | 8.0026644218    |
| 263.2257501438  | 200.6292749214  |
| 5.252630952     | 3.1685672491    |
| 29.128332114    | 35.1424191039   |
| 5572.3716925229 | 6547.5269884781 |
| 0               | 0               |
| 0               | 0               |
| 0               | 0               |
| 0               | 0               |
| 0               | 0               |
| 0               | 0               |
| 0               | 0               |
| 3.7099941512    | 3.3569936863    |
| 5.0125813602    | 3.1182536316    |
| 1.4852199224    | 0.33597586      |
| 2.3951284323    | 2.1672354989    |
| 0               | 0               |
| 0.6370647938    | 0.5764490194    |
| 3.202266066     | 6.2780795539    |
| 0.2606624249    | 0.2358607801    |
| 6.3666736191    | 4.694061799     |
| 50.587321117    | 45.7740122163   |
| 15.7910054256   | 7.5202708307    |
| 14.3144136852   | 10.295512031    |
| 0.1880404422    | 1.3611893742    |

gene\_expression\_table

|                 |                 |
|-----------------|-----------------|
| 25.4199907794   | 21.1612108995   |
| 3.157679452     | 3.7756265664    |
| 30.8713995798   | 20.86212479     |
| 116.3658245586  | 71.8671887662   |
| 1.0820096011    | 2.0125080811    |
| 0.012213403     | 0               |
| 0               | 0               |
| 0.2300110025    | 0.1040628976    |
| 38.2426004017   | 27.4633916249   |
| 21.7045960106   | 24.8077083182   |
| 0               | 0               |
| 310.0846690091  | 361.637179966   |
| 0               | 0.4330458389    |
| 0               | 5.6369920766    |
| 17.4579757873   | 13.0566009073   |
| 14.3287291803   | 6.1739865516    |
| 19.4733832444   | 25.7530670866   |
| 0               | 3.9029816536    |
| 28.7885909782   | 36.4691586833   |
| 49.7818271726   | 58.5587077807   |
| 0.7117795838    | 1.2881096149    |
| 31.5574432035   | 28.5547990844   |
| 0               | 0               |
| 0               | 0               |
| 3.7652734026    | 6.8140263973    |
| 156.6476339651  | 105.145305608   |
| 167.8605128344  | 139.3958120326  |
| 20.9727713097   | 24.727922815    |
| 0.6263494109    | 0.7934544652    |
| 36.6776507173   | 29.2155383108   |
| 15.1437513152   | 15.4157014583   |
| 5.2640333043    | 4.0486930626    |
| 0.4365666639    | 0.9875699763    |
| 20.9040027333   | 16.6565081615   |
| 0               | 2.0749627849    |
| 2.9223951743    | 1.3221667945    |
| 7.1367607882    | 12.1556866602   |
| 2.7327323296    | 0               |
| 2.4118260438    | 2.2465309561    |
| 0               | 0               |
| 0               | 0               |
| 23.5133890536   | 29.254671611    |
| 6.7100358301    | 6.4395607286    |
| 55.8435490217   | 96.0072238162   |
| 3.5861363736    | 4.2433579606    |
| 160.9472780998  | 157.1485799312  |
| 0               | 0               |
| 0               | 0.154588237     |
| 1500.9312445326 | 1456.7542558185 |



gene\_expression\_table

|                |                |
|----------------|----------------|
| 121.3009312634 | 105.2542797873 |
| 0.70493588     | 0.637862272    |
| 4.5851847604   | 0              |
| 3.9485057823   | 6.252419754    |
| 1.0010331326   | 0.9057863083   |
| 0              | 4.9291233765   |
| 26.1168607888  | 38.8782542794  |
| 0              | 3.5570080677   |
| 0              | 0              |
| 0.2536107593   | 0.0764933567   |
| 0              | 2.042679165    |
| 2.2089622964   | 1.2492392475   |
| 6.6632921493   | 6.285855262    |
| 2.6248035287   | 2.0583830359   |
| 55.8411742163  | 53.335078338   |
| 1.5627641367   | 2.994499984    |
| 15.5193247949  | 12.5014137679  |
| 0              | 0              |
| 0              | 0              |
| 0              | 0              |
| 0              | 0              |
| 0.9954101183   | 0.6004655437   |
| 7.5834933749   | 2.1113646705   |
| 0              | 0              |
| 0              | 0              |
| 12.5418965276  | 9.7723655948   |
| 15.3289114391  | 11.4926073262  |
| 0.5428919358   | 0.2456182849   |
| 60.0166923396  | 39.8245413073  |
| 0              | 0              |
| 2.7915541773   | 1.2629709599   |
| 0              | 0              |
| 6.1889910975   | 3.2421734249   |
| 0              | 0              |
| 0              | 0.1199959593   |
| 0.3560884102   | 0.3222071238   |
| 16.7701815032  | 3.0349046996   |
| 16.7104251934  | 8.4002516183   |
| 1.8902711547   | 2.1768913673   |
| 36.1571555     | 44.9856763791  |
| 9.8999544751   | 6.4385541814   |
| 2.4385856439   | 2.2065578211   |
| 18.497696238   | 14.6454592874  |
| 0              | 0              |
| 2.1089486002   | 1.2721901702   |
| 6.1964061445   | 3.3640963501   |
| 16.2456358928  | 13.8089853475  |
| 11.7119930379  | 8.1476281183   |
| 5.5172819056   | 7.8450753539   |

gene\_expression\_table

|                |                |
|----------------|----------------|
| 0              | 3.5976224775   |
| 0.6797455231   | 0.3075343702   |
| 18.3341540893  | 20.1446192027  |
| 0.4721395996   | 0.4272162139   |
| 0              | 0              |
| 0              | 0              |
| 4.3464473592   | 1.3109631038   |
| 0              | 0.1172395301   |
| 1.661836555    | 1.1768206389   |
| 98.763468914   | 87.4914538258  |
| 7.1639510372   | 4.4565892767   |
| 2.8571541972   | 11.6338508754  |
| 2.1081867702   | 0              |
| 0              | 0              |
| 0.9938151271   | 0.642325061    |
| 2.3782321564   | 2.869262505    |
| 84.1761663636  | 80.3804180976  |
| 15.1943672143  | 16.5224951651  |
| 0              | 0              |
| 0.9744461847   | 2.1553377247   |
| 0.7502215128   | 0.7919788844   |
| 0              | 0              |
| 7.5858186695   | 9.4789113111   |
| 413.1928756107 | 297.7906936594 |
| 95.8090883307  | 81.9814192414  |
| 66.336536818   | 74.4306444929  |
| 0              | 0              |
| 0              | 0              |
| 26.084728083   | 15.7352031506  |
| 141.5277349589 | 118.210689208  |
| 1.9740302946   | 3.5724084544   |
| 14.8186891112  | 14.3664779201  |
| 5.3360365394   | 7.644840859    |
| 1.7268384315   | 0              |
| 30.3829697993  | 12.6886500417  |
| 0              | 1.0235567874   |
| 6.9805035718   | 1.9434827585   |
| 1.3747777412   | 0.4146565564   |
| 0              | 0              |
| 0              | 0              |
| 17.9914394971  | 14.922948881   |
| 21.4330444692  | 27.3275172772  |
| 0.9553469033   | 0              |
| 10.9218698914  | 4.2354300428   |
| 270.1028924606 | 207.7425509445 |
| 267.6348405958 | 217.8095069348 |
| 37.9422449057  | 27.4656770666  |
| 9.1266293895   | 6.1936830605   |
| 29.8416047201  | 29.2524051071  |

gene\_expression\_table

|                 |                 |
|-----------------|-----------------|
| 0               | 0               |
| 55.8645307946   | 57.3647126045   |
| 3.3914592998    | 12.2750678227   |
| 0               | 1.3883516083    |
| 9.3274887532    | 3.375996789     |
| 2.4449488977    | 3.1604508866    |
| 0               | 0               |
| 1.8950588268    | 2.5721201669    |
| 65.3131089573   | 32.2356344125   |
| 0.5473666444    | 2.4764275827    |
| 0.5134813088    | 0.929248641     |
| 49.2076152032   | 96.4720971128   |
| 218.7414978673  | 237.51428084    |
| 3.8109071197    | 1.7241524675    |
| 53.7365975757   | 46.5545486209   |
| 0.5029320203    | 1.8203151249    |
| 0               | 8.0498996606    |
| 8.3864678399    | 31.438103782    |
| 250.4730971287  | 132.2072218934  |
| 0               | 0               |
| 12.3289318132   | 4.4623408631    |
| 169.0827082935  | 136.8900289948  |
| 3.9141671114    | 3.5417398909    |
| 362.7362463252  | 449.7862904274  |
| 11.8489912624   | 8.0411829311    |
| 1793.5292179413 | 1796.1060651526 |
| 0               | 0               |
| 24.5535293555   | 14.2825482618   |
| 14.2899685678   | 9.2359279721    |
| 7.1438181366    | 6.4640943904    |
| 75.6458384292   | 60.7357698942   |
| 0               | 0               |
| 0               | 0               |
| 0               | 0               |
| 55.8293032184   | 54.726996417    |
| 2.3957402147    | 13.006734427    |
| 2.123116692     | 7.6844210962    |
| 1.9589229199    | 0               |
| 0               | 0               |
| 34.7559657493   | 50.5430147142   |
| 85.4534834301   | 91.5663679024   |
| 2.1682356825    | 21.5812438515   |
| 69.235536704    | 98.7908839528   |
| 6.9008196324    | 3.1221084175    |
| 0               | 0               |
| 1.8703004443    | 1.692344119     |
| 0               | 0               |
| 3.4794152287    | 0.787088502     |
| 2.88664339      | 2.1766529452    |

gene\_expression\_table

|                |                |
|----------------|----------------|
| 27.5615038614  | 29.4734433735  |
| 8.4286874106   | 4.5760261502   |
| 0              | 3.1865400539   |
| 103.8614291738 | 132.0183544336 |
| 0              | 0              |
| 0              | 0              |
| 16.3782240056  | 16.3398458369  |
| 12.7249445993  | 4.9346506766   |
| 0              | 0              |
| 0              | 0              |
| 5.0598432141   | 2.2892033021   |
| 1.0505354797   | 0.6503958706   |
| 0.7097626225   | 0.8830659159   |
| 2.7891527256   | 2.5237689626   |
| 29.7197329271  | 25.3100651548  |
| 1.4594436239   | 3.6976232111   |
| 15.7167223776  | 8.9391025131   |
| 7.09784203     | 6.823898645    |
| 253.9584326305 | 205.4945375321 |
| 0              | 0              |
| 0              | 0              |
| 2.6784837115   | 2.5852052712   |
| 0              | 0.0455311852   |
| 3.0671019467   | 3.7003623009   |
| 1.5316788464   | 1.6631302393   |
| 5.3240290373   | 4.8174555366   |
| 3.2786646984   | 2.5958665198   |
| 0.3212973234   | 0.2907263576   |
| 0.1827652423   | 0              |
| 51.7331496729  | 35.5525191473  |
| 20.2596403333  | 16.2167386882  |
| 16.4896676173  | 11.9365600754  |
| 13.0205775246  | 10.2712158778  |
| 1.246118847    | 0.7892867352   |
| 6.0848047517   | 3.932746118    |
| 0.3217469513   | 0.1819582525   |
| 0              | 2.1462909191   |
| 4.006331546    | 4.5314187696   |
| 4.3762431139   | 3.9598500442   |
| 0.2551824732   | 0              |
| 12.2143640919  | 9.2101544882   |
| 34.4242360578  | 17.5486314547  |
| 0              | 0              |
| 2.2741690539   | 2.7437136356   |
| 28.7017532611  | 22.5080473133  |
| 11.4297359246  | 33.6121936474  |
| 0.1297056889   | 0.2200582203   |
| 0.1215078735   | 0              |
| 0.5311385727   | 0.2883609131   |

gene\_expression\_table

|                |                |
|----------------|----------------|
| 4.5880685244   | 1.2210354646   |
| 0              | 0              |
| 4.1197396323   | 1.863876245    |
| 0.9667812183   | 0.7654442364   |
| 1.343151511    | 1.2153526282   |
| 0.0649185647   | 0.0587416591   |
| 3.9274185779   | 2.4602749615   |
| 5.3988690254   | 3.9546651607   |
| 0.1581881037   | 0.3339857248   |
| 0              | 0              |
| 0              | 0              |
| 21.1471251162  | 26.3931136413  |
| 7.6163816729   | 7.4218245274   |
| 0              | 0              |
| 5.8336896872   | 4.1673337328   |
| 0              | 0.023228927    |
| 7.8981057423   | 10.2094466347  |
| 0              | 0              |
| 0.2172918      | 0.9830840303   |
| 1.6271742495   | 1.4723510225   |
| 4.0906977492   | 2.643909928    |
| 55.7432335104  | 50.4393471594  |
| 95.7010357694  | 106.275956163  |
| 2.4510584491   | 2.3676981719   |
| 8.4437454551   | 5.3150160307   |
| 3.7273417119   | 3.3726906523   |
| 17.298510392   | 20.8701102311  |
| 208.5099044367 | 239.6625206017 |
| 3.3417448254   | 3.0237827401   |
| 0              | 0.8618792521   |
| 0              | 0              |
| 15.3885528149  | 18.565806319   |
| 4.4185517589   | 0              |
| 8.072874119    | 4.2969129812   |
| 397.4318366731 | 467.9350928396 |
| 5.1756147243   | 0              |
| 8.2992365801   | 9.6551697538   |
| 9.1012698595   | 8.4967354874   |
| 2.3363718176   | 4.2281389786   |
| 0              | 0.5349854295   |
| 0.0711023397   | 0.1930111713   |
| 0.2703514723   | 0.244627929    |
| 0              | 0              |
| 1.9067904351   | 1.0897024049   |
| 2.9841645411   | 2.2681895811   |
| 10.5578420607  | 6.7669059439   |
| 3.8034561803   | 2.6317834258   |
| 8.5853329521   | 3.8842256      |
| 0              | 0              |

gene\_expression\_table

|               |               |
|---------------|---------------|
| 3.0754759502  | 2.2262791641  |
| 0             | 0             |
| 0             | 0.4061578332  |
| 0             | 0             |
| 2.0759685441  | 1.7076756389  |
| 5.6956007163  | 4.2166413156  |
| 0             | 0             |
| 7.3613547603  | 4.5294342534  |
| 0.5565332568  | 0.4873354251  |
| 0             | 0             |
| 9.421754485   | 12.7879326887 |
| 0             | 0             |
| 0.8832288824  | 2.3975728755  |
| 0             | 0             |
| 0.2906115881  | 0.2629603246  |
| 2.9728608645  | 2.3537478504  |
| 0             | 2.9011834839  |
| 2.6310199278  | 4.2852280806  |
| 1.1803219438  | 1.1570173917  |
| 4.3365429713  | 2.1799596175  |
| 61.7513211304 | 35.9877867179 |
| 0.3106382624  | 0             |
| 26.7617724236 | 24.9965721779 |
| 27.9128163988 | 19.7889529741 |
| 0             | 0             |
| 0             | 0             |
| 4.2579646799  | 4.1382201194  |
| 5.3942459009  | 3.9463334475  |
| 3.1587048945  | 0             |
| 0             | 0             |
| 1.281311221   | 1.3701956869  |
| 0             | 0             |
| 0             | 0             |
| 0             | 0.2635973799  |
| 10.5785743568 | 12.3638832284 |
| 1.2525160026  | 1.3600091455  |
| 0.7305475784  | 0.3966222331  |
| 13.1680807601 | 16.68122025   |
| 61.8699448671 | 58.5277978406 |
| 0             | 0.801802313   |
| 2.8326935496  | 2.8072780788  |
| 3.0135034798  | 2.9994503812  |
| 1.0948565142  | 3.9627301346  |
| 0.9495026622  | 0.2863862954  |
| 1.0332755845  | 0.3739843754  |
| 0             | 0             |
| 18.6981518607 | 12.4404781788 |
| 12.4943029813 | 11.3054885033 |
| 73.1991667055 | 71.5331240158 |

gene\_expression\_table

|                |                |
|----------------|----------------|
| 1.0653098738   | 0.9639472125   |
| 59.5445056886  | 61.3621191676  |
| 0              | 0.0322493098   |
| 0.8420012835   | 1.3967911922   |
| 7.3872084682   | 4.9405891458   |
| 0              | 0              |
| 101.8189591263 | 107.3055590223 |
| 0              | 0              |
| 20.7856732175  | 25.5250710719  |
| 0.2427004335   | 0.2196078456   |
| 0              | 0              |
| 1.7734359922   | 4.8140885292   |
| 0              | 0              |
| 1.3697655643   | 0.6197171968   |
| 0              | 0              |
| 0              | 0              |
| 89.5723604229  | 67.1554512993  |
| 36.6960700893  | 48.1126330191  |
| 0              | 0              |
| 0.5047589658   | 0.4567318956   |
| 21.8250679248  | 29.6226674122  |
| 66.0648627338  | 81.0336045527  |
| 6.4557778353   | 7.3019001346   |
| 1.1788040646   | 0              |
| 0              | 0.1182695224   |
| 1.7211684286   | 1.0382678629   |
| 0.1138413399   | 0.2403555105   |
| 0              | 0.0171827006   |
| 6.236702981    | 4.4889806041   |
| 5.6630362815   | 3.416137828    |
| 32.4387916192  | 33.9868603683  |
| 0              | 0              |
| 0              | 0.5602782092   |
| 2.0612157321   | 4.1964617229   |
| 6.6346448406   | 7.2898042205   |
| 4.5702474338   | 4.1353951395   |
| 0              | 1.1568380164   |
| 7.886517788    | 5.35209545     |
| 5.2440303982   | 3.1633790998   |
| 2.2296456484   | 2.6899975433   |
| 1.200926653    | 1.0866602554   |
| 0              | 0              |
| 1.5062000593   | 0.9085915653   |
| 16.9520424954  | 17.0434229839  |
| 0.0328482837   | 0              |
| 67.7207432541  | 77.1638997893  |
| 6.0429957682   | 6.1515153503   |
| 0              | 0              |
| 3.6769299163   | 4.9906131968   |

gene\_expression\_table

|                |                |
|----------------|----------------|
| 5.6667754691   | 0              |
| 4.6302944804   | 4.1897287983   |
| 0              | 0              |
| 0              | 0              |
| 0.4006386552   | 0.3625184788   |
| 0.4373649662   | 0.3957503355   |
| 1.8590797538   | 1.6821910606   |
| 14.1747380819  | 24.3694621028  |
| 3.014319076    | 4.0912666009   |
| 0              | 0              |
| 31.6106213697  | 9.5343058089   |
| 10.3554680498  | 10.0909421384  |
| 167.7018150316 | 102.1957704975 |
| 17.8726719981  | 48.5163409515  |
| 7.2195966168   | 10.8126830236  |
| 0              | 0              |
| 17.9220692899  | 10.1355067894  |
| 4.6032679942   | 24.9916430542  |
| 4.9311239809   | 5.1483863262   |
| 8.3342277851   | 7.5412383187   |
| 0              | 0              |
| 0.7310014484   | 0              |
| 24.8972479275  | 20.5693279402  |
| 0.3634815341   | 0.6166815054   |
| 0              | 0              |
| 0.1509201844   | 1.2290431656   |
| 1.2089151051   | 1.4001774312   |
| 0              | 2.2249284487   |
| 0.1875141989   | 0.1272543748   |
| 0              | 0              |
| 3.4212248879   | 2.8745789355   |
| 115.9242161209 | 91.1202125304  |
| 0              | 0              |
| 3.6211017349   | 2.6983429136   |
| 1.1871487313   | 2.1483865652   |
| 2.6842516125   | 1.3879137346   |
| 1.5116881218   | 0.8704520551   |
| 11.194417832   | 3.9391665858   |
| 0              | 0              |
| 6.7121358866   | 4.8587888552   |
| 13.4226501215  | 13.7867892143  |
| 0.7790631359   | 0.6042312248   |
| 26.9368322693  | 15.5920839984  |
| 22.3367779306  | 22.6207803827  |
| 1.3642835817   | 1.4813688163   |
| 0.3008114642   | 0.907298992    |
| 2.8788590978   | 0.868313302    |
| 3.4855394102   | 4.8236048556   |
| 6.0111995363   | 5.4392427773   |



gene\_expression\_table

|               |               |
|---------------|---------------|
| 0             | 0             |
| 18.0048127982 | 8.1458407243  |
| 7.0422657835  | 5.9800689264  |
| 49.1356226121 | 43.0027213139 |
| 0.7264952052  | 0.2629481037  |
| 0             | 0             |
| 0.9649748527  | 0.8731589205  |
| 14.000657672  | 11.6749066897 |
| 1.9628760807  | 3.5522226405  |
| 0             | 0             |
| 0             | 0             |
| 0             | 0             |
| 0             | 0             |
| 2.1233020793  | 1.1527638132  |
| 3.6096466102  | 4.5968657221  |
| 2.1039508995  | 2.4114332326  |
| 9.4808356019  | 6.862998476   |
| 1.0278398301  | 1.1044253358  |
| 1.2850628048  | 1.1627909766  |
| 0             | 0             |
| 0             | 0             |
| 0             | 0             |
| 0             | 0             |
| 5.2566962931  | 2.818684091   |
| 0             | 0             |
| 7.6867173327  | 6.0481195911  |
| 0             | 0             |
| 0.1756061084  | 0             |
| 15.6758143094 | 28.3685674535 |
| 82.7293678378 | 83.0076307685 |
| 50.6698073824 | 76.2426989354 |
| 0             | 1.0987794793  |
| 3.6475144769  | 1.1001529536  |
| 8.6874023685  | 4.7164853172  |
| 0.0126490707  | 0             |
| 0             | 0             |
| 8.7813824787  | 6.6215390863  |
| 71.9720289511 | 57.5367349303 |
| 3.0311404801  | 1.5237399665  |
| 0.2499624442  | 0.2261788868  |
| 0             | 0             |
| 0.2187382184  | 0             |
| 0.0924673793  | 0.0836692447  |
| 0             | 0             |
| 7.3504294126  | 7.0205495146  |
| 47.2778879937 | 71.2991112794 |
| 1.9171858113  | 1.9825924715  |
| 0.0260719718  | 0.0471825243  |
| 0             | 0             |

gene\_expression\_table

|               |               |
|---------------|---------------|
| 32.9978406731 | 21.1652672439 |
| 78.594827123  | 89.4345691967 |
| 0             | 0.2283382992  |
| 0             | 0             |
| 72.27273267   | 49.0470666626 |
| 10.911027348  | 7.4426169417  |
| 0             | 0             |
| 1.6029507699  | 0             |
| 0             | 0             |
| 7.6784726835  | 6.0793926783  |
| 8.3754637817  | 7.5785507712  |
| 81.5087033952 | 90.5153775954 |
| 3.0919655642  | 3.9168774494  |
| 0             | 0             |
| 28.8816718728 | 15.2446136759 |
| 0             | 0             |
| 7.6352331271  | 5.1322157493  |
| 0.4355371178  | 1.4450201486  |
| 14.3480540626 | 9.9535243951  |
| 26.4792339524 | 27.3825987936 |
| 11.1331994718 | 10.0738919827 |
| 11.0530741725 | 5.834144451   |
| 4.1915989967  | 4.0636870093  |
| 2.5859726884  | 4.6798424117  |
| 0             | 0.0579421775  |
| 0             | 1.7058104199  |
| 6.2289830053  | 11.2726089416 |
| 7.7329835002  | 6.1898321312  |
| 0             | 0             |
| 7.6943665793  | 5.5698071694  |
| 0             | 0.391618031   |
| 8.739416085   | 10.0645663367 |
| 19.6007128707 | 16.1233945327 |
| 0.5438318902  | 0.8611524056  |
| 5.1049887711  | 3.2334796397  |
| 40.3290721914 | 39.6035261538 |
| 0             | 0             |
| 0             | 1.0244304682  |
| 1.3429111241  | 4.2529728981  |
| 1.515889546   | 1.2573503197  |
| 0             | 6.8486090835  |
| 10.0055912763 | 7.3290837482  |
| 9.9590838961  | 8.7611725544  |
| 14.1965091109 | 13.9839616717 |
| 14.5309653155 | 20.1608269834 |
| 0             | 0             |
| 5.2691808953  | 5.5930267878  |
| 0             | 0             |
| 15.454400447  | 9.988526476   |

gene\_expression\_table

|                |                |
|----------------|----------------|
| 5.129355765    | 6.0693990274   |
| 0              | 0              |
| 17.6840255435  | 16.0014166275  |
| 0.2907457511   | 0.6577043055   |
| 25.2204976798  | 25.1700050397  |
| 12.370543054   | 3.2497270114   |
| 22.544777803   | 14.3724986389  |
| 3.0358908877   | 3.1394632605   |
| 0              | 0              |
| 57.4664674417  | 63.6256380845  |
| 0              | 0              |
| 4.1911001688   | 1.5169292708   |
| 2.7378156947   | 1.9387694929   |
| 1.1700796856   | 0.9074985697   |
| 0.1487969109   | 0.3365977615   |
| 18.1458123111  | 15.6729348358  |
| 101.3248018242 | 91.0382353163  |
| 45.8730928756  | 30.2729968087  |
| 0              | 0              |
| 16.0078168903  | 9.1736412765   |
| 7.3199166706   | 6.9546092793   |
| 28.9409872541  | 20.1033780219  |
| 6.9337058385   | 8.3652986229   |
| 17.1477523432  | 32.4869789071  |
| 0              | 0              |
| 1.973032742    | 0.8456691743   |
| 0.0128831102   | 0              |
| 0.7057243941   | 0.6385757601   |
| 9.0655262258   | 19.6870915025  |
| 32.8670223854  | 6.9975938214   |
| 0.7530352469   | 0              |
| 0              | 0              |
| 0              | 0              |
| 129.810864082  | 151.4610013403 |
| 13.749288892   | 17.417490101   |
| 41.3017847078  | 27.1130057396  |
| 27.5669827146  | 21.5807856899  |
| 70.1212594174  | 87.5163105294  |
| 10.7888029882  | 11.0638995581  |
| 20.5191009954  | 29.6183690967  |
| 22.0205339193  | 18.4215154552  |
| 7.6636505451   | 11.0951448206  |
| 33.7279489292  | 34.4566920595  |
| 9.9349416488   | 8.9896466221   |
| 6.4017805162   | 5.7926605538   |
| 39.3325379689  | 27.2159626964  |
| 2.8573007438   | 4.9246339      |
| 0.5399125896   | 0.488540704    |
| 1.26436885     | 0.6864396126   |

gene\_expression\_table

|                 |                 |
|-----------------|-----------------|
| 16.1276802966   | 14.698902835    |
| 18.0674373496   | 16.8932922787   |
| 31.5195682116   | 22.1826327661   |
| 2.1559803329    | 0.975420994     |
| 0.4112447195    | 0.1488461567    |
| 0               | 0               |
| 0               | 0               |
| 0               | 0               |
| 32.8685373307   | 31.0342377825   |
| 12.8944391584   | 5.0003795632    |
| 20.8812295429   | 21.996478929    |
| 0.2995437654    | 0.0542085237    |
| 7.8576869628    | 7.540951146     |
| 12.7996998862   | 5.0670494629    |
| 0               | 0               |
| 4.280562041     | 6.4554548067    |
| 3.4986050975    | 4.7485769834    |
| 0               | 0.7282164181    |
| 164.1050246715  | 173.3928366181  |
| 3.4806741621    | 1.8896958933    |
| 20.943256306    | 13.3768492207   |
| 21.9135745085   | 3.9657060509    |
| 4.9014409164    | 4.9894605577    |
| 4.584978916     | 3.6548291164    |
| 22.7583134539   | 20.5928935366   |
| 0.4916615976    | 0               |
| 5.6134498755    | 4.4444211082    |
| 0.9519447452    | 0.8613686085    |
| 0               | 0               |
| 2.8076401285    | 2.3993585766    |
| 164.1158089634  | 145.559829479   |
| 30.0557093481   | 30.9953875963   |
| 0               | 0               |
| 0               | 0               |
| 1.9665078295    | 1.9411609239    |
| 0.0487883481    | 0               |
| 0               | 0               |
| 5.8671667183    | 3.8740727208    |
| 7.3000828574    | 6.6054907537    |
| 3.6541090018    | 3.7197291672    |
| 0               | 0               |
| 14.0933961866   | 13.9332109396   |
| 26.4792339524   | 13.9963035913   |
| 82.2438438994   | 66.4804941529   |
| 0.2403891341    | 0               |
| 3.7880948872    | 3.8085147252    |
| 8.499488765     | 8.1869539901    |
| 10.1482536523   | 9.1826623035    |
| 3181.4621741979 | 3105.5864070124 |

gene\_expression\_table

|                 |                 |
|-----------------|-----------------|
| 3.7618904143    | 2.0947397518    |
| 175.2192403388  | 158.5473883715  |
| 18.266494334    | 15.4265667479   |
| 11.9635212065   | 11.8093198152   |
| 1.9655203971    | 1.7785040339    |
| 33.6361398937   | 32.1650126073   |
| 0.0464835091    | 0.0420606719    |
| 12.9859511991   | 14.4714924521   |
| 0               | 0               |
| 0               | 0               |
| 0               | 0               |
| 0.5452061717    | 0.8633285667    |
| 0.0194391552    | 0               |
| 36.2805490969   | 39.9910920836   |
| 0               | 0               |
| 29.8581249293   | 24.9389247088   |
| 7.9032343824    | 6.6330465409    |
| 0.6871244923    | 0.3108728058    |
| 0               | 0.154338837     |
| 0               | 0               |
| 444.7145434952  | 572.6470239205  |
| 0               | 0               |
| 2.2834428215    | 0.7748162284    |
| 5.1310902962    | 5.3571630367    |
| 0               | 0               |
| 1.0503407228    | 0.7467447068    |
| 1.6579057146    | 1.3236692066    |
| 55.5432458778   | 43.3834198774   |
| 0               | 0               |
| 37.1402585838   | 18.5178220672   |
| 1.4133649741    | 0.9837579877    |
| 2.4943210477    | 1.3230631524    |
| 0.0449000843    | 0.0406279076    |
| 0               | 0               |
| 0               | 0               |
| 0.838994092     | 1.5629868535    |
| 28.5657452935   | 29.9684136958   |
| 6.3937399665    | 5.3721432611    |
| 0               | 0               |
| 0               | 0               |
| 13.5054918793   | 11.2020922484   |
| 3.3822494819    | 0.4372047769    |
| 0               | 0               |
| 2777.2568735183 | 2016.5666691225 |
| 4.2794460034    | 3.4420115874    |
| 2.9417236571    | 2.1375245265    |
| 0.7382586429    | 0.9352201925    |
| 42.9909625274   | 28.6890714975   |
| 142.7813556163  | 137.1464386618  |

gene\_expression\_table

|                |                |
|----------------|----------------|
| 0              | 0              |
| 0.8360046646   | 0.0945575069   |
| 0              | 0              |
| 9.826372767    | 6.3510056494   |
| 0              | 1.8647977178   |
| 0              | 0              |
| 0              | 0.5091179386   |
| 1.5714707114   | 0.9479650625   |
| 2.0265154413   | 0.3860411557   |
| 0              | 0              |
| 4.5508286894   | 5.4904320799   |
| 356.6836042639 | 433.4013498284 |
| 22.3021368202  | 9.8658371464   |
| 0              | 0              |
| 0.7304524836   | 3.3047550424   |
| 0.6826716221   | 0.6177164254   |
| 5.6125681178   | 2.7085549598   |
| 1.5715694528   | 1.0665277051   |
| 93.9077510546  | 101.5525803335 |
| 0              | 0              |
| 0              | 0              |
| 0              | 0.2386621492   |
| 0.3489832224   | 0              |
| 8.0312812144   | 5.0310807694   |
| 22.3146437539  | 17.947945203   |
| 0.0778536416   | 0              |
| 0              | 0              |
| 0.4379031727   | 0.3962373325   |
| 10.0926575589  | 10.6544154456  |
| 5.3934219278   | 5.3939558798   |
| 10.0783932022  | 7.0350034927   |
| 0.6010570119   | 0              |
| 7.9323638828   | 2.760619682    |
| 0              | 0              |
| 0              | 0              |
| 0.312387494    | 1.6959857116   |
| 17.2663407192  | 11.7176054231  |
| 0.8757687952   | 0.3396174375   |
| 0              | 0              |
| 0.1765901878   | 0              |
| 0.4589511767   | 0              |
| 5.5223534851   | 6.6625462747   |
| 0.2305780692   | 0              |
| 22.168527318   | 21.4920264435  |
| 0              | 0.1464559855   |
| 0.9900578285   | 1.2797932688   |
| 3.157679452    | 0              |
| 10.8745221849  | 6.8276353788   |
| 3.7389716924   | 2.4928945686   |

gene\_expression\_table

|                 |                 |
|-----------------|-----------------|
| 4.7015247899    | 1.1097865171    |
| 5.3222487504    | 1.6052815471    |
| 1.5273002262    | 1.7456587769    |
| 19.6948310533   | 16.6711616746   |
| 0               | 0               |
| 662.8143284354  | 667.5333693314  |
| 3.9404189524    | 0.5942489847    |
| 47.5847870992   | 54.6844161511   |
| 0.4977773095    | 0.9273240397    |
| 52.9231782165   | 48.9585850094   |
| 0               | 0               |
| 0               | 0               |
| 2545.0835360847 | 2248.4960649466 |
| 0               | 0               |
| 15.7178108352   | 16.0000698883   |
| 7.5438030029    | 4.964379118     |
| 1.3816081047    | 1.0001201071    |
| 0.1984451764    | 0.2821710743    |
| 0.2849054409    | 0.3032907164    |
| 374.3142197306  | 375.7825819082  |
| 0               | 0               |
| 3.3910651732    | 5.3697180769    |
| 223.6683405669  | 194.6025271721  |
| 0.6944670335    | 0.7854869011    |
| 1.6587989031    | 1.3341925663    |
| 3.2075674425    | 3.9577801869    |
| 445.3371258004  | 325.3950378161  |
| 229.3762801827  | 202.7160374335  |
| 255.3704607759  | 137.473416603   |
| 0               | 0               |
| 0.3993938738    | 0.2108120796    |
| 5.9004220552    | 11.4407263071   |
| 3.2736173607    | 3.8672350735    |
| 55.2808817723   | 44.4631000057   |
| 0               | 0               |
| 3.3180588806    | 4.0031339706    |
| 31.5677128271   | 23.6872954471   |
| 7.289701864     | 6.5960974966    |
| 0               | 0               |
| 6.3484718074    | 2.297769636     |
| 33.2029105578   | 27.671831388    |
| 27.9211268242   | 22.9677025806   |
| 0.8202191313    | 5.9374119376    |
| 0               | 0               |
| 0               | 0               |
| 0               | 0               |
| 0               | 0               |
| 0               | 0               |
| 64.7964747709   | 56.6674619541   |

gene\_expression\_table

|                |                |
|----------------|----------------|
| 12.1347861722  | 7.015114481    |
| 0              | 0              |
| 2.0331959737   | 2.5473328329   |
| 139.1559054614 | 110.0342015815 |
| 0              | 0              |
| 8.3222751118   | 8.0324511197   |
| 0              | 0              |
| 0              | 0              |
| 12.354654109   | 10.7034194824  |
| 32.0974141212  | 19.3622617111  |
| 121.5291865955 | 115.4413426596 |
| 0              | 0              |
| 8.8796822485   | 12.721756526   |
| 0              | 0.0422516873   |
| 0              | 0              |
| 0              | 0              |
| 8.9762876263   | 6.4977656913   |
| 9.2898443846   | 5.4315236188   |
| 27.2029274315  | 25.2149653761  |
| 0.5594715108   | 0.4339188195   |
| 0              | 0              |
| 34.7354296085  | 22.6405458132  |
| 0.932415061    | 0.8436971448   |
| 5.4384364951   | 4.9209772936   |
| 0.2265923979   | 0.5467532423   |
| 35.9017146055  | 25.7178612533  |
| 1.0657542969   | 1.0714992771   |
| 19.0515143132  | 12.9290931451  |
| 0              | 0              |
| 15.6894393355  | 19.2668310488  |
| 8.510851352    | 7.5299218271   |
| 2.2975112348   | 2.8584963462   |
| 1.3457290481   | 3.3486335203   |
| 0              | 0              |
| 9.6203640435   | 6.1777423694   |
| 0              | 0              |
| 14.2586002917  | 15.0853166197  |
| 59.1488834098  | 23.7870908889  |
| 35.8115773075  | 22.8735237251  |
| 26.8183691159  | 29.4852733491  |
| 383.3492477369 | 382.0466848559 |
| 0.1641748856   | 0.3713847192   |
| 26.9664180434  | 25.5097215153  |
| 4.9670120171   | 3.7127719571   |
| 2.8617516637   | 3.4046606582   |
| 1.8045835384   | 6.5315203183   |
| 103.3213195107 | 71.3479738832  |
| 0              | 0              |
| 17.7118796768  | 17.1447567938  |



gene\_expression\_table

|                |                |
|----------------|----------------|
| 1.4525067541   | 1.3143028814   |
| 4.7943232594   | 4.2176463011   |
| 0              | 0              |
| 0              | 0.0366819546   |
| 0              | 0              |
| 1.4381809309   | 0.5205360556   |
| 6.9523761303   | 5.5719114873   |
| 0.7622809774   | 0.344875534    |
| 13.575609537   | 9.5101241319   |
| 0              | 0              |
| 50.2297705085  | 52.4428638695  |
| 12.2817156535  | 12.2356667828  |
| 0.4961296906   | 0.3928082228   |
| 0.0396072892   | 0.0716774282   |
| 0.0895499376   | 1.2559555958   |
| 0.5190379837   | 0.4877158355   |
| 57.3038476568  | 60.8691183351  |
| 3.5804115963   | 4.5356370082   |
| 22.1499085625  | 19.256401885   |
| 6.0577961972   | 4.4373285329   |
| 0              | 1.2245464654   |
| 2.8846933731   | 1.6313869116   |
| 0.8393334989   | 1.6570301584   |
| 0.6123394046   | 0.6925952681   |
| 9.3967740926   | 7.0855707618   |
| 0              | 5.8106670085   |
| 0              | 0              |
| 38.9867939981  | 39.3477109823  |
| 2.4223904878   | 2.1919036101   |
| 178.3807385563 | 279.101462506  |
| 0              | 0              |
| 0              | 0              |
| 4.5924009782   | 4.1554408068   |
| 0              | 1.3903986776   |
| 13.6291993533  | 15.4155014518  |
| 8.6410103295   | 7.5582032585   |
| 2.0828991883   | 2.2380983576   |
| 43.7279536301  | 45.0248625083  |
| 11.1035448309  | 14.0658825119  |
| 84.0507904896  | 86.5436173283  |
| 180.1542274609 | 226.8962207018 |
| 66.5384067103  | 21.8935911167  |
| 7.6762844131   | 4.6305981913   |
| 45.7115710342  | 53.5275303638  |
| 1.6469192807   | 5.2157607012   |
| 5.2191228431   | 3.5418982588   |
| 5.9648642305   | 4.3178529659   |
| 71.5911758105  | 65.7915589832  |
| 2.7327323296   | 6.1817922098   |

gene\_expression\_table

|                 |                 |
|-----------------|-----------------|
| 6.1527476822    | 6.8520896323    |
| 0               | 1.4165059489    |
| 638.6952091837  | 719.4567856266  |
| 0               | 1.0345455249    |
| 37.010474852    | 28.7048424208   |
| 275.8965344068  | 326.7417559674  |
| 825.1897974297  | 582.5117925267  |
| 7.7703131055    | 18.7492781017   |
| 161.9172593241  | 138.5915538445  |
| 0               | 0               |
| 42.7026085105   | 34.3462385518   |
| 1.4087394074    | 1.3905817452    |
| 28.2935835315   | 26.9489377267   |
| 8.5222300863    | 19.2783811965   |
| 27.7485432436   | 38.2331089131   |
| 30.7482779931   | 39.5937352196   |
| 0               | 0               |
| 6.1199907331    | 5.5376826524    |
| 94.2510200759   | 38.3774286144   |
| 218.318384751   | 183.0911484845  |
| 3.7446891607    | 1.3553550068    |
| 20.7527106913   | 7.3479603581    |
| 45.573585611    | 53.0194194512   |
| 108.7713364067  | 85.1216470255   |
| 12.0740182571   | 10.0847937692   |
| 25.3566893065   | 27.0411873646   |
| 0               | 0               |
| 56.0294082479   | 55.7681220725   |
| 6.0451866202    | 1.6409988121    |
| 74.1553133812   | 109.0367603327  |
| 100.2523447623  | 94.7451925237   |
| 8.0898574482    | 21.9603583754   |
| 103.4089155833  | 85.063372702    |
| 0               | 0               |
| 0               | 0.0770496168    |
| 2.9436635064    | 5.707667723     |
| 0.9631672767    | 0.8715233327    |
| 5456.3117380576 | 5813.3361888899 |
| 2.0610337488    | 3.7298588624    |
| 2.8370148088    | 3.8506155588    |
| 183.8184852133  | 177.9327367109  |
| 4.6023604456    | 4.1644526457    |
| 8.5276262673    | 5.7871764157    |
| 0               | 0               |
| 113.6993101634  | 165.3444461316  |
| 0               | 0               |
| 35.5343944546   | 30.5044595893   |
| 0               | 0               |
| 10.3054883061   | 7.0505616019    |

gene\_expression\_table

|                 |                 |
|-----------------|-----------------|
| 1.8383780892    | 1.2475943466    |
| 26.1845978244   | 4.7386344018    |
| 1.005069015     | 1.4838201925    |
| 0               | 0               |
| 3.680103841     | 1.849970775     |
| 1.2749832136    | 1.5382272582    |
| 17.8822090968   | 20.4735935738   |
| 0.2844943938    | 0.3432335631    |
| 0               | 0               |
| 24.4717509355   | 22.1432999721   |
| 3.0346430286    | 2.7459012258    |
| 13.4727203039   | 9.75264869      |
| 4.4896432809    | 4.2559108457    |
| 0.4078340133    | 0.2767719069    |
| 0.1509584417    | 0.0682974844    |
| 0               | 0               |
| 0.9060909632    | 0.9838532953    |
| 0.7271396914    | 0               |
| 0               | 0               |
| 0.7873908893    | 0.6234128329    |
| 2.2984822201    | 2.0797850311    |
| 1.6241020063    | 1.6956589601    |
| 0               | 0.6979927801    |
| 28.2874884036   | 22.7519783599   |
| 3.107341925     | 3.233435369     |
| 0               | 0.1165941185    |
| 1.251164852     | 0.87086028      |
| 65.9785555068   | 51.7406875983   |
| 0.0190421426    | 0.005743        |
| 0.303510597     | 0.2746320119    |
| 0               | 0               |
| 0               | 0               |
| 10.2662927896   | 16.1816577524   |
| 17.4009294806   | 12.9336037482   |
| 0.0926778515    | 0               |
| 0.5060106441    | 0.3433983589    |
| 0.4668457503    | 0.8096499609    |
| 0               | 0               |
| 0               | 0               |
| 0.3596710935    | 0.2169659467    |
| 335.6066588949  | 335.6398841531  |
| 10.2528214828   | 5.5663683956    |
| 57.7042256968   | 107.8626230541  |
| 1.6267206944    | 1.1959517558    |
| 3282.9462293675 | 3176.1321835094 |
| 0.3154811752    | 0               |
| 0.0182276155    | 0               |
| 0.0519442817    | 0.04700186      |
| 0.9506415694    | 1.0165875057    |

gene\_expression\_table

|                |                |
|----------------|----------------|
| 7.7905050768   | 2.8197000093   |
| 85.9794890302  | 59.8451289363  |
| 7.6018679891   | 7.5038852463   |
| 37.9559618734  | 36.7631354864  |
| 4.5515700851   | 6.1777423694   |
| 3.9172447589   | 3.2913443687   |
| 3.6389134089   | 3.8913445666   |
| 0.3675355293   | 0.3325650665   |
| 0              | 0              |
| 0.3564741187   | 0.5160898123   |
| 0              | 0              |
| 4.8062121141   | 2.4160600716   |
| 3.7447683128   | 5.5809915212   |
| 0.410854453    | 2.4164546804   |
| 12.0728654595  | 16.386225209   |
| 27.4597966624  | 21.4893297822  |
| 2.3471779131   | 2.1238474008   |
| 2.9953112696   | 2.0560986263   |
| 103.1870807484 | 71.8222941495  |
| 13.3911330288  | 9.4663957001   |
| 20.3100310957  | 23.0301088772  |
| 0              | 1.5772802202   |
| 65.2878679461  | 71.965094354   |
| 45.8299765586  | 56.0603796966  |
| 3.9751479804   | 5.8858666695   |
| 0              | 0              |
| 31.1064967195  | 27.141518082   |
| 15.1214277037  | 12.1481438117  |
| 2.1783563988   | 1.4523813716   |
| 10.475394997   | 14.0545894893  |
| 18.0592128512  | 10.5946529626  |
| 0              | 0.3276174219   |
| 10.2689033698  | 8.3626491406   |
| 8.5098033874   | 11.5501622427  |
| 0              | 7.8672409243   |
| 1.6901452224   | 0.2184757715   |
| 0              | 0              |
| 205.9983621106 | 251.2319820405 |
| 54.3547077807  | 41.6163318174  |
| 0              | 0              |
| 108.0745030203 | 106.2949713636 |
| 10.9152552926  | 9.8766848703   |
| 9.0080620957   | 14.9434235313  |
| 0              | 0              |
| 0              | 0              |
| 0              | 0.0765301611   |
| 0              | 0              |
| 1.6094934261   | 4.3690575102   |
| 162.7436744133 | 164.6765680491 |

gene\_expression\_table

|                |                |
|----------------|----------------|
| 49.5858902837  | 57.6872563474  |
| 9.1959666265   | 4.7548479897   |
| 541.7945480362 | 567.4473129162 |
| 2.3859456922   | 4.3178529659   |
| 0.5395642789   | 0.1627418448   |
| 0.1974297416   | 0.3572891866   |
| 0              | 0              |
| 12.2657065219  | 11.0986426594  |
| 0              | 0              |
| 0              | 0              |
| 36.2260903979  | 49.1688470888  |
| 22.1135939996  | 20.0095181863  |
| 1.8092829747   | 0              |
| 10.8200891526  | 9.7905736481   |
| 37.3385998919  | 28.1549060426  |
| 3.5315615397   | 6.3910773487   |
| 3.6584899468   | 0              |
| 4.367742343    | 3.952158109    |
| 0              | 2.948154409    |
| 146.8797775948 | 120.2468233096 |
| 0.3675170132   | 0              |
| 2.4996958186   | 1.3571120717   |
| 18.1189995202  | 18.8060333951  |
| 155.4841838615 | 150.0279314306 |
| 4.8931777192   | 3.3734088267   |
| 0.7730497544   | 0.6994952118   |
| 7.098633429    | 4.659975114    |
| 0.2879484084   | 0.4559634496   |
| 0.9196148794   | 1.1649608343   |
| 42.4662663188  | 17.4662108135  |
| 8.5481316242   | 2.9005460713   |
| 11.4992293367  | 6.6889894157   |
| 3.0697446755   | 4.1664945042   |
| 555.713111698  | 393.5252580702 |
| 0              | 0.2751796502   |
| 5.3529710551   | 2.9061862584   |
| 86.7971468764  | 61.358223849   |
| 10.6518987645  | 10.4251933741  |
| 0.8706843652   | 0              |
| 0.2854899275   | 0.3444346433   |
| 43.7555885271  | 30.7940180285  |
| 0              | 0.061250901    |
| 0              | 0              |
| 1.2862609458   | 0              |
| 0.2159666342   | 2.1495950068   |
| 0              | 0.1111181429   |
| 0              | 0              |
| 0              | 0              |
| 4.1484384156   | 5.0049608353   |

| gene_expression_table |                |
|-----------------------|----------------|
| 0                     | 8.0108224778   |
| 0                     | 0              |
| 0                     | 0              |
| 0                     | 9.6293475152   |
| 0                     | 0              |
| 16.6021525521         | 8.5842755735   |
| 0                     | 0              |
| 0.3386735819          | 0              |
| 6.6908060051          | 5.4682967561   |
| 0.2399996366          | 0.3474624409   |
| 11.2984444304         | 10.2234141275  |
| 4.9675200255          | 4.0862434825   |
| 1.6910345156          | 1.7851575917   |
| 3.4649546774          | 2.0901795711   |
| 0                     | 0              |
| 15.5878386403         | 13.7448655776  |
| 3.6508610996          | 3.7164229395   |
| 0.9706967771          | 1.7566728244   |
| 0.0158945732          | 0              |
| 1.3545842754          | 2.2981829662   |
| 1.1269717415          | 1.2746775556   |
| 0.9395059666          | 1.0626417015   |
| 0.2062913363          | 0.3733260406   |
| 65.4404680808         | 58.2588412099  |
| 0                     | 0.1259112396   |
| 0                     | 0              |
| 10.1629294755         | 12.0254622803  |
| 0.4610638421          | 0.2781295323   |
| 92.5765095669         | 58.6375939743  |
| 10.1015863659         | 2.4928460019   |
| 0.5259005121          | 2.379309275    |
| 2.2361384348          | 4.0467463298   |
| 0.0309282419          | 0              |
| 97.1375360036         | 106.9389688598 |
| 2.8846824048          | 2.2086384979   |
| 0.0494838234          | 0.0895510213   |
| 0.7901664013          | 0.7699819455   |
| 2.1294218588          | 1.9268105135   |
| 5.1652317351          | 2.4926760337   |
| 65.838415102          | 45.580097536   |
| 1.5050024275          | 1.5320291276   |
| 2.115707646           | 1.9560186049   |
| 3.3452693878          | 0.6053943891   |
| 33.5361957251         | 32.8057040277  |
| 0.3721146667          | 0.1683542528   |
| 0.3288085618          | 0.7438072817   |
| 2.3436589057          | 1.4137754812   |
| 840.9387707457        | 826.414108462  |
| 4.9980928901          | 4.5225317324   |

| gene_expression_table |               |
|-----------------------|---------------|
| 0                     | 0             |
| 0                     | 0             |
| 1.6192284455          | 2.1311436364  |
| 6.6774504002          | 7.591357485   |
| 7.0920198847          | 4.8129184992  |
| 0                     | 0             |
| 12.1381513376         | 8.78657933    |
| 3.4964566243          | 2.5705663261  |
| 10.3182870635         | 0             |
| 7.0394353384          | 7.1814607652  |
| 0                     | 0             |
| 0                     | 0             |
| 8.5608186822          | 7.4539573728  |
| 0                     | 0             |
| 12.735920193          | 3.8413720647  |
| 0.0826454243          | 0.0747818342  |
| 58.2648890852         | 55.1174832451 |
| 5.367321788           | 5.767246992   |
| 4.8890377983          | 4.2315116336  |
| 19.5777038636         | 15.8071542555 |
| 0.8863050263          | 1.0692992158  |
| 4.5539852387          | 9.8896326438  |
| 0.064113241           | 0.0580129608  |
| 5.7086341276          | 7.3568758473  |
| 14.4940132417         | 14.5370300513 |
| 8.7839000047          | 8.4156616489  |
| 1.6619213517          | 1.3215141724  |
| 0                     | 0             |
| 1.4151365575          | 0             |
| 0                     | 0             |
| 0                     | 0.9308867186  |
| 1.022392902           | 0.2312784318  |
| 1.0912738015          | 1.7280212439  |
| 0                     | 0             |
| 0.8204220691          | 0.4454160724  |
| 20.3902282528         | 18.4501281454 |
| 7.9689766974          | 7.2107403327  |
| 0                     | 0             |
| 32.9114516458         | 22.3349817172 |
| 32.0058078557         | 27.5759366454 |
| 2.9757987594          | 1.2822170961  |
| 3.943258894           | 3.5680636333  |
| 0.5521935473          | 0.1665510489  |
| 1.3055396097          | 0.2953298609  |
| 0                     | 2.52690888    |
| 14.6192965007         | 39.6848760822 |
| 4.3806904127          | 4.1163308886  |
| 0                     | 0             |
| 0.449818107           | 0.5948733068  |

gene\_expression\_table

|                |                |
|----------------|----------------|
| 0.1334393458   | 0.2414855782   |
| 1.7748502537   | 1.070650582    |
| 1.0580492213   | 0.7180330503   |
| 0              | 0              |
| 0              | 0              |
| 8.4766260052   | 7.6700875584   |
| 1.7714120135   | 1.9234377315   |
| 0              | 0.1062521967   |
| 4.1446084533   | 4.6878188493   |
| 0              | 2.7502677895   |
| 0.2389032095   | 0.4323438438   |
| 1.0980701368   | 0              |
| 0              | 0              |
| 1.0408335606   | 1.4126996765   |
| 0              | 0.2625558936   |
| 6.079009872    | 2.3574004542   |
| 0              | 2.9463998163   |
| 17.6388684833  | 8.2872118704   |
| 7.3240636347   | 3.3135948978   |
| 189.8574905673 | 164.5339787057 |
| 19.3377523676  | 17.9977307517  |
| 12.3109865269  | 10.5826336219  |
| 3.4592884858   | 4.0507723815   |
| 3.8581705912   | 4.4220237188   |
| 0.1385846931   | 0.0626992821   |
| 3.8434156326   | 3.2731485278   |
| 0.1145207487   | 0              |
| 42.1804086656  | 40.5359915916  |
| 57.9388581174  | 38.1280446017  |
| 274.9206782905 | 175.8765883596 |
| 0              | 0              |
| 4.2971969392   | 1.9441624981   |
| 2.5559438749   | 1.1013093284   |
| 0.8625047164   | 1.105621444    |
| 8.5987414736   | 4.9277031496   |
| 7.7347179186   | 8.0755049201   |
| 0.2149849026   | 0              |
| 0              | 0              |
| 0              | 0              |
| 25.2394036001  | 27.4054939431  |
| 4.9328232297   | 0              |
| 0              | 0              |
| 8.9036154848   | 7.6088690852   |
| 0.0862148799   | 0.1560233228   |
| 19.3055038265  | 18.3004523914  |
| 57.491985322   | 43.5283677666  |
| 3.1210905393   | 3.7654978447   |
| 0              | 0              |
| 10.6097472627  | 7.5576400574   |



gene\_expression\_table

|                |                |
|----------------|----------------|
| 1.0586794066   | 0.4789738122   |
| 1.6404382626   | 0.5397647216   |
| 0              | 0              |
| 5.3321687628   | 7.0764038095   |
| 0              | 0              |
| 35.7606762583  | 30.4705448457  |
| 20.9756429152  | 2.7114059239   |
| 5.8960316631   | 3.9518762646   |
| 25.8736427154  | 21.7971966594  |
| 1.4379298476   | 2.044606058    |
| 4.1753878911   | 3.6521690358   |
| 0              | 0              |
| 1.0760820082   | 0.9736943942   |
| 6.2403507978   | 7.5643006616   |
| 0              | 0              |
| 295.6906271739 | 230.5098713315 |
| 0.3944538204   | 0.3569221219   |
| 0.4758373845   | 0.18452664     |
| 0              | 0              |
| 0              | 0.0795252966   |
| 3.6459561247   | 4.25683714     |
| 0              | 0              |
| 5.7091530943   | 0              |
| 0              | 2.0365345844   |
| 85.7645174383  | 60.8660001999  |
| 0.1329087489   | 0.1202626777   |
| 3.023141321    | 3.0774306247   |
| 0              | 0.097980076    |
| 6.5431911272   | 6.8314801777   |
| 2.5069097233   | 3.6861190684   |
| 1.9634043746   | 1.7765893478   |
| 3.6934517835   | 2.0887658128   |
| 0.1166915238   | 0.3167654928   |
| 0              | 0              |
| 0              | 0              |
| 3.319694632    | 5.0063843168   |
| 1.0361153221   | 1.6406783387   |
| 7.1311815679   | 7.0671992365   |
| 22.1009965976  | 23.0747531636  |
| 15.2050163467  | 9.1721876633   |
| 0              | 0              |
| 1.0760026482   | 0.4868112926   |
| 3.3614546834   | 0.6083234468   |
| 4.0595597963   | 3.6732986765   |
| 2.9127685981   | 4.3927049455   |
| 942.2313357208 | 893.8938365629 |
| 0              | 0.6933372955   |
| 0.0953505075   | 0              |
| 1.2137208903   | 0.2928632373   |

gene\_expression\_table

|                 |                 |
|-----------------|-----------------|
| 0.2765957669    | 0               |
| 0               | 0               |
| 4.2070524532    | 0               |
| 5.1462398828    | 6.5615484311    |
| 0.1410594198    | 0.2552756486    |
| 151.6665218477  | 160.8969997577  |
| 2.4015426753    | 2.4834736414    |
| 0               | 0               |
| 0               | 0               |
| 0.0586959726    | 0.0531111375    |
| 0.103181307     | 0.1733898362    |
| 3.1266643134    | 3.7722224283    |
| 12.051560936    | 8.9221685808    |
| 0               | 0               |
| 1.6778772515    | 2.2083341219    |
| 0.5138701385    | 1.1624403842    |
| 28.7835425624   | 17.363220662    |
| 8.81199811      | 6.7922829097    |
| 11.9701664722   | 11.9713515258   |
| 0.5447913785    | 0.9859105667    |
| 0.2375457165    | 0               |
| 2.2700974057    | 2.3108636136    |
| 34.1131160634   | 38.5841293071   |
| 0.7751068612    | 1.7032945708    |
| 19.1012029957   | 15.5975320562   |
| 0               | 0.0603794018    |
| 0.787423115     | 0.1425001937    |
| 35.7364144118   | 30.8882601585   |
| 0               | 0               |
| 10.3761770976   | 5.7376606036    |
| 6.1967219546    | 2.915698766     |
| 12.4420991538   | 19.9578099965   |
| 0               | 0               |
| 23.1606602234   | 20.9569576051   |
| 1.0453015642    | 0.945842664     |
| 11.0677473224   | 0               |
| 0               | 0.976250495     |
| 1.3475623818    | 0.9145078584    |
| 2.2780251709    | 2.6886188347    |
| 0               | 0               |
| 0.6890791284    | 0.9832340363    |
| 1.353814411     | 3.0625024226    |
| 14.1536038415   | 14.3381702359   |
| 42.5873741119   | 41.302973375    |
| 0               | 0               |
| 0.8614954913    | 0.5716520095    |
| 0               | 1.049597348     |
| 0               | 0               |
| 1915.3247706472 | 1707.2175150849 |

gene\_expression\_table

|                 |                 |
|-----------------|-----------------|
| 74.7441491176   | 80.3134200255   |
| 0.6968219461    | 0.2101734557    |
| 0.5082328385    | 0.3284823103    |
| 16.1487485778   | 12.481270394    |
| 10.8340941484   | 10.5875057763   |
| 1037.3665026151 | 1287.8854759726 |
| 2.4029818872    | 1.9185368022    |
| 2.3249709645    | 1.7123574272    |
| 1.9891916798    | 2.399897372     |
| 5.3438097088    | 3.8829358733    |
| 5.55583798      | 7.3474581395    |
| 1.1572981604    | 2.0943658988    |
| 0.1419298548    | 0.1712339183    |
| 0               | 0.2340958497    |
| 1.3314526289    | 0.6023834387    |
| 958.6976066011  | 997.4251838023  |
| 1.1219669262    | 1.7766235025    |
| 4.5550608372    | 5.7344744698    |
| 5.0741724185    | 2.6236413749    |
| 2.0178956122    | 3.0431597076    |
| 0               | 0               |
| 33.983054133    | 30.7496167159   |
| 1.0820006853    | 0.3263499726    |
| 9.201213732     | 8.3257318331    |
| 58.8763391143   | 44.2063692188   |
| 8.4394983119    | 9.2965995778    |
| 0               | 0               |
| 5.4529532007    | 2.4670563781    |
| 11.1410936352   | 12.9613307505   |
| 1.3176246643    | 3.5767638698    |
| 43.0385189019   | 23.3660804307   |
| 2.5563277271    | 1.6522120849    |
| 19.1722180128   | 15.1795085584   |
| 2.8427497811    | 1.6076664609    |
| 24.4106502961   | 18.689857127    |
| 32.3935566335   | 52.7604436013   |
| 6.8535463436    | 12.0583585302   |
| 0               | 1.0176001421    |
| 10.1224446558   | 18.3186179897   |
| 5.3596568613    | 13.5791415919   |
| 14.2588146745   | 16.8719893653   |
| 21.4059708666   | 23.9266889023   |
| 3.4814493433    | 3.1501945794    |
| 35.9499929121   | 36.3563929013   |
| 2.7915541773    | 2.9469322397    |
| 4.427170894     | 2.5752420779    |
| 36.0775162303   | 41.7712953406   |
| 1.6189589334    | 3.4181405572    |
| 20.7548888247   | 19.3491854933   |

gene\_expression\_table

|                |                |
|----------------|----------------|
| 985.7995161733 | 824.7965066809 |
| 6.3352400815   | 2.8662256716   |
| 62.4650797274  | 32.2980683629  |
| 2.0490695063   | 1.5450863072   |
| 7.5381337679   | 5.1156686037   |
| 116.0378874534 | 114.2614997437 |
| 7.4771509887   | 6.7657111138   |
| 3.2350460993   | 3.1933486257   |
| 4.0605766351   | 5.1439062705   |
| 0              | 0              |
| 33.0990424404  | 35.9396609166  |
| 8.596256595    | 9.3340025692   |
| 2.1286924289   | 4.4943511382   |
| 2.0562120057   | 3.3490196457   |
| 1.5629413934   | 5.6569193116   |
| 12.7678966564  | 5.7765250721   |
| 6.9114438218   | 5.5589601319   |
| 91.5243484988  | 68.201363914   |
| 1.5711322633   | 0              |
| 73.2781126744  | 61.0711393758  |
| 0              | 0              |
| 0              | 0.6728078404   |
| 31.7098578048  | 22.3165535145  |
| 39.0073734277  | 38.8254673942  |
| 426.2796292187 | 359.3457518606 |
| 11.3145078773  | 10.2379491612  |
| 14.4447351181  | 13.941695896   |
| 4.0497940158   | 3.8171480163   |
| 1.5778640344   | 2.4475416027   |
| 0              | 0              |
| 2.3212862602   | 2.567179145    |
| 5.4601652429   | 5.6143620264   |
| 0              | 0              |
| 24.8954737537  | 34.3828673424  |
| 1.762946092    | 2.6586739579   |
| 0              | 0              |
| 1.9914905282   | 3.2436056616   |
| 0              | 0              |
| 2.8080947307   | 1.9359304105   |
| 7.3399863704   | 6.0881310475   |
| 3.9543964544   | 5.084727354    |
| 2.0930649256   | 0              |
| 7.8021700041   | 8.8247563124   |
| 0              | 0              |
| 1.9656046514   | 1.7785802715   |
| 2.6554173589   | 2.7031031084   |
| 1.0508919154   | 1.4263516523   |
| 4.4403924914   | 2.9095106815   |
| 14.44837066    | 9.6997896498   |

gene\_expression\_table

|                 |                 |
|-----------------|-----------------|
| 0               | 0.0808554508    |
| 2.6387899119    | 1.705509249     |
| 25.7599032118   | 18.5411596853   |
| 0.0952117484    | 0.0861524912    |
| 2.4326899388    | 0               |
| 2.4351938201    | 1.2241604024    |
| 26.7380413703   | 25.1427388155   |
| 0               | 1.3354071863    |
| 16.7144990691   | 27.684864913    |
| 6.6330505127    | 1.2003851103    |
| 82.1751081287   | 91.1463929592   |
| 34.1828809856   | 21.8332449449   |
| 6545.5396777907 | 5684.3519359155 |
| 28.0518096923   | 33.8436285666   |
| 9.4720133571    | 19.9984523055   |
| 122.0185438015  | 96.0075300408   |
| 0               | 0               |
| 46.9675822041   | 39.2295564144   |
| 0               | 0               |
| 2.6961208367    | 1.2197944603    |
| 1.8099563215    | 0               |
| 0               | 0               |
| 0               | 0               |
| 1.5192635826    | 1.775664366     |
| 37.0199486529   | 30.044199       |
| 45.0421644472   | 45.6472452969   |
| 12.2730149587   | 9.1387000107    |
| 0               | 0               |
| 1.7418884799    | 15.7615036334   |
| 5.1898827595    | 0               |
| 9.2420130328    | 8.3626491406    |
| 168.1671562472  | 202.8883995564  |
| 0               | 0               |
| 0               | 0               |
| 2.7982748725    | 1.4659081399    |
| 29.7840123416   | 26.0207934967   |
| 4.274318647     | 2.528830776     |
| 308.4077281312  | 275.9965597914  |
| 0               | 0               |
| 0               | 0               |
| 4.8006973804    | 1.6707377361    |
| 0               | 0               |
| 0               | 0               |
| 53.4154839719   | 62.1425308526   |
| 3.0002175422    | 5.4295025471    |
| 2.9594437947    | 3.2134285055    |
| 87.3958082252   | 59.3101695992   |
| 28.7619611496   | 25.0243298267   |
| 6.4861998345    | 1.1738094997    |

gene\_expression\_table

|                 |                 |
|-----------------|-----------------|
| 8.8609569586    | 8.9087222102    |
| 6.8185806322    | 4.6273520657    |
| 4.2219656826    | 7.6405037652    |
| 44.8391805505   | 44.2612349851   |
| 13.2123682379   | 23.9104618222   |
| 0               | 0               |
| 0               | 0               |
| 131.7717221974  | 178.8507561318  |
| 5.117522942     | 1.1576495478    |
| 17.1049196898   | 16.2711252684   |
| 137.5184991305  | 136.2846567312  |
| 1.7301147762    | 0               |
| 221.113830475   | 221.9583984083  |
| 0.9761412516    | 2.3553676081    |
| 127.6882083128  | 155.0653172757  |
| 0               | 15.2710647118   |
| 74.8688026055   | 67.7451465984   |
| 0               | 0               |
| 2.6907755835    | 0               |
| 0               | 1.2965856849    |
| 54.7058789192   | 29.7004171954   |
| 40.959086916    | 54.6175225198   |
| 0               | 0               |
| 75.9718991646   | 45.3080743026   |
| 39.2427944857   | 31.771121537    |
| 10.456012117    | 13.6003858818   |
| 45.0976121325   | 70.9680711913   |
| 0               | 0               |
| 0               | 0               |
| 470.1149241049  | 440.3099441255  |
| 14.4376603815   | 7.2577435093    |
| 149.9299463866  | 178.059437579   |
| 7.4574958273    | 9.6398944457    |
| 0               | 12.257971628    |
| 0               | 0               |
| 0               | 0               |
| 1751.5218558096 | 2080.8119563639 |
| 0               | 3.4691460894    |
| 60.7619267351   | 70.8959325688   |
| 57.5843581735   | 79.5291291768   |
| 66.7991968306   | 85.6280818531   |
| 0.7522651861    | 0.6806882646    |
| 1.3225215652    | 0               |
| 23.5163810865   | 12.3193238783   |
| 0.1608340176    | 0.1455308983    |
| 960.1468723267  | 1189.8649970406 |
| 12.7466495845   | 8.7876759618    |
| 12.1482580414   | 28.2660923017   |
| 15.0088035261   | 16.2968856414   |

gene\_expression\_table

|               |               |
|---------------|---------------|
| 1.4782226857  | 1.2159745273  |
| 2.675602037   | 0.4401859008  |
| 3.3959136596  | 3.6215113271  |
| 0.0351126848  | 0.0317717647  |
| 9.4553408797  | 9.2950588382  |
| 32.7978140978 | 26.9792277453 |
| 23.0822144377 | 5.6961752237  |
| 47.2333936197 | 54.1872075661 |
| 2.3201173424  | 2.2743084037  |
| 0.0781381412  | 0.0942712166  |
| 0             | 0             |
| 6.7340995088  | 9.7112923167  |
| 12.4648081228 | 5.2634400173  |
| 51.849225819  | 63.976157113  |
| 0             | 0             |
| 0             | 0             |
| 0             | 0             |
| 10.0391745807 | 9.3678357552  |
| 5.2597634766  | 5.7111656988  |
| 2.5861691361  | 3.5101484428  |
| 50.114832244  | 54.9074847731 |
| 3.1073529549  | 0.93723097    |
| 2.7342687233  | 3.2988094561  |
| 4.3997494109  | 3.9811197517  |
| 0             | 0             |
| 49.1903336076 | 41.7280743802 |
| 7.1723681759  | 8.0523179942  |
| 0.4666105968  | 0.6333199313  |
| 2.1925793829  | 2.5582625245  |
| 0.7872474995  | 0.7123420624  |
| 27.4054291089 | 31.4999627291 |
| 1.1044428282  | 0.9327329424  |
| 0             | 0             |
| 3.004264001   | 2.3408553959  |
| 0             | 0.2618026595  |
| 0             | 0             |
| 0             | 0             |
| 0.5962792124  | 1.3488603146  |
| 2.3694967735  | 1.8224362564  |
| 3.4922439387  | 5.1045541374  |
| 5.789992721   | 3.9293125979  |
| 26.98618622   | 16.7073882043 |
| 22.7014025913 | 14.25814661   |
| 0.4202620624  | 0.5160871577  |
| 0             | 0             |
| 11.4596606161 | 6.9128605542  |
| 6.7714214314  | 4.5287487648  |
| 7.185611685   | 7.0929941939  |
| 19.3771621981 | 18.3887442604 |

gene\_expression\_table

|                |                |
|----------------|----------------|
| 0              | 0              |
| 3.076448689    | 3.3404749672   |
| 0              | 0.0384194778   |
| 5.0655773122   | 3.9655822874   |
| 0.7748716293   | 0              |
| 15.6405837853  | 12.1867934829  |
| 3.9999375457   | 0              |
| 6.1887838421   | 6.9999127483   |
| 0              | 0              |
| 8.2452997501   | 13.0563503961  |
| 3.4118149289   | 3.2929981619   |
| 1.4171124053   | 0.9617071895   |
| 2.6595420844   | 2.9221671359   |
| 7.0628381497   | 0              |
| 3.8577285343   | 4.0142720653   |
| 0.4469513964   | 0              |
| 6.0420573176   | 39.6369425259  |
| 3.7252117506   | 2.8892257317   |
| 1.80619699     | 1.9975266833   |
| 0.2989337166   | 0              |
| 0              | 0              |
| 0.1800330439   | 0.2280644318   |
| 0.6395894154   | 0.4629867416   |
| 12.4282044495  | 10.6538012993  |
| 0              | 0.0278730253   |
| 0              | 0              |
| 0.9713661212   | 0.1883447291   |
| 2.0655689718   | 2.4564435481   |
| 467.1784743014 | 362.3375420286 |
| 0              | 0              |
| 509.7149463684 | 441.9454449702 |
| 2.8292930356   | 2.1943628412   |
| 3.6528313759   | 3.011468099    |
| 0              | 0              |
| 9.9042480894   | 7.9661097863   |
| 4.6868159035   | 4.2408722915   |
| 0              | 0.0773753899   |
| 1.337470844    | 1.3963990019   |
| 0              | 0              |
| 0              | 0              |
| 4.1667861202   | 3.1589189134   |
| 3.8414329681   | 1.6042736741   |
| 4.3327216649   | 3.8051616675   |
| 0.7191471761   | 0.8947419033   |
| 28.0753821728  | 22.1546956559  |
| 3.0499434198   | 3.1539952084   |
| 1.7671263609   | 0.7994934486   |
| 14.1822231659  | 15.6074662398  |
| 0              | 0              |



gene\_expression\_table

|                |                |
|----------------|----------------|
| 0              | 0              |
| 0.9260809386   | 0.5761014221   |
| 17.2145533112  | 14.9943106583  |
| 45.5520632565  | 33.9441131693  |
| 1.3042488404   | 0.5192666553   |
| 0.5117792205   | 1.3892525503   |
| 13.6535015071  | 11.0187811632  |
| 9.4423845806   | 8.5439556316   |
| 2.9526193888   | 2.1092226428   |
| 0.0690424849   | 0.0624731944   |
| 1.4178985487   | 1.3899032286   |
| 28.6055442387  | 20.8740072153  |
| 1.9701562671   | 3.0900112666   |
| 0.0668068945   | 0.3929270616   |
| 31.4180891412  | 21.1509560404  |
| 0              | 0.1677328773   |
| 0              | 0.7782724426   |
| 0              | 0.0187056835   |
| 0.7396796546   | 1.2270504176   |
| 2.5412906549   | 2.9126880957   |
| 3.0910190538   | 2.877983102    |
| 0              | 0              |
| 1.5449023621   | 1.2425841633   |
| 3.2321794213   | 3.8995230965   |
| 6.4704834796   | 8.24998284     |
| 10.688305148   | 9.6713286969   |
| 2.3459513459   | 1.3267109623   |
| 22.5395691663  | 18.6324348262  |
| 0              | 0              |
| 5.9152249114   | 10.4230947295  |
| 0              | 0              |
| 310.5449867805 | 255.2995428916 |
| 2.6566019497   | 9.615320789    |
| 0              | 0.5136101557   |
| 13.350161645   | 9.0599351092   |
| 0              | 4.1076028137   |
| 145.7386472472 | 99.6364939121  |
| 0              | 0              |
| 1.5596222189   | 2.6342894067   |
| 0.7495406145   | 0.4521486213   |
| 3.3262537976   | 3.4110677489   |
| 0              | 0              |
| 1.3288655572   | 0              |
| 15.8536902801  | 16.0329097746  |
| 117.2806777616 | 102.5155208658 |
| 0.3359983858   | 0              |
| 0              | 0              |
| 0              | 0.7887814688   |
| 0.1113985108   | 0.403196428    |

gene\_expression\_table

|                |                |
|----------------|----------------|
| 1.3394590689   | 1.2120115165   |
| 0              | 0              |
| 0.989365148    | 0.8952285152   |
| 0.7829857133   | 0.5313643342   |
| 0              | 0              |
| 0              | 0              |
| 10.3423631682  | 7.0187269392   |
| 1.2007007531   | 1.7072877635   |
| 0              | 0              |
| 0              | 0              |
| 0              | 0              |
| 0              | 0              |
| 0.7073795984   | 0.7467523866   |
| 2.556183769    | 2.6020874905   |
| 1.991001352    | 3.6031210271   |
| 4.8913668277   | 2.4141602713   |
| 0.2749443218   | 0.3317117008   |
| 0              | 0.0100993233   |
| 67.4479562645  | 51.3940065921  |
| 302.9077766314 | 218.6166521762 |
| 2.2354246612   | 3.0340909588   |
| 11.5621380026  | 12.3082560538  |
| 4.8939397594   | 3.3212164637   |
| 37.2829418426  | 36.5468187316  |
| 0.0916265239   | 0.1658167909   |
| 0              | 0              |
| 3.9355473485   | 2.0031107794   |
| 4.5783406207   | 6.1580947281   |
| 95.3713989854  | 85.4979053649  |
| 0              | 0.0674612813   |
| 0              | 0              |
| 0              | 0              |
| 90.1104543175  | 124.0774007834 |
| 2.0343081299   | 3.6814934309   |
| 8.7064839477   | 10.3020978902  |
| 0.2466932901   | 0.4464415756   |
| 0              | 0              |
| 0              | 0              |
| 5.1918834853   | 4.3063931522   |
| 1.521283327    | 1.6346358646   |
| 0              | 0              |
| 0.2900665601   | 0              |
| 171.1052287276 | 129.5697065887 |
| 0.457533528    | 0.8279997769   |
| 2.9949826353   | 4.2908562288   |
| 0.3067522635   | 0.8326957158   |
| 1.1428108163   | 1.128080787    |
| 25.8071608554  | 19.830367415   |
| 0              | 0              |

gene\_expression\_table

|                |                |
|----------------|----------------|
| 12.7250436917  | 6.4767794489   |
| 213.2032505951 | 144.1178705945 |
| 2.5811233605   | 3.2697465981   |
| 264.527367922  | 217.0141774454 |
| 17.9966494963  | 11.2939464441  |
| 3.0296019189   | 6.8533494255   |
| 0              | 0.2793625377   |
| 7.854644734    | 6.6067737257   |
| 0              | 0              |
| 0.1488098109   | 0              |
| 0              | 0              |
| 0              | 1.2775145581   |
| 11.6587220724  | 12.0564707245  |
| 33.018924715   | 37.0217760637  |
| 117.2734600655 | 77.6451684301  |
| 0.8717664648   | 1.4198745114   |
| 66.6593165402  | 45.2375857568  |
| 0              | 0              |
| 0              | 0.1201160546   |
| 0              | 0              |
| 0              | 0              |
| 3.8000763664   | 2.6294447796   |
| 85.2039650368  | 56.8082668532  |
| 2.6444438638   | 2.3928289353   |
| 0              | 0.0630138155   |
| 0.5584924938   | 0              |
| 11.7729573895  | 19.7837303474  |
| 125.5577319733 | 172.6738229419 |
| 0              | 0              |
| 0.9693585521   | 1.4253289657   |
| 38.9342464685  | 26.5884606885  |
| 323.3063279887 | 317.4415877469 |
| 5.2294114365   | 5.3233207433   |
| 1.2399514574   | 1.3259667995   |
| 2.0889408143   | 1.3501294148   |
| 1.4781852443   | 0              |
| 6.9895997018   | 6.0303845137   |
| 5.4404988935   | 1.8460662967   |
| 3.4767205785   | 4.7188736245   |
| 0.9845906378   | 1.7818165852   |
| 184.4782331214 | 132.5584072036 |
| 242.473047545  | 167.9797290897 |
| 0.2719311491   | 0.2460573018   |
| 17.2154075608  | 12.8682761792  |
| 1.4614903243   | 0              |
| 8.3236063705   | 5.9809983216   |
| 0.9058209417   | 1.6392668335   |
| 1.8608185411   | 0              |
| 13.021256879   | 15.0813485002  |

gene\_expression\_table

|                |                |
|----------------|----------------|
| 15.0037322395  | 15.5155991695  |
| 520.095872884  | 421.0716745535 |
| 3.5975978074   | 3.2552916887   |
| 19.1181083359  | 17.29904856    |
| 7.9892733063   | 5.1028981759   |
| 85.9270237355  | 50.7762901668  |
| 0              | 0              |
| 2.1518025215   | 2.4879121584   |
| 12.304697058   | 8.136328568    |
| 1.4900644858   | 1.7267535908   |
| 0.1404936798   | 0.0635629568   |
| 2.4624050814   | 2.5066247334   |
| 0              | 0              |
| 0.3535612346   | 0.7998010131   |
| 95.9196105698  | 60.7551008898  |
| 114.3197485426 | 103.4423932878 |
| 89.7297534302  | 74.6967319058  |
| 0.3369737909   | 0.5042762688   |
| 0.0189920555   | 0              |
| 2.1486933975   | 1.555398715    |
| 4.291824653    | 4.3688968595   |
| 355.66984229   | 349.8881519862 |
| 1.1788278755   | 1.2266637655   |
| 374.4367548425 | 345.5187525513 |
| 3.2267161226   | 3.7538985195   |
| 60.7919079489  | 68.7595596008  |
| 0              | 0              |
| 8.3929289755   | 2.8478828166   |
| 0              | 2.1077409505   |
| 19.7448826204  | 20.9289609735  |
| 0.9963504564   | 0.9015491818   |
| 12.5914344556  | 15.0624320132  |
| 0              | 0              |
| 167.310071569  | 136.4385909768 |
| 0              | 0              |
| 0.4608259852   | 0.4864755854   |
| 0              | 0.0172136708   |
| 7.753407005    | 6.1005928505   |
| 0              | 0              |
| 0.8473527103   | 0.3833641756   |
| 6.1814007993   | 5.8876312016   |
| 5.7162231598   | 5.5806750438   |
| 0              | 0              |
| 1.1517709025   | 1.3027270025   |
| 0              | 0              |
| 5.0347507084   | 3.380036681    |
| 0              | 0              |
| 19.7684506138  | 20.3211867958  |
| 0.0716246955   | 0.1620242787   |

gene\_expression\_table

|               |               |
|---------------|---------------|
| 0             | 0             |
| 0.804835498   | 0             |
| 0.9096896784  | 0             |
| 0.6611559038  | 2.3929915837  |
| 0.2590380283  | 0.7031728274  |
| 1.8000194816  | 0.814375143   |
| 12.1359427373 | 13.0402055275 |
| 1.991001352   | 7.2062420542  |
| 2.2190202141  | 47.1852673641 |
| 3.1394472617  | 7.5752893091  |
| 0             | 2.0515672795  |
| 1.7664577647  | 2.1977751359  |
| 8.7515683936  | 5.3992292622  |
| 0             | 0             |
| 2.3581320739  | 1.600319467   |
| 0             | 0             |
| 1.7949041542  | 1.5158468962  |
| 3.4799339096  | 3.3456247956  |
| 25.0344164512 | 18.1219429559 |
| 1.7688217178  | 1.4774039478  |
| 0.417836022   | 0.3240681785  |
| 5.5756407405  | 6.9370492919  |
| 1.3110694784  | 1.1863231536  |
| 6.0862133488  | 4.4480577639  |
| 25.471469811  | 27.6574764875 |
| 0.877921856   | 0.2269682537  |
| 0             | 0             |
| 0.0828622749  | 0             |
| 17.0680725455 | 7.315612412   |
| 7.570511454   | 2.6639621823  |
| 0.2609569201  | 0.1180636272  |
| 8.3368957155  | 7.0999081407  |
| 0             | 0.098591793   |
| 5.9569227962  | 4.9214233985  |
| 0             | 0             |
| 0             | 0             |
| 0             | 0             |
| 0             | 0             |
| 24.6598989833 | 21.2757066616 |
| 11.862607249  | 8.1577622422  |
| 1.9293682241  | 1.1109583461  |
| 0             | 0             |
| 0.4772749933  | 0.2159314912  |
| 8.0952438039  | 5.1274953173  |
| 5.6281048882  | 7.2751414561  |
| 0.1770509175  | 0.961228705   |
| 0             | 0             |
| 0.1954187008  | 0.1768249     |
| 55.4457330234 | 55.7233383232 |

gene\_expression\_table

|                |                |
|----------------|----------------|
| 5.9639733294   | 5.9154052737   |
| 1.5451828455   | 1.6977669037   |
| 0              | 2.904694267    |
| 0.1553050781   | 0.1405280292   |
| 8.6918261035   | 8.2393265274   |
| 49.532448574   | 44.8195092381  |
| 304.3730901389 | 197.5784896284 |
| 6.8589929721   | 6.2063699196   |
| 0              | 0              |
| 556.0964694346 | 642.0564778462 |
| 21.6491115458  | 20.8951792555  |
| 12.9804785656  | 9.396324159    |
| 39.6557132231  | 37.513554792   |
| 6.4549745337   | 8.0310907037   |
| 0              | 0              |
| 0              | 0              |
| 4.8974990879   | 5.9086790426   |
| 1.4574026479   | 0              |
| 0              | 0              |
| 13.4939788107  | 12.2100466538  |
| 0              | 0              |
| 4.7856429106   | 9.2792058315   |
| 0.6614406523   | 2.6334244243   |
| 0              | 0              |
| 13.3655014475  | 12.9278484614  |
| 45.5257608771  | 51.9216696563  |
| 0              | 0              |
| 9.8976914782   | 10.5134956634  |
| 2.6901278614   | 1.0818516302   |
| 0              | 0.510314474    |
| 20.80166672    | 13.5939691694  |
| 9.1427860056   | 11.582008786   |
| 1.0253892041   | 0.7422599485   |
| 0.4342828455   | 0.3929614741   |
| 0              | 0              |
| 64.0911129177  | 56.5247625188  |
| 9.8884520954   | 8.3084675896   |
| 4.535427485    | 3.7308075067   |
| 27.1493448228  | 30.4619946962  |
| 293.9793898457 | 296.3873927902 |
| 0              | 0.6412393357   |
| 3.9559702699   | 3.1818360361   |
| 525.1949819899 | 468.8303143726 |
| 13.7481838275  | 20.4895178989  |
| 0              | 0              |
| 3.1887932774   | 3.1258329982   |
| 84.248633      | 78.9550892673  |
| 46.6746072372  | 55.6715468747  |
| 9.481099643    | 12.2556957328  |

gene\_expression\_table

|                 |                |
|-----------------|----------------|
| 0               | 0.5623785066   |
| 27.7127961859   | 22.4363893369  |
| 54.1839030998   | 33.9427278932  |
| 0.8602882106    | 0.5189553719   |
| 13.9855704729   | 16.873152127   |
| 3.4213624209    | 3.095824839    |
| 2.2411233671    | 2.0278837882   |
| 4874.9930203961 | 4872.482109539 |
| 31.9331818683   | 26.1979400049  |
| 0               | 0              |
| 0.692657006     | 0.8774524006   |
| 103.7466692542  | 138.3425869813 |
| 10.5177689878   | 11.2473858551  |
| 14.3039783409   | 12.9429759249  |
| 224.5391948867  | 143.3509833538 |
| 33.2761013861   | 24.6353968464  |
| 0               | 0              |
| 2.3360742491    | 2.4020457205   |
| 0               | 0              |
| 0               | 0              |
| 63.3216707765   | 37.0743400247  |
| 27.8731736722   | 29.4245960847  |
| 0               | 0              |
| 6.0719171441    | 4.8074102951   |
| 4.9611282043    | 9.5393038865   |
| 1.7877234379    | 1.6176241928   |
| 9.4980485475    | 10.5041728663  |
| 7.8851616177    | 6.8105864915   |
| 5.3222487504    | 6.9562200374   |
| 7.3386642548    | 9.6913963287   |
| 0               | 0              |
| 16.283546772    | 29.4683826861  |
| 0               | 0              |
| 0.9102004372    | 0.4941577258   |
| 5.9585192329    | 6.896200488    |
| 0               | 18.5941344273  |
| 3.6219345641    | 2.7310940324   |
| 12.4388311628   | 8.7541181361   |
| 459.3600761416  | 428.0337858108 |
| 13.8027157598   | 11.1607473405  |
| 44.0161463055   | 28.1139352831  |
| 0               | 0              |
| 0.295755408     | 0.2676147176   |
| 1.618401607     | 1.7673951014   |
| 1.6612782887    | 0.4294886037   |
| 16.926639425    | 15.9542652914  |
| 0.2672514408    | 0.4836457217   |
| 20.2265128111   | 15.2516583218  |
| 0.142375365     | 0              |

gene\_expression\_table

|                |                |
|----------------|----------------|
| 108.8400069977 | 130.3172664516 |
| 1.9545666088   | 2.1223109788   |
| 10.1326883171  | 11.4607224836  |
| 0              | 0.0634559224   |
| 0              | 0              |
| 11.912682513   | 13.6985772954  |
| 2.9344444706   | 2.6552364126   |
| 0              | 0              |
| 4.7559773022   | 3.3103485271   |
| 70.9323854693  | 56.4370165642  |
| 5.3334032416   | 10.6170631581  |
| 31.9888125413  | 25.7289993482  |
| 0              | 0              |
| 33.0981038599  | 36.5001830633  |
| 7.7768395108   | 3.1985839617   |
| 4.7964092042   | 5.1800452969   |
| 3.1169628687   | 3.0218447728   |
| 0.2690750771   | 0.2434729809   |
| 11.5866708567  | 11.587817944   |
| 0.2641935886   | 0.3585839382   |
| 0.7380237146   | 0.5463833302   |
| 0              | 0              |
| 2.2555550603   | 1.7858245363   |
| 0.741327062    | 0.6707908868   |
| 3.0251523956   | 2.0529852093   |
| 15.2935617482  | 0              |
| 1.091845459    | 0.740968482    |
| 0              | 0              |
| 0              | 0              |
| 0.410951766    | 0.8451143462   |
| 2.4290604068   | 1.1835055594   |
| 7.7590968411   | 6.6865049855   |
| 0              | 0              |
| 0              | 0              |
| 0              | 0              |
| 15.594983425   | 6.539310533    |
| 8.6023567613   | 8.7568371212   |
| 0              | 0              |
| 4.1679925461   | 3.1428451753   |
| 11.2111095644  | 4.347595305    |
| 5.1079445984   | 4.799697798    |
| 37.2764286851  | 29.4053198066  |
| 6.0218399383   | 5.4488707608   |
| 27.6728297685  | 27.7036094857  |
| 177.6885354575 | 126.4973934306 |
| 0.2942315104   | 0.0532471633   |
| 13.2513334514  | 9.838349655    |
| 30.0598258201  | 32.7506324332  |
| 4.9601677622   | 3.9895245551   |



gene\_expression\_table

|                |                |
|----------------|----------------|
| 0.4677912392   | 1.2698447808   |
| 11.2167771365  | 7.7613956253   |
| 7.5630987887   | 3.2950094222   |
| 0              | 0              |
| 3.2504584727   | 2.9411821491   |
| 1.3940951706   | 1.1212880656   |
| 12.0638811872  | 10.1882859934  |
| 0              | 0              |
| 0              | 0              |
| 0.5050385236   | 1.1424621347   |
| 0.8199118411   | 2.2256953205   |
| 0              | 0              |
| 2.388054522    | 0.8643338643   |
| 4.3457897687   | 2.2470253084   |
| 1.4072200914   | 1.2733251778   |
| 6.477273211    | 8.7914553452   |
| 4.7276302508   | 4.8125286156   |
| 182.2609912085 | 158.9867843453 |
| 0              | 0              |
| 65.2964665983  | 47.51052711    |
| 0.6702789614   | 0.4332163629   |
| 0              | 0              |
| 3.0330820482   | 3.1667178119   |
| 10.6930740141  | 11.2237468224  |
| 5.8550940408   | 4.162706813    |
| 1.2301212333   | 2.226154029    |
| 2.3584928465   | 1.6767816489   |
| 0              | 0              |
| 2.9422689545   | 2.0706905399   |
| 11.4315269982  | 8.2750672684   |
| 36.2804397427  | 25.3873033293  |
| 0              | 0.2194928333   |
| 0              | 0              |
| 0              | 0              |
| 2.1216561179   | 1.9197836714   |
| 57.875645716   | 42.6051770788  |
| 0              | 0              |
| 1.0175718262   | 1.4322799083   |
| 16.3147111198  | 13.910714077   |
| 4.1161366326   | 7.6352092363   |
| 20.3615350049  | 16.5817485158  |
| 5.0158500298   | 4.5385993065   |
| 0.2836104873   | 0.5132507365   |
| 12.7066500067  | 7.6650873486   |
| 0              | 0              |
| 0              | 0              |
| 0.2375244468   | 0.3223865197   |
| 71.5449424548  | 101.7304307369 |
| 18.1152941492  | 6.5566602649   |

gene\_expression\_table

|                 |                 |
|-----------------|-----------------|
| 11.0774873678   | 4.5561276378    |
| 11.9484865101   | 16.0011763817   |
| 71.6872288401   | 77.2217796172   |
| 0               | 0               |
| 19.4201189112   | 7.5309956893    |
| 73.4712676182   | 77.3592261834   |
| 5.4944859184    | 3.480185588     |
| 0               | 0               |
| 0               | 0               |
| 0               | 0               |
| 87.559805181    | 55.7534726436   |
| 87.5593820948   | 53.39294178     |
| 7.9868936131    | 4.8179683202    |
| 127.9201888907  | 136.7940030611  |
| 1.9253177498    | 0               |
| 5.5202640589    | 11.6550445332   |
| 3032.1362676376 | 3087.852615202  |
| 489.3701170305  | 628.1684571331  |
| 0               | 0               |
| 26.1002824826   | 20.2430392691   |
| 0               | 0               |
| 6.0882103658    | 6.733131949     |
| 83.391342567    | 84.7596700873   |
| 0               | 0               |
| 43.8666804202   | 51.6006797245   |
| 2.4599659261    | 4.4518076019    |
| 37.7625028201   | 55.9136559954   |
| 17.9419381761   | 14.7588993218   |
| 12.7054205292   | 26.8252098994   |
| 0               | 0               |
| 0               | 0               |
| 12.173716698    | 13.8332999698   |
| 18.156247526    | 12.3215305393   |
| 0               | 0               |
| 223.9138086223  | 207.8615595867  |
| 18.4486677172   | 30.8184078047   |
| 3.7434401303    | 16.9362866496   |
| 0               | 7.881692802     |
| 1.4129438222    | 2.557008608     |
| 4345.763593059  | 4628.0490792586 |
| 34.9514787429   | 31.6258971543   |
| 11.3382482964   | 10.2594307145   |
| 61.9903887991   | 44.8736758782   |
| 680.4192189088  | 606.278665786   |
| 1.8017607427    | 1.6303258688    |
| 35.8569219767   | 32.7248887049   |
| 2.5319118967    | 2.4437378333    |
| 0               | 0               |
| 0               | 0               |

gene\_expression\_table

|                 |                 |
|-----------------|-----------------|
| 0               | 0               |
| 11.5744899112   | 13.4655355138   |
| 0               | 0               |
| 6.7343909106    | 7.6170294504    |
| 0.7765212575    | 0               |
| 1.6046255604    | 1.4519478079    |
| 1146.0742934384 | 1507.9758659611 |
| 0               | 4.9297369094    |
| 12.2530643598   | 13.7750102605   |
| 0               | 0               |
| 6.198643827     | 3.8060067282    |
| 0               | 0               |
| 35.6579826666   | 16.1325891365   |
| 0               | 0               |
| 7.0137015901    | 4.2309054941    |
| 33.637021113    | 57.0684529252   |
| 0               | 0               |
| 0.7942721815    | 1.3067242842    |
| 22.5590381256   | 30.6188684423   |
| 0.8033730471    | 0.726933288     |
| 4.0010344494    | 3.6203419299    |
| 330.4368515692  | 494.4938362929  |
| 78.5066100817   | 59.4726882407   |
| 11.0980451094   | 10.2756193085   |
| 3.9161933109    | 4.8935059864    |
| 8.2212948391    | 6.8191298778    |
| 0               | 1.9457384589    |
| 0               | 0.6444320728    |
| 3.8284066932    | 0               |
| 5.4660878441    | 3.6557373991    |
| 3.0557228235    | 4.6082921821    |
| 123.9623654878  | 106.5120237826  |
| 2.5800496494    | 3.7241818158    |
| 65.9571795744   | 54.3101207181   |
| 13.263689007    | 7.5010428655    |
| 0               | 0               |
| 1.8390211137    | 0.9984245823    |
| 0               | 1.0796839455    |
| 0.685719693     | 5.5842702914    |
| 0               | 0               |
| 9.3614025415    | 5.647119276     |
| 1.3084080269    | 1.1839149353    |
| 55.9006050105   | 42.1514541614   |
| 0               | 0.5343358337    |
| 0               | 0               |
| 0               | 0.5107685783    |
| 6.4396312672    | 7.769213149     |
| 117.2616709742  | 110.1853344577  |
| 2.7333174188    | 0.3533209004    |

gene\_expression\_table

|                 |                 |
|-----------------|-----------------|
| 11.4769383738   | 9.5195142496    |
| 61.0718204594   | 42.3667106456   |
| 102.1712738638  | 129.4297592486  |
| 191.7450860038  | 232.6488324845  |
| 0.4225817618    | 0               |
| 164.4222634615  | 175.0326210587  |
| 0               | 0               |
| 0               | 0               |
| 0               | 0.4973566698    |
| 0.3800360214    | 0.5158142328    |
| 0               | 0               |
| 154.932833634   | 137.2084117475  |
| 0               | 0               |
| 0               | 0               |
| 2.6328715885    | 2.9779471811    |
| 0               | 0               |
| 1.8447411693    | 1.6692167712    |
| 3403.364349659  | 4005.8902698828 |
| 0.0670498985    | 0               |
| 19.5337158198   | 27.9855933754   |
| 0               | 1.0209446635    |
| 10.649079378    | 16.3067980323   |
| 3.1077059529    | 12.3728542112   |
| 0.2023474136    | 0               |
| 1.0379375799    | 1.5652989199    |
| 5.9874193378    | 5.4177252296    |
| 15.6225228754   | 12.0572301155   |
| 1.2957422653    | 1.9540905038    |
| 24.487571549    | 31.1847918722   |
| 2.7895291507    | 2.8210636386    |
| 0.2829998624    | 0.3072874121    |
| 0               | 43.588396016    |
| 4.3317379701    | 5.7640874986    |
| 1232.8033425926 | 1555.5651065039 |
| 10.3685690715   | 12.9561160019   |
| 0.6034036091    | 1.528773811     |
| 16.7357889032   | 17.4378583492   |
| 1018.5052934766 | 693.6744227952  |
| 19.0186974589   | 17.2090964811   |
| 72.1259924818   | 37.2933204615   |
| 4.3311198763    | 4.3669082406    |
| 1.0272156798    | 2.2462375932    |
| 0.2019524937    | 0.5482110365    |
| 0               | 0               |
| 1.3188752911    | 0.7160317529    |
| 1.3562774608    | 1.2272296633    |
| 67.1050835747   | 76.6991165918   |
| 9.6216309529    | 4.7676519155    |
| 0               | 0               |

gene\_expression\_table

|                 |                 |
|-----------------|-----------------|
| 22.3705273041   | 17.7506810151   |
| 13.0381970219   | 12.1782005978   |
| 0.0638880842    | 0.2890461368    |
| 4.1867304724    | 7.5767385011    |
| 7.8147069672    | 0               |
| 0               | 0               |
| 0               | 0               |
| 53.9168890992   | 46.1135286824   |
| 64.1325459466   | 74.8180104415   |
| 1778.1910917425 | 1323.4015420061 |
| 2.1628251377    | 1.1959661509    |
| 29.162985111    | 26.0191048267   |
| 0               | 0.5165037341    |
| 17.8537174593   | 0               |
| 0               | 0               |
| 0.7777389107    | 0.5864485016    |
| 15.2989072783   | 7.1779756964    |
| 0               | 0               |
| 0               | 0               |
| 1.331543764     | 1.8072740117    |
| 7.4946137773    | 8.8454508833    |
| 616.0949976952  | 366.5585546094  |
| 1.2273961393    | 0               |
| 4.0661740085    | 1.1320872481    |
| 2.4633301099    | 1.5602635213    |
| 6.1598246101    | 6.9671579935    |
| 0               | 0               |
| 0               | 0               |
| 0.491893662     | 1.7803628257    |
| 24.0500016668   | 12.7568466172   |
| 0.2630864046    | 0.3060695851    |
| 44.280488202    | 19.0483719517   |
| 1.9164820291    | 1.9508980435    |
| 0               | 0.0145693753    |
| 13.227613697    | 19.9483763121   |
| 0               | 0               |
| 0               | 0               |
| 49.5698456662   | 32.0381057516   |
| 0               | 0               |
| 1.4992523882    | 0.7536670764    |
| 1.4249494978    | 1.3479752781    |
| 19.9149311708   | 18.0200548788   |
| 0               | 0               |
| 0               | 0               |
| 0               | 0.6285989641    |
| 6.800218603     | 4.4439689992    |
| 0.4247515921    | 0.9128006253    |
| 0.4398570367    | 0               |
| 9.8608123194    | 4.4612852945    |

gene\_expression\_table

|                |                |
|----------------|----------------|
| 5.4986504122   | 3.5933891829   |
| 85.5229227858  | 48.3659643604  |
| 0.6060913353   | 0.3427641499   |
| 2.5715697102   | 1.3961331899   |
| 3.8375130868   | 2.5665412835   |
| 2.1864315762   | 1.3189305603   |
| 4.7426983889   | 5.8363551916   |
| 2.6169985884   | 3.6835478358   |
| 3.4743403263   | 3.5367322218   |
| 20.3397022502  | 10.181162767   |
| 21.7727851278  | 14.5166270976  |
| 13.408682415   | 10.2171503867  |
| 0.0704758813   | 0.3188510265   |
| 65.6059460482  | 46.2159859799  |
| 4.2764773889   | 3.4826191925   |
| 2.9071099194   | 1.4796577707   |
| 11.2311608668  | 13.6911896123  |
| 0              | 0              |
| 5.4298689646   | 9.826449902    |
| 4.1303193009   | 4.627164928    |
| 0.860752455    | 0.41233401     |
| 11.0543625598  | 12.3108385065  |
| 0.3452655246   | 0.2343105149   |
| 3.8471543057   | 0.497300465    |
| 0.6729007291   | 0.4059168123   |
| 15.6757130026  | 9.321040496    |
| 3.0027535771   | 2.9111207234   |
| 0.5801973865   | 0.1499978463   |
| 10.3504426618  | 10.0345857078  |
| 0.1044527023   | 0              |
| 54.9324469418  | 39.7645645884  |
| 1.9468725941   | 2.1139566502   |
| 0.2951123184   | 0.2670328171   |
| 6.659329372    | 15.4258022817  |
| 1.208256939    | 0.5144908591   |
| 29.2432196052  | 29.2461147012  |
| 0              | 7.8676015753   |
| 0              | 0              |
| 21.2041087536  | 29.5177986436  |
| 3.2304797338   | 1.8269402235   |
| 0              | 0.6295581995   |
| 15.5305169923  | 3.1228469411   |
| 0.6834960189   | 0.8246165094   |
| 0.3332204615   | 0              |
| 15.9219939392  | 19.6711503983  |
| 0              | 12.9684041683  |
| 110.1314715233 | 117.0183635206 |
| 0              | 0.902689603    |
| 2.7320345394   | 2.0226153989   |

gene\_expression\_table

|                |                |
|----------------|----------------|
| 23.5014285318  | 22.9441419684  |
| 16.9981257178  | 20.5077055431  |
| 0              | 0              |
| 7.0980578486   | 4.6243354508   |
| 0              | 0.2065756313   |
| 0.1280627225   | 0.1158777435   |
| 32.0393517586  | 24.9921161657  |
| 17.9559898171  | 26.5868245671  |
| 12.0196547413  | 14.6826031623  |
| 4.5851847604   | 4.1489112016   |
| 0              | 0.6367240013   |
| 2.4053775237   | 2.6118112853   |
| 0              | 0.6198917896   |
| 5.7239763265   | 5.5030577088   |
| 6.2290779839   | 7.0454880155   |
| 37.8716623173  | 54.8291673183  |
| 0              | 0              |
| 7.7612143478   | 4.7701672735   |
| 76.2926334817  | 70.6771568805  |
| 0              | 0              |
| 225.9173532708 | 278.108524824  |
| 0              | 0              |
| 0              | 0              |
| 46.7995911608  | 53.3637013957  |
| 0.2594710636   | 0              |
| 6.2975784098   | 6.7344409646   |
| 8.9036997251   | 4.6840266539   |
| 0.3066958417   | 0.8325425558   |
| 2.8806779947   | 2.08526859     |
| 414.4148662769 | 472.3996509601 |
| 0              | 0              |
| 3.7690668839   | 6.8208914716   |
| 137.9289907408 | 128.0053855951 |
| 6.006610913    | 3.1057661456   |
| 31.5721721527  | 32.3492021747  |
| 266.7751119397 | 293.1186798481 |
| 22.7477515952  | 39.5833396599  |
| 17.6977897959  | 19.216645478   |
| 27.1223192097  | 20.1875032265  |
| 18.6292091683  | 21.4539403606  |
| 38.9738287227  | 45.4739683473  |
| 1158.342992242 | 990.8535929286 |
| 1.5098890518   | 0              |
| 0.2540980844   | 0.2299210269   |
| 0              | 0              |
| 20.4497687196  | 24.4150045187  |
| 22.3473328464  | 17.7322765575  |
| 0              | 0              |
| 80.6998485218  | 68.7260019827  |

gene\_expression\_table

|                 |                 |
|-----------------|-----------------|
| 0.3926491713    | 4.6187593725    |
| 0               | 0               |
| 5.9412888215    | 2.8461091573    |
| 21.2136959525   | 17.5616063129   |
| 24.4009704502   | 23.1182778699   |
| 209.397200871   | 189.4733664306  |
| 0               | 0.811821144     |
| 0               | 0               |
| 12.0836976253   | 8.2004637304    |
| 0               | 0               |
| 2.2343120839    | 3.0325808829    |
| 0               | 0               |
| 0               | 0               |
| 10.0217913505   | 14.358035113    |
| 0               | 0               |
| 9.5850593941    | 8.6730551473    |
| 0               | 10.463115073    |
| 0               | 0               |
| 74.5736301462   | 55.9574150812   |
| 74.8991972215   | 87.136263272    |
| 0               | 0               |
| 0               | 0.8802397282    |
| 0               | 0.2708791153    |
| 0               | 0               |
| 13.0982596883   | 8.8889847161    |
| 0               | 0.3565076677    |
| 89.0111925901   | 92.6622934335   |
| 14.4134926231   | 3.2605175212    |
| 31.221345877    | 21.4315510444   |
| 19.1153703108   | 17.2965710539   |
| 12.1973453318   | 9.197321613     |
| 13.8724266082   | 13.0352736138   |
| 16.6563179864   | 13.4850208819   |
| 0               | 0               |
| 0.4367038689    | 0               |
| 2.4383139504    | 1.8385933156    |
| 221.9497902154  | 215.988696978   |
| 446.4405740001  | 446.9371374053  |
| 43.5199341022   | 38.621786704    |
| 9.9830314899    | 14.7111475655   |
| 0.7801335637    | 4.2354300428    |
| 1.7859180988    | 1.615990629     |
| 0.8222530381    | 0               |
| 2363.9696906214 | 7781.8875984234 |
| 25.4730869445   | 15.9250125975   |
| 0               | 0               |
| 4.5524221997    | 3.0894494625    |
| 4.6350751831    | 6.174580419     |
| 905.5408473463  | 891.8671150223  |



gene\_expression\_table

|                 |                 |
|-----------------|-----------------|
| 6.1550295519    | 3.9781339852    |
| 62.4950385027   | 70.3038238475   |
| 13.5055613327   | 8.5543689812    |
| 0               | 5.5469896821    |
| 38.1716631307   | 34.539685753    |
| 102.5920696677  | 166.9744951285  |
| 20.3424509945   | 22.4973183388   |
| 91.1878619234   | 99.0137658252   |
| 3.2592556479    | 0               |
| 13.263689007    | 6.0008342924    |
| 229.2007133274  | 162.0254718134  |
| 334.1234635362  | 256.9822929813  |
| 0               | 0               |
| 1.6725963439    | 4.5403538152    |
| 47.4441284176   | 27.7255537392   |
| 12.4300001107   | 1.2497004395    |
| 4.5282612997    | 8.1948078481    |
| 132.4575471632  | 142.8052510774  |
| 1.8192092154    | 0               |
| 137.3739218587  | 137.1619266842  |
| 128.7358050684  | 93.189426659    |
| 13.0979797182   | 16.7899455777   |
| 1.1564725672    | 1.0464359102    |
| 24.576178396    | 37.0629855232   |
| 22.1922272873   | 20.4822830254   |
| 0               | 0               |
| 62.5890761686   | 48.0156283028   |
| 0               | 0               |
| 12.794822461    | 11.0261085698   |
| 10.2123163894   | 14.6169958585   |
| 15.0069167051   | 18.1053743223   |
| 6.1024989506    | 7.3624735829    |
| 3.238052606     | 1.2818560485    |
| 0               | 0               |
| 3.1798742239    | 2.1579854155    |
| 1664.6374794074 | 1485.8028532016 |
| 30.1831242522   | 42.0172993105   |
| 2.0830664655    | 1.5707214729    |
| 0.8766588499    | 0               |
| 54.4941728152   | 55.4727743379   |
| 135.5087516828  | 133.3441323007  |
| 5.940577324     | 10.7506803285   |
| 27.1695677984   | 28.0964840508   |
| 7.2932056525    | 19.7978037141   |
| 0               | 2.8203023806    |
| 95.8970942293   | 78.5085675818   |
| 823.3934426215  | 927.2909182706  |
| 23.597974307    | 16.9348697823   |
| 2.9421371058    | 8.8739903498    |

gene\_expression\_table

|                 |                 |
|-----------------|-----------------|
| 0.7613263362    | 0               |
| 0               | 0               |
| 0               | 0               |
| 7.8049525184    | 3.531161406     |
| 1987.4717928319 | 2187.8748004054 |
| 27.3368322683   | 67.1399554132   |
| 3.3673897427    | 6.0939751628    |
| 17.8703916806   | 8.0850251509    |
| 22.8141744487   | 22.0671249188   |
| 0               | 0.9214654459    |
| 118.2158431583  | 120.6815982357  |
| 5.4007247484    | 9.7737075279    |
| 54.3775452159   | 69.5637132987   |
| 68.6603681137   | 65.5517823178   |
| 14.7705150701   | 11.0407532648   |
| 0.8619908961    | 1.5599474706    |
| 0               | 0               |
| 0               | 0               |
| 32.5307868623   | 47.4239103007   |
| 5.5412297409    | 7.0195858795    |
| 152.4057004376  | 141.2680480563  |
| 0               | 0               |
| 22.0727048529   | 13.1247985821   |
| 3.4896096407    | 28.4182059293   |
| 0               | 0               |
| 6.4861174491    | 11.7379459042   |
| 3.3295431099    | 6.0254839997    |
| 32.7621060803   | 9.8816133558    |
| 5719.2285445235 | 6181.5455665521 |
| 31.3091371411   | 64.386634039    |
| 44.3242265552   | 25.0667761583   |
| 19.4268762736   | 22.2946038924   |
| 0               | 0               |
| 5.2555478978    | 5.6471447031    |
| 3.7891333353    | 0               |
| 21.2472887823   | 14.4192304733   |
| 5.205158012     | 4.7098949138    |
| 3.4289207774    | 0               |
| 42.759110206    | 39.6701539884   |
| 1.1576654692    | 6.2850918559    |
| 5.3455183952    | 15.4780806839   |
| 7.3575682843    | 1.3315013054    |
| 71.4198638841   | 83.0884748183   |
| 47.3191067278   | 92.7696544668   |
| 0.878019974     | 2.3834330102    |
| 7.960625715     | 9.6042452452    |
| 2.5232492382    | 0.5707914498    |
| 3.4131451749    | 0               |
| 71.5732818339   | 67.5789806208   |

gene\_expression\_table

|                 |                |
|-----------------|----------------|
| 0               | 1.7345730447   |
| 303.7734040805  | 351.6716728634 |
| 56.6688834182   | 43.3881654846  |
| 0               | 0              |
| 0               | 0              |
| 2099.6762302662 | 2139.72410961  |
| 40.004997489    | 17.0346263785  |
| 2.2466981687    | 0              |
| 0               | 0              |
| 91.1878619234   | 85.261853905   |
| 23.6851589411   | 32.1473265666  |
| 12.1714223995   | 14.1599951126  |
| 25.9263578992   | 5.8648758078   |
| 100.5777365463  | 73.9439296698  |
| 0               | 0              |
| 1.5817495563    | 5.0093694766   |
| 69.4397256318   | 51.1969645256  |
| 302.932153565   | 261.3593689897 |
| 0               | 0              |
| 51.9249435457   | 47.7545972863  |
| 0               | 0              |
| 6.9029418564    | 0              |
| 79.7270923921   | 69.1966394377  |
| 4.8520312297    | 4.3903676233   |
| 66.7809973981   | 40.2845894087  |
| 0               | 0              |
| 22.5633990454   | 22.9685905645  |
| 43.1381066819   | 16.9711215366  |
| 6.29152993      | 51.2361013326  |
| 0               | 0              |
| 0.8313423309    | 0              |
| 142.5864085015  | 163.8896634542 |
| 3.9751315705    | 8.3927752342   |
| 11.3188967477   | 8.0154159942   |
| 0               | 0.5748426127   |
| 4.1145115363    | 3.1911615768   |
| 0               | 0              |
| 3.4192776911    | 5.1565641135   |
| 22.9454965972   | 23.7283045488  |
| 0               | 4.416511255    |
| 34.797746362    | 43.9041186769  |
| 30.4711914843   | 24.5083578775  |
| 0               | 0              |
| 0.4431031648    | 0.1336475177   |
| 4.6748022774    | 0              |
| 0.2655224057    | 0              |
| 73.1870712398   | 112.9693797159 |
| 0               | 0.8983692403   |
| 0               | 0              |

gene\_expression\_table

|                |                 |
|----------------|-----------------|
| 3.0467526396   | 3.1371149873    |
| 158.0438570876 | 125.9504300683  |
| 13.2697206983  | 16.0095018261   |
| 1.5928010816   | 1.4412484108    |
| 30.9111396351  | 27.9699903461   |
| 1.4575482425   | 1.3188646797    |
| 9.032693334    | 8.1732459021    |
| 419.0969654037 | 357.9558066521  |
| 34.3403214524  | 29.001364539    |
| 0              | 0               |
| 132.3504173057 | 222.4067310112  |
| 0              | 0               |
| 0              | 2.2860321114    |
| 1.557269496    | 0               |
| 26.6349941521  | 24.1007137911   |
| 45.1425059027  | 26.1422484027   |
| 0              | 0               |
| 273.6857669162 | 247.6449703533  |
| 6548.594150813 | 6443.3933693788 |
| 107.69462779   | 167.0531022709  |
| 30.2002118606  | 18.2178041997   |
| 0              | 0               |
| 17.9211520439  | 17.2294796973   |
| 10.5541506856  | 9.5499388334    |
| 84.6712032451  | 65.6698828222   |
| 108.6745916747 | 108.1678012355  |
| 4.0449287241   | 3.4674250066    |
| 5.9307169436   | 3.130410491     |
| 30.0910540893  | 27.227934729    |
| 0.9700191415   | 0.2633169758    |
| 6.2276881312   | 6.0620368023    |
| 10.8864780688  | 17.7311623624   |
| 0.975032272    | 2.6467781736    |
| 16.0864199404  | 16.6142197447   |
| 23.2362763302  | 17.8715721084   |
| 1.5879903031   | 0.7184476854    |
| 4.545298301    | 3.1637075998    |
| 0              | 4.1910588709    |
| 2.1825067925   | 1.9748444941    |
| 17.6559641537  | 22.5543885707   |
| 0              | 0.1186745842    |
| 158.2883640935 | 146.3411004334  |
| 2.4356288736   | 2.0878885734    |
| 0.7663046775   | 0               |
| 0              | 0               |
| 50.9887195977  | 38.6046111674   |
| 6.0329382682   | 5.458913101     |
| 0              | 0               |
| 1.0631053561   | 4.8097622571    |

gene\_expression\_table

|                |                |
|----------------|----------------|
| 0              | 1.7595409094   |
| 2.3882890666   | 0              |
| 1.2705973765   | 1.7245528686   |
| 2.9320855924   | 2.6531019782   |
| 5.2488965877   | 8.141951706    |
| 0.4736877993   | 3.0003197332   |
| 136.4227855547 | 97.4544939224  |
| 20.0780613409  | 22.2049219995  |
| 0              | 0              |
| 0              | 0              |
| 43.9028366427  | 44.9071395993  |
| 0              | 0              |
| 0.8204728192   | 0.7424060421   |
| 0              | 0              |
| 17.7713454707  | 20.1985866322  |
| 0              | 0.3387083522   |
| 37.3020059002  | 34.6528491269  |
| 0.7167072814   | 0.432342428    |
| 3.4728310739   | 3.7708755908   |
| 4.7032979804   | 2.7082275329   |
| 0.6901635718   | 1.2489910542   |
| 4.8368650416   | 8.7532889513   |
| 0.2213834958   | 0.6009575493   |
| 0              | 0              |
| 5.1181811905   | 5.2486863162   |
| 3.6123416764   | 3.2686327003   |
| 120.7786250641 | 77.4942176838  |
| 2.2869325456   | 2.3280010774   |
| 0              | 0              |
| 8.9246745215   | 30.6869186963  |
| 0              | 0              |
| 0.3678946476   | 0.4161125189   |
| 0.8703934895   | 1.7326690356   |
| 1.0703742926   | 0.7748238075   |
| 9.0558199443   | 19.4611586177  |
| 0              | 0              |
| 11.2015799676  | 2.5339415438   |
| 2.659230468    | 3.7811849679   |
| 0              | 0              |
| 2.8070399361   | 2.1166285262   |
| 1.7517016642   | 1.7069552098   |
| 46.0455075819  | 48.756149027   |
| 0              | 3.5122473777   |
| 0              | 0              |
| 11.1362343642  | 11.0843019206  |
| 304.439223395  | 332.1871622166 |
| 1.2001363747   | 2.1718903419   |
| 0.6393749973   | 1.5909833789   |
| 0              | 3.6845758982   |

gene\_expression\_table

|                |               |
|----------------|---------------|
| 5.3371751888   | 5.6342426596  |
| 1.3288373167   | 0.9218403131  |
| 13.6443624419  | 14.9004914711 |
| 1.0879983526   | 0.984476916   |
| 1.0810052722   | 0.6113432606  |
| 0              | 0             |
| 2.7629196896   | 6.6667518967  |
| 0.9672480758   | 0.954780927   |
| 0              | 0.2229625482  |
| 0.16760549     | 1.3649226765  |
| 2.3029509552   | 1.9970023821  |
| 0.7877915955   | 0.2851337554  |
| 1.408170824    | 1.2741854496  |
| 73.4353671936  | 64.6192536478 |
| 1.7187097015   | 1.9284194942  |
| 1.4559482993   | 3.1288653007  |
| 0.3636634878   | 0.109687148   |
| 0              | 0.4093275077  |
| 141.3169931265 | 108.968236625 |
| 14.3217142099  | 10.2308086201 |
| 0.828415734    | 1.4991864006  |
| 4.2299454237   | 6.1828399712  |
| 0.2881517167   | 0.1955508798  |
| 1.5755548337   | 0.7603429962  |
| 10.7387388314  | 9.7169636897  |
| 5.3111085968   | 2.8033625998  |
| 0.4430583122   | 0.2672679787  |
| 16.2676603849  | 16.5597935875 |
| 1.8716900509   | 1.0585009416  |
| 11.2169583036  | 16.9161354757 |
| 69.5898331234  | 48.0548798616 |
| 28.7239124993  | 32.1063745582 |
| 57.7062277169  | 62.6586784391 |
| 0              | 0.2032427404  |
| 11.9090889755  | 11.1273466398 |
| 11.7326293578  | 11.903109667  |
| 4.6706334052   | 1.2074941525  |
| 0              | 0             |
| 0.1256209595   | 0.170502466   |
| 1.5004173085   | 1.3576548173  |
| 0.1504176202   | 0.2722112115  |
| 0              | 0.0360690119  |
| 34.3326550458  | 26.2865761385 |
| 0              | 0             |
| 0              | 0             |
| 0              | 0             |
| 0.4716054533   | 0.6400993362  |
| 14.6307696145  | 11.5118899925 |
| 0              | 0             |

gene\_expression\_table

|                |                |
|----------------|----------------|
| 4.8802527705   | 1.7172959713   |
| 1.6153590893   | 1.9488800765   |
| 4.2454920293   | 4.9940016517   |
| 46.8213660794  | 42.3663822393  |
| 8.6077037804   | 5.0070172352   |
| 6.5196876392   | 3.6303686081   |
| 0              | 0              |
| 2.3171490792   | 1.6307478181   |
| 1.8351889362   | 2.4908601285   |
| 23.4818528558  | 30.6909622253  |
| 0.7445806536   | 0              |
| 159.2169017711 | 69.8509811818  |
| 0.5392341319   | 2.1956706026   |
| 0.6852366104   | 0.5425326889   |
| 38.4961950072  | 36.0344885179  |
| 63.7120432653  | 81.9235938797  |
| 1.7027750698   | 2.7733653655   |
| 0.2176678439   | 0.5908712099   |
| 9.5204293036   | 7.3839210124   |
| 11.4003720066  | 9.3778576777   |
| 2.0768083479   | 2.4574194391   |
| 0.0397925502   | 0.180031739    |
| 4.3170496284   | 1.4204686296   |
| 8.1737019091   | 14.7919724856  |
| 0              | 0              |
| 0.0476385165   | 0              |
| 0              | 0              |
| 0              | 0              |
| 0              | 0              |
| 1.9937220426   | 4.209385447    |
| 8.3400883591   | 9.642802731    |
| 26.4946397126  | 20.0168873083  |
| 0              | 0              |
| 0              | 0              |
| 2.2151458146   | 0              |
| 0              | 2.6072549508   |
| 38.5516783534  | 234.6711080491 |
| 1.8484806674   | 5.0178013848   |
| 14.7544648012  | 14.9399563189  |
| 0.0787729922   | 0.2138335749   |
| 1.133957013    | 2.0521253555   |
| 4.3405566961   | 7.8551182725   |
| 8.4189601314   | 5.0786056716   |
| 4.0618201302   | 3.675343943    |
| 0              | 0              |
| 6.9055556171   | 9.3727532966   |
| 0.2117975854   | 0.3066325727   |
| 2.9956317281   | 1.00392659     |
| 0.2315330938   | 0.6285091856   |

gene\_expression\_table

|               |               |
|---------------|---------------|
| 0.641810225   | 0.5807429299  |
| 0             | 0             |
| 3.8284453308  | 3.7306493658  |
| 42.1741293977 | 26.2668848449 |
| 0.6498043873  | 1.1759529188  |
| 1.1941200997  | 1.4406684474  |
| 0.5541861172  | 3.5101928858  |
| 0.1429220829  | 0.1293232577  |
| 2.1152215476  | 2.4403007097  |
| 0.3674290872  | 0.3324687521  |
| 3.8321460774  | 3.5758831321  |
| 13.7768087145 | 9.8216699533  |
| 0             | 0             |
| 0.8201466779  | 0.6360950851  |
| 9.8659480852  | 6.2680464662  |
| 1.4690113906  | 1.6246231541  |
| 18.9060357931 | 7.3316376028  |
| 8.9436399108  | 24.2779973417 |
| 0             | 0             |
| 0             | 0             |
| 0             | 0.1382289826  |
| 0             | 1.003560277   |
| 25.7145814535 | 7.7559590005  |
| 18.7274970852 | 14.5248029082 |
| 715.270472716 | 600.984004675 |
| 69.8788694624 | 20.58651105   |
| 0             | 0             |
| 0             | 0             |
| 0             | 0.3038746793  |
| 28.7621065339 | 13.8802317712 |
| 1.1481002446  | 0             |
| 0             | 0.2913485548  |
| 0             | 0.3696750516  |
| 0             | 0             |
| 11.5049371146 | 8.1330151077  |
| 1.8775973423  | 1.6989467278  |
| 0             | 0             |
| 0             | 0.1339003235  |
| 0             | 4.3508191069  |
| 10.1299747425 | 11.7850147778 |
| 13.3927463813 | 23.025048047  |
| 0             | 0             |
| 9.4019463742  | 6.9122341119  |
| 22.2183622961 | 14.743166485  |
| 1.1440849637  | 1.2940337111  |
| 51.4506350431 | 46.9600107764 |
| 4.0031986796  | 5.795680379   |
| 2.6677743477  | 7.2418186744  |
| 7.4398401278  | 8.1745111104  |



gene\_expression\_table

|                 |                 |
|-----------------|-----------------|
| 0.5499041877    | 1.741535657     |
| 0.9545031506    | 0.8636835853    |
| 1.5053556925    | 0.953486325     |
| 1.8196629967    | 0               |
| 0               | 0               |
| 4.8333856449    | 8.7469922768    |
| 0               | 0               |
| 0               | 0               |
| 0               | 1.1384818423    |
| 0               | 0               |
| 9.5718378441    | 5.9961403442    |
| 750.2866993581  | 855.25544662    |
| 2.5839403886    | 2.4842124186    |
| 4.6814021394    | 4.235973639     |
| 0               | 0               |
| 19.5035171405   | 17.647786286    |
| 0               | 0.5102848866    |
| 33.2041960614   | 50.6817433861   |
| 1.1666446432    | 10.5564012821   |
| 0               | 0               |
| 0               | 0               |
| 0               | 0               |
| 1.6460831396    | 2.2341911395    |
| 1106.9846667486 | 886.466188723   |
| 100.8916797309  | 68.4689890454   |
| 31.1563164595   | 18.1233250443   |
| 51.3813094286   | 56.5995088675   |
| 5.1275946819    | 6.4955962679    |
| 42.0268979944   | 22.8168604275   |
| 311.20575211    | 347.8526277421  |
| 51.8253071825   | 31.2628038239   |
| 11.6337841029   | 11.6964963616   |
| 2.1562193021    | 2.9265873295    |
| 7.4424831513    | 4.2089636687    |
| 2.8643339631    | 4.0172850653    |
| 82.9275049819   | 84.4167097621   |
| 1.6509570656    | 1.9918279184    |
| 2.8977914369    | 1.3110354304    |
| 19.2959555464   | 21.6503676001   |
| 0               | 0               |
| 0.0949496483    | 0               |
| 10.5561869871   | 6.3678542559    |
| 4.5001280174    | 3.2721006552    |
| 7.0749698274    | 5.2378338241    |
| 0.4262982588    | 0               |
| 0.5323349151    | 0.1605613447    |
| 2262.5812878476 | 1868.5674781365 |
| 1.4618591232    | 1.6167132501    |
| 0               | 0               |

gene\_expression\_table

|                |                |
|----------------|----------------|
| 3.2825373548   | 4.4553131594   |
| 0              | 2.0949308838   |
| 0              | 0              |
| 38.3142276989  | 22.7822790514  |
| 1.8005748374   | 0.9775516804   |
| 0.6963895713   | 0              |
| 24.0693834057  | 25.4090866383  |
| 3.0780712886   | 2.7851973509   |
| 0              | 0              |
| 0.8485551883   | 0.3839082076   |
| 0              | 1.6434501984   |
| 0.6679741285   | 1.057730409    |
| 8.5197418439   | 7.7091009888   |
| 29.3579410585  | 25.0466005307  |
| 0.0453963151   | 0              |
| 0              | 0              |
| 158.4031102819 | 152.7160749878 |
| 18.989229381   | 22.9099096631  |
| 8.2397600647   | 7.7128542025   |
| 5.1103530325   | 1.5413701627   |
| 0              | 0              |
| 3.4263037416   | 0              |
| 14.1788706586  | 11.5467948484  |
| 0.5478650773   | 0.6196706553   |
| 0              | 0              |
| 28.8791645221  | 27.5066891204  |
| 0              | 0              |
| 24.2605069316  | 26.7243632457  |
| 33.6952838516  | 40.6523031358  |
| 0              | 1.9341931644   |
| 15.1213677849  | 12.7496879723  |
| 3.6490232077   | 4.8257428249   |
| 4.6431611017   | 4.8162059863   |
| 7.2947440029   | 6.2912539514   |
| 0.4969365772   | 0.8993075915   |
| 2.9309075749   | 1.3260180236   |
| 1.021878628    | 0.5043536649   |
| 0              | 0              |
| 0.32992013     | 0.5970574336   |
| 11.9199819508  | 8.711618411    |
| 0.4233419774   | 0.1276872045   |
| 34.4366690626  | 26.5828853055  |
| 0              | 0              |
| 9.5908894579   | 8.9775832646   |
| 1.5852440594   | 0.7968946823   |
| 2.023839024    | 1.2818916107   |
| 23.2806685607  | 19.9268690925  |
| 116.7432424312 | 136.5529427201 |
| 16.5701963745  | 8.5677523766   |

| gene_expression_table |                 |
|-----------------------|-----------------|
| 0                     | 0.3546782936    |
| 0                     | 0               |
| 0                     | 0               |
| 4.0009665283          | 5.6717727387    |
| 3.5590181225          | 1.2386087707    |
| 0.2874435145          | 0.3901405328    |
| 0.7335668558          | 0.9292766738    |
| 4.7745641072          | 3.1571213954    |
| 5.8406226534          | 7.4318850464    |
| 0.346061256           | 0.5218900643    |
| 21.2147524282         | 7.9594000261    |
| 0                     | 0               |
| 8.8108723381          | 8.6481690537    |
| 2.2334570085          | 1.7178048415    |
| 0.7483616079          | 0               |
| 0.1402364297          | 0.0906379575    |
| 72.3796041979         | 83.1254664436   |
| 5.3730787021          | 4.8618381982    |
| 1.4319420854          | 0               |
| 0                     | 0               |
| 40.4551027994         | 31.8606554987   |
| 34.3239782043         | 25.7032571299   |
| 0.5804216059          | 1.0503906945    |
| 0                     | 0               |
| 85.2208343926         | 80.7721875986   |
| 0.5216286586          | 0.4719964621    |
| 2.2589425137          | 1.2264044816    |
| 17.071950368          | 18.3700945418   |
| 1.8784192383          | 2.3795665904    |
| 1.4366232013          | 4.4197641257    |
| 12.3505004862         | 10.554514792    |
| 4.2881305519          | 3.3258182248    |
| 0                     | 0.3936146525    |
| 28.0745842154         | 22.6570231495   |
| 0                     | 0.2930420067    |
| 0                     | 0               |
| 14.0478854634         | 8.932229664     |
| 0.8073741302          | 0.730553674     |
| 75.3472042238         | 49.4043688472   |
| 9.0039853788          | 26.0712622925   |
| 0                     | 5.7801381101    |
| 9.5735288109          | 1.2375173831    |
| 6.7367230326          | 3.0478668922    |
| 1350.4638374818       | 1347.5921992352 |
| 16.196178991          | 10.4679546267   |
| 2009.7611874938       | 1994.73716092   |
| 4.4012241049          | 8.7613990876    |
| 24.1831196238         | 27.6405871622   |
| 44.5223674041         | 41.346291206    |

gene\_expression\_table

|                 |                 |
|-----------------|-----------------|
| 0               | 0               |
| 5.7869498286    | 15.7089902943   |
| 1.2634272521    | 0.5716070074    |
| 0               | 0               |
| 72.0998806896   | 38.4746851492   |
| 100.7232424088  | 91.1395746343   |
| 0               | 13.7119188236   |
| 3.7244475976    | 8.4251797718    |
| 0               | 2.3482453652    |
| 0               | 0               |
| 0               | 4.0329419408    |
| 54.6239532301   | 56.8405494566   |
| 9.0484096727    | 9.0971853937    |
| 1447.8367643072 | 1306.3341564307 |
| 12.0429697959   | 10.897099004    |
| 1.5341806422    | 2.7764112394    |
| 6.3112611259    | 8.5661309246    |
| 0.8169582792    | 1.4784518107    |
| 284.2957503458  | 303.5496068425  |
| 20.7849681882   | 26.8675845126   |
| 1037.1311063634 | 943.3373715541  |
| 69.8356208489   | 50.5526917226   |
| 3.7892675305    | 7.1691508523    |
| 0               | 1.0786694537    |
| 3.7369681521    | 4.2267514386    |
| 0               | 0               |
| 0.5105882032    | 0               |
| 2.8698930416    | 2.1640224639    |
| 0.8053063854    | 1.1658922753    |
| 0               | 0               |
| 0               | 1.9804733638    |
| 0               | 0.1677808406    |
| 27.3526189612   | 37.125086489    |
| 3.1935511771    | 3.4676273983    |
| 12.7075283507   | 4.9278967687    |
| 7.4979420095    | 3.3922619499    |
| 0               | 0.370048084     |
| 2.2943950162    | 2.0760867186    |
| 0               | 0               |
| 0               | 0               |
| 0               | 0               |
| 0               | 0               |
| 0.2875171526    | 0.2601603201    |
| 1.0886478069    | 1.4775968635    |
| 51.2149676583   | 35.1075296334   |
| 0.1287861832    | 0.1747985521    |
| 0               | 3.7665721664    |
| 0               | 0.2416502314    |
| 1.1553736069    | 0               |

gene\_expression\_table

|                 |                 |
|-----------------|-----------------|
| 0               | 0               |
| 5.3769310167    | 3.5384174332    |
| 62.2584400934   | 60.8414127738   |
| 32.9385813031   | 20.3925690071   |
| 0               | 0.7457400126    |
| 325.3171679162  | 298.8923924057  |
| 0               | 0               |
| 11.7429738885   | 11.6882119906   |
| 19.2787934262   | 18.0459772771   |
| 3.6993047433    | 1.6736606799    |
| 4.6087208111    | 1.0425519579    |
| 0               | 0               |
| 0               | 0.978421066     |
| 0               | 1.9006385608    |
| 0               | 0.622551893     |
| 1.4181627049    | 1.2832266177    |
| 27.8790915435   | 25.2264371529   |
| 0               | 0               |
| 0               | 0               |
| 0.3011747193    | 0.8175551686    |
| 0               | 0               |
| 0.3114618777    | 0               |
| 7.6228097742    | 6.897510681     |
| 45.2171216149   | 43.6424312177   |
| 0               | 0               |
| 0               | 0               |
| 0.5342125824    | 1.2353122236    |
| 0.2926674538    | 0.5296411556    |
| 2111.7189077003 | 2142.4031201936 |
| 0               | 0               |
| 0.3891200936    | 0.3520958913    |
| 2.4436774896    | 3.9800973332    |
| 3.5076470508    | 3.5706370655    |
| 1.5462394674    | 0.4663723551    |
| 142.6482001149  | 172.9610822653  |
| 2.4483697481    | 3.8266189691    |
| 21.9254296522   | 11.9035544392   |
| 0.1873282135    | 0.3390084212    |
| 0               | 0               |
| 22.3615601038   | 22.309161521    |
| 0               | 0.6540742887    |
| 9.4330707117    | 18.3842140754   |
| 0               | 0               |
| 2.4440025919    | 2.019158541     |
| 0.1839821177    | 0.1664764909    |
| 0               | 3.600173287     |
| 52.3833744775   | 55.1695301047   |
| 0               | 0               |
| 0               | 0               |

gene\_expression\_table

|                |                |
|----------------|----------------|
| 2.9747701969   | 0.5383450411   |
| 602.6264047743 | 518.5576181435 |
| 0              | 0              |
| 0              | 0              |
| 0.0861095511   | 0.0779163545   |
| 37.9859495823  | 29.9970698831  |
| 2.4276302675   | 2.1966448325   |
| 0              | 0              |
| 100.9961410014 | 72.9334625798  |
| 2.8095624702   | 3.8133551252   |
| 1.8524862121   | 1.1174832564   |
| 0.2780267845   | 0.4192882442   |
| 0              | 0              |
| 0              | 0              |
| 13.8758835274  | 10.59379906    |
| 1.336085889    | 1.2089592897   |
| 14.9066040286  | 13.4882626683  |
| 0.4249325152   | 0              |
| 314.6243154653 | 224.6003820456 |
| 0              | 0              |
| 32.9194681268  | 27.0792994069  |
| 0              | 0              |
| 1.6717600544   | 0.9626238071   |
| 8.4601986861   | 7.0508635423   |
| 0              | 0.0127775814   |
| 6.8013552024   | 5.1127335404   |
| 1.0377919735   | 0.7042856998   |
| 0.4967053679   | 0.1498148619   |
| 2.9666648857   | 1.3421955514   |
| 20.6197820538  | 11.5904765134  |
| 0.08456877     | 0              |
| 11.567934912   | 0              |
| 0.1293972534   | 0.1170852958   |
| 0.7619410712   | 0.3712388096   |
| 25.0824375902  | 17.9178005474  |
| 9.8034126763   | 13.0725109599  |
| 37.7657275976  | 33.8967907219  |
| 44.7437987848  | 25.9113551391  |
| 0              | 0              |
| 2.1399060696   | 1.2908647781   |
| 1.0986489388   | 0.5680652084   |
| 0              | 0              |
| 0.0850965449   | 0.6929976086   |
| 0              | 0              |
| 17.6239388765  | 12.4676913833  |
| 13.2728823455  | 20.5885494698  |
| 0.8517018293   | 0.5504740414   |
| 1.0945631663   | 0.7781848622   |
| 9.3514484309   | 8.4616719223   |

gene\_expression\_table

|               |               |
|---------------|---------------|
| 3.9188396977  | 3.5459678875  |
| 0.6421256479  | 0             |
| 4.672406939   | 2.1139171593  |
| 0             | 0             |
| 12.786519353  | 8.6774256891  |
| 0             | 0             |
| 0             | 2.4087643923  |
| 1.2568534775  | 2.2745314502  |
| 0             | 0             |
| 4.6779362535  | 2.6936238808  |
| 0.5269033054  | 0.5721230808  |
| 1.7163172577  | 1.7672207852  |
| 7.6846402127  | 7.5494687341  |
| 21.7067811592 | 15.4325387754 |
| 0             | 0             |
| 9.6911709782  | 6.5768027782  |
| 13.4182016319 | 10.1178996347 |
| 0.5121435025  | 0.3089425363  |
| 0.5828756646  | 0.7032212079  |
| 0.1246782611  | 0.0752102058  |
| 0             | 0             |
| 0.0822605371  | 0             |
| 0             | 0             |
| 0.0377840798  | 0.3418898036  |
| 3.9353131901  | 5.446042514   |
| 4.8474935521  | 4.223807562   |
| 29.0866230984 | 22.5592061688 |
| 8.2183417878  | 6.4664162634  |
| 0             | 0.2008907267  |
| 0             | 0             |
| 4.7633228559  | 3.4480797763  |
| 6.1921175541  | 4.3099590099  |
| 10.3778172109 | 6.2602554857  |
| 0.0245641653  | 0.0222269212  |
| 0             | 0             |
| 1.3652702371  | 1.0000588301  |
| 1.1452485812  | 0.9622598792  |
| 15.0082888915 | 13.9424129631 |
| 8.1083092655  | 6.2668633358  |
| 83.5137897275 | 51.2779979742 |
| 0             | 0             |
| 2.8496206851  | 0             |
| 0.185788425   | 0.1681109307  |
| 10.2490776148 | 4.1882097486  |
| 0             | 0             |
| 0             | 0             |
| 3.5037361609  | 6.7936303698  |
| 17.7068481059 | 28.2127713087 |
| 5.2850040456  | 6.4454980509  |

gene\_expression\_table

|                |                 |
|----------------|-----------------|
| 93.0348778814  | 86.6587097745   |
| 2.5307593823   | 3.1226745876    |
| 0.354756192    | 0               |
| 22.3135061803  | 14.8062999467   |
| 1.7129507376   | 1.5499660045    |
| 0.3500451748   | 0               |
| 0              | 0               |
| 9.0428015405   | 9.5461243823    |
| 12.2687148238  | 6.0132392265    |
| 9.0484096727   | 10.0069039331   |
| 39.6981815591  | 22.3769903585   |
| 1.6697250982   | 0               |
| 0.8352927181   | 0               |
| 0              | 3.6784161168    |
| 54.9205762796  | 53.836211595    |
| 11.1904110352  | 2.0251319901    |
| 0              | 0               |
| 0              | 0               |
| 17.4689390658  | 37.1459689797   |
| 3.8317886779   | 5.673599417     |
| 34.0037973545  | 41.7570956257   |
| 2.9209325141   | 5.2860201975    |
| 7806.071089145 | 8143.4851250858 |
| 338.1801501796 | 355.546120108   |
| 220.0733196839 | 214.2503847302  |
| 0              | 0               |
| 4.5608183519   | 8.2537264416    |
| 0              | 0               |
| 0.908828364    | 0.8223546873    |
| 21.0474003285  | 22.8537255223   |
| 0.6389060215   | 0.5781150571    |
| 3.3230214339   | 2.4054726813    |
| 0.8229487229   | 0.9308079589    |
| 97.7860871512  | 80.5917809349   |
| 0              | 0.7020012466    |
| 6.1761215921   | 5.5884727431    |
| 0              | 0               |
| 0              | 0               |
| 11.2805450566  | 9.0063686936    |
| 5.6145839713   | 10.1607291952   |
| 8.4650929068   | 3.4042896966    |
| 122.2005557921 | 102.7864974946  |
| 4.5799072641   | 6.9068930854    |
| 4.4667171745   | 2.8169533189    |
| 7.1847703625   | 7.8347193181    |
| 0.6586041578   | 0.7042914802    |
| 3.2997121275   | 5.2824796924    |
| 0              | 0               |
| 15.0810291914  | 9.0973943563    |



gene\_expression\_table

|                |                |
|----------------|----------------|
| 0.4011563901   | 0              |
| 4.2069658046   | 3.2628679035   |
| 16.8711823554  | 9.5411964177   |
| 2.5975978827   | 2.3504402801   |
| 8.2701744073   | 7.1506893241   |
| 0              | 1.2694479416   |
| 162.4362213897 | 189.9188236159 |
| 0              | 0.5265989407   |
| 12.3692721075  | 9.9823699019   |
| 3.2001004349   | 0.723903901    |
| 7.6433472051   | 15.8082148701  |
| 0.1172391292   | 0.2121679983   |
| 0.1963606963   | 0.533031798    |
| 0              | 0              |
| 0              | 3.2103679113   |
| 3.855299031    | 3.4884730214   |
| 0              | 2.9517798644   |
| 1.1934282289   | 1.4398337271   |
| 50.430936666   | 66.6936648295  |
| 0              | 0              |
| 0              | 2.708346588    |
| 27.9293345364  | 25.9549239127  |
| 20.8317799861  | 7.0686250812   |
| 3.8304168831   | 0              |
| 0              | 6.9826351076   |
| 0              | 0              |
| 4.542359249    | 8.2203209485   |
| 0              | 0              |
| 0              | 7.1933407102   |
| 0              | 1.1796832672   |
| 38.9587661088  | 48.4713584369  |
| 0.8385090752   | 0              |
| 3.8636366522   | 3.4960173302   |
| 0              | 0              |
| 0.6600940102   | 0              |
| 0.6276103544   | 0.5678941559   |
| 22.9855185628  | 18.198670363   |
| 1.8170568414   | 13.9754158128  |
| 1.3452637414   | 1.8258958245   |
| 78.5902992496  | 104.5772769594 |
| 24.7152730079  | 7.801273702    |
| 226.1458975701 | 316.8440506405 |
| 13.6246538626  | 14.0894721914  |
| 2.0588524529   | 10.2462562532  |
| 7.2443187228   | 6.5550324942   |
| 680.5772757768 | 705.6836963716 |
| 81.834053851   | 78.1361858249  |
| 0              | 0.641644493    |
| 18.532100409   | 19.1643410537  |

gene\_expression\_table

|                  |                 |
|------------------|-----------------|
| 0                | 0               |
| 0.8930449394     | 0.3463170138    |
| 320.3758578273   | 326.1291390705  |
| 0                | 1.6093911305    |
| 0                | 0               |
| 11.4029370127    | 30.9538931849   |
| 0                | 0               |
| 0                | 0               |
| 3.9885341465     | 18.045155062    |
| 8.3538837147     | 5.6692680117    |
| 0                | 5.7052011423    |
| 1.4895794081     | 2.0217721907    |
| 5.9447267377     | 6.147536877     |
| 19.8742300618    | 11.5414736727   |
| 1051.2686301143  | 753.1525377969  |
| 49.0092640502    | 36.9550874576   |
| 12.5390976713    | 15.78576841     |
| 57.7304449587    | 42.7397550324   |
| 0                | 0               |
| 20.664082682     | 18.69792573     |
| 23.9709749773    | 22.438109076    |
| 50.4490494773    | 46.2304115294   |
| 2.9329697272     | 2.6539019888    |
| 0                | 4.3058824016    |
| 1.8544719298     | 1.6780216642    |
| 123.1060955744   | 100.6127905318  |
| 0                | 3.0168728161    |
| 696.5709518707   | 1157.6178089068 |
| 13.6287096932    | 10.43473377     |
| 14.7137985414    | 11.1312117911   |
| 41.6330124191    | 71.1576418951   |
| 8.4073169919     | 7.6073731954    |
| 3.8628694487     | 10.4859693752   |
| 9.9098540561     | 9.9632734186    |
| 2.5431511082     | 2.8764675447    |
| 0                | 2.0941997848    |
| 116.3133664793   | 127.1726383848  |
| 24.3477317858    | 32.4668563009   |
| 0                | 3.0175623871    |
| 0.473872419      | 0.8575683162    |
| 94.2510200759    | 51.1699048192   |
| 431.9825318808   | 455.5679244944  |
| 19637.3023971529 | 21751.696691868 |
| 3.4104857194     | 15.4299151979   |
| 39.851448003     | 38.4636176802   |
| 0                | 0               |
| 31.4440903184    | 33.1942701521   |
| 746.6315003965   | 910.0602999784  |
| 8.9490180557     | 12.3844610163   |

gene\_expression\_table

|                |                |
|----------------|----------------|
| 7.4901472908   | 8.8107120881   |
| 39.1804624121  | 33.7642850214  |
| 6.3789420048   | 7.6959934574   |
| 17.7537818298  | 12.851628565   |
| 35.0857001929  | 26.2260697826  |
| 145.4813953958 | 131.6390554602 |
| 4.9094468872   | 3.7019335549   |
| 0              | 4.2232359064   |
| 0.7820152172   | 6.3684686172   |
| 14.129096146   | 11.985687668   |
| 23.6371938562  | 26.7351872081  |
| 1.6702029544   | 0              |
| 3.8934193005   | 5.1243144779   |
| 709.7266577876 | 516.7680709396 |
| 122.7569519062 | 108.0196493243 |
| 232.8256767718 | 215.4390071629 |
| 2.8080754285   | 4.446559597    |
| 1.651299633    | 0.7470904557   |
| 0              | 0              |
| 0              | 0              |
| 11.3969987562  | 1.7187651925   |
| 0              | 2.0112485441   |
| 0              | 0.593367587    |
| 5.7369938236   | 5.5904448204   |
| 15.5142648267  | 10.0272181706  |
| 20.0237850262  | 23.0599745735  |
| 0              | 0              |
| 0              | 1.3673573737   |
| 228.5222569925 | 182.1621895969 |
| 2.489770974    | 2.2528729426   |
| 1.8847768903   | 1.7054431525   |
| 0.9055194034   | 0.5958985959   |
| 0              | 0              |
| 1.2024112335   | 3.2640107409   |
| 62.5539922373  | 43.0494634022  |
| 28.9737414466  | 20.2376322861  |
| 25.9873804973  | 33.5924565989  |
| 18.5486486803  | 13.9864767914  |
| 51.4982948948  | 45.0704948014  |
| 0              | 0              |
| 27.3489268034  | 20.4429399693  |
| 0              | 0              |
| 6.1944768926   | 9.3418026064   |
| 4.4522605761   | 6.7143909284   |
| 11.6284923367  | 18.1744646179  |
| 6.3307730792   | 0.7160511712   |
| 3.5122912633   | 0              |
| 247.236736416  | 338.3651956463 |
| 52.1760023051  | 47.2115327355  |

gene\_expression\_table

|               |                |
|---------------|----------------|
| 9.006208585   | 5.4328540919   |
| 31.7002887729 | 32.2695597475  |
| 24.947795658  | 9.2951969527   |
| 20.3123320116 | 18.3796436164  |
| 0.6839196507  | 1.2376914117   |
| 34.5352358198 | 27.8313714132  |
| 10.1795405927 | 7.5362500945   |
| 0.572050509   | 0.4358911561   |
| 2.051058468   | 1.8559032836   |
| 1.9874454544  | 0.9990794191   |
| 0.200444547   | 0.0906862722   |
| 3.4322625808  | 1.7746787799   |
| 0.0480739456  | 0.1739991228   |
| 4.4599315544  | 2.5680935974   |
| 15.29127195   | 9.8830928607   |
| 0.8743542494  | 1.0548809783   |
| 5.5306634996  | 2.2747404704   |
| 16.8084571049 | 17.2179138485  |
| 0.1200491871  | 0.1086266842   |
| 0             | 0              |
| 2.777612527   | 1.8431063177   |
| 4.494852249   | 3.0854421136   |
| 0             | 0              |
| 0             | 0              |
| 85.4330001104 | 80.7399174805  |
| 18.0520980842 | 16.7328692586  |
| 12.9342508009 | 9.2821464332   |
| 0.7099957618  | 0.3212203568   |
| 0.1010622781  | 0.1828927032   |
| 13.8151257384 | 15.407761792   |
| 14.0002954614 | 13.4599497743  |
| 3.086536473   | 1.0473214071   |
| 31.3689030106 | 31.5674727783  |
| 5.4964967092  | 2.8420075224   |
| 6.4758357336  | 9.3754712425   |
| 13.6552579626 | 9.1787282471   |
| 1.0415332328  | 0.3534123314   |
| 31.4242244294 | 23.5056515274  |
| 62.0325591316 | 114.5057155801 |
| 10.3007372668 | 11.8626293256  |
| 0.6665474854  | 0.3618758859   |
| 168.937512616 | 161.0378688756 |
| 0             | 0              |
| 1.3699906484  | 0.7747737883   |
| 0             | 0              |
| 3.7777491212  | 2.9468119578   |
| 0             | 0              |
| 0.3629638507  | 0.985285129    |
| 0             | 0              |

gene\_expression\_table

|                |                |
|----------------|----------------|
| 2.4150837978   | 2.4281023787   |
| 0.87094424     | 4.72845109     |
| 4.0611417658   | 2.2048380744   |
| 12.0909994574  | 8.5473114954   |
| 6.362211543    | 4.5448867184   |
| 0              | 0              |
| 0              | 0              |
| 106.9884746087 | 68.1246261336  |
| 17.8900917563  | 21.1687608505  |
| 11.4636169275  | 6.6009177217   |
| 4.609812925    | 27.1127742123  |
| 135.0420229539 | 116.5328088869 |
| 3.687151354    | 3.3363243476   |
| 2.8056050166   | 3.1098534069   |
| 0.8139229877   | 0.8837753008   |
| 0              | 0              |
| 0              | 0              |
| 0              | 0              |
| 5.2270534158   | 4.4850669849   |
| 0              | 0              |
| 0              | 0              |
| 0              | 0              |
| 0              | 0              |
| 104.9472859148 | 73.3795005843  |
| 0.4833425675   | 0.218676618    |
| 0.4885969245   | 0.1473692162   |
| 0              | 0              |
| 0.0168336657   | 0              |
| 0              | 0              |
| 11.9346076955  | 12.5988886303  |
| 0.6261558692   | 0.7082225786   |
| 1.5200088111   | 0.6876911087   |
| 211.5341067062 | 212.3830528127 |
| 3.2865117067   | 1.7347195664   |
| 8.113099856    | 0              |
| 3.1271712263   | 3.4826160025   |
| 0              | 0              |
| 119.4204028036 | 159.7375107025 |
| 0              | 0              |
| 0              | 0              |
| 0.7197147745   | 1.0419759624   |
| 55.8807398346  | 43.7871822334  |
| 22.1952031726  | 18.2237917775  |
| 18.0953230397  | 10.5518625212  |
| 1.0344807521   | 0              |
| 0.4024862066   | 0.1820951192   |
| 1.2848207995   | 0.6643268559   |
| 0.4151743756   | 0.601073835    |
| 36.4909124476  | 22.8278510723  |

gene\_expression\_table

|                |                |
|----------------|----------------|
| 3.2786646984   | 2.2250284455   |
| 0.2073688551   | 0.3752760295   |
| 3.7742521485   | 1.5523352864   |
| 58.9969801026  | 66.9662897543  |
| 13.3509251658  | 8.682934378    |
| 0              | 0              |
| 162.7576180944 | 108.7003715124 |
| 0              | 0.1731297433   |
| 1.1533642615   | 0              |
| 0              | 0.5569454709   |
| 11.2577607313  | 7.0997525065   |
| 7.5411808307   | 6.648683262    |
| 1.4312397398   | 1.4029810081   |
| 7.2212466511   | 7.6705305998   |
| 117.7868323061 | 108.0967363276 |
| 538.243540293  | 345.176929572  |
| 16.1353648499  | 9.1772111904   |
| 1.1310999231   | 0.8772663735   |
| 0              | 0              |
| 2.5022823859   | 2.0377745209   |
| 2.9972591125   | 3.7969040677   |
| 0              | 0.4315030379   |
| 3.3253470321   | 1.5929709738   |
| 0              | 0              |
| 0.5341604272   | 1.2083396283   |
| 1.644058247    | 1.8595356657   |
| 34.7358701293  | 33.2268492894  |
| 12.0671047716  | 7.5592644732   |
| 0              | 0              |
| 2.9053306677   | 3.0928149942   |
| 3.1514046067   | 5.4179509131   |
| 1.1841378032   | 1.3393360498   |
| 21.5946703029  | 16.9537969039  |
| 1.3203672315   | 0.853383028    |
| 99.413113583   | 111.3717461153 |
| 0              | 0              |
| 0              | 0.2206742239   |
| 3.3863427893   | 1.7235772164   |
| 160.0205248733 | 160.549683746  |
| 10.3382270668  | 6.8033163841   |
| 22.1406532592  | 16.5996023178  |
| 0.3880592568   | 0              |
| 1.9673314481   | 0.296690461    |
| 10.3314388244  | 12.4645569026  |
| 29.6076370806  | 24.1409028467  |
| 2.4388414109   | 2.5962226496   |
| 0.0934110448   | 0              |
| 31.2346625047  | 26.6925787984  |
| 0              | 0              |

gene\_expression\_table

|                |                |
|----------------|----------------|
| 2.6129603391   | 2.1494009286   |
| 0.9273243657   | 1.2586362326   |
| 12.4905713077  | 7.7500195837   |
| 203.1435213411 | 178.5628662652 |
| 0              | 0              |
| 1.0521147559   | 1.0385537352   |
| 0              | 0              |
| 1.9025216341   | 0.6885998041   |
| 7.8852391005   | 4.9944791711   |
| 1.477324616    | 1.3367593604   |
| 1.5656248426   | 1.9318062965   |
| 0.0426018188   | 0.2312899121   |
| 12.7651704198  | 12.0318576094  |
| 7.2248447478   | 5.1365375593   |
| 0              | 0              |
| 3.3695283852   | 3.0489227352   |
| 13.4027937605  | 14.4856700621  |
| 128.9199764633 | 99.9886552135  |
| 51.0652026771  | 75.9105537993  |
| 3.2069028973   | 3.9708442832   |
| 1.1684977702   | 1.5859753993   |
| 2.0220906275   | 1.2197944603   |
| 21.4402026565  | 29.1002985526  |
| 44.6412219565  | 38.4232524098  |
| 1.2192693079   | 0.5940618028   |
| 0              | 0              |
| 0              | 0              |
| 13.6355681381  | 9.1393807154   |
| 2.4236342588   | 2.1930290381   |
| 14.7084610189  | 20.6289076437  |
| 6.6910129653   | 6.6047705045   |
| 1.2997129693   | 1.1760471996   |
| 11.8513974746  | 12.0642238195  |
| 3.5106948953   | 3.1766574604   |
| 5.2578364183   | 1.9823171031   |
| 7.6095573232   | 14.4268020939  |
| 3.3010425524   | 0.9956510761   |
| 0.6178235635   | 0.2795192819   |
| 19.4208336614  | 13.22696668    |
| 11.8306719761  | 11.1332010485  |
| 71.4369540645  | 98.660798314   |
| 16.9548073546  | 11.304323927   |
| 42.5133721588  | 43.8778905193  |
| 45.3448776564  | 29.8402760068  |
| 5.3781622809   | 6.4885841093   |
| 0              | 0.5407485641   |
| 0              | 2.2564668602   |
| 0.777998111    | 0              |
| 61.5471960281  | 46.1549288832  |

gene\_expression\_table

|                 |                |
|-----------------|----------------|
| 0               | 0              |
| 0.7835864963    | 0.9175674566   |
| 5.1670609991    | 3.1169485169   |
| 7.2137953454    | 6.8112139525   |
| 4.1554995635    | 2.5067399444   |
| 2.3275993745    | 1.504379808    |
| 1.0266735562    | 1.3005819169   |
| 0.3385242792    | 0              |
| 4.1339875401    | 2.8604930292   |
| 0.4933907513    | 0.3348340125   |
| 280.5496409748  | 297.9464936614 |
| 2.6642668105    | 2.4107657579   |
| 5.7195522803    | 3.7638875106   |
| 0.4602438222    | 0.7139182322   |
| 899.7380260593  | 863.3826544521 |
| 5.7603702998    | 3.0404964172   |
| 2.2963811927    | 6.7531227183   |
| 2.5141545549    | 4.5498729234   |
| 0               | 2.7789158955   |
| 0               | 0              |
| 69.23606323     | 79.6156166134  |
| 1.5462667794    | 0.9327611858   |
| 46.9065138054   | 28.9387011034  |
| 1.1264714259    | 0              |
| 2.0799450109    | 1.0265679898   |
| 7.2194255255    | 6.5325078478   |
| 4.8608485624    | 5.9977445452   |
| 4.5556915967    | 1.6488897075   |
| 1.9500992967    | 1.1469576484   |
| 1.8315182973    | 1.9472711422   |
| 0               | 0.7581597337   |
| 19.452624579    | 24.0023673771  |
| 0.2529899673    | 0.2289183455   |
| 3.4622823701    | 1.5664256577   |
| 1.3203780943    | 1.7378124632   |
| 37.0966338296   | 30.7333707158  |
| 0.620483878     | 1.9650601366   |
| 0               | 0              |
| 35.4631476297   | 28.9582589165  |
| 2.4526052158    | 4.4384869027   |
| 3.2176064977    | 1.2939804404   |
| 1098.9523266938 | 948.1380014445 |
| 27.3297970219   | 24.1377945816  |
| 1.3013185192    | 2.6493749635   |
| 0               | 0              |
| 0               | 0              |
| 8.4819753842    | 10.5530259339  |
| 0.7617675604    | 0.5514292016   |
| 0.1393643892    | 0.5044162936   |



gene\_expression\_table

|                 |                 |
|-----------------|-----------------|
| 19.4569888405   | 22.462425798    |
| 11.8880192134   | 10.5613118908   |
| 4507.6553021719 | 4172.3885953512 |
| 3.1641280049    | 7.8734312188    |
| 0               | 0               |
| 0               | 0               |
| 0               | 0               |
| 835.9173773003  | 766.3334558148  |
| 446.2701236056  | 446.8810529358  |
| 25.2773006025   | 5.3368473148    |
| 351.76326558    | 342.7776264966  |
| 204.2883208564  | 171.4823417343  |
| 20.2850996284   | 12.7465294127   |
| 23.2572655278   | 24.3992707912   |
| 127.2388771024  | 76.7548572288   |
| 0.3618745451    | 0.3274427165    |
| 71.2627480739   | 80.6027535379   |
| 9.9432470975    | 8.9971618196    |
| 20.4471416267   | 18.5016262958   |
| 2.1600728697    | 1.0238093517    |
| 0               | 0.5501223203    |
| 8.2892169066    | 9.3756376986    |
| 0               | 1.9451650867    |
| 1.2875095224    | 0.9320039141    |
| 3.6105067824    | 5.4449539897    |
| 12.7567030554   | 11.7607125714   |
| 29.8371683526   | 26.4237759336   |
| 18.0346822098   | 15.7747518689   |
| 2.3508816498    | 3.5208806605    |
| 23.5460233486   | 29.8279155973   |
| 0               | 0               |
| 0.8419081584    | 2.6663064413    |
| 21.0587594527   | 12.4272062536   |
| 23.1492364706   | 22.768066093    |
| 0               | 0               |
| 40.0619403679   | 34.8907269311   |
| 0.170901804     | 0.1546407497    |
| 3.2697657105    | 2.3011740358    |
| 4.2524214246    | 4.2325907863    |
| 0.4080792635    | 0               |
| 104.7995180803  | 88.9012487768   |
| 2.9366593685    | 1.9929304247    |
| 6.2573514972    | 3.3971842456    |
| 1.7331862223    | 1.2197703099    |
| 7.9199635801    | 10.3016866903   |
| 16.9568416969   | 21.2447398847   |
| 1.9101550193    | 1.0636348246    |
| 0               | 0               |
| 57.5797067177   | 57.8900918367   |

gene\_expression\_table

|                 |                 |
|-----------------|-----------------|
| 0               | 0.4911397114    |
| 3.0754759502    | 2.7828489552    |
| 3.3118362201    | 2.5686170523    |
| 1.6148376212    | 0.4870627354    |
| 27.327323296    | 14.8363013036   |
| 414.0836336817  | 342.3040724626  |
| 0.3446199018    | 0.311829827     |
| 5.8875150515    | 3.0236178503    |
| 17.1557263644   | 14.4528061051   |
| 43.1001621122   | 17.7269296975   |
| 10.3535419341   | 10.5828422262   |
| 3.9927442572    | 1.0322401535    |
| 61.6401068989   | 55.3064430829   |
| 8.3362232361    | 7.5430439055    |
| 0.4657937588    | 0.2107370853    |
| 52.5053494036   | 68.8403581432   |
| 34.7989932606   | 34.2868467019   |
| 46.9023345004   | 35.1938533067   |
| 10.1088186155   | 8.6896304796    |
| 5.3121291788    | 6.6759554611    |
| 0.587882098     | 0.2279768505    |
| 3.9888612811    | 4.6921251268    |
| 27.6425016606   | 26.8882853316   |
| 0.212800938     | 0.0770212972    |
| 2.461150091     | 2.8244564708    |
| 6.4209367023    | 2.5992078676    |
| 1400.1645210261 | 1853.7755391465 |
| 3.104120873     | 3.4329391016    |
| 24.8189926263   | 23.3648759522   |
| 2.8069679302    | 1.3546075076    |
| 0.0613507107    | 0.1110265623    |
| 0               | 0               |
| 0               | 0               |
| 0               | 0               |
| 7.5785126943    | 5.5716605773    |
| 0               | 0               |
| 0               | 0.0317373938    |
| 0               | 0               |
| 2.3496821995    | 1.063056704     |
| 2211.1484311913 | 2064.4939219178 |
| 7.0768001854    | 3.7229378478    |
| 1.2481336163    | 0.5646877729    |
| 11.2906283714   | 14.8601334619   |
| 39.8037318449   | 21.6098793235   |
| 3.2410678095    | 2.3259225811    |
| 22.6144013037   | 25.5783430186   |
| 16.3078143529   | 16.3957221105   |
| 0.4370374403    | 0.0988634933    |
| 0               | 0               |

gene\_expression\_table

|                |                |
|----------------|----------------|
| 3.2337145095   | 3.62270548     |
| 0              | 0              |
| 0              | 0              |
| 3.6610718838   | 3.5197716942   |
| 16.783685618   | 9.1120456298   |
| 42.8004380832  | 36.5150087697  |
| 8.8615005789   | 10.5696324846  |
| 23.2576517135  | 17.0988354048  |
| 0.418364911    | 0              |
| 1.1128528971   | 3.020899762    |
| 6.7289555668   | 11.1626265327  |
| 2.3434079518   | 3.3926978332   |
| 1.0792261194   | 0              |
| 0              | 0              |
| 1.7028545644   | 2.5680507787   |
| 0              | 0              |
| 18.6896981713  | 15.2534205007  |
| 3.5028210239   | 2.4381021355   |
| 0.3633434917   | 1.31508758     |
| 1.7364723695   | 1.9640619848   |
| 0.6322611331   | 0.57210242     |
| 15.8788948751  | 2.3946735794   |
| 0              | 0              |
| 1.9102091249   | 1.1883131889   |
| 0.5836396692   | 0.5281072166   |
| 6.4602244008   | 3.2475242161   |
| 7.4525035951   | 3.2251085964   |
| 1.3956658235   | 1.9995446122   |
| 1.8124704904   | 2.2363862724   |
| 226.3739736036 | 209.4551586907 |
| 17.7556337542  | 12.6234518321  |
| 439.9526578072 | 361.0600156317 |
| 1.209187627    | 0              |
| 5.3788231918   | 4.8670361081   |
| 1.8314755999   | 3.3144268024   |
| 0              | 0.3949570826   |
| 0              | 0              |
| 4.8677103957   | 3.6494883787   |
| 0.1378266915   | 0.1247126853   |
| 1.1909503504   | 0.9118434627   |
| 18.1524826224  | 4.1063251768   |
| 0.4901240712   | 0.2822205843   |
| 4.120410862    | 2.724570662    |
| 0.930043532    | 0              |
| 0              | 0              |
| 5.3882920183   | 3.5754429259   |
| 684.4718524622 | 325.9712455149 |
| 8.8176630009   | 3.191470155    |
| 5.6987727211   | 3.52816094     |

gene\_expression\_table

|                |                |
|----------------|----------------|
| 0.0669431463   | 0              |
| 47.3996311978  | 16.3389052517  |
| 2.0970838941   | 1.7515841154   |
| 2.2203416275   | 1.3976204525   |
| 0              | 0.2011815555   |
| 0              | 0              |
| 2.3455132007   | 3.6204642009   |
| 631.4404798526 | 774.1004428294 |
| 0              | 0              |
| 139.8115884049 | 96.9506095607  |
| 14.3395930164  | 11.2451749943  |
| 4.0746763846   | 2.8091252905   |
| 25.6294933255  | 18.3830185051  |
| 2.3217787886   | 0              |
| 0              | 0              |
| 0              | 0              |
| 1.9483099076   | 2.938218495    |
| 0.1498083293   | 0              |
| 179.8714165233 | 191.2062966388 |
| 0              | 0              |
| 0.0212796593   | 0              |
| 9.9739695567   | 6.2715831249   |
| 2.0293093664   | 2.1422608397   |
| 0.5564741991   | 0.7552897512   |
| 136.049124038  | 127.0726886965 |
| 1.345511865    | 2.4349767959   |
| 20.6175378179  | 26.6881719822  |
| 0              | 0              |
| 53.4111446012  | 40.3524967347  |
| 0.3308353141   | 0.4989280375   |
| 0.5416142158   | 0.3920643384   |
| 0              | 0              |
| 0.3465860085   | 1.4112398773   |
| 1.5131252367   | 3.6510762798   |
| 4.7652675456   | 4.4316332472   |
| 2.4368291964   | 2.3427790279   |
| 0              | 0              |
| 0.0508629335   | 0.0230117002   |
| 3.1819649313   | 2.4557930689   |
| 0              | 0.0180735401   |
| 0              | 0              |
| 0.9002874187   | 0.8146264003   |
| 0              | 0.1864297377   |
| 12.1330157819  | 12.7120368128  |
| 24.7189363504  | 18.1065915722  |
| 21.039306731   | 12.6916318433  |
| 0              | 0.3479157066   |
| 16.7674765261  | 12.7764849647  |
| 71.0401001784  | 58.5668960374  |

gene\_expression\_table

|                 |                |
|-----------------|----------------|
| 2.0263165222    | 0.2619307854   |
| 30.8621002808   | 20.9442127605  |
| 5.1644394562    | 7.9441861363   |
| 11.1289534003   | 10.0700499187  |
| 0.0560449045    | 0.2028492585   |
| 0.5362454115    | 0.4852224525   |
| 1.4467218074    | 0.4760248596   |
| 5.9173342979    | 3.7795120078   |
| 5.0637945016    | 6.3002251573   |
| 2.5913644582    | 4.0779129682   |
| 4.550049245     | 7.6460777316   |
| 83.7225970223   | 58.0799952558  |
| 29.2581375155   | 48.5361597182  |
| 1.3760455344    | 0.5533852595   |
| 2.2164582244    | 1.6044523979   |
| 12.9958948109   | 14.6991932638  |
| 0.6290620397    | 0.2008968408   |
| 0.8630531834    | 0.9110907721   |
| 2.2533777996    | 1.7841007009   |
| 0               | 0.1246820619   |
| 1.1883228269    | 1.2288636168   |
| 0               | 0              |
| 0               | 0              |
| 3.8651719737    | 7.8691647785   |
| 0               | 0              |
| 1.0102309125    | 1.0055198263   |
| 9.5853456292    | 6.570692536    |
| 15.8879008047   | 9.5841270035   |
| 3.9078291895    | 3.4556412627   |
| 4468.1352154132 | 4232.223929563 |
| 9.6786703892    | 5.1897832263   |
| 4.6734350716    | 3.4933272996   |
| 8.7554890462    | 8.459530223    |
| 0               | 0              |
| 181.0758578672  | 201.9996451831 |
| 0.6743833003    | 0.4068111501   |
| 2.0435890298    | 1.1226949062   |
| 61.2842060001   | 47.4598640399  |
| 4.5920637162    | 2.0775678174   |
| 58.8917675846   | 34.1591685038  |
| 67.63702543     | 70.7216898171  |
| 63.9848528707   | 61.5438304103  |
| 12.1212534261   | 9.8563191237   |
| 22.9554628702   | 17.4029680754  |
| 0               | 0              |
| 2.363880636     | 1.8012302184   |
| 7.3570843611    | 6.0781931139   |
| 3.1175567115    | 2.9181990974   |
| 12.9469465372   | 7.029038216    |

gene\_expression\_table

|                |                |
|----------------|----------------|
| 0              | 0              |
| 16.1708696818  | 15.0277011307  |
| 5.1657771695   | 3.4441923897   |
| 23.5576823053  | 21.3162036222  |
| 52.5605747034  | 50.5587622457  |
| 6.0782167217   | 6.3460192806   |
| 19.6168845818  | 11.0939793642  |
| 20.3952163102  | 19.6849510362  |
| 28.3102199656  | 27.9453211008  |
| 1.3172479565   | 0.9932614656   |
| 24.4827820448  | 16.940744667   |
| 0.7069511536   | 1.492600189    |
| 0              | 0              |
| 6.1237826247   | 3.5621445543   |
| 2.3969734687   | 2.8918733105   |
| 0.8869156395   | 2.1400718029   |
| 0              | 0              |
| 1.8361050449   | 0              |
| 4.2270419248   | 7.6496902557   |
| 32.7498494001  | 22.2253121942  |
| 0              | 2.0257534822   |
| 0              | 0              |
| 4.2881980698   | 4.8502279449   |
| 2.4873939423   | 1.3504332491   |
| 11.4951739169  | 14.5619951315  |
| 33.6081627247  | 22.3423315138  |
| 7.7621436712   | 8.5286415557   |
| 20.9444096791  | 14.0076895854  |
| 0              | 0              |
| 0              | 0              |
| 1.024576551    | 0.8741130564   |
| 0.9045650056   | 0.5208617152   |
| 102.7997291381 | 86.9077832107  |
| 16.4048437473  | 12.5245803574  |
| 80.2461373307  | 70.1410795434  |
| 1.8051532667   | 1.8586915437   |
| 0              | 1.1700124468   |
| 0              | 0              |
| 1.989724186    | 1.8670865297   |
| 102.3821449813 | 104.0844782333 |
| 23.223947431   | 11.9080597728  |
| 0.9140227643   | 0.9373288278   |
| 0              | 0              |
| 0              | 1.3091863788   |
| 39.9388030323  | 9.9692923869   |
| 18.1321528911  | 19.8409087588  |
| 8.8859812334   | 7.8067579726   |
| 0              | 0              |
| 0.4395323896   | 0.1988557659   |

gene\_expression\_table

|                |               |
|----------------|---------------|
| 11.6930938952  | 10.5805132786 |
| 6.5294508426   | 11.8163664742 |
| 42.8985531212  | 29.1126143559 |
| 27.8085369751  | 17.1944404275 |
| 0.1936150792   | 0.1751928903  |
| 28.3853266688  | 28.252955229  |
| 0              | 0.0223533358  |
| 0              | 0.2337394069  |
| 4.5959142001   | 4.7527082867  |
| 5.3384770976   | 7.2457933279  |
| 0.6732550273   | 0.6560570215  |
| 0              | 0             |
| 0.2193828721   | 0.1985089158  |
| 4.4568318018   | 4.7048993103  |
| 0.5212741459   | 0.5764924986  |
| 0              | 0.0176276195  |
| 0.0578188162   | 0             |
| 15.1178881749  | 11.3343959932 |
| 19.6169539917  | 14.38719046   |
| 0              | 0.0429730461  |
| 9.9984642976   | 12.4787933582 |
| 0              | 0             |
| 0.1992360769   | 0.5859069397  |
| 4.2341159587   | 5.2502261067  |
| 14.9910690036  | 3.3911727314  |
| 7.7236939692   | 3.9935976536  |
| 32.3576872625  | 22.9597138145 |
| 0.481857204    | 0.4360092026  |
| 0.7271512222   | 0.8972234417  |
| 39.5677771637  | 30.8490926971 |
| 5.3285785307   | 4.4506819868  |
| 0              | 0.1476357569  |
| 0.0214064179   | 0.0387392578  |
| 5.854544814    | 3.3711322403  |
| 53.3289235347  | 16.639570763  |
| 0              | 0             |
| 10.158523128   | 10.9428031592 |
| 0              | 0             |
| 54.5960401328  | 59.4940477872 |
| 0              | 0.0377883586  |
| 2.6704599447   | 0             |
| 11.1400653589  | 5.4277486258  |
| 108.8922378332 | 94.1143817637 |
| 0.0409672555   | 0.0741385634  |
| 105.1985477446 | 88.3322221165 |
| 0.1844507953   | 0.0834502873  |
| 2.6947186819   | 2.6308191402  |
| 23.3911768277  | 21.1655408949 |
| 2.3784583132   | 5.3803787926  |

gene\_expression\_table

|                |                |
|----------------|----------------|
| 12.543104222   | 11.1665875654  |
| 0              | 3.8299493598   |
| 15.5360294806  | 28.1155984359  |
| 2.0828062681   | 0              |
| 13.1664819229  | 13.7188182796  |
| 1.4504860935   | 1.3815520881   |
| 0              | 0              |
| 0              | 0              |
| 9.0088037137   | 10.7601507339  |
| 0              | 0              |
| 1.7762517553   | 1.7411810258   |
| 0              | 0              |
| 0              | 0              |
| 0              | 0              |
| 0              | 1.5979949698   |
| 24.2192767825  | 21.5013606569  |
| 23.339578624   | 21.5830027816  |
| 162.6793122372 | 167.2962631341 |
| 0.7295940946   | 0              |
| 1.378761851    | 0.6237873485   |
| 0.4619299638   | 0              |
| 2.0135882729   | 3.27959698     |
| 3.2018966659   | 1.3371881199   |
| 51.1336806967  | 53.2435201305  |
| 0              | 0              |
| 0              | 0.7676824704   |
| 2.1384815826   | 4.3537684905   |
| 0.669960184    | 0              |
| 0              | 0              |
| 5.5593377501   | 4.6893326017   |
| 0              | 0              |
| 9.2559379817   | 8.7242178659   |
| 24.684013131   | 19.6115406438  |
| 39.7735046944  | 25.7065103267  |
| 6.0561198621   | 6.2627302862   |
| 10.6375450683  | 13.2349227502  |
| 2.9447102882   | 5.3290509056   |
| 0.9145460452   | 1.1033711194   |
| 0              | 0              |
| 14.4796505721  | 26.2038664054  |
| 149.1035440989 | 119.9258329449 |
| 27.1623418495  | 59.6891496109  |
| 426.1352101011 | 293.7821517297 |
| 0              | 5.3760698154   |
| 1.4575482425   | 0              |
| 0              | 4.0274055654   |
| 0              | 0              |
| 0              | 0              |
| 277.6120954962 | 362.8411432635 |



gene\_expression\_table

|                |                 |
|----------------|-----------------|
| 1466.565406271 | 1340.7045320713 |
| 86.7735117612  | 49.3014601619   |
| 0              | 0               |
| 1.5107228704   | 3.6452795205    |
| 12.938860277   | 9.0059590991    |
| 0              | 0               |
| 134.9140314285 | 111.3571231716  |
| 0.4606901771   | 0.2084280935    |
| 51.6068521817  | 49.5144308441   |
| 2.8001262658   | 6.8409856438    |
| 6.5010840627   | 5.8825155145    |
| 17.9043524911  | 25.2012130089   |
| 7.7108648814   | 4.9837053391    |
| 26.3845525437  | 21.7037284836   |
| 1.9949487807   | 3.6102647004    |
| 113.5520831848 | 80.1933815845   |
| 1.2526342913   | 6.2339639355    |
| 152.1558762106 | 178.4720898097  |
| 0              | 0               |
| 19.0279647673  | 43.7059158939   |
| 0              | 0               |
| 13.3759901004  | 7.8315369615    |
| 59.4856355467  | 50.916169754    |
| 30.7440523938  | 15.7236702486   |
| 1.2721299074   | 2.3021772506    |
| 2.5046234767   | 0               |
| 71.8645105211  | 62.1994602749   |
| 1.3817651205   | 1.2502922098    |
| 0              | 0               |
| 9.8445776819   | 9.9768263316    |
| 125.9025667335 | 90.0787487606   |
| 417.5818828757 | 326.324640187   |
| 1.999802338    | 1.3571430741    |
| 0              | 0               |
| 4.6815523529   | 3.1770821699    |
| 8.4238209629   | 17.1501903854   |
| 0              | 0               |
| 0              | 0               |
| 321.0883034049 | 420.3985611339  |
| 85.7734150955  | 86.9256654707   |
| 4.0527938633   | 0               |
| 0              | 0               |
| 15.3676615839  | 22.2487220448   |
| 43.1741822938  | 27.1765026817   |
| 1.5973787226   | 4.6975191122    |
| 0.3288344995   | 0               |
| 0              | 0               |
| 14.5871404797  | 13.1991956042   |
| 91.3089154098  | 121.4278435431  |

gene\_expression\_table

|                |                |
|----------------|----------------|
| 0              | 0              |
| 311.5314855747 | 253.7007522922 |
| 21.004978272   | 15.2051084864  |
| 166.1317322491 | 170.3678156911 |
| 4.2329898913   | 3.8302271541   |
| 0              | 0              |
| 5.1157285792   | 0              |
| 35.2173811566  | 21.2443328974  |
| 28.7641420687  | 34.0356691746  |
| 0              | 0              |
| 120.1534180638 | 90.083112437   |
| 20.5108592892  | 49.4914168448  |
| 0              | 16.4718571768  |
| 155.1133733749 | 132.6988614152 |
| 57.71045466    | 63.8236990376  |
| 81.7504892656  | 39.1616740245  |
| 1.0349760877   | 0              |
| 7.1872206442   | 21.6778907116  |
| 108.9989168076 | 111.4923305091 |
| 20.4540874367  | 22.7789676581  |
| 70.6996829644  | 40.5160512718  |
| 84.7999694852  | 105.0008325259 |
| 1.744909156    | 1.5788836265   |
| 3.6329825467   | 6.5746192447   |
| 3.2142001229   | 5.8167474554   |
| 0              | 4.4094306758   |
| 162.6280340036 | 155.5630291096 |
| 0              | 0              |
| 632.9627747072 | 587.1760569046 |
| 0              | 0              |
| 0              | 0              |
| 0              | 0              |
| 3.1123158544   | 3.2494426118   |
| 3.0830850961   | 1.394867051    |
| 0              | 0              |
| 2.6381480433   | 1.7903491146   |
| 0.6135002274   | 0.5551265867   |
| 3.2438570191   | 2.935208814    |
| 0.5664062234   | 0.6150162092   |
| 47.1922495486  | 24.2362570426  |
| 0.8756690941   | 0.7043115315   |
| 0.349140503    | 0.9477608991   |
| 0.0578136613   | 0.1046255536   |
| 18.4085982127  | 13.5057140085  |
| 5.5151632227   | 7.208360736    |
| 18.2503051557  | 16.1297733483  |
| 26.2765563399  | 8.9161428028   |
| 5.3414304437   | 3.3295386215   |
| 8.7062127617   | 9.8472868426   |

gene\_expression\_table

|                 |                 |
|-----------------|-----------------|
| 3.4127016444    | 5.1466468709    |
| 5.1155906034    | 7.4773726113    |
| 1.2459976929    | 1.7345274652    |
| 29.2385930015   | 31.5443886807   |
| 184.3427963691  | 264.4435450903  |
| 0.2153887635    | 0.3897896814    |
| 3.7758949037    | 2.2777493864    |
| 1.9788495738    | 3.5811299182    |
| 8.9647053197    | 5.1620079935    |
| 3.2118297688    | 3.4874746912    |
| 4.5150488662    | 2.3345420766    |
| 101.6728774059  | 77.213323275    |
| 0               | 0               |
| 2.037480448     | 2.9190605542    |
| 7.26918297      | 7.6737861025    |
| 0               | 0               |
| 1.4657482326    | 0               |
| 0.7746453534    | 3.5046949596    |
| 0.9099125582    | 0.3528581666    |
| 9.7257790072    | 4.6097257365    |
| 20.8088090174   | 10.4604897602   |
| 0.2246283087    | 1.0162762843    |
| 6.3923938815    | 6.5729170949    |
| 0               | 0               |
| 1949.3335449858 | 1716.4418170068 |
| 62.1008974541   | 45.4494835619   |
| 1664.9315330162 | 1321.5050493849 |
| 91.4905881342   | 136.3524132844  |
| 4.3522097766    | 17.0651149213   |
| 2.9267267233    | 3.5310039968    |
| 0.4859465064    | 0               |
| 24.9636712187   | 18.2164635216   |
| 3.4938370277    | 3.5333334285    |
| 581.8675558948  | 559.2058114476  |
| 3.6194636338    | 6.550154028     |
| 1.0215875441    | 2.1954143699    |
| 1.8811856561    | 0.9456631216    |
| 12.6751371826   | 5.2934384296    |
| 0.2145565199    | 1.5531342708    |
| 0.4091607305    | 0.7404593824    |
| 0.2918390972    | 0.2640710381    |
| 0.8278516743    | 2.621789835     |
| 6.8129474151    | 3.7936649412    |
| 0.4437230591    | 0               |
| 12.2468309242   | 9.0667334021    |
| 0               | 0.5081029398    |
| 60.0688568937   | 46.8043113843   |
| 0               | 0.0546370265    |
| 3.0923738942    | 2.6905183507    |

gene\_expression\_table

|               |               |
|---------------|---------------|
| 91.229875682  | 65.1706482098 |
| 0             | 0.6147059806  |
| 16.3142725924 | 17.5298674557 |
| 1.1959652038  | 0.8657367046  |
| 0             | 0             |
| 20.3156991057 | 13.4335044767 |
| 40.642781742  | 41.2141253455 |
| 2.9294037071  | 0.589038949   |
| 10.6264077988 | 13.6217044511 |
| 1.6268323152  | 1.1323397099  |
| 22.5619452182 | 20.9822985998 |
| 54.3278945675 | 52.8000590067 |
| 26.0966913595 | 10.8985983297 |
| 2.4777627043  | 0             |
| 0             | 0             |
| 4.7977829358  | 4.1242169257  |
| 1.8202821544  | 1.796819995   |
| 5.8715131984  | 4.1322146353  |
| 35.323215465  | 22.0184483103 |
| 12.597805027  | 20.3556115754 |
| 5.6936157848  | 5.7579797861  |
| 0.8862978476  | 1.4435422492  |
| 1.9253177498  | 1.1614177394  |
| 0.553996731   | 0             |
| 13.2791919872 | 9.3595951523  |
| 0.7165375466  | 0.2881600254  |
| 1.8048290934  | 1.4697920433  |
| 7.9074142581  | 4.3725216752  |
| 12.7061298141 | 6.190778637   |
| 5.9159542787  | 5.9478444059  |
| 0             | 0             |
| 18.4829853569 | 9.662961588   |
| 46.1218518679 | 30.57216074   |
| 3.291762126   | 1.5768824933  |
| 0             | 11.2212795949 |
| 25.943306776  | 13.1182926324 |
| 1.4416222294  | 2.1740900052  |
| 0             | 0             |
| 0.4788990259  | 0.2888883272  |
| 2.3188267495  | 1.0490969043  |
| 3.0888235223  | 2.7949265255  |
| 14.6144152665 | 10.0753335127 |
| 0             | 0             |
| 4.2330103599  | 3.5748959635  |
| 13.6006132908 | 15.8959410683 |
| 4.3767985324  | 4.2078746538  |
| 0             | 0             |
| 0.0620465407  | 0.4491432319  |
| 23.9918732296 | 17.638629061  |

gene\_expression\_table

|                |                |
|----------------|----------------|
| 0.5687023156   | 0.7718866952   |
| 0              | 0              |
| 3.3122210956   | 1.9980454331   |
| 3.4257003775   | 0.3874687557   |
| 0              | 0              |
| 0              | 0              |
| 0              | 0              |
| 1.7218455075   | 1.6359151727   |
| 7.151192469    | 3.8236350844   |
| 0.0942213984   | 0.1136751619   |
| 0.2027326123   | 0              |
| 12.5685347746  | 12.7373761212  |
| 8.0173412963   | 7.2545031114   |
| 0              | 4.7660055752   |
| 0              | 0.3284283763   |
| 2.1766459656   | 1.9695413163   |
| 0.3275965401   | 0.1976174754   |
| 28.4745037232  | 30.7925522051  |
| 0.4919268319   | 0.5341448644   |
| 0              | 0              |
| 1.3462301665   | 0.5220592947   |
| 22.9945751107  | 24.3657118008  |
| 0.1749769336   | 0.0395820342   |
| 0.0950163529   | 0.1719513744   |
| 1.8474858853   | 1.2537752487   |
| 9.8848630811   | 19.0812436399  |
| 35.0829636713  | 40.8148347676  |
| 5.6916821049   | 4.9441218794   |
| 0              | 0.2331985346   |
| 7.9603844182   | 6.0024713301   |
| 8.7011864857   | 12.4314970119  |
| 9.2198200538   | 2.7808559303   |
| 49.9291230917  | 50.0438113047  |
| 0.8960300871   | 0.4053870737   |
| 6.1065602881   | 3.4347889776   |
| 0.2872923581   | 0.1987905817   |
| 5.0960733174   | 16.9076947115  |
| 29.805617899   | 31.2346264433  |
| 2.135672157    | 2.1901282524   |
| 0.5553462967   | 0.5025059167   |
| 0.1212211626   | 0              |
| 252.7702255495 | 246.8718540722 |
| 2.7351230221   | 5.7747202464   |
| 1.8316474119   | 1.5298789528   |
| 311.4364871546 | 378.4221991285 |
| 30.6147156694  | 25.371715205   |
| 0              | 0              |
| 7.1579747895   | 3.8099435639   |
| 0              | 0              |

gene\_expression\_table

|                |                |
|----------------|----------------|
| 0              | 0              |
| 15.0326870257  | 18.1364654059  |
| 7.8221553089   | 2.7525123043   |
| 0.5045960334   | 0              |
| 1.8239501563   | 1.713881069    |
| 0.554739234    | 0.4392120382   |
| 0              | 0              |
| 1.2237585966   | 0.7382131822   |
| 2.0205037956   | 3.1994477255   |
| 9.7418592751   | 7.5556592153   |
| 4.1801969778   | 4.8415454827   |
| 1.8802105605   | 2.0415735627   |
| 1.8300130985   | 1.7278852743   |
| 0              | 0.2539872789   |
| 254.2027917476 | 187.2221395938 |
| 0              | 0              |
| 0              | 0              |
| 0.4958051418   | 0.2243150074   |
| 33.1215843536  | 49.9501908564  |
| 2.911644785    | 2.6346060834   |
| 1.7351042554   | 1.1775087358   |
| 1.5971951119   | 1.4452243556   |
| 12.6980486577  | 7.8992705547   |
| 1.1070686629   | 2.0034654288   |
| 0.7306353802   | 0.2203721676   |
| 0.2472807347   | 0.2237523379   |
| 7.6125823907   | 8.3643113647   |
| 1.5038066987   | 1.13393476     |
| 9.0224104444   | 5.1952354454   |
| 0.204951086    | 0.3709005856   |
| 130.4223557061 | 157.0253772444 |
| 94.6893969134  | 135.6597476602 |
| 0              | 0              |
| 1.9690825641   | 3.5634545319   |
| 29.1766832645  | 16.0474022172  |
| 6.1129599689   | 4.28231292     |
| 0.6174117857   | 2.7933298302   |
| 6.0077101693   | 9.060142364    |
| 0              | 0              |
| 1.0470081025   | 0              |
| 37.1137190531  | 29.6315324929  |
| 15.2512442004  | 5.6823985798   |
| 0              | 0              |
| 5.5165806906   | 5.8725719817   |
| 42.3049997989  | 37.9875297735  |
| 118.1722943063 | 187.1246562697 |
| 15.5358419167  | 18.934766266   |
| 45.7573500691  | 28.4985857974  |
| 23.6970742037  | 17.4574743189  |

gene\_expression\_table

|                |                |
|----------------|----------------|
| 58.0431180106  | 33.3056201754  |
| 0.6950601811   | 0.4492330223   |
| 1.8293978819   | 0              |
| 0.5955307982   | 0.4041501916   |
| 6.0608334628   | 7.1715861425   |
| 0.2236144147   | 0              |
| 11.7388889409  | 8.1226684066   |
| 3.8576168217   | 4.4878760714   |
| 0              | 0              |
| 157.9390439857 | 158.7904190926 |
| 29.3562533355  | 0              |
| 4.4414179323   | 4.0188235748   |
| 7.6576171247   | 5.5432049308   |
| 0              | 0              |
| 0.9384242965   | 0.1698269221   |
| 3.1767239827   | 1.7246780321   |
| 4.0864693981   | 6.1627464491   |
| 11.0207216752  | 10.59537355    |
| 0              | 0              |
| 0.4560390682   | 0              |
| 1.8846551583   | 3.8369992569   |
| 80.5246383318  | 70.5858742228  |
| 12.249373802   | 11.0838639737  |
| 2.458446064    | 1.8537737929   |
| 503.791881995  | 415.6749195011 |
| 13.044157957   | 11.8030255901  |
| 0              | 2.9623775257   |
| 0.2179328266   | 0.4929920999   |
| 0              | 0              |
| 0.4851416131   | 0.3292358288   |
| 0              | 0              |
| 10.8357791364  | 6.3442634284   |
| 7.0236807541   | 6.9909266926   |
| 0              | 0              |
| 2.1649825425   | 0.8706611781   |
| 3.0119855301   | 2.7253995548   |
| 0.1722292671   | 0.1558419067   |
| 0              | 0              |
| 5.631922299    | 3.3124345859   |
| 0.2451561203   | 0              |
| 0.270969057    | 1.4711205085   |
| 2.142913475    | 1.3116889327   |
| 0.2739162529   | 0.495707052    |
| 4.8725563535   | 3.9680458307   |
| 93.4794702972  | 101.0093157211 |
| 1.5129160321   | 1.1408035881   |
| 191.2094722701 | 151.9736657785 |
| 9.5718631976   | 11.0058361677  |
| 0.9851593161   | 1.0971358301   |

gene\_expression\_table

|                |                |
|----------------|----------------|
| 1.5718657518   | 1.6593558878   |
| 4.5522801584   | 4.9429649086   |
| 2.9740021283   | 3.1395352538   |
| 11.5458121138  | 7.7110618899   |
| 0              | 0              |
| 0.4986008444   | 0.3007731402   |
| 3.3486476722   | 4.2776877053   |
| 4.5527536637   | 3.8449281508   |
| 420.7437131828 | 278.5687099002 |
| 11.0515043566  | 9.9999700371   |
| 0              | 0              |
| 0.5828629131   | 0.3013739244   |
| 0              | 0              |
| 1.2761076604   | 3.1753917276   |
| 1.7931413869   | 1.0325169476   |
| 107.7154515153 | 68.2265397589  |
| 40.9833087296  | 55.6257111377  |
| 124.3765296422 | 93.7852387641  |
| 31.6030135186  | 18.468271604   |
| 5.8028552641   | 4.2834838632   |
| 0.8508337172   | 1.0148393735   |
| 350.9635922826 | 396.9624059428 |
| 1.7106812105   | 3.095824839    |
| 6.2177958269   | 3.616831116    |
| 15.413220199   | 18.7408446094  |
| 8.1729387962   | 14.7905914779  |
| 0              | 8.8498980683   |
| 198.2344824422 | 265.4716909805 |
| 0.5535763359   | 0.2504521825   |
| 2.0923645357   | 6.6264769901   |
| 3.8617931857   | 2.9426099089   |
| 0.422992184    | 0.9568627559   |
| 0.2900290805   | 0.3936498626   |
| 0              | 0              |
| 161.895227991  | 88.1659615553  |
| 3.3771636403   | 1.1258326605   |
| 8.5683464369   | 7.7530809265   |
| 0              | 0              |
| 25.2403652348  | 24.2662056156  |
| 8.6530365026   | 6.1071760289   |
| 0.1424434759   | 0              |
| 5.7562254322   | 7.1431255992   |
| 10.1743778994  | 5.2607433526   |
| 1.5667176277   | 1.417646759    |
| 0              | 0              |
| 5.0824632749   | 7.0516074128   |
| 0.1427864075   | 0              |
| 3.7998680764   | 3.3619092128   |
| 0              | 0              |



gene\_expression\_table

|                |                |
|----------------|----------------|
| 19.5645176811  | 16.7194836755  |
| 19.8478471246  | 19.6697684263  |
| 7.5425621292   | 10.2373477214  |
| 1.7065060518   | 1.6299197722   |
| 0.2903031937   | 0.525362547    |
| 2.5686721669   | 1.1621334017   |
| 0              | 0              |
| 4.9673473942   | 4.3370024453   |
| 23.6766480867  | 25.0965099826  |
| 198.2855426356 | 148.0989470532 |
| 1.5417642707   | 2.3251127952   |
| 0.7227183766   | 0.3269763952   |
| 6.7865995385   | 5.6291258965   |
| 9.9692913616   | 12.6290192147  |
| 1.3589650555   | 1.2296615373   |
| 11.8753523586  | 17.1926881893  |
| 4.6546683387   | 3.6374494036   |
| 1.9595368099   | 2.8566446394   |
| 0.1166952571   | 0.2111837514   |
| 43.0570414738  | 41.3952417837  |
| 0              | 0              |
| 120.4367987668 | 75.4459028421  |
| 9.9756448199   | 7.8006590897   |
| 0              | 12.3689901093  |
| 25.8492547087  | 25.0604317452  |
| 102.3700443216 | 75.7879247266  |
| 9.9825923901   | 11.7425925055  |
| 17.9442147171  | 12.7705555391  |
| 10.6103576192  | 16.9860268067  |
| 27.6743078864  | 23.5681302197  |
| 0.6331556067   | 1.0312412143   |
| 444.9818286337 | 395.5286402902 |
| 0.2347083516   | 0.3185642978   |
| 13.128863973   | 10.1197205531  |
| 0              | 0              |
| 586.4235982258 | 568.9188754595 |
| 39.7986046356  | 28.0091981371  |
| 14.1788706586  | 19.2446580807  |
| 0              | 0              |
| 0              | 0              |
| 2.0110348598   | 1.8196878626   |
| 110.2236052426 | 76.8081777271  |
| 6.319168751    | 6.5347533441   |
| 0              | 0.4741357364   |
| 13.9168311985  | 17.3149147343  |
| 1.0981114596   | 1.7388486077   |
| 177.2303272493 | 160.3671233323 |
| 5.3961195093   | 3.9332754025   |
| 1.89962345     | 4.2971927099   |

gene\_expression\_table

|                 |                 |
|-----------------|-----------------|
| 34.4098376394   | 29.3195378452   |
| 0               | 0               |
| 7.8021700041    | 21.1794151498   |
| 10.8718762353   | 14.0534760947   |
| 12.202445978    | 22.0828025258   |
| 0               | 0               |
| 0.9393245072    | 0               |
| 24.0355311148   | 18.197796301    |
| 3.5348572666    | 3.3169845517    |
| 4.1173417734    | 3.9584317078    |
| 2.5400682424    | 2.4686352038    |
| 10.4079134082   | 13.2954576241   |
| 7.8785424575    | 7.9066101347    |
| 0               | 0               |
| 0.0633680846    | 0               |
| 0.0257851866    | 0               |
| 3.2478093449    | 3.3139491349    |
| 0               | 0               |
| 10.3068327131   | 4.6630764004    |
| 0.6266211087    | 0.4535992284    |
| 0               | 0               |
| 131.2055567243  | 87.062463955    |
| 4.6007832306    | 2.5467920708    |
| 33.1474514056   | 28.118925332    |
| 1.2131422872    | 1.4636181201    |
| 0               | 2.2341911395    |
| 0.5104988771    | 2.0786654827    |
| 3.3710854685    | 0               |
| 5.5526175627    | 4.019435361     |
| 1.4216172569    | 0               |
| 0               | 0               |
| 0               | 1.4611882062    |
| 8.8496918686    | 6.0664066332    |
| 0.42360255      | 0.2299784357    |
| 0               | 1.9261504878    |
| 17.2124208488   | 0               |
| 0               | 0               |
| 93.721772197    | 65.7471415079   |
| 72.3444780558   | 49.494908338    |
| 2.63220659      | 4.525336438     |
| 0               | 0               |
| 0.0262727237    | 0.0475458256    |
| 1.1887361404    | 0.4429063273    |
| 55.6403980555   | 41.4616558145   |
| 6.2942441362    | 0               |
| 3.5701781186    | 2.280339489     |
| 146.7755873869  | 143.026269071   |
| 0.6750343719    | 0.9772893572    |
| 2128.9780211166 | 1442.5242047373 |

gene\_expression\_table

|                |                 |
|----------------|-----------------|
| 0              | 0               |
| 17.5593427702  | 4.7665791708    |
| 2.5500852777   | 6.460855602     |
| 4.498784472    | 1.1307588258    |
| 2.7008146404   | 2.7929555608    |
| 95.2544961836  | 91.4952436311   |
| 0.3549169216   | 0.4415772634    |
| 0.7590488728   | 0.7440620345    |
| 0.7632271267   | 0.5022597765    |
| 0.6936877946   | 0.8787581954    |
| 13.4674784165  | 12.5791666921   |
| 0.1901976002   | 0.1721005794    |
| 0              | 0               |
| 0              | 0               |
| 0.0792094177   | 0               |
| 5.0312527269   | 3.6420291678    |
| 2363.149145889 | 2465.2445348253 |
| 8.3391614619   | 6.2880854696    |
| 9.9486491188   | 3.7325572535    |
| 4.8584941418   | 7.0339449582    |
| 6.9229219017   | 6.264216106     |
| 20.1215319486  | 16.4450303592   |
| 157.7009613584 | 108.2520983056  |
| 1.5332133152   | 0               |
| 0.5980267208   | 1.0822507229    |
| 56.7559306577  | 39.9433126312   |
| 9.5785569247   | 9.5338885161    |
| 26.5999232593  | 22.2175198542   |
| 146.0333366563 | 108.1133020839  |
| 10.3853068122  | 9.7887085471    |
| 118.5745378539 | 107.2923456793  |
| 9.9575262626   | 7.3206919039    |
| 26.4094534492  | 24.2480540259   |
| 12.0002532527  | 17.6449761747   |
| 116.6561012751 | 105.5564455079  |
| 1.4578759369   | 1.648951493     |
| 0              | 0               |
| 17.522087159   | 31.7097728824   |
| 0              | 0               |
| 1.0698092028   | 7.7441474957    |
| 28.1118649475  | 38.1555937669   |
| 19.8275928079  | 20.7011845756   |
| 0              | 0               |
| 1.0142549814   | 4.5887505886    |
| 2.9559747429   | 2.6747181113    |
| 10.0642903244  | 10.9280255547   |
| 73.0939785564  | 53.1374724533   |
| 45.5590451035  | 34.944991144    |
| 22.817762921   | 18.0658506654   |

gene\_expression\_table

|                |                |
|----------------|----------------|
| 21.7336101846  | 21.2548358778  |
| 21.0534746144  | 14.9680673961  |
| 11.8434533972  | 12.1779162454  |
| 35.9060341284  | 34.4390056848  |
| 1.1765780377   | 0.6210332187   |
| 0.8193286235   | 0.9884942865   |
| 41.4533898252  | 31.9522482581  |
| 9.3766438996   | 2.8281566931   |
| 0.3176447337   | 0.2874213064   |
| 1.3967888257   | 0.722220818    |
| 0              | 0              |
| 0              | 0              |
| 4.1155892629   | 4.5219963841   |
| 18.0258266961  | 17.147141849   |
| 1.8235520889   | 1.8150481805   |
| 0.8286980522   | 0.4998991042   |
| 8.8917456555   | 7.8780902457   |
| 0              | 0.6313948751   |
| 39.908330134   | 31.5972225235  |
| 39.9501160726  | 28.6698343119  |
| 0.7026370653   | 0.9990862925   |
| 9.6106653861   | 2.898741589    |
| 0.1603109284   | 1.0154030623   |
| 1.877489191    | 2.0224391274   |
| 5.8884019      | 3.2983656672   |
| 46.3099064897  | 45.211765217   |
| 0              | 0              |
| 8.5165093003   | 4.2383968093   |
| 0              | 0              |
| 40.9977039909  | 18.5484164993  |
| 3.6166224931   | 1.0908354012   |
| 18.1510711861  | 16.4240235669  |
| 15.0750992253  | 15.0047983754  |
| 0.2715793591   | 0.3686084762   |
| 0              | 0.638541013    |
| 2.3113573282   | 1.6266717379   |
| 7.1817174125   | 4.3322584041   |
| 2.2176710606   | 4.0133258682   |
| 29.4973514824  | 51.8706485091  |
| 9.3029062111   | 11.223664564   |
| 792.720846625  | 722.8550521791 |
| 0              | 0              |
| 524.6770478581 | 395.6290012993 |
| 26.6992503381  | 20.8941458127  |
| 10.1939883228  | 9.2240453876   |
| 0.0899138944   | 0.1220380802   |
| 3.6720136933   | 1.9728097889   |
| 3.0503077879   | 2.7600755063   |
| 76.5331760004  | 70.7900719297  |

gene\_expression\_table

|                 |                 |
|-----------------|-----------------|
| 4.6233707956    | 1.8302654527    |
| 0               | 0.2891461615    |
| 4462.5068469522 | 3321.7266161237 |
| 32.8364708807   | 30.9818782766   |
| 0               | 0               |
| 0               | 0               |
| 0               | 0.3887237337    |
| 0               | 0               |
| 0               | 0               |
| 2.2917521191    | 6.2210858679    |
| 4.994884597     | 0               |
| 0               | 0.4096895309    |
| 0.3310429948    | 0.898634228     |
| 47.7854423818   | 37.3956567396   |
| 35.1731324359   | 36.8747959912   |
| 0.741712723     | 0.5145405537    |
| 0               | 0               |
| 0               | 0.1350184647    |
| 568.1968127671  | 458.2028596113  |
| 0.0614362203    | 0.0555906547    |
| 7.818615577     | 7.231901092     |
| 1088.4978639926 | 890.2241977585  |
| 6.2968519783    | 4.3302640166    |
| 34.5735969378   | 32.5874690051   |
| 3.9204500169    | 3.4851894612    |
| 0.1489110644    | 0.2694847931    |
| 10.4622602942   | 6.3111944514    |
| 3.2886973259    | 2.8127260493    |
| 5.1148790569    | 1.2179489126    |
| 0               | 0               |
| 6.5269054267    | 4.724704011     |
| 15.2128332697   | 8.9474805221    |
| 0               | 0               |
| 11.3652520375   | 12.4220944646   |
| 7.1285429823    | 7.0744925778    |
| 4.3470973506    | 4.2047517645    |
| 0               | 0.1011309421    |
| 0               | 0               |
| 7.4987448558    | 6.3329003326    |
| 0               | 0               |
| 46.2523850545   | 34.4112653332   |
| 0.900579165     | 1.6297807748    |
| 13.615571971    | 12.4800713188   |
| 12.0943105399   | 9.3801897875    |
| 15.2957817455   | 16.1826340494   |
| 3.5210167715    | 2.9985856237    |
| 0.5639705031    | 0.3827321569    |
| 0.4605281436    | 0.5952993869    |
| 32.5641860275   | 33.0016420332   |

gene\_expression\_table

|                |                |
|----------------|----------------|
| 0.3406318725   | 0.821923341    |
| 0.2094752788   | 0.1263626769   |
| 0              | 0              |
| 208.8271647101 | 168.8020944093 |
| 17.6953424405  | 21.8476811572  |
| 130.5922637193 | 144.4258477145 |
| 3.1791813276   | 4.3150303786   |
| 18.6181492592  | 14.6169548709  |
| 0              | 1.2958220891   |
| 0.3225034904   | 0.1459088798   |
| 0              | 0              |
| 0              | 0              |
| 1.3118196285   | 1.2661353899   |
| 2.4143118443   | 2.352639302    |
| 0.2166550695   | 0              |
| 0              | 0.7252361053   |
| 2.2465468191   | 1.6516428556   |
| 1.9939678038   | 2.5825463523   |
| 0.0837349298   | 0.1515353498   |
| 64.7741992824  | 40.6688778721  |
| 0              | 0              |
| 0              | 0              |
| 0              | 2.4886688937   |
| 0              | 0              |
| 6.5986370767   | 3.8383627521   |
| 4.0211164018   | 3.9295941634   |
| 29.8300411365  | 30.0970031277  |
| 1.461237499    | 1.5626034376   |
| 106.7155179866 | 96.5616940399  |
| 0.1847591164   | 0.2786325989   |
| 0.8243369764   | 0.7459025304   |
| 36.699837653   | 35.2410391712  |
| 54.2524118456  | 49.9592311687  |
| 46.1719768678  | 47.2281877286  |
| 9.5548807496   | 5.7638319708   |
| 0              | 0.0534472839   |
| 2.1035565547   | 1.8399593797   |
| 0              | 0              |
| 0.2249048246   | 0.3197942984   |
| 10.3092602982  | 10.2167636338  |
| 15.8384128082  | 22.1485446104  |
| 291.5928775281 | 276.412448017  |
| 7.6448263753   | 6.4112788422   |
| 12.4630335203  | 6.2651079363   |
| 0              | 0              |
| 5.9894834415   | 4.5407400282   |
| 14.9653426543  | 23.9578834778  |
| 0.8416830612   | 0.703013687    |
| 0.8370958745   | 0.2840427893   |

gene\_expression\_table

|                 |                 |
|-----------------|-----------------|
| 112.9114038548  | 110.7846330911  |
| 44.2087712698   | 45.5290154633   |
| 194.2314071398  | 239.6598757871  |
| 0               | 8.9918508673    |
| 1.6064386063    | 0.9690588968    |
| 446.0845942612  | 430.8160866967  |
| 3.4583840967    | 2.3469929677    |
| 1.6159536756    | 2.1640531431    |
| 32.5090416839   | 34.4585722675   |
| 0               | 0               |
| 25.2773006025   | 28.5902534723   |
| 12.2887164613   | 12.6357536786   |
| 3.429360392     | 2.8209652863    |
| 95.3669387122   | 82.3705100826   |
| 15.0423663014   | 14.5498044206   |
| 0               | 0               |
| 2.0997420893    | 1.8999547303    |
| 18.6165521973   | 28.8775109953   |
| 22.7467168069   | 14.9044967642   |
| 6.4012233538    | 3.5256604202    |
| 0               | 0               |
| 0.7015631432    | 0.3174052231    |
| 6.7859832663    | 8.5964297714    |
| 26.2131526953   | 21.512590398    |
| 18.3872490769   | 10.1449570001   |
| 5.8841555555    | 4.259429475     |
| 2.1911764435    | 2.6766304749    |
| 75.1096932188   | 62.104227444    |
| 0               | 0               |
| 11.8466588986   | 15.5919517071   |
| 5.631922299     | 5.8604611904    |
| 1.5332719064    | 2.1441379026    |
| 134.5694420044  | 105.8829202782  |
| 1450.8431523495 | 1408.1004777158 |
| 2.3000789441    | 1.4865927351    |
| 70.7568278746   | 72.5610095496   |
| 1.8314263363    | 1.6571688249    |
| 2.5913244365    | 2.038924994     |
| 32.1107576284   | 29.297595346    |
| 0.3543670176    | 0.2137663461    |
| 135.8877942388  | 159.6300364066  |
| 1.5444351161    | 1.4973047094    |
| 4.9098323825    | 2.6656014491    |
| 3.8258969209    | 3.7503575185    |
| 9.4703738204    | 17.9954916468   |
| 30.7820658244   | 30.1742975278   |
| 33.9247318898   | 31.4277209801   |
| 0               | 0.0978783767    |
| 0.0696642279    | 0.1891073385    |

gene\_expression\_table

|                  |                  |
|------------------|------------------|
| 97.4093231078    | 75.3714300578    |
| 0                | 0.809332727      |
| 0                | 0                |
| 0.5226835487     | 0.1182377452     |
| 0                | 0.3206819725     |
| 17.0733812038    | 11.2004337914    |
| 13899.6259671385 | 13802.3591392381 |
| 33.4594316474    | 31.855423935     |
| 2.5829345294     | 2.8683476058     |
| 0                | 0                |
| 0                | 0                |
| 0                | 0                |
| 1.2453925626     | 0.8698840907     |
| 1.3295562544     | 0.9357062868     |
| 0                | 0.4485690409     |
| 0                | 0                |
| 198.7356028666   | 218.7075450795   |
| 7.9003339523     | 7.1486288434     |
| 1.6458974457     | 1.4892927343     |
| 25.1712612592    | 24.7741698444    |
| 11.3048844692    | 7.6425366828     |
| 0                | 0                |
| 2.2318341669     | 0.5048696104     |
| 21.1521861151    | 21.175713102     |
| 0.6906754252     | 0.7291184582     |
| 0                | 0.2034118431     |
| 0                | 0.2259466266     |
| 16.8935420537    | 20.1417459427    |
| 1.9101309734     | 3.0246734561     |
| 8.9548799083     | 10.4179323972    |
| 11.8044760764    | 6.9552635598     |
| 0                | 0                |
| 0.4447917172     | 0.8049408843     |
| 0.1090698665     | 0                |
| 4.1388557851     | 3.7450497691     |
| 11.5093804163    | 11.2821365214    |
| 0.7685044987     | 1.6225590045     |
| 3.6790160519     | 5.4095650496     |
| 2.4506877136     | 1.8143250518     |
| 43.2725395188    | 21.752900714     |
| 30.3743812605    | 39.9771690738    |
| 0                | 0                |
| 244.6754356006   | 191.6275437804   |
| 41.3343967707    | 48.9781416111    |
| 23.1661764175    | 34.9365815692    |
| 55.2261477464    | 39.0402041736    |
| 359.0394563428   | 272.4539864988   |
| 106.314181068    | 141.4684466712   |
| 6.1819897918     | 5.5937825922     |



gene\_expression\_table

|                 |                 |
|-----------------|-----------------|
| 2.3886800766    | 3.2421010421    |
| 31.193515449    | 47.470156599    |
| 0               | 0               |
| 153.328492725   | 160.3212150991  |
| 1.7458487385    | 0               |
| 15.8476849025   | 7.1699005434    |
| 4.0508715747    | 2.5963512978    |
| 4.4223727065    | 2.236182912     |
| 12.3749430939   | 14.4634188134   |
| 4462.9797796902 | 4794.8554879015 |
| 6.0659215914    | 8.2331371645    |
| 10.6087467907   | 9.5993401998    |
| 16.9072131452   | 9.8067415268    |
| 0.5707803075    | 0.8263542466    |
| 0.100596807     | 0.0910251694    |
| 50.4305291034   | 44.2451436331   |
| 7.6082346121    | 4.589548216     |
| 0.5236252347    | 0.2605916868    |
| 42.2673351405   | 37.5374076447   |
| 7.8411845004    | 7.0951073745    |
| 58.9778909985   | 65.9800683631   |
| 0.5483678538    | 1.0337322131    |
| 5.2720630474    | 4.4978378033    |
| 0               | 0.0635079179    |
| 10.582218878    | 6.7027354652    |
| 0.5330480402    | 0.4823293063    |
| 16.5038124987   | 24.8891651852   |
| 0.4339695987    | 0.7853560644    |
| 5.6575673252    | 3.6566129635    |
| 149.4919235121  | 119.2599418613  |
| 17.2919887973   | 20.8622421317   |
| 0               | 0.4428659994    |
| 362.4345147228  | 327.9494058638  |
| 8.8275980618    | 7.5439059676    |
| 0.5165719412    | 0.4674208838    |
| 0               | 0               |
| 0               | 0.2526086917    |
| 411.5309414261  | 409.9291826035  |
| 18.7460592416   | 29.4014922718   |
| 0.1114365861    | 0               |
| 0               | 0               |
| 20.9161079381   | 24.2640655836   |
| 0.9606938769    | 0.8692852732    |
| 15.7469130175   | 8.5983036625    |
| 0               | 0               |
| 24.4329687627   | 19.9513095374   |
| 318.0890458182  | 368.9717743005  |
| 14.8073558549   | 16.2456300967   |
| 52.3981065783   | 52.1145706389   |

gene\_expression\_table

|                 |                 |
|-----------------|-----------------|
| 0.0753665408    | 0               |
| 44.9959505039   | 50.3460753755   |
| 0               | 0.3830616134    |
| 140.3783427983  | 146.6351725933  |
| 329.961978248   | 367.7994141872  |
| 0               | 0               |
| 3.3626942721    | 3.0427388779    |
| 2.5334359972    | 2.2923833032    |
| 2.8018066507    | 1.901414164     |
| 6.6834896508    | 6.0475654802    |
| 1.3209250882    | 1.4940512709    |
| 0               | 0               |
| 1.5385487618    | 0               |
| 5.8214694894    | 3.9506739481    |
| 3290.9326927619 | 3287.4135688988 |
| 0               | 0               |
| 5.5757472801    | 4.7929620022    |
| 9.842260703     | 7.4214867762    |
| 0.0977682781    | 0.1769315416    |
| 96.165160257    | 95.1728610747   |
| 8.510157933     | 4.9502757683    |
| 1.718769093     | 2.332846128     |
| 6.9417699921    | 5.9323113379    |
| 0.7656331224    | 0.4156705569    |
| 0               | 0               |
| 0               | 0.0342231909    |
| 0               | 0               |
| 0               | 0               |
| 0               | 0               |
| 1.1160451241    | 1.514782618     |
| 3.2092864167    | 1.1615710214    |
| 11.3550143262   | 8.2196811851    |
| 175.935237475   | 102.3398096384  |
| 66.538922348    | 57.9570816923   |
| 17.1419378635   | 12.3174855978   |
| 0.1598122341    | 0               |
| 0.7357892952    | 0.4161125189    |
| 0               | 0               |
| 1.7805154426    | 1.6827065621    |
| 1.228360613     | 4.4459356585    |
| 0.8819119849    | 0.7647493885    |
| 73.6406708277   | 39.9803218474   |
| 42.7346795646   | 30.7365301347   |
| 0.8526214299    | 1.9287393997    |
| 28.9893134253   | 33.8618661348   |
| 0.7037797457    | 4.4577129952    |
| 0               | 0               |
| 0               | 0               |
| 4.9334070155    | 12.4992017452   |

gene\_expression\_table

|                |                |
|----------------|----------------|
| 7.4092982169   | 7.397864202    |
| 3.7881236454   | 1.4432375893   |
| 66.2789932535  | 67.1122455073  |
| 2.7823975261   | 2.2658908593   |
| 1.2464098221   | 1.5037543575   |
| 0              | 0              |
| 0              | 1.4266085415   |
| 0              | 0              |
| 30.332760723   | 0              |
| 6.086799294    | 11.0152986595  |
| 53.084862539   | 52.4406975686  |
| 4.8033488965   | 5.5881222972   |
| 0              | 0              |
| 2.1692565344   | 1.7992837304   |
| 92.6751807673  | 135.0244245162 |
| 0.9783011941   | 0.5901448534   |
| 257.0428292977 | 249.9427167819 |
| 0              | 0              |
| 147.0367723181 | 98.7769028439  |
| 0              | 0              |
| 12.0300820446  | 11.580252663   |
| 24.5147344024  | 15.5504037788  |
| 2.6760927931   | 2.9595701858   |
| 65.7519257294  | 72.8156659955  |
| 24.410981001   | 13.9505129729  |
| 14.3264512056  | 15.5559726355  |
| 19.9664888013  | 26.2788463665  |
| 353.2701672578 | 167.8199420766 |
| 63.6657072338  | 83.2115688551  |
| 66.2859973442  | 34.6032591826  |
| 3.0137275691   | 1.6361855048   |
| 0.3616377467   | 0.3272284491   |
| 2.1514668359   | 1.7810764165   |
| 0              | 0              |
| 0.7608102366   | 0.3442101331   |
| 2.5138132619   | 3.5153336289   |
| 0              | 0              |
| 0.2886045739   | 0.3656019848   |
| 21.3721551383  | 10.1297565483  |
| 2.447128627    | 1.2533705388   |
| 0.1046850342   | 1.3261417096   |
| 1.5456183808   | 1.9230132272   |
| 7.1679961335   | 4.3239812577   |
| 0.3534727222   | 0.142151251    |
| 0.1009078064   | 0              |
| 3.5137715474   | 1.5897206868   |
| 2.6715193923   | 2.6859202969   |
| 0              | 0              |
| 0.4805019697   | 0.5217395002   |

gene\_expression\_table

|                |                 |
|----------------|-----------------|
| 25.4622451349  | 17.6694294085   |
| 123.5697584443 | 111.8122784071  |
| 70.9746518419  | 71.8897595478   |
| 36.0712222288  | 22.439380357    |
| 2.05920115     | 1.8632712014    |
| 1.441135708    | 0               |
| 160.0652580802 | 164.6757351666  |
| 239.3058183255 | 216.5362231011  |
| 0              | 0               |
| 145.3554959676 | 125.5467199413  |
| 2.2065194008   | 2.2461438805    |
| 6.8423532667   | 4.5620204425    |
| 3.6960248025   | 5.0165302508    |
| 0              | 0               |
| 0              | 0               |
| 6.6722497697   | 5.0636216609    |
| 54.953137129   | 62.1555341024   |
| 30.0287545305  | 16.5392121885   |
| 105.7779198312 | 95.7133069643   |
| 20.5880403214  | 12.4194124585   |
| 0.4518724575   | 0.8177549209    |
| 5.4355330854   | 7.3775252086    |
| 0              | 5.2786227283    |
| 2.0594336803   | 5.5904448204    |
| 4.3861185684   | 5.6224466402    |
| 4.6988914357   | 0               |
| 218.0988037756 | 122.4912566909  |
| 41.8368699437  | 31.8788661476   |
| 22.9068095569  | 18.5830610972   |
| 81.4284256178  | 95.3514050406   |
| 5.5986407935   | 15.1978151689   |
| 181.1406737982 | 153.9717452009  |
| 0              | 128.1731596442  |
| 4.8311450026   | 2.1857343449    |
| 5.4742825708   | 3.9627301346    |
| 3.2545299817   | 8.8345987798    |
| 40.2762123057  | 136.6649631817  |
| 0              | 0               |
| 25.9517216431  | 37.5719258438   |
| 9.0493004921   | 11.6975327338   |
| 34.2288748569  | 54.2010839317   |
| 13.8908834412  | 16.7589151931   |
| 0              | 0               |
| 0.2280017176   | 0.7220769179    |
| 0              | 0               |
| 0              | 0               |
| 0              | 7.139986719     |
| 862.3516654739 | 1061.4894312815 |
| 94.7300300738  | 73.1546909712   |

gene\_expression\_table

|                 |                |
|-----------------|----------------|
| 315.8500952304  | 330.9233343188 |
| 26.752048901    | 27.6647210897  |
| 1.9813833612    | 1.7928576604   |
| 234.6556144103  | 249.7982108487 |
| 2.888548388     | 5.2274145489   |
| 18.8714598833   | 16.2001827873  |
| 11.9339104176   | 10.0271010028  |
| 0               | 0.7790072251   |
| 0               | 0              |
| 1.6142250605    | 2.0866198997   |
| 43.5322790154   | 27.1848183192  |
| 1.8199183482    | 2.0584447561   |
| 0               | 9.2256012882   |
| 797.0815484042  | 658.5238582196 |
| 0               | 0              |
| 37.1311280313   | 31.3582789628  |
| 83.7840300971   | 77.9179951195  |
| 6.4500698089    | 14.590887979   |
| 13.4843418741   | 10.1677722145  |
| 0               | 0              |
| 0               | 0              |
| 296.9326149966  | 247.8115722424 |
| 0               | 0              |
| 296.5458924339  | 295.1629875547 |
| 6440.5136317279 | 5192.912856967 |
| 8.7261111888    | 5.9218759465   |
| 0               | 0              |
| 8.1033367996    | 14.6646325391  |
| 101.9026230204  | 66.1718949913  |
| 0               | 0              |
| 36.2126033948   | 29.4903248921  |
| 1.7828846088    | 1.6132457711   |
| 0.927511045     | 1.9582727237   |
| 17.6035196849   | 9.4391530563   |
| 75.6852803514   | 102.7259065387 |
| 0               | 3.4879353879   |
| 276.395506948   | 192.6975980862 |
| 9.5243136077    | 11.849872695   |
| 5.9309178487    | 0              |
| 42.290022921    | 37.1407135235  |
| 89.655843847    | 67.3166741571  |
| 1.3494943262    | 2.4421838678   |
| 12.2235008353   | 16.1956630016  |
| 54.115195207    | 48.9662142964  |
| 7.1449842839    | 5.6031296364   |
| 639.9148205152  | 709.0551815529 |
| 7.9121789088    | 11.9322446162  |
| 127.4240865305  | 105.6915501288 |
| 3.8025815143    | 5.8695513799   |

gene\_expression\_table

|                |                |
|----------------|----------------|
| 29.1394305728  | 23.3819296016  |
| 1.7937125532   | 0              |
| 126.1454388377 | 127.9783880225 |
| 205.8430743401 | 190.7455401471 |
| 0              | 0              |
| 6.9049019914   | 0              |
| 0              | 0              |
| 2.6540246012   | 0              |
| 2.9672682342   | 4.0274055654   |
| 45.5064186182  | 38.0091231575  |
| 161.5389214756 | 133.7288395911 |
| 3.7656621261   | 0              |
| 0              | 0              |
| 42.2492024356  | 38.2292532143  |
| 87.5228428779  | 118.7927604381 |
| 0              | 10.6323506926  |
| 0              | 1.423225037    |
| 121.52618153   | 85.8248935168  |
| 375.4318361355 | 530.0648214834 |
| 3.7656621261   | 0              |
| 1.5888982203   | 0              |
| 6.2928867405   | 3.79608524     |
| 0              | 0              |
| 4.8048931032   | 2.8984764133   |
| 4.3998968359   | 5.9718797241   |
| 8.2926326633   | 4.5021605468   |
| 3.8425224935   | 1.390764861    |
| 5.3541496909   | 6.4596136726   |
| 2.625055399    | 1.1876426271   |
| 3.7019499685   | 2.7406758238   |
| 2.0130233736   | 1.8214871723   |
| 8.0041213398   | 5.9257153753   |
| 1.4389563325   | 1.7360556833   |
| 20.894109115   | 20.1337320777  |
| 0.2449599219   | 0.2216523471   |
| 1.9681592049   | 1.6112830237   |
| 0.8065806373   | 0.8920213876   |
| 10.148001074   | 8.3476670524   |
| 2.937161877    | 4.2523124188   |
| 20.9891140554  | 10.6830173521  |
| 0              | 0              |
| 4.2073220497   | 1.6920006976   |
| 18.84350897    | 17.4768413412  |
| 29.8894931188  | 12.621257594   |
| 15.9606254636  | 11.1092273232  |
| 8.2954026696   | 8.444370775    |
| 2.3628772099   | 1.9242476394   |
| 9.6558953724   | 19.6585901704  |
| 2.9383054781   | 2.4814813808   |

gene\_expression\_table

|                |                |
|----------------|----------------|
| 203.3570018115 | 207.3739638226 |
| 0.7705745172   | 1.3945109795   |
| 3.43150146     | 1.8629994981   |
| 0              | 0              |
| 0              | 0              |
| 41.414423849   | 44.0869442089  |
| 9.9058918488   | 9.5609182589   |
| 31.4361714441  | 30.2921483716  |
| 0              | 0              |
| 16.0365551855  | 26.1192611541  |
| 0              | 0              |
| 6.5590138947   | 0              |
| 25.8937654208  | 31.2400158387  |
| 0              | 0              |
| 0.5619557797   | 1.0169730342   |
| 0.1326501551   | 0.1200286887   |
| 82.7301784967  | 74.8585241827  |
| 3.6811402775   | 6.9179923721   |
| 39.0375514923  | 42.7164111166  |
| 30.6757089916  | 21.3232279958  |
| 20.0568296934  | 18.1484519665  |
| 2.5416656532   | 1.623409355    |
| 6.6958866007   | 9.3406236046   |
| 0              | 0              |
| 3.8998932853   | 4.0329419408   |
| 0              | 0              |
| 0              | 0.1751952152   |
| 87.8483333682  | 75.7490026855  |
| 0.5524165601   | 0.4998549402   |
| 0              | 0              |
| 49.5698456662  | 7.4755580087   |
| 138.3818328272 | 108.5196716811 |
| 0.0961067242   | 0.0869623113   |
| 26.9893689865  | 23.5279056133  |
| 36.7233675314  | 19.6913738318  |
| 0.686063633    | 1.2415713829   |
| 8.4402451848   | 5.940019804    |
| 104.8739067549 | 87.3036846455  |
| 38.7785612465  | 30.1927214219  |
| 0.2197459672   | 0.15465136     |
| 1.1138299036   | 1.0078506331   |
| 0.0254151199   | 0              |
| 2.2647632653   | 2.8689841391   |
| 0.3727582959   | 0.3372908945   |
| 0.8997969703   | 1.7640623376   |
| 9.2124123395   | 11.2352961825  |
| 0.6597060005   | 0.5969359488   |
| 7.2515198349   | 5.2915713154   |
| 3.4703116864   | 0.7850291635   |

gene\_expression\_table

|                 |                 |
|-----------------|-----------------|
| 6.1964813344    | 11.1336920679   |
| 16.0092806361   | 16.6589244087   |
| 23.3855914474   | 26.9315288522   |
| 0               | 0.7398058528    |
| 0.0911570964    | 0.3299345332    |
| 3.5878662013    | 6.7635125637    |
| 6.321591641     | 6.3556683685    |
| 0               | 0.0857830215    |
| 27.9954013319   | 31.0888802905   |
| 0.9048191449    | 0.5458179596    |
| 0.2342655412    | 0.4239510419    |
| 2.5697278062    | 5.4255180006    |
| 0.5541365035    | 0.1790754406    |
| 0               | 0               |
| 126.9717623942  | 111.8671502128  |
| 0               | 0               |
| 1115.0125555514 | 1051.8535556495 |
| 147.1829653099  | 84.3904782636   |
| 4.0806315047    | 2.1719796723    |
| 2.3342225274    | 2.112124701     |
| 0               | 3.4294935559    |
| 0               | 0.1313602396    |
| 0.1647198183    | 0.1490469709    |
| 40.660700178    | 30.3371762498   |
| 10.8615753239   | 8.0411829311    |
| 1.201248001     | 2.5362190644    |
| 30.6668444336   | 28.8588970512   |
| 0.2054764091    | 0               |
| 0.5388756383    | 0               |
| 0               | 0               |
| 0               | 0               |
| 28.6568174106   | 32.6945540442   |
| 0               | 0               |
| 6.1067172857    | 5.0233383217    |
| 0.6748407913    | 0.9159460298    |
| 0.9633792693    | 1.4528585909    |
| 5.1735755553    | 6.2417566416    |
| 2.6208115516    | 1.778583902     |
| 0               | 0               |
| 0               | 0               |
| 20.5824593325   | 15.337468359    |
| 0.1355802132    | 0.1226799562    |
| 54.8372931788   | 43.5789580606   |
| 0               | 0               |
| 1.1440191773    | 0.690111628     |
| 0               | 0               |
| 0               | 0               |
| 4.0684189505    | 3.8413720647    |
| 9.6653624382    | 4.8976017862    |



gene\_expression\_table

|                |                |
|----------------|----------------|
| 13.7344523921  | 5.5233953462   |
| 8.246913031    | 6.8882136319   |
| 2.0526249167   | 0              |
| 1.9990879621   | 2.5841109924   |
| 1.6599417382   | 2.1028010263   |
| 1.5785468918   | 1.2243004167   |
| 9.6328625464   | 12.9338792067  |
| 2.4754785354   | 3.7332340139   |
| 6.0579159709   | 14.0953222599  |
| 154.3014349821 | 133.5869234704 |
| 4.201765551    | 2.4194378496   |
| 6.3078503708   | 10.1922637911  |
| 74.2336509621  | 62.6165013267  |
| 7.3588881716   | 6.4870848284   |
| 32.8832029053  | 34.5151210618  |
| 2.4995931924   | 2.0172459329   |
| 0              | 0.3348807266   |
| 2.8810731905   | 2.1953206998   |
| 1.7545880863   | 1.9845520261   |
| 0.6649071644   | 0.6016422296   |
| 0              | 0.0592458223   |
| 1.5497432586   | 1.4022874761   |
| 8.9903818954   | 11.1479086063  |
| 10.8474144606  | 9.0404069675   |
| 0              | 0              |
| 3.1036420458   | 2.8083350884   |
| 0              | 0.0573384559   |
| 0              | 0              |
| 4.0975036031   | 3.7076321862   |
| 1.1195047732   | 0.8103884378   |
| 2.5989860446   | 0              |
| 43.2209080172  | 34.7631132843  |
| 20.4772742565  | 19.0435832906  |
| 50.6364804758  | 48.8730604104  |
| 0.5330869929   | 0              |
| 0              | 0              |
| 1.5408235197   | 3.1369869836   |
| 0              | 0              |
| 72.1397307661  | 77.0107067529  |
| 0              | 0              |
| 7.4229196741   | 5.5971998573   |
| 0              | 0              |
| 14.394701248   | 17.6768762103  |
| 159.9190115821 | 147.7817400376 |
| 7.3970019088   | 8.1274426935   |
| 2.8034082522   | 4.058668955    |
| 1.403497466    | 2.5399135094   |
| 5.7493988865   | 0              |
| 28.2954125821  | 40.1115951799  |

gene\_expression\_table

|                |                |
|----------------|----------------|
| 14.5856822031  | 9.2385132564   |
| 41.6299067526  | 70.9061319549  |
| 0.6575948938   | 0.7933676143   |
| 0              | 2.9356983419   |
| 32.6643087487  | 28.4616684517  |
| 190.7197112124 | 172.5730123314 |
| 39.1784583989  | 42.5408231257  |
| 28.6360312223  | 23.3202196252  |
| 104.2422766629 | 134.498720447  |
| 53.4567431879  | 56.3538792403  |
| 69.7303864019  | 44.5381010178  |
| 29.8304189486  | 25.1926253945  |
| 129.0394272501 | 204.9813286213 |
| 0              | 0              |
| 167.0351676511 | 163.7371862906 |
| 0.5277457103   | 0              |
| 76.8987442938  | 77.6106279865  |
| 4.621169142    | 8.3629434447   |
| 10.3018943744  | 4.6608421689   |
| 8.7927227246   | 5.9670811064   |
| 23.8248246702  | 37.1275422974  |
| 1.5670541762   | 5.6718051419   |
| 54.0944943614  | 17.4812439663  |
| 15.2249378146  | 8.2657844788   |
| 4.9271316174   | 12.6319132401  |
| 0              | 0              |
| 256.763467882  | 332.1216463737 |
| 46.5541094695  | 44.9328583479  |
| 0              | 0              |
| 11.2144949329  | 20.2949046016  |
| 18.345980451   | 6.0365045466   |
| 20.6051877024  | 30.1182557643  |
| 702.8561511937 | 596.3772496028 |
| 169.5286321888 | 172.5730123314 |
| 50.9319959186  | 46.0858917196  |
| 0              | 5.1751608951   |
| 0.4986519672   | 0              |
| 66.6647554532  | 45.959392318   |
| 12.1971908333  | 12.0399776045  |
| 2.0671660396   | 5.6114347308   |
| 6.1848486256   | 2.7981847061   |
| 4.0161649514   | 7.2680655742   |
| 5.2191228431   | 7.0837965176   |
| 215.8088817196 | 189.0428049324 |
| 508.8833468461 | 409.9251328647 |
| 4.6203967723   | 6.2711592637   |
| 31.3877186972  | 42.6018354214  |
| 6.3379921406   | 0              |
| 12.8039121613  | 11.585638827   |

gene\_expression\_table

|                |                |
|----------------|----------------|
| 0              | 19.3362657537  |
| 3.8004839562   | 3.43887352     |
| 11.1815490416  | 21.9215558518  |
| 33.0494428996  | 27.6044651194  |
| 16.1228834721  | 12.5046985019  |
| 0              | 33.5924565989  |
| 3.2035551287   | 1.6104119939   |
| 5.8290283291   | 5.2744048915   |
| 3.3988331824   | 3.0754392243   |
| 11.5519064986  | 26.1318991357  |
| 7.9334856567   | 4.7857508081   |
| 11.5089480904  | 7.4384919108   |
| 2.1700631494   | 1.9635848453   |
| 0              | 0              |
| 10.7742664016  | 8.2097775698   |
| 32.3946631598  | 49.6055302739  |
| 8.8434051568   | 8.4726722281   |
| 0              | 0              |
| 49.4997723757  | 37.3249517765  |
| 5.4125455957   | 1.95901995     |
| 7.4897627863   | 2.710849167    |
| 0              | 1.9966478287   |
| 150.8832347362 | 155.5771853594 |
| 14.0319001036  | 12.69678553    |
| 15.9396116982  | 19.2306415781  |
| 1.3062993919   | 0              |
| 239.2587924981 | 190.8224853428 |
| 372.9449348998 | 521.5287433084 |
| 1.6005329137   | 1.8103057131   |
| 1.0472335564   | 3.3165679049   |
| 0              | 0              |
| 52.4881228834  | 46.0097693922  |
| 5.0258552903   | 4.5476525812   |
| 17.7149804611  | 20.8382540995  |
| 2.3103812997   | 0              |
| 2.1128825818   | 0.8193621104   |
| 2.3109563596   | 3.5846953279   |
| 9.1300019275   | 9.4007847923   |
| 44.3480994828  | 32.1027546456  |
| 45.025895932   | 39.2327947797  |
| 3.5077072865   | 1.3602660506   |
| 23.0117286579  | 27.8567225562  |
| 22.2591195672  | 15.8252263801  |
| 3.5012777752   | 3.3793454563   |
| 1.6164267383   | 1.5056445365   |
| 2.4883934816   | 0.7139303589   |
| 0              | 0              |
| 2.9229806487   | 2.1639791098   |
| 2.1575560551   | 1.8020933377   |

gene\_expression\_table

|                 |                 |
|-----------------|-----------------|
| 3.061322282     | 2.9547114534    |
| 2.4556185993    | 2.2219701159    |
| 12.3647552428   | 11.5079318134   |
| 3.5415770533    | 3.364831288     |
| 4.459435855     | 2.5678081665    |
| 24.902105781    | 20.9787273834   |
| 0.2891410604    | 0               |
| 3.8767258955    | 4.3848264393    |
| 0.3693966101    | 0               |
| 4.1400598303    | 2.8646947215    |
| 1.1778610629    | 0.775119507     |
| 0               | 0               |
| 1.5296501327    | 1.3841061815    |
| 7.6307834246    | 13.8094513006   |
| 0.8361384145    | 0.3782905396    |
| 0.853001522     | 0.5467197782    |
| 193.2458001026  | 148.2498077428  |
| 61.1315275464   | 60.5830437345   |
| 22.1935775901   | 16.065513165    |
| 1.0473087293    | 1.4214882754    |
| 3.9447819758    | 5.099202566     |
| 26.9331237748   | 54.8335728462   |
| 2.9595823303    | 2.677982442     |
| 65.0227664026   | 64.778971069    |
| 12.3378410966   | 11.1639137359   |
| 4.4039696667    | 2.6566256376    |
| 3490.9687912314 | 3413.7793367475 |
| 324.223509061   | 412.5573576049  |
| 171.521621252   | 164.901691798   |
| 800.2060310034  | 565.3678589566  |
| 101.3785147035  | 99.3768736327   |
| 25.6621188145   | 26.6689812693   |
| 44.5422392028   | 23.5107313696   |
| 0               | 0               |
| 4.19174236      | 4.073860136     |
| 5.2648881018    | 4.0493505077    |
| 8.2070965523    | 6.6444978103    |
| 2.42306099      | 2.4361225722    |
| 17.1446038869   | 40.3346323769   |
| 0               | 0               |
| 0               | 0               |
| 16.5796112588   | 10.9106078044   |
| 3.1600731877    | 9.5313229683    |
| 42.0373026901   | 56.3518746915   |
| 2.0102036247    | 3.6378714366    |
| 2.2336279712    | 1.0105507841    |
| 0.5974145405    | 0.5405714292    |
| 0               | 0               |
| 2.06589766      | 3.1155509141    |

gene\_expression\_table

|                |                |
|----------------|----------------|
| 12.1956460639  | 8.5829709393   |
| 0.2783379514   | 0              |
| 0              | 0              |
| 12.1099418225  | 6.5746192447   |
| 21.8612382381  | 25.1760392581  |
| 2.0514704595   | 2.4750347663   |
| 47.0915102395  | 37.5977846308  |
| 15.9652461562  | 15.4311431444  |
| 0              | 0              |
| 0.9693746534   | 0.8771400866   |
| 23.3423950237  | 12.4808276317  |
| 0.2818844628   | 0              |
| 34.6351523033  | 54.8444202395  |
| 6.2372792831   | 4.0827571613   |
| 0              | 2.0136004032   |
| 39.1183100329  | 33.4567394715  |
| 0              | 0              |
| 1.3760960064   | 2.490325007    |
| 104.176734059  | 101.9595305643 |
| 10.3029047603  | 13.4659757367  |
| 0              | 0              |
| 0.7403865781   | 0.8039278662   |
| 70.5631530834  | 50.264242787   |
| 5.6594483738   | 13.2291472312  |
| 0              | 0              |
| 41.0183122673  | 37.5852966359  |
| 28.621318642   | 36.9972034844  |
| 0              | 0              |
| 252.5083892856 | 256.3463192885 |
| 26.0218811834  | 22.3066777415  |
| 2.0956704837   | 1.8962705319   |
| 0              | 0              |
| 11.9703723517  | 8.4448274335   |
| 1.5094204332   | 0.682900654    |
| 25.1726326911  | 9.1109975454   |
| 25.4848173061  | 11.5299872868  |
| 0              | 0              |
| 0              | 10.0758141144  |
| 6.9650592709   | 3.1511720834   |
| 0              | 0              |
| 101.529866992  | 99.6881266821  |
| 0              | 8.0827563939   |
| 0              | 0              |
| 0              | 0              |
| 242.3821341389 | 97.4754808923  |
| 68.3883821638  | 81.5377506152  |
| 1.776170666    | 1.0714471001   |
| 18.7356278243  | 15.8227631373  |
| 0              | 0.7084620163   |

gene\_expression\_table

|                |                |
|----------------|----------------|
| 0              | 0              |
| 0              | 0              |
| 3.7173844066   | 5.5042048961   |
| 0              | 0              |
| 15.4220361751  | 13.2201968278  |
| 0              | 0              |
| 6.6509335466   | 4.6425397175   |
| 0              | 0              |
| 52.9905250887  | 31.9657032527  |
| 31.8734197875  | 0              |
| 23.1649503695  | 31.4412593253  |
| 0              | 0              |
| 2.9285543773   | 2.649906753    |
| 2.4436911327   | 2.5270600344   |
| 32.5792137873  | 42.3765652024  |
| 3.7794160988   | 1.3679240953   |
| 456.4228083548 | 342.9957246683 |
| 13.5532353997  | 23.5053580428  |
| 85.0621197197  | 60.8855968063  |
| 9.7854177785   | 0              |
| 4.408235696    | 9.7906874219   |
| 31.6349911269  | 45.7999494999  |
| 184.3730990869 | 161.2692619449 |
| 3.4500018699   | 0              |
| 0              | 0.5234461537   |
| 0              | 4.9833290968   |
| 106.8662684068 | 101.7874745054 |
| 1.8114651535   | 1.1707906566   |
| 13.5868608812  | 11.7436094399  |
| 60.7365491151  | 70.4143688276  |
| 2.7845393297   | 12.5979726223  |
| 1.920047627    | 2.0848295168   |
| 9.8667187087   | 10.2033314218  |
| 3.353405566    | 5.2411223265   |
| 0              | 0              |
| 1.7128904069   | 1.2399291313   |
| 0              | 0              |
| 0              | 0              |
| 0.3622818928   | 0.4917169585   |
| 57.6682130741  | 61.2125237188  |
| 0              | 12.6749208755  |
| 12.812696645   | 7.2459921751   |
| 0.2393657065   | 0.3248856195   |
| 57.6766564435  | 51.2223483527  |
| 214.2337616834 | 233.9565774772 |
| 3.9780217871   | 1.1998396295   |
| 145.9005790775 | 121.0168248974 |
| 3.4072998383   | 3.0831002904   |
| 18.6904565235  | 13.8765843578  |

gene\_expression\_table

|                |                |
|----------------|----------------|
| 9.103467857    | 6.0195553977   |
| 1.4725214339   | 1.90344742     |
| 34.6416709647  | 33.6391452112  |
| 52.2861396618  | 47.3111906853  |
| 2.6016218449   | 3.3104269241   |
| 6.4189835811   | 5.2802061567   |
| 0              | 0              |
| 7.1971477445   | 13.0246995298  |
| 137.3181920729 | 186.378853318  |
| 7.0756827875   | 6.4024420191   |
| 3.8524147885   | 1.7429316052   |
| 14.8345533236  | 12.925916834   |
| 1.9566242542   | 3.3196018985   |
| 2.8216248758   | 3.0637817228   |
| 1.0182425376   | 1.8427165277   |
| 13.5391491507  | 16.9062683616  |
| 0              | 0              |
| 0              | 0              |
| 0.6414283664   | 1.3929537709   |
| 0.0340381018   | 0.1231977066   |
| 16.6658866823  | 6.7022898557   |
| 0              | 1.8015605136   |
| 0              | 0              |
| 0              | 0              |
| 0.3657664496   | 0.330964312    |
| 3.0975220975   | 3.6271496335   |
| 5.145043783    | 6.9832506974   |
| 4.3970790455   | 4.9733793345   |
| 22.9530056508  | 20.4046915662  |
| 0              | 0              |
| 13.8835399841  | 5.5833518475   |
| 3.4976964778   | 1.8461892301   |
| 6.7703284955   | 4.0840944914   |
| 0              | 0              |
| 21.2241075133  | 16.4611414506  |
| 0.2550129849   | 0.230748876    |
| 0              | 0              |
| 1.6931284131   | 1.723533463    |
| 110.4145647843 | 117.9478676356 |
| 1.7034510108   | 0              |
| 0              | 0              |
| 5.2068852649   | 5.4553722139   |
| 9.9411344735   | 10.155927655   |
| 5.9687278796   | 4.9507445497   |
| 0              | 0              |
| 1.1768601161   | 1.4198448186   |
| 3.1270552232   | 2.2400370914   |
| 0              | 0              |
| 0.6350406053   | 0.2873087148   |

gene\_expression\_table

|                |                |
|----------------|----------------|
| 2.9221234267   | 1.8886340698   |
| 20.1724461809  | 17.0361965349  |
| 0              | 1.9879288425   |
| 2.4089253563   | 1.453146444    |
| 101.2231924915 | 76.7082624842  |
| 6.0688461707   | 7.488278754    |
| 72.3510184766  | 65.4669259112  |
| 88.6887921448  | 104.7332916895 |
| 0.5094400688   | 0.645354638    |
| 11.7014671579  | 3.0251685251   |
| 26.7648552754  | 32.9367775957  |
| 0              | 0              |
| 5.1651446596   | 1.3353396494   |
| 0              | 0              |
| 0.3538556427   | 0.4031981937   |
| 0              | 0              |
| 0.5634722695   | 1.0197174303   |
| 10.2723869162  | 5.4924908236   |
| 10.4175535606  | 11.410831086   |
| 35.5421629909  | 31.0117937159  |
| 2.4551020837   | 0              |
| 47.524618592   | 30.1934000714  |
| 0              | 0              |
| 0              | 0              |
| 0.4471500171   | 1.6184174131   |
| 1.6418350716   | 2.1789047706   |
| 3.9768796495   | 2.734848922    |
| 0              | 0              |
| 41.6613175084  | 35.9021949237  |
| 354.738662855  | 297.6884462717 |
| 9.408526028    | 10.835132853   |
| 0              | 0              |
| 2.2256209149   | 5.0346409287   |
| 0              | 0              |
| 6.6966063549   | 4.8057581184   |
| 5.0622571567   | 9.1611817276   |
| 0              | 0              |
| 33.2167406833  | 42.9374526562  |
| 0              | 0              |
| 0              | 1.5025135655   |
| 0              | 0.4072336263   |
| 1.5413118432   | 3.254202694    |
| 107.5475211958 | 110.1389292431 |
| 25.1080470878  | 20.6536849865  |
| 8.02714067     | 6.7681403103   |
| 36.7951451004  | 29.398018453   |
| 0.2193268078   | 0.5953745577   |
| 0.6622748041   | 0.7555891174   |
| 67.0866576358  | 65.3729582481  |



gene\_expression\_table

|                 |                 |
|-----------------|-----------------|
| 12.0559617297   | 14.2421159556   |
| 37.9931435503   | 30.0027508774   |
| 933.8264843469  | 752.6661594706  |
| 4.9797543949    | 2.8162113237    |
| 11.1148231903   | 3.3524213924    |
| 6.4042552668    | 4.2144726076    |
| 0               | 0               |
| 4.9887362059    | 5.4168783875    |
| 2.4644989632    | 3.446372177     |
| 49.8706271886   | 56.6692459413   |
| 1.1779339279    | 1.6749153994    |
| 2.4162058886    | 2.1863074664    |
| 0               | 0               |
| 6.6523390835    | 9.6978881366    |
| 0               | 0               |
| 0.4555727159    | 1.4427897567    |
| 0               | 0               |
| 0.9145651544    | 1.655091261     |
| 0.8748610606    | 0               |
| 5.6859150069    | 3.0011966778    |
| 35.5581195802   | 18.6275256384   |
| 20.8076411912   | 24.7115201275   |
| 9.955686051     | 15.0140287085   |
| 60.2591290639   | 77.1337217402   |
| 13.0793885323   | 10.3555410246   |
| 5.4282372766    | 5.856315538     |
| 111.8012100211  | 72.2596357053   |
| 301.7408569729  | 364.0408800276  |
| 4.7242133059    | 8.2440862449    |
| 164.108846311   | 188.563977052   |
| 0               | 0               |
| 2.2809439393    | 1.2899471824    |
| 0               | 0               |
| 2.4044261549    | 0.5933586973    |
| 0               | 0.5561477565    |
| 0.9022359723    | 1.2245843278    |
| 4.908224717     | 4.8557277257    |
| 0               | 0               |
| 6.203507108     | 8.8208254633    |
| 2084.6316336681 | 1948.3026225331 |
| 4.7548957286    | 7.9903096403    |
| 14.4696497509   | 11.2224719527   |
| 41.5142044548   | 46.4609708602   |
| 4.5898727197    | 8.3063062168    |
| 20.9433826216   | 23.0115044127   |
| 2.5882664374    | 2.3419967081    |
| 4.1943532867    | 4.7440834567    |
| 12.4382420356   | 14.5649856955   |
| 2.5820499913    | 0.8344184813    |

gene\_expression\_table

|                |                |
|----------------|----------------|
| 0              | 0              |
| 0              | 0              |
| 40.9117543575  | 41.9083713349  |
| 14.1239669969  | 0              |
| 9.3200738995   | 9.3703140346   |
| 15.8227234075  | 17.7260752699  |
| 66.7955561506  | 25.9028818378  |
| 0.955659783    | 0              |
| 2.3028146483   | 0.5209263088   |
| 0.0839155321   | 0.1518621863   |
| 3.3617644949   | 3.0418975676   |
| 565.2026457638 | 429.5079785361 |
| 1.5567332591   | 1.4086123884   |
| 18.1973282933  | 20.2656976968  |
| 82.898056294   | 67.1968423372  |
| 6.9708828991   | 10.8949690928  |
| 8.5984036388   | 3.890139115    |
| 1.3744831615   | 1.9021341812   |
| 49.1053225959  | 44.433023666   |
| 2.7090772256   | 2.0427604401   |
| 0              | 0              |
| 68.6609388709  | 64.4902314719  |
| 6.2681045      | 4.9154764647   |
| 4.0922958861   | 1.8514599878   |
| 3.9231131777   | 3.5498347522   |
| 29.2920766418  | 30.3334757443  |
| 8.404272918    | 7.8218935824   |
| 7.3366030378   | 4.4256907286   |
| 0              | 16.7154158564  |
| 34.5009251628  | 38.541003805   |
| 0              | 0              |
| 5.2869712036   | 1.1959809252   |
| 0              | 0              |
| 2.8970370334   | 2.0971105903   |
| 31.4549368484  | 23.7183717147  |
| 0.1609156151   | 0.7280236599   |
| 1.0974093951   | 0.9929925117   |
| 362.4859107515 | 300.6629189998 |
| 3.1793545234   | 8.6305309065   |
| 2.1526491393   | 2.4347846907   |
| 4.9340743685   | 0              |
| 38.6456299333  | 36.7772736925  |
| 7.9363883363   | 12.5671922355  |
| 6.0285343603   | 4.5457735154   |
| 12.945925384   | 10.9331970545  |
| 1.3698441567   | 1.5149511765   |
| 10.2626803307  | 9.7147953656   |
| 130.5025855646 | 100.2836295365 |
| 0.7759458404   | 0.6085003076   |

| gene_expression_table |                |
|-----------------------|----------------|
| 0                     | 0              |
| 0                     | 0              |
| 0                     | 0              |
| 0.6636973074          | 0.6005474887   |
| 0.5199407686          | 0              |
| 1.0923563739          | 1.482630417    |
| 50.42356284           | 34.2193764732  |
| 1170.9022185732       | 989.7891409485 |
| 11.3306170653         | 4.5566780372   |
| 5.5648512358          | 4.4429681104   |
| 0                     | 0              |
| 10.7106034661         | 5.6812272817   |
| 5.4854600689          | 4.581716902    |
| 4.3604476712          | 7.8911150289   |
| 15.0946505105         | 10.4064128039  |
| 1.3687128565          | 0.9526783457   |
| 1.0003467883          | 0.9051652687   |
| 8.1171837032          | 6.8202138278   |
| 10.3297214763         | 7.3149368337   |
| 2.1503005336          | 4.3778308797   |
| 0.709978487           | 2.5697003296   |
| 46.0058826756         | 24.816984946   |
| 0                     | 0              |
| 0                     | 0              |
| 6.6411017969          | 4.8073686144   |
| 92.7867769185         | 76.7618305056  |
| 19.868440183          | 5.99266248     |
| 2.2796965481          | 8.2511471521   |
| 0                     | 11.4798569073  |
| 0                     | 0              |
| 550.218285504         | 430.7378513298 |
| 0                     | 0              |
| 0.8933417774          | 1.6166832529   |
| 0.2254265614          | 0.407955114    |
| 0                     | 0              |
| 0                     | 0              |
| 158.4831833297        | 130.3670386111 |
| 27.9717367863         | 43.0274544741  |
| 772.1403138151        | 925.1649729132 |
| 1.8352274098          | 4.9818246956   |
| 99.9551110726         | 131.8343994576 |
| 6.4665872732          | 8.4518792851   |
| 1.4881740012          | 6.7328822131   |
| 30.6634607282         | 33.8152884731  |
| 3.7849647717          | 4.566441284    |
| 8.7773574373          | 5.2948032259   |
| 70.8784576983         | 44.4007918499  |
| 121.3358024652        | 84.9325675785  |
| 6.7380991439          | 7.5039741054   |

gene\_expression\_table

|                |                |
|----------------|----------------|
| 11.6876298326  | 11.4568665396  |
| 62.4208737328  | 50.5361861151  |
| 0              | 0              |
| 0              | 0              |
| 45.3174406246  | 46.8634892236  |
| 0              | 0              |
| 0.6972326445   | 1.261783976    |
| 348.7184170258 | 257.5083287028 |
| 12.0266610167  | 3.109240566    |
| 0              | 8.4627150278   |
| 0              | 0.6523612909   |
| 4.3048677882   | 3.8952659753   |
| 675.4018304011 | 810.6937211319 |
| 115.1295817684 | 80.4989966058  |
| 0              | 0              |
| 0              | 0              |
| 1.0273965149   | 0              |
| 0              | 0              |
| 10.158523128   | 19.6970456865  |
| 59.1270920982  | 71.3349821328  |
| 17.4313714549  | 21.5083666395  |
| 81.435911519   | 41.2649466861  |
| 716.4760579697 | 700.6926549797 |
| 260.2248776938 | 225.9830582236 |
| 24.0454808317  | 31.7995529188  |
| 0              | 0              |
| 0              | 0              |
| 627.385838668  | 509.7140491396 |
| 81.6303127998  | 54.1664266605  |
| 1.0659013667   | 4.8224121286   |
| 12.6904023017  | 18.5493472709  |
| 4.7742336086   | 4.3199723309   |
| 1.5831226028   | 0              |
| 114.0516545456 | 72.2398656271  |
| 340.1826973309 | 307.8148160368 |
| 0              | 1.8370326923   |
| 0              | 0              |
| 4.9407578421   | 0              |
| 1.1646889046   | 0              |
| 3.5179371261   | 4.2442808048   |
| 39.5629877128  | 38.8546082824  |
| 0              | 0              |
| 92.3699777096  | 63.6808462749  |
| 2.9244453613   | 5.2923774076   |
| 673.8147676804 | 544.7511847758 |
| 5.5581172982   | 0              |
| 0              | 7.8864011012   |
| 73.4935023824  | 75.1747090511  |
| 0              | 0              |

gene\_expression\_table

|                 |                 |
|-----------------|-----------------|
| 10.4795920412   | 12.2714373734   |
| 0               | 0.6833248159    |
| 301.5574278805  | 224.7120926529  |
| 2.2857681197    | 4.136561317     |
| 0               | 1.5146667558    |
| 0               | 0               |
| 6.3770832485    | 5.7703131946    |
| 55.7627035145   | 64.2179549727   |
| 21.8675927874   | 11.8721541757   |
| 37.0041477263   | 29.2389011034   |
| 1.92557185      | 0               |
| 88.1574495936   | 71.7924586043   |
| 7.3497437126    | 4.4336176346    |
| 0               | 0               |
| 0.9682809867    | 0               |
| 0               | 7.276411231     |
| 7.3243262589    | 11.597998005    |
| 11.4312284469   | 55.165674352    |
| 68.2775450494   | 57.9197226237   |
| 68.6052879675   | 89.6676388525   |
| 314.1284412069  | 288.6125005835  |
| 1.2537106688    | 1.13442195      |
| 19.9233262384   | 14.2977923057   |
| 282.6761729237  | 318.603098735   |
| 3.6787841421    | 3.3287532636    |
| 0               | 1.4907221594    |
| 1369.4087847816 | 1437.1851564295 |
| 9.8867386142    | 5.0097768196    |
| 0.3713309683    | 0.4199992188    |
| 0.9786074122    | 0               |
| 0.2169622126    | 0.3926371569    |
| 5.2109150678    | 6.9966062237    |
| 0.1967561381    | 0.2373801095    |
| 0.7172028662    | 0.8112025908    |
| 0               | 0               |
| 0               | 0               |
| 0               | 0               |
| 1.8241182619    | 1.9714975675    |
| 0               | 0               |
| 2.5680693337    | 1.2909562938    |
| 25.4110790011   | 21.5098167233   |
| 4.1838290652    | 0.946435977     |
| 0               | 0               |
| 0               | 0               |
| 0.0392482283    | 0               |
| 0.7280831333    | 0.9882106475    |
| 1.7790728585    | 1.9317560439    |
| 0               | 0               |
| 8.8247429979    | 8.4841493417    |

gene\_expression\_table

|                 |                 |
|-----------------|-----------------|
| 1.6760789681    | 1.7061778456    |
| 0               | 0               |
| 0               | 0               |
| 1.5941353288    | 4.3273671191    |
| 35.768375428    | 32.3650673261   |
| 0.3032267418    | 0.2743751651    |
| 10.091251741    | 19.9742463372   |
| 16.1587212164   | 20.9284455116   |
| 2.3450024229    | 1.8389617179    |
| 0.6503450622    | 1.0788537649    |
| 49.2322975455   | 45.7519148972   |
| 3668.0585932944 | 3886.8691141471 |
| 8.1577064063    | 6.7663866311    |
| 0.8721416646    | 1.5783173463    |
| 0               | 0               |
| 2.5612674648    | 2.4395438398    |
| 3.9823473262    | 2.6366581895    |
| 49.152356792    | 44.4755826278   |
| 16.8844077097   | 13.5318376784   |
| 18.5110307941   | 17.8917608373   |
| 4.6110616892    | 2.0861629894    |
| 18.8722646174   | 11.3843976721   |
| 0.5081106268    | 0.7662744183    |
| 2.5797700755    | 1.9283420211    |
| 11.3678428515   | 6.6860361044    |
| 0.5656683664    | 0.4094766854    |
| 1.6536016307    | 1.4962638774    |
| 3.0256019883    | 3.2852645125    |
| 2.0048861737    | 2.2676552687    |
| 5.801504213     | 4.5933121976    |
| 0               | 0.18458426      |
| 32.6040988015   | 21.0013290137   |
| 13.6193041715   | 27.3854388702   |
| 20.6921825383   | 17.7871843301   |
| 5.5507163431    | 2.51128694      |
| 4.2024849401    | 2.9250959261    |
| 22.8380025166   | 12.3990001816   |
| 6.5382289526    | 4.4370945922    |
| 1.6067460941    | 0.726933288     |
| 0               | 3.877841807     |
| 4.59264191      | 3.8093539131    |
| 0               | 0               |
| 2.8364356911    | 4.6197954427    |
| 0               | 0               |
| 2.1401890542    | 4.0491567456    |
| 0.7811359839    | 1.7670301214    |
| 0               | 0               |
| 1.3628562802    | 0.9248868883    |
| 5.0103220837    | 4.5335973363    |

| gene_expression_table |                 |
|-----------------------|-----------------|
| 0                     | 0               |
| 0                     | 0               |
| 0                     | 0               |
| 0                     | 0               |
| 0.7950443652          | 0.719397068     |
| 0.2355316943          | 0.3836181625    |
| 0                     | 0               |
| 0                     | 0               |
| 262.5934009288        | 287.6307690532  |
| 0.9989313217          | 0.6025896544    |
| 2.7647185704          | 2.309224321     |
| 43.8245161232         | 34.8961167552   |
| 0                     | 1.8339703332    |
| 67.7387027268         | 63.4516857994   |
| 0.5389154474          | 0               |
| 1313.574345392        | 1952.6830559304 |
| 34.3260364033         | 33.0856146033   |
| 1.1157234368          | 0.7765876918    |
| 33.2798800915         | 28.679379663    |
| 2.9044574468          | 0.8760342033    |
| 0.759231556           | 0.772865769     |
| 0                     | 0               |
| 45.381206556          | 39.6944767089   |
| 0                     | 3.6850901447    |
| 7.6201555925          | 1.1491848401    |
| 89.1747746596         | 72.2596357053   |
| 16.7344593404         | 30.2844004927   |
| 0                     | 0               |
| 3.6508610996          | 3.3034870573    |
| 49.232522044          | 31.1836841922   |
| 50.5228712312         | 49.287233286    |
| 7.5812200092          | 10.2898171811   |
| 12.9091506122         | 7.3773877862    |
| 2.341903356           | 0               |
| 29.4460804128         | 20.1981206327   |
| 16.8951962455         | 21.975987204    |
| 5.7658242528          | 2.9346832067    |
| 8.2253117081          | 7.4426854456    |
| 663.6392054038        | 757.4081591502  |
| 4.0720228601          | 0               |
| 0                     | 0.8485015389    |
| 41.949562702          | 34.162311383    |
| 0.7364327274          | 0.6663622409    |
| 14.325044583          | 32.4050943627   |
| 11.1071675209         | 19.3827926575   |
| 8.2725711063          | 14.9708963637   |
| 3.1552211042          | 2.2840051804    |
| 0                     | 0.9214011337    |
| 0.2730175507          | 0.3705605008    |

gene\_expression\_table

|                 |                 |
|-----------------|-----------------|
| 69.8423068825   | 126.3938290412  |
| 0               | 0               |
| 25.1336053536   | 15.5060317634   |
| 2.9002475652    | 2.0502291346    |
| 20.633331422    | 10.3722780039   |
| 8.5975591678    | 12.9658568487   |
| 7.2389272676    | 9.8252310419    |
| 1.1675315415    | 0               |
| 0               | 0               |
| 1.0068656008    | 1.3882877345    |
| 8.2255435703    | 6.3264609595    |
| 0               | 0               |
| 16.7232351975   | 15.8595461825   |
| 11.4627367531   | 5.7046408531    |
| 2.3910288279    | 2.1635259658    |
| 3.1207196609    | 3.4512961921    |
| 4.2326828859    | 1.8141865389    |
| 13.1054029712   | 10.1643799128   |
| 8.3984983159    | 10.9769018717   |
| 0               | 0.8983284869    |
| 0.8256060156    | 0.7470508224    |
| 7.025259008     | 3.8140895926    |
| 21.8577646558   | 34.6115535968   |
| 2.7867554021    | 2.8818282753    |
| 186.2226926288  | 157.8615282089  |
| 9.802866        | 10.2347743572   |
| 17.3159535416   | 11.9574373121   |
| 0               | 0               |
| 5.1160649263    | 3.4719591777    |
| 0               | 0               |
| 3.4199250422    | 4.7608064995    |
| 0               | 0               |
| 3.3762340695    | 1.2219961534    |
| 93.1720821923   | 63.6985437664   |
| 49.5634671699   | 31.9369105097   |
| 68.3603784165   | 53.0194194512   |
| 0.0379305396    | 0               |
| 0               | 0               |
| 0               | 0               |
| 1597.5621268991 | 1993.6347244507 |
| 28.7914314904   | 553.6043476493  |
| 0               | 56.0349551925   |
| 5.0206668643    | 227.1478913172  |
| 0.5468230012    | 1.4843808006    |
| 114.4663565484  | 63.7384933898   |
| 9.6683558959    | 9.2088695894    |
| 3.7390545444    | 5.0749335392    |
| 2.1800066602    | 1.9725822457    |
| 0               | 2.8948219369    |



gene\_expression\_table

|                |                |
|----------------|----------------|
| 15.0623708214  | 9.7351489148   |
| 0              | 1.7768284581   |
| 0.9528201083   | 2.586482046    |
| 19.1567892901  | 11.7424203435  |
| 0              | 0              |
| 1.101427389    | 1.9932563988   |
| 1.0617128444   | 3.8427697405   |
| 0              | 0              |
| 2.0914797136   | 2.4602220596   |
| 0              | 0              |
| 33.9770587457  | 26.9011678083  |
| 0              | 0              |
| 72.2686646337  | 108.4919494951 |
| 3.1851385332   | 2.8820773053   |
| 0              | 2.6871230294   |
| 0              | 0              |
| 0              | 408.87574339   |
| 0              | 51.4834808376  |
| 0              | 266.8456100253 |
| 0              | 21.809199521   |
| 1.3295113822   | 0              |
| 92.0218095727  | 55.1637715624  |
| 2.9324539171   | 4.9751911075   |
| 83.5553977096  | 52.3420788503  |
| 11.0331613813  | 8.8088579725   |
| 11.3301980646  | 1.4645923501   |
| 4.8460244274   | 3.1890417159   |
| 6.8899409548   | 7.2123141491   |
| 1.1786978433   | 0.9845044469   |
| 2.2030588887   | 1.087331503    |
| 9.3597260144   | 7.4105166676   |
| 2.3617823224   | 3.0720269443   |
| 7.7869015697   | 8.2203209485   |
| 0              | 0              |
| 0              | 0.9850645757   |
| 1.4906066518   | 2.0231664451   |
| 0              | 0              |
| 21.7213413652  | 23.6862981309  |
| 4.6172788345   | 5.898284572    |
| 0.6268082059   | 0.4253762481   |
| 0.1891079675   | 0              |
| 225.7125295134 | 191.9821367072 |
| 3.3036586703   | 5.9786408529   |
| 6.636232095    | 10.3719348918  |
| 90.0115743047  | 49.3618823831  |
| 0              | 0              |
| 21.532336525   | 16.0452900605  |
| 14.0473205239  | 12.3255648195  |
| 8.7831949519   | 7.9474869226   |

gene\_expression\_table

|                 |                 |
|-----------------|-----------------|
| 0               | 0               |
| 1692.3372820934 | 1651.5556260506 |
| 58.1781088554   | 69.1728163159   |
| 0               | 0               |
| 0.4954347485    | 0               |
| 0               | 0               |
| 0               | 1.0889009769    |
| 1378.5881487635 | 1161.2863123402 |
| 0.6807967507    | 0.7920256439    |
| 15.211882407    | 12.3599540291   |
| 2.2007157815    | 3.9826418495    |
| 0               | 0               |
| 26.3591489374   | 23.8511148413   |
| 0               | 0               |
| 6.0257481476    | 2.3367459042    |
| 91.894744574    | 108.7360477408  |
| 0               | 0               |
| 0               | 0               |
| 0               | 0               |
| 32.3552437339   | 31.2284694107   |
| 0               | 0               |
| 0               | 0               |
| 106.0755678746  | 126.6970771915  |
| 0               | 0               |
| 42.2840732836   | 44.5756964885   |
| 25.7945775165   | 30.8424884864   |
| 49.3259873352   | 42.9160504628   |
| 13.7103128342   | 14.8869561773   |
| 0               | 0               |
| 5.6260152653    | 10.5886730994   |
| 34.8886539512   | 34.1287027554   |
| 1.5049674982    | 1.3617720631    |
| 177.4801471619  | 168.219106057   |
| 0               | 0               |
| 0               | 0               |
| 0               | 0               |
| 27.5393503127   | 39.3458238924   |
| 0               | 0               |
| 0               | 0               |
| 187.8409231186  | 196.3425027092  |
| 3.3963936234    | 6.1464635714    |
| 0               | 0               |
| 18.771383606    | 29.7242998081   |
| 5.6212898893    | 7.6296486862    |
| 1563.2204901158 | 1643.0855800713 |
| 8.1440457202    | 7.7785491185    |
| 32.8296821476   | 21.0417403466   |
| 0               | 0               |
| 14.3359211242   | 17.6889264538   |

gene\_expression\_table

|                |                 |
|----------------|-----------------|
| 2.3043604056   | 0               |
| 16.3894466269  | 14.8300149831   |
| 36.459666609   | 27.1809207267   |
| 0              | 0.7352120649    |
| 74.3036779587  | 85.2428443505   |
| 0.9737308118   | 2.9369392101    |
| 18.0883435504  | 18.0039908104   |
| 0              | 0               |
| 61.6506129145  | 52.5969539576   |
| 0              | 0               |
| 39.7879792622  | 68.052961313    |
| 0              | 0               |
| 0              | 0               |
| 24.1113700275  | 12.1206715418   |
| 2.2654196844   | 2.3915130714    |
| 13.7546145788  | 11.904757952    |
| 1.9406317879   | 5.0923522633    |
| 0              | 0               |
| 41.1132311596  | 24.8009119518   |
| 49.3969335135  | 16.2534139038   |
| 131.7543252125 | 97.2568675722   |
| 21.3721551383  | 27.9335710878   |
| 7.9265073747   | 9.5630825377    |
| 3.9010850021   | 2.6474268937    |
| 22.2597933836  | 67.1393563826   |
| 0              | 0               |
| 6.4012538808   | 2.8960920135    |
| 0              | 0               |
| 0.7283739158   | 0.6590702133    |
| 0.9765332587   | 0.8836175612    |
| 49.6984940896  | 59.9596743575   |
| 0              | 0               |
| 342.3659797847 | 274.0453205751  |
| 31.6168734167  | 34.7389834435   |
| 0              | 0               |
| 89.3072571809  | 58.4317041      |
| 2.3855555768   | 0               |
| 0              | 0               |
| 0              | 0               |
| 11.4857680516  | 38.7372255906   |
| 0.4862866349   | 0               |
| 0              | 3.1834664681    |
| 7.7471292842   | 7.0100013732    |
| 1429.703312964 | 1159.6403677898 |
| 0              | 1.706766056     |
| 333.1998424964 | 362.1325108856  |
| 7.1881944144   | 7.4798855805    |
| 2.8317150649   | 6.0854187007    |
| 12.4321856792  | 8.0352011219    |

gene\_expression\_table

|                |                |
|----------------|----------------|
| 13.5595333715  | 18.4040456924  |
| 1.4369014567   | 1.73357654     |
| 11.7725050358  | 6.3914211399   |
| 18.1242955376  | 19.4747572534  |
| 0              | 0              |
| 0              | 0              |
| 0.6119306247   | 0.3691375529   |
| 16.7406768619  | 12.118260944   |
| 17.2506369078  | 25.2149653761  |
| 7.753795168    | 7.016033008    |
| 0.6222569159   | 1.9706753125   |
| 1.4181627049   | 4.4912931621   |
| 1.7414726555   | 6.303096416    |
| 12.2194789847  | 19.3494238073  |
| 123.1906504692 | 168.0116111244 |
| 81.7936816819  | 73.2153150153  |
| 0              | 0              |
| 141.8400597208 | 120.7945294093 |
| 96.4060677111  | 139.902258158  |
| 2.7391453877   | 7.4355592472   |
| 3.7712240959   | 2.4374269231   |
| 11.4611609645  | 24.1981796553  |
| 0.7050721455   | 0              |
| 14.1639588134  | 11.7482557946  |
| 2.6436053466   | 2.3920702017   |
| 1.2792685583   | 0              |
| 0              | 0              |
| 7.0597054392   | 2.1293282973   |
| 13.6026807142  | 16.0544422587  |
| 0              | 0              |
| 0              | 0              |
| 20.2674879774  | 17.7659706001  |
| 0              | 1.5379584626   |
| 2.8289560452   | 0.511957011    |
| 1.1581862226   | 1.7466441897   |
| 17.1194577973  | 8.8517523821   |
| 1.3965787219   | 6.9503297538   |
| 2.5194366962   | 0              |
| 79.2772216513  | 63.4570982648  |
| 0              | 1.3379786605   |
| 7.980496609    | 9.2843538965   |
| 0              | 0              |
| 0.5409134285   | 0.4894463146   |
| 6.7312839251   | 4.3989199222   |
| 1.2907215191   | 1.8686580362   |
| 0.9478459894   | 0.490091339    |
| 1.5248692505   | 1.4783359212   |
| 1.7168374538   | 1.7561111104   |
| 2.7159452546   | 3.0357687389   |

gene\_expression\_table

|                |                 |
|----------------|-----------------|
| 0              | 0.6022117001    |
| 4.0627357431   | 3.851228267     |
| 0              | 3.5930694545    |
| 62.8052326061  | 53.9008725445   |
| 0.2593557534   | 0.2346784365    |
| 7.234647473    | 4.5320410036    |
| 0              | 0               |
| 7.1284274216   | 8.6616542777    |
| 0              | 0               |
| 0.4973092204   | 0.6749864737    |
| 13.2336785671  | 9.8691046104    |
| 157.1190520523 | 142.1694062715  |
| 3.2424152248   | 4.4008563065    |
| 0              | 0               |
| 4.0370940531   | 6.3926984023    |
| 28.2274397248  | 22.3489354543   |
| 0              | 0               |
| 15.9759736192  | 50.5955916252   |
| 3.6233587519   | 1.0928671725    |
| 65.5859268907  | 77.9969728223   |
| 30.4769631437  | 29.4789958038   |
| 25.3797709785  | 23.9633981728   |
| 18.0811013156  | 11.3266462336   |
| 7.5148379643   | 5.099859172     |
| 0.0491489349   | 0               |
| 0              | 0               |
| 0              | 0               |
| 0              | 0               |
| 0              | 0               |
| 11.4989655995  | 13.4877763009   |
| 945.5643491735 | 1090.8840045546 |
| 14.1021244034  | 10.8462788777   |
| 25.723300034   | 29.5423184126   |
| 0              | 0               |
| 0              | 0               |
| 0              | 0               |
| 0              | 0               |
| 3.3671954553   | 6.0936235603    |
| 0              | 0               |
| 43.6100709968  | 34.5956270831   |
| 137.0589341122 | 122.8021163915  |
| 6.6251524304   | 10.9904280936   |
| 104.7904711606 | 60.1741118274   |
| 2.1682356825   | 3.1881382962    |
| 5.0462179631   | 3.9137809506    |
| 0              | 0               |
| 0              | 0               |
| 0              | 8.8159168236    |
| 0.4226797007   | 0.3824623513    |

gene\_expression\_table

|                 |                 |
|-----------------|-----------------|
| 2.6315261061    | 3.1748537109    |
| 0               | 0.7107696481    |
| 6.7495786308    | 3.8171038696    |
| 1.4007352062    | 0               |
| 0               | 0               |
| 0               | 2.6194117943    |
| 14.4417888753   | 14.8100305224   |
| 125.799936974   | 121.2539712698  |
| 44.1587709072   | 35.1622735779   |
| 48.2729689981   | 33.9732301097   |
| 1.4983217536    | 2.7115173027    |
| 38.6034118155   | 42.2841129644   |
| 0               | 0               |
| 1.664771555     | 3.0127419999    |
| 0               | 0.6965197554    |
| 5.9470344733    | 6.2780467462    |
| 42.8810230973   | 39.561760153    |
| 12.6737820602   | 9.1743123303    |
| 2.1146077425    | 2.4957468763    |
| 5.6087871577    | 1.4500340978    |
| 270.217928663   | 236.7695255929  |
| 1056.6808975975 | 1048.1964432838 |
| 1.9314579686    | 1.5888023592    |
| 7.4124578921    | 5.6481460798    |
| 0               | 0               |
| 31.2747620755   | 22.7772556925   |
| 0.2238219542    | 0.3375427097    |
| 0.4854775865    | 0               |
| 5.462395323     | 5.841321288     |
| 0               | 0               |
| 3.4395244125    | 3.2953327876    |
| 0               | 0               |
| 7.7114470971    | 13.9554285871   |
| 0               | 1.8824804568    |
| 4.1136994693    | 5.2112018554    |
| 28.4656829876   | 31.8177365314   |
| 21.0691366601   | 17.3313085638   |
| 2.5451918756    | 0.9212082509    |
| 15.3333204407   | 8.3976496266    |
| 0.5103334086    | 0.8927668143    |
| 85.0770399214   | 68.6917068013   |
| 0.6203189978    | 0.8419448418    |
| 31.436562406    | 24.4946671501   |
| 506.1578894567  | 562.7415854822  |
| 12.8001677799   | 15.4430009573   |
| 1.1717980811    | 0               |
| 8.2371533706    | 1.8633500979    |
| 0.4848322835    | 0               |
| 0               | 0               |

gene\_expression\_table

|                 |                 |
|-----------------|-----------------|
| 0               | 0               |
| 210.6718440813  | 280.3334253261  |
| 2.4171732783    | 2.9825220141    |
| 0               | 0               |
| 32.674214644    | 24.0218154893   |
| 0               | 0.097517602     |
| 9.0740702213    | 7.8948902304    |
| 0               | 0               |
| 2.1014962346    | 1.7113877741    |
| 13.4698180407   | 12.1881847454   |
| 26.7806807781   | 23.9747455865   |
| 100.2179135048  | 105.7960482009  |
| 0.262864981     | 0.2378537663    |
| 0.6249043262    | 1.1308912048    |
| 6.1319940772    | 4.0072817027    |
| 55.1366271815   | 48.1818811801   |
| 19.8446333147   | 21.8042555656   |
| 2.8502201906    | 1.8846728085    |
| 19.6091214936   | 9.4631160218    |
| 4.8310608084    | 2.7608794779    |
| 8.2396454501    | 2.1301872438    |
| 4.2718900419    | 3.514023648     |
| 1.3683384924    | 1.0228138698    |
| 4.2347304299    | 3.831802083     |
| 1.2291244085    | 1.9065857763    |
| 2.869538455     | 1.7975811521    |
| 2.5914192931    | 2.2894594267    |
| 0               | 0               |
| 1117.9395020222 | 1080.1501726382 |
| 0.552250279     | 0.7852498979    |
| 1.1644100485    | 0.2107236304    |
| 1.6555557324    | 1.39102976      |
| 0               | 0               |
| 8.3502181928    | 5.5408519927    |
| 3.4889016091    | 2.8699434301    |
| 10.137953562    | 10.1704446702   |
| 0.0949082659    | 0.0858778846    |
| 0               | 0               |
| 31.9453885082   | 34.9278802926   |
| 23.3627828787   | 35.2330809804   |
| 1.7720239827    | 1.9597337437    |
| 95.7352881086   | 76.7260777548   |
| 2.9822035121    | 2.3611448454    |
| 28.1770141131   | 15.297607698    |
| 6.0976441918    | 5.5174623515    |
| 12.3959710346   | 28.8424612186   |
| 107.4192223611  | 77.1869980447   |
| 68.1965863161   | 79.8571294346   |
| 0               | 0               |

gene\_expression\_table

|                |                 |
|----------------|-----------------|
| 9.800206823    | 26.6031948481   |
| 2.4262845745   | 1.4636181201    |
| 0.6365783681   | 1.4400221911    |
| 2.1402092003   | 2.3922353273    |
| 1.6995725615   | 7.1300816225    |
| 0              | 1.0566540294    |
| 0.7566672496   | 9.5854006953    |
| 283.9954356545 | 234.4321376395  |
| 6.5434652328   | 2.1145943496    |
| 1.337566878    | 1.1002721498    |
| 1.0413845511   | 0.8245110553    |
| 9.5191268919   | 9.724801964     |
| 0              | 0               |
| 0              | 0               |
| 0              | 0               |
| 0              | 0               |
| 2.8257266728   | 1.8048444372    |
| 25.9157478857  | 18.3920805842   |
| 2.2798176634   | 2.2279280897    |
| 55.8688144026  | 35.0367182679   |
| 4.8675773257   | 2.825486303     |
| 74.3515299101  | 51.7516089508   |
| 313.6253343111 | 232.1871929103  |
| 11.0105121694  | 8.174669289     |
| 0.2268919182   | 0.273737983     |
| 0.6019249106   | 2.7232632211    |
| 9.7483211143   | 11.2177345917   |
| 2.8178568964   | 1.0927465603    |
| 0              | 0               |
| 0              | 0               |
| 0              | 0               |
| 0.2096905375   | 0.1897387925    |
| 2.8738007693   | 3.2209040093    |
| 4.2076590938   | 1.9036532723    |
| 0              | 6.8252994408    |
| 19.2265757909  | 14.7612567852   |
| 0              | 6.314024245     |
| 2.7225336644   | 0.6158721517    |
| 2.0563134361   | 1.8606582493    |
| 0              | 0               |
| 975.014311586  | 1013.7312999075 |
| 0              | 0.2724049902    |
| 0              | 0               |
| 19.3883041396  | 6.4976057896    |
| 7.1059322025   | 10.0019317175   |
| 2.8327459291   | 5.1264286742    |
| 4.9403395946   | 12.2932523387   |
| 0              | 0               |
| 0              | 0               |



gene\_expression\_table

|                 |                |
|-----------------|----------------|
| 3.6370340761    | 2.9445571647   |
| 16.339122017    | 23.9367750146  |
| 87.1929818575   | 74.4428525169  |
| 12.3707460639   | 4.4774751376   |
| 7.8365581723    | 6.0481387001   |
| 0               | 0.7013672339   |
| 8.3094776883    | 16.2908268404  |
| 12.8483090167   | 20.3451699276  |
| 71.2703456764   | 46.0636268086  |
| 8.5796341808    | 12.7035730771  |
| 59.2945703147   | 58.5303049213  |
| 3.0937357735    | 2.0995285374   |
| 2.8729069426    | 3.2494426118   |
| 67.0421960149   | 68.2461338255  |
| 100.5641561462  | 82.1676914071  |
| 155.7011548359  | 115.8207378165 |
| 1.9254447915    | 6.5334058611   |
| 11.4571264372   | 13.2268592311  |
| 185.9000795211  | 159.8013634044 |
| 60.4918491733   | 59.9491046786  |
| 12.0309112209   | 16.3292816769  |
| 45.4513751377   | 35.5527896094  |
| 1.2303148639    | 3.11710622     |
| 1.9042101159    | 1.7230273353   |
| 51.5235849153   | 48.2288192037  |
| 0.5820888852    | 0.5267039874   |
| 0.7423832447    | 1.0076198629   |
| 1.0845476417    | 1.3084727135   |
| 0               | 0              |
| 0               | 4.1606793077   |
| 6.413682134     | 8.7051446253   |
| 0               | 0.7235468291   |
| 40.1763951749   | 50.8951387049  |
| 2578.8823086509 | 2303.347074783 |
| 5.3332732696    | 6.434426925    |
| 13.3448194434   | 10.5656946325  |
| 58.5283129399   | 43.4538916054  |
| 0               | 0              |
| 28.0746754689   | 11.113992556   |
| 29.3698904925   | 49.0622562156  |
| 0.5090916608    | 0.4606523411   |
| 5.7701663314    | 6.6134484661   |
| 1.3654710255    | 3.7066454216   |
| 14.320826372    | 5.1832883562   |
| 15.9940786498   | 13.6899810535  |
| 0               | 0              |
| 96.6495693585   | 102.0290898189 |
| 1.256193371     | 1.7050026402   |
| 0               | 0.1348281736   |

gene\_expression\_table

|                 |                |
|-----------------|----------------|
| 167.5917383561  | 173.3092936443 |
| 1.1704819822    | 0              |
| 7.0657292176    | 5.7845368961   |
| 38.8351254711   | 35.1400206314  |
| 6.6448634366    | 5.805282959    |
| 0               | 0              |
| 3.8208872352    | 6.9146709144   |
| 0               | 0              |
| 0               | 0              |
| 0.7052425516    | 1.2762795286   |
| 0.390567992     | 0.3534060243   |
| 16.7125520135   | 23.6287146395  |
| 20.0412883348   | 26.3772935931  |
| 1148.0268658191 | 760.1901024061 |
| 0.8679262895    | 2.159697058    |
| 0               | 0              |
| 0.9086203634    | 0.8221664776   |
| 3.5944792666    | 4.2161646495   |
| 1.1990156067    | 0.7890407581   |
| 33.6521069118   | 23.6834567154  |
| 29.8779800641   | 23.172972328   |
| 0               | 0.6519746873   |
| 176.3852803628  | 180.6820544255 |
| 16.6680021795   | 24.1313062179  |
| 3.8732953164    | 3.5047569869   |
| 49.7388337764   | 42.6982440039  |
| 4.4172140199    | 0              |
| 2.8519725722    | 1.4336731075   |
| 0               | 0              |
| 0.4041716566    | 1.7066714949   |
| 6.5428713664    | 4.1935648293   |
| 7.4548035268    | 10.9386323998  |
| 0               | 0              |
| 10.4778893382   | 8.0223284652   |
| 12.694365929    | 6.7004675249   |
| 0.0279633199    | 0              |
| 46.0859949705   | 53.2845863292  |
| 5.3248386525    | 4.818188118    |
| 107.2284172801  | 61.1684339123  |
| 1.5501399263    | 2.932806112    |
| 0.2280337893    | 0.206336711    |
| 22.2542692933   | 24.4518388121  |
| 237.6826476199  | 185.2889185032 |
| 0               | 0              |
| 0               | 0.3973703592   |
| 2.0092565631    | 3.7318458928   |
| 1.9055365139    | 1.7242275285   |
| 0.5883799616    | 0.375809278    |
| 0               | 0              |

gene\_expression\_table

|                 |                 |
|-----------------|-----------------|
| 3.5186441355    | 4.7757755131    |
| 0.1773091159    | 0.3208768306    |
| 0               | 0               |
| 0.8737346413    | 0.3953000402    |
| 39.119053192    | 23.1910940665   |
| 851.3313467297  | 896.5029098858  |
| 57.0655920379   | 44.0730535513   |
| 0               | 0               |
| 2.5081756761    | 4.5390529288    |
| 6.9964453593    | 5.3997521629    |
| 8040.6534602087 | 9071.7032224714 |
| 1.2101906028    | 0               |
| 13.9851980903   | 6.3272635722    |
| 5.9982298391    | 5.7564469536    |
| 0               | 0               |
| 0               | 1.0186601422    |
| 118.3962252189  | 57.6859226614   |
| 52.605950021    | 21.9694945667   |
| 37.3967064644   | 48.3406643843   |
| 13.6355681381   | 18.8701331241   |
| 101.7829394575  | 171.49365262    |
| 34.8925197657   | 43.600185384    |
| 0               | 0               |
| 10.6750012129   | 33.8075171405   |
| 0               | 42.340716624    |
| 590.7344558616  | 523.2181941459  |
| 257.1458145346  | 332.9096247918  |
| 139.9898946372  | 172.4120300438  |
| 229.0926580342  | 169.3585211843  |
| 34.6952770564   | 26.3710210511   |
| 91.1294456121   | 48.6294386927   |
| 248.7556203693  | 227.8830008755  |
| 0               | 0               |
| 0               | 0               |
| 1.7629359483    | 1.5951951962    |
| 62.1147214616   | 84.3068961614   |
| 7.4344244116    | 15.1358622917   |
| 0               | 20.7168857487   |
| 297.1007939387  | 305.1607532311  |
| 33.9040849909   | 13.6347383871   |
| 48.6822085677   | 63.8727440536   |
| 97.2670527183   | 56.4606798835   |
| 148.3412679191  | 214.8951477056  |
| 2.0948618165    | 3.0802505634    |
| 64.4413951217   | 92.8198273465   |
| 27.5668206501   | 17.6525908492   |
| 9.6622900051    | 8.7429373797    |
| 5.453671231     | 4.0375329275    |
| 6.0115607366    | 5.9835265709    |

gene\_expression\_table

|                |               |
|----------------|---------------|
| 28.3095957463  | 20.8129833572 |
| 14.4304213713  | 8.1608675548  |
| 8.7653781752   | 8.397916291   |
| 18.0368055609  | 19.0407351717 |
| 2.8020084324   | 0.3169251835  |
| 16.7672164781  | 15.1718405908 |
| 0              | 0             |
| 0.5343253096   | 0.8288315065  |
| 0              | 0             |
| 5.985146411    | 3.2494011411  |
| 15.1231489067  | 16.2499917999 |
| 13.7300796497  | 11.945848891  |
| 2.4447147969   | 3.4410503464  |
| 0              | 0             |
| 0.5474590686   | 0             |
| 33.4595984583  | 19.6793785992 |
| 179.897543402  | 98.8310529542 |
| 9.647458293    | 8.417748423   |
| 1.1255899637   | 0.8729929207  |
| 2.1469227917   | 1.5541170068  |
| 5.8198568939   | 3.8032988535  |
| 3.2285166126   | 3.0098531162  |
| 2.3931323828   | 4.5277159566  |
| 1.0603019596   | 1.0964751931  |
| 181.6258921819 | 149.266983656 |
| 69.4678740352  | 89.7972977226 |
| 1.5692959071   | 0.2839959438  |
| 0.0456283423   | 0.013762291   |
| 30.8688219579  | 29.5747402589 |
| 1.102125355    | 0.997259755   |
| 0              | 0             |
| 0              | 0.074980181   |
| 9.2591970422   | 7.9372403213  |
| 0.1146999097   | 0.4151455305  |
| 17.0208141817  | 20.8125795235 |
| 1.7598054206   | 2.9193313116  |
| 3.0191978406   | 2.9270631692  |
| 25.8800586119  | 16.8775562182 |
| 7.0304291653   | 5.5904040047  |
| 5.0966007725   | 7.1737038104  |
| 0              | 0             |
| 56.6954751104  | 38.4040888635 |
| 0.8563748258   | 0             |
| 10.850046782   | 7.3632606399  |
| 0              | 0             |
| 71.5198917046  | 56.0862290077 |
| 4.6085388424   | 5.7338093685  |
| 34.2191859378  | 33.6325292841 |
| 0              | 0.5671622393  |

gene\_expression\_table

|                |                |
|----------------|----------------|
| 85.5992205076  | 82.8168213118  |
| 1.5082969346   | 1.9106985921   |
| 1.1987066432   | 1.6269772144   |
| 0.5516324572   | 0.3119659022   |
| 8.7102223263   | 5.5170202742   |
| 3.5546492649   | 4.8246444549   |
| 2.9512425729   | 2.0028271502   |
| 28.3109333929  | 15.6364665551  |
| 0.7636089434   | 0.8883677315   |
| 0.5030314359   | 0.2731012426   |
| 6.2285609131   | 5.2184467964   |
| 30.4039718996  | 14.9743847023  |
| 1.9051736434   | 1.0774369904   |
| 0              | 0              |
| 3.1499952303   | 2.198785759    |
| 1.8310049665   | 2.7613125797   |
| 167.1701389953 | 165.9499866621 |
| 2.1651387201   | 1.7142378472   |
| 3.2505794901   | 4.6654971029   |
| 0              | 0              |
| 0              | 3.0595215396   |
| 2.7267253089   | 3.2897085632   |
| 0              | 0              |
| 0.1158796406   | 1.4679540947   |
| 1.671854701    | 1.1181418833   |
| 8.1809810816   | 4.7899000553   |
| 9.2674515611   | 9.7832784357   |
| 1.0883500441   | 1.1489276687   |
| 0              | 0              |
| 0              | 0              |
| 2.0380022221   | 2.8583384463   |
| 1.1754301692   | 0.615762472    |
| 5.4264357897   | 2.9460710626   |
| 5.2548731209   | 3.346026458    |
| 1.2258698607   | 0              |
| 0.7065617196   | 0.7991667692   |
| 0.4323150912   | 0.4563777735   |
| 0              | 0              |
| 0              | 0              |
| 0              | 33.422368211   |
| 1.4072447695   | 1.8521418296   |
| 2.0110625795   | 1.6377416503   |
| 13.9628327623  | 11.9693272209  |
| 0.4229043152   | 0.063777599    |
| 0              | 0              |
| 1.5768963111   | 0.5548888161   |
| 0.8229487229   | 0              |
| 0.7443147591   | 0.6734943089   |
| 54.7424684956  | 49.5338034579  |

gene\_expression\_table

|                |                |
|----------------|----------------|
| 0              | 0              |
| 2.4591366775   | 2.2251534541   |
| 5.2438477136   | 2.5238847593   |
| 24.0868433116  | 11.8881904037  |
| 5.6280842118   | 4.0740642481   |
| 24.677790109   | 22.9500052342  |
| 5.5299871674   | 6.7698701328   |
| 0              | 0              |
| 9.3043444249   | 10.7151542818  |
| 0.4401766303   | 0.1327648247   |
| 2.2761045706   | 1.5446524364   |
| 0.0299387641   | 0.0270901349   |
| 0              | 1.3946582974   |
| 2.6248979744   | 2.3751428084   |
| 1.71880284     | 1.555261288    |
| 7.3942765773   | 5.0552122384   |
| 265.075716094  | 220.7972478331 |
| 18.8439211374  | 10.4505821775  |
| 1.717579591    | 2.1193014945   |
| 0.2294088368   | 0.2075809248   |
| 0              | 0              |
| 1.871415965    | 1.128902333    |
| 0.3897042081   | 0.5641990852   |
| 4.3987743872   | 3.6740653846   |
| 38.2582526144  | 27.1998857233  |
| 78.6770571891  | 61.6361087581  |
| 0              | 0              |
| 0.1800341546   | 0.122178128    |
| 0              | 0.8556230236   |
| 0.8352369305   | 0.5983142512   |
| 0              | 23.8183024236  |
| 15.3741389966  | 0              |
| 896.4760183218 | 795.0187317174 |
| 0              | 0              |
| 10.5662411604  | 10.4300497281  |
| 0              | 0.035460589    |
| 0.7419302267   | 0.3356683306   |
| 22.5321514724  | 16.8424678321  |
| 39.0369442348  | 59.6069493262  |
| 22.8600687958  | 26.8904571103  |
| 0              | 0              |
| 9.0757280507   | 5.9724988575   |
| 2.1771873121   | 1.9700311545   |
| 4.5236364113   | 5.537884647    |
| 10.7224184866  | 5.1364568126   |
| 0              | 0.011040798    |
| 5.7811619299   | 5.0507103953   |
| 0.8451798433   | 0.5098414862   |
| 0              | 0              |

gene\_expression\_table

|               |                |
|---------------|----------------|
| 5.4436000817  | 4.9256495726   |
| 1.9707971847  | 2.3777049905   |
| 0             | 0              |
| 0.5290559432  | 0.3829736412   |
| 11.1408965553 | 9.2634899406   |
| 0.3855081714  | 0.3139448744   |
| 0             | 0              |
| 2.3499082154  | 1.4175452793   |
| 9.0541448219  | 8.1926563126   |
| 56.1946805277 | 42.7865967868  |
| 2.2460640782  | 2.3710801309   |
| 0             | 0              |
| 0.2042401416  | 0.4065753862   |
| 0             | 0              |
| 1.4820893321  | 2.8497752817   |
| 0             | 0              |
| 31.5153244938 | 33.3853907213  |
| 20.8734216904 | 18.0479088213  |
| 13.4254041019 | 27.3329926363  |
| 0             | 0              |
| 1.1231368276  | 0.5543301911   |
| 0.6085326833  | 0.8810107154   |
| 0             | 0.2101868404   |
| 4.7609913225  | 5.025988367    |
| 0.4955020515  | 0.249086535    |
| 2.376799484   | 1.8146113788   |
| 5.9042168679  | 4.6746344329   |
| 12.6946198417 | 13.0711242013  |
| 0             | 0              |
| 0             | 0              |
| 87.4357850643 | 109.2948195607 |
| 1.0368516439  | 0.4690983706   |
| 0             | 0              |
| 2.3460456517  | 1.3267642952   |
| 8.0999138738  | 7.966542424    |
| 0.0292309777  | 0.0528993867   |
| 0             | 0              |
| 0             | 0              |
| 0.722555524   | 0.5884248896   |
| 3.179508491   | 2.2376534082   |
| 0             | 0              |
| 0.1957792615  | 0              |
| 48.8241731304 | 30.2939143934  |
| 0.3767606948  | 0.6818249422   |
| 18.2442798405 | 10.196342196   |
| 0             | 0              |
| 0.2806152122  | 0.0846383631   |
| 31.75983394   | 15.7595114484  |
| 3.5003169383  | 2.0003791267   |

gene\_expression\_table

|                |                |
|----------------|----------------|
| 0              | 0              |
| 2.5452584775   | 1.6313489652   |
| 0              | 0              |
| 1.1815167387   | 0.178182861    |
| 23.0801685697  | 22.7594337623  |
| 0              | 6.6682672206   |
| 0.3303940105   | 0.3843739393   |
| 0              | 0              |
| 1.4202015155   | 1.2850714386   |
| 3.7104952516   | 3.5341548503   |
| 0              | 0              |
| 0.2807616116   | 0.1270237794   |
| 40.5888383495  | 51.2031549706  |
| 9.3511026488   | 6.3460192806   |
| 42.287252938   | 32.8592082299  |
| 26.8413403589  | 27.5257499892  |
| 11.1815490416  | 9.6960727806   |
| 1.6160360099   | 0.292454514    |
| 0              | 0              |
| 0              | 0              |
| 1.1159882135   | 1.6830059717   |
| 3.9052617526   | 0              |
| 0              | 0              |
| 0              | 0              |
| 2.4000753262   | 1.0858558516   |
| 83.017978258   | 67.4797259618  |
| 75.2372635007  | 117.7866958603 |
| 0.535081157    | 0              |
| 5.3469550114   | 3.2254667587   |
| 59.143888149   | 58.5336002682  |
| 14.5817254932  | 9.4244970327   |
| 0              | 0              |
| 0.3705129237   | 0.3352591661   |
| 176.8077451327 | 157.3330683528 |
| 2.4819355121   | 3.3686745199   |
| 31.3166041426  | 66.1193761771  |
| 10.1165288502  | 14.6463297111  |
| 27.7694288309  | 37.6908130282  |
| 55.9577777081  | 111.3936511457 |
| 3.4644747288   | 4.7022526116   |
| 10.4694549359  | 7.8944181327   |
| 24.7032971228  | 17.6192776125  |
| 56.6433099688  | 97.9516735509  |
| 41.9254537579  | 26.6959209689  |
| 67.1302256368  | 75.6420817138  |
| 41.0537818258  | 59.848871011   |
| 9.7381619329   | 6.2199460275   |
| 163.8209980057 | 136.7847298207 |
| 332.7208576648 | 411.9020588748 |



gene\_expression\_table

|                 |                 |
|-----------------|-----------------|
| 463.5807505604  | 497.8345767746  |
| 3.5024895202    | 4.1596180692    |
| 0               | 0               |
| 12.2459292418   | 13.4135360338   |
| 7.1338049617    | 0               |
| 170.7549039918  | 171.6753633726  |
| 79.8926886942   | 58.5806519862   |
| 273.6458110741  | 242.8471082457  |
| 219.3993670338  | 187.888635472   |
| 14.3070275795   | 10.1314448084   |
| 24.2783225023   | 32.952413953    |
| 60.9925413085   | 69.7126624072   |
| 206.5095859484  | 218.7864190264  |
| 4628.6172462722 | 4225.3297131264 |
| 16.7658299715   | 20.5536971724   |
| 4.5938469483    | 12.470247585    |
| 3.0888235223    | 0               |
| 8.6331703596    | 5.8588027115    |
| 0               | 1.6154962608    |
| 0               | 0               |
| 30.5094564165   | 31.5503162201   |
| 39.8957521559   | 37.7406270831   |
| 387.083168981   | 271.0100673246  |
| 50.2048134744   | 35.6715721778   |
| 6.7620356443    | 4.3704556703    |
| 3.4913841423    | 3.5540821091    |
| 61.4070674007   | 59.1109315096   |
| 40.9306124823   | 50.9246720784   |
| 10.8395675392   | 0               |
| 0.7068826506    | 1.9188714307    |
| 18.5143805249   | 20.0376203544   |
| 4.3385489054    | 5.2343231785    |
| 18.0071863244   | 10.5430659124   |
| 12.6038117552   | 12.4413574681   |
| 21.276059654    | 28.8775109953   |
| 10.9498192976   | 8.8650169864    |
| 1.7010677285    | 1.1544102346    |
| 129.2489996257  | 132.5446346003  |
| 1.2298792808    | 2.2257161668    |
| 24.6453680874   | 4.4600795417    |
| 0               | 0               |
| 4304.4862325879 | 3802.5771336969 |
| 0               | 1.7483559056    |
| 8.7303833425    | 5.7452365526    |
| 234.4279917524  | 256.7798860018  |
| 14.2975088799   | 15.9226117212   |
| 0               | 0.6438663404    |
| 2157.0124861432 | 2700.2445804334 |
| 44.0680127057   | 39.8750063731   |

gene\_expression\_table

|                 |                 |
|-----------------|-----------------|
| 396.3575450348  | 315.3600035649  |
| 68.2068155483   | 67.3276775692   |
| 0.7617635831    | 0.896067774     |
| 4.2748484933    | 3.868102972     |
| 63.745784583    | 15.7310365405   |
| 14.771905154    | 16.1318381635   |
| 43.0262855336   | 46.4374385821   |
| 1.7305251937    | 2.3488024155    |
| 1.5317646097    | 2.0790292037    |
| 0               | 0               |
| 1.6440428089    | 0               |
| 3.7238534731    | 0               |
| 1.6416380206    | 0.7427192936    |
| 0.2918128307    | 0               |
| 65.811204526    | 89.3240484008   |
| 1.972095821     | 1.7844538159    |
| 20.5138170885   | 20.4657482178   |
| 320.1580105148  | 380.7425895889  |
| 53.560700366    | 38.9944082465   |
| 0               | 0               |
| 8.3824143741    | 8.788782886     |
| 2.3777799719    | 32.273065784    |
| 8.6502319611    | 15.6543503281   |
| 0.9522604123    | 6.0315796824    |
| 55.1195066638   | 77.8869347691   |
| 147.1824910967  | 135.3263314239  |
| 0               | 0               |
| 76.8221246196   | 74.1467871011   |
| 8.1115963164    | 12.2329831758   |
| 2.4900542566    | 2.6286508165    |
| 0               | 0               |
| 6.6773720402    | 8.4588419317    |
| 86.366948219    | 99.7076773636   |
| 0.6118964061    | 1.6610261001    |
| 0.2244417117    | 0.6092592427    |
| 0               | 0.278150042     |
| 23.0290551776   | 36.4662805238   |
| 2419.2698061315 | 2276.0817484186 |
| 6.4255185979    | 2.907069996     |
| 29.0048524517   | 26.2450835732   |
| 47.8235420435   | 45.2224460025   |
| 0               | 0               |
| 25.7592830292   | 29.5238786987   |
| 0               | 0               |
| 0               | 0               |
| 5.3115114112    | 6.6084272982    |
| 0               | 0               |
| 0               | 0               |
| 0.9834889051    | 0               |

gene\_expression\_table

|                  |                  |
|------------------|------------------|
| 9.6914635861     | 7.174910567      |
| 17.7830167026    | 10.1800134009    |
| 20.7747726455    | 16.1546031856    |
| 62.586405159     | 65.2700894393    |
| 18.465352223     | 12.751148305     |
| 0                | 0                |
| 0                | 0                |
| 254.417379886    | 281.8897247692   |
| 0                | 1.3576199134     |
| 13.6236845503    | 15.6147207062    |
| 152.0388645803   | 129.3593021124   |
| 5.1016287061     | 5.1593005353     |
| 41.750946146     | 54.9504076727    |
| 7.3784982149     | 7.5110006315     |
| 87.7336588983    | 125.1337553489   |
| 0                | 0                |
| 9.1380811272     | 5.3634202394     |
| 3.084211014      | 2.361406292      |
| 0                | 0                |
| 8.5262617521     | 13.2257152069    |
| 8.3474497316     | 11.3298033248    |
| 2.642647692      | 0                |
| 317.3029105994   | 223.3093389533   |
| 3.7608088433     | 5.1044601534     |
| 14486.3616894974 | 15453.7476724992 |
| 34.1568146972    | 26.2938823953    |
| 0                | 0                |
| 8.0786588636     | 0                |
| 26.2970075349    | 21.6317146376    |
| 0                | 0.5755443126     |
| 0                | 0                |
| 0                | 0                |
| 213.0437094395   | 148.2071336473   |
| 0                | 4.878727067      |
| 17.0444601726    | 15.4227049572    |
| 4.9282015098     | 2.9728602758     |
| 1.8627191133     | 2.6967746246     |
| 0.7616045262     | 1.148564967      |
| 8.388947739      | 6.2623701936     |
| 0                | 0.2434954341     |
| 272.107614273    | 233.8175605156   |
| 88.0166729708    | 74.9571920134    |
| 0                | 0                |
| 28.7289646667    | 17.3302974023    |
| 894.7438997064   | 831.0345679666   |
| 0                | 3.8711275858     |
| 15.1092103763    | 8.7498184455     |
| 0                | 0                |
| 8.9907922745     | 4.5196287036     |

gene\_expression\_table

|                  |                  |
|------------------|------------------|
| 0                | 10.7114283516    |
| 18.4159771635    | 26.3842298752    |
| 7.2551257622     | 19.6944337792    |
| 1.3620293043     | 8.9351481483     |
| 26.4964081863    | 17.1252243395    |
| 2.4634964808     | 5.5727460715     |
| 1.9004895021     | 3.439321465      |
| 13.263845605     | 10.9107366207    |
| 0.5515568626     | 0.9981540832     |
| 0                | 0                |
| 14.1888293446    | 19.9714405108    |
| 2.7233557261     | 2.2468001754     |
| 0                | 6.8015638554     |
| 5.2396179542     | 5.6686778779     |
| 0.8057244261     | 0                |
| 0                | 0                |
| 0                | 0                |
| 0.5283190146     | 0.4780502406     |
| 0                | 1.3163660827     |
| 277.5282754191   | 330.0458860839   |
| 2.7250761875     | 2.4657892124     |
| 6.7709568905     | 13.4787627508    |
| 319.723694107    | 337.5195328834   |
| 767.0682227336   | 931.7824079574   |
| 392.9741356151   | 387.9089748292   |
| 0                | 3.7722224283     |
| 0                | 0                |
| 0                | 10.3992402074    |
| 0                | 0                |
| 1.6817541246     | 1.9021721289     |
| 0                | 0                |
| 23.1718034783    | 16.0336192791    |
| 0                | 0                |
| 69.4056441415    | 67.2876424228    |
| 34.9253331125    | 15.801119621     |
| 7.6762844131     | 15.4353273043    |
| 74.38688628      | 49.9209038922    |
| 0                | 0                |
| 1.373699078      | 0.9943949115     |
| 25.7609369158    | 29.6670459401    |
| 50.7404637094    | 35.4182787133    |
| 44062.9508050024 | 49348.6669359763 |
| 2.8221979608     | 0.6384174981     |
| 1.4235591675     | 1.2881096149     |
| 32.0456139394    | 43.0270958194    |
| 1.6998125718     | 1.0253852772     |
| 129.0517873485   | 110.252397291    |
| 53.2652907743    | 39.8150592736    |
| 8.1349639854     | 7.3609341753     |

gene\_expression\_table

|                |                |
|----------------|----------------|
| 19.0558135687  | 17.7086994545  |
| 2.56765505     | 2.3233464637   |
| 11.4004619873  | 4.5847666065   |
| 0              | 0              |
| 0              | 0              |
| 2.907254739    | 3.2882921798   |
| 0              | 0              |
| 0              | 0.6736317708   |
| 3.7809505225   | 5.7019977728   |
| 0.6881778174   | 0              |
| 0              | 0              |
| 3.0898047242   | 1.3979071838   |
| 3.1435057256   | 4.7406763298   |
| 0              | 0              |
| 1.5922795927   | 1.0805824056   |
| 9.953260438    | 14.1526352087  |
| 956.6184266007 | 918.5933671559 |
| 40.2956788172  | 57.4270270615  |
| 0              | 0              |
| 0              | 0              |
| 6.1354322573   | 9.2527582306   |
| 17.2425344586  | 23.4028991511  |
| 60.3362436092  | 64.8319652168  |
| 166.4039191108 | 123.6831833797 |
| 85.4738633254  | 57.6853892042  |
| 5.9309178487   | 6.7082497172   |
| 129.7374545335 | 81.5230050843  |
| 10.1737329309  | 3.3475335514   |
| 27.0520233147  | 57.1154809045  |
| 1.9866636585   | 1.7976355451   |
| 6.136722569    | 0              |
| 15.0801632121  | 22.7421799196  |
| 10.8837294314  | 6.8179559873   |
| 163.743841843  | 130.7328150852 |
| 4.3704616798   | 12.3032581932  |
| 266.805678775  | 337.775545912  |
| 0              | 0              |
| 78.6184243247  | 75.7275455642  |
| 19.902492424   | 15.2382150973  |
| 50.7107905962  | 31.6101721437  |
| 179.6234293646 | 193.9904334409 |
| 0              | 3.6058273659   |
| 6.235807725    | 8.1502486413   |
| 65.7640388934  | 58.4687803645  |
| 0              | 0              |
| 6.2789864347   | 5.3337001387   |
| 79.1255203674  | 56.0323126575  |
| 7.9055100042   | 6.755906157    |
| 0              | 0.2563363645   |

gene\_expression\_table

|                |                |
|----------------|----------------|
| 279.9205603273 | 249.4195624184 |
| 175.7838302138 | 132.5485486281 |
| 17.704808779   | 12.5035881904  |
| 16.404751521   | 20.1876545492  |
| 40.281005267   | 36.4483270999  |
| 5.2575206418   | 2.3786376583   |
| 1.1541123818   | 1.2531603515   |
| 0.945625634    | 0              |
| 33.9438446472  | 33.7106392187  |
| 130.749069284  | 118.3084884223 |
| 0              | 1.5329581332   |
| 24.0503233232  | 17.9216228262  |
| 45.4923854585  | 23.5222012354  |
| 6.1319940772   | 3.699029264    |
| 0              | 0              |
| 0              | 0              |
| 8.3573396875   | 5.8816731227   |
| 0              | 0              |
| 0              | 0              |
| 10.0374479307  | 10.7853495044  |
| 73.020954979   | 93.7812010829  |
| 1.3292388482   | 2.1048365358   |
| 0              | 0              |
| 0              | 0              |
| 5.4600955823   | 3.0878597192   |
| 0              | 0              |
| 0.4734469846   | 0.1427997344   |
| 10.2163324648  | 7.1899827358   |
| 0              | 0.8602786031   |
| 0              | 0              |
| 0              | 0              |
| 1.0724435229   | 0              |
| 0              | 0              |
| 1.2956272008   | 1.1723501859   |
| 1.0064191148   | 1.3659897334   |
| 0              | 0              |
| 0.5574469074   | 1.5132199721   |
| 0              | 1.521650005    |
| 8.3355882162   | 3.7712346534   |
| 68.3796497896  | 85.3201994613  |
| 3.2318214437   | 0              |
| 527.9459574329 | 584.8631867026 |
| 32.2381330032  | 47.9233294187  |
| 12.7902824489  | 9.9199765385   |
| 42.3531092754  | 33.5328642878  |
| 146.7596600141 | 171.6627277963 |
| 25.5918667141  | 35.3446480666  |
| 6.5962930539   | 5.9686655108   |
| 192.8201485605 | 254.4406610779 |

gene\_expression\_table

|                 |                 |
|-----------------|-----------------|
| 77.3780325102   | 57.0497701343   |
| 44.0407095102   | 47.8203612437   |
| 0               | 0               |
| 2.4895888978    | 4.1836009254    |
| 120.2159738873  | 104.5938475943  |
| 10.4888985678   | 14.2363430374   |
| 25.3038126987   | 26.7122243352   |
| 0.6803160453    | 0               |
| 208.3369687936  | 271.6475230917  |
| 1857.5018555102 | 1846.5986089501 |
| 70.8074330133   | 59.012035826    |
| 447.2589549003  | 276.9020018774  |
| 2.8407433621    | 2.5704508262    |
| 8.6168711078    | 4.0902234999    |
| 134.1452215084  | 159.7125023392  |
| 23.0326906745   | 21.8832223783   |
| 12.0082781134   | 14.125420639    |
| 120.1017905973  | 169.281094018   |
| 1011.8752162995 | 1102.8779440407 |
| 0               | 0               |
| 2.7756221645    | 2.5115258144    |
| 28.3128485596   | 37.7542020645   |
| 171.8062695209  | 143.2662816527  |
| 0.396135264     | 1.4337743144    |
| 0               | 0               |
| 0.6135948317    | 1.1104243791    |
| 1.7693497341    | 2.1346649597    |
| 0.6570322394    | 1.7835497762    |
| 3.2647254213    | 1.4770458093    |
| 2.5382290586    | 2.87090039      |
| 0               | 3.870370989     |
| 23.4212449888   | 27.4259093252   |
| 0               | 0               |
| 0               | 0               |
| 0               | 0               |
| 7.2804680178    | 0               |
| 36.3911651575   | 30.3956303377   |
| 71.5867327249   | 87.909418256    |
| 12.2188524412   | 11.2818843625   |
| 58.1867293834   | 55.5221851725   |
| 108.8810291623  | 64.8493711557   |
| 2.6517735201    | 1.0283405081    |
| 11.106563575    | 12.2033169777   |
| 45.5394289855   | 64.8781925095   |
| 3.4355595398    | 4.8357106357    |
| 192.1024291187  | 162.8226371347  |
| 0               | 0               |
| 4.1833792073    | 4.7316710668    |
| 4.9784092042    | 2.7028325521    |
| 3.8189703325    | 6.0473016536    |

gene\_expression\_table

|                |                |
|----------------|----------------|
| 0              | 0              |
| 0              | 0              |
| 26.9537371287  | 20.7307595176  |
| 0              | 0              |
| 0              | 0              |
| 12.3479196152  | 15.4491324618  |
| 23.316556909   | 19.0886856226  |
| 4.1073511027   | 2.7029401532   |
| 11.7951259008  | 7.8886187183   |
| 69.8628043157  | 89.725171379   |
| 0              | 0              |
| 0              | 0              |
| 0              | 0              |
| 0              | 0              |
| 0              | 0              |
| 16.8509640896  | 25.2887351798  |
| 10.6322156369  | 16.8360080349  |
| 20.2078364373  | 19.3606842089  |
| 1.2000376631   | 2.1717117031   |
| 367.7808564826 | 444.3572763245 |
| 23.7382250179  | 29.5784214564  |
| 0              | 3.4406660004   |
| 0.9995843354   | 1.356713043    |
| 0              | 0              |
| 26.7824998506  | 23.7073544416  |
| 6.5335709569   | 9.6740367196   |
| 19.4137202711  | 18.7376356865  |
| 7.3911134284   | 9.1648450487   |
| 51.0287535674  | 37.6926065478  |
| 6.2766435396   | 1.8931433919   |
| 0.7410785422   | 1.3411320266   |
| 10.0188747429  | 8.2885427257   |
| 72.8289080254  | 74.6859243052  |
| 0.1089883909   | 0.4930915321   |
| 8.4914782375   | 6.6590564065   |
| 3.9256236962   | 4.3201294037   |
| 22.0061205245  | 22.4013044853  |
| 24.1877617834  | 21.8863319684  |
| 70.4676596822  | 69.6485597026  |
| 0              | 0              |
| 96.2276318845  | 104.7064924961 |
| 48.6173205856  | 43.9914543264  |
| 1.2862609458   | 2.3277502325   |
| 252.9858938673 | 248.5359161989 |
| 31.7843103066  | 35.4707654785  |
| 3.7693914677   | 3.4107394359   |
| 60.2428197481  | 69.8419681519  |
| 409.1676756416 | 867.1316269067 |
| 22.2703641616  | 14.1059603292  |



gene\_expression\_table

|                 |                 |
|-----------------|-----------------|
| 0               | 0               |
| 1.9492395334    | 4.2330534488    |
| 37.7238026366   | 32.7690609826   |
| 0               | 0.3946147196    |
| 299.0091304682  | 274.868640302   |
| 0               | 0               |
| 20.2051711991   | 21.765094044    |
| 0.7143060345    | 1.6158521754    |
| 0               | 0               |
| 0               | 2.6080275471    |
| 11.9025805173   | 7.3689935923    |
| 2002.0590050375 | 1999.2335658345 |
| 1.2269832569    | 0               |
| 2.6597498692    | 6.0166964923    |
| 0               | 0               |
| 21.3716059091   | 22.3915179827   |
| 1.4577666891    | 2.6381246827    |
| 1.6232518208    | 4.896006024     |
| 22.6971400962   | 20.5375407335   |
| 1061.0951205634 | 856.8279850463  |
| 49.8379433228   | 30.0639577418   |
| 2.0079903534    | 1.8169330365    |
| 0               | 0               |
| 438.5193156175  | 679.2589810387  |
| 91.1771099057   | 80.9451058902   |
| 12.414534825    | 14.8279694235   |
| 0               | 231.7645838019  |
| 0               | 0               |
| 31.3091371411   | 17.4980146624   |
| 55.9148872295   | 97.8163586759   |
| 4.4063748447    | 5.8145423952    |
| 5.918407394     | 2.1421118681    |
| 0               | 0               |
| 1016.3501455999 | 955.3135395666  |
| 99.8498351201   | 93.9632415897   |
| 0               | 0               |
| 3.572492142     | 0               |
| 2.1798980887    | 3.1559744075    |
| 0.8867629073    | 0.5349258175    |
| 23.7092961841   | 9.8176538125    |
| 0               | 1.9133788099    |
| 1.5531251765    | 0.9368984063    |
| 19.013658744    | 29.7770836024   |
| 40.7134108376   | 30.9452555319   |
| 390.826729491   | 454.3673668098  |
| 15.8859454586   | 14.6802599565   |
| 13.6405565578   | 17.17242121     |
| 2.9733152451    | 4.5736947735    |
| 13.9055936852   | 15.378607421    |

gene\_expression\_table

|                |                |
|----------------|----------------|
| 0              | 3.7379301907   |
| 1.2410469246   | 0              |
| 1.8600277802   | 10.9398177437  |
| 6.0345601935   | 4.0952855268   |
| 278.2456031306 | 154.9359660834 |
| 0              | 0              |
| 2.3211455762   | 5.1007091486   |
| 11.8808425527  | 11.7907590185  |
| 6.9927978599   | 6.7564226883   |
| 0              | 0              |
| 165.4229158361 | 180.5002928479 |
| 1.6724046203   | 3.0265555808   |
| 1.7379461474   | 9.4354988279   |
| 0              | 0.4615219522   |
| 2.7653635155   | 20.0179460855  |
| 13.3618001269  | 12.0904445765  |
| 11.0429156462  | 9.9921985299   |
| 28.5073425317  | 16.3367769587  |
| 0              | 0              |
| 6.5311371096   | 6.8188950673   |
| 0              | 0.4786742365   |
| 0              | 0              |
| 0              | 0              |
| 6.2908916334   | 6.0271650894   |
| 1.0191434694   | 0.6147823155   |
| 0.6632899738   | 0.6001789123   |
| 3.3624531694   | 3.7186364303   |
| 0              | 0              |
| 0              | 0              |
| 1.3389059289   | 1.8172665105   |
| 0              | 0              |
| 0              | 0              |
| 0              | 0              |
| 5.2479318466   | 2.1916610221   |
| 1.3598289339   | 0.8202954793   |
| 989.7777977617 | 734.1724233156 |
| 0              | 0              |
| 50.4341126621  | 55.2428300186  |
| 37.715401233   | 56.4405372901  |
| 18.9884804762  | 10.9338438362  |
| 16.5742300153  | 14.9972165049  |
| 9.5730139334   | 9.7981762264   |
| 0.4472706454   | 0.2428281024   |
| 2.1588732444   | 3.1965703253   |
| 3.1219810074   | 4.708215208    |
| 2.0025034249   | 2.8003144618   |
| 201.737927205  | 169.953698492  |
| 12.1249602251  | 8.6082414832   |
| 5.0414851098   | 9.123590493    |

gene\_expression\_table

|                 |                 |
|-----------------|-----------------|
| 21.6976976546   | 12.4938505773   |
| 0               | 0               |
| 1.0626960653    | 0.824213232     |
| 8.2835302277    | 14.9907291181   |
| 0.3380184162    | 0               |
| 1.4727613821    | 1.5991563737    |
| 0.3338074931    | 0.3020462031    |
| 25.7320245287   | 22.3523139782   |
| 2317.9947569131 | 2097.4409788379 |
| 56.625862361    | 46.8461670201   |
| 4.8653348094    | 4.5002366178    |
| 4.3289658514    | 3.2642259528    |
| 25.8127075512   | 25.9004619124   |
| 0.2888662768    | 0.9148337699    |
| 149.9141908227  | 163.0883879673  |
| 9.3822429245    | 10.9151181838   |
| 55.2574224417   | 51.8984853711   |
| 0.536142943     | 0               |
| 3.3238541765    | 1.50379718      |
| 0               | 3.0987799335    |
| 0               | 0               |
| 10.1294267221   | 7.0825297443    |
| 0               | 1.3523699491    |
| 0               | 0               |
| 0               | 0               |
| 51.9561545119   | 33.9535467087   |
| 2.266827579     | 2.7348563765    |
| 199.1265741743  | 210.6157812339  |
| 7.2164498335    | 3.6276751603    |
| 0               | 5.5330408396    |
| 30.6916811102   | 3.471426622     |
| 0               | 0               |
| 2.4353293119    | 0               |
| 885.3925182606  | 828.538427721   |
| 0               | 0               |
| 12.7312896228   | 9.4253941766    |
| 72.3529569869   | 94.3967013595   |
| 3.9464587254    | 3.5709590055    |
| 263.8421757602  | 277.4860318524  |
| 0               | 0               |
| 0               | 2.1008649655    |
| 16.6244784592   | 13.1623483982   |
| 45.5796873094   | 49.4914168448   |
| 5.0034492139    | 9.0547568199    |
| 249.4816741667  | 100.330605016   |
| 0               | 2.1435030757    |
| 0               | 0               |
| 1.2181729905    | 1.1022656294    |
| 4.3853495364    | 7.936180008     |

gene\_expression\_table

|                |                |
|----------------|----------------|
| 8.4650929068   | 0.8510724241   |
| 0              | 0              |
| 5.9664904203   | 5.3987876677   |
| 497.3013969604 | 498.4437084015 |
| 7.4648543913   | 20.2637535585  |
| 7.2263783595   | 3.269399565    |
| 193.5020942672 | 163.4179453643 |
| 2.6551515756   | 0              |
| 25.6065758911  | 20.5956871191  |
| 2.779146876    | 2.5147151548   |
| 0              | 0              |
| 0              | 1.3333840464   |
| 3.3710255541   | 2.1117305428   |
| 0              | 0              |
| 301.6741296715 | 289.5139351613 |
| 63.8805782698  | 83.0910011485  |
| 162.2983043056 | 156.9838506882 |
| 0              | 0              |
| 0.8835765576   | 1.9987638824   |
| 33.7998280244  | 39.3220598156  |
| 0.6520550561   | 2.3600519217   |
| 0              | 0              |
| 0.6515745761   | 0.8843673261   |
| 11.4740372266  | 8.1575210581   |
| 2.0572267604   | 1.6753362049   |
| 0.4825871699   | 0.8733394267   |
| 3.0939544584   | 2.0996769455   |
| 3.4812832039   | 2.2500316057   |
| 0              | 0              |
| 0              | 0              |
| 0.4989418613   | 0              |
| 0              | 0              |
| 0              | 0              |
| 0.5954736796   | 0.323289143    |
| 1.1531819402   | 0              |
| 0.5036090541   | 0              |
| 0.9264117028   | 1.6765299947   |
| 0.3133872736   | 2.5521204354   |
| 6.6282291058   | 1.1995125789   |
| 0.2510203862   | 0.2271361672   |
| 0              | 0              |
| 0              | 0              |
| 0              | 0              |
| 0.4771423215   | 0              |
| 0              | 0              |
| 0              | 0              |
| 0.4354533465   | 0.3502405365   |
| 9.3581001065   | 3.5282044586   |
| 0.5181680544   | 0              |

gene\_expression\_table

|                 |                 |
|-----------------|-----------------|
| 12.9250734465   | 21.2641305361   |
| 0               | 0               |
| 23.7855525069   | 17.2179138485   |
| 0               | 0               |
| 196.6315081907  | 256.2081272026  |
| 0               | 1.3438350411    |
| 34.2432205714   | 26.5585960302   |
| 1.6917970672    | 1.5308250746    |
| 0               | 0               |
| 7.1999890978    | 7.3835768699    |
| 181.8863435503  | 165.3181540313  |
| 7.7422307602    | 6.8463514607    |
| 627.1998568478  | 589.7060150431  |
| 0               | 0               |
| 108.2980691619  | 105.2227088756  |
| 112.4280868721  | 126.5430912688  |
| 11.1683535798   | 5.0528506146    |
| 22.5958283722   | 24.1632993378   |
| 26.4087504719   | 26.7072906116   |
| 0               | 2.4484116178    |
| 5.5997151824    | 10.9783061961   |
| 555.0908326337  | 553.6437691334  |
| 0               | 0               |
| 0               | 0               |
| 0               | 0               |
| 1.0383643803    | 2.8186966287    |
| 371.829418865   | 367.19205955    |
| 8.1576219406    | 5.1943440345    |
| 44.5537963772   | 59.2861300672   |
| 25.007062295    | 22.6276772462   |
| 28.4295750346   | 10.2898171811   |
| 5.5286312648    | 7.5038852463    |
| 3510.9223952762 | 3108.1991213725 |
| 30.9379541176   | 28.8425641815   |
| 20.8297146526   | 24.0832975252   |
| 18.3043068367   | 24.8440186075   |
| 21.8577646558   | 29.6670459401   |
| 199.0029434653  | 180.0681072676  |
| 0               | 0               |
| 0               | 0               |
| 179.2959799732  | 151.1997538655  |
| 0               | 0               |
| 35.2547867659   | 38.0350277643   |
| 4.0156648981    | 2.5954145094    |
| 0.9484225246    | 2.5745445659    |
| 2.5874631625    | 2.9265873295    |
| 0               | 0.5519392718    |
| 0               | 0               |
| 191.5746080434  | 225.7091851585  |

gene\_expression\_table

|                 |                 |
|-----------------|-----------------|
| 9.1539307479    | 7.5729808046    |
| 7.756543279     | 7.0185196403    |
| 0               | 0               |
| 2.0885705837    | 1.8898461769    |
| 49.6682822391   | 59.9232247074   |
| 12.3819444762   | 3.7346069147    |
| 33.1684155374   | 35.1365734007   |
| 0               | 0.2415551693    |
| 26.0733731254   | 25.4073401893   |
| 1.5801649373    | 1.7872682213    |
| 18.8608650338   | 11.1997472857   |
| 0.575385807     | 1.0412773943    |
| 1.2282227383    | 1.6670387377    |
| 5.9200884186    | 1.339200187     |
| 69.2423134765   | 78.0905047203   |
| 0               | 0               |
| 3.1165348516    | 2.8200011627    |
| 72.1736384295   | 78.0837670055   |
| 0               | 1.9105405851    |
| 0               | 0               |
| 1.0179346897    | 4.605398536     |
| 0               | 0               |
| 46.0487834556   | 44.289727805    |
| 11.6495239133   | 9.6626648398    |
| 6.2342682168    | 6.2051954825    |
| 8.646814248     | 16.9521790561   |
| 2.1756722201    | 2.6248802949    |
| 30.5564862391   | 14.4256078419   |
| 47.7097091446   | 59.6621875862   |
| 31.838642461    | 0               |
| 12.3756928633   | 21.5964590712   |
| 1.9543571554    | 3.1831253246    |
| 11.554193552    | 11.7616827351   |
| 0               | 0               |
| 177.2599495671  | 120.2954453477  |
| 0               | 0               |
| 0               | 0               |
| 1790.2923478417 | 1745.0899968606 |
| 27.4442659915   | 52.7700922965   |
| 13.2336126147   | 7.620107038     |
| 0               | 3.117610977     |
| 86.5878807581   | 112.6269344203  |
| 0.1985339018    | 0               |
| 4.458042291     | 13.1100649884   |
| 2.2180875358    | 0.9444893093    |
| 14.2110953647   | 14.6959207162   |
| 12.9058451196   | 3.8926243383    |
| 28.2410992649   | 56.4317508265   |
| 21.1060806135   | 29.5148872353   |

gene\_expression\_table

|               |                |
|---------------|----------------|
| 1.6056556758  | 3.874346425    |
| 98.6498367549 | 93.841063311   |
| 1.6789479756  | 1.519198555    |
| 0             | 1.1247091023   |
| 1.0978016145  | 0.9933474121   |
| 17.6902793668 | 8.0035377044   |
| 2.2515521463  | 3.0559804267   |
| 0             | 0              |
| 0             | 0              |
| 0             | 0              |
| 1.4587626637  | 1.3199635504   |
| 0             | 0              |
| 0.9543470636  | 0.8635423498   |
| 33.3884858148 | 35.9968246581  |
| 10.0992555891 | 12.1844351115  |
| 1.356499635   | 2.0457178299   |
| 0             | 13.7806215484  |
| 2.4587222628  | 7.7867246464   |
| 54.1174254738 | 65.2909764755  |
| 87.7319725444 | 112.8094175079 |
| 0             | 0.6729793263   |
| 23.4624879763 | 79.4766606766  |
| 5.944317826   | 2.9338498707   |
| 37.3936257006 | 50.7535161531  |
| 0             | 0              |
| 0             | 0              |
| 7.0841155147  | 3.496403119    |
| 0             | 0              |
| 0.9316767502  | 0.8430290832   |
| 3.9805541764  | 3.6018103247   |
| 0             | 0              |
| 0             | 0              |
| 0.9411119079  | 5.1093989976   |
| 0.6237466508  | 0.564398078    |
| 9.2459175588  | 11.5035004655  |
| 6.8677563953  | 4.8826639055   |
| 0.945074356   | 0              |
| 1.2828680126  | 0              |
| 0             | 0              |
| 3.3524949237  | 4.5502649736   |
| 0             | 0              |
| 16.9621492399 | 16.5288585411  |
| 0             | 0              |
| 5.0241246239  | 5.3037676827   |
| 0             | 0              |
| 2.3699998922  | 2.4508547455   |
| 79.5608610847 | 51.8756966098  |
| 4.0005642741  | 0              |
| 0             | 0              |

gene\_expression\_table

|                 |                 |
|-----------------|-----------------|
| 4.070886693     | 11.0506435073   |
| 1.5056042421    | 0.3405870555    |
| 6.7491424335    | 6.8254387326    |
| 4.1141247977    | 3.3090416877    |
| 5.9176872471    | 8.0319420665    |
| 3.6943870122    | 3.3428715435    |
| 1.0784881938    | 0.4879358174    |
| 1.1152773206    | 0               |
| 55.9878644915   | 72.1271009588   |
| 33.4087030926   | 34.5484735188   |
| 1.6203373829    | 4.1541332421    |
| 13.5331211462   | 8.5718252577    |
| 7.7118176438    | 3.8062088636    |
| 0.5461168554    | 1.4824639291    |
| 144.7051883908  | 142.3225037015  |
| 0.6118792983    | 0.5536598866    |
| 2.0306274054    | 7.3496648258    |
| 1.239807776     | 10.0965770726   |
| 0               | 0               |
| 108.9032952214  | 102.5909502756  |
| 7.1547448495    | 4.3930588361    |
| 0               | 1.0608144189    |
| 12.4921779578   | 16.4084017829   |
| 0               | 0               |
| 1134.0822309538 | 1031.6054839554 |
| 1.2589574517    | 1.1391695093    |
| 23.7587915596   | 16.286498203    |
| 0               | 0               |
| 6.54996988      | 0               |
| 0               | 0               |
| 2.9784746163    | 0               |
| 7.9278878472    | 5.2422176728    |
| 0               | 0               |
| 9.2738330893    | 15.7339529358   |
| 0               | 0               |
| 0.629967958     | 1.7100823113    |
| 0               | 0               |
| 3.6490072526    | 2.4013160735    |
| 0               | 0.5481897903    |
| 494.6041880985  | 479.4117404913  |
| 0               | 0               |
| 0               | 0               |
| 0               | 0               |
| 5.7934921151    | 8.6342939459    |
| 0               | 0               |
| 18.3951484727   | 7.8328834165    |
| 4.6461453412    | 1.0510178683    |
| 67.5605694809   | 88.0487331733   |
| 48.8683977281   | 67.8704735365   |



gene\_expression\_table

|                 |                 |
|-----------------|-----------------|
| 2.1265944089    | 2.1075141953    |
| 2.8105366597    | 3.0517418963    |
| 101.990838943   | 102.0009360966  |
| 15.6788681994   | 13.6616008568   |
| 61.0240979424   | 47.2822608077   |
| 23.9633044391   | 36.8614933953   |
| 1.8844117414    | 1.705112747     |
| 139.1185497759  | 47.2056094518   |
| 1.1935584021    | 2.1599861655    |
| 0               | 0               |
| 3.0556009261    | 2.3698842945    |
| 0.7599780137    | 2.063001684     |
| 0               | 0               |
| 3.7564515725    | 4.5320410036    |
| 16.9007005628   | 9.5578899137    |
| 1.3878374846    | 0.7534720784    |
| 0.7672355392    | 0.1388468421    |
| 3.4282301821    | 1.7725937959    |
| 8.857029343     | 12.5938938407   |
| 119.6298614935  | 158.0409949762  |
| 0               | 0               |
| 0               | 0               |
| 0               | 0               |
| 0               | 0               |
| 15.8705465013   | 19.8653409561   |
| 5.4117425474    | 1.9587292943    |
| 9.7968695183    | 9.3712668138    |
| 4.9994487405    | 3.7697988131    |
| 0               | 0               |
| 123.8353680442  | 101.8660142234  |
| 0.9152536169    | 1.2422528803    |
| 0               | 0               |
| 328.0489422713  | 392.3519660926  |
| 0.8743018541    | 1.5822266476    |
| 125.544444197   | 141.1874226886  |
| 2.8047016355    | 7.6135152499    |
| 23.3761513743   | 19.1374741301   |
| 2.0365798308    | 1.8428022674    |
| 0               | 0               |
| 1.0244388364    | 0               |
| 2602.8206922423 | 2274.5097721323 |
| 9.1868674421    | 9.5002863674    |
| 20.8697724328   | 22.6608532857   |
| 8.7146445513    | 12.6167343862   |
| 0               | 0               |
| 1.4642771887    | 2.649906753     |
| 0               | 0               |
| 2.1615968059    | 0               |
| 0               | 0               |

gene\_expression\_table

|                  |                  |
|------------------|------------------|
| 0                | 0                |
| 28.2647041082    | 26.4003708404    |
| 0                | 1.1152553701     |
| 0                | 2.93039219       |
| 155.0019772275   | 226.5637790606   |
| 0                | 0                |
| 11.3033073229    | 9.0913905093     |
| 1.1978701074     | 0                |
| 6.2761935365     | 1.8930076632     |
| 13679.9206226045 | 14571.5994008773 |
| 15.0359310952    | 9.4190430846     |
| 20.05906489      | 28.6894596738    |
| 0                | 0                |
| 83.9080607287    | 82.6731622294    |
| 14.1582318367    | 3.2027742463     |
| 19.6102928868    | 0                |
| 0.9221956834     | 3.337800504      |
| 4.5845914943     | 4.8804404515     |
| 0.3417755841     | 1.5462807097     |
| 259.0114151706   | 234.3668615062   |
| 0.6673401595     | 0.6038437288     |
| 0                | 1.8068617592     |
| 0                | 0                |
| 0                | 0                |
| 99.6087316734    | 120.9654343534   |
| 37.6306511778    | 39.971915556     |
| 0                | 3.0780684177     |
| 4249.6803790178  | 4042.454764569   |
| 2662.6419897352  | 2866.7068002746  |
| 39.1817809537    | 45.7166033021    |
| 0                | 0                |
| 13.3523528521    | 16.8095947074    |
| 0                | 1.270384473      |
| 2.4824985806     | 1.8719104222     |
| 6.0140387089     | 19.0463413239    |
| 0.8031077177     | 0.7266932043     |
| 37.0129897771    | 35.5844621115    |
| 166.6021309986   | 146.2724560146   |
| 293.3450796267   | 436.2999747662   |
| 18.9809946762    | 28.6249684375    |
| 0                | 0                |
| 1.8150450224     | 1.9708154026     |
| 1.3880751506     | 0                |
| 8.5800575772     | 16.7217675027    |
| 40.7746902303    | 31.6243188582    |
| 22.9295268077    | 12.4486897156    |
| 3.1295705508     | 7.079491336      |
| 3.8645747592     | 3.4968661778     |
| 1.8289698024     | 1.6549460266     |

gene\_expression\_table

|                 |                 |
|-----------------|-----------------|
| 96.1757866185   | 65.7008443071   |
| 66.8885176286   | 118.5265073233  |
| 4.127481626     | 6.1356736016    |
| 5.7163606795    | 7.471327359     |
| 0               | 0               |
| 0               | 0               |
| 22.0860700995   | 9.9923065723    |
| 9.5167597833    | 5.0884683576    |
| 0               | 0               |
| 11.8985147231   | 8.971990515     |
| 2.7225336644    | 0               |
| 0               | 0               |
| 0.2843123703    | 0               |
| 0.4035865649    | 0               |
| 2.9576440113    | 1.3381142756    |
| 1.2053316845    | 1.0906461546    |
| 871.5979061422  | 899.746462694   |
| 6.0665521446    | 2.7446643333    |
| 38.7112275167   | 49.7765056515   |
| 0               | 0               |
| 0               | 0               |
| 2.7056203816    | 0               |
| 0.9352001736    | 0               |
| 6.4804379087    | 9.3821340985    |
| 21.6589273643   | 20.509652522    |
| 0               | 0               |
| 0               | 0               |
| 0               | 8.7313726477    |
| 39.1099182064   | 47.8057434696   |
| 11.644100485    | 42.1447260762   |
| 1002.9828992493 | 1258.4701064243 |
| 13.1222414691   | 20.3548792651   |
| 1.9562963137    | 3.5403152168    |
| 19.3373862263   | 22.496737478    |
| 22.708261335    | 23.349549776    |
| 2.3656995851    | 0               |
| 23.9328405294   | 21.6556660953   |
| 37.4508376449   | 32.1038959714   |
| 4.891683637     | 3.319685372     |
| 0               | 0               |
| 0               | 2.1543465149    |
| 13.4063555717   | 14.9850572569   |
| 0               | 0               |
| 1.7481497613    | 1.581815893     |
| 1.8447411693    | 0.8346083856    |
| 1.5357147421    | 0.6947968761    |
| 0.9659731136    | 3.4962487933    |
| 0.822160369     | 0               |
| 1.0861354804    | 1.47418694      |

gene\_expression\_table

|                 |                 |
|-----------------|-----------------|
| 22.7073312784   | 21.9886402917   |
| 1.8644647181    | 2.8117727559    |
| 7.6098219207    | 7.344809176     |
| 0               | 0               |
| 0               | 0               |
| 0               | 0.4529553092    |
| 0               | 0               |
| 4.2902059868    | 2.5317386235    |
| 1.8100685947    | 2.8662256716    |
| 1.2018664614    | 1.0875106424    |
| 3.0526326829    | 2.0716343932    |
| 0               | 0.6133541834    |
| 4.1273148254    | 3.7346069147    |
| 1.2234165448    | 0               |
| 0               | 0               |
| 1.8922078577    | 1.3697336595    |
| 0               | 0               |
| 0               | 0               |
| 0               | 0               |
| 0               | 0               |
| 1.3026255888    | 0.5893413438    |
| 3.3300497355    | 3.5154004909    |
| 0               | 0               |
| 0               | 0               |
| 0               | 0.4283528697    |
| 90.0786840969   | 108.2715955085  |
| 0               | 0               |
| 32.7498494001   | 21.4021524833   |
| 129.0041781793  | 142.3531964994  |
| 30.3152536465   | 28.9547354754   |
| 51.8837129767   | 35.6150067141   |
| 7.2869323624    | 3.6631063938    |
| 10.6626488973   | 16.0801893342   |
| 0               | 3.0104519862    |
| 40.3355167832   | 41.2582152205   |
| 162.7576180944  | 128.8625371961  |
| 1238.6426259292 | 1491.2805232164 |
| 2.1424460951    | 1.938595513     |
| 5.9486509545    | 1.7942152002    |
| 0               | 0               |
| 0               | 0               |
| 24.12576752     | 36.6436110458   |
| 0               | 2.4804989325    |
| 2.1893844399    | 2.9716016154    |
| 53.3039693916   | 55.1224861936   |
| 0               | 0               |
| 99.1771307928   | 69.7982236431   |
| 1.6568314681    | 0               |
| 0.6948970236    | 2.515114392     |

| gene_expression_table |                |
|-----------------------|----------------|
| 0                     | 1.6847671571   |
| 0                     | 0.9077169584   |
| 0                     | 0              |
| 0                     | 0              |
| 1.7269406294          | 0.7813123894   |
| 42.9416524293         | 41.9033327207  |
| 0                     | 2.8726406      |
| 4.9011615968          | 3.4845040281   |
| 0.8137459443          | 0.3681596097   |
| 0                     | 1.6126020493   |
| 15.591706961          | 9.8329732901   |
| 1.2086867623          | 1.0936820018   |
| 12.5738658527         | 20.7762698074  |
| 22.7736990816         | 30.1176530496  |
| 9.7821373837          | 6.6385360929   |
| 16.287586352          | 13.1003080559  |
| 0                     | 0              |
| 0                     | 0              |
| 77.6361880306         | 35.1246096935  |
| 123.2166042327        | 113.7774133115 |
| 13.6565898267         | 14.5378652608  |
| 0                     | 0              |
| 1.1591830857          | 1.5733327903   |
| 38.3072296665         | 36.1694121736  |
| 0                     | 0              |
| 0                     | 4.3412809745   |
| 2.9087037296          | 2.6319448651   |
| 628.2686619358        | 840.9358943444 |
| 153.0202723027        | 149.9990043091 |
| 6.7042196015          | 6.0663230067   |
| 10.7332451504         | 11.3306581785  |
| 24.5314130437         | 27.7466066485  |
| 0                     | 0              |
| 34.8488644293         | 31.5330464411  |
| 7.003507936           | 11.0899853718  |
| 73.6652760415         | 19.6047452381  |
| 17.6742070354         | 15.992532336   |
| 15.2177918203         | 6.8849207006   |
| 0                     | 0              |
| 17.9002220461         | 26.1644530304  |
| 71.607646173          | 70.1938080833  |
| 2.6175202561          | 0              |
| 35.2979578743         | 42.1600202865  |
| 12.7653255402         | 16.6843786287  |
| 0                     | 0              |
| 0                     | 0              |
| 7.7216501232          | 6.210619126    |
| 11.7054067354         | 11.2536329808  |
| 2.1823435656          | 2.4234915249   |

| gene_expression_table |                 |
|-----------------------|-----------------|
| 0                     | 1.2562408834    |
| 0                     | 0               |
| 0                     | 0               |
| 0.9490085799          | 0.858711815     |
| 4.4933963375          | 4.0658563115    |
| 0                     | 0               |
| 0                     | 0               |
| 1.3231212395          | 2.9930705186    |
| 23.8512785498         | 11.1390268994   |
| 5.4288587564          | 4.0935923855    |
| 9.6212281045          | 5.8038549722    |
| 3.4497299593          | 4.1619909973    |
| 8.6597224942          | 4.9863944371    |
| 0                     | 8.4302908323    |
| 0                     | 0               |
| 18.8393861076         | 32.1995986423   |
| 14.2631036848         | 18.8626014005   |
| 8.6102436753          | 6.8171177415    |
| 8.1562553735          | 6.0383452249    |
| 1.841249105           | 1.6660569717    |
| 5.6788330639          | 6.1662005807    |
| 5.5586466931          | 2.5148748344    |
| 1.3409979695          | 2.4268079859    |
| 3.7205298757          | 5.0497904284    |
| 0                     | 0               |
| 0                     | 0               |
| 1.2838840116          | 0               |
| 0                     | 0               |
| 5.5886330086          | 6.7425104409    |
| 1.8300480286          | 4.1398041528    |
| 5.7174807293          | 5.1734708811    |
| 3.7038124258          | 1.3405600572    |
| 1.3119375872          | 1.1871086632    |
| 0                     | 0               |
| 0                     | 0               |
| 1.3857021472          | 0               |
| 0                     | 0               |
| 3.3404332228          | 2.5907965153    |
| 1.1954899242          | 0.8113056175    |
| 2.5842931879          | 0               |
| 0.9506781721          | 0               |
| 8.7182897566          | 21.6940827423   |
| 3.4361888619          | 4.663860849     |
| 0                     | 0               |
| 1277.7916957422       | 1376.9430279296 |
| 0                     | 0               |
| 15.800988184          | 12.9977704473   |
| 0                     | 0               |
| 2.341903356           | 4.23814942      |

gene\_expression\_table

|                |                |
|----------------|----------------|
| 4.4658885546   | 10.1024146337  |
| 1.0666026689   | 0              |
| 15.9361296597  | 5.7679321823   |
| 7.7653503394   | 1.4052977444   |
| 168.1581830251 | 171.1779527632 |
| 251.6146966106 | 250.4413227737 |
| 196.6194633816 | 206.215500034  |
| 7.3347588979   | 4.4245782801   |
| 2.1977391908   | 5.9658826567   |
| 359.595483047  | 397.1556150049 |
| 159.7451595739 | 181.3906115017 |
| 0              | 0              |
| 0              | 1.017090558    |
| 74.1093249109  | 68.6174188775  |
| 48.4518319892  | 52.0620326741  |
| 21.5534334051  | 21.4529216497  |
| 8.8287209516   | 10.1477842152  |
| 53.9892610559  | 52.7604436013  |
| 0              | 0              |
| 15.0735717079  | 25.1803266821  |
| 0              | 0.2840998395   |
| 17.7993861086  | 12.9741173153  |
| 0              | 1.742126609    |
| 0              | 0              |
| 0              | 0              |
| 2.2647163928   | 2.7323092965   |
| 169.4414891749 | 187.6934779515 |
| 32.5377871099  | 25.3096731767  |
| 0.8496423193   | 3.0752004294   |
| 11.8228814026  | 5.0674508035   |
| 1.815167606    | 1.1731836349   |
| 1.5260236633   | 0.2301374609   |
| 0.7792446808   | 0              |
| 22.6281507121  | 21.0518794068  |
| 0              | 0              |
| 9.8189261666   | 9.9299251172   |
| 1.4484801682   | 3.4950917846   |
| 2.2638797099   | 2.3411141699   |
| 0              | 0              |
| 509.5995928294 | 544.169375038  |
| 0.6832790665   | 0.6182660724   |
| 510.228910114  | 427.8998181913 |
| 240.0832291984 | 300.9674518283 |
| 0.4340276928   | 0.1963652994   |
| 0              | 0              |
| 34.4453306422  | 46.751862447   |
| 7.8453222733   | 5.0706081746   |
| 1.8396978018   | 2.8753101983   |
| 0              | 0              |

gene\_expression\_table

|                |                |
|----------------|----------------|
| 308.6105858074 | 172.3011826541 |
| 1.9513624012   | 2.7746606648   |
| 61.1193329469  | 48.3909288393  |
| 0              | 1.2022434608   |
| 27.4555034506  | 33.1242037887  |
| 117.7757338372 | 121.4892832211 |
| 4.1487333213   | 3.7539874723   |
| 0.3685265415   | 0.3334617852   |
| 2.1872328004   | 1.6126169721   |
| 0              | 4.6432654262   |
| 0              | 0.6458191685   |
| 38.751813832   | 30.4508680807  |
| 0              | 0              |
| 559.9705323748 | 381.1797557589 |
| 72.3847834183  | 49.1231086264  |
| 18.2985676101  | 35.8745528352  |
| 31.8418996111  | 35.5650468892  |
| 38.7466209908  | 30.2351752187  |
| 8.7590257367   | 9.7200967776   |
| 3.3696148521   | 2.7102230888   |
| 0              | 0              |
| 78.441171547   | 59.0054829377  |
| 45.4623075529  | 37.8094082028  |
| 5.0808113622   | 3.9286698948   |
| 40.8868341771  | 28.7092935322  |
| 345.0604955046 | 218.3336967067 |
| 5.53842512     | 5.1970614874   |
| 6.7918819567   | 5.74915123     |
| 1.278461463    | 0.8097724199   |
| 0              | 0              |
| 76.8078792975  | 47.7162277359  |
| 12.765212725   | 7.612909681    |
| 28.2255780839  | 19.7354205537  |
| 4.7934481832   | 2.710849167    |
| 11.6783663833  | 9.9455878284   |
| 0.4846248609   | 0.2806486535   |
| 0              | 0              |
| 13.5368880198  | 8.16591541     |
| 0              | 0              |
| 0              | 0              |
| 31.6959845925  | 19.2694814686  |
| 0.8286124809   | 0.6134491857   |
| 2.0061680703   | 2.9044546255   |
| 0              | 0              |
| 0              | 0              |
| 0.2923296902   | 0.2116119615   |
| 0              | 0              |
| 8.058294035    | 5.6088917365   |
| 0.8737608042   | 1.5812475079   |



gene\_expression\_table

|                |                |
|----------------|----------------|
| 0              | 0              |
| 0.0212711794   | 0.0128315054   |
| 0.0484150133   | 0.1314251887   |
| 256.9846765019 | 215.7637598923 |
| 0              | 0              |
| 0.1937179073   | 0              |
| 24.2731959049  | 23.9910498203  |
| 3.1899668923   | 2.8864462532   |
| 22.3675876816  | 19.7574555839  |
| 7.7713478136   | 8.2039014695   |
| 0              | 0              |
| 5.4901440857   | 9.9355299668   |
| 1.8962903441   | 2.0018379712   |
| 1.5214353548   | 1.3766730276   |
| 0              | 0              |
| 2.5359312702   | 3.0595215396   |
| 5.4486258642   | 6.1627464491   |
| 12.7289263748  | 5.3913049405   |
| 8.0399694194   | 7.4249777525   |
| 0              | 0              |
| 0.0857814839   | 0.0776195024   |
| 0.0595877391   | 0.0539180537   |
| 50.895550841   | 51.7085353963  |
| 6.7278695507   | 7.9140395077   |
| 0.0473394243   | 0.042835148    |
| 10.3146397368  | 0              |
| 1.3547739955   | 1.1850069421   |
| 1.4511694756   | 1.9696392645   |
| 5.394858601    | 4.118804245    |
| 25.3299616454  | 19.6455884574  |
| 612.0095872541 | 606.6985221642 |
| 310.811241037  | 291.0486387066 |
| 13.9824566114  | 8.0513023265   |
| 1.2416806372   | 1.1235365582   |
| 50.3006330547  | 54.6175225198  |
| 0              | 0              |
| 0              | 0.0668721625   |
| 430.9242264556 | 415.8349887289 |
| 134.2016924128 | 117.4728408777 |
| 39.5972930339  | 40.1495582555  |
| 8.5543140236   | 13.0364356658  |
| 0.8764025734   | 1.5860283255   |
| 10.9152552926  | 6.9959851165   |
| 28.904629715   | 18.4049459539  |
| 0              | 0.0993852181   |
| 30.2916891026  | 27.409479617   |
| 5.5381915297   | 8.3520679734   |
| 19.30951498    | 19.8657011095  |
| 0              | 0              |

gene\_expression\_table

|                |                |
|----------------|----------------|
| 35.4989243497  | 10.7070847067  |
| 0              | 0              |
| 2.9401607929   | 4.2123139891   |
| 38.1609756765  | 28.8451956196  |
| 0.9521671936   | 0              |
| 0              | 0              |
| 0              | 0              |
| 88.0399228225  | 79.6630541769  |
| 0              | 0              |
| 0.6691459323   | 0.605477685    |
| 9.9873556718   | 13.0240177319  |
| 6.8209714389   | 6.4005574154   |
| 26.8058806704  | 4.331310841    |
| 13.7498920878  | 13.2996522405  |
| 4.3240352231   | 4.1427631663   |
| 6.8229860505   | 6.1737890035   |
| 1.6437765484   | 1.3944127849   |
| 23.3056736026  | 18.2125131969  |
| 2.4848944746   | 2.8105755436   |
| 54.3089728167  | 34.9163674953  |
| 0              | 0              |
| 6.6424119771   | 5.7098764722   |
| 3.2480093294   | 6.2453028311   |
| 0.8208754543   | 0.5777102855   |
| 1.6797211499   | 0.7599490815   |
| 21.582925899   | 0              |
| 13.3620825238  | 18.1360501557  |
| 2.4887799922   | 3.0026350016   |
| 40.748963583   | 46.2533319119  |
| 34.8963395063  | 34.0285095256  |
| 5.2773876882   | 4.1964336135   |
| 261.9770155097 | 223.3321013112 |
| 2.6414675399   | 1.1153967086   |
| 14.217557891   | 16.6384465407  |
| 0.3928950083   | 0.888779071    |
| 0              | 5.5318816021   |
| 17.8108540074  | 11.2813242853  |
| 0              | 0              |
| 1.1247731889   | 1.3570035747   |
| 7.9840527021   | 7.2243818777   |
| 6.4478592074   | 2.5004378252   |
| 0.5503086434   | 0.9958951772   |
| 5.2872106931   | 7.6546246455   |
| 4.6786792503   | 3.7955605362   |
| 3.6472865215   | 4.5378473182   |
| 1.9871597268   | 2.9968073555   |
| 2.6123129187   | 3.6769525366   |
| 185.1216956659 | 171.9745100894 |
| 2.796127071    | 1.8071997924   |

gene\_expression\_table

|                 |                |
|-----------------|----------------|
| 0               | 0              |
| 3.2737252093    | 5.0781172972   |
| 26.1772152644   | 32.9918994163  |
| 0               | 10.079660579   |
| 23.2385446817   | 19.6708229902  |
| 10.0106435245   | 13.9989522541  |
| 7.1338049617    | 8.6067119391   |
| 1290.6925106674 | 1388.836245087 |
| 40.3102715381   | 35.4521505399  |
| 3.0263211622    | 2.5903511093   |
| 150.671854469   | 106.0388389025 |
| 0               | 0              |
| 0.2606779489    | 0.0786249423   |
| 10.5186421521   | 10.7868500691  |
| 0.5250228876    | 0.4750677352   |
| 19.2349396245   | 21.2724887515  |
| 543.0648752297  | 396.5967564314 |
| 0.8659301981    | 2.3506146555   |
| 6.4931964876    | 5.7354884679   |
| 27.8069806292   | 27.5574910557  |
| 1.0150429304    | 0.7653859121   |
| 0.6897394179    | 2.4964469235   |
| 0               | 0              |
| 2.4836130497    | 3.9658251805   |
| 0               | 0.8423513293   |
| 18.8851463858   | 14.5566596183  |
| 2.1135056543    | 1.4343065342   |
| 36.076224974    | 22.5994329986  |
| 1.5558361176    | 1.7782744529   |
| 0               | 0              |
| 1.1565184026    | 2.354574115    |
| 2.4768793664    | 2.4653287476   |
| 0               | 0.3368502614   |
| 0               | 0              |
| 2.1871526515    | 3.5622869518   |
| 0               | 0              |
| 1.1005550206    | 1.6182381078   |
| 2.4323857638    | 3.8516587381   |
| 0.3730454925    | 0.3375507648   |
| 17.4541797094   | 12.3386252228  |
| 0.9426807115    | 0.8529860339   |
| 0               | 27.2363242274  |
| 9.4556434917    | 4.9679726963   |
| 4.5829043503    | 2.7645651794   |
| 0.8387621499    | 1.7076491325   |
| 0.5393886303    | 0.6100832483   |
| 381.1404887081  | 310.3879806432 |
| 2.1320519505    | 0.7716761424   |
| 0               | 0.4955829965   |

gene\_expression\_table

|                |                |
|----------------|----------------|
| 2.573928782    | 3.2606325631   |
| 51.0141884886  | 50.4294211325  |
| 0.1885446698   | 0.0853024614   |
| 0              | 0              |
| 4.1116127681   | 11.1611966549  |
| 0              | 0.7807348203   |
| 0              | 2.813090868    |
| 0              | 0              |
| 5.4562669812   | 2.8212064202   |
| 18.5925205034  | 14.274459083   |
| 0.3344157582   | 1.0590880743   |
| 14.4814470548  | 16.7889346519  |
| 0              | 0              |
| 280.5535683839 | 250.9810871764 |
| 0              | 0              |
| 29.3530608769  | 33.0207400573  |
| 5.270231659    | 5.0014001627   |
| 62.7259583308  | 62.4334436272  |
| 0              | 0              |
| 13.2424781114  | 17.6884167673  |
| 21.5916368876  | 8.8805566012   |
| 0              | 2.826340279    |
| 9.4781666789   | 2.8587777054   |
| 140.4681869495 | 150.4482671607 |
| 0              | 0              |
| 0              | 0              |
| 0              | 0              |
| 14.222518098   | 12.8692665037  |
| 6.6590862199   | 3.0127419999   |
| 25.1603757792  | 24.1056033658  |
| 0.929954612    | 2.5244124119   |
| 4.062008605    | 1.8377572424   |
| 26.8508082038  | 54.6659852727  |
| 0              | 0              |
| 60.5326823417  | 50.2086630899  |
| 2.1229622274   | 10.5653102857  |
| 0              | 0              |
| 6.5592947285   | 7.9135833618   |
| 8.4203483679   | 9.7960688425   |
| 28.5930060904  | 284.5966616349 |
| 1.5173872658   | 2.7460202165   |
| 7.5523110158   | 5.4669758203   |
| 0              | 0              |
| 0              | 0              |
| 45.9175520064  | 38.8965286934  |
| 0.7115886511   | 2.8974691879   |
| 0              | 5.5330408396   |
| 0.2303760042   | 0.2084560676   |
| 41.504052459   | 50.0733375435  |

gene\_expression\_table

|                |                |
|----------------|----------------|
| 0              | 0.089740946    |
| 2.651541483    | 2.3992512265   |
| 0              | 0.5961311571   |
| 0.4419689474   | 0              |
| 1.9345268107   | 2.9822642335   |
| 0.7613991759   | 0.6889531687   |
| 35.6732166136  | 22.1267083247  |
| 8.8126665166   | 7.1019811836   |
| 38.266302062   | 24.5040725656  |
| 7.6675832952   | 15.1004053235  |
| 0              | 0              |
| 21.9914389022  | 12.0698767335  |
| 2.2014421588   | 1.825980006    |
| 6.0026569192   | 3.2589077866   |
| 30.8316947048  | 34.6841298986  |
| 12.3414463777  | 13.4006111758  |
| 16.3340296935  | 20.843407664   |
| 1.4053031352   | 2.7248370368   |
| 5.8239869235   | 3.9523823761   |
| 179.953275902  | 194.1446388729 |
| 0              | 2.1417643484   |
| 15.8753753328  | 16.6703276601  |
| 0.1377759323   | 0              |
| 0.6572690291   | 0              |
| 0              | 0.1593596978   |
| 18.6861184049  | 12.3228976071  |
| 16.6145745892  | 21.715376731   |
| 4.7836255435   | 12.9854119115  |
| 2.6542308062   | 2.4016846646   |
| 0.6800425506   | 1.1537578241   |
| 0              | 0              |
| 0.945870853    | 1.5894777566   |
| 0              | 0.0252414534   |
| 3.1335287238   | 2.8353780931   |
| 0              | 0              |
| 32.8522694946  | 29.726424566   |
| 25.4730393788  | 8.1350531642   |
| 35.6025640696  | 26.4623482677  |
| 21.6042318476  | 20.6346555959  |
| 0              | 0.2711350238   |
| 0.8701477819   | 0.5249030036   |
| 16.1010106434  | 19.9365581418  |
| 0              | 9.2709518563   |
| 0              | 0              |
| 0.1490317358   | 0.4045547588   |
| 33.9612186251  | 44.17417206    |
| 179.7726805092 | 178.8607277395 |
| 0              | 0              |
| 1.6173949696   | 1.4635022267   |

gene\_expression\_table

|                 |                 |
|-----------------|-----------------|
| 4.5441669811    | 4.3402293258    |
| 4.9431491871    | 5.7507632249    |
| 18.5768580561   | 10.2723484386   |
| 14.2001012803   | 17.2967073638   |
| 26.3174320446   | 22.7057687725   |
| 53.4319225402   | 27.4919738516   |
| 1.2089872313    | 3.2818616449    |
| 0               | 1.2420580904    |
| 1352.2492694985 | 1198.5406161312 |
| 36.0916707675   | 14.9680673961   |
| 0.1290687265    | 0               |
| 1.9822501959    | 1.0180130367    |
| 0.4143490261    | 0.3749243282    |
| 30.3205601086   | 31.8607009426   |
| 12.6284401971   | 0               |
| 0.1873739232    | 0               |
| 3.3781101893    | 5.0944799889    |
| 0.0212005631    | 0               |
| 1.4427666506    | 1.4505439271    |
| 50.8049683393   | 42.9062205851   |
| 418.2830029999  | 309.8469994133  |
| 2.2567179873    | 0.3403324339    |
| 6.3916725647    | 5.7835143589    |
| 3.538270379     | 3.4302955473    |
| 113.5996869562  | 118.3064436675  |
| 0               | 0.2266059397    |
| 3286.7712869101 | 2566.0160923555 |
| 6.2571278687    | 4.954049968     |
| 8.7524862279    | 9.1381154865    |
| 0               | 0.2444693797    |
| 3.5055401028    | 0               |
| 0               | 3.8366275627    |
| 43.7647031353   | 56.9257996245   |
| 23.8503562136   | 46.0395307528   |
| 5.4490215441    | 5.4783946566    |
| 36.5630366845   | 27.3580204368   |
| 0               | 0               |
| 2.6652933154    | 3.507919407     |
| 191.0318547659  | 204.630355866   |
| 57.6248290507   | 37.2442226162   |
| 29.5203021546   | 24.1675376649   |
| 97.7928205708   | 88.4879781068   |
| 2.0664340922    | 1.8698159399    |
| 15.4428461919   | 10.0919593534   |
| 0               | 0               |
| 303.9595397447  | 360.3949330801  |
| 3.2574364608    | 1.4737480959    |
| 0               | 0               |
| 6.3222982143    | 6.537989572     |

gene\_expression\_table

|                |                |
|----------------|----------------|
| 7.3858752191   | 7.6855881137   |
| 43.0168541793  | 43.6706767147  |
| 0              | 0.3434043139   |
| 7.1240517128   | 12.8924174252  |
| 28.0218781839  | 36.6248102355  |
| 0.5083466746   | 0              |
| 59.953275817   | 30.9993200901  |
| 368.8400043456 | 425.0531325669 |
| 0.6582104735   | 0.2977913595   |
| 16.4302453916  | 7.4334659028   |
| 42.6869237365  | 62.2018236559  |
| 26.0218477221  | 29.67429418    |
| 10.4177493094  | 8.0798707258   |
| 0              | 0              |
| 13.1126943449  | 9.8875340349   |
| 10.6554082198  | 14.4623427943  |
| 1.4591030643   | 3.0806336457   |
| 113.3166865637 | 96.7309162028  |
| 4.2573848578   | 6.420501626    |
| 0.1875810994   | 0.5091991043   |
| 5.6848072892   | 7.7158594058   |
| 4.7379932317   | 0              |
| 21.9139946844  | 30.3762032443  |
| 10.9897075926  | 6.6293687626   |
| 19.9220531267  | 21.8893204464  |
| 0              | 0              |
| 0              | 0              |
| 3.770040803    | 0              |
| 0              | 1.0440360177   |
| 0.6831893028   | 0.4464668358   |
| 2.1996167508   | 0              |
| 81.597650282   | 296.2354290591 |
| 0.7604533466   | 0              |
| 0.6397745191   | 0.5789009184   |
| 1.068751266    | 2.9011834839   |
| 0              | 3.0569239217   |
| 0              | 0              |
| 0.2856846498   | 0              |
| 26.5845017368  | 25.1484359116  |
| 3.8639318116   | 3.76522936     |
| 0              | 0              |
| 0.6802979188   | 0.6155685764   |
| 6.7146880575   | 3.4718830883   |
| 0.065127936    | 0              |
| 7.2283311708   | 4.162178449    |
| 266.3419967052 | 218.5538753486 |
| 5.0559991683   | 3.8710931886   |
| 3.2636693085   | 2.8168374091   |
| 0              | 0              |

gene\_expression\_table

|                |                |
|----------------|----------------|
| 1.567138336    | 0              |
| 4.7270923239   | 3.0552260499   |
| 1.0717738858   | 5.8187770998   |
| 12.2104796362  | 18.1198196698  |
| 203.7064619759 | 178.2806800545 |
| 0              | 0              |
| 5.5459104266   | 2.7879029107   |
| 0.0723856812   | 0.0327491453   |
| 0              | 0              |
| 550.0655559204 | 483.5473561959 |
| 1.4322935167   | 1.9440193555   |
| 20.4728335781  | 19.1985054667  |
| 10.161976603   | 8.6203870647   |
| 0.1779600891   | 0.1610274495   |
| 0              | 0.127296912    |
| 0              | 3.7031796475   |
| 57.3728843194  | 32.5971245515  |
| 0.7341279012   | 1.1956980879   |
| 3.4591812742   | 3.825610903    |
| 1.8918643553   | 0              |
| 294.4899797088 | 266.4696930208 |
| 5.4788050724   | 11.4403958318  |
| 25.5178340735  | 25.2277989039  |
| 13.4043796029  | 12.1289726783  |
| 21.4894285593  | 25.1637826853  |
| 16.5782157861  | 10.5561347287  |
| 35.5517352255  | 22.3490173458  |
| 78.7119172446  | 67.0105056295  |
| 16.9986335186  | 23.6634440641  |
| 1.3891588822   | 2.5139649319   |
| 1.3600507639   | 1.2306439422   |
| 365.8690541291 | 361.9274351509 |
| 23.9277621344  | 22.7906009495  |
| 0              | 0              |
| 10.6777355882  | 15.4588237042  |
| 0              | 0              |
| 0              | 0.4025686236   |
| 6.0606516065   | 4.5476986563   |
| 2.1756722201   | 1.8172248196   |
| 3.8865364698   | 3.5167382641   |
| 103.1257934475 | 85.1993067949  |
| 0              | 0              |
| 4.2445965708   | 4.1287841858   |
| 2.067385725    | 2.8060155393   |
| 7.9546699603   | 6.1181256314   |
| 0              | 0              |
| 0              | 0              |
| 0.9142900593   | 0.7169904822   |
| 9.3586003257   | 13.5490293197  |



gene\_expression\_table

|                 |                 |
|-----------------|-----------------|
| 15.0465060195   | 12.9036295171   |
| 5.2223920923    | 5.3161753463    |
| 4.096495231     | 1.8533598796    |
| 1.3868876338    | 0               |
| 0               | 0               |
| 0               | 0.721293528     |
| 0.3464572667    | 0.1791384968    |
| 59.4027498916   | 59.7976158817   |
| 112.1060342397  | 104.7115464586  |
| 3.2913098176    | 2.4017310878    |
| 1421.067782112  | 1119.0625901008 |
| 36.4689284747   | 21.7493170401   |
| 0.3651805348    | 0               |
| 0.2095008459    | 0.1895671498    |
| 0               | 0               |
| 0.017449822     | 0.0157894972    |
| 10.2532456867   | 15.1816328196   |
| 0               | 0.3395009886    |
| 0               | 0               |
| 0.718209058     | 1.2997450534    |
| 4.0264219766    | 3.6433138715    |
| 3.092686516     | 6.7162127065    |
| 0               | 0.3298891887    |
| 0.1393497474    | 0.3782724743    |
| 152.2118000554  | 107.4958611164  |
| 0               | 3.1033933811    |
| 0               | 0               |
| 3.0318300484    | 2.0978603914    |
| 9.1435499735    | 13.7892578268   |
| 4.5534765723    | 2.4938173689    |
| 26.1733527741   | 25.1183300545   |
| 15.2910309585   | 14.5643283616   |
| 0               | 0               |
| 6.6293891742    | 5.3321000747    |
| 4.3131215573    | 3.9027344104    |
| 625.0435606018  | 83.5014370113   |
| 0               | 5.2234847841    |
| 0.2129800729    | 0               |
| 56.7162589422   | 45.5372790348   |
| 50.9846739041   | 49.1887599542   |
| 2733.9540454207 | 2566.3472071738 |
| 24.0396395569   | 30.8157630835   |
| 10.3674197572   | 8.3027020798    |
| 2.4774050869    | 1.5411575103    |
| 15.8587585954   | 13.2459887392   |
| 7.7517881642    | 8.0933272703    |
| 0.9188851183    | 0.8314545562    |
| 52.2826413251   | 63.7210135484   |
| 23.6806362833   | 28.990091197    |

gene\_expression\_table

|                |                |
|----------------|----------------|
| 6.9050505318   | 6.106044144    |
| 12.984329197   | 7.8325929655   |
| 0              | 0.0617806038   |
| 0              | 0              |
| 57.031828728   | 44.0630163338  |
| 588.8259604741 | 721.6539153884 |
| 59.3945364886  | 56.4575388013  |
| 763.4075727618 | 710.7616006894 |
| 16.4315671071  | 13.452115594   |
| 2.4269572344   | 0              |
| 1.8239252316   | 2.1715545253   |
| 4.8663941322   | 5.5042048961   |
| 0              | 0              |
| 20.9367944641  | 18.073669187   |
| 0.9464435255   | 1.7127816434   |
| 0              | 0.5665780629   |
| 3.0380763593   | 1.099603152    |
| 16.2597539773  | 14.7126623976  |
| 12.8358280713  | 9.549714788    |
| 1.0372201975   | 3.2848557958   |
| 5.5938707152   | 5.6240246415   |
| 2.8780309351   | 1.3020952709   |
| 3.9094823751   | 2.8300007203   |
| 11.0113644587  | 7.970919513    |
| 51.1294729024  | 45.3998205729  |
| 0              | 0              |
| 48.8930233114  | 45.5294949569  |
| 8.6348734905   | 0              |
| 23.1187895398  | 22.8208045693  |
| 7.7922055469   | 4.598340454    |
| 0              | 0              |
| 0.5138429917   | 0              |
| 0              | 0              |
| 23.0660277114  | 25.54938579    |
| 4.00507467     | 2.7179982972   |
| 20.1609643891  | 14.0077709141  |
| 0.2463382098   | 0.4457989859   |
| 30.0435908717  | 30.2055417404  |
| 0              | 0.6273145851   |
| 10.6345405501  | 13.4717516095  |
| 0              | 0              |
| 0              | 0              |
| 7.4616729838   | 6.7517058183   |
| 0.6135432257   | 0.5551654938   |
| 7.619006021    | 6.4344642593   |
| 4.0393294318   | 4.5687415017   |
| 93.1563441966  | 132.4598873915 |
| 2.8596742273   | 3.0580496198   |
| 0.5778469606   | 0.5228656756   |

gene\_expression\_table

|                |                |
|----------------|----------------|
| 55.8872220551  | 50.5696354067  |
| 71.4906879922  | 50.3132424682  |
| 14.9513829968  | 13.5287809838  |
| 4.9415945496   | 2.5550909289   |
| 22.5852289594  | 17.5168095224  |
| 1.6469192807   | 0              |
| 11.8425794706  | 0              |
| 0.5425628615   | 0              |
| 3.2895559623   | 4.5640580077   |
| 23.4486064411  | 1.5155361547   |
| 1.0974093951   | 0.9929925117   |
| 32.0365345757  | 20.5723459239  |
| 2.319932884    | 3.9359900551   |
| 1.7450482896   | 1.3158412682   |
| 4.1493560377   | 3.7545509382   |
| 10.7279837557  | 43.6825437464  |
| 72.8225307129  | 53.1772706125  |
| 15.3418064224  | 8.982506951    |
| 0              | 0              |
| 9.2276864627   | 10.805475641   |
| 44.7547788581  | 29.2474200347  |
| 0              | 0.9729409274   |
| 5.0839981559   | 11.9606844215  |
| 1.0989799569   | 0              |
| 1.8660431082   | 2.6533443547   |
| 1.4573480574   | 0.8241772136   |
| 7.3374121636   | 6.6392682316   |
| 3.6236212245   | 2.4591292621   |
| 7.22995932     | 7.6323792619   |
| 0              | 0              |
| 4.3503064905   | 3.9363812521   |
| 130.712976136  | 67.5861882766  |
| 0              | 0              |
| 5.3847787074   | 2.4362124826   |
| 5.9967356793   | 5.8137376446   |
| 10.5495718783  | 0              |
| 0              | 0              |
| 16.4311265116  | 17.3456839364  |
| 195.57718375   | 123.8778124712 |
| 2.8020084324   | 0              |
| 356.3765976489 | 528.8473406718 |
| 8.6297661126   | 5.2057710739   |
| 12.1986673121  | 6.5410264483   |
| 1.1428542187   | 1.0341133275   |
| 7.4284713112   | 4.7662702945   |
| 31.3952232325  | 23.6733450867  |
| 1.6424080196   | 3.4676490846   |
| 2.9454632995   | 3.7312895427   |
| 0              | 0              |

gene\_expression\_table

|                 |                 |
|-----------------|-----------------|
| 2.4175738041    | 3.2813178401    |
| 35.5963596407   | 44.2879505572   |
| 0.8023569021    | 0.2420046092    |
| 0.6082739059    | 0               |
| 0.6358570486    | 0.5753561894    |
| 0               | 0               |
| 0.2565916517    | 0               |
| 50.879230318    | 61.9133696838   |
| 0               | 0               |
| 0               | 0               |
| 0               | 3.9502799053    |
| 436.5421720878  | 364.1459986713  |
| 0               | 0               |
| 6.4384133828    | 7.4903243879    |
| 6.0264592762    | 5.4530505755    |
| 1.4882752031    | 3.142225369     |
| 9168.4269219098 | 8733.5219086813 |
| 0               | 0               |
| 329.2416186649  | 308.8331070161  |
| 3.0498159115    | 2.6807838475    |
| 0               | 0               |
| 2.2896242156    | 0               |
| 0.6951240461    | 0.9884034595    |
| 30.3246780219   | 25.3286120209   |
| 3.2395611671    | 2.931321706     |
| 71.4783988261   | 56.1671591092   |
| 110.2846727689  | 134.6498360001  |
| 2.2567262983    | 3.5005750689    |
| 0               | 3.528958953     |
| 0.2419056904    | 0.4377774425    |
| 0               | 0               |
| 0               | 0.0539376594    |
| 0               | 0               |
| 0               | 0.9780405196    |
| 1.508713462     | 1.2045543565    |
| 0               | 0               |
| 0               | 0.0616550944    |
| 3.717448986     | 0               |
| 13.0491685841   | 10.167620649    |
| 46.1281354718   | 36.8286277944   |
| 1.4185763644    | 0.6418004591    |
| 17.673136585    | 15.5917746439   |
| 0               | 0               |
| 0               | 0               |
| 0               | 0.2480522236    |
| 19.1980122681   | 16.2002475206   |
| 0.0207879409    | 0.0376199981    |
| 9.4348537945    | 9.5128146902    |
| 1.8841683874    | 5.9671239171    |

gene\_expression\_table

|                |                |
|----------------|----------------|
| 27.2006131309  | 19.0548502911  |
| 351.8307661107 | 274.4436105803 |
| 0.8521168258   | 0.7710391682   |
| 1.0721676887   | 1.108745733    |
| 1.0870661184   | 1.7213584194   |
| 13.9919040113  | 11.078020631   |
| 34.9978324201  | 20.7058956119  |
| 11.8195543647  | 23.5288706865  |
| 23.47671212    | 26.8788190427  |
| 0              | 0              |
| 3.7988347269   | 4.0102780812   |
| 2.7497282148   | 6.9666677801   |
| 2.91663002     | 2.5002160869   |
| 8.6963901017   | 5.6206724469   |
| 0              | 0              |
| 594.1435732547 | 437.893392374  |
| 4.110123563    | 2.922111795    |
| 1.1853483649   | 0.8044231638   |
| 0              | 0              |
| 14.531930187   | 3.2873096223   |
| 3.2350460993   | 20.4906536815  |
| 0.8342658266   | 0.7548866651   |
| 63.7145958311  | 60.8257642623  |
| 0              | 0              |
| 0              | 0              |
| 0.5144046084   | 0              |
| 131.7866535956 | 134.6341027149 |
| 0              | 0.5480441464   |
| 0              | 0              |
| 9.6021967868   | 3.475424777    |
| 0              | 0.6608186727   |
| 0.836849804    | 0.3786123905   |
| 3.6843580575   | 5.834144451    |
| 0.0681641442   | 0.123356853    |
| 7.7952223906   | 2.3511728305   |
| 5.0463675663   | 3.6529705156   |
| 0.6254043426   | 0              |
| 0              | 18.9341490762  |
| 1.5565052816   | 0.8450436616   |
| 6.8844368381   | 5.4507187344   |
| 1.3333995529   | 14.478342654   |
| 5.7048124761   | 7.7430119902   |
| 18.9568806909  | 20.2026124184  |
| 4.6141865616   | 3.3923122384   |
| 0.3575527196   | 0.4313761418   |
| 50.8652902573  | 31.0404757465  |
| 2.1197236536   | 3.260659633    |
| 0.5718451794   | 0.5174349551   |
| 0              | 0              |

gene\_expression\_table

|                |                |
|----------------|----------------|
| 54.5277124155  | 56.3879784019  |
| 0              | 0              |
| 0              | 0              |
| 0.1067812633   | 0.386484735    |
| 41.3265914111  | 33.120778436   |
| 39.2693069981  | 34.4395707218  |
| 0.0265095443   | 0.0239872003   |
| 0              | 0              |
| 0.0224543265   | 0.040635661    |
| 7.1939352324   | 3.4260225887   |
| 4.4920129026   | 3.7936308745   |
| 1.1096788795   | 13.0532294466  |
| 16.7503170513  | 16.600029988   |
| 0              | 0              |
| 0              | 0              |
| 21.7837922278  | 16.425913805   |
| 0              | 0              |
| 1.6593496313   | 2.2749469155   |
| 5.307019463    | 1.9208257593   |
| 0              | 0              |
| 15.5749698147  | 11.4969491458  |
| 30.1729016104  | 39.6319276151  |
| 32.2335081312  | 25.1892823282  |
| 142.876362733  | 119.2266298676 |
| 4.0681624771   | 8.8345987798   |
| 202.1875317809 | 161.2437916746 |
| 5.9715224358   | 4.9121280858   |
| 82.92472591    | 69.3715749839  |
| 75.9525654759  | 77.8027823005  |
| 3.7519435731   | 5.6582528045   |
| 0              | 0.6863444473   |
| 143.3027379983 | 120.6533624215 |
| 6.6386843601   | 6.0070233468   |
| 0              | 0              |
| 83.1174895193  | 91.9220904964  |
| 0              | 0              |
| 12.1907054299  | 19.0531616729  |
| 32.9829622158  | 32.2645211544  |
| 28.4579942124  | 37.0159960011  |
| 545.7801028154 | 481.267768128  |
| 59.2427442348  | 55.4543633857  |
| 2.567090333    | 3.650170038    |
| 0              | 0              |
| 275.5204068416 | 266.3031183853 |
| 29.8557997035  | 19.9058369636  |
| 0              | 0              |
| 6.4340699665   | 5.8218777105   |
| 51.7830543853  | 55.1052642915  |
| 0.8036164197   | 2.1814605122   |

gene\_expression\_table

|                 |                |
|-----------------|----------------|
| 4.1214852847    | 4.9724427282   |
| 7.7700783165    | 8.526674677    |
| 0               | 0              |
| 0               | 0              |
| 0               | 0.4913529723   |
| 3.0020695283    | 3.6219027279   |
| 2.3040975815    | 3.4747768319   |
| 7.4564069033    | 17.8312006791  |
| 0.6765180052    | 1.1018669689   |
| 0               | 0              |
| 0               | 0.85804208     |
| 231.2444230237  | 193.6784136998 |
| 2.3866091813    | 0.8638107368   |
| 0               | 0              |
| 2.5450734808    | 4.605826995    |
| 627.8083239109  | 737.0868295188 |
| 11.9470113883   | 4.9893557987   |
| 32.0356146571   | 28.5957506191  |
| 43.1415398568   | 41.5152057967  |
| 13.0526430257   | 9.2798383205   |
| 133.5605019331  | 169.9164330203 |
| 406.6169420568  | 381.2411225391 |
| 0               | 0              |
| 32.3255304767   | 29.2498039878  |
| 60.5396593682   | 57.6625265052  |
| 1.2323030976    | 1.858418796    |
| 0               | 2.9967846799   |
| 4.0758146683    | 4.917342562    |
| 2.125591187     | 1.9233443245   |
| 4.6656192487    | 6.0309892386   |
| 0               | 0              |
| 1000.0555611884 | 990.526863306  |
| 5.731223645     | 7.0380155282   |
| 4.6845586475    | 4.5920656275   |
| 1.9440881975    | 1.1727407176   |
| 62.2919023508   | 59.2929676136  |
| 597.7122447096  | 673.8344484184 |
| 306.3020395195  | 301.7161435367 |
| 0.1226209851    | 0              |
| 0.1934494986    | 0              |
| 2.6244379184    | 1.4613701699   |
| 0.8315555503    | 1.1286514015   |
| 1.0529197231    | 0.9527359663   |
| 25.6785589811   | 15.4901880095  |
| 1.4678126668    | 1.3281524591   |
| 0.9020566718    | 1.340944869    |
| 5.5698432841    | 3.4483395773   |
| 48.5227029019   | 39.0274127783  |
| 2.5042679835    | 1.0458418075   |

gene\_expression\_table

|                |                |
|----------------|----------------|
| 43.7654605198  | 35.3364924876  |
| 2.3352633044   | 1.2074665426   |
| 0              | 4.5558481208   |
| 5.3585742017   | 0              |
| 26.4179191533  | 21.8356524038  |
| 13.6832327552  | 11.030606816   |
| 0              | 0              |
| 0              | 0              |
| 36.6161664917  | 20.5956871191  |
| 90.9037875872  | 67.5661360029  |
| 1.4622959567   | 2.2052677597   |
| 86.1067858231  | 80.0196321003  |
| 0              | 0              |
| 10.1148144484  | 19.3217434466  |
| 12.0265119413  | 6.3002251573   |
| 75.5256460271  | 72.0335189513  |
| 170.9221759724 | 139.5121499147 |
| 1.5862206901   | 1.4352941339   |
| 0.5838708969   | 0.6603955541   |
| 1.8494765213   | 2.0918769519   |
| 5.8965611913   | 8.0032681524   |
| 33.1843621859  | 50.0448652136  |
| 0              | 7.3918451531   |
| 24.0437662503  | 12.9176472048  |
| 12.6795094272  | 7.3427666108   |
| 0.4904056303   | 0              |
| 16.2926386463  | 16.848477873   |
| 57.1163641452  | 57.4242516022  |
| 310.3688377464 | 266.0567695246 |
| 0              | 2.4671716396   |
| 7.7730729397   | 7.0334765282   |
| 1.1774246788   | 0.9588550134   |
| 3.0317528424   | 2.9718932062   |
| 22.8584770075  | 24.130781122   |
| 4.265890914    | 1.9299988466   |
| 29.8880899461  | 29.1571168809  |
| 20.8033145072  | 24.2619282546  |
| 0              | 0              |
| 2.8759744221   | 3.6866337457   |
| 3.2994477365   | 3.7092701948   |
| 0.5846195543   | 0.2644969335   |
| 1.5386298875   | 2.0883472887   |
| 3.9108446858   | 2.3591557261   |
| 125.6369552973 | 108.0549239119 |
| 16.361352115   | 21.8850514419  |
| 0.3086101228   | 0.1861642169   |
| 8.5089762292   | 7.0577463976   |
| 0.6864980812   | 0.7764735032   |
| 6.1043074767   | 3.7974004988   |



gene\_expression\_table

|                |                 |
|----------------|-----------------|
| 26.2600034337  | 14.2568417315   |
| 0.6331116471   | 1.3367013539    |
| 0              | 0.0822098641    |
| 0              | 0               |
| 15.0929551741  | 10.925506222    |
| 31.5684981931  | 37.5423114734   |
| 1.3362490452   | 0.8060712812    |
| 0.4192003306   | 0.7586280764    |
| 0.7788841505   | 0               |
| 4.036209899    | 3.1956491765    |
| 0              | 0               |
| 1.4085635645   | 1.1329251745    |
| 6.5651977986   | 1.9801763077    |
| 0              | 0               |
| 4.4814921583   | 2.0275423987    |
| 10.4156834433  | 9.0755855617    |
| 1.329996163    | 3.6103469763    |
| 0.0825841427   | 0               |
| 4.1006730177   | 1.3605166797    |
| 2.1676719396   | 3.9228423113    |
| 0.2472394297   | 0.4793892066    |
| 0              | 0               |
| 1.016776011    | 0.3066770917    |
| 0.2669726973   | 0.2415706394    |
| 1.610826156    | 1.0931688195    |
| 4.0036518175   | 3.169871477     |
| 72.0415832051  | 75.5575813726   |
| 909.3300484705 | 1033.1229525264 |
| 48.9285637661  | 31.3393734855   |
| 0.610462674    | 0               |
| 0              | 0               |
| 59.5903466439  | 60.6604648043   |
| 7.8922058643   | 7.9347490344    |
| 0              | 1.4516551087    |
| 7.0336130039   | 4.2429167422    |
| 36.2363145146  | 28.3173259679   |
| 8.7352539487   | 1.9760268588    |
| 4.0400005283   | 0.7311200888    |
| 3.1538632064   | 2.7240606079    |
| 5.8220502425   | 9.6581663925    |
| 0              | 0               |
| 14.9060665179  | 13.4877763009   |
| 5.2846572561   | 11.9545748053   |
| 101.6020745665 | 64.354351047    |
| 3.3664185297   | 3.0461087779    |
| 13.4408640329  | 12.1619856687   |
| 0              | 0               |
| 8.9263125774   | 10.7693161565   |
| 25.2672947437  | 3.2661641374    |

gene\_expression\_table

|                  |                  |
|------------------|------------------|
| 0                | 0                |
| 10.7675704116    | 14.6145779816    |
| 15.2973346757    | 17.0987137234    |
| 5.3985265699     | 5.3733512128     |
| 7.2587352775     | 10.3212643836    |
| 0.5503294007     | 0.2489831855     |
| 0                | 0                |
| 1.0366306375     | 1.172495954      |
| 0.9491526341     | 1.1451228835     |
| 306.6467550252   | 336.9275767862   |
| 0                | 0                |
| 2.8802230551     | 1.0424696339     |
| 5.0634903373     | 4.9341456867     |
| 28.0372635489    | 24.161485072     |
| 0                | 0                |
| 0.5183539895     | 0.1876133492     |
| 10.0247752561    | 2.7212798083     |
| 14.5385912946    | 10.5242126419    |
| 9.1884171662     | 7.794518289      |
| 0                | 0                |
| 0                | 0                |
| 0                | 0                |
| 6.4078137427     | 3.7446189908     |
| 0                | 0                |
| 0                | 0                |
| 3.8212721298     | 3.4576837297     |
| 0.3517507403     | 0.4455950476     |
| 7.7524218426     | 14.0295807049    |
| 0                | 0                |
| 0                | 0                |
| 0.1435224127     | 0                |
| 0                | 0                |
| 2.9015580407     | 1.9562393129     |
| 0.7195550469     | 0.3255452234     |
| 1.8792626017     | 2.186297409      |
| 0                | 0                |
| 6.3472487091     | 4.1023695483     |
| 0                | 0                |
| 0.0657254225     | 0.0396478304     |
| 23.4904754044    | 44.7481923341    |
| 22.3888356641    | 15.7566663433    |
| 0                | 0                |
| 29.2928489007    | 19.2768564257    |
| 0                | 0                |
| 16179.0741155216 | 18448.9581584656 |
| 0                | 0                |
| 0                | 0                |
| 2.3715958888     | 4.2918840843     |
| 4.9326445474     | 3.8256948882     |

gene\_expression\_table

|                |                |
|----------------|----------------|
| 9.1212293788   | 11.7905112471  |
| 5.0529797366   | 4.5721961765   |
| 0.1737915095   | 0              |
| 6.8697302023   | 7.3462828852   |
| 0.2061951272   | 0.0932879827   |
| 3.3578959512   | 2.5319975917   |
| 3.291305463    | 3.7903633199   |
| 10.8718762353  | 7.3780749497   |
| 1.5032385862   | 0              |
| 2.1457939749   | 1.9416248469   |
| 0              | 0              |
| 4.9721288585   | 3.7886636969   |
| 0.3020153161   | 1.0931160192   |
| 2.3653959522   | 2.1403320204   |
| 2.4319465342   | 2.567308815    |
| 39.4609392554  | 45.6498127214  |
| 0.2334764149   | 0.8450459154   |
| 0              | 0              |
| 7.4471885564   | 7.351199523    |
| 8.2886639402   | 7.0454637575   |
| 170.4684197745 | 137.8500789637 |
| 0.1178594571   | 0.1066453038   |
| 0              | 0.0366132856   |
| 4.990897802    | 9.0320424926   |
| 0              | 0              |
| 1.1341675909   | 0.3420844065   |
| 0.2559378648   | 0.1736893162   |
| 0              | 0              |
| 5.3881710624   | 3.8717162545   |
| 0.4366646587   | 0.2963374959   |
| 115.4756197021 | 103.7472333466 |
| 0.6572098157   | 0.6796311683   |
| 7.7145433458   | 5.1887257512   |
| 0.9330948637   | 2.1952118899   |
| 0              | 0              |
| 204.5689268699 | 169.8695576636 |
| 6.0789840267   | 3.4799573037   |
| 6.9951896868   | 3.7402227425   |
| 21.2915839588  | 28.8985817804  |
| 57.5374991663  | 65.4435406664  |
| 0.1333235061   | 0.2412759428   |
| 13.1798174415  | 19.0812436399  |
| 4.8361779219   | 3.7508766294   |
| 266.4850759406 | 482.258828981  |
| 331.7300311227 | 310.9624880884 |
| 0              | 0              |
| 5.0344107248   | 4.2517010468   |
| 198.7079922901 | 154.3524321626 |
| 6.5074148439   | 10.010014683   |

gene\_expression\_table

|                |                |
|----------------|----------------|
| 5.4772624712   | 5.7305010723   |
| 0              | 0              |
| 14.5826462658  | 15.9822189637  |
| 0              | 1.0772611541   |
| 0.0106591149   | 0              |
| 2.2924723052   | 1.3828979671   |
| 3.9223096212   | 2.7040820213   |
| 0.9420081615   | 1.9178493211   |
| 0.0657094084   | 0.0416200787   |
| 0              | 0              |
| 3.1467826826   | 2.5626338615   |
| 0.8724806642   | 5.9209906309   |
| 9.9466364557   | 3.0000762285   |
| 0              | 0              |
| 0              | 0.184408932    |
| 2.7480332349   | 0.6781532538   |
| 88.6672799726  | 85.4068946541  |
| 8.3275926066   | 6.2793620564   |
| 0              | 0              |
| 101.1540978258 | 110.0410058767 |
| 7.7315077072   | 7.6318539994   |
| 3.875852759    | 3.6595524445   |
| 0              | 3.9932956574   |
| 3.1851806758   | 1.6593997977   |
| 59.2882211799  | 68.4194063024  |
| 0.2142488043   | 0.3877266939   |
| 0              | 0              |
| 0              | 17.658365415   |
| 0              | 0              |
| 0              | 0              |
| 6.7906356296   | 8.8754129784   |
| 0.5484113682   | 0.4962308363   |
| 2.125978348    | 4.3283129573   |
| 0.3056469657   | 0.2765651083   |
| 1.7642149828   | 2.1284700433   |
| 0.4561616884   | 0.165103431    |
| 7.704829577    | 6.6812378198   |
| 1.0773569783   | 0.8862255025   |
| 0              | 0              |
| 628.4198564606 | 753.7608884186 |
| 15.7749304625  | 10.7847766717  |
| 37.7809876357  | 33.1009068209  |
| 9.6327856121   | 21.7906007153  |
| 4.732729307    | 19.6991186712  |
| 0              | 0              |
| 2.9942911486   | 2.3707151716   |
| 32.3564396402  | 30.4976793646  |
| 0              | 0              |
| 239.8720917959 | 988.4511318398 |

gene\_expression\_table

|                |                |
|----------------|----------------|
| 9.5782425129   | 4.3334434411   |
| 50.2938688235  | 58.6359280547  |
| 65.1606321499  | 71.4675081519  |
| 1.9724513017   | 0.5949251577   |
| 4.0048194634   | 1.3589125521   |
| 42.3145530967  | 52.3274606707  |
| 15.9911266167  | 17.8087317337  |
| 317.4036513571 | 317.6352858436 |
| 6.3648117209   | 6.9110511417   |
| 237.7067999061 | 207.3383813943 |
| 24.6229719331  | 22.2801325151  |
| 91.2472676967  | 96.326095743   |
| 15.1720129769  | 19.6120262101  |
| 4.3264596016   | 8.9481219645   |
| 0              | 0              |
| 40.3812545882  | 67.4566852545  |
| 69.0294185643  | 47.4706422074  |
| 54.8435939123  | 54.1366984806  |
| 139.6529472278 | 157.4022361844 |
| 11.2345411934  | 16.3375572684  |
| 0              | 1.1875357959   |
| 30.1563642164  | 48.5616647943  |
| 9.8634788452   | 16.9574684575  |
| 5.0484629439   | 22.8405457497  |
| 2.7333466799   | 4.4518910034   |
| 16.9910196901  | 7.0958535036   |
| 2.610495242    | 0              |
| 657.5300153309 | 747.728804039  |
| 1.25787205     | 2.2763747639   |
| 0              | 1.06543745     |
| 0              | 0              |
| 14.531930187   | 18.4089338852  |
| 0              | 0              |
| 0.4610686989   | 1.6687947723   |
| 0              | 0              |
| 0              | 0              |
| 0              | 0              |
| 37.8400909056  | 14.6741409152  |
| 0.6608526917   | 1.4201871432   |
| 1.9089822841   | 2.2588363431   |
| 113.3648633081 | 143.6097095625 |
| 121.8672280562 | 97.4494457746  |
| 16.3430668699  | 17.9013214949  |
| 0              | 0              |
| 7.0370054217   | 12.7348894952  |
| 5.0464086354   | 4.2976473468   |
| 0.1526683678   | 0.2762843961   |
| 37.2409876608  | 27.4472083116  |
| 0              | 0              |

gene\_expression\_table

|                |                |
|----------------|----------------|
| 509.8801897866 | 414.8059869987 |
| 5.9441885238   | 5.3786077637   |
| 4.6789666893   | 4.9393982381   |
| 1.3960806293   | 0.8038835758   |
| 0              | 0              |
| 71.7838027441  | 35.183243289   |
| 4.3154786468   | 4.1651917081   |
| 22.8234042304  | 18.8714642096  |
| 38.1348786944  | 45.4857108064  |
| 0              | 0              |
| 15.4576166418  | 41.9605417349  |
| 0              | 0              |
| 0              | 0              |
| 9.6761741402   | 11.6740006131  |
| 39.0456500653  | 70.6610282428  |
| 39.4325889399  | 62.4411135834  |
| 0              | 7.400131975    |
| 1.0290873845   | 2.7935137185   |
| 149.4008270249 | 81.1113353746  |
| 69.4397256318  | 48.8698297745  |
| 0.0397185626   | 0.0359394      |
| 10.3438907535  | 11.6996060292  |
| 5.6072474665   | 2.5368630752   |
| 276.7569350205 | 324.2668725143 |
| 0.6760961303   | 0.349580904    |
| 3.5364693397   | 2.5599836035   |
| 0              | 0              |
| 0.1542051428   | 0.0279065502   |
| 26.9152924282  | 25.542358788   |
| 57.6760999675  | 60.6140930483  |
| 0              | 1.435918582    |
| 3.1529028434   | 3.7444427919   |
| 1.8663568332   | 1.1821430156   |
| 12.1879280821  | 5.0128476015   |
| 3.0491239097   | 11.0360170895  |
| 0              | 0.0311800859   |
| 22.6333177179  | 18.4719683171  |
| 0              | 0              |
| 0              | 0              |
| 0              | 0              |
| 27.7528275419  | 43.0494634022  |
| 7.5794824725   | 6.4548761488   |
| 0              | 0              |
| 49.3880662604  | 48.4129367457  |
| 11.8521997626  | 10.7244804576  |
| 4.6928459015   | 0              |
| 276.065428718  | 462.1266900702 |
| 2.4419528696   | 2.2096046602   |
| 1.8875200243   | 0.8539626407   |

gene\_expression\_table

|                 |                 |
|-----------------|-----------------|
| 41.9844357238   | 37.1454635828   |
| 254.0294890763  | 208.5621219287  |
| 3.5611564334    | 0               |
| 16.9607632062   | 17.9930012256   |
| 11.2398896012   | 12.0195999227   |
| 0               | 1.1137656448    |
| 50.407109854    | 25.3394154383   |
| 0               | 0               |
| 0.3011811437    | 0.6540580863    |
| 0               | 5.5099480148    |
| 35.7131263183   | 30.8120483394   |
| 7.092106069     | 7.0590329146    |
| 11.8922223282   | 7.3019001346    |
| 3425.8165400788 | 3997.9966580432 |
| 0               | 0               |
| 1.0781362068    | 1.4633297082    |
| 0               | 0               |
| 50.2453733514   | 30.448768992    |
| 3.1112182339    | 2.5592640121    |
| 9.4620823683    | 7.7056012835    |
| 0.0940832747    | 0.08513139      |
| 192.4738222687  | 203.5957528425  |
| 0               | 0               |
| 3.940568321     | 3.284132033     |
| 10.1195402004   | 8.2028599677    |
| 965.9352642859  | 827.2050244021  |
| 0.2088172021    | 0.1889485536    |
| 947.7451203483  | 684.4813370512  |
| 652.2674725517  | 518.5415748527  |
| 36.7137843678   | 38.5358055216   |
| 3.1139850401    | 2.817693962     |
| 5.2781253171    | 0               |
| 0               | 0               |
| 0.9362670762    | 0.564788431     |
| 0.8267071184    | 0.7480471569    |
| 7.6913602218    | 8.187692535     |
| 1.3046348698    | 1.4756259857    |
| 7.9214313732    | 8.2704448568    |
| 1.487295721     | 0.9207980254    |
| 0               | 0               |
| 0.0345768334    | 0.125147595     |
| 0.3185824754    | 0.4035777526    |
| 0               | 0               |
| 0               | 0               |
| 0               | 0               |
| 16.5467058778   | 11.8530797384   |
| 3.7625060687    | 8.0857092845    |
| 1.24209466      | 0               |
| 0               | 0               |

gene\_expression\_table

|                 |                 |
|-----------------|-----------------|
| 4.5111599353    | 3.7903633199    |
| 3.8354057758    | 5.3634576238    |
| 0               | 0               |
| 0               | 0               |
| 136.4791174231  | 59.7548375529   |
| 1.0585289897    | 2.8734345584    |
| 1579.550428759  | 1604.7815163813 |
| 23.217588172    | 6.2457610372    |
| 9.9902577868    | 38.7415693339   |
| 208.8457024078  | 188.9743422318  |
| 0.2926909386    | 0               |
| 0               | 0               |
| 17.536127293    | 18.5121891233   |
| 0.1232414129    | 0.4460606978    |
| 0               | 0               |
| 5.250110798     | 0               |
| 0.4598480178    | 0               |
| 4042.5853144891 | 3408.5343399091 |
| 65.8807755473   | 68.7834427406   |
| 72.9834638405   | 36.0213791087   |
| 323.8137802762  | 347.2246428116  |
| 4.6703130306    | 0               |
| 3.5330683002    | 2.5118516255    |
| 8.6422862262    | 5.7799892487    |
| 0               | 0               |
| 3.1109166979    | 1.5354095826    |
| 0               | 0               |
| 1.7935550525    | 3.4776448668    |
| 0.1757541849    | 0               |
| 0               | 0               |
| 96.8238148105   | 88.7793207711   |
| 17.9789822757   | 21.8283635214   |
| 0               | 0               |
| 80.4022008357   | 101.1430941225  |
| 2.8837613696    | 2.4086545235    |
| 0               | 0               |
| 24.540353063    | 41.4500327892   |
| 0               | 0               |
| 13.7860312137   | 14.3382881632   |
| 0               | 0               |
| 0.2404611084    | 0.7252719635    |
| 195.4025612645  | 209.5529435453  |
| 3.4392612769    | 3.0047095885    |
| 0               | 0               |
| 3.8475891107    | 2.8484972907    |
| 0               | 0               |
| 0               | 0               |
| 0               | 0               |
| 0               | 0               |



gene\_expression\_table

|                 |                 |
|-----------------|-----------------|
| 0               | 0               |
| 0               | 0               |
| 1.4033624689    | 1.6507849831    |
| 3.3698998312    | 2.1483414545    |
| 1.0794656635    | 1.5628097595    |
| 3.321962183     | 2.4593583166    |
| 0               | 0               |
| 156.1572726687  | 114.0027142396  |
| 0.5056336132    | 0               |
| 3.7014498896    | 2.3923302847    |
| 2920.9325140635 | 2431.5692908683 |
| 15.5065483884   | 13.5472913734   |
| 146.4424160167  | 123.233031841   |
| 32.19341992     | 32.7715464999   |
| 11.4620466003   | 7.481045752     |
| 119.2897816357  | 107.9395350715  |
| 2710.8757710671 | 3185.2372559221 |
| 11.3129666496   | 10.7898818536   |
| 213.7325368136  | 101.7874745054  |
| 1028.0984432542 | 968.0267410467  |
| 12.468136865    | 16.9227180815   |
| 63.9097261883   | 72.2860126484   |
| 0               | 0               |
| 68.8960235382   | 40.7612064179   |
| 47.7111115361   | 36.264034573    |
| 0               | 0.4358983522    |
| 158.7270778353  | 149.4305247859  |
| 17.9382457054   | 14.1703118476   |
| 58.2892707796   | 67.2666040771   |
| 58.6600496626   | 73.7203230029   |
| 0               | 0               |
| 0               | 0               |
| 10.5713885847   | 9.6651775779    |
| 8.0804485532    | 7.7990461931    |
| 7.8034328732    | 6.9680405515    |
| 0               | 0               |
| 0               | 0               |
| 0               | 0               |
| 4.8775789077    | 1.9860680149    |
| 9.02663925      | 9.5290624978    |
| 10.4991912198   | 6.9092426761    |
| 1.7947275208    | 4.2223008036    |
| 6.1712452025    | 8.9344965356    |
| 1.1252117308    | 1.3575326617    |
| 3.5046215003    | 6.3423238798    |
| 2.1617812094    | 2.8452231559    |
| 16.3771662437   | 14.0960297402   |
| 0               | 0.1992729878    |
| 2.6151743875    | 1.971953672     |

gene\_expression\_table

|                |                |
|----------------|----------------|
| 25.6528490686  | 25.5332201981  |
| 0.4153930533   | 0.5638035266   |
| 8.5779922078   | 6.2595233198   |
| 9.7521198873   | 4.8132109534   |
| 1.3294783418   | 0.6561711495   |
| 0              | 0              |
| 0              | 0              |
| 0              | 0              |
| 1.2971765325   | 1.0857206934   |
| 5.7854269745   | 6.6626663617   |
| 11.5211196587  | 12.3795712873  |
| 0              | 0              |
| 9.4922124675   | 10.0205495468  |
| 0.2484471334   | 0              |
| 5.2635585367   | 3.3339171003   |
| 2.2514363316   | 1.3581436596   |
| 0.7553353649   | 1.3669326406   |
| 1.178404186    | 1.7060492286   |
| 36.7692991627  | 42.1429558844  |
| 3.0114467356   | 2.3615904224   |
| 0.2281122249   | 0.2064076836   |
| 5.3958561941   | 6.4082135846   |
| 65.3074275468  | 53.0985272454  |
| 0              | 0              |
| 8.2933754363   | 5.4576530986   |
| 158.6560193645 | 115.0759799585 |
| 0.2117180863   | 0.7024358844   |
| 13.0344852023  | 7.413543144    |
| 2.1299567584   | 2.0593009921   |
| 21.6034701966  | 22.3404936112  |
| 60.506732774   | 57.4422101009  |
| 0              | 0              |
| 0              | 0              |
| 4.1264976971   | 4.1072542885   |
| 11.9110616296  | 2.6944354262   |
| 26.3041909394  | 0              |
| 0.2865346513   | 0.2592713023   |
| 0.6602672695   | 0.9559101022   |
| 4.0467798987   | 4.3940817208   |
| 4.515306906    | 4.6835868225   |
| 72.4671750385  | 59.1433999215  |
| 374.7173342427 | 337.0023567508 |
| 76.5435856425  | 61.5649568912  |
| 21.2788301907  | 18.2227069432  |
| 0.9681524823   | 1.2264478846   |
| 0              | 4.6856558805   |
| 44.7891263477  | 30.3956303377  |
| 0              | 0              |
| 34.1978770478  | 33.0538176986  |

gene\_expression\_table

|                 |                 |
|-----------------|-----------------|
| 4.8565534611    | 3.5155676568    |
| 0               | 0               |
| 16.5168069666   | 20.6934330109   |
| 3.1302899592    | 2.2254944581    |
| 53.1584798914   | 56.3128144745   |
| 0               | 0               |
| 0               | 0               |
| 7.0338955804    | 11.1381039054   |
| 84.8154263035   | 109.9472586913  |
| 2.9334119945    | 5.972179894     |
| 0               | 0               |
| 0               | 0               |
| 31.6523293272   | 28.6406569335   |
| 702.9327115535  | 709.0889023287  |
| 0               | 0               |
| 64.8962067382   | 89.4802720016   |
| 158.8257054522  | 173.4475377318  |
| 0               | 0               |
| 70.312083994    | 73.9537696802   |
| 15.0610582756   | 7.4334659028    |
| 564.9166129582  | 595.423702583   |
| 5.3800982645    | 4.694325936     |
| 0               | 0               |
| 0               | 0.5479759025    |
| 0               | 0               |
| 177.6958412357  | 206.8001032682  |
| 1952.1459203195 | 1783.7197866186 |
| 0               | 0               |
| 3948.7010524593 | 4814.4237324424 |
| 1.3427257416    | 0               |
| 18.3771681814   | 14.0703604183   |
| 111.0072881644  | 192.5197915275  |
| 22.2579068005   | 28.1961397722   |
| 44.6930859481   | 66.7269979523   |
| 0.9495026622    | 1.7183177721    |
| 1087.6403141437 | 975.2867016582  |
| 291.4060313328  | 201.1112372888  |
| 43.102091308    | 27.300693679    |
| 13.0126371192   | 36.6317899528   |
| 14.4126027366   | 27.712687848    |
| 14.713523562    | 13.8924036761   |
| 0               | 0               |
| 0               | 0               |
| 0.3847842792    | 0.6963452466    |
| 237.1811661482  | 196.9500470878  |
| 23.3710508878   | 19.1801364287   |
| 0.3121936472    | 0.5649777654    |
| 471.4766068896  | 504.182904711   |
| 45.0370215554   | 37.2462829489   |

gene\_expression\_table

|                |               |
|----------------|---------------|
| 13.6058979556  | 16.4150891431 |
| 21.8729644958  | 17.6456871398 |
| 39.851448003   | 24.9643672444 |
| 0              | 0             |
| 0              | 0             |
| 0              | 0             |
| 0.9416357812   | 1.4910709226  |
| 2.5682611135   | 3.8027370456  |
| 0              | 0.8552073229  |
| 4.8586739129   | 4.8848647389  |
| 8.29569746     | 10.3212643836 |
| 0.2751647004   | 0.2489831855  |
| 0.6535007573   | 0             |
| 1.8141036157   | 0.7034975724  |
| 0.3163842114   | 1.1451228835  |
| 292.0445285954 | 303.895461415 |
| 0              | 0             |
| 1.4401115275   | 1.5637044508  |
| 7.595235506    | 5.2865846644  |
| 17.3564012446  | 19.3291880576 |
| 0.1555061969   | 0.2345166864  |
| 5.0123876281   | 7.2567461555  |
| 14.8293631205  | 9.4717913777  |
| 0.039316499    | 0.0711511844  |
| 0              | 0             |
| 1.5179671374   | 2.0074739471  |
| 4.903043944    | 3.8027370456  |
| 0              | 0.8552073229  |

gene\_expression\_table

| C2_U937_OH_R1_001 (GE) - TPM | LZ1_U937_OH_R1_001 trimmed (GE) - TPM |
|------------------------------|---------------------------------------|
| 0                            | 0.2321106905                          |
| 2.5441829695                 | 2.7255778441                          |
| 0                            | 0                                     |
| 0                            | 0                                     |
| 10.2971727446                | 24.6102212833                         |
| 8.2003134361                 | 4.1341075164                          |
| 0                            | 0                                     |
| 8.2606098584                 | 11.1053476421                         |
| 536.0935820579               | 243.2396849126                        |
| 12.4686633228                | 13.5389782973                         |
| 0                            | 0.6693555263                          |
| 0.3333320831                 | 1.6804609737                          |
| 0                            | 0                                     |
| 102.5438106366               | 76.9702781308                         |
| 160.7935250847               | 199.5384053246                        |
| 1.2062947981                 | 0                                     |
| 107.109578371                | 126.3355106194                        |
| 3.4699539818                 | 1.499437059                           |
| 2.9636572237                 | 2.2411480427                          |
| 25.868751925                 | 33.5352274193                         |
| 22.8495416094                | 17.7221109056                         |
| 20.855995187                 | 12.6172142766                         |
| 0                            | 0                                     |
| 21.1784997213                | 21.772568695                          |
| 0                            | 0                                     |
| 411.0197183726               | 404.2323798184                        |
| 38.868751582                 | 37.4866599818                         |
| 279.4870161965               | 294.6591236575                        |
| 0                            | 0                                     |
| 3.967106714                  | 3.2307335386                          |
| 17.6215351484                | 20.5999396049                         |
| 0                            | 1.0398209708                          |
| 16.4702282979                | 19.4035101858                         |
| 16.5370370645                | 5.5579899281                          |
| 4.1064705819                 | 1.8820334824                          |
| 0                            | 1.9520243712                          |
| 9.824534533                  | 7.5473411618                          |
| 0.7351671173                 | 0.3706272851                          |
| 0.7786564132                 | 3.6638185421                          |
| 38.9066839238                | 27.981414278                          |
| 21.8249019197                | 29.5390756243                         |
| 15.6680976684                | 19.4181724971                         |
| 0                            | 0                                     |
| 0                            | 0                                     |
| 3.3631104388                 | 0                                     |
| 0                            | 0.070894287                           |
| 0.2133630683                 | 0                                     |
| 0                            | 0                                     |

gene\_expression\_table

|                |                |
|----------------|----------------|
| 7.3343201786   | 6.7787967813   |
| 3.4608448152   | 3.4895018771   |
| 0.3266795314   | 0.0823461394   |
| 52.9682159273  | 67.3747476262  |
| 0.7361776079   | 0.7422734279   |
| 0              | 0              |
| 0.6362741818   | 0              |
| 15.7727695744  | 10.6022492531  |
| 19.5174409197  | 40.5880457282  |
| 0              | 0              |
| 0.0420831268   | 0              |
| 91.8534816823  | 84.7079836563  |
| 30.9598824991  | 24.9129620926  |
| 0.206522654    | 0.4164654744   |
| 0.2991295237   | 0.3016064256   |
| 79.1963460836  | 44.9168179594  |
| 1.7791297371   | 2.4345264334   |
| 16.0799646704  | 11.4928393564  |
| 26.8253331877  | 29.6481737618  |
| 0.9768805359   | 0.6715700893   |
| 12.7952368063  | 12.4213898749  |
| 0              | 0.0740966008   |
| 741.395392743  | 719.3030649427 |
| 0.363832232    | 0.366844896    |
| 31.9177187565  | 37.2840349913  |
| 2.9569710564   | 3.8333003903   |
| 2.8900492655   | 3.6760977594   |
| 21.9902840147  | 22.1723716152  |
| 0              | 0              |
| 5.5779123403   | 4.3742996081   |
| 51.5468840059  | 40.0531351386  |
| 28.9608767371  | 21.3389609438  |
| 44.2005287872  | 35.5471095005  |
| 1.1049673885   | 0.4285065088   |
| 0.2281105604   | 0.2830761838   |
| 14.1618582037  | 22.8465977171  |
| 2.8364180853   | 2.5739141987   |
| 0              | 0.0862975202   |
| 0.4218827676   | 0.2126880557   |
| 158.6282509382 | 170.9976323171 |
| 1.181863511    | 2.383299547    |
| 1.7741143431   | 1.2374607574   |
| 760.2395443177 | 705.2503407312 |
| 0              | 0.3961729607   |
| 0              | 0.1714962772   |
| 5.6080627432   | 4.6264087272   |
| 0              | 0.4503565013   |
| 8.3441849766   | 5.7146793163   |
| 0.2253452038   | 0.4544222891   |

gene\_expression\_table

|                |                |
|----------------|----------------|
| 4.2545812789   | 3.8876410095   |
| 8.6248572222   | 9.5881997556   |
| 8.2735592142   | 14.4090253584  |
| 30.3473723852  | 19.5995239229  |
| 6.4505687876   | 5.7745633321   |
| 6.9596173924   | 6.5494292003   |
| 18.9085224016  | 18.520374977   |
| 1.6047842888   | 1.1865864927   |
| 0.3058672477   | 0              |
| 1.3592449429   | 1.7620714138   |
| 0.8759539132   | 1.4606887186   |
| 36.6541531026  | 57.7294880437  |
| 14.9443359567  | 16.4379060309  |
| 0              | 0              |
| 12.598785714   | 10.1624866169  |
| 12.4479271457  | 14.4819236984  |
| 0.9977114678   | 0.6333903343   |
| 1.0430842234   | 0.9791888362   |
| 124.753799501  | 102.7691177826 |
| 0.2779188623   | 0              |
| 398.4602411117 | 572.8794834627 |
| 7.089418221    | 7.4968100377   |
| 2.2879868378   | 1.7860120307   |
| 9.384736669    | 15.4039814106  |
| 0.2956226397   | 0.4967841722   |
| 0              | 1.2968436233   |
| 3.9274522997   | 2.2628417384   |
| 13.6381909945  | 19.1174110206  |
| 0.491658181    | 0.1652430969   |
| 37.2422061533  | 32.412084112   |
| 6.4997465711   | 6.838504541    |
| 2.4864995315   | 2.5070886577   |
| 235.6586200796 | 238.4585667089 |
| 14.9307754565  | 10.7937263057  |
| 13.29949514    | 14.2803743619  |
| 8.9907012356   | 6.3456032729   |
| 63.05830084    | 56.9889532623  |
| 0.4899967083   | 0.6381531613   |
| 2.0541824166   | 0.9205296884   |
| 4.1722065734   | 25.2405238257  |
| 2.7829036041   | 1.9319635526   |
| 0.0752226501   | 0.0758455212   |
| 0.1691857565   | 0.1705866765   |
| 0              | 0              |
| 23.0880187709  | 24.9825518232  |
| 0              | 0              |
| 0              | 0              |
| 1.8815833566   | 1.5177308444   |
| 0.6872338352   | 1.3858487658   |

gene\_expression\_table

|                |                |
|----------------|----------------|
| 0.8972087776   | 0.9046379947   |
| 0              | 0              |
| 0.1320560796   | 0.3994486569   |
| 0              | 2.5044523209   |
| 5.1886257777   | 2.5068033013   |
| 0              | 0.9207486883   |
| 0              | 0              |
| 0.1892716986   | 0              |
| 631.4146081911 | 992.7313831822 |
| 2.5495015544   | 2.2571230482   |
| 1.5123396463   | 1.3554332197   |
| 8.1454154202   | 8.6039511289   |
| 0              | 0              |
| 0              | 1.0080431464   |
| 0.9264374192   | 1.0989513648   |
| 12.951417301   | 14.551078037   |
| 12.74930419    | 16.1433290033  |
| 0              | 0              |
| 5.5125072489   | 7.4864915624   |
| 0              | 0              |
| 15.2024750537  | 9.4328351456   |
| 1.1730744823   | 0.2956969921   |
| 0.4426404053   | 3.5704450386   |
| 14.2930059035  | 17.850431107   |
| 0.6556064454   | 0.8813801423   |
| 0.1637788386   | 0              |
| 0.1031651151   | 0.2080387199   |
| 146.7327122717 | 123.6709181024 |
| 1.4582141289   | 1.0782116955   |
| 0.8024480594   | 1.4563667216   |
| 0              | 0              |
| 12.4807097497  | 17.0254856281  |
| 1.2088274347   | 1.772853772    |
| 5.2986154202   | 5.4707096528   |
| 18.6061630341  | 16.3343372095  |
| 52.5381744925  | 84.2138207194  |
| 1.5298645068   | 3.470697776    |
| 90.8877122178  | 92.8703668256  |
| 2.8270868464   | 2.5654465442   |
| 23.4039457446  | 14.8622275664  |
| 71.3460661903  | 92.7932182053  |
| 0              | 0              |
| 0.3780959464   | 0              |
| 0.4872217064   | 0.5895072966   |
| 0.3686662444   | 1.6727352111   |
| 0              | 0              |
| 3.6287679021   | 1.6261401905   |
| 14.2218944254  | 4.0330285079   |
| 0.1656018486   | 0              |



gene\_expression\_table

|                 |                 |
|-----------------|-----------------|
| 8.9846216977    | 10.5688539296   |
| 12.7437916585   | 13.4917806638   |
| 4.6125736602    | 7.9450610747    |
| 13.7109563087   | 18.3254841532   |
| 186.6612280224  | 155.5526657535  |
| 0.4132973276    | 0.520899476     |
| 26.5346902451   | 30.4845889646   |
| 0.4810594245    | 0.610215101     |
| 2.8722030053    | 3.1674845753    |
| 3.1105591957    | 1.809412941     |
| 0               | 0               |
| 8.9106476897    | 7.6064508818    |
| 0.8849066428    | 0.8922339937    |
| 0               | 0               |
| 0               | 0               |
| 46.5558522024   | 62.924449977    |
| 1.1254192868    | 0.6808429023    |
| 0               | 0               |
| 7.531255816     | 11.3904260561   |
| 0               | 0               |
| 0               | 0.0275484883    |
| 4.3014982867    | 3.7046201447    |
| 2.1485582725    | 1.361705162     |
| 27.3741351637   | 38.931659       |
| 3.8690136795    | 2.7864646635    |
| 1.0275316343    | 1.5540599585    |
| 0.1026885636    | 0.1035388625    |
| 10.5826646729   | 12.2594855858   |
| 12.3488366141   | 0               |
| 1309.6257457212 | 1434.1527675792 |
| 13.8597426024   | 11.8006942461   |
| 40.3450299502   | 50.7014889075   |
| 168.4514133679  | 216.2790412428  |
| 37.6027530588   | 56.8711764264   |
| 5.3711653127    | 3.6924821778    |
| 37.8190742244   | 32.6491642497   |
| 2.1522901066    | 2.7126398205    |
| 93.7509083487   | 108.0310859254  |
| 65.9762718502   | 68.273173728    |
| 0               | 0               |
| 0               | 0               |
| 0               | 0               |
| 0               | 0               |
| 0.1967248679    | 0.2975307327    |
| 1.0622248723    | 0.9736549846    |
| 0.664279789     | 1.3395605376    |
| 0               | 0               |
| 27.0097654485   | 27.4252008136   |
| 3.1968833682    | 3.0475353836    |

gene\_expression\_table

|                 |                 |
|-----------------|-----------------|
| 24.1188215118   | 25.468137616    |
| 61.8074517267   | 53.8211618612   |
| 4.5572811912    | 4.7763994034    |
| 18.4233157617   | 24.6069933906   |
| 0.1694795812    | 0               |
| 2.0755151514    | 2.0089931295    |
| 7.1323426269    | 6.6954423424    |
| 0.0339908675    | 0.1370892975    |
| 7.0187949005    | 11.5804032403   |
| 1.3249164082    | 0               |
| 9.4058675746    | 10.7482518143   |
| 0               | 0.3813268839    |
| 585.8629679903  | 671.3009403884  |
| 1.7992172302    | 2.1164679753    |
| 1.0699953673    | 1.7980922009    |
| 6.381429838     | 6.4342704128    |
| 423.4820669086  | 495.9969206464  |
| 0               | 0               |
| 0               | 0               |
| 3.0942604172    | 1.6899360974    |
| 441.1743586006  | 741.3790729484  |
| 0.160005699     | 0.3226612094    |
| 263.1181887423  | 314.3433900414  |
| 0.3036572476    | 0               |
| 4.2785831407    | 2.5289032199    |
| 1957.7625844999 | 3325.1646605176 |
| 20.3486307521   | 25.518174048    |
| 5.551632678     | 6.8789810519    |
| 3.3086744974    | 1.1120238444    |
| 5.755461965     | 5.8031192967    |
| 13.1353119497   | 13.2440771405   |
| 4.7120856271    | 7.3906053213    |
| 8.6503080999    | 8.7219358172    |
| 15.6247642098   | 20.9513860203   |
| 0               | 0               |
| 1.5929298855    | 0.803059964     |
| 1.0222728368    | 1.03073763      |
| 0.8545035725    | 0.9399045543    |
| 8.4813795242    | 6.1082917508    |
| 3.3752211288    | 4.8616702788    |
| 4.4775216357    | 2.2572985768    |
| 0               | 0               |
| 0               | 0               |
| 13.2618334161   | 11.6833070778   |
| 1.3172751614    | 1.1621598467    |
| 11.8750037994   | 10.227222089    |
| 84.2171390244   | 16.0394032437   |
| 1.8705293027    | 0.3143363283    |
| 3.2567136155    | 2.1513768114    |

gene\_expression\_table

|                |                |
|----------------|----------------|
| 17.6041125819  | 26.0701378326  |
| 15.4567652921  | 24.6075046835  |
| 31.4179309124  | 40.6576969247  |
| 0.4757794547   | 0              |
| 8.0013596822   | 15.4629265823  |
| 4.0873012811   | 3.3361655114   |
| 8.7403048911   | 4.5925222415   |
| 22.5004142739  | 27.8266872854  |
| 897.2211178108 | 852.7914948161 |
| 9.7460137926   | 3.5275384861   |
| 21.4899184401  | 38.3354496233  |
| 1.6287414572   | 2.307996154    |
| 55.9246814828  | 53.4199815617  |
| 9.0213405481   | 10.2330456186  |
| 7.5738556581   | 6.4910844619   |
| 1.9652342593   | 1.7338187285   |
| 21.8809615136  | 30.6418665053  |
| 0              | 0              |
| 1.0133392054   | 1.3955336925   |
| 75.2749561515  | 72.3125157576  |
| 13.3945447745  | 11.3108198254  |
| 4.2090246461   | 3.0313406506   |
| 0.6376270871   | 0.6429068728   |
| 3.2743127386   | 0.9432643561   |
| 111.4177956887 | 96.3244362923  |
| 3.9467659118   | 4.2389757029   |
| 0.0949824321   | 0              |
| 2.1651096159   | 2.1830375159   |
| 0.5022443108   | 1.012806155    |
| 20.1402490358  | 18.6493019415  |
| 6.6480214631   | 5.0850872176   |
| 0              | 0              |
| 0              | 0              |
| 14.6038083884  | 18.1227486366  |
| 0              | 0              |
| 0              | 0              |
| 0.4492895101   | 0.2265048958   |
| 75.106766188   | 70.0989678496  |
| 43.1027124487  | 59.9973496881  |
| 9.1491960207   | 6.0244602204   |
| 7.477897606    | 9.3188753581   |
| 9.8965806672   | 16.2151079634  |
| 83.9776404006  | 81.1932934254  |
| 0              | 0              |
| 5.6576925037   | 5.7045402685   |
| 0              | 0              |
| 60.9031411594  | 115.2837816089 |
| 0.3296770633   | 0              |
| 32.9990735195  | 37.4663075812  |

gene\_expression\_table

|                |                |
|----------------|----------------|
| 260.3000052974 | 226.3376711372 |
| 17.7340197268  | 5.9602879671   |
| 0              | 0              |
| 4.6325214292   | 2.3354402011   |
| 0.6894764029   | 0.5213891399   |
| 4.5765212198   | 7.690694151    |
| 4.105097159    | 2.6490168742   |
| 28.467026605   | 39.1170139535  |
| 0.3475579543   | 0.3504358614   |
| 26.3692502565  | 34.1840536718  |
| 6.2890716235   | 2.8948716567   |
| 0.5630948725   | 0              |
| 0              | 3.3944279959   |
| 2.6355603183   | 4.2518139558   |
| 142.490387827  | 155.6928763252 |
| 0.1418506035   | 0.1430251784   |
| 0.14332483     | 0.4335348362   |
| 2.0742197361   | 1.5685462761   |
| 0.4017055098   | 0              |
| 2.6805927051   | 2.0541196353   |
| 0.181841426    | 0.1833471396   |
| 0.008833       | 0              |
| 32.2608297684  | 45.4163987222  |
| 0              | 0              |
| 36.1547571196  | 33.4162874302  |
| 2.8911413117   | 2.0278824487   |
| 1.6255063459   | 1.2292246001   |
| 258.6857575832 | 242.4937228232 |
| 10.8579519838  | 10.2659861796  |
| 3.199181114    | 3.6931601285   |
| 3.2029623227   | 0.6458968046   |
| 6.1039254579   | 7.8114404011   |
| 23.1372839949  | 31.5625877075  |
| 13.0018330553  | 27.3114437331  |
| 6.9760042059   | 10.667881579   |
| 4.6967519135   | 2.8875870356   |
| 2.8883058064   | 3.4946664428   |
| 1.9213062414   | 0.8697701618   |
| 97.4527605062  | 73.1235014199  |
| 0              | 0              |
| 55.8478274815  | 61.9710885205  |
| 12.7253557935  | 17.2631591526  |
| 18.4936589645  | 21.5872490852  |
| 0.2517113348   | 0.5075911935   |
| 2.7094800336   | 2.73191552     |
| 7.957185095    | 11.7838892032  |
| 68.4830030507  | 109.968625831  |
| 0.8836164934   | 0.3563732646   |
| 26.5359837368  | 35.4513175983  |

gene\_expression\_table

|                |                |
|----------------|----------------|
| 12.0006497549  | 13.108354488   |
| 0.3376677446   | 0.1459130388   |
| 43.7954746803  | 56.5223900681  |
| 29.876758415   | 22.6514918162  |
| 8.1028378567   | 5.8356659428   |
| 0              | 0              |
| 11.8413211859  | 10.7454344936  |
| 2.673746202    | 5.9309487582   |
| 119.0159325323 | 94.5262645266  |
| 0              | 0              |
| 21.4313576008  | 16.3928957205  |
| 36.1771301129  | 48.6355866558  |
| 247.1540508237 | 333.4373915307 |
| 2.4154090554   | 1.8555501154   |
| 3.6652524239   | 4.1659514081   |
| 30.0601339128  | 27.3306975756  |
| 34.8708934726  | 35.1596372341  |
| 46.1029859597  | 68.0498190645  |
| 0              | 0              |
| 33.0118827781  | 28.7219351436  |
| 25.3803805145  | 41.5846264518  |
| 0              | 0.7678995344   |
| 0.2055384229   | 0.3108605344   |
| 19.4226321391  | 22.3251428522  |
| 301.6172256244 | 320.816679602  |
| 1.9574495865   | 1.6567202068   |
| 0.3011005685   | 0.1517968957   |
| 134.2744438902 | 73.1230739504  |
| 0              | 0              |
| 0              | 0              |
| 15.1577413126  | 13.1991730098  |
| 0              | 0.5497462576   |
| 0              | 0              |
| 5.0147799637   | 4.2363629594   |
| 0.8734291674   | 6.164630364    |
| 12.0136634052  | 16.4113522351  |
| 44.1808246724  | 67.7109202691  |
| 64.8755290535  | 62.3648175622  |
| 7.4546207226   | 4.2325064779   |
| 4.302100925    | 9.3180735529   |
| 3.3539028784   | 4.0580093062   |
| 5.5695565068   | 6.083647346    |
| 0.6896209212   | 0.6953312349   |
| 1.2042763169   | 1.517810207    |
| 3.6729044854   | 9.6286254451   |
| 2.7383128572   | 0.3451233862   |
| 1.2897769848   | 1.5442924623   |
| 3.5969994448   | 1.8133919584   |
| 0              | 0              |

gene\_expression\_table

|                 |                 |
|-----------------|-----------------|
| 182.8531742242  | 206.8510782928  |
| 12.1151638257   | 14.3095644138   |
| 0               | 0               |
| 2.6517250523    | 1.539392843     |
| 2.1264558686    | 3.2160955523    |
| 0.0326177073    | 0.0438503918    |
| 2.0958046312    | 1.8945560406    |
| 0               | 0               |
| 0.22196866      | 0               |
| 14.5284160593   | 16.692723638    |
| 0.1726106823    | 0               |
| 70.9510214695   | 67.2584393902   |
| 274.4150926468  | 239.275344552   |
| 10.5441210944   | 11.4707537193   |
| 4.7427059895    | 6.1482565685    |
| 0               | 0               |
| 2.2279752622    | 3.3696355693    |
| 1.4452438591    | 0.6245190031    |
| 1.9500914721    | 2.9493584149    |
| 11.2420736852   | 14.083080272    |
| 55.5399846106   | 68.4442929036   |
| 0.0701903604    | 0               |
| 0               | 0               |
| 0               | 0               |
| 0               | 0               |
| 75.8832958326   | 132.5290860324  |
| 19.692672326    | 26.0606520047   |
| 71.1783387307   | 78.6495577296   |
| 0.626190754     | 0.0901965489    |
| 74.4454796014   | 78.2560394816   |
| 0.6811430064    | 0.2289277066    |
| 10.3926735461   | 8.4877702365    |
| 0.3861271614    | 0.4671893228    |
| 2.442324817     | 9.8501926416    |
| 40.7260482497   | 53.0400633296   |
| 728.1773947281  | 678.5852299269  |
| 40.8855330878   | 32.4942750338   |
| 1.0900501839    | 2.1981523968    |
| 0               | 0               |
| 1.7674267327    | 1.8457067327    |
| 3.9696946162    | 5.6035911968    |
| 1.2868258881    | 0.9514862702    |
| 7.7706051737    | 6.0232638107    |
| 2.1562194818    | 3.8046290946    |
| 16.063847849    | 11.1781162966   |
| 37.134184646    | 42.6131705695   |
| 9399.1237823277 | 8597.0802181227 |
| 1.0475111564    | 0               |
| 19.9537171073   | 27.1605706043   |

gene\_expression\_table

|                |                |
|----------------|----------------|
| 0              | 0              |
| 0.8519747072   | 0              |
| 0.2492379149   | 0.7539050881   |
| 1.0991018557   | 1.363941934    |
| 3.268417956    | 2.6363853224   |
| 232.7801089048 | 338.1102682675 |
| 0              | 0.0305241155   |
| 0              | 0              |
| 3.4494621276   | 3.4780249366   |
| 42.0173125504  | 73.1763085703  |
| 0.1561818818   | 0.1574751249   |
| 6.7535311673   | 13.6189057546  |
| 513.7979491766 | 523.4385621649 |
| 25.9905111401  | 31.0251652276  |
| 79.8046969991  | 91.6043295751  |
| 9.8888630241   | 5.9628973745   |
| 18.3891570466  | 28.7392102966  |
| 0.5096163101   | 0.9249050154   |
| 0.5315467507   | 0.4660418716   |
| 1.8156790905   | 1.490115703    |
| 0              | 0              |
| 0.910299616    | 3.4877814741   |
| 6.1723122292   | 7.3549523671   |
| 17.0651554162  | 11.1609477725  |
| 527.00055533   | 614.7069311811 |
| 5.9937048308   | 5.5784629852   |
| 2.0581919875   | 3.2610828965   |
| 0              | 0              |
| 4.1676764903   | 5.3694603707   |
| 3.1369974236   | 3.1629729105   |
| 3.4488275009   | 2.9557772967   |
| 0              | 0              |
| 6.1633789995   | 6.2144140335   |
| 0              | 0              |
| 14.9620933344  | 9.0695504721   |
| 14.1886331486  | 13.1461645306  |
| 0              | 0              |
| 4.9263273337   | 13.6595775998  |
| 0              | 0              |
| 0.107838234    | 0.0271827935   |
| 0.007657       | 0              |
| 0              | 0              |
| 0.576871657    | 0.5369061835   |
| 31.9707702091  | 79.1234997262  |
| 6.3500591237   | 12.805279875   |
| 0              | 0.1003356518   |
| 2.1971484959   | 2.883460612    |
| 2.5389682698   | 2.5599918563   |
| 4.6191523314   | 7.2448453831   |

gene\_expression\_table

|                |                |
|----------------|----------------|
| 0              | 0              |
| 23.0043808515  | 29.7989592071  |
| 98.4502989786  | 85.5737099044  |
| 33.5134559056  | 18.9969076286  |
| 0.3064592565   | 0.3932687198   |
| 3.5471350201   | 3.9016435597   |
| 10.2740460684  | 10.8858537913  |
| 51.5938413189  | 54.6986116247  |
| 2.034362913    | 1.9174337358   |
| 0              | 0              |
| 6.7032874011   | 11.1037314793  |
| 14.0960692703  | 16.6295395801  |
| 0.3317571346   | 0.5575070085   |
| 0.3678653849   | 0.5563671674   |
| 2.4069454993   | 2.0068396774   |
| 0.1038274078   | 0              |
| 4.8604128578   | 5.8807906263   |
| 29.9281352124  | 49.7015665609  |
| 82.5398388923  | 74.3065169372  |
| 11.1413177189  | 9.8124573892   |
| 0.0247173941   | 0.0249220632   |
| 19.9291888832  | 17.4732259667  |
| 2.1158922459   | 2.7429590676   |
| 0              | 0              |
| 13.9590554501  | 10.7905585129  |
| 34.4020074874  | 27.8546066844  |
| 40.4638723265  | 36.4815811217  |
| 1.2757910639   | 1.9790078167   |
| 2.2832971297   | 0.627873727    |
| 43.1999590707  | 41.0359106703  |
| 4.2864908082   | 4.538083747    |
| 0.3988623896   | 0.1340550387   |
| 6.4192266142   | 5.6633326401   |
| 14.8039018453  | 17.0897420597  |
| 4.5122610277   | 6.8244363008   |
| 0              | 0              |
| 0              | 0              |
| 143.5508765319 | 107.7059618037 |
| 0              | 0              |
| 1.4295972757   | 1.6362233596   |
| 0.2035990383   | 0.0684283043   |
| 0              | 0              |
| 0              | 0              |
| 0.004596       | 0.0139034718   |
| 2.2653829672   | 1.5813285005   |
| 2.412084236    | 2.1760511578   |
| 112.623210844  | 82.1095583978  |
| 0.2716301291   | 0.1742868438   |
| 0              | 0.0943678351   |



gene\_expression\_table

|                |                |
|----------------|----------------|
| 0.1791496269   | 0.3612661028   |
| 10.5092559383  | 6.5409113729   |
| 0              | 0              |
| 0.8990917228   | 1.1157372694   |
| 78.3732088281  | 80.5202182557  |
| 0.2710720877   | 0.1242348472   |
| 1.4896882461   | 0.9298240158   |
| 1.054617755    | 1.7177198382   |
| 4.3835698687   | 4.0690843022   |
| 0.7417256131   | 0.5609005295   |
| 9.0272171493   | 14.649830687   |
| 0              | 0              |
| 0              | 0              |
| 0.2609579202   | 0.2631187472   |
| 1.743074483    | 1.5347251017   |
| 0.2835440299   | 0.2858918783   |
| 5.227803765    | 4.6549902438   |
| 0.076171417    | 0.0768021443   |
| 14.0610869351  | 13.4313327299  |
| 0.1681584109   | 0.1994715577   |
| 0              | 0              |
| 0.1028123367   | 0.1554954907   |
| 2.8912458577   | 2.5507881277   |
| 0.6273539104   | 0.3162743152   |
| 0.0637048581   | 0.1926970728   |
| 275.7848640047 | 310.1335539842 |
| 30.9550810285  | 18.3596473116  |
| 0.6527251543   | 0.9213819405   |
| 0              | 0              |
| 3.4940195491   | 3.5229513099   |
| 0.0196742682   | 0.009919       |
| 4.4451815686   | 4.5773507735   |
| 38.2691616556  | 35.9551776632  |
| 1.6797330791   | 1.5726674635   |
| 0.8118506869   | 2.4557193231   |
| 2.2482019021   | 1.3223104048   |
| 0              | 0              |
| 55.9802148718  | 58.7015016025  |
| 0.0785214617   | 0.0659763735   |
| 1.0976351294   | 3.8735338251   |
| 0.0166299707   | 0              |
| 0              | 0.0187846485   |
| 0              | 0              |
| 1.6493415179   | 0.623624501    |
| 5.4940999637   | 5.0202562671   |
| 11.2714176516  | 12.1027198371  |
| 7.7657346134   | 5.8725283038   |
| 0              | 0              |
| 0.2269238129   | 0.1144014125   |

gene\_expression\_table

|                |                |
|----------------|----------------|
| 34.6428704651  | 40.0023232805  |
| 0.0414126711   | 0.0417555831   |
| 3.0697365348   | 3.0951550769   |
| 8.380589292    | 10.4489044996  |
| 1.0948612984   | 0.5810142899   |
| 0.3983495682   | 0.1004120121   |
| 27.7809623926  | 25.3900867491  |
| 1.186929177    | 0.5983786925   |
| 0              | 0              |
| 0              | 0              |
| 0              | 0              |
| 0              | 0              |
| 0.1076034438   | 0.1808240662   |
| 0.1098095679   | 0.2214376625   |
| 18.3748220859  | 19.1344140543  |
| 117.8444976444 | 147.6465182005 |
| 2.8676387445   | 1.0408981835   |
| 2.9650793907   | 4.0767699999   |
| 1.7131842256   | 2.2209043089   |
| 0              | 0              |
| 1.0455851036   | 1.054242931    |
| 37.9104202226  | 44.1968843121  |
| 14.4859432111  | 10.9544190923  |
| 0              | 0              |
| 4.5846559653   | 4.5242650076   |
| 0              | 0              |
| 0.232528778    | 0.8205897048   |
| 0              | 0              |
| 8.844714428    | 9.9827819785   |
| 15.8396161061  | 15.1889877889  |
| 1.9747537448   | 1.3373096162   |
| 8.1624807913   | 9.3652510675   |
| 0.7948784218   | 1.030448965    |
| 4.2478873246   | 5.612287334    |
| 2.4163020513   | 2.4363099167   |
| 3.4106746072   | 9.0271551335   |
| 0              | 0.7165293113   |
| 0              | 0              |
| 0              | 0              |
| 1.2415853374   | 0.4172887061   |
| 0.4591728641   | 0.6944624752   |
| 1.0546560781   | 1.0633890164   |
| 2.2448126236   | 2.0119115501   |
| 3.8444102412   | 5.1683244869   |
| 2.5297210331   | 2.8762852469   |
| 0.1955150694   | 0.1577072046   |
| 5.3074360402   | 4.886045853    |
| 0.4847791206   | 0.3601634615   |
| 0              | 0              |

gene\_expression\_table

|                 |                 |
|-----------------|-----------------|
| 0               | 0               |
| 0               | 5.5981875409    |
| 0               | 0               |
| 2.2014844704    | 3.1667913564    |
| 0               | 0               |
| 142.7549703236  | 134.7049207787  |
| 0.1014709627    | 0.0613867076    |
| 1065.0012980796 | 1076.7554369095 |
| 0.0447042958    | 0.2253723186    |
| 6.6364450482    | 6.7883740139    |
| 12.0927662413   | 12.9432310041   |
| 3.4231635617    | 2.2230055447    |
| 22.1022843428   | 22.9817149517   |
| 0.1420413241    | 0.0954783188    |
| 0.1210394535    | 0.1423819886    |
| 28.3482370933   | 38.7061063898   |
| 11.798453015    | 14.9891471408   |
| 1.7243879277    | 2.0429331269    |
| 4.9940148072    | 4.1198457908    |
| 0               | 0.0775014082    |
| 0.6379591441    | 0.4502691755    |
| 0.0547872327    | 0               |
| 4.4049002152    | 2.2206872006    |
| 1.4787680637    | 1.428887271     |
| 0.2799225533    | 0.1652139012    |
| 0               | 0               |
| 0.9343413642    | 1.020584557     |
| 2.5983505781    | 2.1160455119    |
| 2.0336053232    | 1.4096804697    |
| 5.2483289727    | 8.1677582846    |
| 2.9748438855    | 3.9993022423    |
| 0.386082282     | 0.5839187769    |
| 4.8481195491    | 4.7960323619    |
| 13.1976683207   | 11.5617760948   |
| 0.1971042491    | 0.2649817926    |
| 3.9983646328    | 6.5511429027    |
| 2.9119964561    | 2.4755427581    |
| 2.7050620775    | 3.8505331505    |
| 0               | 0               |
| 0               | 0               |
| 0               | 0.054050747     |
| 0.1966140237    | 2.3789047179    |
| 2.0818290001    | 1.1661485035    |
| 0               | 0               |
| 34.7631400531   | 37.2416785504   |
| 0               | 0               |
| 0.7018593965    | 0.7813867835    |
| 8.7719503806    | 4.9529677907    |
| 0.6561086573    | 0.5880368685    |

gene\_expression\_table

|                |                |
|----------------|----------------|
| 24.3544167983  | 24.5560802836  |
| 69.6098804878  | 51.2664970892  |
| 0              | 0              |
| 1.2822447028   | 1.2005148613   |
| 0              | 0              |
| 1.9522073276   | 1.5746978551   |
| 11.1792355468  | 14.0043621838  |
| 6.7955209956   | 6.4487439028   |
| 0              | 0.9985930128   |
| 35.3229758976  | 12.184237365   |
| 9.4815069103   | 15.0570271813  |
| 0.8840235024   | 0.6685076554   |
| 55.5297816191  | 75.1860188911  |
| 0              | 0              |
| 10.6949263781  | 14.5894199124  |
| 1.9405611969   | 2.6088396719   |
| 11.3458586534  | 8.389191445    |
| 0              | 0              |
| 15.3439779819  | 19.522968619   |
| 0.6918999064   | 0.6976290909   |
| 28.2168344587  | 20.3895107928  |
| 0.9676714406   | 0.9756841143   |
| 0              | 0              |
| 43.4015602011  | 38.2536116952  |
| 13.4798540581  | 15.1016357596  |
| 3.9031101587   | 3.9354293395   |
| 1.1205381311   | 1.6947248954   |
| 66.5035780759  | 47.3324132076  |
| 2.570377264    | 2.1929438626   |
| 100.1029418871 | 137.4761144824 |
| 4.4598335177   | 0              |
| 2.2038449365   | 7.2723062592   |
| 4.3702798637   | 3.4717621786   |
| 11.5731559222  | 8.3712290075   |
| 3.2918192421   | 3.8297038965   |
| 14.9882913719  | 16.3460652093  |
| 0              | 0              |
| 0              | 0.2047371003   |
| 0              | 0.8624111238   |
| 35.4542323108  | 35.1314648429  |
| 326.1675790509 | 381.4873045482 |
| 9.827196215    | 8.440632849    |
| 0              | 0.0719763003   |
| 0              | 1.2370169358   |
| 4.5870287375   | 4.0926356458   |
| 0              | 1.814729753    |
| 0              | 1.376728637    |
| 16.2997445815  | 21.7518252786  |
| 0.2464745322   | 0.1656769543   |

gene\_expression\_table

|                |               |
|----------------|---------------|
| 0              | 0             |
| 0.835288709    | 0.6737641642  |
| 49.445530545   | 50.3000911864 |
| 4.9235189094   | 5.5848233791  |
| 16.5106916176  | 24.9711092811 |
| 1.0792211942   | 0             |
| 0              | 0             |
| 13.0658582291  | 19.3045460495 |
| 1.7538645696   | 1.1789248068  |
| 0.1753894251   | 0.196490793   |
| 2.1124928078   | 2.5004171991  |
| 5.229571987    | 2.4071819544  |
| 4.1728545322   | 1.803174555   |
| 0.5363932431   | 1.0816695509  |
| 10.9828818691  | 14.2377739084 |
| 12.7704421734  | 9.8104275115  |
| 8.6353438293   | 8.4683038661  |
| 2.0103509327   | 0             |
| 4.7662624762   | 4.462462526   |
| 16.3476577834  | 20.1917024074 |
| 0.067311749    | 0             |
| 64.8435612567  | 42.030314793  |
| 123.1641709064 | 89.8922929094 |
| 17.9781940847  | 16.0553960993 |
| 0.0816091093   | 0             |
| 5.9670467828   | 6.7160440345  |
| 4.706633375    | 4.7456060221  |
| 1.8462472304   | 0.7446139333  |
| 0.0921267432   | 0             |
| 39.7179490394  | 43.7208491304 |
| 2.9489808474   | 2.3510600605  |
| 0.1850182653   | 0.1865502843  |
| 0.779851696    | 0             |
| 0.122349499    | 0.4934503904  |
| 6.3477408241   | 7.3849643556  |
| 3.6805743051   | 1.6493559145  |
| 1.7457769347   | 1.9435901699  |
| 41.6252455173  | 43.2652856188 |
| 1.3195015633   | 1.3304275192  |
| 10.885436278   | 11.5432736578 |
| 0.1243224263   | 0.4763370737  |
| 0              | 0             |
| 1.3146989276   | 2.0679127808  |
| 1.1996343518   | 0.4031892544  |
| 17.8984965282  | 26.4446731618 |
| 2.3116359762   | 1.9721960654  |
| 16.0633862077  | 21.7563540784 |
| 6.764236605    | 3.1336269816  |
| 0.2002467615   | 0             |

gene\_expression\_table

|                |                |
|----------------|----------------|
| 0.2858739888   | 0.0720602825   |
| 1.0995366389   | 0              |
| 7.3345797087   | 0              |
| 5.5791134412   | 16.8759316277  |
| 0.3174880105   | 0.9603507825   |
| 7.7318420832   | 2.5986215219   |
| 0              | 0              |
| 60.1156646061  | 6.6343073377   |
| 0.80331632     | 1.1171973423   |
| 4.5532978025   | 2.2955003875   |
| 2.7481335194   | 4.3102718879   |
| 0              | 0              |
| 10.1305764274  | 8.8423694907   |
| 7.3345797087   | 0              |
| 0.7816401472   | 0.5629374384   |
| 20.724108874   | 14.7499144101  |
| 0.3523650594   | 1.0658483133   |
| 0.0993733993   | 0.1001962475   |
| 1.5115400706   | 1.1430421317   |
| 3.0150478808   | 3.7769865701   |
| 0.9424342653   | 0.6334919773   |
| 3.1703506925   | 1.4530010712   |
| 4.2624605903   | 4.8076584982   |
| 8.682593887    | 10.943111178   |
| 58.0115372423  | 39.4820284528  |
| 11.0339704583  | 11.7267052736  |
| 0              | 0              |
| 22.7965358505  | 36.0103025678  |
| 406.2407992124 | 418.340265314  |
| 34.1491785997  | 27.592724088   |
| 14.5307012702  | 9.376653309    |
| 1.1197287187   | 2.2580009646   |
| 290.2094044498 | 125.6025115721 |
| 0              | 0              |
| 0              | 0              |
| 0              | 0              |
| 1.5007154958   | 0.4035045252   |
| 6.2568780802   | 2.9883255731   |
| 8.0537637522   | 7.7427564284   |
| 0.6108835221   | 0.4106279075   |
| 1.8564208518   | 1.5152607538   |
| 1.7222988547   | 1.9681014689   |
| 15.603374177   | 78.6628791316  |
| 9.1364823693   | 6.6236017646   |
| 0.7443883096   | 0.7005153095   |
| 0              | 0.2925478976   |
| 0.2841983327   | 0.1910343993   |
| 0.9380072885   | 0              |
| 0.5812651107   | 0.6786168614   |

gene\_expression\_table

|                |                |
|----------------|----------------|
| 0.1279438773   | 0              |
| 1.3041984894   | 1.5779972763   |
| 0.4838241039   | 0.7665905414   |
| 0              | 0              |
| 12.2851601806  | 16.515847738   |
| 0.7758322481   | 0              |
| 0              | 12.7031082711  |
| 0              | 14.6599002018  |
| 11.3563019158  | 0              |
| 97.0389618759  | 97.8424799985  |
| 118.6031756261 | 86.971093332   |
| 11.3563019158  | 0              |
| 0              | 0              |
| 10.3601350811  | 2.6114801979   |
| 79.0523350751  | 39.8534586722  |
| 12.8518863199  | 0              |
| 28.4562359372  | 28.6918639864  |
| 74.6534206976  | 97.6178281671  |
| 2.7922624012   | 1.407691678    |
| 0.326967081    | 0.5769303542   |
| 1.1067428214   | 0.8927256457   |
| 104.5170709896 | 115.7569546409 |
| 215.5059936496 | 239.2158551757 |
| 1.4717906624   | 3.7099440695   |
| 449.2142428211 | 450.8719866008 |
| 1.3321714649   | 0              |
| 1.2623646287   | 0              |
| 45.2609171281  | 50.6211060476  |
| 15.4141679074  | 11.7020633296  |
| 5.3247055508   | 4.697696554    |
| 6.2564551797   | 4.8745652553   |
| 5.977828418    | 5.0227725211   |
| 0.995357433    | 0              |
| 0              | 0              |
| 496.0808301604 | 469.9758291372 |
| 214.1843966524 | 202.7991954316 |
| 3.6146245445   | 5.5807247806   |
| 4.8299690213   | 4.3829666394   |
| 1.4118796153   | 1.4235704953   |
| 12.7920958431  | 4.4147582082   |
| 9.5713988562   | 4.825326771    |
| 57.3948954316  | 33.6591666519  |
| 0.8457175487   | 1.705440799    |
| 4.4510226457   | 0.9973063872   |
| 12.643512948   | 11.4733852767  |
| 0.5211481781   | 0              |
| 208.90850726   | 228.1915416788 |
| 21.8921865829  | 16.053426837   |
| 0              | 0              |

gene\_expression\_table

|                 |                 |
|-----------------|-----------------|
| 5.4076065403    | 5.3475299728    |
| 0               | 0.6942502368    |
| 3.7140106894    | 0.9361910143    |
| 9.2240388839    | 7.4403338416    |
| 0               | 0               |
| 63.2856216911   | 81.4591274076   |
| 0               | 2.8616433519    |
| 63.3117504606   | 59.6637076777   |
| 13.2952956007   | 10.9270789489   |
| 123.4424686648  | 131.2783739198  |
| 19.4684163362   | 14.0211585352   |
| 6.2515147354    | 7.4346374363    |
| 23.2719187014   | 32.1552182271   |
| 0               | 0               |
| 565.5696887072  | 685.2823500741  |
| 8.1176484034    | 6.3432707651    |
| 0.6205696348    | 0               |
| 0.7980104049    | 0.1341030372    |
| 3.0422788895    | 4.3344685803    |
| 0               | 0               |
| 149.5317274016  | 142.6201802506  |
| 0               | 0.6942502368    |
| 2.7129270467    | 2.1883128605    |
| 0               | 0               |
| 0               | 0               |
| 7.8204815166    | 8.4803502654    |
| 24.9028694937   | 31.7706655269   |
| 333.0028716735  | 561.309132495   |
| 0.6300771582    | 3.8117665659    |
| 0               | 0               |
| 0.614968766     | 0               |
| 415.4066544827  | 594.4326263302  |
| 3.0431527861    | 0               |
| 9.3743913977    | 11.4137537084   |
| 4334.8794602561 | 4109.3047584537 |
| 0               | 0               |
| 5507.6559114421 | 5277.3228677093 |
| 0               | 0               |
| 4.8762609115    | 3.6874786025    |
| 0               | 0               |
| 2.6352501307    | 2.6570709664    |
| 0               | 11.161011634    |
| 72.875669868    | 90.435824109    |
| 217.7790101993  | 174.21405629    |
| 145.171659086   | 184.0665404842  |
| 0.8619413482    | 0.6207703843    |
| 18.9318374724   | 22.6677125192   |
| 4.3334129212    | 4.5165747787    |
| 11.3939777908   | 14.1914591791   |



gene\_expression\_table

|                 |                 |
|-----------------|-----------------|
| 3.144822069     | 6.8702017514    |
| 59.5662157938   | 66.4487486145   |
| 12.056091983    | 9.5510806579    |
| 1107.4186500778 | 1168.2678926397 |
| 33.8009735023   | 39.2251383778   |
| 4823.5260575804 | 6551.302077835  |
| 1.6649295127    | 0.8572165473    |
| 138.6574494528  | 161.8718541722  |
| 0               | 0               |
| 152.7530152988  | 142.4871168369  |
| 13.3457948827   | 13.003990245    |
| 330.1999889971  | 413.5392795833  |
| 4.2455565784    | 2.9289077595    |
| 33.2423405872   | 31.8010645979   |
| 0.887895178     | 3.2228901902    |
| 0               | 0               |
| 45.1692115822   | 62.2616297746   |
| 0               | 0               |
| 33.0726348743   | 37.0095496217   |
| 0               | 0.0335922998    |
| 44.0201671281   | 37.2572049328   |
| 19.5352075408   | 11.0495176298   |
| 37.5209159576   | 54.9168428834   |
| 269.1886007362  | 246.2863233903  |
| 2.3606580858    | 2.8562462386    |
| 1335.703685161  | 1068.3402272063 |
| 38.1184487304   | 47.3034873083   |
| 5.7945855542    | 7.3032085544    |
| 0               | 0               |
| 1.3448514035    | 4.4069586125    |
| 241.215551879   | 288.1215118671  |
| 12.867351887    | 10.9779139211   |
| 5.9788630024    | 8.7076458104    |
| 3.2723188811    | 0.8248537198    |
| 91.0110285813   | 112.6934092052  |
| 1584.8276330963 | 1640.4492717764 |
| 236.4143984901  | 228.0079964057  |
| 0.5114269916    | 1.0313235885    |
| 6.494805495     | 8.1857310771    |
| 2.1178713571    | 0.4270816214    |
| 68.3167378622   | 51.9441241152   |
| 6.0810461627    | 11.1479990013   |
| 8.3454210479    | 8.4145241888    |
| 67.636276674    | 84.5979787407   |
| 19.4405573595   | 21.2349933143   |
| 0.9270077397    | 2.3367092577    |
| 48.3064440918   | 61.3701133039   |
| 238.8610889125  | 253.4318322305  |
| 11.7731788216   | 16.9580929306   |

gene\_expression\_table

|                |                |
|----------------|----------------|
| 2.602182722    | 2.2925793909   |
| 103.2008078641 | 122.2045369886 |
| 25.1000714473  | 26.0926505974  |
| 20.1320215823  | 22.5794773808  |
| 1.1017609004   | 1.4282792794   |
| 0.2236326059   | 0              |
| 15.2464304941  | 14.5186389347  |
| 15.3357836011  | 13.8351095549  |
| 8.6834489539   | 8.1019666799   |
| 174.0066865417 | 200.2337411238 |
| 8.6992263111   | 11.9038516208  |
| 141.4692183966 | 105.8301487752 |
| 2.8828585376   | 2.9067296615   |
| 15.3086281091  | 15.2336193603  |
| 2.4606197107   | 1.8607459069   |
| 11.4634031599  | 14.5999886323  |
| 8.9265815059   | 9.2147944126   |
| 4.199595238    | 4.2343694237   |
| 18.9396219451  | 22.466410526   |
| 5.3116063343   | 5.080942821    |
| 4.9361317207   | 1.4220013423   |
| 115.0378635625 | 67.6610778545  |
| 68.2199331144  | 95.5892185625  |
| 1.1893503556   | 0.5995993059   |
| 0.5494145837   | 0.3323783625   |
| 13.6488542178  | 8.4447849231   |
| 1.8297600862   | 1.7219170915   |
| 110.7651714102 | 128.9750981636 |
| 5.6062756293   | 7.2677541131   |
| 0.2293425641   | 0              |
| 2.9467617652   | 0.9903873437   |
| 1.7322738086   | 0              |
| 90.9689040927  | 104.7017108466 |
| 10.1725177938  | 10.2567499645  |
| 220.6661751987 | 223.9571440814 |
| 453.7304905348 | 531.5836873408 |
| 5.6992707227   | 3.8309751802   |
| 9.7623974457   | 10.3900799848  |
| 0              | 0              |
| 0              | 0              |
| 0              | 0              |
| 0              | 0.0518036165   |
| 2.6470410074   | 3.3361993448   |
| 0              | 0              |
| 0              | 0              |
| 1.3725018048   | 2.7677332443   |
| 0              | 1.751932546    |
| 0              | 0              |
| 8.0574801078   | 2.3211997121   |

gene\_expression\_table

|                 |                |
|-----------------|----------------|
| 0               | 0              |
| 59.7932537925   | 54.1953908803  |
| 0.0969904666    | 0.488967916    |
| 19.1963233514   | 17.9877836136  |
| 0               | 0.1661725317   |
| 161.8326222415  | 181.3029506531 |
| 0               | 0              |
| 4.7768073047    | 1.6054536725   |
| 0               | 0.5562250148   |
| 0               | 0              |
| 1615.1758497494 | 2171.139894384 |
| 0               | 0              |
| 62.6120588503   | 73.8761282728  |
| 4.9732867102    | 10.7452871667  |
| 0               | 0.50959625     |
| 22.8977732006   | 28.8592189298  |
| 14.2570727121   | 12.7641209373  |
| 31.7453761572   | 25.7457578517  |
| 15.4994992643   | 15.9446213479  |
| 11.5899001247   | 12.051052138   |
| 0               | 0              |
| 0               | 0              |
| 0               | 0.147212387    |
| 5.3913791219    | 4.2085329402   |
| 1.0956508223    | 0.3682410707   |
| 0.3578066104    | 0.5411540702   |
| 7.3854287327    | 6.2054856549   |
| 0.6670889898    | 0              |
| 21.371123557    | 26.4352786557  |
| 4.2523228001    | 0              |
| 0               | 0.8627315322   |
| 34.2508629947   | 23.9472620752  |
| 0               | 0              |
| 58.493283642    | 48.7062445378  |
| 36.692788929    | 44.8682396414  |
| 0               | 0              |
| 59.1138520135   | 55.6001271876  |
| 1.8368623612    | 4.6301806348   |
| 35.784566977    | 21.2784655041  |
| 13.8342575673   | 26.1540192818  |
| 0               | 0              |
| 263.5410723629  | 213.533734087  |
| 112.1808376747  | 123.3924393504 |
| 31.1353518831   | 72.4457630605  |
| 3.2136889212    | 4.5364192185   |
| 0.215448476     | 0.2172324682   |
| 30.6833749881   | 41.8565426451  |
| 37.0310664424   | 39.6424933518  |
| 1.8260847039    | 0              |

gene\_expression\_table

|                |               |
|----------------|---------------|
| 8.960593918    | 5.9193457722  |
| 19.5339951528  | 9.8478718913  |
| 0              | 0             |
| 0              | 0             |
| 2.0162388827   | 1.1088731338  |
| 1.5601260185   | 1.573044433   |
| 7.8513341881   | 3.5183760484  |
| 44.6866605293  | 45.8335217871 |
| 0.8149244643   | 0.7042905747  |
| 0.1394981119   | 0.1406532073  |
| 0              | 0.0773442024  |
| 1.4552369699   | 0             |
| 5.144555924    | 7.3335635838  |
| 5.0973839294   | 4.3837697614  |
| 0.1283090721   | 0.2264001569  |
| 12.2532054012  | 13.3842219624 |
| 0              | 0             |
| 192.3469141933 | 112.365489023 |
| 25.4301782201  | 38.8592723883 |
| 17.9313646019  | 20.9414007274 |
| 9.445045645    | 8.7641541171  |
| 0              | 0             |
| 19.7121429748  | 23.9875115751 |
| 13.5929936885  | 16.9132302509 |
| 2.4812989311   | 1.6866370749  |
| 0.2617974138   | 0.065991298   |
| 52.599709014   | 48.5023261771 |
| 15.3284905215  | 16.8604538548 |
| 7.2412857835   | 8.8776517272  |
| 0.216296292    | 0.0545218261  |
| 57.0259526552  | 60.913880005  |
| 4.743147655    | 3.4100752835  |
| 0.0990545551   | 0             |
| 45.7741443142  | 46.4026475833 |
| 1.3680991021   | 3.1037117928  |
| 1.3796136392   | 0.1738796681  |
| 0.2213287104   | 2.0084525378  |
| 0.4643676064   | 0.2217849822  |
| 1.8076747939   | 1.012579446   |
| 0              | 0             |
| 0              | 0.7894099102  |
| 0.821035042    | 2.7594450423  |
| 14.0831106514  | 11.8331033019 |
| 3.6863829204   | 5.6731746362  |
| 1.1181521719   | 1.4092636015  |
| 0.7506071938   | 0.983869245   |
| 1.8561928568   | 2.1389289292  |
| 0              | 0             |
| 0              | 0             |

gene\_expression\_table

|                |                |
|----------------|----------------|
| 0.9210267257   | 0.9286531641   |
| 35.0146548659  | 24.713212317   |
| 13.5924260589  | 15.5860515032  |
| 0              | 0.3371853679   |
| 3.009889544    | 2.3450824104   |
| 5.4241928178   | 7.9302053236   |
| 0.1297241125   | 0.110675464    |
| 0              | 0.2309656049   |
| 126.7818580621 | 83.7517760959  |
| 3.5494069132   | 4.3822007774   |
| 0              | 0.7380270124   |
| 0.1304789601   | 0.1534859359   |
| 114.0376434155 | 134.7365192965 |
| 0              | 0              |
| 0              | 0              |
| 1.7613598216   | 2.0181187791   |
| 7.1138699566   | 4.3962171829   |
| 8.1557859713   | 12.1636591535  |
| 0.500056025    | 0.2520983359   |
| 3.3437419956   | 2.5285720524   |
| 0.3995040216   | 0.3125265991   |
| 193.8570245559 | 225.4269605874 |
| 51.5544519625  | 53.640320685   |
| 4.5223309042   | 2.3884548596   |
| 0              | 0.0411800792   |
| 1.0310733247   | 1.0838497547   |
| 0              | 0              |
| 0              | 0              |
| 0.119395625    | 0.0752401653   |
| 0              | 0              |
| 0.6147077038   | 0.295141766    |
| 6.4640398862   | 7.3179671607   |
| 73.9212633976  | 74.9474327293  |
| 2.3409011244   | 2.1821499526   |
| 2.6587244623   | 2.5020236957   |
| 0              | 0              |
| 0              | 0              |
| 20.1118320385  | 21.7804665076  |
| 7.5686784511   | 9.9207548426   |
| 4.9626191061   | 4.4960885122   |
| 82.8955889623  | 65.8443367242  |
| 0              | 0.2294094359   |
| 3.0575696677   | 3.5155734235   |
| 0.445862475    | 0.7867201642   |
| 1.0491654395   | 1.0578529134   |
| 4.8612865566   | 3.3203979213   |
| 3.6287679021   | 3.2522803809   |
| 435.142262007  | 401.5635857156 |
| 0              | 0              |

gene\_expression\_table

|                |                |
|----------------|----------------|
| 0              | 0.0382959442   |
| 360.6177017877 | 211.0053426524 |
| 0              | 0              |
| 6.2639169469   | 4.4582008037   |
| 50.7062508438  | 29.0717136794  |
| 0.9845494308   | 1.9854037209   |
| 16.5588921297  | 34.8230978478  |
| 0.2150220365   | 0.2168024977   |
| 2.3571209547   | 1.4259832674   |
| 0              | 0.0982470592   |
| 0              | 0.0340961952   |
| 10.0824604809  | 10.0953500903  |
| 3.2565865788   | 5.0895060768   |
| 177.7670701059 | 185.7893106711 |
| 0.0196839202   | 0.0396938205   |
| 0.2360638728   | 0.4284334226   |
| 13.6245764176  | 11.1934312496  |
| 3.1880384765   | 1.6791832996   |
| 11.4407465285  | 16.8526154547  |
| 3.1585925229   | 3.6892611736   |
| 3.5236505944   | 3.7558464374   |
| 23.7602106034  | 20.3857309107  |
| 0.2136274784   | 0.2153963921   |
| 32.2725031021  | 36.7234109711  |
| 0              | 0              |
| 17.3138588804  | 12.0613547423  |
| 6.691361235    | 8.9349091785   |
| 2.3980721723   | 3.9450421956   |
| 4.0095021388   | 3.3689185701   |
| 1.0013482363   | 0.7211712616   |
| 8.2220559341   | 10.1099238618  |
| 18.7327518007  | 8.0947996466   |
| 0              | 0              |
| 5.3327987693   | 5.3769562951   |
| 14.3413869908  | 18.3485796435  |
| 19.3961958453  | 21.1715853823  |
| 22.8682159519  | 37.4685563692  |
| 1.9501575231   | 2.141088256    |
| 0              | 0              |
| 3.3127992355   | 3.8969354967   |
| 0.4914868069   | 0.1238891244   |
| 0              | 0              |
| 0.5604234345   | 0.5441356514   |
| 4.7820972353   | 6.0271184384   |
| 0.9396373187   | 0.8070596582   |
| 7.8220291833   | 5.6334274628   |
| 8.637419187    | 8.856549335    |
| 8.0596229442   | 12.2314278096  |
| 0.3944673247   | 0.5966004878   |

gene\_expression\_table

|                |                |
|----------------|----------------|
| 0.661781984    | 0.1906462232   |
| 10.2719208181  | 9.8862044421   |
| 3.9221737575   | 6.5198296838   |
| 0              | 0              |
| 0              | 0              |
| 11.4043709186  | 10.5536961648  |
| 0              | 0              |
| 1.1779142945   | 2.3753357119   |
| 10.4331537322  | 16.3909174949  |
| 0              | 1.1321931701   |
| 1.7403168928   | 1.7222324027   |
| 8.2498224473   | 9.3710623508   |
| 1.0792211942   | 0              |
| 0.2296948146   | 0              |
| 62.9997417333  | 71.5572427489  |
| 23.7554900858  | 25.6807031013  |
| 0              | 0              |
| 0              | 0              |
| 373.6884279081 | 223.7147310161 |
| 42.2630186341  | 43.807728119   |
| 0              | 0              |
| 73.715727392   | 64.7538171862  |
| 8.8572507851   | 10.6247423195  |
| 0.048040827    | 0.0484386226   |
| 10.3832433718  | 9.5738265751   |
| 20.4581047541  | 28.0322508596  |
| 20.0871262708  | 12.9869482626  |
| 10.0567386303  | 7.5232347892   |
| 9.5889721765   | 7.5198451812   |
| 15.1499641505  | 18.2640788465  |
| 0.4408104024   | 0.222230237    |
| 0              | 1.4506048176   |
| 114.947898804  | 117.3761388996 |
| 3.3734554395   | 0.4251736107   |
| 24.0668714561  | 25.693574782   |
| 5.0559481849   | 5.8402132796   |
| 7.5038305897   | 17.8022707142  |
| 10.121474644   | 9.9080428726   |
| 9.7919133866   | 7.8983952108   |
| 321.3401408942 | 379.2146007469 |
| 0.4214350074   | 0.1062311609   |
| 0              | 0              |
| 0              | 0              |
| 0.0721844097   | 0.1455642461   |
| 28.7947696223  | 29.0332008543  |
| 4.8654358096   | 7.7204827262   |
| 10.2071231679  | 8.2054982587   |
| 0              | 0              |
| 0              | 0.029897979    |

gene\_expression\_table

|                |                |
|----------------|----------------|
| 8.6451127197   | 8.7166974173   |
| 6.5790654643   | 7.6043048565   |
| 5.8323828921   | 4.0324643364   |
| 1.7741566007   | 0.8944236334   |
| 64.0772827302  | 51.3549704777  |
| 0              | 0              |
| 0.8155882246   | 0.8223415936   |
| 0.5090005957   | 0.6842870759   |
| 5.7279040311   | 5.3310767751   |
| 6.3544555352   | 5.1256582023   |
| 114.7652226578 | 126.2633161612 |
| 49.8862876079  | 51.0732007031  |
| 10.2702551237  | 8.4725153962   |
| 0.1584469446   | 0              |
| 23.2765930574  | 20.7980257128  |
| 6.2473044886   | 5.6474102023   |
| 0.4608051439   | 0.2323103896   |
| 0              | 21.3749793551  |
| 2.9341972354   | 2.2244311748   |
| 15.9886571329  | 17.4281611525  |
| 1.3380864333   | 1.4201750303   |
| 59.6822859149  | 60.1764770873  |
| 11.4431105224  | 11.5378636659  |
| 86.9932195729  | 70.429516901   |
| 2.3539023186   | 1.1866967457   |
| 0.1305233286   | 0.2632082191   |
| 3.4190291397   | 1.7236699762   |
| 15.045040982   | 18.5750441977  |
| 0.3208495442   | 0              |
| 10.7183493443  | 18.4356432236  |
| 5.977046409    | 4.8506285818   |
| 0.4348734244   | 0.3587517291   |
| 14.169323642   | 16.2894523459  |
| 0              | 0              |
| 0              | 0              |
| 0.0259186428   | 0              |
| 0.1506921344   | 0              |
| 0              | 0              |
| 1.5329193481   | 0.8832071322   |
| 119.8857836682 | 119.8273646044 |
| 3.8904321574   | 4.7071756315   |
| 0              | 0              |
| 0.1321978284   | 0.0999693561   |
| 4.2395745542   | 3.7657893329   |
| 1.6668120554   | 1.6806138693   |
| 20.1262129408  | 9.3659378541   |
| 14.9118865156  | 13.0306474082  |
| 6.9896740295   | 5.052961158    |
| 2.0534330444   | 2.7402832345   |



gene\_expression\_table

|               |                |
|---------------|----------------|
| 35.3148386036 | 34.5206519164  |
| 10.5607492759 | 11.1045474087  |
| 1.9178988187  | 3.9813111942   |
| 87.9029781878 | 103.6894860786 |
| 0.9346152089  | 0.6282361099   |
| 8.9107927259  | 10.6959254181  |
| 4.8278488666  | 5.3466277032   |
| 4.376160347   | 5.8057849427   |
| 7.1429589296  | 7.3433229939   |
| 0.1027362038  | 0.1035868972   |
| 4.1310022036  | 5.6352819717   |
| 0.1230562788  | 0.1418002627   |
| 0             | 0              |
| 8.5469307839  | 5.7105257524   |
| 0.0283647398  | 0.1429980511   |
| 29.8226395523 | 31.7716337305  |
| 1.8968393448  | 2.6563137068   |
| 0             | 0              |
| 0             | 0              |
| 0.5635881844  | 0.5114294108   |
| 0             | 0.024512813    |
| 5.3519863508  | 8.7001615873   |
| 0.0579905029  | 0              |
| 3.557076751   | 3.5865306484   |
| 0             | 0              |
| 11.0640254256 | 14.130476834   |
| 5.1478867602  | 6.0854292066   |
| 27.8652554954 | 24.2206810432  |
| 7.9713681622  | 8.6448499508   |
| 0.0422501931  | 0              |
| 0             | 0              |
| 60.0284607186 | 55.3962371294  |
| 0.7063381838  | 0.1424373845   |
| 0             | 0.1246258314   |
| 2.6825493421  | 2.7047618325   |
| 3.8978143963  | 4.623634972    |
| 10.3484970951 | 11.3471777522  |
| 18.8158335663 | 16.1515275673  |
| 0             | 0              |
| 0.6013771604  | 0.2122248742   |
| 7.4266241212  | 10.3741652625  |
| 6.2726088325  | 5.9731845335   |
| 3.7319452109  | 0              |
| 4.3217452215  | 5.083785996    |
| 15.190191218  | 31.1992013284  |
| 1.7351071005  | 1.4673011284   |
| 48.0609009132 | 57.6891223382  |
| 7.4961711366  | 8.8573150516   |
| 0.4520897146  | 0.3038887886   |

gene\_expression\_table

|                 |                 |
|-----------------|-----------------|
| 0.244551931     | 0.2958922927    |
| 116.1884945295  | 116.5138898689  |
| 0.3656407437    | 0.5027296131    |
| 104.6513645013  | 158.7356477043  |
| 4.3802878818    | 4.7437107331    |
| 3.5608872688    | 1.7171347785    |
| 261.8283936994  | 351.1282548335  |
| 12.4385035146   | 12.8898738452   |
| 1406.5847630085 | 1520.0247469997 |
| 16.9809720493   | 11.4604128968   |
| 2.5529882876    | 3.7508721777    |
| 76.6309647752   | 55.3470756575   |
| 1.069816435     | 1.0786749066    |
| 6.9907174217    | 9.0949717686    |
| 17.4376372811   | 18.3045763675   |
| 0.0700810043    | 0.0176653252    |
| 0               | 0               |
| 3.0381060982    | 4.4854918528    |
| 36.707536464    | 43.8654676168   |
| 0               | 0               |
| 0               | 0               |
| 0               | 0               |
| 304.0042162942  | 314.2371262008  |
| 103.1157194787  | 133.6751426296  |
| 172.7725452754  | 180.7357838833  |
| 73.5702527096   | 82.2830777782   |
| 0               | 0.5740453357    |
| 1.4000352757    | 2.8232561604    |
| 0.0664015485    | 0.1004270665    |
| 0.6366963476    | 0.6419684264    |
| 235.3260928325  | 203.0016698244  |
| 0.6121898002    | 0               |
| 0               | 0               |
| 187.9621152273  | 211.8922233657  |
| 2.9251372081    | 0.9831194716    |
| 53.14138037     | 71.1080400369   |
| 20.0991906356   | 9.3533627496    |
| 16.0334042981   | 14.6662131379   |
| 51.2702143482   | 113.7284510758  |
| 16.0102269841   | 12.7025291989   |
| 0               | 0               |
| 10.4770333164   | 14.8932078834   |
| 7.6560793084    | 8.2708654793    |
| 5.9434657809    | 8.8127644897    |
| 4.74368286      | 3.416401636     |
| 4.4399737781    | 4.8648948936    |
| 0.9385994478    | 0.6123579613    |
| 3.6872169096    | 3.6050893724    |
| 0               | 0               |

gene\_expression\_table

|                |                |
|----------------|----------------|
| 7.624610824    | 7.6877453924   |
| 1.0305290496   | 0.3197114484   |
| 10.9000991792  | 13.6709306218  |
| 13.2502634085  | 10.6334538191  |
| 0              | 0              |
| 22.4688588148  | 25.9865134825  |
| 9.0743027128   | 11.3579270822  |
| 32.4721328409  | 44.0310188091  |
| 10.1046772048  | 9.5091244552   |
| 4.0392002164   | 3.6937954566   |
| 40.135675402   | 38.3219824667  |
| 0.6112474199   | 0.3641824563   |
| 0.3714178399   | 0.6990541891   |
| 10.5548030638  | 15.9633010447  |
| 7.2358196587   | 7.9210835992   |
| 0.2771607518   | 0.4284988079   |
| 0.7019439452   | 1.3144045533   |
| 0.0274299622   | 0.0691427308   |
| 43.943206518   | 61.8111009357  |
| 1.8348762477   | 1.8500696946   |
| 587.0454171995 | 471.537349234  |
| 181.2390698941 | 130.6130468671 |
| 11.3510778826  | 7.4392948254   |
| 2.7834363143   | 2.9144258852   |
| 7.1545760439   | 13.7062552493  |
| 2.1165478334   | 0.8536294497   |
| 13.6210504131  | 13.188122291   |
| 0              | 0              |
| 6.2572418796   | 4.9533896082   |
| 0              | 0              |
| 0.6719450403   | 0.2540658717   |
| 1.2906045618   | 0.780774744    |
| 0.573667434    | 1.2211038439   |
| 25.8338883779  | 30.3891028343  |
| 1.1403946159   | 1.5679602283   |
| 0              | 0              |
| 3.9896882275   | 3.8110019745   |
| 0.0218152939   | 0.02932791     |
| 0.0435454527   | 0.0219530125   |
| 0.0249565253   | 0.0377447616   |
| 0.3857009626   | 0.3589797302   |
| 32.8949086354  | 32.9061307512  |
| 0.7223580423   | 0.2731272868   |
| 13.0384766694  | 9.4605222636   |
| 5.7030586528   | 15.6079084645  |
| 3.9780741683   | 3.4577707573   |
| 0              | 0              |
| 3.458728761    | 2.42791464     |
| 1.0820651371   | 1.3282043874   |

gene\_expression\_table

|                 |                 |
|-----------------|-----------------|
| 0.5077750189    | 0.1599936193    |
| 16.8588810942   | 8.1592698242    |
| 0.1521817696    | 0               |
| 14.1160786983   | 13.8339099033   |
| 0.0305690238    | 0.0308221465    |
| 5.7589819778    | 7.5694070951    |
| 73.7554451643   | 73.1763085703   |
| 316.1889341307  | 330.6242790357  |
| 1.9255099602    | 1.1574052021    |
| 0.1260471572    | 0.0423636246    |
| 1.1925418187    | 1.17944039      |
| 7.3922222057    | 11.744802745    |
| 1.5203412869    | 2.0439070256    |
| 44.5589616748   | 41.502336507    |
| 4.525232181     | 3.3751499867    |
| 3.6493585204    | 4.7308841289    |
| 3.8911771151    | 1.307799162     |
| 2.9699780147    | 6.4498441964    |
| 0.64037872      | 0.6456812902    |
| 0               | 0               |
| 7.5130864585    | 4.0519033483    |
| 0               | 0               |
| 0.5019742869    | 0               |
| 0               | 0               |
| 0               | 0               |
| 85.0561203715   | 113.2477290589  |
| 12.6932210567   | 22.0131199856   |
| 2.4420083008    | 6.1555725585    |
| 0.3731058476    | 0.3761953006    |
| 1.9713321166    | 0.7453708005    |
| 79.4009942744   | 86.5496903453   |
| 4.3262683018    | 0               |
| 0               | 0.67136816      |
| 46.8299007595   | 53.3498343459   |
| 0               | 0               |
| 0               | 0               |
| 0               | 0               |
| 2.0419883004    | 2.5813033391    |
| 1.7790524705    | 2.1409676135    |
| 54.4904316337   | 63.2498791958   |
| 29.471625365    | 46.0808079637   |
| 2227.9450346615 | 2396.2211986208 |
| 0.11558519      | 0.2330845554    |
| 0               | 0               |
| 2.0508491567    | 1.608312952     |
| 0.5313604828    | 0.1785867807    |
| 1.5883656738    | 1.8199067306    |
| 785.2393318611  | 890.4154034347  |
| 3.917161464     | 2.2950360915    |

gene\_expression\_table

|                |                |
|----------------|----------------|
| 0              | 0              |
| 33.1509554667  | 52.5720788052  |
| 9.9882494076   | 11.1248930002  |
| 13.830334461   | 18.59313959    |
| 21.2058510089  | 21.4676587139  |
| 108.0880512016 | 139.557492902  |
| 1.7087817194   | 1.6591187961   |
| 0.3412140021   | 0.5733989649   |
| 0              | 0              |
| 288.7928616875 | 348.8963505777 |
| 4.1740450985   | 3.4659122398   |
| 20.4624101694  | 14.6180795229  |
| 198.39392841   | 201.4554027731 |
| 2.8492196266   | 3.2623460667   |
| 0.3598190839   | 0.5441977765   |
| 106.9531592192 | 97.9482323997  |
| 0              | 0              |
| 7.5942218955   | 6.9160946874   |
| 2.6416158589   | 2.0326629671   |
| 19.5416105709  | 22.3660468886  |
| 0.9536647675   | 1.1218217044   |
| 2.6893034777   | 3.7574639114   |
| 25.378785838   | 28.7314318304  |
| 0.3884209201   | 0.4637808799   |
| 13.267471107   | 17.0524214548  |
| 1.9289753091   | 1.1470205745   |
| 0              | 0              |
| 0              | 0              |
| 2.6863040768   | 3.2244614974   |
| 4.8227466937   | 3.6019857789   |
| 30.8565805195  | 23.3340632252  |
| 0              | 0              |
| 7.5249282112   | 7.5872373711   |
| 131.0243808475 | 104.5490916709 |
| 10.4349407454  | 12.2562486513  |
| 0              | 0              |
| 2.7669381535   | 5.8764913192   |
| 1.6967601162   | 2.545351331    |
| 0              | 0              |
| 0.0178147715   | 0.0179622843   |
| 1.3407730335   | 0.9586023614   |
| 1.6383542886   | 1.6519204618   |
| 0.6832783565   | 0              |
| 11.7756269768  | 13.156715476   |
| 0.3333996393   | 0.8404007759   |
| 168.9411712604 | 178.8570692943 |
| 2.4206129228   | 1.2516187096   |
| 0              | 0              |
| 0.3456799394   | 0              |

gene\_expression\_table

|                |                |
|----------------|----------------|
| 2.2641583277   | 3.129791015    |
| 0.4752356395   | 0.375003207    |
| 151.5169755606 | 98.7426140678  |
| 24.3984686228  | 24.7988879772  |
| 2.8545870912   | 1.4391120586   |
| 1.6185094547   | 1.6319113054   |
| 0.8855342147   | 1.0416778891   |
| 0.8403021175   | 0.9531676424   |
| 0.5438979167   | 0.5092300483   |
| 4.1373824513   | 4.0111937427   |
| 0.7198470324   | 1.7626756713   |
| 12.7830336059  | 16.7555463439  |
| 32.407007906   | 41.5868088276  |
| 5.1092021634   | 4.9368620512   |
| 32.3661311371  | 35.6816801885  |
| 0.4469642959   | 0.3004435492   |
| 5.4332674447   | 6.177608831    |
| 0.1050626815   | 0.105932639    |
| 0              | 0.0958021103   |
| 23.0876202883  | 18.8284365135  |
| 51.0239068819  | 55.5079616783  |
| 0              | 0              |
| 0              | 0.204236503    |
| 37.9826449199  | 31.6941973426  |
| 14.6939900257  | 19.9557891497  |
| 557.9476901343 | 808.3956042876 |
| 0.7346746295   | 0.7407580043   |
| 3.2867961018   | 3.7282634736   |
| 0              | 2.4763204095   |
| 177.768577093  | 228.1243566998 |
| 73.775343654   | 81.6879463804  |
| 162.171432661  | 153.3651098035 |
| 27.3388332448  | 33.0344962491  |
| 0              | 0              |
| 66.0532895369  | 44.4001566341  |
| 20.3046773509  | 16.2076392798  |
| 6.0925507392   | 6.7014537702   |
| 31.1173087705  | 33.2764848996  |
| 49.9028629368  | 58.5646141054  |
| 1.5835107457   | 4.7898683828   |
| 98.4368316561  | 103.7355844928 |
| 68.0412790043  | 61.7843368284  |
| 0              | 0              |
| 0              | 0              |
| 0.9285026724   | 1.8723820287   |
| 7.2959450055   | 9.8084774675   |
| 3.3928374021   | 0              |
| 26.4552365995  | 20.3979907849  |
| 17.2305216222  | 22.7187956166  |

gene\_expression\_table

|                |                |
|----------------|----------------|
| 13.3388794099  | 12.3439058126  |
| 142.7752484971 | 122.9787515994 |
| 0              | 0.1064874025   |
| 0.7963068178   | 0.6863504528   |
| 13.1313889384  | 15.8408598255  |
| 0.0740261778   | 0              |
| 18.7823867894  | 25.741952004   |
| 0.5789923897   | 0.5837866586   |
| 9.5543917431   | 15.5836120062  |
| 17.6239089121  | 20.9120693685  |
| 0.4870211386   | 0.3273692346   |
| 0.066842103    | 0              |
| 0              | 0              |
| 18.5517706006  | 16.6270098236  |
| 0.2020013708   | 0.6110220482   |
| 1.1690649891   | 1.7681179127   |
| 0              | 0              |
| 1.0594014466   | 1.5259623976   |
| 0              | 0              |
| 0              | 0              |
| 3.3217567923   | 3.18785193     |
| 8.9861089365   | 12.149329892   |
| 3.488109612    | 2.8999762194   |
| 3.9057389488   | 4.922599871    |
| 0.5577086883   | 0              |
| 7.0914040025   | 6.9568768442   |
| 1.911940858    | 2.5925215412   |
| 0.4474111861   | 0.4511159145   |
| 0.1145468215   | 0.1668265604   |
| 0              | 0.090436822    |
| 20.1675250874  | 29.2077644831  |
| 0.1180764749   | 0.0595270957   |
| 7.5179801153   | 7.8329061338   |
| 0.487481591    | 0.491518117    |
| 4.9130475358   | 3.0623054273   |
| 1.4479597997   | 1.1791899298   |
| 10.5080719836  | 10.5950826658  |
| 4.9758409424   | 5.6190878539   |
| 59.9296193837  | 77.4953101406  |
| 7.3005610034   | 8.3295665733   |
| 8.2111310201   | 8.2791221904   |
| 0.6199181795   | 0.4687884967   |
| 36.2505871587  | 38.0658125029  |
| 0              | 0.0394265334   |
| 3.3556621234   | 2.7067585872   |
| 4.8987916422   | 3.9789252075   |
| 0.1444793122   | 0              |
| 0.0836162112   | 0.084308584    |
| 371.1551850675 | 474.2188081996 |

gene\_expression\_table

|                |                 |
|----------------|-----------------|
| 50.2518612412  | 50.6679650455   |
| 0.8103652458   | 0.4456774727    |
| 1.7064745321   | 8.6030238292    |
| 2.0876888363   | 2.5907392788    |
| 0              | 0               |
| 0.3674174055   | 0.5248179878    |
| 0              | 0               |
| 2.5313014868   | 4.2985458351    |
| 0              | 0               |
| 6.9143527947   | 4.1260526292    |
| 66.8912263876  | 55.7986607795   |
| 0.2211034762   | 0               |
| 0.877760045    | 0.6637711646    |
| 6.5316450043   | 3.2928647078    |
| 0.4088946148   | 0.4122804119    |
| 1434.961244881 | 1441.3209467372 |
| 0.9616806431   | 0.9378521138    |
| 0              | 0.9594866184    |
| 12.2724030049  | 11.6336968317   |
| 10.7046681491  | 12.4936221616   |
| 10.7981864813  | 15.085228109    |
| 0.8510725131   | 0.4501611567    |
| 0.724180032    | 0.5737101132    |
| 0              | 1.7512278974    |
| 0.3647637167   | 0.3028810184    |
| 0.4513170534   | 0.8451005155    |
| 3.9355058587   | 5.2907910503    |
| 1.9065049905   | 3.4326634815    |
| 18.9570612577  | 17.1702327317   |
| 14.6099413574  | 16.5164827187   |
| 2.8865349963   | 1.6371205665    |
| 17.7109574294  | 23.3745960403   |
| 2.6235477461   | 2.2829056979    |
| 0.1683817357   | 0.1697759981    |
| 253.4661906204 | 254.8761290499  |
| 3.6004665395   | 4.6007505367    |
| 0              | 0.1171443082    |
| 47.7552665934  | 51.3121071239   |
| 4.134482271    | 3.8164313287    |
| 3.6510679275   | 4.2200269512    |
| 1.6974189479   | 1.8670627616    |
| 0.1684827446   | 0.254816765     |
| 0              | 0               |
| 1.4759408027   | 0.8928972797    |
| 0.7586189953   | 0.7343046127    |
| 3.9119751809   | 8.6776090881    |
| 5.757932968    | 8.7084161407    |
| 10.6229613862  | 8.6448569531    |
| 0.361506494    | 0.3124284858    |



gene\_expression\_table

|                  |                 |
|------------------|-----------------|
| 3.2116274279     | 4.209687142     |
| 0.2077388958     | 0.0698196833    |
| 16.19766732      | 18.8551566192   |
| 0.9593357001     | 0.7738234807    |
| 23539.1649801931 | 16033.322469455 |
| 12.4613267575    | 11.5318115614   |
| 7.0605843954     | 6.0204300045    |
| 11.5216157356    | 5.2390477532    |
| 14.0537983178    | 12.6048595553   |
| 6.2532904965     | 6.2080689533    |
| 0                | 0               |
| 0.7636700037     | 0.6114654033    |
| 0                | 1.5694297053    |
| 2.5234997512     | 3.3218493579    |
| 10.6902294839    | 10.7220182416   |
| 3.264469369      | 3.0383080341    |
| 7.8944508979     | 4.3530264755    |
| 5.9066068139     | 5.0839768002    |
| 3.5236505944     | 3.3836454391    |
| 0.3126673982     | 0.252205119     |
| 32.5597270762    | 36.6173335571   |
| 0.528485391      | 0.5328614435    |
| 25.0873640236    | 32.0021297643   |
| 2.9480023235     | 2.7742520043    |
| 279.4048253146   | 306.5842161453  |
| 1.6061480583     | 1.5020962802    |
| 11.070458973     | 10.5532831657   |
| 0                | 0.0700550331    |
| 0.8498095437     | 0.7322140919    |
| 10.367463794     | 7.4666501349    |
| 0.359817335      | 0.2821752533    |
| 88.8936540677    | 106.4938557023  |
| 10.579514979     | 9.7495157527    |
| 1.1374429211     | 1.3762336378    |
| 5.7827034529     | 5.9150876056    |
| 4.4337399583     | 5.0535555064    |
| 38.8491903685    | 50.9713071131   |
| 1.8786364759     | 2.4624499556    |
| 69.1744321308    | 70.6825293195   |
| 57.3662839125    | 76.6330557623   |
| 1.379902953      | 1.53046196      |
| 5.479846153      | 4.5129670037    |
| 4.3944779967     | 2.6585195298    |
| 24.8793958334    | 27.3152202339   |
| 6.5112723337     | 7.2005288311    |
| 17.8265120801    | 21.8257197232   |
| 32.984350625     | 33.2574731212   |
| 0                | 0.3235874407    |
| 39.9737322084    | 53.2598209166   |

gene\_expression\_table

|                 |                 |
|-----------------|-----------------|
| 5.0971943214    | 3.6710006829    |
| 0.3067907928    | 0.257775944     |
| 1.9302852924    | 2.4952163605    |
| 0               | 0               |
| 5.972129849     | 4.4731746578    |
| 7.400748229     | 4.9746860888    |
| 3.469748605     | 3.5609522398    |
| 1.7650562699    | 1.5572126341    |
| 8.8936611709    | 11.5454038237   |
| 31.0976048654   | 30.3270682057   |
| 7.221558054     | 4.7848905586    |
| 2.6447611719    | 5.333321525     |
| 3814.3165520905 | 4091.2424170264 |
| 0.8396740661    | 1.5521492703    |
| 7.1696215627    | 13.2777342616   |
| 48.3814763214   | 33.6948475033   |
| 450.4974507844  | 449.5497970344  |
| 63.1052216223   | 90.2184599365   |
| 0.0539428597    | 0.2175581052    |
| 0               | 0               |
| 0.1750256892    | 0               |
| 0.7790075864    | 0.981822568     |
| 58.001797226    | 80.575301042    |
| 11.3819586273   | 14.7551212424   |
| 3.6311738188    | 3.3796073235    |
| 13.0928307751   | 12.9078832238   |
| 5.0123645736    | 3.8819571841    |
| 0.8872741314    | 0.9940234289    |
| 0               | 0               |
| 0               | 0               |
| 1.1055470993    | 1.1592894913    |
| 32.1023175507   | 26.8025745597   |
| 0               | 0               |
| 1.3297101781    | 0.4469068884    |
| 20.9449083582   | 22.2298314375   |
| 166.9223356727  | 163.5635414921  |
| 2.3206953129    | 4.0948451591    |
| 0.4366483446    | 0.5956512301    |
| 31.8503269666   | 31.5506547821   |
| 9.6174472238    | 10.6667915277   |
| 4.2462407221    | 3.6327040057    |
| 0               | 0               |
| 15.2290213798   | 14.6325292156   |
| 1.2324019702    | 1.1965842389    |
| 29.4508699299   | 47.7899623906   |
| 29.9126801202   | 42.2685450187   |
| 73.27786808     | 69.3752447408   |
| 1.2677450104    | 1.0956363455    |
| 9.3063378019    | 14.4504324353   |

gene\_expression\_table

|                 |                 |
|-----------------|-----------------|
| 1.5446398582    | 0.7787150208    |
| 65.6385807385   | 54.6721631318   |
| 0               | 0               |
| 17.6374423559   | 11.8556578895   |
| 62.3821897774   | 67.5579028561   |
| 51.5728428527   | 50.6665544871   |
| 469.7379428801  | 710.4413174719  |
| 1.6610188685    | 1.1165151418    |
| 4.9923220943    | 6.0403924182    |
| 0               | 0               |
| 15.1974040344   | 10.9451743588   |
| 0               | 0               |
| 244.478467643   | 282.2278879466  |
| 34.6679014409   | 41.9459572248   |
| 0               | 0               |
| 160.6094147878  | 117.7121944474  |
| 0.3174039996    | 0.1920193325    |
| 0               | 0               |
| 27.4128406195   | 19.4148279641   |
| 43.6303280099   | 58.6554707939   |
| 0.0376176527    | 0.0758582813    |
| 27.9932179663   | 16.5586737402   |
| 1.4310041186    | 1.5630911362    |
| 0               | 0               |
| 0               | 0.0102212195    |
| 20.8262064349   | 21.64476751     |
| 0               | 0               |
| 0.095442182     | 0               |
| 1782.2604319074 | 1657.0635121065 |
| 3.1927189328    | 4.5330969628    |
| 0.0976263655    | 0               |
| 148.436223747   | 119.1674891781  |
| 25.3003863773   | 27.7875509475   |
| 1.3870501256    | 1.3985354083    |
| 171.370043016   | 206.3189361116  |
| 0               | 0               |
| 390.9681247846  | 396.9686065116  |
| 8.5602811051    | 8.9764099006    |
| 560.1759017203  | 578.870829276   |
| 3.2054587859    | 2.5856009264    |
| 235.8723912864  | 259.2297961125  |
| 9.704675054     | 6.9893095111    |
| 8.0581988596    | 10.6249002173   |
| 41.361179958    | 20.4262852247   |
| 0.1531370039    | 0.1544050343    |
| 0.4616549459    | 1.280063449     |
| 1.009758869     | 1.7453486436    |
| 14.5637564345   | 17.9116792659   |
| 15.1052244391   | 22.7334643304   |

gene\_expression\_table

|                 |                |
|-----------------|----------------|
| 27.9110218138   | 33.3685318444  |
| 9.6200330556    | 4.4596277933   |
| 10.352028829    | 8.7947686567   |
| 0               | 0.0266674651   |
| 3.0917303287    | 1.1335749045   |
| 8.3746114524    | 8.4439563005   |
| 0               | 0              |
| 0               | 0              |
| 0               | 1.0199983273   |
| 1.552065344     | 1.3910373451   |
| 0.2199234606    | 0.1478296716   |
| 8.2542553209    | 9.1345649007   |
| 2.600966194     | 1.8029709129   |
| 10.1986020528   | 9.59751353     |
| 1.2183945047    | 1.71987656     |
| 0               | 0              |
| 24.9874598449   | 31.6910253564  |
| 1.1408054431    | 0.2875629324   |
| 1.2184847513    | 0.9214306883   |
| 0               | 0              |
| 11.5054283469   | 10.3577656293  |
| 1.2501453161    | 0.9758686272   |
| 0               | 0              |
| 1.6416409071    | 2.0690428683   |
| 0               | 0              |
| 102.5025826849  | 128.5589858774 |
| 208.0989776896  | 191.1873928269 |
| 9.5406952213    | 11.2782638888  |
| 77.3992616008   | 93.2146305587  |
| 37.2882518601   | 50.6583119384  |
| 10.581091172    | 14.1781494008  |
| 18.0830561285   | 33.5483344317  |
| 13.3676668322   | 11.2961459863  |
| 0               | 0              |
| 3.2020622982    | 5.0977524411   |
| 3.1616799764    | 1.7077820592   |
| 10.5839063811   | 13.1342092306  |
| 5.6558399522    | 3.8017815848   |
| 43.6054833502   | 53.801176346   |
| 67.8095243944   | 73.0326719903  |
| 0.0520023218    | 0.0524329201   |
| 10.1761135937   | 11.4916206036  |
| 1.2174541569    | 0.6904885066   |
| 2.242096602     | 3.4504840785   |
| 1926.3997313903 | 2059.163745332 |
| 124.8900952966  | 138.7300849979 |
| 0               | 0.1797424138   |
| 2.1844997081    | 2.0815668375   |
| 0               | 0.0257081893   |

gene\_expression\_table

|                 |                 |
|-----------------|-----------------|
| 2.619282459     | 2.9128357462    |
| 46.3316371549   | 43.5588422264   |
| 11.5766463684   | 19.259633642    |
| 1.798926786     | 2.6429985849    |
| 0.6874751799    | 0.8562660145    |
| 0.6571737282    | 0.478555543     |
| 1.7491579963    | 2.3515222197    |
| 2.1056851413    | 0               |
| 27.2540841671   | 25.4113890809   |
| 36.1430179269   | 38.0130839369   |
| 0               | 0.8014524028    |
| 8.7658593129    | 18.8297281734   |
| 65.3622478879   | 62.1190982269   |
| 3.660785609     | 3.1730493761    |
| 0.038595094     | 0.009729        |
| 0               | 0               |
| 5.3540812008    | 6.5230847347    |
| 5.5525956464    | 3.9989808362    |
| 0               | 0               |
| 1133.0676272583 | 1122.5059983205 |
| 0.36577378      | 0.153667717     |
| 145.9721877662  | 94.9017056771   |
| 9.0526556463    | 5.5080435034    |
| 0.7266634363    | 0.2930721902    |
| 1.5534013374    | 0.8950080395    |
| 6.9271320177    | 7.7801927361    |
| 0               | 0               |
| 0.0522296967    | 0               |
| 1.4742230345    | 4.4592904224    |
| 0.6770115905    | 1.194580615     |
| 0               | 0               |
| 0               | 0.0633339931    |
| 7.2413449219    | 5.7367403566    |
| 0.538434821     | 0.7600505617    |
| 7.622818649     | 8.0608622009    |
| 6.7390349604    | 7.5176915978    |
| 8.1222289844    | 5.6302702591    |
| 0.0738652059    | 0.0744768369    |
| 1.9624924721    | 2.5995246291    |
| 0               | 0               |
| 8.2059135789    | 9.9975827024    |
| 0               | 0               |
| 0               | 0               |
| 0               | 0               |
| 3.9748363358    | 2.194719929     |
| 8.8873468646    | 9.3786081583    |
| 1.0050250735    | 0.982326221     |
| 2.3697348848    | 3.5211579156    |
| 0               | 0               |

gene\_expression\_table

|                 |                |
|-----------------|----------------|
| 0.3836404426    | 0.4022898109   |
| 0.48349037      | 1.4624815417   |
| 12.3713903552   | 14.9685959946  |
| 0.237184143     | 0              |
| 0               | 0              |
| 0               | 0              |
| 0               | 0              |
| 0               | 0              |
| 0.3557688866    | 0              |
| 12.823262965    | 11.6364998484  |
| 0.1640639422    | 0.2105376657   |
| 8.2369743509    | 11.7249593131  |
| 6.3404816541    | 6.5405135437   |
| 1.4244746338    | 2.2569954081   |
| 5.4795361544    | 5.0720473489   |
| 0.4551992862    | 0.2868553143   |
| 8.7655401862    | 7.8070078261   |
| 1.5182250072    | 1.0805622112   |
| 0.5292196398    | 0.4446681434   |
| 12.764375455    | 11.6060445066  |
| 8.9863639411    | 10.7081878372  |
| 5.2968215927    | 11.7494986714  |
| 116.6332464775  | 126.6450903292 |
| 6.064225353     | 4.5292143397   |
| 13.0074935424   | 15.7792254211  |
| 54.4477374421   | 22.1233102269  |
| 0               | 1.5169376744   |
| 0               | 0              |
| 0               | 0              |
| 0.942794346     | 0              |
| 8.1416544065    | 2.0103845596   |
| 10.4271026362   | 14.566818424   |
| 0               | 0.4610763796   |
| 2.066352437     | 2.8771626263   |
| 2.7855080171    | 5.617146086    |
| 10.6748255447   | 11.4807648079  |
| 2.9773406098    | 4.3957770454   |
| 28.8601748174   | 40.3659485206  |
| 63.4352669023   | 63.9605341309  |
| 5.9357165684    | 9.4047901736   |
| 4.7257893802    | 3.2942661256   |
| 9.8562444544    | 5.1032242583   |
| 2.8514594917    | 1.6586945884   |
| 3.8671447082    | 4.1680740875   |
| 0.8904355131    | 0.2693425935   |
| 1304.3705518675 | 954.143824435  |
| 0               | 0              |
| 0               | 0              |
| 39.0084354424   | 31.4651516526  |

gene\_expression\_table

|                |                |
|----------------|----------------|
| 0.3322666942   | 0.4381004406   |
| 0              | 0.034952018    |
| 71.7523973183  | 111.4527677181 |
| 22.3385080179  | 16.7863664549  |
| 0              | 0              |
| 0              | 0              |
| 2.9369991317   | 2.3839545636   |
| 96.3164105887  | 151.1953645976 |
| 97.7616231946  | 101.872550464  |
| 0              | 0.0129595341   |
| 157.5752744042 | 144.91570968   |
| 4.0725705311   | 4.5951372993   |
| 12.4870985904  | 11.9609715204  |
| 6.2019919531   | 6.9047369995   |
| 0.5221880166   | 0.5265119245   |
| 11.6202472142  | 15.1180220831  |
| 13.1440958829  | 11.780385607   |
| 0              | 0              |
| 40.9651018947  | 49.565169519   |
| 4.575797362    | 4.3422933073   |
| 23.2436470498  | 26.3656270745  |
| 2.5919172355   | 2.2113209114   |
| 8.3649551058   | 15.9313044366  |
| 4.771693833    | 4.4102714375   |
| 5.6200099262   | 5.9998718811   |
| 7.1539699293   | 12.8963405367  |
| 9.3559393424   | 1.8866819889   |
| 0.9838764647   | 0              |
| 101.4404305192 | 97.3097584231  |
| 254.2761640477 | 242.8878919799 |
| 0              | 0              |
| 179.4338746163 | 101.4616971642 |
| 72.2590979839  | 90.0598784578  |
| 9.7924180463   | 16.4558380866  |
| 1.4836946062   | 1.1319583064   |
| 10.6078166822  | 12.4782621681  |
| 16.6309794087  | 18.7035388523  |
| 0              | 0              |
| 55.5834582462  | 68.1612684631  |
| 1.5637276131   | 2.1022344667   |
| 5.384091664    | 4.9116573504   |
| 4.644649445    | 3.8505561594   |
| 3.4305816562   | 3.2400648287   |
| 0.2674325759   | 0.2696470155   |
| 4.6872480598   | 4.7260601894   |
| 3.2213344192   | 2.1653388315   |
| 1.0522126992   | 0.8550742074   |
| 2.3465191271   | 2.2461542699   |
| 0              | 0              |

gene\_expression\_table

|                |                |
|----------------|----------------|
| 9.0118509575   | 10.0218445389  |
| 0.1166436067   | 0              |
| 52.9643351561  | 76.8749699934  |
| 26.5021459386  | 25.1284360768  |
| 922.5541091396 | 773.1277865291 |
| 0.006312       | 0              |
| 0.8807610488   | 1.2210743499   |
| 2.4978587832   | 2.0310822324   |
| 0              | 0              |
| 1.4943556711   | 1.2153729531   |
| 0.2229882214   | 0.3747244091   |
| 6.3495501349   | 3.5851909711   |
| 0              | 0              |
| 2.7144410366   | 3.5007085606   |
| 0.4411872903   | 0.3160708692   |
| 3.0047830407   | 3.6355964929   |
| 31.9157820195  | 25.322639601   |
| 0.1953996155   | 0.2626901278   |
| 40.212325344   | 42.4608240117  |
| 5.2759135777   | 2.8644000394   |
| 25.4553504078  | 38.2007516671  |
| 0              | 0              |
| 10.1947512675  | 11.4034514891  |
| 0.115543902    | 0.1398007773   |
| 32.2076767519  | 35.004838346   |
| 0.62485202     | 0.3693255999   |
| 1.8481425928   | 1.5692175915   |
| 0.4025493511   | 0.3320857694   |
| 19.3323022043  | 23.4258208028  |
| 10.4899324424  | 7.2297065546   |
| 0              | 0              |
| 0              | 0              |
| 1.6848356627   | 1.1325244791   |
| 1.1811413715   | 0.5762524134   |
| 0              | 0              |
| 0              | 0              |
| 1.1032789483   | 2.0394265866   |
| 0.1651707268   | 0.0832692004   |
| 0              | 0.0823589899   |
| 0.7179428279   | 0.6204751348   |
| 0.2398473672   | 0.1319091225   |
| 3.0477467196   | 2.2762838355   |
| 0.1739785179   | 0.2631286856   |
| 7.4885187201   | 8.4814132121   |
| 3.3036305593   | 1.7634630862   |
| 0              | 0              |
| 0.5678038965   | 1.0877604891   |
| 0              | 0              |
| 2.5450335895   | 3.4040200193   |



gene\_expression\_table

|                |                |
|----------------|----------------|
| 2.7853395761   | 1.3456932035   |
| 11.7442756885  | 16.3873203613  |
| 0.5890776623   | 0              |
| 0.4741924783   | 0.318745977    |
| 4.0146275918   | 4.8349560456   |
| 1.9614219176   | 3.0763649918   |
| 5.8268106481   | 7.2204920798   |
| 0              | 0              |
| 0.0312482433   | 0              |
| 1.0673286435   | 1.0761665153   |
| 1.8601435423   | 1.0099094986   |
| 0              | 0              |
| 2.0592716451   | 2.8475289162   |
| 2.3472145509   | 1.8751152745   |
| 0.6575907113   | 0.2946825792   |
| 11.7877689558  | 10.9711163052  |
| 7.1147915617   | 5.1810089067   |
| 0              | 0              |
| 0.8479595098   | 1.7099618498   |
| 1.0429886609   | 1.0516249888   |
| 7.2528595907   | 5.9259835926   |
| 27.9472845033  | 31.433999129   |
| 6.3488849856   | 9.6021841156   |
| 1.2029972465   | 0.2021597507   |
| 26.4888055495  | 25.7427880047  |
| 185.0718177299 | 213.7626495282 |
| 27.5318132442  | 47.1475742961  |
| 1.1440411528   | 0.927334971    |
| 0.09652765     | 0.1094928011   |
| 1.1941192682   | 0.8026713418   |
| 0.8406723854   | 1.4530859321   |
| 20.8297666541  | 19.5020844072  |
| 1.7477009223   | 2.17254147     |
| 2.6598000884   | 2.6330637665   |
| 2.2275638641   | 2.4501915363   |
| 5.775774586    | 5.3383001041   |
| 54.3191375651  | 57.3593417936  |
| 4.6724861266   | 5.8104504271   |
| 25.5636358492  | 34.6829567374  |
| 2.0230657313   | 2.110155989    |
| 183.9152418485 | 333.5118559378 |
| 29.5442095418  | 38.5502718256  |
| 41.9256600474  | 39.0436461191  |
| 155.8549773635 | 131.8209609605 |
| 0.0362558409   | 0.0182780263   |
| 1.9134845362   | 1.8991831247   |
| 73.047046177   | 79.8541679262  |
| 7.38608172     | 5.389450854    |
| 8.1369288031   | 10.8402270144  |

gene\_expression\_table

|                 |                 |
|-----------------|-----------------|
| 5.9312241621    | 5.4921461043    |
| 3.18537275      | 3.2117488023    |
| 0.6455689561    | 0.1859755724    |
| 14.3327200825   | 13.745305776    |
| 0.1397039073    | 0.0563442827    |
| 4.7401852979    | 3.5694520287    |
| 4428.3141202349 | 4270.9442222797 |
| 10.9267049683   | 9.6951202347    |
| 0               | 0               |
| 6.459743709     | 7.5282820112    |
| 0               | 1.6759008314    |
| 533.0395712203  | 523.0250565518  |
| 8.9268378033    | 16.5013846941   |
| 3.2390421265    | 3.1505968427    |
| 0               | 0               |
| 0               | 1.2433755579    |
| 0               | 0.0119674875    |
| 5.6748588945    | 2.6926347309    |
| 24.3931096984   | 31.3294644349   |
| 17.0612688473   | 5.3757944994    |
| 3.1957326945    | 2.8641729164    |
| 8.0156551181    | 7.4354654622    |
| 0.2864143799    | 0.2475308535    |
| 0.0706320854    | 0.4273016694    |
| 3.2251068673    | 5.8532614787    |
| 4.6451072258    | 6.4311713145    |
| 11.8610141406   | 10.8269931059   |
| 1.1951669499    | 0.8676456262    |
| 1.3279042012    | 1.1901330969    |
| 0.0450589298    | 0.1211520913    |
| 8.9984294308    | 11.2504452529   |
| 0               | 0.5412886228    |
| 3.7780678146    | 5.1229211159    |
| 4.2975518353    | 0               |
| 0.084392755     | 0.0680732463    |
| 0               | 0               |
| 106.9447089179  | 133.8496145817  |
| 0.4436758641    | 0.7668851361    |
| 0               | 0               |
| 0               | 0               |
| 21.9306727005   | 19.0505682318   |
| 2.8472184113    | 4.3061916328    |
| 15.2593158892   | 22.7707895428   |
| 0.5837554709    | 0.2615951911    |
| 3.4812534442    | 3.8610874466    |
| 55.2920972111   | 52.2456543218   |
| 2.8312755709    | 4.4682567166    |
| 0.4264843296    | 0.53751972      |
| 3.0431527861    | 5.3318889792    |

gene\_expression\_table

|                |                 |
|----------------|-----------------|
| 3.0630116353   | 4.9413991885    |
| 0.3676618004   | 0.6796279869    |
| 1.7306155508   | 2.3139497074    |
| 2.2292565243   | 1.9832784567    |
| 15.5608355914  | 17.8136161636   |
| 16.5541050375  | 20.0294149036   |
| 0              | 0               |
| 12.6711163181  | 24.4411157895   |
| 0.7119014147   | 1.2920331941    |
| 16.2921479097  | 1.6427052858    |
| 0              | 0.0515898557    |
| 9.6584526254   | 8.6563805763    |
| 0.0144189493   | 0               |
| 0.6735018746   | 0.6173442879    |
| 11.5977280474  | 10.2715472465   |
| 0.2457171847   | 0.3096897661    |
| 1.1197774733   | 0.8088713843    |
| 38.9896187574  | 40.2548892276   |
| 6.3134957606   | 6.1005332406    |
| 468.4841581645 | 636.8849142378  |
| 898.4384146451 | 1073.3228807686 |
| 33.6739712791  | 34.1050588135   |
| 0.2669853131   | 0.1076784197    |
| 76.4701807332  | 73.3422412428   |
| 0.5992582855   | 0.3740411774    |
| 24.3595278607  | 28.9959008575   |
| 6.2242491265   | 5.4101622306    |
| 27.4515941645  | 36.2461830395   |
| 0.4896428571   | 0.7240893428    |
| 1.9062344747   | 4.667759928     |
| 5.5318520131   | 4.8706307309    |
| 130.0686924933 | 146.7133649645  |
| 23.5486505984  | 17.8077315335   |
| 4.0619409522   | 5.0407080739    |
| 19.3156653768  | 21.0654515566   |
| 4.8402140624   | 7.002159244     |
| 1.7633721149   | 1.7187076987    |
| 45.6108052323  | 67.9469425282   |
| 7.6194265509   | 6.6581824328    |
| 1.1137601694   | 0.9982066767    |
| 7.7449020657   | 8.1299518413    |
| 0              | 0               |
| 1.7801564275   | 1.7168577841    |
| 4.3404787571   | 2.9839223931    |
| 0.0436973108   | 0               |
| 2.2196010298   | 2.9839735183    |
| 0              | 0               |
| 0.7827721639   | 0.6457531123    |
| 2.9902077753   | 0               |

gene\_expression\_table

|                 |                 |
|-----------------|-----------------|
| 15.9835921165   | 18.8019324612   |
| 16.0836551299   | 21.2654705821   |
| 0.8721790781    | 0.8490768663    |
| 0.4706055564    | 0.3882291895    |
| 0.2912726674    | 0.2936845117    |
| 8.8154706357    | 6.7486500801    |
| 0.3044802322    | 0.15350072      |
| 14.7378826782   | 16.5967912434   |
| 3.4170000423    | 1.9810440807    |
| 1.4352710628    | 0.7792376483    |
| 0.2986227173    | 0.1003651409    |
| 3.2380604325    | 1.5068643499    |
| 7.5135052463    | 13.6053743704   |
| 3405.2259369542 | 3398.6183744818 |
| 0.7233585948    | 1.0210875762    |
| 0               | 0               |
| 11.2154634205   | 10.9313871773   |
| 0.6928921512    | 0.4657530345    |
| 1.3618966502    | 1.2968862277    |
| 12.5834884997   | 11.6624169648   |
| 2.7088730032    | 1.5607448361    |
| 15.1650001878   | 11.0431908456   |
| 0.1408508589    | 0.0568068622    |
| 47.7850756565   | 43.8843806432   |
| 1.8036566106    | 2.3202719744    |
| 0               | 0               |
| 8.2286100534    | 10.0434293157   |
| 0.4223680946    | 0.3097203324    |
| 9.188391962     | 11.0172137639   |
| 0.0857532554    | 0.1441055395    |
| 0.009898        | 0.00998         |
| 4.3832810088    | 4.2814644243    |
| 0.1112319743    | 0.0841147618    |
| 18.7945727375   | 17.6139667208   |
| 0.3801529864    | 0.1533203169    |
| 0.3242236747    | 1.389360553     |
| 0.7954562718    | 0.9357167644    |
| 0               | 0.2775275112    |
| 25.6430886605   | 31.7806238836   |
| 0               | 0.0508498194    |
| 1.3041098689    | 0.986181282     |
| 4304.7612157957 | 4503.4159619546 |
| 96.3584498946   | 97.7073142242   |
| 0               | 0               |
| 0               | 0               |
| 9.1437024703    | 13.1012749045   |
| 80.9825799856   | 114.8442140302  |
| 0               | 0               |
| 347.4849105686  | 287.3542944341  |

gene\_expression\_table

|                |                |
|----------------|----------------|
| 10.173582951   | 10.3338078227  |
| 8.7683053408   | 2.2102275296   |
| 0.9895411311   | 0.9977348939   |
| 1.5222804075   | 0              |
| 122.664190104  | 105.3569471631 |
| 0              | 0              |
| 3.5576216128   | 2.2603517947   |
| 25.4223478397  | 28.7588120124  |
| 0.1899335314   | 0.1915062506   |
| 4.1826252504   | 6.3258883777   |
| 31.9193628557  | 30.6511112984  |
| 1.4051604811   | 3.5419893105   |
| 5.0650468176   | 4.7286919066   |
| 7.6521756575   | 5.1022109255   |
| 0              | 0              |
| 2.3973539506   | 2.0143374323   |
| 0.2905553629   | 1.1718450706   |
| 2.2775494744   | 2.2964084177   |
| 1.1442328472   | 0.4750560352   |
| 0              | 0.6721454764   |
| 81.6231939066  | 92.4708582337  |
| 45.8335731726  | 51.7905340646  |
| 224.845274751  | 172.0544772638 |
| 4.9930797366   | 8.1809394297   |
| 32.3933857926  | 21.3989890617  |
| 29.1505247354  | 43.6679683141  |
| 1.3038145542   | 1.3146106159   |
| 43.7528994944  | 60.8074233879  |
| 641.8281357556 | 740.7769089314 |
| 8.3521160206   | 13.0146971065  |
| 0              | 0              |
| 11.1064097253  | 15.7606757331  |
| 0              | 0              |
| 0.0969006879   | 0.097703061    |
| 0              | 0              |
| 5.6641860023   | 9.2805172453   |
| 0              | 0              |
| 35.8434015644  | 50.5962772684  |
| 0.830469504    | 1.6746921909   |
| 0              | 0              |
| 7.1192858793   | 8.1145278468   |
| 0.083100289    | 0.1256825847   |
| 7.4587042955   | 7.8623044197   |
| 9.7838315044   | 7.8918761683   |
| 0.5598575544   | 0.8467400698   |
| 4.1921607343   | 2.7350357033   |
| 9.8738758317   | 14.9334527065  |
| 15.4081863372  | 11.6518288198  |
| 2.4979370884   | 3.8283038011   |

gene\_expression\_table

|                 |                 |
|-----------------|-----------------|
| 0.8296318547    | 0.6482886703    |
| 0               | 0.0190999674    |
| 0.5119878832    | 0.3441515535    |
| 0.5785211605    | 0.3499869165    |
| 0.0592755854    | 0.1792992267    |
| 0               | 0               |
| 11.2736120836   | 12.7878319327   |
| 2.3275228801    | 2.6727394578    |
| 15.4650686847   | 9.3558750684    |
| 0               | 0               |
| 0               | 0               |
| 4.3706637074    | 3.7877095692    |
| 0               | 0.1706142503    |
| 2.3885093386    | 1.9266296562    |
| 0               | 0               |
| 0.4299156297    | 0.866950977     |
| 2.1349816019    | 1.6593421072    |
| 4.8408605567    | 7.0800515859    |
| 14.1417222192   | 13.0705857841   |
| 3.0948196002    | 3.8736569039    |
| 6.0076838814    | 6.858412143     |
| 34.9950022659   | 31.6794618087   |
| 0               | 0               |
| 613.1564157188  | 704.595683568   |
| 5153.9932260749 | 3021.2660500407 |
| 3.1788728079    | 2.0180857649    |
| 7.9320781898    | 10.312899377    |
| 0.3011430895    | 0.2732729981    |
| 0               | 0               |
| 15.3771520409   | 17.7194062722   |
| 23.1636405966   | 26.8675408641   |
| 0.0750426207    | 0               |
| 1.8689874552    | 2.133354742     |
| 0               | 0               |
| 11.2477569885   | 9.6142514555    |
| 1.4360170457    | 1.4479077925    |
| 0.146159091     | 0.2947386835    |
| 4.2108092058    | 4.8380961888    |
| 1.1354933252    | 1.1448956255    |
| 0               | 0               |
| 22.5587795249   | 19.496206694    |
| 0               | 0               |
| 213.7775020244  | 212.6544008341  |
| 0               | 0               |
| 0.027085793     | 0               |
| 0               | 0               |
| 0               | 0.2567135615    |
| 15.0318944872   | 28.5805722568   |
| 0.1039182946    | 0               |

gene\_expression\_table

|                 |                 |
|-----------------|-----------------|
| 1.1697605683    | 0.7582156804    |
| 0.6852299996    | 0.3454519774    |
| 16.5915601946   | 18.19837869     |
| 0.2572616819    | 0.2593919028    |
| 6.3773067063    | 8.4203862548    |
| 5.2355826837    | 10.5578704493   |
| 0               | 0.1760361599    |
| 0.4058967269    | 0               |
| 16.8948403387   | 5.286642145     |
| 30.4362807878   | 28.0728238501   |
| 1682.6702226679 | 1527.8803631204 |
| 2.3748020483    | 3.5286871472    |
| 1.9332489793    | 1.5882834721    |
| 7.222447757     | 5.9168299678    |
| 0.0920972707    | 0.0928598698    |
| 0               | 0               |
| 6.6013481437    | 5.8880086007    |
| 44.9158074797   | 90.0093570265   |
| 1.7780936572    | 0.7171267694    |
| 0.3735536763    | 0.5649702562    |
| 8.7215022539    | 8.7937194848    |
| 16.9226366356   | 15.9252447769   |
| 3.2518569872    | 5.1523741552    |
| 2.4498721872    | 0.449119641     |
| 0               | 0               |
| 0               | 0               |
| 1.6608591552    | 2.4188835333    |
| 0.9108344934    | 1.1807698325    |
| 5.0686469904    | 6.9845102317    |
| 0               | 0               |
| 5.4600095507    | 6.1606038126    |
| 0               | 0               |
| 12.7483194596   | 15.0958360617   |
| 0.6231487371    | 1.0471810612    |
| 42.5385119086   | 34.7762808302   |
| 4.4423765581    | 5.8993828622    |
| 8.8955505157    | 8.3285511492    |
| 38.4629358108   | 52.7427352767   |
| 2.5761275487    | 4.2379591399    |
| 6.2221177533    | 8.4778907645    |
| 0.6896209212    | 0               |
| 0               | 0               |
| 0               | 0               |
| 0               | 0               |
| 9.5526539645    | 8.5372359999    |
| 6.2687310242    | 10.5963643959   |
| 0               | 0.1151757892    |
| 0.5590347274    | 0.3355141307    |
| 1.3277170694    | 7.6975885529    |

gene\_expression\_table

|                |                |
|----------------|----------------|
| 0.6659185031   | 0.5895505335   |
| 32.9293392293  | 28.1713992093  |
| 20.411613288   | 19.0964489471  |
| 3.3876890981   | 3.0561887823   |
| 0              | 0              |
| 0              | 0              |
| 1.0948174693   | 0.2759707397   |
| 3.0022265564   | 3.342407559    |
| 0.1505703635   | 0.0303634282   |
| 11.5393304143  | 16.2403537434  |
| 26.1922577353  | 19.4099957628  |
| 0              | 0              |
| 10.9799885239  | 11.9478103605  |
| 0.4411650503   | 0              |
| 33.2300998773  | 34.2181350815  |
| 13.3783361968  | 12.4281721889  |
| 0              | 0              |
| 19.4157252558  | 28.9198215201  |
| 92.6046534636  | 117.6082993672 |
| 0              | 0              |
| 5.4529350601   | 6.59770483     |
| 153.9726801888 | 144.8977883155 |
| 0              | 0              |
| 157.596981755  | 165.0728916691 |
| 0.8043088735   | 0.4054844227   |
| 0.6956197984   | 0.7013797849   |
| 1.9809547811   | 3.4953761706   |
| 1.6751949582   | 0              |
| 14.6996641652  | 15.8971282882  |
| 51.6932648556  | 44.6754034367  |
| 2.2100529056   | 1.3062758687   |
| 12.6615857014  | 21.2773804424  |
| 194.0498988682 | 202.6983324732 |
| 103.8059970482 | 61.7382038409  |
| 1.971171203    | 1.0305520411   |
| 40.4600784112  | 36.7155924028  |
| 1.5997902393   | 0.806518544    |
| 61.3845673939  | 69.9160018311  |
| 0.0899772632   | 0.0151203846   |
| 0              | 0              |
| 1.186569319    | 1.2884248971   |
| 1.7329196024   | 1.6281368466   |
| 2.5169727455   | 3.066525493    |
| 3.7302378005   | 2.7860189147   |
| 0              | 0              |
| 1.0056747484   | 1.6160658523   |
| 2.0863678623   | 2.1036437519   |
| 0.53522148     | 0.5396533098   |
| 13.5854546626  | 15.0025135998  |



gene\_expression\_table

|                 |                 |
|-----------------|-----------------|
| 2.7859227278    | 3.0970928479    |
| 0               | 0               |
| 0               | 0.4563333274    |
| 2026.1914562461 | 2147.0415453733 |
| 0.7608118507    | 0.7821530562    |
| 27.9889365557   | 29.5592261923   |
| 1.3158326513    | 0.4422427424    |
| 0               | 0               |
| 37.7993111363   | 51.7238401493   |
| 19.9694215695   | 15.4882889918   |
| 3.7782077065    | 3.8094926492    |
| 75.9204802702   | 99.3069789864   |
| 7.2323888811    | 5.0845225122    |
| 6.9614384233    | 9.1787991219    |
| 0.3471772316    | 0.4083939838    |
| 0.0498048949    | 0               |
| 1.7551034181    | 1.4842111044    |
| 77.6765381663   | 74.1794783776   |
| 11.4776908106   | 7.1830739741    |
| 4.5626109451    | 5.9680748546    |
| 4.2996131711    | 4.2685199181    |
| 3.1084768018    | 3.886427998     |
| 40.1509419198   | 30.0733876226   |
| 1.0451051526    | 0.8916422357    |
| 3.637968647     | 3.2448509329    |
| 1.0996686411    | 1.33052916      |
| 4.1856604821    | 3.7379970792    |
| 0               | 0.0819162184    |
| 29.0460086836   | 44.6619434071   |
| 4.159191974     | 5.8615532674    |
| 0.4946655458    | 0.3520669818    |
| 0.3399601488    | 0.1613059498    |
| 0.6882689496    | 0.7237095571    |
| 0.1879427543    | 0.1326492923    |
| 8.7915259918    | 7.3579674948    |
| 15.4157863627   | 17.9816205541   |
| 0               | 0.6467122703    |
| 0.8557960901    | 0.6598512432    |
| 17.5544330873   | 16.2248077004   |
| 0               | 0               |
| 0.2375517243    | 0.2844285032    |
| 2.0143834508    | 1.6925527359    |
| 75.3426711377   | 89.2606798373   |
| 2533.4306544696 | 2711.9007609635 |
| 2.2796750756    | 3.2836451709    |
| 0.0149819676    | 0.0151060238    |
| 55.9169790759   | 60.2772266085   |
| 8.3413615723    | 6.2057549858    |
| 21.7089799451   | 16.5500215999   |

gene\_expression\_table

|                |                |
|----------------|----------------|
| 0.0439305299   | 0.1107357268   |
| 3.3504649027   | 2.7545388132   |
| 0              | 0.8578868745   |
| 2.4790874001   | 3.428043636    |
| 18.9219392118  | 22.1138547616  |
| 0              | 0.1310322987   |
| 1.4451095977   | 1.9206906086   |
| 15.2811302572  | 16.0703588179  |
| 0              | 0              |
| 5.2758744323   | 3.9196762343   |
| 0.5685612732   | 0.617366797    |
| 9.9179579355   | 9.4546232251   |
| 121.0171695542 | 95.9490468208  |
| 5.128848273    | 8.0155413717   |
| 2.6604393946   | 1.8973559851   |
| 0.649285239    | 0.2182205195   |
| 22.7163282083  | 17.2504380062  |
| 86.3238127262  | 60.0858223317  |
| 0.0524165641   | 0.1585517774   |
| 15.5910880556  | 14.605281023   |
| 2.0219363004   | 1.6988988942   |
| 12.6262371357  | 13.9549011353  |
| 0.4810837824   | 0.3811243325   |
| 56.500617046   | 56.9684628356  |
| 12.5172727953  | 11.611246764   |
| 2.318041851    | 2.4774702512   |
| 9.1702259623   | 6.9932876125   |
| 0.6126566483   | 0.2059098899   |
| 0.0940102986   | 0.1105868614   |
| 3.2008360572   | 3.4646445743   |
| 5.9928650235   | 6.9488613603   |
| 0              | 0              |
| 0.1368489309   | 0.2069731353   |
| 31.694186039   | 30.7582520439  |
| 46.8719180722  | 104.7384553032 |
| 4.7111361958   | 3.530514014    |
| 0              | 0.1572660909   |
| 4.7672490758   | 3.6050427323   |
| 1.9269227146   | 2.2417827      |
| 1.144698977    | 4.6167100142   |
| 0.1133249697   | 0.0571316709   |
| 0              | 0              |
| 0.0279195098   | 0              |
| 3.9942486956   | 4.0273225368   |
| 9.298364331    | 19.244156287   |
| 0              | 0.1852722436   |
| 15.8028213218  | 7.7392133123   |
| 0              | 0              |
| 1.2625030307   | 3.5006317991   |

gene\_expression\_table

|                 |                |
|-----------------|----------------|
| 46.8669431009   | 35.2340050548  |
| 2236.5707024498 | 2441.526993773 |
| 0.0510194332    | 0.0257209464   |
| 199.4080502274  | 239.1546533832 |
| 0               | 0              |
| 1007.389582442  | 979.1693862007 |
| 2.6320663183    | 2.211550659    |
| 0               | 0.7204865628   |
| 3.6118468548    | 4.0059296957   |
| 40.8672304929   | 33.984021542   |
| 0.0803668947    | 0.1296517792   |
| 2.1717845136    | 1.8065583395   |
| 6.0704922241    | 6.6672543825   |
| 41.5667058115   | 31.7640454863  |
| 15.2062079992   | 10.6238318513  |
| 4.9717018677    | 12.5321734473  |
| 0               | 0              |
| 44.7237087099   | 61.4674676299  |
| 0.4979627994    | 0.702920559    |
| 1.1009021921    | 0.4440072261   |
| 21.6468936942   | 19.4490337698  |
| 4.8995927547    | 6.2874804059   |
| 0.7611460538    | 0.4997339862   |
| 3.4354569719    | 5.287011083    |
| 0               | 0              |
| 3.4708921641    | 2.6043776161   |
| 5.4688589369    | 2.6039009039   |
| 3.4533043869    | 4.4767273001   |
| 0               | 0              |
| 1.963809873     | 2.2275798047   |
| 0.9541213143    | 1.4430326821   |
| 117.4847966319  | 125.1881599858 |
| 2.7668590681    | 2.7897696739   |
| 39.8240946672   | 32.4319579883  |
| 0.1439051505    | 0.1450967378   |
| 20.9781258137   | 19.5320974624  |
| 20.8593152027   | 22.1473733143  |
| 0.5835253949    | 1.7650715962   |
| 0.3590169805    | 0.2714923294   |
| 628.7261697011  | 415.3349240605 |
| 0.9698931691    | 0.9779242395   |
| 1.9835025451    | 1.466612893    |
| 48.2664559684   | 35.8538080721  |
| 0               | 0              |
| 3.2908989699    | 3.2555422364   |
| 0.9605187733    | 0.744978631    |
| 17.3606062756   | 8.752179225    |
| 0               | 0.1036516298   |
| 0               | 1.6132612144   |

gene\_expression\_table

|                 |                |
|-----------------|----------------|
| 0               | 2.4619679728   |
| 0.3508619788    | 0.2358448296   |
| 0               | 0              |
| 0               | 0              |
| 0               | 0              |
| 7.3623730386    | 10.229719373   |
| 9.97260488      | 12.1822393656  |
| 3.6273421373    | 3.1461314907   |
| 5.0411689362    | 5.294699646    |
| 2.2498886597    | 4.2648148953   |
| 8.691454359     | 7.8691959678   |
| 14.9744875124   | 16.56257695    |
| 11.1508177012   | 16.0616436474  |
| 0.319815868     | 0              |
| 15.5081753507   | 13.4154823668  |
| 15.7066531509   | 17.6781878935  |
| 3.3543428681    | 3.9417490999   |
| 32.3720078022   | 40.7539730651  |
| 5.3684336329    | 0              |
| 4.1999628496    | 2.0326752381   |
| 16.9723460329   | 13.9605100363  |
| 0               | 0.2473928441   |
| 0               | 0              |
| 1.3050459154    | 1.5351608689   |
| 43.3324112941   | 57.7205101918  |
| 1369.9430540695 | 1405.387651209 |
| 6.0779532052    | 5.2090387501   |
| 40.623083758    | 62.8045018993  |
| 51.4672423938   | 36.3724203014  |
| 4.8946423425    | 2.7273317691   |
| 2.027988978     | 1.4871137957   |
| 98.2367491307   | 122.9963840312 |
| 0               | 0              |
| 14.7314631852   | 13.665169485   |
| 0.8706226245    | 0.8778316985   |
| 4.4233534984    | 9.9693681416   |
| 22.6167913376   | 16.0619947695  |
| 21.3576567778   | 22.4341198207  |
| 3.1476750408    | 2.4837956939   |
| 3.6030319595    | 0              |
| 25.0249853223   | 22.4479584518  |
| 0               | 0              |
| 0.6475084426    | 5.2229603958   |
| 95.1915267299   | 99.8577170059  |
| 127.6935517303  | 159.4973849165 |
| 148.5570051571  | 118.7597812883 |
| 3.7394821624    | 3.7704464434   |
| 84.5055538841   | 94.6725453345  |
| 28.1339982542   | 22.9637279513  |

gene\_expression\_table

|                 |                 |
|-----------------|-----------------|
| 82.9414559774   | 100.3538899095  |
| 0               | 0               |
| 0               | 0               |
| 0               | 0.1945580535    |
| 6.7904765554    | 4.7926929307    |
| 5.3040567684    | 8.1141709376    |
| 0               | 2.7869997503    |
| 3314.4178305636 | 3999.4388766945 |
| 181.2241670228  | 170.1192814627  |
| 14.8288681303   | 20.3886226174   |
| 7.8056533758    | 9.8378588034    |
| 23.8803928873   | 15.7753273911   |
| 2.5812862714    | 2.776170951     |
| 128.9066303078  | 160.0967596555  |
| 14.4405286632   | 7.2800507631    |
| 8.6073956889    | 6.5532799755    |
| 15.498371659    | 3.9066759623    |
| 9.2159184815    | 20.9075167344   |
| 2.6824487849    | 3.7305661279    |
| 0               | 0               |
| 72.689890432    | 54.9688419981   |
| 4.6040113661    | 3.3158101896    |
| 3.0855547006    | 4.1481389639    |
| 0.9406379793    | 0               |
| 0               | 0               |
| 6.2630456224    | 4.6675391675    |
| 2.7275087429    | 3.1308756925    |
| 20.6882146489   | 22.9841014442   |
| 0.8459412111    | 1.0235350968    |
| 74.9073730463   | 86.3680703229   |
| 0.5988813263    | 1.2076805658    |
| 137.3122591018  | 159.9327599318  |
| 24.2755702449   | 21.8540900464   |
| 55.2886447244   | 5.7668746489    |
| 0               | 0.4444094373    |
| 17.064745321    | 13.7648381266   |
| 107.1993977239  | 88.9103136563   |
| 92.9401948556   | 60.3907430428   |
| 4.6781597167    | 2.3584482957    |
| 104.8604454006  | 143.1404321189  |
| 46.0611605704   | 58.4832285384   |
| 32.6589111187   | 57.3214417134   |
| 0.0813042966    | 0               |
| 2.0549563041    | 3.4532868241    |
| 6.6548990723    | 9.0439185325    |
| 33.1883594664   | 23.7480570022   |
| 32.6055335804   | 32.565372924    |
| 300.2665177776  | 216.2520246062  |
| 130.9146823922  | 115.3895954448  |

gene\_expression\_table

|                 |                 |
|-----------------|-----------------|
| 4.6688996423    | 3.3852115706    |
| 3.1893893208    | 3.3944541113    |
| 6.0791449967    | 7.0051229056    |
| 25.0156021182   | 39.5383499102   |
| 23.6040718076   | 16.7478118916   |
| 12.6503736711   | 15.6540150762   |
| 69.6072104683   | 109.0690826973  |
| 13.9861823594   | 33.8447833647   |
| 5.6857608096    | 0               |
| 34.0458823273   | 36.2893829628   |
| 2586.5878506066 | 3149.6684763591 |
| 67.3140382987   | 53.217365898    |
| 13.1879911774   | 9.9363636798    |
| 26.2274998631   | 24.6578709211   |
| 2.2650059289    | 10.2769245317   |
| 64.3495092265   | 65.982047508    |
| 10.6294985932   | 14.2900196429   |
| 63.4667341276   | 76.4551743495   |
| 2.9913729426    | 2.2621069541    |
| 0.5922961508    | 0.3981337198    |
| 49.9729686479   | 73.9856268589   |
| 44.2760889448   | 34.034542177    |
| 7.3339568673    | 9.8595796194    |
| 6.7439473749    | 6.9543304032    |
| 8.0646816761    | 10.2998495768   |
| 111.7623579817  | 192.4555535326  |
| 5.1604279281    | 4.9553887239    |
| 86.5861755885   | 103.5455856175  |
| 28.7882253565   | 25.5233917651   |
| 540.8547889353  | 800.6483838651  |
| 2.2842721742    | 2.5795691979    |
| 1.3002811814    | 2.9498579674    |
| 0               | 2.757871962     |
| 13.3467259898   | 12.6937103184   |
| 0.7809782595    | 0.9449340544    |
| 0.1170062809    | 0.1179751357    |
| 9.0268040869    | 9.6887460596    |
| 17.9064205194   | 16.2123767012   |
| 109.9906725287  | 142.6931804156  |
| 5.5599095775    | 4.8825995782    |
| 0               | 0               |
| 1.7244481819    | 1.44893937      |
| 13.2588257255   | 15.7992706838   |
| 77.4609257079   | 62.6535178938   |
| 0.5503839447    | 0.933033217     |
| 0               | 0               |
| 4.4486000273    | 5.0236883914    |
| 6.7510534657    | 6.163053543     |
| 0.9489967465    | 0.758884831     |

gene\_expression\_table

|               |                |
|---------------|----------------|
| 0.7225506772  | 0.7285336613   |
| 0.3863413455  | 0.1947701966   |
| 3.1472860344  | 3.0464128461   |
| 28.2088939397 | 20.2153120327  |
| 8.0993271251  | 6.7184505823   |
| 58.1802916185 | 57.7732268536  |
| 1.0210853596  | 0.8579502667   |
| 2.1202769074  | 2.0042189777   |
| 7.2033812593  | 7.0504514665   |
| 0             | 0              |
| 0             | 0              |
| 2.4143178424  | 1.9271615116   |
| 10.5335621502 | 13.8070190704  |
| 17.5952052897 | 17.6786512577  |
| 89.7463557635 | 145.5294865606 |
| 1.1218012803  | 2.2621804111   |
| 0.7182018987  | 1.9914094015   |
| 0             | 0              |
| 0.1749990903  | 0.1764481469   |
| 0             | 0              |
| 0.0267940406  | 0.0270159051   |
| 1.5175556033  | 1.5064598462   |
| 0.0120694214  | 0              |
| 0             | 0.0139443374   |
| 25.770112541  | 31.1043339771  |
| 2.6942459623  | 1.5463468659   |
| 24.3786784329 | 34.4990074575  |
| 0             | 0              |
| 0.2008060547  | 0.0337448004   |
| 0             | 0              |
| 0.9622752832  | 1.2778813863   |
| 0.0941345411  | 0.0949140095   |
| 3.5684196289  | 7.6456808304   |
| 1.9347206265  | 1.3192060231   |
| 1.7830126672  | 2.5468502751   |
| 5.8334803154  | 4.0994249804   |
| 15.4920258119 | 19.4687865104  |
| 49.0012346494 | 47.485600143   |
| 0.2472690799  | 0.2960634131   |
| 0.2263788838  | 0.0760844613   |
| 1.6377844821  | 1.4207110297   |
| 5.2589586053  | 6.6089189107   |
| 8.0722591761  | 11.1377163871  |
| 9.5919452535  | 9.4295858193   |
| 3.4244403593  | 3.6283618762   |
| 0.1815532962  | 0.137292468    |
| 14.620774412  | 15.3026706367  |
| 0             | 0              |
| 0             | 0.1043690646   |

gene\_expression\_table

|                 |                 |
|-----------------|-----------------|
| 0               | 0               |
| 5.9247875604    | 4.5443907307    |
| 0               | 0.0104089487    |
| 12.4166142031   | 17.445105027    |
| 0               | 0               |
| 0               | 0               |
| 4.7629037938    | 4.6244778479    |
| 3.0995655051    | 3.3290504578    |
| 33.4868488335   | 33.7641321987   |
| 0               | 0               |
| 0.4558073958    | 0.6893724717    |
| 1.5243963652    | 1.3833170325    |
| 11.0434343129   | 11.1348779911   |
| 1.1736293579    | 1.0012939864    |
| 0.0182405605    | 0.042913731     |
| 0.7529876898    | 0.6073781628    |
| 0.5619636173    | 0.4249626613    |
| 8.6453949169    | 9.0959811665    |
| 0               | 0               |
| 31.0855211909   | 49.6899962068   |
| 20.3010688365   | 22.78020434     |
| 4.7067684909    | 4.6544779826    |
| 1.742760521     | 0.988420059     |
| 0               | 0               |
| 2.6171186497    | 3.8133724144    |
| 3.2167611672    | 2.0721703867    |
| 18.4425213834   | 20.815558445    |
| 51.5972410185   | 42.6906803873   |
| 0               | 0.1052947452    |
| 0.4072124763    | 0.2052921723    |
| 0               | 0               |
| 29.597812583    | 30.7206254607   |
| 0               | 0.0592198356    |
| 2.0404977428    | 1.074757961     |
| 98.6454046048   | 153.5998912491  |
| 1183.9178874772 | 1118.7751916425 |
| 7.2734273261    | 11.524313376    |
| 625.8754500243  | 669.2101228177  |
| 2.3469459172    | 0               |
| 3.0978398102    | 2.9985514154    |
| 20.4259229394   | 23.9092041703   |
| 3.4856793022    | 3.5145420026    |
| 0.1917379817    | 0.0552358978    |
| 0.1882532533    | 0.1355800422    |
| 1.2976931893    | 1.348698212     |
| 27.2633906755   | 25.1037201569   |
| 4.9410642786    | 4.9819780993    |
| 0.4085996006    | 0.5149786935    |
| 3.1481894997    | 3.7033006046    |



gene\_expression\_table

|                |                |
|----------------|----------------|
| 0.2732445434   | 0.3306085299   |
| 0.1210810286   | 0              |
| 0              | 0.0726082557   |
| 0              | 0              |
| 0              | 0              |
| 0              | 0              |
| 2.4016074689   | 3.4216758208   |
| 0.0670382259   | 0              |
| 0              | 0              |
| 21.4526208411  | 24.0336182153  |
| 0              | 0.0378539556   |
| 0              | 0.1417072395   |
| 12.9003148558  | 16.1603788354  |
| 4.5593071701   | 5.6186287694   |
| 16.021081085   | 12.2545625176  |
| 27.9723647189  | 27.8682243975  |
| 0              | 0              |
| 0.2910455549   | 0.3301374585   |
| 0.794486694    | 0.1602130669   |
| 0.058868015    | 0.0593554637   |
| 1.5505434907   | 1.4431223615   |
| 66.5679473726  | 63.0336405996  |
| 7.9672210396   | 9.996861835    |
| 1.1212551259   | 1.5073860383   |
| 0.1866940685   | 0.1254933091   |
| 5.6326368723   | 5.3128721888   |
| 0              | 0              |
| 0.0553100522   | 0.0627390446   |
| 0              | 0              |
| 4.1458835035   | 3.184924142    |
| 0.8278557952   | 0.9738292015   |
| 8.456639652    | 7.1891478454   |
| 8.2663795599   | 9.2358907173   |
| 42.0184493383  | 38.7607283314  |
| 0.3105693442   | 0              |
| 182.8520411364 | 188.053445424  |
| 0              | 0.1527635514   |
| 1.4547120983   | 1.2754414321   |
| 0.1443718361   | 0.0970448585   |
| 13.5688681539  | 13.9171065099  |
| 111.7533458628 | 139.1913408167 |
| 0.1058312821   | 0.1067076039   |
| 3.2985058682   | 3.6376142077   |
| 3.5607838606   | 4.3083221452   |
| 0.1226076707   | 0.0561922305   |
| 3.3665443705   | 3.445083584    |
| 0              | 0              |
| 0              | 0              |
| 15.9766808516  | 14.9302682303  |

gene\_expression\_table

|               |               |
|---------------|---------------|
| 3.9840699375  | 1.8746277642  |
| 3.6140089089  | 4.7104515598  |
| 3.7003580998  | 3.6179378612  |
| 1.2701366875  | 0.2328461608  |
| 0.2358659495  | 0             |
| 0.0875261481  | 0             |
| 0             | 0             |
| 40.4261643707 | 45.9423791401 |
| 8.0186658516  | 9.3100729368  |
| 39.066484157  | 21.7092442481 |
| 11.0115134044 | 2.7756731914  |
| 2.7847894776  | 3.2446249955  |
| 2.0357762648  | 1.894738373   |
| 37.0914002385 | 41.6726483925 |
| 3.4466597254  | 3.2435193742  |
| 1.2834458577  | 0.7548760678  |
| 0.4012948729  | 0.4720540315  |
| 2.3006846906  | 2.319735202   |
| 1.9136335925  | 1.6882942817  |
| 0             | 0             |
| 1.4156226524  | 1.4273445261  |
| 0.1058363401  | 0.085370163   |
| 5.2108904468  | 3.9993427594  |
| 0             | 0             |
| 19.4885384262 | 23.64129876   |
| 0.495409144   | 0.499511313   |
| 0.7655679382  | 0.771907121   |
| 0             | 0             |
| 3.2310448939  | 2.598482638   |
| 7.2781529629  | 4.261017329   |
| 0.4317370329  | 0.5223743683  |
| 0.5337825125  | 0             |
| 1.1593591476  | 2.5177579876  |
| 1.2701488171  | 0.9147615102  |
| 0             | 0.372298212   |
| 0.3901107847  | 1.5733641791  |
| 0             | 0.4180098272  |
| 0             | 0             |
| 11.1897432134 | 11.4328303613 |
| 2.5163845268  | 2.5372211117  |
| 8.1801945341  | 10.6917605134 |
| 0             | 0             |
| 2.8180006875  | 4.735557941   |
| 0.4790751625  | 0.12076052    |
| 0.2921510296  | 0.2719109049  |
| 2.1874759651  | 2.9407854224  |
| 21.0441915919 | 21.6797157488 |
| 98.750307909  | 98.8447423906 |
| 1.1870889224  | 1.1969184532  |

gene\_expression\_table

|                 |                |
|-----------------|----------------|
| 3.5989780418    | 7.9833135741   |
| 3.8616284227    | 5.0184230874   |
| 44.7137851771   | 37.2694661926  |
| 13.6038331304   | 18.7220171575  |
| 0.2111053491    | 0.319280068    |
| 1.2547533934    | 0.4217144036   |
| 41.3562366399   | 23.2911553858  |
| 23.442810087    | 26.7797849868  |
| 8.7327850896    | 12.4307234068  |
| 1.5071629524    | 1.1872209479   |
| 0               | 0              |
| 0               | 1.175098125    |
| 5.5495750871    | 2.6795484282   |
| 6.981027589     | 12.8759141208  |
| 89.8239681773   | 120.3975955408 |
| 4.6961181829    | 5.1467432178   |
| 11.0857708637   | 9.8625574447   |
| 1000.9973514805 | 990.0247931903 |
| 0               | 0              |
| 38.0268892756   | 31.4276769159  |
| 1.073226415     | 1.5149583716   |
| 0               | 0              |
| 0               | 0              |
| 6.2574596618    | 6.7599361266   |
| 0.562146508     | 0.3542508043   |
| 1.0430516434    | 0.7011256618   |
| 0               | 0              |
| 1.1020389865    | 1.0256900979   |
| 2.6672923928    | 2.1305466436   |
| 0               | 2.6830937359   |
| 0.0355831916    | 0.071755667    |
| 14.4745267156   | 12.1619842456  |
| 34.9837313231   | 40.10928007    |
| 0.0153099745    | 0.007718       |
| 0.1120186204    | 0              |
| 0.8055566492    | 0.764448897    |
| 1.1290164267    | 0.9676103316   |
| 7.5431914974    | 12.2671804579  |
| 1.6508982069    | 2.6355663931   |
| 0               | 0              |
| 189.4868830311  | 172.2976877715 |
| 6.9901479595    | 7.1420026624   |
| 25.0532874165   | 31.4596918693  |
| 0.3215977586    | 0.1621303529   |
| 3.6288195873    | 1.5503676024   |
| 21.4527640878   | 30.0034592111  |
| 1.9991599244    | 1.6255755648   |
| 0               | 0.2068489954   |
| 0               | 0              |

gene\_expression\_table

|               |               |
|---------------|---------------|
| 0             | 0.0318557078  |
| 7.6160900433  | 10.1988764813 |
| 2.3795795378  | 2.0357555505  |
| 0.5533829344  | 0.4742703755  |
| 1.7175813794  | 0.7871834463  |
| 1.0948174693  | 1.9480287507  |
| 0.1652738488  | 0             |
| 1.1755094061  | 1.4007417914  |
| 12.7837700337 | 13.3054186619 |
| 1.1915012924  | 1.5670009033  |
| 0.4092201077  | 1.5679126799  |
| 1.1935416814  | 1.4039954173  |
| 0             | 0             |
| 0.1151011059  | 0.0580270926  |
| 0             | 0             |
| 2.2747375461  | 2.5165594894  |
| 1.3149311216  | 2.209698721   |
| 20.7765752441 | 19.5861014842 |
| 0             | 0             |
| 0.7327050425  | 0.5910176868  |
| 0             | 0             |
| 12.2329569504 | 8.984207017   |
| 1.3691510022  | 1.6565856884  |
| 0.1833936955  | 0.2773683937  |
| 1.7499486255  | 0.9048404311  |
| 44.21228327   | 73.6218653066 |
| 29.0691114132 | 39.5449875417 |
| 1.1789422281  | 1.0188894011  |
| 1.3531282023  | 1.2790618116  |
| 1.3431900192  | 1.0670337948  |
| 0.9330093408  | 1.2543133329  |
| 0.1472819729  | 0.297003043   |
| 0.620844733   | 0             |
| 1.6140516571  | 2.8479790423  |
| 14.1991179421 | 18.5332517601 |
| 73.3457970867 | 72.5836247783 |
| 0.3257312361  | 0.2886189058  |
| 9.2364147272  | 6.2085970812  |
| 0             | 0             |
| 1.5527629642  | 2.9355382686  |
| 0             | 0             |
| 10.1618577178 | 16.1694713053 |
| 2.75187936    | 4.2133815949  |
| 4.752601806   | 4.5257353614  |
| 0             | 0.3803275996  |
| 2.6278617395  | 0             |
| 0.3883759064  | 0.4755043299  |
| 16.8256199518 | 21.5165121137 |
| 0             | 0             |

gene\_expression\_table

|                |                |
|----------------|----------------|
| 1.2713264951   | 1.1653214035   |
| 3.8060783813   | 0              |
| 506.2407741473 | 639.7422334254 |
| 2.2207996109   | 2.0152697801   |
| 34.253212486   | 48.010005113   |
| 6.5861874529   | 5.9028653295   |
| 58.0659851131  | 60.2561881312  |
| 0              | 0.1299339842   |
| 18.8023660287  | 15.3222648436  |
| 0.0492088191   | 0.0330775241   |
| 0.9724109224   | 0              |
| 0              | 0              |
| 0.5294357635   | 0.4396162115   |
| 0.3975999635   | 0              |
| 85.4965971233  | 127.9846548364 |
| 11.6384136725  | 10.1405260381  |
| 62.2781054901  | 57.2734577241  |
| 2.9478010809   | 5.3499779151   |
| 0              | 0.0630711451   |
| 0.9227840347   | 0.7975071636   |
| 5.3561405365   | 4.3619353135   |
| 8.6073885914   | 9.2259638603   |
| 0.231727245    | 0.274877684    |
| 225.9198666781 | 241.1463645158 |
| 6.7621855265   | 9.3301395443   |
| 1.6825228818   | 0.8351777413   |
| 19.7857218945  | 18.3210198188  |
| 0.0944321311   | 0.0238035159   |
| 6.7360574101   | 0              |
| 20.3171165033  | 9.6736373416   |
| 0.7415823121   | 0.5607921638   |
| 0              | 0              |
| 11.4970864224  | 10.8677685996  |
| 16.986648048   | 27.988520699   |
| 0.1199278759   | 0.0744128755   |
| 0              | 0.8080902672   |
| 75.9348069916  | 83.3191845449  |
| 0.8482153009   | 1.4661237155   |
| 205.5436825421 | 228.0841861061 |
| 29.7199871147  | 26.3215563054  |
| 7.5035179556   | 9.3748269642   |
| 0.2848768033   | 0.1615700742   |
| 19.4472843349  | 12.2327102548  |
| 0.0329350815   | 0              |
| 4.5572094194   | 7.3967403798   |
| 0.1276144527   | 0.1286711471   |
| 3.7612690428   | 3.1270779856   |
| 2.2424020454   | 1.9108197408   |
| 3.8706857622   | 1.9513682285   |

gene\_expression\_table

|                |                |
|----------------|----------------|
| 4.284452543    | 3.9876271184   |
| 0              | 0.2917393075   |
| 0              | 0              |
| 29.7161720797  | 33.4547630721  |
| 11.2535844448  | 14.6059463554  |
| 4.7674768106   | 3.1430079031   |
| 1.2404113809   | 0.416894147    |
| 1.028885824    | 2.0748107505   |
| 242.8438185035 | 288.0008487805 |
| 1.1388310481   | 4.018913451    |
| 0.8736833775   | 0.6498573903   |
| 0.8769754168   | 1.0223991402   |
| 0              | 0              |
| 1.1959348734   | 1.2701489933   |
| 3.1986917063   | 2.90266024     |
| 0.5716628264   | 0.3602477524   |
| 2.8571375939   | 2.5853295093   |
| 0.00643        | 0              |
| 0              | 0.004238       |
| 5.2723614019   | 5.2834048738   |
| 0.732032539    | 0.527210026    |
| 1.1267407185   | 1.3885306649   |
| 0.2108873002   | 0.6379005728   |
| 10.9443593942  | 11.4947736415  |
| 2.4369437163   | 2.4571225022   |
| 8.5074040624   | 13.5990280811  |
| 13.3080411818  | 20.2410688205  |
| 9.2509437556   | 13.2738139758  |
| 31.8343975232  | 33.8648602612  |
| 2.5353464723   | 2.0876777231   |
| 0.0475649748   | 0.0239794151   |
| 8.8753931917   | 11.8125277986  |
| 7.288365639    | 7.8441350286   |
| 45.5600005642  | 59.3356198079  |
| 2.5340964965   | 2.2412980202   |
| 3.7025120254   | 3.4923204912   |
| 2.7979548172   | 2.7523150314   |
| 0              | 0              |
| 0.0683062193   | 0.0459145466   |
| 21.3932811666  | 18.4067629782  |
| 1.4355690096   | 0.8514447332   |
| 3.3797888199   | 2.2326799813   |
| 2.2062056026   | 1.4155742316   |
| 5.917415284    | 2.3865654594   |
| 9.953991753    | 8.744598727    |
| 3.1113837982   | 1.8941266082   |
| 86.1688378018  | 59.8021351672  |
| 23.9063060216  | 13.0036134002  |
| 97.7666316455  | 136.2485987607 |

gene\_expression\_table

|                |                |
|----------------|----------------|
| 8.7039230103   | 9.5073275685   |
| 48.0003757507  | 52.4309894671  |
| 3.1857863219   | 5.4874499061   |
| 38.4013677499  | 30.9754761045  |
| 83.8463930239  | 110.1943929601 |
| 102.6573987023 | 107.9593724217 |
| 1.1167605362   | 2.6273513519   |
| 91.1390230572  | 72.5032763974  |
| 0              | 0              |
| 0              | 0              |
| 75.3080805997  | 79.3830981201  |
| 1.7956876735   | 0.7725041599   |
| 0.076804443    | 0              |
| 0.3744282153   | 0.2516857453   |
| 1.8991344696   | 1.6051032337   |
| 14.6117671261  | 21.4852719464  |
| 2.18121777     | 2.7167564754   |
| 0.6986354246   | 0.6083630569   |
| 51.7892466849  | 81.7754847185  |
| 14.4867176455  | 12.4803851326  |
| 1.0442448998   | 0.4589527617   |
| 0.9699536845   | 0              |
| 2.1170407175   | 2.3717450994   |
| 43.0157945823  | 36.8469927981  |
| 0              | 0              |
| 0              | 0              |
| 190.2225450367 | 147.7484345979 |
| 8.2232493282   | 8.6368133776   |
| 5.3998196147   | 4.8961619582   |
| 8.7034531122   | 7.5218750482   |
| 4.4928028401   | 3.0994770315   |
| 0.2888103495   | 0.2046282954   |
| 0              | 0              |
| 0              | 0              |
| 0              | 0              |
| 0.3619971473   | 0.4866594882   |
| 0              | 0              |
| 0              | 0              |
| 0.3321344203   | 0.4784065927   |
| 0              | 0              |
| 3.7955966477   | 3.4942407444   |
| 18.6406963053  | 4.6987620234   |
| 5.4618192843   | 7.3656728843   |
| 0.9981398698   | 1.0064048332   |
| 11.6279357704  | 10.2586919178  |
| 219.6875702882 | 131.0581094035 |
| 1.2202549057   | 1.0300680527   |
| 3.1447411649   | 3.1363157644   |
| 6.1589716084   | 9.0144727949   |

gene\_expression\_table

|                 |                 |
|-----------------|-----------------|
| 1.8174384695    | 0.9162437626    |
| 7.6943510789    | 6.9949749462    |
| 0               | 0               |
| 56.5642483737   | 72.7474918707   |
| 1.701532322     | 1.0293729795    |
| 0.8059413594    | 1.1608783554    |
| 3.6150083547    | 7.0754755443    |
| 3.0965486098    | 2.73191552      |
| 6.9092820431    | 4.952741421     |
| 4.7725292136    | 4.8120475024    |
| 0               | 0               |
| 2.8076290839    | 3.6396993604    |
| 23.0807310094   | 21.5480073242   |
| 11.6138790716   | 8.8475904934    |
| 8.6049162474    | 9.6401867817    |
| 15.3478733812   | 14.4924222863   |
| 7.8182504659    | 7.8204250411    |
| 3.6168816912    | 3.9941480141    |
| 40.8230082909   | 45.1964335987   |
| 2.9950037217    | 2.2648525866    |
| 12.5090411849   | 13.2329134421   |
| 0.8971333857    | 0.6784214839    |
| 9.4237592643    | 12.6081463343   |
| 2.9641689113    | 1.7494907209    |
| 11.2202632214   | 13.808723558    |
| 1.8121979167    | 1.5324933241    |
| 2.1100679661    | 2.291197032     |
| 1435.6039729891 | 1325.6727246496 |
| 0.8272379504    | 1.1121170446    |
| 2.2142896181    | 0               |
| 0               | 0               |
| 0               | 0               |
| 59.0461392895   | 71.5579588561   |
| 1.1673268375    | 1.863571824     |
| 2.9691701414    | 4.5619138391    |
| 0.0691193886    | 0               |
| 396.3486622914  | 512.5033319104  |
| 9.5532081591    | 4.4456825628    |
| 0               | 0               |
| 12.3554615264   | 9.8772313499    |
| 0               | 0               |
| 8.8668676203    | 9.2196725462    |
| 1.0958593588    | 1.9888802558    |
| 9.414967753     | 8.3063112406    |
| 0.8014539353    | 1.2121354009    |
| 0.3278654445    | 0               |
| 3.4369440633    | 5.3906272281    |
| 11.2328256726   | 8.8396781117    |
| 55.5185626572   | 51.5000145428   |



gene\_expression\_table

|                |                 |
|----------------|-----------------|
| 5.838003472    | 11.0801774638   |
| 1.4941515472   | 0.9586968802    |
| 12.9589130572  | 6.5331088003    |
| 0.783289129    | 0.7897750496    |
| 32.8005366113  | 35.3929887836   |
| 120.3503316791 | 96.6479547155   |
| 82.2658986486  | 89.2901031958   |
| 0              | 0.3727571902    |
| 12.4749619584  | 13.8749869631   |
| 11.1152451963  | 8.850611732     |
| 28.0922555664  | 21.9358013658   |
| 4.1317869188   | 4.8603328979    |
| 12.0226457952  | 6.0610988514    |
| 0.3721004176   | 0.7503630906    |
| 3.3445513049   | 2.2481636092    |
| 10.960977835   | 6.3152792819    |
| 1.3900453517   | 1.401555436     |
| 0              | 0               |
| 3.0761909468   | 3.3497959685    |
| 1.0561540765   | 1.6186471167    |
| 6.6508096903   | 11.0449801887   |
| 5.6290160659   | 7.6077545084    |
| 6.0680491226   | 6.7234008685    |
| 613.256149455  | 633.1849546696  |
| 31.9731570969  | 29.967631432    |
| 0.8943104295   | 1.3525734709    |
| 3.6356706224   | 2.3639111785    |
| 2.6804679103   | 1.3513315828    |
| 1.0188025525   | 1.0272386105    |
| 100.4066681408 | 132.9754042318  |
| 2.9405746023   | 0               |
| 6.3350385884   | 4.5624964476    |
| 18.9623808481  | 24.2868007082   |
| 2.3694012639   | 1.2863958012    |
| 0              | 0               |
| 0.8867177566   | 1.4116738488    |
| 17.520923672   | 17.6660033331   |
| 7.0718260855   | 5.9419861616    |
| 0.0384117008   | 0.0129099213    |
| 0              | 0               |
| 0.0475162997   | 0               |
| 0              | 0               |
| 0.2843012425   | 0.1194397337    |
| 8.5334565952   | 10.3249400871   |
| 719.9767094811 | 809.0277128316  |
| 1048.886722173 | 1298.0083305929 |
| 483.5470619772 | 551.492124526   |
| 331.4556347645 | 277.8743308626  |
| 1.3622054368   | 1.2590279133    |

gene\_expression\_table

|               |               |
|---------------|---------------|
| 4.7020186149  | 5.4450549882  |
| 0             | 0             |
| 8.3248792686  | 8.7935176644  |
| 54.3873729363 | 59.199811678  |
| 0.397633926   | 0.3376222993  |
| 0             | 0             |
| 0.0297517353  | 0             |
| 2.0482203974  | 0.6883934706  |
| 0             | 0.1554094627  |
| 2.0877001588  | 1.5592496891  |
| 1.1262998966  | 2.4334844399  |
| 0             | 0             |
| 0             | 0             |
| 0.5776386236  | 0.3667099484  |
| 20.1169918073 | 24.5036390288 |
| 1.968650013   | 1.3233007704  |
| 0             | 0             |
| 1.6287795075  | 1.0340195839  |
| 0             | 0             |
| 4.9782974813  | 5.4132074189  |
| 1.1905976249  | 0.9432155928  |
| 0.1624128856  | 0.2183436317  |
| 0.1295677449  | 0.1741874844  |
| 4.2532045445  | 5.5674258769  |
| 5.943205143   | 11.3190099964 |
| 3.4087912435  | 2.908245393   |
| 2.994813985   | 4.2584273783  |
| 49.9495401581 | 50.3631406332 |
| 0.1987536594  | 0.1502995594  |
| 11.0734004309 | 9.8463805577  |
| 10.9172900121 | 13.4788030646 |
| 5.8207343207  | 6.2475729141  |
| 51.2907205697 | 56.9925108473 |
| 0.1155844166  | 0.1553886638  |
| 39.0707193885 | 41.2480857985 |
| 14.5407886569 | 12.4449650555 |
| 1.296417949   | 1.0202167916  |
| 0.3324179482  | 0.8379262261  |
| 0.3131951315  | 0.4060137881  |
| 0.9977195533  | 0.2728084166  |
| 21.9826723448 | 26.9433242351 |
| 0             | 0.0333470456  |
| 1.1351264372  | 1.4306571245  |
| 6.1171553913  | 4.754351751   |
| 0.9532051506  | 0.7688784305  |
| 5.4405581804  | 5.766921224   |
| 2.6763838361  | 1.2992995763  |
| 5.1381330315  | 8.1410664558  |
| 5.3836905354  | 4.5306815995  |

gene\_expression\_table

|                |                |
|----------------|----------------|
| 0.0334183358   | 0.0673901037   |
| 1.0138484014   | 0.7402452476   |
| 0              | 0.0136139628   |
| 0.1786147067   | 0.257276717    |
| 0              | 0              |
| 0.3631488976   | 0.2441039356   |
| 1.9879290983   | 3.0369543618   |
| 8.2526404727   | 9.6011254113   |
| 2.0654854302   | 1.8953894478   |
| 19.9918231642  | 10.0786813887  |
| 2.158731414    | 1.8656627145   |
| 0.4091561307   | 0              |
| 0.2214138237   | 0.2232472112   |
| 0.2591121661   | 0.5225154193   |
| 2.0499010996   | 1.8897143141   |
| 0.3897561625   | 0.3929834862   |
| 9.1908742729   | 10.0759999715  |
| 0              | 0              |
| 995.2074589567 | 1011.870367587 |
| 7.4164599459   | 6.8547150364   |
| 6.1880112748   | 6.8430486866   |
| 1.6324482765   | 1.1395146086   |
| 14.2668994911  | 18.2210438785  |
| 9.5778845629   | 7.5984890287   |
| 0.4401297287   | 0.4437741639   |
| 2.0351091334   | 1.7279668058   |
| 0.5822608749   | 0.6150385037   |
| 0.0948103852   | 0              |
| 0.424722028    | 0.4710627701   |
| 0              | 0              |
| 25.5516793105  | 36.8369370222  |
| 1.2065475841   | 2.4330764794   |
| 2.7879760398   | 5.0240248119   |
| 0.3703231247   | 0.1166842299   |
| 0.1543977118   | 0              |
| 3.874419096    | 4.9482342254   |
| 0.6953677622   | 0.4674171079   |
| 0.0141419615   | 0              |
| 10.7036004424  | 13.4902877147  |
| 0.319204162    | 0.2682060744   |
| 0.0235863695   | 0.0475633465   |
| 1.5368519505   | 0.8608764707   |
| 0.2505866127   | 0.0842205205   |
| 0.0429626913   | 0.0866368762   |
| 2.2427352466   | 1.8501593852   |
| 1.0988260606   | 1.1284418675   |
| 85.4993922855  | 60.9299273765  |
| 1.5595344054   | 1.3365807329   |
| 0.1684112867   | 0.0849028969   |

gene\_expression\_table

|                |                |
|----------------|----------------|
| 1.2772060939   | 0              |
| 0.2335142892   | 0.1530411174   |
| 6.0257574241   | 4.4372745907   |
| 0.1185548323   | 0.2091888921   |
| 1.6856413243   | 1.6146190988   |
| 0              | 0.0701227289   |
| 0              | 0              |
| 11.9475348869  | 14.4127347298  |
| 4.8076361385   | 7.3721561283   |
| 0.3862959843   | 0.1947473282   |
| 2.9088621311   | 3.2713657175   |
| 1.0213902747   | 1.1671607947   |
| 2.879340817    | 2.0902916253   |
| 5.3116063343   | 5.7675567157   |
| 59.3293637324  | 92.6766618378  |
| 43.0200351748  | 52.5247037036  |
| 0              | 0              |
| 8.2334406854   | 10.5845611496  |
| 14.0754052871  | 7.7042040315   |
| 25.8706516541  | 22.8795259095  |
| 3.6296066767   | 3.1473085877   |
| 0.0853392917   | 0.0728080965   |
| 2.3274735539   | 2.4624305432   |
| 1.8732577666   | 1.0577106549   |
| 0.4734418807   | 0.8353837673   |
| 3.4379634782   | 2.7867387067   |
| 0              | 0              |
| 0              | 0.0904424578   |
| 0              | 0              |
| 12.6111561229  | 14.0309860542  |
| 0.1123969287   | 0              |
| 0              | 0.1714253796   |
| 236.0828900437 | 296.8470674727 |
| 1.3233557275   | 0.500367599    |
| 48.7953770637  | 37.1635108742  |
| 0.8014818265   | 0.4714023938   |
| 4.6225105612   | 4.1947079765   |
| 0              | 0              |
| 14.9062770699  | 11.5613126923  |
| 2.5806905875   | 3.1350116267   |
| 102.206717242  | 79.5497044896  |
| 0              | 2.6327984036   |
| 0              | 0              |
| 3.2863270955   | 3.3135390867   |
| 0              | 0              |
| 0              | 0              |
| 2.5635107174   | 2.5847375244   |
| 0.608359784    | 0.7102494192   |
| 3.9960336132   | 5.1572764598   |

gene\_expression\_table

|                |                |
|----------------|----------------|
| 0.7160804765   | 0.1805024712   |
| 0              | 0              |
| 0              | 0              |
| 6.6902685002   | 8.7338627766   |
| 2.1165926316   | 1.9401079939   |
| 11.7584240067  | 13.9592343303  |
| 4.9082392161   | 5.2316744467   |
| 0.6232259999   | 0.1713781471   |
| 52.320607835   | 47.9580378349  |
| 0              | 0              |
| 3.5712126443   | 2.7434541654   |
| 6.6800080591   | 4.7357725576   |
| 0              | 0.1664751227   |
| 0.1937589834   | 0.1953633787   |
| 13.5341314115  | 7.9602827345   |
| 0              | 0              |
| 0              | 0              |
| 1.2095759263   | 2.6317504194   |
| 78.4072390943  | 93.5401096074  |
| 8.9564362935   | 5.4183593186   |
| 0              | 0              |
| 1.8859504501   | 1.9558972904   |
| 4.0566436717   | 3.5789548954   |
| 1.3715801273   | 1.0372029846   |
| 1.3161459717   | 1.0782233654   |
| 15.6858158469  | 15.3364365027  |
| 4.1120739641   | 5.0976927561   |
| 1.80914739     | 2.3308299571   |
| 6.332528531    | 8.8834284314   |
| 0.0171298836   | 0.0172717253   |
| 140.5797399317 | 175.1448039195 |
| 494.4571204538 | 561.4385898742 |
| 11.4417627492  | 12.8603659315  |
| 0.148540306    | 1.9470135634   |
| 1.4621856596   | 1.0285765758   |
| 3.7887090875   | 3.8200809855   |
| 0.5864974097   | 0.2956769115   |
| 3.9101597559   | 2.4969402963   |
| 5.371333138    | 6.2709375964   |
| 6.7569789595   | 3.7588574998   |
| 3.8107204787   | 4.1195521903   |
| 0.6743078574   | 0.9518479226   |
| 0.5930702984   | 1.0763660477   |
| 98.4127869577  | 115.2644777607 |
| 3.1458857666   | 4.5313355032   |
| 1.3934678143   | 1.5703010894   |
| 0              | 0.0848272204   |
| 0.3103276722   | 0.2542290554   |
| 0.1091413935   | 0.0660270745   |

gene\_expression\_table

|                 |                 |
|-----------------|-----------------|
| 0               | 0               |
| 0               | 0               |
| 3.297220222     | 3.0991310624    |
| 2.3789562487    | 3.4540630231    |
| 0.9034907006    | 0.3036573114    |
| 6.095860212     | 4.5567664678    |
| 1.8971785651    | 3.0900496813    |
| 0               | 0               |
| 84.5621667262   | 18.6978886882   |
| 0.9030569886    | 0.910534631     |
| 5.4989814441    | 4.9047632898    |
| 0.0892353782    | 0.1799485596    |
| 1.8585413913    | 0.7027240478    |
| 91.7471771277   | 178.8466295158  |
| 154.9507880379  | 201.4594217534  |
| 0.8374326555    | 0.5463550558    |
| 0.04481297      | 0.0301226918    |
| 11.0458418634   | 19.4902845848   |
| 0.2455460262    | 0.2475792372    |
| 0.9525634871    | 0.7872549684    |
| 0               | 0               |
| 2.3392475644    | 2.4973595899    |
| 0               | 0               |
| 0.8781319463    | 1.3415200003    |
| 0.3126670748    | 0.225182909     |
| 0.0492089593    | 0.0165388092    |
| 2.4609905174    | 3.5629905513    |
| 1.0702226692    | 0.8632676037    |
| 14.5651427637   | 19.4697409733   |
| 5.3999618819    | 6.5681800199    |
| 24.5680211902   | 24.4455132218   |
| 1.65916808      | 2.6766505584    |
| 0.6228184403    | 1.2559512099    |
| 4.2625541894    | 7.8793911135    |
| 2.053083684     | 3.1051259525    |
| 6567.1156652842 | 6140.4888284674 |
| 0               | 0               |
| 2.665230929     | 2.4902313487    |
| 0               | 0               |
| 3.4134549111    | 4.5479865709    |
| 3.2766359245    | 4.1547381295    |
| 3.2009392794    | 2.2861063283    |
| 55.0952333996   | 50.9546186988   |
| 21.5035841941   | 19.4891161726   |
| 0.0427467487    | 0.0431007074    |
| 2.9108908498    | 3.5219929098    |
| 3.10524678      | 4.6964390399    |
| 3.1087453411    | 5.3286277136    |
| 0               | 0.0445367473    |

gene\_expression\_table

|                 |                 |
|-----------------|-----------------|
| 0.5158833476    | 0.3901162879    |
| 5.0450820672    | 5.0868571933    |
| 0               | 0               |
| 6.3978736711    | 4.671305467     |
| 0.6202309299    | 0.9172044479    |
| 0               | 0               |
| 0.5284415128    | 0.3623156973    |
| 12.8457692869   | 13.4702224367   |
| 0               | 0               |
| 2.9706981268    | 2.614077028     |
| 0.503934888     | 0.38108074      |
| 0               | 0               |
| 18.7438183659   | 21.3252501022   |
| 0               | 0               |
| 1446.5162494034 | 1508.2020265636 |
| 67.1357848551   | 72.0697634703   |
| 1.5102727247    | 1.359623514     |
| 1.2095798891    | 1.4454467002    |
| 14.3504794637   | 20.3352418293   |
| 7.4484412307    | 11.8428768871   |
| 89.8462169774   | 111.9795237781  |
| 0               | 0               |
| 0               | 0               |
| 0               | 0               |
| 1.0543930541    | 2.3920285828    |
| 4.4520742867    | 3.2264249719    |
| 11.7640150318   | 13.5559147225   |
| 1.1058287962    | 0.5574927317    |
| 1.0611757911    | 0.6538661036    |
| 9.2104458458    | 12.3822822782   |
| 0.4927904845    | 0.7795734186    |
| 0.2777928184    | 0.2427473053    |
| 0               | 0               |
| 0.0255511501    | 0.051525446     |
| 0.3154657939    | 0.4771169492    |
| 5.5648032361    | 7.9847164699    |
| 2.6834986221    | 2.5052953452    |
| 0               | 0.0275708609    |
| 0               | 0               |
| 0.4859592396    | 0.48998316      |
| 67.4247709857   | 73.0456420171   |
| 0.3847378766    | 0.5172315293    |
| 59.6125683058   | 85.0853747896   |
| 16.0839167739   | 21.6227966558   |
| 24.5286589799   | 21.4095878321   |
| 132.9869956389  | 142.6140144598  |
| 1.246459359     | 1.1311024489    |
| 0               | 0               |
| 1.3680860991    | 0.5517657411    |

gene\_expression\_table

|               |               |
|---------------|---------------|
| 0.129364933   | 0.130436122   |
| 0.3219799279  | 0.1623230198  |
| 1.5171160558  | 1.9120979151  |
| 0.2759851162  | 0.3514994198  |
| 0.8260609858  | 3.3316042926  |
| 0.4730528969  | 0             |
| 0             | 0.0326104959  |
| 0             | 0             |
| 0             | 0             |
| 3.9667621489  | 3.7774079252  |
| 7.8382229788  | 6.6386261206  |
| 1.3145308382  | 0.6024616521  |
| 2.6292029175  | 3.8984907059  |
| 1.8449783007  | 1.2520949783  |
| 70.8208269374 | 71.9998405869 |
| 5.7048097563  | 6.813964162   |
| 1.2390423089  | 1.1163975612  |
| 4.5419235377  | 3.6636258616  |
| 4.851638362   | 3.4094445206  |
| 1.1446231214  | 1.9235016997  |
| 1.7826719857  | 1.8460124369  |
| 0             | 0.4095175282  |
| 82.9356076753 | 114.406394895 |
| 4.5769781119  | 3.5099065769  |
| 2.5380846689  | 3.3268312206  |
| 5.8678084427  | 5.5346930738  |
| 41.6952819638 | 40.5367514449 |
| 0.3420208684  | 0.2122171854  |
| 1.1490379001  | 1.5292891079  |
| 0.1468449864  | 0.5922436665  |
| 3.1096142157  | 2.1555620347  |
| 0             | 0             |
| 20.7857222791 | 25.3912239818 |
| 0.3356509826  | 0.359582189   |
| 5.3204790432  | 3.7253712202  |
| 0.543426453   | 0.3793335389  |
| 11.1159023113 | 14.2406843944 |
| 0             | 0             |
| 0             | 0.0600653956  |
| 0.6133310329  | 0.7067538724  |
| 27.3990914214 | 35.5454094928 |
| 2.1108468021  | 4.2566507724  |
| 0             | 0             |
| 0.2832929084  | 0.999735371   |
| 0             | 0.1035314765  |
| 18.4193388469 | 12.1120811181 |
| 0.4076315222  | 0.1297916401  |
| 2.5397640367  | 1.9205956594  |
| 2.7245311519  | 4.180356276   |



gene\_expression\_table

|                 |                 |
|-----------------|-----------------|
| 0.0675946544    | 0.0170385907    |
| 0.031417561     | 0.015838855     |
| 0.0319354655    | 0               |
| 0.2452635042    | 0.1236471879    |
| 2928.6919024104 | 2815.8089886825 |
| 0               | 0.1077553685    |
| 0.7571614651    | 0.5725732794    |
| 1.339996898     | 1.161939604     |
| 1.065204816     | 1.7184401628    |
| 0               | 0               |
| 0.0436264554    | 0.8797539674    |
| 1.5212413769    | 1.1929849651    |
| 3.5960252543    | 4.2026337418    |
| 1.8826490485    | 1.7287525296    |
| 0.4334923258    | 0.6556227014    |
| 0               | 0               |
| 0               | 0               |
| 16.7839624414   | 16.546874465    |
| 0               | 0               |
| 0               | 0.1220528231    |
| 0               | 0               |
| 3.78928418      | 0               |
| 0.7733832662    | 1.5595743255    |
| 0               | 0.0604935131    |
| 0               | 0               |
| 0.5361834452    | 0.5406232404    |
| 0               | 0               |
| 68.543393706    | 66.9512406538   |
| 2.8306233109    | 1.427030954     |
| 21.7817594122   | 26.4358856098   |
| 3.2296076082    | 2.2961441894    |
| 0.0608141986    | 0.0919766437    |
| 0.3821973081    | 0.2040151986    |
| 0               | 0               |
| 5.4036435835    | 5.4483877302    |
| 20.3583283969   | 13.8333475443   |
| 0.0401811572    | 0.013504624     |
| 8.1668724416    | 16.4689942693   |
| 0               | 0               |
| 5.1580597066    | 6.461563136     |
| 1.0464911978    | 0.95466543      |
| 22.6605812859   | 18.728048519    |
| 0.1925537204    | 0.0970740679    |
| 0               | 0               |
| 0.0561628322    | 0.2265115241    |
| 0.9303029684    | 0.8442055957    |
| 4.1753041938    | 2.50587931      |
| 0.4883692092    | 0.426758007     |
| 0.2887221726    | 0.3175777068    |

gene\_expression\_table

|                |                |
|----------------|----------------|
| 2.074988727    | 1.5267189356   |
| 13.9459230498  | 12.4310931047  |
| 0.5301576917   | 0.4009106936   |
| 0              | 0.009457       |
| 1.2983125181   | 1.4960720239   |
| 750.4262067517 | 527.7564072649 |
| 47.1723310348  | 34.3510087569  |
| 0.4102932425   | 0              |
| 0              | 0              |
| 0.3629225367   | 0.4879035576   |
| 2.9538619912   | 4.2383799553   |
| 0              | 0              |
| 0              | 0              |
| 226.899964214  | 201.8913760789 |
| 3.2527843045   | 2.733098791    |
| 34.8501960838  | 23.2608748982  |
| 0.0742564236   | 0.099828392    |
| 0.008496       | 0.004283       |
| 7.3581472047   | 13.5663092239  |
| 0.1555412647   | 0.1306910027   |
| 6.3784842001   | 12.8626007679  |
| 0              | 0              |
| 47.6157504779  | 70.068687062   |
| 49.9375639739  | 44.0571821216  |
| 26.1644325426  | 28.7524169799  |
| 2.7554625949   | 3.0988494684   |
| 0.8616194209   | 0.8687539451   |
| 0              | 0              |
| 0.6629336532   | 0.5347383892   |
| 8.7237046535   | 7.4632219209   |
| 0.1269685993   | 0.3840598372   |
| 10.2024757927  | 12.315369891   |
| 6.0010103702   | 7.2771943649   |
| 4.3247778753   | 5.6228642719   |
| 0.360449812    | 0.3997779152   |
| 0.1729905679   | 0.8721149656   |
| 29.1116885628  | 1.630708       |
| 5.2251184191   | 5.9269323511   |
| 0.2581787844   | 0.2603165993   |
| 0              | 0              |
| 14.4308457401  | 15.0794416403  |
| 0.2692753284   | 0.1357525133   |
| 0              | 0              |
| 0              | 0              |
| 0.5230894041   | 0              |
| 54.0116798434  | 48.2350401708  |
| 5.1472652057   | 6.9198485941   |
| 19.153431473   | 19.0628414265  |
| 26.1626627081  | 31.0659766421  |

gene\_expression\_table

|                |                |
|----------------|----------------|
| 3.5632179674   | 2.7270063992   |
| 15.0173319544  | 16.5549045158  |
| 1.3173128345   | 1.4389057225   |
| 2.5862400719   | 3.6280418592   |
| 0              | 6.3748028696   |
| 0.1692678251   | 0.5973429863   |
| 11.8755140694  | 12.9716683119  |
| 9.9962888575   | 12.4892722157  |
| 0.1637027808   | 0.2750971662   |
| 0.1356016267   | 0.4101733735   |
| 81.538721506   | 73.2914540773  |
| 8.9308638669   | 11.6041426399  |
| 164.3422313659 | 127.6103911267 |
| 103.6140626328 | 128.6113944084 |
| 0              | 0              |
| 2.3009445683   | 3.1792554655   |
| 59.312204946   | 63.3211747544  |
| 21.4296033074  | 17.6939607852  |
| 3.1774206403   | 2.0824250501   |
| 2.2711549809   | 2.9634789094   |
| 0              | 0              |
| 6.4109824663   | 8.8146378377   |
| 4.6750186395   | 5.4389186595   |
| 0              | 0.0113585715   |
| 3.0672206666   | 3.3305120976   |
| 163.7360864929 | 223.1732466811 |
| 8.0308363531   | 4.8851688188   |
| 1.2655401173   | 1.8431389205   |
| 0              | 0              |
| 1.7859082622   | 1.9869751573   |
| 14.0351633749  | 14.3636503598  |
| 0              | 0              |
| 0.3138921411   | 0.0791228207   |
| 1.1716478822   | 0.6750568889   |
| 4.1303790034   | 5.2057250667   |
| 0.7930688089   | 0.9734695587   |
| 0              | 0.0132058855   |
| 9.2819679428   | 8.951920555    |
| 3.5180478283   | 3.4665608576   |
| 0.1049248291   | 0.3173809352   |
| 11.1271817182  | 13.5405572395  |
| 0.00522        | 0              |
| 0.0939229706   | 0.07365609     |
| 0              | 0              |
| 0              | 0.0428462232   |
| 2.0987451848   | 1.6752644875   |
| 9.2731845052   | 12.635094415   |
| 0.0732610258   | 0.2092916862   |
| 12.8827148887  | 11.5851302689  |

gene\_expression\_table

|                 |                 |
|-----------------|-----------------|
| 1.4059038917    | 1.2825409772    |
| 4.7136901092    | 5.0738509986    |
| 35.0386411354   | 36.1317005887   |
| 0               | 0               |
| 38.8802868372   | 36.4474785569   |
| 0.0780917882    | 0.0787384168    |
| 0               | 0.1449156385    |
| 9.8095230746    | 11.5392077689   |
| 1.1329932448    | 1.599324781     |
| 0               | 0.0658628979    |
| 0.18770441      | 0.1892586712    |
| 30.9550810285   | 27.3099753759   |
| 28.3030305471   | 35.5261385709   |
| 9.0009064836    | 10.259189973    |
| 0               | 0.0294927351    |
| 0               | 0               |
| 0               | 0               |
| 0               | 0               |
| 1.8341947045    | 2.3933185398    |
| 9.8773442552    | 10.9550455091   |
| 5.4458416685    | 5.9582488675    |
| 0               | 0               |
| 0.4916261954    | 0.8497663547    |
| 2.5581277259    | 2.7328403146    |
| 2.8938238524    | 2.7836347031    |
| 1.442603027     | 1.9636402159    |
| 0.5551127701    | 0.4664244225    |
| 0               | 0               |
| 1.0966782308    | 0.7655255501    |
| 1.0544389929    | 1.7147905383    |
| 0               | 0               |
| 0.8599917956    | 0.2167782106    |
| 4.1528512227    | 2.4742772073    |
| 0               | 0               |
| 4.8948215306    | 4.9353524445    |
| 1530.3291094012 | 1679.4067583378 |
| 2.0323491251    | 3.6885198955    |
| 0.1567922081    | 0               |
| 0               | 0               |
| 1.2282976152    | 1.238468369     |
| 4.9852618373    | 7.037158282     |
| 1.001486332     | 1.312712707     |
| 0               | 0.0194741449    |
| 0               | 0               |
| 964.1554147836  | 619.0507620761  |
| 4.3589432196    | 3.0346683115    |
| 0.064840536     | 0.0653774393    |
| 62.1241126228   | 47.0346204839   |
| 2.9921687371    | 2.442288801     |

gene\_expression\_table

|               |               |
|---------------|---------------|
| 1.0019220185  | 1.0102182995  |
| 8.5016426437  | 9.5037827649  |
| 6.2052625219  | 4.1147300791  |
| 76.0113992721 | 53.7366539112 |
| 0             | 0             |
| 8.1888897804  | 9.2425710281  |
| 0.191258473   | 0.1607018026  |
| 9.4143263191  | 13.0518855319 |
| 0.2437407955  | 0.0351084369  |
| 0             | 0             |
| 4.0851745929  | 4.1190013338  |
| 0             | 0             |
| 2.6270909298  | 3.5948599915  |
| 0.2833958277  | 0.1768881826  |
| 1.3505936564  | 1.1023909584  |
| 0             | 0             |
| 2.2438211502  | 6.7872024317  |
| 4.5883000238  | 4.6262928274  |
| 5.1305457889  | 6.1091004253  |
| 0.2083668565  | 0.7878457889  |
| 1.0649979323  | 1.073816505   |
| 0             | 0             |
| 0.2790875085  | 0.351748069   |
| 1.2495932474  | 0.4845924373  |
| 1.7752975676  | 0.859198887   |
| 5.5697396444  | 3.5468583962  |
| 0.3540007422  | 0.5353979969  |
| 9.6959924264  | 6.9647999242  |
| 0.9349862084  | 0.9427282364  |
| 24.555350629  | 31.8325858972 |
| 0.0415404017  | 0.0837687429  |
| 0.2577380795  | 0.2331206905  |
| 3.3456849962  | 3.5420579171  |
| 0.1867263601  | 0.0627575076  |
| 0.5656871938  | 1.3037058077  |
| 0.8861792529  | 1.1448188375  |
| 33.8187669386 | 47.4947553423 |
| 0.7536889294  | 0.8684911424  |
| 3.4820311331  | 4.3706669622  |
| 48.549903306  | 51.5877865829 |
| 0.773575856   | 0.8068772558  |
| 0             | 0             |
| 0             | 0             |
| 0.412986054   | 0             |
| 8.8575660834  | 7.556923823   |
| 1.4748656555  | 1.4173712978  |
| 0             | 0.0174188007  |
| 3.5657772804  | 3.7516207528  |
| 3.3152517479  | 3.1039387283  |

gene\_expression\_table

|                |                |
|----------------|----------------|
| 0.4980518213   | 1.3391356604   |
| 2.7810679956   | 2.8040962565   |
| 0.6071970758   | 0.816299853    |
| 2.2581530423   | 2.3310621231   |
| 1.5654789119   | 1.8790972027   |
| 13.0061781097  | 12.0824457309  |
| 0.0100438991   | 0.0303811988   |
| 8.6279399918   | 11.0596800686  |
| 4.187491028    | 4.6912944294   |
| 58.9292615877  | 68.7173036515  |
| 17.9839946965  | 13.3904556961  |
| 33.3964750772  | 39.7528591632  |
| 0.4051256031   | 0.5446402552   |
| 1.9197589555   | 3.0970484197   |
| 24.8717170075  | 29.8392456863  |
| 126.7096999186 | 149.7862996145 |
| 9.1099976955   | 5.8684703236   |
| 0.1991506718   | 0              |
| 1.4056750662   | 1.0629859277   |
| 1.6120632409   | 0.6501646858   |
| 4.7171957625   | 3.7222872026   |
| 0              | 0              |
| 3.5445542749   | 6.1731077411   |
| 3.2812937183   | 3.7220220352   |
| 2.7450278451   | 3.0752863116   |
| 5.5126801977   | 5.3234683114   |
| 3.2835158662   | 0              |
| 6.5670317323   | 1.6553522897   |
| 1.3141665063   | 1.4196945921   |
| 4.6758343597   | 6.5028303168   |
| 0.0562803151   | 0.0567463367   |
| 8.9063117247   | 6.6774799519   |
| 3.6920287989   | 2.2335600892   |
| 13.6584966619  | 12.6437479521  |
| 0.0427944067   | 0.0862975202   |
| 32.9442719749  | 17.8861106335  |
| 423.8855240714 | 470.9414030101 |
| 6.8208441538   | 4.298327025    |
| 9.1406736971   | 12.1787638349  |
| 0.0182298569   | 0.073523227    |
| 1.2321089389   | 0.8282075012   |
| 16.2245062059  | 14.9301304396  |
| 1.8706609788   | 2.8920977958   |
| 165.9509333508 | 170.3581506209 |
| 0.1273519442   | 0.0642032324   |
| 0.034149531    | 0              |
| 30.6115094213  | 24.7821038804  |
| 2.6080652397   | 1.6991655527   |
| 1.2689724109   | 1.2155059686   |

gene\_expression\_table

|                 |                 |
|-----------------|-----------------|
| 0.2852296181    | 0.0958638079    |
| 1.1969879569    | 0.6704996974    |
| 0.0795762009    | 0.0458486405    |
| 1.0197942582    | 1.1615287075    |
| 0.2917035703    | 0.882356948     |
| 0               | 0               |
| 5.1215781122    | 5.8303075121    |
| 4.9355944034    | 9.3999855375    |
| 0.1392950563    | 0.0468161568    |
| 1.3024153466    | 0.9772649841    |
| 0               | 0.5813459323    |
| 71.1654743944   | 55.8773936066   |
| 0.8663146159    | 0.8337840172    |
| 5.937839341     | 5.4076190669    |
| 1.0727198618    | 1.1648025575    |
| 13.9021655913   | 13.507561316    |
| 0.6954418716    | 0.2474824888    |
| 1.7063595917    | 2.3461211913    |
| 0               | 0               |
| 0               | 0               |
| 0.3129427054    | 0.1262135942    |
| 2.305347477     | 1.2423712851    |
| 1.4343313443    | 2.0086224067    |
| 0.632905308     | 0.3190729978    |
| 137.7542011773  | 159.2849443126  |
| 1472.7567026014 | 1372.8798432228 |
| 0.5960617039    | 0.4964760412    |
| 0               | 0.0215417972    |
| 0.6962296407    | 13.8643948703   |
| 12.9441220799   | 17.0670900404   |
| 0.0676335613    | 0.2045807758    |
| 0.3103907566    | 0.2608007547    |
| 0.5627371423    | 1.3982278576    |
| 5715.8493350576 | 6091.2014766682 |
| 0.7016170689    | 0.3537133575    |
| 22.4615542444   | 22.883456053    |
| 0.2948354564    | 0.2180029881    |
| 0               | 0.0524751015    |
| 1521.6633402727 | 2150.0419063108 |
| 1.0668662217    | 0.9353915344    |
| 14.3510594998   | 9.4712017256    |
| 0.651817075     | 0.4381429059    |
| 0.3717307769    | 0.7496176877    |
| 59.1442996019   | 66.3384543049   |
| 1.042673863     | 6.3078455052    |
| 2.2674031145    | 1.7146335317    |
| 6.9959235374    | 7.053852345     |
| 1.1823489092    | 1.9868986515    |
| 0.5105653162    | 1.5443789518    |

gene\_expression\_table

|               |               |
|---------------|---------------|
| 1.1246985761  | 1.426282495   |
| 0.0246182612  | 0.0744663282  |
| 1.3666864643  | 1.1024025028  |
| 0.8226821458  | 0.5696526812  |
| 0.0877034695  | 0             |
| 2.4645559568  | 2.1663783332  |
| 3.2246037003  | 1.0450621926  |
| 1.5233208584  | 0.5119781709  |
| 0             | 0             |
| 0             | 0             |
| 45.9335673278 | 55.3193973709 |
| 0.3830513653  | 0.3862231708  |
| 0.3729479519  | 0.150414439   |
| 0.4088982447  | 0.5153550898  |
| 1.8243179151  | 1.9379645031  |
| 0.789367298   | 0.3979517741  |
| 0             | 0             |
| 0.9824285074  | 0.6810123203  |
| 0.2260248914  | 0.1139482301  |
| 8.2123754081  | 9.3154239927  |
| 3.1982150076  | 4.1685112712  |
| 0             | 0             |
| 1.7909738348  | 1.6929410191  |
| 3.1073631172  | 4.1573736974  |
| 0.8282527594  | 0.9279011061  |
| 0.8751392139  | 0.5042203925  |
| 0.3371973687  | 0             |
| 4.8401003361  | 3.416124697   |
| 4.3271043674  | 3.781209792   |
| 0             | 0             |
| 0.330224775   | 0.4550441812  |
| 0.0894129553  | 0.0772742806  |
| 5.5843022109  | 4.5507122514  |
| 1.7886837013  | 1.2882104693  |
| 0             | 0             |
| 7.2433927486  | 10.7402510174 |
| 7.961054728   | 6.2095468335  |
| 7.6467365873  | 4.2054841992  |
| 5.1384916983  | 6.3063341091  |
| 2.1565611694  | 1.4635507689  |
| 1.4110349402  | 1.0461167838  |
| 22.5669645652 | 25.1202253301 |
| 1.7541953602  | 2.0213951313  |
| 6.4556104875  | 7.5300951571  |
| 0             | 0.0124382311  |
| 2.0460965268  | 1.4939247605  |
| 0.2352753409  | 0.1054326697  |
| 0.1032113484  | 0.4162639046  |
| 2.2978740247  | 2.9656336163  |



gene\_expression\_table

|                 |                |
|-----------------|----------------|
| 3.6990348399    | 2.7481736227   |
| 4.0762937786    | 2.4176746959   |
| 0               | 0              |
| 2.0526794357    | 2.6784047177   |
| 17.310218762    | 15.6634456365  |
| 24.8755901587   | 26.3569031748  |
| 10.8835666258   | 8.7308892918   |
| 0               | 0.0890892144   |
| 578.7457281262  | 574.3895432062 |
| 0.9206808467    | 1.1181848709   |
| 0.3506162696    | 0.1767597503   |
| 47.5235384301   | 43.2762654955  |
| 0.5808273858    | 0.5856368492   |
| 9.4655240504    | 5.8093316851   |
| 2.8822492097    | 3.422758006    |
| 0               | 0              |
| 1.012707122     | 0.5616009892   |
| 0               | 0              |
| 0               | 0              |
| 8.3158248712    | 9.0671571381   |
| 0.0939491945    | 0.0315757094   |
| 0               | 0              |
| 2.2677109977    | 1.7701846257   |
| 1.8104594448    | 1.7701340234   |
| 0               | 0              |
| 1.9674540831    | 2.8654099111   |
| 0               | 0              |
| 22.7834890566   | 19.2235520379  |
| 1.0837821422    | 0.7050040355   |
| 0               | 0              |
| 14.5934281842   | 12.0811877333  |
| 0.0962406511    | 0.1455563383   |
| 1.7942009042    | 2.0831571723   |
| 10.4521565091   | 13.5497625309  |
| 0               | 0              |
| 1070.6600132589 | 888.1202448664 |
| 7.840793856     | 5.8872371801   |
| 1.7182791645    | 1.7769304051   |
| 4.6328009907    | 2.3916350867   |
| 0.1854433481    | 0.2804683303   |
| 0               | 0              |
| 1.5023058814    | 1.281707751    |
| 4.4450282338    | 3.5854677557   |
| 19.4409102723   | 11.381741492   |
| 1.9039397371    | 2.1182952332   |
| 0               | 0              |
| 0.4716868121    | 0.7133888273   |
| 0               | 0              |
| 13.4485140352   | 8.4749204086   |

gene\_expression\_table

|                 |                 |
|-----------------|-----------------|
| 0               | 0               |
| 989.0273995339  | 1146.4068395862 |
| 4.7001184256    | 14.2171113794   |
| 1.4999981496    | 0.9863600109    |
| 5.2453492906    | 4.5052593393    |
| 5.2097527413    | 4.3774095008    |
| 27.0250582497   | 18.8983859971   |
| 12.6639958991   | 12.6517129303   |
| 0               | 0.173153592     |
| 101.2461929411  | 102.6469977798  |
| 30.3308484446   | 38.3735910661   |
| 0.4749487245    | 0.2394407369    |
| 25.0296518172   | 16.0850612829   |
| 10.5426189507   | 12.4785966848   |
| 3.2161803638    | 4.3237486859    |
| 5.9947085456    | 8.0591292354    |
| 1.8827665936    | 1.8253428751    |
| 45.3039376132   | 33.0357565599   |
| 8.1905592479    | 10.3430197073   |
| 13.2192516848   | 10.8851147406   |
| 12.6046637005   | 15.4175177833   |
| 149.1280817049  | 145.1153519237  |
| 1.183023735     | 0.7952130697    |
| 14.9640676062   | 28.4008951777   |
| 0.1479159045    | 0.2796388168    |
| 44.8257283399   | 53.7931752531   |
| 0               | 0               |
| 0.0557846478    | 0.018748855     |
| 0.1648621312    | 0               |
| 3.4622038913    | 2.9090601723    |
| 0.1428336169    | 0.1218599728    |
| 0               | 0               |
| 1208.9696256897 | 1224.8502259609 |
| 0.8397148864    | 0.846668033     |
| 0.9716997758    | 1.6329096759    |
| 0.6057862648    | 0.8144031957    |
| 0               | 0               |
| 5.6238564854    | 7.6103059962    |
| 26.9048835108   | 31.0030466217   |
| 9.8589812865    | 8.5850785428    |
| 0               | 0               |
| 2.6027666028    | 2.5149718604    |
| 29.7442918813   | 25.2301751075   |
| 1.8412025882    | 0.8938455353    |
| 34.6301874058   | 15.1812774056   |
| 21.5091556899   | 24.9637517949   |
| 57.165745358    | 57.0794957539   |
| 1.2044685779    | 1.4701140225    |
| 1.0981890566    | 0.484436078     |

gene\_expression\_table

|                |                |
|----------------|----------------|
| 19.9787083405  | 24.4535821065  |
| 3.0967290354   | 3.7468453024   |
| 34.8284786546  | 29.4312825344  |
| 7.3533142673   | 7.4142024009   |
| 0.6443201736   | 1.9489661414   |
| 0.589057573    | 1.3858487658   |
| 0.4057537048   | 0.409113494    |
| 39.6368241175  | 45.5601359431  |
| 24.4791284305  | 24.0777239723  |
| 11.3305394029  | 11.7417037613  |
| 0              | 0              |
| 0              | 0.0294840474   |
| 66.3423402625  | 59.215584797   |
| 26.0708414932  | 8.088220801    |
| 0.4189084333   | 0.0844754297   |
| 8.325452489    | 9.5935888947   |
| 8.7864651186   | 14.7653671097  |
| 2.6276713741   | 3.7428447854   |
| 2.3378926287   | 0.8250379324   |
| 54.1754371581  | 45.5200246726  |
| 12.1938415612  | 18.8038286381  |
| 1.8171516715   | 3.664396705    |
| 57.0691692089  | 54.9843129155  |
| 0.9052367307   | 0.5704577639   |
| 5.8334803154   | 0              |
| 337.4269913846 | 378.5557721116 |
| 34.9019487363  | 34.0047378608  |
| 25.3259787494  | 13.0792543802  |
| 57.762114653   | 72.8005076306  |
| 5.4914702767   | 8.1425612656   |
| 20.42494134    | 19.1230625209  |
| 183.9677798803 | 149.6784622312 |
| 0              | 0              |
| 2.0755750077   | 2.0927615284   |
| 0              | 0              |
| 0              | 0              |
| 0              | 0              |
| 0              | 0              |
| 0              | 0              |
| 0              | 0              |
| 240.8426696492 | 354.1371970318 |
| 0              | 0              |
| 0.0376700758   | 0              |
| 0              | 0              |
| 0              | 0.083592335    |
| 7.6373818411   | 10.0442897716  |
| 96.194933611   | 80.2813232001  |
| 29.2619909238  | 1.4049662342   |
| 2.3690113032   | 3.8218041342   |
| 3.7940989961   | 2.2147721458   |

gene\_expression\_table

|                 |                 |
|-----------------|-----------------|
| 16.0784043496   | 13.0328062025   |
| 2.23193374      | 2.2504149683    |
| 4.9307126566    | 4.709880722     |
| 106.4422960627  | 94.6697938922   |
| 13.2330684576   | 12.834351942    |
| 0.393577488     | 0.3968364536    |
| 0               | 0               |
| 0.6402474705    | 0.6582067765    |
| 2.5210843238    | 2.2840798426    |
| 25.2206498026   | 22.1930059761   |
| 0               | 0               |
| 0               | 0               |
| 0               | 0               |
| 0               | 0.2868950077    |
| 15.5161445114   | 15.4781916984   |
| 4.9731042706    | 4.6077198757    |
| 13.1455125492   | 14.6068481439   |
| 0.3862603508    | 0.1947293639    |
| 0.0874977722    | 0               |
| 0               | 0               |
| 0               | 0               |
| 1.1729948195    | 1.0841486754    |
| 0.0282936523    | 0               |
| 124.0628712719  | 54.0162042695   |
| 24.4872582095   | 37.9846487235   |
| 33.6010869249   | 24.4130366903   |
| 0.1923318102    | 0.193924388     |
| 6.7239247855    | 8.7613309674    |
| 0.1388722883    | 0               |
| 0.451190743     | 0.909853535     |
| 0.0663032897    | 0.0668523052    |
| 11.2251628565   | 10.4474873664   |
| 0.7156799343    | 1.4432120522    |
| 2.3013922589    | 2.872936398     |
| 220.121013428   | 254.4091212611  |
| 0               | 0               |
| 0               | 0               |
| 0               | 0               |
| 7.5563188187    | 8.5712488923    |
| 53.500241813    | 17.9810811325   |
| 4563.2070575852 | 3626.5052872552 |
| 35.0566965779   | 29.816499172    |
| 0               | 0               |
| 45.7575979693   | 33.758405582    |
| 3.8880599898    | 1.9601272748    |
| 25.4315651598   | 28.7315632288   |
| 0.1030358817    | 0               |
| 0               | 0               |
| 5.5862663986    | 5.632522729     |

gene\_expression\_table

|                |                |
|----------------|----------------|
| 63.6415286752  | 72.3926316907  |
| 10.166372971   | 7.5530399813   |
| 0              | 0.4609226264   |
| 47.1421092155  | 36.151450835   |
| 0              | 0              |
| 1.0722980992   | 0.5606103585   |
| 0.2217976452   | 0              |
| 27.2822454099  | 29.3420292136  |
| 27.8845329028  | 28.851432985   |
| 0.0553412189   | 0              |
| 1.2976171075   | 1.7841297984   |
| 4.0467877339   | 5.0219035293   |
| 1.2252968881   | 0.9076722574   |
| 24.4081131724  | 21.9184783305  |
| 9.5146530135   | 11.2281940439  |
| 4.1042973064   | 1.5518558964   |
| 22.9193450638  | 23.1091256299  |
| 3.2867799269   | 4.9138556453   |
| 13.0029035803  | 14.9542466225  |
| 9.1060812244   | 3.9349212471   |
| 0              | 0              |
| 0              | 0              |
| 0.2459901338   | 0              |
| 15.4533081762  | 7.7906336121   |
| 3.1562380814   | 3.1375507346   |
| 0              | 0              |
| 42.9205228454  | 26.5425645638  |
| 4.7374099911   | 4.094260697    |
| 4.4691864566   | 4.3480809227   |
| 0.0855417643   | 0.1293751221   |
| 8.4212873111   | 9.8142942865   |
| 5.0153702712   | 6.5739691846   |
| 10.0895633416  | 10.6537279239  |
| 8.5682277927   | 9.3591071763   |
| 4.1034375022   | 4.2878669382   |
| 0.1121124128   | 0.1130407446   |
| 5.4581078753   | 4.3646885912   |
| 2.4853144193   | 0              |
| 16.7593116053  | 18.2234248271  |
| 184.2313643455 | 247.6758232999 |
| 0.0157187301   | 0.0158488869   |
| 0              | 0              |
| 102.842706753  | 87.321500638   |
| 42.1419584359  | 66.3920457447  |
| 8.425375323    | 7.9411096115   |
| 13.4309707004  | 17.8186632287  |
| 0.0319436157   | 0              |
| 9.9907385024   | 16.7891091233  |
| 3.6004784287   | 3.630291708    |

gene\_expression\_table

|                |                |
|----------------|----------------|
| 0.009005       | 0.009079       |
| 14.4315530281  | 18.9438218545  |
| 0.9421075417   | 1.1450952226   |
| 1.1910726254   | 1.2009351427   |
| 9.4928500221   | 11.4390551328  |
| 0.0300207263   | 0.0151346544   |
| 0.9998515362   | 4.5365880281   |
| 0              | 0              |
| 688.5783729891 | 797.7100439972 |
| 0              | 0              |
| 0.9904773906   | 1.7177277181   |
| 2.8734495786   | 4.0878905159   |
| 0              | 0              |
| 1.5529095441   | 1.9572102544   |
| 0.8457763957   | 0.5385977267   |
| 24.6224503298  | 20.0920092194  |
| 12.9551640949  | 9.3303125682   |
| 1.8468633423   | 2.1071765792   |
| 23.6101009448  | 20.1986919463  |
| 19.7033104047  | 13.7362387671  |
| 0.4165164026   | 0.2099826554   |
| 3.1752780399   | 4.0747260964   |
| 0              | 0              |
| 13.3319074439  | 16.3645397602  |
| 0.6338924443   | 1.2782826115   |
| 0              | 0              |
| 11.7973018341  | 11.3285598203  |
| 3.6939321148   | 2.1908936616   |
| 0              | 0              |
| 11.83993348    | 8.5491286669   |
| 0              | 0              |
| 1.6582925052   | 1.2405337679   |
| 15.3002906039  | 13.2231279517  |
| 0.4641577711   | 1.7550043774   |
| 143.0470825168 | 166.3315625381 |
| 755.3935165861 | 851.6069299047 |
| 7.8643330858   | 12.9754679601  |
| 3.1706121024   | 3.855044211    |
| 24.3938894893  | 21.1316713972  |
| 0              | 0              |
| 0.4018176475   | 0.4051448447   |
| 11.8388863701  | 19.397489609   |
| 2.1282168305   | 0.6602582292   |
| 0.6222799321   | 1.5685815941   |
| 1.2725591813   | 1.1843967112   |
| 4.4282007898   | 3.2742364696   |
| 0              | 0              |
| 1.136819262    | 0.9725609444   |
| 90.1392574764  | 113.6070544014 |

gene\_expression\_table

|                 |                 |
|-----------------|-----------------|
| 540.1167984336  | 629.9081321232  |
| 33.9083926461   | 35.8986248758   |
| 161.2015964951  | 111.1189128911  |
| 7.3267200023    | 9.7202472706    |
| 0               | 0               |
| 21.6714695519   | 35.8979354854   |
| 27.460946286    | 32.6580337625   |
| 29.9487389925   | 26.9613620654   |
| 5.8165375136    | 6.8421506688    |
| 2.4307536186    | 5.310242488     |
| 51.5270421304   | 68.8217909055   |
| 103.1369464946  | 117.1160305513  |
| 1.6546383514    | 0.667335745     |
| 2116.2596873985 | 1996.6964689641 |
| 22.5127862025   | 26.1040803593   |
| 0.2579821252    | 0.3251478896    |
| 0.4255780229    | 0               |
| 4.4684866677    | 4.8273078995    |
| 257.2891639243  | 349.764751013   |
| 229.3745078578  | 359.9524754657  |
| 5.4386560697    | 2.3842131011    |
| 0.5872817549    | 0.5756961999    |
| 2.832789703     | 2.8562462386    |
| 0               | 0               |
| 1.8009524777    | 2.118509194     |
| 0.3085637381    | 0.1555593794    |
| 0               | 0               |
| 0.9774044173    | 0.9854976836    |
| 3.8722476772    | 4.9779969143    |
| 253.4179686355  | 202.2720485552  |
| 61.8003819126   | 52.2370426689   |
| 5.5714548252    | 5.4869469171    |
| 4.5550989488    | 4.5928168354    |
| 179.6956349744  | 217.1721000395  |
| 44.3301062572   | 47.6281381079   |
| 0.2668665155    | 0.2690762679    |
| 9.1798386014    | 9.6362284645    |
| 2.8343342512    | 2.6769299322    |
| 3.3475825511    | 2.6803866917    |
| 7.3312629875    | 5.6648730779    |
| 40.8115969533   | 51.5525034653   |
| 9.0835058596    | 3.925165977     |
| 0               | 0.2186973245    |
| 0.3219619231    | 0.3246278857    |
| 0               | 0               |
| 5.7209357337    | 6.7296917048    |
| 8.2606098584    | 10.6426248237   |
| 1265.5434216044 | 1500.6158684287 |
| 9.7532101716    | 9.8339703217    |

gene\_expression\_table

|                |                |
|----------------|----------------|
| 0              | 0.6244742171   |
| 12.7194641451  | 9.300417302    |
| 0              | 0              |
| 1.7992294842   | 1.1722056314   |
| 0              | 0              |
| 236.8440324811 | 238.8051877601 |
| 0.8425799472   | 0.8308852392   |
| 0.1079200966   | 0              |
| 12.6975755064  | 9.6731632598   |
| 404.0660566606 | 486.2657821208 |
| 0              | 0              |
| 6.7152939558   | 10.1563485715  |
| 6.6011582992   | 14.4691702306  |
| 5.7239746323   | 3.2817601154   |
| 1.6534029438   | 1.8338030979   |
| 28.1656169811  | 49.3242986192  |
| 7.6911028782   | 11.2013604807  |
| 11.1156326242  | 15.02847213    |
| 0              | 0              |
| 0              | 0              |
| 21.9834727666  | 20.9988984955  |
| 1.3502090631   | 1.4910454111   |
| 12.0521590455  | 19.8850178189  |
| 2.053422012    | 2.0704250979   |
| 0.5863733543   | 0.6367078741   |
| 0.173566812    | 0.3500080175   |
| 1.8742334216   | 2.6134878601   |
| 43.1304383372  | 44.7506987137  |
| 0.63917019     | 0.4603305379   |
| 9.1805693505   | 9.87369368     |
| 11.3729954553  | 11.2004896944  |
| 14.4111528928  | 14.9231982572  |
| 1.924952136    | 2.8542521239   |
| 12.6039569217  | 16.8782405525  |
| 4.8533831568   | 3.0906763868   |
| 0              | 0.0160726273   |
| 0.2130764418   | 0.2685509909   |
| 0.4928013927   | 1.2422049215   |
| 6.3912964635   | 7.0579538555   |
| 60.9756690448  | 62.8939163375  |
| 42.645673381   | 47.8301204653  |
| 0.3776396442   | 0.6092266219   |
| 0              | 0              |
| 2.0606254449   | 3.2463877779   |
| 1.5619757442   | 1.2832595723   |
| 1.9065891666   | 1.5379011382   |
| 0.0870971632   | 0.1756367192   |
| 0.56550067     | 0.2850916113   |
| 0              | 0              |



gene\_expression\_table

|                 |                 |
|-----------------|-----------------|
| 0.0802669       | 0.121397309     |
| 0.1856047539    | 1.0292789607    |
| 10.9554994605   | 3.2069656469    |
| 5.3598016151    | 5.4041827342    |
| 1.8185585474    | 2.0125063293    |
| 4.2193944876    | 2.8362217456    |
| 42.9875506957   | 61.9676649454   |
| 0.7030481854    | 0.38665619      |
| 5.7545622701    | 6.6310996023    |
| 10.5413834393   | 14.4668007687   |
| 7.3621307438    | 6.0772621915    |
| 2.8735270358    | 2.5661985039    |
| 18.3782560415   | 15.0890682788   |
| 2.5266127222    | 2.1399285603    |
| 0.8342987458    | 0.2762172386    |
| 0               | 0               |
| 6.0431855905    | 3.0466126895    |
| 5.2057139534    | 5.3752967407    |
| 4.9311426788    | 3.891110357     |
| 2.6069054758    | 2.1197512962    |
| 40.6170506268   | 51.4431864309   |
| 1.5315465561    | 1.4412797673    |
| 4.9344640388    | 5.2272383063    |
| 0.255731082     | 0.199624745     |
| 69.6251402351   | 78.5306726121   |
| 2.9669661552    | 4.2380061046    |
| 0.2491336643    | 0.0837321941    |
| 6.8155556137    | 6.1847918179    |
| 0               | 0               |
| 9.8735560918    | 18.537478914    |
| 8.6285202856    | 5.0368233426    |
| 16.8299843492   | 27.4397883247   |
| 47.9417129225   | 56.6550212473   |
| 0.0241909729    | 0.048782566     |
| 0.0675179646    | 0.0850962976    |
| 0               | 0               |
| 3.7388733799    | 3.99158748      |
| 0               | 12.3780820467   |
| 0               | 0               |
| 0               | 0               |
| 24.1410694814   | 12.1704831864   |
| 0               | 13.4694210671   |
| 0               | 50.5910281474   |
| 259.5659663292  | 412.399815513   |
| 3380.7710803287 | 3483.1922879481 |
| 0               | 13.2541563468   |
| 10.5451374932   | 10.6324550914   |
| 7.3345797087    | 14.7906254265   |
| 2.154001149     | 3.0405718937    |

gene\_expression\_table

|                |                |
|----------------|----------------|
| 0              | 0              |
| 4.5877649971   | 4.6257533704   |
| 0              | 27.0014906042  |
| 15.2722680936  | 0              |
| 37.0504830843  | 44.8287295746  |
| 0              | 12.4577692702  |
| 13.5474001678  | 27.3191551996  |
| 0              | 0              |
| 1.8629064583   | 0.8720827169   |
| 0.9608886968   | 1.9376904139   |
| 3.105047419    | 3.1307583482   |
| 0              | 2.6909705562   |
| 4.613990601    | 3.101464088    |
| 37.5178175463  | 41.2060215586  |
| 368.6523066889 | 298.8581971641 |
| 0              | 0              |
| 11.9701560734  | 0              |
| 11.5615362878  | 23.31454008    |
| 8.737962401    | 16.2651986362  |
| 46.6836086862  | 31.3801107022  |
| 11.9701560734  | 24.138546694   |
| 0.7867247484   | 0              |
| 1.543811522    | 2.5943247441   |
| 12.71003327    | 12.8152769976  |
| 0              | 0              |
| 12.1726111444  | 0              |
| 0              | 79.3437878804  |
| 0              | 0              |
| 242.5974046897 | 326.1415999951 |
| 0              | 278.786576719  |
| 0              | 0              |
| 0              | 0              |
| 0              | 24.7034914039  |
| 7.2881583181   | 7.3485069366   |
| 36.1358477278  | 24.290043849   |
| 23.6453596357  | 59.6028796706  |
| 12.3290044353  | 24.8621862095  |
| 4.750532237    | 0              |
| 0              | 0              |
| 1.712056221    | 2.2194420084   |
| 0.9090061685   | 2.7495992169   |
| 7.7504897477   | 8.1402777496   |
| 9.829806063    | 15.1971740312  |
| 6.536835912    | 4.2841261489   |
| 0              | 0              |
| 2.053551519    | 1.5529167579   |
| 3.1199702351   | 3.1458047306   |
| 0.5161338437   | 0.6938768278   |
| 2.6897900671   | 2.7120625133   |

gene\_expression\_table

|                 |                 |
|-----------------|-----------------|
| 0               | 0               |
| 28.2533321746   | 25.7215247562   |
| 0               | 0               |
| 2.4216832512    | 2.0660840326    |
| 0               | 0               |
| 3.3836654157    | 1.3646733615    |
| 0               | 0               |
| 797.4717770793  | 729.277448282   |
| 203.9492804548  | 185.0742496321  |
| 61.3044223419   | 96.8945576504   |
| 0.5557572463    | 0               |
| 0               | 0               |
| 8.5248515276    | 13.9925774256   |
| 0               | 0               |
| 2.2967583485    | 2.3157763483    |
| 96.5154376114   | 120.8043568074  |
| 259.0940282086  | 174.1596143974  |
| 24.8511009367   | 22.5511894336   |
| 15.8573099109   | 21.0759005906   |
| 57.7479793646   | 76.9622923603   |
| 35.7323095923   | 35.0716856761   |
| 239.2116320336  | 204.445628594   |
| 0.864424743     | 2.0336924912    |
| 16.7915766823   | 15.9900272454   |
| 7.5093439606    | 8.7363739352    |
| 109.5788885561  | 126.6303502614  |
| 69.9654558161   | 82.5890287599   |
| 30.0833946636   | 25.5431546801   |
| 2222.1909890579 | 2682.7112435881 |
| 24.7141867288   | 29.902595089    |
| 689.8953413838  | 407.918228988   |
| 0               | 0               |
| 62.4134967079   | 66.8634472619   |
| 10.338572606    | 16.5839223634   |
| 0               | 0               |
| 7.652566234     | 7.7159322834    |
| 72.8303663271   | 67.3139760496   |
| 2.7171519921    | 1.8264340034    |
| 1629.7466420834 | 1744.3377357001 |
| 3185.4426873772 | 3172.3156586983 |
| 4.0776523168    | 1.1212954829    |
| 13.823452215    | 11.0788558777   |
| 19.7292235453   | 38.3642782796   |
| 2.4010196294    | 0               |
| 2.4032244224    | 0.4846248001    |
| 0.8359557272    | 0               |
| 22.864294507    | 33.5325370681   |
| 77.0562777209   | 68.3710120761   |
| 149.6861223224  | 187.0626884776  |

gene\_expression\_table

|                |                 |
|----------------|-----------------|
| 0              | 0               |
| 985.4857551871 | 1031.9859741398 |
| 16.1542531811  | 13.5733469252   |
| 19.7423023978  | 22.8252896847   |
| 9.9252630086   | 6.0044686915    |
| 44.2001035777  | 37.5293445166   |
| 41.0040005078  | 40.1950972892   |
| 89.2977641696  | 124.6668678578  |
| 0              | 1.5732575826    |
| 42.7999450828  | 39.6171029582   |
| 0              | 0               |
| 0              | 0               |
| 0              | 0               |
| 0              | 0.9433409945    |
| 67.7579785412  | 50.3403448243   |
| 281.9861789151 | 331.7079823044  |
| 2.7862432706   | 3.8308832519    |
| 40.350073276   | 34.425081013    |
| 0              | 0               |
| 17.8187517138  | 36.5629914035   |
| 111.0355820068 | 99.8517543194   |
| 0              | 3.2014635       |
| 267.852570217  | 174.4703149583  |
| 20.5630181118  | 32.251780444    |
| 491.2747443362 | 515.6828373542  |
| 221.0484709157 | 303.6537122964  |
| 1.0894314231   | 0.3661507714    |
| 15.0765679621  | 19.729486282    |
| 1.8033968693   | 1.9395516325    |
| 0              | 0               |
| 66.6146623019  | 67.9954691263   |
| 16.2972057351  | 15.3720136886   |
| 16.25141754    | 30.4311154189   |
| 26.4498207494  | 24.8505052909   |
| 0              | 0               |
| 0              | 0               |
| 1.7161386204   | 3.4606977526    |
| 0.1687963961   | 0               |
| 27.5166880768  | 26.849551283    |
| 18.1743846948  | 47.6446756559   |
| 0              | 1.6211450656    |
| 21.3871468924  | 23.2666803203   |
| 12.5132193889  | 18.9252501383   |
| 37.1985952517  | 42.7809807222   |
| 248.5658312227 | 253.0338938941  |
| 118.3814874473 | 96.3032135687   |
| 34.837236405   | 40.4477774545   |
| 2.4201954902   | 4.8804711895    |
| 0              | 0               |

gene\_expression\_table

|                 |                 |
|-----------------|-----------------|
| 191.3684144736  | 34.5753957497   |
| 8.4318834866    | 2.6847481794    |
| 35.3740391081   | 11.0147931043   |
| 0               | 0               |
| 0.7967956091    | 0               |
| 0               | 0               |
| 4.0300828777    | 6.7724223984    |
| 49.1353384344   | 57.4006144798   |
| 331.6207045097  | 393.5344056068  |
| 74.2455657945   | 96.7222172849   |
| 60.7026364924   | 78.5467715609   |
| 0.8937666984    | 1.8023348277    |
| 1.2769228368    | 1.2874962253    |
| 43.4759124954   | 61.0087392798   |
| 2.8415274874    | 0.3581320469    |
| 0.4180992718    | 0               |
| 0.1899084726    | 0               |
| 39.6114796488   | 50.9032552535   |
| 97.2359771178   | 78.7543475957   |
| 2.6230729254    | 2.6447929293    |
| 50.5535993446   | 35.8183038628   |
| 6.3696635803    | 11.2392117708   |
| 2765.7491448602 | 2820.1015062695 |
| 33.9699980794   | 47.2993895629   |
| 47.3348996893   | 56.4044590724   |
| 17.8647035179   | 19.5136822854   |
| 100.7019724598  | 123.2652776462  |
| 14.6463554669   | 8.2042403617    |
| 83.9306861706   | 92.4372626315   |
| 88.0439763884   | 93.118544831    |
| 15.1437271733   | 7.1255906294    |
| 695.3996050628  | 844.0477400676  |
| 0.6850261834    | 0.8633730636    |
| 7.7648618628    | 23.4874732835   |
| 26.7520937748   | 22.4780090859   |
| 4.6678231486    | 5.3237169814    |
| 19.9718193388   | 39.1126254734   |
| 10.9850135781   | 9.565613487     |
| 0               | 0               |
| 1634.1407820055 | 1754.1521806355 |
| 248.9564376745  | 238.2542666729  |
| 6.2768794562    | 3.7422790736    |
| 0.2072109043    | 0.3760680356    |
| 1861.6739829256 | 2030.389416003  |
| 0               | 0               |
| 8.4075458963    | 7.8943584663    |
| 178.9389812782  | 234.4429709438  |
| 2.6263556783    | 2.4444026442    |
| 49.7795231539   | 87.412538798    |

gene\_expression\_table

|                 |                 |
|-----------------|-----------------|
| 18.5086274533   | 15.491311944    |
| 0.8850426672    | 0               |
| 6.1494771404    | 5.0875052816    |
| 15.1428420928   | 19.8729347647   |
| 1.3447100617    | 1.6270137039    |
| 35.8683197833   | 31.4481066084   |
| 8323.3155545661 | 6826.9203459714 |
| 0               | 0.4943222479    |
| 0.3831023402    | 0.7725491357    |
| 3.640341015     | 5.5057265566    |
| 0               | 0.3822307401    |
| 0               | 0               |
| 0               | 0               |
| 6.7931419948    | 8.8251777634    |
| 0.1415663512    | 0.2854771449    |
| 7.6100207593    | 10.9005807815   |
| 1.2301784213    | 1.2403647489    |
| 1.9182558958    | 2.7400313221    |
| 1.0478264377    | 0.6501555841    |
| 1.543144897     | 1.5559227016    |
| 0               | 0               |
| 13.210794446    | 14.5202012954   |
| 6.0115246386    | 6.4942524246    |
| 388.9457921136  | 476.7737351303  |
| 14.8174689335   | 12.2722767498   |
| 12.694943339    | 15.7539226049   |
| 0.7585676375    | 0.8236833825    |
| 8.9352159399    | 8.1453066396    |
| 35.3509600337   | 46.8541908411   |
| 0               | 0               |
| 80.3450498629   | 90.1515804558   |
| 290.9883085439  | 192.3019276897  |
| 0.6143847313    | 1.4867329483    |
| 1.9124068554    | 1.6197235186    |
| 10.3100078545   | 10.3953784932   |
| 0               | 0               |
| 4.7484299779    | 3.8535538447    |
| 33.1813711842   | 38.2355715231   |
| 0.3517031945    | 0.1773077128    |
| 2.1647284448    | 2.8062683854    |
| 0.1097911878    | 0.1722004651    |
| 243.5991768388  | 282.8954057436  |
| 0.05475302      | 0               |
| 25.8793827369   | 26.0936734984   |
| 6.3965937096    | 5.7329420861    |
| 0               | 0               |
| 0               | 0               |
| 0               | 0               |
| 0               | 0.47201565      |

gene\_expression\_table

|                 |                 |
|-----------------|-----------------|
| 1.4774557535    | 1.9862528372    |
| 45.7925111715   | 42.0675397095   |
| 9.191892607     | 10.0567712118   |
| 1.2263354784    | 1.2364899851    |
| 4.5118681447    | 8.5929863438    |
| 0               | 0               |
| 5.6502895695    | 1.7990766427    |
| 5.6565808272    | 3.8022795912    |
| 1.8520275788    | 2.8010445676    |
| 8.3696305692    | 9.5493202493    |
| 1.7752245852    | 2.9832068242    |
| 0.8709189338    | 1.7562609227    |
| 3941.6641074929 | 4478.1873139675 |
| 3.4393229998    | 3.5228463269    |
| 33.5361409661   | 26.8305409961   |
| 110.08695314    | 130.1531241267  |
| 28.0399871411   | 39.2753908321   |
| 8.787078126     | 15.9477090285   |
| 0               | 0.13868751      |
| 0               | 0               |
| 6.905425426     | 1.4919867592    |
| 175.2123916539  | 187.1166590267  |
| 2.35591151      | 2.0433714577    |
| 4.7049193637    | 1.1859694545    |
| 3.5540744725    | 2.866802808     |
| 0               | 0               |
| 463.8199845446  | 509.855523675   |
| 3.7404830525    | 2.5779570069    |
| 307.3533282892  | 422.3919596434  |
| 20.861032867    | 52.5844246369   |
| 0               | 0               |
| 54.4136569054   | 80.0103236058   |
| 31.6454262789   | 33.5780097397   |
| 14.6085588303   | 14.3518429664   |
| 68.8528828      | 79.113635963    |
| 0.2067599767    | 4.3779125248    |
| 209.6307682992  | 238.7958396407  |
| 91.9427793355   | 105.8432628678  |
| 9.8698458428    | 5.6866124451    |
| 78.9394354249   | 125.3591054789  |
| 15.2240067021   | 8.2366213439    |
| 629.7776679049  | 500.8311146498  |
| 6.7867946052    | 5.6112532339    |
| 922.421160968   | 1002.5312870384 |
| 0               | 0.1296525031    |
| 88.0205629093   | 129.7960053793  |
| 17.4894424497   | 17.4822419396   |
| 3.0618254899    | 2.6122279833    |
| 3.666705984     | 3.6970676516    |

gene\_expression\_table

|                 |                 |
|-----------------|-----------------|
| 24.3917594465   | 16.5957704702   |
| 0               | 1.7180587392    |
| 101.4612125268  | 147.2689742193  |
| 89.4457983576   | 96.5826438892   |
| 0.9641425528    | 0.2160280013    |
| 12.3240042758   | 13.2108547974   |
| 53.2020591804   | 58.2783712334   |
| 92.8408284217   | 99.7145573625   |
| 0.2216013036    | 0.2234362435    |
| 42.9675005321   | 64.2861680491   |
| 63.6633769172   | 54.9185671053   |
| 38.3795622578   | 37.9807413203   |
| 196.460463681   | 203.8768340645  |
| 8.9676736885    | 11.6540422205   |
| 0               | 0               |
| 112.031736555   | 132.7768389958  |
| 5770.3188983398 | 5499.3816691762 |
| 167.1084321486  | 160.8334169897  |
| 70.9981157946   | 77.6784322381   |
| 0.6615701564    | 1.3340963989    |
| 0.6525722624    | 2.6319031984    |
| 16.7060434721   | 25.8280426278   |
| 0               | 0.1682311487    |
| 14.5517567093   | 12.7344061647   |
| 0.2297535588    | 0.3790734585    |
| 2.0055448742    | 1.5382178228    |
| 0               | 0               |
| 0.3501152369    | 0               |
| 0               | 0               |
| 0               | 0               |
| 3.5228421086    | 2.0720073096    |
| 2.0024180614    | 2.0189988159    |
| 0.2794430728    | 0.5635139274    |
| 3.6799469969    | 1.2368061016    |
| 5.4137825597    | 5.8107790906    |
| 4.4466551372    | 3.7037402746    |
| 0               | 0               |
| 0               | 0               |
| 0               | 0.0122388617    |
| 136.0225714085  | 184.4416081169  |
| 7.4414251743    | 6.3585109309    |
| 0.4570164099    | 0.2304003365    |
| 14.5272794061   | 7.9432099257    |
| 25.6258472502   | 24.7146456605   |
| 0               | 0.4445115222    |
| 4.2935459145    | 3.9960905042    |
| 1.1407677716    | 1.2460648918    |
| 14.8396359838   | 28.1726607449   |
| 0.2938430701    | 0.3386013695    |



gene\_expression\_table

|                  |                 |
|------------------|-----------------|
| 27.9497333558    | 27.2583583709   |
| 7.8312358416     | 9.4752976089    |
| 1.0215757017     | 0.850898249     |
| 0.0232716748     | 0               |
| 0                | 0               |
| 0                | 0               |
| 0                | 0               |
| 0                | 0               |
| 0.051173154      | 0               |
| 1.0664774385     | 0.6662235972    |
| 4.594834945      | 6.6298136965    |
| 31.889650156     | 32.7841729969   |
| 18.9301870432    | 16.8456669301   |
| 4.4598335177     | 8.0941726288    |
| 2.1189985541     | 2.7939429878    |
| 0.8323102787     | 0.7343018484    |
| 426.0875859218   | 605.8683612813  |
| 31.0843204972    | 29.3567350787   |
| 8.305580502      | 6.6266625315    |
| 0.0347675833     | 0.0408980502    |
| 0                | 3.7437578331    |
| 0                | 0               |
| 1.6598240451     | 1.0997732544    |
| 0.7403026058     | 0.6678607315    |
| 1.8334780957     | 1.0563771231    |
| 1.4524163221     | 2.0621746409    |
| 6.9322445956     | 9.7855045654    |
| 0.0111486986     | 0               |
| 0.5987059201     | 0.3923812258    |
| 0                | 0               |
| 0.9191909638     | 0.9268022014    |
| 0                | 0               |
| 7.0411452654     | 3.6511449559    |
| 1.1593546582     | 3.2146249826    |
| 12160.4777031211 | 9451.3650289109 |
| 7.1214502754     | 8.7122411015    |
| 0.1158277914     | 0               |
| 267.9044956426   | 342.5269039156  |
| 29.5125423252    | 35.2002554494   |
| 0                | 0               |
| 2.5638400002     | 1.2925347669    |
| 0                | 0               |
| 0                | 0               |
| 0.0844910862     | 0.0851907034    |
| 3.6016295728     | 3.1069092618    |
| 6.4248023925     | 8.0975026349    |
| 0.4324341936     | 0.7751376125    |
| 67.6205809004    | 60.6972780054   |
| 4.485063459      | 4.0773947284    |

gene\_expression\_table

|               |               |
|---------------|---------------|
| 0.7552991042  | 0             |
| 0.5290580203  | 0.721711337   |
| 0.3331263662  | 0.5038271617  |
| 6.3392734063  | 4.5940810294  |
| 1.0239454155  | 0             |
| 0.2867989358  | 0.4731933861  |
| 0.3427951857  | 0.806478529   |
| 0             | 0             |
| 0.2777472562  | 0.2800471051  |
| 5.0653197636  | 3.9941411587  |
| 60.163313614  | 77.0738798159 |
| 18.105802111  | 0             |
| 3.7104376184  | 2.2981420029  |
| 0             | 0             |
| 3.2082516481  | 4.41111429    |
| 0             | 0.2583127383  |
| 5.112712863   | 5.4496221681  |
| 1.2075439597  | 2.5111821604  |
| 2.6243282989  | 2.7122101652  |
| 3.571218849   | 4.6598456859  |
| 0.5858211027  | 0.6891172352  |
| 60.7974204339 | 39.1281991457 |
| 6.5379207693  | 8.3668417626  |
| 0             | 0             |
| 23.649856148  | 22.9625120721 |
| 6.585272742   | 5.3355545443  |
| 0.2582456911  | 0             |
| 42.3097004627 | 56.8800536917 |
| 2.7351199548  | 3.0398121781  |
| 3.6197782068  | 3.1283582531  |
| 0.0621801107  | 0.0626949847  |
| 11.7138000067 | 7.4014312565  |
| 0             | 0             |
| 1.8017414793  | 4.178319284   |
| 5.1636528695  | 3.8180338572  |
| 0.5311970727  | 0.9372922631  |
| 12.7485440339 | 10.14797893   |
| 0.0235133565  | 0.0474161114  |
| 1.1003660675  | 1.068385742   |
| 2.0285642993  | 1.4609725387  |
| 3.0153239305  | 6.3144524416  |
| 35.0162697137 | 28.0748233504 |
| 1.0629629419  | 0.9109999645  |
| 0.2069482443  | 0.2782158021  |
| 20.573072621  | 23.363647322  |
| 0             | 0             |
| 0.4937165336  | 0.7311506343  |
| 0             | 0             |
| 0             | 0.008583      |

gene\_expression\_table

|                |                |
|----------------|----------------|
| 0.2183788249   | 0.6165238283   |
| 0.0393459146   | 0              |
| 0              | 0              |
| 3.5768036729   | 4.6698527252   |
| 0.9108612538   | 0.3673614073   |
| 1.1405713821   | 1.3143036921   |
| 1.3732088683   | 2.2707104462   |
| 9.4805701722   | 8.9855283976   |
| 1.3337487296   | 2.3907425018   |
| 8.1959360446   | 8.2638013949   |
| 9.5899277293   | 11.6527893468  |
| 1.1513447991   | 1.0447905199   |
| 0.7311247718   | 0.9072969261   |
| 0.3362992577   | 0.7798930589   |
| 0.0387295095   | 0              |
| 10.24027989    | 8.9783244831   |
| 3.6277880074   | 3.4836451618   |
| 13.5760954043  | 17.0526358914  |
| 0.2244102951   | 0.1257047191   |
| 4.746311975    | 3.9492924263   |
| 0.889967551    | 1.3460052121   |
| 0.2663874502   | 0.6983424131   |
| 1.3488220019   | 2.2399847512   |
| 1.2118169053   | 0.7636569955   |
| 0.0900293195   | 0.1815495905   |
| 48.0820416025  | 54.6306489136  |
| 0.9039221416   | 0.9114069478   |
| 14.4166386762  | 12.7190120061  |
| 8.1474869772   | 10.3349385455  |
| 1.3892590173   | 1.1206100724   |
| 0.2611848126   | 0.0877825062   |
| 0.6005769133   | 0.562296345    |
| 3.7080927195   | 2.6429427666   |
| 3.4456949268   | 3.9225138378   |
| 0.0512578905   | 0              |
| 1.2317926215   | 0.4967969261   |
| 2.1015321555   | 2.7880705407   |
| 2.1742319953   | 1.8549684425   |
| 13.4190980538  | 16.6801039772  |
| 85.7876154905  | 94.5877063937  |
| 5.1044056463   | 6.778543601    |
| 0.7835101657   | 0.8315767544   |
| 2.9429794885   | 0.5934696872   |
| 0.904089163    | 0.4715044925   |
| 3.2423579445   | 3.4946683278   |
| 0.1350792524   | 0.2451559645   |
| 2.0451024407   | 4.4677460478   |
| 3.3824285667   | 1.5157494726   |
| 273.7717571764 | 325.1962620241 |

gene\_expression\_table

|                |                |
|----------------|----------------|
| 20.5395443468  | 27.171020511   |
| 0              | 0              |
| 0.7154427873   | 0.6011390962   |
| 0              | 0              |
| 11.1393375019  | 9.827628382    |
| 0.8616004596   | 2.2649157984   |
| 40.5082463659  | 46.3630842663  |
| 0              | 0              |
| 30.0376356317  | 25.8478402299  |
| 0.1651269092   | 0.1664942205   |
| 1.387676937    | 1.2242714837   |
| 0.9472615365   | 1.528168334    |
| 0.0416773683   | 0.0420224721   |
| 1.3507596271   | 0.7782539492   |
| 10.3510674509  | 9.4754958867   |
| 16.4858579181  | 20.2430804283  |
| 1.0801256922   | 1.6972512129   |
| 0.1385548086   | 0.2561205041   |
| 0              | 0              |
| 0.3311329469   | 0.6677496978   |
| 11.4428189559  | 12.6913266537  |
| 0.135003343    | 0.04537374     |
| 0              | 0              |
| 8.4043197144   | 5.7069193553   |
| 8.071276472    | 6.7139404162   |
| 0              | 0.0228145442   |
| 0              | 0              |
| 0.2554298865   | 0.2575449394   |
| 0              | 0              |
| 0              | 0              |
| 0              | 0              |
| 0              | 0              |
| 24.0734777312  | 32.9416774162  |
| 1.2194928766   | 1.6906872455   |
| 10.521833322   | 10.1155180483  |
| 1.7431892282   | 1.3182176048   |
| 136.7283905821 | 172.0094957011 |
| 0              | 0              |
| 7.0888896607   | 9.3658053085   |
| 7.5512850219   | 5.393117135    |
| 1.3718477654   | 0              |
| 0              | 0.0717148917   |
| 0              | 0              |
| 0              | 0              |
| 1.5888371032   | 1.2556163358   |
| 0.0937215863   | 0.283492906    |
| 0              | 0              |
| 0              | 0              |
| 1.0305432381   | 0              |

gene\_expression\_table

|                 |                 |
|-----------------|-----------------|
| 1.6973563979    | 1.3905215433    |
| 0               | 0               |
| 0               | 0               |
| 0               | 0               |
| 2.275135906     | 3.0238759572    |
| 0               | 0               |
| 0               | 0               |
| 5184.9554080017 | 5020.5558623017 |
| 0               | 0               |
| 1.9555557685    | 2.1360608598    |
| 0.2653781836    | 0               |
| 0.2707350554    | 0.4679602985    |
| 0               | 0               |
| 3.5330076294    | 4.1150270538    |
| 102.3506995163  | 63.1763131019   |
| 0.7270977948    | 0.6788133618    |
| 0               | 0               |
| 11.4491395585   | 9.7482182164    |
| 46.6978879773   | 58.2542593225   |
| 0.5516703065    | 0.5006145047    |
| 2.6586542546    | 2.4593292523    |
| 0.941663589     | 0.6962713327    |
| 6.0426570628    | 5.3311059156    |
| 9.8230207711    | 8.1967108788    |
| 0.1260237063    | 0.1588340359    |
| 75.3325101241   | 87.2555738222   |
| 0.2766318491    | 0.364744758     |
| 0.1187902592    | 0.239547772     |
| 23.5504343168   | 13.7782185808   |
| 0.2133172195    | 0.2688544552    |
| 4.7827782194    | 4.0645785864    |
| 369.7714740409  | 332.3338514252  |
| 9.8274829437    | 8.7655283188    |
| 0.3429170034    | 0.0691512964    |
| 221.0781913856  | 210.7941910486  |
| 0               | 0.1596578884    |
| 8.7394290049    | 9.5198853195    |
| 1.6345548245    | 1.4982632152    |
| 1.053356215     | 1.8586371826    |
| 8.8677509247    | 8.3173759517    |
| 5.6368148856    | 6.7036033255    |
| 12.8157516817   | 20.0629046576   |
| 0.9294602951    | 0.5727067907    |
| 13.8052754205   | 16.7603204304   |
| 1.4359372261    | 1.0741944573    |
| 4374.8727814507 | 5001.8704270625 |
| 1.8860792009    | 1.1186450747    |
| 0.3750050479    | 0.3985486177    |
| 0.0244719799    | 0.0986984674    |

gene\_expression\_table

|               |               |
|---------------|---------------|
| 1.3900010734  | 1.8394829133  |
| 1.2422802901  | 0.4356754176  |
| 0             | 0             |
| 23.5110229276 | 40.1966264921 |
| 0.106377797   | 0.080443983   |
| 2.7815755633  | 3.178555764   |
| 0.2247763057  | 0.1295071633  |
| 0.104336667   | 0.1227340482  |
| 1.9321954135  | 1.7084168896  |
| 2.6183015331  | 2.6399820282  |
| 3.0443230044  | 4.8833449528  |
| 1.4077371812  | 0.7096968802  |
| 7.5498245496  | 5.1463706098  |
| 2.5864570898  | 2.5112859789  |
| 19.6594943579 | 31.0375207615 |
| 34.7919324055 | 35.9264571958 |
| 6.3150076462  | 6.4946441853  |
| 0.1695669289  | 0.5129130155  |
| 1.8285978418  | 0             |
| 0             | 1.5909346341  |
| 0             | 0             |
| 0             | 0.7165293113  |
| 2.7355800546  | 2.0551530006  |
| 0.023615973   | 0             |
| 2.1206436724  | 2.7280525859  |
| 0             | 0.0488889678  |
| 3.1301756395  | 3.3665009488  |
| 1.6998171907  | 2.6932593273  |
| 4.5173184823  | 7.8080974848  |
| 0             | 0             |
| 0.0669862297  | 0.0450272668  |
| 0             | 0             |
| 12.7624938522 | 15.0868223127 |
| 12.1195355583 | 18.620784379  |
| 0             | 0             |
| 0.7113332417  | 0.9467348105  |
| 0.6560110601  | 0.3858417918  |
| 2.7969961285  | 3.3381441684  |
| 3.9377293084  | 4.6608282176  |
| 0             | 0             |
| 0.8910436945  | 1.0727425223  |
| 5.5553644482  | 8.0725552959  |
| 1.7665656343  | 1.4484430207  |
| 0.4022246723  | 0.2281248224  |
| 3.3371678118  | 3.2658360539  |
| 0.9795745056  | 0.4938428705  |
| 8.1645036301  | 11.4126961641 |
| 0.8647678705  | 0.9342090696  |
| 1.6865147577  | 2.0523031069  |

gene\_expression\_table

|                |                |
|----------------|----------------|
| 40.1712274913  | 44.693914437   |
| 0.0474200289   | 0              |
| 15.3368460844  | 16.8696444912  |
| 0              | 0              |
| 1.880081476    | 4.0019261708   |
| 29.6369189445  | 32.0555833706  |
| 9.7954328724   | 11.8935830406  |
| 44.8723350699  | 56.0162502448  |
| 8.7257386252   | 7.7828381346   |
| 414.1229633651 | 458.9964255937 |
| 103.1241539574 | 99.6153439063  |
| 1.083894027    | 0              |
| 8.5714138106   | 7.0525149434   |
| 0.3077884731   | 0.3103370743   |
| 0.0540066136   | 0              |
| 3.0191441203   | 2.1216759391   |
| 1.6378622479   | 1.2486379207   |
| 0.0125131197   | 0.004206       |
| 0.0195630992   | 0.009863       |
| 5.2662672303   | 4.6372898294   |
| 0              | 0              |
| 0              | 0              |
| 0              | 0              |
| 30.198759061   | 39.5834605912  |
| 22.5914783124  | 22.1368948944  |
| 0.3430285377   | 0.4099187431   |
| 44.435132377   | 43.5168589573  |
| 4.8089467442   | 3.5018869769   |
| 0              | 0              |
| 0.1501929065   | 0.4543096763   |
| 0.2506484294   | 0.2527238901   |
| 51.5164852153  | 80.6484361467  |
| 30.5771303668  | 19.0168330194  |
| 0.4413003044   | 1.1123860811   |
| 4.035328455    | 3.48749353     |
| 22.7036477575  | 18.9673607388  |
| 2.0660346615   | 2.331135302    |
| 189.0343555857 | 160.6391524034 |
| 8.3858246265   | 5.949999413    |
| 108.5752606363 | 133.0240083655 |
| 0.7176722293   | 0.4824098787   |
| 1.8074541112   | 2.7336307392   |
| 4.0740456899   | 3.2519927212   |
| 0.9832044179   | 1.7348549931   |
| 1.0967434531   | 1.0407763673   |
| 8.5720806863   | 5.6325563799   |
| 5.819329969    | 4.7918048567   |
| 16.2179027208  | 18.9802238919  |
| 5.3063084924   | 6.1578310718   |

gene\_expression\_table

|                 |                 |
|-----------------|-----------------|
| 42.8475912283   | 52.9229215843   |
| 5.8366561011    | 5.7396774599    |
| 3.9175648577    | 2.3700022372    |
| 0               | 1.6565331659    |
| 9.1150053899    | 8.1693164185    |
| 0               | 1.4659900202    |
| 2.4492090098    | 2.9184874217    |
| 2.3634266991    | 2.5532107899    |
| 12.62641463     | 10.8448969329   |
| 1266.212947928  | 747.9642824916  |
| 0.7734989715    | 1.3471066087    |
| 2.249619221     | 2.1430062657    |
| 26.9389058723   | 22.0232188161   |
| 72.2608973539   | 83.9182364308   |
| 2.8588665262    | 3.6738241996    |
| 66.7909677813   | 89.9397128461   |
| 9.6210528522    | 7.6486435835    |
| 5.8790297443    | 4.5329549065    |
| 16.0389020873   | 15.5248416645   |
| 0.9292686126    | 1.3533914287    |
| 45.066540273    | 46.3237487281   |
| 1.8327068947    | 0.5939621931    |
| 9.1280921075    | 8.1448460631    |
| 0.2796842326    | 0.1740000743    |
| 0               | 0               |
| 6.4502268201    | 6.595237581     |
| 55.4946353856   | 72.3385160179   |
| 0.612544395     | 0.4803683786    |
| 4.3788073045    | 7.3584423862    |
| 6.9336308927    | 0               |
| 16.4873461448   | 16.2248945879   |
| 0               | 0.5851547707    |
| 8.6422129888    | 7.1073237801    |
| 2.7155958292    | 3.4226024458    |
| 7379.5873568774 | 8711.3422256491 |
| 1.6626176931    | 0.8381923881    |
| 6.1986335741    | 5.8035347769    |
| 2.8131236356    | 2.8364173289    |
| 0               | 0               |
| 22.806736391    | 25.97649362     |
| 4.0714581982    | 6.537865503     |
| 29.5891037651   | 20.2871964147   |
| 29.1128255775   | 32.336371275    |
| 1.5989210191    | 2.3131000922    |
| 2.545492845     | 1.6237486568    |
| 13.2522136059   | 13.6588789359   |
| 186.7576659371  | 220.2133578714  |
| 5.1807999973    | 5.3729474581    |
| 68.6796628784   | 61.2195607701   |



gene\_expression\_table

|                |                |
|----------------|----------------|
| 0              | 0              |
| 8.4495827186   | 16.0367969058  |
| 9.5172603069   | 10.4956979594  |
| 0.6640882435   | 0              |
| 58.2412804235  | 53.7375786384  |
| 16.8033742555  | 11.6087584585  |
| 0              | 0              |
| 23.358013337   | 26.521876393   |
| 3.8323331539   | 3.4249678348   |
| 3.2690674642   | 2.609441427    |
| 11.0177375366  | 12.241092608   |
| 0.4826433074   | 0.5109717592   |
| 3.7798032262   | 3.9075849596   |
| 0.770232913    | 0.1941526809   |
| 0              | 0              |
| 171.3168620924 | 289.7724942002 |
| 3.2443932606   | 3.8389970202   |
| 0              | 0.0125720508   |
| 2.6529870159   | 2.0062160396   |
| 56.0627562931  | 46.6347555592  |
| 0              | 0              |
| 5.3772368287   | 5.8000248051   |
| 11.4409241357  | 10.1898322714  |
| 0              | 0              |
| 3.0303395112   | 2.4443454652   |
| 0.4229095994   | 0.5814701532   |
| 0              | 0              |
| 35.6247927217  | 57.7282163221  |
| 0.6263150943   | 0.2806672056   |
| 0.7969886246   | 1.0714506428   |
| 0.2249368808   | 0.1619996004   |
| 21.0991746272  | 21.660681398   |
| 0              | 0              |
| 505.8570858066 | 398.1537673828 |
| 1.556804021    | 2.1092775597   |
| 2.3133690448   | 2.4158290368   |
| 7.6985740218   | 5.075363752    |
| 22.7078892278  | 15.2639459081  |
| 45.1892734128  | 58.4284332697  |
| 1.8658005042   | 2.2430288644   |
| 73.4964597173  | 62.6059797922  |
| 0.9722467192   | 0.7352229584   |
| 0              | 0              |
| 0              | 0              |
| 0              | 0              |
| 0.715288726    | 0.5769692628   |
| 0              | 0.0972969611   |
| 1.2224831926   | 0.9165530314   |
| 503.6116311808 | 705.8771437356 |

gene\_expression\_table

|                |                |
|----------------|----------------|
| 1.1252237827   | 1.0084809311   |
| 0.8903001206   | 0.5236420767   |
| 2.4738528277   | 2.4943372346   |
| 383.0659231206 | 512.312721104  |
| 396.1661083989 | 401.3196459858 |
| 9.9876661313   | 11.6900771467  |
| 0              | 0              |
| 2.9066274435   | 3.4007125666   |
| 5.7309008673   | 5.7783548241   |
| 2.3772275274   | 2.3969118414   |
| 0.7446514577   | 0.6256812036   |
| 15.1916756499  | 7.6587341424   |
| 15.4006555213  | 19.9648010391  |
| 0              | 0              |
| 15.5506956686  | 33.3188548813  |
| 299.7028310636 | 234.6152796603 |
| 364.271725013  | 350.2409045543 |
| 165.9222840745 | 154.4272442933 |
| 24.9789374026  | 19.7888209727  |
| 1.091496696    | 2.2010693763   |
| 1.088227649    | 0.8862311545   |
| 30.1273977402  | 31.4044108046  |
| 0.7068709937   | 0.5966992836   |
| 0.0109341613   | 0              |
| 2.0221273145   | 1.4618322305   |
| 0.1878570073   | 0.1736281544   |
| 0              | 0              |
| 0              | 0              |
| 0              | 0.0525306568   |
| 4.2599260655   | 2.505533224    |
| 0.4510361091   | 0.3979244965   |
| 11.9994040293  | 10.2213691526  |
| 2.3476354835   | 1.7404961504   |
| 5.1943257446   | 4.7029145546   |
| 0              | 0              |
| 310.2586992564 | 277.5198818399 |
| 17.727551684   | 27.0330962066  |
| 0              | 0              |
| 0              | 0.0401335671   |
| 174.5971354485 | 164.9305234068 |
| 5.7381477092   | 4.9147018508   |
| 17.5281742443  | 15.0102118418  |
| 0.1162503043   | 0.2344257987   |
| 10.6436901801  | 10.3740963696  |
| 15.3863339578  | 12.7292212798  |
| 0.1586768197   | 0.1028511783   |
| 1.9515474175   | 1.5422567943   |
| 0              | 0.1071784451   |
| 3.8673430407   | 2.0425250773   |

gene\_expression\_table

|                 |                 |
|-----------------|-----------------|
| 14.7480148719   | 16.2863370553   |
| 2.366766733     | 2.1907607862    |
| 0.3490751225    | 0.0879913981    |
| 5.2187628207    | 4.1732913794    |
| 0.3793129247    | 0.2731812675    |
| 0.4343542176    | 0.2335737757    |
| 0.7640440661    | 1.6370375901    |
| 0               | 0.3361830217    |
| 0               | 0.5281405095    |
| 17.2466982156   | 24.9742922402   |
| 5.2675439984    | 5.0898628078    |
| 3.7181079433    | 3.4364873014    |
| 0.0696843365    | 0.1171022471    |
| 1.3363997132    | 1.2847927737    |
| 0.01173296      | 0               |
| 2.141137643     | 1.904882688     |
| 6.5573743327    | 7.3614490059    |
| 1.832974236     | 1.6122176442    |
| 328.5776506659  | 395.1265248109  |
| 0.1348429925    | 0.0479857206    |
| 12.6780482853   | 0.913073369     |
| 0               | 0.0210283604    |
| 7.402475021     | 10.449278313    |
| 109.555086721   | 156.2359805946  |
| 108.5166885494  | 119.935943224   |
| 0               | 0.0640167491    |
| 4.5502648067    | 5.7676993501    |
| 8.4636288933    | 7.574866924     |
| 6.3206512269    | 8.6153363495    |
| 672.2710370975  | 905.0784020206  |
| 0               | 1.3037525719    |
| 2.2794429991    | 1.9535699782    |
| 0.7118750088    | 0               |
| 2.5200964926    | 6.6455976673    |
| 0               | 1.320791858     |
| 10.7890520748   | 18.3572820703   |
| 6.0373768661    | 0               |
| 3.8461222921    | 6.6479478728    |
| 152.4440457192  | 160.8104126709  |
| 0               | 0.2511657897    |
| 52.7074884594   | 78.8446767363   |
| 38.5222589786   | 43.2282641947   |
| 0               | 0               |
| 37.2397565454   | 43.9122027093   |
| 138.6438840432  | 150.3422386893  |
| 3.3687184105    | 3.0569513688    |
| 12.6838208742   | 13.6051569719   |
| 3137.0646311734 | 3621.1670749399 |
| 260.5281530051  | 247.6513963086  |

gene\_expression\_table

|                |                 |
|----------------|-----------------|
| 32.2929614689  | 37.0294278934   |
| 11.5538028187  | 10.9434438965   |
| 6.7174915951   | 10.1216211191   |
| 0              | 0               |
| 33.6126257597  | 47.347651579    |
| 0.5024224271   | 0.5455505663    |
| 1.1799988272   | 1.208654882     |
| 0.2815933357   | 0.2208305802    |
| 7.7529802649   | 8.8831565674    |
| 0.2362013895   | 0.2381572235    |
| 5.919443185    | 5.1158214353    |
| 0.0604700642   | 0.0121941557    |
| 12.6879014646  | 16.5623167879   |
| 37.9024399979  | 38.2162860741   |
| 0.1075943952   | 0.1084853161    |
| 3.3119197313   | 4.4809995838    |
| 0.0191533965   | 0.057935981     |
| 475.4169787447 | 262.0687530932  |
| 0.9273606528   | 1.9550826713    |
| 1.7091803781   | 2.0175606056    |
| 0              | 0               |
| 0              | 0               |
| 0              | 0.5282462356    |
| 87.44087141    | 115.2925796245  |
| 16.1704349584  | 18.2608519281   |
| 4.7466158873   | 6.3343053585    |
| 166.5763222579 | 236.3645315268  |
| 5.5275603709   | 2.0899989727    |
| 25.1183865134  | 31.3360244775   |
| 7022.986679002 | 5908.3938362348 |
| 0              | 0               |
| 0              | 0               |
| 2.0673770454   | 4.168991368     |
| 0              | 0               |
| 0              | 0               |
| 0.1346439613   | 0               |
| 2.7950379458   | 1.4761905102    |
| 3.2144203872   | 2.867071161     |
| 2.0513826792   | 1.1819250735    |
| 2.9405746023   | 2.3295828571    |
| 0              | 0               |
| 2.5140359232   | 1.2674265304    |
| 4.212345957    | 3.1854192925    |
| 0.6171881162   | 0.1037164433    |
| 3.8617556722   | 4.0344697391    |
| 46.0483841401  | 64.9478783292   |
| 9.5113475971   | 9.9207983137    |
| 13.4703778932  | 15.3344230432   |
| 0.556545148    | 0.1496409455    |

gene\_expression\_table

|                 |                 |
|-----------------|-----------------|
| 26.8842581209   | 21.4427476086   |
| 2.7147367272    | 3.6346635249    |
| 26.3701871436   | 24.100725155    |
| 37.1743130316   | 44.8315671952   |
| 1.7554085239    | 2.1526345325    |
| 0               | 0               |
| 0.0238319371    | 0.0480585486    |
| 0.2723063314    | 0.4118416913    |
| 32.8182415375   | 45.3276486033   |
| 22.6528080828   | 23.5221840617   |
| 0               | 0               |
| 308.1862915999  | 315.3078661162  |
| 0.188861939     | 0               |
| 7.3752925764    | 7.4363626984    |
| 11.5995096124   | 18.9964211501   |
| 8.0778820623    | 10.3167085178   |
| 30.1478335356   | 27.4173246485   |
| 1.7021862739    | 0               |
| 6.8164700923    | 32.0735938117   |
| 45.5771003324   | 61.008554245    |
| 0.8426644167    | 0.566427991     |
| 33.2092001229   | 31.3914229267   |
| 3.1445358117    | 6.3411474385    |
| 0.7253269175    | 0               |
| 3.2689409164    | 4.6443762388    |
| 92.7263089015   | 115.4626796146  |
| 147.6833953442  | 171.1699235038  |
| 15.0480770257   | 19.2187287744   |
| 0.2966100029    | 0.1993773615    |
| 22.0742885736   | 33.5264751868   |
| 7.0966757285    | 9.415051054     |
| 3.5314692047    | 4.189071838     |
| 0.5168442613    | 0.3474159473    |
| 9.9730395992    | 18.3732316367   |
| 0.7038440065    | 1.3179624575    |
| 4.6130356105    | 5.8140415422    |
| 8.780433584     | 8.8531387879    |
| 0               | 0               |
| 3.1352556556    | 2.5120382864    |
| 0.2609993233    | 0               |
| 0               | 0               |
| 20.2979026486   | 18.1270079449   |
| 5.6169015663    | 5.2588821696    |
| 114.5946199443  | 77.7696670568   |
| 4.1367085027    | 5.0490592187    |
| 158.9334555341  | 135.5269788795  |
| 0               | 0.1791433833    |
| 0.2696789261    | 0.0679779916    |
| 1350.0684994777 | 1768.2872726173 |

gene\_expression\_table

|               |               |
|---------------|---------------|
| 90.9148857234 | 87.8857265146 |
| 0             | 0             |
| 0             | 0             |
| 5.8432157193  | 4.8442041848  |
| 0.7900713648  | 0.7966134449  |
| 0             | 1.4450082091  |
| 32.9141276163 | 26.8175100123 |
| 0.7756493428  | 2.3462160097  |
| 0             | 0             |
| 0.200163803   | 0.1009106163  |
| 0             | 0.8982392821  |
| 2.070331028   | 1.0437370634  |
| 5.3709375665  | 6.9384952098  |
| 1.450149278   | 3.0635671414  |
| 44.0729794954 | 64.1881065183 |
| 2.7933355837  | 1.8654511255  |
| 9.6346635646  | 13.4044239905 |
| 0             | 0             |
| 0             | 0             |
| 0             | 0             |
| 0             | 0             |
| 1.3093889455  | 1.4522542818  |
| 2.3020451287  | 2.7853282859  |
| 0             | 0             |
| 0             | 0             |
| 4.5369346774  | 8.1786553718  |
| 8.6417390678  | 9.0618276635  |
| 0.364208591   | 0.2592172034  |
| 41.3158862925 | 47.230085718  |
| 0             | 0             |
| 3.304876153   | 2.2214944915  |
| 0             | 0             |
| 2.6994384251  | 2.8513998472  |
| 0.456195632   | 0.9199461976  |
| 0.0523331886  | 0.0527665265  |
| 0.3372538795  | 0.3683836705  |
| 6.6179828406  | 8.007338593   |
| 3.6635562938  | 1.4775567523  |
| 2.407396633   | 1.8803266437  |
| 41.0222974943 | 41.6188838229 |
| 7.2031607126  | 8.6168879049  |
| 2.1467453563  | 0.970302604   |
| 10.9495627346 | 11.0402291219 |
| 0             | 0             |
| 1.109666833   | 0.8391414604  |
| 4.4014954253  | 12.8207196533 |
| 17.8730420272 | 16.6498714712 |
| 8.3492028465  | 7.8921912207  |
| 4.0435085045  | 2.5089170677  |

gene\_expression\_table

|                |                |
|----------------|----------------|
| 0.6276046513   | 0.3164007238   |
| 0.8047398068   | 0.6310914921   |
| 12.9199467537  | 15.1112372244  |
| 0.6055383626   | 0.4696557245   |
| 0              | 0              |
| 0              | 0              |
| 4.0022027241   | 6.3412523861   |
| 0.051131042    | 0.0515544257   |
| 1.140534264    | 1.3799739661   |
| 75.4966951361  | 85.1905017171  |
| 3.2688291976   | 5.3446967024   |
| 8.4563474072   | 5.9684583412   |
| 0.8319494853   | 0.8388383316   |
| 0              | 1.0740648436   |
| 0.7283477602   | 0.7908694191   |
| 2.971970343    | 2.8388646428   |
| 77.8862426173  | 79.6713676783  |
| 14.4117328626  | 14.3719680088  |
| 0.9150012032   | 0              |
| 1.3672665916   | 1.4647498131   |
| 0.8388321325   | 0.7960263243   |
| 0.0778575688   | 0              |
| 10.1211388973  | 11.6422619181  |
| 202.2484754514 | 216.3258488565 |
| 78.4946615716  | 84.1170633421  |
| 65.4456337104  | 70.2107505527  |
| 0              | 0.525344598    |
| 0              | 0              |
| 19.9636626158  | 15.4112419285  |
| 118.1459316957 | 137.8953129789 |
| 3.8950379321   | 5.4982063807   |
| 12.1134436352  | 12.6349110851  |
| 6.4927270622   | 4.9540999493   |
| 4.7702113267   | 2.0613044668   |
| 11.3750997244  | 22.6285986242  |
| 0              | 0.4500946255   |
| 4.1320530295   | 2.136547662    |
| 0.3616838414   | 0.729357432    |
| 0              | 0.1924585758   |
| 0              | 0              |
| 9.8610075209   | 12.3288987379  |
| 34.4090033308  | 31.2051481459  |
| 1.1310198542   | 2.2807702252   |
| 7.3887007652   | 9.31235239     |
| 207.8508094237 | 211.3631029404 |
| 222.4814550509 | 249.5285911262 |
| 13.9748666779  | 30.1941079052  |
| 6.3028408005   | 11.348268981   |
| 29.4408304311  | 42.547942839   |

gene\_expression\_table

|                 |                 |
|-----------------|-----------------|
| 0               | 9.6487320996    |
| 41.1189589501   | 48.9521086759   |
| 6.6918236533    | 13.494468805    |
| 0.6054942761    | 4.2735559322    |
| 1.4723552158    | 0.7422734279    |
| 2.2053605559    | 2.0846453892    |
| 0.2049300036    | 0.137751266     |
| 1.8696080891    | 3.0161426055    |
| 37.4900075861   | 44.8880208031   |
| 2.1600619288    | 1.960153229     |
| 1.0131704567    | 0.6129359274    |
| 59.3349220389   | 67.4404852454   |
| 293.4931520604  | 269.8124960679  |
| 1.5038905763    | 0.7581716704    |
| 54.5940799019   | 63.2348206808   |
| 0.3969420939    | 1.0005722992    |
| 31.5968327084   | 42.4779547311   |
| 27.8946509449   | 23.358573125    |
| 172.9764613696  | 191.0191288097  |
| 0.9272565608    | 1.246579446     |
| 5.8384097394    | 11.773507818    |
| 193.1506428311  | 267.3386375319  |
| 3.604159669     | 5.1914334719    |
| 418.834217894   | 439.40823522    |
| 16.7554641355   | 13.7510975093   |
| 2131.2829821947 | 1876.3052379831 |
| 0               | 0               |
| 29.0685290293   | 27.2157108687   |
| 15.3064581439   | 17.8700224651   |
| 3.7588673552    | 2.8424941145    |
| 69.794733594    | 77.1555664776   |
| 11.5615362878   | 29.1431751      |
| 0               | 0               |
| 0               | 0               |
| 49.5715615195   | 47.2052526268   |
| 2.8362783602    | 0               |
| 5.8648887513    | 4.223894412     |
| 3.0921831747    | 3.1177875832    |
| 0               | 0               |
| 48.9845590548   | 48.8962674418   |
| 50.5835032466   | 76.0561406894   |
| 14.545989926    | 23.2937513684   |
| 74.6108414058   | 76.288204883    |
| 1.3616282538    | 6.8645151708    |
| 0               | 0               |
| 1.4146396966    | 1.3643380645    |
| 0               | 0               |
| 1.0298059509    | 0.3461110404    |
| 2.8478756206    | 2.2971656585    |



gene\_expression\_table

|                |                |
|----------------|----------------|
| 20.5171106353  | 24.1763732849  |
| 10.6438268216  | 11.4027092038  |
| 2.7794569497   | 1.4012359353   |
| 67.3351711729  | 74.7803994023  |
| 0              | 0              |
| 0              | 0              |
| 8.2862890324   | 10.1929810971  |
| 7.8911158465   | 2.1699428657   |
| 0.6205529137   | 0.3128456595   |
| 7.4064955751   | 7.1359207774   |
| 0.9983778518   | 0              |
| 0.8073218771   | 0.9460079001   |
| 0.6652189502   | 0.6707272066   |
| 5.5033885216   | 2.2195834372   |
| 24.6063035759  | 27.3606189491  |
| 1.4974369496   | 1.1614125197   |
| 13.6449684679  | 13.0432549024  |
| 4.0264476463   | 6.5309634758   |
| 247.2071210239 | 194.1998287867 |
| 0              | 0              |
| 0              | 0              |
| 1.3388725122   | 1.8473121333   |
| 0.2085013295   | 0.0900976272   |
| 3.4005471611   | 2.9637957924   |
| 2.1155516489   | 1.7064553527   |
| 2.1885529388   | 3.795480928    |
| 1.7790476344   | 2.9352744      |
| 0.4437751974   | 0.3835284158   |
| 0.0360621391   | 0.0363607468   |
| 36.695942555   | 40.1265419168  |
| 15.9900418558  | 16.7425393033  |
| 11.7131115827  | 17.05903396    |
| 8.4320561214   | 7.4391420534   |
| 1.0326820616   | 0.7933204168   |
| 8.2328029856   | 4.1504868038   |
| 0.3332971668   | 0.432073272    |
| 0              | 0              |
| 8.6955578752   | 5.9778820072   |
| 5.1809639321   | 3.3486309037   |
| 0.1007021438   | 0              |
| 12.3181095428  | 10.530091564   |
| 20.4728174475  | 30.2882930794  |
| 0              | 0              |
| 0.5983004923   | 1.2065092788   |
| 27.1836357465  | 20.5565446502  |
| 32.7010785483  | 19.3283290557  |
| 0.1663528553   | 0.1806326499   |
| 0.0599380082   | 0.0120868634   |
| 0.6288064251   | 0.3804079035   |

gene\_expression\_table

|                |                |
|----------------|----------------|
| 3.4081509856   | 3.4363717232   |
| 0              | 0.5353486241   |
| 2.8450879217   | 3.0735495976   |
| 1.144556756    | 0.6251018068   |
| 1.118984241    | 1.781447116    |
| 0              | 0              |
| 2.861297091    | 3.726445001    |
| 3.5509079575   | 3.6826053687   |
| 0.2913187747   | 0.2098078577   |
| 0              | 0              |
| 0              | 0              |
| 23.3091388832  | 25.8233467969  |
| 8.0921004496   | 6.9935194313   |
| 0              | 0              |
| 3.7561185465   | 5.2532414537   |
| 0.0101307063   | 0              |
| 9.4394923449   | 9.9666007775   |
| 0              | 0              |
| 0.085749424    | 0.1729189211   |
| 2.6755353591   | 1.4567524764   |
| 2.0755334405   | 2.9065550237   |
| 46.3112412733  | 59.53576201    |
| 125.3154711404 | 147.1235064975 |
| 2.2482172137   | 2.8467208572   |
| 7.968156583    | 7.741985442    |
| 3.4321310993   | 7.4154651451   |
| 18.5290068352  | 20.6490057721  |
| 544.8524690881 | 192.837991994  |
| 2.6374920162   | 1.7728876103   |
| 0.1879433678   | 0              |
| 0              | 0.2559326579   |
| 15.5192589523  | 12.416160642   |
| 6.9747366097   | 0              |
| 9.369947063    | 5.8574708657   |
| 432.7209456279 | 478.2197047779 |
| 2.0424423807   | 4.1187091025   |
| 17.779173794   | 13.6806674726  |
| 9.6346517323   | 8.0474569498   |
| 1.1524971118   | 1.6268562937   |
| 0              | 0.2352522786   |
| 0.3928256172   | 0.1980391785   |
| 0.3200647658   | 0.3227150192   |
| 0.550760003    | 0              |
| 0.8712843602   | 1.2778166016   |
| 2.8734289682   | 3.1346992258   |
| 9.2008438997   | 5.0761108942   |
| 2.5604445051   | 2.5816459228   |
| 3.1056782123   | 4.1277471171   |
| 0              | 0              |

gene\_expression\_table

|               |               |
|---------------|---------------|
| 2.7914383777  | 2.2026932681  |
| 0             | 0             |
| 0.4251250045  | 0.4286451951  |
| 0             | 0             |
| 1.4597283026  | 1.8773155449  |
| 5.7212741144  | 5.2535904691  |
| 0             | 0             |
| 4.3962281193  | 5.8971559919  |
| 0.5313474063  | 0.4500276121  |
| 0             | 0             |
| 12.641498978  | 11.2466251911 |
| 0             | 0             |
| 1.7427341459  | 1.5814481603  |
| 0             | 0             |
| 0.0764556425  | 0.1156330848  |
| 3.3728754684  | 2.1439852009  |
| 1.2652774577  | 2.2325702318  |
| 4.9837155737  | 3.1406141017  |
| 0.3881567198  | 0.782741599   |
| 2.3451438533  | 3.0036334495  |
| 40.0639578132 | 52.8892181456 |
| 0.9806923985  | 0.4944064452  |
| 25.0964372364 | 22.8997691606 |
| 22.030356669  | 23.1287668522 |
| 0             | 0             |
| 0             | 0             |
| 3.410411018   | 3.790045408   |
| 4.8462357137  | 3.6076895441  |
| 0             | 0             |
| 0             | 0             |
| 2.1144998066  | 1.1587003473  |
| 0             | 0             |
| 0             | 0             |
| 0.1532817323  | 0.1931887015  |
| 10.8713578731 | 10.2598485869 |
| 0.3954222874  | 0.3986965287  |
| 0.9225424471  | 1.1045904555  |
| 18.70737517   | 13.9021982876 |
| 89.8938417069 | 87.2812254112 |
| 0             | 1.0577436921  |
| 2.0227945241  | 1.9858717925  |
| 2.8065421823  | 3.1415369545  |
| 1.2961830417  | 2.1781931862  |
| 0.3122502642  | 0.5037372971  |
| 0.6524151297  | 0.7400445365  |
| 0             | 0             |
| 13.2384602092 | 14.0045424318 |
| 12.4562565206 | 10.72781988   |
| 59.5060648549 | 74.5616116224 |

gene\_expression\_table

|                |                |
|----------------|----------------|
| 1.2331765099   | 0.7912466945   |
| 43.7322548211  | 60.5474984868  |
| 0              | 0              |
| 0.4984158978   | 0.7817334993   |
| 4.1826770429   | 4.9840949834   |
| 0              | 0.2532972852   |
| 116.7601258302 | 112.4840421395 |
| 0              | 0              |
| 11.7180117458  | 13.8826733772  |
| 0.1915527633   | 0.337993058    |
| 0              | 0              |
| 2.4494661176   | 2.8225698213   |
| 0              | 0              |
| 1.0810956337   | 1.3625593766   |
| 0              | 0              |
| 0              | 0              |
| 71.7054551943  | 79.4272930071  |
| 46.3992545013  | 45.8895058981  |
| 0              | 0              |
| 0              | 0.8033655741   |
| 38.7575210484  | 52.1045966784  |
| 45.189808368   | 71.2667637904  |
| 8.2797993282   | 11.2381757078  |
| 0              | 0              |
| 0.257901235    | 0.156022051    |
| 3.6225131689   | 2.8535225811   |
| 0.209649897    | 0.0754949553   |
| 0.0224813948   | 0.0100744662   |
| 4.1951889127   | 5.1323109564   |
| 2.532764907    | 3.5301660291   |
| 41.3233487974  | 31.9284700888  |
| 0.2723965119   | 0.5493041094   |
| 0.4887022087   | 0.2463744209   |
| 1.6268267989   | 3.0755578504   |
| 6.9195721453   | 4.9026645168   |
| 7.9356090445   | 7.6376224833   |
| 1.0090510114   | 0.7630547424   |
| 5.8354510858   | 6.6682735242   |
| 1.8395032177   | 5.3323630606   |
| 2.3463481519   | 2.9572209668   |
| 0              | 1.4335304502   |
| 0              | 0              |
| 1.9812956199   | 3.3960925037   |
| 10.4062782079  | 17.9870502863  |
| 0              | 0              |
| 60.3775742392  | 78.841381797   |
| 5.0675623201   | 3.6067225348   |
| 0              | 0              |
| 1.4510194232   | 0.7315171976   |

gene\_expression\_table

|                |                |
|----------------|----------------|
| 1.4908454353   | 3.7579754531   |
| 3.6544875096   | 1.8423740019   |
| 0              | 0              |
| 0              | 0              |
| 0.316206446    | 2.072360882    |
| 0.5177893586   | 0.1740256147   |
| 0              | 0.739719735    |
| 13.4249957944  | 24.8162927345  |
| 2.0816856309   | 4.7975377139   |
| 1.289506175    | 0              |
| 26.334919681   | 27.9505078474  |
| 5.0296091472   | 6.3390701899   |
| 198.5394852173 | 178.3947883811 |
| 37.6163009967  | 59.2621527145  |
| 9.8243269824   | 9.5094489655   |
| 0              | 0.4783947655   |
| 13.8504103977  | 15.4507454681  |
| 13.6243376036  | 22.8952535097  |
| 7.4844595873   | 4.8297175374   |
| 8.14399107     | 7.2639540319   |
| 0              | 0              |
| 0              | 0              |
| 15.4852917726  | 19.3822952977  |
| 0.645479925    | 0.397726227    |
| 0              | 0              |
| 0.7742452565   | 0.4203533873   |
| 1.0304749264   | 1.2506573396   |
| 1.7466228139   | 1.3697331589   |
| 0.1664962862   | 0.2238332485   |
| 0              | 0              |
| 3.1824046522   | 2.8198159908   |
| 124.3022892601 | 116.013226284  |
| 0              | 0              |
| 3.026092364    | 2.7545099801   |
| 1.4054463152   | 0.4723613084   |
| 1.8159099258   | 2.1361040454   |
| 1.1117605267   | 0.7655379684   |
| 7.1172935664   | 4.9491223188   |
| 0              | 0              |
| 4.3263678164   | 3.5609728371   |
| 11.1665501905  | 13.8572471548  |
| 0.5599802024   | 0.8026418755   |
| 19.2278442032  | 20.3327679272  |
| 23.5253719798  | 26.7219788695  |
| 1.1306073936   | 0.8142637405   |
| 0.791390802    | 0.5585606653   |
| 2.6508494803   | 3.0546279821   |
| 5.5828767555   | 4.6501302326   |
| 4.2007487452   | 5.5809369179   |

gene\_expression\_table

|               |               |
|---------------|---------------|
| 0             | 0             |
| 11.9666575054 | 11.5001639748 |
| 6.7125352813  | 5.992155011   |
| 49.2704127451 | 48.3963668341 |
| 0.3440344019  | 0.5203246989  |
| 0.008386      | 0.008456      |
| 0.6664106335  | 0.7919160356  |
| 8.7750813927  | 9.94005614    |
| 6.9714523936  | 4.6861190474  |
| 0             | 0             |
| 0             | 0             |
| 0             | 0             |
| 0             | 0             |
| 0.7541229683  | 1.0983084413  |
| 3.7985801282  | 3.6172541086  |
| 1.6882317142  | 1.8975465667  |
| 7.1086656933  | 4.5268598193  |
| 1.6985101127  | 1.456966279   |
| 1.321589984   | 1.3480278053  |
| 0             | 0             |
| 0.1180837398  | 0             |
| 0             | 0             |
| 0             | 0             |
| 2.5354259778  | 2.9437566319  |
| 0             | 0             |
| 6.5943341938  | 5.9840439251  |
| 0             | 0             |
| 0             | 0             |
| 18.5583447786 | 21.3382623385 |
| 86.3574357357 | 86.6743094722 |
| 51.0003289962 | 34.2062431212 |
| 0             | 0             |
| 1.4394112678  | 4.3539903599  |
| 7.8850716985  | 7.0861930893  |
| 0             | 0             |
| 0             | 0             |
| 5.9406500979  | 8.2360311758  |
| 70.8675662512 | 66.1717564281 |
| 2.4587997327  | 1.4740948345  |
| 0.2466054357  | 0.1491884514  |
| 0             | 0             |
| 0.0863202212  | 0             |
| 0             | 0.1839618369  |
| 1.0100245718  | 0.3818954793  |
| 7.5202947212  | 6.4451806869  |
| 58.9807543889 | 49.9621658027 |
| 0.5404108306  | 1.1987483862  |
| 0.0823098363  | 0.010373924   |
| 0.0162748783  | 0             |

gene\_expression\_table

|               |                |
|---------------|----------------|
| 23.7360690028 | 20.9410357993  |
| 82.4736132887 | 87.1840489964  |
| 1.1950073656  | 0.903676848    |
| 0             | 0.0587024539   |
| 55.8533164812 | 52.721176701   |
| 7.352975861   | 10.2858975103  |
| 0             | 0              |
| 0             | 0              |
| 0             | 0              |
| 9.8479555196  | 8.4018847811   |
| 1.6525961743  | 6.6651211021   |
| 97.958918176  | 134.1503716791 |
| 3.5385107565  | 2.829643144    |
| 0.4556540892  | 0              |
| 33.2427544532 | 24.8990980663  |
| 0.0705853264  | 0.0711697987   |
| 4.304395173   | 4.7740408546   |
| 0.5729171091  | 1.3286204667   |
| 7.7382628966  | 13.5113667499  |
| 43.2905644459 | 46.6593038313  |
| 8.7869440234  | 8.8597031361   |
| 7.9967292657  | 8.429442616    |
| 3.8990024287  | 4.1695474502   |
| 0             | 0              |
| 0.0252700084  | 0              |
| 0.1239909784  | 0              |
| 10.7104278284 | 10.6220794339  |
| 7.0422730461  | 6.5088701742   |
| 1.1811361607  | 1.5878885339   |
| 3.441267314   | 4.4902805807   |
| 0.5123827597  | 0.1722084922   |
| 12.2276278469 | 8.5353764407   |
| 9.8445323642  | 12.7620626085  |
| 0.4292225599  | 0.2163883399   |
| 3.424771386   | 3.4531297466   |
| 53.2966781119 | 46.1499903158  |
| 2.7126714117  | 5.4702666477   |
| 0             | 0              |
| 2.9147266687  | 0.2671692429   |
| 1.6201586605  | 0.9047487696   |
| 0.9956156098  | 1.0038596714   |
| 5.8287178241  | 7.3936221905   |
| 9.49782179    | 13.4290689903  |
| 9.5736184829  | 12.5130075623  |
| 19.3055624527 | 18.8872387966  |
| 0             | 0.6250345047   |
| 5.238403336   | 6.6123037727   |
| 0             | 0.0436877868   |
| 9.3659203324  | 9.8827049102   |

gene\_expression\_table

|                |               |
|----------------|---------------|
| 6.4229020131   | 8.0852952394  |
| 0              | 0             |
| 19.4819564556  | 23.1614725475 |
| 0.6310502455   | 0.7519620402  |
| 27.369963606   | 20.0702523074 |
| 3.1495241351   | 3.9695041846  |
| 11.9298001477  | 15.0866976475 |
| 2.8524940159   | 2.761069162   |
| 0              | 0             |
| 94.7963385113  | 59.7915628252 |
| 0              | 0             |
| 2.2052338547   | 2.5570180979  |
| 1.2683175756   | 2.1787298752  |
| 1.1543654551   | 0.8978842468  |
| 0.0880791365   | 0.2072197492  |
| 10.4157749043  | 14.7684674994 |
| 73.2130737291  | 89.1510065385 |
| 31.57782692    | 26.6242446539 |
| 0.6650470773   | 0.6705539105  |
| 8.0017010829   | 8.2802727834  |
| 4.9106946725   | 5.825125908   |
| 25.9566439128  | 24.1941665796 |
| 7.2966248659   | 9.0430327467  |
| 14.1683703595  | 13.4328126578 |
| 0              | 0             |
| 1.8850652902   | 1.611441272   |
| 0.0101680715   | 0             |
| 0.800683451    | 0.6669110721  |
| 22.5383148684  | 8.2964067999  |
| 4.9592119477   | 26.155290044  |
| 0.5943375557   | 0.2996294441  |
| 0              | 0             |
| 0              | 0             |
| 214.3445484282 | 222.915607283 |
| 15.1923914618  | 17.2329637768 |
| 35.1543604487  | 32.867600408  |
| 28.3579665536  | 26.9905992082 |
| 88.7406350068  | 99.0964549936 |
| 8.5151270465   | 9.1580111096  |
| 28.1481442677  | 31.6858839481 |
| 18.1996412722  | 19.3422512857 |
| 12.0971637174  | 6.7085329634  |
| 18.4622474322  | 29.8707765186 |
| 7.3707391826   | 9.1711224011  |
| 6.0000140603   | 9.2337470954  |
| 23.7391011503  | 24.8562722737 |
| 4.080732488    | 3.5189994609  |
| 1.0653230713   | 0.859315469   |
| 0.997910649    | 1.4086432001  |



gene\_expression\_table

|                 |                 |
|-----------------|-----------------|
| 13.4206540675   | 14.9268110671   |
| 14.9728242175   | 16.5345956045   |
| 20.730839191    | 34.837496879    |
| 0.5849319866    | 0.9650870797    |
| 0.3570350799    | 0.1309059858    |
| 0               | 0               |
| 0               | 0               |
| 0               | 0               |
| 32.7090860606   | 27.5780442995   |
| 3.6346474789    | 8.4289104878    |
| 14.020838598    | 15.9970594674   |
| 0.1654916912    | 0.2860491823    |
| 6.436640131     | 5.3530144452    |
| 7.2609845729    | 8.9126534399    |
| 0               | 0               |
| 4.3169199583    | 3.3118108097    |
| 5.0048470436    | 6.9603986331    |
| 0               | 0               |
| 122.2805715856  | 156.1442213753  |
| 3.2049999602    | 2.7237253349    |
| 14.584932208    | 19.1174110206   |
| 11.2420225183   | 21.7982895761   |
| 4.8356143123    | 4.5099808461    |
| 3.3602417925    | 3.8224332378    |
| 24.0145928711   | 26.9694440742   |
| 0.1940234228    | 0.3912600155    |
| 3.2305355568    | 3.8156773862    |
| 0.933100981     | 0.4154302799    |
| 0               | 9.2810878975    |
| 2.3082778141    | 2.3894549646    |
| 125.6819728227  | 172.6273046149  |
| 26.7740656007   | 24.3577420581   |
| 0               | 0               |
| 0               | 0               |
| 2.1164700306    | 1.9205956594    |
| 0               | 0               |
| 0               | 0               |
| 4.6306962936    | 4.3535644678    |
| 5.3184312875    | 6.4796510629    |
| 1.8475799914    | 3.7711933241    |
| 0.0535609838    | 0               |
| 8.6514531597    | 10.488477693    |
| 13.3463228729   | 19.7158284793   |
| 72.2680741757   | 72.4301540523   |
| 0               | 0               |
| 2.9897764621    | 4.1868512577    |
| 5.5180948366    | 8.4002269507    |
| 9.798941613     | 8.2477193206    |
| 3551.5370800644 | 3366.9407906778 |

gene\_expression\_table

|                 |                 |
|-----------------|-----------------|
| 3.4258781836    | 3.3391041853    |
| 134.2726891366  | 171.054688069   |
| 15.2178805824   | 16.1514633723   |
| 10.5867992366   | 8.7992185184    |
| 2.3269480283    | 0.977590004     |
| 35.5223969582   | 24.3339518689   |
| 0.0550310798    | 0.0184955858    |
| 17.6934237447   | 13.3255587912   |
| 0.091253587     | 0.0613394667    |
| 3.95442656      | 7.9743413186    |
| 0               | 0.1567282936    |
| 0.6185666284    | 0.2982858457    |
| 0               | 0               |
| 46.2058956577   | 26.9032168004   |
| 0               | 0               |
| 30.9979632011   | 27.5991245031   |
| 4.2488509711    | 4.6486315666    |
| 0.1807723667    | 0.4556730701    |
| 0               | 0.0678683214    |
| 0               | 0.2772403483    |
| 388.1179268463  | 581.8932016795  |
| 0               | 0               |
| 0.7884716233    | 2.1578583833    |
| 5.6073372803    | 3.2980313832    |
| 0.4234185227    | 2.5615474981    |
| 1.1250547007    | 0.6567408537    |
| 0.5003133981    | 0.5044561762    |
| 51.1786077843   | 46.4942704719   |
| 0.3577954929    | 0               |
| 17.6477250354   | 25.3336235811   |
| 1.3729313573    | 1.2977809982    |
| 1.96865775      | 1.0951497692    |
| 0.0177188296    | 0.0357310959    |
| 0               | 0               |
| 0               | 0               |
| 0.4479460291    | 0.9425847364    |
| 20.2584413155   | 25.2032811256   |
| 3.6044981196    | 4.5429308542    |
| 0.0144929911    | 0               |
| 0               | 0               |
| 11.1034270229   | 14.03152722     |
| 0.3813515082    | 0.5767638575    |
| 0               | 0               |
| 1657.4133893012 | 2076.1247255707 |
| 2.8146485487    | 3.594742834     |
| 2.1986486036    | 2.2700587201    |
| 1.8645601057    | 0.7637497342    |
| 32.0222617225   | 33.3565375641   |
| 101.4219321503  | 97.8915829193   |

gene\_expression\_table

|                |                |
|----------------|----------------|
| 0.0530497183   | 0.0534889893   |
| 0.0824777079   | 0.166321307    |
| 0              | 0              |
| 6.3706083918   | 7.2611888429   |
| 0.4066420702   | 0              |
| 0              | 0              |
| 0.0444077705   | 0.0447754831   |
| 0.9818983265   | 1.302669479    |
| 0.841810204    | 1.315610086    |
| 0              | 0.0226800453   |
| 4.3899394739   | 4.0238997996   |
| 320.3904940725 | 328.4500294806 |
| 10.9524142801  | 15.775863256   |
| 4.371788209    | 0              |
| 2.0177989135   | 1.7438631661   |
| 0.8082039685   | 0.5432641288   |
| 5.0203865418   | 5.5086004605   |
| 0.3100926388   | 0.4689904791   |
| 88.5791549431  | 85.6672095937  |
| 0              | 0              |
| 0              | 0              |
| 0.104086432    | 0              |
| 0.4131556317   | 0.1851452051   |
| 7.0701292346   | 4.9163258568   |
| 17.1227442855  | 25.1568820185  |
| 0              | 0              |
| 0              | 0.0200006218   |
| 1.3824707537   | 0.6969590588   |
| 10.6209201577  | 11.8243720624  |
| 8.2895391898   | 7.5675409968   |
| 6.3635455118   | 7.1036920691   |
| 0              | 0              |
| 5.5382809853   | 4.1274078106   |
| 0              | 0              |
| 0.2149417655   | 0              |
| 1.4793221466   | 2.1130595902   |
| 10.9020498392  | 7.5572219265   |
| 0.2468591929   | 0.2489032774   |
| 0              | 0              |
| 0              | 0              |
| 0              | 0.5478440214   |
| 8.3538882564   | 12.0852621648  |
| 0.1819851151   | 0.0917460092   |
| 15.6220020385  | 22.681955424   |
| 0              | 0.0644019489   |
| 0.7814090407   | 0.7878793935   |
| 1.8691629925   | 0              |
| 7.9697256166   | 8.2123270456   |
| 2.7180315547   | 3.1320432581   |

gene\_expression\_table

|                 |                 |
|-----------------|-----------------|
| 2.0166882912    | 2.3587291617    |
| 0.7001027567    | 3.1765493871    |
| 1.5543713003    | 1.3433503402    |
| 23.316394149    | 21.7399329968   |
| 0.4482401768    | 1.5818311934    |
| 744.2072767684  | 803.5045646939  |
| 1.0366663794    | 2.3518133021    |
| 47.6192038732   | 41.3826910234   |
| 0.8897433967    | 0.8505076394    |
| 48.7760728149   | 45.7487967915   |
| 0               | 0.1507444751    |
| 0               | 0               |
| 2063.6135774752 | 2004.4136673755 |
| 0               | 0               |
| 14.3437158388   | 19.1530233986   |
| 4.4654936039    | 6.139731171     |
| 1.1994866723    | 1.209418861     |
| 0.3691852323    | 0.2030412115    |
| 0.2314769439    | 0.2934091697    |
| 377.0143370659  | 343.5358186616  |
| 0               | 0.0399867784    |
| 5.3528367891    | 2.3612576037    |
| 156.1625432075  | 176.281842403   |
| 0.2740561222    | 0.5526508144    |
| 2.1092939246    | 1.4667307933    |
| 3.4521705234    | 3.132680183     |
| 353.2051350816  | 359.598599662   |
| 171.9523223052  | 203.4716331956  |
| 118.635425198   | 180.0697612026  |
| 0.031010767     | 0.0312675475    |
| 0.4202986598    | 0.2648618041    |
| 5.4885402783    | 6.0370771644    |
| 3.4449626783    | 3.0393022014    |
| 27.4712226248   | 39.1040391574   |
| 0               | 0               |
| 0.872932581     | 4.8408843027    |
| 26.4342131034   | 27.8785278594   |
| 5.4215113666    | 4.4623701756    |
| 0               | 0.064782124     |
| 1.0021138406    | 2.526029275     |
| 18.9645753337   | 25.7272556901   |
| 16.8281901875   | 22.2193894499   |
| 1.9420885107    | 0.3263616191    |
| 0               | 0               |
| 0.0118547875    | 0.0239058991    |
| 0               | 0               |
| 0               | 0               |
| 0.0312287524    | 0.0314873379    |
| 67.9025289964   | 65.2574274091   |

gene\_expression\_table

|                |                |
|----------------|----------------|
| 8.3802707581   | 9.3885138526   |
| 0              | 0.1705390699   |
| 1.6664317314   | 2.1780764393   |
| 84.1037688711  | 102.7578637964 |
| 0              | 0              |
| 5.6926178596   | 6.1812744206   |
| 0              | 0              |
| 0              | 0              |
| 11.2032586426  | 10.9299508171  |
| 12.6665376782  | 21.99522548    |
| 106.8625930007 | 130.6212156508 |
| 0              | 0              |
| 13.1406414875  | 10.3051284068  |
| 0              | 0.0185795821   |
| 0.0133114585   | 0              |
| 0              | 0              |
| 11.3353415948  | 7.1432514826   |
| 7.0500625353   | 4.6631363996   |
| 17.2807901185  | 20.063863414   |
| 0.8831324473   | 0.4452225536   |
| 0              | 0              |
| 25.4403250467  | 26.4708745957  |
| 0.6623227286   | 1.1872124502   |
| 4.5215198787   | 4.0967610371   |
| 0.3874853672   | 0.2404270079   |
| 21.2517316371  | 24.205369055   |
| 0.6542300562   | 0.5654119891   |
| 13.425465353   | 14.3488311074  |
| 1.6689171825   | 0.4807818365   |
| 11.498484665   | 18.0594115859  |
| 8.2845961774   | 7.0738774109   |
| 1.6999916554   | 3.0853227754   |
| 1.5931870052   | 0.5354597256   |
| 0              | 0              |
| 8.9400623262   | 9.8784540433   |
| 0              | 0              |
| 12.1193533398  | 15.2746325267  |
| 36.3094734226  | 47.0701660534  |
| 21.1983755874  | 32.6895031355  |
| 26.7426937791  | 25.0135362115  |
| 353.8690448049 | 390.3991356267 |
| 0.0971820051   | 0.2286356511   |
| 26.3624007717  | 29.019286613   |
| 2.5566807599   | 5.1557020248   |
| 3.1997606169   | 2.5936566283   |
| 1.4242783108   | 0.7180359283   |
| 54.7223068648  | 77.8947213108  |
| 0              | 0              |
| 23.6996316139  | 19.1429217711  |

gene\_expression\_table

|                |                |
|----------------|----------------|
| 1.13170218     | 0.8595095989   |
| 2.3124127894   | 2.9674405264   |
| 0              | 0              |
| 0.0159979024   | 0.0483911126   |
| 0.1004640523   | 0              |
| 0.7945650087   | 1.4878394101   |
| 4.3897634308   | 5.9278289448   |
| 0.1933826155   | 0.2816434029   |
| 9.7641392862   | 10.3677327617  |
| 0              | 0              |
| 66.3277052754  | 67.6456232163  |
| 11.9943799474  | 10.1192165295  |
| 0.3426266503   | 0.394815685    |
| 0.062520578    | 0.0630382713   |
| 0              | 0.017815765    |
| 0.5435791093   | 0.428932286    |
| 29.4961325374  | 28.7490256007  |
| 4.3329871538   | 3.6090631128   |
| 21.4239550482  | 17.453893416   |
| 3.472026863    | 4.6485720953   |
| 0              | 0              |
| 1.9921662547   | 2.0086621205   |
| 1.5055658304   | 1.6091144146   |
| 0.2416462619   | 0.5482061582   |
| 3.0901916441   | 8.1010268612   |
| 7.6025243019   | 0              |
| 0              | 0              |
| 35.5044917038  | 34.6051991608  |
| 4.3017437856   | 0.481929311    |
| 183.3177875478 | 165.6128104305 |
| 0.3758008662   | 0              |
| 0              | 0              |
| 2.1747479023   | 1.0963778055   |
| 0.6063870533   | 1.8342244802   |
| 10.756926803   | 26.4371203546  |
| 11.8212794136  | 8.5955509139   |
| 1.489821165    | 1.7611500898   |
| 62.4796127002  | 47.3977178496  |
| 14.0216622741  | 19.4394293087  |
| 66.3375872339  | 89.9513304397  |
| 178.0549896904 | 169.8425147358 |
| 21.4837502661  | 36.1027393029  |
| 4.0390354762   | 5.0906002104   |
| 45.6282230125  | 74.8935557674  |
| 2.5996817118   | 2.621208028    |
| 3.604320828    | 3.1149993632   |
| 7.0617069558   | 5.6961443793   |
| 36.1977225981  | 44.5090890126  |
| 5.3920631872   | 3.2620268664   |

gene\_expression\_table

|                 |                 |
|-----------------|-----------------|
| 6.5370479611    | 5.3671013617    |
| 2.4710923053    | 2.491553854     |
| 713.2758635085  | 653.4875346657  |
| 1.353572229     | 0.909853535     |
| 24.6900283906   | 26.6476026136   |
| 240.1687321177  | 219.5560581947  |
| 639.7383412558  | 710.2377642895  |
| 21.4646807203   | 12.3670949332   |
| 112.2516285647  | 130.5935920796  |
| 0.661722224     | 0               |
| 29.9584784198   | 47.197727479    |
| 1.2129337872    | 1.2739347114    |
| 18.4131812575   | 23.8983355925   |
| 13.4524417554   | 8.4773955606    |
| 25.1360342426   | 28.3553582983   |
| 21.4680775942   | 18.8224705517   |
| 0               | 0               |
| 9.6604783076    | 21.9160588587   |
| 20.4567492843   | 22.5012421702   |
| 212.2343621173  | 252.1288821568  |
| 1.7733109403    | 2.6819919059    |
| 9.9699481754    | 14.7197365292   |
| 33.3999937202   | 47.9243323866   |
| 99.7697916849   | 112.2931223195  |
| 8.4299342186    | 9.6083985281    |
| 21.0850387441   | 21.2596305825   |
| 0               | 0               |
| 59.6990848407   | 73.5697295842   |
| 4.2940796057    | 4.0891008145    |
| 53.0405676835   | 75.6093201005   |
| 135.3912568301  | 144.4903402391  |
| 10.3755733195   | 22.5324332461   |
| 21.0223295129   | 33.664873917    |
| 58.4634828669   | 65.0456076181   |
| 0               | 0               |
| 3.9828067938    | 3.3464882432    |
| 1.5203710249    | 0.3832400634    |
| 5263.8872911382 | 6601.8745204088 |
| 2.8466955431    | 2.0501908744    |
| 2.5190221983    | 3.3865074989    |
| 170.3844571349  | 122.4679386328  |
| 3.6324404062    | 3.4336109459    |
| 7.2913531661    | 6.2206931254    |
| 0               | 0               |
| 113.7747843202  | 142.1843034323  |
| 0               | 1.3202912167    |
| 21.9332011084   | 25.0151197848   |
| 0               | 0               |
| 6.249037651     | 11.7014522301   |

gene\_expression\_table

|                 |                 |
|-----------------|-----------------|
| 0.8388309667    | 0.7086238005    |
| 2.0666349861    | 6.2512424407    |
| 1.0855091809    | 1.5154582074    |
| 0               | 0               |
| 2.581816787     | 2.8309747528    |
| 2.8511496129    | 2.5365513312    |
| 21.026443393    | 15.1017616727   |
| 0.2806736194    | 0.0754660533    |
| 0               | 0.0119311596    |
| 3.8628950495    | 11.6846437033   |
| 2.3951100931    | 2.6161876881    |
| 6.7345023612    | 8.577178744     |
| 5.4839536023    | 4.5936244346    |
| 0.6840065285    | 0.6085326643    |
| 0.1191448496    | 0.1201314126    |
| 0               | 0               |
| 0.5721101535    | 0.4326355763    |
| 0.2869496671    | 0               |
| 0               | 0.0954116276    |
| 0.854497808     | 0.9007357882    |
| 3.2095452409    | 2.5326167872    |
| 1.2325309482    | 1.0936083449    |
| 0               | 0               |
| 44.6521375629   | 36.2676204045   |
| 4.5984152443    | 3.4619138816    |
| 0               | 0.0512706151    |
| 0.810247643     | 0.8807815393    |
| 65.9603595748   | 99.7598032424   |
| 0.0225436867    | 0.007577        |
| 0.1197737736    | 0               |
| 0               | 0               |
| 0               | 0               |
| 7.3185973305    | 8.5651405301    |
| 17.4124803025   | 13.1056772771   |
| 0.0731465465    | 0.0737522267    |
| 0.3744111713    | 0.2894254319    |
| 0.7676266464    | 0.6191863008    |
| 0.0263899103    | 0               |
| 0.005733        | 0               |
| 0.2365604615    | 0.3816308299    |
| 379.8930464721  | 323.2987192204  |
| 5.6644703147    | 5.1285809163    |
| 89.8882973247   | 63.4428237293   |
| 1.3641426889    | 0.8090813468    |
| 3905.4242434925 | 3408.5482878046 |
| 0.3734930961    | 0.3765857556    |
| 0.0143862542    | 0.0435161329    |
| 0.1434906686    | 0.206684034     |
| 1.0060834517    | 0.8940599649    |



gene\_expression\_table

|                |                |
|----------------|----------------|
| 5.3288755466   | 2.6865002933   |
| 78.2997969805  | 51.3162961733  |
| 4.3635051696   | 3.8496820159   |
| 32.9104730735  | 40.4151726214  |
| 1.7961769057   | 3.6220998159   |
| 1.6562725543   | 2.5606468824   |
| 2.7414870873   | 2.6325596227   |
| 0.3384262077   | 0.5849631438   |
| 0              | 0              |
| 0.0844047967   | 0.1985752984   |
| 0              | 0              |
| 4.6362941169   | 2.9747991186   |
| 3.9117979921   | 3.6812431705   |
| 0.3242693252   | 0.4086929924   |
| 20.9628782075  | 21.616832569   |
| 12.5936587856  | 17.718054265   |
| 0              | 0.9339318661   |
| 1.7526705607   | 2.3425453238   |
| 84.5733652092  | 90.4058748657  |
| 8.5873381244   | 11.1560726274  |
| 25.4650827809  | 19.1290889983  |
| 0.6878906895   | 1.3871733524   |
| 73.545706305   | 77.9332746876  |
| 52.9176849087  | 40.1857446984  |
| 4.2069805591   | 5.0326629298   |
| 0              | 1.7917655802   |
| 18.4132409194  | 28.7326453357  |
| 17.5673982706  | 10.5714863447  |
| 1.4478153837   | 1.9159925203   |
| 12.8292950513  | 12.5043420998  |
| 12.2171497317  | 16.1875256516  |
| 0              | 0.0720325646   |
| 15.3991070319  | 6.537523063    |
| 7.8358152035   | 6.7720273898   |
| 5.2786111128   | 5.0562039477   |
| 0.1905653126   | 0              |
| 5.7634084798   | 8.7166974173   |
| 151.9820368729 | 235.206354619  |
| 34.6498198875  | 51.57327264    |
| 0              | 0.4939437148   |
| 81.5898174355  | 95.3530900082  |
| 8.6149302813   | 15.9248192716  |
| 14.8118055961  | 11.3501841036  |
| 0              | 0              |
| 3.0399393196   | 0              |
| 0.0333766851   | 0.0336530563   |
| 0              | 0              |
| 2.5406045544   | 1.280820845    |
| 117.7425468854 | 152.8357235791 |

gene\_expression\_table

|                |                |
|----------------|----------------|
| 63.3629818496  | 43.218116536   |
| 3.1105591957   | 6.2726315288   |
| 535.3599803141 | 471.8944717591 |
| 3.295463246    | 1.8987147931   |
| 0.3548786019   | 0.5247984524   |
| 1.0128469002   | 0.3927821705   |
| 0              | 0              |
| 4.8403909805   | 12.2011779738  |
| 0.1561141257   | 0.1574068078   |
| 0              | 0              |
| 57.1833154195  | 55.8550387577  |
| 7.7570159263   | 8.7989027146   |
| 4.9979557911   | 0              |
| 12.152820539   | 15.2340193432  |
| 24.5580937142  | 29.7137324628  |
| 2.3227549908   | 2.8103859028   |
| 0              | 0              |
| 5.5764607907   | 3.5780410446   |
| 3.8572878995   | 0              |
| 99.3649197348  | 111.3196640444 |
| 0.7251624816   | 0.8774005108   |
| 1.3152665467   | 1.5913889221   |
| 20.8198868456  | 23.1127157685  |
| 153.3960232605 | 151.928743639  |
| 2.5746464481   | 1.8542610451   |
| 0.838934422    | 0.8074319649   |
| 3.680164658    | 3.5998724618   |
| 0.1704487479   | 0.4010069605   |
| 1.1854921548   | 0.5610631565   |
| 33.5167537391  | 26.4977914344  |
| 5.4816643544   | 5.1018965      |
| 11.0206571201  | 11.1119121948  |
| 5.5378612047   | 3.6643140991   |
| 354.1489752871 | 464.2058959571 |
| 0.1600168162   | 0.322683628    |
| 4.6473507326   | 4.6858324977   |
| 67.4347721681  | 83.1027471562  |
| 7.4634233447   | 8.7361786827   |
| 1.3743856469   | 1.3857660631   |
| 0.1502164176   | 0.3029205291   |
| 35.4936467241  | 49.3287811522  |
| 0              | 0.0269342177   |
| 0              | 0              |
| 0              | 0              |
| 0              | 0              |
| 0.0969227091   | 0.171019213    |
| 0              | 11.228859729   |
| 0              | 0              |
| 4.3655729855   | 3.3012911458   |

gene\_expression\_table

|                 |                |
|-----------------|----------------|
| 0               | 10.5679377668  |
| 0.1301809956    | 0.2625178837   |
| 0               | 0              |
| 0               | 0              |
| 0               | 0              |
| 11.4867010201   | 11.839188778   |
| 0.2749460423    | 0.2772226961   |
| 0.2673001426    | 0.2695134856   |
| 8.6876994818    | 4.3798184067   |
| 0.2651896006    | 0.2100885817   |
| 13.3760468874   | 14.9853393906  |
| 4.0097503437    | 4.7616996632   |
| 2.6693181358    | 1.9811849521   |
| 2.9626308032    | 2.6424898779   |
| 0               | 0              |
| 12.7107953704   | 12.7211117388  |
| 3.1816163648    | 3.5105991725   |
| 2.6814487541    | 2.1242981032   |
| 0               | 0              |
| 2.6059646707    | 1.3474579549   |
| 2.1124892605    | 2.5783985911   |
| 0.926888353     | 0.5607379967   |
| 0.1221124998    | 0.082082424    |
| 54.5649645041   | 69.7159227133  |
| 0.0183043293    | 0.0369117916   |
| 0               | 0.1102499331   |
| 5.8616115498    | 9.3318123773   |
| 0.3032478206    | 0.2140311765   |
| 55.7132533866   | 78.2760534252  |
| 4.5903638611    | 5.3591696099   |
| 2.0753505646    | 2.0925352269   |
| 6.3731979434    | 7.6123033438   |
| 0.0366154488    | 0.0369186381   |
| 111.8051362048  | 81.1662650321  |
| 2.7145898497    | 1.9424351045   |
| 0.2733878173    | 0.078757591    |
| 0.8635064409    | 0.7981018744   |
| 1.9364113307    | 1.9340262279   |
| 3.2613519403    | 4.1104464101   |
| 48.65026121     | 43.9543935303  |
| 2.0044667259    | 1.9836373247   |
| 1.9057897934    | 1.5738576859   |
| 1.8481916586    | 1.863495362    |
| 31.9531357625   | 32.3379347932  |
| 0.5139640065    | 0.5182198166   |
| 0.3243926459    | 0.3270787357   |
| 1.2331645045    | 2.1759072264   |
| 1099.8462159826 | 674.2399769978 |
| 4.930968245     | 5.9661581603   |

gene\_expression\_table

|               |               |
|---------------|---------------|
| 0.0602819025  | 0             |
| 0             | 0             |
| 1.8298431602  | 1.903566199   |
| 5.2026506265  | 5.7907414368  |
| 4.1980642153  | 6.3492385854  |
| 0             | 0             |
| 9.8994452141  | 14.1671714429 |
| 3.1045491285  | 3.1302559317  |
| 2.0359423873  | 2.0528007355  |
| 7.8436465232  | 7.1397036275  |
| 0             | 0             |
| 1.3807302329  | 2.0882447769  |
| 7.5853262423  | 6.8126249169  |
| 0             | 0             |
| 5.0259504514  | 5.9121616876  |
| 0.1630709839  | 0.2959582884  |
| 54.3469856068 | 53.7432101063 |
| 3.8390478253  | 2.9364966905  |
| 3.8167597996  | 4.1866816792  |
| 11.8265848741 | 14.3813226038 |
| 0.9715576712  | 0.6269456156  |
| 8.626223966   | 7.972847903   |
| 0             | 0             |
| 7.4410229043  | 4.6805443691  |
| 9.4410218404  | 12.7154236723 |
| 7.3405539741  | 10.4852266344 |
| 1.2520594512  | 0.9818876369  |
| 0             | 0             |
| 0             | 0             |
| 0             | 0             |
| 0.5413101181  | 0.545792364   |
| 0.7060634788  | 1.0170142041  |
| 1.8302504948  | 1.3026392745  |
| 0.3470760788  | 0.3499499958  |
| 0.7122753074  | 0.5223077874  |
| 14.416743613  | 19.6068588968 |
| 4.9417989844  | 4.9827188888  |
| 0             | 0             |
| 20.2934057215 | 23.7352733565 |
| 34.8719457648 | 31.1524801142 |
| 1.7335398569  | 2.1989636728  |
| 3.1122405791  | 10.9830387458 |
| 0.6537330715  | 0.2197154069  |
| 1.6744079891  | 1.168804177   |
| 0             | 0             |
| 74.9993846963 | 58.1695438869 |
| 3.258015665   | 4.2235627207  |
| 0             | 0             |
| 0.4369496877  | 0.3166580998  |

gene\_expression\_table

|                |                |
|----------------|----------------|
| 0.4476006448   | 0.2389272046   |
| 1.0116969335   | 0.7062051838   |
| 0.5915090872   | 0.8770691162   |
| 0              | 0              |
| 0              | 0              |
| 7.0423448262   | 8.3432731724   |
| 3.2156242203   | 2.6783810674   |
| 0.185356783    | 0.186891605    |
| 2.4533676889   | 1.2368412357   |
| 0.9595675299   | 0.4837565501   |
| 0.3771115633   | 0.2851756388   |
| 0.4333291993   | 0              |
| 0.5776708208   | 1.1649082934   |
| 1.1637691272   | 0.4141431394   |
| 0.2862677037   | 0.4040933471   |
| 2.0562406135   | 4.1465340769   |
| 0              | 1.295637661    |
| 12.984552495   | 13.0920693423  |
| 4.9547664567   | 6.8692163877   |
| 171.1271238775 | 171.1254624161 |
| 17.4427843263  | 21.32450057    |
| 6.1942811652   | 7.5926562547   |
| 3.9347923081   | 4.29124108     |
| 4.4661233893   | 5.2195075184   |
| 0.1230511442   | 0.1240700527   |
| 2.408907195    | 3.0585566727   |
| 0              | 0.182269228    |
| 35.2426884037  | 33.4510541062  |
| 40.5321584442  | 42.9635631185  |
| 171.3749373119 | 211.1152310866 |
| 0              | 0              |
| 1.3566353161   | 2.1372949267   |
| 2.6416944368   | 2.2277119482   |
| 1.0494695215   | 0.7721704556   |
| 6.1079471515   | 5.1321026579   |
| 5.8698771219   | 6.3919604012   |
| 0.4241952886   | 0.2138538904   |
| 0              | 0              |
| 0              | 0              |
| 16.6002914061  | 19.4157875582  |
| 1.9466300638   | 1.9627488733   |
| 0              | 0              |
| 11.7120526267  | 11.8090327093  |
| 0.0680456077   | 0              |
| 17.6555528104  | 19.9964832123  |
| 44.9128726913  | 51.3538602968  |
| 2.052782755    | 2.4837366571   |
| 0.0782049655   | 0              |
| 7.1860323123   | 6.1676870651   |

gene\_expression\_table

|                |                |
|----------------|----------------|
| 0.6266767726   | 0.4212439238   |
| 0.5296605029   | 0.7120617143   |
| 0              | 0              |
| 4.9098536308   | 4.1018503275   |
| 0              | 0              |
| 29.8707458917  | 34.6239420767  |
| 7.0950647829   | 5.9615120969   |
| 2.9299677072   | 4.9526778824   |
| 27.8147104894  | 28.7550271432  |
| 2.0265976795   | 1.879908358    |
| 2.910980633    | 1.7167476068   |
| 0              | 0              |
| 0.4600397409   | 0.6065718194   |
| 7.7131023834   | 6.9336838238   |
| 0              | 0              |
| 172.7876960364 | 181.0061728869 |
| 0.6226500564   | 0.4708543701   |
| 0.1341276754   | 0.2163812827   |
| 0              | 0              |
| 0.0693658748   | 0              |
| 5.1054062203   | 4.3521301753   |
| 0              | 0              |
| 2.0026591552   | 3.5336733356   |
| 0.4440914054   | 0.4477686448   |
| 54.4175767458  | 59.5520427285  |
| 0.3671465771   | 0.1586514365   |
| 2.236905283    | 1.5036184516   |
| 0.085463041    | 0.3015974719   |
| 6.3560031835   | 7.2097123683   |
| 2.5350728415   | 2.6807502297   |
| 1.5496286022   | 1.1718450706   |
| 2.9150788286   | 3.6740209353   |
| 0.2762984414   | 0.4643104894   |
| 0              | 0              |
| 0              | 0              |
| 6.5502219241   | 3.0820814076   |
| 1.1244202639   | 1.4429302049   |
| 6.0303509417   | 7.5665762103   |
| 20.1269345303  | 22.9994053038  |
| 10.6672442266  | 12.7722428345  |
| 0              | 0              |
| 1.0615518772   | 0.6422051491   |
| 7.4285347893   | 5.0825310625   |
| 3.2040317592   | 4.8458434724   |
| 3.8315332876   | 3.8632597857   |
| 886.1695543597 | 916.62954946   |
| 0              | 0              |
| 0.0752559562   | 0.1138186546   |
| 0.8940740153   | 0.5795211056   |

gene\_expression\_table

|                |                |
|----------------|----------------|
| 0.0727682857   | 0.1467416675   |
| 1.6655033472   | 1.6792943245   |
| 0              | 0              |
| 4.2463232425   | 7.9114384787   |
| 0.1669979814   | 0.0561269286   |
| 178.5236306722 | 151.9090940169 |
| 3.1139237811   | 1.365090526    |
| 0.8036166006   | 0              |
| 0              | 0              |
| 0              | 0.0233548718   |
| 0.1570560326   | 0.2991178599   |
| 4.5241871408   | 0.4146953697   |
| 8.214707243    | 13.5139246735  |
| 0              | 0              |
| 1.8660233266   | 1.2442009999   |
| 0.8618470213   | 0.7667500854   |
| 17.1959478511  | 19.0880769835  |
| 6.8261271649   | 5.7138981102   |
| 8.8259775042   | 14.4139701447  |
| 0              | 0.2167701161   |
| 0.1874843722   | 0.3308144201   |
| 2.2956001276   | 2.5968778707   |
| 52.1652114932  | 28.8436030692  |
| 0.6554546881   | 0.6168232866   |
| 14.3403364167  | 20.3910097644  |
| 0.0263329419   | 0              |
| 0.3936029775   | 0.4804120815   |
| 27.3632324073  | 23.3452238353  |
| 0.1424172621   | 0              |
| 5.4596397357   | 9.8628518624   |
| 1.6628719074   | 2.6629005633   |
| 18.970456278   | 13.2767620868  |
| 0              | 0              |
| 19.1936735451  | 21.195709348   |
| 1.4437683545   | 1.0398023464   |
| 10.9191069056  | 13.2114253288  |
| 0.8515336939   | 0.4292923523   |
| 1.0968082534   | 1.3404730027   |
| 1.9933737383   | 1.7734231786   |
| 0              | 0              |
| 1.1504726712   | 1.117817224    |
| 2.4041387047   | 1.0773537125   |
| 18.2739981912  | 14.5076389356  |
| 36.2121881954  | 43.5335842081  |
| 0              | 0              |
| 0.7026051316   | 0.7541276663   |
| 0.4577552132   | 0.6153941252   |
| 0              | 1.2772982354   |
| 1800.762369839 | 2336.062098579 |

gene\_expression\_table

|                 |                 |
|-----------------|-----------------|
| 54.9365468509   | 60.9677611876   |
| 0.5499708732    | 0.7393664444    |
| 0.6016886943    | 0.5777818066    |
| 12.3471992905   | 13.9219528653   |
| 7.3537510935    | 8.7941112804    |
| 1607.5626758712 | 1214.3239168993 |
| 1.4503165325    | 1.4060823887    |
| 1.1095331833    | 1.8071639236    |
| 2.7736337828    | 2.0051097822    |
| 4.409344276     | 3.8015284111    |
| 5.0595902674    | 5.6116340794    |
| 2.7402134075    | 2.0721775331    |
| 0.093349153     | 0.0941221182    |
| 0.1701582608    | 0.1029403401    |
| 0.5254284606    | 1.5893376017    |
| 1107.4161709368 | 1076.4321294226 |
| 1.1068988525    | 1.0044579422    |
| 4.6892724892    | 6.1465317963    |
| 2.5030130108    | 2.1632047497    |
| 1.0617574241    | 2.9440102014    |
| 0               | 0               |
| 29.8014755243   | 24.0385941197   |
| 1.5656217285    | 1.2915700769    |
| 10.893169149    | 15.8648657219   |
| 50.4232675601   | 36.3860560688   |
| 5.9369108174    | 6.2780740565    |
| 0.5680952216    | 0.572799258     |
| 3.4968178429    | 5.1530525166    |
| 10.0493423302   | 8.8659852426    |
| 1.5599146766    | 2.0971084548    |
| 18.6826241252   | 34.2496783476   |
| 2.5940531459    | 2.6155328554    |
| 13.2403138959   | 19.0713550588   |
| 2.3838857793    | 3.5347429796    |
| 15.5612028954   | 19.4257828157   |
| 15.3400845594   | 21.9117336054   |
| 9.0153371507    | 9.8474863956    |
| 0.3328503336    | 1.0068193687    |
| 22.2556279083   | 14.0968682054   |
| 8.037268118     | 8.9568532862    |
| 9.0896516687    | 12.2198897487   |
| 11.9257341599   | 17.5357052556   |
| 4.121631959     | 4.4328112856    |
| 43.9514890939   | 33.6572836791   |
| 4.7737099988    | 4.9983626059    |
| 4.6172974043    | 4.9071806042    |
| 60.4698166223   | 37.3540961483   |
| 1.9166594778    | 1.7893797406    |
| 17.1255069368   | 25.2753413428   |



gene\_expression\_table

|                |                |
|----------------|----------------|
| 723.4248994332 | 852.5514997112 |
| 1.5625393702   | 2.8358599826   |
| 17.6074772823  | 19.5286010028  |
| 2.8301705561   | 1.7665176312   |
| 4.4621377458   | 6.4986796038   |
| 106.3985872825 | 123.5752429642 |
| 2.5291654168   | 8.0753414685   |
| 2.9014538759   | 0.5850957952   |
| 5.1277348886   | 5.8164687116   |
| 0              | 0              |
| 5.2247232952   | 31.6079154986  |
| 9.595428962    | 10.456691323   |
| 4.2002079598   | 3.3879897753   |
| 3.5703306716   | 2.6181049574   |
| 3.08390202     | 6.218875715    |
| 7.917751692    | 5.8060462357   |
| 5.151848319    | 7.0278631001   |
| 70.1115451487  | 66.407725047   |
| 0              | 0.6251466829   |
| 54.7912298617  | 57.5467930206  |
| 0              | 0              |
| 0.733570109    | 0.4437866028   |
| 15.2943964705  | 23.131559507   |
| 30.7868019141  | 34.1459006928  |
| 314.1579343437 | 314.5847282161 |
| 10.6664399667  | 8.3787099253   |
| 12.0915383113  | 12.9928269471  |
| 6.4592382022   | 3.6927811158   |
| 2.4906771826   | 2.5113009013   |
| 0              | 0              |
| 4.4784398094   | 2.4630125074   |
| 7.0518566518   | 5.1351795488   |
| 0              | 0              |
| 14.4781375839  | 28.1533278774  |
| 2.8159603617   | 3.2735199921   |
| 1.70092912     | 0              |
| 1.7289753429   | 2.8526594589   |
| 0              | 0              |
| 2.216305499    | 2.1814511931   |
| 8.9310723028   | 9.2484039004   |
| 4.1887520846   | 3.6437491244   |
| 0              | 0.555214277    |
| 9.2368637508   | 11.6416854544  |
| 0              | 0              |
| 1.5161068841   | 1.528660804    |
| 2.0696064239   | 2.3508882723   |
| 1.5897268537   | 1.2544359448   |
| 1.8731516074   | 1.8886619883   |
| 11.2195358213  | 12.4251364731  |

gene\_expression\_table

|                 |                 |
|-----------------|-----------------|
| 0               | 0               |
| 2.3058250185    | 2.8498995987    |
| 18.7139059739   | 15.8405277731   |
| 0.0375732199    | 0               |
| 1.4400112725    | 2.9038701859    |
| 2.1355458148    | 2.1532289158    |
| 24.2065641361   | 21.0692934878   |
| 1.7472117352    | 0.5872264293    |
| 28.9553615166   | 26.3770604901   |
| 1.5705523926    | 2.6392619021    |
| 70.0876126049   | 103.3650812194  |
| 23.8050375054   | 18.4016498123   |
| 6765.0537045748 | 5902.9192675584 |
| 27.0600708329   | 23.5635738343   |
| 8.7218168144    | 12.5629094999   |
| 90.0231760739   | 92.5276823355   |
| 0.5818937884    | 0.3911413879    |
| 23.762464182    | 42.6474224278   |
| 0.1394305485    | 0.4217552535    |
| 1.595947077     | 3.2183242058    |
| 0               | 0.7201737353    |
| 0               | 0               |
| 0               | 0               |
| 1.6237647773    | 1.3349559636    |
| 35.2425893088   | 27.3341621906   |
| 50.0067140053   | 50.898710061    |
| 7.1640110768    | 11.1910772982   |
| 0               | 0               |
| 9.6235710361    | 15.9410662653   |
| 2.5600911833    | 2.5812896754    |
| 2.4314379524    | 3.6773567229    |
| 159.7638973894  | 195.7824196001  |
| 0               | 0               |
| 0               | 0               |
| 1.5111166593    | 0.7618146292    |
| 29.3840115211   | 27.584058313    |
| 1.6218901259    | 3.0744015432    |
| 314.2965369933  | 281.8378583744  |
| 3.2565865788    | 0               |
| 0               | 0.6537523063    |
| 2.4774093551    | 3.5264798278    |
| 0               | 0               |
| 0               | 0               |
| 63.2377335237   | 42.5075767358   |
| 5.3278640388    | 2.984433724     |
| 2.8029103795    | 2.3550995862    |
| 75.6101299537   | 49.4866623101   |
| 23.5736472705   | 25.9696647445   |
| 4.0954174954    | 4.1293290512    |

gene\_expression\_table

|                 |                 |
|-----------------|-----------------|
| 8.9362194912    | 8.0961349114    |
| 4.596787941     | 6.556618527     |
| 2.9156851262    | 1.6799017521    |
| 34.9874359994   | 44.6032864979   |
| 15.6419105419   | 15.2935091263   |
| 1.2012612291    | 0               |
| 0               | 0               |
| 147.3356240022  | 133.9913407306  |
| 2.5243971726    | 3.0543601262    |
| 15.0578705346   | 21.6395039833   |
| 118.8741801077  | 114.6472626195  |
| 0.6827516982    | 0.6884051322    |
| 204.5102440671  | 248.8190875833  |
| 1.5408505989    | 1.8125443068    |
| 114.039031813   | 121.6683932916  |
| 0               | 3.3576173973    |
| 51.7043175101   | 44.6849555862   |
| 0               | 0               |
| 0               | 0               |
| 0               | 0               |
| 0               | 1.1403104459    |
| 32.3827056879   | 28.2974001646   |
| 17.8650334659   | 33.4526446094   |
| 0               | 0               |
| 61.3240303452   | 78.3202999657   |
| 26.0821973785   | 38.6254335442   |
| 7.994580185     | 9.1008786526    |
| 54.9378847013   | 43.6900882778   |
| 0               | 0               |
| 0               | 0               |
| 309.2008376335  | 367.5499682026  |
| 10.7619534043   | 11.4893643363   |
| 162.7080174292  | 231.1688309278  |
| 2.5225170082    | 2.9673051011    |
| 0               | 10.7805394242   |
| 3.4333005792    | 3.4617295646    |
| 0               | 0               |
| 1415.3133249995 | 1958.0215256875 |
| 0.7564899581    | 0               |
| 54.5823112135   | 61.3966163967   |
| 62.1930917548   | 95.2680344647   |
| 39.5412481051   | 39.8686641123   |
| 0.4452973356    | 0.4988717339    |
| 0.521904013     | 2.104902277     |
| 3.907461874     | 12.8044055376   |
| 0               | 0.0639951549    |
| 848.4083581461  | 1278.9976450739 |
| 15.8091515042   | 14.9739930006   |
| 37.6674769741   | 24.8592288898   |
| 11.8457876171   | 18.5130063653   |

gene\_expression\_table

|               |               |
|---------------|---------------|
| 1.7765599142  | 1.4169751563  |
| 1.2478433211  | 1.0646103943  |
| 3.2545833251  | 3.1367589752  |
| 0.0692822393  | 0.0139711843  |
| 8.476135063   | 6.9671091552  |
| 26.4741854437 | 27.484316986  |
| 4.9684841691  | 10.8541875793 |
| 48.9289990451 | 50.3409684349 |
| 4.1964230861  | 2.0001899297  |
| 0.0822279914  | 0.1554541299  |
| 0             | 0.6925937103  |
| 7.7232549888  | 7.9546731706  |
| 7.3784430645  | 9.9193856983  |
| 62.6235356668 | 38.1353165275 |
| 0             | 1.0424973925  |
| 0             | 0             |
| 0             | 0.1970543772  |
| 8.0472827084  | 8.9877236175  |
| 3.5286047158  | 3.7671065517  |
| 2.4056403656  | 1.6170399655  |
| 56.828271375  | 47.5688402178 |
| 2.0437473631  | 2.6788714411  |
| 2.6376018568  | 1.208837348   |
| 2.5079372065  | 1.5561254428  |
| 0             | 0             |
| 29.522237143  | 32.8249138606 |
| 5.3463435257  | 5.5491606543  |
| 0.6137919899  | 0.4332120885  |
| 1.7760459836  | 1.2627099512  |
| 2.019354285   | 2.0360752776  |
| 31.5679595746 | 29.4716239208 |
| 0.8716880833  | 1.2890621035  |
| 0             | 0             |
| 2.5226223342  | 2.669689946   |
| 0.1141785776  | 0.1918733633  |
| 0             | 0             |
| 0             | 0             |
| 2.3530846073  | 1.5421698559  |
| 2.5246882545  | 2.451312353   |
| 4.2404220587  | 4.2755343054  |
| 5.2838153589  | 4.1756608442  |
| 11.2100043573 | 14.3169145755 |
| 14.755355397  | 22.6351070351 |
| 0.4027716949  | 0.4419397442  |
| 0             | 0             |
| 7.2356843415  | 5.9276737457  |
| 4.2987442266  | 5.1543495594  |
| 6.9602156671  | 6.4980081485  |
| 13.055461598  | 18.2409409009 |

gene\_expression\_table

|                |                |
|----------------|----------------|
| 0              | 0              |
| 2.6709160057   | 2.5706216147   |
| 0.033511358    | 0.008447       |
| 3.885732666    | 4.6652545588   |
| 0              | 0              |
| 13.030225282   | 17.2870004166  |
| 2.0294836346   | 1.5915577237   |
| 7.0215183796   | 7.4900741434   |
| 0.4328405557   | 0.4364246339   |
| 10.5749344344  | 11.4826909747  |
| 2.782555105    | 3.4391172849   |
| 0.6990402563   | 0.9867599917   |
| 2.4738914802   | 2.192027576    |
| 4.1807903217   | 4.9179769284   |
| 3.1208536139   | 3.8885992233   |
| 0.1763795264   | 0.2667600202   |
| 16.0944628766  | 6.0102707112   |
| 2.1001039799   | 3.8114884972   |
| 1.5047490558   | 1.1179434212   |
| 0              | 0              |
| 0              | 0              |
| 0.2415566595   | 0.1289418549   |
| 0.3533598301   | 0.3562857788   |
| 10.8415643575  | 7.0272877363   |
| 0.0243122235   | 0.0245135376   |
| 0              | 0              |
| 0.5749923745   | 0.5245389007   |
| 2.6084201908   | 2.2777841953   |
| 425.7877295423 | 408.6591544945 |
| 6.0996041277   | 6.5344930251   |
| 428.6296690878 | 471.7246594714 |
| 3.1900519822   | 2.5731734242   |
| 2.7548847552   | 3.0037877613   |
| 0              | 0              |
| 8.0341253446   | 11.165761973   |
| 0              | 1.8648636299   |
| 0.0472434343   | 0.006805       |
| 1.136807359    | 1.1052840921   |
| 0.3097756474   | 0.2342555274   |
| 0              | 0.072294498    |
| 3.1997780507   | 3.8984136725   |
| 1.6325474633   | 3.1745549966   |
| 3.0173174045   | 3.44794215     |
| 0.3547444962   | 0.751132012    |
| 18.6802679526  | 25.4596530489  |
| 2.9230115933   | 1.0401935997   |
| 0.9588665695   | 2.2851786116   |
| 14.8236973778  | 13.4212957711  |
| 0              | 0              |

gene\_expression\_table

|                |                |
|----------------|----------------|
| 0.0568106432   | 0              |
| 0.5481861743   | 0.6218160261   |
| 15.5548539754  | 13.1870722249  |
| 24.3206311552  | 40.514633285   |
| 0.5764562546   | 1.0379098632   |
| 0.605887199    | 1.4254430559   |
| 11.6498458623  | 11.4526530789  |
| 11.5927129038  | 12.3148854246  |
| 2.3916980373   | 2.442418867    |
| 0.0272460963   | 0.0824151119   |
| 1.9583985374   | 1.5514830525   |
| 20.149451487   | 23.8655288102  |
| 2.7470917132   | 2.8743608509   |
| 0.2504567631   | 0.2126573783   |
| 21.126970786   | 19.5017484424  |
| 0.0365762162   | 0.0737581613   |
| 0              | 0.114078101    |
| 0              | 0.0164511197   |
| 0.9243445771   | 0.9319984885   |
| 1.4040101546   | 1.8201032648   |
| 2.5103184013   | 2.4776307124   |
| 0              | 0.0543498088   |
| 1.219323395    | 1.2977209412   |
| 9.1411437774   | 3.8582103322   |
| 8.3566925058   | 6.6704954413   |
| 6.4811699661   | 9.646663295    |
| 1.9672783336   | 2.8003314611   |
| 27.6725388688  | 22.2549095297  |
| 0.1080578247   | 0              |
| 8.8458186483   | 7.5564302935   |
| 0              | 0              |
| 270.1941597865 | 262.6052637537 |
| 5.2418472973   | 7.3993523961   |
| 0.6719940559   | 0.6775584127   |
| 9.2196078003   | 13.1139287977  |
| 5.3742797803   | 1.8062602613   |
| 98.4103597093  | 90.2047577345  |
| 0              | 0              |
| 2.2156940334   | 1.9444429107   |
| 0.5915793963   | 0.5964778903   |
| 4.375442717    | 3.1764045486   |
| 0              | 1.540281369    |
| 1.2236175693   | 1.057499632    |
| 12.5126195222  | 18.9243428875  |
| 66.2779605898  | 96.9554440786  |
| 0              | 0              |
| 0              | 0.1039310075   |
| 1.0320209843   | 0.6937109972   |
| 0.4396096923   | 0.4654123125   |

gene\_expression\_table

|                |                |
|----------------|----------------|
| 0              | 0.2664824641   |
| 0              | 0              |
| 1.3014372307   | 1.2684731538   |
| 0.7531584204   | 1.0125264638   |
| 0              | 0              |
| 0              | 0              |
| 4.931674604    | 8.4018283816   |
| 1.2861103041   | 0.7507556552   |
| 1.8821984542   | 2.5303783284   |
| 0              | 0              |
| 0              | 0.1983165538   |
| 0.2075649833   | 0.4185673946   |
| 0.3722023755   | 0.6567476079   |
| 3.4045030206   | 2.415599166    |
| 3.5356717823   | 2.3766322925   |
| 3.1586239762   | 3.892507103    |
| 0.2893352591   | 0.2005651044   |
| 0.0132136897   | 0.0133231039   |
| 37.8239457239  | 64.9743897995  |
| 207.7647504721 | 209.4851186523 |
| 2.572969925    | 1.0377100231   |
| 10.19907294    | 15.9665256533  |
| 2.7359878746   | 2.4340966373   |
| 34.3300813451  | 32.1418936281  |
| 0.1627127549   | 0.3098912549   |
| 0              | 0              |
| 1.9413463724   | 0.9787107155   |
| 5.5178856166   | 4.0865202259   |
| 78.408796819   | 80.4635268067  |
| 0.0588430473   | 0.0296651446   |
| 0              | 0              |
| 0              | 0              |
| 66.4819382562  | 85.7391585379  |
| 1.6055898135   | 0              |
| 7.9288203874   | 6.928544066    |
| 0.4218589899   | 0.2781148586   |
| 0              | 0              |
| 0.8321298429   | 0.1398366971   |
| 6.1465874671   | 5.5088741877   |
| 1.5008524135   | 1.5889440219   |
| 0              | 0.0467756062   |
| 0              | 0              |
| 104.3971243071 | 127.9555790715 |
| 0.7222221266   | 0.3641011951   |
| 3.2502358506   | 2.0854584501   |
| 1.0894772332   | 1.342609282    |
| 1.0659648368   | 0.7027482334   |
| 19.7218378499  | 21.107589133   |
| 0              | 0              |

gene\_expression\_table

|                |                |
|----------------|----------------|
| 10.5664059635  | 9.4935739655   |
| 121.3308285313 | 146.0003906925 |
| 1.0185834963   | 1.4378248367   |
| 181.494693159  | 216.4037971907 |
| 8.0183661267   | 13.7440939263  |
| 3.5866970508   | 2.8127526118   |
| 0.1218368722   | 0              |
| 7.4217273047   | 6.6468262965   |
| 0.4527518339   | 0.4565007848   |
| 0.1761735449   | 0.0592107755   |
| 0              | 0              |
| 0              | 1.1235379291   |
| 14.4598392202  | 11.2660328948  |
| 29.1762984524  | 32.5596051712  |
| 80.1423558365  | 107.93097053   |
| 1.3072890663   | 2.1506068866   |
| 48.8533154455  | 46.6528569202  |
| 0              | 0              |
| 0.3143133904   | 0.1056386734   |
| 0              | 0              |
| 0.1280558043   | 0              |
| 1.6760419236   | 1.7788633308   |
| 43.3570936674  | 64.2359112577  |
| 3.5220539428   | 2.8935849055   |
| 0.0274818745   | 0.0277094344   |
| 0.2203967643   | 0.6666651906   |
| 7.7432306434   | 14.2762924386  |
| 173.7482156131 | 108.5199394416 |
| 0              | 0              |
| 2.1517650379   | 1.8320918382   |
| 24.0614541523  | 28.6451541731  |
| 594.4951770934 | 355.8187941484 |
| 4.9012211628   | 8.3230401146   |
| 1.645892992    | 1.5025398166   |
| 2.5025047098   | 1.1577156262   |
| 0.7291665702   | 0.1470408673   |
| 9.55780115     | 6.8558119708   |
| 2.6837163565   | 3.2471262123   |
| 2.9155238357   | 2.4209009508   |
| 1.3987692502   | 0.6268229207   |
| 134.8946223474 | 174.8720561075 |
| 177.9173626292 | 284.9144561682 |
| 0.2146232798   | 0.3246006587   |
| 12.1104757175  | 12.8064014691  |
| 1.7302349208   | 0              |
| 4.8304822989   | 6.6238534261   |
| 0.8489729338   | 0.9911610678   |
| 0.4895540406   | 0              |
| 10.2771045825  | 10.5694468255  |



gene\_expression\_table

|                |                |
|----------------|----------------|
| 15.2251522379  | 15.3512220712  |
| 327.6708577164 | 461.0854915253 |
| 7.0985637669   | 5.7258739785   |
| 11.6069853267  | 14.0437144963  |
| 5.4710192976   | 5.0488364806   |
| 88.5791549431  | 43.2608016532  |
| 0              | 0              |
| 2.5474844433   | 2.1404821224   |
| 5.4160597836   | 8.097206547    |
| 1.3101523583   | 1.2169850805   |
| 0.2217709479   | 0.2515582041   |
| 1.3361341698   | 1.837087977    |
| 0              | 0              |
| 0              | 0.2813609499   |
| 74.8939978751  | 77.1498330977  |
| 84.5883213218  | 144.9908640919 |
| 70.8197425744  | 88.543633396   |
| 0.5216879689   | 0.3248871312   |
| 0              | 0              |
| 1.8654559743   | 1.7526592713   |
| 2.222947244    | 3.3086655184   |
| 420.5723215092 | 413.9822533607 |
| 1.5351549264   | 1.313341333    |
| 245.7843658947 | 320.1002526086 |
| 2.9105199166   | 1.7424306766   |
| 44.9816021195  | 89.1963302903  |
| 0              | 0              |
| 6.6241692055   | 5.8441422822   |
| 2.2980941452   | 0.9268492823   |
| 16.4742671929  | 20.5388815432  |
| 0.9829694184   | 0              |
| 9.01145356     | 12.0581512199  |
| 0              | 0.106853928    |
| 117.7857595814 | 161.9095539807 |
| 0              | 0              |
| 0.303091379    | 0.4584016298   |
| 0              | 0              |
| 5.1216907209   | 6.5054249206   |
| 0              | 0              |
| 0.1337556352   | 0.2022947712   |
| 7.0612870473   | 6.7314067019   |
| 4.8083765584   | 4.9080458945   |
| 0              | 0              |
| 1.3635630719   | 1.9477096538   |
| 0              | 0              |
| 3.8455229009   | 5.1698203174   |
| 0              | 1.3573346925   |
| 20.2724638201  | 20.5473446608  |
| 0.0847953266   | 0.0997470401   |

gene\_expression\_table

|               |               |
|---------------|---------------|
| 0             | 0             |
| 0             | 0             |
| 0.1794944998  | 0.36196156    |
| 2.3481955655  | 1.5784263228  |
| 0.2044473074  | 0.4122804119  |
| 1.4206761017  | 1.7905497748  |
| 8.0817455707  | 10.5630847546 |
| 3.1428193621  | 0.7922107642  |
| 8.3190309015  | 8.3879155223  |
| 2.0648562155  | 0             |
| 0.8947389388  | 0.9021477047  |
| 1.5684607313  | 0.9664405424  |
| 5.7298591788  | 5.6981633524  |
| 0             | 0.0495770214  |
| 1.9774929028  | 2.1111535778  |
| 0             | 0             |
| 1.6055239723  | 0.904633755   |
| 3.261538307   | 5.0193582158  |
| 19.7585623586 | 11.9533022922 |
| 1.9866909227  | 1.1369181207  |
| 0.3062238866  | 0.4750146653  |
| 7.8844220906  | 5.2689925059  |
| 1.5991890699  | 0.9484887887  |
| 2.9560493242  | 5.0296384597  |
| 24.1242111926 | 26.3509658655 |
| 0.6434118379  | 0.9232062449  |
| 1.3055884515  | 0             |
| 0.0326997721  | 0.0329705382  |
| 9.7488064194  | 11.4379986674 |
| 4.8132518613  | 4.5184102899  |
| 0.051490451   | 0.1730560361  |
| 6.1928890552  | 6.4392987072  |
| 0             | 0             |
| 4.4971221688  | 5.3587890749  |
| 0.1092594469  | 0             |
| 0             | 0             |
| 0             | 0.0695006582  |
| 0             | 0             |
| 21.1603244435 | 12.0939422757 |
| 8.239117443   | 9.2513563001  |
| 1.1420740257  | 1.2213205631  |
| 0             | 0             |
| 0.1883460662  | 0.2848584609  |
| 7.3476023215  | 6.4421244853  |
| 7.6148834051  | 8.1578085161  |
| 0.9083001957  | 0.7044778875  |
| 0.336340513   | 0.1695627678  |
| 0.0385588435  | 0.0388781248  |
| 52.1121872343 | 45.4705054778 |

gene\_expression\_table

|                |                |
|----------------|----------------|
| 2.9419384301   | 4.0159121635   |
| 1.785761982    | 1.6688012757   |
| 6.3340429827   | 5.1091929416   |
| 0.0612877292   | 0.123590428    |
| 9.7184403552   | 7.1639108914   |
| 41.2656568671  | 56.9363758875  |
| 201.0606215375 | 352.7949860809 |
| 6.0579654881   | 7.2777691264   |
| 0.2302045129   | 0.464221381    |
| 538.0094574823 | 693.1489206891 |
| 19.9344720047  | 21.8223541633  |
| 11.7816580641  | 11.362726918   |
| 56.6218462202  | 51.3529374567  |
| 6.3682838931   | 7.0631171761   |
| 0              | 0              |
| 0              | 0              |
| 5.4759554792   | 5.0341250071   |
| 2.3005274483   | 1.1597883288   |
| 0              | 0              |
| 7.5035522433   | 10.9824451001  |
| 0              | 0              |
| 5.6656457756   | 4.8964794826   |
| 1.3051149405   | 1.3685586407   |
| 0.2799730159   | 0              |
| 13.4588159104  | 18.7049527419  |
| 40.6100559212  | 45.8523329851  |
| 0.0147859591   | 0.0149083922   |
| 6.4532359813   | 8.9038657667   |
| 2.2411549692   | 2.0218480734   |
| 0.4451213816   | 0.2244035748   |
| 12.3133795584  | 15.4808546131  |
| 12.2671971691  | 15.2790738286  |
| 1.2948712631   | 1.1423941122   |
| 0.8140557686   | 0.5183977569   |
| 0              | 0              |
| 62.910212217   | 52.1329658311  |
| 7.5257868915   | 7.7286235905   |
| 4.230451926    | 6.0701084541   |
| 38.5700079209  | 41.0499029097  |
| 471.8056801987 | 349.2902034275 |
| 0.8389807273   | 0.8459277948   |
| 3.6426519597   | 2.9732307462   |
| 453.5481508951 | 595.9941606497 |
| 26.807947785   | 29.2824213554  |
| 0              | 0              |
| 3.3556987939   | 4.2293565103   |
| 96.1784390133  | 111.940083496  |
| 44.3733006804  | 43.8965631751  |
| 7.483014389    | 9.1617571629   |

gene\_expression\_table

|                 |                 |
|-----------------|-----------------|
| 1.4716025741    | 0.494595994     |
| 23.5992650128   | 17.9910961589   |
| 43.5873716296   | 69.6538952025   |
| 0.5941141469    | 0.6275590404    |
| 7.3587965551    | 15.4577710084   |
| 2.4302976101    | 2.1781523234    |
| 2.2450407334    | 1.5776818584    |
| 6082.8734669046 | 4235.1883252218 |
| 25.5395001266   | 26.9368767708   |
| 0.9622805133    | 0               |
| 0.8746938709    | 0.9646182179    |
| 165.9201611116  | 145.5675419739  |
| 7.1692284131    | 7.9894966956    |
| 6.3088383134    | 21.0919948232   |
| 133.8987225884  | 180.1753876717  |
| 15.5192589523   | 32.4992023549   |
| 0               | 0               |
| 1.8437605212    | 2.239283165     |
| 2.7352233118    | 7.5841478954    |
| 0.3281083355    | 0.3308251926    |
| 24.9885029901   | 44.4625004844   |
| 21.9990684108   | 31.423407395    |
| 0               | 0               |
| 5.3913338856    | 4.5299800863    |
| 5.3839499965    | 9.3765536718    |
| 1.6314356535    | 1.7338604588    |
| 11.2445871194   | 12.5974404627   |
| 5.7990873295    | 7.5584539621    |
| 2.5670434413    | 7.2942985926    |
| 8.1402268545    | 7.0238379923    |
| 0.8221683666    | 0               |
| 18.7423342165   | 19.437456964    |
| 0               | 0               |
| 1.3290050696    | 0.7605460562    |
| 6.2886236414    | 6.2304227774    |
| 2.7031197518    | 0               |
| 1.9057556247    | 3.8430719576    |
| 8.7265969915    | 7.1490708321    |
| 236.0449345952  | 371.7769546354  |
| 9.0395989525    | 9.4650059152    |
| 18.3917677522   | 43.2694694155   |
| 0               | 0               |
| 0.116713359     | 0.2353595767    |
| 1.7398157905    | 1.4655526422    |
| 1.685794871     | 2.3607692633    |
| 16.420991889    | 17.1182167194   |
| 0.1054648961    | 0.106338184     |
| 25.276168289    | 10.7307217743   |
| 0               | 0.0566505375    |

gene\_expression\_table

|                |                |
|----------------|----------------|
| 120.1769033796 | 112.4231303849 |
| 2.6225106827   | 2.6442260311   |
| 9.5967415592   | 9.474618465    |
| 0.009225       | 0.0186025631   |
| 0.009478       | 0              |
| 12.8300249088  | 17.478766499   |
| 2.6055312571   | 3.6696083944   |
| 0              | 2.5049926558   |
| 6.4245735553   | 3.6391974022   |
| 53.5707127338  | 54.0142978433  |
| 5.0513043468   | 2.9709930808   |
| 23.2213381232  | 26.556386994   |
| 0              | 0              |
| 34.6944442833  | 31.6893291474  |
| 5.3009282529   | 10.9709501728  |
| 4.5793482401   | 3.8169406536   |
| 1.4057608671   | 1.5945762168   |
| 0.743291878    | 0.2141276019   |
| 10.107464702   | 16.499970434   |
| 0.3649036372   | 0.4599064661   |
| 0.3706752092   | 0.7741851095   |
| 0              | 0              |
| 1.7802102717   | 2.0193199474   |
| 0.8776452017   | 2.3597664671   |
| 2.1886512582   | 1.4043107856   |
| 6.0352673703   | 0              |
| 1.5080546856   | 1.6291520682   |
| 0              | 0              |
| 0              | 0              |
| 0.4717761892   | 0.5648731691   |
| 1.7696772925   | 1.8586779878   |
| 9.6232925118   | 6.4686512641   |
| 0              | 0              |
| 0              | 0              |
| 0              | 0              |
| 2.8519541257   | 7.4159420073   |
| 8.8505478096   | 8.2514899587   |
| 0.8107075572   | 0              |
| 1.781873683    | 1.3820217302   |
| 6.7943340395   | 6.8505936122   |
| 7.055082495    | 5.2374129422   |
| 24.8943906214  | 29.2839461689  |
| 5.9409663177   | 7.188191632    |
| 25.7909040724  | 38.6552816459  |
| 111.8840315638 | 143.4824440276 |
| 0.325113562    | 0.2809762468   |
| 13.8108393653  | 15.9531396514  |
| 30.0192569836  | 24.4095382412  |
| 4.3498244032   | 2.8507976519   |

gene\_expression\_table

|                |               |
|----------------|---------------|
| 0.8307158018   | 0.4653302404  |
| 8.2019590614   | 10.8952312003 |
| 4.0900216495   | 4.1238885258  |
| 0              | 0             |
| 1.3813927714   | 2.0892468138  |
| 0.8863511026   | 0.924507325   |
| 7.6171920904   | 12.480430997  |
| 0              | 0.0218761606  |
| 0              | 0             |
| 0.4982558302   | 0.7033341992  |
| 1.2942406125   | 0.4349857995  |
| 0              | 0             |
| 3.0156580182   | 1.1402357889  |
| 0.7349872437   | 1.9761952189  |
| 1.1106568425   | 1.1198534876  |
| 7.0293114078   | 7.4096765282  |
| 3.264896553    | 4.7027587022  |
| 136.0888517797 | 159.128493428 |
| 0              | 0             |
| 42.7692560893  | 53.3015952525 |
| 0.6423834496   | 0.6858027738  |
| 0              | 0             |
| 2.9002753661   | 1.7638578872  |
| 11.1402355459  | 10.0411570553 |
| 3.9610010237   | 4.4930245072  |
| 1.5372274796   | 2.0394161654  |
| 1.4958116782   | 1.8768680577  |
| 0              | 0             |
| 1.9351694205   | 1.5609546653  |
| 5.263067134    | 7.1260691728  |
| 18.707908126   | 19.6327273284 |
| 0              | 0             |
| 0.0509251207   | 0             |
| 0.0306116056   | 0             |
| 1.7389347233   | 1.1688891595  |
| 39.4849764529  | 53.8631946904 |
| 0              | 0             |
| 0.7585065925   | 0.9447372587  |
| 9.7811745615   | 12.234079673  |
| 3.8984224373   | 4.5039302939  |
| 25.3109789611  | 19.8493268799 |
| 7.0429627585   | 6.0801818295  |
| 0.5596031676   | 0.9027790187  |
| 10.0287992339  | 12.0780327384 |
| 0              | 0             |
| 0              | 0.407677      |
| 0.3983686181   | 0.3780397704  |
| 127.051362344  | 79.3021011267 |
| 7.1488019261   | 10.0911952718 |

gene\_expression\_table

|                 |                 |
|-----------------|-----------------|
| 7.1533414746    | 7.6132723025    |
| 15.0886626824   | 17.3054726528   |
| 60.6209705682   | 62.4812218241   |
| 0               | 0               |
| 21.896349387    | 12.1427125459   |
| 95.4160188524   | 94.0799967904   |
| 5.2038669018    | 3.4979712163    |
| 2.9137879915    | 4.4068728339    |
| 0               | 0.4939016913    |
| 0               | 0.8671128424    |
| 56.3094872499   | 73.5504039464   |
| 42.8161473013   | 68.1642326409   |
| 6.5663576836    | 7.150387891     |
| 110.1401141782  | 103.2215168102  |
| 1.5195685065    | 0               |
| 7.2615021709    | 6.5894670601    |
| 2967.129975395  | 3370.1131927105 |
| 264.9774252783  | 561.5130573395  |
| 4.6357850816    | 4.6741710788    |
| 10.2999017376   | 16.8141150283   |
| 0               | 0               |
| 6.0064453869    | 5.9215991542    |
| 77.9887721058   | 95.9068760775   |
| 0               | 0.1614831844    |
| 24.2354272394   | 33.1632859646   |
| 1.9415427656    | 1.9576194503    |
| 33.8685004194   | 28.6851129596   |
| 19.4710747241   | 18.0097980232   |
| 3.3426096205    | 10.1108629549   |
| 0               | 0               |
| 0               | 0               |
| 14.7474366821   | 15.0948470808   |
| 11.3445251846   | 25.2850212752   |
| 0               | 0.2578881649    |
| 169.8526568525  | 226.3655913841  |
| 22.401109119    | 27.1039182021   |
| 11.0794966093   | 17.1292329747   |
| 6.8748000851    | 6.9317259462    |
| 3.3455229932    | 2.8110209568    |
| 5164.4568847654 | 4936.7924244351 |
| 26.7236109014   | 31.2908425328   |
| 6.264146021     | 13.5343188061   |
| 44.033655372    | 73.9971169262   |
| 362.7992800358  | 615.8723755836  |
| 2.6070924046    | 5.0183892511    |
| 32.4477455289   | 29.7645668674   |
| 3.5969877928    | 3.0894725879    |
| 0               | 0               |
| 0               | 0               |

gene\_expression\_table

|                 |                 |
|-----------------|-----------------|
| 0               | 0               |
| 16.1497906802   | 14.6387171756   |
| 0               | 0               |
| 4.9829607702    | 5.0242215093    |
| 0               | 0               |
| 0.3166150713    | 0.9577102799    |
| 1588.8457442558 | 1040.6299054378 |
| 0               | 0               |
| 8.9381673881    | 12.8534351746   |
| 0               | 0               |
| 5.5038561489    | 5.2851715165    |
| 2.9625135432    | 0               |
| 28.1432752976   | 63.8467018157   |
| 1.0214023543    | 1.0298599397    |
| 10.148610584    | 7.4419234867    |
| 51.4371749886   | 61.9011117455   |
| 0               | 0               |
| 0.9973155374    | 1.3647071305    |
| 17.8048552649   | 35.904571967    |
| 1.9022008936    | 1.2786345421    |
| 3.6089603205    | 2.2742773956    |
| 341.0451784395  | 414.6657485653  |
| 73.2494263263   | 75.3088624866   |
| 9.2684539446    | 10.0640616846   |
| 7.7271972658    | 3.8584897805    |
| 7.8405196782    | 6.5424348008    |
| 0               | 0.8556109771    |
| 0               | 0               |
| 1.5107963976    | 0.7616531724    |
| 3.5169639148    | 2.8841496728    |
| 4.2205580319    | 5.4713645964    |
| 85.9165943097   | 110.2538374737  |
| 4.799896105     | 3.5441815416    |
| 61.4273744638   | 59.1803877951   |
| 12.4312791312   | 8.5760416181    |
| 1.2010106532    | 0               |
| 2.0320417212    | 2.7806062599    |
| 0.2354383591    | 0.9495514995    |
| 0.5412083537    | 1.091379514     |
| 0.7261502171    | 0               |
| 5.9108341907    | 7.2013984908    |
| 2.0653376635    | 1.0412197076    |
| 55.1498570048   | 48.1923156059   |
| 0               | 0               |
| 0               | 0               |
| 0               | 0               |
| 7.623776025     | 5.9787028629    |
| 113.9070431417  | 78.9595366665   |
| 1.1556894964    | 0.8545232876    |



gene\_expression\_table

|                 |                 |
|-----------------|-----------------|
| 10.1905222501   | 12.5582153941   |
| 49.0046531812   | 65.6105705139   |
| 56.447500699    | 44.7188552374   |
| 198.6284365996  | 184.6674525421  |
| 0               | 0               |
| 164.1224647438  | 194.3445039679  |
| 0.0839551629    | 0               |
| 0               | 0               |
| 0               | 0.2187055636    |
| 0.974823507     | 0.7938770558    |
| 0               | 0               |
| 150.9007745755  | 139.6897042727  |
| 0               | 0               |
| 0               | 0.0904847483    |
| 2.2078851893    | 3.011873388     |
| 0               | 0               |
| 1.6986351203    | 1.3049146216    |
| 5111.7032067372 | 4315.8746194105 |
| 0               | 0.0266788625    |
| 34.046099384    | 43.3957907123   |
| 0               | 0               |
| 14.5468546521   | 10.7560258176   |
| 7.6036038686    | 3.4623194478    |
| 0.1597039019    | 0               |
| 2.8671944692    | 1.5601876226    |
| 8.7761261529    | 6.6365967673    |
| 10.8795611211   | 12.4322675852   |
| 1.9601219159    | 1.117068772     |
| 14.3162679712   | 29.2304941178   |
| 3.2377242711    | 2.0240109641    |
| 0.40204679      | 0.2702505897    |
| 85.5448710553   | 4.7918452166    |
| 3.3182955929    | 3.1429982165    |
| 1669.2707416023 | 1021.5563945274 |
| 9.9370524073    | 10.8051650218   |
| 0.5714878729    | 0.6722566686    |
| 13.2088211167   | 18.1611749867   |
| 551.7543108362  | 660.4217793663  |
| 19.2993689541   | 19.459174793    |
| 32.5290681994   | 40.9980259881   |
| 3.8578658782    | 2.7080958618    |
| 0.5742714015    | 0.6471473529    |
| 0               | 0               |
| 0               | 0               |
| 0.9888836733    | 0.4722972594    |
| 1.8350572589    | 1.5418768372    |
| 57.1443834237   | 66.0493978591   |
| 6.5090824823    | 4.648777548     |
| 0               | 0               |

gene\_expression\_table

|                 |                 |
|-----------------|-----------------|
| 23.9036051364   | 19.3086166978   |
| 11.4937963285   | 11.4216194338   |
| 0.2269082303    | 0.1779455327    |
| 6.058070284     | 6.3858802926    |
| 0               | 0               |
| 0               | 0               |
| 0.0112908285    | 0               |
| 46.9262355209   | 42.3188290527   |
| 88.1363975301   | 74.6384115981   |
| 1117.4954023216 | 1291.2504419064 |
| 1.564770742     | 1.2908680499    |
| 27.0410212736   | 26.3723289253   |
| 2.0273398138    | 0.9085008576    |
| 22.5458446258   | 15.6286160742   |
| 0               | 0               |
| 0.869599682     | 0.6189178487    |
| 11.4039340804   | 12.8511113968   |
| 0               | 0               |
| 0               | 0               |
| 0.7881966376    | 1.324538657     |
| 6.0437592038    | 6.742080736     |
| 332.2198674547  | 546.5312555927  |
| 0               | 0               |
| 1.7280588046    | 2.3646419654    |
| 2.2358276628    | 2.9404449577    |
| 5.2668181351    | 6.1274184427    |
| 0               | 0               |
| 0               | 0.2564753912    |
| 1.2617475123    | 1.0764728984    |
| 9.1635344737    | 9.5693908894    |
| 0.3337111808    | 0.2392707069    |
| 19.1931051185   | 29.750137292    |
| 0.8508346095    | 1.2391597566    |
| 0.0254162513    | 0.0192200304    |
| 17.3999548846   | 5.2632098639    |
| 0               | 0.009867        |
| 0.0538969088    | 0               |
| 14.9041127877   | 27.237387788    |
| 0               | 0               |
| 1.2490324301    | 0.7953946584    |
| 0.9201680853    | 1.1081905221    |
| 18.3376411111   | 16.9801379003   |
| 0               | 0               |
| 0.0537158897    | 0               |
| 2.3759447014    | 1.4742267035    |
| 3.7271618427    | 4.2841474819    |
| 0.4819042298    | 0.6971530833    |
| 0.5207396809    | 1.050103192     |
| 9.3392458577    | 13.3401524951   |

gene\_expression\_table

|                |                |
|----------------|----------------|
| 3.1343307689   | 3.4033829576   |
| 57.2540201783  | 63.1970827352  |
| 0.0896927246   | 0.3918867906   |
| 2.2325893889   | 1.6371462154   |
| 2.2386635305   | 2.5891417316   |
| 1.438045125    | 0.7249763325   |
| 5.6148044462   | 4.4535537046   |
| 3.1555970875   | 3.2395761607   |
| 2.5707598175   | 3.8016684196   |
| 13.8331034815  | 15.3251919889  |
| 12.7751706931  | 13.2229260067  |
| 11.9753670342  | 12.9169363488  |
| 0.1112470186   | 0.2243363693   |
| 42.396951877   | 45.2007690674  |
| 3.2064734987   | 2.2120692393   |
| 1.0755252313   | 1.7350895581   |
| 11.0803257977  | 10.4272699542  |
| 0              | 0              |
| 4.2855564357   | 2.1605212058   |
| 3.6479599675   | 4.1085901403   |
| 0.8392020051   | 0.7454186543   |
| 8.7247215208   | 6.0902068212   |
| 0.2384400136   | 0.6182084165   |
| 2.6026195373   | 2.6241701796   |
| 0.7081212134   | 0.8924808953   |
| 11.4884249028  | 13.5438468957  |
| 2.6238634199   | 2.090869492    |
| 0.1635443731   | 0.4617160249   |
| 8.8985368099   | 8.0897065139   |
| 0.0412199588   | 0              |
| 52.0269132949  | 43.71476265    |
| 2.1896276342   | 1.278176004    |
| 0.2329191558   | 0              |
| 13.0346701631  | 6.3593235498   |
| 0.6450985807   | 0.7070002533   |
| 24.902521011   | 28.783170268   |
| 3.4312545121   | 0              |
| 0.3204388397   | 0.3230921906   |
| 22.5285162097  | 23.3640623004  |
| 4.4619319143   | 3.0528103047   |
| 0.5491316234   | 0              |
| 3.4048758553   | 2.7464555789   |
| 1.9180561981   | 0.9367514152   |
| 0              | 0              |
| 16.3123207686  | 19.1277086117  |
| 5.6558399522   | 9.5044539619   |
| 117.1872938199 | 126.2345436191 |
| 0.3936851331   | 1.5877799603   |
| 3.4304367679   | 4.7435547977   |

gene\_expression\_table

|                |                 |
|----------------|-----------------|
| 18.3045814229  | 19.9326420615   |
| 10.0619040081  | 20.2904405123   |
| 0              | 0.285371896     |
| 4.7618567848   | 6.4958584791    |
| 0.0900927125   | 0               |
| 0.2021485336   | 0.2293001971    |
| 19.6194175533  | 29.0134144839   |
| 26.4112159234  | 33.7745205813   |
| 17.3130160318  | 15.5433468383   |
| 5.4283265914   | 4.8651334422    |
| 2.4992189467   | 1.3999518858    |
| 2.7527648884   | 2.1055963228    |
| 0.811050158    | 0.27258865      |
| 4.6588599993   | 6.8326357315    |
| 12.2908422912  | 14.2515072087   |
| 43.3411309715  | 65.5500170996   |
| 0              | 0               |
| 8.6682801953   | 5.593636306     |
| 75.9848577637  | 96.1289372296   |
| 2.5330598642   | 5.108069054     |
| 245.6899319227 | 170.3758081069  |
| 6.8625090242   | 0               |
| 0              | 0               |
| 56.7566326853  | 43.2984315771   |
| 0.2047890831   | 0               |
| 7.4556019287   | 5.6949523043    |
| 4.3307767134   | 5.2729203076    |
| 0.8472153221   | 0.4576235224    |
| 0.2273592273   | 3.2093858284    |
| 433.5839056019 | 520.5012903753  |
| 0              | 0               |
| 5.9495169944   | 1.4996952932    |
| 115.8395648708 | 133.9667692073  |
| 1.693126234    | 0.6828583756    |
| 43.4241943069  | 34.7314234414   |
| 213.0604401657 | 305.8092198823  |
| 17.6085331396  | 22.2799538687   |
| 15.364894659   | 15.4921216106   |
| 22.9601461526  | 20.1912081935   |
| 18.0448539669  | 19.5419958117   |
| 40.878855028   | 33.0554960369   |
| 951.6975150395 | 1168.6198276268 |
| 0              | 1.2015565518    |
| 0.8021937089   | 0.505522604     |
| 0              | 0               |
| 18.1576145448  | 23.9585731033   |
| 14.5172378497  | 15.1846401317   |
| 0              | 0               |
| 61.819517603   | 73.1921810954   |

gene\_expression\_table

|                 |                 |
|-----------------|-----------------|
| 2.4792055854    | 2.3435009204    |
| 0               | 0               |
| 3.5858569922    | 3.3374300313    |
| 26.0051409253   | 17.7796358086   |
| 21.1844724605   | 24.7866075897   |
| 174.9896349235  | 232.800947907   |
| 0               | 0               |
| 0.4184031009    | 0.4218676317    |
| 12.7161738065   | 11.6194557193   |
| 0               | 0               |
| 0.4408610315    | 0.8890230444    |
| 0               | 0               |
| 0.2025058058    | 0               |
| 5.6027456332    | 10.3013700559   |
| 0               | 0               |
| 8.8259094491    | 13.3484868146   |
| 18.2528870895   | 25.3055380539   |
| 0               | 0               |
| 41.631043338    | 66.2203857024   |
| 121.2453283742  | 96.0964521557   |
| 0.4526806409    | 0.4564290023    |
| 0               | 0.3870729751    |
| 0.3544111294    | 0               |
| 0.2267235704    | 0               |
| 8.4918295963    | 9.6789465823    |
| 0.3109635209    | 0.470307619     |
| 90.3735084935   | 67.9115556941   |
| 3.9815772289    | 4.5880527379    |
| 26.3410562589   | 29.5577857965   |
| 7.543459961     | 6.4049874278    |
| 8.8245918607    | 8.8976627113    |
| 13.2650078439   | 9.1288638009    |
| 13.8379981285   | 18.1383563634   |
| 1.7596714766    | 0.5914140668    |
| 0               | 0.0868812835    |
| 1.6037115123    | 2.1020880797    |
| 175.175194477   | 233.2792385729  |
| 369.8487285385  | 381.7300575985  |
| 30.7153669266   | 38.6288748735   |
| 11.931310165    | 13.0515298559   |
| 3.3864878507    | 2.1728822243    |
| 0.5873110422    | 0.4737393541    |
| 0               | 0.3271709017    |
| 3138.0530009466 | 2352.3928958891 |
| 28.1466999232   | 24.1412285845   |
| 0               | 0               |
| 3.6828520067    | 4.7096112976    |
| 6.6560021209    | 4.2008513961    |
| 875.1716549164  | 979.2544345809  |

gene\_expression\_table

|                |                 |
|----------------|-----------------|
| 6.9398482147   | 3.498656349     |
| 70.6541303031  | 108.8749615358  |
| 4.7967051413   | 6.9859452225    |
| 9.6767144055   | 14.6352617141   |
| 23.432276453   | 19.4073213718   |
| 222.6713563487 | 196.1525571954  |
| 16.9473673671  | 19.785755315    |
| 81.5666385101  | 77.4042730655   |
| 0              | 1.945265435     |
| 23.5540025644  | 15.8326922179   |
| 186.5510921482 | 176.6960578079  |
| 224.1525943789 | 206.0667193252  |
| 0              | 0               |
| 4.6203732087   | 4.65863159      |
| 43.6864879064  | 35.3958975132   |
| 5.4502509194   | 8.2430714879    |
| 1.7869786069   | 1.8017754438    |
| 149.0292523768 | 123.3504448118  |
| 1.4358217135   | 0.3619277107    |
| 100.9457252761 | 120.6300359463  |
| 64.3501507969  | 146.8404591978  |
| 12.9220731757  | 15.6348872056   |
| 1.8255057296   | 1.6105438871    |
| 34.2678482627  | 26.7285951349   |
| 15.9389663388  | 21.7222687707   |
| 0              | 0               |
| 38.6599314682  | 55.7631268704   |
| 0              | 2.4043572085    |
| 12.6229873361  | 11.151723303    |
| 12.6031148079  | 12.7813538698   |
| 17.7664476486  | 15.9231647449   |
| 8.0273894337   | 12.9501746502   |
| 1.5972826963   | 1.6910342208    |
| 1.0237633484   | 0               |
| 0.9411505048   | 2.214201676     |
| 1602.153171622 | 1822.2172698954 |
| 23.8222106706  | 28.6385956202   |
| 1.1645514395   | 1.0015187117    |
| 0.0691908221   | 0.2092912423    |
| 45.1006072401  | 61.1339968575   |
| 100.2666466239 | 86.6063367584   |
| 14.0659081546  | 4.7274596742    |
| 27.5705270773  | 49.4201264584   |
| 10.0733605346  | 13.0587064032   |
| 3.690009659    | 2.4803761931    |
| 81.0935925536  | 112.6541063395  |
| 841.5559178517 | 888.5935123538  |
| 20.2304316504  | 19.7503931553   |
| 5.031215025    | 6.2435388639    |

gene\_expression\_table

|                 |                 |
|-----------------|-----------------|
| 0.9013220212    | 0.9087852974    |
| 0               | 0.6664355964    |
| 0               | 1.3263240758    |
| 4.1067368554    | 4.1407421397    |
| 2273.4204330502 | 1723.7392259881 |
| 40.0692644148   | 49.724372419    |
| 5.9798979449    | 5.6944462615    |
| 10.1374750547   | 11.1102359334   |
| 36.0124462564   | 31.302278011    |
| 0.4018737399    | 0.8104028031    |
| 92.1063719855   | 118.598998724   |
| 5.6834055858    | 3.5815414152    |
| 101.374807193   | 92.515067409    |
| 59.7376744345   | 64.5346331187   |
| 11.4042884022   | 9.1989760675    |
| 1.7008286279    | 1.0289472669    |
| 0               | 0               |
| 1.2652774577    | 0               |
| 27.8147104894   | 36.6742653878   |
| 18.3684840862   | 11.4651221024   |
| 129.0886028725  | 115.3668783269  |
| 0               | 0               |
| 15.181169196    | 27.6025611753   |
| 17.9022688177   | 13.8850047355   |
| 0               | 0               |
| 9.5070984284    | 6.2676519852    |
| 11.8253778279   | 5.2992427932    |
| 25.857687446    | 13.0358992812   |
| 7396.415714214  | 5392.2354139985 |
| 33.6967132538   | 73.6140911421   |
| 16.0339482998   | 27.9243263591   |
| 19.0724797763   | 26.0176093215   |
| 0.196714786     | 0.5950309693    |
| 7.3885760067    | 7.1883611688    |
| 2.2429470476    | 0               |
| 17.0690055164   | 27.1742259943   |
| 12.3246059321   | 6.2133290902    |
| 2.0297221168    | 2.0465289588    |
| 56.1752728058   | 38.5499467987   |
| 0.4568471849    | 4.6063004681    |
| 10.1255573907   | 6.3808754451    |
| 3.4842027663    | 2.049281057     |
| 80.5265044937   | 121.789940138   |
| 77.8060144771   | 75.3122656854   |
| 2.4254387374    | 3.4936032256    |
| 6.6320252413    | 7.390829347     |
| 1.2446809355    | 1.0039898794    |
| 2.6938451675    | 8.1484535744    |
| 87.1905300336   | 76.1495594571   |

gene\_expression\_table

|                 |                 |
|-----------------|-----------------|
| 1.5129799163    | 3.8137698594    |
| 282.0646697515  | 446.1529211446  |
| 54.1875768587   | 63.3086936112   |
| 0               | 0               |
| 0               | 0               |
| 1876.1784109721 | 2033.4276106197 |
| 29.7168777874   | 31.8356284382   |
| 5.3196597517    | 0               |
| 0               | 0               |
| 123.549467155   | 122.1536184315  |
| 32.7138924506   | 42.4089970124   |
| 6.8616911826    | 8.9940610462    |
| 46.040698038    | 49.0009280846   |
| 69.4588806534   | 80.0388864098   |
| 0               | 0.7744041192    |
| 1.872607894     | 1.8881137727    |
| 43.6415896467   | 49.119581004    |
| 222.410239355   | 224.2518775437  |
| 0               | 0               |
| 49.7159551081   | 51.4824219922   |
| 0.0660299329    | 0.0998650273    |
| 2.7240939966    | 1.6479902952    |
| 77.0511217304   | 98.4062354128   |
| 0               | 0               |
| 46.4326215428   | 45.5517736      |
| 0               | 0               |
| 18.9213157186   | 22.4446954568   |
| 27.3856366677   | 25.373556539    |
| 27.3109511791   | 25.0337235011   |
| 0.578309067     | 0.5830976778    |
| 0.3280709442    | 0.3307874917    |
| 150.5564876014  | 156.4032458931  |
| 5.7518931781    | 6.8539793151    |
| 4.6609600199    | 8.2242203311    |
| 0               | 0.7583367343    |
| 6.7267628341    | 5.3791947078    |
| 0               | 0               |
| 3.5982470565    | 6.802578486     |
| 14.6603708848   | 22.1726461826   |
| 1.5409193286    | 2.330518057     |
| 36.1678131054   | 30.0318906885   |
| 20.9320326695   | 19.309156918    |
| 0.1228533494    | 0.2477412401    |
| 0.408008782     | 0.1175392126    |
| 5.5344233303    | 7.4403338416    |
| 0.2619564261    | 0.3697757296    |
| 81.5482335269   | 66.8065797334   |
| 0               | 0.2633634478    |
| 0.8863369876    | 1.7873523645    |



gene\_expression\_table

|                 |                 |
|-----------------|-----------------|
| 2.6534264008    | 2.3827761145    |
| 169.3677456999  | 211.1550107477  |
| 16.5825763763   | 13.6399071455   |
| 0.6285638724    | 2.5350744454    |
| 54.8928025866   | 34.8483220899   |
| 5.1767038603    | 2.3198083836    |
| 23.1695978724   | 17.0718293017   |
| 292.1328640204  | 321.0459111039  |
| 18.0688688884   | 22.7731071705   |
| 0               | 0               |
| 166.6359480679  | 164.6721576016  |
| 2.6496295772    | 0               |
| 1.9939896351    | 3.0157508987    |
| 0               | 0               |
| 29.1969831202   | 23.5509958617   |
| 22.8025547378   | 17.9620064354   |
| 1.2670873836    | 2.1292988849    |
| 221.151172904   | 264.4674805499  |
| 8292.9663890674 | 8179.4479465274 |
| 110.2958370425  | 102.0267219668  |
| 17.2146701764   | 18.0247990982   |
| 0               | 0               |
| 19.4485170534   | 20.0552296635   |
| 6.9416052654    | 10.3586447606   |
| 50.5977762857   | 118.3973501956  |
| 139.574548722   | 67.6134292081   |
| 4.704713408     | 5.506045718     |
| 2.9255335547    | 3.5397096521    |
| 18.3519201673   | 19.0481125712   |
| 0.7655933876    | 0.5403529467    |
| 6.4791799565    | 4.955939953     |
| 23.1989877519   | 17.3267287865   |
| 2.4369084305    | 3.7502905687    |
| 23.5330460867   | 16.4866937931   |
| 22.465727703    | 26.8122780566   |
| 1.7233298627    | 2.0535268765    |
| 5.2431285847    | 5.7039023144    |
| 3.6556476643    | 1.8429588825    |
| 1.722556491     | 0.8684099446    |
| 21.7223226637   | 20.6624447605   |
| 0               | 0               |
| 115.4244884577  | 153.3480881487  |
| 2.8329141501    | 2.6013385272    |
| 0               | 0.1524546464    |
| 0.0146716078    | 0.0147930941    |
| 41.8857283555   | 51.7555851929   |
| 5.8328772844    | 4.9209837015    |
| 5.442008574     | 0               |
| 2.5171867114    | 3.8070449081    |

gene\_expression\_table

|                |                |
|----------------|----------------|
| 0              | 0              |
| 0              | 0.950289815    |
| 1.169964309    | 2.8648692442   |
| 5.7854150636   | 1.1666640836   |
| 7.5456738696   | 8.5032318477   |
| 0.9346522956   | 0.753913247    |
| 136.9518594716 | 128.5627074784 |
| 16.7271034182  | 15.977946275   |
| 1.3764391755   | 0              |
| 0              | 0              |
| 39.9234890795  | 41.0135809401  |
| 0              | 0              |
| 0.2833088394   | 0.4896938406   |
| 0.058563837    | 0              |
| 19.4142307926  | 15.608250128   |
| 0.7385952063   | 0.148942209    |
| 45.7314232696  | 37.204712808   |
| 0.9239203045   | 0.6654076448   |
| 3.4261907736   | 5.1127501132   |
| 4.3870343127   | 3.9129728054   |
| 1.1802173751   | 1.4646030854   |
| 7.9077294373   | 4.3990114932   |
| 0.232970991    | 0.4991626616   |
| 0              | 0              |
| 6.3286361709   | 5.2949051957   |
| 2.4008944785   | 3.9337589908   |
| 68.4608610224  | 105.7260352302 |
| 1.1281094618   | 2.9573716148   |
| 0              | 0.2907166348   |
| 22.540328148   | 25.5678416047  |
| 1.2856190848   | 1.9443967221   |
| 0.2903630428   | 0.3659591939   |
| 2.1295860691   | 1.7316288881   |
| 1.0982390751   | 0.6814356287   |
| 27.2493094382  | 13.5122673906  |
| 7.0950647829   | 3.5769072581   |
| 4.4204568686   | 6.6855898041   |
| 3.6729236121   | 3.3254452575   |
| 0              | 0              |
| 4.0001595762   | 1.923565434    |
| 0.4253972235   | 2.0373684242   |
| 47.7467964617  | 43.6592844553  |
| 0.9190664688   | 0.3088922252   |
| 0.1039023545   | 0              |
| 9.4799302777   | 10.3180377083  |
| 374.3024566343 | 376.638361839  |
| 0.9472147851   | 2.3876451756   |
| 0.7569457898   | 1.2084214985   |
| 1.0712894355   | 1.0801601042   |

gene\_expression\_table

|               |               |
|---------------|---------------|
| 2.4572317705  | 3.7163678234  |
| 0.9439134934  | 1.0222279198  |
| 15.2249885794 | 15.9126810962 |
| 0.2146772957  | 1.0822745115  |
| 0.9065142184  | 0.8602545768  |
| 0             | 0             |
| 2.9075344382  | 7.329024719   |
| 0.5552045873  | 0.8746904445  |
| 0.3889577998  | 0.1960892564  |
| 0.4629927111  | 0.6002054488  |
| 2.8400277565  | 2.3290159703  |
| 0.8704768955  | 0.1880753063  |
| 0             | 0.2801525181  |
| 79.4946378057 | 65.1409713991 |
| 1.8448425477  | 1.778054467   |
| 2.3700514838  | 2.751748556   |
| 0.2870235747  | 0.5305670974  |
| 0.1785177915  | 0.1799959842  |
| 92.1378390927 | 154.01970447  |
| 8.0314329885  | 12.14690429   |
| 1.6345801361  | 2.9666071042  |
| 9.2451035935  | 4.0134909651  |
| 0.3695663715  | 0.4299536727  |
| 0.5803074857  | 0.8358752059  |
| 11.5443702652 | 11.5662912317 |
| 2.2705713917  | 4.4026395267  |
| 0.0582810688  | 0             |
| 14.444266381  | 15.5752500681 |
| 0.646293605   | 0.4654608233  |
| 9.2746250462  | 7.2260990781  |
| 35.4116491143 | 52.4642995549 |
| 22.003739126  | 30.9258531646 |
| 61.4857285136 | 62.7602214045 |
| 0             | 0             |
| 9.7569022422  | 9.1681117675  |
| 14.3109827052 | 7.9220690322  |
| 2.7647439347  | 3.5841047483  |
| 0.1190235472  | 0             |
| 0.0743603181  | 0.1249600813  |
| 0.5921066507  | 0             |
| 0.2967950076  | 0.3192027509  |
| 0.031461166   | 0.031721676   |
| 22.928444487  | 23.906424277  |
| 0             | 0             |
| 0             | 0             |
| 0             | 0             |
| 0.2791630606  | 0.4691243883  |
| 8.5350511172  | 10.1243817229 |
| 0.00857       | 0.008641      |

gene\_expression\_table

|               |               |
|---------------|---------------|
| 0.9629421449  | 1.9418313166  |
| 1.8592755224  | 1.6068608608  |
| 4.4397833437  | 4.3076200965  |
| 32.84803749   | 56.9250537342 |
| 4.1247351965  | 4.4035300733  |
| 4.7498790634  | 4.7892098006  |
| 0             | 0             |
| 2.0320263535  | 2.3561801168  |
| 2.3537049305  | 2.0689387677  |
| 22.6516794651 | 16.6103590269 |
| 0.5876647177  | 0             |
| 77.1113179192 | 82.5491999459 |
| 1.2767812554  | 1.7164712954  |
| 0.2704135389  | 0.5793869068  |
| 29.8595004153 | 30.6349365695 |
| 63.5180334228 | 65.3782356966 |
| 1.3439253703  | 1.7615696335  |
| 0.3435912856  | 0.3464363472  |
| 6.1722599226  | 8.117437166   |
| 12.4060734849 | 10.7218288408 |
| 1.7021769548  | 1.9069684478  |
| 0.1727357905  | 0.0949996942  |
| 1.3938779224  | 1.7177352399  |
| 6.451142937   | 1.6261401905  |
| 0             | 0             |
| 0             | 0.0189551582  |
| 0             | 6.2557332758  |
| 0             | 0             |
| 0.1549753734  | 0             |
| 2.3603355034  | 2.3798799453  |
| 12.0678514626 | 11.4303366177 |
| 16.6476338451 | 16.8878328488 |
| 1.1238815287  | 0.5665938395  |
| 0             | 0             |
| 0.8741585169  | 0.8813968693  |
| 0             | 0             |
| 82.2915882158 | 23.0093172997 |
| 1.4589243814  | 0             |
| 13.8631538845 | 11.7414745332 |
| 0.0777150668  | 0.1253737217  |
| 2.0137102414  | 2.2559827769  |
| 5.1387153552  | 4.6055695993  |
| 1.1074524084  | 1.1166225197  |
| 8.8159932885  | 5.2525867371  |
| 0.7437616756  | 0             |
| 6.2677885574  | 8.5178405375  |
| 0.2340275089  | 0.2528200096  |
| 1.7951319974  | 1.1919488141  |
| 0.6395860589  | 0.5527560562  |

gene\_expression\_table

|                |                |
|----------------|----------------|
| 0.8442542408   | 0.8512449749   |
| 0              | 0              |
| 3.254055851    | 2.5779290621   |
| 28.5310139429  | 25.7161880257  |
| 1.4531089567   | 1.8960651221   |
| 1.2173524387   | 0.9502703709   |
| 3.4991575622   | 1.1025412086   |
| 0.3948073694   | 0.5686807413   |
| 1.2729565481   | 2.4197076366   |
| 0.7974878903   | 0.4385952992   |
| 2.2684080949   | 2.5254404425   |
| 12.0266707739  | 11.6279167218  |
| 0              | 0.0426375857   |
| 0.4623611804   | 0.4195707302   |
| 7.4554068976   | 7.6841879599   |
| 0.9017757727   | 1.428810124    |
| 8.526686518    | 18.2692425321  |
| 21.1764632782  | 15.420753216   |
| 0              | 0              |
| 0              | 0              |
| 0.0602850584   | 0.0607842407   |
| 0.7294621907   | 0.1471004809   |
| 13.2700604951  | 16.2658111784  |
| 20.5875270726  | 15.967691794   |
| 708.5446160782 | 798.6308814288 |
| 23.7283211894  | 29.0977301845  |
| 0.8277632249   | 0.8346174074   |
| 0              | 0              |
| 0              | 0.2672491877   |
| 24.9707303657  | 25.177497153   |
| 0              | 0              |
| 0.0726081537   | 0              |
| 0.0806121902   | 0.0812796886   |
| 0              | 0              |
| 8.9384598579   | 9.5846941217   |
| 1.259619157    | 2.3159721885   |
| 0              | 0              |
| 0.0875958355   | 0.029440387    |
| 1.2649994664   | 4.4641594375   |
| 10.2794694786  | 5.7581040269   |
| 20.083579283   | 30.9077095498  |
| 0.0329547807   | 0.0166138292   |
| 5.7972985937   | 5.845302348    |
| 15.7823773528  | 17.6811791266  |
| 1.0384222562   | 0.6145556708   |
| 54.7321447396  | 43.080174056   |
| 7.8988710302   | 7.3271344476   |
| 0              | 1.0614957908   |
| 5.8719381532   | 7.1892513683   |

gene\_expression\_table

|                 |                 |
|-----------------|-----------------|
| 1.3020454707    | 2.1880448062    |
| 1.1300209489    | 1.1393779359    |
| 1.0098943079    | 1.0781540496    |
| 0               | 0               |
| 0.1421254739    | 0.4299069744    |
| 7.2480790005    | 7.3080957476    |
| 0               | 0.1850714257    |
| 0               | 0               |
| 0               | 0               |
| 0               | 0               |
| 6.1018165828    | 8.0566381468    |
| 995.7955714996  | 749.4278241004  |
| 3.18654742      | 1.3494319436    |
| 4.8032718942    | 5.2155866469    |
| 0               | 0.746737046     |
| 16.1441581993   | 12.8708484443   |
| 0               | 0.1121952821    |
| 50.5602265979   | 47.3756642461   |
| 2.7623437092    | 1.3926084631    |
| 0.9617554323    | 0.9697191194    |
| 0               | 0               |
| 0               | 0               |
| 3.8975427797    | 1.9649079302    |
| 740.4558722198  | 790.6335554966  |
| 98.4307359481   | 88.0945674055   |
| 21.0774072165   | 30.9924064669   |
| 71.4085516422   | 79.9998228743   |
| 6.0704769853    | 5.7126932395    |
| 21.2287869895   | 35.4513175983   |
| 263.6813614837  | 295.0006015514  |
| 36.0339762581   | 31.4225736396   |
| 12.7528242033   | 6.1720426826    |
| 2.5527133989    | 2.1448756669    |
| 4.4055181315    | 4.0718309813    |
| 3.2214870238    | 2.5643385122    |
| 87.9498181407   | 86.6157940165   |
| 0.2171712836    | 0.4379390827    |
| 1.4612022404    | 1.4092449415    |
| 17.9707485165   | 19.9622192876   |
| 0               | 0               |
| 0.0749395757    | 0.4155805655    |
| 9.7201223951    | 8.6805390159    |
| 5.0739326471    | 4.4764533333    |
| 5.0763291768    | 5.2646019844    |
| 0               | 0               |
| 0.1400495013    | 0.2824183248    |
| 1716.0734950978 | 2263.7772784237 |
| 1.1324147086    | 1.2279644616    |
| 0               | 0.2283671169    |

gene\_expression\_table

|                |                |
|----------------|----------------|
| 2.5907621672   | 3.591795111    |
| 1.8273017459   | 0.7369729893   |
| 0              | 0.2316568428   |
| 21.1678127621  | 22.6498097956  |
| 1.1368915357   | 1.0030172371   |
| 0.2748148094   | 1.3854518829   |
| 22.1630549899  | 43.8950544948  |
| 4.8587722121   | 4.8990046244   |
| 0              | 0              |
| 0.502295429    | 0.1688182063   |
| 1.7918726103   | 1.4453679771   |
| 1.1862057627   | 0.9302439849   |
| 8.6154543038   | 9.1105394393   |
| 21.8468767797  | 17.3552181761  |
| 0.0358293122   | 0.018062996    |
| 0              | 0.1148067967   |
| 111.6255345347 | 133.9343034334 |
| 29.2061421938  | 26.7356658177  |
| 5.9426521671   | 5.6526976435   |
| 2.0166882912   | 0.6777957361   |
| 0              | 0              |
| 1.3521153223   | 0              |
| 12.3098339717  | 24.8235278053  |
| 0.4324057769   | 0.4904845369   |
| 0              | 0              |
| 24.5925042112  | 34.4726812538  |
| 0              | 0              |
| 26.6403473513  | 33.9958761476  |
| 19.6290550105  | 22.3453444185  |
| 0.843549201    | 0.4252670486   |
| 17.2238404875  | 13.127402979   |
| 4.3200199656   | 3.9090434852   |
| 6.0779437698   | 5.4974199044   |
| 7.9164527366   | 5.8504460131   |
| 0.9805253868   | 0.1977288992   |
| 4.0481634692   | 3.4985860666   |
| 0.4949123296   | 0.7023109119   |
| 0              | 0              |
| 0.3905871428   | 0.2625475648   |
| 13.0263463152  | 7.1143633332   |
| 0.3341251782   | 0.2807432142   |
| 28.8684581724  | 31.5847335788  |
| 0              | 0              |
| 10.7019425117  | 10.5931702474  |
| 1.1121451733   | 1.6820312136   |
| 1.197995257    | 1.6910811347   |
| 18.6227091749  | 21.7812179469  |
| 112.3662191901 | 146.1526818714 |
| 9.80859467     | 3.7675479711   |

gene\_expression\_table

|                 |                 |
|-----------------|-----------------|
| 0.0515613085    | 0.1559647649    |
| 0.2355154036    | 0.2374655573    |
| 0               | 0               |
| 2.7893782281    | 4.3513768805    |
| 1.9446758727    | 1.525049945     |
| 0.17014988      | 0.2859313054    |
| 1.7369160362    | 1.7512983368    |
| 2.790030714     | 3.3611461486    |
| 5.9782646449    | 5.6646483785    |
| 0.4552181807    | 0.3327659765    |
| 11.4348378903   | 11.7354068644   |
| 0               | 0.192503249     |
| 10.372117755    | 10.6956845657   |
| 2.4238077223    | 1.7773656272    |
| 0.8859732875    | 0.9925660785    |
| 0.0632471073    | 0.0717421686    |
| 56.5767451196   | 71.4449858719   |
| 6.361101574     | 3.848264294     |
| 1.6952532352    | 0.5697635175    |
| 0.7201557312    | 2.1783566529    |
| 27.7904306394   | 24.7415455627   |
| 28.0245562001   | 32.024157754    |
| 2.6340819636    | 0.9237889135    |
| 0.0707631669    | 0               |
| 72.6551454913   | 87.2976350548   |
| 0.6998874961    | 0.4981290499    |
| 1.4263070716    | 1.6178820932    |
| 12.7458067421   | 14.3200720228   |
| 2.3720857231    | 1.6443126295    |
| 2.1543405021    | 1.8292035621    |
| 14.0800199261   | 11.1934791044   |
| 7.2523555502    | 8.7748892504    |
| 0.171665029     | 0.1730864782    |
| 15.5705095929   | 21.5867287783   |
| 0.3834084751    | 0.3865832377    |
| 0.032750737     | 0.0330219251    |
| 13.48464808     | 6.7981529509    |
| 0.3186124216    | 0.3212506491    |
| 105.1467253497  | 71.2575824194   |
| 23.8066045283   | 27.2281138283   |
| 1.680573576     | 4.2362233508    |
| 4.8574058532    | 2.720903862     |
| 5.3169987961    | 7.3714100518    |
| 1045.938983541  | 1310.716821157  |
| 11.1089755572   | 14.1162808022   |
| 1565.9170679945 | 2108.1017708475 |
| 7.6421231716    | 4.9034381127    |
| 24.1094794925   | 31.3992732927   |
| 40.5337719833   | 37.2952758493   |



gene\_expression\_table

|                 |                 |
|-----------------|-----------------|
| 0               | 0               |
| 17.3560616143   | 14.2761331808   |
| 0.4985837436    | 0.5027121995    |
| 0               | 0               |
| 51.068823491    | 50.7560964412   |
| 88.8489391714   | 89.5846409083   |
| 5.9801049764    | 3.6177734607    |
| 10.8395628197   | 5.74252321      |
| 1.0241275474    | 7.2282538882    |
| 0               | 0               |
| 5.2765954525    | 4.4335729952    |
| 73.290876984    | 69.5508256673   |
| 7.9350125018    | 10.4009325026   |
| 1070.8860694001 | 1147.2379853983 |
| 9.5049856728    | 26.3551486913   |
| 1.8162918206    | 4.8835503511    |
| 8.0944507329    | 8.1614757477    |
| 2.5791567596    | 0.6501282804    |
| 289.4529283702  | 300.8993078053  |
| 13.6705499963   | 24.8107448772   |
| 949.659710946   | 992.9870646872  |
| 57.3229070855   | 63.355019597    |
| 5.8454629567    | 8.3610650535    |
| 1.41130282      | 0               |
| 2.2120682863    | 3.3455775321    |
| 0               | 0               |
| 0               | 0               |
| 1.6988101381    | 1.5225572514    |
| 0.8262707224    | 1.1535404488    |
| 0.5431740633    | 0               |
| 0               | 0               |
| 0               | 0               |
| 47.5615416869   | 22.7873028387   |
| 3.2766880851    | 3.5579602819    |
| 7.1639231944    | 2.8892972402    |
| 2.2191732786    | 2.9833984608    |
| 0               | 0               |
| 1.8108649383    | 6.3905084698    |
| 0               | 0.2599086891    |
| 0               | 0               |
| 0               | 0.7234945763    |
| 0               | 0               |
| 0.3971180954    | 0.3432054673    |
| 3.2220816322    | 1.299504659     |
| 37.3594670088   | 32.7286443395   |
| 0.3811697343    | 0.2049738449    |
| 1.6426947422    | 1.6562968559    |
| 0.1053896081    | 0.1062622727    |
| 1.3678282558    | 0.4597181248    |

gene\_expression\_table

|                 |                 |
|-----------------|-----------------|
| 2.6484107964    | 0               |
| 5.9798645541    | 3.3064342053    |
| 46.5171597704   | 62.4263524524   |
| 49.2574198115   | 32.4203971668   |
| 0               | 0.9837858803    |
| 348.599058402   | 300.0405759443  |
| 0.4013694717    | 0               |
| 9.6157700696    | 8.5272726273    |
| 17.3146477745   | 16.9289885048   |
| 2.554736023     | 4.7837960344    |
| 3.6374603625    | 0               |
| 0               | 0               |
| 0               | 0               |
| 0.4144576066    | 0.4178894673    |
| 0.2715101892    | 0.5475167858    |
| 4.4771734614    | 3.9499653343    |
| 25.0598140046   | 25.8835944964   |
| 0               | 0               |
| 0               | 6.4005738478    |
| 0.3961732364    | 0.3395356415    |
| 0               | 1.0348164848    |
| 0.1229115715    | 0.2726445134    |
| 3.0081740184    | 0               |
| 53.53182401     | 44.3795160655   |
| 0               | 0               |
| 0               | 0               |
| 1.030652245     | 0.7085361974    |
| 0.1154947659    | 0               |
| 2845.1520966376 | 2274.5992523638 |
| 0               | 0               |
| 0.4094871367    | 0.10321946      |
| 4.1145323094    | 3.1762735157    |
| 3.4605391702    | 3.4891937011    |
| 0.5084911306    | 0.4101612986    |
| 228.5494621577  | 127.1403781287  |
| 6.7633664453    | 3.2768399353    |
| 8.9984835209    | 6.6302650348    |
| 0.1848123859    | 0.1863427001    |
| 0               | 0               |
| 17.1964562375   | 20.7609904768   |
| 0.8557736432    | 0.2876199207    |
| 8.0178078279    | 4.9082631998    |
| 0               | 0               |
| 4.1514221149    | 1.98719675      |
| 0.2541157197    | 0.1830142078    |
| 0               | 1.5831253013    |
| 39.3105843597   | 32.1189008306   |
| 0               | 0               |
| 0               | 0               |

gene\_expression\_table

|                |                |
|----------------|----------------|
| 0.7043565312   | 0.9469184814   |
| 445.6083880351 | 608.2715829834 |
| 0              | 0              |
| 0.0208553656   | 0              |
| 0.0339812382   | 0              |
| 34.0689057473  | 39.0227459478  |
| 1.4142064592   | 1.5639085359   |
| 0              | 0              |
| 54.2270219375  | 63.3701117349  |
| 2.6794355714   | 3.5400567789   |
| 1.3158772033   | 1.3267731482   |
| 0.4388685927   | 0.4978154085   |
| 0              | 0.0780169663   |
| 0              | 0              |
| 8.5559560604   | 14.4930282139  |
| 2.8120366649   | 0.8860379243   |
| 13.495291651   | 13.6070376054  |
| 0              | 0              |
| 208.119914641  | 261.406167434  |
| 0              | 0              |
| 22.1436531638  | 16.6708346687  |
| 0              | 0              |
| 1.3794214294   | 0.8466004179   |
| 7.1165557929   | 6.8211386165   |
| 0              | 0              |
| 4.7073319525   | 6.2035109406   |
| 1.7405524355   | 0.6193993577   |
| 0.0653379452   | 0              |
| 4.6829158774   | 9.4433842699   |
| 11.3426840805  | 11.9338493806  |
| 0              | 0              |
| 7.988803865    | 10.356369538   |
| 0.0510637766   | 0              |
| 0.3238127473   | 0.4081175442   |
| 19.4491569546  | 15.933290013   |
| 10.9952552905  | 9.033281505    |
| 33.0519234862  | 32.4773173701  |
| 16.9508687084  | 42.0159357599  |
| 0              | 0              |
| 1.1259557444   | 1.206234012    |
| 0.4335576108   | 0.3122483046   |
| 0              | 0              |
| 0.4365592082   | 0.2370168114   |
| 0              | 0              |
| 10.8749335881  | 14.6624759552  |
| 15.9629736858  | 16.5981264804  |
| 0.4001254428   | 0.4034386279   |
| 0.6787711081   | 0.5599567484   |
| 5.9613236286   | 5.1520162031   |

gene\_expression\_table

|               |               |
|---------------|---------------|
| 3.8662094786  | 6.1505297929  |
| 0.3801011204  | 0.3832484968  |
| 3.5033387675  | 2.602782512   |
| 0             | 0             |
| 6.6858417418  | 7.8859355364  |
| 0             | 0             |
| 1.3131517291  | 0.2648050212  |
| 0.7935832771  | 0.6001158278  |
| 0             | 0             |
| 3.859911293   | 3.5534490521  |
| 0.831723147   | 0.6708880953  |
| 1.5414568811  | 1.5777695069  |
| 7.6247575849  | 8.1247054917  |
| 11.625425755  | 11.7216885354 |
| 0             | 0             |
| 1.9122036105  | 3.8560747127  |
| 8.8253296617  | 7.5636456283  |
| 0.2021061555  | 0.2037796685  |
| 0.5750476144  | 0.4251934274  |
| 0.196806121   | 0.0992178738  |
| 0             | 0             |
| 0             | 0             |
| 0             | 0             |
| 0.2982131009  | 0.1954435695  |
| 5.1157142811  | 3.5922302936  |
| 3.8259131711  | 5.3577682396  |
| 31.1556443873 | 26.8669157134 |
| 6.4393725082  | 6.0661656007  |
| 0.0438066929  | 0.0441694284  |
| 0             | 0             |
| 3.7594809476  | 2.6534275782  |
| 4.1352940344  | 4.1695357826  |
| 8.1907540728  | 7.7997667082  |
| 0.0193874138  | 0             |
| 0             | 0             |
| 0.9236122885  | 0.8277867879  |
| 1.0975858957  | 1.0415758199  |
| 14.0565193073 | 13.8544200179 |
| 6.0662224762  | 6.9902320213  |
| 49.8276609237 | 69.2286939683 |
| 0             | 0             |
| 0             | 0             |
| 0.2199519322  | 0.2217732147  |
| 4.3055129697  | 5.788218924   |
| 0             | 0             |
| 0.4712235603  | 0             |
| 2.9628692603  | 3.5848834827  |
| 34.4823742497 | 31.7046497465 |
| 4.987329379   | 4.0229010334  |

gene\_expression\_table

|                 |                 |
|-----------------|-----------------|
| 111.222326021   | 68.5924962931   |
| 2.6329586708    | 2.1054997325    |
| 0               | 0.2823118866    |
| 22.3073524378   | 17.1649973407   |
| 1.0139674326    | 1.7039390901    |
| 0               | 0               |
| 0               | 0               |
| 6.5423279166    | 9.3950162715    |
| 6.4554375208    | 8.7463221554    |
| 7.5382618767    | 7.6006814442    |
| 32.6161257886   | 31.0735740929   |
| 0.6589202416    | 3.321881712     |
| 0.9888896327    | 0               |
| 1.6042477212    | 1.6175314795    |
| 51.7748572164   | 52.6082508375   |
| 7.0656788726    | 6.2336621199    |
| 0               | 0               |
| 0               | 0               |
| 48.2561248792   | 56.3015994819   |
| 4.5363930702    | 4.8511655238    |
| 52.7169100918   | 56.0527031522   |
| 3.8422723199    | 3.4866789669    |
| 6776.7790384684 | 7092.1147788035 |
| 329.1898616925  | 353.7016451338  |
| 217.0543316246  | 198.0146967473  |
| 4.6860920276    | 3.1499297232    |
| 14.9985544214   | 9.6785586828    |
| 0               | 0               |
| 0.3227841908    | 0.6509139241    |
| 19.9341433513   | 23.0303394688   |
| 0.5042603846    | 0.7626537677    |
| 2.0981715743    | 1.0577726015    |
| 0.8118964791    | 1.2279289187    |
| 84.5519703107   | 87.2346983534   |
| 0.3061600059    | 0.7717378071    |
| 7.3118111531    | 4.0957531254    |
| 0               | 0               |
| 1.3380537       | 0               |
| 7.5939377859    | 7.6568183703    |
| 9.0842549035    | 7.3722610574    |
| 4.8252569576    | 5.6137059824    |
| 88.9762303103   | 104.7792890677  |
| 4.6690121694    | 5.4669754441    |
| 3.47196825      | 2.0465732597    |
| 5.2344210656    | 5.4243685432    |
| 0.8978488968    | 0.4764649549    |
| 4.8079706933    | 5.4537552568    |
| 0               | 0               |
| 11.2415259231   | 15.3350604155   |

gene\_expression\_table

|                |                |
|----------------|----------------|
| 0              | 0.31923676     |
| 2.1345253905   | 2.630466718    |
| 11.0964010047  | 13.7056470015  |
| 1.5376272056   | 1.0335728811   |
| 8.9206220559   | 9.5063695066   |
| 0.7381832842   | 1.6746653521   |
| 196.6271083895 | 206.2435597067 |
| 0.2296627472   | 0.9262577551   |
| 8.7071139634   | 7.9811018673   |
| 1.2628491685   | 0              |
| 9.1924683072   | 11.2960883459  |
| 0.3238608845   | 0.0932978775   |
| 0.1549788496   | 0.0781310656   |
| 0.3731219669   | 0.1881057767   |
| 1.4001203894   | 0.3529284747   |
| 4.0570903107   | 1.5340066888   |
| 0              | 0.6490017306   |
| 0.1569867235   | 0.7914331552   |
| 61.235257339   | 46.3067307624  |
| 0              | 0              |
| 0              | 0.2977392799   |
| 19.5113822682  | 20.5739945094  |
| 11.3036044591  | 15.5416396928  |
| 3.778974187    | 2.2861592859   |
| 3.0452988741   | 0              |
| 0              | 0              |
| 0              | 0              |
| 0              | 0              |
| 0              | 0              |
| 0              | 0              |
| 44.6813244018  | 44.5668795187  |
| 0              | 0.333639108    |
| 5.7176217193   | 5.7649657199   |
| 2.378209447    | 4.7958037835   |
| 0.2604915655   | 0.262648531    |
| 0.495345212    | 0.2497234258   |
| 13.0391725719  | 12.5755268372  |
| 4.3023688185   | 2.5304965041   |
| 1.0617574241   | 1.8734610373   |
| 91.2174440954  | 158.1931436225 |
| 8.8460509684   | 6.8609996217   |
| 421.7475014729 | 319.2926263952 |
| 16.8981045316  | 12.3912923798  |
| 7.3123270503   | 9.8305010596   |
| 6.1940901959   | 4.8041380999   |
| 668.5553836547 | 584.5998401194 |
| 75.8810110564  | 78.5069663331  |
| 0              | 0              |
| 17.7608358215  | 21.0681200505  |

gene\_expression\_table

|                  |                  |
|------------------|------------------|
| 6.0543060687     | 12.2088758778    |
| 0.6544952513     | 0.2030506805     |
| 336.0601749053   | 323.3770187406   |
| 1.0528425706     | 0.3538534975     |
| 0                | 1.762392374      |
| 35.9993439394    | 47.6403790849    |
| 5.3229384326     | 3.5780095408     |
| 0                | 0                |
| 4.7219615128     | 7.9351018041     |
| 7.4175215634     | 4.5704641625     |
| 4.9763570193     | 0                |
| 1.3226168519     | 0.7408714464     |
| 3.3513650008     | 4.0549386356     |
| 14.2811511141    | 14.7534879842    |
| 803.6225459007   | 812.9989293533   |
| 29.0106402652    | 26.6507826309    |
| 17.4265469986    | 15.835453069     |
| 41.4219069878    | 58.4708537545    |
| 0.2561116085     | 0.5164646128     |
| 11.5124120396    | 19.8298875012    |
| 14.352522981     | 25.324892468     |
| 44.3822436947    | 51.0147092057    |
| 1.7361478756     | 1.7505238154     |
| 3.7558023948     | 3.7869018134     |
| 1.463653021      | 0.5534147264     |
| 89.3265566315    | 156.4307913749   |
| 0                | 3.979881499      |
| 876.3704622828   | 687.4180005759   |
| 9.5154010663     | 14.1827187122    |
| 13.802280413     | 15.5481660149    |
| 45.6376432411    | 53.3780259726    |
| 1.99065751       | 2.6761878437     |
| 3.810990913      | 6.1480757002     |
| 9.5595027787     | 8.3242963751     |
| 4.0143943324     | 3.0357262402     |
| 0                | 0.4604473731     |
| 184.5582957584   | 107.0238454194   |
| 55.1212781847    | 29.0635692201    |
| 3.2900828979     | 1.9903955931     |
| 0                | 0                |
| 64.4697553204    | 80.0044166052    |
| 397.9690035731   | 409.7374859155   |
| 20872.0423904162 | 20456.3987948683 |
| 6.729365441      | 4.07105223       |
| 31.1035151045    | 39.1132366173    |
| 0                | 0                |
| 31.0217945652    | 26.0655553157    |
| 511.2899747243   | 723.4806377737   |
| 9.971387048      | 12.1485274872    |

gene\_expression\_table

|                |                |
|----------------|----------------|
| 6.5028077195   | 6.5566533476   |
| 36.0773156642  | 42.3149958255  |
| 7.551926982    | 8.7425278056   |
| 14.0122781     | 11.3026439132  |
| 26.2869516726  | 33.5860035432  |
| 105.0913753085 | 114.7917012253 |
| 5.1664136134   | 1.9534475284   |
| 4.6046425714   | 3.7142165578   |
| 9.5667576358   | 4.6674067213   |
| 13.4166163446  | 14.2304490641  |
| 37.3115921996  | 37.6205458399  |
| 0              | 0.3322832396   |
| 4.7490340463   | 3.6616853661   |
| 483.5721664902 | 555.2339703996 |
| 115.108458006  | 118.3021695637 |
| 243.626255454  | 265.3453580609 |
| 3.324435397    | 2.2346419593   |
| 0.8145612969   | 0.4927836976   |
| 0              | 0              |
| 0              | 0              |
| 7.4959576504   | 7.5580269235   |
| 0              | 0              |
| 0              | 0              |
| 5.7470217886   | 6.4969861092   |
| 15.7432190921  | 15.8735787086  |
| 9.6978426029   | 14.8482931801  |
| 0              | 0              |
| 1.1926763483   | 1.202552145    |
| 176.0682065436 | 167.7838288992 |
| 0              | 0              |
| 1.4875713916   | 2.9997780545   |
| 0.9745726158   | 1.0481519294   |
| 4.2712500529   | 0              |
| 0.949010231    | 2.8706051491   |
| 52.5002660487  | 57.1417414388  |
| 16.6492889565  | 24.0683251615  |
| 38.0912905481  | 35.4523388086  |
| 18.9095240185  | 11.070639754   |
| 48.3079814454  | 47.0284033785  |
| 0              | 0              |
| 21.1160577187  | 17.9789876314  |
| 0              | 1.0597518218   |
| 6.518703732    | 7.394266108    |
| 2.9283109914   | 9.4481871304   |
| 14.3925482708  | 15.7736128679  |
| 4.0597378059   | 6.2974675706   |
| 0              | 0              |
| 295.1387645107 | 363.9853552329 |
| 33.5943905911  | 16.3899505362  |



gene\_expression\_table

|                |                |
|----------------|----------------|
| 2.3694012639   | 2.3890207736   |
| 28.1470970352  | 28.380165301   |
| 20.8484432274  | 15.7658069762  |
| 15.1727918048  | 17.6076247651  |
| 0.8096814894   | 1.088514598    |
| 28.7477655383  | 28.5563881881  |
| 5.112712863    | 9.5736605656   |
| 0.760411407    | 0.5151318648   |
| 1.8886118039   | 1.16586747     |
| 1.7864647187   | 0.8786620978   |
| 0.2966288496   | 0.19939003     |
| 2.3219431663   | 3.5117545584   |
| 0.0948566201   | 0.1147704812   |
| 0.960007515    | 1.6132612144   |
| 6.8964157165   | 12.5411710151  |
| 0.9201190685   | 0.6958034934   |
| 5.2910413613   | 3.8010828483   |
| 15.5189216138  | 13.2498348091  |
| 0.0947495363   | 0.1433011457   |
| 0              | 0              |
| 1.5345730667   | 2.0630398578   |
| 3.8228328893   | 3.6694719524   |
| 0              | 0.040930964    |
| 0              | 0              |
| 70.4253268318  | 86.1166603396  |
| 14.0739732256  | 15.5920428135  |
| 7.9203371252   | 9.4943720497   |
| 0.7004604822   | 1.2712689924   |
| 0.1515516099   | 0.1125942725   |
| 15.3412105529  | 13.8063642172  |
| 14.8481910799  | 8.7041508935   |
| 2.2838130968   | 2.9167836132   |
| 29.5014666985  | 24.7297997014  |
| 3.8216972111   | 3.3326203354   |
| 6.133310329    | 4.3804016049   |
| 6.3125320335   | 12.1086479151  |
| 1.2844317347   | 0.8806457637   |
| 20.9988204025  | 30.3419771221  |
| 82.2520724472  | 74.0474551009  |
| 10.1623978345  | 10.6191478885  |
| 1.1047608068   | 0.3713028769   |
| 135.8305122084 | 158.5229926713 |
| 0              | 0.1038351693   |
| 0.6757958017   | 1.7716182596   |
| 0              | 0              |
| 3.1358322635   | 3.8874566834   |
| 0.2537413543   | 0.0852808085   |
| 0.6206879944   | 0.4814057832   |
| 0              | 0              |

gene\_expression\_table

|                |                |
|----------------|----------------|
| 2.6473878866   | 2.4557644891   |
| 2.405892759    | 1.3861796752   |
| 3.8463364057   | 6.1404603417   |
| 8.9464625337   | 8.1184882663   |
| 4.5589147714   | 4.3968092867   |
| 0              | 0              |
| 0.009938       | 0              |
| 76.6226530401  | 86.7171717532  |
| 14.6629331188  | 20.2600318578  |
| 9.4589883314   | 5.3906547313   |
| 12.7341281198  | 10.0882346412  |
| 136.4955831385 | 108.4901383475 |
| 2.9101061771   | 2.9342029214   |
| 2.3804160131   | 2.651302782    |
| 0.8351116384   | 0.5829415397   |
| 0              | 0              |
| 0              | 0.009873       |
| 0              | 0              |
| 2.6317736732   | 2.9045786963   |
| 0              | 0              |
| 0              | 0              |
| 0              | 0              |
| 0              | 0              |
| 51.7689192286  | 55.9937728159  |
| 0.5722215023   | 0.1923199019   |
| 0.1799597492   | 0.1425677643   |
| 0              | 0              |
| 0.013286071    | 0.0133960845   |
| 0              | 0              |
| 5.1022076296   | 8.3102747156   |
| 1.0501691581   | 0.8720064237   |
| 0.6998110067   | 1.51201221     |
| 156.6628351079 | 166.0310127324 |
| 1.9454242111   | 1.9070460068   |
| 2.1344374685   | 11.836612656   |
| 2.9427805484   | 2.5364328382   |
| 0              | 0              |
| 164.9432128967 | 120.8580954003 |
| 0              | 0              |
| 0.1617134331   | 0              |
| 0.9372646377   | 1.0882112186   |
| 44.7862307134  | 46.3031958044  |
| 16.8688927914  | 19.2981890478  |
| 10.9494118436  | 13.4400937164  |
| 0.3061762867   | 1.1319423075   |
| 0.3441366899   | 0.2669125136   |
| 0.9778363123   | 1.2050294115   |
| 0.6553576998   | 0.4295097959   |
| 21.3338296967  | 26.7088480055  |

gene\_expression\_table

|                |                |
|----------------|----------------|
| 2.156421375    | 1.8481357333   |
| 0.3682509853   | 0.2062779101   |
| 2.5049428848   | 2.9352552253   |
| 63.9217905222  | 60.0061838379  |
| 5.9272296988   | 11.6206014754  |
| 0              | 0              |
| 105.5185949322 | 127.9791765824 |
| 0.0755061383   | 0.1522627136   |
| 0.227574904    | 0.2294593075   |
| 1.2144880761   | 0.4898177928   |
| 13.8663823967  | 9.2303075345   |
| 5.7230018335   | 5.6165133066   |
| 0.8001435993   | 0.8542260859   |
| 7.929616625    | 6.6210885611   |
| 100.4076926561 | 96.7358829646  |
| 312.7660586727 | 519.8173782158 |
| 9.8240910595   | 11.7397785236  |
| 1.7854547085   | 1.3501791953   |
| 0.0183536339   | 0.004626       |
| 1.2837118344   | 1.4436885273   |
| 5.6774510749   | 4.7703853732   |
| 0              | 0              |
| 1.9298161471   | 1.4009729265   |
| 0              | 0              |
| 0.7377812752   | 0.7438903742   |
| 1.1894508707   | 1.3083272282   |
| 34.0735406573  | 31.9863246632  |
| 10.2566523729  | 9.2335546506   |
| 0              | 0              |
| 3.5744595797   | 3.4680552468   |
| 6.0937989177   | 5.768078754    |
| 0.7009408629   | 0.7067449098   |
| 9.2737900284   | 9.097862015    |
| 0.4466175879   | 0.5253683692   |
| 138.2432625816 | 135.6207250337 |
| 0              | 0.1350498524   |
| 0.1924829109   | 0.0646922466   |
| 2.7562128257   | 2.1895429453   |
| 195.0080390121 | 131.96159527   |
| 10.3848274927  | 7.4791554753   |
| 19.2221067677  | 26.1773035862  |
| 0.1531390404   | 0.3088141754   |
| 0.7763640342   | 1.1741889188   |
| 16.5801042982  | 10.6881696982  |
| 20.6288972963  | 26.5390517669  |
| 2.623107315    | 2.3213594795   |
| 0.1474504474   | 0.1858392389   |
| 18.4891076267  | 18.6422042052  |
| 0              | 0.3582093901   |

gene\_expression\_table

|                |                |
|----------------|----------------|
| 2.2497758374   | 2.7409891392   |
| 0.9148703517   | 1.5681578822   |
| 9.0132643046   | 9.5138926242   |
| 145.4442414829 | 155.8862784263 |
| 0              | 0              |
| 1.1323470551   | 0.7992063123   |
| 0.0320050533   | 0              |
| 0.4504729609   | 0.8579390792   |
| 9.9575551144   | 5.6475041149   |
| 3.4979617687   | 2.9391051437   |
| 1.4603475973   | 1.9821305134   |
| 0.2521780453   | 0.2373150937   |
| 12.803629082   | 15.8725178081  |
| 6.5168591639   | 5.7494685002   |
| 0              | 0              |
| 0              | 2.6814413302   |
| 10.1374750547  | 9.0363252258   |
| 87.2150225393  | 109.1886836035 |
| 72.9301709032  | 77.4042730655  |
| 3.7966008314   | 2.8878181976   |
| 0.9222438279   | 1.1623504305   |
| 1.241292171    | 0.7151831568   |
| 12.691355778   | 21.327408082   |
| 39.5301004895  | 40.2906570621  |
| 1.4064612127   | 1.4927444488   |
| 0.1831952996   | 0.1847122237   |
| 0.0958090535   | 0.0966023876   |
| 9.167589937    | 9.6453922823   |
| 3.043198742    | 2.1040440284   |
| 15.3815811673  | 26.3359465292  |
| 6.4811313652   | 7.502915654    |
| 0.8206449646   | 0.8274402052   |
| 11.8871031392  | 9.6277229918   |
| 2.924772247    | 2.9489904317   |
| 3.198787766    | 3.4867836751   |
| 9.2948273802   | 11.6786945875  |
| 1.7369116698   | 1.9702056759   |
| 0.4266683128   | 0.4302012826   |
| 10.960350301   | 15.2056571461  |
| 9.1506797864   | 11.8625795542  |
| 129.0852006709 | 82.2813107577  |
| 15.4945800084  | 15.977946275   |
| 50.3308984561  | 51.0119674296  |
| 42.8380072173  | 44.8329515307  |
| 5.1290688415   | 4.4582236284   |
| 0.1179168729   | 0.1188932678   |
| 0.8200839037   | 2.1498736964   |
| 1.0233994083   | 0.515936765    |
| 52.0700059901  | 48.6432516375  |

gene\_expression\_table

|                |                 |
|----------------|-----------------|
| 0              | 0               |
| 0.5638811663   | 0.5868906413    |
| 4.0781336829   | 4.7972191429    |
| 3.8369447786   | 4.4927025512    |
| 2.4988592702   | 1.8109270941    |
| 1.1809746488   | 3.5722606536    |
| 0.8913390442   | 0.8987196577    |
| 0.1335911523   | 0.1346973359    |
| 3.3587382495   | 2.3222055988    |
| 0.778823181    | 0.4417155686    |
| 256.9700917361 | 336.0634869457  |
| 1.7523237133   | 1.9788536265    |
| 2.0519048722   | 4.9653489493    |
| 0.5967681514   | 0.4970644606    |
| 818.3690105004 | 836.6116565786  |
| 3.5992385456   | 4.20204812      |
| 1.5858784725   | 0.6852900543    |
| 3.1418264842   | 3.8347560538    |
| 0.692544889    | 0.3491397071    |
| 0              | 0               |
| 80.8290262111  | 75.1850699821   |
| 2.237400494    | 1.0254213587    |
| 37.8626374702  | 37.3277949899   |
| 0.2222685713   | 0.2241090364    |
| 1.6416089938   | 1.730438577     |
| 5.3814204696   | 6.543094254     |
| 3.8364536926   | 4.9231902789    |
| 1.4382426956   | 0.3625379679    |
| 1.4621711156   | 0.9311232174    |
| 1.481675148    | 1.2570991863    |
| 0.9919563093   | 2.6671201883    |
| 17.91194984    | 18.2948162674   |
| 0.3993476784   | 0.2013272117    |
| 2.0494702437   | 1.3776270716    |
| 1.7052811834   | 1.7194015358    |
| 22.5294195268  | 31.8215295095   |
| 2.6934632893   | 1.2344391596    |
| 0              | 0               |
| 33.1095311783  | 30.6303961769   |
| 1.1614399687   | 0.9758809306    |
| 3.9503568242   | 4.2675720264    |
| 915.4092060813 | 1109.6207614879 |
| 22.6796774263  | 27.4982018699   |
| 4.1082935822   | 1.6828141512    |
| 0              | 0               |
| 0              | 0               |
| 15.4809147328  | 11.8122936878   |
| 0.8417214208   | 0.8790015816    |
| 0.164991262    | 0.16635745      |

gene\_expression\_table

|                 |                 |
|-----------------|-----------------|
| 23.5643525865   | 20.8229098424   |
| 11.6004167301   | 14.0185662172   |
| 4868.2216194631 | 5254.6384840352 |
| 8.7405740876    | 6.9244601174    |
| 1.0944012681    | 0.2758658278    |
| 2.0276968027    | 0               |
| 0               | 0               |
| 518.6872114743  | 770.2498337465  |
| 514.2431772493  | 435.6357945775  |
| 6.3175823721    | 8.3814398243    |
| 406.4806300338  | 327.3029350693  |
| 129.8732049325  | 161.1519180674  |
| 15.7877727595   | 12.3312333988   |
| 28.3319872519   | 28.5665864765   |
| 74.1225071472   | 106.0772845167  |
| 0.1428058205    | 0.2879766099    |
| 53.510438557    | 68.91873577     |
| 5.2318446809    | 7.9127494047    |
| 24.6104932625   | 16.6784485794   |
| 1.6236670322    | 1.8417505382    |
| 0.2399218715    | 0.2419085124    |
| 8.9956815261    | 7.0087670022    |
| 0.2827781087    | 0               |
| 1.219409475     | 1.0245888599    |
| 8.5488419767    | 6.464722138     |
| 8.6435439149    | 10.3432141451   |
| 25.0523009738   | 32.9639648702   |
| 13.0478153655   | 14.1126455836   |
| 3.4549709284    | 3.8383883604    |
| 23.0439606495   | 26.6075627186   |
| 0               | 0.2694759541    |
| 2.4918038653    | 2.3449411191    |
| 16.2594307003   | 30.6022541771   |
| 19.065049905    | 15.2181414347   |
| 0.3518984458    | 0.3548122938    |
| 34.7810376712   | 41.4452260107   |
| 0.4720984351    | 0               |
| 2.724053297     | 3.0357262402    |
| 3.7757800672    | 3.6378429122    |
| 0               | 0.1623729611    |
| 78.8364420537   | 104.2481792128  |
| 3.1869418701    | 3.2133309153    |
| 4.1155432961    | 4.6475760811    |
| 0.6459657892    | 0.8811903715    |
| 5.2741786913    | 4.9239359456    |
| 25.9944639132   | 21.7981726482   |
| 1.3916319057    | 1.2277607364    |
| 0               | 0               |
| 40.0800769598   | 51.2309031608   |

gene\_expression\_table

|                 |                 |
|-----------------|-----------------|
| 0.321297158     | 0.107985872     |
| 3.4387284363    | 3.6711554468    |
| 2.9872988242    | 2.6355304079    |
| 3.5049305913    | 0.7496263302    |
| 18.3330148365   | 21.746845776    |
| 290.5048669473  | 299.0126526094  |
| 0.543986622     | 0.1371227576    |
| 4.0816102958    | 4.115407523     |
| 18.6762196693   | 12.2400626426   |
| 22.162629851    | 22.3461445382   |
| 7.6419542709    | 9.536178774     |
| 1.5756485984    | 2.4965215716    |
| 54.5777411168   | 48.0221419328   |
| 5.9214724765    | 3.9803362907    |
| 0.2757228748    | 0.0926686537    |
| 42.2858774332   | 58.4113473669   |
| 29.9066739274   | 29.5389180088   |
| 37.9208237407   | 46.4279981928   |
| 4.7870671971    | 6.6367205653    |
| 3.6103199403    | 3.8750672729    |
| 0.5965578629    | 0.2673322579    |
| 4.5649371755    | 3.6504462104    |
| 17.8626762425   | 26.1222235923   |
| 0.3694996983    | 0.1693451323    |
| 2.0135436202    | 2.8184181977    |
| 4.0008651736    | 3.8995273416    |
| 1327.1227821106 | 1579.0745138181 |
| 1.7694053692    | 3.0191728655    |
| 20.5778579132   | 14.2644219497   |
| 1.8461801375    | 1.8614671848    |
| 0.1573695954    | 0.0244111805    |
| 0               | 0.0450063221    |
| 0               | 0               |
| 0               | 0               |
| 7.2898145564    | 8.1040411855    |
| 0               | 0               |
| 0.006921        | 0.0139560702    |
| 0               | 0               |
| 1.9704069695    | 2.4541868159    |
| 1739.2058905037 | 1931.7704355574 |
| 3.8967953828    | 4.7803591011    |
| 0.985096894     | 0.2483134642    |
| 13.3667935807   | 12.6606588257   |
| 32.5934075104   | 44.7415914766   |
| 2.3816160758    | 2.0900523379    |
| 25.2854472261   | 33.7431440966   |
| 7.8656353433    | 15.1405526674   |
| 0.086233601     | 0.2173691169    |
| 0               | 0               |

gene\_expression\_table

|                |                |
|----------------|----------------|
| 2.4914611017   | 2.3282797522   |
| 0              | 0              |
| 0              | 0              |
| 2.7089276248   | 1.6388151222   |
| 8.6103055248   | 12.3545874702  |
| 34.7456579611  | 45.7380039487  |
| 8.7424901696   | 10.2573162916  |
| 21.7024298223  | 20.24338377    |
| 0.990590997    | 0.8323278775   |
| 1.9762330057   | 2.4353962579   |
| 6.6385853468   | 9.1478588599   |
| 1.8495486898   | 1.4918909039   |
| 0.4258928228   | 0              |
| 0.1996547982   | 0.4026160261   |
| 0.2239980186   | 1.5809696296   |
| 0.0505557708   | 0              |
| 15.1848072862  | 14.58146957    |
| 3.9342702895   | 4.0204535347   |
| 1.2904695715   | 1.012009547    |
| 2.0986105337   | 1.1659524596   |
| 0              | 0.2515739504   |
| 9.3993842992   | 6.3181430944   |
| 0              | 0.5563849415   |
| 1.3191884425   | 1.615135764    |
| 0.276384652    | 0.3715642908   |
| 4.5322405363   | 3.7129374318   |
| 6.3934052937   | 5.1570760237   |
| 1.2392297636   | 1.3883233774   |
| 1.2354345254   | 1.7701546388   |
| 180.6820490178 | 197.0774917936 |
| 10.7605501593  | 10.3450165019  |
| 258.4076329336 | 437.63811472   |
| 0              | 0              |
| 5.1739206862   | 5.4174073603   |
| 1.8068787882   | 2.2903136532   |
| 0              | 0              |
| 0              | 0              |
| 3.3479147937   | 4.6484178247   |
| 0.1631708063   | 0.2742032005   |
| 0.723049739    | 1.4216218681   |
| 3.5817387691   | 5.4170953156   |
| 0.2989166747   | 0.2482050234   |
| 2.3765045263   | 2.6484126277   |
| 0              | 0              |
| 0              | 0              |
| 5.528564058    | 3.430364672    |
| 284.3281516692 | 308.1836797979 |
| 6.4026416207   | 9.9641675307   |
| 5.0896048447   | 5.2510916273   |



gene\_expression\_table

|                |                 |
|----------------|-----------------|
| 0.017611759    | 0.0177575909    |
| 16.0330463     | 25.1468090095   |
| 1.7187950348   | 1.9897720701    |
| 0.9904970513   | 0.8834642607    |
| 0.0438701117   | 0               |
| 0              | 0               |
| 2.4501312397   | 3.0194012728    |
| 940.4689496203 | 1361.5988999558 |
| 0              | 0               |
| 95.3935463184  | 116.4599487283  |
| 12.0721165169  | 10.2701908634   |
| 4.670802848    | 3.5514102465    |
| 22.0783733454  | 21.0175484384   |
| 0              | 0               |
| 0              | 0               |
| 0              | 0.059652488     |
| 2.7459200073   | 2.2887566435    |
| 0.1182371166   | 0.1788242448    |
| 146.8698677605 | 183.5800953606  |
| 0              | 0               |
| 0.0251926468   | 0.008467        |
| 4.8699753227   | 4.5067141584    |
| 2.6026723281   | 1.8840578311    |
| 1.427401877    | 0.7196106435    |
| 136.3673655119 | 123.3178884775  |
| 1.7256740427   | 1.8738065827    |
| 16.6115252985  | 16.2933176705   |
| 0              | 0               |
| 36.0159771307  | 37.5521867836   |
| 0.2175947858   | 0.3510344805    |
| 0.5770875337   | 0.5172142487    |
| 0.7035245688   | 0.7093500098    |
| 0.8890214855   | 0.4826677201    |
| 4.5779319197   | 2.8096410523    |
| 2.9774708461   | 3.6868206599    |
| 1.8631794024   | 1.9392074424    |
| 0              | 0               |
| 0              | 0               |
| 2.1420634911   | 2.271514383     |
| 0              | 0.007948        |
| 0              | 0               |
| 0.8437866867   | 0               |
| 0              | 0.4918790476    |
| 11.6760670661  | 11.01048484     |
| 13.935405578   | 17.3293148654   |
| 14.9448583854  | 15.626703849    |
| 0.0758672975   | 0.0764955064    |
| 13.4660032314  | 15.2161712647   |
| 38.6251887493  | 37.0605830248   |

gene\_expression\_table

|                 |                 |
|-----------------|-----------------|
| 1.142344564     | 0.5759017975    |
| 29.5776886642   | 19.7355459391   |
| 7.3369163062    | 9.8635582116    |
| 6.3437059011    | 4.920180083     |
| 0.1769350995    | 0.1784001868    |
| 0.5502053523    | 0.341391541     |
| 1.0899322705    | 1.3082825103    |
| 2.8845917191    | 4.0164685065    |
| 4.4962087325    | 4.281581265     |
| 3.3346464783    | 2.644976743     |
| 4.3606863678    | 4.3967944471    |
| 55.0654654868   | 36.6441422795   |
| 21.1678127621   | 25.2236518178   |
| 0.905043448     | 1.0342092109    |
| 1.6618852179    | 1.2346867001    |
| 6.8380582795    | 5.6019274227    |
| 0.3504642093    | 0.4269841357    |
| 0.7095519456    | 0.8298956627    |
| 1.3338688918    | 2.3535991752    |
| 0               | 0               |
| 0.7369142566    | 0.6754692513    |
| 0               | 0               |
| 0.1994611332    | 0.1005563722    |
| 2.6692837605    | 1.9224188621    |
| 0               | 0               |
| 0.5182649988    | 1.0049161975    |
| 6.8775374135    | 6.4721868779    |
| 11.3640309717   | 11.0630214005   |
| 2.9791316508    | 3.2511717119    |
| 4135.1297850201 | 4127.7656240593 |
| 6.0828662211    | 4.7069009567    |
| 4.0894643563    | 2.4254862459    |
| 6.6760737017    | 7.2627767225    |
| 0.2219130513    | 0               |
| 138.6277438181  | 159.7435797459  |
| 0.3548406922    | 0               |
| 1.4977066177    | 1.2487433       |
| 35.2962423958   | 46.3529335224   |
| 2.0537777356    | 4.0197567241    |
| 36.350274203    | 45.0630341537   |
| 53.9760689697   | 68.776332048    |
| 50.102785247    | 57.7344624543   |
| 9.6637320163    | 7.7884834443    |
| 13.0986333559   | 19.995788441    |
| 0               | 0               |
| 1.767511779     | 1.5593789955    |
| 4.9230061778    | 3.8182849776    |
| 5.6847194538    | 2.224277109     |
| 11.0132234016   | 9.8451531477    |

gene\_expression\_table

|                |               |
|----------------|---------------|
| 0              | 0             |
| 9.6584526254   | 10.2601296563 |
| 4.613583625    | 4.651785786   |
| 21.6918813235  | 20.8299981339 |
| 45.2210212662  | 49.7405104082 |
| 5.1662894407   | 6.5113352603  |
| 13.0635644475  | 14.8791827426 |
| 20.1213075042  | 21.6404472482 |
| 23.3596466114  | 26.6252129966 |
| 0.6064600493   | 0.3930954175  |
| 17.049866132   | 19.3876788257 |
| 1.4879077614   | 1.5002281823  |
| 0.420020796    | 0             |
| 3.8550778464   | 4.2931037067  |
| 1.9864168729   | 2.384363252   |
| 1.400069068    | 2.7055656631  |
| 2.7056602779   | 0             |
| 1.0144097933   | 0.7305781984  |
| 3.3362180272   | 4.3729960736  |
| 33.6024179245  | 29.9713515237 |
| 1.3252213606   | 0             |
| 0.0895003198   | 0             |
| 4.6536680836   | 5.1187659913  |
| 0.9815952454   | 1.9794464266  |
| 9.6774768118   | 10.8248484406 |
| 22.1947581726  | 22.9243569158 |
| 5.6887239922   | 6.3976550985  |
| 16.5305001423  | 20.1699438303 |
| 0              | 0.3176732868  |
| 0              | 0             |
| 0.9472794021   | 1.001714599   |
| 0.6490302916   | 0.752565175   |
| 68.9946153885  | 83.2999595709 |
| 14.7683798385  | 10.6070507715 |
| 59.2416804957  | 64.5108011574 |
| 2.2599133352   | 0.817333327   |
| 2.2962203945   | 1.2862410777  |
| 0              | 0             |
| 1.6576462073   | 1.3488266269  |
| 106.9487444104 | 104.000210034 |
| 11.9142652826  | 18.789438599  |
| 0.9859104814   | 0.630388505   |
| 0.9231433496   | 0             |
| 0.5709683728   | 0             |
| 22.8262311681  | 25.7551503262 |
| 11.4820089572  | 17.2817343766 |
| 6.4016874487   | 7.4414008489  |
| 0              | 0             |
| 0.2601776682   | 0.4372200575  |

gene\_expression\_table

|               |                |
|---------------|----------------|
| 20.764899075  | 20.9368400398  |
| 0             | 0              |
| 21.5459609743 | 31.2934368989  |
| 17.9242437019 | 17.0891167147  |
| 0.2292177824  | 0              |
| 16.8024661614 | 37.2715128088  |
| 0.009749      | 0.004915       |
| 0.0509697515  | 0.0513917997   |
| 4.1455459068  | 2.3511783061   |
| 6.144577921   | 5.3103919502   |
| 0.6131198562  | 0.5151639276   |
| 0.0393903295  | 0              |
| 0.0865746195  | 0.1745829781   |
| 4.7878186607  | 4.925983216    |
| 0.6628412804  | 0.6222381351   |
| 0             | 0              |
| 0.0456338452  | 0.0460117102   |
| 10.9091504696 | 9.4526800401   |
| 13.2826107708 | 15.3645115736  |
| 0             | 0              |
| 9.0251618252  | 12.2551329123  |
| 0             | 0.0842877747   |
| 0.3341525543  | 0.4161946268   |
| 6.3122912511  | 6.6453487154   |
| 3.6974345436  | 5.219270917    |
| 7.4022510937  | 7.9025764682   |
| 21.2208378376 | 20.3776706116  |
| 0.6275093047  | 0.7285697526   |
| 0.7304289174  | 0.7101743813   |
| 36.8267734694 | 51.0932365832  |
| 3.8012265536  | 4.1588895136   |
| 0             | 0              |
| 0.008448      | 0              |
| 3.6405786027  | 4.4472232181   |
| 21.7707779353 | 30.7314671233  |
| 0             | 0.3372441315   |
| 9.9266451281  | 10.7787522587  |
| 0             | 0.3843734593   |
| 48.6502822586 | 43.9142256558  |
| 0.00824       | 0.008308       |
| 2.63459553    | 2.1251287563   |
| 6.0870205147  | 4.4325834746   |
| 92.7600837615 | 120.5706616041 |
| 0.0404170632  | 0.0244510388   |
| 81.7972245931 | 84.0708168855  |
| 0.0363947223  | 0.2201765037   |
| 2.9663580836  | 2.4830284345   |
| 15.3350600523 | 19.6653129621  |
| 3.2851216937  | 3.0757291535   |

gene\_expression\_table

|                |                |
|----------------|----------------|
| 9.0215188033   | 11.1086583964  |
| 0              | 0              |
| 16.3492051244  | 33.6560226592  |
| 0              | 0              |
| 12.1236783661  | 11.4302962851  |
| 1.0242990248   | 2.0048093915   |
| 0.2997914697   | 0              |
| 0              | 0.0994129817   |
| 12.8932569826  | 9.6544250355   |
| 0              | 0.1549986778   |
| 1.4019172822   | 1.2957318645   |
| 0.028036565    | 0.0282687181   |
| 0.4307841137   | 0.6515267457   |
| 0              | 1.3290568864   |
| 0              | 0.3513478472   |
| 16.9512226479  | 17.0915849759  |
| 23.8864437089  | 21.8390919154  |
| 161.2613887084 | 148.4578492466 |
| 0.431877365    | 1.306360403    |
| 0              | 0.274301667    |
| 0.3645809765   | 0.7351996809   |
| 3.0195494315   | 2.5638336051   |
| 3.1102966437   | 2.4500398737   |
| 45.5290085947  | 42.5320674106  |
| 0              | 0              |
| 0              | 0.6751550247   |
| 1.1603689156   | 1.5954234477   |
| 1.4541176853   | 1.1995840735   |
| 0              | 0              |
| 5.949478571    | 5.8862660106   |
| 0              | 0.1162203055   |
| 6.2399473427   | 8.900335382    |
| 22.3330294917  | 20.6015334354  |
| 22.8709322094  | 38.886016144   |
| 4.4384123534   | 8.9503280644   |
| 9.1828470037   | 7.4071074704   |
| 7.3597454491   | 6.6395619052   |
| 0.842112735    | 0.4851918496   |
| 0              | 0              |
| 17.1422257426  | 10.8026060289  |
| 161.2663646012 | 142.8258255845 |
| 64.3141204773  | 49.4069828078  |
| 246.9087478421 | 396.9794950335 |
| 1.5630908297   | 2.3640506909   |
| 2.8759465891   | 0              |
| 1.7564506014   | 0.7083978621   |
| 0              | 0              |
| 0              | 0              |
| 328.6605008989 | 374.3388470135 |

gene\_expression\_table

|                 |                 |
|-----------------|-----------------|
| 1217.1602016017 | 1473.8896555221 |
| 50.9667060254   | 52.9946267876   |
| 0               | 0               |
| 4.3719391008    | 5.0092504055    |
| 9.0337565073    | 9.900607954     |
| 0               | 0               |
| 94.4595754439   | 113.135637087   |
| 0.1818012337    | 0.4582665361    |
| 63.2033000661   | 52.5744833827   |
| 3.5360261449    | 3.1196425187    |
| 6.7344628772    | 4.8501619248    |
| 23.0284867864   | 27.9685469899   |
| 5.6511427653    | 3.5064223359    |
| 19.1676976193   | 22.4281831865   |
| 2.361787819     | 1.1906721433    |
| 56.8332467175   | 95.8737436888   |
| 0.7414868089    | 1.1214398867    |
| 155.6721340252  | 182.7476319478  |
| 1.0404129149    | 0               |
| 21.3716761274   | 26.2078071425   |
| 0               | 2.5710010983    |
| 8.3835634431    | 6.8876153027    |
| 52.6594535447   | 60.1322451914   |
| 25.8474217585   | 26.5933141544   |
| 2.0080722195    | 2.0246997925    |
| 0.2470986254    | 0.498289385     |
| 59.4938161881   | 42.891863488    |
| 1.090566355     | 1.6493949654    |
| 0               | 0               |
| 10.877848236    | 12.2213974639   |
| 70.4829117699   | 97.8621152544   |
| 199.7448420226  | 302.0982036382  |
| 1.2824141782    | 2.586066074     |
| 0.129382375     | 0               |
| 8.3136219544    | 6.9853848226    |
| 16.6213772266   | 10.893355404    |
| 2.3039796204    | 1.1615287075    |
| 2.3713529948    | 1.7932414991    |
| 420.4482396183  | 628.1515490937  |
| 101.5457684533  | 92.1479441256   |
| 0               | 0               |
| 0.1640588423    | 0.1654173096    |
| 9.7032147821    | 9.1720883925    |
| 29.630852731    | 32.116922565    |
| 4.8853701166    | 6.9914903823    |
| 0               | 0.1308418148    |
| 0.3178209909    | 1.2818106602    |
| 24.752923222    | 22.0558066623   |
| 113.0127564726  | 104.59045052    |

gene\_expression\_table

|                |                |
|----------------|----------------|
| 0              | 4.1945957225   |
| 165.9677049023 | 268.5735453341 |
| 31.4987781039  | 26.744925908   |
| 109.2670496831 | 170.3990829124 |
| 3.758526557    | 2.5264323551   |
| 1.0755922046   | 5.4224925088   |
| 8.7481750733   | 8.8206131649   |
| 19.1921502377  | 19.3510682664  |
| 22.7022705268  | 22.8902536363  |
| 0              | 2.0448469461   |
| 83.9938810402  | 109.2766207984 |
| 16.1883179137  | 0              |
| 6.2467669212   | 7.2432663035   |
| 140.2313039273 | 138.4000372144 |
| 60.7310936323  | 48.4768923755  |
| 28.4656150526  | 66.9697484499  |
| 1.2252915666   | 0.8236249528   |
| 12.2905395611  | 15.2520735104  |
| 125.3017171212 | 116.282404589  |
| 21.731648603   | 30.6762324507  |
| 48.3601265882  | 76.8916619856  |
| 97.7513923087  | 131.4144128215 |
| 2.0657699233   | 1.3885835029   |
| 2.8673531232   | 8.6732875696   |
| 3.4881365746   | 3.5170196221   |
| 1.9230611461   | 5.8169543887   |
| 99.016826067   | 160.8480515135 |
| 1.9778925013   | 3.9885403503   |
| 764.047687187  | 611.6433170598 |
| 0              | 0              |
| 0              | 0              |
| 0              | 0              |
| 3.30671093     | 4.2866893373   |
| 2.0784807213   | 1.9423480364   |
| 0              | 0              |
| 1.9520381843   | 2.0119395922   |
| 0.1614029034   | 0.4068484463   |
| 4.373732198    | 4.6250677308   |
| 0.6705592303   | 0.540889365    |
| 18.6233820822  | 22.8376100705  |
| 0.6719290768   | 0.9484900537   |
| 1.3089158064   | 0.6946074255   |
| 0.1254818858   | 0.1725285297   |
| 12.9583827692  | 12.0758584578  |
| 7.9802716348   | 7.0710359073   |
| 17.5864769748  | 26.5981491618  |
| 9.073281292    | 10.4553272939  |
| 3.4662881072   | 3.4949902415   |
| 6.748726188    | 7.9180894383   |

gene\_expression\_table

|                 |                 |
|-----------------|-----------------|
| 2.3942178741    | 3.6210643116    |
| 6.0562655496    | 7.8287354423    |
| 1.5129401596    | 1.792424733     |
| 27.2187116058   | 31.9186727995   |
| 253.7267319557  | 223.6255962987  |
| 0.2549952975    | 0.2785323146    |
| 1.1175553322    | 1.1268090994    |
| 2.0824250902    | 1.3122927076    |
| 5.7890021664    | 3.9723600547    |
| 2.0279646269    | 1.5335676872    |
| 3.0544536187    | 4.619618419     |
| 67.3492579271   | 71.5190054146   |
| 0               | 0               |
| 1.8091052825    | 1.8916440526    |
| 4.6216703684    | 4.499251922     |
| 0               | 0               |
| 2.8921263167    | 0.5832148362    |
| 2.4455738443    | 1.8493680681    |
| 0.410373662     | 0.2586073163    |
| 6.396774196     | 6.8182985035    |
| 13.9903688807   | 21.772635047    |
| 0.2659338467    | 0.3575145018    |
| 7.3385235808    | 6.0119225092    |
| 0               | 0               |
| 2141.7612502278 | 1763.3400328932 |
| 49.7342901752   | 54.143261862    |
| 1342.8741757892 | 1426.6328106294 |
| 95.5713862813   | 100.6455413338  |
| 9.1600200001    | 8.6586265485    |
| 3.8498941769    | 2.5878484732    |
| 0.2876521319    | 0               |
| 19.3849403549   | 16.9821164276   |
| 2.5953239464    | 5.6425055727    |
| 422.1607483541  | 555.0789460606  |
| 3.2137686456    | 7.5608862614    |
| 2.0157351415    | 1.3210770081    |
| 1.9796493182    | 1.3306943595    |
| 5.0019637749    | 8.1470014754    |
| 0.846700059     | 1.1951954636    |
| 0.7265982254    | 0.9361188149    |
| 0.0575839366    | 0.4644860216    |
| 0.8167335837    | 1.8116921607    |
| 5.5322697099    | 5.3174210342    |
| 0.5253166027    | 0.7062218886    |
| 12.8878457108   | 13.5852236901   |
| 0.1772769491    | 0.2234310839    |
| 29.3018304749   | 48.1342331649   |
| 0.0476571016    | 0.0240258599    |
| 1.9713140376    | 3.2654040361    |



gene\_expression\_table

|               |               |
|---------------|---------------|
| 78.0671944111 | 90.5588727532 |
| 0.3574511918  | 0.5406165277  |
| 13.6808954102 | 17.8512894763 |
| 1.0855110632  | 0.3331085411  |
| 0             | 0.0686483986  |
| 19.8372904433 | 14.1979917837 |
| 38.9908244106 | 42.6595280451 |
| 2.1836021464  | 1.5541292975  |
| 17.4728243242 | 12.3322539935 |
| 1.3827553371  | 0.9958607553  |
| 18.5491142761 | 21.1964020959 |
| 59.5536312712 | 56.4439517079 |
| 17.032109113  | 22.3650211114 |
| 1.3689122851  | 1.7746037742  |
| 0.0765291497  | 0.0771628391  |
| 2.6506751397  | 3.9134847037  |
| 1.8937903442  | 3.3580362997  |
| 5.9213842175  | 4.6724990448  |
| 29.7376621749 | 30.6085655045 |
| 12.4286158564 | 13.6056604315 |
| 5.1545613888  | 4.3976671909  |
| 1.1891769577  | 0.4937156734  |
| 1.7728299243  | 0.3830377725  |
| 0             | 0             |
| 7.2813155015  | 11.1792659034 |
| 0.9111341289  | 0.4751786136  |
| 0.9259068757  | 1.0772004503  |
| 4.0739690225  | 6.4674472407  |
| 4.4356334497  | 9.1391747632  |
| 5.9662027681  | 6.277153159   |
| 0             | 0             |
| 11.1839848522 | 12.0937367128 |
| 32.1691619496 | 33.2891010795 |
| 2.7508689242  | 3.5441046607  |
| 5.7095219577  | 1.9189329631  |
| 9.936838416   | 18.5201898057 |
| 2.1808004585  | 2.3422620856  |
| 0.559918805   | 0             |
| 0.3149782582  | 0.5398968689  |
| 1.3726108721  | 0.4613255308  |
| 2.1331383243  | 1.5362867788  |
| 9.6120952776  | 10.7993083099 |
| 0             | 0             |
| 3.0068357851  | 3.9300248892  |
| 13.1943237476 | 8.5684058975  |
| 4.4259683501  | 3.7007067706  |
| 0             | 0             |
| 0.2938236118  | 0.2468804824  |
| 20.1192119655 | 42.9581782686 |

gene\_expression\_table

|                |                |
|----------------|----------------|
| 0.5049581528   | 0.4525683477   |
| 0              | 0              |
| 4.1391345411   | 2.8554897459   |
| 3.0417237404   | 1.8742229772   |
| 0              | 0              |
| 0              | 0              |
| 0              | 0              |
| 1.9025675576   | 2.3979018917   |
| 6.0289477186   | 5.9495319611   |
| 0.0743648001   | 0.0999740905   |
| 1.3600673394   | 1.6939948876   |
| 10.6141763314  | 9.9019111594   |
| 5.9322509922   | 4.7850977614   |
| 0              | 0              |
| 0              | 0              |
| 0.7158044994   | 0.4330389736   |
| 0.1723716809   | 0.6082964353   |
| 23.2958792394  | 24.5941318884  |
| 0.3882561834   | 0.117441326    |
| 1.5337360339   | 0              |
| 1.2902030767   | 0.9947955056   |
| 26.3274177393  | 22.5726346892  |
| 0.1726269843   | 0.1044338394   |
| 0.1406104175   | 0.132323075    |
| 1.7619182528   | 1.837766463    |
| 13.0028118141  | 10.7505934813  |
| 29.2277402474  | 45.4233090986  |
| 5.1211011791   | 4.619978848    |
| 0              | 0.410183034    |
| 7.3299109756   | 11.6138083621  |
| 7.5903541541   | 10.7509309242  |
| 13.5833561104  | 7.3370524665   |
| 42.4381546795  | 38.8162420211  |
| 0.3535985427   | 0.178263234    |
| 3.3216431601   | 2.1670954937   |
| 0.2667614183   | 0.1412094077   |
| 11.3959676577  | 3.3795089533   |
| 36.4899591669  | 39.8811020769  |
| 3.0902519558   | 2.5493239416   |
| 0.2191551869   | 0.3314548082   |
| 0              | 0.096466745    |
| 282.7839098379 | 300.1320674909 |
| 4.8571023222   | 4.2624830119   |
| 1.3344356624   | 1.906104144    |
| 409.6718387794 | 483.8750552479 |
| 25.7812305862  | 27.0193175645  |
| 0              | 0              |
| 2.6585761202   | 3.6858113924   |
| 0              | 0              |

gene\_expression\_table

|                |                |
|----------------|----------------|
| 0              | 0.1321613732   |
| 13.1829309017  | 18.6089265527  |
| 8.9175416604   | 6.3977142359   |
| 0.6637590435   | 0.1338510423   |
| 1.5226152714   | 1.9260071407   |
| 0.2462800759   | 0.1793417636   |
| 0              | 0              |
| 1.7707410681   | 0.9738564285   |
| 4.4850787323   | 2.91431751     |
| 8.9702905629   | 9.8751914303   |
| 3.629169911    | 3.6592207662   |
| 1.7807608664   | 1.9451317364   |
| 1.507146514    | 1.0130841592   |
| 0.0738467319   | 0.0744582099   |
| 221.627342696  | 312.8474974994 |
| 0              | 0.1143252226   |
| 0              | 0              |
| 0.3913171626   | 0.2959180589   |
| 32.676759769   | 19.7684011802  |
| 2.7576395956   | 2.3170615507   |
| 1.1982612011   | 0.8629880303   |
| 1.1345361834   | 1.398137349    |
| 7.2033200957   | 4.7367171018   |
| 2.6212816168   | 4.4049779801   |
| 0.384438885    | 0.4845277246   |
| 0.29275169     | 1.3774869787   |
| 10.0853204514  | 4.110803858    |
| 1.7308789134   | 1.1967162681   |
| 3.2368141845   | 8.8117637147   |
| 0.0808794329   | 0.0815491442   |
| 212.2536118927 | 144.5325799151 |
| 137.0126463695 | 138.147161231  |
| 0.1513191987   | 0.0508573924   |
| 2.5531809559   | 2.2385410685   |
| 18.7383657185  | 26.1777773278  |
| 4.4356021715   | 5.9631074413   |
| 1.7055357581   | 0.2456654598   |
| 6.5855847913   | 8.4993482801   |
| 0.592258918    | 0              |
| 0              | 0              |
| 35.3229758976  | 42.5648217142  |
| 8.4968014334   | 6.0684036253   |
| 0              | 0              |
| 7.4274018402   | 6.5850702715   |
| 43.9670543748  | 38.9342859606  |
| 96.5991941381  | 57.0960070342  |
| 14.5139150373  | 17.1572154914  |
| 37.7558185272  | 42.0881005794  |
| 22.1788463788  | 18.5241565915  |

gene\_expression\_table

|                |                |
|----------------|----------------|
| 38.5481767824  | 51.2598645131  |
| 0.4702117625   | 0.276561418    |
| 0.9625754529   | 0.2426364825   |
| 0.1762598367   | 0.1777193326   |
| 6.9913407375   | 5.750688935    |
| 0              | 0              |
| 7.6299901555   | 7.4184132215   |
| 3.9145462241   | 2.8505822942   |
| 0.131055131    | 0              |
| 145.430053521  | 103.3422457334 |
| 3.8615996454   | 3.8935751039   |
| 1.7527077843   | 0              |
| 5.4394379512   | 4.8750919896   |
| 0.3839453902   | 0.3871245986   |
| 0.2962627872   | 0.3733949393   |
| 3.8862349157   | 5.4352199233   |
| 9.1382659147   | 7.5879457304   |
| 9.5136237133   | 9.8664685713   |
| 0              | 0              |
| 0.719863104    | 0.1814559585   |
| 2.9749506278   | 3.1870583272   |
| 88.8770668992  | 102.6294151761 |
| 17.7244673183  | 12.7352183931  |
| 1.455257404    | 3.2606832621   |
| 340.2134944525 | 378.3694393395 |
| 12.6709900244  | 12.1104984566  |
| 0.6459828421   | 1.3026636329   |
| 0.258007173    | 0.303500828    |
| 0              | 0.1731380996   |
| 0.2752100283   | 0.2533594013   |
| 0.0300952626   | 0.0303444624   |
| 8.4264355565   | 6.9745003581   |
| 5.5434818877   | 7.5456683281   |
| 0              | 0              |
| 1.3290086229   | 1.3400133008   |
| 1.7829206455   | 0.5992279604   |
| 0.2038994631   | 0.0685292751   |
| 0              | 0.0652268542   |
| 3.4448968812   | 5.1541098988   |
| 0.1612424407   | 0.0975465523   |
| 0.8554557717   | 1.2938088879   |
| 1.7410515595   | 1.7053118722   |
| 0.2522217073   | 0.3269702512   |
| 4.1661686478   | 5.170050522    |
| 102.0732051083 | 77.6402029847  |
| 0.7960519956   | 2.2072698932   |
| 131.5392214997 | 151.1347047812 |
| 11.8537050748  | 9.7424477049   |
| 1.4354637425   | 1.0252061846   |

gene\_expression\_table

|                |                |
|----------------|----------------|
| 1.4990636633   | 1.9284354823   |
| 4.4911428013   | 3.4415316418   |
| 3.2861484616   | 2.8794667271   |
| 7.1599007933   | 8.0942404099   |
| 0              | 0              |
| 0.4591109687   | 0.3967822076   |
| 2.4874730627   | 2.4296930548   |
| 4.9108268759   | 5.0722583765   |
| 233.8695290084 | 382.8020362173 |
| 7.7684459846   | 10.8559465491  |
| 0              | 0.0324499051   |
| 0.5586054617   | 0.3644435361   |
| 0              | 0              |
| 2.2661450437   | 0.8885759377   |
| 1.3509180916   | 1.4918283963   |
| 48.8836606275  | 53.5743861195  |
| 43.1284275004  | 43.485546666   |
| 62.7164748472  | 85.2308476805  |
| 20.2660792221  | 26.4592675303  |
| 4.7004627818   | 4.3748163084   |
| 0.9462405917   | 0.6463094198   |
| 326.4644112594 | 403.9784870043 |
| 3.2403968134   | 3.4033630053   |
| 5.9590250654   | 5.1247844485   |
| 17.1069973397  | 25.4896709857  |
| 8.8694933878   | 13.2789050283  |
| 1.9298290837   | 0.9729043874   |
| 256.5907042646 | 274.4906966046 |
| 0.0546141777   | 0.1101328062   |
| 3.71567515     | 5.8277991337   |
| 2.486480047    | 3.8819133087   |
| 0.7928916167   | 0.3366134945   |
| 0.400587565    | 0.4039045766   |
| 0              | 0              |
| 98.7903757225  | 113.9233752865 |
| 1.5431532524   | 1.7681035524   |
| 4.5889196843   | 7.3056593984   |
| 0              | 0.0596537139   |
| 22.3223137254  | 24.0315393432  |
| 7.1709336523   | 6.7482908338   |
| 0.2248487243   | 0.113355277    |
| 5.9060757892   | 5.6932228845   |
| 7.8389934224   | 6.9400125283   |
| 1.0510600399   | 1.1221022136   |
| 0.1513298045   | 0              |
| 5.081061605    | 3.6401219916   |
| 0.0281737557   | 0.0568140895   |
| 2.6991616697   | 2.9903029969   |
| 0              | 0              |

gene\_expression\_table

|                |                |
|----------------|----------------|
| 17.4430766997  | 17.2991918945  |
| 26.8543399063  | 20.6835930812  |
| 6.0883078346   | 6.820801391    |
| 1.1972178401   | 1.9238654169   |
| 0.4582470509   | 0.5775518803   |
| 3.5478446742   | 5.1103173239   |
| 0              | 0              |
| 4.4707553415   | 5.7907568997   |
| 29.1649673257  | 29.810214007   |
| 129.3743198764 | 173.9274487983 |
| 1.4196544106   | 1.0905978429   |
| 0.5704097853   | 0.1437832468   |
| 6.2490914798   | 4.9506570493   |
| 7.868322612    | 9.5201702438   |
| 1.1963294911   | 0.7071035907   |
| 13.1217696562  | 10.3953321307  |
| 3.6319778506   | 3.4094966493   |
| 2.5776268395   | 3.0754484642   |
| 0.1381536405   | 0.2321626721   |
| 38.9388845892  | 29.9813661428  |
| 0              | 1.720094957    |
| 75.7309992143  | 95.8425550929  |
| 7.3387278064   | 8.5755738595   |
| 16.1832622241  | 10.8781770392  |
| 22.5875724134  | 24.9785998883  |
| 74.3691996134  | 81.4651893211  |
| 10.4394371995  | 15.292315588   |
| 11.4573667883  | 15.2425362222  |
| 15.1381359561  | 13.3149552292  |
| 33.4055836773  | 35.6253976452  |
| 0.3498052848   | 0.6550176297   |
| 429.387907031  | 518.0305374899 |
| 0.509423654    | 0.3735577224   |
| 6.9080227484   | 11.4152277392  |
| 0.2489361871   | 0              |
| 563.0404296246 | 675.9509895811 |
| 29.4480804935  | 28.8121607452  |
| 12.5896029256  | 14.1042771621  |
| 0              | 0              |
| 0.8868830979   | 0              |
| 1.5872212464   | 3.2007280385   |
| 89.9944523128  | 78.1369116348  |
| 2.8499666236   | 3.591956738    |
| 0.8271290147   | 0.6254834593   |
| 8.2379564631   | 11.0748930104  |
| 1.7875502141   | 1.2015678561   |
| 97.0136120948  | 159.2368470196 |
| 2.6618246731   | 3.1609972101   |
| 0.3748222818   | 2.2675556851   |

gene\_expression\_table

|                 |                 |
|-----------------|-----------------|
| 28.1766007499   | 26.0138965315   |
| 0               | 0               |
| 36.947455003    | 24.835595636    |
| 11.6452263524   | 14.8315617967   |
| 32.1028439995   | 30.7502339332   |
| 0               | 0               |
| 0               | 0               |
| 15.6794395769   | 25.1777280093   |
| 2.4799174766    | 2.9692868699    |
| 2.3356762552    | 3.7885048196    |
| 2.4873923654    | 4.1175936912    |
| 14.9793963502   | 18.513883449    |
| 6.1616576122    | 7.1246311841    |
| 0               | 0               |
| 0.0500136384    | 0.0756416544    |
| 0               | 0               |
| 2.9451288391    | 2.3646142612    |
| 0               | 0               |
| 5.8105208107    | 2.9293170249    |
| 0.3956515551    | 0.324128752     |
| 0.0255627212    | 0.0128871949    |
| 69.0365116463   | 83.5297910779   |
| 1.8369577639    | 6.1810737693    |
| 51.0973116019   | 27.2027796716   |
| 2.8724393371    | 1.2872107494    |
| 1.9487713898    | 1.9649079302    |
| 2.2160285439    | 2.0312527921    |
| 0               | 0               |
| 8.1805481299    | 4.1241430313    |
| 0.7212985014    | 0.5656553133    |
| 0               | 0               |
| 0.6372601075    | 0               |
| 5.9793025802    | 7.6293833218    |
| 0.4346300877    | 0.202259531     |
| 0               | 0               |
| 0.3995589918    | 14.1003620262   |
| 0               | 0               |
| 47.7899085673   | 49.8616482937   |
| 49.2066739948   | 47.2738344329   |
| 3.531724051     | 1.6757496559    |
| 0               | 0               |
| 0.0103679519    | 0.0418152092    |
| 0.6346762615    | 0.6677547269    |
| 43.5916148632   | 45.5804423301   |
| 2.4838848453    | 2.5044523209    |
| 3.1492883956    | 4.1781127056    |
| 116.9573868227  | 113.4334239643  |
| 0.6926073705    | 0.4834678244    |
| 1373.7119983397 | 1690.2074149679 |

gene\_expression\_table

|                 |                 |
|-----------------|-----------------|
| 0               | 0               |
| 9.0082303438    | 6.2881073919    |
| 6.6418110027    | 6.0880069353    |
| 2.9589103765    | 2.5856230725    |
| 2.7914255397    | 2.3539785452    |
| 91.951141657    | 94.4618237993   |
| 0.2976278137    | 0.4060072036    |
| 0.8986257687    | 0.5788759594    |
| 0.4654766582    | 0.6349772019    |
| 0.5474972254    | 0.4968276325    |
| 9.6006468554    | 11.5816005287   |
| 0.0750572946    | 0.2270363895    |
| 0               | 0               |
| 0               | 0               |
| 0.0937747574    | 0.0315170822    |
| 3.8574905893    | 4.0038270828    |
| 2494.4878447258 | 3091.8743575059 |
| 7.4044494844    | 6.3597223643    |
| 6.3199270674    | 9.9445850424    |
| 2.4924870439    | 1.8365149703    |
| 6.8299467038    | 11.0184018599   |
| 16.1371847803   | 18.3369407453   |
| 81.5469670926   | 144.9707313284  |
| 3.6302932354    | 3.6603533921    |
| 0.9439923058    | 0.2379522269    |
| 46.2881216832   | 45.6677181598   |
| 10.7729047093   | 9.718728482     |
| 16.3512113728   | 18.7255271072   |
| 117.8771738893  | 87.1590426921   |
| 9.392012306     | 10.1584929951   |
| 123.3629161934  | 88.9991872613   |
| 10.8061757889   | 8.5019125198    |
| 22.9895057017   | 23.7979970162   |
| 19.5344972347   | 15.2198295623   |
| 101.5961633756  | 129.6473556308  |
| 1.0068076116    | 1.1601649681    |
| 4.6264725362    | 0               |
| 40.7199344514   | 34.8598107281   |
| 0               | 0               |
| 3.3774131523    | 7.6621035811    |
| 24.9608890374   | 44.7423543731   |
| 20.4641367786   | 38.8396937816   |
| 0               | 0               |
| 2.4015203634    | 4.4392440236    |
| 2.0413930948    | 2.4783571028    |
| 8.1702525697    | 6.1784289386    |
| 51.0333360349   | 47.4786422738   |
| 27.0278435632   | 35.6552346617   |
| 19.1346213109   | 27.2372653821   |



gene\_expression\_table

|                |                |
|----------------|----------------|
| 24.9503728639  | 20.4400390054  |
| 17.2100295885  | 22.1394411211  |
| 8.7101855185   | 7.7112957448   |
| 31.4563470451  | 39.1459814809  |
| 0.9673137783   | 0.4291423358   |
| 2.3710866603   | 1.6300364494   |
| 43.6231132415  | 67.8091732369  |
| 4.3170003748   | 2.4872838389   |
| 0.1253514994   | 0.1263894557   |
| 1.1024239038   | 1.1909489756   |
| 0.4266028282   | 0.2150676279   |
| 0              | 0              |
| 2.7842171568   | 4.6787858233   |
| 18.4221295424  | 13.5172114512  |
| 2.0869115608   | 0.5079084023   |
| 0.109009146    | 0.5495589079   |
| 7.8950961478   | 7.4445140167   |
| 0.6884170777   | 1.110587877    |
| 28.6855759914  | 34.5942997387  |
| 18.4836117859  | 29.8734742853  |
| 1.0695095177   | 0.6789708376   |
| 5.0568499492   | 5.948509604    |
| 0.5693685999   | 0.4465091402   |
| 1.4112566967   | 1.3162217373   |
| 3.0983041915   | 3.9049491053   |
| 30.298332734   | 41.7021016766  |
| 0              | 0              |
| 5.5454072134   | 6.9467979942   |
| 0              | 0              |
| 14.1564859498  | 34.6647165994  |
| 2.3787007111   | 3.3577561131   |
| 13.8781585577  | 6.7708426404   |
| 18.4420734338  | 19.044654275   |
| 0.5894504754   | 0.5943313411   |
| 0              | 0              |
| 1.1148209992   | 0.5109327841   |
| 4.4086103149   | 3.1750823014   |
| 3.5006201984   | 2.6472049612   |
| 48.3189744683  | 52.0408282579  |
| 8.5661031879   | 12.338619511   |
| 789.9559363911 | 640.6208131988 |
| 0              | 0              |
| 371.6322314349 | 342.5915267077 |
| 16.5163170352  | 17.8015663363  |
| 11.3749071423  | 13.567100818   |
| 0.0887063462   | 0.0715526938   |
| 1.9924840981   | 2.9221565029   |
| 2.5221151976   | 2.7741809832   |
| 57.4959116928  | 57.7464269062  |

gene\_expression\_table

|                 |                 |
|-----------------|-----------------|
| 2.6227352453    | 3.5067739053    |
| 0.6305187559    | 0.5085917456    |
| 2673.9011053447 | 2783.9091166976 |
| 46.6273338018   | 36.404695042    |
| 0.9158745043    | 0               |
| 0               | 0               |
| 0               | 0.5128072976    |
| 0.7286621056    | 0               |
| 0               | 0.1409263601    |
| 2.4117053548    | 5.4712691051    |
| 5.9133636473    | 0               |
| 0               | 0.3603103575    |
| 0.3919164843    | 0               |
| 28.286208857    | 35.2008898711   |
| 30.8238434662   | 36.0015385474   |
| 0.4878343219    | 0.6689483254    |
| 0               | 0               |
| 0.0588848726    | 0               |
| 382.779727732   | 593.1132378859  |
| 0.0969778059    | 0.0488904088    |
| 9.2563334003    | 7.2589838447    |
| 759.9761069724  | 935.6255388479  |
| 5.8643969756    | 3.7081251555    |
| 25.3924578579   | 25.0295215531   |
| 3.1485234236    | 3.1198599646    |
| 0.2350578899    | 0.197503546     |
| 6.1930509596    | 5.7239707143    |
| 2.2045025423    | 2.885998528     |
| 0.9561194465    | 2.1423032566    |
| 0.2388568791    | 0               |
| 6.0344959719    | 4.6004482445    |
| 9.3052849637    | 8.2473761135    |
| 0.374326786     | 0.5032351318    |
| 15.0981761576   | 12.4472002762   |
| 4.0835649384    | 5.6728323943    |
| 3.7859006757    | 3.3400931541    |
| 0               | 0               |
| 0.080134239     | 0.0807977798    |
| 5.6225076077    | 5.4701495014    |
| 0.2902477729    | 0.1463255654    |
| 25.7562847501   | 28.8323419397   |
| 2.2212108511    | 2.6875239479    |
| 10.3972696443   | 10.9758698218   |
| 7.5000409479    | 7.7340109419    |
| 13.0937880849   | 16.3857209397   |
| 2.69724866      | 2.3899364581    |
| 0               | 0.2244014062    |
| 0.4932869321    | 0.3141293864    |
| 28.5286404301   | 39.9080150838   |

gene\_expression\_table

|                |                |
|----------------|----------------|
| 0.7617295829   | 0.6325010445   |
| 0.0275549353   | 0.0833493009   |
| 0              | 0              |
| 167.7481833751 | 161.3820006185 |
| 20.2313452513  | 20.0040513913  |
| 100.207646691  | 158.7730613601 |
| 3.1364847586   | 2.2137192003   |
| 14.9105806155  | 15.9055845606  |
| 0.5651398774   | 1.1396388849   |
| 0.2545378016   | 0.5132909354   |
| 0              | 0              |
| 0.0871644095   | 0.0439430814   |
| 1.1043855558   | 1.2875193776   |
| 2.5284652049   | 2.1799232973   |
| 0.0854981523   | 0.1149414777   |
| 0.6325865983   | 1.1161931321   |
| 2.0501474111   | 2.1229915816   |
| 2.499486836    | 1.7890191525   |
| 0.1321765846   | 0.1999065827   |
| 39.1250684378  | 28.9292947717  |
| 0              | 0              |
| 0              | 0              |
| 0.1205966335   | 0              |
| 0              | 0              |
| 4.4268115877   | 3.9383534188   |
| 4.3162185103   | 4.6079559311   |
| 23.2310128806  | 29.620589758   |
| 1.1532904032   | 1.691403738    |
| 96.3405367374  | 92.7757744147  |
| 0.4131629952   | 0.3185643393   |
| 0.7900299144   | 0.6560001834   |
| 32.2168025037  | 42.0200301678  |
| 43.008504103   | 49.0956386633  |
| 30.1038543286  | 40.1665416989  |
| 4.5440844699   | 8.188590145    |
| 0.077698916    | 0.0235026874   |
| 2.0199641969   | 2.2877890365   |
| 0              | 0              |
| 0.3550149459   | 0.2301136712   |
| 7.9429154752   | 8.2040195207   |
| 17.6144278309  | 16.9009132693  |
| 220.5521904544 | 262.4341877667 |
| 6.8431268739   | 5.7869210387   |
| 12.2045754169  | 10.2853058363  |
| 0              | 0.0991007252   |
| 4.6633539355   | 5.539305018    |
| 14.5372133724  | 20.6122314657  |
| 0.8431542792   | 0.6955657406   |
| 0.2890487718   | 0.1249038006   |

gene\_expression\_table

|                 |                 |
|-----------------|-----------------|
| 115.6897447893  | 99.5971066018   |
| 46.8287853658   | 37.1483110209   |
| 208.0476867051  | 175.6450698452  |
| 0               | 0               |
| 1.6301458831    | 1.0653248717    |
| 386.9338275198  | 416.1469666536  |
| 2.217759583     | 1.6340902092    |
| 2.3722459856    | 1.6974696489    |
| 30.4230036235   | 32.522803809    |
| 0               | 0               |
| 26.4340946621   | 29.1674105886   |
| 12.5645393976   | 16.6691820824   |
| 2.7066431242    | 3.1011989999    |
| 67.7847986185   | 72.8737399618   |
| 15.7614715049   | 13.4153096983   |
| 0               | 0               |
| 2.0715424449    | 0.4177391149    |
| 27.6372560841   | 29.2770445882   |
| 15.9410096861   | 19.6621251672   |
| 4.5030511021    | 4.3188581103    |
| 0               | 0               |
| 0.1384282228    | 0               |
| 8.1103291326    | 9.9518457151    |
| 20.9294554162   | 27.6518910611   |
| 12.5654812056   | 13.7401923264   |
| 3.2508733842    | 5.73613566      |
| 2.8102734802    | 2.4412067708    |
| 67.4574312707   | 69.5618217537   |
| 0.0160629755    | 0               |
| 9.0667113962    | 10.5701913172   |
| 5.5562852923    | 6.3866144398    |
| 1.2101439885    | 0.9983163467    |
| 89.2777473962   | 110.9692325395  |
| 1493.1846178417 | 1403.9215742798 |
| 2.593358589     | 1.5688995284    |
| 51.8119801114   | 68.1948412879   |
| 1.7345569787    | 1.6760480893    |
| 4.3572041034    | 2.1069828303    |
| 36.325836412    | 24.7016791017   |
| 0.3729150403    | 0.3525027312    |
| 191.9215023767  | 217.2252271079  |
| 1.7195966937    | 1.3607317239    |
| 1.9375572322    | 3.1257614645    |
| 4.4036007494    | 3.9326282697    |
| 17.5651900786   | 17.7106362817   |
| 17.715052305    | 23.9857643669   |
| 32.5128603927   | 45.6377959446   |
| 0.1280615007    | 0.1721625291    |
| 0.164948721     | 0.0831572784    |

gene\_expression\_table

|                  |                  |
|------------------|------------------|
| 71.4476103497    | 76.0109669329    |
| 0.3529699038     | 0.7117852477     |
| 0                | 0                |
| 0.4125311054     | 0.4159470139     |
| 0                | 0.0940102423     |
| 14.9912354849    | 13.5868480017    |
| 14850.3310698185 | 15409.8675688387 |
| 31.4600316982    | 32.0678373736    |
| 1.5752790893     | 2.3357690834     |
| 0.2531723275     | 0.255268687      |
| 0                | 0                |
| 0                | 0                |
| 1.1122668565     | 1.0519278822     |
| 1.4768773134     | 1.2931713457     |
| 0.1956319891     | 0                |
| 0                | 0                |
| 170.4542733405   | 237.5842901032   |
| 9.3530784723     | 5.3624556113     |
| 1.1366550708     | 0.4911715675     |
| 29.2770474887    | 22.8424486936    |
| 9.1788395982     | 8.3758921087     |
| 0                | 0                |
| 1.4312093374     | 1.4430602746     |
| 16.5168879864    | 22.7420864601    |
| 0.5224063743     | 0.6870418569     |
| 0                | 0                |
| 0                | 0                |
| 16.2352885133    | 15.8952379303    |
| 2.826716724      | 2.2800983785     |
| 11.1063736579    | 10.6893231108    |
| 10.4000964654    | 7.6461970308     |
| 0                | 0                |
| 0                | 0.1769806865     |
| 0                | 0.0433984247     |
| 2.0999678085     | 2.5878799351     |
| 7.1913789347     | 12.2120862054    |
| 1.4152757615     | 1.5289229602     |
| 6.714772352      | 5.1235256079     |
| 3.165087078      | 3.368589333      |
| 20.8713447963    | 37.3055690751    |
| 33.7803637966    | 40.9270286968    |
| 0                | 0                |
| 240.9837353688   | 199.619249873    |
| 70.6840743998    | 44.6412502334    |
| 37.7870217445    | 27.0386473077    |
| 42.9065104675    | 41.8884018541    |
| 238.6138141966   | 347.7348005586   |
| 69.1016125146    | 106.9990487082   |
| 5.9880750713     | 7.379360419      |

gene\_expression\_table

|                 |                 |
|-----------------|-----------------|
| 1.8852799841    | 1.4256680943    |
| 31.8936607448   | 37.7994627944   |
| 0               | 0               |
| 121.0154265337  | 181.6704680776  |
| 2.75584304      | 2.0839968218    |
| 13.4012997237   | 12.6114495646   |
| 3.8632525553    | 2.9550109452    |
| 3.8496882469    | 3.4157772657    |
| 9.3600393441    | 16.4131198188   |
| 4907.2422883737 | 3879.5846306444 |
| 5.3860103567    | 1.2068018875    |
| 9.0707680047    | 7.7388192402    |
| 11.6333342698   | 12.7646327593   |
| 1.0361310453    | 0.8175995919    |
| 0.0396983147    | 0.1200810938    |
| 44.5208364149   | 33.8500873722   |
| 2.0016148345    | 4.0363778758    |
| 0.4855973455    | 0.3333571195    |
| 34.9041788121   | 34.8817539566   |
| 4.5742576975    | 6.3755973118    |
| 50.3571779718   | 55.8942365771   |
| 1.027906166     | 0.8364071903    |
| 5.9442959646    | 4.6749431905    |
| 0               | 0               |
| 11.4841090465   | 7.7896447617    |
| 2.7346237232    | 1.0604874648    |
| 18.4531208394   | 21.0684675945   |
| 0.1712565458    | 0.0863373064    |
| 7.0168508514    | 6.7533641745    |
| 96.3447338232   | 114.3888175077  |
| 16.9232784447   | 18.8981845872   |
| 0               | 0               |
| 311.5241264759  | 330.5661162564  |
| 1.9353428811    | 5.8541046856    |
| 0.4077074827    | 0.4110834499    |
| 0               | 0               |
| 0.4406754484    | 0.1110811006    |
| 495.2788159816  | 314.4674581851  |
| 18.4942987001   | 22.3769259151   |
| 0.1319279844    | 0               |
| 0               | 0               |
| 23.5452963364   | 22.7266309291   |
| 0.9477917086    | 0.3822559083    |
| 9.5355405077    | 10.9108351192   |
| 0               | 0               |
| 19.7542043863   | 22.7631730618   |
| 307.4578044222  | 245.884203961   |
| 14.5354498413   | 16.1287542829   |
| 35.7161290485   | 49.4517089438   |

gene\_expression\_table

|                 |                 |
|-----------------|-----------------|
| 0               | 0               |
| 63.3893705517   | 33.9785135284   |
| 0.2338876248    | 0.2021351142    |
| 125.051081492   | 135.5327738501  |
| 415.1694250038  | 306.34434522    |
| 0               | 0               |
| 3.4502344393    | 5.1290053716    |
| 10.497529649    | 5.0402157318    |
| 1.1056712972    | 0.5574133301    |
| 6.5937300404    | 3.9889971232    |
| 1.4335034958    | 1.7957669881    |
| 0               | 0               |
| 0.607154389     | 0               |
| 8.0406015958    | 6.3699277086    |
| 2978.1969103995 | 3149.7114277054 |
| 0               | 0               |
| 5.6108820009    | 4.5480593816    |
| 6.4733857564    | 4.7864576906    |
| 0.1543283921    | 0.2334094315    |
| 62.8537978948   | 82.5060995086   |
| 5.9970471953    | 7.9816505223    |
| 2.2609145807    | 1.7097268358    |
| 6.8485416634    | 6.2914500866    |
| 0.0604280504    | 0.6702125847    |
| 0               | 0               |
| 0               | 0               |
| 0.3867305932    | 0               |
| 0.6000046969    | 1.2099459108    |
| 0               | 0               |
| 0               | 0.8881389857    |
| 2.7862432706    | 4.0862754687    |
| 10.3063146268   | 8.1325993181    |
| 112.4088041483  | 140.0077290591  |
| 77.1792419625   | 53.5696822053   |
| 11.6392431077   | 13.039578112    |
| 0               | 0               |
| 0.6533168463    | 0.4391510326    |
| 1.5235319989    | 0               |
| 1.7019531565    | 1.7003024107    |
| 3.0700546223    | 3.0954757982    |
| 0.6380497651    | 0.7018178735    |
| 54.488754618    | 58.6026042136   |
| 23.782987527    | 28.7759032425   |
| 1.0094048161    | 0.8481358812    |
| 26.8319863516   | 39.218053168    |
| 1.1109247159    | 0.8400926844    |
| 0               | 0               |
| 0               | 0               |
| 21.0260927741   | 14.5260605773   |

gene\_expression\_table

|                |                |
|----------------|----------------|
| 6.856079797    | 6.3537230213   |
| 1.7309363556   | 2.6179037133   |
| 65.3888629589  | 67.5000758846  |
| 3.7332405062   | 3.0998907916   |
| 0.6558242528   | 0.3306273588   |
| 0              | 0              |
| 0              | 1.2546618716   |
| 0              | 0              |
| 0              | 4.0230911157   |
| 4.8040426127   | 2.4219109219   |
| 46.8944988784  | 49.9957501775  |
| 7.762670703    | 6.461783029    |
| 0.2096433539   | 0              |
| 2.5681479689   | 2.3017005991   |
| 139.1603938749 | 110.0001512047 |
| 1.4155717526   | 1.2975392772   |
| 174.1070689455 | 286.984025828  |
| 0              | 1.4835983848   |
| 71.2122844366  | 109.9190318383 |
| 0              | 0.509954364    |
| 11.009943822   | 11.2538777581  |
| 16.3563795547  | 20.4639306714  |
| 2.0534521225   | 3.1944169919   |
| 82.1026942299  | 80.8301163209  |
| 16.2244313386  | 20.4484694608  |
| 9.8938323594   | 12.2559299213  |
| 21.7278635435  | 22.6300126529  |
| 254.4237834171 | 249.5022724418 |
| 80.9559791844  | 71.0711961783  |
| 37.8289394494  | 41.3883196303  |
| 1.4271614652   | 4.0771068396   |
| 0.2568822718   | 0.5180187022   |
| 1.7883802554   | 2.2403253527   |
| 0              | 0              |
| 1.2009480255   | 0.3027230787   |
| 3.3367980709   | 3.9554761389   |
| 0              | 0              |
| 0.4555657594   | 0.3674704085   |
| 17.2697222423  | 17.8176688837  |
| 1.1843557104   | 1.2309060741   |
| 1.1154143755   | 0.9996892576   |
| 1.2961315493   | 1.1531152879   |
| 4.0858881995   | 11.0915561328  |
| 0.3099782803   | 0.3750540167   |
| 0.1592841749   | 0.0803015531   |
| 3.4665814145   | 3.1457573797   |
| 1.8742334216   | 2.1259718554   |
| 0.1558858825   | 0              |
| 0.4171629471   | 0.4970930651   |



gene\_expression\_table

|                |                |
|----------------|----------------|
| 20.3984276243  | 20.7196846941  |
| 86.2079343707  | 101.8477277178 |
| 57.6893211239  | 56.4810095338  |
| 26.0969748274  | 31.39627352    |
| 2.5191170058   | 2.4580415      |
| 1.7061374174   | 1.1468432398   |
| 137.5812393052 | 148.3174754411 |
| 109.4267352786 | 166.254947355  |
| 0              | 0              |
| 114.0708578601 | 95.9557104118  |
| 2.3945743047   | 3.1826211561   |
| 4.4055634401   | 9.1706696627   |
| 2.3701515493   | 3.492751397    |
| 0              | 0              |
| 0              | 0              |
| 4.2468652332   | 6.5086868643   |
| 52.4079432102  | 51.0197656741  |
| 15.9719908018  | 15.5847529662  |
| 100.7587887478 | 107.3984288784 |
| 4.874770051    | 18.0221614146  |
| 0.8321670693   | 0.8989904113   |
| 4.5045282206   | 6.9208797913   |
| 0              | 2.3211997121   |
| 5.2826159875   | 2.8680389131   |
| 4.6156936213   | 4.0721740972   |
| 0              | 3.7393368631   |
| 139.4893393563 | 107.7275965345 |
| 45.1852616522  | 28.9127038692  |
| 31.4829815495  | 22.9434462148  |
| 81.2799534031  | 108.635347129  |
| 4.4187606073   | 11.1383739062  |
| 179.7910236712 | 246.8025636683 |
| 31.0552592843  | 0              |
| 6.6727674667   | 4.8057288741   |
| 6.0488541947   | 4.7920250097   |
| 3.8529857716   | 10.3597064107  |
| 111.2588419575 | 100.1608088322 |
| 0              | 0              |
| 38.9168468     | 41.3043079325  |
| 5.1015816687   | 6.6869720219   |
| 48.9653099905  | 40.8585605624  |
| 25.5814125669  | 19.0378646861  |
| 0.6838870497   | 0              |
| 0.2699275713   | 0.5443253407   |
| 0.6618743616   | 0              |
| 0              | 0              |
| 0              | 0              |
| 806.315577078  | 961.3709633936 |
| 69.9322165271  | 62.0629246425  |

gene\_expression\_table

|                 |                |
|-----------------|----------------|
| 247.0998454452  | 260.1700784769 |
| 21.6169333857   | 23.316575751   |
| 1.7872212851    | 0.9010100658   |
| 179.7561848183  | 192.229154964  |
| 1.7098530206    | 2.8733520491   |
| 20.2411242225   | 20.793798482   |
| 7.4005720711    | 10.514427137   |
| 0.7361124479    | 0.5138361197   |
| 0               | 0.2162936095   |
| 1.8200524969    | 1.651610878    |
| 29.5189401033   | 37.8141147414  |
| 1.9750244261    | 2.8965503291   |
| 20.1175579011   | 8.1136554576   |
| 624.5426561903  | 717.0467101081 |
| 0               | 0              |
| 38.0977532713   | 30.5335824359  |
| 41.3294031279   | 64.8225288872  |
| 13.3632345819   | 11.2282392129  |
| 10.1991556254   | 11.6249485889  |
| 0               | 0              |
| 0               | 0              |
| 253.6958804387  | 331.5031848834 |
| 0               | 0              |
| 278.5202290589  | 299.7055694915 |
| 5601.5267125358 | 7219.921348844 |
| 6.8871352528    | 6.0761428468   |
| 3.0026832184    | 1.5137732673   |
| 17.5879188515   | 17.7335532572  |
| 72.8576286755   | 90.1565793512  |
| 0               | 0              |
| 16.434082482    | 20.8928138394  |
| 1.1257218411    | 0.7094020187   |
| 2.6841599366    | 1.4762104164   |
| 16.981167875    | 19.7159869726  |
| 43.4436789157   | 36.9591259037  |
| 39.5505341754   | 23.0065540816  |
| 139.4709054539  | 272.2370784059 |
| 8.4567614266    | 14.6850212058  |
| 0               | 0              |
| 38.7769787411   | 42.5624519414  |
| 68.8794566286   | 81.5940317174  |
| 1.863918767     | 2.5952965811   |
| 15.8494164316   | 16.8491692813  |
| 18.9825512345   | 45.4568675534  |
| 9.3987023691    | 8.339343817    |
| 553.790115353   | 632.5279931946 |
| 8.8467069968    | 15.2164040056  |
| 75.4276646895   | 101.4029778151 |
| 3.0894810047    | 2.9370594361   |

gene\_expression\_table

|                |                |
|----------------|----------------|
| 24.9511694314  | 24.9390109926  |
| 1.4156983209   | 0              |
| 122.7919484395 | 88.2175088648  |
| 168.3350250321 | 206.2403502128 |
| 0              | 0              |
| 5.4497350415   | 0              |
| 0              | 0              |
| 1.0473523656   | 1.0560248266   |
| 2.4883050186   | 2.2137433191   |
| 15.1953204857  | 27.8566241838  |
| 130.2082277609 | 134.0215328696 |
| 0              | 0              |
| 0              | 8.4955909462   |
| 58.3545108578  | 47.630525173   |
| 89.8013028517  | 83.579898931   |
| 3.0913530584   | 9.3508517797   |
| 0              | 0.6258430875   |
| 81.8788829805  | 117.5452579057 |
| 443.1905145834 | 574.3506952177 |
| 3.7150890898   | 5.9933622196   |
| 0.3135118471   | 0              |
| 7.4500475367   | 4.590505735    |
| 0              | 0.3938213473   |
| 4.7403631412   | 5.0982560886   |
| 5.2089671936   | 5.2520993485   |
| 5.8905087691   | 5.6093240968   |
| 1.8196402648   | 3.0578459204   |
| 7.0429909129   | 9.9418332378   |
| 2.0718406158   | 3.6557433753   |
| 3.1874029874   | 4.6867856157   |
| 1.1915930196   | 1.6019464612   |
| 4.1636753047   | 7.8172486638   |
| 0.3785682866   | 1.7176633677   |
| 15.2058027103  | 24.6171155598  |
| 0.386672156    | 1.169621829    |
| 1.3314697545   | 1.4170778565   |
| 0.5304988118   | 0.3565943575   |
| 17.8390520704  | 19.0879965195  |
| 4.6363450266   | 3.9735253114   |
| 15.0127411498  | 9.9173789892   |
| 2.1015768533   | 0              |
| 0.7379231107   | 4.0921836129   |
| 15.6159693258  | 21.7434753695  |
| 8.6498355346   | 13.4786189782  |
| 10.4975156275  | 12.2128141144  |
| 5.1149968652   | 7.220291276    |
| 1.4919319342   | 1.4102678219   |
| 9.5262162      | 13.4471354598  |
| 2.9374951359   | 3.3515316538   |

gene\_expression\_table

|                |                |
|----------------|----------------|
| 262.4059479399 | 213.2042477136 |
| 1.5204513234   | 0.9198247301   |
| 1.6249997849   | 2.4576830669   |
| 0              | 0              |
| 0              | 1.4339435544   |
| 45.1843911089  | 28.1105850589  |
| 7.0364557518   | 9.8537780291   |
| 35.1223277148  | 33.7886968638  |
| 0              | 0              |
| 24.048198803   | 15.9521886126  |
| 0              | 0              |
| 0              | 3.7282900777   |
| 33.2098140621  | 21.0353252618  |
| 0              | 0              |
| 1.44146258     | 0.6707992697   |
| 0.2093898507   | 0.2111236753   |
| 76.9551589117  | 86.9975122547  |
| 5.475489733    | 5.2954888415   |
| 48.007245321   | 44.7924671464  |
| 25.4936873623  | 22.4714782079  |
| 16.6417658036  | 15.5517926145  |
| 1.2980160225   | 1.3087640702   |
| 7.0463578653   | 5.2175172111   |
| 0.0729707183   | 0              |
| 5.2765954525   | 5.541966244    |
| 0              | 0              |
| 0.2292208243   | 0.1540792377   |
| 64.0327460646  | 74.4324578072  |
| 0.7993297799   | 0.9280619357   |
| 0              | 0.4001737423   |
| 26.0821973785  | 23.0108965795  |
| 85.5546374806  | 99.1107511588  |
| 0.1137792071   | 0.1147213406   |
| 22.145787869   | 25.6687153506  |
| 21.4697308522  | 20.565132678   |
| 1.2634528911   | 2.183853846    |
| 3.3307569028   | 3.8558681653   |
| 73.8329413974  | 104.8229229841 |
| 30.8434679827  | 36.9598027875  |
| 0.125259199    | 0.106866177    |
| 0.7192610906   | 0.8057964841   |
| 0.0100295174   | 0.020225131    |
| 2.6812168535   | 1.982506761    |
| 0.3236218768   | 0.3559653648   |
| 1.4795210844   | 1.9393036787   |
| 5.6903097394   | 8.2873954032   |
| 0              | 0.5249882872   |
| 7.1079758624   | 5.0260903276   |
| 4.108446266    | 2.4164383278   |

gene\_expression\_table

|                |                 |
|----------------|-----------------|
| 8.1743049793   | 5.8821048425    |
| 28.7455808135  | 21.0210759683   |
| 22.8198324211  | 17.9333208274   |
| 0.3226475243   | 0               |
| 0.1079194223   | 0.1088130346    |
| 8.023276873    | 3.6879571884    |
| 5.3358367794   | 6.2184640523    |
| 0.1870604255   | 0.1886093542    |
| 20.5890234114  | 21.2658375262   |
| 0.7141339017   | 0.6000393265    |
| 0.0924477372   | 0.3728529531    |
| 0              | 0.681655666     |
| 0.6404134655   | 0.6457163234    |
| 0              | 0               |
| 111.4212775736 | 111.0143730843  |
| 0.1850261929   | 0.2798374163    |
| 956.4868370483 | 1081.6145880598 |
| 108.1139905518 | 118.8664301221  |
| 2.652310484    | 2.38774338      |
| 4.6057475972   | 3.2507194112    |
| 2.9913729426   | 2.2621069541    |
| 0              | 0               |
| 0.0650030491   | 0.1966238943    |
| 39.6923656702  | 40.588707213    |
| 7.7932391328   | 6.0897717541    |
| 2.0541996426   | 1.5534068756    |
| 20.3313513532  | 22.9401431441   |
| 0.1621734803   | 0.081758168     |
| 0.2126554043   | 0.6432488066    |
| 0              | 0               |
| 0.0772278492   | 0               |
| 24.584308588   | 36.1902984657   |
| 0              | 0               |
| 4.8197630063   | 4.4178840074    |
| 1.4647108183   | 1.8796134764    |
| 1.5207056578   | 1.2777480477    |
| 4.5369725947   | 5.4894484661    |
| 3.8784208761   | 3.9105356206    |
| 0              | 0               |
| 0              | 0               |
| 12.135842598   | 16.4756908712   |
| 0.2140149824   | 0.1618403286    |
| 55.8885049572  | 44.3979799425   |
| 0              | 0.2663113207    |
| 1.6553605798   | 2.1242678181    |
| 0.0885287616   | 0               |
| 0              | 0               |
| 4.7467309819   | 4.3637383884    |
| 4.4244980409   | 6.4609534198    |

gene\_expression\_table

|                |                |
|----------------|----------------|
| 4.4162956408   | 7.2865050302   |
| 7.0096118091   | 4.038659406    |
| 0              | 0              |
| 2.1412892599   | 2.0453872914   |
| 1.8996724167   | 1.2549188136   |
| 1.3348687935   | 1.0767375965   |
| 15.2055883296  | 12.3641098118  |
| 2.2794172157   | 2.7907826869   |
| 18.7834675201  | 14.8068557231  |
| 117.6487078808 | 120.1388296209 |
| 3.7684869301   | 2.431802484    |
| 7.8233704878   | 9.3223601061   |
| 78.4501484362  | 63.0795429863  |
| 6.4068140033   | 6.6107961881   |
| 34.7773735412  | 31.7507085177  |
| 2.1860965321   | 1.9891544836   |
| 0.1460497196   | 0              |
| 1.4361500105   | 1.5687120131   |
| 2.6830870107   | 3.3161790394   |
| 0.2623909708   | 0.7936909921   |
| 0              | 0.0130262563   |
| 1.5289301267   | 1.2332721823   |
| 11.694785388   | 10.5992112284  |
| 10.3637836583  | 10.3360169762  |
| 1.5004688062   | 0.3491292086   |
| 2.8363418699   | 3.1198121659   |
| 0.0500134212   | 0.1260688765   |
| 0              | 0              |
| 4.3456594625   | 6.0629712849   |
| 0.3534303253   | 1.3363382165   |
| 0              | 0              |
| 55.1956923108  | 34.1559690857  |
| 22.2224897489  | 22.6328283817  |
| 31.9721151576  | 42.9824746315  |
| 0              | 0              |
| 0              | 0              |
| 3.9523384691   | 3.6785217953   |
| 0              | 0              |
| 85.7249377283  | 79.0168620877  |
| 0              | 0              |
| 5.614475935    | 15.752252802   |
| 2.3084752504   | 2.0172449011   |
| 17.0416556022  | 15.5463127721  |
| 145.3509978938 | 122.5236715094 |
| 8.9656963159   | 11.3524772186  |
| 3.3189100019   | 3.1232990054   |
| 1.6615781072   | 4.7467869828   |
| 12.1006595483  | 9.9131966687   |
| 19.7268853047  | 21.3913806552  |

gene\_expression\_table

|                |                |
|----------------|----------------|
| 3.4535509775   | 5.2232214655   |
| 59.9150712354  | 38.9749612616  |
| 1.1245231581   | 1.0466165737   |
| 2.8167265192   | 3.0982364136   |
| 34.3740004257  | 30.8076708718  |
| 112.8950013981 | 206.5800316019 |
| 38.6522896838  | 51.4434951228  |
| 20.3410424501  | 6.8364912423   |
| 154.6443436722 | 138.2584925092 |
| 74.7559921395  | 57.8219171306  |
| 22.6615212253  | 29.3775003201  |
| 23.9362331731  | 22.9474945706  |
| 136.9251284645 | 134.6359702496 |
| 0              | 0              |
| 214.2294397654 | 179.0796904282 |
| 0.4165264466   | 1.0499385951   |
| 45.5195941173  | 72.9636873616  |
| 12.3602445662  | 8.3764962054   |
| 6.0981236413   | 7.1733880599   |
| 3.4698544022   | 4.3732325833   |
| 42.8310710194  | 32.6526235829  |
| 3.7104205389   | 3.1176201492   |
| 21.3472010059  | 36.8982233893  |
| 3.6049118677   | 10.2984919293  |
| 13.6106879605  | 10.1291683952  |
| 0              | 0              |
| 365.4382077452 | 328.6030460328 |
| 26.3325609515  | 27.7855160175  |
| 0.9397168388   | 2.8424941145   |
| 8.8511069505   | 10.411796915   |
| 10.530672284   | 7.9634025788   |
| 25.019641809   | 25.857483941   |
| 557.7813912378 | 769.330453576  |
| 121.2575940942 | 210.7959506141 |
| 47.9288392079  | 35.8545572068  |
| 4.5140298481   | 17.0677787532  |
| 1.771038164    | 0.1984114454   |
| 82.6815871858  | 63.1562280234  |
| 7.4388179216   | 9.2652173642   |
| 2.4472846718   | 2.4675490847   |
| 8.5425001058   | 2.4609243238   |
| 8.1886038083   | 8.7890799577   |
| 5.6639327298   | 3.6341659238   |
| 133.1823486202 | 202.7979774258 |
| 347.7607826988 | 508.6754652753 |
| 4.900220451    | 5.0556983041   |
| 38.5356906888  | 34.6917681362  |
| 8.7540216114   | 6.3046486533   |
| 6.3159774806   | 7.6419313031   |

gene\_expression\_table

|                |                |
|----------------|----------------|
| 10.5412762199  | 8.5028494763   |
| 5.9991092173   | 3.0243920187   |
| 17.6502084189  | 25.9530229655  |
| 17.0552302164  | 26.3004586997  |
| 12.270614644   | 22.4532878298  |
| 21.975744547   | 7.3859039185   |
| 2.1070208122   | 2.2660988967   |
| 2.3002976713   | 8.117707423    |
| 4.4709155702   | 6.3111109426   |
| 17.0951456986  | 20.6840397147  |
| 5.0688744802   | 6.7643558155   |
| 10.3811495538  | 11.7754979309  |
| 3.7109264218   | 1.9187970517   |
| 0              | 0              |
| 7.8323128569   | 6.54336717     |
| 76.7030427945  | 59.4909015875  |
| 8.8272805671   | 5.7955921645   |
| 1.4524836204   | 0              |
| 69.9968159644  | 56.6252633749  |
| 6.4078257953   | 3.0150796379   |
| 5.9113399089   | 7.1523455605   |
| 0              | 0              |
| 157.8575127774 | 170.3340785352 |
| 14.1510832058  | 21.7125685827  |
| 15.9352157836  | 17.3356256137  |
| 0              | 0              |
| 151.5169755606 | 212.6008601991 |
| 343.40718086   | 310.2766174392 |
| 1.4211339067   | 1.0348732446   |
| 1.6530706492   | 0.6250345047   |
| 0.1729541926   | 0              |
| 39.484693575   | 51.5593387199  |
| 5.9500293537   | 2.9996488873   |
| 23.0697289161  | 16.9169125204  |
| 0.3039137013   | 2.451441744    |
| 1.1911465485   | 1.5613125812   |
| 3.9084344513   | 1.8390389356   |
| 9.0695054314   | 9.8962155647   |
| 25.422506554   | 35.1060846837  |
| 27.6398551828  | 27.2051822696  |
| 0.790993965    | 1.7944732903   |
| 33.8699441511  | 23.509333117   |
| 10.0389387175  | 16.1320407822  |
| 2.8555178257   | 2.3219052891   |
| 1.3320586014   | 1.1728378749   |
| 1.2454503405   | 1.3282109978   |
| 0.0693157694   | 0              |
| 1.9399603657   | 2.749006629    |
| 2.6852854957   | 2.047149754    |



gene\_expression\_table

|                |                 |
|----------------|-----------------|
| 2.7383224332   | 2.5985851719    |
| 1.453583709    | 2.4426998569    |
| 6.69185606     | 11.9482854498   |
| 2.8650910626   | 3.6638630097    |
| 2.7997107102   | 2.903547435     |
| 22.5909601997  | 20.8418897813   |
| 0.4564126097   | 0.1150479683    |
| 4.2071273937   | 3.8563308622    |
| 0.4373227135   | 0.4409439056    |
| 2.4987276223   | 3.1977228482    |
| 0.9930179895   | 0.9586345614    |
| 0              | 0               |
| 1.7103210997   | 1.2172822478    |
| 6.4528299514   | 14.3137758396   |
| 0.1649818065   | 0.2217972217    |
| 0.8275199065   | 0.7495206768    |
| 256.9637161105 | 133.7246295402  |
| 49.9715803275  | 75.8676160084   |
| 10.5098480158  | 7.0645822694    |
| 3.5130272849   | 2.0835979039    |
| 3.7806089692   | 4.2603742417    |
| 49.9162926474  | 52.0519241342   |
| 2.5155501427   | 2.4457948251    |
| 56.2442144806  | 47.8245092205   |
| 6.4180391708   | 11.1572118695   |
| 3.2441353483   | 3.8551047579    |
| 3589.261573419 | 3045.9245865641 |
| 463.8102974104 | 378.9584202166  |
| 245.3662117087 | 277.2563050657  |
| 882.4640079231 | 680.4132192836  |
| 120.0203952327 | 94.1221618052   |
| 28.8268282395  | 33.8676551342   |
| 37.5965629656  | 29.0462948028   |
| 0              | 0               |
| 3.9822823388   | 2.903339745     |
| 6.1291328523   | 5.9703967118    |
| 10.3980918776  | 9.96857589      |
| 1.0624529582   | 1.9282508237    |
| 27.7395355962  | 15.6900553511   |
| 0              | 0               |
| 0              | 0               |
| 8.9219706683   | 11.0948790164   |
| 5.8195820517   | 5.4486438697    |
| 49.1528765024  | 58.8523578691   |
| 4.7596955673   | 3.5993306916    |
| 1.1018151162   | 1.5553139681    |
| 0.3536347395   | 0.3565629645    |
| 0              | 0               |
| 1.6305220384   | 0               |

gene\_expression\_table

|                |                |
|----------------|----------------|
| 6.6843655049   | 7.5484802377   |
| 0              | 0.1661241875   |
| 0              | 0              |
| 8.6020593695   | 10.6006848073  |
| 14.1170011737  | 20.2964800651  |
| 1.8889911651   | 2.1767230896   |
| 36.4384853573  | 41.8838386628  |
| 18.9009984932  | 16.1700048185  |
| 0.0661996122   | 0.1334955384   |
| 0.3825423607   | 0.3857099515   |
| 13.8173432734  | 14.7761047776  |
| 0.3337184879   | 1.2337665967   |
| 56.9500007053  | 62.0152929605  |
| 4.1372550789   | 4.3299249539   |
| 1.1709075339   | 1.7709046154   |
| 31.7202321481  | 36.8869299969  |
| 0.0846812135   | 0              |
| 1.764899456    | 2.1901704239   |
| 94.3876241197  | 77.8272472353  |
| 17.1667722801  | 11.3874469987  |
| 0              | 0              |
| 1.6946281038   | 1.4140636508   |
| 44.4354167882  | 71.6853732856  |
| 9.677965597    | 12.9482516523  |
| 0              | 0              |
| 40.1600866183  | 50.202593474   |
| 21.513853606   | 27.1149952355  |
| 0              | 0              |
| 247.9019828083 | 325.9213270699 |
| 12.9713209154  | 17.4383042671  |
| 2.4810306254   | 4.1692907784   |
| 0              | 0.2742239244   |
| 5.5244953543   | 8.7993649504   |
| 0.8934893034   | 0.4504438609   |
| 31.7882405593  | 22.0353779431  |
| 17.0969373296  | 15.2104466723  |
| 0              | 0              |
| 8.7886206011   | 8.8613935965   |
| 1.3743036332   | 6.2355751664   |
| 0              | 0              |
| 77.5756146711  | 110.880417813  |
| 2.3500592128   | 5.9237964081   |
| 0              | 0              |
| 1.0374758372   | 0.348688839    |
| 185.9876119018 | 171.4538581977 |
| 108.2693817864 | 101.4826619683 |
| 0.700926641    | 1.1778842836   |
| 17.7446470822  | 17.3945909423  |
| 0              | 0              |

gene\_expression\_table

|                |                |
|----------------|----------------|
| 0              | 0              |
| 0              | 0              |
| 3.2006921389   | 2.1514633609   |
| 4.6320555682   | 0              |
| 9.9297355889   | 12.9186547536  |
| 0              | 0              |
| 4.3494108302   | 4.6122578996   |
| 0.4581923501   | 0              |
| 67.9625174881  | 54.4688059556  |
| 15.7226790587  | 6.3411474385   |
| 27.4246126709  | 32.2603149188  |
| 1.5485866249   | 1.5614094889   |
| 3.5954784334   | 3.8841967616   |
| 3.0308108095   | 2.1530254092   |
| 42.8555643565  | 35.3785347445  |
| 5.0709753503   | 2.7068637612   |
| 393.8155960753 | 357.061068754  |
| 13.8169219082  | 21.1216955067  |
| 72.1459180532  | 64.6607223659  |
| 3.8615996454   | 3.8935751039   |
| 8.2236257782   | 7.0160711159   |
| 47.4393999804  | 52.8671856367  |
| 206.1498867147 | 207.856883232  |
| 2.7229345336   | 0              |
| 0.9131509569   | 0.6905341358   |
| 0.8693409439   | 2.1913485127   |
| 150.9328700264 | 194.7042720711 |
| 1.5318317856   | 1.5445159134   |
| 13.0042576353  | 10.5298945422  |
| 44.9406405982  | 49.8440421067  |
| 8.0582856141   | 5.9090990317   |
| 2.5761953522   | 3.8198929304   |
| 11.6810498017  | 9.5343878039   |
| 2.7669996582   | 4.7307193781   |
| 0.3185348635   | 0.1284689795   |
| 1.8926725445   | 1.6357239137   |
| 0              | 0.280606157    |
| 0              | 0              |
| 0.214449857    | 0.1922005158   |
| 74.8371318936  | 84.2821687187  |
| 0              | 5.5736172486   |
| 6.6363262712   | 10.6741807446  |
| 0.7084530382   | 0.3809702873   |
| 52.2655921553  | 41.2237252234  |
| 206.9836962342 | 226.3340136473 |
| 3.6629569662   | 4.2209001035   |
| 63.9738341256  | 103.2056974207 |
| 5.3784634015   | 2.7114995235   |
| 14.3733092044  | 12.2040635499  |

gene\_expression\_table

|                |                |
|----------------|----------------|
| 7.3231386796   | 7.6624100407   |
| 1.4942524065   | 1.1299690225   |
| 25.0071450282  | 30.2570560107  |
| 53.9985012406  | 46.0353282433  |
| 2.3741807848   | 2.2320939335   |
| 4.0299485551   | 3.947223204    |
| 0              | 0.4198843107   |
| 5.3963721564   | 10.5957408128  |
| 220.1452527263 | 300.5107071955 |
| 9.7729184042   | 8.7589704406   |
| 1.2668922198   | 2.4270268471   |
| 8.6727848937   | 15.5216627405  |
| 3.8606933794   | 1.9463306668   |
| 1.7815873973   | 2.9190518387   |
| 2.2770196392   | 0.9453599628   |
| 11.8612980998  | 14.9763283292  |
| 0              | 0.0718586978   |
| 0              | 0.2321756711   |
| 0.7593767405   | 0.8167089683   |
| 0.0134323873   | 0.0135436124   |
| 18.2689588504  | 22.1042790199  |
| 0              | 0.3961053821   |
| 0              | 0              |
| 0              | 0              |
| 0.7217083747   | 0.873221261    |
| 5.8242282236   | 3.7699710887   |
| 8.1215129279   | 8.7005596543   |
| 3.9042234426   | 2.1869732454   |
| 23.6776638227  | 21.6305548904  |
| 0              | 0.1638439964   |
| 10.3489074024  | 11.0484001521  |
| 1.495312968    | 1.6236712226   |
| 4.4529350899   | 0.8979614045   |
| 0              | 0              |
| 23.9303618924  | 18.0963855359  |
| 0.100635259    | 0.2029371115   |
| 0.1319728399   | 0              |
| 1.7121493516   | 1.3052713127   |
| 94.4074659579  | 126.3087386317 |
| 1.3444588608   | 0              |
| 0              | 0              |
| 5.5875667492   | 5.3067080108   |
| 7.5929996325   | 6.7626873296   |
| 2.7479981931   | 4.5519507394   |
| 0              | 0.0938203287   |
| 1.9608925917   | 0.7284161316   |
| 2.056705807    | 2.3847964964   |
| 1.1719204297   | 0              |
| 0.2506047909   | 1.0107195612   |

gene\_expression\_table

|                |                |
|----------------|----------------|
| 3.0064311224   | 2.3669253689   |
| 7.1645505081   | 13.9126493205  |
| 0              | 0.8741636019   |
| 3.1687644861   | 1.2780012064   |
| 98.3658034036  | 77.0283612373  |
| 4.3544300029   | 5.4881078464   |
| 56.5266697042  | 66.8815723492  |
| 91.9467325419  | 105.2685353869 |
| 0.723741498    | 0.5675711553   |
| 0.6596751915   | 0.6651375435   |
| 30.4190229772  | 31.9488579391  |
| 0              | 0              |
| 2.9118722861   | 2.3487869235   |
| 0              | 0              |
| 0.3723768994   | 0.3337425035   |
| 0              | 0              |
| 0.8616524522   | 0.532482508    |
| 5.7121322754   | 6.8741593675   |
| 3.8946866322   | 6.3267303238   |
| 21.0388979463  | 40.9109934638  |
| 0.7266389809   | 0.4884372117   |
| 34.3168255688  | 34.6009814452  |
| 0              | 0              |
| 0              | 0.1105754268   |
| 0.7940605848   | 0.2668785657   |
| 2.2029077931   | 1.6767494906   |
| 3.7351433933   | 2.5318129396   |
| 0              | 0              |
| 31.0546962555  | 37.6268335506  |
| 287.8822535651 | 264.0851669294 |
| 4.7254678742   | 9.1888646358   |
| 0.284665533    | 0.2870226678   |
| 0.4391461423   | 1.7711297323   |
| 0              | 0              |
| 5.7409689235   | 7.1667220207   |
| 6.2428384778   | 8.560562793    |
| 0              | 0.1732828034   |
| 38.0763605106  | 27.6923353335  |
| 0              | 0              |
| 0.1638207782   | 0.4955318227   |
| 0.2368061312   | 0.2387669726   |
| 1.419237816    | 1.0221354461   |
| 113.7250326459 | 105.0466554145 |
| 24.3204657267  | 22.402676028   |
| 8.06332368     | 9.0737622226   |
| 25.7968697692  | 29.904261319   |
| 0.6924199599   | 0.6981534506   |
| 0.8749616051   | 0.8020060068   |
| 49.3846999661  | 57.4936682068  |

gene\_expression\_table

|                 |                 |
|-----------------|-----------------|
| 15.7265766173   | 13.4582911027   |
| 23.1712433626   | 32.7083536343   |
| 620.8997374189  | 841.4865506719  |
| 16.703778525    | 7.9256903177    |
| 10.2345138393   | 5.8967196342    |
| 4.8248422385    | 5.7914210693    |
| 0               | 0               |
| 6.6935626214    | 6.7489877699    |
| 3.2713390095    | 1.872080129     |
| 48.5143384386   | 64.6061102693   |
| 1.5273501106    | 1.0043459534    |
| 1.9070048952    | 2.4034944922    |
| 0               | 0               |
| 12.8343068614   | 12.3523714553   |
| 0.1185749752    | 0               |
| 1.0337450071    | 0.9969871944    |
| 0               | 0               |
| 1.8045649945    | 1.0917044719    |
| 0               | 0.0696206809    |
| 4.2071646565    | 5.6560020264    |
| 13.2936905187   | 13.4037671419   |
| 25.1470370348   | 33.6345334873   |
| 12.4411755208   | 9.2430895848    |
| 37.6999022499   | 45.0296843914   |
| 13.5489182538   | 11.0589923979   |
| 4.4490481784    | 4.7351039216    |
| 116.6025548102  | 100.6213182981  |
| 282.5121871969  | 338.9968163453  |
| 7.5903917724    | 5.9077665221    |
| 196.3417619387  | 190.7121885921  |
| 0.7646274995    | 0               |
| 1.8002485957    | 1.701708106     |
| 0               | 0               |
| 0.776334956     | 0.7827632936    |
| 0               | 0               |
| 1.068142676     | 1.0769872883    |
| 3.7705430554    | 4.5048305756    |
| 1.4473718128    | 0               |
| 7.8105328969    | 11.4014190434   |
| 2184.4167757961 | 2222.2537330367 |
| 6.7014817628    | 4.3244623902    |
| 6.9337276387    | 12.9541738474   |
| 34.0587016573   | 28.6897155877   |
| 7.2451687881    | 5.935443668     |
| 24.2041882419   | 24.4046077798   |
| 1.0214023543    | 2.0597198793    |
| 1.6552091624    | 3.3378298002    |
| 12.4155628136   | 16.0118663254   |
| 1.746770007     | 1.6878491561    |

gene\_expression\_table

|                |                |
|----------------|----------------|
| 0.3208018724   | 0.1078194098   |
| 0              | 0.7822827759   |
| 43.2562086728  | 39.1608042532  |
| 11.1474251138  | 11.239729874   |
| 6.1299365512   | 7.0047872921   |
| 13.0828539112  | 12.2917857714  |
| 5.648441862    | 7.5936173707   |
| 1.5085203567   | 1.5210114574   |
| 0.9087550916   | 1.3744198745   |
| 0.4305004194   | 0.0667792493   |
| 0              | 0              |
| 348.5678133054 | 453.6775689485 |
| 1.2007368874   | 1.1825240927   |
| 22.6483208216  | 27.8486063509  |
| 42.9369838414  | 61.8464539764  |
| 10.75353942    | 8.825357981    |
| 10.7450404042  | 13.1148581709  |
| 2.0101058413   | 1.705043864    |
| 25.0778443019  | 37.9282470475  |
| 2.1127011128   | 2.7204900656   |
| 0              | 0              |
| 58.9301968433  | 78.4278166685  |
| 4.4524249442   | 5.3206431436   |
| 2.0186680707   | 3.0530750718   |
| 1.5481702262   | 2.3414844635   |
| 21.3208057874  | 17.8712908501  |
| 7.2016758351   | 9.74544015     |
| 2.4126906936   | 3.405736118    |
| 0              | 0              |
| 38.1557024343  | 37.624252541   |
| 0              | 0.7659744663   |
| 1.5647900724   | 2.6295785115   |
| 1.1071684645   | 2.2326724492   |
| 1.4862274319   | 1.6138057805   |
| 30.2877155355  | 30.2881932593  |
| 0.063501804    | 0.1280552445   |
| 0              | 0.4366544174   |
| 270.200044754  | 516.8297735741 |
| 1.2546622513   | 3.795153942    |
| 2.1001418509   | 1.5940969686   |
| 0              | 1.9632466959   |
| 30.7642358927  | 41.623752813   |
| 16.0510945756  | 10.2630266185  |
| 6.6084120369   | 7.3294453182   |
| 6.8117658341   | 13.736339497   |
| 1.3214149217   | 1.6957267358   |
| 8.5360290751   | 8.2925969975   |
| 102.2235618107 | 77.2372735551  |
| 0.5511778904   | 0.5557418451   |

gene\_expression\_table

|                 |                 |
|-----------------|-----------------|
| 0               | 0               |
| 0.1205284712    | 0               |
| 0               | 0.2444654264    |
| 0               | 0.9242879352    |
| 2.0518317492    | 1.0344108335    |
| 2.155371943     | 2.3905411327    |
| 26.8630407681   | 21.066481783    |
| 1027.4994900212 | 1416.0813419852 |
| 5.9618380236    | 8.2654058088    |
| 5.6838837616    | 5.2099530905    |
| 0               | 10.3777627456   |
| 9.3278980499    | 9.40513646      |
| 3.1638157259    | 1.8468497926    |
| 15.4867918834   | 13.3016906792   |
| 9.6442966018    | 13.8712209713   |
| 0.7894242607    | 0.7959609826    |
| 5.131942813     | 7.9606725813    |
| 7.5505598217    | 5.4214366268    |
| 6.3804476564    | 8.7564090228    |
| 3.8185593959    | 2.7806844472    |
| 3.0819511331    | 3.6724655104    |
| 19.2026243964   | 29.922517785    |
| 0               | 0               |
| 0               | 0               |
| 4.5426586106    | 4.9326022163    |
| 83.6943046614   | 85.4421656897   |
| 15.6812848061   | 34.2574517653   |
| 2.6988961272    | 0.907081325     |
| 5.0066478881    | 10.0962095303   |
| 0               | 0               |
| 236.648971151   | 400.9606941635  |
| 0               | 0               |
| 1.0576129815    | 1.0663704041    |
| 0.1779192569    | 0.2690887401    |
| 0               | 0               |
| 0               | 0               |
| 102.3412882983  | 147.1394591683  |
| 62.9190508175   | 67.8919764714   |
| 760.0962088895  | 825.4730196795  |
| 2.8969283378    | 4.3813739471    |
| 177.8371561735  | 114.5964330684  |
| 5.9544246281    | 4.2883781739    |
| 5.8727509907    | 5.3292415666    |
| 28.9281392325   | 26.3080988516   |
| 2.2681397406    | 3.3467133188    |
| 8.2471210234    | 9.978492245     |
| 60.6747350563   | 54.2350568004   |
| 83.1167968868   | 82.8941101008   |
| 7.9771273502    | 6.3932976261    |



gene\_expression\_table

|                |                |
|----------------|----------------|
| 9.2245314894   | 10.4635282348  |
| 19.4471236365  | 58.8244588147  |
| 0              | 0              |
| 0.1385481404   | 0              |
| 32.3606733781  | 42.9324099979  |
| 0              | 0.0551338666   |
| 0.825442529    | 0.4623763862   |
| 270.4827767013 | 339.7069401708 |
| 5.4240650695   | 16.4069349409  |
| 0              | 3.721359282    |
| 0              | 0              |
| 3.7374068089   | 3.0831986498   |
| 522.1860433113 | 548.4478488345 |
| 105.3227756946 | 116.6061502422 |
| 0              | 0              |
| 0              | 0              |
| 0.8108788214   | 0              |
| 2.8159333573   | 0              |
| 22.9076426032  | 20.2101604851  |
| 63.6360133142  | 63.4500212099  |
| 30.0170482701  | 23.9602669965  |
| 69.4156806989  | 46.6603119618  |
| 619.7465180915 | 630.6374926097 |
| 258.4530646084 | 257.1185752416 |
| 35.0363797442  | 23.5509958617  |
| 0              | 0              |
| 0.9118855038   | 1.8388724992   |
| 319.2253351518 | 410.0372745191 |
| 60.1320634079  | 90.9449683537  |
| 4.2063450258   | 2.9688225716   |
| 13.4830441252  | 12.4294296372  |
| 3.7680923242   | 3.7992935078   |
| 0              | 0              |
| 73.1379577164  | 80.550665248   |
| 566.8147997655 | 416.0981000283 |
| 2.0029378248   | 0.4039045766   |
| 0              | 0              |
| 0.9748806419   | 2.9488590314   |
| 3.6769506323   | 2.3171232058   |
| 4.8589674689   | 4.6659061886   |
| 44.9340025406  | 37.6270771846  |
| 0              | 0              |
| 91.9973436174  | 103.2601472158 |
| 1.7311019457   | 2.9090601723   |
| 532.7260873781 | 654.1465705029 |
| 13.1603315915  | 13.2693039541  |
| 0              | 0              |
| 71.8759897206  | 83.9139622589  |
| 2.8918357967   | 0              |

gene\_expression\_table

|                 |                 |
|-----------------|-----------------|
| 19.4613657979   | 15.9432918368   |
| 0               | 0               |
| 322.0081134102  | 314.0872478494  |
| 2.4054081451    | 4.5474858843    |
| 0.330291709     | 0.6660532905    |
| 0               | 0               |
| 3.0758144716    | 3.9470878888    |
| 53.2133556501   | 58.8983558645   |
| 15.5332151204   | 17.4020398079   |
| 45.4540101721   | 35.8762750241   |
| 0.7598845283    | 0.7661766504    |
| 52.1840943018   | 108.7401419198  |
| 3.2226827893    | 6.4987355647    |
| 0               | 0               |
| 0.7642215385    | 1.1558243589    |
| 1.0578072885    | 6.3993979202    |
| 12.2841323057   | 12.3858494175   |
| 28.5701896983   | 18.1937439956   |
| 70.7286028063   | 66.2203857024   |
| 93.2533945718   | 127.3894776157  |
| 443.4092345405  | 394.2002975761  |
| 0.9894986159    | 1.9953840532    |
| 12.2001237561   | 23.7822141429   |
| 369.8827051244  | 297.961724156   |
| 2.9035023052    | 0.7318860918    |
| 0               | 0.6555239928    |
| 1452.4694300598 | 1548.5580973112 |
| 6.8667872804    | 6.2942243568    |
| 0.4762471665    | 0.2585642055    |
| 0               | 0               |
| 0.4280967977    | 0.2589849575    |
| 4.5107534229    | 5.0831751843    |
| 0.2329364316    | 0.1826729571    |
| 0.4776102865    | 0.8026084574    |
| 0               | 0               |
| 0               | 0               |
| 0               | 0.2948958895    |
| 2.2595232149    | 1.9354898923    |
| 0               | 0               |
| 2.252071138     | 1.9301112446    |
| 18.7619200031   | 27.3974335813   |
| 3.7148760228    | 1.6647273582    |
| 1.4958030425    | 1.2065510714    |
| 0.0178453609    | 0.0359862539    |
| 0.0464653471    | 0               |
| 1.1492879028    | 1.738206641     |
| 2.2466301675    | 2.3596177996    |
| 0.0854533164    | 0.0287203004    |
| 9.5768488692    | 12.7285596278   |

gene\_expression\_table

|                 |                 |
|-----------------|-----------------|
| 0.7854453421    | 1.2087644417    |
| 0               | 0               |
| 0.212369108     | 0               |
| 2.2018164129    | 4.2286633499    |
| 30.6734191248   | 48.1701194882   |
| 0.1196617564    | 0.3619577986    |
| 18.169199421    | 22.8368202858   |
| 18.7549514798   | 19.1623860007   |
| 1.5114924941    | 1.6795192465    |
| 0.8554811927    | 0.6900519121    |
| 46.2081866187   | 36.5314284646   |
| 3351.9930599439 | 3846.4335386626 |
| 4.2923455941    | 7.5738036268    |
| 2.8680958571    | 0.6940427378    |
| 0               | 0               |
| 1.7023120914    | 1.7700456042    |
| 2.8747786803    | 2.434809636     |
| 37.7161851948   | 55.4129411334   |
| 16.1817164086   | 11.7089191005   |
| 20.0886693664   | 18.0788527056   |
| 3.3793573492    | 4.8489064463    |
| 14.8950473049   | 17.5214477065   |
| 1.0694115731    | 1.0108750241    |
| 1.3278905898    | 1.8744404139    |
| 7.8506204954    | 8.8202695359    |
| 1.2947256738    | 0.8552925189    |
| 0.2610229881    | 0.7895530619    |
| 3.5819615972    | 3.3708467803    |
| 2.7691446287    | 1.3960370799    |
| 4.0065127988    | 9.2335730085    |
| 0.0805017347    | 0.0811683186    |
| 26.1691314505   | 21.7683026858   |
| 16.7208486228   | 16.2571853921   |
| 17.9645712053   | 23.0533220022   |
| 2.1904679746    | 11.0430292561   |
| 2.8065537759    | 3.9874356874    |
| 7.2100118291    | 14.0850696468   |
| 4.3540336356    | 3.5771076226    |
| 1.268133929     | 1.2786345421    |
| 3.6240475041    | 10.7185641021   |
| 4.0778662432    | 2.7410883122    |
| 0               | 0.1642844746    |
| 3.8057454105    | 3.8372583755    |
| 0               | 0               |
| 4.3764521338    | 2.5547157028    |
| 1.5412905748    | 0.310810605     |
| 0               | 0.1891168674    |
| 1.0756424401    | 1.0845491532    |
| 0.98860664      | 3.9871706593    |

gene\_expression\_table

|                 |                 |
|-----------------|-----------------|
| 1.5239928722    | 1.536612091     |
| 0               | 0               |
| 0               | 0.1970510329    |
| 0.1420588471    | 0               |
| 1.4902970691    | 1.186292585     |
| 0.2602527105    | 0.1686906631    |
| 0               | 0               |
| 4.8465025853    | 0               |
| 332.6962576723  | 281.3756531944  |
| 0.7884124981    | 0.3974704211    |
| 1.8463674358    | 2.792484051     |
| 35.6264233055   | 32.4339063218   |
| 0.7998395598    | 0.8064625241    |
| 80.5712633813   | 52.9568224259   |
| 0.2126711141    | 0.4288642175    |
| 1780.9821731809 | 1254.3972226694 |
| 34.4539931128   | 32.9577830028   |
| 0.4402956854    | 0.4097921491    |
| 38.1487372345   | 43.1938796366   |
| 0.7641201156    | 2.3113419296    |
| 0.5617762778    | 0.8685229196    |
| 0               | 0               |
| 47.7565169211   | 45.1424609636   |
| 9.642950573     | 6.4818651555    |
| 2.5059388367    | 1.010675571     |
| 46.2208325374   | 50.310659149    |
| 19.811657627    | 19.9757054036   |
| 0.5878347132    | 0.3951347999    |
| 0.9604879592    | 1.4526617266    |
| 47.5999002014   | 45.0556338917   |
| 43.6138031589   | 54.0263565926   |
| 4.4876423003    | 1.508267207     |
| 10.1886240435   | 8.1102549314    |
| 4.6209029465    | 4.6591657142    |
| 14.9938673732   | 20.5983050882   |
| 20.8353661117   | 20.5877327579   |
| 4.5507111488    | 4.8751672467    |
| 7.1410639062    | 1.963689417     |
| 692.2334417154  | 496.2719678829  |
| 1.6069341533    | 4.8607204688    |
| 0.7401047717    | 1.1193496651    |
| 20.6930889567   | 20.8644353073   |
| 1.2205912284    | 1.3479075201    |
| 24.4966080599   | 31.3493005788   |
| 13.1495972265   | 15.7839056006   |
| 17.4111361068   | 13.1664800149   |
| 0.9961108231    | 1.2554487316    |
| 0.4018456917    | 0               |
| 0.2693509109    | 0.162948741     |

gene\_expression\_table

|                 |                 |
|-----------------|-----------------|
| 104.7345680754  | 125.0547733825  |
| 0               | 0               |
| 17.2821022421   | 19.3950100861   |
| 2.5751673819    | 2.6686154523    |
| 5.4283265914    | 10.946550245    |
| 19.2260786117   | 22.8062089174   |
| 7.8558789115    | 10.0811816818   |
| 1.3822218392    | 1.393667142     |
| 0.7058532636    | 2.135093961     |
| 1.4758243967    | 0.934797351     |
| 3.1648788975    | 4.8275392292    |
| 0               | 0               |
| 12.6278062159   | 14.2679311727   |
| 8.4815937059    | 6.7274351996    |
| 0.943566875     | 0.9513799541    |
| 5.0629290976    | 3.3112553537    |
| 3.3406701893    | 2.747849921     |
| 15.5152760808   | 17.8785694236   |
| 6.2603112384    | 10.0251776756   |
| 0               | 0.3950272509    |
| 0.4683478985    | 0.8007310274    |
| 3.8813092738    | 5.0315759167    |
| 34.5027420003   | 21.742773333    |
| 2.3172916982    | 1.7028581022    |
| 140.0152838782  | 188.7528625741  |
| 6.8442430493    | 8.4011149928    |
| 11.6886416901   | 13.6892278166   |
| 0               | 0               |
| 3.1545974442    | 3.6896336522    |
| 5.2389855062    | 0               |
| 2.9068266964    | 3.7682952241    |
| 0.0984364273    | 0               |
| 2.131770286     | 2.6867776553    |
| 56.1057182918   | 67.8294303944   |
| 33.9321286082   | 32.8684794395   |
| 78.0403699423   | 43.71476265     |
| 0.0299369044    | 0.0452771894    |
| 0               | 0               |
| 0.015102416     | 0               |
| 1213.0793455883 | 1337.6036808934 |
| 82.3738071375   | 20.0479740303   |
| 4.8876443729    | 0               |
| 45.5697992567   | 7.9908058911    |
| 0.4315833121    | 0.5439462249    |
| 55.5958486064   | 56.0562025821   |
| 11.0445898061   | 7.0865728515    |
| 3.0564664751    | 3.8256518933    |
| 2.5808748701    | 2.0239686901    |
| 1.893754546     | 1.2729570179    |

gene\_expression\_table

|                |                |
|----------------|----------------|
| 5.519459179    | 12.4145928705  |
| 0              | 0.7813351925   |
| 0.5640142111   | 0.3791229701   |
| 13.6564220243  | 12.7859663259  |
| 5.6809522164   | 2.86399629     |
| 2.8252514221   | 1.9721392186   |
| 4.1898159448   | 2.957156408    |
| 0              | 1.5106220348   |
| 1.8570519299   | 2.4133529328   |
| 1.3764391755   | 1.3878365957   |
| 20.2648140807  | 30.4184782212  |
| 0.4128527944   | 1.2488141001   |
| 84.2613823336  | 79.7308452718  |
| 6.7037055116   | 3.3796073235   |
| 0              | 2.3632487197   |
| 0              | 0              |
| 114.8506628396 | 9.1422369762   |
| 38.4912205324  | 3.2341618272   |
| 79.6270063052  | 6.175872851    |
| 3.1705094005   | 0              |
| 0              | 0              |
| 59.0108687535  | 53.5495503114  |
| 6.3647560017   | 4.3755398939   |
| 78.6286331323  | 62.6565426246  |
| 9.7324575837   | 9.9421649197   |
| 8.9424263366   | 9.6605066784   |
| 2.6077865834   | 3.155256013    |
| 6.8773782068   | 7.1493432579   |
| 0.8945137465   | 1.3709193846   |
| 1.5807066868   | 1.5141057409   |
| 6.0021158676   | 5.3535291704   |
| 2.4465666373   | 2.7604947598   |
| 4.4386755575   | 10.3279140365  |
| 0              | 0              |
| 0.1432036281   | 0.2887788131   |
| 4.1176456374   | 5.3379530363   |
| 0              | 0              |
| 18.2426531119  | 15.2911556388  |
| 7.1812468777   | 5.1873744934   |
| 0.8657461952   | 0.6235106361   |
| 0.0746272951   | 0.1504904728   |
| 167.4562613559 | 156.2694559878 |
| 3.911148437    | 6.1343864985   |
| 13.3322909359  | 12.7225432284  |
| 78.5769471312  | 71.6304265609  |
| 0              | 0.7292658099   |
| 14.4953300693  | 19.6551348829  |
| 9.0711257141   | 14.7356055945  |
| 6.0078970925   | 6.5236173471   |

gene\_expression\_table

|                 |                 |
|-----------------|-----------------|
| 0               | 0               |
| 1764.4644954647 | 1584.6829812569 |
| 60.1141090431   | 48.3105726484   |
| 0               | 0               |
| 0.2606832183    | 0.1314208854    |
| 0               | 1.252766612     |
| 0.2374482461    | 0               |
| 1187.7976446308 | 1385.7019188275 |
| 0.5757030988    | 0.6578661487    |
| 15.9264178409   | 12.22900882     |
| 2.9310660745    | 3.6120777909    |
| 0               | 0               |
| 26.3235745462   | 27.8258116064   |
| 0               | 0               |
| 6.1146740978    | 1.7125849548    |
| 69.7389180148   | 95.6302792234   |
| 0               | 0               |
| 0.0540755966    | 0               |
| 1.5579097805    | 0               |
| 32.3463206253   | 36.0472294731   |
| 0               | 0               |
| 0               | 0               |
| 106.1579414647  | 144.854445756   |
| 0               | 0               |
| 51.0314630687   | 58.6412507678   |
| 31.9919662999   | 28.2247625543   |
| 51.283881072    | 49.8213577367   |
| 18.7563065753   | 20.9118826998   |
| 0.3087705835    | 0               |
| 7.5486223229    | 6.8052435715    |
| 23.4428772373   | 29.6400386424   |
| 1.3065850223    | 1.6766960312    |
| 194.8560819238  | 171.2204613172  |
| 2.8170486824    | 0.811535679     |
| 0               | 0               |
| 0.4914343693    | 0.9910072516    |
| 38.6092829637   | 33.7384510307   |
| 0               | 0               |
| 0               | 0               |
| 175.0937568853  | 201.0277458083  |
| 3.350779882     | 2.7028204527    |
| 0               | 0               |
| 26.8529602875   | 17.7389979283   |
| 2.2183182706    | 0               |
| 1287.7849726578 | 1568.6093215928 |
| 10.7128943554   | 9.9014676216    |
| 28.6100870785   | 26.125575008    |
| 0               | 0               |
| 8.2288808522    | 17.1126016826   |

gene\_expression\_table

|                 |                 |
|-----------------|-----------------|
| 0               | 0               |
| 8.8505836499    | 8.923869722     |
| 24.7944229578   | 32.4814008338   |
| 0.3206440604    | 0.3232991106    |
| 70.1640996321   | 72.3289292241   |
| 0.7685228455    | 1.6789207412    |
| 22.1283160439   | 21.5918192905   |
| 0               | 0               |
| 44.4874181532   | 38.5479447537   |
| 0               | 0               |
| 63.5717238243   | 59.2714552308   |
| 0               | 0               |
| 4.1332699722    | 0               |
| 7.4005720711    | 12.791745457    |
| 2.3094948141    | 2.0281514021    |
| 15.3398749697   | 13.5632769338   |
| 2.9101448845    | 3.0886757362    |
| 0               | 0               |
| 27.0407188977   | 38.1704763268   |
| 19.4934120604   | 16.081220166    |
| 84.8322230087   | 111.7469008729  |
| 25.3021511922   | 34.9604260672   |
| 0               | 5.256537921     |
| 4.6184318754    | 2.9104213636    |
| 41.9696114708   | 63.9677625351   |
| 0               | 0               |
| 6.3152847113    | 5.0940620642    |
| 9.4932317746    | 0               |
| 0.8623101799    | 0               |
| 1.9268367335    | 1.036155545     |
| 52.2997768034   | 58.3827850372   |
| 0.3315469925    | 0.3342923229    |
| 155.892917093   | 303.8886171796  |
| 24.5082020681   | 26.5083126937   |
| 0               | 0               |
| 68.8596783177   | 76.5368553713   |
| 0               | 1.8984043427    |
| 2.4647453216    | 0.8283847717    |
| 0               | 0               |
| 29.2559078267   | 31.1600254772   |
| 0               | 0               |
| 0.9255920057    | 0.9332562463    |
| 8.7349542157    | 7.9265545504    |
| 1022.9318654598 | 1045.4958092274 |
| 1.4887252932    | 0               |
| 365.0867058481  | 350.3338335033  |
| 5.105992747     | 7.0788743242    |
| 6.844528215     | 5.7744763259    |
| 6.3078278322    | 5.6533857382    |



gene\_expression\_table

|                |                |
|----------------|----------------|
| 18.7283993955  | 10.7905585129  |
| 2.3626729935   | 2.1916578474   |
| 3.7166078997   | 7.1824836492   |
| 33.079637832   | 15.7753273911  |
| 0.8923814432   | 0              |
| 0.5332140277   | 0              |
| 0.8049498198   | 0.6492920792   |
| 11.8914110705  | 7.9932508711   |
| 29.6740840419  | 20.7678586215  |
| 9.1795935592   | 9.2556039538   |
| 2.2100399045   | 0.9903732639   |
| 1.9587633893   | 3.1035441912   |
| 2.0617015056   | 2.0787731487   |
| 27.7273527303  | 19.4483098155  |
| 171.9120652714 | 115.0834456371 |
| 60.3912377121  | 62.291099248   |
| 0              | 0              |
| 142.6789666926 | 157.139822369  |
| 106.2375602235 | 108.5647764602 |
| 8.1070755721   | 11.9888341836  |
| 2.6575545443   | 3.2154720824   |
| 6.0305263905   | 6.0804613563   |
| 0.5564823922   | 1.4027256753   |
| 15.3711097284  | 12.2108512643  |
| 1.9560761929   | 3.0241522703   |
| 1.0096703325   | 0              |
| 0              | 0              |
| 0.9286524309   | 2.8090260387   |
| 13.5366916288  | 15.0607231891  |
| 2.9020388464   | 4.3891031854   |
| 0              | 0              |
| 13.2468826523  | 10.5844530368  |
| 0              | 0              |
| 0.6698311247   | 0.4502517144   |
| 3.8087724064   | 2.9186359314   |
| 10.978202688   | 13.0153227036  |
| 1.1022580782   | 3.0563092409   |
| 1.9884804252   | 0              |
| 68.5863676205  | 58.2351897672  |
| 0              | 1.1767143975   |
| 5.3988467166   | 5.4435511435   |
| 0              | 0              |
| 0.4269191467   | 0.6456812902   |
| 5.3127059481   | 6.6958713724   |
| 0.8149677201   | 0.7190014572   |
| 0.694657874    | 0.592654527    |
| 1.3754424483   | 1.7335395191   |
| 1.6495946669   | 1.6632539145   |
| 2.710993146    | 1.2713679821   |

gene\_expression\_table

|                |                |
|----------------|----------------|
| 1.641495818    | 0.1324070403   |
| 2.9774999374   | 5.5424394955   |
| 0.9140984668   | 0              |
| 49.3277704914  | 50.3627109429  |
| 0              | 0.1031965244   |
| 5.929603575    | 4.4286687874   |
| 0              | 0              |
| 7.5551208429   | 6.7262493695   |
| 0              | 0              |
| 0.5887563983   | 0.5936315168   |
| 12.969866398   | 10.4733821091  |
| 115.1494946363 | 119.3662238851 |
| 5.4380780161   | 2.9028215078   |
| 0              | 0.901237364    |
| 4.7794508063   | 3.6142698063   |
| 25.7597179732  | 25.9730178666  |
| 0.9458920768   | 0.9537244094   |
| 36.2512555817  | 42.9081995504  |
| 2.2242558222   | 2.2426734746   |
| 74.6881777808  | 66.3593016584  |
| 33.1781031264  | 29.6893865932  |
| 33.0949194841  | 27.6611095322  |
| 10.4285277745  | 12.7285387072  |
| 8.1553046336   | 13.0817806333  |
| 0              | 0              |
| 0              | 0              |
| 0              | 0              |
| 0              | 0              |
| 0.104640697    | 0              |
| 13.44537351    | 15.0818355629  |
| 889.9535641643 | 953.7580956955 |
| 11.9649496456  | 13.4668172741  |
| 26.5491194717  | 21.2577002723  |
| 0              | 0              |
| 0              | 0.098840884    |
| 0              | 0              |
| 0              | 0              |
| 0.4429298462   | 1.3397924025   |
| 0              | 0              |
| 44.085260755   | 32.1690248791  |
| 100.7508347345 | 116.5555226212 |
| 11.1114996961  | 7.1761025105   |
| 45.3295261138  | 71.363746231   |
| 4.599099756    | 2.911718921    |
| 4.6939643103   | 5.5933469716   |
| 0              | 0              |
| 0              | 0              |
| 7.6896762221   | 9.6916869448   |
| 0.5004037086   | 0              |

gene\_expression\_table

|                |                |
|----------------|----------------|
| 3.4615794332   | 6.2824366403   |
| 0              | 0              |
| 6.3259848699   | 10.406808239   |
| 0              | 0              |
| 0.6560297466   | 0.6614619131   |
| 0              | 1.7277739524   |
| 9.8784988685   | 8.4279431542   |
| 115.4766677843 | 136.019692594  |
| 33.458470148   | 55.5230409096  |
| 27.1636952693  | 29.8784952094  |
| 2.4833746816   | 1.9077622346   |
| 34.4769165946  | 34.7623980833  |
| 0              | 0              |
| 5.2557234791   | 9.9360802372   |
| 0.1012564643   | 0.1020949049   |
| 5.8671654939   | 5.5213645869   |
| 55.5773260016  | 41.6517735052  |
| 2.0005716023   | 5.0428426684   |
| 1.4875573307   | 1.7559510438   |
| 1.8971865796   | 3.8257919578   |
| 180.8754986647 | 211.6345878857 |
| 841.2914034454 | 972.4601818175 |
| 2.078747333    | 1.1877107357   |
| 7.851754068    | 7.606307918    |
| 0              | 0.010959535    |
| 23.4797048968  | 26.7092697356  |
| 0.3533056221   | 0.2078014878   |
| 0              | 0.0965847083   |
| 2.7435087641   | 4.74210175     |
| 0              | 0              |
| 3.5929391531   | 3.4616815597   |
| 0              | 0.0142959316   |
| 27.3883750749  | 30.6835120503  |
| 0.9578286872   | 1.2416912477   |
| 6.0065093647   | 4.4194223633   |
| 28.6340420531  | 22.6527425     |
| 22.6758295299  | 15.7504756588  |
| 1.2052847124   | 2.2279856702   |
| 10.8280287861  | 11.3993515702  |
| 0.8592718586   | 0.5279545441   |
| 48.5528515926  | 84.3690605316  |
| 0.3059940408   | 1.0489944639   |
| 24.8114942024  | 26.4067725924  |
| 617.1464614386 | 475.9495788604 |
| 13.4701449248  | 13.5816826552  |
| 1.387272927    | 0.9325067031   |
| 6.90754878     | 5.7356730218   |
| 0              | 0.1929126534   |
| 0.519643057    | 0              |

gene\_expression\_table

|                |                 |
|----------------|-----------------|
| 0.2070797393   | 0               |
| 275.4932098103 | 251.4762269045  |
| 3.2952363502   | 3.2350873209    |
| 0              | 0               |
| 37.4736504746  | 24.3767393656   |
| 0              | 0               |
| 11.7067296032  | 12.3591322261   |
| 0              | 0.025268099     |
| 1.2854292797   | 1.7559700128    |
| 15.3138956241  | 15.4407002851   |
| 26.083725304   | 23.2389662061   |
| 176.8709895973 | 109.6597457568  |
| 0.311201629    | 0.3137784924    |
| 3.3702646649   | 0.6630578907    |
| 5.3774587385   | 6.5063832781    |
| 58.3454481911  | 51.6158716377   |
| 13.4249957944  | 25.3802993876   |
| 1.5141223927   | 1.6138975878    |
| 8.2541951921   | 9.8830197526    |
| 3.210899815    | 3.6421731458    |
| 0.4645135193   | 0.9367197225    |
| 2.6053386093   | 3.0904844313    |
| 2.1599386175   | 1.3729758108    |
| 2.7852385213   | 1.1233205263    |
| 1.3165558219   | 1.1877250296    |
| 1.4808309815   | 2.1957247118    |
| 2.2707585019   | 2.1596570311    |
| 0              | 0               |
| 1159.006475392 | 1296.7728864222 |
| 0.8094669579   | 0.7533873605    |
| 0.8271158123   | 1.0192901082    |
| 2.2866501471   | 1.835057009     |
| 0              | 0.1254878838    |
| 4.1739576617   | 4.6515216177    |
| 2.8370799114   | 2.5661013273    |
| 16.5247135776  | 9.7338495381    |
| 0.1373293431   | 0.1132907567    |
| 0              | 0               |
| 34.9306326597  | 28.8644056248   |
| 33.0369279512  | 41.0571104131   |
| 1.5539783194   | 0.7834229143    |
| 42.0975173942  | 65.3016926874   |
| 1.4710761827   | 2.373211571     |
| 16.375899813   | 19.9768744349   |
| 3.9260700631   | 5.8740209862    |
| 20.266016151   | 32.4122760136   |
| 89.7683943555  | 99.3114590544   |
| 85.4860692467  | 95.7710279887   |
| 3.1924840983   | 0               |

gene\_expression\_table

|                |                 |
|----------------|-----------------|
| 21.2708969889  | 9.7486490007    |
| 1.5957996317   | 5.1488429977    |
| 2.009693081    | 1.0131670377    |
| 1.8878990837   | 2.8552973687    |
| 3.3534944289   | 1.9058025509    |
| 0.2304164027   | 0.2323243349    |
| 3.2846227458   | 3.9139698288    |
| 182.199809883  | 241.8608190835  |
| 4.4266876509   | 3.9054244643    |
| 1.3915816469   | 0.6289778579    |
| 1.2842483787   | 0.4661576731    |
| 7.8765612164   | 7.2086944546    |
| 0.0637147276   | 0.0642423088    |
| 0              | 0.7023981222    |
| 0.0113316048   | 0               |
| 0              | 0               |
| 2.6237901346   | 1.3888959406    |
| 12.6334508043  | 16.9840805347   |
| 2.1952188044   | 1.6328331292    |
| 49.552071246   | 55.2447467568   |
| 4.0592227719   | 2.7772806365    |
| 51.9113432536  | 61.4440035114   |
| 178.9994470559 | 222.7658951255  |
| 11.4754047552  | 10.1100803652   |
| 0.1193838656   | 0.3310241213    |
| 0.7126092336   | 1.1975164982    |
| 10.5373259399  | 8.7273326314    |
| 1.429720937    | 2.2424259662    |
| 0              | 0               |
| 0              | 0               |
| 0              | 0               |
| 0.1241246297   | 0.0417174757    |
| 3.0542895364   | 2.7677239518    |
| 0              | 0.8371046114    |
| 4.8371064965   | 5.6274917409    |
| 13.5652527437  | 9.5047575943    |
| 3.4421265447   | 5.2059429186    |
| 2.9545668867   | 3.5206739242    |
| 0.6086091122   | 1.6363963158    |
| 0              | 0               |
| 983.1930459107 | 1071.5362620756 |
| 0.5940125734   | 0.119786243     |
| 0              | 0.1960660772    |
| 13.885451742   | 8.5716908356    |
| 6.5431325557   | 7.8539429622    |
| 4.4715232085   | 5.6356863216    |
| 7.7983849268   | 6.8800886074    |
| 0              | 0.5645002411    |
| 0              | 0               |

gene\_expression\_table

|                 |                 |
|-----------------|-----------------|
| 3.0216324388    | 4.7223116251    |
| 23.3351656047   | 18.5750441977   |
| 59.1054219571   | 67.1491115321   |
| 11.7164220545   | 9.8445319313    |
| 4.7297442964    | 5.502586512     |
| 0.6117669948    | 0.6168326494    |
| 12.023558763    | 14.3273215451   |
| 11.091286119    | 10.5440902547   |
| 36.8307139941   | 45.9132115183   |
| 7.0793241014    | 7.1379434961    |
| 48.9258017143   | 56.4803347184   |
| 3.0521867426    | 1.8464759796    |
| 1.984026558     | 2.2862343132    |
| 66.1418158679   | 43.3481713032   |
| 75.2246205499   | 100.9309357652  |
| 134.9506963157  | 161.5334034283  |
| 5.1288821156    | 7.8527924671    |
| 12.7843730259   | 12.7330343589   |
| 145.5000559535  | 175.0595685172  |
| 43.1965474254   | 40.1157387556   |
| 17.6344412597   | 15.728869247    |
| 36.0041707451   | 46.9015096855   |
| 3.495720015     | 3.1330363166    |
| 2.6300910662    | 0.7576769094    |
| 34.3551642102   | 45.9505395999   |
| 1.0336885227    | 0.8106372104    |
| 1.4648259989    | 0.8861731766    |
| 0.7133214073    | 0.5753823757    |
| 0               | 0               |
| 0               | 3.6591997982    |
| 5.2026489764    | 4.3950700876    |
| 1.1044479749    | 0               |
| 42.0150335645   | 19.183215134    |
| 2198.1643233384 | 2218.0236442388 |
| 5.4721130201    | 4.5271172257    |
| 15.469577451    | 11.6152870747   |
| 50.339418953    | 45.9791891538   |
| 0               | 0               |
| 15.2336971219   | 21.2943204615   |
| 32.9874369214   | 23.3723029541   |
| 1.4063126941    | 0.202565354     |
| 7.2866210563    | 6.2755257244    |
| 3.2331184303    | 5.1614922376    |
| 6.7816785292    | 4.5585555398    |
| 13.1351822259   | 15.6519365866   |
| 0               | 0.8638869762    |
| 95.3515606619   | 94.5387547102   |
| 2.7265097845    | 1.4995016092    |
| 0.1176037639    | 0.2371551322    |

gene\_expression\_table

|                |                |
|----------------|----------------|
| 154.0033059767 | 125.7470140053 |
| 0.3079366264   | 0              |
| 5.4438910574   | 6.1583548665   |
| 12.9676690795  | 20.2068894673  |
| 4.882808541    | 4.1026999858   |
| 0              | 0.3327403267   |
| 6.9737091672   | 7.4115326279   |
| 0              | 0              |
| 0.3324467389   | 0.3351995196   |
| 0              | 0              |
| 1.0789034024   | 0.7770265125   |
| 23.9077472892  | 12.8840875485  |
| 30.1974391852  | 33.347245514   |
| 794.9959127695 | 911.8396050754 |
| 1.1131509931   | 1.2087043131   |
| 0              | 0              |
| 0.6274922816   | 0.8586482      |
| 3.3885961038   | 3.3901692228   |
| 0.6882401544   | 0.9541661728   |
| 26.8552384156  | 27.3751657689  |
| 19.7915101551  | 20.3799738928  |
| 0.2843421933   | 0.8600899521   |
| 116.8864989384 | 141.6900755818 |
| 14.0323413771  | 33.6027689622  |
| 2.0380142724   | 3.3391958869   |
| 50.3290653086  | 31.4624012023  |
| 0              | 0              |
| 2.2509363469   | 2.0173999322   |
| 0.0374519955   | 0.1510484468   |
| 1.4354769975   | 1.4473632725   |
| 2.7971667823   | 4.3389666878   |
| 9.4617030337   | 7.375500375    |
| 0              | 0              |
| 7.6336030113   | 11.2245175559  |
| 5.4270146409   | 6.3137911252   |
| 0.0441404337   | 0.0111264832   |
| 55.5708482797  | 38.7123239864  |
| 2.101330318    | 4.2374602043   |
| 72.6719860414  | 93.6790810786  |
| 2.1132442092   | 1.8503817704   |
| 0.179977027    | 0.0907336513   |
| 28.2283628271  | 18.9747360023  |
| 192.88351492   | 165.8662994261 |
| 0.4218982246   | 0              |
| 0.173302985    | 0              |
| 3.1716354303   | 2.6088113082   |
| 4.0105494619   | 2.7800838171   |
| 0.2731661122   | 0.5921702593   |
| 1.9392539816   | 4.8882792859   |

gene\_expression\_table

|                 |                 |
|-----------------|-----------------|
| 5.5542217015    | 4.2001595176    |
| 0.2099134144    | 0.2116515743    |
| 0               | 0.2380302792    |
| 1.2068004761    | 1.042965622     |
| 25.5516793105   | 17.7122388903   |
| 865.9637204826  | 928.6176622799  |
| 38.556420583    | 48.2792391214   |
| 0.8901280708    | 0               |
| 1.6496604983    | 4.9899608732    |
| 8.85141904      | 6.222734993     |
| 9453.5919592685 | 7382.9403755254 |
| 0               | 0               |
| 11.0379009275   | 10.6655780045   |
| 5.4514323764    | 4.1224291738    |
| 4.4729223687    | 2.0044265792    |
| 0               | 0.4479413951    |
| 53.9105343755   | 94.218684443    |
| 28.7443104378   | 33.0076466061   |
| 33.7320839036   | 48.8913844885   |
| 13.610705776    | 15.9574504671   |
| 80.3327914687   | 101.9457288991  |
| 19.0151129789   | 22.4781797423   |
| 0               | 0               |
| 28.4354155707   | 30.7946394581   |
| 40.6248209008   | 52.132448184    |
| 549.7562994242  | 615.3089378516  |
| 234.1775381495  | 327.4150379127  |
| 116.6260728729  | 188.7657512125  |
| 165.4495710144  | 204.9497377966  |
| 23.549770576    | 19.3271394271   |
| 65.469698921    | 57.6441175136   |
| 183.5276042001  | 182.5881798723  |
| 0               | 0               |
| 0               | 0               |
| 1.1131261617    | 1.6835148806    |
| 68.0894639463   | 97.4876428746   |
| 4.4007478252    | 5.1767188993    |
| 9.0351433053    | 13.6649363984   |
| 329.5515065577  | 386.5953649254  |
| 23.7857787609   | 7.494604286     |
| 35.5410189587   | 43.5834870864   |
| 64.4566555152   | 99.311142801    |
| 148.2234582114  | 188.4126851139  |
| 1.4467094001    | 1.406592659     |
| 91.8607515432   | 92.621392189    |
| 20.0836407347   | 19.9124416205   |
| 7.626019962     | 10.2522215981   |
| 2.7391270558    | 5.5236160608    |
| 2.6095630731    | 4.3055528899    |



gene\_expression\_table

|                |                |
|----------------|----------------|
| 17.4558727604  | 16.8963972251  |
| 13.3468313144  | 8.6127026963   |
| 7.5285499224   | 8.0012073996   |
| 24.0650379739  | 20.675922119   |
| 1.5204075231   | 1.2542703169   |
| 14.760582308   | 15.9092056999  |
| 0              | 0              |
| 0.481965068    | 0.1822334682   |
| 0              | 0              |
| 5.3011673264   | 5.2392201018   |
| 20.8880619327  | 10.1544216739  |
| 8.0232128145   | 11.4515795702  |
| 4.1805957287   | 3.1343888501   |
| 0.0317444249   | 0              |
| 0.108021333    | 0.3267473676   |
| 38.9520765058  | 32.6178997266  |
| 76.063504339   | 99.3361330232  |
| 8.0222236204   | 10.8305660152  |
| 0.888378586    | 0.6398104899   |
| 1.1861301245   | 2.2210531869   |
| 3.8277972773   | 7.2043866344   |
| 2.7411658211   | 3.4256338537   |
| 3.4341708968   | 2.4238249622   |
| 0.9563995883   | 0.9643189269   |
| 123.6223473509 | 127.9610384449 |
| 70.4930573904  | 75.3844484777  |
| 1.7340066041   | 0.7492992058   |
| 0.012004147    | 0.0242070915   |
| 18.6308365717  | 10.1150574634  |
| 0.918184504    | 1.266866979    |
| 0              | 0              |
| 0              | 0              |
| 7.5001889769   | 7.3683883308   |
| 0.1357913807   | 0.2281929718   |
| 18.8799056443  | 24.5274607236  |
| 3.1251080577   | 2.5674693377   |
| 2.7233370131   | 2.4884603115   |
| 17.6657214902  | 16.977062624   |
| 4.7921524599   | 5.5947542736   |
| 5.3633633723   | 4.7693562221   |
| 0              | 0              |
| 41.8724187844  | 46.7561197041  |
| 0              | 0.1703739062   |
| 7.7071176681   | 9.0660913273   |
| 0.117066946    | 0.0885272274   |
| 69.6185841955  | 39.8404346661  |
| 2.727987557    | 4.8135085118   |
| 23.1660844172  | 36.0345617043  |
| 0.4947067982   | 0.4988031516   |

gene\_expression\_table

|                |                |
|----------------|----------------|
| 75.8747342188  | 83.8389093588  |
| 2.4999079208   | 0.8402026911   |
| 0.4730431805   | 1.9078406047   |
| 0.1360560012   | 0.3292382273   |
| 6.8745948733   | 5.5452152281   |
| 1.4027640568   | 4.5260142614   |
| 2.8533750884   | 2.5834304379   |
| 15.3800306829  | 15.0684947692  |
| 0.9901219215   | 0.4774576273   |
| 0.2911484094   | 0.2268412191   |
| 4.0966073461   | 5.2320030888   |
| 29.0084465476  | 19.9074561432  |
| 0.6578554721   | 0.6633027562   |
| 0              | 0              |
| 2.8768336136   | 2.9722759563   |
| 1.8465570193   | 2.5903960867   |
| 192.7861579022 | 184.0498733829 |
| 2.0292577558   | 1.8306859366   |
| 3.2732741926   | 2.7651816522   |
| 0.1739890327   | 0.1754297256   |
| 0              | 0              |
| 1.4347227987   | 2.0665754694   |
| 0              | 0              |
| 0.6402108779   | 1.0604840957   |
| 1.1187245677   | 0.6941464718   |
| 9.8752405735   | 4.2125816531   |
| 6.5016812154   | 6.760377438    |
| 1.5032268257   | 0.8660994823   |
| 0.0899885135   | 0              |
| 0              | 0              |
| 2.2116949219   | 2.4327366168   |
| 0.6347525499   | 0.8369342359   |
| 1.7131387128   | 4.3183103209   |
| 4.7618754675   | 4.5689843035   |
| 0.2902575277   | 1.1706438649   |
| 0.4879507915   | 0.2108533726   |
| 0.2843393848   | 0.4300407285   |
| 0              | 0              |
| 0              | 0              |
| 0              | 14.6970138732  |
| 0.6563087344   | 1.5780030416   |
| 1.5078809681   | 2.7206563332   |
| 11.1652522349  | 10.3804808743  |
| 0.0278149792   | 0.1121811898   |
| 0              | 0              |
| 0.7260019724   | 0.7668713219   |
| 3.2475859165   | 2.2921339816   |
| 1.1749097176   | 0.7403990001   |
| 42.736190986   | 35.9873047694  |

gene\_expression\_table

|                |                |
|----------------|----------------|
| 0              | 0              |
| 1.7467994486   | 2.9354393123   |
| 3.9626215419   | 4.0398272042   |
| 18.146562584   | 13.0691591173  |
| 3.1093993004   | 3.6576706422   |
| 12.9847285953  | 16.0925534822  |
| 5.6482739485   | 5.5656109123   |
| 0.0119323249   | 0.0240622578   |
| 8.4561622011   | 11.7795939937  |
| 0.2460835201   | 0.1167629091   |
| 1.5269647308   | 1.9924346041   |
| 0.0590733699   | 0.0476500152   |
| 0.6082447783   | 1.4309896246   |
| 2.6587026716   | 2.4022015779   |
| 2.0348630752   | 3.0775687294   |
| 5.2523791645   | 8.9572135524   |
| 189.7242925437 | 237.5297876799 |
| 10.7946849516  | 14.0283554635  |
| 3.019313019    | 2.9200563202   |
| 0.7242491658   | 0.4564038837   |
| 0              | 0              |
| 1.4770262018   | 1.3899727514   |
| 0.3690916421   | 0.2480985707   |
| 5.3411675329   | 3.7697760486   |
| 28.5779348922  | 29.0864062255  |
| 43.6669887873  | 55.8642038455  |
| 0.0149256912   | 0.0300985627   |
| 0.2309011726   | 0.1611783131   |
| 0.5597373607   | 0.7524962546   |
| 0.8102859945   | 1.1354852144   |
| 0              | 0              |
| 24.7738504122  | 12.2346058586  |
| 868.2275064681 | 839.8884709006 |
| 0              | 0              |
| 8.3394687977   | 15.0971202157  |
| 0              | 0              |
| 0.4391796393   | 0.1476054025   |
| 19.3300378409  | 15.9818800562  |
| 39.4754929638  | 62.1305201864  |
| 16.2382009636  | 20.9206201031  |
| 0.1900589249   | 0.3832653648   |
| 5.0467101312   | 8.1251834692   |
| 2.8639300991   | 1.4438222443   |
| 6.9305959275   | 5.1880485777   |
| 6.720405366    | 6.5250878643   |
| 0              | 0              |
| 4.3268087517   | 5.7904081958   |
| 0.6670632275   | 0.1120977925   |
| 0              | 0              |

gene\_expression\_table

|               |               |
|---------------|---------------|
| 2.6255739899  | 3.8506395688  |
| 1.4258414697  | 1.8950814005  |
| 0             | 0             |
| 0.3618858149  | 0.3789162989  |
| 7.9612469255  | 13.6581680881 |
| 0.42597047    | 0.3681408527  |
| 0             | 1.7344847565  |
| 1.442528159   | 1.8700364831  |
| 7.9705805699  | 6.6509626712  |
| 45.974620109  | 47.173341617  |
| 0.8863597287  | 0.8936991117  |
| 0.1828950233  | 0.1475275688  |
| 0.402994372   | 0.3575715553  |
| 0             | 3.1127723753  |
| 1.827730995   | 2.4325821652  |
| 0             | 0             |
| 27.6036932453 | 24.773771607  |
| 23.0642614289 | 15.3189292247 |
| 26.4902004661 | 25.3740715708 |
| 0             | 0             |
| 0.7252710821  | 1.0156619336  |
| 1.1526913113  | 0.7263975108  |
| 0             | 0             |
| 3.5488829504  | 3.9992418237  |
| 0.4128044994  | 0.2628774769  |
| 1.2896834195  | 1.7436678578  |
| 4.9511844915  | 6.7541287388  |
| 13.4742368905 | 14.6308706965 |
| 0             | 0             |
| 0             | 0             |
| 54.0690751784 | 66.711331352  |
| 0.6137560038  | 0.4125587521  |
| 0.2868638868  | 0             |
| 1.1572690688  | 1.7502775205  |
| 7.3657387043  | 8.1273645957  |
| 0.0922828934  | 0.0116308787  |
| 0             | 0             |
| 0             | 0             |
| 0.3706828144  | 0.3162518647  |
| 1.672964015   | 2.1085209617  |
| 0             | 0             |
| 0.0772599744  | 0             |
| 24.2218551618 | 32.7482463252 |
| 1.040762182   | 0.7495571956  |
| 8.6819951425  | 11.7430167854 |
| 0             | 0             |
| 0.2829986807  | 0.2605296644  |
| 13.3419203253 | 20.3824186501 |
| 2.471841159   | 2.0524896893  |

gene\_expression\_table

|                |                |
|----------------|----------------|
| 0              | 0              |
| 2.0925629375   | 1.6879120996   |
| 0              | 0              |
| 0.4274045996   | 0.8227106354   |
| 24.907811396   | 21.1407884415  |
| 2.9081953083   | 1.7593657379   |
| 0.1117566178   | 0.3380460105   |
| 1.128507462    | 0              |
| 1.2933490486   | 1.5648701425   |
| 4.3157291392   | 3.6521223739   |
| 0              | 0              |
| 0.3323891624   | 0.6144260216   |
| 52.1445336027  | 47.8609453528  |
| 10.1480685442  | 7.4415260117   |
| 27.435764721   | 42.2073767882  |
| 25.7747035141  | 21.0041030426  |
| 7.3542535079   | 5.1906045931   |
| 1.0203728403   | 0.5787123193   |
| 0              | 0              |
| 0              | 0              |
| 1.7616006949   | 2.2202342418   |
| 1.5411255544   | 0              |
| 0.2137051841   | 0.2154747413   |
| 0.6502874488   | 0.6556720669   |
| 0.9471368763   | 0              |
| 85.5123291523  | 85.1006570496  |
| 59.8527399571  | 75.554224139   |
| 0              | 0              |
| 4.2201161041   | 5.6734136134   |
| 56.8908431165  | 62.509784747   |
| 14.796917659   | 12.432867961   |
| 1.7375450371   | 2.3359100613   |
| 1.7545771968   | 1.3268293037   |
| 139.1610786516 | 162.0794483211 |
| 0.9794411961   | 1.9751026554   |
| 37.0752246423  | 17.9988471831  |
| 25.5504981669  | 7.2455809623   |
| 130.407263701  | 54.1417402961  |
| 108.9403567569 | 56.4055684574  |
| 2.7343573237   | 3.446248504    |
| 9.6402596422   | 6.9429175147   |
| 22.9379111243  | 20.2368647461  |
| 89.4121398356  | 92.6567413324  |
| 41.0560046591  | 66.7278216082  |
| 49.9838967905  | 42.8381144885  |
| 53.5532095893  | 88.9356584386  |
| 4.0690071175   | 5.0144110938   |
| 157.6789010352 | 130.6322970741 |
| 365.8136192341 | 486.7406211318 |

gene\_expression\_table

|                 |                 |
|-----------------|-----------------|
| 327.6872020329  | 383.1025037373  |
| 3.2826783602    | 3.8324696342    |
| 2.8597574857    | 0.9611457748    |
| 6.1043195526    | 11.0274674487   |
| 8.4455971122    | 10.7863376803   |
| 104.8205864736  | 115.1250160191  |
| 39.1380707264   | 65.7702471289   |
| 252.3188011409  | 258.5958807103  |
| 173.1622577835  | 160.5660605347  |
| 12.7647641743   | 17.5731295704   |
| 16.7665843661   | 20.7695133236   |
| 55.739578248    | 60.033017064    |
| 224.8264265546  | 200.8811418242  |
| 3885.1962992854 | 4785.1727854583 |
| 18.9950851224   | 17.2156147234   |
| 14.5028843106   | 18.2787168763   |
| 6.0946809265    | 1.8435441346    |
| 3.4068905747    | 4.2938760946    |
| 0               | 1.4207832795    |
| 0               | 0.5099991637    |
| 24.0797702758   | 27.3140545358   |
| 26.1206941896   | 32.4702531348   |
| 259.8889011776  | 317.0973371381  |
| 54.1179544126   | 46.119725759    |
| 6.2900085196    | 4.228061395     |
| 1.7222473367    | 1.041904905     |
| 32.4824607766   | 39.5096585004   |
| 79.4157940869   | 86.8592660934   |
| 0.7129327726    | 0               |
| 0.8368670162    | 2.5313897441    |
| 27.0762607235   | 23.8337367302   |
| 5.5168078725    | 5.1788691257    |
| 20.9004104519   | 28.6599239607   |
| 8.8172206299    | 10.2579582046   |
| 31.4854816148   | 35.9790186506   |
| 9.0970632928    | 13.5292757022   |
| 2.0977778766    | 2.1151482453    |
| 103.7107188393  | 130.2832884906  |
| 2.9120686528    | 1.4680908235    |
| 11.6709021716   | 7.8450276756    |
| 0               | 0               |
| 3139.8798877473 | 3422.5721540335 |
| 1.5250020054    | 0.7688147901    |
| 7.5169168096    | 4.7369747701    |
| 175.2856004794  | 225.0124217021  |
| 19.7476896385   | 12.6906598762   |
| 0.2808059438    | 0.1415655599    |
| 2613.9156211188 | 2741.8936239627 |
| 51.5717410219   | 47.5647699368   |

gene\_expression\_table

|                |                 |
|----------------|-----------------|
| 391.0344427816 | 288.2266842486  |
| 112.5591471653 | 69.0815866713   |
| 1.5030661179   | 1.09116868      |
| 4.2174370578   | 4.2523589803    |
| 44.213347562   | 66.8691753942   |
| 12.8648983893  | 13.7821384853   |
| 45.8238584463  | 58.3729151116   |
| 1.7072841511   | 2.7542737421    |
| 2.1156701049   | 2.1331886278    |
| 0.5148569321   | 0               |
| 0.3243926459   | 0.3270787357    |
| 0.4898455905   | 1.481705074     |
| 2.2674270323   | 1.3064012332    |
| 0.3454725232   | 0.8127773783    |
| 70.0086280488  | 85.9583636465   |
| 2.5292936143   | 2.3540650072    |
| 24.7011234943  | 20.5105417489   |
| 274.3454704821 | 214.7422622664  |
| 47.1320791524  | 37.9688879019   |
| 0              | 0               |
| 5.408211594    | 7.3588942292    |
| 15.9517545978  | 16.0838409646   |
| 14.2234315003  | 8.6047240315    |
| 3.006308819    | 4.3573530998    |
| 73.3002477638  | 62.7910769705   |
| 163.0052460798 | 106.7362860772  |
| 0              | 0               |
| 74.7798608671  | 81.1049407121   |
| 11.7372305012  | 13.6275128636   |
| 0.7369838099   | 1.1559120309    |
| 0.1355473567   | 0               |
| 4.2161245373   | 7.9706917344    |
| 84.6194009254  | 69.9150659961   |
| 0.4829428847   | 0               |
| 0.1771419583   | 0.1786087586    |
| 0.1213080731   | 0               |
| 20.9021918775  | 17.4100053853   |
| 2556.301388481 | 2754.5653297549 |
| 5.9769822062   | 6.9395758985    |
| 28.4935484875  | 29.7116901307   |
| 44.5459192264  | 43.8861930917   |
| 0              | 0               |
| 39.3059574077  | 42.3646268544   |
| 0.136446787    | 0               |
| 0              | 0               |
| 4.9781686623   | 5.019389721     |
| 0.5637564938   | 0               |
| 0.2990518398   | 0               |
| 0              | 0               |

gene\_expression\_table

|                  |                  |
|------------------|------------------|
| 6.6059937412     | 5.2584424637     |
| 13.6056982681    | 18.9168942557    |
| 15.2437262439    | 17.95313473      |
| 63.6296387115    | 62.8902683952    |
| 15.5326977777    | 13.5344690622    |
| 0.6359930489     | 0                |
| 1.363724555      | 0.9166777957     |
| 309.3965856821   | 258.2437935905   |
| 0.8881371424     | 0.596994162      |
| 16.1288613178    | 15.5396402289    |
| 165.6683005196   | 153.496303225    |
| 3.1975074443     | 5.3733066271     |
| 19.4717445179    | 37.7557263262    |
| 9.827196215      | 8.0736488121     |
| 104.0620750105   | 109.0654739389   |
| 0                | 0                |
| 8.5767713292     | 8.9426011625     |
| 3.3704749675     | 3.0837185733     |
| 0                | 0.0429067079     |
| 9.2929849488     | 5.331169496      |
| 9.8824116619     | 9.8364949598     |
| 0                | 0                |
| 173.9119534223   | 215.0984632107   |
| 2.9682407894     | 4.4892283644     |
| 12149.5722933162 | 17873.9504754694 |
| 23.3371825805    | 23.124726046     |
| 0                | 0                |
| 0                | 3.2144631672     |
| 14.1511840193    | 19.9757054036    |
| 0.7530270823     | 0.2530874741     |
| 0                | 0                |
| 0                | 0                |
| 115.2613827274   | 160.8791120592   |
| 2.1277328423     | 1.0726756245     |
| 24.6628098849    | 47.4734151395    |
| 4.9083204192     | 4.1085731469     |
| 1.9602162129     | 1.4823356405     |
| 1.202201821      | 1.1111434511     |
| 4.4691932189     | 7.0930922377     |
| 0.1061943464     | 0                |
| 247.2086975469   | 263.2763078238   |
| 75.5971851094    | 55.6223041014    |
| 0                | 0                |
| 23.5143030917    | 27.9427619366    |
| 717.9844383414   | 685.2539206731   |
| 6.1904110824     | 6.8090944931     |
| 11.2095322626    | 14.4285335651    |
| 0                | 0                |
| 7.8844848631     | 9.1422369762     |



gene\_expression\_table

|                  |                  |
|------------------|------------------|
| 17.5181898721    | 4.7101991723     |
| 41.7878941748    | 29.3105483366    |
| 10.3070722311    | 8.6603488015     |
| 1.8812320528     | 1.083891053      |
| 29.1280526373    | 36.8998188501    |
| 4.3747408731     | 2.9406435525     |
| 2.2499589962     | 0.7561964934     |
| 15.0230765506    | 13.0912550522    |
| 0.3264896553     | 0.9875793275     |
| 0                | 0                |
| 13.3761271849    | 16.3097231053    |
| 2.6235625438     | 2.613415679      |
| 0                | 0                |
| 4.9444996318     | 5.6199526857     |
| 1.5898070111     | 0.961782717      |
| 0                | 0                |
| 0                | 0                |
| 1.8764051869     | 0.8408633372     |
| 0                | 0.5788533732     |
| 331.6904225859   | 485.8800836449   |
| 3.2261739286     | 1.0842959432     |
| 5.8784198797     | 5.3882684982     |
| 264.9610222732   | 360.4472175257   |
| 680.0531448999   | 604.1547060479   |
| 355.2709495515   | 361.0556811699   |
| 2.4677384404     | 0.8293907393     |
| 0                | 0                |
| 3.0235762486     | 0                |
| 0                | 0                |
| 2.654668928      | 3.6803945178     |
| 0                | 0                |
| 23.6674498447    | 20.6093215841    |
| 0                | 1.4935221199     |
| 60.6479773056    | 65.0953366759    |
| 3.4456284089     | 31.2674352599    |
| 11.1073475595    | 13.9143072417    |
| 45.5004772699    | 61.5396282259    |
| 0                | 0.0687467639     |
| 0.5421000915     | 0.3279533272     |
| 21.2561535538    | 33.5459931424    |
| 40.0472133338    | 50.1851035128    |
| 69996.7887430875 | 52797.9983000386 |
| 1.3921478484     | 3.9302909579     |
| 0                | 0.566427991      |
| 31.4112704046    | 41.5429621986    |
| 1.5651850679     | 0.9017973561     |
| 123.5701483514   | 124.3326988559   |
| 27.8743134404    | 33.6339996058    |
| 4.8154265999     | 14.5659002841    |

gene\_expression\_table

|                |                 |
|----------------|-----------------|
| 20.8323138765  | 22.5417506015   |
| 1.5199027862   | 1.5324881376    |
| 5.2487648245   | 8.5683667441    |
| 0              | 1.8006577171    |
| 0.3099674332   | 0.312534077     |
| 2.8682101581   | 1.445979994     |
| 0              | 0               |
| 0.5875747598   | 0.8886601408    |
| 4.9735628828   | 3.0088474824    |
| 0              | 0               |
| 0              | 0               |
| 0.6096616975   | 1.229419839     |
| 4.5485561465   | 2.9185035449    |
| 0.4265238219   | 0.2150277976    |
| 0.1570895196   | 0.4751708349    |
| 12.3446244585  | 6.7891868004    |
| 785.8338054498 | 1027.9715568803 |
| 44.922591525   | 46.4970776545   |
| 0              | 0.2277846849    |
| 0              | 0               |
| 12.1060661718  | 1.6275078441    |
| 15.8769019102  | 11.4345489067   |
| 93.7533314789  | 79.524938081    |
| 80.9119164806  | 138.3345206008  |
| 66.2494440331  | 55.9938342508   |
| 8.1917714429   | 7.0796591218    |
| 101.6849753237 | 103.2439359155  |
| 4.7448105183   | 5.5201145609    |
| 35.5849509969  | 75.3471755737   |
| 0.7839930653   | 0               |
| 2.4217224275   | 1.2208875878    |
| 9.9184238954   | 18.0009937362   |
| 3.634251207    | 5.9961994972    |
| 133.9871191704 | 167.673062219   |
| 7.2820939494   | 9.0813800152    |
| 308.940050746  | 314.7575107813  |
| 0.3267737796   | 0               |
| 67.0540969542  | 64.5820460133   |
| 22.3539210533  | 1.8274880839    |
| 20.4566056445  | 44.8391170149   |
| 176.0677801788 | 156.7759303551  |
| 0              | 0               |
| 4.7849359491   | 5.6516238793    |
| 70.9162499938  | 60.5497405856   |
| 2.4126906936   | 2.9192023868    |
| 5.0568647537   | 5.3026869426    |
| 52.9469836786  | 56.1231171131   |
| 8.8392504105   | 7.5144124213    |
| 0.3353837757   | 0               |

gene\_expression\_table

|                |                |
|----------------|----------------|
| 258.0315453747 | 232.9610151576 |
| 158.0076625993 | 194.2878339998 |
| 10.7358344775  | 13.4593217587  |
| 19.6802727931  | 19.0599471557  |
| 35.0808534428  | 28.1865331755  |
| 4.4953236195   | 7.4961346697   |
| 0.819801067    | 0.8265893199   |
| 1.8658516661   | 1.6931714408   |
| 25.4835337662  | 29.31813668    |
| 74.3607297032  | 137.7118722172 |
| 1.337121475    | 2.0222899953   |
| 16.7487008765  | 11.8211703751  |
| 43.5990940811  | 46.5459993935  |
| 6.4529504862   | 7.3196811879   |
| 0              | 0              |
| 0              | 0.3824825721   |
| 4.0309378681   | 9.2370807025   |
| 0              | 0.1956827613   |
| 0.2559294604   | 0.25804865     |
| 15.1015328439  | 10.7334901594  |
| 41.8298398787  | 54.3604436285  |
| 0.7868322612   | 1.5866950406   |
| 0              | 0              |
| 0              | 0              |
| 1.0773532434   | 2.4441167759   |
| 0              | 0              |
| 0.9341771343   | 0.2511766568   |
| 7.6153400928   | 4.2908694125   |
| 0              | 0              |
| 0              | 0              |
| 0              | 0              |
| 0.8464324409   | 1.0668015142   |
| 0              | 0              |
| 3.0677444657   | 4.1241953503   |
| 0.7943222834   | 0.8008995627   |
| 0              | 0              |
| 0.6599524401   | 1.9962512635   |
| 0.8295362309   | 0.8364050945   |
| 5.2083058634   | 8.2917355931   |
| 83.5099975808  | 64.7263161549  |
| 1.2753671661   | 3.2148191826   |
| 605.5555012428 | 720.5115374123 |
| 49.9795579106  | 35.7335067419  |
| 10.8158642542  | 18.1757059484  |
| 50.8375708832  | 48.9179526792  |
| 134.1943772752 | 206.5190062776 |
| 21.2616140004  | 28.9408517278  |
| 8.1811142265   | 6.3741166543   |
| 294.8573742462 | 265.331277441  |

gene\_expression\_table

|                 |                 |
|-----------------|-----------------|
| 46.3687778282   | 88.9442147777   |
| 42.7043963891   | 54.0728427625   |
| 0               | 0               |
| 3.36843921      | 2.405734543     |
| 97.6181306654   | 110.3847975899  |
| 10.3480321195   | 2.0867435226    |
| 25.6772377958   | 19.4173910424   |
| 0.5369434926    | 0               |
| 213.454158741   | 247.6593481897  |
| 2149.2211019849 | 1932.4789443406 |
| 66.1798284058   | 77.8491252096   |
| 278.6856278462  | 327.8254546579  |
| 0               | 0               |
| 2.7872610114    | 5.1710266171    |
| 165.7778280873  | 147.485761043   |
| 9.0893441808    | 16.0380627356   |
| 8.2929044237    | 13.1396142549   |
| 140.3636759507  | 113.9559505318  |
| 1201.8322407334 | 1389.5644382229 |
| 0.1151456089    | 0.0193498428    |
| 2.7383454158    | 2.02474794      |
| 30.5788523856   | 49.2127055288   |
| 162.1871851071  | 163.5301543638  |
| 0.781630294     | 0.1576204958    |
| 0               | 0               |
| 1.210708443     | 0.7324401312    |
| 1.3964698208    | 0.9386887347    |
| 0.7778499151    | 0               |
| 1.2883519963    | 1.2990200224    |
| 2.378933486     | 2.9036070683    |
| 0               | 0               |
| 25.8251313396   | 30.9726730043   |
| 2.8031378147    | 2.8263488218    |
| 0               | 0               |
| 11.4923055315   | 5.7937330139    |
| 54.7926315304   | 46.7811704061   |
| 80.3783394884   | 101.389650905   |
| 10.0374266741   | 13.4940536545   |
| 56.7790392065   | 56.8282405038   |
| 58.7403804743   | 93.2273268076   |
| 1.1959588869    | 1.2058618642    |
| 6.8875097368    | 17.0456911487   |
| 60.7959600436   | 37.782003389    |
| 2.2596131988    | 0.9113294492    |
| 124.7489765449  | 92.8851276786   |
| 0.1841915951    | 0               |
| 0.5158995261    | 1.3524455439    |
| 1.8336449272    | 2.6411831119    |
| 2.8885557125    | 3.0391033159    |

gene\_expression\_table

|                |                |
|----------------|----------------|
| 0              | 0              |
| 0              | 0.7613535056   |
| 12.7640385841  | 17.1596393273  |
| 0              | 0.1403980865   |
| 0              | 0              |
| 16.2427818913  | 14.1936409945  |
| 13.3638883357  | 16.7879592281  |
| 2.5049896661   | 1.4857246455   |
| 7.4879742579   | 8.7742980891   |
| 95.6050116103  | 90.1196645399  |
| 0              | 0              |
| 0              | 0              |
| 0              | 0.2922533468   |
| 0              | 0              |
| 0              | 0              |
| 17.1923259122  | 18.8064975123  |
| 16.5208434821  | 14.8067929894  |
| 10.320041679   | 14.8987775067  |
| 0.4735684382   | 0.4774897582   |
| 350.6769109434 | 465.2376896332 |
| 26.1068937939  | 26.6327515882  |
| 1.5005590491   | 1.5129842272   |
| 1.7750877593   | 1.8395024172   |
| 0              | 0              |
| 13.3262865292  | 24.7882713337  |
| 17.579522079   | 9.2170452173   |
| 15.8331408862  | 14.934293792   |
| 5.2933432492   | 8.060222063    |
| 40.6857146366  | 54.2824398907  |
| 2.8897623503   | 1.2487245601   |
| 0.4679205243   | 1.2974364631   |
| 7.5685655943   | 7.4034379955   |
| 59.3966712846  | 40.5696273139  |
| 0.2150493423   | 0.6071240828   |
| 8.0423397574   | 11.4876554718  |
| 4.3962675525   | 4.8548293291   |
| 21.7105771919  | 18.60679641    |
| 26.7264691639  | 19.2484100793  |
| 65.0291314339  | 62.9794018478  |
| 0.3896619566   | 0              |
| 72.1027517695  | 88.6937425133  |
| 30.6972079776  | 45.4598571403  |
| 3.5531619059   | 5.6297738939   |
| 152.605405655  | 232.9605939425 |
| 37.6289344577  | 32.8817803669  |
| 2.9750146769   | 0.9998829624   |
| 50.5186922385  | 47.9407110599  |
| 679.8695287146 | 593.385156065  |
| 13.4757135077  | 10.6335370549  |

gene\_expression\_table

|                 |                 |
|-----------------|-----------------|
| 0               | 0               |
| 3.6922774004    | 2.7921381066    |
| 23.818988815    | 24.6166242296   |
| 0               | 0.1735262436    |
| 323.9184412053  | 246.1612550698  |
| 0.0661668992    | 0               |
| 15.5673600583   | 15.3134278025   |
| 3.2416791912    | 2.5579733333    |
| 0               | 0               |
| 0               | 1.1468432398    |
| 9.8886132611    | 11.4660687882   |
| 1640.2690629587 | 1855.9510208485 |
| 0.2421009617    | 0               |
| 7.3472820161    | 4.2332115431    |
| 0.1204024482    | 0               |
| 23.0820710591   | 20.5878299342   |
| 2.0134643303    | 2.7551853204    |
| 3.2029029305    | 2.2605968974    |
| 15.9234249494   | 19.0656411244   |
| 647.9835304641  | 921.9035975007  |
| 13.1116312469   | 29.7454507937   |
| 0               | 3.1958824552    |
| 0               | 0               |
| 351.9701520918  | 416.9893976912  |
| 81.1270588398   | 102.6763438258  |
| 16.2650876729   | 14.2263052501   |
| 72.4711867206   | 9.6146414043    |
| 0               | 0.8927142057    |
| 16.7162126534   | 20.8850837765   |
| 72.0808912861   | 80.0938441276   |
| 5.2166364042    | 5.8442578478    |
| 3.2697968115    | 3.296871926     |
| 0               | 0               |
| 793.3315990907  | 1011.4271387421 |
| 74.0786527104   | 79.4596287971   |
| 0.8450968841    | 0               |
| 2.114708033     | 0               |
| 3.6130448677    | 2.2551670772    |
| 0.8165300601    | 0.9997107766    |
| 13.1623251967   | 20.3067094761   |
| 1.8775609856    | 0.841381279     |
| 0.8172088668    | 1.6479513107    |
| 12.1207504884   | 15.7128618072   |
| 29.5626379373   | 44.7111410999   |
| 392.9790921945  | 521.8914745585  |
| 20.0075698627   | 14.5247327024   |
| 11.7020549394   | 20.0582188038   |
| 2.9333834682    | 3.3125937118    |
| 10.6702095465   | 11.3733378035   |

gene\_expression\_table

|                |                |
|----------------|----------------|
| 2.3288618175   | 2.3481456457   |
| 0.4897518402   | 0              |
| 5.872152036    | 5.9207756042   |
| 1.7860547217   | 9.0042195428   |
| 188.6367822872 | 244.1357267837 |
| 0.8056030602   | 0              |
| 1.962833547    | 3.9581730545   |
| 10.889449293   | 7.6247346659   |
| 6.9222702726   | 7.7341393883   |
| 0              | 0              |
| 114.2408942868 | 149.0653362079 |
| 3.2998882802   | 0.6654425126   |
| 4.8008952352   | 6.915212007    |
| 0.2012810722   | 0.3044216298   |
| 17.4606370623  | 9.9029348596   |
| 10.5458803701  | 7.7704183951   |
| 8.7156869761   | 10.670968066   |
| 13.4997539773  | 15.5020281149  |
| 0              | 0              |
| 6.3442940078   | 3.3983143886   |
| 0.6262848156   | 1.0524511385   |
| 0              | 0              |
| 0              | 0              |
| 3.6508262557   | 3.3865719187   |
| 1.3406084268   | 0.9461964087   |
| 1.5705166926   | 0.7917605728   |
| 2.2115301667   | 2.5271547721   |
| 0              | 0              |
| 0              | 0              |
| 1.98138653     | 2.3973517628   |
| 0              | 0.1231245065   |
| 0              | 0              |
| 0.0791124388   | 0              |
| 3.8233490596   | 2.7306305174   |
| 0.7751272309   | 0.4809511188   |
| 724.2866747986 | 881.9808501309 |
| 0              | 0              |
| 48.1855131957  | 43.3035822208  |
| 29.7671051608  | 30.013587687   |
| 12.2619038433  | 17.1714401323  |
| 14.0156890733  | 17.9002092045  |
| 7.8652123187   | 8.9294370019   |
| 0.1412044088   | 0.284747266    |
| 2.7882058457   | 2.8112932106   |
| 4.1067368554   | 3.8646926638   |
| 2.2270509353   | 2.4627973837   |
| 170.2037481345 | 206.67383781   |
| 11.6308626384  | 10.4653862772  |
| 9.94755541     | 0              |

gene\_expression\_table

|                |                 |
|----------------|-----------------|
| 11.9356319639  | 17.5284575103   |
| 0              | 0.0528679193    |
| 0.7788292589   | 0.966496308     |
| 9.8067383879   | 14.2825825585   |
| 0.1333915246   | 0.2017440828    |
| 1.2786242663   | 2.1096192162    |
| 0.6586488825   | 0.2656410945    |
| 17.8720552478  | 21.2964137535   |
| 1976.113074643 | 1959.3784059913 |
| 51.7153748919  | 48.9248565617   |
| 2.90132917     | 3.9148109502    |
| 2.8472184113   | 6.8899066125    |
| 28.8447044982  | 18.9144760591   |
| 0.512976218    | 0.5172238489    |
| 166.9934888272 | 193.9987297827  |
| 5.8182073202   | 6.6663456891    |
| 46.3725189117  | 56.0799691597   |
| 0.4231540125   | 0               |
| 5.9025863586   | 2.6450941929    |
| 1.3514541283   | 1.3626446632    |
| 1.4962695092   | 0               |
| 10.5384818902  | 11.5417568239   |
| 0              | 1.7840566933    |
| 0              | 0               |
| 0              | 0.525225774     |
| 29.9956449903  | 44.0261049321   |
| 0.5963690581   | 0.6013072122    |
| 216.6284755709 | 248.9371102139  |
| 5.0627786954   | 5.104700356     |
| 7.2392855046   | 0               |
| 12.1117961006  | 25.9506831866   |
| 0              | 1.1599041918    |
| 0.9610490855   | 2.9070207711    |
| 898.8854597832 | 1102.0473525147 |
| 0              | 0               |
| 11.4184615883  | 11.5130106297   |
| 58.4330257496  | 91.7228584648   |
| 0              | 1.5702787341    |
| 191.8851604903 | 328.686010887   |
| 0              | 0               |
| 0.458119436    | 0               |
| 11.2074940855  | 15.4345509602   |
| 52.1623577219  | 39.8991098276   |
| 9.8725052663   | 0               |
| 109.3916099677 | 209.5650838221  |
| 0              | 7.5406013702    |
| 0              | 0               |
| 0.9614502916   | 0.484705726     |
| 4.3264540662   | 6.1071901652    |



gene\_expression\_table

|                |                |
|----------------|----------------|
| 2.2270416728   | 4.1167177204   |
| 0.5071474563   | 0              |
| 3.5318160879   | 6.7264482115   |
| 449.8631964468 | 596.6663943697 |
| 10.310441417   | 16.3362817291  |
| 2.1387983177   | 5.0318528182   |
| 157.8134369676 | 123.1898245074 |
| 0              | 0              |
| 19.0873569056  | 19.2454072072  |
| 2.0106700462   | 1.2901121737   |
| 0              | 1.9100637683   |
| 2.6168470681   | 3.2248523017   |
| 3.1722562376   | 3.4048800469   |
| 0              | 0              |
| 202.0226340808 | 243.7070627533 |
| 68.7997358698  | 76.7829489727  |
| 146.8674327739 | 148.6402539449 |
| 0              | 0              |
| 0.3486840316   | 1.0547137889   |
| 35.013189322   | 28.0983947441  |
| 1.4152554308   | 1.1675243976   |
| 0              | 0.1631945712   |
| 1.0285182335   | 1.1666640836   |
| 5.1748298585   | 8.4787289337   |
| 1.3801267074   | 1.5552669748   |
| 0.761769599    | 0.384038665    |
| 2.5436687422   | 2.4621420004   |
| 3.33639998     | 3.7597944275   |
| 0              | 0              |
| 0              | 0              |
| 0.1968964186   | 0.198526793    |
| 0.4074189833   | 0.2053962808   |
| 0              | 0              |
| 0.9869604148   | 0.6160345956   |
| 0              | 2.0648073158   |
| 0              | 0.2003838487   |
| 2.3763218594   | 2.0273834935   |
| 0.6183569327   | 1.4963451705   |
| 1.8309792613   | 2.1098747883   |
| 0.6934176746   | 0.5992795086   |
| 0.8152225417   | 1.6439457655   |
| 0              | 0              |
| 0              | 0              |
| 0              | 0              |
| 0              | 0              |
| 0              | 0              |
| 0.4391519675   | 0.346529979    |
| 7.3859362719   | 6.826503317    |
| 0.4089672246   | 0.8247072458   |

gene\_expression\_table

|                 |                |
|-----------------|----------------|
| 12.0559532781   | 14.960961211   |
| 0               | 0              |
| 22.5274668587   | 20.190224471   |
| 0.8135254573    | 0              |
| 223.4773289131  | 275.4006481037 |
| 2.9303975322    | 0.5909324593   |
| 12.5480948746   | 20.4378424272  |
| 0               | 0.3365793414   |
| 0.074840218     | 0              |
| 5.1143708687    | 7.6395847874   |
| 164.1546839425  | 167.1366305431 |
| 5.6939698234    | 7.77151336     |
| 772.7652175094  | 530.010355374  |
| 0               | 0              |
| 126.1105029003  | 145.5215403824 |
| 145.0052198135  | 91.6514697994  |
| 6.0600991086    | 3.3328794258   |
| 25.3997858411   | 21.795834353   |
| 22.6823751744   | 24.7245335601  |
| 2.1356250264    | 2.1533087834   |
| 8.8392171503    | 8.9124091037   |
| 445.5765100575  | 607.3876161431 |
| 0               | 0              |
| 0               | 0              |
| 0.2147293368    | 0              |
| 2.4586058236    | 0.4131606633   |
| 318.7932846724  | 374.003829107  |
| 4.4115317382    | 5.65023944     |
| 43.4383138126   | 34.412713461   |
| 17.8866317159   | 24.2536152883  |
| 11.2191057508   | 6.7872024317   |
| 5.0907560312    | 7.3327276493   |
| 3457.7812980219 | 3701.797629182 |
| 22.5681188337   | 22.5684747974  |
| 14.1566463523   | 25.785052893   |
| 24.0779720703   | 24.2773464921  |
| 30.1898992503   | 21.742773333   |
| 173.5973388332  | 225.0447278646 |
| 0               | 0              |
| 0.6478727435    | 0.6532373669   |
| 157.8755712579  | 196.0666672701 |
| 0               | 0.0814164771   |
| 50.8342269306   | 59.3480718207  |
| 2.0374633603    | 0.9130374678   |
| 2.245644387     | 2.6416123353   |
| 3.3185274186    | 1.5443104801   |
| 0.2407142887    | 0.2427074911   |
| 0               | 0              |
| 248.4916816972  | 248.2361976469 |

gene\_expression\_table

|                 |                 |
|-----------------|-----------------|
| 9.8050780994    | 12.3838511627   |
| 5.5479700647    | 3.8578684742    |
| 0               | 0               |
| 1.6484167785    | 1.6620662728    |
| 44.1011111844   | 41.1724856731   |
| 9.7725234591    | 1.6422405884    |
| 40.5445480485   | 34.7643255797   |
| 0.1580222238    | 0.1062204704    |
| 30.4721060204   | 43.8920374452   |
| 2.3384148612    | 1.8862222337    |
| 15.5838337148   | 14.5402710574   |
| 0.4541266768    | 0.9157740237    |
| 2.6658008159    | 4.3983402912    |
| 5.2565231935    | 4.7111547818    |
| 100.9835265962  | 82.2543516653   |
| 2.4849568715    | 0               |
| 3.6896155535    | 5.5802503812    |
| 55.7251378016   | 58.0594477505   |
| 0.8332337296    | 0               |
| 0               | 0               |
| 3.213644078     | 1.6201271136    |
| 0               | 0               |
| 34.4381083765   | 42.282946905    |
| 6.5127397839    | 13.1333353062   |
| 8.1187150089    | 7.9378821244    |
| 7.3932621421    | 13.7621188777   |
| 1.4309685534    | 0.865690498     |
| 25.6897294203   | 28.5455569036   |
| 60.5021306681   | 59.296729743    |
| 9.4233143556    | 14.2520142715   |
| 17.0932813386   | 25.6763644371   |
| 3.5477224701    | 3.4215728711    |
| 10.2591181235   | 11.4934081962   |
| 0.263519844     | 1.3285094238    |
| 96.3550869535   | 138.6417433414  |
| 0               | 0               |
| 0               | 0.52366232      |
| 2038.3836059893 | 1851.3010000733 |
| 50.0900229575   | 70.9797002012   |
| 10.4447076123   | 8.1377405202    |
| 0.5438667238    | 0               |
| 81.153751005    | 105.5121303842  |
| 0               | 0               |
| 4.3981705533    | 6.6518835229    |
| 1.2872344153    | 1.1940617324    |
| 7.7445133148    | 13.7324371278   |
| 1.697669194     | 5.9910428069    |
| 35.2916384724   | 62.2717657737   |
| 28.7730816293   | 25.9575087213   |

gene\_expression\_table

|                |                |
|----------------|----------------|
| 1.6896977465   | 4.0462615231   |
| 76.8617667285  | 97.6276155603  |
| 0.6625598471   | 0.6680460851   |
| 0.4905132962   | 0.9891498517   |
| 1.407975507    | 1.7472419194   |
| 6.9810792013   | 7.0388850923   |
| 0.2221313685   | 1.1198534876   |
| 0.3967779665   | 0              |
| 0.2715357985   | 0.5475684286   |
| 0              | 0              |
| 1.1513371247   | 1.5478274901   |
| 2.3567929068   | 2.3763080147   |
| 0.9415301333   | 1.5189221559   |
| 25.2306970697  | 30.2448773664  |
| 14.6133123637  | 8.036899603    |
| 1.07062542     | 0.1799150984   |
| 6.0100679241   | 1.7313809961   |
| 8.7325253862   | 6.3590467003   |
| 54.10250067    | 43.066175667   |
| 143.9525154309 | 148.3597211023 |
| 0.2935028328   | 0.5918662874   |
| 55.3163162466  | 35.6668625889  |
| 3.1988101807   | 3.4403173332   |
| 43.900798583   | 30.873428579   |
| 0              | 0              |
| 0              | 0              |
| 4.0663130056   | 3.0749876742   |
| 0.3028426821   | 0              |
| 2.2059942802   | 1.1121303601   |
| 3.6652887868   | 3.6956387195   |
| 0              | 1.4910287607   |
| 0              | 0              |
| 1.8569454529   | 4.4935719383   |
| 0.9845915217   | 1.4891164499   |
| 14.1387038348  | 10.5768671608  |
| 6.775522073    | 4.8797327684   |
| 0.3729527835   | 0.376040969    |
| 0              | 0.7656713901   |
| 0              | 0              |
| 2.4254785457   | 3.5571816666   |
| 0              | 0              |
| 15.7045407507  | 14.536663695   |
| 0              | 1.3496560322   |
| 3.3044335809   | 8.9958478511   |
| 0              | 0              |
| 1.0688780213   | 1.8860252644   |
| 42.0164957088  | 54.46852415    |
| 1.5787345959   | 0              |
| 0              | 0              |

gene\_expression\_table

|                |                 |
|----------------|-----------------|
| 16.0648578998  | 14.578092723    |
| 1.4853838995   | 1.7972201063    |
| 5.3268008823   | 4.8970050307    |
| 6.3138007173   | 5.6385291499    |
| 7.0058548829   | 10.5957988885   |
| 5.1026796859   | 5.8799219902    |
| 0.9576036376   | 0.7509700693    |
| 1.3203589064   | 0.4437639872    |
| 90.6243972198  | 68.3423093896   |
| 15.067438852   | 18.9902534508   |
| 3.7300110594   | 2.5789007426    |
| 5.874603078    | 9.6925859047    |
| 2.213308374    | 2.2316353774    |
| 0.8620519646   | 2.1729751759    |
| 134.0719421519 | 171.4810059828  |
| 1.529276377    | 1.3796299404    |
| 3.2053695595   | 4.8478667891    |
| 3.4248398623   | 5.4264552413    |
| 4.8680152791   | 0               |
| 97.1381837183  | 61.1398782649   |
| 3.3276522357   | 5.388664847     |
| 0              | 0               |
| 24.330765506   | 23.0891606117   |
| 1.111657563    | 0.3736208315    |
| 941.2559801944 | 1039.7767094396 |
| 3.9745586824   | 2.0037347415    |
| 26.7070632471  | 18.3340987276   |
| 0              | 0               |
| 3.8772020682   | 1.3031022402    |
| 0              | 0               |
| 1.7630841292   | 1.7776831111    |
| 7.4604274785   | 6.7942474634    |
| 0              | 0               |
| 16.9261773112  | 11.5313055775   |
| 0              | 0               |
| 0.7458089471   | 2.0052920483    |
| 0              | 0.1251470311    |
| 2.0945459766   | 2.2438826829    |
| 0.2390790476   | 0.0964234838    |
| 630.8754675104 | 612.9463059187  |
| 0              | 1.2481875897    |
| 0              | 0               |
| 1.6965436674   | 0               |
| 4.169088041    | 5.0172114771    |
| 0              | 0               |
| 8.3267756065   | 9.6873742573    |
| 1.375124211    | 3.2351917331    |
| 87.3455728213  | 87.8682137743   |
| 54.7151190761  | 60.594558678    |

gene\_expression\_table

|                 |                 |
|-----------------|-----------------|
| 2.7574162936    | 3.6264113606    |
| 1.9964095254    | 0.6709801757    |
| 61.4318274716   | 66.2122644876   |
| 12.2600601518   | 13.1702792977   |
| 50.3266703371   | 53.7240227244   |
| 76.1255528028   | 42.9070249809   |
| 1.8591039946    | 0.7497992225    |
| 48.0375631694   | 96.8706635504   |
| 0.4710115405    | 0.4749116885    |
| 0               | 0.5546307901    |
| 2.4116512386    | 3.4737437051    |
| 0.5998171759    | 0               |
| 0               | 0               |
| 2.9648017875    | 4.9822523858    |
| 10.2126555111   | 14.7103143382   |
| 0.7667513032    | 0               |
| 0.544990699     | 0.3052796786    |
| 2.3192152279    | 2.143550914     |
| 6.491144387     | 10.0690668284   |
| 159.5674019433  | 149.4646302634  |
| 0               | 0               |
| 0               | 0               |
| 0               | 0               |
| 0               | 0.0912743185    |
| 21.9203659416   | 25.3645322732   |
| 7.6882500952    | 5.5986028367    |
| 10.2728300136   | 10.4692679977   |
| 1.9729223545    | 1.9892588738    |
| 0.2185728142    | 0               |
| 76.6353221296   | 86.2287185481   |
| 1.2641463992    | 1.0925262806    |
| 0               | 0.4798975349    |
| 606.2702846674  | 462.6680168765  |
| 1.4951038876    | 1.0436426966    |
| 93.4246034925   | 112.0387603376  |
| 11.068137392    | 11.1597856207   |
| 15.3748056379   | 17.2737849025   |
| 0.6027685376    | 1.2155193635    |
| 0               | 0               |
| 0.404272228     | 0.40761975      |
| 2531.2813986492 | 2529.5421348206 |
| 9.8403576824    | 4.1776166087    |
| 32.1196048893   | 30.7247686678   |
| 14.4439787955   | 8.3220458439    |
| 0.4915602383    | 0               |
| 1.1556894964    | 1.7478885427    |
| 1.6240448689    | 0.4093731387    |
| 1.4217109663    | 0.5733933014    |
| 0               | 0               |

gene\_expression\_table

|                  |                  |
|------------------|------------------|
| 0                | 0                |
| 15.111929321     | 20.678869351     |
| 0.4863902911     | 0                |
| 1.0954423652     | 0.1840855048     |
| 181.9359379654   | 154.9772288291   |
| 0                | 0                |
| 8.6733914735     | 9.2449366341     |
| 0                | 0                |
| 10.7326334854    | 4.1621167765     |
| 13061.9013584473 | 13816.7366482474 |
| 13.2364903141    | 13.8063034125    |
| 25.7904094466    | 24.4591735671    |
| 0                | 0                |
| 62.3004962133    | 85.3214435363    |
| 8.3808516322     | 14.0837469188    |
| 0                | 15.6057002148    |
| 1.2737347671     | 1.1008129347     |
| 4.469808192      | 3.6483779656     |
| 0.5394968326     | 1.0879281276     |
| 241.3970171537   | 241.2031172013   |
| 1.0534043949     | 0                |
| 1.9700421102     | 1.589083824      |
| 0.1933068683     | 0                |
| 0                | 0                |
| 97.2365498926    | 152.2775404361   |
| 24.8577892061    | 33.5266615885    |
| 2.2373688783     | 0.4511790223     |
| 4483.8190744546  | 4182.7608757484  |
| 2536.5969176137  | 3141.9476432507  |
| 41.096971887     | 42.2578098538    |
| 0                | 0.3614769913     |
| 11.6839049274    | 14.5525700396    |
| 0                | 1.6759008314     |
| 3.5920991285     | 4.2803599375     |
| 20.1731175211    | 10.7683191095    |
| 1.5846438794     | 0                |
| 28.2998251483    | 34.9773550399    |
| 180.3129095252   | 154.8960580282   |
| 436.8030286083   | 527.3697725343   |
| 9.9872421011     | 32.7273053941    |
| 0.2442163671     | 0.246238568      |
| 1.4325350993     | 1.01107791       |
| 2.1910931677     | 1.6569271658     |
| 14.8460042099    | 8.6662252708     |
| 33.3310124898    | 41.719041277     |
| 14.477812532     | 16.4224058838    |
| 6.7925885655     | 1.8678637323     |
| 2.5417822141     | 1.5376974607     |
| 2.309640504      | 1.0188347631     |

gene\_expression\_table

|                |                 |
|----------------|-----------------|
| 63.3398768048  | 67.9192337983   |
| 102.2848121549 | 118.6569802007  |
| 6.6316232029   | 6.4519201907    |
| 9.2739918871   | 8.8453361541    |
| 0.0470553459   | 0               |
| 0              | 0               |
| 8.715781216    | 18.4546972568   |
| 6.65761853     | 5.3357724999    |
| 0.56983819     | 0               |
| 8.6083925087   | 9.0742037472    |
| 7.5207157117   | 3.2498528531    |
| 0              | 0               |
| 0              | 0.1131266535    |
| 0              | 0.3211706719    |
| 0.58358454     | 1.1768336671    |
| 1.5221043428   | 1.8224656596    |
| 947.0926474039 | 1103.9145380399 |
| 0              | 3.6207820041    |
| 22.5127862025  | 28.3740003906   |
| 0              | 0               |
| 0              | 0.5257013927    |
| 2.1354270084   | 2.691386407     |
| 0.3690561548   | 0               |
| 5.6261966585   | 4.125660819     |
| 17.2932100119  | 19.8414253784   |
| 0              | 0               |
| 0              | 0               |
| 1.0879903763   | 1.0969993348    |
| 37.6369763408  | 45.5929514741   |
| 57.4385980776  | 27.7988211329   |
| 907.7130634867 | 1271.7429832258 |
| 19.9738425961  | 23.8687209761   |
| 0              | 0               |
| 16.8973773748  | 22.5331950844   |
| 24.4399507802  | 20.1245633899   |
| 1.2447616628   | 1.255068745     |
| 17.1182804047  | 18.1527859993   |
| 20.2240977917  | 32.9402134769   |
| 6.7563833031   | 5.1092464724    |
| 0              | 0               |
| 2.8186904722   | 0.9473434204    |
| 9.025009841    | 11.6100133915   |
| 0.1853597666   | 0               |
| 0.689868808    | 2.4345341097    |
| 3.6399324006   | 0.7340144746    |
| 0              | 1.2221084111    |
| 4.9556002335   | 3.0748519491    |
| 1.2977899406   | 2.9442062616    |
| 0.8572388999   | 1.2965057277    |



gene\_expression\_table

|                 |                 |
|-----------------|-----------------|
| 23.109813933    | 28.0565128043   |
| 4.9051329624    | 2.2255871664    |
| 10.2103654034   | 11.7079379615   |
| 0               | 0               |
| 0               | 0               |
| 0               | 0               |
| 0.340648744     | 0               |
| 3.018019483     | 3.5625480457    |
| 1.6071833522    | 1.6204914186    |
| 0.2371450666    | 0.2391087145    |
| 2.108144968     | 2.12560118      |
| 0               | 0               |
| 2.7921495597    | 3.9882985718    |
| 1.2874517307    | 0.8113201889    |
| 0               | 0.4289751334    |
| 3.434903552     | 2.8610248001    |
| 0               | 0.2303790023    |
| 0               | 0               |
| 0.1912457673    | 0.1928293523    |
| 0               | 0               |
| 1.5421575121    | 1.2957726173    |
| 2.6282615968    | 1.3250122824    |
| 0               | 0               |
| 0               | 0               |
| 0.3736304394    | 0.9418105905    |
| 102.3982214118  | 95.2218066186   |
| 0               | 0               |
| 17.9500095751   | 27.5099361812   |
| 115.4757368193  | 97.6525765437   |
| 24.5911194319   | 28.8155120208   |
| 31.0651604092   | 38.4411166052   |
| 5.4317406333    | 5.4767174339    |
| 1.4025931964    | 5.6568287259    |
| 1.3129321385    | 0               |
| 31.8350469716   | 36.9832304147   |
| 176.6289523866  | 165.3706829936  |
| 1566.2808267581 | 1535.0410238102 |
| 2.5364075204    | 1.7049399354    |
| 3.9125068438    | 4.733884599     |
| 0               | 0               |
| 0               | 0               |
| 32.6424099005   | 32.9127010023   |
| 0.270451645     | 0.2726910837    |
| 0               | 0.8711465306    |
| 87.1459848997   | 66.6581683497   |
| 1.4581854049    | 0.7351298569    |
| 80.2528116915   | 88.4908779553   |
| 0.6538320544    | 0.6592460232    |
| 1.3711290416    | 0.5529929968    |

gene\_expression\_table

|                |                |
|----------------|----------------|
| 0              | 0              |
| 0              | 0              |
| 0              | 0              |
| 0              | 0              |
| 0.3407495456   | 1.0307132296   |
| 22.5946367064  | 45.5634571369  |
| 0.7159024024   | 0.5413727522   |
| 3.1775083175   | 3.4824122276   |
| 0.8028172943   | 0.1618929831   |
| 0.2344318026   | 0.2363729837   |
| 14.7297267044  | 11.0917716423  |
| 4.7698161472   | 1.9237247883   |
| 10.3554767469  | 15.0092593343  |
| 22.813506316   | 20.214239529   |
| 2.8952288324   | 3.8922698491   |
| 7.8558789115   | 13.681603711   |
| 0              | 0.7901620362   |
| 0.6112149757   | 0.6162760594   |
| 21.8838657214  | 37.5106226372  |
| 94.8580594607  | 100.2649494489 |
| 10.7785448973  | 13.1052824401  |
| 0              | 0              |
| 0.6861691183   | 0.9224677996   |
| 46.0085793369  | 23.194773607   |
| 0              | 0              |
| 0              | 0              |
| 9.1828470037   | 5.7868027112   |
| 583.8106149647 | 679.205516012  |
| 124.1269439989 | 123.4634799807 |
| 9.9212723802   | 17.3392685213  |
| 7.7653378843   | 4.9824967336   |
| 16.9413684317  | 29.282827137   |
| 0              | 0              |
| 22.9205615896  | 32.3544931205  |
| 11.0551207417  | 13.2366601606  |
| 32.4904236278  | 18.9660009739  |
| 10.4621049145  | 11.7208166362  |
| 22.5201241381  | 21.1928257415  |
| 1.9504217721   | 0.9832859891   |
| 19.5616480339  | 21.3672611095  |
| 49.4521662566  | 56.9847409071  |
| 1.0329467297   | 4.1659996268   |
| 44.8531889718  | 44.1009975007  |
| 8.6757885194   | 15.237802261   |
| 0.384214412    | 0              |
| 0              | 0              |
| 6.4329338364   | 4.43792692     |
| 11.8369075828  | 8.7328693977   |
| 2.5836414949   | 2.5260945378   |

gene\_expression\_table

|                 |                 |
|-----------------|-----------------|
| 0               | 0.5524141669    |
| 0               | 0               |
| 0               | 0               |
| 0.3745053383    | 1.1328191388    |
| 4.3345375755    | 3.7744615241    |
| 0               | 0               |
| 0               | 0               |
| 4.1771252898    | 3.6852492391    |
| 14.5740106219   | 14.6946887642   |
| 3.5706326024    | 1.8000993736    |
| 7.1717443004    | 4.2536052754    |
| 3.176506581     | 1.8301766961    |
| 5.5920580199    | 4.698635256     |
| 0               | 0               |
| 0               | 0               |
| 33.8685004194   | 24.1541311216   |
| 12.5561518324   | 18.7719040936   |
| 2.9731126807    | 1.284741918     |
| 7.6078046376    | 7.9658308156    |
| 0.7266084138    | 3.6631249873    |
| 1.7928211338    | 2.2595829363    |
| 4.3871950253    | 4.9764629316    |
| 6.3503438286    | 3.7350407499    |
| 1.4682251871    | 8.1421044599    |
| 0.4450525679    | 1.3462132983    |
| 0               | 1.4713776403    |
| 1.5199696598    | 3.5759629848    |
| 0               | 0.5294409922    |
| 4.4108619034    | 6.6710781817    |
| 5.4164111677    | 5.0971769657    |
| 3.3844168011    | 4.1707612357    |
| 2.0462792191    | 1.1789846629    |
| 1.0354545583    | 1.044028501     |
| 0               | 0               |
| 0               | 0               |
| 0               | 0               |
| 0               | 0               |
| 3.3897302049    | 3.2279207221    |
| 2.2409254226    | 1.6648808144    |
| 0.3399447996    | 0.342759667     |
| 2.2509852367    | 3.0261656245    |
| 18.0625256196   | 13.8758780518   |
| 6.1020732032    | 4.1017337352    |
| 0               | 0               |
| 1153.6682666754 | 1410.5018310406 |
| 0               | 0               |
| 10.7704298863   | 16.575198771    |
| 0.7771150049    | 1.5670996032    |
| 5.5450835358    | 0.9318331428    |

gene\_expression\_table

|                |                |
|----------------|----------------|
| 9.6930051705   | 8.8847880011   |
| 7.1554913526   | 1.6975862212   |
| 9.6428920585   | 12.6818331317  |
| 4.0858993516   | 5.9736115359   |
| 104.1482140319 | 151.47546634   |
| 265.2573610085 | 246.0002765571 |
| 172.8175243454 | 156.4680558139 |
| 8.6835032496   | 9.7282287053   |
| 8.0947008434   | 10.7851404778  |
| 398.5901444794 | 448.181682574  |
| 147.0931222595 | 149.5574189759 |
| 0              | 0              |
| 0              | 0              |
| 68.3531190911  | 80.2341853582  |
| 52.3422279209  | 53.7395793699  |
| 21.4766093807  | 11.363222862   |
| 12.7121119409  | 10.4437853102  |
| 74.1437420372  | 79.9133813842  |
| 0              | 0              |
| 17.3877861169  | 18.4544877371  |
| 0.1239029261   | 0.1249288876   |
| 14.8287310793  | 15.836805674   |
| 0.7597842533   | 0              |
| 0              | 1.2041735076   |
| 0              | 0.1348913837   |
| 1.48953409     | 1.8022415729   |
| 141.8232956892 | 151.6350861012 |
| 33.339781312   | 36.3414561128  |
| 0              | 0              |
| 4.4200798091   | 8.1705794275   |
| 0.9209776174   | 0.9286036491   |
| 0.501843029    | 0.1011996946   |
| 0.4100156718   | 0              |
| 16.9790096906  | 22.5725124058  |
| 2.5952038312   | 0              |
| 10.3708497751  | 10.2269060928  |
| 2.2864432079   | 3.2659490422   |
| 1.6591533688   | 2.57367964     |
| 0              | 0              |
| 534.607243848  | 663.7170827453 |
| 2.5615898552   | 1.6312425832   |
| 378.1462559624 | 399.1034038562 |
| 247.7149319329 | 194.0413941692 |
| 0.4281986785   | 0.0863488641   |
| 0              | 0              |
| 54.3723649229  | 46.0118149335  |
| 7.9611008821   | 5.1283749823   |
| 2.0459893648   | 3.1942155958   |
| 0              | 0              |

gene\_expression\_table

|                |                |
|----------------|----------------|
| 259.1199402026 | 305.6806913366 |
| 1.430115517    | 2.329315795    |
| 45.223872867   | 64.7062201905  |
| 1.0486558731   | 1.0573391276   |
| 29.2938451495  | 31.9640589569  |
| 137.2638449353 | 137.150774442  |
| 4.5023171809   | 0.8253814573   |
| 0.4362926532   | 0.2566114344   |
| 1.5664451764   | 1.5149499601   |
| 0.6750140769   | 0.2268678135   |
| 0              | 1.1359593934   |
| 29.7802289282  | 48.2863729021  |
| 0              | 0              |
| 354.7844674218 | 396.5606243321 |
| 52.9643836016  | 63.6035112011  |
| 21.663380285   | 18.2023008358  |
| 35.3410439159  | 35.8316455879  |
| 22.1642120959  | 30.5513406018  |
| 9.065308892    | 8.943098731    |
| 2.3639898674   | 2.0856189976   |
| 0              | 0              |
| 43.6354756667  | 52.2696946954  |
| 27.7025492593  | 46.8192459545  |
| 4.9214380619   | 3.0140705806   |
| 29.9467247291  | 34.099180938   |
| 149.9849273073 | 246.7385568155 |
| 4.3712350282   | 3.2647632994   |
| 5.1876128764   | 5.7536250308   |
| 0.5045166639   | 1.1191273423   |
| 0.8205280136   | 0              |
| 36.1916874129  | 42.8773572022  |
| 6.4113764962   | 6.3490281646   |
| 22.6147391123  | 26.375444788   |
| 3.310350349    | 4.4106130956   |
| 8.5394834732   | 11.8902672447  |
| 0.5278404218   | 0.2931017838   |
| 0              | 0              |
| 15.3138329972  | 7.8998608621   |
| 0              | 0              |
| 0              | 0              |
| 20.7165776496  | 23.2528111551  |
| 0.5053538522   | 0.7193482829   |
| 2.3750701556   | 1.9157892847   |
| 0.1605007965   | 0              |
| 0              | 0.0725098577   |
| 0.13843377     | 0.2093700784   |
| 0              | 0              |
| 5.3000471539   | 5.9194340134   |
| 0.8620261515   | 1.216829661    |

gene\_expression\_table

|                |                |
|----------------|----------------|
| 0              | 0              |
| 0.005596       | 0.002821       |
| 0.0955295943   | 0.13484886     |
| 211.6028419803 | 184.8421119864 |
| 0.0445514026   | 0              |
| 0.3822325317   | 0.0770795114   |
| 26.0840332127  | 27.7858953095  |
| 1.9302369565   | 1.5231287153   |
| 23.7484995276  | 22.4618181804  |
| 9.7115057353   | 9.7919205574   |
| 0              | 0              |
| 4.3331289342   | 6.5535132417   |
| 1.9955446049   | 2.0120684446   |
| 1.0006682664   | 1.0089541659   |
| 0.1373828147   | 0              |
| 3.3358314434   | 5.0451800231   |
| 3.2252703228   | 4.8779651124   |
| 6.8400891848   | 8.1898640569   |
| 6.9343602052   | 4.8810534357   |
| 0              | 0              |
| 0.0789874719   | 0.1934151128   |
| 0.1881199125   | 0.213387316    |
| 42.2838071332  | 53.2924156663  |
| 3.9825083496   | 5.621678967    |
| 0.0373629227   | 0.0376723014   |
| 2.0352227187   | 6.1562253233   |
| 1.0336213338   | 1.3476466768   |
| 1.7180162337   | 1.8765955401   |
| 2.661202686    | 3.8906957065   |
| 5.7119494755   | 8.6388697618   |
| 532.4894368019 | 552.6897808364 |
| 186.8346555216 | 270.3493312419 |
| 7.524366272    | 19.7253440248  |
| 0.7350028814   | 1.1116334614   |
| 73.1615656223  | 57.1840078794  |
| 2.8209921956   | 1.4221755218   |
| 0              | 0              |
| 460.6546575413 | 512.2182010504 |
| 91.912017235   | 98.6707140157  |
| 44.7729410969  | 34.1929834053  |
| 5.8631823537   | 7.7031654828   |
| 1.2681275811   | 1.6273449076   |
| 7.5978899008   | 7.057590359    |
| 17.4619182322  | 22.0081366332  |
| 0              | 0              |
| 20.2697380196  | 22.5337408049  |
| 7.2850844428   | 7.5902545288   |
| 17.1190723321  | 19.4710520466  |
| 1.1408054431   | 3.4507551892   |

gene\_expression\_table

|                |                |
|----------------|----------------|
| 51.3658522176  | 28.2497346954  |
| 0              | 0.81147896     |
| 1.8370937119   | 2.5347338698   |
| 43.3416553484  | 30.4607578369  |
| 1.127255447    | 0.7577263564   |
| 0              | 0              |
| 0              | 0.0781777112   |
| 79.1817593303  | 83.0960832095  |
| 0              | 0              |
| 0.2640637072   | 0              |
| 15.6492396591  | 12.6230568731  |
| 5.1841037471   | 2.71403482     |
| 15.111929321   | 16.7607677898  |
| 12.9103571403  | 13.2059155594  |
| 2.2082633073   | 3.7446498101   |
| 8.0776235956   | 7.2157494459   |
| 1.2568179221   | 1.7168852597   |
| 18.533491323   | 27.6791745618  |
| 1.7160655497   | 2.1010484578   |
| 31.7717631114  | 34.4990637806  |
| 0              | 0              |
| 6.4221399612   | 8.0611097035   |
| 6.2485573737   | 3.8771062867   |
| 1.7996690103   | 0.8709940456   |
| 2.3200273716   | 0.6683537278   |
| 2.8390754789   | 2.8625840631   |
| 17.4010703684  | 11.1651002911  |
| 2.9464266584   | 6.2717398714   |
| 50.6208424712  | 63.0324831483  |
| 24.868149342   | 30.1967255132  |
| 3.4078988288   | 3.8815401146   |
| 213.2283868212 | 214.0288152327 |
| 2.2237802622   | 1.8217826061   |
| 15.1113402768  | 16.6696008064  |
| 0.6977131345   | 0.1563312121   |
| 0              | 4.8651334422   |
| 14.0573226563  | 16.7722382126  |
| 0.8515336939   | 0              |
| 1.6768307787   | 0.9945385596   |
| 11.3426301065  | 5.7182756177   |
| 3.3234359515   | 4.1363353468   |
| 1.5201703159   | 1.2043097648   |
| 8.3459250898   | 7.1527775437   |
| 4.2656768447   | 2.9529241444   |
| 5.0376245859   | 4.1723133254   |
| 4.9665292423   | 3.0309484266   |
| 1.2599788283   | 1.732379883    |
| 142.2121773659 | 147.3182324458 |
| 2.3119485215   | 1.960236708    |

gene\_expression\_table

|                 |                 |
|-----------------|-----------------|
| 0               | 0               |
| 3.5988742152    | 4.0938888534    |
| 25.0877780885   | 27.5274711978   |
| 2.1979939192    | 3.32429117      |
| 24.1097504656   | 23.2654265752   |
| 5.3870182179    | 5.4316247005    |
| 7.5071974331    | 7.9478277644    |
| 1445.4339091135 | 1481.6926747896 |
| 37.9105425837   | 34.4769600904   |
| 2.6144851736    | 2.7663135279    |
| 89.1889942198   | 83.2662145713   |
| 0.1512383785    | 0.0762453438    |
| 0.1714513537    | 0.1037226202    |
| 12.4528514952   | 16.4622660922   |
| 0.5956675737    | 0.4439216794    |
| 13.7756156491   | 15.3069973591   |
| 297.8383221233  | 455.9864855266  |
| 2.0503217062    | 1.8950241937    |
| 7.9312288395    | 7.1356974523    |
| 30.0462487271   | 24.4994692849   |
| 0.7343679578    | 0.6731352666    |
| 0.8165714184    | 1.6466658573    |
| 0.0944464596    | 0.0952285109    |
| 2.6520439513    | 3.5459616217    |
| 0.2204220769    | 0.2222472524    |
| 13.341086889    | 17.6261767903   |
| 0.8340484658    | 1.2614320385    |
| 24.6404211325   | 29.8133434061   |
| 1.3248965788    | 1.8245991125    |
| 0.1362627224    | 0               |
| 1.5973808212    | 1.6106077191    |
| 3.4210606484    | 3.6464961846    |
| 0               | 0               |
| 0               | 0               |
| 1.726223263     | 2.2626721304    |
| 0               | 0               |
| 1.4115068629    | 1.4779329124    |
| 3.8395499163    | 4.8391784937    |
| 0.1962855852    | 0.1979109017    |
| 12.484332653    | 13.6728546949   |
| 0.6696147319    | 0.675159387     |
| 16.9691867707   | 11.9767884938   |
| 5.1157133262    | 6.1290047506    |
| 3.7677964239    | 3.0391961259    |
| 1.9859940745    | 1.5852640756    |
| 0.5587518438    | 0.5097234171    |
| 305.8310252085  | 357.903770444   |
| 1.3461877651    | 1.8663352022    |
| 0               | 0               |



gene\_expression\_table

|                |                |
|----------------|----------------|
| 2.5393607858   | 3.174880652    |
| 43.5215501166  | 51.6257935075  |
| 0.0744050021   | 0.1500422054   |
| 0.2276288871   | 0              |
| 5.6789510355   | 5.4533093607   |
| 0              | 0              |
| 2.4537162034   | 2.4740338717   |
| 0              | 0              |
| 3.6911924808   | 2.1710248616   |
| 14.8965948323  | 15.46830063    |
| 0.4618943523   | 0.3991877199   |
| 17.1443525696  | 15.6657221387  |
| 0              | 0              |
| 175.7369647646 | 273.8884084445 |
| 0              | 0.1984182268   |
| 37.5682349278  | 37.8793136637  |
| 5.0219099068   | 5.5749571144   |
| 71.7849127548  | 52.4126096639  |
| 1.1423143452   | 0.3839243754   |
| 11.4471052116  | 10.5382486993  |
| 15.1048135195  | 14.0583571423  |
| 0              | 0              |
| 0              | 1.2571070766   |
| 203.0646016895 | 173.9485947906 |
| 0              | 0              |
| 0              | 0              |
| 0              | 0              |
| 11.8160075344  | 11.9138484016  |
| 13.1393086976  | 6.6240534915   |
| 15.7695695806  | 11.1889926069  |
| 2.2019166568   | 4.810323554    |
| 5.0761104522   | 4.3100147408   |
| 49.0068708622  | 45.4062333373  |
| 0              | 0              |
| 66.3552503319  | 75.6023065841  |
| 3.7700113235   | 4.223587108    |
| 4.7271306004   | 0              |
| 5.6083759873   | 7.3947585912   |
| 7.5952115707   | 3.5897356418   |
| 131.6420025448 | 28.8218158135  |
| 1.4970086767   | 2.113166239    |
| 7.3515379819   | 8.0134177375   |
| 0              | 0              |
| 0              | 0              |
| 27.3732958392  | 41.2055692293  |
| 2.1060959365   | 1.6988281454   |
| 0.603273792    | 0              |
| 0              | 0.2291640211   |
| 30.5734993356  | 55.0476055368  |

gene\_expression\_table

|                |                |
|----------------|----------------|
| 0.0391382333   | 0.0197311561   |
| 2.7903265539   | 2.5008279814   |
| 0.5942570435   | 0.4868318888   |
| 0              | 0.0439643797   |
| 4.4108619034   | 2.2807104895   |
| 0.8012517821   | 0.9088722451   |
| 22.7058861138  | 28.8463129437  |
| 8.0965780045   | 9.5333556396   |
| 29.737262201   | 36.3081416449  |
| 7.2976211179   | 9.3321585556   |
| 0              | 0              |
| 10.3856706253  | 14.201302879   |
| 2.6062520127   | 1.97087455     |
| 5.6851592904   | 7.6429793202   |
| 30.25320387    | 35.4771426895  |
| 10.7146161029  | 18.6603094431  |
| 15.536187757   | 12.6651841909  |
| 3.089757933    | 5.3519982409   |
| 3.4474622874   | 1.3517810977   |
| 166.6111714181 | 148.7131432236 |
| 0.9340760985   | 0.4709052953   |
| 21.0375790467  | 14.7390662624  |
| 0              | 0.1096408865   |
| 0.7781302466   | 0.5230489666   |
| 0              | 0.070076174    |
| 17.6227658639  | 16.1304409106  |
| 14.3273327375  | 16.1598967387  |
| 1.8877524824   | 11.4203025834  |
| 2.814978176    | 2.3432371281   |
| 1.3082736111   | 0.5749951826   |
| 0              | 0              |
| 0.9598296947   | 1.2903699145   |
| 0              | 0.0110995723   |
| 4.2593245964   | 3.047775935    |
| 0              | 0              |
| 37.9329464292  | 24.6911303874  |
| 18.3307997546  | 31.0030466217  |
| 33.3681988097  | 22.7669546905  |
| 11.3675124804  | 16.2373228296  |
| 0.2364973022   | 0              |
| 0.2289231073   | 0.6924560232   |
| 16.5536057983  | 14.8361561896  |
| 8.0865801563   | 0              |
| 0              | 0              |
| 0              | 0.1185981569   |
| 49.6294556064  | 40.3279218645  |
| 170.4565975057 | 160.8633072322 |
| 0              | 0              |
| 0.1823626596   | 0.7354907568   |

gene\_expression\_table

|                 |                 |
|-----------------|-----------------|
| 4.4831385844    | 4.2189099053    |
| 5.1089892216    | 4.1210348179    |
| 19.3455571116   | 9.6502108848    |
| 8.836694165     | 14.5600236638   |
| 20.2881391293   | 15.9103251589   |
| 27.2874173995   | 33.7664052042   |
| 3.3397013175    | 3.3673552668    |
| 2.1667683023    | 1.0923549685    |
| 1022.0210085916 | 1540.2191733971 |
| 18.990377477    | 22.7378043946   |
| 0               | 0               |
| 1.3107996255    | 1.3856045033    |
| 0.3270274379    | 0.4946030171    |
| 31.2642790625   | 40.4741791185   |
| 8.305893063     | 13.3994702364   |
| 0.0739429927    | 0.0745552678    |
| 5.9989355918    | 4.0324059828    |
| 0               | 0               |
| 0.8856650259    | 1.0843555114    |
| 28.9597562203   | 35.4886882236   |
| 311.3165190068  | 335.4530105001  |
| 2.2264101485    | 1.3469073837    |
| 4.764406455     | 3.9561179283    |
| 1.5957719888    | 1.7095471628    |
| 76.1257611895   | 112.5756285219  |
| 0.1976568452    | 0.1992935162    |
| 3013.2730386897 | 3046.1983836909 |
| 4.6298207392    | 7.4690517593    |
| 7.7050232836    | 8.8403855858    |
| 0               | 0.1075019533    |
| 5.5335368297    | 4.184517405     |
| 1.6732476232    | 0               |
| 63.6859878528   | 65.3016926874   |
| 32.6283286517   | 55.6743899556   |
| 11.2295343328   | 7.949853757     |
| 28.5801177033   | 29.9358694627   |
| 0               | 0               |
| 4.2071972621    | 3.6635751596    |
| 226.7138571448  | 179.4077090644  |
| 42.9540319406   | 48.4049666998   |
| 31.6201723735   | 37.1956654701   |
| 92.1223211408   | 112.968398528   |
| 2.0386817758    | 2.4666753686    |
| 7.4484412307    | 11.9479134892   |
| 0.0794486694    | 0               |
| 322.6266634781  | 296.1047083864  |
| 3.2136889212    | 0.6480598884    |
| 1.5590698812    | 0               |
| 7.4848673082    | 5.7499769518    |

gene\_expression\_table

|                |                |
|----------------|----------------|
| 9.4726872946   | 8.3756015834   |
| 34.7793891838  | 58.445625427   |
| 0.8986023938   | 0              |
| 19.6794509273  | 28.3462914058  |
| 20.2733981384  | 28.4938905331  |
| 0.6018234631   | 0              |
| 28.7290772563  | 35.7827208917  |
| 494.336328564  | 437.5104392208 |
| 0.6493706729   | 0.2618990799   |
| 9.7257518096   | 0              |
| 67.3818178418  | 82.4982848046  |
| 34.3236109797  | 32.1966222561  |
| 7.9286181938   | 10.6590267393  |
| 0              | 0              |
| 16.3863475666  | 19.1307744994  |
| 13.7213251238  | 14.2812311929  |
| 2.495145874    | 1.1611415054   |
| 59.9051582741  | 79.9677791782  |
| 6.1603050077   | 6.211314588    |
| 0.7402475021   | 0.6717393201   |
| 8.1322670499   | 4.8066651158   |
| 3.9732074777   | 0              |
| 32.7515282721  | 31.538555592   |
| 7.7099486246   | 9.7172372765   |
| 26.393184273   | 37.9358697117  |
| 0.3001274537   | 0.4539189283   |
| 52.9438627246  | 0              |
| 0              | 0              |
| 1.3659893408   | 0.4591000775   |
| 0.6815030801   | 0.3926549572   |
| 0              | 0              |
| 18.8491995241  | 28.1119734057  |
| 0.3000961676   | 0.1512905368   |
| 0.2524729257   | 2.5456349397   |
| 2.1087957628   | 1.4883801545   |
| 0              | 0              |
| 0              | 0              |
| 0.056369578    | 0.0568363388   |
| 20.5051133068  | 17.7900329433  |
| 3.1082779606   | 3.0157508987   |
| 0.0550081215   | 0              |
| 0.3835208472   | 0.4640358483   |
| 2.8390754789   | 6.1068460012   |
| 0.0128506529   | 0              |
| 5.44568511     | 3.3990526613   |
| 204.5445273653 | 285.2009792817 |
| 4.1439573739   | 2.9402646777   |
| 3.1306733152   | 2.9368333931   |
| 0              | 0              |

gene\_expression\_table

|                |                |
|----------------|----------------|
| 1.8553099048   | 1.2471150333   |
| 4.2638694678   | 3.4035142285   |
| 6.3442794439   | 5.9703582398   |
| 12.9138397087  | 10.6886926351  |
| 185.1565878961 | 195.3266446664 |
| 0              | 0              |
| 1.9453968227   | 1.8389113316   |
| 0.0142827076   | 0.0432029208   |
| 0.0130393266   | 0.0262945941   |
| 421.1553483949 | 520.0469688773 |
| 1.7898731385   | 1.3297744845   |
| 21.5933724227  | 18.5137529337  |
| 7.2684880319   | 11.1193671041  |
| 0.8427363646   | 0.4956668093   |
| 0.0555173136   | 0.1119540345   |
| 1.0766984706   | 1.085613928    |
| 39.4900210652  | 37.6934388728  |
| 0.5794148205   | 0.3505275524   |
| 3.9435925146   | 4.7409097702   |
| 0              | 0              |
| 303.1669190681 | 249.6364225676 |
| 8.8146736988   | 8.0492037042   |
| 30.2101538964  | 34.5968896617  |
| 11.2206674738  | 14.8692748727  |
| 20.1199980832  | 18.1070470696  |
| 8.4806656635   | 10.01675531    |
| 21.7091293375  | 28.1428571243  |
| 53.2728711241  | 69.8787017189  |
| 15.4803147642  | 29.1358618816  |
| 1.7542430807   | 2.9847974437   |
| 0.9839758222   | 0.653899581    |
| 351.4382614881 | 418.0092879022 |
| 19.5477649446  | 21.4634503875  |
| 0.8088852306   | 2.4467492891   |
| 7.3740331344   | 10.4091299589  |
| 0              | 0              |
| 0.6144952659   | 0.2655357907   |
| 6.0084238492   | 5.3523689088   |
| 2.091415578    | 1.2652399587   |
| 3.7247875109   | 3.0928718593   |
| 79.623241613   | 146.2926488485 |
| 0              | 0              |
| 3.0988176509   | 3.6311489405   |
| 4.1812222878   | 2.0565094335   |
| 6.1213138996   | 8.229334159    |
| 0              | 0              |
| 0              | 0.4544015404   |
| 0.5051262141   | 0.4122976357   |
| 8.8635972874   | 11.1712388966  |

gene\_expression\_table

|                 |                 |
|-----------------|-----------------|
| 10.9449981345   | 11.7058064858   |
| 6.826738004     | 4.0260611829    |
| 2.5788485616    | 3.9585170433    |
| 0.5473046646    | 0.5518365475    |
| 0               | 0               |
| 0.2359303832    | 0.4757679462    |
| 0.2539117863    | 0.2166274582    |
| 66.5166385661   | 46.3858372104   |
| 102.0378293712  | 115.1135551848  |
| 3.3937509153    | 2.7881760419    |
| 837.3833730849  | 1246.8603704471 |
| 17.9895744431   | 27.3726978261   |
| 0.2882209131    | 0.4359112317    |
| 0               | 0               |
| 0               | 0               |
| 0.013772376     | 0               |
| 10.7899136734   | 10.3847463758   |
| 0.1480647295    | 0.1492907597    |
| 0               | 0               |
| 0.7794198206    | 1.0716459573    |
| 3.5123909626    | 3.4571540158    |
| 4.1495661443    | 5.6606058605    |
| 0.359681968     | 0.2175961598    |
| 0.5499130926    | 0.1663399723    |
| 111.3437723712  | 159.5355246388  |
| 0               | 0               |
| 0               | 0.1324840932    |
| 2.2521317004    | 2.4836658167    |
| 16.838736369    | 15.7654410359   |
| 2.4116682159    | 2.6223543947    |
| 25.9783393177   | 23.8265715112   |
| 12.7037234736   | 18.5729266829   |
| 0               | 0               |
| 5.9105440636    | 6.3502714684    |
| 3.8904650171    | 7.6001915147    |
| 433.6254601822  | 568.9486620573  |
| 3.6449442566    | 0.4593907161    |
| 0.1400798264    | 0.0847438432    |
| 39.7198543067   | 37.3470479011   |
| 42.7716106521   | 46.0814358522   |
| 2531.5798321623 | 2284.8679277269 |
| 26.4837443208   | 34.2755431328   |
| 7.3831034932    | 9.6253526967    |
| 1.0387566988    | 2.3411531417    |
| 12.7573239456   | 16.746116769    |
| 3.7650123075    | 8.7786847211    |
| 0               | 0.3656203854    |
| 52.2120805062   | 51.3707604263   |
| 28.5848332736   | 18.8448440249   |

gene\_expression\_table

|                |                |
|----------------|----------------|
| 4.6447604641   | 4.8081066683   |
| 6.831972793    | 8.6106800355   |
| 0.161664243    | 0.1630028821   |
| 0              | 0              |
| 35.1445394796  | 43.8143981856  |
| 796.4903395208 | 794.734594589  |
| 40.0115965726  | 56.0981254484  |
| 702.72108395   | 662.5571352614 |
| 11.7335967988  | 11.2080839448  |
| 0              | 0.3218919035   |
| 2.0835503199   | 1.8716243833   |
| 6.961505402    | 4.3567133058   |
| 0.2651240087   | 0.0534638665   |
| 14.6251231461  | 16.2782997936  |
| 1.991963179    | 1.1925215594   |
| 0              | 0              |
| 0.7193459609   | 0.7253024088   |
| 5.8461935145   | 11.9329750572  |
| 10.6935734462  | 8.2852081141   |
| 2.4558966643   | 0.8254107959   |
| 4.4149957946   | 8.4084900876   |
| 2.3661490262   | 2.2425971098   |
| 3.0855822603   | 2.9037232101   |
| 6.0835495093   | 6.1339235259   |
| 64.3027861433  | 57.6101957035  |
| 0              | 0              |
| 36.3412006713  | 41.9306723888  |
| 3.4075626778   | 3.435778544    |
| 21.9789101685  | 19.2339917946  |
| 7.4870108903   | 6.3357729608   |
| 0              | 0              |
| 0.4055536431   | 0.2044558879   |
| 0              | 1.2849314918   |
| 23.6978876923  | 27.0588983036  |
| 3.612604627    | 3.4717752696   |
| 13.7810682504  | 18.0494097732  |
| 0.4131507875   | 0.2695464764   |
| 29.420547573   | 30.5496578031  |
| 0              | 0.2758527194   |
| 9.6523806728   | 6.1355841655   |
| 0              | 0              |
| 1.4002055134   | 0              |
| 9.8152831083   | 8.9069015205   |
| 0.7263639703   | 0              |
| 6.013345902    | 4.9178790924   |
| 5.1806053382   | 3.2144631672   |
| 91.0299616016  | 120.0248685418 |
| 3.3855223861   | 4.2410844175   |
| 0.5700864461   | 0.4023648794   |

gene\_expression\_table

|                |                |
|----------------|----------------|
| 37.2172413036  | 52.8135451848  |
| 48.5877221207  | 59.2621527145  |
| 9.2437000291   | 13.4846043598  |
| 4.5966441842   | 2.8089127761   |
| 19.098778432   | 21.8245130824  |
| 0.649920428    | 0              |
| 9.3468264145   | 0              |
| 0.4282209714   | 0.6476501967   |
| 3.0290185858   | 2.2687599765   |
| 5.9486632581   | 13.9951475236  |
| 0.606295833    | 1.2226323688   |
| 18.3520348639  | 27.5503946844  |
| 1.7165820494   | 1.8461823755   |
| 1.1477414674   | 1.1572451869   |
| 3.2749039779   | 2.9351301169   |
| 17.9926408478  | 29.8803259996  |
| 49.4088631338  | 72.6935926994  |
| 12.4647477884  | 11.8497912932  |
| 0              | 0              |
| 8.7824490466   | 8.6391911603   |
| 28.454619473   | 19.7863683705  |
| 0              | 0              |
| 4.8150910067   | 6.0687021534   |
| 0.4336882398   | 0.4372793371   |
| 4.8391528253   | 2.4396113909   |
| 1.0064430585   | 1.5221651631   |
| 5.7910962721   | 9.6036984686   |
| 4.4686947559   | 4.5056971841   |
| 7.1328605938   | 4.1553334566   |
| 0              | 0.3576686883   |
| 5.1502579802   | 6.2314848016   |
| 66.3209969817  | 81.7301944698  |
| 0              | 0              |
| 2.1249843408   | 4.2851599778   |
| 5.9161992101   | 4.772150004    |
| 0              | 2.0988143456   |
| 0              | 0              |
| 15.2841438853  | 19.0687981656  |
| 108.052320373  | 155.6386187644 |
| 0              | 2.2298138966   |
| 500.6647888089 | 674.9713112943 |
| 3.4055471636   | 5.7229105677   |
| 5.1705232424   | 6.651499017    |
| 1.8040090043   | 0.1515789049   |
| 4.7969715657   | 5.2666204457   |
| 23.230187825   | 23.9430432226  |
| 0.8641868775   | 1.524849657    |
| 2.0922520144   | 1.171987015    |
| 0              | 0.886850058    |



gene\_expression\_table

|                |                |
|----------------|----------------|
| 5.2472324593   | 9.1384498027   |
| 26.3387240224  | 21.2454546383  |
| 0.316632483    | 0.4256724212   |
| 0.2400419024   | 0.2420295372   |
| 0.7527809468   | 1.3493586641   |
| 3.1021794565   | 0.7819666595   |
| 0.4050329802   | 0.3062901011   |
| 42.2338082431  | 69.80904858    |
| 0              | 0.6105079903   |
| 0              | 0              |
| 0              | 0              |
| 401.0701802824 | 431.5315363751 |
| 0              | 0              |
| 7.380355328    | 11.5891704966  |
| 15.4583614058  | 17.9842641881  |
| 1.1746300723   | 1.9739273988   |
| 6582.112590388 | 8402.256741934 |
| 0              | 0              |
| 280.2634415615 | 318.2500830198 |
| 3.1635979297   | 2.5310319406   |
| 0              | 0              |
| 0.9035497778   | 0.9110315006   |
| 1.4107649027   | 1.343421744    |
| 21.4791704856  | 26.2978171388  |
| 3.2873695135   | 2.2097267576   |
| 71.6318893032  | 73.7219193285  |
| 101.6493383026 | 115.4151211124 |
| 1.1450151503   | 1.2827736609   |
| 0              | 2.3277147073   |
| 0              | 0.2406330509   |
| 0              | 0              |
| 0              | 0              |
| 20.5630181118  | 17.2777395236  |
| 0.5331844009   | 0.4300794903   |
| 1.2958282449   | 1.0240591118   |
| 0              | 0              |
| 0              | 0              |
| 5.5012851818   | 5.5468378367   |
| 12.3017434631  | 8.9421348477   |
| 28.9113663614  | 34.549052512   |
| 3.0789545836   | 0.2822226777   |
| 16.738354032   | 16.7011521286  |
| 0              | 0              |
| 0              | 0              |
| 0.2163633487   | 0.1090774582   |
| 14.0455282055  | 16.994196384   |
| 0.0246105094   | 0.0165428623   |
| 10.4251204085  | 5.6847606503   |
| 2.2306366906   | 3.7485119648   |

gene\_expression\_table

|                |                |
|----------------|----------------|
| 17.6593636418  | 19.9003648878  |
| 302.5803829256 | 298.3276281878 |
| 0.9415535953   | 0.8363321461   |
| 0.4835512783   | 1.0360549273   |
| 1.8231934995   | 0.9732124636   |
| 8.2823952117   | 9.7428058881   |
| 22.3102770546  | 34.0995851912  |
| 13.0601151974  | 7.5247187037   |
| 24.7685375128  | 29.072355615   |
| 0              | 0              |
| 3.1231801506   | 2.3932713313   |
| 12.1533405199  | 4.5952404854   |
| 2.2413895275   | 2.7485866863   |
| 10.2955165614  | 8.4034782151   |
| 0.3193723692   | 0              |
| 315.7723241075 | 411.805984782  |
| 2.6646646003   | 2.8035433028   |
| 1.1694290753   | 0.6681636798   |
| 0              | 0              |
| 4.3010296847   | 2.8910958565   |
| 19.1495955808  | 9.010475246    |
| 1.4815108683   | 1.8257290585   |
| 57.4380457834  | 65.3563723901  |
| 1.0458462506   | 0.5272531202   |
| 0              | 0              |
| 1.014992256    | 0.2046793527   |
| 171.1188220492 | 131.9391018162 |
| 0              | 0              |
| 0              | 0.4853743974   |
| 4.5471546188   | 5.3489411773   |
| 0.8645978183   | 0.2905856682   |
| 0.4953665208   | 0.4994683369   |
| 2.1809261634   | 4.0314725555   |
| 0.0806984354   | 0.054244432    |
| 2.0508085739   | 0              |
| 2.7880129703   | 3.8819934956   |
| 0.740406156    | 0              |
| 4.1288240024   | 8.3260243527   |
| 2.4569621368   | 2.8489026849   |
| 3.9902873668   | 6.2489994402   |
| 21.047870851   | 9.5499697165   |
| 5.6281965506   | 4.2561000586   |
| 18.78541009    | 22.2933424909  |
| 3.3003579038   | 2.639199301    |
| 0.4233009218   | 0.521651788    |
| 25.2077861075  | 22.1217822731  |
| 3.1787085967   | 2.698972183    |
| 0.4513322154   | 0.4550694113   |
| 0              | 0              |

gene\_expression\_table

|                |                |
|----------------|----------------|
| 43.4754680847  | 72.6163190226  |
| 0              | 0              |
| 0.7991179835   | 0.8057349729   |
| 0.2949721191   | 0.1699511979   |
| 34.7140822896  | 36.6458946654  |
| 30.0398873285  | 38.2213646504  |
| 0.0732298554   | 0.0105480322   |
| 0              | 0.0932941291   |
| 0.008861       | 0.008934       |
| 6.4249425979   | 4.6702894814   |
| 2.9544566253   | 1.4298818916   |
| 11.8235790177  | 11.038409796   |
| 13.2202875441  | 17.1382581822  |
| 0.42611346     | 0              |
| 0              | 0              |
| 15.7602388355  | 13.2904365737  |
| 0              | 0              |
| 1.6271428773   | 2.6409919573   |
| 2.9320177142   | 0.8446559697   |
| 0.3981498563   | 0              |
| 14.017920223   | 15.8192006785  |
| 33.0325200889  | 32.9187618941  |
| 17.0566910628  | 25.6511449203  |
| 140.6442868731 | 126.6489044364 |
| 10.9167930194  | 12.3021513627  |
| 138.6162348346 | 183.0567878869 |
| 5.3557496198   | 3.8880699746   |
| 72.8581360229  | 93.3831712587  |
| 67.8634130789  | 78.6891490254  |
| 4.441865733    | 2.9857640048   |
| 0.2993316907   | 0.3018102667   |
| 98.5867058797  | 114.0390703024 |
| 4.8903131104   | 6.8679093222   |
| 0.4837462882   | 0.1951007538   |
| 82.829512477   | 77.5022644343  |
| 0              | 0              |
| 17.931139227   | 16.7567169189  |
| 34.8265938815  | 34.7602741511  |
| 33.6909622605  | 35.3853497496  |
| 392.3484608988 | 489.6553371192 |
| 84.647540253   | 79.6585560111  |
| 2.8220557979   | 2.3347064228   |
| 0              | 2.0632580784   |
| 108.7280614323 | 164.4425543666 |
| 17.3628499727  | 22.5085123615  |
| 0              | 0              |
| 5.0781280602   | 4.8001657681   |
| 59.7221301355  | 60.0715508682  |
| 1.1099533337   | 3.9969434055   |

gene\_expression\_table

|                |                 |
|----------------|-----------------|
| 3.7950579566   | 5.4664034651    |
| 7.6983458739   | 8.0252127242    |
| 0              | 0               |
| 0              | 0               |
| 0.1428607424   | 0.1440436817    |
| 2.7643014746   | 3.9817012894    |
| 2.4246969944   | 1.9354463786    |
| 13.8718177231  | 13.9866814512   |
| 0.3737621068   | 0.4845304206    |
| 0              | 0               |
| 0              | 0               |
| 199.8571292706 | 168.5603684732  |
| 0.753458207    | 1.1395456752    |
| 0              | 0.2218311227    |
| 3.3478573504   | 4.3882524851    |
| 784.2027248608 | 590.4415566342  |
| 11.9678941391  | 14.2609913528   |
| 15.5464275559  | 23.7711182193   |
| 53.5066987758  | 46.8654427178   |
| 15.4528144287  | 9.274267493     |
| 155.4172247554 | 170.7847977817  |
| 340.4548103218 | 353.3858451286  |
| 0              | 0               |
| 19.9667876473  | 22.9282477292   |
| 42.7516777515  | 60.8550738231   |
| 1.4589038442   | 2.124754814     |
| 3.0496001437   | 0.4392645642    |
| 3.7530045162   | 4.324663734     |
| 1.6776355103   | 1.6915269464    |
| 8.1538143997   | 6.0996971694    |
| 0              | 0               |
| 936.9752592449 | 1119.3041255494 |
| 8.0775043088   | 8.7959401211    |
| 4.3135351313   | 4.6599136939    |
| 1.1507873957   | 1.0313922992    |
| 55.2299749008  | 50.537028852    |
| 705.6885329165 | 656.9486238183  |
| 270.8219977732 | 299.2910372318  |
| 0.1451690147   | 0.2439517788    |
| 0.0381702924   | 0.0384863564    |
| 2.0713532655   | 2.4901403727    |
| 0.1640775433   | 0.6617446616    |
| 1.0882446216   | 1.2169563056    |
| 15.4817022622  | 24.692017979    |
| 1.3032898803   | 2.0441269295    |
| 0.8899420042   | 0.999860884     |
| 4.7430871594   | 3.7325749519    |
| 43.7931370515  | 45.0496015563   |
| 1.7484497635   | 2.4527687896    |

gene\_expression\_table

|                |                |
|----------------|----------------|
| 44.373377955   | 47.1519869152  |
| 1.250688896    | 1.924752983    |
| 0              | 2.0033697975   |
| 2.1146433096   | 2.3098327744   |
| 19.2466154864  | 21.5285140627  |
| 7.8542348999   | 7.5233072977   |
| 0.3598978042   | 0.9071947243   |
| 0              | 0              |
| 26.1657884947  | 25.5949149559  |
| 79.4334656032  | 89.1337590374  |
| 2.1158972951   | 1.6485500402   |
| 86.6340682251  | 73.4616266599  |
| 0              | 1.1123434528   |
| 15.9663551507  | 21.0175675979  |
| 5.9949449766   | 9.5705934159   |
| 68.604127954   | 70.7965912185  |
| 118.9078873421 | 165.1150933599 |
| 4.3817694607   | 1.2623006045   |
| 0.4608235846   | 0.8711988234   |
| 2.5544931389   | 3.127569265    |
| 7.4462336905   | 7.27326963     |
| 61.8397562624  | 44.0130438204  |
| 3.2237654375   | 0              |
| 15.1220464845  | 20.9276152845  |
| 5.8042794545   | 9.2830236756   |
| 0.7741111319   | 0.1951302639   |
| 11.0220532593  | 9.7241549077   |
| 53.8448756124  | 68.1790573979  |
| 269.6713776632 | 258.9049439633 |
| 0              | 1.084903846    |
| 0              | 0              |
| 0.9292894438   | 1.2649288057   |
| 3.0907374536   | 3.2168566617   |
| 18.5423333309  | 23.7488086479  |
| 6.7337596468   | 4.8092416626   |
| 36.1211969136  | 20.9974141934  |
| 19.8854028128  | 27.591827376   |
| 0              | 0              |
| 2.7427716062   | 2.765482759    |
| 2.8408459492   | 3.0235008153   |
| 0.2307072334   | 0.4652351475   |
| 3.0359320176   | 3.9793918396   |
| 4.1155432961   | 7.7805403144   |
| 110.4501782797 | 118.7890625952 |
| 8.9831614959   | 20.9455736477  |
| 0.1420838874   | 0.143260394    |
| 4.19735012     | 5.2195970489   |
| 1.3545567532   | 0.8194637874   |
| 4.3661865767   | 4.8577547031   |

gene\_expression\_table

|                 |               |
|-----------------|---------------|
| 26.9436234438   | 29.2564747008 |
| 0.7495307101    | 1.0076494649  |
| 0               | 0             |
| 0.1044688701    | 0.0526669553  |
| 10.9592284222   | 12.2510590671 |
| 33.8140629188   | 35.649223191  |
| 1.581963782     | 1.240604572   |
| 0.9098549869    | 0.5837929486  |
| 0.614738957     | 0.9297438309  |
| 3.1856027136    | 3.9480595737  |
| 0               | 0             |
| 1.1117171866    | 0.8095552196  |
| 4.3180179026    | 2.6122636028  |
| 0               | 0             |
| 3.3159791157    | 2.6747493092  |
| 7.6117039096    | 8.4422047644  |
| 4.1988295871    | 3.1751980747  |
| 0               | 0             |
| 1.6721816507    | 1.9035799173  |
| 3.7424799891    | 5.7141103413  |
| 0.1951351932    | 0.1686437006  |
| 0               | 0             |
| 0.8024965255    | 0.4045707452  |
| 0.4214195844    | 0.1062272732  |
| 0               | 2.4035276621  |
| 4.1473766957    | 3.2856359586  |
| 69.1356775479   | 74.9199702828 |
| 1319.5273779955 | 965.390074217 |
| 34.9290047281   | 45.7180745432 |
| 0               | 0             |
| 0               | 0             |
| 47.8718939631   | 61.8172846669 |
| 5.5368626722    | 10.8165004735 |
| 1.8993074677    | 1.2766896192  |
| 6.4765411376    | 5.5972879446  |
| 31.8496961497   | 35.3903032192 |
| 12.926908557    | 8.6892987276  |
| 2.2320161433    | 1.9289983319  |
| 2.4326324805    | 2.5098168601  |
| 13.4023395514   | 11.3897947697 |
| 0               | 0             |
| 17.6470527318   | 23.7242357169 |
| 11.8176838167   | 9.8127964647  |
| 96.228051331    | 131.387824232 |
| 17.270278248    | 2.6789665343  |
| 5.3041410146    | 0             |
| 0               | 0             |
| 8.2193362902    | 8.8793522177  |
| 5.6978179825    | 10.0537465016 |

gene\_expression\_table

|                  |                 |
|------------------|-----------------|
| 0.8662020568     | 0.4366872634    |
| 11.6852575248    | 12.8531080736   |
| 26.2776449535    | 32.5819762965   |
| 3.8347373375     | 4.5109054273    |
| 9.411928688      | 4.9512328187    |
| 0.6515261382     | 0.4379473421    |
| 0                | 0               |
| 1.2272503616     | 1.753000962     |
| 0.6242703102     | 0.2517757988    |
| 359.1925365583   | 317.6222047392  |
| 0                | 0               |
| 1.3639399253     | 2.6358648736    |
| 5.2260483582     | 5.5792820662    |
| 16.8598684372    | 13.2808393117   |
| 0.1208903578     | 0               |
| 0.2659240837     | 0.1856257148    |
| 4.7472681638     | 6.3821030424    |
| 9.8682160379     | 11.5696842775   |
| 7.7052638127     | 9.5970817979    |
| 0                | 0               |
| 0                | 0               |
| 0                | 0               |
| 6.6905256016     | 5.8960452116    |
| 0                | 0.017132066     |
| 0                | 0               |
| 3.7699522482     | 3.0994145867    |
| 0.1665728207     | 0.3918882441    |
| 3.0593225671     | 0               |
| 0.1930476135     | 0               |
| 10.2753927507    | 0               |
| 0.0849569396     | 0.0856604141    |
| 0.0332917695     | 0               |
| 1.5940697069     | 1.8562827237    |
| 0.7098913855     | 0.5726156368    |
| 3.2489563572     | 3.7743591731    |
| 0.7844203094     | 0               |
| 5.0543324715     | 4.0138087902    |
| 0                | 0.071922797     |
| 0.0605198782     | 0.0261518593    |
| 56.1078877383    | 49.6853968707   |
| 8.835260979      | 14.8473669563   |
| 0.0294160121     | 0               |
| 17.8651111025    | 23.8407892431   |
| 0                | 0               |
| 25147.9603680069 | 15056.609127772 |
| 0                | 0               |
| 0                | 0.1368146795    |
| 5.1474395143     | 2.3591191807    |
| 9.4547178181     | 4.7665031711    |

gene\_expression\_table

|                |                |
|----------------|----------------|
| 11.5697967406  | 13.9987186709  |
| 4.9851179584   | 4.1886637998   |
| 0.1028744883   | 0.0691508845   |
| 11.0904044264  | 12.1762136596  |
| 0.1830833244   | 0.1435772499   |
| 3.6072702787   | 2.8206390262   |
| 3.6603707233   | 2.0239212534   |
| 7.8656353433   | 6.8492976353   |
| 0              | 0.1495330211   |
| 2.1699002475   | 2.0277799268   |
| 0              | 0.0539803848   |
| 3.0981176285   | 2.8113940588   |
| 0.9534695516   | 1.2017057857   |
| 2.566991419    | 2.5882470475   |
| 4.4786660183   | 4.9995814779   |
| 37.2554664136  | 41.1414748654  |
| 0.7831587698   | 0.6038451144   |
| 0              | 1.187667856    |
| 6.8128326173   | 8.2161562208   |
| 8.0286677244   | 7.7953277344   |
| 117.7811875078 | 125.5167885767 |
| 0.2790638363   | 0.0703436468   |
| 0.0159679542   | 0.0322003493   |
| 6.5651597164   | 4.6336651493   |
| 0              | 0              |
| 0.6464961601   | 0.6518493849   |
| 0.2272505455   | 0.1018365614   |
| 0              | 0              |
| 6.6291248309   | 5.1706542047   |
| 0.043080023    | 0.0434367413   |
| 106.0066002463 | 101.9963688023 |
| 0.3334543478   | 0.5603591197   |
| 6.1538696183   | 5.9421877774   |
| 1.3256112263   | 1.2623328962   |
| 0              | 0              |
| 153.8162638055 | 177.8677038159 |
| 5.6301586953   | 4.541422776    |
| 4.015269195    | 4.1750332528   |
| 0              | 10.5897856255  |
| 95.9165418678  | 71.2493032272  |
| 0.2893725221   | 0.2387197902   |
| 16.3835428858  | 19.1413005887  |
| 4.3622654201   | 5.2230840571   |
| 358.679128708  | 240.4682651497 |
| 351.3573708601 | 328.8174363229 |
| 0              | 0.1837766463   |
| 3.3111988862   | 2.403804114    |
| 164.5524007303 | 183.4309031494 |
| 6.9336215214   | 7.0773435127   |



gene\_expression\_table

|                |                |
|----------------|----------------|
| 6.4168967829   | 5.1079192397   |
| 0.10032838     | 0              |
| 14.9090936652  | 15.0325464178  |
| 0              | 1.4211310844   |
| 0.0294446948   | 0.008482       |
| 8.1420634225   | 1.2162196574   |
| 2.6534624921   | 2.4524812883   |
| 1.3940354151   | 1.5929890104   |
| 0.0311169253   | 0.0732073646   |
| 0              | 0              |
| 2.6077978324   | 1.8781366807   |
| 1.3772211263   | 0.3471562553   |
| 4.5794245539   | 5.2769644176   |
| 0              | 0              |
| 0.0804252699   | 0              |
| 1.5773829859   | 1.8886525995   |
| 99.3281251273  | 95.5982984342  |
| 6.3900298068   | 5.5685423764   |
| 0              | 0              |
| 96.2074369241  | 103.1092209566 |
| 8.5984679261   | 7.5509997571   |
| 3.0590398854   | 4.0901426343   |
| 0              | 1.7559953055   |
| 2.2092049096   | 2.1122825244   |
| 53.9143443072  | 69.7458997587  |
| 0.2818285758   | 0.1704973317   |
| 0.5363432763   | 1.6223531849   |
| 2.8879677669   | 0              |
| 0              | 0              |
| 0              | 0              |
| 4.1685386047   | 5.103710408    |
| 0.5771159202   | 0.2182104942   |
| 4.6143379683   | 4.2295876142   |
| 1.8092526672   | 1.4593871532   |
| 3.9451820319   | 2.1059203676   |
| 0.46803683     | 0.2178056983   |
| 4.5608119913   | 6.7701275207   |
| 0.6957085212   | 0.584557702    |
| 0              | 0              |
| 457.5357352153 | 703.6164721899 |
| 10.6520583972  | 16.1801339661  |
| 32.6587619647  | 41.2807942384  |
| 15.205466888   | 21.5597442928  |
| 10.0854039785  | 6.4026500687   |
| 0              | 0              |
| 2.5109660145   | 3.7231731356   |
| 24.4734497579  | 34.3319636587  |
| 0              | 0              |
| 461.7884627283 | 237.3203662084 |

gene\_expression\_table

|                |                |
|----------------|----------------|
| 7.5596849779   | 9.5278524207   |
| 49.2367394231  | 41.9476256089  |
| 51.428417202   | 83.2810895752  |
| 1.1027113348   | 0.7194272983   |
| 2.370620719    | 1.7926877447   |
| 33.3970131746  | 37.6021338123  |
| 32.0381565387  | 24.9617523375  |
| 311.8966354718 | 388.9171622475 |
| 7.0328518081   | 5.571567882    |
| 264.51532472   | 227.5092570288 |
| 30.6456507755  | 33.9139843692  |
| 113.2774470054 | 130.8560837818 |
| 11.5469373041  | 17.2482224762  |
| 9.5123340583   | 6.394066444    |
| 0              | 0              |
| 51.4841586107  | 63.0341376359  |
| 26.1513023678  | 40.6504272818  |
| 87.8829524495  | 52.2406103102  |
| 230.1124310613 | 125.757572109  |
| 19.792251297   | 18.0403490974  |
| 0              | 0.5222020761   |
| 39.7357183061  | 29.4892790187  |
| 19.0727831594  | 11.3814422605  |
| 25.8994414972  | 26.1138983526  |
| 2.5887721854   | 4.5678642916   |
| 14.4418222697  | 25.4824602272  |
| 0              | 0              |
| 660.9720438127 | 708.8713497093 |
| 0.9927830108   | 2.5025090438   |
| 1.3939904135   | 0              |
| 0              | 0              |
| 16.8218049892  | 14.6482190064  |
| 1.4331412747   | 0              |
| 2.365357917    | 3.1187728529   |
| 0              | 0              |
| 0              | 0.7938357008   |
| 0              | 0              |
| 19.1992610751  | 21.5091533157  |
| 1.1083615902   | 0.5587696149   |
| 2.433860654    | 1.5191514687   |
| 115.197638373  | 119.5345708762 |
| 123.0266040877 | 95.8531936272  |
| 15.2749692376  | 18.4817418887  |
| 0              | 0              |
| 12.0336633323  | 13.0666377361  |
| 4.1000524414   | 5.0789172052   |
| 0.3614832571   | 0.6074607846   |
| 30.933416295   | 42.3030763666  |
| 0              | 0              |

gene\_expression\_table

|                |                |
|----------------|----------------|
| 354.4302192017 | 396.4518314272 |
| 4.989358353    | 6.3821959051   |
| 7.4883853015   | 4.3957760903   |
| 0.9516106435   | 1.0604893098   |
| 0              | 0.1049957584   |
| 60.1967811883  | 66.6457455669  |
| 6.3578988424   | 3.3197462962   |
| 10.8702202171  | 21.450735112   |
| 59.5123109425  | 53.7976710744  |
| 0.0880360403   | 0              |
| 32.0250421129  | 25.3708880727  |
| 0.1129459378   | 0              |
| 0              | 0              |
| 10.1826374644  | 12.8336917871  |
| 46.2255179676  | 51.7869801955  |
| 35.0127065147  | 15.6900553511  |
| 5.3789658738   | 3.254103408    |
| 1.6244267006   | 1.2284081612   |
| 85.9098591681  | 107.0026887755 |
| 66.9847655043  | 49.119581004   |
| 0.0313481122   | 0.0790192151   |
| 18.3689491818  | 19.5499980713  |
| 1.1063883688   | 3.3466490084   |
| 456.4669973844 | 312.0077398008 |
| 0.3049216569   | 0.3458773348   |
| 4.465887199    | 6.191441272    |
| 0              | 0              |
| 0.0486829311   | 0.0490860436   |
| 29.2739659418  | 27.6879176995  |
| 85.8678424831  | 72.287676702   |
| 0.9393591045   | 0              |
| 4.1992549142   | 4.2340262819   |
| 0.9574716137   | 1.3367074557   |
| 8.7449044218   | 6.6129865734   |
| 7.2196176443   | 15.7720305619  |
| 0.0543936087   | 0.0411330058   |
| 22.5920493429  | 20.836714218   |
| 0              | 0              |
| 0.8526055192   | 0              |
| 0              | 0              |
| 42.2435915557  | 39.4383184777  |
| 6.4660022115   | 6.4308418102   |
| 0              | 0              |
| 49.1308218355  | 48.7188390063  |
| 15.5906988121  | 11.7898466286  |
| 3.7038565914   | 0              |
| 475.2644583454 | 414.6657485653 |
| 4.3364831702   | 3.8865696338   |
| 1.1173023199   | 0.9387949934   |

gene\_expression\_table

|                 |                 |
|-----------------|-----------------|
| 49.3365161501   | 42.6916392883   |
| 210.7431972474  | 252.5316023415  |
| 1.4053319676    | 1.4169686307    |
| 27.4651659946   | 20.3040190757   |
| 16.6670087973   | 11.9261416153   |
| 0.3238270569    | 0.8162711586    |
| 15.47159904     | 28.9708891512   |
| 0               | 0               |
| 0.5942725308    | 0.4793546599    |
| 0               | 0               |
| 25.5647700553   | 32.3858033262   |
| 6.2272042599    | 8.2541104662    |
| 5.3634327632    | 8.9567415416    |
| 4108.5690783913 | 4653.9133469812 |
| 1.0374135264    | 5.2300184504    |
| 1.5363931295    | 1.4776174104    |
| 0               | 0               |
| 40.2021914239   | 38.7009137551   |
| 3.6275133968    | 2.9260404284    |
| 6.5345042802    | 8.2828269761    |
| 0.0371278926    | 0.0374353251    |
| 158.329890478   | 175.8207428885  |
| 1.5556998301    | 1.5685815941    |
| 3.7239559155    | 3.4247000614    |
| 6.5725592173    | 10.4018458133   |
| 643.7360306033  | 794.1749009846  |
| 0.7004434393    | 0.4569810024    |
| 806.3448103433  | 224.8783260992  |
| 429.1743909894  | 617.7072102507  |
| 41.7262652374   | 48.4994061231   |
| 3.0721640605    | 3.923630091     |
| 1.5621719466    | 0.5250357674    |
| 0               | 0               |
| 1.1494845738    | 1.4901463631    |
| 1.0439736309    | 0.9868294825    |
| 8.0939358482    | 8.2809706672    |
| 1.737603301     | 1.2328827613    |
| 10.5803701611   | 6.3038060674    |
| 1.0502931144    | 0.7163755381    |
| 0               | 0.008485        |
| 0.0477574506    | 0.0343949284    |
| 0.4463115328    | 0.3802877371    |
| 11.0723943679   | 3.721359282     |
| 0               | 0               |
| 0               | 0               |
| 7.0739425316    | 9.8757932746    |
| 6.8671545238    | 7.8596950602    |
| 0.2450826529    | 0.247112027     |
| 0.2638579841    | 0               |

gene\_expression\_table

|                 |                 |
|-----------------|-----------------|
| 4.1962562635    | 7.3080957476    |
| 5.3662526206    | 5.6187905086    |
| 0               | 0.1298380855    |
| 0               | 0.9356252033    |
| 85.1311431786   | 89.3395728653   |
| 5.4304270322    | 5.1946035733    |
| 1815.3258914267 | 1573.4458356765 |
| 3.2191899672    | 2.9961655739    |
| 19.7121762199   | 22.7147431475   |
| 219.4575102078  | 226.1060240179  |
| 0.2310080674    | 0.2329208987    |
| 0               | 0.0729119262    |
| 29.9877347464   | 16.2809468587   |
| 0.0972690195    | 0.3922977703    |
| 0               | 0               |
| 2.0718406158    | 4.1779924289    |
| 0.1814688941    | 0.3659430459    |
| 2853.4424881075 | 3805.6288536461 |
| 56.6631736784   | 60.1570201404   |
| 60.2209352615   | 52.7996405631   |
| 346.0680751332  | 308.5838940828  |
| 0               | 3.7165944174    |
| 1.7926040627    | 2.0082749783    |
| 6.0795654774    | 6.1299065048    |
| 0               | 0               |
| 2.0646921141    | 3.4321378311    |
| 0               | 0               |
| 2.7300355957    | 1.8350941931    |
| 0.1387150377    | 0.0699318245    |
| 0               | 0               |
| 97.5612999296   | 98.1123047085   |
| 50.7427890824   | 18.020227667    |
| 0               | 0               |
| 74.2921944684   | 84.27078116     |
| 1.8383285668    | 3.0892510004    |
| 0               | 0               |
| 36.1547571196   | 46.869597954    |
| 3.9301331545    | 3.9626760955    |
| 13.6946833049   | 9.7097916231    |
| 0               | 0               |
| 0.4428325129    | 0.2551424733    |
| 222.7660295444  | 239.0087300758  |
| 2.7144574566    | 3.2796021374    |
| 0               | 0               |
| 1.7944329192    | 2.1572321499    |
| 0.0186554939    | 0               |
| 0               | 0               |
| 0               | 0               |
| 0               | 0               |

gene\_expression\_table

|                 |                 |
|-----------------|-----------------|
| 0               | 0               |
| 0.0524547672    | 0               |
| 0.9968509718    | 0.6142309939    |
| 2.5388174531    | 2.6207883573    |
| 1.0223696486    | 1.4603499284    |
| 2.1451732754    | 2.5234254446    |
| 0               | 0.0801308591    |
| 98.7385009795   | 131.3293127297  |
| 0.3990743421    | 0               |
| 2.3997143491    | 3.0507809133    |
| 2224.6756731958 | 2461.9827594161 |
| 16.2478439672   | 14.8930746021   |
| 84.3738011051   | 122.3644786492  |
| 12.3868136463   | 22.7370782256   |
| 9.4172463077    | 8.5232724344    |
| 351.2525609537  | 120.4877835454  |
| 3495.2344982885 | 2694.3622785945 |
| 11.2213628323   | 11.8009155151   |
| 239.7169112184  | 143.2307288799  |
| 807.904853755   | 886.923962209   |
| 11.07062023     | 12.4025433529   |
| 68.3056998786   | 92.1815809003   |
| 1.3385203002    | 0               |
| 67.9707463921   | 66.4248438494   |
| 51.9656651301   | 47.8397894355   |
| 0               | 0.0958400687    |
| 169.5228121544  | 115.4291535634  |
| 24.7200857846   | 12.575683013    |
| 66.6741366603   | 76.6378941243   |
| 82.3071888683   | 71.3184334142   |
| 0               | 0               |
| 0               | 0               |
| 7.7786048256    | 8.544066098     |
| 4.8894489972    | 5.5729704799    |
| 8.0227853095    | 6.005630735     |
| 0               | 0               |
| 0               | 0               |
| 0.0747125126    | 0               |
| 2.213553475     | 2.134844138     |
| 4.7495525439    | 5.9861007217    |
| 10.5465172051   | 7.215824226     |
| 2.4080489633    | 1.2854056712    |
| 8.0366418811    | 9.330944008     |
| 1.8501667988    | 0.9700531657    |
| 4.4005235947    | 4.4369615407    |
| 2.3266345924    | 2.0331133146    |
| 13.0834074609   | 14.3042994906   |
| 0.5214471008    | 0.5257648737    |
| 0.1720034974    | 1.5608497437    |

gene\_expression\_table

|                |                |
|----------------|----------------|
| 28.8514961815  | 16.8418088648  |
| 0.6147214548   | 0.2479246294   |
| 4.8046803941   | 7.0464944092   |
| 7.3470587894   | 6.3496243932   |
| 0.7154309341   | 1.1060776116   |
| 0              | 0              |
| 0              | 0              |
| 0              | 0              |
| 1.2029700617   | 0.9677641708   |
| 5.8115052719   | 5.6503542819   |
| 11.0822306673  | 11.6037646548  |
| 0.0290079607   | 0              |
| 9.7809418568   | 9.44227497     |
| 0.2941325707   | 0.395424128    |
| 6.0237276622   | 4.6075634243   |
| 1.1846396937   | 1.692136004    |
| 1.490382344    | 1.8032679064   |
| 1.5811062936   | 0.8439874054   |
| 56.1060843642  | 36.5758598785  |
| 2.3768022806   | 2.3166003043   |
| 0.2700583992   | 0.0907648605   |
| 5.9888132633   | 8.8563241494   |
| 31.3747769049  | 47.8284593545  |
| 0              | 0              |
| 3.7686764742   | 6.5997959121   |
| 107.3316074395 | 129.7642188917 |
| 0.3898994428   | 0.477369657    |
| 8.5239659529   | 6.52000156     |
| 2.9361347342   | 2.2638712388   |
| 17.4566358587  | 16.9871884306  |
| 62.2384639566  | 65.121889944   |
| 10.513046387   | 0              |
| 0              | 0              |
| 6.5137257927   | 5.4183210068   |
| 5.0921413652   | 2.7646263936   |
| 0              | 0              |
| 0.3769153015   | 0.3040290385   |
| 0.8859037906   | 0.5779784342   |
| 3.5133396638   | 5.0721176895   |
| 5.1717586936   | 4.8202025407   |
| 75.699462858   | 65.5840646348  |
| 384.2924696302 | 356.6578624272 |
| 62.0906055489  | 76.1408981627  |
| 19.043699353   | 21.77165271    |
| 0.7641201156   | 0.8474920409   |
| 6.1305892507   | 1.0302254623   |
| 39.7688454656  | 37.8704712811  |
| 0              | 0              |
| 25.4573056104  | 29.0698979923  |

gene\_expression\_table

|                 |                 |
|-----------------|-----------------|
| 5.7495956374    | 4.637763515     |
| 0               | 0               |
| 14.5401408166   | 16.1771459361   |
| 2.6470714318    | 4.0924515666    |
| 46.5605351007   | 46.4301824573   |
| 0               | 0               |
| 0               | 0               |
| 6.9394300004    | 9.795647429     |
| 95.9014062588   | 98.3709221705   |
| 0.5788032241    | 2.917979633     |
| 0.3800174953    | 0               |
| 0               | 1.2268217413    |
| 25.6392050446   | 35.1315352176   |
| 558.7756051218  | 649.0503533329  |
| 0.2334716788    | 0               |
| 93.9028160954   | 100.8284414833  |
| 90.7736835566   | 141.6463330309  |
| 1.2098434695    | 0.6099307081    |
| 81.5812630582   | 68.6270276685   |
| 19.4515036193   | 11.9854589488   |
| 713.5045748396  | 644.6925413286  |
| 5.3836695999    | 5.6576109613    |
| 0               | 0               |
| 0               | 0               |
| 0               | 0               |
| 158.3297265873  | 196.1046596432  |
| 1593.6114255069 | 1266.6615301604 |
| 1.8776970555    | 0.6310816915    |
| 3944.8286348173 | 4217.8538972191 |
| 0               | 1.068529446     |
| 16.1778613572   | 24.7489682314   |
| 129.9595260832  | 122.2017752556  |
| 36.0127304231   | 38.9678262572   |
| 30.8649988506   | 34.677209177    |
| 3.7470031702    | 1.889014864     |
| 889.3608907988  | 1040.9809053975 |
| 231.9430478961  | 269.2379504902  |
| 34.0185824006   | 32.5852552787   |
| 19.9700304723   | 21.2859833274   |
| 14.9299927761   | 22.5804278715   |
| 12.3700885033   | 14.5088467293   |
| 0               | 0               |
| 0               | 0               |
| 1.2906964622    | 1.0717279188    |
| 201.833423693   | 191.4652794084  |
| 15.871916826    | 15.5708193471   |
| 0.9548026983    | 0.5589922147    |
| 280.7782261563  | 395.662265376   |
| 31.34140307     | 42.7768569617   |



gene\_expression\_table

|                |                |
|----------------|----------------|
| 13.1248773773  | 14.4366067265  |
| 14.0394856699  | 20.2374621166  |
| 28.4958738208  | 35.1016226053  |
| 2.7175794861   | 0              |
| 0              | 0.0992786743   |
| 0              | 0              |
| 1.5328327809   | 1.0303501316   |
| 4.6068531535   | 4.9236995589   |
| 0              | 0              |
| 2.9825734847   | 4.0812953866   |
| 9.0027143972   | 9.0772601676   |
| 0.5429384485   | 0.7664078487   |
| 0              | 0              |
| 1.1249794981   | 1.4436478511   |
| 0.7491243723   | 0.1258878994   |
| 342.8656030784 | 346.6730161483 |
| 0              | 0              |
| 2.3868948693   | 1.7190423089   |
| 6.3019994907   | 6.8191225254   |
| 17.3867393259  | 12.2183721667  |
| 0.16364559     | 0.4537517473   |
| 4.3516624835   | 5.5843401621   |
| 9.4092292454   | 11.9167748058  |
| 0.0155153906   | 0.093863182    |
| 0              | 0              |
| 1.1289454964   | 1.2312155031   |
| 3.2247972075   | 3.3443997004   |
| 0              | 0              |

gene\_expression\_table

| LZ3_U937_0H_R1_001 trimmed (GE) - TPM | C1_U937_24H_R1_001 (GE) - TPM |
|---------------------------------------|-------------------------------|
| 0                                     | 0.1121412914                  |
| 3.1100517472                          | 2.2463533751                  |
| 0                                     | 0                             |
| 1.1206796055                          | 0.2977300398                  |
| 11.6550332553                         | 15.2342053968                 |
| 11.2772250917                         | 3.4953464268                  |
| 4.0683476776                          | 0.8106259653                  |
| 6.73193829                            | 4.0240542897                  |
| 353.8780633523                        | 101.8490388806                |
| 15.2419022604                         | 15.0291467352                 |
| 0                                     | 0.9701715116                  |
| 2.2410888758                          | 2.3544899368                  |
| 0.2927842873                          | 0                             |
| 109.5662922036                        | 76.7795398137                 |
| 183.9569023282                        | 54.2274813308                 |
| 0                                     | 2.3505265786                  |
| 164.8126546759                        | 53.1615848918                 |
| 5.4536524615                          | 11.1079835245                 |
| 5.8870891307                          | 6.4966909174                  |
| 54.2098188618                         | 22.5029351728                 |
| 22.0230405839                         | 20.1211927768                 |
| 28.8940123637                         | 11.5143731657                 |
| 0                                     | 0                             |
| 27.9194577369                         | 27.5115870344                 |
| 0                                     | 0.7752969243                  |
| 457.1356375234                        | 482.5050655019                |
| 30.9872680462                         | 38.0746756963                 |
| 277.9962490212                        | 126.8304966382                |
| 0.3438320216                          | 0                             |
| 5.4090102818                          | 1.4122313756                  |
| 25.9114678654                         | 11.1966700197                 |
| 1.260655827                           | 0                             |
| 30.3061888575                         | 14.0196064267                 |
| 13.4767668401                         | 24.1674414164                 |
| 2.7380826618                          | 2.9096967801                  |
| 0                                     | 0                             |
| 11.7237304287                         | 8.5462516452                  |
| 1.123350701                           | 0.7162552022                  |
| 1.5864043372                          | 4.0460040066                  |
| 28.6026258138                         | 46.7858586853                 |
| 22.8334849849                         | 21.5508081135                 |
| 21.9460819322                         | 14.0724600173                 |
| 4.2246347432                          | 0                             |
| 0                                     | 0                             |
| 0                                     | 3.2765956074                  |
| 0                                     | 0                             |
| 0.2608185777                          | 0.1039371893                  |
| 0                                     | 0                             |

gene\_expression\_table

|                |                 |
|----------------|-----------------|
| 7.9694181887   | 4.9622551218    |
| 4.2305944949   | 2.098783305     |
| 0.5990077716   | 0.5171982002    |
| 56.2820244492  | 44.2617495087   |
| 0              | 1.0758595473    |
| 0              | 0               |
| 0.777792185    | 0.1549765632    |
| 15.7103604514  | 18.4973396506   |
| 37.2788214101  | 23.7692020334   |
| 0              | 0.0227661413    |
| 0              | 0.0615008297    |
| 87.6356916075  | 67.1179374149   |
| 21.1063546853  | 18.7071399283   |
| 0.252456741    | 0.2347449201    |
| 0              | 0.145717261     |
| 58.7780682581  | 38.4072939703   |
| 1.7088012074   | 1.2381158938    |
| 7.4644622783   | 13.2866200923   |
| 29.6386837797  | 24.3761568385   |
| 0.8141966455   | 1.2978417657    |
| 8.2729844046   | 11.9767127863   |
| 0              | 0               |
| 576.5573159415 | 1158.9830350936 |
| 0              | 0               |
| 34.7344259196  | 14.9794822441   |
| 2.0655147417   | 11.935173787    |
| 4.8372793692   | 2.8590222856    |
| 21.3780340943  | 7.7600883338    |
| 0              | 0               |
| 4.5456887937   | 3.3210359784    |
| 56.074695998   | 27.8748802163   |
| 36.0830720215  | 36.6263676139   |
| 50.1720741742  | 59.9812837275   |
| 1.0390235289   | 0.4968657654    |
| 0.3360453702   | 0.3048711171    |
| 22.8514333839  | 27.0431968038   |
| 2.1959470608   | 2.4410494691    |
| 0              | 0.0416935357    |
| 0              | 0.205514991     |
| 179.6123244227 | 125.5847585026  |
| 0.9631531279   | 3.8382016284    |
| 1.3368741775   | 1.8113480076    |
| 914.9363823691 | 916.4746391275  |
| 0.2401556448   | 0.2871087972    |
| 0              | 0.1657124363    |
| 5.4843116372   | 12.5667338004   |
| 1.3650055239   | 0.6527518343    |
| 6.3509876381   | 7.8227588984    |
| 0.1836438268   | 0.6220534537    |

gene\_expression\_table

|                |                |
|----------------|----------------|
| 2.9254900515   | 2.5259408326   |
| 4.5957405492   | 6.3561046498   |
| 11.033167575   | 5.8623453219   |
| 22.2015357259  | 27.1923159053  |
| 8.0326714716   | 7.9292062989   |
| 5.8985697467   | 7.63945762     |
| 16.8402681489  | 17.8957613996  |
| 0.7846860452   | 0.9902177929   |
| 0              | 0              |
| 1.0444114788   | 0.9459134611   |
| 1.070780691    | 1.1160111711   |
| 62.7947195441  | 31.670915386   |
| 10.5180579017  | 5.0739039105   |
| 0              | 0.3841794137   |
| 0              | 13.5021550282  |
| 9.3640332376   | 12.1277086044  |
| 0.7227372794   | 0.6120287688   |
| 1.143178376    | 0.332909892    |
| 89.2210206325  | 68.7603844158  |
| 0              | 0              |
| 545.0706969943 | 194.1049958802 |
| 9.3003371139   | 5.1381679451   |
| 1.7142126786   | 1.1505182876   |
| 13.0728112137  | 5.7411529266   |
| 0.4818320685   | 0.6720416533   |
| 0.7861321883   | 0.3132766492   |
| 4.1151285221   | 2.7331571233   |
| 19.5179150238  | 20.5791935798  |
| 0.8013482275   | 0.3193402983   |
| 38.3372587035  | 55.3810916854  |
| 6.9090423895   | 9.49881432     |
| 3.0395385494   | 4.617957738    |
| 187.2474710957 | 267.725784751  |
| 13.9469997079  | 22.3689613421  |
| 8.4454675053   | 11.4428724833  |
| 7.6932683285   | 8.7594186132   |
| 66.594833658   | 29.1921222844  |
| 0.773682705    | 0.7359788948   |
| 1.5345408766   | 3.3911582541   |
| 0              | 28.4541462023  |
| 2.2865013333   | 2.2001649551   |
| 0.0804592457   | 0.1030606509   |
| 0.2068154939   | 0.8241675624   |
| 0              | 0              |
| 28.223179693   | 14.9503387233  |
| 0              | 0.2595563428   |
| 0              | 0              |
| 0              | 1.0999081725   |
| 1.2601291744   | 1.0043324803   |

gene\_expression\_table

|                |                 |
|----------------|-----------------|
| 1.7234847021   | 1.4985058249    |
| 0              | 0               |
| 0.4842826708   | 0               |
| 3.0363423133   | 0               |
| 4.7569970967   | 4.2126251726    |
| 0              | 0               |
| 0              | 0               |
| 0              | 0               |
| 824.1806940157 | 1292.9032124637 |
| 4.0287152082   | 1.7569165664    |
| 1.2324728255   | 1.3097202148    |
| 14.2244169002  | 3.2121408838    |
| 0              | 0               |
| 0              | 0.4870230665    |
| 1.7986646729   | 1.3273605043    |
| 15.6058569451  | 7.9314693247    |
| 10.5107885568  | 15.0211466787   |
| 0              | 0               |
| 5.0883162008   | 5.8091244267    |
| 0              | 0               |
| 8.5771197102   | 32.1863044494   |
| 0.2389976394   | 1.0476560915    |
| 2.1643640922   | 0.9703206827    |
| 11.9127334744  | 12.5011425629   |
| 0.4007121334   | 0.6387412005    |
| 0              | 0.0797828428    |
| 0.1261107594   | 0               |
| 71.4488150469  | 70.9690750409   |
| 0.7922423564   | 3.1571157424    |
| 1.1771110896   | 0.0390902683    |
| 0              | 0               |
| 13.2373684237  | 6.8845065246    |
| 0.2686710622   | 0.6959318214    |
| 5.1816927771   | 4.3363407401    |
| 14.1172661779  | 20.9404180161   |
| 64.223541836   | 20.6715311086   |
| 0.9350659602   | 4.4715278437    |
| 139.4375630021 | 113.8071105729  |
| 4.8382294388   | 1.6526166198    |
| 14.5682574988  | 17.1873523749   |
| 94.7146517018  | 76.6838095377   |
| 0              | 0               |
| 0.9243815974   | 0               |
| 0.7742643351   | 0.7832353644    |
| 0.9013275469   | 1.167342914     |
| 0              | 0               |
| 1.9714962135   | 3.535419126     |
| 5.4328378867   | 14.5055431321   |
| 0              | 0.1613417994    |

gene\_expression\_table

|                 |                 |
|-----------------|-----------------|
| 20.1354112626   | 9.482953425     |
| 14.020401359    | 4.9663848427    |
| 5.8734240288    | 5.6173960343    |
| 12.8627107999   | 12.5816045321   |
| 92.8546892215   | 299.1788475209  |
| 0.2526107775    | 0.6039980992    |
| 27.2902811555   | 25.7278057682   |
| 0.5690855552    | 0.8012990333    |
| 2.5235520338    | 2.1861848396    |
| 1.1699690782    | 2.1563465918    |
| 0               | 0.0383007762    |
| 6.6157050857    | 10.1194517739   |
| 0               | 5.3883920694    |
| 0               | 0.1218763944    |
| 1.2929625208    | 0               |
| 46.4362981936   | 34.4360714034   |
| 0.8942253642    | 1.2335268061    |
| 0               | 0               |
| 20.7142489667   | 13.7578442116   |
| 0               | 0               |
| 0               | 0               |
| 2.9577506268    | 4.3218076259    |
| 1.951064894     | 0.7176985261    |
| 31.1730536335   | 18.0373050288   |
| 2.0269486845    | 3.7694846654    |
| 0.3140179571    | 1.1888047596    |
| 0               | 0.0500234682    |
| 13.2116691231   | 6.4714396995    |
| 22.6431361359   | 13.5350630346   |
| 1354.0322541668 | 2524.1081864934 |
| 13.1774072899   | 9.6022795419    |
| 52.1774782373   | 27.628951607    |
| 237.0277072525  | 65.5291534905   |
| 31.0948048581   | 18.3177177407   |
| 3.8797921922    | 8.919876097     |
| 29.3096391094   | 27.4540253083   |
| 5.7553023662    | 1.5726924013    |
| 86.7705974781   | 112.8691533635  |
| 79.3770675579   | 47.0252037575   |
| 0               | 0               |
| 0               | 0               |
| 0               | 0               |
| 0.3116955551    | 0.2484237143    |
| 0.1202398818    | 0               |
| 2.7150066096    | 3.2928620823    |
| 1.0150333837    | 0.6471914254    |
| 0               | 0               |
| 31.8546112674   | 27.89013934     |
| 1.9184352288    | 2.9164400088    |

gene\_expression\_table

|                 |                 |
|-----------------|-----------------|
| 26.8029547063   | 13.3299863219   |
| 60.443568892    | 64.3232138564   |
| 3.0053521295    | 5.1703175828    |
| 13.4540852802   | 13.7534229186   |
| 0               | 0.123839834     |
| 4.0594310083    | 2.2243355808    |
| 10.6728849285   | 7.9672338633    |
| 0.0415510041    | 0.0993493933    |
| 13.6498283304   | 14.4535503471   |
| 0               | 10.9720839025   |
| 11.497889592    | 2.4437079851    |
| 0               | 0               |
| 661.2696474578  | 477.3490954457  |
| 1.6495448905    | 1.3146997505    |
| 0.4359934016    | 1.9111952078    |
| 1.9501915994    | 10.8802221555   |
| 590.8776281515  | 204.2102914668  |
| 0.5678290829    | 0.2262820363    |
| 0               | 0               |
| 3.7824756051    | 1.7585526338    |
| 652.6298320557  | 375.3184716412  |
| 0               | 0.4676688261    |
| 405.4286568104  | 102.3244066031  |
| 0               | 0               |
| 3.0659860397    | 2.6592270616    |
| 3595.6233659215 | 1739.7236129126 |
| 31.0931325421   | 18.6480499607   |
| 4.6605455912    | 4.7571539571    |
| 5.3927719431    | 2.4176700086    |
| 7.7633906943    | 4.5439314218    |
| 10.7045497829   | 0               |
| 6.4001468421    | 4.8459171555    |
| 10.5742810731   | 3.3711127884    |
| 24.8102738015   | 10.5147331735   |
| 0               | 0               |
| 2.9208361387    | 1.9399404067    |
| 1.3746077253    | 0.4481888527    |
| 1.0445594364    | 0.9460474648    |
| 8.3929647305    | 3.1478853422    |
| 3.5365085749    | 7.7512162062    |
| 2.1893588871    | 1.0905847422    |
| 0               | 0               |
| 0               | 0               |
| 17.1940009687   | 16.5750104312   |
| 1.1070531688    | 0.9224356439    |
| 15.1210447347   | 3.253928487     |
| 43.4671178815   | 32.8202731149   |
| 1.5243775038    | 0.5315364236    |
| 3.1573932922    | 3.9388168612    |

gene\_expression\_table

|                |                |
|----------------|----------------|
| 29.5893966385  | 9.9155681328   |
| 19.3918345325  | 8.7184526286   |
| 39.9178429     | 31.9353333155  |
| 0              | 0.4635401958   |
| 8.150829742    | 8.769968463    |
| 3.2714427821   | 2.583661319    |
| 8.4270493042   | 9.4749524857   |
| 26.4304726847  | 26.2887926013  |
| 848.7804864426 | 882.4920806565 |
| 4.276709234    | 6.208466052    |
| 23.2385234125  | 23.3529168413  |
| 2.0448115869   | 1.651174116    |
| 43.176798652   | 47.3168231253  |
| 16.5417560004  | 7.9103427661   |
| 6.172271755    | 5.4727738261   |
| 1.6516054336   | 1.4958432033   |
| 25.8985209118  | 14.8042232541  |
| 0              | 0              |
| 0.4834040064   | 3.1303727673   |
| 81.873717057   | 43.3101581214  |
| 10.2335720051  | 14.5180969963  |
| 3.307617009    | 2.4897404459   |
| 0.3897229995   | 0.9939589678   |
| 0              | 4.785123295    |
| 125.3807255732 | 97.6080178405  |
| 4.0904154294   | 3.3227861037   |
| 0              | 0              |
| 2.4576185675   | 0.6780255858   |
| 1.227903665    | 1.1009795688   |
| 29.1417765541  | 14.6164981665  |
| 7.0057348724   | 3.5735191463   |
| 0              | 0              |
| 0              | 0              |
| 16.9364551797  | 16.7818975855  |
| 0              | 0              |
| 0              | 0              |
| 0              | 0              |
| 70.8954158125  | 55.4513095018  |
| 54.0883111026  | 32.7961291033  |
| 6.8474265296   | 4.0930880399   |
| 8.4221434425   | 6.4260023476   |
| 17.7685636604  | 7.3821521275   |
| 101.2494279162 | 90.7836295845  |
| 0              | 0.1596792394   |
| 0              | 0              |
| 0              | 0              |
| 90.6030487185  | 55.697874678   |
| 0.4030027474   | 0              |
| 45.762298324   | 22.7617899162  |



gene\_expression\_table

|                |                |
|----------------|----------------|
| 143.0418219118 | 79.1057972277  |
| 7.2261206183   | 31.6760002457  |
| 0              | 1.3582401162   |
| 1.4157178884   | 5.5476611538   |
| 0.6321206013   | 0.6297561237   |
| 3.2634093115   | 4.7374663124   |
| 8.6311996274   | 5.759272772    |
| 24.0202509566  | 22.9486419632  |
| 0.4248606472   | 1.1851600193   |
| 37.3324800558  | 20.7755577919  |
| 6.1837184442   | 8.3917197975   |
| 0              | 0              |
| 1.0288322588   | 4.5099289927   |
| 4.9400211813   | 5.3922990606   |
| 122.4379990005 | 153.1526839289 |
| 0              | 0.2418527067   |
| 0.1752026656   | 0.6981892462   |
| 2.6940333956   | 2.020861164    |
| 0              | 0              |
| 3.3423373117   | 2.9511480042   |
| 0.4445719914   | 0              |
| 0.0107974323   | 0.008606       |
| 40.9243346572  | 21.0527935972  |
| 0              | 0              |
| 7.3660298087   | 24.2169735003  |
| 2.6122195703   | 4.9599605501   |
| 1.1177134321   | 2.0785941326   |
| 221.0197390737 | 78.7179543923  |
| 9.4609896726   | 15.1724712969  |
| 3.7407005728   | 3.5686055251   |
| 7.8307092593   | 0.3120567245   |
| 6.600593439    | 11.6650811692  |
| 26.7860457318  | 16.1772613688  |
| 18.5426008188  | 9.5005241097   |
| 8.3854576332   | 2.4354300422   |
| 2.9407109116   | 4.9107537438   |
| 3.059951483    | 3.0485055866   |
| 1.2462154627   | 1.7381755069   |
| 96.9645549608  | 125.8584159627 |
| 0              | 0              |
| 75.1323699412  | 46.9260284229  |
| 24.0406078356  | 12.8488368798  |
| 20.2593119531  | 17.1170202966  |
| 0.6153922779   | 0.8583265227   |
| 0              | 0              |
| 9.1190586913   | 4.966438465    |
| 114.7202356134 | 46.9520272766  |
| 0.8641180457   | 0.5165314622   |
| 11.3533103758  | 22.2985186031  |

gene\_expression\_table

|                |                |
|----------------|----------------|
| 11.8173345869  | 17.0507418477  |
| 0.1179344828   | 0.6932107247   |
| 43.5428732673  | 17.3519996183  |
| 12.1739494664  | 21.4362634589  |
| 4.9525221528   | 5.4978823762   |
| 0              | 0              |
| 8.4437667745   | 14.4208842117  |
| 0.6536864012   | 0.5209930045   |
| 90.218234832   | 93.2816631333  |
| 0              | 0.0569368433   |
| 22.5845253569  | 21.6000449745  |
| 24.1219243488  | 28.8380341502  |
| 246.8065332342 | 217.0556393667 |
| 2.1090259745   | 2.241212865    |
| 4.8063178251   | 3.5709650963   |
| 27.4002037424  | 21.838169565   |
| 46.6481551788  | 37.819948476   |
| 55.1950586769  | 26.6260584112  |
| 0              | 0              |
| 49.1410951041  | 30.8657821199  |
| 38.1353886906  | 32.4548164049  |
| 0              | 0              |
| 0.2512536004   | 0.0500627548   |
| 16.6197849061  | 7.0015069544   |
| 341.703164745  | 290.4960064384 |
| 1.4845957684   | 2.3386273047   |
| 0.5521055446   | 0.2200161468   |
| 66.2701542568  | 106.6849886116 |
| 0              | 0              |
| 0              | 0              |
| 19.3713068318  | 20.1379278496  |
| 0              | 0.0885342753   |
| 3.8586850232   | 0              |
| 3.3135950106   | 6.4043286757   |
| 4.2707775984   | 5.9567235678   |
| 10.8958439854  | 13.2148891967  |
| 84.8995979901  | 43.732997136   |
| 56.5651651776  | 90.8453698814  |
| 7.166260984    | 8.8141422697   |
| 5.0641837149   | 2.1733345377   |
| 2.8699068198   | 6.8620123072   |
| 7.2338388101   | 8.7611838776   |
| 1.6860082602   | 1.0078209989   |
| 0.36803187     | 1.1732967329   |
| 4.4898197769   | 1.4313681245   |
| 1.6736796819   | 2.0009030426   |
| 1.4781046165   | 0.7461050187   |
| 2.1985160939   | 2.2428594567   |
| 0.1246898183   | 0              |

gene\_expression\_table

|                 |                  |
|-----------------|------------------|
| 218.0709986748  | 225.945505309    |
| 14.1750737761   | 3.5410516511     |
| 0               | 0                |
| 1.8990682135    | 3.1967678689     |
| 2.5994151636    | 1.2948459628     |
| 0.0531632401    | 0.0264821902     |
| 1.546002246     | 1.6546356445     |
| 0               | 0                |
| 0               | 0.6487757832     |
| 13.6295973777   | 25.1821591169    |
| 0               | 0.3363406666     |
| 66.7167026595   | 68.8304218976    |
| 149.7775900757  | 252.0115071541   |
| 9.4973860965    | 19.1940602059    |
| 5.7975630002    | 6.2709521015     |
| 0               | 0.5477523367     |
| 7.4896639552    | 7.5973148417     |
| 1.2619215911    | 0.8046088399     |
| 4.7676487602    | 9.4996302792     |
| 15.6164756869   | 11.7826385797    |
| 66.2166341665   | 28.0576789991    |
| 0               | 0                |
| 0               | 0                |
| 0               | 0                |
| 0               | 0.1594522933     |
| 122.5770462897  | 46.8671157062    |
| 24.0726514997   | 11.9913032918    |
| 51.252224172    | 106.3958591273   |
| 0.1093522906    | 0.2614638075     |
| 189.7517648579  | 141.202791942    |
| 0.4163202927    | 1.5760995009     |
| 12.5771359134   | 10.8340984774    |
| 0.2202705354    | 0.5517514584     |
| 5.3076242502    | 4.4946052014     |
| 64.30459356     | 23.1457245854    |
| 843.8953652386  | 353.9548459384   |
| 42.3352871112   | 43.1141950334    |
| 1.3324955476    | 4.2480361074     |
| 0               | 0                |
| 1.3117515425    | 2.2446982515     |
| 7.7641935822    | 5.4146058686     |
| 1.0486916363    | 1.0238735754     |
| 7.102794186     | 9.9123998931     |
| 1.976849026     | 3.9389090534     |
| 13.2755262161   | 15.4301798802    |
| 36.3649164383   | 44.9737966068    |
| 8169.4271198848 | 11519.2893211614 |
| 0               | 1.0205643009     |
| 13.4154663498   | 7.7761659052     |

gene\_expression\_table

|                |                |
|----------------|----------------|
| 0              | 0              |
| 0              | 0              |
| 0.3046725892   | 0.1214131786   |
| 1.550262072    | 0.8648994154   |
| 2.3972212133   | 2.2290373387   |
| 356.1903379471 | 317.1915001347 |
| 0.111020277    | 0              |
| 0              | 0              |
| 3.614297235    | 4.801037042    |
| 42.0239982353  | 20.4682159925  |
| 0              | 0.6086566315   |
| 29.8472750758  | 10.1227676259  |
| 511.7209984549 | 422.9859414487 |
| 28.8497419756  | 46.5690379692  |
| 86.8719630814  | 61.1250838854  |
| 8.6514384758   | 10.8623988548  |
| 13.4875275929  | 25.9783485654  |
| 0.1245926975   | 0.893711898    |
| 0.593269744    | 0.9456809437   |
| 0.8258665824   | 0.4936664331   |
| 0              | 0              |
| 1.5578716324   | 1.862453206    |
| 5.2587322253   | 9.2025257393   |
| 12.1217760939  | 13.3683315958  |
| 707.2991630072 | 614.4280047392 |
| 5.0724033744   | 4.3796391639   |
| 6.1102086201   | 6.7318963577   |
| 0              | 0.1149965494   |
| 4.953119634    | 3.4401157405   |
| 1.5338872142   | 9.1688978096   |
| 2.5295425975   | 3.696118391    |
| 0              | 0.6583957371   |
| 7.2136124152   | 6.6436397612   |
| 0.2769162348   | 0              |
| 6.4232431662   | 7.809213618    |
| 8.5940830212   | 14.8199336169  |
| 3.5528730349   | 0              |
| 7.527530997    | 4.7995992983   |
| 0              | 0              |
| 0.1318232581   | 0.0262660334   |
| 0              | 0.001865       |
| 0              | 0.1080328108   |
| 0.4610776267   | 0.6755190346   |
| 43.818767431   | 33.5080556345  |
| 8.8983819681   | 13.6560219779  |
| 0              | 0.0484758783   |
| 2.3021408672   | 2.5653553281   |
| 2.0010550441   | 1.7250483274   |
| 7.1365851947   | 6.187948614    |

gene\_expression\_table

|                |                |
|----------------|----------------|
| 0              | 0.033870302    |
| 29.0973608072  | 33.2297942248  |
| 37.349158809   | 117.4164944787 |
| 15.6939822232  | 21.686333814   |
| 0.3405644661   | 0.4750067956   |
| 4.3360770823   | 3.9271434331   |
| 9.3661573076   | 8.0586969149   |
| 52.866806943   | 39.9176004103  |
| 1.7299750934   | 3.1238510688   |
| 0              | 0.8396245592   |
| 7.0236089636   | 4.6648912099   |
| 13.8826834934  | 15.7906907303  |
| 0.8110909228   | 0.5925751318   |
| 0.2248423947   | 0.1792010887   |
| 2.0369702575   | 2.3224793311   |
| 0              | 0              |
| 10.6946097147  | 5.2089184939   |
| 33.3565947025  | 31.3022330402  |
| 39.0379466119  | 38.0542510923  |
| 9.5171241454   | 3.367576079    |
| 0              | 0.0240815479   |
| 13.0956567877  | 12.6245736437  |
| 2.9560023025   | 1.5460962473   |
| 0              | 0.1659624757   |
| 9.3850803666   | 16.206623368   |
| 31.2216035333  | 19.4246412055  |
| 33.2375215946  | 57.2571466972  |
| 2.3993050784   | 1.5776180388   |
| 2.0299203929   | 2.7301419597   |
| 45.581945389   | 59.5886751921  |
| 3.4059206637   | 2.3565826072   |
| 0              | 0.3562183122   |
| 7.8469698081   | 4.495130257    |
| 17.0474622278  | 7.1070232939   |
| 9.1931053843   | 3.2971385266   |
| 0              | 0              |
| 0.1944158191   | 0.3099017557   |
| 121.0393450375 | 80.5898642543  |
| 0              | 0              |
| 1.03909186     | 1.4492871214   |
| 0.4977657287   | 0.1983615248   |
| 0              | 0              |
| 0.1558029283   | 0.062088056    |
| 0.0224750134   | 0.0134345667   |
| 0.426037226    | 2.2919955109   |
| 0.9311280156   | 1.7934471669   |
| 67.7772276351  | 172.1854442817 |
| 0.1962085307   | 0.2646425397   |
| 0              | 0              |

gene\_expression\_table

|                |               |
|----------------|---------------|
| 0.3102436187   | 0.2109037879  |
| 6.3440444214   | 9.6700807515  |
| 0.0167003006   | 0.006655      |
| 1.859955707    | 1.4487078813  |
| 78.0967379487  | 67.671919498  |
| 0.09037174     | 0.1800674003  |
| 0.3468609121   | 1.6932609642  |
| 1.8841895955   | 2.1340137145  |
| 3.4873096724   | 4.8809189461  |
| 0.5666861097   | 0.5871490486  |
| 14.6082658807  | 11.1822081419 |
| 0              | 0             |
| 0              | 0.0126189603  |
| 0.3189993193   | 0.0317806087  |
| 1.8906773438   | 2.2842450045  |
| 0              | 0             |
| 4.1497107933   | 4.1341885995  |
| 0.0465566061   | 0.2782947531  |
| 4.523291441    | 20.0082910176 |
| 0.1813761613   | 0.2457488925  |
| 0              | 0.0128736934  |
| 0              | 0.2253769324  |
| 1.4358123071   | 2.9048967507  |
| 0.8947025456   | 0.305607726   |
| 0.0778738823   | 0.3413634016  |
| 279.2780191349 | 189.000393527 |
| 2.2258828217   | 42.5770905494 |
| 0.4255478019   | 0.6571318306  |
| 0              | 0             |
| 4.2711478436   | 7.4161558837  |
| 0.0360752309   | 0.0287522318  |
| 2.5435108926   | 2.9486507836  |
| 32.3517002032  | 42.4295054662 |
| 0.9533335341   | 1.3442863699  |
| 1.4886297551   | 2.1751568133  |
| 0.687059887    | 2.0991023792  |
| 0              | 0             |
| 54.3538844397  | 58.1242101393 |
| 0.0639906307   | 0.095626906   |
| 0.6708837558   | 5.3469942616  |
| 0.1423012769   | 0.008101      |
| 0              | 0             |
| 0              | 0             |
| 0.2520228267   | 1.506480739   |
| 4.1975497136   | 7.2764165223  |
| 8.589113242    | 11.6232382964 |
| 12.6572848955  | 5.0439758839  |
| 0              | 0.0241025526  |
| 0.1386977291   | 0.1959628371  |

gene\_expression\_table

|                |                |
|----------------|----------------|
| 22.0101828413  | 45.5970348557  |
| 0.0506235407   | 0.1311288702   |
| 2.9442670352   | 3.358863246    |
| 8.8125353103   | 7.2870444247   |
| 0.9861723305   | 1.4596897793   |
| 0.1217372911   | 0.5821532488   |
| 21.4483656908  | 15.6699671645  |
| 1.2695567907   | 1.156395842    |
| 0              | 0              |
| 0              | 0              |
| 0              | 0              |
| 0              | 0.004085       |
| 0.1315362466   | 0.4193415325   |
| 0.5369321978   | 0.534923777    |
| 15.8336498763  | 15.9945315765  |
| 140.6454940739 | 105.6415376313 |
| 0.5608719181   | 3.4085210925   |
| 5.6015966853   | 6.8280816328   |
| 2.2438125063   | 1.8479467182   |
| 0              | 0              |
| 0.3195351727   | 0.5093438976   |
| 39.1013415679  | 36.3580757029  |
| 6.9566588467   | 11.8450889098  |
| 0              | 0              |
| 2.6233174521   | 3.9915346134   |
| 0              | 0              |
| 0.8527411836   | 1.1893720496   |
| 0              | 0              |
| 6.2935095221   | 10.1605640883  |
| 9.8844099308   | 11.8708827393  |
| 1.2250006931   | 1.9383117652   |
| 8.6016834697   | 11.3803072309  |
| 0.555241518    | 0.9403798375   |
| 6.2670377255   | 3.2823473844   |
| 1.8460799859   | 4.5121084366   |
| 7.8173729903   | 0.4153670255   |
| 0              | 0.1730909553   |
| 0              | 0              |
| 0              | 0              |
| 0.5059115499   | 1.0080383266   |
| 0.6548506729   | 0.3355206029   |
| 0.9499583591   | 0.7841641378   |
| 0.7927389708   | 1.3122393658   |
| 5.9178527189   | 4.0229596339   |
| 2.3686263074   | 1.9140327031   |
| 0.1434005314   | 0.2666797183   |
| 3.6670730339   | 5.1709041176   |
| 0.5302229247   | 0.571741685    |
| 0              | 0              |

gene\_expression\_table

|                 |                 |
|-----------------|-----------------|
| 0               | 0               |
| 0               | 5.409384455     |
| 0               | 0               |
| 1.8299693379    | 1.4013033444    |
| 0               | 1.2890271316    |
| 115.998197047   | 120.6329098428  |
| 0.1984636788    | 0.1878352501    |
| 1008.6153094983 | 1383.3781352543 |
| 0.2732363884    | 0.1306628806    |
| 5.4083341661    | 8.339847978     |
| 13.4178702162   | 10.422259002    |
| 2.1277282888    | 3.0242043701    |
| 12.2426225399   | 10.0939269672   |
| 0.0578778955    | 0.2306456017    |
| 0.0246601082    | 0.196542927     |
| 26.711963775    | 16.9741701258   |
| 7.7882180336    | 6.3222180818    |
| 1.1066583142    | 1.1340193426    |
| 1.1099576537    | 1.1058058035    |
| 0               | 0               |
| 0.3899259555    | 0.1864643609    |
| 0               | 0               |
| 4.3076988645    | 2.1457928544    |
| 0.9791550031    | 2.1610909142    |
| 0.1752639531    | 0.2793733917    |
| 0.1509412915    | 0               |
| 0.9517954051    | 0.568941101     |
| 1.343805327     | 2.3367774689    |
| 0.9322174149    | 0.5572382463    |
| 4.6025279192    | 4.7798403265    |
| 2.8283879887    | 2.5762818439    |
| 0.4719534287    | 0.4701880641    |
| 3.6900365237    | 4.9907658369    |
| 8.7277156513    | 12.5419786169   |
| 0.4417297969    | 0.3520619882    |
| 5.193146927     | 2.3129579409    |
| 2.6523054436    | 1.8357617707    |
| 1.3615877287    | 3.6431570439    |
| 0               | 0               |
| 0.030322348     | 0               |
| 0               | 0               |
| 3.1244754565    | 5.6509078185    |
| 2.2621000304    | 1.126819268     |
| 0               | 0               |
| 18.5915812738   | 16.93443526     |
| 0               | 0               |
| 0.6970962755    | 0.7550339265    |
| 5.4687191004    | 4.9995826024    |
| 0.0891153532    | 0.7457689087    |



gene\_expression\_table

|                |                |
|----------------|----------------|
| 15.9488816729  | 14.6180861814  |
| 62.1543612813  | 55.7296829004  |
| 0              | 0              |
| 0.6717588587   | 1.4723414469   |
| 0              | 0              |
| 3.1023340884   | 1.3789409243   |
| 6.8328421074   | 12.0468290372  |
| 2.0523073555   | 2.6482834446   |
| 0              | 0.4824573561   |
| 19.31709803    | 46.1876195793  |
| 15.6469757118  | 12.4707579545  |
| 0.8104838188   | 1.0766028865   |
| 50.425538313   | 76.5146922442  |
| 0              | 0              |
| 10.2538483133  | 5.720676247    |
| 0.7907248042   | 2.5208545916   |
| 12.0201181383  | 6.2639279137   |
| 1.26473342     | 0              |
| 18.4590089635  | 17.5594477289  |
| 0.4228949998   | 0.674101025    |
| 28.1690625361  | 19.4727678179  |
| 0              | 0              |
| 0              | 0              |
| 40.6031571074  | 47.606660839   |
| 16.7831468252  | 11.4306520249  |
| 1.3632077246   | 3.2594605926   |
| 1.9568064619   | 0.6628255571   |
| 62.1668292356  | 46.8794942673  |
| 2.416978531    | 2.793207739    |
| 151.9044924222 | 119.3875147697 |
| 0              | 7.6039352748   |
| 3.9185699671   | 0.0975978092   |
| 5.2613590986   | 4.9029856435   |
| 8.611350732    | 21.4478488962  |
| 3.2501335018   | 3.1454626141   |
| 19.0697718532  | 15.049744984   |
| 0              | 0              |
| 0              | 0              |
| 0              | 0.208331415    |
| 40.350890757   | 8.0399912601   |
| 349.2173262397 | 376.2918383481 |
| 10.6781588959  | 8.8651806054   |
| 0.1745249326   | 0              |
| 0              | 0              |
| 3.5095803302   | 4.1153648704   |
| 0              | 0              |
| 2.2950333878   | 0.9977230711   |
| 12.306667038   | 9.5749708108   |
| 0.100431528    | 0.2801564052   |

gene\_expression\_table

|               |                |
|---------------|----------------|
| 0             | 0              |
| 0.6807139109  | 0.8680546146   |
| 41.6895090385 | 36.9904134391  |
| 7.2724650105  | 6.4957521412   |
| 26.9105935277 | 46.9173830164  |
| 2.6385160196  | 0              |
| 0             | 0.6813472221   |
| 17.0788882666 | 11.4693729721  |
| 0.8337596313  | 1.7562122164   |
| 0.0952884276  | 0.2658095905   |
| 1.9086908801  | 1.1633019899   |
| 1.8066371659  | 7.6979455376   |
| 1.3359675641  | 4.0171103987   |
| 0             | 1.0451894317   |
| 17.2615605432 | 12.4837429519  |
| 13.3806872286 | 13.0343997631  |
| 7.9531420197  | 8.2403286239   |
| 0             | 0              |
| 3.3293479102  | 4.1461179044   |
| 16.4865111381 | 10.3526280293  |
| 0.082283006   | 0.0983702669   |
| 25.478309605  | 84.3843957958  |
| 81.9514237442 | 143.8586203091 |
| 17.581475734  | 20.7686292011  |
| 0.3491611828  | 0              |
| 3.3926593633  | 6.8275372932   |
| 4.8779396113  | 3.6385397056   |
| 0.6018355853  | 2.6681505366   |
| 0.2252345387  | 0.2692704456   |
| 32.9618296111 | 37.8974436319  |
| 2.1796969595  | 2.5390357081   |
| 0             | 0.2403449808   |
| 0             | 0              |
| 0.2991241413  | 0.1788031518   |
| 6.4165793948  | 4.876198933    |
| 1.4997318309  | 1.7929464138   |
| 1.4671709784  | 3.2599959228   |
| 34.5504535454 | 38.5517618128  |
| 1.1089242624  | 1.6471209957   |
| 13.53596217   | 8.2283371013   |
| 0.121579048   | 0.1816864135   |
| 0             | 0              |
| 0.899981557   | 1.3833490616   |
| 0.9776353762  | 0.3895913935   |
| 21.0129093191 | 21.9270705862  |
| 1.5215751489  | 2.8411990201   |
| 13.7746137691 | 12.613562803   |
| 5.1400125132  | 5.9668289603   |
| 0.0611962463  | 0.3048366939   |

gene\_expression\_table

|                |                |
|----------------|----------------|
| 0              | 0.9051899387   |
| 0              | 0.688661644    |
| 0              | 10.7188503437  |
| 0              | 32.6135562784  |
| 0              | 0              |
| 3.1505109589   | 2.5109810563   |
| 7.0585347697   | 1.7580329948   |
| 39.119621765   | 41.9600312661  |
| 0.8126791318   | 1.6192785324   |
| 2.7830136347   | 5.5452072755   |
| 0              | 4.9086377131   |
| 0              | 7.1459002292   |
| 3.5118198525   | 10.8275054091  |
| 0              | 3.5729501146   |
| 0.9554899685   | 0.8159279247   |
| 3.7255142294   | 21.9725462794  |
| 0              | 0.6866011848   |
| 0.0607378514   | 0.0968170536   |
| 2.5406312573   | 2.0249023227   |
| 5.1375655873   | 2.7149499546   |
| 0.5760236918   | 0.7651587298   |
| 1.0569517168   | 0.7019987586   |
| 5.6520710558   | 4.0120370628   |
| 12.2721458455  | 6.0800767501   |
| 54.9585606925  | 61.4646418325  |
| 14.9462837712  | 9.2974057987   |
| 0              | 0              |
| 47.3736723761  | 25.911786828   |
| 490.7117034091 | 246.1966336682 |
| 16.2975204943  | 30.7640062067  |
| 8.8812859406   | 12.1749375245  |
| 1.3687750841   | 3.2727722753   |
| 157.2978362648 | 546.8159745012 |
| 0.1793479553   | 0.0357354191   |
| 0              | 0              |
| 0              | 0              |
| 0.6114998942   | 1.8032691459   |
| 2.0127663813   | 7.2188551131   |
| 9.5016231391   | 6.1130359954   |
| 0.5808088366   | 0.958883       |
| 1.6209427497   | 2.1531727134   |
| 2.3860824648   | 2.2373244311   |
| 19.0738251551  | 49.406444335   |
| 7.7534003634   | 7.6140498461   |
| 0.6066351335   | 0.3384449519   |
| 0.7093571339   | 0              |
| 0.2316058585   | 0.4037941697   |
| 0.955529811    | 2.5131627988   |
| 0.3739727252   | 0.8792743146   |

gene\_expression\_table

|                |                |
|----------------|----------------|
| 0              | 0              |
| 0.5579959043   | 2.858958996    |
| 0.5914346639   | 0.4713778992   |
| 0              | 0              |
| 10.7268463964  | 17.0987553746  |
| 0              | 0.5669056776   |
| 0              | 0              |
| 35.5466741527  | 0              |
| 13.882133101   | 0              |
| 184.5231849274 | 388.6754160218 |
| 144.9825024429 | 425.4420094293 |
| 13.882133101   | 0              |
| 0              | 0              |
| 25.3288042545  | 45.4213091488  |
| 193.2697889857 | 57.7640562002  |
| 15.7103604514  | 0              |
| 17.3926890006  | 78.5519263246  |
| 64.165491633   | 44.3216644075  |
| 1.7066540937   | 1.0201621629   |
| 0.5995350298   | 0.278736472    |
| 1.4430943002   | 1.329869111    |
| 132.3973190788 | 53.8160488476  |
| 168.6162700083 | 166.9578763798 |
| 0              | 1.0754470245   |
| 282.479590656  | 245.5602129446 |
| 0              | 2.9202791022   |
| 0              | 0              |
| 43.7042343328  | 34.4620455958  |
| 20.3942745312  | 13.869235807   |
| 4.0055439893   | 3.5416229394   |
| 3.4763614947   | 8.1735248719   |
| 1.217899547    | 11.1627642012  |
| 0              | 1.6970663739   |
| 0              | 0              |
| 473.4669000189 | 462.2349254337 |
| 179.2405497474 | 159.6846684873 |
| 3.7281746845   | 5.8877412084   |
| 2.9521173937   | 3.3724325015   |
| 0.5753017396   | 0.917039673    |
| 5.4573028313   | 9.2008899676   |
| 7.6782810528   | 12.6764138328  |
| 16.4662347769  | 44.2212089504  |
| 0              | 0.8239617626   |
| 1.8136681366   | 3.3728501769   |
| 8.5006027491   | 9.6493060409   |
| 0.6370602355   | 0.7616127371   |
| 207.0071024185 | 90.9737133351  |
| 14.5971133403  | 4.8475040441   |
| 0.7977152309   | 0              |

gene\_expression\_table

|                 |                 |
|-----------------|-----------------|
| 4.195028879     | 4.761911443     |
| 0               | 0.8385451566    |
| 2.2700343436    | 2.7138518045    |
| 6.7653714985    | 6.2907276128    |
| 0               | 0               |
| 75.7154135132   | 41.323724957    |
| 0               | 0               |
| 65.759047915    | 43.7425749078   |
| 5.4629886927    | 8.925788756     |
| 135.4778876861  | 82.2994671344   |
| 14.959067975    | 16.2579413      |
| 9.6014319059    | 7.9647572503    |
| 29.5016110034   | 38.6285115681   |
| 0               | 0               |
| 634.9846868453  | 442.2354233297  |
| 4.8375351205    | 8.3536961501    |
| 0               | 0.5038380829    |
| 1.1380847858    | 0.9070621797    |
| 3.7997788767    | 3.4472810328    |
| 0               | 0               |
| 100.4522064614  | 126.6541429828  |
| 0               | 1.006254188     |
| 4.3112255227    | 1.7180396701    |
| 0               | 0               |
| 0               | 0               |
| 9.19913674      | 3.4502501363    |
| 27.3353892857   | 51.7429658882   |
| 433.4810979121  | 399.354076548   |
| 0.7702168398    | 0.3069343226    |
| 0               | 0               |
| 0.7517480889    | 0               |
| 751.7214437542  | 49.4854716562   |
| 0               | 0               |
| 9.0810439375    | 0.6893010174    |
| 2904.3991022225 | 4943.7625517166 |
| 0               | 0.4381761975    |
| 6719.7835723844 | 3579.02478296   |
| 0               | 1.4562647144    |
| 7.4510284588    | 1.1877052043    |
| 2.2393386835    | 0               |
| 3.2213737659    | 2.5674592493    |
| 1.9330517666    | 6.932955935     |
| 93.6528684045   | 46.4237104542   |
| 204.6128345881  | 193.7646922873  |
| 103.5819545053  | 95.3031569897   |
| 0.1505216425    | 0.779784767     |
| 23.1425942696   | 10.9516134317   |
| 3.8092485887    | 3.8187186597    |
| 12.2895782822   | 11.5906160663   |

gene\_expression\_table

|                 |                 |
|-----------------|-----------------|
| 1.9221415063    | 1.5319613145    |
| 39.505867884    | 51.2426952928   |
| 8.4214675229    | 21.8139132033   |
| 1196.1403112502 | 726.3488552317  |
| 43.6576786669   | 55.6106651916   |
| 5668.9927803743 | 7828.377304876  |
| 0.4763322134    | 3.9171984229    |
| 154.974311525   | 63.3570042037   |
| 0               | 0               |
| 105.8457256319  | 192.9930385716  |
| 11.3787577285   | 8.9050591541    |
| 397.2686861385  | 253.1315985942  |
| 3.004643781     | 2.1770216478    |
| 26.1779033623   | 22.0861451494   |
| 3.2561336777    | 2.5086577232    |
| 0               | 0               |
| 53.1188036395   | 39.2722922971   |
| 0               | 0               |
| 38.2846033629   | 24.0443372702   |
| 0               | 0               |
| 41.2419976357   | 42.4181897776   |
| 9.3190883578    | 30.4058527832   |
| 60.661740755    | 34.1972711197   |
| 414.372658694   | 165.1290710961  |
| 1.7314247189    | 2.9899102845    |
| 788.1364159788  | 1105.959099647  |
| 38.7110450235   | 16.2835254509   |
| 6.1979733772    | 7.0569023523    |
| 0               | 0.1836902115    |
| 1.6439688134    | 3.439420884     |
| 289.9718785377  | 126.2815041364  |
| 6.0497176227    | 5.7860048271    |
| 1.6241471056    | 9.0612026674    |
| 5.000171556     | 3.9851745381    |
| 87.8316324737   | 108.1149339301  |
| 2019.7589026603 | 2299.6615964381 |
| 269.2517782031  | 185.9829427148  |
| 1.8755306846    | 1.9930828495    |
| 4.9620991837    | 17.4012545061   |
| 0.5177842627    | 3.9204407385    |
| 56.1306945675   | 47.4644287249   |
| 8.7851309908    | 6.4632146096    |
| 22.1034277736   | 16.9390375646   |
| 81.6331354073   | 62.1427673087   |
| 32.346073216    | 13.6792181276   |
| 0.5665948706    | 1.3547411882    |
| 43.697446907    | 71.0663045274   |
| 286.2625331709  | 181.001700083   |
| 27.4128197945   | 15.0206544495   |

gene\_expression\_table

|                |                |
|----------------|----------------|
| 1.7912154716   | 2.0429623933   |
| 80.6801337063  | 52.0267110785  |
| 32.5855524675  | 29.572739754   |
| 17.6968768485  | 16.1981880084  |
| 1.5392124835   | 2.0957218126   |
| 0.5467444638   | 0.4357594718   |
| 15.0135346072  | 9.9028142933   |
| 11.5111426111  | 17.8246801043  |
| 8.71363605     | 8.2075308766   |
| 197.9781614089 | 273.0801734493 |
| 11.3936566192  | 5.7511926353   |
| 126.446610513  | 98.5558406109  |
| 3.5240544173   | 4.4939168275   |
| 17.8573484013  | 13.5013231208  |
| 2.0052684162   | 5.2940841738   |
| 13.2755262161  | 7.0537965167   |
| 8.5737160913   | 7.7651324472   |
| 5.1336553481   | 18.4120295839  |
| 23.1521101389  | 17.9096889934  |
| 7.6584058707   | 3.3836323557   |
| 6.8960112502   | 4.4656406515   |
| 128.9055216526 | 116.7484948361 |
| 100.3585612812 | 49.1345840574  |
| 0              | 0.2896886842   |
| 0.4029681371   | 0.2141124348   |
| 8.5318912424   | 21.45772045    |
| 2.2367292846   | 2.139228183    |
| 145.8838683793 | 56.0465806417  |
| 0              | 0              |
| 0              | 0.2234428074   |
| 0              | 0.3189952619   |
| 1.0587802155   | 0.6328918781   |
| 87.0731916865  | 45.1505009262  |
| 12.4350556223  | 12.5537222518  |
| 251.9995689553 | 214.2824128851 |
| 503.6065264794 | 312.424119862  |
| 2.3222945679   | 2.3556735113   |
| 24.5304196347  | 2.3778158025   |
| 0              | 0.042431519    |
| 0.9286095719   | 0              |
| 0              | 0              |
| 0.1884166588   | 0.350395504    |
| 1.2134201739   | 1.7730259318   |
| 0              | 0              |
| 0              | 0              |
| 0.8388845628   | 0              |
| 0              | 0              |
| 0.1557201974   | 0              |
| 2.8141709245   | 0.5607288764   |

gene\_expression\_table

|                 |                 |
|-----------------|-----------------|
| 0.0923423488    | 0               |
| 41.211600128    | 27.5782091095   |
| 0.7113765964    | 1.0866973421    |
| 10.840228419    | 8.182345804     |
| 0.2014638829    | 0.0401420595    |
| 211.015359867   | 124.3837443072  |
| 0               | 0               |
| 5.190443571     | 1.0342056932    |
| 0               | 0               |
| 0.8437115179    | 0               |
| 1925.1994586948 | 1269.9901268266 |
| 0               | 0               |
| 68.3956830758   | 36.3412510497   |
| 5.2109389059    | 8.6524118952    |
| 0               | 0               |
| 32.8889788889   | 13.6641008309   |
| 14.2729996331   | 16.5845565825   |
| 53.9910649482   | 43.0312870086   |
| 21.3792121855   | 16.5292322773   |
| 7.969324192     | 10.5860193997   |
| 0               | 0               |
| 0               | 0.0729970549    |
| 0               | 0               |
| 3.8267488274    | 5.5915708765    |
| 0               | 0.1779109318    |
| 0.2186943878    | 0.261451621     |
| 5.1588979499    | 7.4524212221    |
| 0               | 0.3249641803    |
| 20.1992925101   | 32.6272840984   |
| 0               | 0               |
| 0               | 0.4168176311    |
| 25.9770093786   | 23.9921350616   |
| 0               | 0               |
| 42.1788342922   | 44.342225767    |
| 40.0821887802   | 25.1002773473   |
| 0               | 0.2375511002    |
| 71.7224929806   | 45.5587754716   |
| 6.7362336726    | 4.026621879     |
| 53.2775251643   | 36.6519201395   |
| 7.3986620177    | 7.5815865924    |
| 0               | 0               |
| 163.7665918657  | 179.7990205873  |
| 101.5130983014  | 61.0348841688   |
| 65.8737243553   | 18.6673267217   |
| 1.5713868011    | 2.191712534     |
| 0.7901034443    | 0.4198122796    |
| 41.9205605525   | 29.4544375041   |
| 29.7591201309   | 39.1963465007   |
| 0               | 0.889554659     |



gene\_expression\_table

|                |                |
|----------------|----------------|
| 9.065031425    | 15.653946944   |
| 2.9848352342   | 22.5998943846  |
| 0              | 0              |
| 0.8027191472   | 0              |
| 0.4481243781   | 1.3393444416   |
| 1.9071240976   | 0              |
| 4.2656008983   | 3.8246806908   |
| 43.32384694    | 20.6425961725  |
| 0.7115551954   | 0.6096484864   |
| 0              | 0.1359095721   |
| 0              | 0.0467098194   |
| 0              | 3.5445037785   |
| 6.071936206    | 7.9504084691   |
| 1.8326844814   | 3.7246916425   |
| 0              | 0.0937562748   |
| 10.8178220938  | 9.0363997563   |
| 0              | 0              |
| 100.5701858409 | 202.2753071712 |
| 31.2793569659  | 25.2376603616  |
| 21.1311247226  | 17.5329286015  |
| 6.693206678    | 8.1351679063   |
| 0              | 0              |
| 24.096452746   | 9.2714058814   |
| 9.5455354641   | 15.3566142532  |
| 1.3632275275   | 2.702675335    |
| 0.0800063826   | 0.1912970756   |
| 30.7754761462  | 54.5316384903  |
| 16.4067842562  | 19.9003181092  |
| 4.6271131654   | 6.694238892    |
| 0              | 0.1317075913   |
| 53.4899450721  | 72.7492586089  |
| 3.1763520232   | 4.7014993628   |
| 0              | 0.0965064116   |
| 33.8755069192  | 35.556765053   |
| 1.6723871884   | 0.499839463    |
| 0.4216156877   | 0.6720617821   |
| 2.7055591152   | 1.6172633043   |
| 0.2091344745   | 0.5714803116   |
| 2.4552576161   | 1.565487108    |
| 0              | 0.083286787    |
| 0.3190210082   | 0.3813932336   |
| 1.3381959278   | 0.7999142048   |
| 5.7384765448   | 13.7208275904  |
| 4.5062960409   | 3.4025229647   |
| 0.6834239435   | 0.7489543195   |
| 0.3211441688   | 0.7861454448   |
| 1.6207436748   | 1.0333959711   |
| 0              | 0              |
| 0              | 0              |

gene\_expression\_table

|                |                |
|----------------|----------------|
| 0.5629392249   | 0.5234446219   |
| 30.2135285779  | 21.2710294794  |
| 15.2472643575  | 12.4637794694  |
| 0              | 0              |
| 1.0034561566   | 4.7985728656   |
| 8.619811043    | 4.2277258945   |
| 0.0487928989   | 0.0777766187   |
| 0              | 0.1115880581   |
| 72.145983303   | 108.61280018   |
| 3.2762777234   | 3.7403935212   |
| 0              | 0              |
| 0.1860829363   | 0.1694965797   |
| 109.3104427045 | 128.2346479478 |
| 0              | 0.0821740841   |
| 0.2174645908   | 0              |
| 1.8595089781   | 1.9110550811   |
| 7.2935144894   | 6.3719271772   |
| 8.7235478443   | 6.3733391275   |
| 0              | 0.3653941949   |
| 2.3843435307   | 2.1265707541   |
| 0.1936601536   | 0.3724498989   |
| 192.8208775803 | 141.6525906617 |
| 43.5783669599  | 48.0908602771  |
| 2.7202120205   | 5.3151692163   |
| 0.0832096874   | 0.01326375     |
| 0.7240602925   | 0.8335622072   |
| 0              | 0              |
| 0              | 0              |
| 0.0547317022   | 0.2617294828   |
| 0              | 0              |
| 0.4293879783   | 0.6416727478   |
| 6.0995967229   | 4.8061812467   |
| 53.7155377032  | 30.8084122219  |
| 2.2676486464   | 1.8503648586   |
| 3.033397902    | 2.6335018738   |
| 0.0372332659   | 0              |
| 0              | 0              |
| 34.4190550647  | 14.8772768885  |
| 6.6614968283   | 4.7193451929   |
| 2.9452755597   | 5.1677987532   |
| 86.5077132323  | 77.1924120108  |
| 0.4171963495   | 0.1662543226   |
| 3.0491144954   | 2.795998946    |
| 0.6267841952   | 0.4235329994   |
| 0              | 0.5962693498   |
| 3.6421883692   | 3.972323338    |
| 3.6965554003   | 6.3833956441   |
| 291.507012714  | 246.7044248625 |
| 0              | 0              |

gene\_expression\_table

|                |                |
|----------------|----------------|
| 0              | 0              |
| 218.4178666017 | 614.6479200042 |
| 0              | 0.0248823719   |
| 4.0537676526   | 5.9232863636   |
| 29.1690201301  | 25.1852570673  |
| 2.4070593304   | 1.4388333652   |
| 18.940603426   | 10.1983104351  |
| 0.3942697921   | 0.0523726676   |
| 1.9593411314   | 2.1127660606   |
| 0              | 0              |
| 0              | 0.049419413    |
| 8.9869558765   | 8.083586731    |
| 2.5875887802   | 3.0934917352   |
| 155.2181678818 | 130.6148006291 |
| 0.0240619527   | 0.0287663374   |
| 0.4039957883   | 0.2529903341   |
| 6.7853335937   | 8.1119432706   |
| 1.3959802284   | 4.1838651447   |
| 10.3797590824  | 5.6603002188   |
| 5.0844402043   | 3.0468701414   |
| 4.9227078036   | 2.0107606127   |
| 16.2362673246  | 21.3517059123  |
| 0.1566850782   | 0.4162639735   |
| 39.1686578064  | 24.2554919097  |
| 0              | 0              |
| 7.3114591669   | 9.3543311228   |
| 6.4110626939   | 9.6907448062   |
| 2.3142974754   | 3.197155151    |
| 2.4506411846   | 0.9765897771   |
| 0.6120324028   | 0.6620067574   |
| 10.7862012893  | 4.3960315836   |
| 9.8139551228   | 1.9554491099   |
| 0              | 0              |
| 0              | 35.5033650625  |
| 16.057944983   | 11.1544847638  |
| 20.6648825816  | 16.0366448383  |
| 34.9431113208  | 15.5959574061  |
| 3.0196131545   | 1.6677693579   |
| 0              | 0              |
| 3.1497053047   | 2.6896488684   |
| 0.15020042     | 0.9576869639   |
| 0              | 0.0101257278   |
| 0.5835789701   | 0.5055617954   |
| 8.7685732752   | 3.4943096013   |
| 0.8933776051   | 1.3731982195   |
| 4.6324147163   | 6.271784823    |
| 7.2478013687   | 3.530115413    |
| 9.8522176748   | 5.0594664838   |
| 1.2055086123   | 0.8647195314   |

gene\_expression\_table

|                |                |
|----------------|----------------|
| 0.1155676212   | 0.3914601387   |
| 16.2664624939  | 7.3920358268   |
| 6.3495136266   | 1.6524442029   |
| 0              | 0.0383909475   |
| 0              | 0              |
| 8.2117591571   | 17.5797289113  |
| 0              | 0              |
| 0              | 0              |
| 14.8298387742  | 4.9641873273   |
| 0.6863229139   | 1.3675113798   |
| 1.457657777    | 0.7221777896   |
| 11.8718864215  | 7.0710519951   |
| 0              | 0              |
| 0.1403913886   | 0              |
| 57.063061256   | 39.3787570963  |
| 31.4340857352  | 19.6846602973  |
| 1.055208618    | 0              |
| 0              | 0              |
| 291.0877650058 | 283.9392578706 |
| 44.9033722884  | 32.5173510976  |
| 0              | 0              |
| 64.1701939214  | 78.3484541128  |
| 10.3577769574  | 14.0081606394  |
| 0.0587259091   | 0.0702074904   |
| 11.5235902113  | 16.0394031613  |
| 17.9546976587  | 10.7325223467  |
| 20.9934497859  | 20.2426573976  |
| 9.9141332576   | 11.0622948386  |
| 7.81447981     | 22.8367314873  |
| 12.4805792214  | 12.1932389793  |
| 0.1347134993   | 0.6978899039   |
| 1.75868103     | 2.1025231184   |
| 146.7791967301 | 144.8035263245 |
| 1.5464130985   | 0              |
| 15.5751594148  | 22.758119675   |
| 5.8204477921   | 7.3170923485   |
| 17.8060387085  | 12.0413130203  |
| 10.9311847161  | 9.6217561071   |
| 7.1818790635   | 12.4020258229  |
| 331.0209727219 | 249.1692060985 |
| 0.1287922977   | 0.7185390455   |
| 0              | 0              |
| 0              | 0              |
| 0              | 0.087909364    |
| 24.5327807973  | 16.5773839142  |
| 7.4101121083   | 2.0981541484   |
| 10.9598413192  | 12.6994572313  |
| 0              | 0              |
| 0              | 0.0144448236   |

gene\_expression\_table

|                |                |
|----------------|----------------|
| 0              | 2.10568006     |
| 9.8077554726   | 2.735899345    |
| 5.6018303333   | 4.7488184778   |
| 1.8589359904   | 0.8642585236   |
| 32.1350319744  | 54.2918147463  |
| 0              | 0.1226949579   |
| 0              | 0.993259381    |
| 0.2074036093   | 0.4959067346   |
| 2.1544263194   | 4.9366454424   |
| 4.6606755356   | 1.6096572452   |
| 116.219559558  | 86.632536498   |
| 61.9200130401  | 44.4904205483  |
| 8.2745774916   | 7.8456578812   |
| 1.3558173366   | 0.0771854764   |
| 21.7451010462  | 33.3714127875  |
| 5.5301033085   | 5.5618883345   |
| 0.2816479514   | 0              |
| 0              | 6.1363606957   |
| 2.7507879193   | 3.3315863682   |
| 22.4501098015  | 3.6838338486   |
| 1.3774309059   | 0.5832183876   |
| 57.204624804   | 23.8699961053  |
| 10.7601918395  | 12.0063359606  |
| 78.6873516059  | 60.1581201543  |
| 0              | 0.5733372526   |
| 0.319107793    | 0              |
| 3.1346087361   | 8.3276895485   |
| 27.0239647355  | 20.3417317743  |
| 0              | 0.3125958027   |
| 10.7901205378  | 6.1427197546   |
| 3.0295000683   | 7.8117291402   |
| 0.4832695781   | 0.6547881635   |
| 11.6551297574  | 14.7724505473  |
| 0              | 0              |
| 0              | 0              |
| 0              | 0              |
| 0.5526257445   | 0              |
| 0              | 0              |
| 0.8030855183   | 2.0268732298   |
| 150.3734374259 | 143.7169532326 |
| 4.7557292356   | 2.7480053163   |
| 0              | 0              |
| 0              | 0.1770959931   |
| 4.3187722765   | 5.2614867875   |
| 4.2206162735   | 1.6239339024   |
| 9.4625456873   | 6.7875484161   |
| 8.1015729292   | 11.4612014179  |
| 3.5466881811   | 3.8225197553   |
| 3.6913982998   | 1.9123470319   |

gene\_expression\_table

|               |                |
|---------------|----------------|
| 30.4010200229 | 48.2173872331  |
| 11.157614204  | 11.7221992603  |
| 1.9307412707  | 3.3524192463   |
| 99.6297430598 | 102.0632941089 |
| 0.5077729949  | 0.55646101     |
| 17.1171028752 | 2.6871512948   |
| 2.8056991668  | 3.2385815494   |
| 4.5048349354  | 4.3757847731   |
| 4.9650685491  | 3.4796044136   |
| 0             | 0.1501400268   |
| 3.8616164121  | 4.2614826639   |
| 0.1074471787  | 0.1541451849   |
| 0             | 0              |
| 5.2868946802  | 3.2605973494   |
| 0.0346735316  | 0.1519928677   |
| 34.6214439136 | 22.7509754747  |
| 0.7729093635  | 1.0780255621   |
| 0             | 0.007008       |
| 0.0110923694  | 0              |
| 0.6544926276  | 0.5490900769   |
| 0             | 0              |
| 5.2071824906  | 2.9796047926   |
| 0.0708885591  | 0.2259948706   |
| 3.226106144   | 2.5153346645   |
| 0             | 0              |
| 14.6970030567 | 15.0552388185  |
| 4.9908911389  | 3.7183576728   |
| 13.050940092  | 26.2122787986  |
| 9.8576397597  | 9.5498490775   |
| 0.1032946833  | 0              |
| 0             | 0              |
| 68.4048915926 | 72.3618682862  |
| 0.3453758364  | 0.4129007297   |
| 0             | 0              |
| 3.71641886    | 1.3067708526   |
| 5.185172826   | 3.8533907364   |
| 10.5945221143 | 14.2412284841  |
| 12.7436804792 | 11.2715814977  |
| 0.4024381887  | 0              |
| 0.44108009    | 0.3808395141   |
| 11.9154385129 | 6.1427032477   |
| 5.5378135102  | 2.5039141848   |
| 4.5619921456  | 1.0907826704   |
| 5.2829735277  | 2.8655267021   |
| 26.1337870163 | 8.4959684423   |
| 2.1894440198  | 1.0088301131   |
| 56.2636564033 | 57.4777559285  |
| 7.4452988806  | 7.6456785921   |
| 0.3223745097  | 0.4312836187   |

gene\_expression\_table

|                 |                 |
|-----------------|-----------------|
| 0.1345249639    | 0.2442174417    |
| 111.926410937   | 50.5501776373   |
| 0.3250657098    | 0.4695821894    |
| 72.8630973741   | 99.9643902176   |
| 4.3629561175    | 4.2676065189    |
| 2.8388400396    | 2.262576977     |
| 236.5000498061  | 281.4818764099  |
| 8.8696034042    | 10.6037114688   |
| 1455.1957969928 | 1104.8894692196 |
| 10.7137155091   | 20.4800473994   |
| 2.318320097     | 2.6294457668    |
| 35.3322394594   | 59.6330724881   |
| 1.5039256962    | 1.042295784     |
| 8.8212332536    | 2.0872062885    |
| 19.1260529419   | 22.86541322     |
| 0.042834095     | 0.008535        |
| 0               | 0               |
| 4.509652691     | 2.6956704703    |
| 33.2384485583   | 22.517600604    |
| 0               | 0               |
| 0               | 0               |
| 0               | 0               |
| 247.8882851531  | 232.6432367691  |
| 100.325810602   | 114.814975904   |
| 256.0800539296  | 144.1308777464  |
| 72.5513993658   | 58.1251806194   |
| 0               | 0.2773426125    |
| 2.1392831253    | 1.3640198614    |
| 0.1623407235    | 0.1617334802    |
| 0               | 1.860952675     |
| 279.1430923924  | 92.3458326048   |
| 0               | 0.2982207166    |
| 0               | 11.3095396772   |
| 254.5000037215  | 125.2638563746  |
| 3.5757365701    | 1.4249445419    |
| 84.3884728741   | 38.2259124222   |
| 1.8899681746    | 12.8037108698   |
| 12.9316296289   | 18.5196837248   |
| 81.4756360365   | 62.439132679    |
| 10.9085203262   | 10.9955719668   |
| 0               | 0               |
| 10.8127208989   | 8.9943270279    |
| 7.687683625     | 8.7911167515    |
| 4.4874478892    | 4.0023072677    |
| 4.5561663266    | 1.0728837993    |
| 4.8627873057    | 6.2385917667    |
| 0.4049504607    | 0.753080018     |
| 4.2341448855    | 1.7417525107    |
| 0               | 0               |

gene\_expression\_table

|                |                |
|----------------|----------------|
| 7.1529047123   | 4.7507659511   |
| 0.290708289    | 0.7723223483   |
| 15.27438471    | 12.0442915969  |
| 11.9000889236  | 6.8498883936   |
| 0              | 0              |
| 20.5997311675  | 15.7742928157  |
| 11.6663332631  | 10.7462292718  |
| 43.8008026899  | 39.8187293496  |
| 10.2934384612  | 3.9378951772   |
| 2.4113791093   | 7.8705864272   |
| 26.575531579   | 42.1396219615  |
| 0.4924721033   | 0.818844531    |
| 0.6053698265   | 0.2291800563   |
| 11.6121307681  | 13.8824340382  |
| 12.6359811171  | 10.5745211201  |
| 0.248457683    | 0.2520288298   |
| 0.6129057145   | 3.028641031    |
| 0.0502962658   | 0.006681       |
| 37.800788136   | 40.698571502   |
| 1.2015982317   | 2.1388250905   |
| 435.1205025156 | 797.626960379  |
| 90.1279838804  | 334.9807066631 |
| 9.7130230089   | 17.9709975287  |
| 2.6173223317   | 2.8335182274   |
| 14.4306908303  | 9.9330011107   |
| 1.2936517079   | 0.9279451737   |
| 10.585811592   | 8.0854313867   |
| 0              | 0.0544244851   |
| 4.2669801242   | 6.3859756278   |
| 0.0787698259   | 0.1569503671   |
| 0              | 0.7364919272   |
| 0.2103542091   | 1.5088850569   |
| 0.7791785011   | 2.5150951858   |
| 32.9968178096  | 25.8953587961  |
| 2.0276907956   | 1.0605557131   |
| 0              | 0              |
| 1.9893277225   | 4.2450731179   |
| 0.0444456326   | 0.0106270516   |
| 0.0399230164   | 0.005303       |
| 0.0457609098   | 0.0182358956   |
| 0.2538777756   | 0.3227844751   |
| 16.1478391108  | 18.4216929521  |
| 0.4415112668   | 0.5278317271   |
| 9.9801519431   | 5.1643307529   |
| 1.9918611808   | 4.7625852666   |
| 4.6951793177   | 2.7397469668   |
| 0              | 0.006296       |
| 1.8731680104   | 4.6280801106   |
| 1.3514895907   | 1.4667539375   |



gene\_expression\_table

|                 |                 |
|-----------------|-----------------|
| 0.387945414     | 0.5565517711    |
| 7.4190879995    | 8.8696038508    |
| 0               | 0               |
| 11.2887955401   | 9.4471181741    |
| 0.0747361704    | 0.0148913232    |
| 5.1541947376    | 4.3584158479    |
| 47.6044207652   | 66.6843282298   |
| 294.0127426863  | 163.2121019348  |
| 1.2674175928    | 2.7959271026    |
| 0.0642008958    | 0.081869759     |
| 1.0399471321    | 1.4356792069    |
| 6.8457392933    | 3.6010299466    |
| 1.1013277495    | 1.4812310428    |
| 38.4961235808   | 52.7699805118   |
| 2.8795251593    | 2.9291489807    |
| 3.8237458252    | 1.8412307443    |
| 1.5855466281    | 1.8955389772    |
| 3.4909141547    | 2.8935763764    |
| 0               | 1.6377511578    |
| 0.2954451247    | 0.1177359992    |
| 3.2037636098    | 6.0431030448    |
| 0               | 0               |
| 2.7612978788    | 0               |
| 0               | 0               |
| 0               | 0               |
| 95.9760202122   | 49.2250570394   |
| 14.8957491687   | 13.3560278092   |
| 5.9703034522    | 11.8959424873   |
| 0.4560908186    | 0.0605846385    |
| 1.0542828182    | 2.4607947495    |
| 62.4338976061   | 85.0942748309   |
| 0               | 2.7096277973    |
| 3.2558073238    | 2.2705401734    |
| 40.146301895    | 42.3662739106   |
| 0               | 0               |
| 0               | 0               |
| 0               | 0               |
| 1.4902451329    | 2.1527726586    |
| 2.0344374195    | 1.8171556968    |
| 55.8874260165   | 33.0185720505   |
| 49.6018502086   | 18.310044059    |
| 1903.5724708876 | 2782.9504436258 |
| 0.4238797994    | 0.1689177026    |
| 0               | 0               |
| 0.8356640854    | 0.2220101983    |
| 0               | 0.1725638072    |
| 1.6327466995    | 1.6881878469    |
| 700.6909771867  | 332.576443182   |
| 2.0706610103    | 2.8365089538    |

gene\_expression\_table

|                |                |
|----------------|----------------|
| 0              | 0              |
| 59.4093836333  | 30.1031383123  |
| 9.2283393784   | 7.1853241956   |
| 16.9064317982  | 32.563505448   |
| 16.4105429971  | 13.8290971836  |
| 114.0431576576 | 73.7986552207  |
| 1.7793850408   | 1.2332028975   |
| 0.1390352314   | 0.0554060653   |
| 0              | 0              |
| 359.3860314017 | 307.3455563424 |
| 4.5021374391   | 3.1098059036   |
| 19.124741784   | 21.2993596942  |
| 150.5000316948 | 119.6069499193 |
| 2.6564748184   | 2.8464988059   |
| 0              | 0.2191017905   |
| 82.390245061   | 105.9488002997 |
| 0              | 0              |
| 5.0908439432   | 9.0695742601   |
| 2.5068442759   | 2.116497715    |
| 23.8879910877  | 11.4490739694  |
| 0.712418506    | 0.5936121605   |
| 3.5692308639   | 3.3312980897   |
| 36.7382979585  | 9.6517867129   |
| 0.349861635    | 0.537767425    |
| 16.2183782351  | 10.4403681464  |
| 0.3023091833   | 2.0721072627   |
| 0              | 0              |
| 0.1821805388   | 0.0241998778   |
| 2.5019298759   | 2.2744712988   |
| 5.6770577197   | 3.3064807941   |
| 24.7534870418  | 21.1379103663  |
| 0              | 0              |
| 5.2563416596   | 3.1420080358   |
| 85.7126265445  | 129.5353437612 |
| 11.7380921647  | 7.7871106496   |
| 0              | 0.2449577153   |
| 5.9011237262   | 4.990023171    |
| 2.3270927661   | 1.5119922803   |
| 0              | 0              |
| 0              | 0              |
| 1.0429894019   | 0.7600186877   |
| 0.5722147547   | 0.9121189723   |
| 0.8352508731   | 0.1664253154   |
| 8.9480710901   | 9.9223378341   |
| 0              | 0.0812057628   |
| 146.1501447613 | 164.5952191366 |
| 1.3656912271   | 3.1142228374   |
| 0              | 0              |
| 0.4225649305   | 1.6839372238   |

gene\_expression\_table

|                |                 |
|----------------|-----------------|
| 2.4552576161   | 2.6862335604    |
| 0.2778389477   | 0.4428794844    |
| 133.265804702  | 93.612210319    |
| 33.9140198549  | 22.2372248946   |
| 2.8613858419   | 2.0580538444    |
| 0.7419348693   | 1.9710923363    |
| 1.3230455475   | 1.4139582049    |
| 1.1555992582   | 0.8698534941    |
| 0.5698884822   | 0.662382918     |
| 3.4527883011   | 3.0425918749    |
| 0.754245457    | 1.0519938316    |
| 13.1803547232  | 8.5554901822    |
| 50.6590125448  | 34.0609462398   |
| 5.9853417914   | 10.6814642281   |
| 22.0147104414  | 56.0732310623   |
| 0.1821255397   | 0.2177331484    |
| 4.239393737    | 3.9982808223    |
| 0              | 0               |
| 0              | 0               |
| 24.4873362101  | 11.7430342396   |
| 32.8276188537  | 39.2457906708   |
| 0.206498953    | 0.054860409     |
| 0.1238058978   | 0.148011355     |
| 68.8454012138  | 41.7907558044   |
| 18.6953289372  | 19.7210098121   |
| 458.5173604058 | 1002.6809476664 |
| 2.6942356063   | 0.7157753834    |
| 3.515605136    | 3.8026652604    |
| 2.0014905395   | 1.9940038674    |
| 165.225367789  | 110.2153455859  |
| 129.4669056553 | 19.6229981727   |
| 83.3979662813  | 180.882334666   |
| 45.8854302241  | 34.5627988265   |
| 0              | 0               |
| 53.8297627704  | 72.398353421    |
| 25.3378761758  | 22.2551400128   |
| 9.0274372888   | 6.2056321092    |
| 47.2597282626  | 16.0771052077   |
| 78.0026762736  | 69.3420369636   |
| 0              | 0               |
| 121.8133421358 | 67.5467567562   |
| 89.4980257588  | 58.7314477887   |
| 1.7099712056   | 0.6814299903    |
| 0.1548670205   | 0               |
| 0              | 0               |
| 10.6674467766  | 8.362658106     |
| 0              | 4.9583367825    |
| 26.6323836437  | 17.9412022736   |
| 28.0838364853  | 19.5851512764   |

gene\_expression\_table

|                |                |
|----------------|----------------|
| 10.4981704114  | 8.3671211982   |
| 73.6713127112  | 129.316306639  |
| 0.1291029593   | 0.2315160782   |
| 0.7850151223   | 0.8696715536   |
| 15.4787423654  | 10.0521053154  |
| 0.045245418    | 0.0180304701   |
| 20.4851831472  | 15.8885412768  |
| 0.5308274743   | 0.0705122518   |
| 12.3664743697  | 8.761043182    |
| 19.4419302581  | 7.1194922213   |
| 0.0992237954   | 0              |
| 0              | 0              |
| 0              | 0              |
| 21.6700833264  | 36.7515501009  |
| 0.7407895466   | 0.1968049567   |
| 1.2861761084   | 0.8827181831   |
| 0              | 0              |
| 1.5417024039   | 1.3884857747   |
| 0              | 0.0348599995   |
| 0              | 0              |
| 2.2504369248   | 2.865885229    |
| 9.9861542029   | 10.0482885157  |
| 2.169364556    | 2.2357758032   |
| 4.058274436    | 3.2344754115   |
| 0.3408762069   | 0.2716809144   |
| 5.3886206881   | 7.0957093251   |
| 1.7461752655   | 2.1625108292   |
| 0.7292305402   | 0.8282132127   |
| 0.2178150293   | 0.1550002012   |
| 0.0548217962   | 0.0436933861   |
| 21.9636882327  | 12.1464830669  |
| 0              | 0.1150389992   |
| 6.7394099197   | 6.9583535887   |
| 0.1787716912   | 0.5699295585   |
| 3.1120918818   | 3.5029656367   |
| 1.08923707     | 1.790518498    |
| 9.03924484     | 9.1002271405   |
| 4.5010877842   | 4.6054472275   |
| 62.0838707636  | 42.5539304149  |
| 8.2197754973   | 10.1076015454  |
| 8.4314358886   | 8.4798967209   |
| 0.1894495837   | 0.5284746273   |
| 37.6548444929  | 19.0314900081  |
| 0              | 0              |
| 0.8204034832   | 0              |
| 3.4932127466   | 3.1818479685   |
| 0              | 0              |
| 0.2044277058   | 0.1629304273   |
| 385.0709625536 | 209.5759682834 |

gene\_expression\_table

|                 |                 |
|-----------------|-----------------|
| 31.6450952652   | 36.3484597083   |
| 0.7204392791    | 0.6818572191    |
| 11.4731263048   | 7.4815923413    |
| 2.1594063581    | 2.6598249383    |
| 0               | 0.0387425353    |
| 0.449137172     | 0.3728809606    |
| 0               | 0               |
| 2.6057307012    | 1.5575903038    |
| 0               | 0               |
| 3.7086272829    | 2.904249266     |
| 50.7894780135   | 58.5358502392   |
| 0               | 0.0538539168    |
| 0.7510919757    | 0.9193184753    |
| 3.9921959627    | 14.3181466588   |
| 0.2499198027    | 1.4939097933    |
| 1208.4685731676 | 1566.1332204952 |
| 0.9057704989    | 0.8294238419    |
| 0               | 1.236169614     |
| 12.3093254321   | 9.4018493842    |
| 8.6938343492    | 8.3934389312    |
| 11.6095360675   | 10.266903156    |
| 0.3240481933    | 0.5777066612    |
| 0.6007051971    | 0.5795595493    |
| 2.1231497684    | 0               |
| 0.5114657965    | 0.5748798947    |
| 0.9457671473    | 0.816598865     |
| 4.1235669264    | 5.8426915912    |
| 3.1628805147    | 6.8991401929    |
| 17.6746486621   | 11.1912027431   |
| 19.4830214041   | 16.6064567225   |
| 2.2053428637    | 2.2410355456    |
| 15.1375173179   | 18.0269299471   |
| 2.6798792206    | 4.2192462668    |
| 0.2058326456    | 0.1230376312    |
| 180.3927807964  | 205.3444702752  |
| 2.0481159391    | 2.6916638611    |
| 0               | 0.2263870565    |
| 50.7111903043   | 37.1274298518   |
| 3.0609096804    | 4.850769248     |
| 3.2657022468    | 2.776308676     |
| 1.414740864     | 2.7813126093    |
| 0               | 0.4103714633    |
| 0               | 0               |
| 1.7440741945    | 1.9652294187    |
| 0.3709394112    | 0.4286801975    |
| 11.4769530897   | 1.5245363989    |
| 4.0471912118    | 8.2744729515    |
| 6.4598841034    | 4.7020162713    |
| 0.315651125     | 0.5450820557    |

gene\_expression\_table

|                  |                 |
|------------------|-----------------|
| 5.4963257984     | 3.3636851518    |
| 0.0846478317     | 0.2473715272    |
| 20.9475266428    | 16.7292019069   |
| 0.5863539899     | 1.0281228398    |
| 17546.6156922195 | 19324.559781039 |
| 10.6421867115    | 12.140763516    |
| 4.8482644478     | 7.9829828986    |
| 2.2092887019     | 13.4262509799   |
| 12.0856472533    | 13.3738444387   |
| 6.2329033311     | 2.5775651851    |
| 0                | 0.013881406     |
| 0.7413270605     | 0.7112002356    |
| 2.8541125232     | 0.379124877     |
| 3.256144249      | 0.7512338805    |
| 11.5547880332    | 7.9484627837    |
| 3.8370594905     | 2.2630424162    |
| 6.0314428796     | 8.2922571269    |
| 4.2265374462     | 10.7373560905   |
| 1.0255641258     | 3.7599588692    |
| 0.6115357581     | 0.2741617256    |
| 31.6371327411    | 30.2987102263   |
| 0.3478619669     | 0.5445954995    |
| 32.8743227231    | 12.1747085429   |
| 2.4024581794     | 4.021032403     |
| 241.1741057917   | 233.1730374602  |
| 1.4511955447     | 1.1792925245    |
| 7.6275296609     | 8.8246434398    |
| 0.0849331646     | 0.1353847488    |
| 0.4344162123     | 0.7978412746    |
| 7.2419204962     | 6.1326069812    |
| 0.1759386875     | 0.3116099207    |
| 79.5110393926    | 139.868628416   |
| 7.9264174123     | 9.9748651767    |
| 1.0011090391     | 0.86438243      |
| 3.8930026684     | 6.0830280513    |
| 3.770349749      | 4.7422612991    |
| 58.0211318938    | 26.288988421    |
| 2.2964765995     | 4.3012266535    |
| 59.1271897674    | 61.8432534217   |
| 59.6228358535    | 34.3198923917   |
| 1.4619075577     | 1.5460662509    |
| 5.0112078905     | 7.1117129209    |
| 1.0743766573     | 4.0673600182    |
| 20.2753259523    | 19.1221792429   |
| 6.6756996402     | 4.9113074682    |
| 22.5696912683    | 4.8071952805    |
| 31.1481574631    | 29.4324694117   |
| 0.1961551095     | 0.6253484217    |
| 42.1020520106    | 53.289160051    |

gene\_expression\_table

|                 |                 |
|-----------------|-----------------|
| 2.6703837671    | 5.3207901352    |
| 0.3125218235    | 0.273990482     |
| 3.0251448402    | 2.3387314124    |
| 0.0297998234    | 0               |
| 3.4416318779    | 9.8498874443    |
| 7.5389985171    | 8.5456196594    |
| 5.0367558804    | 3.4408564469    |
| 1.3099922287    | 1.5661105674    |
| 11.2794509283   | 9.7479842287    |
| 47.985177451    | 27.0691939573   |
| 5.8010949325    | 8.2419207624    |
| 3.2330002215    | 3.8650884335    |
| 2673.0043322002 | 2777.5351036313 |
| 0.6842877334    | 0.1363456244    |
| 10.5528906595   | 10.1213913411   |
| 31.4003063486   | 31.2221085834   |
| 351.6285027383  | 279.3465413511  |
| 73.6868076006   | 47.2584461826   |
| 0               | 0.1313879965    |
| 0               | 0               |
| 0.2139543252    | 0.5968312524    |
| 2.1426117352    | 1.138451836     |
| 105.5657441928  | 23.2317743626   |
| 17.8887809489   | 19.2740192333   |
| 2.0486803907    | 4.0820344054    |
| 7.4689509893    | 9.3544163645    |
| 2.3087993053    | 4.0164386961    |
| 1.1750036078    | 0.3962059369    |
| 0.0216541621    | 0.004315        |
| 0               | 0               |
| 1.135208958     | 0.6031800822    |
| 36.0461947396   | 33.8946650183   |
| 0               | 0               |
| 3.2509198532    | 2.1591730869    |
| 21.5607627256   | 20.9431108094   |
| 196.8638389272  | 120.6828094667  |
| 3.0732614292    | 3.2972861883    |
| 0.2197860939    | 0.2001956328    |
| 25.9562477023   | 11.4324694563   |
| 10.5808752795   | 7.0275313362    |
| 3.1458639799    | 7.5845140713    |
| 0               | 0.1050946433    |
| 13.7978968565   | 17.7174342018   |
| 1.2833222671    | 0.8671714015    |
| 28.6884843026   | 39.6773939953   |
| 26.4234321858   | 24.0378111425   |
| 53.8297627704   | 59.4940172789   |
| 0.7195094543    | 0.9263495374    |
| 22.2973965623   | 15.0511129964   |

gene\_expression\_table

|                 |                 |
|-----------------|-----------------|
| 2.8322903349    | 2.2573568128    |
| 61.0504217789   | 84.8033289896   |
| 0               | 0               |
| 28.7470720853   | 18.1383767729   |
| 45.1893514108   | 88.9151289548   |
| 54.9610037657   | 53.467056664    |
| 820.3078650617  | 885.887578816   |
| 1.3536381349    | 0.5394299144    |
| 9.1540468424    | 7.2958445503    |
| 1.2134899107    | 0               |
| 5.307874421     | 15.8640601807   |
| 0               | 0               |
| 279.3640465254  | 107.8756092285  |
| 55.9397805669   | 50.6641228313   |
| 0.6002252671    | 0               |
| 118.788885776   | 131.1652098144  |
| 0.1551999798    | 0.2473911148    |
| 0               | 0               |
| 16.8129327005   | 40.9856227352   |
| 36.826162018    | 33.9051531396   |
| 0.1839377874    | 0.0366499518    |
| 16.4253010087   | 21.6366611534   |
| 1.0204152764    | 2.3236534029    |
| 0               | 0               |
| 0               | 0.002469        |
| 23.8916377527   | 23.2559883223   |
| 0               | 0.0155819459    |
| 0               | 0               |
| 1425.2948035373 | 1912.2174048588 |
| 3.345285376     | 3.0471059881    |
| 0.1193400994    | 0.0951149616    |
| 119.826078353   | 85.6791977567   |
| 27.0616629496   | 27.5106505016   |
| 1.5071584319    | 1.276292708     |
| 329.6579378903  | 117.7717865338  |
| 0               | 0.1549680004    |
| 499.1423040705  | 121.926993518   |
| 7.9528152342    | 11.1756949911   |
| 427.5929229794  | 458.7147301511  |
| 3.1347250784    | 7.8074987194    |
| 357.5345939355  | 328.6206596572  |
| 8.4736834604    | 6.7535897904    |
| 9.3958394569    | 3.8046691195    |
| 36.1147121944   | 18.5038063037   |
| 0.5615916923    | 0.1491976084    |
| 0.8465020726    | 0.9557804494    |
| 1.3225136823    | 0.3513511349    |
| 18.5855275965   | 16.6838973134   |
| 18.1933362646   | 17.1513873968   |



gene\_expression\_table

|                |                 |
|----------------|-----------------|
| 28.7573578568  | 20.7832371796   |
| 2.0275325952   | 15.4593392753   |
| 10.5454107578  | 8.3113857546    |
| 0              | 0.0644202119    |
| 1.0307407589   | 1.7799343871    |
| 4.7530158405   | 4.5652540901    |
| 0              | 0               |
| 0              | 0               |
| 0              | 1.4783971747    |
| 0.8432313754   | 1.9321776236    |
| 0.1194836048   | 0.1190366706    |
| 3.6915144667   | 6.8650515331    |
| 0.9935826591   | 1.7421643627    |
| 6.5303026675   | 7.9489972858    |
| 0.8936314731   | 1.7805776028    |
| 2.3297720895   | 0.3094743286    |
| 30.9293031263  | 38.6605548809   |
| 0              | 1.1114586249    |
| 0.3723740269   | 1.0387472028    |
| 0              | 0               |
| 9.0414178333   | 12.6106371622   |
| 1.1338247014   | 1.0215364507    |
| 0              | 0               |
| 0.5016923147   | 0.9996314206    |
| 0.3476876689   | 0               |
| 119.1886312666 | 52.3686196776   |
| 191.888024403  | 96.8128278919   |
| 20.1081123428  | 10.5773696038   |
| 93.7380929299  | 67.7277287713   |
| 50.9095224754  | 32.318677831    |
| 9.8710677299   | 8.0707806783    |
| 30.062840502   | 15.5037307735   |
| 14.4733324013  | 12.3415898761   |
| 0              | 0.0451151835    |
| 6.7984418954   | 4.2690499847    |
| 0.8281908      | 2.9153282902    |
| 17.2505918682  | 8.8574336009    |
| 5.7614943371   | 2.2959772757    |
| 47.6931161726  | 18.7263887669   |
| 92.3109830378  | 20.269988672    |
| 0              | 0               |
| 7.4636707129   | 12.8886376526   |
| 0.2790443047   | 1.9460036818    |
| 1.8752680133   | 2.2419041792    |
| 2190.187452355 | 1896.5309493287 |
| 119.0290838906 | 144.0192263401  |
| 0.4358314126   | 0.2605206985    |
| 2.2595429342   | 1.7540968867    |
| 0              | 0               |

gene\_expression\_table

|                |                |
|----------------|----------------|
| 3.1076824228   | 3.1148219743   |
| 27.5529244628  | 51.5447397727  |
| 14.1514858394  | 14.3805225532  |
| 2.827334756    | 1.3520443074   |
| 0.7909469554   | 0.3742944805   |
| 1.3835302403   | 1.1204692896   |
| 1.4254666293   | 2.272215364    |
| 6.0060575857   | 0              |
| 13.9711618978  | 29.5508998253  |
| 34.6598828336  | 38.5524391658  |
| 0.4858315374   | 0.1936057044   |
| 8.8519618827   | 4.5486703567   |
| 65.4642064887  | 39.5552476354  |
| 2.4337748993   | 2.0023091586   |
| 0.0353844656   | 0.0423025299   |
| 0.1423506155   | 0              |
| 13.3625414634  | 2.3908267844   |
| 1.4544826374   | 4.6369346393   |
| 0              | 0.0158749248   |
| 935.7455895641 | 2134.930264883 |
| 0.558909971    | 0.8018198513   |
| 105.7714390469 | 61.2949285888  |
| 8.9673710229   | 7.8313557297   |
| 0.3553142076   | 1.6991286609   |
| 0.4521199369   | 1.3693034318   |
| 5.9310622274   | 4.4138597802   |
| 0              | 0              |
| 0.1915393602   | 0              |
| 2.1297721019   | 0.979294886    |
| 1.6551805473   | 0.2473483897   |
| 0              | 0              |
| 0              | 0              |
| 2.5291259874   | 4.2834316381   |
| 0.7898300598   | 1.2065426822   |
| 6.7046022903   | 10.324958207   |
| 6.6604369594   | 5.2734948118   |
| 8.9979281866   | 10.8807703189  |
| 0              | 0.0359825248   |
| 1.8815557409   | 1.5745948602   |
| 0              | 1.1320190394   |
| 8.9861451865   | 5.3853991404   |
| 0              | 0              |
| 0              | 0              |
| 0              | 0              |
| 2.0823884197   | 2.8122343969   |
| 9.4830190287   | 4.898048814    |
| 0.9464922161   | 0.6319650583   |
| 1.9820234443   | 1.7923379353   |
| 0              | 0              |

gene\_expression\_table

|                |                |
|----------------|----------------|
| 0.3751747868   | 0.5756079981   |
| 0.4925222518   | 0.4317983547   |
| 12.0983953283  | 9.6425125567   |
| 0              | 0.2021973314   |
| 0              | 0              |
| 0              | 0              |
| 0              | 0.2745497415   |
| 0              | 0              |
| 0.434897828    | 0.1155389524   |
| 7.6635146057   | 9.2312263477   |
| 0.1640900476   | 0.2179683478   |
| 8.8844249965   | 8.7331764771   |
| 7.2141229932   | 5.0606956705   |
| 1.8408045271   | 1.1697428716   |
| 5.1609671378   | 6.432547717    |
| 0.0695554011   | 0.8315427092   |
| 5.8933284848   | 6.8320398019   |
| 0.8733664008   | 1.8272090162   |
| 0              | 0.1718685503   |
| 11.7025392816  | 6.2180081962   |
| 12.7826401107  | 3.900040471    |
| 11.6548617001  | 5.6766189953   |
| 102.622253233  | 65.5574407466  |
| 3.020115323    | 0              |
| 12.4223260303  | 19.5043549179  |
| 33.7756119119  | 6.3339807253   |
| 0              | 0.3664444526   |
| 0              | 0              |
| 0              | 0              |
| 0              | 0              |
| 2.6404576725   | 2.1854056816   |
| 19.6568896538  | 5.8138106259   |
| 0.2235995007   | 0              |
| 1.6839624834   | 4.3619252048   |
| 0              | 0              |
| 10.439268004   | 3.9867507768   |
| 5.3293423601   | 2.9007495713   |
| 30.0708157323  | 18.1316455215  |
| 57.2635049122  | 44.3716840038  |
| 7.2559190538   | 5.3699493254   |
| 2.8527821503   | 3.1547434108   |
| 2.6050676348   | 9.8622283629   |
| 1.4747072574   | 4.0068846644   |
| 3.9122170501   | 3.0531068503   |
| 0.2176966481   | 0.4771411552   |
| 909.1687202524 | 981.2693565822 |
| 0              | 0              |
| 0              | 0              |
| 35.7634221658  | 22.8029743085  |

gene\_expression\_table

|                |                |
|----------------|----------------|
| 0.1562185983   | 0.5727340586   |
| 0              | 0              |
| 87.7113286772  | 44.4001328654  |
| 12.7518375378  | 27.5128013288  |
| 0              | 1.4853128896   |
| 0              | 0              |
| 2.1451100279   | 2.0246079223   |
| 121.263902128  | 54.7860701982  |
| 109.7849024769 | 57.4214795406  |
| 0              | 0.012522464    |
| 155.4801633246 | 121.9912390068 |
| 5.2154438549   | 5.4793498844   |
| 12.2115502714  | 7.1474500218   |
| 6.0019563368   | 7.1124647094   |
| 0              | 0.2543774569   |
| 12.524648471   | 10.2865761057  |
| 18.6643400465  | 10.3482574918  |
| 1.0387015174   | 0              |
| 22.534391085   | 44.9002002125  |
| 5.659337355    | 4.8514471678   |
| 21.9020130229  | 20.0508912023  |
| 4.6307427163   | 2.7194903912   |
| 8.52121734     | 4.1880760353   |
| 6.8861784591   | 3.4221391051   |
| 6.5332295716   | 3.0329627353   |
| 10.3351563616  | 5.4386626288   |
| 2.2873712974   | 0              |
| 0              | 0              |
| 89.4672071442  | 52.8329730767  |
| 288.1098334022 | 175.4185935535 |
| 0              | 0              |
| 80.0305411751  | 146.4691363035 |
| 87.103912365   | 68.4446954143  |
| 19.5879523806  | 11.1305967982  |
| 1.2937677182   | 1.0239150186   |
| 15.5914809226  | 6.3978164927   |
| 22.8321391905  | 13.4610812209  |
| 7.677383673    | 16.8270653064  |
| 79.5765692025  | 51.8362098615  |
| 0              | 1.7774181495   |
| 3.7609163195   | 3.5595060087   |
| 5.8669536108   | 2.7821400026   |
| 2.7868862779   | 5.2567676654   |
| 0.4358853956   | 0.2171274726   |
| 5.2088820916   | 3.9439424925   |
| 2.7964179185   | 2.6836164758   |
| 0.8446964847   | 1.3311583006   |
| 2.614259999    | 1.9388915847   |
| 0              | 0              |

gene\_expression\_table

|                |                |
|----------------|----------------|
| 6.3181359836   | 11.1041483363  |
| 0              | 0.5113934596   |
| 79.0684894617  | 33.031270339   |
| 31.4309114916  | 26.1702573195  |
| 839.3384903946 | 997.5447720727 |
| 0              | 0              |
| 0.6729106337   | 1.2335241853   |
| 1.1819706923   | 2.0018341054   |
| 0              | 0              |
| 1.3221050707   | 1.8178814415   |
| 0.181723017    | 0.3041526991   |
| 1.8628310679   | 12.0837305793  |
| 0.0815451273   | 0              |
| 4.2441812289   | 2.9521261362   |
| 0.3122348327   | 0.3393457126   |
| 1.9589850485   | 1.639392191    |
| 18.4389414364  | 25.7642295228  |
| 0              | 0.3172883821   |
| 37.5445129661  | 19.1262078835  |
| 3.9688399139   | 5.7332917007   |
| 28.2224365419  | 23.6470079041  |
| 0              | 0              |
| 7.7888963699   | 5.7034247956   |
| 0.1412427953   | 0.0788001031   |
| 32.4684587084  | 26.4888891531  |
| 0.474101096    | 0.9026707117   |
| 1.0701475426   | 1.1846051155   |
| 0.2013067019   | 0.4545883967   |
| 17.9095507114  | 16.7656709848  |
| 7.1419622522   | 8.861717213    |
| 0              | 0.0144506037   |
| 0              | 0              |
| 0.6865237497   | 4.1037346468   |
| 0.6520599068   | 2.190150278    |
| 0              | 0              |
| 0              | 0              |
| 1.7982221467   | 0.8061731144   |
| 0.0504768636   | 0.100576105    |
| 0.0499251041   | 0.0198953428   |
| 0.5955314547   | 0.5745679298   |
| 0.0533078958   | 0.1168386891   |
| 1.9318011401   | 4.3990289018   |
| 0.1417828304   | 0.1836282303   |
| 6.8969173753   | 9.5945808839   |
| 0.9502148619   | 4.3546384716   |
| 0.7755410106   | 0.5975083146   |
| 0              | 0.1382993353   |
| 0              | 0              |
| 2.7301415725   | 1.5181001001   |

gene\_expression\_table

|                |                |
|----------------|----------------|
| 1.9861599394   | 1.8939278716   |
| 19.3233044377  | 9.4085993877   |
| 1.4401967428   | 0              |
| 0.193220268    | 0.0384995037   |
| 3.4080193116   | 6.1386507827   |
| 3.4633081975   | 4.6712478503   |
| 4.1866784668   | 10.9854863521  |
| 0              | 0              |
| 0              | 0.0152221966   |
| 0.4349067857   | 0.982101324    |
| 0.5247393528   | 1.394070773    |
| 0              | 0              |
| 2.7810039374   | 2.2355887625   |
| 1.589136515    | 2.4979255864   |
| 0.3572666074   | 0.9610116328   |
| 14.963779678   | 7.8404021669   |
| 7.9724700139   | 1.0590198139   |
| 0.0298857412   | 0.0476383234   |
| 1.0365598648   | 1.1359508188   |
| 0              | 0.1693596908   |
| 7.0316684009   | 5.8479577924   |
| 22.6932628793  | 25.0658099842  |
| 4.8506143916   | 2.3195858084   |
| 1.2254699358   | 0.781367044    |
| 21.0667390965  | 11.8154317297  |
| 167.2863553084 | 132.6935925182 |
| 11.7526612986  | 40.0224651164  |
| 1.1242803018   | 1.0490457384   |
| 0.0589985057   | 0.1528223291   |
| 1.7029965564   | 1.4542512132   |
| 0.8808445391   | 1.053059637    |
| 20.9157519886  | 13.7708798798  |
| 2.3412808683   | 1.7843802435   |
| 2.6011072353   | 1.76684841     |
| 2.2279183082   | 0.7398615574   |
| 3.7263239658   | 7.5029264256   |
| 51.9315666338  | 73.3038402789  |
| 4.44245283     | 3.692411432    |
| 22.9775112867  | 20.5108402647  |
| 2.1319218389   | 2.3448377996   |
| 320.453903005  | 135.7252599543 |
| 29.7420406735  | 11.8523156532  |
| 35.2348060348  | 33.0464686459  |
| 131.699387166  | 204.1351787995 |
| 0.0221598727   | 0.0883079304   |
| 2.1563351808   | 2.272067875    |
| 50.7565491507  | 76.7864579578  |
| 4.5144348174   | 5.2550301842   |
| 10.4260775344  | 8.0072036454   |

gene\_expression\_table

|                 |                 |
|-----------------|-----------------|
| 4.1431014065    | 8.3141736415    |
| 2.4592754793    | 2.1233995818    |
| 0.1127363246    | 0.9434428832    |
| 10.9574815091   | 16.6021687491   |
| 0.0341552778    | 0               |
| 2.7872190286    | 4.7059339103    |
| 4160.2975082969 | 2625.9333585937 |
| 9.4389372105    | 9.9359113763    |
| 3.151921846     | 0               |
| 4.6148368332    | 7.2335177058    |
| 2.0318249083    | 0.8096899076    |
| 437.9378021519  | 318.4178509928  |
| 9.6998360891    | 10.7104383333   |
| 3.3073129657    | 2.3018184981    |
| 2.6609608628    | 1.0604029641    |
| 1.5074408829    | 0               |
| 0               | 0.005782        |
| 5.712858346     | 2.6018235992    |
| 24.8487871971   | 30.6972404936   |
| 14.3384862125   | 22.3363146805   |
| 3.9065170114    | 5.3621795275    |
| 7.2508682958    | 4.9199567845    |
| 0.1000336345    | 0.2391826893    |
| 0.2590255219    | 0.2752603994    |
| 3.829783791     | 5.3416416195    |
| 6.1867572363    | 3.8501487802    |
| 13.6411667379   | 13.2311564301   |
| 0.2921984075    | 0.5356339825    |
| 0.5410840901    | 1.5812430741    |
| 0.0367205255    | 0.0365831706    |
| 9.5698524491    | 4.8218214018    |
| 0               | 0               |
| 3.0258307085    | 2.2212196945    |
| 1.3133497821    | 5.2337485351    |
| 0.1031631129    | 0.1068883154    |
| 0               | 0               |
| 217.1772496671  | 80.6231173608   |
| 0.309918163     | 0.7718972479    |
| 0               | 0               |
| 0               | 0               |
| 12.3731171677   | 15.2030964075   |
| 3.4804873317    | 3.1900709286    |
| 12.6842049399   | 11.2987492757   |
| 0.7135924358    | 0.3475624576    |
| 3.404433875     | 5.2571341096    |
| 59.0929565264   | 38.9401172971   |
| 2.5581293537    | 3.5380017009    |
| 0.4344513054    | 0.7271480484    |
| 3.2931154476    | 2.9405665497    |

gene\_expression\_table

|                |                |
|----------------|----------------|
| 3.245039696    | 2.4868472833   |
| 0              | 0.8955095752   |
| 1.9315739273   | 1.4295162378   |
| 2.0838850131   | 2.4913081686   |
| 19.0218252777  | 10.7249224867  |
| 17.4341047442  | 13.0887004805  |
| 0              | 0              |
| 17.5097386411  | 15.0288859474  |
| 0.9137521862   | 0.6935880015   |
| 0              | 7.1428671645   |
| 0.020848798    | 0.0166166497   |
| 5.4113829807   | 7.907007447    |
| 0              | 0              |
| 0.8232999384   | 0.4175667212   |
| 6.8970436715   | 10.6122560838  |
| 0.3003687898   | 0.3890188196   |
| 0.8580754727   | 1.1235379084   |
| 32.1552312616  | 45.3367762161  |
| 12.8628710782  | 7.4325589947   |
| 545.4367257794 | 365.6786958071 |
| 887.1391773101 | 625.3487148182 |
| 23.9967319544  | 17.9486182419  |
| 0.065273461    | 0.390175815    |
| 54.719078579   | 30.8914928921  |
| 0.4534792075   | 0.6950506872   |
| 32.2589514405  | 22.4143938319  |
| 1.3118320812   | 4.1821603518   |
| 36.7532192284  | 28.0190026013  |
| 0.3192253894   | 0.4134407048   |
| 1.664437753    | 2.5204820016   |
| 5.7145591076   | 5.2756833981   |
| 135.5487754988 | 52.8771066851  |
| 18.5911286596  | 17.9241170753  |
| 3.0556212003   | 4.4140776772   |
| 19.7568054752  | 18.242691688   |
| 4.887757019    | 4.5106707709   |
| 1.2214927946   | 1.4889419899   |
| 48.2208951109  | 39.4332622373  |
| 8.3206087326   | 7.3244405602   |
| 1.0589281343   | 1.3262444328   |
| 3.7610606974   | 4.2379774618   |
| 0.1018146262   | 0              |
| 1.8922547338   | 1.3196236644   |
| 6.0294019482   | 2.4027394716   |
| 0.0534163225   | 0.0851464258   |
| 0.3014752627   | 1.3215293515   |
| 0              | 0              |
| 0.6959081925   | 0.5893093472   |
| 5.4829198771   | 6.5548929004   |



gene\_expression\_table

|                 |                 |
|-----------------|-----------------|
| 10.4205919539   | 14.0151778554   |
| 15.5803585228   | 9.6089063193    |
| 0.588229666     | 0.7911396421    |
| 1.1505521817    | 0.1042044078    |
| 0.7121131452    | 0.2554018026    |
| 5.9867658416    | 6.3619968583    |
| 0               | 0.7416189637    |
| 18.0492584468   | 27.2123730761   |
| 1.9840740083    | 1.3316395679    |
| 1.0122111432    | 1.2370012333    |
| 0.1825206982    | 0.1697154393    |
| 1.5985277317    | 2.0323950518    |
| 11.0590494408   | 6.4238691373    |
| 3139.3595100591 | 3637.1154147442 |
| 1.237943876     | 1.6209260344    |
| 0.2532926002    | 0.2018761176    |
| 14.3954682612   | 7.1025172234    |
| 1.4116715604    | 0.646939922     |
| 0.7399134256    | 1.2900050514    |
| 12.8962436095   | 8.297024649     |
| 1.2614748932    | 1.1310806569    |
| 8.2390886535    | 9.0290969386    |
| 0.172178442     | 0.4254053126    |
| 34.6014937806   | 40.1803426877   |
| 0.9123392938    | 2.2117215019    |
| 0               | 0               |
| 6.0882152052    | 6.4346427559    |
| 0.1408117669    | 0.3366841288    |
| 10.1695531445   | 8.770563873     |
| 0.2096524227    | 0.1949436605    |
| 0.0120991129    | 0.007232        |
| 4.437255981     | 3.8367976922    |
| 0.0339929557    | 0.108370571     |
| 19.8820380854   | 13.381180404    |
| 0.2788232153    | 0.1111121054    |
| 1.4862616282    | 0.1579415674    |
| 0.1620631717    | 0.5812450795    |
| 0               | 0               |
| 22.5666061937   | 16.1640473883   |
| 0               | 0               |
| 1.0959889058    | 1.1117418392    |
| 4065.8953976338 | 6324.636710583  |
| 72.5890323391   | 54.4821483035   |
| 0               | 0               |
| 0.0393055119    | 0.0469901852    |
| 10.5891296122   | 4.4542419725    |
| 114.6748779953  | 63.7669216597   |
| 0               | 1.2848217315    |
| 192.1309136738  | 269.82207143    |

gene\_expression\_table

|                |                |
|----------------|----------------|
| 12.5284788564  | 9.5814754093   |
| 2.2968263295   | 6.7121558228   |
| 0.6048158015   | 0.9640855341   |
| 0.4652152477   | 0.5561701051   |
| 99.0389056547  | 34.3034222928  |
| 0              | 0              |
| 1.9659393186   | 2.0654175709   |
| 25.5182679293  | 16.008822506   |
| 1.1608896025   | 0.1850475582   |
| 4.7933540174   | 1.7828250515   |
| 42.7348347654  | 31.0982484893  |
| 0              | 0.3422533057   |
| 5.0450056239   | 3.5639863078   |
| 7.2419204962   | 5.5313710027   |
| 0              | 0.4090010849   |
| 3.4189930864   | 4.0874450131   |
| 0              | 0.2830809285   |
| 0              | 9.9853214238   |
| 0.6582255717   | 0.7869161366   |
| 1.6297884641   | 0              |
| 81.8400172352  | 56.7386527035  |
| 57.9597157472  | 89.693994058   |
| 220.86531848   | 207.3257873318 |
| 4.5777180372   | 4.8646345191   |
| 31.4054814417  | 29.3835202943  |
| 39.7065554473  | 36.9208290807  |
| 0.7969023417   | 1.905411576    |
| 36.1380236303  | 50.1159638683  |
| 679.6831811136 | 470.1332696186 |
| 6.4971238792   | 9.6167627375   |
| 0              | 0.1405827197   |
| 18.1022142859  | 9.1174427175   |
| 0              | 0              |
| 0              | 0              |
| 0              | 0              |
| 15.57899       | 17.9350496406  |
| 0              | 0.114000969    |
| 58.4207634964  | 26.7730293914  |
| 5.0758989487   | 1.6182119371   |
| 0              | 0              |
| 9.4594934173   | 5.1267156904   |
| 0.0507915905   | 0              |
| 12.2673764838  | 5.0207201214   |
| 6.3216714775   | 4.5618126736   |
| 1.0265688353   | 0.4431825255   |
| 2.1101159416   | 6.9673674945   |
| 8.9088026601   | 9.0472623149   |
| 11.6077544983  | 10.3424431178  |
| 2.9313792096   | 2.3606681806   |

gene\_expression\_table

|                 |                |
|-----------------|----------------|
| 0.6845551874    | 0.7981862441   |
| 0               | 0              |
| 0.104310423     | 0.3325447835   |
| 0.5303954455    | 0.4650020986   |
| 0               | 0.0144376855   |
| 0.0468503973    | 0.0746802418   |
| 8.8284862256    | 13.9011217668  |
| 3.3984367208    | 1.6062507898   |
| 0               | 3.013447048    |
| 0               | 0              |
| 0               | 0              |
| 3.973962869     | 3.2200664294   |
| 0               | 0.2472902345   |
| 2.9197537013    | 1.8151113062   |
| 0.1238603668    | 0.0740382367   |
| 1.1386614308    | 1.0122358205   |
| 1.1418037585    | 1.9933907875   |
| 3.1863724211    | 3.6279470184   |
| 10.564325074    | 17.4137744037  |
| 2.4786215184    | 1.8195211373   |
| 8.3149864015    | 5.151729191    |
| 39.0882046828   | 43.1181741375  |
| 0               | 0              |
| 602.2256485256  | 283.7282361939 |
| 2811.3685330651 | 4504.844157514 |
| 2.0149148468    | 2.3514998965   |
| 5.3584842521    | 4.1690678838   |
| 0.3865284585    | 0.2787264751   |
| 0               | 0              |
| 0               | 4.2804514917   |
| 22.5673370978   | 16.3743551562  |
| 0               | 0              |
| 1.7242879061    | 1.6147678364   |
| 0               | 2.0845528353   |
| 13.4639903437   | 10.4654734356  |
| 0.6383313516    | 0.826726735    |
| 0               | 0              |
| 4.9678042981    | 3.8401192278   |
| 0.9253640016    | 0.6760619307   |
| 0               | 0              |
| 16.5457372805   | 22.449429929   |
| 0               | 0              |
| 270.0944899734  | 104.8379955124 |
| 0               | 0.0270388393   |
| 0               | 0.0263890205   |
| 0               | 0.040371446    |
| 0.3112338145    | 0.0620139259   |
| 25.7253343749   | 19.0387655852  |
| 0               | 0              |

gene\_expression\_table

|                 |                 |
|-----------------|-----------------|
| 0.7149674263    | 0.7326442862    |
| 2.0940914853    | 0.3338013496    |
| 18.5459704941   | 13.8893050006   |
| 0.157240488     | 0.939913934     |
| 9.7446577657    | 3.8093156665    |
| 10.6058198485   | 3.7163693904    |
| 0               | 0               |
| 0.9923498741    | 0.5931827649    |
| 15.6674403126   | 13.338459423    |
| 31.0753138069   | 14.6581743302   |
| 2587.2545384083 | 1562.3964716574 |
| 1.6806828678    | 1.7657268937    |
| 0.8752725317    | 0.697598826     |
| 8.5529394727    | 7.586391335     |
| 0               | 0.2243202521    |
| 0               | 0               |
| 7.345403496     | 7.5034525859    |
| 74.1228747031   | 28.9912412515   |
| 2.3909285169    | 0.8661764121    |
| 0.7610637531    | 0.5762448876    |
| 5.3306549979    | 11.3295262406   |
| 26.8924676993   | 15.9377308432   |
| 3.4072493863    | 1.3578017621    |
| 2.1780106707    | 0.6509591149    |
| 0               | 0               |
| 0.0717017266    | 0               |
| 2.2558466289    | 0.6292743872    |
| 0.9543593955    | 0.316929856     |
| 5.1633322688    | 5.3497793179    |
| 0               | 0               |
| 6.4360351783    | 5.6361927715    |
| 0               | 0               |
| 12.8656611632   | 11.9871045913   |
| 0.6093979378    | 0.3440337914    |
| 34.1980583202   | 30.8031392166   |
| 4.5032877998    | 4.1697529377    |
| 7.3788328733    | 8.4345714438    |
| 47.0177350287   | 21.4848011254   |
| 3.1491013343    | 3.5005908281    |
| 7.4004525194    | 7.6185297948    |
| 0               | 0               |
| 0               | 0               |
| 0               | 0               |
| 0               | 0               |
| 9.5541739578    | 4.653457653     |
| 5.8599423126    | 7.7241533955    |
| 0               | 0               |
| 0.6671025912    | 0.3760704505    |
| 4.0575587929    | 2.263733527     |

gene\_expression\_table

|                |                |
|----------------|----------------|
| 0.4169421431   | 0.767468713    |
| 28.0553819916  | 62.706203354   |
| 18.4737044632  | 19.4084900978  |
| 1.5256933722   | 3.9085365663   |
| 0.007981       | 0              |
| 0              | 0              |
| 0              | 0.6666585472   |
| 2.0643591807   | 3.0468701414   |
| 0.0184059727   | 0.1760363927   |
| 12.3426364198  | 14.872871051   |
| 23.5322473273  | 25.239580736   |
| 0              | 0.0505891894   |
| 14.0865827785  | 8.420334741    |
| 2.4267938602   | 0.4298162348   |
| 40.6210290004  | 18.9429755261  |
| 8.2688266376   | 12.5216029718  |
| 0              | 0              |
| 22.6552837411  | 32.8885019552  |
| 184.4943185062 | 63.92355244    |
| 0              | 1.8566552388   |
| 6.3991285212   | 6.5876986808   |
| 151.7157402166 | 127.7373097283 |
| 0              | 0              |
| 125.3154874593 | 87.2063787598  |
| 0.9832005982   | 0.7836183111   |
| 0              | 0.8471565301   |
| 3.0269402556   | 13.5099679199  |
| 0              | 0              |
| 17.0996416419  | 14.6102608146  |
| 60.1816287493  | 45.5669525087  |
| 2.3289703254   | 1.9675793771   |
| 18.5732805571  | 10.7938870105  |
| 237.2098368209 | 171.3186550995 |
| 59.6461142562  | 60.5881620459  |
| 0.8924417019   | 1.0313600375   |
| 40.2123787711  | 16.6246432309  |
| 0.9778051517   | 3.5069314476   |
| 69.4791854119  | 88.4622592163  |
| 0.0916580909   | 0.0292208766   |
| 0              | 0              |
| 1.2831188251   | 0.7558757346   |
| 2.0702055451   | 1.6787480103   |
| 2.4357916995   | 1.9072857286   |
| 3.2651171453   | 2.4004186786   |
| 0              | 0              |
| 0.8835979045   | 1.2859929072   |
| 4.2081780101   | 1.016348392    |
| 0.6542636749   | 0.521453096    |
| 8.9625546965   | 18.1732018843  |

gene\_expression\_table

|                 |                 |
|-----------------|-----------------|
| 2.3576943217    | 2.7490539988    |
| 0               | 0               |
| 0               | 0.2204715713    |
| 2136.4954183025 | 2684.3442876089 |
| 0.5835476775    | 0.4360236669    |
| 26.3029679757   | 18.349942713    |
| 1.0723305374    | 0.9614874899    |
| 0               | 0               |
| 39.6055792669   | 34.634857578    |
| 11.6421474814   | 14.3672974033   |
| 2.5192059234    | 4.3502900339    |
| 80.6233750892   | 79.679225063    |
| 4.2177214036    | 3.9433635936    |
| 3.6002909368    | 11.0865465213   |
| 0.3536627045    | 0.1973102948    |
| 0               | 0               |
| 1.1765468179    | 1.378995162     |
| 72.7834314696   | 60.3426384202   |
| 7.2571659896    | 9.3508261376    |
| 5.7281526702    | 4.7455933982    |
| 4.1238748603    | 5.929056255     |
| 5.1678013734    | 3.2102230708    |
| 17.7627134439   | 38.559243466    |
| 1.2775539908    | 2.7413620519    |
| 3.591899466     | 4.0896729057    |
| 0.6721266552    | 2.2498981107    |
| 2.4121214558    | 4.1071143108    |
| 0               | 0               |
| 34.6186679035   | 21.2241077559   |
| 5.5464716984    | 3.1312440833    |
| 0.4624080298    | 0.2551449435    |
| 0.2933456209    | 0.2143154548    |
| 0.9735638293    | 1.254911643     |
| 0.0918977445    | 0.4486145831    |
| 7.1646054549    | 11.5044636303   |
| 18.8445146784   | 13.8412425953   |
| 0.5227063856    | 0.6249014125    |
| 0.6153761362    | 0.6375972637    |
| 13.0285766612   | 18.324483728    |
| 0.0221276625    | 0.005879        |
| 0.2540887954    | 0.3688587589    |
| 2.2982549039    | 3.3363590483    |
| 80.5876219295   | 52.0968101563   |
| 2181.007370672  | 3652.3397909929 |
| 0.5971527602    | 2.3003537815    |
| 0.009157        | 0.0182457022    |
| 57.8540257893   | 58.8301224931   |
| 7.1277341443    | 9.6653486945    |
| 13.5923368702   | 14.9601267902   |

gene\_expression\_table

|               |               |
|---------------|---------------|
| 0.1342535333  | 0.096300973   |
| 3.9696438082  | 3.4400440472  |
| 0             | 0             |
| 2.7707225932  | 2.5878361607  |
| 19.4506430775 | 25.976843123  |
| 0             | 0.1740930619  |
| 1.4453395398  | 1.8879123881  |
| 13.055850241  | 12.4333715246 |
| 0             | 0             |
| 2.4892100733  | 3.3816805401  |
| 0.3207779053  | 0.6604612413  |
| 15.0997382171 | 9.443212371   |
| 99.0567319721 | 63.6266324802 |
| 7.3667679865  | 4.6846035542  |
| 1.189816662   | 1.2643905016  |
| 0.2645657062  | 0.1757173903  |
| 19.0254880412 | 22.7730607439 |
| 56.1960373847 | 109.31752357  |
| 0.0640748833  | 0.0510681665  |
| 11.6245202126 | 7.1640840544  |
| 1.3308877605  | 1.2501432527  |
| 8.3108970649  | 8.7135140732  |
| 0.252036364   | 0.4017497756  |
| 74.7440619836 | 52.0308759123 |
| 17.6271244316 | 9.1220622305  |
| 3.0036298518  | 2.3487474826  |
| 5.8040782219  | 10.7257253458 |
| 0.4992811451  | 0.8953444077  |
| 0.0191532932  | 0.1221225558  |
| 4.48816066    | 2.9579848702  |
| 1.8314445699  | 10.9475637781 |
| 0.6349911117  | 0.2530463587  |
| 0.1672864184  | 0             |
| 30.9948018209 | 19.1062972651 |
| 63.4912872984 | 38.8779423358 |
| 4.4359645778  | 4.3728519365  |
| 0             | 0.0759810868  |
| 3.7084503773  | 2.0320183067  |
| 2.5366950044  | 2.3105886849  |
| 4.4311139588  | 2.1375663315  |
| 0             | 0.3588316054  |
| 0             | 0.0289446532  |
| 0             | 0.0136006451  |
| 4.0951143208  | 5.3351183009  |
| 2.9911778505  | 11.443158548  |
| 0             | 0.5370713934  |
| 8.2789854324  | 7.4782025218  |
| 0             | 0             |
| 3.8582619681  | 0.7687659906  |

gene\_expression\_table

|                 |                 |
|-----------------|-----------------|
| 29.6505710426   | 41.255391862    |
| 2439.4588260067 | 2867.0513813135 |
| 0.0155917518    | 0.0932005804    |
| 184.7442168139  | 106.341832794   |
| 0               | 0               |
| 919.7780642     | 1737.7293572398 |
| 1.0724939401    | 1.0684822247    |
| 0               | 0               |
| 3.9736637187    | 5.1024533817    |
| 33.4761961324   | 25.3809485004   |
| 0.1571869346    | 0.1565989693    |
| 1.7256366765    | 2.2349364038    |
| 6.3605751995    | 4.4885547388    |
| 30.4871011845   | 26.2167488649   |
| 9.952802645     | 16.5065138749   |
| 10.6356099249   | 3.4310296668    |
| 0.3054085346    | 0.2028440928    |
| 54.9964310383   | 19.0632780873   |
| 0.6087180414    | 0.0970305763    |
| 0.2691522447    | 0.5720436645    |
| 19.1256562017   | 10.7538297169   |
| 4.4647837104    | 11.1527543765   |
| 0.6707806289    | 1.0088744563    |
| 3.978530499     | 2.2020270075    |
| 0               | 0               |
| 3.453504162     | 1.9660492359    |
| 3.8997142853    | 3.1081017724    |
| 6.030538499     | 7.4498964132    |
| 0               | 0               |
| 2.7006682302    | 2.5111951669    |
| 1.7495007413    | 0.4647884398    |
| 104.4475471161  | 84.3294103986   |
| 3.4591241544    | 2.9713774039    |
| 37.4474141114   | 63.4224784238   |
| 0               | 0.1402032412    |
| 24.8354163578   | 9.2525510229    |
| 21.8284969807   | 18.5521769569   |
| 2.139933561     | 0.2842572048    |
| 0.3291512642    | 0.0437226744    |
| 265.0225410199  | 390.7661928697  |
| 1.0977903761    | 0.8924461751    |
| 1.5356222014    | 1.4815661913    |
| 44.4705121686   | 18.9197517725   |
| 0               | 0               |
| 2.8084046162    | 3.9624308457    |
| 1.6257519529    | 2.0155902656    |
| 15.9164212624   | 4.6513529684    |
| 0.1256649315    | 0               |
| 1.9558820292    | 0               |



gene\_expression\_table

|                 |                |
|-----------------|----------------|
| 2.9848352342    | 1.1894681255   |
| 0.2859330279    | 0.0569726963   |
| 0               | 0.0866805482   |
| 0               | 0              |
| 0               | 0.9667902168   |
| 9.3291519327    | 6.5606511452   |
| 15.2383484227   | 11.3042657595  |
| 3.3375123884    | 3.3060281006   |
| 3.594738636     | 3.2231631082   |
| 4.290470291     | 1.3152066399   |
| 12.3592040815   | 9.0727175969   |
| 18.9707022708   | 8.9746140649   |
| 14.7993125456   | 9.6223706328   |
| 0               | 0              |
| 12.6742059462   | 12.2047118854  |
| 20.9861285949   | 11.8031720975  |
| 3.2744239261    | 3.4796541708   |
| 32.8649502204   | 20.1352269568  |
| 13.124925841    | 6.5379157108   |
| 3.0804628336    | 3.0280210107   |
| 13.1035447656   | 8.2678692047   |
| 0               | 0.1195246672   |
| 0               | 0.1240388219   |
| 0.79765496      | 0.8476493793   |
| 51.5123660234   | 28.661557986   |
| 1282.0045460625 | 919.1539324977 |
| 6.6868123446    | 4.4411999999   |
| 69.5216703325   | 83.1139453981  |
| 42.0063022921   | 60.9748170664  |
| 4.2512868013    | 11.0433733295  |
| 3.3805194439    | 3.5923994107   |
| 128.0040168325  | 131.4692903319 |
| 0               | 0              |
| 25.9315007021   | 20.3805521068  |
| 0.5321318174    | 1.2723392462   |
| 7.9517370325    | 9.8866474835   |
| 18.7519755299   | 31.327996641   |
| 27.0622941254   | 17.4126382896  |
| 1.505649339     | 0.8000092719   |
| 0               | 0              |
| 22.6795047912   | 14.292443056   |
| 0               | 0              |
| 2.3745753989    | 0              |
| 97.557455415    | 81.032814013   |
| 216.6688043189  | 144.8339857765 |
| 167.3301052723  | 210.9001958526 |
| 6.3126170376    | 3.5131679688   |
| 120.1352373027  | 120.4481959966 |
| 25.6571278729   | 26.1050105323  |

gene\_expression\_table

|                |                 |
|----------------|-----------------|
| 117.9799515093 | 28.6500439386   |
| 0              | 0               |
| 0              | 0               |
| 0              | 0.1879964368    |
| 8.3007919356   | 1.6539484845    |
| 10.1728077332  | 7.2168371358    |
| 3.3788965349   | 0               |
| 3992.104847486 | 3753.1228441482 |
| 193.6240670596 | 141.6628643526  |
| 32.9582836911  | 21.6711010813   |
| 7.156320775    | 14.7344079034   |
| 23.1521101389  | 10.4296212584   |
| 3.2605876913   | 1.7185037874    |
| 165.6932029544 | 98.9092979013   |
| 17.6523433807  | 34.6701617621   |
| 7.3008576256   | 4.1929867333    |
| 14.2091012427  | 2.8311902826    |
| 14.0821158108  | 11.2235527809   |
| 4.6359268189   | 1.7573156148    |
| 0              | 0               |
| 55.5358349466  | 47.213312403    |
| 12.0600436639  | 12.4955297873   |
| 2.5145557278   | 4.008239857     |
| 0              | 1.3746605979    |
| 0              | 0               |
| 9.9861542029   | 1.3265067347    |
| 2.9750896858   | 4.1699868186    |
| 29.7387187092  | 28.647673183    |
| 1.2409111955   | 0.57692577      |
| 113.9752577249 | 88.6068003435   |
| 1.4641650681   | 0               |
| 224.2860669707 | 81.8825553601   |
| 30.7346789617  | 18.1606582017   |
| 25.6359789088  | 78.0133544884   |
| 0              | 0.2147106974    |
| 18.0788656923  | 5.5419202528    |
| 103.5657155043 | 49.6940494164   |
| 48.6005375421  | 74.4516804432   |
| 4.2889954188   | 2.2789078529    |
| 128.1831595251 | 88.0173085103   |
| 41.7080976725  | 39.0589613266   |
| 59.1448864053  | 24.1586973608   |
| 0.2484693248   | 0.0594095792    |
| 4.1866881698   | 2.6694577026    |
| 4.9517755039   | 6.0608538679    |
| 40.570004825   | 20.8610326511   |
| 40.0455560347  | 21.5025055044   |
| 263.8706251449 | 185.3666440721  |
| 103.8620185602 | 59.550065266    |

gene\_expression\_table

|                 |                |
|-----------------|----------------|
| 2.1162050487    | 3.2710427639   |
| 2.3825772455    | 3.3447099139   |
| 7.2189269781    | 3.6382675531   |
| 42.1501075145   | 12.1860422825  |
| 42.746683767    | 22.5709974973  |
| 13.3552969302   | 14.8459592047  |
| 105.7863447746  | 165.8757121481 |
| 38.7530705094   | 20.439589117   |
| 0               | 0              |
| 30.9164180669   | 50.7028121091  |
| 2654.1619066895 | 5705.245071397 |
| 28.0519788052   | 35.399595429   |
| 13.6410328509   | 9.8130446714   |
| 11.2646524185   | 29.6965050459  |
| 8.3063432127    | 0.5516848623   |
| 40.6642101171   | 44.3640741874  |
| 5.77496737      | 14.9587511464  |
| 73.8053561426   | 29.8748900464  |
| 2.7425281786    | 2.1858156955   |
| 0.2413442352    | 0.2244120437   |
| 72.6867391045   | 38.2103893818  |
| 28.4016140215   | 58.0856028981  |
| 11.9535351261   | 3.0962938111   |
| 9.5554456434    | 5.6744896535   |
| 11.8300818639   | 9.6905720495   |
| 171.9265094896  | 138.2501809873 |
| 4.2555272082    | 3.2520296475   |
| 92.7164009666   | 91.8791327843  |
| 21.2360734378   | 28.0476583994  |
| 577.0035715577  | 516.1631413385 |
| 2.4572525567    | 2.2700202786   |
| 2.3842281444    | 0.7917699413   |
| 6.6871653038    | 2.6648606555   |
| 4.0498874146    | 6.5478043809   |
| 1.2410851258    | 1.0081764262   |
| 0.2860608634    | 0.0569981678   |
| 8.4242004288    | 5.6739307944   |
| 9.6044042949    | 8.989919388    |
| 82.2412959749   | 92.6051380546  |
| 4.9329626462    | 4.0626621465   |
| 0               | 0              |
| 1.0539971271    | 2.1001091998   |
| 15.8394506587   | 11.8901990388  |
| 45.7839481399   | 73.394966539   |
| 0.9389605786    | 0.757197563    |
| 0               | 0              |
| 5.5468038198    | 6.0244842883   |
| 3.2341272201    | 5.3330148594   |
| 0.6000359329    | 1.0042896688   |

gene\_expression\_table

|               |                |
|---------------|----------------|
| 0.8832580137  | 1.9358991177   |
| 0             | 0              |
| 1.8467016024  | 3.9248937085   |
| 14.8191503857 | 25.893291149   |
| 5.8983207745  | 3.5257546923   |
| 54.9567963858 | 43.2642055231  |
| 0.7281118802  | 0.6632121989   |
| 1.2554331069  | 1.5493001481   |
| 5.4980892352  | 7.9424088818   |
| 0             | 0              |
| 0             | 0              |
| 1.1067384178  | 1.6661490095   |
| 13.3056156817 | 9.407374143    |
| 12.4523894978 | 21.2327330367  |
| 84.8253432697 | 110.4238519662 |
| 5.4852344723  | 2.4591225094   |
| 0.8779419942  | 0.4373290049   |
| 0             | 0              |
| 0             | 0.1704973004   |
| 0             | 0              |
| 0.004679      | 0.06153268     |
| 1.3387213586  | 2.2444498061   |
| 0             | 0              |
| 0             | 0              |
| 30.1221743334 | 30.3302131079  |
| 1.5707419834  | 1.6961134188   |
| 41.8258296374 | 15.0009761162  |
| 0             | 0              |
| 0.2863801203  | 0.2445504871   |
| 0.0205402546  | 0              |
| 1.5205847046  | 1.2119175072   |
| 0.115071635   | 0              |
| 9.814715423   | 3.4766232909   |
| 1.3271418312  | 1.484907143    |
| 0.9081601913  | 0.4342863236   |
| 3.8896056824  | 8.1806746736   |
| 18.1143323127 | 11.7029303102  |
| 43.9266135061 | 49.8625038212  |
| 0.1133496947  | 0.3312487336   |
| 0.0922431093  | 0.1960492149   |
| 1.4428218321  | 2.0012520136   |
| 5.4037833548  | 6.7573088555   |
| 11.4257166919 | 9.5203090789   |
| 7.9146139865  | 7.0478351964   |
| 5.2503540327  | 2.4033014082   |
| 0.0554834453  | 0.4864279795   |
| 12.4331678567 | 10.4512452116  |
| 0             | 0              |
| 0.1265347335  | 0.1008491394   |

gene\_expression\_table

|                 |                 |
|-----------------|-----------------|
| 0               | 0.002396        |
| 5.0439251933    | 6.5351525445    |
| 0.0126195779    | 0.007543        |
| 16.17357337     | 13.0887750432   |
| 0               | 0               |
| 0               | 0               |
| 4.4565394354    | 6.5309048634    |
| 2.4710612825    | 3.1839514848    |
| 40.0820731449   | 24.8089066177   |
| 0               | 0               |
| 0.6268348936    | 0.8048984638    |
| 1.2112409223    | 0.9653681737    |
| 12.272435017    | 12.2265293807   |
| 0.3310763367    | 0.7916110311    |
| 0.0297300876    | 0.0266569927    |
| 0.9204647262    | 0.8803408161    |
| 0.2862307125    | 0.4334432801    |
| 7.1220984478    | 7.4158979284    |
| 0.144754257     | 0               |
| 20.3899542545   | 33.2405748742   |
| 19.2126701062   | 15.3126433482   |
| 1.7703484313    | 2.7337758541    |
| 0.8654666976    | 0.955084849     |
| 0               | 0               |
| 3.53083492      | 1.6635852365    |
| 2.4030249024    | 3.1340111192    |
| 19.1796034081   | 16.7612817322   |
| 32.2787036876   | 40.8812733128   |
| 0               | 0.2034872014    |
| 0.0829638885    | 0.859597004     |
| 0.1625722746    | 0               |
| 26.2488594741   | 28.624386785    |
| 0               | 0               |
| 0.7445786612    | 2.0770218806    |
| 135.8498139055  | 41.3628447443   |
| 1157.7236995362 | 1715.5992112463 |
| 11.1774570569   | 7.6937199103    |
| 517.5545246257  | 721.3678394734  |
| 2.1517094106    | 1.4291072251    |
| 2.5750587582    | 3.4406898284    |
| 22.0989905247   | 9.6071250252    |
| 5.7522859917    | 2.7168091439    |
| 0.0334833872    | 0.5604167691    |
| 0.0657496916    | 0.8384480212    |
| 1.0250079483    | 1.8964657336    |
| 26.8545813496   | 32.3793579268   |
| 4.9004093935    | 4.8593718304    |
| 0.2913627354    | 0.3151534115    |
| 4.0087493918    | 1.9809022176    |

gene\_expression\_table

|                |                |
|----------------|----------------|
| 0.2004112156   | 0.0532430847   |
| 0              | 0              |
| 0              | 0              |
| 0              | 0              |
| 0              | 0              |
| 0              | 0              |
| 3.4463329136   | 1.8566018291   |
| 0              | 0.0489852684   |
| 0              | 0              |
| 26.2240419541  | 19.9331319612  |
| 0.0458932941   | 0.0182886512   |
| 0              | 0              |
| 12.1855693246  | 10.9497936515  |
| 1.548159228    | 5.0589679045   |
| 12.1558574823  | 15.0707049546  |
| 24.831274171   | 25.7928148381  |
| 0              | 0              |
| 0.1778894733   | 0.2126688829   |
| 1.553910083    | 1.1223707653   |
| 0              | 0.14338414     |
| 0.4374023667   | 1.5106563056   |
| 48.8242622929  | 32.9917161468  |
| 9.4146219089   | 9.7890812679   |
| 0.9137606598   | 2.093788196    |
| 0.1521452979   | 0.1212609529   |
| 5.7748762477   | 4.7796438828   |
| 0              | 0              |
| 0.0507089486   | 0.1044064899   |
| 0              | 0              |
| 1.9306656103   | 4.5200930763   |
| 0.7308778738   | 0.8513683573   |
| 8.9186598283   | 7.7544428947   |
| 6.8276759558   | 4.135699116    |
| 32.5123534174  | 23.5173099424  |
| 0              | 0              |
| 106.3961809433 | 119.0030221723 |
| 0.1852071334   | 0              |
| 1.2370534687   | 0.9448600947   |
| 0.1176550289   | 0              |
| 17.1587700188  | 8.4333294931   |
| 126.2773712356 | 129.9222799777 |
| 0              | 0              |
| 5.2921951099   | 2.2093864145   |
| 3.3080988562   | 4.5099391351   |
| 0.0408757266   | 0.2008992895   |
| 4.2995881187   | 5.6787041712   |
| 0              | 0              |
| 0              | 0              |
| 15.2430528531  | 15.1860354773  |

gene\_expression\_table

|               |               |
|---------------|---------------|
| 3.3279656415  | 5.1430950127  |
| 4.3100730153  | 4.6374670573  |
| 2.4672979274  | 3.8236627027  |
| 0.7057437713  | 1.4062078052  |
| 0.0961088251  | 0.0382997302  |
| 0.106993425   | 0             |
| 0.1369028016  | 0.1091125681  |
| 48.5800316517 | 59.4131047851 |
| 4.1584883204  | 6.7470627929  |
| 29.575863432  | 45.1980462275 |
| 8.4129111669  | 3.3525769065  |
| 3.1015799909  | 1.266137483   |
| 3.2542797943  | 1.2968428014  |
| 36.9206483055 | 24.5216965576 |
| 2.3875108291  | 3.3020290244  |
| 0.3922264122  | 0.6773160686  |
| 0.2452747769  | 0.5864575555  |
| 1.6282289071  | 1.6221384382  |
| 1.2670978988  | 1.4759881169  |
| 0             | 0             |
| 2.8590551849  | 0.4797239159  |
| 0             | 0.08249099    |
| 2.9472576786  | 4.3191044948  |
| 0             | 0.0161894984  |
| 19.3562807846 | 8.1585636343  |
| 0.3027982052  | 0.3619986887  |
| 0.6238953546  | 0.5904835617  |
| 0.0540862329  | 0.0215535683  |
| 2.6801421942  | 2.2859948991  |
| 4.1136369458  | 6.9384320299  |
| 0             | 0.2944415249  |
| 0.1631261642  | 0.9750958976  |
| 2.3983722775  | 1.6074152519  |
| 0.9611649817  | 1.8856757123  |
| 0.5416392901  | 0.1079226524  |
| 0.9537558754  | 0.3800753222  |
| 0             | 0.2019560657  |
| 0             | 0             |
| 6.5656939017  | 9.4483055425  |
| 1.9225440417  | 1.9153526728  |
| 11.8513853626 | 9.2980555628  |
| 0             | 0             |
| 5.1671566474  | 2.9743009968  |
| 0.5856294787  | 1.4585972583  |
| 0.2747156132  | 0.3174781104  |
| 2.928674496   | 1.3700596606  |
| 33.8336664952 | 19.6114094724 |
| 87.9780185279 | 79.0878739751 |
| 0             | 0.6425285989  |

gene\_expression\_table

|                 |                |
|-----------------|----------------|
| 7.919011544     | 5.610232959    |
| 6.241575214     | 4.8700746015   |
| 42.6339245882   | 15.1020267851  |
| 16.8659919286   | 8.0402680204   |
| 0.4386997969    | 0.3907820029   |
| 2.0451086684    | 1.8337129565   |
| 13.4356698305   | 29.9470258252  |
| 28.4187366843   | 20.2141295887  |
| 13.8148382997   | 7.4237668329   |
| 1.5545091048    | 0.9865756844   |
| 0               | 0.3583083165   |
| 0.8140930521    | 9.4081556137   |
| 4.0130072799    | 1.0661323819   |
| 12.2802379847   | 7.7967762518   |
| 75.8158867027   | 111.6488847324 |
| 5.9902051695    | 5.8683352089   |
| 7.9714302502    | 8.3651654091   |
| 1779.4094258324 | 891.4949152833 |
| 0               | 0.1026221448   |
| 34.2919950953   | 29.4567222255  |
| 1.0495439132    | 2.091236087    |
| 0               | 0              |
| 0               | 0              |
| 5.8735106592    | 11.7030810175  |
| 0.6871772786    | 0.5134551441   |
| 0.8500291645    | 1.0162195072   |
| 0               | 0              |
| 0.7253889247    | 1.2801681567   |
| 1.3973754695    | 3.0036658956   |
| 2.1686154621    | 1.0802518256   |
| 0.0217487438    | 0.0520017398   |
| 7.8639569634    | 17.2359911952  |
| 39.6608080388   | 19.7905860913  |
| 0.0280727527    | 0.0298322616   |
| 0.1369334322    | 0.0545684904   |
| 1.5639764293    | 1.0849175718   |
| 0.41403856      | 2.3099430413   |
| 5.9489827421    | 6.8750071303   |
| 1.0090427682    | 2.345626255    |
| 0               | 0              |
| 126.3446891257  | 84.4182155033  |
| 5.8105140442    | 5.2666543226   |
| 23.4858565211   | 17.520427297   |
| 0.1965632352    | 0.1174967886   |
| 1.5037049699    | 1.7976963466   |
| 26.2242170612   | 10.1133383652  |
| 1.2613194713    | 1.4450916616   |
| 0               | 0              |
| 0.0145304431    | 0.00579        |



gene\_expression\_table

|               |               |
|---------------|---------------|
| 0             | 0.1385160755  |
| 5.6733029743  | 6.1448272954  |
| 1.3221989835  | 4.4610976201  |
| 0.4735251779  | 0.3841424892  |
| 1.5269819346  | 1.8255242219  |
| 1.1021484822  | 1.9764465165  |
| 0.6061005381  | 0.3220444745  |
| 0.2612658778  | 1.2493852808  |
| 6.5532974695  | 6.830113061   |
| 0.8865719598  | 0.9589633255  |
| 0.5002374932  | 0.3189544517  |
| 1.4590052824  | 2.2772248908  |
| 0             | 0             |
| 0             | 0.5046307673  |
| 0             | 0             |
| 2.0468873555  | 2.5086387361  |
| 1.6073937612  | 5.3379374238  |
| 17.3447246526 | 21.7232348103 |
| 0             | 0             |
| 0.7165367036  | 0.9518086179  |
| 0.0328780707  | 0             |
| 11.0768672997 | 15.9645941472 |
| 0.6694692194  | 0.4001790225  |
| 0.112091758   | 0.201010452   |
| 2.2488672644  | 0.9180402073  |
| 54.8647096346 | 46.0118654371 |
| 30.8812310342 | 22.758202576  |
| 0.9950857461  | 1.9280312379  |
| 1.2405648828  | 0.247184898   |
| 1.7912049921  | 2.1810615484  |
| 0.3258646282  | 0.6060053361  |
| 0.4801065149  | 0.1195776633  |
| 0.0843256632  | 0.168020478   |
| 1.1838262193  | 3.9313268669  |
| 15.3361905207 | 10.5175165783 |
| 48.1502719945 | 19.8497228588 |
| 0.4947076182  | 0.3462020889  |
| 4.790014134   | 2.4542212396  |
| 0             | 0             |
| 2.3726542214  | 1.7019210194  |
| 0             | 0             |
| 12.8102128351 | 11.5247396766 |
| 2.4918098395  | 2.5321388865  |
| 4.6800037371  | 3.7299983655  |
| 0             | 0             |
| 0             | 0             |
| 0.4069347373  | 0.2973025574  |
| 18.5612925761 | 11.7948100183 |
| 0             | 0             |

gene\_expression\_table

|                |                |
|----------------|----------------|
| 0.8476858569   | 1.1260200626   |
| 0              | 2.7811262667   |
| 548.7022960941 | 486.6416697671 |
| 1.4931083913   | 2.5423126297   |
| 39.9161525592  | 40.064809089   |
| 2.6836885084   | 9.4825454819   |
| 40.4124432709  | 47.9005980983  |
| 0              | 0              |
| 14.4832740531  | 14.680039513   |
| 0.100256137    | 0.0559334295   |
| 0              | 0              |
| 0              | 0.0418303357   |
| 0.6091210526   | 0.6523558013   |
| 0.9720656698   | 0              |
| 94.8947562512  | 19.1634725331  |
| 9.5691566804   | 7.083730495    |
| 64.4175198064  | 35.3387827212  |
| 3.1710283147   | 2.5847729428   |
| 0              | 0              |
| 0.6445866363   | 0.7706106347   |
| 2.7700689221   | 4.4155317527   |
| 7.678081617    | 5.666193616    |
| 0.1499650168   | 0.5843359003   |
| 187.5604996223 | 161.6755360191 |
| 5.6558268749   | 3.6408643263   |
| 1.5188263881   | 0.8070107438   |
| 18.7567975542  | 13.5723993938  |
| 0.0288588535   | 0.0115003622   |
| 3.0878508989   | 7.7932949633   |
| 10.3483260374  | 20.3443121109  |
| 0.8093951804   | 0.5741337302   |
| 0              | 0              |
| 13.1758410309  | 5.3089627139   |
| 24.5631943504  | 24.1181203046  |
| 0.0451082579   | 0.0674092924   |
| 0.979710674    | 1.1712552227   |
| 38.2216372192  | 33.7268196424  |
| 0.394999066    | 1.2986211245   |
| 176.4544122133 | 177.8394112036 |
| 17.1832067437  | 23.4773926334  |
| 9.9700278809   | 4.3704031843   |
| 0.3047083913   | 0.3469355598   |
| 18.5383324344  | 13.4714977903  |
| 0              | 0.016043919    |
| 7.4730363228   | 4.0068083428   |
| 0              | 0.1864974238   |
| 2.6619062612   | 1.6393868228   |
| 1.5646385491   | 4.5482715423   |
| 7.0973863686   | 0              |

gene\_expression\_table

|                |                |
|----------------|----------------|
| 5.2373863348   | 3.6925938362   |
| 0              | 0.14095009     |
| 0              | 0              |
| 27.4113008142  | 22.9127220159  |
| 14.488301972   | 7.523231933    |
| 2.465625997    | 7.5925189935   |
| 0.673910927    | 1.208502235    |
| 0.7187012644   | 0.286405171    |
| 308.6259735797 | 321.5422748502 |
| 3.4803152263   | 3.8833725717   |
| 0.6127898404   | 1.3047207355   |
| 0.770521127    | 0.8544155331   |
| 0              | 0              |
| 1.0136053271   | 1.219544464    |
| 4.6921609882   | 1.0907422711   |
| 0.0873512731   | 0.4525275637   |
| 2.6866251586   | 1.5345700722   |
| 0.007861       | 0              |
| 0              | 0.0225226152   |
| 3.4004413829   | 5.2627865291   |
| 1.0226843427   | 0.1528288414   |
| 0.9182311131   | 1.036769282    |
| 1.2889607872   | 0.8218491949   |
| 4.4595225612   | 6.8864043274   |
| 1.9363244507   | 1.3651961636   |
| 10.0191198842  | 9.2993533687   |
| 12.4077750803  | 5.8235755511   |
| 11.743450749   | 7.6263562574   |
| 21.4210453958  | 41.1168371585  |
| 2.427745728    | 1.7085035243   |
| 0.0290721098   | 0.0347560369   |
| 10.8494288479  | 5.8800122431   |
| 3.8040219651   | 7.8189410114   |
| 47.5713651123  | 55.0226071469  |
| 1.7934179272   | 1.6892526756   |
| 2.6280072745   | 2.152723382    |
| 3.0031609975   | 5.0862767988   |
| 0              | 0              |
| 0.1669973263   | 0.0665490659   |
| 17.0856493747  | 15.8406393735  |
| 0.8258181317   | 1.2340936787   |
| 1.9945222102   | 6.5289166972   |
| 0.9193986034   | 2.2960052683   |
| 1.4467094516   | 1.153038372    |
| 9.8789100074   | 13.6827213568  |
| 3.0857834532   | 1.7158554034   |
| 62.9269403659  | 46.0646673421  |
| 8.4594248584   | 13.4844511536  |
| 133.2135257831 | 101.9252998291 |

gene\_expression\_table

|                |                |
|----------------|----------------|
| 3.5466069449   | 4.2400088283   |
| 62.5882249358  | 47.5450093751  |
| 6.328332399    | 1.8752324924   |
| 9.3884946406   | 22.4481036545  |
| 124.4080045066 | 50.7038115084  |
| 113.3459134408 | 48.6639778594  |
| 1.3651467283   | 2.1760645296   |
| 70.5255100601  | 85.1286756532  |
| 0              | 0              |
| 1.3659857316   | 0              |
| 87.8734073287  | 146.7416135047 |
| 1.0829054418   | 1.9710968444   |
| 0.0938870337   | 0              |
| 0.2288536515   | 0.6079936356   |
| 1.9118512736   | 3.2651998311   |
| 26.7925022058  | 7.1179422818   |
| 2.5095124953   | 1.3125659099   |
| 0.6211080797   | 0.7425417539   |
| 56.4397148857  | 36.2957096687  |
| 16.2517519416  | 2.9925363284   |
| 0.458231632    | 1.3173793439   |
| 0              | 0.4725009838   |
| 2.3003608227   | 1.4896415377   |
| 46.5338279817  | 15.9477594866  |
| 0              | 0              |
| 0              | 0              |
| 102.358238439  | 298.8321492445 |
| 8.7957076367   | 11.3499212756  |
| 4.6063343731   | 4.1822351285   |
| 7.9794348176   | 11.5079740774  |
| 1.7343401739   | 5.8746994882   |
| 0.2099195965   | 0.3308125681   |
| 0              | 0              |
| 0              | 0              |
| 0              | 0              |
| 0.7375189297   | 0.2743104764   |
| 0              | 0              |
| 0              | 0.009537       |
| 0.174002855    | 0.2311359852   |
| 0.0770221054   | 0.0767340005   |
| 2.8242265282   | 2.7064752344   |
| 2.8483373056   | 0              |
| 5.3412952802   | 3.8579540326   |
| 1.6776964116   | 0.790126247    |
| 8.8838642881   | 4.5138232198   |
| 196.9364866252 | 99.8835529645  |
| 1.2488316059   | 0.7464961746   |
| 2.9667073055   | 3.3802189818   |
| 7.5288297429   | 5.7101858025   |

gene\_expression\_table

|                 |                 |
|-----------------|-----------------|
| 3.3325007018    | 1.3280141288    |
| 8.480552108     | 7.8036467965    |
| 0               | 1.4167869203    |
| 75.7812970591   | 25.9337190627   |
| 2.0799815244    | 1.1604327017    |
| 0.9851961761    | 0.7291224588    |
| 6.4985979116    | 4.6614885063    |
| 0.4731590912    | 0.1885556867    |
| 4.157026329     | 7.8885271831    |
| 4.6269809093    | 3.8480752392    |
| 0.8290037082    | 0               |
| 3.9223916306    | 2.5400178279    |
| 24.0343790099   | 9.3001737739    |
| 3.7858665914    | 7.5434107489    |
| 8.1812836891    | 5.5890385386    |
| 9.8274506606    | 11.1554535396   |
| 8.6469542194    | 5.9848868566    |
| 3.3686373926    | 2.8106808549    |
| 33.2684846929   | 44.841939607    |
| 1.8305712815    | 4.2553558628    |
| 11.7817911338   | 14.5847424095   |
| 0.9870037488    | 0.6992439563    |
| 9.4151890274    | 9.0489132558    |
| 2.1210436542    | 0.9508994045    |
| 11.295395283    | 9.7259318689    |
| 1.4292006421    | 2.221213251     |
| 1.5873121956    | 1.6999778859    |
| 1267.1565073807 | 2028.7690840133 |
| 1.3483059795    | 0.7387944167    |
| 0.3007538451    | 0.779035038     |
| 0               | 0               |
| 0               | 0               |
| 69.3690991212   | 83.7013734703   |
| 0.9513065462    | 1.4216222072    |
| 1.728363411     | 2.3417818024    |
| 0.0844926949    | 0               |
| 410.5332656476  | 546.8040602303  |
| 2.6949233499    | 17.5409733449   |
| 0               | 0               |
| 8.5227019788    | 13.0264262646   |
| 0               | 0               |
| 15.4117131451   | 6.4790779305    |
| 1.607516136     | 0.5338343814    |
| 11.9885560439   | 4.0130873229    |
| 0.979710674     | 0.7808368151    |
| 1.2023645833    | 0.6388624429    |
| 6.0686568461    | 4.6507359553    |
| 8.8750398172    | 19.5521493922   |
| 51.397803573    | 41.7577634694   |

gene\_expression\_table

|                 |                |
|-----------------|----------------|
| 8.8156430351    | 4.6283264686   |
| 0.1660432547    | 0.860195242    |
| 7.9205958612    | 13.2568270625  |
| 0.4468359987    | 0.9157671504   |
| 22.8617108763   | 22.7061149403  |
| 82.0216820904   | 137.4885215658 |
| 88.7322425899   | 26.873701946   |
| 1.35576759      | 0              |
| 17.293362886    | 7.5179678079   |
| 7.0477019109    | 8.8810458166   |
| 20.397706339    | 24.6943688905  |
| 5.8925595474    | 2.6836654371   |
| 15.4315171358   | 3.5140102401   |
| 0.3308085558    | 0.3295711504   |
| 2.7256235772    | 7.6031991014   |
| 12.4418193186   | 13.7301564098  |
| 0.4248036626    | 1.0721438153   |
| 0               | 0              |
| 1.6545703604    | 2.6973513164   |
| 1.6009148711    | 1.7492743044   |
| 14.3471661661   | 9.5289999319   |
| 6.2953859412    | 4.7840994899   |
| 6.0319632832    | 5.4896685037   |
| 708.7345492571  | 456.5897878974 |
| 31.6529572741   | 18.8658920054  |
| 1.1843216701    | 1.4158699892   |
| 2.6998111333    | 4.634581296    |
| 1.0922162449    | 1.5233830602   |
| 0.8143008194    | 1.1643893684   |
| 131.9929027843  | 126.0645246214 |
| 3.5946074986    | 7.1623233911   |
| 2.2125877027    | 6.6129342344   |
| 16.2886001636   | 12.1083397781  |
| 1.3367980023    | 1.6869436834   |
| 0               | 0              |
| 0.8557409945    | 1.0230480648   |
| 18.1228128054   | 11.1612872844  |
| 8.6447182996    | 12.6314940591  |
| 0               | 0.0249490489   |
| 0               | 0              |
| 0.0580847183    | 0              |
| 0               | 0              |
| 0.2027285087    | 0.0115411539   |
| 11.772624965    | 13.7773803698  |
| 1086.8847486682 | 759.5580560896 |
| 1478.6221601322 | 1105.239360097 |
| 775.2078732148  | 445.3643784395 |
| 168.4443304285  | 253.989144626  |
| 1.1795043937    | 0.580633892    |

gene\_expression\_table

|               |               |
|---------------|---------------|
| 4.4958243549  | 5.2840949319  |
| 0             | 5.2108979841  |
| 9.2072836796  | 5.6002622802  |
| 80.0830396218 | 46.0636725538 |
| 0.4860743512  | 0.5658150999  |
| 0.0388393915  | 0             |
| 0.1818450903  | 0.1159455296  |
| 0.9538205017  | 2.8032454356  |
| 0.1884149774  | 0             |
| 1.1342397941  | 1.845661955   |
| 1.5734946305  | 1.9595111222  |
| 0.2734147107  | 0             |
| 0             | 0             |
| 0.6015054551  | 0.7712157673  |
| 22.6108355743 | 9.8655147377  |
| 0.4010851084  | 2.397508981   |
| 0             | 0             |
| 1.069266126   | 0.9991464957  |
| 0             | 0             |
| 4.5343343335  | 4.1369630421  |
| 0.311872804   | 0.6628399545  |
| 0.2647149647  | 0.1846073499  |
| 0.1583857751  | 0.0210391101  |
| 3.7397669937  | 5.1615659168  |
| 4.8433821417  | 9.6505304735  |
| 3.2854903254  | 3.8001062831  |
| 3.8486496322  | 3.2544396174  |
| 37.574862768  | 82.3554867917 |
| 0             | 0.0242050989  |
| 7.7807133931  | 5.8614908367  |
| 16.6137578522 | 7.380391499   |
| 5.049612334   | 3.5672406652  |
| 56.9405955748 | 49.9712848494 |
| 0.2354872016  | 0.3002961285  |
| 32.5896539972 | 45.6787666732 |
| 9.9208760211  | 7.9893779248  |
| 0.9663188718  | 2.4029099563  |
| 0.2031766255  | 1.052566494   |
| 0.2734678277  | 0.5448898162  |
| 0.3410826984  | 2.1129808517  |
| 26.2556558148 | 16.0137599184 |
| 0             | 0             |
| 0.6937987562  | 0.7603239253  |
| 3.7388564504  | 4.2215205542  |
| 0.3495641681  | 0.6965132129  |
| 3.2400501093  | 4.4171681147  |
| 0.9087934151  | 2.5351032822  |
| 2.2431927213  | 11.0846176744 |
| 3.7310248136  | 5.8234076848  |

gene\_expression\_table

|                |                 |
|----------------|-----------------|
| 0.0408511317   | 0.1790726347    |
| 0.7692487548   | 0.425761857     |
| 0              | 0               |
| 0.2183416002   | 0.0621499665    |
| 0              | 0               |
| 0.2959461844   | 0.1179356734    |
| 3.2401036349   | 1.1444670087    |
| 11.446187807   | 5.257148133     |
| 1.7589078725   | 2.5210921042    |
| 0              | 19.4775405551   |
| 2.0733973301   | 1.2018278907    |
| 0              | 0               |
| 0              | 0.7909661139    |
| 0.3167430387   | 0.1262232984    |
| 1.7182857158   | 1.9401061697    |
| 0.204190475    | 0.3526062638    |
| 7.7575539882   | 14.6398024408   |
| 0              | 0               |
| 592.2333765358 | 2261.2516305434 |
| 4.1552520558   | 6.4729997379    |
| 3.4161482718   | 6.5150225793    |
| 0.6907610885   | 2.722123397     |
| 10.5471057858  | 11.5501454665   |
| 5.808702527    | 6.4018408664    |
| 0.322813158    | 0.4073671691    |
| 1.3093428363   | 2.1392900889    |
| 0.6100846428   | 0.8914438012    |
| 0              | 0.0461857107    |
| 0.6749434894   | 0.4482792204    |
| 0              | 0               |
| 23.5630943426  | 16.7054334129   |
| 0              | 0               |
| 2.1753628516   | 3.6120430029    |
| 0.3112238055   | 0.4735456592    |
| 0              | 0               |
| 10.4195401244  | 4.1522261324    |
| 1.700058329    | 0.4516531143    |
| 0              | 0               |
| 13.0842599205  | 12.6008070268   |
| 0.2601336653   | 0.3628248719    |
| 0              | 0.0919184738    |
| 1.2524489922   | 1.7884619429    |
| 0              | 0.1627602402    |
| 0.1050366225   | 0.2302162015    |
| 2.2430921047   | 1.5891212162    |
| 1.0696037594   | 1.3282863494    |
| 51.4574925589  | 56.7788503098   |
| 1.7157608099   | 1.8232991186    |
| 0.2058687692   | 0.2050987071    |



gene\_expression\_table

|                |                |
|----------------|----------------|
| 1.5612780573   | 0              |
| 0.3282695315   | 0.2331948968   |
| 4.1381946626   | 4.0237703724   |
| 0.0724617034   | 0.115505051    |
| 0.8242224413   | 1.1906521263   |
| 0.170030475    | 0.1355155742   |
| 0              | 0              |
| 13.300860251   | 11.4323282467  |
| 4.7750094426   | 3.1226409282   |
| 0.0590268327   | 0.4469259041   |
| 2.8720259434   | 5.3410615843   |
| 0.6659010816   | 0.5307281972   |
| 1.6894820625   | 2.1320057994   |
| 3.8292029353   | 4.5778555401   |
| 70.0527547997  | 71.2686401952  |
| 48.955028378   | 40.3130316351  |
| 0              | 0              |
| 7.8001389228   | 10.327859342   |
| 12.7816077766  | 13.9092250217  |
| 16.348370444   | 16.1804171411  |
| 2.3071837425   | 3.8191352293   |
| 0.0481477732   | 0.2462340604   |
| 2.7850338937   | 2.8983762053   |
| 1.1907488192   | 2.4820936637   |
| 0.7234290762   | 0.5765784438   |
| 2.1425141789   | 2.6927538476   |
| 0              | 0              |
| 0              | 0              |
| 0              | 0              |
| 15.2388914268  | 8.049932169    |
| 0              | 0.0547527787   |
| 0              | 0              |
| 193.5261767907 | 171.8308064026 |
| 0.4718268742   | 1.0207060201   |
| 30.2081437058  | 41.6231208924  |
| 0.6531631791   | 1.3665119805   |
| 3.7670894009   | 3.0023987368   |
| 0              | 0              |
| 11.2133427757  | 15.826148194   |
| 3.1166710852   | 2.7717921162   |
| 43.8383150559  | 3.4939468576   |
| 3.1919462504   | 0              |
| 11.8389259583  | 0              |
| 0              | 1.6008937443   |
| 0              | 0              |
| 0              | 0              |
| 9.4010349273   | 1.2487826536   |
| 0.9785120512   | 0.3119526015   |
| 6.0571745912   | 3.0367249037   |

gene\_expression\_table

|                |                |
|----------------|----------------|
| 0.2188371831   | 1.1336967825   |
| 0              | 0              |
| 0              | 0              |
| 9.8139551228   | 4.0824288434   |
| 1.0976671058   | 3.2806836868   |
| 10.896187281   | 10.7168496141  |
| 6.1713396829   | 2.2543603458   |
| 0.1385167035   | 0.3035968653   |
| 37.7931182441  | 23.1703084671  |
| 0              | 0              |
| 2.2866956997   | 2.8166121794   |
| 4.4656463912   | 5.7454913604   |
| 0              | 0.040215156    |
| 0.2368542169   | 0.1887746018   |
| 13.7869568702  | 15.3836324228  |
| 0.0646410011   | 0.1030387333   |
| 0              | 0.0161122138   |
| 1.4007844526   | 1.6436415953   |
| 85.3593166354  | 104.2833690099 |
| 3.8319740511   | 16.5794667368  |
| 0              | 0              |
| 1.4491194606   | 0.9712156635   |
| 3.4092499143   | 1.7600032242   |
| 1.5610119378   | 1.0425418311   |
| 1.1061041847   | 0.941680676    |
| 15.1072631502  | 7.7569269081   |
| 4.2850283579   | 4.2525807715   |
| 1.7610347252   | 1.7136463853   |
| 7.4044239006   | 2.6824462892   |
| 0              | 0              |
| 153.4713005118 | 85.0257787383  |
| 617.2929099528 | 297.6082782397 |
| 8.4836765325   | 8.6803738205   |
| 1.1802579785   | 0.3256181077   |
| 0.498809349    | 1.1595349      |
| 3.2591201434   | 3.7254240834   |
| 1.792360569    | 1.4285249261   |
| 1.6729456035   | 1.8095468299   |
| 5.356479659    | 5.8528735029   |
| 3.7026886516   | 17.7064251156  |
| 2.3051323786   | 1.3396307864   |
| 0.6594281481   | 0.5912653728   |
| 1.1599664584   | 1.0978461704   |
| 70.4796281024  | 123.4833026908 |
| 3.2962142523   | 7.1150833078   |
| 2.3045977348   | 0.3194403166   |
| 0              | 0.1639327171   |
| 0.0948374322   | 0.3023446022   |
| 0.0133416262   | 0.0691169502   |

gene\_expression\_table

|                 |                 |
|-----------------|-----------------|
| 0               | 0               |
| 0.6686530004    | 0.1332303743    |
| 3.3132709729    | 4.0563360898    |
| 2.5591067433    | 1.5297205685    |
| 0.3681473733    | 1.4670812009    |
| 4.4967042437    | 7.2190132422    |
| 2.6759339526    | 1.4929177157    |
| 0               | 0               |
| 19.948635997    | 5.0588407317    |
| 1.2042675743    | 1.0797866579    |
| 4.912264929     | 7.8302245835    |
| 0               | 0.173879659     |
| 1.2779505183    | 3.1121940242    |
| 134.5839376914  | 118.18949538    |
| 104.6763959822  | 109.2507940487  |
| 0.2408686265    | 0.5759223497    |
| 0.0547801228    | 0.0727669535    |
| 27.0052430973   | 28.2494401145   |
| 0.2001063752    | 0.5582020294    |
| 0.4915419668    | 0.646598572     |
| 0.004673        | 0.001862        |
| 2.1867034539    | 0.9049253472    |
| 0               | 0               |
| 0.9108002528    | 0.62221259      |
| 0.1638040515    | 0.3989121511    |
| 0.0601538536    | 0.1198576903    |
| 3.47117989      | 2.0134384283    |
| 1.1961216571    | 0.6851973161    |
| 12.6790858438   | 7.7940024299    |
| 4.7150025561    | 6.1378913919    |
| 15.0161796825   | 34.1718144555   |
| 1.2169168605    | 2.1014325353    |
| 0.1268906103    | 1.5169916382    |
| 5.6448355401    | 4.8450517317    |
| 2.6491528787    | 3.3893444053    |
| 4959.9595108351 | 2738.0151324241 |
| 0               | 0               |
| 1.6507315491    | 1.7051458467    |
| 0               | 0               |
| 3.949128698     | 3.0880989154    |
| 3.5805977844    | 2.2007837225    |
| 1.1412571414    | 5.1976604065    |
| 48.1741374554   | 41.6323901031   |
| 16.8350719466   | 10.2398081441   |
| 0               | 0.1457648626    |
| 2.7280465477    | 1.8434059852    |
| 2.2142782191    | 2.8993085087    |
| 3.5721712849    | 3.2710758792    |
| 0               | 0               |

gene\_expression\_table

|               |                 |
|---------------|-----------------|
| 0.5780723839  | 0.2722483997    |
| 5.6979496542  | 3.686474331     |
| 0.0545883636  | 0               |
| 3.7755912618  | 3.5465274242    |
| 0.4043630112  | 0.6042757077    |
| 0             | 0               |
| 0.413424467   | 0.5457383935    |
| 12.3529345387 | 20.19137712     |
| 0             | 0               |
| 1.8487285081  | 2.4469804604    |
| 0.3080092112  | 0.1227428351    |
| 0             | 0.2559910409    |
| 15.9460400482 | 20.7294294624   |
| 0             | 0               |
| 975.583789619 | 2376.4365346779 |
| 51.4455520803 | 46.2091599109   |
| 1.5165071347  | 1.8130014798    |
| 1.4786106552  | 1.2002872775    |
| 16.119919865  | 6.4238490103    |
| 7.3541183763  | 8.094159554     |
| 93.0500065921 | 55.0132874978   |
| 0             | 0               |
| 0             | 0               |
| 0             | 0               |
| 2.5778153535  | 1.7335167146    |
| 3.0612880988  | 4.540868724     |
| 10.2718060161 | 25.6516821322   |
| 0.4505945289  | 1.4185526243    |
| 0.7206661153  | 0.9477209662    |
| 13.9884580334 | 12.2366050509   |
| 0.9866819853  | 1.7093700538    |
| 0.135831432   | 0.4240131571    |
| 0             | 0.1054106224    |
| 0             | 0.0373407837    |
| 0.1928153272  | 0.5762822765    |
| 2.354714447   | 4.1705004869    |
| 2.4906387893  | 2.735506684     |
| 0.0334262988  | 0.0133205065    |
| 0             | 0               |
| 0             | 0.2029106183    |
| 80.6675241516 | 91.5471097626   |
| 0.2612833361  | 0.6247343837    |
| 55.8365264827 | 58.4561927109   |
| 16.5057394396 | 15.7668930856   |
| 32.6693983724 | 15.6939908384   |
| 117.460638889 | 88.3744643827   |
| 0.6094770941  | 0.9715157049    |
| 0             | 0               |
| 0.501711388   | 1.1596165325    |

gene\_expression\_table

|               |               |
|---------------|---------------|
| 0.6325514173  | 0.3781111969  |
| 0             | 0.1568485538  |
| 0.2318185001  | 1.2009471335  |
| 0.4261500818  | 0.3396448375  |
| 3.0293722305  | 2.0120271449  |
| 0.5782677607  | 0.5761047222  |
| 0             | 0             |
| 0             | 0             |
| 0             | 0             |
| 1.7510408832  | 5.0992814727  |
| 4.2158928504  | 6.1092699628  |
| 0.2921644451  | 0.9896434055  |
| 3.5920970281  | 2.938268716   |
| 0.997550818   | 1.5209758248  |
| 65.7376711707 | 49.8166953657 |
| 7.0809417065  | 5.2587756214  |
| 0.8056521326  | 1.5924348868  |
| 1.1104246356  | 2.950056103   |
| 3.7740969327  | 1.6472292198  |
| 1.1660053481  | 2.6950137291  |
| 2.2380644368  | 2.0653996913  |
| 0             | 0.3957062415  |
| 76.8719687018 | 65.2632494612 |
| 3.6249130402  | 3.014695411   |
| 2.4820776662  | 2.5964330015  |
| 4.8590660506  | 3.8727123834  |
| 48.3531811125 | 40.5910971194 |
| 0.2412069351  | 0.3011818768  |
| 0.6742094961  | 2.1941794375  |
| 0.5385172906  | 0.4292023525  |
| 0.4751555431  | 3.8817012468  |
| 0             | 0             |
| 20.033872589  | 21.8087874253 |
| 0.3932093092  | 0.1464761313  |
| 3.7939080838  | 2.0878435587  |
| 0.3065970327  | 0.6923537678  |
| 14.2277123565 | 9.6195435036  |
| 0             | 0.0227532132  |
| 0.0728219502  | 0.0580396449  |
| 0.1606598779  | 0.7256004456  |
| 26.1246233756 | 20.2876371786 |
| 5.3124531352  | 3.9921187284  |
| 0             | 0             |
| 0.346301982   | 0.2070039736  |
| 0             | 0             |
| 12.2370148867 | 10.7282927322 |
| 0.4982955798  | 0.3762429583  |
| 2.3284874776  | 1.0825629069  |
| 2.6064879473  | 1.7311588355  |

gene\_expression\_table

|                 |                 |
|-----------------|-----------------|
| 0.0619716258    | 0               |
| 0               | 0               |
| 0               | 0               |
| 0.1217995201    | 0.1941502769    |
| 2317.9090550728 | 3453.5059702428 |
| 0.1306402131    | 0               |
| 0.1542611365    | 0.4610523457    |
| 1.2121455927    | 0.7572050509    |
| 0.781274493     | 1.2453633567    |
| 0               | 0               |
| 0.8532753206    | 0.7225710626    |
| 0               | 0.0823393321    |
| 3.1969755061    | 4.6580874572    |
| 1.0274025158    | 1.3756639236    |
| 0.7948623869    | 1.2670226652    |
| 0               | 0               |
| 0               | 0               |
| 10.0305313603   | 7.0859537318    |
| 0.7193623755    | 0               |
| 0               | 0               |
| 0.3743247697    | 0               |
| 2.947689983     | 0               |
| 0               | 0.9418603177    |
| 0               | 0               |
| 0               | 0               |
| 0.2621758389    | 0.7313464409    |
| 0               | 0.0213027741    |
| 66.7690319185   | 37.5638282135   |
| 1.1534004013    | 1.9917491557    |
| 16.7647618324   | 12.5756630066   |
| 2.4294930902    | 2.7632962265    |
| 0.3717014598    | 0.1777493244    |
| 0.0549652202    | 0.1971346325    |
| 0               | 0               |
| 3.0723275126    | 3.97908592      |
| 11.6316685398   | 20.1580080737   |
| 0               | 0.0260983407    |
| 0               | 3.9783912623    |
| 0               | 0               |
| 6.3052983199    | 3.1218210294    |
| 0.3654995187    | 0.6554382302    |
| 14.9856099693   | 29.6781468321   |
| 0.0588452208    | 0.1172502149    |
| 0               | 0               |
| 0               | 0.0820770947    |
| 0.8529134128    | 0.9063712522    |
| 1.2759903925    | 4.4795282938    |
| 0.2387962707    | 0.1903224333    |
| 0.2566827674    | 0.5625897928    |

gene\_expression\_table

|                |                |
|----------------|----------------|
| 1.9880682496   | 1.3659529547   |
| 8.6473988794   | 13.3902535975  |
| 0.3240368077   | 0              |
| 0              | 0.006854       |
| 1.3150082336   | 0.8854397201   |
| 247.6800521606 | 447.8120761066 |
| 7.4749947467   | 40.0012121005  |
| 0.1432998032   | 0.3140803233   |
| 0              | 0              |
| 0              | 0.5893108039   |
| 1.1110308384   | 4.4274998953   |
| 0              | 0              |
| 0              | 0              |
| 245.9123943576 | 112.810521717  |
| 3.1810062818   | 4.0142029271   |
| 28.2009675759  | 23.6719367565  |
| 0.0302574308   | 0.2049809093   |
| 0              | 0.0124158522   |
| 9.5087061322   | 7.8857476056   |
| 0.5070299716   | 0.1136550153   |
| 2.5990552002   | 3.1071999704   |
| 0              | 0              |
| 28.3165727939  | 42.0025282244  |
| 57.2292301035  | 60.436071087   |
| 15.4528661596  | 12.3160511736  |
| 2.7205689723   | 3.5106036872   |
| 0.7124980374   | 0.3086230018   |
| 0              | 0.0216993087   |
| 0.4862287008   | 0.4844099389   |
| 10.0176990794  | 4.5071994673   |
| 0.310417072    | 0.4948095071   |
| 11.5933896832  | 8.9600186561   |
| 7.6331299614   | 5.0565504798   |
| 5.7040502228   | 4.4907300462   |
| 0.0881239739   | 0.140470947    |
| 0.211466559    | 0.4213511162   |
| 7.9081364969   | 56.7256012572  |
| 4.2581813399   | 11.4540841985  |
| 0              | 0.3144215327   |
| 0              | 0              |
| 15.0746149136  | 9.7139174187   |
| 0.164583329    | 0.1967612366   |
| 0.2839947336   | 0              |
| 0.050586428    | 0              |
| 0              | 0              |
| 53.7630346405  | 43.225418332   |
| 3.6703933827   | 5.2238058555   |
| 18.2776155589  | 23.4161890316  |
| 24.3515297858  | 23.7428856221  |

gene\_expression\_table

|                |               |
|----------------|---------------|
| 3.253683169    | 4.1198579623  |
| 13.2173548962  | 13.2654548507 |
| 1.6103052067   | 2.4064226734  |
| 2.3367335598   | 1.6432891024  |
| 0              | 1.0266346413  |
| 0.206915816    | 0.1236851025  |
| 14.2748795961  | 6.6527618754  |
| 12.2196304277  | 8.4688155197  |
| 0              | 0.2392373766  |
| 0              | 0.198169984   |
| 60.0106219255  | 44.544530118  |
| 10.6921394549  | 5.4269875531  |
| 117.7658515727 | 96.6208704704 |
| 144.8908607794 | 76.0938516903 |
| 0              | 0.0311692598  |
| 2.5001893901   | 1.369960521   |
| 35.1858762178  | 49.2884165177 |
| 13.6136198883  | 8.0554203245  |
| 1.7478594228   | 2.4765460908  |
| 2.7762977747   | 1.6270075875  |
| 0              | 0             |
| 3.5622236472   | 1.9873834274  |
| 3.7366136347   | 3.0657007713  |
| 0              | 0             |
| 3.4610047038   | 1.0344175945  |
| 217.6511736561 | 98.1293893795 |
| 6.7339947323   | 7.4685983749  |
| 0.8594540959   | 0.4794939891  |
| 0              | 0             |
| 2.1831240827   | 1.5899692977  |
| 11.9239885678  | 10.5974381491 |
| 0              | 0             |
| 0.1151120985   | 0.2217175978  |
| 0              | 2.0384065234  |
| 4.1654615204   | 3.8732217162  |
| 0.3372036715   | 0.3695365793  |
| 0              | 0.00638       |
| 4.4399084138   | 9.2397837301  |
| 2.8833034589   | 3.1159520791  |
| 0.1539142359   | 0.2657867545  |
| 12.7812392177  | 8.2708887205  |
| 0.006381       | 0.002543      |
| 0.0574065038   | 0.1169254006  |
| 0.0445799725   | 0             |
| 0              | 0             |
| 1.7638095481   | 1.3631704694  |
| 13.4802866503  | 4.5173175501  |
| 0.3582220055   | 0.3271418872  |
| 11.3499429252  | 9.7809770467  |



gene\_expression\_table

|                 |                 |
|-----------------|-----------------|
| 1.3094098244    | 1.2066735201    |
| 4.0490386781    | 3.7235935876    |
| 29.7875839335   | 23.5857601544   |
| 0               | 0               |
| 30.5720081904   | 20.4757325153   |
| 0.1145528472    | 0.007608        |
| 0               | 0               |
| 6.328754764     | 11.1500393069   |
| 1.1079918898    | 1.5453863497    |
| 0               | 0               |
| 0.1147265026    | 0               |
| 37.164293541    | 15.3486609905   |
| 27.5372610159   | 19.6963893254   |
| 9.8068955232    | 9.5319144943    |
| 0               | 0               |
| 0               | 0               |
| 0               | 0               |
| 0               | 0.1543539618    |
| 1.7145854746    | 1.5242150018    |
| 8.2794723838    | 11.8228537513   |
| 8.2151296204    | 3.2737602124    |
| 0               | 0               |
| 0.429265765     | 0.7868945391    |
| 2.3080961801    | 2.4033093344    |
| 2.5209475089    | 4.8934088416    |
| 1.3225965227    | 1.3352179437    |
| 0.50893434      | 0.5483442548    |
| 0               | 0               |
| 0.7734217977    | 1.2944883439    |
| 1.1226459191    | 1.4084142469    |
| 0               | 0               |
| 0.6570427075    | 0.6807684078    |
| 1.4998793382    | 4.5977506679    |
| 0.3101229999    | 0.5561333457    |
| 4.5329633165    | 4.2631111254    |
| 1595.0739286407 | 2419.2699791713 |
| 2.4843775087    | 0.9900338298    |
| 0               | 0               |
| 0               | 0               |
| 1.6516406678    | 0.3989000306    |
| 5.6877961644    | 4.5332165504    |
| 1.4078686585    | 1.09768888      |
| 0.0236100203    | 0.009409        |
| 0               | 0               |
| 528.1460827897  | 1723.6238732025 |
| 4.5672385558    | 2.8817645669    |
| 0               | 0.063172536     |
| 38.9166675668   | 53.5256545886   |
| 1.9159260636    | 2.1516924704    |

gene\_expression\_table

|               |               |
|---------------|---------------|
| 1.7146726891  | 1.4642218912  |
| 6.5518249602  | 9.3633244745  |
| 4.9886072665  | 6.9170771154  |
| 26.7004608582 | 64.2670169698 |
| 0             | 0             |
| 5.3786340613  | 11.5505768224 |
| 0.1948312927  | 0.403733235   |
| 15.34430627   | 11.2740962363 |
| 0             | 0.0339243785  |
| 0.0667422903  | 0             |
| 2.4968928204  | 1.791038212   |
| 0             | 0.8252952302  |
| 2.5232427176  | 3.9535287481  |
| 0.3134346692  | 0.4273062391  |
| 0.5503294131  | 1.7857965783  |
| 0             | 0             |
| 8.2286533307  | 4.3721992828  |
| 5.3352138585  | 1.7990101405  |
| 3.9421893327  | 4.6415239981  |
| 0.7641333748  | 0.177630856   |
| 1.3832382104  | 0.9079010811  |
| 0             | 0             |
| 0.6823224617  | 0.7137587116  |
| 1.4100218332  | 1.8729967712  |
| 0.7812552213  | 1.8679989561  |
| 4.3001322635  | 2.5704284466  |
| 0             | 0             |
| 7.7467601671  | 7.0694892613  |
| 0             | 0             |
| 34.3049950393 | 10.2530026643 |
| 0.0507796808  | 0.1922410003  |
| 0.2270309307  | 0.1218611665  |
| 2.4538927254  | 2.3903868473  |
| 0             | 0.1212819268  |
| 0.8890784642  | 0.6692354665  |
| 1.5910679656  | 1.3355449651  |
| 19.1938618143 | 22.3581082269 |
| 0.4606609666  | 0.5638379201  |
| 3.1272193496  | 2.1462483749  |
| 37.8915510816 | 34.3841696665 |
| 0.5217280245  | 0.7536758896  |
| 0             | 2.0668871333  |
| 0             | 0             |
| 0             | 0             |
| 6.3855293318  | 7.3020608827  |
| 1.6902191307  | 1.2685355776  |
| 0             | 0.0168313385  |
| 2.5584646456  | 2.3789682793  |
| 3.7631463054  | 2.307120046   |

gene\_expression\_table

|                |                |
|----------------|----------------|
| 0.4058845755   | 1.293972303    |
| 3.229642761    | 3.6578601014   |
| 0.3711239225   | 0.8873657173   |
| 2.2346127521   | 1.9381506066   |
| 1.3669054027   | 1.8883521655   |
| 12.6834474286  | 10.5359360469  |
| 0              | 0.0489276167   |
| 9.6475866284   | 8.4711519822   |
| 5.1188589597   | 4.0042180131   |
| 73.2889153988  | 37.9427205118  |
| 11.8375036943  | 15.6344467772  |
| 34.587346364   | 38.6381179916  |
| 0.3301548683   | 2.8287112092   |
| 2.9334317566   | 1.9638925242   |
| 20.7822091011  | 20.7044722437  |
| 160.2331583888 | 149.5236579441 |
| 8.197490354    | 11.094557767   |
| 0              | 0.0970137954   |
| 2.7922710959   | 5.5636529418   |
| 2.7588582358   | 2.0417715264   |
| 1.0028484996   | 3.3969308075   |
| 0              | 5.5967391333   |
| 1.1817060917   | 0.6278857936   |
| 0.7520827942   | 2.2977600826   |
| 2.6098861267   | 3.7639886254   |
| 2.8473770409   | 2.7989032723   |
| 0              | 11.1966700197  |
| 2.0069123132   | 10.3969078755  |
| 1.7785796986   | 1.6461771889   |
| 5.5187208307   | 3.6130225469   |
| 0.068797997    | 0              |
| 8.1654181342   | 8.2322153777   |
| 1.9858069691   | 1.4388210634   |
| 12.0904780161  | 9.6935607466   |
| 0.0523125974   | 0.2293144463   |
| 15.489087769   | 19.7518721123  |
| 372.4920134365 | 397.7866262787 |
| 1.5633588366   | 15.3674420373  |
| 7.1831006793   | 2.2263832715   |
| 0.3565517031   | 0.1065654013   |
| 0              | 1.8006200556   |
| 12.1250437761  | 17.5673198205  |
| 1.5244848125   | 3.5843264719   |
| 186.9264761477 | 202.7129612636 |
| 0              | 0              |
| 0              | 0.0332710463   |
| 18.5734407324  | 26.5586333804  |
| 2.0600305392   | 3.2055360271   |
| 1.0082884927   | 2.1017585224   |

gene\_expression\_table

|                 |                 |
|-----------------|-----------------|
| 0.6973388965    | 0.1389460933    |
| 0.8128989261    | 0.6478865907    |
| 0.0277929362    | 0.0387645656    |
| 0.8772465587    | 0.9567618764    |
| 0.3565833155    | 3.1261955861    |
| 0               | 0               |
| 6.4626607584    | 6.1970436062    |
| 4.0222353456    | 5.8772119705    |
| 0.0283794338    | 0.0791651817    |
| 0.9626616509    | 1.0770990169    |
| 0               | 0               |
| 43.7034702863   | 74.470676346    |
| 0.6017030984    | 0.9974887917    |
| 5.0926670572    | 6.0883412279    |
| 0.3026101552    | 0.6163554868    |
| 12.9774191564   | 22.1330052343   |
| 0.7000986234    | 0.1793519667    |
| 1.517005425     | 2.1914299397    |
| 0               | 0.0252936823    |
| 0               | 0               |
| 0.1530185556    | 0.5792954926    |
| 0.777405587     | 2.2847681084    |
| 1.7533505872    | 0.9316224505    |
| 1.2894566957    | 0.308312021     |
| 141.469730725   | 120.7504558996  |
| 828.8276648957  | 1505.2604314744 |
| 0.348477982     | 0.4292339066    |
| 0.0783503881    | 0.0624458518    |
| 11.0640756092   | 1.1870589123    |
| 12.7802050261   | 15.7639238734   |
| 0               | 0               |
| 0.2740304985    | 0.26880539      |
| 1.5969090426    | 0.597212796     |
| 5472.346673352  | 7519.5458510495 |
| 0               | 0.8544602711    |
| 19.7349911522   | 15.7289371713   |
| 0.336384333     | 0.2106506733    |
| 0               | 0               |
| 1905.3525155464 | 2512.268830919  |
| 0.68042874      | 1.3331710081    |
| 9.2499321574    | 9.4059943875    |
| 1.0623894362    | 0.5292077586    |
| 1.1360247732    | 0.150903389     |
| 57.753622666    | 71.9433007814   |
| 5.0983277669    | 5.5871829481    |
| 2.2520155374    | 1.2426046695    |
| 6.5397140497    | 9.4220566419    |
| 0.9635487004    | 3.0718223998    |
| 1.8723707056    | 1.49229361      |

gene\_expression\_table

|               |               |
|---------------|---------------|
| 1.3181554622  | 0.931966014   |
| 0.0150468868  | 0.065958654   |
| 1.1694622494  | 1.5312582769  |
| 0.5088883916  | 0.7435778093  |
| 0             | 0.0427236643  |
| 1.2359853773  | 2.7397807044  |
| 0.9854523527  | 2.6367435639  |
| 0             | 0.247355661   |
| 0             | 0             |
| 0             | 0             |
| 42.8923303626 | 55.0075959745 |
| 0             | 0             |
| 0.3647182434  | 0.5450309958  |
| 1.0621685904  | 0.6722653748  |
| 1.4734435232  | 2.3804303294  |
| 0.6432905111  | 0.4486189763  |
| 3.5297098707  | 8.4396163689  |
| 0.8256441965  | 0.6879557888  |
| 0.2762966017  | 0.1651578605  |
| 8.4703597067  | 6.6259233125  |
| 3.8141965193  | 3.457935693   |
| 0             | 0             |
| 0.4104968106  | 1.2541480708  |
| 3.3602049608  | 2.7363285171  |
| 0.2249933343  | 0.1793213887  |
| 0.5348923945  | 0.6800711894  |
| 0.4121956944  | 0.4106538565  |
| 2.9583097379  | 3.8398379459  |
| 3.8789847339  | 2.8105274212  |
| 0.0238200107  | 0.0189847286  |
| 0.5113182205  | 0.3163676946  |
| 0.0468428099  | 0.1182245666  |
| 4.9561129668  | 5.9250892641  |
| 1.6789325626  | 1.976063806   |
| 0             | 0             |
| 8.3335945916  | 4.6701125878  |
| 6.6102291451  | 3.5122684072  |
| 5.5235218394  | 8.2966209573  |
| 6.7077159372  | 6.6033400154  |
| 1.0139293792  | 2.7576732657  |
| 1.2682887307  | 0.8288852808  |
| 19.4207089689 | 16.2699636394 |
| 1.2253472581  | 0.9155728406  |
| 7.1177748798  | 7.7694344597  |
| 0             | 0.006009      |
| 1.6387058166  | 1.9590913899  |
| 0.0479340843  | 0.4393440174  |
| 0.2523345517  | 0.5027813642  |
| 1.5730173648  | 1.7910096199  |

gene\_expression\_table

|                |                 |
|----------------|-----------------|
| 3.331824601    | 3.3193617501    |
| 2.9311350501   | 2.1025231184    |
| 0              | 0               |
| 1.4760174235   | 2.4704337991    |
| 9.2237207214   | 8.2162428244    |
| 18.5542394083  | 26.4949321436   |
| 7.5746845247   | 11.6484700842   |
| 0              | 0.0430423068    |
| 484.0573554302 | 766.8590978408  |
| 0.5371492834   | 0.8766103686    |
| 0.0535748979   | 0.4056461876    |
| 37.1890314565  | 46.0640384592   |
| 0.3944517198   | 0.7702334581    |
| 5.5338678829   | 8.5092131143    |
| 1.8790984345   | 3.3385240772    |
| 0              | 0               |
| 0.7427700583   | 0.5426605734    |
| 0              | 0               |
| 0              | 0               |
| 7.3285464849   | 11.9644384547   |
| 0              | 0.2135755641    |
| 0              | 0               |
| 1.7884437369   | 2.5657257264    |
| 1.6766180744   | 1.2828261915    |
| 0              | 0               |
| 5.344552724    | 4.6856138263    |
| 0              | 0               |
| 19.8102760353  | 11.3773242622   |
| 0.1282096828   | 1.2773010826    |
| 0              | 0               |
| 8.6379527809   | 16.3881358274   |
| 0.0882346343   | 0               |
| 1.7280239338   | 1.615618012     |
| 6.5709723382   | 7.7101965517    |
| 0              | 0               |
| 896.8942739471 | 1280.3159595776 |
| 7.9532760933   | 11.2961044172   |
| 1.561875415    | 2.2106401916    |
| 1.404476897    | 5.7954929811    |
| 0.4533780908   | 0.3161775457    |
| 0              | 0               |
| 2.1189736113   | 1.5762487911    |
| 4.6186252296   | 7.0373573534    |
| 16.0987987285  | 11.6088772375   |
| 1.2840870227   | 2.9423528162    |
| 0              | 0               |
| 0.4324483768   | 0.8042174612    |
| 0              | 0               |
| 10.2748050835  | 15.5592849515   |

gene\_expression\_table

|                 |                 |
|-----------------|-----------------|
| 0               | 0               |
| 1155.0585660647 | 1019.2250978326 |
| 0               | 0               |
| 0.558059109     | 2.0014979828    |
| 6.6494841415    | 4.7318653034    |
| 4.5110128637    | 2.9608446508    |
| 15.4522676194   | 36.0973724574   |
| 10.3677949049   | 16.6396165375   |
| 0               | 0               |
| 87.2833318534   | 78.9405102459   |
| 38.4938885885   | 19.4808082699   |
| 0.290292626     | 0.8869007688    |
| 13.7853103125   | 26.6635648091   |
| 8.9651989265    | 9.1549557708    |
| 5.7185637583    | 2.658680824     |
| 5.1074161253    | 5.8404967798    |
| 1.5933636861    | 2.2223650851    |
| 27.1956780612   | 79.0158143752   |
| 8.5541778943    | 5.539417376     |
| 8.6183648043    | 8.264147617     |
| 17.9340778509   | 14.8975503988   |
| 119.2880811649  | 142.4639870723  |
| 0.6427324307    | 0.4482297813    |
| 38.7366906223   | 13.2927290992   |
| 0.0904074358    | 0.0540415575    |
| 39.9686419984   | 39.0056281037   |
| 0               | 0               |
| 0.04546139      | 0.1449322864    |
| 0               | 0               |
| 3.6679550719    | 3.3169209171    |
| 0.1343093834    | 0.1070455942    |
| 0               | 0               |
| 1020.0349974245 | 977.4613678798  |
| 0               | 0.8181135168    |
| 1.8477231614    | 0.6837300465    |
| 1.0490745986    | 1.0082628202    |
| 0               | 0.115555613     |
| 4.8846524784    | 7.0652645567    |
| 21.142915       | 35.8865233192   |
| 6.5737000145    | 9.9328180042    |
| 0               | 0               |
| 4.3747898686    | 3.8565464262    |
| 21.9313797724   | 26.6791994615   |
| 0.9169586923    | 2.1924690335    |
| 34.9703420927   | 52.80939866     |
| 22.6991232495   | 10.7794429991   |
| 49.1876332622   | 42.4472948593   |
| 1.6273480297    | 1.7139043333    |
| 0.8390279009    | 1.0587933369    |

gene\_expression\_table

|                |                |
|----------------|----------------|
| 19.9266582033  | 20.0458008103  |
| 3.0283946282   | 5.9335646512   |
| 19.8682931576  | 25.2070210295  |
| 32.9589852297  | 14.3283056957  |
| 1.5752554795   | 2.1971084243   |
| 1.2001230233   | 3.1564735095   |
| 0.4960001045   | 0.1976579168   |
| 52.3289329534  | 44.4097578953  |
| 18.9377232943  | 16.6362153464  |
| 15.004860623   | 11.4223661451  |
| 0.043855524    | 0.0174765921   |
| 0              | 0.0284896757   |
| 39.8842547161  | 84.7681402325  |
| 31.8694319989  | 39.077197352   |
| 0              | 1.9182211588   |
| 9.9348585269   | 9.8494152611   |
| 10.229258749   | 6.5222372559   |
| 3.0591517783   | 4.977924493    |
| 0.9049950134   | 0.3986064538   |
| 36.7916439217  | 85.0373333594  |
| 22.797343782   | 9.4342441358   |
| 2.221316548    | 3.0982106485   |
| 80.6142196202  | 50.0409764395  |
| 0.5532882481   | 1.157559158    |
| 0              | 0              |
| 432.8097320892 | 377.3642855225 |
| 21.572051948   | 46.03927036    |
| 12.0815216946  | 26.7808346481  |
| 42.8699767818  | 23.1134411747  |
| 9.4769858378   | 8.1826651524   |
| 18.725842028   | 28.7832298284  |
| 123.5755780651 | 204.5234185721 |
| 0              | 0              |
| 12.6860877473  | 4.0443631434   |
| 0              | 0              |
| 0              | 0              |
| 0              | 0              |
| 0              | 0              |
| 0              | 0              |
| 0              | 0              |
| 226.9411196884 | 340.9715334831 |
| 0              | 0              |
| 0              | 0              |
| 0.0473480581   | 0              |
| 0              | 0              |
| 10.2831999356  | 7.8992299813   |
| 92.4867474669  | 65.463841956   |
| 10.2200989577  | 18.3273663307  |
| 6.9502055453   | 5.3085594403   |
| 3.1733478746   | 2.33462977     |



gene\_expression\_table

|                 |                 |
|-----------------|-----------------|
| 15.0299193893   | 18.4291683071   |
| 4.0925296124    | 2.7181475384    |
| 2.2206157067    | 3.4764861785    |
| 117.0483365899  | 79.2498622733   |
| 14.6357215894   | 16.3920866644   |
| 0               | 0.3834528457    |
| 0               | 0               |
| 0.4296897566    | 0.7216247541    |
| 3.2158075587    | 2.9367971189    |
| 16.2558938344   | 23.4549548577   |
| 0               | 0               |
| 0               | 0               |
| 0               | 0               |
| 0               | 0.1386096289    |
| 14.8307316001   | 18.011741296    |
| 4.3540257086    | 3.7975679603    |
| 8.963823896     | 13.5914722693   |
| 0               | 0.9408098483    |
| 0               | 0.1136625638    |
| 0.2369379391    | 0               |
| 0               | 0               |
| 1.5533791598    | 1.238054936     |
| 0               | 0               |
| 65.4880451334   | 230.7544863419  |
| 19.9557555658   | 30.8921864596   |
| 22.9534136908   | 47.1793773282   |
| 0               | 0.0936920711    |
| 10.1162313117   | 7.105265697     |
| 0               | 0.0338249619    |
| 0.7721603381    | 0.263750412     |
| 0               | 0.0645976609    |
| 11.0830137318   | 6.8352496849    |
| 0               | 0.6972693201    |
| 3.6170489935    | 2.5625025756    |
| 257.9509294609  | 247.4161804149  |
| 0               | 0               |
| 0               | 0               |
| 0               | 0               |
| 8.4122408154    | 5.7843776404    |
| 16.1941839414   | 208.7440771142  |
| 4810.2635712478 | 5333.1753180111 |
| 45.5747732975   | 13.9020411236   |
| 0.0961442727    | 0               |
| 31.3780876316   | 30.9888840622   |
| 7.1292441874    | 4.9578772122    |
| 27.7169852421   | 20.0009910357   |
| 0.1259527824    | 0.05019266      |
| 0               | 0               |
| 7.3165128545    | 8.4068139975    |

gene\_expression\_table

|               |                |
|---------------|----------------|
| 80.2583809296 | 73.8264090301  |
| 7.5219345798  | 3.7143174777   |
| 0             | 0              |
| 28.0019986319 | 90.4032811236  |
| 0             | 0.1023301047   |
| 1.0195073021  | 0.9673274151   |
| 0             | 0              |
| 46.6903813264 | 37.3897897541  |
| 26.2341269306 | 15.3615655314  |
| 0.2029500903  | 0              |
| 1.8746340614  | 1.2642363645   |
| 2.2831665708  | 3.6394020414   |
| 1.1921451371  | 0.7674277868   |
| 26.1072744919 | 14.3052904336  |
| 7.5105174215  | 8.9373397397   |
| 7.7347907462  | 0.499839463    |
| 10.8332361862 | 28.433218801   |
| 6.3730853366  | 2.6501202795   |
| 7.450765534   | 14.6478472886  |
| 0             | 5.7033196022   |
| 0.006773      | 0.002699       |
| 0             | 0              |
| 0             | 0              |
| 3.148396995   | 6.9005645805   |
| 2.5540449638  | 1.5808329768   |
| 0             | 0              |
| 37.0765131257 | 43.2102877637  |
| 8.2729844046  | 5.2749049003   |
| 3.6421387704  | 4.2396335194   |
| 0.121995628   | 0.0763961298   |
| 13.1018646644 | 6.9792824586   |
| 7.3570468455  | 1.2215879094   |
| 7.7692287966  | 13.1195841174  |
| 11.2220836446 | 6.857132231    |
| 3.1920703348  | 3.2346467599   |
| 0             | 0.1638425407   |
| 4.8315078086  | 7.5181275477   |
| 0             | 0              |
| 14.0596114307 | 16.6483446923  |
| 218.106358991 | 200.5136720396 |
| 0             | 0.007657       |
| 0             | 0              |
| 69.0023674728 | 147.2822244718 |
| 25.7575168609 | 43.196302201   |
| 8.9559299917  | 6.513373829    |
| 13.8258887312 | 19.4560184109  |
| 0.0390484093  | 0              |
| 13.0698873761 | 9.4775794768   |
| 3.8144469616  | 4.7940717654   |

gene\_expression\_table

|                |                |
|----------------|----------------|
| 0              | 0              |
| 12.6485304481  | 9.5503968066   |
| 0.7730239941   | 0.9430193394   |
| 1.4559870671   | 1.9340545028   |
| 11.1796738131  | 10.3201397147  |
| 0.0366978371   | 0.0584969073   |
| 3.6667056433   | 2.678859446    |
| 0              | 0              |
| 544.8980688785 | 651.0697138462 |
| 0              | 0              |
| 0.9201898377   | 1.5246963795   |
| 3.6569042315   | 2.3968588187   |
| 1.3716204006   | 0              |
| 0.7593210235   | 1.966849941    |
| 0.7618145609   | 0.455378974    |
| 14.5594652243  | 31.7436452099  |
| 15.8366089282  | 9.9172048343   |
| 2.3170480797   | 1.8940562456   |
| 25.8003260299  | 12.1984224166  |
| 19.6814214862  | 13.6020557766  |
| 0.7637349089   | 1.352672216    |
| 3.1757832819   | 4.0779208542   |
| 0              | 0              |
| 17.0057178671  | 18.3539494207  |
| 0.4843004433   | 1.3123697919   |
| 0              | 0              |
| 10.4382154874  | 9.5234511884   |
| 5.7108101469   | 3.0167308779   |
| 0              | 0              |
| 4.2953115513   | 12.6144692503  |
| 0              | 0              |
| 0.7846933356   | 2.110747011    |
| 17.3673785389  | 12.599707348   |
| 0.9929398681   | 0.6217990294   |
| 128.326983547  | 75.8652351016  |
| 843.425632168  | 776.5260796532 |
| 13.983261223   | 6.501112874    |
| 3.1918428542   | 3.4978939729   |
| 10.4998231923  | 17.4063520321  |
| 0.5286147795   | 0              |
| 0              | 0              |
| 23.5170851445  | 7.9298554419   |
| 0.5003014986   | 1.7544739403   |
| 1.1410280706   | 0.454704       |
| 0.7179681202   | 1.4067223006   |
| 3.9696115008   | 1.6298417118   |
| 0              | 0              |
| 1.3054446163   | 0.8894162774   |
| 90.904880201   | 76.8428997244  |

gene\_expression\_table

|                 |                 |
|-----------------|-----------------|
| 748.2808330075  | 218.3823308772  |
| 48.7039678541   | 22.2993750525   |
| 123.9822098429  | 156.9167327665  |
| 8.0135359452    | 10.8952125589   |
| 0               | 0               |
| 39.737349409    | 12.8192013117   |
| 41.7457150407   | 16.2928185639   |
| 39.2248271348   | 19.2785316882   |
| 11.8503876453   | 2.3612121395    |
| 11.390342956    | 1.9735194483    |
| 40.0829652056   | 40.0960249085   |
| 107.715695728   | 64.3876679778   |
| 0.2022657552    | 1.7732806989    |
| 1602.3922471092 | 2488.005837484  |
| 33.0240069547   | 13.1601916244   |
| 0.2365212435    | 0.5655276584    |
| 2.0809347275    | 1.2438905344    |
| 4.6820166188    | 4.3535364221    |
| 377.1045347304  | 250.6704908085  |
| 279.3371263727  | 81.9124365416   |
| 4.6249071303    | 3.3405153952    |
| 0.4985437668    | 0.8185268927    |
| 1.7314247189    | 3.7948861303    |
| 0.8831471839    | 0               |
| 3.6691906382    | 3.0705913168    |
| 0.9429836655    | 0.3757825558    |
| 0               | 0               |
| 0               | 2.3806525824    |
| 6.0352127849    | 4.7629522805    |
| 187.1672893804  | 97.3168134885   |
| 73.2887381523   | 55.3958581128   |
| 5.701930674     | 5.1125420941    |
| 0               | 4.4379206328    |
| 243.7355964346  | 82.1404275485   |
| 44.195830203    | 28.7636520773   |
| 0.9786662548    | 0.2600014684    |
| 8.9157822472    | 9.8013046431    |
| 2.1051569737    | 2.7089899376    |
| 1.203570827     | 2.5899886343    |
| 5.7791422688    | 5.1400514007    |
| 47.6465853767   | 22.3380522455   |
| 6.7416106152    | 7.743606387     |
| 0.132571887     | 0               |
| 1.5742865251    | 0               |
| 0               | 0               |
| 9.3244898332    | 7.4316889027    |
| 7.853928005     | 7.3774328645    |
| 1368.5189413075 | 1968.8419329235 |
| 6.9547840733    | 14.253468413    |

gene\_expression\_table

|                |                |
|----------------|----------------|
| 0              | 0              |
| 9.3765675154   | 5.8177405743   |
| 0              | 0              |
| 1.7933635822   | 1.5102294863   |
| 0              | 0              |
| 252.8221158159 | 101.5630735784 |
| 1.1884428436   | 0.8524781393   |
| 0.0659616641   | 0.052571945    |
| 4.1391275563   | 11.2712961958  |
| 471.4854090277 | 334.7940290525 |
| 0              | 0              |
| 8.7952365755   | 9.1128310707   |
| 14.3845222457  | 6.9905932903   |
| 4.6647214502   | 1.4761925473   |
| 0.4042294738   | 2.1746741429   |
| 57.9875714293  | 27.4410664052  |
| 6.6595605862   | 5.3077201424   |
| 11.2718096662  | 6.1532311876   |
| 0              | 0              |
| 0              | 0.1087287114   |
| 16.6188068156  | 18.4588960077  |
| 1.2575376045   | 1.6756651063   |
| 14.0630895458  | 4.2698623634   |
| 1.9591315962   | 2.1713812489   |
| 0.5651633805   | 0.6756592315   |
| 0.9547693623   | 0.5918565342   |
| 1.8036273745   | 3.0498409579   |
| 40.2535258215  | 44.2004314575  |
| 0.3348567059   | 1.7347416226   |
| 13.4669775367  | 5.8635527091   |
| 6.7896123445   | 15.3322217352  |
| 9.7604566471   | 12.2379432894  |
| 2.6299281813   | 3.7508668407   |
| 9.3888157685   | 9.2097934271   |
| 1.8735336687   | 4.6040965429   |
| 0              | 0              |
| 0.3907023009   | 0.5189878134   |
| 0              | 0.2400621252   |
| 6.6967093075   | 1.6308502082   |
| 65.1133722032  | 89.1106371546  |
| 34.5586091421  | 36.6468239739  |
| 0.1846532029   | 0.699057495    |
| 0              | 0              |
| 2.8338108236   | 1.944878563    |
| 1.5911543609   | 1.2681620569   |
| 0.6215057161   | 1.8575428319   |
| 0.425876107    | 0.1272849291   |
| 0.2592290484   | 0.3099112675   |
| 0              | 0              |

gene\_expression\_table

|                 |                 |
|-----------------|-----------------|
| 0.1349144486    | 0.0830896912    |
| 0.7941022271    | 0.5876979453    |
| 1.2960179503    | 8.435644866     |
| 4.4672120439    | 3.9164419548    |
| 2.1688159381    | 1.5557064316    |
| 2.0631433126    | 5.2070792641    |
| 33.6640108226   | 20.6136546799   |
| 0.3906444737    | 0.6538278586    |
| 6.0295482982    | 2.903380666     |
| 12.5280197263   | 6.7041649025    |
| 6.577605164     | 6.045016716     |
| 2.6595759141    | 1.839741457     |
| 14.4423559827   | 39.7757490297   |
| 1.8531441501    | 2.8554751398    |
| 0.3957668461    | 0.7279134666    |
| 0               | 0.0340845421    |
| 6.1560758176    | 9.8128779496    |
| 4.1401420484    | 2.8719824505    |
| 4.9795787809    | 3.6554386296    |
| 0.82238059      | 3.9326612913    |
| 29.2679348766   | 36.2397962487   |
| 0.8112815037    | 1.541886329     |
| 3.5122870522    | 2.2820538083    |
| 0.1915996438    | 0.2612082556    |
| 99.5365161455   | 191.4300112114  |
| 3.0223908113    | 4.0950761609    |
| 0               | 0.1213623943    |
| 5.1654983771    | 5.6441936692    |
| 0               | 0               |
| 5.4105102755    | 10.1171259084   |
| 3.3308359848    | 10.1026139101   |
| 23.1996267528   | 13.4316169958   |
| 75.6190328469   | 29.8833498928   |
| 0               | 0.0117843343    |
| 0.1650701749    | 0.0411131805    |
| 0               | 0               |
| 3.2262079448    | 4.2855202108    |
| 0               | 0               |
| 0               | 0               |
| 0               | 0               |
| 0               | 0               |
| 0               | 0               |
| 0               | 0               |
| 61.3354377536   | 0               |
| 278.8374357714  | 298.8684911413  |
| 3392.7933298952 | 1992.1029170866 |
| 0               | 0               |
| 0               | 0               |
| 0               | 7.1459002292    |
| 6.3194087383    | 2.9380263194    |

gene\_expression\_table

|                |                |
|----------------|----------------|
| 0              | 0              |
| 8.4122408154   | 5.5871829481   |
| 49.1040103411  | 0              |
| 0              | 0              |
| 99.6404843044  | 28.8778979659  |
| 60.4140899762  | 0              |
| 16.5605681935  | 0              |
| 0              | 0              |
| 2.195917679    | 2.1066776782   |
| 1.1746063889   | 0.7021276302   |
| 2.7111870116   | 4.5377567518   |
| 0.5437454792   | 3.4669540667   |
| 2.6321022746   | 4.3454540741   |
| 42.5865204882  | 29.3726932272  |
| 235.5138719922 | 160.6333074355 |
| 0              | 0              |
| 29.2650373481  | 0              |
| 0              | 0              |
| 32.8659420137  | 25.8669742418  |
| 0              | 0              |
| 29.2650373481  | 0              |
| 0              | 0.5748648985   |
| 1.2581206564   | 2.5068291906   |
| 0              | 0              |
| 0              | 0              |
| 0              | 0              |
| 0              | 0              |
| 0              | 0              |
| 514.0288722977 | 0              |
| 0              | 118.846010167  |
| 0              | 0              |
| 0              | 12.4933890421  |
| 0              | 0              |
| 0              | 3.5503365063   |
| 0              | 0              |
| 43.3567237098  | 28.7963638598  |
| 0              | 0              |
| 0              | 0              |
| 0              | 5.9549168576   |
| 0.2989780163   | 1.5488703079   |
| 2.2223686398   | 3.0996780675   |
| 11.4481464459  | 12.1132407693  |
| 16.0214921061  | 6.3846251763   |
| 6.792126771    | 9.7122341188   |
| 0              | 0              |
| 0.6275739173   | 2.2508152082   |
| 2.2247771676   | 2.6597463373   |
| 0.8412408393   | 1.1733317922   |
| 5.4800738247   | 3.6397168958   |

gene\_expression\_table

|                 |                 |
|-----------------|-----------------|
| 0               | 0               |
| 23.4719820751   | 22.1815688152   |
| 0               | 0               |
| 3.8711694447    | 5.0817551131    |
| 0               | 0               |
| 1.6544996432    | 2.1428041796    |
| 0               | 0               |
| 527.6104888582  | 1181.0404913135 |
| 237.8043443587  | 206.3451707859  |
| 54.685617272    | 54.0774996478   |
| 3.3968346922    | 1.3536514672    |
| 0               | 0               |
| 11.6326558483   | 4.5390811403    |
| 0               | 3.8203016889    |
| 2.005425542     | 0               |
| 101.7086919397  | 81.0625965301   |
| 177.4223373645  | 309.6928948269  |
| 36.454080929    | 30.0918273616   |
| 17.6220367607   | 29.4942827435   |
| 82.4739319665   | 35.0943888612   |
| 25.1255325321   | 8.4722166738    |
| 266.495735718   | 248.5521575273  |
| 1.0566872409    | 0.1403646202    |
| 25.0877045705   | 13.1785822032   |
| 7.4142498684    | 7.1754731797    |
| 132.1161171601  | 42.8989995507   |
| 93.8710334026   | 71.4907712611   |
| 27.4840581475   | 29.4637705109   |
| 2927.8869082217 | 1975.5727242297 |
| 33.9293157368   | 34.2654480875   |
| 510.1683914634  | 165.9624757362  |
| 0               | 0               |
| 63.1820458262   | 46.5560725465   |
| 17.808152624    | 13.0486167872   |
| 0               | 0               |
| 8.4637081115    | 4.7929542834    |
| 124.8879813256  | 38.4349500203   |
| 2.2143279793    | 0               |
| 1512.3494094047 | 2079.566644018  |
| 3075.5865885363 | 4580.5643303185 |
| 0               | 4.1533359721    |
| 11.2653458839   | 9.8418894901    |
| 18.9493325376   | 12.1279749953   |
| 2.9350464897    | 7.0177627355    |
| 4.1128383317    | 2.8096827848    |
| 0               | 0.2036127652    |
| 17.7861698107   | 18.2259152054   |
| 41.4457474864   | 39.0384967015   |
| 90.2008245617   | 119.1332249847  |



gene\_expression\_table

|                |                |
|----------------|----------------|
| 0              | 0              |
| 956.7670039134 | 984.8324743438 |
| 13.5762198336  | 10.9842945567  |
| 25.0986529335  | 23.4660151195  |
| 13.3460879684  | 2.9009817341   |
| 59.7184125765  | 44.1963102051  |
| 45.9469770353  | 51.6010332571  |
| 82.2891511881  | 97.039142637   |
| 0              | 2.2802974308   |
| 36.8808656758  | 34.8630411496  |
| 0              | 0              |
| 0              | 0              |
| 0              | 0              |
| 0              | 0              |
| 39.234545271   | 49.5111963074  |
| 207.8673278367 | 131.954700395  |
| 4.9541095295   | 3.9484627547   |
| 11.3826007799  | 61.9921290769  |
| 0              | 0              |
| 20.2533824823  | 15.5329631705  |
| 83.6401051782  | 100.2850706869 |
| 9.0565607308   | 0              |
| 118.8011118861 | 154.7297746201 |
| 19.550670784   | 30.0510625708  |
| 445.3297887561 | 739.9217384841 |
| 255.7052432348 | 195.8494054687 |
| 0              | 0.3538020612   |
| 12.5479819172  | 24.5333019595  |
| 1.3227014688   | 2.0498393067   |
| 0              | 0              |
| 72.3830005314  | 68.5066359991  |
| 25.705776049   | 22.0242752223  |
| 17.028003586   | 21.4881253866  |
| 34.5372050182  | 29.8690870405  |
| 0              | 0.271990481    |
| 0              | 0.1359952405   |
| 0              | 0              |
| 0.1031697667   | 0.3700218786   |
| 37.4345688949  | 26.5926307186  |
| 13.3300028073  | 61.9739926755  |
| 1.9654402352   | 4.6994121864   |
| 37.840007969   | 27.9654072018  |
| 15.2963683395  | 20.5728545717  |
| 36.946149513   | 47.5671977701  |
| 224.9666227197 | 391.2002167789 |
| 120.0447729446 | 78.6382945778  |
| 40.0046728913  | 44.2262306995  |
| 5.9169747644   | 10.0212314584  |
| 0              | 0              |

gene\_expression\_table

|                 |                 |
|-----------------|-----------------|
| 9.465454443     | 674.1137494268  |
| 1.0849763346    | 34.5893737005   |
| 3.1795453028    | 85.3998995356   |
| 0               | 0.8039342582    |
| 0               | 1.5525966454    |
| 0               | 0               |
| 6.5685874776    | 6.5440173587    |
| 38.9379494632   | 28.2275886428   |
| 275.2571331045  | 353.0056082031  |
| 69.0732360461   | 57.292375368    |
| 59.3631332186   | 62.5909790323   |
| 0               | 3.0477120273    |
| 0               | 3.7322233399    |
| 54.241468686    | 38.8641070769   |
| 0               | 4.3256721776    |
| 0               | 2.8514067068    |
| 0               | 0               |
| 50.3206257329   | 38.9708460156   |
| 68.2000143627   | 97.0641555904   |
| 0               | 0               |
| 41.7551108343   | 48.587543027    |
| 7.4619504974    | 5.9472309688    |
| 2549.9723654578 | 5376.5398448719 |
| 56.6855935074   | 28.1054452963   |
| 47.3424314948   | 29.3473256795   |
| 30.0274038673   | 10.5156056055   |
| 160.4607932862  | 111.8546877777  |
| 19.8932772251   | 17.4406016051   |
| 99.4414024177   | 84.9166603257   |
| 71.1237576935   | 88.9283079231   |
| 2.468259331     | 8.8524960756    |
| 914.5282292307  | 728.885913757   |
| 0.6280405844    | 1.0011061892    |
| 7.1189226051    | 15.130227053    |
| 21.8014707761   | 9.0499672172    |
| 4.6770696434    | 2.3857023173    |
| 40.3768105845   | 37.7935227582   |
| 10.6815736657   | 8.6349134783    |
| 0               | 0.0204757325    |
| 2515.469893617  | 1461.856326246  |
| 211.4825216353  | 189.1084333269  |
| 2.935742084     | 7.0460146519    |
| 1.0638518925    | 0.4845131443    |
| 2083.3909000095 | 1760.4174892529 |
| 0               | 0               |
| 6.6161563979    | 4.8379657368    |
| 172.135469322   | 141.2086834234  |
| 1.0701670129    | 1.64025231      |
| 97.0886235163   | 56.1280127286   |

gene\_expression\_table

|                |                 |
|----------------|-----------------|
| 9.4749578723   | 12.8458044352   |
| 0.5409454679   | 0.2874250854    |
| 2.3129918605   | 4.6854913388    |
| 22.0367417203  | 20.1394224125   |
| 1.7259858365   | 0.9825884018    |
| 27.6420643262  | 29.2479644739   |
| 7307.237691756 | 9046.8717558799 |
| 0              | 0.1194127146    |
| 0.4683106981   | 0.3732471675    |
| 3.9051140167   | 4.1981282129    |
| 0              | 0               |
| 0              | 2.8436287664    |
| 0.5419868691   | 0               |
| 6.7869641166   | 4.8683355476    |
| 0              | 0.2413680618    |
| 7.6045198014   | 7.2083041098    |
| 0              | 3.196086706     |
| 4.2989980734   | 1.8689094386    |
| 2.8573488862   | 1.8454215065    |
| 0.8383849294   | 0.668199128     |
| 0              | 0.1071768983    |
| 13.6758108053  | 8.4067024989    |
| 5.3802162911   | 6.0660545807    |
| 411.6903437168 | 174.8317850008  |
| 18.7600186567  | 2.8357007573    |
| 19.0997055149  | 13.7162056284   |
| 1.3552637847   | 0.3411017318    |
| 9.1270683238   | 6.3203303401    |
| 47.0470687315  | 14.9987478072   |
| 0.4246299537   | 0.3384332839    |
| 91.7184099329  | 63.8104407306   |
| 139.8855490506 | 215.5470246103  |
| 0.6008273242   | 0.4190059304    |
| 1.3091445222   | 1.6023613419    |
| 14.6748724701  | 8.9439880097    |
| 0              | 0               |
| 4.1056644604   | 5.4725487081    |
| 32.6975052688  | 27.7095360841   |
| 0.4299278581   | 0.2998237845    |
| 2.3101747776   | 2.0337186549    |
| 0.1789474418   | 0.2436467097    |
| 224.6906681909 | 257.1961629977  |
| 0.0223103353   | 0.0177815059    |
| 24.0428961097  | 16.1367326282   |
| 6.6029669504   | 3.94696094      |
| 0              | 0               |
| 0              | 0               |
| 0              | 0               |
| 0              | 0.4560965672    |

gene\_expression\_table

|                 |                 |
|-----------------|-----------------|
| 0.602022195     | 3.11880557      |
| 19.903121901    | 59.4860199351   |
| 7.8893331832    | 7.6216463042    |
| 0               | 0               |
| 6.1282032932    | 1.4652673086    |
| 0               | 0               |
| 2.1811605234    | 1.3038010722    |
| 4.1488193175    | 2.5718313963    |
| 2.8928242837    | 1.7542630211    |
| 14.0005568676   | 7.7787966564    |
| 1.4467094516    | 1.729557558     |
| 0               | 0.848514851     |
| 4738.0500931715 | 1699.5463748952 |
| 2.8695919418    | 2.0477402165    |
| 24.5079633759   | 20.9536162781   |
| 182.2082820273  | 34.4070259553   |
| 50.951626181    | 9.2292798475    |
| 7.9486885673    | 6.5063855636    |
| 0               | 0               |
| 0               | 0               |
| 1.808851576     | 3.6041709585    |
| 211.6478486598  | 84.0899455029   |
| 2.8799055712    | 2.9493454697    |
| 5.7513719977    | 6.8758304554    |
| 2.9868849895    | 3.7439872401    |
| 0               | 0               |
| 490.2469839227  | 248.028959801   |
| 3.1254577604    | 2.8831174395    |
| 361.9442237927  | 170.3658773655  |
| 38.2513124034   | 40.648780289    |
| 0               | 0               |
| 121.9462985698  | 77.3119152573   |
| 28.5572227848   | 59.7256689464   |
| 16.4840734734   | 9.1235633334    |
| 80.7000843131   | 59.0226563477   |
| 1.7692279375    | 2.8201760879    |
| 213.2207675272  | 200.7301844872  |
| 132.7469159228  | 27.1554092387   |
| 10.7723789063   | 14.939061349    |
| 126.6521603486  | 178.81283504    |
| 14.5249405025   | 19.1735572703   |
| 541.0320763367  | 272.1820355838  |
| 6.1392553832    | 5.2236432966    |
| 860.331208491   | 714.1393387003  |
| 0.1571878123    | 0               |
| 134.4972574475  | 95.4038447372   |
| 14.7444044878   | 16.6723013949   |
| 2.591187652     | 1.1473311953    |
| 1.1205606563    | 1.339642974     |

gene\_expression\_table

|                 |                 |
|-----------------|-----------------|
| 15.0296539195   | 10.6263085484   |
| 2.0829362185    | 0               |
| 178.545630165   | 162.9414701748  |
| 96.6224729166   | 45.9828074506   |
| 0.5238150919    | 0.7827836043    |
| 10.9419972123   | 9.8583572771    |
| 20.875459564    | 32.9558386395   |
| 78.3328952978   | 64.6440641403   |
| 0.8126674023    | 0.5397517204    |
| 66.9259842436   | 34.7726145298   |
| 38.0468855849   | 68.7451053588   |
| 42.5717606011   | 39.4696094005   |
| 225.1154313664  | 98.7002653463   |
| 7.551761247     | 10.0960697547   |
| 0.2750172508    | 0               |
| 116.2869146378  | 61.8515304363   |
| 5479.8583494297 | 3196.9899895124 |
| 139.2791850045  | 123.5873074592  |
| 78.4796702072   | 36.7934650392   |
| 0.8087144068    | 1.6113787429    |
| 0               | 0.9536776062    |
| 18.1526635688   | 14.4678101229   |
| 0               | 0               |
| 13.4251399257   | 13.6424209919   |
| 0.2553223518    | 0.3357648442    |
| 1.6553616414    | 1.8119990928    |
| 0               | 0               |
| 0.4279867122    | 0               |
| 0               | 0               |
| 0               | 0               |
| 2.0634742395    | 1.0725681988    |
| 1.7416962161    | 0.9754532811    |
| 0.3415958786    | 0.4764453718    |
| 0               | 0.5975469428    |
| 6.4044176186    | 4.7640779835    |
| 4.0176658003    | 3.8613679674    |
| 0               | 0               |
| 0               | 0               |
| 0               | 0               |
| 200.6782481276  | 80.1054456874   |
| 8.6339873605    | 9.8919452405    |
| 0.1862214971    | 0.4081548385    |
| 7.5981166598    | 10.2807027762   |
| 18.1596890466   | 15.5589151929   |
| 0               | 0               |
| 2.8261165821    | 6.9181971616    |
| 0.8134545847    | 1.620823637     |
| 27.1286155537   | 9.3780918325    |
| 0.2052563862    | 0.3067329221    |

gene\_expression\_table

|                 |                  |
|-----------------|------------------|
| 23.8388996427   | 22.4293470363    |
| 8.6893688391    | 3.7561994132     |
| 0.1628858083    | 0.5841954939     |
| 0               | 0                |
| 0               | 0                |
| 0               | 0                |
| 0               | 0                |
| 0               | 0                |
| 0.0208516393    | 0                |
| 0.6093286162    | 0.5872849942     |
| 6.1010101183    | 2.7014173312     |
| 29.810101847    | 26.8048863939    |
| 13.4986697751   | 14.0419929717    |
| 11.9939049271   | 8.038445862      |
| 2.3910454318    | 1.3498575795     |
| 0.6358937397    | 1.2839240341     |
| 454.0800956277  | 478.9922686807   |
| 23.6854152962   | 16.7070524946    |
| 5.3854408552    | 9.2881195889     |
| 0.0425004744    | 0.0254048996     |
| 4.5388487633    | 9.6466580909     |
| 0               | 0.007437         |
| 1.1014553135    | 0.8547664183     |
| 0.285776295     | 0.645336626      |
| 0.9605461035    | 2.8070625275     |
| 1.9566271463    | 1.3717354619     |
| 5.4234185954    | 6.7539150451     |
| 0               | 0.005431         |
| 0.3903296611    | 0.330539172      |
| 3.6868734847    | 0                |
| 1.1236343837    | 0.7734253136     |
| 0               | 0.2438396731     |
| 2.7051242594    | 4.9980104066     |
| 3.3658844239    | 3.3179963372     |
| 6118.9935884686 | 16285.4802461107 |
| 8.7053797379    | 6.1981731047     |
| 0               | 0.0564240811     |
| 365.7544742124  | 279.8487182801   |
| 27.497427263    | 25.6851505267    |
| 0.0353796038    | 0                |
| 0.9643325631    | 2.1135959471     |
| 0               | 0                |
| 0.0254297454    | 0.0101338497     |
| 0.3098499442    | 0.3704291226     |
| 3.0818844935    | 3.3920129566     |
| 5.3548539085    | 6.3306575982     |
| 0.1762049265    | 0.4447160861     |
| 59.4752574408   | 79.1376210926    |
| 3.055884589     | 4.6204065147     |

gene\_expression\_table

|               |               |
|---------------|---------------|
| 0             | 0             |
| 0.1521716138  | 0.4548072256  |
| 0.2714794886  | 0.2975104071  |
| 4.116780388   | 6.8517194686  |
| 3.7550639244  | 4.4892215116  |
| 0.3187161894  | 0.6350480322  |
| 0.6983975989  | 0.3618083086  |
| 0             | 0             |
| 0.2037137304  | 0.2164818447  |
| 3.4928844161  | 4.4921301279  |
| 63.7907082982 | 34.9050656097 |
| 22.1328348498 | 4.4100091823  |
| 2.2678504527  | 4.4670922125  |
| 0             | 0             |
| 2.1391747578  | 3.8361115282  |
| 0.3131726209  | 0.7488028406  |
| 3.9284869367  | 4.8388704076  |
| 1.6606371388  | 1.5073654057  |
| 2.165415347   | 1.4382103375  |
| 3.5951321056  | 7.7773717103  |
| 0.9548233315  | 0.4280632959  |
| 26.8816232752 | 94.5214279917 |
| 7.3772894079  | 6.5330616004  |
| 0             | 0             |
| 27.8392391188 | 22.9347984478 |
| 6.7562058262  | 9.7956570122  |
| 0.1403039312  | 0.2096686764  |
| 42.0225685559 | 24.9045344024 |
| 2.73555516    | 3.2249651757  |
| 1.7383446641  | 2.0152346785  |
| 0.0380050028  | 0.1135885298  |
| 6.777728509   | 6.7333553103  |
| 0             | 0             |
| 0.8809915487  | 1.4043138515  |
| 1.0520225826  | 6.7916066197  |
| 0.8116802152  | 0.6469152689  |
| 20.5053067307 | 6.2102961145  |
| 0.0574862393  | 0.0114542419  |
| 0.7472810311  | 0.6948534043  |
| 0.8856253123  | 2.0469652043  |
| 6.8048904473  | 2.0338309277  |
| 19.081511987  | 34.2182460048 |
| 0.7796301904  | 1.553427892   |
| 0             | 0             |
| 18.0012946474 | 22.9976662695 |
| 0             | 0.6370848018  |
| 0.6223875644  | 0.5185952129  |
| 0             | 1.4201346025  |
| 0.010405812   | 0             |

gene\_expression\_table

|                |                |
|----------------|----------------|
| 0.1067799689   | 0.3404177706   |
| 0              | 0.0191668774   |
| 0.1744168087   | 0              |
| 2.9148963593   | 3.5071300664   |
| 0.3340356021   | 1.2867730199   |
| 0.7469215199   | 0.6151455024   |
| 2.0143601422   | 1.913173482    |
| 12.1686676596  | 3.6946743376   |
| 3.6231038208   | 1.5882026274   |
| 11.0207339935  | 5.5895689337   |
| 8.1158453991   | 8.6245201997   |
| 0.7037115544   | 0.168259029    |
| 1.0083210698   | 1.5342208959   |
| 0.4933173942   | 0.3604128855   |
| 0              | 0.0377332065   |
| 6.919826916    | 8.6135557096   |
| 3.589969852    | 0.9256930673   |
| 8.1571817994   | 12.0498892092  |
| 0.2133622494   | 0.3886887454   |
| 6.196279727    | 4.6242147713   |
| 0.8901091603   | 1.1626666706   |
| 0.130254587    | 0.5190694538   |
| 1.1638747335   | 1.6619803922   |
| 1.4813452212   | 0.8116922978   |
| 0              | 0              |
| 64.0398389883  | 35.8330423276  |
| 0.4143635702   | 1.7613381258   |
| 15.4202473789  | 7.9007488449   |
| 12.5298497196  | 7.9378957446   |
| 0.6793013688   | 0              |
| 0.2128511177   | 0.1555069544   |
| 0.1048793211   | 0.7941013137   |
| 2.5008741859   | 2.8652474769   |
| 3.9403282429   | 4.8189992231   |
| 0              | 0              |
| 0.9034583221   | 0.240021038    |
| 2.0281168424   | 2.4785175034   |
| 2.0104004156   | 2.0368275414   |
| 17.5320284046  | 6.5715352692   |
| 91.2881572891  | 43.2936307162  |
| 5.9353345689   | 5.3369817267   |
| 1.1594129442   | 0.7633546427   |
| 0.7195094543   | 2.0070906644   |
| 0.9527359399   | 0.5922834435   |
| 3.0068025829   | 2.7776969112   |
| 0.1320985071   | 0.3421714042   |
| 3.749951062    | 4.3170679516   |
| 2.2970762018   | 1.8307871018   |
| 283.0883644538 | 192.2824326031 |



gene\_expression\_table

|                |                |
|----------------|----------------|
| 19.08199032    | 20.2513058649  |
| 0              | 0.0175617269   |
| 0.825982032    | 0.4840543567   |
| 0              | 0              |
| 1.7021140223   | 6.7829887302   |
| 1.2789279589   | 2.833096808    |
| 68.2544810028  | 47.9994154012  |
| 0              | 0              |
| 18.9923314115  | 22.2009798889  |
| 0              | 0              |
| 0.8481597303   | 0.8449871479   |
| 2.0843069771   | 2.0303658477   |
| 0              | 0.1015130816   |
| 1.1794222318   | 1.065342895    |
| 6.8261319197   | 10.3501790943  |
| 11.1737121677  | 12.801703811   |
| 2.8807934906   | 1.3871752426   |
| 0.1693717118   | 0.2474826474   |
| 0              | 0              |
| 0.4626085073   | 0.0691317147   |
| 7.9264726862   | 4.6451901953   |
| 0.1375252841   | 0.2082565134   |
| 0              | 0              |
| 6.2899474058   | 8.2716738108   |
| 9.8664631418   | 7.3721678698   |
| 0.0276598462   | 0.0220451066   |
| 0              | 0              |
| 0              | 0.1244295213   |
| 0              | 0.0133320618   |
| 0.006888       | 0.002745       |
| 0              | 0.0215373486   |
| 0              | 0              |
| 20.4943754662  | 27.6424452811  |
| 1.6770695138   | 1.448023507    |
| 10.4691224768  | 12.1583559572  |
| 1.3318147638   | 1.8575662648   |
| 130.3378052265 | 129.8502703677 |
| 0              | 0              |
| 8.9643901022   | 13.3367484959  |
| 5.256437407    | 4.8025062653   |
| 0              | 1.3365574648   |
| 0              | 0.1039443795   |
| 0              | 0              |
| 0              | 0              |
| 1.2073265719   | 2.1964365808   |
| 0.4009839125   | 0.2511042366   |
| 0              | 0              |
| 0              | 0              |
| 1.2597532633   | 0              |

gene\_expression\_table

|                 |                 |
|-----------------|-----------------|
| 1.9451970047    | 2.0154377374    |
| 0               | 0               |
| 0               | 0               |
| 0               | 0               |
| 2.5283310219    | 3.2745357808    |
| 0               | 0               |
| 0               | 0               |
| 4174.5511061154 | 6617.786956791  |
| 0               | 0               |
| 2.3905040272    | 1.1907811157    |
| 0.2162684821    | 0.2585514233    |
| 0.2363936091    | 0.1507259951    |
| 0.2150197502    | 0.0856861834    |
| 4.2443453252    | 3.5014691879    |
| 59.4901416919   | 150.7619980528  |
| 0.5267060659    | 0.7608670498    |
| 0               | 0.007251        |
| 14.617646914    | 6.0730678814    |
| 51.2508481967   | 22.7483006288   |
| 0.3034669478    | 0.1746806042    |
| 2.594023414     | 2.2338033319    |
| 0.8441438838    | 0.5810450958    |
| 2.1544380958    | 3.8021576455    |
| 4.5546920993    | 9.2403157452    |
| 0               | 0.1227817909    |
| 58.601275317    | 149.2154836993  |
| 0.1560735654    | 0.5286652       |
| 0               | 0.0578672108    |
| 12.4394511881   | 40.2238801466   |
| 0.1955718985    | 0.3896807047    |
| 6.2641585319    | 2.4297231015    |
| 287.3832272     | 155.5752066338  |
| 5.8526232291    | 7.4265102769    |
| 0               | 0.1670477922    |
| 126.3123471352  | 297.3332735163  |
| 0               | 0.154273306     |
| 6.4862431159    | 6.3859577041    |
| 1.5258272499    | 1.2305731871    |
| 1.8076487806    | 1.5196527462    |
| 8.8233264758    | 7.8359445365    |
| 3.7102889629    | 3.2387596304    |
| 14.017116354    | 16.7576215835   |
| 0.7890192957    | 0.6037001709    |
| 10.67652603     | 7.4113013974    |
| 0.6794762493    | 2.1887553216    |
| 3953.639041578  | 3147.2745585231 |
| 1.8987085855    | 1.5132850994    |
| 0.4212438572    | 0.6122218071    |
| 0               | 0.0357636703    |

gene\_expression\_table

|               |               |
|---------------|---------------|
| 0.9557777946  | 1.1849633122  |
| 1.1884571776  | 1.1840116961  |
| 0             | 0             |
| 32.4889975212 | 21.1633463289 |
| 0             | 0.0777309492  |
| 2.7579760281  | 1.2947875778  |
| 0.2355174083  | 0.1329606516  |
| 0             | 0.2456605538  |
| 1.0174544969  | 1.7811255011  |
| 1.5061908316  | 2.250835278   |
| 3.5522753107  | 4.7860597634  |
| 1.7208414382  | 1.9429918207  |
| 5.3294407855  | 6.2160067372  |
| 1.2881115451  | 2.3332605483  |
| 18.6564941797 | 23.3121430672 |
| 36.6010905405 | 24.9455901976 |
| 5.4036995608  | 5.106621728   |
| 0             | 0.0826024397  |
| 0.7451028459  | 0             |
| 0.9644068899  | 1.9215989586  |
| 0             | 0             |
| 0             | 0             |
| 1.9670698472  | 1.5155105572  |
| 0.0288685598  | 0.0460169209  |
| 2.4433268908  | 1.6148756154  |
| 0             | 0.0236200753  |
| 2.0407354521  | 2.7446876764  |
| 3.2652477301  | 1.8926742768  |
| 5.1276137228  | 5.344207496   |
| 0.1107042088  | 0             |
| 0             | 0.0217543442  |
| 0             | 0             |
| 12.9112432602 | 10.5047409736 |
| 13.4041585889 | 12.5106079163 |
| 0             | 0             |
| 0.6608546812  | 0.1801889556  |
| 0.8687454474  | 0.6125047647  |
| 2.7213203308  | 3.0865298684  |
| 2.6160576428  | 4.4202375711  |
| 0             | 0.0926643928  |
| 1.3168262989  | 1.1855694731  |
| 4.9933604931  | 6.6859733968  |
| 2.6815512576  | 1.0875217357  |
| 0.122921539   | 0.1592002686  |
| 3.119548564   | 2.5102105607  |
| 1.3171930569  | 0.524906413   |
| 6.5780077664  | 13.4683718506 |
| 0.6543993768  | 0.2607806257  |
| 1.0663571394  | 1.0198736439  |

gene\_expression\_table

|                |                |
|----------------|----------------|
| 60.1124919089  | 24.6298455811  |
| 0              | 0.1155004134   |
| 18.2235967147  | 7.105434659    |
| 0.2917345333   | 0.0581286572   |
| 4.851846316    | 3.3581479108   |
| 34.2525556459  | 17.0622161531  |
| 10.1189583527  | 7.829660469    |
| 76.9362429232  | 28.1990627632  |
| 6.5639929888   | 8.9917300768   |
| 441.5387972521 | 255.0469740229 |
| 94.325130085   | 85.7167917016  |
| 0.6624850793   | 0              |
| 4.3492918166   | 4.9829765425   |
| 0.1881228846   | 0.2249030423   |
| 0              | 0              |
| 2.6281917107   | 2.13925651     |
| 1.2696562006   | 1.2065266676   |
| 0.0101974976   | 0.0182868361   |
| 0              | 0              |
| 3.6479580355   | 3.2837083909   |
| 0              | 0.0935420838   |
| 0              | 0              |
| 0              | 0              |
| 26.4560849457  | 32.8544623936  |
| 23.3376340942  | 11.1601625021  |
| 0.29507972     | 0.4270387631   |
| 36.9052210213  | 62.2452741703  |
| 3.5924391585   | 5.0756748066   |
| 0              | 0              |
| 1.83598317     | 0.5121523641   |
| 0.3063968257   | 0.518926247    |
| 91.1474644508  | 48.870419627   |
| 9.7811575096   | 17.6794352627  |
| 2.1578114455   | 1.719792038    |
| 2.3489775664   | 2.995444611    |
| 13.4801831003  | 16.7477004864  |
| 1.7438357824   | 1.7253314122   |
| 134.8603424453 | 134.4328855973 |
| 4.9356532133   | 6.9597167244   |
| 162.8186550543 | 66.1138751877  |
| 0              | 0.2330701213   |
| 1.1047310441   | 0              |
| 4.7726739221   | 3.3077019163   |
| 0.6009427495   | 1.317128767    |
| 1.6166993522   | 0.314273563    |
| 6.2400976691   | 4.5511347877   |
| 1.5412899951   | 3.8270000848   |
| 24.4272754023  | 10.862983234   |
| 11.8715556753  | 5.072262074    |

gene\_expression\_table

|                 |                 |
|-----------------|-----------------|
| 51.0681707548   | 34.7008238802   |
| 6.5622781283    | 3.8261087005    |
| 2.8733380209    | 2.480911473     |
| 0               | 0.4001663347    |
| 8.6662604003    | 8.8805250869    |
| 0               | 0               |
| 3.5383092644    | 4.2300888572    |
| 3.095455997     | 1.069077462     |
| 9.1465126475    | 7.0620322481    |
| 846.8820739447  | 357.2156419622  |
| 0.9455380594    | 0.8563647533    |
| 3.188617959     | 3.1867755121    |
| 31.1505376679   | 16.3150263831   |
| 104.8953515393  | 109.0602584558  |
| 3.768822353     | 2.5122522906    |
| 97.2236669681   | 51.2662305324   |
| 5.8804678344    | 12.6182466529   |
| 5.072911153     | 2.8638968874    |
| 19.6062217456   | 10.9384148864   |
| 1.5146046265    | 0.9053635048    |
| 23.365058219    | 32.8022806401   |
| 0.8801302371    | 1.1159757221    |
| 9.0846598626    | 6.3354747774    |
| 0.1163883154    | 0.4638118371    |
| 0               | 0               |
| 6.3301028692    | 4.4919446917    |
| 58.842532228    | 27.0335277187   |
| 0.9983793298    | 0.2983934531    |
| 0               | 0               |
| 9.2463122052    | 9.007020907     |
| 20.315642508    | 16.0632149726   |
| 0.472952423     | 1.0366033074    |
| 7.4954019844    | 2.2343297063    |
| 2.2525787178    | 1.1338877499    |
| 8601.1630852606 | 4532.7744408086 |
| 0               | 0.2024809298    |
| 7.5773131922    | 7.3332850321    |
| 2.8729292957    | 2.5499448233    |
| 0               | 0               |
| 18.8443656044   | 9.9784443966    |
| 4.9770184909    | 6.2439132679    |
| 18.8085115669   | 6.3421455885    |
| 34.0655226812   | 25.1786566493   |
| 0.9347837085    | 1.2191394827    |
| 2.5401248661    | 4.4792034292    |
| 11.1598120786   | 12.3374692975   |
| 271.0414305408  | 99.8269387609   |
| 3.9808034709    | 4.7590956998    |
| 62.9663750895   | 66.549245662    |

gene\_expression\_table

|                |                |
|----------------|----------------|
| 0              | 0              |
| 25.5184860371  | 13.3168267608  |
| 8.3619791359   | 5.2157430775   |
| 2.4353776755   | 0.9705072111   |
| 82.9490240534  | 55.1371087917  |
| 10.6507464467  | 17.1290352869  |
| 0              | 0              |
| 15.434175978   | 10.4559817139  |
| 2.6617659338   | 2.5033081394   |
| 2.9971219939   | 3.0522646945   |
| 10.4657865907  | 14.3238087261  |
| 0.4719929909   | 0.7641196523   |
| 3.9771345775   | 4.5915576997   |
| 0.2353863937   | 0.5440537334   |
| 0              | 0              |
| 244.4664882096 | 232.311185674  |
| 2.7532565454   | 3.1348089786   |
| 0              | 0              |
| 2.9728009947   | 2.261647377    |
| 85.6650618577  | 25.9447667765  |
| 0              | 0.0800606811   |
| 1.8343881193   | 9.3813027095   |
| 8.1582530842   | 12.4006040613  |
| 0              | 0              |
| 1.333561544    | 1.7123833549   |
| 0.4229768917   | 0.6929602163   |
| 0              | 0.006119       |
| 52.8801289914  | 18.8003603001  |
| 0.9357553701   | 0.0678003732   |
| 0.4871261018   | 0.4853039831   |
| 0.2160451852   | 0.5713565533   |
| 26.7298737054  | 28.0937545821  |
| 0              | 0              |
| 353.2548557268 | 729.6617129835 |
| 1.7246510544   | 0.9242730571   |
| 1.8179363259   | 2.2941059132   |
| 6.1532581742   | 5.4811572084   |
| 15.3402253375  | 24.2584833069  |
| 69.5375658909  | 31.3367189873  |
| 1.6228667434   | 1.6430146508   |
| 44.6634794375  | 36.8317133996  |
| 1.039929297    | 1.0656405167   |
| 0              | 0              |
| 0              | 0              |
| 0              | 0              |
| 0.1165841178   | 0.6039697521   |
| 0              | 0.0470077739   |
| 0.5747630265   | 0.5038995259   |
| 563.185170013  | 224.4314194678 |

gene\_expression\_table

|                |                |
|----------------|----------------|
| 0.7641624123   | 0.7917561869   |
| 0.6348520118   | 1.879361171    |
| 1.6128421374   | 3.293958908    |
| 277.8508876301 | 279.2635169611 |
| 402.5258700412 | 302.4902740987 |
| 14.3435461329  | 6.9408053684   |
| 0              | 0              |
| 2.5475127762   | 2.0437447541   |
| 2.3351829735   | 8.3752131916   |
| 5.8119252537   | 0              |
| 0.9102743769   | 2.1764866839   |
| 6.1901860002   | 17.2676876689  |
| 21.5154496973  | 20.3632216121  |
| 0              | 0              |
| 35.6426813752  | 9.4691621875   |
| 129.7057111177 | 561.3158923129 |
| 283.7091467743 | 431.272056542  |
| 117.8818770423 | 187.9054946956 |
| 19.629430846   | 68.6633099955  |
| 0              | 1.0634183279   |
| 0.7162979657   | 1.0602333761   |
| 30.7550792132  | 33.2618947997  |
| 0.4219978847   | 0.560559175    |
| 0.0133661014   | 0.005326       |
| 1.0727035948   | 2.2303118509   |
| 0.1530930285   | 0.2211545461   |
| 2.0080574842   | 5.6015294949   |
| 0              | 0              |
| 0              | 0.0253795105   |
| 4.3395039659   | 6.2255114519   |
| 0.6202733306   | 0.3295750231   |
| 10.3689508003  | 8.8688247903   |
| 0.8440555348   | 3.0945057597   |
| 6.479214827    | 3.563148414    |
| 0              | 3.6711594764   |
| 210.6078828158 | 221.7610748038 |
| 21.312265869   | 15.7013787828  |
| 0.0581812292   | 0              |
| 0              | 0              |
| 139.6870413056 | 148.3479816612 |
| 5.6567803074   | 4.8090631231   |
| 9.6860573382   | 15.3227542863  |
| 0.7105315662   | 0.0566299031   |
| 9.1077172308   | 10.1394431104  |
| 14.950355348   | 17.6811331557  |
| 0.1108395395   | 0.1435524205   |
| 1.9342736368   | 1.7214876309   |
| 0              | 0              |
| 3.9395872616   | 2.2876274662   |

gene\_expression\_table

|                 |                 |
|-----------------|-----------------|
| 16.0659644561   | 13.0490595631   |
| 1.9445931519    | 1.3608486841    |
| 0.1066788148    | 0.170047644     |
| 2.1998285587    | 4.3393679875    |
| 0.4305585638    | 0.8710944785    |
| 0.2123847395    | 0.3855645543    |
| 1.1674752815    | 0.790913633     |
| 0.6793013688    | 0.5414083274    |
| 0               | 0               |
| 13.6812953831   | 16.7136551438   |
| 4.292755831     | 6.3615891235    |
| 4.1663208021    | 0.7546793596    |
| 0.1135777287    | 0.1244681743    |
| 0.949789143     | 1.4231395619    |
| 0               | 0               |
| 2.1554749257    | 0.9203195432    |
| 6.1151798718    | 7.1131786008    |
| 1.6685753409    | 1.70982921      |
| 243.2062501713  | 265.7919460887  |
| 0.0387845472    | 0.065687102     |
| 2.7674746313    | 0.330854731     |
| 0               | 0               |
| 5.4293454478    | 5.7696391668    |
| 112.8246712256  | 99.0605425028   |
| 56.1222590102   | 66.5865032679   |
| 0.0310449933    | 0.0556719625    |
| 2.7016981326    | 3.1032475931    |
| 8.0792432573    | 5.1884346201    |
| 6.7248902148    | 7.1273781255    |
| 1163.2289368422 | 819.1905581361  |
| 0               | 0               |
| 5.990822751     | 3.1091271831    |
| 2.175519746     | 0.5201717062    |
| 4.2654572802    | 1.6998008525    |
| 2.6688311399    | 0.2127078598    |
| 23.0802554901   | 3.9418153164    |
| 0               | 8.8231012092    |
| 6.7165201663    | 6.4237408301    |
| 248.9888520802  | 138.2257500383  |
| 0               | 0               |
| 54.3962536707   | 22.5189423632   |
| 44.0417101321   | 63.0432576133   |
| 0               | 0               |
| 51.6950426781   | 19.0633065201   |
| 135.9042539731  | 147.1833050946  |
| 3.3630150721    | 2.2700910269    |
| 12.8657800706   | 15.907038511    |
| 3687.2661526044 | 2836.3237786461 |
| 288.64809921    | 142.8927695083  |



gene\_expression\_table

|                 |                 |
|-----------------|-----------------|
| 31.7351699958   | 30.5368765154   |
| 11.9836279418   | 11.5976939566   |
| 10.5181957838   | 6.6917580964    |
| 0               | 0               |
| 47.735325987    | 33.4703341133   |
| 0.8031448156    | 0.1506147037    |
| 0.87004937      | 1.2956302839    |
| 0.0382471551    | 0.3657992618    |
| 9.046582882     | 8.0685515043    |
| 0.2887365229    | 0.345187788     |
| 8.2697442266    | 1.3731351415    |
| 0.0739196163    | 0.0294572466    |
| 16.1330683564   | 9.2711322514    |
| 36.0963088877   | 17.6049294914   |
| 0.0657625927    | 0               |
| 5.6402820138    | 3.185353535     |
| 0.0234134318    | 0.00933         |
| 169.9232586424  | 412.3005784714  |
| 1.958072892     | 0.6981626661    |
| 1.6306970816    | 1.5027525769    |
| 0               | 0               |
| 0               | 0               |
| 0.8966075884    | 0.4083445872    |
| 57.5557130556   | 47.5106363074   |
| 16.6042881679   | 14.9667334042   |
| 6.1436567907    | 4.4204883273    |
| 176.1705303963  | 98.4688210365   |
| 2.1115569069    | 3.8707316884    |
| 45.2770636612   | 32.1457191061   |
| 7200.6944815233 | 4116.1280495806 |
| 0               | 0               |
| 0               | 0               |
| 5.0543924468    | 3.0212917486    |
| 0               | 0               |
| 0               | 0               |
| 0               | 0               |
| 1.6270005045    | 5.4462731583    |
| 2.8714562316    | 2.8908282046    |
| 2.1494095227    | 1.5703376719    |
| 1.7973037493    | 3.6323211483    |
| 0               | 0               |
| 0.6146398989    | 2.8167677198    |
| 1.28731051      | 5.6429791563    |
| 0.3772305298    | 0.7516389616    |
| 3.5831626643    | 3.3091105523    |
| 57.5918238803   | 61.0718279604   |
| 17.239782611    | 5.1126463616    |
| 13.9875997358   | 10.0192888046   |
| 0.1814213554    | 1.0302336182    |

gene\_expression\_table

|                 |                 |
|-----------------|-----------------|
| 23.0536866447   | 41.048214258    |
| 3.0465280737    | 4.5310190653    |
| 27.8996073326   | 17.1278822452   |
| 24.948824092    | 15.6234582805   |
| 1.8268643739    | 1.4444689678    |
| 0               | 0               |
| 0.0388434105    | 0.0464377379    |
| 0.1664359034    | 0.2874097925    |
| 37.0916673127   | 16.0647975466   |
| 25.4868985713   | 16.6898061256   |
| 0               | 3.415817667     |
| 384.4883177477  | 131.142231496   |
| 0               | 0               |
| 9.0156808056    | 0               |
| 13.5778824946   | 10.3764795241   |
| 11.8494455109   | 5.2467209277    |
| 20.9557497931   | 17.5657819545   |
| 0               | 1.6583981315    |
| 22.220178318    | 12.175384467    |
| 38.9038869974   | 44.0218468122   |
| 0.3433623516    | 0.1368311952    |
| 20.2977403958   | 7.0776355009    |
| 0               | 9.1909312068    |
| 0               | 0.353334069     |
| 3.4510977874    | 3.8362948597    |
| 97.5554900511   | 107.2490326018  |
| 173.8702946103  | 194.1739474808  |
| 21.7674410959   | 11.6066016812   |
| 0               | 0.6742862351    |
| 35.8647821774   | 16.851244855    |
| 16.4370219501   | 1.091702565     |
| 5.2057060013    | 3.9465974332    |
| 1.3688979544    | 0.419623854     |
| 19.1146134389   | 9.1167035406    |
| 0.3687388573    | 0.195925105     |
| 4.2292888226    | 1.9662855162    |
| 9.8220265836    | 8.39315323      |
| 0               | 0               |
| 1.7794162607    | 3.3818811269    |
| 0.6380998624    | 0               |
| 0               | 0               |
| 24.8124951529   | 14.6905543591   |
| 6.3757518235    | 4.8469906089    |
| 95.1841792698   | 185.3621721217  |
| 5.988293944     | 2.9166595046    |
| 133.6146407606  | 166.0697680499  |
| 0               | 0.3462032759    |
| 0.1648300113    | 0.3284269133    |
| 1771.6952696646 | 1381.4277728907 |

gene\_expression\_table

|               |               |
|---------------|---------------|
| 94.7602544839 | 57.8616188479 |
| 0             | 0             |
| 1.8959077352  | 0             |
| 8.7301432427  | 4.3013030179  |
| 0             | 1.5394941145  |
| 0             | 1.7453427753  |
| 39.8283673206 | 26.7228527307 |
| 0             | 0             |
| 0.7953713959  | 0             |
| 0.1223417876  | 0.3250244327  |
| 0             | 0.8679454866  |
| 1.2654036106  | 2.0170724916  |
| 5.7448332994  | 4.006341131   |
| 1.6882730414  | 1.5474013365  |
| 50.882460216  | 40.5537055318 |
| 2.2172857555  | 1.7495215777  |
| 9.7689951822  | 1.2006391584  |
| 0             | 0             |
| 0             | 0             |
| 0             | 0             |
| 0.0385005196  | 0.0306852052  |
| 0.640247565   | 1.2119201073  |
| 2.8140584072  | 3.0278148686  |
| 0             | 0             |
| 0             | 0             |
| 5.2099020022  | 4.3532505455  |
| 5.4931791954  | 5.556826027   |
| 0.5237819572  | 0.4800769074  |
| 46.6449570329 | 39.0992998392 |
| 0             | 0             |
| 0.673322633   | 1.3416080742  |
| 0             | 0.0740131636  |
| 2.8284330933  | 2.129044642   |
| 0             | 1.3333804801  |
| 0             | 0             |
| 0.286294982   | 0.3240145569  |
| 3.2359730953  | 2.5790950252  |
| 2.6870354348  | 0.7138625197  |
| 1.4506966843  | 2.0811892079  |
| 30.2123920775 | 52.0067658068 |
| 10.1484397963 | 7.8504896283  |
| 0.9953927963  | 2.3800067555  |
| 7.8078748614  | 22.6692643165 |
| 0             | 0             |
| 2.0347129005  | 1.4865414363  |
| 5.978290565   | 2.8588456705  |
| 13.5364498595 | 9.3690933007  |
| 7.3205220266  | 6.8271046353  |
| 4.5626329094  | 0.7575943601  |

gene\_expression\_table

|                |                |
|----------------|----------------|
| 0.3835972031   | 0.1528649357   |
| 0.5465152101   | 1.0889418872   |
| 5.6856811184   | 14.8533510956  |
| 0.2847000794   | 0.2949805508   |
| 0              | 0              |
| 0              | 0              |
| 5.1253289401   | 2.3209806361   |
| 0.0833379194   | 0.024907857    |
| 1.1850769106   | 0.9445152585   |
| 59.3044726077  | 86.4332573634  |
| 2.1599304851   | 3.2277767411   |
| 4.8240174655   | 8.2388108487   |
| 0.6779926291   | 0.4052739389   |
| 0              | 0              |
| 0.2054641073   | 0.6004403059   |
| 3.2505665788   | 1.9811435203   |
| 81.9043126431  | 56.946414358   |
| 9.1943483087   | 30.6442177897  |
| 1.1185127505   | 0.8914631196   |
| 0.4700726757   | 1.019884576    |
| 1.0857201951   | 1.0576221394   |
| 0              | 0.0758547103   |
| 5.4019679611   | 6.5275560524   |
| 253.5263613363 | 285.5351123386 |
| 86.4081038504  | 69.0681095489  |
| 101.762334789  | 71.4135159756  |
| 1.2738322216   | 1.7766943468   |
| 0              | 0              |
| 13.3458907725  | 17.7786110778  |
| 119.0400250694 | 84.4115574264  |
| 3.8090875293   | 5.69225918     |
| 9.1909711753   | 9.3600717235   |
| 8.5803437655   | 4.5305717447   |
| 2.4990797073   | 0.9958927115   |
| 24.8037130407  | 9.2853204868   |
| 2.7284235859   | 0.8698296914   |
| 3.2378786054   | 2.5806137312   |
| 1.1053209187   | 0.792854217    |
| 0.6999974952   | 0.0929838828   |
| 0              | 0              |
| 11.0899194418  | 8.4544561867   |
| 30.7829071238  | 32.5874236211  |
| 3.6868734847   | 1.4692330225   |
| 5.6450444997   | 4.4991431504   |
| 173.7301198946 | 218.9465465922 |
| 278.0766199426 | 163.1775198316 |
| 28.0651099326  | 18.477999639   |
| 11.0067112084  | 7.4565672498   |
| 19.1941134678  | 17.210085263   |

gene\_expression\_table

|                 |                |
|-----------------|----------------|
| 7.7986055205    | 3.1077737839   |
| 64.798815918    | 58.8851200263  |
| 6.5441575846    | 9.7795182704   |
| 2.2204989428    | 2.0647135219   |
| 1.7998316027    | 4.6620580385   |
| 2.3588858745    | 1.4771820473   |
| 0               | 0.0665527505   |
| 2.2854401488    | 0.3643026159   |
| 51.5569627348   | 33.957384775   |
| 2.1123966182    | 3.2619673997   |
| 0.9908131882    | 2.6651889096   |
| 75.1695267917   | 37.3127926992  |
| 284.9063268669  | 296.455759694  |
| 0               | 4.0293096826   |
| 51.8450512757   | 61.5417628073  |
| 1.6983002542    | 1.3535581441   |
| 38.6244959391   | 20.5226768776  |
| 26.007625776    | 10.594451358   |
| 292.0014348851  | 88.2758919581  |
| 0.3778313014    | 0.9034032123   |
| 7.1369695612    | 10.9024191852  |
| 208.2065946253  | 91.5248383268  |
| 5.6645806698    | 2.7589916601   |
| 347.3754543715  | 253.6169479579 |
| 14.2898784831   | 9.3011319814   |
| 2201.8807952002 | 691.5064950684 |
| 2.4261432203    | 1.9336544915   |
| 25.66333994     | 16.9699740286  |
| 26.09673979     | 10.9883088734  |
| 3.4461766683    | 3.2044003394   |
| 68.3573913492   | 20.6865305852  |
| 14.1330150246   | 8.4480898793   |
| 0.3647891304    | 0              |
| 0               | 0              |
| 48.8143342597   | 56.1221481047  |
| 0               | 5.98718488     |
| 12.2902936244   | 2.0407201979   |
| 0.9449840873    | 1.1297391944   |
| 0               | 0              |
| 59.2807475532   | 92.1081856574  |
| 62.9189281704   | 103.3198267179 |
| 19.873174047    | 8.7531702539   |
| 52.6679869997   | 108.5253436882 |
| 2.496715673     | 2.9848519049   |
| 0.0715792194    | 0              |
| 1.6841675573    | 1.4621419811   |
| 2.6328407303    | 0              |
| 2.9373213126    | 1.6721909259   |
| 3.4812907153    | 3.6994866978   |

gene\_expression\_table

|                |                |
|----------------|----------------|
| 24.1739360544  | 11.8009210164  |
| 17.0771890383  | 12.6384595907  |
| 0.8494136474   | 0.3384945498   |
| 89.4691713843  | 56.0953167988  |
| 0              | 0.4858279696   |
| 0              | 0              |
| 11.9525717417  | 4.4402199412   |
| 5.2615809735   | 22.7148990277  |
| 0.1896435611   | 1.058031465    |
| 4.4263138931   | 2.2449672265   |
| 0              | 3.8907797329   |
| 1.1735914794   | 0.8396993336   |
| 0.7275774108   | 0.4434412395   |
| 10.7638944481  | 7.5065421065   |
| 20.5212936136  | 17.8119490574  |
| 1.1264565741   | 2.9178318231   |
| 13.213897092   | 12.1717393565  |
| 3.4239978022   | 4.4345472248   |
| 167.8521036937 | 345.2226691073 |
| 0.1506343952   | 0              |
| 0              | 0.005417       |
| 1.1198200799   | 0.892505071    |
| 0.0970954312   | 0.3385628438   |
| 3.0295946158   | 4.3799898998   |
| 1.3546162998   | 2.198538483    |
| 2.9963624981   | 1.2367068475   |
| 2.3724409491   | 1.8120678179   |
| 0.3099875496   | 0.5455961797   |
| 0.1322488832   | 0              |
| 39.487440991   | 29.8352560173  |
| 12.7804000425  | 12.283208656   |
| 15.9092257736  | 14.5817392221  |
| 4.3484707448   | 6.3539007838   |
| 0.8415785312   | 0.5270134987   |
| 6.9189421464   | 12.6999436287  |
| 0.388026688    | 0.3324547197   |
| 0              | 0              |
| 7.2474512414   | 6.7389856798   |
| 5.0341590168   | 3.8828349691   |
| 0              | 0              |
| 3.9281381232   | 9.5227155163   |
| 31.341365101   | 15.3790497006  |
| 0              | 0              |
| 0.8532679317   | 1.5058493425   |
| 13.8457209486  | 16.9205545754  |
| 22.0548107551  | 45.5925508647  |
| 0.1329612554   | 0.24311023     |
| 0.0146538444   | 0.0116792248   |
| 0.3587096214   | 0.6738936614   |

gene\_expression\_table

|                |                 |
|----------------|-----------------|
| 3.3850218006   | 2.4384756655    |
| 0              | 0               |
| 1.4905212796   | 1.088960336     |
| 0.8161564201   | 1.4868179155    |
| 1.1518863345   | 1.4918509423    |
| 0.0626334094   | 0.0748789513    |
| 3.2062225661   | 0.7549997084    |
| 3.7205907291   | 4.200896837     |
| 0.2543663821   | 0.1723221404    |
| 0              | 0               |
| 0.0864330281   | 0               |
| 26.0310810518  | 17.943324046    |
| 4.5220199862   | 3.2662012351    |
| 0              | 0.0181686414    |
| 3.4066279613   | 2.4790118748    |
| 0.0371518335   | 0.00987         |
| 7.1846560641   | 7.0710205229    |
| 0              | 0               |
| 0.2096430555   | 0.375945976     |
| 1.1120104946   | 2.2939031758    |
| 2.3962130294   | 1.9659704884    |
| 79.2562885592  | 52.4518848008   |
| 90.2338651568  | 61.0458873929   |
| 2.4127151048   | 2.0948717479    |
| 5.1358513156   | 5.0107788897    |
| 8.9903450765   | 9.3149849066    |
| 23.4449100865  | 11.0847791777   |
| 146.7999382157 | 1307.5907179642 |
| 1.6120571421   | 1.2848217315    |
| 0.4594902224   | 0.2746628862    |
| 0              | 0               |
| 13.8158379031  | 15.5309019029   |
| 0              | 0               |
| 7.3305470457   | 14.7888317299   |
| 547.4444474199 | 509.9574254439  |
| 1.2483578365   | 2.4873765874    |
| 16.0142013248  | 20.0568335702   |
| 6.2023832299   | 8.609198669     |
| 1.9723644011   | 2.807123824     |
| 0.2852146323   | 0.795613765     |
| 0.0342997567   | 0.3963888993    |
| 0.6520875241   | 0.4677468186    |
| 0              | 0               |
| 1.6944336047   | 1.0610885961    |
| 1.7274725676   | 3.189606818     |
| 7.2152267502   | 6.2579953011    |
| 2.9140728703   | 3.3547772728    |
| 2.0707815865   | 2.6819464463    |
| 0              | 0               |

gene\_expression\_table

|               |               |
|---------------|---------------|
| 1.6319699896  | 1.6554267183  |
| 0             | 0             |
| 0.3897599285  | 0.4314466807  |
| 0             | 0             |
| 1.2745687522  | 2.1477779726  |
| 2.7475568282  | 6.5694707018  |
| 0             | 0             |
| 6.0842459256  | 7.8587067635  |
| 0.398377138   | 0.7454573012  |
| 0             | 0             |
| 19.0892216754 | 5.9770283632  |
| 0             | 0             |
| 2.1303473219  | 0.7640563157  |
| 0             | 0             |
| 0.0934606542  | 0.1489776961  |
| 3.764532401   | 1.9645219448  |
| 0.3866740733  | 0.7704554005  |
| 0.7615221426  | 6.2717020261  |
| 1.1387742146  | 1.399234642   |
| 1.6270703559  | 1.9760569546  |
| 41.4014204837 | 37.22250218   |
| 0             | 0.477732216   |
| 23.4598795017 | 17.8126030622 |
| 21.3776416761 | 18.3657894927 |
| 0             | 0             |
| 0.0604011284  | 0.024070078   |
| 3.1647453388  | 7.3668895364  |
| 2.6575489183  | 4.6774412031  |
| 0             | 0             |
| 0             | 0             |
| 1.4609738417  | 2.3512068436  |
| 0             | 0.0510611937  |
| 0             | 0             |
| 0.140530612   | 0.2613425741  |
| 9.0367439955  | 5.8042494195  |
| 0.9667416146  | 1.0112817444  |
| 0.4933824406  | 0.8988103676  |
| 13.5515305498 | 12.8933025771 |
| 33.9159670501 | 76.2282157733 |
| 0             | 0             |
| 2.3425558152  | 1.2187587609  |
| 3.0527985015  | 1.6104827855  |
| 2.9928987242  | 0.561261862   |
| 0.2290199623  | 0.6084354722  |
| 0.7975231492  | 0.675358979   |
| 0             | 0             |
| 8.4893979431  | 20.7212252027 |
| 12.3717229822 | 9.3546974425  |
| 58.6167010862 | 58.2567257544 |



gene\_expression\_table

|               |               |
|---------------|---------------|
| 1.0278106081  | 1.0103131524  |
| 39.89480491   | 29.2527442778 |
| 0             | 0.006851      |
| 0.5415750369  | 0.4586168619  |
| 3.0987722812  | 4.5072845136  |
| 0             | 0             |
| 88.4114077817 | 66.5498627047 |
| 0             | 0             |
| 15.7567225612 | 2.71143538    |
| 0.4097752691  | 0.069984426   |
| 0.1256997184  | 0             |
| 2.1387630613  | 1.875071365   |
| 0             | 0             |
| 1.3215493559  | 1.184945433   |
| 0             | 0             |
| 0             | 0.7322192507  |
| 43.2096916117 | 65.4330567817 |
| 47.3262310939 | 28.2175395046 |
| 0.1961441764  | 0             |
| 0             | 0             |
| 26.3210227458 | 18.8802487356 |
| 75.7790137451 | 88.6190857055 |
| 9.3427984277  | 1.8615702477  |
| 0             | 0.6798333619  |
| 0.1261051105  | 0.8291804947  |
| 2.3524921885  | 4.8528222787  |
| 0.1098340864  | 0.1677823117  |
| 0.0152675736  | 0.0121683716  |
| 4.3077459452  | 4.0600206945  |
| 3.9156484421  | 2.4313220333  |
| 27.7279864924 | 28.2259853612 |
| 0.6659640897  | 0.6634730189  |
| 0             | 0             |
| 1.2429126534  | 1.2382634785  |
| 9.8302654931  | 5.1928298592  |
| 4.4093731877  | 6.6771771656  |
| 0.3083702016  | 0.3686600736  |
| 8.3222449959  | 3.6954685053  |
| 5.0594387652  | 2.8002853833  |
| 2.151161372   | 0.8572459396  |
| 0             | 1.6160474837  |
| 0             | 0.0968429611  |
| 4.6017408177  | 4.3432368478  |
| 19.9898415452 | 9.0523038986  |
| 0.0158460065  | 0.006315      |
| 62.9170632759 | 91.129576027  |
| 10.9317755354 | 10.4552493128 |
| 0             | 0             |
| 0             | 1.0602693447  |

gene\_expression\_table

|                |                |
|----------------|----------------|
| 1.8224343558   | 3.9943583945   |
| 3.3504799185   | 2.6703578292   |
| 0              | 0              |
| 0              | 0              |
| 2.7057522792   | 0.3850901831   |
| 0.6329543585   | 0.5044694097   |
| 0.2989399202   | 0.4765147536   |
| 33.5056672136  | 4.9048659399   |
| 3.2717407851   | 2.3178685729   |
| 0              | 1.8845011243   |
| 42.3582178757  | 22.9566775537  |
| 9.6066847049   | 7.6566003493   |
| 236.0939554208 | 123.6912920265 |
| 37.3610205263  | 16.0337777702  |
| 8.2865007384   | 10.1458956091  |
| 0              | 0              |
| 13.3286382865  | 5.455067147    |
| 66.6184711995  | 19.9107844766  |
| 7.5022852738   | 8.8961478908   |
| 8.6152073199   | 5.4168151303   |
| 0              | 0.514132807    |
| 0              | 0              |
| 17.4934497917  | 8.7400193109   |
| 0.4164406485   | 0.3493751007   |
| 0              | 0              |
| 0.9464503307   | 0.4642018892   |
| 1.1197064515   | 1.2084779801   |
| 0.4744668655   | 0.9453841984   |
| 0.2487562496   | 0.2433198418   |
| 0              | 0              |
| 2.1219406854   | 1.5972470615   |
| 105.0652420301 | 153.9694891268 |
| 0              | 0              |
| 2.5688512768   | 2.7025599369   |
| 2.2907213937   | 0.6846458519   |
| 2.4047818353   | 2.1377788414   |
| 0.5966493512   | 0.6340453925   |
| 4.8001646938   | 3.7062123205   |
| 0              | 0              |
| 2.5903465787   | 3.0537777603   |
| 12.0751569515  | 8.8219921118   |
| 0.6509738001   | 0.8584781656   |
| 11.6566724249  | 17.1721134601  |
| 27.9014956713  | 20.787418043   |
| 0.6581301705   | 1.0228427083   |
| 1.1125207316   | 0.6939292971   |
| 0.4629203816   | 0.7379020889   |
| 4.8464563326   | 6.739951639    |
| 3.564339523    | 4.3815814431   |

gene\_expression\_table

|               |               |
|---------------|---------------|
| 0             | 0             |
| 9.828350071   | 12.2964111451 |
| 4.5470052497  | 5.519306637   |
| 52.0689205885 | 48.7771898405 |
| 0.140184466   | 0.3631162579  |
| 0.006834      | 0.006809      |
| 0.3491277801  | 0.8463665035  |
| 9.1376495809  | 5.38292125    |
| 6.6282376397  | 42.6393838172 |
| 5.0891117008  | 8.1121210121  |
| 0             | 1.1364529335  |
| 0.7918813549  | 0             |
| 0             | 0             |
| 1.5364208492  | 0.6122695171  |
| 5.6753250661  | 2.4672419949  |
| 1.6915759338  | 1.4830186908  |
| 5.0309088508  | 5.8322507556  |
| 1.0536382427  | 2.0746953615  |
| 1.5967483905  | 0.741114315   |
| 0             | 0             |
| 0             | 0.1150460772  |
| 0             | 0             |
| 0             | 0             |
| 4.6959803855  | 1.4596654313  |
| 0             | 0             |
| 7.093701329   | 4.3045471705  |
| 0             | 0             |
| 0             | 0             |
| 20.6960278826 | 14.7502388099 |
| 95.2657694282 | 107.863276923 |
| 48.6115714814 | 62.0557315038 |
| 1.757363666   | 0.4668773766  |
| 2.9326006176  | 4.2071487599  |
| 7.1243624519  | 5.0936531673  |
| 0             | 0             |
| 0             | 0.0123796288  |
| 5.3456019971  | 4.0193256713  |
| 55.9553681058 | 43.1192449531 |
| 2.1933324872  | 2.2336866259  |
| 0.2411636822  | 0.3603923966  |
| 0             | 0             |
| 0.3165578394  | 0.0420498319  |
| 0.2676374893  | 0.2310848613  |
| 0             | 1.4145604403  |
| 6.2380622545  | 8.0071870116  |
| 57.8754351849 | 78.9634424625 |
| 1.981821671   | 0.9477161142  |
| 0             | 0.0852044726  |
| 0             | 0.007928      |

gene\_expression\_table

|                |               |
|----------------|---------------|
| 21.9630209437  | 22.9648734676 |
| 53.9989144082  | 62.8393913699 |
| 1.0955977194   | 0.582133111   |
| 0              | 0             |
| 85.7082038084  | 37.049538443  |
| 11.4176979071  | 7.6478652515  |
| 0              | 0             |
| 0              | 0             |
| 0              | 0             |
| 9.7232465711   | 9.0410845442  |
| 0              | 13.6857116185 |
| 109.0230397197 | 85.4677249347 |
| 4.1763782716   | 3.9824381986  |
| 0.5569991676   | 0             |
| 19.7377276803  | 38.4024356178 |
| 0              | 0.1031543156  |
| 3.262294014    | 1.8871497555  |
| 0.9804808178   | 0.9209953801  |
| 11.9972647045  | 6.1600770759  |
| 48.1746370575  | 20.361276515  |
| 2.6853267769   | 8.5609029834  |
| 5.3320011229   | 4.0725766615  |
| 2.4553180767   | 2.3022436149  |
| 0              | 0.4971226232  |
| 0.0308904803   | 0             |
| 0.4547059274   | 0.0604006771  |
| 10.7316441239  | 3.8489406806  |
| 7.3173033451   | 7.0326408789  |
| 0.9625603778   | 0.3835839497  |
| 7.423522289    | 4.4374525471  |
| 0.2087817473   | 0.4992018937  |
| 10.3481006328  | 9.0111731952  |
| 20.6299212962  | 11.9891065459 |
| 0.1311722062   | 0.1306815502  |
| 3.2014394426   | 3.7292198012  |
| 54.2922911055  | 63.7651665169 |
| 3.3160148326   | 1.3214444476  |
| 1.0923009983   | 0.6529291161  |
| 0.3239100503   | 5.4213339444  |
| 1.0968972933   | 1.3720639493  |
| 2.4341142944   | 3.8800149956  |
| 8.2743352283   | 6.1367419266  |
| 9.4750691171   | 6.8071677572  |
| 10.4893117299  | 9.1200662858  |
| 25.4687046532  | 20.1125231202 |
| 0              | 0.9059321188  |
| 5.0348221875   | 7.1295225018  |
| 0              | 0             |
| 5.8576572826   | 4.0319702625  |

gene\_expression\_table

|               |                |
|---------------|----------------|
| 6.0432470302  | 2.7875098267   |
| 0             | 0              |
| 28.0804543758 | 35.9785123653  |
| 0.5610228058  | 0.1117848546   |
| 33.0996663331 | 23.3861201764  |
| 4.4275355312  | 2.2246652086   |
| 13.3473236186 | 8.1754368644   |
| 2.8592877815  | 2.1955005435   |
| 0             | 0              |
| 71.6290355369 | 125.2250136484 |
| 0             | 0              |
| 2.6957146893  | 0.6445514972   |
| 1.3781445192  | 1.5789379285   |
| 0.6047638325  | 1.2210700798   |
| 0.2153388145  | 0.3289511048   |
| 16.3134095071 | 6.3423954773   |
| 52.321255211  | 86.8301842169  |
| 26.4551758983 | 41.9710355945  |
| 1.2194469793  | 0.3239694877   |
| 6.9499513594  | 7.5907059268   |
| 5.7380806786  | 6.4026111638   |
| 26.371018397  | 18.1518236451  |
| 5.2030510482  | 2.6658456605   |
| 15.2516343134 | 7.5200318183   |
| 0             | 0.1479540982   |
| 1.5028273628  | 1.5171687106   |
| 0.006215      | 0.0148597522   |
| 0.9787688211  | 0.8987949134   |
| 6.1224916585  | 2.7883840835   |
| 16.3213709586 | 14.4949139015  |
| 0.3632640765  | 1.4476210787   |
| 0             | 0              |
| 0.0125437832  | 0.0149962351   |
| 336.174493649 | 171.3987085518 |
| 6.9642873829  | 9.1188259415   |
| 43.7546095698 | 32.3818436228  |
| 22.2634591723 | 32.2133644575  |
| 75.8179808328 | 78.0909282582  |
| 9.541614038   | 7.1208006289   |
| 16.9687043504 | 34.4678898761  |
| 21.0449753854 | 9.584574006    |
| 4.4363324817  | 27.9916750493  |
| 23.6182600075 | 13.3859070661  |
| 6.1345461522  | 8.8618193995   |
| 6.1764356899  | 10.5375817927  |
| 14.509536833  | 26.2418624416  |
| 4.463265481   | 3.5572563366   |
| 1.3022687123  | 0.8303344084   |
| 1.2198626414  | 1.2152996863   |

gene\_expression\_table

|                 |                 |
|-----------------|-----------------|
| 14.4888224485   | 5.0099948119    |
| 15.2041045806   | 17.3276625957   |
| 35.4784136166   | 20.8707971767   |
| 0.3900167063    | 0.77711566      |
| 0.0396768767    | 0.6324554149    |
| 0               | 0               |
| 0.0864255987    | 0               |
| 0               | 0.007637        |
| 22.4049021179   | 35.0269498597   |
| 7.5531914146    | 7.0822949055    |
| 19.0937896408   | 16.775631973    |
| 0.1733998345    | 0.3109522033    |
| 8.097986495     | 5.0351575284    |
| 7.3323055249    | 7.2279852219    |
| 0               | 0.0849748793    |
| 3.5562897045    | 3.5201292489    |
| 8.2276667408    | 4.5398164186    |
| 0               | 0               |
| 168.1625392568  | 108.1619913125  |
| 2.5186149461    | 2.0519630485    |
| 22.5832286013   | 17.2885169565   |
| 11.6282151253   | 10.1103004143   |
| 4.4333517641    | 3.9456466138    |
| 2.8437339322    | 3.0639417331    |
| 31.5038275909   | 23.2066078313   |
| 0.237177472     | 0.1890322386    |
| 5.7543454623    | 2.3830550268    |
| 0.4295910183    | 0.8500649956    |
| 5.6260923119    | 6.7260571701    |
| 2.4830760644    | 2.4587953439    |
| 125.0250046125  | 64.0357497704   |
| 22.0681317018   | 18.6080891546   |
| 0               | 0.003162        |
| 0.0286423491    | 0.0456563376    |
| 1.5523249851    | 4.0209479399    |
| 0               | 0               |
| 0               | 0               |
| 1.8358833981    | 5.0602781188    |
| 6.5013392184    | 6.2611199568    |
| 2.3135983083    | 1.119544317     |
| 0               | 0.0782747195    |
| 6.9245529135    | 7.1745973402    |
| 13.6588754934   | 11.6926142363   |
| 84.6387551414   | 43.2151068912   |
| 0               | 0               |
| 1.8273763368    | 4.2883853426    |
| 6.6131483089    | 3.5840958604    |
| 8.3848729023    | 5.7073663156    |
| 3717.0094425832 | 3847.0241862739 |

gene\_expression\_table

|                 |                 |
|-----------------|-----------------|
| 2.3731153969    | 3.727152686     |
| 169.0514641731  | 120.63508989    |
| 8.8117537963    | 9.2079784412    |
| 11.1926315036   | 9.4781501859    |
| 0.9481667092    | 1.8892400916    |
| 24.5234894851   | 21.7130362239   |
| 0               | 0.008936        |
| 14.3092556485   | 14.0323694995   |
| 0.0371833029    | 0.0148176868    |
| 0               | 0               |
| 0.0158344916    | 0.0378606285    |
| 0.5260147311    | 0.6550589345    |
| 0.009377        | 0.0112108421    |
| 42.1632605297   | 25.8056717799   |
| 0               | 0               |
| 37.8924278528   | 23.4010121398   |
| 4.3650579141    | 3.9633996796    |
| 0.3867135295    | 0.7044882448    |
| 0               | 0.1967382338    |
| 0               | 0.0892967363    |
| 412.558117364   | 78.9148653676   |
| 0               | 0.0772088485    |
| 0.5507662166    | 2.7435302449    |
| 3.0464456571    | 3.9455653639    |
| 0.5175938728    | 4.7440516487    |
| 0.4343007327    | 1.7307048392    |
| 0.9879554235    | 0.2249736979    |
| 31.7231470342   | 89.3991410339   |
| 0               | 0.1742956649    |
| 18.6477383549   | 14.2795497072   |
| 1.5209541348    | 1.9437191546    |
| 1.4522104102    | 2.2156376971    |
| 0               | 0               |
| 0               | 0               |
| 0               | 0               |
| 0.6904228035    | 0.730533776     |
| 16.5760752235   | 17.8272387534   |
| 3.0843390851    | 2.8094189401    |
| 0               | 0               |
| 0.0172294773    | 0               |
| 8.3247822937    | 6.2743212588    |
| 0               | 0.2786560313    |
| 0               | 0               |
| 2108.1869584997 | 3189.5482904935 |
| 1.605647581     | 1.0054889923    |
| 1.7631080881    | 2.2620461347    |
| 0.7122716905    | 1.7598263614    |
| 25.4050705436   | 22.3141591686   |
| 55.1021615592   | 42.6500075029   |

gene\_expression\_table

|                |                |
|----------------|----------------|
| 0.0648488615   | 0.0775275494   |
| 0.1512331911   | 0.0602669984   |
| 0              | 0              |
| 4.0630633466   | 7.1512286293   |
| 0              | 0              |
| 0              | 0              |
| 0.1628544005   | 0.0648980943   |
| 0.9475965088   | 0.9314646185   |
| 1.5435642762   | 0.820154933    |
| 0              | 0.0219151437   |
| 5.1224109879   | 2.6439697114   |
| 280.2186946359 | 185.4606515817 |
| 13.8665717575  | 8.2888219055   |
| 0              | 0              |
| 2.4665910872   | 1.9658917472   |
| 1.8112637167   | 1.5092086449   |
| 4.6930033221   | 3.9561490831   |
| 0.9476560498   | 0.2265867112   |
| 69.6089816924  | 91.584190692   |
| 0              | 0.0726868075   |
| 0              | 0              |
| 0              | 0              |
| 0.2244659305   | 0.1341757829   |
| 5.2153886452   | 4.9286635343   |
| 21.828176914   | 18.7675511849  |
| 0              | 0.0199552541   |
| 0              | 0              |
| 0.8449776676   | 1.4310888793   |
| 10.0078757481  | 12.3956831633  |
| 4.92969947     | 3.4378817837   |
| 6.667632256    | 7.3623165847   |
| 0              | 0              |
| 3.8265710037   | 5.0439099627   |
| 0              | 0              |
| 0              | 0              |
| 0.6027826984   | 3.5431149675   |
| 11.6609918049  | 5.9746491265   |
| 0.1207059199   | 0.2164579444   |
| 0              | 0              |
| 0              | 0              |
| 0.6641939115   | 1.3234189242   |
| 10.6559295719  | 13.9778262273  |
| 0              | 0.3546072242   |
| 16.0411407778  | 3.6528315693   |
| 0              | 0              |
| 0.47760373     | 0.6253597883   |
| 0              | 0.6070264776   |
| 6.2093943897   | 9.7698788803   |
| 1.2340963741   | 2.080658761    |



gene\_expression\_table

|                 |                 |
|-----------------|-----------------|
| 1.0847027153    | 2.043402083     |
| 3.4232692034    | 0               |
| 0.9694333847    | 1.2980448395    |
| 15.3238438542   | 21.4952661803   |
| 0               | 0.3275320171    |
| 556.9944425606  | 666.2062403611  |
| 0.9504287201    | 2.3987464422    |
| 51.5274398082   | 30.8008193578   |
| 0.6215069634    | 0.7880500557    |
| 44.7796888797   | 33.9020126674   |
| 0               | 0               |
| 0.0419692396    | 0.050174702     |
| 1443.5558412406 | 3323.6583607036 |
| 0.2419554293    | 0               |
| 15.1645386097   | 16.0520533527   |
| 5.2932789826    | 2.9004135692    |
| 1.1996775315    | 0.7702336069    |
| 0.3555682733    | 0.3814873493    |
| 0.2263690253    | 0.3962748653    |
| 249.5456405684  | 478.666030362   |
| 0               | 0               |
| 0.4089623174    | 5.2151369482    |
| 87.148037221    | 169.5097279446  |
| 0.2512580852    | 0.4338849531    |
| 2.1338781654    | 3.2242760414    |
| 2.250661811     | 2.4104113344    |
| 290.1789547023  | 340.767248392   |
| 200.0841195607  | 124.5403590496  |
| 118.5125407443  | 107.5051490661  |
| 0               | 0.015106513     |
| 0.6903920097    | 0.2367344549    |
| 4.2695439115    | 2.6736747564    |
| 3.5093165879    | 3.740923107     |
| 18.7660101266   | 20.4669974287   |
| 0.5821539688    | 0               |
| 2.8011043309    | 1.9667273638    |
| 18.3853375219   | 20.6477656229   |
| 6.0863381894    | 3.5572955424    |
| 0.0785404069    | 0               |
| 0               | 2.6849207414    |
| 21.0751032526   | 9.5742994896    |
| 19.8363799604   | 14.2482885397   |
| 0.3956735711    | 0.157677414     |
| 0.0802975572    | 0               |
| 0               | 0.0230996546    |
| 0.014586515     | 0.0116255628    |
| 0               | 0               |
| 0               | 0.0152127018    |
| 36.3428108836   | 88.2076804741   |

gene\_expression\_table

|                |                |
|----------------|----------------|
| 6.5042431219   | 8.7478834764   |
| 0              | 0.0823937558   |
| 1.8861796076   | 2.3150810904   |
| 71.3621322309  | 69.1671933376  |
| 0              | 0              |
| 8.0293282301   | 3.8396611871   |
| 0              | 0              |
| 0              | 0              |
| 12.7440052783  | 14.4523463214  |
| 14.623576778   | 13.0262896502  |
| 125.0356382631 | 73.9652416229  |
| 0              | 0.0123862439   |
| 8.9240775501   | 8.9618221797   |
| 0              | 0.008976       |
| 0.0162721491   | 0              |
| 0              | 0              |
| 6.9282554273   | 18.6363178734  |
| 4.2745846295   | 4.8355663205   |
| 24.0049163787  | 12.11699658    |
| 0.1542222644   | 1.9052028187   |
| 0              | 0              |
| 18.6024056608  | 17.7122852857  |
| 0.7196749899   | 1.32641857     |
| 3.0055640818   | 5.460830623    |
| 0.4372325386   | 0.6969552787   |
| 25.9784716364  | 28.9487109932  |
| 0.9139905666   | 0.7739859796   |
| 12.1445196494  | 10.987283988   |
| 0              | 0.7549215495   |
| 17.2996180529  | 8.8328903478   |
| 6.751485808    | 7.6351817584   |
| 4.5718160131   | 1.932303297    |
| 0.1622948667   | 1.0994770051   |
| 0              | 0              |
| 8.8326083178   | 6.6220489266   |
| 0              | 0.0209252324   |
| 13.6508720544  | 9.1930500685   |
| 22.1926533223  | 13.8974883961  |
| 31.5023802987  | 19.8431311229  |
| 20.5881952638  | 26.7199749946  |
| 374.381425651  | 347.6002864567 |
| 0.1583958744   | 0.0473410161   |
| 20.6954928907  | 34.8740102757  |
| 4.0629280315   | 3.6118210195   |
| 2.5309322894   | 3.0257582579   |
| 1.7410615912   | 0.3469098132   |
| 35.4141856169  | 44.9515211023  |
| 0              | 0              |
| 17.8434850824  | 8.741880487    |

gene\_expression\_table

|                |                |
|----------------|----------------|
| 0.8444200938   | 1.4390941399   |
| 2.5697563716   | 2.5857455144   |
| 0              | 0              |
| 0.0391122061   | 0.007793       |
| 0.1228089352   | 0              |
| 1.2488008308   | 0.6635358032   |
| 6.516003006    | 2.8257681709   |
| 0.3151921846   | 0.2826118737   |
| 12.0414738789  | 5.9350769653   |
| 0              | 0              |
| 85.8563644736  | 90.618582842   |
| 12.8069220131  | 7.0114972488   |
| 0.2991660992   | 0.5484065792   |
| 0.0764261986   | 0.083754355    |
| 0.3455909987   | 0.0516447448   |
| 0.6644801804   | 0.4067909216   |
| 28.8452519763  | 25.3846635104  |
| 2.6483579267   | 4.6115545635   |
| 11.7326721838  | 23.6697907519  |
| 4.6617321692   | 2.82816754     |
| 0              | 0              |
| 3.3049920459   | 2.218192548    |
| 1.2883001688   | 0.8947697646   |
| 0              | 0.1471437481   |
| 4.1552520558   | 3.7633719407   |
| 0              | 9.8759360561   |
| 0              | 0              |
| 51.3581855332  | 17.8720947663  |
| 0.5842803821   | 4.191082942    |
| 121.9053542516 | 147.168049676  |
| 0              | 0              |
| 0              | 0              |
| 5.3168963039   | 0.5297008196   |
| 2.2237729802   | 0.59078796     |
| 8.2184043464   | 5.240104325    |
| 11.2547392123  | 10.5758730886  |
| 2.1979786025   | 0.8258511953   |
| 52.3721978835  | 103.772857658  |
| 8.570157056    | 11.5264349587  |
| 99.2680066028  | 32.3155380843  |
| 169.1150965194 | 274.2520911406 |
| 17.5080633886  | 15.1168971473  |
| 12.3434610351  | 3.9351327112   |
| 94.6906797277  | 34.6331203974  |
| 3.1778943367   | 3.6409083598   |
| 5.0354079644   | 0.2508286389   |
| 7.1936237553   | 4.2426956696   |
| 44.2487005706  | 27.7401512959  |
| 0.6591348082   | 3.6773479827   |

gene\_expression\_table

|                 |                 |
|-----------------|-----------------|
| 8.9042533431    | 1.8196813442    |
| 1.5103522494    | 3.3103459484    |
| 1027.0215385028 | 690.7508486098  |
| 2.7577154934    | 0.6593760301    |
| 30.6065945957   | 10.3334369896   |
| 309.2442030568  | 213.7113014861  |
| 779.2036298016  | 639.032088683   |
| 13.7441250319   | 12.9458391334   |
| 192.1055713506  | 117.7766099555  |
| 0               | 0               |
| 50.3548984094   | 18.2423794468   |
| 1.2973717018    | 1.1078732745    |
| 30.6499816189   | 12.2141335526   |
| 8.2222447222    | 12.2872335278   |
| 31.3351576689   | 21.5797847205   |
| 40.505402062    | 21.8252022886   |
| 1.2311074833    | 0               |
| 0               | 11.7649573823   |
| 52.2866776781   | 4.5296605942    |
| 220.9083092963  | 75.7491504218   |
| 5.0580247806    | 1.727693141     |
| 18.2811467071   | 16.4782161283   |
| 32.9770350573   | 31.2892217753   |
| 154.5775380945  | 90.9867620855   |
| 8.9607759657    | 6.9632610451    |
| 24.9009846991   | 16.0162905639   |
| 0               | 0               |
| 67.5714428017   | 39.8526636244   |
| 8.1653516264    | 4.067404367     |
| 91.6670586949   | 34.7477343576   |
| 130.0392761261  | 74.9479343396   |
| 15.6101834926   | 8.942280887     |
| 83.1407391586   | 27.710315429    |
| 17.2505918682   | 78.5648694661   |
| 0.0410771526    | 0.0654776025    |
| 1.8257435752    | 3.2336254099    |
| 1.8585269296    | 1.1109450119    |
| 6161.7416108406 | 6799.6224799773 |
| 2.9827270019    | 0.792418658     |
| 3.4214386672    | 6.4082443477    |
| 113.420240704   | 63.2777526151   |
| 3.6077890962    | 4.8661210898    |
| 4.7993463909    | 4.9180054668    |
| 0               | 0               |
| 203.7231044119  | 48.3984085935   |
| 0               | 0               |
| 29.4487091307   | 18.2161773156   |
| 9.654652239     | 0               |
| 9.9427316532    | 5.5084468482    |

gene\_expression\_table

|                 |                 |
|-----------------|-----------------|
| 0.692838501     | 1.3915377606    |
| 0               | 1.0067357645    |
| 1.3779808785    | 0.8542031396    |
| 0               | 0               |
| 3.4716615497    | 2.9241530343    |
| 1.8451550638    | 4.9837086       |
| 19.1892824123   | 11.5055803735   |
| 0.1372400478    | 0.3646045193    |
| 0               | 0.005764        |
| 11.8051685378   | 9.4088085875    |
| 1.7078965014    | 2.3334967296    |
| 9.9654982819    | 7.4245832995    |
| 2.5783371       | 3.4523229962    |
| 0.5410324135    | 0.4508072392    |
| 0.1820558172    | 0.0870599177    |
| 0               | 0.0851296276    |
| 0.3496785027    | 0.3832075647    |
| 0               | 0               |
| 0               | 0               |
| 0.5222761949    | 0.718991223     |
| 2.7293229209    | 4.1466484788    |
| 0.9039998479    | 1.0086925999    |
| 2.2327085172    | 0.2965809284    |
| 33.3565947025   | 28.3981030757   |
| 4.5718927281    | 5.0476048319    |
| 0               | 0.0247707375    |
| 0.7118933041    | 1.2457786732    |
| 76.3873058065   | 79.4838676378   |
| 0.0153098773    | 0.018303132     |
| 0               | 0.1166926355    |
| 0               | 0               |
| 0               | 0.1232710581    |
| 5.9109981579    | 8.4036020263    |
| 10.1929637686   | 14.933583081    |
| 0.04470778      | 0.0772036172    |
| 0.1220497248    | 0.2492660435    |
| 0.4691798156    | 0.6506553575    |
| 0               | 0.0128555196    |
| 0               | 0               |
| 0               | 0.0921900108    |
| 311.0118814787  | 371.8182318082  |
| 2.5436362422    | 4.3361637087    |
| 60.8007954855   | 92.9764696109   |
| 0.6866385658    | 1.3290505987    |
| 3289.3438971444 | 5390.4753824891 |
| 0               | 0.2425900785    |
| 0               | 0.0140161729    |
| 0.1252895639    | 0.2795988433    |
| 1.0839384241    | 0.9552819116    |

gene\_expression\_table

|                |                |
|----------------|----------------|
| 3.5075957835   | 3.3946332962   |
| 84.5482317675  | 99.171230968   |
| 3.7782652898   | 3.1441577402   |
| 24.7571149895  | 30.1112557197  |
| 2.195676644    | 4.3749272188   |
| 1.4847471675   | 1.8826097806   |
| 2.872491082    | 2.6073689334   |
| 0.118199385    | 0.9891609381   |
| 1.1209175796   | 0.2233449466   |
| 0.1719630549   | 0.1507614405   |
| 0              | 0              |
| 3.3489674342   | 6.6728809193   |
| 3.5066879384   | 6.1402157018   |
| 1.1891767144   | 0.5528733193   |
| 9.9007120561   | 17.8706636058  |
| 13.2466012942  | 8.8455914378   |
| 0              | 0.4512171557   |
| 2.3417955066   | 2.6805093403   |
| 71.3157416424  | 34.1416583033  |
| 11.5066618238  | 7.9641995742   |
| 19.8431505552  | 19.1264361872  |
| 0.840889066    | 0              |
| 100.2109071182 | 34.45770416    |
| 34.3908024261  | 71.9505401323  |
| 3.2250725704   | 3.6819346729   |
| 2.1722967538   | 0.4328342346   |
| 27.8678563219  | 6.1934218654   |
| 15.4072314508  | 17.414324907   |
| 1.8804483085   | 1.8954545702   |
| 8.364130404    | 4.7913852828   |
| 12.8283077656  | 30.6727748652  |
| 0.1746613597   | 0.0696032122   |
| 10.8981779708  | 13.0288953713  |
| 6.8418795394   | 2.9991663497   |
| 7.0979286092   | 2.6999808682   |
| 0.1164751102   | 0.5569892611   |
| 0              | 7.0189335334   |
| 177.1441993686 | 191.1166410273 |
| 44.3734955177  | 62.6942930263  |
| 0              | 1.4318552744   |
| 115.6039663748 | 84.0074792639  |
| 12.2862070762  | 13.2894142042  |
| 18.1061985034  | 13.2763149452  |
| 0              | 0              |
| 0              | 0              |
| 0.0816004346   | 0.2113675309   |
| 0              | 0              |
| 1.5528387164   | 7.1163391416   |
| 143.0862886042 | 77.372850757   |

gene\_expression\_table

|                |                |
|----------------|----------------|
| 63.7872670343  | 69.4496153926  |
| 4.4361327549   | 4.5458117341   |
| 467.1581334696 | 424.8154108449 |
| 1.1509798009   | 6.1920423286   |
| 0.318126988    | 0.3803244223   |
| 0.7619205935   | 0.9867917705   |
| 0              | 0              |
| 8.8754621466   | 7.6632946446   |
| 0.3816730285   | 0.3041962897   |
| 0              | 0              |
| 54.6108122457  | 0              |
| 16.5940351551  | 16.5319643648  |
| 0              | 4.1737586904   |
| 10.4392183769  | 11.6001895887  |
| 16.5111231189  | 22.7300281335  |
| 3.975124284    | 1.3578017621   |
| 0              | 0              |
| 3.2224677926   | 6.0750911003   |
| 0              | 1.8790302635   |
| 114.7172628935 | 116.9772905441 |
| 0.7091605816   | 0.635857139    |
| 1.3666332218   | 1.4736465447   |
| 16.4528984901  | 10.9617190764  |
| 189.5051580305 | 122.601873609  |
| 2.2480648659   | 2.8667595144   |
| 1.0255274468   | 0.7802007145   |
| 2.4172091103   | 1.8462616908   |
| 0.3472656596   | 0.5397080451   |
| 0.7393701054   | 1.5792799532   |
| 28.8662414433  | 35.2520678434  |
| 3.6081651013   | 5.4433552864   |
| 9.5095307985   | 10.1055572683  |
| 4.0194345706   | 6.2805847633   |
| 421.2621469137 | 358.9728695075 |
| 0.0489018071   | 0.07795022     |
| 5.1645446744   | 3.8074675696   |
| 37.9455294636  | 39.1071645279  |
| 9.6477474278   | 5.5580466165   |
| 2.1000899571   | 1.3390300602   |
| 0.137720293    | 0.2012342106   |
| 28.143584734   | 26.1690914756  |
| 0              | 0              |
| 0              | 0              |
| 0              | 0              |
| 0              | 1.0379256924   |
| 0.2073398917   | 0.0708220549   |
| 0              | 10.8501579882  |
| 0              | 0              |
| 0              | 1.8608056942   |

| gene_expression_table |               |
|-----------------------|---------------|
| 0                     | 1.7019210194  |
| 0                     | 0             |
| 0                     | 0             |
| 0                     | 4.0915621297  |
| 0                     | 0             |
| 10.0891030291         | 6.4245833362  |
| 0                     | 0.2678731522  |
| 0                     | 0             |
| 2.1864683076          | 3.1118424532  |
| 0.2778618824          | 0.1384112633  |
| 18.1678923134         | 15.9279423022 |
| 4.9015857791          | 1.9967071412  |
| 1.3142715676          | 2.7993116972  |
| 1.2536201655          | 3.3859905448  |
| 0                     | 0             |
| 12.4303108149         | 22.7189488272 |
| 2.6417621712          | 2.1347475427  |
| 0.9365279242          | 3.8254016645  |
| 0                     | 0.0122221738  |
| 1.6336280669          | 0.3906041765  |
| 2.1746039146          | 3.3038662979  |
| 1.0197394208          | 1.3545667149  |
| 0.099514906           | 0.1189711988  |
| 51.9352261584         | 65.5385492513 |
| 0                     | 0.0267501852  |
| 0.1336645678          | 0.1065316712  |
| 8.6738227558          | 4.8091146589  |
| 0.07413904            | 0.2511298457  |
| 78.153062144          | 44.4918439077 |
| 5.316003889           | 4.4722783676  |
| 1.2684715932          | 3.0329443535  |
| 5.2737070471          | 2.8180440815  |
| 0.1193582296          | 0.083238235   |
| 67.1647544909         | 42.6379183391 |
| 2.4620090051          | 2.5167858216  |
| 0.0954839523          | 0.294893049   |
| 0.5864248295          | 0.782869914   |
| 1.3621999467          | 1.2547655387  |
| 4.3189586627          | 1.6549243804  |
| 37.3025306457         | 24.6337591563 |
| 1.1343951844          | 1.9709849562  |
| 1.3312395819          | 1.830238822   |
| 1.9365088684          | 3.6012951584  |
| 27.2545848538         | 21.3736271582 |
| 0.269262079           | 0.7511136952  |
| 0.2379257924          | 0.3792573112  |
| 1.8843011036          | 1.6519824502  |
| 661.1513455354        | 555.43197539  |
| 3.9180036513          | 5.044326865   |



gene\_expression\_table

|               |                |
|---------------|----------------|
| 0             | 0.2349246872   |
| 0.0196213622  | 0              |
| 1.3491995517  | 2.1506444889   |
| 5.0382886664  | 2.5344071359   |
| 6.3672132338  | 3.6734892383   |
| 0             | 0              |
| 14.4434240068 | 12.9115676492  |
| 2.8462895233  | 2.7306190309   |
| 0             | 0              |
| 7.4242000054  | 10.6269775258  |
| 0             | 0              |
| 0             | 2.690422868    |
| 4.5972549454  | 5.1855579757   |
| 0             | 0              |
| 3.0719028801  | 4.2845771906   |
| 0.0797362775  | 0.1588760403   |
| 51.1035867288 | 40.7299450345  |
| 5.6638643432  | 3.4823386604   |
| 5.5885508764  | 2.9421692293   |
| 13.8031800004 | 12.9988321976  |
| 0.9501186571  | 1.116946337    |
| 8.7873668546  | 12.256296198   |
| 0.0309282167  | 0.0123250113   |
| 5.3407886421  | 5.1212807454   |
| 7.4973487962  | 8.8960257042   |
| 12.2135436707 | 6.3570851633   |
| 0.7288278006  | 0.7938710663   |
| 0.6568894006  | 0              |
| 0             | 0              |
| 0.5340497369  | 0              |
| 0             | 0.263692553    |
| 0.9864043281  | 1.1792575621   |
| 1.5792908952  | 1.9405062936   |
| 0             | 0.3381476689   |
| 0.5540800555  | 1.0724716993   |
| 20.0823288086 | 16.3324162344  |
| 3.8442330193  | 2.4073364731   |
| 0             | 0              |
| 35.7220771691 | 13.0491009048  |
| 34.3238834739 | 18.6543157157  |
| 1.0937331972  | 1.1986062388   |
| 5.7066822829  | 9.0965378593   |
| 0.7991342232  | 1.2738320369   |
| 0.3148960441  | 0.6274363205   |
| 0.6735803888  | 0              |
| 70.5234617458 | 129.2777842057 |
| 3.4137023611  | 1.846220903    |
| 0             | 0.1510984964   |
| 0.4673677706  | 0.3059785672   |

gene\_expression\_table

|                |                |
|----------------|----------------|
| 0.2896700309   | 0.1539128033   |
| 0.2853958213   | 1.2889548897   |
| 0.5104027665   | 0.2372970041   |
| 0              | 0              |
| 0              | 0.0445165596   |
| 4.9499909516   | 6.2608294748   |
| 1.7090577151   | 2.7923704395   |
| 0              | 0.2934563857   |
| 0.9996792106   | 3.3861955315   |
| 2.0527349017   | 0.5843018707   |
| 0.9219749449   | 0.4592631265   |
| 0              | 0.2110909791   |
| 0              | 0.2814052212   |
| 0.5020979347   | 0.433523838    |
| 0.1399753686   | 0.4741360654   |
| 2.7230481018   | 2.337235306    |
| 3.1416045896   | 0.8346275376   |
| 9.981696513    | 6.2600558131   |
| 4.5425919423   | 3.5199112337   |
| 161.6750952939 | 146.334119028  |
| 21.0558214525  | 16.1443711013  |
| 7.1265813975   | 3.2541318679   |
| 3.4356827319   | 2.3470843849   |
| 4.4668340272   | 3.807329696    |
| 0.0668532327   | 0.0799237979   |
| 3.2718759796   | 1.9557824216   |
| 0.1104895799   | 0              |
| 27.223982605   | 22.9839250367  |
| 27.9496954168  | 22.2761185844  |
| 163.8764819434 | 145.0857029542 |
| 0              | 0              |
| 3.1094506217   | 2.1478215695   |
| 2.0549781594   | 2.5035449295   |
| 0.866816938    | 0.9119347431   |
| 9.6787400302   | 4.0774153224   |
| 6.8884183824   | 2.9738158323   |
| 0.0518543404   | 0.3099622606   |
| 0              | 0              |
| 0              | 0.0283895634   |
| 14.610580865   | 12.6151387104  |
| 5.9489827421   | 5.4525918619   |
| 0              | 0              |
| 6.6812707317   | 13.407647933   |
| 0.0831800871   | 0.0994427376   |
| 18.0346438048  | 13.2544802568  |
| 31.6961417776  | 53.681887407   |
| 2.0074847354   | 6.7999171818   |
| 0              | 0.1142897554   |
| 4.5373584185   | 6.567217086    |

gene\_expression\_table

|                |                |
|----------------|----------------|
| 0.8937368437   | 0.3815973333   |
| 0.7194064929   | 0.8600586217   |
| 0              | 0              |
| 4.2870621915   | 5.5010817819   |
| 0              | 0              |
| 25.7326584554  | 14.7803179539  |
| 1.4455209452   | 11.5209112341  |
| 4.3190382227   | 3.5262648071   |
| 21.0893311704  | 46.6517647199  |
| 1.9818774765   | 3.9884176194   |
| 2.6184683418   | 3.2106754886   |
| 0              | 0              |
| 0.6488772248   | 0.9308880982   |
| 6.3614820321   | 5.681283346    |
| 0              | 0              |
| 96.008438646   | 148.2291090093 |
| 0.5708533699   | 0.2274872261   |
| 0.2295438743   | 0.0653386441   |
| 0              | 0              |
| 0.1271910055   | 0.0168953655   |
| 3.1204669095   | 3.0748805287   |
| 0              | 0.0559453832   |
| 1.2240419969   | 2.6828194991   |
| 0              | 0              |
| 55.1637183946  | 33.2977041856  |
| 0.2564606325   | 0.5365527911   |
| 2.5521350139   | 2.0340709036   |
| 0.2611786211   | 0.1457129351   |
| 3.5813389172   | 4.692751815    |
| 3.8547483928   | 1.9879352811   |
| 1.9337562947   | 1.5412183887   |
| 1.7817205195   | 3.638864611    |
| 0.6755036574   | 0.6729769033   |
| 0              | 0              |
| 0              | 0              |
| 4.2704536866   | 4.0417558558   |
| 1.249554643    | 0.9461092739   |
| 7.0439749502   | 8.2253112029   |
| 22.9632674787  | 18.3018978136  |
| 14.6697946596  | 7.7946248447   |
| 1.1385055778   | 1.3610963313   |
| 0              | 1.8616388923   |
| 5.5133215924   | 8.400598083    |
| 1.9583309633   | 5.4628160489   |
| 2.3418651368   | 3.5463200212   |
| 710.8323545353 | 577.7099482554 |
| 0              | 0              |
| 0.0459970688   | 0.1283100407   |
| 0.3512992521   | 0.7621899917   |

gene\_expression\_table

|                 |                 |
|-----------------|-----------------|
| 0.0889531676    | 0.3899299096    |
| 0               | 0               |
| 0               | 6.4700480737    |
| 5.1907764411    | 3.7323729352    |
| 0.2721881616    | 0.0271170029    |
| 156.4193823455  | 134.9726011335  |
| 2.4825081062    | 2.5721510513    |
| 0               | 0               |
| 0               | 0               |
| 0               | 0.0112836056    |
| 0.4764144606    | 0.1756848321    |
| 3.5193721248    | 3.6063851074    |
| 18.4980439947   | 8.0033867927    |
| 0               | 0               |
| 1.6188154082    | 2.125911108     |
| 0.9915634738    | 0.370445431     |
| 13.6923264259   | 12.6036167731   |
| 5.3529932533    | 5.0192659985    |
| 15.0438479768   | 8.1144854492    |
| 0               | 0               |
| 0.2864800343    | 0.4338208316    |
| 1.5741984975    | 2.6456710052    |
| 25.5658222602   | 29.5102914979   |
| 0.3204955025    | 0.5534475675    |
| 24.0473812498   | 15.5835251189   |
| 0.0643796557    | 0.0256555362    |
| 0.6077644453    | 0.2421964292    |
| 31.3908554812   | 24.1984623173   |
| 0               | 0               |
| 5.283547537     | 5.4300089355    |
| 2.1522942931    | 3.9072882144    |
| 13.0954179063   | 15.5470003532   |
| 0               | 0               |
| 15.6417780381   | 15.8058873431   |
| 1.1345699224    | 1.0549709416    |
| 12.0129287578   | 15.9573250897   |
| 0.5204645036    | 1.037035362     |
| 0.8938378164    | 1.6190806779    |
| 1.4811516411    | 1.7707335862    |
| 0               | 0               |
| 1.5342076418    | 0.9221762146    |
| 0.6530798443    | 2.3422930834    |
| 11.2805414058   | 18.7502930557   |
| 38.9317168218   | 31.0741042758   |
| 0               | 0               |
| 0.6372307629    | 0.6955716824    |
| 1.4921803111    | 0.2973197477    |
| 0               | 0               |
| 2309.8808685249 | 2369.9343981871 |

gene\_expression\_table

|                 |                 |
|-----------------|-----------------|
| 54.9862615799   | 21.3734077198   |
| 0.6722935794    | 0.6251269105    |
| 0.3502449083    | 0.6699548167    |
| 7.9524484661    | 10.0246432815   |
| 7.944075098     | 7.5811236949    |
| 1361.3723967921 | 893.3222086541  |
| 2.0456436326    | 1.9564721316    |
| 1.6171411012    | 1.3408443986    |
| 2.0471162282    | 2.4473506693    |
| 4.1792463768    | 3.7822733832    |
| 5.1541063609    | 3.5327610978    |
| 3.3496826282    | 3.8933451415    |
| 0.1141115635    | 0.090947779     |
| 0.1248025797    | 0.2652495992    |
| 1.605731311     | 0.8958459974    |
| 1215.1685879135 | 1825.0750849951 |
| 1.0824733132    | 1.4019515503    |
| 7.4519184962    | 2.2843213031    |
| 2.9723041907    | 3.2050485315    |
| 0.6489550027    | 2.3274991987    |
| 0               | 0               |
| 40.0728034703   | 18.1467769147   |
| 2.0878277949    | 2.2880199915    |
| 10.3568825679   | 11.7921624551   |
| 54.3866861338   | 32.9915789535   |
| 9.0274713443    | 2.9626317911    |
| 0.6944490856    | 1.2453326374    |
| 3.9457555612    | 2.6206641812    |
| 7.6778024242    | 7.9550465625    |
| 2.5424876663    | 1.7730841578    |
| 39.4473711393   | 24.8209366366   |
| 2.9948464457    | 0.8424406808    |
| 19.6534338367   | 12.8997114846   |
| 3.4283550414    | 2.1176292905    |
| 11.7756935996   | 14.438948983    |
| 23.4399694124   | 19.3045606213   |
| 11.5715236144   | 6.0020041983    |
| 1.2206454184    | 1.0809595868    |
| 18.4858912017   | 32.5246645793   |
| 9.8248907621    | 7.8305122267    |
| 12.6986765579   | 11.807764775    |
| 17.6153450405   | 10.1665802432   |
| 4.0306813872    | 0.4015604429    |
| 40.1252534014   | 32.5221664695   |
| 4.2643766754    | 13.5949618187   |
| 5.3391662378    | 2.4924227196    |
| 31.0648254733   | 38.9281512483   |
| 1.7355233719    | 1.5561284065    |
| 23.3616947207   | 7.9797631449    |

gene\_expression\_table

|                |                |
|----------------|----------------|
| 833.29739107   | 530.4501226021 |
| 3.4381335942   | 2.7402184715   |
| 45.1997159409  | 27.4472498098  |
| 1.1532159163   | 2.2321529553   |
| 10.9091833876  | 3.5020326082   |
| 110.3069425285 | 66.264643236   |
| 6.6986704202   | 2.4641035273   |
| 1.4187142677   | 3.9575409957   |
| 6.4641109046   | 3.5907497325   |
| 0              | 0              |
| 31.9339450192  | 0              |
| 8.8860701496   | 4.9575855699   |
| 6.8458724659   | 2.3188901507   |
| 2.7773657126   | 2.3716944359   |
| 9.8015146512   | 1.8027418361   |
| 3.0796156004   | 7.1881109787   |
| 8.8908782343   | 3.838302639    |
| 72.7198381928  | 42.4337267297  |
| 2.0211038393   | 0.6040631408   |
| 54.8845159201  | 17.0525018024  |
| 0              | 0.0491770845   |
| 0              | 0.2144097829   |
| 33.9929557219  | 14.9009535085  |
| 29.4802022694  | 11.498015207   |
| 267.1526296164 | 171.5988589801 |
| 9.0968611635   | 9.5461850569   |
| 12.7115725798  | 13.042682863   |
| 4.3142440618   | 5.09285063     |
| 2.6096960399   | 1.2999671729   |
| 0              | 0.0499714787   |
| 2.3639971037   | 5.5036241026   |
| 3.7115212117   | 2.3855729595   |
| 0              | 0.3047995914   |
| 27.811641241   | 11.0830441812  |
| 2.7943189521   | 1.4847288891   |
| 0              | 0              |
| 3.4585009058   | 3.445564216    |
| 0              | 0              |
| 2.580237002    | 1.5166454455   |
| 11.5076266217  | 9.5244217933   |
| 2.7108002628   | 3.8409392119   |
| 0              | 0.2682446289   |
| 11.2912964956  | 5.6245304277   |
| 0              | 0              |
| 2.7584213918   | 2.1469557682   |
| 2.4018241642   | 0.9443741965   |
| 1.2673752084   | 1.1447886407   |
| 2.8806806575   | 2.5314036777   |
| 14.1646183676  | 7.1678145667   |

gene\_expression\_table

|                 |                 |
|-----------------|-----------------|
| 0               | 0               |
| 1.7275774563    | 1.7029983655    |
| 15.8156383373   | 12.1549982229   |
| 0               | 0.0732133241    |
| 5.280881479     | 2.5721070646    |
| 2.0884214924    | 1.8725486858    |
| 28.5788669191   | 14.4123581556   |
| 0               | 0.8511326644    |
| 18.4494009845   | 6.3174081558    |
| 1.2799129809    | 4.8454765375    |
| 88.2337685817   | 40.2573585311   |
| 26.1897078308   | 12.3694193603   |
| 5622.7047457661 | 8358.4117745701 |
| 28.5679530362   | 32.3557691427   |
| 30.461984342    | 6.6765687599    |
| 78.0557657868   | 81.0783168082   |
| 0.711316684     | 0.7558997008    |
| 56.9333607312   | 22.2251358345   |
| 0               | 0.4075312404    |
| 8.4539535498    | 2.5914865009    |
| 0.8731226253    | 0.3479426672    |
| 0               | 0               |
| 0               | 0               |
| 1.1298759327    | 1.0465498771    |
| 40.6877335942   | 25.5318871093   |
| 48.3817538294   | 27.3618796438   |
| 10.6075631326   | 3.6127420917    |
| 0               | 0               |
| 13.4445873586   | 13.3942972299   |
| 3.7553978562    | 0.9976934958    |
| 2.9722303557    | 4.737780135     |
| 183.2797141584  | 149.0686647055  |
| 0               | 0               |
| 0               | 0               |
| 1.1367472237    | 0.9626208909    |
| 30.4696502293   | 14.1166237897   |
| 2.3791506886    | 1.3905474648    |
| 506.8187826925  | 158.9693066076  |
| 7.9618116315    | 9.5184361084    |
| 0               | 0               |
| 1.7814273918    | 1.4198111012    |
| 0               | 0               |
| 0               | 0               |
| 58.8974182613   | 17.6031328867   |
| 2.1709566571    | 5.7675629034    |
| 3.9973785295    | 2.5032392892    |
| 42.970487105    | 54.60262953     |
| 27.2158856315   | 16.8000986698   |
| 10.0126134717   | 3.4913062825    |

gene\_expression\_table

|                 |                |
|-----------------|----------------|
| 11.3987310597   | 5.6780467777   |
| 5.2080300721    | 1.1469424512   |
| 3.0550133034    | 3.2464916038   |
| 60.9584370885   | 23.5085493325  |
| 17.9620882481   | 16.3940375925  |
| 0               | 0.5851796036   |
| 0               | 1.2432472695   |
| 197.7629317636  | 113.9919884773 |
| 1.8515191553    | 1.9675663556   |
| 18.8301416437   | 7.8411357877   |
| 123.2008158918  | 107.0040827626 |
| 3.3384283089    | 0.9977822269   |
| 234.9969332215  | 207.2192616769 |
| 2.19748842      | 1.8139654183   |
| 173.4435372175  | 61.3663645312  |
| 0               | 9.7331376748   |
| 49.6604594641   | 34.1825214618  |
| 0               | 0              |
| 0.9735222669    | 0              |
| 0               | 1.9282420821   |
| 31.668128154    | 4.206622932    |
| 33.2777375046   | 25.279361146   |
| 0               | 0              |
| 60.8037429826   | 18.255872331   |
| 41.8468491299   | 22.2348367832  |
| 15.4471841185   | 10.427105828   |
| 52.0230186161   | 57.2939668957  |
| 0               | 2.1878048673   |
| 0               | 0              |
| 497.3319306267  | 199.7741638398 |
| 17.0248831896   | 7.4012512544   |
| 194.3766112626  | 140.5085006522 |
| 6.681061648     | 0.4096043578   |
| 0               | 2.6042394057   |
| 8.3938479216    | 1.6724900656   |
| 0               | 0              |
| 2428.4663342114 | 746.7159361543 |
| 1.8494919149    | 1.842573801    |
| 82.9208131229   | 39.0383321467  |
| 93.5703063695   | 23.3050755292  |
| 32.2239213227   | 13.911467348   |
| 1.0281956981    | 0.9640938188   |
| 2.5519367231    | 2.5423910804   |
| 13.732571606    | 5.4724817033   |
| 0               | 0.309184351    |
| 1409.6620994451 | 421.3167570727 |
| 9.6626853981    | 5.7175823171   |
| 33.4875293552   | 20.0173605801  |
| 19.548659605    | 10.964005958   |



gene\_expression\_table

|               |               |
|---------------|---------------|
| 1.134468324   | 1.2012674915  |
| 1.760059054   | 1.6365771035  |
| 3.1008561951  | 4.1500965894  |
| 0.0169383533  | 0.033749989   |
| 7.7147149949  | 7.2707092109  |
| 23.7324900116 | 16.4311895255 |
| 9.1103370258  | 2.0169465266  |
| 25.6335537854 | 55.6153707423 |
| 2.518254486   | 4.0513036569  |
| 0.2261629571  | 0.0150211322  |
| 0.4198426081  | 0.5019265998  |
| 10.6592340459 | 8.5359448476  |
| 10.2221362835 | 12.1408061419 |
| 39.4129395947 | 69.7717972245 |
| 0             | 0             |
| 0.6977998099  | 0             |
| 0             | 0             |
| 4.0861936099  | 7.1165520387  |
| 3.2985017221  | 3.3367198788  |
| 2.4060231448  | 2.5568248522  |
| 46.1662504111 | 55.0181678585 |
| 2.4983109052  | 2.3894072185  |
| 2.4914647926  | 2.7449607379  |
| 1.88661189    | 3.9470653469  |
| 0             | 0             |
| 27.9314914481 | 33.2939121269 |
| 5.1258506703  | 1.9405373277  |
| 0.6377631414  | 0.8073032496  |
| 0.9741973     | 1.2201241083  |
| 0.9494201535  | 1.2863815701  |
| 18.2226782208 | 21.5006417825 |
| 1.0300472003  | 0.7926466001  |
| 0             | 0             |
| 2.5442502106  | 1.7486451383  |
| 0.0930491999  | 0.3151838926  |
| 0             | 8.1023567837  |
| 0             | 0.3875056424  |
| 2.1573374386  | 2.0059832928  |
| 1.7717195101  | 2.5280676923  |
| 4.6652064619  | 5.9904411075  |
| 1.7456821971  | 3.0609082037  |
| 25.1227102912 | 7.0080465222  |
| 14.9451026367 | 10.6278081032 |
| 0.3620256219  | 0.4501179665  |
| 0             | 0             |
| 4.7910532409  | 9.252532945   |
| 4.8287872631  | 2.2638705652  |
| 3.1512162446  | 12.1809843955 |
| 15.275247945  | 6.3598072235  |

gene\_expression\_table

|                |                |
|----------------|----------------|
| 0              | 0              |
| 1.3356704974   | 0.8279751557   |
| 0.0102412109   | 0.0367304514   |
| 3.5418959558   | 4.1468444507   |
| 0              | 0.4468796813   |
| 17.814618724   | 8.4355115786   |
| 0              | 0              |
| 6.5929091297   | 5.0067400112   |
| 0.5291115232   | 0.4217058848   |
| 11.9325936404  | 10.302897971   |
| 2.4139264574   | 2.0550938417   |
| 0.5127110896   | 1.0896923071   |
| 1.7411636025   | 1.6433532909   |
| 4.2588899203   | 5.430987951    |
| 3.4117739269   | 2.4349286119   |
| 0.3234139177   | 0.3436844505   |
| 10.2014060204  | 32.8127694289  |
| 3.0806426097   | 2.9668153399   |
| 1.1617454991   | 1.4660399163   |
| 0              | 0              |
| 0              | 0              |
| 0.2084349842   | 0.2353426995   |
| 0.3702453918   | 0.7869023381   |
| 10.4130001755  | 11.1913992268  |
| 0              | 0.005922       |
| 0              | 0              |
| 0.7028802804   | 0.5468627816   |
| 1.5658187675   | 2.5299743238   |
| 363.0909837084 | 583.0491631695 |
| 0              | 5.94269396     |
| 375.3363499671 | 432.6152059466 |
| 3.8020834934   | 3.185688744    |
| 3.2109837738   | 2.2314786807   |
| 0              | 0.0253815775   |
| 16.1914591347  | 8.4621084325   |
| 6.7827576122   | 4.504924253    |
| 0.0330006645   | 0.009863       |
| 1.935587131    | 0.8306725426   |
| 0.0946687311   | 0.2640809308   |
| 0              | 0              |
| 4.6176983389   | 4.1133217264   |
| 1.2829199664   | 0.568053841    |
| 2.9507353452   | 3.4051501568   |
| 0.2601873576   | 1.2442277484   |
| 20.0003729581  | 17.8231786124  |
| 2.942584386    | 2.1777432909   |
| 1.5983652365   | 1.8259364902   |
| 8.5056512238   | 9.947545933    |
| 0              | 0              |

gene\_expression\_table

|               |                |
|---------------|----------------|
| 0             | 0.0415119071   |
| 0.5584266114  | 0.6898588592   |
| 11.7967592411 | 14.8145030416  |
| 27.1447329893 | 31.9367276541  |
| 0.4026684297  | 0.4914237305   |
| 2.3453809945  | 0.9838349404   |
| 6.586446832   | 7.7322949202   |
| 9.3630652875  | 6.6556842281   |
| 1.9116183668  | 2.1210544076   |
| 0.1665304155  | 0.0398178001   |
| 1.2539890395  | 1.9307339418   |
| 23.5923682522 | 13.7181278169  |
| 3.1046499701  | 2.373432379    |
| 0.1933658082  | 0.2632781025   |
| 16.7323133363 | 17.0079516204  |
| 0             | 0.0712706118   |
| 0             | 0              |
| 0.0199449718  | 0.003974       |
| 0.5352320116  | 0.4739821781   |
| 1.5528297007  | 1.0747726691   |
| 2.420347711   | 1.6620707025   |
| 0             | 0              |
| 1.1592943286  | 2.3429146623   |
| 2.3388042143  | 5.7992500014   |
| 5.2495602403  | 6.1628293699   |
| 13.4559979738 | 5.5627246097   |
| 0.8487649012  | 1.7475527804   |
| 20.8065194871 | 12.0360145329  |
| 0             | 0.0526390376   |
| 7.6594041395  | 12.2092060291  |
| 0             | 0              |
| 198.650434523 | 134.1141418049 |
| 3.8446330019  | 5.1070026219   |
| 0.5476378371  | 0.3273536228   |
| 15.0940212503 | 7.3784300948   |
| 0             | 9.5993852643   |
| 93.7390652461 | 80.9366391104  |
| 0.0978158474  | 0              |
| 1.5047229924  | 1.2192635294   |
| 0.2410521776  | 0.2881806124   |
| 2.4603625517  | 2.9413913361   |
| 0             | 0              |
| 0.8547260286  | 0.3406115538   |
| 17.5449931484 | 7.4399349541   |
| 96.3992180225 | 49.907254966   |
| 0             | 0              |
| 0.1400040476  | 0.0836882134   |
| 1.2615596849  | 0.83789384     |
| 0.3761703602  | 0.273041816    |

gene\_expression\_table

|                |               |
|----------------|---------------|
| 0.6461548297   | 0             |
| 0              | 0             |
| 1.166658976    | 1.3524887642  |
| 0.826245386    | 0.4327442247  |
| 0              | 0             |
| 0              | 0             |
| 9.354664226    | 4.2249182691  |
| 0.8274540592   | 1.5827691404  |
| 3.8347180354   | 2.4450394159  |
| 0              | 0             |
| 0              | 0             |
| 0              | 0             |
| 0.4549863992   | 0.9972259013  |
| 2.6203430686   | 2.7026783093  |
| 3.3616055114   | 2.3921651883  |
| 5.2554605564   | 2.6072158154  |
| 0.1326330946   | 0.1673735005  |
| 0.0107684233   | 0.004291      |
| 61.6488305013  | 19.1078938001 |
| 203.5279914535 | 92.8914044864 |
| 1.4378246411   | 2.7932704577  |
| 12.1394245218  | 7.5832751593  |
| 3.1477809564   | 1.4896031016  |
| 30.4750660432  | 23.293413066  |
| 0.0884012395   | 0.0616493992  |
| 0.0964618371   | 0             |
| 1.5425372458   | 1.0875584045  |
| 3.2830402979   | 4.1152106718  |
| 75.826593865   | 67.2247471624 |
| 0              | 0.0716616633  |
| 0              | 0             |
| 0              | 0             |
| 88.8285042064  | 65.5248732747 |
| 0.9813498999   | 1.9553582264  |
| 8.0769353709   | 7.853601847   |
| 0.456185073    | 0.4505267021  |
| 0              | 0             |
| 0.1695349026   | 2.1619295888  |
| 4.8004137979   | 2.7447148069  |
| 1.0549335555   | 1.8278043923  |
| 0              | 0             |
| 0.1399280598   | 0.2788093044  |
| 80.1995411349  | 73.4842584697 |
| 0.662142291    | 1.0554648252  |
| 0.4815930399   | 1.7272498245  |
| 1.9237041244   | 1.3562982637  |
| 0.2505871571   | 0.9386833373  |
| 13.8326333985  | 15.0014850355 |
| 0.1028892419   | 0.2050087595  |

gene\_expression\_table

|                |                |
|----------------|----------------|
| 9.3357250514   | 10.9571119394  |
| 149.5325426321 | 46.8962817056  |
| 1.4941601703   | 1.8855235098   |
| 178.3831195674 | 188.574634834  |
| 8.6815806919   | 7.2540895908   |
| 2.6793790034   | 3.1061604734   |
| 0              | 0.0593513308   |
| 7.5247912847   | 4.3597506668   |
| 0              | 1.7644198097   |
| 0.1435716555   | 0.0286069238   |
| 0              | 0              |
| 0.681076203    | 1.0856457673   |
| 19.282853376   | 16.3291161914  |
| 27.0088967635  | 27.4598249606  |
| 110.1557807544 | 75.6979769251  |
| 1.9344839819   | 0.7373818248   |
| 48.5217757403  | 29.7478631959  |
| 0              | 0              |
| 0.1921109686   | 0.1275949122   |
| 0              | 0              |
| 0.1565375535   | 0.2183328242   |
| 0.8626617413   | 0.8164631677   |
| 60.5719260804  | 71.9833863947  |
| 4.7837972828   | 2.0334520567   |
| 0.1007829068   | 0.0133874565   |
| 0              | 0              |
| 17.5787011084  | 7.3284947979   |
| 137.9850722302 | 220.269987031  |
| 0              | 0              |
| 1.1690460065   | 1.4441946855   |
| 29.7674983388  | 20.1944270234  |
| 408.15827549   | 936.2443256382 |
| 10.4060021915  | 1.3822770717   |
| 1.5225696809   | 1.2568388179   |
| 1.2596308721   | 2.6675995901   |
| 0.3565381567   | 0.2841636068   |
| 5.5673605165   | 15.874028462   |
| 4.2648055966   | 3.0068805033   |
| 1.8868156005   | 3.0076126009   |
| 1.6148856179   | 2.006324428    |
| 162.2800193002 | 117.3433086625 |
| 244.9037545102 | 180.6237154779 |
| 0.1967693109   | 0.3397910287   |
| 11.5543787319  | 9.6405956792   |
| 0.7050226868   | 0.8428626184   |
| 9.3296823178   | 5.3650906212   |
| 0.9285567238   | 1.3060001117   |
| 0              | 0.8346807618   |
| 9.2965491519   | 13.0165485932  |

gene\_expression\_table

|                |                |
|----------------|----------------|
| 15.5095669507  | 20.6020702214  |
| 334.5255488739 | 410.4535375524 |
| 10.4128834653  | 2.9392811786   |
| 17.0262872264  | 6.2196198446   |
| 6.1210971001   | 5.9175134083   |
| 43.1430667781  | 127.0909521223 |
| 0              | 0              |
| 1.441707187    | 1.999349661    |
| 10.2734719485  | 6.5504278593   |
| 1.2736753089   | 1.1005604879   |
| 0.2033223826   | 0.0945288612   |
| 1.4848297467   | 2.6626962047   |
| 0              | 0              |
| 0.4263947004   | 0.4757757204   |
| 67.0938258226  | 78.4991989014  |
| 179.2304393124 | 67.3033918497  |
| 64.0627145984  | 35.8789234138  |
| 0.4126424079   | 0.7300119843   |
| 0              | 0.003651       |
| 2.0212322009   | 1.7761616906   |
| 3.6231571095   | 2.4235916031   |
| 326.6642832474 | 491.9958817005 |
| 1.137332738    | 1.2917094785   |
| 309.3929046946 | 148.5945058132 |
| 2.2236675931   | 0.9747539371   |
| 100.8081462298 | 18.2601942705  |
| 0              | 0              |
| 3.0365606452   | 8.6722464311   |
| 1.1236914636   | 1.7911811862   |
| 28.0305025682  | 19.0870483453  |
| 0.720958939    | 0.3830731505   |
| 12.7659174109  | 5.1693190351   |
| 0              | 0              |
| 150.9582479731 | 107.6083446767 |
| 0              | 0.2432369994   |
| 0.2964031704   | 0.59058892     |
| 0              | 0              |
| 6.5860787198   | 4.601110769    |
| 0.2961890423   | 0.1967207552   |
| 0.2861339635   | 0.2443402848   |
| 5.6499284966   | 5.691336829    |
| 4.4990872545   | 3.8749845094   |
| 0.5223572423   | 0.2081613359   |
| 0.9723246571   | 1.051717998    |
| 0              | 0              |
| 2.4287628954   | 2.5913970737   |
| 0              | 2.623115118    |
| 17.4507752456  | 20.4231149803  |
| 0.0691034821   | 0.0757294969   |

gene\_expression\_table

|               |               |
|---------------|---------------|
| 0             | 0             |
| 0             | 0             |
| 0.658251222   | 0.2623156006  |
| 1.2757659875  | 0.7625963539  |
| 0             | 0.3983759449  |
| 0.5788860636  | 0.9227531396  |
| 6.4032245556  | 8.5299993053  |
| 0             | 0.3827464301  |
| 3.746592424   | 1.9196116015  |
| 1.0096458876  | 2.2129123683  |
| 5.4687191004  | 0.4358610474  |
| 1.4912431254  | 1.2734271929  |
| 5.6609898227  | 5.3148083506  |
| 0             | 0             |
| 1.2797578306  | 1.3599688902  |
| 0             | 0             |
| 1.0967578522  | 2.0012845843  |
| 2.4131593288  | 2.9267703526  |
| 9.6612786304  | 10.5876541659 |
| 0.9189161685  | 1.5432358907  |
| 0.2303588878  | 0.4704692994  |
| 3.5862508747  | 5.3145940408  |
| 1.14992672    | 0.9852378126  |
| 3.3876788035  | 2.0700043101  |
| 36.8622982659 | 17.138059427  |
| 0.8772693798  | 0.699190329   |
| 0             | 0             |
| 0.0399727475  | 0.047787873   |
| 6.500238416   | 4.9217022097  |
| 3.8549030891  | 5.6596600979  |
| 0.0839237162  | 0.0334439182  |
| 7.5702909963  | 2.451141536   |
| 0.1051236928  | 0             |
| 4.6227776764  | 2.0911395679  |
| 0             | 0             |
| 0             | 0             |
| 0             | 0             |
| 0             | 0             |
| 16.875623223  | 19.1276629547 |
| 9.1560315887  | 6.1115946168  |
| 1.184561518   | 0.7923734085  |
| 0             | 0.0913783098  |
| 0.4604747531  | 0.18350093    |
| 8.2008029255  | 4.3574012938  |
| 7.5632055164  | 7.8826802875  |
| 0.9395026613  | 1.0891501454  |
| 0             | 0.5734544756  |
| 0             | 0.0751338617  |
| 41.1413967675 | 39.014409592  |

gene\_expression\_table

|                |                |
|----------------|----------------|
| 3.7069292696   | 3.4174615811   |
| 1.9167324298   | 1.3579113241   |
| 9.2914078973   | 4.3197713706   |
| 0              | 0.0447833429   |
| 5.2910852124   | 8.9910367204   |
| 53.0987663691  | 52.9001478676  |
| 293.6590550409 | 170.4483548989 |
| 8.1931622359   | 2.3859660156   |
| 0.5628116814   | 0.1121412914   |
| 744.2075009898 | 406.5377808986 |
| 23.6719962801  | 16.0922364939  |
| 20.6638762379  | 9.4823044411   |
| 56.6940951102  | 47.8884434632  |
| 9.5362533045   | 1.8613386099   |
| 0              | 0.4901722894   |
| 0              | 0.09855808     |
| 7.4814169998   | 3.7659447905   |
| 2.1091523771   | 1.120673595    |
| 0              | 1.2619868796   |
| 11.2436699174  | 8.9612899414   |
| 0              | 0              |
| 6.266181911    | 0.7885570048   |
| 1.3401312098   | 0.7883556174   |
| 0              | 0              |
| 15.1183125625  | 8.4168668792   |
| 54.4465147491  | 27.9874898545  |
| 0              | 0.007203       |
| 7.6809501782   | 6.7008622297   |
| 1.5860988344   | 1.8387385659   |
| 0              | 0.1626265466   |
| 14.1229400039  | 21.9938073786  |
| 10.879180133   | 11.9516278428  |
| 1.1871541913   | 0.4336616474   |
| 0.4189959434   | 0.521785836    |
| 0              | 0              |
| 38.744767946   | 80.4748205855  |
| 5.7923706919   | 2.0367190763   |
| 4.1768798713   | 6.7372717005   |
| 29.8607937839  | 24.216809634   |
| 293.9019847774 | 587.3368888602 |
| 0.6837227008   | 1.362330406    |
| 5.5130382472   | 5.3234190316   |
| 537.3830865366 | 409.2830216799 |
| 29.2593598563  | 16.0130193179  |
| 0              | 0              |
| 3.8456833525   | 4.0867182806   |
| 103.0552990799 | 75.1947946365  |
| 40.9378594284  | 19.5766701057  |
| 5.2270638561   | 7.5508920682   |



gene\_expression\_table

|                 |                 |
|-----------------|-----------------|
| 1.4990929675    | 0.119478843     |
| 18.9975527362   | 18.5059027728   |
| 57.303208754    | 50.8791974964   |
| 0.3804193142    | 0.5512673998    |
| 11.2443947421   | 22.7033980014   |
| 2.6407434508    | 3.6832118712    |
| 1.8295835217    | 2.0878656763    |
| 4497.8709328752 | 4999.9751019348 |
| 27.728210818    | 32.9856898327   |
| 1.5684103582    | 0.9375261861    |
| 1.0358266321    | 1.0386098278    |
| 81.6562447414   | 75.5775226332   |
| 7.3800290789    | 3.8600224549    |
| 12.5827846568   | 4.6907848534    |
| 176.3170959553  | 90.1668908873   |
| 32.1047714304   | 16.2831108269   |
| 0               | 0               |
| 2.3050673695    | 1.5922019732    |
| 3.3435826519    | 7.3283668027    |
| 0               | 0               |
| 17.9684490228   | 22.9135835788   |
| 30.6270325591   | 31.5543599059   |
| 0               | 0               |
| 3.2952282859    | 2.3345083202    |
| 11.3679252061   | 5.2454497793    |
| 0.862397486     | 1.5250296725    |
| 17.3092376416   | 4.2604038075    |
| 8.299201394     | 7.0279341556    |
| 4.2790865043    | 2.159960723     |
| 9.2809872727    | 5.8337299281    |
| 0               | 0.4005091875    |
| 17.6741555078   | 20.0862136975   |
| 0               | 0.2593243603    |
| 0.8781610758    | 1.4347970858    |
| 5.0803148699    | 6.8460900453    |
| 0               | 0               |
| 1.6016189062    | 1.2184795432    |
| 9.0007350931    | 5.8451994959    |
| 313.0621881163  | 333.3101956093  |
| 13.175186849    | 4.7422622442    |
| 24.9804489165   | 19.9096066722   |
| 0               | 0               |
| 0.2140085386    | 0.0284277372    |
| 1.6960396476    | 1.3195717467    |
| 2.1752295682    | 2.6005116202    |
| 16.89785825     | 15.4562433293   |
| 0               | 0               |
| 16.2621106336   | 16.201281423    |
| 0.1373637043    | 0.2463297998    |

gene\_expression\_table

|               |                |
|---------------|----------------|
| 98.6446323333 | 118.5648132173 |
| 0.5657295621  | 0.7514845645   |
| 10.9980160671 | 3.9931731175   |
| 0             | 0.0134813833   |
| 0.0231720808  | 0.004617       |
| 14.246967687  | 11.7366196609  |
| 2.4267008903  | 2.6392392041   |
| 0             | 0.6051274736   |
| 4.1473571001  | 6.3999621729   |
| 48.376848411  | 42.7885484383  |
| 5.1456656545  | 1.0252836087   |
| 24.7664409022 | 21.2574284101  |
| 0             | 0.0425958424   |
| 23.7003027368 | 37.9774759272  |
| 5.1157446447  | 11.4164040585  |
| 3.6572762161  | 6.1866772859   |
| 1.2888191691  | 0.8131989098   |
| 0.129801772   | 0.4655384719   |
| 12.6497130088 | 9.6129905486   |
| 0.3345482247  | 0.3491681086   |
| 1.229895964   | 0.3482418729   |
| 0             | 0              |
| 1.3600992275  | 0.4878042158   |
| 1.4304642004  | 0.855068088    |
| 0.7296665036  | 1.6961866851   |
| 0             | 1.960004081    |
| 0.6583825824  | 0.734630255    |
| 0.3626214956  | 0              |
| 0.0565711373  | 0              |
| 0.8470385412  | 0.6463686276   |
| 2.9745142272  | 2.3707103304   |
| 7.4859740238  | 9.1626517766   |
| 0             | 0              |
| 0             | 0              |
| 0             | 0              |
| 2.9358116616  | 2.7054678575   |
| 4.2238785888  | 7.3235339212   |
| 0             | 0              |
| 1.1728726938  | 1.7360356101   |
| 5.0219347001  | 6.0807514299   |
| 6.3497230096  | 6.8358259884   |
| 21.5170941065 | 25.4789402414  |
| 9.544785029   | 6.2842630848   |
| 30.3911153591 | 27.0516156475  |
| 97.0618060592 | 101.9732185024 |
| 0.3406493548  | 0.2715001116   |
| 13.276608292  | 15.9376540509  |
| 19.5317637736 | 30.3084060407  |
| 3.190378793   | 5.0855120431   |

gene\_expression\_table

|                |                |
|----------------|----------------|
| 1.1283120758   | 0.4946002908   |
| 7.161579801    | 4.693107341    |
| 4.1889468561   | 4.9002359835   |
| 0              | 0              |
| 2.4123394167   | 1.6342548423   |
| 1.1582138642   | 0.6997733024   |
| 11.6392285137  | 6.1843687557   |
| 0              | 0.0317075559   |
| 0              | 0              |
| 0.6090762472   | 0.3883506996   |
| 0.1318417781   | 1.2084072816   |
| 0              | 0              |
| 1.84319536     | 2.3871910383   |
| 3.593842721    | 1.0741199336   |
| 0              | 0.2705213966   |
| 4.6869532623   | 7.0041322307   |
| 1.9955320335   | 3.7489275677   |
| 200.5142940475 | 121.7490698923 |
| 0              | 0              |
| 29.5506124796  | 29.5047804515  |
| 0.5543013571   | 0.5154127684   |
| 0              | 0              |
| 2.64493995     | 2.0856112124   |
| 7.2216719498   | 10.1958595219  |
| 2.8244963811   | 3.9395037023   |
| 1.9780342539   | 1.3794447248   |
| 1.6253379324   | 1.2468288736   |
| 0              | 0              |
| 0.630822244    | 1.5083102951   |
| 10.4776767345  | 3.9556362234   |
| 21.0020136402  | 11.9031208353  |
| 0              | 0.3264229451   |
| 0              | 0              |
| 0              | 0.007456       |
| 1.9682433743   | 1.0824063478   |
| 51.8161456486  | 34.0377338293  |
| 0              | 0              |
| 1.4180876029   | 1.4562534293   |
| 15.5890775363  | 8.3232842163   |
| 5.3611837731   | 3.7190090413   |
| 29.4672031912  | 36.9897944141  |
| 6.6962274452   | 7.130874631    |
| 0.8208819084   | 0.3816453013   |
| 8.513452538    | 6.5138746041   |
| 0              | 1.8025487403   |
| 0              | 0              |
| 0.1718726298   | 0.468027934    |
| 103.5398046423 | 151.2903465327 |
| 5.2432889115   | 6.2684113632   |

gene\_expression\_table

|                 |                 |
|-----------------|-----------------|
| 1.9431920161    | 4.2590315074    |
| 18.4446332289   | 10.4741149066   |
| 62.576784353    | 30.1869978094   |
| 0               | 0               |
| 26.7664631384   | 16.5331319715   |
| 88.928522665    | 65.7407118682   |
| 9.2768867921    | 3.1687495367    |
| 8.9046577457    | 1.4194159109    |
| 1.7963862895    | 0.4772444853    |
| 0               | 0               |
| 61.0116509907   | 79.1743191093   |
| 73.4584890513   | 39.5192055726   |
| 3.5318031251    | 4.9900035472    |
| 129.8902934489  | 92.3457545094   |
| 0               | 1.8505976774    |
| 9.7642396651    | 13.7956700413   |
| 3778.1971146937 | 3346.7911402982 |
| 631.3555151766  | 192.5268283267  |
| 0               | 0               |
| 20.3850592381   | 16.7249006556   |
| 0               | 0               |
| 4.5685914666    | 5.3317599888    |
| 99.7433219765   | 110.2405615135  |
| 0.1957786226    | 0.0780185213    |
| 65.5999657093   | 25.2985493681   |
| 1.1866871493    | 7.5663890472    |
| 72.8665000513   | 39.5966942109   |
| 20.6544258143   | 14.0316681204   |
| 10.2151545461   | 4.8849332481    |
| 0               | 0               |
| 0               | 3.2977846443    |
| 15.9789318603   | 23.0215571999   |
| 21.8964268865   | 21.2328016505   |
| 0               | 0               |
| 235.2348088189  | 121.3225035068  |
| 24.6451408774   | 23.1889015072   |
| 4.514587224     | 4.3177921846    |
| 8.4038704265    | 3.3489741372    |
| 1.3632077246    | 5.432434321     |
| 4970.563603737  | 6523.1548266574 |
| 45.312828827    | 27.7159073868   |
| 18.5965348458   | 5.6670742803    |
| 44.2581466422   | 59.5845904134   |
| 676.5130652196  | 256.6126097775  |
| 3.4766763177    | 4.618228856     |
| 41.901395265    | 28.9984264808   |
| 3.257050329     | 3.4395592054    |
| 0               | 0               |
| 0               | 0               |

gene\_expression\_table

|                 |                 |
|-----------------|-----------------|
| 0               | 0.2151333995    |
| 11.964711402    | 13.3503516393   |
| 0               | 0.0385317668    |
| 9.3399234994    | 5.8257310315    |
| 0               | 0               |
| 0.3870355503    | 2.0050566906    |
| 1649.2063040826 | 2348.9071806075 |
| 0               | 2.0946720239    |
| 16.6579238013   | 15.4892397635   |
| 0               | 0               |
| 8.7570867391    | 3.9153092675    |
| 0               | 3.6078799073    |
| 54.4711153411   | 35.4165951276   |
| 1.2485792943    | 0.4975635693    |
| 13.1576995982   | 15.7301791045   |
| 87.217401653    | 21.0155365529   |
| 0               | 0               |
| 0.9578919171    | 1.2978600714    |
| 16.3237142997   | 41.1987251325   |
| 1.1626410686    | 0.1544389538    |
| 2.2058266809    | 4.0655150074    |
| 711.1811950685  | 78.1816262005   |
| 98.3486650766   | 67.562871134    |
| 13.6954990809   | 10.0223368064   |
| 7.0169208381    | 9.5359959281    |
| 5.9489268727    | 3.6877086551    |
| 0               | 0               |
| 0.3435634815    | 0               |
| 0               | 0.7359658462    |
| 2.6941624628    | 1.6447158033    |
| 3.9308804704    | 4.9931254481    |
| 124.1214940819  | 76.0967456217   |
| 4.6821250408    | 3.1294227882    |
| 56.1582975798   | 67.5816637367   |
| 3.9990008422    | 4.4621274726    |
| 0.7340677391    | 0.5850575386    |
| 1.2420008666    | 1.5555321286    |
| 0.5756075635    | 0.2293817902    |
| 0.3307910646    | 1.4500363886    |
| 0               | 0.471646839     |
| 9.3329406258    | 6.7185767404    |
| 0               | 0.7545778423    |
| 67.4161061516   | 44.7759552992   |
| 0               | 0               |
| 0               | 0               |
| 0.8169119993    | 1.085141734     |
| 13.4614005104   | 10.3161903779   |
| 119.6609834691  | 82.3656119921   |
| 0.4709113798    | 0.8632358399    |

gene\_expression\_table

|                 |                 |
|-----------------|-----------------|
| 9.6888279991    | 15.6279971416   |
| 73.6525898099   | 98.2274627913   |
| 73.9311080066   | 98.2060868327   |
| 236.5000498061  | 256.768437856   |
| 0               | 0               |
| 181.9631539986  | 215.679706618   |
| 0               | 0               |
| 0               | 0.060643848     |
| 0.2651537629    | 0               |
| 0.5958202668    | 0.7305742428    |
| 0               | 0               |
| 159.8154697162  | 187.8926957846  |
| 0               | 0               |
| 0               | 0.4371654104    |
| 1.9051452176    | 3.922572455     |
| 0               | 0.0138558957    |
| 1.0876590144    | 1.576131743     |
| 5112.0856988098 | 6401.6655474057 |
| 0               | 0.1160059401    |
| 25.9134183771   | 26.5988058011   |
| 0               | 0               |
| 15.8065049289   | 11.9680087494   |
| 5.6967959514    | 9.319746763     |
| 0               | 0.0388988938    |
| 1.3352024375    | 3.2811798524    |
| 6.6018973305    | 8.4681483662    |
| 10.085345871    | 9.8047116252    |
| 1.6668422693    | 1.4945466287    |
| 17.5004450357   | 18.1323831264   |
| 1.741453215     | 2.365826216     |
| 0.1365190861    | 0.6093177656    |
| 0               | 164.3734004423  |
| 4.3021787296    | 2.3022405993    |
| 862.0481815444  | 1748.0866165216 |
| 9.289049672     | 8.7322658976    |
| 0.6403799592    | 0.4639887905    |
| 15.4127433481   | 11.3091465617   |
| 934.518802311   | 419.4282861564  |
| 14.4172544329   | 11.4906607968   |
| 0               | 25.7499688695   |
| 3.880187072     | 4.5674413821    |
| 0.8671751747    | 0.2468375612    |
| 0               | 0               |
| 0               | 0               |
| 0.3817351312    | 0.8873835426    |
| 0.9346685987    | 0.9684193227    |
| 56.2241512742   | 31.9109161165   |
| 3.6468717641    | 4.2717982426    |
| 0               | 0               |

gene\_expression\_table

|                 |                 |
|-----------------|-----------------|
| 18.4286274745   | 23.3548543745   |
| 6.9490201217    | 10.995990292    |
| 0.1540980055    | 0.331606644     |
| 8.0787123044    | 5.3656623271    |
| 0               | 0               |
| 0               | 0               |
| 0               | 0               |
| 30.6413266919   | 32.7984665904   |
| 64.9099715615   | 125.4839335442  |
| 1162.3177584913 | 1757.0379545763 |
| 0.8694554024    | 1.3859250599    |
| 24.0045137355   | 35.7152676775   |
| 0.5507231207    | 0.5486631142    |
| 29.2829430244   | 26.0844595981   |
| 0.1458823837    | 0               |
| 0.4689763998    | 1.0465776628    |
| 13.9403594545   | 7.9516838058    |
| 0               | 0               |
| 0               | 0               |
| 0.6423364879    | 0.5759404175    |
| 4.7157396866    | 4.3848935521    |
| 502.2953248706  | 368.4930969757  |
| 0.2960478456    | 0.3539285572    |
| 3.1686119094    | 1.9241201149    |
| 1.9012960495    | 2.3203755957    |
| 8.6668702065    | 6.8088816436    |
| 0               | 0               |
| 0               | 0               |
| 0               | 1.229289502     |
| 7.2010655761    | 4.6233279917    |
| 0.2900864854    | 0.3106765081    |
| 26.2634017198   | 22.3276050744   |
| 0.6933829565    | 0.8059208781    |
| 0.015534625     | 0               |
| 10.6349977066   | 5.0857041522    |
| 0               | 0               |
| 0               | 0               |
| 14.233622153    | 20.1928619766   |
| 0               | 0               |
| 0.8839589001    | 0.3522609636    |
| 1.343545551     | 1.0832673116    |
| 11.4368564872   | 13.3082812035   |
| 0               | 0               |
| 0               | 0               |
| 0.7819523597    | 0.0890317062    |
| 3.3715472086    | 4.030722928     |
| 0.307350145     | 0.4388873646    |
| 0.8487478423    | 0.42278653      |
| 9.9893938312    | 7.5824975397    |

gene\_expression\_table

|                |                |
|----------------|----------------|
| 2.3578204752   | 0.9396003735   |
| 55.6222569643  | 56.2215584183  |
| 0.1827364739   | 0.1456423514   |
| 2.7291545511   | 1.1864491709   |
| 3.4609684228   | 3.3036866775   |
| 1.5821013372   | 1.2609467286   |
| 3.1115125916   | 2.662244582    |
| 3.2262347356   | 2.2638914325   |
| 2.0950264867   | 2.6716031218   |
| 9.3943426084   | 21.2973855082  |
| 11.47058677    | 10.8494123168  |
| 11.4047155681  | 17.6366237396  |
| 0.2039853199   | 0.1219333818   |
| 40.9941032735  | 43.5916950619  |
| 2.6818635656   | 2.0552553272   |
| 1.2270906694   | 2.2005012194   |
| 9.7823377064   | 14.3637308472  |
| 0              | 0              |
| 0              | 0              |
| 3.7002927678   | 3.3083540394   |
| 0.7816034628   | 0.292004939    |
| 10.6652452814  | 6.0482769599   |
| 0.3331120621   | 0.7798851948   |
| 1.0604951945   | 1.9017510498   |
| 1.1902263948   | 0.9486194364   |
| 9.2904096186   | 7.6628241575   |
| 2.8970556418   | 3.0717617193   |
| 0.3198709963   | 0.5417466557   |
| 9.4511337647   | 6.2535000612   |
| 0              | 0.1003989748   |
| 52.9988063421  | 65.4726965649  |
| 1.8313834737   | 1.9087423151   |
| 0              | 0.4538547851   |
| 9.5088797343   | 3.1236323779   |
| 0.8571513886   | 0.6285036469   |
| 27.4713787481  | 14.6459105519  |
| 8.3888456284   | 0              |
| 0.7834195773   | 1.7170761487   |
| 24.3918933426  | 18.8134097704  |
| 2.727170041    | 2.4840858786   |
| 0.3356338332   | 0              |
| 3.3297416829   | 2.6538292986   |
| 0.9158843462   | 2.3796916025   |
| 0              | 0              |
| 25.2579075228  | 12.4787063603  |
| 13.8275864091  | 12.8574727437  |
| 115.4773251114 | 154.9973047875 |
| 3.3687309659   | 0.1917788609   |
| 4.912295737    | 2.9124798488   |



gene\_expression\_table

|                 |                 |
|-----------------|-----------------|
| 31.0278120534   | 22.5893565168   |
| 20.4997324725   | 11.9815239764   |
| 0               | 0.1378737571    |
| 4.0404402574    | 4.0389719709    |
| 0               | 0.1316626638    |
| 0.1544435895    | 0.2461854172    |
| 33.0433872405   | 20.8138007204   |
| 18.8988359335   | 16.6315271332   |
| 27.251913306    | 24.954871748    |
| 5.8983796206    | 4.7010531572    |
| 0.3394541083    | 1.6232849464    |
| 2.5527781688    | 1.5259376272    |
| 0.6609608379    | 0.7901861783    |
| 3.2789786961    | 5.2955145447    |
| 12.7708512326   | 18.2613636713   |
| 48.4136013703   | 17.8369274701   |
| 0               | 0               |
| 7.4173753238    | 6.7843843649    |
| 84.1224081541   | 81.7125506158   |
| 0               | 0.8226325971    |
| 200.2236503767  | 258.0546172506  |
| 2.7962818761    | 20.0579201903   |
| 0               | 0               |
| 38.5445864306   | 34.3043649646   |
| 0               | 0.1496407171    |
| 4.4188374783    | 5.5579146115    |
| 2.7968374656    | 3.5426777519    |
| 0.7027626068    | 0.6632847373    |
| 1.3896385804    | 2.1043496667    |
| 571.9949612567  | 317.2478494789  |
| 0               | 0               |
| 3.6363944625    | 1.4491169413    |
| 92.8104757438   | 66.0840741849   |
| 1.2418234692    | 2.3093996212    |
| 41.8836289835   | 33.2923134642   |
| 367.6921975914  | 191.7058062128  |
| 20.6808486825   | 27.9198326595   |
| 8.5374108227    | 10.8870095679   |
| 20.0477614779   | 13.2030533962   |
| 22.0583308207   | 18.8829273031   |
| 43.2917036094   | 21.0966183877   |
| 1041.2322539871 | 1029.4281564384 |
| 0.7283702248    | 2.9025828831    |
| 0.612884366     | 0.9280996005    |
| 0               | 0               |
| 16.7156351269   | 5.7330376919    |
| 16.2534501793   | 13.6811397806   |
| 0               | 0               |
| 104.7664056652  | 36.9588470856   |

gene\_expression\_table

|                 |                 |
|-----------------|-----------------|
| 1.1364833654    | 1.2077144475    |
| 0               | 0               |
| 3.0346694776    | 3.6279817797    |
| 16.5477603294   | 22.0389953084   |
| 22.7111522723   | 16.0038976386   |
| 145.577810312   | 153.3208848765  |
| 0               | 0               |
| 0               | 0               |
| 4.8576447527    | 14.1312655336   |
| 0               | 0.2747884628    |
| 2.1556635474    | 1.2885601102    |
| 0               | 0               |
| 0               | 0.0986482077    |
| 7.2517656943    | 7.8668303467    |
| 0               | 0               |
| 5.3944695473    | 6.449149528     |
| 11.1563169918   | 0               |
| 0               | 0               |
| 46.0646609508   | 27.2731702943   |
| 102.4950828737  | 68.7601054527   |
| 0               | 0               |
| 0               | 0.9350466195    |
| 0.1444126943    | 0.2301960186    |
| 0.5543013571    | 0               |
| 9.4778974079    | 6.564747389     |
| 0.3801270007    | 0.0757410235    |
| 62.7409431425   | 69.2760383377   |
| 7.6483730605    | 14.6853632519   |
| 30.122344006    | 13.8665371367   |
| 14.0745416484   | 8.5098398123    |
| 4.9033311148    | 5.0803895666    |
| 10.5528579547   | 8.4107075837    |
| 18.6073799927   | 7.5836365317    |
| 0               | 1.1429363651    |
| 0               | 0.0839511468    |
| 2.3524844796    | 1.4843337686    |
| 197.9757937022  | 182.7445022005  |
| 299.3696463795  | 231.2957940924  |
| 31.8947442836   | 32.982102747    |
| 11.5579505104   | 17.6559000716   |
| 0.3763363       | 4.0492288353    |
| 0.5743510604    | 0.9727445433    |
| 0               | 0.4742052254    |
| 2983.3304387056 | 1590.1427184976 |
| 16.9800759523   | 12.5538690696   |
| 0               | 0               |
| 4.6117841782    | 2.6692052207    |
| 4.4098089927    | 9.8261724729    |
| 1110.9150963402 | 1601.8043443702 |

gene\_expression\_table

|                 |                 |
|-----------------|-----------------|
| 7.2108783944    | 5.409058451     |
| 79.0355896939   | 29.2230754335   |
| 14.3331771368   | 11.1640221344   |
| 5.9144886405    | 7.070838252     |
| 21.4830045242   | 10.5994057905   |
| 142.6865996123  | 131.7795556961  |
| 49.0659747018   | 20.8565081824   |
| 99.7084209982   | 23.3730486662   |
| 0               | 1.2531065966    |
| 15.9960033687   | 43.3463811627   |
| 224.5879707142  | 103.268256257   |
| 241.7716539697  | 239.7967741019  |
| 0               | 0               |
| 4.8411611709    | 2.8938315441    |
| 40.5291325784   | 35.722239544    |
| 7.3287255116    | 7.434063188     |
| 2.1844324898    | 4.3525230291    |
| 174.0187192825  | 140.8613325062  |
| 0.4387931099    | 1.0491642793    |
| 146.2491736567  | 122.0255268026  |
| 74.5225568707   | 70.9440771279   |
| 21.061544048    | 7.1341391904    |
| 4.7419984622    | 3.5570904755    |
| 18.1785013017   | 25.8271531584   |
| 17.5570638094   | 13.8224648963   |
| 0               | 0               |
| 66.2932378723   | 16.4786205275   |
| 0.7287473061    | 0.5808171133    |
| 14.8427200156   | 10.7756230461   |
| 11.9129785705   | 11.6364033218   |
| 12.8699272818   | 3.8465360091    |
| 7.8502519147    | 3.3238772589    |
| 2.9288175616    | 1.1282400421    |
| 0               | 0.4987136984    |
| 2.6844488844    | 0.1528232899    |
| 1933.0637421508 | 1815.7854224505 |
| 26.8806167367   | 17.4070445191   |
| 1.6329152333    | 1.017797347     |
| 0               | 0               |
| 67.9106144989   | 19.6422362604   |
| 98.0540985508   | 80.2664166187   |
| 17.1944010152   | 13.7040676219   |
| 20.5960777612   | 44.7688082991   |
| 7.0364823616    | 21.030486178    |
| 0               | 2.9959045502    |
| 63.8838819983   | 84.2746543457   |
| 845.8463169874  | 448.6714335919  |
| 34.5435164772   | 22.5257267681   |
| 15.1390554165   | 6.2215011574    |

gene\_expression\_table

|                 |                 |
|-----------------|-----------------|
| 0.7345273933    | 0.1463559716    |
| 0               | 0               |
| 0               | 0.6407963993    |
| 2.5100718553    | 1.5004096861    |
| 1608.2359695741 | 1616.3057382713 |
| 48.9813379384   | 58.5577450523   |
| 5.6854988605    | 2.9130335883    |
| 23.7068533429   | 5.3677674346    |
| 26.5651301497   | 18.7528827862   |
| 1.4737715116    | 0.5873035192    |
| 131.601468158   | 55.7456922481   |
| 4.3421811847    | 4.8450517317    |
| 108.5450427795  | 45.0579270007   |
| 86.3251910408   | 26.2943549674   |
| 17.6583372722   | 7.1603687978    |
| 1.6632970536    | 0.9942452463    |
| 0.2077709663    | 0               |
| 1.5466962932    | 0               |
| 46.2067135585   | 25.014634024    |
| 11.7615885005   | 17.256819828    |
| 163.1796114351  | 61.4547419707   |
| 0               | 0.1974770006    |
| 24.3379865389   | 21.4585499749   |
| 5.0501613123    | 28.1751172632   |
| 0               | 7.6009914362    |
| 6.2578039344    | 10.5094109334   |
| 6.4246841463    | 9.6009784571    |
| 5.268144822     | 12.5962537722   |
| 6801.2485987744 | 7190.1081093797 |
| 35.6992349859   | 15.3206093481   |
| 29.4002492296   | 21.6570526882   |
| 23.7716651777   | 18.5818469521   |
| 0.721402318     | 0.0958271837    |
| 6.8135526979    | 3.9149777585    |
| 0               | 1.8210400207    |
| 21.5975579888   | 18.8180575936   |
| 5.0219347001    | 7.004409875     |
| 1.6541108066    | 2.6366776404    |
| 52.7424239283   | 21.2261548949   |
| 3.3507457664    | 6.0087818518    |
| 5.6730897856    | 5.9601531002    |
| 9.2281532293    | 2.9702512677    |
| 68.9058606652   | 37.2661195517   |
| 110.3291908025  | 45.4826892963   |
| 3.3884535029    | 1.6878894144    |
| 8.1070984033    | 4.0808960387    |
| 1.8258225126    | 0.363798587     |
| 2.1953342116    | 3.7181081783    |
| 82.5644196486   | 41.5764585424   |

gene\_expression\_table

|                 |                |
|-----------------|----------------|
| 2.7742378724    | 1.4740590408   |
| 362.0405906352  | 255.9155604111 |
| 55.725545049    | 21.3688464053  |
| 0               | 0.5507099627   |
| 0               | 0.1332303743   |
| 1742.0796402225 | 984.0166273538 |
| 18.1632038251   | 27.1428952252  |
| 2.1676136379    | 2.1595055743   |
| 0               | 0.7138625197   |
| 196.4842413789  | 80.0526916817  |
| 28.5642917298   | 13.6595738958  |
| 5.0327075311    | 2.0055529781   |
| 53.1542004433   | 76.0065376439  |
| 42.4538478032   | 101.5081131215 |
| 0               | 0              |
| 1.5260714402    | 1.9764720251   |
| 32.2570559736   | 24.2258991992  |
| 305.8627394499  | 136.7848140194 |
| 0               | 0              |
| 54.6141258539   | 46.4733663094  |
| 0.0403580463    | 0.0482485021   |
| 1.3319911965    | 1.0616070552   |
| 65.1470997017   | 61.9319322302  |
| 1.1703095248    | 0              |
| 49.0897400679   | 72.1365233464  |
| 2.9553816847    | 0              |
| 29.9325947437   | 27.1096640242  |
| 31.6671104098   | 9.7350144849   |
| 30.3503298069   | 38.7031077525  |
| 0               | 0              |
| 0               | 0.3196314348   |
| 163.5935685251  | 150.3876031453 |
| 2.5568037353    | 5.8586517409   |
| 8.3090515694    | 4.1626369264   |
| 0               | 0.2442537525   |
| 6.2380675453    | 9.6045885261   |
| 0               | 0              |
| 5.4981966114    | 8.5451033324   |
| 22.6648980556   | 14.4932856254  |
| 0.7063670697    | 1.3136197564   |
| 30.97213995     | 24.1197237067  |
| 19.054645102    | 15.4036490281  |
| 0.1501779858    | 0.538618456    |
| 0.6412586767    | 0.3123315642   |
| 4.5102476656    | 5.3920522396   |
| 0.2561759277    | 0.3062612271   |
| 70.6108617279   | 44.6908690932  |
| 0               | 0.1272406587   |
| 3.2504194037    | 0              |

gene\_expression\_table

|                 |                 |
|-----------------|-----------------|
| 2.8381436493    | 2.201432075     |
| 222.7756434375  | 205.14858715    |
| 19.2039331029   | 11.6918388053   |
| 1.5367339481    | 0               |
| 42.2493309315   | 63.3845387557   |
| 0.7031210272    | 1.9613747132    |
| 26.144218476    | 13.8914265405   |
| 364.6659345155  | 182.9686172096  |
| 51.9060645951   | 24.205573701    |
| 0               | 0               |
| 171.2689431961  | 101.3673471311  |
| 0               | 0               |
| 3.6562293414    | 4.3710636467    |
| 0               | 0               |
| 17.1316222691   | 35.8418352771   |
| 29.6163626727   | 39.5721913061   |
| 4.6467263307    | 0.4114973357    |
| 333.2083953177  | 145.3116737084  |
| 10793.197382523 | 9609.9217941896 |
| 124.9318786828  | 115.8383079765  |
| 31.5652504378   | 20.3197157217   |
| 0               | 0               |
| 37.8225782094   | 14.211158102    |
| 14.2556974466   | 13.3908091317   |
| 67.6866201242   | 75.8044821606   |
| 59.5734144961   | 97.8097513252   |
| 3.7998472975    | 5.5249790377    |
| 2.9801842257    | 2.6602568856    |
| 34.970169547    | 8.6769731619    |
| 0.4679370708    | 0.3356544453    |
| 6.9643645951    | 3.9362461423    |
| 13.6542514951   | 36.8332180145   |
| 2.8221324248    | 5.3107548594    |
| 17.5581750066   | 13.1818465598   |
| 19.6160576428   | 14.2940765851   |
| 0.3830231277    | 2.1369063024    |
| 5.2286296328    | 2.3524839895    |
| 17.8748990025   | 0               |
| 1.0528409098    | 0.6293416245    |
| 19.5395371446   | 10.3821058996   |
| 0               | 0               |
| 134.4569717124  | 92.6101928283   |
| 3.3393229367    | 3.1050432354    |
| 0               | 0.5155954957    |
| 0.008967        | 0.0250148253    |
| 58.229513725    | 31.2062956302   |
| 5.2385191317    | 5.334900291     |
| 0               | 0               |
| 5.1284184511    | 2.8611717982    |

gene\_expression\_table

|                |               |
|----------------|---------------|
| 0              | 0.7476385019  |
| 0              | 0.4591202881  |
| 3.2689917911   | 1.5469628854  |
| 0              | 1.1273174598  |
| 9.676112535    | 7.2794899097  |
| 0.4570138296   | 0.2731826084  |
| 111.9930157113 | 62.5735161142 |
| 19.3713068318  | 6.4329491742  |
| 0              | 0             |
| 0              | 0             |
| 69.0610467936  | 52.2900676642 |
| 0              | 0             |
| 0.197897975    | 0.414031229   |
| 0.2863576493   | 0.0855859544  |
| 24.0459223855  | 15.5401384159 |
| 0.1805742228   | 0.6476355943  |
| 42.4669760475  | 60.7133563444 |
| 0.6223310497   | 0.9828198721  |
| 5.0258793789   | 3.6050974806  |
| 3.9189575407   | 1.9726981848  |
| 1.4427174278   | 1.50365876    |
| 6.9999086492   | 3.5864872213  |
| 0.3915829909   | 0.8086087485  |
| 0              | 0             |
| 4.4442175428   | 5.0179395633  |
| 3.1183243471   | 2.631523853   |
| 74.1536580006  | 65.0111287404 |
| 2.6201377045   | 3.022495419   |
| 0              | 0.5618239952  |
| 26.6926212318  | 42.5484419076 |
| 0              | 0             |
| 0.1774723162   | 0.3182552503  |
| 2.6032415729   | 1.6397638333  |
| 1.342505785    | 0.8642204807  |
| 16.9280383233  | 65.2827800436 |
| 10.8414070891  | 3.4562733702  |
| 0              | 3.7683994011  |
| 2.1991068528   | 2.3369397198  |
| 0              | 0             |
| 2.2568593222   | 3.3876155958  |
| 1.5600380093   | 1.2951688431  |
| 35.9178346583  | 32.2051340359 |
| 0.7489881326   | 1.6416103139  |
| 0              | 0             |
| 10.5907460969  | 7.6763300166  |
| 381.3460666332 | 692.093061241 |
| 2.8947279272   | 2.5378320506  |
| 1.2337375649   | 0.6760174905  |
| 0              | 1.3046636152  |

gene\_expression\_table

|                |               |
|----------------|---------------|
| 3.2183155174   | 5.2155443311  |
| 0.9188109541   | 1.0047827301  |
| 7.4899054793   | 3.8892270596  |
| 0.2624251112   | 1.1503513885  |
| 0.7170305472   | 0.6494076907  |
| 0              | 0             |
| 4.4427733129   | 3.3638777275  |
| 0.6362731489   | 0.5916335959  |
| 0.4754685097   | 0.142106999   |
| 0.5659700215   | 0.8055042619  |
| 2.0830184131   | 2.0844500123  |
| 0.22801832     | 0.4543308128  |
| 1.0189520532   | 0.5414083274  |
| 45.8252700866  | 78.4857821853 |
| 1.6913747531   | 1.7445203694  |
| 3.9507143337   | 3.2886936054  |
| 0.1754312054   | 0.2796399943  |
| 0.3273346942   | 0.1739254842  |
| 153.5336093571 | 92.8386233553 |
| 17.8174123078  | 7.8248272038  |
| 1.9981380542   | 1.5925311378  |
| 4.2380133814   | 12.8228589917 |
| 0.2780086794   | 0.6924219362  |
| 0.3040189548   | 0.5855713972  |
| 8.8423485329   | 13.8812791408 |
| 3.4161038591   | 1.2762471591  |
| 0.0712437518   | 0.0567818089  |
| 11.2808051632  | 9.1863410786  |
| 1.0157658367   | 0.9894781751  |
| 8.760761867    | 10.7816369465 |
| 39.7540939752  | 34.1486489864 |
| 31.7882359939  | 17.2151232793 |
| 63.0982756482  | 65.4506992313 |
| 0              | 0             |
| 10.2409844921  | 9.0082177787  |
| 9.9475596649   | 8.2700164884  |
| 2.5749860224   | 2.1164171842  |
| 0              | 0             |
| 0.1211990595   | 0.1207457085  |
| 0              | 0.8653123735  |
| 0.4353686082   | 0.5879587899  |
| 0              | 0.0153259193  |
| 12.8993022007  | 19.2289811183 |
| 0              | 0             |
| 0              | 0.0105736878  |
| 0              | 0             |
| 0.3412535871   | 0.1359908446  |
| 7.6716095682   | 3.6685985001  |
| 0              | 0             |



gene\_expression\_table

|               |                |
|---------------|----------------|
| 1.8310702015  | 2.1890651939   |
| 1.2338108425  | 1.4750348561   |
| 2.3552283375  | 4.325571481    |
| 67.7598573793 | 76.5072514728  |
| 1.7795806529  | 3.6640430273   |
| 3.6289571784  | 2.6030756799   |
| 0             | 0              |
| 1.6145889158  | 1.7322840424   |
| 1.9919133773  | 2.0285616964   |
| 15.1035224941 | 17.554864878   |
| 0             | 0.5725472498   |
| 97.7533539199 | 129.3865194021 |
| 0.9104425911  | 1.1402751317   |
| 0.4958370385  | 0.6915752705   |
| 33.2989315873 | 27.0498752647  |
| 61.4693579234 | 28.363524927   |
| 0.8214184074  | 1.6366917044   |
| 0.9450263817  | 0.2510643906   |
| 10.1694470263 | 2.8760125136   |
| 7.3327167196  | 17.931162285   |
| 1.6183763044  | 0.8291945261   |
| 0.1535673562  | 0.1070950511   |
| 1.8932218319  | 2.565150596    |
| 7.885984854   | 12.5703791146  |
| 0.0105206819  | 0              |
| 0.0229808124  | 0.009158       |
| 0             | 0              |
| 0             | 0              |
| 0             | 0              |
| 6.7323982476  | 2.9383991217   |
| 10.2816573465 | 10.8666973379  |
| 11.5401350114 | 14.9831461478  |
| 0             | 0              |
| 0             | 0              |
| 0.5342929843  | 0              |
| 0             | 0.2769592021   |
| 42.2666435397 | 4.3792884842   |
| 0             | 0              |
| 6.7786203238  | 8.779243937    |
| 0.0570001173  | 0.0605726993   |
| 1.3675516812  | 1.7439184486   |
| 2.7918450941  | 1.9469814438   |
| 0             | 2.1579271706   |
| 4.8985533701  | 4.8802300946   |
| 0.9091866924  | 0.9963644192   |
| 6.9956016247  | 5.7082985194   |
| 0.1634737914  | 0.0895742704   |
| 0.8028290234  | 2.9433596897   |
| 0.1116915255  | 0.1780379808   |

gene\_expression\_table

|                |                |
|----------------|----------------|
| 0.9288274339   | 0.9459165125   |
| 0              | 0              |
| 2.3440679105   | 2.8306664378   |
| 25.893372823   | 41.3797197649  |
| 1.6718161451   | 1.4573673065   |
| 0.8160613918   | 1.415591923    |
| 0.8020178694   | 1.2784286124   |
| 0.275782355    | 0.3022258556   |
| 1.8877076602   | 0.9555717852   |
| 0.8862386494   | 0.6710219595   |
| 2.3107832795   | 2.6704820322   |
| 8.257064804    | 5.6981336453   |
| 0              | 0.0205998005   |
| 0.8477970419   | 0.472990457    |
| 8.3035148772   | 4.7213524678   |
| 0.4724338986   | 1.4120002103   |
| 6.5144774919   | 5.7112966011   |
| 20.1339151515  | 20.0586032689  |
| 0              | 0              |
| 0              | 0              |
| 0              | 0              |
| 0              | 0.0710697033   |
| 14.9492656211  | 7.9853691213   |
| 10.9700288987  | 12.0861826788  |
| 686.5718304326 | 289.0353992136 |
| 18.0306921465  | 23.7427270924  |
| 0              | 3.22587723     |
| 0              | 0              |
| 0.3240069735   | 0.2582360078   |
| 19.4247695002  | 12.1641835613  |
| 0              | 0              |
| 0.0665680647   | 0.0884254182   |
| 0.1970833748   | 0.117807705    |
| 0              | 0              |
| 10.9265225938  | 5.5292197628   |
| 1.9926558131   | 1.407688824    |
| 0              | 0              |
| 0.0713857414   | 0.2844748784   |
| 4.6390694159   | 7.086632354    |
| 4.1885983826   | 8.6240568377   |
| 23.2583709712  | 32.182460987   |
| 0              | 0.008027       |
| 3.9685601817   | 4.5185321035   |
| 20.7217261913  | 10.8204164384  |
| 0.5243110745   | 0.5278482832   |
| 54.3876867781  | 25.8880291258  |
| 9.2694833767   | 4.7713187202   |
| 0              | 0.5128480234   |
| 6.152533075    | 1.2259038455   |

gene\_expression\_table

|                 |                 |
|-----------------|-----------------|
| 1.0610947508    | 1.6385447957    |
| 0               | 0.7339677053    |
| 1.5249849994    | 1.3311792969    |
| 0               | 0               |
| 0.1737365526    | 0.2077040192    |
| 7.927523037     | 10.2207726229   |
| 0               | 0               |
| 0               | 0               |
| 2.4278169997    | 0               |
| 0               | 0               |
| 8.3469342097    | 6.4402536256    |
| 667.2975137425  | 619.7076906077  |
| 2.6487963693    | 2.9183001334    |
| 1.8066460841    | 4.4997205929    |
| 0               | 0.6313586802    |
| 8.2611161475    | 21.2156654451   |
| 0.2720461312    | 0.1626171177    |
| 39.6397591583   | 33.0116574343   |
| 2.2511567191    | 1.3456416952    |
| 0.4702663604    | 0.6559102288    |
| 0               | 0               |
| 0               | 0               |
| 3.1762809194    | 1.2657599548    |
| 440.5576041608  | 1607.7394477054 |
| 102.7480508355  | 38.7904610979   |
| 39.7216191035   | 33.3696973025   |
| 65.7376711707   | 25.7672562236   |
| 12.3677540631   | 8.0828986742    |
| 36.4927833507   | 17.7741814952   |
| 242.8502393492  | 147.8044733721  |
| 61.9060482199   | 27.0418898641   |
| 19.3306889297   | 6.9578668839    |
| 3.6405594011    | 5.181345304     |
| 5.3853789318    | 3.5768231077    |
| 2.5562453113    | 3.0560202626    |
| 105.0110629675  | 99.6364419162   |
| 0               | 1.0579231442    |
| 1.397894102     | 1.0212878218    |
| 17.1273929103   | 19.1406016692   |
| 0               | 0               |
| 0.4122332494    | 0.146023563     |
| 3.7343554073    | 6.7643397645    |
| 4.5355488732    | 7.8322112847    |
| 5.0972842777    | 3.9565939174    |
| 0               | 0               |
| 0.0855994245    | 0.1364467772    |
| 1658.8593770424 | 747.3622207352  |
| 1.2014528661    | 1.9463590492    |
| 1.1074688615    | 0               |

gene\_expression\_table

|                |                |
|----------------|----------------|
| 1.1876216011   | 2.6818729557   |
| 1.340234501    | 1.0681770313   |
| 0              | 0              |
| 24.8197291165  | 20.6232782349  |
| 1.2160357985   | 2.353746478    |
| 1.0078146364   | 0.9371085332   |
| 32.8980217756  | 15.4235130049  |
| 11.8788885776  | 0.591722751    |
| 0              | 1.8282015252   |
| 0.4093428802   | 0.8971857694   |
| 1.7523320011   | 4.1898655645   |
| 0.4027882591   | 1.7014340271   |
| 6.4217531772   | 7.9843699093   |
| 16.5900828315  | 21.6073716541  |
| 0              | 0.0785421355   |
| 0              | 0              |
| 135.5432313367 | 63.0773240468  |
| 18.5556842014  | 24.8043700178  |
| 2.4671537815   | 5.68053841     |
| 11.504422738   | 0              |
| 0              | 0              |
| 0              | 0.9879994739   |
| 27.3595392895  | 16.3543197664  |
| 0.3303625265   | 0.3686220043   |
| 0              | 0              |
| 15.3977571754  | 18.4081933448  |
| 0.1324795581   | 0.4223488381   |
| 20.3535034188  | 12.7747431981  |
| 31.7351699958  | 15.4226649067  |
| 1.0311686297   | 1.2327737924   |
| 11.7707435162  | 10.3723615412  |
| 3.8590933221   | 3.3455271329   |
| 3.988043655    | 1.3497743752   |
| 4.2887608735   | 8.6988167529   |
| 0.4794442427   | 0.0955301717   |
| 4.9485426251   | 2.5354452149   |
| 0.4481400713   | 0.5714736405   |
| 0              | 0              |
| 0.3183068305   | 0.0634232377   |
| 14.3754932235  | 7.5794954197   |
| 0.272293465    | 0.5425498762   |
| 26.8423819381  | 32.2399775177  |
| 0              | 0              |
| 9.8116749288   | 8.0742873713   |
| 1.1895667276   | 0.3047443961   |
| 2.2454890914   | 1.283894976    |
| 23.6752991036  | 11.974806717   |
| 206.0375141168 | 137.3919254148 |
| 7.9934599457   | 5.4607268726   |

gene\_expression\_table

|                 |                |
|-----------------|----------------|
| 0               | 0.1255872799   |
| 0               | 0              |
| 0               | 0              |
| 5.211177068     | 3.8456921543   |
| 1.3206690339    | 1.1578415266   |
| 0.3466567577    | 0.0828864171   |
| 1.4862646172    | 0.8179133335   |
| 3.5877531297    | 2.7888622646   |
| 7.836214668     | 5.4385166467   |
| 0.5008196752    | 0.498946335    |
| 6.9890683939    | 5.4708699931   |
| 0               | 0              |
| 11.3102888741   | 5.454564628    |
| 1.3467741068    | 2.7049406493   |
| 0.2406730092    | 0.9111364888   |
| 0.0869786101    | 0.1463477321   |
| 59.0884612131   | 44.41815774    |
| 6.7391278831    | 2.0658214922   |
| 0               | 1.92691735     |
| 0               | 0              |
| 27.8277070157   | 15.2659912212  |
| 13.132112768    | 15.6995897587  |
| 1.3999764256    | 3.62632334     |
| 0               | 0              |
| 80.0679447813   | 155.8367101165 |
| 0.3522870081    | 0.5414954321   |
| 1.4166275356    | 0.4776804397   |
| 12.4645496033   | 13.4823189548  |
| 1.4498385997    | 1.2277530971   |
| 1.663264298     | 0.9389909072   |
| 11.5847654194   | 15.1687392585  |
| 7.0923204255    | 6.7125016953   |
| 0               | 0.2508735098   |
| 35.6880955102   | 24.5782585241  |
| 0.1562283075    | 0.5603181408   |
| 0               | 0              |
| 4.029387754     | 4.7441912042   |
| 0.3894771447    | 0.465624344    |
| 67.9539818283   | 95.7243636714  |
| 15.6366757196   | 11.9432759168  |
| 1.0271806016    | 9.8240484762   |
| 1.3195053398    | 5.2582786651   |
| 12.1867277194   | 6.4752760936   |
| 1193.3350610008 | 1084.541808351 |
| 13.5797972302   | 9.785359875    |
| 2162.3406215865 | 2284.920043367 |
| 4.2462995368    | 8.2916154544   |
| 31.3138197325   | 6.6063576445   |
| 38.9987683179   | 26.2022398988  |

gene\_expression\_table

|                 |                 |
|-----------------|-----------------|
| 0               | 0               |
| 8.9331955986    | 22.6944403993   |
| 0               | 0.4857578524    |
| 0               | 0.2522725166    |
| 32.1055110695   | 35.5393542821   |
| 88.603243025    | 71.1869502523   |
| 1.462036037     | 6.9915226588    |
| 5.1654345733    | 19.1524901799   |
| 7.511463695     | 2.9933466808    |
| 0               | 0               |
| 9.6752975928    | 6.8544758575    |
| 88.2744626188   | 49.3537980072   |
| 9.2148971997    | 10.6299697627   |
| 1704.1843566271 | 1245.3255756587 |
| 17.4285798157   | 24.3087423189   |
| 5.1806193876    | 6.4884172953    |
| 5.3279647859    | 13.6492335674   |
| 2.7587037558    | 0.4711516613    |
| 373.032284327   | 472.1975225466  |
| 21.0082508119   | 21.6907472867   |
| 1218.2072909819 | 905.5001156716  |
| 60.6396451657   | 35.9791903649   |
| 6.1485322483    | 5.09909264      |
| 0.5750667115    | 1.8333300694    |
| 2.7040692126    | 3.5919393481    |
| 0               | 0               |
| 0.2463076634    | 0.2944636052    |
| 0.9229572806    | 2.5746137599    |
| 0.621567464     | 1.3313712908    |
| 0               | 0               |
| 2.111683613     | 0               |
| 0.0894483254    | 0.1069364875    |
| 28.8638411012   | 96.1267805007   |
| 5.2379330735    | 3.6835343518    |
| 7.0058394747    | 4.5367619658    |
| 2.7127544738    | 4.1439978364    |
| 0               | 0.1572354434    |
| 0               | 2.6464216134    |
| 0               | 0               |
| 0               | 0               |
| 0               | 0               |
| 0               | 0               |
| 0.069349113     | 0.3316306048    |
| 2.3632358357    | 5.1273513713    |
| 20.2140751005   | 25.3595464732   |
| 0.2174425159    | 0.0742728554    |
| 2.0080574842    | 4.0010924964    |
| 0               | 0.2053569952    |
| 0.5573520338    | 0.6663206778    |

gene\_expression\_table

|                 |                 |
|-----------------|-----------------|
| 0               | 1.2901406807    |
| 3.5370417527    | 8.0812738621    |
| 67.2749527204   | 59.0443423292   |
| 14.2169801804   | 71.6521691525   |
| 0.3975733764    | 0.6337379743    |
| 234.5946363352  | 582.7293500856  |
| 0               | 0.7820887668    |
| 8.2139725134    | 11.8516001929   |
| 10.5828572886   | 30.7991327938   |
| 4.0152239693    | 1.600081932     |
| 5.0023038253    | 3.1009019789    |
| 0               | 0               |
| 0               | 0               |
| 0.5066398994    | 0               |
| 1.9913915351    | 0               |
| 0.6841214504    | 2.7262498444    |
| 17.1846660394   | 10.7188503437   |
| 0               | 0               |
| 0               | 7.7308871002    |
| 0.339002146     | 0.5693231837    |
| 0               | 0               |
| 0.060099663     | 0.1796245719    |
| 3.6772421537    | 5.8615796028    |
| 40.717099484    | 37.6673098339   |
| 7.4478745844    | 0               |
| 0               | 0               |
| 0.6299432576    | 1.5746726467    |
| 0               | 0.1687855556    |
| 2572.4566821014 | 2931.8824204066 |
| 0.0466117968    | 0               |
| 0.3128524462    | 0.1745420356    |
| 3.0649569866    | 3.0378334317    |
| 1.2690662608    | 4.3829734246    |
| 0.4972704394    | 0.1486231126    |
| 140.3794742251  | 293.9684181088  |
| 2.4695584148    | 12.9648215027   |
| 2.5384376589    | 6.0694620244    |
| 0.5422025922    | 0.5581802724    |
| 0               | 0               |
| 17.1489024561   | 19.7301377564   |
| 0.3487039973    | 1.528558474     |
| 3.5003936352    | 1.115936078     |
| 0.0158277971    | 0               |
| 1.1789864395    | 1.9814592909    |
| 0.0443764713    | 0.353683832     |
| 0               | 15.2973320968   |
| 21.9556679552   | 29.2197500688   |
| 0               | 0               |
| 0               | 0               |

gene\_expression\_table

|                |                |
|----------------|----------------|
| 0.5740114572   | 0.2287457358   |
| 629.8648987944 | 514.3585056746 |
| 0.7273916373   | 0              |
| 0              | 0              |
| 0.124617699    | 0.0993212484   |
| 29.6522363038  | 27.6161559625  |
| 0.8922578537   | 1.2444884481   |
| 0              | 0              |
| 42.8646895383  | 55.2589648977  |
| 3.0494980426   | 1.800350369    |
| 1.3106705881   | 1.3769916684   |
| 0.6482470248   | 0.2137894264   |
| 0              | 0              |
| 0              | 0.0258258597   |
| 9.6222280793   | 8.5859328176   |
| 1.0742126804   | 1.5410801318   |
| 17.7658598626  | 13.8223931051  |
| 0              | 0              |
| 235.4374194453 | 272.1725932175 |
| 0              | 0              |
| 16.602179795   | 17.2592123887  |
| 0              | 0              |
| 0.6598282657   | 1.227072273    |
| 5.1551980094   | 5.7779040848   |
| 0.006812       | 0              |
| 3.5333551146   | 3.7816344266   |
| 0.625788342    | 1.1970192969   |
| 0              | 0.2228000236   |
| 8.5867118531   | 8.2694397477   |
| 11.1526738691  | 10.3301868195  |
| 0              | 0              |
| 1.3950924643   | 23.90583372    |
| 0              | 0              |
| 0.2827386498   | 0.3661853678   |
| 11.6752105659  | 20.1331363827  |
| 6.2225850357   | 5.9513367895   |
| 24.8296171693  | 20.3163291193  |
| 20.7210249722  | 16.5148135816  |
| 0              | 0.8031975487   |
| 1.1183145223   | 0.6170573978   |
| 0.5299880634   | 0.5430914922   |
| 0              | 0              |
| 0.1231516768   | 0.4089700734   |
| 0              | 0              |
| 14.6849016255  | 9.7327814001   |
| 15.2448481247  | 8.8696892356   |
| 0.4108608193   | 0.5457652994   |
| 0.4903015812   | 0.4809526985   |
| 5.8991793516   | 5.1856881054   |



gene\_expression\_table

|               |               |
|---------------|---------------|
| 4.3060195594  | 3.3482245347  |
| 0.6195226092  | 0.9258078824  |
| 4.9587303084  | 5.7485753461  |
| 0.2306813404  | 0             |
| 6.9392416349  | 7.1898164689  |
| 0             | 0             |
| 0             | 1.4073084997  |
| 0.97008945    | 0.9664607836  |
| 0             | 0             |
| 1.8463382692  | 5.8861822454  |
| 0.5846095517  | 0.7191655338  |
| 1.7415524329  | 1.0353341937  |
| 8.5792171684  | 7.2175732288  |
| 9.7233941837  | 10.1341167437 |
| 0             | 0             |
| 0             | 1.8630128462  |
| 4.3152921412  | 10.1030038686 |
| 0.4392141147  | 0.1969070459  |
| 0.7966741808  | 0.4108534592  |
| 0.1403378018  | 0.1997326592  |
| 0             | 0             |
| 0             | 0             |
| 0.0185229555  | 0             |
| 0.2187244047  | 0.1597979207  |
| 3.1267672823  | 3.2485745207  |
| 4.0706005004  | 3.5549237865  |
| 24.0537978745 | 29.5553822934 |
| 7.3544843074  | 4.1901135442  |
| 0.4819502967  | 0.0640196718  |
| 0.0353451355  | 0             |
| 3.4467392175  | 3.4796311433  |
| 5.2848275959  | 6.8674688386  |
| 7.7875113215  | 4.2116929549  |
| 0.0118497492  | 0.0566660382  |
| 0.0170180947  | 0             |
| 0.2822597712  | 0.5499099758  |
| 0.6708536637  | 0.660481429   |
| 13.9007923939 | 11.5791320508 |
| 7.5784286143  | 2.9226120526  |
| 50.8384052549 | 47.7813601353 |
| 0             | 0.1658104011  |
| 1.3746565395  | 0             |
| 0.17924861    | 0             |
| 4.7846645019  | 3.8134137865  |
| 0             | 0             |
| 0             | 0.8034276253  |
| 7.4851791125  | 3.1753155415  |
| 31.3817589768 | 28.5634280721 |
| 4.7664285965  | 2.6503811386  |

gene\_expression\_table

|                 |                 |
|-----------------|-----------------|
| 95.0400200151   | 85.2160664048   |
| 1.7757642191    | 1.7691218872    |
| 0.5134029821    | 0               |
| 15.7872463916   | 18.0159306603   |
| 0.8263271479    | 1.31717797      |
| 0               | 0               |
| 0               | 0               |
| 7.7551038989    | 5.6014192795    |
| 9.3708411172    | 8.4513458616    |
| 11.1548755576   | 4.8318044376    |
| 42.0680832606   | 21.3932360333   |
| 0               | 1.6049243763    |
| 0.4029450668    | 0               |
| 5.8831776112    | 2.3444685204    |
| 50.0436116683   | 33.1398563919   |
| 6.4779028829    | 3.8722031845    |
| 0               | 0               |
| 0               | 0               |
| 40.449663691    | 41.977458093    |
| 2.8567019673    | 4.2857657759    |
| 31.6351789612   | 45.7577912959   |
| 1.8787431384    | 5.2408037049    |
| 5884.6473569335 | 5589.2833703432 |
| 278.111528768   | 463.1268980742  |
| 196.5184022079  | 111.9732338276  |
| 0               | 6.0873919478    |
| 11.7340693671   | 10.5211597622   |
| 1.4702823234    | 0.5859130645    |
| 0.8329954351    | 0.8211440009    |
| 25.8908190705   | 9.1037552508    |
| 0.9246244722    | 0.9825769276    |
| 0.9618149887    | 2.555246062     |
| 0.5954854884    | 0.5141569733    |
| 102.7568233478  | 67.4101672524   |
| 0.1871275519    | 0.5219972583    |
| 2.9793600179    | 1.9788103852    |
| 0               | 0               |
| 0               | 1.3036327399    |
| 8.4827015022    | 9.3757948487    |
| 8.9379654011    | 5.7204875516    |
| 6.8059323255    | 2.5313771119    |
| 112.0871298928  | 93.6355706858   |
| 7.5486005224    | 5.3559669958    |
| 2.6771057024    | 3.4346939065    |
| 5.5988132553    | 2.1603181463    |
| 0.8376005014    | 1.1509895397    |
| 4.5304524076    | 4.0987514232    |
| 0               | 0               |
| 13.7418290109   | 19.971917087    |

gene\_expression\_table

|                |                |
|----------------|----------------|
| 0.3870355503   | 0              |
| 2.4643195106   | 2.0218483801   |
| 10.8515407098  | 24.1895006191  |
| 1.253080782    | 0.2496787146   |
| 8.4223426817   | 5.1581575633   |
| 1.8047351472   | 0.3595968896   |
| 167.2836979764 | 164.9036708497 |
| 0              | 1.1187737694   |
| 6.1282032932   | 5.9767482326   |
| 0.385931978    | 0.4613860569   |
| 7.9010344435   | 8.4662143051   |
| 0.1696684086   | 0.2028405069   |
| 0.1262991558   | 0.2390707827   |
| 1.1402763078   | 0              |
| 0.4278826362   | 0.1705128482   |
| 1.0848807693   | 1.9146002475   |
| 0              | 0              |
| 0.3838063847   | 0.917689772    |
| 64.5624384836  | 33.5587510761  |
| 0              | 0              |
| 1.0829174503   | 0.2876977987   |
| 27.1282815752  | 1.1608829821   |
| 15.0738707454  | 0              |
| 1.8477924605   | 2.9454091257   |
| 0              | 0.4944932722   |
| 0              | 0.2015931747   |
| 4.3824666764   | 0.4366073848   |
| 0              | 0              |
| 0.5478509755   | 0              |
| 0              | 0              |
| 36.8043335186  | 49.5390050168  |
| 0              | 0.1611934391   |
| 7.9212251041   | 4.2707457344   |
| 2.9071629419   | 5.2133194051   |
| 0.3184292396   | 0              |
| 0              | 0.2413013154   |
| 6.2371182887   | 6.3518722252   |
| 1.3148218723   | 0.698615316    |
| 0.3244775014   | 0.9051385773   |
| 167.2585903572 | 39.9919083642  |
| 9.1499357435   | 6.5191137944   |
| 246.338451878  | 393.3684090518 |
| 12.2061285044  | 16.8375750797  |
| 3.4761652703   | 6.7284300119   |
| 3.4946581342   | 5.6479064966   |
| 814.4351504962 | 539.6156100468 |
| 67.8127942956  | 64.374206505   |
| 0              | 0.2726382347   |
| 22.9882683143  | 11.1966700197  |

gene\_expression\_table

|                  |                  |
|------------------|------------------|
| 7.4008848394     | 0                |
| 0.9846965226     | 0.3433546262     |
| 327.2807858048   | 480.0277371983   |
| 0.4290041133     | 3.0772756991     |
| 0                | 1.7029543655     |
| 22.0030995927    | 26.3049551225    |
| 4.3378992186     | 11.2363500522    |
| 0                | 0.7898523909     |
| 0                | 3.0669938108     |
| 4.0299120998     | 8.2304179386     |
| 0                | 9.6966839756     |
| 1.7964321402     | 4.7964294973     |
| 2.4580587249     | 5.3875013224     |
| 14.5956294715    | 12.6592529677    |
| 887.7556855516   | 1035.4574732638  |
| 44.9199154056    | 30.7767385863    |
| 11.8347233652    | 20.6463967741    |
| 40.5078646459    | 1.0089085755     |
| 2.1915257495     | 0.7485696828     |
| 17.5912059041    | 15.3055204962    |
| 26.3171456477    | 15.5723218126    |
| 48.0531848803    | 47.8734396202    |
| 1.1790534195     | 3.1010578188     |
| 0                | 2.7443892759     |
| 1.5655446576     | 3.5650026564     |
| 111.1099635191   | 122.1454911243   |
| 1.608373282      | 4.4865998354     |
| 813.4483774073   | 680.8070237816   |
| 7.0802170548     | 7.2552683939     |
| 18.617531654     | 17.3422789052    |
| 44.6305737618    | 29.345996423     |
| 5.6779636252     | 3.8788970934     |
| 1.8634475727     | 4.4555454169     |
| 5.3116799232     | 8.0435532182     |
| 3.3737430846     | 2.566676078      |
| 0                | 0.6673776586     |
| 140.2738710958   | 118.3209638507   |
| 27.1997387219    | 64.0498105823    |
| 0.8043704551     | 3.2054466742     |
| 0.2285959753     | 0.1821927208     |
| 60.6222349891    | 254.8689027681   |
| 412.3740317987   | 229.2469160252   |
| 19789.7457605725 | 24444.1096895297 |
| 8.2260886889     | 11.8012587936    |
| 51.2648848478    | 32.1760694233    |
| 0                | 0                |
| 30.3372477682    | 41.8095482606    |
| 694.9257092629   | 489.6942164859   |
| 11.4273656624    | 10.2208597862    |

gene\_expression\_table

|                |                |
|----------------|----------------|
| 7.2264915881   | 4.1756871173   |
| 49.5016984044  | 21.8786082144  |
| 9.9154239973   | 2.5888050016   |
| 8.5644213704   | 12.2866354634  |
| 27.9635984029  | 27.4679957141  |
| 99.9175738562  | 81.0571165506  |
| 4.3419133141   | 7.3929669944   |
| 0              | 6.2806656685   |
| 4.1496841027   | 8.8696566734   |
| 11.5017867099  | 8.9972515142   |
| 25.6558012718  | 31.8077940536  |
| 2.0142640611   | 0.3210767374   |
| 3.4148814838   | 5.8516256819   |
| 538.5226571151 | 453.72257127   |
| 93.4448116514  | 105.2193128685 |
| 234.7943941649 | 362.924426686  |
| 3.0478840081   | 5.8030568791   |
| 0.5974399991   | 1.1904104917   |
| 0              | 0.3530672004   |
| 0              | 0              |
| 10.0795021878  | 3.2864070511   |
| 0              | 0              |
| 0.6326793548   | 0              |
| 4.6835036027   | 6.4475425376   |
| 14.9681574892  | 19.1727879078  |
| 18.440807377   | 15.7472816965  |
| 0              | 0.0660123525   |
| 1.4579474847   | 0.871496377    |
| 228.3524180324 | 174.67682091   |
| 0              | 0.4786289829   |
| 3.6368642202   | 0              |
| 0.516244664    | 1.3767780139   |
| 5.2212473904   | 1.0403434124   |
| 3.4802578617   | 1.1557465963   |
| 56.1019248584  | 32.5190242312  |
| 17.1646484255  | 12.5077527615  |
| 39.3998250914  | 47.10293777    |
| 11.1848312569  | 9.8058345924   |
| 54.5726396608  | 68.0012085948  |
| 0              | 0              |
| 21.2237110711  | 10.5150145589  |
| 0              | 0              |
| 12.9489299843  | 5.5571358278   |
| 2.1477697535   | 0.8558943668   |
| 15.0438810076  | 17.1722431239  |
| 6.1079277386   | 3.0425403698   |
| 0              | 4.7263747905   |
| 280.2773562082 | 184.7664003859 |
| 23.8449739658  | 41.1766865265  |

gene\_expression\_table

|                |               |
|----------------|---------------|
| 8.6891870151   | 4.616898502   |
| 30.584427951   | 12.9497608036 |
| 12.0348124319  | 31.3145250687 |
| 8.398856184    | 12.5511597849 |
| 1.6496136226   | 0.3944263592  |
| 26.8118526766  | 29.0455815957 |
| 10.7140552818  | 8.5391830723  |
| 0.6390584764   | 0.7061227434  |
| 1.0836617135   | 1.0889961221  |
| 0.7989527943   | 1.740508543   |
| 0.2659096434   | 0.5009301733  |
| 0.7095955252   | 1.9794354967  |
| 0.1159543165   | 0.0462082335  |
| 0.5867646088   | 1.714738043   |
| 13.0970634816  | 6.5390344267  |
| 0.5623844572   | 0.8964493296  |
| 2.9105357919   | 2.6419022328  |
| 15.6048392824  | 16.887732587  |
| 0.1158234154   | 0.2307803446  |
| 0              | 0             |
| 2.0545437181   | 1.1747188476  |
| 4.2618624225   | 2.577348367   |
| 0              | 0             |
| 0              | 0             |
| 87.9207784377  | 38.3214591013 |
| 11.6819048653  | 14.219774304  |
| 7.960716388    | 8.1024187046  |
| 0.1712509181   | 1.0919062128  |
| 0.0292514556   | 0.2681067598  |
| 13.328828668   | 11.4260917905 |
| 7.5979576994   | 10.7655639772 |
| 0.9305904223   | 2.0767252887  |
| 23.7592092956  | 24.7411377767 |
| 3.2828207764   | 2.8680130757  |
| 3.4363362763   | 5.6020622635  |
| 4.1405848917   | 5.7751355673  |
| 1.1304797769   | 2.0522798964  |
| 25.6693087199  | 15.384247758  |
| 59.8489921958  | 91.584190692  |
| 8.131211879    | 11.2511065111 |
| 0.7073932688   | 0.5894249561  |
| 112.8733463714 | 75.3726547699 |
| 0              | 0             |
| 1.8174289609   | 0.9546962295  |
| 0.1048847914   | 0.0417969859  |
| 3.3934075592   | 3.2805450401  |
| 0              | 0.4120232456  |
| 0.8754685029   | 0.7442720176  |
| 0              | 0             |

gene\_expression\_table

|                |                |
|----------------|----------------|
| 0.6472422323   | 2.5276990704   |
| 1.6805734198   | 3.8508604536   |
| 4.7018258524   | 0.9368476891   |
| 9.8426746786   | 6.8277823834   |
| 4.5229280953   | 4.2163378015   |
| 0              | 0              |
| 0              | 0              |
| 114.6916048163 | 118.0713485038 |
| 22.2393029291  | 10.3174747932  |
| 2.5136576722   | 9.8166804398   |
| 12.2307513909  | 3.5447277598   |
| 79.5221352309  | 146.2119742543 |
| 0              | 2.8352447207   |
| 1.9624639132   | 2.4809839508   |
| 0.0785272625   | 0.7197484527   |
| 0              | 0.1379890702   |
| 0              | 0              |
| 0              | 0              |
| 2.2606817903   | 3.5689113367   |
| 0              | 0              |
| 0              | 0              |
| 0              | 0              |
| 0.0140267162   | 0              |
| 66.7350017932  | 48.1445828337  |
| 0.34974656     | 0.1393753264   |
| 0.1414194445   | 0.0563561833   |
| 0              | 0.0118502554   |
| 0.008121       | 0.009708       |
| 0              | 0              |
| 6.2370238084   | 6.6916703748   |
| 0.302057486    | 1.053246689    |
| 0.733251995    | 0.7305092304   |
| 138.3884621133 | 98.5985210863  |
| 1.6514715571   | 3.1852894705   |
| 11.7412740204  | 1.5596473623   |
| 2.3208413445   | 1.6647552902   |
| 0              | 0              |
| 127.7403258341 | 168.1861366655 |
| 0              | 0              |
| 0.5930436032   | 0              |
| 0.555504458    | 0.7609615292   |
| 51.1346613255  | 31.341259287   |
| 16.456997578   | 5.9260624277   |
| 11.6389077236  | 9.5855073768   |
| 0.7485500114   | 0.2485833413   |
| 0.3235987973   | 0.3223883604   |
| 1.0182384834   | 0.4939831647   |
| 0.5207281274   | 0.6863862678   |
| 29.3386833848  | 25.2884464047  |

gene\_expression\_table

|                |                |
|----------------|----------------|
| 2.2406386741   | 1.208045212    |
| 0.350121453    | 0.2192531357   |
| 2.4000117936   | 2.3085849703   |
| 73.7605821222  | 50.9359542641  |
| 11.6733773511  | 2.5665572456   |
| 0.0529382144   | 0              |
| 99.0775029371  | 106.9014337401 |
| 0              | 0              |
| 0              | 0.1108603099   |
| 2.375376808    | 2.7214653358   |
| 6.2535815639   | 26.1012159628  |
| 4.1042572325   | 4.1632487883   |
| 1.0931805324   | 1.1234837989   |
| 6.2097676086   | 6.9409957304   |
| 79.0631890008  | 53.8277812245  |
| 442.831096124  | 345.9077259622 |
| 5.7821751307   | 8.0647652754   |
| 0.6235913289   | 1.2735804485   |
| 0              | 0.006706       |
| 1.4485207228   | 2.2608605224   |
| 3.7592809593   | 5.9923506996   |
| 0.2300454807   | 0.5500439627   |
| 2.9252089605   | 1.729758522    |
| 0              | 0              |
| 0.2576789003   | 0.7188021117   |
| 1.189640133    | 0.579426333    |
| 30.6405996097  | 34.1509479185  |
| 11.6423386269  | 8.3868173099   |
| 2.5420285263   | 0              |
| 2.8030620515   | 3.7781924962   |
| 6.2329719155   | 4.6042336185   |
| 0.7140348465   | 2.0487282183   |
| 9.4980948545   | 8.241590414    |
| 0.4549606647   | 1.1603426875   |
| 109.6157012158 | 111.9358203481 |
| 0              | 0              |
| 0.0392157208   | 0.1875313558   |
| 2.552454988    | 3.4176675548   |
| 103.591779502  | 167.358307208  |
| 5.8939151809   | 9.214317047    |
| 20.1406494028  | 7.9045169787   |
| 0.5615991608   | 0.1491995925   |
| 1.2653871465   | 1.0085231238   |
| 6.3129201795   | 13.3730514957  |
| 18.8343549242  | 32.8993785387  |
| 2.3529933733   | 1.3605505859   |
| 0.0901229446   | 0.1616145037   |
| 15.067595942   | 13.0097368884  |
| 0              | 0              |



gene\_expression\_table

|                |                |
|----------------|----------------|
| 2.9793438488   | 2.922534862    |
| 1.2301880749   | 1.8718048317   |
| 10.1571862987  | 5.2825616925   |
| 191.092981069  | 117.7136931333 |
| 0.3098499442   | 0.2469527484   |
| 0.738239973    | 0.2758044565   |
| 0.0391235116   | 0              |
| 0.1223701489   | 0.755856988    |
| 3.423454215    | 18.0385415853  |
| 2.8506445858   | 4.5439705791   |
| 1.1672156123   | 0.9302796687   |
| 0.3699199845   | 0.1637939026   |
| 12.5724119656  | 10.6337956091  |
| 5.2278958378   | 2.4801622099   |
| 0              | 0              |
| 0              | 0              |
| 10.416647681   | 8.4452874305   |
| 43.5336824829  | 82.4931129395  |
| 100.8814612453 | 60.0687350721  |
| 4.3153420624   | 3.4069134587   |
| 0.7515775039   | 0.4118214055   |
| 0.5419200993   | 0.9934031587   |
| 20.6855003151  | 26.7905627621  |
| 29.9387883946  | 23.8614407279  |
| 1.5835489093   | 1.9292106947   |
| 0.4478819868   | 0.1784826651   |
| 0              | 0.0466721997   |
| 9.7448826338   | 7.1842392577   |
| 2.1257468347   | 2.4566426361   |
| 15.2550221148  | 13.1480025765  |
| 5.8686245995   | 6.3144065437   |
| 1.1285663722   | 0.1499126554   |
| 6.6699641746   | 7.6892314708   |
| 2.4462513507   | 2.3246194433   |
| 3.2761567307   | 3.790337932    |
| 11.8865592289  | 15.4643854676  |
| 2.1232298299   | 4.865161908    |
| 0.0745094958   | 0.5641539996   |
| 12.793688984   | 8.9923361265   |
| 8.4465289755   | 4.9125022009   |
| 67.5620397405  | 112.2123171372 |
| 7.7485227327   | 15.6106233293  |
| 41.6577760285  | 52.3563100699  |
| 35.131550062   | 32.4906948872  |
| 4.9726471122   | 2.5847200098   |
| 0              | 0.5169757631   |
| 1.2029811102   | 1.917570082    |
| 1.2510205265   | 0              |
| 39.248211675   | 48.7045440568  |

gene\_expression\_table

|                |                |
|----------------|----------------|
| 0              | 0              |
| 0.800474811    | 0.5050710443   |
| 3.3234524766   | 2.9799188478   |
| 4.0851395163   | 1.3264725156   |
| 3.2932916208   | 2.5296776596   |
| 1.9248575092   | 1.3423602406   |
| 0.9905343019   | 1.0263023269   |
| 0.1633040554   | 1.7570866535   |
| 3.2846221791   | 2.7113640241   |
| 0.7140348465   | 0.6639397004   |
| 304.1523239462 | 364.7529707848 |
| 1.8850213969   | 1.4340864745   |
| 1.5049696683   | 8.8960855223   |
| 0.6343472641   | 0.6319744575   |
| 888.1467854313 | 833.4278596812 |
| 2.7788016644   | 3.845010309    |
| 0              | 0.4414520878   |
| 1.4149656904   | 0.5638691772   |
| 1.0582230465   | 0.4217058848   |
| 0              | 0.0706045523   |
| 87.6735963184  | 55.7348426919  |
| 1.7404772804   | 1.3871735528   |
| 32.9130100002  | 22.1331806747  |
| 0              | 0.1082753953   |
| 3.2837404046   | 3.8530498443   |
| 9.6740268332   | 4.009341718    |
| 7.2477878183   | 6.4561348346   |
| 4.395329721    | 1.7515555111   |
| 1.3640549807   | 0.7685111635   |
| 1.1044051484   | 1.4611639618   |
| 0.8083893048   | 0.8053654855   |
| 22.1802285004  | 6.7991576258   |
| 0.5491904296   | 0.5106604125   |
| 1.3918370278   | 1.2202350989   |
| 1.1001866586   | 1.4537367475   |
| 27.4241346884  | 16.0224702916  |
| 1.94558857     | 1.0735260934   |
| 0              | 0              |
| 35.8838491506  | 23.2788248513  |
| 1.1831363438   | 0.5657811673   |
| 6.0362276863   | 1.8556402274   |
| 873.8877883654 | 885.7915815992 |
| 26.967046683   | 47.535847666   |
| 1.726328546    | 2.4390899672   |
| 0              | 0              |
| 0              | 0              |
| 15.8553510609  | 4.6878580277   |
| 1.0289343207   | 1.2740348881   |
| 0.5378348635   | 0.0535823066   |

gene\_expression\_table

|                 |                |
|-----------------|----------------|
| 20.7140372879   | 13.2847825584  |
| 13.7634683287   | 9.5568383163   |
| 5166.3687475939 | 5920.965120887 |
| 6.4870929751    | 6.1840390449   |
| 1.3378143855    | 0.7996861357   |
| 0               | 0              |
| 0.2383743644    | 0              |
| 753.4340674531  | 507.4585763935 |
| 378.893913399   | 220.7666423771 |
| 1.6258354082    | 4.6972862877   |
| 353.3044067489  | 217.7785543377 |
| 174.4876375705  | 56.6065384785  |
| 11.6882703331   | 15.5982806531  |
| 26.1783689562   | 19.8276197159  |
| 128.6057413696  | 48.9203344176  |
| 0               | 0              |
| 50.6107860468   | 70.0192543992  |
| 5.8625364459    | 7.8582717006   |
| 20.2205802517   | 22.0120365828  |
| 1.4885982704    | 1.779636116    |
| 1.1731380085    | 0.4674999317   |
| 7.9974336848    | 2.3902556693   |
| 0               | 0              |
| 2.3601586333    | 2.7720947236   |
| 10.1599625455   | 7.7505283872   |
| 7.5471517288    | 9.6704894757   |
| 35.8304907395   | 16.7803895569  |
| 15.9498673887   | 11.5565135556  |
| 4.1452027843    | 2.3843158879   |
| 20.4454758699   | 29.8745312498  |
| 0               | 0.3905815123   |
| 2.6398863016    | 1.4970835713   |
| 31.3595949318   | 13.7290075629  |
| 23.0626704198   | 8.0296483414   |
| 1.1471107641    | 0.1142819941   |
| 31.1629706953   | 21.3714781695  |
| 0.164886003     | 0.0657076956   |
| 3.1546688583    | 2.6539779855   |
| 3.5898929157    | 2.7794240326   |
| 0.1968573681    | 0              |
| 82.1523135973   | 63.5872839134  |
| 2.8332879715    | 2.2581519368   |
| 3.8234907266    | 1.7642558536   |
| 0.650291244     | 0.5923280441   |
| 4.536949556     | 5.4239746523   |
| 15.1014970787   | 27.4571417883  |
| 0.7088142002    | 1.9490094561   |
| 0               | 1.3582401162   |
| 32.0200637484   | 29.3636414947  |

gene\_expression\_table

|                 |                 |
|-----------------|-----------------|
| 0.3927590113    | 0.417375869     |
| 4.9453636047    | 2.0692833979    |
| 4.3364222116    | 3.5471129048    |
| 2.3369921911    | 0.9313002236    |
| 27.6836619455   | 24.1654296005   |
| 357.5840977306  | 207.3600533383  |
| 0.6095634698    | 0.4195775999    |
| 4.528865946     | 4.404862865     |
| 10.5589317943   | 20.2428058026   |
| 21.4215567448   | 9.7919494904    |
| 5.7344797611    | 8.9565561804    |
| 2.7515702264    | 1.9737200484    |
| 50.47483862     | 53.2733242578   |
| 8.0427853756    | 5.7691446828    |
| 0.3370482464    | 0.1790866673    |
| 35.6667642681   | 37.9022410803   |
| 33.574056999    | 19.1771237267   |
| 39.1810526296   | 21.9912642304   |
| 2.6820708205    | 3.6922712505    |
| 2.4202052105    | 2.2693198268    |
| 0.162053843     | 0.4359087165    |
| 8.0817492483    | 3.6806944341    |
| 21.6689495012   | 18.6652267856   |
| 0.1847792461    | 0.4418113689    |
| 2.316601737     | 2.1925395574    |
| 3.3419950058    | 3.1508383304    |
| 2219.0040116184 | 1141.0616399173 |
| 3.1612355955    | 1.8564948116    |
| 16.205442775    | 16.2412125513   |
| 1.1735367434    | 1.7267402916    |
| 0               | 0.2476728983    |
| 0               | 0               |
| 0               | 0               |
| 0               | 0               |
| 10.5106355934   | 8.6502209134    |
| 0               | 0               |
| 0.00846         | 0.006743        |
| 0               | 0               |
| 2.1252868089    | 3.613588601     |
| 1797.1785577899 | 1061.4587963227 |
| 4.3665487696    | 4.2394827252    |
| 2.1073480635    | 0.1199694529    |
| 17.3300820907   | 10.9511065543   |
| 41.7628569741   | 13.199348176    |
| 2.8035003261    | 2.5566817694    |
| 30.0002543159   | 9.4192601186    |
| 8.7409854474    | 4.1799788971    |
| 0.5270669694    | 0.084015272     |
| 0               | 0               |

gene\_expression\_table

|                |                |
|----------------|----------------|
| 3.1198866717   | 2.1017464526   |
| 2.8916357774   | 0              |
| 0              | 0              |
| 3.6425822015   | 2.2873425604   |
| 14.9784271737  | 7.0982225329   |
| 28.3157816735  | 12.4593570964  |
| 13.0186676415  | 8.0529967245   |
| 18.8160151211  | 25.5685775555  |
| 0.8072766511   | 0.9651083925   |
| 1.8789401768   | 0.9626975538   |
| 4.3280627125   | 8.6237467695   |
| 1.5826434428   | 1.8019697012   |
| 0              | 0              |
| 0              | 0.3890374977   |
| 0.2738189185   | 0.6547072456   |
| 0              | 0.0246276207   |
| 18.7389444934  | 18.3166081025  |
| 3.7044744449   | 1.8906322146   |
| 1.2269378751   | 2.3049999432   |
| 1.3612202162   | 1.8777163931   |
| 0.3050026643   | 0.6077235743   |
| 15.3199524373  | 15.2626474149  |
| 0              | 0              |
| 1.0366701308   | 3.6262489277   |
| 0.3941667497   | 0.3141538799   |
| 4.8477507011   | 5.5195628061   |
| 2.3446216184   | 3.2390473411   |
| 0.8415861983   | 0.7378256199   |
| 1.1127905853   | 2.5656822631   |
| 151.0775119844 | 159.0196218166 |
| 11.0125475209  | 11.9465860707  |
| 315.8818056541 | 381.5740343258 |
| 0              | 0.697356002    |
| 4.4597152249   | 4.2329991363   |
| 1.4514700711   | 1.5592091858   |
| 0              | 0              |
| 0              | 0              |
| 4.6292744197   | 2.9409589765   |
| 0              | 0.5829020809   |
| 1.2374153052   | 1.1271192626   |
| 8.7567545658   | 3.4895998009   |
| 0.1719532869   | 0.2312686179   |
| 1.8347866221   | 2.7114198792   |
| 0              | 0              |
| 0              | 0              |
| 3.1191733967   | 5.8697335138   |
| 263.5720061246 | 472.0778718255 |
| 8.6774238649   | 3.7292008219   |
| 5.0641076367   | 4.0937911076   |

gene\_expression\_table

|                |                |
|----------------|----------------|
| 0.0215289083   | 0.0300277298   |
| 11.9772054927  | 9.112017735    |
| 1.1672687515   | 1.5815474359   |
| 0.372553888    | 1.1505970297   |
| 0.1608826714   | 0.0213707843   |
| 0              | 0              |
| 3.2613107949   | 2.3075323941   |
| 962.9504700457 | 893.3408548836 |
| 0              | 0              |
| 147.4967317609 | 78.3706736577  |
| 11.5290287679  | 15.8046037371  |
| 4.0248475109   | 2.3126244391   |
| 17.9423893827  | 23.4331336242  |
| 0              | 0              |
| 0              | 0.3318856751   |
| 0              | 0.2305626519   |
| 2.1482614215   | 2.4434243932   |
| 0.0722675129   | 0              |
| 192.5869424325 | 80.9634721763  |
| 0              | 0              |
| 0.0410612162   | 0.0122722874   |
| 6.1162388613   | 3.1198007165   |
| 1.5499859539   | 2.2106272557   |
| 0.4697753552   | 1.1767313178   |
| 94.588408342   | 103.7897906352 |
| 1.6226867437   | 1.6166170055   |
| 19.3392437344  | 15.5236200833  |
| 0              | 0              |
| 36.0217078988  | 16.2488211512  |
| 0.3191897998   | 0.1695977893   |
| 0.470294292    | 0.3644162149   |
| 0              | 0              |
| 0.668772129    | 0.5996434991   |
| 1.4598627197   | 3.8784054205   |
| 2.8734553287   | 5.6236289216   |
| 1.0653204327   | 1.3467982154   |
| 0              | 0              |
| 0              | 0.0537778812   |
| 1.534979348    | 1.4033004626   |
| 0              | 0.00384        |
| 0              | 0.0154375626   |
| 0              | 0.7788131729   |
| 0.3975621477   | 0.4752900568   |
| 9.3442069195   | 11.2120251542  |
| 17.6027015691  | 17.8762808677  |
| 10.8259818992  | 9.4373009419   |
| 0              | 0.1108734569   |
| 18.7315592495  | 8.7652466872   |
| 38.8390300361  | 53.412550079   |

gene\_expression\_table

|                 |                 |
|-----------------|-----------------|
| 0.2792842142    | 0.5564790762    |
| 16.4830011293   | 19.9175031317   |
| 5.9791793414    | 4.0704895203    |
| 4.1755818608    | 5.467379805     |
| 0.1081442101    | 0.1723835063    |
| 0.569106332     | 0.7216078066    |
| 0.6344530516    | 2.0732219056    |
| 4.5336511122    | 2.7434726462    |
| 2.1374269143    | 3.4070908251    |
| 1.8479351516    | 2.7290456526    |
| 4.0763226975    | 3.873640784     |
| 49.8115789676   | 26.2879736337   |
| 4.7047068731    | 44.0588216836   |
| 0.5900481196    | 0.9405456257    |
| 1.0692190749    | 0.9373932561    |
| 2.0897391574    | 5.6211904453    |
| 0.2320572052    | 0.1849513472    |
| 0.7285892436    | 1.0922523753    |
| 2.0381795095    | 1.7327407791    |
| 0               | 0               |
| 0.4913543417    | 0.2937098442    |
| 0               | 0               |
| 0               | 0.0485825165    |
| 1.8645583104    | 2.6006173759    |
| 0               | 0               |
| 1.1208710115    | 0.6991377429    |
| 6.3054124368    | 4.4670767907    |
| 8.6223607623    | 11.2625865757   |
| 2.4421081868    | 3.3464054678    |
| 4097.3842465653 | 4859.3447582707 |
| 2.2480317257    | 6.4776784097    |
| 1.8623835464    | 6.1326421491    |
| 5.5838037736    | 6.8466674287    |
| 0               | 0.054051104     |
| 136.8914383533  | 115.1206148623  |
| 0.1084407969    | 0.5617828781    |
| 1.1970756483    | 1.1645368012    |
| 26.900113135    | 43.1975969445   |
| 2.5105722001    | 1.7949653917    |
| 21.8533682951   | 22.352201374    |
| 67.4313853763   | 36.4067678822   |
| 45.9348610153   | 46.0051719318   |
| 5.1361336486    | 10.0291665172   |
| 16.3112776468   | 8.9450997383    |
| 0               | 0               |
| 1.050309125     | 2.5830647416    |
| 4.7835106101    | 5.5342656668    |
| 1.8150623854    | 11.1389620298   |
| 6.1068136148    | 16.2607946391   |

gene\_expression\_table

|               |                |
|---------------|----------------|
| 0             | 0              |
| 8.4333241257  | 14.5350774439  |
| 2.3608137204  | 3.1359773102   |
| 12.6269133158 | 34.7199215924  |
| 31.0658458258 | 41.4179039716  |
| 5.4131644151  | 2.3668910042   |
| 10.646079553  | 8.1314639897   |
| 16.7257031636 | 16.3364116301  |
| 12.415313957  | 6.4318144151   |
| 1.059066988   | 0.7807780676   |
| 18.5262587342 | 18.1339635617  |
| 0.2273554118  | 0.3624079646   |
| 0             | 0.2046079545   |
| 4.6421755424  | 2.186274414    |
| 1.6959060777  | 3.3176862832   |
| 2.2818557621  | 0.8524951389   |
| 0             | 0              |
| 0.0885736765  | 0.9883144587   |
| 2.8547740396  | 2.9253554942   |
| 31.5970436913 | 20.7760432588  |
| 0.539990907   | 0.7531594629   |
| 0             | 0.0871979556   |
| 3.8786738026  | 4.3278652881   |
| 1.9198694714  | 1.1476128641   |
| 7.0240086227  | 5.5981879832   |
| 23.1608172131 | 19.6460187172  |
| 7.2214524043  | 7.9938224585   |
| 16.2535847486 | 13.129287105   |
| 0.1925700151  | 0              |
| 0             | 0              |
| 0.9320247627  | 0.8103608545   |
| 0.7933854666  | 0.6639509268   |
| 54.2962467771 | 73.2781859026  |
| 4.4514527997  | 8.0811946196   |
| 65.3078866911 | 39.4579247883  |
| 1.9518057278  | 1.400043531    |
| 0.6237640344  | 0              |
| 0             | 0.005816       |
| 1.0664917921  | 1.6575039436   |
| 66.530062719  | 161.9692648427 |
| 15.435559042  | 5.2086169893   |
| 0.6466891609  | 0.7731242266   |
| 0             | 0              |
| 1.3959225471  | 0              |
| 34.5467771452 | 12.443269254   |
| 11.798208265  | 11.4298261107  |
| 7.0529455029  | 5.0650847292   |
| 0             | 0              |
| 0.2120303509  | 1.3096708948   |



gene\_expression\_table

|                |               |
|----------------|---------------|
| 4.2305598972   | 12.363223498  |
| 11.0243209612  | 0             |
| 26.8084664646  | 14.8691199248 |
| 14.3091557999  | 10.6917237834 |
| 0.280199645    | 0             |
| 21.9089229019  | 10.9134857585 |
| 0.005959       | 0.007124      |
| 0              | 0.0496585726  |
| 3.4839643733   | 4.2913346485  |
| 6.0089877272   | 6.0720324014  |
| 0.5496244972   | 0.3783201238  |
| 0.0481513965   | 0.0191885136  |
| 0.1058302606   | 0.2108687948  |
| 2.9860762667   | 6.1164081838  |
| 0.4191042673   | 0.846207484   |
| 0              | 0.0112351071  |
| 0              | 0.2445296186  |
| 6.4593962327   | 13.534751374  |
| 10.9574071989  | 10.5194597428 |
| 0.0458200948   | 0             |
| 10.3672316304  | 9.2569445932  |
| 0              | 0             |
| 0.1681950375   | 0.2681054333  |
| 6.8084560892   | 7.551727453   |
| 4.5198057297   | 7.2046386847  |
| 2.12909067     | 7.2118307917  |
| 15.6093428964  | 14.1860513963 |
| 0.6276091523   | 1.3616807089  |
| 0.6537219419   | 0.9276721254  |
| 36.614365793   | 35.5445431284 |
| 3.5591613058   | 3.9004329     |
| 0              | 0             |
| 0.0103264524   | 0.00823       |
| 3.6800591415   | 4.6041827891  |
| 16.8548762494  | 13.0799516105 |
| 0.4088672872   | 0             |
| 3.2669798996   | 12.0891070983 |
| 0.1553352788   | 0.0619016959  |
| 40.2136679868  | 46.9473540183 |
| 0.0503648895   | 0.0120423593  |
| 5.1529177137   | 3.850232232   |
| 8.2676394717   | 3.1299513073  |
| 109.0441983813 | 47.0637051586 |
| 0.098812986    | 0.0669414924  |
| 78.4870043999  | 90.6615214524 |
| 0.133468549    | 0.2304801259  |
| 2.8735335393   | 2.5765064534  |
| 18.5638351052  | 12.6922326745 |
| 3.7289456441   | 2.514767432   |

gene\_expression\_table

|                |                |
|----------------|----------------|
| 11.5160222816  | 7.2337897089   |
| 0              | 0              |
| 37.4728900497  | 19.5789380687  |
| 0              | 0.400394838    |
| 10.0084378986  | 12.1186010367  |
| 2.1359698088   | 1.3795181406   |
| 0.3664700988   | 0.2920794397   |
| 0              | 0              |
| 9.0393584261   | 8.5206322392   |
| 0              | 0              |
| 0.9282688439   | 1.5223574955   |
| 0              | 0.0409730014   |
| 1.3164942356   | 0.5246279301   |
| 1.6113190207   | 0              |
| 0.4259663186   | 0              |
| 16.0921958219  | 16.6908515907  |
| 15.094495321   | 15.5803889432  |
| 171.684024283  | 79.5171074951  |
| 0.3519560686   | 0.070127912    |
| 0              | 0.1325253185   |
| 0.4456698738   | 0.3552022593   |
| 1.1656255733   | 1.3935185934   |
| 2.970373872    | 3.7405084889   |
| 33.3436705715  | 27.7112702525  |
| 0              | 0.2985381416   |
| 0.4092714707   | 0.815481142    |
| 3.610611046    | 1.8499399102   |
| 1.6159434008   | 1.545502931    |
| 0              | 0              |
| 5.0454647317   | 7.0462856203   |
| 0              | 0              |
| 8.5580372758   | 4.8931972572   |
| 13.6501340953  | 15.7402060837  |
| 19.186731979   | 17.9134511158  |
| 7.9297075523   | 3.3263351992   |
| 9.3009342896   | 19.4269495407  |
| 3.7880739947   | 8.8686756241   |
| 0.882353717    | 0.9376567789   |
| 0              | 0              |
| 9.6043488779   | 13.9177066862  |
| 63.9355774313  | 129.5160607392 |
| 44.9249456313  | 33.5676762759  |
| 373.6108714489 | 110.2011613051 |
| 1.9107483324   | 1.9036010859   |
| 4.9218471904   | 0              |
| 0.8588458185   | 8.7274592945   |
| 0              | 1.8550038624   |
| 0              | 0              |
| 424.0800893098 | 394.3275440932 |

gene\_expression\_table

|                 |                |
|-----------------|----------------|
| 1385.7677529778 | 790.5661227607 |
| 32.1247536533   | 55.0866873128  |
| 0               | 0              |
| 3.6438622936    | 6.1955963744   |
| 1.9205243147    | 9.9493706035   |
| 0               | 0              |
| 100.1897360671  | 74.0420254379  |
| 0               | 0.0885622305   |
| 37.3427052266   | 43.7028615402  |
| 4.7277315397    | 4.6831326758   |
| 7.0562741829    | 9.0607340268   |
| 29.7498617329   | 18.4842762836  |
| 4.7824970434    | 8.046893312    |
| 17.3562323346   | 15.9080056682  |
| 0.9623629565    | 7.4783528924   |
| 73.4820200309   | 80.9271844478  |
| 1.2085411431    | 0.5418092415   |
| 165.8295598362  | 85.5838166687  |
| 0               | 0              |
| 29.6555118633   | 12.0992105856  |
| 0               | 0              |
| 5.6934488612    | 4.3864643994   |
| 62.8206677753   | 33.6880965899  |
| 19.9895085615   | 39.5725093313  |
| 1.8410257605    | 2.9346229034   |
| 0.9061724581    | 1.8055657525   |
| 67.8275761217   | 41.2951389862  |
| 0.6665632619    | 1.0625119197   |
| 0               | 0              |
| 6.2687098571    | 10.0681184506  |
| 76.2723339435   | 67.5440298601  |
| 357.1007170082  | 125.2779191301 |
| 1.2058803896    | 1.4896984724   |
| 0.0790795879    | 0.126054059    |
| 3.3875701021    | 7.6497704603   |
| 9.1432120872    | 15.3841082445  |
| 0               | 2.2447105562   |
| 0               | 0.2887938468   |
| 373.1511822856  | 303.9509496435 |
| 68.6859545003   | 57.0516743457  |
| 0               | 1.5582032444   |
| 0.2005482685    | 0.2397577296   |
| 18.5333934122   | 11.8170037495  |
| 24.9021088146   | 30.8533263834  |
| 4.8160951705    | 10.3638535211  |
| 0.1586297073    | 0.3792872285   |
| 0.7770193732    | 0.5418790263   |
| 21.1105023462   | 27.4812089896  |
| 106.1142040275  | 113.0310527191 |

gene\_expression\_table

|                |                |
|----------------|----------------|
| 0              | 6.0796947398   |
| 328.1173075345 | 212.6032469422 |
| 10.1327979877  | 16.9594248888  |
| 158.5029078741 | 88.7134944313  |
| 3.573488821    | 3.6618397852   |
| 1.3148218723   | 0              |
| 42.7756611823  | 0              |
| 12.1348991073  | 9.0268325883   |
| 16.0105584218  | 19.9915065935  |
| 0              | 0              |
| 135.7966591865 | 71.2740495797  |
| 39.5777402937  | 6.5716163073   |
| 0              | 0              |
| 230.3754299596 | 116.3833248017 |
| 52.5857479627  | 77.2481655302  |
| 60.3145281931  | 31.4311267495  |
| 1.4978168721   | 0              |
| 26.5812075684  | 11.0532643939  |
| 133.357758704  | 75.6157096303  |
| 38.7091896467  | 16.3331559751  |
| 19.3264586009  | 25.3701965816  |
| 90.4270854248  | 45.044419271   |
| 2.5252316506   | 2.0126287197   |
| 3.5051003398   | 1.396795737    |
| 3.4886915977   | 1.5447297681   |
| 0              | 0              |
| 100.8665180574 | 118.8005913096 |
| 0              | 1.9270119134   |
| 572.193893743  | 2030.719999316 |
| 2.1503945867   | 0              |
| 0.0292475253   | 0              |
| 0              | 0              |
| 3.6957062031   | 3.3597175399   |
| 1.4253097433   | 1.9756219872   |
| 0              | 0              |
| 2.4392308309   | 2.0286108689   |
| 0.3946032088   | 0.1179381529   |
| 2.7384631413   | 3.5856602923   |
| 0.3825279737   | 0.3702086205   |
| 26.4572413442  | 11.033697246   |
| 0.4224226238   | 0.9258535694   |
| 0.6737012798   | 0.9060947112   |
| 0.2370590541   | 0.0388989709   |
| 9.3603211528   | 12.1468119922  |
| 5.9122529146   | 6.0079406038   |
| 22.4193461224  | 20.39770363    |
| 6.3379031808   | 13.8912310848  |
| 2.118624233    | 1.1865553477   |
| 4.6498622413   | 6.5153437878   |

gene\_expression\_table

|                 |                 |
|-----------------|-----------------|
| 2.9267319104    | 2.6242058954    |
| 9.3015571009    | 5.7491761425    |
| 0.878485575     | 1.123940484     |
| 28.3902140874   | 25.2214183233   |
| 197.3744144477  | 255.8430473413  |
| 0.3896381374    | 0.2173811792    |
| 0.6071636889    | 0.4839140511    |
| 0.6363978012    | 1.6484450436    |
| 2.7520005796    | 6.0317544945    |
| 0.6197544562    | 0.6174362347    |
| 4.3561176283    | 2.727888969     |
| 50.7986567906   | 55.1459684807   |
| 0               | 0               |
| 1.3924136529    | 1.3708852005    |
| 7.5977473928    | 3.4935358392    |
| 0               | 0               |
| 1.4141534021    | 0.8453182158    |
| 1.494755153     | 2.0848295287    |
| 0.1254119043    | 0.6497025342    |
| 4.0214692785    | 6.9444730824    |
| 11.1535177469   | 14.3712580674   |
| 0.4334426335    | 1.1659175649    |
| 5.0460377464    | 9.1047504015    |
| 0               | 0               |
| 1436.5379485022 | 2883.3395776843 |
| 38.3279299546   | 29.4942827435   |
| 1007.4760079668 | 1468.3608951845 |
| 33.7503280225   | 42.4180743038   |
| 11.1973614115   | 5.2988516415    |
| 3.1374499542    | 2.6255999037    |
| 0               | 0.1868349214    |
| 15.5386719996   | 10.2171622384   |
| 3.9657091644    | 6.0053303612    |
| 486.4179770973  | 248.7258287587  |
| 7.8571289184    | 2.2613468072    |
| 1.5400426861    | 2.4548513312    |
| 1.1091466764    | 0.7232713263    |
| 6.5848289729    | 3.7486846297    |
| 0.6210121747    | 0.8249189982    |
| 0.5427924359    | 0.707906742     |
| 0.1407831315    | 0.0841539152    |
| 0.3993555085    | 0.7957233999    |
| 3.9185963586    | 4.6595396905    |
| 0.4281038583    | 1.1089065393    |
| 11.0996330035   | 13.0557091293   |
| 0.3250594544    | 0.3022539835    |
| 35.0141244827   | 26.6234634853   |
| 0               | 0.0232155697    |
| 3.38514916      | 0.8459797512    |

gene\_expression\_table

|               |               |
|---------------|---------------|
| 94.0408754619 | 56.6749893281 |
| 0.3277157294  | 0             |
| 8.8537526508  | 16.2691707817 |
| 0.346160048   | 0.7587034831  |
| 0.2496833768  | 0.0331665899  |
| 16.3338163895 | 20.6788705553 |
| 38.5360707446 | 23.4392803492 |
| 1.0991118879  | 2.5028585298  |
| 22.640616567  | 9.5330715609  |
| 0.8451516074  | 1.1306726576  |
| 16.9304777923 | 13.1322799207 |
| 35.4290186321 | 57.8282296333 |
| 20.3361407714 | 6.7533574847  |
| 2.3905446241  | 1.1431692847  |
| 0.0311835035  | 0.0124267441  |
| 3.3559520386  | 1.4757071174  |
| 2.1553457039  | 1.8768848625  |
| 4.0912689711  | 4.0132582221  |
| 32.9438321921 | 14.0336376561 |
| 12.1543580549 | 21.2770567604 |
| 3.5544226203  | 4.3137366865  |
| 1.0261198385  | 1.9423350165  |
| 0.9287729589  | 1.0486720172  |
| 0             | 0             |
| 8.2939288194  | 8.6525378955  |
| 0.1536255965  | 1.1478821436  |
| 0.5223895508  | 0.9714796511  |
| 3.9204946231  | 5.0247972864  |
| 3.3004649389  | 4.0396895367  |
| 10.7812313208 | 6.065451447   |
| 0             | 0             |
| 10.1050142333 | 9.8698195482  |
| 16.5575245309 | 17.4234672652 |
| 2.4286225237  | 3.126787755   |
| 0             | 3.7084310109  |
| 15.4597637286 | 16.7221016554 |
| 2.3181277371  | 2.1708892682  |
| 0             | 0.2727575455  |
| 0.3080277462  | 0.2455004428  |
| 0             | 0.6686504704  |
| 1.862559935   | 3.711185879   |
| 4.0285665531  | 7.7594285102  |
| 0             | 0             |
| 1.4974692231  | 4.1229802873  |
| 7.6544224929  | 16.2320403228 |
| 3.8268524633  | 2.8922701589  |
| 0             | 0             |
| 0.1197249632  | 0.3220482408  |
| 40.5078646459 | 14.4129796503 |

gene\_expression\_table

|                |                |
|----------------|----------------|
| 0.1371709507   | 0.6012945671   |
| 0.026064858    | 0              |
| 2.7961760746   | 3.1836763918   |
| 1.4459876255   | 3.7866643765   |
| 0              | 0.008282       |
| 0              | 0              |
| 0              | 0              |
| 2.6164466477   | 2.2011793044   |
| 4.5473766957   | 4.3741474612   |
| 0.0151507956   | 0.0301882466   |
| 0.4889908904   | 0.4287023808   |
| 10.5497227689  | 6.8618715632   |
| 7.0099599198   | 5.6833184929   |
| 2.5408814015   | 0              |
| 0              | 0              |
| 0.7000090986   | 1.1158250892   |
| 0.5267750529   | 0.2519062202   |
| 20.4366303511  | 22.9636197863  |
| 0.6644551789   | 0.6997965952   |
| 0              | 0              |
| 0              | 0.2587968059   |
| 23.3527982489  | 13.2613042078  |
| 0.0422044217   | 0.126139662    |
| 0.0859422612   | 0.2146227804   |
| 1.4853781342   | 1.1838576044   |
| 12.7158834367  | 9.5012392952   |
| 35.7284777533  | 20.9822177339  |
| 6.9190795565   | 2.188316954    |
| 0.2486483955   | 0.0495436628   |
| 10.8802496315  | 6.8863033262   |
| 14.3597004408  | 7.4831318119   |
| 1.1860372384   | 8.0348855001   |
| 25.5680036998  | 44.2997658199  |
| 0              | 0              |
| 3.7419668069   | 2.8237388267   |
| 0.1956561674   | 0.3703561815   |
| 4.0972415195   | 4.2451922132   |
| 31.2977178146  | 27.1831283184  |
| 1.9918125865   | 2.2170114667   |
| 0.2678989602   | 0.213517497    |
| 0              | 0.0233033329   |
| 269.0340903173 | 153.9520574338 |
| 4.0682205656   | 5.0826850814   |
| 1.4953000677   | 0.7583962021   |
| 369.15354796   | 302.2008325206 |
| 22.2678202721  | 49.7410083983  |
| 0              | 0.0385773446   |
| 1.8280619128   | 4.047164353    |
| 0              | 0              |

gene\_expression\_table

|                |                |
|----------------|----------------|
| 0              | 0.255408263    |
| 12.0862761572  | 8.8301156953   |
| 6.0793769877   | 6.1819465109   |
| 0.5679730973   | 0.2263394266   |
| 1.6582226612   | 1.362073632    |
| 0.217429967    | 0.2866005036   |
| 0              | 0              |
| 1.5742425101   | 1.4899362809   |
| 2.6803994012   | 7.2828361029   |
| 6.4897460489   | 6.7330075646   |
| 3.3071031639   | 3.5679545278   |
| 0.544207955    | 3.1084546281   |
| 1.5736834111   | 1.7895828854   |
| 0              | 0.1798676269   |
| 216.736771738  | 38.6393997399  |
| 0              | 0              |
| 0              | 0              |
| 0.7175289512   | 0.2859379998   |
| 2.6629744541   | 14.8568754291  |
| 2.4346000551   | 1.0075126081   |
| 0.8370140012   | 1.8345428416   |
| 1.0786813149   | 1.6580259596   |
| 1.5313841345   | 3.3564430199   |
| 0.5340497369   | 3.4051334274   |
| 0.1174861282   | 0.4681866627   |
| 0.1192881848   | 0.2376839633   |
| 3.6723084657   | 13.0663286372  |
| 1.3904191891   | 1.0599931025   |
| 1.9783678554   | 8.3569029411   |
| 0              | 0.196997095    |
| 175.7480511963 | 261.0819265903 |
| 95.1628107386  | 133.4880443022 |
| 0.1849751154   | 0.0737132828   |
| 2.7139574227   | 1.7845117843   |
| 24.0099991748  | 16.8266154378  |
| 6.2782837696   | 3.1463537109   |
| 0.8935180249   | 1.8990416588   |
| 11.2704603504  | 2.5664691769   |
| 0              | 0              |
| 0              | 0.4025498156   |
| 43.1793955965  | 31.4764982786  |
| 7.3571976387   | 11.7274842966  |
| 0              | 0.5388081529   |
| 6.4181824419   | 7.423481127    |
| 42.9968491798  | 38.3040909105  |
| 48.8625384939  | 118.4540967982 |
| 21.8716676871  | 6.6436203263   |
| 48.1600101423  | 34.2713323551  |
| 16.1861445842  | 32.2915130553  |



gene\_expression\_table

|                |                |
|----------------|----------------|
| 47.1219350159  | 50.0753846836  |
| 0.3831964737   | 0.8685110725   |
| 0.2941670769   | 0.2344533846   |
| 0.2154629677   | 0.3148302932   |
| 5.2852314251   | 8.8728632237   |
| 0              | 0              |
| 8.6608111381   | 9.5576288739   |
| 4.5193618583   | 3.0722647539   |
| 0              | 0              |
| 130.3691590406 | 109.9775876619 |
| 9.440967783    | 5.6433920321   |
| 2.142539264    | 0.8538099969   |
| 4.0634365352   | 2.9441724032   |
| 0              | 0              |
| 1.086469735    | 0.1804009571   |
| 3.3713924536   | 2.2595439836   |
| 5.256832402    | 7.0701781046   |
| 13.6232603518  | 7.4813176261   |
| 0              | 0              |
| 0.2199931698   | 0.6136767693   |
| 2.2728933289   | 5.3439638493   |
| 86.1875034906  | 55.6309195573  |
| 9.5307997791   | 7.8493234726   |
| 1.778930952    | 1.2602857066   |
| 367.8677852803 | 225.7824726317 |
| 9.0353840494   | 14.5311329106  |
| 0.7896602134   | 0.3146825805   |
| 0.7884806918   | 0.1466325171   |
| 0              | 0              |
| 0.2194052181   | 0.2856171091   |
| 0              | 0.0733026815   |
| 4.6122159123   | 5.9428197133   |
| 6.4376225888   | 4.8607899919   |
| 0              | 0              |
| 0.9283441908   | 1.1098460093   |
| 0.7264906567   | 1.1580370933   |
| 0              | 0.3973084424   |
| 0              | 0              |
| 3.5318898815   | 2.4901418327   |
| 0.2759476329   | 0.0314189071   |
| 0.6535771379   | 1.979442499    |
| 1.6874303252   | 1.9688774177   |
| 0.2202285906   | 0.6143334818   |
| 4.544339374    | 4.3087797608   |
| 116.4575910844 | 52.864148389   |
| 0.4865536264   | 1.5996210418   |
| 129.0105363341 | 81.2147728381  |
| 8.1124526675   | 21.491290018   |
| 0.8408104488   | 1.2819921981   |

gene\_expression\_table

|                |                |
|----------------|----------------|
| 1.2005906428   | 2.2159322157   |
| 2.1960191832   | 0.2625365841   |
| 2.6302065658   | 3.0300984437   |
| 7.293651911    | 5.2846324753   |
| 0              | 0.1112171131   |
| 0.4008749392   | 0.4473005008   |
| 1.9004553814   | 4.4304311287   |
| 5.1245777383   | 4.7261500527   |
| 294.5492303096 | 284.0768636902 |
| 7.1638589153   | 6.3071712066   |
| 0.0786830871   | 0              |
| 1.0443567505   | 0.9123948641   |
| 0.3135353476   | 0              |
| 1.3850867719   | 3.3731030371   |
| 1.7693408938   | 0.7050890355   |
| 44.1676283492  | 79.7220264583  |
| 32.950568737   | 38.0796860292  |
| 84.9988907397  | 33.8723793126  |
| 16.8333392851  | 17.5930709274  |
| 5.6722585028   | 2.7301133847   |
| 0.7835711714   | 1.4646296814   |
| 332.5629566345 | 744.5641276133 |
| 4.1261616419   | 4.1436133551   |
| 3.4279584705   | 2.8174872216   |
| 13.9412528122  | 14.7224511753  |
| 11.1707688543  | 13.4857100884  |
| 0              | 0.9400924552   |
| 214.2073494592 | 312.4874984717 |
| 0              | 0.1064184945   |
| 2.5233907508   | 5.2290199224   |
| 3.0395147312   | 2.1490063274   |
| 0.9692439528   | 0.9147964253   |
| 0.9094148678   | 0.6411785423   |
| 0              | 0              |
| 107.023501425  | 85.8748813626  |
| 1.1146769074   | 1.6743034715   |
| 6.79053459     | 1.5295086169   |
| 0              | 0.0864627714   |
| 20.6556259808  | 15.6395555864  |
| 7.5136020378   | 5.4228267491   |
| 0.1374294177   | 0.0547661425   |
| 6.2676392084   | 3.6358602639   |
| 4.9081181884   | 6.9853701931   |
| 2.2673529607   | 1.0842584724   |
| 0              | 0.0737184493   |
| 4.4132029731   | 8.7933903482   |
| 0              | 0.0274489958   |
| 3.7883151574   | 1.8667812898   |
| 0              | 0.5480466689   |

gene\_expression\_table

|                |                |
|----------------|----------------|
| 17.302853408   | 12.8154187869  |
| 28.72379435    | 24.1649191366  |
| 9.7578777952   | 3.361290014    |
| 0.8689525788   | 0.8019136351   |
| 0.2800844237   | 0.1674220526   |
| 0.6195635108   | 2.7158824154   |
| 0              | 0              |
| 5.1288105413   | 5.1263788497   |
| 25.943373687   | 25.6512645931  |
| 148.7271593632 | 84.7437384365  |
| 0.9090238972   | 1.7783155298   |
| 0.4357990293   | 0.2778680972   |
| 9.0030998106   | 4.566251852    |
| 12.0229611927  | 6.324378047    |
| 1.0085607913   | 0.9846924565   |
| 9.1658687706   | 9.5881625653   |
| 3.1129564699   | 3.131817017    |
| 1.9955915919   | 2.1555482049   |
| 0.0562937724   | 0.0897331245   |
| 27.6942794259  | 25.8662696582  |
| 0              | 0.8310417304   |
| 78.5290005728  | 48.5949088742  |
| 7.0698478609   | 10.1803804502  |
| 8.7923066611   | 23.6504302556  |
| 28.5021168605  | 6.7439320373   |
| 52.7503348214  | 29.9664026911  |
| 11.3166620938  | 10.7465969031  |
| 17.5070956111  | 5.658833296    |
| 17.7176586876  | 10.3554791584  |
| 23.9516167596  | 21.2802317563  |
| 0.3665209899   | 0.3164633337   |
| 571.1602366762 | 358.4925408094 |
| 0.3396698081   | 0.2030395541   |
| 13.6049993657  | 7.3846526031   |
| 0              | 0.363798587    |
| 725.211069854  | 261.494052757  |
| 22.9319480004  | 24.1213050073  |
| 22.2296256727  | 5.4514399221   |
| 0.2237345503   | 0              |
| 0              | 0.2160170856   |
| 0.9701228783   | 0              |
| 68.4511154923  | 49.6849801448  |
| 3.4838467923   | 3.6443560598   |
| 0.25277408     | 1.6117028243   |
| 4.1959231443   | 27.0878780297  |
| 1.125673665    | 1.1346567109   |
| 129.6227859188 | 91.2208325686  |
| 3.3261669065   | 2.7662401824   |
| 1.3745670495   | 2.3736707193   |

gene\_expression\_table

|                 |                |
|-----------------|----------------|
| 18.1209023834   | 21.8842404524  |
| 0               | 0              |
| 67.7477789733   | 38.9967442987  |
| 22.4768197218   | 7.1656781093   |
| 33.3565947025   | 15.6385048226  |
| 0               | 0              |
| 0.2265649922    | 0              |
| 23.426099608    | 8.1095300644   |
| 2.3367754962    | 3.1208248609   |
| 2.4827562242    | 1.1872652902   |
| 3.6759854795    | 2.8755328851   |
| 14.1763077985   | 15.1825266817  |
| 6.495583825     | 5.0668798617   |
| 0               | 0              |
| 0.3056875337    | 0.1949082206   |
| 0               | 0              |
| 2.4667863505    | 2.9225028526   |
| 1.9452059648    | 0              |
| 7.4580215525    | 11.322094419   |
| 0.4534228762    | 0.2650130713   |
| 0               | 0.006226       |
| 101.2696616148  | 43.7193716058  |
| 4.3343909586    | 1.4359242372   |
| 33.9794405958   | 45.6010917534  |
| 0.5852196354    | 2.3321223725   |
| 2.3822106895    | 1.4239799492   |
| 0.7387937175    | 2.3062280349   |
| 0               | 0              |
| 3.2142981347    | 4.7678315136   |
| 2.2533031847    | 1.9130235681   |
| 0.0439305268    | 0              |
| 0               | 0.3104334079   |
| 4.5925057691    | 2.1136723206   |
| 0.0817383196    | 0.2442977203   |
| 3.5940830446    | 0              |
| 0               | 13.4301764716  |
| 0               | 0              |
| 45.7193600434   | 73.4846625694  |
| 50.5041918825   | 37.5385898114  |
| 2.0316416265    | 5.8697223012   |
| 0               | 0              |
| 0.0506958299    | 0.0101012399   |
| 0.7083746118    | 0.3495018564   |
| 50.1293628088   | 37.4367264823  |
| 3.0363423133    | 3.6299816738   |
| 3.3431976295    | 3.9968306846   |
| 63.9963918872   | 119.3748277785 |
| 1.0420366961    | 0.2076277815   |
| 1557.5638134947 | 820.4812934268 |

gene\_expression\_table

|                 |                 |
|-----------------|-----------------|
| 0               | 0               |
| 1.6941248002    | 1.6877878445    |
| 3.4444499861    | 8.5298922667    |
| 3.3758866915    | 4.4202832889    |
| 3.1020774489    | 1.2361895913    |
| 54.4339688762   | 58.5969560775   |
| 0.1712118633    | 0.3411428742    |
| 0.7323300973    | 0.4985537004    |
| 0.3681806377    | 0.5868855043    |
| 0.3346348755    | 0.2667065261    |
| 9.4307070837    | 8.769068997     |
| 0               | 0.3290691247    |
| 4.0908116723    | 0               |
| 0               | 0.1572178161    |
| 0.0382106098    | 0.0152270725    |
| 3.8139757382    | 3.7306237526    |
| 2734.7565110285 | 1798.7866317643 |
| 8.3808543489    | 10.8209589443   |
| 2.9263577211    | 6.8104013543    |
| 4.8046603525    | 2.0080741112    |
| 15.0282736275   | 5.9888238575    |
| 26.9280526502   | 14.4742787362   |
| 83.9447362771   | 78.4038158761   |
| 2.2188655366    | 5.3053578309    |
| 1.1539519584    | 2.2992710907    |
| 28.5958981384   | 28.6101633051   |
| 9.2413885008    | 7.8257975445    |
| 15.2994520685   | 9.2436711645    |
| 60.8401220029   | 58.698466168    |
| 4.5923810721    | 10.5645597673   |
| 143.0008428233  | 48.6974490127   |
| 6.5047517644    | 6.1414445885    |
| 17.0490051078   | 18.2171284624   |
| 11.5778403039   | 6.343993058     |
| 130.0143863549  | 128.3681084726  |
| 2.8131164277    | 1.0509726861    |
| 0               | 0               |
| 43.2024430454   | 32.9356010028   |
| 0               | 0               |
| 7.2250609144    | 7.198035225     |
| 67.8057946265   | 13.510432755    |
| 20.6011667889   | 8.502844382     |
| 0.7235034418    | 0               |
| 5.382040758     | 2.339742098     |
| 2.1389425786    | 1.2379756895    |
| 9.5713092941    | 6.4675615064    |
| 47.0140306255   | 18.6151710709   |
| 34.4947625222   | 22.0404702355   |
| 19.2627487458   | 14.8042508168   |

gene\_expression\_table

|                |                 |
|----------------|-----------------|
| 17.8974241724  | 24.7727587729   |
| 18.8615005708  | 12.430934974    |
| 16.1010616153  | 9.8314794035    |
| 37.067078732   | 25.4012361347   |
| 0.4729842063   | 0.5466093838    |
| 2.7667079317   | 1.9425767676    |
| 87.3947695363  | 26.2679322061   |
| 3.7694095342   | 4.5063718508    |
| 0              | 0               |
| 0.4812933534   | 0.5753916628    |
| 1.3037160527   | 0.3117214656    |
| 0              | 0               |
| 3.4034735462   | 3.390742689     |
| 12.2631042885  | 13.5055963655   |
| 0.791713099    | 2.5590609346    |
| 0.7995276022   | 0.4779221583    |
| 6.3447029017   | 6.7304978828    |
| 0.1683065063   | 2.0121233727    |
| 31.2841290911  | 19.5907544137   |
| 29.5724432026  | 15.227460655    |
| 0.8715908628   | 1.3121440708    |
| 6.6967093075   | 4.721482421     |
| 0.6573387019   | 0.9553541994    |
| 0.9057004702   | 1.4952609691    |
| 2.5700341737   | 2.3178546522    |
| 38.2129716292  | 34.438738596    |
| 0              | 0               |
| 14.5846874249  | 8.1859902517    |
| 0              | 0               |
| 19.7772855138  | 11.821984573    |
| 3.4893161655   | 2.6651358942    |
| 10.3978375058  | 8.2871551137    |
| 12.9081999648  | 15.5767999273   |
| 0.6550491858   | 0.6787029004    |
| 0.3404228045   | 0.1356597746    |
| 0.4955548385   | 0.8392920258    |
| 6.9289185452   | 5.5224004724    |
| 2.1396082937   | 0               |
| 49.9375516191  | 37.1258343109   |
| 13.4631611775  | 12.518614801    |
| 920.0775824142 | 1264.3153164988 |
| 0              | 0.9469162188    |
| 525.6777870545 | 230.1744211662  |
| 16.3607176252  | 14.9816860732   |
| 14.5831630962  | 9.3253429844    |
| 0.0216872238   | 0.0950668474    |
| 2.6017125955   | 2.0956440218    |
| 4.4144038924   | 3.0715433406    |
| 57.9774321663  | 26.3736918428   |

gene\_expression\_table

|                 |                |
|-----------------|----------------|
| 2.1606160042    | 2.7219141075   |
| 0.616605325     | 0.1842896649   |
| 3013.3756803131 | 3801.334071097 |
| 34.1175865333   | 40.19448603    |
| 0               | 0              |
| 0.1977867495    | 0              |
| 0               | 0              |
| 0               | 0              |
| 0               | 0              |
| 2.5795952864    | 1.9091028807   |
| 4.81906298      | 0.9602074084   |
| 0               | 0              |
| 0               | 0              |
| 30.5279129529   | 31.6550982201  |
| 33.2329223561   | 23.6423475959  |
| 0.5486298758    | 1.5589346551   |
| 0               | 0              |
| 0               | 0              |
| 415.16105859    | 261.8756438466 |
| 0.0296368224    | 0.3188804153   |
| 7.3757666207    | 10.5546545368  |
| 753.9770884837  | 815.5416693852 |
| 4.0096324434    | 6.9724524557   |
| 26.1756611207   | 35.078035123   |
| 3.2183994672    | 4.019520454    |
| 0.1197244541    | 0.238553238    |
| 4.2058271727    | 5.8661331022   |
| 3.5423853023    | 2.1564529445   |
| 1.1687763777    | 0.6210157403   |
| 0               | 0              |
| 4.3180499392    | 7.0622826564   |
| 5.3205344538    | 10.4550411238  |
| 1.6778054851    | 0.7901776161   |
| 9.3366975809    | 9.3450372739   |
| 4.2153129543    | 2.2986985197   |
| 2.8201559385    | 2.3341350536   |
| 0               | 0              |
| 0               | 0              |
| 5.2251235948    | 6.3267803482   |
| 0               | 0              |
| 16.114325338    | 13.2384157292  |
| 1.6291471419    | 1.0387540725   |
| 9.3830709002    | 9.1100246646   |
| 5.0008228899    | 7.1410344673   |
| 11.1247829109   | 9.8617595379   |
| 2.5977638451    | 1.6324602791   |
| 0.068014819     | 0              |
| 0.4760543552    | 0.4805972995   |
| 33.617169833    | 22.4110831778  |

gene\_expression\_table

|               |                |
|---------------|----------------|
| 0.4929622741  | 0.7203068766   |
| 0.0168418065  | 0.1409419952   |
| 0             | 0.007091       |
| 111.035870712 | 206.4321931814 |
| 21.0613530634 | 18.3756464356  |
| 73.4973004111 | 145.0500484107 |
| 2.3004548071  | 2.6738248188   |
| 16.1136740135 | 15.3165226584  |
| 0             | 0.5506018531   |
| 0             | 0.4029835977   |
| 0             | 0              |
| 0             | 0.1061526697   |
| 0.9703264047  | 1.0927877456   |
| 1.1646636279  | 2.8382897911   |
| 0.034838123   | 0.055532495    |
| 0.1933211053  | 2.0800581668   |
| 1.0837338079  | 2.0783840948   |
| 1.6785918877  | 2.0443557085   |
| 0.1615748643  | 0.2092616314   |
| 28.6962822053 | 40.6598291556  |
| 0             | 0              |
| 0             | 0              |
| 0.2948386772  | 0              |
| 0             | 0.0531880576   |
| 2.864863275   | 4.0229883151   |
| 4.5003032331  | 3.0611275414   |
| 24.0682415123 | 19.8422885056  |
| 1.2816376798  | 1.0980855408   |
| 93.0863058619 | 74.4715142112  |
| 0.207964789   | 0.3078205173   |
| 0.6817028895  | 0.9508141256   |
| 36.1306030915 | 19.8694910632  |
| 42.1520928548 | 35.3491499127  |
| 48.8353659602 | 20.8944718101  |
| 5.3183917702  | 5.5575357522   |
| 0.037992181   | 0.0454200832   |
| 1.7250840583  | 2.345426242    |
| 0             | 0              |
| 0.1084940496  | 0.4879411179   |
| 10.420007578  | 3.7749203768   |
| 11.1133784383 | 14.9469412175  |
| 227.742289218 | 192.8568469529 |
| 2.698436311   | 6.5954007074   |
| 8.6842387309  | 15.0851111361  |
| 0             | 0              |
| 5.6224718376  | 3.921008497    |
| 16.1045449728 | 17.7040608486  |
| 0.6558910087  | 0.721892986    |
| 0.4038149092  | 0.522995746    |



gene\_expression\_table

|                |                 |
|----------------|-----------------|
| 98.4369438074  | 88.9156536671   |
| 23.4308732863  | 26.2786050708   |
| 93.6971981555  | 276.4032726083  |
| 0              | 5.3489608717    |
| 1.2915761894   | 1.3382147857    |
| 347.7147817097 | 328.9236200258  |
| 1.6683239069   | 2.4931251911    |
| 1.3719829754   | 3.1064795608    |
| 35.3973183789  | 18.3913217159   |
| 0.197271189    | 0               |
| 33.5328552948  | 17.0074158694   |
| 22.6344672476  | 5.0468604317    |
| 2.2558948318   | 1.258575667     |
| 72.4055890432  | 57.2911391208   |
| 8.0071006624   | 9.1737221727    |
| 0              | 0               |
| 1.0129152309   | 1.4127769216    |
| 23.5206757518  | 25.2221013678   |
| 13.0541009159  | 15.0031826823   |
| 3.8935010012   | 9.844475031     |
| 0.1382378419   | 0               |
| 0              | 0.1348672055    |
| 5.7053425259   | 5.218099661     |
| 27.9371149565  | 16.9925437897   |
| 6.922931406    | 8.7075077563    |
| 4.5416250415   | 3.1672458115    |
| 3.2239206015   | 3.2434534497    |
| 49.0393606138  | 55.7642167618   |
| 0              | 0.0156497611    |
| 12.8150649497  | 7.660277748     |
| 4.0752575555   | 1.8946731336    |
| 0.6051682717   | 0.8306685746    |
| 79.9693257572  | 65.9856687381   |
| 959.0096226463 | 2420.5721434037 |
| 1.5850824229   | 0.3158306691    |
| 47.7863146223  | 26.4486486685   |
| 1.2368716595   | 1.091417072     |
| 2.2827081673   | 5.7179121048    |
| 25.1716141339  | 16.7697466037   |
| 0.4558575725   | 0.3292605011    |
| 139.1547744036 | 208.9825527799  |
| 2.2351057211   | 3.9869342632    |
| 4.2633041688   | 6.0406856157    |
| 3.1272870534   | 3.432255737     |
| 15.076072239   | 13.8363107773   |
| 27.5330091828  | 7.0270165213    |
| 35.0684677739  | 31.0553710894   |
| 0.2087260226   | 0.1663562183    |
| 0.1008180355   | 0.2410582098    |

gene\_expression\_table

|                  |                  |
|------------------|------------------|
| 56.2886633593    | 48.7664533367    |
| 0.4314763047     | 0                |
| 0                | 0                |
| 0.252142456      | 0.3265590965     |
| 0                | 0.0454198381     |
| 11.530674712     | 8.8618193995     |
| 16645.4669244067 | 17129.0321729071 |
| 31.8605834257    | 35.6286810522    |
| 1.6424640137     | 1.0607869516     |
| 0                | 0.1233297793     |
| 0                | 0                |
| 0                | 0.5057277028     |
| 1.0118352217     | 2.0245012263     |
| 1.1877365067     | 1.7702074065     |
| 0.2391438103     | 0.2858991376     |
| 0                | 0                |
| 216.571242075    | 158.067089458    |
| 8.070606573      | 7.2363762712     |
| 0.7939806512     | 0.7910107282     |
| 34.2975537589    | 43.2952140915    |
| 7.0832483167     | 8.5680223286     |
| 0                | 0                |
| 0.9420568736     | 2.4133707369     |
| 11.5064252       | 14.9672874028    |
| 0.8884845574     | 0.6085482824     |
| 0                | 0.0864307984     |
| 0.0602290086     | 0.0720044629     |
| 16.2030079076    | 6.724407953      |
| 1.1518085756     | 2.4786003888     |
| 9.2567840626     | 6.8858784321     |
| 11.7862436623    | 11.0824849265    |
| 0                | 0.4555039935     |
| 0.8582697985     | 0.2565178196     |
| 0.2104611411     | 0                |
| 0.8556785722     | 1.3639645842     |
| 12.0296002194    | 12.1689814249    |
| 2.224358646      | 1.6743400677     |
| 5.1024255844     | 10.3434912461    |
| 4.5138978478     | 3.8974116088     |
| 53.3463681303    | 6.4700480737     |
| 31.303274158     | 29.5936968208    |
| 0                | 0                |
| 246.9732425416   | 199.2111024987   |
| 46.5259807932    | 52.0276968623    |
| 25.3308151155    | 62.0510278975    |
| 37.4640249232    | 55.073471662     |
| 313.7292204327   | 244.8679796504   |
| 105.5887063343   | 113.0081392861   |
| 10.3021137986    | 14.0448965445    |

gene\_expression\_table

|                 |                |
|-----------------|----------------|
| 2.1125479236    | 1.3775863654   |
| 62.2429518837   | 27.8023436029  |
| 0               | 0              |
| 212.0348321363  | 90.3917996058  |
| 5.895379966     | 3.0205686921   |
| 19.6583670851   | 11.533291141   |
| 3.7454345528    | 3.4069528718   |
| 2.2588431356    | 2.1253719446   |
| 14.6754399015   | 10.011356723   |
| 5146.6075729619 | 2657.623160687 |
| 2.9261995561    | 7.2881349131   |
| 7.1890905345    | 9.0316548289   |
| 14.6390403731   | 8.4172143763   |
| 0.9912395678    | 0.3730675645   |
| 0.3396951796    | 0.3867708953   |
| 38.0073765469   | 38.3366815268  |
| 3.670211098     | 0.4875309995   |
| 0.341005579     | 0.7398565123   |
| 24.9208121152   | 23.172421639   |
| 11.1832979903   | 7.6679503522   |
| 42.1590975159   | 39.8884455408  |
| 0.9038195817    | 0.9926788732   |
| 4.5778361902    | 6.4284329596   |
| 0               | 0.0134924299   |
| 10.4649642463   | 11.45992522    |
| 1.5428537099    | 2.5618043184   |
| 18.9084113912   | 8.0638505084   |
| 0.1046734307    | 0.2502765473   |
| 7.7977415048    | 4.505772732    |
| 85.3430518034   | 111.0411115243 |
| 17.3506371775   | 16.7981898728  |
| 0               | 0              |
| 356.8618355894  | 171.1619807042 |
| 5.4413295493    | 2.8283353008   |
| 0.2491942176    | 0.4965241892   |
| 0               | 0.0868214159   |
| 0.4040167702    | 0.3220044208   |
| 377.8694493444  | 394.2112491091 |
| 19.2919377645   | 16.3368090382  |
| 0.0537569904    | 0.1285341835   |
| 0               | 0              |
| 20.3738909638   | 28.8935884373  |
| 1.2744560529    | 0.5078755554   |
| 9.2989289946    | 6.2108921817   |
| 0               | 3.4548397727   |
| 19.548275162    | 17.0693995896  |
| 241.9986986783  | 349.3835280834 |
| 11.1610405866   | 12.6670976457  |
| 57.0295596773   | 39.2094476615  |

gene\_expression\_table

|                 |                |
|-----------------|----------------|
| 0               | 0.0289766498   |
| 35.2431385259   | 27.5309873364  |
| 0.3675961777    | 0.3580829183   |
| 168.3003622917  | 88.1015941234  |
| 232.9932447411  | 143.4098561229 |
| 0               | 0              |
| 4.7042731397    | 3.1459989907   |
| 2.4442581984    | 11.9320651291  |
| 0.6757955287    | 1.1445550608   |
| 3.2241142841    | 5.1392869261   |
| 1.5399339313    | 1.5659152595   |
| 0               | 0              |
| 0               | 0              |
| 4.2124138547    | 12.0304170691  |
| 3212.1829373442 | 3413.758475544 |
| 0.1384608412    | 0              |
| 2.4207655956    | 4.3946726578   |
| 8.4407198378    | 7.7784608985   |
| 0.0471634009    | 0.5262542201   |
| 65.2360178579   | 47.9496528764  |
| 4.9850056328    | 6.4270527955   |
| 0.9673229085    | 1.4868585109   |
| 3.7207874192    | 2.7430835292   |
| 0.2954730317    | 0.2354942404   |
| 0               | 0.0163427893   |
| 0.0182452722    | 0.0145416199   |
| 0.4727459351    | 0.1883910424   |
| 0.733455761     | 5.5534129803   |
| 0               | 0.0950542529   |
| 1.884329931     | 1.8236448894   |
| 4.3348458383    | 6.5396414375   |
| 7.120954103     | 5.0205941566   |
| 159.6385521378  | 75.6956614856  |
| 46.7976161976   | 84.5781191611  |
| 14.714432665    | 9.740621211    |
| 0               | 0              |
| 0.2218403952    | 1.1669359177   |
| 0               | 0              |
| 1.431533917     | 1.3767383165   |
| 4.9380079436    | 1.023263714    |
| 0.8685948113    | 0.2260495126   |
| 79.0414500843   | 36.0991944068  |
| 42.2875943356   | 18.9582369955  |
| 1.4395655206    | 1.229297791    |
| 38.9021692418   | 5.471527595    |
| 0.679006462     | 0.4058799633   |
| 0               | 0              |
| 0.3837226847    | 0.1529149406   |
| 24.7506970363   | 30.3484502868  |

gene\_expression\_table

|                |                |
|----------------|----------------|
| 5.4229912218   | 4.0274719401   |
| 1.057962753    | 2.2996481285   |
| 58.2364905511  | 43.5329509525  |
| 3.3555702473   | 3.4232510204   |
| 0.6012678887   | 0              |
| 0              | 0              |
| 0.7605620793   | 0.9092605922   |
| 0              | 0              |
| 4.8775062247   | 23.3244560494  |
| 0              | 10.5310356944  |
| 57.0896815602  | 59.2635281622  |
| 7.503102839    | 5.5403216303   |
| 0              | 0              |
| 2.5289183866   | 3.4056133356   |
| 149.6530863692 | 171.3629341839 |
| 1.2584862175   | 2.6329354569   |
| 375.6936683914 | 261.0799651168 |
| 0              | 0              |
| 105.3210666145 | 47.1101301563  |
| 1.8547719999   | 0              |
| 11.3596697695  | 8.3648709734   |
| 15.666274562   | 11.9031288894  |
| 2.7970512127   | 2.315012157    |
| 62.4906084384  | 50.7487731852  |
| 21.0725792881  | 30.6261856422  |
| 6.9110776534   | 13.3573392809  |
| 22.1823983018  | 20.2384198453  |
| 268.4075141528 | 263.1590225127 |
| 75.9276959901  | 71.3940395621  |
| 32.9602417914  | 31.8567448795  |
| 2.3261146764   | 4.0554740311   |
| 0.488471167    | 0.0973288034   |
| 2.0536521983   | 1.4343792573   |
| 0              | 0              |
| 0              | 0.3656418939   |
| 2.9214156379   | 4.1735298784   |
| 0.1536432029   | 0.0612273972   |
| 0.4455129534   | 0.3550771925   |
| 18.1651042719  | 8.2170874217   |
| 1.2027679183   | 1.1627646429   |
| 0.5050004292   | 0.8251027792   |
| 1.0718086927   | 1.0956551807   |
| 7.6840891776   | 5.2056356001   |
| 0.3220842323   | 0.1057014694   |
| 0.0973558177   | 0.0775933228   |
| 2.1188035048   | 3.1240994665   |
| 1.4319338953   | 4.1656068179   |
| 0              | 0.2278136597   |
| 0.5563057666   | 0.5911732032   |

gene\_expression\_table

|                 |                 |
|-----------------|-----------------|
| 16.4388792001   | 21.0881882468   |
| 72.3836087102   | 70.8402745418   |
| 56.722921987    | 73.9221665504   |
| 19.5758454824   | 20.3694042458   |
| 2.2847240638    | 3.7210561155    |
| 0               | 3.6015365388    |
| 144.9111937279  | 91.8904347922   |
| 258.3681460542  | 83.9750251479   |
| 0.3846664198    | 0.1532910226    |
| 136.2548730286  | 100.0227826991  |
| 2.5280083966    | 3.2873734749    |
| 9.9022501971    | 5.4691341599    |
| 6.9089767558    | 6.7499114577    |
| 0               | 0               |
| 0               | 0               |
| 8.6177887062    | 5.3375247961    |
| 48.6005375421   | 28.1709061137   |
| 15.1156864048   | 7.5295727247    |
| 142.5243900151  | 101.6727616979  |
| 11.9180006284   | 11.6095669762   |
| 1.0899159877    | 0.8976269929    |
| 7.3418806908    | 3.3437339572    |
| 0               | 6.7287465173    |
| 1.9869409224    | 1.3856560717    |
| 6.7002323903    | 6.2535801727    |
| 11.3337221936   | 3.6132249146    |
| 126.9785834423  | 133.0095140591  |
| 27.6176091968   | 35.9802439473   |
| 24.3867389347   | 25.3584481225   |
| 118.9985017514  | 66.758215166    |
| 5.4015667554    | 3.2288171603    |
| 262.146691776   | 25.3251994577   |
| 50.6166233889   | 97.8289415585   |
| 8.1569023801    | 4.1792868476    |
| 3.1689515904    | 3.9989907668    |
| 9.4199082965    | 4.3795139147    |
| 150.5765948579  | 29.0348430636   |
| 0               | 0               |
| 40.0611397067   | 21.9512089928   |
| 4.3653810363    | 6.4614488604    |
| 63.9840134748   | 8.2251197652    |
| 26.8038393484   | 16.0221469752   |
| 0               | 1.9988828887    |
| 0.4399519609    | 0.4163909843    |
| 0               | 0.6448478768    |
| 0               | 0               |
| 0               | 0               |
| 1307.9586141097 | 1339.6565273842 |
| 76.8194945167   | 47.5676732062   |

gene\_expression\_table

|                 |                  |
|-----------------|------------------|
| 264.6357412612  | 170.437726696    |
| 13.5197164594   | 31.8361616338    |
| 1.0923645719    | 0.92503675       |
| 119.8565247683  | 156.5574120686   |
| 4.1803057705    | 1.3882230449     |
| 24.042812174    | 25.952827983     |
| 11.513832759    | 5.2437781537     |
| 0.1384363306    | 0.5792577117     |
| 0.2622295634    | 0.2089989449     |
| 2.113619437     | 1.9505555162     |
| 44.3661212949   | 15.4405919076    |
| 2.4143028395    | 1.4868954324     |
| 14.7552232332   | 3.920008162      |
| 835.8956629726  | 510.7649589759   |
| 0               | 0                |
| 53.7361497625   | 38.5453059103    |
| 71.8531591741   | 36.686999342     |
| 10.1124159227   | 11.4695331651    |
| 9.7572663802    | 6.9125467405     |
| 0               | 0                |
| 0               | 0                |
| 340.717084202   | 129.6809339155   |
| 0               | 0                |
| 389.1060331639  | 294.1583685792   |
| 7356.3109635304 | 10143.1933105329 |
| 5.2618432134    | 3.3549830621     |
| 1.835265054     | 0                |
| 21.4997657052   | 9.3466231823     |
| 87.9057276334   | 49.7805605117    |
| 0               | 0                |
| 34.0644598917   | 13.9228882598    |
| 1.2040885298    | 1.6451445648     |
| 2.0880121369    | 2.8528482193     |
| 14.153224895    | 18.2990353307    |
| 76.3402754498   | 50.2622503739    |
| 14.8760718251   | 9.6332776537     |
| 201.092613778   | 92.3308009422    |
| 11.4863182085   | 5.4928094785     |
| 5.7221475465    | 1.1401487154     |
| 56.4019351517   | 36.3447917878    |
| 50.1515540016   | 50.6056986222    |
| 3.4719777926    | 2.5510056353     |
| 14.7415368707   | 8.8118372638     |
| 46.4091752383   | 11.5588948689    |
| 10.3402176526   | 1.8313848122     |
| 809.1053227494  | 441.1312232102   |
| 14.6311961398   | 2.5350378163     |
| 112.6938228596  | 34.7023429978    |
| 3.8845369764    | 2.6230045263     |

gene\_expression\_table

|                |                |
|----------------|----------------|
| 12.4655141751  | 15.4311268279  |
| 0.8652866342   | 1.3792799803   |
| 87.0375702057  | 123.4543756839 |
| 190.222742763  | 225.506415484  |
| 0              | 0              |
| 0              | 2.6547712636   |
| 0              | 0              |
| 0.8535340143   | 1.870750924    |
| 0.8946310609   | 1.7825693003   |
| 27.0182014673  | 32.9734947594  |
| 155.852697133  | 68.715111273   |
| 4.5413869417   | 0              |
| 0              | 8.209070751    |
| 20.3810081532  | 10.8292117372  |
| 113.9967126696 | 92.5387649651  |
| 0              | 0.7529572725   |
| 0              | 0              |
| 104.3796901611 | 41.4057664459  |
| 638.5627254285 | 324.7754588397 |
| 2.724832165    | 2.8956157852   |
| 0              | 0.4581702978   |
| 7.0832708469   | 3.225954528    |
| 0              | 0.190269713    |
| 6.567325605    | 5.234208165    |
| 0              | 2.5374841737   |
| 10.0009115071  | 1.7535764601   |
| 0              | 0.88641533     |
| 10.3313636436  | 6.8618124525   |
| 6.3316314162   | 2.7754969629   |
| 6.1691965106   | 3.6876721998   |
| 1.9421642741   | 1.9348995148   |
| 7.5468650874   | 2.8675726756   |
| 1.3883045859   | 0.3688297508   |
| 26.5727388203  | 15.075459897   |
| 0.3545058754   | 0.753450302    |
| 1.672822275    | 0.8287782715   |
| 0.3890943638   | 0.7408210807   |
| 8.900716386    | 4.2563629566   |
| 4.8174137455   | 4.630003601    |
| 8.8595019557   | 18.4092704833  |
| 0              | 1.7550124535   |
| 2.9316609827   | 0              |
| 14.3169162565  | 10.8673242967  |
| 19.705538157   | 9.5765017753   |
| 14.016861946   | 5.8217910341   |
| 6.7528701901   | 4.5847421427   |
| 0.2279703138   | 1.1810114149   |
| 24.4545120991  | 8.8170997616   |
| 4.2523142061   | 1.6192493638   |



gene\_expression\_table

|                |                |
|----------------|----------------|
| 239.7984929786 | 129.6893939265 |
| 0.9293125439   | 1.1850705989   |
| 3.972853746    | 3.1663944757   |
| 0              | 0              |
| 0              | 0              |
| 43.482206519   | 25.757575755   |
| 8.601481013    | 3.7451044348   |
| 30.5265531451  | 15.2258044309  |
| 0              | 0              |
| 18.5664756621  | 14.181053928   |
| 0              | 0              |
| 1.3560288001   | 2.3416579487   |
| 44.7599473099  | 9.9555394748   |
| 0              | 0              |
| 0.813262121    | 0.7021907314   |
| 0.127980825    | 0.4335071623   |
| 65.5648254724  | 96.5593748056  |
| 6.8299286582   | 4.3003687793   |
| 69.1955792541  | 27.7492233558  |
| 32.6339048662  | 16.4414210531  |
| 12.9005483636  | 11.7647915035  |
| 1.2260990839   | 1.1209176291   |
| 7.4023000578   | 4.5052171442   |
| 0              | 0              |
| 4.8376487964   | 6.4260711164   |
| 0              | 0.2015859302   |
| 0.1868022422   | 0.7816346976   |
| 69.7990938239  | 49.073964898   |
| 0.8882855191   | 0.5309777065   |
| 0              | 0.3866775818   |
| 31.8833136228  | 12.705621019   |
| 81.2190370222  | 85.127259132   |
| 0              | 0.3325568313   |
| 27.150769118   | 18.4440814461  |
| 27.5572053933  | 6.0137610067   |
| 0.9928709437   | 1.3628386188   |
| 2.1111859266   | 3.5455442024   |
| 71.2323462261  | 67.256317151   |
| 34.0782270181  | 22.3641574134  |
| 0.1413405568   | 0.1079557637   |
| 0.3907718969   | 0.4671722349   |
| 0              | 0.0146572674   |
| 1.5295299859   | 1.4802713135   |
| 0.3596370786   | 0.1719800826   |
| 1.0128111169   | 1.4991193627   |
| 6.9559296481   | 8.1618947739   |
| 0.9547261913   | 0.6341033279   |
| 8.3503794922   | 5.8908536688   |
| 1.6740777742   | 2.5017237081   |

gene\_expression\_table

|                |                 |
|----------------|-----------------|
| 4.398367144    | 9.1722411584    |
| 32.436072009   | 40.1626095476   |
| 11.8965438588  | 9.8903265907    |
| 0              | 0.4715212956    |
| 0.1758966719   | 0.3154296995    |
| 4.6154294732   | 3.9084404508    |
| 6.9461624748   | 3.2406696671    |
| 0.0914663151   | 0.0728993448    |
| 13.5049768967  | 28.0097412824   |
| 0.5456057542   | 0.4783371028    |
| 0.6780579463   | 0.0450347759    |
| 1.2396362618   | 2.1406655269    |
| 0.7064762984   | 0.7304652347    |
| 1.2384728985   | 0               |
| 119.6815367126 | 100.2046194964  |
| 0              | 0.2253330741    |
| 921.265754991  | 1757.3492200392 |
| 82.2487268698  | 73.1166484443   |
| 1.215835735    | 2.4456478348    |
| 1.1260285549   | 0.8974532725    |
| 5.4850563571   | 3.2787235432    |
| 0              | 0.0279078401    |
| 0.0794608127   | 0.0316654343    |
| 41.2941366972  | 27.152184829    |
| 7.1449392416   | 10.2502270815   |
| 1.9798962653   | 1.4817732518    |
| 15.3854278239  | 23.1097235845   |
| 0.1486826778   | 0.1580016246    |
| 0              | 0.5179622973    |
| 0              | 0               |
| 0              | 0               |
| 35.4616778353  | 16.047763559    |
| 0              | 0.4228120236    |
| 5.3561443493   | 4.6957763007    |
| 1.4649438793   | 2.5297379222    |
| 0.7745566627   | 0.9259912752    |
| 4.9914639565   | 4.7517801157    |
| 0.316069763    | 5.9198847888    |
| 0              | 0               |
| 0              | 3.3844786898    |
| 20.0915727838  | 8.3789662123    |
| 0.1962116162   | 0.3388279738    |
| 46.6961800468  | 69.9426850958   |
| 0              | 0               |
| 1.7476030863   | 1.576122989     |
| 0              | 0               |
| 0              | 0               |
| 4.8638462269   | 4.3185817714    |
| 5.2220775214   | 3.9390690953    |

gene\_expression\_table

|                |                |
|----------------|----------------|
| 7.361663917    | 6.7473970768   |
| 0.9180714138   | 0.1219516431   |
| 2.9705577443   | 0.7891856612   |
| 3.5819074457   | 1.5646540109   |
| 2.0018890387   | 1.1806853186   |
| 0.9790595425   | 1.647337701    |
| 15.4396710044  | 16.8454404801  |
| 1.3931988343   | 2.7759750134   |
| 8.3495361317   | 16.3038764051  |
| 129.5720131864 | 92.8330252546  |
| 2.9482632662   | 3.0840969022   |
| 9.1287178758   | 8.2284218021   |
| 62.5162877432  | 65.5477356523  |
| 7.5207203989   | 6.0888677684   |
| 21.9964874884  | 31.0170336598  |
| 2.248660275    | 2.0259643606   |
| 0.0892668081   | 0.0355731605   |
| 2.048169381    | 2.2154087991   |
| 3.597255241    | 2.9092019746   |
| 0.3207511043   | 0.8947436941   |
| 0.0315854872   | 0              |
| 1.8689897186   | 1.4895989378   |
| 17.0265786593  | 14.5944864209  |
| 11.1541069449  | 5.9266050501   |
| 0.8465529808   | 2.0803531408   |
| 2.5215939389   | 2.2923476378   |
| 0              | 0.2923610611   |
| 0              | 0              |
| 3.7679605629   | 4.135406836    |
| 0.7560684802   | 0.6886769093   |
| 0              | 0.9992485736   |
| 79.0553353075  | 40.158753849   |
| 37.5921669811  | 19.1358293173  |
| 63.5102771418  | 43.4797110773  |
| 0.2571610758   | 0.2049593219   |
| 3.8376453011   | 7.6465808068   |
| 3.344818531    | 3.184204539    |
| 0              | 0              |
| 44.5755293875  | 98.4784450468  |
| 0              | 0              |
| 6.8632291392   | 5.8267876182   |
| 1.5050233042   | 2.2490905377   |
| 13.8880029248  | 12.254790844   |
| 148.9553205486 | 120.0267098016 |
| 9.6854195815   | 12.5947332568  |
| 6.2208728803   | 0.6467064422   |
| 2.7081877667   | 2.0235432446   |
| 7.3960241505   | 32.0523614968  |
| 19.1095831827  | 15.0491670253  |

gene\_expression\_table

|                |                |
|----------------|----------------|
| 12.6650351575  | 5.0470643926   |
| 59.0654706464  | 66.8473899415  |
| 0.9516709986   | 1.4748396869   |
| 1.5650970608   | 4.2411402516   |
| 30.9309119866  | 21.8613589515  |
| 148.2273079046 | 197.5760976575 |
| 39.6893316667  | 43.6832488498  |
| 0              | 0              |
| 169.4839838272 | 108.3608924666 |
| 78.8647576445  | 71.5358959604  |
| 43.531434526   | 14.981881068   |
| 35.4957997468  | 20.2620581363  |
| 123.1138938519 | 202.8604223857 |
| 1.7314247189   | 0.6899792964   |
| 165.6320145285 | 103.4672722001 |
| 0              | 1.5217929393   |
| 54.2171450081  | 101.2058219156 |
| 5.6969753331   | 21.7155898218  |
| 2.4848160573   | 6.4363558551   |
| 3.5346733037   | 4.0848839573   |
| 33.8407691698  | 59.2860782642  |
| 4.1577066916   | 1.8074856388   |
| 27.9591160576  | 32.6826527959  |
| 1.4689014885   | 3.2194953813   |
| 17.0340734922  | 14.3656042908  |
| 0              | 4.0975395762   |
| 400.8276696648 | 352.6388993845 |
| 8.9830778331   | 39.377695264   |
| 0              | 4.5777147706   |
| 16.2296114118  | 19.4026845192  |
| 8.8500978857   | 9.6185385458   |
| 48.9350847216  | 38.6969322838  |
| 809.7641514758 | 237.0712612197 |
| 204.4514591788 | 213.8710335467 |
| 75.5987269842  | 51.2148434791  |
| 28.9696336979  | 22.539278604   |
| 0.2405496251   | 0.5751596104   |
| 85.7575115328  | 39.0567915048  |
| 9.6282373218   | 9.1659014377   |
| 5.9832033003   | 1.9869409464   |
| 5.9671398747   | 3.5668916998   |
| 6.4579909916   | 6.9485413294   |
| 1.2588519911   | 1.7558004722   |
| 214.8574111019 | 102.3927104432 |
| 425.1085880377 | 263.6551470128 |
| 9.1941243335   | 6.8281647992   |
| 48.7890529424  | 45.2543789162  |
| 0              | 12.1840392699  |
| 3.0883025372   | 9.2302517769   |

gene\_expression\_table

|                |                |
|----------------|----------------|
| 12.8858320802  | 16.4321689634  |
| 0.9166764108   | 5.8447842458   |
| 30.5658718094  | 12.5388688719  |
| 24.5277626145  | 36.1653026931  |
| 24.999673747   | 20.1463171075  |
| 17.9090114052  | 14.2736175061  |
| 0.5151314852   | 0.889554659    |
| 7.0298057154   | 1.120561662    |
| 12.0237080765  | 7.6228299734   |
| 5.5726377532   | 14.9898411873  |
| 8.747684908    | 5.3742276581   |
| 4.7587839636   | 13.2747538063  |
| 1.9773608527   | 3.6618162511   |
| 0              | 0.3625133566   |
| 3.2826342954   | 5.0145450129   |
| 60.1045387039  | 133.1724856539 |
| 6.2736134722   | 3.2000751196   |
| 0              | 7.0755949544   |
| 71.6360456207  | 79.6943644089  |
| 6.2664266053   | 3.3295929247   |
| 8.671344742    | 8.9268727965   |
| 2.1289296679   | 0.4241932607   |
| 152.3428892257 | 205.7367920111 |
| 18.8027395871  | 19.4817033123  |
| 18.9668561429  | 11.8482460828  |
| 0              | 0.2511205873   |
| 274.1757279505 | 54.3573364106  |
| 621.5023462232 | 410.6125048404 |
| 2.1232662234   | 0.3076834972   |
| 1.7681485205   | 1.8118642377   |
| 0              | 0              |
| 60.1356214333  | 11.9821362471  |
| 4.8489434945   | 5.7969669444   |
| 13.6731257547  | 53.80682403    |
| 1.1145275506   | 1.7765737704   |
| 1.3104696886   | 1.8568075569   |
| 3.0258991755   | 3.9348210634   |
| 6.5305306893   | 7.9888891714   |
| 38.7335232272  | 32.7554723101  |
| 36.2008077152  | 29.172898781   |
| 1.4503863475   | 2.5045992526   |
| 29.1022389606  | 24.3903078285  |
| 11.5047809332  | 9.6278672651   |
| 2.0268189723   | 1.5256461549   |
| 1.0320405708   | 1.2795131044   |
| 0.9661760905   | 1.2950835017   |
| 0              | 0.202597937    |
| 2.3714399465   | 2.2220923577   |
| 1.3610522716   | 1.6271534278   |

gene\_expression\_table

|                 |                 |
|-----------------|-----------------|
| 3.7411794307    | 2.6678800531    |
| 0               | 1.1801589834    |
| 8.8619229782    | 3.0561142594    |
| 2.8189526891    | 2.5871397307    |
| 1.8578814105    | 2.5718211875    |
| 24.0255432858   | 14.5264783659   |
| 0.2092223984    | 0.0833759168    |
| 1.4025989403    | 5.4030961444    |
| 0.3563937252    | 0.8521454814    |
| 1.644723431     | 4.5411832161    |
| 0.542372707     | 1.1012724022    |
| 1.2089044112    | 0               |
| 1.8447574173    | 2.3524569767    |
| 3.1552188354    | 7.125077597     |
| 0.4033530306    | 0.5357923588    |
| 0.8229755817    | 0.7242425282    |
| 164.1513274001  | 302.0392813527  |
| 37.2133677732   | 67.7128225525   |
| 17.1298849583   | 6.8263239183    |
| 1.2630538874    | 2.4159923968    |
| 2.4466656369    | 2.4194581084    |
| 31.3212882417   | 31.1579011096   |
| 1.9768181797    | 1.6193040098    |
| 24.3965334533   | 50.6307329529   |
| 14.3383609532   | 4.7436076629    |
| 3.1158955328    | 4.910343866     |
| 5384.4057691304 | 3897.1800029229 |
| 298.1477294556  | 426.5581381578  |
| 108.5988766545  | 364.7638160688  |
| 972.980039617   | 1378.1494059517 |
| 57.0558081941   | 58.4664564203   |
| 32.9095978611   | 13.9449462289   |
| 27.4558266776   | 34.488725135    |
| 0               | 0.6397148618    |
| 2.8459126213    | 2.1488342003    |
| 4.4446169868    | 3.9472382996    |
| 11.4605584132   | 8.2207365413    |
| 2.0780163809    | 1.5009265087    |
| 20.6763850829   | 26.3667764037   |
| 0.849823893     | 0.3386580343    |
| 0               | 0               |
| 12.7240935887   | 9.4168274585    |
| 15.2441877458   | 9.9222818682    |
| 36.8022444381   | 42.5009870101   |
| 3.3940266172    | 4.057597316     |
| 1.0775017578    | 1.2881655725    |
| 0.5763853478    | 0.2296917402    |
| 0               | 0.1232728641    |
| 0.9965886839    | 0.9266701694    |

gene\_expression\_table

|                |                |
|----------------|----------------|
| 10.45898242    | 7.1636538124   |
| 0.134270181    | 0              |
| 0.1585600208   | 0              |
| 17.5255016988  | 4.6559857901   |
| 21.7308581907  | 5.4760684307   |
| 4.2883923542   | 0.6572848331   |
| 28.5075283123  | 42.246330606   |
| 12.7777077394  | 19.6005769964  |
| 0              | 0.0644966505   |
| 0              | 0              |
| 18.9378906874  | 9.7904705343   |
| 0.4079430524   | 0.1625668487   |
| 50.1239749476  | 32.7361393781  |
| 4.5453028919   | 4.5155451894   |
| 5.7253476901   | 0.8555897626   |
| 44.7208938343  | 14.4219788295  |
| 0              | 0.2475084575   |
| 0.4978713616   | 1.5872289592   |
| 70.2542137024  | 78.2677826373  |
| 6.6268260327   | 9.0227853619   |
| 0.7972634212   | 0              |
| 1.0714870824   | 1.2525088497   |
| 71.7005460733  | 20.4917035024  |
| 14.3331139572  | 10.0636477965  |
| 0              | 0              |
| 42.8305798385  | 22.1586482728  |
| 33.5310897332  | 25.6765111924  |
| 0              | 0              |
| 311.9524506687 | 197.7188245125 |
| 17.8384042073  | 10.0047969509  |
| 2.5273777227   | 5.237281804    |
| 0              | 0              |
| 6.8511083513   | 2.8862035843   |
| 0.1820360408   | 0.3627102524   |
| 29.1438570693  | 39.6809521869  |
| 17.2114202186  | 9.3083931806   |
| 3.3619495974   | 1.339749625    |
| 10.7433565842  | 16.5899143366  |
| 5.0399151323   | 7.0294883207   |
| 0              | 0              |
| 83.3667928011  | 38.6205542071  |
| 2.8727516254   | 2.2896047673   |
| 0              | 0.9854126119   |
| 0              | 0              |
| 146.1563759577 | 95.778805794   |
| 95.0903917032  | 33.4084824874  |
| 0              | 1.8210548001   |
| 16.8710522646  | 9.604540159    |
| 0              | 0.075257341    |

gene\_expression\_table

|                |                |
|----------------|----------------|
| 0.1205942375   | 0              |
| 1.8874340258   | 0              |
| 6.3579417184   | 1.6241434693   |
| 0              | 0              |
| 5.4818014326   | 8.5820373406   |
| 0              | 0              |
| 5.1334547598   | 2.2648833936   |
| 0              | 0              |
| 34.0834938607  | 17.8269015251  |
| 15.3757323479  | 15.318218678   |
| 20.4870749681  | 28.2035199571  |
| 0              | 3.0174995588   |
| 3.2963796585   | 2.126812939    |
| 1.9366594577   | 1.4764221345   |
| 40.2727810902  | 77.6347076091  |
| 1.8231896908   | 4.7952166987   |
| 320.9378406531 | 288.5071966854 |
| 15.2555164501  | 9.2276318468   |
| 53.2828932261  | 68.8256149377  |
| 0              | 15.0490454189  |
| 9.0860919511   | 3.4667636113   |
| 73.2514291299  | 4.865161908    |
| 231.2480352207 | 220.9314288412 |
| 0              | 4.6425540032   |
| 1.3953137231   | 1.1120755878   |
| 0.5313484435   | 5.0818647258   |
| 217.0621891204 | 88.6626055803  |
| 2.3718798894   | 1.9899012699   |
| 8.3151559619   | 9.1416958242   |
| 45.7801579435  | 33.9330327975  |
| 7.6118140593   | 12.1333467215  |
| 3.70492261     | 1.6240682339   |
| 12.9191950693  | 9.75476478     |
| 2.5000544349   | 2.2269813811   |
| 0.3893823363   | 0.3103406663   |
| 3.4704517863   | 2.8976894728   |
| 0              | 0.0338928129   |
| 0              | 0              |
| 0.2912745403   | 0.2321480111   |
| 79.1775417581  | 39.0143013613  |
| 0              | 5.962675973    |
| 17.9630741197  | 5.234064522    |
| 0.3464099297   | 1.8406088888   |
| 63.8903326352  | 34.9055778031  |
| 274.4023261426 | 119.2913066102 |
| 5.7569911242   | 1.2745459602   |
| 66.4722806655  | 19.4775405551  |
| 2.4655213039   | 1.9650391219   |
| 18.2637326598  | 10.3184132858  |



gene\_expression\_table

|                |               |
|----------------|---------------|
| 5.7427456298   | 7.7405344755  |
| 1.5729047756   | 2.0219629023  |
| 35.0526272569  | 11.8570712483 |
| 65.4720137882  | 43.8411740136 |
| 2.9414576735   | 1.2815856572  |
| 3.9410211279   | 4.0945486714  |
| 0.5090584032   | 0             |
| 11.110089159   | 5.8109789502  |
| 149.0451137413 | 72.5939393867 |
| 11.3776939577  | 11.1840000084 |
| 2.6327393491   | 1.0491565841  |
| 12.1920206433  | 7.3934704875  |
| 2.7136412326   | 1.9747236611  |
| 5.17237519     | 3.6884829643  |
| 2.783466831    | 1.5007121928  |
| 19.7244754889  | 10.4630191316 |
| 0              | 0.1388704184  |
| 0.2814846217   | 0             |
| 0.4950798978   | 0.5178894289  |
| 0.0164199746   | 0.006543      |
| 16.9725330832  | 17.4430163926 |
| 0              | 0.1913732151  |
| 0              | 0             |
| 0              | 0             |
| 0.4411141845   | 0.2460999383  |
| 2.9005915642   | 3.3275814221  |
| 6.8254127043   | 4.6981002344  |
| 0.5302875481   | 2.9585022987  |
| 26.6129135313  | 24.1523223135 |
| 0              | 0             |
| 10.0461260319  | 8.4516627657  |
| 0.4218220482   | 0.7284232843  |
| 3.2660053282   | 0             |
| 0              | 0             |
| 21.2083336435  | 16.3203332332 |
| 0              | 0.2941393571  |
| 0              | 0.128577885   |
| 1.4038146064   | 1.8206754839  |
| 89.5130564799  | 55.1283594775 |
| 0              | 1.3098731302  |
| 0              | 0             |
| 5.243934537    | 5.3033426643  |
| 8.0442349402   | 5.178370674   |
| 5.7586266517   | 1.6255077653  |
| 0.1137456807   | 0             |
| 1.576992006    | 2.0361367758  |
| 2.5770053115   | 2.9305542452  |
| 0              | 2.2835463789  |
| 0.3063434813   | 1.0987113192  |

gene\_expression\_table

|                |               |
|----------------|---------------|
| 2.1647917694   | 4.3735753389  |
| 7.1362020743   | 11.2459502293 |
| 0              | 0             |
| 0.3873550623   | 2.7785242223  |
| 65.3101932702  | 76.3764178078 |
| 5.5890743478   | 2.227267258   |
| 71.2144249354  | 38.9160557836 |
| 94.9937805658  | 78.8894574803 |
| 1.1058921161   | 0.7149168848  |
| 1.61279594     | 2.5708211182  |
| 36.1518127206  | 27.166795632  |
| 0              | 0             |
| 1.4238085232   | 2.8369653972  |
| 0              | 0.0439287971  |
| 0.3477220237   | 0.3502004947  |
| 0              | 0             |
| 0.9173888823   | 0.3249626115  |
| 6.7573605296   | 5.2061451889  |
| 3.4384494276   | 1.3702350966  |
| 22.044257296   | 11.2249198397 |
| 0.5921704162   | 1.0619196735  |
| 25.3647901501  | 21.7710010447 |
| 0              | 0             |
| 0              | 0             |
| 0.6471152793   | 0.386816828   |
| 2.1912579964   | 1.1783271657  |
| 3.0695137191   | 5.8255510642  |
| 0              | 0             |
| 29.9866155704  | 18.4331707742 |
| 358.8123108588 | 252.978879681 |
| 4.951277863    | 3.6173554038  |
| 0              | 0.5546852249  |
| 2.6840978881   | 0.2139246312  |
| 0              | 0.3285711923  |
| 5.9039108393   | 4.5722881394  |
| 6.4103340039   | 6.3255334032  |
| 0              | 0.0837193553  |
| 47.3082146464  | 37.7050047867 |
| 0              | 0             |
| 0.6007717648   | 2.4739014692  |
| 0              | 0.3749108624  |
| 1.2392142901   | 2.2716252665  |
| 92.9030179841  | 83.1797568197 |
| 16.8835579987  | 20.6232782349 |
| 7.4805627578   | 5.7165682836  |
| 27.569105154   | 23.3272720302 |
| 0.3174096456   | 0.4216298127  |
| 0.3611527221   | 0.8912014135  |
| 56.0121790964  | 34.4736450395 |

gene\_expression\_table

|                 |                 |
|-----------------|-----------------|
| 11.7931376547   | 20.7297863167   |
| 24.6593376111   | 10.8892002687   |
| 1069.4114394136 | 724.8567896151  |
| 2.402232683     | 44.0357450872   |
| 3.5745258924    | 12.1079276991   |
| 5.3362565109    | 4.8126468922    |
| 0               | 0               |
| 4.3318179129    | 8.2476188961    |
| 3.3504627685    | 1.8089428184    |
| 46.4367283804   | 45.2597349371   |
| 1.2176467047    | 0.4205385733    |
| 1.9426288575    | 1.9353623604    |
| 0               | 0               |
| 10.3403922683   | 4.262778013     |
| 0               | 0.1732870136    |
| 0.824130756     | 0.6568384441    |
| 0               | 0               |
| 0.8823721535    | 0.5274429587    |
| 0.4220328286    | 0.1345453422    |
| 3.3143187027    | 2.5504495817    |
| 26.1812471761   | 12.9517150126   |
| 26.9760570225   | 42.0002371967   |
| 18.4100482306   | 9.8882908038    |
| 30.4869934256   | 21.7555122067   |
| 16.5624239273   | 2.2000628507    |
| 3.7264418362    | 5.2175716439    |
| 125.8433981497  | 204.6900813677  |
| 336.7852777385  | 233.1617993463  |
| 12.6970612118   | 7.5248707689    |
| 311.6379017306  | 115.6759344807  |
| 0               | 0               |
| 1.3754087161    | 0.986590032     |
| 0               | 0               |
| 1.476229711     | 1.3866673566    |
| 0               | 0.2363102064    |
| 2.3938116475    | 1.2141092622    |
| 4.1040597493    | 3.3212892163    |
| 0               | 0               |
| 11.5427730322   | 5.962753861     |
| 1745.5933434786 | 3238.6798812737 |
| 5.8982423148    | 2.4810536319    |
| 15.4560610597   | 2.7816187978    |
| 38.4718553503   | 21.8416808202   |
| 10.5172306852   | 4.4117433581    |
| 19.4845196371   | 19.5554267524   |
| 0               | 0.4975635693    |
| 5.5642271313    | 3.0236802932    |
| 18.0006176016   | 7.8765802636    |
| 2.1352808259    | 2.5882073408    |

gene\_expression\_table

|                |                |
|----------------|----------------|
| 0.1307178553   | 0.1562746786   |
| 0              | 0              |
| 45.9881923208  | 31.6075934558  |
| 2.2711331017   | 6.3353858921   |
| 8.992004165    | 1.1944492185   |
| 17.8100512616  | 8.2561274983   |
| 9.2063328741   | 7.3375169129   |
| 2.3050505935   | 0.1837142752   |
| 1.1108773992   | 1.4387387412   |
| 0.2833658701   | 0.1129223706   |
| 0              | 0              |
| 436.717985649  | 248.3508910765 |
| 1.2629914052   | 0.6937472796   |
| 24.9846430819  | 9.9564747268   |
| 78.3137664926  | 38.8444132662  |
| 14.9795349272  | 9.9896103408   |
| 17.2827852918  | 10.4686280245  |
| 2.3011750776   | 2.2070818562   |
| 32.049010907   | 11.6610735773  |
| 2.4892540919   | 2.2567480542   |
| 0              | 0              |
| 56.294849203   | 47.0756604134  |
| 6.4506294553   | 2.0886126833   |
| 0.9870614238   | 1.8684016184   |
| 3.4696000854   | 1.8854301156   |
| 22.1377721289  | 11.2621096455  |
| 12.6259989395  | 1.0616944145   |
| 2.3594507148   | 0.9402500302   |
| 5.3468534937   | 2.1307413319   |
| 30.8208157393  | 28.6584937228  |
| 0              | 0              |
| 4.4632595349   | 2.4138492983   |
| 0.4511404065   | 0.7191246305   |
| 0.698765089    | 1.8378394964   |
| 37.9346406208  | 22.4942413862  |
| 0.0776256657   | 0.123736485    |
| 0.5293901077   | 0.6328918781   |
| 432.3005465275 | 216.7934948747 |
| 3.0674401753   | 1.8335797603   |
| 3.3172311677   | 1.1954837636   |
| 0              | 2.8455520865   |
| 31.8210671206  | 19.5976240358  |
| 17.2283057973  | 11.4425749913  |
| 7.4319745698   | 3.4767430011   |
| 9.9921795666   | 3.6500945566   |
| 1.4684724243   | 2.0189117544   |
| 9.4444414314   | 5.9186362521   |
| 135.3994675654 | 52.696517489   |
| 0.4491793716   | 0.7259431377   |

gene\_expression\_table

|                |                |
|----------------|----------------|
| 0              | 0              |
| 0              | 0              |
| 0.1481922239   | 0              |
| 0              | 0.7655276823   |
| 0.7524580181   | 0.299857365    |
| 3.4251914524   | 0.6299777277   |
| 17.0270227668  | 21.3253321164  |
| 1010.771744016 | 533.1128312455 |
| 12.1464172616  | 6.6555406505   |
| 4.6583680807   | 4.9398514378   |
| 15.0981225933  | 4.0111059563   |
| 7.4829420376   | 10.0819347223  |
| 2.2390796282   | 1.0545147329   |
| 12.9714552123  | 18.1619625021  |
| 13.1763314772  | 8.2216754102   |
| 0.6602668519   | 0.6679170471   |
| 5.7908054705   | 7.8844977331   |
| 4.8247363523   | 3.7338918947   |
| 8.6661841805   | 3.7125201969   |
| 4.4085446177   | 4.44372547     |
| 1.5412207625   | 1.91078938     |
| 29.0219162447  | 10.2047147169  |
| 0              | 0              |
| 0              | 0              |
| 7.0480660592   | 6.213142754    |
| 96.5544166273  | 70.5841862146  |
| 41.5329728865  | 10.1852595186  |
| 0              | 4.3824466249   |
| 30.6010499227  | 7.316780452    |
| 0              | 0              |
| 518.9211940288 | 253.1420016557 |
| 1.0851436143   | 0.4324338329   |
| 0.8618958465   | 3.2629531569   |
| 0.1087457353   | 0.5633626266   |
| 0.9706580447   | 0.3868109006   |
| 0              | 0              |
| 180.7053441784 | 69.2420796562  |
| 52.6248883832  | 59.1495863485  |
| 642.6309466182 | 609.2352667741 |
| 0.885313394    | 2.4696051421   |
| 99.7056967989  | 141.3456078187 |
| 6.5855701843   | 5.8012491519   |
| 1.4357897761   | 6.0077603671   |
| 23.343701225   | 13.2630461366  |
| 3.5841080589   | 2.6409716973   |
| 7.2586212897   | 6.7493720616   |
| 29.4575129301  | 54.0829287522  |
| 85.0375951878  | 64.2547956428  |
| 7.0009862341   | 4.2845192056   |

gene\_expression\_table

|                |                |
|----------------|----------------|
| 13.6254341111  | 10.6723399784  |
| 36.4511493113  | 18.9468532309  |
| 0              | 3.5661358423   |
| 0              | 0.1687300479   |
| 33.3121916035  | 28.6242927017  |
| 0              | 0.0799116532   |
| 0.2242299403   | 0.4914606343   |
| 243.6314359233 | 133.3034314038 |
| 11.6033185058  | 15.5233154118  |
| 0              | 3.595853641    |
| 0              | 0              |
| 9.1373369886   | 3.6412633352   |
| 817.8589535326 | 647.8651373318 |
| 141.3707040907 | 112.6735201124 |
| 1.7391256442   | 0.6930481443   |
| 0              | 0              |
| 0.9912318122   | 0              |
| 0              | 0              |
| 12.8345638912  | 39.1501083722  |
| 55.3171380158  | 69.5766547548  |
| 28.2844504011  | 36.8607219108  |
| 78.5693400561  | 19.4123110154  |
| 687.7646686504 | 791.6228982771 |
| 229.159885464  | 219.2377416186 |
| 14.2763518909  | 26.3124584376  |
| 2.1386330848   | 0              |
| 3.3441122025   | 1.3326413557   |
| 494.5443237285 | 203.7496868173 |
| 105.0091977953 | 30.3387576868  |
| 5.6560970415   | 0.8196276563   |
| 18.3655438115  | 16.514076938   |
| 4.6061789805   | 0              |
| 0              | 0              |
| 114.163385387  | 89.3447003929  |
| 425.4550118792 | 637.0064040627 |
| 0.9793698577   | 4.2931085006   |
| 0              | 0              |
| 1.1917103763   | 2.8494065424   |
| 1.6855371954   | 6.7169294483   |
| 3.1112625102   | 5.4102539912   |
| 37.9376111641  | 23.0020478937  |
| 0              | 0              |
| 188.8463949106 | 24.5216187393  |
| 0              | 1.6865699579   |
| 681.3723701254 | 296.4567607365 |
| 18.7686439526  | 21.3696444948  |
| 0              | 0              |
| 50.8677111068  | 36.242046552   |
| 3.5350283688   | 0              |

gene\_expression\_table

|                 |                 |
|-----------------|-----------------|
| 11.8949492686   | 11.6134465233   |
| 0               | 0.1451742153    |
| 278.1068062887  | 332.4798412089  |
| 5.1457193979    | 4.2476478854    |
| 0.8075082013    | 0.9653852134    |
| 0               | 0               |
| 4.1017385162    | 6.8106596084    |
| 65.7825287071   | 56.3272525446   |
| 14.7684923188   | 7.1464357433    |
| 43.244178572    | 33.0632538108   |
| 0               | 1.480673533     |
| 76.5488499578   | 84.7361280949   |
| 5.5152457602    | 8.3204180856    |
| 1.1948799981    | 0               |
| 0.9341971705    | 0               |
| 1.2930812938    | 7.7294667645    |
| 15.8996419026   | 14.9601591613   |
| 9.1907044688    | 27.8352316317   |
| 20.5856726593   | 89.4178053681   |
| 165.4758969176  | 181.7089676869  |
| 473.2570456749  | 324.2342756342  |
| 0.9071847238    | 1.0845496266    |
| 20.5476749022   | 8.5845354615    |
| 344.4958441336  | 244.0584823334  |
| 0.8873224259    | 3.5360134139    |
| 0               | 0.633415953     |
| 1090.3626022714 | 2182.8437564513 |
| 7.0586543475    | 7.9065309775    |
| 0.1791299967    | 0.3390739093    |
| 0               | 0               |
| 0               | 0.2919589109    |
| 5.1896661735    | 2.4235565514    |
| 0.063276752     | 0.0756480747    |
| 0.7784517198    | 0.844476762     |
| 0               | 0.1259003414    |
| 0               | 0               |
| 0               | 0               |
| 1.8576813906    | 1.724103568     |
| 0               | 0               |
| 1.9270785565    | 0.7130946554    |
| 22.1440262377   | 13.8670371321   |
| 1.0091392189    | 4.2225308365    |
| 0.7313978471    | 1.7487888434    |
| 0               | 0               |
| 0               | 0               |
| 1.9317494961    | 1.539618955     |
| 1.773663859     | 1.6416272983    |
| 0.0696397073    | 0               |
| 9.844438621     | 3.9230460091    |

gene\_expression\_table

|                 |                 |
|-----------------|-----------------|
| 1.0106752656    | 1.0471705774    |
| 0               | 0               |
| 0               | 0               |
| 3.8450530733    | 1.634419399     |
| 40.4820829207   | 13.8843247934   |
| 0.2925530585    | 0.1748752498    |
| 22.5145839141   | 14.0644463508   |
| 15.7427712365   | 12.6689242917   |
| 1.2443516521    | 2.2690213489    |
| 0.9411790461    | 0.9793322324    |
| 46.2155391446   | 43.7405343028   |
| 4537.1971459943 | 2890.9337612914 |
| 5.9029142988    | 3.6591857012    |
| 0.8414419848    | 7.5446507739    |
| 0               | 0               |
| 1.5607010457    | 1.554863168     |
| 3.5610331643    | 1.64315126      |
| 55.3258735268   | 29.3967596924   |
| 10.2394731258   | 11.0358132176   |
| 16.2358511701   | 10.8373305234   |
| 1.9066074718    | 3.2924245717    |
| 11.7051136446   | 14.3391170136   |
| 1.0621540841    | 0.6837477524    |
| 1.7314513402    | 0.7115520897    |
| 5.4838454807    | 14.0953988606   |
| 0.5457566498    | 1.000436006     |
| 0.3190788595    | 0.5086165273    |
| 5.8381995622    | 3.7224713566    |
| 0               | 2.4088476416    |
| 9.7952563001    | 5.297534764     |
| 0.0984066648    | 0.039215428     |
| 26.6579860701   | 19.3344209859   |
| 9.48992784      | 15.7088995858   |
| 24.4556681768   | 11.5356983915   |
| 5.3553292617    | 5.8688271332    |
| 4.3664449849    | 2.796500627     |
| 9.3644912889    | 12.5124562007   |
| 2.3655304108    | 2.2781259623    |
| 2.3252821372    | 0.1544389538    |
| 2.6580577122    | 1.7654100793    |
| 3.8771069494    | 2.8693633009    |
| 0               | 0               |
| 3.0102514213    | 2.5082473782    |
| 1.0497004448    | 1.6732383833    |
| 1.5017117673    | 2.8425796295    |
| 2.2609192041    | 0.3003282835    |
| 0.458562171     | 0.1827387588    |
| 0.6574416405    | 1.3099648965    |
| 4.833957062     | 3.8527003296    |



gene\_expression\_table

|                 |                |
|-----------------|----------------|
| 0               | 5.9391547696   |
| 0.6963040643    | 0              |
| 0               | 0              |
| 0               | 0              |
| 1.9176463408    | 1.7576354286   |
| 0.2726890793    | 0.2897803442   |
| 0               | 0              |
| 0               | 0              |
| 295.5750290927  | 174.9104052379 |
| 0.1606281006    | 0.2560436214   |
| 3.2829532889    | 2.4121215171   |
| 36.3624154435   | 31.1715535498  |
| 0.4888686172    | 0.7792639689   |
| 49.0157082137   | 36.1313631171  |
| 0.2599727212    | 0.2072002246   |
| 1181.3382809401 | 3457.708112648 |
| 25.1982868124   | 17.7879993941  |
| 0.2484114454    | 0.8084420179   |
| 36.6953338562   | 20.4115908626  |
| 2.8022195682    | 2.0472743357   |
| 0.4120348219    | 0.4743481435   |
| 1.2393452161    | 0              |
| 67.8648478846   | 50.0175971457  |
| 4.9115432535    | 6.2632593774   |
| 6.1266029616    | 3.6622116643   |
| 70.6263969207   | 36.5883520445  |
| 33.4440444019   | 8.7318615368   |
| 0.7185789697    | 0.9545214538   |
| 0               | 0.9357797447   |
| 53.4369608065   | 40.2235694947  |
| 45.6979211053   | 53.4183300324  |
| 12.8001274034   | 5.8295990438   |
| 6.555128511     | 8.0979548327   |
| 2.2594675705    | 1.3506095537   |
| 18.5578632832   | 11.5039223904  |
| 18.8474296043   | 20.502377494   |
| 2.955272191     | 5.1264028492   |
| 4.7614667824    | 10.4360438288  |
| 326.5744047754  | 752.6388791066 |
| 1.9643431432    | 0.7827981691   |
| 2.7141492958    | 0.3605329186   |
| 15.177346497    | 9.6771679354   |
| 0.9236630621    | 0.7927946327   |
| 42.6141277765   | 20.1946812236  |
| 16.4570083598   | 13.7264233602  |
| 13.3022897037   | 10.602025477   |
| 1.3698703173    | 0.970486223    |
| 0               | 0              |
| 0.3292590514    | 0.2886641489   |

gene\_expression\_table

|                 |                |
|-----------------|----------------|
| 124.6600932707  | 99.3550369343  |
| 0               | 0              |
| 12.3081507402   | 15.8126333471  |
| 2.2297820574    | 1.7423070195   |
| 9.9535156097    | 4.8479610684   |
| 33.1796887789   | 29.1990943856  |
| 14.8412435125   | 4.5226936144   |
| 1.689651058     | 1.009998502    |
| 0               | 0.3438477185   |
| 1.2258440581    | 1.2350842997   |
| 3.8688008148    | 2.4904897522   |
| 0               | 0.0673413167   |
| 11.4803683225   | 12.3029603489  |
| 4.2854572692    | 5.9496535406   |
| 0               | 0.9192939495   |
| 3.8472218573    | 3.666186306    |
| 2.0418455127    | 3.2975580547   |
| 11.7409392107   | 13.3166092747  |
| 8.3279480282    | 8.3416444872   |
| 0.4789222565    | 1.622244804    |
| 0.6720843428    | 0.8034844546   |
| 6.7779675291    | 5.1319868027   |
| 7.9081364969    | 63.0284458414  |
| 3.0247432595    | 1.7984909952   |
| 163.5920699215  | 102.8753290748 |
| 7.6389937787    | 4.9286527926   |
| 11.210891236    | 11.6507544729  |
| 0               | 0              |
| 2.7764874681    | 3.5037290512   |
| 0               | 0              |
| 2.6650151212    | 4.5515082914   |
| 0.1203303326    | 0.0479520925   |
| 1.9544336971    | 2.5961640579   |
| 66.2540234136   | 40.5987865195  |
| 25.3584632759   | 20.7883408885  |
| 87.1535926514   | 32.3843445375  |
| 0.0182976859    | 0.021875091    |
| 0               | 0.4663727702   |
| 0.0246152607    | 0.0220708675   |
| 1015.3768199584 | 55.3093419397  |
| 38.1946997062   | 2.7674058608   |
| 2.9873690502    | 0              |
| 14.5318131085   | 3.8606549758   |
| 1.0551492955    | 0.788401844    |
| 59.4661320164   | 91.4045596601  |
| 7.1187570795    | 2.4455617326   |
| 2.0613934671    | 4.9801806087   |
| 1.0516348464    | 1.1175478992   |
| 1.5433047872    | 0              |

gene\_expression\_table

|                |                |
|----------------|----------------|
| 9.8611155639   | 10.9617719576  |
| 0              | 1.132476113    |
| 0              | 0.3663367628   |
| 12.2222744926  | 12.1171586478  |
| 0              | 6.9185146521   |
| 2.9223061301   | 1.4821545978   |
| 2.0486803907   | 1.4287120419   |
| 3.6628891399   | 5.8387006816   |
| 2.6232166019   | 2.3721670103   |
| 0              | 0.6705153813   |
| 32.5947988618  | 15.7354281271  |
| 1.5140344505   | 0.6033484526   |
| 97.4562312636  | 150.2947810213 |
| 3.073020586    | 12.6543066567  |
| 2.8651502065   | 4.5670927579   |
| 0              | 0              |
| 36.946149513   | 4.4169540786   |
| 27.4471812677  | 0              |
| 29.9499637542  | 5.9675868935   |
| 0              | 0              |
| 0              | 0              |
| 57.1538057923  | 66.3378864698  |
| 4.5974996492   | 3.3119110237   |
| 86.8153134372  | 23.4760136383  |
| 11.8971186728  | 8.4215962366   |
| 7.8081223455   | 6.5342891767   |
| 2.1252012447   | 2.1172518268   |
| 6.4519005782   | 4.6227980361   |
| 1.2465541371   | 0.6449119947   |
| 1.7390540252   | 0.8085228711   |
| 4.232934615    | 2.586488686    |
| 3.1331393371   | 2.8660307953   |
| 13.1474000291  | 2.1622460961   |
| 0              | 0              |
| 0              | 0.2092796478   |
| 5.7525471861   | 5.7310295054   |
| 0              | 0              |
| 13.1651333268  | 20.0218053164  |
| 6.6821236009   | 4.7513625123   |
| 0.6803373897   | 0.5121099303   |
| 0.1824513035   | 0.1090613013   |
| 176.3915718009 | 62.4824073254  |
| 4.7810531618   | 9.7380352206   |
| 11.9321824666  | 9.1621113693   |
| 75.0008907248  | 54.0083906364  |
| 0              | 0.176167693    |
| 14.0532645274  | 12.1745196629  |
| 10.0619644823  | 7.8557992891   |
| 7.3441537319   | 5.6282173615   |

gene\_expression\_table

|                 |                 |
|-----------------|-----------------|
| 0               | 0               |
| 1383.8921103553 | 2170.6318005869 |
| 52.1983928698   | 46.3030575749   |
| 0.2255991244    | 0.089902104     |
| 0               | 0.4127130058    |
| 0               | 0               |
| 0               | 0.2313399736    |
| 1089.383608498  | 1699.8963268396 |
| 1.0321653198    | 0.8039471198    |
| 10.4831564516   | 7.8777175324    |
| 4.6446090385    | 2.2739558071    |
| 0               | 0               |
| 24.1337828275   | 17.5802003093   |
| 0               | 0               |
| 2.9068198935    | 2.9786881302    |
| 81.8400172352   | 52.9970289524   |
| 0               | 0               |
| 0               | 0               |
| 0               | 2.0870205127    |
| 39.5406824844   | 38.978117823    |
| 0               | 0               |
| 0.4721117173    | 0               |
| 116.669506336   | 59.5439732204   |
| 0               | 0               |
| 49.9053701047   | 24.0701626669   |
| 22.6645818844   | 21.1630319099   |
| 38.4378313833   | 30.999947519    |
| 13.6686287204   | 15.0231780307   |
| 0.3774463175    | 0               |
| 5.9707754002    | 5.2778898473    |
| 21.8338777966   | 8.519614456     |
| 1.0163944954    | 1.099386276     |
| 170.0370266349  | 159.3465336181  |
| 0.9838878147    | 4.9010376738    |
| 0               | 0.1084847931    |
| 0               | 0               |
| 23.7731184578   | 35.3869721511   |
| 0               | 0               |
| 0               | 0               |
| 157.7940931643  | 74.7107437942   |
| 1.638419713     | 1.6322911249    |
| 0               | 0               |
| 41.88081937     | 0.9021440463    |
| 2.7117092977    | 3.2418792217    |
| 1360.9298104166 | 1581.4751110492 |
| 10.2582364147   | 10.7852192189   |
| 27.0549316305   | 24.4555806408   |
| 0               | 1.0240108945    |
| 15.0886820521   | 7.7666584223    |

gene\_expression\_table

|                 |                 |
|-----------------|-----------------|
| 0               | 0               |
| 6.6579084614    | 8.7887306088    |
| 30.6409683087   | 15.913377469    |
| 0.3919606539    | 0.1561978025    |
| 96.0109332789   | 51.7795075944   |
| 1.7223344598    | 1.7470900207    |
| 24.432278887    | 18.4295300666   |
| 0               | 0               |
| 67.9777035589   | 33.5230976885   |
| 0               | 0               |
| 58.5174222807   | 28.5429627531   |
| 0               | 0               |
| 0               | 6.0404145871    |
| 7.7542138989    | 20.0855431064   |
| 1.2749777541    | 2.395250575     |
| 7.5006877296    | 12.9908816622   |
| 3.5574097034    | 2.9845078236    |
| 0.3312841165    | 0.044005991     |
| 28.9231480425   | 19.4295156225   |
| 25.9953517349   | 15.5388689193   |
| 105.372911925   | 74.6515622798   |
| 12.6010182787   | 11.8691262758   |
| 0               | 4.571331503     |
| 3.9990008422    | 7.6868582512    |
| 78.7462176347   | 22.8223021389   |
| 0               | 0               |
| 6.1759275922    | 12.3056524731   |
| 0               | 8.0928940147    |
| 1.7568372728    | 0.7001062952    |
| 1.8843179195    | 2.5030260497    |
| 55.9406054549   | 33.6662890763   |
| 1.2158657403    | 0.6460361257    |
| 304.9057681832  | 199.978791837   |
| 18.5202546549   | 18.6680490856   |
| 21.8316972307   | 0               |
| 90.8031907963   | 22.4508048211   |
| 0               | 0.4585948071    |
| 1.00431528      | 0.8004468721    |
| 0               | 0               |
| 33.2443954646   | 24.8902142813   |
| 0               | 0               |
| 1.6971886863    | 4.5089073868    |
| 6.4066523391    | 7.6592255358    |
| 1017.4460761113 | 1643.4900253905 |
| 0               | 0.3626070898    |
| 352.8998344624  | 576.8413541701  |
| 6.1549612046    | 3.5582515059    |
| 5.2933231264    | 4.8992731623    |
| 9.4243038715    | 8.8769217089    |

gene\_expression\_table

|                |                |
|----------------|----------------|
| 3.2705583096   | 26.0665970255  |
| 1.3863220424   | 2.6241592318   |
| 5.3004508204   | 0.7543748897   |
| 24.5901294022  | 37.672708875   |
| 0              | 0              |
| 0.2172699105   | 1.0389945693   |
| 0.1967968203   | 0.7450306308   |
| 15.6130194282  | 24.0292032489  |
| 14.0828842755  | 13.7751119015  |
| 12.4680982856  | 14.4088944833  |
| 0.6003532633   | 0.8373506581   |
| 5.1309108784   | 4.7709372277   |
| 4.2004305814   | 2.343442454    |
| 35.3680476494  | 46.3937398148  |
| 163.6399757249 | 50.4528363279  |
| 72.9747142651  | 29.5879210314  |
| 0              | 0              |
| 138.1888815611 | 68.9696518018  |
| 155.3133951321 | 153.8582433081 |
| 11.2315878342  | 6.8453873874   |
| 3.703448521    | 2.1490276085   |
| 1.8429540409   | 26.4392695046  |
| 1.0203800535   | 0.2710835394   |
| 9.1102551343   | 17.6985466803  |
| 2.3911402028   | 1.5881306849   |
| 0.3085594688   | 1.2296211486   |
| 0              | 0.1733262786   |
| 5.6760011953   | 1.8095263483   |
| 16.404827225   | 8.4133311237   |
| 3.5475007471   | 1.4136924596   |
| 0              | 0              |
| 10.3880973431  | 9.0099267301   |
| 0.8199256154   | 0              |
| 0.2729375841   | 0.3262999775   |
| 2.7935441954   | 2.4491234314   |
| 11.2078605508  | 9.5204305006   |
| 3.0316920331   | 1.208140737    |
| 1.2153758388   | 2.1794934001   |
| 33.8306278143  | 79.1313246378  |
| 0              | 2.5583148434   |
| 5.2247153023   | 5.4791284234   |
| 0              | 0              |
| 0.521873094    | 0.415936802    |
| 7.3963321997   | 2.8755769216   |
| 0.9962301502   | 1.2406296289   |
| 0.4899007992   | 0.9240759844   |
| 1.0508523859   | 1.4238134056   |
| 1.0442548206   | 2.0232989191   |
| 2.6203430686   | 3.3783478866   |

gene\_expression\_table

|                 |                |
|-----------------|----------------|
| 0.1605273519    | 0              |
| 4.3863601361    | 4.2397839389   |
| 0               | 2.6717508171   |
| 41.9013273211   | 72.4581884716  |
| 0               | 0              |
| 6.0403720239    | 3.637412311    |
| 0               | 0              |
| 7.3687546927    | 6.9300847852   |
| 0.1195556562    | 0              |
| 0.4798037686    | 0.9321176269   |
| 13.7499908351   | 10.5954155246  |
| 125.9766307727  | 82.3149526115  |
| 5.0834568181    | 1.7141187977   |
| 0               | 0              |
| 6.3293538509    | 4.4624802379   |
| 11.9147981561   | 35.6106908336  |
| 0               | 0              |
| 52.0209471722   | 39.9254923835  |
| 1.35948373      | 1.4704898167   |
| 59.6614356315   | 40.3459766341  |
| 27.8832587713   | 61.8208130103  |
| 30.8741495968   | 16.1217821688  |
| 11.6297603138   | 11.497133567   |
| 10.8754697124   | 3.6115964975   |
| 0.0237094379    | 0.0188966013   |
| 0.1695961803    | 0              |
| 0               | 0.9755707269   |
| 0               | 0.3029886399   |
| 0               | 0              |
| 13.765023624    | 14.0000863632  |
| 1185.9642160594 | 720.7321163557 |
| 10.8845799068   | 11.1149622499  |
| 24.34056524     | 22.0623067358  |
| 0               | 0              |
| 0               | 0              |
| 0               | 0              |
| 0               | 0              |
| 0               | 1.5103747119   |
| 0               | 0              |
| 37.8482713326   | 67.948618304   |
| 158.1627299377  | 110.2997802224 |
| 8.8777011633    | 11.0733061037  |
| 37.9131792551   | 34.8658737009  |
| 1.307445661     | 5.1060159815   |
| 7.6506404768    | 6.2362005434   |
| 0               | 0              |
| 2.403770998     | 0              |
| 5.87499289      | 6.5553792586   |
| 0.2039006166    | 0.0812551666   |

gene\_expression\_table

|                |                |
|----------------|----------------|
| 3.3851940034   | 5.3960504346   |
| 0.3789297665   | 0.1510049445   |
| 7.7329895427   | 8.2717317896   |
| 0              | 0              |
| 0.4009708587   | 0              |
| 2.7929529691   | 0.2782505794   |
| 8.3600598311   | 16.1023246717  |
| 126.6487689398 | 82.0137715147  |
| 30.6751444746  | 26.8252422948  |
| 46.142505888   | 21.8249654845  |
| 1.8792544214   | 4.8965884077   |
| 43.1252785431  | 46.8697814779  |
| 0              | 0              |
| 8.8339407011   | 7.0407175352   |
| 0              | 0              |
| 5.2595554555   | 6.6689405162   |
| 39.7491811127  | 44.2070858507  |
| 1.2227660671   | 7.7964304098   |
| 1.2418443368   | 1.5023132634   |
| 8.8900847982   | 5.5451463693   |
| 222.7552690425 | 141.0437868169 |
| 949.2145010106 | 1113.905419159 |
| 0.8470318176   | 2.7003630534   |
| 9.7863136284   | 5.6998289704   |
| 0              | 0              |
| 19.502629715   | 32.8471557561  |
| 0.1799527885   | 0.2868474662   |
| 0.3512914592   | 0.233318291    |
| 3.3537109272   | 2.5774710758   |
| 0              | 0.2244710556   |
| 1.9520305864   | 3.6560903727   |
| 0              | 0              |
| 22.3200047005  | 74.1217188145  |
| 0.6690661612   | 1.1998142763   |
| 3.968895865    | 3.3214020153   |
| 23.4249047037  | 20.8157832038  |
| 13.2436716146  | 34.2433777938  |
| 1.9644802127   | 2.3485583755   |
| 12.2631012053  | 7.9896808871   |
| 0.4595448677   | 0.7652233199   |
| 56.8262073563  | 24.1551557042  |
| 0.4488626704   | 0.5068081683   |
| 35.3849823143  | 17.9620508064  |
| 312.0564440628 | 240.4209673005 |
| 17.4952632253  | 5.3314747652   |
| 0              | 1.3515858196   |
| 1.9868007007   | 4.9484224417   |
| 0              | 0.0932032645   |
| 0              | 0.5062754224   |



gene\_expression\_table

|                 |                 |
|-----------------|-----------------|
| 0               | 0               |
| 215.2123669538  | 271.9796999377  |
| 4.8761839295    | 1.6897197662    |
| 0               | 0               |
| 26.3521533557   | 74.7859041933   |
| 0               | 0.1657430378    |
| 6.2292772358    | 9.8624704813    |
| 0               | 0.0488318267    |
| 1.3178898594    | 1.353359005     |
| 12.376834207    | 12.1455799896   |
| 27.0749169514   | 30.2871552887   |
| 119.5198419993  | 135.3951073278  |
| 0               | 0.5558594739    |
| 0.9043612258    | 2.8030439701    |
| 6.2448205922    | 7.1383085027    |
| 47.9126549109   | 51.1818583931   |
| 28.7191433259   | 21.7994041771   |
| 0.7932379274    | 1.2644332522    |
| 7.9879689482    | 7.8743202005    |
| 2.3305029219    | 2.7372629797    |
| 0.5678290829    | 1.5839742541    |
| 2.9974676919    | 5.3006035464    |
| 1.090577297     | 1.9900067532    |
| 2.0428332476    | 3.5276660139    |
| 1.4399714196    | 1.8227669975    |
| 1.9166744331    | 1.3154367914    |
| 1.3288467026    | 2.0672079942    |
| 0               | 0               |
| 1014.6036422435 | 2313.0211796919 |
| 1.2178534481    | 0.8493086059    |
| 1.1234224233    | 1.4326018656    |
| 2.9663764261    | 1.7504354037    |
| 0               | 0               |
| 3.4910580056    | 2.2473227761    |
| 1.9380524512    | 2.7844212728    |
| 13.714795112    | 25.7593938261   |
| 0.19839617      | 0.3101648319    |
| 0               | 0               |
| 27.2893386242   | 39.4055367181   |
| 30.0538734229   | 20.5847506267   |
| 1.0447849762    | 1.8546533988    |
| 56.7387296093   | 41.540401454    |
| 3.9561898007    | 2.0065265724    |
| 16.8053801324   | 8.9621718261    |
| 5.8830050663    | 4.3803258685    |
| 32.461849293    | 14.6382972591   |
| 94.493497596    | 58.9134444509   |
| 89.0181765693   | 103.851654233   |
| 5.8538188097    | 0               |

gene\_expression\_table

|                |                 |
|----------------|-----------------|
| 10.6371407792  | 0               |
| 4.2916106599   | 9.4839643147    |
| 1.3051125155   | 3.6406459014    |
| 2.6721887396   | 2.3717722025    |
| 2.9813582473   | 3.6533537892    |
| 0.2816648584   | 0.3367335329    |
| 0.7300323081   | 7.5639365044    |
| 213.9112664491 | 88.1178567813   |
| 3.6075046039   | 3.5041602946    |
| 0.9385338721   | 1.168779051     |
| 0.9419319983   | 1.4263811573    |
| 3.8513759847   | 6.6704242942    |
| 0.1557718939   | 0.0620756886    |
| 0.2128929668   | 0               |
| 0              | 0.0552005164    |
| 0              | 0               |
| 2.044695108    | 2.5243403818    |
| 15.6884736299  | 10.2570497769   |
| 1.7816495253   | 1.8231946532    |
| 46.6974620636  | 28.8175440789   |
| 2.5696390954   | 4.2372864599    |
| 60.698280129   | 82.4607753805   |
| 246.3196965712 | 98.6576010496   |
| 8.5800656627   | 13.5682087499   |
| 0.1459368309   | 0.1308518524    |
| 0.8711054271   | 0               |
| 8.8429109215   | 10.2255178269   |
| 1.5535242208   | 2.2441841231    |
| 0              | 0.0422442666    |
| 0              | 0               |
| 0              | 0               |
| 0              | 0.2217078733    |
| 2.7096274248   | 2.4546542921    |
| 0              | 0               |
| 10.4613903381  | 7.0690104535    |
| 12.928644205   | 10.7522370671   |
| 6.3115694526   | 1.5091105733    |
| 0              | 0.9159059936    |
| 2.9758957678   | 1.482382143     |
| 0              | 0               |
| 794.8407649811 | 1476.5008285121 |
| 0              | 0.1736195427    |
| 0              | 0               |
| 14.8953826034  | 19.4641196689   |
| 12.1880906668  | 4.5534376967    |
| 8.1990969602   | 0               |
| 2.9790237375   | 2.1368739998    |
| 0              | 0               |
| 0              | 0               |

gene\_expression\_table

|                 |                 |
|-----------------|-----------------|
| 4.0630633466    | 4.9678346396    |
| 22.8953034565   | 19.145159317    |
| 81.4100899193   | 31.0904690918   |
| 7.1611749862    | 7.1343882651    |
| 5.5593446251    | 2.9686626005    |
| 2.243502571     | 0.2980147522    |
| 10.6893083736   | 12.5129562864   |
| 8.5222804012    | 6.9466928723    |
| 49.1154325347   | 40.4502168124   |
| 8.6538839993    | 4.4981810755    |
| 38.1382543372   | 52.1575913585   |
| 2.9848352342    | 6.9881252373    |
| 3.811197022     | 2.2091293413    |
| 68.7249311878   | 41.8862216189   |
| 101.7306649095  | 64.9217955853   |
| 139.6220485214  | 108.3417471236  |
| 1.8576684876    | 2.9611516621    |
| 13.7219980157   | 10.1011063285   |
| 167.3992452771  | 100.0638481865  |
| 36.1291764142   | 35.9940334839   |
| 26.5312436602   | 12.2248010458   |
| 37.7476036316   | 27.6207056607   |
| 3.5610221012    | 4.7302692346    |
| 0.4592953199    | 3.6606184285    |
| 38.5680548831   | 26.6404938523   |
| 0.701998951     | 2.573692971     |
| 1.7906277622    | 1.9266442192    |
| 0.3487904       | 1.1814514911    |
| 0               | 0               |
| 0               | 4.4197381657    |
| 4.8128253963    | 3.2193810164    |
| 0.1928708068    | 0.6148779656    |
| 47.4836613836   | 29.3490573916   |
| 2110.2665780528 | 1714.7354835279 |
| 5.3170582661    | 5.1262931155    |
| 9.6563079845    | 13.7889362737   |
| 53.5722968201   | 81.9330897494   |
| 0               | 0               |
| 16.0825722384   | 15.5164436124   |
| 16.3477271963   | 36.0476253817   |
| 0.7367571948    | 0.9786684253    |
| 6.4948969595    | 7.0991752962    |
| 4.9402724489    | 3.6749388638    |
| 4.1450185408    | 12.1132407693   |
| 11.4690472127   | 13.4620782789   |
| 0               | 0               |
| 106.8460616955  | 93.6728309779   |
| 2.4239498841    | 3.1393478772    |
| 0.1437608048    | 0               |

gene\_expression\_table

|                |                |
|----------------|----------------|
| 120.1143935267 | 121.5061013693 |
| 0              | 0              |
| 6.9793230112   | 4.7217191227   |
| 23.0573021531  | 29.2880953802  |
| 7.7373679428   | 3.3917074154   |
| 0              | 0              |
| 9.2159768001   | 2.7544511981   |
| 0              | 0.2772877746   |
| 1.2191653356   | 1.6194733183   |
| 1.0206266651   | 0.1355745282   |
| 0.7536397347   | 1.0511489924   |
| 14.6126147612  | 24.6983246215  |
| 33.3982487918  | 37.8265123269  |
| 829.6510158431 | 421.0953838682 |
| 1.4654062365   | 1.251364126    |
| 0              | 0              |
| 0.6574774659   | 0.7423538916   |
| 4.6560471877   | 2.1625617712   |
| 0.9464807898   | 0.7962608098   |
| 49.4228130736  | 16.3886881473  |
| 28.8262651214  | 16.4105366193  |
| 1.0427539358   | 0.8310827715   |
| 125.2241869557 | 146.5080696502 |
| 28.4102664553  | 22.4295821168  |
| 1.2456513397   | 2.7301822255   |
| 41.2204702194  | 39.7178379432  |
| 2.1308633007   | 0              |
| 2.2929851491   | 1.7666089518   |
| 0.0915638893   | 0.0912213902   |
| 0.9098709163   | 0.776972143    |
| 6.575583432    | 2.5155790634   |
| 8.4559202496   | 12.3556260245  |
| 0              | 0              |
| 12.0531149016  | 7.1273466267   |
| 8.1650133205   | 16.8790287641  |
| 0              | 0.0107512342   |
| 55.5796905677  | 22.6409105269  |
| 0              | 14.3309203501  |
| 112.4499358081 | 84.6941594103  |
| 2.1074004032   | 1.7879762533   |
| 0.3300103849   | 0.0876735907   |
| 23.7713663397  | 41.2532972046  |
| 161.6972771607 | 106.848222474  |
| 0              | 0              |
| 0.2118484629   | 0.3376896535   |
| 3.0098229827   | 3.8625577826   |
| 5.2089727992   | 5.4947524074   |
| 0.5509726483   | 0.339327238    |
| 8.2970175776   | 2.361709195    |

gene\_expression\_table

|                 |                 |
|-----------------|-----------------|
| 10.184360037    | 5.0731324731    |
| 0.0855338877    | 0.1704278881    |
| 0               | 0.0575006323    |
| 1.6859577764    | 1.1757559589    |
| 34.4884244229   | 23.0791567821   |
| 782.4202050164  | 361.1770900528  |
| 56.8642863171   | 34.4064869052   |
| 0.3627024727    | 1.3008447596    |
| 6.856346639     | 6.5896166087    |
| 4.3677558492    | 11.3928036149   |
| 6496.2774454417 | 8366.8411917313 |
| 0               | 0.4652896218    |
| 14.6173239506   | 5.1529366817    |
| 5.9624564999    | 2.9351347414    |
| 1.8225916657    | 6.2946838013    |
| 0               | 0               |
| 109.8352291234  | 110.2997802224  |
| 37.0896098079   | 14.780349732    |
| 30.9259969926   | 24.6482534451   |
| 22.4418914771   | 14.3399243054   |
| 154.0726425025  | 60.0491122816   |
| 29.6566376088   | 23.9559774508   |
| 0               | 0               |
| 29.6103080467   | 20.0083899319   |
| 36.1166977921   | 48.5751620772   |
| 718.2535279963  | 677.8464413587  |
| 364.507625571   | 145.2576668733  |
| 155.6967065632  | 28.406477057    |
| 239.0864050306  | 161.481284504   |
| 25.4402336464   | 14.139882956    |
| 96.9392644894   | 47.1653448421   |
| 128.9437441942  | 110.7886962086  |
| 0               | 0               |
| 0               | 0               |
| 2.0410560122    | 0.745587826     |
| 111.5331549928  | 51.0801725817   |
| 7.172730173     | 3.5729501146    |
| 33.1341301635   | 6.6020380697    |
| 364.1137585743  | 256.2416782775  |
| 21.8070998675   | 31.8641097231   |
| 71.6270821515   | 17.3133693824   |
| 88.5313393991   | 34.2216712546   |
| 176.2556716976  | 58.0170435689   |
| 2.0842820381    | 1.6108494975    |
| 107.8511855038  | 51.322107942    |
| 27.0056355925   | 12.0663142931   |
| 6.2147827658    | 16.0979937833   |
| 3.8266910329    | 2.8592828326    |
| 5.7999517777    | 4.16034488      |

gene\_expression\_table

|               |               |
|---------------|---------------|
| 24.7524864158 | 18.0272361772 |
| 21.3187755844 | 17.2512951149 |
| 6.1353500964  | 6.7732005794  |
| 20.7165523113 | 26.6656668718 |
| 0.5068831488  | 0.8079794046  |
| 10.5772723831 | 13.8849794057 |
| 0             | 0             |
| 0.2945810738  | 0.4989146043  |
| 10.2448929872 | 0             |
| 6.0311102339  | 4.3721793543  |
| 12.7669578584 | 21.6226441405 |
| 12.48253914   | 4.8728219164  |
| 4.3242100259  | 3.5508653023  |
| 0             | 0             |
| 0.5281883253  | 0.368348828   |
| 33.0888545776 | 31.8394470994 |
| 59.3309234159 | 84.3405933249 |
| 11.8010425136 | 7.153494172   |
| 0.7756920133  | 0.4945859199  |
| 1.0356751938  | 1.6508819212  |
| 4.5231912019  | 4.4751942488  |
| 3.6812120593  | 2.2380801775  |
| 1.6791951406  | 1.7565597316  |
| 0.7306992673  | 1.1938643242  |
| 81.1857457407 | 84.8861292353 |
| 42.6507336915 | 61.0485762837 |
| 1.0598393145  | 2.4737641319  |
| 0.0293481396  | 0.040933706   |
| 12.2632707842 | 12.2173994272 |
| 1.5063844103  | 0.353117578   |
| 0.0378402114  | 0             |
| 0             | 0.0159297433  |
| 7.0525817318  | 5.71464365    |
| 0.0553312171  | 0.2425466914  |
| 25.5201718519 | 13.8841038236 |
| 1.0847436833  | 2.3869067946  |
| 1.5604934259  | 2.6947376296  |
| 15.6337882294 | 23.3517586751 |
| 5.9607792473  | 1.5153369558  |
| 4.143195211   | 4.3363502241  |
| 0             | 0.8170014098  |
| 45.0738372104 | 36.5330736359 |
| 0             | 0             |
| 6.0191698554  | 4.0672963396  |
| 0.0357761474  | 0.11405544    |
| 32.2011048207 | 67.8276706391 |
| 3.8905271351  | 3.1007795443  |
| 31.3070043084 | 28.0142001442 |
| 0             | 0             |

gene\_expression\_table

|                |               |
|----------------|---------------|
| 95.2916528869  | 46.0752218494 |
| 1.0186430628   | 1.5657420022  |
| 2.3130235328   | 1.0369672004  |
| 0.5654782349   | 0.1723228111  |
| 8.0884838383   | 4.8977284749  |
| 0              | 1.708348057   |
| 1.7795986514   | 2.2693657301  |
| 14.011921705   | 8.3403651306  |
| 0.5262354656   | 0.9646513839  |
| 0.3397271922   | 0.2643183519  |
| 3.1159403204   | 3.8581827795  |
| 23.7640440445  | 21.1596684311 |
| 1.6083470293   | 1.3276456273  |
| 0              | 0             |
| 3.1259461775   | 2.6990196348  |
| 1.7665529761   | 2.7768022678  |
| 178.9018497902 | 121.837817509 |
| 1.6972516513   | 1.6648891072  |
| 1.4599356203   | 3.3830003217  |
| 0              | 0             |
| 0              | 0             |
| 1.7538291076   | 1.1731662111  |
| 0              | 0             |
| 0.4472025531   | 0.4900827474  |
| 1.5078088848   | 0.8943144798  |
| 6.9644186446   | 9.5286919162  |
| 7.4510284588   | 4.156968215   |
| 1.2250463828   | 1.7086496526  |
| 0              | 0             |
| 0              | 0             |
| 2.4578298234   | 4.4271342354  |
| 0.8356192026   | 0.6422092935  |
| 3.4030252267   | 2.5036032342  |
| 3.8493683822   | 2.3196889492  |
| 1.8923501271   | 0.094263585   |
| 0.5112678821   | 0.5772695212  |
| 0.2433068485   | 0.3601323106  |
| 0              | 0             |
| 0              | 0             |
| 5.9394442888   | 7.1006730125  |
| 0.8022827567   | 0.7869851365  |
| 1.0671498753   | 2.1649765956  |
| 4.0768517917   | 7.5581117907  |
| 0.1700074755   | 0.0135497243  |
| 0              | 0             |
| 1.0987809667   | 0.8925778299  |
| 1.9849516279   | 2.5312343301  |
| 0.3590573147   | 1.0015998816  |
| 53.963678575   | 46.8986131475 |

gene\_expression\_table

|                |                 |
|----------------|-----------------|
| 0              | 0               |
| 0.9490296959   | 0.1890959609    |
| 4.4133992119   | 2.5094449241    |
| 13.7321235583  | 16.4169094639   |
| 4.8869763799   | 2.9212178452    |
| 15.2113845228  | 10.4104727192   |
| 3.7661151247   | 6.9412514098    |
| 0              | 0.0697522203    |
| 10.6089789865  | 7.9676228278    |
| 0.1238656606   | 0.4865577785    |
| 1.9214868089   | 1.8596051262    |
| 0.0144424548   | 0.1784165576    |
| 0.7435285741   | 1.481494739     |
| 1.8571671677   | 2.1025231184    |
| 0              | 0               |
| 5.3901299756   | 4.8961472339    |
| 223.8644254427 | 219.3273835016  |
| 10.5564825165  | 8.7641629029    |
| 2.184385734    | 2.7915584666    |
| 0.3873337451   | 0.6835675451    |
| 0              | 0               |
| 1.0833248964   | 1.3910625489    |
| 0.1879932445   | 0.3446136859    |
| 5.3865342172   | 7.8706989177    |
| 25.0471227126  | 37.5614829661   |
| 47.1373271269  | 88.2609623737   |
| 0.0182454141   | 0.0218125995    |
| 0.043424223    | 0.0432617926    |
| 1.8246194581   | 0.5453383143    |
| 0.8562010791   | 1.4450796721    |
| 19.6244226993  | 7.3603827192    |
| 0              | 21.6736383838   |
| 611.6464446001 | 1932.0957340502 |
| 0              | 0               |
| 10.1943059194  | 13.4800122665   |
| 0.0189049613   | 0.007534        |
| 0.536860525    | 0.3565682481    |
| 13.7050294088  | 15.6312069237   |
| 97.687967061   | 45.0263412432   |
| 22.4229764671  | 14.2091338839   |
| 0              | 0               |
| 5.2736562128   | 4.1238392761    |
| 2.4506411846   | 0.4185384759    |
| 6.2898747516   | 6.4453856617    |
| 5.7810214492   | 8.6087832715    |
| 0.005886       | 0.002346        |
| 5.0006634568   | 3.4873707634    |
| 0.5436194858   | 1.0290134965    |
| 0              | 0               |



gene\_expression\_table

|               |               |
|---------------|---------------|
| 1.1671074508  | 1.7441127435  |
| 2.0598764997  | 0.7892967046  |
| 0             | 0             |
| 0.6635628949  | 0.2305307426  |
| 11.9107584675 | 6.888187699   |
| 0.5579072313  | 0.4298344058  |
| 0             | 0             |
| 2.6450557656  | 1.0038711645  |
| 8.3994575772  | 6.7613755122  |
| 44.9601146822 | 37.2827023346 |
| 1.6252514006  | 0.4317792185  |
| 0.1788591445  | 0.1960091246  |
| 0.2561660659  | 0.3062494373  |
| 0             | 0             |
| 2.0555089785  | 1.6738704634  |
| 0             | 0             |
| 10.7533324369 | 12.8557308927 |
| 10.7406241224 | 23.0059638426 |
| 21.0483412167 | 16.7756871034 |
| 0.0316763947  | 0.0252463261  |
| 0.93583812    | 1.2562022027  |
| 0.5284009154  | 0.6551059278  |
| 0.1120560656  | 0.1339642974  |
| 4.2106192584  | 2.0847228919  |
| 0.2921479078  | 0.4445205384  |
| 2.1139841445  | 0.5568609539  |
| 7.1204830616  | 5.462263384   |
| 12.0365965943 | 10.6872265728 |
| 0             | 0             |
| 1.9935537409  | 0             |
| 46.0925242256 | 29.6314690862 |
| 0.2500885294  | 0.7972897957  |
| 0             | 0             |
| 1.5561315385  | 0.6201243013  |
| 6.455699542   | 5.9576478774  |
| 0.0141010187  | 0.0337158557  |
| 0             | 0             |
| 0             | 0             |
| 0.104568199   | 0.458379049   |
| 1.8746375531  | 1.4941003046  |
| 0             | 0             |
| 0             | 0.0752724888  |
| 24.2257092801 | 22.2579180338 |
| 0.9087464793  | 1.0139889415  |
| 13.7192643824 | 6.6018761955  |
| 0             | 0             |
| 0.3459423131  | 0.2277675716  |
| 22.2400720947 | 20.0889063741 |
| 2.4883928671  | 1.7353594393  |

gene\_expression\_table

|                |                |
|----------------|----------------|
| 0              | 0              |
| 2.4556645234   | 1.3455634454   |
| 0              | 0              |
| 0.3799756508   | 0.6624700836   |
| 20.0864093542  | 14.5059107789  |
| 0              | 1.4166915042   |
| 0.4553771861   | 0.1270286712   |
| 0              | 2.7486925127   |
| 1.8972137696   | 0.9870611782   |
| 5.2756193683   | 2.5904007891   |
| 0              | 0.349025117    |
| 0.6771967712   | 0.2428789262   |
| 59.1689065841  | 26.3128338962  |
| 0              | 16.1787486361  |
| 39.8767222789  | 32.3331829786  |
| 20.7172129237  | 26.3156419643  |
| 6.5177226652   | 7.433757974    |
| 0.3897877498   | 1.4290534058   |
| 0              | 0              |
| 0              | 0.7572261987   |
| 2.5123117909   | 3.6471037923   |
| 0              | 0              |
| 0              | 0.5205192339   |
| 1.5898444731   | 0.3167795166   |
| 0.578897967    | 0.4613860569   |
| 122.8586853393 | 54.3695567391  |
| 93.3285683982  | 65.6595752004  |
| 0.2581230602   | 0.1028630154   |
| 4.7288453643   | 2.7410367358   |
| 63.3031600251  | 19.1863890748  |
| 5.0244442335   | 14.4162721642  |
| 0.7080013562   | 2.8214121718   |
| 1.4298829767   | 2.5641619747   |
| 170.1128263983 | 116.4270769124 |
| 0.5986426369   | 0.4771227082   |
| 18.4642633686  | 94.3171913741  |
| 7.8083389069   | 84.4035761014  |
| 29.4711291605  | 537.5712220824 |
| 59.3868496327  | 217.2958449251 |
| 5.5708734227   | 1.4430091784   |
| 13.8887740784  | 8.2182339387   |
| 15.5620255075  | 15.8669674225  |
| 105.6555964031 | 42.3461325157  |
| 78.6521238436  | 21.7909649123  |
| 54.9910351073  | 35.5495974157  |
| 76.4667473839  | 61.8214762282  |
| 3.0396802632   | 2.8631296364   |
| 167.6919098874 | 75.4031256436  |
| 474.3266894082 | 208.4322243206 |

gene\_expression\_table

|                 |                 |
|-----------------|-----------------|
| 346.5056036991  | 330.0300586803  |
| 3.3792007116    | 3.0719865914    |
| 0               | 0.9287304106    |
| 10.882115646    | 14.6204165355   |
| 20.6480778865   | 0               |
| 146.4393546368  | 119.4487402576  |
| 58.47481594     | 26.2152396294   |
| 274.1677475494  | 212.4439409874  |
| 262.7055762701  | 82.847540922    |
| 14.4035638946   | 8.3706505562    |
| 21.6669385841   | 15.8685478922   |
| 48.0056074696   | 71.5847827136   |
| 183.4713541191  | 153.2102966019  |
| 4937.3231016389 | 4310.9802975669 |
| 31.5686406698   | 10.3968782294   |
| 21.0526744588   | 6.18178869      |
| 4.4701438439    | 7.4223717581    |
| 2.0823199652    | 13.2769980589   |
| 2.5837890904    | 1.029649721     |
| 0               | 0.4927990582    |
| 16.8202933108   | 8.5881552978    |
| 52.9256863681   | 14.8160522276   |
| 308.3983362561  | 282.4968234947  |
| 37.5472571625   | 45.6654561594   |
| 7.2230107574    | 8.9137458415    |
| 1.8947735138    | 1.426251661     |
| 37.1860166071   | 28.1305430351   |
| 42.7806612596   | 19.3432126893   |
| 0               | 0               |
| 5.7970012208    | 1.2230083604    |
| 26.7940021593   | 14.7949827835   |
| 9.5343917522    | 9.7304041893    |
| 18.9062679572   | 14.457555876    |
| 13.818356073    | 3.8546669964    |
| 43.6201623033   | 43.9682577898   |
| 8.757316639     | 7.0350416067    |
| 2.1540613141    | 1.9620607485    |
| 136.1301689314  | 76.6103174943   |
| 2.3731742332    | 2.8371567124    |
| 14.2667057072   | 0               |
| 0               | 0.327544767     |
| 2779.7801107681 | 2392.7742551586 |
| 0.9320939587    | 0.742885933     |
| 9.571671493     | 6.1029556437    |
| 210.3040442893  | 149.0340692964  |
| 22.0177160796   | 21.67107633     |
| 0               | 0.4787690421    |
| 3149.2524033002 | 1454.3683313085 |
| 37.3854654486   | 23.7592995746   |

gene\_expression\_table

|                |                 |
|----------------|-----------------|
| 280.2110191988 | 676.5594414847  |
| 74.7794462625  | 107.2796113875  |
| 0.7349492489   | 1.9330083583    |
| 5.1554654865   | 2.8762614825    |
| 68.0248415468  | 36.3917717879   |
| 17.9377728661  | 7.931642392     |
| 55.5157082627  | 29.8962427423   |
| 5.4262329065   | 3.4930662222    |
| 1.8473074757   | 1.6195498288    |
| 0              | 0               |
| 1.189628962    | 0.3160477593    |
| 1.7963862895   | 0.9544889705    |
| 2.7717406681   | 2.5246837378    |
| 0.1407704605   | 0.560975607     |
| 87.6501930029  | 47.5803579437   |
| 0              | 0.9477801642    |
| 31.4637660897  | 38.8286856492   |
| 282.4121974061 | 117.8177500163  |
| 43.9537423254  | 25.4451519299   |
| 0.1944238749   | 0.0387393246    |
| 6.6110881644   | 5.7806491252    |
| 12.6174472465  | 49.8239042623   |
| 11.8231329247  | 4.1572616205    |
| 5.7421282856   | 1.2814255053    |
| 66.6562227008  | 25.5466950178   |
| 175.2116737359 | 201.2531297452  |
| 0.8785721486   | 1.750571614     |
| 97.3415874754  | 75.4159868504   |
| 16.0869122092  | 4.3315509018    |
| 2.6026038022   | 1.3163794618    |
| 0.3313907047   | 0.1320604487    |
| 8.3750241894   | 7.70187416      |
| 91.9468166693  | 50.3815868371   |
| 0.5903574469   | 0               |
| 0.108270644    | 0               |
| 0.1482890142   | 0               |
| 31.661255188   | 17.2655461696   |
| 2704.426334849 | 3832.7029802601 |
| 4.2066937671   | 3.2645360369    |
| 25.6022657758  | 24.6760551014   |
| 53.2066447983  | 32.7156421798   |
| 0              | 0               |
| 48.8766769599  | 21.7884351973   |
| 0              | 0.3988102244    |
| 0              | 0               |
| 5.7651124769   | 3.9566662588    |
| 0              | 0               |
| 0              | 0               |
| 0.948869765    | 0.3781281887    |

gene\_expression\_table

|                  |                  |
|------------------|------------------|
| 4.6751604049     | 4.9117276183     |
| 15.9315450695    | 10.604557178     |
| 19.260544693     | 12.1683168796    |
| 82.8991653425    | 69.3340399578    |
| 9.8453336304     | 11.7702080211    |
| 0.7774485234     | 0                |
| 0                | 0.8857621475     |
| 345.6502934333   | 260.5138378024   |
| 0.5428368369     | 0.2884300424     |
| 24.9738399208    | 8.9045728235     |
| 149.9710837647   | 107.9678894759   |
| 4.9220496605     | 4.9036384959     |
| 49.4361394433    | 10.9447158166    |
| 4.4492328733     | 6.0283228117     |
| 110.7085376685   | 95.00090173      |
| 0                | 0.117216894      |
| 9.4121214913     | 1.9940781257     |
| 3.3189894898     | 6.1114621103     |
| 0                | 0                |
| 7.6385534383     | 7.8051087796     |
| 7.5889849624     | 8.4555259236     |
| 0                | 1.5240531643     |
| 195.5854459419   | 114.0883406501   |
| 1.8142135539     | 5.0607967211     |
| 14226.5520792184 | 20749.6855920044 |
| 33.200412317     | 25.284936116     |
| 0                | 0                |
| 0                | 0                |
| 19.605129477     | 10.5701481761    |
| 0.6136752535     | 0.4891038172     |
| 0                | 0                |
| 0                | 0                |
| 224.3308244454   | 98.204236506     |
| 6.5024403938     | 0                |
| 49.3334683334    | 15.2907795012    |
| 4.4151037913     | 1.9398904814     |
| 1.9768658517     | 2.1723865132     |
| 0.8572617559     | 0.8296535519     |
| 8.2959953074     | 4.273591005      |
| 0                | 0.0517312671     |
| 279.527637024    | 184.4002766096   |
| 49.9520332309    | 106.4974964066   |
| 0                | 0                |
| 25.1512421696    | 29.659498745     |
| 1111.5227622687  | 382.816519664    |
| 2.7517315931     | 7.9501719635     |
| 12.2449833169    | 17.4274005216    |
| 0                | 0                |
| 11.5657511519    | 9.025949639      |

gene\_expression\_table

|                 |                  |
|-----------------|------------------|
| 1.4276351891    | 15.3607865473    |
| 28.1322369122   | 64.0195842292    |
| 14.6994600822   | 5.0209632142     |
| 1.8068674455    | 0.7200435082     |
| 28.3026963224   | 27.2872535991    |
| 1.1883902883    | 8.7611934215     |
| 2.7503874491    | 0.5480198984     |
| 14.0434103177   | 7.8812532604     |
| 1.0642837512    | 0.159045412      |
| 0               | 0                |
| 22.4353691421   | 13.9412424915    |
| 2.4342946971    | 4.8811742525     |
| 3.6260904082    | 0                |
| 5.8244484122    | 6.5909479102     |
| 0.3886813277    | 0.4646729357     |
| 0               | 0.5146831526     |
| 0               | 0                |
| 1.2743050192    | 1.2187568829     |
| 0               | 0.8389966617     |
| 443.7152238797  | 289.6225595592   |
| 0               | 0                |
| 8.4924020112    | 10.1527629253    |
| 329.0339334278  | 223.3159069055   |
| 714.7223975472  | 409.0493932936   |
| 499.7771865442  | 429.9175846727   |
| 1.0055348928    | 1.8031925537     |
| 0               | 0                |
| 0.9240175243    | 0                |
| 0               | 0                |
| 1.622555814     | 1.3740135807     |
| 0               | 0.4149368799     |
| 25.6438170597   | 10.4811877427    |
| 0               | 1.4431519629     |
| 102.835332564   | 81.0075081193    |
| 16.8479748228   | 11.7494679112    |
| 13.1663584375   | 4.7549520261     |
| 62.6478699266   | 40.0399941461    |
| 0               | 0                |
| 0.5301377635    | 0.422523806      |
| 30.5028122023   | 19.8089401216    |
| 42.6602474579   | 44.0334859609    |
| 72500.949047714 | 55741.9850932393 |
| 5.4457112876    | 1.3563353353     |
| 0               | 0.2736623905     |
| 37.4003196236   | 23.2505032785    |
| 3.8266167282    | 1.7427671238     |
| 97.0159902588   | 41.5576835121    |
| 64.2379182902   | 25.8216537645    |
| 11.7729157774   | 3.9096262057     |

gene\_expression\_table

|                |                |
|----------------|----------------|
| 34.0371733229  | 18.9103136513  |
| 0.3096590911   | 2.9616076448   |
| 10.3880973431  | 8.8881709635   |
| 0              | 3.4798583622   |
| 0              | 0.4529904452   |
| 0.7012295987   | 1.1177705848   |
| 0              | 0.2882003535   |
| 0              | 0.8586894091   |
| 3.9518481091   | 3.028512331    |
| 0              | 0.1322940352   |
| 0              | 0              |
| 2.2357819194   | 1.633440504    |
| 4.0438043564   | 3.8272443952   |
| 0.5213898424   | 0.1038879117   |
| 0.192028852    | 0.5356695645   |
| 4.1155295676   | 13.6671174347  |
| 860.1597529576 | 753.1084012688 |
| 55.400091761   | 47.4464980174  |
| 0              | 0              |
| 0              | 0              |
| 1.9731543264   | 3.1452378357   |
| 26.339686461   | 3.3146730431   |
| 114.6056379893 | 17.3983923904  |
| 124.710185123  | 99.3949605193  |
| 49.8891404909  | 34.9506359521  |
| 12.8748319797  | 7.4109666503   |
| 174.7173691402 | 49.5345825752  |
| 2.6769856668   | 4.4449537875   |
| 26.0997829996  | 67.6056043002  |
| 0              | 3.0553004792   |
| 2.9603539357   | 0.5898561178   |
| 20.6115598963  | 10.6296035278  |
| 3.2309595374   | 5.1501983634   |
| 177.7275040074 | 113.4127134487 |
| 10.7758065629  | 10.3620904721  |
| 381.6050081799 | 173.8918827618 |
| 0              | 0.9551029176   |
| 85.6382589529  | 46.6404656158  |
| 0              | 18.5414740731  |
| 70.6705331498  | 26.4293992796  |
| 209.637851933  | 216.0939527199 |
| 0              | 0.574550872    |
| 4.5122288975   | 6.3933876442   |
| 54.0424212975  | 59.3161779091  |
| 1.7695880361   | 0.7051875226   |
| 6.2434118789   | 4.7789753285   |
| 61.4041346009  | 51.5849411732  |
| 9.7459093372   | 11.1447649269  |
| 0.136659576    | 0.4901342192   |

gene\_expression\_table

|                |                |
|----------------|----------------|
| 242.2359033866 | 257.1446127421 |
| 164.8851752865 | 112.6411983912 |
| 15.5539713699  | 8.4950139882   |
| 18.8344855154  | 17.4079779582  |
| 38.8631003398  | 34.7124485141  |
| 4.4383973793   | 5.7272777729   |
| 1.6702308569   | 1.7749154962   |
| 7.5267991741   | 2.7267799338   |
| 26.7583373608  | 24.8279788362  |
| 111.3058747849 | 137.5030169291 |
| 1.6345196197   | 1.62840562     |
| 18.4265024746  | 26.3805184209  |
| 90.91715055    | 29.9841337009  |
| 0              | 7.4657538469   |
| 0              | 0              |
| 0              | 0              |
| 7.1672520186   | 10.8891749132  |
| 0              | 0.189083213    |
| 0.9385573386   | 0              |
| 15.7367053823  | 15.9190390365  |
| 47.724595133   | 32.6030255854  |
| 1.6030614924   | 1.8525955895   |
| 0              | 0              |
| 0              | 0              |
| 1.9754618933   | 1.5744580661   |
| 0              | 0              |
| 0.7613024859   | 1.1831894836   |
| 4.3807618344   | 4.2552659985   |
| 0              | 0              |
| 0              | 0              |
| 0              | 0              |
| 1.0346931504   | 0.4123291323   |
| 0              | 0              |
| 3.7500620632   | 1.4944139099   |
| 0.7282446177   | 0.1934721556   |
| 0              | 0.1186700165   |
| 1.0756491777   | 0.53581283     |
| 0              | 1.1314753849   |
| 8.3772632382   | 4.2731149723   |
| 97.5700965223  | 97.5510565939  |
| 0              | 1.242558795    |
| 909.235118773  | 706.6454348178 |
| 57.7633454981  | 59.7606357942  |
| 13.2214930787  | 14.7526819383  |
| 69.8063703838  | 27.0265304901  |
| 167.4949518587 | 104.5938193501 |
| 35.7370090032  | 11.3930665581  |
| 11.3644666444  | 7.7895066278   |
| 151.151661788  | 155.991932728  |



gene\_expression\_table

|                 |                 |
|-----------------|-----------------|
| 92.6266311745   | 98.6158093399   |
| 38.2414155567   | 41.3639464105   |
| 2.1216563954    | 0.2818293649    |
| 3.9460681591    | 4.2389752596    |
| 111.5233953768  | 91.5515390632   |
| 12.649607265    | 2.0163665276    |
| 13.3690840394   | 46.3272220331   |
| 0               | 0               |
| 361.431646848   | 129.6038139787  |
| 1911.5916434505 | 1982.0472231669 |
| 50.3373592599   | 78.0892660418   |
| 363.3812962752  | 274.2317036148  |
| 1.3703741204    | 0.5460992679    |
| 4.7019282788    | 1.4120910459    |
| 166.8878938443  | 198.1591157181  |
| 19.4441906921   | 10.848016904    |
| 10.1373848509   | 5.4248557398    |
| 151.5277570972  | 119.8807625113  |
| 1378.8043435126 | 756.6110056856  |
| 0               | 0.1589266656    |
| 1.7852795541    | 2.756832526     |
| 39.5366440121   | 24.062948683    |
| 193.3850695879  | 137.2917012393  |
| 0.764382339     | 0.685370817     |
| 0               | 0               |
| 2.3679843493    | 1.7693450921    |
| 0.8535340143    | 2.2675768776    |
| 0               | 0.6315333333    |
| 1.5749029945    | 1.5690119937    |
| 2.7549928603    | 1.9517779032    |
| 0               | 0               |
| 19.6060551205   | 15.4937489742   |
| 0               | 9.5585982861    |
| 0               | 0.5088472133    |
| 17.5604827401   | 6.9979187623    |
| 51.3148841759   | 29.4898633977   |
| 87.9780185279   | 39.81063663     |
| 11.6684514139   | 8.7245959232    |
| 76.8077255511   | 46.3698507365   |
| 76.4592641655   | 38.9477213746   |
| 1.644705129     | 1.8206144778    |
| 17.6042144626   | 12.6581243388   |
| 54.2194190423   | 43.9583436197   |
| 2.7621889075    | 2.0547197488    |
| 118.4770649509  | 62.172309452    |
| 0               | 0               |
| 3.6577363353    | 1.5078845776    |
| 2.0813725948    | 2.1054884604    |
| 4.4521540623    | 0.9788690902    |

gene\_expression\_table

|                |                |
|----------------|----------------|
| 0              | 0              |
| 0              | 0              |
| 17.5533456512  | 27.20306791    |
| 0              | 0              |
| 0              | 0              |
| 18.5317513011  | 12.7771754317  |
| 12.051324786   | 9.6049969786   |
| 0.9006297643   | 2.5123305625   |
| 9.6482044923   | 4.534946525    |
| 103.2797251795 | 57.4036876417  |
| 0              | 0              |
| 0              | 0.0639904597   |
| 0              | 0              |
| 0              | 0              |
| 0              | 0              |
| 28.5502908093  | 9.0071074045   |
| 12.5018864004  | 8.1756701474   |
| 8.3146897093   | 11.1971261331  |
| 1.7366939009   | 1.6148511992   |
| 353.8093124536 | 286.8928485559 |
| 39.7980154228  | 27.7544043161  |
| 1.8343084395   | 2.9239153922   |
| 1.3260481173   | 0.9127516885   |
| 0              | 0              |
| 12.3581397988  | 4.3651329964   |
| 17.7646544495  | 14.1585639209  |
| 15.6086256592  | 14.4306235001  |
| 8.0553253483   | 7.1568943343   |
| 49.7348969836  | 27.6272438196  |
| 3.2801727708   | 4.7258906746   |
| 0.9294900269   | 0.1709562876   |
| 9.2519409702   | 5.1176837512   |
| 84.3183671748  | 14.0004950413  |
| 0.1577279443   | 0.1257103642   |
| 12.0157771784  | 4.5706811499   |
| 6.1417952796   | 3.9364418944   |
| 17.2505918682  | 29.0841103312  |
| 30.3372477682  | 31.6187130497  |
| 77.4007831305  | 28.5520077331  |
| 0.4763292828   | 0              |
| 88.1396078089  | 66.7355371834  |
| 37.5247796453  | 25.2344810658  |
| 2.4819682561   | 6.1817108347   |
| 186.5473962345 | 155.6273341954 |
| 42.9316886579  | 15.6827368873  |
| 0.6061179368   | 0.9661611574   |
| 57.2140920491  | 34.3810006186  |
| 573.9672943073 | 616.8414909982 |
| 15.7567225612  | 14.8415410275  |

gene\_expression\_table

|                |                |
|----------------|----------------|
| 0              | 0              |
| 3.5731887285   | 7.3444770157   |
| 36.3959121017  | 29.2978953184  |
| 0.4207587196   | 0              |
| 288.4839085538 | 243.3530374384 |
| 0              | 0              |
| 25.5277816884  | 9.9879553783   |
| 0.8614527774   | 3.6388972      |
| 0              | 0              |
| 0              | 0              |
| 12.6924062797  | 12.2836460143  |
| 1737.610531296 | 2493.125191059 |
| 0              | 0              |
| 5.1322515594   | 6.1356649493   |
| 0              | 0              |
| 24.4176136536  | 18.5960883691  |
| 0.5274198043   | 2.1718474556   |
| 3.6542632258   | 1.144186773    |
| 23.1147594196  | 12.9281670428  |
| 811.5440696426 | 315.0116754641 |
| 40.0696924693  | 3.1935847879   |
| 0.9686542089   | 1.9300618221   |
| 0              | 0.0697009404   |
| 233.0543537162 | 182.8884500828 |
| 100.8308383552 | 74.5754860166  |
| 17.4872069774  | 24.8200918411  |
| 18.6505239675  | 0.9290380391   |
| 0              | 0.8626067476   |
| 21.3226199916  | 9.382263918    |
| 100.7004402159 | 36.5465145215  |
| 4.6941094864   | 3.5294724099   |
| 3.4260464785   | 2.7305849488   |
| 0              | 1.4474965628   |
| 1161.476871109 | 826.7863961916 |
| 88.6282803675  | 59.1204406448  |
| 0              | 0              |
| 0.8616848044   | 0.3433846523   |
| 1.6825319545   | 2.5143575436   |
| 1.2120271194   | 1.0512296121   |
| 25.3948173678  | 12.0512152211  |
| 1.0200719566   | 1.1178819609   |
| 0.4994848827   | 1.1942796849   |
| 16.580489683   | 19.2598325935  |
| 63.634061844   | 25.9845479088  |
| 586.033707759  | 244.4691406351 |
| 15.0006536711  | 33.7226861634  |
| 19.7406065718  | 6.9546244558   |
| 4.7332783557   | 5.4300541022   |
| 13.0434423318  | 8.7621086814   |

gene\_expression\_table

|                |                |
|----------------|----------------|
| 3.4162074905   | 2.9496384678   |
| 0.7483510348   | 0              |
| 5.8323010753   | 3.9332514329   |
| 2.1833031172   | 7.8304909191   |
| 209.9426554601 | 222.1868293743 |
| 0              | 0.7848792052   |
| 2.8792806064   | 1.5298722763   |
| 9.2440587909   | 9.3568326374   |
| 6.5179490575   | 3.0986852497   |
| 0              | 0              |
| 149.0382106283 | 128.6053532278 |
| 0              | 1.2859999266   |
| 8.3838492939   | 18.3754760211  |
| 0.1230246719   | 0.5392837658   |
| 10.6720871603  | 36.1493701888  |
| 12.8914602704  | 5.7300605395   |
| 11.0347084924  | 3.0326710709   |
| 8.7095602555   | 5.8455455828   |
| 0              | 0              |
| 3.6353301275   | 2.7042265596   |
| 0              | 0.2033912864   |
| 0              | 0.0809199342   |
| 0              | 0              |
| 4.4628309802   | 3.343495434    |
| 1.6387821277   | 1.9591826208   |
| 1.2798838874   | 1.2113415989   |
| 2.5231839791   | 2.01099671     |
| 0              | 0              |
| 0              | 0              |
| 0.4844159963   | 1.4799856456   |
| 0              | 0              |
| 0              | 0              |
| 0.1934167326   | 0              |
| 1.7526471512   | 3.1041622931   |
| 0.7288680546   | 0.7551873559   |
| 842.9384689772 | 685.9226342235 |
| 0              | 0              |
| 44.1770819862  | 26.0243896729  |
| 40.5863994799  | 9.2023536208   |
| 15.8218869099  | 8.7939298105   |
| 20.5596148459  | 7.9654985717   |
| 6.2835358348   | 9.6238563708   |
| 0.2157632842   | 0.1146433126   |
| 2.0828801804   | 2.6410224482   |
| 2.1753956079   | 2.200600873    |
| 2.7223842529   | 1.3648495571   |
| 140.9438059061 | 126.5978224004 |
| 8.6386394208   | 15.1327901867  |
| 2.4320115695   | 4.8458290255   |

gene\_expression\_table

|                 |                 |
|-----------------|-----------------|
| 17.1277620568   | 13.14536491     |
| 0               | 0.0255424545    |
| 1.464698295     | 0.9630848834    |
| 26.6398239297   | 16.9857128838   |
| 0.2445900407    | 0.0649800373    |
| 0.7104598432    | 1.3023562942    |
| 1.449258107     | 1.0267285952    |
| 22.3436237531   | 12.2677588766   |
| 2014.3655781523 | 1463.6805390496 |
| 32.7795677815   | 39.188345069    |
| 3.5987895978    | 1.9121750141    |
| 2.7843898654    | 1.3869873603    |
| 13.3150588579   | 24.8600671772   |
| 0.3483726084    | 0.4442489649    |
| 206.9297563432  | 172.456878627   |
| 6.1424182703    | 3.8649108997    |
| 54.8307320994   | 46.2553070109   |
| 0.2586352656    | 0.4122685246    |
| 4.0085667401    | 7.0286876044    |
| 2.7534001574    | 1.9750326703    |
| 0               | 0.3644446258    |
| 15.325633119    | 13.365300487    |
| 0               | 1.1492586929    |
| 0               | 0               |
| 0.6367720512    | 0               |
| 36.6671773342   | 39.0270108301   |
| 0.3645057477    | 1.0167984297    |
| 199.9057890563  | 207.4347292174  |
| 4.2548173392    | 3.0828378104    |
| 0               | 0               |
| 18.5070772607   | 4.4250841545    |
| 0               | 0               |
| 5.2866110282    | 1.6385712635    |
| 1171.8234003089 | 602.2681834729  |
| 0               | 0               |
| 8.9331955986    | 12.0147037408   |
| 78.7347968834   | 56.6063916491   |
| 3.8075420515    | 1.5173199026    |
| 300.5346438634  | 250.6815899361  |
| 0               | 0               |
| 1.1200256974    | 0.4463344748    |
| 13.0319241232   | 9.8538988822    |
| 43.975266993    | 64.839947565    |
| 7.2409891792    | 11.5422462549   |
| 124.8073220408  | 149.2085690659  |
| 2.2855143634    | 1.8215722292    |
| 0               | 0               |
| 0               | 1.873434643     |
| 3.7021107887    | 3.7936418033    |

gene\_expression\_table

|                |                |
|----------------|----------------|
| 2.2686441085   | 4.701128922    |
| 1.8598365583   | 1.7293544332   |
| 4.3173509637   | 2.8674678026   |
| 594.209165516  | 528.0078324798 |
| 10.8031335107  | 9.3276940187   |
| 8.7150092648   | 2.0837784844   |
| 149.3526043974 | 156.2336409516 |
| 1.2808446737   | 0              |
| 20.5876798427  | 21.3310974567  |
| 2.4578766407   | 1.4246881945   |
| 0.3859531412   | 3.0760757183   |
| 2.1325850365   | 2.2662485324   |
| 5.8792739654   | 1.2960794782   |
| 0              | 0              |
| 291.0550988892 | 200.3404171387 |
| 71.9039538456  | 43.236835442   |
| 231.503339893  | 147.9306877606 |
| 0              | 0              |
| 0.8524743658   | 0.8492856442   |
| 16.3050313575  | 26.9186975082  |
| 0.4718268742   | 1.5041983455   |
| 0              | 0              |
| 0.628638932    | 1.1273174598   |
| 5.9304360315   | 5.0417091831   |
| 1.1908870121   | 1.3050756859   |
| 0.2327999696   | 0.5566300083   |
| 2.3631615919   | 2.0817163582   |
| 4.0784710501   | 1.9121013327   |
| 0              | 2.8323815602   |
| 0              | 0.0777524974   |
| 0.48137894     | 0.0959156638   |
| 0              | 0.1984691367   |
| 0              | 0              |
| 0.4596102447   | 0.6868365756   |
| 0              | 0.4433711413   |
| 0              | 0              |
| 2.4579546735   | 1.6028251038   |
| 0.9070678085   | 0.6024499184   |
| 1.5987283033   | 0.5096794185   |
| 0.4843687685   | 0.4825569637   |
| 0.9965416484   | 0.2647504097   |
| 0              | 0.0770561235   |
| 0.1120578497   | 0.2232773838   |
| 0.2301733757   | 0              |
| 0              | 0              |
| 0              | 0              |
| 0.3034237861   | 0.5952764352   |
| 6.3953233844   | 2.398645221    |
| 0              | 0.8965050453   |

gene\_expression\_table

|                 |                |
|-----------------|----------------|
| 15.3042216333   | 15.8116782472  |
| 0               | 0              |
| 20.6534637561   | 21.3382902724  |
| 0.3977868416    | 0.1585195603   |
| 285.3238595491  | 156.6435261552 |
| 5.7314670051    | 1.4275070439   |
| 7.0795387918    | 23.0399876206  |
| 1.6322452417    | 1.6261397495   |
| 0               | 0.0364574899   |
| 5.7887892175    | 6.3669181128   |
| 180.9923458087  | 131.0814088881 |
| 8.488297312     | 6.9005418834   |
| 568.6571918009  | 531.5760784654 |
| 0               | 0              |
| 158.4417953532  | 147.0983301308 |
| 96.1243354922   | 108.7677017243 |
| 7.4079663482    | 12.0767833506  |
| 20.80951818     | 27.7738686046  |
| 28.4767010567   | 24.4879470693  |
| 0               | 0.5201717062   |
| 6.7532541568    | 8.2530050942   |
| 562.93760234    | 324.9793536984 |
| 0               | 0              |
| 0               | 0              |
| 0               | 0.2615068753   |
| 0.5009068025    | 4.3914916005   |
| 400.6243534516  | 251.8120948149 |
| 6.9959741385    | 5.343517442    |
| 69.5353478575   | 48.8705382566  |
| 12.8173653131   | 13.8210207431  |
| 0               | 18.5818469521  |
| 6.667526982     | 1.7713564734   |
| 3987.6860547721 | 3713.105401143 |
| 21.9344393181   | 16.4005584858  |
| 32.377697174    | 12.4577162942  |
| 25.7541507452   | 23.1653425358  |
| 10.5441819958   | 48.3218084784  |
| 101.0515647126  | 92.6196903355  |
| 0               | 0.4138654036   |
| 0.7919704605    | 0.3156032227   |
| 191.2245846618  | 140.2148446986 |
| 0               | 0              |
| 75.8769527824   | 28.9339226983  |
| 1.1069463268    | 1.6542086108   |
| 3.2026320652    | 4.4669134513   |
| 3.4325274354    | 1.1191705857   |
| 0.5885063324    | 0.1172609992   |
| 0               | 6.3817197723   |
| 274.4423419585  | 137.457146842  |

gene\_expression\_table

|                 |                 |
|-----------------|-----------------|
| 14.6354039964   | 4.3741978682    |
| 8.185089443     | 7.269129968     |
| 0.6427030849    | 0               |
| 2.6867362627    | 2.9443550355    |
| 47.9199420067   | 16.7092433018   |
| 1.991015978     | 15.8685478922   |
| 38.2449495569   | 69.6720319542   |
| 0               | 0.0256595263    |
| 37.7333724389   | 27.3748538918   |
| 2.2868139005    | 2.2023179638    |
| 9.098478122     | 11.3305560311   |
| 1.3878300829    | 0.221222214     |
| 0.2962472212    | 4.1319473187    |
| 5.7116993161    | 8.2509849217    |
| 97.7869715531   | 63.0826349584   |
| 0               | 1.2105161156    |
| 4.1343936935    | 3.8942599508    |
| 59.0367604704   | 37.702519625    |
| 0               | 0               |
| 0               | 0               |
| 1.9642060929    | 1.174115331     |
| 0               | 0               |
| 43.0297715763   | 37.761701297    |
| 7.9612818682    | 8.0248141006    |
| 12.3303807534   | 4.554164078     |
| 18.0752942056   | 5.2637841722    |
| 1.3993918843    | 3.3459777393    |
| 23.0719990312   | 28.0936297936   |
| 79.9065517143   | 78.8347675187   |
| 5.7596084143    | 2.2952257283    |
| 16.6308038659   | 22.0914607205   |
| 4.1482388783    | 1.5028080692    |
| 11.844199683    | 8.6069828785    |
| 0.6442621156    | 0               |
| 134.1335998043  | 52.4505076375   |
| 0.4703449266    | 0               |
| 0               | 0               |
| 1637.2985446529 | 2968.9198890136 |
| 66.1955465058   | 29.6765724894   |
| 10.4463695469   | 7.632015891     |
| 1.3296635304    | 1.4571588457    |
| 99.2037004172   | 149.8094513915  |
| 0               | 0               |
| 5.3763971295    | 7.4988010387    |
| 1.3847124234    | 0.5518131359    |
| 14.0373090787   | 14.3100297956   |
| 10.3762958606   | 2.8944951909    |
| 77.1998420504   | 29.1809656708   |
| 31.4703064697   | 9.2213500787    |



gene\_expression\_table

|               |               |
|---------------|---------------|
| 4.6474081688  | 3.0866828759  |
| 98.8379958496 | 75.8570511496 |
| 4.049621106   | 0             |
| 1.7988349333  | 0.2389475072  |
| 1.0591586287  | 1.8465943906  |
| 14.9341286376 | 20.4044801936 |
| 0.8146112827  | 1.0820855864  |
| 0             | 0.7731419861  |
| 0             | 0.1322753179  |
| 0             | 0             |
| 0.9382758183  | 0.6543363066  |
| 1.4404915027  | 5.7404130985  |
| 2.5320727467  | 1.6511572841  |
| 42.4940083648 | 24.5816462747 |
| 14.6156375958 | 8.4130032116  |
| 1.3087503918  | 0.7823129687  |
| 3.1486317397  | 0             |
| 7.709566841   | 4.0176120053  |
| 60.9145528877 | 31.9038646482 |
| 86.3143784908 | 57.919446493  |
| 0.358782764   | 0.2859525758  |
| 28.1506442263 | 31.6883490081 |
| 1.8247968582  | 4.0514784902  |
| 41.0379941618 | 40.0757853724 |
| 0             | 0             |
| 0             | 0             |
| 2.7960350183  | 3.7141017523  |
| 0             | 0             |
| 1.1236017692  | 0.895519106   |
| 3.2003644426  | 5.3565007856  |
| 0             | 0             |
| 0             | 0             |
| 1.8159689047  | 5.6084461742  |
| 0.601790559   | 1.1990790646  |
| 3.9027004417  | 15.774586077  |
| 4.969506796   | 6.7898305587  |
| 0.9118074209  | 1.9984728747  |
| 0.6188553137  | 0.1233080911  |
| 0             | 0             |
| 3.2344859753  | 1.1815419822  |
| 0             | 0             |
| 13.8473719021 | 8.1519307636  |
| 0.545430989   | 2.8256320458  |
| 7.6748501011  | 5.312056515   |
| 0             | 0             |
| 1.633267928   | 1.8875039881  |
| 40.6378016616 | 30.8141876561 |
| 0             | 0             |
| 0             | 0             |

gene\_expression\_table

|                 |                 |
|-----------------|-----------------|
| 17.6741555078   | 9.3909570534    |
| 1.2710306583    | 0.5065105227    |
| 6.7030871259    | 3.5107273099    |
| 6.174476345     | 5.3604886498    |
| 21.4101849997   | 5.6880264448    |
| 4.9009721026    | 5.1489655858    |
| 1.1705906777    | 0.7774746844    |
| 0               | 0.2143988564    |
| 84.6877836886   | 179.1401661673  |
| 25.3256971883   | 19.2672825119   |
| 2.6055016038    | 3.2187369429    |
| 5.8755378295    | 5.4633227566    |
| 7.7785572097    | 4.717063303     |
| 1.3172333961    | 1.4697829675    |
| 122.9188357181  | 83.4535760914   |
| 1.2790720394    | 1.9604424749    |
| 15.6731891045   | 5.4650969741    |
| 6.5789136901    | 5.2434439564    |
| 4.4630573762    | 3.5570904755    |
| 63.6896085048   | 48.323419635    |
| 4.5608416204    | 2.7508299246    |
| 0               | 0               |
| 17.8842793008   | 21.2259249888   |
| 0.9059391791    | 2.3466312215    |
| 1114.4244172973 | 1056.6175239097 |
| 3.0366043154    | 1.2100983001    |
| 11.8085472685   | 27.9576955178   |
| 0               | 0               |
| 0               | 7.5549248214    |
| 0               | 0.4365734049    |
| 0               | 0.2862882352    |
| 7.2075452492    | 6.5064893359    |
| 0               | 0               |
| 12.8618746298   | 14.9308208546   |
| 0               | 0               |
| 1.8233786223    | 0.9688310328    |
| 0               | 0.0604631767    |
| 1.7602804853    | 1.2116445582    |
| 0.058450844     | 0.069878647     |
| 547.369535929   | 454.8030250535  |
| 0               | 3.0152288109    |
| 0               | 0.5219140007    |
| 0               | 2.6859636036    |
| 7.2335472582    | 3.0791365616    |
| 0               | 0.9728636281    |
| 7.0468543042    | 6.8644842005    |
| 2.8016246645    | 0.8931664167    |
| 76.6136590954   | 47.6862531361   |
| 77.8493761082   | 39.5437464581   |

gene\_expression\_table

|                 |                |
|-----------------|----------------|
| 2.6379483053    | 2.8227535939   |
| 1.3558024122    | 2.4853449807   |
| 90.6322486674   | 51.5961339209  |
| 18.2083859242   | 4.3536663784   |
| 51.7368699526   | 37.6521066986  |
| 27.7437456801   | 104.8015485894 |
| 0.9090399073    | 0.9056395996   |
| 167.776912568   | 110.3185610466 |
| 0.5757723726    | 0              |
| 0               | 0.2679627247   |
| 3.1586172281    | 2.2656976328   |
| 0               | 1.1687741806   |
| 0               | 0              |
| 2.4161488096    | 3.3699555234   |
| 15.5414563047   | 12.2851282039  |
| 1.3389851385    | 0              |
| 0.5181600132    | 0.2064887243   |
| 0.7087618558    | 2.7302946983   |
| 10.3763858467   | 27.2425439314  |
| 220.4500037891  | 136.1447505121 |
| 0               | 0              |
| 0               | 0              |
| 0               | 0              |
| 0               | 0              |
| 24.4990366865   | 17.6953627205  |
| 3.9159355428    | 5.9299574509   |
| 8.5068147759    | 8.2328519206   |
| 0.8039110774    | 0.6407232073   |
| 0.801561174     | 0.3194251583   |
| 69.2419590266   | 109.2906442261 |
| 1.1037954774    | 2.0233866859   |
| 0               | 0.2318563148   |
| 578.1636480282  | 600.9766520355 |
| 1.2652892024    | 1.5126675924   |
| 126.3163191648  | 41.7180905511  |
| 12.8533821763   | 2.695853364    |
| 23.6272697961   | 11.9834353427  |
| 0.491222884     | 1.5660334115   |
| 0               | 0.1187051735   |
| 0               | 0.1969362337   |
| 3126.9606585271 | 2761.583961174 |
| 10.1296989939   | 4.5413137644   |
| 27.1824517265   | 46.9400090507  |
| 8.4078861334    | 16.4178146168  |
| 0               | 0.2394575122   |
| 0               | 1.6889396868   |
| 0.4963148919    | 0.3955667217   |
| 0.6951692906    | 1.5236517477   |
| 0               | 0.4241932607   |

gene\_expression\_table

|                  |                  |
|------------------|------------------|
| 0                | 0                |
| 17.1535694168    | 16.3006638617    |
| 0.2972858071     | 1.7770427708     |
| 0.4463623467     | 0.266815624      |
| 176.3874193313   | 156.6268039194   |
| 0                | 0.2897335716     |
| 15.1464265349    | 11.3475074871    |
| 0.5778523384     | 0                |
| 4.036846276      | 4.0217462574     |
| 15035.2249614015 | 15203.9375512038 |
| 12.5538414801    | 10.3390234696    |
| 26.2201651813    | 35.7001860947    |
| 0                | 0                |
| 80.9544687826    | 76.7086848957    |
| 1.7074821645     | 7.484819078      |
| 0                | 0                |
| 1.7794681707     | 2.4819367776     |
| 4.4232123324     | 7.5690987714     |
| 1.3189798744     | 0.8541300082     |
| 194.0667150907   | 343.7758319399   |
| 0.6438495616     | 1.7960353913     |
| 0.4816424747     | 3.2629179004     |
| 0.4726030876     | 0.0941670586     |
| 0                | 0                |
| 118.8635823445   | 118.9228778703   |
| 35.516777875     | 11.6373799919    |
| 3.8289959101     | 0.8719253408     |
| 3653.0767567071  | 7239.3041332494  |
| 3449.7473931716  | 3789.952407376   |
| 48.2480158146    | 61.2489501443    |
| 0.4382466676     | 0                |
| 22.9641811851    | 15.7357943431    |
| 0.6772749694     | 0.5397932717     |
| 2.1955209796     | 1.2726158704     |
| 21.7587844669    | 44.5109170807    |
| 0.7748380561     | 0.7719397369     |
| 33.4782375879    | 35.5765446639    |
| 224.3961670988   | 77.6899526044    |
| 538.5386237929   | 216.4361429601   |
| 21.3650001629    | 4.865161908      |
| 0                | 0.1189669936     |
| 0.3502309655     | 0.4187050916     |
| 3.3480360966     | 1.0673640338     |
| 8.5964226916     | 8.5008283396     |
| 33.7194920797    | 37.7925330265    |
| 14.3795598411    | 9.2566529371     |
| 3.7742607691     | 0.9024343114     |
| 1.8642702143     | 1.4858374571     |
| 3.705637846      | 0.1406391135     |

gene\_expression\_table

|                 |                 |
|-----------------|-----------------|
| 80.5002518158   | 42.7320591147   |
| 111.5900750764  | 24.1097350138   |
| 6.1155105023    | 6.2910000047    |
| 12.8686666777   | 4.3956105628    |
| 0.0575212406    | 0               |
| 0               | 0               |
| 20.2432013567   | 16.9831416285   |
| 6.6776484651    | 3.6589687191    |
| 0               | 0.2775896516    |
| 10.0447226292   | 5.6230651587    |
| 5.2533991284    | 3.140249121     |
| 0               | 0.9073975542    |
| 0               | 0.1093113721    |
| 0.5840702732    | 0.2327542121    |
| 0               | 0.8528580499    |
| 1.3954843247    | 1.0658694103    |
| 1619.6542241394 | 883.7903298764  |
| 4.3897556022    | 0               |
| 41.2800086934   | 34.46716854     |
| 0               | 0.6042149591    |
| 0               | 0.5079717178    |
| 3.2629770432    | 1.5603704256    |
| 0.9022808131    | 0               |
| 5.0018594526    | 5.4814647312    |
| 17.7377486779   | 14.4276085808   |
| 0               | 0.1535427733    |
| 0               | 0               |
| 2.6599552087    | 2.3850049659    |
| 57.923827097    | 42.8681761654   |
| 28.0855605835   | 60.4378912038   |
| 1103.1524229709 | 1635.0422311666 |
| 28.033597064    | 14.0544607167   |
| 0               | 0               |
| 15.9914603402   | 13.8074243754   |
| 14.9379019786   | 26.7876468618   |
| 2.6628305251    | 1.6675183353    |
| 20.9256718254   | 9.4891606231    |
| 19.9679912357   | 7.5783999998    |
| 4.7194947285    | 3.5263809228    |
| 0               | 0               |
| 0               | 0               |
| 6.8476485963    | 1.0612053878    |
| 0               | 0.2708871779    |
| 3.7948821795    | 0.3360610879    |
| 1.334854245     | 0.3546296422    |
| 0               | 0.1476114857    |
| 4.6598526763    | 3.7139378177    |
| 4.7593202855    | 0.6322023757    |
| 2.0958062926    | 2.5055601935    |

gene\_expression\_table

|                 |                 |
|-----------------|-----------------|
| 22.6767282357   | 21.5197466422   |
| 5.3965047998    | 9.9163215503    |
| 10.2787350831   | 5.7540660161    |
| 0               | 0               |
| 0               | 0               |
| 0               | 0.0962315872    |
| 0               | 0.8297141877    |
| 1.889629895     | 3.5858317011    |
| 2.6195303575    | 1.5658391266    |
| 0.8696702684    | 0.9241783731    |
| 3.6814737327    | 0.5868324804    |
| 0               | 0               |
| 3.982031956     | 4.1938305144    |
| 0.7869012474    | 0.6271662442    |
| 0               | 0               |
| 2.3732819565    | 3.4920436884    |
| 0               | 0.3339139458    |
| 0               | 0               |
| 0               | 0               |
| 0               | 0.143664695     |
| 3.1419318255    | 0.6260358555    |
| 3.2128308653    | 1.4937127876    |
| 0               | 0               |
| 0               | 0               |
| 0.9134641768    | 0               |
| 118.0390665099  | 111.3945887408  |
| 0               | 0               |
| 36.8632176398   | 30.4295583084   |
| 115.3561252209  | 172.9918115642  |
| 22.7485584096   | 29.1387424212   |
| 60.4140899762   | 20.6359227954   |
| 4.2963738238    | 4.82506887      |
| 15.4309801072   | 4.7827919317    |
| 0               | 1.7055432289    |
| 41.4536730127   | 28.9933123667   |
| 168.2448163083  | 95.5408284123   |
| 1686.3590859269 | 1714.6608258562 |
| 0               | 0.4118598884    |
| 10.521970142    | 4.1930448817    |
| 0               | 0               |
| 0               | 0               |
| 34.914798589    | 18.7172113573   |
| 0               | 0.9222303011    |
| 1.0561586858    | 0.8417664586    |
| 84.4882850163   | 81.9764546121   |
| 0               | 0               |
| 103.9015324553  | 59.3152896664   |
| 0               | 3.1850622757    |
| 0               | 0.9351000609    |

gene\_expression\_table

|                |                 |
|----------------|-----------------|
| 0              | 0               |
| 0              | 0               |
| 0              | 0               |
| 1.9360649594   | 0               |
| 0              | 0.3319838835    |
| 39.3992049732  | 14.0820999582   |
| 1.5314793402   | 0               |
| 5.2352789603   | 0.8748909665    |
| 0.5888263601   | 0.9385981226    |
| 0.5731467005   | 0.7994039446    |
| 14.1311843231  | 6.72126529      |
| 2.3322811639   | 2.3235571535    |
| 15.8233846273  | 13.6623036268   |
| 25.7749132747  | 14.6493743216   |
| 5.898626787    | 4.2311251357    |
| 13.9682291882  | 3.478995088     |
| 0              | 0.3817566136    |
| 0              | 1.687226443     |
| 32.1014434765  | 29.8492753776   |
| 141.7782272829 | 73.8760488784   |
| 17.4386558033  | 5.8683571147    |
| 0              | 0               |
| 1.3979743142   | 2.3398118078    |
| 36.1553500799  | 44.8250248392   |
| 0              | 0               |
| 2.3144496818   | 0.4611584742    |
| 8.4189491414   | 2.7958192184    |
| 712.5161591532 | 1186.8069949963 |
| 144.5582008732 | 95.194528872    |
| 12.9364576353  | 9.3438494381    |
| 7.7665734846   | 5.1583481608    |
| 14.7924369109  | 10.6107156618   |
| 0              | 0               |
| 14.9431878604  | 55.8273455402   |
| 13.5139642044  | 6.3951219199    |
| 54.3493550751  | 58.3111401235   |
| 21.3150862575  | 6.2290378032    |
| 33.0347709727  | 14.6272012513   |
| 1.1921140722   | 0               |
| 19.9270710142  | 41.0285678738   |
| 40.3007692234  | 57.3571746409   |
| 1.2626913316   | 2.5159363473    |
| 38.8232219952  | 21.8496782422   |
| 15.0528666319  | 10.3612600902   |
| 0.2348350566   | 0.0935826579    |
| 0              | 0               |
| 7.449845443    | 3.3811237375    |
| 9.1758651426   | 7.5945121274    |
| 2.4883469454   | 2.1357875869    |

gene\_expression\_table

|                 |                 |
|-----------------|-----------------|
| 0.3348673272    | 0.6672294795    |
| 0               | 0               |
| 0               | 0               |
| 0.4578015794    | 0               |
| 1.2042297988    | 1.9195605105    |
| 0               | 0               |
| 0               | 0               |
| 4.1487775129    | 1.9076579124    |
| 19.300140119    | 11.684675492    |
| 2.6188805515    | 4.3484741705    |
| 0               | 7.6037760901    |
| 4.4377310733    | 1.547396034     |
| 9.8739695968    | 4.0861532228    |
| 0               | 0               |
| 0               | 0               |
| 28.2741408181   | 35.8140831786   |
| 13.7610376401   | 6.1165746246    |
| 2.5959875635    | 1.8621195455    |
| 5.7230199581    | 6.5568546342    |
| 3.5528730349    | 0.7079166683    |
| 3.2873617385    | 0.8733507208    |
| 4.6926079032    | 2.6714599866    |
| 1.9406915852    | 2.8357007573    |
| 8.9739149334    | 1.4304556113    |
| 2.1761587639    | 0               |
| 1.7838655385    | 0.7108771613    |
| 4.9547634511    | 1.7276804716    |
| 0               | 0               |
| 8.0878668718    | 1.4324646782    |
| 5.7382965989    | 1.2313177096    |
| 2.7581117428    | 4.2132855018    |
| 0               | 2.1360422217    |
| 0               | 0               |
| 0               | 0               |
| 0               | 0               |
| 0               | 0               |
| 0               | 0               |
| 0               | 0               |
| 1.1510174466    | 1.6512652947    |
| 0.8650562077    | 1.0916392027    |
| 1.2466625994    | 0.8279995985    |
| 1.3758209713    | 0.5482698586    |
| 13.6685299177   | 43.1566897989   |
| 3.3152338588    | 2.9725497597    |
| 0               | 1.0465544179    |
| 1510.1959231376 | 1456.7215362965 |
| 0               | 0               |
| 19.4024575664   | 12.1502113771   |
| 0               | 1.1356859927    |
| 1.1297337853    | 0.9004063692    |



gene\_expression\_table

|                |                |
|----------------|----------------|
| 14.0032352723  | 6.4388563819   |
| 4.6307605337   | 6.5613353957   |
| 7.6875862691   | 12.2541287699  |
| 6.7428066572   | 4.0803108057   |
| 161.1122990169 | 105.0608622613 |
| 263.5655839613 | 276.3996885875 |
| 142.2737941278 | 118.5475301415 |
| 5.3074296892   | 6.3450923903   |
| 8.1281157909   | 8.7314461778   |
| 459.1821191741 | 217.5497969364 |
| 161.6770799911 | 128.8578552485 |
| 0.9677219142   | 0              |
| 0              | 0.2160836548   |
| 81.477486889   | 32.4690865648  |
| 60.1858756886  | 45.407168019   |
| 17.9354678241  | 18.7488502061  |
| 7.8273026542   | 10.9172339505  |
| 44.7963859881  | 25.7394141617  |
| 0              | 0              |
| 29.0859538326  | 18.2778986629  |
| 0.1514610059   | 0.3017889173   |
| 16.934330043   | 11.2156416386  |
| 0.9287729589   | 0              |
| 0              | 0              |
| 0              | 0.0651710352   |
| 1.4566650763   | 1.8865812552   |
| 192.5655422895 | 88.561791276   |
| 41.8565947533  | 19.3136972428  |
| 0.409867312    | 0.8166683671   |
| 6.6038858962   | 2.6316734968   |
| 1.1258184189   | 0              |
| 0.4907690391   | 0.1466799881   |
| 0.7518150061   | 0.5492687242   |
| 15.3743888731  | 14.1527973312  |
| 0              | 3.6120616097   |
| 10.1698625958  | 9.1602771836   |
| 3.4937329484   | 1.6707189463   |
| 3.744326371    | 0.4352040627   |
| 0              | 0              |
| 613.0499956861 | 342.8757025289 |
| 2.3072959479   | 1.9046084709   |
| 444.2424681721 | 138.2765826924 |
| 260.586246171  | 224.5158805712 |
| 0.4187497721   | 0.5840567857   |
| 0              | 0              |
| 73.5870104381  | 111.6230587228 |
| 8.9208007725   | 6.2481340727   |
| 1.8556189035   | 2.5559981003   |
| 2.0591695384   | 0.410293423    |

gene\_expression\_table

|                |                |
|----------------|----------------|
| 348.42779615   | 177.9801905633 |
| 2.151627187    | 2.3043473407   |
| 54.7559181741  | 11.7494679112  |
| 1.2818944508   | 2.2987790328   |
| 54.4497354703  | 25.0216077162  |
| 151.8854178438 | 80.3000444973  |
| 1.0006741284   | 3.3895655988   |
| 0.3555542833   | 0.5490476888   |
| 1.094199281    | 1.526148926    |
| 0              | 0.3288247888   |
| 1.0329089349   | 0.6860301927   |
| 39.3555125867  | 31.9547656329  |
| 1.775988262    | 0              |
| 532.8246192533 | 138.2631047858 |
| 92.0245527134  | 51.1670460723  |
| 20.5968605249  | 6.4490853343   |
| 39.8413669582  | 21.9981634505  |
| 20.5776478381  | 14.965493591   |
| 13.473293958   | 8.4826351536   |
| 2.8897806902   | 0.503819982    |
| 0.2479825764   | 0              |
| 44.2226599155  | 38.3343433235  |
| 53.0536921517  | 25.5761536979  |
| 1.7825327615   | 3.9956965011   |
| 28.7178556163  | 29.0505956295  |
| 180.9316576409 | 104.5478269387 |
| 5.5413770158   | 3.7067216241   |
| 5.4959013271   | 4.6751011102   |
| 0.9250943923   | 0.5161150579   |
| 0              | 0              |
| 33.7340088329  | 13.2227508758  |
| 8.3971860993   | 2.7885920063   |
| 18.5672919862  | 22.1151955371  |
| 4.1911499586   | 1.3822254653   |
| 8.6161583228   | 8.3198082688   |
| 0.327296132    | 0.4919026992   |
| 0              | 0.006806       |
| 6.9655386723   | 54.6484344394  |
| 0.6467188718   | 0              |
| 0              | 0              |
| 22.6962980588  | 17.9939152664  |
| 0.763106632    | 0.4489108198   |
| 2.9033254196   | 2.0825750812   |
| 0              | 0              |
| 0              | 0              |
| 0.2820395869   | 0.2809846042   |
| 0              | 0              |
| 2.3921967311   | 4.011801816    |
| 0.4215020651   | 0.6718806659   |

gene\_expression\_table

|                |                |
|----------------|----------------|
| 0.0481738077   | 0.0191974445   |
| 0.0136816178   | 0.0299869703   |
| 0.1868431541   | 0.2233731099   |
| 170.4578765279 | 136.8062599548 |
| 0              | 0              |
| 0              | 0.2606798141   |
| 21.7974717008  | 22.2543488708  |
| 2.5647324878   | 2.1667578567   |
| 23.6355021304  | 22.2161697791  |
| 9.6846502707   | 11.951596637   |
| 0              | 0              |
| 2.6484445841   | 6.3324910779   |
| 2.2869253581   | 3.5846370452   |
| 2.2018204783   | 2.3398234266   |
| 0              | 0.0334621725   |
| 4.0777760615   | 1.1375064241   |
| 2.628416201    | 4.9753105181   |
| 11.2356839819  | 5.5187329045   |
| 2.8788716757   | 6.644438888    |
| 0              | 0              |
| 0.0965556046   | 0.0109936496   |
| 0.1437255765   | 0.2863759281   |
| 37.4741131551  | 19.7397840632  |
| 6.4910462808   | 4.7854069943   |
| 0.0228365303   | 0.0091         |
| 2.4878902376   | 1.9828673312   |
| 1.6338568692   | 0.8941747782   |
| 1.7501097778   | 2.5804738432   |
| 3.7410633933   | 2.4631069751   |
| 8.7279780286   | 2.0868793452   |
| 650.923979602  | 297.9436296688 |
| 230.1332364762 | 154.9325693106 |
| 9.1979109804   | 6.1090038333   |
| 1.3477196941   | 1.4321903823   |
| 79.0346265735  | 135.3758137876 |
| 0              | 0              |
| 0              | 0              |
| 490.0915883971 | 621.5627447893 |
| 115.873201767  | 99.0819099626  |
| 31.0233730378  | 46.3744895677  |
| 5.4297363777   | 6.5778622427   |
| 3.241286148    | 1.010868092    |
| 9.799712787    | 12.7356886124  |
| 18.5914513545  | 13.3083347099  |
| 0.052984842    | 0.0633439795   |
| 17.7893808903  | 22.5333236825  |
| 6.5306331763   | 7.2159728484   |
| 21.1818428161  | 12.5090176697  |
| 4.1836188719   | 5.0015638121   |

gene\_expression\_table

|                |                |
|----------------|----------------|
| 5.7082250464   | 129.6607079292 |
| 0              | 0              |
| 3.5458326806   | 1.271724956    |
| 43.2158937619  | 33.1461753596  |
| 0              | 0              |
| 0              | 0              |
| 0.4739045949   | 0.2266233273   |
| 115.5591149903 | 73.2088754181  |
| 0              | 0              |
| 0              | 0.9004476646   |
| 9.210688686    | 19.3124467426  |
| 2.6810955727   | 6.2163009283   |
| 17.5494210187  | 12.6987429761  |
| 14.4095025796  | 8.9323752864   |
| 5.0307334386   | 2.0536630337   |
| 6.3229667012   | 6.8343256825   |
| 1.338115833    | 2.0737275161   |
| 22.8259925122  | 16.8348402223  |
| 0.5993563384   | 1.3136517176   |
| 26.8880772357  | 25.0932488782  |
| 0              | 0.1855003862   |
| 6.0881670003   | 4.7884688822   |
| 8.0300506671   | 7.8829405007   |
| 0.8799781804   | 2.1741827171   |
| 3.2411888014   | 0.9687194934   |
| 6.9410665505   | 0              |
| 16.7592525449  | 8.4767169812   |
| 4.4021525163   | 4.4654257985   |
| 41.1756318742  | 65.4955235802  |
| 32.8507927254  | 17.5851471481  |
| 3.2401230065   | 4.8881190858   |
| 217.9429695441 | 207.7431616765 |
| 1.6140417632   | 2.7082178728   |
| 10.6078868569  | 23.3958249755  |
| 0.6159805793   | 0.8497058873   |
| 0              | 1.1752632893   |
| 21.766280881   | 21.1142087646  |
| 2.602322518    | 0              |
| 1.3263320822   | 3.1953150201   |
| 6.9327102266   | 9.516005367    |
| 2.285225778    | 2.6055312377   |
| 1.7255471809   | 2.8563386206   |
| 10.4572531535  | 6.9115447406   |
| 4.1248512568   | 3.4736246774   |
| 1.9793817055   | 4.820390013    |
| 1.4379082773   | 8.9771861946   |
| 1.5402191602   | 2.2319387578   |
| 203.6100987077 | 102.491866254  |
| 2.2480853818   | 2.662015271    |

gene\_expression\_table

|                 |                 |
|-----------------|-----------------|
| 0.3288897889    | 0               |
| 3.2712921593    | 2.2026721505    |
| 27.510747816    | 40.0783533453   |
| 1.3434322356    | 5.8889910745    |
| 19.8891887953   | 16.8605869225   |
| 9.2192534385    | 0.8747398453    |
| 8.2592311546    | 8.9597448437    |
| 1438.7797889554 | 1765.3427552052 |
| 31.4401925332   | 31.7933330855   |
| 3.1565336647    | 3.3491337204    |
| 80.7600858546   | 106.2045584832  |
| 0               | 0               |
| 0.1257509987    | 0.1503367453    |
| 15.8991324457   | 6.7402812649    |
| 0.69649512      | 0.6686574883    |
| 10.997252316    | 11.0930680193   |
| 481.6616020224  | 141.8001487075  |
| 2.715209783     | 1.6646482521    |
| 6.4137917357    | 8.856560884     |
| 26.1893997161   | 30.8006231913   |
| 1.3057507707    | 0.9756499101    |
| 0.6654603586    | 0.5303769375    |
| 0               | 0               |
| 2.6780936278    | 2.8365861579    |
| 0.0898158759    | 0.5368794916    |
| 14.9587094048   | 12.6841499042   |
| 2.803775624     | 0.8125928628    |
| 23.427337316    | 18.4050254832   |
| 2.370110784     | 1.180622635     |
| 0               | 0               |
| 2.6500453443    | 2.2232696603    |
| 2.987115475     | 2.0474481134    |
| 0               | 0               |
| 0               | 0               |
| 2.5321969715    | 2.102270972     |
| 0               | 0               |
| 1.1281785585    | 1.5867650147    |
| 0.8800368627    | 3.7407788471    |
| 0.1799570829    | 0.0478090519    |
| 19.2078817228   | 11.8486126552   |
| 0.9094980335    | 0.6161452883    |
| 6.2230251832    | 3.3065320836    |
| 5.591394567     | 3.8113808374    |
| 5.3427480299    | 3.7442886118    |
| 1.3150108405    | 2.2372339947    |
| 0.5529270922    | 0.7517603017    |
| 411.8511212172  | 148.9818149046  |
| 0.411400601     | 3.6887556347    |
| 0               | 0.2105759105    |

gene\_expression\_table

|                |                |
|----------------|----------------|
| 1.2416628118   | 2.6224788215   |
| 106.5451891788 | 30.3276147857  |
| 0.1364308755   | 0.3624547979   |
| 0.1855049019   | 0.1108866071   |
| 11.9006478493  | 13.1734810011  |
| 0              | 0              |
| 0              | 0              |
| 0              | 0              |
| 5.6402191598   | 1.6482756833   |
| 8.9690287656   | 24.6944165704  |
| 0.0806610528   | 0.9000245656   |
| 13.9716952501  | 29.4917996197  |
| 0              | 0.2026857812   |
| 250.4231729964 | 127.5560639687 |
| 0.2405578468   | 0.1917264229   |
| 34.0603279821  | 29.7389668201  |
| 5.766814014    | 4.3985085945   |
| 39.3366892816  | 88.0257550798  |
| 0.465461377    | 0.1854881185   |
| 15.8183237704  | 7.0310074217   |
| 9.9423564595   | 9.433491995    |
| 1.5067954361   | 0              |
| 3.0481773418   | 0              |
| 246.1552183587 | 217.6800288392 |
| 0              | 0              |
| 0              | 0              |
| 0              | 0              |
| 14.805187049   | 15.829061741   |
| 3.2123420731   | 40.3241095199  |
| 19.9909476063  | 23.330371158   |
| 3.5888795881   | 3.9330007316   |
| 3.2658537804   | 4.9455292988   |
| 40.4775792629  | 96.7828102119  |
| 0              | 0.9960105966   |
| 77.0580777702  | 51.3953864873  |
| 0              | 9.1825727754   |
| 0              | 0              |
| 12.6568106978  | 7.3555225834   |
| 13.0563470484  | 4.6248921427   |
| 37.7015809735  | 15.3906670078  |
| 2.5619557669   | 1.8231233197   |
| 4.8576447527   | 2.4197372489   |
| 0              | 0              |
| 0.0522256465   | 0.1248727056   |
| 32.5189943936  | 34.3693684685  |
| 1.2014458599   | 2.7358898139   |
| 1.474903915    | 0              |
| 0.4445333827   | 0.110717646    |
| 46.7169451694  | 24.4678984709  |

gene\_expression\_table

|                |                |
|----------------|----------------|
| 0.04784323     | 0.0476642701   |
| 1.7054708876   | 2.7563039748   |
| 0.5902241585   | 0.3799490562   |
| 0.2665071824   | 0.0424816479   |
| 2.3157567539   | 5.1926844585   |
| 0.4285153069   | 0.9514048321   |
| 25.9519108188  | 13.6048978926  |
| 7.9710540867   | 6.1676948263   |
| 37.2033100985  | 21.842384179   |
| 7.1801029094   | 3.2081221738   |
| 0              | 0              |
| 12.4347483563  | 7.1730482934   |
| 3.1859259821   | 2.2570729757   |
| 5.7913613776   | 5.3081226297   |
| 23.7167312497  | 42.6105267819  |
| 10.7163209846  | 23.2504696595  |
| 15.1529484202  | 14.3313905015  |
| 3.8738171213   | 3.5891740367   |
| 0              | 3.7319750382   |
| 113.5200239069 | 129.0618057279 |
| 0              | 0.6825354899   |
| 18.1529561886  | 14.3550117544  |
| 0              | 0.2118863303   |
| 1.5853323458   | 0.7581131201   |
| 0              | 0.0677128023   |
| 14.6671409533  | 13.3945879868  |
| 11.2801845772  | 10.4099280436  |
| 6.9228604743   | 2.7587860721   |
| 2.5608009895   | 2.7425638539   |
| 1.1891899939   | 2.7780151878   |
| 0              | 0              |
| 1.564415796    | 1.7144204254   |
| 0              | 0              |
| 3.1911845403   | 3.614302717    |
| 0              | 0              |
| 19.3696913446  | 36.2554169953  |
| 19.5165369231  | 33.9901786087  |
| 33.1225796366  | 24.8101209424  |
| 15.6328167177  | 12.9209350968  |
| 0.578196503    | 0.1152067462   |
| 0              | 1.3939633811   |
| 15.9430456994  | 12.4623678199  |
| 0              | 3.9392778651   |
| 0              | 0.2983476056   |
| 0              | 0.0859487586   |
| 45.0529369293  | 35.805521361   |
| 176.9762995364 | 73.4968747085  |
| 0              | 0              |
| 1.2260773823   | 0.6218500556   |

gene\_expression\_table

|                 |                 |
|-----------------|-----------------|
| 2.3138890205    | 2.4750931399    |
| 4.5420463561    | 3.9367992526    |
| 10.4550520709   | 19.1454978818   |
| 17.9157153849   | 14.5939377013   |
| 11.416130823    | 29.0610700738   |
| 32.8511917525   | 24.3700033486   |
| 4.0825066602    | 3.4862021544    |
| 0               | 0.5277572377    |
| 1394.2966188373 | 1359.8173679282 |
| 17.4106159115   | 24.5727784369   |
| 0               | 0.0248119341    |
| 1.0079256565    | 1.2976778276    |
| 0.5996457017    | 0.5177490049    |
| 41.0489380542   | 13.9138346957   |
| 18.2758722851   | 8.9014495786    |
| 0               | 0.0360204176    |
| 3.8023995042    | 6.1693159249    |
| 0               | 0.004076        |
| 0.7733226553    | 0.8012472047    |
| 18.5173884079   | 36.462172956    |
| 289.6008453027  | 166.652753413   |
| 1.8144006296    | 2.0245274295    |
| 6.5092770718    | 1.3652481698    |
| 2.1945356178    | 3.9839733734    |
| 131.314333516   | 40.7920990384   |
| 0               | 0.2407152406    |
| 2876.2044518726 | 4675.2518499573 |
| 12.0737497283   | 4.8114349136    |
| 10.8802791654   | 5.3065411245    |
| 0               | 0               |
| 0               | 4.7172899759    |
| 4.0908116723    | 0               |
| 47.502192231    | 31.0238441238   |
| 53.6919031992   | 29.6493337483   |
| 4.9651467009    | 17.4584976343   |
| 25.7786194048   | 30.8186318798   |
| 0               | 0               |
| 2.922129653     | 4.6113396688    |
| 138.9082029322  | 191.7188549493  |
| 42.3591738633   | 50.6408727919   |
| 34.9233487171   | 16.7545507348   |
| 143.0475025577  | 32.7475362934   |
| 1.9936949174    | 0.1986237405    |
| 15.313120948    | 13.8539533432   |
| 0               | 0               |
| 298.3162697209  | 493.6549071736  |
| 3.1427736022    | 3.4441196963    |
| 0               | 0               |
| 8.2782337602    | 3.6461608666    |



gene\_expression\_table

|                |                |
|----------------|----------------|
| 6.0570064391   | 7.3832046004   |
| 55.674281824   | 29.6491139416  |
| 0.183077762    | 0.3647859016   |
| 24.0564894412  | 10.9561165623  |
| 33.0433872405  | 12.2701023728  |
| 0.2452263504   | 0.0977236277   |
| 45.4479931344  | 9.055598544    |
| 527.0707907036 | 470.9170406198 |
| 0              | 0.1897997523   |
| 7.9259476151   | 4.737780135    |
| 58.2998952476  | 46.5720294876  |
| 31.8122324508  | 16.5832722518  |
| 2.5127602578   | 9.012100164    |
| 0.5344958598   | 0.4259972418   |
| 13.7053833537  | 18.0654480404  |
| 16.5026418518  | 13.5839673982  |
| 0.469247382    | 5.7969025294   |
| 79.4174375926  | 48.0887460834  |
| 4.1075234796   | 5.3198068163   |
| 0.904890908    | 0.6490844063   |
| 2.3995563207   | 7.2400442975   |
| 0              | 0              |
| 31.7139220566  | 29.847469791   |
| 8.8357218256   | 5.3989717804   |
| 19.2207901592  | 14.4984482119  |
| 0.3668808112   | 0.7310169516   |
| 0              | 0              |
| 0              | 0              |
| 0              | 0.6654248731   |
| 0.4760461403   | 0.4925064462   |
| 2.1221895017   | 0.4228502699   |
| 60.9641705254  | 28.3116453629  |
| 0.3668425666   | 0.7309407484   |
| 0.6172542409   | 0.7379344459   |
| 1.5466962932   | 1.1300012541   |
| 0              | 0              |
| 0              | 0              |
| 0.0689071135   | 0.0274597453   |
| 24.4828675049  | 24.1589901734  |
| 2.150723142    | 1.3141759983   |
| 0              | 0              |
| 0.5625867457   | 0.6538960899   |
| 7.6351732056   | 2.3050343852   |
| 0              | 0              |
| 3.4869457418   | 4.6739781146   |
| 265.1543323507 | 172.92918691   |
| 1.6885475646   | 2.3925069808   |
| 1.9134936699   | 3.2817938859   |
| 0              | 0              |

gene\_expression\_table

|                |                |
|----------------|----------------|
| 3.7799363492   | 0              |
| 1.8459964391   | 3.6781828005   |
| 4.6532118813   | 5.7690034172   |
| 13.9011866447  | 7.6992099249   |
| 169.1497724042 | 131.4433064152 |
| 0              | 0.0854946455   |
| 2.3780855623   | 3.1391770393   |
| 0              | 0              |
| 0              | 0.0444636309   |
| 493.6596872069 | 407.0073737659 |
| 2.3031271723   | 1.5602683054   |
| 12.5695709704  | 20.6085458185  |
| 6.1276697564   | 5.1279890857   |
| 1.3735666734   | 0.8894787075   |
| 0              | 0.0270445751   |
| 2.6323483805   | 3.9337529312   |
| 30.8948871648  | 29.2403571791  |
| 0.5666290818   | 0.5362840994   |
| 3.7082410338   | 2.290509511    |
| 0.3042116823   | 0              |
| 262.5057156602 | 401.208277236  |
| 8.5388411639   | 8.7499555364   |
| 31.6863341224  | 26.3443593063  |
| 13.7163312942  | 11.6347924539  |
| 13.8219956331  | 24.381520182   |
| 17.7718411301  | 6.3739312918   |
| 17.872262722   | 17.5536169735  |
| 56.9559234719  | 39.7810278079  |
| 18.923395274   | 15.3334572716  |
| 2.4124680405   | 2.9909526419   |
| 0.6014142383   | 1.0676024125   |
| 342.7751858786 | 339.4576298784 |
| 18.3266444396  | 11.7416684806  |
| 0              | 2.3642308288   |
| 5.1509378529   | 5.7474709835   |
| 0              | 0              |
| 0.4292395854   | 0.5986875916   |
| 5.2768449123   | 5.2571066189   |
| 1.5339487963   | 1.8016803211   |
| 3.4818912881   | 4.0559061541   |
| 97.3327801783  | 83.6085699061  |
| 0              | 0.7215141073   |
| 2.7642501076   | 2.6519136188   |
| 2.1192763682   | 2.831691751    |
| 9.4014620568   | 5.1992497101   |
| 0              | 0              |
| 0.6886329063   | 0.16465369     |
| 0.499860487    | 0.4335448749   |
| 13.543761672   | 16.9113527232  |

gene\_expression\_table

|                 |                 |
|-----------------|-----------------|
| 10.6709783507   | 14.7215938957   |
| 2.5192810675    | 6.8393618916    |
| 3.5758879625    | 2.231257629     |
| 0               | 0               |
| 0               | 0               |
| 0.2884052402    | 0.1532407715    |
| 0.2148826207    | 0.2283507647    |
| 50.8641808986   | 56.240915107    |
| 71.5250714516   | 49.0112756763   |
| 2.868152547     | 3.4697292446    |
| 932.6419593023  | 904.4308827195  |
| 21.5909242766   | 20.0761515556   |
| 0.3523260572    | 0               |
| 0.2021263457    | 0.4027405646    |
| 0.0922939126    | 0               |
| 0.0252533736    | 0.003355        |
| 9.1429092043    | 10.8707224087   |
| 0               | 0               |
| 0               | 0               |
| 1.9055516086    | 1.3116382623    |
| 4.6002914638    | 4.318283451     |
| 3.282205202     | 1.6646905952    |
| 0.0879362488    | 0.1051287828    |
| 0.537778358     | 0               |
| 184.4628174732  | 51.3850230218   |
| 0               | 4.6152705406    |
| 0               | 0.1280159675    |
| 1.8927173368    | 1.8513532173    |
| 24.9947994982   | 40.4280014531   |
| 3.2948944996    | 1.9580240838    |
| 30.7998390541   | 7.8522160722    |
| 17.4703991781   | 14.697598036    |
| 0               | 0.67196115      |
| 8.0542630809    | 3.2568550866    |
| 5.9447117549    | 6.3962732952    |
| 413.9602123742  | 373.4566930856  |
| 0               | 0.4438974187    |
| 0.0684943676    | 0.1091810577    |
| 37.7643880346   | 23.1113503743   |
| 66.6182399443   | 27.4563409848   |
| 2058.7700093721 | 1855.0148104076 |
| 36.2397440043   | 13.2863409966   |
| 10.922251657    | 4.993988264     |
| 2.5395870696    | 1.3692238893    |
| 16.4774884199   | 5.8628048494    |
| 8.9171769638    | 2.4072291417    |
| 0.8865400532    | 2.1197373775    |
| 69.4868070865   | 39.7926409938   |
| 36.2865228223   | 14.1925328926   |

gene\_expression\_table

|                |                |
|----------------|----------------|
| 5.4507194441   | 1.6592677336   |
| 4.1757588147   | 1.6640556748   |
| 0.0988105352   | 0.1050036582   |
| 0              | 0              |
| 45.2892226357  | 18.047926444   |
| 875.7725555687 | 336.6705259803 |
| 64.8285740376  | 41.7502871853  |
| 750.3085153799 | 573.5639963426 |
| 18.3066372718  | 4.7381612613   |
| 0.7805091746   | 0.1555179285   |
| 1.8986479069   | 2.5835749187   |
| 3.5213215671   | 12.5124012872  |
| 0.1296368062   | 0.1549822722   |
| 24.1469020124  | 6.1066701449   |
| 1.7501627575   | 1.8800731083   |
| 0.302057486    | 0.4814842007   |
| 0.879340515    | 1.0512615592   |
| 10.6325746159  | 7.1544833085   |
| 10.8704022893  | 6.4155934169   |
| 0.5003548489   | 2.2930229381   |
| 6.5962900489   | 6.0936805758   |
| 1.3883616393   | 1.4523268258   |
| 2.6403070968   | 2.8809481292   |
| 20.185145383   | 7.620495867    |
| 62.238404356   | 59.1579340688  |
| 0              | 0              |
| 58.6214803309  | 13.1404958665  |
| 8.3309230407   | 0.553317388    |
| 13.6871593215  | 15.4540900861  |
| 8.9888141535   | 14.0677910467  |
| 0              | 0.0283013803   |
| 0.2478777728   | 0.6914616074   |
| 0              | 0              |
| 26.6665458072  | 28.3634019303  |
| 2.4150591845   | 3.6571588192   |
| 16.8462079597  | 15.2259903466  |
| 0.2673753998   | 0.3078114222   |
| 37.5745045574  | 17.7543902315  |
| 0.3344377041   | 1.1994722052   |
| 10.773211205   | 11.5506592774  |
| 0              | 0              |
| 0              | 1.3641857198   |
| 10.7985293795  | 8.6065095668   |
| 0              | 0.2358928377   |
| 6.7790844351   | 3.9383178795   |
| 3.4100007181   | 1.1647698671   |
| 141.235615028  | 166.2904648187 |
| 4.2012239345   | 2.8236568539   |
| 1.4634547024   | 0.4443369385   |

gene\_expression\_table

|                |                |
|----------------|----------------|
| 65.7149671551  | 33.573926741   |
| 51.7306438057  | 41.9932274933  |
| 12.98258036    | 5.2694149      |
| 3.9162829102   | 2.8498890838   |
| 18.677332549   | 24.8099587788  |
| 0              | 0.9498021808   |
| 0              | 6.8297869479   |
| 0.2617322332   | 0.2086025689   |
| 3.3853466523   | 2.6559883347   |
| 20.1992925101  | 12.2352315369  |
| 1.6940483447   | 1.0970125888   |
| 23.6801579831  | 13.2112854764  |
| 1.1191352333   | 0.4459796216   |
| 0.5612073344   | 1.5095919003   |
| 3.1136756857   | 1.8612172988   |
| 34.9324485331  | 17.0142045438  |
| 52.3862106821  | 38.5593902689  |
| 8.2715771734   | 10.4092256075  |
| 0              | 0              |
| 12.3069068665  | 8.5565236383   |
| 33.5839743528  | 35.8482341506  |
| 0.5187000871   | 0.6201118373   |
| 4.9050397116   | 8.0141751647   |
| 0              | 0.6337976439   |
| 3.6007155269   | 2.7673047333   |
| 0.9666586296   | 1.7509869024   |
| 8.0571708714   | 7.0340933374   |
| 2.185042837    | 3.1346921933   |
| 6.7816994791   | 5.6367114392   |
| 0              | 0.1728030214   |
| 3.7774568156   | 3.1779206249   |
| 141.1251491744 | 34.7006012621  |
| 0              | 0              |
| 5.1952326866   | 3.6230597674   |
| 7.8519516272   | 4.2818338229   |
| 2.5445558504   | 9.1261361386   |
| 0              | 0              |
| 19.8159316682  | 9.2880511941   |
| 157.2440009435 | 150.389589273  |
| 1.3516883968   | 0.5386529364   |
| 618.8976388868 | 191.8257047346 |
| 9.7136613517   | 11.059802208   |
| 5.4487361675   | 3.3872934617   |
| 2.3890216264   | 0.9520341502   |
| 3.9092654311   | 3.4792140872   |
| 24.1900110716  | 14.4178040786  |
| 1.5845947052   | 1.0524449681   |
| 1.9892474008   | 2.604660004    |
| 0              | 0              |

gene\_expression\_table

|                 |                 |
|-----------------|-----------------|
| 5.2480673853    | 5.1122492526    |
| 36.4898155529   | 23.9504249827   |
| 0.2580378898    | 0.0514145373    |
| 1.1737249199    | 0               |
| 1.0224577778    | 0.4278259545    |
| 0               | 9.4449280709    |
| 0.371339309     | 0.0986534124    |
| 64.3225532286   | 23.9464134964   |
| 0               | 0               |
| 4.1377081024    | 4.9466769664    |
| 0               | 0               |
| 414.5948699209  | 426.156567546   |
| 0               | 0               |
| 5.9159800641    | 4.5972038227    |
| 7.2679073546    | 38.2310089707   |
| 4.3076622469    | 1.9073552125    |
| 9420.4155223686 | 10986.715893735 |
| 0               | 1.769847509     |
| 358.3981662147  | 340.9858281309  |
| 4.2455513997    | 1.6583659415    |
| 0               | 0               |
| 0.5522571684    | 2.0907274102    |
| 2.0598702985    | 0.9354055577    |
| 35.6338169267   | 4.7832288893    |
| 3.1255275249    | 2.046235308     |
| 85.2955198001   | 61.6531393941   |
| 94.7420546404   | 70.8633564531   |
| 1.3996856404    | 2.8508756549    |
| 0.9406898533    | 1.4994738519    |
| 0               | 0.0930070081    |
| 0               | 0               |
| 0               | 0.0458368096    |
| 0               | 10.0170208569   |
| 0.6517735153    | 0.415574736     |
| 1.1987345513    | 1.3648578592    |
| 0               | 0               |
| 0               | 0               |
| 2.2416209575    | 6.7890376405    |
| 5.420622741     | 24.3886622439   |
| 45.813362819    | 21.125723734    |
| 1.0264814996    | 1.4998747807    |
| 16.411622377    | 11.9335473476   |
| 0               | 0               |
| 0               | 0               |
| 0               | 0               |
| 14.9842806328   | 11.3620426409   |
| 0.0300842976    | 0.0759284735    |
| 6.2418814416    | 7.9804511742    |
| 3.6356900535    | 2.3543588764    |

gene\_expression\_table

|                |                |
|----------------|----------------|
| 19.470718558   | 14.5062462253  |
| 230.5893184765 | 217.8323045489 |
| 0.767313892    | 0.9173324607   |
| 0.3694382234   | 0.4122230805   |
| 1.1799011537   | 1.4628291085   |
| 13.4993842862  | 4.7071112154   |
| 15.3678120749  | 13.5420929628  |
| 22.807004155   | 5.4532064289   |
| 29.0062822153  | 21.6906067026  |
| 0              | 0              |
| 1.8325572337   | 2.2516997066   |
| 3.1835242287   | 20.8269457395  |
| 3.2582737147   | 1.7705923552   |
| 8.9895795499   | 6.6871120162   |
| 0              | 0              |
| 681.8657593621 | 358.3099874342 |
| 2.8324613084   | 2.031743772    |
| 1.000670741    | 1.3292369116   |
| 0.0552638762   | 0              |
| 7.0102006795   | 0.6983978685   |
| 18.7270283341  | 17.413180381   |
| 1.4085739307   | 1.1226440735   |
| 59.4979548378  | 43.2626141177  |
| 0              | 0.2547355561   |
| 0              | 0.3298948294   |
| 1.2407434831   | 0.4944409689   |
| 143.5538763858 | 165.0823716982 |
| 0              | 0              |
| 0              | 0              |
| 8.1061717029   | 3.4149309315   |
| 1.056898811    | 0.280785448    |
| 0.6055443072   | 0              |
| 2.6660005615   | 3.7184395605   |
| 0.0657647434   | 0.0131037494   |
| 1.2534713236   | 2.4975653072   |
| 2.4343668657   | 4.9151956243   |
| 0.3016949497   | 0.3606797342   |
| 5.0471434078   | 18.1017515665  |
| 3.4539462766   | 1.7354742971   |
| 4.1513139668   | 3.1018393323   |
| 4.5026220413   | 28.7089905021  |
| 7.9120016662   | 3.4271332355   |
| 17.2735036666  | 13.2002319083  |
| 2.7823535271   | 2.7165070793   |
| 0.7474279446   | 0.504058689    |
| 23.966770087   | 18.8742958258  |
| 1.3293206344   | 1.4262211884   |
| 0.4137870276   | 0.4397218531   |
| 0              | 0.2368489985   |

gene\_expression\_table

|                |                |
|----------------|----------------|
| 67.102447203   | 21.6063877533  |
| 0              | 0              |
| 0.9768551676   | 0.1946402387   |
| 0.2060450538   | 0.2463291988   |
| 38.1630865787  | 25.4225528324  |
| 30.6010499227  | 27.7573099688  |
| 0.0127881997   | 0.0356730216   |
| 0              | 0              |
| 0              | 0.008633       |
| 4.9315544719   | 6.1140896495   |
| 3.1781878614   | 3.0511615254   |
| 8.5649424791   | 0.6399678673   |
| 16.4172193116  | 8.3312406726   |
| 4.1671056733   | 0.4151518413   |
| 0              | 0              |
| 16.1130298205  | 7.2586385148   |
| 0              | 0              |
| 2.0860732895   | 1.2856276316   |
| 1.0240421188   | 1.2242539677   |
| 0              | 0              |
| 15.2244457154  | 10.5581544105  |
| 36.1537421035  | 34.0538614322  |
| 32.1590668248  | 13.2379990437  |
| 151.2488648866 | 118.410222066  |
| 7.8499235804   | 7.0385045058   |
| 215.3214217405 | 85.4770094498  |
| 2.6187831084   | 1.4610329573   |
| 92.836858157   | 29.7771386761  |
| 85.7226150473  | 73.0049059606  |
| 6.0331231632   | 1.6829556729   |
| 0              | 0.2916314884   |
| 98.7032131811  | 74.8369686796  |
| 8.5400005851   | 3.0629002681   |
| 0              | 0.7540833365   |
| 81.8117608131  | 35.3460535704  |
| 0              | 0              |
| 14.9692944552  | 15.7654897194  |
| 42.572609931   | 13.7093705136  |
| 44.6164277796  | 21.1990103714  |
| 597.0011836249 | 497.8676556484 |
| 96.5762622877  | 34.1661478682  |
| 2.2113641878   | 1.7977234581   |
| 0              | 0.9968365738   |
| 69.4762034727  | 191.3981839273 |
| 21.9826605261  | 32.322018834   |
| 0              | 0              |
| 6.9835371082   | 4.9474950046   |
| 55.7655165055  | 73.3982312584  |
| 4.6519731093   | 1.2358859144   |



gene\_expression\_table

|                 |                |
|-----------------|----------------|
| 3.3136730142    | 3.4333291826   |
| 8.2143255489    | 4.1950878823   |
| 0.3629081923    | 0              |
| 0               | 0              |
| 0.0873176786    | 0.5219463755   |
| 1.9309304478    | 2.1160784801   |
| 1.85249381      | 0.6890107345   |
| 7.9647180386    | 7.9861186944   |
| 1.1095973848    | 1.456588833    |
| 0               | 0              |
| 0.4574445263    | 2.5521072247   |
| 198.8273256343  | 117.4418390824 |
| 1.1512998679    | 2.0187083401   |
| 0               | 0              |
| 1.6369906925    | 4.5664288591   |
| 620.7268448054  | 433.8809176296 |
| 11.526472571    | 9.1866857947   |
| 34.4581877802   | 24.3842024539  |
| 51.2028268913   | 40.5457560641  |
| 11.6936723457   | 11.2914721654  |
| 166.0300294885  | 67.5900069401  |
| 413.5966987632  | 130.3645288642 |
| 0               | 0              |
| 21.0177715007   | 17.5618706865  |
| 61.4827821116   | 55.7400505426  |
| 0.9907713452    | 1.500339282    |
| 3.1953275494    | 4.8811754176   |
| 1.9661723109    | 4.1788111965   |
| 0               | 0.8172394639   |
| 6.4305541181    | 8.8409704411   |
| 0               | 0              |
| 1002.2024280415 | 1779.852143418 |
| 8.0967424459    | 7.3975305543   |
| 5.8378949523    | 4.4277086894   |
| 0.6252185465    | 0.1868639659   |
| 63.6114977324   | 23.1721713419  |
| 831.9210885644  | 753.4629523013 |
| 250.6309749186  | 125.9647693197 |
| 0.0591523426    | 0              |
| 0.0933200056    | 0.0557825626   |
| 1.655575614     | 1.9404504158   |
| 2.0057112884    | 0.1598567063   |
| 0.9916695331    | 1.3108544367   |
| 18.2369062337   | 11.7239472642  |
| 3.3633447727    | 2.5395264144   |
| 1.0567976824    | 1.1519359435   |
| 3.2525528248    | 3.2685637677   |
| 36.194688906    | 41.8892477789  |
| 2.6019720554    | 1.8886314559   |

gene\_expression\_table

|                |                |
|----------------|----------------|
| 44.4985501438  | 34.4301865995  |
| 0.7241982592   | 0.8657872328   |
| 3.2384546697   | 0              |
| 5.8161944119   | 1.8885577841   |
| 34.0656916632  | 14.2589554688  |
| 9.8411765972   | 6.600011696    |
| 0              | 0.4382994499   |
| 0              | 0              |
| 16.2314461369  | 13.6975609086  |
| 67.3440996297  | 47.4326221263  |
| 2.1162339711   | 2.1551696089   |
| 88.68902761    | 59.7996119639  |
| 0              | 0              |
| 9.2166157139   | 26.3581445442  |
| 3.6641604246   | 4.8672726073   |
| 96.3355815434  | 42.7719269534  |
| 180.6311974606 | 102.299430394  |
| 1.5303851886   | 1.8295928506   |
| 1.4082961127   | 0.7856958553   |
| 2.8996082798   | 2.3110097239   |
| 5.2149169005   | 7.8970235828   |
| 58.6964793817  | 45.7183211211  |
| 0              | 0              |
| 19.210361446   | 12.8552971343  |
| 8.0739030456   | 4.2899745179   |
| 0.2365715936   | 0.6599227212   |
| 19.087517779   | 17.4500865849  |
| 58.1672849771  | 65.2696704815  |
| 269.2367053288 | 221.3875630333 |
| 0              | 0              |
| 0              | 0              |
| 1.192777881    | 1.1090951552   |
| 4.143798341    | 3.108365751    |
| 23.2790648729  | 10.9856787185  |
| 2.7438200798   | 6.0138247141   |
| 34.4680541188  | 28.9974830773  |
| 23.6392141038  | 17.1520851429  |
| 0              | 0              |
| 2.5435108926   | 1.8429067398   |
| 4.3891038197   | 2.0566040423   |
| 0.2820203747   | 0.505737835    |
| 1.8555869977   | 1.7747002415   |
| 8.1752268825   | 3.7590678698   |
| 181.8217383507 | 99.9566988742  |
| 38.7772446364  | 8.8888239686   |
| 0.1488734714   | 0.0593266412   |
| 6.6701841419   | 3.2714998133   |
| 0.9107080372   | 1.253725695    |
| 5.8894338014   | 3.9604977605   |

gene\_expression\_table

|                 |                |
|-----------------|----------------|
| 27.8692067331   | 15.6493414396  |
| 0.9162388564    | 0.4868328644   |
| 0               | 0              |
| 0               | 0.3816804195   |
| 12.8142767087   | 6.3831721437   |
| 42.2050830722   | 23.5233204924  |
| 0.4297375432    | 1.3700162852   |
| 0.5055554226    | 2.1355369208   |
| 0.3757335833    | 0.1497312535   |
| 4.2186451164    | 2.7803568928   |
| 0               | 0              |
| 1.0569857305    | 1.4140715754   |
| 5.2784171908    | 5.0483260956   |
| 2.7564914421    | 0              |
| 1.6214032979    | 2.4768521528   |
| 6.513271777     | 4.1529014843   |
| 2.5663597018    | 2.4289221039   |
| 0               | 0.0158758234   |
| 1.1209595855    | 2.0758719995   |
| 3.0063431655    | 1.6147483757   |
| 0.2385365187    | 0.3734409821   |
| 0               | 0              |
| 0.817487628     | 0.3909262925   |
| 0               | 0.8724797672   |
| 2.9139835008    | 0              |
| 2.7763313854    | 2.9824117529   |
| 90.8313063019   | 31.4753208388  |
| 1048.4579960951 | 826.2222457513 |
| 48.2670767461   | 45.9728377247  |
| 0               | 0.2347084385   |
| 0.7358328784    | 0.586464368    |
| 68.2726363603   | 41.9354530806  |
| 10.1525300862   | 8.0916432454   |
| 1.8058017951    | 0.9252242261   |
| 6.7860274616    | 5.8592247982   |
| 47.6737964477   | 44.9623785586  |
| 10.5347125913   | 4.6179350755   |
| 3.1182329212    | 4.0385397263   |
| 2.0746678372    | 1.8739960807   |
| 11.936363248    | 7.3681996992   |
| 1.4921012258    | 2.9730398982   |
| 33.0771463202   | 13.754470813   |
| 11.4719299741   | 3.725013491    |
| 129.8839827849  | 37.1104115313  |
| 4.8718791986    | 5.8243868388   |
| 0               | 7.7515407829   |
| 0               | 1.4276039226   |
| 6.4590775303    | 7.4359041336   |
| 17.4127696245   | 7.63295998     |

gene\_expression\_table

|                  |                  |
|------------------|------------------|
| 0.5294299295     | 0.421959657      |
| 9.0899797741     | 9.3147205017     |
| 22.1382950286    | 18.3363253382    |
| 5.2084966197     | 4.0474309094     |
| 8.0036861205     | 4.5849050688     |
| 0.663697026      | 1.1108402512     |
| 0                | 0.2512555621     |
| 1.1251585019     | 0.7472998614     |
| 0.1526236904     | 0.9123167646     |
| 347.509504377    | 449.1368150699   |
| 0                | 0                |
| 1.9451867647     | 3.377501505      |
| 4.9792009632     | 6.47682756       |
| 14.8132827682    | 21.046010146     |
| 0                | 0.1766707439     |
| 0.2250484897     | 0.2291890557     |
| 10.6390897766    | 4.8178607942     |
| 8.2758285161     | 12.2415393297    |
| 10.5271658791    | 6.4030708776     |
| 0.2089801206     | 0.0832793682     |
| 0                | 0                |
| 0                | 0                |
| 6.6974445902     | 6.4157619953     |
| 0                | 0                |
| 0                | 24.2917760954    |
| 5.8137401814     | 4.2097904741     |
| 0.2036213976     | 0.1893357591     |
| 3.7397669937     | 0                |
| 0                | 0                |
| 0                | 41.7127578813    |
| 0.0692351878     | 0.0275904841     |
| 0                | 0.0486530256     |
| 2.7994222222     | 1.4108810173     |
| 0.3471132337     | 0.8991185836     |
| 5.2234891212     | 2.4084398581     |
| 0                | 0                |
| 4.3741595862     | 2.8761465684     |
| 0                | 0.0347485733     |
| 0.042274577      | 0.0631746704     |
| 48.3092585425    | 25.4308910155    |
| 20.800713673     | 9.40501191       |
| 0                | 0                |
| 19.0552578687    | 20.3064603141    |
| 0                | 0                |
| 10054.6306888991 | 22287.3755145557 |
| 0                | 0                |
| 0.1658710757     | 0                |
| 2.2881149162     | 4.7870678348     |
| 2.3795069005     | 8.9405721051     |

gene\_expression\_table

|                |                |
|----------------|----------------|
| 14.4574041343  | 15.7810349126  |
| 2.4375565756   | 4.9378255141   |
| 0.0419184975   | 0.0334093595   |
| 6.6279133897   | 10.4449374229  |
| 0.0248671237   | 0.4062953548   |
| 3.3296884649   | 3.0482687175   |
| 2.74243444     | 2.1282214855   |
| 4.8075419961   | 5.7474709835   |
| 0              | 0              |
| 1.8761743082   | 1.4437621752   |
| 0              | 0              |
| 2.3985541256   | 2.9681126497   |
| 0.8741528265   | 0.4064120739   |
| 1.8542332408   | 3.1261955861   |
| 2.1508127654   | 4.2076162728   |
| 43.8549744861  | 28.7111844343  |
| 0.6757738999   | 0.9201030512   |
| 0              | 0              |
| 5.5520802393   | 5.6614609423   |
| 7.0275789487   | 4.925046751    |
| 100.5385011047 | 108.7633364685 |
| 0.0568553823   | 0.1812566783   |
| 0              | 0.0311143683   |
| 1.6050721738   | 8.4750621161   |
| 0              | 0              |
| 0.1823740851   | 0.4360605744   |
| 0.123464383    | 0.2214046053   |
| 0              | 0              |
| 5.2749542418   | 7.8599857351   |
| 0.2106469579   | 0.3357744365   |
| 67.5576364559  | 91.6291731039  |
| 0.7246580677   | 0.3248763521   |
| 7.2240773904   | 7.5658301183   |
| 0.5401497665   | 1.0762586204   |
| 0              | 0.0762966298   |
| 147.0107562499 | 69.75097092    |
| 3.3514295688   | 3.0288532845   |
| 4.7549467365   | 4.5843489952   |
| 12.8388206535  | 1.023263714    |
| 43.8390421265  | 92.7771986123  |
| 0.1286304739   | 0.1025194603   |
| 13.0337805226  | 10.7680712012  |
| 4.3326612022   | 5.7774085632   |
| 213.4887338054 | 450.9946376683 |
| 266.0818170591 | 588.3416821627 |
| 0              | 0.1775786407   |
| 0.8095329625   | 2.7743767366   |
| 161.9240905898 | 151.3865985771 |
| 5.2319597114   | 4.6286017102   |

gene\_expression\_table

|                |                |
|----------------|----------------|
| 7.4312732684   | 5.7253549525   |
| 0              | 0.0244368669   |
| 12.5138119864  | 21.9456268838  |
| 2.2972636417   | 0.4577341232   |
| 0.005142       | 0.006147       |
| 2.5804059276   | 16.7466247187  |
| 1.3515153586   | 2.6929199001   |
| 1.476879881    | 1.2223569105   |
| 0.0697360567   | 0.0492642367   |
| 0              | 0.006024       |
| 1.3662066934   | 2.0567677895   |
| 1.0522113144   | 0.2515861121   |
| 2.3991278771   | 6.0550563526   |
| 0              | 0              |
| 0              | 0.8227417606   |
| 0.7230822385   | 1.296679526    |
| 71.7483938592  | 109.9692546537 |
| 3.9056395716   | 4.9138154554   |
| 1.4814231703   | 0              |
| 97.8675784512  | 58.4462773377  |
| 5.0859245705   | 8.7826274013   |
| 3.9020049798   | 4.1465699643   |
| 4.2578593359   | 0              |
| 2.1883920989   | 1.5215056819   |
| 76.2683411502  | 39.3129723148  |
| 0.2411583701   | 0.377545623    |
| 2.6225399095   | 0.5225460345   |
| 0              | 0.4689459689   |
| 0              | 0.0305137823   |
| 0.0356503844   | 0              |
| 4.731713258    | 2.610838554    |
| 0.5291071036   | 0.3279907263   |
| 5.6406437874   | 4.3934622097   |
| 0.5897761795   | 1.645196261    |
| 0.8510570112   | 2.0348966191   |
| 0.1760418575   | 0.0175383364   |
| 4.9557446571   | 4.690347082    |
| 0.4724698411   | 0.6213273592   |
| 0.4687161349   | 0.1867851518   |
| 688.5491667089 | 569.3815127494 |
| 15.7269691938  | 12.4671235077  |
| 34.1367296191  | 41.3872718377  |
| 19.1682734104  | 14.8143116082  |
| 9.5888848532   | 14.7389407704  |
| 0              | 0              |
| 3.0694467868   | 1.9427074133   |
| 35.119667348   | 20.2154625315  |
| 0              | 0              |
| 300.2315851118 | 258.6042709566 |

gene\_expression\_table

|                |                |
|----------------|----------------|
| 16.1718990237  | 0.9206518431   |
| 59.254668097   | 51.130964931   |
| 56.1992485386  | 65.2889057342  |
| 1.0308026911   | 0.4423771364   |
| 2.897886354    | 4.8117444501   |
| 29.2579643983  | 21.9630735726  |
| 40.9441583571  | 18.4446282367  |
| 301.1608875122 | 257.4032329697 |
| 10.1322675441  | 6.7295782052   |
| 180.7855950962 | 128.0320235171 |
| 40.2028593039  | 36.0472307094  |
| 107.293062335  | 77.1082204857  |
| 15.6835210924  | 13.124879144   |
| 7.7520239997   | 10.5746064456  |
| 0              | 0              |
| 52.4459126843  | 70.4625014079  |
| 67.9315510208  | 28.6633904915  |
| 40.8873807488  | 87.8585950545  |
| 160.7390162188 | 247.7425410259 |
| 24.3879335248  | 18.1261164477  |
| 1.2662123742   | 2.0183616731   |
| 59.9156657972  | 28.7895039798  |
| 16.6534918793  | 10.6183671604  |
| 19.4830214041  | 34.9382595979  |
| 2.6371319578   | 1.8916326996   |
| 15.762432774   | 12.0602669817  |
| 0              | 0              |
| 694.3941048241 | 496.2146629129 |
| 1.2135945309   | 2.9017320527   |
| 0              | 0.6790652506   |
| 0              | 0              |
| 14.487748071   | 21.0450557711  |
| 1.7518958263   | 0.1745342775   |
| 4.225969794    | 1.5067949462   |
| 0              | 0              |
| 0              | 0              |
| 0              | 0              |
| 15.6463315648  | 27.0188632229  |
| 1.4345785233   | 0.412883586    |
| 2.1251370761   | 1.8348961784   |
| 109.3743820082 | 270.2338493805 |
| 120.311820209  | 0              |
| 22.8217946895  | 18.6852104654  |
| 0              | 0              |
| 21.499451473   | 12.1750285657  |
| 3.1503827591   | 4.7364306148   |
| 0.3682359749   | 0.9685066259   |
| 41.4355097554  | 18.1287870264  |
| 0.8440150476   | 0              |

gene\_expression\_table

|                |                |
|----------------|----------------|
| 627.3264290028 | 194.2383524935 |
| 5.1432497865   | 3.736447114    |
| 6.1444169154   | 4.8721612991   |
| 0.7959179811   | 1.2687052983   |
| 0              | 0.0169091163   |
| 112.5426067269 | 73.597791618   |
| 2.6369291535   | 2.4334923384   |
| 19.3624249855  | 8.6237642138   |
| 44.3182604916  | 98.9682136703  |
| 0              | 0              |
| 37.2837583485  | 26.743893587   |
| 0              | 0.165060665    |
| 0              | 0.741021358    |
| 12.4474260767  | 7.9055519972   |
| 12.5570766855  | 67.5545742002  |
| 9.5111371381   | 26.5315687562  |
| 5.2602701661   | 9.9571283555   |
| 1.1583403563   | 2.2420717692   |
| 78.248442459   | 78.7763372248  |
| 66.9954239451  | 59.3287327328  |
| 0.0383204558   | 0.0152708465   |
| 9.9797823215   | 13.9194334488  |
| 2.7049352353   | 2.1558538355   |
| 333.7687473333 | 360.8271228913 |
| 0.5591119879   | 0.5198858957   |
| 4.776778202    | 2.1755019119   |
| 0              | 0              |
| 0.059510828    | 0              |
| 32.6181719986  | 23.2205585849  |
| 43.0865971559  | 49.117651212   |
| 0              | 0.3050648075   |
| 3.5172195414   | 3.4093588006   |
| 1.8906934675   | 1.4351399902   |
| 4.8104627385   | 2.9819806925   |
| 8.8253811689   | 12.3093171659  |
| 0.0166229139   | 0              |
| 17.1267586865  | 37.0260486231  |
| 0              | 0              |
| 2.0844784488   | 0.2076681356   |
| 0              | 0.6822587789   |
| 38.2513124034  | 22.1027742821  |
| 8.6031554605   | 4.4354795324   |
| 0.0177066688   | 0.007056       |
| 58.0729374768  | 32.4387586566  |
| 10.4820818176  | 14.0504110585  |
| 6.7914842222   | 11.7278726019  |
| 359.569574305  | 506.821452629  |
| 5.0064900288   | 5.8679564834   |
| 0.4552696712   | 1.4514134816   |



gene\_expression\_table

|                 |                 |
|-----------------|-----------------|
| 42.7569344425   | 46.4531495424   |
| 209.4598204924  | 143.8501476568  |
| 8.5895063244    | 2.7383605955    |
| 14.0361378847   | 17.8203509763   |
| 9.3654814756    | 19.8394819662   |
| 0.5937774029    | 0.3943708999    |
| 21.6145611738   | 0               |
| 0               | 0               |
| 0.987970185     | 0.138956419     |
| 0               | 2.9265085976    |
| 29.2475452953   | 32.8901783474   |
| 7.3556461674    | 5.4534935944    |
| 4.0977186087    | 5.633699434     |
| 4198.3283057785 | 5358.9032117797 |
| 3.8044548553    | 1.5160896432    |
| 1.271337772     | 1.4738411889    |
| 0               | 0               |
| 36.2463543523   | 39.2566196042   |
| 2.1830562226    | 4.6760143499    |
| 4.564506944     | 6.6392524503    |
| 0               | 0               |
| 200.0837879564  | 58.3674793893   |
| 0               | 1.51568         |
| 3.751834531     | 3.7078982077    |
| 8.3395101733    | 5.5118583084    |
| 659.723699145   | 540.48941452    |
| 0.1007333832    | 0.6021395105    |
| 318.7761338793  | 1138.2869707986 |
| 602.5944867613  | 435.8347906983  |
| 50.2984544779   | 38.1120672765   |
| 3.3799181848    | 2.743705912     |
| 0.6365416914    | 2.5366427059    |
| 0               | 0               |
| 0.501838978     | 1.5998778401    |
| 0.7976067499    | 0.6356986106    |
| 6.6931098194    | 9.0163956031    |
| 1.5733891047    | 1.5048036161    |
| 6.4668105834    | 7.1454525658    |
| 1.0195643451    | 0.6922152342    |
| 0               | 0.0041          |
| 0.1417787982    | 0.046528907     |
| 0.391894538     | 0.4623899943    |
| 0               | 1.7979268205    |
| 0               | 0               |
| 0               | 0               |
| 6.6517734451    | 3.8435974557    |
| 2.7225484426    | 2.8027767726    |
| 0               | 0.477555976     |
| 0               | 1.7994923129    |

gene\_expression\_table

|                 |                 |
|-----------------|-----------------|
| 6.6839900116    | 1.6724900656    |
| 4.5413977947    | 2.7481604378    |
| 0               | 0.4391071945    |
| 0               | 0               |
| 101.9419405996  | 43.163264284    |
| 2.3829596312    | 3.8663035762    |
| 1578.7584407432 | 2577.8275212681 |
| 4.5406056614    | 3.8601568482    |
| 27.5388495832   | 35.3922325494   |
| 228.4382638207  | 105.5055059632  |
| 0.1411940596    | 1.1815936976    |
| 0               | 0               |
| 15.5089455738   | 8.9896341024    |
| 0.0594516369    | 0.0473834041    |
| 0.9119255613    | 0.7268115677    |
| 1.2663262832    | 2.0185432457    |
| 0.8873224259    | 0.1768006707    |
| 3550.145735054  | 2071.7823238358 |
| 86.3787885975   | 42.70310385     |
| 48.0098327574   | 76.5283994527   |
| 277.3937682357  | 308.8100134964  |
| 0               | 0               |
| 2.191309141     | 2.3286532729    |
| 7.7942873557    | 4.3340274124    |
| 0               | 0               |
| 2.796769699     | 0.7883213576    |
| 0               | 0               |
| 1.2360152226    | 2.8075734134    |
| 0               | 0.0337866606    |
| 0               | 0               |
| 99.6432895772   | 63.4090759727   |
| 33.1552344855   | 78.04991902     |
| 0               | 0               |
| 48.2460101604   | 100.6549031269  |
| 1.6051453846    | 1.4072443094    |
| 0               | 0               |
| 34.7255690982   | 45.288885507    |
| 0               | 1.9145159317    |
| 7.5676728147    | 12.9463853202   |
| 0               | 0               |
| 0.1933306638    | 0.3852150022    |
| 265.3305320682  | 102.9527143629  |
| 2.8033053114    | 1.4249078635    |
| 0               | 0               |
| 2.4466460849    | 1.6474099319    |
| 0               | 0               |
| 0               | 0               |
| 0               | 0               |
| 0               | 0               |

gene\_expression\_table

|                 |                 |
|-----------------|-----------------|
| 0               | 0               |
| 0               | 0               |
| 1.0154727286    | 0.9172513688    |
| 1.8842635163    | 2.22321189      |
| 0.6248808655    | 1.4110985285    |
| 2.0395632711    | 1.7416578738    |
| 0               | 0               |
| 83.8904968692   | 77.0952420125   |
| 0.48783514      | 0.0972020738    |
| 2.4232855205    | 2.6937624949    |
| 1655.6423907146 | 1653.660740466  |
| 16.5083726036   | 9.9707647319    |
| 105.2592573374  | 57.9927494759   |
| 22.1303930101   | 19.9588919546   |
| 9.2456969514    | 9.8251871735    |
| 177.0626787982  | 892.5858584971  |
| 2702.8157747894 | 4071.6975003804 |
| 7.5223252356    | 15.2822649395   |
| 179.0763060243  | 339.5129042951  |
| 592.2703208085  | 1061.5259602556 |
| 6.3905413234    | 16.9277647767   |
| 68.083007585    | 140.263887597   |
| 0.8181147835    | 0.9780655027    |
| 54.9662883647   | 130.916240622   |
| 40.5078646459   | 41.4569705577   |
| 0.232388737     | 0.0463038951    |
| 127.7251359212  | 179.8992209268  |
| 11.6752312794   | 19.8694404851   |
| 71.7231486812   | 45.7960724257   |
| 48.7347522781   | 31.9506495057   |
| 0               | 0               |
| 0               | 0               |
| 6.1089390497    | 8.5734460819    |
| 4.9374755635    | 2.2782767862    |
| 5.2998433366    | 7.9940474829    |
| 0               | 0               |
| 0               | 0               |
| 0               | 0               |
| 1.8823545962    | 2.3441419473    |
| 6.5316738853    | 10.1223762011   |
| 7.3669935703    | 4.2201762605    |
| 2.9436392648    | 3.1051359952    |
| 10.1218260044   | 2.016792965     |
| 0.995136908     | 1.3699546513    |
| 5.8403541146    | 3.9810844127    |
| 1.3272545899    | 2.4179015862    |
| 11.5614764533   | 7.2948791216    |
| 0.4249504291    | 0.3386887052    |
| 0.84103979      | 1.67578768      |

gene\_expression\_table

|                |                |
|----------------|----------------|
| 24.7498601573  | 30.8216026367  |
| 0.2254337315   | 0.2295813854   |
| 4.2715065798   | 5.0002463435   |
| 3.4213970868   | 3.579029145    |
| 1.2826802572   | 0.3252791385   |
| 0.0209854958   | 0.008363       |
| 0              | 0              |
| 0              | 0              |
| 0.7509092895   | 2.1258521887   |
| 4.3131920909   | 5.4597918335   |
| 9.2050833718   | 6.3675465718   |
| 0              | 0.0282617411   |
| 6.1053889317   | 6.488054858    |
| 0.2397017108   | 0.9552203797   |
| 5.332193482    | 3.035570374    |
| 0.6033847266   | 0.7694435032   |
| 3.2793628774   | 2.1780641747   |
| 2.1601555287   | 1.2685917927   |
| 40.205008467   | 26.1533105035  |
| 1.5495694923   | 1.5051789214   |
| 0              | 0              |
| 7.9715653706   | 8.3631461839   |
| 38.3530512168  | 22.0160017277  |
| 0              | 0              |
| 4.9705951386   | 5.1210951517   |
| 122.0925639016 | 89.8047921479  |
| 0.5106638462   | 0.3391691223   |
| 8.9826192437   | 7.1592154579   |
| 1.59049943     | 3.3093258518   |
| 14.3916095882  | 18.0952634835  |
| 69.3823519562  | 51.1032187847  |
| 21.4188724353  | 0              |
| 0              | 0              |
| 7.5643628228   | 4.4423137437   |
| 5.2670696173   | 3.4346408      |
| 0              | 0              |
| 0.1842990235   | 0.3488583237   |
| 1.0829435874   | 1.2946713415   |
| 3.4162904001   | 3.5396520648   |
| 4.8876308026   | 3.1968330691   |
| 85.6817476898  | 20.7598562364  |
| 332.9566228127 | 231.4314982684 |
| 67.6951235539  | 94.0099305139  |
| 33.7275420666  | 10.8839260919  |
| 0.7472585515   | 1.1166950922   |
| 2.4980448917   | 1.4932205004   |
| 27.0078337768  | 21.5254477355  |
| 0              | 0              |
| 38.6180946447  | 19.274173948   |

gene\_expression\_table

|                 |                 |
|-----------------|-----------------|
| 3.7484809172    | 3.3610135889    |
| 0               | 1.5864060181    |
| 18.999911695    | 9.5254815829    |
| 4.8537364826    | 2.450027629     |
| 45.0327367565   | 20.6874224398   |
| 0               | 0               |
| 0               | 0               |
| 8.4828751142    | 2.3663204628    |
| 79.2183023974   | 70.5383286895   |
| 1.4150774531    | 3.8064175762    |
| 0               | 0.3702416791    |
| 0               | 0               |
| 25.716342479    | 29.7834235116   |
| 676.5667814868  | 713.7993285605  |
| 0               | 0               |
| 132.6774671789  | 53.9120995445   |
| 161.1609348408  | 76.3309021756   |
| 3.6973321508    | 1.4734008405    |
| 77.9836460466   | 40.3189421756   |
| 12.5494170573   | 26.5842107577   |
| 683.5352061776  | 768.2450843367  |
| 4.6345687472    | 6.5010639497    |
| 0               | 0               |
| 0               | 0               |
| 0               | 0.2425568613    |
| 275.4914896529  | 94.3157567012   |
| 1769.562244111  | 1039.9831361042 |
| 2.2953282364    | 0.6097979867    |
| 4907.8357563803 | 4870.7793206374 |
| 5.1818453762    | 0.2581231217    |
| 17.0483516186   | 19.0227312078   |
| 115.1322788749  | 148.3118634613  |
| 28.9904683479   | 53.9131191202   |
| 45.2758680125   | 21.4792911621   |
| 1.8321596986    | 3.1030209084    |
| 1101.3500774744 | 544.3769830377  |
| 212.0526377517  | 149.0684620416  |
| 31.1886624028   | 20.7146664693   |
| 29.9915155818   | 15.565046778    |
| 22.5960706968   | 18.7019022482   |
| 19.1332034857   | 6.3948710342    |
| 0               | 0               |
| 0               | 0               |
| 1.0209092939    | 0.9246277576    |
| 196.3437716142  | 140.3508729112  |
| 15.4692388411   | 26.8523625713   |
| 0.564758111     | 0.7802019069    |
| 425.9335327084  | 201.0466700781  |
| 48.824763336    | 25.694217068    |

gene\_expression\_table

|                |               |
|----------------|---------------|
| 8.7513105157   | 17.1465324377 |
| 18.9418752412  | 12.9690783727 |
| 30.3974477463  | 29.9236136069 |
| 0              | 0.8825569037  |
| 0.1203632575   | 0             |
| 0              | 0             |
| 0.965270503    | 1.6065376519  |
| 3.6041563039   | 4.1292760006  |
| 1.367799731    | 0.9084556066  |
| 4.9480717887   | 3.1134083919  |
| 5.0023038253   | 4.7842487675  |
| 0.7964364312   | 1.163737406   |
| 0              | 0.1256277811  |
| 0.8751232793   | 0.5978398891  |
| 0.3052473808   | 0.851495647   |
| 291.1566117753 | 451.008218466 |
| 0              | 0             |
| 3.3346058823   | 3.4328703821  |
| 5.918672843    | 6.3270743216  |
| 10.948948133   | 21.5593274666 |
| 0.2000431019   | 0.1594358648  |
| 10.1554947868  | 7.3231484072  |
| 12.2033403542  | 12.6328214087 |
| 0.0189662725   | 0.0302325252  |
| 0.0358236744   | 0             |
| 1.2673853514   | 1.3917149757  |
| 3.1536367659   | 4.8025275224  |
| 0              | 1.2718378493  |

gene\_expression\_table

| C1_U937_2H_R1_001 trimmed (GE) - TPM | C2_U937_24H_R1_001 (GE) - TPM |
|--------------------------------------|-------------------------------|
| 0                                    | 0                             |
| 4.9165864397                         | 0.4678777967                  |
| 0                                    | 0                             |
| 0                                    | 0                             |
| 15.0080720284                        | 13.4660293891                 |
| 14.4063215883                        | 0                             |
| 0                                    | 2.4481773324                  |
| 0                                    | 8.1020502824                  |
| 421.9308443436                       | 157.7410348282                |
| 6.7399890356                         | 40.9212249772                 |
| 0                                    | 0                             |
| 2.3423929937                         | 0.9808016639                  |
| 0                                    | 0                             |
| 78.9987179256                        | 69.2853563796                 |
| 428.7936139463                       | 30.3282977811                 |
| 0                                    | 0                             |
| 81.9631062982                        | 82.400569254                  |
| 5.5735038045                         | 23.3372530563                 |
| 4.1652455726                         | 4.360156258                   |
| 36.3570063242                        | 5.4369021632                  |
| 29.6434007583                        | 10.3435165324                 |
| 31.2659969521                        | 0                             |
| 0                                    | 0                             |
| 36.1850639626                        | 30.5470377579                 |
| 0                                    | 3.1219731209                  |
| 871.230938475                        | 545.2172573026                |
| 38.0019058933                        | 41.0233178484                 |
| 385.334801722                        | 81.2986463002                 |
| 0                                    | 0                             |
| 15.4399422341                        | 1.3468705823                  |
| 23.6892452955                        | 8.2659240872                  |
| 0                                    | 0                             |
| 22.4169478147                        | 14.7937436638                 |
| 23.2418310278                        | 24.329421456                  |
| 3.1480376721                         | 5.4922476628                  |
| 0                                    | 5.6964987023                  |
| 7.2326593969                         | 8.2593908218                  |
| 1.0332340583                         | 2.1631675092                  |
| 7.2957046713                         | 6.109682961                   |
| 19.8840186882                        | 57.640103682                  |
| 22.6597865166                        | 10.413720197                  |
| 20.9501426692                        | 19.5293455836                 |
| 0                                    | 0                             |
| 0                                    | 0                             |
| 9.4533070516                         | 0                             |
| 0                                    | 0                             |
| 0.1199476874                         | 0                             |
| 0                                    | 0                             |

gene\_expression\_table

|                |                 |
|----------------|-----------------|
| 4.5813132366   | 2.9973085065    |
| 4.1691543704   | 1.8703919855    |
| 0.4591288294   | 0               |
| 72.1531303769  | 38.3641913876   |
| 0              | 0               |
| 0              | 0               |
| 0              | 0               |
| 8.2102585594   | 22.3455796294   |
| 41.1459195059  | 43.0713232387   |
| 0              | 0               |
| 0              | 0.1238260667    |
| 85.0135535317  | 59.3278148891   |
| 28.4503436668  | 15.7667632765   |
| 0.9675180645   | 0               |
| 0              | 0               |
| 48.6962862723  | 45.7734746198   |
| 2.8576708539   | 1.4956971012    |
| 12.5870313851  | 2.395642824     |
| 17.4006576532  | 4.5537282879    |
| 0.37444037     | 0.391962129     |
| 11.4436962677  | 11.9791985915   |
| 0              | 0               |
| 734.9337595035 | 1189.3782067851 |
| 0              | 0               |
| 48.1407999988  | 5.726537027     |
| 2.3747706049   | 7.4576905975    |
| 4.2492613372   | 1.9623986031    |
| 17.0348297405  | 12.7371189256   |
| 0              | 0               |
| 5.2262847166   | 3.647230816     |
| 25.2564412135  | 19.4808558495   |
| 29.744357881   | 19.6649879751   |
| 51.7676986411  | 44.9004045948   |
| 0.2389179302   | 0.7502939432    |
| 0.1972898151   | 0.4130437963    |
| 17.5152182601  | 28.3356534228   |
| 3.7206572313   | 4.1729610179    |
| 0              | 0               |
| 1.1858627347   | 0               |
| 141.0942784078 | 108.9801026435  |
| 2.214719353    | 4.6367121835    |
| 1.0246903383   | 1.6447150275    |
| 617.2001632622 | 708.8172257445  |
| 0              | 0               |
| 0              | 0               |
| 3.4393316462   | 9.600729426     |
| 0.6277515097   | 0.657126843     |
| 3.0977668564   | 5.0957113162    |
| 0.6334188075   | 1.1050988989    |



gene\_expression\_table

|                |                |
|----------------|----------------|
| 3.7372270344   | 0.7824217592   |
| 3.1081355238   | 5.2057267956   |
| 19.0276361922  | 6.6393417925   |
| 16.3103034208  | 25.4395691043  |
| 5.5920469414   | 7.9823510703   |
| 4.6950394073   | 8.737318299    |
| 20.500570732   | 21.4598851886  |
| 1.5036198295   | 0.9443886025   |
| 0              | 0              |
| 1.528270931    | 1.1427040302   |
| 1.1364014796   | 1.1895788464   |
| 55.6515131855  | 49.5960683018  |
| 19.0939849839  | 2.6649971906   |
| 0              | 0              |
| 0              | 44.4850428198  |
| 22.8778520231  | 11.2698401068  |
| 0.8309479529   | 1.7396635342   |
| 0.8088239474   | 0.1058340599   |
| 100.3200338207 | 60.5488790414  |
| 0              | 0              |
| 370.3785626218 | 232.6261507765 |
| 5.8324445933   | 6.6141519859   |
| 1.2447602571   | 0.8686721475   |
| 12.2694830919  | 7.7061766304   |
| 0              | 1.1597930576   |
| 1.8076691246   | 0              |
| 1.5770865009   | 1.6508855136   |
| 31.7902881079  | 15.6601880091  |
| 0              | 0              |
| 13.2231728786  | 58.8282660971  |
| 0              | 14.9673588166  |
| 1.7473142781   | 2.2863487733   |
| 149.0419361725 | 274.8858313991 |
| 6.3348905655   | 21.5518184585  |
| 15.5359224093  | 7.1150268477   |
| 15.1630808922  | 18.5180683922  |
| 33.3060524067  | 45.2838970286  |
| 0.5164961226   | 0.3003696184   |
| 0.6415627397   | 4.3652983594   |
| 35.1827427659  | 0              |
| 1.6670718414   | 2.416266935    |
| 0.1057210017   | 0.096834645    |
| 0.2377806102   | 0.4978148815   |
| 0              | 0              |
| 19.7858839947  | 9.1131722112   |
| 0              | 0              |
| 0              | 0              |
| 0              | 2.2145604105   |
| 0.9658666551   | 0              |

gene\_expression\_table

|                 |                |
|-----------------|----------------|
| 1.8013915176    | 4.1485109091   |
| 0               | 0              |
| 0.7423881501    | 0.3885639252   |
| 0               | 0              |
| 4.253846189     | 1.2722579709   |
| 0               | 0              |
| 0               | 0              |
| 0               | 0              |
| 1353.6854558635 | 755.7496122178 |
| 2.6218347707    | 2.0126496733   |
| 1.8893371086    | 0.494436935    |
| 8.7222105483    | 4.5651811211   |
| 1.6499196322    | 0              |
| 0               | 2.9417237612   |
| 0.9190963733    | 0.6414033673   |
| 18.7225238666   | 7.62169157     |
| 10.8343787909   | 4.3620647666   |
| 0               | 0              |
| 3.4784712166    | 1.9861334306   |
| 13.425185958    | 0              |
| 3.2871050416    | 8.6023088964   |
| 0.2747811755    | 0.8629182896   |
| 1.8663150112    | 0              |
| 9.1308988532    | 8.1244486837   |
| 0.9214162226    | 1.2860446086   |
| 0               | 0.4819054797   |
| 0.2899849789    | 0              |
| 71.6022122473   | 24.1286422911  |
| 0.7286876523    | 3.6232346611   |
| 0.9022347659    | 0              |
| 0               | 0              |
| 10.318177668    | 7.560708319    |
| 0.9266922111    | 0.9700563324   |
| 5.6000625684    | 4.3654046626   |
| 16.2309510866   | 8.9671928814   |
| 96.5590951437   | 11.8914743616  |
| 2.1501344058    | 2.2507489226   |
| 75.4421775169   | 163.3294024568 |
| 0.7946607911    | 2.4955396947   |
| 13.5538444852   | 8.6512745068   |
| 68.9836697861   | 118.1177547628 |
| 0               | 0              |
| 0               | 0              |
| 0.9586659534    | 0.716804479    |
| 0               | 0.5423847332   |
| 0               | 0              |
| 1.1333376521    | 7.118229891    |
| 8.7447650873    | 15.692523789   |
| 0               | 0.2436347667   |

gene\_expression\_table

|                 |                 |
|-----------------|-----------------|
| 4.2091187704    | 30.842577369    |
| 8.9553240772    | 16.8738915743   |
| 3.2413502248    | 3.958532278     |
| 19.7180792375   | 9.3821715349    |
| 160.5495993266  | 235.6339385472  |
| 0.2904325187    | 0.3040231703    |
| 20.7979876586   | 15.7653659164   |
| 0.610671574     | 0.4566054713    |
| 2.5229450364    | 2.7730553019    |
| 1.0088556085    | 3.1681935807    |
| 0               | 0               |
| 6.1464491791    | 7.720883214     |
| 0               | 15.6225809334   |
| 0               | 0.2944638232    |
| 0               | 0               |
| 63.8258254806   | 30.2547281325   |
| 0.4745131452    | 1.1590081116    |
| 0               | 0               |
| 15.8771043221   | 0               |
| 0               | 0               |
| 0               | 0               |
| 2.5189593102    | 3.6915659383    |
| 2.2431849384    | 0.5418816255    |
| 28.3483301319   | 13.9895847569   |
| 0               | 1.6263211232    |
| 0.3610337893    | 1.5117127749    |
| 0.2886454489    | 0               |
| 10.7594168562   | 2.6500938001    |
| 0               | 9.0838536947    |
| 1636.8644256493 | 2037.9245559644 |
| 12.9860342936   | 1.8124946122    |
| 55.8807857072   | 18.9250795721   |
| 78.3484357953   | 131.9367131552  |
| 31.0873255327   | 9.7626126434    |
| 2.7450386587    | 5.7469828743    |
| 47.2466489382   | 13.8190166861   |
| 4.1592607447    | 1.5832332265    |
| 75.2922152702   | 66.9931568712   |
| 83.9412160798   | 30.6520483817   |
| 0               | 0               |
| 0               | 0               |
| 0               | 0               |
| 0.3583636694    | 0               |
| 0               | 0               |
| 1.3571767805    | 3.9779186228    |
| 0               | 1.9545874982    |
| 0               | 0               |
| 36.8913199666   | 24.6257361805   |
| 2.4507442768    | 3.7626243447    |

gene\_expression\_table

|                 |                 |
|-----------------|-----------------|
| 23.6666756115   | 13.4193293217   |
| 64.7551994306   | 89.2783161501   |
| 7.2477520039    | 4.4109925068    |
| 19.5037312374   | 9.8561926516    |
| 0               | 0.249339718     |
| 1.8668891074    | 2.9313739429    |
| 2.7652654445    | 5.0656632701    |
| 0.0955443223    | 0.2000305469    |
| 5.380637781     | 13.1423183891   |
| 0               | 7.7969105502    |
| 11.1630426114   | 2.4600867118    |
| 0               | 2.2256157568    |
| 593.3870664275  | 447.9478355513  |
| 0.8428979283    | 0               |
| 4.0101744836    | 4.1978286912    |
| 4.4843617823    | 23.4710267949   |
| 721.4291978748  | 163.6240957111  |
| 0               | 0               |
| 0               | 0               |
| 3.2616004983    | 3.4142255422    |
| 575.1137962403  | 470.3327912423  |
| 0               | 0               |
| 490.9911183232  | 123.6122717628  |
| 0               | 0               |
| 4.1471010051    | 3.0388138369    |
| 3449.4384755283 | 1553.2273654378 |
| 17.1592807977   | 15.3427476754   |
| 5.6403560661    | 4.1330056918    |
| 1.5500490061    | 3.2451656241    |
| 3.9050164319    | 4.6717140783    |
| 0               | 0               |
| 8.8300782062    | 6.1621850107    |
| 11.346998368    | 1.6968536799    |
| 19.4694117029   | 8.5313610265    |
| 0               | 0               |
| 2.238769079     | 7.0305936397    |
| 0               | 0.300795198     |
| 0.8734213914    | 2.74287819      |
| 11.3524562797   | 0               |
| 4.0660066173    | 7.093789105     |
| 3.7757356728    | 0               |
| 0               | 0               |
| 0               | 0               |
| 12.990626735    | 15.7663964455   |
| 0.2314190762    | 0               |
| 14.6034157659   | 2.9117667925    |
| 31.5632602093   | 24.7801859686   |
| 2.1907655836    | 0.4586562834    |
| 2.2096436845    | 0.9913041042    |

gene\_expression\_table

|                 |                |
|-----------------|----------------|
| 23.9683695701   | 11.330948785   |
| 19.4368808498   | 5.9842413072   |
| 30.5963183631   | 28.3885064227  |
| 0               | 0              |
| 5.6227197472    | 5.8858322434   |
| 2.7354576554    | 3.4361545143   |
| 10.3808310742   | 14.488796169   |
| 45.9521809711   | 17.0686259888  |
| 1317.2139524869 | 706.2414490353 |
| 4.9170326261    | 5.1471228292   |
| 23.2329337817   | 31.6161402278  |
| 1.4848217076    | 2.3314548498   |
| 55.4815369774   | 24.9632516355  |
| 11.4110662424   | 9.2905879575   |
| 8.1608659665    | 7.057054189    |
| 2.0715157017    | 2.1684512937   |
| 36.1218689112   | 12.7743833061  |
| 0               | 0              |
| 1.1115617832    | 0.7272354926   |
| 53.313771208    | 55.8085637737  |
| 8.9419905715    | 4.4338863634   |
| 2.1126914616    | 1.7692430829   |
| 1.4338356705    | 0.5628492483   |
| 1.3148153117    | 4.1290244067   |
| 108.4337872658  | 102.8247987879 |
| 3.8587456674    | 3.2819424914   |
| 0               | 0              |
| 2.1735242643    | 0.9100933194   |
| 0.9411663738    | 0.2463019517   |
| 31.1942936288   | 14.5128958942  |
| 1.9331177344    | 3.3726284322   |
| 0               | 0              |
| 0               | 0              |
| 12.6306412635   | 14.32349329    |
| 0               | 0              |
| 0               | 0.4583832663   |
| 0               | 0              |
| 68.3469930167   | 42.3971899535  |
| 54.6813173864   | 29.7424067856  |
| 6.298117138     | 4.9446259004   |
| 8.73843916      | 7.1695448016   |
| 10.4317956743   | 9.0999554926   |
| 42.0365238242   | 84.6223133894  |
| 0               | 0              |
| 0               | 0              |
| 0               | 0              |
| 114.6660391912  | 84.5294239125  |
| 0               | 0              |
| 28.8402582419   | 34.6775010101  |

gene\_expression\_table

|                |                |
|----------------|----------------|
| 107.4014876637 | 21.080116724   |
| 16.6160797457  | 34.7872425884  |
| 0              | 0              |
| 4.3404905756   | 6.2474524304   |
| 1.9380369036   | 0.760772407    |
| 7.5040360142   | 6.1719301367   |
| 7.8464821021   | 8.2136545      |
| 26.2004061201  | 25.9439313025  |
| 0              | 0.5113300477   |
| 32.5224157356  | 27.3146021287  |
| 6.148813591    | 8.045680498    |
| 0              | 0              |
| 0              | 2.4764489315   |
| 4.4449496491   | 3.1019659692   |
| 156.4109232449 | 201.7388707542 |
| 0.3987253273   | 0              |
| 0              | 0.421721277    |
| 0.7287984001   | 2.2887065238   |
| 0              | 0              |
| 1.8083592352   | 0.9464902728   |
| 0              | 0              |
| 0              | 0              |
| 35.9303621016  | 10.7462018018  |
| 0              | 0              |
| 0              | 8.865194736    |
| 1.766664666    | 5.1781377165   |
| 1.7134150307   | 1.4946612267   |
| 299.9191502856 | 47.4463827676  |
| 12.5672331059  | 20.5620824294  |
| 3.7794653651   | 6.0026979504   |
| 3.6012598292   | 9.424447675    |
| 12.5381109796  | 8.2893637385   |
| 25.6319055419  | 16.4191772117  |
| 33.5010685727  | 15.9403341556  |
| 10.4579869856  | 2.0526306586   |
| 2.2540027398   | 5.0560236985   |
| 2.7062290641   | 2.2662926128   |
| 1.4328030628   | 2.0767159393   |
| 127.4084760663 | 36.6768861535  |
| 0              | 0              |
| 82.2284888663  | 42.603436997   |
| 17.5595605848  | 9.5310194884   |
| 16.7946678091  | 12.5575473579  |
| 1.4150617883   | 0.7406394658   |
| 0              | 7.9724174779   |
| 11.1833547154  | 2.5608350425   |
| 106.9431388039 | 33.5842476354  |
| 0.9934967264   | 0.5199934666   |
| 16.7826425914  | 13.6639831759  |

gene\_expression\_table

|                |                |
|----------------|----------------|
| 5.622068668    | 15.6937351927  |
| 0.2033880495   | 0.3548424943   |
| 50.8829525195  | 13.7455473757  |
| 14.3221784711  | 13.6294345459  |
| 4.0671646744   | 3.4059885687   |
| 0              | 0              |
| 17.1970217263  | 9.2912248663   |
| 9.0187025201   | 0              |
| 57.002584561   | 32.280488229   |
| 0              | 0              |
| 18.6954890323  | 0              |
| 40.0595585949  | 12.9028081802  |
| 518.594479222  | 143.3974727737 |
| 1.293224793    | 1.0153054741   |
| 2.2478383767   | 3.9217081739   |
| 25.8859026024  | 20.9620012302  |
| 25.8915396426  | 46.462494729   |
| 94.8545797206  | 37.7594067026  |
| 0              | 0              |
| 38.912988716   | 37.6005263211  |
| 46.0745625716  | 26.4490386068  |
| 0              | 0              |
| 0.2888721405   | 0              |
| 34.9406270081  | 5.7149464109   |
| 401.5944337294 | 316.8132814584 |
| 1.1245290661   | 2.3543017378   |
| 0              | 0              |
| 41.3759760906  | 62.3272333536  |
| 0              | 2.0856071821   |
| 0              | 0              |
| 13.5566531759  | 18.2456104027  |
| 0              | 0              |
| 0              | 0              |
| 3.809717679    | 3.1903932846   |
| 0              | 0              |
| 9.8039008582   | 5.7014831866   |
| 54.6423199495  | 29.639627594   |
| 56.2105449626  | 75.2616043561  |
| 3.8653120784   | 9.1571612264   |
| 3.5830218176   | 3.7506876193   |
| 1.8854851369   | 6.9080043097   |
| 5.5446091056   | 6.4868977987   |
| 0.9692215638   | 0              |
| 0.8462696963   | 0.8858704842   |
| 4.1296406411   | 2.1614426053   |
| 0              | 2.0143139101   |
| 0              | 1.4231476772   |
| 3.2354372736   | 1.4817416346   |
| 0              | 0              |

gene\_expression\_table

|                 |                  |
|-----------------|------------------|
| 225.6491945018  | 236.2083412315   |
| 12.6487390952   | 1.5277650952     |
| 0               | 0                |
| 2.4845621924    | 2.8372648346     |
| 0               | 1.5642294576     |
| 0.0305615102    | 0.0639832431     |
| 1.828259937     | 2.0201354073     |
| 0               | 0                |
| 0               | 1.3062482856     |
| 20.8936891492   | 35.7895626465    |
| 0               | 0.5078924382     |
| 78.4103256545   | 73.1578148152    |
| 165.0745777695  | 106.0358507105   |
| 5.4596834557    | 10.6138811001    |
| 9.5222768136    | 11.9614406735    |
| 0               | 0                |
| 4.6969318968    | 0                |
| 2.901721532     | 1.2150024844     |
| 0               | 2.8689902016     |
| 14.8424919189   | 5.5131429663     |
| 125.2785529     | 20.1755235686    |
| 0               | 0                |
| 0               | 0                |
| 0               | 0                |
| 0               | 0                |
| 106.6495003119  | 43.8586158028    |
| 13.8384452093   | 36.2150216771    |
| 41.1110796079   | 126.2355688712   |
| 0.7543493159    | 0.5264324889     |
| 138.0208835879  | 153.8007635868   |
| 0               | 1.1691202246     |
| 5.2582644736    | 8.8680750722     |
| 0.289428784     | 0.530201816      |
| 7.6278746629    | 3.9924087148     |
| 71.5475759166   | 29.9582442804    |
| 952.5248452093  | 143.7675886551   |
| 55.4341293705   | 29.7217318255    |
| 3.0640025885    | 9.6221433968     |
| 0               | 0                |
| 3.9034507509    | 1.485858499      |
| 2.2316687358    | 4.6721972257     |
| 1.2057053001    | 1.1359131355     |
| 5.5097580844    | 12.771080171     |
| 0.7576098527    | 3.9653092268     |
| 20.9868765792   | 24.2989873715    |
| 35.1777281219   | 33.8055045564    |
| 7082.7627021915 | 14716.0581066149 |
| 0               | 1.541106808      |
| 22.4350187799   | 11.7424274064    |



gene\_expression\_table

|                |                |
|----------------|----------------|
| 0              | 0              |
| 0              | 0              |
| 2.101735207    | 0              |
| 2.4953215844   | 1.8657778365   |
| 7.3497101146   | 0              |
| 366.0517200412 | 239.4880851081 |
| 0              | 0              |
| 0              | 0              |
| 1.385147353    | 0              |
| 110.9477912079 | 18.7321839236  |
| 0.329256646    | 0.2297760361   |
| 0              | 18.3431061704  |
| 376.754472129  | 508.6988716292 |
| 33.5890866442  | 38.6769591752  |
| 73.6924254961  | 43.1794569005  |
| 7.3578781093   | 11.1253805227  |
| 18.091413559   | 37.875985303   |
| 0              | 0              |
| 0.7795383994   | 2.2440454522   |
| 1.4242771867   | 1.3666817635   |
| 0              | 0.7911729856   |
| 2.0469959427   | 0              |
| 4.7317205942   | 6.0538368108   |
| 8.4268354925   | 10.8568187707  |
| 580.2413299914 | 759.2418088054 |
| 11.6637215768  | 9.4962932402   |
| 3.305905765    | 4.325755066    |
| 0              | 0              |
| 5.5320112685   | 6.8127989466   |
| 1.7635460033   | 1.8460702997   |
| 10.1789599904  | 2.536971329    |
| 0              | 0              |
| 7.0035341815   | 1.5434234174   |
| 0              | 0              |
| 5.7577598797   | 5.2410360997   |
| 10.0604694808  | 9.4028967545   |
| 0              | 0              |
| 3.4618313738   | 0              |
| 0              | 0              |
| 0              | 0              |
| 0              | 0              |
| 0              | 0.1087568907   |
| 0.5924778166   | 0.5549180569   |
| 43.5714263431  | 8.5519369715   |
| 8.7069598775   | 10.4815576122  |
| 0              | 0              |
| 3.1369780093   | 2.4628285524   |
| 3.5683702758   | 2.9489608939   |
| 5.5902871642   | 9.06097857     |

gene\_expression\_table

|               |                |
|---------------|----------------|
| 0             | 0              |
| 31.8822557292 | 20.21252593    |
| 47.7124459679 | 49.9451271832  |
| 11.2480447161 | 14.7179895232  |
| 0.1566219726  | 0.245926535    |
| 0.9064162236  | 2.846494619    |
| 11.7474437496 | 13.3219231083  |
| 38.388760638  | 59.1614626375  |
| 1.1188084635  | 3.5134877201   |
| 0             | 0              |
| 9.4210754018  | 7.0442358173   |
| 13.1539915861 | 26.363605359   |
| 1.5542170049  | 0.3253891701   |
| 0             | 0.5412065023   |
| 1.5613015626  | 2.0429524082   |
| 0             | 0              |
| 9.1080317814  | 5.7205426779   |
| 54.4334745132 | 33.6703918097  |
| 70.4315338586 | 57.8253678319  |
| 8.6781856821  | 2.5672957455   |
| 0             | 0.0727288567   |
| 16.3848872498 | 12.5160399161  |
| 1.6992924897  | 2.2235125919   |
| 0             | 2.0048978865   |
| 20.2725841216 | 7.5301138899   |
| 23.4424213975 | 37.5759537338  |
| 24.6735778294 | 34.6475399818  |
| 2.4826834453  | 2.3100972767   |
| 2.3338469496  | 0              |
| 52.4066286432 | 37.4646637393  |
| 4.0449611463  | 1.6216250474   |
| 0.1868591942  | 0.1956031814   |
| 3.3831917648  | 7.0830132286   |
| 10.8553104077 | 13.2571594109  |
| 8.4556226083  | 8.8512994465   |
| 0             | 0              |
| 0             | 0.4679682653   |
| 80.0126381121 | 45.0305330406  |
| 0             | 0              |
| 0.651637207   | 1.3642605203   |
| 0             | 0.7987640982   |
| 0             | 0              |
| 0             | 0.3750251725   |
| 0             | 0.0135246107   |
| 2.2042123311  | 0              |
| 3.2116189679  | 0.3735450167   |
| 97.4063296559 | 107.0626331482 |
| 0.1388218686  | 0.2179769578   |
| 0             | 0              |

gene\_expression\_table

|                |                |
|----------------|----------------|
| 0.1258921214   | 0.1757109112   |
| 8.3879806761   | 10.3075343713  |
| 0              | 0              |
| 0.5832094296   | 3.4595024792   |
| 96.054039988   | 69.9470212886  |
| 0.207805006    | 0.1450194283   |
| 0.1993970513   | 1.4610941906   |
| 2.5083437137   | 2.6257204648   |
| 6.845387907    | 3.480489938    |
| 1.8242903656   | 0.545616333    |
| 7.2498409761   | 11.8895803435  |
| 0              | 0              |
| 0              | 0              |
| 0              | 0.3839233834   |
| 1.5871868912   | 2.6727811405   |
| 1.5940176965   | 0.8343044982   |
| 2.6717709473   | 6.7922169093   |
| 0              | 0.3361919976   |
| 4.1604271651   | 7.6214466571   |
| 0.1668259316   | 0.2619487077   |
| 0              | 0              |
| 0.1444966802   | 0              |
| 2.0317378325   | 2.3926635428   |
| 0.2939029832   | 1.230624134    |
| 0.1790668474   | 0.1874461954   |
| 332.5345180341 | 235.0579100408 |
| 15.3548972223  | 58.9358818931  |
| 0.8562089553   | 0.2560785275   |
| 0              | 0              |
| 3.5075989754   | 5.1404295615   |
| 0              | 0              |
| 1.3292427084   | 4.7309095617   |
| 46.1014726418  | 58.8610744649  |
| 1.3490090583   | 3.177304415    |
| 1.1410082961   | 1.1944012366   |
| 3.1597152816   | 0              |
| 0              | 0              |
| 63.8406788563  | 54.5919470055  |
| 0.0919644058   | 0.0577607019   |
| 0              | 0              |
| 0.0467448874   | 0.1467968766   |
| 0              | 0              |
| 0              | 0              |
| 1.1590261519   | 0.6066311147   |
| 5.791225289    | 9.0933343829   |
| 9.0521790047   | 18.9515428313  |
| 5.4571411731   | 1.9041684996   |
| 0              | 0              |
| 0.2609411284   | 0.3642023259   |

gene\_expression\_table

|                |                |
|----------------|----------------|
| 29.771319961   | 57.3945374395  |
| 0              | 0.1827799607   |
| 4.2479594268   | 4.3077800218   |
| 5.5725878702   | 14.8485386485  |
| 1.1338253921   | 0.8477730086   |
| 0              | 0.2930275385   |
| 33.7929052977  | 16.2530237804  |
| 1.2511192573   | 0.8731098586   |
| 0              | 0              |
| 0              | 0              |
| 0              | 0              |
| 0              | 0              |
| 0.1008201993   | 0.738766228    |
| 0              | 0.3231054325   |
| 28.7882231275  | 7.9770055595   |
| 109.7623172642 | 108.7433109421 |
| 1.2896951228   | 3.7126259298   |
| 2.2730423697   | 5.5519527146   |
| 0.6879369906   | 2.8805146995   |
| 0              | 0              |
| 2.2042623666   | 0.7691365919   |
| 48.2857807096  | 15.6864695746  |
| 8.7253454968   | 4.5668219446   |
| 0              | 0              |
| 5.2096090093   | 3.7312669687   |
| 0              | 0              |
| 1.3072219759   | 0              |
| 0              | 0              |
| 5.5659962188   | 13.9834904748  |
| 8.717847765    | 11.7331653917  |
| 1.5741074691   | 1.6477670795   |
| 14.240961581   | 4.1409335013   |
| 1.1703526244   | 1.4478675767   |
| 3.2938787844   | 3.4480142754   |
| 5.0939552022   | 2.9624024517   |
| 4.7935021614   | 0              |
| 0.9987695428   | 0              |
| 0              | 0              |
| 0              | 0              |
| 1.1633166814   | 0              |
| 0.6453404003   | 0              |
| 1.8723245866   | 0.6533130417   |
| 1.4022008224   | 1.7613793716   |
| 4.0022903955   | 2.5137454026   |
| 3.3284350745   | 2.3755824618   |
| 0.3297418894   | 0.3451720042   |
| 3.2431689456   | 2.7159451951   |
| 0.1434375758   | 0.3002993378   |
| 0              | 0              |

gene\_expression\_table

|                 |                 |
|-----------------|-----------------|
| 0               | 0               |
| 0               | 0               |
| 0               | 0               |
| 3.2178189518    | 0.7773219829    |
| 0               | 0               |
| 127.5164610585  | 121.2373374956  |
| 0.1140891665    | 0.0597139574    |
| 1152.2632905862 | 1538.5685327885 |
| 0.5026340256    | 0               |
| 6.4884399401    | 8.4900792512    |
| 14.119479939    | 8.7586336516    |
| 2.6093855734    | 4.0972357952    |
| 22.3268605124   | 16.2585289257   |
| 0               | 0               |
| 0.1134092125    | 0               |
| 63.0828129601   | 22.5908331959   |
| 17.9085928341   | 2.7772765804    |
| 0.7270576831    | 0.2536933338    |
| 2.5522885463    | 4.0075825124    |
| 0               | 0               |
| 0               | 0.1877141211    |
| 0               | 0               |
| 6.1908276614    | 1.2961048994    |
| 0.3463868944    | 2.9007672347    |
| 0.1535276692    | 0.3214238468    |
| 0               | 0               |
| 0.8754411496    | 0.2291017505    |
| 1.6854593587    | 3.5286592555    |
| 2.500848382     | 0               |
| 5.4519865336    | 3.692835656     |
| 5.5746236887    | 0               |
| 1.0852317892    | 0               |
| 8.2279200787    | 4.037316415     |
| 12.7711293822   | 9.5491059337    |
| 0.3693578751    | 0.5799627017    |
| 3.5121661615    | 6.6177293518    |
| 3.0494175983    | 0.3360119626    |
| 1.3418136474    | 3.7456084768    |
| 0               | 0               |
| 0               | 0               |
| 0               | 0               |
| 3.8686119282    | 0.5785202548    |
| 0               | 0.6806230019    |
| 0               | 0               |
| 97.7150893423   | 6.3929762795    |
| 0               | 0               |
| 1.0275229371    | 0.5162905844    |
| 9.1230598881    | 5.678360027     |
| 0               | 0.4290099176    |

gene\_expression\_table

|                |                |
|----------------|----------------|
| 18.3368022573  | 14.0762337447  |
| 62.9531414924  | 65.8990038058  |
| 0              | 0              |
| 1.2872281172   | 0.8084780068   |
| 0              | 0              |
| 3.2924548209   | 1.1488412261   |
| 5.7133660881   | 6.9775070595   |
| 4.9438939819   | 3.763811745    |
| 0              | 1.4570729458   |
| 23.5157499275  | 24.6161582604  |
| 9.3279894365   | 12.5543420556  |
| 1.2424429351   | 0.6502912306   |
| 62.4350684521  | 28.0100090502  |
| 0              | 0              |
| 14.1469070562  | 6.7874147198   |
| 1.8182296003   | 0              |
| 36.1441209182  | 6.6768472703   |
| 0              | 0              |
| 14.7190070201  | 11.4662518718  |
| 0              | 1.0179286872   |
| 25.1161620333  | 30.4427441879  |
| 0              | 0              |
| 0              | 0              |
| 27.3870075989  | 42.5684821233  |
| 11.2267499136  | 7.34506271     |
| 0              | 4.9219602384   |
| 1.5748503073   | 0.7065191479   |
| 54.9805057492  | 57.553292365   |
| 0              | 2.9088920228   |
| 177.0738162589 | 132.0371899443 |
| 0              | 0              |
| 2.2526357676   | 4.1265818771   |
| 5.5837916341   | 3.7018855883   |
| 10.6078621405  | 11.1042520039  |
| 2.8470510462   | 4.8429508494   |
| 17.1960491657  | 13.5005475805  |
| 0              | 0              |
| 0              | 0              |
| 2.4042281323   | 1.2583664221   |
| 60.1382480658  | 8.9931983971   |
| 413.5168125371 | 311.0818860782 |
| 6.1384645069   | 13.9223739065  |
| 0              | 0.2100449705   |
| 0              | 0              |
| 4.2669458135   | 3.3014114664   |
| 0              | 0              |
| 1.4392655783   | 0.5022051088   |
| 14.8230373352  | 14.1060675608  |
| 0.4618739062   | 0              |

gene\_expression\_table

|               |               |
|---------------|---------------|
| 0             | 0.3094430324  |
| 1.5652654067  | 0.4915533771  |
| 51.8093488082 | 33.1248008959 |
| 4.6131437817  | 6.6398937699  |
| 25.7831156163 | 21.5916993985 |
| 0             | 0             |
| 0             | 0             |
| 14.9088127388 | 9.5161363047  |
| 0.2738836992  | 0.8600998701  |
| 0.2191106674  | 0.2867048086  |
| 3.0980704144  | 1.8917751684  |
| 2.2369124633  | 2.3415877181  |
| 1.1170859293  | 4.9697775947  |
| 0             | 0             |
| 16.1708309924 | 10.7720692146 |
| 5.1280296807  | 5.3679933905  |
| 6.3176128814  | 6.2651771728  |
| 0             | 0             |
| 5.3316191818  | 3.4345290865  |
| 21.8268861282 | 12.02540257   |
| 0             | 0             |
| 32.5477871296 | 14.9911719529 |
| 69.6334025962 | 88.1291469706 |
| 12.9946074628 | 18.1369119178 |
| 0             | 0             |
| 3.9006198145  | 4.0831474634  |
| 5.1768750018  | 0.9031874009  |
| 0.3459722238  | 1.2675664032  |
| 0             | 0             |
| 35.8485006349 | 29.4847254202 |
| 1.7349567031  | 3.8340800399  |
| 0             | 0             |
| 0             | 0             |
| 0.3439100209  | 0             |
| 6.8625966469  | 6.4653557336  |
| 2.2990356804  | 3.6099269424  |
| 1.3290260744  | 3.9596182343  |
| 20.945099451  | 43.8504308351 |
| 2.3181021073  | 0.7279729779  |
| 12.6611082905 | 2.2089298051  |
| 0.3494556871  | 0.3658082998  |
| 0             | 0             |
| 1.7738225898  | 1.083149535   |
| 1.1240102561  | 0             |
| 22.4155978841 | 30.2431657172 |
| 0.7997213869  | 2.5114319065  |
| 13.4782941264 | 16.2253551627 |
| 0             | 1.6137728273  |
| 0             | 0.2946046403  |

| gene_expression_table |                |
|-----------------------|----------------|
| 0                     | 0.6308701549   |
| 0                     | 2.7731093396   |
| 0                     | 0              |
| 0                     | 16.4160728106  |
| 0                     | 0.9341818109   |
| 7.2444322616          | 0              |
| 0                     | 0              |
| 15.9730492844         | 21.1206322463  |
| 1.090082238           | 2.9342368744   |
| 2.133130575           | 4.4658988113   |
| 6.0080839895          | 5.3907680761   |
| 0                     | 0              |
| 3.8251150254          | 2.6694063091   |
| 0                     | 0              |
| 0.9416135683          | 1.478513891    |
| 26.5565271989         | 35.8699706554  |
| 0                     | 0              |
| 0                     | 0.292397883    |
| 2.6554756132          | 1.6678423989   |
| 4.8795133418          | 4.8390137505   |
| 3.0905835799          | 0              |
| 1.6202694771          | 0              |
| 10.3566947562         | 4.8892278688   |
| 8.3894758905          | 11.1771639947  |
| 52.9956679446         | 55.4755750194  |
| 10.8972290744         | 8.7747382507   |
| 0                     | 0              |
| 38.4470252213         | 42.4820318953  |
| 508.7115188759        | 288.9184899408 |
| 7.232071758           | 7.5704931161   |
| 8.985699495           | 15.3919325929  |
| 0                     | 0              |
| 61.5656173935         | 455.1537676847 |
| 0                     | 0              |
| 0                     | 0              |
| 0                     | 6.5842934864   |
| 2.2497783346          | 5.2988751938   |
| 3.7025993302          | 3.8758607048   |
| 8.686743739           | 6.7510386855   |
| 0                     | 0.199719274    |
| 2.9818172616          | 0.2601124985   |
| 1.6137263608          | 2.3649358856   |
| 65.7888685867         | 22.9558091335  |
| 6.7918215065          | 7.5539941612   |
| 0                     | 0.4380600186   |
| 0.8155644866          | 0.8537284389   |
| 0.1997120041          | 0.6968581076   |
| 0.8788759767          | 0              |
| 0.5159582259          | 0.2700511228   |



gene\_expression\_table

|                |                |
|----------------|----------------|
| 0.2397567727   | 0              |
| 0.733189647    | 3.0699956311   |
| 0.5828453701   | 1.8303580258   |
| 0              | 0              |
| 18.0882623852  | 15.4920223801  |
| 0.5451932516   | 0              |
| 35.41370169    | 0              |
| 0              | 0              |
| 0              | 0              |
| 121.2289263844 | 444.1562171679 |
| 212.1506211728 | 253.8035526674 |
| 31.9212261782  | 0              |
| 0              | 0              |
| 7.2802796547   | 38.1047843917  |
| 259.2412624857 | 0              |
| 0              | 0              |
| 13.331187539   | 55.8200564763  |
| 42.6241494611  | 30.8898874119  |
| 0              | 2.0539994108   |
| 0.6892994451   | 0              |
| 1.24436945     | 2.3880983987   |
| 120.2540323658 | 41.4292763031  |
| 231.7221907988 | 100.2731482389 |
| 0              | 4.3306204347   |
| 299.8645180511 | 546.5610602971 |
| 0              | 0              |
| 0              | 0              |
| 53.4550854549  | 38.0504137124  |
| 8.6654818403   | 17.0747838897  |
| 3.1661214768   | 4.971417938    |
| 8.7930790475   | 2.5103309998   |
| 0              | 8.7946290745   |
| 0              | 2.9287556644   |
| 0              | 0              |
| 408.6569157815 | 218.7881531258 |
| 213.6296140747 | 128.7545422682 |
| 2.2225620283   | 7.3120638212   |
| 4.9780403332   | 4.7372594208   |
| 0              | 0              |
| 2.6545490635   | 10.1046088158  |
| 2.5222569426   | 8.3609017291   |
| 13.1698192838  | 8.6163091957   |
| 0              | 2.4884528702   |
| 2.7802888975   | 10.1863691792  |
| 7.1078849346   | 8.6805775342   |
| 1.4648861036   | 1.533434752    |
| 133.458452493  | 65.1950027399  |
| 14.9179045257  | 7.8079903862   |
| 0              | 1.9201390843   |

gene\_expression\_table

|                 |                 |
|-----------------|-----------------|
| 6.4308304156    | 2.7539010271    |
| 0               | 0               |
| 5.2198231486    | 0               |
| 0               | 10.8563839414   |
| 0               | 0               |
| 68.1274813147   | 31.6957663995   |
| 0               | 0               |
| 70.9521174365   | 51.1382966726   |
| 7.8511573293    | 7.8898065621    |
| 130.4349258411  | 92.7932003003   |
| 21.8893694728   | 22.9136721059   |
| 7.2091368567    | 5.1882084286    |
| 12.113818617    | 17.7529505964   |
| 0               | 0               |
| 545.8368186281  | 442.8187195253  |
| 4.8487724865    | 8.6584933044    |
| 0               | 0.6086580132    |
| 0               | 0               |
| 2.6026265942    | 2.1406119961    |
| 0               | 0               |
| 117.3855666453  | 122.8785684036  |
| 3.8708590462    | 2.0259970271    |
| 4.575430902     | 0               |
| 0               | 0               |
| 0               | 0               |
| 12.0281339953   | 1.7366875593    |
| 32.8566880098   | 35.8896011451   |
| 414.426303309   | 209.4299514063  |
| 0               | 0               |
| 0               | 0               |
| 0               | 0               |
| 841.3264574459  | 101.4134705956  |
| 0               | 0               |
| 16.9039720097   | 1.0408814906    |
| 3477.1599332503 | 3010.8856025808 |
| 2.5283645793    | 0               |
| 3764.9393926932 | 3042.9456792667 |
| 0               | 0               |
| 0               | 0               |
| 0               | 0               |
| 0               | 1.1077146031    |
| 8.8898992982    | 18.6117958149   |
| 106.3617846214  | 27.4910947514   |
| 121.4184057942  | 100.6209301877  |
| 152.3659090458  | 53.1652664296   |
| 0.3461165053    | 0.7246257251    |
| 33.2594773373   | 10.444751628    |
| 2.4635149817    | 5.8739196519    |
| 13.1876411974   | 7.8884289113    |

gene\_expression\_table

|                 |                 |
|-----------------|-----------------|
| 0               | 0               |
| 51.655050462    | 44.7494267415   |
| 4.8411790824    | 32.9401784067   |
| 921.1861378096  | 795.1986410724  |
| 39.4383425777   | 46.9134557503   |
| 9677.9062261634 | 9778.0870502521 |
| 1.6927372469    | 1.355019121     |
| 158.1847904549  | 63.934969932    |
| 0               | 0               |
| 101.0284051333  | 145.4144742858  |
| 11.6638477936   | 3.6298965415    |
| 454.3065908621  | 337.4982044299  |
| 1.884277759     | 1.3149677604    |
| 27.9565321925   | 27.4192203713   |
| 1.9966149551    | 5.2251140057    |
| 0               | 0               |
| 59.4647747642   | 47.1061410065   |
| 0               | 0               |
| 36.6218976049   | 23.9597511779   |
| 0               | 0.0980307906    |
| 68.6415920027   | 33.0904933266   |
| 8.0357803735    | 35.0492120584   |
| 51.0323575961   | 21.3681569988   |
| 140.1217460807  | 249.3537501206  |
| 0               | 2.7784152752    |
| 674.3359030135  | 1393.3996801797 |
| 34.6165507353   | 13.8043488617   |
| 4.0719742539    | 6.3937805286    |
| 0               | 0               |
| 0               | 0.9892780812    |
| 227.8850926481  | 348.9881575237  |
| 8.3466022034    | 5.824784989     |
| 1.8673199114    | 5.8641007755    |
| 0               | 0               |
| 121.1784983785  | 192.6225382037  |
| 1848.2530167515 | 1984.3498846909 |
| 276.5447926666  | 181.4685692178  |
| 0               | 0               |
| 2.2820165923    | 23.8880247329   |
| 1.1906173525    | 0               |
| 44.0725274096   | 49.4302289648   |
| 3.107837095     | 4.8799002805    |
| 13.6838303788   | 8.1852335502    |
| 57.7572461168   | 35.2683152368   |
| 10.6254391021   | 14.3005518913   |
| 1.3028547474    | 1.3638212156    |
| 50.2399766655   | 44.0626731569   |
| 390.5589720273  | 307.7746579221  |
| 15.758580012    | 16.4959952683   |

gene\_expression\_table

|                |                |
|----------------|----------------|
| 1.7753468267   | 2.3044449379   |
| 121.4310588169 | 49.4329762334  |
| 22.9708556736  | 26.3358388856  |
| 17.1673705051  | 14.3100093709  |
| 2.3595581199   | 2.7787190849   |
| 0              | 0              |
| 15.4757485649  | 22.4306707267  |
| 16.6378204108  | 14.2497648846  |
| 7.6503161535   | 8.0083090591   |
| 269.6214543987 | 248.1994767347 |
| 4.3665178265   | 4.5708469514   |
| 98.3443641911  | 89.5185582063  |
| 1.6206751124   | 5.0895415003   |
| 18.5622839979  | 12.659523965   |
| 0              | 2.4133889584   |
| 12.7193191389  | 2.6629027256   |
| 8.3638561614   | 7.5044904277   |
| 0              | 0              |
| 9.3947726426   | 29.5031896797  |
| 5.3595946402   | 4.0074245158   |
| 1.982126353    | 4.1497580259   |
| 70.0608730404  | 33.8489253557  |
| 91.2087671908  | 37.9606705577  |
| 1.6715618335   | 1.7497817745   |
| 0              | 0              |
| 6.539543265    | 11.8656340083  |
| 1.3715306502   | 2.1535661619   |
| 174.7565304074 | 48.3619094244  |
| 0              | 0              |
| 0              | 2.0244637093   |
| 1.8406666673   | 0.9633998943   |
| 0              | 1.2742675548   |
| 135.0883072962 | 37.8775983169  |
| 1.9062499025   | 13.9681637201  |
| 232.5999786491 | 149.5079550981 |
| 541.4509126498 | 362.0234536899 |
| 3.883631093    | 3.5571932925   |
| 10.6714800025  | 7.9791763096   |
| 0              | 0              |
| 0              | 0              |
| 0              | 0              |
| 0.1444180261   | 0.1511759989   |
| 0              | 0.9735869858   |
| 0              | 0              |
| 0              | 0              |
| 0              | 2.0192356544   |
| 0              | 0              |
| 0              | 0              |
| 3.2355181272   | 0              |

gene\_expression\_table

|                 |                 |
|-----------------|-----------------|
| 0               | 0               |
| 41.1239483471   | 14.0374969402   |
| 0               | 0               |
| 8.7975982128    | 7.6743980306    |
| 0.2316277379    | 0               |
| 242.6092942759  | 63.4905202019   |
| 0               | 0               |
| 0               | 0               |
| 0               | 0               |
| 0               | 0               |
| 1767.2751584087 | 2410.4340498521 |
| 0               | 0               |
| 52.4240776059   | 11.7594080106   |
| 0               | 0               |
| 0               | 0               |
| 30.5723972732   | 28.6342793189   |
| 10.018737747    | 22.7833195973   |
| 42.6764181699   | 62.9489393931   |
| 13.8355505584   | 25.2681753706   |
| 4.0722304013    | 8.525576972     |
| 0               | 0               |
| 0               | 0               |
| 0               | 0               |
| 2.4442792352    | 3.0703897433    |
| 1.0265817743    | 0               |
| 0.5028761045    | 0               |
| 13.3454376555   | 5.691453396     |
| 0               | 0               |
| 17.959583228    | 20.7448202846   |
| 0               | 0               |
| 0               | 0               |
| 31.62322081     | 19.1261860901   |
| 0               | 0               |
| 35.1004134209   | 18.371460286    |
| 17.5555923225   | 20.6742351546   |
| 0               | 0               |
| 51.4606412597   | 81.7766072754   |
| 2.5816017981    | 5.4048132527    |
| 18.0539333396   | 20.2486698891   |
| 41.3168716668   | 33.0737397248   |
| 0               | 0               |
| 146.4448849837  | 372.2944233248  |
| 118.7595618667  | 72.8754001491   |
| 43.7589021922   | 14.0943320637   |
| 7.2266406217    | 0               |
| 0               | 0               |
| 15.220120695    | 13.2769491697   |
| 40.4794300999   | 12.1067559366   |
| 5.1329088717    | 0               |

gene\_expression\_table

|               |               |
|---------------|---------------|
| 5.2111393171  | 8.1824881542  |
| 0             | 7.1846425532  |
| 1.8256132738  | 0             |
| 0             | 0             |
| 0.5152190778  | 2.157314038   |
| 0             | 0             |
| 0             | 5.133753679   |
| 54.1417826586 | 27.2041543806 |
| 0.4908549896  | 0.7707364731  |
| 0             | 0             |
| 0.053905006   | 0.1692823954  |
| 0             | 0             |
| 6.4824008424  | 1.5659403938  |
| 3.7927443769  | 4.4113600512  |
| 0.270496259   | 0.2831540028  |
| 9.0889445429  | 15.0225116522 |
| 0             | 0             |
| 76.2311327979 | 74.4337386242 |
| 29.7468487887 | 29.279803299  |
| 29.3715046482 | 14.0444372692 |
| 5.9638855956  | 7.8540499558  |
| 0             | 0.1528481851  |
| 29.6148935625 | 15.0003427843 |
| 21.949450731  | 15.317709892  |
| 1.1755009277  | 2.461015869   |
| 0.1839704183  | 0             |
| 56.8659932267 | 37.0390286512 |
| 13.1939767022 | 20.0696652918 |
| 6.7077002787  | 7.2637075063  |
| 0.1519958458  | 0.1591084191  |
| 55.5471594539 | 75.5904010684 |
| 4.0576957852  | 3.7621367319  |
| 0             | 0             |
| 54.2482514156 | 42.9540971763 |
| 1.9227826627  | 2.0127583629  |
| 0.969482833   | 0.5074246605  |
| 3.1106445899  | 4.5586880135  |
| 0.4121945081  | 0.5033967798  |
| 1.6937202615  | 1.1819847304  |
| 0             | 0             |
| 0.7335718281  | 0.7678989729  |
| 0             | 4.0263777784  |
| 6.5976606899  | 20.7191852514 |
| 8.4532006511  | 3.99621607    |
| 0.7857484912  | 0.8225172181  |
| 0.9494407583  | 0.5521496594  |
| 0.745362763   | 0             |
| 0             | 0             |
| 0             | 0             |

gene\_expression\_table

|                |                |
|----------------|----------------|
| 1.2944487847   | 0.4516739666   |
| 29.5266203509  | 21.8176267103  |
| 19.9274200342  | 18.5072922769  |
| 0              | 0              |
| 0.3845656704   | 3.2204899041   |
| 7.2422141778   | 3.5910521742   |
| 0.056098337    | 0.1174468639   |
| 0              | 0.3370079002   |
| 61.4429068805  | 83.6135280285  |
| 2.4433382408   | 3.4102307888   |
| 0              | 0              |
| 0.1222536593   | 0.1279744611   |
| 121.4404767315 | 88.6906228456  |
| 0              | 0              |
| 0              | 0              |
| 3.6007089864   | 1.8846012254   |
| 9.675604826    | 3.3761233839   |
| 10.0296669751  | 2.9997144202   |
| 0              | 0.7356864313   |
| 1.8275570134   | 3.0062633459   |
| 0.3291430723   | 0.4256146166   |
| 227.473907409  | 126.4583809427 |
| 33.9159227273  | 25.8203652361  |
| 1.4124154609   | 5.2803884666   |
| 0.0382672495   | 0              |
| 1.109958736    | 1.5491983028   |
| 0              | 0              |
| 0              | 0              |
| 0.0419508787   | 0.1756558003   |
| 0              | 0              |
| 0.5759569676   | 2.2393748      |
| 7.9691465957   | 7.3410119378   |
| 56.5634109803  | 77.3358614119  |
| 1.738112455    | 0.7797628289   |
| 3.9857925833   | 1.5646146943   |
| 0              | 0              |
| 0              | 0              |
| 28.8941279081  | 16.6573357312  |
| 6.3823989138   | 3.1178281098   |
| 3.4367932699   | 4.5499265936   |
| 59.9381942404  | 56.0765325934  |
| 0.3197736001   | 0              |
| 4.3726240479   | 2.9988806655   |
| 1.1279401793   | 0.9839346696   |
| 0              | 0.5145135342   |
| 4.6282995849   | 6.229129709    |
| 3.9666817824   | 8.3046015395   |
| 345.5179690932 | 217.0117908695 |
| 0              | 0.0345479607   |

gene\_expression\_table

|                |                |
|----------------|----------------|
| 0              | 0              |
| 114.6667257498 | 427.3157022839 |
| 0              | 0.150294862    |
| 0              | 4.3367175581   |
| 41.9203807779  | 5.8509366743   |
| 3.1628027501   | 1.6554023002   |
| 27.2621265254  | 3.1322024747   |
| 0              | 0              |
| 1.1926060528   | 1.9419765335   |
| 0.2738929695   | 0              |
| 0.0950533097   | 0              |
| 6.6915324552   | 7.0046595337   |
| 1.8307762073   | 0.4791116273   |
| 147.7465882487 | 72.9857687869  |
| 0.0553291796   | 0              |
| 0              | 0.2778392492   |
| 9.9288721916   | 5.1967445216   |
| 1.0699940777   | 3.8502197992   |
| 18.0892068927  | 6.0488986484   |
| 4.6589787985   | 3.2206560819   |
| 6.7917027476   | 3.2585287383   |
| 12.4448108415  | 29.5282289834  |
| 0.3602889975   | 0              |
| 35.6377223837  | 28.4877391161  |
| 0              | 0              |
| 14.157735744   | 0              |
| 9.9126551688   | 10.6425775925  |
| 1.4190943638   | 3.713750524    |
| 1.8783729889   | 0              |
| 0.6031439718   | 0.8418237428   |
| 10.1463937202  | 5.9006607713   |
| 3.7611112415   | 3.9371106532   |
| 0              | 0              |
| 9.9932458613   | 20.9217500964  |
| 17.2765493519  | 6.3829402099   |
| 32.5121772995  | 16.2313945283  |
| 33.7469263349  | 18.5041464151  |
| 2.6799241054   | 1.1476349506   |
| 0              | 0              |
| 4.9146076553   | 4.8738167838   |
| 0              | 0.3615396645   |
| 0              | 0              |
| 0.5250947401   | 0.4885922655   |
| 3.360477922    | 3.517729888    |
| 0.9782258344   | 1.5360021706   |
| 4.5066116091   | 7.7195394914   |
| 9.2588519318   | 3.0153248235   |
| 8.1743583019   | 8.8013556109   |
| 0              | 0.5803434893   |



gene\_expression\_table

|                |                |
|----------------|----------------|
| 1.062966375    | 0.4172652679   |
| 8.5307059863   | 4.8084057083   |
| 8.0451010799   | 2.4952793358   |
| 0              | 0              |
| 0              | 0              |
| 7.9043036251   | 11.0322423382  |
| 0              | 0.9057627855   |
| 0              | 3.4659138995   |
| 21.8242719559  | 6.4253048574   |
| 0              | 0              |
| 1.0870723697   | 0.6637991525   |
| 9.0995903118   | 6.4526912116   |
| 0              | 0              |
| 0              | 0              |
| 105.6108434223 | 24.5673005795  |
| 11.7026392356  | 15.8532759291  |
| 0              | 0              |
| 0              | 0              |
| 118.4547723812 | 144.9130998795 |
| 63.2840444071  | 29.054996125   |
| 0              | 0              |
| 53.3712994044  | 37.7935891593  |
| 18.0821473818  | 19.4226885773  |
| 0              | 0              |
| 10.3687365672  | 10.451939009   |
| 13.2704587328  | 1.5434937264   |
| 7.7582122054   | 7.2188924938   |
| 5.4712852171   | 10.500070912   |
| 26.9534705868  | 3.1349717136   |
| 13.8863359504  | 17.4433685236  |
| 0              | 0              |
| 0              | 2.116615085    |
| 88.4937248105  | 101.2519322998 |
| 0              | 1.2407636693   |
| 19.8968055967  | 20.8278671509  |
| 3.1734806979   | 8.6660405681   |
| 8.6850990269   | 5.1951509171   |
| 7.4578383594   | 7.8068243582   |
| 16.5143486452  | 46.0990126273  |
| 529.4326195064 | 251.4294496193 |
| 0.2961510334   | 0              |
| 0              | 0              |
| 0              | 0              |
| 0              | 0              |
| 23.3005358623  | 12.837301766   |
| 5.1565874056   | 2.8162891099   |
| 6.978896797    | 14.6109419065  |
| 0              | 0              |
| 0              | 0              |

gene\_expression\_table

|                |                |
|----------------|----------------|
| 0              | 25.4375182291  |
| 9.9230611407   | 2.8329289274   |
| 4.6840402507   | 10.0516167571  |
| 0              | 0.3728790584   |
| 120.8455094909 | 21.7548488916  |
| 0              | 0              |
| 1.1462611851   | 0.599949966    |
| 0              | 0              |
| 3.0962429065   | 0.6482260241   |
| 3.5723251087   | 2.2436942178   |
| 107.6746474752 | 89.627388816   |
| 51.7751906339  | 47.4232377968  |
| 7.8732209052   | 4.8076259774   |
| 0              | 0              |
| 15.9579901453  | 28.9548769534  |
| 7.2663875507   | 5.0709431333   |
| 0              | 0              |
| 0              | 0              |
| 1.5503162764   | 3.2457251783   |
| 20.0418055834  | 0.6357470407   |
| 0              | 0.8288856775   |
| 30.0252042334  | 21.4523719608  |
| 9.0722457522   | 8.6334337974   |
| 48.8399803373  | 49.4098057326  |
| 0              | 0              |
| 0              | 0              |
| 0              | 5.0301030702   |
| 17.261157927   | 37.0412154843  |
| 0              | 0              |
| 14.1778902079  | 11.1310033775  |
| 9.0150489123   | 8.1500533149   |
| 0.7778768708   | 0.3489759638   |
| 20.1002628926  | 13.2479395289  |
| 0              | 0              |
| 0              | 0              |
| 0              | 0              |
| 0              | 0              |
| 0              | 0              |
| 0.6155508015   | 3.2217760422   |
| 102.5605936142 | 202.4500364433 |
| 4.3742184999   | 4.0065444773   |
| 0              | 0.0726627256   |
| 0.0928981286   | 0.1458678785   |
| 3.9723147919   | 5.9402819617   |
| 0.6693160328   | 3.5031817908   |
| 30.4620682189  | 18.2214435499  |
| 10.2460246559  | 6.8253070494   |
| 4.2630608189   | 2.7163340049   |
| 4.7533773911   | 0.5331224384   |

gene\_expression\_table

|                |                |
|----------------|----------------|
| 31.6905057655  | 34.8809047873  |
| 14.2064031345  | 11.5418152333  |
| 5.0738706134   | 2.9876062362   |
| 111.5480423572 | 126.8124287553 |
| 0.2918992438   | 0              |
| 19.0835718739  | 2.4970723179   |
| 7.3414256775   | 5.5890648729   |
| 3.8844855602   | 2.0331291072   |
| 7.4800450455   | 3.2968716613   |
| 0              | 0              |
| 8.8795814021   | 2.8600299047   |
| 0.1482414411   | 0.258630548    |
| 0              | 0              |
| 7.5257203777   | 3.3329504506   |
| 0              | 0              |
| 32.6876184541  | 23.179407105   |
| 1.4810532855   | 2.7906452453   |
| 0              | 0              |
| 0              | 0              |
| 0.8712989776   | 0.6633243628   |
| 0              | 0              |
| 7.982425987    | 2.5710645583   |
| 0.1630044686   | 0              |
| 3.2253301591   | 3.3762579498   |
| 0              | 0              |
| 15.9644979921  | 14.9752842427  |
| 4.9896906651   | 6.7901351265   |
| 20.7068600454  | 11.9374123633  |
| 8.988684703    | 9.6820394335   |
| 0.1187603131   | 0.1243176455   |
| 0              | 0              |
| 31.4586814624  | 56.8804304065  |
| 0.7941733529   | 0.4156681586   |
| 0              | 0              |
| 1.0053773364   | 2.6310587266   |
| 3.544684276    | 4.3852026527   |
| 5.8176811224   | 7.9930157257   |
| 18.5826533952  | 9.7261099111   |
| 0.4626925974   | 0              |
| 0.2535600475   | 0              |
| 10.8725859729  | 7.2840726157   |
| 6.6118365409   | 2.5634201063   |
| 0              | 2.1961870807   |
| 6.4114003414   | 4.2387908027   |
| 18.9768165007  | 4.9662069007   |
| 1.10129906     | 0.4940716396   |
| 65.7598124659  | 45.6419316126  |
| 5.9261775556   | 8.9605969781   |
| 0.5294878759   | 0.2771325046   |

gene\_expression\_table

|                 |                 |
|-----------------|-----------------|
| 0.3437033271    | 0.3597867608    |
| 109.4557070037  | 24.773542649    |
| 0.9343391223    | 0.4890305385    |
| 109.99125208    | 69.6184709427   |
| 1.8240700673    | 3.3414964774    |
| 3.9166569429    | 0.9110966759    |
| 380.6734936366  | 110.0582945959  |
| 8.7407918297    | 9.149813026     |
| 1451.9693884163 | 1297.5761235016 |
| 9.6232885027    | 28.6090402193   |
| 4.1006566682    | 2.1462724733    |
| 27.6504744876   | 17.5095543111   |
| 0.4510691858    | 0.4721767538    |
| 12.6774727184   | 1.3270709024    |
| 12.0859256997   | 17.9229311961   |
| 0.0492473608    | 0               |
| 0               | 0.171220245     |
| 4.2698790783    | 2.2348430194    |
| 61.1440346534   | 32.0026203363   |
| 0               | 0               |
| 0               | 0               |
| 0               | 0               |
| 221.9405545591  | 193.4345538309  |
| 147.8806804854  | 142.416631664   |
| 285.3154158287  | 152.5106119179  |
| 114.6943058492  | 34.563122052    |
| 0               | 0               |
| 10.8221688994   | 0               |
| 0.1866469265    | 0.0976904903    |
| 0               | 0               |
| 148.2191539775  | 161.5663623758  |
| 0               | 0               |
| 0               | 0               |
| 220.1413965857  | 172.8321063987  |
| 2.7407386405    | 0               |
| 76.7811085981   | 68.6832740107   |
| 8.6917624449    | 0               |
| 24.6247888104   | 10.213565583    |
| 172.9374355012  | 120.6866403601  |
| 13.2795327575   | 19.3068641343   |
| 0               | 0               |
| 9.6556412394    | 7.8332910934    |
| 5.3800841386    | 4.8272936716    |
| 9.8272834031    | 4.1148585823    |
| 3.3334833517    | 0               |
| 2.7413250464    | 3.171667632     |
| 1.0863557023    | 0.3249117716    |
| 3.4547773801    | 0.6575349172    |
| 0               | 0               |

gene\_expression\_table

|                |                |
|----------------|----------------|
| 1.9936634748   | 2.608695011    |
| 0.6684682374   | 0.4664992604   |
| 17.9349623741  | 10.9516285713  |
| 11.4015087866  | 11.9350369673  |
| 0              | 0              |
| 22.2908166505  | 7.7779682711   |
| 15.8318040326  | 23.9382661153  |
| 34.621679968   | 72.4835700296  |
| 5.6806113276   | 5.9464328328   |
| 3.1684788082   | 7.7390746229   |
| 43.588252286   | 45.1806110371  |
| 0.7809747512   | 1.0627761212   |
| 0.4872054932   | 0.1457154407   |
| 5.9336614747   | 15.5283108529  |
| 4.0678072426   | 9.1246250308   |
| 0.4155019765   | 0.4349451938   |
| 1.1274752545   | 1.1802349228   |
| 0.0385511954   | 0              |
| 36.5982738279  | 33.5220135637  |
| 0.7368029807   | 1.3497423201   |
| 354.0359696247 | 650.9720757829 |
| 119.7229193657 | 253.2435300332 |
| 9.571962611    | 12.2465176149  |
| 2.3070508005   | 3.6750123952   |
| 6.0332009962   | 8.4206956896   |
| 0.7932488658   | 0              |
| 14.7063291501  | 10.8823223783  |
| 0.1570200997   | 0              |
| 3.779319048    | 5.2495339131   |
| 0              | 0.3792055497   |
| 0.4721895775   | 0              |
| 0.4836983076   | 1.7721645893   |
| 0.3583358982   | 0.7502081121   |
| 31.653134886   | 28.7489024762  |
| 4.0797461766   | 0.3050468542   |
| 0              | 0              |
| 3.2463151844   | 3.3982249594   |
| 0.0613202199   | 0.0213965568   |
| 0              | 0              |
| 0.0350749255   | 0              |
| 0.3613866484   | 0.4073973774   |
| 25.4821250858  | 18.2911193204  |
| 0              | 1.0627389408   |
| 7.8779559463   | 5.3782181399   |
| 18.320715067   | 2.3972530268   |
| 4.6269921156   | 1.614503337    |
| 0              | 0              |
| 2.5843500834   | 4.1223367868   |
| 0.6612081659   | 2.21487708     |

gene\_expression\_table

|                 |                 |
|-----------------|-----------------|
| 0.490632907     | 1.1205640156    |
| 13.2687317529   | 9.9211683887    |
| 0.4277650175    | 0               |
| 16.3164473932   | 5.8227162915    |
| 0.171851846     | 0.0899467857    |
| 6.9376369539    | 3.6311401877    |
| 97.8540314272   | 57.2930698543   |
| 249.9441332702  | 127.4464914547  |
| 0.6245055633    | 2.2880515143    |
| 0.1181012341    | 0.0618138626    |
| 1.3024061409    | 1.9221022794    |
| 11.3338174572   | 1.318242006     |
| 2.0576111895    | 1.988211809     |
| 35.9955981092   | 39.6024437265   |
| 5.2273538202    | 1.8239884519    |
| 2.5644791676    | 3.8349753578    |
| 0               | 3.8164873036    |
| 6.4217370337    | 2.6888956655    |
| 0               | 0.4710651524    |
| 0               | 0               |
| 1.4733767796    | 1.5423227452    |
| 0               | 0               |
| 0               | 1.4770171875    |
| 0               | 0               |
| 0               | 0               |
| 83.7811273441   | 122.9961818916  |
| 27.1161527138   | 17.9273937995   |
| 5.1481481303    | 12.574457638    |
| 1.0487565616    | 0               |
| 1.038971668     | 3.9878294611    |
| 96.5132265215   | 56.8291033414   |
| 0               | 0               |
| 0               | 3.9184427294    |
| 42.7380946243   | 37.5799228849   |
| 0               | 0               |
| 0               | 0               |
| 0               | 0               |
| 1.88470665      | 1.7038687011    |
| 3.5488887019    | 3.039510486     |
| 56.0364076185   | 25.8097860504   |
| 44.4221277356   | 15.0813535376   |
| 2594.8283430789 | 3210.3883709861 |
| 0.3248963458    | 0               |
| 0               | 0               |
| 1.2810433904    | 0               |
| 0               | 0               |
| 1.3191184786    | 1.3808460004    |
| 890.7456039806  | 356.5164432653  |
| 4.1662029331    | 3.1151131555    |

gene\_expression\_table

|                |                |
|----------------|----------------|
| 0              | 0              |
| 50.6628349069  | 20.8346199951  |
| 9.7938808684   | 9.5687021409   |
| 28.0767067112  | 24.8689208709  |
| 13.9403813321  | 27.9274370328  |
| 145.381258625  | 87.0652527769  |
| 2.3126441521   | 1.1173214932   |
| 0.3197041143   | 0              |
| 0              | 0              |
| 336.4061621902 | 250.7141567343 |
| 1.8404311842   | 3.6122874115   |
| 12.638357562   | 14.5797393595  |
| 239.2804817145 | 55.8916731176  |
| 3.8007961923   | 2.4156105328   |
| 0.7585567762   | 1.0587374396   |
| 68.190854684   | 115.1419684017 |
| 0              | 0              |
| 3.442977848    | 8.6498168611   |
| 2.1494205023   | 1.8409104101   |
| 21.5262940191  | 6.216167368    |
| 0.8935464194   | 0              |
| 4.3196086297   | 3.5043505622   |
| 12.5152238119  | 10.480694206   |
| 0.2298537737   | 0.8120576422   |
| 15.9828417923  | 6.8638979577   |
| 0.8341726517   | 2.1830184103   |
| 0              | 0              |
| 0              | 0              |
| 3.0563102469   | 1.6937623224   |
| 8.5353678858   | 5.781325884    |
| 37.9462172856  | 28.3727803392  |
| 0              | 0              |
| 3.0216694683   | 12.6522682155  |
| 98.5458113078  | 117.1446347507 |
| 13.1055140215  | 9.6358099843   |
| 0              | 0              |
| 5.1298648464   | 4.8502452934   |
| 0.8142865583   | 2.6789422329   |
| 0              | 0              |
| 0              | 0              |
| 0.8222738111   | 0.860751723    |
| 0.4385924572   | 0.4591161827   |
| 0.9603074629   | 0              |
| 14.3134700546  | 8.4280849187   |
| 0              | 0              |
| 219.172486252  | 164.4238002581 |
| 1.2212411115   | 2.9220308764   |
| 0              | 0              |
| 0              | 0              |

gene\_expression\_table

|                |                |
|----------------|----------------|
| 3.5927399487   | 3.2235947192   |
| 0.8711943711   | 0.6079743315   |
| 57.1324385095  | 76.1166302849  |
| 24.8883458155  | 15.6317904721  |
| 4.1724320864   | 1.5118889058   |
| 1.137359828    | 0.5952910201   |
| 0.276570256    | 0.2895122296   |
| 2.9524877629   | 0.7726620059   |
| 0.6552141161   | 0.971655611    |
| 3.354719544    | 2.5752481696   |
| 2.3124630441   | 0.6051684131   |
| 16.0911081833  | 6.8684614113   |
| 34.7806885675  | 50.8559463881  |
| 7.1806825434   | 9.0826781608   |
| 29.0278021158  | 51.1376574959  |
| 0.4187879848   | 0.8767699387   |
| 4.2242461097   | 2.040885091    |
| 0              | 0              |
| 0              | 0              |
| 13.3610604678  | 8.991183174    |
| 43.4040833096  | 15.8035327804  |
| 0.1582777838   | 0.3313686348   |
| 0.8540552167   | 0              |
| 36.8154269161  | 57.8072809618  |
| 10.1150385452  | 31.7651008885  |
| 566.7057425977 | 565.6326325427 |
| 2.0650837913   | 0              |
| 1.1548495556   | 1.2088901913   |
| 2.3011604823   | 0              |
| 206.4820320531 | 116.7179006876 |
| 64.8838255867  | 17.3129496759  |
| 113.1752564498 | 121.762106488  |
| 28.6648665435  | 29.367795013   |
| 0              | 0              |
| 15.4723342948  | 145.7671933699 |
| 17.8356421339  | 24.8936700324  |
| 8.3032446212   | 12.4944495682  |
| 63.6124271431  | 33.2945702074  |
| 64.3867187873  | 67.3996646683  |
| 4.4510620661   | 0              |
| 77.838035777   | 45.2008222813  |
| 54.804355352   | 120.5917674828 |
| 0              | 0              |
| 0              | 0              |
| 0              | 0              |
| 7.640250746    | 13.8908682793  |
| 0              | 0              |
| 17.4970710454  | 25.9474373971  |
| 19.8699345271  | 20.7997386624  |



gene\_expression\_table

|                |                |
|----------------|----------------|
| 16.9493505296  | 8.6024180974   |
| 102.8519807213 | 35.8882967463  |
| 0.1484326917   | 0.1553785289   |
| 0.8664482355   | 0.8692018823   |
| 5.9320907001   | 8.2795734172   |
| 0              | 0.3267237181   |
| 24.3426395947  | 9.9279513648   |
| 0              | 0.8518182437   |
| 9.4786831992   | 7.4416752533   |
| 25.37349622    | 7.9050109842   |
| 0              | 0.2388364674   |
| 0.1878852733   | 0              |
| 0              | 0              |
| 8.1117307537   | 38.8174415364  |
| 0              | 3.5662324262   |
| 1.4787467518   | 0.6019782233   |
| 0              | 0              |
| 0.9926175334   | 0.6679713849   |
| 0              | 0              |
| 0              | 0              |
| 4.0498121169   | 2.9439730199   |
| 16.073841048   | 12.0185777104  |
| 2.4081633319   | 2.7009130603   |
| 5.4892859181   | 4.3096158313   |
| 0.3919133472   | 0.4102527459   |
| 4.3098596378   | 9.0230749392   |
| 1.8531863453   | 1.8752418083   |
| 0.6707307254   | 1.6675284703   |
| 0.0715505809   | 0.1872468908   |
| 0              | 0              |
| 31.9517202803  | 14.026113414   |
| 0.2489242905   | 0              |
| 6.6918493999   | 5.161572544    |
| 0.1370253295   | 0.430312094    |
| 3.7663629677   | 3.2855067762   |
| 0.4696205      | 1.9663846719   |
| 12.0335729617  | 3.435457714    |
| 5.5946009653   | 5.5635777736   |
| 62.813764797   | 23.9102200161  |
| 10.8005350011  | 9.0447527194   |
| 3.6928834392   | 6.7649577857   |
| 0.435629234    | 0.4560142968   |
| 44.8765329858  | 21.5539276597  |
| 0              | 0              |
| 3.7729482859   | 0              |
| 3.6337304489   | 4.804761015    |
| 0              | 0              |
| 0.2350353143   | 0.4920673601   |
| 608.7470005927 | 184.5186542664 |

gene\_expression\_table

|                 |                 |
|-----------------|-----------------|
| 34.2429234008   | 80.6519356069   |
| 1.2424588322    | 1.5173656194    |
| 14.3900963299   | 2.5105790072    |
| 2.5955709009    | 3.8983465399    |
| 0               | 0               |
| 0.774575266     | 0.63063867      |
| 0               | 0               |
| 1.8724184548    | 1.1760224315    |
| 0.0404291248    | 0               |
| 3.9664144383    | 1.3494067975    |
| 67.8434779808   | 55.2927268413   |
| 0               | 0               |
| 0.6168200074    | 1.03309409      |
| 0               | 9.6094084745    |
| 0               | 0.6015690342    |
| 1397.1021134491 | 1023.3323029012 |
| 0.5760856101    | 0.9277588649    |
| 0               | 1.555568658     |
| 12.0884394266   | 6.9443298658    |
| 10.7168297545   | 8.198002131     |
| 8.0452222702    | 12.2497376287   |
| 0.5882617679    | 0.9442101029    |
| 0.3634972705    | 0.3044055619    |
| 0               | 0               |
| 0.4824977952    | 0.6944795688    |
| 0.3624568693    | 0.9485446653    |
| 5.2677348151    | 4.4113887682    |
| 9.5695728904    | 2.8048654206    |
| 10.3862668731   | 15.1266605792   |
| 18.6667377997   | 7.8160955666    |
| 1.7748739868    | 2.6541833869    |
| 22.2608761061   | 24.1499291505   |
| 2.4244877229    | 4.4413958273    |
| 0.2366506064    | 0               |
| 188.1979286725  | 98.5022806155   |
| 3.0060852697    | 2.8320782401    |
| 0               | 0.3418565922    |
| 43.3889052877   | 39.7418599142   |
| 3.764724988     | 5.4829822653    |
| 3.254033682     | 3.9303515081    |
| 1.9518727896    | 5.9026059398    |
| 0.2367925684    | 0.247873164     |
| 0               | 0               |
| 1.5211883995    | 1.5923716871    |
| 0.7676598893    | 0.8035821687    |
| 4.3984404599    | 0               |
| 6.4739483663    | 14.4008991144   |
| 7.5786528894    | 6.3466338774    |
| 0.1935527897    | 0.5571775011    |

gene\_expression\_table

|                 |                  |
|-----------------|------------------|
| 3.3853148108    | 4.6462224761     |
| 0.1297621224    | 0.0679171396     |
| 23.4487898902   | 17.182245402     |
| 0.5393159162    | 1.693658844      |
| 15614.690735231 | 22502.7587227536 |
| 12.475484108    | 10.5478706736    |
| 3.4302541677    | 11.2852811655    |
| 3.8101063342    | 23.9303906874    |
| 14.2396591787   | 7.9338372497     |
| 7.5717438649    | 2.5476621485     |
| 0               | 0                |
| 1.5152374382    | 0.7269818661     |
| 0               | 0                |
| 1.3792450718    | 1.4437861889     |
| 8.5402350223    | 9.4365307725     |
| 4.2350947526    | 1.8471974988     |
| 6.2410418429    | 17.0586197829    |
| 5.264294694     | 8.6898472797     |
| 1.4149380724    | 1.974865902      |
| 1.0546454447    | 0.7359980511     |
| 32.853891599    | 45.4456118466    |
| 0.51421505      | 0.1794258329     |
| 28.0467820164   | 15.0990263181    |
| 4.4194597685    | 1.1565665716     |
| 290.6750429344  | 178.1133912075   |
| 1.7666189545    | 2.4657160642     |
| 7.3551058116    | 5.3302738775     |
| 0               | 0                |
| 0.9120546138    | 1.0456608019     |
| 4.163102681     | 8.7158261816     |
| 0.3146590592    | 0.4234929174     |
| 98.3807073523   | 184.095981623    |
| 16.3078091654   | 12.7195129975    |
| 0.6394435974    | 1.3387321128     |
| 5.4181659432    | 3.6989389835     |
| 2.8447514051    | 3.970493592      |
| 53.4579829949   | 21.522893801     |
| 1.5841877126    | 2.7638650386     |
| 83.8108515069   | 59.2683402081    |
| 85.8265397807   | 26.4472170058    |
| 1.292914853     | 1.0827329509     |
| 5.1735944492    | 9.2312903535     |
| 1.2352359695    | 3.8791147475     |
| 40.4057618091   | 17.89468586      |
| 2.9520030775    | 5.5622531835     |
| 15.2114252463   | 1.8733219595     |
| 27.0236018856   | 34.4977542468    |
| 0               | 0                |
| 37.6210211203   | 38.8563925242    |

gene\_expression\_table

|                 |                 |
|-----------------|-----------------|
| 0               | 12.8554853729   |
| 0.2874509195    | 1.3540592187    |
| 1.8086014815    | 1.7476007331    |
| 0.2055693231    | 0               |
| 1.918508926     | 12.8028145714   |
| 8.8603798639    | 8.0652148916    |
| 3.1349103325    | 4.0108529638    |
| 2.3920867624    | 1.8548320924    |
| 12.8120045677   | 9.1590979115    |
| 28.6595744153   | 25.5005827333   |
| 5.2197296202    | 4.8568750089    |
| 0               | 0               |
| 3124.0507397175 | 2602.6459970346 |
| 0.3933708053    | 2.0588920252    |
| 13.9836873408   | 9.4716776898    |
| 23.1331067348   | 29.3522538928   |
| 753.7782148753  | 188.3893171149  |
| 87.3669287071   | 27.7137038124   |
| 0               | 0.1587223349    |
| 0               | 0               |
| 0               | 0.5149983931    |
| 0               | 0.573041102     |
| 72.4605402835   | 32.2368011405   |
| 1.5234925795    | 19.1374042819   |
| 1.5702771719    | 1.6437575453    |
| 14.7209616505   | 17.978125724    |
| 3.2670529937    | 4.7024081289    |
| 0.9698978353    | 0.2175608021    |
| 0               | 0               |
| 0               | 0               |
| 1.2430250365    | 0.6505959009    |
| 17.1488909412   | 35.0479033611   |
| 0               | 0               |
| 1.2458861949    | 2.6083736937    |
| 21.6902990056   | 3.2436123187    |
| 129.6905717923  | 93.3886183738   |
| 5.4360008304    | 1.1380751807    |
| 0.1443961213    | 0.2267296037    |
| 39.2664539798   | 19.7298763283   |
| 9.9122872158    | 0.9432843619    |
| 4.3402480684    | 3.7861232603    |
| 0               | 0               |
| 9.065008405     | 20.5599358502   |
| 1.0264108686    | 1.3430515963    |
| 42.6849452675   | 20.3101668085   |
| 19.639361908    | 10.9216375195   |
| 56.0872118185   | 57.6995140423   |
| 2.1635425226    | 0.3996678469    |
| 15.1722308301   | 9.3102599531    |

gene\_expression\_table

|                 |                 |
|-----------------|-----------------|
| 0               | 4.5449730759    |
| 36.098278823    | 83.9721791353   |
| 0               | 0               |
| 11.0170603624   | 17.2988976929   |
| 32.472033853    | 67.9830944645   |
| 81.7752312336   | 77.8198766217   |
| 509.2886540242  | 849.0438776732  |
| 0               | 1.6291361805    |
| 5.6131315954    | 4.4068465639    |
| 0               | 0               |
| 0               | 12.7763100607   |
| 0               | 0               |
| 273.8841206086  | 192.871176677   |
| 11.6936861794   | 40.8029555408   |
| 0               | 0               |
| 132.7806278789  | 77.4395333429   |
| 0               | 0.7471476925    |
| 0               | 0               |
| 14.3976825421   | 23.44442372     |
| 108.0397441364  | 35.1512768816   |
| 0.3172163639    | 0               |
| 10.4914181721   | 14.277066824    |
| 3.0167879344    | 0.7017682424    |
| 0               | 0               |
| 0               | 0.0149140463    |
| 34.6736991867   | 21.2120874047   |
| 0.0449554771    | 0.0470591473    |
| 0               | 0               |
| 1935.2204892653 | 1764.3874746184 |
| 4.3956032381    | 4.0261317258    |
| 0               | 0.1915049216    |
| 105.490041059   | 118.6671732775  |
| 24.1287799572   | 19.9404274253   |
| 2.1660191215    | 0.4534753912    |
| 255.1787127086  | 179.9843827748  |
| 0               | 0               |
| 677.8664574795  | 69.8835579334   |
| 5.7748658956    | 7.0526143315    |
| 680.4216991886  | 477.3272185759  |
| 3.6040667347    | 5.659075985     |
| 245.3135116247  | 548.2874166749  |
| 3.8969568197    | 4.0793130606    |
| 10.8026163651   | 6.9307830173    |
| 2.3726816702    | 37.2556527061   |
| 0               | 0               |
| 0.64882882      | 0.339595228     |
| 0.8109466188    | 0               |
| 27.4412875809   | 16.0108728813   |
| 14.6733327919   | 16.013579928    |

gene\_expression\_table

|                 |                 |
|-----------------|-----------------|
| 34.7441767204   | 11.7322625627   |
| 3.1081355238    | 5.2057267956    |
| 11.8548763665   | 8.4611043187    |
| 0               | 0.2334671368    |
| 1.5800890088    | 4.9620855672    |
| 12.3305001399   | 4.1069318275    |
| 0               | 0               |
| 0               | 0               |
| 0               | 0               |
| 1.4542242495    | 1.5222739815    |
| 0.2747461896    | 0.0719007017    |
| 2.8294803441    | 1.1847538124    |
| 1.5992833082    | 2.8699217314    |
| 6.5524727578    | 6.2875015536    |
| 2.7398106776    | 1.4340094075    |
| 0               | 5.6078739293    |
| 28.2714181573   | 27.7447178654   |
| 0.80166741      | 0.8391810551    |
| 0.8562542549    | 3.5852890621    |
| 0.182347406     | 0               |
| 17.3252158924   | 7.2543764518    |
| 2.1537487604    | 3.0851496127    |
| 0               | 0               |
| 0               | 0               |
| 0               | 0.8369010098    |
| 63.24644162     | 29.424901677    |
| 176.0897155443  | 75.5681350691   |
| 15.720761581    | 8.7122155457    |
| 94.678976674    | 75.913609293    |
| 43.898901462    | 39.54106507     |
| 8.2182395144    | 2.4579451782    |
| 29.4810168654   | 8.5132598696    |
| 11.0935525007   | 14.2348858229   |
| 0               | 0               |
| 2.8423009611    | 2.9753050826    |
| 1.9043806635    | 2.3257444594    |
| 10.6795278758   | 8.7837131668    |
| 2.6496499136    | 11.0945560842   |
| 51.6083680632   | 18.5705290031   |
| 83.7504975905   | 28.719339371    |
| 0               | 0               |
| 6.8649254177    | 7.1861663375    |
| 0.3208237631    | 0.8955641561    |
| 3.151134642     | 3.819420566     |
| 1908.4621157817 | 1537.9640174387 |
| 130.9004988203  | 62.2845115461   |
| 1.0021711358    | 0               |
| 2.6315876589    | 2.0483901282    |
| 0               | 0               |

gene\_expression\_table

|                 |                 |
|-----------------|-----------------|
| 2.8150713391    | 2.3801087128    |
| 35.1980462643   | 44.2141465173   |
| 17.8973236549   | 5.1094964735    |
| 3.6118365468    | 3.1759146049    |
| 1.2503840422    | 0               |
| 0.7183702915    | 1.5039721752    |
| 0               | 0               |
| 0               | 8.2610689458    |
| 31.3022010255   | 17.2457750705   |
| 36.7839488196   | 36.6716535322   |
| 0               | 1.1694199724    |
| 21.9615585015   | 2.2428526035    |
| 61.4991770361   | 42.0201350493   |
| 2.7079044394    | 0.9448731799    |
| 0               | 0.0283907058    |
| 0               | 0               |
| 6.2707046659    | 3.2820696541    |
| 5.574175681     | 1.1670033161    |
| 0               | 0               |
| 1402.0317956041 | 1753.7949012374 |
| 0.8567891532    | 0.3587528776    |
| 64.9813190927   | 58.3046477247   |
| 7.8970183551    | 8.2665555729    |
| 0.4085130543    | 2.1381461419    |
| 1.4554760227    | 2.1765490442    |
| 5.0937713144    | 6.450159581     |
| 0               | 0               |
| 0.1468115213    | 0               |
| 2.2602911951    | 1.1830302233    |
| 1.4272498388    | 0               |
| 0               | 0               |
| 0               | 0               |
| 5.8155905933    | 7.6096604863    |
| 0.6053907277    | 1.2674393978    |
| 6.0099686525    | 6.5647328109    |
| 3.0227605818    | 5.2736820425    |
| 16.4095141273   | 6.7215872097    |
| 0               | 0               |
| 2.0551052075    | 2.3777226548    |
| 1.0886628328    | 0               |
| 4.1646684233    | 10.5635300915   |
| 0               | 0               |
| 0               | 0               |
| 0               | 0               |
| 1.8621327412    | 2.2277375509    |
| 12.2789364649   | 7.6456303319    |
| 1.1674773929    | 0.3621063532    |
| 3.5058133964    | 1.10095988      |
| 0               | 0               |

gene\_expression\_table

|                 |                |
|-----------------|----------------|
| 0.4313472266    | 0.5869914894   |
| 0.4530114812    | 0              |
| 13.9098080553   | 10.9205331804  |
| 0               | 0              |
| 0               | 0              |
| 0               | 0              |
| 0               | 0              |
| 0               | 0              |
| 0               | 0              |
| 10.4129077822   | 10.9001748492  |
| 0.2096201837    | 0.2633151126   |
| 10.8956066127   | 6.0591513378   |
| 6.3063688007    | 2.7266950925   |
| 2.4024181802    | 1.5568045977   |
| 2.524972178     | 6.6078176253   |
| 0.9596336562    | 1.0045392567   |
| 7.8023184333    | 3.009051026    |
| 1.2551622206    | 3.1533526553   |
| 0               | 0              |
| 11.8529351124   | 6.7068040936   |
| 20.2076878908   | 5.7690810093   |
| 5.9554964756    | 12.468362201   |
| 133.2985212034  | 76.3677643934  |
| 0               | 1.9826082084   |
| 12.5683701081   | 11.960455463   |
| 6.8528136933    | 11.9558130844  |
| 0               | 0              |
| 0               | 0              |
| 0               | 0              |
| 0               | 0              |
| 1.8681821162    | 3.9112056194   |
| 13.771866318    | 7.0233325843   |
| 0               | 0              |
| 2.7658443573    | 0              |
| 7.8297347229    | 8.1961234352   |
| 0               | 18.8458666665  |
| 2.0922383827    | 4.6931650342   |
| 33.2173114845   | 15.8483257483  |
| 61.2651636841   | 42.1165621891  |
| 0               | 4.990099305    |
| 2.6239282852    | 2.9183833714   |
| 2.2463303885    | 8.6219699522   |
| 1.5413685663    | 4.5177892906   |
| 6.3721205371    | 0.7847412808   |
| 0.7508727829    | 0.7860095177   |
| 1049.6059897651 | 999.3853110629 |
| 0               | 0              |
| 0               | 0              |
| 43.8592457245   | 22.9558091335  |



gene\_expression\_table

|                |                |
|----------------|----------------|
| 0.5747461629   | 0.6016411363   |
| 0              | 0              |
| 114.4713018251 | 42.7956899812  |
| 13.0320763073  | 20.7729025002  |
| 0              | 2.9905361237   |
| 0              | 0              |
| 3.5306790601   | 2.1740561808   |
| 188.0548085735 | 54.3047569365  |
| 113.0741168105 | 56.4300002244  |
| 0              | 0              |
| 150.1577112034 | 136.8085311907 |
| 1.9079192918   | 2.2825136772   |
| 9.6524346461   | 8.7262817706   |
| 8.7165341921   | 4.9423943095   |
| 0              | 0              |
| 11.2389317169  | 7.3530326131   |
| 9.7031223419   | 8.5945329773   |
| 0              | 0              |
| 23.0296146173  | 12.0536372398  |
| 6.3553545472   | 4.5935657112   |
| 23.1395330891  | 19.9478065574  |
| 2.2417150318   | 2.9332687756   |
| 9.7970428623   | 2.0510981646   |
| 3.7257413751   | 2.3400514024   |
| 4.8011053976   | 8.4303252819   |
| 9.7498018283   | 2.5515097919   |
| 0              | 33.0348790521  |
| 0              | 8.6849216373   |
| 93.2691428788  | 66.3908670791  |
| 415.1902873926 | 342.0071698053 |
| 0              | 0              |
| 95.4208731996  | 32.1062295778  |
| 90.2719145049  | 32.4830501213  |
| 13.3456159747  | 9.604455937    |
| 0.7784915904   | 1.280589725    |
| 14.1987249554  | 6.6884163913   |
| 21.5758721135  | 21.0798044676  |
| 0              | 0              |
| 79.5268294039  | 102.4027140605 |
| 0              | 0              |
| 5.0446823577   | 3.7719613351   |
| 2.7078202977   | 2.8851480938   |
| 3.3567268229   | 6.9637191839   |
| 0.5011476334   | 0              |
| 4.3917672784   | 1.6717374325   |
| 2.4933483485   | 4.6705681868   |
| 1.2360311135   | 0.8779836225   |
| 3.5066218376   | 2.53453961     |
| 0              | 0              |

gene\_expression\_table

|                |                 |
|----------------|-----------------|
| 8.5679230858   | 8.5789047553    |
| 1.967228582    | 0               |
| 70.7053600685  | 26.2037085372   |
| 20.7938322013  | 30.6426806299   |
| 786.4595243971 | 1050.2147005961 |
| 0.035485488    | 0               |
| 0.3094644372   | 1.2957827134    |
| 2.0384090216   | 1.8967070242    |
| 0              | 0               |
| 1.6941072329   | 2.2106544922    |
| 0.2925036837   | 0.1749664311    |
| 2.2607260252   | 14.0745402919   |
| 0              | 0               |
| 3.5488250312   | 3.5291460801    |
| 0.2937139277   | 0.7515643209    |
| 2.3649054715   | 1.5324957751    |
| 74.759584594   | 30.8559813827   |
| 0              | 0.0958244934    |
| 35.6006635995  | 21.4282833388   |
| 1.1407670172   | 4.7765946685    |
| 28.2879959315  | 27.8698534083   |
| 0              | 0               |
| 11.641599211   | 5.1557686691    |
| 0.194868174    | 0.1359912917    |
| 41.738771476   | 15.9998570888   |
| 0.4239550917   | 0.8241886131    |
| 2.4607473147   | 2.0034753004    |
| 0.3085960308   | 0.1076788784    |
| 26.5612093997  | 14.5397736507   |
| 8.584521078    | 5.86058456      |
| 0              | 0               |
| 0              | 0               |
| 0              | 6.6099832776    |
| 0.8567868853   | 2.0179795951    |
| 0              | 0               |
| 0              | 0               |
| 1.0337290286   | 0.5410509434    |
| 0.2321377226   | 0.2430004969    |
| 0              | 0               |
| 0.5765864769   | 0.4526756751    |
| 0.6128933452   | 0               |
| 1.5864549643   | 1.6606923697    |
| 0.2852693129   | 0.1706390599    |
| 8.3620679619   | 6.3386450363    |
| 1.0924842495   | 5.1462293866    |
| 0              | 0.2489019554    |
| 1.596029829    | 0               |
| 0              | 0               |
| 2.5549248037   | 1.6046887768    |

gene\_expression\_table

|                |                |
|----------------|----------------|
| 1.6310960949   | 1.3659379686   |
| 16.1147525908  | 8.1887547444   |
| 0              | 0              |
| 0.444299722    | 0.2325452581   |
| 5.6423224889   | 8.5313977465   |
| 3.9818464314   | 3.8475461919   |
| 5.1260885207   | 6.1512240381   |
| 0              | 0              |
| 0              | 0              |
| 1.0000450055   | 2.0936832717   |
| 1.206610212    | 0.421024321    |
| 0              | 0              |
| 2.6461119447   | 1.4426747367   |
| 1.5225561805   | 1.8594373849   |
| 0.4107577739   | 0.4299789886   |
| 17.8414003238  | 4.0020600356   |
| 1.1110466943   | 0              |
| 0              | 0              |
| 0.5958785594   | 1.8712872394   |
| 0              | 0              |
| 4.920983937    | 4.047417817    |
| 31.7629261622  | 31.4680469781  |
| 4.4614918463   | 4.6702652352   |
| 3.0996931798   | 2.0648357213   |
| 18.8384953782  | 9.3904922901   |
| 196.6071024858 | 86.9247963146  |
| 39.3085368891  | 24.4316019484  |
| 1.6394095254   | 0.8580624572   |
| 0              | 0.2485214415   |
| 0.5594214197   | 1.1711985579   |
| 0.3375758557   | 0.3533725573   |
| 17.14679127    | 11.8201832858  |
| 3.0955991756   | 1.5497834318   |
| 2.582751027    | 3.9842668274   |
| 1.1384399038   | 0.5958563288   |
| 5.4116738671   | 6.6090623336   |
| 65.5099866896  | 57.7762047502  |
| 6.2750414953   | 4.5827993563   |
| 37.7774284082  | 9.6788963782   |
| 1.7648066863   | 0.8210622115   |
| 389.652021193  | 64.6155409413  |
| 9.7700342121   | 15.3408274741  |
| 29.257424833   | 22.7021698174  |
| 129.6805768256 | 141.5833984424 |
| 0              | 0.0533398837   |
| 1.6808060935   | 2.1113503382   |
| 49.710659517   | 37.3307809587  |
| 7.6489387419   | 5.7191908516   |
| 9.5529420568   | 13.7499552253  |

gene\_expression\_table

|                 |                 |
|-----------------|-----------------|
| 8.1658638552    | 8.9041474691    |
| 1.413743267     | 2.9597974214    |
| 0.259231178     | 1.3568088883    |
| 9.186094717     | 17.5834581028   |
| 0               | 0               |
| 4.3851475503    | 4.9434521706    |
| 3824.7891436318 | 1895.7119852094 |
| 5.5284623628    | 8.7879159003    |
| 0               | 7.586828097     |
| 6.131130298     | 4.4432540474    |
| 0               | 0               |
| 441.0178353811  | 227.0681216246  |
| 14.8695045369   | 6.809825719     |
| 2.6778134261    | 1.1212481727    |
| 6.1187378723    | 0               |
| 0               | 0               |
| 0               | 0.0349241424    |
| 7.5065221115    | 2.9466698412    |
| 29.3854955467   | 31.6150362738   |
| 14.9866299401   | 18.825506592    |
| 2.9942759801    | 5.2239861673    |
| 7.6605610032    | 8.9624489954    |
| 0.1150110091    | 0.3009822364    |
| 0.2978077004    | 0.4156579602    |
| 5.4392371666    | 5.6937636827    |
| 7.4053769979    | 2.4479709765    |
| 10.6529898741   | 9.4994186582    |
| 0.2687578743    | 0.1406671356    |
| 2.0736567758    | 0.4341385117    |
| 0.0844368939    | 0               |
| 13.4055680024   | 5.2954245966    |
| 0               | 0               |
| 3.2957699978    | 3.4499939872    |
| 0               | 0               |
| 0.1897744698    | 0               |
| 0               | 0               |
| 126.2418187679  | 167.9244545047  |
| 0.7126403202    | 0.5594909888    |
| 0               | 0               |
| 0               | 0               |
| 12.8030959611   | 7.942050813     |
| 1.6006390735    | 0.8377701088    |
| 18.8725409091   | 3.5919404517    |
| 0.9115932359    | 0               |
| 2.9356179344    | 4.0973183725    |
| 60.3916036722   | 37.1868235539   |
| 3.4601660532    | 2.8976663023    |
| 0.7492482395    | 0.5228726363    |
| 3.5057146727    | 3.6697629234    |

gene\_expression\_table

|                 |                |
|-----------------|----------------|
| 4.5918744992    | 3.6050618117   |
| 0.6889693244    | 0              |
| 1.4805171454    | 1.9925964527   |
| 2.9487893361    | 1.5433882652   |
| 21.3923300205   | 8.7973969006   |
| 15.391234146    | 13.1139787663  |
| 0               | 0              |
| 17.0342243226   | 8.1051512489   |
| 0.700374839     | 0.6284130398   |
| 0               | 4.7938277138   |
| 0               | 0.1003681274   |
| 6.4101267079    | 9.4730619364   |
| 0               | 0              |
| 0.5163093784    | 0.5404698302   |
| 11.4540001492   | 11.5288313829  |
| 0               | 0.5422516369   |
| 0.79863526      | 1.1802452006   |
| 37.9079366629   | 41.6462670895  |
| 5.1760602964    | 5.418271576    |
| 568.5876608274  | 384.8346651604 |
| 1741.1753688424 | 532.6250932564 |
| 38.2009900734   | 12.8852114421  |
| 0.4502785482    | 0.3142327458   |
| 47.1838532721   | 21.9519107749  |
| 0.8021163854    | 0.5877557281   |
| 38.0398676045   | 42.8064194996  |
| 6.032976095     | 1.2630572684   |
| 40.4188167546   | 19.2319073     |
| 1.0093074638    | 0.2881465982   |
| 3.0618288175    | 1.6025528204   |
| 5.4751352108    | 6.1898488835   |
| 177.5433386774  | 45.4303409425  |
| 6.8950501331    | 53.4109853613  |
| 0               | 5.516270844    |
| 18.8367142564   | 9.2791385132   |
| 7.3941691516    | 3.4056773433   |
| 1.9826524702    | 0.8647623956   |
| 33.495417392    | 9.6725019358   |
| 3.7123337287    | 5.9785394151   |
| 1.0435495211    | 1.4565092327   |
| 2.98219272      | 1.248697204    |
| 0               | 0.2450727222   |
| 2.3931264739    | 2.2773742627   |
| 2.772857772     | 5.2247021987   |
| 0               | 0              |
| 5.5458105619    | 0              |
| 0               | 0              |
| 0.6000764432    | 0.4187711566   |
| 0               | 0              |

gene\_expression\_table

|                 |                 |
|-----------------|-----------------|
| 24.9599964101   | 6.7932767683    |
| 24.7371416485   | 11.1615105285   |
| 0.5917637285    | 0.4424678791    |
| 1.3228167513    | 0.5035335753    |
| 0.9824797648    | 0.342818146     |
| 9.1774996015    | 8.1659128807    |
| 0               | 0.6719306366    |
| 20.8285125359   | 36.2849851138   |
| 2.6413157032    | 1.2567794615    |
| 0.6206735061    | 1.786723476     |
| 0.1398988769    | 0.1464453783    |
| 2.2754515557    | 0.7329016089    |
| 6.4651768379    | 10.3771579598   |
| 3808.2998839251 | 4504.4995184852 |
| 1.219965451     | 2.5541063079    |
| 0               | 0               |
| 9.4576037303    | 4.4000745771    |
| 0.3246063616    | 0.6795923237    |
| 1.4887175971    | 6.4561516344    |
| 13.5766334838   | 2.243991409     |
| 2.5381075772    | 1.5182154937    |
| 18.9453458265   | 2.4789855342    |
| 0               | 0.2486650949    |
| 29.9435512254   | 39.4048228675   |
| 2.4475215872    | 0.9150186413    |
| 0               | 0               |
| 12.7821766565   | 6.3715773969    |
| 0               | 0.6778814461    |
| 7.678442027     | 11.3259219615   |
| 0.0803474312    | 0.252321753     |
| 0               | 0               |
| 4.6203323556    | 5.2395834948    |
| 0.1563299848    | 0               |
| 18.287075336    | 12.7618735522   |
| 0.2137130476    | 0               |
| 0.9113545351    | 0               |
| 0.3726556373    | 1.5603755224    |
| 0               | 0               |
| 32.8696779225   | 18.3391821372   |
| 0               | 0               |
| 0.9164247833    | 0.4796542226    |
| 4695.8621475293 | 6932.5856026281 |
| 96.7695167854   | 154.8945200297  |
| 0               | 0               |
| 0               | 0               |
| 6.7636499801    | 5.6641214111    |
| 109.9065253818  | 83.6723992447   |
| 0               | 0               |
| 271.4642806409  | 117.010073985   |

gene\_expression\_table

|                |                |
|----------------|----------------|
| 9.9559029685   | 8.8696040107   |
| 5.2814298942   | 3.685714596    |
| 1.3907417438   | 1.4558208422   |
| 0              | 3.3593867025   |
| 102.1613572161 | 24.507530056   |
| 0              | 1.1141617928   |
| 2.3287799398   | 1.2905756944   |
| 31.9533112675  | 20.6772862397  |
| 0.5338807703   | 0              |
| 7.3480416219   | 4.6151338408   |
| 34.1796445033  | 26.8342985331  |
| 1.9748702468   | 0              |
| 2.109222165    | 3.3118833195   |
| 3.4692522342   | 3.6315942423   |
| 0              | 0.4940908522   |
| 6.7386793917   | 3.5270063443   |
| 0              | 0              |
| 6.4019231299   | 0              |
| 0.3783886669   | 0              |
| 0              | 0              |
| 92.80443138    | 56.6691828531  |
| 62.1951313238  | 81.3819036397  |
| 242.6480655195 | 153.5830075503 |
| 0              | 7.3458589227   |
| 12.5591709553  | 31.2238195432  |
| 14.0466324366  | 66.1677206415  |
| 0              | 0              |
| 43.2106801685  | 66.1093357302  |
| 697.1900802083 | 390.8486620829 |
| 10.671278961   | 4.4682545538   |
| 0              | 0              |
| 14.4531521686  | 9.0776883299   |
| 0              | 0              |
| 0              | 0              |
| 0              | 0              |
| 1.9901699056   | 6.2498968792   |
| 0              | 0              |
| 60.4509462755  | 14.0621599008  |
| 4.6687037855   | 7.3307603378   |
| 0              | 0              |
| 2.6101921949   | 5.4646697943   |
| 0              | 0              |
| 8.9580028806   | 4.9878661514   |
| 4.5180538241   | 2.0562930452   |
| 1.1802701984   | 0.2059167302   |
| 3.003680516    | 7.0140656303   |
| 7.9298003376   | 6.9173929772   |
| 6.7987563037   | 12.1250903732  |
| 4.0724159074   | 0.58799761     |

gene\_expression\_table

|                 |                 |
|-----------------|-----------------|
| 0.5829993398    | 1.4646732398    |
| 0               | 0.1114770296    |
| 1.1992813285    | 0               |
| 0.6504619179    | 0.2553374902    |
| 0               | 0               |
| 0               | 0               |
| 11.3881606334   | 19.1773641376   |
| 2.362530619     | 1.3316606776    |
| 17.3881941148   | 0               |
| 0               | 0               |
| 0               | 0               |
| 4.9750876544    | 2.7633725997    |
| 0               | 0               |
| 1.342763646     | 0.8433585793    |
| 0               | 0               |
| 0.8056281089    | 0.6324953198    |
| 2.5004923517    | 1.4396259361    |
| 2.8410404473    | 1.8783066845    |
| 2.2083730194    | 9.2468511376    |
| 2.3997718968    | 3.1400851017    |
| 10.0483981271   | 4.5288451705    |
| 24.8800516429   | 38.0315798183   |
| 0               | 0               |
| 742.2053521626  | 488.4097452031  |
| 3303.2647304085 | 4386.4584204849 |
| 4.3022473415    | 1.385713526     |
| 5.2806639978    | 3.070983421     |
| 0.2962672057    | 0.1772176507    |
| 0               | 0               |
| 0               | 0               |
| 42.5909242715   | 16.9111520505   |
| 0               | 0               |
| 1.4868405988    | 1.5564165974    |
| 0               | 0               |
| 6.563900176     | 10.9936876204   |
| 2.2017134508    | 0.3841235974    |
| 0               | 0               |
| 2.477320822     | 2.8813843017    |
| 0.8865938618    | 1.1136979199    |
| 0               | 0               |
| 19.0230211082   | 23.7061837296   |
| 0               | 0               |
| 161.3163386227  | 67.5460239842   |
| 0               | 0               |
| 0.0253783239    | 0.0531317809    |
| 0               | 0               |
| 1.0734983863    | 0.3745774109    |
| 14.4867029739   | 20.2194684655   |
| 0.1460510389    | 0               |



gene\_expression\_table

|                 |                |
|-----------------|----------------|
| 0.9394454525    | 0.2458515889   |
| 0               | 0              |
| 19.8522024953   | 14.9536510801  |
| 0               | 0.3784854481   |
| 10.2433471383   | 5.8081181684   |
| 14.2961313811   | 4.8416538983   |
| 0               | 0.5137178465   |
| 0               | 0              |
| 4.9126970573    | 1.7141947931   |
| 22.8464858112   | 8.6503148132   |
| 3362.2431676625 | 729.4461632098 |
| 2.1079858902    | 1.1033140437   |
| 0.6037927799    | 0.6320469758   |
| 5.0753623433    | 9.2975076428   |
| 0.2588745729    | 1.0839539415   |
| 0               | 0              |
| 6.6609887673    | 3.2373187639   |
| 96.2679436384   | 36.344272754   |
| 2.4990058479    | 0              |
| 0.3500051184    | 0.5495751622   |
| 12.2575574393   | 8.5540960063   |
| 15.855845667    | 14.938031181   |
| 1.3057981017    | 4.1007069083   |
| 0.6260274514    | 3.2766105409   |
| 0               | 0              |
| 0               | 0              |
| 2.0748797016    | 1.0859863552   |
| 2.5602484058    | 0.3828648589   |
| 2.8494738551    | 4.4742204432   |
| 0               | 0              |
| 4.7503991181    | 5.5464639144   |
| 0               | 1.8020835167   |
| 18.7503610941   | 10.468146839   |
| 0.5838658842    | 0.1222375221   |
| 28.007561467    | 21.4248106809  |
| 3.0456090014    | 4.1445648738   |
| 9.3766290106    | 4.6740018597   |
| 66.3103978736   | 21.1258056442  |
| 7.6223062156    | 0.797898841    |
| 7.0903944472    | 6.9273736774   |
| 0               | 0              |
| 0               | 0              |
| 0               | 0              |
| 0               | 0.0176415815   |
| 11.5949159794   | 24.2749891154  |
| 8.8103320235    | 0              |
| 0               | 0              |
| 0.5986212298    | 0.4308104801   |
| 4.6650702388    | 4.8833699817   |

gene\_expression\_table

|                |                |
|----------------|----------------|
| 0.7304657264   | 0.9080189332   |
| 28.0486337475  | 67.5306593124  |
| 22.618848124   | 16.169854102   |
| 1.5035360156   | 1.0492621789   |
| 0              | 0              |
| 0              | 0              |
| 1.538701433    | 0              |
| 3.1645893726   | 2.0244123943   |
| 0.084647109    | 0.0886081302   |
| 10.8118992383  | 17.6841201885  |
| 13.2763416863  | 22.1098210149  |
| 0              | 0.9167086581   |
| 13.7510436776  | 10.5559792991  |
| 0              | 0              |
| 19.8735944893  | 11.4419634399  |
| 5.492854391    | 24.3264572678  |
| 0              | 0              |
| 26.0473095585  | 1.2983895724   |
| 100.7973179236 | 61.4532556601  |
| 0              | 0              |
| 7.9703300277   | 7.7015056895   |
| 76.0677128845  | 159.2545306567 |
| 0              | 0              |
| 103.2201647982 | 103.5482073432 |
| 0              | 1.1833056604   |
| 7.8212210571   | 0              |
| 4.1761728038   | 5.8287930984   |
| 0              | 0              |
| 24.3249089353  | 19.5333994908  |
| 0              | 68.8085411865  |
| 0.6426411962   | 2.4666153796   |
| 16.6087716913  | 13.6604059922  |
| 151.4363767641 | 255.3977960887 |
| 76.6443598639  | 40.8192279059  |
| 1.2312733156   | 1.5037051922   |
| 22.2512305302  | 13.4578694059  |
| 2.248410902    | 2.3536242207   |
| 78.2842074969  | 93.6542625736  |
| 0.0421525803   | 0              |
| 0              | 0              |
| 2.1807773276   | 0.8057032113   |
| 1.937342572    | 2.781256589    |
| 1.866991122    | 1.3371910045   |
| 1.5533716732   | 2.9811117633   |
| 0              | 0              |
| 1.1484009811   | 1.1096675619   |
| 3.8119471987   | 1.2277924476   |
| 0.7522222483   | 0.7874221306   |
| 11.5167480065  | 17.7662486867  |

gene\_expression\_table

|                 |                 |
|-----------------|-----------------|
| 4.2166386908    | 1.4713180976    |
| 0               | 0               |
| 0               | 0               |
| 2284.4931887567 | 3024.3362099352 |
| 0.3354592062    | 0.7901029354    |
| 17.8803640342   | 19.6936097993   |
| 0.6164417488    | 2.5811513888    |
| 0               | 0               |
| 44.2705868332   | 26.4812616499   |
| 8.635644668     | 9.0397455528    |
| 2.896389967     | 5.5585294561    |
| 120.2969658975  | 66.4131356187   |
| 6.1547702674    | 4.0999507912    |
| 3.0104281385    | 17.3321483023   |
| 0.162645713     | 0               |
| 0               | 0               |
| 1.591415756     | 1.9990623593    |
| 95.2229945061   | 67.4594638308   |
| 7.7874845648    | 11.0632877013   |
| 4.8526881714    | 5.0797674063    |
| 4.4624144681    | 4.6712310307    |
| 1.747512382     | 2.1951436713    |
| 19.3473540614   | 19.1275540539   |
| 0.2259744156    | 2.6020365901    |
| 2.7531272135    | 4.1170835599    |
| 1.5455194691    | 0.9707047905    |
| 6.1348148141    | 5.2782662099    |
| 0               | 0               |
| 32.6579627642   | 10.683180187    |
| 5.0483856801    | 4.3111393971    |
| 0.7361187594    | 0               |
| 0.2810552674    | 0.2942071149    |
| 0.5803928684    | 0.8968625894    |
| 0.1584854791    | 0.5530057725    |
| 5.168511028     | 12.8496264776   |
| 11.8950474282   | 24.013935993    |
| 0               | 0               |
| 0.8490148027    | 0.4443720233    |
| 15.2729702545   | 11.0683811306   |
| 0               | 0               |
| 0.1251993559    | 0.4368600007    |
| 2.4536175974    | 2.7660052709    |
| 91.7710596082   | 82.5177520568   |
| 2840.9567131164 | 3391.7183017492 |
| 1.8308279841    | 2.395625886     |
| 0.0421125452    | 0               |
| 50.2190719036   | 45.7451824866   |
| 6.6014654622    | 7.8635334708    |
| 14.8832643667   | 7.7898598218    |

gene\_expression\_table

|               |               |
|---------------|---------------|
| 0             | 0.0646309476  |
| 2.1733296785  | 4.8533964951  |
| 0             | 0             |
| 2.787368994   | 2.5009736574  |
| 16.9232448305 | 24.6746871749 |
| 0             | 0.0955963116  |
| 2.0310163759  | 1.5462231427  |
| 14.1638636428 | 12.8927433957 |
| 0             | 0             |
| 3.12207604    | 2.995824428   |
| 1.3522881524  | 0.6434399242  |
| 5.3222038761  | 9.0201253215  |
| 78.6725220182 | 78.4323478729 |
| 9.0103674908  | 4.904641743   |
| 1.4591573788  | 1.33650821    |
| 0.4055698398  | 0             |
| 13.6712803449 | 30.4740573471 |
| 48.3377758725 | 77.6530342674 |
| 0.1473367837  | 0             |
| 17.7163724855 | 2.2775054731  |
| 1.8944748752  | 1.2966592592  |
| 10.6927604285 | 6.6682435292  |
| 0.4829535034  | 0.5055530829  |
| 54.3892380438 | 66.0438536196 |
| 11.2590651146 | 5.5983156629  |
| 3.1275563654  | 3.4103217479  |
| 7.981532408   | 14.5185670262 |
| 0             | 1.5022422846  |
| 0             | 0.1383087047  |
| 3.7047182494  | 2.2160450159  |
| 0.8422618617  | 8.8167510489  |
| 1.4601282635  | 0             |
| 0.1923331076  | 0             |
| 25.6129786323 | 20.982933223  |
| 74.7778427104 | 44.7297350246 |
| 3.2211361386  | 2.8098897268  |
| 0             | 0             |
| 7.3091865064  | 2.5504054708  |
| 1.2499275311  | 0.8722781969  |
| 4.8264208572  | 2.2454537447  |
| 0             | 0             |
| 0             | 0             |
| 0             | 0             |
| 3.9839027524  | 3.4120862074  |
| 12.3804976669 | 14.399819074  |
| 0             | 0.5406710647  |
| 8.8839736282  | 6.642639249   |
| 0             | 0             |
| 0             | 0             |

gene\_expression\_table

|                 |                 |
|-----------------|-----------------|
| 32.3565674277   | 32.661010553    |
| 2709.3236144307 | 3605.9050866286 |
| 0.0358524033    | 0.0750601989    |
| 100.3022414982  | 80.2909343154   |
| 0               | 0               |
| 1283.6403963681 | 1430.3985599873 |
| 1.2330713655    | 0               |
| 0               | 1.0512806169    |
| 3.0457427399    | 1.0627556076    |
| 67.5026719832   | 25.2067080241   |
| 0.2033116818    | 0.1418837035    |
| 1.9076969659    | 1.7573307295    |
| 9.1411275778    | 3.1896274317    |
| 47.9655296923   | 32.1859319488   |
| 10.4332961474   | 18.3199644667   |
| 12.8102956318   | 1.2190679384    |
| 0               | 0               |
| 77.0740869359   | 10.9663131111   |
| 0.2799429474    | 0.5860854888    |
| 0.8252016812    | 0.8638166014    |
| 12.6513287343   | 8.1982591136    |
| 4.7576614026    | 11.795432933    |
| 0.4478006187    | 0.8854265563    |
| 2.0329820271    | 2.1281144541    |
| 0               | 0               |
| 2.0420097442    | 3.5626076981    |
| 3.8430794715    | 1.7879620211    |
| 0               | 1.4515797396    |
| 0               | 0               |
| 2.7600190445    | 3.6114660287    |
| 5.3638451147    | 2.8074218478    |
| 81.3080853842   | 109.99200184    |
| 3.0048715985    | 3.700568395     |
| 43.0541677902   | 63.0964139313   |
| 0               | 0               |
| 19.9212969871   | 5.004841105     |
| 20.4327387657   | 14.879220214    |
| 3.2804422159    | 3.4339489491    |
| 0.2522886042    | 0.2640943295    |
| 391.7605030955  | 282.508338546   |
| 0.8077793725    | 1.05697378      |
| 1.6726175608    | 1.3618009254    |
| 29.957148953    | 17.1871329894   |
| 0               | 0               |
| 1.9198796294    | 4.5675442807    |
| 0               | 1.7392282053    |
| 7.3197927057    | 5.1082126159    |
| 0               | 0.3024815587    |
| 0               | 0               |

gene\_expression\_table

|                 |                |
|-----------------|----------------|
| 6.8634697508    | 0              |
| 0.3287438893    | 0              |
| 0.2500820779    | 0              |
| 0               | 0              |
| 0               | 1.297693385    |
| 11.1045068939   | 5.547883574    |
| 14.0159084498   | 17.493271646   |
| 3.2890423266    | 1.8362407989   |
| 4.4281661575    | 4.0173294084   |
| 1.7707681152    | 0.5296086763   |
| 5.9830172541    | 8.8725687427   |
| 11.734605418    | 5.0737107227   |
| 29.5525694548   | 9.3743842079   |
| 0               | 0              |
| 13.0444719337   | 11.5807225337  |
| 20.1924301867   | 7.1651950349   |
| 3.052444676     | 3.6923262974   |
| 47.2962635829   | 16.144392307   |
| 0               | 15.796165166   |
| 2.8333441303    | 4.4488936819   |
| 27.6199950967   | 21.0272433674  |
| 0               | 0              |
| 0               | 0              |
| 0               | 0              |
| 49.1679012347   | 29.2435737426  |
| 1881.2816889468 | 628.5984330821 |
| 5.1253230251    | 5.3651600783   |
| 38.0622334721   | 31.8746700669  |
| 32.7798381113   | 35.6863052462  |
| 0.7241190905    | 5.3060272923   |
| 3.1093298122    | 3.7973009921   |
| 116.8250444144  | 134.9974601056 |
| 17.6874990954   | 0              |
| 14.9070264099   | 22.5399685628  |
| 0               | 0.6404334911   |
| 6.5824545847    | 8.4216946198   |
| 7.1865282737    | 16.2029935761  |
| 25.3929103236   | 13.4546609736  |
| 3.0774760138    | 1.6107425201   |
| 0               | 0              |
| 26.9241156684   | 16.5041540142  |
| 0               | 0              |
| 0               | 0              |
| 102.7044661904  | 70.7305742341  |
| 69.6434299041   | 179.451965739  |
| 104.3940579674  | 134.257214715  |
| 3.5037478685    | 5.7635349884   |
| 96.7735803411   | 123.4043203323 |
| 16.3183744466   | 9.1979919324   |

gene\_expression\_table

|                 |                 |
|-----------------|-----------------|
| 97.4943474236   | 66.5586189388   |
| 0               | 0               |
| 0               | 0               |
| 0               | 0               |
| 5.7261687719    | 1.9980407053    |
| 7.9686453596    | 5.9197985561    |
| 23.3087782127   | 32.5326685368   |
| 6416.1664618088 | 3637.4575939978 |
| 117.3422393824  | 154.5011515593  |
| 22.7357457349   | 51.5659173091   |
| 2.7425964535    | 17.2256097006   |
| 9.2586165173    | 12.1148363419   |
| 2.9022765866    | 2.2785654293    |
| 130.6294974993  | 107.4403335521  |
| 11.5973211554   | 27.3150276361   |
| 3.9501020038    | 3.1012088612    |
| 10.8910240056   | 5.7003321469    |
| 25.90486062     | 0               |
| 2.600016334     | 2.9938511478    |
| 0               | 0               |
| 161.7554822589  | 35.6473164451   |
| 1.8487619       | 9.6763691687    |
| 8.0949218797    | 1.8157971212    |
| 0               | 2.7677482667    |
| 0               | 0               |
| 3.8271050114    | 1.6024770281    |
| 2.5948849721    | 3.9509983711    |
| 20.9993813495   | 12.963765653    |
| 0               | 0.4978221957    |
| 86.2040202952   | 87.1262448224   |
| 0               | 0               |
| 173.0203961679  | 83.5923707593   |
| 26.8069083565   | 10.2041181392   |
| 10.7179216373   | 123.4140785073  |
| 0               | 1.2968986558    |
| 25.5823934753   | 6.6948773525    |
| 179.8229074703  | 50.8750364581   |
| 69.6650488989   | 135.2150888269  |
| 3.2874388934    | 3.4412730328    |
| 95.2270370184   | 142.4044870318  |
| 71.9291629881   | 15.0590107916   |
| 98.6003757347   | 24.9138046185   |
| 0               | 0               |
| 0               | 2.0155121219    |
| 4.8798618038    | 11.0677940011   |
| 15.04654302     | 44.101788763    |
| 28.5326442562   | 26.2474744671   |
| 167.2469723408  | 150.6443941842  |
| 53.613816713    | 48.469561161    |

gene\_expression\_table

|                 |                 |
|-----------------|-----------------|
| 2.5067792375    | 0.6174312423    |
| 3.1128463418    | 2.3461275641    |
| 9.276212609     | 4.5996103733    |
| 41.8094594635   | 15.9148775393   |
| 12.2867155119   | 33.4403329528   |
| 6.4652198831    | 30.4549054759   |
| 100.4728546885  | 130.0841685355  |
| 41.9344108109   | 10.9741779048   |
| 0               | 0               |
| 35.5453288968   | 28.6220428122   |
| 2992.1288966542 | 4112.7687140338 |
| 25.8016128694   | 2.2507489226    |
| 7.1288247695    | 7.0359910347    |
| 21.9174734867   | 13.5572811836   |
| 3.183332351     | 0               |
| 47.5190293467   | 57.7656693559   |
| 3.3198075225    | 6.950312673     |
| 83.5194331203   | 48.2600822681   |
| 8.4083967644    | 0               |
| 0.554958223     | 0.3872848194    |
| 72.9011787042   | 68.8674274006   |
| 25.8767546154   | 55.4651779384   |
| 9.6202812251    | 8.6318208936    |
| 4.7391102994    | 3.6079088813    |
| 10.5788058368   | 6.3279062996    |
| 247.0849110278  | 99.7638937393   |
| 4.950240087     | 3.374250188     |
| 150.9355250392  | 92.8241076715   |
| 25.1131991467   | 32.1302169907   |
| 767.0498913868  | 470.1922135507  |
| 2.3114951447    | 0.5377023246    |
| 0               | 0               |
| 0               | 8.0481649124    |
| 6.651786108     | 1.949654917     |
| 0.8780951351    | 0.6893888844    |
| 0               | 1.7214057816    |
| 6.2751128384    | 2.8559798952    |
| 6.1632045974    | 5.9139747563    |
| 89.1442520795   | 270.7773925291  |
| 5.2934396872    | 4.7495517254    |
| 0               | 0               |
| 4.0393504898    | 0               |
| 21.1755661176   | 13.2998799973   |
| 59.816904466    | 25.0464032238   |
| 0.9350389216    | 0.6228686693    |
| 0               | 0               |
| 5.7520655581    | 4.9740601683    |
| 2.8208185324    | 4.2950071184    |
| 0.6438836555    | 1.2517400719    |



gene\_expression\_table

|               |               |
|---------------|---------------|
| 0             | 4.2520893871  |
| 0             | 0             |
| 2.8309280284  | 2.963399959   |
| 14.416704733  | 28.8107162774 |
| 5.8126605763  | 2.3662571579  |
| 57.6099569596 | 23.3441758042 |
| 0.9567168653  | 0.500742988   |
| 2.3280658128  | 1.5596841889  |
| 4.2471111946  | 7.754394319   |
| 0             | 0             |
| 0             | 0             |
| 2.5448860846  | 0.8879909395  |
| 11.8434406676 | 3.0994122101  |
| 9.8916096432  | 12.1710587435 |
| 124.832871649 | 57.1700353449 |
| 1.5766255891  | 0             |
| 1.0093904433  | 0             |
| 0             | 0             |
| 0             | 2.0596805131  |
| 0             | 0             |
| 0             | 0.0337882348  |
| 1.4731952867  | 1.0127439017  |
| 0.033925721   | 0             |
| 0             | 0             |
| 40.1838899375 | 22.1390926075 |
| 1.5146415687  | 2.6831851547  |
| 26.4484739854 | 16.3599786679 |
| 0             | 0             |
| 0.1881473839  | 0.0984758256  |
| 0.0236156111  | 0             |
| 0.9895764888  | 1.4502365499  |
| 0.1323005499  | 0             |
| 6.2690043664  | 0             |
| 1.056354924   | 1.4334270096  |
| 2.0882660222  | 2.1859854375  |
| 2.9813137464  | 7.281920112   |
| 20.1953663046 | 8.588287039   |
| 57.3902896182 | 33.6424709174 |
| 0.3040818547  | 0.6820954724  |
| 0.1414054134  | 0.1480224125  |
| 1.1830529639  | 1.7499319283  |
| 5.7843832672  | 3.8124456454  |
| 9.5537554146  | 2.5002047138  |
| 5.1676836149  | 5.1743071329  |
| 2.6103588419  | 2.3909456745  |
| 0.5103249169  | 0             |
| 18.0917345735 | 7.9494219183  |
| 0             | 0             |
| 0             | 0             |

gene\_expression\_table

|                 |                 |
|-----------------|-----------------|
| 0               | 0               |
| 4.3419043005    | 7.7826740533    |
| 0               | 0.0151879668    |
| 13.7317924109   | 5.9893187939    |
| 0               | 0               |
| 0               | 0.0838309028    |
| 4.958504143     | 3.4603566573    |
| 4.3562566527    | 5.1549019948    |
| 43.141809862    | 14.3692851065   |
| 0               | 0               |
| 0.6406104329    | 0.3352937467    |
| 0.6427347765    | 0.8970816595    |
| 14.1099055556   | 29.5403437499   |
| 0.5075282762    | 0.5312778205    |
| 0               | 0               |
| 0               | 0.8862412189    |
| 0.5265378308    | 0.4133826887    |
| 9.5091597879    | 11.0601515525   |
| 0               | 0               |
| 21.3116429712   | 15.6162378172   |
| 14.7261707664   | 13.4883655578   |
| 11.9580395944   | 1.0653285421    |
| 1.8370104055    | 0.9614862168    |
| 0               | 0               |
| 4.081911569     | 1.6434317998    |
| 2.76281393      | 1.8404263142    |
| 12.3796427192   | 17.0086116533   |
| 55.4540858567   | 43.7600405844   |
| 0               | 0.3072765832    |
| 0               | 0.1996980862    |
| 0               | 0               |
| 23.6537540821   | 37.1409303807   |
| 0               | 0               |
| 0.5136357002    | 1.6130131155    |
| 164.9644108868  | 62.4601130751   |
| 1121.7305655469 | 1580.8745805116 |
| 6.4254918933    | 5.5032297793    |
| 735.9004952247  | 1047.1763276929 |
| 0               | 3.4528456416    |
| 2.0898390193    | 6.9275014671    |
| 21.1181101195   | 9.6715158916    |
| 3.4292417879    | 0.5128159323    |
| 0.3079730672    | 0.886557431     |
| 0.1511879162    | 0.6330507311    |
| 1.3468292688    | 1.8798046717    |
| 31.0336753065   | 30.4969498685   |
| 6.0271930968    | 1.920201266     |
| 0.7656835451    | 0.1001891678    |
| 1.1061487029    | 2.7017909458    |

gene\_expression\_table

|                |               |
|----------------|---------------|
| 0.1536116411   | 0             |
| 0              | 0             |
| 0              | 0             |
| 0              | 0             |
| 0              | 0             |
| 0              | 0             |
| 2.0545412484   | 3.6868843352  |
| 0              | 0             |
| 0              | 0             |
| 15.6335378053  | 22.209780975  |
| 0.2110583743   | 0.1104673753  |
| 0.3950511795   | 0             |
| 22.52593708    | 12.652697732  |
| 3.5599097427   | 1.4905976104  |
| 24.8459975779  | 9.7532453313  |
| 26.2090067568  | 35.2741432655 |
| 0              | 5.2466358441  |
| 0.3067855316   | 0             |
| 0.8932833819   | 0.4675420765  |
| 0              | 0.1732141908  |
| 1.6763057685   | 0.3509495399  |
| 86.2354492594  | 29.5225245077 |
| 8.9579677153   | 6.5119108013  |
| 0.5252860004   | 1.6495995268  |
| 0              | 1.0986632387  |
| 2.0429262399   | 2.1385240016  |
| 0              | 0             |
| 0.0777350188   | 0.061029444   |
| 0              | 0             |
| 1.6647985536   | 6.9708080403  |
| 1.0342244734   | 0.2706551289  |
| 8.3896296432   | 8.2943173513  |
| 11.3039117652  | 1.97214549    |
| 33.9248992782  | 17.756199402  |
| 0              | 0             |
| 170.6398778967 | 71.0195345069 |
| 0.4258739454   | 0             |
| 1.4815305251   | 1.0545834681  |
| 0              | 0             |
| 12.4942981502  | 15.144062293  |
| 84.4707182375  | 96.7131870689 |
| 0              | 0             |
| 6.0845604869   | 0.9098978001  |
| 5.2046507456   | 2.5145538008  |
| 0.0626610384   | 0.3935593914  |
| 4.6608606141   | 3.6961843709  |
| 0              | 0             |
| 0              | 0             |
| 18.0729598046  | 16.6255025913 |

gene\_expression\_table

|               |               |
|---------------|---------------|
| 2.7996877533  | 4.8844963501  |
| 2.4776958729  | 3.6310938619  |
| 0.6303800289  | 1.6496959063  |
| 0.6491280953  | 2.3782630752  |
| 0             | 0.2313385834  |
| 0             | 0             |
| 0             | 0             |
| 50.0756400667 | 84.6766940263 |
| 20.490476901  | 3.5748865036  |
| 26.8288928606 | 24.1655932843 |
| 0             | 0             |
| 2.7831875531  | 2.1850691182  |
| 0.8803580206  | 0             |
| 29.7884440867 | 42.0962132151 |
| 1.2917538998  | 1.6902511364  |
| 0.9019037582  | 0             |
| 0             | 0.7871843106  |
| 1.0210979204  | 2.4940526611  |
| 2.2412493661  | 1.4076765385  |
| 0             | 0             |
| 1.9030709854  | 1.2677154553  |
| 0.1784960866  | 0.0622829087  |
| 2.8419938098  | 3.6615182257  |
| 0.0467083271  | 0             |
| 19.6865569316 | 2.6879713043  |
| 0             | 0.2429499676  |
| 0.7173070803  | 0.375436562   |
| 0             | 0.1301881744  |
| 3.0273621235  | 3.5085646043  |
| 5.0595128306  | 3.6843619667  |
| 0.4854247652  | 0             |
| 1.1252997964  | 1.1779576652  |
| 0             | 0.2624089952  |
| 0.6800454513  | 1.0678017821  |
| 0             | 0             |
| 0             | 0             |
| 0             | 0             |
| 0             | 0             |
| 9.2262277938  | 14.9259454997 |
| 1.3262363085  | 1.3882969057  |
| 14.4774283535 | 6.2402499465  |
| 0             | 0             |
| 2.6403559299  | 9.6736854543  |
| 2.3565916774  | 0             |
| 0.3158469653  | 0.1983761243  |
| 2.3423760426  | 1.5324915096  |
| 11.5733626039 | 13.4610362247 |
| 80.6514701279 | 40.8056667007 |
| 1.4830075756  | 1.9405052621  |

gene\_expression\_table

|                 |                 |
|-----------------|-----------------|
| 4.0465212332    | 2.1179381348    |
| 7.4776011721    | 5.6812586823    |
| 34.353949188    | 46.4868505539   |
| 13.5919803973   | 4.3632566009    |
| 0.2966961273    | 0.5590437866    |
| 0               | 1.2306688319    |
| 13.0909354453   | 15.8960826698   |
| 26.6500457255   | 17.0057798124   |
| 13.4766907606   | 6.0459968977    |
| 0.1323892943    | 0.8315063302    |
| 0.4135021761    | 0               |
| 2.3399545533    | 2.9393419364    |
| 0               | 0               |
| 13.4009678198   | 13.5270576015   |
| 131.2519085665  | 179.3460781919  |
| 5.7392324807    | 10.8140348427   |
| 3.0549799291    | 2.5583490094    |
| 1213.5361439765 | 1573.8514928181 |
| 0               | 0.6198597615    |
| 26.2842058342   | 47.6912154238   |
| 0.8044567886    | 2.5263028841    |
| 0               | 0               |
| 0               | 0               |
| 1.8845337403    | 8.5484516012    |
| 0.5267091922    | 0.1378390746    |
| 0               | 1.0230306244    |
| 0               | 0               |
| 1.4297084768    | 0.2494351675    |
| 1.4605411435    | 2.6500698842    |
| 3.7399618716    | 3.9149716085    |
| 0               | 0.2094011068    |
| 4.520687618     | 18.9289241794   |
| 36.8756795258   | 20.3382979686   |
| 0               | 0               |
| 0               | 0               |
| 1.3319557612    | 0.6971419988    |
| 0.3173532104    | 3.9864432356    |
| 8.8915899645    | 7.1597443752    |
| 0.3867066897    | 4.4528268989    |
| 0               | 0               |
| 161.7244075681  | 112.5235742341  |
| 7.3354332884    | 5.4847795715    |
| 38.0191518197   | 15.3765927063   |
| 0               | 0               |
| 0.8644223856    | 1.085847144     |
| 5.8355991607    | 24.4346929912   |
| 2.1752527421    | 2.8463033244    |
| 0               | 0               |
| 0               | 0               |

gene\_expression\_table

|               |               |
|---------------|---------------|
| 0             | 0             |
| 8.6969721489  | 12.6054592948 |
| 0.81075365    | 5.3043280087  |
| 0.6610850368  | 0.4070707039  |
| 0.877803421   | 0.9188798145  |
| 1.629213282   | 0.7579784634  |
| 0             | 0.4863044218  |
| 0.9011504699  | 0             |
| 9.2732053702  | 0             |
| 1.310544664   | 0             |
| 1.1502694901  | 0.7224574823  |
| 0.8387262475  | 3.219238159   |
| 1.070138528   | 0             |
| 0             | 0.6773506778  |
| 0             | 0             |
| 3.3746212079  | 2.7888434228  |
| 8.6242715976  | 2.5793829386  |
| 21.840838964  | 18.3897002934 |
| 0             | 0             |
| 0             | 0.8623692243  |
| 0.0252004579  | 0             |
| 9.3392444862  | 16.4419086193 |
| 1.0262725581  | 0.2685741236  |
| 0.3866235469  | 0.1349051373  |
| 1.1351306144  | 1.0562208992  |
| 52.7229466929 | 45.3347183517 |
| 44.745868026  | 25.7957931337 |
| 0.6312128852  | 1.8996568019  |
| 1.9017419453  | 0.4976832638  |
| 0.6864634235  | 2.6348158939  |
| 1.6235014641  | 0.9151005462  |
| 0.2759948443  | 0             |
| 0             | 0.6089278311  |
| 1.3610726905  | 2.6120663062  |
| 21.0495042189 | 11.7326589095 |
| 68.7221302434 | 11.9896582736 |
| 0.4439234485  | 0.4646966351  |
| 2.3602248319  | 8.235568101   |
| 0             | 0             |
| 2.7278960478  | 0.5711093292  |
| 0             | 0             |
| 19.6376017203 | 12.6142367436 |
| 1.7189352292  | 2.3991626476  |
| 1.4843337236  | 5.8267215534  |
| 0             | 0             |
| 0             | 0             |
| 0.1559541282  | 0.3265038548  |
| 31.145378842  | 15.6976502371 |
| 0             | 0             |

gene\_expression\_table

|                |                |
|----------------|----------------|
| 2.0574978707   | 2.0404207942   |
| 0              | 2.7997665081   |
| 426.8949444634 | 407.1493978678 |
| 2.496962381    | 2.9405323664   |
| 53.6955874721  | 39.0411961562  |
| 4.1139992558   | 5.167814273    |
| 75.0558272558  | 30.5542334973  |
| 0              | 0              |
| 10.8598427612  | 18.9467065632  |
| 0              | 0.144792818    |
| 0              | 0              |
| 0              | 0              |
| 0.7003207197   | 0.8247283815   |
| 0              | 0              |
| 97.3078318642  | 12.346824918   |
| 9.9818410765   | 9.3048924306   |
| 80.7952680658  | 30.2057300735  |
| 4.9715528381   | 1.7347314295   |
| 0              | 0              |
| 1.4821926616   | 0.3878877906   |
| 4.0533983937   | 2.4246144249   |
| 8.5007192622   | 7.5295053958   |
| 0.2682062243   | 1.0027028822   |
| 259.5986375098 | 142.9104743451 |
| 6.5026364315   | 2.0944382186   |
| 0.8731151096   | 1.5232868599   |
| 14.7550881366  | 9.5049510572   |
| 0              | 0              |
| 4.7335658591   | 7.4326062331   |
| 4.759084985    | 13.2847576087  |
| 0.4839018955   | 0.5455109203   |
| 0              | 0              |
| 7.742603762    | 4.5810390388   |
| 32.6080252447  | 10.971611446   |
| 0.2074480763   | 0              |
| 0              | 0              |
| 106.72189621   | 19.7145699851  |
| 0.56767458     | 1.3073250124   |
| 166.5652607685 | 157.2562086296 |
| 44.0275115249  | 12.9991112267  |
| 9.1702193797   | 5.7596012604   |
| 0.2502359741   | 0.104778259    |
| 12.0361154019  | 12.5993396973  |
| 0              | 0              |
| 9.9978759366   | 3.5975918638   |
| 0.1793545927   | 0              |
| 3.5241613195   | 1.359132074    |
| 1.6733967742   | 2.7735290856   |
| 0              | 0              |

gene\_expression\_table

|                |               |
|----------------|---------------|
| 4.6319581203   | 5.8184500769  |
| 0              | 0             |
| 0              | 0             |
| 43.5578887388  | 28.9669718697 |
| 16.4892816407  | 8.1020502824  |
| 2.0616639073   | 5.0356564749  |
| 0              | 0.6083010547  |
| 4.5446920861   | 0.4324871628  |
| 430.0113004724 | 47.2167980506 |
| 3.2011198482   | 3.3509147289  |
| 1.1272620974   | 1.4750147388  |
| 1.232537266    | 2.0965965494  |
| 0              | 0             |
| 1.4791180671   | 0.8445451055  |
| 4.4955726868   | 0             |
| 0.6025788098   | 0.4205174657  |
| 3.5007258809   | 2.1556121667  |
| 0              | 0.0189207005  |
| 0              | 0.037102207   |
| 4.6369282837   | 4.4732122245  |
| 0.5879020532   | 0.6154126502  |
| 2.2873755353   | 0.9209277637  |
| 1.1855586896   | 0.6205181723  |
| 10.2544347678  | 1.3417857707  |
| 3.7674788563   | 0.3585251125  |
| 9.6236491853   | 4.8843555256  |
| 19.0206789223  | 5.3095313455  |
| 19.0024207004  | 2.093855783   |
| 27.9120471167  | 33.5149689805 |
| 2.6130720388   | 1.7406769558  |
| 0              | 0.0699779721  |
| 10.9769810331  | 12.5352476068 |
| 4.8339491255   | 7.4697474165  |
| 48.0239218763  | 67.0282379448 |
| 1.3746230225   | 2.3546419413  |
| 4.0286418999   | 1.4057200938  |
| 2.1100471541   | 4.618370324   |
| 0              | 0             |
| 0.1280004878   | 0.0669951049  |
| 12.0267983693  | 5.87514045    |
| 0.4747312098   | 1.4908380928  |
| 0.6551853803   | 7.5442891543  |
| 1.6912865223   | 2.9507157844  |
| 8.3165784544   | 0             |
| 7.4796676735   | 15.6593503293 |
| 3.9603319854   | 1.5546201889  |
| 47.1838532721  | 34.5742594705 |
| 16.7994521293  | 11.1066786324 |
| 80.5177197628  | 82.4532145062 |



gene\_expression\_table

|                |                |
|----------------|----------------|
| 6.1164254242   | 6.4026406427   |
| 38.2282962942  | 44.7250737349  |
| 7.8355111267   | 4.2963748368   |
| 21.5883437159  | 7.5328533306   |
| 105.6506988753 | 35.730554379   |
| 63.6068374775  | 26.7957139397  |
| 1.0463607469   | 0              |
| 96.3616800124  | 46.7450414857  |
| 0              | 0              |
| 0              | 0              |
| 67.3534076732  | 60.4330100138  |
| 1.0767928324   | 2.8884009047   |
| 0              | 0              |
| 0              | 0.550861791    |
| 1.1775536367   | 1.6435422654   |
| 25.6699719874  | 12.5398868546  |
| 2.5245895553   | 2.2651941624   |
| 0.4463140532   | 1.0278380355   |
| 69.3533976369  | 30.189582074   |
| 8.2471809274   | 0.5395689898   |
| 0.6021024274   | 1.2605550483   |
| 0              | 0              |
| 2.6447786367   | 0.6921349487   |
| 37.4507212252  | 25.7621093708  |
| 0              | 0              |
| 0              | 0              |
| 135.5920437296 | 203.5323146825 |
| 8.6679692365   | 12.0981103122  |
| 4.4770396837   | 3.8863995437   |
| 16.600829875   | 7.3169085528   |
| 1.9940114591   | 7.6535076819   |
| 0.1755268869   | 0.3445135952   |
| 0              | 0              |
| 0              | 0              |
| 0              | 0              |
| 0.3391771048   | 0.3550487361   |
| 0              | 0              |
| 0              | 0              |
| 0.5334804049   | 0.1396110917   |
| 0              | 0              |
| 1.85547388     | 4.3701747697   |
| 6.5496000293   | 0              |
| 4.2219458194   | 2.0088680754   |
| 0.3507066911   | 2.2027070632   |
| 9.7032872128   | 5.88056985     |
| 360.2175888911 | 32.3206113969  |
| 1.1167418141   | 0.5844996081   |
| 4.5158298668   | 3.4196375157   |
| 7.2599310469   | 5.8458892825   |

gene\_expression\_table

|                 |                 |
|-----------------|-----------------|
| 0               | 0               |
| 7.4456753082    | 6.6806504081    |
| 0               | 0               |
| 70.8834138577   | 14.4278496239   |
| 0.9565613613    | 2.0026463905    |
| 1.9417767164    | 0.6775470781    |
| 11.9545440038   | 5.631278042     |
| 5.4400207302    | 0               |
| 2.2759192339    | 3.8118716671    |
| 6.476215155     | 4.8423332592    |
| 0               | 0               |
| 1.1274163478    | 1.1801732595    |
| 32.0381305995   | 10.0612019047   |
| 5.0781492539    | 7.5939697613    |
| 8.0624684518    | 11.2529971043   |
| 8.9021241322    | 2.8672907067    |
| 6.6277369955    | 4.5643939446    |
| 3.8730011929    | 4.8144057744    |
| 53.9993716302   | 28.2631232708   |
| 0.7015502047    | 5.14065239      |
| 10.9519240579   | 13.8779750056   |
| 0.6304340517    | 0.8579153873    |
| 12.7351329632   | 5.0658056321    |
| 2.0321779119    | 1.2763636264    |
| 10.6675479585   | 4.8551003441    |
| 2.629096645     | 1.7200774825    |
| 2.2812124424    | 2.8655528323    |
| 1498.2599855352 | 2073.2362326822 |
| 0.3875447294    | 0.8113594014    |
| 1.7289186472    | 0.3619645146    |
| 0               | 0               |
| 0               | 0               |
| 71.8807040865   | 97.6485373024   |
| 1.3671742306    | 3.1485310966    |
| 3.97427967      | 3.7442287772    |
| 0               | 0               |
| 714.3779193248  | 578.6600967607  |
| 10.3280546728   | 15.1358915104   |
| 0               | 0               |
| 8.9305061343    | 9.0887270067    |
| 0               | 0               |
| 7.3992293126    | 6.9301598101    |
| 1.2321325978    | 0               |
| 25.3616828005   | 6.9256880046    |
| 2.252792549     | 2.3582109049    |
| 0               | 0.964716539     |
| 9.6608446674    | 3.3709730995    |
| 9.6262649427    | 31.4393708682   |
| 33.2919756695   | 52.2747867541   |

gene\_expression\_table

|                 |                 |
|-----------------|-----------------|
| 13.8358314826   | 6.3995855833    |
| 1.1454228795    | 0.3996741328    |
| 3.6425977205    | 11.4391540449   |
| 0.4403466839    | 1.3828574925    |
| 55.8043203933   | 14.3922633246   |
| 125.7363281979  | 150.4229712812  |
| 42.1672475914   | 44.8523865294   |
| 0               | 0               |
| 17.3520730924   | 6.4331028477    |
| 9.197895241     | 8.4056642947    |
| 17.2177184965   | 29.2103597199   |
| 15.4852880491   | 4.0524786845    |
| 11.8279840996   | 3.5375625685    |
| 0.8557612498    | 0.597204127     |
| 3.1337131711    | 4.9205306827    |
| 9.9032196798    | 11.5184845938   |
| 1.4109527056    | 0.7952956126    |
| 0               | 0               |
| 3.1128516638    | 0.3620573419    |
| 1.3062388354    | 1.2430578731    |
| 15.3955876478   | 5.7557203032    |
| 6.7329790208    | 2.8192182287    |
| 5.2481756538    | 4.5127326913    |
| 316.1537629012  | 468.843039471   |
| 39.2402261814   | 10.6003752004   |
| 0.6284503025    | 1.5350027827    |
| 2.2922112005    | 4.4990140001    |
| 0               | 1.3145086236    |
| 1.1014361132    | 1.2682750214    |
| 125.4361376631  | 127.2025538735  |
| 0               | 0               |
| 3.8157957417    | 0               |
| 18.7273845512   | 18.0957448651   |
| 2.5615798785    | 1.0725791162    |
| 0               | 0               |
| 0.9182744057    | 1.2358859397    |
| 22.7304236971   | 0               |
| 3.3130116013    | 3.4680424034    |
| 0.0359902545    | 0.1130232042    |
| 0               | 0               |
| 0               | 0               |
| 0               | 0               |
| 0.1331895473    | 0               |
| 10.9652757467   | 14.7066879687   |
| 1139.8943626081 | 708.2839821472  |
| 1738.8637691152 | 1510.0816268736 |
| 542.1920615326  | 785.259339695   |
| 282.6453202799  | 219.164128597   |
| 1.1167913537    | 1.3360583701    |

gene\_expression\_table

|               |               |
|---------------|---------------|
| 4.056647761   | 3.4245779544  |
| 0             | 0             |
| 15.6001696098 | 0             |
| 52.1169869225 | 29.0964141529 |
| 0.3823717707  | 0.8621085325  |
| 0             | 0             |
| 0.334514485   | 0             |
| 1.0966297379  | 2.0089055086  |
| 0             | 0             |
| 1.3040620178  | 2.9576841227  |
| 0.9045417881  | 0             |
| 0             | 0             |
| 2.6464004043  | 0             |
| 0.180408232   | 0.8813016304  |
| 27.7039864481 | 12.7124959197 |
| 0.9222738587  | 0             |
| 0             | 0             |
| 0.5934842693  | 0.2662526072  |
| 0             | 0             |
| 6.5851329197  | 4.8827407668  |
| 0.717134913   | 1.2511548337  |
| 0.1521744929  | 0             |
| 0.242799773   | 0             |
| 4.4045682476  | 4.3911218321  |
| 14.8494659225 | 15.5443396174 |
| 5.896437175   | 3.086179074   |
| 1.9426313375  | 4.5189685487  |
| 43.2006984914 | 79.1389456015 |
| 0.1396682776  | 0             |
| 5.6369963725  | 8.2097766075  |
| 16.2830122854 | 4.5890298732  |
| 6.8612314682  | 4.972361214   |
| 58.8457837372 | 29.259735994  |
| 0.1082980572  | 0.6801948798  |
| 45.2213123528 | 22.9924621898 |
| 12.8320460797 | 17.4125201867 |
| 1.7775990502  | 2.0468590475  |
| 1.8687753439  | 0.4890559493  |
| 0.1257649429  | 1.1848504819  |
| 0.3565006867  | 2.9357060049  |
| 30.0450197427 | 15.7254810755 |
| 0.092964832   | 0.0973150771  |
| 1.5953533119  | 1.6700071113  |
| 3.9404298102  | 3.7498366809  |
| 0.5358694658  | 0.2804726113  |
| 5.0975892651  | 2.052357127   |
| 1.3931480578  | 1.8958416861  |
| 9.2845840802  | 10.798946418  |
| 4.5875386031  | 5.1764084945  |

gene\_expression\_table

|                 |                 |
|-----------------|-----------------|
| 0.1878700061    | 0.4916532341    |
| 1.9653850754    | 0.7200740173    |
| 0.0379529803    | 0               |
| 0.2868942218    | 0.2252394754    |
| 0               | 0               |
| 0.1134187498    | 0.2374522526    |
| 2.3705964073    | 1.5952675748    |
| 12.0446998306   | 8.4055505535    |
| 1.3699163823    | 1.9120279571    |
| 0               | 58.8242609047   |
| 2.6005455285    | 0               |
| 0               | 0               |
| 0               | 1.085819306     |
| 0.4855558391    | 0               |
| 1.152406076     | 2.2403315446    |
| 0.939050258     | 0.3276642227    |
| 7.9963818076    | 10.7314983217   |
| 0               | 0               |
| 1623.4374817419 | 1846.8745359438 |
| 5.2116986922    | 7.2741035382    |
| 5.0498042938    | 6.4607980358    |
| 0.7059414919    | 1.8474392206    |
| 17.5687462254   | 10.7946395307   |
| 7.513201287     | 4.9154862298    |
| 0.3711458374    | 0.2590089536    |
| 2.1075349129    | 2.5213211505    |
| 0.5455555638    | 0.5710845769    |
| 0               | 0               |
| 0.318358283     | 0.4582265977    |
| 0               | 0               |
| 30.8711858433   | 14.5091294415   |
| 0               | 0               |
| 4.0017048735    | 2.9671819477    |
| 0.065058416     | 0.340513968     |
| 0               | 0               |
| 6.534321253     | 8.3601120877    |
| 0.6515322734    | 2.0460612489    |
| 0               | 0               |
| 25.0721327224   | 14.4349541864   |
| 0.1495408794    | 0               |
| 0               | 0               |
| 0.9599799316    | 0.502450868     |
| 0               | 0.7373300656    |
| 0.2415261228    | 0.1264141114    |
| 1.1461935343    | 1.5997721541    |
| 1.3155448612    | 1.3172310199    |
| 53.6401069237   | 42.9383654578   |
| 2.1918336998    | 3.2121593213    |
| 0.2366921386    | 0               |

gene\_expression\_table

|                |                |
|----------------|----------------|
| 7.1801515849   | 0              |
| 0.4922858579   | 0.1374192374   |
| 5.5190238534   | 3.3866836946   |
| 0.0833109151   | 0              |
| 1.6583486797   | 3.4719006348   |
| 0.1954880136   | 0              |
| 0              | 0              |
| 24.5876358456  | 13.1829818043  |
| 6.4753138812   | 5.3047746113   |
| 0              | 0.5683217478   |
| 5.0316729836   | 4.9379322447   |
| 0.5742015353   | 0.8014280307   |
| 1.2949580262   | 1.3555549711   |
| 7.6565637716   | 5.2096518705   |
| 101.7031197988 | 47.6104556643  |
| 42.2135557816  | 58.9185587282  |
| 0              | 0              |
| 15.6216811509  | 2.4226207837   |
| 7.9128610537   | 14.1996679253  |
| 22.4936980386  | 12.9020711997  |
| 4.0809586263   | 1.7087700577   |
| 0.0922610348   | 0.1352096844   |
| 2.5800437652   | 3.9064791172   |
| 1.2637216298   | 1.9842853236   |
| 0.6653946622   | 0.3482657445   |
| 3.4107212198   | 1.9835134983   |
| 0              | 0              |
| 0              | 0              |
| 0              | 0              |
| 17.113056149   | 13.2221299435  |
| 0              | 0.3307185246   |
| 0.4778993555   | 0              |
| 343.5111980619 | 253.3444290193 |
| 0.9299492433   | 0.6489771839   |
| 43.5609269178  | 34.5076084775  |
| 1.126435474    | 1.1791464862   |
| 3.4648886284   | 7.2540528875   |
| 0              | 0.044026245    |
| 13.9665959732  | 12.3709013905  |
| 2.5345360844   | 3.568013838    |
| 105.8440657486 | 0              |
| 0              | 0              |
| 0              | 0              |
| 0              | 0              |
| 0              | 0              |
| 0              | 0              |
| 14.4114529584  | 0              |
| 0.7200116415   | 0.8479172743   |
| 4.0436566184   | 1.8812789362   |

gene\_expression\_table

|                |                |
|----------------|----------------|
| 0.5032044547   | 0              |
| 0              | 0              |
| 0              | 0              |
| 14.8464917429  | 3.9371106532   |
| 2.5240270855   | 3.7744824749   |
| 13.8603248948  | 12.2767718664  |
| 3.1534815836   | 2.8884163476   |
| 0.3185117871   | 0.3334163947   |
| 53.4789315897  | 34.988407973   |
| 0              | 0              |
| 2.3900613865   | 7.0053288823   |
| 2.3470894146   | 6.449415912    |
| 0              | 0              |
| 0.544633665    | 1.1402390766   |
| 6.3404747002   | 9.9557612971   |
| 0              | 0              |
| 0              | 0              |
| 0.7157842869   | 0.5619593041   |
| 73.4645025494  | 134.4321582586 |
| 3.776323016    | 6.5883904257   |
| 0              | 0              |
| 1.5146241224   | 1.426950214    |
| 7.3048849417   | 1.4920416699   |
| 1.9941465916   | 1.0437308664   |
| 1.6185448997   | 1.2102028131   |
| 14.0289480359  | 7.692365993    |
| 5.2108240858   | 4.6612567211   |
| 0.8475500131   | 0.6900527766   |
| 8.5130393265   | 1.6202550823   |
| 0              | 0              |
| 123.6320526146 | 70.4423581728  |
| 623.1138336381 | 313.975068384  |
| 13.708157528   | 6.6229034951   |
| 0.4175292925   | 0              |
| 1.4337319357   | 0.5002742466   |
| 4.5359469976   | 4.7482044799   |
| 2.4728626371   | 0.8628596893   |
| 1.6486497306   | 1.9175527896   |
| 3.1785651285   | 5.8227830007   |
| 4.5845344869   | 11.6548735943  |
| 3.7545415253   | 1.3871412389   |
| 0.379079982    | 0.7936376989   |
| 1.6670507069   | 0.6980238207   |
| 170.4467821153 | 90.6738607315  |
| 5.0529794863   | 6.6117890725   |
| 1.6128303822   | 0.9647440073   |
| 0              | 0              |
| 0.3816288481   | 0.285347849    |
| 0.1227134373   | 0.0642278771   |

gene\_expression\_table

|                 |                 |
|-----------------|-----------------|
| 0               | 0               |
| 1.5375319848    | 0               |
| 2.5133823507    | 2.9598692427    |
| 4.8146152465    | 2.2399612786    |
| 0               | 4.4307425307    |
| 4.1359728271    | 14.5347960207   |
| 2.4612670781    | 1.2882204502    |
| 0               | 0               |
| 10.4251878848   | 8.7304236746    |
| 0.6922872972    | 0               |
| 5.3504960897    | 4.3562322295    |
| 0               | 0               |
| 0               | 1.0253628709    |
| 131.810700589   | 41.9935233654   |
| 154.7343006915  | 65.9898224313   |
| 0.2769322931    | 1.014619228     |
| 0               | 0               |
| 15.5242797816   | 24.3760966051   |
| 0               | 0               |
| 0.9327508751    | 0.5284038988    |
| 0.0107458038    | 0               |
| 1.3537483624    | 1.2146540341    |
| 0               | 0               |
| 1.1967638304    | 0.7046807764    |
| 0.0837019328    | 0.2628561749    |
| 0.2074808768    | 0.0482644102    |
| 2.7492843936    | 1.7638961656    |
| 0.8595056519    | 0.089972581     |
| 24.1923497593   | 8.4414730865    |
| 5.5414142358    | 8.8271857728    |
| 20.8990746428   | 16.1699837959   |
| 2.7982355494    | 1.9527851006    |
| 0.2917782046    | 0.9162954806    |
| 9.9846145181    | 3.1355519416    |
| 6.7328056245    | 2.3492880204    |
| 5898.7302789827 | 2374.3327944885 |
| 0               | 0               |
| 2.1975506681    | 2.4049469157    |
| 0               | 0               |
| 4.6260736534    | 2.8696584117    |
| 5.3028639484    | 1.8990293758    |
| 1.4995771728    | 3.1394983466    |
| 53.8665068881   | 30.9219934119   |
| 28.5241540175   | 5.6874149024    |
| 0               | 0.2515574368    |
| 1.6364342175    | 1.7130103784    |
| 4.3642413498    | 0.761410658     |
| 4.3691583712    | 4.7565555014    |
| 0               | 0               |



gene\_expression\_table

|                 |                 |
|-----------------|-----------------|
| 0.4833624285    | 0               |
| 4.7784245942    | 6.131519052     |
| 0               | 0               |
| 4.3408855738    | 4.5440152496    |
| 0.9298112217    | 0.6083258097    |
| 0               | 0               |
| 0.1782464169    | 0.3109789554    |
| 16.3689343425   | 28.2222060885   |
| 0               | 0               |
| 1.3664098299    | 2.7017728418    |
| 0.1770626968    | 0               |
| 0               | 0               |
| 15.3076118937   | 13.4153784932   |
| 0               | 0               |
| 1516.1858925417 | 1938.6940456999 |
| 68.5367503237   | 73.7094811197   |
| 2.880670493     | 0.9522537153    |
| 1.7629559637    | 0.9227263248    |
| 14.1726373688   | 11.412183995    |
| 12.8841171638   | 3.3717558246    |
| 128.0273626007  | 47.7325602139   |
| 0               | 0               |
| 0               | 0               |
| 0.1078024717    | 0               |
| 1.1114154748    | 1.1634236333    |
| 8.6035510533    | 2.4562227635    |
| 9.4477884836    | 9.8898932519    |
| 0.4144472544    | 1.3015233496    |
| 0.9942800245    | 0.3469356284    |
| 12.5524740296   | 13.961102399    |
| 0.6209409517    | 0.8249969389    |
| 0.3123371482    | 0.3269528165    |
| 0.6082404417    | 0               |
| 0               | 0               |
| 0.2216842911    | 0.9282316083    |
| 3.0080780775    | 3.7786075924    |
| 1.1174812351    | 4.2404279876    |
| 0               | 0               |
| 0               | 0               |
| 0.5854174908    | 0.2042706079    |
| 54.4374816435   | 59.09540799     |
| 0.3604842747    | 0.2515686432    |
| 76.1654105864   | 56.949667677    |
| 26.7911077484   | 11.6853270386   |
| 23.6684312624   | 14.0038171824   |
| 159.8959364155  | 110.8315046578  |
| 1.7518251724    | 0.3667601996    |
| 0               | 0               |
| 0.9998374816    | 1.2076435396    |

gene\_expression\_table

|               |                |
|---------------|----------------|
| 1.090888737   | 0              |
| 0             | 0              |
| 1.0661086046  | 1.1159966497   |
| 0.5307842751  | 0.5128819133   |
| 0             | 0              |
| 0             | 0.3479796065   |
| 0             | 0              |
| 0             | 0              |
| 0             | 0              |
| 6.1945004774  | 2.9179661314   |
| 13.2193925662 | 0              |
| 0             | 2.1097617859   |
| 2.3910051359  | 2.2753555309   |
| 1.8948906609  | 0.9395816059   |
| 49.5607462022 | 108.9478272704 |
| 7.6477228109  | 6.4561244857   |
| 1.6302476937  | 1.4738251283   |
| 1.7022415643  | 0              |
| 2.2728972665  | 1.9466643379   |
| 2.6811672364  | 2.806631182    |
| 3.6565887195  | 1.4176655738   |
| 0             | 0              |
| 93.5050654594 | 44.2473902365  |
| 3.986445242   | 2.276175846    |
| 2.8537027414  | 2.2404303029   |
| 3.1923325016  | 2.2278107884   |
| 36.0897412026 | 23.2776884048  |
| 0.0369761673  | 0.6193031907   |
| 1.2919240425  | 2.1638064217   |
| 0             | 0.4320790416   |
| 1.0925948808  | 0              |
| 0             | 0.0959713307   |
| 12.3593917242 | 12.9377435814  |
| 0.33414752    | 0.0823020692   |
| 4.9850798313  | 2.1743142796   |
| 0.3525017789  | 0.4919959093   |
| 12.4981964899 | 3.4631586132   |
| 0             | 0              |
| 0             | 0              |
| 0.4925717838  | 0.9023375308   |
| 36.454058524  | 22.5734672093  |
| 6.6313817506  | 2.192113928    |
| 0             | 0              |
| 0.7963029754  | 0              |
| 0             | 0              |
| 28.138364407  | 11.7820343143  |
| 0             | 0.5050195892   |
| 1.7847443397  | 0.9341303011   |
| 3.995653535   | 1.0456570604   |

gene\_expression\_table

|                 |                 |
|-----------------|-----------------|
| 0.0475001517    | 0               |
| 0               | 0               |
| 0.0897668294    | 0               |
| 0.1723517006    | 0.4510420412    |
| 3392.9184411466 | 4722.2449194915 |
| 0.1502001083    | 0.4716859529    |
| 1.4188610906    | 0.7426280102    |
| 1.4312978699    | 1.4194182059    |
| 0.2994165188    | 0.940282717     |
| 0               | 0               |
| 0.2452576479    | 0.2567343629    |
| 2.3755723388    | 0.9946944466    |
| 3.9053648516    | 5.2905011724    |
| 1.9844642165    | 1.6816450803    |
| 0               | 0.6377573837    |
| 0               | 0               |
| 0               | 0               |
| 10.4839422636   | 10.9745333553   |
| 0               | 0               |
| 0               | 0               |
| 0               | 0               |
| 0               | 2.0272091828    |
| 2.7173615085    | 0               |
| 0               | 0               |
| 0               | 0               |
| 0.3014296935    | 0.3155349526    |
| 0               | 0               |
| 48.1668502152   | 56.7233944438   |
| 1.3260914161    | 1.3881452332    |
| 21.542466847    | 14.2424440021   |
| 2.4440893965    | 1.9493023979    |
| 0.1709415446    | 0               |
| 0.1263895983    | 0.0661519697    |
| 0               | 0               |
| 8.4775843057    | 4.0673823809    |
| 17.4162622247   | 13.6734359488   |
| 0.0188240828    | 0.0197049468    |
| 0               | 0               |
| 0               | 0               |
| 5.7116082566    | 4.1392247873    |
| 1.6808933786    | 0.4398874962    |
| 16.7072060621   | 27.3265809739   |
| 0.1353114532    | 0.1416432883    |
| 0               | 0               |
| 0               | 0               |
| 0.915240198     | 1.2318022642    |
| 1.8163302807    | 2.6326032817    |
| 0.2745496571    | 0.3831961037    |
| 0.2951141807    | 0.6178478169    |

gene\_expression\_table

|                |                |
|----------------|----------------|
| 3.1527290507   | 1.1550908275   |
| 11.9305400751  | 11.2994122116  |
| 0.7451053922   | 0              |
| 0              | 0.0137990755   |
| 1.2512240445   | 0.4365914928   |
| 490.4261112825 | 204.2461141089 |
| 7.3664368103   | 28.2742009628  |
| 0              | 0.1724647732   |
| 0              | 0              |
| 0.6800883167   | 0              |
| 2.2354117427   | 4.6800335438   |
| 0              | 0              |
| 0              | 0              |
| 186.7341153384 | 61.9454311631  |
| 2.133411768    | 4.466487514    |
| 27.5943080517  | 24.5527349863  |
| 0              | 0.3641554851   |
| 0.0119403264   | 0.0124990683   |
| 7.6822142528   | 6.1859229344   |
| 0.3643401352   | 0.1525557034   |
| 0              | 6.2560513813   |
| 0              | 0              |
| 72.3471688526  | 60.5860961665  |
| 54.8314868963  | 78.0603283343  |
| 23.9641454428  | 6.9201479257   |
| 1.7873724421   | 2.1828469663   |
| 1.139722653    | 0.3728298226   |
| 0              | 0              |
| 0.1863428363   | 0.1950626607   |
| 8.1737685214   | 1.555682933    |
| 0.7137875349   | 1.1207833246   |
| 12.5213614815  | 7.1878701555   |
| 7.5222754572   | 5.0109033923   |
| 2.8791570479   | 3.0138858325   |
| 0.6079091623   | 0              |
| 1.4587682906   | 1.5270306589   |
| 13.6382542183  | 19.0352664501  |
| 5.5076970071   | 8.3278390996   |
| 0              | 1.13950409     |
| 0              | 0              |
| 10.3252307425  | 8.4923103603   |
| 0              | 0              |
| 0              | 0              |
| 0              | 0              |
| 0              | 0              |
| 51.3297765896  | 25.7306871607  |
| 4.8227852708   | 6.310581517    |
| 17.3671091474  | 28.7240757201  |
| 50.7688422622  | 28.9168853716  |

gene\_expression\_table

|                |               |
|----------------|---------------|
| 2.7754586959   | 3.1579727886  |
| 18.0104320471  | 19.4423848248 |
| 1.5428379638   | 2.5840549319  |
| 2.2124918308   | 3.9703274292  |
| 5.9238878742   | 0             |
| 0              | 0.2490281808  |
| 11.6832346208  | 6.4061622051  |
| 8.5516838427   | 7.6730192748  |
| 0.153383074    | 0             |
| 0              | 0             |
| 58.6314672507  | 16.1187128354 |
| 8.2816018792   | 6.7727621094  |
| 116.8140934354 | 16.6745936423 |
| 133.4881705761 | 64.6705984915 |
| 0              | 0             |
| 4.3117893209   | 1.5045191505  |
| 98.0703631106  | 59.0292234862 |
| 20.3948963106  | 3.9719564247  |
| 3.5725419657   | 2.8047880258  |
| 4.5063169146   | 4.7171878712  |
| 0              | 0             |
| 1.6382287349   | 0             |
| 8.0867239236   | 1.5872134356  |
| 0.0316654047   | 0.0331471722  |
| 3.9791980508   | 0.6942337885  |
| 217.8548199888 | 81.1526548692 |
| 8.3951904928   | 11.5220961532 |
| 0.7905075794   | 1.2412485083  |
| 0              | 0             |
| 2.0772321226   | 1.4496234745  |
| 14.2024283988  | 8.6724308303  |
| 0              | 0             |
| 0.3970412153   | 0.4618006335  |
| 1.8819223434   | 1.4774895032  |
| 3.192752352    | 3.9498203488  |
| 0.581536421    | 1.0145819019  |
| 0              | 0             |
| 4.5374813688   | 4.7498106513  |
| 2.3598315185   | 3.2936782826  |
| 0.3539175932   | 0.2469859991  |
| 12.6726571248  | 9.596440744   |
| 0              | 0.0153597478  |
| 0.0586680889   | 0.138180227   |
| 0              | 0             |
| 0              | 0             |
| 2.2122470049   | 1.4151915869  |
| 15.4986008267  | 5.899581993   |
| 0.1029640544   | 0.2874192222  |
| 14.3542243057  | 9.9034495167  |

gene\_expression\_table

|                 |                 |
|-----------------|-----------------|
| 1.3172767111    | 1.1819297556    |
| 4.11812741      | 4.6856882863    |
| 48.7970657045   | 23.4314225617   |
| 0               | 0               |
| 31.9002529678   | 14.8413378367   |
| 0.1317040874    | 0               |
| 0               | 0.422900328     |
| 15.3185628702   | 4.8106163201    |
| 2.5477683769    | 0.6667474966    |
| 0               | 0               |
| 0               | 0.5523044644    |
| 31.0753872356   | 22.7706816405   |
| 40.5900423162   | 13.5966188929   |
| 10.4502012498   | 10.3634653706   |
| 0               | 0               |
| 0               | 0.4912682946    |
| 0               | 0               |
| 0               | 0               |
| 1.5163838611    | 2.8572161807    |
| 10.3123616185   | 5.3974618377    |
| 5.8624924051    | 5.7958902294    |
| 0               | 0               |
| 0.5922442671    | 1.6532214824    |
| 2.1400581918    | 2.8674575322    |
| 2.9918888347    | 5.3829408354    |
| 1.6219948308    | 1.6978953074    |
| 0.7801782843    | 0.9528007487    |
| 0               | 0               |
| 0.8299397203    | 0.9928872626    |
| 1.6253665605    | 1.2010057522    |
| 0               | 0               |
| 0.9065008405    | 0.3163067054    |
| 2.6529943892    | 4.1657099996    |
| 0               | 0               |
| 5.0031877803    | 5.6737520372    |
| 1938.1620092677 | 2713.7037511642 |
| 5.7126938483    | 0               |
| 0               | 0               |
| 0               | 0               |
| 1.3810399294    | 0.4818883453    |
| 1.8683977918    | 1.9558285778    |
| 0.9852710138    | 0.1473394717    |
| 0               | 0               |
| 0               | 0               |
| 767.0171408684  | 1632.5823310797 |
| 7.8765914731    | 5.4967818831    |
| 0               | 0.1907878323    |
| 42.8790943974   | 51.3907608226   |
| 6.4081018277    | 3.3539829524    |

gene\_expression\_table

|               |               |
|---------------|---------------|
| 0             | 2.3584571246  |
| 11.4290552047 | 4.3504990571  |
| 4.714124748   | 8.3890239547  |
| 71.2196947644 | 77.1231584547 |
| 0             | 0             |
| 7.9017028629  | 8.9907166195  |
| 0.2688025125  | 0             |
| 16.5391010413 | 6.9252161632  |
| 0.2936257062  | 0             |
| 0             | 0             |
| 4.5931777132  | 3.6060849597  |
| 0             | 0             |
| 5.0108720101  | 4.8312465365  |
| 0.1517318608  | 0.1985401014  |
| 1.6270112489  | 1.7031464665  |
| 0             | 0             |
| 0             | 6.6022553159  |
| 2.8310862223  | 3.6221356789  |
| 8.5154694204  | 3.5943333716  |
| 0.7321183433  | 0             |
| 2.6193857042  | 0.5875625598  |
| 0             | 0             |
| 0.3922410459  | 0             |
| 1.6211350779  | 0.5656651076  |
| 0.3992121774  | 1.8805190462  |
| 6.5919501746  | 2.5876565054  |
| 0             | 0             |
| 8.1941008313  | 7.831666849   |
| 2.6281360299  | 0             |
| 42.7280263485 | 0             |
| 0.0583825866  | 0.1833437158  |
| 0.1811178408  | 0.178440625   |
| 1.8808652372  | 1.9688794314  |
| 0             | 1.0988532695  |
| 1.8172343169  | 1.4267031993  |
| 2.1795772517  | 1.2222693924  |
| 44.1352636334 | 17.7694431934 |
| 1.0592653736  | 0.3960118546  |
| 3.3956907104  | 3.1364033313  |
| 53.5374680735 | 25.2741716438 |
| 0.8247840032  | 0.6279122752  |
| 5.96317674    | 0             |
| 0             | 0             |
| 0             | 0             |
| 8.6183910921  | 9.0216846041  |
| 1.1011945295  | 1.559568311   |
| 0             | 0             |
| 1.3073451725  | 2.0527826521  |
| 3.9937636766  | 0.6967749914  |

gene\_expression\_table

|                |                |
|----------------|----------------|
| 3.2665849228   | 1.4654756616   |
| 6.2538034767   | 1.2274588567   |
| 0.2844599021   | 1.4888553398   |
| 2.5691865422   | 2.3730091804   |
| 1.7811048574   | 2.1934715436   |
| 10.2693353082  | 12.4698654046  |
| 0              | 0              |
| 9.7760493345   | 12.3982969141  |
| 6.1032448931   | 3.1944216675   |
| 79.2206650034  | 46.7411001564  |
| 9.3324718918   | 27.6793446794  |
| 11.7341943971  | 32.7554411805  |
| 0              | 0.7946987119   |
| 3.5075404988   | 2.5419282841   |
| 26.548657599   | 18.5273262692  |
| 208.7869842    | 131.7770580084 |
| 9.9583282458   | 13.0304043494  |
| 0              | 0              |
| 0              | 3.1020606336   |
| 1.812527906    | 2.8460164308   |
| 1.1529983737   | 1.2069523842   |
| 0              | 4.8293577938   |
| 4.5287837677   | 0.94814121     |
| 0.5764581183   | 1.2068664036   |
| 2.0004314117   | 4.1880812962   |
| 3.928435171    | 2.7415096175   |
| 0              | 9.6614697123   |
| 0              | 0              |
| 2.1108383745   | 3.3144210784   |
| 5.4385734907   | 3.0837456815   |
| 0              | 0              |
| 5.6167355009   | 8.9033457788   |
| 0.8302286235   | 0              |
| 11.2529519389  | 8.3149612747   |
| 0              | 0              |
| 21.3697997434  | 22.3697893581  |
| 337.2147868938 | 428.3001055119 |
| 8.3880076785   | 17.5610410164  |
| 18.3523974285  | 2.8816783706   |
| 0.102483958    | 0.107279646    |
| 0              | 2.4169180599   |
| 17.1268341474  | 11.6742263661  |
| 2.453830179    | 1.1008525693   |
| 264.9428417273 | 184.4020718015 |
| 0.1789856524   | 0              |
| 0              | 0              |
| 15.7017052859  | 24.3259594924  |
| 2.1428971663   | 1.8889878063   |
| 0.89173297     | 2.2403068564   |



gene\_expression\_table

|                 |                 |
|-----------------|-----------------|
| 0               | 0               |
| 1.1215306881    | 1.5653495776    |
| 0.0319541888    | 0               |
| 2.0171817696    | 1.2224906917    |
| 0.8199443547    | 4.2915663037    |
| 0               | 0               |
| 3.7151361084    | 2.9167381017    |
| 4.6244580452    | 4.8408573599    |
| 0.0652569975    | 0               |
| 1.1919326611    | 2.1389289995    |
| 0               | 0               |
| 61.930018959    | 48.1238562794   |
| 0.940837289     | 1.3324621422    |
| 3.9034389456    | 11.5537957993   |
| 0.8504661552    | 0.4046651429    |
| 14.7428179951   | 23.2420198056   |
| 0               | 0.2407387423    |
| 0.8720683078    | 2.5104099059    |
| 0               | 0               |
| 0               | 0               |
| 0.175929012     | 0.5524845793    |
| 0.7820762116    | 1.9882060901    |
| 1.3439121173    | 1.1723332047    |
| 1.4825185197    | 0.9311353612    |
| 203.173120869   | 147.8748147266  |
| 2155.791998823  | 2338.434711485  |
| 0.9469986755    | 0.3050193933    |
| 0               | 0.0628643893    |
| 0.9785097296    | 1.5364479404    |
| 22.3904009301   | 8.7893059095    |
| 0               | 0               |
| 0.1938826295    | 0.2536940936    |
| 0.9038787315    | 1.3009910469    |
| 6744.1528334345 | 7445.3025691248 |
| 0.4930407212    | 1.290280818     |
| 26.9646671231   | 21.3419620187   |
| 0.2209993913    | 0.694022858     |
| 0               | 0               |
| 3011.3914754574 | 2281.0367685667 |
| 1.1734572535    | 2.183766449     |
| 7.3343885037    | 6.1420781802    |
| 2.2393322985    | 0.4262037797    |
| 0.9578171167    | 0               |
| 54.1042664708   | 111.2126070496  |
| 5.8616666687    | 2.0453201908    |
| 1.593350727     | 0.8339554082    |
| 6.9404881734    | 2.4217550054    |
| 1.1078144755    | 0               |
| 0               | 0               |

gene\_expression\_table

|               |               |
|---------------|---------------|
| 1.1733012872  | 1.7058407818  |
| 0             | 0.0362185831  |
| 2.3049567403  | 1.6085440631  |
| 0.4457759126  | 0.8457773592  |
| 0             | 0.2580600945  |
| 1.9539317799  | 5.764210703   |
| 2.5897088385  | 0.6777232579  |
| 1.4272917958  | 0             |
| 0             | 0             |
| 0             | 0             |
| 50.2109392604 | 35.6660781906 |
| 0             | 0             |
| 1.0483127354  | 0.877894425   |
| 0             | 1.8047231234  |
| 2.1061192972  | 1.821252557   |
| 0.3698030727  | 0.3871078316  |
| 0             | 8.4961821166  |
| 0.5177795139  | 1.6260262799  |
| 0             | 0.6650592632  |
| 5.0496292269  | 6.7961882891  |
| 5.0430615825  | 5.7380970115  |
| 0             | 0             |
| 0.6292770446  | 0.3293618823  |
| 2.8554872127  | 2.2857887601  |
| 0.5173601967  | 0.2707849105  |
| 0.2928468074  | 0.6744109558  |
| 0             | 0             |
| 4.6645548233  | 6.5104405968  |
| 4.8651921456  | 3.3952376653  |
| 0             | 0.0573359161  |
| 0.3712891682  | 0.1943317341  |
| 0.107712548   | 0.0751686037  |
| 4.7305470836  | 9.0034741533  |
| 0.9875994585  | 1.6916951544  |
| 0.0498996759  | 0             |
| 10.180161638  | 3.7611308682  |
| 10.1332467229 | 4.8617374591  |
| 1.9540068424  | 14.3181056425 |
| 4.9017062841  | 8.8938707836  |
| 1.6903205642  | 5.186226084   |
| 1.1665449722  | 1.953812623   |
| 28.9254833602 | 11.6866460897 |
| 1.761013      | 0             |
| 9.6066848075  | 6.7041500358  |
| 0             | 0.0725957815  |
| 2.7765071186  | 0.4152046355  |
| 0.0367406251  | 0.4615186227  |
| 0.2901149354  | 0.9110721775  |
| 4.3921560708  | 2.4340684897  |

gene\_expression\_table

|                 |                |
|-----------------|----------------|
| 3.2834371419    | 1.7185420106   |
| 2.6959956142    | 4.2332301701   |
| 0               | 0              |
| 2.7152188025    | 4.2634142624   |
| 11.2285349253   | 5.2239861673   |
| 28.4429906368   | 27.2928029505  |
| 7.3689778021    | 12.1550876333  |
| 0               | 0              |
| 572.0165876981  | 909.6174770421 |
| 1.1175132168    | 0.67725652     |
| 0.4927705043    | 0.1289573664   |
| 35.4468448547   | 104.1598299481 |
| 0.7256165878    | 0.4747321693   |
| 5.2698810176    | 7.4001595763   |
| 0.900184757     | 2.6384637287   |
| 0               | 0              |
| 1.2809701609    | 0.1489902834   |
| 0               | 0              |
| 0               | 0              |
| 10.6002016193   | 9.1046014459   |
| 0               | 0.2764376158   |
| 0               | 0              |
| 2.8787018272    | 3.4438963542   |
| 1.0794823264    | 2.0985643499   |
| 0               | 0              |
| 7.3737087124    | 3.8593789522   |
| 0               | 0              |
| 11.7901042018   | 20.7566914203  |
| 0.9827044716    | 1.4401655239   |
| 0               | 0.073116507    |
| 15.9763688769   | 16.7239754596  |
| 0               | 0.0707950086   |
| 1.3754419824    | 1.5997834842   |
| 10.9124897168   | 6.1509185676   |
| 0               | 0              |
| 1173.9180903103 | 745.6891471359 |
| 7.0338980988    | 11.2900038893  |
| 1.8576462335    | 3.6298712901   |
| 4.1671224132    | 2.5082195316   |
| 0               | 0.2728257398   |
| 0               | 0              |
| 2.923480221     | 0.6800629083   |
| 1.874167568     | 9.8093417397   |
| 19.3905542311   | 5.5357979982   |
| 1.1072586608    | 4.0567530611   |
| 0               | 0              |
| 0.9943920251    | 0.346974709    |
| 0               | 0              |
| 11.2225245173   | 7.419585609    |

gene\_expression\_table

|                 |                 |
|-----------------|-----------------|
| 0               | 0               |
| 1568.7886652613 | 840.1950340218  |
| 0               | 0               |
| 2.5664544358    | 1.1513787645    |
| 8.1911436746    | 3.4297777387    |
| 3.9660835798    | 5.7484724877    |
| 25.7298277779   | 7.6953836659    |
| 6.5315596026    | 7.8627809517    |
| 0               | 0               |
| 108.1916635557  | 77.1443293713   |
| 41.8136680458   | 23.8747193203   |
| 0.2225041475    | 0.6987483697    |
| 17.0089980792   | 10.5210926684   |
| 9.0190615163    | 14.8360209017   |
| 1.3697430195    | 3.1544468837    |
| 6.1274251481    | 4.2761033956    |
| 3.2567599894    | 4.6875929706    |
| 31.8360072239   | 61.8906935021   |
| 9.8349383825    | 5.1475798231    |
| 11.1473275208   | 11.0206857762   |
| 16.2630536472   | 14.5920647205   |
| 201.7134948643  | 143.1243442263  |
| 0.7389645072    | 0.7735439998    |
| 27.2167372566   | 18.1302109744   |
| 0.1039435434    | 0.163211298     |
| 44.2234729013   | 17.3275060439   |
| 0               | 0               |
| 0               | 0.0547138806    |
| 0               | 0               |
| 5.1903184357    | 5.0936221108    |
| 0.0617674557    | 0.0323289172    |
| 0               | 0.2857111778    |
| 1287.3065570166 | 1044.9187215101 |
| 0.7867798577    | 0               |
| 0.9104445135    | 1.2707311087    |
| 1.2770953421    | 1.6339356137    |
| 0               | 0.6979806831    |
| 7.0719989829    | 6.5319968926    |
| 23.4081888897   | 16.964005815    |
| 8.1877647004    | 9.8895083713    |
| 0               | 0               |
| 1.2193450244    | 6.7011193979    |
| 9.2897442974    | 19.4489069264   |
| 0.9584080486    | 1.6052100759    |
| 16.9289348037   | 8.8605581279    |
| 28.2725222721   | 8.1956828781    |
| 54.60209741     | 33.4777748584   |
| 1.3364286348    | 2.0518170598    |
| 0.9646500001    | 1.548345185     |

gene\_expression\_table

|                |                |
|----------------|----------------|
| 30.4537292802  | 25.4445444399  |
| 6.9636322589   | 2.4298307061   |
| 13.9855354928  | 18.5439771673  |
| 41.3385994185  | 14.4243398387  |
| 5.4333241962   | 1.8958580059   |
| 0.5519238029   | 2.8887540737   |
| 0              | 0              |
| 37.880909876   | 60.6465738199  |
| 24.7804836143  | 17.6291768844  |
| 16.8090945841  | 10.6500096819  |
| 0              | 0              |
| 0.0821955727   | 0              |
| 45.855860424   | 54.4018854154  |
| 5.6370817389   | 29.5043314882  |
| 0              | 0.4930411554   |
| 5.5718727785   | 7.5823876894   |
| 9.4086544131   | 7.3866959409   |
| 5.5102460726   | 8.345329539    |
| 0              | 0.114650879    |
| 67.6803415466  | 203.6863064467 |
| 26.2106393099  | 8.4422011414   |
| 0              | 0              |
| 42.7772555216  | 33.5842476354  |
| 0.954192658    | 0              |
| 0              | 0              |
| 494.2717968436 | 335.6114662593 |
| 18.7392077666  | 25.3855412813  |
| 20.8356120661  | 45.4387596303  |
| 11.5973211554  | 18.2100184241  |
| 9.0799268808   | 6.6533724183   |
| 16.403457922   | 21.4638124168  |
| 120.3180795    | 131.3078092197 |
| 0              | 0              |
| 0              | 0              |
| 0              | 0              |
| 0              | 0              |
| 0              | 0              |
| 0              | 0              |
| 0              | 0              |
| 0              | 0              |
| 366.6976936648 | 265.7472492635 |
| 0              | 0              |
| 0              | 0              |
| 0              | 0              |
| 0              | 0              |
| 5.9114177301   | 5.3738239596   |
| 66.8386252658  | 73.1465936235  |
| 35.2508603705  | 24.6002717433  |
| 0              | 6.9706168287   |
| 2.2452137027   | 1.7627080575   |

gene\_expression\_table

|                 |                 |
|-----------------|-----------------|
| 16.8371664992   | 17.6250536971   |
| 2.0912342257    | 2.1890925366    |
| 4.741459936     | 2.6725646223    |
| 50.9549047566   | 131.2967760953  |
| 13.4616251187   | 19.2831811603   |
| 0               | 0               |
| 0               | 0               |
| 0.4587369079    | 0.9234678525    |
| 2.5675619158    | 4.300335607     |
| 15.46740523     | 21.5882601345   |
| 0               | 0               |
| 0               | 0               |
| 0               | 0               |
| 0               | 0               |
| 16.239275208    | 14.3278839668   |
| 3.0224453948    | 2.5706519227    |
| 17.0927420007   | 16.3138309034   |
| 0               | 0.1420673309    |
| 0               | 0.0858182825    |
| 0               | 0               |
| 0               | 0               |
| 1.9233376066    | 0.8628596893    |
| 0               | 0               |
| 79.2559337528   | 298.6728389127  |
| 21.1787066595   | 25.8647131917   |
| 23.6121737409   | 45.0723482112   |
| 0               | 0               |
| 8.1416074099    | 5.1744296769    |
| 0               | 0               |
| 1.6487171988    | 0.1327590874    |
| 0               | 0               |
| 12.1356191304   | 6.3517498277    |
| 0               | 0               |
| 1.8482692534    | 0.322459689     |
| 288.491229504   | 372.7657834261  |
| 0               | 0               |
| 0               | 0               |
| 0               | 0               |
| 16.6885098098   | 2.3821964575    |
| 15.7543963182   | 217.389481007   |
| 2919.6256008653 | 8203.6133000543 |
| 22.5681733685   | 22.9225301989   |
| 0               | 0               |
| 39.2131752092   | 42.6900625755   |
| 5.1430015841    | 7.4025406084    |
| 37.0344660694   | 26.1455072682   |
| 0               | 0               |
| 0               | 0               |
| 7.290370482     | 7.3379999049    |

gene\_expression\_table

|                |               |
|----------------|---------------|
| 78.1223397793  | 63.7039060325 |
| 6.3921065106   | 5.1168168958  |
| 0              | 0             |
| 31.7279649922  | 79.1242782901 |
| 0              | 0             |
| 0.2232669312   | 0.934858404   |
| 0              | 0             |
| 22.4949050285  | 49.2357725844 |
| 24.2116648579  | 17.6123756976 |
| 0              | 0             |
| 0.9947587489   | 0.694205341   |
| 5.2500200062   | 1.8318973984  |
| 0.4920235905   | 0.588625829   |
| 22.5121080426  | 12.3438602733 |
| 12.352872298   | 7.4070313186  |
| 1.4420869971   | 0             |
| 12.025734484   | 14.3868262963 |
| 1.2743104799   | 0.6669706163  |
| 21.701342445   | 18.5321642033 |
| 3.6565887195   | 19.1384852469 |
| 0              | 0             |
| 0              | 0             |
| 0              | 0             |
| 21.7187139418  | 3.7891718051  |
| 2.6240574365   | 0.6540116562  |
| 0              | 0             |
| 25.7374999262  | 42.0966781149 |
| 5.7069861907   | 7.9653891933  |
| 3.9670599063   | 2.3070536599  |
| 0.0400746362   | 0             |
| 6.4557943797   | 4.8270644336  |
| 8.4585688183   | 2.9514611743  |
| 10.0490220531  | 6.5453181176  |
| 10.8952688153  | 12.6056453939 |
| 3.7748550005   | 4.3905528276  |
| 0              | 0             |
| 6.0839353818   | 6.9224241785  |
| 0              | 2.4376096605  |
| 29.5582428808  | 15.4707033987 |
| 135.2948366957 | 285.693614218 |
| 0              | 0             |
| 0              | 0             |
| 110.8497374817 | 86.4588653426 |
| 51.8245341749  | 33.5831096107 |
| 7.2077895153   | 8.622942397   |
| 16.889444348   | 11.4398562643 |
| 0.0897897388   | 0             |
| 11.3316514495  | 11.8619106893 |
| 4.0482081975   | 2.1188210873  |

gene\_expression\_table

|                |                |
|----------------|----------------|
| 0              | 0              |
| 26.7884681263  | 13.6204105646  |
| 1.124558233    | 0.9113662457   |
| 0              | 0              |
| 8.1351471159   | 10.9002591434  |
| 0              | 0              |
| 1.4052324106   | 2.9419791856   |
| 0.0369386116   | 0              |
| 708.3182304408 | 767.7101458449 |
| 0              | 0.4462487393   |
| 1.4477399053   | 1.0491827577   |
| 4.2044283193   | 2.7796879217   |
| 0              | 0              |
| 1.7460182781   | 0.4569305932   |
| 0.2502502907   | 0.130980317    |
| 36.6978225887  | 11.1201546621  |
| 26.0110280815  | 16.3369210613  |
| 1.9125898014   | 2.4311075025   |
| 35.1936724779  | 14.7362174568  |
| 13.9250403532  | 9.2760538139   |
| 0.1951297525   | 2.0426075646   |
| 5.679756929    | 3.3974505446   |
| 0              | 0              |
| 16.2932262885  | 20.4667920756  |
| 0.2227246184   | 0.466293822    |
| 0              | 0              |
| 7.2637997554   | 10.579068953   |
| 2.137719251    | 4.1558266408   |
| 0.5549899411   | 0              |
| 4.2942783873   | 3.3714203265   |
| 0              | 0              |
| 0.7518168997   | 2.83319213     |
| 11.2638202085  | 10.7190048343  |
| 0.6523463933   | 2.3900542139   |
| 226.9854371995 | 40.7326479035  |
| 819.2345268015 | 735.0601858503 |
| 24.7851937863  | 9.8170289722   |
| 3.1454883235   | 2.195119969    |
| 10.6232652104  | 24.2626382249  |
| 0.3038803874   | 0              |
| 0              | 0              |
| 12.4791428248  | 10.1601876271  |
| 0.2300833334   | 0              |
| 0              | 0.9155032229   |
| 1.5133520215   | 1.4401532814   |
| 3.8724468196   | 4.632749859    |
| 0              | 0              |
| 1.5493163416   | 1.2163618972   |
| 95.0140606986  | 72.937478883   |



gene\_expression\_table

|                 |                 |
|-----------------|-----------------|
| 546.5536774894  | 264.8747207716  |
| 59.5703094535   | 0               |
| 158.4720893959  | 117.5385320483  |
| 13.0070819147   | 9.0771614175    |
| 0               | 0               |
| 13.0534171305   | 13.6642455765   |
| 19.7921752138   | 7.2514192237    |
| 34.5749041857   | 28.3248159511   |
| 13.624667822    | 0.7131113836    |
| 2.2775206406    | 5.9602403393    |
| 43.2628333872   | 27.5661808424   |
| 53.4777690042   | 135.5310971244  |
| 0               | 3.8949075243    |
| 2143.4742871969 | 2726.4501378655 |
| 15.8201971381   | 8.2802478693    |
| 0.3625786735    | 0               |
| 0               | 0               |
| 1.7943413351    | 8.4523800801    |
| 298.6387547361  | 297.5477065592  |
| 206.0274437843  | 38.0591294156   |
| 3.9880229181    | 6.9577342563    |
| 0.4126949483    | 0.6720105966    |
| 3.3177658205    | 3.473019094     |
| 0               | 0               |
| 1.6874217154    | 0               |
| 0               | 1.361884333     |
| 0               | 0               |
| 0               | 0               |
| 4.3537727278    | 2.5635968166    |
| 234.8247896358  | 129.8946556125  |
| 49.152702821    | 61.6794197077   |
| 6.191440656     | 4.5749408305    |
| 6.4019231299    | 0               |
| 193.7382329308  | 164.7783486308  |
| 58.728569383    | 26.7290195017   |
| 1.5002606417    | 0               |
| 9.5437396836    | 7.4002477354    |
| 1.1093262612    | 0.5278348436    |
| 2.2140376446    | 2.3176424831    |
| 7.7036695928    | 6.0481193604    |
| 60.5806704842   | 18.8897276177   |
| 5.4712852171    | 6.6818633076    |
| 0               | 0               |
| 0               | 0               |
| 0               | 0               |
| 1.3400730042    | 9.8194675817    |
| 12.8997781543   | 0               |
| 1078.3190539663 | 1759.9234384436 |
| 13.7075621166   | 2.391500161     |

gene\_expression\_table

|                |                |
|----------------|----------------|
| 0              | 0              |
| 7.0959983049   | 6.5709692277   |
| 0              | 0              |
| 1.167097388    | 0.4072370517   |
| 0              | 0              |
| 182.844265707  | 93.2463371004  |
| 0.7547625793   | 0.3269302077   |
| 0.3033506714   | 0              |
| 11.8971293842  | 4.981539958    |
| 432.9960933118 | 341.6867544297 |
| 0              | 0              |
| 11.460367744   | 7.7625383657   |
| 15.3281078597  | 6.7559492111   |
| 4.7321817755   | 0.9907243942   |
| 0              | 0.4864999322   |
| 66.6696670333  | 8.7236802989   |
| 10.5091309561  | 3.4574259471   |
| 24.1436574463  | 9.2917089753   |
| 0              | 0              |
| 0              | 0              |
| 23.5788891483  | 20.4266913526  |
| 1.2650928448   | 1.3242922628   |
| 4.6196179845   | 6.4477210811   |
| 3.3082997651   | 3.0946941132   |
| 0.6656298867   | 0.4645184804   |
| 0.2439379256   | 2.298175963    |
| 3.0264410541   | 3.2853975505   |
| 54.8322367986  | 44.2333867899  |
| 1.0266468962   | 0.8060162621   |
| 9.7487438321   | 4.8023207825   |
| 13.3820161745  | 16.3429247991  |
| 8.7584977763   | 10.8874126728  |
| 3.8193978144   | 3.9981247185   |
| 28.2318766346  | 11.0099314431  |
| 1.436030317    | 2.2548430089   |
| 0              | 0              |
| 0.2994663818   | 0.4702196531   |
| 0.6926033155   | 0              |
| 11.9767873672  | 0              |
| 53.1916816984  | 41.2450082545  |
| 47.1406589989  | 23.9683406616  |
| 0              | 0.8889383535   |
| 0              | 0              |
| 4.7061423912   | 1.8947554177   |
| 1.1382854817   | 1.3617725821   |
| 2.5009587996   | 1.1219957045   |
| 0              | 0              |
| 0.3973889327   | 0.4159845588   |
| 0              | 0              |

gene\_expression\_table

|                 |                 |
|-----------------|-----------------|
| 0.0846077982    | 0               |
| 1.565139261     | 0               |
| 2.9801242952    | 2.0797185294    |
| 4.7936542845    | 3.5842650405    |
| 2.2441845657    | 0.9135778225    |
| 3.9534068623    | 5.3799260529    |
| 68.912535119    | 36.5627230635   |
| 0.7186129399    | 0.9403001133    |
| 6.9323126921    | 3.6283534836    |
| 14.8152931954   | 1.7231741993    |
| 4.4553830473    | 5.1548043229    |
| 1.9615925539    | 1.8118097157    |
| 8.117860392     | 37.8535325986   |
| 1.4204021127    | 3.2711121388    |
| 0.5250258448    | 0.6595130154    |
| 0               | 0               |
| 1.415556868     | 2.9635943568    |
| 7.5807696286    | 3.8754807184    |
| 3.0132306223    | 3.7850799793    |
| 2.600153043     | 4.9487744871    |
| 51.6768305874   | 35.2246663318   |
| 1.0044992659    | 1.8025788536    |
| 3.8625864545    | 1.2865154751    |
| 0.2318806225    | 0.2184582294    |
| 89.5613168995   | 204.8661285699  |
| 3.4749134007    | 2.1825121923    |
| 0               | 0               |
| 6.1304715253    | 8.4227640321    |
| 0               | 0               |
| 18.1832636612   | 13.0233595191   |
| 6.8080711649    | 7.572067343     |
| 42.2744318824   | 25.2872250372   |
| 81.1449058689   | 37.9205549748   |
| 0               | 0               |
| 0.0474462601    | 0.0496664853    |
| 0               | 0               |
| 2.4728311505    | 5.1770922161    |
| 0               | 36.1223606408   |
| 0               | 0               |
| 0               | 0               |
| 33.9288504661   | 0               |
| 0               | 0               |
| 0               | 0               |
| 420.0781035166  | 300.8716295453  |
| 9668.9394093626 | 1259.7441719895 |
| 0               | 0               |
| 0               | 0               |
| 61.8499172191   | 0               |
| 8.4765006888    | 2.535187002     |

gene\_expression\_table

|                 |                |
|-----------------|----------------|
| 44.0982606875   | 0              |
| 6.4478333356    | 0              |
| 0               | 0              |
| 0               | 0              |
| 83.3156328048   | 0              |
| 0               | 0              |
| 38.0801451113   | 0              |
| 0               | 0              |
| 0.7480586405    | 0.978829611    |
| 0               | 0              |
| 0               | 7.8311496798   |
| 0               | 5.2352865082   |
| 7.7816302517    | 1.8101706529   |
| 28.247722258    | 21.6843447226  |
| 249.9468984143  | 119.9197287941 |
| 0               | 0              |
| 0               | 0              |
| 0               | 0              |
| 15.1146968689   | 31.6439638395  |
| 174.96282889    | 0              |
| 0               | 0              |
| 0               | 0.5787178773   |
| 1.4464907425    | 3.0283571776   |
| 0               | 0              |
| 0               | 0              |
| 0               | 35.8168861322  |
| 0               | 0              |
| 0               | 0              |
| 1045.5994900659 | 0              |
| 0               | 47.8570258208  |
| 0               | 0              |
| 0               | 0              |
| 0               | 0              |
| 61.4584620468   | 0              |
| 0               | 0              |
| 0               | 34.7872425884  |
| 69.3107566267   | 0              |
| 0               | 0              |
| 0               | 0              |
| 2.0624521056    | 0              |
| 2.5551091999    | 2.6746743196   |
| 6.3541663417    | 8.5519369715   |
| 5.5260852512    | 1.9282252607   |
| 1.8374275286    | 6.7319317657   |
| 0               | 0              |
| 4.3292184589    | 9.0636043552   |
| 0               | 3.0600834754   |
| 0               | 1.0124536629   |
| 4.2003793595    | 7.9144814049   |

gene\_expression\_table

|                 |                 |
|-----------------|-----------------|
| 0               | 0               |
| 35.4676911352   | 13.7209900614   |
| 0               | 0               |
| 1.047240952     | 6.0293535184    |
| 0               | 0               |
| 2.8533254006    | 7.9649210816    |
| 0               | 0               |
| 819.8660817897  | 977.2923182103  |
| 207.2618252314  | 198.4958166331  |
| 51.2301232793   | 48.7521932102   |
| 0               | 1.635269029     |
| 0               | 0               |
| 12.2598084426   | 4.0833864742    |
| 0               | 0               |
| 3.6890954348    | 0               |
| 121.614336266   | 48.963546649    |
| 175.3273347835  | 314.121553231   |
| 30.9351283661   | 26.1150991808   |
| 14.1823274545   | 27.5711107695   |
| 82.7685378475   | 40.3766922913   |
| 15.9991822332   | 13.0261104991   |
| 173.2210536916  | 337.306936968   |
| 0               | 1.6956648124    |
| 5.2443492133    | 10.9795120807   |
| 8.9302572559    | 0.8498313088    |
| 94.2323917655   | 50.0571098269   |
| 57.5603853195   | 70.2962122014   |
| 18.6924043075   | 26.0894753017   |
| 2112.0417260859 | 2282.1922210001 |
| 28.856215093    | 35.800329426    |
| 406.9956337715  | 213.0204004359  |
| 0               | 0               |
| 46.6004485822   | 86.0842842508   |
| 23.7767801258   | 15.2101908706   |
| 0.6406484709    | 0               |
| 4.0972308031    | 8.5779175395    |
| 82.4556901787   | 14.8817525831   |
| 0               | 0               |
| 1781.7753848219 | 1710.140024223  |
| 2743.6293900123 | 4846.8406405061 |
| 2.0839636457    | 11.998149533    |
| 6.9741708758    | 27.1162315719   |
| 13.2039338111   | 16.5861667363   |
| 6.7489831828    | 0               |
| 0               | 4.2427716355    |
| 0               | 1.2298647652    |
| 58.4262154236   | 0               |
| 138.6215132533  | 45.3463253227   |
| 154.0774820507  | 43.4235481449   |

gene\_expression\_table

|                 |                |
|-----------------|----------------|
| 0               | 0              |
| 1149.0060295706 | 932.382341252  |
| 10.4059316341   | 10.8928722554  |
| 12.5784779605   | 33.304971748   |
| 13.9493722395   | 2.9204252957   |
| 26.1560592684   | 34.2250245264  |
| 64.0318958351   | 26.8112951779  |
| 88.8173272401   | 72.7618631663  |
| 0               | 0              |
| 27.6111215467   | 13.4193293217  |
| 0               | 0              |
| 0               | 0              |
| 0               | 0              |
| 0               | 0              |
| 25.0604857112   | 52.4663584408  |
| 237.7889738142  | 354.5170060578 |
| 6.4078375369    | 5.9623904414   |
| 34.8982461937   | 18.2656465127  |
| 0               | 0              |
| 24.6038509515   | 11.0379327661  |
| 91.1017752846   | 60.0445285915  |
| 8.9250340105    | 0              |
| 93.279894365    | 55.7970758025  |
| 6.4222466954    | 13.4455453496  |
| 436.9563229749  | 785.6166749018 |
| 246.0344340807  | 240.0866510513 |
| 1.0207544416    | 0              |
| 11.7217004702   | 26.4281486398  |
| 1.3517696114    | 2.1225375411   |
| 2.6354114431    | 0              |
| 57.7919642634   | 87.1146889101  |
| 25.121352121    | 9.2812566511   |
| 6.5258313195    | 20.4936134765  |
| 25.3456802135   | 35.375625685   |
| 0               | 0              |
| 0               | 0              |
| 0               | 0              |
| 0.2372333872    | 0              |
| 17.4652635021   | 70.5183770592  |
| 61.3032639103   | 32.0859604935  |
| 0               | 0              |
| 20.5662562796   | 8.2802478693   |
| 13.1899443132   | 13.8071614837  |
| 22.8726896237   | 27.3634357207  |
| 181.3904795155  | 203.9436393009 |
| 68.0638107715   | 83.1236284933  |
| 0               | 55.9121687807  |
| 3.4014421337    | 0              |
| 0               | 0              |

gene\_expression\_table

|                 |                 |
|-----------------|-----------------|
| 9.3279894365    | 725.8269610648  |
| 0               | 22.1985186827   |
| 2.924478076     | 96.4318205506   |
| 0               | 0               |
| 0               | 2.3445041711    |
| 0               | 0               |
| 3.7760293216    | 0               |
| 40.0053316601   | 7.9766404052    |
| 283.8636083792  | 345.3328499851  |
| 75.7213886301   | 50.2654417042   |
| 54.0321862193   | 59.5374701829   |
| 2.5122728458    | 18.4088342105   |
| 0               | 11.2717146644   |
| 41.5751233992   | 38.2453858848   |
| 0               | 6.2707170169    |
| 0               | 0               |
| 0               | 0.5587897335    |
| 45.8472002049   | 43.4218745003   |
| 49.2870095226   | 173.5413411407  |
| 0               | 0               |
| 72.9703777347   | 32.162101833    |
| 6.7141400872    | 5.4664750615    |
| 2970.122379142  | 4256.3801100295 |
| 40.9224260304   | 30.1448169761   |
| 48.3828450593   | 37.9851729609   |
| 27.200103651    | 6.5706737455    |
| 96.9237394286   | 146.4241300429  |
| 18.2974128573   | 38.3072631782   |
| 87.1086521946   | 56.9905375887   |
| 65.7642456877   | 127.7193812125  |
| 8.5134464347    | 5.9412194075    |
| 805.960712932   | 901.8597619182  |
| 0               | 2.0156320215    |
| 32.73916724     | 0               |
| 25.0656608245   | 15.3058479587   |
| 4.0867756276    | 1.3509518998    |
| 36.7058966619   | 14.691350332    |
| 7.7193946057    | 10.2844254604   |
| 0               | 0               |
| 1244.0038923277 | 1947.038131929  |
| 213.4944009541  | 167.6135774257  |
| 5.216359332     | 2.7302281929    |
| 0.4659563433    | 1.5852217835    |
| 1696.4151360865 | 3221.4422733815 |
| 0.2305356211    | 0               |
| 4.8742279909    | 8.8130898414    |
| 187.288711789   | 147.5448891983  |
| 1.1357501934    | 1.9814951391    |
| 108.4806931601  | 64.1843888169   |

gene\_expression\_table

|                 |                 |
|-----------------|-----------------|
| 11.0098822304   | 27.1082971866   |
| 0.8292502074    | 0.4340272882    |
| 3.9889512543    | 3.2476984796    |
| 15.5395098298   | 16.9739204882   |
| 1.1339464469    | 0.7913392877    |
| 27.3971791582   | 28.6792171258   |
| 6484.5001408638 | 6403.7162648021 |
| 0               | 0.7212784035    |
| 0               | 1.1272464662    |
| 3.0280052678    | 1.3115997244    |
| 0               | 0               |
| 0               | 0               |
| 0               | 0               |
| 9.1801545556    | 3.4595047878    |
| 0               | 0               |
| 6.4512151846    | 6.9308098026    |
| 0               | 2.413131136     |
| 2.6959956142    | 0.4703589078    |
| 0.9062512661    | 0.7114941473    |
| 0.9639107607    | 1.0090165063    |
| 0               | 0               |
| 13.7161570284   | 8.7548768736    |
| 6.0348882902    | 11.0552540304   |
| 626.3255772746  | 118.4479061525  |
| 10.4125396789   | 4.671338366     |
| 16.927020632    | 15.3246378476   |
| 0.6560751448    | 0.1716939673    |
| 7.0530780362    | 4.1417521895    |
| 32.8553440565   | 25.1654592106   |
| 0               | 0               |
| 127.4197177872  | 96.5871558754   |
| 88.8392558201   | 22.4474181306   |
| 0.6907852262    | 0               |
| 1.5051540742    | 1.1254193166    |
| 11.1156996302   | 9.9735887206    |
| 0               | 0               |
| 4.8831501204    | 2.7262158974    |
| 32.3586061076   | 34.8690708568   |
| 0               | 0.5174285583    |
| 2.0282655044    | 1.668210676     |
| 0.2057400589    | 0.071789189     |
| 263.08305155    | 257.9875114974  |
| 0.1026028571    | 0               |
| 17.4585347059   | 15.2295821112   |
| 5.9933569951    | 2.509525314     |
| 0               | 0               |
| 0               | 0               |
| 0               | 0               |
| 0               | 0               |



gene\_expression\_table

|                 |                 |
|-----------------|-----------------|
| 1.3843179944    | 2.898192993     |
| 20.0226991351   | 20.9596518176   |
| 9.3454160472    | 3.4527283574    |
| 0               | 0               |
| 0               | 5.9003525087    |
| 0               | 0               |
| 3.3436416863    | 0.8750264522    |
| 3.1799963988    | 0               |
| 2.6029156177    | 0.908239272     |
| 11.1439160744   | 8.4250041248    |
| 0               | 0               |
| 0               | 0               |
| 4524.1508994352 | 2160.8207722053 |
| 3.2225105258    | 3.2126727363    |
| 25.6157987849   | 16.0886867432   |
| 124.5981059375  | 30.0989111634   |
| 43.8819523767   | 6.0949866865    |
| 7.9038210963    | 6.7223622742    |
| 0               | 0               |
| 0               | 0               |
| 13.8645264048   | 1.4513310323    |
| 179.2238755466  | 64.0621463854   |
| 2.4210155438    | 3.2796898778    |
| 3.3062434468    | 6.9219150727    |
| 2.7472732216    | 4.7059045614    |
| 0               | 0               |
| 509.7342259     | 420.712824205   |
| 2.1294292637    | 1.2538546275    |
| 464.3833608231  | 162.564083797   |
| 58.6379046099   | 0               |
| 0               | 0               |
| 89.2210527318   | 66.7115067555   |
| 40.5172042673   | 48.2632824067   |
| 13.6876456795   | 8.8173246454    |
| 79.7178967523   | 74.6398306003   |
| 5.8117792482    | 0               |
| 204.6622585021  | 134.193867011   |
| 140.4124550975  | 21.3018824853   |
| 10.8990252477   | 6.2231127001    |
| 177.5115590452  | 153.8806372663  |
| 10.4372898699   | 22.9439655586   |
| 524.5715250234  | 122.7636749315  |
| 2.2892255654    | 3.9939146449    |
| 1081.7435240019 | 682.9427845995  |
| 0               | 0               |
| 98.9661711283   | 320.5039799187  |
| 20.3423840021   | 25.2869767207   |
| 4.634231846     | 0               |
| 2.5766695864    | 2.6972436142    |

gene\_expression\_table

|                 |                 |
|-----------------|-----------------|
| 12.8206040664   | 12.2535348196   |
| 0               | 0               |
| 128.4946802024  | 131.2268562397  |
| 83.8071988937   | 38.0780830818   |
| 1.5056061542    | 1.8912723336    |
| 14.9504659118   | 11.8329766207   |
| 16.6160797457   | 1.9326245882    |
| 75.1691585867   | 17.8158483644   |
| 0               | 0               |
| 75.9723646149   | 32.6266483207   |
| 30.8192095241   | 29.1393107645   |
| 5.9933569951    | 37.6428797099   |
| 266.3141648601  | 73.6162284922   |
| 5.6015719481    | 5.8636948431    |
| 0               | 0               |
| 119.3335604978  | 41.639239234    |
| 3960.6210748015 | 3406.7039012394 |
| 149.4570339133  | 58.110298899    |
| 129.5064622867  | 22.2240419002   |
| 0               | 5.8398438954    |
| 0.9171518572    | 0.9600695421    |
| 14.6093792903   | 20.7548104759   |
| 0               | 0               |
| 26.7543420693   | 7.5401573641    |
| 0.3816151029    | 0.338015277     |
| 2.3127590804    | 1.311366085     |
| 0               | 0               |
| 0               | 0               |
| 0               | 0               |
| 0               | 0               |
| 1.8566801154    | 2.591416771     |
| 3.1390052602    | 0.9064533844    |
| 0.3927407705    | 0               |
| 0.6895931515    | 0.721862335     |
| 6.3815342212    | 5.6524389137    |
| 4.3474864302    | 5.6886562374    |
| 0               | 0               |
| 0               | 0               |
| 0               | 0               |
| 206.2948248437  | 69.8178691819   |
| 3.8997738969    | 3.340032514     |
| 0.2141032104    | 1.5688544779    |
| 7.9231061499    | 3.4026109266    |
| 19.8346882393   | 20.7628430414   |
| 0               | 0               |
| 7.4268624665    | 3.8871994816    |
| 1.3360682291    | 0.2797177813    |
| 15.7830958794   | 7.4740835366    |
| 0               | 0.2470310169    |

gene\_expression\_table

|                 |                 |
|-----------------|-----------------|
| 23.1534471603   | 31.0729509071   |
| 14.9008917027   | 3.8995429606    |
| 0.8739435752    | 0.5227653423    |
| 0               | 0               |
| 0               | 0               |
| 0               | 0               |
| 0               | 0               |
| 0               | 0               |
| 0               | 0               |
| 0.8797722201    | 0.6821783279    |
| 9.7979954537    | 3.263427997     |
| 31.636958091    | 36.7971049968   |
| 14.1088512138   | 12.6592013106   |
| 17.5504929057   | 6.561342812     |
| 2.7490408525    | 1.9184539411    |
| 1.1697630467    | 0.7653134701    |
| 952.0036277837  | 1092.9927187451 |
| 29.707282799    | 16.7682171885   |
| 6.0902629191    | 10.200406201    |
| 0.0570077543    | 0.0170501157    |
| 0               | 10.9252281646   |
| 0               | 0               |
| 1.5996239164    | 1.1163183712    |
| 0.9856910696    | 0.5732311191    |
| 2.2087246391    | 0               |
| 1.9996266578    | 1.3082488976    |
| 7.0148600968    | 7.3431171386    |
| 0               | 0               |
| 0.4207229438    | 0.7046567582    |
| 0               | 0               |
| 1.6441965648    | 1.2293828293    |
| 0.7035019201    | 2.2092658736    |
| 2.8274042055    | 3.5516534886    |
| 3.6661604594    | 3.8377166943    |
| 7511.5122507169 | 8318.3718043883 |
| 6.1387175893    | 6.4259759591    |
| 0               | 0               |
| 483.9174180883  | 287.1421549246  |
| 27.8207029841   | 23.8275487209   |
| 0               | 0               |
| 2.356020864     | 2.3211950491    |
| 0               | 0               |
| 0               | 0               |
| 0               | 0               |
| 3.4870715883    | 4.7099967029    |
| 5.33572067      | 7.3039887751    |
| 0.6077607748    | 0.5655116899    |
| 50.9953246621   | 89.7781902321   |
| 4.9601251486    | 3.8941738843    |

gene\_expression\_table

|               |               |
|---------------|---------------|
| 0             | 0             |
| 0.5248657898  | 0.5494266348  |
| 0.4681894758  | 0.3267321197  |
| 3.3410531941  | 6.4118930136  |
| 0             | 3.0128734022  |
| 0.4397225482  | 0.3835826297  |
| 0.1605928106  | 1.1767537234  |
| 0             | 0             |
| 0             | 0.3268991913  |
| 3.2856961923  | 4.2037707345  |
| 86.5745697707 | 36.6259651588 |
| 0             | 53.2748023288 |
| 2.532903541   | 6.7065571159  |
| 0             | 0             |
| 3.2792789975  | 1.7163656492  |
| 0             | 0             |
| 6.5697066284  | 6.0174913096  |
| 2.1214148399  | 1.7765483507  |
| 1.6597524448  | 0.7721865649  |
| 5.314381022   | 7.4174199389  |
| 0.4574094645  | 0.5266950951  |
| 14.544202806  | 57.0929694694 |
| 7.5394152584  | 6.6590594517  |
| 0             | 0             |
| 19.6968764886 | 16.1082675432 |
| 6.2803229397  | 8.6502732428  |
| 0.161310711   | 0.2532887536  |
| 89.1956858854 | 28.5295864277 |
| 4.0187794508  | 4.3897422509  |
| 1.0901539173  | 1.5215562019  |
| 0.1310857217  | 0             |
| 5.0486703802  | 5.2849205093  |
| 0             | 0             |
| 2.5322414683  | 0             |
| 2.419069934   | 5.0645383219  |
| 0.746566181   | 0.3907506952  |
| 18.8603445663 | 5.9228716259  |
| 0.0660932738  | 0.0691860771  |
| 0.801888713   | 0.8394127139  |
| 1.0182241338  | 2.5580914748  |
| 5.2158277959  | 1.3649749942  |
| 26.6819115316 | 39.1026704471 |
| 0.1493931772  | 0.9383037592  |
| 1.1634142459  | 0.8119037748  |
| 34.6970893791 | 20.3905814307 |
| 0             | 0             |
| 0.4770490258  | 0.6809622383  |
| 0             | 2.1444793849  |
| 0             | 0             |

gene\_expression\_table

|                |                |
|----------------|----------------|
| 0.3683022827   | 0.3855368128   |
| 0              | 0              |
| 0              | 0              |
| 3.2224274185   | 4.7225071275   |
| 2.560323626    | 0              |
| 1.3740050237   | 0.5992920563   |
| 1.4667727448   | 1.7778427848   |
| 9.5935555187   | 5.0212406931   |
| 1.6662268786   | 0.8720985865   |
| 16.1264671468  | 7.2347560743   |
| 11.7501195144  | 12.2999607683  |
| 2.2654061691   | 0.6775470781   |
| 0.7377302009   | 0.8825736397   |
| 0.1890595151   | 0.1979064652   |
| 0              | 0              |
| 6.9725749834   | 5.2402023788   |
| 4.3702647859   | 1.0166153884   |
| 10.0252959764  | 8.8017757504   |
| 0.2102636298   | 0.2934704218   |
| 2.979130499    | 5.152366294    |
| 1.0233793187   | 1.0712678672   |
| 0.5990269799   | 0.4702936219   |
| 0.6690670004   | 2.8015026897   |
| 0.4257843113   | 0.4457086856   |
| 0.2530618059   | 0              |
| 49.4216017664  | 30.6182367616  |
| 1.2704092998   | 1.3298574987   |
| 10.1308680265  | 10.6049371772  |
| 13.2977180856  | 5.4133249639   |
| 0.7810086706   | 0.8175555999   |
| 0.3262932106   | 0              |
| 0.1205822083   | 1.0097983633   |
| 2.8753135397   | 3.9504444908   |
| 4.3740707222   | 4.5787532812   |
| 0              | 0              |
| 0.6924847748   | 0              |
| 1.8654186924   | 0.6509033576   |
| 1.0969376696   | 2.9526900329   |
| 21.5540017093  | 3.1336959677   |
| 98.8842872036  | 34.5038434634  |
| 10.498450714   | 8.7917765774   |
| 0.6954804403   | 0.7280251167   |
| 0              | 0              |
| 0.5257837401   | 0.8255813101   |
| 2.1999035227   | 6.5795627476   |
| 0.151876743    | 0.1589837429   |
| 3.8323612769   | 1.0029237      |
| 0              | 5.5291733487   |
| 347.8743104945 | 231.7336785224 |

gene\_expression\_table

|               |                |
|---------------|----------------|
| 20.3224518716 | 14.5046122779  |
| 0             | 0              |
| 1.2289599359  | 1.5203719009   |
| 0             | 0              |
| 0             | 0              |
| 1.6434031948  | 2.1730174302   |
| 89.2446831142 | 51.5425355103  |
| 0             | 0              |
| 21.8359275993 | 20.5719565008  |
| 0.4641522792  | 0              |
| 0.975149078   | 1.0207807152   |
| 1.8638483713  | 3.0659612804   |
| 0             | 0.2452643128   |
| 1.2656087016  | 1.5140940101   |
| 8.4224193781  | 12.8240617992  |
| 22.0228769142 | 8.6450351117   |
| 0.946318757   | 4.2926056036   |
| 0.3245510302  | 0.3397382413   |
| 0             | 0              |
| 0.6648397749  | 0.1391901272   |
| 9.6493246142  | 2.2446355933   |
| 0             | 0.4634420002   |
| 0             | 0              |
| 4.8211330907  | 5.0467357206   |
| 7.3734072244  | 13.6557056225  |
| 0             | 0              |
| 0             | 0              |
| 2.871933219   | 0              |
| 0             | 0              |
| 0             | 0              |
| 0             | 0              |
| 0             | 0              |
| 30.8129744013 | 13.2814100105  |
| 2.7851287271  | 2.5790585588   |
| 4.8146379816  | 21.599728611   |
| 1.5312185812  | 1.6028712264   |
| 174.533998427 | 151.3282947195 |
| 0             | 0              |
| 10.9936735483 | 9.3503452843   |
| 6.1908502153  | 2.7773777599   |
| 0             | 4.8438562232   |
| 0             | 0              |
| 0             | 0              |
| 0             | 0              |
| 2.1726651062  | 2.1479820511   |
| 0             | 0.1378839488   |
| 0             | 0              |
| 0             | 0              |
| 4.3451033665  | 0              |

gene\_expression\_table

|                 |                 |
|-----------------|-----------------|
| 1.7891507911    | 2.1850187932    |
| 0               | 0.153762397     |
| 0               | 0               |
| 0               | 0               |
| 2.325505045     | 2.4343259475    |
| 0               | 0               |
| 0               | 0               |
| 4877.9064386209 | 7984.3920702452 |
| 0               | 0               |
| 2.2903486559    | 0.4795048864    |
| 0.7459467954    | 0.2602843403    |
| 0.1087149044    | 0.1138021666    |
| 0               | 0.5175629224    |
| 4.4517684269    | 4.4808527048    |
| 82.504131191    | 144.0906167426  |
| 0.6812620674    | 0.4754276012    |
| 0               | 0               |
| 12.1577131432   | 5.9890011986    |
| 76.6494943484   | 19.5575910512   |
| 0.2326020314    | 0.2434865328    |
| 2.1939563298    | 2.7990074199    |
| 0.529381072     | 0.3694354716    |
| 3.5385826641    | 0               |
| 2.8563469242    | 4.9833471998    |
| 0               | 0.0927035434    |
| 105.0004001232  | 144.7198944748  |
| 0.418696666     | 0.2504510728    |
| 0.3339054173    | 0.3495303625    |
| 9.8070363111    | 22.2428958064   |
| 0.1499023904    | 0               |
| 5.5695849966    | 2.8145846581    |
| 283.3677442114  | 76.4743554665   |
| 4.9581352228    | 11.1217474335   |
| 0               | 0.4036017949    |
| 155.3561846675  | 63.6362622141   |
| 0               | 0               |
| 10.9667432423   | 7.5767516722    |
| 1.6707421656    | 1.661477563     |
| 1.7081885578    | 0.8344571335    |
| 5.2171121835    | 5.4612444667    |
| 9.3441464621    | 3.402226557     |
| 8.5318975545    | 10.9158422297   |
| 1.1611570395    | 0.4558098116    |
| 11.879082261    | 3.3159888707    |
| 1.3020162246    | 1.6355321455    |
| 3974.6474392002 | 4160.63917563   |
| 0.6237113331    | 0.9793464125    |
| 0.3133795916    | 0.9244877506    |
| 0               | 0.0720067459    |

gene\_expression\_table

|               |               |
|---------------|---------------|
| 0.9767822963  | 1.0224903593  |
| 2.1255064627  | 1.5892632333  |
| 0             | 0             |
| 37.3533602735 | 24.0623341544 |
| 0             | 0             |
| 3.8224662955  | 2.0916078663  |
| 0.3159098511  | 0             |
| 0.2443983943  | 0.2046679208  |
| 0.919121681   | 1.5743970702  |
| 0.8658514123  | 4.5318425863  |
| 5.8344771459  | 2.8501660734  |
| 2.6379888626  | 2.0710742226  |
| 7.1735212229  | 3.4417179209  |
| 1.3463381532  | 0.5637357627  |
| 25.4489243657 | 28.9232056492 |
| 43.2609745481 | 26.6222974166 |
| 3.9051632789  | 4.4595311314  |
| 0             | 0             |
| 1.7133243354  | 0             |
| 0             | 0             |
| 0             | 0             |
| 0             | 0             |
| 2.2615862074  | 1.2626218977  |
| 0             | 0             |
| 2.6036025026  | 0.7889422441  |
| 0             | 0             |
| 5.2791328713  | 3.6841115887  |
| 2.0477081891  | 1.4290198132  |
| 13.6046248086 | 0.9494164504  |
| 0.3818376537  | 0             |
| 0             | 0             |
| 0             | 0             |
| 19.7924777771 | 2.5898321701  |
| 30.0110400379 | 6.7925172718  |
| 0             | 0             |
| 1.1197053847  | 0.1674430665  |
| 0.6146565898  | 0             |
| 5.1343846205  | 3.527111245   |
| 4.3311494217  | 6.5488561649  |
| 0             | 0             |
| 1.2336182162  | 1.5652664168  |
| 3.2149506699  | 2.8846223635  |
| 2.0189833841  | 0.6283261693  |
| 0.2826515364  | 0.1479390403  |
| 3.7245647851  | 2.1660300126  |
| 0.5506936956  | 0.8646947177  |
| 9.909992967   | 7.0978127825  |
| 0.5787525139  | 0.48466797    |
| 2.2885627188  | 2.0534185052  |



gene\_expression\_table

|                |                |
|----------------|----------------|
| 56.4582928543  | 14.2655731967  |
| 0              | 0.4185883594   |
| 14.4705118894  | 10.7295872658  |
| 0              | 0              |
| 4.1103124485   | 3.0733232604   |
| 30.2930494569  | 6.3421196595   |
| 10.6645028153  | 11.3665166639  |
| 69.8906846848  | 30.8648753573  |
| 12.2635114094  | 16.7873386214  |
| 433.2695432534 | 318.9927437672 |
| 70.9471641447  | 101.8520268971 |
| 1.5233491785   | 0              |
| 3.2957725693   | 2.0224118463   |
| 0              | 0              |
| 0              | 0              |
| 3.0859848261   | 3.7687906879   |
| 1.0105985267   | 1.0578890041   |
| 0              | 0              |
| 0              | 0              |
| 3.8487426841   | 3.5123244639   |
| 0              | 0              |
| 0              | 0              |
| 0              | 0              |
| 40.3204473676  | 28.1381490162  |
| 16.0990942306  | 4.6812343577   |
| 0.3214042628   | 0.4112096052   |
| 31.0760757343  | 58.1791294292  |
| 1.5019313881   | 3.5374804943   |
| 0              | 0              |
| 0              | 0.4419300154   |
| 0.2348477308   | 0.737511956    |
| 106.6997237638 | 47.8682942516  |
| 13.6554024434  | 4.2042354429   |
| 0.6202215709   | 1.9477336331   |
| 8.1020233316   | 2.8270512199   |
| 0              | 7.6346945203   |
| 1.5209804555   | 2.1711191079   |
| 284.3362103406 | 132.0784547029 |
| 3.4920836492   | 4.5693675533   |
| 195.1810968047 | 78.0109922051  |
| 0              | 0              |
| 0              | 0              |
| 3.5786444526   | 2.7471439729   |
| 2.0727538002   | 0              |
| 1.4507372138   | 0.7593118858   |
| 4.6024364481   | 2.8340031015   |
| 4.3619868398   | 3.1391964582   |
| 22.793306515   | 9.3735354633   |
| 11.2569115061  | 9.4269386607   |

gene\_expression\_table

|                |                 |
|----------------|-----------------|
| 70.7582231255  | 34.670745776    |
| 8.6081663641   | 2.2262424672    |
| 4.4047252289   | 4.6108422509    |
| 0              | 0               |
| 15.6574035528  | 8.9400459845    |
| 4.0868842607   | 0               |
| 0              | 5.8963024195    |
| 1.8980896819   | 3.4770923       |
| 9.2014645635   | 6.8800305152    |
| 826.8791228362 | 338.7022975156  |
| 0.5929675747   | 0.6207152103    |
| 2.0948735086   | 3.4923996694    |
| 10.232714765   | 12.8538597424   |
| 76.1688245448  | 174.6534756758  |
| 4.2543195065   | 1.8143474818    |
| 139.5710119036 | 44.6064150461   |
| 4.1605608592   | 19.0542289251   |
| 4.8603704944   | 2.035123688     |
| 11.7217004702  | 6.6070371599    |
| 1.1609175742   | 0.9114316199    |
| 19.2233174521  | 22.1867468796   |
| 1.1038978006   | 1.1555541732    |
| 8.1742272322   | 4.7537423931    |
| 0.2341751443   | 0.4202284437    |
| 0              | 0               |
| 3.9581383623   | 4.8116410425    |
| 48.2617526839  | 50.5201384456   |
| 0.5739300324   | 0.2002622717    |
| 2.0513852044   | 0               |
| 0              | 10.5099288906   |
| 14.088571968   | 14.3597389398   |
| 0              | 0               |
| 6.1069882373   | 3.4094729852    |
| 3.2713799156   | 0.2853718819    |
| 6719.15009789  | 5066.7205895156 |
| 0              | 0               |
| 8.7118141884   | 9.1194793897    |
| 3.1028876977   | 1.9907622962    |
| 0.6089957356   | 0               |
| 19.5882646318  | 14.2912856861   |
| 5.5102614253   | 3.1059061857    |
| 32.1596401602  | 24.3777668872   |
| 28.8821369379  | 29.7755769985   |
| 3.1265241935   | 3.0682766307    |
| 2.7744189165   | 8.5598845098    |
| 21.5224593873  | 13.8643647      |
| 198.2304571543 | 119.5605647621  |
| 6.2411220682   | 2.1777241356    |
| 55.9566485343  | 65.1648135322   |

gene\_expression\_table

|                |                |
|----------------|----------------|
| 0              | 0              |
| 5.5884190857   | 11.6998529976  |
| 16.7199356086  | 5.2507011128   |
| 0              | 0              |
| 53.282768174   | 62.242905326   |
| 16.6187738083  | 14.6496348835  |
| 0              | 0              |
| 21.8855408017  | 10.5260619637  |
| 2.9378827633   | 2.0502397266   |
| 5.7431020839   | 3.2063188343   |
| 12.6245346703  | 9.0855144638   |
| 0.5426613802   | 0.9230893122   |
| 3.2277209205   | 5.0681408787   |
| 0.433006787    | 0.7932209839   |
| 0              | 0              |
| 324.3101986803 | 106.9895714487 |
| 4.1452759346   | 2.4457603029   |
| 0.03504834     | 0              |
| 0.6214361507   | 3.2525797989   |
| 90.611835069   | 41.2399881708  |
| 0              | 0.4835836823   |
| 4.5695843304   | 13.6143374354  |
| 8.0397723161   | 13.1850504323  |
| 0              | 0              |
| 1.3628683514   | 2.8532862553   |
| 0.324204283    | 0.3393752682   |
| 0              | 0              |
| 47.6843302072  | 23.7099554854  |
| 0.7824435154   | 0              |
| 0.746747029    | 0              |
| 0.0451622186   | 0.6618578835   |
| 22.2851646534  | 21.0704410756  |
| 0              | 0              |
| 655.53287666   | 643.1130232397 |
| 2.4614958436   | 1.2883401854   |
| 2.0901239102   | 2.6741369898   |
| 14.1490896595  | 2.6137393377   |
| 13.4377263496  | 35.7524516718  |
| 56.7861813064  | 42.2361452257  |
| 1.4119929668   | 2.6394044752   |
| 53.4284186967  | 39.150003296   |
| 2.0496532006   | 2.1455657473   |
| 0              | 0              |
| 0              | 0              |
| 0.0592124369   | 0              |
| 0.2680789735   | 0.1403118008   |
| 0              | 0              |
| 0.7929821923   | 0.2766964723   |
| 701.7675378701 | 270.1130120755 |

gene\_expression\_table

|                |                |
|----------------|----------------|
| 0              | 0.7357503318   |
| 1.251264352    | 2.837936123    |
| 2.7814834876   | 0.9705472281   |
| 402.10698919   | 151.2206269102 |
| 522.1928425369 | 341.6428801434 |
| 10.4051053985  | 9.8644594928   |
| 0              | 0              |
| 2.9289350178   | 2.9046250789   |
| 0              | 0              |
| 0              | 0              |
| 0              | 0.7303581281   |
| 7.1170016149   | 59.6003065631  |
| 12.3684078505  | 45.3151356453  |
| 0              | 0              |
| 10.9277931616  | 0              |
| 188.3692920154 | 564.1651715087 |
| 324.0268620994 | 502.0005265886 |
| 103.6417742563 | 246.1925717469 |
| 20.0608139725  | 62.9986506621  |
| 0              | 0              |
| 0.588246088    | 0.6157727839   |
| 33.479943943   | 33.5473012684  |
| 0.6931154819   | 0.5320696269   |
| 0              | 0              |
| 0.9652010169   | 0.6735780929   |
| 0.1760146353   | 0.5988162583   |
| 0              | 0              |
| 0              | 0              |
| 0              | 0              |
| 2.9935375188   | 6.2672373663   |
| 0.3169523354   | 1.161243892    |
| 10.467592889   | 18.2623648658  |
| 1.164516466    | 3.0475236504   |
| 2.3837775413   | 4.6787348954   |
| 0              | 0              |
| 283.4819220064 | 197.8315491415 |
| 24.2973011697  | 23.2788342093  |
| 0              | 0              |
| 0              | 0              |
| 221.7441454197 | 109.2332034047 |
| 4.6826874829   | 5.8095545083   |
| 14.1734557371  | 2.8260373061   |
| 0.3267659036   | 0              |
| 11.3024154639  | 9.3954493744   |
| 18.8522028525  | 25.5386129294  |
| 0.1274348108   | 0.1667475776   |
| 2.0756209948   | 2.7935340326   |
| 0              | 0              |
| 2.3294240281   | 5.4187295944   |

gene\_expression\_table

|                 |                 |
|-----------------|-----------------|
| 15.5103485333   | 13.1365196772   |
| 2.1812138781    | 2.0549544697    |
| 0               | 0.2567810589    |
| 1.2645971708    | 0.7942640363    |
| 0.4569445387    | 1.0363752556    |
| 0.352709792     | 0.1704067749    |
| 1.073818908     | 0.2810169383    |
| 0               | 0               |
| 0               | 0               |
| 19.5976655794   | 5.9384741897    |
| 7.0947550502    | 4.5206308841    |
| 3.4837210649    | 0.4558425169    |
| 0.130582971     | 0.136693539     |
| 0.4367979162    | 1.646055601     |
| 0               | 0               |
| 2.4781999323    | 3.3353564393    |
| 4.7505171047    | 6.5641161869    |
| 1.6443429365    | 2.1802996306    |
| 355.8798901768  | 221.745904981   |
| 0.044591501     | 0.0700172086    |
| 0               | 0.6661445085    |
| 0.0586228241    | 0               |
| 16.6459878347   | 0               |
| 192.9938281008  | 75.0693552429   |
| 111.4524000631  | 30.7020426614   |
| 0               | 0.1120901973    |
| 5.1161032224    | 4.9729724937    |
| 7.0836177111    | 3.7774998166    |
| 8.2252803783    | 8.9545855998    |
| 1180.3698375934 | 855.8546196798  |
| 2.0192216684    | 2.9591942604    |
| 4.1647096429    | 0               |
| 2.0009967448    | 3.1419486537    |
| 6.5387946557    | 1.7111936104    |
| 0               | 0               |
| 25.588198463    | 3.9682349688    |
| 0               | 0               |
| 10.8109964411   | 3.2333976793    |
| 162.0386639792  | 111.1961109459  |
| 0               | 0               |
| 58.2903099176   | 34.3226122004   |
| 54.1407647871   | 64.949009773    |
| 0               | 0               |
| 47.9028354695   | 14.8576076655   |
| 139.7079381073  | 119.3055432433  |
| 3.3141746396    | 1.8172313581    |
| 15.1713725543   | 11.1169168019   |
| 3255.2713443869 | 2932.3640195493 |
| 208.7971041631  | 223.3538185966  |

gene\_expression\_table

|                |                 |
|----------------|-----------------|
| 39.1564232697  | 24.22061287     |
| 15.7461226365  | 23.694247749    |
| 6.3647450962   | 11.7705585576   |
| 0              | 0               |
| 30.5674241751  | 42.17893433     |
| 0.5431731634   | 0.4548725546    |
| 0.7370750274   | 1.3226847475    |
| 0.0879472974   | 0.1841254988    |
| 10.896356861   | 5.1846575898    |
| 0              | 0               |
| 5.5462856999   | 2.4882092148    |
| 0.101984534    | 0.1779280862    |
| 16.8768068281  | 8.9999400446    |
| 26.0154083833  | 16.85839198     |
| 0              | 0               |
| 3.1031386687   | 3.3316395557    |
| 0.0538379401   | 0               |
| 173.4006607749 | 166.9936732426  |
| 2.3697286291   | 0.9922475813    |
| 1.2889597683   | 1.1039531135    |
| 0              | 0               |
| 0              | 0               |
| 0.5890575505   | 0.3083111092    |
| 113.4396846191 | 34.6348452056   |
| 23.1811252398  | 15.7014485097   |
| 10.5952588418  | 2.8754597251    |
| 207.808349795  | 90.8680659306   |
| 5.8264952618   | 4.0660955576    |
| 39.4908337169  | 37.5807168158   |
| 7716.882434801 | 6289.9369892509 |
| 0              | 0               |
| 0              | 0               |
| 0              | 0               |
| 0              | 0               |
| 0              | 0               |
| 0              | 0               |
| 0              | 0               |
| 3.3670809554   | 2.3497612715    |
| 3.8226509715   | 2.1826527849    |
| 4.1187106613   | 2.5868662606    |
| 1.180801231    | 4.0171828547    |
| 0              | 0               |
| 1.4133317328   | 4.438403757     |
| 2.9601019995   | 2.4788948517    |
| 0.867421525    | 1.2106828035    |
| 6.0159908599   | 3.285655456     |
| 41.8985462369  | 95.550331984    |
| 22.1257465187  | 7.7203701011    |
| 14.2497587113  | 8.5237539385    |
| 0.521460938    | 1.5284148728    |

gene\_expression\_table

|                 |                 |
|-----------------|-----------------|
| 14.6625410649   | 47.2266698461   |
| 3.2524742489    | 4.4522636911    |
| 25.574770695    | 8.167585401     |
| 28.6842465391   | 4.2895017447    |
| 2.0003701864    | 1.1865867161    |
| 0               | 0               |
| 0.0223295888    | 0.0467489825    |
| 0.2551403341    | 0.5341590094    |
| 27.6071281959   | 18.091238036    |
| 28.8277014599   | 14.5909222163   |
| 4.3799896272    | 4.5849491585    |
| 333.7707933052  | 189.3637416529  |
| 0               | 0               |
| 0               | 0               |
| 13.8323624506   | 11.790565036    |
| 15.8941820661   | 5.5459809187    |
| 24.9241196186   | 31.3085183296   |
| 0               | 0               |
| 25.5470586777   | 20.0568908531   |
| 55.2206280617   | 40.4632557608   |
| 0               | 0               |
| 23.3367868382   | 24.4288206785   |
| 0               | 0               |
| 0               | 0               |
| 6.2649597431    | 5.2465004435    |
| 150.9733817888  | 80.5099802508   |
| 175.7209604824  | 190.6939682122  |
| 35.2486424017   | 11.8073874744   |
| 0.4168678792    | 0.4363750133    |
| 42.0985414468   | 19.5677395439   |
| 15.7483571252   | 0               |
| 3.795443179     | 2.1393341508    |
| 0               | 1.0138472256    |
| 16.9582580661   | 5.0719461961    |
| 0.8478953759    | 0               |
| 3.2416748467    | 0               |
| 9.5463332072    | 9.7493164186    |
| 0               | 0               |
| 1.4163483394    | 2.3886747168    |
| 0               | 0               |
| 0               | 0               |
| 14.6712887843   | 20.4770996864   |
| 2.7065911318    | 1.8888298509    |
| 68.1390705775   | 125.3636711089  |
| 3.3659421137    | 6.4062723163    |
| 109.6098584272  | 113.8697647723  |
| 0               | 0               |
| 0.3790178378    | 0               |
| 1385.8765455036 | 1957.0223076151 |

gene\_expression\_table

|               |               |
|---------------|---------------|
| 93.8861341003 | 42.5702608464 |
| 0             | 1.637086258   |
| 2.5430643734  | 0             |
| 5.8398544633  | 10.6979734317 |
| 1.1103987425  | 0             |
| 0             | 0             |
| 28.9701993211 | 24.4563274347 |
| 0             | 2.2822830581  |
| 0             | 0             |
| 0             | 0.0981608637  |
| 0             | 0             |
| 2.1440102898  | 1.7634086105  |
| 7.2340138849  | 6.0909449258  |
| 2.3292563994  | 2.8446283188  |
| 61.9419753565 | 32.4202603157 |
| 3.9768538508  | 3.3090106126  |
| 15.745292845  | 1.9778503602  |
| 0             | 0             |
| 0             | 0             |
| 0             | 0             |
| 0             | 0.0926726099  |
| 4.7846993937  | 2.311660212   |
| 0             | 2.7094297934  |
| 0             | 0             |
| 0             | 0             |
| 5.7967221062  | 5.2589133653  |
| 8.2589093876  | 4.5769664775  |
| 0.301102183   | 0.6303842328  |
| 39.2045006003 | 34.8444819839 |
| 0             | 0             |
| 0             | 1.6207200938  |
| 0             | 0             |
| 3.6132396402  | 2.6476236294  |
| 1.2823121522  | 0             |
| 0             | 0             |
| 0.4213248466  | 0.4961706102  |
| 3.7204739477  | 0             |
| 12.3573899254 | 2.1559413516  |
| 2.3827141508  | 2.2946751561  |
| 42.9722396929 | 24.7407078656 |
| 9.6088576511  | 15.0877493618 |
| 0.9363488541  | 2.8315873543  |
| 2.5648275233  | 28.1908977775 |
| 0             | 0             |
| 2.3393570077  | 1.6325507375  |
| 2.749352191   | 4.3170102286  |
| 21.296973554  | 10.8609628394 |
| 6.7053214644  | 5.9223603878  |
| 4.3714714689  | 1.8304129588  |



gene\_expression\_table

|                |                |
|----------------|----------------|
| 0              | 0              |
| 0.6283413185   | 0.394646551    |
| 8.7159474045   | 6.0825373451   |
| 1.0474442866   | 0.137057368    |
| 0              | 0              |
| 0              | 0              |
| 3.214205754    | 2.2430753223   |
| 0.0479077775   | 0              |
| 1.2823629549   | 0.7550834172   |
| 103.4247728172 | 76.9880788399  |
| 0.9933290373   | 1.2997642464   |
| 2.3769795857   | 9.1234337876   |
| 1.5590079638   | 0.8159805      |
| 0              | 0              |
| 0.7874229644   | 0              |
| 0.8793535099   | 2.3012560978   |
| 91.7833213765  | 47.8311774812  |
| 21.7332967847  | 19.6550176936  |
| 0              | 0              |
| 0.6005039432   | 0.6286042396   |
| 1.3869754446   | 0.4355634902   |
| 0              | 0              |
| 6.811811053    | 2.9361156223   |
| 355.4109037197 | 64.8127793423  |
| 82.0177286749  | 43.5324723098  |
| 91.2441414644  | 77.0273126332  |
| 0              | 0              |
| 0              | 0              |
| 16.659289835   | 4.5891719419   |
| 130.8250228455 | 84.2750261935  |
| 6.5690955239   | 4.5843288163   |
| 19.9600296307  | 4.9162469938   |
| 4.9325109483   | 5.163325452    |
| 3.8310005142   | 0              |
| 22.4682616126  | 18.0920409446  |
| 0              | 1.3134894666   |
| 3.573758167    | 2.4939936537   |
| 2.0333012969   | 1.5963364979   |
| 0.5365356608   | 0              |
| 0              | 0              |
| 13.8590649383  | 5.8030373161   |
| 31.8796620816  | 56.5617893314  |
| 0              | 0              |
| 6.922922328    | 9.9644561301   |
| 234.6963587162 | 308.405381454  |
| 200.2586595729 | 117.6868313248 |
| 33.6700312184  | 17.6228021573  |
| 1.2654673291   | 5.2987370836   |
| 11.0339605743  | 2.8875723778   |

gene\_expression\_table

|                 |                |
|-----------------|----------------|
| 0               | 9.3858100502   |
| 58.4865419237   | 40.0867446537  |
| 7.5239710239    | 0              |
| 0               | 0              |
| 4.1386169728    | 0              |
| 2.7120662575    | 2.0278400772   |
| 0               | 0.2009964424   |
| 2.1020991911    | 1.1002329615   |
| 32.93124768     | 44.8139246774  |
| 0.6071679487    | 3.1779004203   |
| 0               | 1.7887013944   |
| 84.9079495644   | 28.5689496468  |
| 545.939111885   | 419.0897868352 |
| 0               | 4.4250717358   |
| 40.5838079707   | 23.8966357284  |
| 1.1157574404    | 1.1679687791   |
| 9.868330288     | 10.3301141101  |
| 23.9212604781   | 36.1698198107  |
| 277.8379686236  | 96.9464214051  |
| 0               | 0              |
| 2.7351802725    | 17.1790303943  |
| 172.7484472496  | 118.8325416995 |
| 2.1709002914    | 3.7874775633   |
| 211.6148027136  | 187.1976479619 |
| 23.0011704872   | 11.4654758666  |
| 2134.7760907554 | 889.1888278189 |
| 0               | 0              |
| 13.6180348247   | 14.9341073483  |
| 15.8511867506   | 3.5556290347   |
| 5.2828665488    | 0              |
| 65.0009779449   | 19.7942306301  |
| 97.4943474236   | 17.0094248399  |
| 0               | 0              |
| 0               | 0              |
| 36.1251376614   | 66.1772935178  |
| 5.3149627824    | 6.9545924222   |
| 4.7101460048    | 4.9305550467   |
| 4.3458812224    | 0              |
| 0               | 0              |
| 57.8297252201   | 64.8598282563  |
| 79.8227456095   | 80.9468251167  |
| 7.2153640982    | 12.5883393822  |
| 103.3842231304  | 64.9332232071  |
| 9.568441334     | 0              |
| 0.1645926051    | 0              |
| 1.1064724734    | 1.7735692811   |
| 0               | 0              |
| 1.9297754334    | 0              |
| 8.0050427054    | 3.3518539485   |

gene\_expression\_table

|                |                |
|----------------|----------------|
| 31.2675070949  | 10.9102184058  |
| 22.438906998   | 3.9148208297   |
| 1.9531814714   | 0              |
| 112.4655133161 | 94.7569111251  |
| 0              | 0              |
| 0              | 7.2991758469   |
| 9.7825483599   | 2.4381709661   |
| 2.0164542328   | 18.9973192456  |
| 0.8721505495   | 1.8259248393   |
| 5.5516762926   | 4.3585982581   |
| 0              | 0              |
| 1.5946338564   | 1.1556373771   |
| 1.3777857307   | 1.2362216217   |
| 0              | 9.7159551561   |
| 30.3810719575  | 27.7428155435  |
| 1.6188918348   | 2.7114353731   |
| 19.4262535847  | 14.5996996071  |
| 6.8891381134   | 7.2115120547   |
| 264.8666009356 | 133.5462073022 |
| 0              | 0              |
| 0              | 0              |
| 0.7922974371   | 0.6220294641   |
| 0.1674493321   | 0.175285044    |
| 5.022282292    | 3.7309853957   |
| 1.585751023    | 1.8970919861   |
| 4.9214114862   | 0.5151706596   |
| 4.5460847394   | 2.8552899675   |
| 0.5345999033   | 0.497436668    |
| 0              | 0              |
| 37.7724958241  | 28.8946459309  |
| 20.7443644593  | 8.5955553213   |
| 21.949450731   | 3.829427473    |
| 8.147396096    | 4.2643248106   |
| 1.3822607421   | 0.2893885952   |
| 3.3747931635   | 11.6074921574  |
| 0.4461233581   | 0.8405990791   |
| 0              | 0              |
| 3.3330256756   | 3.4889930268   |
| 5.6011842155   | 5.0815171045   |
| 0              | 0              |
| 11.29068067    | 9.4552181613   |
| 27.4287898873  | 12.9486874994  |
| 0              | 0              |
| 0.2802920276   | 1.4670407985   |
| 16.9799991316  | 11.1091063217  |
| 31.696164654   | 29.8614344428  |
| 0.1258918416   | 0.2259135266   |
| 0              | 0              |
| 0.4713335325   | 0.986778722    |

gene\_expression\_table

|                |                |
|----------------|----------------|
| 3.8918387299   | 4.0739554722   |
| 0              | 1.5622821044   |
| 1.7136871741   | 2.3918378004   |
| 0.1340505891   | 1.1225873812   |
| 1.4898944903   | 0.8664518857   |
| 0.0720110956   | 0.0753808206   |
| 5.026730548    | 1.4031877368   |
| 4.5628268534   | 1.4926069268   |
| 0.0584901957   | 0.1224544331   |
| 0              | 0              |
| 0              | 0              |
| 27.5019040813  | 23.7084586133  |
| 9.7482602532   | 3.4014751517   |
| 0              | 0              |
| 1.362323422    | 1.4260726985   |
| 0              | 0.0298087525   |
| 13.2666501993  | 10.4810994606  |
| 0              | 0              |
| 0.9641260956   | 0.2523104794   |
| 2.8578335264   | 1.4170568623   |
| 4.5376176759   | 1.696411906    |
| 39.0526322276  | 74.946816226   |
| 110.9819375264 | 166.6862777693 |
| 1.7635740286   | 1.9614808637   |
| 8.5517914327   | 4.6891263285   |
| 2.756375998    | 8.6560779054   |
| 15.5334828607  | 14.3473807085  |
| 175.0304081982 | 647.8166577498 |
| 8.0314857894   | 3.2335828257   |
| 0.5282866549   | 1.1060151553   |
| 0              | 0              |
| 15.6473114727  | 18.8612654207  |
| 14.703871901   | 0              |
| 5.2675633616   | 20.4020089897  |
| 669.2457403061 | 594.9223577416 |
| 0              | 0              |
| 7.8908150523   | 12.3900929843  |
| 7.8521399484   | 10.5680277032  |
| 1.9437201256   | 4.0693511687   |
| 0              | 0.6865253937   |
| 0.3154818599   | 0.3302446835   |
| 0.2998881107   | 0.9417636967   |
| 0              | 0              |
| 0.7792519773   | 0.5826547878   |
| 1.8537079041   | 3.3264879151   |
| 10.2474008056  | 8.1728937541   |
| 1.9854090256   | 2.5978941208   |
| 3.5712390293   | 1.6614904272   |
| 0              | 0              |

gene\_expression\_table

|                |               |
|----------------|---------------|
| 2.7291840931   | 3.2140068353  |
| 0              | 0             |
| 0              | 0.9381709703  |
| 0              | 0             |
| 1.7584818035   | 2.322875322   |
| 5.1691587427   | 2.1042960818  |
| 0              | 0             |
| 3.8650520481   | 5.6414875593  |
| 0.3584531837   | 1.0839886197  |
| 0              | 0.1238133972  |
| 10.4511069532  | 5.4700807661  |
| 0              | 0             |
| 1.4695860832   | 0             |
| 0              | 0.0885513945  |
| 0.1074538999   | 0             |
| 1.6488270259   | 0.4314957756  |
| 7.1130916041   | 2.7922295034  |
| 1.7510796342   | 3.055034288   |
| 0.6546376736   | 1.3705422643  |
| 2.3160810407   | 2.2379639552  |
| 35.9903810504  | 24.3061508473 |
| 0              | 0             |
| 26.8127722866  | 22.0530068099 |
| 20.428778885   | 18.7116421417 |
| 0              | 0             |
| 0              | 0             |
| 6.4374907534   | 3.9919650966  |
| 2.5462051198   | 3.1984242928  |
| 0              | 0             |
| 0              | 0             |
| 1.1628801649   | 3.3813794141  |
| 0              | 0             |
| 0              | 0.1811022079  |
| 0              | 0.451018626   |
| 7.3339453516   | 6.9094204525  |
| 0.8336140827   | 1.1634968762  |
| 0.4862171407   | 1.017938881   |
| 13.0486784684  | 8.7664069007  |
| 46.7927766162  | 58.7789068099 |
| 1.5726804822   | 0             |
| 1.571086537    | 1.6446047842  |
| 2.9416085459   | 2.2394616136  |
| 2.4289451707   | 1.6950710031  |
| 0.3510794757   | 0             |
| 0.9169310164   | 0.7198787754  |
| 0              | 0             |
| 9.7604593576   | 20.4343908216 |
| 14.5887787194  | 8.3992995243  |
| 108.8031438938 | 20.3990212409 |

gene\_expression\_table

|                |               |
|----------------|---------------|
| 0.7090187362   | 1.1545285589  |
| 55.0415882745  | 30.7291910496 |
| 0              | 0             |
| 0.3113307429   | 0             |
| 3.562730963    | 2.983557811   |
| 0              | 0             |
| 126.2303660813 | 82.0641905823 |
| 0              | 0             |
| 16.4689749388  | 3.4479265576  |
| 0.2692161202   | 0             |
| 0              | 0             |
| 1.9671887289   | 6.1777271693  |
| 2.2256840641   | 1.1649169456  |
| 0              | 3.1810331203  |
| 0              | 0             |
| 0              | 0             |
| 82.3255198206  | 65.3763404827 |
| 34.0594666136  | 32.1748960169 |
| 0              | 0             |
| 0.5599052646   | 0.5861057651  |
| 24.2095163386  | 63.3559728517 |
| 60.2546067494  | 71.5977319283 |
| 10.7416338533  | 0             |
| 0              | 0             |
| 0.4349579845   | 0.303541091   |
| 1.9092107909   | 4.3301947037  |
| 0.0420929393   | 0.1762506335  |
| 0              | 0.00735       |
| 4.8741017151   | 2.6333847673  |
| 2.3033041156   | 3.5070343798  |
| 23.3572680843  | 31.7192566504 |
| 3.8283724446   | 0.8015038624  |
| 0.6868421539   | 1.4379652116  |
| 3.1438126405   | 2.9917507798  |
| 2.1027137002   | 3.8519410785  |
| 10.1391189527  | 7.4295019411  |
| 0              | 0             |
| 4.9208295625   | 4.0064091211  |
| 2.5853133662   | 3.3828648444  |
| 1.6488270259   | 1.7259831023  |
| 0              | 0             |
| 0              | 0             |
| 2.227675385    | 2.9148979939  |
| 25.0721327224  | 15.3097998946 |
| 0              | 0             |
| 80.6838212992  | 66.9850273737 |
| 5.8653083979   | 6.1397727147  |
| 0              | 0             |
| 0              | 2.1347514038  |

gene\_expression\_table

|                |                |
|----------------|----------------|
| 0              | 0              |
| 0              | 8.0647669663   |
| 0              | 0              |
| 0              | 0              |
| 2.2220476251   | 0.4652054574   |
| 0.485148286    | 0.5078505693   |
| 0              | 2.1586884736   |
| 22.0127138261  | 13.1673075998  |
| 2.5077312648   | 0.8750264522   |
| 0              | 0              |
| 11.6880560946  | 12.2349931203  |
| 3.5344096249   | 8.3245514449   |
| 186.023697383  | 246.3912743875 |
| 26.4337471169  | 48.4237280457  |
| 8.0083573098   | 9.8284674398   |
| 0              | 0              |
| 17.3950913665  | 7.8038941685   |
| 45.9556886105  | 8.0176938668   |
| 7.9944148236   | 10.1303011708  |
| 7.9240842723   | 11.520677815   |
| 0              | 0              |
| 0              | 0              |
| 24.0150786227  | 10.0555411218  |
| 0.60478933     | 0.422060106    |
| 0.2546425463   | 0              |
| 1.1718603938   | 0.5257273044   |
| 1.0727939117   | 1.5721927095   |
| 3.2730339097   | 0              |
| 0.1040003192   | 0.2721674117   |
| 0              | 0.014779127    |
| 3.523931424    | 1.9862942179   |
| 116.8993218707 | 138.6855127075 |
| 0              | 0              |
| 1.6539422989   | 4.5756783184   |
| 1.3168479798   | 0              |
| 2.1267953207   | 0.4452635392   |
| 0.7622019033   | 0.7180819009   |
| 6.2087193116   | 0              |
| 0              | 0              |
| 4.9636367371   | 1.6886700211   |
| 13.88309035    | 8.8460174537   |
| 0.7870191736   | 0.5330777045   |
| 13.621652983   | 6.4395807927   |
| 11.9783486133  | 30.7459956622  |
| 1.210668238    | 0.6336604412   |
| 1.1122531337   | 0.582150245    |
| 0              | 2.2285434281   |
| 3.6389121242   | 6.6660882509   |
| 5.9733625049   | 2.1812383124   |

gene\_expression\_table

|               |                |
|---------------|----------------|
| 0             | 0              |
| 11.0370959348 | 6.6020409082   |
| 4.5668122878  | 3.7740900763   |
| 43.3350075144 | 69.2134184509  |
| 0.161173359   | 0.5061461691   |
| 0             | 0              |
| 0.669000623   | 0.7703368079   |
| 9.4399667308  | 6.3752938606   |
| 4.3546513312  | 29.6297635984  |
| 0             | 0              |
| 0             | 0              |
| 0             | 1.906096663    |
| 0             | 0              |
| 1.1776393219  | 0.7396478363   |
| 2.5210435746  | 3.8809038376   |
| 1.0891128708  | 0.8957750918   |
| 3.1549928531  | 5.5043820718   |
| 0.7125838407  | 2.0886008152   |
| 1.4686551743  | 0.5878218391   |
| 0             | 0              |
| 0             | 0.3474514888   |
| 0             | 0              |
| 0             | 0              |
| 4.9671521966  | 1.1303451568   |
| 0             | 0              |
| 9.2679480898  | 3.4925894325   |
| 0             | 0              |
| 0             | 0.2039067346   |
| 24.7098883258 | 15.328104176   |
| 72.1561155567 | 92.9632328173  |
| 49.2588602037 | 52.8860565514  |
| 0             | 0              |
| 0             | 0              |
| 5.3000886718  | 4.5393576547   |
| 0             | 0              |
| 0             | 0              |
| 8.8130799282  | 2.4277588978   |
| 57.3573066931 | 51.1162543034  |
| 2.4283284096  | 1.173212715    |
| 0.4159072883  | 0.1451231573   |
| 0             | 0              |
| 0.4852719351  | 0              |
| 0.9231272423  | 0              |
| 0             | 1.1144671832   |
| 6.3415986252  | 7.9027984721   |
| 63.7212184311 | 112.7458168587 |
| 1.5190311494  | 1.5901134896   |
| 0.0867612182  | 0.0302737227   |
| 0             | 0              |



gene\_expression\_table

|               |                |
|---------------|----------------|
| 18.5331367562 | 28.6155694616  |
| 62.7442808876 | 90.569772911   |
| 0.279918738   | 0.5860348043   |
| 0             | 0              |
| 93.5301809752 | 24.4767203269  |
| 7.6342548473  | 9.9406415795   |
| 0             | 0              |
| 0             | 0              |
| 0             | 0              |
| 5.3233542768  | 6.6869497298   |
| 27.8715183794 | 9.7252509418   |
| 57.5360242287 | 193.5912700164 |
| 2.7438170127  | 3.5902657809   |
| 0             | 0              |
| 13.3487806601 | 47.5096637066  |
| 0.1984070329  | 0              |
| 3.1457783487  | 1.7731449886   |
| 0.9662414802  | 0.1685760484   |
| 8.4883297305  | 7.7748449475   |
| 31.0505720444 | 28.111194633   |
| 0             | 25.8548449303  |
| 9.1954895865  | 3.2085960493   |
| 2.9889917106  | 1.3906045138   |
| 0             | 0              |
| 0.0710310153  | 0              |
| 0.348524026   | 0              |
| 8.3901271173  | 9.8160025515   |
| 3.2991665829  | 2.4174846597   |
| 0             | 0              |
| 0.5689998127  | 4.7650071063   |
| 0             | 0              |
| 11.4568068907 | 6.4577276184   |
| 23.7187029883 | 8.2762028044   |
| 0.1508117532  | 0.3157378349   |
| 2.2650891074  | 5.927707187    |
| 31.2105584116 | 83.1296504143  |
| 3.812499805   | 0              |
| 0             | 0              |
| 0             | 3.1186685334   |
| 1.1210030856  | 1.0267774053   |
| 0             | 14.6475766389  |
| 8.9846857955  | 7.7453928538   |
| 9.5128159242  | 8.673065089    |
| 13.7541600615 | 12.5198082083  |
| 10.7456753684 | 16.8727712043  |
| 0             | 0              |
| 4.60844205    | 6.706664354    |
| 0             | 0              |
| 7.9591738572  | 0.6408938163   |

gene\_expression\_table

|                |                |
|----------------|----------------|
| 5.6897519232   | 9.8503096078   |
| 0              | 0              |
| 20.4333893141  | 65.0242625464  |
| 0.6450210405   | 0.1688011233   |
| 18.5134672646  | 35.744957361   |
| 3.5411764504   | 2.3168025738   |
| 15.9140904943  | 11.3041740358  |
| 3.8486517457   | 4.7002055026   |
| 0              | 0              |
| 32.0703834881  | 89.9373962594  |
| 0              | 0              |
| 0.6198652446   | 0.324435772    |
| 1.3204041538   | 0.1382191838   |
| 1.112497795    | 1.2616029835   |
| 0              | 0.4319424381   |
| 14.6387578019  | 2.8732071582   |
| 79.9427900868  | 65.4555477138  |
| 33.2855810854  | 24.0297682899  |
| 0              | 0              |
| 10.0621383326  | 6.8154649653   |
| 5.0747735025   | 4.2497960918   |
| 26.9145268149  | 10.5228115442  |
| 12.3914296256  | 0.8945710815   |
| 13.6714811938  | 7.4667295584   |
| 0              | 0              |
| 1.9582138678   | 1.3263719469   |
| 0.0142906253   | 0              |
| 1.0763867344   | 0.3072970199   |
| 27.15109141    | 6.3159141819   |
| 0              | 0              |
| 0.8353064089   | 1.74878835     |
| 0              | 0              |
| 0              | 0              |
| 132.6251834538 | 261.7961955692 |
| 12.9637208891  | 4.7895360149   |
| 29.6444291289  | 32.9123307016  |
| 25.0814474796  | 25.1761442731  |
| 85.8286333302  | 101.0755613291 |
| 10.3718413478  | 10.4396026254  |
| 27.0962725561  | 23.2586683888  |
| 12.4436059105  | 5.3068475494   |
| 6.8007402762   | 16.0176997862  |
| 26.5510333178  | 5.053359326    |
| 17.1917635022  | 9.2288430248   |
| 6.2135434914   | 6.0397102105   |
| 7.6993633075   | 40.2982567568  |
| 3.3203957511   | 4.8976788555   |
| 1.1977990358   | 0              |
| 1.4025046079   | 0.5872536576   |

gene\_expression\_table

|                 |                |
|-----------------|----------------|
| 13.2228021641   | 6.3779722981   |
| 13.5835846062   | 16.5502419849  |
| 29.1359727658   | 8.1331671342   |
| 0.4484113286    | 1.0952538881   |
| 0.2737045985    | 0.4775207916   |
| 0               | 0              |
| 0               | 0.6240917694   |
| 0               | 0              |
| 28.5335334837   | 14.9343733057  |
| 5.1082828333    | 0              |
| 11.0627157157   | 13.751713405   |
| 0.3987236901    | 0.1391272585   |
| 7.1314042686    | 5.1149861622   |
| 2.6621441505    | 9.2890597327   |
| 0               | 0              |
| 4.2206445879    | 1.9329395942   |
| 9.2169885431    | 4.570244118    |
| 0               | 0              |
| 134.5468310051  | 121.9060273492 |
| 2.960059629     | 0.2694412358   |
| 21.8648135402   | 11.4439835451  |
| 26.7384617596   | 7.6335478254   |
| 5.7767453006    | 2.1342583586   |
| 3.2695074086    | 3.8027805029   |
| 26.8911163765   | 22.4046828919  |
| 0.545376973     | 0.570897629    |
| 6.2267346404    | 2.7158798859   |
| 0.8175075983    | 0.7844489377   |
| 0               | 27.0845517835  |
| 2.8548506232    | 1.8111769698   |
| 143.2935630861  | 52.829807321   |
| 39.9582249442   | 16.6798976679  |
| 0               | 0              |
| 0               | 0              |
| 1.7847443397    | 2.2834296249   |
| 0               | 0              |
| 0               | 0              |
| 4.0456196509    | 6.4444624974   |
| 2.4915805823    | 1.3040864553   |
| 3.166664385     | 2.5192836734   |
| 0               | 0.1575986971   |
| 9.5535845158    | 3.3335466531   |
| 18.3212500289   | 14.3078326644  |
| 105.825882412   | 44.5658436617  |
| 0               | 0              |
| 1.867535388     | 2.9323887273   |
| 10.0363444805   | 4.1387235094   |
| 7.424815371     | 4.5129228821   |
| 3928.4648295519 | 5297.822095498 |

gene\_expression\_table

|                 |                 |
|-----------------|-----------------|
| 1.2839653045    | 3.3601196256    |
| 178.5422248448  | 134.849751014   |
| 18.9113482524   | 8.0127863948    |
| 18.4983684166   | 13.4706022735   |
| 4.3605177616    | 5.1351368808    |
| 20.7754321853   | 13.0929480665   |
| 0               | 0               |
| 19.4084404746   | 15.3962107334   |
| 0               | 0               |
| 0               | 11.635568091    |
| 0               | 0.0762287717    |
| 0.7559642979    | 0.3165357151    |
| 0               | 0               |
| 36.2198685586   | 31.0211673385   |
| 0               | 0               |
| 31.0820402371   | 39.4705197532   |
| 5.2091892649    | 2.6599759995    |
| 0.381097362     | 1.3297687727    |
| 0.1892031807    | 0               |
| 0               | 0.2696857183    |
| 645.0856938558  | 139.0266236622  |
| 0               | 0               |
| 3.1661440004    | 2.3200115421    |
| 3.940391047     | 3.6664709083    |
| 4.7607182445    | 2.4917468952    |
| 1.4147561767    | 0.6098066549    |
| 0               | 1.019167035     |
| 53.474129933    | 68.4494344675   |
| 0               | 0               |
| 21.0193538266   | 8.8011777965    |
| 1.4471805844    | 1.3886589856    |
| 1.8127522948    | 2.0973243527    |
| 0.0498055415    | 0.0521361681    |
| 0               | 0               |
| 0               | 0               |
| 1.0401454924    | 0.6303686666    |
| 19.28751462     | 13.9407589545   |
| 4.0527277484    | 3.1817799118    |
| 0               | 0               |
| 0               | 0               |
| 15.8132818274   | 6.9697923491    |
| 0               | 0               |
| 0               | 0               |
| 3084.8769007152 | 2047.3771803671 |
| 3.6921011506    | 0.5521244668    |
| 2.2248511494    | 2.2254525785    |
| 1.3102646728    | 1.7144723562    |
| 35.7658821488   | 13.7278275172   |
| 187.6201067102  | 22.9558091335   |

gene\_expression\_table

|                |                |
|----------------|----------------|
| 0.2982330106   | 0              |
| 0              | 0              |
| 0              | 0              |
| 9.3427979058   | 3.2599965633   |
| 0              | 0              |
| 0              | 0              |
| 0.1248250087   | 0.3919984067   |
| 1.1621054588   | 0.9123642233   |
| 1.3014260951   | 0.3715433755   |
| 0              | 0              |
| 4.8236627729   | 3.1705433025   |
| 448.4058996523 | 153.8333174578 |
| 10.9949805852  | 4.6037941888   |
| 0              | 0              |
| 4.0512820848   | 0.8481719806   |
| 2.2717660966   | 1.5853815404   |
| 5.8107061117   | 4.7791977674   |
| 0.8716338587   | 0              |
| 205.7941908098 | 117.0205705156 |
| 0              | 0              |
| 0              | 0              |
| 0              | 0              |
| 0.3871105948   | 0.5403003346   |
| 6.8528620551   | 1.0760307713   |
| 18.908220579   | 24.1114992441  |
| 0              | 0              |
| 0              | 0              |
| 0.971490586    | 2.0339020518   |
| 3.1098077845   | 4.557461665    |
| 7.2421770976   | 2.6368943757   |
| 2.5553109138   | 5.6841316292   |
| 0              | 0              |
| 6.7684587313   | 3.5425927691   |
| 0              | 0              |
| 0              | 0              |
| 1.3860667314   | 1.4509270648   |
| 15.3221885655  | 4.0097957729   |
| 0.138778419    | 0.4358174675   |
| 0              | 0              |
| 0              | 0              |
| 1.0181856982   | 0.5329156068   |
| 5.1047381      | 7.481056648    |
| 0.2557693545   | 0.8032138792   |
| 31.6163566423  | 3.6773143348   |
| 0              | 0              |
| 1.0982243564   | 1.1496152428   |
| 0              | 0              |
| 8.1237874599   | 7.9885461555   |
| 2.6194513167   | 1.142511373    |

gene\_expression\_table

|                 |                 |
|-----------------|-----------------|
| 1.3604815416    | 0.4747148761    |
| 1.9679063318    | 0               |
| 2.6749925631    | 1.0267281082    |
| 35.2363633188   | 20.6557300211   |
| 1.2599503054    | 0.6594545403    |
| 847.2290349726  | 1108.1206456481 |
| 2.9139470062    | 0               |
| 24.7214119976   | 30.5409844278   |
| 0.324800496     | 1.9039965318    |
| 63.956761931    | 36.517957192    |
| 0               | 0               |
| 0               | 0.2020439731    |
| 1584.6285584857 | 1759.1803704306 |
| 0               | 0               |
| 13.0762685206   | 12.5474857626   |
| 6.0858066407    | 0.3981618167    |
| 1.6858078294    | 0.6417070563    |
| 0.4088051595    | 0.4279350025    |
| 0.2602617626    | 0.4865010499    |
| 452.5879918353  | 368.0151513677  |
| 0               | 0               |
| 5.6423224889    | 5.9063522861    |
| 205.1635176621  | 44.9506144649   |
| 0.1925848645    | 0.2015967816    |
| 3.2711595093    | 2.568173897     |
| 1.9407288905    | 1.3543629172    |
| 288.4974395604  | 333.2095762843  |
| 217.0459909285  | 126.4888172948  |
| 197.2135575447  | 75.0698444247   |
| 0               | 0               |
| 0.2953524985    | 0.270526706     |
| 3.2725296582    | 0.9787617506    |
| 2.5217145961    | 4.1179585688    |
| 34.0669274607   | 16.6418341263   |
| 0               | 0               |
| 0               | 4.1738625787    |
| 41.4220423287   | 9.3872959696    |
| 8.3971264298    | 3.5811379866    |
| 0               | 0               |
| 0               | 1.4743179132    |
| 32.9535331692   | 11.1603340847   |
| 32.6609456157   | 11.199942786    |
| 0               | 0               |
| 0               | 0               |
| 0               | 0               |
| 0               | 0               |
| 0               | 0               |
| 0               | 0               |
| 55.368336788    | 63.3592039256   |

gene\_expression\_table

|                |                |
|----------------|----------------|
| 8.5997924975   | 9.785017062    |
| 0              | 0.4976759537   |
| 2.9492753377   | 0.9080250807   |
| 84.8279568664  | 49.493655506   |
| 0              | 0              |
| 3.0771688163   | 0.6442326935   |
| 0.0133249092   | 0              |
| 0              | 0              |
| 11.8091398409  | 14.4983404651  |
| 13.8460561851  | 6.2117039137   |
| 126.9754950962 | 112.4234034143 |
| 0              | 0              |
| 9.8498118409   | 16.3253210768  |
| 0              | 0              |
| 0              | 0              |
| 0              | 0              |
| 15.9311545932  | 8.3383226975   |
| 3.329238332    | 1.1616761521   |
| 23.5511584136  | 10.7857853555  |
| 0.3546258885   | 1.484881753    |
| 0              | 0              |
| 36.8977275638  | 12.3050992063  |
| 0.6205703752   | 0.6496096708   |
| 2.5770332528   | 2.8202435844   |
| 0.2513482376   | 0.5262199177   |
| 30.421168557   | 16.211853723   |
| 0.9194817887   | 1.1000097162   |
| 16.6044563163  | 11.0609252422  |
| 0              | 1.4030424763   |
| 18.0251090136  | 17.5673036637  |
| 5.8742040992   | 7.9059660249   |
| 1.5928253914   | 1.667360898    |
| 0.7463768152   | 1.1719547449   |
| 0              | 0              |
| 9.2944583561   | 4.6845202031   |
| 0              | 0              |
| 14.8430750103  | 10.4433382863  |
| 0              | 15.2625109374  |
| 18.6936894858  | 22.0145082681  |
| 43.1830877708  | 27.7919781138  |
| 410.3629785541 | 292.6027360977 |
| 0.0910557206   | 0.1906332595   |
| 33.9915602628  | 44.8335457387  |
| 3.5932641368   | 2.2568455338   |
| 4.1737558616   | 2.5845171949   |
| 0              | 2.0954096649   |
| 60.3207665759  | 15.7858620393  |
| 0              | 0              |
| 18.2762335025  | 10.7136182476  |

gene\_expression\_table

|                |                |
|----------------|----------------|
| 0.8262549195   | 1.6001003821   |
| 3.2499598995   | 0.7731909607   |
| 0              | 0              |
| 0              | 0              |
| 0              | 0              |
| 0.6381224538   | 0.6679830905   |
| 5.5085301812   | 4.1517354463   |
| 0.1207946087   | 0.1264471349   |
| 6.5578566949   | 4.8307348562   |
| 0              | 0              |
| 33.4840807892  | 100.1055201214 |
| 7.7062373298   | 7.4906436803   |
| 0.6191248695   | 0.4320643489   |
| 0.1757379759   | 0.0919807754   |
| 0.0496667567   | 0              |
| 0.6200323277   | 0.5331452945   |
| 24.873045603   | 37.6089536932  |
| 4.1039674095   | 2.2172958      |
| 14.211970153   | 15.3813180463  |
| 4.7997335815   | 1.6747782772   |
| 0              | 0              |
| 1.5999270103   | 0.8373974169   |
| 1.6081478766   | 0.8860002061   |
| 0.5094293705   | 0              |
| 3.4744657948   | 2.7277888268   |
| 0              | 7.4565964527   |
| 0              | 0              |
| 34.9296295086  | 24.3760966051  |
| 2.6870432795   | 4.2191732875   |
| 189.6247674292 | 159.6615700969 |
| 0              | 0              |
| 0              | 0              |
| 5.0941333561   | 2.1330043614   |
| 0              | 1.7842429848   |
| 18.8977833633  | 5.9346288442   |
| 11.8215793792  | 12.0403114672  |
| 2.4548654778   | 1.3604504507   |
| 30.1067703702  | 122.5606758824 |
| 12.316637498   | 33.5217705977  |
| 99.6634707672  | 47.115498603   |
| 308.7565022308 | 254.4176276738 |
| 67.0980998023  | 0              |
| 0              | 0              |
| 38.7749358165  | 34.3448688806  |
| 0              | 1.9123362841   |
| 5.7893263002   | 0              |
| 7.9398503707   | 4.8483119372   |
| 59.5595308036  | 23.3799715196  |
| 1.5156454085   | 6.3462772581   |



gene\_expression\_table

|                 |                |
|-----------------|----------------|
| 6.5624540469    | 2.7478163851   |
| 1.7364873039    | 0              |
| 544.6095798012  | 938.3853508464 |
| 2.5364879982    | 1.3275908738   |
| 73.3106616793   | 3.0696479689   |
| 166.52121298    | 164.8911429141 |
| 863.4096279258  | 448.5084441541 |
| 20.1115625255   | 9.0225743692   |
| 194.1699060867  | 137.1977962792 |
| 0               | 0              |
| 63.1573138432   | 5.509394192    |
| 1.5626480438    | 0.5948259694   |
| 21.4737660402   | 10.9511229092  |
| 9.4533070516    | 89.0610305286  |
| 31.4796963585   | 17.5748126809  |
| 31.4839491072   | 20.5982659567  |
| 0               | 0              |
| 40.7316988397   | 0              |
| 5.2274101009    | 10.9440485404  |
| 378.0218784776  | 123.65976015   |
| 2.4922840212    | 1.7392728444   |
| 14.0121746081   | 9.429343492    |
| 54.1635263465   | 15.1194887466  |
| 75.0016962449   | 146.7821170751 |
| 9.2721723248    | 4.3138040972   |
| 33.1496514919   | 32.5977904138  |
| 0               | 0              |
| 124.3015489426  | 45.541363281   |
| 8.0467677675    | 4.2116562189   |
| 51.4106152234   | 43.053080408   |
| 138.3886782181  | 72.4322552963  |
| 40.3816343363   | 2.3484040949   |
| 24.3317078407   | 50.9405970721  |
| 79.3336356486   | 23.72743297    |
| 0               | 0.09887469     |
| 5.1311335465    | 0.9765895455   |
| 2.1367918765    | 5.59195509     |
| 5714.5064890718 | 7478.971802539 |
| 1.1431036638    | 3.5897839682   |
| 10.2276409382   | 4.9413408606   |
| 180.1917209342  | 49.6378175814  |
| 3.828885692     | 2.0040282884   |
| 4.72964639      | 8.2516132388   |
| 0               | 0              |
| 207.1992309844  | 51.8662005416  |
| 0               | 0              |
| 27.2884322209   | 20.1015647081  |
| 0               | 0              |
| 15.6136073743   | 7.2965351362   |

gene\_expression\_table

|                 |                 |
|-----------------|-----------------|
| 0.7647097229    | 1.4675722429    |
| 0               | 0               |
| 0.8801649128    | 0.9213518112    |
| 0               | 0.1329320105    |
| 4.6264539606    | 2.0891142512    |
| 2.357131033     | 4.4413773453    |
| 23.4792160133   | 12.7127145305   |
| 0               | 0.3303434226    |
| 0               | 0.0348181285    |
| 10.8581426852   | 22.7324886153   |
| 7.2934031872    | 1.7618525816    |
| 3.4870854379    | 13.0366497942   |
| 2.371499571     | 1.7377309358    |
| 0.6785864934    | 0.3551703128    |
| 0.5023531939    | 0.3505737151    |
| 0               | 0               |
| 0.4020335525    | 0.4208465214    |
| 0               | 0               |
| 0               | 0               |
| 0.7642385619    | 0.6857149217    |
| 3.1379663931    | 3.0795056605    |
| 0.8314798136    | 0.870388516     |
| 1.7113314658    | 0               |
| 34.864415494    | 58.3934067748   |
| 2.5851206522    | 5.4121802871    |
| 0               | 0               |
| 1.1743414159    | 0.7822781043    |
| 102.4616506237  | 91.9339669972   |
| 0.035204248     | 0.0221109684    |
| 0               | 0.3524242712    |
| 0               | 0               |
| 0               | 0               |
| 13.2246736019   | 9.2290106086    |
| 7.9276189135    | 13.7107107241   |
| 0.1028031604    | 0.1434850472    |
| 0.4911319806    | 0.257057134     |
| 0.561004087     | 1.3100326297    |
| 0               | 0               |
| 0.0161135327    | 0               |
| 0.132988715     | 0.2784237173    |
| 313.492720045   | 184.5913853086  |
| 1.6247100422    | 4.081770182     |
| 42.9531195508   | 70.5303378041   |
| 1.3533332874    | 1.6527721873    |
| 3836.7037214147 | 5530.8395988733 |
| 0.6998967143    | 0.7326480481    |
| 0               | 0.0846606898    |
| 0.3457160202    | 0.0603156062    |
| 0.7189784748    | 1.2041963689    |

gene\_expression\_table

|                |                |
|----------------|----------------|
| 2.8805463606   | 3.6184081889   |
| 47.6864917816  | 65.277330324   |
| 4.0884329095   | 3.2098118872   |
| 34.3937995381  | 31.6580222837  |
| 0              | 2.6425498581   |
| 0.6207449245   | 1.299584776    |
| 4.7703791434   | 1.9206179871   |
| 0.5435863893   | 0.4267674419   |
| 0              | 1.3490513729   |
| 0              | 0              |
| 0              | 0              |
| 2.3694684195   | 1.2401732836   |
| 3.9095477664   | 2.8135890713   |
| 0              | 0.4770676299   |
| 22.7661603996  | 19.625934627   |
| 15.6415469645  | 6.8940992484   |
| 0              | 0              |
| 2.0622768983   | 1.6790512393   |
| 112.2593873225 | 21.8895855607  |
| 12.5331898796  | 10.2041913079  |
| 11.1218904552  | 23.2846680581  |
| 0              | 0              |
| 72.4207462353  | 37.2156417537  |
| 23.5356606252  | 22.6660406162  |
| 3.00643894     | 5.874631131    |
| 0              | 0              |
| 19.7171237918  | 9.0299025344   |
| 7.9948386797   | 15.9174210832  |
| 2.6707001982   | 1.0650187976   |
| 9.2157514908   | 7.549824677    |
| 17.3906183723  | 19.3565815613  |
| 0.2008122501   | 0              |
| 14.8080519243  | 11.9238366699  |
| 9.4395227019   | 0              |
| 5.9350214705   | 0.7765934972   |
| 0              | 0              |
| 24.3003929014  | 0              |
| 208.6343125346 | 187.1976479619 |
| 67.2500055162  | 46.1221314902  |
| 0              | 1.4414521518   |
| 72.9716146256  | 43.6493066423  |
| 4.0359256041   | 29.5734937616  |
| 8.3268479483   | 38.352594885   |
| 0              | 0              |
| 0              | 0              |
| 0              | 0              |
| 0              | 0              |
| 1.7853349887   | 3.7377577806   |
| 120.34924422   | 87.3738707099  |

gene\_expression\_table

|                |                |
|----------------|----------------|
| 34.0496523289  | 27.4176843187  |
| 1.457235879    | 9.1525592331   |
| 388.0389055937 | 252.634720517  |
| 0              | 4.1556959462   |
| 0.3990087689   | 0.278453463    |
| 0.6569984441   | 0.6877423738   |
| 0              | 8.1842449954   |
| 6.8028842675   | 14.2424440021  |
| 0.4388184071   | 0.4593527057   |
| 0              | 0              |
| 60.2758349062  | 26.2901724714  |
| 13.6275359316  | 5.7060919975   |
| 4.0139041846   | 4.2017329218   |
| 10.1557191247  | 14.4967515964  |
| 41.417944139   | 28.9040514234  |
| 0              | 4.1007069083   |
| 0              | 0              |
| 1.9949712382   | 1.4916606918   |
| 0              | 7.5664971597   |
| 147.4099577057 | 105.5791144905 |
| 0              | 0.4267459417   |
| 0.5545588859   | 0.9675153419   |
| 17.1428807253  | 9.9007303035   |
| 164.0766378813 | 148.5876365418 |
| 1.8092569264   | 2.1644802786   |
| 1.7150151123   | 1.0098384912   |
| 3.2423088199   | 1.1313437063   |
| 0.1597037801   | 0.0835885213   |
| 1.0880910104   | 1.7796995496   |
| 29.9764322832  | 34.7412185855  |
| 2.3705096008   | 6.2035911753   |
| 11.8444407893  | 7.629966623    |
| 3.1618996354   | 8.4019503402   |
| 493.9067792121 | 236.4660140271 |
| 0              | 0.3531270335   |
| 2.9688988979   | 4.3509579536   |
| 48.1399863836  | 9.448626403    |
| 9.1631554853   | 6.0580679923   |
| 0              | 0              |
| 0.2111203224   | 0              |
| 43.1431167539  | 42.3393547331  |
| 0              | 0              |
| 0              | 0              |
| 0              | 0              |
| 1.4373694811   | 0              |
| 0.2724383114   | 0              |
| 0              | 0              |
| 0              | 0              |
| 0              | 3.2113329809   |

gene\_expression\_table

|                |                |
|----------------|----------------|
| 9.820425772    | 0              |
| 0              | 0              |
| 0              | 0              |
| 0              | 0              |
| 0              | 0              |
| 12.1975992388  | 4.7568474858   |
| 0              | 0              |
| 0              | 0              |
| 3.8306038071   | 8.77155801     |
| 0.7454167108   | 0.2229423232   |
| 8.3552202748   | 30.6116959174  |
| 2.7551175931   | 1.8352994612   |
| 2.1884154429   | 3.7089487758   |
| 1.9217552303   | 7.040889983    |
| 0              | 0              |
| 15.4382613225  | 19.6698652574  |
| 2.6998184456   | 2.8261551657   |
| 1.6151220857   | 2.2542679406   |
| 0              | 0              |
| 1.1269322366   | 0              |
| 1.2500964891   | 4.2529310192   |
| 0.7816121739   | 2.727291146    |
| 0              | 0.2395371845   |
| 84.2980858285  | 67.4076750872  |
| 0              | 0              |
| 0.6147091185   | 0              |
| 4.3358682078   | 0.9077526197   |
| 0.1704787763   | 0.4461406239   |
| 66.7489853237  | 26.8740278245  |
| 7.8096934407   | 3.5544105786   |
| 3.5001394959   | 0.6106544765   |
| 3.3072569066   | 6.0585322358   |
| 0.102921711    | 0.2873010227   |
| 86.2000621695  | 26.3181779813  |
| 2.2152751297   | 2.3189378757   |
| 0              | 0.2298344844   |
| 0.6742263412   | 0.3528882211   |
| 2.10532061     | 1.4513080082   |
| 3.4377284647   | 2.3990635554   |
| 40.1918003916  | 20.5231983289  |
| 1.1477317929   | 2.6213222318   |
| 1.1224086728   | 2.0294267094   |
| 2.9685993804   | 1.5537567882   |
| 29.8271207645  | 26.3114045172  |
| 0              | 0.6481268274   |
| 0.3647317972   | 0.3817992482   |
| 0              | 1.8142415015   |
| 558.1589773605 | 373.5108975869 |
| 2.7720741099   | 8.7053759982   |

gene\_expression\_table

|                |                |
|----------------|----------------|
| 0              | 0              |
| 0              | 0              |
| 3.1840549925   | 3.2475884768   |
| 5.5077544593   | 4.3738178831   |
| 6.5557020587   | 6.1762257166   |
| 0              | 0              |
| 21.5428441562  | 12.2150877885  |
| 3.1512439413   | 2.2837187788   |
| 0              | 5.9905895122   |
| 11.406553185   | 11.6999083404  |
| 0              | 0              |
| 1.9405349727   | 2.0313413838   |
| 5.1959855691   | 3.9386797962   |
| 0              | 0              |
| 2.3545590561   | 4.9294790545   |
| 0.2750239893   | 0.3838581414   |
| 55.8172393854  | 39.9778603789  |
| 2.6047509187   | 5.453277998    |
| 1.6505326054   | 3.0853008815   |
| 12.5288201549  | 8.2187962098   |
| 0.9831362765   | 1.3721888946   |
| 14.1442576573  | 17.978873924   |
| 0              | 0              |
| 5.9485411821   | 6.2269003374   |
| 8.7167298056   | 5.6775444636   |
| 8.0241124557   | 4.7997697037   |
| 2.2345343135   | 0.1754323713   |
| 0.7552411066   | 0              |
| 0              | 0              |
| 0              | 0              |
| 0              | 0              |
| 0              | 0              |
| 2.4209969031   | 2.5342863016   |
| 0              | 0.5106211086   |
| 1.4560886815   | 0.7621128294   |
| 22.6179165047  | 4.9325648228   |
| 5.051205266    | 2.643787007    |
| 0              | 0              |
| 27.3803383713  | 11.942328451   |
| 27.2987581084  | 29.3165063261  |
| 1.4146769656   | 0.8227089452   |
| 8.7481414445   | 4.5787532812   |
| 0.408348136    | 0.8549131855   |
| 0.7240866929   | 1.5159399705   |
| 0              | 0              |
| 129.7319572932 | 135.8027025294 |
| 4.8592928318   | 1.1738494912   |
| 0              | 0              |
| 0.3454352076   | 0.2008887132   |

gene\_expression\_table

|                |               |
|----------------|---------------|
| 0.3700448989   | 0.4648331688  |
| 0.6562525008   | 1.144935874   |
| 0.4890183312   | 0.4095213692  |
| 0              | 0             |
| 0              | 0             |
| 4.4539202841   | 3.1082262436  |
| 8.6457519497   | 4.1137844545  |
| 0.1302540175   | 0.4090475768  |
| 3.4480637041   | 4.8125522734  |
| 2.0229234206   | 0             |
| 0.2650040391   | 0.8322143312  |
| 0              | 1.2750347814  |
| 0              | 1.6997478821  |
| 1.3469720556   | 0             |
| 0              | 0.8423186797  |
| 4.3348875049   | 1.5125788346  |
| 0.8026613933   | 1.2603323271  |
| 12.7931297512  | 5.120385772   |
| 8.7045403236   | 0             |
| 155.2309425149 | 168.704896839 |
| 26.966285969   | 18.6049239624 |
| 7.5107975275   | 5.3606329946  |
| 3.16006783     | 2.8353786009  |
| 4.8503111281   | 3.5839617391  |
| 0.1537254502   | 0.0804594798  |
| 2.5078348889   | 2.3626690468  |
| 0              | 0             |
| 54.2103949945  | 16.5512505211 |
| 58.4262154236  | 18.3480727154 |
| 163.1614474886 | 77.2650877749 |
| 0              | 0             |
| 1.1916693669   | 0.9979463745  |
| 0.9450625799   | 3.1091856207  |
| 0.5580958353   | 1.168423329   |
| 5.4049672599   | 5.3250730654  |
| 11.8796635716  | 4.145188926   |
| 0.834654071    | 0             |
| 0              | 0             |
| 0              | 0             |
| 37.3291700434  | 1.95379854    |
| 0              | 0             |
| 0              | 0             |
| 9.3276731906   | 12.0616059788 |
| 0.0956340915   | 0.2002184867  |
| 28.5529106208  | 16.011980621  |
| 74.1850836608  | 36.7846765416 |
| 1.1540260748   | 6.0401408801  |
| 0              | 0.1150557719  |
| 5.0080388059   | 2.1843281666  |

gene\_expression\_table

|                |                |
|----------------|----------------|
| 0.5871715149   | 0.7683099083   |
| 1.3233895515   | 1.0389877021   |
| 0              | 0              |
| 5.5204079431   | 3.0957497181   |
| 0              | 0              |
| 26.4450853528  | 18.6857351169  |
| 3.3238984745   | 6.9588774453   |
| 3.8756677107   | 2.5356423362   |
| 21.7727240746  | 15.5397056875  |
| 0.911444354    | 4.5319510555   |
| 3.8596337064   | 3.0705850067   |
| 0              | 0              |
| 0.1989411522   | 1.0412525439   |
| 7.4445508237   | 6.1523013463   |
| 0              | 0              |
| 169.0439055337 | 29.0521877849  |
| 0.43754898     | 0              |
| 0.0754034173   | 0              |
| 0              | 0              |
| 0              | 0.1020516309   |
| 3.6529042169   | 3.9604058513   |
| 0              | 0              |
| 1.4073097106   | 1.4731640992   |
| 0              | 2.6134033383   |
| 82.0768457333  | 29.2900884173  |
| 0.1474293935   | 0.1543282819   |
| 1.6767138929   | 0.877587461    |
| 0              | 0.1257339108   |
| 4.606071886    | 6.867142696    |
| 2.0855973547   | 2.547057206    |
| 2.1779116771   | 1.1399130091   |
| 2.0484857506   | 0.5360859167   |
| 0.1294403922   | 0.6774874687   |
| 0              | 0              |
| 0              | 0              |
| 1.2274601193   | 1.2848985317   |
| 1.4366421965   | 0              |
| 6.4035621652   | 5.9146004215   |
| 3.7716293806   | 0              |
| 11.244137336   | 7.8468675964   |
| 0              | 0              |
| 0.5967794414   | 2.4988218062   |
| 9.6946273035   | 10.9289199137  |
| 9.0061556329   | 0              |
| 5.3849942345   | 11.2739649568  |
| 980.7126987781 | 559.0898743396 |
| 0              | 0              |
| 0              | 0              |
| 0.4487744067   | 0.8455942648   |



| gene_expression_table |                 |
|-----------------------|-----------------|
| 0                     | 0.2141145702    |
| 0                     | 0               |
| 0                     | 0               |
| 6.7463862547          | 3.8026585642    |
| 0                     | 0.3275850248    |
| 200.1434277965        | 129.0454258398  |
| 1.5222387351          | 3.5853101386    |
| 0                     | 0               |
| 0                     | 0               |
| 0                     | 0.0681553974    |
| 0.3270118491          | 0.4278927663    |
| 1.1560869828          | 12.1018552329   |
| 7.2917601587          | 3.8164873036    |
| 0                     | 0               |
| 1.0151945096          | 1.5054917428    |
| 1.4250296445          | 1.0441992602    |
| 18.1813494236         | 7.4271754233    |
| 3.6202714908          | 6.0634885972    |
| 10.8320036238         | 8.4127189635    |
| 0.6043113279          | 0               |
| 0.1317491181          | 0.4137427664    |
| 4.0919316122          | 3.7891718051    |
| 29.7314815073         | 21.2200582112   |
| 0.3684811747          | 0.385724076     |
| 26.355881639          | 19.4747241773   |
| 0.0740187958          | 0.0774824702    |
| 0.1164601661          | 0.0609549321    |
| 20.1161839899         | 10.5287556258   |
| 0                     | 0               |
| 5.1154679328          | 3.3467773885    |
| 3.2993907796          | 4.8928609526    |
| 10.6647433301         | 13.1338763784   |
| 0                     | 0               |
| 19.2682693138         | 9.4126287788    |
| 1.1595036215          | 2.1240835734    |
| 0                     | 12.8514220676   |
| 0                     | 0               |
| 0.6539694266          | 0.9779594498    |
| 1.97757834            | 1.3800787852    |
| 0                     | 0               |
| 0.6467686157          | 1.1078735653    |
| 2.252583512           | 0               |
| 12.7988509276         | 25.3664389843   |
| 30.0144671309         | 31.965396885    |
| 1.2360378564          | 0.64693883      |
| 0.7007852367          | 0.9336449163    |
| 0.8577973007          | 0               |
| 0                     | 0               |
| 3718.0136783345       | 3149.2806367074 |

gene\_expression\_table

|                 |                 |
|-----------------|-----------------|
| 55.9643526067   | 14.1033576349   |
| 1.288252752     | 1.0788287414    |
| 0.4026847623    | 1.3488902536    |
| 10.0760870052   | 13.2821537754   |
| 7.2106491545    | 11.5737043465   |
| 1071.5135633205 | 1142.3779402113 |
| 1.4111545956    | 0.9847926025    |
| 1.2595020591    | 0.6906113546    |
| 1.9858646844    | 2.0787922777    |
| 3.6823190522    | 2.9144774157    |
| 6.6368922175    | 12.4061829144   |
| 3.2093403808    | 1.343807975     |
| 0.1049573867    | 0.2197376353    |
| 0.0956589631    | 0.2002705576    |
| 0.7384587366    | 0               |
| 1252.8762826939 | 2212.8813743042 |
| 0.622272442     | 1.9541741549    |
| 4.833030498     | 2.9895212818    |
| 2.2112120034    | 2.5251104917    |
| 2.9844749753    | 1.5620660311    |
| 0               | 0               |
| 33.5073740628   | 8.7688339237    |
| 0.4000707407    | 3.7691267462    |
| 17.0107858654   | 0               |
| 50.0237159958   | 45.0916975493   |
| 5.6983266288    | 4.6867677317    |
| 0               | 0.8357862428    |
| 9.0730548969    | 3.9573434105    |
| 5.2964094051    | 29.5693459418   |
| 1.4615787657    | 1.5299726488    |
| 47.7405949036   | 19.989837334    |
| 2.4305258819    | 0.4240435308    |
| 15.9501264839   | 2.7827508444    |
| 3.5474939733    | 2.8882756517    |
| 16.663126561    | 2.1803587053    |
| 57.4922261894   | 18.8070461152   |
| 9.7140692206    | 8.8422908429    |
| 0               | 2.6116910842    |
| 10.4263244829   | 61.2875395837   |
| 7.1342568536    | 7.4681010097    |
| 15.8166292092   | 3.8207909654    |
| 13.9674304586   | 8.7726178341    |
| 3.0894457712    | 0               |
| 25.0212568129   | 12.2775537302   |
| 4.1287188169    | 10.2645605941   |
| 2.8062008188    | 3.3047051078    |
| 26.249076363    | 49.5493907328   |
| 0.9976859047    | 1.462120999     |
| 25.1153642643   | 11.684722573    |

gene\_expression\_table

|                |               |
|----------------|---------------|
| 802.649568477  | 543.587894367 |
| 4.3921140014   | 1.8390563548  |
| 69.2895606766  | 20.7234093462 |
| 1.894113299    | 4.3620443459  |
| 4.877655718    | 2.917659027   |
| 140.0725805558 | 75.295053958  |
| 4.7394572582   | 11.1627852892 |
| 0.3262257946   | 1.0244741266  |
| 4.9546263226   | 2.828986748   |
| 0              | 0             |
| 44.058244117   | 0             |
| 3.8141684636   | 2.5667039975  |
| 3.9354298396   | 0.8239172814  |
| 4.5617175918   | 0.9550361994  |
| 1.733697019    | 0             |
| 9.1046727748   | 2.1179381348  |
| 5.5369440955   | 7.5794405334  |
| 83.6076986762  | 31.257171846  |
| 2.9046379397   | 0             |
| 68.4496396398  | 47.022089605  |
| 0              | 0             |
| 0              | 0.8633873785  |
| 52.7613698566  | 14.3189700536 |
| 27.4037226427  | 16.6077228898 |
| 295.0272198975 | 90.9576285483 |
| 7.3212118202   | 10.2184059268 |
| 10.390583217   | 9.4536721713  |
| 2.8076531861   | 6.4658791594  |
| 2.5003571419   | 1.5704160991  |
| 0              | 0             |
| 1.7165954256   | 5.0912809608  |
| 3.3036563139   | 1.7291246699  |
| 0.8793774001   | 0             |
| 37.7894569807  | 9.1287223029  |
| 1.489944974    | 1.8521036605  |
| 0              | 0             |
| 2.6508795838   | 3.2374139386  |
| 0              | 0             |
| 2.9665588255   | 1.5526887673  |
| 11.5343582958  | 11.3638617469 |
| 1.8469158281   | 4.1083504235  |
| 0              | 1.6202550823  |
| 8.6545784344   | 6.7946739869  |
| 0              | 0             |
| 1.8830315665   | 1.2449350314  |
| 2.1355085063   | 0.9250090805  |
| 1.1657047338   | 1.016877777   |
| 1.1889180235   | 2.666899022   |
| 7.7549490508   | 10.2825950572 |

gene\_expression\_table

|                 |                 |
|-----------------|-----------------|
| 0               | 0               |
| 3.3452399235    | 2.1886117716    |
| 16.8847800442   | 12.9162696389   |
| 0.1056138926    | 0               |
| 6.7461699343    | 4.2371122486    |
| 0.300138379     | 1.5709160584    |
| 16.2835073781   | 11.5665800306   |
| 0               | 3.4273492091    |
| 31.1105047584   | 13.4870560331   |
| 0               | 4.6212185326    |
| 161.722999996   | 49.2482184318   |
| 15.6130694193   | 4.6696215933    |
| 4932.8133179343 | 6244.8948861798 |
| 13.8295763062   | 28.9534495032   |
| 3.5022855815    | 0               |
| 79.4442152268   | 58.5212451979   |
| 0               | 0               |
| 32.0608733088   | 12.5854299847   |
| 0.391922838     | 0.4102626808    |
| 5.9813588367    | 4.6959402589    |
| 2.0076990041    | 0               |
| 0               | 0               |
| 0               | 0               |
| 0.5617490959    | 0.3675224236    |
| 19.8972219676   | 28.8050999015   |
| 45.2999174166   | 23.7098527529   |
| 13.472064236    | 4.3049685174    |
| 0               | 0               |
| 19.3219456451   | 16.1808855211   |
| 0               | 0               |
| 3.4172427518    | 10.7314530029   |
| 183.0854362077  | 130.1792821899  |
| 0               | 0               |
| 0               | 0               |
| 1.7970491939    | 0.8550642074    |
| 29.0506527273   | 8.9441365306    |
| 3.2824382258    | 2.481583261     |
| 330.824024893   | 74.7703497492   |
| 18.3077620728   | 28.7466976367   |
| 0               | 0               |
| 2.0481487348    | 0.8575963523    |
| 0               | 0               |
| 0               | 0               |
| 84.6446740184   | 8.8605581279    |
| 1.6639997607    | 1.741865838     |
| 3.2827711303    | 2.0618321064    |
| 13.0501591644   | 9.7577393967    |
| 25.7688448797   | 15.4141061253   |
| 10.07276889     | 4.5189082797    |

gene\_expression\_table

|                 |                |
|-----------------|----------------|
| 6.5526938413    | 8.002544705    |
| 9.1392644876    | 1.6494710383   |
| 1.1708067476    | 3.6767822775   |
| 39.5643052687   | 31.9492528319  |
| 13.3235051225   | 11.1575777661  |
| 0               | 0              |
| 0               | 7.5094801155   |
| 154.288595973   | 85.0044512822  |
| 5.6766263319    | 0              |
| 20.9196973459   | 12.2224881673  |
| 123.4870055788  | 106.4539586929 |
| 0               | 2.00893954     |
| 241.4387604443  | 144.4210128013 |
| 2.8874329478    | 0.7556372498   |
| 149.0931522093  | 66.3297055249  |
| 9.360359556     | 9.7983731293   |
| 103.8105302907  | 0              |
| 0               | 0              |
| 0               | 0              |
| 0               | 1.6638565253   |
| 60.6826459405   | 6.3522261494   |
| 16.738834472    | 32.5410805005  |
| 0               | 0              |
| 90.0178578224   | 28.0685704104  |
| 16.037433707    | 38.3723378042  |
| 9.4236675508    | 20.4881059211  |
| 95.6993298726   | 95.6240102007  |
| 0               | 13.2148105621  |
| 0               | 0              |
| 622.1120371498  | 277.7276580418 |
| 44.486150831    | 5.588143092    |
| 301.4372437363  | 174.0926103075 |
| 5.9087483287    | 0              |
| 0               | 0              |
| 0               | 0              |
| 0               | 0              |
| 2167.567263586  | 733.2735961201 |
| 0               | 0              |
| 75.3819520055   | 53.8440711355  |
| 117.6655917182  | 35.1919134619  |
| 49.3981279583   | 0              |
| 1.2516783254    | 1.8925833583   |
| 1.4670106665    | 1.5356587328   |
| 6.864634235     | 4.3115169173   |
| 0.1784055743    | 0.7470159132   |
| 2083.7847646769 | 460.4955016744 |
| 14.8125538458   | 9.8672638003   |
| 88.5532100543   | 8.0606100348   |
| 8.3242781979    | 24.3986647431  |

gene\_expression\_table

|               |               |
|---------------|---------------|
| 1.6397225605  | 1.1703085894  |
| 1.0792432304  | 1.4121823801  |
| 3.6323934326  | 3.2390555473  |
| 0             | 0.0407714343  |
| 5.5678962765  | 3.2530846518  |
| 33.0736955156 | 15.002590792  |
| 13.9658233905 | 2.4365579089  |
| 49.5869619975 | 39.1753662633 |
| 2.5735965131  | 6.9595690726  |
| 0             | 0.1209744799  |
| 0             | 0             |
| 4.2017728015  | 8.0637200623  |
| 9.6786357716  | 7.2368163779  |
| 45.3139784062 | 52.9076272966 |
| 0             | 0             |
| 0             | 0             |
| 0             | 0             |
| 7.6559875455  | 4.3714068225  |
| 4.6675256274  | 1.2214850673  |
| 3.0736234216  | 3.4319489789  |
| 53.245857596  | 50.8297702239 |
| 4.0213130664  | 1.2027109996  |
| 2.6959956142  | 1.4110767234  |
| 0             | 2.8382287051  |
| 0             | 0             |
| 21.5984527481 | 21.4191872255 |
| 4.7146483155  | 2.4676340205  |
| 0.8626484695  | 0.5418094166  |
| 1.4080721845  | 0.8039794105  |
| 2.6197693313  | 0.4570600318  |
| 27.9347191014 | 24.0815737606 |
| 0.9800849843  | 1.2824344937  |
| 0             | 0             |
| 2.1105757757  | 2.4031408464  |
| 0.2139616826  | 0.3359608767  |
| 0             | 0             |
| 0             | 0             |
| 0.6614243485  | 1.7309384658  |
| 4.0739747123  | 3.1640687641  |
| 2.0858821569  | 11.2293772474 |
| 5.6197446156  | 0.8403882703  |
| 11.0285003446 | 11.5445737726 |
| 11.5539073609 | 4.6517565232  |
| 0.3662818053  | 0.348565262   |
| 0             | 0             |
| 7.2032739476  | 8.8709973245  |
| 4.8986202774  | 1.7092829611  |
| 8.695264834   | 9.1021556161  |
| 21.4941702104 | 7.1341398992  |

gene\_expression\_table

|                |                |
|----------------|----------------|
| 0              | 0              |
| 2.3887913907   | 2.5005737477   |
| 0              | 0.0246510893   |
| 5.8084101796   | 3.8992663729   |
| 0              | 0              |
| 19.7589937635  | 9.0806077223   |
| 1.9015464308   | 0              |
| 7.1509639768   | 5.0902011557   |
| 0              | 3.8207909654   |
| 16.0057123066  | 4.7870548575   |
| 2.2707390296   | 2.6411079804   |
| 0.5894759305   | 1.8511805289   |
| 1.4750521686   | 2.6469883427   |
| 9.7930906888   | 0              |
| 4.2078760044   | 1.1945170334   |
| 0.9915641198   | 0              |
| 8.3777107735   | 10.5236901173  |
| 4.7225158075   | 4.3255657275   |
| 1.3356859702   | 0.23303146     |
| 0              | 0              |
| 0              | 0              |
| 0.0798808587   | 0.2090471137   |
| 0.2837865239   | 0.7426654483   |
| 5.8046399183   | 3.7976658015   |
| 0              | 0.071536676    |
| 0              | 0              |
| 0.7696360921   | 0.8862159317   |
| 1.6365985972   | 2.6040373243   |
| 423.6234694407 | 469.2785764472 |
| 0              | 49.3558256098  |
| 469.3314887459 | 497.8881779336 |
| 3.3625725478   | 5.1625530451   |
| 3.4216155935   | 1.6966082216   |
| 0              | 0              |
| 6.7138587417   | 10.8615017872  |
| 0              | 0              |
| 0.0379416358   | 0              |
| 1.7118383017   | 0.2389257281   |
| 0              | 0.2278722075   |
| 0              | 0.2109735513   |
| 2.4983885999   | 3.5306543332   |
| 0.9833353927   | 0.6862334032   |
| 2.6857524698   | 2.8114309792   |
| 0.2991434901   | 1.1481864806   |
| 26.0729535578  | 20.4697687638  |
| 0.9666165963   | 2.5296224005   |
| 0.9800948765   | 1.2824474376   |
| 19.9834725357  | 15.1325967523  |
| 0              | 0              |

gene\_expression\_table

|                |                |
|----------------|----------------|
| 0              | 0.0835802736   |
| 0.7062397486   | 0.4704559375   |
| 16.418380516   | 15.1317427899  |
| 23.7782356985  | 28.0022927943  |
| 0.810175294    | 0.6057764725   |
| 0.8515387519   | 0.2971287009   |
| 10.2332323792  | 7.7127059672   |
| 10.4739909431  | 6.0911757597   |
| 2.1547375917   | 2.9773491164   |
| 0.3063422614   | 0.1603387009   |
| 0.5242692821   | 2.0580083019   |
| 30.7072047584  | 13.5719676043  |
| 3.9337222181   | 2.1351549739   |
| 0.1482114613   | 0.4266541018   |
| 24.5348233731  | 21.3051485195  |
| 0.308434298    | 0              |
| 0              | 0              |
| 0.0458624011   | 0              |
| 1.3674861361   | 0.4294430998   |
| 0.3758578154   | 0.7868918062   |
| 1.8385897076   | 1.1963889104   |
| 0              | 0              |
| 1.9040968601   | 2.1925179837   |
| 3.5853038707   | 6.2551274334   |
| 8.808629128    | 11.6114089298  |
| 10.1210027075  | 4.8432503841   |
| 0.650563238    | 1.3620120706   |
| 12.9640408574  | 10.6626826297  |
| 0              | 0              |
| 13.12295885    | 12.6525381939  |
| 0              | 0              |
| 171.8940199625 | 117.5688681047 |
| 2.9468429848   | 6.1694782012   |
| 0              | 0.6590953603   |
| 6.0160357355   | 11.1418250095  |
| 0              | 0              |
| 50.2945312791  | 75.2114856406  |
| 0              | 0              |
| 2.7680243448   | 2.6560900002   |
| 0              | 0.5802242325   |
| 1.4758624521   | 3.0898494671   |
| 0              | 0              |
| 1.9653970092   | 3.0860502412   |
| 20.1718889492  | 9.2043330581   |
| 89.044862676   | 57.5135864997  |
| 0              | 0              |
| 0.0965795567   | 0.0673993008   |
| 1.933926232    | 0              |
| 0.648737791    | 0.3233786511   |



gene\_expression\_table

|                |               |
|----------------|---------------|
| 0              | 3.1106517587  |
| 0              | 0             |
| 1.219395554    | 0.3829369767  |
| 0.8685290457   | 0.3409392935  |
| 1.0561596027   | 1.105582089   |
| 0              | 0             |
| 12.4283192096  | 3.5026644411  |
| 1.1416119403   | 0.9958609401  |
| 0              | 5.5382108992  |
| 0              | 0             |
| 0              | 0             |
| 0              | 0.6107425336  |
| 0.392331378    | 0.9582774558  |
| 4.6076124949   | 2.5971203623  |
| 3.3127855497   | 2.3118705159  |
| 4.6858854008   | 1.5489976356  |
| 0.1524913708   | 0.2128361759  |
| 0              | 0.0129600575  |
| 63.0036464129  | 28.853944035  |
| 176.0006706827 | 50.2463286423 |
| 1.0331878853   | 1.2978425051  |
| 18.1063527939  | 1.5794692467  |
| 2.7143080373   | 1.8942151939  |
| 40.2074218151  | 15.6330233409 |
| 0.0508184862   | 0.425572105   |
| 0              | 0             |
| 1.9099135428   | 0.8568373023  |
| 4.5295058535   | 3.8793779391  |
| 95.9955237797  | 65.6245476937 |
| 0              | 0             |
| 0              | 0             |
| 0              | 0             |
| 134.7223178953 | 31.8447126702 |
| 2.2565618617   | 0             |
| 10.4005904711  | 4.665977638   |
| 0.2736452073   | 0.5251588918  |
| 0              | 0             |
| 0.3898364849   | 1.2242360935  |
| 3.3594813981   | 3.5166867322  |
| 1.6874876947   | 2.2080660985  |
| 0              | 0             |
| 0              | 0             |
| 69.996773431   | 42.2724456638 |
| 1.0150406367   | 1.859443216   |
| 2.2147951243   | 1.7388265566  |
| 1.7013289398   | 1.068565091   |
| 0.6914541961   | 0.8444455441  |
| 25.2187276529  | 19.7396626985 |
| 0              | 0             |

gene\_expression\_table

|                |                |
|----------------|----------------|
| 5.5873021127   | 7.6957332336   |
| 211.8962025015 | 37.4563435587  |
| 0.5726236306   | 0              |
| 217.759651849  | 167.7365063421 |
| 13.201228087   | 4.381625673    |
| 7.2812874802   | 1.7589258149   |
| 0.3424690876   | 0              |
| 4.1723201388   | 3.8537310663   |
| 3.8178961246   | 1.3321842526   |
| 0              | 0              |
| 0              | 0              |
| 0.783049239    | 0.8196916557   |
| 5.5424868741   | 13.537638126   |
| 37.4225572468  | 37.5067608641  |
| 154.9397180196 | 127.3164202688 |
| 0.386803735    | 0.4049040318   |
| 45.5535716485  | 17.9683472976  |
| 0              | 0              |
| 0              | 0.1541401263   |
| 0              | 0              |
| 0              | 0.1883967255   |
| 2.7275115428   | 0.5191171178   |
| 47.2563657252  | 44.2605780528  |
| 5.5000436151   | 3.8382770267   |
| 0.038624155    | 0              |
| 0              | 0              |
| 18.655978873   | 6.5096588436   |
| 94.5411518772  | 159.7925268151 |
| 0              | 0              |
| 1.2096715809   | 0.8441850581   |
| 33.4095226104  | 20.4719445835  |
| 297.585292419  | 942.5194165888 |
| 3.6254618442   | 3.7951136068   |
| 1.9380911817   | 1.5706708929   |
| 1.5723608219   | 1.4726819936   |
| 0              | 0              |
| 4.8683088433   | 14.7221216712  |
| 4.5261662177   | 3.9483050108   |
| 3.3744915914   | 2.0185138974   |
| 1.5290238043   | 1.8292271382   |
| 210.6516022802 | 69.3028109134  |
| 193.3177971765 | 202.3640115464 |
| 0.3016403715   | 0.1578777446   |
| 14.1146106672  | 4.3456168117   |
| 0              | 0              |
| 9.7760998071   | 3.69545502     |
| 1.130382404    | 3.9442603698   |
| 0              | 0              |
| 5.1997913412   | 7.2574841385   |

gene\_expression\_table

|                |                |
|----------------|----------------|
| 7.1326847388   | 12.4440922143  |
| 546.5536774894 | 360.2296202493 |
| 7.9812904314   | 8.354771121    |
| 17.9442272347  | 1.707628983    |
| 2.8671575332   | 7.0940404512   |
| 23.3423966428  | 52.9418348142  |
| 0              | 0              |
| 3.1825237829   | 3.0538277638   |
| 9.9742830379   | 4.3962209973   |
| 1.6528581097   | 0.9409874979   |
| 0.7012934951   | 0.1631355979   |
| 1.7071434856   | 1.4296227624   |
| 0              | 0              |
| 0              | 0.6158115812   |
| 75.9993504218  | 97.8535157684  |
| 213.9910211326 | 41.4823387379  |
| 71.6637417225  | 29.1733603896  |
| 0.4312951153   | 0.7825607662   |
| 0              | 0              |
| 0.8342054115   | 1.6217345058   |
| 2.9754489028   | 2.8032152571   |
| 426.1180461135 | 693.7047566877 |
| 1.1114753406   | 1.2319266711   |
| 361.8847483584 | 68.8761769149  |
| 1.5339615821   | 0.8028712924   |
| 71.6481896952  | 17.6472782714  |
| 0              | 0              |
| 1.1637349301   | 10.9637221734  |
| 2.5838687112   | 4.0571694278   |
| 14.0798989899  | 16.0488732699  |
| 0.5526022355   | 0.5784609943   |
| 11.1263204651  | 6.6908133225   |
| 0              | 0              |
| 156.9488531966 | 88.7423124797  |
| 0              | 0              |
| 0.681563314    | 0.5350925588   |
| 0              | 0              |
| 5.4220467474   | 4.1100395091   |
| 0.2270236459   | 0.2376471095   |
| 0.6579498194   | 0.6887382683   |
| 5.41321244     | 2.6443765327   |
| 5.0058443584   | 3.3187239607   |
| 0              | 0              |
| 1.2776050264   | 1.6717374325   |
| 0              | 0              |
| 3.4229486806   | 2.2630256438   |
| 3.7839751397   | 3.9610444565   |
| 21.3315220258  | 22.3297204529  |
| 0.1588997791   | 0              |

gene\_expression\_table

|               |               |
|---------------|---------------|
| 0             | 0             |
| 0             | 0             |
| 0             | 0             |
| 1.8334724904  | 0.3838537927  |
| 0.287338642   | 0.6015690342  |
| 0.9983382686  | 0.6967033554  |
| 8.4136423136  | 9.6880901742  |
| 0             | 0             |
| 2.4614542467  | 5.1532736549  |
| 0             | 0             |
| 0             | 0             |
| 2.2043791248  | 1.538354665   |
| 7.7220350428  | 3.695261257   |
| 0             | 0             |
| 5.231528916   | 0.342270989   |
| 0             | 0             |
| 1.4600683873  | 2.7788938055  |
| 3.1363525497  | 1.767832056   |
| 16.6616969859 | 23.2551642286 |
| 0.9055709226  | 1.263928911   |
| 0.4634857512  | 0.3465531046  |
| 5.1539956283  | 4.0463808017  |
| 1.1898878791  | 0             |
| 5.9721701076  | 2.4462919437  |
| 59.3340249858 | 14.7882220151 |
| 1.2520764282  | 0.5097037358  |
| 0             | 0             |
| 0.0919152052  | 0.0962163335  |
| 8.4699396124  | 3.1292775557  |
| 0.9330678393  | 4.8836515251  |
| 0.1929781186  | 0.0505021095  |
| 10.879675757  | 2.8471962523  |
| 0             | 0             |
| 4.3093910334  | 1.8044187748  |
| 0             | 0             |
| 0             | 0             |
| 0             | 0             |
| 0             | 0             |
| 12.722818814  | 6.9920429612  |
| 6.3161421903  | 3.30585153    |
| 0.8755187662  | 0.7128241948  |
| 0             | 0             |
| 0             | 0.277096242   |
| 6.2857699443  | 4.6999353994  |
| 6.6889186643  | 8.4023081181  |
| 0             | 1.0279219438  |
| 0             | 0.9896537162  |
| 0             | 0             |
| 36.8550495707 | 26.78460755   |

gene\_expression\_table

|                |                |
|----------------|----------------|
| 4.9616653058   | 2.6635097815   |
| 1.3467129508   | 1.2815743116   |
| 7.1216993058   | 0              |
| 0              | 0.0901669983   |
| 8.4936423863   | 6.0074988796   |
| 61.0488935206  | 19.1716942368  |
| 521.1194461383 | 130.6138691108 |
| 6.1591459241   | 4.1718213241   |
| 0              | 0.6773574483   |
| 594.742157084  | 469.8226215207 |
| 19.2114689947  | 28.4898191106  |
| 7.1993156905   | 0              |
| 40.7890660121  | 92.0932314724  |
| 6.7126857854   | 4.2160816343   |
| 0              | 0              |
| 0              | 0              |
| 4.0744232021   | 7.1084731631   |
| 0              | 0              |
| 0              | 3.8113356897   |
| 23.8130978489  | 16.3808762867  |
| 0              | 0              |
| 3.0334214277   | 0              |
| 1.0271867958   | 1.0752535133   |
| 0              | 0              |
| 16.8706458346  | 2.6757726791   |
| 41.5569418226  | 38.5457030436  |
| 0              | 0              |
| 8.5922932427   | 6.9956176253   |
| 1.3262363085   | 2.429519585    |
| 0              | 0              |
| 12.391756792   | 25.9432463142  |
| 16.226656646   | 9.2007366348   |
| 0.6824494689   | 1.190640612    |
| 0.1204323588   | 0.6303396687   |
| 0              | 0              |
| 26.5474766088  | 58.8765956564  |
| 4.3091685038   | 1.6402959979   |
| 12.3486595024  | 1.4362787945   |
| 51.7986343067  | 26.4807688836  |
| 321.5556957963 | 522.0195060987 |
| 0.7860919794   | 0              |
| 1.4627236169   | 11.7389782253  |
| 407.5405360585 | 500.4477557257 |
| 23.3238514207  | 14.0857384351  |
| 0              | 0              |
| 5.8952961196   | 2.468465479    |
| 95.1218308231  | 85.5978521228  |
| 58.8340180032  | 9.8539404627   |
| 6.0096775612   | 0              |

gene\_expression\_table

|                 |                 |
|-----------------|-----------------|
| 0.6894168976    | 0               |
| 16.17920791     | 18.6299368735   |
| 80.9087499688   | 16.9389672881   |
| 0.7952308771    | 0.749198995     |
| 6.894903258     | 28.8701879059   |
| 5.3132178832    | 3.1781985068    |
| 0.9561431653    | 1.4012396019    |
| 4570.8934354576 | 2327.5146526268 |
| 33.5327976985   | 37.0795236099   |
| 0               | 0               |
| 1.0756643519    | 1.4477137118    |
| 127.1950954786  | 19.0210184961   |
| 4.2424960148    | 8.8820431958    |
| 14.0000533498   | 0.9770119458    |
| 171.5820491936  | 84.0116667366   |
| 20.1336035733   | 24.5883703056   |
| 0               | 0               |
| 1.1778621616    | 2.8358532207    |
| 3.8441951716    | 16.0963298247   |
| 0               | 0.9654312252    |
| 53.7127397856   | 25.9505547213   |
| 30.9183941946   | 23.3748708159   |
| 0               | 0               |
| 10.9448474088   | 4.4065408991    |
| 4.8152519108    | 5.7606620957    |
| 0.9915185586    | 1.9460928711    |
| 11.7063737232   | 8.5779175395    |
| 7.1563394527    | 5.4103233554    |
| 7.2156565498    | 4.8066516693    |
| 5.7203045606    | 3.684912918     |
| 2.3110183739    | 0               |
| 25.5886391769   | 12.6051987653   |
| 0               | 0               |
| 1.2115707918    | 1.2682656707    |
| 4.7649910898    | 8.0451073894    |
| 7.5981510199    | 0               |
| 3.3480340248    | 0.7009407369    |
| 5.3658140343    | 5.6169047499    |
| 481.3587474887  | 236.0536257526  |
| 13.3561427621   | 9.8890969803    |
| 20.1044244377   | 18.0387440716   |
| 0               | 0               |
| 0.1640337479    | 0               |
| 2.2285445123    | 1.2312148795    |
| 2.1060314163    | 2.480154924     |
| 12.7780574265   | 11.1921637222   |
| 0               | 0               |
| 3.7393857838    | 3.914368563     |
| 0               | 0.165320535     |

gene\_expression\_table

|               |               |
|---------------|---------------|
| 121.950581511 | 88.0834686684 |
| 2.1681083611  | 0.9078255843  |
| 5.6198561262  | 1.7648503862  |
| 0             | 0.027143482   |
| 0             | 0             |
| 12.9388803599 | 16.1379478783 |
| 2.2087775239  | 2.5555189774  |
| 0             | 7.3101994134  |
| 4.4639530195  | 7.0092623668  |
| 59.6897496716 | 32.6615175384 |
| 4.7328737161  | 2.4771731453  |
| 28.4745563204 | 18.342775163  |
| 0             | 0             |
| 23.5200102285 | 37.8316811943 |
| 6.2738040112  | 12.3138444109 |
| 3.9474158356  | 5.7490550011  |
| 1.7287497971  | 0.2585208317  |
| 0             | 0             |
| 15.5583455993 | 6.3729356015  |
| 0.5494827401  | 0.4218100506  |
| 0.7442316597  | 0.623246101   |
| 0             | 0             |
| 1.5637378906  | 2.6190596182  |
| 1.6446381457  | 1.7215982054  |
| 2.2371057171  | 1.1708950076  |
| 0             | 0             |
| 0.6055662821  | 0.6339034682  |
| 0             | 0             |
| 0             | 0             |
| 0.4144085194  | 0.433800569   |
| 1.6581180956  | 2.1696361791  |
| 10.2461897743 | 4.2902621405  |
| 0             | 0             |
| 0             | 0             |
| 0.0665435701  | 0             |
| 2.9534499115  | 2.2083251395  |
| 3.9191128403  | 5.1727247821  |
| 0             | 0             |
| 1.1558392853  | 0             |
| 8.4386830532  | 5.1141704917  |
| 3.4867701711  | 8.2123468264  |
| 28.9796273995 | 26.6362378067 |
| 4.7712445968  | 4.9945127183  |
| 24.1650638368 | 47.8570258208 |
| 131.884088133 | 98.6111009345 |
| 0.3263771084  | 0.4783096779  |
| 13.1914801707 | 17.7541318427 |
| 24.4975915656 | 22.0822857233 |
| 2.4453687413  | 0.6399496521  |

gene\_expression\_table

|                |               |
|----------------|---------------|
| 1.0377974252   | 0.8147704966  |
| 8.0508616572   | 3.8307263178  |
| 5.5929253562   | 6.5051595978  |
| 0              | 0             |
| 0.8320569135   | 0.5806617473  |
| 0.6872906152   | 0.8093835592  |
| 8.029135938    | 1.8677456745  |
| 0              | 0             |
| 0              | 0             |
| 0              | 0.8796455644  |
| 0              | 0.6346990537  |
| 0              | 0             |
| 1.5893736093   | 0.5545825305  |
| 1.377308342    | 0.7208794154  |
| 1.5609627385   | 1.6340072474  |
| 4.4905831499   | 8.4612921346  |
| 3.6053440479   | 3.4309585525  |
| 231.2632161319 | 98.9655939728 |
| 0              | 0             |
| 30.6148624419  | 14.851266756  |
| 0.4248621559   | 0.2223716892  |
| 0              | 0             |
| 1.6822272823   | 2.302775941   |
| 6.6423401077   | 7.9464745756  |
| 2.7834767538   | 1.4568641123  |
| 1.3645153453   | 2.3806119865  |
| 1.6818201296   | 1.9561334473  |
| 0              | 0             |
| 1.4505421741   | 3.0368392105  |
| 10.5670438457  | 4.4246094546  |
| 31.1221636217  | 15.1658583202 |
| 0.2690751271   | 0             |
| 0              | 0             |
| 0              | 0             |
| 0.9051741756   | 0.7580250965  |
| 41.8923840646  | 61.5077087161 |
| 0              | 0             |
| 1.0033282966   | 0.3938544626  |
| 18.7931817368  | 7.2861480509  |
| 4.3375440356   | 5.2574411371  |
| 16.9395663307  | 26.0072930774 |
| 3.493577329    | 10.023046806  |
| 0              | 0.9879511978  |
| 7.8304923903   | 5.7378415901  |
| 0              | 0             |
| 0.5682605924   | 0             |
| 0.1976059821   | 0.6205585802  |
| 62.3554039914  | 154.28233473  |
| 4.0188879246   | 8.413899747   |



gene\_expression\_table

|                 |                 |
|-----------------|-----------------|
| 2.2341333065    | 1.169339256     |
| 12.1935800591   | 17.7588491662   |
| 143.8919849201  | 11.8914743616   |
| 0               | 0               |
| 9.232208598     | 38.6569016327   |
| 54.8260649951   | 74.453999519    |
| 7.923205609     | 3.8279853447    |
| 0               | 0               |
| 0               | 0               |
| 0               | 0               |
| 39.5698329397   | 150.6235798226  |
| 57.0084364191   | 59.6761190861   |
| 5.9063224022    | 6.9555441935    |
| 118.081136665   | 71.6711043959   |
| 0               | 2.2356013645    |
| 6.1233680183    | 8.5465441496    |
| 2730.4398526926 | 4261.3305077454 |
| 416.5944112221  | 277.5110218031  |
| 0               | 0               |
| 20.6798641353   | 30.306595958    |
| 0               | 0.7034875484    |
| 4.5022426759    | 7.0693844707    |
| 93.7692267266   | 119.3802726785  |
| 0               | 0               |
| 92.4525471359   | 10.1872442216   |
| 0               | 14.2820663805   |
| 87.5843337561   | 83.710383518    |
| 18.5451796692   | 13.2576534359   |
| 0               | 14.7530221834   |
| 0               | 0               |
| 0               | 0               |
| 13.5037285711   | 18.7379269819   |
| 11.7482559065   | 15.8117270834   |
| 0               | 0               |
| 149.9461179213  | 165.6294314883  |
| 37.78012646     | 14.8305110656   |
| 4.1524212116    | 4.3467317872    |
| 0               | 0               |
| 6.2692472099    | 3.2813068256    |
| 4468.363848326  | 6993.1465449256 |
| 26.6543911357   | 32.9747017259   |
| 20.1231727352   | 2.633103379     |
| 88.0166508352   | 71.9807407399   |
| 674.0958403923  | 229.1821685087  |
| 3.3310133932    | 5.579018529     |
| 26.7448476788   | 30.8677816544   |
| 3.931942283     | 2.7439571013    |
| 0               | 0               |
| 0               | 0               |

gene\_expression\_table

|                |                 |
|----------------|-----------------|
| 0              | 0               |
| 8.2536651113   | 5.7599276296    |
| 0              | 0               |
| 2.801303082    | 2.9323887273    |
| 0              | 0               |
| 0.8899676476   | 2.7948397812    |
| 823.5284473418 | 2272.7170009739 |
| 0              | 6.3261341077    |
| 16.8867137111  | 13.7966200564   |
| 0              | 0               |
| 6.875862633    | 6.9405576632    |
| 0              | 13.0754209986   |
| 39.5537148814  | 34.5038434634   |
| 0              | 0               |
| 6.0510859794   | 12.6684873394   |
| 74.623915492   | 48.8224413272   |
| 0              | 0               |
| 1.0412392445   | 1.5511019603    |
| 37.5355121894  | 58.9379529435   |
| 0.8911437516   | 0               |
| 0              | 3.3184570909    |
| 352.4403674287 | 103.3011411009  |
| 78.9828654235  | 52.6459223313   |
| 8.8750382424   | 11.9875373363   |
| 2.0685943572   | 10.1773482573   |
| 5.3197047195   | 3.1820787266    |
| 0              | 2.4968883037    |
| 0              | 0               |
| 2.1233353021   | 0               |
| 3.1634467323   | 1.1038262392    |
| 3.3895689065   | 6.5050006474    |
| 114.3954095074 | 56.8502924179   |
| 3.7477617258   | 3.4238281774    |
| 46.4586205643  | 59.7377182687   |
| 7.3563916692   | 7.7006305184    |
| 6.7517987786   | 1.7669364978    |
| 0.4079878409   | 0.8541588757    |
| 0              | 0               |
| 0              | 0               |
| 0              | 4.2732720748    |
| 3.4613871316   | 2.8986888768    |
| 0              | 1.519270661     |
| 55.1181325579  | 25.2425947177   |
| 0              | 0               |
| 0              | 0               |
| 0              | 0.6554488776    |
| 2.3810595369   | 7.4774402562    |
| 90.0504204333  | 151.8702402089  |
| 0.8662685225   | 2.7204154381    |

gene\_expression\_table

|                 |                  |
|-----------------|------------------|
| 14.8526295256   | 9.994918667      |
| 49.6789949478   | 85.0969634519    |
| 102.0003886911  | 94.9097318798    |
| 169.1882193941  | 427.5827996943   |
| 0               | 0                |
| 257.4858999906  | 196.5358136955   |
| 0               | 0                |
| 0               | 0.0732603693     |
| 0               | 0                |
| 0.8431119941    | 0.7722443915     |
| 0               | 0                |
| 118.8391333824  | 222.0064288639   |
| 0               | 0                |
| 0               | 0.5281145653     |
| 2.1903900125    | 4.2036284974     |
| 0               | 0                |
| 0.4547298204    | 2.3800434302     |
| 3487.4745691202 | 10559.5609005332 |
| 0.0743752834    | 0.3114225577     |
| 41.5300031757   | 35.9127921087    |
| 0               | 1.3101374326     |
| 9.0865541925    | 5.7070531044     |
| 4.1366776022    | 10.8256286576    |
| 0               | 0.2349576603     |
| 2.0468179586    | 3.0799843826     |
| 7.1159585251    | 6.9523499917     |
| 11.2130934649   | 10.9374999648    |
| 1.1977547123    | 0.5015212297     |
| 18.1086038479   | 17.9028769435    |
| 1.0921033575    | 2.0958809936     |
| 0.2825265349    | 0.7229376726     |
| 0               | 41.9514332824    |
| 2.2611728004    | 2.6628562194     |
| 2609.5231223592 | 2731.6345156854  |
| 11.501363625    | 8.5996889038     |
| 0.6693271052    | 0.8407775384     |
| 23.6271886488   | 11.1886529136    |
| 669.4991317325  | 247.2679524267   |
| 30.1379174531   | 3.1548206966     |
| 57.1471104249   | 0                |
| 5.078838383     | 4.4543650404     |
| 1.1394418046    | 0.2981903605     |
| 0               | 0                |
| 0               | 0                |
| 1.1703728215    | 0.3062849653     |
| 1.504454486     | 1.5748547181     |
| 62.6833664384   | 69.7176425537    |
| 2.2870329583    | 3.4580773902     |
| 0               | 0                |

gene\_expression\_table

|                 |                |
|-----------------|----------------|
| 14.8887411889   | 22.3791116427  |
| 12.8297752503   | 9.4010969366   |
| 0               | 0.7418426818   |
| 3.8701185309    | 8.9126815508   |
| 8.668485095     | 0              |
| 0               | 0              |
| 0               | 0              |
| 47.5182533661   | 26.5861598338  |
| 107.0292500737  | 142.5255849305 |
| 1390.5866519181 | 1600.191960259 |
| 1.0662754242    | 1.5347355038   |
| 30.765597655    | 56.5960069133  |
| 0.6331792517    | 1.9884257207   |
| 15.8434279709   | 8.2924068236   |
| 0               | 0              |
| 1.1502786876    | 0.7525658948   |
| 13.1991648265   | 5.9214914857   |
| 0               | 0              |
| 0               | 0              |
| 1.4770185651    | 1.5461349463   |
| 7.5905146872    | 5.6755065797   |
| 690.4263475539  | 354.0174174706 |
| 2.042238791     | 0              |
| 3.4695497304    | 2.9055245278   |
| 1.3662278337    | 3.4323835568   |
| 5.6940019253    | 2.9802250186   |
| 0               | 0              |
| 0               | 0              |
| 0.545634391     | 0.8567506393   |
| 3.6796593355    | 1.925923622    |
| 0.3126742655    | 0.5673298957   |
| 26.5721695202   | 22.7582194534  |
| 1.3286643356    | 0.8345031307   |
| 0.1250236518    | 0.0186962963   |
| 19.563688936    | 10.2395812273  |
| 0.0275084292    | 0              |
| 0               | 0              |
| 31.4202782831   | 6.8522031793   |
| 0               | 0              |
| 1.4782665028    | 0.3868603202   |
| 0.6466210081    | 1.1281322178   |
| 24.1945673359   | 13.2139516208  |
| 0               | 0              |
| 0               | 0              |
| 2.31178864      | 1.0755411955   |
| 6.0764353306    | 1.5353605042   |
| 0.5300514745    | 0.3699033208   |
| 0               | 1.5322327833   |
| 5.4690665289    | 8.0149844542   |

gene\_expression\_table

|                |                |
|----------------|----------------|
| 2.0331310072   | 0              |
| 54.2094492609  | 45.2195919908  |
| 0              | 0.0879711035   |
| 2.2820165923   | 2.9860030916   |
| 3.7015407793   | 1.1624257858   |
| 0.8084350703   | 1.2693981073   |
| 4.6295490299   | 1.5419684556   |
| 5.1607339516   | 3.5452121527   |
| 7.2261028452   | 1.5128489782   |
| 13.4411142797  | 7.5375454443   |
| 10.4868448631  | 11.3102254708  |
| 13.6993846989  | 17.6182559506  |
| 0              | 0              |
| 47.376085895   | 42.9465391057  |
| 1.8974777      | 0.9931346332   |
| 2.8216296814   | 1.4768332501   |
| 6.921219964    | 19.9240116906  |
| 0              | 0              |
| 0              | 0              |
| 4.6906529429   | 4.4533916938   |
| 0.6739708355   | 0              |
| 6.6026595003   | 2.9621262048   |
| 0.2872400462   | 0.4009084101   |
| 0.6096380635   | 1.9144973602   |
| 0.7464169757   | 1.3022420051   |
| 11.4266152524  | 4.1604585316   |
| 3.8066430001   | 3.9847730487   |
| 0              | 0.5774587015   |
| 6.1506733154   | 9.4431203499   |
| 0              | 0              |
| 36.5603802839  | 25.5141372599  |
| 1.1877655649   | 1.1303149905   |
| 0              | 0              |
| 7.3868793349   | 9.2790538078   |
| 1.0249064777   | 0.0825281914   |
| 34.1453909432  | 10.7229624815  |
| 9.6448520097   | 10.0961782721  |
| 0              | 0.9428643778   |
| 19.9021440353  | 18.9395049084  |
| 2.2396365548   | 4.6888785643   |
| 1.5435442701   | 0              |
| 11.4848456575  | 0              |
| 0.3369643689   | 3.1745921061   |
| 0              | 0              |
| 12.9064919947  | 24.1765860558  |
| 0              | 5.5472780421   |
| 139.3582499383 | 164.6500758734 |
| 0              | 1.1583854455   |
| 3.0305167914   | 3.4607218726   |

gene\_expression\_table

|                 |                |
|-----------------|----------------|
| 17.1506736386   | 17.2351020039  |
| 21.9977537294   | 9.8687692081   |
| 0               | 0              |
| 3.3068868413    | 3.6264706115   |
| 0               | 0              |
| 0.3551348136    | 0.2974025426   |
| 19.6081316642   | 16.677118948   |
| 28.9712448822   | 11.37260269    |
| 13.3328349239   | 25.8199663962  |
| 1.6953762489    | 1.7747105741   |
| 0               | 0.8170824318   |
| 0.8004514808    | 1.3965137118   |
| 0.7599221333    | 0              |
| 4.365168781     | 7.8926600709   |
| 5.1822163536    | 12.6576699737  |
| 65.1143298951   | 26.385028642   |
| 0               | 0              |
| 4.2233557504    | 5.4412131372   |
| 76.5680208601   | 65.3863298502  |
| 2.3733775733    | 0              |
| 227.287866482   | 186.0685299916 |
| 0               | 26.9231420589  |
| 0               | 0              |
| 41.3612383009   | 22.5319653723  |
| 0.2878189876    | 0.6025746804   |
| 9.2082989366    | 7.3124942042   |
| 6.8905488089    | 3.3660614227   |
| 0.5103048029    | 0.4451535612   |
| 0.6390799902    | 1.3379708688   |
| 381.1671252048  | 335.642563383  |
| 0               | 0              |
| 0               | 13.1294656217  |
| 109.8447973106  | 64.0630337404  |
| 2.8555069704    | 3.9855054145   |
| 28.3262281052   | 42.5906817752  |
| 246.6008526475  | 110.6316095378 |
| 16.4985037437   | 26.4137722268  |
| 27.4838504867   | 0              |
| 16.0132536336   | 4.5716144239   |
| 9.3929551203    | 7.86599519     |
| 36.9745881938   | 15.4819185847  |
| 1509.5762514315 | 1293.572293595 |
| 1.6748485638    | 1.7532223058   |
| 2.536730961     | 0.5900969066   |
| 0               | 0              |
| 22.3689069037   | 5.606563908    |
| 20.2124388772   | 12.3755920861  |
| 0               | 0              |
| 46.074683466    | 42.718643351   |

gene\_expression\_table

|                |                 |
|----------------|-----------------|
| 0.4355471681   | 1.8237135627    |
| 0              | 0               |
| 0.3876700523   | 3.6522979918    |
| 20.5273481381  | 24.1083931466   |
| 21.6534746127  | 11.6667037211   |
| 174.2058136953 | 92.966666453    |
| 0              | 0               |
| 1.1760818016   | 0               |
| 7.8189268898   | 10.523326956    |
| 0              | 0               |
| 0              | 0               |
| 0              | 0               |
| 0              | 0               |
| 9.2639162406   | 2.9092250384    |
| 0              | 0               |
| 14.1763378275  | 3.7099282033    |
| 9.6200089196   | 3.3567242204    |
| 0              | 0               |
| 71.6242834093  | 16.8959791965   |
| 77.9954779389  | 79.8703427265   |
| 0              | 0               |
| 0              | 0               |
| 0              | 0               |
| 0.6372932338   | 0               |
| 6.226834463    | 7.061400905     |
| 0              | 0               |
| 69.0192762191  | 43.6504377548   |
| 3.9970515368   | 17.5731849816   |
| 19.1075108292  | 3.7503070707    |
| 13.3918590586  | 3.5046311834    |
| 4.5099795659   | 2.3605109573    |
| 6.5103191953   | 7.4345088933    |
| 14.5863681479  | 9.1613581845    |
| 0              | 3.4517903709    |
| 0              | 0               |
| 1.352353212    | 2.8312718746    |
| 171.8743633398 | 282.0322773111  |
| 460.0937671602 | 84.5598750505   |
| 33.4208810993  | 52.4771930012   |
| 10.440921864   | 10.5983028718   |
| 0.865365291    | 3.6234385928    |
| 1.9810345397   | 0               |
| 0              | 0               |
| 1951.099852084 | 1515.4913852031 |
| 23.6323673712  | 24.2004450932   |
| 0              | 0               |
| 1.2624466966   | 0.5286089157    |
| 3.7132837695   | 10.3156197345   |
| 895.3651022498 | 1542.4810365665 |

gene\_expression\_table

|                 |                 |
|-----------------|-----------------|
| 4.8767738421    | 7.1469722162    |
| 89.9322713905   | 50.9928300132   |
| 10.4867566145   | 10.9774794024   |
| 0               | 0               |
| 21.1710109086   | 7.3872327648    |
| 137.4473983404  | 340.3593599307  |
| 47.6370521726   | 0               |
| 134.8671806027  | 21.1767339257   |
| 0               | 1.8922581415    |
| 58.8511333539   | 46.2037831106   |
| 246.2964712037  | 116.4356504505  |
| 197.6679288223  | 135.7897442563  |
| 0               | 0               |
| 0.9276660365    | 3.8843029097    |
| 31.7957989633   | 44.7607952362   |
| 3.0640025885    | 3.2073811323    |
| 0               | 5.2580344943    |
| 143.8027500342  | 130.8973315862  |
| 2.017962802     | 0               |
| 68.3093512144   | 115.5094577765  |
| 209.4407981124  | 89.6896966264   |
| 20.5827072963   | 5.0696153634    |
| 1.9242305413    | 3.3571233237    |
| 45.4353219324   | 45.6589883631   |
| 11.8160586559   | 7.215241542     |
| 0               | 0               |
| 75.4642435528   | 3.1598222775    |
| 0               | 0               |
| 10.8134794963   | 19.8091094705   |
| 11.3280399096   | 12.2893348819   |
| 12.9472493379   | 3.8723170607    |
| 6.7692136657    | 5.9049798329    |
| 1.7959093584    | 1.6449545723    |
| 0               | 0               |
| 0.8818210468    | 0.9230854433    |
| 1386.9665656199 | 1381.8994156978 |
| 23.1789552914   | 21.5676475373   |
| 1.7329853842    | 0.8062576049    |
| 0.1944872458    | 0.6107645519    |
| 36.1007756347   | 32.5170578513   |
| 50.7307906371   | 22.61867442     |
| 0               | 0               |
| 43.0541677902   | 58.5895272219   |
| 8.0900083341    | 21.1714410654   |
| 0               | 3.6191811879    |
| 75.9815101987   | 42.4197487087   |
| 650.5164862201  | 419.5796246746  |
| 9.0262474469    | 6.6140384821    |
| 8.7028630355    | 4.5550546859    |



gene\_expression\_table

|                 |                 |
|-----------------|-----------------|
| 1.689006645     | 2.6520643614    |
| 0               | 0               |
| 0               | 0               |
| 4.328832473     | 0               |
| 1341.0521913037 | 723.1728346248  |
| 43.3192228917   | 54.4155903872   |
| 11.2058588695   | 0               |
| 12.3892380558   | 3.8906959674    |
| 23.5613968054   | 21.010023953    |
| 0               | 0               |
| 130.0104677278  | 58.6613128135   |
| 2.9953843554    | 1.0451839805    |
| 37.4390322712   | 52.2546319719   |
| 59.9698435259   | 30.1325298383   |
| 7.123580119     | 12.6767719261   |
| 0               | 1.0009090831    |
| 0               | 0.5001147495    |
| 0               | 0               |
| 22.0518615627   | 27.2808166514   |
| 4.9172994067    | 6.434252617     |
| 247.3996688763  | 77.6929856127   |
| 0               | 0               |
| 20.2869154311   | 14.6456772341   |
| 19.3542952312   | 36.4679464877   |
| 0               | 0               |
| 6.1669230302    | 21.518337534    |
| 0               | 3.8661312507    |
| 24.227637234    | 0               |
| 4133.4134639607 | 4940.3409768182 |
| 66.3022425124   | 26.4399331105   |
| 4.0972308031    | 8.5779175395    |
| 19.9725364883   | 15.4052624037   |
| 0               | 1.1576334785    |
| 4.7366563497    | 2.6698570396    |
| 0               | 2.1998944475    |
| 10.9425704343   | 15.860246972    |
| 5.7738357732    | 0               |
| 0               | 1.9907622962    |
| 29.4190169886   | 7.5417957296    |
| 6.420717953     | 10.7538758331   |
| 10.6731556423   | 6.2070004912    |
| 2.4484208279    | 5.1259870319    |
| 135.8103077398  | 35.5413716235   |
| 139.970263112   | 64.1025459372   |
| 1.9478921192    | 4.0780856088    |
| 10.7926449467   | 3.0811859001    |
| 1.3994605623    | 1.4649476536    |
| 3.7860406283    | 5.2842754649    |
| 62.1335416662   | 30.7138297312   |

gene\_expression\_table

|                 |                |
|-----------------|----------------|
| 10.6320205442   | 0              |
| 327.0508482466  | 280.1086667451 |
| 48.353933888    | 35.4316432578  |
| 0               | 0              |
| 0               | 0              |
| 1355.1797312902 | 658.805006601  |
| 26.1033252779   | 2.7324817969   |
| 0               | 0              |
| 0               | 0              |
| 84.2919878767   | 109.4131252827 |
| 78.8184821704   | 0              |
| 7.7149620652    | 0              |
| 57.5177669385   | 37.630802178   |
| 90.6474802844   | 72.9917584685  |
| 0               | 0              |
| 1.7545600252    | 0              |
| 45.645158956    | 5.9726378074   |
| 218.8091389788  | 171.7861564228 |
| 0               | 0              |
| 40.6017883261   | 59.3047391151  |
| 0.0928011793    | 0              |
| 3.06284286      | 1.6030835674   |
| 93.8520360166   | 58.5684176823  |
| 0               | 0              |
| 49.3846694448   | 29.5403437499  |
| 0               | 0              |
| 28.1570761745   | 29.4746731616  |
| 14.563366976    | 6.5335083458   |
| 41.8733807822   | 21.9164128597  |
| 0               | 0              |
| 1.8443375125    | 0              |
| 170.9885015565  | 134.2423703688 |
| 10.2886596773   | 4.6157625485   |
| 6.0048125745    | 0.5714368112   |
| 0               | 1.475345044    |
| 3.2600237032    | 7.507664916    |
| 0               | 0              |
| 2.5285620924    | 3.9703274292   |
| 3.6360507015    | 7.6123959293   |
| 7.0384317456    | 2.2670128651   |
| 21.7461945948   | 14.7964683279  |
| 17.5260568853   | 2.6208829116   |
| 0               | 0              |
| 0.4915133985    | 0.5145135342   |
| 5.1855372228    | 0              |
| 0.2945314553    | 0.3083139147   |
| 167.1413864064  | 14.9968018358  |
| 0.3671020658    | 0              |
| 2.4913888042    | 2.6079721583   |

gene\_expression\_table

|                 |                 |
|-----------------|-----------------|
| 1.6315400648    | 3.1717905255    |
| 137.5142631537  | 203.7175497149  |
| 24.5324566808   | 23.1123971904   |
| 0               | 0               |
| 34.2882662549   | 47.8570258208   |
| 4.8503681336    | 1.6924462678    |
| 2.5048849516    | 28.8430983665   |
| 430.1267397477  | 259.2373334258  |
| 66.0262989927   | 21.2664517691   |
| 0               | 0               |
| 212.0589794358  | 82.9383963684   |
| 0               | 0               |
| 0               | 11.7342941233   |
| 0               | 0               |
| 42.6760246938   | 68.7277368785   |
| 30.0446689461   | 37.740713927    |
| 0               | 1.2427660755    |
| 245.760650674   | 113.4974573954  |
| 5851.4456389637 | 14548.880032109 |
| 142.2149531839  | 122.0732641059  |
| 20.4720191347   | 7.7927263756    |
| 0               | 0               |
| 12.4244293508   | 22.1099018416   |
| 8.5852950615    | 20.4250905919   |
| 56.3530583848   | 42.1357663917   |
| 51.5066968174   | 21.7962050156   |
| 4.9591480764    | 3.7080064656    |
| 4.659887003     | 4.8779441989    |
| 16.6892920592   | 7.941027065     |
| 0.2151992776    | 0.4505388509    |
| 6.4894085853    | 3.9443675072    |
| 7.2455133587    | 20.225503227    |
| 1.8025953612    | 6.7930090337    |
| 15.6810077345   | 13.5846563032   |
| 33.5073740628   | 5.3962054915    |
| 0               | 1.382932748     |
| 5.8175591336    | 2.0299296821    |
| 0               | 5.3782181399    |
| 3.6314274508    | 1.267119457     |
| 16.1287630561   | 2.4119286931    |
| 0               | 0               |
| 194.6667795492  | 55.9385424452   |
| 2.8439242055    | 3.4235549289    |
| 0.4250127806    | 0.4449010515    |
| 0.0206200801    | 0               |
| 38.0910088572   | 26.5823063328   |
| 8.6996692747    | 5.6041637911    |
| 0               | 0               |
| 4.7170101056    | 4.9377403499    |

gene\_expression\_table

|                |                |
|----------------|----------------|
| 0              | 0              |
| 0              | 0              |
| 2.3490226965   | 1.9671552771   |
| 0              | 3.4046196022   |
| 5.1985293821   | 11.5365992349  |
| 0.5254394881   | 1.100054358    |
| 124.7786907151 | 72.2565724498  |
| 19.7970173362  | 0              |
| 0              | 0              |
| 0              | 0              |
| 23.2909895199  | 63.1686444045  |
| 0              | 0              |
| 0.2275279302   | 0.9526999657   |
| 0.1646160432   | 0.1723191727   |
| 10.3372595759  | 10.820986721   |
| 0              | 0              |
| 16.5509408614  | 62.3715633605  |
| 0.7420088795   | 0.998653927    |
| 2.3113484251   | 5.2422648964   |
| 6.6400042028   | 3.4753600206   |
| 0.7655658312   | 0.2671300401   |
| 9.9641393199   | 1.60467792     |
| 0.2455702487   | 0.1713743945   |
| 0              | 0              |
| 5.6773564959   | 5.5468239799   |
| 4.6396840864   | 3.0906882977   |
| 90.1279774046  | 38.2481648266  |
| 1.5854913665   | 3.6513040978   |
| 0              | 0              |
| 27.7192150003  | 45.597078186   |
| 0              | 0              |
| 0.1020220362   | 0              |
| 0.9654863608   | 2.8298643405   |
| 0.9498524913   | 1.2428754835   |
| 20.0903861244  | 43.3754190114  |
| 0              | 5.219158084    |
| 0              | 0              |
| 3.792546869    | 1.7644521315   |
| 0              | 0              |
| 3.6326695218   | 6.8810012115   |
| 1.6441445021   | 0.6258478044   |
| 35.8619462942  | 25.5955152367  |
| 0.8611291727   | 0.9014253028   |
| 0              | 0              |
| 9.8823187619   | 9.4211181351   |
| 340.5378573871 | 678.0416648834 |
| 1.3312545589   | 5.5741999311   |
| 0.5319213495   | 0.9280205934   |
| 0              | 1.5760896028   |

gene\_expression\_table

|                |                |
|----------------|----------------|
| 1.480069047    | 5.1644272468   |
| 1.2283470259   | 0.9257953973   |
| 18.2664352961  | 3.8242408895   |
| 0.6034325754   | 0              |
| 1.0492195501   | 1.2552197485   |
| 0              | 0              |
| 4.0863683051   | 3.2081909747   |
| 1.2679994078   | 0.4084107191   |
| 0.2733286327   | 0              |
| 0              | 2.1407841303   |
| 2.2352353197   | 2.8969349726   |
| 0.1747719968   | 1.4636029538   |
| 1.5620173412   | 0              |
| 59.7859684977  | 42.2439465086  |
| 1.8302241035   | 1.5965571416   |
| 1.8168914661   | 2.3245591576   |
| 0              | 0.8445427666   |
| 0              | 0.7879104166   |
| 158.119359386  | 125.5657431456 |
| 13.7960848106  | 11.3782823325  |
| 4.5946121032   | 1.9238459165   |
| 3.9702203032   | 11.7123773719  |
| 0.3196330805   | 0.5855327773   |
| 1.3981508097   | 0.6098235883   |
| 7.393639931    | 13.9743171297  |
| 1.9637872498   | 0              |
| 0              | 0              |
| 16.9171376366  | 8.2640912881   |
| 1.0380886562   | 1.0866655211   |
| 7.7024639114   | 11.1640112953  |
| 50.7846795291  | 29.7702296934  |
| 26.2393588202  | 19.6194408113  |
| 104.5509587269 | 96.0421419965  |
| 0              | 0              |
| 8.9025190415   | 6.914177041    |
| 9.070678131    | 6.605312139    |
| 1.4802608257   | 3.0990578539   |
| 0              | 0              |
| 0.3483634829   | 0.1458659946   |
| 0              | 0              |
| 0.3893193663   | 0.4075373808   |
| 0              | 0              |
| 16.1122887497  | 8.8164518109   |
| 0              | 0              |
| 0              | 0              |
| 0              | 0              |
| 0              | 0              |
| 17.6404578744  | 4.4318243305   |
| 0              | 0              |

gene\_expression\_table

|               |                |
|---------------|----------------|
| 0             | 1.2592784004   |
| 3.2850427346  | 0.7815374425   |
| 4.9447898376  | 10.1058731415  |
| 72.1343451254 | 81.5506244954  |
| 2.0460254959  | 3.5696138096   |
| 10.5698189115 | 5.8233834527   |
| 0             | 0              |
| 2.8558932877  | 0.2989533456   |
| 2.3749697429  | 2.3085263708   |
| 23.153164052  | 18.1774540135  |
| 0             | 0              |
| 61.5465308306 | 142.8589193399 |
| 0             | 4.0698900992   |
| 0.3800502929  | 0.497293207    |
| 45.646975875  | 33.9105192514  |
| 55.794282943  | 46.7241199004  |
| 1.5110463258  | 0.7908775099   |
| 0.2414486517  | 0.7582413794   |
| 6.034607009   | 5.527369377    |
| 8.8138048082  | 16.8479212915  |
| 0.7088324138  | 1.6695042513   |
| 0.2206999762  | 0.2310275266   |
| 3.9180265508  | 5.0127840151   |
| 9.066701217   | 14.236459782   |
| 0             | 0              |
| 0             | 0              |
| 0             | 0              |
| 0             | 0              |
| 0             | 0              |
| 2.2115416333  | 8.4884421311   |
| 13.3629395497 | 11.2982034981  |
| 17.4052849438 | 7.7657980546   |
| 0             | 0              |
| 0             | 0              |
| 0             | 0              |
| 0             | 0              |
| 29.156969143  | 6.1042711292   |
| 2.0504322403  | 0              |
| 15.1973997212 | 8.5661448992   |
| 0.0873791572  | 0.1829360466   |
| 1.8867673811  | 5.9251732897   |
| 8.0246239946  | 1.6800264915   |
| 0             | 3.2585857166   |
| 5.6319813726  | 1.1791054524   |
| 0.5226566017  | 0.5471140688   |
| 13.7880116481 | 7.2166075476   |
| 0.2819244617  | 0              |
| 2.9537001729  | 1.4171287018   |
| 0.2568287181  | 0              |

gene\_expression\_table

|                 |                |
|-----------------|----------------|
| 2.1357892468    | 0              |
| 0               | 0              |
| 2.1233567315    | 3.5905447843   |
| 23.6946619574   | 13.3556997504  |
| 1.2013288256    | 1.0060355493   |
| 0.993435742     | 2.6575812428   |
| 0.6147324675    | 0.6434985809   |
| 0.1585367117    | 0.497866085    |
| 2.5222889387    | 0.736833       |
| 1.4265010225    | 0.4266438455   |
| 3.0552758158    | 2.085812605    |
| 13.8926934351   | 5.8171181666   |
| 0               | 0              |
| 0.1299642782    | 0.9523212635   |
| 6.7525759082    | 2.9249211666   |
| 1.4484488055    | 0.5685856044   |
| 17.9756331051   | 6.2722647688   |
| 6.6138380353    | 10.3849941605  |
| 0               | 0              |
| 0               | 0              |
| 0               | 0.177383722    |
| 0.4100864481    | 0              |
| 16.8218283832   | 6.1248688144   |
| 22.2573507917   | 20.1923565442  |
| 1157.7392792107 | 228.8231379664 |
| 18.0263551708   | 13.2089229209  |
| 0               | 0              |
| 0               | 0              |
| 0               | 0              |
| 27.6505193508   | 8.9059730007   |
| 0               | 0              |
| 0               | 0              |
| 0               | 0              |
| 0               | 0              |
| 7.5773680238    | 6.2620637024   |
| 2.0827299915    | 0.8720761404   |
| 0               | 0              |
| 0.0820738564    | 0.3436578539   |
| 3.5557644013    | 13.0275414681  |
| 6.4209726928    | 8.40179882     |
| 31.1974752266   | 9.3306703546   |
| 0               | 0              |
| 7.170030142     | 1.364645144    |
| 21.3596753036   | 18.9193155884  |
| 1.5863492222    | 1.3948886108   |
| 56.0792054513   | 24.9359597297  |
| 0.8881118187    | 9.2967058885   |
| 0               | 0              |
| 2.9473796526    | 0              |

gene\_expression\_table

|                 |                |
|-----------------|----------------|
| 1.8299481764    | 1.5963164425   |
| 0.5293926163    | 1.1083305839   |
| 1.0018919536    | 0.8739791759   |
| 0               | 0              |
| 0               | 0              |
| 6.4337355088    | 14.5920647205  |
| 0               | 0              |
| 0               | 0              |
| 0               | 0              |
| 0               | 0              |
| 9.3924810997    | 4.2747816458   |
| 633.28105137    | 488.67460247   |
| 2.5079625805    | 1.5001837123   |
| 4.1542865103    | 2.1743421858   |
| 0               | 0              |
| 4.2213326393    | 9.9424527576   |
| 0               | 0.3274140877   |
| 45.3887387422   | 36.9975811671  |
| 2.588207528     | 6.7733036705   |
| 1.0813524653    | 0              |
| 0               | 0              |
| 0               | 0              |
| 5.4777666855    | 0.9556826954   |
| 773.593236234   | 520.5813195692 |
| 80.827046385    | 58.5756758605  |
| 29.6230537016   | 46.5138756147  |
| 56.9948581325   | 68.7408910159  |
| 2.2751193748    | 5.9539562594   |
| 31.7005471171   | 21.4719735622  |
| 304.5933815368  | 191.3080103701 |
| 16.4249611018   | 11.4623728962  |
| 8.6032045746    | 6.0038582938   |
| 2.3917921632    | 7.5111448196   |
| 5.1597467552    | 1.0802389301   |
| 1.9063621735    | 3.6585440553   |
| 80.4891166652   | 108.3285856234 |
| 0               | 0              |
| 0.8928841899    | 1.3085327932   |
| 18.8356005285   | 15.2358663381  |
| 0               | 0              |
| 0.2106463146    | 0              |
| 7.806319541     | 10.6230963162  |
| 2.9415842432    | 8.2112914098   |
| 4.382610063     | 4.3743111831   |
| 0               | 0              |
| 0.1968313206    | 0              |
| 2566.2112149141 | 747.1586123524 |
| 1.2011638771    | 2.2632691849   |
| 0               | 0              |



gene\_expression\_table

|                |                |
|----------------|----------------|
| 3.6411635463   | 0              |
| 1.54089895     | 0              |
| 0              | 0              |
| 14.5714840987  | 44.4889368187  |
| 0.7989170269   | 1.2544529538   |
| 0              | 0.8086194998   |
| 11.1245955955  | 34.9354972654  |
| 23.9005130182  | 0              |
| 0              | 0              |
| 1.8825243309   | 0.9853080808   |
| 1.0073485418   | 4.2179477507   |
| 0.7409521305   | 1.1634369495   |
| 6.4972510363   | 8.0378844097   |
| 13.9565899209  | 8.7658091448   |
| 0              | 0              |
| 0              | 0              |
| 116.0935017208 | 45.9828266707  |
| 23.224250022   | 36.1838403803  |
| 4.0972308031   | 4.2889587698   |
| 0              | 5.9339359512   |
| 0              | 0              |
| 0              | 5.9677286939   |
| 22.019131527   | 8.2319665406   |
| 0.3038604184   | 0.1590397111   |
| 0              | 0              |
| 37.092338451   | 8.8245583605   |
| 0              | 0              |
| 22.2308539455  | 15.9223563351  |
| 24.9177238989  | 11.1787444015  |
| 1.1855586896   | 1.2410363446   |
| 6.8618530669   | 21.5488506522  |
| 4.3590496727   | 3.0963413303   |
| 2.38678888     | 1.1834893565   |
| 4.4251565058   | 12.3084957937  |
| 0.5512282586   | 0              |
| 8.1277931259   | 3.4032517357   |
| 0.7728556809   | 0.6472168759   |
| 0              | 0              |
| 0              | 0              |
| 3.0512936788   | 2.1293850101   |
| 0.1565310824   | 0.16385588     |
| 20.2864583376  | 35.0164020587  |
| 0              | 0              |
| 7.7039009683   | 9.2164586856   |
| 1.9538181247   | 0.2045246115   |
| 0.8979795909   | 0.7050000891   |
| 29.3138946972  | 16.8040324406  |
| 101.0714234025 | 175.2329270978 |
| 5.2515816248   | 2.7486634446   |

gene\_expression\_table

|                 |                 |
|-----------------|-----------------|
| 0.5797310434    | 0               |
| 0               | 0               |
| 0               | 0               |
| 3.8463386638    | 5.8846306762    |
| 0.9110424449    | 0.9536742428    |
| 0               | 0.1668839113    |
| 0.9764532514    | 1.0221459168    |
| 3.2591989573    | 2.7720156931    |
| 3.6442837497    | 7.4176983114    |
| 0.3838693955    | 0.3348603178    |
| 5.7396395618    | 3.604933959     |
| 0               | 0               |
| 9.1108751571    | 8.6701947515    |
| 2.1058480553    | 2.4637302386    |
| 1.6602443242    | 0.5793115559    |
| 0.0666675615    | 0.0930496511    |
| 67.9353857644   | 38.7896671793   |
| 9.5361636134    | 0               |
| 1.5883856779    | 1.6627134302    |
| 0               | 0               |
| 49.0300199572   | 12.1786608456   |
| 15.7547448745   | 13.7433172228   |
| 1.6095856379    | 2.3588676052    |
| 0               | 0               |
| 136.8462554292  | 122.2766339192  |
| 0.462894414     | 0.6056941724    |
| 0.7517214501    | 2.3606936933    |
| 17.4016665146   | 9.1079846112    |
| 4.5840117004    | 0.8724578814    |
| 3.1871564372    | 1.3345191627    |
| 12.9387250014   | 13.5441864837   |
| 2.7180688873    | 8.5357788843    |
| 0               | 0               |
| 27.3542920327   | 21.1453463023   |
| 0               | 0               |
| 0               | 0               |
| 6.7384455802    | 0               |
| 0               | 0.9374902961    |
| 55.7193950248   | 53.2548656465   |
| 15.9803126856   | 21.9556362597   |
| 2.3619471209    | 0               |
| 0               | 12.7044522989   |
| 9.3409105808    | 5.8668084291    |
| 1540.0058684737 | 864.6555720522  |
| 5.9885519602    | 13.8808775303   |
| 1870.6835325098 | 1936.8898921705 |
| 6.8348978405    | 8.1768384389    |
| 21.177782874    | 5.9116765735    |
| 18.6282630738   | 20.4069388437   |

gene\_expression\_table

|                 |                 |
|-----------------|-----------------|
| 0               | 0               |
| 7.7030279259    | 26.8782915128   |
| 0.7007300689    | 3.6676019961    |
| 0               | 0               |
| 32.8110728278   | 17.1732256873   |
| 147.8746751786  | 68.7975112307   |
| 10.0856221473   | 3.5191913462    |
| 6.7134497508    | 31.8945033757   |
| 5.7574036543    | 6.0268186199    |
| 0               | 0               |
| 7.4159439464    | 0               |
| 66.6509466101   | 72.9412025894   |
| 6.6913154654    | 10.506648585    |
| 1284.8135152398 | 1071.1452600914 |
| 20.038045818    | 6.9919055471    |
| 5.105382231     | 16.0328584926   |
| 10.5011755201   | 10.9925730338   |
| 1.812426415     | 3.794476094     |
| 233.363321074   | 283.8969785829  |
| 27.447360546    | 17.2390480366   |
| 701.0496911003  | 743.2633751037  |
| 117.747337459   | 3.2436123187    |
| 5.3495977573    | 5.1999346656    |
| 1.3223352947    | 0               |
| 1.036310538     | 5.4240209837    |
| 0               | 0               |
| 0               | 0               |
| 0.5305727854    | 2.221602746     |
| 1.2506036375    | 0.1870178628    |
| 0               | 0               |
| 0               | 0               |
| 0.2056816632    | 0.2153064388    |
| 18.9631046603   | 90.3196572611   |
| 2.8339643081    | 5.9331566399    |
| 2.0136943726    | 0               |
| 4.1585563493    | 6.5297310235    |
| 0               | 0               |
| 0               | 0               |
| 0               | 0               |
| 0               | 0               |
| 0               | 0               |
| 0               | 0               |
| 0               | 0               |
| 1.1162521599    | 0.6677066564    |
| 1.2075855598    | 2.5281879034    |
| 36.1520364981   | 16.2187516503   |
| 0               | 0.0747706624    |
| 0               | 0               |
| 0               | 0               |
| 0               | 5.3662930442    |

gene\_expression\_table

|                 |                 |
|-----------------|-----------------|
| 0               | 5.1951509171    |
| 5.4221594989    | 5.6758868737    |
| 79.1891957112   | 55.9058064492   |
| 44.2292559961   | 20.1299752145   |
| 0               | 0.9569783167    |
| 495.949748806   | 520.1260588002  |
| 0               | 0               |
| 7.8155555583    | 8.1812807633    |
| 12.5360663612   | 30.8769073505   |
| 2.0517319564    | 2.1477417775    |
| 1.2780590439    | 8.0271912535    |
| 0               | 0               |
| 0               | 1.2555686015    |
| 0               | 0               |
| 0               | 0               |
| 1.5731008624    | 1.646713369     |
| 30.9249586095   | 3.5968974821    |
| 0               | 0               |
| 0               | 0               |
| 0.1670394409    | 0               |
| 2.8848594781    | 0               |
| 0               | 1.2296337248    |
| 16.9112452166   | 0               |
| 86.9391742728   | 38.5031525922   |
| 0               | 0               |
| 0               | 0               |
| 1.1193116754    | 0.8959977251    |
| 0.3246421743    | 0               |
| 1963.8554368463 | 5151.7668497575 |
| 0               | 0               |
| 0.1438775096    | 0.7530509464    |
| 2.7106559446    | 4.5399996804    |
| 1.4590751598    | 4.0729383677    |
| 0.5717234539    | 0               |
| 129.750983294   | 221.9540356701  |
| 2.7158608451    | 18.6083886212   |
| 5.8370022862    | 3.055071016     |
| 0.7272801676    | 0.1087589853    |
| 0               | 0               |
| 11.4482869646   | 21.9706741978   |
| 0               | 0.8393473613    |
| 16.0979377056   | 0               |
| 0               | 0               |
| 1.5323137107    | 3.3314211734    |
| 0.2040826677    | 0               |
| 0               | 23.0997915742   |
| 17.1461512714   | 20.9399134757   |
| 0               | 0               |
| 0               | 0               |

gene\_expression\_table

|                |                |
|----------------|----------------|
| 1.3199087936   | 0              |
| 579.9916817172 | 491.36539945   |
| 0              | 1.7508667983   |
| 0              | 0              |
| 0              | 0              |
| 26.8138299896  | 23.2568154829  |
| 0.7693872913   | 0.2684634679   |
| 0              | 0              |
| 43.0885561031  | 14.6590809922  |
| 4.1553531478   | 4.0779383643   |
| 1.7808920148   | 1.720825855    |
| 0.3084019718   | 0.2152223302   |
| 0              | 0              |
| 0              | 0              |
| 11.0629006587  | 7.0490510288   |
| 0              | 1.0342727192   |
| 7.7812665051   | 12.2180807552  |
| 0              | 0              |
| 261.0332527794 | 250.0408000417 |
| 0              | 0              |
| 19.9178237083  | 21.7186133282  |
| 0              | 0              |
| 0.5057466591   | 0.5294128334   |
| 6.4209726928   | 5.6873715089   |
| 0              | 0              |
| 4.990925241    | 3.766480689    |
| 1.4389669843   | 1.2050422079   |
| 0              | 0              |
| 3.2907811452   | 12.056700893   |
| 14.2087051085  | 7.2554120516   |
| 0              | 0              |
| 3.2079408667   | 23.5063845359  |
| 0              | 0              |
| 0.4225926095   | 0.6125090257   |
| 4.3930677721   | 12.7739980249  |
| 7.4404216056   | 2.3964900294   |
| 22.9728878764  | 16.974983462   |
| 29.779308769   | 6.2345634717   |
| 0              | 0              |
| 1.1868483327   | 0.4141287786   |
| 0.5222911469   | 0.7289753503   |
| 0              | 0.2803472967   |
| 0.4719678767   | 0.0988106778   |
| 0              | 0              |
| 13.8623035496  | 10.4181419647  |
| 17.5273584218  | 10.2746239806  |
| 0.5398586203   | 0.6122144683   |
| 0.8672479917   | 0.1815660898   |
| 7.1813906102   | 3.341084608    |

gene\_expression\_table

|               |               |
|---------------|---------------|
| 4.1054845696  | 2.5279992749  |
| 1.7806990815  | 0.7456104192  |
| 3.628016131   | 3.7977874202  |
| 0             | 0             |
| 9.9284371155  | 7.0524156626  |
| 0             | 0             |
| 0.7382229472  | 0.7727677389  |
| 0.8365008962  | 0.2918815193  |
| 0             | 0             |
| 3.7738280686  | 3.4566197384  |
| 0.4091282537  | 0.7953645435  |
| 0.8534408625  | 1.0995411959  |
| 12.420989079  | 7.6483666795  |
| 18.91866933   | 0             |
| 0             | 0             |
| 5.3749789679  | 5.6264985522  |
| 8.6824365195  | 7.7903374343  |
| 0.3787310547  | 0.5946803914  |
| 0.4310376177  | 0.225603909   |
| 0.0921998016  | 0.0965142475  |
| 0             | 0             |
| 0.091247726   | 0             |
| 0             | 0             |
| 0.3352967511  | 0.1316200512  |
| 5.3923762057  | 2.4191613795  |
| 3.3855786431  | 4.7948305449  |
| 27.6552139648 | 55.4862092179 |
| 7.5307888855  | 3.8724435078  |
| 0.1231354506  | 0.9022826077  |
| 0             | 0             |
| 4.7553560252  | 1.6592935495  |
| 3.1701338524  | 3.8715585513  |
| 12.7906912766 | 0             |
| 0             | 0             |
| 0             | 0             |
| 0.4326942136  | 0.301961289   |
| 1.5425922931  | 0.7598951368  |
| 13.0964152883 | 18.3564611727 |
| 6.3708663424  | 4.5113742371  |
| 56.2444392019 | 77.3473893299 |
| 0             | 0             |
| 0             | 0             |
| 0.206086319   | 0             |
| 7.3347209029  | 4.9906646913  |
| 0             | 0             |
| 0             | 0.6932678782  |
| 4.9969657639  | 3.4871976     |
| 15.3715067463 | 20.5604782858 |
| 8.9210513982  | 2.6681450729  |

gene\_expression\_table

|                 |                 |
|-----------------|-----------------|
| 57.670137242    | 95.3191324487   |
| 3.5728658921    | 0.2671468894    |
| 0               | 0               |
| 21.4511421024   | 29.3641498154   |
| 0               | 0               |
| 0               | 0.2032291736    |
| 0               | 0               |
| 8.9162243219    | 1.7500227747    |
| 1.7011381878    | 5.9358071338    |
| 12.2674116866   | 3.502216195     |
| 26.7099461116   | 17.3804319654   |
| 0               | 0               |
| 0               | 0               |
| 0               | 0               |
| 50.2032515018   | 44.8762825514   |
| 7.4477964438    | 7.7963125359    |
| 0               | 0               |
| 0               | 0               |
| 68.7900130948   | 109.5348306501  |
| 4.2504220799    | 6.876219592     |
| 16.1652022697   | 50.7649356634   |
| 3.2400523869    | 5.6527818287    |
| 7944.9030027771 | 2953.4182929513 |
| 282.2386031156  | 198.2104897239  |
| 218.1015511739  | 84.6826873561   |
| 0               | 0               |
| 15.1773007243   | 5.2958384309    |
| 0               | 7.0780811116    |
| 0.8064962805    | 0.2110589726    |
| 16.3428205      | 7.3318178623    |
| 0               | 1.4837438378    |
| 4.4232847462    | 9.2605405041    |
| 0.4564290618    | 0               |
| 73.9250629216   | 73.7682599076   |
| 0               | 0.4504250543    |
| 9.1345063764    | 2.3904878144    |
| 0               | 0               |
| 0               | 0               |
| 8.4646598855    | 10.4017612915   |
| 5.6051933753    | 8.4752571703    |
| 4.1733011017    | 2.1842943709    |
| 164.1888998254  | 103.9226296223  |
| 6.3503433369    | 4.8748367308    |
| 1.8017157283    | 1.8860261588    |
| 6.1305586092    | 2.9948030856    |
| 0.5313152472    | 1.3209224922    |
| 7.6019843975    | 2.6525718805    |
| 0               | 0               |
| 11.1524486085   | 7.7828814244    |

gene\_expression\_table

|                |                |
|----------------|----------------|
| 0              | 0.9316132604   |
| 1.9999664291   | 2.4424795581   |
| 10.1369694888  | 31.0177167594  |
| 0.7203481405   | 0              |
| 2.854044231    | 7.2555948352   |
| 3.1124193094   | 0.5430105818   |
| 238.8940802269 | 190.7336555729 |
| 1.2911098263   | 0.6757633482   |
| 7.0457386471   | 4.2699919471   |
| 0.8874300418   | 0.9289569085   |
| 8.8821373245   | 8.4525206509   |
| 0.3901434749   | 0              |
| 0.1452090932   | 0.3040081674   |
| 0              | 0              |
| 0              | 0              |
| 2.1382505017   | 1.8652574308   |
| 0              | 0              |
| 1.3238135297   | 0              |
| 55.9406545441  | 24.7746953664  |
| 0              | 0              |
| 0.8300370126   | 0              |
| 15.0716874099  | 1.3147466545   |
| 20.2192453518  | 0              |
| 0              | 4.4477256867   |
| 0              | 0              |
| 0              | 0              |
| 0              | 0              |
| 0              | 0              |
| 0              | 0              |
| 0              | 0              |
| 0              | 0              |
| 28.3599211548  | 53.2481293637  |
| 0              | 0              |
| 5.3571869157   | 4.4862991435   |
| 10.0272996731  | 0              |
| 0.7322110877   | 0              |
| 0              | 1.457511691    |
| 6.3741873463   | 11.67681272    |
| 1.0077876376   | 2.1098931615   |
| 2.2383562315   | 0              |
| 128.2007420178 | 42.9439471243  |
| 9.5635410134   | 6.0066374198   |
| 485.5218501697 | 762.3624213247 |
| 2.1590263704   | 2.2600569825   |
| 15.9865140346  | 5.9766411982   |
| 5.8036191587   | 4.205905447    |
| 489.2479104146 | 532.4920482615 |
| 58.4744666596  | 64.7085087437  |
| 0              | 0              |
| 20.5567831077  | 6.1482079987   |



gene\_expression\_table

|                  |                  |
|------------------|------------------|
| 17.0179407701    | 0                |
| 1.6981929318     | 0.4444147656     |
| 282.2117801907   | 389.787304033    |
| 0.9864721244     | 2.0652672364     |
| 0                | 0                |
| 12.6487390952    | 29.7914193562    |
| 0                | 0                |
| 0                | 0                |
| 0                | 0                |
| 1.1583210473     | 7.2751447784     |
| 0                | 51.2487942886    |
| 0.826160018      | 5.62132859       |
| 9.4202920095     | 3.9444440374     |
| 7.5678733474     | 13.4329707332    |
| 1156.004405166   | 794.3757646397   |
| 41.6788062326    | 49.3199043393    |
| 8.4663651227     | 22.7894005328    |
| 29.1080245905    | 0                |
| 0.7198995451     | 0.7535869019     |
| 9.4383430564     | 22.5828704698    |
| 18.3378411108    | 24.9547371624    |
| 54.1785568592    | 47.7590035016    |
| 2.1689364656     | 5.1084693358     |
| 0                | 16.5766997461    |
| 2.0570780645     | 1.076669027      |
| 83.6954740812    | 92.2231199812    |
| 0                | 0                |
| 688.5207045659   | 676.6944993507   |
| 9.303189867      | 8.5212121854     |
| 14.448382798     | 8.6825764438     |
| 35.9189701034    | 48.3425758608    |
| 3.7303357548     | 0                |
| 2.142449255      | 4.4854082977     |
| 5.4962663692     | 3.8356410265     |
| 2.8209973283     | 1.4765022782     |
| 0                | 0                |
| 59.1345884058    | 140.685825781    |
| 14.9253565991    | 43.1513966954    |
| 0                | 1.9361585303     |
| 0                | 0.5502415519     |
| 139.3976026901   | 80.256355963     |
| 494.3630181392   | 211.9439592229   |
| 27081.9374725931 | 27395.1634372509 |
| 3.78309062       | 0                |
| 37.3289434627    | 14.3963229115    |
| 0                | 0                |
| 34.8794432593    | 51.7247811403    |
| 706.4084715493   | 530.3745522628   |
| 12.2624222514    | 5.5012442006     |

gene\_expression\_table

|                |                |
|----------------|----------------|
| 5.8159264699   | 1.7394514236   |
| 60.0176200125  | 36.8291024795  |
| 9.4344785071   | 2.4689901104   |
| 31.509489749   | 61.8449275026  |
| 32.1504030712  | 31.2931209162  |
| 131.2886530795 | 60.1266063802  |
| 1.8152724662   | 3.8004345557   |
| 7.7658645261   | 16.2585289257  |
| 3.4698100814   | 14.5287127753  |
| 18.6113770593  | 8.2030684617   |
| 39.3294329826  | 20.5849175462  |
| 2.7790157986   | 0.9696861737   |
| 1.9630845531   | 6.9868169474   |
| 543.2957110674 | 304.7475264705 |
| 133.6699806205 | 93.5012875762  |
| 337.7279098348 | 512.559839114  |
| 3.1148653558   | 0.8151559996   |
| 0              | 1.4380669295   |
| 0              | 0              |
| 0              | 0              |
| 2.1070253447   | 0              |
| 0              | 0              |
| 0              | 0              |
| 3.9161699095   | 3.5869970655   |
| 24.5846296101  | 5.1470111319   |
| 13.1249408447  | 17.9665365807  |
| 0              | 0              |
| 3.3524726406   | 0              |
| 132.779920489  | 176.900555635  |
| 2.7617852683   | 0              |
| 2.0906939249   | 6.565580858    |
| 0.7305090014   | 1.9117320568   |
| 6.0029902345   | 0              |
| 0              | 1.3961914571   |
| 38.1146379964  | 33.7600106062  |
| 25.3730542192  | 4.131613768    |
| 70.0073914579  | 81.904925107   |
| 17.1459494357  | 10.7689715906  |
| 44.9505242606  | 49.0145444409  |
| 0              | 0              |
| 13.1899443132  | 2.7614322967   |
| 0              | 0              |
| 9.1616539328   | 7.1927768782   |
| 3.2924548209   | 0              |
| 12.3126216396  | 18.4125498756  |
| 7.9002307887   | 4.5943990727   |
| 3.8960186982   | 0              |
| 387.3753376345 | 233.2535827443 |
| 30.461249148   | 28.698001932   |

gene\_expression\_table

|                |                |
|----------------|----------------|
| 0              | 0              |
| 21.9772700602  | 18.4045487676  |
| 13.0227814704  | 10.2241322514  |
| 14.4845420695  | 3.3694087392   |
| 0              | 0              |
| 13.1684797985  | 16.9175772171  |
| 8.2121332855   | 11.8200722153  |
| 0.3339729437   | 0.8740026218   |
| 2.4918224315   | 0.4536393177   |
| 0.9798130269   | 2.4359494148   |
| 0.1667577468   | 0.2909351604   |
| 2.7194619022   | 0.5693435657   |
| 0.1066523116   | 0              |
| 3.148212636    | 1.4123707495   |
| 12.4617932583  | 9.7837027099   |
| 0.9698798445   | 0.3384216368   |
| 2.4167802164   | 1.5568444905   |
| 10.2018865014  | 23.5680638408  |
| 0.1331648894   | 0              |
| 0              | 0              |
| 1.4378346728   | 0.4300335607   |
| 3.1806776718   | 4.4993459062   |
| 0              | 0              |
| 0              | 0              |
| 92.6608605832  | 30.8626441077  |
| 18.5591436626  | 18.4051041754  |
| 6.1842039252   | 11.1345761871  |
| 0.3937823712   | 0.8244184598   |
| 0.1793657739   | 0.3285784424   |
| 14.968083111   | 8.5803731224   |
| 11.6473995483  | 5.0801808626   |
| 2.5678117737   | 1.7919808695   |
| 40.6495812293  | 27.9139539358  |
| 2.9033352479   | 4.2548736158   |
| 5.7466708113   | 8.2714273656   |
| 7.7899537411   | 2.7181603071   |
| 1.5885699355   | 1.3605597083   |
| 46.0117771972  | 29.1908341977  |
| 104.5908747531 | 141.1782261712 |
| 13.5035975572  | 5.980400454    |
| 0.1478739245   | 0.309587229    |
| 188.396507393  | 68.1851494821  |
| 0              | 0              |
| 0.5698747038   | 0.5965417195   |
| 0              | 0              |
| 5.0574741166   | 2.7226986235   |
| 0              | 0.248870876    |
| 0.80523729     | 0.561945324    |
| 0              | 0              |

gene\_expression\_table

|                |                |
|----------------|----------------|
| 1.4882990631   | 4.6738299297   |
| 0.9660972823   | 0              |
| 3.6038660964   | 0.9431268241   |
| 8.8016080986   | 3.5098953003   |
| 4.6429609011   | 4.4714079643   |
| 0              | 0              |
| 0              | 0.0292407977   |
| 92.3045342528  | 50.6125091108  |
| 22.8976537526  | 9.5876554276   |
| 0              | 2.4201981629   |
| 20.4537904232  | 2.6763644772   |
| 106.5304808574 | 128.1787632636 |
| 0              | 0              |
| 2.1784875312   | 1.4659899551   |
| 0.3611385208   | 0.5670567392   |
| 0              | 0              |
| 0              | 0              |
| 0              | 0              |
| 2.9990292982   | 1.5696837239   |
| 0              | 10.6583121362  |
| 0              | 0              |
| 0              | 0              |
| 0              | 0              |
| 52.9150291722  | 44.3129302352  |
| 0.8042235992   | 0              |
| 0.2167909904   | 0              |
| 0              | 0              |
| 0              | 0              |
| 0              | 0              |
| 13.2384962555  | 0              |
| 0.6945651119   | 1.8176673899   |
| 1.1240492896   | 0.8824864811   |
| 128.5724859768 | 47.1061410065  |
| 1.6708872157   | 0.6360274866   |
| 0              | 0              |
| 3.7356558      | 0.8379565792   |
| 0              | 0              |
| 43.1958941432  | 247.1874992037 |
| 0              | 0              |
| 0              | 0              |
| 0.878180142    | 0.8357037855   |
| 69.0151883681  | 44.1495518943  |
| 17.7811760211  | 9.5452501003   |
| 11.1512703417  | 8.404623888    |
| 1.147500606    | 0              |
| 0.0744098211   | 0.2336753798   |
| 0.6107961381   | 0.532815044    |
| 1.1052799503   | 1.0605842499   |
| 30.9828883988  | 21.4474424987  |

gene\_expression\_table

|                |                |
|----------------|----------------|
| 1.5153615798   | 0.9517633225   |
| 0.8050856456   | 0              |
| 2.0932997636   | 2.9880746324   |
| 90.6127777031  | 81.881614643   |
| 10.1815658219  | 5.8134585555   |
| 0              | 0.1274248386   |
| 139.7030556044 | 89.994088396   |
| 0.4244777106   | 0              |
| 0              | 0              |
| 0              | 1.4294116723   |
| 6.8114737678   | 16.6371647003  |
| 5.5767169862   | 2.4697863406   |
| 0.5292021997   | 1.1079319299   |
| 5.5723044277   | 4.3747933223   |
| 113.9166003884 | 36.5042674043  |
| 430.8793878854 | 283.1654966185 |
| 7.6706561263   | 10.7061344417  |
| 0.7169575348   | 1.1257608324   |
| 0              | 0.0540040265   |
| 2.3593140483   | 1.4527747218   |
| 4.6546050251   | 3.4802964667   |
| 0              | 0              |
| 3.4716708687   | 0              |
| 0              | 0              |
| 0.592518916    | 0.6202455569   |
| 1.8236761108   | 0.7954225696   |
| 29.7238055338  | 36.8767014827  |
| 5.1482573076   | 5.3891675597   |
| 0              | 0              |
| 2.6540261144   | 5.5564400081   |
| 3.1461337679   | 4.7570692016   |
| 1.3135080996   | 2.0624596296   |
| 5.6362228578   | 1.1062438548   |
| 0.4184631331   | 1.9712021237   |
| 162.7858247378 | 109.9376193417 |
| 0              | 0              |
| 0              | 0.283182401    |
| 3.9910793842   | 2.9490635617   |
| 64.3794008673  | 127.0820652698 |
| 8.3401503078   | 5.4565147966   |
| 31.5766031588  | 3.6726905872   |
| 0              | 0.9011975339   |
| 1.091133897    | 0.3807309963   |
| 12.9882003696  | 7.1978701914   |
| 19.4888685036  | 20.148978603   |
| 1.803527674    | 1.4992328861   |
| 0.1036164571   | 0.2169302799   |
| 17.3235674418  | 18.1342155405  |
| 0              | 0              |

gene\_expression\_table

|                |               |
|----------------|---------------|
| 4.7428910324   | 0.8274720604  |
| 1.8001149094   | 1.3459645931  |
| 13.4593375452  | 7.8733545892  |
| 88.525449227   | 92.6679555177 |
| 0              | 0             |
| 0.8487717622   | 0.3331836124  |
| 0              | 0             |
| 1.2662263983   | 0.8836525736  |
| 6.9973784456   | 15.5652370637 |
| 3.2774527485   | 1.7154097955  |
| 1.8945530643   | 0.1652673145  |
| 0.0472561842   | 0.1484025445  |
| 27.7296087857  | 12.3520011232 |
| 4.0070894067   | 4.1945992496  |
| 0              | 0             |
| 0              | 0             |
| 8.2594920372   | 7.7813919347  |
| 85.8029020749  | 44.9090040333 |
| 43.1574977929  | 26.8238629725 |
| 2.4339187171   | 2.7437983847  |
| 1.0801327918   | 0.6784062552  |
| 0.2492232849   | 1.0435422797  |
| 26.7554289219  | 21.7835617164 |
| 41.064037079   | 16.4356740916 |
| 0.9363307966   | 2.3959123244  |
| 0              | 0.5390367858  |
| 0              | 0             |
| 8.9631355748   | 2.3456403102  |
| 4.3992375316   | 2.5583876441  |
| 17.9469407123  | 23.0564772819 |
| 4.7231064665   | 4.9441219872  |
| 1.7300522027   | 0             |
| 12.0506788327  | 8.0274629381  |
| 3.8942479227   | 0.9058838671  |
| 3.8881796264   | 3.052593857   |
| 6.8331275688   | 14.3057610466 |
| 0              | 3.1941979601  |
| 0.1713306198   | 1.2554356823  |
| 12.0453319444  | 9.2142601134  |
| 12.5982770632  | 2.7474598846  |
| 106.3506178699 | 93.8641472805 |
| 10.8883595349  | 10.3617046731 |
| 64.1055074436  | 45.5081880027 |
| 50.2989296653  | 30.3151587559 |
| 5.965741232    | 0.5204087713  |
| 0.9943512947   | 0             |
| 2.7661910333   | 0             |
| 0              | 1.2045067288  |
| 47.6964545096  | 33.7750856024 |

gene\_expression\_table

|                |                 |
|----------------|-----------------|
| 0              | 0               |
| 0.6646788857   | 0.3211302545    |
| 5.7315765573   | 5.9997829562    |
| 4.5228256103   | 1.0925697885    |
| 2.4144996154   | 2.6423706573    |
| 1.1065268476   | 1.5444083268    |
| 0.4555361811   | 0.9537055599    |
| 0              | 1.1792422428    |
| 5.1251237004   | 1.9765610518    |
| 0.2736475208   | 0.4296790895    |
| 337.4068115068 | 459.4971919509  |
| 2.9553452526   | 1.2374556912    |
| 5.1908964737   | 1.2075115567    |
| 0.5834591081   | 0.4580713496    |
| 892.6688003608 | 1202.1320794683 |
| 3.1948532616   | 3.7159498894    |
| 0              | 1.3332326387    |
| 1.8592218814   | 0.4865558213    |
| 0              | 0               |
| 0              | 0               |
| 92.8003536327  | 56.9458391279   |
| 1.1434671051   | 1.7954626566    |
| 21.2854822521  | 22.2815262699   |
| 0.6247707563   | 0               |
| 1.6779525068   | 2.8542661815    |
| 6.2285747426   | 2.7943019722    |
| 8.823124757    | 2.0524441519    |
| 1.0106826748   | 0               |
| 0.5407882457   | 0.5660941745    |
| 1.3713412622   | 1.701348177     |
| 1.8588481792   | 1.9458320956    |
| 20.9240020005  | 5.4757826805    |
| 0.7015745343   | 0.7344043809    |
| 4.4806372293   | 0               |
| 1.4646330155   | 1.2544116715    |
| 26.7204822222  | 6.9927136196    |
| 0.6882734402   | 1.0807213027    |
| 0              | 0               |
| 33.5808725712  | 22.0957147909   |
| 1.6323354296   | 0               |
| 2.7759968563   | 4.5664116282    |
| 953.867416442  | 846.6329482912  |
| 26.5443270091  | 41.4519264116   |
| 2.1652366944   | 2.6443175683    |
| 0              | 0               |
| 0              | 0               |
| 16.4651452229  | 4.9244639606    |
| 1.0984905771   | 1.4152540568    |
| 0.3091806605   | 0.4854729336    |

gene\_expression\_table

|                 |                 |
|-----------------|-----------------|
| 37.9558146458   | 16.3602101514   |
| 11.5084955819   | 7.7803736442    |
| 4103.4057076991 | 6923.7406664831 |
| 4.6797568676    | 4.2864008813    |
| 2.3071747299    | 0.805045958     |
| 0               | 0               |
| 0               | 0               |
| 622.2292840471  | 408.6878164324  |
| 396.0210849671  | 276.3684688507  |
| 14.9540879393   | 3.9134643429    |
| 284.1415377683  | 148.71890294    |
| 170.6619164441  | 50.2817104978   |
| 5.0002893979    | 17.6656800214   |
| 16.0771300631   | 27.3967818657   |
| 107.5352935038  | 70.3545977598   |
| 0               | 0               |
| 59.2862987793   | 62.0605729319   |
| 6.1275411451    | 5.1314212148    |
| 37.4237289038   | 15.4325578325   |
| 2.3960667436    | 2.7470647422    |
| 0               | 0               |
| 2.298709136     | 0               |
| 0               | 0               |
| 0.5712693848    | 2.0930058239    |
| 6.6749408861    | 11.179666512    |
| 10.4125642183   | 6.4280961485    |
| 24.9987681657   | 17.3228586012   |
| 16.6708505071   | 18.1489932284   |
| 3.6867792453    | 2.9180075639    |
| 57.4606798772   | 31.7152041234   |
| 0               | 0               |
| 3.7355557172    | 3.177166907     |
| 11.1719283587   | 20.1999595651   |
| 20.6543281552   | 7.0121635516    |
| 0               | 0.6902877515    |
| 42.216876166    | 25.0035917983   |
| 0.1895732939    | 0               |
| 3.6269965649    | 3.3748623503    |
| 5.896262632     | 2.2219831575    |
| 0               | 0.4738451917    |
| 69.0229341805   | 68.4500490527   |
| 0               | 1.7049652434    |
| 5.5527874215    | 6.2970130901    |
| 0.9612707807    | 0.5590294387    |
| 2.1963103202    | 4.0233998298    |
| 25.3203772085   | 33.3208633581   |
| 0.4889641578    | 1.3649200081    |
| 0               | 0               |
| 64.7575368384   | 30.64381581     |



gene\_expression\_table

|                 |                 |
|-----------------|-----------------|
| 0               | 2.2059097839    |
| 3.4114801164    | 1.1903729019    |
| 0.5248090561    | 4.3949379702    |
| 0.5970876839    | 1.2500562362    |
| 30.3129081707   | 25.3851090325   |
| 652.1258207138  | 290.8647406752  |
| 0.8919646619    | 0.2667724926    |
| 1.765065456     | 4.988684307     |
| 13.7803712086   | 21.9812832379   |
| 24.6288647775   | 10.6158544431   |
| 9.9959380072    | 8.0147437061    |
| 1.8981267844    | 3.9738974488    |
| 45.3914464485   | 33.6818858903   |
| 12.9457698213   | 0               |
| 1.2917075051    | 0.5408609373    |
| 41.6012161084   | 31.1056608779   |
| 36.8852839301   | 15.2649377956   |
| 62.1780635051   | 14.6115147049   |
| 8.4099260405    | 1.7606929059    |
| 4.5830507588    | 2.0560767596    |
| 0.5589512798    | 0.6826249956    |
| 1.3273965885    | 6.4843869089    |
| 23.7634534916   | 12.8389434813   |
| 0.1416300138    | 0.6918684401    |
| 2.2639335163    | 2.7183839743    |
| 3.5612208067    | 3.5316629436    |
| 1286.3399033051 | 1720.5706692638 |
| 3.8258384172    | 3.203893365     |
| 16.6851730358   | 14.2638573471   |
| 1.0378789534    | 1.3037352065    |
| 0               | 0.5342847921    |
| 0               | 0               |
| 0               | 0               |
| 0               | 0               |
| 4.7286483476    | 6.0499061308    |
| 0               | 0               |
| 0               | 0               |
| 0               | 0               |
| 2.2805924853    | 1.3641781291    |
| 1886.2802914639 | 660.1299127179  |
| 5.8418306808    | 3.248698071     |
| 0.6922478152    | 0.7246412225    |
| 4.5542401554    | 5.9591920717    |
| 33.1142988794   | 11.5546222484   |
| 1.4876537957    | 1.5572678475    |
| 45.9893253411   | 6.5647328109    |
| 8.0397723161    | 4.2079948188    |
| 0               | 0               |
| 0               | 0               |

gene\_expression\_table

|                |                |
|----------------|----------------|
| 3.757816513    | 0.3576056136   |
| 0              | 0              |
| 0              | 0              |
| 2.2843428799   | 1.5941584123   |
| 18.6173492147  | 10.7186965689  |
| 50.1894461383  | 7.0997347836   |
| 12.9572577024  | 8.8864876503   |
| 12.8993069138  | 17.1599657203  |
| 3.2485069595   | 0              |
| 6.172175612    | 0.6460999634   |
| 9.9521498427   | 10.417855961   |
| 1.5596590111   | 0.5442141709   |
| 0              | 0              |
| 0              | 0              |
| 0.629632029    | 0.6590953603   |
| 0              | 0              |
| 10.975552336   | 18.7230561421  |
| 5.9777135526   | 3.1287189075   |
| 2.4182385764   | 2.9532987171   |
| 1.8058000587   | 1.8903016135   |
| 0              | 0              |
| 8.8068538032   | 27.6568990141  |
| 0              | 0              |
| 1.0594523503   | 1.9408006085   |
| 0.6474039007   | 0.81323863     |
| 7.9622462227   | 3.333934299    |
| 3.9536439192   | 4.5148939701   |
| 0.7740730676   | 1.4855416557   |
| 1.2794013609   | 2.1045676757   |
| 275.6501404759 | 150.2036190716 |
| 9.8477426727   | 5.8906074898   |
| 453.970874399  | 522.7356480955 |
| 0              | 0              |
| 3.9154987917   | 3.5131908817   |
| 3.6278023618   | 0.6076101837   |
| 0              | 0              |
| 0              | 0              |
| 6.1708812355   | 3.2298223439   |
| 0.1528846348   | 0.1600387986   |
| 0.6097222782   | 0.6382539423   |
| 0              | 0              |
| 0.1482740366   | 0.2586874161   |
| 1.7579142414   | 0.7360700009   |
| 0              | 0              |
| 0              | 0              |
| 4.7815821368   | 5.0053339986   |
| 239.763876627  | 355.5599770239 |
| 9.3897761479   | 2.8668401582   |
| 4.9905625583   | 3.4827290397   |

gene\_expression\_table

|                |                |
|----------------|----------------|
| 0.0495045789   | 0              |
| 12.5186120609  | 10.4835316464  |
| 1.6104434192   | 0.9365574184   |
| 0.8566678359   | 0.5604719999   |
| 0              | 0              |
| 0              | 0              |
| 3.8261278505   | 3.3643425341   |
| 652.0104622675 | 1500.194633108 |
| 0              | 0              |
| 95.6607621685  | 53.1030404728  |
| 20.1478948876  | 14.4304830839  |
| 3.228461381    | 2.4783261769   |
| 18.721922243   | 23.953118065   |
| 0              | 0              |
| 0              | 0              |
| 0              | 0              |
| 2.3669936313   | 2.3700274519   |
| 0              | 0              |
| 150.8587486746 | 76.4119897088  |
| 0              | 0              |
| 0              | 0              |
| 7.6883012602   | 3.5332997535   |
| 3.9392796968   | 1.7672641785   |
| 0.3086352643   | 0.9692331141   |
| 132.7708870802 | 80.3135611114  |
| 4.1044099782   | 1.1717656066   |
| 10.7997506793  | 11.6376234013  |
| 0              | 0              |
| 36.8133333462  | 6.623374273    |
| 0.3669799778   | 0              |
| 0.4205509361   | 0.2515602383   |
| 0              | 0              |
| 0.7689029574   | 0.6036625542   |
| 1.6784383108   | 5.2709400997   |
| 3.8175843833   | 6.3017416761   |
| 2.3651770245   | 2.2105842485   |
| 0              | 0              |
| 0              | 0              |
| 3.0105439999   | 1.9560543979   |
| 0              | 0              |
| 0              | 0              |
| 0              | 1.3067218268   |
| 0              | 0              |
| 8.5001564011   | 15.8185194257  |
| 18.2796985407  | 23.2354644122  |
| 1.5558605722   | 27.6873275706  |
| 0.2132540311   | 0.223233152    |
| 17.2941503414  | 10.5887939303  |
| 47.2808553509  | 21.9970402171  |

gene\_expression\_table

|                 |                 |
|-----------------|-----------------|
| 0.3210995927    | 1.3445011817    |
| 24.4527637264   | 23.0373172569   |
| 6.3015354641    | 5.3970650336    |
| 2.7432937829    | 1.4358324553    |
| 0.0621679638    | 0.4555395885    |
| 0.8327643669    | 0.747199868     |
| 1.021223716     | 0.7635795672    |
| 5.4054982205    | 1.6166988396    |
| 7.0212848904    | 2.9399370309    |
| 2.6245234997    | 4.0555924612    |
| 7.9312429117    | 6.0380957464    |
| 49.5304106269   | 29.1645914814   |
| 0               | 11.3244566448   |
| 0.6783921226    | 0.8876714491    |
| 1.2293061763    | 1.0294647793    |
| 2.4026219822    | 1.2575257676    |
| 0.4925567926    | 0.2148357306    |
| 0.4786720531    | 0.9186306876    |
| 1.8746741193    | 0.9811993015    |
| 0               | 0               |
| 0.1883071927    | 0.3942378763    |
| 0               | 0               |
| 0               | 0.2934488176    |
| 6.4311788883    | 4.488081897     |
| 0               | 0               |
| 1.1206014051    | 1.9941670052    |
| 4.8329867626    | 2.6982101757    |
| 9.5461694567    | 12.2989266657   |
| 3.6451476897    | 2.8875723778    |
| 5233.8269575073 | 5667.3644721518 |
| 4.3739632539    | 2.9136804989    |
| 3.606275232     | 1.8875145831    |
| 6.9136628481    | 6.7202426689    |
| 0               | 0               |
| 123.9586298791  | 79.8980351652   |
| 0.2493538406    | 1.305111175     |
| 1.376305869     | 1.6949522912    |
| 53.2813655299   | 31.4133039388   |
| 2.8864635734    | 3.0215342635    |
| 31.8254162465   | 7.0136150447    |
| 80.0283259783   | 37.5234185147   |
| 50.8563697704   | 40.9508995421   |
| 8.9939717619    | 5.8010632723    |
| 27.8721109744   | 11.8866705428   |
| 0               | 0               |
| 1.9321039436    | 2.166981245     |
| 2.8385620753    | 2.2285434281    |
| 2.5041836082    | 15.4785402591   |
| 7.659432473     | 15.0334724483   |

gene\_expression\_table

|                |               |
|----------------|---------------|
| 0              | 0             |
| 10.1807894772  | 10.6571946785 |
| 6.6349133815   | 3.7883950895  |
| 0              | 21.2755130936 |
| 50.9494347078  | 32.9898490339 |
| 6.9151574736   | 2.352593418   |
| 14.960057008   | 14.9482827711 |
| 16.5905296487  | 21.3138927727 |
| 79.9353901614  | 8.9652780776  |
| 0.9741072677   | 0.3823838077  |
| 19.7025674714  | 19.7884097554 |
| 1.3069791705   | 0             |
| 0              | 0             |
| 4.6902822987   | 2.53953198    |
| 2.4815927561   | 2.9688202386  |
| 1.9676272018   | 1.0298506904  |
| 0              | 0             |
| 0.2036704547   | 0.4264022335  |
| 13.1288019129  | 0.9816541396  |
| 38.1442530998  | 19.0139025146 |
| 0.6208401746   | 5.1991367625  |
| 0.5031496999   | 0             |
| 3.5675215854   | 3.7344620612  |
| 1.6554891236   | 0.5776523166  |
| 14.8762286559  | 4.00431978    |
| 28.1501636835  | 16.7247616562 |
| 6.7651407333   | 10.9444644267 |
| 18.1820690364  | 13.7459763342 |
| 0              | 0             |
| 0              | 0             |
| 1.0715706671   | 0.8837749084  |
| 1.0033912086   | 0.5729151398  |
| 70.7490867181  | 43.5645626943 |
| 7.3925791195   | 5.9527010332  |
| 69.6362140277  | 26.62245145   |
| 1.5880875053   | 3.3970809272  |
| 0.7171560984   | 0             |
| 0              | 0.0351274086  |
| 0.9809364444   | 0.770129174   |
| 123.5883517452 | 92.3083919158 |
| 18.6053307989  | 4.7940820687  |
| 0.6759215022   | 1.1320814839  |
| 0              | 0             |
| 0              | 0             |
| 38.1915746468  | 3.1982984974  |
| 16.8389080984  | 6.3652610644  |
| 9.3983432395   | 5.8188964719  |
| 0              | 0             |
| 0              | 1.020734588   |

gene\_expression\_table

|               |               |
|---------------|---------------|
| 29.1838419256 | 33.943873253  |
| 0             | 0             |
| 38.5729629558 | 13.5851101942 |
| 15.7660889448 | 8.6107072581  |
| 0             | 0.2248180256  |
| 40.9324517004 | 19.7759382964 |
| 0             | 0             |
| 0             | 0             |
| 4.3697403489  | 0             |
| 7.8956271118  | 3.6159809118  |
| 1.3212791989  | 0.4810809845  |
| 0             | 0             |
| 0             | 0             |
| 5.9050381576  | 4.6000830582  |
| 0.5139775762  | 0.9415505967  |
| 0             | 0             |
| 0             | 0.3356843941  |
| 8.1452142942  | 6.0186110985  |
| 14.2013675227 | 9.8306849066  |
| 0             | 0             |
| 12.3656312353 | 8.6739987565  |
| 0             | 0             |
| 0.3867555363  | 0.0578362254  |
| 5.0446087706  | 8.1030952869  |
| 12.4716632461 | 2.1758781326  |
| 1.2239326683  | 12.8120601532 |
| 15.4933179153 | 7.8388548397  |
| 0.8017521338  | 1.6785394871  |
| 0.6966043269  | 0.3454112818  |
| 34.2291979629 | 60.9703847355 |
| 2.0460254959  | 2.1417682858  |
| 0             | 0             |
| 0             | 0             |
| 3.1486884174  | 4.7380428292  |
| 28.557709026  | 12.8117371872 |
| 0             | 0             |
| 10.1951915313 | 16.8509536891 |
| 0             | 0             |
| 63.165572857  | 37.4915017394 |
| 0             | 0.0484922885  |
| 4.4433225054  | 3.1008304458  |
| 3.8021993827  | 2.9850911207  |
| 81.6367121622 | 80.2248104247 |
| 0.0908860807  | 0.0475695258  |
| 73.6740456807 | 72.9808312248 |
| 0.1023012748  | 0             |
| 2.2025124758  | 3.2936828565  |
| 20.0877885879 | 10.5138935502 |
| 3.9574670919  | 0             |

gene\_expression\_table

|                |                |
|----------------|----------------|
| 10.7717207947  | 8.6917458083   |
| 0              | 4.9148207544   |
| 26.8074850228  | 28.0619285338  |
| 0              | 0              |
| 7.523765271    | 15.288388089   |
| 1.185546283    | 1.4183124084   |
| 0              | 0              |
| 0              | 0              |
| 6.2623051793   | 11.4369879844  |
| 0              | 0              |
| 1.3135414145   | 1.3750079603   |
| 0              | 0              |
| 0              | 1.2675460806   |
| 0              | 0              |
| 0.9794868772   | 0              |
| 7.6033865286   | 5.3061222565   |
| 16.500994568   | 12.508143654   |
| 110.8581741768 | 68.3380408288  |
| 0              | 0              |
| 0              | 0              |
| 1.0247941537   | 0              |
| 1.7868626429   | 1.8704780304   |
| 3.005295312    | 3.7179133452   |
| 37.3384068451  | 19.3936380856  |
| 0              | 1.8032343949   |
| 0              | 0.9851361947   |
| 3.558174824    | 1.5519491344   |
| 0.7431551681   | 2.333792282    |
| 0              | 0              |
| 4.703423352    | 6.892924935    |
| 0              | 0              |
| 12.4061692394  | 4.925993459    |
| 18.031264552   | 13.2824278151  |
| 26.4713213738  | 7.9171526477   |
| 0.9596810764   | 1.0045888959   |
| 9.5872773634   | 24.7037771017  |
| 7.6216652117   | 6.8385577801   |
| 1.0144627041   | 0.7079560025   |
| 0              | 0              |
| 16.0615920331  | 4.2032966482   |
| 104.1366572405 | 38.4740056182  |
| 43.0427172136  | 40.5511926237  |
| 294.4943999252 | 62.8331465574  |
| 0              | 0              |
| 0              | 0              |
| 0              | 3.100925041    |
| 0              | 0              |
| 0              | 0              |
| 307.9419768518 | 465.6195197191 |

gene\_expression\_table

|                 |                |
|-----------------|----------------|
| 1911.8995136217 | 912.903763014  |
| 47.0076480109   | 16.4024495137  |
| 0               | 0              |
| 2.2343646391    | 1.1694603348   |
| 3.3121075801    | 5.778493465    |
| 0               | 0              |
| 106.4740899495  | 70.1867092857  |
| 1.02204368      | 0              |
| 37.9988641186   | 26.862391563   |
| 4.3484668153    | 3.5765331263   |
| 3.6056726462    | 9.4359959566   |
| 5.149006077     | 34.6496873614  |
| 23.2160945092   | 2.5581558536   |
| 16.6290551892   | 9.051746037    |
| 1.1064511979    | 3.4746811664   |
| 67.5871975685   | 90.0453378769  |
| 0.3473720041    | 0              |
| 343.8097303893  | 81.7950325442  |
| 0               | 0              |
| 16.2360169265   | 13.5966188929  |
| 0               | 0              |
| 2.6183565236    | 0.9136270906   |
| 51.7176626443   | 39.203209912   |
| 22.2410375708   | 34.1466346397  |
| 5.6444543281    | 4.4314379128   |
| 2.0836953357    | 2.1812008678   |
| 39.8579525071   | 40.8160628185  |
| 1.5327267423    | 0              |
| 0               | 0              |
| 9.1729047831    | 6.4014309996   |
| 107.179216373   | 44.1978793552  |
| 407.0579258434  | 80.8132083894  |
| 0.8318573316    | 0.5805224665   |
| 0               | 0.190348387    |
| 5.1930247625    | 2.7180149431   |
| 9.3441464621    | 17.1174523649  |
| 0               | 0              |
| 0               | 4.3609419122   |
| 488.3819877777  | 372.8347953572 |
| 104.6588350356  | 55.774114043   |
| 4.4955726868    | 4.7059408724   |
| 0               | 0              |
| 17.0466206787   | 1.7844309185   |
| 28.109981676    | 39.2338331978  |
| 11.9603028645   | 9.7377618709   |
| 0               | 0.763658732    |
| 0.4466786728    | 0              |
| 12.9446604058   | 23.7131993569  |
| 118.165441757   | 64.2571103378  |



gene\_expression\_table

|                |                 |
|----------------|-----------------|
| 0              | 0               |
| 322.529342936  | 223.0716456229  |
| 23.2998296463  | 0               |
| 102.3789326437 | 90.0225531254   |
| 5.8693195301   | 4.9151772367    |
| 0              | 0               |
| 0              | 0               |
| 35.3445025028  | 27.2620022951   |
| 14.7261707664  | 10.2768499488   |
| 0              | 0               |
| 178.9766820233 | 31.8896699116   |
| 37.9195446868  | 15.8775886978   |
| 0              | 0               |
| 95.9364480576  | 139.7227805406  |
| 64.0154798056  | 67.011053735    |
| 42.6738607049  | 22.3353818597   |
| 0              | 0               |
| 18.6023697383  | 11.1273478756   |
| 85.8617390585  | 89.8795982987   |
| 13.962309218   | 0               |
| 60.124926258   | 54.729081378    |
| 128.7199765924 | 64.7804647467   |
| 0              | 0               |
| 8.0597916695   | 4.2184728936    |
| 0.8913400712   | 5.5982994351    |
| 0              | 5.6584459387    |
| 113.3915149016 | 118.6976169083  |
| 0              | 5.8197825972    |
| 654.9146356646 | 2229.6174836814 |
| 0              | 0               |
| 0              | 0               |
| 0              | 0               |
| 3.7179098719   | 4.1698796743    |
| 2.8499338186   | 1.3424828022    |
| 0              | 0               |
| 1.7070508808   | 3.1909491337    |
| 0.2268422689   | 0.7123717348    |
| 5.9970954634   | 3.1388633466    |
| 0.7539451845   | 0.7892256908    |
| 26.881473186   | 10.3671396087   |
| 0.4317059287   | 0.3389305517    |
| 0.3872850586   | 0.4054078787    |
| 0.2244548671   | 0.0335654465    |
| 9.3820647376   | 8.6656711716    |
| 6.1177099018   | 12.0964165395   |
| 25.4229500322  | 37.4547772481   |
| 18.2170887802  | 0               |
| 4.0816641461   | 2.6187293513    |
| 11.7268311246  | 3.249418926     |

gene\_expression\_table

|                 |                 |
|-----------------|-----------------|
| 4.6267816721    | 3.082093458     |
| 9.1664723445    | 6.85386647      |
| 1.5947611749    | 1.2242173281    |
| 41.1649479873   | 18.716398105    |
| 219.4449040315  | 156.6229935952  |
| 0.4181110071    | 0.4376763128    |
| 1.3961405859    | 0               |
| 2.1950443066    | 3.0636804811    |
| 4.9720619577    | 4.4949917005    |
| 0.7125461926    | 0.7458894528    |
| 1.4309515183    | 0.748956107     |
| 114.7948625339  | 103.3011411009  |
| 0               | 0               |
| 2.6367608916    | 1.5772267791    |
| 8.5113256138    | 2.8135607519    |
| 0               | 0               |
| 0               | 5.1059032973    |
| 1.7185549574    | 2.248717399     |
| 0.5767559977    | 1.0565537854    |
| 8.7334237511    | 5.9154765751    |
| 14.5332548956   | 11.6337241998   |
| 0.747508699     | 0.5216586753    |
| 7.0907804113    | 14.5077897565   |
| 0               | 0               |
| 2245.3413423275 | 2082.6866900336 |
| 52.6772162594   | 27.5711107695   |
| 1433.7231811818 | 1093.8132838492 |
| 83.576858507    | 24.996513671    |
| 12.8738682886   | 6.7381474159    |
| 3.967919547     | 4.9087958103    |
| 0.5390374924    | 0               |
| 14.2921396819   | 20.5712836457   |
| 7.9790700023    | 6.4433160935    |
| 609.3577840459  | 335.7223114302  |
| 4.0148999435    | 1.0506938192    |
| 0.9915489323    | 4.003513687     |
| 1.62299693      | 1.6989442994    |
| 15.1414637405   | 2.2642859049    |
| 1.9039792559    | 0.9965375298    |
| 0.7942596555    | 0.7126514214    |
| 0               | 0               |
| 1.8365934717    | 0.9612679948    |
| 4.3599695594    | 3.3469276582    |
| 0.984402036     | 5.1523333051    |
| 11.1148615036   | 18.5297768491   |
| 0.3737284569    | 0.1304056341    |
| 46.2719055133   | 28.0935628474   |
| 0               | 0               |
| 2.6386340054    | 0.96673767      |

gene\_expression\_table

|               |               |
|---------------|---------------|
| 108.653609595 | 76.940414184  |
| 0.5023765846  | 0             |
| 14.7035293689 | 11.8396723325 |
| 0.7959766057  | 1.3887065873  |
| 0             | 0.2003333153  |
| 15.0234965628 | 19.9605753838 |
| 42.751231544  | 26.851053054  |
| 2.5273492851  | 3.023560449   |
| 18.6633389035 | 5.1412318343  |
| 2.0821940756  | 1.453086238   |
| 34.064390977  | 16.7376247523 |
| 55.7994127442 | 53.7376781454 |
| 17.8140469701 | 3.4964337797  |
| 1.0993860249  | 1.150831271   |
| 0             | 0             |
| 5.3219538548  | 0.5570992154  |
| 3.4876278443  | 1.9214893318  |
| 5.0656605127  | 3.0301175354  |
| 46.1481287262 | 13.6719646585 |
| 13.9741497109 | 9.4037550429  |
| 3.3435841207  | 3.8889394992  |
| 1.376379639   | 1.0291333354  |
| 0.3559439974  | 0.7452004548  |
| 0             | 0             |
| 10.5435646757 | 8.2777093273  |
| 0.6181942938  | 1.0169066314  |
| 1.2012069674  | 0.8382779174  |
| 4.3856604556  | 2.5504918615  |
| 5.4208881837  | 1.7023668204  |
| 5.8331453135  | 5.3428415022  |
| 0             | 0             |
| 13.6682014011 | 7.1538991923  |
| 46.4016471399 | 14.3228047871 |
| 2.1478800876  | 4.4967782295  |
| 20.6341627781 | 0             |
| 0             | 7.9740852604  |
| 0.9328219858  | 3.2084111113  |
| 0             | 0             |
| 0.1770733518  | 0.5560782453  |
| 1.2860824597  | 1.3462640766  |
| 1.7131429737  | 0             |
| 3.8597809855  | 4.0403976009  |
| 0             | 0             |
| 2.8172869974  | 2.2937604685  |
| 6.9146538645  | 13.1604032786 |
| 4.8549757529  | 2.8587161442  |
| 0             | 0             |
| 0.2753011805  | 0.3602297104  |
| 34.9296295086 | 36.5641449077 |

gene\_expression\_table

|                |                |
|----------------|----------------|
| 0              | 0.3301771027   |
| 0              | 0              |
| 2.7555677378   | 5.1280235012   |
| 2.8499756408   | 1.9888925969   |
| 0              | 0              |
| 0              | 0              |
| 0              | 0              |
| 2.1964561189   | 1.0996356792   |
| 4.68737444     | 7.171356927    |
| 0.1393537921   | 0.0364686966   |
| 0              | 1.4124296253   |
| 9.4803434902   | 10.5077346931  |
| 5.558286112    | 5.8183834669   |
| 5.8426215424   | 0              |
| 0              | 0              |
| 2.0120420797   | 0.8424778527   |
| 0.1211291196   | 0.1267972992   |
| 36.2076779607  | 27.4184673828  |
| 0              | 0.6854467301   |
| 0              | 0              |
| 0              | 2.0098134064   |
| 20.8081751832  | 9.4856590933   |
| 0.3396638744   | 0.3047642433   |
| 0.210794299    | 0.110329159    |
| 1.0246643878   | 3.2178392112   |
| 14.6197485748  | 20.6602282202  |
| 40.7690103196  | 18.751917064   |
| 2.7779461402   | 4.2297291761   |
| 0.5717537509   | 0              |
| 7.3583985052   | 3.0810925053   |
| 12.6997564835  | 17.016365501   |
| 8.181688506    | 11.4193956376  |
| 29.8221627109  | 16.9467387423  |
| 0              | 0              |
| 5.4922043638   | 3.2578853577   |
| 0.2062045989   | 0.5101999973   |
| 1.884277759    | 5.9173549216   |
| 22.2976031174  | 31.0676876413  |
| 2.0531334947   | 1.9838851385   |
| 0.6160193998   | 0.6448457346   |
| 0              | 0              |
| 215.4077067816 | 266.4853548673 |
| 3.7924283741   | 7.1458078609   |
| 1.4066030115   | 0.9816162203   |
| 276.3694207105 | 537.2751359881 |
| 28.4582366851  | 30.3436424379  |
| 0              | 0              |
| 5.6047080912   | 5.3780629288   |
| 0              | 0              |

gene\_expression\_table

|                |                |
|----------------|----------------|
| 0              | 0              |
| 7.4111329925   | 4.8487083974   |
| 4.8204151046   | 6.5597793777   |
| 1.3060239063   | 0              |
| 1.7119568262   | 1.0589487005   |
| 0.3076730069   | 0.1207764071   |
| 0              | 0              |
| 1.3574575731   | 0              |
| 0.5603123415   | 5.8653189103   |
| 10.548893971   | 8.0798959368   |
| 2.411185369    | 3.3006358388   |
| 2.5027544533   | 2.1832247146   |
| 1.5003956374   | 1.6629945222   |
| 0.1037872298   | 0.2172878076   |
| 190.1692822113 | 68.6441942486  |
| 0              | 0              |
| 0              | 0              |
| 0.2749866054   | 0              |
| 0              | 12.8198162244  |
| 1.9378499687   | 2.0285307363   |
| 0.4811672862   | 0              |
| 0              | 4.8219563171   |
| 6.1623385393   | 3.6861155658   |
| 2.4560378894   | 3.8564505214   |
| 0.540306197    | 0              |
| 0              | 0.8613972649   |
| 5.4284643355   | 12.6277483159  |
| 1.668101697    | 1.3096197918   |
| 3.6393212665   | 3.8096215742   |
| 0              | 0.9519237591   |
| 101.6286378655 | 234.0454635995 |
| 105.0344727247 | 73.299673945   |
| 0.2835602883   | 0              |
| 2.8082702884   | 1.6331566449   |
| 29.82593807    | 13.9500893993  |
| 5.9058733751   | 4.1214906071   |
| 0.6848657134   | 3.5845683933   |
| 7.4045210561   | 9.3012145165   |
| 0              | 0              |
| 0              | 0              |
| 21.7950852987  | 32.9549652592  |
| 6.9660229789   | 4.1668541205   |
| 0              | 3.2545167881   |
| 8.279028902    | 9.0432439531   |
| 54.4495755593  | 43.1231218301  |
| 14.0446008149  | 29.4036224597  |
| 10.1992261229  | 11.0446490257  |
| 75.805111287   | 35.1910534444  |
| 22.0988869083  | 29.7076341562  |

gene\_expression\_table

|                |                |
|----------------|----------------|
| 43.9698939283  | 36.1644204436  |
| 0.2202849738   | 1.3835586265   |
| 0              | 0              |
| 0              | 0.345753179    |
| 10.0844941638  | 10.2857165211  |
| 0              | 0              |
| 4.5957863616   | 3.2072293323   |
| 4.8903680219   | 1.2798026168   |
| 0              | 0              |
| 93.4369690007  | 65.2062050153  |
| 0              | 0              |
| 0              | 0              |
| 8.4942327572   | 0.8891716339   |
| 0              | 0              |
| 0              | 0.65379628     |
| 2.8190318189   | 5.1641573761   |
| 1.5109757887   | 4.745043546    |
| 8.404526409    | 7.5981105578   |
| 0              | 0              |
| 0              | 1.0590683675   |
| 1.56791917     | 8.2064460088   |
| 58.617677668   | 55.5167912505  |
| 7.743500272    | 7.494091142    |
| 0.9090126754   | 1.4273242367   |
| 633.5700045945 | 190.2527733038 |
| 11.1302060926  | 10.4859349135  |
| 0              | 0              |
| 0.7252277533   | 0.1265274069   |
| 0              | 0              |
| 0.2354382898   | 0.5633268858   |
| 0              | 0.0885527831   |
| 9.5449905014   | 4.8107914554   |
| 8.0507383395   | 7.6119073131   |
| 0              | 0              |
| 1.3341737842   | 0.8379634871   |
| 0              | 0              |
| 0              | 0.3999713654   |
| 0              | 0              |
| 3.748335136    | 3.2697805799   |
| 0.2719400976   | 0              |
| 0.3005731683   | 2.202468427    |
| 1.9225999278   | 2.5614490071   |
| 0.5064039223   | 0.8481613648   |
| 3.6032643153   | 3.3946896196   |
| 94.6318609852  | 61.1221979443  |
| 1.6782062499   | 1.1711580755   |
| 110.3491320968 | 57.00635007    |
| 10.382972018   | 16.6409896448  |
| 0.4203041031   | 0.9679384741   |

gene\_expression\_table

|                |                |
|----------------|----------------|
| 2.4700948828   | 1.9772860808   |
| 7.5744438404   | 1.057184845    |
| 3.1889560016   | 2.532413689    |
| 7.6233474358   | 6.3840626825   |
| 0              | 0              |
| 0.7374324686   | 0              |
| 2.6219975978   | 4.8032122744   |
| 3.7034466069   | 6.6962004508   |
| 492.3233109393 | 238.3173854834 |
| 10.3434565439  | 4.8122105214   |
| 0              | 0              |
| 0.9236318312   | 2.9972435046   |
| 0              | 0              |
| 0.7077629577   | 2.9635295547   |
| 0.2712336807   | 0.5678518636   |
| 65.7160126968  | 37.5224521385  |
| 15.1536157981  | 0              |
| 65.1501417072  | 0              |
| 20.4491753982  | 11.4675454471  |
| 3.5571972318   | 2.4824363896   |
| 0.343196229    | 1.7064656833   |
| 333.6919932438 | 727.7228153157 |
| 3.7951556309   | 6.3563970136   |
| 8.8677090531   | 3.0942230935   |
| 24.0428766054  | 24.0493759547  |
| 6.799391049    | 11.0717682741  |
| 0              | 5.678360027    |
| 343.0317419677 | 423.5346785137 |
| 0.4605420494   | 0.3213952637   |
| 3.4814416332   | 8.5034927566   |
| 3.6073302419   | 1.8880667724   |
| 0.3519039285   | 1.2279036849   |
| 0.3217155514   | 0              |
| 0              | 0              |
| 123.0474225575 | 53.9590055848  |
| 1.5773170579   | 1.0319542871   |
| 8.8255716154   | 3.5532923236   |
| 0              | 0              |
| 23.4982746204  | 15.4390856071  |
| 8.6385639842   | 3.8180717348   |
| 0              | 0              |
| 5.108087054    | 4.7742121055   |
| 6.4491180205   | 6.7509014308   |
| 1.216520072    | 0.7276837429   |
| 0              | 0.2226376211   |
| 3.3826417801   | 10.2293559139  |
| 0.0791931067   | 0.1657978209   |
| 2.9036763561   | 1.8629515385   |
| 0              | 0              |

gene\_expression\_table

|                |                |
|----------------|----------------|
| 24.9171051325  | 16.4071045066  |
| 19.9194903008  | 20.851613375   |
| 6.0848055916   | 4.7771558813   |
| 1.7877828143   | 1.1008478005   |
| 0.6440392245   | 1.0112651005   |
| 1.4246533162   | 1.4913192905   |
| 0              | 0              |
| 4.1566996291   | 6.8809839061   |
| 24.1998348892  | 46.1479057624  |
| 223.5140355003 | 80.3834542017  |
| 2.2802749835   | 1.5913195778   |
| 0              | 0              |
| 3.1366892147   | 4.5968567325   |
| 15.4818492253  | 10.4183453546  |
| 0.6957395575   | 0.1213827265   |
| 7.9036602665   | 11.0313443858  |
| 4.4591303785   | 1.9653866373   |
| 2.1736215704   | 1.8961126316   |
| 0.7766672002   | 0.1355018287   |
| 38.8059271577  | 11.4574398122  |
| 0              | 0              |
| 111.5737198019 | 24.5883703056  |
| 8.3332863053   | 8.5802345649   |
| 0              | 42.327013468   |
| 79.8757789446  | 8.5757464645   |
| 54.1963474914  | 64.8370740509  |
| 8.8585743477   | 8.1139687307   |
| 13.1952302066  | 7.9598579788   |
| 23.5391364668  | 6.6340182358   |
| 15.3489008887  | 25.5184074084  |
| 0.9832614259   | 0.2940779076   |
| 760.4538085066 | 562.3393942547 |
| 0.1301754408   | 0.681334693    |
| 14.5632283004  | 3.9523316109   |
| 0              | 0              |
| 887.4409508166 | 390.7750901204 |
| 23.9128018648  | 10.2694523299  |
| 11.795963318   | 4.1159832703   |
| 0              | 0              |
| 0              | 0              |
| 4.4614918463   | 0              |
| 108.2122914874 | 22.0667599087  |
| 9.012285302    | 3.144670302    |
| 0.5812405427   | 1.216878835    |
| 9.6483019389   | 6.0598737834   |
| 1.2180831425   | 0.7969267273   |
| 190.2515086872 | 99.5771187728  |
| 5.1543186234   | 2.4366830698   |
| 2.1071625119   | 2.2057661794   |



gene\_expression\_table

|                 |                |
|-----------------|----------------|
| 17.4942196886   | 13.6513997909  |
| 0               | 0              |
| 77.8912059096   | 81.5360878422  |
| 22.3965085949   | 5.4102790528   |
| 9.023731069     | 0              |
| 0               | 0              |
| 0.5209741404    | 0              |
| 21.2203605843   | 4.5565861056   |
| 2.323585244     | 2.5843360797   |
| 2.5690346059    | 0.597611413    |
| 1.3566114616    | 2.5124730263   |
| 10.1867703867   | 14.9288376464  |
| 9.0570873251    | 4.490957093    |
| 0               | 0              |
| 0.0702912213    | 0.2207413968   |
| 0               | 0              |
| 2.7594700133    | 2.3269262473   |
| 0               | 0              |
| 4.0831722859    | 7.6936363036   |
| 0.069508118     | 0.9458893253   |
| 0.0718537963    | 0              |
| 116.432098362   | 20.3134138376  |
| 3.3022203128    | 1.9483478253   |
| 35.6198730452   | 44.5034663969  |
| 0               | 0              |
| 2.7388833428    | 2.8670480861   |
| 2.8313613842    | 2.9638535935   |
| 0               | 0              |
| 2.8743195744    | 2.1491585656   |
| 3.6044179056    | 3.7730849271   |
| 0               | 0              |
| 0               | 0              |
| 5.3544790527    | 1.5569553759   |
| 0.0939764576    | 0.0983740413   |
| 0               | 0              |
| 0               | 0              |
| 0               | 0              |
| 49.0603096527   | 40.3511927563  |
| 63.9376781379   | 40.2943578688  |
| 4.0876953113    | 6.4184656038   |
| 0               | 0              |
| 0.1457154532    | 0              |
| 0.8532174703    | 0.3247794095   |
| 59.9039913843   | 26.6030418897  |
| 0               | 0              |
| 4.8920486393    | 6.3402482353   |
| 156.5492520055  | 147.4874098133 |
| 0.149756745     | 0.1567645406   |
| 1701.2291661087 | 620.9498744461 |

gene\_expression\_table

|                 |                 |
|-----------------|-----------------|
| 0               | 0               |
| 0               | 8.1556804143    |
| 7.3545915944    | 16.5819149137   |
| 3.0496210497    | 5.8042302112    |
| 2.1399185949    | 0.4480110136    |
| 95.9079588858   | 62.9601571113   |
| 0.344480996     | 0.1545432087    |
| 0.9121417932    | 1.0282731142    |
| 0.7696470723    | 0.4833974046    |
| 0.153895017     | 0               |
| 11.5655514571   | 2.0177926561    |
| 0               | 0.2208497867    |
| 0               | 0               |
| 0               | 0               |
| 0.2635897903    | 0.2759243492    |
| 2.8701930135    | 2.503751942     |
| 2575.2605963077 | 2903.1355134103 |
| 4.6251188394    | 5.6484739216    |
| 2.9607616817    | 4.7898413616    |
| 6.1976926151    | 0               |
| 15.3585401398   | 0               |
| 12.9599212609   | 6.783187306     |
| 132.7056864671  | 12.6286896314   |
| 0               | 12.4621385019   |
| 0               | 0.6944045227    |
| 41.9711142954   | 21.967566313    |
| 5.8437722688    | 5.5611171023    |
| 26.6689186803   | 5.9397612862    |
| 36.8154269161   | 38.5381873079   |
| 5.7599650048    | 12.5614579741   |
| 116.5826385705  | 25.0334497829   |
| 7.3636088427    | 3.1314503253    |
| 33.1720059831   | 15.7837610115   |
| 16.6391422118   | 7.8379933308    |
| 258.8021993369  | 163.4818169063  |
| 0               | 0.8464133867    |
| 13.0044690015   | 0               |
| 25.9152308604   | 31.649242056    |
| 0               | 0               |
| 1.1866887866    | 1.242219324     |
| 23.3873723588   | 16.3211822163   |
| 43.9876231947   | 3.5420002385    |
| 0               | 0               |
| 2.250130229     | 1.1777120014    |
| 2.6934010974    | 1.1032581603    |
| 8.2931394683    | 2.3372496499    |
| 52.6671528259   | 21.7625081021   |
| 36.1453080342   | 20.3197149151   |
| 13.7099440727   | 6.6237666391    |

gene\_expression\_table

|                |                |
|----------------|----------------|
| 14.3674336242  | 19.1183273479  |
| 26.6898563963  | 36.6696691354  |
| 5.3743839957   | 8.7513622599   |
| 42.2185986432  | 29.1848476605  |
| 0.7613214052   | 1.1384958261   |
| 1.2117900245   | 2.8541141153   |
| 27.2487621548  | 51.6994872226  |
| 1.7335113188   | 1.8146301564   |
| 0              | 0              |
| 0.8853667591   | 0.2316992689   |
| 0              | 1.882864499    |
| 0              | 0              |
| 3.2608776112   | 3.7548157109   |
| 13.8428291116  | 9.392054075    |
| 0.8091120585   | 5.0818444347   |
| 0.306411861    | 1.9245015495   |
| 7.1919117143   | 6.4529604019   |
| 0.3870118531   | 1.215365666    |
| 32.4108107539  | 14.0674830943  |
| 25.213579227   | 15.9960222269  |
| 1.0020883989   | 0.8158738381   |
| 8.2916220234   | 9.919570894    |
| 0.5334760086   | 1.0238062352   |
| 0.9917190593   | 1.3495639053   |
| 4.6655185187   | 0.9767678477   |
| 36.4993038049  | 32.5469348674  |
| 0              | 0              |
| 5.1958286897   | 10.8779300438  |
| 0              | 0              |
| 22.7384076885  | 0              |
| 3.3431236671   | 4.1994762588   |
| 12.5838283744  | 13.1726826379  |
| 12.9596236882  | 9.1899137228   |
| 0.4518752212   | 0.9460410145   |
| 0              | 0.8194141301   |
| 0.2848754937   | 1.7892366416   |
| 5.3108931325   | 6.4859828256   |
| 0              | 0              |
| 32.7200178765  | 98.8759196072  |
| 20.63854836    | 10.802159707   |
| 577.6978948002 | 756.3597080755 |
| 0              | 0              |
| 380.5381029454 | 117.1603536691 |
| 28.0153399541  | 13.4063106112  |
| 8.5782623426   | 6.9388421286   |
| 0.0498686168   | 0              |
| 2.291170073    | 0.6662178574   |
| 2.4168301882   | 4.5538642932   |
| 59.1118199098  | 21.7231028768  |

gene\_expression\_table

|                 |                 |
|-----------------|-----------------|
| 2.7245085651    | 2.8520006475    |
| 0.7089255628    | 0               |
| 3283.8632555562 | 1553.7432833832 |
| 26.1505247658   | 54.7484522682   |
| 0               | 0               |
| 0               | 0               |
| 0               | 0.4988336123    |
| 0               | 0               |
| 0               | 0               |
| 1.6947548743    | 5.3221803677    |
| 0               | 0               |
| 0               | 0               |
| 0               | 0               |
| 27.9356645667   | 16.4959952683   |
| 39.5540436902   | 25.631639646    |
| 0.9324464508    | 0.8325386861    |
| 0               | 0               |
| 0               | 0               |
| 439.0820056122  | 248.4479130926  |
| 0               | 0.0713372626    |
| 6.7455272353    | 10.2891494191   |
| 1021.6624298167 | 826.4091288073  |
| 4.4702721879    | 13.160971262    |
| 42.0794125893   | 25.6484929063   |
| 2.136237852     | 3.0348456884    |
| 0.3303600117    | 0.0576365085    |
| 5.8026454351    | 5.0618145569    |
| 3.3481611814    | 2.0924398754    |
| 0.8958463571    | 0.3125890204    |
| 0               | 0               |
| 4.9645630018    | 6.4960967077    |
| 5.6952709697    | 7.7282313447    |
| 1.0521884756    | 0.3671417116    |
| 9.2367656739    | 11.2369409839   |
| 5.6116718697    | 3.7381701546    |
| 4.8220296357    | 1.7405773169    |
| 0               | 0               |
| 0               | 0               |
| 6.8392471232    | 6.6755508692    |
| 0               | 0               |
| 29.6432267334   | 4.7739026814    |
| 1.997939808     | 1.0457162255    |
| 9.0226374293    | 8.4182336023    |
| 10.0617353046   | 7.5232638732    |
| 14.8786554301   | 7.9240694033    |
| 2.5272160242    | 2.6454758961    |
| 0.3127929122    | 0.1637149539    |
| 1.3135939816    | 0.458354329     |
| 40.4565419896   | 24.9560653352   |

gene\_expression\_table

|                |               |
|----------------|---------------|
| 0.377846837    | 0.5273706667  |
| 0.0387268377   | 0.0405390417  |
| 0              | 0             |
| 165.7527944812 | 95.9149780858 |
| 25.1319548089  | 24.387701244  |
| 201.1942027887 | 50.5461575551 |
| 2.2040722439   | 3.2300950587  |
| 10.6298258244  | 13.6706134035 |
| 1.5885415854   | 0             |
| 0              | 0.5617170803  |
| 0              | 0             |
| 0              | 0.1282369778  |
| 2.0371953193   | 0.7108416351  |
| 1.4420441658   | 3.0190478732  |
| 0.0801084096   | 0             |
| 0.8890631841   | 0.4653332365  |
| 0.6229970522   | 2.2825246602  |
| 2.3419209649   | 2.0883233696  |
| 0.0928832001   | 0.5833777518  |
| 32.2596137348  | 27.629334831  |
| 0.143858326    | 0             |
| 0              | 0             |
| 0              | 0             |
| 0              | 0.1070890912  |
| 3.9734733875   | 2.4080795806  |
| 4.460434376    | 3.9220929561  |
| 32.5034077987  | 20.537243996  |
| 2.3576461027   | 2.7764674096  |
| 80.2676271509  | 59.4107058684 |
| 0.2049445557   | 0.4290696774  |
| 1.0450263401   | 0.2734819627  |
| 42.3710033516  | 6.087767453   |
| 60.7121995013  | 39.5813777018 |
| 56.3062194791  | 27.3060195681 |
| 7.33761528     | 6.2585726272  |
| 0              | 0.1143112679  |
| 2.1000382798   | 2.3611462443  |
| 0              | 0             |
| 0.2494762923   | 0.5596080358  |
| 10.8910240056  | 5.1302989322  |
| 12.7773111002  | 15.8830729138 |
| 404.3127469888 | 128.98510314  |
| 4.3434374696   | 3.8971599086  |
| 9.2164360321   | 8.0397623104  |
| 0              | 0             |
| 4.1299613721   | 3.7593225653  |
| 24.2620460608  | 9.356928356   |
| 1.436368061    | 1.4284031102  |
| 0.3482065838   | 0.850501739   |

gene\_expression\_table

|                 |                 |
|-----------------|-----------------|
| 86.0131949019   | 95.5667992544   |
| 22.2609890637   | 20.9386413108   |
| 131.5094914591  | 79.0832387266   |
| 0               | 0               |
| 1.1031096895    | 1.5100304697    |
| 379.1991201301  | 345.6588645859  |
| 2.6374026429    | 2.7608186451    |
| 1.649100955     | 3.3024292779    |
| 29.8789017378   | 16.1777952068   |
| 0               | 0               |
| 23.8330776533   | 19.0781386718   |
| 16.7293133673   | 12.3233673687   |
| 2.7665653834    | 0.7240063737    |
| 58.3025322074   | 30.2007941301   |
| 15.5350421343   | 11.443627548    |
| 0               | 0               |
| 3.4937169905    | 1.2190679384    |
| 34.4174358082   | 17.4993061969   |
| 13.9210250394   | 15.4832310838   |
| 1.5436031582    | 8.7255108024    |
| 0               | 0               |
| 0               | 0               |
| 10.5383187193   | 9.0052688419    |
| 27.7245922479   | 16.2806068579   |
| 10.944252199    | 5.2074469433    |
| 5.5479633085    | 5.1243331876    |
| 3.2812674317    | 4.1981045095    |
| 53.8678660376   | 47.3664132541   |
| 0               | 0               |
| 8.3624156075    | 7.0863535601    |
| 6.8719477494    | 3.9237366959    |
| 0.6184676579    | 0.3237042789    |
| 71.3907278688   | 31.7042400705   |
| 1115.7393176011 | 1507.3278939344 |
| 4.0092939305    | 1.5261479756    |
| 65.406004172    | 19.1706611678   |
| 1.218908806     | 3.1898676597    |
| 2.2495568279    | 5.3637652532    |
| 24.3396129618   | 10.8750009155   |
| 0.3930825842    | 0.5486355957    |
| 145.4449986892  | 207.6150384871  |
| 1.346061263     | 3.6507193133    |
| 2.1784980041    | 2.280439782     |
| 4.3617723721    | 3.2084558196    |
| 15.7575571261   | 18.6942477859   |
| 23.4747499093   | 8.1910798886    |
| 47.4868664471   | 46.8952752603   |
| 0.1199885948    | 0               |
| 0.0772752355    | 0.1617825868    |

gene\_expression\_table

|                  |                  |
|------------------|------------------|
| 47.3441456867    | 36.3703460836    |
| 0                | 0                |
| 0                | 0                |
| 0.4348411179     | 0.4551893012     |
| 0                | 0                |
| 22.2529664326    | 12.3905762832    |
| 13939.9034507028 | 19955.5370903528 |
| 26.7873233918    | 31.7570771589    |
| 1.8232627618     | 2.3175632203     |
| 0                | 0                |
| 0                | 0.0858108928     |
| 0                | 0                |
| 1.6965238182     | 0.9133260909     |
| 1.4748139147     | 2.0584361738     |
| 0                | 0                |
| 0                | 0                |
| 197.6088030919   | 151.7635613278   |
| 5.154980625      | 7.5546876881     |
| 0.9128581235     | 0.9555748852     |
| 29.3908320572    | 49.2258593024    |
| 5.7655053071     | 4.22470957       |
| 0                | 0                |
| 1.8567511192     | 1.2957579365     |
| 23.4631203492    | 7.8386380551     |
| 0.7022891389     | 0.3341601932     |
| 0                | 0                |
| 0                | 0                |
| 17.1959788917    | 8.7695506244     |
| 1.5891135082     | 1.108983546      |
| 28.3806430028    | 7.4271754233     |
| 7.30836134       | 7.6503526328     |
| 0                | 0                |
| 0                | 0.5164742132     |
| 0                | 0                |
| 4.5910371092     | 1.3731064306     |
| 8.5112078214     | 14.4779143326    |
| 0.8524657188     | 1.4872607445     |
| 4.0809586263     | 17.6216912198    |
| 2.4713018679     | 3.6217233687     |
| 45.3335060849    | 2.7914627023     |
| 19.1436736129    | 25.6505506741    |
| 0                | 0                |
| 187.0198784006   | 140.8598987165   |
| 31.6585354804    | 29.7117076327    |
| 32.5497164999    | 37.6594823702    |
| 26.801143058     | 44.0868839711    |
| 353.0080566111   | 239.718733029    |
| 97.1182440688    | 65.3546867831    |
| 4.3637930629     | 10.4411307056    |

gene\_expression\_table

|                 |                 |
|-----------------|-----------------|
| 2.6496499136    | 3.6981853614    |
| 37.7470826177   | 24.6958996218   |
| 0               | 0               |
| 154.961823579   | 71.2155461303   |
| 3.8731749844    | 0               |
| 13.8121404605   | 15.7728796405   |
| 3.5573069698    | 2.7438301265    |
| 2.7413250464    | 1.812381504     |
| 18.8745418146   | 16.1654457448   |
| 3983.9699839053 | 2242.4434956013 |
| 6.7286401299    | 3.5217518222    |
| 8.965928699     | 5.2793353507    |
| 14.4264403557   | 5.0338395901    |
| 0.7597675422    | 1.0604273373    |
| 0.1115872836    | 0               |
| 32.3058919948   | 26.5201420836   |
| 0               | 0               |
| 0.1742498175    | 0.8816181482    |
| 32.1250151221   | 11.8153451088   |
| 7.9415201215    | 8.7090035773    |
| 73.1530055011   | 32.3736635054   |
| 0.6589684215    | 1.751042282     |
| 3.8430045268    | 4.0228360957    |
| 0               | 0               |
| 5.6735383746    | 10.0349109072   |
| 0.5912849977    | 0.6189538979    |
| 22.1208365225   | 11.9772261445   |
| 0               | 0.7558620081    |
| 1.7930491549    | 2.8154310559    |
| 129.5195914118  | 93.4683054317   |
| 15.0891995807   | 24.6299460649   |
| 0               | 0               |
| 429.5678801411  | 215.226333909   |
| 8.1600310953    | 3.4167503477    |
| 0               | 0.599822516     |
| 0               | 0               |
| 0.6193433727    | 1.6208131281    |
| 276.2294271569  | 292.5492951471  |
| 24.952941034    | 14.5114455784   |
| 0.3708340145    | 0               |
| 0               | 0               |
| 19.3343749876   | 30.9814188918   |
| 1.0656523127    | 0.5577595029    |
| 12.0464181859   | 8.1965809869    |
| 0               | 0               |
| 25.1192396172   | 22.1428905158   |
| 396.3634005419  | 218.0316823697  |
| 16.6304137652   | 10.7460654737   |
| 50.9174444161   | 33.6896871191   |



gene\_expression\_table

|                |                 |
|----------------|-----------------|
| 0              | 0               |
| 35.9580219876  | 13.4832216801   |
| 0.0939186494   | 0.2949405839    |
| 133.9607510196 | 92.2877120497   |
| 286.4435694217 | 66.6327911133   |
| 0              | 0               |
| 3.3570700436   | 4.034779212     |
| 2.8102208148   | 13.2377569252   |
| 0.3884889621   | 1.2200043549    |
| 0              | 0               |
| 1.4652397699   | 1.150353726     |
| 0              | 0               |
| 0              | 0               |
| 0              | 8.4495696462    |
| 2673.88845021  | 3736.4798515518 |
| 0              | 0               |
| 2.7832108199   | 2.9134498465    |
| 1.8195924378   | 10.1586101356   |
| 0.1084497301   | 1.3622950036    |
| 90.0040504949  | 55.8315539132   |
| 6.7427971304   | 2.1174969345    |
| 2.5420657618   | 0.332627565     |
| 5.98902684     | 1.7912230007    |
| 0.3397122547   | 1.9558491047    |
| 0              | 0               |
| 0              | 0               |
| 0              | 0               |
| 5.0596274507   | 0               |
| 0              | 0               |
| 1.237976109    | 1.2959066121    |
| 5.6958555883   | 5.2170916363    |
| 13.8551387964  | 5.2739939732    |
| 130.1044291775 | 58.3682588822   |
| 45.8716265114  | 37.9090795703   |
| 9.5073707493   | 2.6344227286    |
| 0              | 0               |
| 0.5101101811   | 1.1747571977    |
| 0              | 0               |
| 1.0972453492   | 1.6080265928    |
| 2.2709372874   | 0.950881887     |
| 0.8559803729   | 0.1706734414    |
| 51.0538223102  | 38.4788603823   |
| 25.5249940007  | 15.2682422596   |
| 0.945772655    | 0.4950148183    |
| 29.2331593373  | 9.7923555597    |
| 0              | 0.8172006724    |
| 0              | 0               |
| 0              | 0               |
| 8.7558323783   | 57.2847336868   |

gene\_expression\_table

|                |                |
|----------------|----------------|
| 7.5102684385   | 4.0050209944   |
| 0.8846287417   | 5.5561471375   |
| 31.5086377267  | 26.5696948286  |
| 3.0863820723   | 3.2308078533   |
| 0.460861169    | 0              |
| 0              | 0              |
| 0              | 7.3228386171   |
| 0              | 0              |
| 0              | 70.4423581728  |
| 0              | 0              |
| 32.4135022478  | 39.0198181687  |
| 3.2983648979   | 5.8430482244   |
| 0              | 0              |
| 2.2057326031   | 3.5683754354   |
| 95.8306930051  | 155.0323418148 |
| 1.0851832775   | 1.1359639128   |
| 280.869858105  | 231.6466293212 |
| 0              | 0              |
| 106.2627350603 | 46.5635926905  |
| 0              | 0              |
| 11.0730139596  | 9.0648896571   |
| 36.4442753751  | 7.7766630734   |
| 1.9789755041   | 3.1073710823   |
| 32.6576881798  | 36.4649484427  |
| 17.101861577   | 35.8042701104  |
| 11.9187414123  | 15.8035327804  |
| 18.792142607   | 11.9434179891  |
| 166.5430075239 | 369.1827706173 |
| 88.2767000309  | 57.4980412043  |
| 50.9039473862  | 30.1953849223  |
| 6.6859711114   | 8.3986055394   |
| 0.6418362567   | 0.3359353395   |
| 1.7264190685   | 1.3288279615   |
| 0              | 0              |
| 0.8439308376   | 0.4417110899   |
| 1.2674792009   | 4.3784079479   |
| 0              | 0.7396532184   |
| 0.1920812482   | 0.335115998    |
| 7.9023738634   | 10.6356364582  |
| 1.1267669966   | 1.340333548    |
| 0.4644886432   | 1.4586725049   |
| 0.8572407099   | 1.4582016819   |
| 4.417288518    | 5.5487921198   |
| 0.2178281026   | 0.091208506    |
| 0              | 0.2343401547   |
| 2.4360379421   | 1.5300187074   |
| 2.3048590435   | 0.3446734037   |
| 0.4381768424   | 0              |
| 0.3197988751   | 1.1158790379   |

gene\_expression\_table

|                 |                 |
|-----------------|-----------------|
| 15.9271043882   | 19.5622893107   |
| 139.5177730373  | 40.9954921731   |
| 91.6544551253   | 44.2815608117   |
| 21.673221915    | 16.5792611728   |
| 3.6546792198    | 3.8256981955    |
| 1.598583729     | 1.6733886942    |
| 136.2049073715  | 53.4669567105   |
| 147.4725744679  | 52.9280514675   |
| 0               | 0               |
| 109.9336239488  | 116.9958808529  |
| 1.5297423033    | 3.2026517336    |
| 7.589899091     | 7.945064809     |
| 4.0998256295    | 2.1458375099    |
| 0               | 0               |
| 0               | 0               |
| 5.7299700553    | 4.9984177322    |
| 50.7974314888   | 31.9046838805   |
| 8.6894290858    | 4.5480233934    |
| 84.9663237797   | 84.7069357027   |
| 15.2248933888   | 11.1561345234   |
| 1.0024815208    | 1.5740882502    |
| 7.2352559447    | 8.2049784974    |
| 0               | 27.0953812724   |
| 9.1377297889    | 3.5869970655    |
| 7.7034138782    | 7.6394761262    |
| 0               | 0               |
| 325.3496934127  | 130.9901067568  |
| 109.912884886   | 38.3520686852   |
| 14.0190020441   | 41.2734784974   |
| 69.071832482    | 72.3040160299   |
| 12.4206152512   | 0               |
| 0               | 146.5959007647  |
| 267.6975321564  | 0               |
| 5.3589608187    | 0               |
| 4.8578903414    | 3.813909757     |
| 0               | 0               |
| 212.2133690643  | 23.3835571298   |
| 0               | 0               |
| 69.088843852    | 60.268186199    |
| 14.3399447743   | 1.5010975669    |
| 28.4763548487   | 19.8725948863   |
| 30.8170009629   | 16.1295339326   |
| 0               | 0               |
| 0.1264557647    | 0.132373202     |
| 0               | 0               |
| 0               | 0               |
| 0               | 0               |
| 1085.8316137981 | 1759.0897190666 |
| 83.3389496168   | 45.5158727609   |

gene\_expression\_table

|                 |                  |
|-----------------|------------------|
| 276.5980916273  | 77.2110314039    |
| 42.3925478189   | 4.4376286931     |
| 2.825813465     | 0.986015354      |
| 199.0471161213  | 48.0834072106    |
| 3.2041302064    | 3.3540659554     |
| 16.102475795    | 24.7221091199    |
| 7.5644130275    | 2.9693948015     |
| 0.7958174344    | 0.8330573327     |
| 0               | 0.6311992228     |
| 1.5347859146    | 1.6066054915     |
| 37.4064293149   | 10.6791396499    |
| 2.5234367619    | 3.1698237419     |
| 33.9288504661   | 0                |
| 1037.9326963248 | 375.5810292442   |
| 0               | 0                |
| 30.2043906338   | 51.7382030081    |
| 67.1216467507   | 43.2385060215    |
| 9.8377916885    | 4.6809756688     |
| 21.1898527749   | 6.523947605      |
| 0               | 0                |
| 0               | 0                |
| 438.0984882648  | 120.5077923453   |
| 0               | 0                |
| 309.2076823574  | 234.1492531621   |
| 7027.135961121  | 10216.2811823699 |
| 14.519194084    | 5.0662042884     |
| 0               | 0                |
| 35.9545941068   | 14.1139020888    |
| 143.6219113074  | 30.6253506238    |
| 0               | 0                |
| 24.1013576654   | 14.7170153864    |
| 1.5821357062    | 0                |
| 2.4006363863    | 3.5899614631     |
| 13.0178349317   | 10.5987764755    |
| 64.8736261329   | 35.9520123237    |
| 25.6550515281   | 76.0907744754    |
| 306.5924726745  | 42.0904028337    |
| 14.5266975435   | 6.9120306571     |
| 0               | 6.8867427401     |
| 35.8726004672   | 31.7741276293    |
| 66.6533232239   | 32.1174234867    |
| 2.4948837923    | 2.6116306927     |
| 14.527448316    | 11.1519857901    |
| 13.3394285368   | 0                |
| 6.8688475919    | 4.4247827987     |
| 415.9338718495  | 461.4689941331   |
| 5.851070742     | 12.2497376287    |
| 106.0091375916  | 0                |
| 2.481190561     | 1.2986483466     |

gene\_expression\_table

|                |                |
|----------------|----------------|
| 10.3677525127  | 3.1920313412   |
| 0              | 2.0827867151   |
| 93.2847822236  | 88.7727265801  |
| 217.3280421747 | 192.9411760015 |
| 0              | 0              |
| 0              | 0              |
| 0              | 0              |
| 0.981328018    | 0              |
| 1.2342939042   | 0.4306840335   |
| 46.5951871564  | 12.1938966943  |
| 133.4374931758 | 27.9363274402  |
| 0              | 0              |
| 0              | 0              |
| 101.5409274808 | 0              |
| 58.250971826   | 121.9535966926 |
| 0              | 0              |
| 0              | 0              |
| 109.596137823  | 32.1228983501  |
| 499.0205351493 | 499.8235336497 |
| 4.1770710214   | 10.9313376826  |
| 0              | 0              |
| 10.4706027641  | 8.5248874979   |
| 0              | 1.1492698691   |
| 7.1064544365   | 4.6493734949   |
| 0              | 0              |
| 3.6794501926   | 0.9629070786   |
| 3.4098628754   | 2.6770693401   |
| 17.8173156026  | 14.5063865424  |
| 1.4559249435   | 1.5240542588   |
| 5.599633822    | 2.7354441442   |
| 1.1164758437   | 1.5582943998   |
| 6.4571589137   | 2.5347444727   |
| 1.0641108339   | 0.5569526971   |
| 16.8558892585  | 13.8636555978  |
| 1.0868898556   | 0              |
| 2.287147223    | 1.8500429191   |
| 0.3976452355   | 0.8325057103   |
| 8.1866894327   | 4.2848908354   |
| 1.9548329113   | 4.0926167751   |
| 18.9168136792  | 9.1393924513   |
| 0              | 0              |
| 5.9633678062   | 1.8998671897   |
| 13.0638836915  | 5.4700807661   |
| 13.2620008241  | 13.8825898448  |
| 18.6122837667  | 5.7024107511   |
| 7.4763797214   | 3.0100897517   |
| 2.6210280131   | 0.2743677772   |
| 16.0662425602  | 14.0150456159  |
| 1.7383058105   | 2.5020173807   |

gene\_expression\_table

|                |                |
|----------------|----------------|
| 315.0879263638 | 63.7176065021  |
| 0.8547618925   | 0.8947600687   |
| 2.2838414327   | 3.1876169416   |
| 0              | 0              |
| 0              | 0              |
| 59.4505521441  | 19.8012539629  |
| 9.1567813744   | 3.4506966973   |
| 27.1719422542  | 27.9693830286  |
| 0              | 0              |
| 26.6828891058  | 24.2073019155  |
| 0.692395896    | 0              |
| 0              | 0              |
| 22.738828054   | 13.7806151406  |
| 0              | 0              |
| 0.6233509869   | 2.6100815993   |
| 0.1471425476   | 0.4620840395   |
| 26.2196219884  | 109.7862269132 |
| 7.2243264137   | 4.9319904339   |
| 16.1125621777  | 28.4622893905  |
| 19.1543357906  | 16.7481931937  |
| 19.9662375231  | 10.7488533144  |
| 3.6485700489   | 1.5624421973   |
| 5.2610966331   | 4.2114548777   |
| 0              | 0              |
| 6.1799532887   | 4.5283988844   |
| 0              | 0              |
| 0              | 1.1241050455   |
| 76.810379829   | 43.2025173238  |
| 0.8170261086   | 0.7839869187   |
| 0              | 2.3356155153   |
| 27.4927434977  | 9.593084451    |
| 63.9585111932  | 77.663646392   |
| 0.3198199407   | 0.3347857627   |
| 25.5568560969  | 22.3576779399  |
| 15.0872207256  | 4.737966013    |
| 1.2683632715   | 1.062172582    |
| 3.1207883584   | 4.7187460165   |
| 76.3135743031  | 63.3231836766  |
| 41.3479684221  | 28.6225145879  |
| 0.0812512719   | 0.0567022577   |
| 0.3369596917   | 1.0581826806   |
| 0.0281917914   | 0              |
| 0              | 1.0519007259   |
| 0.3307865281   | 0.1731327632   |
| 0.7485766893   | 1.3930772968   |
| 7.1087955515   | 8.3716292903   |
| 0              | 1.5320480322   |
| 6.4869098603   | 5.1607509086   |
| 0.9623631844   | 0              |

gene\_expression\_table

|                 |                 |
|-----------------|-----------------|
| 6.186117494     | 9.559210072     |
| 15.9825045318   | 51.1206612569   |
| 19.8091330139   | 2.962298853     |
| 0               | 0               |
| 0.2022325174    | 0.4233917838    |
| 3.9798504051    | 5.2076070148    |
| 6.2331047398    | 4.2818868168    |
| 0.7361267314    | 0.4403276752    |
| 15.5269877803   | 14.7759688985   |
| 0.5018365566    | 0.2626598798    |
| 0.7795790786    | 0               |
| 1.9003184022    | 0               |
| 0.5707719025    | 0.5055607634    |
| 0               | 0               |
| 109.3392463835  | 101.8461954516  |
| 0               | 0               |
| 1245.6025785745 | 1322.2546060916 |
| 98.6044508601   | 71.0685437378   |
| 2.3963567647    | 1.9510502198    |
| 7.7677281845    | 0               |
| 2.1020991911    | 11.0023296146   |
| 0               | 0               |
| 0.1827159094    | 0.1912660134    |
| 38.7727483471   | 40.5871006643   |
| 3.8335284145    | 5.15946414      |
| 0.999365725     | 1.5110774882    |
| 27.2138249072   | 9.970549015     |
| 0.1139626347    | 0.2385909239    |
| 0               | 0               |
| 0               | 0               |
| 0               | 0               |
| 19.3490062692   | 17.3609432696   |
| 0               | 1.5323251755    |
| 4.3106590962    | 1.2892498109    |
| 0.748568995     | 0.7835979251    |
| 1.0686310916    | 0.7457581169    |
| 11.4776056933   | 8.0097965284    |
| 0.7267855969    | 3.043180733     |
| 0               | 0               |
| 0               | 0               |
| 22.831149356    | 7.3104420635    |
| 0.1503927227    | 0.1574302786    |
| 55.0100471916   | 79.731991641    |
| 0               | 0               |
| 0.8460042693    | 1.5497871143    |
| 0               | 0               |
| 0               | 0               |
| 2.5507723108    | 5.5456639363    |
| 4.2885318968    | 0.8978423414    |

gene\_expression\_table

|                |               |
|----------------|---------------|
| 7.8996186951   | 5.3159641679  |
| 5.6294836027   | 0             |
| 0              | 0             |
| 2.534278622    | 1.9896517385  |
| 0.5523884751   | 1.9274574368  |
| 0.7504317689   | 3.1421914664  |
| 12.7533976929  | 19.4840565159 |
| 2.7459313416   | 7.6651357138  |
| 4.799828481    | 14.0684156811 |
| 157.4242844481 | 91.7962614353 |
| 0.4237109036   | 2.6612295225  |
| 6.4972145556   | 5.7549026788  |
| 55.8263596838  | 42.3680775333 |
| 5.4278856877   | 8.3246163734  |
| 28.2079387263  | 30.0370177989 |
| 2.5478686512   | 1.7257673224  |
| 0.2052642739   | 0.2148695179  |
| 1.6820201701   | 2.2889483551  |
| 2.1895668423   | 2.8013658215  |
| 2.2126502765   | 0             |
| 0.0363145733   | 0             |
| 0.8595284759   | 0.8997497021  |
| 9.6032499596   | 12.3724670447 |
| 5.3829713453   | 10.6068045724 |
| 0.6488678403   | 2.3773095579  |
| 1.2683717919   | 2.2760993941  |
| 0.1405818321   | 0.2943205841  |
| 0              | 0             |
| 5.8234953316   | 4.9065390207  |
| 0              | 1.0399390538  |
| 0              | 0             |
| 53.9357743451  | 38.336815171  |
| 27.7621330831  | 27.0798001077 |
| 26.2120388029  | 47.0376320422 |
| 0              | 0             |
| 8.8244611081   | 0             |
| 7.2639415046   | 5.3674264887  |
| 0              | 0             |
| 52.1486431664  | 77.1774303069 |
| 0              | 0             |
| 6.5184993911   | 7.9009288596  |
| 0.4325901228   | 4.0754967461  |
| 7.9836808813   | 19.1023392705 |
| 114.1716104449 | 89.8825926883 |
| 6.4468993408   | 12.8836506827 |
| 3.7316259332   | 1.3020818646  |
| 1.556833406    | 4.0742117119  |
| 12.7550729061  | 55.6330853164 |
| 21.9707347029  | 18.6181124436 |



gene\_expression\_table

|                |                |
|----------------|----------------|
| 6.471683164    | 13.5490449989  |
| 38.0290136644  | 62.5563137113  |
| 0.243146312    | 1.018096912    |
| 0              | 0.7534528415   |
| 33.5490499012  | 5.6190338775   |
| 211.5563617297 | 159.9404740938 |
| 30.421168557   | 45.4924466717  |
| 0              | 9.9753015548   |
| 145.6094461125 | 190.5289636077 |
| 65.0540327608  | 103.0512663999 |
| 13.6497568223  | 47.628302335   |
| 31.9864914126  | 15.0097480288  |
| 168.5839757534 | 109.8792798031 |
| 0              | 0              |
| 180.1374331472 | 129.3030025038 |
| 0              | 4.90237637     |
| 68.8962690287  | 44.6458611042  |
| 3.986923516    | 22.6560869731  |
| 2.8568511337   | 5.9810722473   |
| 3.2511172504   | 6.8065034715   |
| 41.109836417   | 46.1073767773  |
| 6.083906971    | 0              |
| 42.8603328187  | 17.9463846828  |
| 6.7553215788   | 0              |
| 10.9308684678  | 9.5353110489   |
| 0              | 12.3750088682  |
| 233.4553931153 | 466.2767102903 |
| 10.3280546728  | 5.4056755394   |
| 0              | 5.5300757763   |
| 4.1465697341   | 39.0654584332  |
| 3.7000598245   | 9.6830059102   |
| 21.0981792578  | 57.0541011795  |
| 836.7619675297 | 319.8744351577 |
| 340.840805009  | 233.7591544448 |
| 34.7670497794  | 22.7462233359  |
| 22.2047102521  | 9.9616153316   |
| 3.3187863575   | 1.7370436933   |
| 88.0334077041  | 40.5472712241  |
| 11.0698096254  | 9.0127458568   |
| 9.1720383521   | 0              |
| 3.430280134    | 14.3631938453  |
| 17.8197678642  | 10.1040525222  |
| 11.5786526005  | 3.0301175354   |
| 338.706562143  | 90.6384205789  |
| 413.0343259632 | 338.6836221207 |
| 3.2032423546   | 5.3650184912   |
| 32.8826399462  | 72.8923075248  |
| 10.545652697   | 0              |
| 3.5506936534   | 0              |

gene\_expression\_table

|                |                |
|----------------|----------------|
| 0              | 0              |
| 6.3235458475   | 4.4129687785   |
| 26.8735217448  | 17.3114187156  |
| 8.4600426933   | 23.615803646   |
| 26.8265289383  | 21.3957056002  |
| 0              | 0              |
| 3.9483914397   | 0.8266309078   |
| 3.2329328151   | 6.7684327369   |
| 3.7701650114   | 6.5776468165   |
| 6.4069919526   | 30.1806184214  |
| 5.4477680409   | 11.8440562609  |
| 9.1188086952   | 22.9092456262  |
| 5.0817579206   | 2.7997665081   |
| 0              | 0              |
| 18.8706071036  | 14.4860086708  |
| 30.4055812802  | 130.2070745217 |
| 5.1933024941   | 1.8121068714   |
| 0              | 0              |
| 45.7564650052  | 83.8208297878  |
| 8.4054334253   | 2.5139319099   |
| 1.6616079746   | 3.4787242588   |
| 0              | 0              |
| 194.6135362232 | 203.7203840855 |
| 19.0237955114  | 27.1554613281  |
| 18.8597951025  | 19.7423302439  |
| 0              | 3.033644398    |
| 206.6541450251 | 80.1608284457  |
| 488.9065880872 | 354.3125118473 |
| 0.4438488789   | 0              |
| 0              | 1.8240080901   |
| 0              | 0              |
| 63.6809621733  | 7.6183865725   |
| 13.9373593458  | 2.9179102895   |
| 9.8251952843   | 39.0828503728  |
| 3.4170623747   | 0              |
| 0.3348172554   | 1.7524243479   |
| 2.5634346677   | 2.6833893738   |
| 3.4922343552   | 5.1179125212   |
| 35.7298347536  | 28.1868602838  |
| 33.2967322096  | 29.0456974635  |
| 1.1116954027   | 2.9092916507   |
| 15.8674034896  | 19.4985912782  |
| 15.8727788428  | 4.6154272164   |
| 4.4016422172   | 1.0841446991   |
| 1.0547210495   | 1.3248914632   |
| 0.9425268765   | 1.47994796     |
| 0              | 0.8158233237   |
| 2.6528107793   | 2.9312226756   |
| 2.2091768862   | 0.9635642783   |

gene\_expression\_table

|                 |                 |
|-----------------|-----------------|
| 2.2638534141    | 2.8437472295    |
| 1.3619508266    | 0               |
| 14.4993893769   | 1.2306390329    |
| 2.5535276266    | 1.0280841298    |
| 3.1478627277    | 0.9414758477    |
| 20.3201684623   | 15.9532808104   |
| 0.1603652564    | 0               |
| 1.0750672029    | 9.0029956905    |
| 1.6390168035    | 1.7157138153    |
| 3.2416748467    | 1.6966837397    |
| 0.9502149878    | 1.5541872597    |
| 0               | 0               |
| 1.4139738308    | 2.0721960891    |
| 4.8368385153    | 0               |
| 0.4637444126    | 0.647260149     |
| 0.8673447505    | 1.0317406086    |
| 139.7989778778  | 346.3399041114  |
| 56.5085952246   | 45.6322279324   |
| 4.9236573387    | 15.462172626    |
| 1.1617300748    | 5.472417065     |
| 3.5422820707    | 2.8355611282    |
| 42.6794875325   | 73.1580206821   |
| 1.5151960621    | 2.1147985882    |
| 37.1561693206   | 22.8793379948   |
| 9.9532974615    | 5.209528641     |
| 3.5824179659    | 3.7500555106    |
| 4619.0562283671 | 2199.4719356292 |
| 775.4862884655  | 211.7673392569  |
| 202.1521296323  | 236.5072414919  |
| 826.8341049722  | 483.6759664469  |
| 74.9695966292   | 58.8583224339   |
| 19.5878356447   | 20.504439097    |
| 50.7810618959   | 25.8603263679   |
| 0               | 0               |
| 2.2387452568    | 2.8843154169    |
| 4.964077808     | 4.2793630912    |
| 7.6663110033    | 8.526618154     |
| 1.49321502      | 2.1883250292    |
| 20.9194686716   | 17.9168606657   |
| 0               | 0               |
| 0               | 0               |
| 15.047164778    | 9.625788148     |
| 9.3475195566    | 3.6693496081    |
| 93.25998616     | 54.2355793636   |
| 5.5745596832    | 10.5037533938   |
| 2.4776579413    | 0               |
| 0.3313418572    | 0               |
| 0               | 0               |
| 0               | 1.5992247265    |

gene\_expression\_table

|                |                |
|----------------|----------------|
| 5.2609098034   | 4.7203642075   |
| 0              | 0              |
| 0              | 0              |
| 21.4927777853  | 5.6246305248   |
| 11.7574004158  | 5.3845672895   |
| 1.5170661485   | 0.7940282687   |
| 35.8485006349  | 10.7217183346  |
| 11.6721658418  | 13.4823274931  |
| 0.1860793073   | 0              |
| 0              | 0              |
| 14.1232448599  | 7.3920676928   |
| 0.9380433358   | 0.3273128758   |
| 48.0239218763  | 36.8655308696  |
| 5.8882715902   | 4.9310483668   |
| 4.9369246039   | 1.7226485475   |
| 31.5038479683  | 18.666823896   |
| 0              | 0              |
| 2.6712669584   | 1.1984004108   |
| 53.0624972863  | 41.967734993   |
| 7.619016872    | 6.6462876189   |
| 0              | 0              |
| 3.1208481861   | 1.2035898709   |
| 78.2723707141  | 17.432997675   |
| 6.2777586006   | 10.4049119366  |
| 0              | 0              |
| 38.5883321013  | 25.9245425994  |
| 40.8192120647  | 37.9816246028  |
| 0              | 0              |
| 225.4428177234 | 178.7820508711 |
| 13.6728203371  | 23.8543891024  |
| 1.1623141103   | 1.2167040463   |
| 0              | 0              |
| 5.6263424993   | 4.4761146355   |
| 1.2557465605   | 0.4381695412   |
| 11.1691246876  | 17.5376678474  |
| 59.3651170513  | 2.9591942604   |
| 0              | 0              |
| 18.5278324812  | 9.6974167948   |
| 0              | 2.0218865187   |
| 0              | 0              |
| 115.0185016689 | 22.5751383276  |
| 13.2114789162  | 0              |
| 0              | 0              |
| 0              | 0              |
| 164.3051946429 | 117.2684850523 |
| 68.7202354014  | 60.7251662146  |
| 0              | 0              |
| 8.3130185801   | 15.953707606   |
| 0.4342499577   | 0              |

gene\_expression\_table

|                |                |
|----------------|----------------|
| 0              | 0              |
| 0              | 0              |
| 5.248114873    | 1.1772209812   |
| 0              | 0              |
| 9.0036504436   | 10.367469182   |
| 0              | 3.2711695579   |
| 7.1667786356   | 3.0891183783   |
| 0              | 0              |
| 44.0849137563  | 20.5101539232  |
| 8.838919537    | 0              |
| 8.565261536    | 8.9660688757   |
| 0              | 4.5565861056   |
| 3.970397395    | 4.9118612076   |
| 2.7106710782   | 1.2160781323   |
| 74.5358255285  | 71.7187490598  |
| 1.6769310613   | 3.5108045053   |
| 437.638995381  | 143.7233267491 |
| 18.1660391894  | 8.5244632616   |
| 40.8403923162  | 48.648257539   |
| 21.7090029139  | 11.3624326898  |
| 2.6671895524   | 4.6533323648   |
| 49.1276807052  | 0              |
| 279.5056986374 | 278.3125941371 |
| 0              | 0              |
| 0              | 0.6717175029   |
| 0              | 7.6738881808   |
| 168.4539958183 | 13.0619792911  |
| 1.1482129601   | 2.4038860788   |
| 8.8852966219   | 7.8882575953   |
| 44.2129953322  | 24.2429112197  |
| 6.1775157474   | 17.2442390896  |
| 3.4077089377   | 3.1212746745   |
| 10.9446847364  | 9.8201451882   |
| 3.3816130033   | 2.4778977827   |
| 0.1790727914   | 0.7498096702   |
| 1.1400170236   | 3.1823028746   |
| 0.1955683311   | 0              |
| 0              | 0.1724261564   |
| 0.2009310906   | 0.2804447539   |
| 63.9686232108  | 90.1411599147  |
| 0              | 0              |
| 9.7711066931   | 5.1141704917   |
| 0.1327585326   | 1.6676508596   |
| 31.9889945207  | 24.8043735586  |
| 327.7784642496 | 154.4025157113 |
| 7.3543859276   | 0              |
| 80.9203083616  | 32.9415861066  |
| 1.8897783363   | 1.9782096147   |
| 11.6952225986  | 7.2342015776   |

gene\_expression\_table

|                |                |
|----------------|----------------|
| 6.2141825476   | 5.2852899647   |
| 1.4000557983   | 1.0991780576   |
| 34.6774543593  | 6.8675996053   |
| 54.2965088511  | 50.3785054122  |
| 2.1643921148   | 1.0384338316   |
| 5.5020307655   | 1.6939693171   |
| 0              | 0              |
| 11.9751837552  | 5.0142227133   |
| 257.0409795016 | 179.3793932529 |
| 8.2847605285   | 7.3031090163   |
| 0.3561084708   | 4.846041165    |
| 15.2363600756  | 5.7417617874   |
| 2.4416896612   | 1.7039649117   |
| 3.7558741407   | 2.6210856565   |
| 1.882480537    | 1.9705703183   |
| 14.4176047266  | 13.520158257   |
| 0              | 0              |
| 0.6472589055   | 0              |
| 0.7115061712   | 0              |
| 0              | 0              |
| 30.8111340379  | 6.4505852801   |
| 1.1042618499   | 1.155935258    |
| 0              | 0              |
| 2.0448621735   | 0              |
| 0.6085911532   | 0.2123566289   |
| 4.2443901281   | 4.6545759809   |
| 0              | 0              |
| 3.0484199797   | 0.6382138685   |
| 17.4204682386  | 23.379039441   |
| 0              | 0              |
| 4.2778763143   | 5.3736690021   |
| 1.2932764641   | 0.6768973606   |
| 2.5033351388   | 0              |
| 0              | 0              |
| 15.1347210153  | 13.2024525721  |
| 0              | 0.296110799    |
| 0              | 0              |
| 0.6455993936   | 1.5359316141   |
| 93.5593222596  | 56.9817519968  |
| 0              | 0              |
| 0              | 0              |
| 4.4584750221   | 4.9853190974   |
| 6.4029081061   | 8.5643427969   |
| 3.8621495144   | 3.465323112    |
| 0.2615521385   | 0.2737913464   |
| 0.4351451017   | 0.6073433464   |
| 1.0117025818   | 1.0590447229   |
| 0              | 0              |
| 0              | 0              |

gene\_expression\_table

|                |                |
|----------------|----------------|
| 1.5049233689   | 3.6354127895   |
| 8.2046584199   | 9.3693725545   |
| 0              | 0              |
| 2.6721070455   | 0.9323823413   |
| 42.1057887581  | 41.1377018416  |
| 6.1198947522   | 3.8437633898   |
| 43.7757628885  | 61.0989718553  |
| 123.3897139658 | 85.5272995968  |
| 0.6781173491   | 0.8873119098   |
| 3.7085384217   | 0              |
| 35.626786775   | 33.5645327851  |
| 0              | 0.1107374296   |
| 0              | 0.8567939686   |
| 0.0844926579   | 0              |
| 0.4942785767   | 0.5782796496   |
| 0              | 0              |
| 1.0156788807   | 0.490710965    |
| 5.697336653    | 1.6265293123   |
| 6.0819472651   | 1.2733098189   |
| 21.120665137   | 11.791464862   |
| 0.6808321767   | 1.4253827892   |
| 54.9600819145  | 17.6118100428  |
| 0.2708810912   | 0              |
| 0              | 0              |
| 0.4960023805   | 0.5192125759   |
| 1.2141400316   | 1.7793371917   |
| 2.4703641969   | 3.6942338779   |
| 0              | 0              |
| 49.1470848047  | 16.1251475299  |
| 425.2282870767 | 235.8506837214 |
| 10.436433251   | 11.9179649248  |
| 0.8001612614   | 0.837604427    |
| 3.7031641383   | 0              |
| 0.4739804268   | 0.4961601154   |
| 6.4036456295   | 5.8989050392   |
| 7.0191532603   | 5.8780889589   |
| 0              | 0              |
| 24.5638403526  | 20.2033020974  |
| 0              | 0              |
| 1.3814426967   | 6.7484043694   |
| 0.4992255927   | 0              |
| 1.7097043812   | 2.9828486408   |
| 63.5019657625  | 47.1122935281  |
| 14.3475724045  | 21.2032379732  |
| 10.9277931616  | 6.7787579526   |
| 24.3153879122  | 17.2718244129  |
| 0.2432888619   | 0              |
| 0.4791066126   | 0.5015261787   |
| 48.6566537147  | 31.4589380097  |

gene\_expression\_table

|                 |                |
|-----------------|----------------|
| 7.4295047501    | 17.498621005   |
| 37.5464713765   | 15.2401096383  |
| 990.1503376237  | 945.3644834379 |
| 2.7619030969    | 7.2278625968   |
| 4.1097160163    | 12.9060846678  |
| 5.1665001348    | 2.0280990192   |
| 0               | 0              |
| 6.6405231508    | 0              |
| 2.7337522212    | 1.5609146488   |
| 61.7515866671   | 45.7875328123  |
| 1.4932873531    | 2.1493519088   |
| 3.1268801619    | 4.2084013266   |
| 0               | 0              |
| 9.8388337843    | 9.4409675539   |
| 0               | 0              |
| 1.3896995261    | 1.4547298545   |
| 0               | 0              |
| 1.014483901     | 2.1239123852   |
| 0               | 0.6095120396   |
| 2.6279653274    | 3.3011276579   |
| 14.5316100188   | 26.0770453677  |
| 31.7362828052   | 39.2616156212  |
| 16.5650580065   | 3.8533804482   |
| 42.3879926947   | 32.4253405531  |
| 21.7625212985   | 5.6952220329   |
| 3.2422314928    | 2.4242501239   |
| 103.3464985461  | 234.9106773731 |
| 360.9583909075  | 240.449533625  |
| 10.8550035501   | 7.8365229505   |
| 182.0381869945  | 154.2600864431 |
| 2.1492777785    | 0              |
| 1.1069376974    | 0.8276688003   |
| 0               | 0              |
| 2.1821860588    | 2.03048926     |
| 0               | 0.7136821611   |
| 2.001615444     | 2.0952800866   |
| 3.8474196034    | 3.6475089272   |
| 4.0683915717    | 0              |
| 8.1919729056    | 7.5462748956   |
| 2131.4826080672 | 2818.533062262 |
| 14.3161772789   | 0.788741894    |
| 11.4646418534   | 1.8001686474   |
| 53.3207572881   | 26.6393957283  |
| 16.5468188549   | 7.9943627875   |
| 26.55029086     | 15.6333932395  |
| 0               | 0              |
| 5.8157473309    | 1.2175784922   |
| 12.1739594346   | 5.9470292354   |
| 3.0687278794    | 2.7840172021   |



gene\_expression\_table

|                |                |
|----------------|----------------|
| 0.901736252    | 0              |
| 0              | 0              |
| 50.947128168   | 40.7826630811  |
| 26.1117484226  | 0              |
| 5.7435097141   | 1.2024549039   |
| 20.8945229192  | 8.7489088724   |
| 10.5847362147  | 11.0800439114  |
| 0              | 3.3290208569   |
| 0.6386008631   | 0              |
| 0.3723341348   | 0.0974393334   |
| 0              | 0              |
| 331.117813856  | 142.0542272392 |
| 1.3343536679   | 0.821643596    |
| 31.0545172644  | 14.6284643831  |
| 67.0504449019  | 48.1289407402  |
| 12.6531342615  | 5.1509234237   |
| 11.1274365687  | 6.6560798116   |
| 1.2555934665   | 2.1592866006   |
| 35.24543227    | 16.7703297768  |
| 2.8619536459   | 1.8724233785   |
| 0              | 0              |
| 76.1623343918  | 58.5063829604  |
| 6.489384603    | 3.3965261344   |
| 0.5674238017   | 2.9698806431   |
| 4.3517240313   | 1.5184536292   |
| 16.9682095699  | 4.9129569204   |
| 6.1261898004   | 3.3458410113   |
| 2.7127156675   | 1.4198279534   |
| 4.0982683394   | 0              |
| 20.7887754301  | 21.2669950092  |
| 0              | 0              |
| 2.93229364     | 0.7673772315   |
| 0              | 0              |
| 1.9281277557   | 1.6819613141   |
| 23.0283733696  | 14.8531766065  |
| 0.3569921731   | 0              |
| 0              | 3.8228026643   |
| 536.1179850045 | 140.3013427789 |
| 7.0534154161   | 3.6917383178   |
| 1.392901971    | 0.8331898035   |
| 0              | 0              |
| 20.6947858988  | 17.7947620328  |
| 33.0129768253  | 4.6077071165   |
| 5.5726402012   | 5.8334092489   |
| 7.6588283572   | 5.0107622421   |
| 1.8571707984   | 1.9440762226   |
| 10.6833581726  | 4.5833118184   |
| 87.2926735293  | 34.2665597503  |
| 0.4016693555   | 0.3003323443   |

gene\_expression\_table

|                |                |
|----------------|----------------|
| 0              | 0              |
| 0              | 0              |
| 0              | 0              |
| 1.4724161099   | 0              |
| 0.5767457208   | 0.6037342625   |
| 2.4233985958   | 0              |
| 8.3898712661   | 11.7099617353  |
| 905.7605793381 | 465.12784124   |
| 4.1895059985   | 15.3494317867  |
| 5.4466115879   | 7.6019775821   |
| 0              | 0              |
| 6.9645870907   | 10.2924587731  |
| 1.8722343375   | 0.9799223264   |
| 15.3166552986  | 21.0965669712  |
| 11.1625215988  | 9.1809665261   |
| 0.8175184138   | 0.1222533999   |
| 7.7674618928   | 2.3231247364   |
| 3.3765030909   | 2.188026872    |
| 8.4691574349   | 3.6504866707   |
| 5.9630668825   | 4.9936846088   |
| 2.7564095306   | 1.2365976015   |
| 20.6091380219  | 2.0546221746   |
| 0              | 0              |
| 0              | 0              |
| 6.3844389677   | 4.6268278286   |
| 76.4578183847  | 38.4786661682  |
| 14.6927477733  | 7.6901439585   |
| 2.5287596363   | 2.6470917407   |
| 0              | 0              |
| 0              | 0              |
| 336.0250092982 | 222.5351700665 |
| 0              | 2.6119930836   |
| 0              | 0              |
| 0.5001100606   | 0              |
| 0              | 0              |
| 0              | 0              |
| 186.4523234139 | 122.6828561857 |
| 31.0277255988  | 107.1828557588 |
| 715.3176429756 | 344.8377725613 |
| 2.035731028    | 0              |
| 120.2717077367 | 133.7685004131 |
| 7.1730796341   | 10.8459584767  |
| 4.9522832535   | 5.1840229928   |
| 25.5101458121  | 6.675970238    |
| 5.1314786524   | 3.5810691702   |
| 6.9545055457   | 5.3386214383   |
| 54.4307006917  | 40.5175178249  |
| 114.2762867181 | 42.5329035382  |
| 12.0737964091  | 7.2221622682   |

gene\_expression\_table

|                |                |
|----------------|----------------|
| 6.4822676925   | 2.261867442    |
| 43.7308579302  | 19.0738427613  |
| 0              | 10.7701126132  |
| 0              | 0              |
| 43.0872814823  | 17.5402617932  |
| 0              | 0.1608945072   |
| 1.031209626    | 0.539732295    |
| 444.61707891   | 214.0944528751 |
| 17.1522085552  | 11.9698919976  |
| 0              | 10.8598635516  |
| 0.7997263266   | 0              |
| 2.8651118268   | 0.9997277907   |
| 435.7541404452 | 696.2213893376 |
| 116.0980033883 | 121.5307542364 |
| 0              | 0              |
| 0              | 0              |
| 0              | 0              |
| 0              | 0              |
| 8.5854244474   | 69.6506085815  |
| 55.6494813736  | 45.7706640172  |
| 19.3357965022  | 42.3212668874  |
| 97.5596483931  | 18.9120195809  |
| 794.7530285516 | 773.1188576044 |
| 170.4808986311 | 310.2743874197 |
| 14.362123695   | 8.5909671098   |
| 0              | 0              |
| 0              | 5.3662930442   |
| 574.5119788528 | 164.2989054802 |
| 60.3657652828  | 37.9143315342  |
| 2.3647080176   | 6.1884085113   |
| 11.9111921849  | 21.536622218   |
| 0              | 0              |
| 0              | 0              |
| 69.5816605025  | 72.8377012101  |
| 447.2279564027 | 453.5259079076 |
| 2.25200886     | 4.7147810869   |
| 0              | 0              |
| 5.480549161    | 0              |
| 1.2919343556   | 4.0571694278   |
| 6.5038023117   | 5.4465157179   |
| 22.4778634338  | 21.2887801369  |
| 0              | 0              |
| 58.5495146421  | 40.8595408877  |
| 1.6219745112   | 1.6978740369   |
| 667.807655103  | 379.1042035895 |
| 6.1653568276   | 12.9077235357  |
| 0              | 0              |
| 116.9675942152 | 48.2343479691  |
| 0              | 0              |

gene\_expression\_table

|                 |                |
|-----------------|----------------|
| 12.9921062943   | 12.1684798627  |
| 0               | 0              |
| 226.2817133516  | 422.2473390653 |
| 1.6903296958    | 1.7694278699   |
| 1.8568221285    | 1.9437112369   |
| 0               | 0.1455558174   |
| 4.7158646998    | 2.4682706727   |
| 106.8403362545  | 47.6791062988  |
| 16.9796810111   | 0              |
| 29.484430424    | 39.9418286517  |
| 0               | 0              |
| 39.115556912    | 40.9459507929  |
| 1.811716296     | 4.7412367459   |
| 0               | 0              |
| 1.074068335     | 1.1243288519   |
| 0               | 0              |
| 8.124528952     | 13.8201576824  |
| 21.1335357434   | 17.6979755973  |
| 47.3356585912   | 128.831841373  |
| 169.1124521664  | 274.3902828407 |
| 233.1920115091  | 420.8691737467 |
| 0               | 0              |
| 19.0517277303   | 2.3931893121   |
| 302.557237246   | 241.8552888861 |
| 0               | 4.2716558599   |
| 0               | 0              |
| 1383.4944555894 | 2905.335582547 |
| 5.2641080982    | 4.5920329441   |
| 0.1029749733    | 0.5389681908   |
| 0               | 0              |
| 0               | 0.2519277758   |
| 6.1531393388    | 2.7325762407   |
| 0.1455015232    | 0              |
| 1.0938939586    | 0.9368854413   |
| 0               | 0.5069767073   |
| 0               | 0              |
| 0               | 0              |
| 2.0234081752    | 1.1178822047   |
| 0               | 0              |
| 1.5825766323    | 1.3253060424   |
| 34.5521851536   | 7.6145343629   |
| 4.6409238432    | 3.6435702503   |
| 0               | 5.2815298162   |
| 0               | 0              |
| 0.0435362047    | 0              |
| 1.2114423129    | 1.2681311797   |
| 2.8943807761    | 2.6166644095   |
| 0               | 0.0838130693   |
| 11.0124791177   | 8.3256353845   |

gene\_expression\_table

|                 |                 |
|-----------------|-----------------|
| 0.6971981938    | 1.3380092947    |
| 0               | 0               |
| 0.2984722659    | 0               |
| 3.8313144506    | 2.1595533012    |
| 26.7051133153   | 32.747012058    |
| 0               | 0.35209467      |
| 8.3953114628    | 19.041026484    |
| 19.6813710102   | 15.8196626863   |
| 1.0404801427    | 2.1783378321    |
| 0.7213970405    | 1.7620271011    |
| 60.5149592855   | 20.0855479095   |
| 3339.5682815906 | 3088.1381577242 |
| 5.2785589277    | 2.3680999637    |
| 0.3224751763    | 14.5153056976   |
| 0               | 0               |
| 1.495312077     | 1.0956991461    |
| 2.2625859299    | 1.6917589731    |
| 39.3772790081   | 34.8783938885   |
| 7.4916301882    | 12.8836101122   |
| 18.2000693547   | 5.373565702     |
| 4.0187972007    | 4.5892962591    |
| 12.9592116871   | 22.9572231039   |
| 0.9393718394    | 1.1799951574    |
| 1.741853837     | 0.520960874     |
| 4.4134337803    | 3.9599642699    |
| 0.6274691839    | 0.5254650447    |
| 1.1005572812    | 0               |
| 8.0547774903    | 8.4316969718    |
| 0               | 2.909991264     |
| 6.4353344291    | 1.6841182107    |
| 0               | 0               |
| 15.9376412196   | 7.0583765831    |
| 15.1072504331   | 6.1499616234    |
| 17.2146450918   | 15.6175033915   |
| 6.1571472978    | 3.2226340385    |
| 3.5858599411    | 4.1290244067    |
| 12.6665584036   | 3.9777851938    |
| 2.2664213635    | 0.9489909893    |
| 1.7822875031    | 0               |
| 16.2988326187   | 16.350631708    |
| 2.9717336894    | 2.2219961099    |
| 0               | 0               |
| 4.4048536765    | 5.9283986261    |
| 2.4137303016    | 2.526679663     |
| 1.9423722819    | 2.7110195587    |
| 1.7329544568    | 0               |
| 0               | 0               |
| 1.1338140446    | 1.582493778     |
| 0               | 0               |

gene\_expression\_table

|                 |                 |
|-----------------|-----------------|
| 4.2837643389    | 0               |
| 0               | 0               |
| 0               | 0               |
| 0               | 0               |
| 0.8819051385    | 0.461586735     |
| 0.3657698472    | 0.1640939457    |
| 0               | 0               |
| 0               | 0               |
| 171.192316395   | 125.7096930227  |
| 1.4774230707    | 0               |
| 2.3590551094    | 2.222501374     |
| 44.7234673151   | 41.7275545334   |
| 0               | 0               |
| 18.5202602103   | 16.6173488382   |
| 0               | 0               |
| 3372.1131715967 | 3224.8556872041 |
| 27.3155705394   | 14.7301340727   |
| 0.3808059312    | 0.2989691727    |
| 35.1579029432   | 30.3625577385   |
| 0               | 1.1241796377    |
| 0.8421796818    | 0.6611918096    |
| 0               | 0               |
| 52.0172018499   | 36.8863794662   |
| 0               | 9.4578574406    |
| 1.4087797417    | 2.9494058392    |
| 45.7677350704   | 34.0002296198   |
| 18.5627448314   | 8.3277341343    |
| 0               | 0               |
| 5.3996368913    | 2.8261551657    |
| 51.880744352    | 31.4417510623   |
| 43.7833071971   | 54.0819089542   |
| 0               | 17.6060141757   |
| 10.5512183763   | 10.2560320773   |
| 2.5977627082    | 0               |
| 10.5364984846   | 4.9632970138    |
| 19.9123578512   | 6.1306315193    |
| 5.9960215646    | 3.3475213556    |
| 1.8247899056    | 3.8203601625    |
| 355.124553267   | 259.4452430667  |
| 9.0338050083    | 0               |
| 3.1205209215    | 1.0888480712    |
| 11.6331668145   | 4.871014129     |
| 0.8168900187    | 0.5130695991    |
| 21.1867932218   | 13.8613869584   |
| 8.8004685548    | 11.9759669835   |
| 27.5291164337   | 12.807701486    |
| 2.4499563527    | 0.7327431128    |
| 0               | 0               |
| 0.1514227327    | 0.6340339499    |

gene\_expression\_table

|                 |                |
|-----------------|----------------|
| 92.967324111    | 259.5138288643 |
| 0               | 0              |
| 15.6294281804   | 11.4967782647  |
| 3.9208498274    | 2.2100206855   |
| 5.0861287468    | 0              |
| 28.6105981243   | 26.6217044047  |
| 10.0372498588   | 12.6083258302  |
| 3.2377188958    | 2.0335358469   |
| 0               | 0              |
| 1.0636842132    | 1.1691317505   |
| 2.5091568484    | 2.8653508906   |
| 0               | 0              |
| 17.6584533423   | 11.5763220261  |
| 6.3575360605    | 5.6567788461   |
| 5.3045105448    | 2.7763662964   |
| 5.0001854158    | 2.0131410439   |
| 1.976890559     | 2.5867477655   |
| 22.8441779027   | 13.0435420048  |
| 15.5267620777   | 8.6684424128   |
| 0               | 2.8819724994   |
| 0.4579028664    | 0.3594976599   |
| 1.558557557     | 4.8944685499   |
| 15.1536157981   | 47.5881661251  |
| 1.3248068821    | 1.5023673058   |
| 169.6032259091  | 81.9414130135  |
| 7.5280541154    | 2.6267752757   |
| 15.6694956538   | 11.9052161491  |
| 0               | 0              |
| 1.77344032      | 2.970284186    |
| 0               | 0              |
| 3.3558426129    | 3.0546762363   |
| 0               | 0.2896409215   |
| 1.4980387534    | 0.7840693822   |
| 85.7433730984   | 30.4528245667  |
| 29.1552182892   | 16.5677409821  |
| 27.0817631732   | 34.0188496798  |
| 0               | 0              |
| 0               | 0              |
| 0.0141503704    | 0              |
| 1083.4166869381 | 26.37475943    |
| 0               | 8.3578624275   |
| 0               | 0              |
| 0               | 17.4893879634  |
| 0               | 0.6349488275   |
| 78.1366888223   | 92.0171902625  |
| 6.7734633115    | 1.7726060764   |
| 3.2587943839    | 7.1326933356   |
| 0               | 2.5313358612   |
| 0               | 0              |

gene\_expression\_table

|                |                |
|----------------|----------------|
| 5.9671343088   | 1.2492727041   |
| 0              | 0              |
| 0              | 0              |
| 8.2256984357   | 8.6106160816   |
| 7.9842435483   | 0              |
| 2.4435226924   | 2.5578661745   |
| 7.0662472736   | 3.6984544769   |
| 0              | 4.4083755245   |
| 4.1759632753   | 2.79282323     |
| 0              | 8.100113383    |
| 29.5517162959  | 22.4163585537  |
| 0              | 1.2147846795   |
| 102.0271815434 | 179.2739379952 |
| 5.8885393947   | 27.1219994973  |
| 0              | 0              |
| 0              | 0              |
| 8.4955704317   | 17.7862332184  |
| 0              | 0              |
| 0              | 9.0113761386   |
| 0              | 0              |
| 1.47476414     | 0              |
| 65.073095655   | 45.41210681    |
| 1.6264162673   | 6.810094572    |
| 60.6011119889  | 26.1210814942  |
| 10.4387755721  | 6.4056311334   |
| 8.9771808699   | 1.8794527558   |
| 3.4207510027   | 0.5115462027   |
| 6.2939765941   | 2.823642958    |
| 1.005749084    | 0.5790469487   |
| 2.4437491029   | 0.6976645036   |
| 5.1911508512   | 4.0755512146   |
| 2.6198135061   | 3.5994084434   |
| 9.1175108751   | 4.0185938779   |
| 0              | 0              |
| 0              | 0.8427293011   |
| 3.3069190176   | 7.7887456204   |
| 0              | 0              |
| 9.884905587    | 10.3474650423  |
| 6.0255637486   | 5.0460217106   |
| 1.0429330774   | 0.7278244231   |
| 0              | 0.2195845492   |
| 200.2977929743 | 26.2088291159  |
| 2.4430616156   | 3.8360752828   |
| 12.7149012477  | 9.8072866345   |
| 114.9737041593 | 72.8457476599  |
| 0              | 0              |
| 25.2897916574  | 11.7658735241  |
| 9.443653784    | 7.9084520569   |
| 5.8456698259   | 2.0397383883   |



gene\_expression\_table

|                 |                 |
|-----------------|-----------------|
| 0               | 2.6882556554    |
| 2067.9875214836 | 1574.7820352988 |
| 36.7876267016   | 27.7395959883   |
| 0.5187531788    | 0               |
| 0.1831874503    | 0.1917596199    |
| 0               | 0               |
| 0               | 0               |
| 1161.4658433006 | 1688.4217105204 |
| 0.3236467111    | 1.3551664202    |
| 13.0858212981   | 5.4071708217    |
| 4.577156259     | 2.0762482473    |
| 0               | 0               |
| 23.8685372352   | 26.8593631385   |
| 0               | 0               |
| 7.6389458598    | 1.9991016745    |
| 78.4111515132   | 65.6642912424   |
| 0               | 0               |
| 0               | 0               |
| 1.0947751926    | 5.7300233852    |
| 40.6754950369   | 15.0278419343   |
| 0               | 0               |
| 0               | 0               |
| 135.5496353641  | 114.3023851744  |
| 0               | 0               |
| 30.0548134601   | 73.4094997086   |
| 26.0579998513   | 10.697008455    |
| 71.5503669279   | 50.666654214    |
| 17.7429023816   | 15.9198626223   |
| 0               | 0               |
| 5.9910459201    | 5.2261617203    |
| 23.0110099393   | 10.9489996384   |
| 1.669389317     | 1.747507596     |
| 177.0733217291  | 191.1158861931  |
| 2.2623976616    | 1.1841327421    |
| 0               | 0               |
| 1.3813640895    | 0               |
| 39.3909706906   | 27.7700067374   |
| 0               | 0               |
| 0               | 0               |
| 118.551395158   | 67.6903370766   |
| 5.6511883858    | 0               |
| 0               | 0               |
| 36.4388651355   | 0               |
| 15.588577993    | 0               |
| 1313.6413695068 | 1625.6886650021 |
| 2.5093902801    | 11.5579904206   |
| 33.3817135563   | 31.7670863314   |
| 0               | 0               |
| 13.0108579769   | 12.1063954555   |

gene\_expression\_table

|                 |                 |
|-----------------|-----------------|
| 0               | 0               |
| 9.568441334     | 8.0129535961    |
| 30.5230075389   | 20.5020951769   |
| 0.4506463306    | 0               |
| 64.7597957059   | 53.9240223644   |
| 0.7200757123    | 1.5075426256    |
| 22.0709990572   | 18.9031098766   |
| 0               | 0               |
| 23.4466666749   | 40.9064038164   |
| 0               | 0               |
| 29.6026935375   | 60.2856238664   |
| 0               | 0               |
| 0               | 12.1617998137   |
| 17.8304021362   | 12.4431782156   |
| 1.2564614931    | 2.4113045203    |
| 5.9702649937    | 16.665708545    |
| 1.506855786     | 3.6054134533    |
| 0               | 0               |
| 24.7026889445   | 41.7716484621   |
| 4.9812439742    | 15.6430167503   |
| 96.1505565133   | 88.5718909439   |
| 7.9023738634    | 19.3017106093   |
| 0               | 3.0679802862    |
| 3.786378065     | 7.3608968191    |
| 52.1269997922   | 43.0786247005   |
| 0               | 0               |
| 5.3254562923    | 7.432877982     |
| 6.6710889004    | 0               |
| 0               | 0               |
| 0.3610740635    | 2.2678221151    |
| 42.002430942    | 21.98395736     |
| 0               | 0               |
| 219.0983078383  | 122.3204847693  |
| 21.2931699117   | 23.6007250623   |
| 13.6911343016   | 0               |
| 85.3477214097   | 12.7630753484   |
| 0               | 0               |
| 0               | 0               |
| 0               | 0               |
| 28.9559537542   | 24.2487470701   |
| 0               | 0               |
| 1.3008650167    | 4.0852151291    |
| 12.2764633788   | 10.2807477148   |
| 1160.8519186725 | 1241.3463982922 |
| 0               | 2.1902245818    |
| 330.371251285   | 590.0738312541  |
| 5.9801432481    | 4.5906528851    |
| 4.7116315308    | 4.1100917394    |
| 5.9101868554    | 14.4357528891   |

gene\_expression\_table

|                |                |
|----------------|----------------|
| 30.0818990192  | 31.4895671757  |
| 1.3282390618   | 1.1123147015   |
| 4.3528944788   | 2.7339516633   |
| 17.591371383   | 43.4057279222  |
| 0              | 0              |
| 0              | 0.5229791671   |
| 0.4525238137   | 0.2368497252   |
| 14.8557133074  | 18.14269257    |
| 10.3036318059  | 4.1088706116   |
| 20.0688098682  | 9.003394406    |
| 1.035360281    | 0.3612698243   |
| 3.932752156    | 0.8233566845   |
| 0              | 0              |
| 30.4976036539  | 42.5662993481  |
| 102.9822818112 | 64.2661528826  |
| 41.9503678287  | 51.0621108582  |
| 0              | 0              |
| 114.1460697438 | 80.7347843145  |
| 82.7261599009  | 109.8307107977 |
| 12.1536180774  | 4.7708778205   |
| 3.1374304887   | 2.0331040824   |
| 12.7133241731  | 35.4886350156  |
| 0.7821032075   | 0              |
| 22.2578309546  | 15.0760665436  |
| 1.832766542    | 2.3022359767   |
| 0              | 2.228152627    |
| 0              | 0              |
| 7.8309975834   | 0              |
| 14.1047579381  | 7.5540752162   |
| 0              | 4.2695028076   |
| 0              | 0              |
| 10.5383280554  | 2.9417237612   |
| 0              | 0              |
| 0              | 1.3139478916   |
| 4.7106445384   | 1.344839157    |
| 14.9205614043  | 10.2941840313  |
| 2.3237381553   | 0              |
| 0              | 4.3882025058   |
| 43.9692375633  | 31.8646780073  |
| 0              | 1.7169744746   |
| 9.4847011168   | 5.9571199166   |
| 0              | 0              |
| 0.3000048506   | 0.6280868699   |
| 8.296327911    | 3.0395927203   |
| 1.7180836539   | 0.5994935204   |
| 0.5257003791   | 0.5503002783   |
| 1.3290085209   | 2.908870307    |
| 2.4840086676   | 3.1202960061   |
| 1.5949427867   | 1.2985601812   |

gene\_expression\_table

|                |                |
|----------------|----------------|
| 3.1375548635   | 1.9319854418   |
| 2.1460003543   | 3.3696321303   |
| 0              | 0              |
| 60.934259396   | 47.1282502771  |
| 0              | 0              |
| 4.6298379884   | 5.815786866    |
| 0              | 0              |
| 4.7443365782   | 4.0203749705   |
| 0.2749118681   | 0              |
| 0.6895520175   | 0.8661831315   |
| 10.1627267371  | 11.9891802504  |
| 135.0227919764 | 61.147576437   |
| 0.8991644909   | 1.8824809312   |
| 0              | 0              |
| 3.358618222    | 1.1719277214   |
| 31.3113647832  | 26.6309592294  |
| 0              | 0              |
| 13.2910443518  | 41.7389773515  |
| 1.7863202729   | 1.4024327103   |
| 33.2577686562  | 23.9346594588  |
| 22.1491876233  | 39.0495129653  |
| 25.7045299591  | 23.0634524678  |
| 10.7996598385  | 8.0750177028   |
| 14.5877455197  | 7.6351860664   |
| 0              | 0.057069762    |
| 0              | 0              |
| 0              | 0              |
| 0              | 0              |
| 0              | 0              |
| 9.4483400504   | 15.3302294751  |
| 770.9193343589 | 466.6292634305 |
| 12.5142560776  | 11.4623728962  |
| 34.0208796258  | 12.6368250184  |
| 0              | 0              |
| 0              | 0              |
| 0              | 0              |
| 0              | 0              |
| 1.245023592    | 1.3032838788   |
| 0              | 0              |
| 43.5150427123  | 35.8398619696  |
| 157.9950761896 | 84.2544580576  |
| 4.8993123125   | 11.1119088207  |
| 49.1780879546  | 23.3997059952  |
| 0.6012803415   | 4.7206272683   |
| 8.3962966332   | 8.7891973406   |
| 0              | 0              |
| 0              | 0              |
| 10.8073867595  | 2.8282783206   |
| 0.93771723     | 0.4907986309   |

gene\_expression\_table

|                 |                 |
|-----------------|-----------------|
| 8.7570826099    | 3.0556220418    |
| 0               | 0               |
| 6.5511150007    | 5.878003981     |
| 0               | 0               |
| 0               | 0               |
| 1.6055616738    | 0               |
| 8.5437833825    | 14.533326701    |
| 136.5103608725  | 50.8082838329   |
| 45.0645785065   | 41.0203078464   |
| 41.6476067788   | 32.1783592523   |
| 3.9888420159    | 2.7836653205    |
| 33.8060054428   | 44.8247257583   |
| 0               | 0               |
| 3.6933048088    | 0               |
| 0.2846199865    | 0               |
| 9.8951464029    | 4.6036378099    |
| 57.3588700676   | 48.3272533328   |
| 0               | 5.8865139474    |
| 2.3456344268    | 1.2810768387    |
| 4.4439732199    | 4.651926833     |
| 345.270100148   | 117.1658470628  |
| 1210.5985910201 | 1039.0359466549 |
| 0.1947704581    | 2.6505004372    |
| 10.386049525    | 6.7950373578    |
| 0               | 0               |
| 21.1534240502   | 29.2291407768   |
| 0.5793086026    | 0.5197860627    |
| 0               | 0               |
| 1.101668539     | 0               |
| 0               | 0               |
| 4.2641609132    | 2.1143843502    |
| 0.0398541715    | 0               |
| 42.7697190072   | 44.7711076653   |
| 0.3846205065    | 0               |
| 1.8252529588    | 4.7766620071    |
| 13.0017327895   | 11.6658365926   |
| 32.5777541102   | 17.0511073093   |
| 0               | 2.9553742133    |
| 13.4277850039   | 6.559528181     |
| 0.6038279792    | 0.3160419111    |
| 74.045675544    | 24.3170533999   |
| 0.3440452732    | 0.180072354     |
| 36.8083758408   | 13.1815916224   |
| 453.1940107371  | 100.1513241041  |
| 11.8321842903   | 9.9086925811    |
| 0               | 1.3606446985    |
| 2.2842712311    | 3.5867439253    |
| 1.0756030753    | 0               |
| 0               | 0               |

gene\_expression\_table

|                 |                |
|-----------------|----------------|
| 0               | 0              |
| 295.5469926005  | 235.0305690506 |
| 1.2187527616    | 2.2964106914   |
| 0               | 0              |
| 19.8209167377   | 55.7243470926  |
| 0               | 0.1251404364   |
| 20.5180066651   | 6.4839658952   |
| 0.2113270788    | 0              |
| 1.1655452254    | 0.8540604519   |
| 13.8741873524   | 15.640609762   |
| 23.0699752412   | 36.7205087306  |
| 101.9030786466  | 84.0442788884  |
| 0               | 1.5261411016   |
| 0               | 3.3861973355   |
| 2.6451954727    | 7.5157923711   |
| 49.6405059836   | 47.1398021848  |
| 40.8807542486   | 6.5836537999   |
| 1.3376061551    | 1.5274895988   |
| 10.1506867905   | 8.6017436649   |
| 4.23068481      | 3.5429261548   |
| 2.6113855058    | 1.3667920242   |
| 1.2923470153    | 4.9603465236   |
| 1.3858477211    | 3.2467998516   |
| 1.5657954404    | 3.2781321866   |
| 1.5581824168    | 1.2233226164   |
| 1.2242474562    | 1.7941497471   |
| 1.4485865547    | 1.3742125541   |
| 0               | 0              |
| 1786.5522625292 | 2090.171140717 |
| 0.7000972957    | 0.5496435117   |
| 0.5166500135    | 1.0816528103   |
| 1.836429728     | 2.1969880956   |
| 0               | 0              |
| 1.8525004776    | 0              |
| 3.2836988632    | 2.5780184923   |
| 10.5121471263   | 29.4294575786  |
| 0.0701848359    | 0.2204073056   |
| 0               | 0              |
| 29.1604714817   | 44.4351584254  |
| 53.9900642925   | 31.649242056   |
| 0.6552074845    | 1.8289802856   |
| 84.9557043167   | 57.1700353449  |
| 1.2405065284    | 3.0299626966   |
| 14.7752941985   | 10.1128403873  |
| 4.6278826655    | 3.7264940259   |
| 35.3578237774   | 26.7311606781  |
| 133.17330956    | 69.7025456194  |
| 50.4315000329   | 172.3484531758 |
| 0               | 0              |

gene\_expression\_table

|                 |                 |
|-----------------|-----------------|
| 24.4595390514   | 11.3796051322   |
| 1.7942418705    | 0.9391012827    |
| 0.1765315743    | 2.5870919955    |
| 1.5361389443    | 1.3156542291    |
| 1.3710949209    | 3.229322975     |
| 0.6476733501    | 1.3559618329    |
| 0               | 4.3930575512    |
| 283.7046667658  | 69.4240110483   |
| 1.5553621546    | 4.3417188981    |
| 1.4836997208    | 1.1295481771    |
| 1.877132829     | 1.8138206464    |
| 11.9215843442   | 13.5491162887   |
| 0               | 0               |
| 0               | 0               |
| 0               | 0               |
| 0               | 0               |
| 1.7516016438    | 2.4125881705    |
| 18.6010739477   | 11.2108649927   |
| 1.5173363903    | 1.2177268925    |
| 46.0192836451   | 21.8383061411   |
| 4.991873588     | 5.3321081003    |
| 44.4094205042   | 159.385845305   |
| 235.7600030433  | 112.8623232849  |
| 10.3344498769   | 6.8842108004    |
| 0.6711479502    | 0.2634577498    |
| 2.0030605643    | 0               |
| 12.9290076834   | 11.3193575387   |
| 0.4465307823    | 1.8697039113    |
| 0               | 0.2551644296    |
| 0               | 0               |
| 0               | 0               |
| 0               | 0.1217420999    |
| 2.2097051541    | 3.1094228685    |
| 2.3336786838    | 0               |
| 0               | 8.7586336516    |
| 9.047874108     | 12.1773408086   |
| 4.837706006     | 10.128168315    |
| 0               | 0               |
| 0               | 1.1938541377    |
| 0               | 0               |
| 1068.5380477631 | 1344.4249393464 |
| 0.3339398661    | 0               |
| 0               | 0               |
| 6.3723050191    | 5.8366822514    |
| 7.0064664418    | 7.3343307064    |
| 3.1422311761    | 0               |
| 6.8501065235    | 4.3023924       |
| 0               | 0               |
| 0               | 0               |

gene\_expression\_table

|                 |                 |
|-----------------|-----------------|
| 2.9727084246    | 6.0013573098    |
| 15.5350421343   | 15.3585527618   |
| 77.2192445689   | 10.6143926371   |
| 8.2333703607    | 2.8728823369    |
| 4.346361802     | 3.7468510761    |
| 0               | 4.5001825268    |
| 12.289747829    | 30.5539967414   |
| 9.7982650886    | 5.5946019508    |
| 65.8806883614   | 37.4373523692   |
| 5.191081473     | 8.1509934922    |
| 33.8828877376   | 52.1594431667   |
| 1.7158674377    | 2.6942409575    |
| 3.1867798902    | 3.3359037394    |
| 195.2126910504  | 9.7308369561    |
| 81.5821225188   | 76.6854620837   |
| 151.5202840868  | 137.5364675545  |
| 5.8734634905    | 5.0304349807    |
| 9.2029595212    | 8.2573779726    |
| 164.9681376665  | 75.5508876516   |
| 31.9527377538   | 60.2063116545   |
| 3.8129489156    | 12.9719656513   |
| 47.4622161466   | 29.7712488263   |
| 4.0941903917    | 4.2857760837    |
| 0               | 2.2110920309    |
| 67.0065875376   | 22.6930417129   |
| 0.6456836893    | 0.6758981504    |
| 1.2352359695    | 2.5860764983    |
| 1.2030374403    | 0.8395553368    |
| 0               | 0               |
| 0               | 10.6784665241   |
| 10.2763475586   | 4.5511333809    |
| 0               | 1.8569973847    |
| 44.5657763247   | 62.9791343515   |
| 2172.0471119338 | 1369.0498460238 |
| 5.1271549102    | 2.8899649076    |
| 10.1769095293   | 14.5269997775   |
| 31.629003474    | 64.4755527875   |
| 0               | 0               |
| 27.2491717874   | 12.2246930659   |
| 90.2177485605   | 23.6098612984   |
| 0               | 2.3645468635    |
| 7.6806873577    | 5.3600676462    |
| 9.0879148371    | 7.9276495744    |
| 9.5312495126    | 6.6515065334    |
| 11.987483462    | 12.0464947669   |
| 0               | 0               |
| 44.6703330729   | 51.4367260685   |
| 0.6967179677    | 0               |
| 0.1652851594    | 0               |



gene\_expression\_table

|                 |                |
|-----------------|----------------|
| 116.8524308471  | 55.6002203497  |
| 0               | 0              |
| 5.2251196507    | 6.2510018737   |
| 36.4505893521   | 13.8750099431  |
| 3.812499805     | 3.99090392     |
| 0               | 0              |
| 3.1787472186    | 3.8820777132   |
| 0               | 0              |
| 0               | 0              |
| 0.7822922309    | 0              |
| 0               | 3.6280944728   |
| 24.3317078407   | 13.3415849475  |
| 12.1259203339   | 25.3866940168  |
| 1009.9791275764 | 301.3391140465 |
| 1.2034370155    | 1.2597512783   |
| 0               | 0.206846967    |
| 0.6299310158    | 0.6594083381   |
| 3.6180020802    | 2.7052176905   |
| 0.725460733     | 0.5062722153   |
| 22.3972150258   | 28.6553447277  |
| 29.5912778328   | 18.5855925626  |
| 0               | 0              |
| 221.4971944205  | 108.2022901312 |
| 23.4194342555   | 23.2250547243  |
| 0.7160772387    | 0.7495857325   |
| 35.3672676406   | 28.136919202   |
| 0               | 0              |
| 1.7575324348    | 1.1038651975   |
| 0.315819435     | 0.2203987035   |
| 0.4483285164    | 0.6257437815   |
| 2.72163674      | 1.2662197497   |
| 5.3638451147    | 7.4864582608   |
| 0               | 0              |
| 10.7285791663   | 5.6153089627   |
| 8.2140684242    | 4.9133953424   |
| 0               | 0              |
| 29.8205927103   | 23.7836443142  |
| 0               | 12.365976015   |
| 85.3289719103   | 100.1487976035 |
| 1.4068611462    | 1.7999599987   |
| 0               | 0              |
| 14.9876912583   | 42.4526779139  |
| 106.8121029335  | 63.6894253404  |
| 0               | 0              |
| 0.4871342646    | 0              |
| 2.1114694826    | 1.5963095003   |
| 4.932017053     | 2.9501762543   |
| 0.5758783085    | 0.5626378427   |
| 0               | 5.7060919975   |

gene\_expression\_table

|                 |                 |
|-----------------|-----------------|
| 17.5637953757   | 2.0428538696    |
| 0               | 0.6176525949    |
| 0               | 0               |
| 2.9075776277    | 1.5218181699    |
| 19.4519972023   | 10.9642853166   |
| 1481.6394488747 | 409.0475768342  |
| 44.4379940433   | 27.4419482355   |
| 0               | 1.7460847349    |
| 1.8548004896    | 5.824784989     |
| 6.847787794     | 4.3009360601    |
| 6421.0935295234 | 5323.4331139155 |
| 0               | 0               |
| 5.1710397547    | 14.8857942764   |
| 3.8308334696    | 1.2663459473    |
| 4.1909525263    | 8.7741323128    |
| 2.4975403815    | 0               |
| 151.5361579806  | 137.4769243615  |
| 26.932289567    | 9.3975244158    |
| 41.4823990136   | 24.8134560828   |
| 17.7944603324   | 19.558500822    |
| 155.7282816678  | 93.7339197096   |
| 29.4892366197   | 15.4345857106   |
| 0               | 0               |
| 39.9643008188   | 23.2413395929   |
| 31.1431590872   | 86.9346357437   |
| 440.8541726742  | 761.3997875399  |
| 210.6385467114  | 78.0920773832   |
| 150.9707245553  | 27.0917704806   |
| 265.7481391186  | 154.7396813946  |
| 40.02526429     | 12.8917623061   |
| 62.2065150762   | 70.5438926416   |
| 137.1094920879  | 62.7923911807   |
| 2.1325684112    | 0               |
| 0               | 0               |
| 1.1733249158    | 0.4094100324    |
| 118.6627038415  | 88.1529132195   |
| 4.1233278146    | 4.3162769785    |
| 25.3967229067   | 26.5851504756   |
| 383.0020098569  | 261.0670555506  |
| 20.8934439354   | 48.1165139546   |
| 37.8006111799   | 31.0903000577   |
| 95.6793583144   | 36.2268655836   |
| 127.2612282157  | 77.2145762692   |
| 4.792695609     | 1.9763811444    |
| 125.4578424211  | 58.0289085398   |
| 12.2314285065   | 19.2056885786   |
| 10.7179216373   | 11.2194616825   |
| 5.4995452196    | 5.7568938224    |
| 9.335676284     | 9.7725348153    |

gene\_expression\_table

|                |               |
|----------------|---------------|
| 19.6265603594  | 22.5994735079 |
| 21.0091670346  | 13.0906434603 |
| 5.7194233734   | 3.3926679396  |
| 21.4364742231  | 37.8979638159 |
| 4.2736863452   | 2.8468818414  |
| 12.8762866912  | 10.4835316464 |
| 0              | 0             |
| 0.0846716875   | 0.4431692941  |
| 0              | 0             |
| 4.130958247    | 5.8686446424  |
| 17.8238564673  | 14.2678176229 |
| 17.5732251179  | 5.2120741515  |
| 1.8078710537   | 8.2007012521  |
| 0              | 0             |
| 0.9109057057   | 1.5892185081  |
| 29.6921209445  | 27.1963559188 |
| 117.0839891996 | 46.8936231872 |
| 8.40829748     | 7.2014398047  |
| 1.0701974986   | 0.1867128136  |
| 1.9051839869   | 0.9971680827  |
| 4.3037947937   | 6.7577832361  |
| 3.5812408901   | 4.4304276004  |
| 3.3785673682   | 1.0104759489  |
| 2.0162448876   | 1.0552970541  |
| 96.1136600001  | 38.696635771  |
| 51.0380376755  | 41.9030104886 |
| 0.6962983123   | 1.8222031515  |
| 0.0168711212   | 0             |
| 10.0709780164  | 6.3253467855  |
| 1.0187796391   | 0.4265811791  |
| 0              | 0             |
| 0              | 0             |
| 4.3245430168   | 4.5269079503  |
| 0              | 0.1331849117  |
| 32.147682096   | 12.2856572151 |
| 2.1689655334   | 3.6327379902  |
| 1.4353086297   | 0.7512366072  |
| 14.7417024677  | 19.4924632712 |
| 5.1990151976   | 1.4842638112  |
| 5.5487254255   | 4.1644955645  |
| 0              | 0             |
| 43.5659874819  | 36.0423745175 |
| 0              | 0             |
| 9.02658307     | 6.9292503364  |
| 0.1645306936   | 0.1722298291  |
| 21.155636173   | 83.0460153948 |
| 6.3900429077   | 4.0134371557  |
| 31.4132902109  | 14.386426331  |
| 0              | 0             |

gene\_expression\_table

|                |                |
|----------------|----------------|
| 78.8825101819  | 34.4057415527  |
| 3.0115485062   | 1.7513736034   |
| 1.9945029379   | 0              |
| 0.5354123366   | 0.320266687    |
| 4.5893730303   | 2.7813387443   |
| 2.7601030992   | 1.6510061777   |
| 3.4373575977   | 0.6853727832   |
| 13.458848727   | 4.2692876217   |
| 0.3630151332   | 0.7600045073   |
| 0.5951882637   | 0.0778799769   |
| 6.9090482426   | 2.1429196649   |
| 23.4799101023  | 20.1097974499  |
| 0.2641648849   | 0.8295790651   |
| 0              | 0              |
| 3.4941408318   | 3.6576474901   |
| 1.8053753521   | 2.5985534204   |
| 174.6319575299 | 111.1899261686 |
| 1.200843026    | 2.5140718085   |
| 3.3570442527   | 2.0824506914   |
| 0              | 0              |
| 0              | 0              |
| 2.016418342    | 0.9046181482   |
| 0              | 0              |
| 0.5141592341   | 0.6727738386   |
| 1.3707243418   | 1.4348667354   |
| 3.2028619973   | 7.2642665356   |
| 4.5688648944   | 10.7609911966  |
| 1.6096736875   | 0.6318741008   |
| 0              | 0              |
| 0              | 0              |
| 2.0345935892   | 3.7863136506   |
| 0.48036547     | 0.9338530382   |
| 1.2038577508   | 1.8902875524   |
| 5.1813176834   | 2.71188749     |
| 0.5439197994   | 0              |
| 0.489847201    | 1.0255387355   |
| 0.1598488994   | 0.0836644763   |
| 0              | 0              |
| 0              | 0              |
| 13.6574360104  | 0              |
| 0.8514491524   | 0.2970974368   |
| 2.4538543384   | 1.1675824023   |
| 5.7062196442   | 4.2665996274   |
| 0              | 0              |
| 0              | 0              |
| 0.5830588499   | 1.8310284343   |
| 3.6514324942   | 3.822299541    |
| 0              | 0.8642682961   |
| 31.6816867974  | 30.4005315736  |

gene\_expression\_table

|                |                 |
|----------------|-----------------|
| 0              | 0               |
| 5.4556081821   | 0.5710900772    |
| 4.5791455305   | 1.2955201264    |
| 19.4315613655  | 7.627819514     |
| 3.7457806908   | 0.8713472703    |
| 25.8531336619  | 11.9395229801   |
| 4.6908231905   | 16.241854255    |
| 0.0335403589   | 0.1053295921    |
| 9.3826086569   | 11.4586072607   |
| 0.2848224937   | 0.3407435736    |
| 1.5148651352   | 1.9821906609    |
| 0.033209656    | 0.1390547443    |
| 0              | 0               |
| 2.8146194213   | 2.539938102     |
| 0              | 0               |
| 6.7439665947   | 5.7239572734    |
| 222.3395232236 | 211.6619299292  |
| 20.9026711042  | 12.7049816069   |
| 1.3856217185   | 2.7196148021    |
| 0.3817085703   | 1.1987113239    |
| 0              | 0               |
| 1.5223070734   | 1.1589401519    |
| 0.2593682758   | 0.724014109     |
| 5.63002215     | 10.2153590216   |
| 35.6176671005  | 16.6589778026   |
| 70.7750584351  | 45.5919653116   |
| 0.0419543587   | 0.0439175929    |
| 0              | 0.0522621009    |
| 0.5244519159   | 0               |
| 0.6948666386   | 2.1013274893    |
| 29.1987335404  | 5.5572862524    |
| 0              | 0               |
| 796.3271471572 | 1418.3486908366 |
| 0              | 0               |
| 6.9258279591   | 15.6152096891   |
| 0              | 0               |
| 0              | 0.4307497366    |
| 13.04026993    | 7.9627818427    |
| 40.5954724222  | 36.8291024795   |
| 21.9765813694  | 6.1936444343    |
| 0              | 0               |
| 6.635250212    | 3.5926259947    |
| 5.6351189667   | 0.8426873826    |
| 5.6081920805   | 5.8706247615    |
| 6.9963953278   | 12.4504401431   |
| 0              | 0.0283364285    |
| 4.8648597692   | 2.0832989597    |
| 0.6250120365   | 0.3271295887    |
| 0              | 0               |

gene\_expression\_table

|               |               |
|---------------|---------------|
| 6.0383282916  | 2.1069629973  |
| 1.4574081146  | 0.2860512814  |
| 0             | 0             |
| 0.3521140519  | 0.2866819367  |
| 14.362081352  | 5.2444702736  |
| 0.4703885939  | 0.3133455846  |
| 0             | 0             |
| 2.6066421205  | 0.9095395662  |
| 5.021667464   | 7.2784440063  |
| 48.6510073757 | 41.3786816021 |
| 2.491452727   | 0             |
| 0.3084578122  | 0.1076306496  |
| 0.2718647234  | 0.2845865038  |
| 0             | 0             |
| 3.0825218412  | 1.2907067939  |
| 0             | 0             |
| 33.2531692335 | 3.5701779971  |
| 10.8051534024 | 22.0829424799 |
| 14.8921662501 | 11.6917785649 |
| 0             | 0             |
| 0.3397752547  | 1.7783743805  |
| 0.9450231626  | 0.8479243474  |
| 0.2576669586  | 0.2697243614  |
| 2.6405713285  | 2.1498832506  |
| 0.6107077856  | 0.1278571132  |
| 0.7415075626  | 1.3799218779  |
| 6.1399394275  | 5.570287643   |
| 15.0526826235 | 10.6741413127 |
| 0             | 0             |
| 2.2920353593  | 0             |
| 64.9922160324 | 21.9800525115 |
| 0.5750652621  | 0             |
| 0             | 0             |
| 0.3252946951  | 1.3620668227  |
| 5.8596858501  | 4.9071096499  |
| 0.1621227102  | 0             |
| 0             | 0             |
| 0.3177738182  | 0             |
| 0.6411973543  | 0.5034014097  |
| 2.74312772    | 1.6408520439  |
| 0             | 0             |
| 0             | 0             |
| 34.0423899791 | 14.578113038  |
| 0.4179228321  | 3.9373139901  |
| 10.1187586771 | 4.361519308   |
| 0             | 0             |
| 0.4496168333  | 0.1810217074  |
| 15.9101793001 | 4.7584824494  |
| 2.8609634756  | 0.8556688288  |

gene\_expression\_table

|                |                |
|----------------|----------------|
| 0              | 0              |
| 1.1763895556   | 1.6008695889   |
| 6.3022047011   | 0              |
| 1.4198173997   | 1.4862570796   |
| 18.391454159   | 20.0177809778  |
| 3.2698376952   | 10.2685445846  |
| 0.2617789004   | 0.602863183    |
| 0              | 0              |
| 1.9389075922   | 1.1416712911   |
| 1.7330008483   | 3.8549535723   |
| 0              | 0              |
| 1.0900245517   | 0.1630045332   |
| 44.6946429646  | 22.3610072724  |
| 2.5931840526   | 19.0017160686  |
| 36.0417296408  | 31.6251802719  |
| 17.8642981604  | 13.505735747   |
| 6.2015819411   | 1.6229455046   |
| 0.717036947    | 0.5629427624   |
| 0              | 0              |
| 0              | 4.5738086233   |
| 1.2379129807   | 2.5916810597   |
| 0              | 0              |
| 0              | 0.6288095591   |
| 0              | 0              |
| 6.6557253135   | 0              |
| 95.2095440266  | 70.2555354464  |
| 95.3795891305  | 76.2688297234  |
| 0              | 0              |
| 6.91964523     | 6.208668632    |
| 46.1288811284  | 31.1185854494  |
| 20.7961957526  | 7.2564479471   |
| 0              | 0              |
| 0.8219849496   | 2.581348033    |
| 137.6122008828 | 106.6209421004 |
| 0              | 0              |
| 19.2989049276  | 133.3331208295 |
| 0              | 103.3727685736 |
| 33.88364644    | 486.8955953983 |
| 99.3141089583  | 246.9084804427 |
| 3.8429780764   | 0.6704680679   |
| 14.5165894328  | 5.0652954436   |
| 13.5399105661  | 14.8484330143  |
| 74.0018349265  | 89.1575028534  |
| 43.0610410609  | 45.0760619959  |
| 99.7541782043  | 41.1805573344  |
| 55.6588020621  | 68.8566618187  |
| 4.4479164392   | 10.6424104534  |
| 106.3720334481 | 59.5411387933  |
| 295.624453057  | 399.7967466796 |

gene\_expression\_table

|                 |                 |
|-----------------|-----------------|
| 627.245406993   | 490.9689709028  |
| 4.6136109794    | 4.8295027107    |
| 0               | 0               |
| 19.3033381258   | 8.9807238453    |
| 6.3305541452    | 23.193762954    |
| 242.0243293     | 60.5836341177   |
| 42.7826403725   | 27.1906704484   |
| 315.2170713455  | 229.1441001878  |
| 256.4069921233  | 100.0833826778  |
| 8.9700618947    | 10.1121048803   |
| 24.2377161246   | 22.5528075754   |
| 60.5344440989   | 22.3648675123   |
| 150.2201392822  | 98.8081898734   |
| 3936.0487384892 | 5755.6259029512 |
| 14.3980976438   | 5.6519436655    |
| 17.8350805583   | 5.3341899057    |
| 3.4262859474    | 14.3464694744   |
| 4.7881839267    | 2.5061223581    |
| 0               | 0               |
| 1.421774723     | 1.488305995     |
| 25.3820235339   | 10.1218145724   |
| 76.4395430425   | 21.0569723952   |
| 606.1737385072  | 223.7157965739  |
| 43.7295955212   | 30.9085144478   |
| 0               | 15.1427633593   |
| 2.4205171356    | 2.027027267     |
| 57.9710277508   | 6.0683754421    |
| 98.3718535314   | 33.6649423015   |
| 2.0039699941    | 0               |
| 2.3523345454    | 1.6416072811    |
| 20.1344385075   | 15.1751663862   |
| 5.3472747216    | 11.1949957976   |
| 19.9745207223   | 8.6096783784    |
| 10.8033552609   | 3.9913740465    |
| 23.6005274113   | 80.2909343154   |
| 5.753423856     | 12.0453051776   |
| 2.3586425429    | 0.9876056395    |
| 183.9912518484  | 77.5406764147   |
| 1.3642469588    | 7.1404312318    |
| 0               | 5.7234416015    |
| 0               | 0               |
| 2862.4320919323 | 1663.2438536687 |
| 0               | 0               |
| 14.966493414    | 8.2942111878    |
| 328.4714419753  | 148.0431293466  |
| 11.589671784    | 20.4328504635   |
| 0               | 0               |
| 2583.2388016007 | 1691.9222220609 |
| 24.1603475875   | 14.7040230008   |



gene\_expression\_table

|                 |                 |
|-----------------|-----------------|
| 280.4731999419  | 309.467961818   |
| 34.3902712969   | 57.599276296    |
| 1.2674825097    | 2.5651345851    |
| 4.741887393     | 0               |
| 19.2845961937   | 22.4300107779   |
| 17.5158297609   | 12.4208054307   |
| 46.576976211    | 22.8734308524   |
| 1.9195898081    | 5.0235402504    |
| 2.5486711295    | 0.8893116609    |
| 0               | 1.514923289     |
| 0               | 1.908996241     |
| 0               | 0               |
| 0.910495734     | 1.9062038977    |
| 1.2947767249    | 0.6776825929    |
| 79.3491943142   | 61.4661035694   |
| 0.5468881719    | 1.7174386315    |
| 14.0030816979   | 36.035108562    |
| 416.0166323293  | 116.8371526934  |
| 50.534645502    | 17.1565589845   |
| 0.2235336759    | 0.233993828     |
| 7.2319458478    | 6.7978754656    |
| 7.9126768281    | 91.1124145434   |
| 11.1945090619   | 13.3924009016   |
| 2.1125949381    | 2.7643160168    |
| 117.2576015176  | 35.9466373111   |
| 129.030104449   | 192.9542954504  |
| 0               | 0               |
| 90.8961621585   | 105.8539353769  |
| 6.998296992     | 2.093079706     |
| 2.0715746253    | 2.1685129745    |
| 0               | 0               |
| 10.3696504994   | 6.2027962071    |
| 221.3374427527  | 41.4975802585   |
| 0               | 0               |
| 0               | 0               |
| 0               | 0               |
| 19.1587818708   | 13.3702053039   |
| 2499.5154772413 | 4633.3109175842 |
| 5.0910886383    | 2.1317294839    |
| 27.381882535    | 20.7808234107   |
| 43.0122120987   | 55.5307693303   |
| 0               | 0               |
| 40.0029772974   | 37.8868121081   |
| 0               | 0               |
| 0               | 0               |
| 8.1012367871    | 4.6256347141    |
| 0               | 0               |
| 0               | 0               |
| 0               | 3.4259630213    |

gene\_expression\_table

|                  |                  |
|------------------|------------------|
| 3.9091936407     | 12.2763674932    |
| 18.1155856737    | 7.1639117802     |
| 21.2441239386    | 8.6691415274     |
| 49.4205751227    | 101.002889743    |
| 10.2413712498    | 10.1563686438    |
| 0                | 0.9356780703     |
| 1.2777563297     | 1.3375483294     |
| 311.0104378311   | 241.1585358085   |
| 0.8321496091     | 0.4355448271     |
| 24.1793750085    | 17.9285097976    |
| 177.4595766232   | 130.4298411163   |
| 2.3301746618     | 2.0907549229     |
| 50.5225650541    | 30.8506009323    |
| 6.1384645069     | 4.2838073559     |
| 89.0714452494    | 135.2548319358   |
| 0                | 0                |
| 8.4926942335     | 2.8677760712     |
| 1.8421681976     | 3.3057798553     |
| 0.1196152406     | 0                |
| 9.9081496255     | 5.1858983873     |
| 7.1226395882     | 4.846361078      |
| 0                | 0                |
| 423.6665359247   | 170.5737730623   |
| 4.1716875041     | 10.9172490917    |
| 18415.5527628928 | 21890.1505483422 |
| 33.3645354019    | 16.5749620859    |
| 0.277361811      | 0                |
| 0                | 0                |
| 15.9109241412    | 5.5518227562     |
| 1.411113582      | 0.7385729855     |
| 0                | 1.8559801863     |
| 0                | 0                |
| 185.4979591898   | 114.3789679767   |
| 0                | 0                |
| 25.2088188042    | 13.194226745     |
| 3.6444140099     | 3.2699593973     |
| 1.6529810202     | 3.0280800915     |
| 0.2816039685     | 0.5895629845     |
| 6.7464608512     | 4.8704539847     |
| 0                | 0                |
| 254.063493313    | 179.5746121164   |
| 252.6964916899   | 180.3554344274   |
| 0                | 0                |
| 20.0648372542    | 18.5327309735    |
| 837.678627727    | 431.2037382886   |
| 4.7455952514     | 4.967663124      |
| 14.0783436941    | 14.7371330911    |
| 0                | 0                |
| 13.2974145887    | 8.1198021215     |

gene\_expression\_table

|                  |                  |
|------------------|------------------|
| 3.2827711303     | 6.8727736878     |
| 28.9396285295    | 149.6872325451   |
| 12.8764289785    | 6.739487674      |
| 0                | 0                |
| 37.7887028281    | 30.7665611581    |
| 0                | 1.430256407      |
| 5.2703079563     | 4.4135436083     |
| 15.4772665021    | 8.0007495439     |
| 0.6118159596     | 0.6404455965     |
| 0                | 0                |
| 13.9902202581    | 7.3224429804     |
| 0.7107975986     | 3.5342804121     |
| 0                | 0                |
| 5.1803148455     | 7.1421258927     |
| 0                | 0                |
| 0                | 0                |
| 0                | 0                |
| 1.7581179395     | 2.4538509763     |
| 0                | 3.3784798366     |
| 457.375655957    | 331.4619223151   |
| 0                | 0                |
| 3.0042809861     | 3.1448648859     |
| 425.5852594621   | 346.5002483092   |
| 792.593585681    | 317.2315921169   |
| 895.5920514067   | 472.8986616118   |
| 2.3121739656     | 1.2101855233     |
| 0                | 0                |
| 0                | 0                |
| 0                | 0                |
| 2.3318629578     | 1.4645888255     |
| 0                | 1.2531538679     |
| 30.239278162     | 22.1580175605    |
| 0                | 0                |
| 82.4875722341    | 40.2955181732    |
| 0                | 20.2769445129    |
| 17.9759833844    | 10.8941458287    |
| 40.5693131378    | 31.3109570503    |
| 0                | 0                |
| 0.9142676776     | 0.9570503987     |
| 38.9664406236    | 21.7545902286    |
| 54.6758840281    | 50.5009553077    |
| 29463.2917624354 | 71505.1189678008 |
| 3.1305308134     | 0                |
| 0                | 0                |
| 41.2800212699    | 42.0113752245    |
| 1.8855217482     | 1.3158358944     |
| 108.9982601854   | 24.3410734778    |
| 35.9645814941    | 26.8910906993    |
| 13.5355966036    | 4.7229961362     |

gene\_expression\_table

|                 |                |
|-----------------|----------------|
| 13.996593984    | 35.2833436158  |
| 1.4240891964    | 0.7453643865   |
| 2.8102208148    | 1.4708618806   |
| 0               | 0              |
| 0               | 0              |
| 3.2248802774    | 1.6878935081   |
| 0               | 0              |
| 0               | 0.8644446954   |
| 7.6890544809    | 4.3902873426   |
| 0               | 0              |
| 0               | 0              |
| 3.4273743482    | 0.8969391752   |
| 0               | 6.0835202315   |
| 0.5994540956    | 0              |
| 1.3246803726    | 0.4622227202   |
| 9.4634411884    | 6.6041856118   |
| 1631.3996154974 | 778.3063672955 |
| 88.2787317623   | 46.7897179881  |
| 0               | 0              |
| 0               | 0              |
| 2.2685816754    | 7.1242166276   |
| 35.0649356698   | 3.3368893324   |
| 92.0261971546   | 21.8937543817  |
| 184.5840027801  | 117.3130677757 |
| 50.8109134586   | 15.0792382951  |
| 6.5788868587    | 8.6084284251   |
| 71.9558132893   | 48.1229966942  |
| 4.1037240374    | 4.2957558518   |
| 40.0100412171   | 73.2940111149  |
| 0               | 0              |
| 0               | 0              |
| 30.6674725918   | 14.5920647205  |
| 2.7860323072    | 4.8606722731   |
| 146.9092906384  | 128.6192124881 |
| 6.4639287758    | 5.0748039363   |
| 280.3783542847  | 248.6584734296 |
| 0.3061741931    | 1.9230088129   |
| 75.0173783989   | 40.2454877318  |
| 0               | 7.1107606046   |
| 50.0009629175   | 31.404440517   |
| 147.8289985955  | 174.9309236117 |
| 0               | 0              |
| 2.6899781956    | 4.4249141291   |
| 52.1669746507   | 44.3968320463  |
| 0               | 0              |
| 6.3964128586    | 4.6126139697   |
| 64.8736261329   | 31.9573442878  |
| 0.9743565125    | 17.8491435858  |
| 0               | 0.328946199    |

gene\_expression\_table

|                |                |
|----------------|----------------|
| 312.8728970045 | 334.9571271198 |
| 249.1522211937 | 79.3773159196  |
| 15.3280839824  | 8.189816299    |
| 22.9282395682  | 21.7153312872  |
| 23.1112838047  | 24.1927653378  |
| 1.4579797909   | 4.069880698    |
| 0.5120809275   | 1.8761522882   |
| 0              | 7.6861565872   |
| 24.7954187796  | 17.3038057385  |
| 59.7197847687  | 151.8205489664 |
| 3.7584908668   | 3.9343676592   |
| 6.2771498778   | 11.4990507111  |
| 64.8804254124  | 7.5462748956   |
| 2.2673104052   | 4.7468162344   |
| 0              | 0              |
| 0              | 0              |
| 4.1201786335   | 10.7824510823  |
| 0              | 0              |
| 0.7193875482   | 0              |
| 18.0928582139  | 17.4826199154  |
| 67.9343886794  | 24.6161582604  |
| 0.7372309155   | 1.5434585711   |
| 0              | 0              |
| 0              | 0              |
| 4.5424694781   | 0.7925053628   |
| 0              | 0              |
| 0.3501149091   | 0.7329967395   |
| 5.6662473761   | 3.2952204039   |
| 0              | 1.1039611065   |
| 0              | 0              |
| 0              | 0              |
| 0.5948054567   | 2.4905563807   |
| 0              | 0              |
| 10.0602461332  | 1.5044300809   |
| 0              | 0              |
| 0              | 0              |
| 1.8550485239   | 0              |
| 0              | 1.4645044209   |
| 8.4757512091   | 8.0657908687   |
| 55.8897048378  | 101.1301353728 |
| 0              | 5.6289911864   |
| 443.3239754678 | 905.2212269891 |
| 22.9887239664  | 29.4121304523  |
| 12.160847844   | 10.6082574456  |
| 45.6752939992  | 36.2010046546  |
| 297.79308769   | 103.9093911957 |
| 32.8701400287  | 15.6401284532  |
| 5.2263972332   | 14.2245064152  |
| 169.3266364395 | 74.6316614121  |

gene\_expression\_table

|                 |                 |
|-----------------|-----------------|
| 85.831794373    | 103.1591045683  |
| 37.686042704    | 49.677202482    |
| 0               | 0               |
| 1.9725594998    | 5.3686476569    |
| 138.4787403431  | 123.4834112605  |
| 5.8174197241    | 12.1792862261   |
| 26.0634432515   | 13.9913177855   |
| 0               | 0.7899555694    |
| 172.2472195724  | 211.8612493851  |
| 1370.8787598862 | 1900.9093362592 |
| 47.5393893312   | 54.0912743951   |
| 527.4573181364  | 311.6034420817  |
| 0               | 0               |
| 2.820478386     | 2.4603844422    |
| 317.1809812384  | 217.2498229976  |
| 30.6588902152   | 5.3489264       |
| 7.3261184525    | 4.1830585532    |
| 115.2893422914  | 104.5930185977  |
| 768.9342519388  | 850.6933871521  |
| 0               | 0               |
| 1.0262888279    | 1.6114702883    |
| 29.7531518846   | 29.4151344489   |
| 175.6293924265  | 109.5264003545  |
| 1.3182423778    | 2.7598578057    |
| 0               | 0               |
| 0.6806317467    | 1.424963171     |
| 7.8506241437    | 4.7938277138    |
| 0.7288148101    | 1.5258387049    |
| 0               | 0               |
| 1.0558265743    | 2.2104669532    |
| 0               | 0               |
| 28.2724401263   | 11.998149533    |
| 7.879290006     | 0               |
| 0               | 0               |
| 16.151758156    | 0               |
| 17.3888613517   | 37.7053128991   |
| 57.6651730147   | 58.3844533465   |
| 7.1918098665    | 4.922380854     |
| 51.0482693602   | 48.5232972266   |
| 110.0748573973  | 30.4067972483   |
| 0               | 3.0791325228    |
| 22.8799740895   | 14.738850212    |
| 39.7669200343   | 40.5027186253   |
| 7.1983738895    | 5.3189776742    |
| 272.4317048174  | 112.942580937   |
| 0               | 0               |
| 0               | 0               |
| 4.4178512299    | 2.3122912385    |
| 2.4711185889    | 0.7390724022    |

gene\_expression\_table

|                |                |
|----------------|----------------|
| 0              | 0              |
| 0              | 0              |
| 20.9289546843  | 14.0839168913  |
| 0              | 0              |
| 5.281142657    | 0              |
| 16.4025366972  | 11.5057274641  |
| 19.7058701539  | 11.6032482984  |
| 4.9702804952   | 3.0350030707   |
| 7.9640373783   | 2.3819173484   |
| 78.7454344576  | 52.3366918151  |
| 0              | 0              |
| 0              | 0              |
| 0              | 0              |
| 0              | 0              |
| 0              | 0              |
| 14.1329590085  | 8.5902410921   |
| 8.8453607245   | 9.2592751725   |
| 7.9113874885   | 6.9013309192   |
| 1.3311450627   | 2.7868707255   |
| 483.4230865258 | 306.0952943943 |
| 22.446687479   | 26.208269875   |
| 0              | 0              |
| 1.5245885329   | 1.8861001878   |
| 0              | 0              |
| 22.6043400986  | 0              |
| 5.2708228863   | 13.7936713406  |
| 17.2277778824  | 15.0282862952  |
| 6.3766988465   | 4.1322006985   |
| 42.7416332531  | 43.5324723098  |
| 2.3207946759   | 4.8587903178   |
| 1.6440868031   | 0.3442042126   |
| 7.6206611889   | 11.3011274064  |
| 86.1713766247  | 5.6377328255   |
| 0              | 0              |
| 9.4191954792   | 6.5733081677   |
| 5.1783348259   | 4.8046692978   |
| 27.4616431091  | 44.7170852126  |
| 26.8303409687  | 28.0858540128  |
| 107.0279007904 | 28.953180579   |
| 0              | 1.1465475867   |
| 116.1988064635 | 65.061263021   |
| 32.3573375655  | 22.580989191   |
| 8.5607308502   | 1.4935543631   |
| 228.5091690172 | 79.7340489647  |
| 34.0816054388  | 14.7626639813  |
| 0              | 7.2947757236   |
| 50.1183845336  | 41.5337233123  |
| 406.0945364273 | 843.9436398428 |
| 23.8800136612  | 12.0677429514  |

gene\_expression\_table

|                 |                 |
|-----------------|-----------------|
| 0               | 0               |
| 1.2973195729    | 8.1481621518    |
| 38.4976128311   | 19.2734779756   |
| 0               | 0               |
| 176.6985586481  | 115.5276137119  |
| 0               | 0               |
| 30.9507905894   | 13.4065316332   |
| 2.3770377722    | 5.8059636231    |
| 0               | 0               |
| 0               | 0               |
| 8.3387179076    | 13.8207967226   |
| 1666.7658525312 | 1897.1208112132 |
| 0               | 0               |
| 10.326171881    | 4.6325915068    |
| 0               | 0               |
| 23.7065123563   | 5.2243889108    |
| 4.8510950709    | 2.1158748989    |
| 3.9012924723    | 0.9424272918    |
| 13.987147101    | 11.7133351974   |
| 867.8679792063  | 206.6498316339  |
| 36.8552500366   | 0               |
| 0               | 0               |
| 0               | 0               |
| 560.6297471819  | 129.4553271056  |
| 75.3767758586   | 47.9416685972   |
| 17.0758623547   | 23.6410221831   |
| 5.3607358968    | 0               |
| 0               | 0               |
| 18.3863361589   | 6.4155720048    |
| 103.3729028636  | 8.6568150948    |
| 6.7207021177    | 1.9186893209    |
| 3.9390057616    | 8.2466593253    |
| 22.2729216203   | 5.8287930984    |
| 853.223258665   | 987.1651652543  |
| 217.0870577454  | 55.651969802    |
| 0               | 0               |
| 0               | 0               |
| 2.9016695065    | 1.012483917     |
| 0.9836441823    | 1.8877344639    |
| 17.8302384359   | 11.6653724768   |
| 1.172800585     | 3.0692030763    |
| 3.4456167069    | 0               |
| 22.7133340096   | 24.6253434452   |
| 59.6131303925   | 35.9288263947   |
| 441.5787270024  | 384.9676626729  |
| 14.6221193815   | 21.1934139274   |
| 22.3673060794   | 7.5751090828    |
| 2.3087106523    | 3.452493813     |
| 10.2832119066   | 13.4555123959   |



gene\_expression\_table

|                |                |
|----------------|----------------|
| 0              | 4.111488203    |
| 2.0649520475   | 0              |
| 12.3794454403  | 3.2396839254   |
| 5.02038931     | 0              |
| 261.1608974018 | 173.9702346951 |
| 0              | 2.3704193565   |
| 4.4138350015   | 2.3101891555   |
| 11.4783594303  | 8.9003583706   |
| 7.2308967667   | 3.5781971215   |
| 0              | 0              |
| 255.0052235156 | 170.8968606925 |
| 0              | 1.9419288332   |
| 3.8556430428   | 30.2704951886  |
| 0              | 0.5922526531   |
| 27.6073834441  | 9.6330859404   |
| 10.2611169462  | 1.1934756703   |
| 5.2497361753   | 0              |
| 21.0812318254  | 11.0338590208  |
| 0              | 0.7482614346   |
| 2.786416045    | 3.5001660702   |
| 0              | 0              |
| 0              | 0              |
| 0              | 0              |
| 3.6943352284   | 3.4375199007   |
| 0.7536584554   | 3.5501649498   |
| 0.735756219    | 0.7701855814   |
| 0.8288467516   | 2.6028967234   |
| 0              | 0              |
| 0              | 0              |
| 1.4851850667   | 1.5546835955   |
| 0              | 0              |
| 0              | 0              |
| 0              | 0              |
| 0.895581964    | 3.7499611843   |
| 0.6703973188   | 0.3508841212   |
| 978.6342150266 | 561.8751513951 |
| 0              | 0              |
| 36.8053799516  | 20.0343885042  |
| 30.5723972732  | 6.7374774868   |
| 20.1056137671  | 8.0176938668   |
| 21.011440016   | 0              |
| 9.5744107388   | 5.6490120509   |
| 0.1984544751   | 0.1038705289   |
| 2.3947360559   | 3.1904683881   |
| 3.8478510871   | 2.4167456691   |
| 1.413543349    | 0.6341526162   |
| 288.0824709632 | 164.2442173512 |
| 6.2075286092   | 15.5952166991  |
| 5.5922811584   | 5.8539692953   |

gene\_expression\_table

|                 |                 |
|-----------------|-----------------|
| 13.1281257369   | 12.2155112325   |
| 0               | 0               |
| 1.0103987309    | 1.0576798589    |
| 9.18852858      | 16.0308356743   |
| 0               | 0.19624668      |
| 1.6336645945    | 3.078200074     |
| 1.4811075018    | 0               |
| 28.5433186461   | 20.3177129728   |
| 2768.0835243427 | 1274.9504575555 |
| 57.4284734436   | 18.7861911073   |
| 4.6773011614    | 1.0043432296    |
| 6.4025562941    | 0               |
| 16.1591142678   | 11.2768482228   |
| 0.3204257083    | 0.6708397537    |
| 130.7665531415  | 212.8454131431  |
| 10.4072786465   | 4.6689781289    |
| 79.527605418    | 60.1017617527   |
| 0               | 0.6225475743    |
| 11.0609830315   | 0               |
| 0               | 0               |
| 0               | 0               |
| 7.6609733995    | 21.3852400158   |
| 0               | 0               |
| 0               | 0               |
| 0               | 0               |
| 30.9507905894   | 49.1572826552   |
| 0.8381615657    | 7.8964464377    |
| 137.3048389758  | 193.7229809506  |
| 1.7788592737    | 1.8621001473    |
| 6.782926099     | 0               |
| 12.766811732    | 0               |
| 0               | 0               |
| 5.4027914112    | 0               |
| 872.9991773453  | 685.3880689641  |
| 0               | 0               |
| 15.4060558518   | 17.4708894834   |
| 102.6552176194  | 31.2607766404   |
| 4.377620144     | 13.7474063894   |
| 292.6676556915  | 251.8270953481  |
| 1.3094960492    | 0               |
| 1.2877197384    | 1.3479779711    |
| 11.5254676487   | 16.8907149956   |
| 25.2796964579   | 58.2178252253   |
| 5.5500897367    | 5.8098035461    |
| 92.246076663    | 171.6670007909  |
| 0               | 5.5013434455    |
| 0               | 0               |
| 0               | 1.414493374     |
| 1.2161152444    | 0               |

gene\_expression\_table

|                |                |
|----------------|----------------|
| 0              | 4.3685887418   |
| 1.4255317249   | 1.4922388039   |
| 5.5152881926   | 1.1546746961   |
| 611.0395597312 | 595.2139163171 |
| 16.5608203349  | 4.3339440114   |
| 2.0039699941   | 0              |
| 200.3332125663 | 104.8538549813 |
| 0              | 0              |
| 3.1560182668   | 6.607405281    |
| 1.0275920932   | 3.2270333294   |
| 0.8874787054   | 0              |
| 2.4518828915   | 3.4221567802   |
| 3.7393193236   | 0.9032997676   |
| 0              | 0              |
| 233.228958937  | 116.7639464574 |
| 64.9547307837  | 54.0863404104  |
| 136.574360104  | 142.9652923253 |
| 0              | 0              |
| 0              | 0              |
| 10.0426477924  | 18.2218204465  |
| 1.4465877118   | 2.6499901675   |
| 0              | 0              |
| 0.3613804411   | 0.3782910669   |
| 6.3638036011   | 11.4198767378  |
| 1.1409922077   | 0.4777537581   |
| 1.0706222785   | 2.2414430775   |
| 2.0019868471   | 0.5987625341   |
| 3.8616229235   | 2.309900418    |
| 0              | 4.2770480032   |
| 0              | 0              |
| 0.5534526254   | 0              |
| 0              | 0              |
| 0              | 0              |
| 0.6605308091   | 0              |
| 0.6395851119   | 0              |
| 0              | 0              |
| 2.5690617932   | 0.5378559636   |
| 2.0857541463   | 1.4555706797   |
| 1.4704762559   | 3.0785729857   |
| 1.3922252527   | 1.7488485254   |
| 1.5276629859   | 0              |
| 0              | 0.4654355103   |
| 0              | 0.2697286558   |
| 0              | 0              |
| 0              | 0              |
| 0              | 0              |
| 0.7513766035   | 0.5056308735   |
| 8.650415133    | 6.3386450363   |
| 0              | 0              |

gene\_expression\_table

|                |                 |
|----------------|-----------------|
| 19.5506905923  | 20.4655558596   |
| 0              | 20.025280308    |
| 15.8305135367  | 27.6188248134   |
| 0.9146896698   | 0.4787460689    |
| 279.1859695495 | 204.5752409425  |
| 1.6474004145   | 3.4489794667    |
| 18.9921930773  | 17.0407917591   |
| 0.9383152639   | 0.9822232804    |
| 0              | 0.220211057     |
| 6.9217266002   | 4.4588464642    |
| 145.6637930034 | 111.7555725953  |
| 6.8314357554   | 7.9683792043    |
| 259.4798097712 | 183.8489817815  |
| 0              | 0               |
| 92.5591261377  | 173.1657970073  |
| 79.0851278312  | 76.4177342513   |
| 13.9370926276  | 9.7261814987    |
| 20.5073054793  | 16.6965050662   |
| 18.9549274271  | 16.2342934694   |
| 3.0014951173   | 0               |
| 7.2467492936   | 7.5858574799    |
| 692.7030287765 | 300.301285241   |
| 0              | 0.9845922843    |
| 0              | 0               |
| 0              | 0               |
| 0              | 0               |
| 410.3591316656 | 302.4464974639  |
| 5.6974331835   | 4.9115638842    |
| 55.2357053663  | 6.086361466     |
| 32.9402433609  | 10.8889472783   |
| 0              | 0               |
| 3.0663246821   | 1.0699372957    |
| 2996.63277844  | 3418.8236185157 |
| 14.039186029   | 24.4935717695   |
| 35.9417613281  | 12.093312521    |
| 20.304102464   | 24.7965938283   |
| 12.1228926384  | 25.3803552667   |
| 302.0715028574 | 72.9707988825   |
| 0              | 0               |
| 0              | 0               |
| 170.4724770701 | 178.4496555517  |
| 0              | 0               |
| 28.5778040682  | 39.3619589697   |
| 1.2726820802   | 1.9983549491    |
| 3.1561208449   | 2.7531750155    |
| 2.1526129469   | 3.7555724098    |
| 1.3532389876   | 0               |
| 0              | 0               |
| 159.4517712532 | 219.0736288753  |

gene\_expression\_table

|                 |                 |
|-----------------|-----------------|
| 6.3825285792    | 4.8590516133    |
| 4.3019834323    | 9.5694969893    |
| 0               | 0               |
| 2.3167526372    | 4.0419399581    |
| 27.5473390167   | 24.0303363696   |
| 0               | 4.7924716098    |
| 52.9448094631   | 105.2085034511  |
| 0               | 0.1549890413    |
| 27.8095774148   | 33.7686595007   |
| 0               | 3.6696476626    |
| 12.4221205371   | 13.0034077592   |
| 1.9147448443    | 1.3362296124    |
| 2.724818869     | 4.2784882079    |
| 8.2085928547    | 5.1556260318    |
| 54.5442617748   | 68.7490089616   |
| 0               | 0               |
| 1.7285124076    | 9.0469866178    |
| 59.1739000816   | 23.6840555788   |
| 0               | 0               |
| 0               | 0               |
| 0               | 0               |
| 0               | 0               |
| 30.3620826818   | 31.4089458772   |
| 6.4611331448    | 2.2544929324    |
| 4.1492274509    | 10.1345733439   |
| 14.3872535609   | 5.0201660827    |
| 0.8044567886    | 2.5263028841    |
| 29.4737965258   | 29.3103583747   |
| 41.0295130025   | 80.296834373    |
| 13.2439129888   | 4.6212185326    |
| 14.7083262699   | 19.5023541757   |
| 3.9021768439    | 0.4538641504    |
| 17.622716135    | 8.3851648884    |
| 0               | 0               |
| 113.7346958093  | 65.5821668832   |
| 1.0815331243    | 0               |
| 0               | 0               |
| 1724.1043176447 | 2756.5297277995 |
| 53.2745975576   | 43.8173662229   |
| 8.0069569189    | 2.7938795532    |
| 1.5287452579    | 0.8001410825    |
| 72.0358828145   | 94.2584596099   |
| 0               | 0               |
| 3.7088217109    | 6.4706237646    |
| 0.8683834132    | 0.303006334     |
| 16.5143486452   | 16.5013511109   |
| 7.1579220134    | 4.9952490463    |
| 30.0212451378   | 28.6933728487   |
| 8.5134464347    | 15.5957009447   |

gene\_expression\_table

|                |                |
|----------------|----------------|
| 2.3747706049   | 1.2429484329   |
| 92.5925858507  | 67.5540749363  |
| 5.5871329133   | 0              |
| 0              | 0              |
| 1.5221743075   | 1.9120844763   |
| 39.2459816243  | 20.5412393338  |
| 0.6243850954   | 0              |
| 0              | 0              |
| 0              | 0              |
| 0              | 0              |
| 2.6968941297   | 1.6938564047   |
| 0              | 0              |
| 1.587918139    | 6.094821381    |
| 39.4002864746  | 29.6956829808  |
| 18.6710448458  | 7.8178990035   |
| 0              | 0.525037566    |
| 0              | 0              |
| 6.8183610011   | 5.7099383689   |
| 92.045850263   | 25.1355892293  |
| 142.1339382568 | 191.6780094231 |
| 2.4750056082   | 0              |
| 18.6852105734  | 38.4205959397  |
| 4.1960232492   | 4.3923741614   |
| 30.0722617093  | 23.8809839874  |
| 0              | 0              |
| 0              | 0              |
| 3.5718520575   | 0              |
| 0              | 0              |
| 0              | 2.1636509758   |
| 5.8872541551   | 3.0813727065   |
| 0              | 0              |
| 0              | 0              |
| 0              | 4.3711248508   |
| 1.3837853595   | 0.7242694686   |
| 14.102081622   | 14.761981824   |
| 2.1765935946   | 2.2784462565   |
| 0              | 0              |
| 0.7115124273   | 0.744807313    |
| 0              | 0              |
| 4.3385581995   | 0              |
| 0              | 0              |
| 18.8153104758  | 6.0602350708   |
| 1.2541895282   | 0              |
| 0.928837332    | 9.7230183314   |
| 0              | 0              |
| 1.8778063342   | 1.9656773885   |
| 107.7206991823 | 16.3028585154  |
| 0              | 4.6452939788   |
| 0              | 0              |

gene\_expression\_table

|                 |                 |
|-----------------|-----------------|
| 22.5782110384   | 23.6347476849   |
| 2.5051434403    | 0.4370617393    |
| 8.8076526108    | 3.2269308839    |
| 5.0706713264    | 8.4927215668    |
| 16.4105269442   | 10.3070698482   |
| 5.1225111326    | 2.1448866418    |
| 0.5981579906    | 2.8176682916    |
| 0               | 0               |
| 75.7887766119   | 187.3194025296  |
| 10.5881986734   | 27.7091709855   |
| 0.5991212258    | 5.330832958     |
| 13.5104865088   | 3.1428229553    |
| 3.1106744841    | 5.6984147799    |
| 0.6057816167    | 0               |
| 174.4724199259  | 98.6238578687   |
| 1.1312146442    | 0.4736597182    |
| 2.252479008     | 0               |
| 4.1257805079    | 18.7149925924   |
| 0               | 14.323726181    |
| 67.8472933093   | 19.0547299127   |
| 1.9841050773    | 2.0769503307    |
| 0               | 0               |
| 12.9629837181   | 39.7729079972   |
| 0               | 2.1806393539    |
| 1038.3358506611 | 1027.7008444297 |
| 4.1895059985    | 1.4618506463    |
| 7.9862135072    | 6.6879396558    |
| 0               | 0               |
| 0               | 7.6055610059    |
| 0               | 0               |
| 0               | 0               |
| 7.4411034043    | 12.3920782027   |
| 0               | 0               |
| 7.7152685551    | 4.0381504387    |
| 0               | 0               |
| 1.3975873638    | 2.1944801996    |
| 0               | 0               |
| 1.1039103501    | 0.7703782066    |
| 0               | 0.7034700215    |
| 445.0277244069  | 396.5081163248  |
| 0               | 0               |
| 0               | 0               |
| 0               | 0               |
| 5.6703944007    | 3.9571585398    |
| 0               | 0               |
| 10.8025775986   | 13.1927589258   |
| 0               | 0               |
| 99.5494843346   | 43.3223667289   |
| 64.2925023593   | 56.7440136348   |

gene\_expression\_table

|                 |                 |
|-----------------|-----------------|
| 2.8082507969    | 2.7044886326    |
| 1.2470381933    | 7.8323565144    |
| 83.3616127346   | 49.8642741444   |
| 13.5269769202   | 3.7085623591    |
| 46.0056602544   | 41.7939173087   |
| 38.5429735154   | 109.909631609   |
| 2.0902888824    | 0               |
| 19.2897040195   | 201.9235654416  |
| 0               | 1.3859119061    |
| 0               | 0               |
| 3.3894336915    | 2.027451788     |
| 0               | 0.8824558361    |
| 0               | 0               |
| 6.9447569826    | 2.907893433     |
| 7.6160290223    | 10.4254690096   |
| 0.3078925058    | 0               |
| 0               | 1.0690595785    |
| 1.0865067754    | 2.2746986863    |
| 26.6669995468   | 19.0996472836   |
| 108.8137960914  | 152.8003103854  |
| 0               | 0               |
| 0               | 0               |
| 0               | 0               |
| 0               | 0               |
| 16.4308173399   | 50.6776569225   |
| 1.2005980469    | 11.9394048839   |
| 9.9357296737    | 8.1255214203    |
| 5.5456522007    | 0               |
| 0               | 0               |
| 71.804285969    | 71.8963188835   |
| 1.01524758      | 1.0627556076    |
| 0               | 0               |
| 304.441943747   | 1027.7221718165 |
| 0.6465478166    | 1.0152040713    |
| 200.9330336699  | 31.2379603083   |
| 20.222299283    | 0               |
| 13.582412329    | 16.803084827    |
| 1.6943113141    | 1.1823972041    |
| 0               | 0.7170047038    |
| 0               | 0               |
| 1969.6145436992 | 4127.7035628365 |
| 8.7347638782    | 7.6195858328    |
| 18.5198817592   | 36.3497077826   |
| 7.7333946589    | 16.1905503673   |
| 1.3817178923    | 0               |
| 0               | 1.7002596488    |
| 3.4237490316    | 0               |
| 0               | 0.8366530268    |
| 0               | 0               |



gene\_expression\_table

|                  |                  |
|------------------|------------------|
| 0                | 0                |
| 12.1365291881    | 9.5283392242     |
| 0                | 0.7155812942     |
| 1.5395796872     | 0.5372078621     |
| 163.1191179177   | 92.298486192     |
| 0                | 0                |
| 6.9656803272     | 20.4165808701    |
| 0                | 0                |
| 2.3206282868     | 4.8584419675     |
| 16791.8653888527 | 17653.1195092796 |
| 14.754188373     | 12.7585855829    |
| 20.8150518227    | 26.2971682597    |
| 0                | 0                |
| 78.5968744417    | 41.859097476     |
| 15.705057421     | 8.2199840565     |
| 65.2583131949    | 22.7706816405    |
| 2.5573702156     | 1.6062246831     |
| 3.8888893318     | 7.5154487232     |
| 1.5164620087     | 0.7937120636     |
| 125.31568056     | 271.9580560806   |
| 0                | 0                |
| 0                | 3.4780100884     |
| 0                | 0.5687892275     |
| 0                | 0                |
| 113.3989229645   | 115.6616441504   |
| 32.6675761258    | 7.5991644028     |
| 0                | 2.633308019      |
| 3679.2787944862  | 6381.0776800679  |
| 2499.1516979066  | 4766.6626900827  |
| 38.8874980112    | 69.4417282086    |
| 0                | 0                |
| 20.6067950626    | 15.5042139198    |
| 0                | 0                |
| 1.8358122306     | 3.8434363816     |
| 13.3421778008    | 59.3577043259    |
| 0                | 0.9325363098     |
| 41.0567602279    | 10.7444979487    |
| 111.6142184298   | 116.8371526934   |
| 517.7318874419   | 420.6042391426   |
| 0                | 14.6933106163    |
| 0                | 1.4371723058     |
| 0.8053374638     | 0.8430228474     |
| 0                | 1.6117769138     |
| 4.3926703173     | 13.7946697064    |
| 48.4601108064    | 38.891296959     |
| 12.7173201888    | 10.6499369106    |
| 1.7357423501     | 1.8169655878     |
| 7.1446502173     | 1.4957961452     |
| 1.2172738559     | 0.4247452023     |

gene\_expression\_table

|                 |                 |
|-----------------|-----------------|
| 61.4665109134   | 40.6764872192   |
| 114.3859182189  | 32.3617710421   |
| 3.2703002086    | 10.9546635244   |
| 7.7499751163    | 5.1625836918    |
| 0               | 0               |
| 0               | 0               |
| 19.5992269722   | 5.1290908691    |
| 10.0766513021   | 6.5298278234    |
| 0               | 0               |
| 8.7989733514    | 4.6053585621    |
| 6.0399558396    | 3.1612963502    |
| 0               | 0               |
| 0               | 0.3301320642    |
| 0.4476795019    | 0.4686284512    |
| 3.2807747157    | 0               |
| 1.0696139763    | 0.8397495402    |
| 1096.1859189079 | 1026.3187834409 |
| 0               | 3.5221179086    |
| 49.720619577    | 21.2920659496   |
| 0               | 0               |
| 0               | 0               |
| 1.5006084073    | 1.5708286639    |
| 1.0373733525    | 0               |
| 5.7507547916    | 3.0099293134    |
| 19.5554152638   | 12.2823009719   |
| 0               | 0               |
| 0               | 0               |
| 1.529106356     | 1.6006601607    |
| 41.8605808868   | 49.3964448229   |
| 19.3743755056   | 74.3636307047   |
| 1053.2249117644 | 1242.2648682346 |
| 6.2382352585    | 15.2370178574   |
| 0               | 0               |
| 16.8536096181   | 12.830739101    |
| 19.4643826268   | 26.3679177285   |
| 0               | 3.6626066675    |
| 17.4218420709   | 4.34216402      |
| 21.864444302    | 13.7325483441   |
| 8.1391701969    | 0               |
| 1.4873689617    | 0               |
| 0               | 0               |
| 7.8729017378    | 0               |
| 0               | 0               |
| 0.969569954     | 2.0298810377    |
| 2.0462841917    | 0               |
| 1.7034957815    | 0               |
| 4.2860332819    | 2.2432980853    |
| 1.8239672796    | 0.9546594805    |
| 0.6023993774    | 1.2611767394    |

gene\_expression\_table

|                 |                 |
|-----------------|-----------------|
| 19.4434991695   | 14.8024352473   |
| 1.3787750615    | 7.2164709237    |
| 15.1941884333   | 6.479893548     |
| 0               | 0               |
| 0               | 0               |
| 0               | 0.5812594229    |
| 0               | 3.0069909728    |
| 2.2760065253    | 8.6636769749    |
| 2.0078235435    | 4.7290020552    |
| 1.3331736622    | 0               |
| 3.3861411596    | 1.7722970123    |
| 0               | 0               |
| 6.5403360971    | 8.2156656168    |
| 2.2617969187    | 3.3146912817    |
| 0               | 0               |
| 0.8395746983    | 5.7126042805    |
| 0               | 0               |
| 0               | 0               |
| 0               | 0               |
| 0               | 0               |
| 1.4449410002    | 2.2688344905    |
| 0.6156444641    | 2.5778130159    |
| 0               | 0               |
| 0               | 0               |
| 0.5251155637    | 0               |
| 58.1624037247   | 104.5957370454  |
| 0               | 0               |
| 26.2367878464   | 40.1404608643   |
| 111.6864294834  | 54.802848201    |
| 22.418185394    | 31.2896449554   |
| 40.6834168342   | 22.8516564741   |
| 0.89811663      | 11.2817228461   |
| 3.9425241589    | 8.2540254034    |
| 0               | 3.8631925678    |
| 22.3711412022   | 18.3271211329   |
| 132.1805833795  | 161.9893591128  |
| 1926.2936188748 | 2544.4334092066 |
| 0               | 0               |
| 6.5985573548    | 2.3024445693    |
| 0               | 0               |
| 0               | 0               |
| 22.9384917106   | 20.0099062665   |
| 0.7602076975    | 2.3873437654    |
| 1.2142903416    | 0               |
| 50.6807776795   | 141.4729615077  |
| 0               | 0               |
| 115.5686908762  | 52.3456757295   |
| 0               | 0               |
| 0               | 0               |

gene\_expression\_table

|                |                |
|----------------|----------------|
| 0              | 0              |
| 0              | 0              |
| 0              | 0              |
| 0              | 0              |
| 2.8734204307   | 0              |
| 56.9729779554  | 11.7322625627  |
| 0              | 0              |
| 4.6599659293   | 3.252017879    |
| 0              | 0.4724444948   |
| 0              | 1.3795917867   |
| 17.2951436265  | 3.8403403492   |
| 2.6814781994   | 0              |
| 13.9475951163  | 4.443559277    |
| 20.4037518832  | 14.2390238319  |
| 0              | 5.6793118138   |
| 6.0223499153   | 0              |
| 0              | 0              |
| 0.5726844187   | 0              |
| 36.9077803246  | 57.9522935253  |
| 119.8736396884 | 109.6510935651 |
| 10.6931362222  | 1.8655860743   |
| 0              | 0              |
| 1.9287405163   | 0              |
| 35.1024168692  | 23.2073796446  |
| 0              | 0              |
| 2.6609769274   | 0              |
| 16.1324378711  | 0              |
| 610.1238719498 | 1057.116129667 |
| 165.0232071468 | 56.7591994512  |
| 9.295842431    | 13.6231717385  |
| 13.8901951577  | 10.3858430239  |
| 6.8028842675   | 7.1212220011   |
| 0              | 0              |
| 21.4756657011  | 58.4495840836  |
| 19.4216508728  | 6.0991433363   |
| 67.2933957269  | 45.2843731111  |
| 6.5350541782   | 6.8408589302   |
| 8.4401886166   | 13.2527148427  |
| 2.7412028578   | 0              |
| 27.4927434977  | 15.9884740851  |
| 46.3347368942  | 34.6449634776  |
| 0              | 0              |
| 53.2499246972  | 23.77220821    |
| 11.7999769156  | 9.8817209783   |
| 0              | 0              |
| 0              | 0              |
| 10.9445008516  | 9.9622987507   |
| 15.4188021749  | 12.7423560702  |
| 2.2007005218   | 2.4188653188   |

gene\_expression\_table

|                 |                 |
|-----------------|-----------------|
| 0.7700095952    | 0.806041828     |
| 0               | 0               |
| 0               | 0               |
| 0               | 0               |
| 2.215249861     | 1.1594557123    |
| 0               | 0               |
| 0               | 1.0747565273    |
| 3.6691896419    | 3.0727101008    |
| 12.8018206552   | 18.7612260693   |
| 2.0073254787    | 3.1518859796    |
| 5.9290964509    | 1.2413091398    |
| 3.8266224005    | 2.6704582504    |
| 6.1127951064    | 1.8282401274    |
| 0               | 0               |
| 0               | 0               |
| 13.9317604066   | 29.1673810167   |
| 9.7362380342    | 16.5617410759   |
| 4.775468183     | 1.2497334863    |
| 4.1124311817    | 4.3048704428    |
| 2.0424106098    | 2.1379842429    |
| 7.5591133453    | 1.3188064098    |
| 6.1659440603    | 1.61361912      |
| 5.9500226736    | 6.2284511546    |
| 10.3175198727   | 2.1600646616    |
| 0               | 0               |
| 0               | 4.2938504982    |
| 0               | 0               |
| 0               | 0               |
| 12.3984129257   | 2.1630984602    |
| 6.0899573555    | 0               |
| 5.2851092915    | 7.7453928538    |
| 4.9301568864    | 4.3007176941    |
| 0               | 0               |
| 0               | 0               |
| 0               | 0               |
| 0               | 0               |
| 0               | 0               |
| 0               | 0               |
| 4.2347253673    | 0               |
| 2.3206758241    | 1.3881547117    |
| 0               | 0               |
| 1.0545423648    | 0               |
| 9.6707867776    | 60.7399598705   |
| 5.7174028517    | 1.9949819996    |
| 0               | 1.2642826224    |
| 1421.6890694106 | 1614.1077450788 |
| 0               | 0               |
| 12.7471195608   | 15.0115668273   |
| 0               | 0               |
| 12.9888135412   | 0               |

gene\_expression\_table

|                |                |
|----------------|----------------|
| 4.9537991039   | 5.1856097767   |
| 1.1831319301   | 0              |
| 12.9632766617  | 6.168130467    |
| 4.5939925976   | 1.8033623611   |
| 137.3067502214 | 78.6457863096  |
| 247.2066577197 | 300.5124104754 |
| 282.539514647  | 103.7757252101 |
| 1.3560168976   | 17.0336527597  |
| 3.2504642845   | 13.6102728584  |
| 404.7481897029 | 141.2293962423 |
| 125.0807686139 | 112.7486048426 |
| 0              | 0              |
| 0              | 0              |
| 80.2942047413  | 23.014110462   |
| 32.9190129491  | 46.4147592892  |
| 17.3334486279  | 11.2621401385  |
| 10.3226495252  | 8.866209641    |
| 59.887735614   | 40.121698379   |
| 0              | 0              |
| 14.1480313435  | 28.2737924145  |
| 0              | 0              |
| 16.4533481368  | 6.3152007369   |
| 0              | 0              |
| 6.7139853443   | 3.5140815475   |
| 0              | 0              |
| 2.512142858    | 4.3828289803   |
| 116.3839779709 | 90.3223235713  |
| 28.4941811203  | 13.2566901213  |
| 0              | 0              |
| 7.5926420606   | 1.4450792972   |
| 0.8629198439   | 1.8065995351   |
| 0.8463729629   | 0              |
| 0.8643792953   | 0.9048275133   |
| 16.6157167828  | 19.6136551355  |
| 1.0421160124   | 6.5452880131   |
| 12.4933870118  | 7.712672042    |
| 0.5355768639   | 1.1212778569   |
| 3.9461946312   | 0              |
| 0              | 0              |
| 633.7396966817 | 305.0515528074 |
| 3.4106812872   | 4.363678606    |
| 563.2119722201 | 95.3711660932  |
| 213.6052020516 | 145.195296028  |
| 0.2407232032   | 1.2599386548   |
| 0              | 0              |
| 30.0210250245  | 94.2775338344  |
| 8.080841978    | 14.3151988436  |
| 2.7827588489   | 2.6216790531   |
| 2.3674753763   | 0              |

gene\_expression\_table

|                |                |
|----------------|----------------|
| 524.4160397873 | 175.360892994  |
| 2.7829981094   | 2.9132271823   |
| 53.2689043673  | 12.6730903206  |
| 2.9476480598   | 3.0855818487   |
| 41.7347561943  | 16.5304864767  |
| 101.0306293181 | 63.819669564   |
| 2.3009968966   | 0              |
| 0.4087890749   | 0.9628158717   |
| 1.8870397552   | 1.3168952554   |
| 0              | 0              |
| 0.7917063728   | 0              |
| 30.5423684317  | 40.2605132298  |
| 0              | 0              |
| 490.0807407816 | 161.0624833785 |
| 47.67398012    | 39.3985747455  |
| 23.6806922463  | 10.6237795614  |
| 24.8348772465  | 30.6187048064  |
| 38.6423848525  | 6.6041856118   |
| 7.5161302693   | 7.6759453759   |
| 3.3224484431   | 0.4347401047   |
| 0              | 0              |
| 58.7062737175  | 27.4345561934  |
| 46.3503576282  | 27.1708083178  |
| 3.9963682282   | 0.7508624269   |
| 31.9290982438  | 18.2308392052  |
| 201.0873129809 | 47.9062361301  |
| 5.4609006444   | 3.5727755579   |
| 4.3745305077   | 5.8512441883   |
| 1.1345095019   | 0.2968995836   |
| 0              | 0              |
| 38.1489628483  | 15.9736501679  |
| 9.9762559523   | 5.3899819894   |
| 28.4629997755  | 9.4350555654   |
| 2.3262511644   | 1.7393621294   |
| 8.3821681567   | 7.5778975839   |
| 0.2580342977   | 0.4951996316   |
| 0              | 0              |
| 6.0063320365   | 48.2033654027  |
| 0              | 0              |
| 0              | 0              |
| 30.2146433122  | 18.9771139049  |
| 0.6684659365   | 0.4373415513   |
| 0.8901389694   | 1.8635851982   |
| 0              | 0              |
| 0              | 0              |
| 0.4539745127   | 0.0678882906   |
| 0              | 0              |
| 8.0218965407   | 2.1592998961   |
| 1.9384431276   | 1.0145758259   |

gene\_expression\_table

|                |                |
|----------------|----------------|
| 0              | 0              |
| 0.0393251899   | 0.0411653934   |
| 0.053704486    | 0.1686526856   |
| 183.6450388764 | 87.5116111079  |
| 0              | 0              |
| 0              | 0              |
| 26.0966441095  | 26.8842079016  |
| 3.7743781412   | 1.234686991    |
| 20.0853444612  | 36.4849555151  |
| 9.3387545715   | 15.7916077035  |
| 0              | 0              |
| 6.0899573555   | 0              |
| 2.8046203401   | 1.4679306074   |
| 0.5625521107   | 1.1777529383   |
| 0              | 0              |
| 5.6259774064   | 0.9815403905   |
| 4.532927366    | 9.4900870921   |
| 6.6091727946   | 6.6039710787   |
| 3.8615571097   | 1.5399073668   |
| 0              | 0              |
| 0.0634355639   | 0.1992120028   |
| 0              | 0.3459544035   |
| 68.3415088978  | 16.588873577   |
| 4.4777446294   | 6.2497047461   |
| 0.052511386    | 0.0549686313   |
| 0              | 0              |
| 1.001857842    | 0.7341175122   |
| 1.3414280943   | 3.2296590431   |
| 2.9921308354   | 0.7830365437   |
| 8.0278083692   | 0              |
| 551.4397534736 | 448.6981561921 |
| 204.4555722785 | 62.9479333932  |
| 7.0500355778   | 2.9519754557   |
| 4.4763473488   | 2.1626842587   |
| 44.6368919252  | 120.1516818479 |
| 3.9647382833   | 8.3005326509   |
| 0              | 0              |
| 523.3839927679 | 657.1339062836 |
| 115.4232219515 | 76.2209979329  |
| 28.6592434287  | 37.8265145093  |
| 10.4877274307  | 5.2278550702   |
| 2.9164558607   | 0.3392144473   |
| 7.9036876413   | 8.4495696462   |
| 24.9375308261  | 10.3589169523  |
| 0              | 0              |
| 27.7574626985  | 7.6464105166   |
| 4.0955027429   | 17.1485993831  |
| 14.6706385949  | 16.278572799   |
| 3.2066696399   | 10.0701726613  |



gene\_expression\_table

|                |                |
|----------------|----------------|
| 0              | 27.4799467     |
| 0              | 0              |
| 2.4460360558   | 1.7069980997   |
| 27.1016311377  | 34.5841847786  |
| 5.2809703297   | 0              |
| 0              | 0              |
| 0              | 0.2281422492   |
| 122.6409388585 | 59.4351218796  |
| 0              | 0              |
| 0              | 0              |
| 10.1009867693  | 16.0310293263  |
| 0.8406868044   | 3.2267632598   |
| 12.7433556475  | 11.1163957615  |
| 17.8817787878  | 9.9098195935   |
| 4.2321599185   | 2.0674275202   |
| 6.9709094308   | 7.5055986741   |
| 0.3418806817   | 2.3858588375   |
| 28.5937485377  | 17.2210237645  |
| 3.1009229978   | 0.7213398255   |
| 30.6496302813  | 18.2546129314  |
| 0              | 0              |
| 3.3156511507   | 7.3272559907   |
| 6.7553685743   | 13.2001012894  |
| 1.1129046435   | 2.4358724728   |
| 0.9316176417   | 2.9256367385   |
| 0              | 0              |
| 23.7150825861  | 20.1701651092  |
| 4.6011433651   | 1.9265806721   |
| 66.8652357971  | 117.5901933404 |
| 23.3004789078  | 19.2766108556  |
| 4.9669935969   | 4.4566471712   |
| 243.5109657667 | 197.1648197911 |
| 2.1487070728   | 4.0895541787   |
| 16.6119778096  | 17.3893274099  |
| 0.3268648975   | 0.9124276932   |
| 0              | 0              |
| 19.0981806103  | 18.6131211717  |
| 0              | 0              |
| 2.6339441151   | 2.6120825784   |
| 1.771266463    | 1.8541520346   |
| 2.9193083575   | 4.7366698055   |
| 2.4417254763   | 3.1949810732   |
| 8.7972794015   | 8.595014313    |
| 2.6843988443   | 2.8100140114   |
| 2.5286015987   | 3.7056968309   |
| 2.5716394277   | 5.383956143    |
| 0.9659050853   | 3.033312463    |
| 128.6839618676 | 108.9109645307 |
| 2.9539158167   | 3.7105714828   |

gene\_expression\_table

|                 |                 |
|-----------------|-----------------|
| 0               | 0               |
| 2.334464132     | 2.7152269674    |
| 41.4816395548   | 32.5670648607   |
| 3.0891509205    | 0               |
| 18.2936524067   | 16.1031527565   |
| 22.2086674645   | 13.7374022472   |
| 5.2754617877    | 3.865627159     |
| 1334.9674302335 | 1012.6352146174 |
| 43.0427172136   | 25.8092811736   |
| 2.4496698891    | 3.5140421473    |
| 194.9886948473  | 87.4770420338   |
| 0               | 0               |
| 0.1927718189    | 0.2017924845    |
| 13.2235436138   | 2.4427646555    |
| 0.5095851909    | 0.6858398411    |
| 4.7414243181    | 5.7905131828    |
| 671.1737182397  | 134.0613871028  |
| 0.9605354426    | 3.5191913462    |
| 5.3162017933    | 8.9757595608    |
| 23.5009290518   | 33.0571151719   |
| 2.2518782982    | 0.7857512907    |
| 2.2952860122    | 1.6017952196    |
| 0.2654778661    | 0.2779007766    |
| 3.7272914823    | 3.5624293305    |
| 0.2065268261    | 0.2161911507    |
| 20.4311558713   | 23.2822924045   |
| 1.1722059662    | 0.6135293934    |
| 24.6262469574   | 4.8334913382    |
| 1.8166478656    | 1.9016570384    |
| 0               | 0               |
| 0.6414356019    | 3.0215307412    |
| 1.3737426086    | 1.4380262406    |
| 0               | 0               |
| 0               | 0               |
| 3.396547092     | 2.0317067987    |
| 0               | 0               |
| 0.9155952519    | 0.3194800321    |
| 5.3962611336    | 0               |
| 0               | 0               |
| 16.3359252739   | 5.0667724821    |
| 0.2091342319    | 0.4378411377    |
| 19.0793535777   | 9.9860814268    |
| 6.0902119897    | 6.7293783721    |
| 3.3890661304    | 2.2172849175    |
| 0.6977994081    | 1.7043893989    |
| 0.448738736     | 1.1743431292    |
| 473.5148660659  | 106.2155933577  |
| 0.4729968925    | 2.9707833424    |
| 0               | 0               |

gene\_expression\_table

|                |                |
|----------------|----------------|
| 2.5696237924   | 2.6898681156   |
| 41.8683029641  | 44.5123151354  |
| 0.1045718455   | 0.1094652353   |
| 0              | 0              |
| 6.0810902907   | 9.5484780276   |
| 0              | 0              |
| 0              | 0              |
| 0              | 0              |
| 5.1877535011   | 0              |
| 14.3741666073  | 21.5888853737  |
| 0.1854757976   | 2.3298605921   |
| 15.0596107373  | 35.7324542667  |
| 0              | 0              |
| 227.9345914433 | 113.0213757959 |
| 0              | 0              |
| 27.2799691067  | 23.9506315945  |
| 5.7034330675   | 4.029967691    |
| 76.5368350798  | 58.2678835444  |
| 0              | 2.2407760255   |
| 10.4923250674  | 7.3222056189   |
| 18.5072681575  | 10.2564566302  |
| 3.464795905    | 0              |
| 0              | 0              |
| 109.706283072  | 264.6311578099 |
| 0              | 0              |
| 0              | 0              |
| 0              | 0              |
| 9.9640213467   | 14.7762342306  |
| 0              | 38.661312507   |
| 9.8503114256   | 17.1854201061  |
| 1.031554699    | 1.0798258105   |
| 0.750965694    | 1.572213553    |
| 18.6152078127  | 46.7671142596  |
| 0              | 0              |
| 96.9887296255  | 41.001397943   |
| 0              | 22.1858834871  |
| 6.643703478    | 0              |
| 10.913873449   | 6.3469905367   |
| 3.3358194559   | 5.5870680651   |
| 10.5722900917  | 22.1340307559  |
| 1.6831659782   | 3.0833756268   |
| 7.260432112    | 1.753887826    |
| 0              | 0              |
| 0              | 0              |
| 33.5948782538  | 20.4195104145  |
| 2.7626608068   | 2.0656701466   |
| 0              | 0              |
| 0.2555452132   | 0              |
| 49.1077160548  | 12.8514220676  |

gene\_expression\_table

|                |               |
|----------------|---------------|
| 0              | 0.0575804825  |
| 1.1982787456   | 3.6490229223  |
| 1.2527898805   | 0.7649912591  |
| 0              | 0             |
| 1.9074481424   | 2.3294906495  |
| 1.1261121601   | 1.3261590483  |
| 27.1250170984  | 9.0193720358  |
| 8.7062819382   | 7.5147955832  |
| 22.2030463164  | 33.4958628853 |
| 5.0031104465   | 4.1897828961  |
| 0              | 0             |
| 8.1980050478   | 3.7675434708  |
| 2.6454520526   | 2.3432070734  |
| 5.3267708952   | 6.970043257   |
| 28.6541728164  | 31.9301945079 |
| 2.7379566355   | 2.866078014   |
| 14.8665166355  | 16.5348249736 |
| 10.2437817259  | 1.1655581108  |
| 0              | 3.38128943    |
| 92.1293833339  | 88.4038228397 |
| 0              | 0             |
| 12.1746789937  | 8.8755554456  |
| 0              | 0             |
| 0              | 0.7631943031  |
| 0              | 0.6134997697  |
| 18.9710493478  | 18.0200136733 |
| 11.6039244382  | 7.145249743   |
| 10.6124994573  | 0             |
| 1.4721063937   | 2.6967375963  |
| 0.5657542956   | 2.4676187449  |
| 0              | 0             |
| 1.7986454278   | 1.2552081234  |
| 0              | 0.0323913471  |
| 5.0207087875   | 5.2556504672  |
| 0              | 0             |
| 45.8892583487  | 38.1467311146 |
| 21.6075589751  | 24.3585724523 |
| 31.0296184401  | 36.1727295258 |
| 11.9822766577  | 6.9683231082  |
| 0              | 0             |
| 1.2869517452   | 1.01038053    |
| 9.400047437    | 12.2998977323 |
| 0              | 0             |
| 0              | 0             |
| 0              | 0.1730496444  |
| 32.3740095282  | 32.6566109638 |
| 323.9338838294 | 65.1737127954 |
| 0              | 0             |
| 1.0251998842   | 0.5365868126  |

gene\_expression\_table

|                 |                 |
|-----------------|-----------------|
| 3.9204897377    | 1.4656954251    |
| 4.1776775367    | 1.3666156156    |
| 4.0068059598    | 11.3845354626   |
| 15.145674246    | 12.0493507401   |
| 14.709491704    | 18.0035995117   |
| 26.7293852121   | 18.2479396171   |
| 5.3642895831    | 2.8076544814    |
| 1.5226325781    | 0               |
| 1811.38684842   | 1478.3541081996 |
| 28.3579724211   | 31.4311449732   |
| 0               | 0               |
| 1.1885494356    | 1.1819586891    |
| 0.2298088957    | 0.9622507748    |
| 29.2934011633   | 15.8999410047   |
| 9.3387545715    | 24.4393928744   |
| 0               | 0               |
| 1.2490593249    | 5.2300338475    |
| 0               | 0               |
| 1.066928571     | 0.3722849953    |
| 25.0469112007   | 17.0423301731   |
| 435.132971285   | 191.2574900003  |
| 1.6688470699    | 3.0571449559    |
| 1.5755511753    | 0.8246391716    |
| 1.1213817438    | 2.9346406729    |
| 145.0312563555  | 39.8210950858   |
| 0               | 0.2907943346    |
| 4257.2085305632 | 3979.3642871344 |
| 5.2055521622    | 4.5409529164    |
| 8.5884824638    | 5.0815171045    |
| 0.299693746     | 0               |
| 3.8885299549    | 0               |
| 0               | 0               |
| 42.4778521583   | 41.2894699713   |
| 45.8571930558   | 42.4642441404   |
| 6.0443420637    | 11.2483274234   |
| 38.2177841901   | 17.1455002386   |
| 0               | 0               |
| 5.3754252835    | 2.8134828765    |
| 124.6485928358  | 153.3157207289  |
| 43.6282773437   | 61.6011820044   |
| 43.66063463     | 17.1388924729   |
| 129.4724933786  | 54.9450393748   |
| 4.5843953466    | 0               |
| 9.5166774505    | 17.9316105216   |
| 0               | 0               |
| 255.7825839017  | 498.9920062949  |
| 0               | 3.7824039162    |
| 0               | 0               |
| 4.0074437718    | 3.1462276477    |

gene\_expression\_table

|                |                |
|----------------|----------------|
| 7.7831621893   | 7.2897535028   |
| 58.1909307936  | 37.7666475879  |
| 0.4209775693   | 0.4406770144   |
| 0              | 16.5443233794  |
| 29.3564925768  | 10.8459584767  |
| 2.2555397613   | 0              |
| 23.7511911833  | 14.9175701267  |
| 343.5205077121 | 355.5549888787 |
| 0.3650608847   | 0.3821437352   |
| 9.112647338    | 0              |
| 63.3390969013  | 78.533673955   |
| 33.6097054031  | 15.314715959   |
| 6.6033811077   | 2.5921436947   |
| 0              | 0              |
| 24.2421534936  | 27.9142088895  |
| 9.6422569158   | 20.838114564   |
| 1.0790093788   | 1.1295011094   |
| 56.9193259285  | 49.6523655936  |
| 3.9354298396   | 0              |
| 1.2484490876   | 0.2178116115   |
| 7.8823600586   | 7.4260902136   |
| 0              | 0              |
| 25.8597431809  | 55.7638653802  |
| 8.8041512215   | 2.1268009132   |
| 45.7756547837  | 6.6093385899   |
| 0.4218114489   | 0.441549915    |
| 0              | 0              |
| 0              | 0              |
| 0              | 0              |
| 0.5473213808   | 0.4627535967   |
| 0              | 0              |
| 69.5400276467  | 20.7983200471  |
| 0              | 0              |
| 2.8386865463   | 2.2286411498   |
| 2.9637881684   | 1.2409908904   |
| 0              | 0              |
| 0              | 0              |
| 0              | 0              |
| 16.0848716306  | 21.046944435   |
| 5.6048698432   | 2.0707577865   |
| 0              | 0              |
| 0              | 1.0156300991   |
| 4.7881839267   | 0              |
| 0.0361216706   | 0              |
| 3.6445664262   | 2.2890673072   |
| 338.8877343466 | 181.9209357374 |
| 1.7256556669   | 0.4516017258   |
| 2.0607486497   | 2.3320869217   |
| 0.150976358    | 0              |

gene\_expression\_table

|                |                |
|----------------|----------------|
| 0              | 0              |
| 3.7453857857   | 2.0910129771   |
| 7.1332087001   | 0              |
| 26.0054552849  | 10.7755207442  |
| 188.9190078481 | 160.9218508429 |
| 0              | 0              |
| 6.4935838952   | 5.3664063671   |
| 0.1204410226   | 0              |
| 0.0366520103   | 0              |
| 493.6921068679 | 429.448696581  |
| 2.9127550908   | 0.5543738327   |
| 16.5160339548  | 25.0688961667  |
| 5.6361001819   | 3.6873992557   |
| 1.3818190121   | 0.2066400822   |
| 0              | 0              |
| 0              | 3.1680948369   |
| 48.8407896833  | 21.6899332389  |
| 1.1400667375   | 0.6819517818   |
| 1.2790354325   | 4.462957624    |
| 0              | 0              |
| 85.2166476823  | 334.516200669  |
| 8.8823239196   | 9.7873347818   |
| 24.6364663514  | 35.6660781906  |
| 13.9677026599  | 16.0362805974  |
| 25.2393961273  | 15.6565698752  |
| 11.2379857585  | 2.1388839922   |
| 24.9068587052  | 14.77433921    |
| 66.6570977019  | 41.767494473   |
| 23.2071147838  | 12.146540341   |
| 3.6982279024   | 3.8712847181   |
| 0.6914600151   | 0.3948090314   |
| 298.834875259  | 420.73433634   |
| 16.7633277766  | 10.9673498292  |
| 2.2736810442   | 0              |
| 3.553292229    | 4.3394946569   |
| 0              | 0              |
| 0              | 0              |
| 3.4433824897   | 4.63437506     |
| 1.8564387428   | 2.5263028841   |
| 2.4635149817   | 0.6446984984   |
| 169.102058039  | 93.713880925   |
| 0              | 0              |
| 2.4718734417   | 4.3125726395   |
| 2.0065966153   | 3.0007062136   |
| 8.3825524568   | 5.5419852707   |
| 0              | 0              |
| 0              | 0.3315145322   |
| 0.4732834171   | 0.4246547053   |
| 20.7621060581  | 8.6934635744   |

gene\_expression\_table

|                 |                 |
|-----------------|-----------------|
| 11.0854003066   | 17.9929305068   |
| 3.9826549977    | 6.4430331407    |
| 3.4621322275    | 2.8313602018    |
| 7.6920445211    | 0               |
| 0               | 0               |
| 0               | 0.2314017803    |
| 0.3294074327    | 0.0574703161    |
| 37.0646228945   | 40.5234462622   |
| 140.399593142   | 62.9869394245   |
| 2.0021033942    | 3.9450181087    |
| 1464.5779330324 | 627.1822476007  |
| 30.3399440542   | 9.6241476683    |
| 0.4050775079    | 1.2720987516    |
| 0               | 0               |
| 0               | 0               |
| 0.0193562628    | 0.0202620299    |
| 6.5483447288    | 9.3802135026    |
| 0               | 0               |
| 0               | 0               |
| 1.593350727     | 1.2509331123    |
| 2.1156250734    | 4.183180069     |
| 8.9194845574    | 2.8728823369    |
| 0.606614171     | 0.2116667975    |
| 0.3091481776    | 0               |
| 131.7786192148  | 60.3509974472   |
| 7.608867735     | 3.9824605408    |
| 0               | 0               |
| 4.3522027746    | 1.8637617409    |
| 0               | 42.4684866694   |
| 2.9242378882    | 1.5305381047    |
| 26.8334038763   | 9.2095279501    |
| 20.5324848841   | 11.2138918686   |
| 0               | 0               |
| 7.0813100111    | 1.7106176642    |
| 3.4173870671    | 8.5855249667    |
| 543.4788576713  | 118.2008622873  |
| 0               | 0               |
| 0.1574991526    | 0.0824346253    |
| 42.5325062428   | 15.3047106583   |
| 47.9405682363   | 24.6999002535   |
| 1558.1114335952 | 1262.3239403876 |
| 28.8882056488   | 4.6523100757    |
| 7.4023559738    | 4.9813365219    |
| 1.3740341871    | 2.5170800608    |
| 16.2381889689   | 4.9577637953    |
| 3.9686271879    | 0.6923895349    |
| 2.0385516655    | 1.0669723605    |
| 31.9562428808   | 33.4516200669   |
| 35.538802603    | 21.0271178945   |



gene\_expression\_table

|                |                |
|----------------|----------------|
| 7.1372112355   | 2.3689150568   |
| 0              | 5.025626562    |
| 0              | 0.0792805766   |
| 0              | 0              |
| 46.2304434817  | 10.188163178   |
| 616.9421735554 | 574.0548347792 |
| 59.894138349   | 35.5282184369  |
| 564.7926472951 | 382.4392344599 |
| 16.4908788123  | 4.0885014417   |
| 0              | 1.8787232759   |
| 2.1296779535   | 2.1178684594   |
| 2.0242728796   | 16.2456495407  |
| 0              | 0.1560210265   |
| 17.6183560192  | 5.0298541661   |
| 0.8748708928   | 2.9305921925   |
| 0              | 0.7270669559   |
| 1.3479978071   | 0.7055383617   |
| 6.412862794    | 6.7129496582   |
| 10.1249261684  | 16.5604957386  |
| 0.5752696716   | 0.6021891423   |
| 2.7577850681   | 6.4953771946   |
| 2.9264250519   | 0.2784877928   |
| 2.8910693508   | 3.1776733443   |
| 9.7715089342   | 2.5571905118   |
| 42.4041179637  | 51.0466582691  |
| 0              | 0              |
| 42.6506050058  | 13.228568824   |
| 3.192752352    | 0              |
| 9.9081334064   | 4.8808375513   |
| 4.8854708404   | 11.0149504223  |
| 0              | 0.1709464059   |
| 0              | 0              |
| 0              | 0              |
| 29.1151653276  | 24.4744328631  |
| 4.442640041    | 2.6574464392   |
| 27.9545061704  | 12.9591620529  |
| 0              | 0.3575474997   |
| 32.0916415101  | 27.1330941086  |
| 0              | 1.6100154089   |
| 7.6676555902   | 9.8787198604   |
| 0              | 0              |
| 15.743250654   | 0              |
| 2.7589603942   | 0              |
| 0              | 0              |
| 4.1317971614   | 2.752363501    |
| 2.2403186147   | 2.3451532587   |
| 98.4132664781  | 154.527702711  |
| 2.739542174    | 4.8298741002   |
| 0.1602445807   | 0.8387157482   |

gene\_expression\_table

|                |                |
|----------------|----------------|
| 65.8676199257  | 32.4469947628  |
| 118.9518620261 | 59.9531871042  |
| 16.5848625165  | 7.5230754168   |
| 5.8730113726   | 1.6394229724   |
| 17.8948050335  | 37.4643678473  |
| 0              | 0              |
| 0              | 0              |
| 0              | 0              |
| 5.3517918019   | 3.5650531342   |
| 22.2946550417  | 9.7241345084   |
| 1.4607652506   | 1.0194140438   |
| 12.0365949539  | 10.7998643055  |
| 0.6433479755   | 0              |
| 0.6452331973   | 1.3508531558   |
| 2.0456375747   | 0.535340553    |
| 47.6001813892  | 21.7995790411  |
| 82.1957598069  | 16.3183238657  |
| 6.0063320365   | 7.3352947352   |
| 4.3552372638   | 0              |
| 7.8274043581   | 6.9331172494   |
| 71.7085213838  | 40.4191240572  |
| 0              | 1.2485361589   |
| 2.2557755484   | 5.9033337308   |
| 1.2190465255   | 3.8282736835   |
| 4.1398268516   | 1.8572348914   |
| 1.4144964067   | 1.4806870932   |
| 6.6397468514   | 5.6052021349   |
| 4.5219507327   | 4.2076029035   |
| 7.5743048241   | 4.1975686671   |
| 0              | 0              |
| 4.8255893829   | 6.0616806514   |
| 82.8535580494  | 7.2275542408   |
| 0              | 0              |
| 2.9865402606   | 0              |
| 6.6518954675   | 5.9684295017   |
| 0              | 24.4994752575  |
| 0              | 0              |
| 18.2262720609  | 8.6310493825   |
| 159.0926527217 | 128.6879273411 |
| 3.1081355238   | 0              |
| 790.623432942  | 289.667098153  |
| 9.5725916832   | 16.7008942632  |
| 8.5197735865   | 1.5738445304   |
| 0              | 2.2117270869   |
| 3.595659114    | 2.35244767     |
| 23.7005087252  | 6.0758112877   |
| 0.6072818639   | 1.2713986597   |
| 0.6534526455   | 2.7361226052   |
| 0              | 0              |

gene\_expression\_table

|                  |                  |
|------------------|------------------|
| 6.7042508999     | 1.4035946264     |
| 39.4853593713    | 36.1664257346    |
| 0.89001659       | 0.931664493      |
| 0                | 0                |
| 1.4106523434     | 0.8613868368     |
| 0                | 4.5639512771     |
| 0                | 0.2979438832     |
| 48.6533840558    | 24.4464460903    |
| 3.4039460874     | 1.7816160627     |
| 0                | 9.959663222      |
| 0                | 0                |
| 363.1766995192   | 538.5761222802   |
| 0                | 0                |
| 4.4211314142     | 4.2720149131     |
| 6.6848664487     | 52.4826119596    |
| 1.1005822287     | 4.6083338023     |
| 11759.7797240316 | 11227.4281641506 |
| 0                | 0                |
| 271.5189930848   | 308.2435750998   |
| 1.5465218963     | 1.7200713187     |
| 0                | 0                |
| 1.9048289465     | 0.664654837      |
| 1.542136502      | 2.1908357768     |
| 25.8751785424    | 3.6114660287     |
| 4.1068481056     | 0                |
| 47.9898689439    | 77.5374516199    |
| 89.6554283686    | 84.2025972298    |
| 0.7152228068     | 2.6204196125     |
| 2.1630662486     | 2.2642859049     |
| 0                | 0.1404455685     |
| 0                | 0                |
| 0                | 0.0692160399     |
| 19.2667400861    | 10.0841590122    |
| 0.8992311043     | 0.3137700654     |
| 0.590662778      | 0.8244034156     |
| 0                | 0                |
| 0                | 0                |
| 3.0926928478     | 4.3165519181     |
| 11.6602764775    | 15.1521685687    |
| 58.6924312089    | 29.9317794003    |
| 0                | 1.6471936938     |
| 21.3193229588    | 17.6996504254    |
| 0                | 0                |
| 0                | 0                |
| 0                | 0                |
| 10.2888117909    | 11.7721575979    |
| 0.0230590804     | 0.0241381191     |
| 6.8774188616     | 5.0081700216     |
| 4.1800378827     | 3.2817305754     |

gene\_expression\_table

|                |                |
|----------------|----------------|
| 16.5461299272  | 14.2638573471  |
| 145.3416481466 | 160.5952215219 |
| 1.2602838955   | 0.8575178826   |
| 0.1699007062   | 0.8892556448   |
| 2.1102043681   | 2.2089503778   |
| 15.5205578253  | 0              |
| 26.3786717297  | 9.8990176114   |
| 10.4886984267  | 2.7448780202   |
| 26.0416071832  | 15.8554293152  |
| 0              | 0              |
| 3.1604008647   | 3.3082903199   |
| 4.270200969    | 15.9643678294  |
| 3.5758356054   | 1.0694757519   |
| 6.8903532324   | 2.8851136139   |
| 0              | 0              |
| 536.8112410196 | 300.4383926403 |
| 3.2565470093   | 1.0226806733   |
| 0.5478545494   | 1.0322840564   |
| 0              | 0              |
| 0              | 0              |
| 10.7654512233  | 33.8076461785  |
| 1.3881174777   | 3.8748633995   |
| 52.5203924462  | 45.4756786225  |
| 0              | 0.7693286926   |
| 0              | 0              |
| 0              | 0              |
| 155.6159776185 | 123.4075403595 |
| 0              | 0              |
| 0              | 0              |
| 4.7930683817   | 3.3449051579   |
| 0              | 0              |
| 0              | 0              |
| 2.0434421303   | 1.0695320164   |
| 0.0756112635   | 0.0791494566   |
| 0              | 15.085830045   |
| 0.3731798024   | 0              |
| 0.6937314789   | 0.7261943135   |
| 5.802818814    | 18.2230768812  |
| 2.0718692932   | 1.0844107157   |
| 3.8182902039   | 3.2475342883   |
| 5.9163084161   | 24.7726370178  |
| 3.9550492845   | 1.6560495739   |
| 15.8878009141  | 10.7614054713  |
| 3.1989369213   | 2.6789037224   |
| 0.5288217773   | 0.5535677408   |
| 20.9944046341  | 12.361965645   |
| 2.8215711182   | 2.4613376639   |
| 0.7400409691   | 0.5533363101   |
| 1.3666662449   | 0              |

gene\_expression\_table

|                |                |
|----------------|----------------|
| 62.9537903507  | 45.2252726656  |
| 0              | 0              |
| 1.1231132319   | 0              |
| 0.1184474086   | 0              |
| 32.7440247488  | 14.3960316413  |
| 29.4864891752  | 28.7617752697  |
| 0.0294057846   | 0.0307818143   |
| 0              | 0              |
| 0              | 0.0521461177   |
| 6.2999150123   | 10.9911942314  |
| 2.3252962173   | 6.25913318     |
| 36.9274300403  | 5.154057542    |
| 21.5295945709  | 6.7919911999   |
| 0              | 0              |
| 0              | 0              |
| 20.1364426322  | 10.9609333015  |
| 0              | 1.5502733474   |
| 2.5657379864   | 2.3938656409   |
| 3.5320955199   | 2.4649188332   |
| 0              | 0              |
| 14.8517950379  | 12.6912471205  |
| 39.9473170031  | 36.1657363908  |
| 23.5658660623  | 9.3570625902   |
| 88.9282535719  | 157.6071596232 |
| 9.0252407274   | 9.4475725745   |
| 199.568581984  | 79.5837328975  |
| 4.2152266597   | 2.5214149636   |
| 90.2489229985  | 23.6180196061  |
| 117.6329008695 | 79.8729577395  |
| 5.5491382384   | 0              |
| 0              | 0.8807583645   |
| 75.6542617174  | 43.6014480743  |
| 6.3821149591   | 4.1112387649   |
| 0              | 0              |
| 88.473118821   | 44.844274857   |
| 0              | 0              |
| 15.366560646   | 11.5816547106  |
| 32.6311501916  | 13.4562248932  |
| 35.5129964771  | 18.587405128   |
| 589.9836635372 | 488.42216917   |
| 70.2472573288  | 28.4649461897  |
| 4.4747245383   | 1.0645720784   |
| 0              | 0              |
| 118.081136665  | 0              |
| 29.6315614894  | 40.1411434671  |
| 0              | 0              |
| 14.2740194453  | 2.8016185117   |
| 54.2044106099  | 81.3003656924  |
| 1.7828274267   | 0              |

gene\_expression\_table

|                |                 |
|----------------|-----------------|
| 4.571768834    | 1.595234194     |
| 10.4528063105  | 3.0714218695    |
| 0              | 0               |
| 0              | 0               |
| 0.602347063    | 0               |
| 0              | 0               |
| 2.8398072771   | 1.1890778832    |
| 8.2710397683   | 9.2765133645    |
| 0.4502576695   | 1.7281999643    |
| 0              | 0               |
| 1.0518693405   | 1.1010910659    |
| 185.8450080697 | 113.914055785   |
| 1.0589411069   | 1.6627406285    |
| 0              | 0.2157863602    |
| 2.8231297254   | 1.9701578254    |
| 702.1534580453 | 313.283119242   |
| 7.1358296615   | 4.2684270951    |
| 6.7229500746   | 20.1072780732   |
| 68.3641016854  | 21.4689501922   |
| 6.205148574    | 12.9910311002   |
| 83.5731218507  | 171.6539891011  |
| 213.6509791726 | 93.1869479678   |
| 0              | 0               |
| 31.1801592762  | 4.8958829999    |
| 35.3440962488  | 85.0954147702   |
| 1.3669355842   | 0.4769668949    |
| 2.4491618754   | 3.8456538606    |
| 1.5070361926   | 0               |
| 0              | 0               |
| 4.4360150769   | 3.8696635771    |
| 0              | 0               |
| 870.7521389148 | 1748.0794514127 |
| 9.5360632749   | 6.6548658801    |
| 2.5981797515   | 7.7059876221    |
| 0              | 0.3762328086    |
| 71.7895721534  | 30.0595724146   |
| 896.6991860085 | 824.8828527131  |
| 447.2873807924 | 148.5691670577  |
| 0.2720353267   | 0               |
| 0.1072921929   | 0               |
| 2.68722918     | 0.7032441978    |
| 0              | 0               |
| 1.2235709462   | 1.8048021985    |
| 19.7805637785  | 17.3931961158   |
| 1.6281752185   | 1.2782736776    |
| 1.1435529514   | 1.9452305727    |
| 2.2762393351   | 2.0423613189    |
| 26.4136006846  | 46.9521722809   |
| 0.8547280356   | 1.789449255     |

gene\_expression\_table

|                |                |
|----------------|----------------|
| 58.2563482598  | 36.7458210165  |
| 1.4802269788   | 1.1621201221   |
| 4.3438815838   | 1.9487791956   |
| 4.4580098262   | 0.518513364    |
| 27.0499838178  | 10.3234596152  |
| 10.210764462   | 4.0443246648   |
| 0              | 0.5294845337   |
| 0              | 0              |
| 9.879709357    | 16.0875954668  |
| 111.6390547045 | 30.1582325599  |
| 1.3517131606   | 0.282993187    |
| 67.118077969   | 54.9460131632  |
| 0              | 0              |
| 12.466539572   | 22.1848391149  |
| 13.3404412917  | 4.4099055463   |
| 58.1155971072  | 48.1940314123  |
| 164.1861329076 | 107.4182155651 |
| 0              | 0              |
| 0.971490586    | 0.6779673506   |
| 1.025768447    | 3.2213063807   |
| 4.1424918736   | 9.1291322325   |
| 36.8098445921  | 40.6730295262  |
| 9.0616246766   | 0              |
| 19.1695034743  | 10.4694945765  |
| 5.0633209946   | 7.6559263332   |
| 0              | 0              |
| 19.3635578755  | 6.7565554521   |
| 73.915897155   | 66.321219776   |
| 338.23752702   | 294.0005605656 |
| 0              | 0              |
| 0              | 0              |
| 0.9142430836   | 0.6835890385   |
| 2.2419867596   | 3.5203491954   |
| 38.0337422885  | 19.1694693034  |
| 1.5773170579   | 8.2556342968   |
| 21.2389260792  | 24.4018443545  |
| 27.6913602758  | 19.861575545   |
| 0              | 0              |
| 3.4560310419   | 1.3914439887   |
| 3.3272013032   | 2.5541238108   |
| 0              | 0              |
| 4.2668235361   | 0              |
| 7.2301919551   | 1.5137050697   |
| 126.9446392577 | 99.6637149542  |
| 7.8908150523   | 2.4780185969   |
| 0.1141088745   | 0.2986213626   |
| 7.865504312    | 3.7051050803   |
| 0.2855624534   | 1.5942678005   |
| 7.6176222505   | 5.759061577    |

gene\_expression\_table

|                 |                |
|-----------------|----------------|
| 17.477388415    | 21.3444402419  |
| 0.4681872184    | 1.9603832664   |
| 0               | 0              |
| 0               | 0.1536954389   |
| 15.4025496944   | 17.5253311753  |
| 33.3499457475   | 21.6445351697  |
| 0.9881586074    | 1.5515985292   |
| 0.6974986714    | 1.9470341066   |
| 0               | 0              |
| 2.5184119944    | 2.5386206308   |
| 0               | 0              |
| 0.5208176632    | 1.2721078487   |
| 9.7099515058    | 0              |
| 0               | 0              |
| 1.242776861     | 0.6504660065   |
| 15.8327458786   | 2.2396799583   |
| 5.9012075378    | 2.3165069016   |
| 0               | 0              |
| 0.303245518     | 1.1110251172   |
| 3.0056200409    | 2.2023866208   |
| 0.0783574326    | 0.4511327228   |
| 0               | 0              |
| 1.1278615735    | 0.7870928796   |
| 0.5922803906    | 0.9299938046   |
| 3.1269233151    | 3.2732462044   |
| 3.0532299449    | 0.8716648331   |
| 50.8532966923   | 34.221183765   |
| 1058.4322055125 | 620.2687857495 |
| 45.7366376059   | 44.6850710215  |
| 0               | 0.2362815501   |
| 0               | 0              |
| 77.9044614086   | 40.774981813   |
| 6.8090174123    | 6.1094075516   |
| 0               | 0.6209503039   |
| 0               | 8.1671479064   |
| 40.195231067    | 17.212969549   |
| 4.844802177     | 12.6787809763  |
| 0               | 5.6293029209   |
| 2.5443137418    | 1.1652259908   |
| 4.8435938764    | 11.8305776121  |
| 0               | 0              |
| 36.376109194    | 31.1549824816  |
| 14.6550513181   | 8.1817746528   |
| 152.1482121005  | 53.0893051062  |
| 7.4684179383    | 0              |
| 0               | 0              |
| 0               | 0              |
| 4.9507683305    | 10.3648743595  |
| 12.0119210829   | 12.5740132166  |



gene\_expression\_table

|                  |                 |
|------------------|-----------------|
| 0                | 0               |
| 8.9579677153     | 3.1257171846    |
| 12.9759961601    | 27.1664034572   |
| 4.1918312627     | 4.3879860129    |
| 8.0517719763     | 1.204078688     |
| 0.6104543942     | 0.9585304759    |
| 0                | 0               |
| 0.5749426861     | 0.6018468557    |
| 1.4038002101     | 0               |
| 259.160954219    | 525.6210188727  |
| 0                | 0               |
| 2.5559162464     | 2.6755191315    |
| 6.696823309      | 6.7840625521    |
| 19.2526355912    | 18.603280169    |
| 0                | 0               |
| 0.1149971164     | 0.0601891759    |
| 10.0080084548    | 3.4921094834    |
| 10.6438016459    | 6.7526504735    |
| 12.1033288111    | 5.3346098215    |
| 0                | 0               |
| 0                | 0               |
| 0                | 0               |
| 4.1462662118     | 5.2703506458    |
| 0                | 0               |
| 0                | 0               |
| 5.0539020645     | 2.2185535839    |
| 0.2341082829     | 0.3267510249    |
| 0                | 0               |
| 0                | 0.568026392     |
| 0                | 30.2344803222   |
| 0.0796013146     | 0.0833262202    |
| 0                | 0               |
| 1.4515079918     | 1.1230574132    |
| 0.3990842027     | 0               |
| 4.9632790124     | 2.3899453148    |
| 0                | 0               |
| 4.6518930571     | 3.1586440087    |
| 0                | 0               |
| 0.0972081397     | 0.254392371     |
| 42.5138472877    | 15.7914802598   |
| 13.7971540259    | 3.8514094096    |
| 0                | 0               |
| 24.1237192208    | 20.0989900064   |
| 0                | 0               |
| 17893.2695057044 | 8482.6747492988 |
| 0                | 0               |
| 0                | 0.7985193788    |
| 0                | 0               |
| 1.5632998476     | 4.091134301     |

gene\_expression\_table

|                |                |
|----------------|----------------|
| 4.3361779956   | 7.5651456375   |
| 4.6708596705   | 8.8009745889   |
| 0              | 0.1008998478   |
| 11.0840247734  | 10.1523593857  |
| 0.0571806273   | 0.7182764109   |
| 3.5178244269   | 1.9495267135   |
| 1.6594952701   | 1.737150562    |
| 10.0497153951  | 9.4679883423   |
| 0              | 0              |
| 4.4629272008   | 2.6473350619   |
| 0              | 0              |
| 2.6125330485   | 0.6077300644   |
| 0.3350113162   | 0.3506880114   |
| 1.6398887093   | 5.1498795645   |
| 4.0464650253   | 6.5890493379   |
| 52.0833235372  | 24.9402460558  |
| 0.7769530571   | 0.9488619069   |
| 0              | 0              |
| 7.5098311744   | 4.7167500913   |
| 9.751448811    | 4.6664060434   |
| 101.1425327709 | 58.527422386   |
| 0.0653679627   | 0.4789877778   |
| 0.0448840371   | 0.0469843643   |
| 7.3815560649   | 11.5904587051  |
| 0              | 0              |
| 0.4193595016   | 0.87796646     |
| 0.0709749443   | 0.0742961831   |
| 0.4992615274   | 0              |
| 4.2189483532   | 6.624558052    |
| 0              | 0.5070374004   |
| 102.6550080815 | 80.8317657562  |
| 0.416578164    | 0.4360717411   |
| 6.7269230673   | 8.6224974278   |
| 0.8280304254   | 1.0834721442   |
| 0              | 0              |
| 180.227563485  | 72.3364288501  |
| 4.678906303    | 3.1691993222   |
| 2.8216121122   | 3.3228541225   |
| 5.9044369472   | 0              |
| 52.4904607819  | 88.9762339456  |
| 0.1478894641   | 0              |
| 21.9296228622  | 13.0082918423  |
| 5.3645435982   | 3.6100124128   |
| 163.6353267587 | 491.775425802  |
| 571.7024721699 | 646.1497247042 |
| 0              | 0              |
| 1.1168867755   | 0.389716987    |
| 187.1852248905 | 149.798126248  |
| 7.9402045016   | 4.2818170942   |

gene\_expression\_table

|                |                |
|----------------|----------------|
| 4.9364805664   | 8.54621829     |
| 0              | 0.1476039167   |
| 17.5638661875  | 17.3798511671  |
| 0              | 0              |
| 0.0118236524   | 0.0123769346   |
| 0.8476437266   | 21.2954114792  |
| 1.8646425789   | 1.0843875786   |
| 2.3510815465   | 1.6407328595   |
| 0.0364441706   | 0.0915589397   |
| 0              | 0              |
| 1.3962309218   | 2.1923503255   |
| 1.4517023476   | 0.5065446895   |
| 7.3555558106   | 0              |
| 0              | 0              |
| 0              | 0.9465784127   |
| 1.9398039743   | 1.4504115562   |
| 66.62718979    | 109.5992502721 |
| 5.5167834786   | 5.3720360349   |
| 0              | 0              |
| 86.3603820639  | 80.5035923949  |
| 6.2372335186   | 6.5291018944   |
| 2.6169653894   | 4.6961572115   |
| 0              | 0              |
| 2.8907757684   | 2.4656689408   |
| 100.0781198819 | 40.9067651804  |
| 0.1980467272   | 0.4560913051   |
| 0              | 0              |
| 0              | 0              |
| 0              | 0              |
| 0              | 0              |
| 4.1847395336   | 2.6283374578   |
| 0.878694283    | 0.5660383779   |
| 1.7686854766   | 9.8744014516   |
| 0.6780794667   | 2.1294296186   |
| 1.956960299    | 0              |
| 0.8095977625   | 0.1059353131   |
| 6.7660609451   | 5.2188135623   |
| 0.8691354017   | 0.2274515448   |
| 0              | 0              |
| 648.4432055689 | 520.4032109952 |
| 17.4983847971  | 11.3973772209  |
| 30.5999768559  | 29.2465066342  |
| 9.3495445825   | 34.9537574081  |
| 6.2997515268   | 13.1890908062  |
| 0              | 0              |
| 1.2455346199   | 0              |
| 29.9095577016  | 10.9582064299  |
| 0              | 0              |
| 251.6961379833 | 289.8215529487 |

gene\_expression\_table

|                |                |
|----------------|----------------|
| 2.6561729316   | 0              |
| 32.1857374988  | 16.8459268882  |
| 91.9922303746  | 87.1258237029  |
| 0.5469867514   | 0.3817218242   |
| 1.6658838572   | 4.6502349331   |
| 39.1146115437  | 31.1181705018  |
| 12.2802929813  | 28.5665410008  |
| 328.7642552655 | 312.4186074039 |
| 7.0601848241   | 4.4343376889   |
| 339.6918859742 | 126.817957459  |
| 42.0201523363  | 24.1925559582  |
| 78.020883632   | 94.9159149242  |
| 13.2232547274  | 17.6171299092  |
| 6.1703192007   | 10.0474209933  |
| 0              | 0              |
| 82.6948009657  | 64.9233486331  |
| 64.3197000603  | 38.4740056182  |
| 31.3394519227  | 55.9631196122  |
| 76.0963437154  | 193.4532872472 |
| 16.9126404188  | 13.9768889865  |
| 0              | 1.5239171666   |
| 20.9777642976  | 22.5529063353  |
| 17.5057454541  | 20.615533297   |
| 28.0001066995  | 29.3103583747  |
| 3.6383667441   | 0.6347703976   |
| 23.1967201252  | 24.2821996102  |
| 0              | 0              |
| 547.0252270487 | 593.2580758718 |
| 0              | 4.3817709649   |
| 3.9183427501   | 0              |
| 0              | 0              |
| 13.9703055604  | 26.9982265188  |
| 0              | 0              |
| 2.5572085818   | 3.2122463293   |
| 0              | 0              |
| 0              | 0              |
| 0              | 0              |
| 23.9852710964  | 18.8307378368  |
| 0.4581579108   | 0.3836777538   |
| 1.9546558377   | 0.6820410093   |
| 160.3316133039 | 111.8895032593 |
| 160.3316133039 | 92.1442968017  |
| 18.1285916622  | 19.9756952488  |
| 0              | 0.5413967513   |
| 15.6116350537  | 13.6184784088  |
| 1.3171159042   | 3.102186862    |
| 0.5080434147   | 1.5954511941   |
| 36.9788152661  | 20.5751717022  |
| 0              | 0              |

gene\_expression\_table

|                |                |
|----------------|----------------|
| 430.6755751211 | 168.3818535931 |
| 4.7097195653   | 4.8205506822   |
| 2.3067362703   | 1.8110091727   |
| 1.6893886469   | 0.7368511604   |
| 0              | 0.1021346882   |
| 53.0842531278  | 38.203210034   |
| 4.786956502    | 1.0021919709   |
| 25.7534223013  | 7.3107909013   |
| 49.9923492314  | 108.6889515967 |
| 0              | 0              |
| 23.5763049127  | 26.9231420589  |
| 0              | 0              |
| 0              | 0              |
| 16.0999839782  | 8.4266875354   |
| 86.6229884335  | 15.112744996   |
| 32.8055304169  | 91.5750656246  |
| 15.119639081   | 3.1654310801   |
| 0.7610119988   | 1.9915579833   |
| 99.4339658042  | 74.347807814   |
| 154.0524114764 | 53.7537402662  |
| 0.0440579243   | 0.0922391878   |
| 17.2109836997  | 24.0218179944  |
| 0              | 9.7663646083   |
| 318.8008257437 | 552.0782774401 |
| 0              | 0.5607539816   |
| 3.9228382956   | 5.7489679069   |
| 0              | 0              |
| 0.1026314861   | 0              |
| 19.6611772847  | 8.3849385173   |
| 52.0672514889  | 40.3812939983  |
| 0              | 0              |
| 1.9672684367   | 4.5762796166   |
| 1.4491829983   | 0.433427665    |
| 6.1452239035   | 2.5731146933   |
| 16.9112452166  | 3.5405197786   |
| 0.0382235057   | 0              |
| 21.6601385078  | 47.9239872269  |
| 0              | 0              |
| 1.1982868112   | 1.2543600726   |
| 0              | 0              |
| 52.7741141489  | 46.0363780993  |
| 5.9347494215   | 4.788773715    |
| 0              | 0              |
| 50.2185270509  | 29.868454056   |
| 19.7206275455  | 4.587432207    |
| 10.4111043244  | 0              |
| 344.5046240561 | 685.1885527516 |
| 3.3859286314   | 2.835497241    |
| 0.5234341884   | 1.0958560846   |

gene\_expression\_table

|                 |                 |
|-----------------|-----------------|
| 23.8031345737   | 63.917498484    |
| 198.9585375526  | 160.2066982196  |
| 0               | 0               |
| 10.7043880943   | 17.3172738494   |
| 9.4453623543    | 15.0287774615   |
| 0               | 0               |
| 31.0634581043   | 0               |
| 0               | 0               |
| 0.0668172016    | 0.6994388079    |
| 0               | 3.5353479008    |
| 28.5595669062   | 27.0028371341   |
| 12.9804478165   | 7.6174376186    |
| 8.4802372526    | 7.8907252634    |
| 3575.7491773357 | 8822.9616969972 |
| 17.496282889    | 0               |
| 1.8603286156    | 2.1560298593    |
| 0.1439389318    | 0               |
| 37.3269881545   | 36.3974068926   |
| 3.2942579178    | 7.5536625194    |
| 3.6735442688    | 3.2960965934    |
| 0               | 0               |
| 177.4172498452  | 91.2858095645   |
| 0               | 4.5775161147    |
| 4.4286004889    | 4.1541895743    |
| 12.3944118002   | 7.8336014522    |
| 1254.5996128351 | 632.3334838813  |
| 0.231631053     | 0.4849402359    |
| 597.9808246031  | 0               |
| 716.3870363803  | 385.7961853799  |
| 57.014812132    | 42.6305665338   |
| 2.5906473223    | 2.4105559392    |
| 0               | 0               |
| 0               | 0               |
| 1.5001376248    | 2.4159013099    |
| 1.8340542681    | 0.9599389826    |
| 6.6914999059    | 12.0829789206   |
| 1.6280660257    | 3.4085012019    |
| 4.731391234     | 2.8301682493    |
| 0.520985321     | 0.9089409688    |
| 0               | 0               |
| 0.1150633413    | 0.0602238378    |
| 0.6537686933    | 0.6658652319    |
| 0               | 0               |
| 1.6188918348    | 0               |
| 0               | 0               |
| 11.4715492432   | 7.2050129603    |
| 4.173570156     | 2.7305439914    |
| 0.4592656339    | 0.4807567508    |
| 0               | 0.7763799615    |

gene\_expression\_table

|                 |                 |
|-----------------|-----------------|
| 6.4337355088    | 5.6123325848    |
| 4.8345844951    | 4.8583839139    |
| 0               | 0.3789002313    |
| 0.6520835518    | 0               |
| 102.5544040793  | 40.8965290055   |
| 5.4794888371    | 10.6523836918   |
| 2526.7423921463 | 3368.9710040179 |
| 0               | 0               |
| 28.4958534776   | 24.8577528229   |
| 167.0126204534  | 180.4675061576  |
| 0               | 0.33986092      |
| 0               | 0               |
| 12.9679981349   | 16.9685367994   |
| 0.4101176238    | 0               |
| 0               | 0               |
| 0               | 0               |
| 0               | 0.5339569825    |
| 3424.3354671919 | 1738.9459092629 |
| 52.4665655696   | 64.7291623988   |
| 29.438948017    | 84.7454563647   |
| 310.6174067115  | 337.1952894257  |
| 0               | 0               |
| 0.5598665262    | 1.7581956419    |
| 7.0856588743    | 3.054153081     |
| 0               | 0               |
| 2.3528133155    | 1.4777472573    |
| 0               | 0               |
| 2.2737209732    | 2.3801186647    |
| 0               | 0               |
| 0               | 0               |
| 90.933762438    | 53.9653972534   |
| 11.8649627759   | 64.2149631901   |
| 0               | 0               |
| 45.6808192364   | 61.4808404294   |
| 0.9842523671    | 1.0303099885    |
| 0               | 0               |
| 50.8133804469   | 36.0940071395   |
| 0               | 0               |
| 10.3705675725   | 5.5199254319    |
| 0               | 0               |
| 0.5334642855    | 0.8376412395    |
| 200.6952092302  | 84.0346584353   |
| 2.6310413695    | 1.7902038044    |
| 0               | 0               |
| 4.2679487532    | 1.0153784966    |
| 0               | 0               |
| 0               | 0               |
| 0               | 0               |
| 0               | 0               |

gene\_expression\_table

|                 |                 |
|-----------------|-----------------|
| 0               | 0               |
| 0               | 0               |
| 1.2453469281    | 0.9777167589    |
| 3.6531144621    | 1.156111228     |
| 1.9158403874    | 1.5041184203    |
| 3.0149146185    | 3.1559961141    |
| 0               | 0               |
| 133.8501816733  | 57.6938506368   |
| 0.5608754695    | 0               |
| 3.2260198318    | 3.3769798954    |
| 1733.4280269656 | 853.5700561304  |
| 13.0487926699   | 10.5549945536   |
| 116.9579885985  | 59.5150607166   |
| 29.4612773161   | 17.7563082342   |
| 10.8384252703   | 11.5637889223   |
| 132.3225168177  | 1172.0456512329 |
| 4046.0154180809 | 4343.7769200553 |
| 12.8880997432   | 22.3669766096   |
| 137.2588114075  | 365.7354201506  |
| 1024.7261271283 | 788.937146251   |
| 6.0507627894    | 16.2871852016   |
| 62.0305338782   | 179.3393783814  |
| 0               | 0               |
| 67.6050523907   | 184.6137356398  |
| 27.5203141583   | 50.9682019925   |
| 0               | 0               |
| 95.5264970706   | 120.3880804627  |
| 9.1594189906    | 15.8698421722   |
| 89.0212413219   | 60.8167449895   |
| 79.5285585864   | 34.0568425877   |
| 0               | 0               |
| 0               | 0               |
| 9.0390550799    | 6.6489964173    |
| 5.377955806     | 2.5020509733    |
| 6.3780899924    | 5.3650845642    |
| 0               | 0               |
| 0.0195076597    | 0               |
| 0               | 0               |
| 3.5168040408    | 0.566364802     |
| 5.0064121486    | 1.7468949413    |
| 11.6462566005   | 4.4331773232    |
| 2.7871289814    | 2.9175513564    |
| 9.5836588873    | 2.1497403528    |
| 1.6641922567    | 1.3065505063    |
| 2.8272807219    | 3.6994774732    |
| 0.6539895611    | 1.1409878193    |
| 10.6339998942   | 12.0592472664   |
| 0               | 0.7671571535    |
| 0               | 1.0122116951    |



gene\_expression\_table

|                |                |
|----------------|----------------|
| 22.7643944402  | 29.7870543131  |
| 0.3455819111   | 0.3014610435   |
| 2.4555255065   | 3.8556459819   |
| 8.8507355564   | 3.0883005057   |
| 0.6703306772   | 0.5613587859   |
| 0              | 0.0505131017   |
| 0              | 0              |
| 0              | 0              |
| 1.6187586969   | 1.3932619197   |
| 7.5843190188   | 8.2445783745   |
| 11.9810939238  | 7.5250461092   |
| 0              | 0              |
| 8.1894265158   | 3.6739915005   |
| 0.8267719884   | 0.5769735935   |
| 5.838616715    | 4.8894656057   |
| 0.8324706379   | 0              |
| 1.6757156422   | 2.631194938    |
| 2.0914369105   | 2.7366308824   |
| 31.2696084059  | 27.0401844481  |
| 2.6723644279   | 1.3987082251   |
| 0              | 0.2648747208   |
| 5.9853682536   | 7.4402227231   |
| 50.3947428006  | 36.267646814   |
| 0              | 0              |
| 3.7634111201   | 2.4804373559   |
| 162.0221933192 | 81.8777664513  |
| 0.7045466003   | 0.327784677    |
| 8.2620219375   | 6.9189114595   |
| 1.8771822076   | 3.7267697616   |
| 13.1229831998  | 20.306968545   |
| 71.5183906928  | 29.9460239074  |
| 0              | 0              |
| 0              | 0              |
| 2.2886644331   | 3.8332182347   |
| 18.7175350996  | 8.0678760449   |
| 0              | 0              |
| 0.3178393463   | 0              |
| 1.0253645865   | 1.5333514781   |
| 2.6933410081   | 1.1747394248   |
| 3.2983572373   | 3.8363358838   |
| 50.4372782932  | 31.3484958775  |
| 397.9687296473 | 203.6669492306 |
| 84.9061819009  | 54.315143849   |
| 15.595236135   | 12.7952763777  |
| 0              | 1.3490155653   |
| 0              | 3.0064573453   |
| 18.6309228768  | 26.0036640684  |
| 0              | 0              |
| 32.761258446   | 11.7322625627  |

gene\_expression\_table

|                 |                 |
|-----------------|-----------------|
| 11.8517194858   | 3.3835404714    |
| 0               | 0               |
| 14.0933179539   | 3.6882020161    |
| 2.7282221261    | 1.2981309013    |
| 102.112181528   | 30.1099922519   |
| 0               | 0               |
| 0               | 0               |
| 3.9011839634    | 6.1256070172    |
| 68.0591338106   | 72.6408683825   |
| 4.0673691059    | 1.7030798834    |
| 0               | 0               |
| 0               | 0               |
| 25.8708453314   | 44.4909687409   |
| 850.6145830544  | 984.1469708203  |
| 0               | 0               |
| 79.6991122863   | 113.9293707625  |
| 194.4031432111  | 41.3359671222   |
| 6.8014547898    | 0               |
| 68.6612716142   | 33.4947929297   |
| 7.5938727817    | 17.4882937825   |
| 710.9900511296  | 845.1771693349  |
| 7.4598609089    | 8.0320541677    |
| 0               | 0               |
| 0               | 0.7031955479    |
| 0               | 0               |
| 115.9103612687  | 166.1047532739  |
| 1323.31418134   | 733.3613147854  |
| 1.7593283696    | 1.8416553039    |
| 4425.5363964787 | 6756.7403683358 |
| 2.9788444087    | 3.1182380159    |
| 23.5210662809   | 31.187516294    |
| 90.2991013926   | 210.5320745338  |
| 19.751715237    | 46.520971553    |
| 44.6183351358   | 33.7322764324   |
| 0               | 2.2050484369    |
| 1228.2061578056 | 455.1077808072  |
| 301.328162484   | 143.3766684204  |
| 19.1244451076   | 5.004841105     |
| 24.0571722411   | 28.5406383301   |
| 32.9736392657   | 15.6893750144   |
| 17.7402350948   | 11.1422285749   |
| 0               | 0               |
| 0               | 0               |
| 0.2134115075    | 0.89359199      |
| 188.3881944731  | 128.0690893017  |
| 11.4549684017   | 18.933155052    |
| 0.5194524866    | 0.7250133582    |
| 380.3539758478  | 209.0300410996  |
| 45.660025297    | 48.3589781627   |

gene\_expression\_table

|               |                |
|---------------|----------------|
| 16.7693106127 | 17.5540225267  |
| 25.7242509061 | 7.6500014181   |
| 41.560564584  | 30.4537600052  |
| 0             | 2.665416479    |
| 0.2767689042  | 0.2897201734   |
| 0             | 0              |
| 1.0445120679  | 1.64008427     |
| 4.6617556425  | 5.4221114228   |
| 0             | 1.0974533355   |
| 5.9883303753  | 5.6416963023   |
| 14.9532908131 | 3.6122360641   |
| 0.3052271971  | 0.9585304759   |
| 0             | 0              |
| 0.8624140292  | 1.2036937114   |
| 1.7547502626  | 0.3673725933   |
| 329.35037932  | 503.0136632223 |
| 0             | 0              |
| 2.8754057772  | 2.0066393486   |
| 3.672451492   | 8.8192813177   |
| 19.2526355912 | 9.3016400845   |
| 0.4024899073  | 0.0601891759   |
| 7.7840065759  | 8.1482554613   |
| 5.160631101   | 7.0902829972   |
| 0             | 0.0456527339   |
| 0             | 0              |
| 1.1657140632  | 0.4745467605   |
| 7.510606313   | 7.0487448496   |
| 0             | 0              |

gene\_expression\_table

| C2_U937_2H_R1_001 trimmed (GE) - TPM | C3_U937_24H_R1_001 trimmed (GE) - TPM |
|--------------------------------------|---------------------------------------|
| 2.317960909                          | 0.272754654                           |
| 4.2696213865                         | 2.7004360431                          |
| 5.0333842936                         | 0.3948525006                          |
| 3.0770405124                         | 0.3620756145                          |
| 19.2006757283                        | 7.9830194205                          |
| 0                                    | 4.4531798217                          |
| 0                                    | 0.6572125869                          |
| 0                                    | 6.5249800596                          |
| 503.8133358894                       | 148.2093934402                        |
| 2.6826642371                         | 18.68762405                           |
| 4.4563219412                         | 0.2621878878                          |
| 1.6781833004                         | 1.5797757546                          |
| 0                                    | 0                                     |
| 90.5055176096                        | 97.7980883318                         |
| 207.5707851562                       | 52.1063928572                         |
| 0                                    | 1.429261817                           |
| 62.0162345823                        | 52.4504614832                         |
| 1.6637830476                         | 14.2917567979                         |
| 1.2433946788                         | 3.2188278289                          |
| 31.0090502215                        | 22.6227927068                         |
| 30.971658556                         | 15.4454738624                         |
| 18.6668341927                        | 17.0230915417                         |
| 0                                    | 0                                     |
| 39.0260023617                        | 29.6852473633                         |
| 0                                    | 1.0476161203                          |
| 825.4612797877                       | 404.4953115494                        |
| 38.2866658825                        | 46.3868244143                         |
| 360.2452657627                       | 94.853073916                          |
| 0                                    | 0                                     |
| 11.2666352765                        | 1.9886188731                          |
| 18.8576838393                        | 8.9768039042                          |
| 0                                    | 0                                     |
| 16.875048565                         | 13.4889865554                         |
| 0                                    | 9.796840573                           |
| 0                                    | 4.4231774962                          |
| 0                                    | 0                                     |
| 8.6362737092                         | 10.3470797793                         |
| 1.2337498068                         | 1.5243421511                          |
| 0                                    | 2.1526874889                          |
| 13.6977885583                        | 42.229682046                          |
| 23.0976813657                        | 21.3549764869                         |
| 15.5207866009                        | 15.6419986296                         |
| 0                                    | 0                                     |
| 0                                    | 0                                     |
| 0                                    | 0                                     |
| 0                                    | 0.0833082987                          |
| 0                                    | 0.1685335333                          |
| 24.5031784844                        | 4.8054851031                          |

gene\_expression\_table

|                |                 |
|----------------|-----------------|
| 10.2569831737  | 4.9082229432    |
| 1.8964746965   | 2.8173739941    |
| 0.8223452857   | 0.1935308771    |
| 75.2152151576  | 41.356349625    |
| 4.9417824058   | 1.1629998981    |
| 0              | 0               |
| 0              | 0.7538807219    |
| 11.7643101246  | 24.4560966298   |
| 49.1309494018  | 13.4895668267   |
| 0              | 0               |
| 0              | 0.1163437672    |
| 60.1551442741  | 75.2086466212   |
| 24.9791118583  | 20.8102028069   |
| 0.2310561127   | 0.2990723132    |
| 0              | 0.2362796707    |
| 52.2132615483  | 44.6831916641   |
| 2.5591860107   | 1.1041786505    |
| 9.5643851017   | 11.0132538077   |
| 27.703381558   | 26.6900974064   |
| 0.5961420912   | 1.3678877498    |
| 11.0026087834  | 12.0279752907   |
| 0              | 0               |
| 684.3111185403 | 1169.8411056115 |
| 0              | 0.1436938737    |
| 52.2575448838  | 9.8386394842    |
| 1.4178165883   | 8.6753990199    |
| 4.1785051372   | 2.3881845238    |
| 13.94791779    | 6.838552721     |
| 0              | 0               |
| 4.1603530889   | 4.6507164117    |
| 33.3323730644  | 38.8486862064   |
| 35.516730689   | 33.8739751229   |
| 30.0239701761  | 70.4506426353   |
| 0              | 0.604248659     |
| 0.3926284809   | 0.3834651974    |
| 28.519539696   | 18.7930210808   |
| 6.0293932684   | 3.1739859405    |
| 0.5745370248   | 0               |
| 0.7079992709   | 0.0833103334    |
| 143.1227312691 | 116.4453094268  |
| 1.3222606978   | 3.5785821189    |
| 1.0196233666   | 2.30839917      |
| 583.1737519224 | 1027.3206583815 |
| 0              | 0.2327726022    |
| 0              | 0               |
| 4.7912543853   | 11.9603449551   |
| 0              | 0.4410138379    |
| 3.1705187331   | 4.7877984581    |
| 0.2521146508   | 0.4449952807    |

gene\_expression\_table

|                |                |
|----------------|----------------|
| 1.7849985081   | 1.6278171591   |
| 5.9381110345   | 6.725353463    |
| 10.0978916254  | 6.8322635752   |
| 9.7377905479   | 27.5690698768  |
| 7.4866404585   | 7.1190575428   |
| 3.1145486644   | 9.7852616897   |
| 20.8525133594  | 17.282702286   |
| 1.4363372242   | 1.0985904885   |
| 0              | 0              |
| 1.1731220845   | 1.6871723466   |
| 1.0177038987   | 1.3172863318   |
| 44.8997214174  | 33.1794629622  |
| 21.2795156027  | 12.162102993   |
| 0              | 0.2076482103   |
| 8.4572604368   | 7.9613323441   |
| 9.6415300672   | 6.2398580722   |
| 0.7441551128   | 1.1237481944   |
| 0.7243419684   | 0.2414945767   |
| 93.8884843095  | 69.5888558569  |
| 0.932801086    | 0              |
| 502.403385925  | 233.5571336487 |
| 4.0625226946   | 6.8291055042   |
| 1.3624655724   | 1.0785260366   |
| 12.4529881986  | 5.2579996436   |
| 0              | 0.8172836531   |
| 0              | 0.5079762204   |
| 5.6494367856   | 2.8806686962   |
| 22.3292392374  | 15.6335265205  |
| 0.5500637623   | 0.1941781468   |
| 14.4735644501  | 68.4338771326  |
| 6.6395347348   | 13.2816683294  |
| 1.0432044103   | 3.7439954816   |
| 158.1919376539 | 256.6136069586 |
| 1.8910695859   | 27.7596589647  |
| 15.0726216454  | 9.686566318    |
| 22.632151895   | 4.4385453443   |
| 34.284163391   | 32.8654486464  |
| 0.5482049182   | 0.7498975785   |
| 1.5321366921   | 3.4705180649   |
| 28.0070146348  | 28.0124959154  |
| 2.4499618998   | 2.2522439194   |
| 0.1577973359   | 0.0612744849   |
| 0.2839257761   | 0.8352392455   |
| 0              | 0              |
| 22.6806280186  | 14.6785726785  |
| 0              | 0              |
| 0              | 0.4440163143   |
| 1.2630614443   | 0.5944981832   |
| 0              | 0.5428397113   |

gene\_expression\_table

|                 |                 |
|-----------------|-----------------|
| 0.8603922485    | 0.658075781     |
| 0               | 0.3390926858    |
| 0               | 0.2607747191    |
| 0               | 0.9809989434    |
| 2.1768744478    | 4.6961383033    |
| 0               | 0               |
| 0               | 0               |
| 0               | 0               |
| 1005.7537597494 | 1060.8974781532 |
| 3.9654825672    | 2.1120634328    |
| 1.127996737     | 1.9909720559    |
| 1.3018620384    | 3.9829455888    |
| 0               | 1.39094029      |
| 0               | 1.5794100023    |
| 0.9145515512    | 1.5281380769    |
| 17.3879470017   | 8.4764563094    |
| 19.9030229137   | 13.1151460779   |
| 0               | 0               |
| 6.7966767964    | 8.0420866897    |
| 0               | 0.9431586689    |
| 11.7750625153   | 39.0269613164   |
| 0.3281068983    | 1.2354677175    |
| 1.4856690446    | 0.1748188008    |
| 23.9863737853   | 14.5614237363   |
| 0.3667439716    | 0.2589287629    |
| 0               | 0               |
| 0               | 0               |
| 110.6786296524  | 75.8674261034   |
| 0.543813284     | 2.8795749578    |
| 1.8853239772    | 0.0633846372    |
| 0               | 0               |
| 13.5526452712   | 4.8567109309    |
| 1.844219657     | 0.8680379252    |
| 4.4104723074    | 3.6830884507    |
| 14.53562187     | 20.018106587    |
| 113.0372022581  | 18.089491981    |
| 1.2837013483    | 4.8337038412    |
| 55.2781738158   | 94.4369717032   |
| 4.7443877291    | 2.0097810033    |
| 16.4473443154   | 17.5421064965   |
| 67.6619458449   | 86.4719282365   |
| 0               | 0               |
| 0               | 0               |
| 0.3270601592    | 0.788946524     |
| 3.7121511314    | 1.7472365365    |
| 0               | 0.3287488146    |
| 5.4131204756    | 1.2739246783    |
| 4.475069108     | 21.9409065108   |
| 0               | 0.0654036916    |

gene\_expression\_table

|                 |                 |
|-----------------|-----------------|
| 5.0259662154    | 10.6453055693   |
| 8.5545994237    | 6.2913776859    |
| 5.8055798412    | 7.2868593656    |
| 20.3340511637   | 9.3189738471    |
| 126.4869877557  | 299.30259704    |
| 0               | 0.8161494332    |
| 28.2595760634   | 26.8039871716   |
| 0.9375200369    | 0.5761054305    |
| 1.2050252994    | 2.0205848458    |
| 0.4015467751    | 2.5042522585    |
| 0               | 0.0310522402    |
| 6.0548951628    | 10.1690330167   |
| 0               | 5.417092298     |
| 0               | 0.1976218475    |
| 0               | 0               |
| 74.7742901331   | 41.0041839775   |
| 2.4552670179    | 1.8890365697    |
| 0               | 0.1134595126    |
| 25.2777502918   | 8.1796962258    |
| 0               | 0               |
| 0               | 0               |
| 3.0078040278    | 4.5656783149    |
| 0.4120786442    | 0.4848932853    |
| 54.1596499507   | 17.4118659395   |
| 0               | 2.4012202226    |
| 0.8621964485    | 0.7609104616    |
| 0               | 0.1216691336    |
| 9.0687920369    | 5.2467004613    |
| 0               | 7.3156746942    |
| 1447.1797620226 | 2100.2404183255 |
| 7.2362191444    | 10.0961972138   |
| 52.9877813189   | 27.9423805875   |
| 97.6207456016   | 76.5802753368   |
| 29.6962583143   | 21.8397574989   |
| 4.0971971543    | 13.210020373    |
| 35.6745856788   | 30.3610602453   |
| 3.6119508617    | 1.4875649601    |
| 134.8558276207  | 101.5583777042  |
| 85.080111402    | 45.8055095568   |
| 0               | 0               |
| 0               | 0               |
| 0               | 0               |
| 0               | 0.1510565898    |
| 0               | 0.1165433784    |
| 1.2964470749    | 2.974784197     |
| 0.557393715     | 0.7870627808    |
| 0               | 0.0427009849    |
| 37.6665201779   | 30.1992114772   |
| 2.9263507659    | 3.7877833335    |



gene\_expression\_table

|                 |                 |
|-----------------|-----------------|
| 22.3721643835   | 12.6777317144   |
| 60.3488711952   | 77.8919096638   |
| 7.2454565137    | 6.5600792306    |
| 24.0918053084   | 13.134965989    |
| 0               | 0.1673379609    |
| 1.9505404413    | 3.1477063801    |
| 5.7783422262    | 9.0334621739    |
| 0               | 0.2147925993    |
| 8.5664498689    | 11.340167317    |
| 0               | 8.8955843438    |
| 9.8216714359    | 4.127560355     |
| 0               | 1.4936649703    |
| 590.1689665055  | 441.9242014345  |
| 1.5097138172    | 1.4211852092    |
| 2.3942067891    | 2.5355386182    |
| 21.4184983076   | 9.4511868279    |
| 545.5749804797  | 152.0475479721  |
| 0               | 0               |
| 0               | 0               |
| 2.5963778178    | 3.25883728      |
| 579.4233011073  | 333.3282983934  |
| 1.0740795964    | 0.2527740719    |
| 541.7485895381  | 91.6917560799   |
| 0               | 0               |
| 2.9711477409    | 3.9040364357    |
| 2981.8337863946 | 1308.3841602446 |
| 12.3789618935   | 11.201009185    |
| 3.8164763205    | 6.0230235313    |
| 0               | 3.0490736243    |
| 3.3306056492    | 3.2920662208    |
| 14.695695892    | 1.7292437649    |
| 10.5436974255   | 6.4101684163    |
| 5.8067428179    | 3.8719195075    |
| 27.0322852759   | 8.461170777     |
| 0               | 0               |
| 0               | 0.3145601813    |
| 1.7155676377    | 0.2018709874    |
| 0.782192184     | 1.5340103287    |
| 4.0666751048    | 4.3067339977    |
| 14.5652425159   | 7.2364383996    |
| 1.5028260439    | 0.5305129989    |
| 3.3814243391    | 0               |
| 0               | 0               |
| 10.5659184827   | 16.3215208445   |
| 1.657978102     | 0.8779248988    |
| 14.1160263682   | 3.7128995372    |
| 53.3922122      | 36.9568592684   |
| 2.0927352084    | 1.7237662891    |
| 1.5076918352    | 2.3506854728    |

gene\_expression\_table

|                |                |
|----------------|----------------|
| 24.926938785   | 10.3203600862  |
| 19.1132293446  | 7.0684595008   |
| 43.1765783749  | 34.0985858565  |
| 0              | 0.0939534583   |
| 15.6657649897  | 8.9536176869   |
| 2.4497380288   | 3.4206957613   |
| 10.329499101   | 12.3005869951  |
| 44.8399538209  | 23.3963186363  |
| 968.6396277431 | 756.1043270592 |
| 3.3550069615   | 7.500895046    |
| 49.9349873334  | 16.3218170455  |
| 1.7729753293   | 2.0688760401   |
| 66.2486248625  | 47.3199386883  |
| 13.6255678548  | 5.3444056973   |
| 8.4735771718   | 5.6335389204   |
| 4.947053528    | 1.6493405736   |
| 35.5546748901  | 12.7569215034  |
| 0              | 0              |
| 3.6500153004   | 2.6745987264   |
| 69.6283100094  | 47.520380565   |
| 11.8012574753  | 15.0106987911  |
| 5.5499253584   | 3.5621464427   |
| 0.4280236572   | 0.6295697443   |
| 0              | 2.7710888993   |
| 103.5816912992 | 101.8991629385 |
| 6.335446639    | 4.1849240086   |
| 0              | 0              |
| 2.0762653879   | 1.0994144484   |
| 0.2809537255   | 1.1901545415   |
| 26.2115906527  | 11.6879497185  |
| 4.6165408739   | 4.164753756    |
| 0              | 0.2011815935   |
| 0              | 0              |
| 10.0545473975  | 13.6058734828  |
| 0              | 0              |
| 0              | 0              |
| 0              | 0.2661672514   |
| 74.961058972   | 57.4055159847  |
| 64.6529812151  | 35.1009734229  |
| 4.3868815893   | 4.4983554481   |
| 6.7681779522   | 6.7363187229   |
| 7.266148181    | 9.6493789822   |
| 42.4721760397  | 93.1390385435  |
| 0              | 0.1294594677   |
| 0              | 1.4896531613   |
| 0              | 0              |
| 94.4932805912  | 56.7297562814  |
| 0              | 0.0651022231   |
| 24.6644638346  | 28.3655775973  |

gene\_expression\_table

|                |                |
|----------------|----------------|
| 112.2139201048 | 78.2821695209  |
| 0              | 32.6851927217  |
| 0              | 3.3035673861   |
| 5.830686945    | 7.3183724857   |
| 1.7356081877   | 0.6807638687   |
| 8.9603153399   | 4.0668212142   |
| 1.6533915211   | 8.8846654819   |
| 38.894887093   | 20.1974612474  |
| 1.166536285    | 0.2745328445   |
| 18.5138434438  | 20.6694249288  |
| 4.1299256971   | 9.5573844772   |
| 0              | 0              |
| 5.6497120591   | 3.9888125434   |
| 7.076751844    | 4.5799708978   |
| 153.4140971472 | 157.9179403622 |
| 0              | 0.6442673311   |
| 0              | 0.1132109704   |
| 1.3053502419   | 2.5088109785   |
| 0              | 0              |
| 1.9793588256   | 2.6467195293   |
| 0              | 0.0718174384   |
| 0              | 0              |
| 36.7741961904  | 24.5209288698  |
| 0              | 0.0337052078   |
| 30.3372685998  | 26.7734170029  |
| 3.3752231417   | 7.2978662555   |
| 1.363953918    | 1.24384843     |
| 292.4865561258 | 55.2838675199  |
| 10.3403430259  | 15.8325757771  |
| 3.1123666419   | 4.4863474279   |
| 2.150071217    | 2.5299905994   |
| 11.8194740661  | 6.6758328096   |
| 26.4949112539  | 14.0294629055  |
| 10.9097704731  | 8.9862752289   |
| 6.6339993471   | 2.9388169716   |
| 2.6914283577   | 8.1437297137   |
| 2.2619915504   | 2.6616873494   |
| 1.9740711078   | 2.9578146976   |
| 121.7073180747 | 103.381958715  |
| 0              | 0              |
| 73.3917458176  | 29.9926392893  |
| 19.4141451658  | 11.879213245   |
| 20.0539442126  | 17.2205513877  |
| 0              | 0.3976489553   |
| 0              | 2.1401934596   |
| 8.7633428072   | 5.4014362346   |
| 68.1051633411  | 45.579285269   |
| 0              | 0.6281645168   |
| 24.4928264867  | 20.9605304831  |

gene\_expression\_table

|                |                |
|----------------|----------------|
| 11.1885364162  | 16.8519170044  |
| 0              | 0.6191729571   |
| 41.1583815476  | 9.2249718084   |
| 23.3204023709  | 22.867614147   |
| 2.9138781812   | 5.2574364363   |
| 0              | 0              |
| 17.2223844022  | 14.9653618205  |
| 10.7689273324  | 4.2239352666   |
| 92.6128372387  | 94.0095949166  |
| 0              | 0              |
| 29.7648673054  | 14.8853463085  |
| 40.474722216   | 23.3803502937  |
| 420.613206487  | 160.8541713673 |
| 1.9302449257   | 2.5438793169   |
| 3.5787569338   | 3.8689722675   |
| 30.9094798768  | 22.7148505344  |
| 17.6664062146  | 40.2768952544  |
| 105.2863997417 | 29.8463705279  |
| 0              | 0.7766241635   |
| 21.4452380059  | 33.5410283765  |
| 46.1425146982  | 27.3567983426  |
| 0              | 0              |
| 0.3449324426   | 0.1217646881   |
| 48.240391555   | 10.1255610816  |
| 410.0331691865 | 283.2222269555 |
| 1.1029831409   | 2.7763371425   |
| 0              | 0.0594591452   |
| 55.4307317148  | 120.0997912024 |
| 0              | 0              |
| 0              | 0.1740760584   |
| 20.0417168947  | 21.0433860304  |
| 0.6100012657   | 0              |
| 0              | 0              |
| 4.0941494052   | 5.8881643696   |
| 0              | 1.3798273973   |
| 18.2101205743  | 12.2444937782  |
| 63.4670930169  | 38.7368118688  |
| 62.4363801076  | 95.4177867317  |
| 4.3725204802   | 9.2898514701   |
| 7.4871388231   | 2.328389522    |
| 5.6284849123   | 8.2125732014   |
| 7.3995276569   | 8.3862450534   |
| 0              | 0.2723626244   |
| 5.0525099608   | 1.4268702473   |
| 12.3276601799  | 0.2901193609   |
| 2.2977040721   | 1.7574116973   |
| 0.2705612894   | 0.6685763607   |
| 2.4145788163   | 1.7899792551   |
| 0              | 0              |

gene\_expression\_table

|                 |                  |
|-----------------|------------------|
| 254.471170927   | 218.4124618877   |
| 12.1989251228   | 3.0076064639     |
| 0               | 0.2897496879     |
| 1.8879201052    | 4.146832045      |
| 0               | 1.0497925076     |
| 0.0729849293    | 0.0515288564     |
| 2.789469761     | 1.9551516607     |
| 0               | 0.1010265256     |
| 0               | 0.6136585395     |
| 18.1443249556   | 23.7523671169    |
| 0               | 0.3067730929     |
| 64.1142201367   | 76.8802708727    |
| 272.3701325887  | 287.2886492597   |
| 13.0384463312   | 19.3971148187    |
| 4.5480913387    | 6.9572657473     |
| 0               | 0.2220442877     |
| 3.7389649024    | 6.5994646922     |
| 0.6929694875    | 1.4677519961     |
| 0               | 3.8508984772     |
| 8.0038980348    | 11.638196269     |
| 124.2754990228  | 22.7476796791    |
| 0               | 0.0554427227     |
| 0               | 0                |
| 0               | 0                |
| 0               | 0                |
| 86.4137354349   | 46.5601630779    |
| 12.3930141715   | 19.4438268558    |
| 62.1798411283   | 104.3593487319   |
| 0.3002476593    | 0.1059905016     |
| 69.1122204332   | 103.845012773    |
| 0.1905145177    | 2.062443049      |
| 8.3716207713    | 11.0412094215    |
| 0.3455971118    | 0.6709962773     |
| 5.4649121265    | 2.465050557      |
| 74.0415329427   | 14.7441857109    |
| 872.8712335552  | 361.6666233246   |
| 38.7465465625   | 30.7753382813    |
| 0               | 2.5830619661     |
| 0               | 0                |
| 2.5423518449    | 0.9722659513     |
| 13.3238003985   | 4.0763130392     |
| 0.7198459386    | 0.609871189      |
| 4.2293671614    | 12.0270247015    |
| 1.8092725492    | 4.151496418      |
| 9.1126250069    | 17.5139613311    |
| 48.8905233381   | 55.6658873784    |
| 6254.4872436041 | 12387.9239398958 |
| 0               | 1.2411292008     |
| 20.0916722558   | 6.3045033465     |

| gene_expression_table |                |
|-----------------------|----------------|
| 0                     | 0              |
| 0                     | 0              |
| 0.8365369507          | 0.3937414918   |
| 2.6958095892          | 0.8848660743   |
| 0                     | 4.6470481283   |
| 376.990095212         | 214.0874182671 |
| 0                     | 0              |
| 0                     | 0              |
| 1.6539575572          | 3.5031838338   |
| 76.9232909697         | 12.5716251149  |
| 0                     | 0.5705706997   |
| 10.4618822149         | 17.8502330522  |
| 337.4023195255        | 392.4184427211 |
| 23.0618649019         | 39.87946745    |
| 79.1389253421         | 58.4134175965  |
| 6.1825951684          | 10.9125973593  |
| 12.3441968049         | 38.8555164378  |
| 0.6841862311          | 0.6843201339   |
| 0.5429785724          | 0.7940904373   |
| 0.7086171528          | 0.2668257269   |
| 0                     | 0.3185852824   |
| 1.8331864125          | 1.5818821223   |
| 6.2777637326          | 9.8247762809   |
| 8.5141683454          | 20.8569640377  |
| 610.6443965656        | 544.954786382  |
| 3.0949455634          | 4.3701900399   |
| 1.9737350728          | 6.8513623479   |
| 0                     | 0.0932331099   |
| 3.4970756602          | 4.8008471636   |
| 4.2115811481          | 4.9557710598   |
| 4.6302291409          | 2.8604071141   |
| 0                     | 0              |
| 8.362683047           | 5.9042256819   |
| 0                     | 0.0447338452   |
| 9.2665013077          | 10.376291783   |
| 21.0225154809         | 18.1742778741  |
| 0                     | 0              |
| 8.2673112719          | 9.2417444845   |
| 0                     | 0.009601       |
| 0.0904865011          | 0.0319426625   |
| 0                     | 0.006048       |
| 0                     | 0.0291957599   |
| 0.3351115427          | 0.6090146503   |
| 81.2924453056         | 25.2534185347  |
| 11.9561888972         | 12.6008027831  |
| 0                     | 0.0393016739   |
| 2.575209472           | 2.6308089441   |
| 2.3546913886          | 2.5596612445   |
| 5.3832037356          | 4.8648348199   |

gene\_expression\_table

|                |                |
|----------------|----------------|
| 0              | 0.0274602465   |
| 26.2733321718  | 33.5026885343  |
| 170.9154489803 | 122.010586746  |
| 13.9905305934  | 20.347858948   |
| 1.4961359577   | 0.7042017732   |
| 5.41160462     | 2.5471358732   |
| 13.4427571454  | 14.5801650365  |
| 29.2858484717  | 37.0077763091  |
| 2.0781153659   | 3.8426458547   |
| 0              | 0.3403615553   |
| 20.8917190249  | 5.2948653158   |
| 16.0898271193  | 16.2507503505  |
| 0              | 0.2620519217   |
| 1.2346957223   | 0.3632168723   |
| 3.5732365583   | 2.9066793091   |
| 0              | 0              |
| 6.5253554273   | 7.0385252571   |
| 35.45300125    | 41.0222832888  |
| 36.2783925384  | 39.0020535632  |
| 7.4338437884   | 3.0218326159   |
| 0              | 0.1854784105   |
| 16.9207689693  | 10.9819860921  |
| 2.0290676289   | 2.3279154368   |
| 0              | 0.2691071658   |
| 10.9321060842  | 16.4473106348  |
| 12.2464132434  | 28.2031423554  |
| 40.2406219273  | 57.836076181   |
| 1.9763254971   | 2.2867848011   |
| 1.3933838127   | 1.9675150775   |
| 40.4460974291  | 51.3644739979  |
| 4.4188914816   | 2.6724107904   |
| 0              | 0.236293311    |
| 1.3465849138   | 4.4366772644   |
| 11.5217410035  | 7.0330269308   |
| 0              | 3.861209791    |
| 0              | 0              |
| 0              | 0              |
| 82.698932959   | 71.1404413181  |
| 0              | 0              |
| 1.2968298772   | 1.6633190734   |
| 0              | 0.1340175128   |
| 0              | 0              |
| 0              | 0              |
| 0              | 0.005446       |
| 3.21685872     | 2.1679332894   |
| 2.5565903157   | 3.2590371266   |
| 133.7560404017 | 195.7120937478 |
| 0.0828812466   | 0.2145581508   |
| 0.3141331008   | 0              |

gene\_expression\_table

|                |                |
|----------------|----------------|
| 0.4008627197   | 0.2240553613   |
| 4.3546972752   | 14.3476925934  |
| 0.0458538741   | 0.005396       |
| 0.2321302114   | 1.748146009    |
| 123.4216611642 | 65.2803186955  |
| 0.248132922    | 0.3601064675   |
| 1.1904663401   | 2.2132999262   |
| 1.9059907385   | 1.1534301753   |
| 7.4732305692   | 4.1770344144   |
| 2.8007014635   | 0.4394117006   |
| 10.3881475814  | 10.4920451723  |
| 0              | 0              |
| 0              | 0              |
| 0              | 0.489554643    |
| 1.6480053298   | 2.09434599     |
| 0              | 1.1198441597   |
| 2.9623947134   | 4.987450267    |
| 0              | 0.1353759853   |
| 8.6936941315   | 25.8669750957  |
| 0.1660009973   | 0.2812802578   |
| 0              | 0              |
| 0              | 0.3451447226   |
| 2.4260293571   | 2.1053491957   |
| 1.0528188046   | 0.4955411072   |
| 0              | 0.2767593611   |
| 342.4179611734 | 191.2128236993 |
| 30.5579381689  | 57.5320822462  |
| 0.5842114999   | 0.3265350263   |
| 0              | 0              |
| 4.1883051795   | 6.3083292263   |
| 0              | 0.003885       |
| 1.9046444567   | 2.8014959066   |
| 34.613645701   | 47.305577396   |
| 2.0135075538   | 1.8006649773   |
| 1.3624393752   | 1.1222284867   |
| 0.6288181732   | 2.145799524    |
| 0              | 0              |
| 105.218863804  | 59.252466988   |
| 0.0439246333   | 0.1111252285   |
| 0              | 1.3005179015   |
| 0              | 0.0197037922   |
| 0              | 0              |
| 0              | 0              |
| 0              | 3.1755744076   |
| 9.7964002286   | 6.306183576    |
| 12.2828414423  | 12.1985259506  |
| 23.8926875439  | 16.3575536979  |
| 0              | 0.1172464363   |
| 0.2769608593   | 0.1833187921   |



gene\_expression\_table

|                |                |
|----------------|----------------|
| 36.5857688474  | 43.4862386596  |
| 0.0694983137   | 0.0817787238   |
| 4.438301462    | 2.8537521984   |
| 6.049125913    | 10.0363962456  |
| 1.3538625127   | 1.8661924914   |
| 0              | 0.7079685188   |
| 33.2622812071  | 16.6183546177  |
| 0.9959460973   | 0.820351424    |
| 0              | 0              |
| 1.244756206    | 0              |
| 0              | 0              |
| 0              | 0.003312       |
| 0.1203859865   | 0.5666331641   |
| 0.3685625484   | 0.5637942166   |
| 25.2757665821  | 13.0864868989  |
| 142.7655620662 | 104.1001814455 |
| 0.3849953202   | 4.6208480163   |
| 6.3330468486   | 5.1100124737   |
| 2.0536056724   | 2.2231611514   |
| 0              | 0              |
| 0              | 0.9291353577   |
| 41.7511977427  | 30.6469318058  |
| 3.472879881    | 16.1418356107  |
| 0              | 0              |
| 7.5302214698   | 3.6213777514   |
| 0              | 0.005307       |
| 2.7315916297   | 1.1938702863   |
| 0              | 0              |
| 10.6338682186  | 11.6786895191  |
| 27.8830897913  | 16.8424949413  |
| 1.6817370201   | 1.967260762    |
| 8.5023250334   | 13.8954069147  |
| 1.9056524237   | 1.3155312432   |
| 5.8996637031   | 4.85949745     |
| 3.0412597203   | 3.9365181424   |
| 7.1546982962   | 0              |
| 2.3851937914   | 0.4209989294   |
| 0              | 0              |
| 0              | 0              |
| 2.7781541257   | 0.4903584425   |
| 0.7705791227   | 0.1208988131   |
| 1.4904529316   | 0.76729503     |
| 1.5068884749   | 1.6155429796   |
| 8.6021990198   | 3.2053680143   |
| 5.9615574471   | 2.6359279839   |
| 0.524978168    | 0.2007662311   |
| 7.7451164675   | 6.5618532186   |
| 0.1712739528   | 0.5239993293   |
| 0              | 0.0349527429   |

gene\_expression\_table

|                 |                 |
|-----------------|-----------------|
| 0               | 0               |
| 0               | 6.5784635027    |
| 0               | 0               |
| 3.3496875536    | 1.9012327764    |
| 0.4332389526    | 0.6117511654    |
| 120.1341801671  | 140.7044926608  |
| 0               | 0.1282415743    |
| 1199.9850141786 | 1469.7461493781 |
| 0               | 0.2648363531    |
| 8.7160797596    | 7.3692828099    |
| 20.6061691623   | 12.3440782129   |
| 4.6736684505    | 4.3537784136    |
| 33.6144651417   | 17.3219982575   |
| 0               | 0.1308966642    |
| 0.0677090505    | 0.1354446038    |
| 57.4849074616   | 14.4615082725   |
| 19.0080394407   | 7.1760072709    |
| 3.0385423715    | 1.2939743172    |
| 3.0476013402    | 2.5102805323    |
| 0               | 0               |
| 0.2141232795    | 0.1007836168    |
| 0               | 0               |
| 13.3060638729   | 2.9574817813    |
| 1.8612398832    | 2.7254858118    |
| 0.2520680137    | 0.2561620095    |
| 0               | 0               |
| 1.0453346369    | 0.4612673031    |
| 4.3605249037    | 3.8285402327    |
| 2.9861783816    | 1.1043492741    |
| 7.2759187116    | 5.5875572348    |
| 5.5470578386    | 0.7832673118    |
| 1.2958385367    | 1.2960921466    |
| 6.4474467702    | 4.33526629      |
| 14.5234030498   | 10.6810628231   |
| 0.4410377332    | 0.648711837     |
| 5.8712621826    | 3.750447523     |
| 4.2161336218    | 1.2853831531    |
| 0               | 4.0848748287    |
| 0               | 0               |
| 0               | 0               |
| 0               | 0               |
| 0               | 5.5132783809    |
| 2.329135844     | 1.370348048     |
| 0               | 0               |
| 87.5087098779   | 9.4390607768    |
| 0               | 0.006592        |
| 0.7361582102    | 0.8200386227    |
| 9.715857264     | 7.794993661     |
| 0               | 0.8637570306    |

gene\_expression\_table

|                |                |
|----------------|----------------|
| 24.8147353778  | 15.1150455827  |
| 62.9804502775  | 66.6982336699  |
| 0              | 0              |
| 2.1518497182   | 1.2660416817   |
| 0              | 0              |
| 3.9314088288   | 1.9275383572   |
| 14.2127854334  | 12.4428022019  |
| 5.0983359974   | 6.4728385669   |
| 0              | 0              |
| 9.359786938    | 42.5861872604  |
| 12.7294129917  | 11.2340331862  |
| 0              | 0.960137842    |
| 42.6009150687  | 76.4460119029  |
| 0              | 0              |
| 11.965409443   | 7.2054972654   |
| 2.1710864058   | 5.1094383795   |
| 0              | 4.4809949109   |
| 0              | 0              |
| 15.5318088774  | 16.4005677415  |
| 0              | 0.1366313496   |
| 14.2059593958  | 25.8171870913  |
| 0              | 0.3821774035   |
| 0              | 0              |
| 24.7741655531  | 48.9749926326  |
| 6.7027409835   | 8.1828879564   |
| 1.8714739587   | 0.6606494918   |
| 0.2686393474   | 0.7270487332   |
| 78.7804325236  | 50.6765471298  |
| 3.3181387531   | 3.6701892475   |
| 176.6809421434 | 113.4932851335 |
| 0              | 4.4034770542   |
| 2.0173470768   | 0.6330170647   |
| 4.8894387956   | 6.197988149    |
| 10.1331912247  | 19.3760687089  |
| 2.1247295384   | 4.4503044247   |
| 11.2932710555  | 15.4633326516  |
| 0              | 0              |
| 0              | 0              |
| 0              | 0.5067122226   |
| 43.0854275463  | 11.5882648304  |
| 401.6570922081 | 327.6429157402 |
| 13.4378431682  | 6.7561736448   |
| 0              | 0              |
| 0              | 0              |
| 7.1994784659   | 4.6528811428   |
| 0              | 0              |
| 1.7185782977   | 0.4044505041   |
| 22.5268743857  | 8.1415560936   |
| 0              | 0.2920319629   |

gene\_expression\_table

|               |                |
|---------------|----------------|
| 0             | 0.083069904    |
| 0.9345152134  | 0.6158011066   |
| 52.602742997  | 36.0488669177  |
| 3.4427492514  | 7.5350198184   |
| 36.9440945    | 29.3436991578  |
| 0             | 0.8524669356   |
| 0             | 0.2762001155   |
| 18.6705040604 | 9.6564045902   |
| 1.3081410095  | 2.0010778061   |
| 0.1308163148  | 0.3001667507   |
| 2.7744757427  | 1.8862872468   |
| 2.2894469462  | 6.5104858301   |
| 2.3342803521  | 5.8466528113   |
| 0             | 0.2118460547   |
| 26.3305115333 | 15.4915674729  |
| 22.4517576129 | 13.4496737266  |
| 12.7050907718 | 10.6519397937  |
| 0             | 2.3819366803   |
| 5.0603970388  | 4.9365334551   |
| 37.0365334077 | 11.7829894383  |
| 0             | 0.0797534009   |
| 41.9733474899 | 87.9875005974  |
| 72.8122469541 | 142.9444565687 |
| 20.6885610827 | 24.3442471312  |
| 0.273911116   | 0.0322311439   |
| 7.4521568911  | 7.2343913789   |
| 5.4946943696  | 4.1622373779   |
| 1.2393411566  | 2.5034729815   |
| 0             | 0.0727700706   |
| 26.2947953995 | 33.3876139347  |
| 4.8338571368  | 1.9501727095   |
| 0.2069971518  | 0.3897179547   |
| 0             | 0.1539994278   |
| 0             | 0.1449641227   |
| 9.0138337395  | 4.2426342804   |
| 0             | 2.9072519294   |
| 2.8076719913  | 2.2264671609   |
| 28.4594664064 | 45.4628742748  |
| 1.1071868969  | 1.1399742792   |
| 20.1576009889 | 6.745223128    |
| 0.3338185635  | 0.1276614895   |
| 0             | 0              |
| 1.5885461235  | 1.8692435523   |
| 0             | 0.3158600619   |
| 20.8177717277 | 22.8865332443  |
| 3.4615858406  | 2.8934127468   |
| 20.9221670851 | 16.2865023833  |
| 0             | 8.0867156185   |
| 0             | 0.3361178006   |

gene\_expression\_table

|                |                |
|----------------|----------------|
| 0.4797507534   | 1.6935693385   |
| 0              | 0.8064772108   |
| 0              | 17.3805519805  |
| 0              | 13.2206718069  |
| 0              | 0.1253904357   |
| 0              | 5.0894260313   |
| 0              | 1.4253200143   |
| 17.0652060499  | 52.918398356   |
| 0.4648679619   | 2.2099224994   |
| 7.6412969941   | 4.7954776344   |
| 4.0994569576   | 3.4972799625   |
| 0              | 2.8967586634   |
| 6.5974138311   | 10.9281721104  |
| 0              | 0              |
| 0.2810872204   | 1.124568929    |
| 5.1145564519   | 22.1473545069  |
| 0              | 0.5566598656   |
| 0              | 0.1766118102   |
| 1.2683254093   | 2.238659355    |
| 4.2931822872   | 3.2475800497   |
| 2.108777837    | 1.612910419    |
| 0              | 0.6829720831   |
| 7.2744579771   | 5.649508119    |
| 13.6603487969  | 6.8583013784   |
| 24.3385895441  | 75.6075901016  |
| 19.0175564232  | 9.6578627008   |
| 2.0361226528   | 0              |
| 43.3578304958  | 25.2094847916  |
| 358.6452517778 | 225.0763561383 |
| 21.9814560751  | 41.2925792655  |
| 7.8032869364   | 15.2652982159  |
| 7.5164683384   | 2.6533903743   |
| 78.1080080045  | 635.2586239109 |
| 0              | 0.0579447692   |
| 0              | 0              |
| 0              | 0              |
| 4.365374225    | 2.8844767973   |
| 4.421148501    | 10.0145605931  |
| 5.657752686    | 6.1581711443   |
| 0.6834522469   | 0.455724004    |
| 0.8901217591   | 2.2344683062   |
| 1.5415168091   | 3.9905890611   |
| 52.3708403741  | 0              |
| 4.0549420549   | 12.9425681823  |
| 0              | 0.5683859902   |
| 0              | 0.4583663678   |
| 0.0794897808   | 0.4302641811   |
| 0.5247180238   | 1.6670775712   |
| 0              | 0.6282913499   |

gene\_expression\_table

|                |                |
|----------------|----------------|
| 0              | 0.1179053128   |
| 0.4377384669   | 2.4466642957   |
| 0.9279412306   | 1.0919092222   |
| 0              | 20.2773106439  |
| 13.7445519901  | 11.7833502428  |
| 0.650996803    | 0.3064113931   |
| 0              | 0              |
| 48.8001012577  | 0              |
| 0              | 0              |
| 144.7553565396 | 361.9592168849 |
| 108.5665174047 | 374.734248069  |
| 0              | 0              |
| 48.8001012577  | 0              |
| 8.6931354467   | 65.4670064103  |
| 88.44320411    | 31.2213576766  |
| 0              | 0              |
| 31.8366393707  | 46.827750222   |
| 54.8111348     | 40.0798486463  |
| 0              | 1.6541868701   |
| 0.5487127532   | 0.2259847645   |
| 1.2382161913   | 1.2238884236   |
| 103.6038267107 | 48.122648507   |
| 323.5331177632 | 183.5571786201 |
| 0              | 2.3251079251   |
| 247.09438591   | 291.429217276  |
| 0              | 3.1568101121   |
| 0              | 1.4956953853   |
| 39.5739227797  | 37.7039796041  |
| 10.3471584777  | 16.6876108136  |
| 2.2339663626   | 3.9430651313   |
| 7.6360130784   | 5.5034980731   |
| 3.3439764835   | 8.263205843    |
| 0              | 1.375891508    |
| 0              | 0              |
| 510.3128553261 | 419.0249627117 |
| 389.0734473073 | 160.692858922  |
| 2.2747594873   | 5.9779887743   |
| 8.1056037546   | 3.5608050681   |
| 0              | 0.5576153876   |
| 2.0170863755   | 11.3928346812  |
| 7.5293540474   | 13.2306304937  |
| 41.2797927026  | 61.0644151568  |
| 0              | 0.5010184087   |
| 0              | 2.9298516803   |
| 7.7800110192   | 8.9050705974   |
| 0              | 3.499026463    |
| 106.2388130734 | 103.7593791726 |
| 35.6259294353  | 2.6200663104   |
| 0              | 0              |

gene\_expression\_table

|                 |                 |
|-----------------|-----------------|
| 3.141342356     | 3.1624928189    |
| 5.777577164     | 0.4079087929    |
| 0               | 4.4004945347    |
| 12.3837488613   | 4.3715902931    |
| 0               | 0               |
| 108.4649584549  | 41.4800123856   |
| 3.1752941338    | 0.7472742526    |
| 47.2218314887   | 58.0174084036   |
| 7.8748329658    | 10.8107096275   |
| 107.3602227669  | 72.9516256511   |
| 3.7339078539    | 15.3779237325   |
| 4.8421047602    | 7.5969449621    |
| 14.4647006722   | 57.5297137848   |
| 0               | 0               |
| 521.4122117516  | 425.6476663353  |
| 4.4274597525    | 8.5761250549    |
| 0               | 0.5718793151    |
| 0               | 0.7353979605    |
| 3.5516666273    | 4.048647557     |
| 0               | 0               |
| 158.2520831613  | 102.684469186   |
| 2.3110308656    | 1.9035743668    |
| 1.8211223765    | 2.1429162237    |
| 0               | 0               |
| 0               | 0               |
| 4.9525474367    | 2.1562366832    |
| 30.7041329124   | 49.1763712545   |
| 486.3204792885  | 391.0400384237  |
| 0               | 0.2488460879    |
| 0               | 0               |
| 0               | 0.1214395488    |
| 1108.1036225091 | 51.5831126832   |
| 0               | 0               |
| 16.6224970123   | 1.0478414003    |
| 3587.3866280603 | 5299.4374947937 |
| 0               | 1.065750141     |
| 2923.4561574279 | 3496.1546950787 |
| 0               | 0               |
| 0               | 0.9629284568    |
| 0               | 0.3617492127    |
| 2.5271139137    | 1.6355113808    |
| 0               | 1.8736244582    |
| 117.5953758502  | 45.5713607337   |
| 144.9816074877  | 167.045812577   |
| 209.1206589984  | 96.4604021109   |
| 0               | 0.6808395755    |
| 7.942803164     | 14.4867698467   |
| 3.5952886839    | 3.9998203361    |
| 12.3725767463   | 12.4411746565   |

gene\_expression\_table

|                  |                 |
|------------------|-----------------|
| 8.7960127893     | 6.4171708761    |
| 59.5526659416    | 76.0821579835   |
| 5.7806880341     | 26.1882407135   |
| 870.5822218433   | 778.4325853636  |
| 14.9838148744    | 44.0786687402   |
| 10099.4139205853 | 6929.606111322  |
| 4.7558593775     | 3.6515359692    |
| 138.5142752466   | 72.6663141635   |
| 0                | 0               |
| 123.3762934542   | 225.9921775304  |
| 9.0339929168     | 7.3969219693    |
| 379.1471797081   | 221.0122811204  |
| 2.2499522759     | 3.794779706     |
| 24.0590620288    | 26.3285961247   |
| 1.7880677388     | 1.6832166431    |
| 0                | 0               |
| 49.8953170357    | 39.291784095    |
| 0                | 0               |
| 42.8880263272    | 28.0533680873   |
| 0                | 0.078949023     |
| 63.6288613084    | 30.5833633427   |
| 6.3968355174     | 37.6358085201   |
| 24.3744041598    | 47.8023029385   |
| 250.9719493252   | 163.4097928268  |
| 1.5846527346     | 3.7293243965    |
| 654.2263574858   | 1359.5372270846 |
| 43.3027584189    | 13.665041505    |
| 12.1555164788    | 8.0099075886    |
| 0                | 0.7446314594    |
| 2.2569156319     | 0.9295000792    |
| 114.2189592931   | 149.6205434109  |
| 9.9663950996     | 8.9910568451    |
| 2.2297034843     | 8.6581900514    |
| 0                | 3.8771620644    |
| 85.7452694311    | 143.1469523094  |
| 1980.5839046311  | 2330.5547372588 |
| 197.1419545835   | 209.3593353309  |
| 0                | 1.8178717318    |
| 5.4497575009     | 17.6350190769   |
| 0                | 4.5167953999    |
| 75.1793040188    | 48.2126347083   |
| 7.4219261058     | 6.7683746591    |
| 4.6683995888     | 16.4799291034   |
| 60.345225585     | 65.2599882975   |
| 14.4999738121    | 22.8206006316   |
| 1.555694743      | 1.4644698443    |
| 50.2617705377    | 55.7089538408   |
| 230.5566606057   | 228.7520361552  |
| 16.9351081677    | 10.6280298381   |



gene\_expression\_table

|                |                |
|----------------|----------------|
| 2.2046767993   | 2.7040015545   |
| 52.3599252344  | 36.4932424782  |
| 18.9388788092  | 34.8881693777  |
| 30.748463825   | 18.13554037    |
| 1.5848260106   | 1.326126999    |
| 0              | 0.4416133673   |
| 7.1073336146   | 12.5448081139  |
| 22.5757477781  | 23.0583343234  |
| 7.3949866442   | 10.1860923941  |
| 268.5578448116 | 247.4794655519 |
| 5.2139110992   | 5.8898050096   |
| 102.1127614163 | 87.7140053935  |
| 0              | 7.0591450104   |
| 19.4779772989  | 16.5970619235  |
| 1.3764621317   | 3.2393682835   |
| 10.1251388966  | 7.0294130513   |
| 10.7003544286  | 8.6458996578   |
| 0              | 4.9758327151   |
| 14.9573065774  | 30.3604746525  |
| 5.028343964    | 6.6699110183   |
| 2.3667899691   | 1.3925018682   |
| 45.0462473148  | 107.5263697007 |
| 77.4174548148  | 39.3725116584  |
| 3.9919107825   | 0.2348642378   |
| 0.7376174701   | 0.5641708111   |
| 5.7263412822   | 25.1150739675  |
| 2.0471228917   | 3.661453853    |
| 143.9109353212 | 49.9553348006  |
| 13.4405620379  | 0              |
| 0              | 0.634044567    |
| 1.0989388739   | 0.2586244584   |
| 2.9070838809   | 1.0262304103   |
| 126.739151038  | 36.9445752028  |
| 2.2761884686   | 10.1778929246  |
| 190.0324669248 | 197.2366892257 |
| 549.3621145644 | 334.870847403  |
| 4.0576483498   | 3.2058285106   |
| 9.1017521185   | 4.9266180923   |
| 0              | 0.0688024554   |
| 0              | 0              |
| 0              | 0.1103808335   |
| 0.3448893507   | 0.1420410556   |
| 12.2161508579  | 2.2215530351   |
| 0              | 0              |
| 0              | 0              |
| 0              | 0.5420633017   |
| 0              | 0              |
| 0              | 0.0503109773   |
| 3.8634226505   | 0              |

gene\_expression\_table

|                 |                 |
|-----------------|-----------------|
| 0               | 0               |
| 61.9146398766   | 27.885882576    |
| 0.3255367838    | 0.9959544551    |
| 14.3567160256   | 9.1472445509    |
| 0.5531576791    | 0.0325450552    |
| 265.5505822342  | 78.1183980594   |
| 0               | 0               |
| 14.2513570045   | 1.2577187781    |
| 0               | 0.108937221     |
| 2.3165715773    | 0.8177735138    |
| 1146.0804845666 | 1100.2813436949 |
| 0               | 0               |
| 44.7127258169   | 27.8851559906   |
| 4.7692102907    | 9.5402873552    |
| 1.6963518344    | 0               |
| 23.0560828372   | 17.1824042413   |
| 8.6628878038    | 18.3485291849   |
| 60.2236416815   | 33.524695283    |
| 14.0600531835   | 16.9580882502   |
| 8.5093967847    | 17.4512535192   |
| 0               | 0               |
| 0               | 0.0591821448    |
| 0               | 0               |
| 7.5884408045    | 5.1515334474    |
| 1.2258065397    | 0.1442407581    |
| 0               | 0.211971123     |
| 11.2137544471   | 8.4727293527    |
| 0               | 0.2634637413    |
| 21.4449302737   | 31.7603710265   |
| 0               | 0               |
| 0               | 0.6758673059    |
| 28.5299419598   | 21.6238065836   |
| 0               | 0               |
| 47.4269804358   | 32.0567901971   |
| 13.1015865071   | 36.9999547246   |
| 0               | 1.3481569286    |
| 36.2761814659   | 49.3069318371   |
| 3.0826033016    | 8.3427943321    |
| 23.0974184439   | 31.5273518595   |
| 26.1185704884   | 32.0996879071   |
| 0               | 0               |
| 123.7679987477  | 177.8385826483  |
| 83.1281077092   | 76.5273502667   |
| 84.4054995963   | 17.4992419673   |
| 0               | 1.5230780648    |
| 0               | 0.1701807776    |
| 15.144859011    | 29.2263879568   |
| 42.5809363761   | 36.0214492918   |
| 6.1290326984    | 0.7212037903    |

gene\_expression\_table

|                |                |
|----------------|----------------|
| 9.3336675369   | 17.4506624322  |
| 16.3908737049  | 29.8950899382  |
| 0              | 0              |
| 0              | 0              |
| 1.230411314    | 2.5336955392   |
| 2.6181872508   | 2.1565761896   |
| 5.8560121509   | 13.4370100728  |
| 90.5084174269  | 30.4289515694  |
| 0.9768555403   | 1.0115307237   |
| 0              | 0.1101882808   |
| 0              | 0.1287574796   |
| 0              | 1.7242175287   |
| 8.3358319378   | 11.4902856276  |
| 6.0383835324   | 4.4408568459   |
| 0.2153269498   | 0.1773627813   |
| 9.7104008532   | 11.9639420678  |
| 0              | 0              |
| 87.2004342613  | 233.5700860624 |
| 25.9770976847  | 29.6939219295  |
| 27.2778483191  | 20.8381390095  |
| 7.5807108939   | 10.298809672   |
| 0              | 0              |
| 11.4071424934  | 13.5570220547  |
| 24.2676814573  | 14.9632397605  |
| 1.5907759732   | 3.4244162771   |
| 0              | 0.1033956895   |
| 126.7499467663 | 56.9953722028  |
| 12.0620244166  | 22.9121935273  |
| 7.7332502893   | 8.5472389575   |
| 0              | 0.1922067673   |
| 60.6418125165  | 80.7229133987  |
| 6.0910547097   | 4.3818566528   |
| 0              | 0              |
| 62.2846157006  | 36.7429001759  |
| 3.4438945167   | 0.8104867117   |
| 0              | 0.8854171432   |
| 2.97145231     | 1.4860169279   |
| 0.2460937532   | 0.6660310682   |
| 3.3706900331   | 1.6658433882   |
| 0              | 0.135049029    |
| 0.8759332834   | 0.5153557136   |
| 0              | 0.9727920885   |
| 23.6341297571  | 11.1241201017  |
| 6.1864494594   | 4.8275243787   |
| 0.4691178351   | 1.1040226979   |
| 1.2596611824   | 1.1561506063   |
| 3.5600497578   | 0.6283670292   |
| 0              | 0              |
| 0              | 0              |

gene\_expression\_table

|                |                |
|----------------|----------------|
| 3.0913149352   | 0.4850070493   |
| 19.3566402928  | 18.4656188749  |
| 17.1750911848  | 12.8417353538  |
| 0              | 0              |
| 4.5919684674   | 4.7549683602   |
| 9.1028239469   | 4.284520221    |
| 0.1339702497   | 0.1103500334   |
| 0              | 0.4071135858   |
| 58.6935158635  | 135.5394918272 |
| 2.4312562242   | 4.9206813202   |
| 0              | 0              |
| 0              | 0.1116528133   |
| 138.2634052909 | 130.1557317261 |
| 0              | 0              |
| 0              | 0.0702597111   |
| 3.2246135184   | 2.2450232094   |
| 10.0128705171  | 5.4379168213   |
| 14.8275347503  | 6.5092866796   |
| 0              | 0.8887267655   |
| 6.8584181412   | 2.9346568595   |
| 0.3467811166   | 0.40805763     |
| 282.3608812864 | 132.7211410963 |
| 51.5427245899  | 50.4697697973  |
| 1.6865174817   | 5.2731704976   |
| 0              | 0.0268838645   |
| 0.9572074393   | 1.1090183823   |
| 0              | 0.0178376036   |
| 0              | 0              |
| 0.1001842477   | 0.2416681206   |
| 0              | 0              |
| 0              | 0.9248609228   |
| 14.0832184441  | 5.7777129868   |
| 44.108051579   | 36.9801615962  |
| 2.6683987309   | 2.2851545525   |
| 3.5694749823   | 3.0451480431   |
| 0              | 0              |
| 0              | 0              |
| 24.5010651212  | 13.944511114   |
| 13.2097445196  | 6.4567041614   |
| 6.0349389468   | 5.5390278113   |
| 54.5722534133  | 80.9006453764  |
| 0              | 0.1347901968   |
| 4.3209950329   | 3.2201950307   |
| 0.5237692364   | 0.2993552822   |
| 0.5868995079   | 0.1381210284   |
| 1.0526658731   | 3.9947198231   |
| 3.3832002973   | 4.2994957893   |
| 338.3084731084 | 213.6081217644 |
| 0              | 0.004637       |

gene\_expression\_table

|                |                |
|----------------|----------------|
| 0              | 0.0600023893   |
| 151.9808169819 | 744.344242923  |
| 0              | 0.1210398533   |
| 3.7101318504   | 6.6940967193   |
| 36.7075187495  | 21.5968840085  |
| 0.9441489202   | 1.1109808241   |
| 50.4171140009  | 9.4360817038   |
| 1.8042387215   | 0.0424609843   |
| 1.4240505095   | 1.9921990284   |
| 0              | 0              |
| 0              | 0.0400666419   |
| 7.7551284565   | 9.0978132139   |
| 5.465169711    | 2.7009653035   |
| 200.2060570215 | 137.3843285887 |
| 0              | 0.0544185188   |
| 0.158463974    | 0.4475152579   |
| 15.2430815848  | 8.5696834955   |
| 1.3574964326   | 4.7545164529   |
| 24.299673191   | 6.3187985096   |
| 3.2539055502   | 2.7419673902   |
| 6.4202126572   | 3.4990048692   |
| 13.3739345529  | 17.2525463431  |
| 0.4302088936   | 0.4218559708   |
| 39.458976058   | 24.9455026991  |
| 0              | 0              |
| 20.0750115835  | 16.162614631   |
| 10.6223796751  | 7.4639053635   |
| 3.388985067    | 5.3835591101   |
| 0              | 0.7917672531   |
| 0.1200322993   | 1.384172649    |
| 10.0962210118  | 5.9401158549   |
| 26.9460935599  | 4.7561236247   |
| 0              | 0              |
| 5.9662982705   | 21.0616444963  |
| 21.0338395625  | 10.8045611727  |
| 25.6820411737  | 13.4936168176  |
| 30.7017616492  | 13.54754573    |
| 1.7454581672   | 2.3448487141   |
| 0              | 0              |
| 8.6481192102   | 3.0165309857   |
| 0.4124040227   | 1.0676075485   |
| 0              | 0.0164188073   |
| 0.6966642789   | 0.9837185276   |
| 4.0126329107   | 5.6660022029   |
| 2.1025194282   | 1.9654844494   |
| 7.8271888608   | 8.4619260807   |
| 6.6334089685   | 4.2207723361   |
| 13.6650142839  | 7.6788454994   |
| 1.3239819196   | 0.8568618477   |

gene\_expression\_table

|                |                |
|----------------|----------------|
| 0.6346260798   | 0.3733825194   |
| 12.5368950074  | 2.7660327829   |
| 4.981087386    | 2.3026338082   |
| 0              | 0              |
| 0              | 1.6013771484   |
| 7.3408699328   | 18.6951168603  |
| 0              | 0              |
| 0              | 2.7912711343   |
| 19.5447181775  | 6.4203549053   |
| 0              | 0.2217411556   |
| 1.5143756969   | 0.636416839    |
| 9.1130106566   | 7.6300313212   |
| 0              | 0              |
| 0              | 0.1360753726   |
| 92.9874976704  | 27.2796724173  |
| 12.3297576125  | 22.6331603098  |
| 0              | 0              |
| 0              | 0              |
| 155.07587733   | 271.9121452258 |
| 64.9596737878  | 36.0351054559  |
| 0              | 0              |
| 127.4577232461 | 61.9768680669  |
| 16.9185402829  | 14.1726430721  |
| 0              | 0.1138410275   |
| 4.81481672     | 13.4355630151  |
| 31.691610948   | 10.3587625309  |
| 5.1465658468   | 19.924135828   |
| 1.0888460727   | 12.1718378028  |
| 10.7280755541  | 12.6237354781  |
| 12.1595493123  | 16.9096340008  |
| 0              | 0.348192099    |
| 0              | 1.9887167486   |
| 122.8690240211 | 135.0377978402 |
| 2.8306489085   | 0.4996240407   |
| 9.5032407662   | 21.8058191494  |
| 5.1073791981   | 8.1617740473   |
| 7.4075590686   | 7.6705032378   |
| 7.2560500095   | 11.1772801513  |
| 6.5730748633   | 19.3363567243  |
| 628.1380926517 | 245.5054435575 |
| 0              | 0.7906081735   |
| 0              | 0              |
| 0              | 0              |
| 0              | 0.071272255    |
| 74.6811279079  | 26.0185866612  |
| 5.6218884833   | 2.4256029896   |
| 7.8703052481   | 15.8526439863  |
| 0              | 0              |
| 0.0995248523   | 0.0117110977   |

gene\_expression\_table

|                |                |
|----------------|----------------|
| 43.5244146352  | 15.3645645323  |
| 8.0787213698   | 3.295495907    |
| 2.7965269378   | 5.7257755211   |
| 0.4253387353   | 1.2011914694   |
| 121.3202174899 | 35.68940035    |
| 0              | 0.0663163811   |
| 0.684355836    | 1.2884513355   |
| 0              | 0.4020549081   |
| 9.6125089449   | 6.9606445021   |
| 4.2655924638   | 2.2085035369   |
| 129.0869989983 | 78.5002557476  |
| 43.7912932107  | 39.1016083779  |
| 7.050859889    | 9.8639171336   |
| 0              | 0.0625778951   |
| 15.2439165934  | 34.2307852838  |
| 5.0613192908   | 4.8496077523   |
| 1.1599775965   | 0.0454982203   |
| 10.3120811622  | 14.925108471   |
| 1.5549913482   | 3.0234599438   |
| 18.8549175379  | 4.4373194476   |
| 1.1818751207   | 0.2503284198   |
| 42.1119667606  | 29.0622742517  |
| 7.8784447222   | 12.1676263992  |
| 50.0988279773  | 72.6759399509  |
| 15.8011775127  | 0              |
| 0.4380857839   | 0.0515495908   |
| 0              | 1.3503298995   |
| 10.3054821342  | 26.071909312   |
| 0              | 0.253436116    |
| 12.6970040066  | 10.2093930773  |
| 5.8715807362   | 9.0969737188   |
| 0.3980727578   | 1.0148938519   |
| 24.4455071504  | 18.5665314411  |
| 0              | 0              |
| 0              | 0              |
| 0              | 0              |
| 0              | 0.1190303366   |
| 0              | 0              |
| 0              | 1.8162584271   |
| 139.9590084957 | 162.6312588374 |
| 3.2644413828   | 3.4571438152   |
| 0              | 0              |
| 0              | 0.2349491709   |
| 2.371603301    | 5.3421350971   |
| 3.9960380682   | 2.0219207751   |
| 62.3549559496  | 9.1716411029   |
| 5.5611050642   | 14.3962653575  |
| 5.5330180316   | 3.9845526509   |
| 3.8514676121   | 1.6219879523   |

gene\_expression\_table

|                |               |
|----------------|---------------|
| 28.1021805785  | 41.6785990173 |
| 17.2165698464  | 9.9804146568  |
| 4.5439028348   | 2.8961910611  |
| 114.5769812379 | 95.3871519857 |
| 1.0456410124   | 0.4921626616  |
| 18.5144757369  | 1.5082614752  |
| 7.4379436238   | 5.0637928084  |
| 3.8652772418   | 4.4573094643  |
| 7.0513172656   | 4.0380149166  |
| 0.3448216566   | 0.0405751932  |
| 9.7872069375   | 4.8945612007  |
| 0              | 0.0833151664  |
| 0              | 0             |
| 10.368701428   | 4.4329790037  |
| 0              | 0.1008227166  |
| 33.0505946883  | 26.1123019074 |
| 4.2443414019   | 2.6220180409  |
| 0              | 0.002841      |
| 0              | 0.003584      |
| 1.3241309575   | 0.4006558299  |
| 0              | 0             |
| 10.6313382184  | 2.6745313228  |
| 0              | 0.0229030835  |
| 7.7025150855   | 4.0332823951  |
| 0              | 0             |
| 16.8345626599  | 13.9538644977 |
| 7.745426893    | 7.0809160052  |
| 32.2504702261  | 24.919945308  |
| 11.3552918457  | 8.4563602916  |
| 0              | 0.0166865203  |
| 0              | 0             |
| 27.3190883167  | 78.7586654804 |
| 0              | 1.3948251532  |
| 0              | 0.0976323709  |
| 6.0024351912   | 1.6245062174  |
| 6.5412715622   | 4.1202229083  |
| 9.5517070806   | 12.8743383239 |
| 30.7231162131  | 16.6700504076 |
| 0              | 0             |
| 0.4036899572   | 0.296888944   |
| 9.8667659652   | 4.6135394643  |
| 6.4329386457   | 4.8858613114  |
| 0              | 1.4739146686  |
| 10.4761335783  | 4.1248959137  |
| 33.9893611261  | 8.4434542632  |
| 2.2543267214   | 1.1052783911  |
| 60.5981647805  | 46.3990577008 |
| 8.2556226389   | 10.0382113335 |
| 0.1264487092   | 0.3868599848  |



gene\_expression\_table

|                 |                 |
|-----------------|-----------------|
| 0.4514449567    | 0.3766801939    |
| 117.2743824039  | 48.4651636363   |
| 0.3346988136    | 0.4332244113    |
| 198.5324176344  | 115.0096058559  |
| 0.5445150774    | 7.4324836261    |
| 1.5589158163    | 2.9350040721    |
| 389.6137116541  | 256.7369170238  |
| 12.7564354944   | 13.1000799853   |
| 1767.0088299631 | 1298.6693221928 |
| 10.1119418266   | 21.9585661121   |
| 5.8757463495    | 3.3705728766    |
| 39.1306612405   | 59.0911883266   |
| 1.4362838476    | 1.4365649441    |
| 6.8119834279    | 2.5828259037    |
| 14.8322667585   | 28.5854142298   |
| 0               | 0.00692         |
| 0               | 0               |
| 4.3701583216    | 2.4426252524    |
| 59.3206425678   | 14.4974734052   |
| 0               | 0               |
| 0               | 0               |
| 0               | 0               |
| 270.8489640999  | 285.8757627728  |
| 127.1371059082  | 98.9037684734   |
| 217.4588158069  | 113.4418935687  |
| 91.3017249344   | 62.7516994042   |
| 0               | 0               |
| 7.0485738959    | 0.9676406599    |
| 0.1114343878    | 0.1180124436    |
| 0               | 5.029206128     |
| 109.7005001024  | 93.2851883533   |
| 0               | 1.4506893466    |
| 0               | 0               |
| 203.7191259485  | 144.6031584662  |
| 0               | 0.3850898477    |
| 91.6817221938   | 38.8375053097   |
| 0               | 24.4248716518   |
| 19.4174892611   | 16.25512968     |
| 137.665824385   | 62.7717026485   |
| 7.0473957599    | 18.036571356    |
| 0               | 1.5946392362    |
| 12.6824217214   | 8.6827149079    |
| 14.2249618426   | 8.639238451     |
| 14.0813116663   | 5.2470055518    |
| 5.6862851546    | 0.9367479097    |
| 5.5129657678    | 6.4060225374    |
| 0.3706230181    | 0.56694614      |
| 3.7502115463    | 1.7651508254    |
| 0               | 0               |

gene\_expression\_table

|                |                |
|----------------|----------------|
| 2.3805660556   | 4.7620639171   |
| 0              | 0.6261580435   |
| 24.0924727639  | 12.4948381836  |
| 19.0598178686  | 10.8934560483  |
| 0              | 0              |
| 46.5792415563  | 15.2684533395  |
| 12.6028141179  | 10.6897722966  |
| 37.582341692   | 29.1872941174  |
| 9.0440342099   | 5.1880347771   |
| 3.7833732694   | 7.1601367393   |
| 52.5575235028  | 42.9308781899  |
| 0.0932535509   | 1.2454528807   |
| 0.1662158811   | 0.1662484114   |
| 31.8833292177  | 8.3371422577   |
| 6.2450111627   | 11.6759656647  |
| 0.1860513159   | 0.3575803405   |
| 1.0097100213   | 2.0990237071   |
| 0.1380980315   | 0              |
| 89.2223843215  | 58.9218671879  |
| 3.7391138465   | 1.708164787    |
| 562.431146091  | 879.3896965457 |
| 145.9148173313 | 363.234265063  |
| 8.2546796765   | 14.7940855311  |
| 4.311815871    | 3.2979162724   |
| 26.4148171579  | 9.3247012334   |
| 0              | 0.9473769894   |
| 22.101794309   | 7.0540076307   |
| 0              | 0.0220622446   |
| 3.9052704102   | 7.2810529451   |
| 0.2162776446   | 0.0254494085   |
| 0.2819127937   | 0.3648997222   |
| 1.1551355449   | 1.8349860985   |
| 1.0696919095   | 1.7621903105   |
| 28.3469525138  | 22.1064477728  |
| 2.4357433906   | 1.5149603936   |
| 0              | 0              |
| 6.1668648538   | 4.1673358897   |
| 0.0244067995   | 0.0315914515   |
| 0              | 0.008599       |
| 0.083763562    | 0.0492823267   |
| 0.4647133738   | 0.4101214617   |
| 40.8595746371  | 19.8455790567  |
| 2.4245075007   | 0.2496305004   |
| 2.8629392738   | 8.1333013351   |
| 19.1416273788  | 1.6088549248   |
| 8.2874019433   | 3.5214807329   |
| 0              | 0.005104       |
| 2.9389380344   | 4.2882310457   |
| 0.6316210275   | 1.6258134185   |

gene\_expression\_table

|                 |                |
|-----------------|----------------|
| 0.1597767662    | 0.7081689451   |
| 4.5267838131    | 15.980010898   |
| 0               | 0              |
| 19.0401238278   | 11.8275075047  |
| 0               | 0.0241461919   |
| 9.3194970734    | 6.8234506677   |
| 97.0400865755   | 91.582755837   |
| 288.1879419878  | 146.9145545687 |
| 1.864252373     | 2.7055230362   |
| 0.1057655139    | 0.1078604528   |
| 0.8668099774    | 1.6049622754   |
| 26.3148038529   | 6.192930341    |
| 3.0239062852    | 1.3565763523   |
| 39.0338788236   | 54.0336675972  |
| 9.5707695278    | 3.3785797527   |
| 3.4996088551    | 2.6252203253   |
| 8.7068439279    | 3.0736051599   |
| 6.5177819551    | 1.894812577    |
| 0               | 0.2529146425   |
| 0               | 0              |
| 3.5186186565    | 8.2807230326   |
| 0               | 0              |
| 0               | 0              |
| 0               | 0              |
| 0               | 0              |
| 47.5800987262   | 56.5617731697  |
| 10.2247831207   | 9.4246834997   |
| 0               | 14.9491299065  |
| 0               | 0.3438317066   |
| 1.2406008922    | 3.5035586582   |
| 103.718858521   | 76.4483006637  |
| 0               | 4.3936453321   |
| 0               | 3.4186911253   |
| 91.8578012477   | 56.9269531568  |
| 0               | 0              |
| 0               | 0              |
| 0               | 0              |
| 1.6367013819    | 1.4564678382   |
| 2.696659537     | 1.3145954922   |
| 66.9111771088   | 31.7037337305  |
| 48.7421782888   | 17.7125617828  |
| 2568.9022014722 | 2573.424683774 |
| 0.7758954529    | 0.4108485728   |
| 0               | 0              |
| 1.5296505401    | 0.719976428    |
| 0               | 0.209858389    |
| 2.1809280652    | 1.924724909    |
| 1133.9950684809 | 385.5877684249 |
| 3.375704124     | 3.4495367787   |

gene\_expression\_table

|                |                |
|----------------|----------------|
| 0              | 0              |
| 70.2171505603  | 26.948324488   |
| 8.9658151905   | 6.054829804    |
| 19.3416028205  | 35.6562056738  |
| 11.7668143465  | 17.223098402   |
| 128.0415831848 | 74.5606695918  |
| 3.3987077941   | 0.9998155761   |
| 0.7634957172   | 0.1796812098   |
| 0              | 0              |
| 410.423626122  | 336.2638743758 |
| 3.5710944189   | 4.2667576327   |
| 10.3173401642  | 23.1030433905  |
| 229.0456365482 | 93.6367327241  |
| 3.0796299621   | 2.7655339847   |
| 0              | 0.6039628217   |
| 76.4681235675  | 117.2240811897 |
| 0              | 0              |
| 4.933371935    | 10.0621783296  |
| 1.3999364993   | 1.9493126322   |
| 21.2721259622  | 7.1963919187   |
| 2.1339070531   | 0.5021940429   |
| 3.0947390492   | 2.6704934871   |
| 12.7024042712  | 7.3855417494   |
| 0.2058454568   | 0.6378421058   |
| 27.4034854901  | 11.8042310377  |
| 0.4980286604   | 2.422260397    |
| 0              | 0              |
| 0              | 0.0196199789   |
| 4.2934548096   | 1.9703236276   |
| 5.9951728293   | 3.4567171927   |
| 48.5467428355  | 22.0883305887  |
| 0              | 0              |
| 7.2161464145   | 8.0666832459   |
| 91.742880903   | 151.604859467  |
| 12.1092296145  | 10.105787114   |
| 2.5316384408   | 0.1985987381   |
| 4.1494631145   | 5.9522154272   |
| 1.9446240198   | 1.9286600275   |
| 0              | 0              |
| 0.0597931283   | 0              |
| 1.963698636    | 0.7317171787   |
| 2.094833615    | 2.2801180319   |
| 0              | 0.9445018012   |
| 13.8866243588  | 8.421592057    |
| 0              | 0              |
| 255.1637841633 | 142.4269643025 |
| 0.833281522    | 2.8435168856   |
| 4.9627221618   | 0              |
| 0              | 0.4095741266   |

gene\_expression\_table

|                |                |
|----------------|----------------|
| 2.8191225732   | 3.1153434793   |
| 0.3467545675   | 0.5385948343   |
| 93.0271506645  | 87.5721008004  |
| 24.4350722311  | 21.3703019775  |
| 3.4491876148   | 2.2999084391   |
| 0              | 1.8377658269   |
| 0.3302431789   | 1.4572403431   |
| 0.1762732838   | 0.6844890375   |
| 0.5215793282   | 0.521681407    |
| 5.2074841345   | 3.1738089468   |
| 1.3806169139   | 0.9747438464   |
| 17.3484253981  | 10.2947550878  |
| 42.848869397   | 41.887634229   |
| 3.2153287156   | 6.1376453157   |
| 32.547633045   | 57.1498081248  |
| 0              | 0.5884216718   |
| 10.4760607687  | 2.7393754376   |
| 0              | 0.0414940249   |
| 0              | 0              |
| 15.9539899382  | 9.7888167949   |
| 90.1345153827  | 44.2806176517  |
| 0              | 0              |
| 0              | 0.1599996869   |
| 26.3760328909  | 46.2964107814  |
| 17.1105355035  | 17.2915370007  |
| 865.5262258895 | 938.8399545983 |
| 2.4658466375   | 0.5803127602   |
| 6.8948337727   | 0.8113156668   |
| 5.4954756428   | 1.6166326964   |
| 246.5532035984 | 112.5663120316 |
| 72.918192336   | 16.4455554337  |
| 120.1233261728 | 173.5945088301 |
| 13.8367486382  | 17.9098850661  |
| 0              | 0              |
| 18.4749905335  | 71.7404714874  |
| 9.9385703245   | 17.2079510492  |
| 11.7736151434  | 7.3645068502   |
| 50.6382970142  | 27.5585834848  |
| 57.6615007188  | 71.4044013531  |
| 0              | 0              |
| 63.0932114839  | 56.5994202389  |
| 42.736342995   | 68.9886998475  |
| 0              | 2.2098693399   |
| 0              | 0              |
| 0              | 0.3667078779   |
| 6.7221845448   | 6.7800001514   |
| 0              | 8.7099063524   |
| 14.7989675961  | 16.6969122383  |
| 25.2088920862  | 20.4153467957  |

gene\_expression\_table

|                |                |
|----------------|----------------|
| 19.0120610295  | 9.6702647986   |
| 243.2160560626 | 163.7814714458 |
| 0.7089538066   | 0.2085566343   |
| 0.5604064389   | 0.9384206477   |
| 12.5925487321  | 13.0580651894  |
| 0              | 0.0438544498   |
| 40.3914185629  | 14.4806811391  |
| 0.9716590038   | 0.8003463738   |
| 17.9204432555  | 10.2105476437  |
| 26.3300856164  | 6.7058303226   |
| 0              | 0.1282311788   |
| 0              | 0              |
| 0              | 0.0155998696   |
| 13.8370615051  | 30.9359555097  |
| 0              | 0.4786770973   |
| 1.3733388902   | 0.819547432    |
| 0              | 0.0115332032   |
| 1.3545725595   | 1.0061662065   |
| 0              | 0              |
| 0              | 0              |
| 4.5670911155   | 2.750274673    |
| 13.0239770808  | 10.6470677037  |
| 2.6701129941   | 2.9244063648   |
| 3.605013755    | 3.3936181608   |
| 0              | 0.4405289843   |
| 11.5790793171  | 10.0674441015  |
| 2.9504360953   | 2.195901243    |
| 0.6006726376   | 1.0013169931   |
| 0.2563083785   | 0.1407458656   |
| 0              | 0.0708485653   |
| 24.6144950937  | 11.5855587863  |
| 0.0990773558   | 0.093267526    |
| 9.2521704023   | 5.4435183257   |
| 1.799790374    | 0.4428158299   |
| 1.4990955006   | 3.8631313755   |
| 1.4953545043   | 2.0675122529   |
| 20.9001920758  | 11.3743889927  |
| 7.3483559554   | 5.5418233659   |
| 84.0951583214  | 50.4134808965  |
| 15.4758638044  | 6.6771693573   |
| 6.6143206268   | 11.5448969777  |
| 1.0403402384   | 0.7345015372   |
| 52.9551304311  | 21.5867771018  |
| 0              | 0              |
| 0              | 0              |
| 2.2836392113   | 3.869510645    |
| 0              | 0.0570614426   |
| 0              | 0.0660476793   |
| 714.6470755609 | 186.3284246905 |

gene\_expression\_table

|                 |                 |
|-----------------|-----------------|
| 35.7772760345   | 43.3019835113   |
| 1.7308410298    | 0.9892455854    |
| 8.5913634105    | 5.3917144061    |
| 2.4255260877    | 3.5042233631    |
| 0               | 0               |
| 0               | 0.3506820687    |
| 0               | 0.0430046249    |
| 4.0244246681    | 3.4727321737    |
| 0               | 0.005681        |
| 6.5122216357    | 3.4692204088    |
| 75.8018400708   | 64.9565408703   |
| 0               | 0               |
| 0.4419143323    | 1.2133355837    |
| 0               | 18.0575029557   |
| 2.0586080638    | 1.04969186      |
| 1567.1273420767 | 1547.1550132672 |
| 0.899541037     | 0.9277359583    |
| 1.0646512707    | 1.169257638     |
| 12.3220455709   | 13.1115653171   |
| 10.3357182676   | 9.7875531806    |
| 13.9731309458   | 9.4542620513    |
| 0.6555952296    | 0.8540936824    |
| 0.7812716107    | 0.7150289672    |
| 0               | 2.0578783265    |
| 0.3960923184    | 0.5762470371    |
| 1.2983924278    | 0.8657643583    |
| 8.8060333097    | 4.7369448052    |
| 0               | 8.3364027997    |
| 16.1763777712   | 13.1974316963   |
| 14.8595464037   | 15.2121593939   |
| 2.4220764979    | 3.7763287594    |
| 28.0308289323   | 20.3021590464   |
| 1.4474993519    | 4.3575418779    |
| 0               | 0.1330031907    |
| 347.3999732843  | 234.0737395792  |
| 4.4270063935    | 2.942529147     |
| 0               | 0.3211996056    |
| 61.5234520548   | 34.2922251291   |
| 4.8862289626    | 4.8756859919    |
| 6.5755147574    | 3.4818361719    |
| 0.517925603     | 3.4738278944    |
| 0               | 0.1996244649    |
| 0               | 0               |
| 0               | 2.4676779881    |
| 1.0184852034    | 0.2037369064    |
| 15.7560865047   | 0               |
| 14.0112096316   | 8.8120183602    |
| 5.6106359511    | 5.0473660773    |
| 0.0577787083    | 0.5303083838    |

gene\_expression\_table

|                  |                  |
|------------------|------------------|
| 3.1440031768     | 4.0166555538     |
| 0                | 0.3008335933     |
| 23.7994951855    | 16.9264825024    |
| 0.6439788759     | 1.5913180121     |
| 13890.7987543513 | 20066.1757221035 |
| 20.6259967248    | 11.1914560595    |
| 5.7050737203     | 9.364004539      |
| 6.824278462      | 18.3800848882    |
| 16.7288514458    | 15.0702075074    |
| 9.3640616703     | 2.4697084414     |
| 0                | 0                |
| 1.432357531      | 0.6564408766     |
| 0                | 0.9221230944     |
| 1.4116370083     | 1.1904366881     |
| 10.5752945852    | 8.5996638212     |
| 6.7426443415     | 2.8761022733     |
| 5.3821565498     | 7.9895603901     |
| 4.8353200466     | 9.1604574808     |
| 3.3790592932     | 3.5785277071     |
| 0.4197721395     | 0.5680381618     |
| 28.0212283014    | 43.1941096429    |
| 0.8186757085     | 0.6984188834     |
| 31.2570653024    | 14.5994934601    |
| 1.9789227299     | 2.8719400389     |
| 360.2537725749   | 239.6258830588   |
| 2.0313317373     | 0.9744945922     |
| 14.8626632462    | 10.3343548891    |
| 0                | 0.1097627818     |
| 0.4667372292     | 0.9580664869     |
| 7.4565299414     | 4.9719928442     |
| 0.5099107753     | 0.4010609439     |
| 95.6417929431    | 151.686743933    |
| 14.5089981571    | 12.2654232186    |
| 1.6797834899     | 1.275807157      |
| 4.2193359845     | 8.5727207414     |
| 4.0438349261     | 4.7964510115     |
| 33.2801232597    | 24.331022663     |
| 0.6305416372     | 3.8581861342     |
| 95.6278912972    | 73.1153540886    |
| 104.7008026616   | 36.3862122385    |
| 1.5438258517     | 1.126305126      |
| 4.0716092069     | 8.3100213021     |
| 8.8497206982     | 5.206736874      |
| 34.3297044185    | 17.7959840012    |
| 4.2298643145     | 3.4840994139     |
| 28.8478289737    | 7.0404993003     |
| 26.4964615873    | 25.9614272865    |
| 0.5385814247     | 0.443624449      |
| 35.3386302314    | 61.2468191678    |



gene\_expression\_table

|                 |                 |
|-----------------|-----------------|
| 9.7760668259    | 7.1896912571    |
| 0.1716177054    | 0.403885395     |
| 1.6612229193    | 3.2449055818    |
| 0               | 0               |
| 4.868006426     | 9.4009661066    |
| 9.1998953122    | 9.2016958328    |
| 2.183586002     | 3.9153180572    |
| 1.7984172903    | 2.0415097487    |
| 19.7759557683   | 9.747217321     |
| 29.0882133581   | 31.4093382258   |
| 2.7700899621    | 11.4084851141   |
| 0               | 7.3117541826    |
| 3167.4637967666 | 3196.0049174618 |
| 0.4697107602    | 0.2763545222    |
| 10.3131294043   | 11.9043162252   |
| 37.6669902721   | 36.0491935542   |
| 1009.0649785279 | 208.7055094554  |
| 101.1606221393  | 47.2423286356   |
| 0               | 0.1491313976    |
| 0               | 0               |
| 0               | 1.1060095091    |
| 0.6536612129    | 0.9999128048    |
| 45.4244058718   | 17.816978795    |
| 5.4574527247    | 18.8372482791   |
| 3.750029612     | 7.0602607699    |
| 26.3667028474   | 12.8699288336   |
| 3.5353513638    | 4.1743959101    |
| 0.4136150597    | 0.5645733766    |
| 0               | 0.0104942269    |
| 0               | 0               |
| 0.5937016443    | 0.7510049131    |
| 8.7758185979    | 34.3069712483   |
| 0               | 0               |
| 4.46301157      | 3.1509776685    |
| 36.9995023895   | 9.5782159903    |
| 151.9000293537  | 118.0386277637  |
| 1.9472833634    | 3.2079179475    |
| 0.5172555589    | 0.3347602768    |
| 45.0112735203   | 10.8136473203   |
| 17.2158931831   | 6.0773867727    |
| 3.0231502411    | 8.6392625851    |
| 0               | 0.085205169     |
| 9.0201830181    | 20.0959477353   |
| 0.7660015418    | 1.4241403549    |
| 50.9686479568   | 33.6222647774   |
| 42.5043885357   | 22.2480292796   |
| 64.6624668673   | 65.7620988635   |
| 2.1275164853    | 1.1444344813    |
| 19.3660710881   | 8.8946990898    |

gene\_expression\_table

|                 |                 |
|-----------------|-----------------|
| 2.5921985376    | 1.8301453125    |
| 38.3144289428   | 77.2074127527   |
| 0               | 0               |
| 32.8877469334   | 18.5755388764   |
| 23.2642537296   | 120.4502940222  |
| 66.5761601908   | 54.8381563694   |
| 1013.5405645827 | 651.9732698048  |
| 0               | 0.2186705982    |
| 0               | 5.9150842386    |
| 0               | 0.7841226037    |
| 21.8606788439   | 13.7191888433   |
| 0               | 0               |
| 220.0058718854  | 95.1562938174   |
| 65.160828847    | 48.1955897083   |
| 1.6480334383    | 0               |
| 160.8138357901  | 116.7361147729  |
| 0.2130656358    | 0.1253572559    |
| 0               | 0               |
| 18.465250835    | 42.3697484009   |
| 108.0866112836  | 32.6169537731   |
| 0               | 0.0594276786    |
| 25.0548944614   | 22.1115864526   |
| 2.0012468516    | 2.0251872061    |
| 0               | 0.002935        |
| 0               | 0               |
| 30.1110474538   | 20.5630371175   |
| 0               | 0.0126330162    |
| 0               | 0.0376944527    |
| 1621.2739522948 | 2008.6241895051 |
| 5.4673343796    | 3.8085828271    |
| 0.1092237005    | 0.1028188958    |
| 141.0023355728  | 111.9390513373  |
| 36.3932958532   | 26.5865801214   |
| 0               | 1.8260303146    |
| 218.341363671   | 120.7919053114  |
| 0               | 0.5025593791    |
| 539.6115908703  | 119.7768114961  |
| 19.5374535633   | 12.0358039857   |
| 514.7051842094  | 522.5642956234  |
| 2.1517470324    | 9.3682613717    |
| 205.8360682299  | 325.1169550279  |
| 0               | 3.832816965     |
| 7.4897642651    | 4.3086813614    |
| 28.3313885032   | 21.0026681864   |
| 0.5139858529    | 0.1209615166    |
| 1.1621167898    | 1.1395531655    |
| 0.2420809753    | 0.5127423951    |
| 23.0978464592   | 12.1358535065   |
| 22.7399302838   | 14.2124963532   |

gene\_expression\_table

|                 |                 |
|-----------------|-----------------|
| 53.531413014    | 12.1256632556   |
| 2.9690555173    | 14.8918540967   |
| 9.0080495896    | 5.8677350731    |
| 0               | 0.052228495     |
| 3.7734615764    | 2.3311235815    |
| 10.3733276141   | 5.4731488902    |
| 0               | 0               |
| 0               | 0               |
| 0               | 0.1997676843    |
| 2.8940665675    | 2.3838153856    |
| 0.1640325615    | 0.2316207027    |
| 11.4871947154   | 11.449687028    |
| 1.0912286008    | 2.9533140968    |
| 4.5640500923    | 7.1734823711    |
| 1.6357575841    | 1.4435979881    |
| 0               | 0               |
| 39.5600897277   | 32.3370047208   |
| 0               | 1.0137507409    |
| 1.0224242155    | 1.9249398874    |
| 0               | 0               |
| 15.1707993918   | 13.3074761036   |
| 2.9777792871    | 1.6245611298    |
| 0               | 0               |
| 0               | 0.6483585575    |
| 0               | 0.1123329324    |
| 33.5646375997   | 35.5459834252   |
| 147.4256185569  | 84.3680356927   |
| 9.9379213121    | 7.0163761923    |
| 98.6206676649   | 58.5895941016   |
| 36.5708315914   | 42.9372993945   |
| 15.4206195922   | 10.1724525909   |
| 25.4913091746   | 15.8548408377   |
| 9.4006961229    | 15.1848441423   |
| 0               | 0.0365770006    |
| 1.6969476728    | 5.9903992381    |
| 0               | 2.9879392411    |
| 15.4846475145   | 10.3965727953   |
| 0               | 5.2120788656    |
| 40.4406220288   | 17.9015932747   |
| 106.9004359456  | 22.9262113882   |
| 0               | 0.0410761577    |
| 16.3943500302   | 8.3595396706    |
| 0.2553898623    | 2.0735705054    |
| 3.168558474     | 3.1225730281    |
| 2088.9274977295 | 1902.5889212911 |
| 111.3072897804  | 146.0236162512  |
| 0               | 0.0704054601    |
| 3.5451473828    | 2.0099420746    |
| 0               | 0               |

gene\_expression\_table

|                 |                 |
|-----------------|-----------------|
| 4.9127881648    | 2.6926739576    |
| 52.5359941769   | 56.3790632425   |
| 31.0844919643   | 10.9731443086   |
| 4.8303043424    | 1.4615545269    |
| 0.5429240911    | 0.1916577696    |
| 0.8577816431    | 1.7158990409    |
| 0               | 2.9935617377    |
| 0               | 2.7721023416    |
| 38.3605010344   | 31.1342211615   |
| 29.2816452592   | 32.6098934443   |
| 0               | 0.784826241     |
| 21.1067625351   | 5.2683156336    |
| 67.2889733917   | 32.2500731584   |
| 5.8201506168    | 2.6633351497    |
| 0               | 0.0838362559    |
| 0               | 0.0459914558    |
| 4.4925816804    | 3.8767113888    |
| 11.9806820199   | 5.0125079304    |
| 0               | 0               |
| 1619.9007101938 | 1841.5589642294 |
| 0               | 0.6500730563    |
| 56.5313092234   | 58.8249371001   |
| 9.429562248     | 8.9999054031    |
| 0               | 1.2627665426    |
| 1.9862110178    | 1.0809439768    |
| 3.8259628192    | 4.25959753      |
| 0               | 0.0618931832    |
| 0               | 0               |
| 10.3459258922   | 0.6880990238    |
| 2.8403845167    | 0               |
| 0               | 0               |
| 0               | 0.0248080508    |
| 2.6040749357    | 5.5155908791    |
| 0.3614382856    | 1.5098318022    |
| 9.9844175138    | 7.4163494778    |
| 3.3687509977    | 3.879069        |
| 11.9268101469   | 12.0293892653   |
| 0               | 0.0291727248    |
| 2.3247772564    | 1.671735598     |
| 0               | 2.2944526612    |
| 5.5466845101    | 5.9191218054    |
| 0               | 0               |
| 0               | 0               |
| 0               | 0               |
| 2.8587981341    | 3.4760818275    |
| 13.7770947511   | 6.4548616608    |
| 1.6522017511    | 0.6845018205    |
| 2.511703848     | 1.2807270749    |
| 0               | 0               |

gene\_expression\_table

|                |                 |
|----------------|-----------------|
| 0.5150571191   | 0.4424297443    |
| 1.8932398523   | 0.5728569217    |
| 12.4569231401  | 2.9316143757    |
| 0              | 0.093674791     |
| 0              | 0               |
| 0              | 0               |
| 0              | 0.1112951926    |
| 0              | 0.1853480305    |
| 0.3980317624   | 0.0234182154    |
| 16.2594546729  | 13.4490318396   |
| 0.4505406555   | 0.1295926051    |
| 8.5378616944   | 9.2810606928    |
| 7.2028205363   | 5.1046016176    |
| 2.4588396087   | 1.4466593121    |
| 4.5224756845   | 7.9469240417    |
| 0.3819553528   | 1.0786732396    |
| 11.2778493886  | 7.9046943863    |
| 0              | 3.7740537294    |
| 0              | 0.1045064365    |
| 14.153188512   | 4.9061986349    |
| 11.5162644246  | 5.8076562777    |
| 7.1112567058   | 8.7862127997    |
| 121.5263471022 | 69.0956497706   |
| 2.2615377528   | 2.4837431411    |
| 8.8680476287   | 15.6525585938   |
| 46.3687059515  | 19.8991170287   |
| 0              | 0.8912812454    |
| 0              | 0               |
| 0              | 0               |
| 0              | 0               |
| 6.1345157878   | 2.6249054032    |
| 14.7579019317  | 8.0378084534    |
| 0.3069676287   | 0.1083627196    |
| 7.2657224281   | 1.9430867406    |
| 0              | 2.2002472673    |
| 3.582876231    | 8.8535442617    |
| 3.2120627345   | 2.813729697     |
| 48.8375763777  | 22.447139448    |
| 86.256984448   | 45.6101599259   |
| 5.6921473043   | 8.3724431178    |
| 3.3289654223   | 5.3458209653    |
| 8.0468011882   | 16.6227897207   |
| 2.2085952225   | 3.59508392      |
| 2.2378627624   | 1.5799769906    |
| 0.2988639226   | 0.4923427988    |
| 937.3989599797 | 1025.4618315362 |
| 0              | 0               |
| 0              | 0               |
| 52.3708403741  | 30.0420956912   |

gene\_expression\_table

|                |                |
|----------------|----------------|
| 1.0294274009   | 0.4744368328   |
| 0              | 0.0136907748   |
| 133.4318699932 | 24.8917330416  |
| 12.02453357    | 31.2532597386  |
| 0              | 0.4014043338   |
| 0              | 0.0331364472   |
| 3.7198802887   | 2.1521165716   |
| 210.9994561441 | 47.3788194493  |
| 91.0586339822  | 59.4860417054  |
| 0              | 0              |
| 149.4151992068 | 137.0256222766 |
| 3.9054545653   | 3.4849600041   |
| 8.9061805424   | 8.8771003148   |
| 8.6734319688   | 6.6339225242   |
| 0              | 0              |
| 15.0975313266  | 8.0930709707   |
| 1.7824876722   | 12.0603647254  |
| 0              | 0.6711793243   |
| 109.9955323973 | 22.6505711213  |
| 6.3239280759   | 4.9750883453   |
| 35.7566427382  | 22.5674310338  |
| 2.6767560216   | 2.2048187347   |
| 16.3776440558  | 7.2497876634   |
| 2.4468298983   | 2.8791867881   |
| 5.1780466875   | 3.0247451775   |
| 17.8266720284  | 5.1371411968   |
| 0              | 5.17311955     |
| 0              | 0              |
| 50.9117831734  | 55.7143821966  |
| 345.2052617376 | 197.424601667  |
| 0              | 0              |
| 109.8695899447 | 165.1957601642 |
| 171.7913273488 | 56.2840662735  |
| 7.967774096    | 8.203725638    |
| 0.896371506    | 0.9102197648   |
| 15.6826504864  | 6.2343878194   |
| 18.0341128765  | 18.3913216123  |
| 5.2699318511   | 6.821246539    |
| 63.0267441013  | 53.6944626924  |
| 0              | 4.5289717651   |
| 7.3144739205   | 6.2780088235   |
| 3.0023653573   | 2.6972224489   |
| 4.0081538502   | 6.2513711517   |
| 0.5984034216   | 0.211242542    |
| 7.6277245305   | 4.3755805447   |
| 3.6040066024   | 3.3004779455   |
| 0.6325298161   | 1.5010017001   |
| 3.2898944668   | 2.8623577676   |
| 0              | 0              |

gene\_expression\_table

|               |                 |
|---------------|-----------------|
| 10.230666872  | 11.7767291731   |
| 0             | 0.0460678582    |
| 73.9390658261 | 30.4823087509   |
| 38.0875275739 | 26.606919475    |
| 715.734818446 | 1016.6200019521 |
| 0             | 0               |
| 0             | 1.043557627     |
| 2.1635512873  | 3.1823157618    |
| 0             | 0               |
| 1.3023996739  | 2.7194340666    |
| 0.5488508855  | 0.2524621067    |
| 2.6994564052  | 14.1268550285   |
| 0             | 0               |
| 5.0850381803  | 2.966852804     |
| 0.2338092379  | 0.7428335196    |
| 2.6893843378  | 1.645592416     |
| 64.1453543974 | 22.7189973662   |
| 0.3279176016  | 0.2186545191    |
| 22.3175122118 | 28.762086267    |
| 0             | 6.4113781653    |
| 48.6796815137 | 28.5238101167   |
| 0             | 0               |
| 11.2276011083 | 6.3541156627    |
| 0             | 0.0638869489    |
| 77.2151257096 | 28.6619170404   |
| 0.5062304212  | 0.9445810766    |
| 2.9382950548  | 1.3445810967    |
| 0.2456560482  | 0.4480486999    |
| 26.7693335695 | 14.7568296678   |
| 13.8158723978 | 10.9080222911   |
| 0             | 0               |
| 0             | 0               |
| 0             | 3.327090642     |
| 0.5115301057  | 3.1299730969    |
| 0             | 0               |
| 0             | 0               |
| 1.2343408341  | 0.9440924297    |
| 0             | 0.1630835551    |
| 0             | 0               |
| 0.5163617929  | 0.8303912499    |
| 0.0731835193  | 0.2497338142    |
| 1.5154657281  | 7.9800428096    |
| 0.2433074487  | 0.1775060486    |
| 10.3291678326 | 9.35884213      |
| 3.2612461351  | 5.4492656982    |
| 0             | 0               |
| 0.5717295546  | 0.6727546451    |
| 0             | 0               |
| 3.1379134689  | 1.7025999361    |

gene\_expression\_table

|                |                |
|----------------|----------------|
| 4.28480057     | 2.7730606281   |
| 24.8465699278  | 9.012903491    |
| 0              | 0              |
| 0.5305232553   | 0.2184935054   |
| 6.7373062515   | 6.7826681158   |
| 1.8286876962   | 3.8302366482   |
| 10.7488778018  | 10.3118073955  |
| 0              | 0              |
| 0              | 0.0123413506   |
| 1.1941198825   | 2.0608454013   |
| 1.6809011356   | 1.6953580905   |
| 0              | 0.0157422455   |
| 2.9621556408   | 1.7737683637   |
| 1.4544262287   | 2.7953267811   |
| 0.4904719508   | 1.0677066963   |
| 13.6953077588  | 5.9984653688   |
| 1.9899948613   | 0.7805428726   |
| 0              | 0              |
| 2.8460736521   | 1.42331533     |
| 0              | 1.0984629193   |
| 7.554831826    | 6.5685573975   |
| 39.6202059241  | 27.4546651215  |
| 21.3092654424  | 2.8208959279   |
| 0.6729524872   | 1.3461683828   |
| 33.2060330935  | 12.3522888962  |
| 301.836708692  | 129.0284897147 |
| 44.0034309633  | 48.4995453336  |
| 1.4305271064   | 1.1871711964   |
| 0.0404979245   | 0.2763928613   |
| 0.6679861769   | 2.1222537114   |
| 0              | 1.8023927022   |
| 23.4706570006  | 14.925440847   |
| 1.7678196454   | 1.9289079569   |
| 2.434717545    | 2.5211420711   |
| 3.3984313622   | 1.5195960701   |
| 8.0773706766   | 9.1244628783   |
| 62.8249781673  | 64.4317604668  |
| 6.621557084    | 4.1008377681   |
| 61.5119294035  | 18.0024883636  |
| 0.702431971    | 2.0112772337   |
| 354.7110101429 | 106.2444071403 |
| 34.9982012038  | 19.9048327717  |
| 51.7921936333  | 37.888718565   |
| 123.7890113042 | 207.5300956115 |
| 0              | 0.1503503223   |
| 1.5052452368   | 1.7712233292   |
| 72.2616884008  | 87.9153488183  |
| 7.5023854273   | 6.0261127114   |
| 12.5036566634  | 7.7824360899   |



gene\_expression\_table

|                 |                 |
|-----------------|-----------------|
| 7.312936168     | 10.326165727    |
| 1.6881029699    | 2.7147359748    |
| 1.2381566913    | 0.6556230064    |
| 11.1255018971   | 18.9364152786   |
| 0               | 0.0220701673    |
| 4.6319843498    | 5.8296222839    |
| 4100.1658918282 | 2484.2086616541 |
| 12.9582050253   | 10.9612482901   |
| 0               | 0               |
| 12.1077665226   | 5.7651537328    |
| 0               | 0.6564536809    |
| 471.7140979018  | 343.5356246611  |
| 24.9682105261   | 12.0784913978   |
| 4.8601792508    | 2.0618417042    |
| 7.3061777308    | 3.4388741789    |
| 0               | 0.4870326731    |
| 0               | 0.004688        |
| 1.1204104881    | 1.8457431419    |
| 25.3414960684   | 31.4250174466   |
| 5.3685082224    | 14.9505365409   |
| 3.5753635704    | 6.4509377327    |
| 7.533001848     | 6.331492554     |
| 0.3433268801    | 0.2747152583    |
| 0.5926701537    | 0.181322821     |
| 8.9690218751    | 4.2215422171    |
| 6.5155336466    | 3.3679306025    |
| 11.306999582    | 12.5288334404   |
| 1.9254880698    | 0.8307652549    |
| 3.9617333568    | 2.680520599     |
| 0               | 0.0237277573    |
| 14.4970278144   | 4.1580495341    |
| 0               | 0               |
| 6.9962086564    | 2.8813556023    |
| 0               | 3.3945968289    |
| 0.0566508173    | 0.1333221282    |
| 0               | 0.0240897881    |
| 106.6014278809  | 73.7928171755   |
| 1.4891444373    | 0.6007808589    |
| 0               | 0               |
| 0               | 0               |
| 37.3700394512   | 15.4573011363   |
| 2.8669033871    | 4.8353322462    |
| 8.1945680475    | 16.8744713829   |
| 0.4354010476    | 0.333018905     |
| 4.6737626454    | 7.4244875592    |
| 74.23249777     | 39.6816037507   |
| 3.3053337064    | 3.6949194903    |
| 0.4771477096    | 0.6105878685    |
| 4.8558240291    | 3.9602906605    |

gene\_expression\_table

|                 |                |
|-----------------|----------------|
| 5.4830018721    | 2.2581485112   |
| 2.2623560954    | 0.7502327782   |
| 1.6415614404    | 1.4264320394   |
| 3.9611806974    | 1.8126595822   |
| 20.070173354    | 9.2051026049   |
| 22.6521403339   | 15.8922913645  |
| 0               | 0              |
| 24.038170632    | 10.2263812924  |
| 0.9557644373    | 0.8716028299   |
| 0               | 9.008312878    |
| 0.0572443684    | 0.006736       |
| 9.4550835735    | 12.3973252926  |
| 0               | 0.022778792    |
| 0.205502516     | 0.7254449475   |
| 8.4165130949    | 10.8940897988  |
| 0.8247200452    | 0.3396570684   |
| 1.0658143039    | 1.6369887187   |
| 45.7127479128   | 48.3057347986  |
| 8.8293690766    | 7.064877665    |
| 669.050778356   | 366.8956111079 |
| 2798.1164491542 | 537.826233528  |
| 33.9574677167   | 19.5614209829  |
| 0               | 0.3163338798   |
| 100.1611407738  | 24.3085627392  |
| 0.1915560037    | 0.991778083    |
| 38.6088002899   | 24.7198129566  |
| 11.5260359938   | 4.4926431146   |
| 78.9753937484   | 18.0698023107  |
| 1.4243034832    | 0.4383329954   |
| 8.2260587846    | 3.0114343008   |
| 8.3682221865    | 5.6927356206   |
| 265.3907018178  | 59.8701120148  |
| 18.112921019    | 25.963705164   |
| 3.1461724803    | 8.0212248766   |
| 18.5230563722   | 17.1255039426  |
| 6.0038063866    | 5.3608484448   |
| 4.9321212248    | 1.7643038759   |
| 132.3997037833  | 44.4664445414  |
| 6.1376843308    | 7.9043166797   |
| 0.8307114344    | 1.3196234336   |
| 6.4096836456    | 6.6204458719   |
| 0.279551558     | 0.0328948552   |
| 1.039109563     | 0.9476088463   |
| 7.2841462865    | 3.5843455209   |
| 0               | 0.0345161056   |
| 4.1387903919    | 0.8766212609   |
| 0               | 0.0410535395   |
| 0.716530964     | 0.5339903036   |
| 5.0181355747    | 0.5904844328   |

gene\_expression\_table

|                 |                 |
|-----------------|-----------------|
| 20.8627206487   | 12.1343093857   |
| 30.5563275677   | 7.8503182721    |
| 1.4132100656    | 0.8552188112    |
| 0.5743747986    | 0.2534502397    |
| 0.7820972155    | 0.2760883343    |
| 14.2461040162   | 7.0277341301    |
| 0.2554877788    | 0.4509490245    |
| 20.3737195614   | 25.572024373    |
| 4.3007804372    | 1.1470992393    |
| 0.7411252195    | 1.4171343317    |
| 0.3340970246    | 0.2948491862    |
| 2.5080366115    | 2.3855604294    |
| 23.1595463105   | 7.8121991545    |
| 3632.0967450458 | 4112.3422775392 |
| 2.9134388811    | 1.5998481185    |
| 0               | 0.1636704611    |
| 11.2930044077   | 6.0536444115    |
| 0.1938007331    | 0.7297455511    |
| 2.5394675416    | 1.673388405     |
| 9.3855464294    | 9.5379830158    |
| 2.5977157071    | 1.0698569859    |
| 5.6554990044    | 5.9893473682    |
| 0               | 0.3226447295    |
| 38.8192590646   | 44.7169987255   |
| 2.7137524713    | 2.3335469713    |
| 0               | 0               |
| 10.901974556    | 7.9535847991    |
| 0.2577504515    | 0.2426361375    |
| 11.6690861062   | 10.5925037518   |
| 0.0959401472    | 0.225785703     |
| 0.0498306477    | 0.007818        |
| 3.6779882899    | 3.327066896     |
| 0               | 0.0878611176    |
| 14.1529483874   | 10.6584231717   |
| 1.020750058     | 0.2402234894    |
| 2.7205439863    | 0.1920759831    |
| 0.8899509589    | 1.0995663397    |
| 0               | 0               |
| 30.0839289339   | 14.6053414862   |
| 0               | 0               |
| 0.8207038547    | 1.255439786     |
| 4572.556698601  | 5927.0979200852 |
| 62.9712591382   | 59.7103074172   |
| 0               | 0               |
| 0               | 0.13968956      |
| 11.3067436214   | 4.1814628985    |
| 113.5992479257  | 78.3112326306   |
| 0               | 0               |
| 276.4777320391  | 254.2821533518  |

gene\_expression\_table

|                |                |
|----------------|----------------|
| 12.3938792807  | 9.8515652379   |
| 2.102125541    | 5.194503053    |
| 0              | 0.977036844    |
| 0              | 1.3527397685   |
| 66.0765179575  | 33.7923431402  |
| 0              | 0              |
| 2.2900024663   | 3.464547194    |
| 22.8926202834  | 18.6115470287  |
| 0              | 0.1500267567   |
| 0.8774047718   | 1.8583972719   |
| 20.4063781394  | 33.6170831161  |
| 0              | 0              |
| 1.2592753876   | 4.2231026455   |
| 5.7995232877   | 6.3368536249   |
| 0              | 0.1326385646   |
| 4.0232144548   | 2.6826678947   |
| 0              | 0.4590140393   |
| 0              | 4.4975386685   |
| 0.677731644    | 0.3721607831   |
| 0              | 0              |
| 73.8764196166  | 51.796056668   |
| 68.9604505283  | 73.0312378374  |
| 296.4759289797 | 229.9327439773 |
| 4.1896672299   | 3.9439879472   |
| 16.8710409237  | 20.293327255   |
| 16.7726082147  | 44.0778307254  |
| 0              | 0.5149355867   |
| 67.472228726   | 46.702722341   |
| 651.0001258018 | 330.0903218878 |
| 17.8390980728  | 3.2986299695   |
| 0              | 0.1139770212   |
| 10.3548117979  | 11.7783651805  |
| 0              | 0              |
| 0              | 0              |
| 4.2462843547   | 2.498303176    |
| 7.1291835089   | 14.8204186168  |
| 0              | 0.0924259461   |
| 68.1722933527  | 18.8749163792  |
| 2.7873705608   | 0              |
| 0              | 0              |
| 11.4280544637  | 7.4571952367   |
| 0.2789160805   | 0.0164100393   |
| 7.9654399613   | 5.1149471836   |
| 6.567649691    | 3.6708754704   |
| 1.4093206834   | 0.4422263539   |
| 3.0348096378   | 8.3108376187   |
| 7.8905884194   | 10.9561371521  |
| 8.4188374836   | 14.364357008   |
| 4.1920120302   | 2.1309454349   |

gene\_expression\_table

|                 |                 |
|-----------------|-----------------|
| 0.3480698865    | 1.3434031352    |
| 0               | 0               |
| 0.2864042461    | 0.1348048464    |
| 0.5825209151    | 0.4912412078    |
| 0               | 0.1404637257    |
| 0               | 0.0454100877    |
| 17.1455780103   | 13.4965237977   |
| 3.906024679     | 1.9406272807    |
| 10.3813269396   | 6.7186438514    |
| 0               | 0               |
| 0               | 0.006371        |
| 4.3645104928    | 3.3810177388    |
| 0               | 0               |
| 1.6033486076    | 2.1507942784    |
| 0               | 0.0800350398    |
| 0.2404933122    | 0.7074717039    |
| 2.0900272805    | 2.2485365478    |
| 10.5342643327   | 4.3489919897    |
| 6.5923586334    | 15.2041784797   |
| 4.2982295592    | 2.0652398797    |
| 10.498645495    | 4.9415059742    |
| 25.5767917163   | 41.2665645447   |
| 0               | 0               |
| 580.9149634479  | 254.9947078081  |
| 3262.5352926136 | 4829.3793887955 |
| 2.7661673248    | 2.8364576529    |
| 7.7066758902    | 4.5342259831    |
| 0.1516125598    | 0.1784026259    |
| 0               | 0               |
| 14.7461580298   | 5.2055449465    |
| 19.8749073878   | 14.2384463841   |
| 0               | 0.0296377393    |
| 1.657026951     | 1.908043035     |
| 0               | 0.4225112506    |
| 8.0989886646    | 13.7725124445   |
| 1.752660992     | 0.8249430621    |
| 0               | 0.1154497271    |
| 2.7937468677    | 3.3840926371    |
| 0.8469213703    | 0.822172795     |
| 0               | 0               |
| 17.3064727174   | 20.4918193035   |
| 0               | 0               |
| 207.0690566199  | 91.7968600117   |
| 0               | 0               |
| 0               | 0.0213948198    |
| 0               | 0               |
| 0               | 0.1508328171    |
| 37.4791766783   | 16.1141113922   |
| 0               | 0.082084109     |

gene\_expression\_table

|                 |                 |
|-----------------|-----------------|
| 1.40220001      | 0.5939891729    |
| 0               | 0.27062845      |
| 20.8201265351   | 16.5147280035   |
| 0.4317338777    | 1.1684497144    |
| 11.4667818826   | 3.5381570584    |
| 9.5394118437    | 3.4265892945    |
| 0.5859918763    | 0               |
| 0               | 0.9618423197    |
| 3.9107234844    | 9.66367835      |
| 12.7694624304   | 12.6353630352   |
| 2985.0533413016 | 1028.0531015378 |
| 6.7121988835    | 0.9872812551    |
| 1.201614193     | 0.706970213     |
| 3.7876989608    | 8.2899986759    |
| 0               | 0.145493581     |
| 0               | 0               |
| 3.408711928     | 7.9217924995    |
| 96.10598196     | 32.8176910303   |
| 1.1935913096    | 1.1235999139    |
| 0.4179292617    | 0.2704777415    |
| 14.6363343333   | 8.6112934263    |
| 20.8262213264   | 14.9265231608   |
| 3.1184186055    | 0.5504168672    |
| 3.737590921     | 1.0555263271    |
| 0               | 0               |
| 0               | 0.1853264508    |
| 0.6193859006    | 1.894962959     |
| 0               | 0.4111198989    |
| 3.9695369648    | 3.7367659735    |
| 0               | 0.2225266715    |
| 3.272475434     | 6.315188312     |
| 0               | 0               |
| 13.4335028101   | 13.9923116459   |
| 0.5577395875    | 0.3281463196    |
| 25.7252929953   | 24.3681338975   |
| 3.6366585931    | 4.7499777214    |
| 9.5968416312    | 9.0340892599    |
| 44.7533484056   | 22.0772383571   |
| 4.5507688916    | 2.8380935875    |
| 8.4663999495    | 10.7594134946   |
| 0               | 0.5447252487    |
| 0               | 0               |
| 0.0454071762    | 0               |
| 0               | 0.007104        |
| 10.2016501272   | 8.4030031665    |
| 10.5201191772   | 8.0099625524    |
| 0               | 0.0451145852    |
| 0.3127220875    | 0.2418156533    |
| 2.2281609706    | 1.0487515512    |

gene\_expression\_table

|                |                |
|----------------|----------------|
| 0.7086823189   | 0.9108831154   |
| 30.1427315221  | 68.1792565486  |
| 25.6909177742  | 22.6341362431  |
| 4.1890833856   | 3.8730197973   |
| 0              | 0.005157       |
| 0              | 0              |
| 0              | 0.2161965726   |
| 4.6184465874   | 2.4702408921   |
| 0              | 0.3092287923   |
| 10.4894747923  | 13.4823251863  |
| 12.2499141756  | 32.6728309826  |
| 0              | 0              |
| 10.9464371236  | 8.8017991751   |
| 0.740358597    | 1.2196528125   |
| 20.1708283703  | 22.4784701711  |
| 8.0724079463   | 12.3484519375  |
| 1.5285011546   | 0              |
| 20.7348069721  | 34.3324067676  |
| 93.9062108659  | 54.1603265808  |
| 0              | 1.2457470661   |
| 2.1962541309   | 11.1987809828  |
| 50.1130375314  | 134.889421651  |
| 0              | 0              |
| 118.1162163845 | 115.4200133403 |
| 1.3497827826   | 0.9529743176   |
| 0              | 0.4120977801   |
| 1.6622088507   | 17.6033029047  |
| 0              | 0.3308052882   |
| 21.8836337045  | 16.0589419984  |
| 24.7860283429  | 65.1368199668  |
| 0.5115707297   | 2.7088456747   |
| 22.6651108026  | 9.0844874298   |
| 127.2472576201 | 188.7410689352 |
| 96.3351949055  | 58.9460063014  |
| 1.9602957051   | 1.8741787967   |
| 22.4364168569  | 18.5501415233  |
| 5.3695026669   | 1.8954894838   |
| 87.7534693495  | 86.0870635464  |
| 0              | 0              |
| 0              | 0              |
| 3.3698724816   | 0.8651632948   |
| 1.3879891035   | 1.7343537638   |
| 3.9892931679   | 1.7672299699   |
| 2.62767374     | 3.2920555629   |
| 0              | 0              |
| 0.8438564492   | 1.5639223787   |
| 2.4509245862   | 1.3596023622   |
| 0.8982031187   | 0.2113832722   |
| 17.3706427848  | 23.3357236298  |

gene\_expression\_table

|                 |                 |
|-----------------|-----------------|
| 2.6373524035    | 4.0908122091    |
| 0               | 0               |
| 0               | 0               |
| 2160.1433191847 | 2647.6954582702 |
| 0.5507706606    | 0.3593966374    |
| 13.7384779254   | 20.9940559545   |
| 2.9442888852    | 1.0393641582    |
| 0               | 0               |
| 28.6965190983   | 28.6132742224   |
| 20.6230618409   | 24.2671741186   |
| 4.6113082618    | 6.1043965749    |
| 153.4810638069  | 79.3024922251   |
| 3.7859529544    | 4.9790438916    |
| 3.5946503159    | 10.4688243828   |
| 0               | 0.2285267626    |
| 0               | 0               |
| 1.3301789715    | 1.6323036816    |
| 76.9502131564   | 55.9501722349   |
| 5.9777817798    | 10.7855599247   |
| 2.069439517     | 6.4773958205    |
| 6.4385051222    | 4.9114639317    |
| 3.3386325916    | 3.8794646161    |
| 24.38546602     | 50.4417316837   |
| 1.3491419943    | 2.9210671843    |
| 4.226677705     | 3.9235666506    |
| 1.8454524713    | 2.3452691039    |
| 6.5225938777    | 4.5460454517    |
| 0               | 0               |
| 43.8702385881   | 16.3470130401   |
| 5.0763001407    | 2.8746441867    |
| 0               | 0.1723816692    |
| 0.2013591474    | 0.2448374598    |
| 0.6930274738    | 1.3902094805    |
| 0.0630807149    | 0.5492807621    |
| 4.8215187718    | 13.8659977598   |
| 10.6526050519   | 17.4892108457   |
| 0               | 0.3377579726    |
| 1.5206697462    | 1.0338601649    |
| 16.1326747579   | 15.1866655056   |
| 0               | 0.004766        |
| 0.298992624     | 0.4339173406    |
| 4.0566208164    | 4.1634909441    |
| 75.8635720471   | 60.1737356319   |
| 2985.7761068353 | 3699.4251481901 |
| 3.279194564     | 3.0869047891    |
| 0.0251425822    | 0.023668238     |
| 49.0097687174   | 54.3453394253   |
| 7.8825864021    | 9.9151319447    |
| 1.7771602077    | 17.1477244035   |



gene\_expression\_table

|               |                |
|---------------|----------------|
| 0.1474475162  | 0.0607255655   |
| 3.6331391411  | 3.7254598549   |
| 0             | 0              |
| 5.9433981135  | 3.328954329    |
| 28.8678195437 | 18.9375989776  |
| 0             | 0.1796396399   |
| 1.3228188492  | 1.6343901486   |
| 15.4419300264 | 11.8541089575  |
| 0.1203942366  | 0.007083       |
| 5.5919479425  | 2.6320199286   |
| 0.4403785904  | 0.8463832977   |
| 6.6576855235  | 10.3267736184  |
| 73.3628188907 | 67.5870122038  |
| 13.7714876879 | 4.7095551894   |
| 2.8312869378  | 1.9476915831   |
| 0.4842772143  | 0.2564322314   |
| 10.5628554644 | 28.3388515616  |
| 46.8605656506 | 111.0214281506 |
| 0             | 0.1863151374   |
| 19.2988608623 | 5.808259809    |
| 1.566088828   | 1.2899726237   |
| 15.212773177  | 11.3478811382  |
| 0.2306713708  | 0.6242917485   |
| 64.944347688  | 62.9701362362  |
| 8.7386444953  | 10.0059264718  |
| 1.5560454859  | 2.0873400283   |
| 7.9681042372  | 11.1042142201  |
| 0             | 1.7340892171   |
| 0.157767105   | 0.1113868106   |
| 4.1077015856  | 3.1046172843   |
| 10.0571637252 | 11.4792447789  |
| 0             | 0.8206263265   |
| 0             | 0.0540478585   |
| 33.2430332657 | 21.9055788282  |
| 119.052920296 | 22.0140911407  |
| 4.7009717393  | 4.6264603523   |
| 0             | 0              |
| 4.3638260698  | 2.8028092918   |
| 0.4974987153  | 3.1026579186   |
| 3.8420438248  | 2.0344212821   |
| 0.1901807849  | 0.1342715332   |
| 0             | 0              |
| 0             | 0.0220533651   |
| 3.8921264128  | 5.3431798065   |
| 4.9277110322  | 7.9245369811   |
| 0             | 0              |
| 4.5463080532  | 9.8076815631   |
| 0             | 0              |
| 6.3561583482  | 0.3739648423   |

gene\_expression\_table

|                 |                 |
|-----------------|-----------------|
| 37.2560287502   | 50.8209987429   |
| 2472.5495786529 | 2813.8937495504 |
| 0               | 0.0554122015    |
| 302.941350425   | 150.0495642332  |
| 0               | 0.2193297052    |
| 954.6417761482  | 1273.7015346441 |
| 1.4723687694    | 1.38603005      |
| 1.1991833756    | 0.4233240243    |
| 6.0613638097    | 6.5618189158    |
| 59.3914301272   | 27.2333327341   |
| 0.1618450638    | 0.1650507923    |
| 2.1867997037    | 2.3158881364    |
| 4.3660443796    | 7.3209775047    |
| 54.3368860573   | 26.4393342404   |
| 11.6543008057   | 22.1309542655   |
| 4.1717291713    | 2.6180678429    |
| 0               | 0.1644552441    |
| 87.5640063625   | 21.7638616151   |
| 0.3342703954    | 0.2753353777    |
| 0               | 0.8695925572    |
| 12.2290902943   | 14.3899807785   |
| 2.6909821897    | 10.343837912    |
| 0.1188230128    | 0.8389148313    |
| 3.0343937597    | 3.3563392547    |
| 0               | 0               |
| 2.438294699     | 2.9010227831    |
| 5.6086446552    | 3.839823626     |
| 3.3115997083    | 8.3780386157    |
| 0               | 0.1607603783    |
| 0.8239113237    | 2.9084914314    |
| 8.0059823092    | 0.7536516864    |
| 88.1253335743   | 84.3637860856   |
| 1.8995375857    | 3.4521228641    |
| 15.4228572211   | 61.7035025751   |
| 0               | 0               |
| 24.7388401058   | 7.2775534614    |
| 21.7460805275   | 21.6567195313   |
| 0               | 0.2304606822    |
| 0               | 0.1772401402    |
| 343.0444987818  | 282.5625240617  |
| 1.2056774995    | 0.9505435539    |
| 1.9972159995    | 2.0367756389    |
| 38.8663688009   | 21.0862479658   |
| 0               | 0               |
| 2.292463264     | 3.7520376942    |
| 0.7439688973    | 1.546590922     |
| 5.8268777621    | 6.5136673398    |
| 0               | 0.040600549     |
| 0               | 0               |

|                 | gene_expression_table |
|-----------------|-----------------------|
|                 | 0                     |
|                 | 0                     |
|                 | 0                     |
|                 | 0                     |
|                 | 0                     |
|                 | 0.0870913654          |
| 9.9446367869    | 6.7374359419          |
| 11.5864073601   | 12.1946187355         |
| 5.1055343103    | 3.6508248692          |
| 4.2300186271    | 3.1109165355          |
| 2.1144142533    | 0.9952132082          |
| 5.9534319464    | 8.3364359379          |
| 10.6612244795   | 8.0646889904          |
| 22.4558234871   | 8.3046185454          |
| 2.1468466476    | 0                     |
| 9.8582039801    | 11.4029542026         |
| 16.7551692611   | 11.6852309009         |
| 2.9158566727    | 3.8504465506          |
| 41.7422930233   | 15.3133184068         |
| 0               | 4.2404765516          |
| 2.2554668649    | 4.4454663254          |
| 19.4882415076   | 13.406300664          |
| 0               | 0.0969042679          |
| 0               | 0                     |
| 0               | 1.2026511167          |
| 61.3783501008   | 28.5755651621         |
| 2356.6878168345 | 902.1479079259        |
| 4.0799831306    | 1.6803218469          |
| 72.7181189014   | 93.0546250791         |
| 28.7036162303   | 51.9529664847         |
| 2.1616152235    | 12.0565428531         |
| 4.3315363652    | 4.0047247932          |
| 106.8871815679  | 110.6386923086        |
| 0               | 0                     |
| 7.9111002346    | 12.7998726121         |
| 0               | 1.2894315678          |
| 12.2264895776   | 7.1934602565          |
| 14.52201401     | 33.9431129831         |
| 19.4652142392   | 16.0773612791         |
| 1.3780162177    | 0.810756418           |
| 0               | 5.6920038818          |
| 20.2742544717   | 16.052172663          |
| 0               | 0.2637693482          |
| 0               | 3.5802269131          |
| 87.1360525463   | 79.7479401577         |
| 102.3493682783  | 120.4345872642        |
| 149.5840921706  | 201.1608301466        |
| 3.8848705101    | 3.1296031054          |
| 102.9481588176  | 119.9030704642        |
| 11.9909036519   | 36.861607858          |

gene\_expression\_table

|                 |                 |
|-----------------|-----------------|
| 60.7381040274   | 29.7794074225   |
| 0               | 1.2708395403    |
| 0               | 0               |
| 0               | 0.1524175512    |
| 13.6748485185   | 3.218241138     |
| 8.9012128787    | 5.7787942841    |
| 18.5548152646   | 1.0916733321    |
| 5423.3701712175 | 3750.2005744519 |
| 112.7483023733  | 155.0404722985  |
| 18.0986561443   | 26.0884621841   |
| 3.2748415689    | 32.7548249138   |
| 22.1108010275   | 15.2854563625   |
| 1.7327551047    | 1.8010587033    |
| 122.5559187538  | 79.7534136673   |
| 0               | 34.62669685     |
| 5.3062684468    | 3.8850874346    |
| 0               | 0               |
| 15.4660585018   | 6.3696233915    |
| 4.6568872132    | 1.8631194469    |
| 0               | 0               |
| 213.4779810936  | 35.8856741312   |
| 0               | 9.351427899     |
| 3.4520971951    | 4.2245690833    |
| 0               | 1.8575033089    |
| 0               | 0               |
| 1.8279266078    | 1.2905536611    |
| 3.8026607195    | 3.4470946751    |
| 17.359373279    | 27.5383378409   |
| 0               | 0.5345609711    |
| 81.6367567738   | 92.99919233     |
| 0               | 0               |
| 178.7865551834  | 80.8787644501   |
| 32.0092216652   | 18.1478157192   |
| 0               | 108.42701964    |
| 5.9174278797    | 0.1740760584    |
| 19.09191869     | 4.4930953384    |
| 104.4585951246  | 49.8494760382   |
| 43.3253522062   | 106.4482824418  |
| 0               | 7.3904710162    |
| 129.9512923376  | 103.8539520251  |
| 85.8881782135   | 28.2981135208   |
| 69.0172860644   | 17.6757049115   |
| 0               | 0.0481661394    |
| 5.7476771453    | 4.8695734833    |
| 7.7691703495    | 6.9707668022    |
| 28.7465081414   | 23.6782281227   |
| 30.456394       | 23.0214006236   |
| 264.7238369595  | 201.6557554046  |
| 96.0276649955   | 54.7858587751   |

gene\_expression\_table

|                 |                 |
|-----------------|-----------------|
| 2.6411119546    | 3.004205358     |
| 2.973555399     | 4.2337722021    |
| 8.1615663028    | 6.0366251914    |
| 43.115542727    | 10.6808621455   |
| 8.8026906004    | 17.6088267674   |
| 11.5798502535   | 14.9886214273   |
| 66.2998925108   | 160.8597865527  |
| 62.5905752163   | 20.2538551082   |
| 0               | 0               |
| 48.9732389712   | 39.5704378663   |
| 3030.201708678  | 4781.6914130493 |
| 69.3198728108   | 29.6064360272   |
| 6.3234141628    | 11.1325317684   |
| 34.4980217201   | 34.4347839638   |
| 0               | 0               |
| 49.41946227     | 61.8133399389   |
| 7.9281395274    | 17.7251919856   |
| 72.6017855223   | 33.045675579    |
| 7.5301364196    | 1.4767863039    |
| 0.2208856083    | 0.5198325601    |
| 57.3248387879   | 46.4684390733   |
| 25.0131172276   | 75.4868752963   |
| 3.2820720275    | 4.4413194351    |
| 7.2021232896    | 8.8984817241    |
| 9.022709916     | 4.034471516     |
| 261.3173579234  | 107.1263683684  |
| 4.6737460225    | 3.7364935214    |
| 198.2497002364  | 79.2623816372   |
| 34.9846243154   | 28.2284137339   |
| 1064.4339763653 | 537.904088443   |
| 5.2134808402    | 1.4795470464    |
| 3.2731775234    | 2.0541603891    |
| 9.1804466024    | 5.4013195981    |
| 8.8957932914    | 5.0095361162    |
| 0.5242518355    | 0.7711094667    |
| 0.7854348926    | 0.1386332843    |
| 4.5608955204    | 5.826821823     |
| 17.1716391973   | 11.6183822689   |
| 80.6022049428   | 104.039548092   |
| 5.116770994     | 6.0563258186    |
| 0               | 0               |
| 6.752552323     | 1.5891467933    |
| 14.1596148727   | 13.0912812365   |
| 119.9945718684  | 77.9949272297   |
| 0.5277992052    | 0.7237758275    |
| 0               | 0               |
| 6.5697229638    | 5.0951671977    |
| 4.8992638616    | 5.5487815883    |
| 0.878673912     | 1.2019509804    |

gene\_expression\_table

|               |               |
|---------------|---------------|
| 2.4251540564  | 4.5658892906  |
| 0             | 0.0762918725  |
| 0.8450788279  | 4.4748223367  |
| 26.6042257494 | 28.8192123495 |
| 6.1695121729  | 3.4256568447  |
| 67.3107421313 | 49.9598287587 |
| 0.5711916086  | 0.6721216436  |
| 2.0015024872  | 1.2822590322  |
| 5.307207575   | 8.0074721268  |
| 0             | 0             |
| 0             | 0             |
| 3.0387623112  | 1.6686666049  |
| 23.5697525284 | 7.210982354   |
| 14.0905975409 | 20.5304586506 |
| 149.058705561 | 89.5258090859 |
| 3.7651904721  | 1.3291508334  |
| 1.2052789533  | 0.2127379129  |
| 0             | 0             |
| 0             | 0.2764603569  |
| 0             | 0             |
| 0             | 0.0770987664  |
| 1.6803272729  | 2.1100884885  |
| 0             | 0.004767      |
| 0             | 0             |
| 57.4523979523 | 30.9048158752 |
| 1.8085822158  | 3.1922403093  |
| 44.5008203119 | 17.3984119544 |
| 0             | 0             |
| 0.3369906316  | 0.2643581054  |
| 0             | 0.0132725273  |
| 1.4967183894  | 1.1123303879  |
| 0.1579756074  | 0.0743560117  |
| 1.4971211728  | 3.6994938462  |
| 0.9343389998  | 2.0284621553  |
| 4.9870555092  | 1.1149717539  |
| 6.5264573111  | 11.100639605  |
| 30.1432539355 | 12.5030312221 |
| 83.1470661429 | 57.4133458212 |
| 0.2593527481  | 0.3845275505  |
| 0.4221185414  | 0.1887487515  |
| 1.4740627717  | 2.319935074   |
| 7.930186027   | 7.6156725884  |
| 18.5377008024 | 8.8931260472  |
| 14.4873924462 | 8.3342486625  |
| 5.0650293103  | 1.9484694585  |
| 0.3046808526  | 0.3585182141  |
| 25.0698321701 | 11.0780760075 |
| 0             | 0             |
| 0             | 0.0408815697  |

gene\_expression\_table

|                 |                 |
|-----------------|-----------------|
| 0               | 0.009711        |
| 5.6106459283    | 8.4071697057    |
| 0.0173247342    | 0.008154        |
| 19.8126409829   | 12.2195165      |
| 0               | 0               |
| 0               | 0.0112521923    |
| 6.9075789029    | 6.014833866     |
| 3.6185450984    | 4.8434124876    |
| 44.4895143418   | 14.0520699249   |
| 0               | 0               |
| 0.7649312288    | 0.4275452279    |
| 2.3024035065    | 0.4214373539    |
| 13.4785284032   | 14.2741760816   |
| 0.6060223312    | 1.3905586189    |
| 0.1020370626    | 0.004803        |
| 1.0109248848    | 1.1895561576    |
| 0               | 0.2959266091    |
| 18.9242762507   | 6.6062361358    |
| 0               | 0               |
| 66.1635294376   | 46.7128082594   |
| 17.5840219272   | 16.9408653977   |
| 7.595047987     | 3.1458589604    |
| 1.2795486255    | 1.4411182548    |
| 0               | 0               |
| 4.5527049918    | 1.3865621057    |
| 2.0993525465    | 3.5995944221    |
| 19.4015223052   | 10.762614119    |
| 32.089217875    | 47.7087142441   |
| 0               | 0.206220803     |
| 0               | 0.8041335124    |
| 0               | 0               |
| 32.6268593531   | 39.3088778308   |
| 0               | 0               |
| 0.8177533326    | 2.622134058     |
| 176.0232669958  | 42.9048217129   |
| 1040.6120944214 | 1845.4401689126 |
| 11.8574417695   | 6.8121818637    |
| 703.6575879394  | 786.392798823   |
| 1.9693101088    | 3.012475508     |
| 4.5749110315    | 5.5301189549    |
| 23.6403940278   | 10.0143617136   |
| 4.0947415149    | 3.0974694208    |
| 0.1838701062    | 0.5084462533    |
| 0               | 1.0515180368    |
| 0.7370931471    | 2.2314244432    |
| 32.8968847424   | 32.9700640446   |
| 5.6323308629    | 2.761486849     |
| 0.9142767974    | 0.564810893     |
| 7.4846167194    | 1.9686581216    |

| gene_expression_table |                |
|-----------------------|----------------|
| 0                     | 0.3021667066   |
| 0                     | 0              |
| 0                     | 0              |
| 0                     | 0              |
| 0                     | 0              |
| 0                     | 0              |
| 3.1541890422          | 2.0619649357   |
| 0                     | 0.0132382201   |
| 0                     | 0              |
| 25.3344346831         | 19.298732681   |
| 0.1260088295          | 0.0148274695   |
| 0                     | 0              |
| 17.7129606765         | 9.7266659673   |
| 9.3516889305          | 6.1022959218   |
| 5.5627058428          | 10.9094010304  |
| 39.1191095102         | 19.2017067909  |
| 0                     | 0              |
| 0.244214811           | 0.3592097154   |
| 0.5333197212          | 1.0354703074   |
| 0                     | 0.0697489587   |
| 1.6012959707          | 1.6958216773   |
| 81.5995258832         | 33.9112004054  |
| 13.6676298356         | 9.5097772111   |
| 0.6272262284          | 1.3285037298   |
| 0                     | 0.3932478255   |
| 6.7083199028          | 3.3009958134   |
| 0                     | 0              |
| 0.0696155655          | 0.1884083967   |
| 0                     | 0.009265       |
| 7.2888918214          | 4.9121931045   |
| 0.1543665535          | 0.6357513841   |
| 8.9046868522          | 8.9064295973   |
| 9.7482798989          | 3.4412427333   |
| 50.2606376526         | 23.8332362374  |
| 0                     | 0.1226579401   |
| 230.7590153984        | 121.0349816791 |
| 0                     | 0              |
| 1.6275218045          | 0.9075938404   |
| 0                     | 0              |
| 31.4084597912         | 8.6852148134   |
| 110.3195895338        | 147.6161000182 |
| 0.3552099128          | 0.2089879008   |
| 4.1516386698          | 2.8497214056   |
| 4.3024827054          | 3.5439144988   |
| 0.1496428489          | 0.3565718526   |
| 3.3729550644          | 6.270955292    |
| 0                     | 0              |
| 0                     | 0.1230162592   |
| 11.7710778574         | 16.3134437672  |



gene\_expression\_table

|               |               |
|---------------|---------------|
| 4.4573498093  | 4.9827188865  |
| 3.5502393052  | 4.5953265161  |
| 7.9035122219  | 5.2700393508  |
| 0             | 2.7817922469  |
| 0.2638851881  | 0             |
| 0             | 0             |
| 0             | 0.0221156724  |
| 39.0958326391 | 64.9469632498 |
| 17.126889304  | 6.9096771326  |
| 26.0753846884 | 40.1508015829 |
| 4.6198518045  | 5.9798018309  |
| 2.9078962733  | 1.417571362   |
| 1.5768085591  | 0.7421727802  |
| 19.563154894  | 19.0438022383 |
| 3.0848791935  | 2.3594869528  |
| 1.4359103225  | 0.5068910633  |
| 0.4489659201  | 0.2905642155  |
| 1.828887683   | 3.2998156219  |
| 1.6057199915  | 2.6137420124  |
| 0             | 0.0136707741  |
| 1.2394868897  | 0.802177893   |
| 0             | 0.0585194089  |
| 3.6545692472  | 5.1911183045  |
| 0             | 0             |
| 23.507051103  | 10.5832498661 |
| 0.4156952353  | 0.309794323   |
| 0.642384074   | 0.5795186392  |
| 0             | 0             |
| 4.2603832238  | 3.0686839201  |
| 9.193424086   | 6.1816627497  |
| 2.3185171083  | 0.4774351786  |
| 0.4478941292  | 0.6324448758  |
| 0.2993268397  | 1.197541685   |
| 2.0300481226  | 1.4810307808  |
| 1.4871744169  | 0             |
| 0             | 0.9244348062  |
| 0             | 0             |
| 0             | 0             |
| 7.0106439681  | 10.48856179   |
| 2.6393564558  | 2.8572743133  |
| 6.1012966001  | 6.4614607315  |
| 0             | 0             |
| 4.7291394318  | 4.2045022012  |
| 0             | 0.756834165   |
| 0.5279990347  | 0.3550268033  |
| 1.7480949541  | 0.9873527014  |
| 32.245174372  | 16.8032947617 |
| 77.845078468  | 91.1282020974 |
| 0             | 0.468835333   |

gene\_expression\_table

|                |                |
|----------------|----------------|
| 4.8318140013   | 5.1170396192   |
| 7.0565930501   | 4.6092892101   |
| 14.0071323517  | 24.841036563   |
| 15.147742034   | 6.8241838192   |
| 0.6376946406   | 0.3835254176   |
| 1.4038093926   | 0.1651863686   |
| 29.3871124537  | 31.7840229701  |
| 26.5909172029  | 18.1325533131  |
| 6.8965972097   | 6.2893045717   |
| 1.2646525922   | 0.9114721299   |
| 0.4937489486   | 0.4647958406   |
| 2.7940605081   | 7.1673458746   |
| 0              | 2.3152597854   |
| 13.7156931052  | 8.5403624116   |
| 177.0616191736 | 114.8732575644 |
| 4.111813915    | 6.6124456599   |
| 4.3774177208   | 8.8423973773   |
| 807.8732091418 | 964.2054392502 |
| 0.7070667044   | 0.332802393    |
| 27.2004029098  | 32.4991481922  |
| 0.9605746147   | 2.1193292861   |
| 0              | 0              |
| 0              | 0              |
| 4.875558858    | 10.944572294   |
| 0.5503099119   | 0.6568008499   |
| 0              | 2.6090069725   |
| 0              | 0              |
| 1.1381109909   | 0.9039709046   |
| 2.0927792758   | 2.9961330679   |
| 7.4429364112   | 4.2038925604   |
| 0.0597153419   | 0.0632403835   |
| 5.3980000274   | 26.9952823766  |
| 46.3993122699  | 17.3822552882  |
| 0              | 0.0181398129   |
| 0.3759769664   | 0.0442412411   |
| 1.2723546227   | 1.0667412835   |
| 0.3789407239   | 2.4078592808   |
| 15.5173680104  | 7.11151681     |
| 1.3852600964   | 2.1190477284   |
| 0              | 0              |
| 174.6081172095 | 93.2060526739  |
| 6.882065562    | 6.3312670735   |
| 41.2703472462  | 14.7509663332  |
| 0              | 0.2857805141   |
| 2.68366151     | 1.6518072197   |
| 23.2269712717  | 11.7524145052  |
| 1.0822481882   | 1.8847538755   |
| 0              | 0              |
| 0              | 0              |

gene\_expression\_table

|                |               |
|----------------|---------------|
| 0              | 0.0748676637  |
| 3.1953107659   | 6.3448731859  |
| 3.3883271929   | 4.357273276   |
| 1.2072859271   | 0.4261843081  |
| 0.5240776726   | 2.2200574884  |
| 2.1615426885   | 1.8313121445  |
| 0              | 0.3916448978  |
| 0.7173555105   | 1.3083748854  |
| 11.072820569   | 9.2834455232  |
| 1.0432513414   | 1.1662149898  |
| 2.4722961362   | 0             |
| 1.0014946154   | 2.1212271929  |
| 0              | 0.1002404915  |
| 0              | 0.2272932731  |
| 0              | 0.0901862279  |
| 1.4845603425   | 2.7201470035  |
| 4.4134074524   | 3.2890648192  |
| 17.0083084827  | 28.2860163566 |
| 0              | 0             |
| 1.1476434465   | 0.8874274023  |
| 0              | 0.003541      |
| 14.1930417256  | 18.1921215767 |
| 2.7572339587   | 0.3244439506  |
| 0.4616540874   | 0.2535067504  |
| 1.9578303831   | 1.5417608962  |
| 107.9223181741 | 50.2677783186 |
| 41.4272412095  | 25.1026688134 |
| 1.1305649028   | 1.9400743058  |
| 3.1223577955   | 0.9018198891  |
| 1.2295240985   | 2.7488858669  |
| 2.3859300078   | 0.8071636778  |
| 0.1647780496   | 0.2714522563  |
| 0              | 0.4903995677  |
| 3.2504216357   | 3.059819086   |
| 16.9739482635  | 9.8329891051  |
| 63.8234869952  | 19.8481612123 |
| 0.4306850924   | 0.354751256   |
| 5.636529123    | 5.4165486359  |
| 0              | 0             |
| 3.9087459745   | 1.6864557078  |
| 0              | 0             |
| 12.7901429142  | 11.5384650969 |
| 3.0787835387   | 3.9448344688  |
| 4.8740797716   | 3.1805032582  |
| 0              | 0             |
| 0              | 1.0378619584  |
| 0.0931097721   | 0.2629496322  |
| 37.189642384   | 10.6971536958 |
| 0              | 0             |

gene\_expression\_table

|                |                |
|----------------|----------------|
| 1.1637419431   | 1.7649736631   |
| 0              | 2.2547898372   |
| 396.4650664897 | 477.184107374  |
| 5.2176919188   | 1.7980440018   |
| 51.1665293108  | 41.7737360314  |
| 11.7897293361  | 12.3122736296  |
| 83.2200777162  | 45.8657897541  |
| 0              | 0.1017907988   |
| 25.0702497469  | 16.377688274   |
| 0.1101089709   | 0.0971739886   |
| 0              | 0              |
| 0              | 0              |
| 0.8362292606   | 0.5903950023   |
| 0              | 0.1570302846   |
| 142.599257351  | 19.2655430648  |
| 10.8749803591  | 8.3945686062   |
| 82.692766377   | 47.3008702469  |
| 7.5193930343   | 3.5392304292   |
| 0              | 0.0247050927   |
| 1.7698360746   | 0.9892196049   |
| 3.4571612755   | 3.6612401082   |
| 8.0682834079   | 6.4620151005   |
| 0.3202559718   | 0.6352537921   |
| 311.2129156893 | 152.1492498511 |
| 5.9727523097   | 4.7791369944   |
| 0.0868797659   | 0.9507528873   |
| 20.3290975153  | 23.4428407297  |
| 0              | 0.0279716532   |
| 2.8260953639   | 9.9764063357   |
| 7.5768830026   | 26.3013874723  |
| 1.2889627099   | 0.7583617494   |
| 0              | 0              |
| 17.6864332372  | 4.9191150945   |
| 31.9832569803  | 20.6172842627  |
| 0.0928900216   | 0.0218607532   |
| 2.6899833099   | 0              |
| 202.3935929586 | 59.9802084768  |
| 0.4067045977   | 1.3559473143   |
| 223.2769881487 | 181.2328353382 |
| 39.0918221849  | 25.537586752   |
| 8.4861325756   | 5.4115722658   |
| 0.4780772871   | 0.2953408204   |
| 13.1742580694  | 12.894978953   |
| 0              | 0.0780453575   |
| 17.1610549133  | 4.4776730923   |
| 0.2141612467   | 0.1512022309   |
| 7.9732074579   | 1.7461093119   |
| 1.9648439913   | 4.5613679207   |
| 12.9914891415  | 0.764354807    |

gene\_expression\_table

|                |                |
|----------------|----------------|
| 5.5308643669   | 3.2540863635   |
| 0.9711462937   | 0              |
| 0              | 0              |
| 44.0563766405  | 24.9845664024  |
| 28.5293836309  | 10.2130122673  |
| 3.8977915272   | 7.6522708025   |
| 1.156469707    | 1.197520607    |
| 3.9466639637   | 0.8127074878   |
| 542.1870781874 | 218.4383165653 |
| 3.8223488302   | 2.3613245595   |
| 0.8653021101   | 1.2218420601   |
| 0.7358655096   | 1.2880166716   |
| 0              | 0              |
| 1.7661648053   | 1.675193523    |
| 0              | 1.7686320951   |
| 1.6788775621   | 0.5079951338   |
| 2.2129931912   | 1.8517553345   |
| 0              | 0.00254        |
| 0              | 0.0182601432   |
| 4.6682815695   | 5.7869915929   |
| 0.7019939371   | 0.1652073706   |
| 0.8403931332   | 1.7552820625   |
| 1.4156354918   | 0.916178707    |
| 13.7750325426  | 9.0050512862   |
| 3.6806882289   | 1.0587057354   |
| 10.4466124215  | 9.5062290576   |
| 21.1978188022  | 7.6612151284   |
| 19.1074923723  | 5.199379272    |
| 51.9537651008  | 49.4839672966  |
| 2.9783544483   | 1.4352303175   |
| 0              | 0.018785569    |
| 19.0650784048  | 6.3095326048   |
| 8.2457928392   | 9.5734602468   |
| 89.2013720319  | 53.9811406714  |
| 2.9843469281   | 2.8620220741   |
| 4.4095928201   | 2.0283379734   |
| 1.6033410061   | 5.1748188426   |
| 0              | 0              |
| 0.0764205244   | 0.0809316854   |
| 18.1903374715  | 24.1083224111  |
| 0.8502906969   | 1.0672402925   |
| 0.78233468     | 8.1470787703   |
| 1.0097539871   | 3.6437469746   |
| 0              | 1.6359392452   |
| 4.9617877385   | 12.3387807398  |
| 1.773336877    | 2.6199514385   |
| 31.9263636216  | 53.2578510922  |
| 7.3903999501   | 15.7775543569  |
| 87.7831801988  | 97.883875104   |

gene\_expression\_table

|                |                |
|----------------|----------------|
| 9.7378886863   | 6.5886845135   |
| 37.5917411939  | 39.8108099762  |
| 8.0195301848   | 1.8348920871   |
| 51.5558206262  | 34.3772737779  |
| 122.2722633501 | 41.3363417386  |
| 114.852385552  | 50.3531185037  |
| 0              | 2.205297295    |
| 89.8046591835  | 76.9433115499  |
| 0              | 0              |
| 0              | 0.5516631613   |
| 68.935220326   | 159.5283917909 |
| 1.4464820972   | 2.0141240875   |
| 0              | 0              |
| 0              | 0.5175754806   |
| 3.6558000156   | 3.6179097516   |
| 46.9991881416  | 9.3776320694   |
| 2.583880211    | 1.8242724034   |
| 0.5329285001   | 1.1413172895   |
| 81.9926178372  | 31.6456964936  |
| 6.1547997      | 1.9554366479   |
| 0.2696062962   | 1.4699062546   |
| 0              | 0.3830787653   |
| 1.5790203128   | 0.7432138091   |
| 34.4972352163  | 14.7337285274  |
| 0              | 0              |
| 0              | 0              |
| 149.6865578255 | 328.1886528398 |
| 6.9000857289   | 11.7730381408  |
| 4.0420079686   | 4.0044423069   |
| 11.4761777832  | 8.7162362525   |
| 0.793660524    | 6.7240872174   |
| 0.3143860693   | 0.3576070723   |
| 0              | 0              |
| 0              | 0              |
| 0              | 0              |
| 0.6749998288   | 0.365365517    |
| 0              | 0              |
| 0              | 0              |
| 0.3185054447   | 0.1311749681   |
| 0              | 0.0746542348   |
| 4.2464872001   | 3.4977915282   |
| 7.8206556447   | 3.6810288155   |
| 10.3117143279  | 4.368169035    |
| 0              | 1.1333559639   |
| 15.2452193894  | 3.5878124815   |
| 294.9419156458 | 101.2253663305 |
| 0.9524739933   | 0.5940117807   |
| 6.4247484015   | 3.4830031412   |
| 10.0025052267  | 8.2389693869   |

gene\_expression\_table

|                 |                 |
|-----------------|-----------------|
| 1.5250031643    | 0.7177889996    |
| 7.1971756927    | 7.9209335445    |
| 0               | 1.5315410344    |
| 81.112839392    | 24.6221843202   |
| 0               | 1.0752198361    |
| 1.1593049171    | 1.2732113946    |
| 5.7098064996    | 2.2675727534    |
| 0               | 0.764354807     |
| 2.7175981013    | 8.7619718874    |
| 9.9424661798    | 4.8747117792    |
| 0               | 0               |
| 8.0772581392    | 4.7522582044    |
| 29.6481264495   | 9.3407062613    |
| 4.3311757806    | 10.1929963279   |
| 0               | 4.5312963483    |
| 15.5357519617   | 9.4291124641    |
| 6.0395982675    | 6.0285271793    |
| 3.1794259722    | 3.4011210918    |
| 42.9858809354   | 45.8395043603   |
| 3.350789388     | 3.1543013405    |
| 8.9476411751    | 14.1732457665   |
| 0.9033359478    | 1.0098083572    |
| 9.7322183022    | 7.5868899886    |
| 3.1545212933    | 1.7131974667    |
| 15.5068356378   | 7.754935248     |
| 1.5696576451    | 2.3780349849    |
| 3.8134859592    | 3.0129229935    |
| 1639.0844801902 | 1903.8513410536 |
| 0.2313770201    | 0.7351061394    |
| 0.4128886441    | 1.4089545973    |
| 0               | 0               |
| 0               | 0               |
| 66.0604110445   | 76.6552872996   |
| 0.9794978762    | 1.9209599503    |
| 4.7455527965    | 2.7362070131    |
| 0               | 0               |
| 771.7750117978  | 432.5653753985  |
| 7.3994282443    | 14.8017527875   |
| 0               | 0.1714381447    |
| 7.1090766762    | 12.0250561775   |
| 0               | 0               |
| 7.4401424893    | 6.6481928731    |
| 1.4712478187    | 1.2118529772    |
| 9.2167255356    | 6.9719969875    |
| 0               | 1.2661222443    |
| 0               | 1.2948895568    |
| 5.1269722353    | 3.9213931366    |
| 5.0575347024    | 28.2952761785   |
| 31.8022567826   | 56.6588564852   |

gene\_expression\_table

|                 |                 |
|-----------------|-----------------|
| 10.7577940026   | 4.4757564819    |
| 0               | 1.5020938809    |
| 4.3495026104    | 20.9840597754   |
| 0.5258030664    | 1.0105644164    |
| 59.8740735635   | 21.8179734021   |
| 92.9422572233   | 82.4445593698   |
| 33.2962869398   | 35.3573522352   |
| 0               | 0               |
| 14.2446720551   | 5.8919976745    |
| 6.1016084964    | 10.5029746416   |
| 15.5965546116   | 30.6152715484   |
| 9.2452290865    | 5.9833778396    |
| 12.105767445    | 3.7986311143    |
| 0.4541491266    | 0.3874383014    |
| 14.9674431972   | 5.7239659522    |
| 11.8250993257   | 8.5033692748    |
| 0.7775865485    | 1.357230334     |
| 0               | 0.2579760342    |
| 4.1299453107    | 2.0896753437    |
| 1.843323853     | 1.3681641463    |
| 11.8178678319   | 5.7169501515    |
| 6.4316978319    | 5.5815358612    |
| 6.2666688603    | 5.820188508     |
| 296.6138247607  | 538.8745828482  |
| 30.9850394595   | 19.2971864424   |
| 0.5002741525    | 1.0890450753    |
| 2.3949203136    | 6.5889972643    |
| 2.9988889041    | 0.5293192623    |
| 0.3945562714    | 1.7642438394    |
| 149.1103886324  | 116.7623970576  |
| 0               | 1.1613664713    |
| 6.075083338     | 7.3272695365    |
| 31.8224702313   | 13.0553325048   |
| 1.2234783221    | 2.5914023371    |
| 0               | 0               |
| 1.8796806476    | 0.8847287161    |
| 45.2360489186   | 8.5166874561    |
| 7.9119099685    | 7.9134584162    |
| 0               | 0.0151705253    |
| 0               | 0               |
| 0.1594827196    | 0               |
| 0               | 0               |
| 0.0795185645    | 0.0374278245    |
| 8.1832903231    | 12.1328985559   |
| 1026.2909430599 | 746.8509379594  |
| 1484.7416161762 | 1044.1632631144 |
| 452.3023611749  | 440.3897395274  |
| 124.9989657053  | 219.1587173781  |
| 0.1905032492    | 0.8069951975    |



gene\_expression\_table

|                |               |
|----------------|---------------|
| 3.7501205769   | 6.6375415713  |
| 0              | 0             |
| 11.9749077997  | 4.2272652073  |
| 105.7929202448 | 54.4323838369 |
| 0.2458492537   | 0.6571038938  |
| 0              | 0             |
| 0.0998581052   | 0.1410037391  |
| 0.6547242207   | 2.6194094297  |
| 0              | 0.1217483898  |
| 1.5571363038   | 2.687349267   |
| 1.620124086    | 1.1438408203  |
| 0              | 0             |
| 0              | 0             |
| 0.2154193617   | 0.9463408008  |
| 20.845178673   | 11.1978113651 |
| 1.1012559892   | 1.6846034967  |
| 0              | 0             |
| 1.1136077422   | 1.4652466263  |
| 0              | 0             |
| 5.8973131996   | 4.6262489166  |
| 1.1417420261   | 1.4778376768  |
| 0.3634128197   | 0.1282884507  |
| 0              | 0.0682295833  |
| 4.5080107017   | 6.8959539525  |
| 8.8656222494   | 13.8226452794 |
| 7.0407359946   | 3.262155724   |
| 1.8041569064   | 2.8508225206  |
| 45.1364299921  | 88.0142955925 |
| 0.1667731616   | 0.0392484237  |
| 4.6823975765   | 6.5084289775  |
| 8.2258819394   | 5.8956358603  |
| 12.6042526076  | 4.4494303759  |
| 61.482538263   | 39.4805481501 |
| 0.5172601739   | 0.4260623355  |
| 43.1977904156  | 37.2154628701 |
| 14.1873257114  | 12.8211748084 |
| 1.9103137574   | 1.8607350091  |
| 1.6735810252   | 1.3785129346  |
| 0.4505149807   | 0.7775113202  |
| 0.3405483199   | 2.6514537779  |
| 30.1220842889  | 19.833091602  |
| 0              | 0.0653105197  |
| 0.4762393439   | 1.6251345796  |
| 8.9825282113   | 5.2848742299  |
| 2.5594543447   | 0.8658672196  |
| 5.1504189441   | 6.3359796559  |
| 1.3308087423   | 2.2510729053  |
| 3.6954691671   | 12.7554875363 |
| 5.0509810559   | 6.5378429967  |

gene\_expression\_table

|                 |                 |
|-----------------|-----------------|
| 0               | 0.0923889306    |
| 1.1733998882    | 0.3727999701    |
| 0               | 0               |
| 0.1712853385    | 0.1410861207    |
| 0               | 0               |
| 0.1354294892    | 0.0956159959    |
| 4.0437841549    | 1.5940386062    |
| 16.5128598649   | 6.4560054503    |
| 1.0905138472    | 2.3372727273    |
| 33.5500696147   | 19.7391974894   |
| 4.6578350531    | 3.0449324461    |
| 0               | 0               |
| 0.4954325001    | 0.9910589233    |
| 0.289892894     | 0.1364468843    |
| 1.572627518     | 1.8736435173    |
| 0.1868813533    | 0.6157296452    |
| 10.7723381135   | 14.1738706369   |
| 0               | 0.0508931213    |
| 2262.9087368693 | 1887.9722148051 |
| 11.4090404186   | 7.2006965165    |
| 7.3697559658    | 7.4106164808    |
| 0.4214704172    | 2.6285063399    |
| 18.0139278074   | 10.0887005993   |
| 6.603843638     | 6.685775924     |
| 0.8863453572    | 0.7648397703    |
| 1.0785154648    | 3.4265431338    |
| 0.558368081     | 0.6132300421    |
| 0               | 0               |
| 0.2851056352    | 0.458494854     |
| 0               | 0               |
| 38.3668189427   | 14.2520571347   |
| 0               | 1.9060817693    |
| 2.3891501517    | 2.9518807311    |
| 0.0776840518    | 0.4570544438    |
| 0               | 0               |
| 6.0685424919    | 3.7744540567    |
| 0               | 1.3731615645    |
| 0               | 0               |
| 22.4533386112   | 10.3922058479   |
| 0.1785617011    | 0.4832615169    |
| 0               | 0.1583605863    |
| 2.5791289521    | 1.8209179171    |
| 0               | 0.494840175     |
| 0.1441990829    | 0.2545187722    |
| 4.1058926777    | 1.7715160277    |
| 0.7512749287    | 1.4546243318    |
| 58.3983795002   | 55.2694964089   |
| 1.8320360883    | 2.2481480431    |
| 0.5652521381    | 0.2327964323    |

gene\_expression\_table

|                |                |
|----------------|----------------|
| 0              | 0              |
| 0.3918812503   | 0.276676197    |
| 3.6359059451   | 4.51903208     |
| 0.099478743    | 0              |
| 1.6972954385   | 1.8973485141   |
| 0.2334256184   | 0.1373360602   |
| 0              | 0              |
| 25.0627859129  | 10.1113375364  |
| 11.4298436694  | 3.4414913963   |
| 0              | 0.7628291487   |
| 3.004075176    | 5.965139991    |
| 0.9141794833   | 1.0488228686   |
| 0.3865663839   | 2.183390339    |
| 5.9425883211   | 6.6699110183   |
| 112.3888046295 | 69.5855250513  |
| 51.9809582857  | 43.5576324766  |
| 0              | 0.3416741787   |
| 11.7446833143  | 8.6984571691   |
| 5.3991311303   | 19.5359735102  |
| 29.0665492783  | 16.6250772328  |
| 7.5530485159   | 5.1605875199   |
| 0.1762652447   | 0.1607438821   |
| 2.5856235114   | 3.0489787643   |
| 1.2574726769   | 2.101130194    |
| 0.3972626189   | 0.467459256    |
| 2.9413415283   | 2.848734284    |
| 0              | 0              |
| 0              | 0.0708529803   |
| 0              | 0.0296582266   |
| 14.5958006783  | 8.8164439784   |
| 0              | 0              |
| 0              | 0              |
| 307.6313184927 | 175.5103174748 |
| 0.555210453    | 1.4808509702   |
| 40.768221936   | 44.4981663086  |
| 1.7933846156   | 1.3189232358   |
| 11.8947553257  | 4.9292263123   |
| 0              | 0              |
| 10.2627934668  | 12.8310025104  |
| 2.1915337329   | 3.1068153947   |
| 553.685857683  | 12.7471815366  |
| 0              | 0              |
| 0              | 0              |
| 11.0301598733  | 3.8937595048   |
| 0              | 0              |
| 0              | 0              |
| 25.8123420722  | 2.0248936338   |
| 0.5373384523   | 0.4173091601   |
| 5.3648816241   | 4.1664880584   |

| gene_expression_table |                |
|-----------------------|----------------|
| 0                     | 0.8484381136   |
| 0                     | 0              |
| 0                     | 0              |
| 13.9457852635         | 3.9773431481   |
| 2.3680291538          | 3.3690857349   |
| 16.5501446869         | 13.1827852346  |
| 2.3534159946          | 2.1600279241   |
| 0                     | 0.358022188    |
| 111.7504177499        | 25.3600990794  |
| 0                     | 0              |
| 5.137004486           | 2.8208681553   |
| 2.4522575039          | 6.1421492135   |
| 0                     | 0.0652086359   |
| 0.3251643098          | 0.5739316731   |
| 11.3564192545         | 13.8085449705  |
| 0                     | 0.1461921057   |
| 0                     | 0              |
| 7.4785705978          | 1.8605799445   |
| 72.3199948227         | 110.9438793964 |
| 4.5091794582          | 25.6454503277  |
| 0                     | 0              |
| 2.1702736605          | 1.6599458406   |
| 7.6587943495          | 1.3017491814   |
| 1.9842857742          | 0.9666530423   |
| 0.6902320234          | 1.4619538787   |
| 23.9307026724         | 10.4189328051  |
| 3.8463696909          | 5.9104580473   |
| 2.8111965974          | 2.4214101678   |
| 17.5579553301         | 2.1747853393   |
| 0                     | 0              |
| 132.6754964909        | 79.3790024496  |
| 607.8421382966        | 283.1315055399 |
| 23.2935588881         | 9.1118234541   |
| 0.2492787959          | 0.1173306271   |
| 1.2554452258          | 1.4638535978   |
| 5.651708594           | 5.5973949436   |
| 0                     | 0.8107206303   |
| 3.7184606692          | 3.4746742958   |
| 9.9629696329          | 4.9685032779   |
| 6.2562713279          | 13.9873434389  |
| 4.4831709175          | 1.5360580762   |
| 0.905293144           | 1.5978887997   |
| 1.1943412846          | 0.8432294331   |
| 183.5059056271        | 91.8690605806  |
| 10.5587855198         | 7.1884790857   |
| 3.5765342854          | 0.5503437311   |
| 0                     | 0.0332269905   |
| 0.5858872543          | 0.2910859205   |
| 0.0366319902          | 0.1250041911   |

gene\_expression\_table

|                 |                 |
|-----------------|-----------------|
| 0               | 0               |
| 0.9179574434    | 0.3240483874    |
| 2.7197874471    | 4.094274334     |
| 2.8744845285    | 2.1046096394    |
| 0               | 3.3304087991    |
| 3.1748304349    | 8.3018347296    |
| 3.4287349678    | 0.9798302883    |
| 0               | 0               |
| 59.7521466572   | 28.7100803886   |
| 0.2755456076    | 1.1023981396    |
| 4.2592308191    | 7.9354140736    |
| 0               | 0.0704862078    |
| 1.5594924121    | 2.8902132406    |
| 239.5075791188  | 99.8479066208   |
| 253.193726497   | 108.7053822081  |
| 1.3227019001    | 0.6225697729    |
| 0               | 0.0471964727    |
| 9.2685084403    | 14.1781401248   |
| 0               | 0.8081439871    |
| 0.8910129918    | 1.0191606461    |
| 0               | 0               |
| 1.3855415019    | 1.2499486806    |
| 0               | 0               |
| 1.429015171     | 0.4203808368    |
| 0.0999456441    | 0.7056367381    |
| 0.0825819634    | 0.0550654171    |
| 4.1300086792    | 2.1432896482    |
| 1.0263065986    | 0.6642107082    |
| 28.1465666434   | 6.0139108089    |
| 4.8906894387    | 6.0934006095    |
| 32.5498401517   | 32.8115533407   |
| 1.1137594431    | 2.2279548362    |
| 0               | 1.6808584849    |
| 17.8834352194   | 7.1547740817    |
| 7.6565859459    | 2.7028533261    |
| 5808.5239959741 | 2785.0694030959 |
| 0               | 0               |
| 3.2203892251    | 2.1403288555    |
| 0               | 0               |
| 8.1834635915    | 2.888846536     |
| 5.9987087065    | 2.3725026441    |
| 2.0890267192    | 7.3042453353    |
| 55.2427284681   | 40.8030837245   |
| 24.3283761201   | 10.6874956646   |
| 0               | 0.0168826326    |
| 2.2796791433    | 2.1843217175    |
| 6.0797249747    | 2.9638072347    |
| 4.5910163941    | 3.4377972562    |
| 0               | 0               |

gene\_expression\_table

|                 |                 |
|-----------------|-----------------|
| 0.7214583883    | 0.4754067858    |
| 3.3130190465    | 3.032113998     |
| 0               | 0.0176367226    |
| 4.4428324235    | 4.6179647556    |
| 0.9714740868    | 0.7838635683    |
| 0               | 0.0298294096    |
| 0.1418920077    | 0.5927237768    |
| 17.2461090832   | 18.7376751418   |
| 0               | 0               |
| 2.7193061921    | 2.3465272387    |
| 0.4228491428    | 0.223905123     |
| 0               | 0.207543974     |
| 19.5535314001   | 23.9089954968   |
| 0               | 0               |
| 1775.3857327909 | 2114.9825325249 |
| 62.779385398    | 54.8767553733   |
| 3.2586736781    | 1.853333954     |
| 1.0525430139    | 1.574700197     |
| 31.2425841935   | 9.1907937384    |
| 20.1921406139   | 5.7703121251    |
| 108.895934666   | 56.1835571715   |
| 0               | 0               |
| 0               | 0               |
| 0               | 0.0151468793    |
| 0.8847357261    | 1.1451761959    |
| 4.202676418     | 4.615606666     |
| 9.4010702948    | 33.1867418386   |
| 0.8660355104    | 1.5285970642    |
| 0.7914907426    | 0.7450782551    |
| 23.4195066388   | 7.7161708544    |
| 1.3403036408    | 1.2147306007    |
| 0.0621585356    | 0.4242236051    |
| 0               | 0               |
| 0               | 0               |
| 0.2647057064    | 0.404923254     |
| 3.5918441876    | 4.3110565812    |
| 2.1683130758    | 4.3571014601    |
| 0               | 0               |
| 0               | 0               |
| 0               | 1.0144732731    |
| 89.0767514174   | 111.049031507   |
| 0.8608841349    | 0.4052012326    |
| 103.9389006214  | 57.4833459119   |
| 17.3281087926   | 14.7435385414   |
| 30.7192091595   | 24.5801769971   |
| 190.9263240661  | 103.5272153293  |
| 0.8367180507    | 0.6399684396    |
| 0               | 0               |
| 0.4591815712    | 1.5993452433    |

gene\_expression\_table

|                |               |
|----------------|---------------|
| 0              | 0.1021841756  |
| 1.0806867296   | 0.1907467468  |
| 0              | 2.0971231324  |
| 0.438778753    | 0.2524188703  |
| 2.7725739022   | 2.6099920239  |
| 0              | 1.0275654127  |
| 0              | 0.0127735959  |
| 0              | 0             |
| 0              | 0             |
| 4.4379859755   | 4.3953363564  |
| 9.470897456    | 8.5440499349  |
| 1.203290168    | 1.6518979717  |
| 3.6336596295   | 2.626520057   |
| 1.7862827232   | 1.5414082747  |
| 40.4388528566  | 54.1998286233 |
| 6.1861169181   | 5.9620187606  |
| 1.327243347    | 1.3951797319  |
| 7.1140615665   | 3.7072112582  |
| 7.4017900152   | 1.9451646588  |
| 1.2805964082   | 3.2397895591  |
| 4.0427859153   | 2.7401181513  |
| 0              | 0.3208176567  |
| 116.2396396875 | 72.8889590872 |
| 5.6255482567   | 2.1386359096  |
| 4.2593872819   | 3.8091386789  |
| 2.8588921179   | 4.7470634978  |
| 35.0407052042  | 38.9787292439 |
| 0.2649119365   | 0.4468016728  |
| 1.5426427583   | 1.3432694778  |
| 0.4928674564   | 0.1739872645  |
| 4.566206943    | 2.8400457512  |
| 0              | 0.006441      |
| 28.1742323007  | 24.3119379909 |
| 0.539815737    | 0.1132315948  |
| 7.440643808    | 3.2103176573  |
| 0              | 0.875004677   |
| 17.118331111   | 9.8133316976  |
| 0              | 0             |
| 0              | 0             |
| 0.882244935    | 0.5536737883  |
| 55.7901224238  | 17.3859740408 |
| 7.9183084292   | 2.0596535073  |
| 0              | 0             |
| 0              | 0.3356557101  |
| 0              | 0             |
| 22.847366414   | 10.911950275  |
| 0.1440174693   | 0.3135111317  |
| 3.1966541847   | 1.5046022612  |
| 3.1807164033   | 2.1052978044  |

gene\_expression\_table

|                 |                 |
|-----------------|-----------------|
| 0.1134366458    | 0               |
| 0               | 0               |
| 0               | 0               |
| 0.2057993304    | 0.1907043423    |
| 3020.4572909146 | 3049.2490574666 |
| 0.179348864     | 0.0633119875    |
| 0.6353302462    | 1.0715508727    |
| 2.0688673431    | 0.8785145585    |
| 2.5026618938    | 1.5565817246    |
| 0               | 0               |
| 1.3178423417    | 0.9476537802    |
| 0.8509771499    | 0.4339163938    |
| 5.7605025204    | 4.9385399263    |
| 1.5797210219    | 1.0622051702    |
| 2.1824469317    | 1.7976609911    |
| 0               | 0               |
| 0               | 0               |
| 20.0296328023   | 11.4898317653   |
| 0               | 0               |
| 0               | 0               |
| 0               | 0               |
| 0               | 0.8163056901    |
| 3.8936512505    | 0.6872494025    |
| 0               | 0               |
| 0               | 0               |
| 1.0797809744    | 0.8047001446    |
| 0               | 0               |
| 79.0823069488   | 57.1026784516   |
| 1.0556272416    | 2.1737755518    |
| 29.7846771863   | 9.717758764     |
| 2.5014894846    | 2.6982127048    |
| 0.4082310215    | 0.0480365785    |
| 0.0754587701    | 0.2574979538    |
| 0               | 0.00583         |
| 6.3267477458    | 3.6727134199    |
| 20.0534487354   | 18.2657561825   |
| 0               | 0.021159152     |
| 0               | 0               |
| 0               | 0               |
| 8.3938929734    | 3.2717896675    |
| 1.1708070927    | 0.4723507493    |
| 28.6774193338   | 38.2929478517   |
| 0               | 0.0570361575    |
| 0               | 0.004534        |
| 0.3770075226    | 0.1996312802    |
| 1.0928573331    | 0.9001762966    |
| 2.0019863009    | 5.5752488598    |
| 0.5463840836    | 0.2828894676    |
| 0.4404823144    | 0.5597811804    |



gene\_expression\_table

|                |                |
|----------------|----------------|
| 2.4469685612   | 1.6611634343   |
| 11.5323579762  | 9.8183919945   |
| 0.8897051218   | 0.0523458381   |
| 0.0314808846   | 0.001852       |
| 2.9880885375   | 1.0841266035   |
| 900.440578045  | 669.8129090607 |
| 43.9800639464  | 43.471157548   |
| 0              | 0.6944718727   |
| 0              | 0              |
| 0.4060352166   | 1.0988985517   |
| 3.0505479742   | 4.6215872794   |
| 0              | 0              |
| 0              | 0              |
| 158.5933899327 | 82.4070996708  |
| 2.1835155096   | 4.6248201477   |
| 23.0646002875  | 18.416519806   |
| 0              | 0.1759634065   |
| 0              | 0.005033       |
| 16.2292811281  | 7.3897120539   |
| 0              | 0.1638141603   |
| 0              | 0.8397177071   |
| 0              | 0              |
| 51.8323829183  | 47.2681864602  |
| 44.5212470073  | 49.3065304411  |
| 21.7077601306  | 12.8878767494  |
| 3.5570681965   | 4.2693172246   |
| 0.8505651452   | 0.4303701086   |
| 0              | 0.0703705995   |
| 0.2225056718   | 0.9163791353   |
| 6.2109219783   | 4.3850382522   |
| 0              | 0.2507283338   |
| 15.9159359897  | 9.2506427767   |
| 7.6211710411   | 6.0212628846   |
| 4.5838719347   | 3.550948577    |
| 0.2419612495   | 0.3131876052   |
| 1.7418658262   | 0.6148964924   |
| 5.4283258702   | 33.8538326381  |
| 1.4614565604   | 11.4359860945  |
| 0              | 0.8667154918   |
| 0              | 0              |
| 14.0902953686  | 9.4299104594   |
| 0.9037901084   | 0.3722217018   |
| 0              | 0              |
| 0              | 0              |
| 0              | 0              |
| 49.205569802   | 38.2954186833  |
| 4.3190434548   | 5.2516294475   |
| 14.1014843828  | 28.2084883966  |
| 63.2958272344  | 19.0921211534  |

gene\_expression\_table

|                |               |
|----------------|---------------|
| 3.3140812599   | 4.7813494685  |
| 11.4248750362  | 14.8671063657 |
| 1.4738004613   | 4.4222667006  |
| 2.6418615867   | 2.2204862421  |
| 0              | 1.6646819552  |
| 0.5681270057   | 0.5348124182  |
| 9.9646820719   | 5.9408945294  |
| 10.2112761416  | 7.8959770022  |
| 0.1831495356   | 0.1508585482  |
| 0              | 0.8568838628  |
| 50.9162545124  | 40.6078350636 |
| 11.4339023527  | 5.8180680919  |
| 228.2461428903 | 84.3034702226 |
| 130.4130313365 | 60.2977988585 |
| 0              | 0             |
| 6.2926864533   | 1.8174950378  |
| 108.3198126992 | 55.4623305069 |
| 25.4855461114  | 7.9970302472  |
| 3.1993885541   | 2.6980516179  |
| 3.5872269714   | 3.2713470578  |
| 0              | 0.0104826326  |
| 9.7807673338   | 4.8337955832  |
| 7.2420624333   | 1.8463772     |
| 0              | 0             |
| 4.7514256685   | 2.4227695087  |
| 247.2435884482 | 92.9326971397 |
| 4.4552945471   | 9.5414388529  |
| 0.9439183362   | 0.6108902227  |
| 0              | 0             |
| 3.3071367314   | 1.6538919872  |
| 10.1280760088  | 14.6338460231 |
| 0              | 0             |
| 0.2633852625   | 0.5020795672  |
| 0              | 2.7103165087  |
| 4.1589354396   | 3.8334945349  |
| 0.1157321585   | 0.5038738726  |
| 0              | 0.005173      |
| 12.1906189726  | 7.96928419    |
| 2.9519756296   | 2.8578190312  |
| 0.3521675128   | 0.3646683101  |
| 11.9124183001  | 8.2588726     |
| 0.0175206828   | 0             |
| 0.0875669733   | 0.1257089595  |
| 0              | 0.014403154   |
| 0              | 0             |
| 0.8805230828   | 2.1240301085  |
| 10.9355731195  | 7.1268358358  |
| 0.0819639275   | 0.1543152353  |
| 17.5294362799  | 10.1759384844 |

gene\_expression\_table

|                 |                 |
|-----------------|-----------------|
| 0.8988088695    | 1.2162735208    |
| 7.2690765838    | 4.1258196277    |
| 55.5941293518   | 25.2864410781   |
| 0               | 0               |
| 49.3772378034   | 22.9918852229   |
| 0.1048422611    | 0.0308419941    |
| 0               | 0               |
| 23.7787904661   | 9.1474785526    |
| 2.2816529692    | 0.8949409858    |
| 0               | 0               |
| 0               | 0.1482659941    |
| 40.8166745542   | 22.2679979051   |
| 32.9576927836   | 20.9875512311   |
| 19.7024707881   | 8.96444466913   |
| 0               | 0               |
| 0               | 0               |
| 0               | 0               |
| 0               | 0               |
| 2.1727951538    | 2.2584447229    |
| 6.6304225412    | 7.8020237504    |
| 6.2224032837    | 4.7592396466    |
| 0               | 0               |
| 1.8858102072    | 1.0540413629    |
| 2.1465116659    | 2.766354651     |
| 4.1307183424    | 4.926303779     |
| 1.4525768336    | 1.5952984834    |
| 1.0868485538    | 0.6698976965    |
| 0               | 0               |
| 0.8494310749    | 1.4493130717    |
| 1.5983019127    | 2.0553617803    |
| 0               | 0               |
| 0               | 0.7217558694    |
| 0.9503552333    | 4.622239698     |
| 0               | 0.8516687456    |
| 7.9655161802    | 3.4563046473    |
| 1938.3429810316 | 2399.7757290597 |
| 2.7285337237    | 0.1605333957    |
| 0               | 0               |
| 0               | 0               |
| 3.2981060434    | 0.6953250751    |
| 6.692971634     | 4.7253751921    |
| 0.5042051825    | 0.870171368     |
| 0               | 0.0152561224    |
| 0               | 0               |
| 641.1084392716  | 1769.2308195266 |
| 6.6184538072    | 4.3038616514    |
| 0               | 0               |
| 50.4584389919   | 53.8736157445   |
| 7.1734663434    | 2.1383927078    |

gene\_expression\_table

|                |               |
|----------------|---------------|
| 1.3451320849   | 1.8993816594  |
| 17.9892903683  | 9.7080887316  |
| 6.3795069891   | 8.169133376   |
| 102.6357213098 | 62.8012003403 |
| 0              | 0             |
| 14.357845874   | 13.5159113997 |
| 0.3209679793   | 0.4154516187  |
| 13.1658537253  | 10.2248989203 |
| 0.1168695048   | 0.0825122664  |
| 0              | 0             |
| 5.4845579958   | 1.9361051944  |
| 5.6862851546   | 0.3345528249  |
| 3.7789342824   | 3.612923544   |
| 0.1811778778   | 0.2664902005  |
| 2.3744832791   | 1.8034364428  |
| 0              | 0             |
| 0              | 0             |
| 6.0097852547   | 2.3867052759  |
| 5.5760184949   | 4.3420404885  |
| 0.8741977263   | 0.246880607   |
| 2.2340855605   | 0.6572125869  |
| 0              | 0.0287286085  |
| 0              | 0.440897333   |
| 1.2904950065   | 2.4676056495  |
| 0.4766857449   | 2.8606742252  |
| 8.8551275843   | 3.5890546344  |
| 0              | 0.1398109718  |
| 9.997000513    | 9.7611845907  |
| 0              | 0             |
| 35.3216005041  | 6.4653488446  |
| 0.0697126699   | 0.1066402442  |
| 0.2035451121   | 0.2050818963  |
| 4.3045985401   | 2.906998525   |
| 0              | 0.0983289609  |
| 0.8137117394   | 0.5106641516  |
| 1.5801253513   | 1.2577853212  |
| 89.1853329467  | 38.6386405734 |
| 1.1744877105   | 0.5528082685  |
| 2.8621265712   | 2.1329822626  |
| 65.1807540441  | 30.0893126004 |
| 1.4325042233   | 0.5478293983  |
| 0              | 0             |
| 0              | 0             |
| 0              | 0             |
| 12.196656604   | 7.0862091638  |
| 1.3922461107   | 1.2833014443  |
| 0              | 0.0272919152  |
| 6.7645786331   | 3.2145690779  |
| 0.7948029982   | 4.9568003698  |

gene\_expression\_table

|                |                |
|----------------|----------------|
| 1.6716507683   | 0.9179486667   |
| 3.7337274981   | 2.0319846249   |
| 0.6793278763   | 0.7593973963   |
| 1.8045756852   | 2.6543071478   |
| 4.2535140145   | 1.6193014261   |
| 13.2432468501  | 11.0814859705  |
| 0.0337111339   | 0.0238007517   |
| 7.8569948706   | 8.2943839571   |
| 5.2054843492   | 5.6352739649   |
| 42.9975972278  | 40.07148443    |
| 11.1435887158  | 20.4339110041  |
| 54.4887942827  | 37.0046742333  |
| 4.9857688591   | 2.2933691876   |
| 1.9330317021   | 2.2746000208   |
| 43.3244993449  | 20.2676484458  |
| 274.969267189  | 125.5399478804 |
| 5.5207762065   | 12.9926039601  |
| 0              | 0              |
| 0.5897473174   | 3.5391764249   |
| 6.4928346169   | 1.7826955824   |
| 2.0651344813   | 5.0220939746   |
| 0              | 13.6126187476  |
| 6.4892008388   | 1.527169611    |
| 3.4416456096   | 4.6977532305   |
| 2.0474120742   | 3.6940936338   |
| 4.4302107972   | 2.9131653607   |
| 0              | 14.2649050805  |
| 0              | 11.6712859749  |
| 2.2054205567   | 1.7795110038   |
| 7.5763525497   | 4.0436348164   |
| 0              | 0              |
| 7.2816182979   | 8.7035750736   |
| 1.9826957804   | 1.7497798375   |
| 13.4367689182  | 9.5331374447   |
| 0              | 0.0169014549   |
| 42.528257258   | 21.0180750733  |
| 442.9224359185 | 462.7510601328 |
| 11.4466696864  | 17.6784638555  |
| 21.913976411   | 2.7075504092   |
| 0.0611863122   | 0.1007971786   |
| 1.3784749339   | 0.8110263039   |
| 19.9749780749  | 14.8302665557  |
| 7.1158005906   | 3.8418067268   |
| 227.1728851651 | 162.9628542576 |
| 0.2137207076   | 0.0502970671   |
| 0              | 0.0539488034   |
| 18.7488746682  | 26.2976852737  |
| 2.1547460666   | 2.7098065394   |
| 0.8518305184   | 2.831637856    |

gene\_expression\_table

|                 |                 |
|-----------------|-----------------|
| 0               | 0.0751000875    |
| 1.3391818229    | 1.1030714598    |
| 0.038155415     | 0.00898         |
| 0.9507822849    | 0.9174047742    |
| 2.937203379     | 2.3041397819    |
| 0               | 0               |
| 6.0996625847    | 4.7632354435    |
| 1.8406362604    | 3.898580809     |
| 0               | 0.036675963     |
| 2.2365301126    | 1.0526907417    |
| 0               | 0               |
| 65.5556065444   | 75.9115136974   |
| 1.7842583957    | 1.25194694      |
| 2.5715665026    | 7.1677533018    |
| 1.569428937     | 0.8038786905    |
| 13.7861866055   | 18.9924728817   |
| 0.5492156765    | 0.2585050184    |
| 2.3429412914    | 3.0939004301    |
| 0               | 0.0410135551    |
| 0               | 0.1562641253    |
| 0               | 0.4943811529    |
| 1.2006652184    | 3.1867024963    |
| 1.6047199583    | 1.2588502115    |
| 0               | 0.4166050878    |
| 205.6405991793  | 100.8239437769  |
| 2853.9580453674 | 1428.9045015052 |
| 1.2177620601    | 0.4401177878    |
| 0               | 0.0421898236    |
| 1.7526080079    | 1.6498362471    |
| 26.7356196774   | 14.3535456297   |
| 0               | 0.1602693916    |
| 0.3472630254    | 0.3745726347    |
| 0.8769239299    | 0.889001828     |
| 6350.6194161707 | 7054.7496810915 |
| 0               | 1.4201397956    |
| 27.4857527402   | 17.7421759489   |
| 0.197915918     | 0.2484136814    |
| 0               | 0               |
| 3119.5813301127 | 1832.1584723447 |
| 0.7784364315    | 1.483898616     |
| 15.7639409845   | 12.3662950283   |
| 1.9446624585    | 1.0011250994    |
| 1.3516418975    | 0.305861183     |
| 44.6355411941   | 51.2787204802   |
| 2.3330725701    | 4.6670583561    |
| 1.4269246177    | 0.951469255     |
| 2.7624673144    | 12.1897409984   |
| 1.3228037578    | 1.5565442883    |
| 0               | 0.806581733     |

gene\_expression\_table

|                |               |
|----------------|---------------|
| 1.1285828037   | 1.3554802808  |
| 0              | 0.0680600865  |
| 1.3761354023   | 1.1874864312  |
| 0.8649646274   | 0.9042802413  |
| 0              | 0             |
| 5.5146562166   | 3.7437118747  |
| 2.7057481885   | 1.910313694   |
| 0              | 0.6016285962  |
| 0              | 0             |
| 0              | 0             |
| 117.7691086307 | 60.2188782977 |
| 0              | 0.3025687647  |
| 1.2517547446   | 0.294588171   |
| 0.5146565847   | 1.1102608617  |
| 0.874728955    | 2.5475033753  |
| 0              | 0.5195949984  |
| 0              | 1.1403989723  |
| 1.2365259741   | 0.6062588117  |
| 0              | 0.1785349913  |
| 12.0591825885  | 6.3855226075  |
| 6.2835642703   | 4.8060189663  |
| 0              | 0.5854674436  |
| 0.7513984135   | 1.7241337263  |
| 2.8079393195   | 2.8556903576  |
| 1.5444057364   | 0.1453842817  |
| 0.0699356916   | 0.913456593   |
| 1.6976433468   | 0.4661109475  |
| 6.0339359019   | 5.5708770549  |
| 3.8729074799   | 3.9875967873  |
| 0              | 0.0384795305  |
| 0.443343825    | 0.3434413411  |
| 0.0857439379   | 0.1917004305  |
| 4.8783243677   | 8.0968842188  |
| 1.3936698173   | 2.4977432545  |
| 0              | 0             |
| 17.8761563846  | 6.9835828726  |
| 7.5623542686   | 3.8560723905  |
| 5.833033534    | 14.4138444209 |
| 5.3066851082   | 7.3371474467  |
| 1.2527717936   | 3.4806027079  |
| 1.9501045978   | 1.4751576716  |
| 32.1151550607  | 12.7630140346 |
| 1.6822128004   | 1.4351093768  |
| 10.6213121059  | 8.1487656593  |
| 0.041404575    | 0.004872      |
| 1.8944760834   | 2.6750779104  |
| 0              | 0.5213895972  |
| 0.3464164219   | 0.3261027948  |
| 4.9360233963   | 2.504796108   |

gene\_expression\_table

|                 |                 |
|-----------------|-----------------|
| 5.2275214981    | 2.7680530137    |
| 3.2191970845    | 2.6516223314    |
| 0               | 0               |
| 3.2421508427    | 2.7659051662    |
| 31.2844312411   | 13.3225887958   |
| 26.8872262641   | 28.9739503395   |
| 10.132235826    | 13.6168760561   |
| 0               | 0               |
| 454.6253467459  | 835.4559790358  |
| 1.7557693375    | 0.9338388921    |
| 0.1471001439    | 0.5712064456    |
| 31.5246148546   | 50.5438402735   |
| 0.9747384753    | 0.751906213     |
| 4.6043315856    | 10.1495716847   |
| 3.2246404222    | 3.2379196434    |
| 0               | 0               |
| 1.0197087328    | 0.5399514535    |
| 0               | 0.1485565787    |
| 0               | 0               |
| 8.4382279079    | 12.1824503006   |
| 0.1051097071    | 0.1236826803    |
| 0               | 0               |
| 2.7007831615    | 2.8891034593    |
| 1.2889732978    | 1.971756745     |
| 0               | 0               |
| 7.3372466011    | 3.5398351273    |
| 0               | 0               |
| 11.8384563003   | 12.2360931489   |
| 0.8213898966    | 1.4083725457    |
| 0               | 0               |
| 14.4365284476   | 20.5063092277   |
| 0.3230201185    | 0.0475122555    |
| 5.1095915196    | 1.374276712     |
| 18.0418631621   | 10.6149377371   |
| 0               | 0               |
| 1239.2619185853 | 1041.7610411514 |
| 6.7191516581    | 10.60779543     |
| 2.513906136     | 2.7493073034    |
| 3.6074693456    | 6.6454832318    |
| 0.3112090972    | 0.219720003     |
| 0               | 0               |
| 3.1029588902    | 2.0994712349    |
| 5.2217200913    | 10.7088156101   |
| 21.0487311818   | 23.2819760128   |
| 2.6442801566    | 1.6594808918    |
| 0               | 0               |
| 0.39578995      | 0.4657263652    |
| 0               | 0               |
| 5.6422890797    | 14.4404476583   |



gene\_expression\_table

|                 |                 |
|-----------------|-----------------|
| 0               | 0.398659809     |
| 1507.3026767184 | 773.0218599143  |
| 0               | 3.7125804911    |
| 1.3133641497    | 2.2666404838    |
| 7.824613867     | 3.2992573028    |
| 4.3714764209    | 5.0581879617    |
| 24.8710940773   | 37.7012843986   |
| 14.4283612367   | 17.734985731    |
| 0               | 0               |
| 101.1036540517  | 71.711721337    |
| 29.8272873372   | 16.8622010107   |
| 0.2656846692    | 0.8128415684    |
| 24.9257479887   | 25.745352579    |
| 23.0771914235   | 11.0430131835   |
| 2.9440147753    | 2.540431409     |
| 9.1456886408    | 5.5243595965    |
| 3.1596393067    | 2.4309674483    |
| 25.795416739    | 69.4935130385   |
| 11.209768443    | 6.2498053257    |
| 11.8316856683   | 9.6586333807    |
| 20.8062447223   | 13.9551535739   |
| 164.6039537616  | 112.3004453521  |
| 0.4411862494    | 1.1940317261    |
| 23.6353341667   | 8.3435152452    |
| 0.4344041306    | 0.1022327408    |
| 57.8208231062   | 35.1297268596   |
| 0               | 0               |
| 0               | 0.0954715284    |
| 0               | 0               |
| 6.1975835151    | 3.4640333105    |
| 0.0368772138    | 0.1475377243    |
| 0               | 0               |
| 1029.0949563501 | 1030.0627773009 |
| 0               | 0.8843774626    |
| 2.5366389268    | 1.1086641974    |
| 0.8471868385    | 1.0566985892    |
| 0               | 0               |
| 5.9607773282    | 5.3189891816    |
| 4.3001424339    | 36.9378627519   |
| 14.289070745    | 9.0264424883    |
| 0               | 0               |
| 1.8199732627    | 5.7822229635    |
| 26.9390964876   | 31.139858711    |
| 1.144402602     | 2.9086981178    |
| 30.3214018275   | 48.1669455056   |
| 32.720515109    | 8.3115984441    |
| 41.9133316181   | 41.318741211    |
| 1.2766273482    | 1.8902789895    |
| 0.691113543     | 1.3011742146    |

gene\_expression\_table

|                |                |
|----------------|----------------|
| 36.0301545176  | 19.7851327141  |
| 6.2362781341   | 4.8921557979   |
| 34.5126191404  | 53.7113593629  |
| 8.2268369936   | 19.3610519437  |
| 4.3251656441   | 2.5447130156   |
| 0              | 2.6366500265   |
| 0              | 0              |
| 47.8930361785  | 49.1547599439  |
| 24.7058265833  | 16.7667417858  |
| 17.4302272183  | 10.1929294648  |
| 0              | 0              |
| 0              | 0.0346468796   |
| 62.0555877723  | 78.1752758297  |
| 0              | 45.9384959754  |
| 0              | 1.4890137043   |
| 10.3124361881  | 10.451458584   |
| 5.6172778426   | 4.957391652    |
| 5.179683748    | 4.4476576046   |
| 0              | 1.8312909724   |
| 30.3055516436  | 172.3594118471 |
| 9.6299190722   | 11.0482454816  |
| 0              | 7.5355951659   |
| 55.3354452147  | 33.0575036017  |
| 1.5191588623   | 1.5194561784   |
| 0              | 1.1519531666   |
| 566.2664659352 | 338.7940379003 |
| 28.9569869335  | 37.4810818206  |
| 0              | 24.3960471063  |
| 83.087811242   | 38.293052987   |
| 13.0104399224  | 11.3544683584  |
| 12.2417585823  | 25.6406998631  |
| 174.2353504569 | 189.5562441098 |
| 0              | 0              |
| 6.9664167621   | 2.4592165293   |
| 0              | 0              |
| 0              | 0              |
| 0              | 0              |
| 0              | 0              |
| 0              | 0              |
| 0              | 0              |
| 404.1796621813 | 304.184903743  |
| 0              | 0              |
| 0              | 0.0297552478   |
| 0              | 0              |
| 0              | 0              |
| 7.2443770253   | 7.3660116366   |
| 32.6494388741  | 69.1535196596  |
| 9.3537464173   | 13.7582015415  |
| 0              | 8.4206714767   |
| 4.021400499    | 2.1293933989   |

gene\_expression\_table

|                 |                 |
|-----------------|-----------------|
| 15.872124047    | 19.921857752    |
| 3.7456079787    | 3.0852220291    |
| 3.0485628803    | 4.8171595739    |
| 63.9637074368   | 101.3339359031  |
| 16.9200745085   | 15.9776673263   |
| 0               | 0               |
| 0               | 0               |
| 0.5477622102    | 0.8180855492    |
| 1.9621368022    | 2.9726418212    |
| 23.0863811302   | 28.9768149192   |
| 0               | 0.00722         |
| 0               | 0               |
| 0               | 0               |
| 0               | 0.1123773438    |
| 18.8367467485   | 16.3631444983   |
| 3.834562197     | 4.4325066762    |
| 13.8066730529   | 13.7387389804   |
| 0               | 0.7818277519    |
| 0               | 0.0230378963    |
| 0               | 0               |
| 0               | 0               |
| 3.6089307847    | 1.3125953062    |
| 0               | 0.0111744484    |
| 18.9273654241   | 221.6048749293  |
| 50.5775531465   | 45.8758753429   |
| 19.9019980412   | 40.0069419765   |
| 0               | 0               |
| 10.7632196597   | 7.3539229799    |
| 0               | 0.0548469742    |
| 1.3629304983    | 0.3385718632    |
| 0               | 0.0261861806    |
| 13.7661953308   | 5.7121708872    |
| 0               | 0.5653090244    |
| 1.1034778692    | 1.8178486644    |
| 241.2308191061  | 200.2134560041  |
| 0               | 0               |
| 0               | 0               |
| 0               | 0               |
| 2.7173433463    | 5.8087920093    |
| 8.5508142027    | 211.4979897232  |
| 2392.2365653436 | 6172.5142431845 |
| 14.6745945049   | 13.3431513494   |
| 0               | 0               |
| 41.2043498892   | 35.482345772    |
| 3.4543597863    | 4.2454035189    |
| 32.9090992037   | 19.2410692658   |
| 0               | 0               |
| 0               | 0               |
| 4.6874070718    | 8.6674905778    |

gene\_expression\_table

|                |                |
|----------------|----------------|
| 76.3841030862  | 69.7176151341  |
| 8.0815743173   | 5.4416017316   |
| 0              | 0.1805443073   |
| 22.285463989   | 106.9911623963 |
| 0              | 0.0829638276   |
| 0.399893225    | 1.1920718873   |
| 0              | 0              |
| 15.8720571945  | 31.6066604228  |
| 18.6202120728  | 18.9121512414  |
| 0              | 0.0218567609   |
| 3.9593591415   | 1.024975867    |
| 5.2240592826   | 3.8112360551   |
| 0.7553683426   | 0.6913219916   |
| 52.4818469908  | 15.8154158331  |
| 12.4588616735  | 10.1105882431  |
| 0              | 1.1481895082   |
| 21.5392835868  | 38.01793952    |
| 4.184430249    | 2.461911287    |
| 21.8213374903  | 17.2518593958  |
| 0              | 10.2754430673  |
| 0              | 0.002188       |
| 0              | 0              |
| 0              | 0.4857633835   |
| 17.2890539906  | 9.6634210389   |
| 3.8793215092   | 2.0190465363   |
| 0              | 0              |
| 17.2869059619  | 53.3399771379  |
| 1.1357531647   | 5.7466993055   |
| 7.1053978817   | 4.4901278017   |
| 0              | 0.0675686561   |
| 8.8098805652   | 9.2435461652   |
| 15.1501359654  | 2.3769570217   |
| 8.7994111357   | 12.3309995648  |
| 8.5589944806   | 5.680256044    |
| 6.7611398259   | 2.7403445061   |
| 0              | 0.6198959754   |
| 6.9487681571   | 7.4332920935   |
| 0              | 0.327187849    |
| 29.7797319016  | 17.131563992   |
| 125.3412805437 | 208.7791418058 |
| 0              | 0.006208       |
| 0              | 0              |
| 127.17125501   | 159.1097021163 |
| 85.4559870148  | 46.8106128935  |
| 9.221332956    | 7.2338334684   |
| 16.6082112568  | 24.1494358677  |
| 0              | 0.0252319695   |
| 13.5307413393  | 8.3069398184   |
| 3.2225522321   | 4.6451753862   |

gene\_expression\_table

|                |                 |
|----------------|-----------------|
| 0              | 0               |
| 21.9340819273  | 10.216399968    |
| 1.1262167647   | 1.2130861914    |
| 1.3325637911   | 0.9408173566    |
| 9.7139037388   | 11.2931943509   |
| 0              | 0.0592827417    |
| 0              | 3.3565376716    |
| 0              | 0               |
| 750.1401113928 | 715.6447451423  |
| 0              | 0               |
| 2.6595341611   | 1.4395589931    |
| 3.5671018072   | 2.5650849157    |
| 0              | 0.1477170034    |
| 2.0848613109   | 1.6866149083    |
| 0.2988153993   | 0.8790408259    |
| 62.6543796316  | 27.6357402591   |
| 12.42355519    | 10.2331654487   |
| 1.4681306103   | 1.7275505172    |
| 30.0168376795  | 15.3998853703   |
| 12.84846031    | 13.9181838827   |
| 0              | 1.5079280841    |
| 4.8442896064   | 4.7882348908    |
| 0              | 0               |
| 5.8365569611   | 22.6640088118   |
| 1.3297396302   | 1.157882244     |
| 0              | 0               |
| 12.444525773   | 11.6704129155   |
| 1.8232701291   | 3.8617982748    |
| 0              | 0.0779793406    |
| 7.9478612675   | 12.6406285344   |
| 0              | 0               |
| 1.2568067478   | 2.5352323738    |
| 22.0086758472  | 14.8191978317   |
| 0.3894723709   | 0.8707556827    |
| 178.1091253276 | 67.4304591296   |
| 698.7287225532 | 1000.7283725551 |
| 7.9986920936   | 6.3060853436    |
| 4.6949013876   | 4.3091056241    |
| 11.5317102865  | 27.4101337426   |
| 0              | 0.0426969761    |
| 0              | 0               |
| 8.2782899666   | 5.6498210223    |
| 0              | 1.6487309225    |
| 1.044303707    | 0.7372998273    |
| 0.4928297485   | 1.8363917281    |
| 2.6422615072   | 1.3213893134    |
| 0              | 0.2017169831    |
| 0.9249930941   | 0.6938805941    |
| 121.0166111815 | 51.620126006    |

gene\_expression\_table

|                 |                 |
|-----------------|-----------------|
| 664.7068201328  | 205.4950450832  |
| 14.2261779285   | 36.8279020298   |
| 119.8115363063  | 163.1367019161  |
| 10.3542107551   | 9.4424515537    |
| 0               | 0.1648331377    |
| 18.1844173526   | 12.5328911926   |
| 30.7231162131   | 17.380729109    |
| 30.5147948789   | 13.7290647224   |
| 9.7612527329    | 1.6271938529    |
| 2.7195102868    | 2.8800450263    |
| 62.8888334199   | 52.0652305328   |
| 36.969259318    | 79.0941061142   |
| 1.1107187458    | 2.4832689867    |
| 1547.5744637036 | 2151.386078076  |
| 24.5574703103   | 12.0032844323   |
| 0.6494143773    | 0.3566110058    |
| 0               | 0.6723203639    |
| 4.2851244743    | 2.1429815601    |
| 279.2606950584  | 200.702613086   |
| 367.568472735   | 86.5036258647   |
| 3.1746420959    | 3.081873308     |
| 0.7118006496    | 0.7280471957    |
| 3.1693054691    | 4.1022568362    |
| 0               | 0               |
| 1.0074465696    | 1.1854632211    |
| 0               | 0.0609329176    |
| 0               | 0               |
| 0.8201349615    | 2.3161283885    |
| 4.2239377442    | 4.9703110768    |
| 197.8716582077  | 107.3692799006  |
| 39.3707481577   | 61.4698516208   |
| 6.5232261735    | 4.4008411317    |
| 0               | 3.5980309348    |
| 169.3711936767  | 96.7330386075   |
| 66.4670591236   | 35.6617307355   |
| 0.8957052189    | 0.5269885402    |
| 8.0193063789    | 9.3866596579    |
| 3.8534077962    | 4.1233864985    |
| 4.9569513573    | 3.9663371897    |
| 6.8990182778    | 5.5473550618    |
| 42.325032072    | 22.4570315624   |
| 6.5330764361    | 5.6374827718    |
| 0.3640015087    | 0.2141604399    |
| 0               | 0.2543147739    |
| 0               | 0               |
| 9.6008148206    | 10.7324224886   |
| 10.7822318417   | 8.6999734128    |
| 1110.3683735944 | 1929.5550611454 |
| 2.7279559709    | 25.037906968    |

gene\_expression\_table

|                |                |
|----------------|----------------|
| 0              | 0              |
| 6.5177625586   | 6.3656490233   |
| 0              | 0              |
| 2.4155585592   | 1.3556012783   |
| 0              | 0              |
| 207.1318318736 | 100.1278226301 |
| 0.7147737298   | 0.7094283481   |
| 0              | 0.0213112739   |
| 15.1530233555  | 14.1530191105  |
| 443.4492016736 | 357.0751358813 |
| 1.203739884    | 0              |
| 15.2943708861  | 10.135095761   |
| 14.4495589188  | 7.2545314416   |
| 4.8971329683   | 1.3741251866   |
| 2.219778893    | 2.1549129362   |
| 59.7059941237  | 28.6879047344  |
| 14.6997856033  | 4.2188414671   |
| 18.2301813044  | 8.2313778658   |
| 0              | 0              |
| 0              | 0              |
| 21.3587783048  | 27.1892198486  |
| 2.0501061528   | 1.7775296183   |
| 25.7419373333  | 3.6781393305   |
| 2.7736350729   | 1.8000013493   |
| 0.529870741    | 0.7081171122   |
| 0.2912780179   | 0.891142427    |
| 3.6137707963   | 3.086874501    |
| 45.6511204604  | 42.9741693049  |
| 0.9194132247   | 0.8654994484   |
| 20.5423146106  | 4.7538578944   |
| 7.1017833058   | 17.6534745777  |
| 14.3800602793  | 13.7675644712  |
| 2.2803068083   | 4.1590203395   |
| 26.4397866986  | 7.3112539942   |
| 2.5720727726   | 4.9433816321   |
| 0              | 0.01888704     |
| 0              | 0.2734990855   |
| 0              | 0.194629653    |
| 13.2795708465  | 1.9232101074   |
| 79.9810789207  | 88.8545017409  |
| 57.8973238623  | 50.717384122   |
| 0.2535003686   | 0.9247116968   |
| 0              | 0.0259943021   |
| 8.2130354284   | 2.543233068    |
| 1.2621032865   | 1.325182209    |
| 5.972620455    | 2.2087960668   |
| 0              | 0              |
| 0.5931358376   | 0.3210539807   |
| 0.948900842    | 0.0558286207   |

gene\_expression\_table

|                  |                 |
|------------------|-----------------|
| 0.0673515382     | 0.0515141974    |
| 0                | 0               |
| 5.930775871      | 17.3072973421   |
| 5.7239402821     | 4.5223167134    |
| 1.0421074255     | 1.7693016658    |
| 2.3603146418     | 4.388267057     |
| 96.9398185039    | 29.5783998964   |
| 0.8580713814     | 0.9339663138    |
| 6.2082299083     | 2.2727380126    |
| 9.8280222235     | 6.823138763     |
| 3.4300142168     | 6.2930221569    |
| 2.8933939031     | 1.6212662028    |
| 11.4556735647    | 40.7507766282   |
| 1.0176324433     | 2.6743026488    |
| 0.9612705643     | 0.8360510396    |
| 0                | 0               |
| 6.7610741181     | 9.7458079234    |
| 7.7888789066     | 5.003693042     |
| 7.1959933338     | 4.4031163151    |
| 5.9272590015     | 4.7161652798    |
| 65.0539171617    | 32.0830362363   |
| 2.398877128      | 1.8952821998    |
| 5.4507625658     | 2.8862625917    |
| 0.4153212008     | 0.2182899326    |
| 47.5298383227    | 162.6584314866  |
| 4.1492764414     | 4.9801062005    |
| 0                | 0.2295864659    |
| 6.862676708      | 6.5140893876    |
| 0                | 0.042872061     |
| 29.7111845869    | 15.060198787    |
| 10.6696895506    | 8.1308782676    |
| 25.2392339112    | 14.2838180626   |
| 100.3528270827   | 36.2399577437   |
| 0.0811940779     | 0               |
| 0.4532317827     | 0.0399988663    |
| 0                | 0               |
| 2.952723954      | 4.4299527518    |
| 0                | 0               |
| 0                | 0               |
| 0                | 0               |
| 0                | 0               |
| 44.8372160047    | 0               |
| 126.3061444317   | 0               |
| 396.0008216812   | 326.1821486778  |
| 11099.3953383631 | 1830.8257511428 |
| 0                | 0               |
| 0                | 0               |
| 0                | 14.4837933171   |
| 5.7837157046     | 4.0834218645    |



gene\_expression\_table

|                |                |
|----------------|----------------|
| 52.6562400492  | 0              |
| 0              | 0              |
| 0              | 0              |
| 0              | 0              |
| 74.6132822318  | 14.6329186022  |
| 0              | 0              |
| 0              | 0              |
| 0              | 0              |
| 0.4466157478   | 2.4962823389   |
| 4.8376602382   | 3.7949858992   |
| 1.4888166485   | 6.481999644    |
| 0              | 6.5000274551   |
| 13.4214617627  | 6.1957331494   |
| 58.4647245228  | 36.5145294401  |
| 248.7109407728 | 162.4253964845 |
| 0              | 0              |
| 0              | 0              |
| 38.8048997953  | 4.5661758048   |
| 27.0719216877  | 26.2808311379  |
| 0              | 0              |
| 160.7055309609 | 0              |
| 0              | 0.9321400085   |
| 1.7272056217   | 2.1340245147   |
| 0              | 0              |
| 0              | 0              |
| 0              | 0              |
| 88.0402737952  | 0              |
| 0              | 0              |
| 0              | 0              |
| 491.309494018  | 77.0832390096  |
| 42.0105219523  | 0              |
| 0              | 5.0644889772   |
| 0              | 0              |
| 73.3854687267  | 0              |
| 0              | 0              |
| 39.6813965052  | 0              |
| 41.3808139144  | 4.8692838347   |
| 0              | 0              |
| 0              | 4.8279311057   |
| 1.6418028204   | 1.6421241393   |
| 0              | 2.8720625839   |
| 8.6711941659   | 14.7949320708  |
| 4.3990075343   | 11.1290790671  |
| 3.2910150031   | 8.2614188948   |
| 0              | 0              |
| 0              | 2.6358824931   |
| 2.6179507922   | 2.0536965914   |
| 1.154893928    | 0.7474305581   |
| 1.0031061561   | 3.7771387296   |

gene\_expression\_table

|                 |                 |
|-----------------|-----------------|
| 0               | 0               |
| 27.6200668386   | 21.1253612388   |
| 0               | 0               |
| 0               | 3.6785873411    |
| 0               | 0               |
| 2.2713728371    | 2.5390900015    |
| 0               | 0               |
| 763.939506072   | 1270.4852681971 |
| 89.5156080836   | 243.505321923   |
| 66.7332607702   | 57.5850614299   |
| 0               | 1.7559502323    |
| 0               | 0               |
| 9.9811514865    | 4.071540825     |
| 0               | 1.8853119573    |
| 0               | 0               |
| 89.3634224187   | 68.3501090409   |
| 152.9883174428  | 378.0451103176  |
| 27.4060502069   | 29.1640618179   |
| 24.1923386305   | 21.3503588268   |
| 56.6119943289   | 25.8558004533   |
| 23.3494333346   | 10.4905682264   |
| 173.4765252212  | 261.1816825505  |
| 0               | 0.9104015817    |
| 9.393149756     | 12.5266507982   |
| 11.6327103675   | 5.9315620086    |
| 83.9699317722   | 49.6013594548   |
| 63.0033316771   | 81.5496803926   |
| 11.6914113452   | 34.0180348594   |
| 1867.4022674152 | 1800.9762772079 |
| 33.1800728092   | 28.3812718152   |
| 557.4473105205  | 193.4207753994  |
| 0               | 0               |
| 26.1854201871   | 42.3670580261   |
| 12.6182436161   | 15.2190952632   |
| 0               | 0               |
| 6.1154557272    | 5.900770733     |
| 81.4821086355   | 25.5680174368   |
| 0               | 0.7154178231    |
| 1979.2560549058 | 2274.6267301068 |
| 2852.9867482022 | 4820.3821069102 |
| 1.2441952162    | 7.0274186478    |
| 9.5172815061    | 18.6183260437   |
| 23.6495554761   | 17.439163072    |
| 0               | 3.7930868237    |
| 0               | 2.2779419492    |
| 0               | 0.3301568858    |
| 55.8118125575   | 17.2393742117   |
| 144.8328487005  | 35.3023078012   |
| 176.9026006778  | 109.9092393641  |

gene\_expression\_table

|                |                |
|----------------|----------------|
| 0              | 0.5489994087   |
| 1010.37964189  | 896.0661388884 |
| 4.5183166      | 14.7538617101  |
| 15.9030367012  | 23.9112045298  |
| 3.3312946213   | 2.3519623004   |
| 39.0400810061  | 28.4818675048  |
| 57.3437391633  | 41.3855411814  |
| 147.5530620705 | 78.1316152023  |
| 0              | 2.464992467    |
| 22.3721643835  | 34.9157201314  |
| 0              | 0              |
| 0              | 0              |
| 0              | 0              |
| 0              | 0              |
| 23.9391020106  | 76.7609647059  |
| 220.8389266176 | 129.9306748369 |
| 5.9510747739   | 5.8021830076   |
| 10.4177035569  | 69.8735667895  |
| 0              | 0              |
| 23.0832056769  | 14.0748687582  |
| 82.593395603   | 96.2395448366  |
| 3.5523603121   | 1.2540196052   |
| 159.1176623964 | 176.9360226834 |
| 15.337174681   | 28.8756260417  |
| 509.8061691157 | 800.9460091276 |
| 338.595497724  | 232.6102431488 |
| 0              | 0.5736879346   |
| 9.689874694    | 25.2112738652  |
| 0.807051163    | 1.8993155571   |
| 0              | 1.1108722769   |
| 44.1647538307  | 54.8919423057  |
| 21.1740395523  | 23.6697345498  |
| 7.7922742331   | 17.4214336552  |
| 16.14102326    | 23.9788589089  |
| 0              | 0.1102577362   |
| 0              | 0              |
| 0              | 0              |
| 0.5665447112   | 0.3999921813   |
| 8.9377199251   | 20.1576264812  |
| 0              | 38.7606059792  |
| 0              | 2.5400229554   |
| 17.0013255995  | 28.4522297654  |
| 10.4997772877  | 18.5326450757  |
| 31.2131477457  | 42.4673709767  |
| 208.5702957863 | 404.0070467974 |
| 72.2423928899  | 94.0397505814  |
| 0              | 18.3450759506  |
| 8.1230937781   | 7.1688384325   |
| 0              | 0              |

gene\_expression\_table

|                 |                 |
|-----------------|-----------------|
| 7.4254909118    | 694.2008396145  |
| 1.4895051717    | 37.5078224038   |
| 10.4760607687   | 74.9904026053   |
| 0               | 0.9125022274    |
| 0               | 0.9440723294    |
| 0               | 0               |
| 4.5088287676    | 2.6527712912    |
| 45.4942972116   | 23.2869322486   |
| 334.371492571   | 365.428268175   |
| 101.4427301735  | 62.0193286131   |
| 57.7266353307   | 67.1278391375   |
| 0               | 2.4709234485    |
| 0               | 15.1294447823   |
| 49.6434472393   | 37.3505076456   |
| 0               | 5.8918034012    |
| 0               | 3.3025278495    |
| 0               | 0.1500069629    |
| 26.068852149    | 41.7183265758   |
| 53.501772143    | 105.1358186547  |
| 0               | 1.0359706382    |
| 22.9293309184   | 27.5205821286   |
| 10.6895031426   | 4.6120606727    |
| 3132.1072664548 | 5079.6984493326 |
| 43.4347408085   | 28.9621609764   |
| 43.329237888    | 28.8918119307   |
| 17.4885430752   | 13.8171830494   |
| 69.7030437727   | 111.8871555203  |
| 5.4620802991    | 21.2098737071   |
| 56.3406416853   | 85.1649645617   |
| 59.9283925406   | 90.3357201642   |
| 10.1656181473   | 18.7402964908   |
| 796.4444688375  | 800.50524541    |
| 0               | 1.1498288032    |
| 32.5772759576   | 6.133393259     |
| 32.4242283524   | 8.8046807594    |
| 3.0820297331    | 3.3546299425    |
| 28.3601148794   | 21.3880149863   |
| 7.5415645166    | 9.9587854752    |
| 0               | 0.0332012783    |
| 1169.8986106852 | 1375.6563160268 |
| 148.7070875995  | 244.144000139   |
| 7.5110529641    | 5.6047517059    |
| 0               | 1.6858421511    |
| 1374.9338492265 | 2006.7552848407 |
| 0               | 0               |
| 5.8201506168    | 6.5580304464    |
| 216.718559916   | 140.9353267277  |
| 2.4862948967    | 1.8351649513    |
| 80.7235403357   | 50.365442547    |

gene\_expression\_table

|                 |                 |
|-----------------|-----------------|
| 9.8136051165    | 16.0904900424   |
| 0               | 0.4078008059    |
| 1.5876905462    | 6.4142796585    |
| 16.9417066903   | 15.8533262495   |
| 1.1283392168    | 1.8322504263    |
| 27.4797969975   | 29.4099072454   |
| 6257.6445676569 | 9576.2084450634 |
| 1.6455075015    | 0.1936270053    |
| 0               | 0.1513045147    |
| 7.605308718     | 4.0344632963    |
| 0               | 0.1497205393    |
| 0               | 3.0739514036    |
| 0               | 0               |
| 10.5232432721   | 5.1078675287    |
| 0               | 0.027955491     |
| 7.9058928336    | 8.4918512124    |
| 2.7526301685    | 0.6478044444    |
| 6.4383941689    | 1.5783466258    |
| 1.3526549423    | 1.2733361616    |
| 1.1509732042    | 0.677175566     |
| 0               | 0               |
| 19.5737057859   | 9.5889975062    |
| 4.6839362594    | 8.1825938529    |
| 673.6576459584  | 148.9099400562  |
| 15.9856214046   | 6.0610947585    |
| 12.5642051746   | 15.4271068574   |
| 0               | 0.2995928142    |
| 8.2164309136    | 5.4625788378    |
| 28.7059419163   | 15.7632094033   |
| 1.1659028717    | 0               |
| 95.4857169421   | 66.303639614    |
| 182.8964612724  | 255.2443008923  |
| 0.8248432507    | 0               |
| 1.2837525143    | 2.3565245454    |
| 7.5845031905    | 8.0880014439    |
| 38.241768004    | 0               |
| 6.9969650755    | 5.1229637866    |
| 36.3654738687   | 30.7562350297   |
| 0.2951123207    | 0.2430812403    |
| 2.5948748226    | 1.8998879662    |
| 0.163778159     | 0.207171739     |
| 293.574189072   | 281.3657022324  |
| 0               | 0.028832606     |
| 38.2188495287   | 12.4695512943   |
| 7.1564646703    | 4.0420886225    |
| 0               | 0               |
| 0               | 0               |
| 0               | 0               |
| 0               | 1.2942262668    |

| gene_expression_table |                 |
|-----------------------|-----------------|
| 0                     | 1.1670287661    |
| 30.7394063065         | 91.6334156201   |
| 9.1898016771          | 8.2647161662    |
| 0                     | 0               |
| 5.0478467822          | 0.9899675885    |
| 0                     | 0               |
| 7.9850586635          | 2.4664566172    |
| 1.2657086782          | 1.7872325524    |
| 3.45339268            | 2.1537133292    |
| 11.4584377614         | 6.0456719628    |
| 0                     | 1.4022336387    |
| 0                     | 0.3439654441    |
| 3882.2926521333       | 1894.9629589854 |
| 1.4658631292          | 3.2988375331    |
| 22.0226097983         | 17.2760155805   |
| 76.8415807621         | 31.7430343383   |
| 41.8844483619         | 8.3206635956    |
| 14.1565277563         | 11.4523736609   |
| 0                     | 0.0543241728    |
| 0                     | 0               |
| 3.3110323136          | 8.3766031597    |
| 163.5486602337        | 62.6479155973   |
| 1.6154765046          | 3.1415411685    |
| 0                     | 5.1100124737    |
| 3.5786464792          | 5.0882872025    |
| 0.7425205601          | 0               |
| 444.7873553759        | 271.3320675373  |
| 2.3837619259          | 3.9456643439    |
| 660.7244564917        | 168.629459514   |
| 0                     | 37.075362241    |
| 0                     | 0               |
| 38.0485136799         | 70.5154556504   |
| 65.0630569328         | 54.9005411961   |
| 11.3150452724         | 11.5391668051   |
| 59.2283635985         | 62.6002048022   |
| 0                     | 2.7764027984    |
| 209.4688059543        | 246.1661164619  |
| 89.9055807403         | 24.3035611488   |
| 8.2817362977          | 18.0980911964   |
| 205.3367756776        | 120.420268242   |
| 9.9702515661          | 31.2364589396   |
| 452.2754390357        | 272.3313394641  |
| 1.8223244941          | 5.3072186225    |
| 1135.8683646704       | 619.7933464812  |
| 0                     | 0.0507851427    |
| 66.4718367599         | 136.8805653538  |
| 12.6511208351         | 17.6257160111   |
| 3.1620453404          | 1.3952930239    |
| 0                     | 3.9824090206    |

gene\_expression\_table

|                 |                 |
|-----------------|-----------------|
| 9.3183082377    | 15.8990485916   |
| 0               | 0.6729670171    |
| 164.6578164822  | 169.9742142916  |
| 87.7221096978   | 36.3283703382   |
| 0               | 1.0154231611    |
| 10.8852714429   | 12.2451248595   |
| 52.9085286736   | 56.291165243    |
| 189.6750583631  | 72.1384549455   |
| 0               | 0.0875204199    |
| 55.825248237    | 23.9493392746   |
| 61.7293252103   | 77.3862875566   |
| 16.698417564    | 45.4734970037   |
| 243.6598302717  | 99.2972469461   |
| 4.6820531873    | 8.6575907028    |
| 0               | 0               |
| 109.5078670129  | 55.7349657084   |
| 3898.4981060146 | 3368.3868316654 |
| 219.2528032232  | 109.1978654993  |
| 111.543088589   | 25.9522672069   |
| 0               | 0.2612841033    |
| 1.0951399806    | 0.9020564919    |
| 19.9366459197   | 14.8087891308   |
| 1.1200208704    | 0               |
| 30.1033893851   | 12.7955407636   |
| 0.5257773161    | 0.4000814196    |
| 1.4383267264    | 1.9294274987    |
| 0               | 0.008381        |
| 0               | 0               |
| 0               | 0               |
| 0               | 0               |
| 1.9706656569    | 1.9420652887    |
| 2.8434468235    | 1.1558516156    |
| 0.468958457     | 0.1655471426    |
| 0               | 0.9689188081    |
| 3.5169110555    | 5.9316381257    |
| 9.0845761181    | 3.4360162448    |
| 0               | 0               |
| 0               | 0               |
| 0               | 0               |
| 181.5060695427  | 70.0667730091   |
| 9.3131759509    | 9.1157473339    |
| 0               | 0.9325654461    |
| 7.5200537645    | 11.2466074214   |
| 22.4374070673   | 14.6678420356   |
| 0               | 0               |
| 6.6511237646    | 7.3046240374    |
| 1.9144246044    | 1.6519836911    |
| 14.8076189016   | 11.2992891975   |
| 0.4226780424    | 0.1989462424    |

gene\_expression\_table

|                 |                  |
|-----------------|------------------|
| 25.5200744735   | 28.5002132444    |
| 14.1532445423   | 4.1397420519     |
| 1.7889367439    | 0.7718492331     |
| 0               | 0                |
| 0               | 0                |
| 0               | 0                |
| 0               | 0                |
| 0               | 0                |
| 0               | 0                |
| 0.9726909459    | 0.0202106028     |
| 10.1040744617   | 0.8011963747     |
| 56.6649307827   | 2.7533516122     |
| 19.7349418158   | 24.9423882091    |
| 16.4657816482   | 16.3970840877    |
| 3.8296260421    | 9.3353713549     |
| 1.8623659324    | 1.1587690715     |
| 880.0686192657  | 1.2806271623     |
| 23.6483070592   | 379.7117428252   |
| 5.8177414026    | 15.7140608174    |
| 0.0486221638    | 11.5236643107    |
| 0               | 0.0377610689     |
| 0               | 3.9104996574     |
| 0.7958569833    | 0                |
| 0.9154291484    | 1.2548906745     |
| 3.5164844142    | 0.4924279975     |
| 2.3876864905    | 1.7585863144     |
| 13.0296552385   | 1.11213044       |
| 0               | 8.7611464103     |
| 0.6363366288    | 0.008806         |
| 0               | 0.3862117298     |
| 1.6828109574    | 0                |
| 0               | 1.1550962857     |
| 4.051329161     | 0.1976922887     |
| 0.972808462     | 5.4028294009     |
| 9704.4862351141 | 2.8045261009     |
| 11.7917951684   | 16111.8122613836 |
| 0               | 8.7002603655     |
| 509.8494749244  | 0.0457456557     |
| 35.6357420155   | 247.9753254931   |
| 0.0971414789    | 34.0435914619    |
| 3.8061546559    | 0                |
| 0               | 2.2782979477     |
| 0               | 0                |
| 0               | 0.0246479653     |
| 2.2833709699    | 0.4004324104     |
| 5.881110831     | 3.5877276963     |
| 0.0806340627    | 7.3816619031     |
| 58.123981962    | 0.7305927014     |
| 3.2081386483    | 63.8349023136    |
|                 | 4.8784866493     |



gene\_expression\_table

|               |                |
|---------------|----------------|
| 2.5350701952  | 0              |
| 1.1489948601  | 0.4793536846   |
| 0             | 0.7894003956   |
| 1.3298128336  | 6.3374070883   |
| 0             | 3.2352204173   |
| 0.4375481725  | 0.5560523647   |
| 1.3423090654  | 0.9025692572   |
| 0             | 0              |
| 0             | 0.3949020243   |
| 3.4874120703  | 4.0779929459   |
| 106.053891167 | 33.7195105094  |
| 30.3849687076 | 10.7262054282  |
| 3.0244543616  | 4.9405600153   |
| 0             | 0              |
| 0.978919006   | 2.6493580704   |
| 0.8598754159  | 0.5059080606   |
| 8.3349557698  | 5.4808011499   |
| 0.7599328906  | 1.549970358    |
| 2.2020602222  | 2.2024911896   |
| 5.6406421769  | 8.5455860234   |
| 0.6007948705  | 0.5462840479   |
| 13.0250551099 | 131.8087018876 |
| 8.721230482   | 6.2566799013   |
| 0             | 0              |
| 27.9292558371 | 23.8699171649  |
| 9.0778833025  | 10.8212826954  |
| 0.0963078293  | 0.3399765098   |
| 73.9621865357 | 26.4575354959  |
| 3.3382180717  | 3.8667076849   |
| 5.2068635332  | 3.0124026651   |
| 0             | 0.0491154998   |
| 6.8147654593  | 7.2170461946   |
| 0             | 0              |
| 0.6047327606  | 1.1385432724   |
| 3.4662354067  | 6.254040557    |
| 0             | 0.7867269412   |
| 33.7807483359 | 6.8899713693   |
| 0             | 0.009286       |
| 0.8207212822  | 0.8369776301   |
| 0.2431653928  | 2.1746102006   |
| 12.456086757  | 2.3817767522   |
| 26.1959730217 | 42.738201046   |
| 0.5351560046  | 0.9025965429   |
| 0.2315322602  | 0              |
| 42.1574726628 | 18.1321163262  |
| 0             | 0              |
| 0.7249812057  | 0.5118515947   |
| 4.8923645818  | 0.2878424748   |
| 0             | 0              |

gene\_expression\_table

|                |                |
|----------------|----------------|
| 0.4397772861   | 0.6209835605   |
| 0              | 0              |
| 0              | 0              |
| 3.386056501    | 3.060724829    |
| 0.3057195757   | 0.6835069128   |
| 2.3242582452   | 0.5791672845   |
| 1.5670632873   | 1.7138024681   |
| 2.5456310745   | 3.5945354576   |
| 2.9843776534   | 1.6388025178   |
| 19.2560684251  | 7.4449790275   |
| 18.982332789   | 8.5461494114   |
| 1.1593049171   | 0.2728310131   |
| 0.9438199881   | 1.2660768971   |
| 0.451499132    | 0.3851775696   |
| 0              | 0              |
| 6.4043967052   | 9.3698333069   |
| 9.8569498535   | 0.9551855054   |
| 21.6247910936  | 16.6307195985  |
| 0.0836895605   | 0.4825401215   |
| 3.5572788643   | 4.8774287307   |
| 0.9504309079   | 1.166303109    |
| 0.8940972942   | 0.462917415    |
| 0.532606835    | 2.8515710326   |
| 0.5084146303   | 1.2563290336   |
| 0.3021725345   | 0              |
| 93.9385222266  | 38.9715677717  |
| 0              | 1.3387496619   |
| 42.3392427813  | 5.6937854167   |
| 9.7034391326   | 8.5116335036   |
| 0              | 0.3292088916   |
| 0              | 0.2636151274   |
| 0.2879662648   | 1.5925956799   |
| 1.9312394333   | 3.6359856905   |
| 4.8498633451   | 4.3898755807   |
| 0.3440818343   | 0              |
| 2.4806178723   | 0.1945963417   |
| 2.5986721868   | 2.4026040782   |
| 0.6549080661   | 2.3889556945   |
| 15.2514984804  | 5.1876459977   |
| 174.0043486157 | 33.3939232991  |
| 9.1929526706   | 7.5721485679   |
| 0.8304496468   | 0.7491796088   |
| 5.9266530663   | 1.1623162701   |
| 0.4185470417   | 1.1204480879   |
| 1.1257844203   | 4.9897465336   |
| 0.5440526301   | 0.3734425246   |
| 4.5760928482   | 2.423111527    |
| 2.5228250781   | 3.8591934935   |
| 393.3569471186 | 195.1432299727 |

gene\_expression\_table

|                |                |
|----------------|----------------|
| 23.7148437276  | 21.1560933092  |
| 0              | 0.0142381178   |
| 0.6670270229   | 0.5494238791   |
| 0              | 0              |
| 18.6939202883  | 24.196866804   |
| 3.2016997651   | 2.1875474274   |
| 91.8655642615  | 34.5914516187  |
| 0              | 0              |
| 40.8485488917  | 20.0447622196  |
| 0              | 0              |
| 0              | 1.02760622     |
| 1.2717475633   | 2.2821112928   |
| 0              | 0              |
| 0.215888643    | 0.863723579    |
| 8.6855268454   | 11.4036660067  |
| 29.0360187446  | 12.7641662146  |
| 0.5649835941   | 1.3462537522   |
| 0.0775070794   | 0.3830511095   |
| 0              | 0              |
| 0.6350901325   | 0.2989244361   |
| 32.0053661776  | 6.7789334074   |
| 0.1510408036   | 0.2754812519   |
| 0              | 0              |
| 2.8783758971   | 8.806167047    |
| 6.7725660959   | 9.4834481861   |
| 0              | 0.0268095067   |
| 0              | 0              |
| 0              | 0.3026425914   |
| 0.1377868838   | 0.0216178589   |
| 0              | 0              |
| 0              | 0              |
| 0.1742153716   | 0              |
| 32.4641730844  | 19.5247611409  |
| 1.9186314904   | 1.7609711181   |
| 18.8895589569  | 15.945714657   |
| 2.1940515183   | 0.8175517147   |
| 204.1949334978 | 115.4317305735 |
| 0              | 0              |
| 23.793001734   | 10.4265602227  |
| 4.2241626503   | 6.668855763    |
| 0.9208882582   | 1.1919709821   |
| 0              | 0              |
| 0              | 0              |
| 0.0305084416   | 0.00718        |
| 2.3060496384   | 2.4591370505   |
| 0.3145651818   | 0.148059645    |
| 0              | 0              |
| 0.083344504    | 0              |
| 0              | 0.407008332    |

gene\_expression\_table

|                 |                 |
|-----------------|-----------------|
| 1.0681821921    | 3.9383834207    |
| 0               | 0               |
| 0               | 0               |
| 0               | 0.052190855     |
| 2.0826051296    | 3.4716878638    |
| 0               | 0               |
| 0               | 0               |
| 4534.5001965702 | 6580.5055491602 |
| 0               | 0.0311734561    |
| 5.469655571     | 1.8664830028    |
| 0.8907098128    | 0.2096197963    |
| 0.7788767194    | 0.1833009774    |
| 0               | 0.1389396359    |
| 5.3157059548    | 3.4161899283    |
| 56.1486677087   | 155.5051882241  |
| 0.9038577434    | 0.5317850814    |
| 0.0499582237    | 0.005879        |
| 9.3934264728    | 6.9334040214    |
| 74.9357384733   | 23.6933473604   |
| 1.1109688417    | 0.1634097457    |
| 2.5378624421    | 2.8707059607    |
| 0.2107053383    | 0.7933988729    |
| 9.2956638569    | 5.8668610065    |
| 14.77955767     | 9.8995594045    |
| 0.2114916727    | 0.2115330639    |
| 121.1981753554  | 120.238350382   |
| 0.2142649342    | 0.5882933636    |
| 0               | 0.3753253504    |
| 7.8068333477    | 41.4532118281   |
| 0               | 0.2738081412    |
| 4.8158451851    | 2.1857692079    |
| 305.3168772757  | 150.2387704026  |
| 5.9203414017    | 9.7530589512    |
| 0               | 0.2979536999    |
| 306.4874472978  | 394.8103126567  |
| 0               | 0.0938074675    |
| 12.0474154595   | 7.1189197586    |
| 1.0972371594    | 1.5728187669    |
| 1.4277830859    | 1.144050085     |
| 10.3826283703   | 7.2489001762    |
| 5.8213194391    | 3.3678927979    |
| 16.9794166747   | 17.4489325886   |
| 1.6464667402    | 0.5098417869    |
| 44.444484469    | 5.4523302989    |
| 1.5546934914    | 1.7196445839    |
| 2989.1882919632 | 2986.6878875949 |
| 1.8618814647    | 0.7010807926    |
| 0.4082137748    | 0.7725556635    |
| 0.3285489763    | 0.0676556747    |

gene\_expression\_table

|               |               |
|---------------|---------------|
| 0.2915856673  | 0.8577727464  |
| 1.6315684095  | 2.0051953749  |
| 0             | 0             |
| 51.4642878776 | 26.6455510611 |
| 0.178522112   | 0.0315100678  |
| 4.9792119119  | 1.2450465996  |
| 0.7005463352  | 0.1204795055  |
| 0.1167311392  | 0.2129043252  |
| 0.5986320439  | 2.0075708564  |
| 0.5169419281  | 2.8589441962  |
| 3.7156008648  | 5.1372770086  |
| 0.7874832966  | 2.2239174091  |
| 7.8518539164  | 7.5174166806  |
| 4.1798036948  | 2.4970229328  |
| 27.7830390483 | 21.7608290195 |
| 48.2127006836 | 24.5347157131 |
| 4.663023254   | 5.836155032   |
| 0             | 0.2009090459  |
| 0             | 0             |
| 0             | 0.9347583793  |
| 0             | 0.4668354652  |
| 0             | 0             |
| 1.2602256425  | 0.974482773   |
| 0.2377924812  | 0.0652891427  |
| 3.845185766   | 1.4632856653  |
| 0             | 0             |
| 2.1012112752  | 3.54391246    |
| 3.2601320256  | 2.2537675479  |
| 21.659762495  | 4.4602356129  |
| 0             | 0             |
| 0             | 0.0308652221  |
| 0             | 0             |
| 32.4961004477 | 14.7738455871 |
| 22.2759145119 | 8.2055229618  |
| 0             | 0.0566628458  |
| 0.8595014721  | 0.1348501468  |
| 0.9174257792  | 0.4318142727  |
| 3.8317467751  | 2.3896744067  |
| 4.3097324037  | 3.9217788268  |
| 0             | 0.0375636902  |
| 1.2498366323  | 1.3551300827  |
| 7.1293183857  | 8.9053256714  |
| 1.8243889637  | 0.9583750088  |
| 0             | 0.2978564852  |
| 2.4707648372  | 2.5003219036  |
| 0.657564697   | 0.5416298503  |
| 18.0611802779 | 9.0873211608  |
| 1.1057100511  | 0.471645104   |
| 0.9759625923  | 0.9876377589  |

gene\_expression\_table

|                |                |
|----------------|----------------|
| 44.168406335   | 28.7219214281  |
| 0.4774787947   | 0.1685549091   |
| 11.8791394687  | 9.5305863745   |
| 0              | 0              |
| 2.8045628181   | 2.8051117019   |
| 32.5547142503  | 13.1946882685  |
| 12.5025922567  | 7.9825195454   |
| 55.4187384728  | 24.2432508113  |
| 5.6320937567   | 11.6640294048  |
| 500.1074092836 | 246.1456436819 |
| 77.45426893    | 97.4064126212  |
| 0              | 0.3210592363   |
| 3.6639655818   | 6.4191826989   |
| 0              | 0.0607798239   |
| 0              | 0              |
| 2.1495074991   | 2.4570607787   |
| 0.9385611548   | 1.1832918171   |
| 0              | 0.0148259979   |
| 0.0328305895   | 0.003863       |
| 5.4205141864   | 4.6866812371   |
| 0              | 0              |
| 0.0292430638   | 0              |
| 0              | 0              |
| 50.679243231   | 30.3141065164  |
| 28.8350750289  | 13.1950999078  |
| 0.0852839885   | 0.2960435349   |
| 41.3884541075  | 68.4344660052  |
| 4.0351621939   | 5.8560870989   |
| 0              | 0              |
| 0              | 0.2965900027   |
| 0.4206355861   | 0.6269521783   |
| 127.4065276066 | 47.117515533   |
| 15.346309389   | 32.7301523589  |
| 1.481171158    | 1.3943162724   |
| 4.5146974831   | 3.6428216947   |
| 32.6580217971  | 19.47055226    |
| 1.6510466054   | 2.2730618683   |
| 218.5635807729 | 110.8637602446 |
| 11.466891848   | 6.8692151712   |
| 169.4975559526 | 61.0809242344  |
| 0              | 0              |
| 3.0332506825   | 1.4276914461   |
| 3.1336346642   | 2.9163590559   |
| 1.6500034237   | 1.1649362453   |
| 1.4074744038   | 0.4586334392   |
| 6.7886990759   | 5.515708775    |
| 4.2319069011   | 5.2478254575   |
| 37.9089967217  | 11.0946978736  |
| 8.7369729872   | 5.1799432627   |

gene\_expression\_table

|                 |                 |
|-----------------|-----------------|
| 50.3344672321   | 32.5757353321   |
| 9.1903849484    | 3.6284935294    |
| 5.2595332648    | 4.0227831748    |
| 5.5142930798    | 0.9733009919    |
| 8.4981706676    | 6.3998749011    |
| 0               | 0.5742311997    |
| 1.4946316639    | 2.3742913443    |
| 1.699833469     | 1.8668491005    |
| 6.2783756004    | 2.7704136827    |
| 651.0775449544  | 341.8089424723  |
| 1.1800708414    | 1.3052749253    |
| 1.9918695149    | 3.2050574425    |
| 17.1059535516   | 18.403282151    |
| 99.612577825    | 90.4587875984   |
| 5.0799388839    | 2.922366741     |
| 88.4904530171   | 45.8157876369   |
| 6.8309791792    | 13.1531218593   |
| 9.2857661592    | 2.7316422017    |
| 26.9163185944   | 8.488217834     |
| 1.7327654626    | 0.4485682452    |
| 14.71404649     | 31.9270728181   |
| 1.5378148205    | 1.473489074     |
| 7.4559894312    | 5.8862001111    |
| 0.2197019089    | 0.5452493949    |
| 0               | 0               |
| 3.5065941023    | 4.7361740188    |
| 53.5114588156   | 26.3976947692   |
| 0.2284368067    | 0.3763224941    |
| 8.1649653955    | 2.690162051     |
| 0               | 7.6343433446    |
| 13.2810685179   | 14.5859881384   |
| 0               | 0.3056083796    |
| 4.6993841954    | 3.3750660983    |
| 1.6276016658    | 1.0342081304    |
| 5505.3974106758 | 4804.0109015807 |
| 0               | 0.6566432431    |
| 5.9442756377    | 7.5192316736    |
| 3.1074639282    | 2.1517422183    |
| 0               | 0.1711349427    |
| 29.0599099219   | 13.344320122    |
| 2.0244974174    | 5.3600125601    |
| 0               | 3.2721026837    |
| 38.1449132617   | 32.4648765869   |
| 1.8666383423    | 1.9493714726    |
| 2.4410397749    | 6.1550861678    |
| 13.8380523437   | 14.4223051658   |
| 182.934563409   | 113.1847044074  |
| 3.9745666963    | 6.4307044396    |
| 42.5951614228   | 91.6933412084   |

gene\_expression\_table

|                |                |
|----------------|----------------|
| 0.3535527561   | 0.0832051648   |
| 13.3458840456  | 14.9189072738  |
| 20.9629444733  | 5.7556600025   |
| 0              | 0              |
| 35.9609105747  | 50.0187760717  |
| 21.9327483143  | 16.5910392561  |
| 0              | 0              |
| 32.4894062538  | 12.4664059288  |
| 4.0926973962   | 4.0247000899   |
| 5.9432912532   | 4.249881441    |
| 12.7191341982  | 12.4444639198  |
| 0.9719603718   | 0.6481003967   |
| 5.1388163601   | 5.4610609631   |
| 0.387779058    | 0.8669698897   |
| 0              | 0              |
| 415.4113064554 | 153.8247803966 |
| 4.6797481749   | 2.5521267801   |
| 0              | 0.0147734918   |
| 1.4840717351   | 2.0955701424   |
| 103.4923276916 | 28.7842474783  |
| 0              | 0              |
| 4.1972199509   | 12.0014595118  |
| 7.6800159356   | 10.9574609253  |
| 0              | 0.0738033673   |
| 5.2889036058   | 1.7712916922   |
| 0.6452022629   | 1.0325256577   |
| 0              | 0.00248        |
| 69.7493492048  | 14.5723433204  |
| 0.4671446552   | 0.0274844753   |
| 0.2229163362   | 0.8656092694   |
| 0.0539266761   | 0.4949534063   |
| 18.8844881694  | 33.6351085333  |
| 0              | 0              |
| 553.9749680781 | 627.1676643827 |
| 2.7759005785   | 1.3065618131   |
| 2.4957461956   | 3.0346381905   |
| 11.9258462935  | 4.4438318812   |
| 14.0398423131  | 28.1638501014  |
| 51.7470325802  | 33.1749747944  |
| 2.1677309945   | 1.8989072065   |
| 50.3287963818  | 40.704655153   |
| 3.2632286555   | 0.6239746319   |
| 0              | 0              |
| 0              | 0              |
| 0              | 0              |
| 1.6005201297   | 0.4143333426   |
| 0              | 0              |
| 1.1572894518   | 0.718031282    |
| 912.825854728  | 189.411585887  |



gene\_expression\_table

|                |                |
|----------------|----------------|
| 0              | 1.2344499429   |
| 0.4980307995   | 3.4868978873   |
| 4.9819128894   | 4.5595052721   |
| 682.8691080932 | 267.216457012  |
| 575.2090018696 | 282.4789504078 |
| 11.7211170472  | 7.0340465992   |
| 0              | 0.1945047944   |
| 3.1292008617   | 1.9168752619   |
| 25.6467685442  | 7.5446434996   |
| 0              | 0.9388751242   |
| 0              | 1.617531755    |
| 0              | 32.9993549586  |
| 22.1530455843  | 32.149925632   |
| 0              | 0              |
| 0              | 7.6770950398   |
| 168.6940454727 | 599.9184382278 |
| 448.8150263027 | 497.1621986361 |
| 104.7158823047 | 221.7946793374 |
| 47.9078775285  | 79.6272008796  |
| 0              | 0.862163242    |
| 0.9833666324   | 1.3885540067   |
| 34.632713047   | 32.8534315982  |
| 1.2690261195   | 0.7661094059   |
| 0.0366991916   | 0              |
| 2.6891989958   | 2.7424650134   |
| 0.2101731166   | 0.3647835512   |
| 0              | 3.2438738242   |
| 0              | 0.1037341157   |
| 0              | 0              |
| 1.1914939329   | 6.8699563468   |
| 0.5676930789   | 0.6012044287   |
| 12.4989982668  | 11.5209390104  |
| 1.8540129133   | 3.4360492097   |
| 3.5579850679   | 6.1125586481   |
| 0              | 2.2322862082   |
| 265.6254629703 | 230.4105308116 |
| 25.0786749027  | 16.6066628432  |
| 0              | 0              |
| 0.1335972354   | 0.0157203979   |
| 307.6087785101 | 125.3126824781 |
| 5.5914385812   | 6.7743971357   |
| 9.6708820708   | 16.5954469072  |
| 0.7803602042   | 0.0459125253   |
| 13.8927678634  | 9.0612586392   |
| 15.8899603383  | 21.034945824   |
| 0              | 0.2282930601   |
| 3.5406125078   | 1.7914839308   |
| 0              | 0.0419820096   |
| 2.472432324    | 3.2002445021   |

gene\_expression\_table

|                 |                 |
|-----------------|-----------------|
| 17.0050780629   | 13.5908754974   |
| 1.041805457     | 2.1759607009    |
| 0.5858142385    | 0.2412648365    |
| 3.6240303986    | 7.0362593423    |
| 0.2728110014    | 1.3482711211    |
| 0.4535556532    | 0.4460201431    |
| 6.4110540086    | 0.3771946307    |
| 0.3730304044    | 0.1316835567    |
| 0               | 0               |
| 25.8641625225   | 16.1592074129   |
| 6.6299531461    | 5.8077620517    |
| 5.1997417188    | 0.9789664688    |
| 0               | 0.2568674222    |
| 0.9388180855    | 1.0924334929    |
| 0               | 0.004634        |
| 5.9182692692    | 1.840494277     |
| 9.9834796796    | 6.274269748     |
| 1.7016603308    | 2.079358409     |
| 495.7681491121  | 260.7310291211  |
| 0.1597356049    | 0.0908478263    |
| 7.5986316837    | 1.5200237639    |
| 0               | 0               |
| 34.783718356    | 2.3388588848    |
| 217.854642054   | 93.2046162806   |
| 213.6308890867  | 74.5896982044   |
| 0               | 0.0451358777    |
| 6.1089656417    | 3.2861371339    |
| 7.9795359229    | 6.1970875527    |
| 6.2857784421    | 6.0558686146    |
| 950.4019720349  | 725.7790550172  |
| 0               | 0.964622442     |
| 4.9729387797    | 2.2506389315    |
| 0               | 0.9840312102    |
| 8.4583994234    | 1.4546700604    |
| 1.4655574168    | 1.2071658468    |
| 15.8428155632   | 4.6605635813    |
| 0               | 0               |
| 9.2207463012    | 6.9440383267    |
| 103.1919373352  | 133.062701047   |
| 0               | 0               |
| 50.7518123682   | 24.5703908841   |
| 49.331681017    | 57.0008211052   |
| 0               | 0               |
| 33.8957949538   | 17.6990620594   |
| 175.6005460976  | 185.4498052546  |
| 4.5226785474    | 2.5278738241    |
| 12.6809356162   | 12.1505007166   |
| 3377.6770454964 | 3061.8489043828 |
| 191.0827959596  | 183.4111431627  |

gene\_expression\_table

|                 |                 |
|-----------------|-----------------|
| 27.6281668618   | 35.511018169    |
| 3.5253584855    | 12.7214296547   |
| 6.3332721898    | 7.6014140169    |
| 0               | 0               |
| 51.431150673    | 30.8452075055   |
| 0.778301621     | 0.2136932393    |
| 1.1944435975    | 1.3833106311    |
| 0.1050148902    | 0.4324988821    |
| 9.4625242248    | 5.8456440894    |
| 0               | 0.1399299855    |
| 6.6226319733    | 1.5585713165    |
| 0.1217762791    | 0.0525412248    |
| 15.7794147324   | 9.0601186246    |
| 34.0226058064   | 21.5837789572   |
| 0               | 0.0637408704    |
| 3.6103437745    | 3.0297047899    |
| 0               | 0.0151290925    |
| 201.5304753082  | 419.7072245159  |
| 2.8296127239    | 0.9988822977    |
| 2.0987771167    | 1.531172329     |
| 0               | 0               |
| 0               | 0               |
| 0.7033736773    | 0.4138301972    |
| 169.3181083357  | 29.2213914236   |
| 20.6241623245   | 19.7340972081   |
| 11.2457243187   | 3.0325288612    |
| 249.7074015107  | 95.356445689    |
| 3.4786103621    | 4.502612095     |
| 27.149657044    | 38.6727134487   |
| 6461.9459392746 | 4401.2187628185 |
| 0               | 0               |
| 0               | 0               |
| 0               | 1.6330021909    |
| 0               | 0               |
| 0               | 0               |
| 0               | 0               |
| 3.5737932172    | 6.8335888856    |
| 2.4897262371    | 4.3944944186    |
| 3.4426090672    | 3.1249961761    |
| 0               | 3.9403505276    |
| 0               | 0.5484366719    |
| 0               | 1.9858139471    |
| 4.9483806082    | 5.8227636008    |
| 0.3452528915    | 0.8531446692    |
| 5.934188219     | 3.1789952992    |
| 38.4156129729   | 58.9750387864   |
| 14.3106192694   | 5.1813285122    |
| 15.0705653453   | 10.9261530578   |
| 0.1245317702    | 1.6998250025    |

gene\_expression\_table

|                |                 |
|----------------|-----------------|
| 25.5886794803  | 46.9085541175   |
| 3.2861817843   | 4.5699170096    |
| 19.1509289594  | 15.6526295412   |
| 122.324598671  | 27.3484969394   |
| 1.4331445878   | 1.7144888091    |
| 0.0161769104   | 0.003807        |
| 0.0533260119   | 0.0376492577    |
| 0.1523272173   | 0.2509409896    |
| 27.0686052465  | 15.6104623421   |
| 26.4786017629  | 15.712228105    |
| 0              | 0.9231213332    |
| 298.1477219157 | 130.666526454   |
| 0              | 0               |
| 0              | 0.970946008     |
| 13.4493581957  | 9.4955226233    |
| 14.4599654664  | 4.0410751966    |
| 11.9044189516  | 27.3154824889   |
| 2.8565912931   | 1.3445413456    |
| 7.6262194546   | 13.4606682169   |
| 68.5745656543  | 33.5181110256   |
| 0              | 0.443741936     |
| 55.7313340967  | 10.6566049604   |
| 0              | 3.7257600504    |
| 0              | 0.8593936322    |
| 4.4884657896   | 3.4623700611    |
| 150.5102832594 | 107.7642404379  |
| 144.3732450795 | 182.7953112343  |
| 42.0892104762  | 9.707176198     |
| 0.1659226069   | 0.5857238108    |
| 32.6369741921  | 17.8556318727   |
| 11.28274803    | 1.4751576716    |
| 3.8347778594   | 3.568887358     |
| 1.4456044358   | 1.0206263693    |
| 13.6372714162  | 9.0932935867    |
| 1.6874052686   | 0.5162485097    |
| 5.8061612713   | 3.8715317339    |
| 11.6769765224  | 9.1602053608    |
| 0              | 0.851828264     |
| 2.6307767091   | 3.128804695     |
| 0              | 0.1030804873    |
| 0              | 0               |
| 19.4649880117  | 14.8879039888   |
| 5.6557354581   | 5.2290139348    |
| 78.8970251515  | 163.0470808293  |
| 2.9230236488   | 3.2245540992    |
| 117.000058059  | 163.2254394841  |
| 0              | 0               |
| 0.4525723676   | 0.2130169134    |
| 1043.985614492 | 1531.6528192627 |

gene\_expression\_table

|                |               |
|----------------|---------------|
| 105.5117684894 | 49.3801422537 |
| 0.9337024737   | 0.3296065445  |
| 0              | 0.2552253245  |
| 3.922409528    | 6.6668370493  |
| 0              | 1.248140268   |
| 0              | 0             |
| 17.8541079552  | 18.251519896  |
| 2.6033733124   | 0.6126783109  |
| 0              | 0.5139463331  |
| 0.1119709371   | 0.5270251815  |
| 2.9900727368   | 0             |
| 1.0971814702   | 2.259345119   |
| 9.0134515383   | 4.0214932199  |
| 5.7943462598   | 2.2363735657  |
| 32.8723624887  | 52.2192641898 |
| 3.7745492999   | 2.3497048782  |
| 22.3104263682  | 1.7108499409  |
| 0              | 0             |
| 0              | 0             |
| 0.0677451293   | 0             |
| 0              | 0             |
| 1.3184417423   | 0.9825606173  |
| 3.8632681816   | 3.3639740666  |
| 0              | 0             |
| 0              | 0             |
| 9.6903374498   | 5.7556123208  |
| 15.0825756476  | 7.5768938894  |
| 0.4314431067   | 0.5669087354  |
| 37.0969095534  | 43.2362315063 |
| 0              | 0.003936      |
| 1.8487362573   | 0.6526228501  |
| 0              | 0             |
| 6.471670681    | 1.9291891436  |
| 3.0623310511   | 0.5405171264  |
| 0              | 0             |
| 0.5345328429   | 0.3588915801  |
| 17.7699679062  | 6.2729808297  |
| 2.4592568208   | 0.8681428674  |
| 2.048485173    | 2.8121965859  |
| 65.8500105124  | 50.4160610232 |
| 6.5563494819   | 8.0523871285  |
| 2.2361249294   | 3.2305903697  |
| 12.2502948324  | 23.7846380906 |
| 0              | 0.2384601039  |
| 0.9311156664   | 1.0408623543  |
| 11.4901792819  | 4.0561510716  |
| 31.9505066236  | 12.276306243  |
| 11.7596898403  | 7.3800729982  |
| 7.3077565062   | 0.8599043193  |

gene\_expression\_table

|                |                |
|----------------|----------------|
| 1.0532395955   | 0.2478695826   |
| 1.950730846    | 0.7062851133   |
| 32.9568227146  | 22.4517647057  |
| 0.4690191597   | 0.5518952376   |
| 0              | 0              |
| 0              | 0              |
| 4.4776366451   | 2.0322663888   |
| 0              | 0.0336566181   |
| 0.5742098203   | 0.7207180542   |
| 125.3255902216 | 81.4856497961  |
| 3.2617765736   | 3.9428116377   |
| 4.7304514095   | 10.5760196477  |
| 1.8615586261   | 2.0809727129   |
| 0              | 0              |
| 0.3760940408   | 0.6859527672   |
| 1.0500062538   | 1.6679833701   |
| 78.2823975296  | 77.2090868784  |
| 28.0694423436  | 22.2065160304  |
| 0              | 0.1806877672   |
| 1.4340828545   | 1.3331143306   |
| 0.3312280839   | 1.2082447264   |
| 0              | 0              |
| 12.9183135095  | 6.0803961249   |
| 417.6631113752 | 180.6555833309 |
| 104.8313952499 | 55.9967640985  |
| 73.8058819785  | 62.8610064052  |
| 0              | 0.4115570428   |
| 0              | 0              |
| 30.3619223558  | 13.4283863385  |
| 93.7282382569  | 70.9815748348  |
| 1.3073224258   | 4.1534839583   |
| 8.4118572684   | 8.5784742194   |
| 5.889744323    | 4.366194255    |
| 4.5744680076   | 2.6913901654   |
| 25.7967216174  | 11.4134889883  |
| 0              | 0.3526059158   |
| 1.0668259076   | 2.3851363818   |
| 1.8209221777   | 1.2141857015   |
| 1.2813181341   | 0.226159218    |
| 0              | 0              |
| 5.9575104776   | 13.3193943682  |
| 21.2913903324  | 40.3135148726  |
| 0              | 2.3823525938   |
| 3.0999101858   | 7.7816894049   |
| 256.3925097858 | 234.3416087508 |
| 285.268452549  | 144.8835241842 |
| 20.1021221547  | 21.2887655586  |
| 4.5331550781   | 7.112223163    |
| 9.8814590581   | 11.6275211392  |

gene\_expression\_table

|                 |                |
|-----------------|----------------|
| 0               | 1.2598091694   |
| 56.5345519991   | 49.0127228937  |
| 0               | 4.7572291857   |
| 4.0645367753    | 1.1956859558   |
| 4.9417824058    | 4.942749567    |
| 1.8505065688    | 1.8508687333   |
| 0               | 0.0269787221   |
| 0               | 1.9198221951   |
| 33.4237747143   | 35.8595086348  |
| 2.1749960718    | 3.0711836364   |
| 0               | 2.4809115955   |
| 43.451017646    | 39.1987840869  |
| 333.1868982421  | 279.5567543691 |
| 7.5714405504    | 4.1576828668   |
| 34.8304460665   | 58.448195334   |
| 0.6661440916    | 0.9406227718   |
| 11.7834390842   | 20.7983739401  |
| 12.6949187703   | 17.5522928045  |
| 276.464092962   | 113.8604353038 |
| 0               | 1.9531505697   |
| 0               | 7.6861772884   |
| 153.2314249921  | 91.5407541029  |
| 3.4562647168    | 2.8468927083   |
| 316.7423146825  | 284.3491379339 |
| 14.3863861044   | 14.3122540757  |
| 1454.7013609715 | 767.9311217767 |
| 0               | 0              |
| 18.5838106484   | 16.7651489099  |
| 9.4636827121    | 6.681554018    |
| 6.3080920836    | 4.0825054772   |
| 59.2699929982   | 26.2366713176  |
| 0               | 0              |
| 0               | 0              |
| 0               | 0              |
| 30.8112884216   | 70.5172759291  |
| 0               | 5.7875715989   |
| 2.8121129363    | 0.9927046933   |
| 5.1892696289    | 1.2212435826   |
| 0               | 0              |
| 49.323226386    | 87.6384094355  |
| 77.4423308491   | 86.9206190805  |
| 28.7187399287   | 13.1794124655  |
| 126.9746748548  | 69.3101983903  |
| 11.4253518376   | 2.6888442128   |
| 0.0982672286    | 0              |
| 1.2386262361    | 1.8267239685   |
| 0               | 0              |
| 0               | 1.6268685751   |
| 2.5489467913    | 3.9741358633   |

gene\_expression\_table

|                |                |
|----------------|----------------|
| 29.0387001302  | 10.5438433576  |
| 31.2591289859  | 13.6621246263  |
| 0              | 0.2744334481   |
| 78.6095190429  | 53.9582673067  |
| 0              | 0.590825369    |
| 0              | 0              |
| 0              | 6.6761690801   |
| 4.8155594563   | 24.365833213   |
| 0              | 1.10288039     |
| 17.1250941353  | 1.8201004923   |
| 0              | 4.7316571197   |
| 0.5126418495   | 1.077189452    |
| 0.7050716971   | 0.8987966604   |
| 7.3885834823   | 18.2577199642  |
| 31.6459018261  | 18.437231969   |
| 0.7732255716   | 2.911536566    |
| 24.9805572041  | 12.8776529299  |
| 2.9378880626   | 5.0472423974   |
| 303.8958888612 | 284.8017635929 |
| 0              | 0.0243339135   |
| 0              | 0              |
| 1.6555972033   | 1.1410549596   |
| 0.1332970521   | 0.2274335914   |
| 3.4820925939   | 5.1217265849   |
| 0.8114964033   | 2.4110934537   |
| 7.0517889973   | 0.9680820347   |
| 4.8854932832   | 3.193757796    |
| 0.1418550321   | 0.7010679268   |
| 0.1210382133   | 0.0427277301   |
| 45.1028583976  | 34.2930460082  |
| 19.6096967455  | 14.1484630243  |
| 21.8409133115  | 6.6820574503   |
| 7.9597062256   | 6.4002318653   |
| 1.3204086022   | 0.4466961982   |
| 2.8783758971   | 14.1576070218  |
| 0.4261606379   | 0.7710002529   |
| 0              | 0              |
| 5.3064708171   | 4.9953029193   |
| 3.121152735    | 2.4659308942   |
| 0              | 0              |
| 16.1781834224  | 7.9320341523   |
| 35.3205571379  | 15.869023849   |
| 0              | 0              |
| 1.3387488811   | 1.2602455425   |
| 40.5504841402  | 17.5951970487  |
| 26.4931219519  | 40.9721720862  |
| 0.2147474083   | 0.3386092296   |
| 0.0402349367   | 0.004734       |
| 0.5628034132   | 1.2582773694   |



gene\_expression\_table

|                |                |
|----------------|----------------|
| 3.932172421    | 2.5658765926   |
| 0              | 1.0484855915   |
| 2.7283411122   | 1.8460037296   |
| 0.8003263494   | 1.3561123461   |
| 1.9767028526   | 1.1862538291   |
| 0.0859860112   | 0.1112977924   |
| 5.6020988399   | 0.8004564617   |
| 6.8103963271   | 3.0051746455   |
| 0.0698411623   | 0.1890189546   |
| 0              | 0              |
| 0              | 0.01396264     |
| 36.7025151802  | 20.4574169902  |
| 12.4160720222  | 2.4654378939   |
| 0              | 0              |
| 2.4400564109   | 1.7705834588   |
| 0.0340024917   | 0.004001       |
| 5.3800498301   | 6.8582682299   |
| 0              | 0              |
| 0.8634227462   | 0.270930738    |
| 1.975624464    | 2.4726556204   |
| 3.870154026    | 2.459167279    |
| 42.7454737741  | 54.4139775876  |
| 63.3790223848  | 60.3405020929  |
| 1.6671106968   | 2.2352947599   |
| 14.1014635107  | 4.0052561158   |
| 4.9369428846   | 7.1648092803   |
| 19.6390651403  | 13.6088125781  |
| 126.8915726793 | 951.2143149855 |
| 4.4262116578   | 1.041665392    |
| 0.6308092084   | 0.2226821169   |
| 0              | 0.2004986599   |
| 9.0588726582   | 17.1219552488  |
| 23.4098608093  | 0              |
| 5.0318552527   | 12.2120383374  |
| 742.043416958  | 591.8105519431 |
| 0              | 0.8066532638   |
| 10.9925142765  | 15.5218808927  |
| 5.3576996925   | 11.2353587326  |
| 1.5472869289   | 2.3669019705   |
| 0.7831114033   | 0.276446353    |
| 0.4708827595   | 0.2659623058   |
| 0              | 0.2949522644   |
| 0              | 0.4350402814   |
| 0.7975529167   | 0.9071984781   |
| 1.7391391657   | 3.9440605484   |
| 6.9920424886   | 5.9649681275   |
| 1.778032273    | 3.6613711101   |
| 7.5809699791   | 2.7876667861   |
| 0              | 0              |

gene\_expression\_table

|                |               |
|----------------|---------------|
| 2.4441197426   | 1.5338654643  |
| 0              | 0             |
| 0.1189067265   | 0.4197529336  |
| 0              | 0             |
| 1.3998290563   | 2.0060299547  |
| 3.7719717701   | 4.2367331399  |
| 0              | 0.004328      |
| 5.3951493898   | 6.2566915931  |
| 0.5944677923   | 0.7806539952  |
| 0              | 0             |
| 10.6074160236  | 5.3598125733  |
| 0              | 0             |
| 0.584927662    | 0.9635988168  |
| 0              | 0             |
| 0.8981494462   | 0.1358811263  |
| 3.6915159884   | 1.4189779174  |
| 0              | 0.9994310739  |
| 3.4848415079   | 7.0530593778  |
| 0.6514005682   | 1.2110756778  |
| 1.7018793569   | 2.6033837217  |
| 38.8160346302  | 39.8023783638 |
| 0.4114469447   | 0.484149964   |
| 28.2047683968  | 16.8633838329 |
| 25.1556042458  | 17.939770035  |
| 0              | 0             |
| 0              | 0             |
| 9.7338152865   | 6.2528837278  |
| 6.536725252    | 4.4719593441  |
| 0              | 0             |
| 0              | 0             |
| 2.005691759    | 3.1952111847  |
| 0              | 0.0413977107  |
| 0              | 0             |
| 0.1286179041   | 0.2270171931  |
| 8.4653086439   | 7.5567236816  |
| 0.9953903524   | 0.7808511068  |
| 0.7741005677   | 1.4118714176  |
| 16.7437452564  | 15.1051572706 |
| 40.9740248802  | 91.6069217644 |
| 0              | 0             |
| 1.0719892808   | 1.3244812176  |
| 2.7940143401   | 1.7096138858  |
| 1.4501605957   | 1.3651241488  |
| 0              | 0.3453010728  |
| 0.547438141    | 0.4831281889  |
| 0              | 0             |
| 7.2841462865   | 27.8565983417 |
| 8.7099833678   | 9.941573373   |
| 124.1009197546 | 24.1861617884 |

gene\_expression\_table

|                |               |
|----------------|---------------|
| 0.8466152676   | 1.0515580543  |
| 39.4339782071  | 25.5210973277 |
| 0              | 0             |
| 0.9293737483   | 0.5905412282  |
| 3.4033091354   | 5.0058458829  |
| 0              | 0             |
| 104.7158823047 | 61.0495455752 |
| 0              | 0             |
| 16.7152885757  | 5.5535700843  |
| 1.446578344    | 0.0567396649  |
| 0              | 0             |
| 8.2213371026   | 1.3820077494  |
| 0              | 0.31272166    |
| 0              | 3.095559826   |
| 0              | 0             |
| 0              | 0.5936445766  |
| 71.1842908365  | 77.3807010791 |
| 25.7902598578  | 37.5841128915 |
| 0              | 0             |
| 0              | 0             |
| 101.1771732882 | 6.8031579679  |
| 52.5025842873  | 90.3816102394 |
| 6.413110652    | 1.7608062893  |
| 0              | 0             |
| 0.1731228676   | 0.6926269987  |
| 0.7599079884   | 5.4992338481  |
| 0.0502617537   | 0.1833434475  |
| 0.0251520285   | 0.0266367717  |
| 5.8199998352   | 4.263680465   |
| 3.5003785871   | 2.383076938   |
| 18.84467771    | 28.6495160472 |
| 4.5713299186   | 0.3227452643  |
| 0              | 0             |
| 3.0713892822   | 0.8834482158  |
| 6.9046429038   | 7.3122291723  |
| 4.8427114642   | 5.5559620649  |
| 0              | 0             |
| 3.2643310976   | 2.8424444385  |
| 11.5763818479  | 3.5417039329  |
| 3.9376170543   | 2.7800383688  |
| 0              | 0.5615167217  |
| 0              | 0             |
| 0.6649979387   | 4.6950217841  |
| 7.4844462037   | 8.8069541084  |
| 0.0870164921   | 0.0153588568  |
| 83.0532924963  | 81.310427121  |
| 0              | 9.3006724573  |
| 0              | 0             |
| 0              | 4.8711245417  |

| gene_expression_table |                |
|-----------------------|----------------|
| 0                     | 0.5888025766   |
| 0                     | 3.6083077607   |
| 0                     | 0              |
| 0                     | 0              |
| 0.5306543674          | 0.1873264314   |
| 0.5792991426          | 0.2726647143   |
| 0                     | 0.6760826051   |
| 16.8972661889         | 6.4067532277   |
| 8.9831909965          | 0.7047018906   |
| 0                     | 1.5278536735   |
| 41.8689361778         | 15.8749906049  |
| 12.660956605          | 6.8283225209   |
| 122.3951871094        | 128.0200169336 |
| 63.1272849262         | 31.5698198149  |
| 6.2650916606          | 8.8077655876   |
| 0                     | 0              |
| 10.8799898187         | 4.1899068394   |
| 36.5827545633         | 18.6536817543  |
| 9.5458600734          | 8.099311316    |
| 5.2566004129          | 7.6080987065   |
| 0                     | 0              |
| 0                     | 0.2278626736   |
| 24.7326983615         | 11.5990164982  |
| 0.3610792313          | 0.4390449746   |
| 0                     | 0              |
| 1.5991757948          | 0.5174816612   |
| 1.6012336104          | 1.1305037572   |
| 1.9541094881          | 0.99640765     |
| 0.12418326            | 0.2922530919   |
| 0                     | 0.001984       |
| 5.178839635           | 2.2471421931   |
| 120.9741193938        | 193.0854713265 |
| 0                     | 0              |
| 1.9749165015          | 3.037650854    |
| 3.1448071762          | 0.3700497235   |
| 2.0316274283          | 1.673432386    |
| 1.0011314354          | 0.663981784    |
| 11.5323001438         | 4.7495235289   |
| 0                     | 0              |
| 3.1116280511          | 3.0860837786   |
| 15.8565747485         | 6.5304556695   |
| 0.8107672501          | 0.7111863737   |
| 20.2002726952         | 18.645305685   |
| 19.3971385234         | 23.8851674485  |
| 0.9035112208          | 0.8292666793   |
| 0.9296726665          | 0.8595294748   |
| 1.2710365758          | 2.9912596038   |
| 7.0607903675          | 7.1580388333   |
| 5.9714706362          | 4.0598332623   |

gene\_expression\_table

|               |                |
|---------------|----------------|
| 0             | 0              |
| 10.6687325583 | 12.5539065253  |
| 5.453075934   | 5.9944917093   |
| 41.609273109  | 53.60674765    |
| 0.3849033023  | 0.2491038208   |
| 0             | 0.00552        |
| 0.6390647949  | 0.9681846513   |
| 9.8175001909  | 6.2039918502   |
| 7.7996125782  | 30.8986291711  |
| 0             | 4.9326584616   |
| 0             | 0              |
| 0             | 0              |
| 0             | 0.1688664452   |
| 1.1249433942  | 0.7280470081   |
| 1.947836503   | 2.0628187581   |
| 1.8578182926  | 1.0821176878   |
| 2.5115134314  | 7.3882498888   |
| 1.0210466858  | 2.7533607044   |
| 1.0315714231  | 0.9225267269   |
| 0             | 0              |
| 0             | 0              |
| 0             | 0              |
| 0             | 0.6681226828   |
| 3.8681140857  | 1.3351398369   |
| 0             | 0.0372454769   |
| 6.6399258171  | 3.0731944634   |
| 0             | 0              |
| 0             | 0.1094774229   |
| 13.1134404646 | 13.6303601212  |
| 72.0202331203 | 114.0695173061 |
| 45.9989560222 | 66.9932665096  |
| 0             | 0              |
| 0             | 0.7579851836   |
| 6.9039888409  | 4.9420570784   |
| 0             | 0.003943       |
| 0             | 0              |
| 8.0310160621  | 4.2362532115   |
| 51.8290730599 | 49.2254745667  |
| 3.5687196774  | 3.385698065    |
| 0.662161082   | 0.1363539623   |
| 0             | 0              |
| 0             | 0.238642432    |
| 0.612374992   | 0.187351363    |
| 0.8475063634  | 1.0969875914   |
| 6.4905327518  | 10.8621017857  |
| 56.560507604  | 95.3159765711  |
| 1.4510589325  | 0.4695521214   |
| 0.0345328777  | 0.0772062456   |
| 0             | 0.0449938205   |

gene\_expression\_table

|                |               |
|----------------|---------------|
| 24.8960150132  | 29.6857638465 |
| 55.9934560464  | 72.7546993068 |
| 0.3342414878   | 0.2359813429  |
| 0              | 0             |
| 115.6698375321 | 31.915165625  |
| 5.5584178291   | 7.6655772332  |
| 0              | 0             |
| 0              | 0             |
| 0              | 0             |
| 6.3564371088   | 8.5267723436  |
| 11.0934788163  | 8.4849087716  |
| 88.330909539   | 86.038440088  |
| 2.0476868733   | 3.9034140677  |
| 0              | 0             |
| 25.5029232571  | 43.8886175258 |
| 0              | 0.0278773514  |
| 10.4019713152  | 2.550001739   |
| 0.9614635312   | 1.0861007437  |
| 11.4025805338  | 6.7832542818  |
| 22.0454489062  | 18.7481945851 |
| 0              | 1.7351816488  |
| 10.980022783   | 4.8809651974  |
| 1.5862461347   | 1.8665371536  |
| 0              | 0             |
| 0              | 0.0199605482  |
| 0              | 0.1958786761  |
| 6.4824725872   | 3.3978964988  |
| 7.0909616097   | 7.8803882098  |
| 0              | 1.0884634064  |
| 0.6794234117   | 4.6369729616  |
| 0.5732502773   | 0.4047264485  |
| 8.4185755165   | 10.6491057159 |
| 9.4405667308   | 8.0538240074  |
| 0              | 0.0847597421  |
| 4.0569993208   | 3.1030184213  |
| 30.2280598932  | 77.9115671152 |
| 0              | 0.535678575   |
| 0              | 0             |
| 1.7787141698   | 5.7557897415  |
| 0.7529354047   | 1.5258539632  |
| 10.0249905402  | 6.6846350274  |
| 6.3107700666   | 7.0545939953  |
| 9.8932628488   | 5.993170678   |
| 10.2348580394  | 10.502935479  |
| 25.6620942806  | 22.1190152174 |
| 0              | 0.4896545114  |
| 4.6974990689   | 8.5124286688  |
| 0              | 0             |
| 11.6969600351  | 4.5592662553  |

gene\_expression\_table

|                |                |
|----------------|----------------|
| 5.6180658794   | 3.3668870639   |
| 0              | 0              |
| 12.6873855499  | 35.715376814   |
| 0.5776483395   | 0.2039157853   |
| 20.632550819   | 26.3015347909  |
| 3.6998490423   | 2.1146132248   |
| 23.7530958185  | 8.1455124207   |
| 3.2551775281   | 2.4784747836   |
| 0              | 0.4310489348   |
| 34.5120199422  | 146.0859006839 |
| 0              | 0              |
| 3.3307204581   | 0.7403049593   |
| 0.315329979    | 2.0222173228   |
| 0.7748976381   | 2.0060099377   |
| 0              | 0.2782916123   |
| 9.8323003495   | 4.8849743304   |
| 124.7556557413 | 96.6433889387  |
| 48.8820096568  | 38.4359286733  |
| 1.1160750851   | 0.9193005403   |
| 8.4810767354   | 5.4056654647   |
| 6.5443844402   | 7.8433897309   |
| 30.9761206965  | 15.2632813623  |
| 9.1838399452   | 5.2832423822   |
| 31.2297706069  | 5.2616593712   |
| 0              | 0.1199533445   |
| 3.1634969556   | 1.8126905458   |
| 0              | 0.0100395832   |
| 1.1684335966   | 0.7699422027   |
| 26.4164584415  | 7.3471907941   |
| 29.4488386838  | 10.0944160805  |
| 0              | 2.4646744034   |
| 0              | 0              |
| 0              | 0              |
| 95.0179447574  | 216.1615438112 |
| 12.7478566354  | 8.4645190836   |
| 28.9615165768  | 32.5644167463  |
| 17.6411371479  | 32.6340428059  |
| 76.8637988653  | 70.849128861   |
| 10.4793315789  | 9.0801281545   |
| 23.9425088276  | 29.8483316336  |
| 22.0125755759  | 11.2674640003  |
| 12.1808005661  | 27.7107725487  |
| 27.3804594976  | 16.6180196851  |
| 12.6326786063  | 7.5563157704   |
| 6.3594702091   | 5.7994752838   |
| 30.645163492   | 29.5693554019  |
| 4.3252059792   | 3.2233332126   |
| 0              | 0.7573400421   |
| 0.669873307    | 2.0100132258   |

gene\_expression\_table

|                 |                 |
|-----------------|-----------------|
| 15.324520956    | 6.5572278645    |
| 13.5607315144   | 19.1795970256   |
| 32.470926713    | 15.8292633156   |
| 1.2493431664    | 1.1970839927    |
| 0.2178809295    | 0.5255803775    |
| 0               | 0               |
| 0               | 0.0279228797    |
| 0               | 0               |
| 39.7494139829   | 38.1980877574   |
| 3.6597765478    | 5.1677545501    |
| 15.6864169634   | 15.7380612307   |
| 0.0793504098    | 0.1213832016    |
| 4.5730682087    | 5.4368000814    |
| 5.2979603295    | 4.987291481     |
| 0               | 0.0688931303    |
| 5.6696949042    | 3.8917285962    |
| 6.9509646057    | 5.9299242527    |
| 0               | 0               |
| 139.0567647128  | 104.2136957743  |
| 3.534506984     | 1.609374356     |
| 17.9492730793   | 14.9766556583   |
| 17.4149955825   | 8.8799706098    |
| 4.8690465739    | 4.6790191273    |
| 4.9161583489    | 3.9473078023    |
| 25.5567569964   | 20.8966413788   |
| 0               | 0.766286622     |
| 4.6469581345    | 2.5882243079    |
| 1.1388511688    | 0.9667771387    |
| 0               | 0               |
| 2.1692875733    | 2.3824290019    |
| 158.1886342807  | 64.0729206312   |
| 33.9550955236   | 15.53422429     |
| 0               | 0.0230746247    |
| 0               | 0.0231348373    |
| 1.8943135909    | 3.7893686579    |
| 0               | 0.007604        |
| 0               | 0               |
| 6.7210260207    | 6.3021950619    |
| 2.2313340118    | 6.2139498155    |
| 1.6637309604    | 1.9577136127    |
| 0.1797709713    | 0.0634609957    |
| 4.8395928908    | 10.535293055    |
| 45.8370719833   | 11.6453852037   |
| 90.0518666726   | 43.0692821343   |
| 0               | 0               |
| 5.0174117494    | 3.7391953149    |
| 13.7998256798   | 4.2304957253    |
| 8.1507431801    | 5.7377654989    |
| 3305.3264460102 | 4195.2029069497 |



gene\_expression\_table

|                 |                 |
|-----------------|-----------------|
| 1.9164243736    | 4.2846105104    |
| 151.1228942173  | 120.6679387372  |
| 18.2801814911   | 8.793918748     |
| 11.5243176134   | 9.4359691137    |
| 3.2542166405    | 4.0589938095    |
| 28.0979965272   | 29.8460017013   |
| 0               | 0               |
| 14.3032966482   | 15.5737247166   |
| 0               | 0               |
| 0               | 0               |
| 0.086953259     | 0.040927189     |
| 0.8124042361    | 0.6691697209    |
| 0               | 0.006059        |
| 34.94862121     | 29.2494960755   |
| 0               | 0               |
| 27.9876155315   | 26.5612212499   |
| 5.3098555773    | 4.4986402795    |
| 0.6067406095    | 0.9281378375    |
| 0               | 0.2126732494    |
| 0               | 0.072397063     |
| 543.7235197574  | 93.3041550731   |
| 0.5319690615    | 0               |
| 1.8902926772    | 1.3790715642    |
| 5.2278750434    | 5.1673817467    |
| 4.2634593539    | 6.354633838     |
| 0               | 1.8591920264    |
| 1.1625517923    | 0.896784048     |
| 51.7059541483   | 84.6894090706   |
| 0               | 0.1413096912    |
| 40.157598001    | 18.3107231737   |
| 1.8720317834    | 1.5419749558    |
| 1.253158292     | 2.9491848209    |
| 0               | 0.0279918823    |
| 0               | 0               |
| 0               | 0               |
| 0.6536855348    | 1.1999400124    |
| 44.9644426548   | 17.7441057961   |
| 5.4441281148    | 2.348907039     |
| 0               | 0.005724        |
| 0               | 0               |
| 16.3976170126   | 7.7180358619    |
| 0.6399801331    | 0.2259195474    |
| 0               | 0               |
| 2856.6283339949 | 2575.3018387622 |
| 0.6298018543    | 1.1857413901    |
| 2.1843315318    | 2.2507533404    |
| 3.1290853682    | 1.4958114316    |
| 67.6191458311   | 28.4767914278   |
| 194.9359058369  | 40.740847718    |

| gene_expression_table |                |
|-----------------------|----------------|
| 0                     | 0.0419034865   |
| 0                     | 0.032574193    |
| 0                     | 0              |
| 11.1559186596         | 6.7823757227   |
| 0                     | 0.1606014232   |
| 0                     | 0              |
| 0.7452465831          | 0.0350772911   |
| 2.7752615658          | 1.1021577545   |
| 1.1301737001          | 1.0639010706   |
| 0                     | 0.008884       |
| 5.2239796205          | 3.7985685809   |
| 526.4275416696        | 151.9499983876 |
| 11.815860653          | 7.8015391361   |
| 0                     | 0              |
| 4.8374987729          | 4.0984479738   |
| 3.1647454774          | 2.3939734181   |
| 6.9383674345          | 4.1988254214   |
| 0                     | 0.3061741687   |
| 154.7200698587        | 87.8168077696  |
| 0                     | 0.0589306127   |
| 0                     | 0              |
| 0                     | 0              |
| 0                     | 0.2175652326   |
| 6.9553549778          | 3.9958992805   |
| 27.5037022383         | 17.7275402995  |
| 0                     | 0.008089       |
| 0                     | 0.007834       |
| 0                     | 1.979251785    |
| 13.3679382716         | 10.3119309401  |
| 6.0157485032          | 4.7339048977   |
| 9.5350320212          | 5.2957834332   |
| 0                     | 0              |
| 3.2327949643          | 6.1815528753   |
| 0                     | 0              |
| 0                     | 0              |
| 1.2412915168          | 2.2883184003   |
| 25.1565965773         | 4.709375401    |
| 0.3314212231          | 0.3509852674   |
| 0                     | 0              |
| 0                     | 0              |
| 0.6078905347          | 1.6452021915   |
| 14.6289478411         | 10.3283370967  |
| 0                     | 0.3234338447   |
| 20.9733450163         | 8.6377734184   |
| 0                     | 0              |
| 0.5620082234          | 0.6172278435   |
| 6.27361977            | 0.9842898175   |
| 8.8184905075          | 10.3767251564  |
| 5.9949464164          | 2.0549361609   |

gene\_expression\_table

|                 |                 |
|-----------------|-----------------|
| 2.7075082449    | 1.7841192412    |
| 7.0494309696    | 0.8295071319    |
| 2.5552944417    | 1.5409937673    |
| 39.5500755327   | 25.1506514217   |
| 2.2566960021    | 0.6196064171    |
| 787.3162892941  | 662.7188238747  |
| 7.8287522903    | 1.740063214     |
| 28.9871271786   | 31.4179940411   |
| 0.3102666203    | 1.0131275019    |
| 54.8689383817   | 33.2308631406   |
| 0               | 0               |
| 0               | 0.0271193268    |
| 2748.5987462303 | 3320.4086849483 |
| 0               | 0               |
| 22.1197334815   | 12.7079390463   |
| 3.6334278311    | 1.2826372704    |
| 0.7319876555    | 0.9905300594    |
| 0.4130418769    | 0.4727714478    |
| 0.2441762392    | 0.5824808348    |
| 553.6892387642  | 424.6988144782  |
| 0               | 0.0156629005    |
| 4.491537501     | 4.8888062393    |
| 301.9506265319  | 110.6139934785  |
| 0               | 0.4058895386    |
| 1.4647428068    | 3.6194845806    |
| 3.4760379911    | 2.7268378744    |
| 411.8424320053  | 399.0150555673  |
| 232.48828563    | 121.9849369929  |
| 235.4860319912  | 93.4571296489   |
| 0               | 0.0122475604    |
| 0.4408380234    | 0.2697419249    |
| 12.8393125615   | 2.2990480177    |
| 3.4928690648    | 4.9887648499    |
| 54.2375528994   | 27.1240838923   |
| 0               | 0.1880856535    |
| 2.9298927488    | 3.5337974295    |
| 52.0101767857   | 21.3601460745   |
| 6.31312275      | 4.2387041859    |
| 0               | 0               |
| 0               | 1.5831210866    |
| 41.663327556    | 7.0814282334    |
| 25.5512847504   | 12.1847305087   |
| 0               | 0.3835094812    |
| 0               | 0               |
| 0               | 0               |
| 0               | 0.009425        |
| 0               | 0               |
| 0               | 0.0123336527    |
| 76.7901635855   | 95.8192489843   |

gene\_expression\_table

|                |                |
|----------------|----------------|
| 15.6263146528  | 8.5633202749   |
| 0              | 0              |
| 4.5574033055   | 2.5107187682   |
| 104.611181146  | 67.8005306858  |
| 0              | 0              |
| 10.2881606789  | 4.0641864428   |
| 0              | 0.005617       |
| 0              | 0              |
| 14.6231493968  | 13.1306348016  |
| 33.0662138075  | 15.0077731291  |
| 104.8629556352 | 85.1171278988  |
| 0              | 0              |
| 6.8607739862   | 11.7636286545  |
| 0.0618479986   | 0              |
| 0              | 0.005257       |
| 0              | 0              |
| 21.4007088572  | 11.4719056949  |
| 6.0576468936   | 4.2768229      |
| 14.0608204442  | 10.1340447466  |
| 0.2117233834   | 2.3667832825   |
| 0              | 0              |
| 52.2461579602  | 14.2684241848  |
| 0.4940013829   | 1.4532296012   |
| 3.2869537125   | 7.307599852    |
| 0.2000842804   | 0.9770732616   |
| 36.3248874023  | 31.3970622869  |
| 0.7842300521   | 1.0519967405   |
| 18.9256000587  | 11.9832568782  |
| 0              | 0              |
| 21.5231723959  | 9.4318764684   |
| 14.5293899082  | 9.580072774    |
| 3.0431021944   | 2.9541772405   |
| 1.3368349273   | 1.9401008919   |
| 0              | 0              |
| 14.7975973865  | 6.4328942071   |
| 0              | 0.008483       |
| 14.2370008691  | 10.6670194681  |
| 0              | 13.315955928   |
| 36.2724402649  | 23.8033175616  |
| 37.8132062399  | 22.6519141732  |
| 392.3555040576 | 350.7552935015 |
| 0              | 0.1023509008   |
| 38.1528809799  | 34.1962567076  |
| 6.5789124076   | 2.7599815744   |
| 2.5971605752   | 2.6761358132   |
| 2.3902090412   | 0.8437682934   |
| 111.6418268802 | 55.5140099054  |
| 0              | 0              |
| 15.6034676267  | 9.616852757    |

gene\_expression\_table

|                |                |
|----------------|----------------|
| 0.5426316637   | 1.9968109599   |
| 4.0570610402   | 2.4284861434   |
| 0              | 0              |
| 0.1073900533   | 0              |
| 0              | 0              |
| 2.2858812512   | 0.6724495951   |
| 11.5764869205  | 2.5696162112   |
| 0.4327102575   | 0.2460990856   |
| 7.5404955885   | 4.982478808    |
| 0              | 0              |
| 28.1474738671  | 98.5354392298  |
| 7.3942690861   | 8.449484943    |
| 0.4928506966   | 0.2319751308   |
| 0              | 0.0740766478   |
| 0.0593053926   | 0.0697847051   |
| 0.370179805    | 0.6347181484   |
| 19.8000410841  | 27.5701578049  |
| 3.3196315885   | 4.3154356091   |
| 13.2308727062  | 28.0576473365  |
| 4.393919513    | 3.0572378792   |
| 0              | 0              |
| 3.8208373482   | 1.517394095    |
| 1.0106499643   | 1.1892326584   |
| 0.8110564848   | 0.1192963555   |
| 3.1115564778   | 3.6613711101   |
| 0              | 6.0051643066   |
| 0              | 0              |
| 49.6527237874  | 24.0716774646  |
| 0              | 4.9080893509   |
| 236.2690587636 | 152.3306953275 |
| 0              | 0              |
| 0              | 0              |
| 7.2992786017   | 0.8589067236   |
| 0              | 0.7184693683   |
| 18.0521626325  | 4.7794488456   |
| 8.7746539712   | 9.8762234211   |
| 3.2761272528   | 0.7304251602   |
| 31.9550890418  | 124.3202238904 |
| 11.7655038649  | 13.1522543272  |
| 69.0995474304  | 46.5271000657  |
| 245.0672196648 | 225.7639834333 |
| 32.0478276916  | 11.3132116954  |
| 6.778267309    | 1.5951985625   |
| 56.984416065   | 32.6886348988  |
| 0              | 1.9251232228   |
| 8.6410481569   | 1.0167928594   |
| 11.0608242589  | 5.2990787569   |
| 38.5222604116  | 18.4803563891  |
| 1.809780867    | 3.6202701221   |

gene\_expression\_table

|                |                 |
|----------------|-----------------|
| 6.8956836889   | 2.4711295602    |
| 2.0734806972   | 0.7319599412    |
| 431.6149515644 | 704.9397642539  |
| 6.0574688811   | 1.2473700224    |
| 70.0302232218  | 7.828439113     |
| 155.8454846616 | 188.4423676677  |
| 922.4452353258 | 754.3366387874  |
| 24.0145358932  | 14.5326468717   |
| 197.0739542092 | 111.8562418501  |
| 0              | 0.2613441617    |
| 75.4140101387  | 7.3949774009    |
| 3.3925547681   | 1.2974071609    |
| 21.0388488122  | 5.4154692803    |
| 0              | 27.8931463589   |
| 25.8945339546  | 21.5256652527   |
| 18.7969588374  | 23.7772769758   |
| 0              | 0.3977532886    |
| 0              | 0               |
| 24.9674936667  | 7.3448176705    |
| 296.2201766853 | 88.8004539904   |
| 3.9679359577   | 1.6341757462    |
| 8.3657316442   | 17.7191341619   |
| 47.4282108609  | 39.0661707743   |
| 66.1942941098  | 120.0435934526  |
| 9.8414107062   | 4.9216683892    |
| 21.5906599072  | 14.6788763752   |
| 0              | 0.5778060096    |
| 22.2636406659  | 50.6487795489   |
| 2.4020932378   | 3.2976359759    |
| 73.6652100307  | 31.7833685624   |
| 112.1306953314 | 57.6388183585   |
| 32.1455615715  | 1.8912854595    |
| 33.2041926083  | 23.4428407297   |
| 54.1312047564  | 46.9759725127   |
| 0              | 0.0265428856    |
| 3.8989445363   | 3.6703130377    |
| 0              | 1.5011589324    |
| 4928.482709568 | 6875.2817156208 |
| 0              | 2.2485787336    |
| 7.5153721639   | 4.6427559736    |
| 164.2016884979 | 59.9636682011   |
| 4.5719427699   | 6.0074532512    |
| 1.8825035408   | 4.7625585059    |
| 0              | 0.4001329493    |
| 215.1387709217 | 49.9979094105   |
| 0              | 0               |
| 20.5159733758  | 21.7270467289   |
| 0              | 0               |
| 16.3132199429  | 5.8370839863    |

gene\_expression\_table

|                 |                 |
|-----------------|-----------------|
| 1.2174853191    | 1.3341236438    |
| 6.9364106597    | 0               |
| 0.9108451062    | 1.0965258645    |
| 0               | 0               |
| 3.2495835507    | 2.2432887736    |
| 1.6887422165    | 6.7562908878    |
| 22.2352396135   | 11.8876587737   |
| 0.2512125588    | 0.3621124843    |
| 0               | 0               |
| 12.9653405555   | 9.153796246     |
| 3.3495406971    | 2.9954695785    |
| 8.3276213178    | 8.8892007803    |
| 2.8317273457    | 2.0325785212    |
| 0               | 0.6991994594    |
| 0               | 0.2940982042    |
| 0               | 0               |
| 1.4401639601    | 0.6213687834    |
| 0               | 0.3399883704    |
| 0               | 0               |
| 0.6518224228    | 0.935739988     |
| 2.8102045707    | 4.6019216794    |
| 1.158315543     | 1.2461630796    |
| 0               | 0.8415823652    |
| 49.9565017614   | 24.0034084421   |
| 1.0289350154    | 7.191847238     |
| 0               | 0.1004140084    |
| 1.7846707773    | 1.0200114611    |
| 87.389991399    | 68.554583985    |
| 0.0252217204    | 0.0158284904    |
| 0               | 0.5203451365    |
| 0               | 0               |
| 0               | 0.0166569405    |
| 9.2114954163    | 12.9553941176   |
| 15.6396456899   | 14.1898235801   |
| 0               | 0.0529629715    |
| 0.335110897     | 0.330247416     |
| 0.6183470643    | 0.751863158     |
| 0               | 0.0208451484    |
| 0               | 0               |
| 0.158797322     | 0.1307998591    |
| 456.215958731   | 320.7213337363  |
| 8.924051766     | 6.4375322784    |
| 55.3115219292   | 93.2492180483   |
| 2.5586183093    | 1.9015126135    |
| 3450.5176568831 | 4834.0114860306 |
| 0.8357229701    | 0.9833959179    |
| 0               | 0.008523        |
| 0.2752051965    | 0.2347797841    |
| 0.6295724265    | 1.1246970267    |

gene\_expression\_table

|                |                |
|----------------|----------------|
| 7.5670383411   | 3.9663897903   |
| 43.800634855   | 100.5034751592 |
| 4.8818593149   | 3.5903049621   |
| 43.9007799384  | 41.0765091065  |
| 0              | 3.546959212    |
| 3.33544724     | 2.0932392305   |
| 1.314495744    | 2.3717113036   |
| 0.6490781032   | 0.6682994036   |
| 0              | 0.5432287508   |
| 0.1888630021   | 0.0666705758   |
| 0              | 0              |
| 1.4146510082   | 4.4944767667   |
| 1.1670646555   | 4.497511507    |
| 0.5441854075   | 0.8004292802   |
| 23.9861482392  | 24.6494147416  |
| 35.3880789221  | 13.1863743216  |
| 0              | 0              |
| 2.5993003006   | 2.3985854045   |
| 119.5892858838 | 33.2472249859  |
| 12.748352854   | 8.4788246551   |
| 13.6207926543  | 22.2382923769  |
| 2.308821995    | 0              |
| 66.0355775867  | 33.8567948737  |
| 35.9720134453  | 67.5930013641  |
| 2.8719095592   | 3.9426081106   |
| 2.9822284102   | 2.4564334654   |
| 27.9579655724  | 5.7138912035   |
| 8.9848152335   | 18.7440543754  |
| 3.3408494791   | 1.4295201369   |
| 11.9611052574  | 7.3751127021   |
| 12.6170421892  | 27.8062275079  |
| 0.2397831089   | 0.4796600742   |
| 12.2412416162  | 12.3236611353  |
| 3.7571381546   | 2.873667946    |
| 2.6575530733   | 2.5017159394   |
| 0              | 0.4515773844   |
| 19.3441842823  | 6.8286953477   |
| 177.9451206081 | 153.5513263266 |
| 66.4559625094  | 58.9749182822  |
| 0              | 0.3869574663   |
| 118.2518395693 | 65.1794022608  |
| 28.9149727153  | 14.7438514515  |
| 1.9885614425   | 21.527465597   |
| 0              | 0              |
| 0              | 3.6018303339   |
| 0.1120248114   | 0.1845475651   |
| 0              | 0              |
| 4.2636161275   | 7.7763510286   |
| 130.956937396  | 80.8669050443  |



gene\_expression\_table

|                |                |
|----------------|----------------|
| 50.0400455686  | 52.257920086   |
| 1.7400360254   | 6.3472557243   |
| 468.9946573502 | 448.1421173179 |
| 0              | 3.5327191713   |
| 0.6352571489   | 0.4017853449   |
| 0.784499598    | 1.2308284443   |
| 0              | 0              |
| 8.1230937781   | 6.6909158703   |
| 0              | 0.9248483843   |
| 0              | 0              |
| 29.988889041   | 16.9382163932  |
| 19.526615121   | 11.8714419121  |
| 2.3964335439   | 5.0757936401   |
| 13.7802276862  | 11.1560613461  |
| 49.4557648063  | 36.8566052164  |
| 1.5592093027   | 2.385139758    |
| 0              | 1.7105984585   |
| 4.0836473344   | 6.4470185725   |
| 4.3155069446   | 0.5078060631   |
| 166.7531743839 | 125.3618831927 |
| 0              | 1.4319980042   |
| 2.6487199595   | 1.6362942708   |
| 21.1755863446  | 11.7111451772  |
| 129.3972411903 | 138.1079242424 |
| 3.0862463425   | 3.4500092201   |
| 1.1519108326   | 1.0391817375   |
| 4.0558898147   | 2.4079779639   |
| 0.1906968768   | 0.3365897616   |
| 0.974439477    | 1.9970363605   |
| 33.2371398127  | 29.0317802012  |
| 4.2458178838   | 11.1578616502  |
| 5.4396329725   | 10.3693294834  |
| 2.6138196706   | 8.9878315277   |
| 576.0420753143 | 282.428829941  |
| 0              | 0.094796863    |
| 5.6720986493   | 4.004617935    |
| 79.03820081    | 24.0965730423  |
| 9.5017540264   | 5.9630516857   |
| 2.3064796918   | 2.4426329244   |
| 0.1260458145   | 0.3559637169   |
| 83.7130694017  | 20.0799140606  |
| 0              | 0              |
| 0              | 0              |
| 0              | 0              |
| 0              | 1.110773616    |
| 0              | 0.0574187701   |
| 12.4596003211  | 0              |
| 0              | 0              |
| 1.8315647899   | 5.6035299327   |

| gene_expression_table |                |
|-----------------------|----------------|
| 0                     | 2.7596547946   |
| 0                     | 0.1028287759   |
| 0                     | 0.1054490274   |
| 0                     | 6.6344436201   |
| 0                     | 0.0442886326   |
| 16.8494054174         | 5.3431301734   |
| 0                     | 0.1085886801   |
| 0                     | 0.2639224177   |
| 4.2881196685          | 5.0458340008   |
| 0.6993461017          | 0.2768007481   |
| 14.9650284703         | 10.5656169112  |
| 6.8786573334          | 1.9355508743   |
| 2.6131127871          | 3.5434008789   |
| 5.354306663           | 4.3652890108   |
| 0                     | 0              |
| 20.4357439959         | 20.3529768464  |
| 3.0222766856          | 2.4894208528   |
| 1.2857083995          | 2.9501435907   |
| 0                     | 0.002477       |
| 0.6728158146          | 0.3958514659   |
| 1.8658723663          | 2.9420685894   |
| 1.5554943896          | 1.8669585803   |
| 0                     | 0.0643036967   |
| 76.8911383486         | 43.9228917065  |
| 0                     | 0.021687633    |
| 0                     | 0.1727404703   |
| 13.4610149105         | 3.777132405    |
| 0.4071258698          | 0.5389485205   |
| 128.7505209578        | 36.4323462292  |
| 8.9198431101          | 3.7213044282   |
| 0.6965663446          | 1.0655452604   |
| 4.2781737896          | 3.6787878023   |
| 0.0409651102          | 0.0289222076   |
| 126.5163743658        | 48.951107063   |
| 2.0573661341          | 3.4930192792   |
| 0.0655423701          | 0.4010435607   |
| 0.8855779314          | 0.8810146111   |
| 1.5941754529          | 1.5151238218   |
| 3.1926806865          | 1.9857530181   |
| 35.1158546862         | 26.5830837579  |
| 0.9967037637          | 2.8001128889   |
| 1.4011497491          | 1.6702393089   |
| 0.886176003           | 3.128292132    |
| 31.2136325122         | 23.2617680745  |
| 0.4928737416          | 0.579964944    |
| 1.0887847258          | 0.4099756472   |
| 2.06948384            | 2.3134051973   |
| 663.4354553344        | 536.0805448065 |
| 4.9650597606          | 6.4266289707   |

| gene_expression_table |               |
|-----------------------|---------------|
| 0                     | 0.0238080613  |
| 0                     | 0             |
| 1.6572699611          | 2.3516043803  |
| 5.4427225849          | 2.962061001   |
| 6.0014221014          | 3.4388277459  |
| 0                     | 0.1731745907  |
| 15.0054221504         | 9.4590497121  |
| 3.4733480293          | 2.6906685915  |
| 0                     | 0.8040861212  |
| 13.8030001599         | 9.5408315408  |
| 0                     | 0             |
| 2.3171271101          | 4.3625046538  |
| 6.2043504472          | 6.2685014685  |
| 0                     | 0             |
| 7.0287481262          | 4.3007815756  |
| 0.1094656114          | 0.1159274488  |
| 112.2517486181        | 56.1368587596 |
| 4.8875276729          | 4.862342589   |
| 3.9416902039          | 3.3461229012  |
| 10.9708426357         | 12.0878924521 |
| 0.9130564658          | 1.2585761882  |
| 9.6509595346          | 11.4982458089 |
| 0                     | 0             |
| 5.9573142665          | 5.9315187296  |
| 13.8778025839         | 8.7637784243  |
| 13.0032213714         | 6.4424848271  |
| 1.1339772518          | 0.7692146712  |
| 0                     | 0             |
| 0                     | 0             |
| 0                     | 0.1725438615  |
| 0.9084210078          | 0.6948108438  |
| 1.3541810096          | 0.5577130744  |
| 3.6135380426          | 1.3606570359  |
| 0                     | 0.2741522154  |
| 0.2173332745          | 0.920650485   |
| 12.3783404809         | 14.5656035979 |
| 9.0472097837          | 3.0163268074  |
| 0                     | 0             |
| 32.6939350312         | 10.5795196921 |
| 19.7605863614         | 21.3841651166 |
| 1.5015269936          | 0.7950816312  |
| 0                     | 7.9895735568  |
| 0                     | 1.6638839092  |
| 1.729214809           | 0.8139074049  |
| 0                     | 0             |
| 19.3635672325         | 91.1405030374 |
| 5.5791510087          | 2.4946968303  |
| 0                     | 0.1225026559  |
| 0.2749816573          | 0.3559282607  |

gene\_expression\_table

|                |                |
|----------------|----------------|
| 0.5302297022   | 0.1975752158   |
| 0.7836088924   | 1.014280563    |
| 0.9342723722   | 0.577163518    |
| 0              | 0.0289005815   |
| 0.3067191508   | 0.0360916681   |
| 8.8637923576   | 8.0658913216   |
| 0              | 3.3682504152   |
| 0.1555319123   | 0.4575363281   |
| 1.3724053759   | 3.3913121629   |
| 0              | 1.5159072044   |
| 0.6328647017   | 0.8191616662   |
| 1.4544171068   | 0.1711413826   |
| 0              | 2.2814844495   |
| 1.608373727    | 1.6222068942   |
| 0              | 0.4974645213   |
| 0              | 1.4888551566   |
| 1.4376461909   | 0.733061106    |
| 10.7829480692  | 5.9740764726   |
| 6.9291979268   | 1.9568623192   |
| 159.9728645438 | 171.2916390698 |
| 31.4677215971  | 16.8779220644  |
| 10.599005222   | 4.4131190944   |
| 3.5038064334   | 2.6957632053   |
| 4.4288647006   | 3.6480141584   |
| 0.1376687665   | 0.1079966352   |
| 4.4917810994   | 1.8323006267   |
| 0.1516851524   | 0.0178488046   |
| 68.1985185396  | 28.2005852375  |
| 48.8353359878  | 20.5230645377  |
| 236.5738946232 | 130.72788152   |
| 0              | 0.1009771776   |
| 1.9921048625   | 1.5739034075   |
| 1.9345152508   | 3.4714272135   |
| 0.7616038188   | 0.8849776025   |
| 6.4538884087   | 4.3778882183   |
| 11.0328587135  | 4.0801747098   |
| 0              | 0.2010407837   |
| 0              | 0              |
| 0              | 0              |
| 42.344823188   | 13.8991632097  |
| 8.167035795    | 2.1142347273   |
| 0              | 0              |
| 9.8275224258   | 15.2645510935  |
| 0              | 0.1074972044   |
| 21.9176124778  | 13.9937195745  |
| 63.7168028966  | 53.5801348114  |
| 5.5119338557   | 7.6209291847   |
| 0              | 0.0308866929   |
| 5.5812676085   | 6.8606734359   |

gene\_expression\_table

|                |                |
|----------------|----------------|
| 0.701121626    | 0.5775072827   |
| 1.7777414895   | 0.674046967    |
| 0              | 0              |
| 7.5334082515   | 5.5680566436   |
| 0              | 0              |
| 28.8141777233  | 18.9035705216  |
| 15.8758185238  | 14.0108167023  |
| 3.7600904206   | 3.607670489    |
| 44.9057618618  | 40.0476486654  |
| 0.5441624222   | 3.0735186111   |
| 2.9495410771   | 3.4056513128   |
| 0              | 0              |
| 0.83142113     | 0.5310955669   |
| 7.4857146004   | 5.890648685    |
| 0              | 0.2652461858   |
| 313.3187887125 | 170.6928985426 |
| 0              | 0.122956394    |
| 0.4501833385   | 0.0529731111   |
| 0              | 0              |
| 0.4656363572   | 0.0136978673   |
| 2.9597991331   | 4.0143830913   |
| 0              | 0              |
| 7.5618939514   | 2.6694260814   |
| 0              | 0              |
| 98.0051826088  | 33.2863479656  |
| 0.1760404473   | 0.5800114363   |
| 3.503687759    | 2.5914694562   |
| 0.2868463722   | 0.0843830915   |
| 7.3332726547   | 5.6285057617   |
| 3.3204549186   | 1.9291711521   |
| 1.3002852979   | 1.7468034274   |
| 4.8920549581   | 1.7989016129   |
| 0.4636811694   | 0.8002338959   |
| 0              | 0              |
| 0              | 0              |
| 5.8626742808   | 5.6913563273   |
| 1.0292674838   | 0.7670552758   |
| 8.5458387493   | 6.7744980915   |
| 36.0285995769  | 28.3515781792  |
| 10.0696827746  | 9.7425145182   |
| 0              | 1.4713397287   |
| 0              | 1.3416161662   |
| 5.3427813376   | 8.9063782977   |
| 5.3769727596   | 4.4289618407   |
| 5.1440314362   | 5.1450381797   |
| 907.1404313448 | 555.7120392951 |
| 1.0149067853   | 0              |
| 0              | 0.0891659857   |
| 0.5358663248   | 1.0341091383   |

| gene_expression_table |                 |
|-----------------------|-----------------|
| 0                     | 0.2873950117    |
| 0                     | 0               |
| 0                     | 3.278482628     |
| 8.3654633914          | 4.9582818397    |
| 0                     | 0.0879401172    |
| 166.2500805997        | 127.3610735047  |
| 2.2720671689          | 2.9408976719    |
| 0                     | 0.2115897972    |
| 0                     | 0.0174365043    |
| 0                     | 0.0823333466    |
| 0.1171421332          | 0.2641957218    |
| 2.7608886489          | 4.0609249782    |
| 13.0602658919         | 8.3670362686    |
| 0                     | 0               |
| 0.7071221455          | 1.4977281962    |
| 1.7015796511          | 0.6607425656    |
| 22.7687451835         | 13.0844658501   |
| 6.9165497846          | 6.5109679335    |
| 10.430749022          | 9.4754284885    |
| 0                     | 0.3396371384    |
| 0                     | 0.4072535177    |
| 3.1947164983          | 2.8525888193    |
| 27.4328655728         | 33.0398117687   |
| 0.5866545266          | 0.5004797323    |
| 20.9804439548         | 15.2482889697   |
| 0                     | 0.0416002991    |
| 0.3476528534          | 0.1963600336    |
| 13.42297148           | 21.8633585529   |
| 0                     | 0               |
| 8.3987847127          | 5.929714198     |
| 3.6113832537          | 1.8543349944    |
| 17.9779890826         | 14.808300354    |
| 0                     | 0               |
| 12.2707136109         | 12.6340890987   |
| 1.384524017           | 1.3033364551    |
| 10.9945989558         | 12.5061086616   |
| 0                     | 0.8407733309    |
| 1.4502108229          | 1.6802109916    |
| 1.8366128206          | 2.7014298028    |
| 0                     | 0               |
| 0.9829075535          | 1.1276734369    |
| 6.2760453135          | 1.8990071409    |
| 9.1696047367          | 17.7433607936   |
| 29.6063443906         | 27.8335767879   |
| 0.7379554778          | 0               |
| 1.6735678493          | 0.8682772852    |
| 0                     | 0.4821021998    |
| 4.2518900106          | 1.0006405064    |
| 3772.2012143376       | 1968.7565202097 |

gene\_expression\_table

|                 |                 |
|-----------------|-----------------|
| 65.587636091    | 18.7845969551   |
| 1.8459107936    | 1.3756536907    |
| 0.5769986892    | 0.9165890343    |
| 14.2595725583   | 10.2772912111   |
| 10.905989897    | 6.8893416752    |
| 874.64108089    | 1013.5444083381 |
| 1.4977883778    | 1.8285406684    |
| 0.7877722106    | 0.775285856     |
| 2.1077811414    | 2.7695877459    |
| 2.5738141508    | 3.7857615802    |
| 7.3588248418    | 5.195481208     |
| 3.8321646899    | 2.5252143818    |
| 0               | 0.0884827691    |
| 0               | 0.2016096773    |
| 0               | 0.4150311281    |
| 1244.1104825024 | 1742.216543297  |
| 0.7430344547    | 1.4863597494    |
| 5.2463255323    | 2.6545429261    |
| 2.1602727721    | 3.9259697126    |
| 5.3454907837    | 1.1531746373    |
| 0               | 0               |
| 30.0075156802   | 22.3629169073   |
| 0.4777109262    | 2.9230388016    |
| 8.1248013866    | 6.6923224114    |
| 53.0947783238   | 32.0192934085   |
| 11.6643066836   | 2.7450798863    |
| 3.8134859592    | 1.3461996354    |
| 4.5140948606    | 2.0184608953    |
| 8.4323508664    | 10.1704131757   |
| 1.7452217193    | 3.0804057854    |
| 28.5027140089   | 15.4280170112   |
| 0.4837014442    | 1.2521781667    |
| 22.2197570115   | 13.4465177116   |
| 4.2359424458    | 1.9383921741    |
| 37.3066411159   | 10.5357013936   |
| 68.6495207746   | 14.6413656689   |
| 2.5215741666    | 6.5870473169    |
| 0.7447812887    | 2.0595041987    |
| 5.7460251047    | 42.4838318373   |
| 7.0989788032    | 7.5180368662    |
| 20.3388784673   | 8.0345745667    |
| 15.0102322329   | 6.8687705426    |
| 1.8445012979    | 1.08521311      |
| 30.8106929769   | 30.9815182781   |
| 3.0812270956    | 13.1974843025   |
| 3.350789388     | 3.4500170912    |
| 22.6081617738   | 42.9880988196   |
| 2.3826059203    | 1.8784216341    |
| 21.6590155423   | 7.2537594085    |

gene\_expression\_table

|                |                |
|----------------|----------------|
| 925.6248130262 | 508.9871969434 |
| 7.3422644749   | 3.3324359461   |
| 35.4584221982  | 25.7297722871  |
| 1.3570179368   | 2.1290721884   |
| 5.8242435497   | 2.93716811     |
| 171.776356427  | 62.2345729688  |
| 2.8296127239   | 1.6648038296   |
| 0.7790703527   | 5.1795399564   |
| 3.2269917505   | 4.0503508182   |
| 0              | 0              |
| 52.6084576172  | 4.1269610722   |
| 7.1568662406   | 5.8184843398   |
| 5.6389962352   | 1.8800332829   |
| 4.357594024    | 2.8842662998   |
| 2.0701489125   | 0.7307837871   |
| 3.6238605009   | 5.9698795557   |
| 7.1200526705   | 5.2064354155   |
| 149.7496834166 | 21.8165477197  |
| 0              | 0.3264949281   |
| 58.7458792301  | 25.5466854106  |
| 0              | 0              |
| 0              | 0.8112164334   |
| 28.0002512891  | 14.5519976082  |
| 30.999654377   | 16.2121418824  |
| 354.6949050334 | 175.1817423939 |
| 3.3302899656   | 11.7072805273  |
| 12.0591825885  | 12.9347765639  |
| 1.3410094443   | 6.1277715966   |
| 0.5971183617   | 0.9836815459   |
| 0              | 0.0135047425   |
| 2.0497284788   | 6.1905875198   |
| 6.2459082411   | 2.6690527167   |
| 1.0500347804   | 0.1235576804   |
| 31.2390769434  | 8.5771111929   |
| 2.2238660604   | 2.0934600427   |
| 0              | 0.6717741657   |
| 0.52755426     | 2.2347847405   |
| 0              | 0              |
| 1.0626802364   | 2.4175496645   |
| 7.2914753231   | 11.2491827021  |
| 2.2053396591   | 3.1789056514   |
| 0              | 0.3262178009   |
| 5.1670695449   | 9.1201425834   |
| 0              | 0              |
| 2.0117837933   | 2.3394174645   |
| 3.165440779    | 0.6311427377   |
| 1.8559047405   | 1.064624272    |
| 2.6364868374   | 2.9114420351   |
| 8.6425939616   | 9.6612601666   |



gene\_expression\_table

|                 |                 |
|-----------------|-----------------|
| 0               | 0.0278539605    |
| 2.7461759412    | 1.4688306941    |
| 23.2633202095   | 12.5007788795   |
| 0               | 0.0148393711    |
| 3.2221492452    | 1.895752856     |
| 2.1503104593    | 2.656785722     |
| 11.8050336579   | 16.0972095118   |
| 0               | 0.6900532725    |
| 18.7616163745   | 6.8438110012    |
| 1.7571231222    | 4.5487381449    |
| 112.3537215002  | 38.0094314448   |
| 15.9797464978   | 9.0883008507    |
| 5456.9209118695 | 8676.7120891625 |
| 28.8985004671   | 23.8034227704   |
| 29.2737244506   | 3.4446416047    |
| 90.1771218441   | 74.2780462925   |
| 0               | 0.7660542888    |
| 36.6876865254   | 16.1419874013   |
| 0               | 0.3304047393    |
| 0               | 0.6303119886    |
| 0               | 0.2820934811    |
| 0               | 0               |
| 0               | 0               |
| 0.9223026674    | 1.07540819      |
| 11.1210463825   | 25.2800520307   |
| 32.6137500626   | 25.1788113592   |
| 10.8372451568   | 3.9452104645    |
| 0               | 0.0335963175    |
| 13.8430086662   | 12.7597792367   |
| 1.7185273542    | 1.6177540601    |
| 16.3216554882   | 3.8411411331    |
| 193.8671258502  | 122.7984534361  |
| 0               | 0               |
| 0               | 0               |
| 1.9507232724    | 1.5608840403    |
| 27.2065889033   | 12.4854662087   |
| 2.1774713065    | 1.6142063539    |
| 296.2693255449  | 139.976357946   |
| 10.930339422    | 15.4340874487   |
| 0               | 0               |
| 4.4021251078    | 1.1511076214    |
| 0               | 0               |
| 0               | 0               |
| 80.8570715399   | 14.2716875572   |
| 3.9738515521    | 2.3380172227    |
| 6.2717533787    | 1.8449943617    |
| 53.426582462    | 33.2671760108   |
| 27.8392570978   | 17.0688907065   |
| 6.872887027     | 3.8414826589    |

gene\_expression\_table

|                 |                |
|-----------------|----------------|
| 6.5202915507    | 6.7517406191   |
| 9.783967024     | 1.6826403188   |
| 0               | 3.1255990353   |
| 68.838921911    | 22.0772383571  |
| 20.6818902836   | 16.0994630252  |
| 0               | 0              |
| 0               | 2.5198975518   |
| 155.1417167931  | 76.4450686916  |
| 1.6945668273    | 1.7945983828   |
| 20.3321530521   | 8.4078798998   |
| 147.4516524536  | 108.1863951449 |
| 0               | 1.348248281    |
| 132.7066925984  | 154.5406684998 |
| 3.8787591633    | 1.8256556608   |
| 89.0135425981   | 56.560847417   |
| 11.1768884315   | 14.467039363   |
| 136.35230345    | 27.713377463   |
| 0               | 0              |
| 0               | 0.5242186248   |
| 0               | 2.009978389    |
| 43.4754557886   | 4.263133766    |
| 28.5532507359   | 27.5508799001  |
| 0               | 0              |
| 123.4960195615  | 21.5285732618  |
| 38.2995132181   | 23.1773498947  |
| 17.3115113303   | 12.018577219   |
| 75.3151945764   | 58.6748374883  |
| 0               | 1.7737562799   |
| 0               | 0              |
| 480.6630663165  | 165.822648983  |
| 48.8698540137   | 6.5005876108   |
| 74.4695186822   | 99.3121242474  |
| 4.2332617958    | 1.9925130785   |
| 0               | 10.5568967074  |
| 0               | 0              |
| 0               | 0              |
| 1909.6003690185 | 615.6114863899 |
| 0               | 1.4938612211   |
| 55.0655753794   | 43.2386747834  |
| 60.2144996823   | 25.9799657858  |
| 81.1038691639   | 12.1462715418  |
| 0.6642607601    | 1.3678633361   |
| 0               | 1.4428651972   |
| 14.7542891824   | 5.0155110553   |
| 0               | 0.2256032625   |
| 2294.6519715845 | 331.8218400283 |
| 16.0792445796   | 5.676138164    |
| 78.1544621546   | 16.2290154689  |
| 21.867425273    | 13.3335527615  |

gene\_expression\_table

|               |               |
|---------------|---------------|
| 1.2459600321  | 1.6965128453  |
| 1.6108597518  | 2.6916100246  |
| 4.3373180157  | 2.7597924356  |
| 0             | 0.1203958936  |
| 7.4215104347  | 8.7692846094  |
| 38.8339770363 | 14.560750802  |
| 25.0141753031 | 6.2138868783  |
| 71.4990037157 | 65.0715688309 |
| 1.5365222309  | 5.8459539484  |
| 0.0689970798  | 0.0974267058  |
| 0             | 0.4069354958  |
| 7.2470589282  | 8.8228071593  |
| 12.6575914069 | 6.6052532018  |
| 60.3511051953 | 81.5450353662 |
| 0             | 0             |
| 0             | 0             |
| 0             | 0.0385932953  |
| 15.3747706452 | 10.1214638759 |
| 2.7866671615  | 2.7052357034  |
| 2.6914137535  | 2.5048002446  |
| 49.9835501625 | 56.8394782599 |
| 2.0578773354  | 2.0179216516  |
| 1.2071989067  | 2.746323129   |
| 1.2950135767  | 4.5715306767  |
| 0.3739543723  | 0             |
| 33.934185745  | 34.4199916551 |
| 3.6944262662  | 2.3806284044  |
| 0.2060118661  | 0.3636215028  |
| 1.3756347183  | 1.6366961961  |
| 1.5640889304  | 1.7791159276  |
| 24.5263987436 | 29.3219976596 |
| 0.5851431485  | 0.8491973998  |
| 0             | 0             |
| 2.6528074482  | 2.0758378943  |
| 0.1277422005  | 0.2254715313  |
| 0             | 7.6637885679  |
| 0             | 0             |
| 1.9744610518  | 2.2304159723  |
| 2.0399915653  | 2.5666454584  |
| 1.7790580441  | 5.7778366845  |
| 2.3965524205  | 1.7484156475  |
| 23.8291827149 | 7.2313218021  |
| 13.4423826855 | 9.9901029158  |
| 0.31808342    | 0.4304323803  |
| 0             | 0             |
| 4.0476167243  | 9.7042742447  |
| 10.1387461418 | 1.697769344   |
| 5.1913606711  | 13.1336586546 |
| 26.917434622  | 5.8191340906  |

gene\_expression\_table

|                |                |
|----------------|----------------|
| 0              | 0              |
| 4.4823034492   | 1.9658867176   |
| 0.0562384124   | 0.0198527361   |
| 5.3524939318   | 3.9297744372   |
| 0              | 0.3623063706   |
| 19.5653791714  | 10.8341637819  |
| 0              | 0.8905947404   |
| 9.221821892    | 5.5864231453   |
| 0              | 0.5128451851   |
| 24.5724160614  | 10.2806693452  |
| 3.6152167928   | 3.1550712296   |
| 0.9384976676   | 0.8558565176   |
| 2.5161569337   | 2.0133194986   |
| 0              | 1.1007893263   |
| 3.7470715238   | 2.3649249962   |
| 0.887994858    | 0.1044904292   |
| 8.002832632    | 51.3223221939  |
| 7.7536198234   | 2.488279345    |
| 2.6581623244   | 1.5013736786   |
| 0              | 0              |
| 0              | 0              |
| 0.2384575721   | 0.3311000049   |
| 1.0165796401   | 0.5981050564   |
| 5.1983429988   | 14.6805469317  |
| 0              | 0.0384080052   |
| 0              | 0              |
| 0.64329748     | 0.7569686828   |
| 3.5957408331   | 3.4308793365   |
| 412.5251761717 | 579.6130666925 |
| 0              | 6.6247794633   |
| 502.1148604688 | 501.4386218444 |
| 2.4090804195   | 3.8111866701   |
| 1.9353009479   | 2.4543912631   |
| 0              | 0              |
| 8.7455906312   | 9.1760915649   |
| 6.2077867324   | 6.5742370566   |
| 0.0226524114   | 0.0106620446   |
| 2.4528577899   | 0.8498490561   |
| 0              | 0.0917583549   |
| 0              | 0              |
| 2.2374309293   | 3.949180269    |
| 0              | 0.5066027556   |
| 4.219692227    | 4.1311423904   |
| 0.4762628179   | 0.7005235702   |
| 25.9440259081  | 21.7768946508  |
| 3.4626124526   | 2.7163059796   |
| 1.7554471634   | 2.8574633346   |
| 19.8000410841  | 9.3194899622   |
| 0              | 0              |

gene\_expression\_table

|                |                |
|----------------|----------------|
| 0              | 0.1009669651   |
| 0.536643528    | 1.0193712054   |
| 17.6867878322  | 16.6496464291  |
| 39.0400810061  | 13.3639261019  |
| 1.0365030947   | 0.5854339481   |
| 1.3557247907   | 0.8774053724   |
| 20.5281826121  | 7.5342247244   |
| 10.4221983055  | 9.5657713818   |
| 3.1903950144   | 2.8095502963   |
| 0.1828964613   | 0.0322821628   |
| 1.2520243992   | 2.633448957    |
| 38.703457632   | 14.6215044691  |
| 3.8272866429   | 1.7809577786   |
| 0.4424357198   | 0.3123686889   |
| 24.6354425175  | 15.160225988   |
| 0              | 0.0577824363   |
| 0              | 0              |
| 0              | 0.009666       |
| 1.7961557857   | 0.4034936211   |
| 2.6927945514   | 0.9769891937   |
| 1.6613820588   | 1.4592302807   |
| 0              | 0.021288928    |
| 1.5915323155   | 2.996411851    |
| 4.2810899641   | 8.64781501     |
| 8.5702921394   | 7.0592689504   |
| 10.3586971419  | 6.0945437958   |
| 3.1072621454   | 1.2340073134   |
| 6.2656828209   | 9.4979452552   |
| 0              | 0.0426769429   |
| 7.834840429    | 14.605253943   |
| 0              | 0.0942415994   |
| 195.4399451351 | 147.7994129148 |
| 0              | 3.3123897317   |
| 1.5036445766   | 0.0884669915   |
| 11.051607056   | 7.9327055129   |
| 0              | 6.3676415548   |
| 94.3721381037  | 83.2858303838  |
| 0              | 0.0948087202   |
| 1.9280357559   | 1.3774379241   |
| 0              | 0.3115220975   |
| 2.6434160785   | 2.7994589196   |
| 0              | 0              |
| 1.1734070131   | 0.6213370562   |
| 22.2337565845  | 6.5406199927   |
| 99.538724507   | 59.2735126204  |
| 0              | 0              |
| 0.0768815859   | 0.1176066143   |
| 0              | 0.271727974    |
| 0.4057616262   | 0.381968036    |

gene\_expression\_table

|                |                |
|----------------|----------------|
| 2.6612127746   | 0.1043817099   |
| 0              | 0              |
| 1.6016428405   | 1.3192581291   |
| 0.9074459867   | 0.5338962258   |
| 1.8916866347   | 0.4451898491   |
| 0              | 0              |
| 7.4201175909   | 4.0969751779   |
| 2.2719336106   | 2.1921766675   |
| 4.2115811481   | 1.7345198709   |
| 0              | 0              |
| 0              | 0              |
| 0              | 0.655814716    |
| 1.2492523073   | 0.5144986822   |
| 5.0785791506   | 2.5895862783   |
| 0.659280844    | 3.5685710745   |
| 2.3558977292   | 2.91079617     |
| 0.0606949276   | 0.1499815215   |
| 0              | 0              |
| 61.1247983636  | 17.1514895558  |
| 167.1698970419 | 105.6608115539 |
| 1.7271725423   | 1.9742977931   |
| 9.008409518    | 6.9961339899   |
| 2.7008861073   | 1.525504772    |
| 50.7537680031  | 22.9203356198  |
| 0.2427225354   | 0.0928238384   |
| 0              | 0              |
| 0.6515894564   | 0.8817347371   |
| 5.0807399121   | 4.975663914    |
| 100.5892899426 | 81.065235408   |
| 0.0987497897   | 0.023239792    |
| 0              | 0              |
| 0.0647608774   | 0              |
| 186.8137066406 | 49.4603650949  |
| 2.6944841185   | 0.9511805148   |
| 17.7414184972  | 5.845375756    |
| 0.7079593673   | 0.6023638437   |
| 0              | 0.0219132084   |
| 0              | 1.150260546    |
| 4.5845062803   | 5.5968895888   |
| 1.385293197    | 2.2524681898   |
| 0              | 0.0183220977   |
| 0.3841992902   | 0.0452087626   |
| 120.5491979833 | 84.3536701031  |
| 0.3030064145   | 1.3548820253   |
| 2.6446118715   | 2.489533601    |
| 1.218899571    | 0.4302840434   |
| 1.7888910975   | 1.1496481939   |
| 22.2455132105  | 17.8126624552  |
| 0              | 0.1994522893   |

gene\_expression\_table

|                |                 |
|----------------|-----------------|
| 12.6409420102  | 12.0649590411   |
| 223.6439504213 | 40.2991397226   |
| 5.4700039198   | 1.7700535017    |
| 237.9423063608 | 188.5822492821  |
| 12.3029381493  | 6.7860363803    |
| 4.0127717802   | 4.0135571237    |
| 0              | 0               |
| 5.8612073119   | 4.6898835317    |
| 1.5196068332   | 0.7152490527    |
| 0.39420348     | 0.2551227606    |
| 0              | 0               |
| 0.9350125846   | 0.2200460181    |
| 8.8241278986   | 11.6812785143   |
| 43.7342637268  | 34.6810105649   |
| 161.6454522169 | 77.6436383129   |
| 0.4618692439   | 1.1956602363    |
| 48.0874294681  | 33.2086190414   |
| 0              | 0               |
| 0.8791291022   | 0.186204951     |
| 0              | 0               |
| 0              | 0.1517251602    |
| 1.1843015228   | 0.557427437     |
| 44.5478102767  | 66.048501475    |
| 1.7513108975   | 1.7516536483    |
| 0              | 0.0542692022    |
| 0.7397351132   | 0.0870446926    |
| 9.6531381854   | 5.9415553296    |
| 99.6721869816  | 229.8384389658  |
| 0              | 0               |
| 1.9259038384   | 1.6241190712    |
| 54.4882455813  | 19.1204157384   |
| 355.336522312  | 1013.1485127249 |
| 3.4632329925   | 3.9733094301    |
| 0.8211709575   | 1.7129377068    |
| 2.0751346979   | 2.3487912973    |
| 2.9368314021   | 0.2879809973    |
| 6.4589808478   | 19.2793976486   |
| 5.4045418378   | 6.6775053463    |
| 1.151247474    | 2.7770814245    |
| 1.0432888894   | 1.6573125269    |
| 341.3647841789 | 127.6933016616  |
| 301.08813448   | 159.4307968609  |
| 0              | 0.4450135272    |
| 14.375281848   | 7.2911233512    |
| 0              | 1.1389139291    |
| 4.2153618685   | 4.654975539     |
| 1.1997789842   | 1.535311766     |
| 0              | 0               |
| 11.0380351838  | 14.6120233879   |

gene\_expression\_table

|                |                |
|----------------|----------------|
| 14.1948289247  | 24.7205392622  |
| 604.2789273935 | 365.48253693   |
| 1.1912735851   | 3.6446088226   |
| 5.8436166006   | 8.0222199655   |
| 5.6022148422   | 9.7417045386   |
| 48.7766396705  | 186.3987602925 |
| 0              | 0              |
| 1.9000719491   | 2.9065611275   |
| 13.1636330098  | 6.1221029133   |
| 2.2159965281   | 1.2467420004   |
| 0.4652171215   | 0.1642264128   |
| 1.2230653424   | 2.4466094194   |
| 0              | 0              |
| 0.9365986574   | 0.4408385694   |
| 70.7836359543  | 83.2911636351  |
| 170.3462888172 | 63.4747631707  |
| 95.079164074   | 32.4451222498  |
| 0.3948294194   | 0.8483928929   |
| 0.050310758    | 0.00592        |
| 1.8498933851   | 2.7628248496   |
| 1.421153118    | 2.4247944908   |
| 378.0473186526 | 484.204380966  |
| 1.5613824387   | 1.2217912144   |
| 316.7201591472 | 138.6734423041 |
| 2.1369268548   | 1.1135747449   |
| 40.2600835376  | 17.1731018158  |
| 0              | 0              |
| 1.3895764793   | 5.8864169      |
| 0              | 3.8120113807   |
| 18.680367422   | 21.8932791549  |
| 0              | 0.6211508316   |
| 10.4588471239  | 7.5837324008   |
| 0.1778484994   | 0              |
| 188.7752483563 | 113.1585440787 |
| 0              | 0              |
| 1.3224764759   | 0.5027591182   |
| 0              | 0              |
| 7.5905380406   | 5.043835743    |
| 0              | 0.2232870729   |
| 0              | 0.4358159479   |
| 5.1709869593   | 5.3241165953   |
| 5.778065623    | 2.7430668767   |
| 0              | 0              |
| 0              | 1.2116992278   |
| 0              | 0.0775326656   |
| 3.2267582594   | 3.18942048     |
| 4.5183166      | 2.126682769    |
| 18.8807853999  | 19.9743729079  |
| 0.0948684231   | 0.0334895259   |



| gene_expression_table |               |
|-----------------------|---------------|
| 0                     | 0             |
| 0                     | 0             |
| 1.8073548117          | 0             |
| 2.1892874247          | 0.8758863569  |
| 0.343101344           | 0.2422365831  |
| 1.1920819257          | 1.8702983989  |
| 6.0278672552          | 11.2896860024 |
| 2.6371233758          | 1.8618631693  |
| 16.1652654813         | 1.7292437649  |
| 2.7721761724          | 1.4679099094  |
| 0                     | 0.353373046   |
| 3.8020298032          | 0.5506278953  |
| 8.6937279935          | 4.0919668008  |
| 0                     | 0             |
| 1.1712734165          | 1.9754750527  |
| 0                     | 0             |
| 0.9509553969          | 2.0141820197  |
| 3.4569345156          | 2.3728703461  |
| 6.6317227516          | 25.7517272395 |
| 1.982404561           | 2.1418400693  |
| 0.5534326432          | 0.4186444206  |
| 4.9233693444          | 5.9381661464  |
| 1.5786720336          | 0.4458299286  |
| 6.8211154242          | 1.8606682886  |
| 60.7275003081         | 19.0554934423 |
| 0.9967080476          | 0.6450549563  |
| 0                     | 0             |
| 0                     | 0.0387438757  |
| 10.7085897782         | 7.3504704871  |
| 3.8995065058          | 4.5230018162  |
| 0.0576071594          | 0.0406718356  |
| 10.392841974          | 3.2101822841  |
| 0                     | 0             |
| 6.1748375156          | 1.6550188625  |
| 0                     | 0             |
| 0                     | 0             |
| 0                     | 0             |
| 0                     | 0             |
| 17.8504674464         | 21.3621861026 |
| 6.2849096195          | 7.6173221585  |
| 1.2777444975          | 1.3668391082  |
| 0                     | 0             |
| 0                     | 0.2975456649  |
| 10.7223215325         | 4.668276945   |
| 8.5194787306          | 8.3958351143  |
| 0.2345076827          | 1.3797269318  |
| 0                     | 0.9298530161  |
| 0                     | 0             |
| 39.2422379897         | 34.7971963227 |

gene\_expression\_table

|                |                |
|----------------|----------------|
| 6.2283799673   | 3.3784625472   |
| 1.9004396732   | 1.3073455418   |
| 0              | 4.0025620256   |
| 0              | 0.1452318476   |
| 8.2232195705   | 14.4176413271  |
| 29.1585667266  | 27.4487278857  |
| 394.3844917968 | 141.2843131325 |
| 8.6522677851   | 2.545282685    |
| 0              | 1.5456097063   |
| 747.1215502385 | 462.8680014571 |
| 7.6465882275   | 19.1202118722  |
| 24.0700855314  | 5.6646579557   |
| 20.5324336986  | 52.7036719289  |
| 4.5420548005   | 2.6723198415   |
| 0              | 0              |
| 0              | 0              |
| 3.7839906203   | 4.0709713628   |
| 1.9303606131   | 4.9972052859   |
| 0              | 1.0231521038   |
| 18.6854719912  | 8.2213048038   |
| 0              | 0              |
| 4.5276322801   | 1.7048539812   |
| 0.8760921252   | 1.3607858043   |
| 0              | 0              |
| 17.0924447277  | 7.4704292031   |
| 42.7123814167  | 30.5253735446  |
| 0.0248136427   | 0              |
| 7.4098313259   | 4.8290703061   |
| 1.1877104051   | 2.2361277235   |
| 0.3734990355   | 0.175798651    |
| 16.8374844419  | 19.1522592924  |
| 21.7976639782  | 11.8746895537  |
| 0.271629935    | 0.4474780405   |
| 0.5752168086   | 0.8799155298   |
| 0              | 0              |
| 37.6095086428  | 99.0682925955  |
| 9.3553312991   | 3.0823593262   |
| 6.0072695721   | 6.4904061106   |
| 34.5214858469  | 22.1725476109  |
| 317.7963825968 | 715.9954335685 |
| 0.9386458179   | 1.5463074466   |
| 2.3287849966   | 6.4396656456   |
| 433.6001248794 | 378.4419972327 |
| 23.5655718728  | 13.3606390102  |
| 0              | 0              |
| 1.7598433747   | 4.1002021588   |
| 93.6551334923  | 66.1224443515  |
| 33.7208202961  | 16.5330489369  |
| 12.5579168851  | 7.3884556514   |

gene\_expression\_table

|                 |                 |
|-----------------|-----------------|
| 0.8232093758    | 0.871804045     |
| 25.1147577001   | 29.7798837501   |
| 22.0823769153   | 28.9075909184   |
| 0.4747791331    | 0.5363260829    |
| 8.2329705392    | 19.859873806    |
| 0.9063333692    | 7.2520859888    |
| 1.598377454     | 1.7464683666    |
| 4643.8821106834 | 4403.1355686525 |
| 31.0171945426   | 38.0905969635   |
| 0               | 0.506731042     |
| 0.4587194228    | 0.8960273772    |
| 159.1117073941  | 74.0397204035   |
| 7.5987312791    | 6.4080273074    |
| 15.6025237239   | 5.7701294253    |
| 201.5757944563  | 78.5463442644   |
| 12.020427181    | 22.1596331924   |
| 0               | 0               |
| 1.2658007953    | 2.4824480911    |
| 9.1804466024    | 6.7516494976    |
| 0               | 0.1295848844    |
| 44.4022366307   | 15.0939097065   |
| 22.5613713732   | 33.7883439938   |
| 11.3209373744   | 0               |
| 5.0264891271    | 4.1402717722    |
| 10.6780686562   | 1.836407339     |
| 0.8879540557    | 1.358313164     |
| 18.1716398752   | 5.4278866673    |
| 10.9187933833   | 7.8206150566    |
| 2.3498103232    | 1.1981769682    |
| 7.6185476189    | 5.317024942     |
| 0               | 0.6494232617    |
| 28.7572025268   | 8.2481646652    |
| 0.5955817209    | 0.4204929055    |
| 0.9644637748    | 2.1279099948    |
| 9.176958922     | 7.926124866     |
| 0               | 0               |
| 6.396438519     | 1.9757573209    |
| 7.3224421344    | 4.6312740342    |
| 655.0354427659  | 272.6674997254  |
| 12.8362899949   | 5.2636800455    |
| 30.8648732711   | 25.8266468944   |
| 0               | 0               |
| 0               | 0.1613339231    |
| 1.4044322626    | 1.2177027712    |
| 1.8860556076    | 3.0330750551    |
| 14.0123073172   | 13.3371976037   |
| 0               | 0               |
| 13.3952218794   | 14.1859519111   |
| 0               | 0               |

gene\_expression\_table

|                |                |
|----------------|----------------|
| 90.2825775057  | 112.4041022766 |
| 1.5533188729   | 1.3403805192   |
| 4.6973359499   | 3.7112268521   |
| 0              | 0.0218599827   |
| 0              | 0.0149731384   |
| 13.80627482    | 12.3004331692  |
| 2.3598026209   | 2.9727898391   |
| 0              | 0              |
| 4.118833536    | 8.1537504234   |
| 69.653656682   | 50.7017750635  |
| 0              | 2.3274877695   |
| 28.2465722524  | 24.8667724804  |
| 0              | 0              |
| 39.0442324397  | 44.4119349384  |
| 8.4277540768   | 9.5863804292   |
| 4.9184093231   | 5.9562983419   |
| 2.9489165748   | 1.0409977801   |
| 0.7127912546   | 0.3774339295   |
| 9.692709767    | 9.3144260805   |
| 0.5686362379   | 0.4683803158   |
| 0.4443309137   | 0.3973618639   |
| 0              | 0              |
| 2.6140890602   | 1.7577147335   |
| 1.9638067271   | 2.0797317166   |
| 1.3356260975   | 1.5716323461   |
| 6.7522152684   | 3.1781349417   |
| 1.8077154869   | 0.8933989367   |
| 0              | 0.039052613    |
| 0              | 0              |
| 0.5443143006   | 0.7569487461   |
| 2.4748783487   | 2.8248256804   |
| 13.2133985678  | 8.5227264363   |
| 0              | 0              |
| 0.3039739532   | 0              |
| 0              | 0              |
| 11.5874477881  | 4.0312054188   |
| 6.1039303735   | 6.4642499785   |
| 0              | 0              |
| 3.6803961526   | 0.9202791116   |
| 13.2583496378  | 6.2404444435   |
| 6.2451513143   | 7.9610643399   |
| 34.1815968891  | 20.9052558606  |
| 6.8366179592   | 8.3128092069   |
| 30.4143972487  | 19.0872782309  |
| 160.9393865065 | 121.3645122474 |
| 0.233829513    | 0.2201179068   |
| 16.2015426998  | 18.4818464654  |
| 34.1270354504  | 39.2967973499  |
| 0              | 4.2948580644   |

gene\_expression\_table

|                |                |
|----------------|----------------|
| 0.4646995383   | 0.6926289581   |
| 13.9829255656  | 5.2446233167   |
| 3.3391614039   | 4.9769790882   |
| 0              | 0              |
| 3.3117699647   | 1.5977546199   |
| 1.1284218742   | 0.7242627072   |
| 15.9788656342  | 4.3872137301   |
| 0              | 0              |
| 0              | 0              |
| 0.6689341998   | 0.2754974014   |
| 0              | 2.2575986099   |
| 0              | 0              |
| 1.8978172153   | 2.7542344958   |
| 5.7560904083   | 1.064359434    |
| 3.7277855127   | 0.4386488331   |
| 6.4344639616   | 7.3190578216   |
| 5.4791154233   | 2.80917187     |
| 229.2512710472 | 132.8364436064 |
| 0              | 0              |
| 59.7381326275  | 39.2386904121  |
| 0.3804851368   | 0.4626410847   |
| 0              | 3.1582715983   |
| 1.2361173185   | 2.0181746421   |
| 13.5966744555  | 12.1994038812  |
| 1.6618276757   | 3.5198532289   |
| 1.0862143836   | 1.7894091232   |
| 2.1197713905   | 1.7985480908   |
| 0              | 0              |
| 2.1650541238   | 2.5476209984   |
| 7.5706495722   | 4.1572485193   |
| 43.5691497851  | 14.1740540283  |
| 0              | 0.3402596964   |
| 0              | 0              |
| 0              | 0              |
| 1.1889216202   | 1.4498779764   |
| 49.3726374912  | 38.603810574   |
| 0              | 0              |
| 1.4975504365   | 1.3921133925   |
| 25.3492300708  | 7.9216566507   |
| 5.1793144764   | 4.9718319468   |
| 12.1361775788  | 51.5690150027  |
| 3.2445485382   | 6.9085139617   |
| 1.8782404263   | 1.0166584571   |
| 19.6352642761  | 9.1319097501   |
| 0              | 0              |
| 0.6785407338   | 0              |
| 0.3146061505   | 0.4720015836   |
| 54.1501648982  | 191.1556329905 |
| 4.798818003    | 11.2935463163  |

gene\_expression\_table

|                 |                 |
|-----------------|-----------------|
| 0               | 2.1973617967    |
| 6.3304091781    | 8.4173674858    |
| 131.1231546194  | 28.198325735    |
| 0               | 0               |
| 14.6984902818   | 12.1070080665   |
| 53.0804983466   | 68.2894543725   |
| 5.0942939175    | 2.1408785407    |
| 0               | 1.1507872221    |
| 0               | 0.386924545     |
| 0               | 0               |
| 85.9072687177   | 89.9675679127   |
| 57.9871261911   | 31.7434108198   |
| 1.7631349024    | 6.7427175221    |
| 145.7360718614  | 90.9024536548   |
| 0               | 1.200293244     |
| 2.4372354771    | 13.4791160155   |
| 2178.4904098254 | 3231.318738957  |
| 331.6275211833  | 195.1131907848  |
| 15.5594525749   | 1.830882086     |
| 24.6931256045   | 19.1772382254   |
| 0               | 0.2832765822    |
| 5.8239735088    | 5.4824595994    |
| 84.7315256413   | 109.3179383167  |
| 1.6126431236    | 0               |
| 69.722814545    | 12.3064341293   |
| 6.516553734     | 10.7352479214   |
| 127.3165935871  | 35.8482404476   |
| 12.4223399177   | 10.6134873388   |
| 11.219065369    | 3.9604450812    |
| 0               | 0               |
| 0               | 1.336834539     |
| 11.6245278556   | 20.8708833903   |
| 30.0604170352   | 16.9786165774   |
| 0               | 0.3030459177    |
| 153.7814820512  | 134.0358043632  |
| 15.0373232939   | 15.4826270358   |
| 22.31219511     | 2.9171976277    |
| 0               | 0               |
| 0               | 4.4043299453    |
| 3561.3952169804 | 7227.7920736874 |
| 31.8271060156   | 26.5561510647   |
| 3.0035499064    | 7.4219873432    |
| 82.1075802942   | 48.3080292059   |
| 667.3227089748  | 212.0955337504  |
| 7.954900629     | 2.0593184093    |
| 20.8806534958   | 31.6041279939   |
| 4.2478563794    | 2.9201507009    |
| 0               | 0               |
| 0               | 0               |

gene\_expression\_table

|                |                 |
|----------------|-----------------|
| 0              | 0.2906979381    |
| 7.1178048243   | 14.6893856234   |
| 0              | 0               |
| 7.8048627213   | 6.6911916161    |
| 0              | 0.1210258955    |
| 0              | 1.1254110507    |
| 785.6464660444 | 2514.0752233008 |
| 0              | 3.3964982088    |
| 13.2786349735  | 13.0786876998   |
| 0              | 0               |
| 3.8118947163   | 4.5544667734    |
| 0              | 4.6801246221    |
| 62.9730023561  | 24.0826249777   |
| 0              | 0.8067963636    |
| 10.3219955657  | 14.3321629629   |
| 155.9353091485 | 22.2808324861   |
| 0              | 0               |
| 1.1476694109   | 1.5248984318    |
| 29.879922842   | 33.4017436914   |
| 0              | 0               |
| 3.0282598289   | 2.8506846989    |
| 336.6696881192 | 89.1358883146   |
| 87.459128666   | 55.5826292133   |
| 9.5718295196   | 9.0105438418    |
| 3.211050031    | 11.9166350425   |
| 10.889278793   | 4.4846982125    |
| 0              | 1.3405780697    |
| 0              | 0               |
| 0              | 0.2983410589    |
| 4.7217057976   | 2.796537698     |
| 1.3491231568   | 3.4131558463    |
| 85.5447726745  | 68.0270866613   |
| 2.522315219    | 3.9062846924    |
| 55.9114742558  | 63.7865066007   |
| 4.3920091132   | 8.5273333154    |
| 2.0155235814   | 0               |
| 1.4614934026   | 1.0891689892    |
| 0.7902204088   | 0.0929853016    |
| 2.7247506836   | 1.1756126831    |
| 0              | 1.7207382147    |
| 3.3065001451   | 7.1006397129    |
| 1.7330140882   | 1.4274673891    |
| 24.6805109809  | 43.5623668732   |
| 0              | 0.2761106833    |
| 0              | 0.2276915541    |
| 0              | 0.0879775429    |
| 17.0588554639  | 10.7056903965   |
| 71.6841054641  | 85.0536697511   |
| 1.8101683485   | 1.7953081426    |

gene\_expression\_table

|                 |                 |
|-----------------|-----------------|
| 15.2014474714   | 12.5212891685   |
| 45.8381863634   | 99.943630319    |
| 162.3936142693  | 79.6202923943   |
| 98.124934787    | 297.1492095183  |
| 0               | 0.1975863596    |
| 217.7807634516  | 171.0931090579  |
| 0               | 0               |
| 0               | 0.0590001829    |
| 1.4560608874    | 0.3426696128    |
| 0.3775243076    | 0.7700041588    |
| 0               | 0               |
| 113.5214285018  | 211.931013262   |
| 0               | 0               |
| 0               | 0.1772152772    |
| 3.9232058306    | 4.5138520362    |
| 0               | 0               |
| 1.0859549654    | 2.1723349974    |
| 2680.7522290888 | 6955.0882906761 |
| 0               | 0.2403537577    |
| 40.9652975413   | 30.1908636107   |
| 0               | 0.3517060631    |
| 21.6998934344   | 8.5539847231    |
| 4.1162222242    | 11.4308066368   |
| 0               | 0               |
| 1.3747702641    | 3.8824639673    |
| 6.7975401195    | 12.0646623096   |
| 16.73646908     | 14.9314941057   |
| 1.1441586796    | 1.8175488417    |
| 32.4343061259   | 15.407543671    |
| 2.6080872876    | 3.6827261914    |
| 0.1499357199    | 0.7630575313    |
| 0               | 70.386572971    |
| 2.3624911488    | 3.7727829219    |
| 2771.3917970062 | 1609.3964479569 |
| 7.8476508012    | 12.1585440617   |
| 0.7992208348    | 0.7899728129    |
| 20.1517328701   | 9.6431081093    |
| 738.1798803089  | 326.9640841992  |
| 43.1840002191   | 16.0913055735   |
| 27.2949718899   | 22.4826113778   |
| 2.9502821961    | 5.6124192368    |
| 0.5669037003    | 0.3335380292    |
| 0               | 0               |
| 0               | 0               |
| 1.0481269206    | 0.9249988681    |
| 2.5663116648    | 1.3589014871    |
| 46.7800534932   | 46.2387475831   |
| 4.5514477055    | 6.0697846318    |
| 0               | 0               |



gene\_expression\_table

|                 |                 |
|-----------------|-----------------|
| 18.2339915534   | 33.73948627     |
| 11.5593347324   | 10.7340128263   |
| 0.084621118     | 0.3684228393    |
| 8.3181195123    | 6.7428018628    |
| 0               | 0               |
| 0               | 0               |
| 0               | 0               |
| 53.8051131615   | 33.6131933193   |
| 101.6107814774  | 134.8138437867  |
| 1572.1305015775 | 1702.3488081269 |
| 1.5915042288    | 1.8727243572    |
| 29.1728317714   | 36.3619293575   |
| 1.5121158136    | 1.1565501628    |
| 18.9181009281   | 19.478327038    |
| 0               | 0               |
| 1.6310417425    | 1.080839766     |
| 7.5050837306    | 6.0935544295    |
| 0               | 0               |
| 0               | 0               |
| 3.0864012568    | 0.4669419781    |
| 6.4739832824    | 3.9613296027    |
| 658.1344675472  | 297.7681491299  |
| 0.8128560654    | 0.5738930472    |
| 3.7285846778    | 1.5599746522    |
| 3.2627327995    | 2.3035562486    |
| 10.8784238669   | 4.4802276622    |
| 0               | 0               |
| 0               | 0               |
| 0.9772853291    | 0.728315894     |
| 8.7875132601    | 11.2450481963   |
| 0.174231752     | 0.3602470534    |
| 33.6518932997   | 23.0801001224   |
| 2.062467028     | 0.6720664644    |
| 0               | 0.007529        |
| 5.8400846473    | 4.8104227427    |
| 0               | 0.00773         |
| 0               | 0.0212863373    |
| 42.2076268118   | 22.4415610092   |
| 0               | 0               |
| 0.8825739906    | 1.1943043859    |
| 0.6863184472    | 1.5949931946    |
| 28.8899136987   | 13.4501108301   |
| 0               | 0               |
| 0               | 0               |
| 1.2268571309    | 0.3970020484    |
| 6.0046888535    | 3.7683852782    |
| 0.4219443465    | 0.4716771522    |
| 0               | 0.068554584     |
| 9.1425980458    | 8.6064822144    |

gene\_expression\_table

|               |                |
|---------------|----------------|
| 7.2830786995  | 1.8092232351   |
| 84.9576892362 | 53.5552414221  |
| 0.4013903925  | 0.0236158205   |
| 4.0873181256  | 1.7635019077   |
| 2.6519307128  | 2.4184100431   |
| 0.4826624731  | 2.8397466791   |
| 4.2716269005  | 2.8680200815   |
| 3.2736993948  | 3.6255668858   |
| 4.6018372015  | 3.2489914106   |
| 24.074369227  | 21.8532834565  |
| 16.3165277297 | 11.028648701   |
| 9.8147828688  | 11.9340319851  |
| 0.4667339727  | 0.0768888758   |
| 60.6525642865 | 49.8216963384  |
| 6.2307131658  | 4.5989662926   |
| 3.3692124704  | 2.3504148283   |
| 7.6445648448  | 16.5806473184  |
| 0             | 0.0269331875   |
| 0             | 2.5388413295   |
| 4.9496766269  | 3.5558814776   |
| 0.402382878   | 0.3945702243   |
| 6.7577247108  | 7.1566382878   |
| 0.2286557427  | 0.4170420758   |
| 1.4558963422  | 3.1693357208   |
| 0.8912712392  | 1.1885942277   |
| 15.4238041058 | 6.9106581387   |
| 3.5510808786  | 3.7607038562   |
| 0.3293501582  | 0.4392194875   |
| 8.3235521971  | 5.4733025241   |
| 0             | 0              |
| 58.2073496929 | 32.5340026091  |
| 0.6446684758  | 2.1998876107   |
| 0             | 0.2759710614   |
| 13.4070422238 | 5.5216272297   |
| 0.564833596   | 0.5649441401   |
| 8.1543710525  | 13.5532980241  |
| 0             | 0              |
| 0             | 0.6327792606   |
| 17.2832555377 | 15.5071312015  |
| 1.6045645095  | 3.3356299076   |
| 0             | 0.2168770196   |
| 0             | 2.4205322244   |
| 0.2011788721  | 2.3317643689   |
| 0             | 0.0519345792   |
| 5.6778124108  | 10.8329047225  |
| 6.3277145049  | 11.1687404262  |
| 132.086022182 | 150.5478267388 |
| 0             | 0.1554841402   |
| 4.2765715865  | 3.3677334352   |

gene\_expression\_table

|                 |                |
|-----------------|----------------|
| 16.3832309763   | 26.8930354232  |
| 7.5047922711    | 9.27244011     |
| 0               | 0              |
| 4.1366721689    | 4.6021187503   |
| 0               | 0.2846536334   |
| 0.1696217828    | 0.2694520266   |
| 26.3400819146   | 14.6362427545  |
| 23.7830880598   | 15.0104472473  |
| 12.7362294175   | 26.7887831084  |
| 6.0731741351    | 1.1910515141   |
| 1.8640725473    | 0.6580367177   |
| 1.9115840245    | 2.0994050192   |
| 1.8147945812    | 0              |
| 4.2646092951    | 6.3005903744   |
| 6.1879090932    | 11.6501084894  |
| 75.2427258847   | 23.6101809296  |
| 0               | 0.1990855849   |
| 5.0429661111    | 6.7557018561   |
| 129.9229787468  | 66.2482070323  |
| 5.6679396093    | 2.0008407838   |
| 250.5200732912  | 238.286303665  |
| 7.6777274923    | 16.2618990521  |
| 0               | 0              |
| 27.2138258304   | 29.8876961768  |
| 0               | 0.0808805104   |
| 5.3080845489    | 8.0306068226   |
| 7.9535120042    | 4.4858196128   |
| 0.4062251252    | 0.8604098002   |
| 0.7631037789    | 2.0652731665   |
| 273.4739324498  | 297.4323746803 |
| 0               | 0              |
| 0               | 1.174867244    |
| 120.8563713893  | 64.4913946385  |
| 2.2731094628    | 6.5531860253   |
| 26.4437412238   | 32.85310018    |
| 286.0446509941  | 181.1640686953 |
| 8.1118901827    | 27.6812770934  |
| 9.3764386696    | 13.7915790319  |
| 16.2237803654   | 14.3179019448  |
| 26.917943259    | 19.7964789679  |
| 38.7162449681   | 18.7025271127  |
| 1475.5626278766 | 956.935741544  |
| 1.9998799646    | 3.294564598    |
| 0.6731165676    | 0.7128511453   |
| 0               | 0.0144188625   |
| 17.6812374118   | 6.3744592909   |
| 17.3043316852   | 11.6813702682  |
| 0               | 0              |
| 50.3005436097   | 30.3342045167  |

gene\_expression\_table

|                 |                 |
|-----------------|-----------------|
| 2.0802885083    | 0.9179539604    |
| 0               | 0               |
| 2.3145184203    | 5.0112322004    |
| 27.5001591496   | 29.5455941633   |
| 37.2625989613   | 13.1988211766   |
| 252.8788700039  | 175.6580269283  |
| 0               | 0               |
| 0               | 0               |
| 6.6687970523    | 10.829107116    |
| 0               | 0               |
| 0               | 1.2188123167    |
| 0               | 0               |
| 0               | 0.0799787405    |
| 9.9555558605    | 5.9875189088    |
| 0               | 0               |
| 21.1593562882   | 4.9796464487    |
| 0               | 7.2088941574    |
| 0               | 0               |
| 98.7743494384   | 25.0882087196   |
| 89.0825525735   | 70.5176367765   |
| 0               | 0               |
| 0               | 1.3645552712    |
| 0               | 0.3732614729    |
| 0               | 0.358173743     |
| 4.9568348066    | 8.4574319116    |
| 0.5218557451    | 0.3684408551    |
| 81.8412644086   | 65.3241984321   |
| 12.4091341701   | 16.0620224135   |
| 24.2416087416   | 10.4032795269   |
| 19.988456866    | 7.9969475307    |
| 16.155641715    | 6.9704642772    |
| 9.1871611364    | 6.4031661148    |
| 18.5782275773   | 6.6949361286    |
| 0               | 2.5482386979    |
| 0.2892117526    | 0.1020947134    |
| 1.6147991837    | 1.2034191818    |
| 238.509794551   | 169.6981754315  |
| 339.6944548484  | 206.2746137646  |
| 43.2323044699   | 32.6099287383   |
| 13.222736226    | 16.4483021933   |
| 3.0999101858    | 1.7022445573    |
| 1.5769908479    | 0.5566939349    |
| 0               | 0               |
| 2593.0546695538 | 2051.6790899536 |
| 20.8572332974   | 19.1288877201   |
| 0               | 0               |
| 2.4119117724    | 1.3835730675    |
| 2.0464183515    | 11.0969689071   |
| 773.6383025071  | 1372.4652490266 |

gene\_expression\_table

|                 |                 |
|-----------------|-----------------|
| 6.9878286379    | 6.5780670426    |
| 55.9297293877   | 26.3250237414   |
| 1.7888401461    | 8.6302117543    |
| 0               | 0.9554435087    |
| 25.2795873376   | 12.5596382165   |
| 73.2369174073   | 194.2637703993  |
| 11.975113926    | 8.454675944     |
| 96.6242004902   | 32.2143703028   |
| 0               | 0.2539881102    |
| 26.3520546791   | 48.579959494    |
| 218.1989799975  | 117.2142036486  |
| 184.3973291798  | 225.6597111464  |
| 0               | 0               |
| 4.4307784244    | 2.3461653052    |
| 30.1111931614   | 33.8913502589   |
| 3.6586217528    | 8.3949513897    |
| 5.9977778082    | 3.5287950819    |
| 82.1221715582   | 166.4726972661  |
| 0               | 1.5594458266    |
| 94.114480997    | 86.3807790395   |
| 125.0430829873  | 72.2315292601   |
| 10.1199880816   | 6.464450582     |
| 3.8294309008    | 4.9567039986    |
| 47.7424460592   | 22.7267876496   |
| 16.4606815145   | 10.8606419285   |
| 0               | 0               |
| 59.4721368307   | 15.9047529897   |
| 2.0009153135    | 0.4708957446    |
| 12.1050091442   | 15.7633316531   |
| 10.8211431375   | 13.2541537887   |
| 22.0855315406   | 5.1976126875    |
| 8.0828888524    | 4.1214948986    |
| 2.1444345607    | 1.7663505589    |
| 0               | 0.4043306456    |
| 1.0529526561    | 0.7434061627    |
| 1805.7801020887 | 1888.8975122401 |
| 26.1395832007   | 17.0076242659   |
| 1.4944938475    | 0.946923471     |
| 0               | 0.0819797949    |
| 31.0769332904   | 21.8229899307   |
| 85.2549978204   | 85.0076841414   |
| 7.8684202354    | 22.2210640142   |
| 20.5638096281   | 27.8270697888   |
| 0               | 13.6403232239   |
| 0               | 2.4289206909    |
| 187.5023608887  | 64.0550859375   |
| 761.0675962282  | 468.085856373   |
| 18.322492006    | 17.8821936788   |
| 19.4846139323   | 7.3368196839    |

gene\_expression\_table

|                 |                 |
|-----------------|-----------------|
| 2.01678565      | 0.8306036764    |
| 0               | 0               |
| 0               | 1.5585713165    |
| 8.614853824     | 2.4329053682    |
| 1710.4849050998 | 1463.1540737929 |
| 108.6246365254  | 51.7361407432   |
| 2.2300894464    | 4.5922592047    |
| 16.2729266691   | 8.0074986861    |
| 22.9238909823   | 18.7595815416   |
| 0               | 0               |
| 127.1371059082  | 49.2900337531   |
| 2.3844580292    | 4.0684009484    |
| 29.8031205727   | 39.4530265205   |
| 55.8542086059   | 25.5311272793   |
| 7.6554232529    | 7.7069667419    |
| 1.1417251624    | 0.6717344768    |
| 0               | 0               |
| 0               | 0.7495733054    |
| 23.937619346    | 21.1255625305   |
| 13.2110566565   | 13.9909152764   |
| 118.1646273511  | 71.2602631201   |
| 0               | 0.8005194504    |
| 25.8945339546   | 23.58977014     |
| 55.4647407741   | 40.7908792893   |
| 0               | 0               |
| 8.5909996625    | 11.4087697518   |
| 0               | 11.9354125212   |
| 0               | 3.404125076     |
| 4726.8509769673 | 7310.1747693515 |
| 33.9296841362   | 26.1731130504   |
| 19.5694583271   | 29.9356173774   |
| 18.8277865336   | 18.019133359    |
| 0               | 0.1553832075    |
| 6.0909487454    | 3.7371956236    |
| 0               | 0.2952805546    |
| 12.0610641898   | 22.7076229131   |
| 0               | 7.3013199989    |
| 2.2708390244    | 2.4048883616    |
| 22.2239962546   | 21.2582281792   |
| 3.0667047684    | 7.5780475389    |
| 7.080252106     | 7.1649511749    |
| 1.9490509428    | 5.8482971805    |
| 94.597119361    | 41.3446463779   |
| 177.5796117117  | 44.2499458531   |
| 0               | 2.4632123677    |
| 9.3724595807    | 3.8600033599    |
| 6.6841939031    | 0.8848458626    |
| 3.0138552867    | 3.9010466405    |
| 45.3392857158   | 52.3807613276   |

gene\_expression\_table

|                 |                 |
|-----------------|-----------------|
| 0               | 0.2987722442    |
| 254.4299216827  | 247.1690816068  |
| 77.9460236999   | 11.5498190509   |
| 1.8971961612    | 1.1162161549    |
| 0               | 0.1080161291    |
| 1261.6273694436 | 1158.6006851134 |
| 28.0521872391   | 31.5419640915   |
| 0               | 3.5016254247    |
| 0               | 2.3150476465    |
| 108.7022255515  | 66.3237035645   |
| 141.1717214954  | 7.3829725675    |
| 6.9091312471    | 1.0839974024    |
| 42.925011324    | 55.5608864029   |
| 83.260836269    | 92.0947099412   |
| 0               | 0               |
| 3.1425910827    | 3.2048376149    |
| 81.7550083471   | 24.0502966767   |
| 158.6297835185  | 165.7978214235  |
| 0               | 0.6985323216    |
| 38.3339885259   | 44.4442887697   |
| 0.1108107463    | 0               |
| 0               | 0.430347379     |
| 66.8083018891   | 62.3835246451   |
| 0               | 0               |
| 21.06020063     | 59.9713647874   |
| 0               | 0               |
| 14.9428494862   | 31.6498742811   |
| 49.6846383804   | 10.8158317752   |
| 33.3330575214   | 43.1453403339   |
| 0               | 0               |
| 1.1011304899    | 0.5182804674    |
| 183.7544224854  | 123.728167845   |
| 8.7752429834    | 6.4020181704    |
| 7.1701433898    | 3.6049485913    |
| 0               | 0.4950700058    |
| 1.5570735717    | 7.7868915404    |
| 0               | 0               |
| 7.5481759621    | 9.4148616664    |
| 20.2611968376   | 10.7286152699   |
| 0               | 1.7496647152    |
| 22.7205953654   | 22.7632353836   |
| 22.4220762276   | 14.9509763163   |
| 0               | 0.145561103     |
| 1.7606985238    | 0.5064437707    |
| 6.1918744306    | 5.8287870574    |
| 0               | 0.2483003777    |
| 205.2800954646  | 50.323595842    |
| 0.4383441478    | 0.1031599851    |
| 0               | 0               |

gene\_expression\_table

|                 |                 |
|-----------------|-----------------|
| 2.0873215202    | 3.5532346426    |
| 94.1035691731   | 179.7696040395  |
| 21.9700319441   | 14.304859081    |
| 0               | 0.4964968451    |
| 68.2374297247   | 58.6153796635   |
| 1.9305534563    | 2.0445154802    |
| 29.9099831265   | 13.0221878005   |
| 352.7756044743  | 195.9569749802  |
| 72.7751706187   | 13.5588123223   |
| 0               | 0               |
| 219.8217952117  | 90.3688599015   |
| 0               | 0               |
| 6.6925853153    | 3.5438268324    |
| 0               | 0               |
| 39.1984586167   | 47.9698534039   |
| 16.7418169166   | 35.1787678029   |
| 0               | 0.5004303589    |
| 129.4652083388  | 125.935903661   |
| 4024.1657870067 | 9021.4856372331 |
| 118.8698424308  | 138.6753209352  |
| 31.1117480879   | 12.2902381425   |
| 0               | 0               |
| 19.2862675629   | 15.0130644378   |
| 10.25141016     | 13.7077760343   |
| 38.4510166103   | 62.2123471861   |
| 75.8965821835   | 99.9320932054   |
| 4.5116577644    | 7.5319613913    |
| 3.9276799766    | 3.7358776536    |
| 10.8698828713   | 10.8720102269   |
| 0.3854432571    | 0.4837881632    |
| 5.1241952622    | 2.867757917     |
| 8.6516221898    | 45.1329783994   |
| 1.7219344722    | 5.7746749413    |
| 13.9893152585   | 14.2073154769   |
| 13.8496226216   | 8.5105837623    |
| 2.6291584036    | 2.7843596034    |
| 3.2417235181    | 1.5258155101    |
| 0               | 0.721890651     |
| 0               | 1.700789492     |
| 16.5075513366   | 7.2841685496    |
| 0               | 0               |
| 195.9830481641  | 111.5525364535  |
| 5.7729171316    | 3.6562304248    |
| 0               | 0.7166014499    |
| 0               | 0.0318696637    |
| 38.5917925073   | 49.4655476064   |
| 6.7921411195    | 5.9237181483    |
| 0               | 0               |
| 1.4081055157    | 0.8284594691    |



gene\_expression\_table

|                |               |
|----------------|---------------|
| 0              | 0             |
| 0              | 0             |
| 3.3658661651   | 2.1123293503  |
| 7.7672186889   | 2.7419078185  |
| 4.7176148254   | 8.0054454698  |
| 0              | 0.2953093147  |
| 120.463242081  | 73.8587924959 |
| 14.7743425826  | 5.9108936335  |
| 0              | 0             |
| 0              | 0             |
| 36.659930846   | 50.129065259  |
| 0              | 0             |
| 0              | 0.3996126021  |
| 0              | 0             |
| 12.0563165152  | 19.7600154069 |
| 0              | 0.8751143819  |
| 15.1515705558  | 74.3386184831 |
| 0.5062901033   | 1.4521454709  |
| 1.8399352659   | 5.6832650869  |
| 6.2296175916   | 2.3990387665  |
| 0.3047120798   | 1.0756648774  |
| 5.4913114179   | 6.2462430474  |
| 0.8796813592   | 0.4945581891  |
| 0              | 0             |
| 4.9713687269   | 6.0625342389  |
| 3.021867099    | 2.4594515339  |
| 151.247995951  | 56.4724060625 |
| 0.7572726242   | 2.316816659   |
| 0              | 0.1138742827  |
| 16.5492880703  | 37.2779598489 |
| 0              | 0             |
| 0.3654631779   | 0.1863510251  |
| 0.92228366     | 2.3604230002  |
| 0.2835466751   | 1.2345035563  |
| 11.9946249348  | 55.5742104505 |
| 11.9068638928  | 2.1016225053  |
| 3.7091823605   | 3.0552185903  |
| 2.7674483294   | 2.0130835996  |
| 0              | 0             |
| 1.8589918648   | 4.5937022927  |
| 0.8923714927   | 0.8190423399  |
| 44.7679693391  | 36.4168809039 |
| 0              | 2.5408676475  |
| 0              | 0.041035759   |
| 7.3750889045   | 6.025201165   |
| 289.7201171984 | 648.633559922 |
| 0              | 2.0575397761  |
| 0.6351492741   | 0.6228172351  |
| 0              | 2.3270547082  |

gene\_expression\_table

|               |               |
|---------------|---------------|
| 5.3019010146  | 4.0205286534  |
| 0.8800365572  | 1.6154420147  |
| 20.564970114  | 5.8663800085  |
| 0             | 1.1022155914  |
| 2.326698291   | 0.9687698459  |
| 0             | 0             |
| 4.8793940407  | 4.0191109343  |
| 1.1646732016  | 0.5618934915  |
| 0             | 0.5376598556  |
| 1.5539791004  | 0.7314274029  |
| 1.7793458778  | 1.9741144809  |
| 0.6260679722  | 0.3683473533  |
| 0             | 1.0973629721  |
| 58.0030756545 | 72.5574106756 |
| 1.1837630111  | 2.6251465901  |
| 2.8926514467  | 3.432150255   |
| 0.1605599922  | 0.3400759388  |
| 0             | 0.1057571762  |
| 126.955068445 | 95.5701018985 |
| 6.4895360941  | 6.2264746947  |
| 3.2917624514  | 1.162025889   |
| 1.7238929615  | 14.5038199715 |
| 0.3816630396  | 1.0666201425  |
| 1.1129896964  | 0.5729744592  |
| 9.5642030409  | 15.4673186282 |
| 4.1035607671  | 1.7935035438  |
| 0.1956133666  | 0.0460356824  |
| 13.4667875248 | 10.9340022999 |
| 0.9296598883  | 1.2397891106  |
| 9.9047322487  | 11.321909387  |
| 53.3634344367 | 29.969289925  |
| 69.3769592402 | 27.3875364541 |
| 73.885347771  | 95.3352491956 |
| 0             | 0.1750381451  |
| 8.7441939562  | 9.1594948147  |
| 10.3600770562 | 7.8685500454  |
| 0.8837646673  | 2.0798532465  |
| 0             | 0.0470078048  |
| 0             | 0.0685259565  |
| 0             | 0             |
| 0.5976939523  | 0.5157584473  |
| 0             | 0.0497017737  |
| 38.041023815  | 21.7640328985 |
| 0             | 0.004051      |
| 0             | 0             |
| 0             | 0             |
| 0             | 0.3307625167  |
| 21.9064284334 | 4.0648839197  |
| 0             | 0.003385      |

gene\_expression\_table

|               |                |
|---------------|----------------|
| 2.1546659838  | 1.1831853906   |
| 1.0697886293  | 1.3217622337   |
| 5.0609195391  | 5.3927538087   |
| 72.3518705757 | 87.5689782437  |
| 4.071816287   | 2.6831333933   |
| 7.9711976205  | 2.1886001451   |
| 0             | 0              |
| 2.3870878379  | 1.2840632025   |
| 3.038433172   | 2.4788932861   |
| 20.7348069721 | 26.431886767   |
| 0             | 0.2320954887   |
| 73.4906286797 | 128.5867722169 |
| 0.3571135029  | 2.1851219396   |
| 0.4538051873  | 0.4138445312   |
| 24.6153908992 | 27.3098110002  |
| 93.2708899239 | 43.9007736763  |
| 1.3532169435  | 1.9107978112   |
| 0.2883056602  | 0.9159736811   |
| 11.7092948625 | 5.2993604073   |
| 10.9818426906 | 17.3913206001  |
| 1.6927855727  | 1.3943315395   |
| 0.1581182216  | 0.2294713404   |
| 5.718023485   | 2.7525285072   |
| 5.4131204756  | 11.4653221048  |
| 0.0144432736  | 0              |
| 0             | 0.007425       |
| 0             | 0              |
| 0             | 0              |
| 0             | 0              |
| 6.1616963053  | 3.8323929753   |
| 15.9562336863 | 10.8321424185  |
| 35.0927103332 | 15.5552671668  |
| 1.8860862871  | 0              |
| 0             | 0              |
| 1.4670037272  | 0              |
| 0             | 0              |
| 51.0625128702 | 22.6685456059  |
| 0             | 0.5761955025   |
| 18.6120004797 | 6.3512193945   |
| 0.2086729865  | 0.1657433325   |
| 1.5019500329  | 2.385916911    |
| 1.9163863643  | 1.5785094065   |
| 7.4340604339  | 0.8747665131   |
| 5.3799666197  | 6.8054070632   |
| 1.248173105   | 1.1749810694   |
| 13.7198315728 | 7.1034204066   |
| 0.2805303788  | 0.0660200663   |
| 1.3225925148  | 2.2998592284   |
| 0.6133409537  | 0.1443437626   |

gene\_expression\_table

|                 |                |
|-----------------|----------------|
| 1.9835461551    | 0.8669292988   |
| 0               | 0              |
| 3.5105931449    | 2.8457434354   |
| 34.0966846088   | 36.1948026703  |
| 1.7213592926    | 1.2153149516   |
| 1.8452435317    | 2.7606523577   |
| 2.9361249057    | 2.5048319585   |
| 0               | 0.6014341118   |
| 1.330786434     | 1.1126398098   |
| 0.9733351851    | 0.6871945959   |
| 3.6482014089    | 2.725021221    |
| 21.0124734956   | 5.9861482967   |
| 0               | 0.0501036807   |
| 0.3103718888    | 0.6026045209   |
| 8.3410575202    | 4.2531360564   |
| 1.080964799     | 1.0430171902   |
| 7.1546982962    | 10.9446213107  |
| 11.8460401091   | 27.8784906103  |
| 0               | 0              |
| 0               | 0              |
| 0               | 0.0476186154   |
| 0.4896703433    | 0.1728586508   |
| 17.4664136823   | 11.6123001283  |
| 21.2613992094   | 15.0109837404  |
| 1063.3979043445 | 227.5093097331 |
| 51.6591849357   | 32.1666690743  |
| 1.8521915079    | 1.4166589428   |
| 0               | 0              |
| 0               | 0.2093640742   |
| 55.8741598314   | 10.758627918   |
| 0               | 0              |
| 0               | 0.1218740955   |
| 0.5411301551    | 0.2865367377   |
| 0.8679080256    | 0              |
| 2.8572248241    | 5.0431482608   |
| 0.2486917368    | 1.9313961129   |
| 0               | 0.0506595574   |
| 0.0980016132    | 0.4382106047   |
| 0               | 7.494086183    |
| 11.5005991458   | 11.7283960167  |
| 28.3823610766   | 24.4219569893  |
| 0               | 0.006508       |
| 3.8915864711    | 6.7772649224   |
| 21.5810397034   | 15.9292317771  |
| 1.0607553023    | 0.8737341561   |
| 52.147616713    | 30.3324235562  |
| 2.1209285077    | 10.4819330662  |
| 0               | 1.6631600298   |
| 1.4077465014    | 2.0706206072   |

gene\_expression\_table

|                 |                 |
|-----------------|-----------------|
| 1.4567194405    | 1.5855637603    |
| 0               | 1.2645070283    |
| 0.5981626303    | 0.9150160077    |
| 0               | 0               |
| 0               | 0.056131805     |
| 7.6823057436    | 10.6970677868   |
| 0               | 0               |
| 0               | 0               |
| 0               | 0.196098271     |
| 0               | 0               |
| 5.8514314849    | 4.9345254313    |
| 712.7733905414  | 622.5890832973  |
| 3.8502941209    | 3.6245154501    |
| 7.4407393049    | 6.2747923175    |
| 0               | 0.4387475739    |
| 13.2314447543   | 24.6887026315   |
| 0.3734773805    | 0.2636826876    |
| 37.3160747623   | 34.5528750849   |
| 1.54524549      | 0               |
| 0               | 0.607745445     |
| 0               | 0               |
| 0               | 0               |
| 1.0901359563    | 3.4634625075    |
| 1224.2975327668 | 1600.2228932858 |
| 89.088774943    | 49.7946470974   |
| 20.6335998606   | 27.7480848174   |
| 51.7814579262   | 42.1296312425   |
| 5.433286033     | 6.2335184143    |
| 22.266205897    | 12.0523050278   |
| 327.3341798288  | 179.7480548297  |
| 29.418734926    | 28.0782738848   |
| 3.4242651011    | 4.63373595      |
| 0               | 4.2007602726    |
| 2.4644315626    | 2.4649138789    |
| 2.8454031595    | 3.482115809     |
| 96.1093290844   | 67.04735727     |
| 1.4578183538    | 0.7719372343    |
| 1.2793953369    | 1.2294635431    |
| 18.4016887142   | 14.5558176821   |
| 0               | 0               |
| 0.3772884486    | 0.1627837321    |
| 8.3891356783    | 9.6521362372    |
| 3.1931328648    | 8.9299972885    |
| 6.3284317973    | 4.6684898895    |
| 0               | 0               |
| 0.4700592316    | 0.2212476364    |
| 2782.7769741182 | 790.1704006206  |
| 0.8605614706    | 2.1940173717    |
| 0               | 0               |

gene\_expression\_table

|                |                |
|----------------|----------------|
| 0              | 0.7674072391   |
| 1.8399352659   | 2.0928849209   |
| 0              | 0              |
| 20.2992017837  | 19.961944736   |
| 0.4769798864   | 2.8063131566   |
| 0              | 0.3256105509   |
| 13.2835029544  | 10.003653784   |
| 0              | 0.479737458    |
| 0              | 0.7411044707   |
| 2.2478585667   | 0.6612642639   |
| 3.6085223636   | 7.5015339345   |
| 0.8847458526   | 1.4575136587   |
| 2.1158584049   | 6.3073219657   |
| 13.3320731963  | 16.0800582239  |
| 0              | 0.0141506228   |
| 0              | 0.1798802002   |
| 106.1529926544 | 50.1110794117  |
| 19.9923258148  | 27.8505485445  |
| 10.1610649006  | 6.7753690218   |
| 4.5125137415   | 0              |
| 0              | 0              |
| 0              | 1.7355382      |
| 31.9263636216  | 14.3641507095  |
| 0.5442441566   | 0.2775121069   |
| 0              | 0.1350891434   |
| 18.1189249799  | 22.2681343654  |
| 0              | 0.1712090312   |
| 30.7364431866  | 17.4262065054  |
| 27.6281668618  | 9.5029485241   |
| 0              | 0.6663117869   |
| 13.6558440416  | 14.4083959853  |
| 5.2049936295   | 4.2654302491   |
| 5.5499684369   | 1.4296833856   |
| 7.5484708012   | 10.3745169459  |
| 0              | 1.0068604278   |
| 1.9410245177   | 2.9692067256   |
| 0.4306590409   | 0.4922780864   |
| 0              | 0              |
| 0              | 0.2056808042   |
| 4.857928632    | 9.7892128726   |
| 0.5607253975   | 0.7697737183   |
| 24.223373061   | 29.8985234638  |
| 0              | 0              |
| 6.3516679078   | 7.6801926074   |
| 0.6998964216   | 0.3294274819   |
| 1.0722470266   | 1.1670854251   |
| 24.1685510973  | 12.9447185054  |
| 75.4287279393  | 105.6208862385 |
| 6.2707358151   | 7.7477190827   |

| gene_expression_table |                 |
|-----------------------|-----------------|
| 0                     | 0.0203639026    |
| 0                     | 0               |
| 0                     | 0               |
| 1.9431004038          | 3.8869613799    |
| 2.1756898765          | 1.7920952683    |
| 0.1903625054          | 0.1791997755    |
| 1.7489246514          | 0.7545857367    |
| 3.6484679325          | 2.6188247135    |
| 5.318519361           | 6.2014124882    |
| 0.6493510521          | 0.5977895657    |
| 15.0777204014         | 6.2096881729    |
| 0                     | 0.1508078092    |
| 7.1207918559          | 5.7722287495    |
| 2.2186957633          | 2.1582126927    |
| 0.3304069228          | 1.3218863481    |
| 0.0530703187          | 0.0936718326    |
| 55.3086436693         | 48.1604781791   |
| 5.6934050521          | 3.6846889679    |
| 3.7932751198          | 2.4549525035    |
| 0                     | 0.2844222077    |
| 31.7532674268         | 16.1132665473   |
| 12.5414716301         | 19.0003587029   |
| 0.7687806858          | 4.1160431858    |
| 0                     | 0.0279475887    |
| 172.0863108965        | 121.9421027878  |
| 0.5527265475          | 0.5203150326    |
| 1.1968068433          | 1.2322481618    |
| 20.7787408157         | 12.6566578204   |
| 3.9808095783          | 0.6440805196    |
| 4.1862431532          | 1.7464752453    |
| 28.1729704213         | 18.7143633083   |
| 8.9252735894          | 6.7788069071    |
| 0                     | 0.1355966339    |
| 20.1002055262         | 18.3302447082   |
| 0                     | 0.2523757021    |
| 0                     | 0.0129347536    |
| 11.0634558696         | 4.3197344438    |
| 0                     | 0               |
| 50.6226632312         | 88.3304341633   |
| 15.5037596442         | 15.7172933651   |
| 0                     | 1.9912045103    |
| 1.8114773245          | 0.8526267532    |
| 6.6921990412          | 12.337055395    |
| 1387.5101454477       | 950.1042655951  |
| 12.2583893842         | 13.70323419     |
| 1849.266995028        | 2393.0647813447 |
| 4.6636114867          | 8.3687051944    |
| 20.2301388098         | 8.1333139302    |
| 33.106423424          | 28.365096811    |

gene\_expression\_table

|                 |                 |
|-----------------|-----------------|
| 0               | 0               |
| 9.1979248444    | 34.8146455102   |
| 1.6734361013    | 1.0830235131    |
| 0               | 0.4090583829    |
| 63.6652106626   | 28.2371571182   |
| 86.3241588136   | 96.0371075254   |
| 16.0571999153   | 7.0854452143    |
| 6.1663869613    | 24.5978152371   |
| 6.8747207748    | 0.8089489686    |
| 0               | 0               |
| 2.9517091948    | 3.1259508106    |
| 36.175290337    | 57.0404424944   |
| 15.9797464978   | 6.4244885324    |
| 1183.4889314367 | 1239.1671586629 |
| 15.9511680545   | 3.7539505585    |
| 12.1923281376   | 7.6515854495    |
| 4.1796993832    | 19.1811974652   |
| 6.492471056     | 1.6552674932    |
| 293.7134699235  | 378.4018005394  |
| 26.2191711526   | 17.7399693603   |
| 697.5830838797  | 867.1507653854  |
| 147.9980095581  | 18.7210585264   |
| 7.3003126403    | 5.2078596691    |
| 0               | 1.1147751699    |
| 3.7122699811    | 5.9699159622    |
| 0               | 0               |
| 0.6762848678    | 0.079578497     |
| 3.8012339963    | 2.5346519597    |
| 1.2799743958    | 0.6275612259    |
| 0.9115490612    | 0               |
| 0               | 0               |
| 0.2455975103    | 0.0866984387    |
| 11.3216006199   | 93.2549584362   |
| 1.6919704153    | 3.9818860058    |
| 7.2134528175    | 1.4146793274    |
| 9.9311826803    | 4.2361862255    |
| 0               | 0.2549563349    |
| 0               | 2.8607712543    |
| 0               | 0.1018067492    |
| 0               | 0               |
| 0               | 0               |
| 0               | 0               |
| 0.571233819     | 0.3808970772    |
| 0               | 1.8664013624    |
| 43.1679227804   | 31.4449762368   |
| 0.0852900109    | 0.1204329927    |
| 0               | 4.5414233539    |
| 0.3537274875    | 0.4994777165    |
| 0               | 1.4405800132    |



gene\_expression\_table

|                 |                 |
|-----------------|-----------------|
| 2.9630236274    | 4.5325700951    |
| 7.1218587871    | 11.3514934691   |
| 89.0596294914   | 56.5383805014   |
| 57.4050620783   | 75.3842203741   |
| 0               | 0.5138011751    |
| 498.2849970966  | 517.0385469934  |
| 0               | 1.1096332419    |
| 9.7211357087    | 10.386492616    |
| 19.3715078214   | 30.6689225421   |
| 6.1247591589    | 3.4593644282    |
| 1.5260870329    | 5.7463932421    |
| 0               | 0               |
| 0               | 0               |
| 0               | 0.1636881335    |
| 0               | 0.1072317057    |
| 0               | 5.3047174591    |
| 26.669099923    | 8.2074828797    |
| 0               | 0               |
| 5.3265821659    | 2.5071174761    |
| 0               | 0.3520503118    |
| 0               | 0.4053396704    |
| 0.9075832493    | 0.7087330883    |
| 0               | 21.3851619196   |
| 47.9128266894   | 31.9481358374   |
| 0               | 0               |
| 0               | 0               |
| 1.0220540161    | 1.7669730523    |
| 0.3876442289    | 0.2280706442    |
| 1808.1721729163 | 3035.2652307959 |
| 0               | 0               |
| 0.171799263     | 0.3032345047    |
| 2.157801659     | 3.859412266     |
| 4.6459526621    | 4.2368446973    |
| 0.3413378097    | 0.4418177349    |
| 170.0465006672  | 368.6173546341  |
| 3.242917484     | 18.0390066576   |
| 11.6162780104   | 7.1078197067    |
| 0.3721802677    | 0.4817393155    |
| 0               | 0.1477457963    |
| 23.5427982017   | 18.9451613914   |
| 0               | 1.5772581109    |
| 4.8055005963    | 1.4702055085    |
| 0               | 0               |
| 1.5481940881    | 2.6167116546    |
| 0.6092205096    | 0.2293984906    |
| 10.5398637022   | 9.3016998259    |
| 35.2601555644   | 29.712662288    |
| 0               | 0               |
| 0               | 0               |

gene\_expression\_table

|                |                |
|----------------|----------------|
| 0              | 1.2054570061   |
| 542.8875407174 | 458.7966605294 |
| 0              | 0              |
| 0              | 0              |
| 0              | 0.1476280782   |
| 38.4209838636  | 22.1744304597  |
| 3.0623310511   | 1.5134479539   |
| 0              | 0.0254924894   |
| 72.0308203867  | 52.7471718216  |
| 2.1707728462   | 1.3501565469   |
| 3.9258514322   | 1.6360915685   |
| 0.2455015686   | 0.1877732357   |
| 0              | 0              |
| 0              | 0              |
| 17.2302197207  | 8.5830045754   |
| 2.3595653355   | 1.2494261268   |
| 20.9055304865  | 21.3196145154  |
| 0              | 0              |
| 286.0725334885 | 253.219972955  |
| 0              | 0.0314775721   |
| 21.8012656867  | 21.1058896822  |
| 0              | 0              |
| 2.0129832083   | 1.0185319807   |
| 7.9619532548   | 8.5707509353   |
| 0              | 0.002201       |
| 5.9594948522   | 3.131181802    |
| 0.3436443513   | 1.9813963188   |
| 0.2192989196   | 0              |
| 9.8235258733   | 9.0162938675   |
| 11.1728197569  | 9.0081750941   |
| 0              | 0              |
| 0              | 23.4381939823  |
| 0              | 0.0201674047   |
| 0.5822348391   | 0.4202046163   |
| 15.1539945274  | 21.9467298905  |
| 6.8341196372   | 6.4333714348   |
| 27.4311476186  | 19.1296125032  |
| 42.6701572332  | 17.8524478962  |
| 0              | 0              |
| 1.8895672144   | 0.7226229796   |
| 0.831533567    | 0.6604647146   |
| 0              | 0              |
| 0.7889852069   | 0.4641997765   |
| 0              | 0              |
| 18.6746236562  | 11.7862933758  |
| 23.4402842984  | 7.6836134535   |
| 0.9132214423   | 0.4235142656   |
| 0.6213308786   | 0.6214524799   |
| 7.6222714549   | 6.2223361552   |

gene\_expression\_table

|               |               |
|---------------|---------------|
| 4.0371224558  | 2.4770388004  |
| 0.4252544968  | 1.4511522341  |
| 2.4754807017  | 5.2432203823  |
| 0             | 0.0745298546  |
| 7.1978064429  | 8.8184157681  |
| 0.0925536892  | 0.0108908004  |
| 0.8814870272  | 1.4521451312  |
| 0.6658915991  | 0.9010884819  |
| 0             | 4.3026595095  |
| 2.253100163   | 5.4350109352  |
| 1.2562102179  | 0.517364265   |
| 2.1949088837  | 1.0146522255  |
| 11.9233486933 | 6.1253862785  |
| 20.5364931966 | 6.5246333551  |
| 0             | 0             |
| 6.4180804045  | 0.377608029   |
| 16.2916340495 | 9.5851897067  |
| 0.0753716549  | 0.3724975356  |
| 1.0293748512  | 0.2271124216  |
| 0.1651389922  | 0.1165915141  |
| 0             | 0             |
| 0             | 0.0128208405  |
| 0             | 0.005985      |
| 0.3503206861  | 0.1590001628  |
| 3.6793450613  | 2.9945628178  |
| 2.6158031265  | 4.3651887765  |
| 19.262923558  | 30.1143276928 |
| 5.8370810772  | 4.1582259288  |
| 0             | 0.3460250547  |
| 0             | 0             |
| 11.9873314353 | 2.5983821181  |
| 4.4162410854  | 5.8647281679  |
| 16.8002245379 | 5.5712180569  |
| 0             | 0.0497703069  |
| 0             | 0             |
| 1.2916637768  | 1.1044620086  |
| 1.8419572295  | 0.8159746307  |
| 11.1321256908 | 14.066025969  |
| 8.0547202595  | 2.5537933847  |
| 71.1101441427 | 41.5277742835 |
| 0             | 0.2016454333  |
| 0             | 0             |
| 0             | 0.0289563361  |
| 7.4444206133  | 3.4524138206  |
| 0             | 0             |
| 0             | 1.0235917281  |
| 1.3259350302  | 2.3403432887  |
| 16.3151962414 | 28.6771694397 |
| 6.6957474157  | 2.6859857675  |

gene\_expression\_table

|                 |                 |
|-----------------|-----------------|
| 94.2321535163   | 110.0301072959  |
| 1.8283877978    | 1.5418835733    |
| 0               | 0.1105821261    |
| 19.7031403936   | 16.9248323009   |
| 3.4032591896    | 0.9344108515    |
| 0               | 0.1363920509    |
| 0               | 0               |
| 11.3119716847   | 7.2817941679    |
| 14.2189006012   | 7.6486364484    |
| 19.9746831223   | 3.7606762141    |
| 24.1355779805   | 26.1688983497   |
| 0               | 2.6023753156    |
| 0               | 0               |
| 10.7689273324   | 1.26718058      |
| 49.8427439704   | 31.0686478654   |
| 5.928774382     | 2.4417378211    |
| 0               | 0               |
| 0               | 0               |
| 39.3345643758   | 42.2010429084   |
| 5.5366746532    | 5.972092221     |
| 6.434106908     | 45.0475629338   |
| 0               | 6.5251977767    |
| 7869.4469169303 | 5555.3828522726 |
| 273.0220234602  | 362.4273526854  |
| 181.7036249943  | 105.4032200999  |
| 5.2427672539    | 3.0845843065    |
| 6.040900312     | 12.3211095801   |
| 0               | 0.9500545439    |
| 0.8426336651    | 0.6940694169    |
| 23.6960676332   | 9.6771045511    |
| 1.692489061     | 0.7966213175    |
| 0               | 2.5895726675    |
| 0.817509734     | 0.6092441123    |
| 72.5970513822   | 83.4835335613   |
| 0.5137945363    | 0.3627494764    |
| 8.1804035973    | 5.7755326533    |
| 0               | 0.0608334818    |
| 0               | 0               |
| 16.2596721689   | 11.479661905    |
| 1.4873270298    | 6.5630211002    |
| 8.7205957121    | 4.8375794982    |
| 93.4668448767   | 82.352760893    |
| 6.5716993114    | 6.959631669     |
| 2.5099290421    | 3.0378194776    |
| 6.5882632252    | 2.210873864     |
| 0.3172127739    | 1.0358090886    |
| 10.0858579868   | 3.9955726349    |
| 0               | 0               |
| 24.4140623726   | 19.5873051922   |

gene\_expression\_table

|                |                |
|----------------|----------------|
| 0              | 0.1250456723   |
| 2.3880922      | 2.7164010863   |
| 12.1042120585  | 25.6374656171  |
| 1.7202866514   | 0.5060656854   |
| 6.0855671191   | 3.1507924445   |
| 1.85821726     | 0.364427634    |
| 251.4114798845 | 166.4078055051 |
| 0              | 0.4535212507   |
| 10.18425228    | 7.3466015778   |
| 1.0596501671   | 0.623445619    |
| 9.6416904146   | 5.6726925879   |
| 0.3105714095   | 0.4750845285   |
| 0.4334731547   | 0.1836245605   |
| 0              | 0              |
| 0              | 0.2764855676   |
| 2.1276771077   | 2.403493855    |
| 0              | 0.7626457968   |
| 1.5807209154   | 0.4960094996   |
| 77.0732787744  | 39.9045643051  |
| 0              | 0              |
| 0.9911190942   | 0              |
| 28.4946034506  | 2.3529560502   |
| 3.4490166157   | 0              |
| 0              | 2.0894839663   |
| 0              | 2.004544738    |
| 0              | 0              |
| 0              | 0.3539781368   |
| 0              | 0              |
| 0              | 0              |
| 0              | 0              |
| 37.0887284926  | 66.9815011203  |
| 0              | 0.1306871006   |
| 8.9555697243   | 5.1184699587   |
| 7.9821726964   | 2.3481573222   |
| 0              | 0              |
| 0              | 1.271623098    |
| 0              | 4.9258588142   |
| 3.610095292    | 0.7080003583   |
| 3.5636605224   | 1.2580086953   |
| 91.8480993253  | 37.4669482385  |
| 2.2839001061   | 8.3311482124   |
| 410.6528520834 | 404.7640880393 |
| 25.7802029056  | 10.0107434866  |
| 13.6349679659  | 8.5034674516   |
| 3.7314873851   | 5.5199185829   |
| 301.7692748043 | 563.5949893631 |
| 59.8477550265  | 70.8141417521  |
| 0              | 0.5526015919   |
| 10.519782307   | 9.4902880907   |

gene\_expression\_table

|                 |                  |
|-----------------|------------------|
| 40.6410937919   | 0                |
| 1.182856899     | 0.5368636424     |
| 248.0543776208  | 443.8866974887   |
| 0               | 2.9107074586     |
| 0               | 0.6903325898     |
| 3.7758577761    | 44.4305500348    |
| 0               | 4.9052970279     |
| 0               | 0                |
| 26.4144889257   | 4.9731121942     |
| 2.7662238904    | 8.6257976089     |
| 8.3512705696    | 13.7577258906    |
| 0.4932448531    | 6.6165785954     |
| 3.3745355235    | 4.7649825278     |
| 11.7867930497   | 10.9569281002    |
| 1029.9735031936 | 875.7465578506   |
| 34.6206966262   | 34.3728585103    |
| 8.6651999543    | 21.9221482737    |
| 41.7082879814   | 4.0898481129     |
| 0               | 0.8092008543     |
| 15.2950079923   | 21.2182805705    |
| 13.1379571229   | 14.5576441696    |
| 58.3086244562   | 53.8878135149    |
| 1.2949267999    | 6.2473399392     |
| 0               | 4.4500108626     |
| 0               | 3.5406362246     |
| 178.8362992198  | 102.7426841127   |
| 0               | 4.1571399466     |
| 721.6555744483  | 593.8834515752   |
| 5.5543120207    | 9.150069041      |
| 10.8625748232   | 10.8647007485    |
| 55.1438049722   | 21.6292538121    |
| 2.2271338133    | 3.4068712873     |
| 12.7911305918   | 4.51540022       |
| 13.1258111681   | 5.6632227596     |
| 0               | 2.3781999834     |
| 0               | 0.1803581496     |
| 70.6106098915   | 132.1847604673   |
| 19.5191832706   | 66.008722457     |
| 2.2085531541    | 1.8191644406     |
| 0               | 0.3692805143     |
| 224.7074430005  | 247.7651827511   |
| 495.6120375436  | 198.8999903155   |
| 22931.72899808  | 23692.6776654737 |
| 4.517260425     | 9.036289005      |
| 23.4595934422   | 25.6725786006    |
| 0               | 0                |
| 34.7069685669   | 40.0229245648    |
| 837.6812083438  | 512.700995646    |
| 3.4862245811    | 6.5635894091     |

gene\_expression\_table

|                |                |
|----------------|----------------|
| 5.9525150464   | 5.0197694278   |
| 56.8377649942  | 23.2629723865  |
| 11.2653913615  | 2.8721323449   |
| 14.1091555839  | 17.1556636832  |
| 22.2256202989  | 27.8171818327  |
| 189.4271971753 | 78.399008342   |
| 2.1675553921   | 9.4370876988   |
| 0              | 12.0026444619  |
| 7.2505697961   | 12.3100986562  |
| 12.2812505162  | 9.5654225142   |
| 39.134953621   | 48.8131406203  |
| 0              | 0.91109203     |
| 2.3440528005   | 6.178477516    |
| 560.6015179189 | 442.1740271663 |
| 137.9812974966 | 102.6834424707 |
| 273.4976286531 | 326.750779555  |
| 4.6491940764   | 3.7200831798   |
| 0.5467953171   | 0.8364388592   |
| 0              | 0.5724963622   |
| 0              | 0              |
| 5.0318552527   | 2.6644447282   |
| 0              | 0.6928566578   |
| 0              | 0              |
| 5.8452073737   | 7.7722082586   |
| 11.7422695416  | 18.3077083687  |
| 15.6720474906  | 15.1786178374  |
| 0              | 0              |
| 4.0030740752   | 1.1776051532   |
| 172.9614627459 | 176.38737817   |
| 0              | 0              |
| 2.4964268309   | 0.587509508    |
| 0.5451725411   | 1.6935731607   |
| 0              | 0              |
| 1.5926190949   | 1.3118253548   |
| 25.6730967486  | 34.8783037378  |
| 14.1386489934  | 11.5666484484  |
| 19.6690484458  | 79.8488208672  |
| 12.2840386257  | 22.8865109995  |
| 43.6100430404  | 52.3686094903  |
| 0              | 0              |
| 12.5997327453  | 10.0076283409  |
| 0              | 0              |
| 8.2047155808   | 2.2527156603   |
| 0              | 1.3878276172   |
| 12.6017868262  | 27.9270706704  |
| 3.1444660354   | 2.3433940156   |
| 0              | 3.8318942839   |
| 241.5093339938 | 170.510541194  |
| 18.1863731395  | 43.6558377903  |

gene\_expression\_table

|                |                |
|----------------|----------------|
| 11.9289136408  | 6.5504892409   |
| 31.4907769115  | 16.6748505897  |
| 25.268851466   | 36.5955429617  |
| 20.1780848279  | 8.0275877141   |
| 1.8117320675   | 0.3197799959   |
| 15.0093069775  | 37.3413811875  |
| 9.8058303174   | 6.7788856328   |
| 0.5981786771   | 0.6475671617   |
| 2.1992092867   | 0.9133452025   |
| 1.1699615619   | 2.3920071255   |
| 0.1991197795   | 0.4529885282   |
| 2.5977739075   | 1.222721092    |
| 0.0636749572   | 0.0524484627   |
| 1.0740497484   | 1.3270269992   |
| 9.9201369399   | 6.7119942251   |
| 0              | 1.0901904359   |
| 3.1077796953   | 4.3099496396   |
| 9.2413103392   | 18.8322370362  |
| 0.1590076859   | 0.0561313431   |
| 0              | 0              |
| 1.2263355014   | 1.0101210072   |
| 4.8244096598   | 3.0558561302   |
| 0              | 0              |
| 0              | 0              |
| 108.1285782974 | 28.9977415715  |
| 19.8281245536  | 13.9304395935  |
| 5.3167309402   | 9.975166115    |
| 1.4106065913   | 1.0512459054   |
| 0.0535436494   | 0.3622779283   |
| 19.5750604358  | 12.4683989286  |
| 17.3847068172  | 9.2736582376   |
| 2.5551142503   | 1.1425099287   |
| 46.5967571235  | 23.7141666336  |
| 6.5868712101   | 3.7122141815   |
| 6.8619050503   | 4.5418552945   |
| 10.8520066868  | 4.1349068738   |
| 0.5173247934   | 1.4406764238   |
| 47.1716560891  | 16.3908690841  |
| 82.163435791   | 117.9517760185 |
| 17.3645108548  | 12.1867262598  |
| 0.8828562336   | 0.4986516809   |
| 216.5817992412 | 78.9900349219  |
| 0              | 0              |
| 0.9072907861   | 0.5071146678   |
| 0              | 0              |
| 4.1410001907   | 3.2281759321   |
| 0              | 0.4342606049   |
| 0.1602510975   | 0.7165568818   |
| 0              | 0              |



gene\_expression\_table

|                |                |
|----------------|----------------|
| 1.7771275218   | 4.7259932177   |
| 0              | 3.122073643    |
| 9.682322601    | 0.3797732368   |
| 10.5097022339  | 6.8311711786   |
| 4.6569620286   | 5.166716765    |
| 0              | 0              |
| 0              | 0.0235490542   |
| 57.7330910045  | 117.9591282454 |
| 17.3161649624  | 8.6865874181   |
| 9.662420049    | 5.1976126875   |
| 9.1586919896   | 6.8254589992   |
| 116.9696003513 | 165.2805704107 |
| 4.883709906    | 2.2986662126   |
| 5.0167122502   | 2.8313350014   |
| 0.6468349209   | 1.3700361465   |
| 0              | 0.3356226829   |
| 0              | 0.003867       |
| 0              | 0              |
| 5.3715590199   | 3.834568915    |
| 6.078905347    | 2.145915902    |
| 0              | 0              |
| 0              | 0.008882       |
| 0              | 0              |
| 47.3880335901  | 56.8767695389  |
| 0.3200987237   | 0.2071632398   |
| 0.6040131573   | 0.1573787601   |
| 0              | 0.009608       |
| 0              | 0.007871       |
| 0              | 0.0460678582   |
| 6.5865167342   | 5.2702446303   |
| 1.0366958552   | 1.4394594384   |
| 0              | 0.8686453347   |
| 153.5240524174 | 76.7770493809  |
| 2.3579043716   | 2.9879748192   |
| 7.1639815007   | 0              |
| 2.5489257786   | 1.4996615479   |
| 0              | 0              |
| 51.5787547101  | 230.2278840561 |
| 0              | 0              |
| 0              | 0              |
| 1.048605175    | 1.1217223514   |
| 68.673916482   | 29.4502653659  |
| 23.9539387642  | 6.2138684516   |
| 21.8371811598  | 11.0930775429  |
| 2.7403832453   | 0.5239993293   |
| 0.3554009922   | 0.3031954674   |
| 0.8508861535   | 1.3588236088   |
| 0.6598886836   | 0.7247254615   |
| 41.1725426655  | 21.4855307398  |

gene\_expression\_table

|                |                |
|----------------|----------------|
| 0.7237767827   | 1.8736712403   |
| 0.4119966478   | 0.2747181867   |
| 1.5906153294   | 2.2994905917   |
| 86.4656433539  | 47.1178998655  |
| 8.2891793386   | 2.4709840129   |
| 0              | 0              |
| 133.4517510091 | 91.1998109344  |
| 0              | 0.0298208035   |
| 0.7638276719   | 0.1797593321   |
| 0.8152565009   | 3.1657329217   |
| 8.585202999    | 23.7136217651  |
| 9.988453413    | 4.8821904634   |
| 1.4217804663   | 0.8736831378   |
| 3.7427062811   | 7.976215941    |
| 144.3519529259 | 53.505605082   |
| 449.8977816521 | 326.8675361918 |
| 12.2123610326  | 11.7117907854  |
| 1.0701183978   | 1.3599459509   |
| 0              | 0.0181217091   |
| 2.1543118431   | 2.066984139    |
| 5.5579062692   | 5.5122797772   |
| 0              | 0.2972976697   |
| 2.3317901121   | 1.188988396    |
| 0              | 0              |
| 0.3537533883   | 1.6650476318   |
| 1.4517265997   | 0.9395363473   |
| 26.290510983   | 36.6592385236  |
| 7.3768316954   | 9.6206924626   |
| 0              | 0.6159699009   |
| 4.5272610367   | 4.0220600458   |
| 3.7566918133   | 4.6169691724   |
| 0.7842077751   | 2.5376393485   |
| 12.618792916   | 8.9091265076   |
| 1.4990179779   | 1.4993113522   |
| 131.6747702982 | 112.8861775697 |
| 0              | 0              |
| 0              | 0.2787408949   |
| 0.5606603255   | 4.1562956858   |
| 75.7750734082  | 211.5397645412 |
| 12.4483638869  | 11.7184001586  |
| 33.5151579917  | 7.3944964581   |
| 1.0279853766   | 0.0604815626   |
| 0              | 1.1242785383   |
| 10.947367284   | 12.2376874281  |
| 31.8898862087  | 29.9691753565  |
| 0.8234090392   | 1.9452653343   |
| 0              | 0.1310284775   |
| 34.4758089285  | 10.8180568543  |
| 0              | 0              |

gene\_expression\_table

|                |                |
|----------------|----------------|
| 6.2925840016   | 2.6285935446   |
| 0.9211955429   | 1.9511488185   |
| 11.3444747781  | 4.6165474822   |
| 176.8160406783 | 123.7049911763 |
| 0              | 0.3003243078   |
| 1.7736068426   | 0.1192574089   |
| 0              | 0              |
| 0.3359906826   | 0.7709530086   |
| 7.3109161048   | 16.5910392561  |
| 5.8702430431   | 4.3747626028   |
| 3.7703694501   | 1.242247128    |
| 0.2821350478   | 0.2257522118   |
| 14.0897817054  | 12.3516961491  |
| 5.4682626197   | 3.0563918693   |
| 0              | 0              |
| 4.46301157     | 0.5251629448   |
| 7.3967848496   | 7.3692198053   |
| 119.5300637218 | 101.0391762024 |
| 49.9225035866  | 65.7552146768  |
| 2.9062599347   | 3.2882677847   |
| 0.5158999986   | 0.6374129579   |
| 2.3807126919   | 1.4357106406   |
| 21.2985012102  | 23.3911665767  |
| 31.7273494147  | 22.2304609815  |
| 0.248453534    | 1.8564573058   |
| 0              | 0.5788171563   |
| 0              | 0.0378393469   |
| 7.358021498    | 6.2181546733   |
| 2.0428257854   | 2.8502138467   |
| 21.4298342738  | 15.3591432938  |
| 4.0283582294   | 8.5323104966   |
| 2.4100962209   | 0.2025687314   |
| 13.0811887213  | 7.0036537982   |
| 4.1333240859   | 2.249454733    |
| 2.9017147809   | 3.3461612057   |
| 10.0790195226  | 17.8464622007  |
| 5.8297341824   | 5.1448898166   |
| 0              | 0.3851673052   |
| 17.978653819   | 9.3409655928   |
| 13.7895780921  | 6.4904832302   |
| 113.2947074425 | 129.6515051181 |
| 17.7292110991  | 19.6102588783  |
| 63.3485925632  | 55.9067563933  |
| 67.3402791135  | 37.4780769813  |
| 8.9043620283   | 5.0293297185   |
| 1.5830949536   | 0.5122780179   |
| 0              | 2.2672186724   |
| 1.030474943    | 0.2425121455   |
| 58.0694414966  | 53.3502429135  |

gene\_expression\_table

|                |                |
|----------------|----------------|
| 0              | 0              |
| 0.1831547431   | 0.6968426307   |
| 9.1251753503   | 2.4159603302   |
| 4.9851257831   | 1.662033809    |
| 2.7520235046   | 2.2513953359   |
| 2.2021104082   | 1.7620331083   |
| 1.0878806613   | 1.4721265968   |
| 0              | 0.8441794198   |
| 2.5767312374   | 2.5393350095   |
| 0.6535064793   | 0.8458797828   |
| 334.4345366628 | 343.8204223124 |
| 1.6468095965   | 1.0519497818   |
| 6.1982737307   | 7.1314357972   |
| 0.7837748626   | 0.7275674009   |
| 917.4704625918 | 896.7735460328 |
| 6.5700471918   | 3.5911649154   |
| 3.0416054298   | 0.9842414047   |
| 2.2200339008   | 0.5877710433   |
| 0.5811108134   | 0.5470348641   |
| 0              | 0              |
| 89.7941161254  | 55.3033183878  |
| 1.3653753558   | 0.481991497    |
| 31.0643345139  | 13.6244596788  |
| 0.7460176072   | 0.1755679085   |
| 2.2540345626   | 2.5344432727   |
| 4.2499029822   | 3.8131591005   |
| 7.6088960619   | 4.3389526516   |
| 1.2068219633   | 0.4260205241   |
| 0.9040317086   | 0.9118070295   |
| 2.3045904637   | 1.741269738    |
| 1.1097938378   | 0.9141267361   |
| 23.4231022157  | 6.0636364733   |
| 0              | 0.3154410731   |
| 0              | 0.4496827145   |
| 0.4769641897   | 1.6463162056   |
| 33.820384533   | 18.3213959315  |
| 1.643688024    | 0.6769451754   |
| 0              | 0              |
| 35.5151792174  | 27.6358126577  |
| 3.8982329407   | 1.8348215848   |
| 2.3676598993   | 2.1173808118   |
| 896.0513183018 | 811.8759385328 |
| 21.7366563505  | 41.708716421   |
| 3.0163417996   | 2.7380560515   |
| 0              | 0              |
| 0              | 0              |
| 14.0431946065  | 6.4446091476   |
| 0.8071817886   | 1.1279011394   |
| 1.1075464762   | 0              |

gene\_expression\_table

|                 |                 |
|-----------------|-----------------|
| 50.6537241602   | 14.3259408837   |
| 9.4475596396    | 8.3545573635    |
| 3593.4266051104 | 6453.4576302681 |
| 2.0954772123    | 7.3972493655    |
| 0               | 1.0805719211    |
| 0               | 0               |
| 0               | 0               |
| 866.8134080916  | 501.4187701499  |
| 275.8439655104  | 255.9591076737  |
| 23.4362232651   | 4.0709529957    |
| 265.2147936304  | 210.0203754246  |
| 180.1645415754  | 50.9752248194   |
| 6.7170108092    | 13.2610083099   |
| 14.2862561368   | 22.116510809    |
| 80.2526582145   | 26.4413436137   |
| 0               | 0.1692015143    |
| 55.0602594205   | 66.177798744    |
| 10.243365189    | 8.7817456527    |
| 23.0202705954   | 24.2198334888   |
| 1.9073747832    | 1.9398110703    |
| 0               | 0.3790241771    |
| 5.4896215036    | 3.5528032183    |
| 0               | 0.5584095945    |
| 1.3642668618    | 3.4113346597    |
| 4.7821925509    | 12.2860751115   |
| 7.6512556272    | 9.3408603551    |
| 23.9642311669   | 19.0465111944   |
| 12.7399028252   | 14.5225838637   |
| 3.2211645902    | 2.1478633383    |
| 54.889481913    | 29.798784895    |
| 0               | 0               |
| 2.7878128793    | 0.9185180892    |
| 10.9145629672   | 24.9728410033   |
| 13.3311534893   | 10.3532744448   |
| 0.3937015401    | 0.2316344658    |
| 38.470592953    | 23.414678745    |
| 0.2263630518    | 0.0266361592    |
| 3.8496655989    | 2.5480714108    |
| 4.7875587535    | 3.081869225     |
| 0               | 0.1272036221    |
| 43.3778677846   | 55.6366229035   |
| 1.9448337038    | 3.776004286     |
| 5.5253295491    | 1.6254149755    |
| 1.1478208935    | 0.4051925416    |
| 2.6225397928    | 6.0947409164    |
| 24.1873641207   | 29.8843561723   |
| 1.167711092     | 2.1297722589    |
| 0               | 0               |
| 62.4953719461   | 30.4124728344   |

gene\_expression\_table

|                 |                 |
|-----------------|-----------------|
| 0               | 0.888263887     |
| 3.3946107536    | 2.716220093     |
| 4.3865970778    | 4.2031087099    |
| 0.7129621877    | 1.8037278857    |
| 21.7173704042   | 27.2585044484   |
| 629.7162330477  | 196.7999372962  |
| 0.4564563443    | 0.5729200663    |
| 4.2152098021    | 5.4808451944    |
| 10.1862271936   | 20.7452458714   |
| 22.4888480239   | 6.9209997965    |
| 10.9199974271   | 7.7993902275    |
| 1.5109926188    | 1.6001876506    |
| 45.2813379654   | 51.1028460129   |
| 4.4166015537    | 8.0553790509    |
| 0               | 0.2540894687    |
| 76.6408170751   | 54.6110065442   |
| 20.4853342853   | 17.3556791919   |
| 48.4863480584   | 20.5037547703   |
| 5.3557375731    | 4.9629044447    |
| 5.8633561526    | 3.2657236155    |
| 0.2224749329    | 0.6544660991    |
| 6.3399972982    | 2.6732670444    |
| 26.0868178943   | 20.5719602226   |
| 0.1127437362    | 0.3515639689    |
| 2.3057442496    | 2.488632882     |
| 2.9094911319    | 4.3716746743    |
| 1194.6471653191 | 1104.5118218402 |
| 5.938795359     | 1.773924003     |
| 13.9462401477   | 18.7158443387   |
| 2.974310685     | 2.6540710188    |
| 0               | 0.296419143     |
| 0               | 0               |
| 0               | 0               |
| 0               | 0               |
| 10.0379002555   | 8.341946474     |
| 0               | 0.4383951322    |
| 0               | 0.005467        |
| 0               | 0               |
| 5.8353820125    | 2.1515029872    |
| 2109.0730658726 | 1018.9673235317 |
| 5.6676199358    | 4.7196658997    |
| 0.8265896787    | 0.6808541364    |
| 4.0785479823    | 10.1583719072   |
| 35.5865968249   | 10.7013322196   |
| 1.7763570299    | 2.3515209032    |
| 24.9610437846   | 7.0492034641    |
| 9.6000199195    | 3.3889054408    |
| 0.4341489957    | 0.0851439144    |
| 0               | 1.2298299355    |

gene\_expression\_table

|                |                |
|----------------|----------------|
| 3.2633319778   | 2.0879812232   |
| 0              | 0              |
| 0              | 0              |
| 2.1215106047   | 1.7474683122   |
| 15.5612424579  | 7.062786135    |
| 42.1126345276  | 15.0567838833  |
| 9.6032003138   | 6.7800563051   |
| 25.0292666863  | 28.8478162961  |
| 0              | 0.9128685471   |
| 2.9479943706   | 2.0813444651   |
| 12.6262455001  | 10.4001195489  |
| 0              | 0.9496120193   |
| 0              | 0.3364088395   |
| 0              | 0.1577054963   |
| 1.5036445766   | 0.6192689408   |
| 0              | 0              |
| 14.0763158477  | 19.9334510643  |
| 3.9257819509   | 1.679807602    |
| 2.4062806746   | 1.132588993    |
| 1.5812461214   | 2.3342745586   |
| 0              | 0.6897941088   |
| 10.5159659521  | 16.0863897117  |
| 0              | 0              |
| 1.4231882043   | 2.7166816174   |
| 0.1546086157   | 0.2546993224   |
| 0              | 4.5868433328   |
| 1.2875215487   | 2.4240442933   |
| 2.1566870317   | 0.9788562389   |
| 1.9641726621   | 2.5166874913   |
| 293.0738698957 | 147.7593609176 |
| 16.798365871   | 6.8194946542   |
| 528.5194697221 | 295.8055783101 |
| 0              | 0              |
| 6.0111829798   | 3.8772514      |
| 3.6387422177   | 1.6107389042   |
| 0              | 0              |
| 0              | 0              |
| 4.789486231    | 2.9913052257   |
| 0              | 0.4081425633   |
| 0.4853658194   | 1.1422607313   |
| 0              | 2.1218869836   |
| 0.1180326713   | 0.3194450291   |
| 3.3585054046   | 2.9392673634   |
| 0              | 0              |
| 0              | 0              |
| 7.136906674    | 6.1585363055   |
| 222.6730546277 | 489.4151247157 |
| 12.1463482703  | 3.9579558008   |
| 6.7536033564   | 5.0486637506   |

gene\_expression\_table

|                |                |
|----------------|----------------|
| 0              | 0.0173892089   |
| 20.9272711458  | 14.7750824772  |
| 3.2049599367   | 1.0559581307   |
| 0.6393237866   | 1.0381641116   |
| 0              | 0.0173262997   |
| 0              | 0              |
| 2.1929518679   | 2.4944333541   |
| 551.1472146031 | 837.2002287085 |
| 0              | 0.6759677618   |
| 128.0707654715 | 73.5176387097  |
| 13.9282689738  | 9.9826380489   |
| 1.5419985715   | 3.2055654491   |
| 16.1454319585  | 30.202494462   |
| 0              | 0              |
| 0              | 0              |
| 0              | 0.1635619854   |
| 2.949231606    | 3.4992829918   |
| 0.1984242988   | 0              |
| 188.8515495198 | 68.1480113946  |
| 0              | 0              |
| 0              | 0.0165828675   |
| 5.3738576965   | 2.6611071146   |
| 3.3598289382   | 2.2139675723   |
| 0.7370618393   | 2.189935739    |
| 150.0657664707 | 90.455816301   |
| 1.3366191796   | 2.9358950257   |
| 11.7577681113  | 13.8353755715  |
| 0              | 0.2343921611   |
| 48.0785757344  | 13.8202444976  |
| 0.4381983666   | 0.2062513538   |
| 0.6456415296   | 0.354539233    |
| 0              | 0              |
| 0.4590604943   | 0.7022299279   |
| 0.6680554533   | 5.2668794518   |
| 2.9805238622   | 5.9209533679   |
| 2.5215873276   | 1.5785258842   |
| 0              | 0              |
| 0              | 0.0356729376   |
| 3.7187468918   | 1.8670304334   |
| 0              | 0.003113       |
| 0              | 0.0187739368   |
| 0.596224858    | 1.8241035518   |
| 0              | 0              |
| 11.2774988536  | 14.1991592976  |
| 24.9453361491  | 21.8314409474  |
| 13.0046030269  | 6.3396184361   |
| 0.2546394184   | 0.2397075333   |
| 13.6370297881  | 9.2153930745   |
| 71.0933308086  | 51.4235782421  |



gene\_expression\_table

|                |                 |
|----------------|-----------------|
| 0.7668283044   | 1.2181421347    |
| 30.6581281302  | 31.4371735131   |
| 4.1042455343   | 4.9099603057    |
| 1.6378371131   | 4.8181107526    |
| 0              | 0.3493985358    |
| 0.568214706    | 1.0196435478    |
| 0.3484024753   | 1.3323878234    |
| 8.7597089861   | 3.3635185645    |
| 3.353551427    | 3.6501672616    |
| 2.0892364349   | 4.3022109559    |
| 13.7751689196  | 3.4444662179    |
| 62.8389980235  | 20.0080251217   |
| 12.9176738623  | 27.3604277501   |
| 1.0125563315   | 0.8578626352    |
| 1.4678728844   | 1.5199775808    |
| 17.2133373795  | 9.4523092966    |
| 0.1960484632   | 0.2422249101    |
| 0.7620881229   | 1.076099678     |
| 3.3577273424   | 1.3609139749    |
| 0              | 0               |
| 0.8994049729   | 0.6614566149    |
| 0.0336989065   | 0               |
| 0              | 0.1181643915    |
| 7.6792529696   | 1.2048244524    |
| 0              | 0               |
| 1.2042649778   | 0.8659808707    |
| 4.61672469     | 4.4818156386    |
| 11.3987577429  | 12.1232231773   |
| 4.7054566944   | 2.8653534236    |
| 5495.238635507 | 4462.0630227985 |
| 3.7984010414   | 8.7715540521    |
| 6.7283299322   | 4.3703117655    |
| 8.2553707306   | 6.4529389492    |
| 0              | 0.1314653148    |
| 152.8115790881 | 119.6606516564  |
| 0.2977449787   | 1.1211416496    |
| 0.8700354214   | 2.2181713843    |
| 73.8594130743  | 44.2296659768   |
| 4.0548569716   | 2.0516820438    |
| 72.0031301521  | 22.8289886593   |
| 103.5223740701 | 37.5986263419   |
| 92.7570970554  | 56.6938052994   |
| 9.546130819    | 11.5775871461   |
| 33.6920223681  | 9.9597058121    |
| 0              | 0               |
| 2.4718498968   | 2.831064432     |
| 6.3551828789   | 4.6863067126    |
| 2.5629950248   | 15.3474700264   |
| 6.8594017425   | 16.2326104668   |

gene\_expression\_table

|                |                |
|----------------|----------------|
| 0              | 0              |
| 8.6832400165   | 11.5118020574  |
| 6.482066261    | 4.5340969371   |
| 17.3348045372  | 36.3082246178  |
| 62.718551532   | 48.6348405805  |
| 11.3535886919  | 3.8378996638   |
| 15.4273933556  | 8.6945359295   |
| 27.9143582796  | 16.4234243684  |
| 0              | 4.0112110615   |
| 0.7269678175   | 0.61590502     |
| 31.4741987284  | 21.9221510695  |
| 0              | 0.7712805919   |
| 0              | 0              |
| 4.2486607055   | 1.817964584    |
| 2.434045553    | 3.1007465918   |
| 3.1326360314   | 1.8891649122   |
| 0              | 0.5342940674   |
| 1.2159799714   | 1.0874419336   |
| 5.5988063791   | 1.5811488359   |
| 45.5467611738  | 21.6931786551  |
| 0.7413242327   | 0.5233901068   |
| 0              | 0.0706954828   |
| 3.5498806161   | 5.4302917374   |
| 1.9767635125   | 2.3260592786   |
| 12.6880006947  | 6.4497518051   |
| 38.1554759363  | 22.6625882271  |
| 12.48422123    | 6.3945548454   |
| 18.8962569094  | 13.8142350274  |
| 0              | 0.0622166284   |
| 0              | 0              |
| 1.2795262533   | 1.1360584349   |
| 1.089195882    | 0.6151956986   |
| 104.3565218214 | 68.9998855668  |
| 14.9383865832  | 10.3071070292  |
| 78.0889262015  | 40.7537212865  |
| 1.7313874767   | 2.5806117833   |
| 0.8563318163   | 0.6045878187   |
| 0              | 0              |
| 1.5617373288   | 1.3093595551   |
| 169.907988974  | 129.8142708962 |
| 21.1906419426  | 5.1076626687   |
| 0.8878044792   | 1.1491483006   |
| 0              | 0              |
| 0              | 0              |
| 40.1308742833  | 14.3812556072  |
| 30.7186764564  | 9.7924675453   |
| 7.4586862033   | 6.0711819174   |
| 0              | 0.0207496628   |
| 0.8732549111   | 1.5070876837   |

gene\_expression\_table

|               |               |
|---------------|---------------|
| 3.8719375071  | 10.0234466274 |
| 25.9451869743 | 0             |
| 37.019117219  | 12.3590046418 |
| 19.4396362659 | 14.3508244292 |
| 0             | 0             |
| 22.5581791028 | 14.5993255206 |
| 0             | 0.005775      |
| 0             | 0.0201302699  |
| 5.2177590041  | 6.4467284538  |
| 7.6601695717  | 5.7549186094  |
| 1.3033130599  | 0.556942422   |
| 0             | 0             |
| 0             | 0.2393457463  |
| 4.5913528332  | 5.7306666773  |
| 0.920584833   | 1.0381174037  |
| 0             | 0.003036      |
| 0.0765822443  | 0.2883660508  |
| 15.4470567425 | 12.3869921648 |
| 23.7950221995 | 11.5538672262 |
| 0.1258078467  | 0.0148038198  |
| 10.5032095875 | 10.1022498928 |
| 0             | 0             |
| 0.5277847903  | 0.2251287415  |
| 6.6467272136  | 7.9067539506  |
| 0             | 2.3364557419  |
| 5.8458262416  | 10.1462132267 |
| 22.2000556372 | 12.6623133183 |
| 0.5105840416  | 1.2541797462  |
| 0.7880131343  | 1.1590696428  |
| 30.6539447904 | 42.7804153663 |
| 1.3572720957  | 3.8969318331  |
| 0             | 0.0169530543  |
| 0             | 0             |
| 5.8745972404  | 5.0324044583  |
| 34.0997934677 | 12.8974035525 |
| 0             | 0.0990743966  |
| 8.3293962824  | 19.2254456235 |
| 0.4265027609  | 0             |
| 86.30979161   | 50.4144171119 |
| 0             | 0.003254      |
| 10.6112419318 | 2.0810428762  |
| 18.1603102061 | 3.3389456578  |
| 79.0778663678 | 47.4618579289 |
| 0.0813929939  | 0.0542726156  |
| 71.4400920187 | 92.4005035758 |
| 0             | 0.1724871467  |
| 1.5028260439  | 2.785193244   |
| 16.4904769144 | 16.8759113331 |
| 3.9378978885  | 1.9461656505  |

gene\_expression\_table

|                |                |
|----------------|----------------|
| 14.7378768878  | 6.3377390625   |
| 0              | 0              |
| 18.2913772816  | 17.4878266447  |
| 0              | 0              |
| 11.6261890767  | 14.7998638451  |
| 1.820083728    | 2.0346093429   |
| 0              | 0.4144044377   |
| 0              | 0.1168207866   |
| 7.0003125535   | 10.2965920465  |
| 0              | 0              |
| 1.6664837886   | 1.8340676824   |
| 0              | 0.0332187389   |
| 0              | 0.255204319    |
| 0              | 0              |
| 0              | 0              |
| 18.1578928508  | 13.0335087006  |
| 23.7798194083  | 14.5904752669  |
| 105.8975939614 | 82.2943804245  |
| 0              | 0.3411359746   |
| 0.9130996077   | 0.2148890144   |
| 0.6118360012   | 0.2159843803   |
| 2.1336321839   | 2.5734129449   |
| 3.262292165    | 5.4510135255   |
| 49.6896260072  | 26.1512297188  |
| 0              | 0.2420389091   |
| 0              | 0.5289191256   |
| 2.124348044    | 1.9997776962   |
| 1.3310646377   | 2.0883531634   |
| 0              | 0              |
| 8.4867000773   | 8.7086472034   |
| 0              | 0.0910474485   |
| 9.7055843584   | 7.1528828353   |
| 23.1253760355  | 17.2653223299  |
| 28.5981744577  | 18.7739923968  |
| 1.1459226813   | 4.0452245329   |
| 5.2836199858   | 27.35585625    |
| 5.2004413612   | 11.1678387518  |
| 1.6151140909   | 0.4276138729   |
| 0              | 0              |
| 16.7812778422  | 14.9509544959  |
| 212.1197436954 | 157.5071407241 |
| 61.6750215895  | 50.1963592327  |
| 340.4468816531 | 92.5079274832  |
| 0              | 1.5433389105   |
| 0              | 0.4543367734   |
| 0              | 11.237974351   |
| 0              | 0              |
| 0              | 0              |
| 306.4192404552 | 336.5261914477 |

gene\_expression\_table

|                |                |
|----------------|----------------|
| 1822.342434116 | 662.1570049429 |
| 45.4387664823  | 62.5888180644  |
| 0              | 0              |
| 0.6669947916   | 4.3166933108   |
| 3.9548755232   | 6.9805580043   |
| 0              | 0              |
| 106.0009623567 | 69.0356384899  |
| 0              | 0.1077023469   |
| 35.355706842   | 41.6030898146  |
| 4.0797090697   | 3.9714030347   |
| 9.6871761659   | 10.7656356142  |
| 22.8363713548  | 19.6369218548  |
| 11.6722325998  | 10.9877806908  |
| 29.3871638497  | 18.0376236612  |
| 2.6423518285   | 7.6176811368   |
| 44.0201368976  | 107.4819537101 |
| 1.6591405965   | 0.4880780319   |
| 264.979460595  | 86.5139520093  |
| 0              | 0              |
| 23.2642537296  | 16.1969145371  |
| 0              | 1.5105993473   |
| 10.4216362498  | 2.5752610994   |
| 63.8837689192  | 22.3010516826  |
| 17.7048466313  | 49.1666065034  |
| 1.6849629521   | 4.956743288    |
| 1.6587133684   | 1.1710856448   |
| 58.973973958   | 42.8542859983  |
| 1.8301771094   | 0.4307141871   |
| 0              | 0              |
| 8.3451847877   | 8.5923126801   |
| 77.5630748467  | 48.828666252   |
| 569.8565163343 | 132.1379201235 |
| 0.9932926754   | 1.6363316508   |
| 0              | 0.0766484647   |
| 0              | 6.749266435    |
| 8.3681466937   | 15.4266615021  |
| 11.5995438764  | 7.2795695903   |
| 0              | 0              |
| 373.7381546137 | 313.9105028423 |
| 77.2539169116  | 53.7407484665  |
| 21.4720445534  | 3.1582715983   |
| 0              | 0.0647942884   |
| 2.0354792604   | 15.5684759639  |
| 0              | 18.5778292023  |
| 17.455035534   | 7.2821349238   |
| 0              | 0.2050039938   |
| 1.6000916398   | 0.5020877789   |
| 19.3209759029  | 22.0529582509  |
| 104.4486900805 | 112.3393553914 |

gene\_expression\_table

|                |                 |
|----------------|-----------------|
| 0              | 0               |
| 330.1040301445 | 259.7650291107  |
| 11.1286150867  | 24.2258437601   |
| 132.026994597  | 54.6623930477   |
| 1.4016711466   | 2.474021416     |
| 0              | 1.6992008599    |
| 15.8104114874  | 7.7074229748    |
| 8.8849839531   | 6.2729808297    |
| 23.4453625697  | 18.2771677573   |
| 0              | 0               |
| 54.5642543945  | 55.1099815837   |
| 0              | 9.5902530258    |
| 20.9665184963  | 0               |
| 58.5223894722  | 108.1301028658  |
| 50.9591447062  | 97.9406580618   |
| 44.5859857239  | 38.2240385926   |
| 0              | 0               |
| 6.3464171094   | 13.068710062    |
| 48.1237897634  | 73.8617004368   |
| 47.9317720538  | 7.1114753556    |
| 43.700171438   | 24.2418133341   |
| 115.2751244759 | 44.1713605001   |
| 0              | 1.6317327399    |
| 0              | 6.228463909     |
| 8.5145520066   | 1.1271465527    |
| 0              | 5.3165293438    |
| 116.9337458162 | 141.9411745074  |
| 6.6385572305   | 1.5623191692    |
| 528.3860763227 | 1862.7700045965 |
| 0              | 0               |
| 0              | 0               |
| 0              | 0               |
| 6.0249411221   | 3.6940303818    |
| 2.5522571118   | 2.6428539089    |
| 0              | 0.2820759847    |
| 2.0383316611   | 2.3813743808    |
| 0.8125940191   | 0.1593633437    |
| 5.9077661352   | 3.6654277679    |
| 0.7502170153   | 0.4237348749    |
| 37.1664028461  | 8.3491680333    |
| 0.3866140749   | 0.8340366931    |
| 0.2312219881   | 1.1427322485    |
| 0.0765754164   | 0.0360425426    |
| 18.45168023    | 8.2971268179    |
| 3.2466445627   | 6.8765928706    |
| 17.4269851943  | 20.3740490354   |
| 17.4019271482  | 13.3099604503   |
| 4.4021211284   | 1.4244943939    |
| 7.8249890643   | 9.3045940317    |

gene\_expression\_table

|                 |                 |
|-----------------|-----------------|
| 8.5381469882    | 3.4868461028    |
| 9.902957679     | 5.0291111785    |
| 0.8886501517    | 1.0157989374    |
| 46.6711620476   | 22.5514321618   |
| 250.1211969546  | 239.658797648   |
| 0.4279304551    | 0.3608747225    |
| 4.1677105111    | 0.8337052356    |
| 7.8630842661    | 1.6448885037    |
| 4.8575215998    | 7.3988499278    |
| 4.2541364192    | 3.9045597887    |
| 1.7086507602    | 2.4126849345    |
| 122.6439578149  | 69.8938552816   |
| 0               | 0               |
| 1.7991239472    | 1.9317904714    |
| 6.9536902479    | 2.8323737762    |
| 0               | 0               |
| 1.9414145166    | 0.6853392257    |
| 3.5911195064    | 2.7768710435    |
| 0               | 0.6077819936    |
| 15.3357141368   | 8.517498492     |
| 18.374471595    | 9.1289747958    |
| 0.297524943     | 1.0853033328    |
| 6.9274315768    | 11.6838374943   |
| 0               | 0               |
| 2952.764177115  | 2526.4357874112 |
| 52.0135280556   | 30.3175095341   |
| 1682.9440325623 | 1418.092400538  |
| 114.0529109438  | 47.8109429711   |
| 23.058375378    | 2.9393877061    |
| 7.3222993284    | 4.4094444104    |
| 0               | 0.151475856     |
| 21.3322001303   | 16.5670677063   |
| 4.6276609946    | 4.100045224     |
| 718.039637034   | 274.3166592101  |
| 7.1910841347    | 2.6795556602    |
| 0.8456964351    | 2.4878292563    |
| 1.384261203     | 1.4985524102    |
| 9.0399546035    | 3.191196643     |
| 1.1367385831    | 0.8694408071    |
| 1.2193695815    | 0.9246702886    |
| 0.1932735265    | 0.1364550722    |
| 1.6447605621    | 0.903182527     |
| 6.2473104422    | 4.5740895965    |
| 0               | 0.6224141588    |
| 18.1873908437   | 14.17101058     |
| 0.5950086627    | 0.3325699158    |
| 49.7265441681   | 26.2659550125   |
| 0               | 0.037643908     |
| 2.5205628236    | 0.8341729827    |

gene\_expression\_table

|               |               |
|---------------|---------------|
| 97.9406758079 | 62.7122606317 |
| 0.2999354353  | 0.0705868555  |
| 21.6085988936 | 14.302606721  |
| 0.1584081192  | 0.6710362791  |
| 0.2285178452  | 0.0806691419  |
| 14.4892315568 | 19.891072708  |
| 54.7603652939 | 30.9077095659 |
| 1.7244698359  | 2.7901295102  |
| 24.6310780565 | 7.3148606574  |
| 0.4972554897  | 1.4628023768  |
| 33.2041926083 | 14.554096953  |
| 69.2933171354 | 52.9993777523 |
| 19.9417034584 | 4.0673393176  |
| 1.9691094455  | 1.1585263658  |
| 0.0856202819  | 0.1914239688  |
| 5.0838119298  | 1.0842602922  |
| 2.1918201726  | 1.5474699783  |
| 8.6410481569  | 4.2705300095  |
| 40.5481661281 | 15.4149889384 |
| 28.6046726504 | 18.091788951  |
| 7.9849211892  | 3.7061461356  |
| 2.1130564201  | 2.3206729066  |
| 1.7000827041  | 0.9502321515  |
| 0             | 0             |
| 13.5154278407 | 8.0389507199  |
| 0.5272606257  | 1.3773502029  |
| 0.9562137136  | 1.3502129719  |
| 6.4004950343  | 3.9711375992  |
| 9.0620586626  | 2.9704996309  |
| 7.8358064914  | 7.4787689317  |
| 0             | 0             |
| 13.0565892223 | 8.5780655314  |
| 40.4894646421 | 22.8189621527 |
| 1.538826535   | 3.3800451458  |
| 0             | 5.4763060438  |
| 17.1812291024 | 18.5522235198 |
| 0.9547295577  | 2.846025375   |
| 1.8792998248  | 0             |
| 0.3171559413  | 0.510036804   |
| 3.0713350442  | 3.0719361382  |
| 2.0456060229  | 3.0088328977  |
| 6.4523673115  | 10.1956509312 |
| 0             | 0             |
| 4.485369358   | 3.782522144   |
| 13.5107248413 | 16.6046626096 |
| 6.5218074427  | 2.6007066259  |
| 0             | 0             |
| 0.2465458641  | 0.3578032268  |
| 7.944435806   | 11.9189859291 |



gene\_expression\_table

|                |                |
|----------------|----------------|
| 0.376629119    | 0.3545438395   |
| 0              | 0              |
| 2.5591456646   | 3.6996571514   |
| 1.7015297104   | 3.6706842948   |
| 0              | 0              |
| 0              | 0              |
| 0              | 0              |
| 2.3946518089   | 1.261295933    |
| 9.0413644215   | 5.2181669094   |
| 0.166397645    | 0.0293700372   |
| 0              | 1.2638879213   |
| 13.6507777819  | 6.8952857747   |
| 13.2739225181  | 6.5601630067   |
| 6.9764765697   | 2.4627677445   |
| 0              | 0              |
| 0.4805022651   | 1.1308148345   |
| 0.7231809033   | 0.5105805443   |
| 25.7566414102  | 22.4061690314  |
| 0.5212539896   | 0.214676002    |
| 0              | 0              |
| 0.5094600891   | 2.0082650783   |
| 22.8426005887  | 14.1232152847  |
| 0.3476409707   | 0.1636277684   |
| 0.1573139597   | 0.1758558946   |
| 2.8548731243   | 1.8236371507   |
| 12.219862754   | 12.1195462959  |
| 59.0071453375  | 20.2225818066  |
| 2.7139511724   | 2.767707466    |
| 1.365423592    | 0.0803347541   |
| 22.8446777553  | 9.925422064    |
| 16.3774971797  | 7.0661853645   |
| 8.1412310309   | 8.3344202266   |
| 33.5747985277  | 42.5004854442  |
| 0              | 0              |
| 2.6232221124   | 3.5497598019   |
| 0.1790704946   | 0.3740145113   |
| 2.2499522759   | 10.3253308279  |
| 20.9326115615  | 27.5050873793  |
| 3.77165722     | 3.173250227    |
| 0              | 0.129831506    |
| 0.4816799765   | 0.0188931077   |
| 209.3825486368 | 145.8273111986 |
| 3.6227282568   | 6.7495400026   |
| 1.1197180218   | 0.6587865664   |
| 345.7178143175 | 314.3504319032 |
| 31.3282237713  | 37.5477138776  |
| 0              | 0              |
| 6.6923921727   | 2.6249811558   |
| 0              | 0              |

gene\_expression\_table

|                |                |
|----------------|----------------|
| 0              | 0.2070714885   |
| 19.9111117209  | 8.460624545    |
| 6.9070733656   | 4.4024277953   |
| 0.2227827041   | 0.1572891565   |
| 1.207930268    | 1.7165807031   |
| 0.2296137004   | 0.145900782    |
| 0              | 0              |
| 3.7820862998   | 1.5894228974   |
| 0.6690499965   | 8.7780793489   |
| 11.6744129555  | 7.1217011145   |
| 2.6576444432   | 3.7005820531   |
| 1.4942271784   | 2.3443444942   |
| 1.5807984985   | 1.8105235311   |
| 0              | 0.160409857    |
| 125.2825938285 | 42.3832882237  |
| 0              | 0              |
| 0              | 0              |
| 0.9850565857   | 0.3090978422   |
| 36.5585321567  | 28.3921805433  |
| 4.1136374005   | 2.2992472708   |
| 0.5745455656   | 1.4197433199   |
| 2.5386224239   | 2.9871991296   |
| 8.4094169269   | 5.5661444618   |
| 0              | 4.1410526761   |
| 0.967742005    | 0.6832456961   |
| 0.98258568     | 0.1541612522   |
| 0.7202161635   | 14.1528986651  |
| 1.4938678195   | 0.9765752849   |
| 1.0863975769   | 7.0310071561   |
| 0              | 0.4152585009   |
| 81.3767645973  | 297.1799179473 |
| 188.1271615818 | 163.5673814246 |
| 0.1692948698   | 0.0597628245   |
| 2.2355069811   | 1.1837353206   |
| 23.4901793138  | 16.6737124258  |
| 2.6118531266   | 2.8582338756   |
| 2.4533248823   | 2.1170082568   |
| 8.8414878977   | 5.4099688265   |
| 0              | 0              |
| 0              | 0.489549096    |
| 31.8080564235  | 30.2831129762  |
| 17.8240546929  | 9.5080229634   |
| 0              | 0              |
| 5.5875741481   | 7.4852743826   |
| 32.9359367748  | 38.4034194039  |
| 27.9503038734  | 123.6631887611 |
| 14.6982507211  | 7.5111642158   |
| 67.6904630349  | 35.3800513359  |
| 30.8317486796  | 31.1156006546  |

gene\_expression\_table

|                |                |
|----------------|----------------|
| 30.0016923703  | 48.1003599913  |
| 0.3945522436   | 0.8356859191   |
| 0              | 0.4752059581   |
| 0.3943965652   | 0.2784520609   |
| 9.5714908856   | 9.3735405918   |
| 0              | 0.0697035259   |
| 5.4876728945   | 4.950634452    |
| 0              | 2.5767201709   |
| 0              | 0              |
| 92.9749343182  | 92.9931305348  |
| 0              | 9.1507265625   |
| 0              | 0              |
| 9.128408171    | 3.4611195598   |
| 0              | 0              |
| 0.4971851267   | 0.4095267081   |
| 0.4207638064   | 2.1289864284   |
| 3.6084100641   | 8.0674363673   |
| 5.473942054    | 9.0176690712   |
| 0              | 0              |
| 1.2080667707   | 0.4975366129   |
| 1.2481327971   | 4.5529046098   |
| 36.6632012898  | 40.2001455597  |
| 7.8505908984   | 8.7245859393   |
| 1.6281318887   | 1.7242417398   |
| 774.7784338216 | 162.2890191574 |
| 9.3031415813   | 13.3970605784  |
| 0              | 0              |
| 0.2886566354   | 0.1698312522   |
| 0              | 0              |
| 0.2008063504   | 0.4536748809   |
| 0.1010111131   | 0.0356579584   |
| 9.2867296233   | 6.1592505089   |
| 6.2020090818   | 6.7505660787   |
| 0              | 0              |
| 0.9558550467   | 1.6496413018   |
| 3.9894385008   | 0.4694375621   |
| 0              | 0.2147444242   |
| 0              | 0              |
| 4.1027800718   | 2.5894267254   |
| 0.1082381545   | 0.0254727854   |
| 0.7178084874   | 1.7315239875   |
| 1.5861279318   | 2.1758272168   |
| 0.1209359557   | 0.6261439368   |
| 1.7210143692   | 4.7590297623   |
| 85.348572217   | 66.3402061033  |
| 2.6718523519   | 0.7859927243   |
| 162.5661745607 | 63.6296780348  |
| 10.7869216037  | 18.3800939434  |
| 1.1041159783   | 2.1023647887   |

gene\_expression\_table

|                |                |
|----------------|----------------|
| 1.9084719626   | 2.4906860698   |
| 12.6621417179  | 0.8514030143   |
| 2.4947814988   | 3.3682279045   |
| 6.5540023696   | 5.7840750529   |
| 0              | 0              |
| 0.4402715717   | 0.5180679267   |
| 4.6962578375   | 4.8506794614   |
| 2.814101949    | 6.7173224092   |
| 519.9051406718 | 201.925013741  |
| 11.4358993148  | 4.6829080367   |
| 0.1080197433   | 0.0508427689   |
| 0.5514387491   | 1.3237120121   |
| 0              | 0.1519482059   |
| 0              | 3.033067776    |
| 0.7556988949   | 0.8892315218   |
| 114.137113905  | 78.0649192406  |
| 36.1888391349  | 34.0667498245  |
| 105.2501355091 | 26.9234614111  |
| 24.4176679939  | 15.5975290487  |
| 7.2814779055   | 3.6176511489   |
| 0.8708228696   | 2.1156999863   |
| 448.2566002123 | 609.5138589726 |
| 2.7190001076   | 3.4660705094   |
| 6.4708301445   | 2.076608521    |
| 25.5189199406  | 15.9899815891  |
| 15.3357427722  | 15.6041203419  |
| 0              | 0              |
| 304.5762841539 | 350.9800958816 |
| 0.3666117791   | 0.0215696194   |
| 12.4712147485  | 7.6635530537   |
| 4.0381789765   | 2.2808297181   |
| 0.2801310444   | 1.4009293456   |
| 0              | 0.4746306723   |
| 0              | 0              |
| 115.1588128723 | 56.5393242874  |
| 1.8834208955   | 1.8283839281   |
| 9.7276765458   | 1.3354325983   |
| 0              | 0.0233664781   |
| 31.0434403268  | 16.4731028763  |
| 8.0227908266   | 4.8820481898   |
| 0              | 0.0666022304   |
| 4.7923808479   | 4.2550316349   |
| 10.26756464    | 8.9858773508   |
| 1.0375753073   | 0.7813860685   |
| 0              | 0.1195340264   |
| 1.3463660078   | 9.4528110448   |
| 0              | 0.1112709579   |
| 1.7895130978   | 2.5531873903   |
| 0              | 0              |

gene\_expression\_table

|                |                |
|----------------|----------------|
| 23.5142082147  | 13.9475297006  |
| 17.525928702   | 30.1976347678  |
| 3.6328301716   | 4.7556641606   |
| 1.2557240762   | 0.8126863639   |
| 0              | 0.271473861    |
| 0              | 2.8024100098   |
| 0              | 0              |
| 4.5016650569   | 5.5823422015   |
| 13.6640962314  | 23.1162153915  |
| 227.2663022443 | 61.6540514006  |
| 1.5882995067   | 1.361666018    |
| 0              | 0.4787215559   |
| 4.4944972707   | 6.2582697924   |
| 5.2818148543   | 7.6135170474   |
| 1.3845984164   | 0.7005809894   |
| 12.5833241726  | 7.4034040397   |
| 4.0634316249   | 3.7592037702   |
| 2.5954479247   | 1.8494064783   |
| 0              | 0.1636894427   |
| 34.4556017733  | 30.8972749292  |
| 5.7258785476   | 0              |
| 134.9793802204 | 41.4609094437  |
| 7.8298977336   | 9.4629780745   |
| 6.0352405053   | 22.7253521627  |
| 80.7035843123  | 5.4676228126   |
| 92.4486051573  | 47.1398854412  |
| 16.5276932863  | 13.6137053603  |
| 8.54561499     | 6.7561279561   |
| 33.5125331752  | 12.339096466   |
| 25.8742628928  | 25.2450295456  |
| 0.6709023876   | 0.3552531303   |
| 728.9248878451 | 338.4343803891 |
| 1.0880666052   | 0.2926466022   |
| 7.7286479312   | 7.2754451883   |
| 0              | 0.3932648278   |
| 755.3770369815 | 205.4097969906 |
| 30.7498876347  | 23.0023160469  |
| 4.6950534738   | 3.3148040099   |
| 0              | 0              |
| 0              | 0.1751352088   |
| 2.6636581803   | 0.6268657618   |
| 95.6509105235  | 68.5188065406  |
| 7.1741764997   | 3.6581391115   |
| 0              | 1.5516863764   |
| 13.8248528184  | 14.6409442879  |
| 0.9090448998   | 1.1766412834   |
| 204.4555966486 | 97.1242770514  |
| 2.3824247838   | 2.5230611123   |
| 2.5160914131   | 1.4803434352   |

gene\_expression\_table

|                 |                |
|-----------------|----------------|
| 17.0912089859   | 32.6695919424  |
| 2.6717600025    | 0              |
| 72.338973629    | 71.7451216557  |
| 55.5429723917   | 6.2936815329   |
| 16.1623976287   | 15.8485890074  |
| 0               | 0              |
| 0               | 0.0731999212   |
| 18.8414592134   | 5.8867192513   |
| 3.9883645507    | 3.2035589946   |
| 4.0901296572    | 1.4037505384   |
| 2.2429160521    | 3.3283763954   |
| 5.6763828915    | 16.4122510484  |
| 11.573691948    | 5.7600712017   |
| 0               | 0.0117880166   |
| 0               | 0.2469082177   |
| 0               | 0              |
| 2.1051323181    | 2.9294529609   |
| 0               | 1.5711708359   |
| 0.9751155565    | 10.6709994057  |
| 0.1659945807    | 0.5957441841   |
| 0               | 0.0252396991   |
| 81.0994488527   | 76.3438314411  |
| 2.4375338554    | 1.1726073223   |
| 42.5324844188   | 46.1733253478  |
| 0               | 2.3319388963   |
| 0               | 0.3848291675   |
| 2.0284996604    | 2.4665018221   |
| 0               | 0              |
| 3.9224316432    | 3.8655051987   |
| 1.8829621064    | 3.0069984734   |
| 0               | 0              |
| 0               | 0              |
| 6.926402329     | 3.2392231518   |
| 0               | 0.1188381894   |
| 0               | 4.3130175314   |
| 1.3410714849    | 11.519691548   |
| 0               | 0              |
| 103.214591646   | 72.7074925295  |
| 71.6715830452   | 37.5845269621  |
| 1.7432066335    | 9.3536211293   |
| 0               | 0              |
| 0.0695975557    | 0.0163791004   |
| 1.0187980938    | 0.4141380148   |
| 58.523995586    | 40.1713868261  |
| 0               | 1.9619978868   |
| 7.2322462331    | 3.7641225849   |
| 171.9757485993  | 113.9397345043 |
| 0.7152778354    | 0.589167619    |
| 1911.1010608715 | 735.9690164358 |

gene\_expression\_table

|                 |                 |
|-----------------|-----------------|
| 0               | 0               |
| 11.628860331    | 8.4838876007    |
| 8.7818688179    | 11.5259745819   |
| 3.9724900846    | 4.9081540256    |
| 3.0662452114    | 1.5033555438    |
| 89.2871278134   | 71.489361932    |
| 0.3525712236    | 0.2281789695    |
| 0.9215949201    | 0.5027865198    |
| 0.1838019022    | 0.4217457116    |
| 1.2863258055    | 0.2162315216    |
| 9.7821070053    | 7.5157535177    |
| 0.2519207417    | 0.0889306043    |
| 0               | 0               |
| 0               | 0.1274638762    |
| 0.1049145481    | 0.0493812146    |
| 5.1408004517    | 3.2710403406    |
| 2299.3974269803 | 1978.1406670058 |
| 4.6022481777    | 17.1128829256   |
| 4.1781353325    | 6.3157027837    |
| 5.791660369     | 1.3251489224    |
| 13.7543345894   | 2.1579649355    |
| 14.6152807931   | 11.6338147673   |
| 208.8782567437  | 79.6689607803   |
| 0               | 3.5844192162    |
| 0.7920990326    | 0.9320635942    |
| 31.7403148222   | 40.2974488166   |
| 6.3435005574    | 8.5094187496    |
| 27.1016620125   | 11.3211446677   |
| 43.9600548181   | 86.9027599025   |
| 11.4629653279   | 10.8582271162   |
| 99.9437611277   | 42.8414233801   |
| 9.8917155099    | 5.9167915399    |
| 20.0619896139   | 17.6749546365   |
| 12.9143536357   | 9.5853778422    |
| 245.0903348525  | 138.5564314097  |
| 0.4827468736    | 2.15858487      |
| 0               | 0               |
| 30.9444997567   | 35.8055451017   |
| 0               | 0               |
| 1.4169849023    | 5.6690488874    |
| 55.8521390117   | 14.2396060502   |
| 36.3628603141   | 5.7050944197    |
| 0               | 0.2337536545    |
| 2.6868043237    | 1.264625958     |
| 2.5169470902    | 1.8263778103    |
| 7.6173515828    | 6.453607665     |
| 52.9583697129   | 19.863275343    |
| 40.7621169634   | 23.6532382498   |
| 34.0004354651   | 13.7806507378   |

gene\_expression\_table

|                |                 |
|----------------|-----------------|
| 23.2619200699  | 23.3006880843   |
| 11.951045206   | 19.2191666836   |
| 9.9825755063   | 9.5650111722    |
| 27.5838146795  | 20.370128968    |
| 1.1688018607   | 0.641820726     |
| 1.0852180805   | 2.0431632368    |
| 32.5368243259  | 24.6466822825   |
| 4.1398543483   | 5.358507082     |
| 0              | 0               |
| 0.5285932355   | 0.248798441     |
| 0              | 0.1684848332    |
| 0              | 0               |
| 3.1149628415   | 3.8028311079    |
| 15.3048644117  | 15.956192625    |
| 1.2076666436   | 3.4389708863    |
| 0              | 0.6888426069    |
| 9.323699848    | 7.7087153802    |
| 0              | 1.9575876376    |
| 59.4668551837  | 27.4345245466   |
| 41.9668890808  | 17.2838657198   |
| 0.3988532765   | 1.736524641     |
| 12.7295294505  | 9.1537404152    |
| 0.8493408532   | 1.1618258574    |
| 1.4210137824   | 1.6860423406    |
| 4.8281460088   | 2.3599177396    |
| 48.4250921267  | 40.64705044     |
| 0              | 0               |
| 3.9481038055   | 6.5040318704    |
| 0              | 0               |
| 88.2412789865  | 7.9871989841    |
| 3.193528626    | 3.8517735006    |
| 6.0103693641   | 8.4868879899    |
| 16.9721944394  | 14.8021801151   |
| 0.3597126016   | 1.2063312398    |
| 0              | 0.2199715164    |
| 1.7008009099   | 0.8405602184    |
| 3.1707788391   | 6.8402732057    |
| 2.9373521961   | 0.3456384786    |
| 20.6406836828  | 37.4727750501   |
| 12.321895918   | 9.666123489     |
| 587.0502651664 | 1187.1403201832 |
| 0              | 0               |
| 463.2972268779 | 212.8229491973  |
| 25.8059588826  | 11.9214248174   |
| 12.570970044   | 7.0126321616    |
| 0.1190928537   | 0.0700683303    |
| 4.1037129178   | 2.5038442193    |
| 2.1162937407   | 3.441065286     |
| 66.8289854183  | 32.2503021462   |



gene\_expression\_table

|                 |                 |
|-----------------|-----------------|
| 4.0187124769    | 3.0624754157    |
| 1.6930080247    | 0.4980409897    |
| 3831.3747114807 | 3288.0858848344 |
| 22.6756289382   | 41.5108648038   |
| 0               | 0               |
| 0               | 0.063902081     |
| 0               | 0.2678235146    |
| 0               | 0               |
| 0               | 0               |
| 8.094597664     | 2.6193529566    |
| 0               | 2.3354558892    |
| 0               | 0.070567141     |
| 0               | 0.0515952068    |
| 70.9906049455   | 28.6836032563   |
| 34.3784044174   | 25.2170241637   |
| 1.1134027369    | 1.3255553664    |
| 0               | 0               |
| 0               | 0               |
| 694.3339158577  | 245.292255926   |
| 0               | 0.2872570522    |
| 8.7450004612    | 13.675199804    |
| 1025.8523437986 | 824.3224808671  |
| 4.003350502     | 8.440086376     |
| 43.2493788397   | 25.3709495694   |
| 2.8241102879    | 5.0490181091    |
| 0.0657452842    | 0.2552963518    |
| 6.3513472491    | 6.4545034905    |
| 3.2222089406    | 2.3240956321    |
| 1.4262664057    | 0.7132727709    |
| 0               | 0               |
| 3.9520110633    | 6.2198226932    |
| 9.5711166338    | 10.669586162    |
| 0               | 1.2319887476    |
| 12.2216669086   | 9.9090290317    |
| 12.4876819446   | 3.0822118486    |
| 5.9563679257    | 2.0325703049    |
| 0.1480354223    | 0.0174193405    |
| 0               | 0               |
| 6.5111390885    | 7.4149312975    |
| 0               | 0               |
| 45.6063503547   | 20.9854298804   |
| 2.3856722804    | 1.0527084629    |
| 16.1604388114   | 10.0867488164   |
| 9.1538114029    | 8.8189998565    |
| 18.0777846436   | 9.315732164     |
| 1.6459980493    | 2.743866982     |
| 0.1867477131    | 0.0659238571    |
| 0.7842590495    | 0.7792856583    |
| 49.1704261043   | 20.5043755583   |

gene\_expression\_table

|                |                |
|----------------|----------------|
| 0.6015654871   | 1.0617939177   |
| 0.2774544346   | 0.1305923461   |
| 0              | 0              |
| 232.3406347665 | 183.2761884759 |
| 18.6188568552  | 21.4448728591  |
| 201.8009159915 | 90.4606882459  |
| 0              | 3.1587877401   |
| 22.121589213   | 15.7889872727  |
| 1.8968237238   | 0              |
| 0.4271626901   | 0.1759249431   |
| 0              | 0              |
| 0              | 0.1721259216   |
| 1.042519696    | 1.3902983047   |
| 2.8288293317   | 4.5443798001   |
| 0              | 0.0562785061   |
| 1.5924003706   | 0.999348719    |
| 1.8597492179   | 2.1008337219   |
| 1.9160576989   | 2.4496214384   |
| 0              | 0.2610126837   |
| 50.7765119909  | 44.7085579886  |
| 0              | 0.0202129382   |
| 0              | 0              |
| 0              | 0.0952581761   |
| 0              | 0.0431220593   |
| 4.9943053072   | 5.5829630709   |
| 4.04780079     | 4.8382566372   |
| 44.7552793166  | 20.1191312369  |
| 1.2316436074   | 1.1801247942   |
| 80.3547782244  | 81.4527437909  |
| 0.3262898068   | 0.1247822838   |
| 1.0918517498   | 0.95441013     |
| 58.5300598452  | 20.1947797888  |
| 67.4070568427  | 29.6319851956  |
| 61.9154582011  | 23.1976988866  |
| 7.4635834608   | 6.3767896457   |
| 0              | 0.1411594226   |
| 2.7862051209   | 3.0490328036   |
| 0              | 0              |
| 0.2127794243   | 0.5558385531   |
| 8.4529919675   | 4.0551697238   |
| 23.8389915351  | 15.9331732069  |
| 496.5697669733 | 173.6711234359 |
| 5.6802898765   | 7.4977064219   |
| 8.5594710634   | 15.10790514    |
| 0              | 0              |
| 2.1441074113   | 4.9450270493   |
| 7.6238125683   | 16.506541792   |
| 0.8575592352   | 0.9586361359   |
| 0.1385938975   | 0.4892506654   |

gene\_expression\_table

|                 |                 |
|-----------------|-----------------|
| 133.3368920518  | 85.2335786867   |
| 23.1139942166   | 32.139272895    |
| 263.9457758896  | 283.4581521636  |
| 0               | 0               |
| 1.3171859321    | 1.9195333837    |
| 432.8988821382  | 381.2183156818  |
| 3.1492332012    | 2.2571114356    |
| 1.8835210246    | 2.8913172709    |
| 36.9076396067   | 19.3983985106   |
| 0               | 0               |
| 23.4362232651   | 26.5925155367   |
| 11.0977259369   | 6.8775837868    |
| 1.6517310283    | 1.1175661375    |
| 73.2055890218   | 52.1069068868   |
| 26.1072214066   | 10.4287637248   |
| 0               | 0               |
| 2.7811527809    | 0.9817754411    |
| 24.6580168951   | 27.4952700575   |
| 15.5837106323   | 18.4596144384   |
| 4.7922271002    | 11.8853140971   |
| 0               | 0               |
| 0               | 0.0546715926    |
| 8.7313731822    | 6.0436553688    |
| 28.2603632328   | 15.7243881444   |
| 10.0981244173   | 12.3717496846   |
| 3.5071597847    | 2.430272513     |
| 4.0631633219    | 4.2005621756    |
| 47.1693163535   | 56.4124241285   |
| 0               | 0.0190319958    |
| 11.8872349405   | 7.4974175435    |
| 7.4596001305    | 2.3699837826    |
| 0.9231141135    | 0.8038095706    |
| 157.5745550034  | 89.9733782959   |
| 1457.8204585782 | 2210.7559198818 |
| 2.1760736998    | 0.6657528131    |
| 72.8924887845   | 26.5895222826   |
| 0.9703051578    | 1.2559347798    |
| 1.939975299     | 7.1995071416    |
| 33.3162454922   | 12.3448544317   |
| 0.1564555351    | 0.3405875141    |
| 138.9367588748  | 243.372693752   |
| 1.3881107922    | 3.765396395     |
| 0               | 4.132238516     |
| 5.0674813421    | 4.3065457745    |
| 21.3243075209   | 20.5166702297   |
| 20.3857484222   | 9.1953721011    |
| 41.7244512995   | 33.4868059851   |
| 0.1432743186    | 0.2191683138    |
| 0.1845434848    | 0.369159204     |

gene\_expression\_table

|                  |                  |
|------------------|------------------|
| 72.0327624679    | 55.6847660119    |
| 0                | 0                |
| 0                | 0.0179529421     |
| 1.5576871692     | 0.4480499943     |
| 0                | 0.0184119992     |
| 25.4408110822    | 9.7791664023     |
| 14008.0278920517 | 18686.3089849884 |
| 24.6637770964    | 34.4181442796    |
| 2.6436169765     | 1.3357910615     |
| 0                | 0.2999677536     |
| 0                | 0                |
| 0                | 0.2050086144     |
| 1.678488226      | 1.7503281875     |
| 0.9131242621     | 2.4559407612     |
| 0                | 0.0772639581     |
| 0                | 0                |
| 190.3078191027   | 165.963316214    |
| 5.5398490487     | 9.9229785143     |
| 1.6350194679     | 0.8978334286     |
| 33.9247775564    | 39.78166132      |
| 9.6381525578     | 10.4096217836    |
| 0                | 0                |
| 3.325625471      | 3.2175744915     |
| 19.075075824     | 15.5716750138    |
| 0.6098761333     | 0.7355828001     |
| 0                | 0                |
| 0.1653702793     | 0.0778365384     |
| 16.8477014886    | 7.3413358607     |
| 1.265004425      | 2.4560774122     |
| 6.7776729848     | 3.7882643985     |
| 6.9086112455     | 12.0229083442    |
| 0                | 0                |
| 0                | 0.2079710582     |
| 0                | 0.0169992491     |
| 3.915715695      | 1.1979827428     |
| 6.3518406843     | 11.2113243695    |
| 0.6786003019     | 1.7567209944     |
| 7.3094017896     | 13.1164932797    |
| 2.0656285226     | 3.5070472549     |
| 60.4995817866    | 7.1189908494     |
| 22.8588125125    | 32.6003563703    |
| 0                | 0                |
| 130.7204516215   | 180.4167101311   |
| 21.5082537348    | 57.826728003     |
| 16.364848183     | 41.1608340408    |
| 34.2882187687    | 62.4033224251    |
| 409.6260848523   | 216.3310062573   |
| 115.9656071036   | 78.9500212659    |
| 6.6994168515     | 12.3503614137    |

gene\_expression\_table

|                 |                 |
|-----------------|-----------------|
| 2.1092381683    | 3.1644764541    |
| 30.0483422321   | 26.0764582111   |
| 0               | 0.1948715015    |
| 126.3651384272  | 78.0643311455   |
| 0               | 4.3536303473    |
| 10.4952968179   | 14.4669373236   |
| 4.4712208554    | 3.840741204     |
| 4.1347243258    | 2.0474945452    |
| 16.3908737049   | 10.6882982844   |
| 3774.5046842021 | 2507.0405830257 |
| 6.0258310253    | 4.7270669385    |
| 14.7206288618   | 8.5427851272    |
| 16.0777157256   | 10.0674306066   |
| 2.2680317466    | 0.5871348677    |
| 0.3997277919    | 0.1254293405    |
| 34.3117781176   | 38.7262635956   |
| 0               | 1.5810572229    |
| 0.242743442     | 0.8813923548    |
| 55.9839788248   | 24.642651355    |
| 4.9671287288    | 4.1445119395    |
| 81.6682570658   | 36.0998382309   |
| 1.0289601526    | 1.1609226963    |
| 3.7907491417    | 5.7048440929    |
| 0               | 0               |
| 5.372942825     | 16.6580081207   |
| 0.7060333966    | 1.9108172032    |
| 23.6812858816   | 10.1817305615   |
| 0               | 0.0676369884    |
| 5.3525482213    | 4.5348105378    |
| 181.60241392    | 102.9856187968  |
| 18.0175023433   | 20.1591167015   |
| 0               | 0.6102530831    |
| 453.7479469482  | 130.2572088413  |
| 7.7948934849    | 1.528709614     |
| 2.736841821     | 0.4025555075    |
| 0               | 0.0703902043    |
| 0.7395369522    | 0.3915961876    |
| 274.8635055413  | 411.1687728147  |
| 25.6572034365   | 16.6536639335   |
| 0.2952002276    | 0.0347362355    |
| 0               | 0               |
| 19.889927135    | 27.6674552853   |
| 0.6362296733    | 0.4491911933    |
| 15.1034311044   | 11.0018504848   |
| 0               | 0               |
| 36.3085669448   | 19.0401865748   |
| 469.5720845952  | 336.3322654826  |
| 23.2900287889   | 11.8852876833   |
| 41.8708692615   | 34.893595505    |

gene\_expression\_table

|                 |                 |
|-----------------|-----------------|
| 0               | 0.0587318313    |
| 31.4011429028   | 24.1681535384   |
| 0.3364352385    | 0.3299030221    |
| 133.9819122468  | 75.128209566    |
| 272.3592671963  | 108.8159653931  |
| 0               | 0.0913822356    |
| 3.2662370714    | 3.336756017     |
| 0               | 18.7554937771   |
| 0.4638815166    | 1.6921342825    |
| 17.7048466313   | 8.3333231362    |
| 1.3121949004    | 1.7327793837    |
| 0               | 0.308444484     |
| 0               | 0               |
| 1.9276648477    | 14.2901944837   |
| 2703.9499583823 | 3321.9524567953 |
| 0               | 0.0447347252    |
| 2.5848182957    | 3.3457136357    |
| 7.2423790796    | 9.4595460082    |
| 0.9064730564    | 0.4723725102    |
| 79.607992165    | 59.0151183107   |
| 8.051345762     | 5.8738956815    |
| 4.9325163213    | 1.6519350385    |
| 4.5972605435    | 2.404266812     |
| 0.6084583526    | 0.477315635     |
| 0               | 0               |
| 0               | 0               |
| 0               | 0               |
| 0               | 3.554536605     |
| 0               | 0.0770649524    |
| 0.7391126787    | 1.3045717609    |
| 3.4006141565    | 3.4012796941    |
| 13.5359608438   | 4.7783329342    |
| 155.3532939263  | 97.2780295913   |
| 46.9489338329   | 91.4932247864   |
| 7.3456896895    | 10.8831779043   |
| 0               | 0.0249077775    |
| 0               | 1.7058286141    |
| 0               | 0               |
| 1.5198128855    | 1.8870335126    |
| 3.2539791931    | 0.7657920077    |
| 0.5840555328    | 0.2749034536    |
| 70.7155031979   | 25.2502319835   |
| 44.9921173894   | 17.4197120676   |
| 0.5646575531    | 0.3322165075    |
| 38.3969583972   | 5.2575107565    |
| 1.8643422988    | 0.7678205998    |
| 0               | 0               |
| 0               | 0.1239753326    |
| 10.4550429962   | 27.5267494144   |

gene\_expression\_table

|                |                |
|----------------|----------------|
| 6.4297127573   | 4.5195989005   |
| 3.9611446108   | 2.3616149696   |
| 48.0743412747  | 47.4688682387  |
| 2.211206602    | 4.2498168083   |
| 1.100597437    | 0.1942610887   |
| 0              | 0.3021265596   |
| 0              | 1.720087406    |
| 0              | 0.1674581108   |
| 0              | 15.7585277255  |
| 0              | 6.6406711954   |
| 39.3489300347  | 64.5190672997  |
| 2.1207123816   | 7.7002273029   |
| 0              | 0              |
| 1.4366130664   | 3.437276387    |
| 89.4620363047  | 190.2205375419 |
| 0.4319268702   | 2.1854694505   |
| 213.4218469939 | 224.2264873898 |
| 0              | 1.1622568621   |
| 106.2290797877 | 38.5416195048  |
| 0              | 0.5992504087   |
| 8.8146073796   | 9.1554222065   |
| 41.6757767574  | 8.9217206349   |
| 2.1661086765   | 2.6647192502   |
| 37.6955917699  | 51.0863761325  |
| 17.0172949085  | 23.6286328806  |
| 16.1293343316  | 11.9458584021  |
| 8.8153454872   | 24.8952585804  |
| 269.0504372004 | 260.1559316573 |
| 63.24493123    | 76.0741493353  |
| 33.7681556197  | 33.8542344528  |
| 1.5966983474   | 4.9789161444   |
| 0.4789968397   | 0.1465453553   |
| 1.5157783516   | 1.7907521248   |
| 0              | 0              |
| 0              | 1.1264836905   |
| 2.8755626012   | 5.3248389396   |
| 0              | 0              |
| 0.0764525717   | 0.5937479135   |
| 6.7399693422   | 15.3859994717  |
| 1.161966005    | 1.2809314414   |
| 0.415972622    | 0.7505288427   |
| 1.7913036891   | 1.7916542669   |
| 6.3294415955   | 7.8202521808   |
| 0.1040404649   | 0.1346669523   |
| 0              | 0.0157271388   |
| 3.4905485155   | 3.4227761316   |
| 2.3589892698   | 2.405714694    |
| 0              | 0.0615664153   |
| 0.2545740062   | 0.5092476583   |

gene\_expression\_table

|                |                 |
|----------------|-----------------|
| 17.7501483646  | 24.8550711692   |
| 166.5934491211 | 57.4335415881   |
| 103.8290980364 | 81.560592615    |
| 35.8328222266  | 18.1541648401   |
| 4.0911831746   | 3.6587149844    |
| 0              | 4.7168181121    |
| 182.9673769427 | 73.4746683827   |
| 201.2480093522 | 62.7543057493   |
| 0              | 0.12428024      |
| 133.4558186325 | 115.5899515795  |
| 2.9225815869   | 2.9231535682    |
| 7.631866554    | 5.5005095517    |
| 1.223865744    | 4.6804024953    |
| 0              | 0.2975213333    |
| 0              | 0               |
| 3.1358998197   | 5.0653855189    |
| 72.7865917064  | 24.9806793087   |
| 20.7515061455  | 8.3429241684    |
| 62.8057303186  | 85.841822042    |
| 7.2718118901   | 10.6959339171   |
| 0.7980194953   | 1.0094574732    |
| 10.7992176988  | 3.4733692565    |
| 0              | 6.3645297303    |
| 1.3638817205   | 0.9629284568    |
| 4.3571300669   | 6.2094134087    |
| 0              | 0               |
| 249.0314445624 | 144.1734704878  |
| 78.7459527086  | 32.2595565611   |
| 14.6471637363  | 30.2849366841   |
| 85.6485033892  | 60.096330216    |
| 0              | 16.5791080065   |
| 167.2202115331 | 104.3726776507  |
| 0              | 28.6186423148   |
| 0              | 1.8824135354    |
| 0              | 6.9962612624    |
| 8.6213875075   | 2.5361984729    |
| 213.3867781702 | 48.6491525702   |
| 0              | 0               |
| 48.1230454238  | 25.0774180271   |
| 5.136852764    | 4.4326618924    |
| 45.3368682652  | 10.669586162    |
| 20.4430763758  | 20.2065234598   |
| 0              | 2.1607844645    |
| 1.0569758301   | 0.319819974     |
| 0              | 2.0912339816    |
| 0              | 0               |
| 0              | 0               |
| 977.5611338201 | 1370.6696930169 |
| 83.2873999524  | 51.2931874491   |



gene\_expression\_table

|                 |                 |
|-----------------|-----------------|
| 330.2764164117  | 137.3182425273  |
| 59.056090407    | 25.8110732211   |
| 2.9992961642    | 0.7499707899    |
| 676.4608170554  | 107.5664877381  |
| 0               | 2.4760949375    |
| 12.8182807761   | 26.5465758117   |
| 15.8067166027   | 1.8599776648    |
| 0.7602069235    | 0.4472680614    |
| 0               | 0               |
| 2.1380752136    | 2.5518159621    |
| 33.2962869398   | 14.9074241857   |
| 1.8078902407    | 2.73009398      |
| 0               | 6.3562698834    |
| 918.0446602396  | 354.6866536058  |
| 0               | 0.6510035931    |
| 65.5746185885   | 51.6983447243   |
| 89.3954957478   | 32.6457169517   |
| 9.6111605262    | 9.0475685044    |
| 13.3952218794   | 6.304867516     |
| 0               | 0               |
| 0               | 0.2281713376    |
| 427.6589786566  | 100.1960260471  |
| 0               | 0               |
| 306.3694161885  | 270.8410473086  |
| 6525.4521516891 | 9328.4792605672 |
| 5.7789593595    | 3.0600478405    |
| 0               | 0               |
| 10.7330408764   | 14.5240149036   |
| 147.6754419982  | 42.0410845461   |
| 0               | 0               |
| 40.7697048482   | 20.882689347    |
| 0               | 1.4449457272    |
| 2.8665186304    | 1.9756347096    |
| 17.2712843847   | 18.7988996736   |
| 104.8034242525  | 50.9374622316   |
| 25.5281903541   | 18.0234257658   |
| 402.1007101146  | 45.1966320652   |
| 14.1920490316   | 5.00993879      |
| 7.8556260561    | 2.7731165253    |
| 34.5969004313   | 33.7313099605   |
| 73.2719308156   | 39.9878435746   |
| 2.3832450136    | 1.1918557204    |
| 8.0951426161    | 10.1379185861   |
| 43.8024399502   | 7.9656386489    |
| 9.4636827121    | 3.7862139435    |
| 460.9649453981  | 375.8430688736  |
| 8.7332068411    | 2.6718566667    |
| 84.3879480264   | 16.5498948383   |
| 2.6664350788    | 2.893561113     |

gene\_expression\_table

|                |                |
|----------------|----------------|
| 28.400676935   | 15.9383401457  |
| 2.3758101915   | 0.5591235679   |
| 92.148420086   | 134.2877753999 |
| 190.5219659504 | 158.4772693899 |
| 0              | 0.2885181185   |
| 0              | 1.0761739474   |
| 0              | 0              |
| 2.3435411227   | 1.6545880796   |
| 0.9825523743   | 2.5435744416   |
| 51.0012574564  | 16.3672424481  |
| 95.5999156794  | 61.0673575475  |
| 12.4692477081  | 2.6410633575   |
| 9.4267512673   | 2.2184932203   |
| 223.8398466955 | 12.0721578468  |
| 34.7777566252  | 90.0306336842  |
| 5.1878765364   | 1.220915732    |
| 0              | 0              |
| 103.3833796807 | 38.343260794   |
| 475.8334629287 | 314.7622590258 |
| 2.4938495416   | 0.8803544525   |
| 2.1045292783   | 0.2476401362   |
| 6.945884587    | 4.0866141018   |
| 0              | 0.1542606031   |
| 0              | 6.3654280196   |
| 2.9138781812   | 4.1145154719   |
| 14.2788974238  | 3.1019059463   |
| 1.0179004529   | 1.0779878829   |
| 9.4555792529   | 4.172395506    |
| 1.7384706817   | 1.8410939148   |
| 4.0117998958   | 2.6750566994   |
| 0.4443820015   | 1.7255854204   |
| 4.3370295966   | 3.0620318124   |
| 0.6353093595   | 1.1961104876   |
| 15.4546965521  | 15.1405313045  |
| 0              | 0.8781077831   |
| 2.110322094    | 1.4168948471   |
| 0.5935183907   | 1.1453654824   |
| 8.55351759     | 3.4508335896   |
| 3.8903329907   | 3.5706513057   |
| 22.5879267465  | 14.5163499466  |
| 0              | 0              |
| 5.8822807091   | 1.8579258746   |
| 20.5908663987  | 10.3525146963  |
| 29.0321279812  | 9.1616619432   |
| 19.5140176581  | 5.1664862027   |
| 6.1804328518   | 5.9796279719   |
| 4.6945212151   | 0.957501487    |
| 15.9867969044  | 7.5246709159   |
| 1.2972825715   | 2.9919664345   |

gene\_expression\_table

|                |                |
|----------------|----------------|
| 269.3506473842 | 110.1761649605 |
| 1.5309633541   | 0.9607924583   |
| 1.818038487    | 3.2089311126   |
| 0              | 0              |
| 0              | 0              |
| 67.7611691533  | 17.0859909476  |
| 11.3711547221  | 5.2492523917   |
| 24.8745738173  | 21.1888854244  |
| 0              | 0              |
| 8.4963025272   | 10.2475464478  |
| 0              | 0              |
| 0              | 0              |
| 50.0162244644  | 8.0714239767   |
| 0              | 0              |
| 0.7443223086   | 1.6203126638   |
| 0.3513958686   | 0.888998797    |
| 86.0968979662  | 69.075198991   |
| 3.0004603743   | 5.6048977186   |
| 26.4542643368  | 32.9681814033  |
| 16.682773167   | 17.6992321376  |
| 24.5221798918  | 12.6642572092  |
| 2.1783169827   | 1.3515199101   |
| 7.7602379206   | 4.3483230725   |
| 0              | 0              |
| 6.6413456882   | 6.772893423    |
| 0              | 0.1225763944   |
| 0              | 1.3277691492   |
| 83.5032404888  | 52.3507511514  |
| 0.5690902083   | 0.5452855525   |
| 0              | 0.1567488489   |
| 0              | 10.3010443977  |
| 54.986898793   | 85.5519160743  |
| 0.381886163    | 0.2696194605   |
| 20.2717258744  | 20.8015018914  |
| 21.6181673512  | 7.2074660881   |
| 0.6058038558   | 1.3544148173   |
| 4.1404752422   | 3.9951225583   |
| 100.0135485235 | 79.7649733167  |
| 39.4181347421  | 25.768528957   |
| 0.2263785832   | 0.1978821878   |
| 1.4752912511   | 0.568137747    |
| 0              | 0.007922       |
| 1.79983609     | 1.9766773904   |
| 0.1974904969   | 0.3137227643   |
| 0.9931667556   | 1.2738395658   |
| 10.6104651063  | 7.4287791836   |
| 0              | 0.1028194769   |
| 4.9573116393   | 4.8853659303   |
| 0              | 3.3804417417   |

gene\_expression\_table

|                 |                 |
|-----------------|-----------------|
| 6.9176408554    | 12.6100920605   |
| 5.3011576502    | 37.55201738     |
| 34.9169460302   | 13.5188824491   |
| 0               | 0.63714081      |
| 0               | 0.1846965534    |
| 4.7522046227    | 6.0113173911    |
| 5.5820545013    | 3.5578877755    |
| 0.1255691438    | 0.1625330482    |
| 17.6975117552   | 27.1712450793   |
| 0.7989680554    | 0.6933579546    |
| 0               | 0               |
| 0               | 1.2015264461    |
| 0.8912438361    | 0.7032642346    |
| 1.1334881869    | 1.2003988479    |
| 79.6626867662   | 101.4205527344  |
| 0               | 0.2192257424    |
| 1437.5795682691 | 1398.2669768904 |
| 142.8324178241  | 104.7037064433  |
| 3.0203756169    | 2.7123230771    |
| 1.5458635388    | 1.4552151353    |
| 0               | 5.0210734333    |
| 0               | 0.0226261983    |
| 0.4363497623    | 0.1797085956    |
| 29.2900817992   | 26.4607353976   |
| 3.9235598467    | 11.5421403836   |
| 1.856258097     | 1.8098158059    |
| 32.4951069414   | 18.9273246618   |
| 0               | 0.1120869283    |
| 0               | 0.1679745559    |
| 0               | 0               |
| 0               | 0               |
| 44.5577013362   | 19.613109362    |
| 0               | 0.2742348711    |
| 4.411896069     | 4.6723336152    |
| 1.7876817852    | 2.7872258139    |
| 2.1266936763    | 1.1511418248    |
| 5.3297301401    | 4.1212700578    |
| 2.6034902234    | 6.8418817093    |
| 0               | 0               |
| 0               | 0               |
| 22.1302502243   | 9.5482507817    |
| 0.1795788583    | 0.3169658891    |
| 43.5798923674   | 83.7581431425   |
| 0               | 0               |
| 1.0101850548    | 2.288219778     |
| 0               | 0.0349640289    |
| 0               | 0               |
| 3.5143740631    | 4.190505125     |
| 5.632869815     | 2.7115374367    |

gene\_expression\_table

|                |                |
|----------------|----------------|
| 7.4113813918   | 5.6289953318   |
| 2.5207409146   | 8.898473828    |
| 0              | 0.3199149621   |
| 0.7565240748   | 2.5148220954   |
| 1.3191767517   | 1.0089796516   |
| 0              | 1.7924810753   |
| 9.0547245577   | 19.3721853835  |
| 8.1970591146   | 2.9579491371   |
| 10.3163628259  | 13.0834384261  |
| 156.4355772397 | 87.1400906325  |
| 2.0237553773   | 3.5124981018   |
| 7.1613266993   | 6.6711684678   |
| 38.3297104394  | 70.0070827552  |
| 4.6725323337   | 7.3486329816   |
| 26.1326983926  | 29.998692394   |
| 1.7896021724   | 2.3164090105   |
| 0              | 0.0576816678   |
| 0.602533001    | 3.6868056489   |
| 2.6144876341   | 2.6662738145   |
| 0.8806835938   | 0.725410785    |
| 0              | 0              |
| 2.0526677039   | 2.1738382237   |
| 7.497598687    | 11.6248497929  |
| 6.0495283123   | 6.8515418368   |
| 0              | 1.504300641    |
| 1.5145198133   | 2.7495823852   |
| 0.251796009    | 0.2370308595   |
| 0              | 0.041197683    |
| 3.222417892    | 4.0313053128   |
| 0              | 1.0468926618   |
| 0              | 0              |
| 56.4519089472  | 30.1260517322  |
| 12.0544811528  | 25.1775195486  |
| 22.3563629084  | 38.4078563644  |
| 0              | 0              |
| 0              | 7.4393311367   |
| 3.0612799817   | 3.7222844057   |
| 0              | 2.2133108339   |
| 82.6673715305  | 114.3294318588 |
| 0              | 0              |
| 9.012496177    | 8.9660554225   |
| 0              | 3.7684498062   |
| 12.2567696182  | 24.3580862381  |
| 91.2611968249  | 122.3682936901 |
| 7.6980242297   | 11.5287092457  |
| 4.4558081849   | 1.3981741916   |
| 5.576886181    | 1.6405816585   |
| 5.0768002359   | 27.1811316329  |
| 21.2374608357  | 16.3170900599  |

gene\_expression\_table

|                |                |
|----------------|----------------|
| 9.6595221924   | 4.5465471374   |
| 29.1916013566  | 78.6228337464  |
| 0.2903327789   | 1.7765010838   |
| 0.859454752    | 4.3486808398   |
| 40.0597846145  | 17.1583710714  |
| 140.3401604796 | 122.2024043267 |
| 36.3248874023  | 26.867358817   |
| 18.9645143259  | 6.2483567637   |
| 130.4004822705 | 131.7799062242 |
| 39.1831205744  | 78.5433565669  |
| 21.731616641   | 51.1432229583  |
| 26.3406802945  | 23.7112519096  |
| 258.2722340147 | 195.3063238388 |
| 0              | 2.2375946379   |
| 144.4216067114 | 88.2247025586  |
| 1.3980206972   | 2.6320833981   |
| 47.0095441266  | 105.1007228012 |
| 2.7203716485   | 23.2877376483  |
| 0              | 8.4294910091   |
| 3.8820490354   | 3.9970090537   |
| 29.8033458829  | 66.8385737507  |
| 3.1133945703   | 3.9077695948   |
| 20.4712289174  | 41.5526835286  |
| 30.2486279318  | 3.5593585789   |
| 4.3507266501   | 12.2868088521  |
| 0              | 3.322068007    |
| 168.3717532055 | 429.1794245346 |
| 32.8863477525  | 32.1672078551  |
| 0              | 1.8556843078   |
| 0              | 33.2091894426  |
| 8.8362323265   | 7.2783213788   |
| 25.1926215292  | 38.2903976503  |
| 978.6887432748 | 249.9866433982 |
| 308.7483530552 | 153.5786973295 |
| 51.8926962891  | 40.3010382255  |
| 0              | 19.6107495559  |
| 2.6419002834   | 1.2434905093   |
| 67.2753354153  | 45.0239240908  |
| 17.6241131765  | 10.5419735976  |
| 10.9520204579  | 0.9665438725   |
| 0              | 6.2656681136   |
| 11.5255733025  | 4.2772940121   |
| 8.6410481569   | 2.6436614345   |
| 313.2114130761 | 85.1615139396  |
| 517.8498197264 | 311.4477615278 |
| 2.6774182703   | 7.7412784961   |
| 25.4061480911  | 48.6480272009  |
| 20.987011401   | 3.4573607418   |
| 0              | 7.9822924117   |

gene\_expression\_table

|                |                |
|----------------|----------------|
| 7.0761040271   | 11.6570405386  |
| 5.0338213332   | 7.996457394    |
| 14.810198057   | 9.294491969    |
| 13.4691340638  | 27.7359973087  |
| 13.7282785447  | 18.3079537596  |
| 0              | 34.7168786379  |
| 4.7146405372   | 1.5533620099   |
| 7.7206712337   | 5.4509521793   |
| 6.0024351912   | 6.1801866965   |
| 15.3007443373  | 14.4035189282  |
| 4.5034583346   | 5.0637021587   |
| 0              | 7.9437257239   |
| 4.4711247954   | 3.0063864496   |
| 0              | 0.5878132482   |
| 23.283844807   | 5.8331480567   |
| 19.8034228161  | 98.2597360116  |
| 9.646228166    | 4.7024431114   |
| 0              | 1.147303507    |
| 49.1726211146  | 90.0067223946  |
| 4.3014186299   | 3.3743219332   |
| 3.9681396505   | 10.2724891411  |
| 0              | 2.4073939588   |
| 125.4859746626 | 216.5671953126 |
| 12.3903655256  | 25.7575644778  |
| 12.6674115719  | 21.033674796   |
| 0              | 0.4071905364   |
| 199.1605895507 | 63.9678966191  |
| 643.6623735212 | 470.2913493872 |
| 0.7949773784   | 0.5300886428   |
| 0.6935414907   | 1.5505726193   |
| 0              | 0.1366149325   |
| 54.3137720575  | 4.0903079047   |
| 0              | 6.6581543857   |
| 16.4247062514  | 57.4286977371  |
| 0              | 2.2805571636   |
| 1.1993818461   | 1.834707708    |
| 3.0609105464   | 3.2930523431   |
| 6.6719340908   | 7.5073948443   |
| 25.9692610264  | 29.1756631428  |
| 57.4289453136  | 34.3081646706  |
| 2.6548756832   | 2.7334951325   |
| 13.5922188336  | 24.6210285988  |
| 16.8472424982  | 10.6554883326  |
| 2.4733420917   | 0.9822545015   |
| 1.7001990389   | 1.2892920734   |
| 1.2058279628   | 1.2864682204   |
| 0              | 0.328511348    |
| 2.4637134162   | 1.8843848645   |
| 2.6379033236   | 2.2245498506   |

gene\_expression\_table

|                 |                 |
|-----------------|-----------------|
| 3.7844670001    | 3.021804436     |
| 6.5050374815    | 2.4877069898    |
| 16.8453048144   | 1.9821884266    |
| 3.7527149341    | 1.6283346582    |
| 3.7587563057    | 3.4751606128    |
| 13.26917002     | 17.3090607518   |
| 0               | 0.5858387269    |
| 7.7022080901    | 11.7821531129   |
| 0.9785472364    | 0.4605829406    |
| 3.8707741809    | 2.6569335429    |
| 0.8509646591    | 1.1431860265    |
| 13.277114461    | 1.1717393769    |
| 0.6753513113    | 2.026450455     |
| 8.663257665     | 12.4027760914   |
| 0.553741502     | 0.5864292797    |
| 0.4707577276    | 0.9250814898    |
| 66.7716905202   | 291.3648776557  |
| 86.7535718687   | 59.8886936758   |
| 35.2750351653   | 16.6032653541   |
| 2.7743650991    | 3.2645977328    |
| 4.4785260946    | 3.7767512045    |
| 29.3032253596   | 25.9358063216   |
| 3.6184886354    | 1.6676691199    |
| 68.7252348855   | 45.9622779464   |
| 12.6277014786   | 2.6221812163    |
| 3.4998905478    | 6.0859678886    |
| 4831.2100245107 | 3003.4756255507 |
| 751.5215593683  | 380.5717275962  |
| 212.9850121019  | 299.0727726599  |
| 798.5471114894  | 1071.2022016083 |
| 212.6068105749  | 67.1521326519   |
| 15.1440677849   | 13.6620285429   |
| 39.3314248943   | 38.5677671435   |
| 0               | 0.1037293838    |
| 3.7013675729    | 2.4922579937    |
| 3.4867277891    | 5.6619129981    |
| 12.0147331634   | 8.886583554     |
| 1.0697984997    | 1.8462880911    |
| 36.3334243912   | 24.5833032517   |
| 0               | 0               |
| 0               | 0               |
| 15.9709422298   | 8.5743158681    |
| 9.7663620451    | 13.1338130144   |
| 76.3012574568   | 44.4065591498   |
| 3.9938357877    | 5.1695049033    |
| 0               | 0.9573450344    |
| 0.3956440934    | 0.0465554736    |
| 0               | 0               |
| 0.912108373     | 2.2538852394    |



gene\_expression\_table

|                |                |
|----------------|----------------|
| 6.2818742772   | 9.1870592049   |
| 0.18433225     | 0.0650711738   |
| 0              | 0.0512284837   |
| 9.6239243516   | 4.1523092727   |
| 13.161669155   | 5.4721959767   |
| 0              | 0.5328917207   |
| 42.805480883   | 35.5462958701  |
| 14.8985337737  | 21.5463085016  |
| 0              | 0.0522904673   |
| 0              | 0.45325006     |
| 16.8640885155  | 6.9453954718   |
| 0.7467238586   | 0.5711358828   |
| 57.3437391633  | 46.3338124096  |
| 5.2732393096   | 4.5710351618   |
| 1.9650048399   | 1.0405002774   |
| 36.9079107172  | 15.4509045027  |
| 0              | 0.1003333723   |
| 0.9113341239   | 2.7345374461   |
| 81.6641694489  | 77.3724766641  |
| 13.646415134   | 9.8130682851   |
| 2.1890394311   | 0              |
| 0.1961315345   | 1.2693347741   |
| 65.6225276019  | 28.5472913352  |
| 8.7454021649   | 9.2616498383   |
| 0.3993395623   | 0              |
| 34.3858364734  | 18.8552186239  |
| 28.8834602119  | 24.4282941     |
| 0              | 0              |
| 285.5084016174 | 238.0502222854 |
| 12.6981958778  | 13.6612367643  |
| 0              | 3.9194867293   |
| 0              | 0              |
| 9.4055151217   | 2.6561946026   |
| 1.9992592694   | 1.1174517759   |
| 0              | 35.309868801   |
| 23.6286254474  | 10.7243318552  |
| 4.6154382847   | 1.086198018    |
| 3.6872429113   | 11.2808327266  |
| 0              | 7.5988489583   |
| 0              | 0              |
| 85.8373116585  | 40.7386173593  |
| 7.8876898359   | 2.3203628069   |
| 0              | 1.2554462487   |
| 0              | 0              |
| 160.5201300253 | 122.7747113251 |
| 57.5461213904  | 33.3556951863  |
| 0.7841918637   | 0.922759222    |
| 16.5438233867  | 13.8216628804  |
| 0              | 0.1830439951   |

| gene_expression_table |                |
|-----------------------|----------------|
| 0                     | 0.0779245601   |
| 0                     | 0              |
| 3.5809121623          | 1.0534155842   |
| 0                     | 1.8294091318   |
| 4.300381663           | 12.7771633173  |
| 0                     | 0              |
| 5.0338868956          | 2.3101177791   |
| 0                     | 0              |
| 29.2446127392         | 24.7767553959  |
| 21.1085091186         | 6.2096000841   |
| 46.0236996249         | 21.0607156066  |
| 0                     | 7.9508935342   |
| 3.4479397115          | 2.2314564484   |
| 0.9247773026          | 2.1491677954   |
| 75.5157502901         | 61.249547074   |
| 7.008283115           | 6.0082754683   |
| 409.8587507538        | 206.1751851452 |
| 14.9596223084         | 9.2415750438   |
| 52.1293110894         | 54.0193060706  |
| 0                     | 12.20096875    |
| 3.1848007413          | 4.1847727608   |
| 0                     | 14.7915582228  |
| 227.9256624874        | 205.9395296623 |
| 0                     | 6.9901683992   |
| 0                     | 2.5245135174   |
| 1.4589189263          | 6.8668444837   |
| 230.9445038702        | 58.7336244805  |
| 0.3427605551          | 1.6536391909   |
| 9.6695379033          | 13.3061182103  |
| 25.139638478          | 29.8776519616  |
| 12.2939373357         | 13.4536463021  |
| 0                     | 1.8553619538   |
| 20.5364931966         | 10.9842312375  |
| 1.6151478383          | 1.853032167    |
| 0                     | 0.6038586501   |
| 0                     | 2.7230442858   |
| 0                     | 0.0549569942   |
| 0                     | 0.0231438791   |
| 0                     | 0.2070346394   |
| 48.4736791757         | 41.4829227872  |
| 0                     | 0              |
| 10.0763457247         | 3.8066711106   |
| 0                     | 1.5482282309   |
| 45.2704892487         | 39.2864941424  |
| 381.6044373791        | 67.9308240487  |
| 1.7563246476          | 2.4800024184   |
| 134.2002784586        | 24.0028641471  |
| 4.5130406581          | 1.0620997435   |
| 8.2519682458          | 10.9051869141  |

gene\_expression\_table

|                |               |
|----------------|---------------|
| 6.0288678012   | 7.1487443521  |
| 2.0896990338   | 2.1146975169  |
| 41.4071741735  | 13.1686098609 |
| 58.9396571805  | 52.7093013677 |
| 2.2613739263   | 1.4571927044  |
| 3.8645815615   | 4.638405483   |
| 0              | 0             |
| 15.2524389093  | 4.1503727002  |
| 272.8212719724 | 77.582012909  |
| 3.6446244392   | 8.5772652524  |
| 0              | 1.4510245115  |
| 13.0991196296  | 7.6212405957  |
| 3.8873852747   | 1.4485250097  |
| 1.4949207162   | 2.9904265772  |
| 0.4495612548   | 2.9623949854  |
| 7.1731556942   | 9.284724136   |
| 0              | 0             |
| 0              | 0             |
| 1.1894196014   | 0.2599240503  |
| 0              | 0.0265252993  |
| 22.074319188   | 8.3696802859  |
| 3.9556850637   | 0.7757763205  |
| 0              | 0             |
| 0              | 0             |
| 1.4533961818   | 0.399049584   |
| 5.3094198136   | 4.8560881083  |
| 6.8147192447   | 7.016525106   |
| 2.1840090523   | 6.3391490208  |
| 14.9341886384  | 24.0374524164 |
| 0              | 0.0641780185  |
| 7.1512941788   | 4.4478936022  |
| 1.9303220491   | 0.9085646279  |
| 2.9891477336   | 0             |
| 0              | 0             |
| 12.047905298   | 18.0753948083 |
| 0              | 0.2384726077  |
| 0              | 0.234549309   |
| 1.5417767557   | 1.9791381797  |
| 105.6224180259 | 54.7336368645 |
| 0              | 1.0619757388  |
| 0              | 0             |
| 4.4767595614   | 6.3498426956  |
| 12.3177432104  | 4.1483682598  |
| 3.9528531207   | 1.4729197649  |
| 0              | 0             |
| 1.0391840665   | 1.8545932864  |
| 2.7612338278   | 2.7414670681  |
| 0              | 3.2399122441  |
| 1.6822494101   | 0.5443636792  |

gene\_expression\_table

|                |                |
|----------------|----------------|
| 3.3174979246   | 3.8874371554   |
| 25.8282036521  | 10.2704232637  |
| 0              | 0              |
| 2.1271150356   | 2.6281269437   |
| 83.7951612958  | 89.1360600948  |
| 3.653779561    | 1.375809749    |
| 58.0790626068  | 44.7638014154  |
| 107.5150798778 | 69.8164799231  |
| 0.8097169675   | 0.7939955274   |
| 0              | 2.34482126     |
| 24.1064192594  | 33.2049570447  |
| 0              | 0              |
| 1.9546695087   | 4.8301286164   |
| 0              | 0              |
| 0.208306346    | 0.2798387705   |
| 0              | 0              |
| 0.4664568321   | 0.1427088376   |
| 11.7506308402  | 6.9134885693   |
| 9.440921506    | 2.3072829715   |
| 38.669855773   | 11.4746321512  |
| 0              | 0.5739654749   |
| 53.572222879   | 23.9546221997  |
| 0              | 0              |
| 0              | 0              |
| 0.5922596493   | 0.5226843186   |
| 1.2322989788   | 1.5438738252   |
| 2.0016352399   | 5.8759182007   |
| 0              | 0              |
| 49.9259341698  | 17.4182336075  |
| 348.6049586314 | 244.7846269372 |
| 12.461791598   | 5.1989838481   |
| 0              | 0.449709394    |
| 2.9478819462   | 1.3875100607   |
| 0              | 0.1331940577   |
| 7.34052138     | 5.6504284613   |
| 5.0287999561   | 7.5939878306   |
| 0              | 0              |
| 27.2357893836  | 33.774057942   |
| 0              | 0              |
| 0              | 1.9410079817   |
| 0.1987027926   | 0.1870509938   |
| 1.3610000773   | 2.0018624118   |
| 44.1702217437  | 74.4543835697  |
| 11.0853796975  | 22.7680155272  |
| 8.9406442547   | 6.1132423465   |
| 22.8125711457  | 21.2918328877  |
| 0.290502993    | 0.4443856493   |
| 0.610223984    | 0.7674170836   |
| 42.7200461978  | 32.7752015897  |

gene\_expression\_table

|                 |                 |
|-----------------|-----------------|
| 4.8792260444    | 23.0699463687   |
| 33.8534673371   | 12.2736107566   |
| 849.7005125803  | 655.860515857   |
| 1.6489474891    | 48.1198836635   |
| 0               | 16.7457366614   |
| 6.9402857495    | 3.7203582435    |
| 0               | 0               |
| 0               | 4.9761729895    |
| 1.187011262     | 1.571351788     |
| 69.1270114795   | 48.4435681725   |
| 2.4517403213    | 1.3900285364    |
| 3.4670087533    | 2.7615971139    |
| 0               | 0               |
| 3.9160727692    | 4.1472414929    |
| 0               | 0               |
| 1.50853923      | 0.7987947182    |
| 0               | 0               |
| 2.4227217574    | 0.7127046796    |
| 0.4635087869    | 0.1090822355    |
| 3.1379644223    | 2.1785427627    |
| 27.2669626832   | 10.2088820263   |
| 46.507770982    | 39.929516312    |
| 2.197752769     | 7.7582925649    |
| 46.7206771787   | 19.9288942196   |
| 19.4894174005   | 1.274067431     |
| 6.9132836663    | 5.0436173371    |
| 74.0415329427   | 227.7689467943  |
| 383.9891179254  | 237.9077583544  |
| 4.4695145588    | 5.8378024871    |
| 196.664146686   | 127.8871627382  |
| 0               | 0               |
| 0.7552896153    | 1.2220311429    |
| 1.6824691013    | 0               |
| 3.184713266     | 1.2945752821    |
| 0               | 0               |
| 4.7801224657    | 0.8437161156    |
| 5.7209216996    | 3.4577041294    |
| 0               | 0               |
| 5.086513895     | 7.2284069948    |
| 2397.9957095579 | 2856.3504520926 |
| 5.3982513426    | 2.5408507481    |
| 8.8982014407    | 2.3357316251    |
| 63.6685109932   | 23.6675268857   |
| 6.0793834363    | 3.3979673979    |
| 23.7771025507   | 19.3518210515   |
| 6.8564272124    | 0.4033981818    |
| 1.3888773967    | 1.1440052361    |
| 17.4438153435   | 9.9209735178    |
| 3.9085483335    | 2.0408914914    |

gene\_expression\_table

|                |                |
|----------------|----------------|
| 0              | 0.2533984604   |
| 0              | 0              |
| 42.9418170529  | 36.6941666043  |
| 12.4716618897  | 12.474102731   |
| 8.2297565894   | 5.3261788044   |
| 12.9737100431  | 9.2771373947   |
| 12.6388751459  | 6.6924787302   |
| 1.265791583    | 0.1489458015   |
| 0              | 0.9869988186   |
| 0.2222957921   | 0.3400483379   |
| 8.9054562664   | 0.5239528919   |
| 418.0621117973 | 235.2893803174 |
| 1.2184108816   | 0.8822800637   |
| 20.3946312078  | 11.5628556262  |
| 50.325104422   | 30.9546506084  |
| 17.6267924275  | 7.5064336472   |
| 13.2868952643  | 9.8275261992   |
| 0.9638110592   | 2.243031953    |
| 26.7816037787  | 17.5577641023  |
| 2.5630214634   | 2.3524094099   |
| 0              | 0              |
| 80.9149444036  | 55.3372857078  |
| 7.7487544429   | 2.8656464051   |
| 2.0326246509   | 2.4715174979   |
| 1.7320821097   | 1.4266997271   |
| 15.9502784784  | 11.0075924538  |
| 6.0428887257   | 2.0209278936   |
| 4.8587429009   | 1.7151860507   |
| 4.8936034687   | 2.303322918    |
| 24.2590098738  | 32.727859127   |
| 0              | 0              |
| 6.1273669741   | 1.6480177928   |
| 0              | 0.1457570381   |
| 2.3023120724   | 1.2642618526   |
| 25.275388768   | 21.1132471801  |
| 0.2131361336   | 0.1003189867   |
| 0              | 0.6841536069   |
| 546.8036190613 | 180.4726627605 |
| 8.4222445404   | 0.4955231098   |
| 1.2672130164   | 1.3792958201   |
| 0              | 2.3070228787   |
| 34.4188137107  | 20.1464756292  |
| 17.0818604253  | 5.7208373821   |
| 4.4360673273   | 4.6979317212   |
| 12.5745779993  | 3.4973584336   |
| 1.4111903095   | 2.0163807071   |
| 7.528506661    | 6.1519445037   |
| 68.6202071083  | 40.1683086775  |
| 0.1370342223   | 0.9110528047   |

| gene_expression_table |                |
|-----------------------|----------------|
| 0                     | 0              |
| 0                     | 0              |
| 0                     | 0.0478787963   |
| 0                     | 1.0344154805   |
| 1.3773450767          | 0.5672530863   |
| 0.7234245535          | 1.2768814159   |
| 30.0541836673         | 21.2188698362  |
| 1163.1635539477       | 530.66966919   |
| 7.5038209027          | 8.9278606921   |
| 5.8532530417          | 5.7906251826   |
| 0                     | 0              |
| 9.7837384052          | 8.1163358814   |
| 5.5889290852          | 2.8278939377   |
| 12.513594405          | 25.0320869059  |
| 11.9007045633         | 6.3296131944   |
| 0.2789060169          | 0.6399684396   |
| 2.6499609322          | 6.3923330533   |
| 4.6077348827          | 3.4790688565   |
| 7.9315561978          | 3.3365721004   |
| 3.9161629498          | 2.9743527957   |
| 2.8211445399          | 2.1024406552   |
| 42.1862981947         | 6.4808629487   |
| 0                     | 0              |
| 0                     | 0.2115897972   |
| 1.1728372943          | 5.2442987759   |
| 63.2047100508         | 54.7468175668  |
| 8.7720563314          | 10.3220860226  |
| 6.0390125306          | 3.1977499933   |
| 0                     | 1.9773526529   |
| 0                     | 0              |
| 483.1210024511        | 255.3382292192 |
| 0                     | 0.350594442    |
| 1.1832500672          | 0.9746319407   |
| 0.5971644911          | 0.1405367912   |
| 0                     | 0              |
| 0                     | 0              |
| 69.971442093          | 58.3833222387  |
| 14.8196626519         | 57.9823788831  |
| 758.6081457505        | 643.3727103551 |
| 4.8615949932          | 9.7250929216   |
| 109.953223967         | 145.4887956899 |
| 3.8067251252          | 5.9351740467   |
| 0                     | 8.1179563726   |
| 24.1148011206         | 11.8730767298  |
| 2.4137946663          | 2.7747684905   |
| 13.2866233808         | 4.9508872679   |
| 54.8837013248         | 64.411745422   |
| 221.3578106319        | 61.0146554501  |
| 13.7303919131         | 3.635226821    |

gene\_expression\_table

|                |                |
|----------------|----------------|
| 10.3203418414  | 5.6165791308   |
| 43.5146140465  | 11.2648102043  |
| 0              | 0              |
| 0              | 0.2462352908   |
| 71.4570333458  | 29.2610757163  |
| 0              | 0.0431920899   |
| 1.2313325006   | 0.4708957446   |
| 387.5586063619 | 133.0638825046 |
| 11.3782619513  | 11.7821531129  |
| 0              | 2.9153276292   |
| 0              | 0              |
| 0              | 6.8436051629   |
| 392.5215513537 | 641.261910164  |
| 166.3544341295 | 101.1371909243 |
| 0              | 0.5618867188   |
| 0              | 0              |
| 0              | 0              |
| 0              | 1.1121399824   |
| 2.5628911638   | 35.5859228795  |
| 52.2100555271  | 81.8210704138  |
| 16.7914326908  | 34.8243437233  |
| 73.3472385949  | 14.72308796    |
| 536.8011138345 | 741.0658714604 |
| 161.9270776709 | 227.8310744559 |
| 24.4990366355  | 25.9452332113  |
| 0              | 0.6909618811   |
| 0              | 1.8007250165   |
| 802.6969263048 | 171.0147724376 |
| 165.7856479877 | 34.7751501612  |
| 1.4118088909   | 1.4951490325   |
| 10.3438191345  | 17.6487919103  |
| 0              | 0              |
| 0              | 0.2467399686   |
| 52.8723395295  | 65.3256724575  |
| 267.0098804566 | 734.4208773684 |
| 1.3445237666   | 4.4298862744   |
| 0              | 0              |
| 6.5441381978   | 3.0801971565   |
| 3.0853101458   | 5.9903035983   |
| 2.3297910422   | 4.1122006022   |
| 30.0353004169  | 28.5748382704  |
| 0              | 0.2574386449   |
| 29.129997133   | 28.1073794339  |
| 0              | 2.7347631398   |
| 785.1387184731 | 239.2687716503 |
| 0              | 23.3892570938  |
| 0              | 4.0751891591   |
| 80.4143587085  | 41.3355914838  |
| 0              | 0              |



gene\_expression\_table

|                |                 |
|----------------|-----------------|
| 12.2474480932  | 13.642964687    |
| 0              | 0.1176995627    |
| 129.223854759  | 387.056263963   |
| 6.0550963804   | 4.6312740342    |
| 0              | 1.1740247795    |
| 0              | 0.0195372112    |
| 3.7540362485   | 7.6199763491    |
| 96.0165433453  | 47.8003929059   |
| 20.2748622132  | 5.1123101411    |
| 19.3289820228  | 36.8784675307   |
| 0              | 0               |
| 70.0598432557  | 87.9354412387   |
| 2.1633090897   | 8.5276515114    |
| 0              | 0               |
| 0              | 0.603651593     |
| 10.651207109   | 7.9377467325    |
| 4.8506124744   | 22.9735720178   |
| 15.140903707   | 28.5061024909   |
| 56.5219072771  | 100.4291571127  |
| 131.255444762  | 134.2512942729  |
| 147.224684417  | 416.5277971456  |
| 0              | 0.9769948661    |
| 15.469335672   | 5.8891347786    |
| 216.7640119767 | 328.4945986005  |
| 0              | 0.2866812343    |
| 0              | 0               |
| 1395.757815874 | 1770.1307863907 |
| 4.7142699396   | 9.4920216524    |
| 0              | 0.3617146869    |
| 0              | 0               |
| 0.5747420732   | 0.8453743478    |
| 2.2264410173   | 1.9386927055    |
| 0.0868692213   | 0.132884811     |
| 0.4156032809   | 0.8034240535    |
| 0              | 0.0340244423    |
| 0              | 0               |
| 0              | 0               |
| 1.2751550198   | 1.4372980425    |
| 0              | 0               |
| 0.377940235    | 0.6670838861    |
| 21.714523398   | 13.6700513475   |
| 1.3853925083   | 2.1192502803    |
| 0              | 2.2448901312    |
| 0              | 0               |
| 0.0519851081   | 0               |
| 1.928723       | 1.8723622231    |
| 1.8851356852   | 2.310667435     |
| 0              | 0.0112497987    |
| 15.3412332083  | 4.8998399575    |

gene\_expression\_table

|                 |                 |
|-----------------|-----------------|
| 2.2200020216    | 0.9469508605    |
| 0               | 0               |
| 0               | 0               |
| 3.8710208886    | 2.0290603851    |
| 19.1326029918   | 16.4025835307   |
| 0               | 0.0945197253    |
| 10.8599369418   | 13.0737945037   |
| 17.6256440773   | 16.1970383864   |
| 1.6565361477    | 2.2538173879    |
| 1.7227915634    | 1.0136051368    |
| 31.7234037177   | 40.0249358232   |
| 3067.4349361973 | 3125.0879151563 |
| 4.5021060707    | 2.2250054313    |
| 1.1551700698    | 8.2916664832    |
| 0               | 0               |
| 1.249851067     | 1.9539310576    |
| 2.4443746587    | 1.317041581     |
| 54.2527796127   | 24.6845259115   |
| 6.3896442594    | 14.5110905072   |
| 17.2742226943   | 11.474689198    |
| 3.0537243371    | 4.9279816894    |
| 17.8547952861   | 14.7068267836   |
| 0.6730032654    | 0.8711158559    |
| 2.6741426049    | 1.1887404285    |
| 3.0113896292    | 18.8691625041   |
| 0.1498479416    | 1.0579571896    |
| 1.7521842504    | 1.1339881702    |
| 1.602989515     | 4.3383499372    |
| 0               | 2.890389755     |
| 4.8026343501    | 6.1033649656    |
| 0               | 0               |
| 16.8347595733   | 23.4268581855   |
| 21.0455656308   | 13.7972721797   |
| 24.6665098401   | 14.5125513807   |
| 0               | 8.2185952948    |
| 2.9972277643    | 2.4184048576    |
| 12.0997668298   | 8.7206560216    |
| 3.2475084189    | 4.330858656     |
| 0               | 0.2504218436    |
| 4.8654710498    | 5.6297837899    |
| 4.0553675249    | 4.8912532177    |
| 0.5468726858    | 0               |
| 11.2707570851   | 3.006123439     |
| 0               | 2.3740028122    |
| 2.8347256408    | 4.8821406296    |
| 0               | 0.547853088     |
| 0               | 0               |
| 0               | 1.699280221     |
| 13.2725550124   | 0.7808913293    |

| gene_expression_table |                 |
|-----------------------|-----------------|
| 0                     | 3.0094700249    |
| 0                     | 0               |
| 0                     | 0               |
| 0                     | 0               |
| 3.1591592014          | 3.5005378004    |
| 0.4367533907          | 0.3083568481    |
| 0                     | 0               |
| 0                     | 0               |
| 237.9756121957        | 175.9138332623  |
| 0.8820704338          | 0.6746564612    |
| 2.2534942683          | 2.1544969798    |
| 17.4139493855         | 28.277592155    |
| 0                     | 1.2635718835    |
| 27.1691392583         | 40.2970053465   |
| 0.7138049015          | 0.3359739299    |
| 2833.4813777195       | 2279.8049541285 |
| 36.570124981          | 22.2138661109   |
| 0.6820612042          | 0.6286892251    |
| 18.8913877024         | 20.7475442639   |
| 0                     | 2.4142859199    |
| 0.6285114027          | 0.6360301082    |
| 0                     | 0               |
| 44.0794693786         | 55.4048267946   |
| 5.3942331048          | 1.2694797213    |
| 0                     | 3.3650108255    |
| 49.3610219618         | 40.8656489239   |
| 12.6657972132         | 8.9423125051    |
| 0                     | 0.6964878831    |
| 0                     | 1.8967016021    |
| 29.3442822477         | 31.0764973196   |
| 36.5961153247         | 46.7537663293   |
| 5.0207430756          | 11.2250338958   |
| 11.6989345848         | 9.953982573     |
| 3.1019004973          | 5.4750133646    |
| 19.5009779635         | 10.4371006725   |
| 22.3780445515         | 21.8886942357   |
| 3.8184780494          | 5.2795174198    |
| 0                     | 6.1534483277    |
| 795.0791354623        | 996.902113463   |
| 0                     | 2.5386051362    |
| 0                     | 0.8769029696    |
| 8.334462377           | 7.8457350803    |
| 1.1705048566          | 1.1018672351    |
| 34.7853446373         | 23.8149493127   |
| 11.5591756976         | 14.9618608833   |
| 7.3047968619          | 4.7275583176    |
| 1.6716628185          | 1.1802282221    |
| 0                     | 0               |
| 0.3616175168          | 0.1702062538    |

gene\_expression\_table

|                 |                |
|-----------------|----------------|
| 64.7553282366   | 92.525716523   |
| 0               | 0              |
| 20.175752458    | 16.1437608596  |
| 3.2412143288    | 2.019975424    |
| 12.1463482703   | 6.0743627221   |
| 34.1629465493   | 32.1596542244  |
| 10.7866262021   | 5.6411698109   |
| 4.6392606165    | 0.9098369747   |
| 0               | 0.2787735136   |
| 0.889076514     | 1.9354275938   |
| 4.9027078473    | 3.0768108932   |
| 0               | 0.1637903158   |
| 13.2049737263   | 13.332866985   |
| 4.9343570655    | 6.7441967311   |
| 0               | 2.6086019101   |
| 5.0520056344    | 4.7557594046   |
| 3.8358743877    | 3.3331765666   |
| 44.6358426491   | 11.379990566   |
| 8.6519910896    | 8.2900841954   |
| 0               | 2.243627891    |
| 1.5036073512    | 0.8122677219   |
| 0               | 5.255675387    |
| 39.8077230484   | 51.1001247367  |
| 1.0546046959    | 2.1561579707   |
| 124.6261352554  | 73.3238387999  |
| 11.4859374694   | 6.581466824    |
| 19.6157568613   | 11.1503223647  |
| 0               | 0              |
| 3.8116890767    | 3.5383384274   |
| 0               | 0              |
| 4.7039846616    | 4.3051420891   |
| 0               | 0.2332620968   |
| 1.7887573562    | 1.2628993664   |
| 79.529852816    | 44.2098264603  |
| 32.8239299604   | 16.327395287   |
| 51.7398663937   | 36.1488917879  |
| 0               | 0.0472937731   |
| 0               | 0              |
| 0.0168964782    | 0.007953       |
| 1805.1225831073 | 129.8054543778 |
| 123.9382936727  | 25.8021596783  |
| 0               | 0              |
| 39.8998763208   | 8.6075399376   |
| 1.4485572474    | 0.6818074099   |
| 128.2880151349  | 104.2972974408 |
| 6.7399693422    | 4.044773057    |
| 4.5987098661    | 4.7869243138   |
| 0.9624883005    | 0.679536473    |
| 0               | 0.9972395793   |

gene\_expression\_table

|                |               |
|----------------|---------------|
| 11.4002448775  | 7.0427057837  |
| 0              | 0             |
| 0              | 0.5940128786  |
| 13.9145396725  | 11.4612753301 |
| 0              | 0             |
| 2.1882957873   | 2.5749694834  |
| 4.2187833135   | 2.4821229269  |
| 5.0285818626   | 2.958568242   |
| 2.631698635    | 2.7381541764  |
| 0              | 1.0872366965  |
| 29.1498858259  | 19.1361772295 |
| 0              | 0.9783259217  |
| 78.3174877327  | 150.52188043  |
| 0              | 12.4106146346 |
| 0              | 0.9256892126  |
| 0              | 0             |
| 111.5870031908 | 29.841936362  |
| 21.5318552624  | 6.3341380245  |
| 41.1166810597  | 19.3528131981 |
| 10.6414317721  | 3.7565345002  |
| 0              | 0.2072130081  |
| 65.5130971473  | 66.3326674385 |
| 4.8551214979   | 2.685121998   |
| 51.0788725058  | 16.5287518008 |
| 8.5962679202   | 10.8738783261 |
| 6.4316086415   | 5.5499247967  |
| 2.3340588318   | 1.9912045103  |
| 7.3364856803   | 4.0426999431  |
| 0.7806051042   | 0.8266848111  |
| 2.6527255142   | 0.9052246561  |
| 3.0992887371   | 1.7322944335  |
| 3.1282306084   | 2.3006197335  |
| 8.5949297714   | 2.5621274663  |
| 0              | 0             |
| 0.9612913544   | 0.3959033193  |
| 3.9486800364   | 4.065613214   |
| 0              | 0             |
| 13.2786349735  | 19.0971988537 |
| 2.5182225825   | 6.3920341072  |
| 0.6226655385   | 1.0013444487  |
| 0              | 0.2357896672  |
| 251.1272537493 | 40.1037952954 |
| 1.4585885801   | 6.6936573689  |
| 9.5889051098   | 11.0952181191 |
| 90.3198733317  | 39.5359630254 |
| 0              | 0.1428274324  |
| 18.45414021    | 8.8834099996  |
| 11.276347249   | 11.0131764093 |
| 10.8579588784  | 6.5708070657  |

gene\_expression\_table

|                 |                 |
|-----------------|-----------------|
| 0               | 0.7216615521    |
| 2184.5921568106 | 2181.3648077557 |
| 39.4597212666   | 50.3746510133   |
| 0               | 0.072887863     |
| 0               | 0.4118225725    |
| 0               | 0               |
| 0               | 0               |
| 1317.3063103953 | 1652.3906477002 |
| 0.2576370534    | 1.0610660767    |
| 11.102212538    | 9.0480177032    |
| 5.6476082304    | 1.5863559817    |
| 0               | 0               |
| 19.2379132309   | 22.1342181774   |
| 0               | 1.880856535     |
| 0               | 4.5615958892    |
| 131.0793417503  | 61.6964684321   |
| 0               | 0               |
| 0               | 0.0854276368    |
| 0               | 2.1535126639    |
| 22.8561089273   | 35.9717983344   |
| 0               | 0               |
| 0               | 0               |
| 110.1514761594  | 59.5172452656   |
| 0               | 0               |
| 16.3124705386   | 25.2092990154   |
| 10.9817560147   | 24.1933076753   |
| 82.9230509376   | 38.4388819455   |
| 12.7117194067   | 13.8182420314   |
| 0               | 0               |
| 5.3652788204    | 4.9805143709    |
| 29.9745467817   | 12.7857644231   |
| 0.7973445051    | 1.4073539192    |
| 139.8637764486  | 184.8989341836  |
| 1.3507262248    | 4.291381832     |
| 0               | 0               |
| 0               | 0               |
| 40.3160780905   | 31.2877849974   |
| 0               | 0               |
| 0               | 0               |
| 132.9789218733  | 86.3144060341   |
| 5.6232439324    | 2.382075302     |
| 0               | 0               |
| 43.5104151452   | 0.3657052993    |
| 3.7227586396    | 5.2566878462    |
| 1457.0315946937 | 1707.1073236574 |
| 1.7978267837    | 15.3726644361   |
| 18.1181699775   | 20.8932724523   |
| 0               | 0.8302137827    |
| 10.3572166671   | 10.968610964    |

gene\_expression\_table

|                 |                 |
|-----------------|-----------------|
| 0               | 0               |
| 4.570140735     | 6.1843416895    |
| 33.1055616434   | 17.2618625902   |
| 1.0762030517    | 0.4432291609    |
| 73.8125940449   | 47.7704376347   |
| 1.7196360569    | 1.5176228899    |
| 21.5625540395   | 19.4523844538   |
| 0               | 0               |
| 32.6630159812   | 49.1413791609   |
| 0               | 0               |
| 23.7792771169   | 30.3254573103   |
| 0               | 0               |
| 0               | 8.1620802253    |
| 10.6453397529   | 8.7684661341    |
| 1.750347817     | 3.0600302428    |
| 5.5446932281    | 13.8877475537   |
| 3.0844893881    | 3.206077098     |
| 0               | 0               |
| 47.6484257437   | 22.4271769714   |
| 0               | 11.8981977111   |
| 101.0329092578  | 69.1697505941   |
| 22.0172331846   | 18.8756075993   |
| 0               | 9.4713831344    |
| 3.8753021587    | 5.7760903028    |
| 42.5873743473   | 19.274076545    |
| 0               | 0               |
| 2.1196490181    | 11.2238674767   |
| 7.9657213924    | 11.2479252306   |
| 0.9647466476    | 2.6110018306    |
| 1.7245852571    | 3.0439813718    |
| 50.1536807086   | 34.6718283493   |
| 0               | 0.1309429662    |
| 226.7354885149  | 221.6490970077  |
| 40.3816022481   | 7.743521727     |
| 0               | 7.8550456107    |
| 58.2347568639   | 17.9877828671   |
| 6.3194375729    | 0.7436087478    |
| 2.7575399683    | 0.3244799587    |
| 0               | 0               |
| 34.5753240142   | 20.505145595    |
| 0               | 3.8653379025    |
| 3.1066377458    | 0               |
| 8.7953455654    | 11.9019140563   |
| 1723.0711541844 | 1573.3503976392 |
| 0               | 0.8819478542    |
| 281.0706521022  | 605.1889868502  |
| 5.2365034938    | 3.1649235394    |
| 5.1571663815    | 5.1857595229    |
| 4.7047693483    | 7.7505484385    |

gene\_expression\_table

|                |                |
|----------------|----------------|
| 44.8997214174  | 14.7933911296  |
| 1.2688042347   | 1.9409039056   |
| 7.2767014893   | 1.2232143899   |
| 13.5033820561  | 49.4338163214  |
| 0              | 0              |
| 0              | 0.9125585652   |
| 1.350858412    | 0.6358224893   |
| 17.7387042895  | 25.5696065146  |
| 10.5456153332  | 15.2355366598  |
| 17.1167759947  | 8.4593563448   |
| 2.4725773145   | 1.6002160868   |
| 0              | 2.9839035707   |
| 0              | 1.8999389897   |
| 20.2311977576  | 40.4703144507  |
| 44.9304897042  | 49.2523412247  |
| 52.4213517639  | 25.4961560339  |
| 0              | 0.2248769334   |
| 121.5630429347 | 77.5901722436  |
| 40.9577710593  | 145.7191314178 |
| 14.5122238604  | 9.3921002755   |
| 2.4975330149   | 2.623972489    |
| 10.1203666395  | 45.8482789762  |
| 0.9338829603   | 1.0989008606   |
| 18.7604628409  | 17.8443239565  |
| 2.6261333708   | 2.111618445    |
| 3.3888364924   | 1.5950586941   |
| 0              | 0              |
| 15.5845484662  | 4.0344372675   |
| 11.3585675195  | 7.2819671461   |
| 0              | 0              |
| 0              | 0              |
| 20.9724345568  | 11.4507225165  |
| 0              | 0.264906285    |
| 1.4988048317   | 1.4990981643   |
| 1.5340421331   | 2.5873224144   |
| 16.6014005787  | 10.8156541514  |
| 2.7746970563   | 0.5441647245   |
| 0              | 2.5523590192   |
| 60.579436044   | 77.9370345514  |
| 0              | 1.6132247751   |
| 3.0200961278   | 5.3306244597   |
| 0              | 0              |
| 0              | 0.4215244042   |
| 4.9531821346   | 3.6136164078   |
| 2.0515055218   | 1.2070041318   |
| 0.6277210241   | 1.129063777    |
| 0.5770633012   | 1.7145529449   |
| 2.8672016272   | 2.4547583954   |
| 1.058037323    | 3.8594795494   |



gene\_expression\_table

|                |                |
|----------------|----------------|
| 1.763034369    | 1.24473841     |
| 3.8436995488   | 2.623272995    |
| 0              | 2.5787071633   |
| 63.0273688418  | 66.7342887184  |
| 0.3435221775   | 0.1212668501   |
| 6.6339993471   | 5.0306832187   |
| 0              | 0              |
| 5.6650516787   | 7.2374485675   |
| 0              | 0              |
| 0.8233707179   | 1.2013876555   |
| 11.5571123016  | 9.7914698729   |
| 171.5171749183 | 82.344356503   |
| 5.3683093778   | 2.147744006    |
| 0              | 0              |
| 1.336804102    | 5.1909610664   |
| 16.3571802523  | 40.144801743   |
| 0              | 0              |
| 47.6111581939  | 51.6666604749  |
| 2.6662306979   | 1.3176894748   |
| 52.1219678987  | 44.1006021279  |
| 37.5834245226  | 63.0607856408  |
| 8.7694025555   | 19.6060303123  |
| 7.982933628    | 17.8476968873  |
| 4.9767808648   | 6.1489913168   |
| 0              | 0              |
| 0              | 0              |
| 0              | 0.7909410611   |
| 0              | 0              |
| 0              | 0.0826547281   |
| 7.8973600728   | 17.9882641795  |
| 651.2583830838 | 594.6474820095 |
| 17.7446337649  | 12.8577614267  |
| 27.5189287353  | 14.1862013068  |
| 0              | 0.2265347231   |
| 0              | 0.0774323407   |
| 0              | 0              |
| 0              | 0              |
| 2.9732810367   | 0.5247993424   |
| 0              | 0              |
| 54.8611500299  | 62.5688484792  |
| 174.4183394371 | 86.7026706598  |
| 7.0688744052   | 11.4443524819  |
| 77.4061274645  | 31.0941435811  |
| 2.8718739929   | 7.6035071916   |
| 6.2064064745   | 5.2806912835   |
| 0              | 0              |
| 0              | 1.553248327    |
| 6.4523673115   | 6.4536301107   |
| 1.119696396    | 0.3952643057   |

gene\_expression\_table

|                |                |
|----------------|----------------|
| 3.4855119518   | 2.8709833804   |
| 0              | 0              |
| 2.2349898916   | 6.3117947399   |
| 0              | 0.6549411149   |
| 0              | 0.1295479719   |
| 0              | 0.2255908285   |
| 6.3761515435   | 15.4558150805  |
| 144.8910222909 | 86.9516274339  |
| 74.8662086123  | 26.428539089   |
| 21.312855938   | 24.9395284351  |
| 0.3969117667   | 3.3160294961   |
| 32.2932852216  | 33.8829193613  |
| 0              | 0.6165823077   |
| 13.2301506833  | 8.0434301773   |
| 0              | 0              |
| 5.251315244    | 6.4881883922   |
| 46.7738529963  | 54.1215180794  |
| 10.0720153395  | 3.1604663666   |
| 2.3137395827   | 1.8628174174   |
| 4.2451183696   | 2.8722597434   |
| 342.0526145592 | 97.2914987734  |
| 1405.721332013 | 916.789686401  |
| 0.9302752385   | 2.7640055195   |
| 6.2008150483   | 3.7090563292   |
| 0              | 0              |
| 35.3620224516  | 27.2251697145  |
| 0.0988189698   | 0.3372130569   |
| 0.3215126626   | 0.0756648438   |
| 5.2618604127   | 3.4827949963   |
| 0              | 0              |
| 2.4118532405   | 4.036308943    |
| 0.0475885168   | 0              |
| 0              | 58.8920835034  |
| 1.3777869741   | 0.6484972339   |
| 4.9038137108   | 5.7703216954   |
| 19.2213405719  | 21.8348448067  |
| 23.6782567279  | 33.8327011757  |
| 3.3711604386   | 3.014803954    |
| 13.8958416547  | 5.5342687225   |
| 0.4055684322   | 0.7582697557   |
| 90.1490701622  | 30.8035604349  |
| 0.4108128123   | 0.7009354808   |
| 40.4817694177  | 15.7875774414  |
| 550.1626848074 | 276.9924076327 |
| 16.9540927896  | 3.6574807806   |
| 0              | 1.4610589034   |
| 4.0913564075   | 7.0609770102   |
| 0              | 0.1511285383   |
| 0              | 0              |

gene\_expression\_table

|                 |                 |
|-----------------|-----------------|
| 0               | 0.2453555838    |
| 221.5900407618  | 230.4858683975  |
| 1.4552714093    | 1.780915848     |
| 0               | 0               |
| 16.2291329818   | 77.1830388501   |
| 0               | 0.1511726335    |
| 10.6320134495   | 7.6152081595    |
| 0               | 0.0494878226    |
| 3.0618238017    | 0.9498424384    |
| 9.770103582     | 11.8463822024   |
| 24.9055758816   | 39.3416378902   |
| 66.3703724031   | 143.6136781738  |
| 0.3481702237    | 0.2048460967    |
| 0.275899663     | 3.6036301434    |
| 3.6097581205    | 9.2916368121    |
| 51.771003524    | 50.0595122416   |
| 24.4071622729   | 17.8947245325   |
| 2.6135840003    | 1.8110727045    |
| 11.5434204038   | 7.1990707957    |
| 3.7045928283    | 2.3777440799    |
| 4.677250528     | 3.3022347652    |
| 2.0575304211    | 4.6606132026    |
| 1.5759941362    | 2.4849946485    |
| 0               | 3.3000515927    |
| 2.093144477     | 1.6420032379    |
| 1.7541989257    | 1.6169310855    |
| 1.6756547801    | 3.0021398322    |
| 0               | 0               |
| 1305.0541364912 | 1863.4622760308 |
| 0.9404577872    | 0.9467898311    |
| 0.3084571444    | 1.8874012552    |
| 4.5422670215    | 2.5065688238    |
| 0               | 0.1474615592    |
| 1.4746720667    | 3.6440204942    |
| 2.3805789934    | 3.4273864288    |
| 9.9249945368    | 29.5060167992   |
| 0.1257080044    | 0.3155641897    |
| 0               | 0               |
| 25.1229532578   | 42.6318043732   |
| 20.6296665044   | 20.6337039569   |
| 0.5215740492    | 1.749149367     |
| 76.0820476301   | 53.7154854516   |
| 0.4937489486    | 1.8591833625    |
| 22.3926304728   | 11.3382382883   |
| 7.2263050826    | 4.0015055225    |
| 37.528515787    | 18.4919312905   |
| 71.1395153025   | 53.6728356508   |
| 37.1938082723   | 97.952443302    |
| 0               | 4.4129994055    |

gene\_expression\_table

|                 |                 |
|-----------------|-----------------|
| 6.4902905451    | 4.9641347036    |
| 5.3561086746    | 3.6554717834    |
| 1.2647422565    | 3.7701656201    |
| 1.8342515042    | 2.3545803047    |
| 2.2511197827    | 4.1178269531    |
| 0               | 1.9110399618    |
| 2.0044435326    | 9.9062476022    |
| 351.9606620019  | 80.7597190488   |
| 8.0478895847    | 5.1720542064    |
| 1.7716356028    | 1.1181492786    |
| 1.724169813     | 2.089697023     |
| 11.3881281884   | 8.7102729773    |
| 0               | 0               |
| 0.584538418     | 0.0687826845    |
| 0               | 0               |
| 0               | 0               |
| 1.6512064885    | 3.4973569012    |
| 26.9223183311   | 10.2166434261   |
| 1.5702266763    | 2.2527568952    |
| 35.1680438545   | 28.8813735787   |
| 3.5277181632    | 4.7379441736    |
| 37.8769896081   | 88.2483730018   |
| 245.4656363493  | 99.3769880072   |
| 16.8272955052   | 13.3324664155   |
| 0.1001743805    | 0.223963027     |
| 0.7972622673    | 0.0938139177    |
| 7.7190451682    | 11.1638412155   |
| 3.7323110221    | 2.6978282939    |
| 0               | 0.0684988267    |
| 0               | 0               |
| 0               | 0               |
| 0               | 0.2941347239    |
| 1.6869316444    | 2.7841092069    |
| 0               | 0.6557910745    |
| 0               | 7.4946189149    |
| 13.118851596    | 15.9817976574   |
| 8.0871573316    | 4.7580823984    |
| 0               | 0               |
| 0.6809076529    | 1.842816591     |
| 0               | 0.0146659973    |
| 1018.2405706278 | 1452.4091999857 |
| 0               | 0.2815230543    |
| 0               | 0               |
| 6.6578344663    | 15.2208856633   |
| 10.4577304497   | 4.6761356637    |
| 3.7520318606    | 0.4415019029    |
| 3.2717921101    | 1.9249602563    |
| 0               | 0               |
| 0               | 0               |

gene\_expression\_table

|                 |                 |
|-----------------|-----------------|
| 3.0425232708    | 5.4000440138    |
| 27.8248017623   | 18.917292338    |
| 69.8521860019   | 33.0972372807   |
| 6.5541258599    | 7.7122453817    |
| 5.4951283829    | 3.9874420015    |
| 1.026661005     | 1.0872655771    |
| 14.6747717878   | 8.2022127128    |
| 11.6997766018   | 5.2565431853    |
| 80.9134965724   | 29.6211934971   |
| 11.3639068255   | 6.0781448487    |
| 76.1570053125   | 74.4916473532   |
| 1.0244296066    | 5.6656017222    |
| 0.951306493     | 1.4552240898    |
| 166.4977607528  | 45.7142126809   |
| 82.5040753118   | 62.1094798347   |
| 206.2294707333  | 129.3745825344  |
| 9.5635962214    | 5.1766061697    |
| 6.8026786156    | 8.9283388807    |
| 155.9447703813  | 63.7422239761   |
| 38.1536823258   | 44.8954699069   |
| 11.3822830122   | 10.8487689724   |
| 42.3393808205   | 29.710832618    |
| 2.607324869     | 6.2127837425    |
| 2.5221665489    | 4.6001450062    |
| 56.4778570815   | 26.0292038205   |
| 0.7709890324    | 2.0412527386    |
| 1.4749534497    | 2.4876631731    |
| 1.4365062762    | 0.9015136729    |
| 0               | 0.2852070175    |
| 0               | 0.7166579107    |
| 8.4950575565    | 3.1654447553    |
| 1.0591274854    | 1.0593347683    |
| 50.5537604107   | 31.6218519385   |
| 2074.8543337705 | 1444.1111207711 |
| 5.6512265426    | 5.5415024998    |
| 14.3613400374   | 18.9788778605   |
| 25.8406625462   | 87.2439231065   |
| 0               | 0               |
| 41.833688727    | 12.7166486003   |
| 53.8629795238   | 26.056474258    |
| 0.6743026658    | 0.7141072597    |
| 6.6236796371    | 6.4151350963    |
| 2.7128928542    | 2.4474018562    |
| 7.5872948952    | 8.9279762496    |
| 13.1687402896   | 14.5524531574   |
| 0               | 0.3383862427    |
| 53.3393323159   | 55.232704518    |
| 3.3277093457    | 3.2304676558    |
| 0               | 0.1161176698    |

gene\_expression\_table

|                 |                |
|-----------------|----------------|
| 142.7006571073  | 187.3196072354 |
| 0               | 0.0608090801   |
| 4.0108747292    | 7.3415994537   |
| 19.7838248342   | 11.1742287508  |
| 6.373327712     | 3.7140381198   |
| 0               | 0.1303350462   |
| 6.3260573845    | 3.8708160482   |
| 0               | 0.0749367458   |
| 0               | 0.6564915846   |
| 0               | 0.3297499349   |
| 1.0346311221    | 0.9739610454   |
| 8.3010481521    | 27.6755758615  |
| 48.2638364087   | 35.4950604206  |
| 1188.5038830271 | 385.2767619957 |
| 1.4369833954    | 1.7923535371   |
| 0               | 0              |
| 0.7521792984    | 0.6903702075   |
| 4.0556358019    | 2.5002545212   |
| 2.021245565     | 0.9683491199   |
| 25.7532466709   | 14.2195067758  |
| 35.3339429863   | 20.9550500547  |
| 0.9543602202    | 0              |
| 193.9536871154  | 165.9821569914 |
| 30.9079696922   | 21.6484724941  |
| 3.4201743459    | 2.8171654096   |
| 30.4062169375   | 47.9041335436  |
| 0               | 0              |
| 2.5183319706    | 2.6176022803   |
| 0.2514061964    | 0.3402043638   |
| 1.0706678048    | 0.839903801    |
| 2.1665428564    | 1.9120295935   |
| 6.1379197704    | 11.9014162144  |
| 0               | 0.2605655495   |
| 4.2702110481    | 4.2710467753   |
| 5.6046520006    | 11.3763727526  |
| 0               | 0.008717       |
| 25.4341143696   | 26.935509288   |
| 0               | 11.6187509894  |
| 123.5011349931  | 90.8274305313  |
| 2.2398470167    | 1.2958513469   |
| 0               | 0.2843244101   |
| 17.8962946923   | 51.5315960737  |
| 143.6851101692  | 119.1119574219 |
| 0               | 0              |
| 0               | 0.2737808808   |
| 1.5407542461    | 3.906205582    |
| 2.5239233911    | 4.7518444248   |
| 0.5042669798    | 0.4962742425   |
| 9.7633075605    | 2.6806481737   |

gene\_expression\_table

|                 |                |
|-----------------|----------------|
| 16.3118148663   | 5.2098342536   |
| 0.2348496719    | 0.2763478053   |
| 0               | 0              |
| 1.1572800011    | 1.2255951108   |
| 25.0136613695   | 21.6547172458  |
| 1292.8590206437 | 314.5562255861 |
| 38.555772078    | 31.9377041386  |
| 0               | 1.0546560143   |
| 1.1073772333    | 11.5971602785  |
| 7.3590404029    | 9.3328970308   |
| 5732.0571975894 | 9765.602619158 |
| 0               | 0.0943080437   |
| 10.805486116    | 7.6288947306   |
| 5.0557704974    | 3.3145149365   |
| 1.6680915061    | 8.6365165502   |
| 0               | 0.701838133    |
| 108.5665174047  | 99.3613536547  |
| 34.8388463839   | 14.1905421974  |
| 63.684936244    | 35.8037673686  |
| 19.1229863532   | 15.5014012258  |
| 181.3011219205  | 54.1548230761  |
| 46.2158799748   | 11.3943792546  |
| 0               | 0              |
| 35.3481618768   | 18.0934820668  |
| 0               | 83.1401323891  |
| 441.4331585413  | 748.8950751735 |
| 167.6775713496  | 130.0988669238 |
| 195.7206619738  | 49.0912578927  |
| 245.9236629882  | 156.124411276  |
| 36.7637022697   | 11.4638679912  |
| 30.9494556343   | 53.8990104926  |
| 165.7642749064  | 134.3711953126 |
| 0               | 0              |
| 0               | 0              |
| 2.3350459277    | 0.5495300993   |
| 109.6963487117  | 40.8752653405  |
| 9.8470522793    | 2.3174069307   |
| 15.1626834822   | 8.9209711682   |
| 489.2364581783  | 269.0701394707 |
| 4.9896308025    | 30.5307742424  |
| 25.7922457098   | 26.935409427   |
| 85.0779123813   | 30.3194073438  |
| 90.9814168695   | 52.2761493443  |
| 1.90759852      | 0.9998996903   |
| 114.9665987444  | 60.4666384966  |
| 19.6607581952   | 13.6825998201  |
| 21.3298455828   | 19.0751238255  |
| 9.1935490476    | 3.1681452216   |
| 1.5924878532    | 5.6216453666   |

gene\_expression\_table

|                |               |
|----------------|---------------|
| 23.4354112273  | 16.2701161164 |
| 11.3485801404  | 15.6732424994 |
| 7.2846611278   | 7.3128738999  |
| 18.2020039777  | 28.6469940465 |
| 0.4639149246   | 1.6922561474  |
| 23.9168813095  | 12.8653779394 |
| 0              | 0             |
| 0.2022071906   | 0.463977872   |
| 0              | 0             |
| 4.051809277    | 5.8042385318  |
| 12.5193314965  | 21.0660562168 |
| 12.9398824335  | 5.9670911353  |
| 4.3174352319   | 3.5138946737  |
| 0              | 0             |
| 1.4502422167   | 0.4692878381  |
| 22.1589727073  | 35.4612951389 |
| 166.5515282733 | 72.6704466405 |
| 7.3018642477   | 8.0551029075  |
| 1.0649054994   | 0.7267836113  |
| 2.2749156948   | 1.4722923605  |
| 10.7062826028  | 6.1982611135  |
| 6.4791492373   | 2.6989031958  |
| 2.8815949328   | 1.5597565772  |
| 1.8056473171   | 1.2040004681  |
| 123.5942263009 | 79.9883862084 |
| 65.7226196755  | 75.2267016862 |
| 0.8314262401   | 1.4675099282  |
| 0.1208714078   | 0.021334423   |
| 16.8355794258  | 13.5843019835 |
| 1.7841857354   | 0.4962343094  |
| 0              | 0             |
| 0              | 0             |
| 7.7456855999   | 4.9369421424  |
| 0.6076898193   | 0.2145207356  |
| 24.3723547711  | 17.7092641267 |
| 4.5323045401   | 3.0170485017  |
| 2.2851379192   | 2.4200313308  |
| 19.1466527011  | 22.8569289266 |
| 11.2872145891  | 2.0254554144  |
| 3.625298299    | 4.2806015116  |
| 0              | 0             |
| 46.1473691122  | 36.7770251245 |
| 0              | 0             |
| 10.7783372303  | 6.9333068775  |
| 0              | 0.0462350542  |
| 37.8918433295  | 75.0553956304 |
| 6.8671204992   | 4.2198409163  |
| 29.3043330305  | 24.827351896  |
| 0.8302118013   | 0.0976910921  |



gene\_expression\_table

|                |                |
|----------------|----------------|
| 77.6203072807  | 40.2288372555  |
| 0.7991084687   | 1.9746543674   |
| 0.7938561434   | 0.1868262376   |
| 0.3653244249   | 0.1934449004   |
| 5.7684367923   | 6.0750133368   |
| 3.7665664706   | 2.1052579103   |
| 3.9089831701   | 2.9438104102   |
| 24.3496296785  | 9.111409016    |
| 0.7224401332   | 1.3601534544   |
| 0.2220919232   | 0.2090686015   |
| 6.4165582339   | 4.5302216646   |
| 14.273160716   | 26.8723842456  |
| 0.3154303452   | 1.1877348833   |
| 0              | 0.0214267392   |
| 4.6490621535   | 2.8615212468   |
| 4.0420079686   | 2.9488651778   |
| 167.6775713496 | 110.5421409079 |
| 2.5093005006   | 1.898161713    |
| 4.0085328825   | 4.5246762774   |
| 0.5839731687   | 0.2748646864   |
| 0              | 2.1079541606   |
| 1.8917932567   | 1.0320891826   |
| 0              | 0              |
| 0              | 0.5779390949   |
| 1.5404569673   | 0.7930374384   |
| 4.4618339167   | 12.7505918475  |
| 3.4097043013   | 6.9009872739   |
| 0.4805142128   | 2.0920594619   |
| 0              | 0              |
| 0              | 0              |
| 2.4294393195   | 4.478666471    |
| 1.5568821049   | 0.7038677194   |
| 7.1874289054   | 2.3680870094   |
| 4.1245573477   | 2.3963514775   |
| 0.9742143255   | 0.2674837227   |
| 0.7018919494   | 0.8121515633   |
| 0.3817403176   | 0.2358269293   |
| 0              | 0              |
| 0              | 0              |
| 0              | 11.5136989913  |
| 2.8806120484   | 0.8174962522   |
| 4.5282813225   | 2.2254041283   |
| 13.1405213853  | 6.8722055581   |
| 0.0933576175   | 0.0768977906   |
| 0              | 0              |
| 1.044316248    | 1.0923091578   |
| 2.1800259573   | 2.8217622041   |
| 0.4929303157   | 1.7400945445   |
| 53.5925418706  | 45.4420154928  |

gene\_expression\_table

|                 |                 |
|-----------------|-----------------|
| 0               | 0               |
| 1.9543071058    | 1.4564353772    |
| 4.5811319429    | 3.1300384582    |
| 20.3022483395   | 15.0163656363   |
| 4.4727099017    | 2.9239119348    |
| 19.9749333846   | 17.2010356924   |
| 8.1863007639    | 8.8723406177    |
| 0               | 0.0942523414    |
| 11.5769038406   | 8.3932500473    |
| 0.3400968965    | 0.6174395526    |
| 1.5073743076    | 1.7559913225    |
| 0.1982726294    | 0.1166537844    |
| 1.3610000773    | 0.7206704682    |
| 3.1290595661    | 3.3137703079    |
| 0               | 0               |
| 6.7468920966    | 5.4549118425    |
| 273.1834040739  | 210.4172906374  |
| 21.7386335575   | 9.284544787     |
| 1.4477084834    | 3.5287195512    |
| 0.3038568535    | 0.7508520888    |
| 0               | 0               |
| 1.9829840024    | 1.8861479719    |
| 0.2064685844    | 0.5709366266    |
| 2.6890475333    | 6.855776377     |
| 41.6249599415   | 30.5593389715   |
| 67.7656754271   | 56.8378781692   |
| 0               | 0.0176845001    |
| 0.1192295216    | 0.1753718473    |
| 3.7573816581    | 0.589508552     |
| 1.0140982219    | 1.5133089684    |
| 0               | 4.848519298     |
| 27.1511627651   | 15.5750380191   |
| 1338.7832919819 | 1569.2241609929 |
| 0               | 0               |
| 11.4506261691   | 13.7733827554   |
| 0               | 0.036647542     |
| 0               | 1.6188852129    |
| 20.7612597575   | 19.3911471798   |
| 38.7789433406   | 50.574596698    |
| 17.1578984523   | 15.7954817075   |
| 0               | 0               |
| 11.7477892416   | 3.6648702574    |
| 1.922487077     | 0.9048768606    |
| 9.1637031287    | 8.6263497093    |
| 8.3541587835    | 7.2744557651    |
| 0               | 0.009509        |
| 9.2415341782    | 3.4487766592    |
| 0.7463057117    | 1.7124481826    |
| 0               | 0               |

gene\_expression\_table

|                |               |
|----------------|---------------|
| 4.806775582    | 1.5083031595  |
| 1.8490067914   | 1.062267121   |
| 0              | 0             |
| 0.747462165    | 0.2693589274  |
| 12.7622512256  | 7.274029726   |
| 0.3063682331   | 0.6188647813  |
| 0              | 1.3588022413  |
| 0.3458336781   | 0.8952741122  |
| 4.1512175307   | 7.4356615141  |
| 58.0925207269  | 43.6847261752 |
| 0.991653116    | 0.9335032409  |
| 0              | 0.1011269725  |
| 0.4869366925   | 0.2037258003  |
| 10.3618445566  | 0             |
| 2.4538233103   | 1.7901978839  |
| 0              | 0             |
| 36.6521386402  | 10.0633405124 |
| 17.2027571293  | 32.0988193727 |
| 31.1189051498  | 20.4012575294 |
| 0              | 0.0102341918  |
| 1.0819043408   | 1.7982223118  |
| 0.8060144019   | 0.8346252824  |
| 0              | 0             |
| 1.7516760119   | 2.8444541071  |
| 0.072922549    | 0.4891057391  |
| 1.2789242198   | 1.1576239994  |
| 2.4438312633   | 4.6585664326  |
| 13.335473215   | 13.167519391  |
| 0              | 0             |
| 0              | 0             |
| 105.0652371573 | 36.6676386231 |
| 0              | 0.4040002045  |
| 0              | 0             |
| 2.7189636735   | 0.4113523066  |
| 13.0607912995  | 7.02566585    |
| 0              | 0.1002284417  |
| 0              | 0.005075      |
| 0              | 0             |
| 0.2871120194   | 1.058580854   |
| 2.8075508024   | 1.2113373718  |
| 0              | 0             |
| 0              | 0.0610269461  |
| 60.9732979477  | 29.3511807396 |
| 0.9980550083   | 1.0569709468  |
| 10.6610004219  | 7.1087245979  |
| 0              | 0             |
| 0.4129786446   | 0.2478356814  |
| 16.283834083   | 19.0015245097 |
| 1.464076981    | 1.6079285677  |

gene\_expression\_table

|                |                |
|----------------|----------------|
| 0              | 0              |
| 0.9832808575   | 1.7190121482   |
| 0              | 0              |
| 0.6520599562   | 0.5831324169   |
| 13.8501591653  | 17.3839934666  |
| 7.8088049694   | 5.2834607201   |
| 0.3125813219   | 0.3089643505   |
| 0              | 0              |
| 0.8681939663   | 1.0386313091   |
| 4.1386352773   | 2.5567161861   |
| 0              | 0              |
| 0.7437493784   | 0.4594645207   |
| 38.0641978945  | 27.0588058473  |
| 3.0964332796   | 13.1168722686  |
| 41.4539955271  | 25.7672017086  |
| 17.7759613338  | 20.219755618   |
| 9.8734653713   | 6.3899632287   |
| 1.2842843125   | 1.1082268449   |
| 0              | 0              |
| 0              | 0.6139188852   |
| 0.9854333188   | 2.5510324631   |
| 0              | 0.6086604793   |
| 0              | 0.6752150696   |
| 0              | 0.2568280496   |
| 6.3579010028   | 0.3740673714   |
| 104.3679280056 | 58.1153651227  |
| 129.7075295113 | 61.0507833884  |
| 0              | 0.3335835333   |
| 10.6232324018  | 4.0278958571   |
| 45.2887689148  | 19.4441347451  |
| 11.0364592222  | 17.8565898477  |
| 3.887906669    | 2.2874515147   |
| 0.4907521991   | 2.4831146499   |
| 125.5027778194 | 121.1883113566 |
| 1.643688024    | 1.9341290727   |
| 23.0441689698  | 116.0568776216 |
| 10.7196450412  | 73.4754740441  |
| 33.1030759198  | 478.2491213579 |
| 54.3526568853  | 204.6618138265 |
| 3.059180006    | 2.5198177704   |
| 6.933507181    | 5.5750868613   |
| 17.3223736985  | 15.1289023139  |
| 60.0202090872  | 41.7869495571  |
| 6.1701277452   | 27.831512169   |
| 90.5930519398  | 36.3232764427  |
| 67.9707522598  | 77.8484079446  |
| 3.0349179581   | 3.5711904999   |
| 100.553734592  | 71.2005800282  |
| 238.9842943824 | 211.0387611232 |

gene\_expression\_table

|                 |                 |
|-----------------|-----------------|
| 701.7400035602  | 317.5915573719  |
| 1.4497254387    | 3.4459041355    |
| 3.1994768374    | 1.5059308283    |
| 12.8052569453   | 7.3330721919    |
| 5.6693252781    | 1.3342199594    |
| 182.1912753066  | 96.1034530565   |
| 38.3139767805   | 30.0560590171   |
| 303.2030817908  | 185.3612099105  |
| 342.4917955077  | 91.5932686942   |
| 13.1825811796   | 7.7559771504    |
| 35.3728664745   | 18.5412799714   |
| 85.0378002114   | 55.0352278517   |
| 141.5739201322  | 148.6372311369  |
| 3758.1108906691 | 4467.99232635   |
| 9.3124854978    | 8.8506999604    |
| 12.1692947721   | 5.3698572515    |
| 0               | 8.1840254818    |
| 0               | 8.0732149732    |
| 0               | 0.8347854445    |
| 0               | 0.1997676843    |
| 28.864585658    | 6.7929964176    |
| 64.8524868122   | 10.8815224293   |
| 730.7712642117  | 205.8298301669  |
| 37.9347222543   | 44.7428495708   |
| 5.7577237356    | 8.6570956513    |
| 1.156103024     | 1.2923680256    |
| 51.9159311311   | 29.526601134    |
| 63.2490383104   | 38.0100109599   |
| 0               | 0               |
| 0.9362810125    | 1.2118949156    |
| 13.4634367441   | 19.6333061986   |
| 5.1079997616    | 10.7439253209   |
| 21.0449108081   | 15.3534097737   |
| 4.5529132049    | 3.4823209047    |
| 7.0451476843    | 31.5021184578   |
| 9.1599581765    | 8.6677349022    |
| 3.9429252852    | 2.5518039147    |
| 145.5140772184  | 80.912931897    |
| 0               | 3.6420092274    |
| 13.0573243906   | 0.7682282266    |
| 0               | 0.2655559443    |
| 4064.8302179746 | 2601.7278097886 |
| 0               | 3.6137553449    |
| 10.5123429789   | 5.6901460771    |
| 533.8504100376  | 160.2505673561  |
| 10.1970360837   | 19.4552958702   |
| 0.942491226     | 0.3881605749    |
| 2022.6609784258 | 1246.5600206426 |
| 31.5326858981   | 24.631097481    |

gene\_expression\_table

|                 |                 |
|-----------------|-----------------|
| 199.1318417597  | 574.080581673   |
| 32.8514068815   | 96.6406948909   |
| 0.5044859839    | 1.911485635     |
| 8.4931907844    | 2.66505192      |
| 30.70277786     | 21.9778571703   |
| 14.8429452975   | 7.3038407524    |
| 47.3765843583   | 29.8130964022   |
| 3.4381757973    | 2.8319930356    |
| 3.0432819052    | 2.9841936362    |
| 0               | 0.6100211618    |
| 0               | 0.7687043385    |
| 3.2882150924    | 0.7738490899    |
| 1.0871921293    | 2.0468798207    |
| 0.3865122625    | 0.727694884     |
| 119.3827148634  | 45.933991318    |
| 1.9590619503    | 1.1526149178    |
| 9.7536866888    | 40.4980186779   |
| 327.1289546377  | 108.3514870592  |
| 39.9559966583   | 21.589096541    |
| 0               | 0               |
| 7.049323824     | 6.200471567     |
| 12.5976793338   | 56.3300592762   |
| 22.9148301558   | 4.4939833019    |
| 4.4145116564    | 2.8199037604    |
| 67.0063803017   | 26.8313339325   |
| 132.0604106928  | 209.7840542294  |
| 0               | 0.2838541444    |
| 71.9051197133   | 78.2250926624   |
| 5.9688782117    | 7.0235839844    |
| 1.0993764989    | 1.1966144524    |
| 0               | 0.1606014232    |
| 8.844320411     | 6.2442715353    |
| 126.2287983542  | 48.7375653873   |
| 1.6209394479    | 0.1907360804    |
| 0.2972777913    | 0.2098842154    |
| 0               | 0               |
| 53.379323134    | 17.9461411947   |
| 2167.0606189876 | 3711.1302643191 |
| 3.6474579442    | 4.2204340337    |
| 26.1566230918   | 22.4106100724   |
| 39.9462203775   | 39.1482425616   |
| 0               | 0               |
| 40.9424578348   | 27.0326636804   |
| 0               | 0.1077780672    |
| 0               | 0               |
| 7.9146102791    | 3.3113345904    |
| 0               | 0               |
| 0               | 0.1181091545    |
| 0               | 0.1532831514    |

gene\_expression\_table

|                  |                  |
|------------------|------------------|
| 8.1687126018     | 7.2777562918     |
| 13.4594180077    | 9.7854412787     |
| 16.3379963897    | 9.2077315559     |
| 37.9359228332    | 68.9428140669    |
| 7.0798748069     | 10.6786921785    |
| 0                | 0.3767738127     |
| 0                | 1.0771935342     |
| 254.4551899031   | 257.3373185583   |
| 0.496820837      | 0.2923047473     |
| 19.2478487032    | 15.0049357808    |
| 142.768474167    | 128.3841457242   |
| 3.1798659094     | 2.6192256128     |
| 20.109094795     | 10.056515183     |
| 8.5513547434     | 8.6249025253     |
| 91.9136271013    | 96.412316201     |
| 0                | 0.0950332477     |
| 10.4679624738    | 2.1555905348     |
| 2.6186555647     | 6.1257718966     |
| 0                | 0.0336132852     |
| 8.0665813683     | 7.9099608696     |
| 8.0796576416     | 9.0069535943     |
| 0                | 0                |
| 342.4458172831   | 96.1600212776    |
| 0                | 8.4991250126     |
| 17017.3965042468 | 16486.5817864478 |
| 39.8394620981    | 21.2942481432    |
| 0.3311883479     | 0                |
| 0                | 0                |
| 28.4980437297    | 13.7860651121    |
| 0.8424814761     | 0                |
| 0                | 0                |
| 0                | 0                |
| 182.0521912204   | 94.0787074315    |
| 0                | 0.840338341      |
| 30.1009970375    | 13.2824506471    |
| 3.7300040401     | 2.8163384441     |
| 0.6579228904     | 2.4193075483     |
| 1.0087612934     | 0.2769690601     |
| 8.6112874172     | 4.2819712677     |
| 0                | 0.0419409707     |
| 137.4233899364   | 196.4883100368   |
| 246.8751751347   | 132.3380803152   |
| 0                | 0                |
| 28.186756269     | 28.3581096254    |
| 670.1302596349   | 346.1042698577   |
| 0                | 9.5572367006     |
| 11.2069823691    | 16.2956924024    |
| 11.219065369     | 0                |
| 6.6158302287     | 8.2519441418     |

gene\_expression\_table

|                  |                  |
|------------------|------------------|
| 31.3587668934    | 28.1361640158    |
| 10.163479593     | 68.1684371487    |
| 13.4533943994    | 4.7491861329     |
| 0                | 0.9552651212     |
| 25.0678947957    | 31.8572057964    |
| 1.6314765807     | 5.7592795714     |
| 1.2586192587     | 2.3696293352     |
| 16.1992898023    | 9.0207566212     |
| 0.7305487231     | 0.3008730527     |
| 0                | 0                |
| 28.1901065777    | 10.4428235894    |
| 0.9548317653     | 5.5178854546     |
| 0                | 1.1715381508     |
| 5.1295539334     | 7.8999939113     |
| 0                | 0.7534643972     |
| 0                | 0.2086389165     |
| 0                | 0                |
| 0                | 2.058548985      |
| 1.9268960114     | 0.2267380148     |
| 294.0736536659   | 242.2256999747   |
| 0                | 0.8494417448     |
| 5.3809653141     | 7.3870841171     |
| 635.2211865683   | 182.7137403843   |
| 765.478001723    | 413.5209049857   |
| 662.4577898448   | 345.2136242618   |
| 2.7608886489     | 1.4619329921     |
| 0                | 0                |
| 2.5370670997     | 0.5970737957     |
| 0                | 0.6944435947     |
| 2.7843986079     | 1.572674002      |
| 0                | 0                |
| 39.718468064     | 12.9588274101    |
| 0                | 1.7550467333     |
| 65.6637448116    | 117.4452068362   |
| 34.6945064597    | 4.0825054772     |
| 6.778267309      | 5.4502617551     |
| 35.3055094944    | 32.4623059955    |
| 0                | 0.0269282438     |
| 0.3638986931     | 1.0704997414     |
| 46.5285074592    | 22.2650543496    |
| 34.5635057397    | 42.7044514207    |
| 24495.3658767836 | 66608.8986586505 |
| 0.9345152134     | 2.6391475999     |
| 0                | 0.443741936      |
| 57.5062550742    | 25.1337017091    |
| 0.7504792271     | 1.236325348      |
| 115.834507592    | 27.1584130975    |
| 55.2138288516    | 21.2957742057    |
| 16.1623976287    | 4.4376049221     |



gene\_expression\_table

|                 |                |
|-----------------|----------------|
| 11.5966776684   | 22.6360078125  |
| 0.850228347     | 2.1009752548   |
| 2.5166921468    | 5.9227875085   |
| 0               | 4.2319272037   |
| 0               | 0.3672606542   |
| 3.8507203543    | 1.8124583448   |
| 0               | 0.2726005079   |
| 0               | 0.812209861    |
| 3.3386325916    | 4.9107147039   |
| 0               | 0              |
| 0               | 0              |
| 2.0462558342    | 1.2039154758   |
| 2.7757598532    | 2.7763030999   |
| 0               | 0.3369072599   |
| 1.5817559831    | 1.1787939393   |
| 7.5333164791    | 9.5292942875   |
| 1585.9815245495 | 683.6066196376 |
| 105.4106447383  | 40.5082187462  |
| 0               | 0              |
| 0               | 0              |
| 2.7088365711    | 8.9249727252   |
| 53.2889031658   | 12.0931258363  |
| 139.8541025446  | 17.0443812284  |
| 208.5980703047  | 106.9824301896 |
| 55.9804890204   | 34.9969531459  |
| 1.963906514     | 7.6260704447   |
| 97.8533338298   | 57.572049884   |
| 3.6750884497    | 5.4776742269   |
| 47.7746355947   | 71.6759784239  |
| 0               | 3.7156136451   |
| 8.1282187584    | 0.9564481812   |
| 29.9609924001   | 7.0510249637   |
| 4.4356091348    | 4.1755079833   |
| 127.5777527516  | 123.0990956687 |
| 7.0751619597    | 4.6167844433   |
| 237.1431292108  | 177.6413784458 |
| 0               | 0.9894431917   |
| 79.4984441139   | 57.9720981716  |
| 12.1667408802   | 8.3513582663   |
| 50.7487883937   | 27.7504423437  |
| 61.3974268405   | 220.3515307351 |
| 0               | 0              |
| 5.9651649359    | 6.5332689456   |
| 52.6686592992   | 62.6307629621  |
| 0               | 0.7623049114   |
| 3.7340062372    | 5.0528795021   |
| 100.2467536329  | 61.124954678   |
| 6.9806767362    | 14.9224054808  |
| 0               | 0.1324582861   |

gene\_expression\_table

|                |                |
|----------------|----------------|
| 285.8536687027 | 294.4019781622 |
| 297.5042317637 | 124.8088053308 |
| 7.435490611    | 7.0443468686   |
| 22.597577753   | 18.4088690612  |
| 25.7566414102  | 25.1122280932  |
| 1.7409243054   | 6.0773563563   |
| 0.305729249    | 2.3743622957   |
| 0              | 7.369095699    |
| 18.641677448   | 14.1936736416  |
| 96.7770062896  | 86.9065774548  |
| 2.2439433463   | 0.5280900025   |
| 7.4953321431   | 16.5370567545  |
| 25.8238397747  | 23.2966492953  |
| 10.8292743615  | 11.4685345795  |
| 0              | 0              |
| 0              | 0.2996383648   |
| 3.6898243568   | 10.1309119498  |
| 0              | 0              |
| 0.858996315    | 0.5053908412   |
| 16.6185149401  | 13.9818396079  |
| 28.0793608141  | 28.2684174056  |
| 0.8803024757   | 1.2948158244   |
| 0              | 0              |
| 0              | 0              |
| 3.6160060061   | 2.4466004429   |
| 0              | 0              |
| 0.4180603591   | 0.5657217703   |
| 6.0141103549   | 6.4575879253   |
| 0              | 0              |
| 0              | 0.1081548419   |
| 0              | 0.2439604711   |
| 2.1307111726   | 0.7521628857   |
| 0              | 0              |
| 5.1482568417   | 1.2115916264   |
| 0              | 1.4117127652   |
| 0              | 0              |
| 1.476700424    | 0.9556990432   |
| 0.5568476285   | 1.9002049035   |
| 5.5203313935   | 6.2792526159   |
| 26.6944017141  | 107.5837875284 |
| 0              | 0.7555506316   |
| 444.3994341112 | 672.8816729573 |
| 42.7000886005  | 67.1132714641  |
| 14.5208566798  | 10.5368009241  |
| 31.1653269331  | 27.1374770403  |
| 222.8330433288 | 115.4830223287 |
| 42.8172232601  | 12.3858361795  |
| 11.2331951742  | 10.8682239074  |
| 180.9043401249 | 211.6181101774 |

gene\_expression\_table

|                 |                 |
|-----------------|-----------------|
| 72.1217760485   | 92.0123440309   |
| 43.3329747778   | 36.0851937338   |
| 0               | 0               |
| 2.3553665137    | 4.4899300298    |
| 202.0978365506  | 113.499603628   |
| 0               | 4.9042894697    |
| 22.3436231881   | 35.7755735578   |
| 0               | 1.060316866     |
| 106.2651961045  | 106.4876745732  |
| 1325.2818536088 | 2395.1611258878 |
| 54.297124158    | 90.9001388755   |
| 604.875601649   | 191.514165458   |
| 0               | 0.4427483549    |
| 3.1807356505    | 1.5411423591    |
| 261.841530484   | 178.8133447869  |
| 32.0326499376   | 10.2309153362   |
| 11.1336527314   | 6.4569108232    |
| 143.781460283   | 139.3099253052  |
| 548.2841369857  | 763.4469097538  |
| 0               | 0.1288493208    |
| 0.6127283712    | 2.0187943632    |
| 47.3696417478   | 25.0829536804   |
| 205.2511301108  | 118.6594214908  |
| 2.6234476525    | 1.111324697     |
| 0               | 0               |
| 2.4381579735    | 0.6694292563    |
| 0.7811803742    | 2.5738036794    |
| 1.7405061783    | 0.9216247842    |
| 0               | 2.035314881     |
| 0.420242255     | 2.4724970651    |
| 0               | 0               |
| 28.2847045816   | 13.2056908756   |
| 0               | 4.4283457659    |
| 0               | 0               |
| 28.9294013444   | 13.6165003041   |
| 19.2803469896   | 34.7288683504   |
| 63.2120937786   | 46.7542262778   |
| 9.2480733348    | 8.8223676704    |
| 34.330982699    | 57.2157621725   |
| 93.1009677877   | 33.2952116353   |
| 1.0035228799    | 1.1808462122    |
| 15.7616552374   | 6.6768310447    |
| 47.4843328216   | 46.8140669905   |
| 5.5616870589    | 2.2608071722    |
| 338.1847017158  | 70.8716146661   |
| 0               | 0               |
| 0               | 2.4450258601    |
| 0.8792010964    | 2.2242968308    |
| 2.9506790421    | 1.5872303986    |

| gene_expression_table |                |
|-----------------------|----------------|
| 0                     | 0              |
| 0                     | 0              |
| 26.7755959238         | 26.6758133151  |
| 0                     | 0              |
| 0                     | 0              |
| 10.2976433005         | 12.0459675706  |
| 23.5301123678         | 10.6425376792  |
| 2.9674218301          | 3.3171793621   |
| 12.2266123643         | 3.4369099713   |
| 68.6548227147         | 44.4324030235  |
| 0                     | 0.4187763445   |
| 0                     | 0              |
| 0                     | 0              |
| 0                     | 0.0881309802   |
| 0                     | 0              |
| 21.2307040712         | 9.6725904439   |
| 13.202432204          | 8.9069127968   |
| 8.6594932817          | 10.838064178   |
| 1.5894752507          | 1.1222021142   |
| 430.8175047356        | 249.164297565  |
| 17.5249270067         | 26.3835128718  |
| 0                     | 0              |
| 0.9929779358          | 1.830552816    |
| 0                     | 0              |
| 7.7117363415          | 0              |
| 14.1608500963         | 15.9225026353  |
| 17.1425885727         | 17.549377532   |
| 7.976781158           | 7.210373524    |
| 41.3808139144         | 33.2734395368  |
| 2.0783867604          | 3.016288642    |
| 1.3742038713          | 0.277204602    |
| 6.0663823416          | 6.1121840816   |
| 64.3089520734         | 10.5941356775  |
| 0.4330722824          | 0.2208251573   |
| 8.2479044379          | 4.8526580256   |
| 5.3401005252          | 4.0513333814   |
| 14.573785896          | 32.5830735029  |
| 6.4074403508          | 39.2061301859  |
| 94.7718417648         | 30.4140287666  |
| 0                     | 0              |
| 85.5081420267         | 65.3064542886  |
| 57.9552018935         | 9.0927912727   |
| 6.8147192447          | 3.2075543342   |
| 335.0851639492        | 150.3953757887 |
| 28.0659938974         | 20.6407990595  |
| 1.6642128917          | 1.9582807017   |
| 44.8834995826         | 27.2874666094  |
| 427.8562383331        | 485.8377357576 |
| 12.7822794991         | 17.0078083833  |

gene\_expression\_table

|                 |                 |
|-----------------|-----------------|
| 0               | 0               |
| 2.0654471715    | 6.8051575601    |
| 39.9727791872   | 19.2847611091   |
| 0               | 0               |
| 180.1474085095  | 238.7863658281  |
| 0               | 0               |
| 10.1951147972   | 7.1979600658    |
| 4.7305672072    | 4.28617604      |
| 0               | 0               |
| 0               | 0.4492207726    |
| 11.6164775171   | 7.8109250349    |
| 1704.3084971874 | 2635.4663258996 |
| 0               | 0               |
| 12.3301322292   | 2.9017753815    |
| 0               | 0               |
| 20.8578954107   | 19.1088701746   |
| 2.8962641901    | 2.7832298044    |
| 2.8667084645    | 1.9817892208    |
| 11.1343858597   | 11.9226754506   |
| 920.6540622083  | 278.4221756079  |
| 66.011409387    | 9.0621627415    |
| 0               | 0.6259167495    |
| 0               | 0.0565098298    |
| 492.2272057576  | 161.0187577987  |
| 101.397875765   | 70.2483615499   |
| 9.8659882737    | 30.8807823002   |
| 76.8128788263   | 16.5707261071   |
| 0               | 1.0490337771    |
| 25.6135850832   | 8.7548149834    |
| 93.8099033886   | 36.6017372763   |
| 3.8908910814    | 3.1476601682    |
| 9.4068668334    | 4.7965961642    |
| 0               | 0               |
| 848.0634464347  | 875.3774124662  |
| 116.3828311407  | 54.7791099011   |
| 0               | 0.1668835719    |
| 2.365920678     | 2.2271846727    |
| 5.1971779735    | 2.1064581525    |
| 0.7830241432    | 1.3360084882    |
| 7.9839315138    | 13.9667856839   |
| 1.4004014709    | 0.5767487538    |
| 0.6857157085    | 2.1785820691    |
| 33.9015289174   | 17.2105302074   |
| 45.297649521    | 24.8741649712   |
| 402.2669484665  | 203.4830020977  |
| 8.0583589345    | 34.7156722412   |
| 10.9974294286   | 5.9157414434    |
| 1.5752875564    | 6.0706781568    |
| 5.1161813243    | 11.0771953125   |

gene\_expression\_table

|                 |                |
|-----------------|----------------|
| 0               | 1.6555919554   |
| 2.0547411056    | 0.8220572964   |
| 6.1591152786    | 0.869692332    |
| 7.9929025325    | 8.6998609636   |
| 302.3935858862  | 191.2568971807 |
| 0               | 0              |
| 0.8784018226    | 2.2739555508   |
| 6.0915201654    | 12.6035520033  |
| 6.4363805363    | 2.8078086411   |
| 0               | 0              |
| 219.1061486731  | 121.7073333558 |
| 4.4302705406    | 2.3458963729   |
| 4.6038928167    | 13.5435113209  |
| 0               | 1.3514156393   |
| 14.651129718    | 34.4799931885  |
| 5.4455343707    | 5.4466001216   |
| 12.5370644524   | 4.4257122684   |
| 25.172385174    | 6.2202770049   |
| 0               | 0              |
| 4.6580310832    | 5.0112997228   |
| 0               | 0              |
| 0               | 0.5904503608   |
| 0               | 0              |
| 1.9605691631    | 3.9795808204   |
| 0.4499590225    | 2.3826022116   |
| 2.1963539765    | 1.6540489993   |
| 2.9690935314    | 2.2709276473   |
| 0               | 0              |
| 0               | 0              |
| 3.9901707094    | 1.2520632564   |
| 0               | 0              |
| 0               | 0              |
| 0               | 0.0312450954   |
| 5.3469205075    | 4.3412908252   |
| 1.4008727961    | 0.635814588    |
| 1165.3169908368 | 657.0474581407 |
| 0.4939256255    | 0              |
| 40.4322134317   | 22.5471804817  |
| 38.4268047287   | 11.530297583   |
| 14.8617440413   | 6.8606089145   |
| 25.0890491373   | 2.7677161037   |
| 10.6010266325   | 10.3707381335  |
| 0.1184838848    | 0.1022413967   |
| 4.1592338118    | 2.3859097789   |
| 4.1351298355    | 3.2438738242   |
| 3.3757285092    | 1.6456350608   |
| 368.5602053028  | 132.6353603206 |
| 7.1651264188    | 16.5716891127  |
| 0               | 8.6432311882   |

gene\_expression\_table

|                 |                 |
|-----------------|-----------------|
| 17.4176116251   | 11.3749015835   |
| 0               | 0               |
| 0.2010804859    | 0.8991239887    |
| 25.6006587219   | 16.3532004031   |
| 0.2238562686    | 0.1317059292    |
| 1.560562865     | 1.4231446122    |
| 2.2106754024    | 1.4567300133    |
| 27.2660883218   | 15.8815943229   |
| 2798.4660119173 | 1567.8279624171 |
| 75.0021516336   | 54.4660012163   |
| 4.1529538912    | 1.9715647074    |
| 5.7338067742    | 1.6867438068    |
| 19.295051247    | 25.6521050782   |
| 0               | 0.7878795862    |
| 102.892521189   | 207.4183919797  |
| 11.5393377095   | 3.029016167     |
| 91.2554173094   | 43.9332703852   |
| 0               | 0.2506841088    |
| 2.2012575576    | 3.626310253     |
| 3.0239950079    | 1.7791687276    |
| 0               | 0               |
| 5.488625375     | 14.4956772677   |
| 0               | 0               |
| 0               | 0.4225897697    |
| 0               | 0               |
| 52.2499633355   | 47.6864854358   |
| 2.0016406958    | 0.7065996843    |
| 119.3991411443  | 171.741939883   |
| 0               | 1.6246110222    |
| 0               | 0               |
| 45.7332529273   | 2.3917491988    |
| 0               | 0               |
| 8.0641128768    | 0.3795619347    |
| 1002.3257312263 | 569.668325222   |
| 0               | 0               |
| 18.3958496888   | 8.4781779222    |
| 55.7168726157   | 56.6456462887   |
| 0               | 0               |
| 371.4204260465  | 257.2786293491  |
| 0               | 0               |
| 0               | 1.8093217304    |
| 14.6796487475   | 12.3074079091   |
| 24.1485037151   | 63.935020172    |
| 0               | 7.7982014773    |
| 208.057176483   | 133.9315175572  |
| 0               | 9.2302141207    |
| 0               | 0               |
| 0               | 0.5695805838    |
| 2.9042440785    | 7.1765955164    |

gene\_expression\_table

|                |                |
|----------------|----------------|
| 9.9663950996   | 5.5705460888   |
| 3.4043583367   | 1.8026600861   |
| 9.219866459    | 2.0148188495   |
| 699.2207481725 | 590.2506542409 |
| 9.8873574306   | 8.7258463192   |
| 7.1786181642   | 1.6894171997   |
| 170.8650760216 | 138.7293837347 |
| 0              | 0.4138226662   |
| 11.3054836767  | 19.5113190785  |
| 0              | 4.1870986998   |
| 1.0597082747   | 0              |
| 0              | 2.641196731    |
| 3.091150109    | 0.9295472793   |
| 0              | 0              |
| 351.1405782226 | 178.098022461  |
| 52.8819851265  | 43.3509723719  |
| 114.8964409358 | 158.9675485731 |
| 0              | 0              |
| 1.7554737409   | 0.4819890645   |
| 48.7657819046  | 46.3765393843  |
| 1.7273214094   | 2.2866081157   |
| 0              | 0              |
| 0.8630242988   | 1.3201778385   |
| 10.855432029   | 4.0875507036   |
| 2.7248403291   | 1.3466551957   |
| 0.6391969073   | 0.4512861213   |
| 4.7810094255   | 2.1297738777   |
| 7.2459092981   | 3.1779724437   |
| 0              | 0              |
| 0              | 0              |
| 0              | 0              |
| 0              | 0.2413623922   |
| 0              | 0.0557314727   |
| 0.6309739804   | 0.7424676105   |
| 0              | 1.527712787    |
| 0              | 0.1569815022   |
| 3.0676297063   | 3.1043268996   |
| 1.6603522724   | 0.8791820585   |
| 6.145460689    | 0.5165263381   |
| 0.9974454225   | 0.5086011073   |
| 0              | 0.8585824243   |
| 0              | 0.1874190679   |
| 0              | 0              |
| 0.6319850905   | 0.1487314769   |
| 0              | 0              |
| 0              | 0              |
| 0.4485966814   | 0.6334369083   |
| 8.2633342661   | 6.3202570229   |
| 0              | 0.2422795984   |



gene\_expression\_table

|                 |                 |
|-----------------|-----------------|
| 10.8942482634   | 15.3831252529   |
| 0               | 0               |
| 16.802382435    | 32.6227728185   |
| 0               | 0.5140770454    |
| 260.4425889224  | 186.8198522584  |
| 0               | 2.3146941681    |
| 22.6779347337   | 26.3039284164   |
| 4.4816419522    | 2.3730983253    |
| 0               | 0.0147789007    |
| 2.5430767335    | 6.8826131949    |
| 141.5224761205  | 123.4353108123  |
| 8.8563735268    | 7.1029401408    |
| 213.7733484206  | 571.0760036867  |
| 0               | 0.1915071207    |
| 63.4912001274   | 155.7844944135  |
| 46.0057589103   | 129.4966542828  |
| 9.2454502431    | 12.61978968     |
| 29.0217234437   | 33.8297310681   |
| 18.5182667038   | 23.9695059122   |
| 3.5839836977    | 1.686910646     |
| 4.9446274159    | 8.0002274223    |
| 501.2928689505  | 249.7123691737  |
| 0               | 0.1321567751    |
| 0               | 0               |
| 0.3603565386    | 0.3816286564    |
| 0               | 3.5603887351    |
| 357.4970419172  | 264.7554975038  |
| 4.8021967525    | 6.6396299992    |
| 17.3566014892   | 42.4809371801   |
| 43.4731271622   | 19.2439730596   |
| 15.0622292268   | 22.1546721627   |
| 0               | 2.5850195727    |
| 3028.7197379734 | 3977.0567954739 |
| 16.7637167116   | 21.8445850501   |
| 26.056653051    | 14.9697264209   |
| 18.1833309861   | 21.6340779008   |
| 28.9510713079   | 30.660074842    |
| 221.9651411118  | 88.1504664338   |
| 0               | 0               |
| 0               | 0               |
| 155.0898386066  | 144.6647863355  |
| 0               | 0               |
| 52.0836768442   | 29.3754481003   |
| 0.7598332913    | 1.8776025859    |
| 4.3967198845    | 3.1041743795    |
| 4.2839370645    | 1.6130919447    |
| 0               | 0.2852070175    |
| 0               | 0               |
| 131.2472160965  | 138.4182668873  |

gene\_expression\_table

|                 |                 |
|-----------------|-----------------|
| 6.5819120169    | 3.6278935918    |
| 10.2737055279   | 8.6890247322    |
| 0               | 0.2076482103    |
| 2.7663558856    | 2.0616097469    |
| 21.9288965652   | 34.1899699834   |
| 10.9334314558   | 12.8653779394   |
| 43.932267481    | 70.6079904873   |
| 0               | 0.2080338451    |
| 26.5651798722   | 23.9133410729   |
| 2.0929618605    | 2.5243597212    |
| 10.1487808546   | 10.8397331741   |
| 3.0484426546    | 1.2554867575    |
| 2.4402104678    | 3.1585374685    |
| 1.9603205618    | 14.0709361531   |
| 45.1918676204   | 82.5812319151   |
| 0               | 0               |
| 2.0639581435    | 4.3715902931    |
| 64.423060871    | 34.4798077923   |
| 0               | 0               |
| 0               | 0.3227758056    |
| 4.0448280398    | 2.5384280201    |
| 0               | 0               |
| 32.4156406694   | 37.0895460411   |
| 7.7150203332    | 7.2626167035    |
| 6.6059360246    | 5.3440821815    |
| 7.6352588297    | 6.0644804298    |
| 0.9605746147    | 2.9388032767    |
| 38.7130287886   | 28.5745643788   |
| 22.7209054318   | 92.5723904276   |
| 26.3568468331   | 0.6202824743    |
| 19.9044096738   | 19.4260971015   |
| 3.6240223079    | 0.8528780162    |
| 38.2594339696   | 9.90437975      |
| 0               | 0               |
| 125.4486076283  | 59.8587548952   |
| 0               | 0               |
| 0               | 0.2051195698    |
| 1683.9281483815 | 2864.2466473201 |
| 99.9639036344   | 36.892295557    |
| 13.5445179001   | 8.9064430973    |
| 0               | 0.8591906865    |
| 107.5195109312  | 146.7612262004  |
| 0               | 0               |
| 7.3809640585    | 6.0796306071    |
| 0.6912714885    | 0.4677163498    |
| 20.6155529803   | 13.8167058048   |
| 2.8490107767    | 5.3638933824    |
| 18.7029664631   | 25.492364026    |
| 20.3312362946   | 5.6818984041    |

gene\_expression\_table

|                |               |
|----------------|---------------|
| 3.5445414707   | 4.5045341065  |
| 77.0581349263  | 88.7031898277 |
| 0              | 0.5233499542  |
| 1.6463486197   | 0.1937259798  |
| 1.8175768042   | 1.4971209021  |
| 29.2889361898  | 17.2321578568 |
| 0              | 1.842325099   |
| 0              | 0.4701169218  |
| 0              | 0.4289672799  |
| 0              | 0             |
| 1.9321619828   | 0.8336447612  |
| 0              | 2.327011411   |
| 0.6320264292   | 2.7517123031  |
| 35.7553765569  | 28.7870505017 |
| 13.3766775021  | 12.0675998311 |
| 0.5989041466   | 1.0570965154  |
| 2.881723844    | 0.6781853715  |
| 14.6548332392  | 6.5145339338  |
| 66.9010290239  | 29.802088079  |
| 117.7318369768 | 56.1337235417 |
| 0              | 0.811423197   |
| 41.4354150214  | 38.2555609731 |
| 1.4315226562   | 3.8742899861  |
| 23.5261076352  | 47.6442279173 |
| 0              | 0             |
| 0              | 0             |
| 5.9710386531   | 2.0074646222  |
| 0              | 0.2392126605  |
| 0.6170127745   | 3.3397814603  |
| 3.5148854307   | 7.6515419588  |
| 0              | 0             |
| 0              | 0             |
| 0              | 3.8136389293  |
| 0.8261656234   | 0.7777198241  |
| 9.1848099325   | 13.6898464718 |
| 6.4974917955   | 5.2754667811  |
| 0              | 0.8837759622  |
| 0              | 0.2999150027  |
| 0              | 0             |
| 2.9603002601   | 1.5675245065  |
| 0              | 0             |
| 7.7769433412   | 9.5578528784  |
| 1.4975852525   | 1.7622098193  |
| 1.1090932104   | 3.7847056343  |
| 0              | 0             |
| 3.1391149534   | 2.2162795148  |
| 164.2688893659 | 18.0530552949 |
| 5.2988319435   | 1.247027996   |
| 0              | 0             |

gene\_expression\_table

|                 |                 |
|-----------------|-----------------|
| 32.3518528427   | 20.3031745606   |
| 1.9942046435    | 0.4693164544    |
| 12.6203037375   | 4.5169729308    |
| 4.8437735622    | 5.5571805922    |
| 11.757152767    | 13.8346514953   |
| 9.7865873764    | 2.5910742492    |
| 0.7142402047    | 1.0505588079    |
| 0               | 1.3905858742    |
| 54.0467072661   | 156.6256213515  |
| 18.9645143259   | 19.3401518876   |
| 1.7884759281    | 4.4194523532    |
| 8.9624525081    | 6.9604427396    |
| 2.7857633124    | 3.0594760185    |
| 1.4466866371    | 2.2130125887    |
| 162.4986554169  | 99.5284555431   |
| 2.1611921713    | 2.0662497666    |
| 5.3792178422    | 4.7472976008    |
| 1.6421516059    | 6.1834277384    |
| 8.1694525885    | 4.3258507624    |
| 59.2786506075   | 40.4568778974   |
| 4.7383053938    | 2.2700526532    |
| 0               | 0               |
| 9.6074441188    | 20.7887998483   |
| 0               | 3.3660044837    |
| 1120.6261377027 | 1023.1163366465 |
| 6.6700630246    | 3.5319009331    |
| 11.443280591    | 32.6533957699   |
| 0               | 0.0723222298    |
| 0               | 4.0834218645    |
| 0               | 1.238827057     |
| 1.9725262936    | 0.6963220019    |
| 6.0580702098    | 5.7503526018    |
| 0               | 0.2384101018    |
| 10.7479644594   | 17.1639740445   |
| 0               | 0               |
| 0.8344058764    | 1.1782153113    |
| 0               | 0               |
| 1.7575226318    | 1.4476548457    |
| 0.481463964     | 0.4532312393    |
| 367.1070589574  | 431.2592023787  |
| 0               | 1.4667526666    |
| 0               | 0               |
| 0               | 1.5075948403    |
| 3.1597187865    | 2.9744349912    |
| 0               | 0               |
| 11.465770815    | 7.9264219889    |
| 6.1539177129    | 0.724132012     |
| 78.1327766767   | 50.6056871485   |
| 58.7060884736   | 43.5732252292   |

gene\_expression\_table

|                 |                 |
|-----------------|-----------------|
| 1.6095538547    | 3.2039546962    |
| 0.7445230428    | 3.5043235487    |
| 156.4188676074  | 63.5837460852   |
| 11.9217919013   | 4.1180090571    |
| 46.4638319307   | 28.7892938681   |
| 50.7838452112   | 110.1776935995  |
| 4.9918863669    | 2.496431667     |
| 0               | 94.8610778038   |
| 0               | 0.9301192534    |
| 0               | 0               |
| 2.8908628677    | 2.1090420678    |
| 1.0066069433    | 0.8291326625    |
| 0               | 0.0516409036    |
| 1.6584998368    | 1.5612465162    |
| 15.3899179061   | 10.4540218986   |
| 0.7352880336    | 0.0865214044    |
| 0.6097318135    | 0.2391573117    |
| 1.9460414318    | 3.5111931569    |
| 8.3795161296    | 17.5511268771   |
| 129.9308697966  | 134.9904738247  |
| 0               | 0               |
| 0               | 0               |
| 0               | 0               |
| 0               | 0               |
| 10.8607850585   | 18.5514602849   |
| 2.8671869582    | 5.7354961963    |
| 9.2686862568    | 7.1982707751    |
| 3.3109377667    | 0.9090627559    |
| 0               | 0.3452973276    |
| 119.2891364077  | 100.0119339465  |
| 0               | 3.1382612206    |
| 0               | 0.1879768166    |
| 275.33164877    | 723.6463623873  |
| 0.7720208576    | 1.4989220218    |
| 116.4003890355  | 33.2637628203   |
| 9.2872165023    | 3.9341791536    |
| 10.3207355372   | 21.5129692757   |
| 0.6743732586    | 1.1903033662    |
| 0               | 0.0481199329    |
| 0               | 0.1596654649    |
| 2044.8816623784 | 2886.3453398739 |
| 3.4766286045    | 3.2727614296    |
| 33.1709456696   | 49.7661563825   |
| 4.617092366     | 21.7317457965   |
| 0               | 1.9413946476    |
| 0               | 1.5975199574    |
| 0               | 0.6414090828    |
| 0               | 1.5721950571    |
| 0               | 0.3439134227    |

gene\_expression\_table

|                 |                  |
|-----------------|------------------|
| 0               | 0                |
| 18.1147732453   | 19.0419974881    |
| 2.4487653767    | 1.2486345157     |
| 0               | 0.28842663       |
| 131.6047405206  | 151.1427824546   |
| 0               | 0.2349006302     |
| 4.1587415206    | 12.2339865649    |
| 0               | 0                |
| 0               | 3.5866806795     |
| 16028.177369669 | 15992.9566394625 |
| 6.1278180183    | 13.1593606728    |
| 23.9974952433   | 22.9936963624    |
| 0               | 0                |
| 79.8547111489   | 66.1630587537    |
| 14.0646580044   | 6.068294774      |
| 51.9484948872   | 6.1127837387     |
| 0               | 1.7966275447     |
| 3.2147938279    | 8.0700812508     |
| 1.3580669562    | 1.2251628679     |
| 175.1826864412  | 438.9013357695   |
| 0               | 1.7681582749     |
| 0               | 2.4897891475     |
| 0               | 0.0763456623     |
| 0               | 0.7483809613     |
| 76.3827671859   | 115.2093901043   |
| 39.0072466235   | 10.4549680496    |
| 1.5018916685    | 1.7672771825     |
| 3535.7751598943 | 7064.3262662794  |
| 2354.998434887  | 3669.0286395839  |
| 32.7771139472   | 56.4069539452    |
| 0               | 0                |
| 33.8330799106   | 13.6625532456    |
| 3.7191763083    | 0.6564536809     |
| 0.5480203073    | 0.7738271449     |
| 23.8971641773   | 44.9917009223    |
| 0               | 0.8761869794     |
| 52.0885177845   | 27.7619434613    |
| 96.1326132633   | 75.8413665891    |
| 357.0808874445  | 168.6262520767   |
| 8.3802428873    | 10.8471426967    |
| 0               | 0.3858085427     |
| 0.4808130996    | 0.7355051294     |
| 0               | 0.6490216585     |
| 5.2451389029    | 15.7384963028    |
| 25.0746502919   | 39.7187565013    |
| 21.2594500529   | 9.2916618451     |
| 0               | 1.9510558136     |
| 8.5311849276    | 5.4208723178     |
| 2.907010996     | 0.9121819388     |

gene\_expression\_table

|                |                 |
|----------------|-----------------|
| 70.8642147918  | 45.1674062778   |
| 110.7440693298 | 25.1937768759   |
| 3.9049547563   | 7.3978912802    |
| 7.5714405504   | 4.0586904176    |
| 0              | 0               |
| 0              | 0               |
| 0              | 15.1459346404   |
| 8.0214587693   | 3.9778041241    |
| 0              | 0.2250549833    |
| 15.7598342571  | 4.6361525382    |
| 14.4242135458  | 1.2729738109    |
| 0              | 0               |
| 0.3765777442   | 0.2215596733    |
| 0              | 0.1887047842    |
| 0              | 0.4609680825    |
| 1.2771898351   | 1.3901550713    |
| 869.9023519102 | 789.2357296574  |
| 0              | 1.8910233271    |
| 64.7669546646  | 35.882834414    |
| 0              | 0.9797309568    |
| 0              | 0               |
| 1.7918256929   | 2.3192870708    |
| 2.4773847956   | 0               |
| 5.1500861947   | 3.838070131     |
| 22.0161473188  | 15.1513298799   |
| 0              | 0.1244843461    |
| 0              | 0.5983778619    |
| 1.8258541287   | 2.5781808966    |
| 44.5314693757  | 41.5993561538   |
| 15.4228572211  | 88.9256360641   |
| 1027.351719236 | 1629.9113113766 |
| 29.7954620553  | 16.9458334762   |
| 0              | 0.6098030439    |
| 7.3179362295   | 13.9929102339   |
| 21.8745979178  | 39.092408832    |
| 3.1334191057   | 1.1061290648    |
| 18.8216096916  | 8.858961547     |
| 28.7183519425  | 8.9090395802    |
| 5.6692460788   | 2.8590028299    |
| 0              | 0.2089840594    |
| 6.3070626952   | 2.5975340822    |
| 19.8460603136  | 0.8603691074    |
| 0              | 0.4392419453    |
| 2.3154613106   | 0.9536118413    |
| 2.4433986722   | 0               |
| 0              | 0.2393511448    |
| 2.5589036147   | 1.2044256095    |
| 1.0889687872   | 0.5125561931    |
| 0              | 3.4702664179    |

gene\_expression\_table

|                 |                 |
|-----------------|-----------------|
| 18.4679282283   | 27.0088101952   |
| 0               | 7.1678612523    |
| 13.4391599833   | 5.060438654     |
| 0               | 0               |
| 0               | 0.035886618     |
| 0               | 0.0780194727    |
| 0               | 1.2108389514    |
| 2.223574636     | 5.0876041498    |
| 1.1987370571    | 1.9042491121    |
| 0               | 0.3746374317    |
| 3.0324573854    | 0.9515453712    |
| 0               | 0.2112948849    |
| 4.6857563382    | 3.492031155     |
| 0.5401470246    | 1.2711829112    |
| 0               | 0               |
| 1.5037615826    | 4.1287808615    |
| 0               | 0               |
| 0               | 0.1884363415    |
| 0               | 0.0755316399    |
| 0               | 0               |
| 1.7253551268    | 1.4211587747    |
| 2.205360632     | 1.8165347903    |
| 0               | 0               |
| 0               | 0               |
| 0               | 0.0737818154    |
| 53.4228900609   | 116.0865623971  |
| 0               | 0               |
| 21.6889338923   | 26.0885285786   |
| 129.1934533188  | 109.3577933631  |
| 37.9224612336   | 25.7240729513   |
| 31.9908450427   | 19.1006689428   |
| 2.1448213205    | 8.4547736905    |
| 9.4152692317    | 7.2013208673    |
| 0               | 1.5556096045    |
| 40.6496426126   | 21.5929429066   |
| 115.4870922194  | 101.9203185112  |
| 1599.7293946624 | 1621.6885094214 |
| 0               | 0.6678283556    |
| 0               | 1.2361813269    |
| 0               | 0               |
| 0               | 0               |
| 25.1075699614   | 21.889491217    |
| 1.8154765464    | 1.0681363854    |
| 0               | 0.6824596491    |
| 20.1720669082   | 126.9902108214  |
| 0               | 1.7277109415    |
| 65.0176575669   | 58.5507643191   |
| 0               | 1.2911398767    |
| 0               | 0.8664338163    |



| gene_expression_table |                 |
|-----------------------|-----------------|
| 0                     | 0               |
| 0                     | 0               |
| 0                     | 0               |
| 0                     | 0               |
| 1.1436846836          | 0               |
| 76.9514062076         | 8.3987277961    |
| 5.4063898316          | 0               |
| 3.7095383622          | 1.1458169346    |
| 0                     | 0.6341380269    |
| 1.5736840471          | 0.3703510669    |
| 14.3935013684         | 7.5847610664    |
| 1.6009311654          | 1.6954353373    |
| 11.5856355504         | 11.3322874795   |
| 38.2853889197         | 18.8392787421   |
| 6.4783238679          | 1.9057622786    |
| 21.5732524042         | 4.2308773582    |
| 0                     | 0.6190160748    |
| 0.6838230749          | 1.8507069238    |
| 36.7252757469         | 29.3859706296   |
| 107.0183585659        | 75.0849230045   |
| 15.9603899059         | 6.1349973565    |
| 0                     | 0               |
| 1.5353624993          | 2.0776616878    |
| 17.6482557973         | 65.41515968     |
| 0                     | 0               |
| 0                     | 0.7477657188    |
| 7.705279146           | 3.1733829457    |
| 712.8272184361        | 1030.5593160761 |
| 261.7931724862        | 93.4093904327   |
| 6.6599104301          | 10.9714110434   |
| 7.1082050385          | 5.5761538764    |
| 16.2461875562         | 25.8078183569   |
| 0                     | 0               |
| 20.5146922485         | 48.279311057    |
| 2.3190735747          | 9.5509953531    |
| 57.394832486          | 67.5365473948   |
| 0                     | 2.7546402796    |
| 35.2735021346         | 13.0448558324   |
| 0                     | 0               |
| 18.2378634372         | 40.7749674074   |
| 39.519100405          | 62.3128923936   |
| 3.4669609074          | 2.0397878999    |
| 61.7138165419         | 22.5558081923   |
| 15.0292831171         | 11.6057615726   |
| 0.6447846284          | 0               |
| 0                     | 0               |
| 11.3638764506         | 4.3458619506    |
| 12.5970476495         | 8.3236601919    |
| 1.1825018927          | 1.9171102202    |

| gene_expression_table |                 |
|-----------------------|-----------------|
| 0                     | 0.865526901     |
| 0                     | 0               |
| 0                     | 0               |
| 0                     | 0               |
| 6.612887143           | 2.2566030515    |
| 0                     | 0               |
| 0                     | 0               |
| 7.0100081973          | 3.1963644724    |
| 18.3434647347         | 19.5462086578   |
| 3.595319088           | 2.3973484876    |
| 4.2478399981          | 4.1653640658    |
| 10.6615605837         | 1.2545467257    |
| 3.1281778608          | 5.2759989577    |
| 0                     | 0               |
| 0                     | 0               |
| 8.3177217065          | 39.4761293608   |
| 11.6257121961         | 11.7989872916   |
| 0                     | 0.8387265974    |
| 6.8747207748          | 11.7875421141   |
| 2.4387733592          | 0.5739413303    |
| 6.0173875442          | 1.947182863     |
| 5.5219087812          | 3.0322295181    |
| 1.7761801561          | 2.717042478     |
| 2.4639602318          | 0.5798688132    |
| 0                     | 1.0546288401    |
| 0                     | 0.5763415412    |
| 0                     | 2.6013219078    |
| 0                     | 0.2073830872    |
| 9.8696834004          | 2.0323913248    |
| 4.8478745934          | 1.4261245223    |
| 2.5243080267          | 4.158497513     |
| 0                     | 2.1936005009    |
| 0                     | 0.2044740177    |
| 0                     | 0               |
| 0                     | 0               |
| 0                     | 0               |
| 0                     | 0               |
| 6.9527455053          | 2.3056395       |
| 0.3958629186          | 1.1179493459    |
| 0                     | 1.0740771333    |
| 0                     | 1.4816938495    |
| 23.0951181333         | 36.6876605146   |
| 11.3782619513         | 1.6066572427    |
| 0                     | 0.8484908772    |
| 1138.5654197892       | 1392.2546326049 |
| 0                     | 0               |
| 13.3182909015         | 9.8507476848    |
| 2.6082926303          | 0.306918012     |
| 0                     | 0.365000891     |

gene\_expression\_table

|                |                |
|----------------|----------------|
| 8.8727456832   | 2.7841512712   |
| 4.2382133412   | 5.9845310204   |
| 14.0718270575  | 11.4252481617  |
| 4.1141482663   | 3.0660437473   |
| 204.1683122252 | 103.0141541334 |
| 247.5712454048 | 294.6786449154 |
| 207.1575508213 | 80.7898449895  |
| 0              | 10.2885295134  |
| 2.9109520132   | 10.7326682955  |
| 525.32185841   | 206.8730856275 |
| 116.1647751707 | 117.652058338  |
| 0              | 0              |
| 0              | 0              |
| 86.7454874166  | 37.3374073072  |
| 44.9228329386  | 44.0820773024  |
| 17.1287868801  | 23.010814378   |
| 7.5851854175   | 14.727065142   |
| 40.0455537852  | 29.9558975754  |
| 0              | 0              |
| 15.3578956513  | 21.3245454178  |
| 0              | 0.0978697863   |
| 12.7701508662  | 10.7113023674  |
| 0              | 1.800439866    |
| 0              | 0              |
| 0              | 0              |
| 0              | 4.1179926671   |
| 119.0031895606 | 91.53714277    |
| 35.5361119218  | 19.5731531426  |
| 1.1253692114   | 0.2648445785   |
| 9.06611682     | 0.8728451383   |
| 1.3738444929   | 0.1212452973   |
| 0.3368750998   | 0.1585604847   |
| 0.3440420171   | 0.4858014351   |
| 25.327997682   | 16.5906016724  |
| 0              | 3.8070086491   |
| 11.8578421456  | 10.6223849485  |
| 1.9185426002   | 1.806040546    |
| 4.2836521841   | 0.4536519397   |
| 0              | 0              |
| 645.628674498  | 372.7027700653 |
| 2.7150526996   | 2.7155840652   |
| 491.1977438772 | 130.7272297192 |
| 198.7470699147 | 259.2013097824 |
| 0              | 0.7102834491   |
| 0              | 0              |
| 19.5529579407  | 143.4164209094 |
| 14.1024720334  | 6.5504173571   |
| 1.8829189378   | 2.3720298624   |
| 0              | 0.997932512    |

gene\_expression\_table

|                |                |
|----------------|----------------|
| 295.6996234624 | 127.9227920107 |
| 1.4769261415   | 2.1289277769   |
| 37.5857153313  | 18.3712746473  |
| 0              | 1.2424855027   |
| 24.243596443   | 24.0898552913  |
| 72.7983428513  | 56.6592089125  |
| 1.3737712446   | 3.2330355453   |
| 0.3660908954   | 0.8615589258   |
| 1.9313573847   | 2.0958697506   |
| 0              | 0              |
| 0              | 0.3337181613   |
| 44.573965418   | 26.7019313994  |
| 0              | 0              |
| 428.6848331608 | 124.9074175782 |
| 43.9427888534  | 45.8316622638  |
| 8.0789465293   | 10.9324786095  |
| 19.7696573893  | 23.7282318343  |
| 43.7874020348  | 17.396502362   |
| 8.0991706628   | 8.6545435142   |
| 0.9918057994   | 1.1087057781   |
| 0              | 0              |
| 75.1062576683  | 27.6916468161  |
| 37.1921039324  | 24.3827887496  |
| 2.0800711777   | 4.36252537     |
| 34.6595047157  | 26.4585344884  |
| 321.252697431  | 93.5303054306  |
| 4.0754228559   | 5.3710199015   |
| 5.5136720355   | 7.0342955485   |
| 1.3546793851   | 0.5977696371   |
| 0              | 0.3240637809   |
| 45.5523849251  | 11.0776494184  |
| 5.379752662    | 3.7982156744   |
| 37.9518198666  | 20.0627453625  |
| 2.7776977554   | 1.4941802387   |
| 13.6484498185  | 8.8866120825   |
| 0.2054066791   | 0.6677023581   |
| 0              | 0.005518       |
| 3.585978864    | 55.2770787071  |
| 0              | 0              |
| 0              | 0              |
| 38.0461889235  | 15.2832043128  |
| 0.5986444069   | 0.7748679117   |
| 4.2515392235   | 2.5639297523   |
| 0              | 0              |
| 0              | 0.0284022551   |
| 0.3097574831   | 0.2824812143   |
| 0              | 0              |
| 9.5786750613   | 2.9949281457   |
| 0.5786573272   | 0.6128159048   |

gene\_expression\_table

|                |                |
|----------------|----------------|
| 0              | 0              |
| 0.0187827511   | 0.0132610074   |
| 0.3206335422   | 0.3320149865   |
| 220.9207734131 | 149.0423910835 |
| 0              | 0              |
| 0.513166926    | 0.1509609878   |
| 25.2256679038  | 25.8999288482  |
| 0.5633571436   | 1.7898376198   |
| 16.9293386755  | 24.1539299634  |
| 15.4399716705  | 10.0934597664  |
| 0              | 0              |
| 18.1795297253  | 4.7062109235   |
| 0.837225548    | 1.6747788044   |
| 0              | 1.897004874    |
| 0              | 0.2712935672   |
| 3.3588945709   | 1.1857242154   |
| 0              | 6.369028711    |
| 7.8917894668   | 4.6009272913   |
| 5.8185855713   | 7.2084487848   |
| 0              | 0              |
| 0.0378731295   | 0.0178261373   |
| 0.9471026391   | 0.2600398424   |
| 66.2295621475  | 18.2306105968  |
| 9.8023259743   | 6.9206431039   |
| 0.0627020681   | 0.0295126304   |
| 0              | 0.8038018914   |
| 1.0168418498   | 0.7460645732   |
| 1.7619292577   | 3.4303089172   |
| 8.4854050487   | 2.443644314    |
| 0              | 1.1279541423   |
| 550.5573628505 | 351.2667200135 |
| 296.7897166407 | 140.8196402516 |
| 21.8873428537  | 4.3585138628   |
| 0              | 1.74171613     |
| 38.0710009812  | 160.3774797439 |
| 0              | 0              |
| 0              | 0              |
| 442.5260140219 | 673.961403078  |
| 102.4011722852 | 89.8032835992  |
| 18.598387098   | 49.4595071003  |
| 7.156022995    | 6.8065694139   |
| 2.3216274671   | 0.6829652456   |
| 5.4215573841   | 14.0822683735  |
| 18.9060706335  | 10.8453097002  |
| 0              | 0              |
| 24.4220763109  | 17.0372188766  |
| 3.2602007757   | 7.9602830331   |
| 27.6779862893  | 13.3160673502  |
| 0              | 5.8572265029   |

| gene_expression_table |                |
|-----------------------|----------------|
| 0                     | 119.8760022716 |
| 0                     | 0              |
| 3.5697796917          | 1.9475336382   |
| 22.8068987792         | 40.6542721512  |
| 0                     | 0              |
| 0                     | 0              |
| 0                     | 0.3674683753   |
| 84.068206994          | 69.2461906427  |
| 0                     | 0              |
| 0.8862979315          | 0.2085815035   |
| 8.1705216948          | 18.9538262905  |
| 5.3537901333          | 8.386621168    |
| 19.0205119075         | 11.6383551812  |
| 16.328020361          | 11.4540202252  |
| 2.0213915481          | 2.6957162088   |
| 9.0371892457          | 9.8505052287   |
| 1.088608392           | 2.0815704088   |
| 38.352216662          | 16.2354636594  |
| 2.0570595353          | 0.5325196087   |
| 29.6567453996         | 28.3631888069  |
| 0                     | 0              |
| 5.7187097945          | 5.383368479    |
| 2.151028506           | 7.4035173487   |
| 0.845652026           | 2.6156374018   |
| 2.2248261683          | 2.0943638506   |
| 0                     | 1.1212798574   |
| 23.0078689692         | 9.163297393    |
| 0                     | 3.4910331422   |
| 77.9253178635         | 60.9920650954  |
| 22.8860961592         | 22.0193076509  |
| 5.0836447596          | 5.2092632064   |
| 214.4616279221        | 198.2941413002 |
| 1.3994718364          | 3.0190594142   |
| 17.3249394759         | 21.1544490919  |
| 0.6504971791          | 0.8572934438   |
| 0                     | 1.9056824226   |
| 14.940873321          | 20.8195320011  |
| 0                     | 0.8407733309   |
| 1.3242541011          | 3.5644989532   |
| 12.6900558814         | 7.2173263623   |
| 3.3115549069          | 3.6300924681   |
| 1.822238576           | 3.1305752986   |
| 5.6024178577          | 6.9219882684   |
| 2.9916597892          | 4.6015200676   |
| 2.4154540464          | 6.4661569627   |
| 4.3867251034          | 10.0140144111  |
| 1.9222575994          | 2.4881143376   |
| 140.5799567274        | 100.0217295218 |
| 2.1163025195          | 3.4863569228   |

gene\_expression\_table

|                |                 |
|----------------|-----------------|
| 0              | 0               |
| 3.4069500445   | 2.8791628764    |
| 30.9573883411  | 46.7730188262   |
| 0              | 2.6042628946    |
| 9.4325633731   | 19.3361580257   |
| 32.5455765124  | 1.5602239932    |
| 6.9291753399   | 8.3759364117    |
| 1120.447991339 | 1548.1382978728 |
| 48.4019182377  | 36.8149692817   |
| 3.4667471123   | 3.1614762758    |
| 121.9582564994 | 117.4159492659  |
| 0              | 0               |
| 0.1150911511   | 0.1625134246    |
| 10.216920171   | 5.7925427373    |
| 0.1738509781   | 0.7364541289    |
| 8.4923613712   | 12.5467274042   |
| 690.981973025  | 129.9593588519  |
| 1.7204142766   | 1.214647751     |
| 4.9145005706   | 8.74663161      |
| 28.9385906991  | 36.5285776184   |
| 0.6722229085   | 1.0019399943    |
| 0              | 0.9675034254    |
| 0.3169981316   | 0.0746023933    |
| 3.4831037456   | 2.6185315303    |
| 0.2466066906   | 0.6384010581    |
| 17.6022865158  | 14.1354582961   |
| 0.6998457284   | 0.9882108648    |
| 27.5675322369  | 20.5445342201   |
| 2.1691977099   | 1.7229353128    |
| 0              | 0               |
| 0.7659165351   | 1.7123837924    |
| 1.6403395381   | 2.2004153534    |
| 0              | 0.0580209112    |
| 0              | 0               |
| 2.3175439345   | 2.4543502977    |
| 0              | 0.0743098445    |
| 0.9110677424   | 1.1363774251    |
| 4.0271829488   | 2.7484979358    |
| 0.4941066401   | 0.0969026161    |
| 12.281665919   | 11.0514120753   |
| 1.4983206341   | 1.057845086     |
| 5.6955025341   | 11.393234413    |
| 7.4741191607   | 4.0646248321    |
| 5.058461403    | 4.5237447808    |
| 0.5554790985   | 2.4511226995    |
| 0.0893039553   | 0.8827059265    |
| 450.9802461055 | 127.9149500005  |
| 0              | 3.0571064805    |
| 0              | 0.8536189612    |

gene\_expression\_table

|                |                |
|----------------|----------------|
| 3.0683007706   | 3.9314029352   |
| 32.8082494894  | 25.7829553335  |
| 0.1248657002   | 0.33793802     |
| 0              | 0.1498349774   |
| 13.6147950529  | 13.5640578155  |
| 0              | 0              |
| 0              | 0.4845419882   |
| 0              | 0.0590292829   |
| 3.0972604068   | 2.4296992743   |
| 18.6562018246  | 24.4992894141  |
| 0              | 0.8599944208   |
| 12.587519915   | 31.5278576675  |
| 0              | 0              |
| 214.8702461411 | 106.1919593132 |
| 1.32099529     | 0.1554416263   |
| 19.9647633007  | 22.5033935209  |
| 3.9159088865   | 3.7463850437   |
| 49.8491146123  | 110.4716153218 |
| 0              | 0.4511518188   |
| 11.6932947821  | 7.8625770006   |
| 14.2992897268  | 7.3422485159   |
| 0              | 1.9472965539   |
| 0              | 0              |
| 115.8085515258 | 218.7054213789 |
| 0              | 0              |
| 0              | 0              |
| 0              | 0.0273808902   |
| 6.9403253135   | 13.5333663686  |
| 4.4100502278   | 48.2605810641  |
| 3.9206411236   | 20.9910686875  |
| 4.9269781625   | 1.159515865    |
| 2.6901081293   | 4.3261183974   |
| 8.8911157571   | 74.2815017739  |
| 0              | 1.6150252491   |
| 97.9938877854  | 48.7444466111  |
| 0              | 9.099130978    |
| 0              | 0.9334792901   |
| 11.5838993544  | 9.5415488419   |
| 9.559653771    | 5.8119071708   |
| 78.2688846406  | 38.9192810495  |
| 0.5024528769   | 1.5372154733   |
| 7.3356767575   | 3.1388716278   |
| 0              | 0              |
| 0              | 0.0674934494   |
| 27.1743432475  | 31.6715384065  |
| 2.3562855242   | 1.8299444772   |
| 2.0248156012   | 0              |
| 0.1525689436   | 0.0718112014   |
| 54.9729947792  | 21.1310111869  |



gene\_expression\_table

|                |                |
|----------------|----------------|
| 0              | 0.030914932    |
| 1.1706742472   | 3.2907741519   |
| 0.4986379935   | 0.7627720673   |
| 0              | 0              |
| 1.5184128308   | 6.3540146362   |
| 1.176570853    | 1.0680211853   |
| 30.1027776347  | 11.9717269459  |
| 6.7482005307   | 7.7045409244   |
| 25.7321439388  | 19.9107595739  |
| 7.1688537522   | 3.3742384827   |
| 0              | 0              |
| 10.9827359094  | 6.4616972656   |
| 1.9439044484   | 1.9442848919   |
| 9.5407751657   | 6.7359828707   |
| 34.2149776138  | 52.3390306108  |
| 3.2693013192   | 25.3901313402  |
| 10.5400149806  | 10.901095906   |
| 5.8499687947   | 4.5682491973   |
| 1.9284984463   | 0.3025687647   |
| 238.3519177178 | 121.8960992592 |
| 1.5675567893   | 0.1844545385   |
| 7.7878778504   | 15.4871640236  |
| 0.1824871347   | 0.214732764    |
| 1.7411334443   | 0.8195172721   |
| 0              | 0.0823469292   |
| 18.4577455513  | 13.6732517326  |
| 17.1160540725  | 10.262051621   |
| 19.0080394407  | 5.2189143788   |
| 1.7577924035   | 4.26606632     |
| 0              | 3.2061690853   |
| 0              | 0              |
| 1.0738508042   | 1.1793610636   |
| 0              | 0.004348       |
| 5.0727417033   | 4.7752795244   |
| 0              | 0              |
| 62.8528699711  | 32.9971033138  |
| 15.8774489868  | 28.0245112554  |
| 14.3153201301  | 32.1043007736  |
| 14.3076308722  | 11.9721253085  |
| 0              | 0.0934035264   |
| 2.6892346365   | 0.3164424646   |
| 9.5406366285   | 17.1699030959  |
| 0              | 0              |
| 0              | 1.209422163    |
| 0              | 0.0232275667   |
| 40.0624071863  | 37.1342441281  |
| 293.0618034494 | 79.9992168011  |
| 0              | 0              |
| 0.3060391179   | 0.540174729    |

gene\_expression\_table

|                 |                 |
|-----------------|-----------------|
| 5.6844649294    | 2.5575261848    |
| 7.482634954     | 3.4485556003    |
| 3.4174223842    | 16.6481148409   |
| 14.4679494632   | 13.2790696235   |
| 25.9408335116   | 36.2797595425   |
| 20.8152090673   | 34.4538719816   |
| 1.601329143     | 1.1305712052    |
| 0               | 0.4278776086    |
| 1702.0523121583 | 948.4058516678  |
| 21.9102495443   | 20.8598272541   |
| 0               | 0               |
| 1.2063256442    | 1.3276354044    |
| 0.8232210652    | 0.7426584356    |
| 41.4557138257   | 11.2806000374   |
| 22.3021813018   | 17.7140218901   |
| 0               | 0.2044241242    |
| 2.9829189007    | 7.634256885     |
| 0               | 0.006608        |
| 1.6986443781    | 1.4990971954    |
| 37.3845858122   | 38.7116165884   |
| 462.1656648522  | 160.7847359139  |
| 1.9927137839    | 3.7517247622    |
| 2.8219684723    | 2.3244288632    |
| 0               | 3.0330436593    |
| 176.0158786659  | 32.0698887726   |
| 0.9951169827    | 0.2341909972    |
| 3557.0447433211 | 4018.4667803319 |
| 1.0359622654    | 4.0227582918    |
| 6.2423054699    | 4.2497957964    |
| 0               | 0.0842174568    |
| 4.6431619649    | 3.2781675408    |
| 5.6160535013    | 1.3216829705    |
| 54.3443197358   | 36.6629503876   |
| 35.8023410709   | 29.2422357228   |
| 4.8115628097    | 22.4583542653   |
| 26.0768926624   | 21.4792909857   |
| 0               | 0               |
| 3.5302373342    | 4.3806168545    |
| 93.0241652934   | 228.7747714035  |
| 39.9799212109   | 59.0193466255   |
| 26.9978014666   | 13.3646101356   |
| 100.2802513196  | 36.3832888125   |
| 4.1055534519    | 0.161033606     |
| 17.0453135053   | 17.6503665003   |
| 0               | 0               |
| 319.3041108154  | 491.7102160816  |
| 2.1572717234    | 2.2846170972    |
| 0               | 0               |
| 3.5888646957    | 7.0383668156    |

gene\_expression\_table

|                |                |
|----------------|----------------|
| 6.3587861009   | 10.0724466282  |
| 73.6528495035  | 31.5600044082  |
| 1.5080251871   | 0.3548988998   |
| 0              | 14.4342881641  |
| 22.6817372043  | 13.5874424716  |
| 0.6733159158   | 0.7130622611   |
| 56.7209864926  | 18.6882170302  |
| 410.1862076618 | 412.7069339722 |
| 0.6538602638   | 0.2821125704   |
| 0              | 16.64494491    |
| 47.7283458611  | 41.7326746344  |
| 25.023614102   | 11.0003224787  |
| 22.6690122025  | 9.5100910473   |
| 0              | 0              |
| 8.6840204155   | 19.0745222954  |
| 11.1420895399  | 13.3731242032  |
| 1.9326128507   | 4.3208036001   |
| 113.2757332828 | 51.3172852902  |
| 8.4584943528   | 4.5341979176   |
| 0              | 0.2631216245   |
| 11.2944711269  | 8.5278870743   |
| 0              | 2.1230354239   |
| 22.232335534   | 25.1434430708  |
| 6.469377779    | 2.2837566732   |
| 41.4655693121  | 20.6259500851  |
| 0              | 0              |
| 0              | 5.2274840248   |
| 0              | 0              |
| 0              | 0.5394912339   |
| 0.4775854105   | 0.564932916    |
| 0              | 0.6856491937   |
| 96.2156136378  | 93.8305216358  |
| 0              | 0.1185216069   |
| 0.8473948738   | 0.4985651284   |
| 0              | 2.5818636075   |
| 0              | 0              |
| 0              | 0              |
| 0              | 0.1113145334   |
| 48.0160015688  | 30.1335835784  |
| 4.3304963805   | 1.5518718808   |
| 0              | 0              |
| 0.9010689733   | 0.2423516833   |
| 4.4468731324   | 2.3173117053   |
| 0              | 0.005075       |
| 2.6111120251   | 6.2474119983   |
| 382.1735715139 | 141.6262249078 |
| 6.6967777703   | 4.7280624023   |
| 2.8596977903   | 4.2414761856   |
| 0              | 0              |

gene\_expression\_table

|                |                |
|----------------|----------------|
| 2.0757078516   | 2.1982384487   |
| 2.9814922393   | 3.5784909001   |
| 4.2587614996   | 7.3498893877   |
| 16.8199599139  | 8.3735642269   |
| 201.2543429757 | 144.8221863139 |
| 0.1963527378   | 0              |
| 5.3052101464   | 2.8812208693   |
| 0.0479381824   | 0.0112817799   |
| 0              | 0.030898934    |
| 560.4411199218 | 401.7891386721 |
| 3.4780222366   | 1.4510097757   |
| 15.7769895688  | 20.8273814351  |
| 9.2535800574   | 6.0382765366   |
| 0.9428475989   | 0.7766146908   |
| 0              | 0.1315578523   |
| 0              | 3.1892784723   |
| 60.0863798202  | 24.5383406486  |
| 0.9723679228   | 0.8924651955   |
| 6.1090116221   | 4.6725114057   |
| 0.8352714427   | 0.4914323026   |
| 76.3157353587  | 416.0769919598 |
| 8.9314376952   | 10.5753153955  |
| 26.913947343   | 27.839844476   |
| 10.7602328005  | 11.1421859444  |
| 8.3715301066   | 23.4448718197  |
| 19.5183975403  | 8.2299544385   |
| 31.227458542   | 14.6981506348  |
| 75.6693857713  | 39.309612445   |
| 20.7831225288  | 10.5973909877  |
| 0.7359881212   | 3.6373589189   |
| 0.6755309944   | 1.2895010154   |
| 296.0586694588 | 314.2686513499 |
| 24.4646381722  | 13.1833940466  |
| 0              | 4.4725172395   |
| 10.6071648665  | 6.9064077399   |
| 0              | 0.8659388998   |
| 0              | 0.2773623896   |
| 3.3284595056   | 5.3680473686   |
| 1.5516974545   | 2.2953966421   |
| 1.4707999161   | 4.4132633035   |
| 172.2250654097 | 74.773584491   |
| 0              | 0              |
| 3.2326832803   | 3.9362107241   |
| 5.8188791963   | 4.5915713059   |
| 8.9557092295   | 5.3310846269   |
| 0              | 0              |
| 0.3781547091   | 0.177989985    |
| 0.645864805    | 0.4939932766   |
| 17.35392953    | 15.4611474267  |

gene\_expression\_table

|                 |                 |
|-----------------|-----------------|
| 9.9647076351    | 15.6281395071   |
| 5.6201995811    | 6.96939397      |
| 3.1005111564    | 2.8578930224    |
| 0               | 0               |
| 0               | 0               |
| 0.2639572761    | 0.3416586223    |
| 0.3277785521    | 0.215990486     |
| 35.4060890391   | 62.3778330639   |
| 167.6464006523  | 55.5173185654   |
| 2.5312699881    | 3.7893743351    |
| 1921.9798364    | 818.1162250428  |
| 26.3475636172   | 20.7979800986   |
| 0.9673786748    | 0.9106522367    |
| 0               | 0.1959124279    |
| 0               | 0               |
| 0               | 0               |
| 9.4652949924    | 12.6390050418   |
| 0               | 0.1754324603    |
| 0               | 0               |
| 0.9512830785    | 0.8955004753    |
| 3.0875732204    | 4.095550899     |
| 13.9275174524   | 2.7956889509    |
| 0.2414458145    | 0.1704656951    |
| 0.5537150581    | 0.0868742629    |
| 78.6761937834   | 53.2325472448   |
| 4.5427456742    | 2.1381810539    |
| 0.441015087     | 0.0518942822    |
| 2.125970992     | 2.029101385     |
| 8.0738834753    | 42.2774272028   |
| 1.4284364139    | 1.8115745037    |
| 24.6872192821   | 5.8098943158    |
| 17.0554052385   | 9.5328270649    |
| 0               | 0               |
| 7.1546982962    | 4.1329339215    |
| 4.8967034329    | 5.6659224417    |
| 599.805939402   | 213.9617801108  |
| 3.0584537625    | 1.2596097852    |
| 0.0940322028    | 0.066388663     |
| 32.7996957507   | 18.6752077865   |
| 46.5109201406   | 26.1017322716   |
| 2117.1071593946 | 2273.9555507825 |
| 29.1875931729   | 8.5862663252    |
| 8.2075524572    | 4.8289169208    |
| 1.4356017393    | 1.230756602     |
| 19.3894716703   | 5.9890969774    |
| 4.738803359     | 0               |
| 0               | 1.8617849956    |
| 35.3313589623   | 41.6575885235   |
| 35.0555625227   | 17.5854878378   |

gene\_expression\_table

|                |                |
|----------------|----------------|
| 5.8201088818   | 1.8588858972   |
| 11.4653456529  | 4.047384546    |
| 0.2713032505   | 0.2021870825   |
| 0              | 0              |
| 56.3643590676  | 18.7348173592  |
| 454.0480291556 | 355.6406147911 |
| 61.9818877276  | 41.6098614293  |
| 540.2401425195 | 581.4545399042 |
| 17.6184421563  | 4.8780319112   |
| 0              | 0.2521713946   |
| 3.0515716076   | 3.0820920576   |
| 8.8627576018   | 12.6093845426  |
| 0              | 0.0418838052   |
| 14.0249882777  | 5.3635450173   |
| 1.6714459401   | 1.9667918358   |
| 0              | 0.0975904704   |
| 0              | 2.3675199388   |
| 4.3072775671   | 8.7851870012   |
| 9.8229881241   | 7.8243631855   |
| 4.1214602278   | 3.9606093196   |
| 0              | 6.8778582306   |
| 1.4295048031   | 0.7475997767   |
| 2.4164896201   | 4.387091694    |
| 5.8339139919   | 5.4918171792   |
| 52.5320711407  | 64.8680209849  |
| 0              | 0.0719469579   |
| 31.4368169216  | 14.0568569316  |
| 0              | 0.4486004243   |
| 23.6619332805  | 14.1671820183  |
| 2.2436828164   | 12.4086742003  |
| 0.0974982725   | 0              |
| 0              | 0              |
| 0              | 0              |
| 26.8641983536  | 28.573977401   |
| 2.8418603883   | 3.0319110098   |
| 26.7036234884  | 14.6449785016  |
| 0.8157004148   | 0.2879506081   |
| 28.002742668   | 17.8628296012  |
| 1.8365255498   | 0.4322082301   |
| 5.634269499    | 10.2762669302  |
| 0              | 0              |
| 0              | 1.1060095091   |
| 9.8831435892   | 6.2024017751   |
| 0              | 0.1912494155   |
| 3.3638448409   | 3.8790742572   |
| 1.3375443036   | 4.7216685025   |
| 152.7655343719 | 120.9918581292 |
| 2.4103538842   | 3.8694764103   |
| 0.5740278852   | 0.9456427297   |

gene\_expression\_table

|                |                |
|----------------|----------------|
| 111.0357104029 | 29.9419572164  |
| 107.8424450823 | 43.0216171987  |
| 17.8230805345  | 5.0489192417   |
| 3.7401408197   | 2.4755775925   |
| 21.3675808249  | 32.6862252987  |
| 0              | 0.5133661927   |
| 0              | 5.5372294256   |
| 0              | 0.3382478228   |
| 5.8094485406   | 2.8027530124   |
| 4.4368821256   | 6.787147781    |
| 1.4535419404   | 1.4025148941   |
| 14.3724905107  | 15.543045095   |
| 1.5364000714   | 0.2711824874   |
| 1.1556766729   | 0.6346133302   |
| 2.4426265687   | 2.0119685086   |
| 35.5236031214  | 14.6302287275  |
| 69.3798987758  | 28.6733449486  |
| 5.97663144     | 11.533639832   |
| 0              | 0              |
| 7.1895681008   | 10.7441629134  |
| 42.8123587721  | 34.4891008895  |
| 0              | 0.4189615209   |
| 13.4677260423  | 8.5576416295   |
| 2.9112443655   | 1.198982288    |
| 2.1185258919   | 2.8668018674   |
| 2.4128603836   | 2.7540383867   |
| 4.7314029964   | 6.4552277715   |
| 2.3997814533   | 4.3063328862   |
| 5.3201299686   | 5.6967832596   |
| 0              | 0.2801990698   |
| 1.1524145804   | 3.3901180016   |
| 107.1770141956 | 33.9541144528  |
| 0              | 0.1241580972   |
| 3.5661266097   | 3.7766377481   |
| 6.2407739146   | 3.4047247105   |
| 0              | 2.4663292308   |
| 0              | 0              |
| 11.6589505606  | 10.0301841611  |
| 146.792797885  | 147.3295598139 |
| 0              | 0.8734225277   |
| 330.4198355796 | 191.0700316241 |
| 7.620205086    | 17.0367332275  |
| 2.9921097603   | 4.5066471139   |
| 1.5137345699   | 2.0187077659   |
| 4.2934548096   | 4.6311025436   |
| 21.946919418   | 12.6406375507  |
| 1.4502694257   | 1.1945732725   |
| 4.6815940804   | 2.846231763    |
| 0              | 0              |

gene\_expression\_table

|                  |                 |
|------------------|-----------------|
| 11.2074466186    | 8.101084398     |
| 11.7870326917    | 22.1916979643   |
| 0                | 0               |
| 0                | 0.09480345      |
| 0.8422061013     | 0.5285464661    |
| 0                | 9.8015325465    |
| 0                | 0.1199744403    |
| 55.7715442945    | 19.1410399898   |
| 0                | 0.9565487647    |
| 0                | 1.336834539     |
| 0                | 0               |
| 433.6570007976   | 415.6692942291  |
| 0                | 0               |
| 4.8730369248     | 4.5872853004    |
| 7.9821726964     | 37.1008856902   |
| 0                | 3.092765115     |
| 14430.7385820889 | 9897.7615571337 |
| 0                | 0               |
| 226.0348735475   | 346.8427003852  |
| 1.5004026665     | 1.6976202622    |
| 0                | 0               |
| 0                | 2.5871831368    |
| 1.0522359913     | 1.3619836682    |
| 46.3450119597    | 5.5746085768    |
| 2.4519241386     | 2.8851811848    |
| 54.8116395484    | 67.1354117359   |
| 81.041265749     | 72.5216991603   |
| 0.4270116691     | 1.8088739577    |
| 0                | 2.7353114083    |
| 0.1602046002     | 0.0942564435    |
| 0                | 0               |
| 0                | 0.0185810284    |
| 34.5086430322    | 9.4748147949    |
| 0.3579138055     | 0.2105787371    |
| 1.2930324459     | 1.5215123607    |
| 0                | 0.007068        |
| 0                | 0               |
| 3.69287982       | 5.504192046     |
| 6.7215165182     | 29.942024842    |
| 50.3157450944    | 23.2597275977   |
| 1.87893438       | 0.2210943657    |
| 24.871470661     | 10.7080155093   |
| 0                | 0               |
| 0                | 0               |
| 0                | 0               |
| 15.9997493346    | 12.5736919482   |
| 0                | 0.1166376955    |
| 9.2832355803     | 7.6044999389    |
| 6.2390521399     | 3.2302590636    |



gene\_expression\_table

|                |                |
|----------------|----------------|
| 20.9193602216  | 11.8976505243  |
| 269.9628418819 | 232.5765281442 |
| 0.8276742815   | 1.0713175214   |
| 0.202872681    | 0.7639054508   |
| 1.4398420518   | 1.2283409264   |
| 23.1657157732  | 2.998502884    |
| 36.8465752092  | 13.0771500445  |
| 9.393149756    | 4.0527399641   |
| 12.6920005898  | 18.9297166729  |
| 0.4897199792   | 0.1152507818   |
| 4.6123338196   | 2.0722559697   |
| 5.8273170292   | 23.5709678276  |
| 4.2697842291   | 1.2201771065   |
| 4.9365225046   | 10.8431122994  |
| 1.0719347736   | 0              |
| 412.5171121093 | 300.2069397092 |
| 0.3888532527   | 1.6929866064   |
| 1.1775142236   | 1.139256288    |
| 0              | 0              |
| 0              | 1.6986719752   |
| 4.2848869397   | 29.2437742673  |
| 1.1050027217   | 2.3404637284   |
| 49.5508720463  | 44.1854343802  |
| 0.8775641478   | 0.1032630467   |
| 0              | 0              |
| 0.6813397771   | 0.4008665428   |
| 123.8771801157 | 151.0669771499 |
| 0              | 0              |
| 0              | 0              |
| 6.9950719365   | 3.6665840267   |
| 0              | 0.7967608797   |
| 1.1084252544   | 0.1304284924   |
| 2.4400050629   | 1.4355779992   |
| 0.0902848498   | 0.0531191291   |
| 0              | 1.6199149071   |
| 2.2280068366   | 4.5617536644   |
| 0.8283612713   | 0.3898933603   |
| 13.8578989588  | 23.6445718798  |
| 1.6492993171   | 2.4744331546   |
| 4.5592910564   | 3.1518914398   |
| 3.5322317854   | 48.6296471288  |
| 4.7225904443   | 3.4453871982   |
| 15.0652735072  | 15.232363798   |
| 4.2017164982   | 2.2024000235   |
| 0.7893102249   | 0.9473576419   |
| 43.8702385881  | 20.0957641507  |
| 1.1230475141   | 2.6429818983   |
| 0.3787105138   | 0.4159203798   |
| 0              | 0              |

gene\_expression\_table

|                |                |
|----------------|----------------|
| 63.3794618424  | 18.2110695471  |
| 0              | 0              |
| 2.6821429699   | 0              |
| 0.2828680806   | 0.1830681089   |
| 43.7903550961  | 20.7032735372  |
| 29.6074154711  | 34.0857933492  |
| 0              | 0.008263       |
| 0              | 0              |
| 0              | 0.0139986121   |
| 8.0240162342   | 5.2520383043   |
| 3.1732085547   | 2.9404597639   |
| 8.8187587913   | 2.24835885     |
| 17.9602158542  | 7.5833050714   |
| 0              | 1.5146240347   |
| 0              | 0              |
| 13.4647768562  | 11.0908099326  |
| 0              | 0.2080852444   |
| 1.6650330768   | 1.6927883834   |
| 1.4058518913   | 3.1431074833   |
| 0              | 0              |
| 11.2194855941  | 12.1585959444  |
| 46.4105566064  | 42.9305817793  |
| 26.1985681185  | 10.5043136509  |
| 89.3646378507  | 130.2690384078 |
| 11.8544078228  | 6.7209259531   |
| 182.6951999874 | 77.5788711101  |
| 5.0332594391   | 3.0459294474   |
| 68.3881740735  | 29.5065546     |
| 117.6839294842 | 67.0058604493  |
| 3.3130190465   | 3.3136674407   |
| 0              | 0.7093180819   |
| 65.9758709162  | 76.9172422241  |
| 3.5172311044   | 3.7248559043   |
| 0              | 0.8406348762   |
| 84.514204595   | 31.4046111283  |
| 0              | 0.2327011411   |
| 13.2110566565  | 14.1636426255  |
| 25.9758344325  | 13.1988621815  |
| 18.8466074344  | 25.2261313082  |
| 465.0485703842 | 446.9891182739 |
| 45.9986392701  | 32.4759823831  |
| 3.4001654083   | 2.6292137726   |
| 2.2894017413   | 0.2693940944   |
| 273.6994520324 | 192.2614778988 |
| 31.2194508854  | 28.4091377373  |
| 0              | 0              |
| 17.0441233432  | 5.0139585487   |
| 36.2259243509  | 63.1449078187  |
| 0.5322034672   | 0.500995412    |

gene\_expression\_table

|                |                 |
|----------------|-----------------|
| 5.458994378    | 2.7835614087    |
| 8.7588365712   | 4.1226121279    |
| 0              | 0.3517514       |
| 0.741665647    | 0.0872718587    |
| 0              | 0.2821109796    |
| 5.3017393959   | 4.3669928273    |
| 3.0518259499   | 0.798019144     |
| 8.4652873321   | 4.6485183195    |
| 1.2544873571   | 1.0965732681    |
| 0              | 0               |
| 0              | 2.6602885684    |
| 148.5033339412 | 131.3558570356  |
| 2.5288914463   | 1.3390869061    |
| 0              | 0.1737833818    |
| 4.4946714962   | 3.1733302255    |
| 680.3553235086 | 317.8038874315  |
| 9.7378886863   | 6.3022199694    |
| 8.6010504264   | 21.6586473147   |
| 40.8156296072  | 48.6681559728   |
| 4.9395718827   | 14.5309959153   |
| 49.1399188785  | 72.2342503417   |
| 198.4215338266 | 103.3995189941  |
| 0              | 0               |
| 35.3696138968  | 22.1240256843   |
| 59.0844641565  | 54.6265801673   |
| 0.5440705002   | 2.4327912084    |
| 0              | 4.6456416367    |
| 5.3985026813   | 1.0587371034    |
| 0              | 0               |
| 5.2968954129   | 8.7260057682    |
| 0              | 0               |
| 920.0948336775 | 1468.4845619071 |
| 5.4222334731   | 7.7840229292    |
| 3.619464887    | 4.2590273601    |
| 1.2874929555   | 0.5049980126    |
| 66.434160581   | 26.8562535246   |
| 642.4308830444 | 873.5410174933  |
| 364.6196244914 | 150.4690226268  |
| 0.1624140866   | 0.0191112792    |
| 0              | 0               |
| 2.941335267    | 1.6361429708    |
| 0              | 0.8424217651    |
| 1.3282042185   | 1.4378670937    |
| 17.4782831071  | 11.0615550272   |
| 1.4581116774   | 1.8301453125    |
| 0.2560270991   | 1.6870968894    |
| 3.1062632265   | 3.1525604381    |
| 33.9199324256  | 47.1260727252   |
| 1.5309027131   | 2.0716266785    |

gene\_expression\_table

|                |                |
|----------------|----------------|
| 52.6173596282  | 31.4821480103  |
| 2.209361149    | 1.4818615539   |
| 0              | 0.5231492832   |
| 5.3231585983   | 2.9926878059   |
| 21.5329798958  | 9.5808841564   |
| 12.1923281376  | 5.8937887922   |
| 0.6039767502   | 0.2842799788   |
| 0              | 0              |
| 27.5263950389  | 16.1951660335  |
| 116.1038457159 | 45.53983079    |
| 1.2912279361   | 0.3798472481   |
| 60.6213082616  | 71.4540477729  |
| 0              | 0              |
| 13.3972855402  | 29.6024101126  |
| 5.0303271405   | 4.3407394462   |
| 56.7768001761  | 39.8204686527  |
| 157.539457321  | 93.2376702283  |
| 2.100982833    | 2.2250054313   |
| 0.5800120085   | 0.5232504719   |
| 0.6124176865   | 3.1707825775   |
| 3.6447226374   | 9.7415851428   |
| 31.744114389   | 51.7199897828  |
| 0              | 0              |
| 14.9280359188  | 7.1434384899   |
| 8.7330246906   | 5.1380787291   |
| 0.6495526234   | 1.2993594959   |
| 13.8728213195  | 16.3241604507  |
| 58.8403134782  | 53.9062973109  |
| 313.7266446221 | 176.5190351046 |
| 0              | 0              |
| 0              | 0              |
| 1.4035714876   | 1.1561086204   |
| 2.0078103619   | 3.0319932364   |
| 50.4608932841  | 9.1045308848   |
| 8.4753940296   | 4.986501622    |
| 19.1751502157  | 40.1046510621  |
| 13.4710545677  | 19.0216814134  |
| 0              | 0              |
| 3.8092889133   | 2.9882623004   |
| 3.5756085842   | 1.8232160318   |
| 0.3871704786   | 0.227791913    |
| 7.1328173312   | 3.1174713588   |
| 10.3599929046  | 2.4381224633   |
| 107.0947741813 | 112.2534115358 |
| 3.7688620376   | 8.9805168022   |
| 0.2043803155   | 0.0641318635   |
| 6.5743526772   | 3.2601909384   |
| 0.9092812195   | 1.203695968    |
| 4.5479724095   | 6.1246122517   |

gene\_expression\_table

|                |                |
|----------------|----------------|
| 31.3037366599  | 7.7763058792   |
| 0.279523253    | 0.6907220159   |
| 0              | 0.509769781    |
| 0              | 0.0206297509   |
| 6.3971002104   | 6.210165364    |
| 31.0611920468  | 20.2429277518  |
| 0              | 1.3884207784   |
| 0.8328595482   | 2.4827338686   |
| 0              | 0              |
| 4.0095339953   | 2.3852222364   |
| 0              | 0              |
| 0.829187651    | 1.4879513489   |
| 5.7971621713   | 5.7982967397   |
| 0              | 0              |
| 3.7098944323   | 2.0954092232   |
| 4.5985976278   | 2.8258351415   |
| 1.7616080308   | 2.0728856434   |
| 0              | 0.0772276591   |
| 1.4483808241   | 1.6830070406   |
| 5.0244727811   | 2.2804590822   |
| 0.4210378081   | 0.4238726295   |
| 0              | 0              |
| 2.2445688648   | 1.479064194    |
| 0.3536109808   | 0.4160943368   |
| 6.4007198779   | 3.891395091    |
| 1.325730365    | 3.0419766574   |
| 65.0594998251  | 46.1885259445  |
| 702.1322562173 | 918.3526469762 |
| 32.039374668   | 43.7842905328  |
| 0              | 0.126859445    |
| 0              | 0              |
| 42.2832180688  | 40.9647014108  |
| 9.2919053242   | 11.2071375865  |
| 1.4166213465   | 1.9169804519   |
| 3.1053896992   | 4.0195261222   |
| 23.9978822622  | 43.6410525664  |
| 2.8925071244   | 4.7650617738   |
| 0              | 3.2742340544   |
| 2.8481989651   | 1.8768277386   |
| 3.8557143053   | 7.7885548594   |
| 0              | 2.4103832423   |
| 15.7947201455  | 11.1513962441  |
| 6.9996402408   | 6.589186021    |
| 134.5740953903 | 41.171897159   |
| 4.4588925007   | 6.8208172958   |
| 0              | 2.0948462006   |
| 0              | 0.1929042714   |
| 0              | 9.9704383281   |
| 14.3430282766  | 9.0013084643   |

gene\_expression\_table

|                  |                  |
|------------------|------------------|
| 0                | 0.1710512675     |
| 17.8273432639    | 6.2932349191     |
| 9.5348908835     | 17.811296099     |
| 3.5752312769     | 3.9545589761     |
| 4.1204349889     | 6.7879270173     |
| 1.0933843859     | 0.8148380036     |
| 0                | 0.9166711438     |
| 1.0297793935     | 1.2521336828     |
| 0.8381151512     | 1.1834529593     |
| 270.7734058775   | 495.3771391696   |
| 0                | 0                |
| 2.2889497905     | 2.6036288287     |
| 4.9010499868     | 6.4044825769     |
| 8.8418924314     | 23.9298031058    |
| 0                | 0.0954901863     |
| 0.3432854079     | 0.2019721133     |
| 7.966816036      | 4.9997648499     |
| 7.7026685924     | 16.8585500307    |
| 5.3244855816     | 4.7437473113     |
| 0.5737949493     | 0                |
| 0                | 0                |
| 0                | 0                |
| 3.8900055096     | 5.9505845581     |
| 0                | 0.0268426569     |
| 0                | 1.5149603936     |
| 3.1146804361     | 3.1381965575     |
| 0.3727210326     | 0.142538874      |
| 0                | 18.1239815418    |
| 0                | 0.0762432708     |
| 0                | 12.1746579161    |
| 0.0950492347     | 0.0335533542     |
| 0                | 0                |
| 1.5071274341     | 1.214805107      |
| 0                | 0.5046630325     |
| 3.2003010504     | 2.5105312819     |
| 0                | 0                |
| 5.4045418378     | 2.985445512      |
| 0                | 0                |
| 0.0290182371     | 0.1365831355     |
| 50.764345652     | 28.903765157     |
| 6.5898857964     | 8.0128015998     |
| 0                | 0                |
| 31.1567707601    | 18.1927511896    |
| 0                | 0                |
| 21657.3054752702 | 24191.1989853163 |
| 0                | 0                |
| 0.4554308092     | 0.3751340699     |
| 0                | 2.2177719936     |
| 9.3334170964     | 11.3121188955    |

gene\_expression\_table

|                |                |
|----------------|----------------|
| 16.3959972253  | 14.2160300576  |
| 3.3463892346   | 6.8253449531   |
| 0.1150952639   | 0.1083461547   |
| 7.444720524    | 8.954880176    |
| 0.2048323533   | 0.3856422424   |
| 4.200515045    | 2.7330497606   |
| 2.774165963    | 2.0518855714   |
| 14.4000298793  | 5.5069713413   |
| 0              | 0.0585723811   |
| 2.3092464498   | 2.487367502    |
| 0              | 0              |
| 6.2390745209   | 1.3459461047   |
| 0.8000513402   | 0.3765684325   |
| 3.5246440548   | 4.33178279     |
| 2.6843038252   | 4.2325542255   |
| 27.7874382594  | 26.6251086435  |
| 0.3092444467   | 0.7823596281   |
| 0              | 0              |
| 14.3475762311  | 6.7003632155   |
| 6.3209606436   | 5.2065157736   |
| 141.7745042516 | 119.6911624432 |
| 0              | 0.3490141161   |
| 0.053594509    | 0.0504517629   |
| 6.6105496345   | 11.6679589265  |
| 0              | 0              |
| 0.3338286551   | 0.6874288009   |
| 0.169497556    | 0.3290890612   |
| 0.5961512863   | 0              |
| 3.5683732327   | 6.9405475454   |
| 0.1445928926   | 0.1871568355   |
| 66.1698145372  | 94.4556333191  |
| 0              | 0.3072912906   |
| 6.3931275949   | 7.7542693143   |
| 0.4943615482   | 0.8725734708   |
| 0              | 0.0412381769   |
| 195.1328265627 | 72.6889028408  |
| 9.8592769454   | 4.8145890628   |
| 4.632638301    | 3.7167472935   |
| 14.1005765035  | 0.8296080083   |
| 55.1985665751  | 97.7216317041  |
| 0.088294901    | 0.1246760206   |
| 34.0410462432  | 10.3735099652  |
| 3.2028099414   | 3.6610705903   |
| 283.6326824566 | 654.8932652775 |
| 574.8772696843 | 489.70844406   |
| 0              | 0              |
| 6.6681834205   | 5.7540684729   |
| 191.1185627598 | 158.6613582556 |
| 10.9176641153  | 6.1191453524   |

gene\_expression\_table

|                |                |
|----------------|----------------|
| 4.7609296347   | 6.8560133335   |
| 0              | 0.1584969367   |
| 19.3787691728  | 22.690499024   |
| 0              | 0.5566598656   |
| 0              | 0.004984       |
| 1.0121426752   | 13.6963750244  |
| 1.979116953    | 2.7654839317   |
| 2.807346874    | 1.1011358049   |
| 0.1131435505   | 0.0460855767   |
| 0              | 0.009768       |
| 0.4167980179   | 2.4522328812   |
| 0              | 0.4759362791   |
| 10.9787751949  | 4.1339948656   |
| 0.0805517165   | 0              |
| 0              | 0.6352718399   |
| 1.3235738569   | 0.8565977555   |
| 71.9803885244  | 135.0732271882 |
| 7.9661634238   | 5.1736116618   |
| 0              | 0              |
| 80.5389845949  | 61.5564036688  |
| 8.3786280414   | 9.5305006705   |
| 3.7944361477   | 3.9133677185   |
| 11.6907683594  | 0.6878268454   |
| 3.3239338618   | 2.1963317704   |
| 100.1522926165 | 30.8015180612  |
| 0.3310732483   | 0.3116593346   |
| 3.6003428222   | 0.6354789616   |
| 6.4620766086   | 0.3801965475   |
| 0              | 0              |
| 0              | 0.0115181313   |
| 6.9955981117   | 4.9390356898   |
| 0.4035458051   | 0.5793202775   |
| 2.1119274451   | 4.5560291171   |
| 0.4048358667   | 1.7149345308   |
| 1.5578266907   | 2.8412987535   |
| 0.3625174791   | 0.0568766161   |
| 8.929558432    | 6.2544159977   |
| 0              | 0.915889647    |
| 0              | 0              |
| 748.4746081379 | 535.2716738904 |
| 12.5365373053  | 9.8345026223   |
| 23.0350759523  | 34.9566104646  |
| 17.5433887166  | 16.7023226888  |
| 11.2834800105  | 14.900059078   |
| 0.44837216     | 0              |
| 1.9830009592   | 1.7500491656   |
| 17.8569951008  | 21.2224644824  |
| 0              | 0              |
| 291.9549270533 | 318.2830475434 |



gene\_expression\_table

|                |                |
|----------------|----------------|
| 3.1716461674   | 3.3588708283   |
| 48.680405948   | 51.8555326131  |
| 81.0759294951  | 56.6257709222  |
| 0.6531383605   | 0.5892204823   |
| 1.3261170079   | 6.7099048676   |
| 54.1783026724  | 25.500661629   |
| 14.6634820742  | 17.4462486402  |
| 303.4732128925 | 295.1784975155 |
| 6.7442621291   | 6.5471825831   |
| 391.432252096  | 118.153568909  |
| 20.0699364902  | 43.394971565   |
| 47.839995031   | 73.773932527   |
| 11.4832296505  | 14.6946544543  |
| 4.9118461657   | 10.4035922852  |
| 0              | 0              |
| 65.8287080197  | 65.3574620727  |
| 65.8302652848  | 32.2760534271  |
| 24.2138331334  | 82.8870914968  |
| 103.8446487216 | 251.2615873073 |
| 17.006156894   | 17.7599036499  |
| 0              | 2.2500234828   |
| 16.9248906096  | 29.873299406   |
| 10.4515089768  | 15.526602936   |
| 26.7471835267  | 35.4076123824  |
| 7.2407509079   | 2.6412612715   |
| 24.2361158625  | 15.6852617943  |
| 0              | 0              |
| 676.7224760277 | 502.7075913118 |
| 3.3321562373   | 3.5288559284   |
| 1.5595868048   | 1.8351670977   |
| 0              | 0              |
| 5.1327596542   | 19.6290983799  |
| 0              | 0              |
| 3.0534761879   | 1.3653506341   |
| 0              | 0.1403762918   |
| 0              | 0              |
| 0              | 0              |
| 35.8000001816  | 17.6928738668  |
| 1.0941416988   | 0.7209873732   |
| 2.3339883569   | 1.6936170653   |
| 150.154157716  | 209.3735297341 |
| 161.4157195446 | 0.8834326149   |
| 18.2288315982  | 14.2105464204  |
| 0              | 0              |
| 15.5344373778  | 25.9567273482  |
| 6.2908940299   | 3.4236563735   |
| 0.6066374407   | 1.1183348948   |
| 27.0500026074  | 16.7106243645  |
| 0              | 0.5453784748   |

gene\_expression\_table

|                |                |
|----------------|----------------|
| 390.33822577   | 180.8082643777 |
| 3.9990874137   | 3.8675214368   |
| 3.4429946013   | 5.2667870154   |
| 1.344827857    | 1.2461873006   |
| 0              | 0.0411270469   |
| 31.6930546913  | 41.0225683618  |
| 1.1431885373   | 2.9145803009   |
| 17.1998738635  | 8.8929404985   |
| 43.6226638782  | 102.6616501482 |
| 0              | 0.0347694309   |
| 23.0331824768  | 24.9951411356  |
| 0              | 0.2230374042   |
| 0              | 0              |
| 7.4761733551   | 6.660751862    |
| 34.4778592293  | 38.5416195048  |
| 26.1146487811  | 52.2395194099  |
| 3.610769824    | 13.5961467909  |
| 0.4543493311   | 3.2077994274   |
| 152.6537983169 | 97.7973861805  |
| 91.9743843905  | 66.1383158609  |
| 0              | 0.0866655534   |
| 13.7007019483  | 17.3307495008  |
| 0              | 1.3108890569   |
| 300.7757213703 | 402.0344565707 |
| 0.2558581759   | 0.7075110446   |
| 3.7473027144   | 1.7637816954   |
| 0              | 0              |
| 0.0816991885   | 0.009614       |
| 26.0852734732  | 20.1560964456  |
| 47.3210021287  | 53.7870827772  |
| 0              | 0.123665192    |
| 3.1320648457   | 3.3476655191   |
| 1.7304203531   | 0.8435632176   |
| 7.3378038039   | 1.8995679723   |
| 0              | 7.1283873065   |
| 0              | 0              |
| 20.5733484436  | 37.1430262432  |
| 0              | 0              |
| 0              | 0.6734652897   |
| 0              | 2.2125570915   |
| 36.7592067082  | 32.1319806089  |
| 6.9388482811   | 4.4646633705   |
| 0.0486170507   | 0.0171623173   |
| 34.0705925565  | 27.7428991739  |
| 10.4656594086  | 12.6228239348  |
| 6.2157735922   | 2.9256423941   |
| 205.6806538344 | 609.3641530361 |
| 1.6172090965   | 4.5671311117   |
| 0              | 0.220636717    |

gene\_expression\_table

|                 |                 |
|-----------------|-----------------|
| 25.9509938649   | 66.5987749238   |
| 189.1957421848  | 183.7935926621  |
| 0               | 1.1100588483    |
| 10.0704676518   | 22.5376509703   |
| 18.9476908236   | 24.100658793    |
| 0               | 0.8952580909    |
| 29.6734588838   | 0               |
| 0               | 0               |
| 0.5584891075    | 0.3379755086    |
| 0               | 3.7962530063    |
| 35.2020767995   | 31.325624369    |
| 8.4542799588    | 5.3885857454    |
| 11.2510713193   | 4.5013093111    |
| 2950.8606334397 | 5400.9475301908 |
| 0               | 0.4097217209    |
| 0.7933412195    | 2.0724261141    |
| 0               | 0.0202242638    |
| 50.6764945227   | 42.8194214485   |
| 4.3081867834    | 5.7527202818    |
| 5.6397276462    | 5.8251722984    |
| 0               | 0.0733174557    |
| 165.1695734875  | 54.0814400781   |
| 0               | 2.4576660911    |
| 4.3265797399    | 3.7738714754    |
| 11.7281017863   | 7.4916821845    |
| 1569.8780758586 | 482.7498948376  |
| 0.276582798     | 0.7485469825    |
| 310.9479634369  | 829.3568516561  |
| 758.1880421537  | 413.8661322842  |
| 25.2866553875   | 26.3215790981   |
| 0.687423168     | 2.3862296794    |
| 1.7477471374    | 0.4113151037    |
| 2.100982833     | 0               |
| 0.2755790073    | 1.6862250517    |
| 1.5329874741    | 0.5669298307    |
| 7.990093483     | 12.8336613198   |
| 0.6480061732    | 2.007941436     |
| 18.5629519819   | 12.8209154425   |
| 1.2441818655    | 1.0858221327    |
| 0               | 0.003324        |
| 0.0686966201    | 0.0431121975    |
| 0.464166145     | 0.6504563139    |
| 0               | 5.8306552584    |
| 0               | 0               |
| 0               | 0               |
| 12.7846026544   | 4.7280051146    |
| 6.8523383753    | 2.5655484584    |
| 2.1935741761    | 0.6130303849    |
| 0.8856074469    | 1.6673520376    |

gene\_expression\_table

|                 |                 |
|-----------------|-----------------|
| 4.6947423989    | 1.8079551189    |
| 1.616387825     | 2.9616933532    |
| 0               | 0.6611518644    |
| 0               | 0.0916215621    |
| 163.2756556262  | 44.6008179846   |
| 2.8040880432    | 5.1693306354    |
| 3017.0975423725 | 2811.2396353358 |
| 0               | 2.1516073338    |
| 24.5742855595   | 38.4812980813   |
| 215.5067054875  | 121.494629128   |
| 0               | 1.0492091492    |
| 0               | 0               |
| 11.6134856358   | 7.7438390151    |
| 0.1632358564    | 0.3457435838    |
| 0               | 0               |
| 0               | 1.6365279243    |
| 0.6090784196    | 0.4300218515    |
| 3748.1427897968 | 1779.9286836414 |
| 41.3927916885   | 50.5498976207   |
| 52.7280766659   | 41.3634479451   |
| 317.4762451933  | 379.8606737149  |
| 0               | 0               |
| 0.6685176635    | 2.0059454992    |
| 5.9722908439    | 5.3878263842    |
| 0               | 0               |
| 1.311060203     | 0.8374796318    |
| 0               | 0               |
| 2.3756015785    | 2.9151740373    |
| 0               | 0               |
| 0               | 0               |
| 84.641824966    | 61.569738401    |
| 9.0431172369    | 112.0501892858  |
| 0               | 0               |
| 93.507290797    | 103.9173235573  |
| 1.1752624277    | 1.5212255099    |
| 0               | 0               |
| 43.3389551425   | 30.3432059367   |
| 13.1910171318   | 13.9696928034   |
| 10.9139570899   | 12.5707949622   |
| 0               | 0               |
| 0.4246610945    | 0.5246840184    |
| 172.5432151611  | 150.0179009197  |
| 1.8064415165    | 1.6080938103    |
| 0               | 0               |
| 8.5709038601    | 1.6082107966    |
| 0               | 0.007368        |
| 0               | 0               |
| 0               | 0               |
| 0               | 0               |

gene\_expression\_table

|                 |                 |
|-----------------|-----------------|
| 0               | 0               |
| 0               | 0.010358385     |
| 0.5576349761    | 1.0061266324    |
| 3.5505141939    | 2.1963780458    |
| 1.1438200709    | 1.7497142445    |
| 2.8000058099    | 2.1180659005    |
| 0               | 0               |
| 220.935899929   | 64.9938645626   |
| 0               | 0.1576125837    |
| 2.4513243093    | 3.5437840201    |
| 2605.0168166865 | 2099.4444474525 |
| 20.538751112    | 9.2504971831    |
| 172.6298071591  | 68.7002530147   |
| 19.1883893295   | 16.0561733506   |
| 7.4664211488    | 11.0114658273   |
| 72.9239248983   | 935.3251133407  |
| 4111.5883606581 | 4059.2488148568 |
| 11.7444227093   | 15.2969473113   |
| 104.2975178769  | 362.9212020139  |
| 1152.5435679388 | 970.2396130687  |
| 14.4500219715   | 16.1531852937   |
| 45.8519659198   | 131.9798987313  |
| 0               | 2.3788910795    |
| 84.2346825923   | 133.8106789781  |
| 35.3888504085   | 47.8884033585   |
| 0               | 0.1877037253    |
| 110.4864474843  | 201.5410352286  |
| 10.5598158261   | 28.6235891231   |
| 78.3242896684   | 47.3987608292   |
| 103.59530095    | 40.1256396051   |
| 0               | 0               |
| 0               | 0               |
| 9.7722484533    | 10.4864132831   |
| 9.2756949223    | 3.5682731837    |
| 4.6239157993    | 9.8257437397    |
| 0               | 0.084599708     |
| 0               | 0               |
| 0               | 0               |
| 3.8762738182    | 1.4823947594    |
| 1.9926624147    | 4.9240118134    |
| 6.3210912266    | 2.5289313335    |
| 0.950861815     | 3.1888076954    |
| 13.8957060175   | 2.1160232686    |
| 0.7451833609    | 1.1691438454    |
| 2.5319701399    | 4.0221513651    |
| 1.8221158498    | 4.3188002783    |
| 8.9942036266    | 6.8481386023    |
| 1.458478498     | 0.5148578606    |
| 0.5773089591    | 0.7472519286    |

gene\_expression\_table

|                |                |
|----------------|----------------|
| 32.2788537901  | 30.3860434039  |
| 0.3438730497   | 0.3156158501   |
| 6.5971347083   | 6.8140606715   |
| 18.7882020762  | 3.4543895467   |
| 1.1205868327   | 0.3202303268   |
| 0              | 0              |
| 0              | 0              |
| 0              | 0.0398443264   |
| 2.0617652838   | 1.9560277531   |
| 5.9213475184   | 4.2215789501   |
| 16.2137144244  | 8.6976386924   |
| 0              | 0.0229131224   |
| 7.6832775899   | 5.9998827197   |
| 0              | 0.8906083894   |
| 6.9716945409   | 3.3634755071   |
| 1.3253666717   | 0.7407910338   |
| 3.0013729703   | 2.9430984039   |
| 1.2486570024   | 1.836619674    |
| 27.5976379088  | 26.9344533485  |
| 1.0636599616   | 1.6583826757   |
| 0              | 0.035552776    |
| 10.2737055279  | 6.0445389441   |
| 53.90646281    | 20.3571758682  |
| 0              | 0              |
| 6.1581180228   | 5.2682287758   |
| 185.1261975389 | 87.9202629456  |
| 0.7478002147   | 0.3959717122   |
| 7.3990505008   | 8.6484257872   |
| 1.7004328897   | 4.1427741639   |
| 8.8567925709   | 24.1304643323  |
| 103.7910373068 | 41.5863786226  |
| 0              | 4.1520795206   |
| 0              | 0              |
| 2.1862533697   | 4.7592474123   |
| 17.0911573083  | 6.8068606187   |
| 0              | 0              |
| 0.2530141348   | 0.2530636525   |
| 2.6236138648   | 1.0290695431   |
| 6.1640523424   | 3.4374076724   |
| 5.3971443726   | 3.1925765389   |
| 71.5177175424  | 28.7898540711  |
| 353.0064467558 | 210.1766879099 |
| 95.7511750705  | 61.637384501   |
| 11.0723880031  | 9.8308883879   |
| 0              | 1.5089286999   |
| 0              | 1.6141654309   |
| 14.8310361459  | 12.2161848469  |
| 0              | 0              |
| 25.7362562567  | 20.1084925117  |

gene\_expression\_table

|                 |                 |
|-----------------|-----------------|
| 5.1460861722    | 2.2707764637    |
| 0               | 0               |
| 17.6697715008   | 7.1286976817    |
| 4.1461352179    | 1.498476525     |
| 75.5614471087   | 18.5909455854   |
| 0               | 0               |
| 0               | 0               |
| 6.9874075321    | 1.6444176576    |
| 70.9095348887   | 63.2826220069   |
| 2.9140246441    | 3.0860417125    |
| 0               | 0               |
| 0               | 0               |
| 22.0653574995   | 24.9257516414   |
| 681.5814972339  | 694.5576543999  |
| 0               | 0               |
| 56.2809746038   | 60.6869789565   |
| 170.470623988   | 60.1778777516   |
| 4.0606934436    | 0.9556442743    |
| 38.2071144537   | 48.4238825173   |
| 12.6946209353   | 18.3521187469   |
| 818.1349174578  | 788.5432502447  |
| 4.8355365572    | 7.0376067328    |
| 0               | 0               |
| 0               | 0               |
| 0               | 0.065550751     |
| 84.3750199608   | 92.5781214279   |
| 980.1842813174  | 1036.0567048165 |
| 2.1007544405    | 1.2359797537    |
| 4127.1529846815 | 5066.0006235444 |
| 1.7784686267    | 2.5112706248    |
| 18.7238059278   | 24.0152267256   |
| 95.570474743    | 169.8402002804  |
| 35.377281644    | 52.3825001019   |
| 35.5181622265   | 30.6491175477   |
| 0               | 5.4754884406    |
| 817.6393056929  | 557.4169080159  |
| 287.8446053872  | 114.6985027307  |
| 45.6717048107   | 27.5427407923   |
| 9.5752849559    | 22.0838018013   |
| 17.896684662    | 17.5492031764   |
| 15.251770148    | 7.3781168395    |
| 0               | 0               |
| 0               | 0               |
| 0.5096549113    | 0.8096103365    |
| 236.5832043044  | 132.8046023437  |
| 10.798413108    | 28.2931438668   |
| 1.2405212542    | 1.167777918     |
| 227.0839024447  | 173.6863816696  |
| 44.2582968257   | 23.3222339748   |

gene\_expression\_table

|               |                |
|---------------|----------------|
| 18.0212994386 | 14.8439746865  |
| 24.7825960364 | 10.9253698524  |
| 37.445120302  | 23.7827030874  |
| 0             | 2.5043563335   |
| 0             | 0.3111012297   |
| 0             | 0              |
| 0.6236082481  | 2.2197460501   |
| 5.2571976583  | 4.5122497727   |
| 0             | 0.5892221418   |
| 6.4354162985  | 3.702140318    |
| 8.2408699778  | 6.7879270173   |
| 0.7289229239  | 0.7290655822   |
| 0             | 0.3055570479   |
| 0.6865195957  | 1.0097852281   |
| 0             | 0.8875897195   |
| 228.867997825 | 469.2048400864 |
| 0             | 0              |
| 1.9074581588  | 2.468958372    |
| 5.1589999861  | 6.7990715509   |
| 21.2205418353 | 23.9298031058  |
| 0.4805995711  | 0.2262087669   |
| 3.983408018   | 5.312250153    |
| 8.087802022   | 15.9068576903  |
| 0.078113301   | 0.0214470635   |
| 0             | 0              |
| 2.4745594581  | 1.0464339412   |
| 4.6387038161  | 4.4030824395   |
| 0             | 0.1473055355   |



gene\_expression\_table

| C3_U937_2H_R1_001 trimmed (GE) - TPM | LZ1_U937_24H_R1_001 trimmed (GE) - TPM |
|--------------------------------------|----------------------------------------|
| 0                                    | 0                                      |
| 1.8778777694                         | 3.5646354391                           |
| 2.146713481                          | 1.0187365595                           |
| 0                                    | 1.0379675258                           |
| 25.3858787208                        | 10.881188825                           |
| 4.4019665077                         | 4.1779625039                           |
| 1.7865495574                         | 0.5652123166                           |
| 0                                    | 1.8705256962                           |
| 494.9773615375                       | 207.581327888                          |
| 4.1189148549                         | 12.2709040778                          |
| 1.4254494335                         | 0.4509707403                           |
| 1.4314737379                         | 1.3586299649                           |
| 0                                    | 0                                      |
| 112.1307324432                       | 78.9477826256                          |
| 265.5837365629                       | 72.8199069094                          |
| 0                                    | 0.8194572032                           |
| 63.5410721077                        | 34.9097890523                          |
| 2.6609821216                         | 13.1329746017                          |
| 3.5795363027                         | 6.0397929184                           |
| 19.8378095908                        | 22.5939814356                          |
| 33.9666660866                        | 17.6116068544                          |
| 14.9274606822                        | 17.9459346496                          |
| 0                                    | 0                                      |
| 15.6041219905                        | 25.9528863489                          |
| 0                                    | 0.3603859975                           |
| 614.8908423905                       | 560.7144303858                         |
| 33.1117322572                        | 39.0323316246                          |
| 425.5601933834                       | 134.2739160052                         |
| 0                                    | 0                                      |
| 11.4668690286                        | 2.6949251358                           |
| 23.8539431253                        | 10.7562072435                          |
| 0                                    | 2.1017029719                           |
| 17.3103257022                        | 15.1928253768                          |
| 20.7133701673                        | 37.4463305958                          |
| 2.0039750595                         | 3.0431972229                           |
| 0                                    | 3.9454632455                           |
| 8.538623951                          | 10.4876805569                          |
| 0.5919617073                         | 0.7491178659                           |
| 3.3438911609                         | 3.8790029787                           |
| 26.2891755111                        | 34.3774726829                          |
| 22.1648551785                        | 27.782126148                           |
| 15.5948542713                        | 16.5197749864                          |
| 0                                    | 0                                      |
| 0                                    | 0                                      |
| 0                                    | 0                                      |
| 0                                    | 0                                      |
| 0.0458137162                         | 0.0579765091                           |
| 7.8378632314                         | 0                                      |

gene\_expression\_table

|                |                |
|----------------|----------------|
| 7.8741945744   | 7.8886927622   |
| 3.7914237592   | 3.7424281455   |
| 0.0876815482   | 0.1664393494   |
| 86.6130755618  | 44.0090444899  |
| 0.7903671485   | 0              |
| 0              | 0              |
| 3.0739945417   | 0.6483483088   |
| 14.4250825665  | 17.8578647913  |
| 24.8830016741  | 19.0591509125  |
| 0.0167248692   | 0              |
| 0              | 0.1715268345   |
| 105.8304687214 | 68.4852589039  |
| 25.8879261129  | 17.1892810409  |
| 0.1478164322   | 0.3741185581   |
| 0              | 0              |
| 33.782626386   | 50.436999598   |
| 2.0465253057   | 2.6761724712   |
| 19.4488659348  | 7.1900873192   |
| 40.9845129172  | 30.8387861575  |
| 0.8104271356   | 0.7842688137   |
| 10.8420799707  | 12.8225381591  |
| 0              | 0              |
| 891.2312596711 | 1430.292220745 |
| 0              | 0.2471576133   |
| 44.2965735304  | 8.4613720513   |
| 2.2675940824   | 8.3218494271   |
| 3.7233406274   | 2.6579535295   |
| 15.6153844387  | 6.9398798452   |
| 0              | 0              |
| 5.3231099836   | 2.1050964643   |
| 36.0479477835  | 19.2752487757  |
| 24.5153724326  | 21.1869875141  |
| 39.5450834212  | 38.962561337   |
| 0.2737622995   | 0.5774028596   |
| 0.3453740879   | 0.4251453019   |
| 27.3677455807  | 29.2460115639  |
| 4.7708210424   | 4.3674779987   |
| 0.3675557948   | 0.3488518884   |
| 0              | 0              |
| 149.114775786  | 135.4021850581 |
| 3.8065790774   | 2.4085818048   |
| 1.0436743625   | 1.6179222394   |
| 533.3146162788 | 667.3347767241 |
| 0              | 0              |
| 0              | 0              |
| 3.9409320996   | 10.6670349325  |
| 0.2397681032   | 0.9102678478   |
| 4.9017632164   | 5.2405510461   |
| 0.7257981398   | 0.4082158595   |

gene\_expression\_table

|                |                |
|----------------|----------------|
| 5.7096976963   | 3.612764559    |
| 12.583731816   | 3.4553175459   |
| 2.4225191908   | 10.729804552   |
| 17.505398511   | 19.5512218415  |
| 4.5306295185   | 6.1839219928   |
| 6.3760300093   | 9.1403941924   |
| 20.5903713002  | 21.8363142602  |
| 0.9188860722   | 2.1076389931   |
| 0              | 0              |
| 1.2508269023   | 1.6356643687   |
| 0.9766027669   | 1.1214419847   |
| 33.8946307288  | 30.7158224904  |
| 17.9891516702  | 16.3046459988  |
| 0              | 0.1785804598   |
| 13.5261738917  | 10.2702911967  |
| 11.3081783059  | 5.5289852754   |
| 0.7934461782   | 0.9789908416   |
| 0.888168757    | 0.2199058134   |
| 140.495606058  | 64.8711097072  |
| 0              | 0.1887951552   |
| 336.1212113045 | 271.3971143258 |
| 6.6830624322   | 8.3398436958   |
| 1.5451573652   | 1.4038563842   |
| 17.8079326639  | 7.7095637011   |
| 0.5289720403   | 0.5355243774   |
| 0.6904346553   | 0.8737337721   |
| 6.6260062516   | 5.3359743939   |
| 22.1416957102  | 15.8177159946  |
| 0              | 0              |
| 17.2560713698  | 33.5548391824  |
| 7.5849875681   | 8.2548629097   |
| 2.836374665    | 1.583552551    |
| 220.476041268  | 168.6631227987 |
| 8.7710334958   | 17.6062613381  |
| 12.4241163459  | 13.8452008168  |
| 8.2046256218   | 8.5505573439   |
| 28.6591708534  | 26.7381858706  |
| 0.7671781801   | 0.5825108691   |
| 0.3675649014   | 2.2482123145   |
| 71.6691184754  | 11.337012263   |
| 2.2040788089   | 2.975174091    |
| 0.1110446411   | 0.0926188676   |
| 0.0908197033   | 0.2298617005   |
| 0              | 0              |
| 34.1584011903  | 15.1102875069  |
| 0              | 0              |
| 0              | 0              |
| 0.4040170894   | 1.2781925591   |
| 1.475641315    | 0.4668499917   |

gene\_expression\_table

|                 |                |
|-----------------|----------------|
| 0.825644327     | 0.5224197009   |
| 0               | 0              |
| 0.4253299176    | 0              |
| 10.66688778     | 0              |
| 4.9902906869    | 3.3044291714   |
| 0               | 0.6203440493   |
| 0               | 0              |
| 0               | 0              |
| 1585.5793357869 | 814.2419216394 |
| 3.738571823     | 2.1543408801   |
| 1.8040688386    | 1.7122647228   |
| 5.4135677102    | 3.4253907302   |
| 0               | 0.3987429127   |
| 0               | 0              |
| 0.8776163445    | 1.4437918828   |
| 17.6789122625   | 9.6779372977   |
| 14.9610530418   | 10.4735568257  |
| 0               | 0              |
| 5.7974980068    | 4.5089760373   |
| 0               | 0              |
| 4.3942551315    | 16.6825741536  |
| 0               | 1.0625200803   |
| 3.5641715175    | 0.9020801608   |
| 16.7401139941   | 24.9357343266  |
| 0.938486929     | 0.3711374595   |
| 0               | 0              |
| 0               | 0              |
| 145.7326370453  | 61.7506445216  |
| 1.0784915805    | 1.6950102756   |
| 1.3784251578    | 0.0545117034   |
| 0               | 0              |
| 8.8672542583    | 6.732819205    |
| 1.7697387443    | 0.4479150914   |
| 5.1425332288    | 3.7722155742   |
| 17.2204743384   | 10.8961144159  |
| 90.3933883438   | 37.0627992149  |
| 2.4637152126    | 4.1570551144   |
| 67.453176317    | 81.2171595745  |
| 4.2492615417    | 4.6091751712   |
| 26.3472542149   | 11.0784985258  |
| 64.7411400568   | 107.0552911685 |
| 0               | 0              |
| 0               | 0              |
| 0.3661600389    | 0.7943477913   |
| 0.7916070393    | 1.126986492    |
| 0               | 0              |
| 0.865750906     | 5.4779681103   |
| 4.2943383417    | 11.1707419172  |
| 0               | 0.1687443582   |

gene\_expression\_table

|                 |                 |
|-----------------|-----------------|
| 22.5072719269   | 17.2929978992   |
| 8.209112176     | 7.3585189157    |
| 4.5394269413    | 6.7890379864    |
| 14.3778801394   | 10.8303406732   |
| 202.297777656   | 184.4032639975  |
| 0.3327899003    | 0.9826604198    |
| 32.0488773986   | 31.5445904324   |
| 1.1828826433    | 0.8433344522    |
| 2.0236282137    | 1.3109207445    |
| 2.6973089565    | 3.494671839     |
| 0               | 0.0534107501    |
| 7.805838946     | 8.764083234     |
| 0.475022014     | 2.1039640832    |
| 0               | 0.1359661144    |
| 0               | 0               |
| 60.4086568591   | 52.9690453154   |
| 1.5707388407    | 1.4143565436    |
| 0               | 0               |
| 14.1498463962   | 1.2790285254    |
| 0               | 0.4685276989    |
| 0               | 0.0371209668    |
| 4.6181286944    | 3.6526039914    |
| 0.8567788201    | 0.8757319798    |
| 48.7240788374   | 25.6425328041   |
| 1.1868026243    | 3.7546983112    |
| 0.9652716059    | 1.2215354414    |
| 0               | 0.0697581414    |
| 9.1860128975    | 4.1298451069    |
| 6.628913103     | 14.6803670859   |
| 1705.3224881903 | 2269.1589942012 |
| 27.7759047477   | 7.7413588069    |
| 57.125316709    | 34.5567607468   |
| 102.7858253024  | 56.8043731679   |
| 40.370666525    | 24.7929090692   |
| 3.145381742     | 11.277882699    |
| 35.5607193912   | 29.2173977653   |
| 3.1772382671    | 1.3707078749    |
| 163.9187270084  | 178.3225794891  |
| 108.1131310455  | 56.8491577472   |
| 0               | 0               |
| 0               | 0               |
| 0               | 0               |
| 0               | 0               |
| 0               | 0               |
| 1.7624588247    | 2.3615606519    |
| 0.3565884897    | 0.6768853586    |
| 0               | 0               |
| 47.3769098346   | 39.9267324842   |
| 3.6818186343    | 3.7116308723    |

gene\_expression\_table

|                 |                 |
|-----------------|-----------------|
| 21.4686390266   | 10.2476588424   |
| 54.8953833936   | 105.3489126263  |
| 4.8927396072    | 5.6621302576    |
| 34.421369547    | 20.8046235677   |
| 0.1819548596    | 0.1726956758    |
| 1.9608973398    | 2.3122914762    |
| 3.5646282576    | 5.7640284684    |
| 0.1824645627    | 0.115452961     |
| 7.5354436919    | 8.4523466503    |
| 3.7931803136    | 7.2003115393    |
| 8.3029867979    | 8.2354467212    |
| 0.8120679806    | 0.2569146894    |
| 648.3288513589  | 461.0719721579  |
| 1.1267995698    | 1.3240931226    |
| 5.3608660447    | 1.9383109612    |
| 5.1383719605    | 2.167508579     |
| 431.6919599103  | 203.4092467691  |
| 0               | 0               |
| 0               | 0.3108869908    |
| 2.4915201405    | 2.4523162358    |
| 861.4918537447  | 386.5663093116  |
| 1.0307016677    | 0.3260840288    |
| 258.7478110856  | 159.2144924952  |
| 0               | 0               |
| 4.5935267799    | 2.9065165328    |
| 3518.7005381907 | 1484.2860076927 |
| 19.2522103521   | 9.2442526879    |
| 9.4071962404    | 5.9523265477    |
| 4.1442611129    | 5.993708236     |
| 3.62224139      | 3.6401457802    |
| 14.1021934643   | 0               |
| 10.6799825317   | 3.2010023712    |
| 9.2870514851    | 6.6598133937    |
| 21.7900667254   | 15.9759766027   |
| 0               | 0               |
| 2.5652765812    | 1.0821051959    |
| 0.5487608278    | 0.6944478589    |
| 0.3336010939    | 1.6358960867    |
| 9.9728965892    | 3.5666736812    |
| 6.2120038206    | 3.9305946544    |
| 3.8456872034    | 1.8249953639    |
| 0               | 0               |
| 0               | 0               |
| 11.3616587797   | 12.51249434     |
| 1.7677986297    | 0.7829920958    |
| 13.2803279949   | 5.041811409     |
| 16.0740099945   | 45.1324744648   |
| 3.0123265678    | 0.9530125099    |
| 2.1702029731    | 2.3649180057    |

gene\_expression\_table

|                 |               |
|-----------------|---------------|
| 27.1686630567   | 15.3221898013 |
| 28.3853758709   | 13.5395402547 |
| 47.5415314455   | 30.4176218425 |
| 0               | 0.3232053242  |
| 7.8744732083    | 3.6236425994  |
| 3.0821633649    | 3.1732290426  |
| 6.3438915244    | 11.7912587187 |
| 51.7103389623   | 21.7332539535 |
| 1251.6309077663 | 925.893510203 |
| 3.7560963784    | 2.716159188   |
| 44.3688018124   | 29.7584365818 |
| 2.2684955999    | 1.9437329888  |
| 88.1100840822   | 41.7543927621 |
| 10.411800037    | 6.5879813906  |
| 8.2668848018    | 5.7453090954  |
| 2.5054989313    | 1.1681408232  |
| 38.4069088376   | 21.3524274095 |
| 0               | 0.0758659535  |
| 4.0067681525    | 1.8468707197  |
| 41.362466075    | 49.9276698179 |
| 21.9302750715   | 17.7433407001 |
| 3.3891360983    | 3.7783134441  |
| 0.342281195     | 0.6497268872  |
| 1.0043807732    | 2.5420549066  |
| 109.1433704288  | 93.4154082617 |
| 3.54642307      | 4.1090883195  |
| 0               | 0             |
| 2.1584474642    | 2.9415938346  |
| 2.1568567123    | 1.8765085067  |
| 10.1494584363   | 11.4478896673 |
| 3.9378636525    | 1.4015537138  |
| 0               | 0             |
| 0               | 0             |
| 11.2565635483   | 17.043121648  |
| 0               | 0             |
| 0               | 0             |
| 0               | 0             |
| 100.9391837382  | 47.7178027336 |
| 57.3324459631   | 50.7872913461 |
| 4.6106373646    | 3.6783891455  |
| 8.3891649384    | 8.4474191715  |
| 11.2891276752   | 7.5632858305  |
| 46.9321749856   | 72.6769307609 |
| 0               | 1.7813921916  |
| 6.0741514594    | 2.5622464663  |
| 0.8371426691    | 0             |
| 92.5276140381   | 93.2834393918 |
| 0               | 0             |
| 23.221788496    | 24.8657486132 |

gene\_expression\_table

|                |                |
|----------------|----------------|
| 338.4292467202 | 58.4013655356  |
| 0              | 16.0627073131  |
| 2.9934438104   | 1.8940771093   |
| 3.7301386715   | 5.9005369065   |
| 1.3879280608   | 1.5807602495   |
| 7.9842683073   | 6.0882842235   |
| 7.7567962758   | 7.8082604994   |
| 25.4236437558  | 42.783518166   |
| 1.1194243876   | 0.8263577392   |
| 23.8326278695  | 29.7942277133  |
| 4.2566994179   | 5.9440370139   |
| 0              | 0              |
| 2.7107709992   | 5.1456545939   |
| 6.9795866317   | 3.8194822968   |
| 125.8823093475 | 213.5726882168 |
| 0              | 0.5299888092   |
| 0.615499499    | 0              |
| 2.783627077    | 2.2897124716   |
| 0              | 0              |
| 2.7627929651   | 1.7117151994   |
| 0.1952266516   | 0.2470561369   |
| 0              | 0.006          |
| 56.201045173   | 31.8392780174  |
| 0              | 0              |
| 32.3467371455  | 45.0276939174  |
| 2.9690016659   | 9.4784491444   |
| 1.090724237    | 1.8633964892   |
| 456.7400918212 | 79.4746041997  |
| 12.18157081    | 21.4899293451  |
| 2.7377809872   | 4.8504639319   |
| 2.0632381404   | 1.740662764    |
| 8.5696101908   | 9.2498925742   |
| 29.2240046733  | 15.532650122   |
| 19.7750931435  | 17.6647462434  |
| 11.3590798577  | 4.2650297542   |
| 3.8126043159   | 7.0037251699   |
| 4.0311856808   | 3.2701279457   |
| 1.4733802193   | 1.7579935251   |
| 82.7276874352  | 59.2733183953  |
| 0              | 0.1262840382   |
| 60.2759907116  | 34.7266911428  |
| 23.3497037589  | 8.6445572711   |
| 23.5204967793  | 19.2794754906  |
| 0              | 0.1709919223   |
| 0              | 1.8405972851   |
| 10.9456010801  | 5.7432962856   |
| 69.4393248664  | 43.9371653673  |
| 0              | 0.8403586438   |
| 32.7626716847  | 29.2928332754  |



gene\_expression\_table

|                |                |
|----------------|----------------|
| 8.5893396969   | 11.5490233191  |
| 0.0776835517   | 0.5570745018   |
| 73.3499991699  | 16.6605788733  |
| 25.8596939953  | 17.4638328484  |
| 6.8351503974   | 6.8804997525   |
| 0              | 0              |
| 17.7981340699  | 19.1715740041  |
| 8.0375648332   | 2.1795872002   |
| 111.7153091773 | 50.5874650779  |
| 0              | 0              |
| 11.9011580064  | 13.5546488551  |
| 64.7335073815  | 22.3415988046  |
| 325.1433783312 | 153.707678354  |
| 4.3220094969   | 1.4845602178   |
| 2.5756685672   | 4.3006849339   |
| 30.5939063506  | 24.0795184413  |
| 17.6593002757  | 29.9457248839  |
| 62.2534504835  | 43.264823916   |
| 0              | 0              |
| 35.4418653579  | 36.3510942515  |
| 39.7375610979  | 46.6952888231  |
| 1.6353072668   | 0.5173636549   |
| 0              | 0.0698129269   |
| 30.4443858589  | 16.6246094681  |
| 314.9270108024 | 372.7474272874 |
| 1.4112505462   | 2.3003355262   |
| 0.3232643797   | 0              |
| 94.0497972386  | 63.6553762687  |
| 0              | 0.4815055067   |
| 0              | 0              |
| 13.3146756801  | 14.0412537202  |
| 0              | 0              |
| 0              | 0              |
| 5.8204481707   | 6.5370428046   |
| 4.6886085168   | 0              |
| 18.3068119145  | 11.0569635654  |
| 70.2007594643  | 43.578598243   |
| 73.1460042111  | 90.5115814874  |
| 3.1857996582   | 6.8831809272   |
| 9.2375513851   | 3.7884163021   |
| 3.9608595651   | 8.657787078    |
| 6.2286748237   | 7.8034633289   |
| 0.7403834553   | 0.9369431622   |
| 1.6161528625   | 2.4542580406   |
| 11.8297935733  | 0.4990136809   |
| 1.4699391162   | 2.5577529004   |
| 1.3847166048   | 1.3142521741   |
| 3.4755949482   | 1.5149729634   |
| 0              | 0              |

gene\_expression\_table

|                 |                  |
|-----------------|------------------|
| 172.3722795245  | 245.4010903867   |
| 13.3785801465   | 5.5258861287     |
| 0               | 0                |
| 1.7829175651    | 2.8385118884     |
| 0.8561185728    | 0.9028367182     |
| 0.0817102414    | 0.0443155607     |
| 2.1336921957    | 2.2828562904     |
| 0               | 0                |
| 0               | 1.0555104135     |
| 15.9605835699   | 32.1329553607    |
| 0.0926582195    | 0.2345149248     |
| 80.0800211307   | 46.7564440137    |
| 311.2368285407  | 230.1173282859   |
| 11.9160703007   | 15.0795922149    |
| 6.5466172295    | 3.2218033202     |
| 0               | 0.3819225887     |
| 10.1658938729   | 8.3242645909     |
| 1.3299662499    | 1.8233047656     |
| 0               | 4.63655963       |
| 10.7894866174   | 8.2154936211     |
| 127.3541543469  | 42.3872216264    |
| 0               | 0.0476815423     |
| 0               | 0                |
| 0               | 0                |
| 0               | 0                |
| 94.562248871    | 59.8334902324    |
| 14.5352877626   | 22.5746620842    |
| 64.9027283738   | 97.3677522299    |
| 0.4802030257    | 0.5469201727     |
| 66.3210446414   | 61.332144746     |
| 0.9141018586    | 1.9665276361     |
| 7.2524863351    | 7.8365171136     |
| 0.3316397785    | 0.6295270793     |
| 7.2836186413    | 3.3182281262     |
| 51.01117628     | 44.9571175946    |
| 736.0897177111  | 258.0388405711   |
| 46.9935667196   | 26.1404794034    |
| 1.1702880478    | 2.2214705968     |
| 0               | 0                |
| 2.7785199663    | 1.1577638217     |
| 5.9666616491    | 4.3146930289     |
| 0.8289289679    | 1.6026328714     |
| 5.0105670965    | 10.7951962864    |
| 1.446835846     | 2.1971365401     |
| 16.6390329532   | 22.5933895362    |
| 41.1891852412   | 42.0896275542    |
| 6558.1656249349 | 15438.8306452098 |
| 0.5623088755    | 0                |
| 9.6401235863    | 1.3554909828     |

| gene_expression_table |                |
|-----------------------|----------------|
| 0                     | 0              |
| 0                     | 0              |
| 0                     | 0.6772467392   |
| 1.1346211607          | 1.3209769724   |
| 7.0180080251          | 5.7727633969   |
| 265.6438063931        | 260.9724451379 |
| 0                     | 0              |
| 3.4284312083          | 0              |
| 4.2324282564          | 5.6908230848   |
| 84.7524571091         | 19.0287313304  |
| 0.2095979068          | 0.3182912706   |
| 5.57742621            | 12.3517479992  |
| 307.091835775         | 354.3103199904 |
| 22.7719485427         | 52.5615488382  |
| 71.1631922546         | 50.068368113   |
| 7.7023666173          | 10.8009724833  |
| 17.7684935217         | 23.1103419893  |
| 0.5471288253          | 0.5539060691   |
| 0.4962378704          | 0.4552861632   |
| 0.906665122           | 0.3442109681   |
| 0                     | 0.1826586294   |
| 2.9319184831          | 1.3604414716   |
| 6.8274596345          | 7.1153258916   |
| 8.6654844954          | 13.3158923624  |
| 512.265435787         | 645.5896724938 |
| 6.4348974288          | 5.1678365076   |
| 2.2096941211          | 4.7937116504   |
| 0                     | 0              |
| 2.9829709101          | 6.1342140185   |
| 5.3886555245          | 4.2620346853   |
| 5.5540400747          | 4.9199828593   |
| 0                     | 1.8362766341   |
| 6.7578497355          | 6.1467129076   |
| 0                     | 0.1538870116   |
| 10.1352676091         | 5.6265068053   |
| 24.2905374847         | 13.2856202363  |
| 0                     | 0              |
| 7.9334264836          | 9.2029864253   |
| 0                     | 0              |
| 0.0578880671          | 0.0732564028   |
| 0                     | 0.002601       |
| 0                     | 0.0502175503   |
| 0.6550656467          | 0.8214387346   |
| 49.9259886401         | 34.2227831058  |
| 11.972164781          | 19.0434359317  |
| 0                     | 0              |
| 2.8456319604          | 3.8853981649   |
| 2.4389273894          | 3.6537798739   |
| 5.8545698396          | 7.2345362724   |

gene\_expression\_table

|                |                |
|----------------|----------------|
| 0              | 0              |
| 26.9273730073  | 31.4716039209  |
| 134.8549966596 | 101.4716074011 |
| 15.2155746792  | 18.5754706892  |
| 0.2691961504   | 0.5677722144   |
| 4.5006440264   | 3.0668030933   |
| 10.4694484102  | 21.529488265   |
| 34.6197683879  | 38.9142553759  |
| 3.0387631365   | 3.1845588987   |
| 0              | 0              |
| 11.8231695447  | 7.4810139133   |
| 18.0133579651  | 31.4796520468  |
| 0.9498068136   | 0.6009824997   |
| 0.3949437095   | 0              |
| 2.5841191453   | 6.8547596033   |
| 0              | 0              |
| 17.0460696695  | 5.9431745866   |
| 33.0761582935  | 43.6512236422  |
| 63.2968151054  | 53.7344778691  |
| 12.2496497056  | 3.3739062676   |
| 0              | 0.2854463054   |
| 20.8041744251  | 12.7890953463  |
| 3.731982722    | 1.2320251672   |
| 0              | 0.4628720983   |
| 17.7341104034  | 12.3274203975  |
| 19.0267689597  | 21.4223962031  |
| 49.8783006234  | 69.6648927796  |
| 1.5804244495   | 2.9333352563   |
| 2.4513691021   | 2.5381370738   |
| 44.6711467336  | 39.3860780254  |
| 5.8511352966   | 3.0158843624   |
| 0              | 0.6322264981   |
| 5.5995400384   | 5.7234097865   |
| 12.2081330239  | 10.2022971438  |
| 4.0370046163   | 8.6848977171   |
| 0              | 0              |
| 0              | 0.1080401423   |
| 107.1264918788 | 23.8073641443  |
| 0              | 0              |
| 2.4059481208   | 1.916053671    |
| 0.0728619424   | 0.2305139932   |
| 0              | 0              |
| 0              | 0.1731646182   |
| 0              | 0.009367       |
| 2.6192236969   | 2.1899935161   |
| 2.862229419    | 4.2257886426   |
| 165.5582517896 | 95.3393944295  |
| 0.2253463134   | 0.1761356944   |
| 0              | 0              |

gene\_expression\_table

|                |                |
|----------------|----------------|
| 0.4648137181   | 0.2129740937   |
| 5.4324762213   | 9.7832409719   |
| 0.0293346754   | 0.0185612761   |
| 0.3712589471   | 1.4094663895   |
| 98.8970030442  | 75.697101427   |
| 0.3174823882   | 0.3682880423   |
| 1.0662288001   | 2.0721317923   |
| 2.5257827989   | 1.2675128895   |
| 2.5398763708   | 6.2865423658   |
| 0.3981617693   | 1.1966846278   |
| 8.3071753347   | 13.841582913   |
| 0              | 0              |
| 0              | 0.0175972449   |
| 0.2101251434   | 1.1079580616   |
| 2.1349558209   | 2.2681372285   |
| 0              | 0.1926164302   |
| 3.2801019537   | 3.8741877197   |
| 0.081778344    | 0.1552337367   |
| 13.5070494813  | 23.8798571285  |
| 0.1592968578   | 0.2620638411   |
| 0              | 0              |
| 0.0551901419   | 0.1746055566   |
| 3.8800856609   | 2.1482059329   |
| 2.0205990345   | 0.6392587636   |
| 0.06839413     | 0.1731033074   |
| 281.6087125636 | 262.1799930635 |
| 19.5492140054  | 39.5827373129  |
| 0.7007718157   | 0.2956050932   |
| 0              | 0              |
| 5.0909305549   | 8.3074205594   |
| 0              | 0.0601428387   |
| 2.944665187    | 5.3968923466   |
| 40.685939444   | 63.0509530926  |
| 2.7694719841   | 1.8338659184   |
| 0.4358052361   | 2.4817698165   |
| 3.218254051    | 2.290864446    |
| 0.0316248758   | 0              |
| 88.2624366579  | 81.4893028237  |
| 0.1194269464   | 0.1289074298   |
| 2.9460782902   | 2.2369283562   |
| 0.0178540917   | 0.0451881224   |
| 0              | 0              |
| 0              | 0              |
| 1.7707484423   | 2.3809065393   |
| 11.4283766527  | 8.8640662453   |
| 13.9869847379  | 19.1918989533  |
| 20.843412842   | 15.3865823396  |
| 0.106239885    | 0.0336112095   |
| 0.1882576312   | 0.301299679    |

gene\_expression\_table

|                |                |
|----------------|----------------|
| 28.9962551352  | 85.9197928616  |
| 0.0666915451   | 0.1125294137   |
| 3.4985099563   | 4.2027336195   |
| 5.8048250686   | 13.8347995265  |
| 0.6805255978   | 2.7793079794   |
| 0              | 1.2177263021   |
| 26.8607524309  | 22.1829885829  |
| 0.6371491193   | 0.7055140726   |
| 0              | 0              |
| 0              | 0              |
| 0              | 0.0334162279   |
| 0              | 0.005697       |
| 0.1155240612   | 0.5847752457   |
| 0.1178925766   | 0.3729778222   |
| 21.6677785074  | 16.7795373506  |
| 131.7593821553 | 158.2129009403 |
| 0.4925957939   | 3.116859632    |
| 4.3409139526   | 10.8035994669  |
| 3.2844474445   | 3.4913882317   |
| 0              | 0              |
| 0.8419124421   | 0.6214987541   |
| 37.5212167327  | 33.3986981637  |
| 12.2196201192  | 10.8949003642  |
| 0.0237859214   | 0.0451510422   |
| 7.2261048933   | 5.102375786    |
| 0              | 0              |
| 0.8737577295   | 1.8165500648   |
| 0              | 0              |
| 6.9446661001   | 9.9541644987   |
| 17.7190796231  | 24.0033644595  |
| 1.645461647    | 2.1423713069   |
| 15.4113480101  | 19.6940130409  |
| 0.5689259267   | 1.5170721877   |
| 6.7622266554   | 6.6668796514   |
| 3.1346153491   | 5.5398476549   |
| 9.6120467115   | 0              |
| 0              | 0              |
| 0              | 0              |
| 0              | 0              |
| 2.2216293374   | 0.5622871235   |
| 0.7394584065   | 0.8317978028   |
| 1.6090417027   | 1.2820619116   |
| 2.7313920143   | 2.2365794993   |
| 9.4777211724   | 4.5460754716   |
| 3.6982905245   | 4.4973087853   |
| 0.5457576869   | 0.5843939819   |
| 7.6800651486   | 6.1135625826   |
| 0.3287137181   | 0.7106356397   |
| 0              | 0              |

gene\_expression\_table

|                 |                 |
|-----------------|-----------------|
| 0               | 0               |
| 5.9609078771    | 7.5434314961    |
| 0               | 0               |
| 2.67867217      | 2.4326913763    |
| 0.6236131555    | 0.4822719344    |
| 145.6669393329  | 133.4479598746  |
| 0               | 0.1516482083    |
| 1163.4000599599 | 1682.7001726874 |
| 0.1439848472    | 0.5162630008    |
| 7.8477702689    | 8.5591478747    |
| 12.7831696389   | 14.6603086069   |
| 2.2424585117    | 3.9019675707    |
| 28.1784471933   | 22.5217038238   |
| 0.1524968908    | 0.2251460435    |
| 0.0216581811    | 0.0959282597    |
| 52.6270696364   | 20.8622422811   |
| 16.9736851799   | 11.0605564312   |
| 2.3141487101    | 1.3764031645    |
| 3.8993606488    | 3.0841107323    |
| 0               | 0               |
| 0.5479351115    | 0.2166884151    |
| 0               | 0               |
| 9.9311981362    | 5.3861866845    |
| 1.984523988     | 2.7625209399    |
| 0.1685885779    | 0.3895885122    |
| 0               | 0               |
| 1.8390489446    | 1.3223218084    |
| 4.1844201356    | 4.0054307988    |
| 2.0468415459    | 1.4678052301    |
| 9.6769074194    | 6.4330086032    |
| 5.6779024913    | 3.5926464029    |
| 0.6217523102    | 0.3934086935    |
| 9.5261071516    | 7.1460839416    |
| 10.4526441486   | 15.4322587264   |
| 0.3879570949    | 0.8926424782    |
| 2.9512185831    | 4.5835186298    |
| 2.6972401735    | 1.9781702411    |
| 2.0500093307    | 3.4590044048    |
| 0               | 0               |
| 0               | 0               |
| 0.0575528278    | 0               |
| 0.633259951     | 4.6747173568    |
| 2.2350710384    | 2.8284458701    |
| 0               | 0               |
| 69.9788090774   | 25.0911611028   |
| 0               | 0               |
| 1.1616809781    | 0.8542404939    |
| 8.1933535622    | 8.2233367436    |
| 0.2348014587    | 0.8914122254    |

gene\_expression\_table

|                |                |
|----------------|----------------|
| 24.7463900469  | 17.7261238646  |
| 96.1791733955  | 87.172947531   |
| 0              | 0.131180213    |
| 4.0315589242   | 2.2398462126   |
| 0              | 0              |
| 2.0959080014   | 2.4534120221   |
| 20.367253603   | 10.9311184078  |
| 2.7466295508   | 13.3058535579  |
| 0.5316471548   | 1.6819769634   |
| 23.951416733   | 30.3101264248  |
| 11.9608352828  | 10.305526174   |
| 0.7118219102   | 1.0509321593   |
| 83.4642083099  | 46.3446064815  |
| 0              | 0              |
| 16.2101262286  | 18.9466348954  |
| 2.0834046068   | 1.3182572399   |
| 10.5568837481  | 7.1936113019   |
| 0              | 0              |
| 24.9716400272  | 16.131503807   |
| 0.3714150975   | 0.9400394714   |
| 16.6616212089  | 16.2929617551  |
| 0              | 0              |
| 0              | 0              |
| 33.4415765821  | 37.606429453   |
| 20.1001348423  | 7.122189798    |
| 0              | 3.0302298902   |
| 1.0311601649   | 1.0330587659   |
| 68.8789020814  | 28.1692171802  |
| 1.2736527751   | 3.895151363    |
| 131.559881374  | 182.9010791349 |
| 0              | 4.5444646368   |
| 5.3774283775   | 2.9942209992   |
| 6.6825073378   | 6.0725612539   |
| 9.1837312619   | 24.9528209608  |
| 2.7185598859   | 4.9884250018   |
| 20.0323619815  | 20.7792022033  |
| 0              | 0              |
| 0              | 0.1379393134   |
| 0              | 0.5810397728   |
| 51.1895099844  | 15.3643658071  |
| 419.7288651452 | 363.3770210455 |
| 10.159807711   | 13.1043219691  |
| 0              | 0.0969864419   |
| 0              | 0              |
| 5.0663941698   | 5.6492399749   |
| 0              | 0              |
| 1.2826889868   | 0.8116109745   |
| 23.1611795239  | 19.8657304808  |
| 0.1764115716   | 0.334868941    |



gene\_expression\_table

|                |               |
|----------------|---------------|
| 0              | 0             |
| 1.1956983352   | 1.0213672734  |
| 55.2180697438  | 46.5600512256 |
| 5.7264304917   | 5.8531072362  |
| 14.7716938072  | 23.6782269823 |
| 0              | 0             |
| 0              | 0.4750721767  |
| 22.0830964453  | 14.6759377521 |
| 1.1507010569   | 1.1252403399  |
| 0.3556772549   | 0.1456218025  |
| 3.2540754616   | 2.3085641606  |
| 4.1498605969   | 5.0971225043  |
| 1.4933385198   | 6.9517476966  |
| 0              | 0             |
| 14.0372910085  | 19.8956378346 |
| 18.2806211574  | 14.0455380064 |
| 12.0649813964  | 10.2858352995 |
| 0              | 0             |
| 6.8402102681   | 4.559358983   |
| 31.5917962615  | 21.9328697635 |
| 0.0722665217   | 0.1371781532  |
| 71.1084377762  | 45.3079212634 |
| 114.7998580859 | 92.5097224343 |
| 29.7795449459  | 24.774744882  |
| 0              | 0.1108769971  |
| 5.8103443463   | 11.123611608  |
| 7.0303798334   | 3.5448310131  |
| 1.585718602    | 3.8043705976  |
| 0.2967243933   | 0.0625833117  |
| 36.3822490077  | 28.3425306575 |
| 2.724278466    | 2.5157650435  |
| 0.1324248906   | 0.0837907674  |
| 0.4186280285   | 0             |
| 0.1313555636   | 0.1662283189  |
| 10.2224906616  | 4.6438340525  |
| 0.4390554349   | 2.2224699088  |
| 1.7180922051   | 3.5331036094  |
| 28.9652558994  | 55.3316827089 |
| 0.7968539191   | 1.6806760187  |
| 21.9629473912  | 10.4545301819 |
| 0.3737264071   | 0.1351270458  |
| 0              | 0             |
| 1.6373087206   | 2.6435701649  |
| 0.2146564388   | 0.1358221075  |
| 16.1718751869  | 34.3093792169 |
| 2.3672496158   | 2.9232387068  |
| 20.8494015802  | 19.2183955539 |
| 5.2994049549   | 6.4579284943  |
| 0.2149867915   | 0.3570817306  |

gene\_expression\_table

|                |                |
|----------------|----------------|
| 0.5371047179   | 0.3883984241   |
| 0              | 0.2134098612   |
| 31.4978928331  | 14.9475257225  |
| 5.9897882447   | 26.5299269526  |
| 0.6817161807   | 0              |
| 11.0679704002  | 0              |
| 0              | 0              |
| 34.6786057139  | 5.6888233578   |
| 1.0706249747   | 2.4086371692   |
| 2.444231502    | 2.5776125153   |
| 3.2782464301   | 4.1485672791   |
| 0              | 0              |
| 10.8762813727  | 10.0660307417  |
| 0              | 0              |
| 0.8691467318   | 1.5170910127   |
| 7.8527988166   | 16.5626476     |
| 0              | 0.7181032859   |
| 0              | 0.2025182767   |
| 0.8114017614   | 1.6685754602   |
| 6.0816054309   | 3.9101520444   |
| 0.5059031101   | 0.4268080784   |
| 1.2377156667   | 0.7831544738   |
| 7.601174763    | 5.3003548098   |
| 9.6130173638   | 7.9257576306   |
| 42.0401661586  | 32.5118097265  |
| 8.9646719386   | 9.9265650959   |
| 0.3256485865   | 0.4121029639   |
| 31.8169456608  | 36.1342016829  |
| 392.7362243824 | 235.4216557538 |
| 33.6494896319  | 24.3103750529  |
| 4.3680830082   | 13.4245057384  |
| 0              | 1.5213026957   |
| 111.6954521175 | 351.5120706649 |
| 0              | 0              |
| 0              | 0.1521401322   |
| 0              | 0              |
| 1.1815335827   | 2.514673783    |
| 3.8890457649   | 5.8163463738   |
| 7.5406359659   | 6.3935095547   |
| 0.7287224988   | 0.0461093206   |
| 1.5185300931   | 1.441256261    |
| 2.0956196024   | 2.807970731    |
| 25.1278921484  | 47.6984052528  |
| 6.7284963265   | 9.6945638752   |
| 0.586066972    | 0.640522969    |
| 1.8690167714   | 0.9855042408   |
| 0.1779854893   | 0.4665638646   |
| 0              | 2.7612207771   |
| 0.5912068226   | 0.7897271589   |

gene\_expression\_table

|                |                |
|----------------|----------------|
| 0.1831489872   | 0.1738290375   |
| 1.7502495834   | 2.347806977    |
| 1.5583142162   | 0.5634346206   |
| 0              | 0              |
| 15.7017411819  | 13.9092077907  |
| 1.2494111104   | 0              |
| 40.5785216751  | 0              |
| 15.6097511831  | 0              |
| 12.1922316933  | 0              |
| 185.2123286443 | 402.846081817  |
| 138.9092464832 | 395.5216076021 |
| 24.3844633866  | 0              |
| 31.2195023662  | 9.8769425018   |
| 11.1227376851  | 47.5052943004  |
| 226.3235320276 | 53.7016370352  |
| 0              | 8.7305116757   |
| 20.367253603   | 70.8796730446  |
| 108.9520153484 | 41.997015646   |
| 1.4988994831   | 3.7936655972   |
| 0.3510349088   | 0.88845788     |
| 1.8219211094   | 1.9046354939   |
| 104.0708806304 | 43.0416196384  |
| 333.1159618877 | 202.1777837983 |
| 0              | 4.4991593912   |
| 270.4137823491 | 212.7778620164 |
| 0              | 3.6198697184   |
| 0              | 0.857546422    |
| 42.4674324696  | 41.598252487   |
| 16.3541027828  | 8.3768915808   |
| 4.2325223472   | 4.1736528748   |
| 3.6638119936   | 5.0228687148   |
| 1.0696420607   | 8.7984945491   |
| 0              | 3.0427368897   |
| 0              | 0              |
| 568.3417734148 | 218.633014054  |
| 342.0408679238 | 189.3054307674 |
| 2.9105209771   | 6.8292976837   |
| 3.9755498511   | 6.0153181503   |
| 0.5052690427   | 2.8773437205   |
| 7.0972881587   | 5.7155013809   |
| 7.8675189474   | 6.7052071282   |
| 133.9285212889 | 33.0215996491  |
| 0.907970251    | 2.010787648    |
| 1.5928864805   | 1.6798098397   |
| 12.895483794   | 8.7321093245   |
| 2.2380381856   | 1.7701254665   |
| 236.1800835959 | 81.7087579812  |
| 16.3813358423  | 7.2105435755   |
| 0              | 0              |

gene\_expression\_table

|                 |                 |
|-----------------|-----------------|
| 7.1454237977    | 3.1789747387    |
| 0               | 0.2338716354    |
| 0               | 0               |
| 11.8836170493   | 10.0256821038   |
| 0               | 0               |
| 37.5860613146   | 76.835036338    |
| 0               | 0               |
| 50.6458680041   | 31.202449663    |
| 14.873699346    | 9.0317273733    |
| 91.4159794638   | 86.9170940163   |
| 8.3605893691    | 12.847372606    |
| 10.1535740595   | 3.8111980588    |
| 36.089370849    | 36.3021994469   |
| 0               | 0               |
| 479.5062859209  | 448.5097937433  |
| 4.2486517442    | 5.100876301     |
| 0               | 0.7026063862    |
| 0.1427919027    | 1.4456065533    |
| 4.7573189794    | 3.6840699418    |
| 0               | 0               |
| 151.8608924176  | 107.0703088432  |
| 2.9569296668    | 0.9354865417    |
| 0.5825247579    | 2.0272327917    |
| 0               | 0               |
| 0               | 0               |
| 9.0298130114    | 3.6085518274    |
| 37.6485869297   | 60.0724553047   |
| 461.2216283342  | 371.2683817251  |
| 0               | 0               |
| 0               | 0.3396820731    |
| 1.3204724098    | 0.8355181267    |
| 1010.7682741502 | 91.1890116806   |
| 0               | 0               |
| 18.419813297    | 3.8449439476    |
| 4608.819415043  | 4044.5809026254 |
| 0.9657024634    | 1.2220806845    |
| 3681.1902620927 | 1980.661018122  |
| 0               | 2.0307732247    |
| 0               | 0               |
| 0.9833696259    | 0               |
| 2.4250535381    | 3.5803432215    |
| 5.0932118664    | 7.5196057718    |
| 117.3599986718  | 41.5721110934   |
| 133.329428361   | 84.3631062584   |
| 200.0061659     | 115.1244703776  |
| 0.1321983248    | 0.5018844583    |
| 3.8110120028    | 6.4303645388    |
| 4.7046666173    | 5.0606269063    |
| 11.872896133    | 9.1060339462    |

gene\_expression\_table

|                 |                  |
|-----------------|------------------|
| 9.5662125594    | 4.9847764434     |
| 52.3852666822   | 56.3918412091    |
| 14.7926089584   | 28.0797073101    |
| 817.0801509486  | 724.8562075837   |
| 18.4868696998   | 62.8194548578    |
| 6611.9006375226 | 12441.3739851924 |
| 4.5257570047    | 2.1898391116     |
| 165.6467872886  | 75.2902336172    |
| 0               | 0                |
| 132.4254354464  | 178.9578388183   |
| 12.1608837009   | 5.9424414187     |
| 207.106013584   | 256.1863637395   |
| 7.436849673     | 2.88408101       |
| 32.1299780647   | 26.4776699457    |
| 1.7158545852    | 2.895181246      |
| 0.1345873298    | 0                |
| 96.374324782    | 39.2292147273    |
| 0               | 0.3193915753     |
| 34.8346066219   | 22.8072270199    |
| 0               | 0.0226324333     |
| 53.469865931    | 32.7412458625    |
| 9.7192790385    | 34.3093792169    |
| 61.0739308429   | 23.84418913      |
| 171.261270123   | 162.5462537447   |
| 3.0413094556    | 2.2450909894     |
| 727.0729418247  | 951.5045155491   |
| 32.1098528105   | 15.935095664     |
| 10.4981418826   | 7.6267043749     |
| 0               | 0.5123150476     |
| 1.0828837609    | 2.7407434026     |
| 150.4397402156  | 146.1838999752   |
| 5.313272708     | 9.4134036841     |
| 2.8528724904    | 7.6718099599     |
| 2.6348940616    | 2.222943581      |
| 58.2833305405   | 165.9523550477   |
| 1620.0316293733 | 1712.254026338   |
| 241.2046938742  | 306.2381162547   |
| 2.1962911595    | 3.474213209      |
| 8.7161047215    | 14.8906188987    |
| 0.9095065796    | 3.7406385639     |
| 51.7025565348   | 40.3223632034    |
| 8.3092136879    | 6.0086709258     |
| 8.2130784097    | 11.8108142008    |
| 72.6149376969   | 44.7833056902    |
| 19.712032445    | 18.3420991875    |
| 0.9952441585    | 0.3148663042     |
| 61.7160764118   | 42.3318844504    |
| 169.2862278522  | 284.2245536432   |
| 12.0378996465   | 8.759415025      |

gene\_expression\_table

|                |                |
|----------------|----------------|
| 2.7666040798   | 2.5228458838   |
| 88.8955484216  | 67.6605556796  |
| 22.3519440752  | 22.8667357276  |
| 26.8352679305  | 18.7469246331  |
| 1.8024545255   | 2.0314949122   |
| 0              | 0.4557526487   |
| 12.7312189127  | 19.8512377286  |
| 20.5085871151  | 15.9009543492  |
| 7.7920504724   | 9.5965862949   |
| 183.7102403783 | 230.1902276437 |
| 7.6717900807   | 7.175866277    |
| 145.3500847283 | 127.1033329934 |
| 4.333089353    | 7.833505369    |
| 19.9803947091  | 14.953413575   |
| 2.4215989228   | 4.4574456136   |
| 24.2905590557  | 3.8936453623   |
| 11.6373028754  | 11.2616832779  |
| 9.0174492611   | 5.7057173315   |
| 14.353238704   | 36.3275779944  |
| 6.8723521944   | 3.9783459946   |
| 1.5141363058   | 1.9161147487   |
| 51.460718186   | 39.0736186886  |
| 90.0304522148  | 38.1101432429  |
| 3.8306929158   | 1.6158930926   |
| 0              | 0.3732269582   |
| 8.8254258346   | 15.59365999    |
| 0.5238526668   | 3.0660373207   |
| 185.6663367727 | 86.8955184685  |
| 5.1590998485   | 1.6321891351   |
| 0              | 0              |
| 0.7030379833   | 0              |
| 0              | 0              |
| 164.0035983594 | 54.2179219642  |
| 8.737048012    | 11.056591465   |
| 171.4474940835 | 184.419401449  |
| 500.8764949338 | 362.3086369214 |
| 4.8208650243   | 3.6369712086   |
| 5.2405004914   | 8.1054938843   |
| 0              | 0              |
| 0              | 0              |
| 0              | 0              |
| 0.1103202004   | 0.1396084106   |
| 9.2361357497   | 2.02295403     |
| 0              | 0              |
| 0              | 0              |
| 2.2102961151   | 3.2632758778   |
| 0              | 0              |
| 0.1367640486   | 0              |
| 4.943191898    | 0              |

gene\_expression\_table

|                 |                 |
|-----------------|-----------------|
| 0               | 0               |
| 69.6579649547   | 26.358882293    |
| 0.4165194797    | 0.724760567     |
| 21.1693885908   | 8.0793776238    |
| 0.4423481465    | 0               |
| 204.6330155095  | 70.8474751351   |
| 0               | 0.2483030238    |
| 1.7094749636    | 0.7211042092    |
| 0               | 0               |
| 0               | 0               |
| 1099.7947179705 | 1008.8507779107 |
| 0               | 0.1176710861    |
| 57.2092685655   | 48.8682411984   |
| 8.3904338788    | 4.343709659     |
| 0               | 0.3433347288    |
| 22.7395182277   | 18.6658304907   |
| 12.2716115905   | 13.9431746901   |
| 35.5639638605   | 37.973487677    |
| 14.1668330065   | 17.8567531906   |
| 11.665335853    | 8.119260528     |
| 0               | 0.6769244082    |
| 0               | 0.1017949986    |
| 0               | 0               |
| 10.0827318099   | 5.5527594347    |
| 0.7842006303    | 0               |
| 0.9603612883    | 0.3645964544    |
| 7.3627033953    | 5.8532264089    |
| 0               | 0.4531652451    |
| 20.5788523231   | 26.1918691072   |
| 0               | 2.888677423     |
| 0               | 0               |
| 28.451364119    | 25.6448829284   |
| 0               | 0               |
| 53.6260569153   | 29.9132513508   |
| 40.2318848119   | 41.896985658    |
| 0               | 0               |
| 31.4957811482   | 51.2452238023   |
| 2.958108854     | 1.8717192044    |
| 49.7472197864   | 14.0244713453   |
| 0               | 18.2083415156   |
| 0               | 0               |
| 179.0622541848  | 162.0215528331  |
| 95.4122342051   | 73.2373287131   |
| 68.1400702643   | 23.5912661587   |
| 6.9004928204    | 2.1831152214    |
| 0               | 0.7317896331    |
| 17.4398599425   | 18.3915481069   |
| 72.7649406627   | 27.9509473373   |
| 9.802507879     | 1.2404913513    |

gene\_expression\_table

|                |                |
|----------------|----------------|
| 12.6057494796  | 19.9404624299  |
| 18.3503945206  | 9.9523390095   |
| 0              | 0              |
| 0              | 0              |
| 0.9839331256   | 1.9922420633   |
| 0              | 0.529910477    |
| 3.7463402839   | 2.3704662004   |
| 55.4205698367  | 27.7394980903  |
| 0.7811700967   | 0.7513040726   |
| 0              | 0.3790540515   |
| 0              | 0.0260548922   |
| 0              | 4.4485559303   |
| 11.4273998062  | 10.7253808706  |
| 4.0239698134   | 5.3978041149   |
| 0.4476999052   | 0.217906505    |
| 10.4144982178  | 13.2949858576  |
| 0              | 0              |
| 110.5929616752 | 132.8320535136 |
| 29.3370139924  | 33.6919383971  |
| 32.8241254713  | 15.5111725632  |
| 8.4502409405   | 6.416185082    |
| 0              | 0.0352881614   |
| 32.839356128   | 22.394965786   |
| 24.529609002   | 26.719540656   |
| 1.4666667246   | 2.9923954854   |
| 0              | 0.0889217863   |
| 85.9139643471  | 102.9201007852 |
| 15.6694032436  | 16.3916179674  |
| 8.4810676144   | 7.6581947207   |
| 0.0580544293   | 0.1102003972   |
| 65.1637271747  | 111.0382390093 |
| 4.2509531077   | 5.0432922021   |
| 0              | 0              |
| 66.4102005641  | 51.60118839    |
| 2.203205941    | 2.0910908326   |
| 0.3702915188   | 0.4685978651   |
| 0.2376205685   | 3.9091642961   |
| 0.4723099531   | 0.664111696    |
| 1.7250991331   | 1.3644279742   |
| 0              | 0.0580720577   |
| 0.8405577194   | 0.7091413708   |
| 2.6444126446   | 1.8591449904   |
| 17.6397188257  | 19.133807896   |
| 5.6241498761   | 4.4812439165   |
| 0.7502866277   | 1.1393705581   |
| 0.8058588866   | 0.6628708128   |
| 2.8468942424   | 0.9006745339   |
| 0              | 0.0510123411   |
| 0              | 0.1423522067   |



gene\_expression\_table

|                |                |
|----------------|----------------|
| 0.8240190717   | 1.0427826679   |
| 19.6805491413  | 16.3704121054  |
| 18.999455706   | 18.6481970618  |
| 0              | 0              |
| 2.6439099523   | 3.7175831487   |
| 8.1528496252   | 4.2374616598   |
| 0.1071330904   | 0.2372565561   |
| 0.1229652172   | 0              |
| 89.1782596063  | 120.2782109678 |
| 2.3330671706   | 6.1017473059   |
| 0              | 0              |
| 0.0700417145   | 0.3102282572   |
| 124.0499204045 | 151.8641311993 |
| 0              | 0.114592442    |
| 0              | 0              |
| 2.8365185074   | 2.7193695548   |
| 5.1738019465   | 3.8972391697   |
| 10.0330632346  | 9.6956446728   |
| 0.805297221    | 0              |
| 4.0884660215   | 1.7035969161   |
| 0.5250465241   | 0.430480825    |
| 292.5554701205 | 183.8697200503 |
| 54.1716950945  | 39.8652893588  |
| 1.849606344    | 5.7540895564   |
| 0              | 0.0832338424   |
| 1.0363122856   | 1.1624094127   |
| 0              | 0              |
| 0              | 0.3833732001   |
| 0.1762533533   | 0.2129072954   |
| 0              | 0              |
| 0.3771176721   | 0.7953937509   |
| 13.1491961671  | 4.8533604132   |
| 52.9083720557  | 38.7779189067  |
| 2.3709559323   | 2.4303288459   |
| 1.3320679816   | 4.6959071528   |
| 0.0327007817   | 0              |
| 0              | 0              |
| 23.6715042781  | 18.3176291338  |
| 13.8138664639  | 9.563256874    |
| 5.2893061008   | 5.6430858689   |
| 66.8196496873  | 38.8392782738  |
| 0.1221367187   | 0.1545620213   |
| 5.2694935447   | 4.664276605    |
| 0.6701549584   | 0.6966290495   |
| 0              | 0.1187860792   |
| 5.4716607944   | 3.4088848291   |
| 2.3808149914   | 6.7105109351   |
| 332.5636827632 | 243.8280562284 |
| 0              | 0              |

gene\_expression\_table

|                |                |
|----------------|----------------|
| 0              | 0.0258014607   |
| 172.5588648569 | 497.9843281582 |
| 0              | 0.2428907179   |
| 5.9338232451   | 8.0097667595   |
| 49.1015761615  | 16.2097153406  |
| 2.7180551699   | 1.3376433758   |
| 45.5873100761  | 9.3203893006   |
| 0.2308496646   | 0.0730341194   |
| 0.9616382788   | 1.8254062878   |
| 0.1046127277   | 0              |
| 0              | 0.0229719271   |
| 9.2460326956   | 4.946638778    |
| 2.2725961281   | 3.2077717107   |
| 195.9248737068 | 188.1613774965 |
| 0.0422656807   | 0.0267432641   |
| 0.354816527    | 0.1924347925   |
| 13.8148350085  | 8.6555256859   |
| 1.6602687349   | 1.8747767856   |
| 19.0960589942  | 11.5971315502  |
| 4.5326509345   | 3.2291531225   |
| 5.6204930296   | 4.1034473482   |
| 17.270192753   | 13.1331385971  |
| 0.5504458895   | 0.145120891    |
| 29.4508513733  | 30.8491827863  |
| 0              | 0              |
| 21.9680150603  | 20.1016570634  |
| 10.3875424369  | 14.5580740598  |
| 2.8456024122   | 6.0017722423   |
| 4.3046389056   | 1.8158167274   |
| 0.7295028348   | 1.433348973    |
| 10.5496712743  | 4.6317841191   |
| 15.8020163034  | 4.5448166753   |
| 0              | 0              |
| 9.5422375247   | 20.5284275772  |
| 28.465128688   | 15.4731530007  |
| 26.7463408824  | 19.9455873121  |
| 41.7376010186  | 27.1858649738  |
| 3.489512187    | 3.0617049782   |
| 0              | 0              |
| 4.9397946782   | 6.3762540202   |
| 0.2638324108   | 1.0016268117   |
| 0              | 0              |
| 1.1810673664   | 0.7896113317   |
| 11.5517344719  | 7.309265589    |
| 1.3077081013   | 2.1749893874   |
| 6.2592324315   | 6.9968447706   |
| 7.6228961129   | 4.7736002206   |
| 12.4887020072  | 11.1758612841  |
| 0.8470076005   | 1.0718742753   |

gene\_expression\_table

|                |               |
|----------------|---------------|
| 0.4059973215   | 0.4174486671  |
| 8.5216595681   | 4.440479198   |
| 4.3246899715   | 3.5285315715  |
| 0              | 0             |
| 0              | 0             |
| 4.5285432004   | 11.6738465712 |
| 0              | 0             |
| 1.2646197767   | 0.8001778295  |
| 18.7553824582  | 8.0763671431  |
| 0              | 0.3814011927  |
| 1.5916174234   | 0.6786863145  |
| 9.4176614375   | 7.5905651163  |
| 1.1586619435   | 0.3665669382  |
| 0              | 0             |
| 117.3463122358 | 41.765580079  |
| 22.611896482   | 13.4756617477 |
| 0              | 0             |
| 0              | 0             |
| 173.3425702808 | 72.086002577  |
| 55.5513104462  | 33.0030949702 |
| 0              | 0             |
| 95.3300071282  | 50.8351190027 |
| 13.4778475996  | 19.860614684  |
| 0              | 0.0326349759  |
| 9.8274427162   | 12.4364681422 |
| 27.0326303287  | 9.6213802141  |
| 11.0297988865  | 10.9372624897 |
| 8.3589742644   | 20.7155345779 |
| 19.445752214   | 13.0279137959 |
| 11.6684720547  | 17.0035729056 |
| 0.1183145402   | 0.8983507018  |
| 0              | 1.465992965   |
| 127.3393639239 | 116.88050219  |
| 0.4527216544   | 0             |
| 34.9578593006  | 21.1575911178 |
| 4.63761123     | 10.0370181035 |
| 8.0561825333   | 9.2954113886  |
| 10.7610095199  | 12.08253227   |
| 4.2050758289   | 13.3036368392 |
| 470.3285899948 | 367.090276881 |
| 0.113114139    | 0.3578602356  |
| 0              | 0             |
| 0              | 0.6789219286  |
| 0              | 0.0245180675  |
| 36.5351212051  | 34.9723247122 |
| 4.1959883074   | 4.063740785   |
| 7.8486286673   | 18.3654058077 |
| 0              | 0             |
| 0              | 0.0201434263  |

gene\_expression\_table

|                |                |
|----------------|----------------|
| 4.6407368382   | 0              |
| 13.6098619328  | 4.1422544179   |
| 4.3831904831   | 4.5280456486   |
| 0.9523755399   | 0.4304341716   |
| 123.7703452031 | 32.5536057918  |
| 0.0901363605   | 0.1710991366   |
| 0.4378115637   | 2.2161735141   |
| 0.1821559295   | 0.6915460552   |
| 6.6225720726   | 4.938660211    |
| 4.3662097606   | 2.7626835463   |
| 136.5913705566 | 92.5929711545  |
| 62.6221103181  | 63.0849875924  |
| 6.5155064735   | 13.3192773901  |
| 0.170110118    | 0              |
| 18.6916829943  | 36.6380190882  |
| 3.7005044897   | 4.9756109494   |
| 0.3710435264   | 0.1565165062   |
| 0              | 35.4810976107  |
| 1.4685056749   | 2.7425943338   |
| 12.062293469   | 2.4951807611   |
| 1.0585341638   | 0.8133028796   |
| 46.0542361603  | 23.8421794794  |
| 16.3805736311  | 12.9558426335  |
| 49.7030867055  | 38.3411169375  |
| 1.2635857458   | 0              |
| 0              | 0              |
| 0              | 11.0323805499  |
| 22.086066467   | 28.1581349269  |
| 0              | 0              |
| 15.5687268699  | 9.4226810202   |
| 6.8865503131   | 11.4877131476  |
| 0.1697760603   | 0.6445464888   |
| 14.785804474   | 28.5165791794  |
| 0              | 0              |
| 0              | 0              |
| 0              | 0              |
| 0.1617844815   | 0.1023678086   |
| 0              | 0              |
| 0.2351080735   | 1.9339152594   |
| 120.8759439794 | 143.7602125364 |
| 5.2210053283   | 3.964258148    |
| 0              | 0              |
| 0.0354822055   | 0.2469618314   |
| 5.7437447682   | 4.5257414967   |
| 0.6391089194   | 2.2645892982   |
| 34.9047299915  | 8.4135933976   |
| 13.5191675282  | 11.2554510237  |
| 8.6368855554   | 3.4043756189   |
| 3.7607624346   | 1.8052074953   |

gene\_expression\_table

|               |                |
|---------------|----------------|
| 37.3803354273 | 47.6420907248  |
| 11.9860114683 | 15.5268067252  |
| 4.1181481322  | 6.2077556126   |
| 86.5853566699 | 107.2533621412 |
| 1.0034116084  | 0.7759894946   |
| 15.4889593875 | 2.0177525695   |
| 5.8629906159  | 5.6452860453   |
| 5.192843061   | 6.5714580243   |
| 9.9242612791  | 5.232912688    |
| 0             | 0.2093715128   |
| 5.2177441281  | 4.9522274383   |
| 0.2453552569  | 0.1791306159   |
| 0             | 0              |
| 8.9549546429  | 6.2257965327   |
| 0.0609052986  | 0.0770746599   |
| 37.8576002892 | 32.044962424   |
| 4.4123395734  | 2.2191801554   |
| 0             | 0.004886       |
| 0             | 0.006164       |
| 0.9681176531  | 0.5168547003   |
| 0             | 0              |
| 10.0847153753 | 2.6711251718   |
| 0             | 0              |
| 4.0652921292  | 6.6255706607   |
| 0             | 0              |
| 17.8176613896 | 21.5959343374  |
| 9.1478387695  | 9.1646820267   |
| 35.7621312869 | 25.7468259547  |
| 8.3093522324  | 10.4838663637  |
| 0             | 0.0861038906   |
| 0             | 0.1411857644   |
| 31.6773957566 | 51.8369309604  |
| 0.4549987586  | 1.4394837319   |
| 0.530802582   | 0              |
| 3.0720106692  | 2.429737059    |
| 5.0462919421  | 5.3735853478   |
| 10.5547308831 | 13.3568394309  |
| 21.8387615916 | 17.9637873166  |
| 0             | 0.1118208368   |
| 0.1614110326  | 0.2859682332   |
| 11.2954983435 | 10.7732538669  |
| 5.0507485255  | 5.7406393709   |
| 0             | 4.0562812867   |
| 5.9287176571  | 3.5066945418   |
| 44.0928949776 | 19.491374904   |
| 2.2233743665  | 1.292755316    |
| 56.7857956651 | 58.2147217894  |
| 8.2994580003  | 7.3997200492   |
| 0.3842494574  | 0.4734650555   |

gene\_expression\_table

|                 |                 |
|-----------------|-----------------|
| 0.3807021906    | 0.5149980829    |
| 151.1807312433  | 34.6028790611   |
| 0.642363241     | 0.7451585011    |
| 191.0029582886  | 214.819986989   |
| 2.4384463387    | 6.7226661898    |
| 1.8283921631    | 0.8413819636    |
| 487.4270692009  | 218.1689154239  |
| 11.8703052684   | 12.674540234    |
| 1589.2526796172 | 1736.0043939329 |
| 13.5261738917   | 21.582495993    |
| 4.5420828182    | 2.7748635179    |
| 93.8758122194   | 31.1845553515   |
| 0.9762801702    | 1.1264548408    |
| 10.8947895223   | 3.2170082189    |
| 13.4638839628   | 16.2269762928   |
| 0.03761981      | 0.0119018137    |
| 0               | 0               |
| 3.960683136     | 1.7690046272    |
| 40.8691667339   | 27.7067477974   |
| 0               | 0               |
| 0               | 0               |
| 0               | 0.0650880189    |
| 273.3540624022  | 274.0936572011  |
| 187.52240566    | 87.2030055097   |
| 148.3921732874  | 124.7028824502  |
| 75.0032369742   | 76.8562513931   |
| 0.6112391445    | 0               |
| 10.1458638085   | 1.9021370119    |
| 0.1425786441    | 0.1353232079    |
| 0               | 0.8650379809    |
| 102.930784368   | 61.8721820484   |
| 0.6572526814    | 1.6634850529    |
| 0               | 0               |
| 152.7497846445  | 154.7305556025  |
| 2.0936363992    | 1.9870969843    |
| 75.7153047984   | 47.5708584088   |
| 1.6598983535    | 17.8548810211   |
| 21.2951906589   | 18.9763873337   |
| 27.5220902427   | 111.4520172604  |
| 12.6802099687   | 17.4729627849   |
| 0               | 0               |
| 16.9645597763   | 11.9009459776   |
| 10.7148854823   | 13.8381325777   |
| 13.1372712389   | 4.1562505108    |
| 8.0030691368    | 1.2659691493    |
| 5.703624484     | 5.2303214254    |
| 0.9484132936    | 0.4125692734    |
| 3.9586304766    | 2.2770828046    |
| 0               | 0.0697593856    |

gene\_expression\_table

|                |                |
|----------------|----------------|
| 5.3303230919   | 5.1795317952   |
| 0.7659592634   | 0.4846544647   |
| 13.1295760055  | 15.8928610751  |
| 12.7740139308  | 13.4098559949  |
| 0              | 0              |
| 34.0556844176  | 21.5484560201  |
| 6.8867672131   | 16.2610850874  |
| 49.2881991849  | 41.0751727848  |
| 11.5717074407  | 4.3473800973   |
| 3.8322761739   | 9.8908005802   |
| 39.0095397912  | 68.2654457518  |
| 0.5965826664   | 0.9814552982   |
| 0.3721738145   | 0.3868763297   |
| 13.5980820572  | 22.2271945284  |
| 7.3245324402   | 11.7970059383  |
| 0.3372373517   | 0.2510402099   |
| 1.9378634626   | 1.8392509053   |
| 0.0588981267   | 0.0186336542   |
| 100.7625397202 | 95.4507425572  |
| 2.8142003704   | 2.5819603167   |
| 546.7718437995 | 893.5579886074 |
| 156.7362047776 | 371.751164576  |
| 8.9368569565   | 17.6067518108  |
| 3.1798823763   | 4.5816437012   |
| 24.195841722   | 10.6925036441  |
| 1.0604279008   | 0.527196284    |
| 17.432209443   | 9.3755748622   |
| 0              | 0.037947698    |
| 4.663619786    | 8.097320415    |
| 0.2075430254   | 0              |
| 0.5410548485   | 0.4564640454   |
| 0.4618683664   | 1.6365632335   |
| 1.5055204011   | 1.125806773    |
| 35.0249628766  | 27.5615785069  |
| 1.5582487451   | 1.126821897    |
| 0              | 0.1000606112   |
| 4.9033274473   | 5.2065620059   |
| 0.0468422061   | 0.0691577207   |
| 0.0233754021   | 0.0295811894   |
| 0.0401903375   | 0.0678136204   |
| 0.2760614347   | 0.3426329408   |
| 48.9422474451  | 27.272784685   |
| 0.4847064588   | 0.4293716712   |
| 6.1487553232   | 4.9666910866   |
| 27.115509484   | 15.4967508788  |
| 6.6272548086   | 2.609190157    |
| 0              | 0              |
| 2.2561965378   | 4.1638039397   |
| 1.3132433002   | 2.01344115     |

gene\_expression\_table

|                 |                 |
|-----------------|-----------------|
| 0.3236839988    | 0.5605282667    |
| 17.3758579578   | 10.9944321314   |
| 0.1633837677    | 0               |
| 27.0526577111   | 15.5938144983   |
| 0.0984575676    | 0.0622982213    |
| 12.3657935677   | 6.0778470551    |
| 109.5913951682  | 90.186060352    |
| 340.5575505923  | 169.4456401844  |
| 1.5901888143    | 1.9872034808    |
| 0.056385585     | 0.057084029     |
| 0.7665634279    | 2.0949459404    |
| 18.7586660912   | 7.3042416479    |
| 2.9017823834    | 1.9508340336    |
| 43.3496344643   | 63.4686918427   |
| 5.9897237558    | 3.6215065928    |
| 2.6586329206    | 1.6822282548    |
| 9.7477427978    | 0               |
| 6.1319155905    | 2.0175581303    |
| 0.3437582843    | 0.7612858585    |
| 0               | 0.2462757413    |
| 2.6261785136    | 4.6290019118    |
| 0               | 0               |
| 1.077848556     | 0.8524998323    |
| 0.6856862417    | 0.4338623661    |
| 0               | 0               |
| 46.8292535493   | 51.3601010096   |
| 11.9922532899   | 13.7963641296   |
| 1.9663221721    | 11.1975685749   |
| 0.5340932255    | 0.4224289049    |
| 1.4550528804    | 4.2685739823    |
| 111.9713109837  | 107.5854152918  |
| 0               | 0.8396885424    |
| 0.714867754     | 0.9046534592    |
| 63.3359842025   | 74.3665851412   |
| 0               | 0               |
| 0               | 0               |
| 0               | 0               |
| 2.6831106075    | 1.2008237323    |
| 1.7251679121    | 1.6763640587    |
| 73.3408244035   | 37.3774401349   |
| 45.8565390838   | 30.4661178952   |
| 2528.5313484382 | 3894.6755482964 |
| 0.7445600307    | 0.0785190458    |
| 0               | 0               |
| 1.4678738596    | 0.6191901264    |
| 0               | 0.3609624909    |
| 1.9378229626    | 1.7165983018    |
| 838.0370667537  | 457.4491330156  |
| 2.9552169861    | 2.8407935094    |



gene\_expression\_table

|                |                |
|----------------|----------------|
| 0              | 0              |
| 63.9258970134  | 34.5452813715  |
| 8.9777953309   | 7.1007832889   |
| 19.3853799306  | 33.1441377396  |
| 18.0849173431  | 15.5672407193  |
| 148.2059503905 | 129.4093623029 |
| 1.8345639972   | 1.3757693364   |
| 0              | 0              |
| 0              | 0.3466822576   |
| 402.9262615596 | 316.3656539996 |
| 5.0963732985   | 3.7806693441   |
| 13.3486545808  | 11.1266125502  |
| 311.9432534814 | 87.9366493713  |
| 3.9403407948   | 2.4276074269   |
| 0.8691865328   | 0.6110785287   |
| 82.2126335232  | 98.2349298429  |
| 0              | 0.3636360386   |
| 8.1532274826   | 10.3177761267  |
| 3.3211795465   | 2.2903435299   |
| 26.6503406889  | 11.660436637   |
| 1.2513885906   | 0.4318941298   |
| 3.3822203863   | 4.5150306068   |
| 10.2773399507  | 6.3516725705   |
| 0.3731162898   | 0.7360337068   |
| 21.7574420532  | 17.8275673326  |
| 0.6372202737   | 2.1839779053   |
| 0              | 0              |
| 0              | 0              |
| 5.8367498869   | 4.3014402782   |
| 5.7530509417   | 4.6109148963   |
| 30.0221709239  | 24.891681589   |
| 0              | 0              |
| 8.0788331366   | 5.8420750272   |
| 125.6770637592 | 142.088525643  |
| 10.9050962937  | 11.3116566654  |
| 0              | 0              |
| 3.9186778361   | 4.4391252095   |
| 3.0212855962   | 1.8835806281   |
| 0.0501010007   | 0              |
| 0              | 0              |
| 1.4132943214   | 0.5299261824   |
| 2.3452699338   | 1.6429450698   |
| 0.3667870093   | 0.9283259315   |
| 11.2756745598  | 9.9451873646   |
| 0.5369114452   | 0.3397263294   |
| 231.6042441646 | 227.3223850386 |
| 1.3993498716   | 3.7525247834   |
| 0              | 0              |
| 0              | 0.2348264428   |

gene\_expression\_table

|                |                 |
|----------------|-----------------|
| 3.9598866463   | 3.7459749836    |
| 0.7542344419   | 0.5895264278    |
| 87.2863621997  | 79.0789350244   |
| 30.4193305811  | 14.4356871341   |
| 1.9614152544   | 1.2022860529    |
| 1.3032351387   | 1.7866579992    |
| 0.6866295187   | 0.6683987953    |
| 1.0713104798   | 0.9989559287    |
| 0.4379504085   | 0.5674147768    |
| 4.0148235175   | 3.6483703647    |
| 1.1040492719   | 1.3272984941    |
| 20.1682897471  | 15.5552191038   |
| 35.0033294822  | 63.9091919332   |
| 6.2852248164   | 8.3876956068    |
| 37.4527500498  | 72.8048058829   |
| 0.4798650383   | 0.5060511361    |
| 10.921748569   | 3.4553235785    |
| 0.1127962751   | 0               |
| 0              | 0               |
| 23.3290207562  | 20.5273594489   |
| 90.819046762   | 47.4314365667   |
| 0.0604537997   | 0               |
| 0              | 0.1376020416    |
| 18.9831050557  | 44.486683698    |
| 13.5219469623  | 19.3526342146   |
| 996.6851553449 | 1031.9635429618 |
| 2.3662606106   | 0               |
| 4.8520105718   | 5.3028482506    |
| 4.394612163    | 1.6683929606    |
| 206.6270610803 | 122.7573654963  |
| 54.4236840242  | 13.2210185458   |
| 127.2795096467 | 137.517430218   |
| 13.5108820159  | 14.1499037591   |
| 0              | 0.1563819612    |
| 17.7288569842  | 67.3067362841   |
| 20.4368353598  | 28.16136835     |
| 9.9106353308   | 5.6437861663    |
| 41.5067016391  | 32.0280808281   |
| 64.1157554988  | 72.2456663818   |
| 1.700071911    | 1.0757066091    |
| 94.1812981334  | 36.2497832864   |
| 42.2919616712  | 54.8712960497   |
| 4.5054383881   | 0               |
| 0              | 0.0860622094    |
| 0              | 0               |
| 3.9932913803   | 10.3012532228   |
| 1.8212909453   | 6.914441775     |
| 15.0366646831  | 18.5000796985   |
| 33.2030619088  | 30.6130648814   |

gene\_expression\_table

|                |                |
|----------------|----------------|
| 20.2059832198  | 10.7991248199  |
| 233.3934984369 | 123.3085502025 |
| 0.1700804748   | 0.2869787481   |
| 0.6480863577   | 1.0120909836   |
| 13.090982991   | 9.0796752526   |
| 0.0794751952   | 0              |
| 28.8588145053  | 19.0242032788  |
| 1.0878203555   | 0.2949897602   |
| 9.6542909362   | 13.3627237128  |
| 19.844178069   | 11.2422162368  |
| 0.2614352192   | 0              |
| 0              | 0.0908140247   |
| 0              | 0              |
| 9.7373730708   | 37.8076289667  |
| 0.2168705564   | 1.3722307233   |
| 1.4120089649   | 0.9132912925   |
| 0.3448671483   | 0.0793497709   |
| 0.9207388436   | 1.319394953    |
| 0              | 0              |
| 0              | 0              |
| 4.8982491044   | 3.4255720507   |
| 14.252092631   | 16.7871586591  |
| 2.2994797517   | 3.0762371324   |
| 5.8705328874   | 3.6482007884   |
| 0.1496903128   | 0.5682919333   |
| 6.9960950011   | 11.7177933746  |
| 2.7604973866   | 2.0751181256   |
| 0.9286666593   | 0.9320650701   |
| 0.1639713817   | 0.1902111784   |
| 0              | 0.2132577628   |
| 26.7697987427  | 12.7037785484  |
| 0.0316920013   | 0.1804756936   |
| 10.2237398883  | 6.809460914    |
| 0.3140188706   | 0.3973857486   |
| 4.1718031786   | 3.7319534201   |
| 1.1958024236   | 2.7995465834   |
| 18.8026068732  | 14.5410171482  |
| 7.2652685954   | 7.3687836378   |
| 97.4202689538  | 73.8322506948  |
| 12.7882348776  | 7.1780776032   |
| 5.2893281248   | 15.17206547    |
| 0.249581228    | 0.3684811259   |
| 60.0925007377  | 23.9876888947  |
| 0              | 0              |
| 3.6026701646   | 0              |
| 5.332435475    | 4.5757731804   |
| 0              | 0              |
| 0              | 0.1136039162   |
| 701.4424361421 | 307.115871714  |

gene\_expression\_table

|                 |                 |
|-----------------|-----------------|
| 58.855491369    | 49.6537749471   |
| 1.0282003594    | 1.100990635     |
| 16.4887828146   | 6.3758093566    |
| 2.4568778107    | 4.0364257006    |
| 0               | 0               |
| 0.4273346509    | 0.7071804062    |
| 0               | 0               |
| 4.1479598905    | 4.6156542742    |
| 0               | 0.009771        |
| 9.0897718441    | 3.4029583224    |
| 67.5579673624   | 61.6021683195   |
| 0.1186893775    | 0.2252992011    |
| 0.5889821088    | 0.8496958451    |
| 21.0373050545   | 4.4370609538    |
| 0.2194965368    | 0.9721924798    |
| 1724.3410945431 | 1768.2099423594 |
| 1.0155435847    | 0.8888980511    |
| 0               | 3.0885623999    |
| 16.1037144522   | 13.1465845598   |
| 14.0115645552   | 9.2641615337    |
| 13.8278354434   | 9.0145847238    |
| 0.6740552883    | 0.8719616386    |
| 0.472045338     | 0.4568090344    |
| 3.729388518     | 2.359740109     |
| 0.3340234752    | 0.5320205372    |
| 0.6229776849    | 0.7883680786    |
| 6.8407932145    | 9.4207571876    |
| 3.5088712215    | 3.7003493195    |
| 28.4589732499   | 14.842283975    |
| 14.2594266863   | 19.2480761835   |
| 3.9706077208    | 3.3702518869    |
| 32.0002631916   | 28.268814277    |
| 2.3536518581    | 4.6142459372    |
| 0.0903881013    | 0               |
| 357.9416430293  | 164.9903543785  |
| 4.2482166947    | 5.4971309763    |
| 0               | 1.026020542     |
| 61.628176504    | 44.8930868474   |
| 5.6266716444    | 6.2106243221    |
| 4.3978474937    | 4.1740530952    |
| 1.5738605261    | 3.2496072618    |
| 0               | 0.057226641     |
| 0.0896279647    | 0               |
| 1.3204865138    | 2.6068443988    |
| 0.3583625898    | 0.5359569097    |
| 5.8799062752    | 3.7204626464    |
| 6.181770557     | 15.1569261154   |
| 6.6576888463    | 5.4580620318    |
| 0.4435619941    | 1.0056991471    |

gene\_expression\_table

|                  |                  |
|------------------|------------------|
| 2.4998240495     | 3.2725722193     |
| 0.2725927316     | 0.4233620209     |
| 21.6441646396    | 21.9122692874    |
| 0.8239614067     | 1.1078790496     |
| 13117.0268164834 | 19155.4187837667 |
| 13.5618651211    | 17.7421267248    |
| 8.3289818053     | 11.813303229     |
| 6.0635853689     | 20.564626733     |
| 18.4217481961    | 14.264981584     |
| 10.5351736029    | 3.9212029449     |
| 0                | 0                |
| 2.1461649549     | 1.2816779812     |
| 0                | 1.057385572      |
| 3.1607950239     | 1.6666393518     |
| 10.7522587401    | 8.3322586512     |
| 3.2351674825     | 2.3029040109     |
| 3.8404863763     | 11.5636213519    |
| 7.9654022326     | 9.8843565106     |
| 5.5844642281     | 3.4195394568     |
| 0.7385017992     | 0.3823208006     |
| 53.7791181194    | 39.1325421475    |
| 0.9383705541     | 0.566130193      |
| 24.6895257452    | 20.0763295443    |
| 2.3210020533     | 6.9424494811     |
| 381.2076748889   | 276.9966770852   |
| 1.5744298418     | 1.3915280993     |
| 11.4531535686    | 9.2978957416     |
| 0.1491881418     | 0.1887951552     |
| 0.5805949259     | 1.1650772323     |
| 2.3851298271     | 4.0244570863     |
| 0.3262116316     | 0.4345426194     |
| 96.7671895925    | 200.3081557726   |
| 14.9000908691    | 20.4786585688    |
| 1.2211693327     | 1.2672032625     |
| 5.8484591993     | 6.8318118759     |
| 3.6735589747     | 5.1726405442     |
| 47.1187881905    | 25.2867127929    |
| 1.0084608243     | 5.4876199726     |
| 99.4485722354    | 90.8320441403    |
| 91.2481857767    | 53.6958837434    |
| 1.7777720221     | 1.4373348082     |
| 4.8053732328     | 8.2691882952     |
| 7.0769288679     | 9.5527870084     |
| 32.9432601788    | 40.3746343676    |
| 4.7355424937     | 4.1378523162     |
| 36.9103686957    | 8.217406467      |
| 31.3843664963    | 26.336010459     |
| 0.1722767333     | 0.9810602569     |
| 38.1264205378    | 62.9168339558    |

gene\_expression\_table

|                 |                 |
|-----------------|-----------------|
| 1.5635415375    | 11.8718175715   |
| 0.1646867288    | 0.3473472728    |
| 2.6568875639    | 3.4631152229    |
| 0.0261722279    | 0.0828013166    |
| 4.2134254149    | 7.6502910005    |
| 6.6212602909    | 10.1480170943   |
| 2.4945230864    | 3.3461848884    |
| 2.4702429325    | 3.468633106     |
| 12.0547509861   | 15.0285296078   |
| 35.0286465366   | 38.4408433337   |
| 5.5379515038    | 6.7278596336    |
| 5.6788805407    | 8.983163139     |
| 4575.1993507592 | 4101.1366691169 |
| 1.3522228675    | 0.3802702086    |
| 14.6092990234   | 17.2950659758   |
| 25.4359093649   | 25.4121533595   |
| 667.4583696852  | 280.5019835094  |
| 109.2095270077  | 55.6650454889   |
| 0.1158271149    | 0.0366443302    |
| 0               | 0.2357180275    |
| 0.1879092129    | 1.3078782082    |
| 1.0454372664    | 0.9260886421    |
| 57.4279496178   | 25.3921664856   |
| 11.0559886945   | 20.2503819722   |
| 5.9976339868    | 6.6411693143    |
| 28.1131705576   | 16.9977843167   |
| 5.1083557957    | 6.53856223      |
| 0.6879786232    | 0.5357696638    |
| 0.0190181552    | 0               |
| 0               | 0               |
| 1.851604062     | 1.0814652363    |
| 14.6594691334   | 14.1108434038   |
| 0               | 0               |
| 2.3793154228    | 0.6021969562    |
| 24.8536647211   | 36.6938909259   |
| 136.6155990129  | 93.4296651686   |
| 1.0381333919    | 4.5980929422    |
| 0.5515173373    | 0.418761706     |
| 34.1948082012   | 18.2201982798   |
| 15.4880716082   | 5.8799704471    |
| 4.1443669614    | 8.8284582377    |
| 0               | 0.1465553519    |
| 11.925896535    | 19.3518735277   |
| 2.0091795705    | 0.9922278671    |
| 77.0706513017   | 33.135752754    |
| 37.5060233205   | 25.9564700561   |
| 65.3751601294   | 55.3878350671   |
| 1.6527192011    | 1.9684603649    |
| 11.5899904692   | 7.8392284317    |

gene\_expression\_table

|                |                 |
|----------------|-----------------|
| 1.6583397635   | 3.1479028014    |
| 29.1072535072  | 71.7308359539   |
| 0              | 0               |
| 10.5198459301  | 27.9566554954   |
| 42.1688783967  | 109.8671132228  |
| 45.4310443252  | 64.678774601    |
| 878.9490666169 | 806.8702259202  |
| 1.1888569033   | 1.1283592357    |
| 6.4317642957   | 7.4610182152    |
| 2.1315384374   | 0               |
| 6.9926034712   | 23.5974010904   |
| 0              | 0               |
| 205.4147195687 | 187.7409230751  |
| 55.0852780189  | 54.6371906027   |
| 0.7907378648   | 0               |
| 144.9006438936 | 78.8488405633   |
| 0.2726143163   | 0.2587417213    |
| 0              | 0               |
| 22.5058152313  | 37.4373545808   |
| 93.6838544617  | 40.2241490576   |
| 0.2827066405   | 0.0255543309    |
| 36.0645359889  | 13.4381738123   |
| 1.4083110922   | 1.5391681244    |
| 0              | 0.0100973634    |
| 0              | 0               |
| 22.015221702   | 22.2008604082   |
| 0              | 0.0325937292    |
| 0              | 0               |
| 1382.930627476 | 1776.4781173334 |
| 6.2958358192   | 3.850850711     |
| 0              | 0               |
| 114.8612842187 | 109.5870744674  |
| 18.9169018575  | 19.0284598482   |
| 2.3164554875   | 1.675106606     |
| 123.7855901155 | 107.6753291597  |
| 0.3415360776   | 0               |
| 590.3918457938 | 124.7287189239  |
| 6.9847022243   | 10.6998741965   |
| 496.639541273  | 513.9836519364  |
| 5.5062567362   | 6.0970681695    |
| 83.5674840068  | 306.0435981441  |
| 7.4421640603   | 4.7089684935    |
| 7.3203794063   | 3.7055281991    |
| 20.843514701   | 24.0834639629   |
| 0.1644093161   | 0               |
| 2.3542760218   | 1.6464540631    |
| 1.00665179     | 0.4409658651    |
| 20.6186173065  | 16.3078270127   |
| 17.1710575332  | 15.7691172519   |

gene\_expression\_table

|                 |                 |
|-----------------|-----------------|
| 46.6606163481   | 27.0863520134   |
| 5.5795792015    | 11.5678022188   |
| 10.1878651758   | 8.1392530772    |
| 0.1135812629    | 0.08983452      |
| 4.2245770349    | 3.4367999098    |
| 10.917716919    | 6.4340111326    |
| 0               | 0               |
| 0               | 0               |
| 0.5430432635    | 0.6872123747    |
| 0.5554372781    | 1.6400925279    |
| 0.0787039598    | 0.1825973871    |
| 16.6429781837   | 7.5219346023    |
| 1.1344212642    | 2.6503228973    |
| 13.9734106545   | 6.92808916      |
| 0.2616159416    | 1.1587474444    |
| 0               | 0.4315645185    |
| 32.5633120458   | 26.582581501    |
| 0.3061948419    | 0.3874845681    |
| 1.3081765977    | 2.0693451303    |
| 0               | 0.0881373061    |
| 11.0288707331   | 15.3525412283   |
| 0.9525060922    | 2.7395020282    |
| 0               | 0.5604340494    |
| 0.4406202487    | 1.3939943085    |
| 0               | 0               |
| 88.5750015026   | 35.6650689732   |
| 176.2597817432  | 90.004194404    |
| 13.4218350839   | 10.7274397506   |
| 102.3318863967  | 90.5521629221   |
| 37.5634459901   | 34.2127086922   |
| 19.1325611889   | 7.3770765324    |
| 24.4618136002   | 22.1114466561   |
| 6.4240727257    | 13.5780932941   |
| 0               | 0               |
| 3.6186989044    | 6.4111660497    |
| 3.6368669162    | 3.3750901383    |
| 10.7802636847   | 8.6646707129    |
| 3.0360812714    | 1.9210556143    |
| 41.2713421415   | 19.4881376718   |
| 62.8735374205   | 34.5481489867   |
| 0               | 0.0353260888    |
| 12.6731977792   | 12.7195747341   |
| 0.2859215935    | 1.5506961585    |
| 3.6740494264    | 5.4510787266    |
| 1819.4381205841 | 1511.7961556315 |
| 110.5996782355  | 92.9885086718   |
| 0.1913883667    | 0               |
| 2.4226168267    | 1.7122718618    |
| 0               | 0               |



gene\_expression\_table

|                |                 |
|----------------|-----------------|
| 3.8459412653   | 2.9829851769    |
| 47.0533169634  | 67.6263383739   |
| 34.179187772   | 21.6266017583   |
| 3.8075078898   | 2.1647610029    |
| 0.8249126812   | 0.3296568998    |
| 0.6663507436   | 1.835321829     |
| 0              | 4.7529347614    |
| 0              | 16.6883363496   |
| 29.8894915004  | 32.8477336525   |
| 36.7964046504  | 46.7769089232   |
| 0              | 0.2699847609    |
| 15.5487877013  | 8.4143939895    |
| 93.9578211923  | 44.8370318047   |
| 5.8609044699   | 3.0976376243    |
| 0.0103590133   | 0.0655458099    |
| 0              | 0               |
| 3.5926197074   | 3.7886679363    |
| 12.3484454492  | 5.3885365168    |
| 0              | 0               |
| 1622.434547473 | 2376.7707040228 |
| 0.2290739167   | 0.8282551364    |
| 82.6133143376  | 48.6833442164   |
| 7.0379078228   | 6.1496276772    |
| 0.3120610581   | 2.2707219705    |
| 1.2706637481   | 2.5627567034    |
| 6.5270168003   | 5.1028295749    |
| 0              | 0               |
| 0              | 0               |
| 4.316562558    | 1.001465551     |
| 1.9988263905   | 0.2299529208    |
| 0              | 0               |
| 0              | 0.0853411279    |
| 4.1648440025   | 5.6219114847    |
| 1.0405235655   | 1.2801887451    |
| 8.5831452837   | 10.0408778043   |
| 3.7714835073   | 4.2370338194    |
| 10.9001260245  | 9.3109036528    |
| 0              | 0.0501779293    |
| 1.7351354823   | 2.6663110792    |
| 0              | 0.2631016568    |
| 4.8944141006   | 6.4647798483    |
| 0              | 0               |
| 0              | 0               |
| 0              | 0.3676523223    |
| 2.7433423132   | 4.3717135292    |
| 10.4714342172  | 8.5955214238    |
| 1.5634552045   | 0.7245310173    |
| 2.9458804533   | 2.838335898     |
| 0              | 0.0412137703    |

gene\_expression\_table

|                 |               |
|-----------------|---------------|
| 0.2636031735    | 0.3335855079  |
| 1.6437526123    | 1.8611797434  |
| 13.2820401128   | 15.1273842186 |
| 0               | 0.4028083657  |
| 0               | 0             |
| 0               | 0             |
| 0               | 0.2392886825  |
| 0               | 0             |
| 0.127318932     | 0.2819600484  |
| 14.2260805882   | 12.7762320826 |
| 0.0960766795    | 0.2634308466  |
| 11.0541156447   | 9.6275877303  |
| 6.9642894986    | 6.65959437    |
| 1.5730243791    | 2.9583072334  |
| 4.6291523728    | 7.6887781308  |
| 0.9774124015    | 1.0436338854  |
| 12.5476876375   | 5.4583696859  |
| 0.7670496626    | 6.6128175299  |
| 1.5151337147    | 0             |
| 15.7840168139   | 7.5097607953  |
| 15.2611353262   | 8.7684176403  |
| 6.8240604988    | 12.2339607953 |
| 153.7711211765  | 80.1016793872 |
| 12.5389505115   | 0             |
| 16.8016002356   | 21.5382823253 |
| 26.1741487728   | 11.5930351228 |
| 0               | 1.5330294868  |
| 0               | 0             |
| 0               | 0             |
| 0               | 0             |
| 2.4974160383    | 1.1287282785  |
| 18.3430158564   | 8.7901361691  |
| 0.0981901304    | 0.1242580052  |
| 4.1199883322    | 4.7458747545  |
| 2.9905473965    | 0             |
| 8.0224146121    | 4.109237805   |
| 5.7080368889    | 4.9119306275  |
| 49.1955297615   | 26.7592175906 |
| 110.015275585   | 52.3741910664 |
| 0.9103772413    | 5.7603376005  |
| 3.5703474019    | 3.6066463328  |
| 2.5739406503    | 14.8387192061 |
| 1.6484211234    | 4.3211035521  |
| 2.8633121655    | 1.4493898995  |
| 1.2427738373    | 1.0283103714  |
| 1035.7352815917 | 753.343256239 |
| 0               | 0             |
| 0               | 0             |
| 60.7257393586   | 47.6984052528 |

gene\_expression\_table

|                |                |
|----------------|----------------|
| 0.493926401    | 0.468791841    |
| 0              | 0.0235485281   |
| 107.2230601643 | 46.7666075079  |
| 13.5751871495  | 30.4214601051  |
| 0              | 1.3808540973   |
| 0              | 0              |
| 2.8755503285   | 1.3928440544   |
| 196.9052135614 | 85.4108677051  |
| 126.55197742   | 72.130807976   |
| 0.0069         | 0.004366       |
| 145.6567833328 | 115.875947117  |
| 4.9969711086   | 4.6768182725   |
| 10.8925907624  | 9.1189078495   |
| 7.0746737033   | 9.1284306904   |
| 0              | 0              |
| 13.2804836237  | 8.827517361    |
| 7.6972494419   | 7.6663257993   |
| 0              | 0              |
| 50.5775929475  | 54.2652081105  |
| 6.7620752082   | 4.0592299924   |
| 46.2699807146  | 23.3557708479  |
| 5.1373043578   | 4.4695576084   |
| 9.2301575663   | 4.7353838703   |
| 3.9133531403   | 2.8813291293   |
| 4.0224633951   | 4.2294916943   |
| 14.430159684   | 6.9215578088   |
| 16.0713980332  | 12.7113072172  |
| 0              | 3.341822651    |
| 124.3783493794 | 29.7537769973  |
| 174.811474897  | 224.2514899851 |
| 0              | 0              |
| 162.70429218   | 79.8890535652  |
| 128.2192635091 | 66.1309247657  |
| 15.9291384541  | 12.0948386252  |
| 1.0566292203   | 0.5778625266   |
| 14.50697206    | 5.5761301076   |
| 20.7394721091  | 18.5108729091  |
| 3.3713997647   | 7.4662897778   |
| 59.4061134345  | 63.7817864639  |
| 0              | 2.1245351606   |
| 10.7350490837  | 4.1800089744   |
| 3.4167026342   | 2.4890957459   |
| 3.2168887179   | 7.242107854    |
| 0.5742362174   | 0.0605572123   |
| 7.167177053    | 4.727950274    |
| 3.1075969662   | 3.1714622351   |
| 0.9441979222   | 1.557594533    |
| 2.0090180276   | 3.1275303121   |
| 0              | 0              |

gene\_expression\_table

|                |                |
|----------------|----------------|
| 13.5168336864  | 15.3047708419  |
| 0              | 0.3169521874   |
| 64.2434533387  | 40.6495201175  |
| 26.1397030889  | 46.5453040705  |
| 696.5713081134 | 921.5677698888 |
| 0              | 0.0128638873   |
| 0.5909957998   | 1.7949492617   |
| 3.2007679458   | 2.8463110165   |
| 0              | 0.0352096974   |
| 1.1257070844   | 2.8379107958   |
| 0.399003725    | 0.1817757694   |
| 2.9540057158   | 14.6079149607  |
| 0.3580923329   | 0.090631999    |
| 3.6597548384   | 4.3311791981   |
| 0.3116202574   | 0.7413786444   |
| 3.742117205    | 1.6873934835   |
| 38.3442577086  | 24.9589034105  |
| 0.978986635    | 0.2875998326   |
| 45.8918443823  | 34.4150394257  |
| 1.3071392405   | 9.6492861828   |
| 47.3492575985  | 35.9920415536  |
| 0              | 0.5225011218   |
| 15.3061502678  | 8.3322100088   |
| 0.0248098022   | 0.0784909982   |
| 46.0297711966  | 38.0755595291  |
| 0.3932551137   | 1.2441447979   |
| 1.8797524401   | 2.9734949889   |
| 0.1375120534   | 0.4350481403   |
| 26.5258829861  | 20.258625542   |
| 8.5534855771   | 13.0793579128  |
| 0              | 0.006717       |
| 0              | 0.0489606343   |
| 0              | 1.9075640025   |
| 0.8590249139   | 1.8894520286   |
| 0              | 0              |
| 0              | 0              |
| 2.9612264316   | 2.6231685566   |
| 0.1773288333   | 0.1683050553   |
| 0              | 0.110976882    |
| 1.0460723037   | 0.7838214891   |
| 0.0702279194   | 0.1036843316   |
| 2.4237698624   | 4.6008617218   |
| 0.09339248     | 0.2954666428   |
| 9.1410783025   | 12.2647457482  |
| 1.8777221958   | 8.4488062227   |
| 0              | 0              |
| 0.9143993415   | 1.2343012503   |
| 0              | 0              |
| 3.5966935015   | 1.9229445579   |

gene\_expression\_table

|                |                |
|----------------|----------------|
| 4.7970463514   | 2.7593562532   |
| 17.9869097186  | 12.0238548319  |
| 0              | 0              |
| 0.2545487345   | 0.2684393861   |
| 7.3032955564   | 9.848247143    |
| 2.1058008712   | 3.5531421151   |
| 10.6012935688  | 16.6488419493  |
| 0              | 0              |
| 0              | 0              |
| 1.2732155445   | 2.0140418284   |
| 1.3825851664   | 1.895442176    |
| 0              | 0              |
| 3.074138807    | 1.8785219552   |
| 2.423068694    | 2.3672251574   |
| 0.4706636821   | 0.9430605625   |
| 12.6554587331  | 6.4677076929   |
| 2.7583496066   | 1.3425562869   |
| 0              | 0.0166080093   |
| 3.6415089652   | 1.1520675201   |
| 0.3732541192   | 0              |
| 7.2497213322   | 9.8539893309   |
| 36.5036275761  | 41.9453759477  |
| 6.8162221569   | 5.3911360865   |
| 0.968661801    | 0.8172171185   |
| 31.1797014375  | 14.7423262397  |
| 313.9005182451 | 183.2715756647 |
| 92.4286838175  | 56.9991417306  |
| 1.7099211991   | 0.9600300836   |
| 0.0259082464   | 0.2377018525   |
| 0.6410087938   | 1.8927676886   |
| 0.7736174713   | 2.1211672437   |
| 20.605936468   | 15.2618133712  |
| 2.7759669286   | 2.2931696752   |
| 2.5440676977   | 2.3324775772   |
| 2.9350636545   | 0.9629602073   |
| 7.0621651352   | 8.8280660877   |
| 90.037542346   | 64.3255752369  |
| 7.4131609467   | 6.6656136464   |
| 55.3952261795  | 30.1348156591  |
| 1.0485431526   | 1.8482019531   |
| 562.8887439733 | 103.4924635545 |
| 14.9265595376  | 29.5145580345  |
| 53.1389067101  | 39.3589328672  |
| 138.091195244  | 192.3530867232 |
| 0              | 0.0369438425   |
| 1.893839941    | 2.0513472273   |
| 85.0281158194  | 81.4847756402  |
| 10.955598106   | 7.4602225217   |
| 9.4024761399   | 14.4515682935  |

gene\_expression\_table

|                 |                 |
|-----------------|-----------------|
| 8.4471049795    | 10.4429885276   |
| 1.9799107869    | 5.922196663     |
| 0.0990126935    | 0.9397420906    |
| 12.1798739669   | 16.840601021    |
| 0.0299974837    | 0.0189806627    |
| 3.8651446805    | 6.7255064568    |
| 5050.7200154995 | 2303.4214070904 |
| 12.2784596477   | 13.9051955192   |
| 2.7682317369    | 0               |
| 9.1869427779    | 10.5431191107   |
| 0               | 0               |
| 607.3919621545  | 424.5945561144  |
| 19.1678727095   | 14.486598259    |
| 4.2956931062    | 2.5886330567    |
| 0               | 4.4362221899    |
| 1.3239369176    | 0               |
| 0               | 0               |
| 5.7341943122    | 2.7211984444    |
| 45.2066330223   | 45.1747946657   |
| 5.7241054436    | 23.9044142262   |
| 5.3370620141    | 6.7539647524    |
| 8.9499094073    | 7.2965345527    |
| 0.0878563287    | 0.3474398379    |
| 0.2654094305    | 0.5038069449    |
| 6.7271522287    | 6.1970369029    |
| 6.9967292983    | 4.7097056254    |
| 15.6727328577   | 15.8764052054   |
| 0.8212111287    | 0.7144701175    |
| 1.42565034      | 2.3052864287    |
| 0               | 0.0816248558    |
| 15.0708445587   | 7.2130932129    |
| 0               | 0               |
| 5.3149798801    | 3.4515103518    |
| 1.1534729368    | 6.5686551738    |
| 0.1630887284    | 0.0573294779    |
| 0               | 0               |
| 98.0338657304   | 95.7421532087   |
| 0.7485257172    | 0.5166802154    |
| 0               | 0               |
| 0.0319642037    | 0.0202250887    |
| 28.2539697945   | 13.6372996911   |
| 0.9170400754    | 4.8354134491    |
| 40.6287088993   | 16.5854732566   |
| 0.6267253201    | 0.1321851083    |
| 5.9800098855    | 10.8784318649   |
| 67.5032010224   | 49.1511086999   |
| 3.1718440375    | 4.8083378217    |
| 0.8394421851    | 0.4587206125    |
| 4.6597160413    | 5.2867812705    |

gene\_expression\_table

|                |                |
|----------------|----------------|
| 2.1923185801   | 0.9710201665   |
| 0.1973625696   | 0.582771248    |
| 3.2717044606   | 2.4790616469   |
| 1.970994615    | 3.0287460734   |
| 17.8005546702  | 12.4633278135  |
| 22.8310088519  | 14.7056456756  |
| 0              | 0              |
| 17.1526535821  | 16.8411745654  |
| 1.1846712015   | 0.9913945773   |
| 0              | 13.2810500195  |
| 0              | 0.1042742512   |
| 10.5134243657  | 11.7554048313  |
| 0              | 0.0489752252   |
| 0.9202809592   | 0.707078883    |
| 9.5909656125   | 12.6695440144  |
| 0.2638042621   | 0.3338399821   |
| 1.0227701784   | 1.7484389259   |
| 58.6321368418  | 67.3043081912  |
| 10.167341932   | 4.8249768918   |
| 714.2701076014 | 585.9333278965 |
| 1777.593621026 | 868.6695436007 |
| 51.2298204529  | 21.7469400434  |
| 0.1719827539   | 0.2176413643   |
| 126.1522748674 | 30.4083127754  |
| 0.4289128577   | 0.8335583962   |
| 30.874616572   | 42.7486236289  |
| 4.6085599556   | 7.87327736     |
| 47.717037105   | 25.3084738508  |
| 0.7710048718   | 0.4656721671   |
| 4.677831126    | 7.2146573333   |
| 7.2774249338   | 8.5743269828   |
| 187.3626789982 | 71.5127236238  |
| 16.8547006639  | 23.6622456869  |
| 6.3736781843   | 6.1554679379   |
| 27.5089001405  | 25.4395848911  |
| 8.0206832044   | 8.2201056586   |
| 2.0824900306   | 1.7169750793   |
| 181.3146348526 | 52.4777772893  |
| 8.8347104307   | 5.4520638958   |
| 0.7971622063   | 1.2609946796   |
| 10.4791769722  | 4.4684569884   |
| 0.0894205166   | 0              |
| 2.4928598475   | 0.9464020185   |
| 4.0245268787   | 2.010384075    |
| 0              | 0              |
| 3.7068645832   | 1.1727441367   |
| 0              | 0              |
| 0.6875930443   | 1.4985705865   |
| 14.4464173504  | 1.0156502806   |

gene\_expression\_table

|                 |                 |
|-----------------|-----------------|
| 20.782828503    | 13.5120960469   |
| 25.575540256    | 13.8119980213   |
| 0.7749348379    | 1.041959083     |
| 0.5052465162    | 0.2325022577    |
| 0.9381391601    | 0.6331732131    |
| 6.4848471557    | 7.7628752205    |
| 0.6537856364    | 0.6205162782    |
| 16.3511311527   | 36.2575926333   |
| 5.5027846901    | 2.1471359278    |
| 0.592661694     | 1.387506822     |
| 0.1068680452    | 0.3042894703    |
| 4.6129311644    | 2.1150684772    |
| 14.816147758    | 15.1038386763   |
| 3018.4654472994 | 5583.1726848757 |
| 0.6212836292    | 2.1621167666    |
| 0               | 0               |
| 18.0615392561   | 8.6347090348    |
| 0.9298693479    | 0.7452651595    |
| 2.5181385256    | 2.055911709     |
| 12.2815915088   | 12.0019961824   |
| 2.2158257756    | 1.0515342392    |
| 19.8993491816   | 4.5786002116    |
| 0.0907312778    | 0.0574094746    |
| 71.5620902681   | 51.8966314381   |
| 1.8696493737    | 2.8307628325    |
| 0               | 0               |
| 11.1591316141   | 7.7963544785    |
| 0.3710113586    | 0.1304191141    |
| 11.464431449    | 14.6767488925   |
| 0.3068849835    | 0.3689400345    |
| 0.0159393934    | 0.0201710418    |
| 3.0882674733    | 3.6755239182    |
| 0.0298549214    | 0.1511236602    |
| 16.8150238733   | 15.1409250405   |
| 0.4081357931    | 0.1549467527    |
| 2.0885373734    | 0.6056897715    |
| 1.4233487919    | 0.4503061584    |
| 0               | 0               |
| 33.0750281158   | 20.6860120969   |
| 0.0541445042    | 0               |
| 0.9625718595    | 2.9899283474    |
| 4538.3174615251 | 7103.5443797381 |
| 35.9830716      | 55.8063343687   |
| 0               | 0               |
| 0               | 0.0873709375    |
| 14.9834823292   | 4.5768780701    |
| 93.0828045586   | 90.0783518982   |
| 0               | 0               |
| 327.3196173093  | 171.7330841318  |



gene\_expression\_table

|                |                |
|----------------|----------------|
| 10.1133829424  | 10.6482029265  |
| 2.6896384068   | 4.0418859667   |
| 0              | 0              |
| 0              | 0.5170558835   |
| 68.2854765063  | 37.549007607   |
| 0              | 0              |
| 2.9300241422   | 2.2181173532   |
| 23.7432737599  | 19.2355201425  |
| 1.0195720572   | 0.258050355    |
| 3.9291923069   | 2.4861643237   |
| 37.5326329925  | 39.2365973516  |
| 0.7542967015   | 0.9545501478   |
| 4.2294634054   | 1.0194889172   |
| 5.8303173551   | 3.1860285266   |
| 0              | 0              |
| 3.8607323537   | 2.1714194203   |
| 0.6238858971   | 0.1973793516   |
| 7.3355950971   | 1.5471792843   |
| 0.9394098699   | 0.7772974319   |
| 0              | 0              |
| 77.785195287   | 33.6426470945  |
| 39.8749230057  | 76.2284148729  |
| 191.8235950825 | 162.2876703128 |
| 0.670077124    | 6.7837731915   |
| 23.385100133   | 14.0379242931  |
| 6.2592550672   | 45.2627713668  |
| 0.6998937351   | 2.6571122491   |
| 54.5908488695  | 53.0178207493  |
| 827.8968402078 | 364.1361309134 |
| 19.564166589   | 6.1895332677   |
| 0              | 0              |
| 12.3655727026  | 9.6405507223   |
| 0              | 0              |
| 0.1040334826   | 0              |
| 0              | 0              |
| 18.24336882    | 4.8097260585   |
| 0              | 0              |
| 32.0681752879  | 27.5955911693  |
| 0              | 0.5641524925   |
| 0              | 0              |
| 4.9847815724   | 4.4157117276   |
| 0.1338258684   | 0.0282257415   |
| 8.4445200422   | 4.2837732557   |
| 9.0784681955   | 5.9816954298   |
| 1.2021365879   | 0.9032624966   |
| 2.4709960899   | 7.4266372716   |
| 10.8530824852  | 10.8597569593  |
| 12.5029560447  | 8.0937081106   |
| 3.915440504    | 3.1222821153   |

gene\_expression\_table

|                 |                 |
|-----------------|-----------------|
| 0.5566878124    | 1.2398836178    |
| 0               | 0               |
| 0.8245124524    | 0.1739011722    |
| 0.6832162871    | 0.8252990886    |
| 0               | 0               |
| 0               | 0.0260355542    |
| 15.5075518698   | 20.103201088    |
| 6.4553632242    | 3.0304935985    |
| 14.9430978288   | 8.404553813     |
| 0               | 0               |
| 0.0346356633    | 0               |
| 4.2658048503    | 3.8524276918    |
| 0               | 0               |
| 2.6668989476    | 1.6874585158    |
| 0.0543912913    | 0.0344156451    |
| 0.9231228626    | 0.7301230597    |
| 2.0056191467    | 3.1423825967    |
| 9.9946020381    | 4.9146535782    |
| 12.2304961852   | 9.6067198135    |
| 4.8120807695    | 1.8123837998    |
| 10.4477807581   | 6.340921453     |
| 26.3688988862   | 24.2306519542   |
| 0               | 0               |
| 724.2463319001  | 405.6933612671  |
| 4019.1204525126 | 3813.8188313216 |
| 1.7696350031    | 1.7595632799    |
| 8.5159531524    | 2.9777998711    |
| 0.4203030398    | 0.2045717799    |
| 0               | 0               |
| 0               | 2.9845625568    |
| 29.7302511719   | 24.0172919277   |
| 0               | 0               |
| 2.4230187109    | 2.0122531918    |
| 0               | 1.090097333     |
| 8.2733147946    | 10.8134483961   |
| 1.6818777803    | 0.5320972108    |
| 0.1569177638    | 0.0992884327    |
| 3.6271246456    | 4.0911466374    |
| 1.1513497712    | 1.0284806953    |
| 0               | 0               |
| 19.0294627095   | 27.1463889293   |
| 0               | 0               |
| 221.8117247606  | 87.7184726553   |
| 0               | 0               |
| 0.009693        | 0.018399854     |
| 0               | 0               |
| 0.5466933288    | 0               |
| 21.2104451403   | 25.3826960371   |
| 0               | 0               |

gene\_expression\_table

|                |                |
|----------------|----------------|
| 0.9867517473   | 0.2270396744   |
| 3.3105119439   | 0              |
| 21.7445197623  | 23.8872801186  |
| 0.414297813    | 1.0485742224   |
| 10.9221740655  | 5.0026782798   |
| 6.4239661923   | 7.7229530147   |
| 0              | 0              |
| 0              | 0.5514655242   |
| 8.7564970716   | 11.4769612153  |
| 27.6637760199  | 8.9282291565   |
| 2265.648686787 | 675.7359650511 |
| 2.4154196556   | 1.7830598903   |
| 1.9986817662   | 1.1187284523   |
| 5.8155654741   | 4.5996894129   |
| 0.1977529782   | 0              |
| 0              | 0.0110650369   |
| 4.0888090148   | 3.5645322324   |
| 89.2107554694  | 36.6145144954  |
| 1.5271823522   | 1.0871011728   |
| 0.6684178536   | 0.6344039021   |
| 4.6817430966   | 3.9497795817   |
| 9.0841502917   | 12.2622333088  |
| 1.496238858    | 1.8934658209   |
| 2.3910960345   | 1.3616518287   |
| 0              | 0.0729292616   |
| 0              | 0              |
| 3.3681040053   | 0.877528353    |
| 0.9778804104   | 1.5026684653   |
| 5.4417467004   | 3.0988986804   |
| 0              | 0.2296513816   |
| 3.7683753406   | 5.5636203059   |
| 0.6575323336   | 0.4160482109   |
| 24.3496203672  | 12.1846393481  |
| 0.758220738    | 0.4515369186   |
| 28.8007390039  | 16.6614237731  |
| 3.3734617247   | 3.7538292171   |
| 9.8914298177   | 5.3954494713   |
| 33.5859222926  | 19.1609341489  |
| 4.075848843    | 2.5789600485   |
| 5.5968603751   | 6.9684976656   |
| 0              | 0              |
| 0              | 0              |
| 0              | 0              |
| 0              | 0              |
| 9.7896448596   | 13.568505627   |
| 10.6890905373  | 9.1431617088   |
| 0              | 0              |
| 0.6430552492   | 0.4973074994   |
| 2.1381741503   | 3.1567951822   |

gene\_expression\_table

|                |                |
|----------------|----------------|
| 0.6103114911   | 1.0812749042   |
| 31.0680039145  | 46.0946807088  |
| 25.7069232055  | 20.5322968889  |
| 5.7427178266   | 3.8759016284   |
| 0.007009       | 0              |
| 0              | 0.3016558099   |
| 0.2938515625   | 0.3718643498   |
| 4.1633238213   | 2.9742199812   |
| 0.0484961241   | 0.2863982449   |
| 17.2926061958  | 22.3734398585  |
| 16.2882335631  | 20.2235783977  |
| 0              | 0.0705470443   |
| 11.20464297    | 7.0896462775   |
| 0.4736389141   | 0.1498455762   |
| 27.3264091442  | 14.8890951253  |
| 7.9077777708   | 13.2748087616  |
| 0              | 0              |
| 25.1086341072  | 32.3740862139  |
| 108.728738444  | 39.8863264239  |
| 0              | 1.785600781    |
| 4.2151118094   | 5.334155105    |
| 81.1504666043  | 74.1683144239  |
| 0              | 0              |
| 110.0605682673 | 106.0189905752 |
| 1.727027022    | 0.5463811177   |
| 0.7468239058   | 0.9450934471   |
| 4.7852359553   | 14.1298217522  |
| 0              | 0              |
| 11.9635441957  | 19.890948959   |
| 15.8566775592  | 23.4107606799  |
| 2.7818253885   | 2.8991155236   |
| 12.4607968321  | 11.0382543163  |
| 153.7064149593 | 146.0541533916 |
| 106.8248575481 | 61.418235677   |
| 1.9595072176   | 0.8431062819   |
| 24.5520926033  | 13.2646160896  |
| 0.8587748636   | 7.0639761044   |
| 56.7498436891  | 83.5922792155  |
| 0.0322001431   | 0.0101871887   |
| 0              | 0              |
| 1.5188949479   | 0.8060573394   |
| 1.437642596    | 2.8761201467   |
| 2.7397766099   | 1.8285614672   |
| 1.928245755    | 2.6904366669   |
| 0              | 0              |
| 1.6195526895   | 1.3876941131   |
| 3.5839104052   | 1.4881715769   |
| 0              | 0.727170668    |
| 14.1224400591  | 22.4128910975  |

gene\_expression\_table

|                 |                 |
|-----------------|-----------------|
| 3.9879901783    | 3.4938944258    |
| 0               | 0               |
| 0               | 0.4099325802    |
| 2097.1152797632 | 3505.2938616487 |
| 0.656654956     | 0.5877706666    |
| 19.5972935403   | 21.8691391323   |
| 1.1772418429    | 1.638758343     |
| 0               | 0               |
| 52.6595779654   | 30.2630444582   |
| 17.4813221189   | 22.7484310416   |
| 6.0844785677    | 6.6498343421    |
| 120.5325192158  | 102.7499706271  |
| 5.2714885642    | 3.6960849669    |
| 6.6114961763    | 6.9116550766    |
| 0.2484884767    | 0.0786145265    |
| 0               | 0               |
| 1.3372419004    | 2.0384014045    |
| 86.3332607333   | 55.5564808121   |
| 6.798651555     | 8.8724443797    |
| 5.9575885306    | 5.8638462691    |
| 7.6698356954    | 5.841605202     |
| 2.4028485819    | 3.8854227231    |
| 46.8012623636   | 27.275238708    |
| 0.6904828572    | 2.5667721393    |
| 3.1546499511    | 5.9882369325    |
| 1.2986759646    | 2.2410725567    |
| 5.1678287686    | 5.6867850835    |
| 0               | 0.0551901287    |
| 33.5228708722   | 31.0770540467   |
| 5.835397052     | 3.7565137087    |
| 0.2811587004    | 0.1383673434    |
| 0.1932270288    | 0.3532037122    |
| 1.0345047524    | 1.1421655842    |
| 0.1008885473    | 0.7788041269    |
| 5.6138461057    | 19.126774414    |
| 21.093815385    | 22.2791217731   |
| 0               | 1.0166685709    |
| 1.6754418047    | 0.9575296483    |
| 24.0069825825   | 19.3071981191   |
| 0               | 0               |
| 0.2709776069    | 0.4236042581    |
| 1.2975965204    | 2.508744317     |
| 77.7429271238   | 93.8329283662   |
| 2701.979313013  | 4384.5027340585 |
| 4.1956807388    | 2.2123189178    |
| 0.008042        | 0.0152662699    |
| 66.7648004415   | 46.5043796529   |
| 7.4772938884    | 12.5981863092   |
| 9.6638628807    | 18.7038808164   |

gene\_expression\_table

|                |               |
|----------------|---------------|
| 0.2358211338   | 0.0447641686  |
| 2.324273784    | 5.9877084911  |
| 0              | 0             |
| 3.0417958436   | 3.7049925667  |
| 30.2413060602  | 33.4496266885 |
| 0.1046416527   | 0.1544926848  |
| 1.9040929535   | 1.5171546193  |
| 12.0545613767  | 15.068815647  |
| 0              | 0             |
| 4.8692486449   | 3.5211169025  |
| 0.6573675098   | 1.2478317599  |
| 6.2920071949   | 9.1261723727  |
| 94.4389946577  | 55.5907247146 |
| 9.2231854265   | 9.1458059243  |
| 2.6472770036   | 2.1158436519  |
| 0.3098127514   | 0.1960314867  |
| 14.4364950866  | 22.9724825871 |
| 78.0542952168  | 66.1593920032 |
| 0              | 0.0356074909  |
| 20.6563144905  | 6.5350570976  |
| 1.8924658724   | 1.5848501241  |
| 14.4245976605  | 15.4500000539 |
| 0.1475702964   | 0.8170216175  |
| 35.7309911474  | 59.9387945024 |
| 11.5034936976  | 5.782177933   |
| 2.0904839416   | 1.9526112174  |
| 8.4459166796   | 13.4708882139 |
| 0.109625649    | 1.387294671   |
| 0.1513955006   | 0.202232339   |
| 2.7794795596   | 2.4941464052  |
| 4.1820972725   | 4.2746111811  |
| 0              | 0.5293128696  |
| 0              | 0             |
| 56.1448368432  | 27.4512806396 |
| 111.5247173635 | 55.0761783865 |
| 6.2882245859   | 4.0653188669  |
| 0              | 0             |
| 3.8386223154   | 2.244852591   |
| 1.4322199881   | 4.9338943545  |
| 4.0965316734   | 4.6656844927  |
| 0.1216667448   | 0.4234100119  |
| 0              | 0             |
| 0              | 0             |
| 2.0749658065   | 7.9650337913  |
| 14.7115105073  | 6.6489914675  |
| 0              | 0.4993003422  |
| 14.5423340696  | 5.5209258276  |
| 0              | 0             |
| 4.0663050993   | 1.0720505511  |

gene\_expression\_table

|                 |                 |
|-----------------|-----------------|
| 37.5169028792   | 20.9457473977   |
| 1891.1850854268 | 3673.4127486443 |
| 0.0136937349    | 0.103975186     |
| 288.4531782604  | 116.9245632228  |
| 0               | 0               |
| 1429.4857755345 | 1598.0702466049 |
| 0               | 1.490007326     |
| 0               | 0.7281295496    |
| 6.9798824687    | 10.5504408081   |
| 44.780088203    | 35.8709505526   |
| 0.129423972     | 0.2292974899    |
| 2.0110465009    | 2.157672015     |
| 6.0518130128    | 5.9647702619    |
| 38.0498806101   | 31.8037698676   |
| 10.9265336749   | 25.7026031341   |
| 4.8928600528    | 2.8144701955    |
| 0               | 0.4525884322    |
| 77.4540437379   | 36.3494135092   |
| 0.213847003     | 0.8118596618    |
| 0.5515714704    | 0               |
| 9.4341840459    | 8.8813066958    |
| 4.4951214417    | 12.7083571366   |
| 0.627133155     | 0.6854049274    |
| 6.2119387932    | 4.053383306     |
| 0               | 0               |
| 3.6397221601    | 2.6868385295    |
| 4.7297533729    | 2.0639398595    |
| 5.8260711296    | 12.399705384    |
| 0               | 0.6912812355    |
| 7.1157305329    | 3.8353951101    |
| 0.5121767726    | 0.3240756675    |
| 94.5995803651   | 107.6218771171  |
| 3.4431093467    | 4.0154575386    |
| 29.5999751086   | 38.4987926409   |
| 0               | 0               |
| 27.7978080153   | 5.9699333409    |
| 19.0016106621   | 14.4921461822   |
| 0.6264783084    | 1.1891970905    |
| 0.096360995     | 0.0609716321    |
| 542.0001180021  | 218.8122646563  |
| 1.1569848396    | 0.6344630089    |
| 1.3486876647    | 2.3804562226    |
| 31.6856973023   | 16.846616603    |
| 0               | 0               |
| 3.5998028546    | 3.1635358882    |
| 1.0312219168    | 1.8069154365    |
| 13.0469562127   | 8.845023136     |
| 0               | 0               |
| 2.5766825629    | 1.6303748357    |

gene\_expression\_table

|                 |                 |
|-----------------|-----------------|
| 5.242969863     | 0               |
| 0.125562898     | 0               |
| 0               | 0               |
| 0               | 0               |
| 0               | 0.5991986566    |
| 8.5790707611    | 7.6240687049    |
| 8.647704406     | 15.8941724785   |
| 3.7268495082    | 2.9410429935    |
| 6.7653075063    | 5.2795214161    |
| 3.3817020398    | 1.4672532557    |
| 3.6182306809    | 4.8198018863    |
| 11.9844859971   | 8.1379455007    |
| 14.3659463079   | 16.015599993    |
| 0               | 0.8690261025    |
| 16.8704566983   | 9.337819087     |
| 19.0850400609   | 10.2562465025   |
| 3.5494371985    | 3.8196308762    |
| 38.8783510932   | 17.3939103682   |
| 2.8818002184    | 5.4703066164    |
| 1.2625534045    | 3.3096057333    |
| 9.5903521348    | 8.1920928733    |
| 0               | 0               |
| 0               | 0               |
| 1.167591226     | 1.4775676139    |
| 47.8025053147   | 50.7711534473   |
| 1669.6682378597 | 1052.4094946209 |
| 3.9152083618    | 2.4773160967    |
| 37.798212178    | 93.8263079809   |
| 25.3742240734   | 29.3643589118   |
| 1.5211650146    | 8.7500430218    |
| 1.1876006664    | 2.2543338506    |
| 98.5139635929   | 97.5342284967   |
| 0               | 0               |
| 7.5916014351    | 20.0146823802   |
| 0.4673542864    | 0.4435719084    |
| 6.9837552744    | 8.4843150341    |
| 17.1026909055   | 18.3031795536   |
| 23.3488617212   | 15.5693138386   |
| 2.4977976507    | 1.3945244577    |
| 15.4729949149   | 0               |
| 24.736222117    | 11.7826970921   |
| 0               | 0               |
| 0               | 0               |
| 89.8108129191   | 81.6480717838   |
| 59.3387562352   | 139.8269039785  |
| 126.4545195363  | 178.0470880927  |
| 5.4485797038    | 3.5685107491    |
| 84.0055102808   | 167.9660084952  |
| 32.1226959117   | 21.2354646825   |



gene\_expression\_table

|                 |                 |
|-----------------|-----------------|
| 48.5709387258   | 29.7084357494   |
| 0               | 0               |
| 0               | 0               |
| 0               | 0.2621625907    |
| 1.4580637973    | 4.6128897638    |
| 8.0508233866    | 9.5669545987    |
| 2.9675763171    | 5.6331289929    |
| 3793.5258040008 | 3848.4508745325 |
| 124.6516530411  | 120.5978372     |
| 37.6300627912   | 22.8943410837   |
| 3.1425833597    | 8.6165904083    |
| 15.0292970487   | 14.5441933637   |
| 2.7712930249    | 1.9288643167    |
| 98.0052985782   | 71.7836478399   |
| 4.4295675159    | 46.2457486973   |
| 5.280560183     | 3.818550062     |
| 6.239698656     | 6.5801972253    |
| 24.7357401701   | 4.6954012374    |
| 4.7667344165    | 1.5708917966    |
| 0               | 0               |
| 104.0540594382  | 43.2070772464   |
| 4.236779622     | 8.4891609988    |
| 4.8585977959    | 3.9126666117    |
| 1.0098777109    | 4.4729430837    |
| 0               | 0               |
| 9.3552197783    | 4.254596685     |
| 3.6040354887    | 2.5654770047    |
| 22.0054023066   | 18.608360781    |
| 0.7265683017    | 0.6895952333    |
| 74.7444601604   | 73.8743415484   |
| 0               | 0.8136611672    |
| 157.5865999372  | 79.6084814643   |
| 23.2700702775   | 22.3803991519   |
| 2.0468415459    | 63.4609908298   |
| 0               | 0.5988316973    |
| 25.6492177116   | 6.955428389     |
| 150.3598735582  | 62.2514322008   |
| 59.3145347619   | 73.6585542511   |
| 0               | 11.9173346457   |
| 107.3831916635  | 132.6039722383  |
| 56.7778683033   | 31.2901538459   |
| 42.8546698447   | 18.0772947639   |
| 0.1309335772    | 0.110462868     |
| 3.6770337687    | 6.9798392078    |
| 3.7277017751    | 8.0587988572    |
| 41.3783214701   | 21.0908902364   |
| 26.2542038009   | 17.5524423219   |
| 249.5759497016  | 128.7776699376  |
| 98.6650979764   | 53.5951663901   |

gene\_expression\_table

|                 |                 |
|-----------------|-----------------|
| 6.0826743317    | 1.2116474465    |
| 3.8046201471    | 2.8587189903    |
| 5.2213014305    | 4.3656508956    |
| 39.1966791098   | 17.4528218375   |
| 13.1400638565   | 18.4101649184   |
| 14.1989028039   | 10.9373353101   |
| 54.5333963893   | 136.1052681173  |
| 43.0449948414   | 20.9023294922   |
| 0               | 0               |
| 18.7981595596   | 27.7535576433   |
| 3257.6168430122 | 4080.2225452344 |
| 73.0902179749   | 24.4226987969   |
| 6.4570125335    | 5.6115770886    |
| 29.6801474019   | 19.9837085965   |
| 2.4317314982    | 4.6159747019    |
| 68.500756944    | 50.3819487952   |
| 5.0719683844    | 13.6392978302   |
| 81.4088930911   | 51.6722877481   |
| 4.0144573766    | 0               |
| 0.2119648912    | 0.3576508075    |
| 48.8975198563   | 42.5418209012   |
| 32.4745577377   | 62.2396276247   |
| 11.5482466293   | 5.9785025606    |
| 8.2276873       | 6.2472022852    |
| 6.926653994     | 5.1132476637    |
| 345.1372161258  | 141.607566478   |
| 5.8480771031    | 4.9244900047    |
| 167.9040011846  | 134.0537600647  |
| 22.3811535929   | 44.1703680367   |
| 1124.3819750564 | 733.1542238648  |
| 4.1200587437    | 2.1724445849    |
| 2.0939910124    | 2.8707373532    |
| 2.9365612677    | 0               |
| 12.9064151268   | 4.5654837632    |
| 0.7965422688    | 0.4774790003    |
| 0               | 0               |
| 7.8155331367    | 4.8133423329    |
| 24.521046097    | 9.9299145841    |
| 86.9907656991   | 137.1086163728  |
| 6.2580016424    | 6.0309267789    |
| 0               | 0.0122956062    |
| 1.2342557717    | 2.3428957604    |
| 19.0875713949   | 21.9032714549   |
| 102.3541816192  | 106.9758734012  |
| 1.0129668654    | 1.0887873345    |
| 0               | 0               |
| 3.6298044566    | 5.0769801335    |
| 6.5623729364    | 3.6564922852    |
| 0.3688946033    | 1.5672153068    |

gene\_expression\_table

|                |                |
|----------------|----------------|
| 0.7757371486   | 2.6996273789   |
| 0.4147796731   | 0              |
| 3.1086391992   | 3.6773713113   |
| 24.0280317843  | 26.2894558975  |
| 7.4004367402   | 4.1752879032   |
| 90.6185310586  | 51.6492338897  |
| 0.1827077948   | 0.867051481    |
| 2.8810042922   | 1.8679425877   |
| 4.6778953599   | 5.8959299628   |
| 0              | 0              |
| 0              | 0              |
| 2.9160384319   | 2.5968066877   |
| 18.0942889674  | 9.302323454    |
| 18.1612743123  | 17.3629150925  |
| 173.8318748173 | 156.5010506913 |
| 4.8175052848   | 1.143088913    |
| 1.7349035836   | 0.6098589252   |
| 0              | 0              |
| 0              | 0              |
| 0              | 0              |
| 0.016437904    | 0.1508137667   |
| 1.9148025923   | 2.0777460348   |
| 0              | 0.0163979391   |
| 0              | 0              |
| 49.6794903869  | 43.4457688408  |
| 1.4685343215   | 2.6749785965   |
| 39.948532741   | 26.7298149775  |
| 0              | 0.0222466945   |
| 0.2155872539   | 0.3410276829   |
| 0.00902        | 0.0114145651   |
| 1.1087009702   | 1.2754935979   |
| 0.0505318608   | 0.127894488    |
| 10.0566075952  | 5.1511912707   |
| 1.0310953525   | 1.522306703    |
| 3.1904317257   | 1.9177836228   |
| 3.7956841783   | 13.8097068415  |
| 25.0690997007  | 21.0480094307  |
| 45.3014906675  | 76.1911547547  |
| 0.3484298885   | 0.4619291069   |
| 0.270047202    | 0.3417403206   |
| 1.110013962    | 2.0573327369   |
| 6.7098187842   | 8.1287381918   |
| 10.4909691393  | 8.9469706429   |
| 9.783101823    | 7.7648720689   |
| 4.0503936073   | 2.0897112796   |
| 0.0974586564   | 0.4316631789   |
| 21.7539943205  | 11.6054994494  |
| 0              | 0              |
| 0.1111313929   | 0.2812699229   |

gene\_expression\_table

|                 |                 |
|-----------------|-----------------|
| 0               | 0.006682        |
| 5.1568783406    | 9.5445542986    |
| 0.005542        | 0.007013        |
| 22.2904995329   | 12.859649242    |
| 0               | 0               |
| 0               | 0               |
| 5.6185347866    | 5.9517664489    |
| 4.340507538     | 4.7146888255    |
| 35.2027976517   | 26.0656497868   |
| 0               | 0               |
| 0.4893590729    | 0.6579806531    |
| 1.0637940044    | 1.5015463025    |
| 20.4791225635   | 11.5939977197   |
| 1.1630948573    | 1.7785186856    |
| 0.0326387265    | 0.00413         |
| 0.3233658437    | 0.716124833     |
| 0.3519421399    | 0.5408149603    |
| 14.3262204754   | 10.8522240774   |
| 0               | 0               |
| 88.7252172856   | 42.7489262774   |
| 14.0615593005   | 15.5703392943   |
| 6.1221831869    | 3.3818551751    |
| 2.7480958099    | 1.5538527023    |
| 0               | 0.0494665322    |
| 3.7006634641    | 2.7426659037    |
| 3.0698176018    | 3.6420037532    |
| 16.8448297416   | 30.6663553014   |
| 52.2996608168   | 39.5869105061   |
| 0               | 0               |
| 0               | 0.5993575765    |
| 0               | 0               |
| 33.6456929039   | 47.3089716448   |
| 0               | 0               |
| 1.5040609118    | 1.9447419913    |
| 160.8708254653  | 100.9414527124  |
| 1071.1053889561 | 1675.7096920198 |
| 11.3785654693   | 11.8583200527   |
| 598.3830373595  | 1374.1546249356 |
| 1.2598515171    | 0.7971607522    |
| 2.9267653569    | 5.5556605881    |
| 20.1650220189   | 14.5136501721   |
| 3.7422578209    | 2.7230655136    |
| 0.2646664536    | 0.6884694247    |
| 0.1732375278    | 0.7490333056    |
| 1.350347346     | 2.3869545989    |
| 30.6006956294   | 32.143015182    |
| 5.2046826594    | 6.016460385     |
| 0.4021199815    | 0.7170529182    |
| 7.8864931136    | 4.7227865315    |

gene\_expression\_table

|                |                |
|----------------|----------------|
| 0.4107010477   | 0.2598677318   |
| 0              | 0              |
| 0              | 0              |
| 0              | 0              |
| 0              | 0              |
| 0              | 0.0301595333   |
| 2.522336269    | 2.2343827272   |
| 0              | 0              |
| 0              | 0              |
| 14.0749484897  | 13.493649454   |
| 0              | 0              |
| 0              | 0              |
| 21.6142353687  | 19.6512830956  |
| 8.7020706081   | 3.9575554224   |
| 16.6072655074  | 11.2586909347  |
| 24.6686432231  | 14.4778039773  |
| 0              | 0              |
| 0.1952932646   | 0.3459966083   |
| 0              | 1.457213595    |
| 0              | 0.1199702236   |
| 3.8415645196   | 1.7825269421   |
| 88.661712752   | 38.6670383065  |
| 13.8759743912  | 10.7644094757  |
| 1.4044216254   | 0.761688263    |
| 0              | 0.2536491071   |
| 10.3388493383  | 2.9623346862   |
| 0              | 0              |
| 0.0445360411   | 0.1174159002   |
| 0              | 0.0159358098   |
| 8.0542976205   | 2.8163713429   |
| 0.5431517091   | 0.6561064467   |
| 7.1208841039   | 9.2366465144   |
| 14.63152961    | 3.7942544243   |
| 40.3123142234  | 23.5335092102  |
| 0              | 0.2109751999   |
| 329.8035844475 | 132.6611896094 |
| 0.1626614775   | 0              |
| 1.6749658498   | 1.0454990492   |
| 0.3099979005   | 0.0653828794   |
| 32.1493262349  | 13.1906605238  |
| 141.152276234  | 162.6771576964 |
| 0.1136214519   | 0.0718930452   |
| 4.2053016776   | 1.9606412529   |
| 3.5170595135   | 3.4832201738   |
| 0.0837662886   | 0.4618783587   |
| 5.1787750877   | 4.7104396995   |
| 0              | 0              |
| 0              | 0              |
| 15.6884575865  | 15.8827893367  |

gene\_expression\_table

|                |                |
|----------------|----------------|
| 3.2080009928   | 6.1797241911   |
| 4.7317483952   | 6.1675887684   |
| 3.130036773    | 8.531406973    |
| 0.4958656721   | 2.3531621395   |
| 0              | 0              |
| 0              | 0.0594580467   |
| 0              | 0              |
| 40.4594050658  | 101.4705096156 |
| 13.8264383976  | 6.7677585339   |
| 19.5412251982  | 40.109395712   |
| 7.3887897066   | 7.4803140918   |
| 3.7206100908   | 1.7236001941   |
| 3.8668810013   | 1.3829385046   |
| 25.0307661158  | 28.796386753   |
| 3.2069839006   | 1.6389634609   |
| 0.6889597238   | 0.6539004528   |
| 0.8616678394   | 0.7723854857   |
| 0.8450125038   | 3.2491773668   |
| 2.0544948794   | 2.6540948941   |
| 0              | 0              |
| 2.3127782203   | 1.8396921958   |
| 0.0454507529   | 0.1437929623   |
| 4.2584700107   | 5.0720227766   |
| 0              | 0.0112881949   |
| 28.7692304436  | 7.4468845095   |
| 0.6205218591   | 0.2524050872   |
| 1.3013747288   | 0.4767250777   |
| 0.0475022014   | 0.120226519    |
| 2.7668447175   | 2.8220212773   |
| 9.0741982384   | 5.6352983982   |
| 1.3905507203   | 0.351943842    |
| 0.1432684714   | 0.0906519545   |
| 0.2872381841   | 0.5452428413   |
| 1.1039019787   | 0.8628343577   |
| 0.2378521972   | 0.2006653788   |
| 2.5129594695   | 1.8550636639   |
| 0.1483645706   | 0.1877529393   |
| 0              | 0              |
| 11.3726973715  | 11.7568145621  |
| 1.6885086914   | 1.495746107    |
| 8.1317899765   | 3.4988200864   |
| 0              | 0.4531258703   |
| 2.6892727383   | 3.8286345353   |
| 0.5143395643   | 1.6272207812   |
| 0.3860382414   | 0.4274594497   |
| 2.3484946058   | 1.7690366315   |
| 16.9449303296  | 10.721766196   |
| 115.7740499292 | 56.0377028489  |
| 0.4248232476   | 0.8064103151   |

gene\_expression\_table

|                |                |
|----------------|----------------|
| 2.3183378429   | 8.8014559511   |
| 6.31095113     | 5.1299539054   |
| 40.6443492881  | 36.6523287995  |
| 15.851143593   | 7.6646038249   |
| 0.271973607    | 0.4589042062   |
| 0.4490383168   | 3.9777545569   |
| 42.4004216301  | 18.2231458642  |
| 24.0529218122  | 21.2628917272  |
| 9.9271054067   | 7.3281772948   |
| 1.1630123994   | 2.0156893603   |
| 0.1579361115   | 0.5995967037   |
| 5.0049424879   | 5.2026598986   |
| 0              | 1.1681453541   |
| 12.9789668568  | 12.0293360933  |
| 142.3576837914 | 170.7079061268 |
| 2.6305024158   | 7.2125252668   |
| 13.3019972706  | 4.872843726    |
| 619.3766965786 | 892.8179265904 |
| 0              | 0.1431074322   |
| 39.4874649894  | 46.5828946926  |
| 0.9217807141   | 1.3123107321   |
| 0              | 0              |
| 0              | 0              |
| 5.1585157907   | 9.3365830609   |
| 0.6035257359   | 0.3500529794   |
| 0.7465533175   | 2.1256897993   |
| 0              | 0              |
| 0.9101225678   | 1.612443329    |
| 2.3801599994   | 2.4237618644   |
| 0.9523126588   | 3.3141242904   |
| 0.0573036698   | 0.0846030005   |
| 12.94998911    | 36.5998657066  |
| 32.1067677215  | 25.2024649079  |
| 0.008218       | 0              |
| 0.2405284721   | 0.1521924252   |
| 1.5262114139   | 1.4807366271   |
| 0.9090919272   | 1.994097692    |
| 10.18836097    | 12.2320143299  |
| 1.1816131454   | 4.0186513326   |
| 0              | 0              |
| 207.5035832833 | 102.2752904398 |
| 9.3058132053   | 8.1674716842   |
| 36.6333274428  | 14.5132520841  |
| 0.2589527656   | 0.1092334976   |
| 1.7168525208   | 1.2116695262   |
| 26.7467082772  | 20.2144924184  |
| 1.5231925304   | 2.8037458224   |
| 0              | 0              |
| 0              | 0              |

gene\_expression\_table

|                |               |
|----------------|---------------|
| 0.0678394349   | 0.0858496961  |
| 7.2823781846   | 5.3354229632  |
| 1.85799185     | 5.5842385099  |
| 1.0248519656   | 0.4886995468  |
| 2.1792861933   | 1.9092815033  |
| 1.5211139705   | 2.1874373515  |
| 0.1774395461   | 0.6736405369  |
| 1.3767685813   | 1.3793035262  |
| 18.1521214875  | 8.9643758332  |
| 2.8921199579   | 1.4428572318  |
| 0.4393425257   | 0.6671769431  |
| 2.9899274654   | 2.0269844687  |
| 0              | 0             |
| 0.1235736212   | 0.3909509951  |
| 0              | 0             |
| 2.6117752486   | 3.026151972   |
| 17.411241956   | 6.8482941768  |
| 20.3110862076  | 23.7526471502 |
| 0              | 0             |
| 0.576868578    | 1.692313892   |
| 0              | 0             |
| 5.9992150439   | 20.4160785048 |
| 1.6659243958   | 1.1161059331  |
| 0.4430096609   | 0.4048932951  |
| 1.8305878083   | 1.7983968189  |
| 76.2344288146  | 91.9227905303 |
| 55.2347447549  | 34.479162974  |
| 1.1150420216   | 2.0212587862  |
| 0.8171612229   | 0.6319525497  |
| 1.7479531355   | 2.8756079629  |
| 1.5263810034   | 0.8752608779  |
| 0.210831067    | 0.5336065391  |
| 0.148121044    | 0.6091954711  |
| 3.8122940207   | 2.0832618127  |
| 23.5973496146  | 14.6006976114 |
| 113.7423907863 | 34.1394106009 |
| 0.2013470846   | 0.7576990332  |
| 3.3054336762   | 6.4645935465  |
| 0              | 0             |
| 3.1257390112   | 3.1644573064  |
| 0              | 0.0866609627  |
| 19.7741307801  | 16.3949292116 |
| 3.5015624965   | 7.8237847281  |
| 4.1102969891   | 4.2150196924  |
| 0              | 0             |
| 0              | 0             |
| 0.238265141    | 0.2638305616  |
| 40.974762407   | 15.054065464  |
| 0              | 0.1215585912  |



gene\_expression\_table

|                |                |
|----------------|----------------|
| 1.6544339235   | 1.7796102273   |
| 0              | 0.6463839416   |
| 597.8553002948 | 421.848498508  |
| 4.0532610107   | 2.8663934037   |
| 44.9579202988  | 52.099116173   |
| 11.6278540041  | 12.9252141639  |
| 90.0974913146  | 47.9389250187  |
| 0              | 0              |
| 16.868083993   | 12.7727768562  |
| 0.0176103491   | 0.0891424359   |
| 0              | 0              |
| 0.0921904441   | 0              |
| 0.6018428916   | 1.1847458671   |
| 0              | 0              |
| 147.5396651861 | 26.0109915135  |
| 10.6305831445  | 9.8607125232   |
| 78.6183736039  | 31.6137296672  |
| 7.975262595    | 5.9273791332   |
| 0              | 0              |
| 2.1229490344   | 0.7164152818   |
| 5.5292331286   | 5.5977233257   |
| 12.2380449275  | 7.2694296814   |
| 0.1756126111   | 0.7037438157   |
| 385.156245641  | 202.4621726031 |
| 11.272020604   | 4.7145572554   |
| 0.5002261654   | 0.5626915884   |
| 17.3405188821  | 21.94414324    |
| 0              | 0.0160373505   |
| 2.7119602816   | 11.4398047111  |
| 4.8472546313   | 16.1020689758  |
| 1.1231679547   | 1.0885027437   |
| 0              | 0              |
| 11.9576486515  | 5.9389852285   |
| 36.2516449365  | 27.5818079162  |
| 0.0990428358   | 0.025067418    |
| 0.8604484227   | 0              |
| 227.7885335561 | 65.2383929098  |
| 0.8239231124   | 1.9755686518   |
| 226.5674903764 | 251.3987794621 |
| 25.4398874611  | 44.7438723382  |
| 12.4340245421  | 7.5905018077   |
| 0.3440771932   | 0.2660924839   |
| 11.3013611801  | 12.7260781887  |
| 0              | 0.0223733782   |
| 8.8306592407   | 7.0221629046   |
| 0.2055121007   | 0.1300361023   |
| 6.942755907    | 3.8102308732   |
| 3.3661882634   | 3.7880367126   |
| 4.1556043486   | 0              |

gene\_expression\_table

|                |                |
|----------------|----------------|
| 7.7843246884   | 5.8210074413   |
| 0.9319254438   | 0              |
| 0              | 0              |
| 45.2130200502  | 36.0388622045  |
| 26.2204091983  | 16.7534040615  |
| 3.2810305035   | 4.6503413359   |
| 0.6658586159   | 0.421316598    |
| 3.9450765014   | 1.6974261442   |
| 522.5873222164 | 156.9740159491 |
| 7.3359578324   | 4.2549534231   |
| 0.6458323653   | 1.1967465152   |
| 0.5884556186   | 1.7313832504   |
| 0              | 0              |
| 1.3524450698   | 1.6790003511   |
| 2.4039016822   | 3.9112692307   |
| 0.9973316342   | 0.339798007    |
| 4.3258904312   | 2.3888044976   |
| 0              | 0.004368       |
| 0              | 0              |
| 4.9659218665   | 5.9986432812   |
| 0.4490954079   | 0.0710403624   |
| 1.209679348    | 1.2756912038   |
| 0.4528211463   | 1.8623727199   |
| 18.6041134012  | 8.3640320949   |
| 1.9622441332   | 1.7382315164   |
| 9.9133283605   | 8.9507566726   |
| 21.5525374401  | 14.4033263217  |
| 22.9197681442  | 7.2511479991   |
| 41.3895157676  | 84.5186513286  |
| 2.8580702094   | 2.0667663651   |
| 0.0255331004   | 0.0484675818   |
| 25.1557810409  | 10.6114099243  |
| 8.176536334    | 9.7353375914   |
| 60.1230179099  | 75.4399109785  |
| 2.147865507    | 3.7449222026   |
| 5.3855535851   | 3.4076650215   |
| 1.9781848957   | 3.9868336357   |
| 0              | 0              |
| 0.1222236573   | 0.1856064489   |
| 28.7865929175  | 15.6954574035  |
| 0.5439671586   | 1.3193979688   |
| 2.627587208    | 7.6003855262   |
| 1.2381333442   | 3.6786619836   |
| 4.4470945817   | 0              |
| 9.9460361521   | 13.4568924766  |
| 2.1429049617   | 1.2761464501   |
| 51.0616350654  | 42.5716378855  |
| 17.8986810441  | 16.4536566197  |
| 83.5694012073  | 79.5282949792  |

gene\_expression\_table

|                |                |
|----------------|----------------|
| 3.1148709844   | 4.9272729034   |
| 48.0980745083  | 44.0201205626  |
| 5.8429952786   | 2.9757206827   |
| 21.9883022446  | 13.912918562   |
| 96.8472420495  | 46.7451078093  |
| 168.2836519416 | 38.8052497489  |
| 1.9982742188   | 1.011513346    |
| 62.8379760086  | 59.07232065    |
| 0              | 0.8012433127   |
| 0              | 0              |
| 58.8010603425  | 186.0294521157 |
| 0.6169174529   | 1.8704245774   |
| 0              | 0              |
| 0.4019896254   | 0.6782817347   |
| 3.6580775776   | 2.3146186942   |
| 31.3746590344  | 7.858106734    |
| 1.9285212051   | 2.4405120662   |
| 0.4773118702   | 1.1864882283   |
| 106.2196908967 | 36.5089410141  |
| 10.4343416087  | 2.6159836246   |
| 0.229971501    | 1.1822897774   |
| 0              | 0.6589065416   |
| 3.5355828148   | 0.7989682622   |
| 33.9214083891  | 19.653319771   |
| 0              | 0              |
| 0              | 0              |
| 213.0190642007 | 374.0622643997 |
| 11.4035530542  | 15.5948011461  |
| 6.0475397436   | 3.6154123824   |
| 6.3406450306   | 10.557871918   |
| 2.2848229174   | 5.7828121199   |
| 0.201126153    | 0.3658751731   |
| 0              | 0              |
| 0              | 0              |
| 0              | 0              |
| 0.9932000934   | 0.3278813441   |
| 0              | 0              |
| 0              | 0.0398968652   |
| 0.2547018661   | 0.0966963146   |
| 0.0676460417   | 0.0428024801   |
| 3.8387567877   | 3.6994654894   |
| 10.0064127374  | 6.3314758895   |
| 12.7538958121  | 6.2147685594   |
| 0.5358061385   | 1.1865943448   |
| 8.7777142973   | 5.3071813481   |
| 343.9604950677 | 72.1315152249  |
| 1.0968086946   | 0.732552113    |
| 6.1652776148   | 5.3174740938   |
| 14.7177654012  | 11.8768699898  |

gene\_expression\_table

|                 |                 |
|-----------------|-----------------|
| 0               | 1.2346178127    |
| 4.6043396996    | 4.6270985072    |
| 0               | 0.6585737045    |
| 82.7253192451   | 23.9115857223   |
| 2.9228495625    | 0.9247045879    |
| 0.9888756149    | 1.5642574111    |
| 7.7622133967    | 6.2115739741    |
| 3.3244834789    | 1.3147123465    |
| 4.2884559009    | 5.7569893519    |
| 5.1238318924    | 6.1487397156    |
| 0               | 0               |
| 9.0428903405    | 4.6319454491    |
| 35.1810387448   | 12.7755997836   |
| 7.7583451126    | 7.363544206     |
| 10.2647981875   | 7.7939606059    |
| 18.8315657837   | 14.7289058786   |
| 9.1265340516    | 6.0276481555    |
| 3.9755731187    | 3.3930153814    |
| 56.7185398194   | 39.1507555419   |
| 2.1436426264    | 2.0345585317    |
| 12.108857099    | 8.4976109654    |
| 1.155804928     | 0.9903374586    |
| 12.1603796535   | 9.1101469311    |
| 1.7076074826    | 1.866274448     |
| 19.6636161805   | 8.7430217228    |
| 1.5062652321    | 2.7003848809    |
| 2.3525189886    | 2.7565503071    |
| 1750.5602395372 | 2586.3621257705 |
| 1.4062064379    | 0.8429358623    |
| 0.3962136656    | 0.9192368502    |
| 0               | 0               |
| 0               | 0.1128891168    |
| 64.0094445549   | 94.4708589802   |
| 0.9399397381    | 3.0397780735    |
| 5.7682711017    | 5.4747396039    |
| 0               | 0.0469540124    |
| 626.916481041   | 807.7397833303  |
| 6.3116390234    | 7.4880712777    |
| 0               | 1.7692713649    |
| 12.2226935843   | 6.7146252888    |
| 0               | 0               |
| 7.139663855     | 5.2234333295    |
| 0               | 0.893323768     |
| 12.213829978    | 3.4643660148    |
| 4.7324663247    | 1.9055459782    |
| 1.4079976012    | 0               |
| 8.6098488319    | 4.4101331115    |
| 5.4415568113    | 19.5419223538   |
| 41.008409845    | 51.1914640895   |

gene\_expression\_table

|                 |                 |
|-----------------|-----------------|
| 9.4630508783    | 7.3096208137    |
| 1.1666436668    | 1.2918224316    |
| 6.9564049837    | 11.444181859    |
| 0.1681893034    | 1.0287306042    |
| 62.7073448656   | 37.5275444656   |
| 96.0493457925   | 88.9911423196   |
| 53.2526307381   | 35.174466943    |
| 0.7938180902    | 0               |
| 16.5689511988   | 7.6008046433    |
| 7.4723352679    | 9.5266862031    |
| 14.9666699777   | 23.1011536061   |
| 8.1325291417    | 7.952586643     |
| 19.361437049    | 4.9003164302    |
| 0.7626636439    | 0.5055486735    |
| 6.583026058     | 10.9813929414   |
| 6.3041828955    | 7.1800563795    |
| 0.6218190246    | 1.3901932027    |
| 0               | 0.1774904922    |
| 3.9631527623    | 4.0958324565    |
| 1.31532037      | 1.3488322805    |
| 19.7410266372   | 3.4549500577    |
| 7.7149329806    | 5.3697168787    |
| 6.3715336232    | 4.7563063203    |
| 352.1995487868  | 337.4606708376  |
| 36.5023144087   | 15.1427653921   |
| 0.8001166844    | 1.6706820691    |
| 2.2617193823    | 5.1703696507    |
| 0               | 1.5174073676    |
| 1.2620722223    | 1.2244676908    |
| 118.063967704   | 132.0853523821  |
| 6.3140566583    | 3.9951677536    |
| 7.2871677167    | 8.2996124827    |
| 46.2185912461   | 19.1481425689   |
| 3.9135558522    | 0.9905081939    |
| 0.1623666693    | 0               |
| 0.6012558674    | 0.7291761622    |
| 30.3863976682   | 12.817829876    |
| 1.2653964112    | 20.8174002045   |
| 0               | 0.0347916557    |
| 0               | 0               |
| 0.0510139427    | 0.0322786554    |
| 0               | 0               |
| 0.2034856444    | 0.0321884697    |
| 9.0307186391    | 16.231394648    |
| 1578.5427026911 | 724.8001738305  |
| 1148.3567373959 | 1247.8028788319 |
| 397.1567717257  | 358.9967169098  |
| 251.8965540205  | 217.5738381908  |
| 1.2796669082    | 0.6940275249    |

gene\_expression\_table

|               |               |
|---------------|---------------|
| 5.7978534898  | 5.6925689228  |
| 0             | 0             |
| 9.788874537   | 4.8473455077  |
| 90.903845125  | 34.4272302404 |
| 0.3707319807  | 0.3980711318  |
| 0             | 0             |
| 0.0958252218  | 0.1010543768  |
| 0.8377099158  | 2.1202164145  |
| 0             | 0             |
| 2.5734298312  | 2.1535801467  |
| 2.9366433312  | 1.3116261672  |
| 0             | 0             |
| 0             | 0             |
| 0.4823452789  | 0.7412000816  |
| 18.4088546488 | 15.4084471981 |
| 0.3522601703  | 1.1144487209  |
| 0             | 0             |
| 1.1657819174  | 1.4547879918  |
| 0             | 0             |
| 5.7639424381  | 6.9626215453  |
| 0.9130262276  | 0.519938896   |
| 0             | 0.1103299204  |
| 0.1854735198  | 0.058678427   |
| 4.2458393747  | 5.1195950378  |
| 6.3806804928  | 15.7007022681 |
| 4.926532805   | 5.2102162106  |
| 3.8748007978  | 3.8601998303  |
| 55.6888420586 | 87.439118605  |
| 0.0533459458  | 0             |
| 5.8038375844  | 4.6792602179  |
| 11.9601065485 | 5.7514213593  |
| 6.6523685253  | 8.1633586866  |
| 62.932795607  | 54.0417164868 |
| 0.1240925081  | 0.3140740817  |
| 47.3750839036 | 27.1659287142 |
| 11.0730082395 | 15.2761521066 |
| 1.4597413526  | 2.019118715   |
| 1.9628785587  | 1.0161780282  |
| 0.480356022   | 0.5774885603  |
| 0.4266488814  | 2.7397925312  |
| 27.6064428608 | 26.0303742281 |
| 0.1420307309  | 0             |
| 2.2850293762  | 2.6025005971  |
| 6.8410782316  | 7.6183999713  |
| 0.7163589603  | 0.8417876595  |
| 4.193562889   | 6.5388408141  |
| 2.1284375241  | 0.7070445114  |
| 7.8804965177  | 16.7041712429 |
| 5.3248638236  | 7.3432678467  |

gene\_expression\_table

|                 |                 |
|-----------------|-----------------|
| 0.1435129484    | 0.068104984     |
| 1.6890161945    | 0.6887249922    |
| 0               | 0.009172        |
| 0.2739463081    | 0.1386698302    |
| 0               | 0               |
| 0.4765200546    | 0.2192830331    |
| 2.2636082718    | 2.0461137661    |
| 8.519338279     | 10.6732725225   |
| 1.8687003617    | 1.6238360397    |
| 10.7317039384   | 13.58079594     |
| 2.4831794865    | 4.6088871492    |
| 2.1963691972    | 0               |
| 0.0792373157    | 1.0027352794    |
| 0.092728413     | 0.0586731456    |
| 2.4523121404    | 2.3872007186    |
| 0.4782238315    | 0.4917123599    |
| 12.3734168475   | 15.162839175    |
| 0               | 0               |
| 1537.3582926846 | 2458.6278915668 |
| 7.9623805949    | 15.1143937641   |
| 5.7862799768    | 7.5936443254    |
| 0.606673281     | 2.516465122     |
| 22.1732915601   | 13.4761544723   |
| 9.6053503934    | 6.9099241055    |
| 0.4252746449    | 0.6577732487    |
| 1.149953765     | 3.7836440079    |
| 0.5358177496    | 0.8287505172    |
| 0               | 0.0644063567    |
| 0.4407860143    | 0.9328849521    |
| 0               | 0               |
| 43.3145073315   | 22.8390837983   |
| 5.1814429744    | 0.8196289251    |
| 4.9037484219    | 4.2713962937    |
| 0.3478845666    | 0.3616275488    |
| 0               | 0               |
| 5.8234574868    | 4.9129935158    |
| 0.9954044233    | 1.8895020438    |
| 0               | 0               |
| 15.8007922897   | 23.3282518022   |
| 0.2855838054    | 0.433681966     |
| 0               | 0.0961358057    |
| 1.4666476384    | 2.378023852     |
| 0.0896773751    | 0.2837131315    |
| 0.1383754386    | 0.2042971654    |
| 2.0430000486    | 2.4468805018    |
| 0.9393986328    | 1.3270254326    |
| 66.6854657203   | 29.6125338996   |
| 1.4231810851    | 2.1188381217    |
| 0.8136356794    | 0.1144047394    |

gene\_expression\_table

|                |                |
|----------------|----------------|
| 0              | 0              |
| 0.4512656153   | 0.2855346304   |
| 7.995775653    | 3.3115167523   |
| 0.0954611806   | 0.1409386579   |
| 2.2621503164   | 1.5458656971   |
| 0              | 0.1889775924   |
| 0              | 0              |
| 24.2796500412  | 20.8701511552  |
| 5.5916499324   | 5.2390663785   |
| 0              | 0.4920330638   |
| 4.9247016344   | 5.5481152254   |
| 1.8276235479   | 0.7863614282   |
| 1.8547722996   | 3.8337339182   |
| 6.726131935    | 7.2165345948   |
| 124.0152691183 | 104.7279739376 |
| 56.767666794   | 64.5059210176  |
| 0              | 0              |
| 11.4913483613  | 13.703145453   |
| 11.6574323985  | 13.9327185002  |
| 32.9533577896  | 16.829709768   |
| 5.9231049815   | 7.4462794407   |
| 0.1691465719   | 0.0891884259   |
| 2.6571718015   | 4.2867678231   |
| 2.6547140612   | 1.8324530493   |
| 0.2541458102   | 0.2412130269   |
| 3.184417752    | 4.533557198    |
| 0              | 0              |
| 0              | 0.1218691728   |
| 0              | 0              |
| 15.4069658958  | 13.687472887   |
| 0              | 0.0763532041   |
| 0              | 0              |
| 366.7726775812 | 226.4121117645 |
| 0.7695821555   | 1.5732128031   |
| 42.4943155548  | 48.5120869923  |
| 0.7887718364   | 1.0889213101   |
| 7.6095813833   | 10.1531596163  |
| 0              | 0.0101643682   |
| 13.5414384268  | 16.3575386044  |
| 4.5064845972   | 2.8936848778   |
| 508.2235526891 | 30.452111731   |
| 2.8033838859   | 0              |
| 0              | 0              |
| 0              | 0              |
| 0              | 0              |
| 0              | 0              |
| 35.7787173155  | 1.7414377697   |
| 0.9281473676   | 0.369767417    |
| 5.1482147651   | 4.3433210968   |



gene\_expression\_table

|                |                |
|----------------|----------------|
| 1.3453836913   | 0.1216115052   |
| 0              | 0              |
| 0.1143783115   | 0.0723719419   |
| 9.7533976227   | 6.7454647496   |
| 1.583789477    | 4.4442280271   |
| 12.4203415652  | 15.0735696168  |
| 5.2695314172   | 3.7153104221   |
| 0.2433095448   | 0.4233683471   |
| 48.5120891787  | 58.16013726    |
| 0              | 0              |
| 4.38181396     | 2.3104641467   |
| 5.8270216696   | 8.5084623332   |
| 0.0886307276   | 0.0560803686   |
| 0.1040107262   | 0.3948716223   |
| 13.3195056128  | 16.0894522714  |
| 0              | 0.0359220921   |
| 0              | 0              |
| 4.4426200004   | 1.9893453701   |
| 91.6755781045  | 132.0065224274 |
| 7.2117851775   | 17.6443661338  |
| 0.1235279365   | 0              |
| 2.3718781137   | 2.1962729181   |
| 6.7370281098   | 1.894577548    |
| 1.6375673932   | 0.8996095136   |
| 2.1195398926   | 1.1455413211   |
| 18.6265453315  | 7.9110126437   |
| 3.3653505788   | 7.1208903464   |
| 3.1292893339   | 2.1621041856   |
| 9.7546015905   | 3.9277282826   |
| 0              | 0              |
| 173.0438616382 | 94.1745431951  |
| 592.1681960168 | 320.5791016575 |
| 21.950068415   | 16.1822775705  |
| 0.3189485169   | 3.4308051506   |
| 1.9713970464   | 1.9403772443   |
| 5.1221546843   | 7.4352387799   |
| 0.3148345456   | 1.1952539159   |
| 3.5682863971   | 3.7187360964   |
| 7.5877807533   | 11.4266329133  |
| 5.7534544849   | 20.5764639228  |
| 3.880337171    | 2.8555644024   |
| 1.01352049     | 0.5496829781   |
| 1.1461064506   | 1.6115322019   |
| 154.7499849677 | 83.0604480974  |
| 3.1362057171   | 8.3955745889   |
| 2.0240541809   | 0.8352415714   |
| 0.1806467691   | 0              |
| 0.1665853422   | 0.2371624064   |
| 0.070305131    | 0.0296566648   |

gene\_expression\_table

|                 |                 |
|-----------------|-----------------|
| 0               | 0               |
| 0.2936282286    | 0.1857908622    |
| 4.4099083045    | 3.9102631921    |
| 1.5324417748    | 2.391778692     |
| 0               | 2.6596139763    |
| 2.820936379     | 14.6363804224   |
| 3.7602989695    | 2.6767107503    |
| 0.1100413264    | 0               |
| 13.5383721933   | 14.6130904008   |
| 0.7051130245    | 1.0596169476    |
| 7.4932310348    | 9.4825614087    |
| 0.2874118038    | 0.1212383135    |
| 1.9953473782    | 2.0516270906    |
| 308.6352928679  | 114.9558591185  |
| 306.4463900816  | 110.8008280661  |
| 1.1106226918    | 0.5354189962    |
| 0.0160372076    | 0.0710318842    |
| 20.7531080477   | 20.6349935434   |
| 0.0878735016    | 0.6672148805    |
| 0.9681939424    | 1.1748452151    |
| 0.004104        | 0.002597        |
| 2.2159747154    | 1.1217119142    |
| 0               | 0               |
| 1.6569908406    | 0.723067182     |
| 0.1758335798    | 0.4652576359    |
| 0.1408831942    | 0.0278570906    |
| 2.4389006594    | 2.5505575138    |
| 0.5909148221    | 0.8101091373    |
| 23.8113023221   | 11.1686300379   |
| 8.1900476486    | 11.4124539506   |
| 31.5823364007   | 30.7437927294   |
| 4.2751159946    | 3.1558854954    |
| 0.6686636885    | 1.1987592068    |
| 14.1103136736   | 7.4803717782    |
| 6.1228049966    | 5.9661984343    |
| 6889.7823066739 | 3519.9699291117 |
| 0               | 0               |
| 3.1284823598    | 2.6675261231    |
| 0               | 0               |
| 8.2456133417    | 4.3063795549    |
| 5.5965427957    | 2.6643063896    |
| 1.4796292576    | 5.9193474525    |
| 65.1239045614   | 35.3274575872   |
| 28.0150163071   | 11.4892507827   |
| 0               | 0.1161544629    |
| 3.8543634765    | 3.2956986389    |
| 3.0560034226    | 6.3283457216    |
| 7.0089138071    | 5.195090011     |
| 0               | 0.0300061315    |

gene\_expression\_table

|                 |                 |
|-----------------|-----------------|
| 0.4153928814    | 0.3212445515    |
| 3.6502144032    | 4.582034358     |
| 0               | 0               |
| 2.8422690483    | 4.4960562848    |
| 1.1098095221    | 0.8988453197    |
| 0               | 0               |
| 0.1588551268    | 0.6030857001    |
| 12.1363772287   | 24.0847432997   |
| 0               | 0               |
| 2.6094839123    | 3.3022592428    |
| 0.1352572994    | 0.1283744264    |
| 0               | 0.7139632603    |
| 19.8515985747   | 21.3363857556   |
| 0               | 0               |
| 1677.5317010321 | 3122.0809292152 |
| 64.5471089645   | 65.3466491734   |
| 1.9688949359    | 2.4183218814    |
| 1.2505193562    | 1.4607801299    |
| 21.236411916    | 15.2814830167   |
| 16.9161300014   | 10.1197134042   |
| 139.3307309762  | 64.848742122    |
| 0.36983735      | 0.234011561     |
| 0               | 0.1620646901    |
| 0               | 0.0781592098    |
| 2.9715163291    | 1.9697361354    |
| 6.273472397     | 4.0640000223    |
| 24.6584861071   | 18.6468371576   |
| 0.1187228113    | 1.2269745152    |
| 0.8228192774    | 1.4817992642    |
| 20.0764902996   | 15.736843577    |
| 1.204077741     | 0.8484465275    |
| 0.1192963847    | 0.3899996981    |
| 0               | 0.1469959873    |
| 0               | 0               |
| 0.5080305296    | 0.3750275271    |
| 5.5148535461    | 5.6704025872    |
| 2.1874480646    | 5.3338098105    |
| 0               | 0.0185755568    |
| 0               | 0               |
| 0.4471974632    | 1.1318421619    |
| 73.928030519    | 129.1249964051  |
| 0.6884302899    | 0.580798187     |
| 104.72827014    | 110.9691821547  |
| 23.8765238127   | 24.9546422846   |
| 34.9812469445   | 16.4140503102   |
| 238.510329025   | 189.5581750008  |
| 1.6058524771    | 0.9314158629    |
| 0               | 0               |
| 0.7637708002    | 1.245348926     |

gene\_expression\_table

|                |                |
|----------------|----------------|
| 0              | 0.1757597336   |
| 0.3456806548   | 0.437453219    |
| 1.8323886966   | 1.9323816232   |
| 0.4834371615   | 0.2960234646   |
| 1.7737335634   | 6.7338925063   |
| 0.3809055028   | 0.2410148442   |
| 0              | 0              |
| 0              | 0              |
| 0              | 0              |
| 6.1515318998   | 5.5390871926   |
| 13.8009104884  | 7.2415134962   |
| 2.8225851454   | 1.6236069866   |
| 4.6492135253   | 4.7803467819   |
| 2.514074434    | 1.2051212528   |
| 53.0028850461  | 58.8896250225  |
| 5.6536033674   | 6.7371943397   |
| 1.8114006922   | 2.1848465039   |
| 6.826752082    | 4.730959364    |
| 5.2087642122   | 2.4968204473   |
| 2.0481301045   | 3.1102502083   |
| 4.0864207797   | 2.8474872644   |
| 0              | 0              |
| 134.5391297062 | 138.3725639998 |
| 6.4364990939   | 2.8464703577   |
| 2.7249113813   | 5.1724962275   |
| 7.8238630593   | 5.2719455079   |
| 48.6630578154  | 28.3243359728  |
| 0.1412295367   | 0.3217026069   |
| 1.3323072351   | 2.060682594    |
| 0              | 0.798034988    |
| 4.1731385441   | 5.0169866926   |
| 0              | 0.0110784822   |
| 21.0282985252  | 30.9556159611  |
| 0.5029997454   | 0.1425084978   |
| 6.6641352656   | 3.7146917587   |
| 0.1346371639   | 0.8235087972   |
| 17.1289958243  | 13.5033711829  |
| 0              | 0              |
| 0              | 0              |
| 0.9877168791   | 0.7440116475   |
| 47.2615784369  | 34.2473369399  |
| 9.0648992853   | 3.8800600521   |
| 0              | 0              |
| 0.1520729548   | 0.4811145974   |
| 0              | 0              |
| 23.2143347451  | 14.6886806078  |
| 0.2764023193   | 0.3206340662   |
| 5.7942680285   | 1.9409695124   |
| 5.5958091681   | 2.2531743331   |

gene\_expression\_table

|                |                 |
|----------------|-----------------|
| 0.0181425629   | 0.0229591169    |
| 0              | 0               |
| 0              | 0.0216943215    |
| 0.1398872553   | 0.2447110783    |
| 2717.166035269 | 5127.7663536761 |
| 0              | 0               |
| 1.0161195168   | 0.7715295849    |
| 1.8702231237   | 1.0923400602    |
| 1.3723365948   | 3.0391716808    |
| 0              | 0               |
| 2.4355640144   | 0.5630881023    |
| 0.0907343853   | 1.894577548     |
| 4.4749327158   | 6.2736649643    |
| 1.2993618754   | 1.1875653235    |
| 1.1635035139   | 1.3251552129    |
| 0              | 0.2308713933    |
| 0              | 0               |
| 18.0194186748  | 12.4151190196   |
| 1.8953786187   | 0               |
| 0              | 0               |
| 0              | 0               |
| 0.7396747001   | 0               |
| 1.8682008535   | 2.4955208497    |
| 0              | 0               |
| 0              | 0               |
| 1.036172789    | 0.3642388138    |
| 0              | 0               |
| 49.4424931446  | 53.1106126941   |
| 2.7013187528   | 2.6706833848    |
| 33.77847797    | 14.2487039371   |
| 2.8449943475   | 2.0814198817    |
| 0              | 0.0619682269    |
| 0.2172338449   | 0.1832705869    |
| 0              | 0.0150405858    |
| 9.0393940762   | 4.4390946591    |
| 29.459288293   | 15.1826815905   |
| 0.0143796217   | 0.0272957645    |
| 17.5360609036  | 5.5478996181    |
| 0              | 0               |
| 6.5446030316   | 5.7337533516    |
| 1.0700216323   | 0.5754903273    |
| 27.9180787661  | 39.3675721011   |
| 0.1550456031   | 0.0327012795    |
| 0              | 0.007799        |
| 0.7838602289   | 0.1907619824    |
| 1.1485992388   | 0.8531610052    |
| 3.2018896707   | 4.693496064     |
| 0.5243177396   | 0.2875233965    |
| 0.479051992    | 0.6418931998    |

gene\_expression\_table

|                 |                |
|-----------------|----------------|
| 1.6858476542    | 1.6762527994   |
| 13.6705189215   | 19.9085210256  |
| 0               | 0.3601454138   |
| 0               | 0.0159290083   |
| 1.9116074509    | 0.8567674119   |
| 1490.4794678045 | 584.9698849482 |
| 47.8310627968   | 37.3858233252  |
| 0               | 0.2787193922   |
| 0               | 0              |
| 0.1298790072    | 0.4930792828   |
| 3.0493209557    | 5.1708802158   |
| 0               | 0.0105780023   |
| 0               | 0              |
| 195.8860788751  | 57.2055303105  |
| 3.0265903013    | 5.3032161616   |
| 24.2410253667   | 16.6720768573  |
| 0.1594447785    | 0.2185893247   |
| 0               | 0              |
| 15.3481352415   | 8.8545182862   |
| 0.0834952765    | 0.1232722258   |
| 11.4133335829   | 8.666032269    |
| 0               | 0              |
| 51.1207139773   | 54.2017640379  |
| 63.6659535989   | 45.5846529127  |
| 29.0372456013   | 11.9824433926  |
| 2.6169491565    | 4.1036361757   |
| 0.9794569228    | 0.8091093919   |
| 0               | 0.0907795978   |
| 0.2135195266    | 0.7655821686   |
| 9.9334780256    | 7.1832309104   |
| 0               | 1.7250399059   |
| 13.5761357998   | 12.8852834795  |
| 10.9700720437   | 6.6657780661   |
| 3.6656225352    | 4.8707246795   |
| 0.2321893687    | 0.2693458637   |
| 0.1857242877    | 1.0576397283   |
| 12.1545590673   | 26.3681071735  |
| 3.9735629193    | 9.9090614255   |
| 0               | 1.1400049325   |
| 0               | 0.0576322346   |
| 17.1832459706   | 13.7243770856  |
| 0.1445482525    | 0.1829234511   |
| 0               | 0              |
| 0               | 0              |
| 0               | 0              |
| 53.5693524922   | 35.6427643648  |
| 5.0656392873    | 7.5760262236   |
| 14.7259780874   | 29.3802685057  |
| 45.9111176099   | 37.8911536861  |

gene\_expression\_table

|                |                |
|----------------|----------------|
| 3.2263287214   | 4.1995195892   |
| 14.8329278848  | 12.2418442276  |
| 1.1785661249   | 3.5049219975   |
| 3.6216671365   | 2.2151942757   |
| 0              | 2.8633010474   |
| 0.545182549    | 0.6899196056   |
| 9.1372582725   | 6.7227040748   |
| 23.7972851401  | 5.9049167477   |
| 0.2343371105   | 0.2965497834   |
| 0              | 0.3684662488   |
| 97.9460905281  | 26.7650069948  |
| 9.5882587742   | 6.004347104    |
| 261.6169716    | 82.1263880469  |
| 103.6564090833 | 74.3861019342  |
| 0              | 0              |
| 4.391672101    | 1.3315057622   |
| 97.390091308   | 52.7348828261  |
| 35.1445848687  | 9.628586114    |
| 1.876219645    | 2.5901730509   |
| 4.7332349922   | 2.3596306007   |
| 0.028495715    | 0              |
| 11.262911877   | 3.5632577261   |
| 5.4052316017   | 3.7865571391   |
| 0              | 0              |
| 7.0926083317   | 1.2822257036   |
| 202.4005089129 | 134.4706314471 |
| 7.0543479583   | 9.3329421413   |
| 1.2077294912   | 0.6686583455   |
| 0              | 0              |
| 2.5785290743   | 2.3845631394   |
| 12.1299672919  | 11.7272290028  |
| 0              | 0              |
| 0.3875471611   | 0.2985254078   |
| 1.257892098    | 2.1603568529   |
| 7.4276425042   | 4.4893421827   |
| 0.7033684948   | 0.6558641414   |
| 0              | 0              |
| 9.5319374996   | 6.5795515201   |
| 3.2619622944   | 3.8020683949   |
| 0.3830041366   | 0.2851091031   |
| 16.1686262025  | 10.1002404206  |
| 0              | 0.003546       |
| 0.1680609626   | 0.148874881    |
| 0              | 0              |
| 0              | 0.0288671599   |
| 1.7838089929   | 2.7326192587   |
| 13.9919033806  | 11.0665781569  |
| 0.1835253487   | 0.3068995781   |
| 16.3230754979  | 9.382189491    |

gene\_expression\_table

|                 |                 |
|-----------------|-----------------|
| 1.6531431103    | 0.9550551597    |
| 7.5909925213    | 6.9667143806    |
| 48.9031556525   | 34.242945189    |
| 0               | 0               |
| 54.6033609059   | 34.6925983015   |
| 0.2682882318    | 0.0636589449    |
| 0               | 0               |
| 11.9943170946   | 15.1786122537   |
| 3.1626195085    | 3.848310865     |
| 0               | 0.044374385     |
| 0.2015212059    | 0.0637554481    |
| 33.8271220915   | 18.7752939263   |
| 60.1526647717   | 32.1753688724   |
| 13.8649603032   | 9.8363270374    |
| 0               | 0               |
| 0               | 0               |
| 0               | 0.081540835     |
| 0               | 0               |
| 1.1583579695    | 2.4187070799    |
| 14.6946809736   | 8.7228090382    |
| 6.5930944805    | 7.1627759553    |
| 0               | 0               |
| 0.9048248063    | 1.7652715484    |
| 2.1906047169    | 3.4341862801    |
| 3.3211008595    | 4.428755787     |
| 0.6969564313    | 1.4209790122    |
| 0.7780774921    | 0.7122959126    |
| 0               | 0               |
| 1.1321192123    | 0.7449927474    |
| 1.8258960338    | 2.8420891546    |
| 0               | 0.0487209511    |
| 0.5770595098    | 0.7302593784    |
| 1.1146349549    | 5.8345573168    |
| 0.5447421431    | 0.1723405698    |
| 6.3698497756    | 5.0380879907    |
| 1722.6255684079 | 3466.5822287538 |
| 3.9275081692    | 1.3806103885    |
| 0               | 0               |
| 0               | 0.0192027279    |
| 2.0220247293    | 1.1125388034    |
| 8.5635577952    | 4.2896626289    |
| 1.3977665911    | 0.374179972     |
| 0.0207359226    | 0               |
| 0               | 0               |
| 419.9097048114  | 1581.8087252249 |
| 7.4653986046    | 4.3711572779    |
| 0               | 0               |
| 52.9303808116   | 44.9053296467   |
| 4.8951166075    | 2.3230087737    |



gene\_expression\_table

|               |                |
|---------------|----------------|
| 0.8605382617  | 2.4502434884   |
| 13.6911642964 | 10.4206768578  |
| 4.7414431662  | 9.4560410751   |
| 54.4043649732 | 103.8652678874 |
| 0             | 0              |
| 12.2033607152 | 14.8619595886  |
| 0.2737825081  | 0.5413551398   |
| 10.5284464309 | 12.7906338108  |
| 0.2242991933  | 0.1419234816   |
| 0             | 0              |
| 6.1402341819  | 4.1626960736   |
| 0.9094396746  | 0              |
| 2.8708348573  | 5.9593858663   |
| 0.5650476089  | 0.421701175    |
| 1.3809618579  | 1.4854469622   |
| 0             | 0              |
| 12.0449366105 | 3.0485340847   |
| 4.0850102029  | 3.7250907171   |
| 6.9245965837  | 4.6138332151   |
| 0.7829661045  | 0.4600285898   |
| 1.3577776636  | 0.9947736772   |
| 0             | 0.0494140365   |
| 0.2247232148  | 0.6161643703   |
| 3.5087345353  | 1.0447638139   |
| 0.6099123304  | 2.8943778224   |
| 8.1827808249  | 3.7836217801   |
| 0             | 0              |
| 8.4366260384  | 9.2557607217   |
| 2.0076198339  | 0.635152522    |
| 33.8950974106 | 11.9149143909  |
| 0.1114954072  | 0.0282191231   |
| 0.2034632404  | 0.2343062589   |
| 4.7892781704  | 3.7879707818   |
| 0.2004711624  | 0.2536929796   |
| 0.6073270493  | 0.9881517278   |
| 1.6352364773  | 1.6178672104   |
| 59.649093256  | 36.1014990879  |
| 0.8669651428  | 0.8594186715   |
| 4.7301458974  | 3.4756968344   |
| 49.3169722142 | 36.2788804563  |
| 1.1169038624  | 0.6342285311   |
| 0             | 1.4411456267   |
| 0             | 0              |
| 0             | 0              |
| 10.4849056505 | 10.3370690884  |
| 1.7071349604  | 1.6437456242   |
| 0             | 0.0117357206   |
| 4.1611432148  | 5.3711759052   |
| 4.5762238395  | 2.4129735322   |

gene\_expression\_table

|                |                |
|----------------|----------------|
| 2.138852329    | 2.7066826659   |
| 4.1800927672   | 3.7784564853   |
| 1.7383798555   | 1.3749320599   |
| 4.5601323772   | 2.6662432191   |
| 2.0408655016   | 2.3547982369   |
| 12.8652970993  | 14.7917235305  |
| 0.0107832238   | 0.0886989575   |
| 9.2630368756   | 7.6330746444   |
| 6.3273229125   | 6.4267703662   |
| 78.6711454251  | 56.0443526297  |
| 8.911285154    | 12.0288914352  |
| 47.3083734398  | 46.0038111405  |
| 0.4349466274   | 2.2016713936   |
| 4.0190886963   | 2.282220347    |
| 26.364501014   | 30.155783111   |
| 137.2094463697 | 184.7668447073 |
| 8.4221648401   | 9.7985867993   |
| 0              | 0              |
| 3.3955781993   | 1.0742621789   |
| 0.3461452273   | 0.6570616918   |
| 13.2115444773  | 2.5078490419   |
| 0              | 0              |
| 2.4216605261   | 2.4078778564   |
| 9.4675990435   | 3.3435605178   |
| 2.0738763932   | 4.9726547643   |
| 8.8360180117   | 4.3777944326   |
| 1.7626066349   | 5.576374723    |
| 3.5252132697   | 5.576374723    |
| 3.1241388644   | 2.1361905413   |
| 8.8283099706   | 6.4622827151   |
| 0              | 0.0382322046   |
| 8.581191738    | 8.2608686863   |
| 2.5368298021   | 2.1067703041   |
| 16.0544306939  | 9.6383963333   |
| 0              | 0.1162839628   |
| 29.9278504197  | 25.8226401677  |
| 515.193343673  | 510.1655518346 |
| 3.2037783414   | 14.1901519551  |
| 16.4726818064  | 3.9917699242   |
| 0.0782869777   | 0.1609901974   |
| 0.4409345509   | 0.8369932015   |
| 17.8751685219  | 13.6686986135  |
| 4.8200617931   | 5.0830911853   |
| 226.0722585137 | 197.1982658128 |
| 0              | 0.0432562041   |
| 0              | 0              |
| 27.8271317272  | 19.7324200557  |
| 2.3261897147   | 4.8790014516   |
| 1.4986186821   | 2.8447161742   |

gene\_expression\_table

|                 |                 |
|-----------------|-----------------|
| 0               | 0               |
| 0.9995202301    | 1.4455731605    |
| 0               | 0.0231675035    |
| 1.4395389771    | 1.3085544432    |
| 0               | 9.3134894034    |
| 0               | 0               |
| 6.9175608973    | 9.7641441341    |
| 5.2989002016    | 10.0585074035   |
| 0               | 0.0788546447    |
| 0.9755478613    | 2.139869116     |
| 0               | 0               |
| 78.072758796    | 51.2363276501   |
| 1.5008164835    | 1.4043814562    |
| 4.9868323598    | 8.8155389899    |
| 1.6832276148    | 1.0276783949    |
| 12.143925224    | 25.2411957292   |
| 0.3513566503    | 0.5835848794    |
| 1.7486925065    | 3.1613454103    |
| 0               | 0               |
| 1.274352969     | 0               |
| 0.201586925     | 0.4251749316    |
| 1.4082138707    | 2.1330857488    |
| 1.1977089552    | 1.7322069806    |
| 0.4529953625    | 0.7882300632    |
| 205.5041439661  | 164.7150868833  |
| 1992.8649908107 | 2899.473715446  |
| 0.7234075032    | 0.8274353365    |
| 0.0229375433    | 0               |
| 0.1868696596    | 25.0669330063   |
| 24.5868765716   | 25.7031095145   |
| 0               | 0.0459446638    |
| 0.3517516574    | 0.4802782873    |
| 1.0788568686    | 1.1331788599    |
| 6513.7589851535 | 8879.9700879006 |
| 0.2824734868    | 1.0128191458    |
| 19.3421868122   | 23.5235633188   |
| 0.3376406367    | 0.4005737882    |
| 0               | 0               |
| 2931.7788679184 | 2644.2973763484 |
| 1.0955976371    | 1.6070342295    |
| 13.4464855655   | 14.7120160496   |
| 0.6220416829    | 0.8363825573    |
| 0.9977340761    | 0.5260900695    |
| 48.4687897786   | 64.1893199792   |
| 5.9702634007    | 5.90255528      |
| 2.1300169967    | 1.6365546019    |
| 7.5108887831    | 10.0640191771   |
| 0.8462538803    | 3.2127613641    |
| 0               | 0.3468359697    |

gene\_expression\_table

|               |               |
|---------------|---------------|
| 1.2199352033  | 1.53593149    |
| 0.0792911847  | 0.041809041   |
| 2.2742953763  | 2.3674558881  |
| 0.7449005533  | 1.1581244989  |
| 0             | 0             |
| 2.8495064446  | 6.2675780936  |
| 2.9673982447  | 1.7211305746  |
| 0.5451504955  | 0.3449395212  |
| 0             | 0.1037926209  |
| 0             | 0             |
| 92.4650745981 | 78.875457063  |
| 0.4112475197  | 0.5204270149  |
| 0.2402402405  | 0.608040196   |
| 0.0548746213  | 1.1458084513  |
| 2.6930815104  | 2.257280292   |
| 0.847472096   | 0.9830902463  |
| 0             | 0             |
| 1.1865874633  | 0.5422469873  |
| 0.2426624323  | 0.4606280131  |
| 9.6434656295  | 10.4602698393 |
| 6.5322783128  | 5.6699652855  |
| 0             | 2.0140418284  |
| 2.0429816079  | 1.5968398982  |
| 3.9776505801  | 3.694050918   |
| 0.3952088401  | 0.312581455   |
| 0.3131858751  | 0.9625196154  |
| 0.3620182412  | 0.2290640838  |
| 3.8601656823  | 7.5623195166  |
| 5.5747435459  | 3.1354430428  |
| 0.0209203504  | 0.0132371808  |
| 0.6499760657  | 0.5234307834  |
| 0.1097080949  | 0.1735422514  |
| 7.4736666441  | 10.081394398  |
| 1.8517636708  | 2.3650745931  |
| 0             | 0             |
| 13.9520887138 | 8.1044578155  |
| 10.1597159614 | 5.1019660728  |
| 6.3437878035  | 15.3475701779 |
| 5.0674059908  | 8.9556944212  |
| 1.5583778219  | 4.5076609469  |
| 1.604012058   | 1.9170815417  |
| 33.5316955365 | 23.4244457253 |
| 2.8249807586  | 1.7874834899  |
| 9.9205620894  | 10.4045987099 |
| 0             | 0             |
| 2.8026968241  | 2.6840399108  |
| 0.0420989669  | 0.5771518405  |
| 0.2216173333  | 0.4206796699  |
| 3.5525073493  | 3.1844116596  |

gene\_expression\_table

|                 |                 |
|-----------------|-----------------|
| 3.9713183168    | 5.0256384246    |
| 2.5743217843    | 5.3753075385    |
| 0               | 2.1200175117    |
| 2.5926774048    | 0.1640495441    |
| 31.4505440118   | 22.3122049857   |
| 26.2540103378   | 41.8164402231   |
| 10.917090733    | 13.2217694344   |
| 0               | 0               |
| 568.4662336523  | 1334.8681120643 |
| 1.1232403945    | 1.6346587157    |
| 0.1882124492    | 0.595449446     |
| 33.6662964976   | 81.2681748978   |
| 0.5196514172    | 1.2713800594    |
| 5.2038702569    | 6.9271087056    |
| 4.6072321359    | 5.61282559      |
| 0               | 0               |
| 2.0114158576    | 1.4446943723    |
| 0               | 0               |
| 0               | 0.3251398006    |
| 7.6821870998    | 14.8452714992   |
| 0               | 0.0850951131    |
| 0               | 0               |
| 2.1204891453    | 2.385283873     |
| 1.9437261519    | 2.5342916681    |
| 0               | 0               |
| 5.8674362789    | 4.3065839354    |
| 0               | 0.857546422     |
| 12.1791104797   | 13.0164097384   |
| 1.3136952158    | 1.4962138427    |
| 0               | 0               |
| 12.0393449268   | 25.9839929151   |
| 0.2583121524    | 0.0326889807    |
| 1.8095271443    | 2.3268613339    |
| 17.6338371767   | 12.374866342    |
| 0               | 0               |
| 1226.9171790434 | 746.0168974541  |
| 7.701528211     | 13.9392726039   |
| 1.5609512286    | 3.471841805     |
| 3.7801019601    | 6.2439315689    |
| 0               | 0.3149372931    |
| 0               | 0               |
| 2.4813686324    | 1.9625821562    |
| 2.8633342709    | 6.4921090451    |
| 16.1589233465   | 13.632568934    |
| 1.6211728178    | 5.7979087322    |
| 0               | 0               |
| 0.3798055218    | 0.9612753608    |
| 0               | 3.9101520444    |
| 9.7008336914    | 6.7091114542    |

gene\_expression\_table

|                 |                |
|-----------------|----------------|
| 0               | 0              |
| 1284.7852736608 | 1010.4406083   |
| 0               | 0              |
| 2.5206448832    | 2.3923761776   |
| 8.1343252445    | 3.8272027429   |
| 6.7584973076    | 6.3408451561   |
| 25.7385404472   | 15.69363837    |
| 13.5338163376   | 11.7993552812  |
| 0               | 0              |
| 97.3199136397   | 81.2834617054  |
| 44.3858925028   | 17.8482909566  |
| 0.254954691     | 1.0754699821   |
| 21.2614162199   | 18.6847046803  |
| 25.0978851121   | 16.191863705   |
| 3.5575552233    | 3.1779021121   |
| 10.7266250439   | 8.0212178576   |
| 2.332333594     | 3.2958752164   |
| 30.8334806986   | 98.372515428   |
| 12.9767577268   | 9.50740121     |
| 14.192311947    | 14.6674467     |
| 14.8635486072   | 18.2480979039  |
| 151.0792293134  | 109.3281576132 |
| 0.8467368798    | 0.8036487621   |
| 32.1311251994   | 7.1755436124   |
| 0.2580563296    | 0.1884035005   |
| 77.3779657773   | 35.3469306272  |
| 0               | 0              |
| 0.0199636395    | 0.1642137865   |
| 0               | 0.1119937358   |
| 7.0624033615    | 3.9982908552   |
| 0.0589798091    | 0.0895655814   |
| 0               | 0              |
| 1512.5517445679 | 990.0111871519 |
| 0.3005085789    | 0.9507217381   |
| 4.8683877452    | 1.2468417515   |
| 0.8671703813    | 0.7544555871   |
| 0               | 0              |
| 5.8789346683    | 8.2439871715   |
| 33.0118102457   | 26.5451071512  |
| 11.7875004653   | 7.7628709047   |
| 0               | 0              |
| 1.5136086924    | 2.3574733078   |
| 13.6858925502   | 25.6581827354  |
| 0.8053353723    | 2.0846019919   |
| 27.4803464865   | 20.456429031   |
| 27.4118776151   | 19.2367842728  |
| 61.6716080576   | 43.1694936301  |
| 1.8716336493    | 2.3900538104   |
| 0.786017345     | 1.5542064122   |

gene\_expression\_table

|                |                |
|----------------|----------------|
| 31.8004957638  | 32.8831287395  |
| 12.1904830136  | 5.4695220337   |
| 34.8993676641  | 31.9967871163  |
| 15.7891736105  | 3.3301568589   |
| 0.69174815     | 2.1884899456   |
| 0.2108059021   | 2.5343285265   |
| 0              | 0              |
| 20.4261428121  | 51.6978997866  |
| 31.3350631161  | 19.0711368934  |
| 18.2468592286  | 10.1558088097  |
| 0              | 0              |
| 0.0313943913   | 0.0198645446   |
| 99.2490035555  | 83.4857240409  |
| 12.9184147722  | 44.9571175946  |
| 0.539692803    | 1.7074310544   |
| 10.2151811089  | 15.2836555012  |
| 8.534827985    | 7.9583997137   |
| 4.8361585781   | 6.6584199794   |
| 0.9203272244   | 0.4499819099   |
| 38.7755032002  | 186.0561944572 |
| 13.0914220711  | 10.7198110223  |
| 1.950910989    | 3.7032689576   |
| 32.6773293489  | 37.0450609959  |
| 0.24296765     | 0.6918110779   |
| 0              | 1.9813927207   |
| 346.9578042577 | 395.4853328639 |
| 40.4182196551  | 41.291835633   |
| 12.6003398671  | 13.8474288825  |
| 66.4435127392  | 49.0485213456  |
| 7.6297212919   | 6.3637122807   |
| 14.0968334515  | 24.2812862417  |
| 196.5317550093 | 110.742991506  |
| 0              | 0.0172905111   |
| 6.6850700813   | 0              |
| 0              | 0              |
| 0              | 0              |
| 0              | 0              |
| 0              | 0              |
| 0              | 3.5971206904   |
| 1.5597934566   | 0              |
| 245.1037009297 | 339.147092338  |
| 0              | 0              |
| 0              | 0              |
| 0              | 0              |
| 0.044504244    | 0.1971178768   |
| 9.1502385365   | 5.1130159598   |
| 49.8972861171  | 42.3408783503  |
| 7.4799872562   | 20.8247635712  |
| 1.0173570554   | 3.8623461791   |
| 2.1438842536   | 1.6278302906   |

gene\_expression\_table

|                 |                 |
|-----------------|-----------------|
| 15.9080484597   | 15.6339404174   |
| 1.1981124438    | 3.0323834325    |
| 6.4081136626    | 4.7598435639    |
| 58.3862914196   | 61.8881706001   |
| 14.2071457632   | 20.4617127316   |
| 0               | 0.5347281743    |
| 0               | 0               |
| 0.8760670151    | 0.7248855508    |
| 2.8243405067    | 3.0529255586    |
| 25.6001908539   | 40.4957789101   |
| 0.0196259302    | 0.0248362939    |
| 0               | 0               |
| 0               | 0               |
| 0.6109672813    | 0               |
| 18.6076504169   | 19.4548668769   |
| 6.565737489     | 5.797922267     |
| 16.3213240607   | 19.5001541208   |
| 0.1555097687    | 0.295192606     |
| 0               | 0.0594387705    |
| 0               | 0               |
| 0               | 0               |
| 2.0988969707    | 1.2616569112    |
| 0               | 0               |
| 60.5432073311   | 206.8643863463  |
| 43.816248141    | 41.3732950252   |
| 22.8117785055   | 31.5533219781   |
| 0               | 0.1306543703    |
| 12.1054869844   | 10.189439955    |
| 0               | 0.04716919      |
| 1.4532077741    | 0.4597526719    |
| 0.0711838304    | 0.2252049351    |
| 14.1372656561   | 9.0918825849    |
| 3.0734426195    | 2.4308696276    |
| 3.5297088594    | 2.0845014744    |
| 195.3762412817  | 331.6786513528  |
| 0               | 0               |
| 0               | 0.3687789205    |
| 0               | 0               |
| 8.9817344984    | 6.1414351643    |
| 12.034703744    | 171.6804901277  |
| 2441.7990931652 | 4439.5918749404 |
| 18.2638550064   | 12.3663263864   |
| 0               | 0.0534289902    |
| 37.1438855444   | 46.625907674    |
| 8.3485149627    | 5.7485535577    |
| 27.9614828813   | 31.8463196372   |
| 0               | 0               |
| 0               | 1.828550365     |
| 5.5690771746    | 6.7087503698    |



gene\_expression\_table

|                |                |
|----------------|----------------|
| 73.8397989224  | 43.5064314453  |
| 6.893502869    | 4.4526786001   |
| 0              | 0              |
| 24.9496801473  | 82.316396772   |
| 0              | 0              |
| 0.5969336821   | 0.296768143    |
| 0              | 0.1506710286   |
| 23.8229182195  | 35.3368397773  |
| 32.1314367119  | 20.6284294333  |
| 0              | 0              |
| 1.139836773    | 1.7629880978   |
| 10.0261593888  | 4.4407792953   |
| 1.0201760513   | 0.4246763551   |
| 22.1102814665  | 19.9488461791  |
| 13.5589506442  | 11.0139857548  |
| 2.203205941    | 3.8336665265   |
| 13.4515110774  | 36.3288634031  |
| 4.5021569326   | 3.387646821    |
| 17.4500482544  | 15.8719771881  |
| 11.1729985874  | 0              |
| 0              | 0.003764       |
| 0              | 0              |
| 0              | 0.1671054102   |
| 6.9128399335   | 13.9969375289  |
| 2.7203985802   | 1.66091313     |
| 0              | 0              |
| 23.3471360504  | 20.2152867506  |
| 5.0861275674   | 5.057180316    |
| 6.3975470375   | 4.7936790103   |
| 0              | 0.1937000669   |
| 9.0411726294   | 6.3150894598   |
| 9.9614143874   | 5.6215977619   |
| 10.8322493411  | 7.825452768    |
| 11.3891505638  | 6.9985152589   |
| 4.4855885844   | 3.3957269276   |
| 0              | 0.2284797822   |
| 8.2846516257   | 6.7123754838   |
| 1.7788378327   | 1.6883176536   |
| 22.2265893794  | 17.8586575229  |
| 92.6595550194  | 263.2693471824 |
| 0.0168757753   | 0              |
| 0              | 0              |
| 107.0922011062 | 225.8723837248 |
| 82.0047495821  | 62.0268374499  |
| 6.8824924892   | 8.834105786    |
| 21.2499596216  | 19.9285049816  |
| 0              | 0.0216998581   |
| 16.7478483575  | 9.6445190931   |
| 2.8347053051   | 4.0764468574   |

gene\_expression\_table

|                |                 |
|----------------|-----------------|
| 0              | 0               |
| 22.5099329901  | 13.3181075721   |
| 1.0945887712   | 1.2536793713    |
| 0.8524977891   | 2.4273495433    |
| 10.3159003094  | 11.87497042     |
| 0.0161152659   | 0.0305904084    |
| 5.9039746595   | 3.3960833817    |
| 0              | 0.0178542146    |
| 853.6519280641 | 898.6644757446  |
| 0              | 0.103025741     |
| 1.9566298128   | 2.6644806733    |
| 3.8456379074   | 3.2087419256    |
| 0.8031000998   | 0.2540775127    |
| 3.4177972598   | 1.7406158161    |
| 0.4301210983   | 0.6350297569    |
| 59.7551521371  | 16.1040821633   |
| 7.9478771694   | 35.2026803152   |
| 1.8784513098   | 2.278101539     |
| 29.572695438   | 19.4409157166   |
| 14.6262434528  | 12.0080814507   |
| 0.447175896    | 0.7545250505    |
| 3.7189179596   | 5.4906015472    |
| 0              | 0               |
| 23.025679486   | 19.2944923292   |
| 2.1267276328   | 0.6459213747    |
| 0              | 0               |
| 15.3194576349  | 16.7151519471   |
| 2.2162046967   | 4.0592472439    |
| 0              | 0.0894178122    |
| 11.153283711   | 9.0808904196    |
| 0              | 0               |
| 1.1486182618   | 3.1978268032    |
| 19.1642905382  | 13.3634000923   |
| 0.3737430853   | 2.2071735753    |
| 239.0346750994 | 83.0684308671   |
| 804.6117200737 | 1082.8720597481 |
| 18.9332842992  | 3.8853667855    |
| 2.8032930763   | 4.371053366     |
| 20.6565128438  | 17.9715795898   |
| 0.1160663462   | 0.0734400321    |
| 0              | 0               |
| 20.1247032045  | 7.0370676701    |
| 0.9666772271   | 0.8340778854    |
| 2.6723421642   | 0.4227256667    |
| 1.7866103058   | 1.4629522098    |
| 1.584719228    | 1.7380447787    |
| 0              | 0               |
| 0.8506513524   | 1.1232890961    |
| 62.9033260983  | 61.2331777805   |

gene\_expression\_table

|                 |                 |
|-----------------|-----------------|
| 577.9415194128  | 250.7223865854  |
| 23.6628383659   | 23.034565552    |
| 141.7389678848  | 104.1183217943  |
| 19.8720883054   | 8.1206447092    |
| 0               | 0               |
| 17.4500189325   | 9.9897990837    |
| 25.3245639226   | 15.3064223289   |
| 9.760806703     | 17.8016154845   |
| 5.9844935714    | 2.469547437     |
| 4.3494662739    | 4.6785517114    |
| 86.2128517225   | 53.1867154807   |
| 44.0765078624   | 38.0923612036   |
| 2.3093657238    | 1.9108422255    |
| 2184.7721874045 | 1467.7298807315 |
| 24.1699373157   | 9.5583314534    |
| 0.2769720167    | 0.7886330109    |
| 0               | 0.2891026115    |
| 5.8254251879    | 2.6018754237    |
| 317.4561136559  | 296.5190768518  |
| 459.1889903216  | 119.4996140586  |
| 2.5386921305    | 2.2488713799    |
| 0.3853123826    | 0.986295012     |
| 4.815406638     | 4.6505456208    |
| 0               | 0               |
| 1.2890129222    | 2.2429340808    |
| 0               | 0.9432574044    |
| 0               | 0               |
| 2.3610386291    | 1.6599198874    |
| 7.0673780997    | 4.8006364558    |
| 219.2773491277  | 115.0205829972  |
| 52.5898232875   | 52.6067224069   |
| 5.7033535164    | 3.8728052333    |
| 2.4451983657    | 7.7358964215    |
| 203.4940286767  | 130.8494302286  |
| 64.5629278367   | 33.6933672017   |
| 0.2865103809    | 0.7251484089    |
| 10.3955910775   | 6.7485753118    |
| 4.0059321581    | 4.0945490451    |
| 4.3339361847    | 2.6753782487    |
| 6.2525939193    | 5.8180554525    |
| 47.7542021699   | 18.8461124928   |
| 4.8760683209    | 8.5947430696    |
| 0.116433631     | 0.1473448571    |
| 0               | 0.2187143785    |
| 0               | 0               |
| 4.0946999874    | 13.6021617695   |
| 7.8832602818    | 8.7291199156    |
| 1267.4697465865 | 2391.9325228204 |
| 6.9807582931    | 17.6680710592   |

gene\_expression\_table

|                |                |
|----------------|----------------|
| 0              | 0              |
| 6.3587775439   | 4.1553813983   |
| 0              | 0              |
| 2.0208235412   | 1.4666977558   |
| 6.0248162461   | 3.8121532463   |
| 257.8593428344 | 109.9053057303 |
| 0.7455508457   | 0.4717412052   |
| 0              | 0.0733120135   |
| 20.2968840181  | 12.4593236951  |
| 407.7296564427 | 410.9287800553 |
| 0              | 0              |
| 9.5269743964   | 11.0786982001  |
| 15.714796615   | 9.7484403338   |
| 4.2173713723   | 1.1436459739   |
| 0.3550217654   | 2.0217340882   |
| 54.1116606409  | 27.1895646833  |
| 10.3215497619  | 7.8370515198   |
| 18.3076060341  | 12.4420613061  |
| 0              | 0              |
| 0              | 0              |
| 22.3594687632  | 27.7060518228  |
| 1.5876539096   | 1.7689256092   |
| 20.5852665459  | 9.3036851349   |
| 2.3389982157   | 1.9903206305   |
| 0.5326842266   | 0.4672760699   |
| 0.9317147439   | 0.7074418685   |
| 1.9693818398   | 4.2530285158   |
| 43.8074479305  | 40.3624699926  |
| 0.4901564854   | 0.434199515    |
| 10.0753747981  | 5.2663961012   |
| 14.4818105973  | 22.9979540417  |
| 19.6535558275  | 11.5095695273  |
| 2.1882140189   | 7.6151599639   |
| 19.8747221932  | 10.5688284727  |
| 5.7591255918   | 5.2057709371   |
| 0              | 0              |
| 0.114380428    | 0.2533064839   |
| 0              | 0              |
| 10.4560084043  | 5.1687139639   |
| 86.5329359559  | 103.3165457174 |
| 73.5643300596  | 50.4532898438  |
| 0.3243499564   | 0.9235340297   |
| 0              | 0.0447109504   |
| 4.9776900833   | 2.6246606031   |
| 1.3664051153   | 1.0610775051   |
| 3.0021668133   | 2.504013592    |
| 0              | 0.1183332596   |
| 0.2276725483   | 0.3361352037   |
| 0              | 0              |

gene\_expression\_table

|                |                 |
|----------------|-----------------|
| 0.1077191159   | 0.0954217465    |
| 0.9963349777   | 1.3869301937    |
| 4.9324207642   | 10.3231387749   |
| 4.1849694705   | 3.4755068694    |
| 2.3333817019   | 1.476428204     |
| 4.227982537    | 3.057395886     |
| 71.3911205532  | 50.4194178717   |
| 0.8920352899   | 1.1722736219    |
| 4.8542620848   | 4.8864687873    |
| 20.7484339583  | 6.7631162002    |
| 5.5753796371   | 4.1369902175    |
| 3.3494779022   | 1.4500848436    |
| 9.3017888035   | 26.9312199654   |
| 2.0615721942   | 1.9223369925    |
| 0.481277508    | 0.7782290485    |
| 0              | 0               |
| 5.406683695    | 10.6052082702   |
| 8.4170226968   | 4.9849509803    |
| 5.0639416238   | 4.9518955072    |
| 3.2502170807   | 5.7697605022    |
| 67.3228476768  | 58.1849704869   |
| 1.5346638274   | 2.1848534907    |
| 9.7236020453   | 3.4369304038    |
| 0.301125141    | 0.3250293939    |
| 70.9493425366  | 172.355582006   |
| 5.0434906987   | 6.0465363639    |
| 0              | 0.0564136219    |
| 5.26841575     | 8.0560719495    |
| 0              | 0               |
| 27.0491484045  | 15.4961290556   |
| 8.1260174425   | 13.2655115227   |
| 26.526577606   | 14.8384490997   |
| 66.9672161956  | 53.9292203002   |
| 0.1038866167   | 0               |
| 0.3443176047   | 0.091732274     |
| 0              | 0               |
| 2.1251061239   | 5.9761934844    |
| 0              | 0               |
| 0              | 0               |
| 0              | 8.2865873532    |
| 0              | 8.1997258506    |
| 14.342137978   | 0               |
| 13.4672363148  | 0               |
| 329.3401602071 | 341.9688944902  |
| 5927.863049282 | 1755.0567060976 |
| 0              | 8.9298384263    |
| 11.3213580009  | 0               |
| 7.8744732083   | 4.9825085742    |
| 3.7000891693   | 4.0971020748    |

gene\_expression\_table

|                |                |
|----------------|----------------|
| 33.6864385205  | 0              |
| 2.4627336528   | 0              |
| 0              | 0              |
| 0              | 10.3747194449  |
| 7.9555488655   | 20.135234135   |
| 13.2649387736  | 0              |
| 0              | 9.2029864253   |
| 0              | 0              |
| 0.7142977696   | 2.5762066369   |
| 0.5158095351   | 3.5901169508   |
| 0.9524593942   | 6.6292698826   |
| 1.9102167702   | 2.417348103    |
| 7.2653142594   | 10.2389246878  |
| 43.8758610168  | 33.223487764   |
| 222.7553682343 | 154.7896124131 |
| 0              | 0.3083381341   |
| 0              | 0              |
| 12.4125732299  | 0              |
| 18.7623159212  | 19.6339688211  |
| 16.7066526176  | 0              |
| 25.7025424886  | 0              |
| 0              | 0.5344359132   |
| 2.4861756811   | 2.4470558712   |
| 13.6456103057  | 8.6341484122   |
| 26.360176838   | 0              |
| 13.0686288975  | 0              |
| 42.2423334977  | 8.9094971087   |
| 13.8597790774  | 0              |
| 555.6369859328 | 0              |
| 0              | 33.146349413   |
| 0              | 8.5027591972   |
| 0              | 0              |
| 39.456137033   | 8.3218494271   |
| 15.6492695405  | 0              |
| 12.9319277584  | 8.1825716124   |
| 25.3858787208  | 8.0313536565   |
| 66.182670969   | 0              |
| 0              | 0              |
| 0              | 8.304180957    |
| 2.1006623231   | 2.4922067228   |
| 0.9759175037   | 3.705022953    |
| 5.5473320711   | 17.5501451825  |
| 9.849813403    | 6.2323889404   |
| 5.6144064201   | 6.8829102039   |
| 0              | 0              |
| 0.5511780177   | 4.8825474124   |
| 5.86185102     | 1.0597252375   |
| 0.5541261102   | 0.3506187681   |
| 1.9251891415   | 2.233270778    |

gene\_expression\_table

|                 |                 |
|-----------------|-----------------|
| 0               | 0               |
| 41.5238717036   | 20.4973613807   |
| 1.3739634293    | 0               |
| 1.7999596615    | 2.0247284746    |
| 0               | 0               |
| 2.9061878084    | 3.9075914976    |
| 0               | 0               |
| 698.6952055174  | 1120.1233697382 |
| 198.7499872707  | 142.8092852638  |
| 85.3842159678   | 79.9137022682   |
| 1.7899984947    | 0.37753564      |
| 0               | 0               |
| 9.1523601386    | 6.7338152172    |
| 6.2231934718    | 4.4009306753    |
| 0               | 0               |
| 89.3274778685   | 79.1297243212   |
| 204.7609111441  | 422.0911378165  |
| 26.2992256337   | 11.3349151464   |
| 21.6676165646   | 14.6892935556   |
| 60.1572218385   | 37.8697864942   |
| 19.3510162404   | 11.3849554717   |
| 172.1617764274  | 216.0673530615  |
| 0               | 0.7829585088    |
| 17.0260604285   | 9.5056770028    |
| 7.4419400674    | 6.2784356851    |
| 104.7523234864  | 45.2071615267   |
| 80.6118270937   | 86.9428548621   |
| 20.7385958409   | 28.1804130033   |
| 2137.3710052783 | 1453.4414171606 |
| 17.144646482    | 33.0609827335   |
| 388.6273852239  | 170.6840862524  |
| 0               | 0               |
| 30.3628696793   | 29.811503283    |
| 20.1810691104   | 18.5156395186   |
| 0               | 0               |
| 2.7386221696    | 8.6642039921    |
| 79.2773519327   | 37.1062084433   |
| 0.9723865768    | 0               |
| 1492.4543923362 | 1895.6033284716 |
| 2430.5213880592 | 4854.3711310415 |
| 1.9899116239    | 7.050961786     |
| 7.6107627044    | 15.8916380958   |
| 18.6598738953   | 25.8475000154   |
| 0               | 8.1552736254    |
| 1.032049665     | 2.9385944634    |
| 0               | 0.5678793801    |
| 53.5577888968   | 28.2402110522   |
| 76.1100716143   | 39.7827170149   |
| 174.2850725283  | 146.0818240698  |

gene\_expression\_table

|                 |                 |
|-----------------|-----------------|
| 0               | 0               |
| 1081.8408073659 | 1321.6947207867 |
| 8.6716784688    | 19.4328901457   |
| 12.7173120323   | 16.8088194436   |
| 3.1967564912    | 8.7651267022    |
| 52.4487639752   | 23.7046620044   |
| 51.3593237739   | 37.9133911584   |
| 137.1691521285  | 110.1240203356  |
| 1.6751928099    | 1.0599645612    |
| 31.637994355    | 18.8270941523   |
| 0               | 2.1205037846    |
| 0               | 0               |
| 0               | 0               |
| 0               | 0               |
| 30.6297254556   | 82.3680110529   |
| 250.4510212083  | 172.9828184562  |
| 1.3596985325    | 6.8827050825    |
| 13.3292969671   | 40.0615177272   |
| 0               | 0               |
| 27.5208947995   | 17.2012600548   |
| 94.7226973699   | 67.6817150319   |
| 4.5451922563    | 2.1569499434    |
| 167.9606656736  | 95.0040694167   |
| 80.9477097066   | 57.4273656893   |
| 400.036871622   | 851.2572769276  |
| 304.2151869322  | 224.7392523714  |
| 0               | 1.2334497732    |
| 12.3980507475   | 22.2268350067   |
| 1.1616862229    | 1.9601265721    |
| 5.0329437132    | 1.2738216026    |
| 41.4981701214   | 76.5381923454   |
| 30.4783527483   | 24.6418532616   |
| 14.9551487141   | 25.233995037    |
| 23.8791056937   | 18.3761866134   |
| 0               | 0               |
| 0               | 0               |
| 0               | 0               |
| 0               | 0.2293327019    |
| 7.6237865949    | 17.7880894637   |
| 35.1219401619   | 41.9770056329   |
| 0               | 4.368912852     |
| 13.8977139566   | 18.7343296487   |
| 0               | 28.6890163623   |
| 28.0805336243   | 27.2438498809   |
| 225.8068116348  | 279.2604016961  |
| 38.9952008527   | 38.3816139464   |
| 39.6683445907   | 41.5939888857   |
| 7.7950333777    | 9.8644873411    |
| 0               | 0               |



gene\_expression\_table

|                 |                 |
|-----------------|-----------------|
| 13.0636073302   | 514.7395625459  |
| 0.4764499359    | 44.3160611159   |
| 7.8189790892    | 95.7674341822   |
| 0               | 0.4484371968    |
| 0               | 1.0825544508    |
| 0               | 1.048597649     |
| 8.653469158     | 5.4754118956    |
| 49.4778859229   | 31.306727996    |
| 375.0780127842  | 377.3137181578  |
| 48.6729249488   | 68.2898770172   |
| 42.3610959887   | 50.8581836363   |
| 0.9595562665    | 4.2500597043    |
| 1.3709162716    | 13.0115410204   |
| 51.9693164096   | 28.316054683    |
| 0.3813363028    | 11.0992217528   |
| 0               | 2.8402216475    |
| 0               | 0.3870244638    |
| 38.3579154932   | 38.5164783277   |
| 97.5479799847   | 63.8883955186   |
| 0               | 0               |
| 38.1390598436   | 30.6293034205   |
| 7.1234690104    | 4.6876094772    |
| 3548.4100483978 | 4250.3047577299 |
| 44.5750639703   | 29.6696766894   |
| 41.5793372321   | 46.7715304123   |
| 7.9915468242    | 20.7320023866   |
| 103.9077843147  | 99.8180183425   |
| 5.2414879609    | 7.7385202417    |
| 91.4950564972   | 51.7526092427   |
| 67.092802123    | 66.5018240589   |
| 15.1745503347   | 6.8582662296    |
| 870.4290333438  | 839.5683809528  |
| 0.367725251     | 1.628726033     |
| 8.3364281436    | 10.5496135691   |
| 22.338786928    | 9.086583138     |
| 3.3683304565    | 2.1832660973    |
| 28.0394489933   | 23.481704407    |
| 6.4328798562    | 11.3630664495   |
| 0               | 0               |
| 1046.6278589057 | 868.3415785785  |
| 140.4362810726  | 164.8207993896  |
| 5.7427287146    | 4.4123070943    |
| 1.7352157694    | 1.0697911983    |
| 1168.2905150918 | 2892.8598761433 |
| 0               | 0               |
| 5.8671728169    | 3.7837980712    |
| 231.196393507   | 162.1529536721  |
| 2.1689845851    | 3.2022836341    |
| 74.4609697002   | 68.7720740978   |

gene\_expression\_table

|                 |                |
|-----------------|----------------|
| 14.2443634786   | 18.8692216666  |
| 0.3167300217    | 0.400816666    |
| 2.0314264719    | 4.2845616659   |
| 19.0961070664   | 22.2064212816  |
| 1.5880625955    | 1.3702276773   |
| 19.6728527234   | 28.0738446951  |
| 6685.1168758481 | 8004.878186206 |
| 0               | 1.3321761685   |
| 0               | 0.780744407    |
| 5.942217426     | 4.7440216735   |
| 0.8139928191    | 1.5451419136   |
| 0               | 1.3218213014   |
| 0               | 0              |
| 11.0098976772   | 5.3690264776   |
| 0               | 0.1923370082   |
| 9.5318875052    | 7.1389997498   |
| 0.440243677     | 1.1142423562   |
| 4.2905363072    | 2.1718414297   |
| 1.12495624      | 1.7521399827   |
| 1.6567347593    | 0.9318092271   |
| 0               | 0.1494590738   |
| 18.527645636    | 10.3487703151  |
| 5.8777763567    | 6.4902202207   |
| 614.7982356659  | 236.8715486854 |
| 10.7948316086   | 4.6733915441   |
| 10.134689201    | 13.4886602824  |
| 0.3132328051    | 0.2774736968   |
| 9.2644061593    | 5.4462342205   |
| 35.8106056553   | 17.2362329934  |
| 0               | 0              |
| 99.6847508359   | 78.1531778742  |
| 222.3126403588  | 99.9472546184  |
| 0.5276873439    | 0.5008347821   |
| 1.9710507293    | 1.6628883227   |
| 12.1303239748   | 8.9226099163   |
| 0               | 0              |
| 3.2328518764    | 4.4058228451   |
| 21.8105079747   | 35.6510867841  |
| 0               | 0.2986476819   |
| 3.7996743419    | 1.7623113901   |
| 0.1309698262    | 0.2071752182   |
| 247.467138637   | 369.7133985897 |
| 0               | 0.1115840589   |
| 22.7831643481   | 9.8449782866   |
| 6.8674426881    | 4.4418808694   |
| 0               | 0              |
| 0               | 0              |
| 0               | 0              |
| 0               | 0.3180152232   |

gene\_expression\_table

|                 |                 |
|-----------------|-----------------|
| 0.5287367606    | 1.6727693229    |
| 36.0530626477   | 67.7455610837   |
| 10.2884379061   | 8.9013260346    |
| 0               | 0               |
| 6.9968653975    | 0.3405545695    |
| 0               | 0               |
| 1.5963693684    | 1.4141255418    |
| 4.8583663625    | 1.280871506     |
| 2.8720670166    | 2.5162296021    |
| 9.3404126853    | 6.0596918192    |
| 3.1764961298    | 1.6079215748    |
| 0               | 0.5916304993    |
| 3362.7754932563 | 2425.8157168598 |
| 3.9855439654    | 2.7443339377    |
| 23.0899795278   | 10.1527089877   |
| 117.1444474572  | 33.4211668616   |
| 43.7728313392   | 10.6737748614   |
| 22.641333747    | 13.8485816118   |
| 0               | 0.0934391464    |
| 0               | 0               |
| 11.6501458329   | 6.7013950668    |
| 215.3799935456  | 64.7945924601   |
| 1.9853869485    | 3.8203382958    |
| 7.57686799      | 3.1961342028    |
| 3.1479421989    | 5.371917833     |
| 0               | 0               |
| 434.3122533896  | 307.9739551757  |
| 3.405819909     | 2.3479902128    |
| 643.8302517036  | 311.1816585658  |
| 22.3965995236   | 7.0856326644    |
| 0               | 0               |
| 45.0313200107   | 18.8671187543   |
| 68.4832858155   | 59.9898276303   |
| 14.4774323639   | 11.1961385825   |
| 69.8613574827   | 57.7972630762   |
| 5.7714654426    | 2.3877465049    |
| 174.3797495978  | 166.3213430522  |
| 86.2746413937   | 29.5078780138   |
| 4.1628551582    | 13.6489742961   |
| 164.2033466355  | 115.2936259959  |
| 9.1689419435    | 21.692838504    |
| 832.3060633755  | 152.0538469057  |
| 3.3517283647    | 6.6389595128    |
| 839.1997104183  | 704.9439731852  |
| 0               | 0.3494076497    |
| 43.7061101346   | 198.81475547    |
| 17.3200056858   | 17.6164844372   |
| 2.5286187796    | 1.2799702956    |
| 0.9841524389    | 0.6227144134    |

gene\_expression\_table

|                 |                 |
|-----------------|-----------------|
| 20.4388062608   | 8.8910852527    |
| 0               | 0               |
| 162.7960417731  | 148.4525114685  |
| 113.8736869542  | 41.6285017616   |
| 0               | 0.2910928613    |
| 15.7381237397   | 11.896927791    |
| 56.4130638239   | 24.0940609696   |
| 183.6399472283  | 58.2697195009   |
| 0.4758264544    | 0               |
| 52.0826074621   | 34.3671947332   |
| 67.5901555006   | 60.3064424666   |
| 19.0762296892   | 34.7625459342   |
| 248.3504963838  | 94.7308404651   |
| 8.5580250152    | 4.7381428449    |
| 0               | 0               |
| 141.3797768791  | 45.9301090794   |
| 4314.1366457632 | 2914.0804290601 |
| 226.7079535942  | 93.9117414239   |
| 90.8203705198   | 29.2460115639   |
| 0.7102678925    | 0.4494162048    |
| 0.3503038348    | 1.551563222     |
| 24.3129247262   | 21.4364488112   |
| 0               | 0               |
| 29.0841441827   | 12.1234362829   |
| 0.2130293511    | 0.475321207     |
| 1.840317683     | 1.7350245031    |
| 0               | 0               |
| 0               | 0               |
| 0               | 0               |
| 0               | 0               |
| 1.3395136388    | 1.8447031426    |
| 2.4392128482    | 2.2496900296    |
| 0.4500190353    | 0               |
| 0.7901650861    | 0.6666273349    |
| 5.9997806119    | 8.541702345     |
| 4.9815343757    | 7.0920566287    |
| 0               | 0               |
| 0               | 0               |
| 0               | 0.0247373854    |
| 208.8331577197  | 95.5888109868   |
| 5.4163955912    | 6.9400395989    |
| 0.2453285409    | 0.310459259     |
| 12.4928171978   | 6.7263834479    |
| 31.100689837    | 19.1741251071   |
| 0               | 0               |
| 4.9641748729    | 7.1795224794    |
| 2.959785731     | 2.1310947498    |
| 22.5344103503   | 11.0798255311   |
| 0.3605401848    | 0.1996127487    |

gene\_expression\_table

|                  |                  |
|------------------|------------------|
| 26.0011095983    | 33.6691880663    |
| 11.5120649249    | 6.7930977035     |
| 0.5722294982     | 0.8750110522     |
| 0                | 0                |
| 0                | 0                |
| 0                | 0                |
| 0                | 0                |
| 0                | 0                |
| 0                | 0                |
| 0                | 0.0115876069     |
| 1.0080803305     | 1.0709657336     |
| 6.1237957254     | 4.0362309407     |
| 52.3625102675    | 38.2291736279    |
| 19.7077579946    | 18.2177778755    |
| 18.6736636152    | 10.9067151283    |
| 2.6249730212     | 1.2180155009     |
| 1.061121596      | 1.2721566669     |
| 586.4764201615   | 742.1763246171   |
| 35.5972442759    | 21.6792204698    |
| 6.6683268686     | 14.0807851033    |
| 0.0497690691     | 0.0688865008     |
| 1.3287750362     | 6.7261723658     |
| 0                | 0.0103715557     |
| 1.1710302677     | 1.481919665      |
| 0.8366271418     | 0.582305886      |
| 3.0932615846     | 3.3806803468     |
| 2.6094871962     | 1.7115389565     |
| 13.6942413577    | 12.9973789694    |
| 0                | 0.007574         |
| 0.889173829      | 0.7388590926     |
| 0                | 0                |
| 1.5251349012     | 1.0785480158     |
| 0                | 0.3400364469     |
| 5.6155834445     | 3.2798903402     |
| 1.0891072308     | 4.7254196596     |
| 11072.3395563961 | 13284.1006638316 |
| 9.276728625      | 5.9987802572     |
| 0                | 0                |
| 335.0680265146   | 306.4473813653   |
| 31.6849407981    | 30.3170735809    |
| 0.0621455397     | 0                |
| 2.9113642307     | 2.6459856755     |
| 0                | 0.0229585778     |
| 0                | 0                |
| 0.0907104185     | 0.1721888281     |
| 3.0504306782     | 5.0292252195     |
| 6.7409612525     | 8.6297690415     |
| 0.4126803422     | 0.7996803498     |
| 54.8912361855    | 67.7833825435    |
| 4.4205169617     | 5.094619471      |

gene\_expression\_table

|                |                |
|----------------|----------------|
| 0              | 0              |
| 0.7350609288   | 0.6553735306   |
| 0.2980396457   | 0.7166121713   |
| 7.443956489    | 7.6707385822   |
| 0              | 2.7823362836   |
| 0.4758609297   | 0.1594043548   |
| 1.2880983839   | 1.0867116352   |
| 0              | 0              |
| 0.2385536365   | 0.4905643084   |
| 4.3226515722   | 4.0585688096   |
| 110.8513420583 | 44.7726985862  |
| 29.1578371156  | 30.7489719397  |
| 2.1055962359   | 7.093590971    |
| 0              | 0.0844748327   |
| 1.5656404104   | 6.7363939945   |
| 0.5500989115   | 0              |
| 6.2732071227   | 6.7478449243   |
| 1.4584842695   | 2.4096482303   |
| 2.8175033472   | 2.6295595229   |
| 3.1574890747   | 9.7039662759   |
| 0.7337668353   | 0.6079922212   |
| 24.9980468284  | 152.0219224706 |
| 7.5591091024   | 10.4769698862  |
| 0              | 0              |
| 26.0960036133  | 21.2722587759  |
| 5.1762575101   | 11.0239604967  |
| 0              | 0.2728923946   |
| 69.082468953   | 35.9271515376  |
| 3.1700315768   | 4.39167166     |
| 5.2741661047   | 4.4788542283   |
| 0.0500678602   | 0.0211200196   |
| 11.0669195817  | 4.0317441107   |
| 0              | 0              |
| 4.4490428644   | 1.9583273154   |
| 4.6197882489   | 9.1201757794   |
| 0.9980217335   | 0.902128709    |
| 22.3313489714  | 10.0277267307  |
| 0.0252441589   | 0.0798651764   |
| 1.7939220128   | 1.4673108095   |
| 0.7000346439   | 2.4607844466   |
| 3.9843444989   | 7.7207506065   |
| 25.5909560704  | 56.8885834256  |
| 0.8559051991   | 1.155342977    |
| 0              | 0.5623342811   |
| 39.2923980959  | 26.0388405551  |
| 0              | 0              |
| 0.811652349    | 0.7546281667   |
| 0              | 0.2475486855   |
| 0              | 0.005783       |

gene\_expression\_table

|                |                |
|----------------|----------------|
| 0.5157977968   | 0.7120731075   |
| 0              | 0              |
| 0.1531846819   | 0.0969263557   |
| 4.1354813182   | 3.8938869195   |
| 0.5867454843   | 0.5568876157   |
| 2.4927893007   | 0.7748101345   |
| 1.769147824    | 2.1268862742   |
| 7.6338214444   | 5.7318825894   |
| 2.2274390137   | 2.6174456913   |
| 7.0393867257   | 13.9191075827  |
| 19.0076970204  | 12.3610473233  |
| 2.7194079409   | 0.8603415761   |
| 0.5836751005   | 1.0824769057   |
| 0.7221080416   | 0.5254441568   |
| 0              | 0.0526192695   |
| 9.2869078545   | 8.0365882363   |
| 5.9349745565   | 2.2297133242   |
| 22.2336956345  | 22.9780423994  |
| 0.1873892118   | 0.5759065347   |
| 3.3641414348   | 4.9772448133   |
| 1.2594930238   | 0.7419729586   |
| 1.0867849976   | 0.4705003285   |
| 0.5962797178   | 3.3956200688   |
| 0              | 1.6464169348   |
| 0.0966563174   | 0              |
| 64.3340437019  | 42.1693616426  |
| 1.0917666506   | 1.6118816619   |
| 23.2167566892  | 6.1209221138   |
| 12.1332379215  | 8.56990565     |
| 3.5796514633   | 0.7549984038   |
| 0.0934701506   | 0.2957123698   |
| 0.1381682095   | 1.0490976658   |
| 2.8141855272   | 4.2996252842   |
| 2.7446643586   | 3.7753564003   |
| 0              | 0              |
| 2.1159424821   | 0              |
| 5.9374329733   | 2.7049407801   |
| 1.2569177149   | 2.5373997934   |
| 14.6355493317  | 8.6817414762   |
| 123.2449172625 | 57.8577718771  |
| 9.2226704722   | 9.5568020212   |
| 0.885456657    | 1.4847034796   |
| 1.263844095    | 1.1995305349   |
| 1.1714603319   | 1.3553955696   |
| 2.7608135188   | 4.0254241845   |
| 0.3190491606   | 0.2385804308   |
| 4.391282123    | 4.6309131313   |
| 1.210468956    | 2.8083525808   |
| 368.4114798033 | 375.7773727621 |

gene\_expression\_table

|                |               |
|----------------|---------------|
| 43.5736581827  | 28.2406140233 |
| 0.038704528    | 0             |
| 0.896123727    | 0.5400142527  |
| 0              | 0             |
| 20.9287691799  | 22.7014417261 |
| 2.6098843248   | 2.0903582014  |
| 52.8932812479  | 58.0108385619 |
| 0              | 0             |
| 30.3026444824  | 22.1641521508 |
| 0              | 0.1121736042  |
| 1.1173671802   | 2.4745173333  |
| 1.2203865885   | 3.6679007955  |
| 0              | 0.1415608344  |
| 0.8286789363   | 0.611729796   |
| 12.136568621   | 9.0671425607  |
| 25.0595053012  | 23.7288545494 |
| 0.4518050731   | 1.2769126569  |
| 0.2975074705   | 0.2980552496  |
| 0              | 0             |
| 1.0157354895   | 0.3856189984  |
| 18.8371796986  | 13.2146227736 |
| 0.1449408486   | 0.2751304126  |
| 0              | 0.2760636103  |
| 5.1559748911   | 3.4954296202  |
| 9.5319374996   | 12.3366591002 |
| 0.0242927546   | 0.0614841679  |
| 0              | 0             |
| 1.0969276374   | 0.3470359994  |
| 0.0146913559   | 0.009296      |
| 0              | 0.003828      |
| 0              | 0             |
| 0              | 0.0352604844  |
| 39.9220828779  | 38.1095781245 |
| 1.4729162968   | 2.0969454385  |
| 8.9319885223   | 22.274121416  |
| 0.8187830961   | 4.366660068   |
| 213.4556955899 | 176.816637337 |
| 0              | 0.0484002083  |
| 8.9228874046   | 15.7752643678 |
| 9.9087145111   | 7.1958576324  |
| 0              | 2.2366085665  |
| 0.2290844275   | 0.1449512995  |
| 0              | 0.2670719857  |
| 0              | 0.0432234935  |
| 1.7979952213   | 1.8085984763  |
| 0.4527916627   | 0.0955000748  |
| 0              | 0             |
| 0              | 0             |
| 0              | 0             |



gene\_expression\_table

|                 |                 |
|-----------------|-----------------|
| 2.2778720818    | 5.1166325567    |
| 0               | 0               |
| 0               | 1.5177606638    |
| 0               | 0.0897697781    |
| 3.2198003159    | 3.2315830196    |
| 0               | 0               |
| 0               | 0               |
| 4858.9258205353 | 7870.8418531651 |
| 0               | 0.053619245     |
| 3.4991715312    | 3.4318118976    |
| 0.2849124939    | 0.420644122     |
| 0.5813273631    | 0.078820744     |
| 0.1888449415    | 0.238980187     |
| 5.1010251113    | 6.331124219     |
| 79.3520767504   | 113.5393138903  |
| 0.9251780462    | 0.7683359885    |
| 0               | 0               |
| 12.838209855    | 10.5429705291   |
| 64.7733285928   | 30.6807076383   |
| 0.7107340659    | 0.2810694827    |
| 3.0114765281    | 3.2310434521    |
| 1.0109788151    | 1.0661476396    |
| 9.7311795026    | 7.1835450276    |
| 7.6368214401    | 13.1157986911   |
| 0.1014751702    | 0.4280505648    |
| 111.6245745285  | 203.4299848596  |
| 0.3198402676    | 0.4770298869    |
| 0.1275343306    | 0               |
| 9.3644318565    | 29.8238475908   |
| 0               | 0.1811376584    |
| 2.4207080797    | 1.9958296972    |
| 455.7564778774  | 161.8437784415  |
| 6.8986505951    | 9.5004351309    |
| 0               | 0.7920284085    |
| 255.4109705266  | 323.2184088835  |
| 0               | 0               |
| 9.8853789053    | 6.7849683756    |
| 1.6272461604    | 1.2113255418    |
| 1.5223560429    | 1.4036050182    |
| 10.8489420093   | 7.5650466872    |
| 9.9310556779    | 6.1856100396    |
| 15.2074380083   | 14.2044688558   |
| 0.7206891213    | 0.6840152283    |
| 37.5073997893   | 7.6556453919    |
| 0.8951432537    | 3.1781029148    |
| 3136.8610437178 | 2563.287704808  |
| 2.1440247116    | 1.2812466649    |
| 0.2720330529    | 0.8812886592    |
| 0.2364601136    | 0.0498727349    |

gene\_expression\_table

|               |               |
|---------------|---------------|
| 1.7721277692  | 0.4721260482  |
| 1.5656756597  | 2.2014855097  |
| 0             | 0             |
| 35.6675539683 | 32.984516371  |
| 0.171312293   | 0.1806607558  |
| 4.0481300916  | 1.7006157381  |
| 0.1378982509  | 0.1090674892  |
| 0.0186694699  | 0.2480720442  |
| 1.4999674171  | 2.2414728928  |
| 1.4881939175  | 2.9295545692  |
| 4.9026203725  | 2.9140873426  |
| 2.015146363   | 2.2313679393  |
| 7.4205850008  | 5.4899062079  |
| 4.7309201975  | 3.5140512854  |
| 21.6620538477 | 26.8858025115 |
| 43.161175708  | 26.169329342  |
| 6.6442541066  | 7.4644179936  |
| 0.182048637   | 0             |
| 0.6543999014  | 0             |
| 0             | 1.607811413   |
| 0             | 0.8029704847  |
| 0             | 0             |
| 2.9369442701  | 1.0931338158  |
| 0             | 0.0320854889  |
| 2.9309792788  | 2.1691648888  |
| 0             | 0             |
| 4.7048200804  | 1.9846243061  |
| 2.7374093933  | 4.4539030906  |
| 8.3140033201  | 9.8636581138  |
| 0             | 0             |
| 0             | 0.0606732268  |
| 0             | 0.0793731199  |
| 25.9864236618 | 10.1645764614 |
| 19.2076685735 | 11.1733747382 |
| 0             | 0             |
| 1.038623847   | 0.2512749933  |
| 1.1151410251  | 0.9655529287  |
| 4.4123967773  | 2.9470140039  |
| 2.3895033925  | 5.4662400786  |
| 0             | 0.0646106322  |
| 1.5563131017  | 1.7888017492  |
| 12.9811041679 | 6.326759355   |
| 1.8757595744  | 0.567060848   |
| 0.3778531409  | 0.2390834872  |
| 3.8989451903  | 2.9337603013  |
| 1.4723524603  | 0.5988979206  |
| 18.1286214069 | 11.0925808858 |
| 1.1936865268  | 0.3916346494  |
| 2.9969511382  | 1.3827160829  |

gene\_expression\_table

|                |                |
|----------------|----------------|
| 50.5641019918  | 29.1710203663  |
| 0.101821171    | 0.2899193124   |
| 12.7811307467  | 6.8485825886   |
| 0.3843316077   | 0.2431826841   |
| 4.9340451457   | 4.8248731531   |
| 30.6614373262  | 25.6236636548  |
| 14.1453902246  | 12.4180665917  |
| 55.2661028729  | 23.092851396   |
| 7.9267983392   | 9.8032511612   |
| 472.7389325814 | 344.1470160184 |
| 93.6819686484  | 131.7799878591 |
| 0.2909196851   | 0              |
| 8.3776109393   | 4.0099806728   |
| 0.1652222882   | 0.1045430527   |
| 0              | 0              |
| 1.8662498375   | 1.5226805888   |
| 1.5010938215   | 1.2211776629   |
| 0.013434202    | 0.0113338421   |
| 0              | 0              |
| 5.1262150279   | 3.9352144142   |
| 0              | 0              |
| 0              | 0.0295933874   |
| 0              | 0              |
| 49.9834071276  | 41.0290928526  |
| 27.6705376595  | 23.992864582   |
| 0.2182391932   | 0.2071335992   |
| 40.4017089445  | 81.3132667517  |
| 7.1707362402   | 7.4410486038   |
| 0              | 0              |
| 0              | 0.5101433717   |
| 0.3587979898   | 0.4966204601   |
| 71.3189573715  | 112.3557443252 |
| 34.3619061183  | 15.5301537849  |
| 0.9475682484   | 0.8993490988   |
| 7.2206104662   | 7.9627348088   |
| 13.9284846068  | 11.457075259   |
| 2.7462364913   | 2.806987128    |
| 369.5844701438 | 119.8247628609 |
| 10.6703402197  | 7.3845303202   |
| 174.8511192713 | 113.208538199  |
| 0              | 0              |
| 0              | 0              |
| 3.2804500983   | 3.9783828192   |
| 2.6389435914   | 0.8348849963   |
| 1.3506319458   | 0.5697342178   |
| 6.6179349602   | 4.6454459824   |
| 6.6641994135   | 3.2943107192   |
| 29.2267681726  | 10.4269035375  |
| 7.9541654843   | 3.8087062134   |

gene\_expression\_table

|                 |                 |
|-----------------|-----------------|
| 48.301652405    | 27.6517638638   |
| 4.6030143533    | 3.1327943177    |
| 3.7853407645    | 1.862889339     |
| 1.763864023     | 0               |
| 8.1549623595    | 6.8799810567    |
| 0               | 0.9876942502    |
| 0.2390448768    | 1.2100295389    |
| 2.718639595     | 1.949556586     |
| 14.5599725948   | 2.8591149347    |
| 743.7893288646  | 311.337609999   |
| 1.2079064912    | 1.3375126827    |
| 2.0892326263    | 3.3283009179    |
| 32.8302202424   | 15.82708844     |
| 72.0385469211   | 101.6824811217  |
| 5.2960570257    | 2.2086378941    |
| 95.0594891172   | 44.3275189471   |
| 5.3632655178    | 8.1696873292    |
| 8.1681874171    | 3.2889524434    |
| 20.6634179124   | 15.0358001516   |
| 1.6627857545    | 0.4909865792    |
| 37.8410719123   | 15.605051752    |
| 1.4757084163    | 1.778557031     |
| 8.8893849335    | 6.557560372     |
| 0.2619390568    | 0.5982802453    |
| 0               | 0               |
| 4.9743127957    | 3.8880336014    |
| 43.4502856298   | 23.5355143018   |
| 0.2922815012    | 0.1387040486    |
| 11.4916471444   | 11.0721243223   |
| 0               | 1.1418513975    |
| 21.8075933783   | 9.0497157588    |
| 0.2076894624    | 0.2628276202    |
| 6.2719643592    | 2.1974528188    |
| 2.3948659801    | 0.724723942     |
| 6295.9992606231 | 5369.7853769921 |
| 0               | 1.9765293543    |
| 4.2781569684    | 4.5116147694    |
| 2.9437351294    | 2.4189926592    |
| 0.2326043826    | 0               |
| 31.9672131692   | 15.7799235423   |
| 5.666312697     | 5.5316258567    |
| 26.2608339761   | 12.5962487217   |
| 35.7686708558   | 35.006086996    |
| 3.8064105539    | 2.7390501966    |
| 1.4500915628    | 5.6463605327    |
| 18.3379246674   | 18.2049767274   |
| 205.538365254   | 98.203075043    |
| 6.674586258     | 7.5415891278    |
| 56.6371264294   | 71.6733578455   |

gene\_expression\_table

|                |                |
|----------------|----------------|
| 0              | 0.0715576434   |
| 12.8068953077  | 10.1293229387  |
| 15.0074223369  | 5.0509701311   |
| 0.7129713343   | 0.9022535711   |
| 58.6940944857  | 25.7541346427  |
| 26.0581524371  | 19.0247111693  |
| 0              | 0              |
| 39.7623339226  | 19.2983204616  |
| 3.4598604392   | 4.9700720881   |
| 3.2172262197   | 5.7368983275   |
| 14.9177813488  | 18.4014860511  |
| 0.6218044296   | 0.885243761    |
| 3.544357072    | 6.5654771112   |
| 0.4961575451   | 0.8110107165   |
| 0              | 0.0245213723   |
| 314.5533586717 | 203.3061975654 |
| 4.8074067453   | 4.1529412691   |
| 0.0133866249   | 0.00847        |
| 2.3735596776   | 3.0037009797   |
| 109.8458342748 | 39.036523481   |
| 0              | 0              |
| 3.3564253662   | 13.4221045666  |
| 10.4406204634  | 13.2772013959  |
| 0              | 0.1269439236   |
| 4.5547610821   | 3.2113578947   |
| 1.1144610615   | 1.1230423545   |
| 0              | 0.0255972      |
| 63.2898603508  | 36.0127175782  |
| 0.5977046479   | 0.0945481829   |
| 2.2817451292   | 0.4962909822   |
| 0.1724959528   | 0.5129834015   |
| 23.4759896752  | 23.8015317643  |
| 0              | 0              |
| 496.5247887331 | 637.9107531191 |
| 3.499492331    | 1.7846396936   |
| 3.9028857854   | 3.6481531971   |
| 11.1263127487  | 9.2526811321   |
| 13.6866816808  | 35.0464878312  |
| 74.7711405701  | 45.1439200223  |
| 1.8875750125   | 2.2180742338   |
| 68.2495745734  | 41.7496642265  |
| 1.1742897926   | 1.1558124204   |
| 0              | 0              |
| 0              | 0              |
| 0              | 0              |
| 0.61435252     | 0.6478775612   |
| 0              | 0.0655527307   |
| 1.1442040588   | 0.5962235737   |
| 973.5963004332 | 476.1595829992 |

gene\_expression\_table

|                |                |
|----------------|----------------|
| 0.2684557226   | 1.189042153    |
| 0.238958629    | 2.5703850366   |
| 3.0100783411   | 4.5934530223   |
| 846.4171036286 | 363.5209278586 |
| 466.2149288578 | 338.2173602762 |
| 8.9232121252   | 8.5403035268   |
| 0              | 0              |
| 3.2089007109   | 3.2039429433   |
| 18.4582459245  | 1.2977004747   |
| 0              | 0              |
| 0.6662206273   | 2.0234191571   |
| 0              | 30.9599147551  |
| 25.9824517209  | 22.4184327325  |
| 0              | 1.7843381527   |
| 20.8692149511  | 10.5638601775  |
| 235.8268520153 | 550.0815115966 |
| 405.9368716635 | 513.7064766471 |
| 115.7120866025 | 275.5229064013 |
| 57.4663291153  | 88.4792853559  |
| 0              | 1.4829456799   |
| 1.5278179289   | 1.5922353333   |
| 30.909016912   | 40.1533032371  |
| 0.9000946046   | 0.6030291237   |
| 0              | 0.014855535    |
| 2.826363356    | 2.591823648    |
| 0.268913381    | 0.4147473144   |
| 0              | 6.6954680127   |
| 0              | 0.3568513508   |
| 0              | 0.0707838758   |
| 3.0489975799   | 8.9226809012   |
| 0.96847315     | 0.3063967358   |
| 11.7720969397  | 12.3676497414  |
| 2.594574046    | 3.7055413286   |
| 2.6176237025   | 5.3289008925   |
| 1.3484863587   | 0              |
| 413.551126101  | 272.6137050492 |
| 26.1106543111  | 28.7629916202  |
| 0              | 0              |
| 0              | 0              |
| 244.7425304374 | 145.4018079932 |
| 5.8293176864   | 5.8679936163   |
| 25.5208593095  | 9.9498487458   |
| 0.1248074113   | 0              |
| 11.554133586   | 14.0591992478  |
| 11.0126077964  | 23.3164603997  |
| 0.109515159    | 0.1154913699   |
| 3.0578587527   | 2.2573076606   |
| 0              | 0              |
| 2.6691528675   | 6.004923254    |

gene\_expression\_table

|                 |                 |
|-----------------|-----------------|
| 17.5031362915   | 17.7540231509   |
| 2.3327055644    | 1.7659290304    |
| 0.1873851543    | 0.3556992753    |
| 7.7281551123    | 4.7065547323    |
| 0.2327050829    | 1.361990716     |
| 0.4559639242    | 0.4065332207    |
| 1.4354984666    | 1.2326927543    |
| 0.2386434309    | 0.1509996808    |
| 0               | 0               |
| 35.2596030357   | 17.8232529236   |
| 8.6007450006    | 4.771113307     |
| 5.4887186455    | 1.2628879529    |
| 0.1246895896    | 0.1893511654    |
| 0.8341693029    | 1.1189652767    |
| 0               | 0.00797         |
| 3.9213891278    | 1.8823100817    |
| 9.1448179527    | 7.1640014089    |
| 2.0097684171    | 2.2254129495    |
| 388.3640713195  | 331.7411598841  |
| 0.0681264446    | 0.123931047     |
| 1.2152920471    | 1.0765525564    |
| 0               | 0               |
| 15.8947324981   | 12.0687145201   |
| 202.208631382   | 144.0028095506  |
| 299.1029742824  | 106.3230127963  |
| 0               | 0               |
| 2.0936600363    | 2.4728597209    |
| 10.4649401358   | 7.4291182019    |
| 6.9115751325    | 10.336755438    |
| 862.3852232739  | 663.4371027036  |
| 0               | 1.4639809972    |
| 2.3248697079    | 1.7033121477    |
| 1.5285513028    | 1.9343566918    |
| 3.5380911405    | 2.2386982567    |
| 0               | 1.4831143754    |
| 17.3748404572   | 6.4130431844    |
| 2.1605947111    | 1.3670986476    |
| 4.7191231747    | 5.9719732505    |
| 143.0352637055  | 107.0388509022  |
| 0               | 0               |
| 61.6893806041   | 27.2940675664   |
| 56.6819109866   | 74.5415608622   |
| 0               | 0               |
| 46.7573822985   | 30.0141247699   |
| 153.0620854309  | 137.720747561   |
| 3.0741843889    | 1.3730576827    |
| 13.6174684331   | 10.0829532548   |
| 3169.8092333089 | 2938.8775431285 |
| 195.8811360911  | 212.3407770522  |

gene\_expression\_table

|                 |                |
|-----------------|----------------|
| 45.546895237    | 45.5949124005  |
| 11.6524965353   | 13.0811679958  |
| 6.887828544     | 9.024073314    |
| 0               | 0              |
| 37.1482059405   | 21.1547013681  |
| 0.8713471934    | 0.3675585441   |
| 0.9250072464    | 1.20875269     |
| 0.6718249613    | 0.4250917542   |
| 13.2422053738   | 10.2940737496  |
| 0               | 0.0802278723   |
| 6.6577965489    | 1.9148483456   |
| 0.1038739602    | 0.0657253995   |
| 17.2097472241   | 9.9273722469   |
| 39.2729104322   | 14.3708606151  |
| 0               | 0              |
| 4.3154745749    | 3.5189885409   |
| 0               | 0.013011238    |
| 371.7707540342  | 206.7385164815 |
| 1.5386901671    | 0.687242562    |
| 2.327306928     | 1.0761193988   |
| 0               | 0              |
| 0               | 0              |
| 0.899956173     | 0.9253398606   |
| 111.9306691142  | 82.2463155995  |
| 23.0897706934   | 19.6628992951  |
| 7.9437820142    | 8.0611484558   |
| 279.8109742345  | 145.2620917062 |
| 5.9344403874    | 4.2243397428   |
| 33.8234360152   | 35.8619775666  |
| 4082.7644499007 | 3926.701344485 |
| 0               | 0              |
| 0               | 0              |
| 0               | 0              |
| 0               | 0              |
| 0               | 0              |
| 0               | 0              |
| 0               | 0              |
| 4.7155095694    | 4.339927485    |
| 2.3891758054    | 3.6953435862   |
| 1.7304442448    | 3.7824662994   |
| 3.0442773174    | 3.1390603778   |
| 0               | 0              |
| 0.8097277271    | 4.2695716867   |
| 3.165689745     | 7.5830291996   |
| 0.8834918934    | 1.746944612    |
| 7.0931855749    | 3.9508408527   |
| 42.293758834    | 71.9654733406  |
| 14.0847883076   | 11.3628442476  |
| 12.5958687567   | 6.9859906765   |
| 0.278838963     | 1.2854409767   |



gene\_expression\_table

|                 |                 |
|-----------------|-----------------|
| 21.1089004082   | 30.5291068257   |
| 3.3923644957    | 3.9906591622    |
| 34.60267428     | 12.8853148538   |
| 124.4274431563  | 33.6708833637   |
| 2.241173261     | 1.8370634499    |
| 0               | 0.003274        |
| 0.008529        | 0.0593613264    |
| 0.194900412     | 0.3699649291    |
| 32.8336025079   | 22.7279533975   |
| 31.9430360884   | 14.6228551337   |
| 2.5093889588    | 0               |
| 232.5833266644  | 148.3967072743  |
| 0               | 0.2565944519    |
| 10.5575772306   | 0               |
| 19.4724980021   | 14.8521352701   |
| 8.6724895503    | 3.8412128254    |
| 25.3858787208   | 30.117576212    |
| 0.9137415327    | 3.4689749275    |
| 12.1970431502   | 12.348127011    |
| 78.4599312912   | 46.9758007785   |
| 0.3015641267    | 0.1908122368    |
| 24.5119236314   | 15.509719372    |
| 3.3760029866    | 0               |
| 0               | 0.4927272903    |
| 5.5833996077    | 3.2300347205    |
| 162.9277224163  | 162.8117879201  |
| 144.7000144534  | 196.5569605443  |
| 36.0811881683   | 19.7633502097   |
| 0.212295511     | 0.4029847493    |
| 34.9787634055   | 22.8917900583   |
| 16.842126609    | 2.7910451857    |
| 4.2374674978    | 2.5401059352    |
| 0.2774444106    | 0.4681351563    |
| 13.4830757177   | 7.1930619046    |
| 0.7556534924    | 1.1611815326    |
| 6.1907475899    | 3.9171449482    |
| 11.0275252071   | 7.7090965732    |
| 2.3155877387    | 0.3662923048    |
| 2.2540444583    | 1.863604863     |
| 0               | 0.1773014157    |
| 0               | 0               |
| 21.1693885908   | 12.2128672595   |
| 4.1351025795    | 2.6709617904    |
| 52.8397446274   | 74.353038451    |
| 2.6881000903    | 4.7328650173    |
| 119.8867334579  | 118.6023661038  |
| 0               | 0.4827833402    |
| 0.0723824528    | 0.2289970276    |
| 1339.3166515089 | 1631.9433686847 |

gene\_expression\_table

|                |               |
|----------------|---------------|
| 128.0972936547 | 44.8943575421 |
| 0.8959938351   | 0             |
| 0              | 0             |
| 6.2733309146   | 4.7632786464  |
| 0.8482279888   | 0.5367093284  |
| 0.769316922    | 0.9735579915  |
| 26.0565127151  | 27.5536924673 |
| 0.8327443713   | 3.1614731759  |
| 0              | 0             |
| 0.0358162877   | 0.5438991212  |
| 0              | 1.2103571811  |
| 1.8717698596   | 2.7758134758  |
| 9.1299570819   | 5.2448223127  |
| 3.2620631895   | 2.7207850438  |
| 52.5746244397  | 88.9869886643 |
| 2.9600037275   | 2.1686420917  |
| 21.489579369   | 2.4860836984  |
| 0              | 0             |
| 0              | 0.009536      |
| 0              | 0             |
| 0              | 0             |
| 0.8434633133   | 1.3342362972  |
| 4.4486948316   | 3.9095490292  |
| 0              | 0             |
| 0              | 0             |
| 9.0037763456   | 6.3508275673  |
| 17.0712471138  | 8.8057272628  |
| 0.6440292212   | 0.7567935642  |
| 49.160121373   | 40.0440745776 |
| 0              | 0             |
| 2.365430582    | 1.1225301533  |
| 0              | 0.1032119706  |
| 5.3822642333   | 3.1436157332  |
| 0              | 1.2396067604  |
| 0              | 0.1066525572  |
| 0.3117901739   | 0.6173038843  |
| 12.7892306245  | 1.7982847038  |
| 11.0130390123  | 1.9909744112  |
| 2.6574092187   | 4.8831265903  |
| 62.91703048    | 42.5796446767 |
| 8.9130487671   | 9.454722059   |
| 1.708705712    | 3.2937956854  |
| 10.2861086243  | 20.145206022  |
| 0              | 0             |
| 1.4891858316   | 2.2614483976  |
| 4.2004324937   | 5.6478023378  |
| 22.525823754   | 7.9183505025  |
| 10.5911353692  | 9.4529330974  |
| 5.0090174506   | 2.7468262114  |

gene\_expression\_table

|                |                |
|----------------|----------------|
| 1.010703314    | 0              |
| 0.863976165    | 1.3970554154   |
| 18.3096875021  | 25.9791691118  |
| 0.7001202233   | 0.8859907001   |
| 0              | 0              |
| 0              | 0              |
| 5.5244599533   | 1.8125109804   |
| 0.0731930183   | 0.0578903553   |
| 1.4387736669   | 0.7941545425   |
| 128.4573531206 | 93.8704615376  |
| 5.880692502    | 4.2010840121   |
| 7.5656778964   | 8.6168175552   |
| 2.3818366125   | 2.2606314791   |
| 0              | 0              |
| 1.2631676901   | 1.0656787114   |
| 3.0228016635   | 2.9752380793   |
| 93.635513259   | 61.4556689499  |
| 31.2839571515  | 28.7630107133  |
| 0              | 0.3107881788   |
| 1.7890155192   | 0.8997829092   |
| 0.9005780039   | 1.072627525    |
| 0              | 0              |
| 13.9270362375  | 4.9387157902   |
| 530.0940276562 | 101.6343124993 |
| 83.3901654209  | 61.4189315318  |
| 64.0798951904  | 49.4377032892  |
| 0              | 0.7078900015   |
| 0.9997713796   | 0              |
| 20.0936010462  | 8.6879422722   |
| 109.930231314  | 151.7617211775 |
| 5.436273785    | 6.0857253624   |
| 10.3143944991  | 7.6613660207   |
| 2.4491481238   | 2.860944852    |
| 4.3897229034   | 3.2404881779   |
| 23.1045655059  | 15.8723014489  |
| 0              | 1.5162309004   |
| 5.6874495965   | 2.0152648632   |
| 1.1649214401   | 1.1056417827   |
| 0              | 0.3890003876   |
| 0              | 0              |
| 18.8446280296  | 12.1917346029  |
| 24.765470627   | 45.5740171449  |
| 0              | 2.5610720474   |
| 5.2883853864   | 5.2284103715   |
| 179.2833625545 | 282.393397097  |
| 206.6525705306 | 110.3798979692 |
| 27.8637306139  | 23.7334297981  |
| 8.7001568874   | 3.0583073194   |
| 14.7503767784  | 10.6664918513  |

gene\_expression\_table

|                 |                |
|-----------------|----------------|
| 3.4246323925    | 0              |
| 58.5063467162   | 41.2261642372  |
| 8.6212851722    | 5.4550477416   |
| 0               | 0.8226457526   |
| 0.7903671485    | 2.0003934181   |
| 2.8116386072    | 1.7790413527   |
| 0.2200147639    | 0.139212544    |
| 1.6057829506    | 2.2861035899   |
| 18.2381099386   | 33.4262504203  |
| 1.1595313203    | 5.4292613595   |
| 0.4350997022    | 2.0647933575   |
| 68.3354368825   | 43.9715484062  |
| 254.8578566474  | 225.7629166165 |
| 4.0364773857    | 2.5540480807   |
| 50.8622720941   | 49.0402850025  |
| 1.9177233098    | 0.5392994458   |
| 7.5383676445    | 16.6944418385  |
| 11.1670350063   | 11.5623002387  |
| 327.2018230824  | 89.5283371841  |
| 0               | 0.8398688492   |
| 7.3128663646    | 3.305111738    |
| 335.5596649568  | 113.3182607257 |
| 2.7638996059    | 3.3227862904   |
| 404.1286963754  | 217.5328375103 |
| 11.2953072313   | 7.4117175461   |
| 1361.7998677157 | 661.7824319954 |
| 0               | 0              |
| 16.3471754186   | 12.5376262555  |
| 5.6218692522    | 9.5770549234   |
| 2.0177775317    | 1.2767322444   |
| 54.1679112181   | 31.9893496306  |
| 12.4125732299   | 15.7079085572  |
| 0               | 0              |
| 0               | 0              |
| 40.9009328672   | 57.995541846   |
| 1.5225274553    | 2.5689781483   |
| 0.8995141834    | 3.9841217426   |
| 2.4898475303    | 4.726292035    |
| 0               | 0              |
| 46.8053488767   | 56.5693184639  |
| 79.0784990576   | 115.1437150231 |
| 10.1049303245   | 14.5313911084  |
| 73.3336366951   | 52.8260491101  |
| 4.3855703927    | 2.3124448568   |
| 0               | 0              |
| 1.9017646462    | 1.7297811812   |
| 0               | 0              |
| 0.7370728514    | 2.5650725295   |
| 3.26133956      | 2.7084565668   |

gene\_expression\_table

|               |                |
|---------------|----------------|
| 26.0082098537 | 14.4414027925  |
| 17.140967677  | 13.557259032   |
| 0.7460127285  | 0              |
| 67.0531413532 | 49.0565971312  |
| 0             | 0              |
| 0             | 0.5617218484   |
| 17.7924744358 | 5.4038605456   |
| 1.5403591997  | 21.4422933157  |
| 0             | 2.107762364    |
| 0             | 3.5778576234   |
| 13.9342810977 | 4.0692934601   |
| 0.9135995592  | 1.0820334318   |
| 0.6390078745  | 1.4983883341   |
| 3.5450935587  | 11.9633545578  |
| 26.9113432147 | 22.9642759483  |
| 5.6886511464  | 2.4257146374   |
| 19.4056529435 | 17.4551118296  |
| 8.8336127283  | 8.6814027135   |
| 293.354139556 | 181.3917425641 |
| 0             | 0              |
| 0             | 0              |
| 4.0096620587  | 0.9095195685   |
| 0.2238489727  | 0.2360643471   |
| 3.7746170976  | 7.0867675459   |
| 1.6223399919  | 1.8477402705   |
| 5.7331480854  | 1.4867223775   |
| 2.0836386972  | 3.1861462835   |
| 0.2722521099  | 0.5455067763   |
| 0.0774332981  | 0.0244976433   |
| 36.06777338   | 43.3610188506  |
| 21.4588226582 | 17.4423723973  |
| 16.7670745077 | 17.6820489635  |
| 10.1843258903 | 8.3235632699   |
| 0.9503117969  | 0.5678963558   |
| 4.7876909703  | 15.9624619324  |
| 0.2555935343  | 0.6468988807   |
| 1.0049522791  | 0              |
| 5.5165098572  | 7.518057147    |
| 2.1393581603  | 4.873181017    |
| 0             | 0              |
| 12.0748514803 | 14.1890609738  |
| 32.0453272992 | 18.5867173998  |
| 0.0200165842  | 0.0253306601   |
| 3.7469891132  | 2.3708767419   |
| 25.1311876097 | 25.6476670868  |
| 25.4231670267 | 32.1726023679  |
| 0.1167756007  | 0.3824832366   |
| 0.0900900068  | 0              |
| 0.8551170969  | 1.3953868108   |

gene\_expression\_table

|                |                |
|----------------|----------------|
| 3.5446782376   | 3.4728250661   |
| 0              | 2.1641106035   |
| 2.3999744513   | 3.1751797369   |
| 0.4096022707   | 1.0366899585   |
| 2.023329552    | 1.6403142136   |
| 0              | 0.2088386376   |
| 3.3279081911   | 0.8098871973   |
| 6.6442732212   | 2.6878733414   |
| 0.3127625546   | 0.0989489753   |
| 0              | 0.0205532832   |
| 0              | 0              |
| 34.2933937927  | 31.0821575213  |
| 8.6877545435   | 3.9265040665   |
| 0              | 0.0380044816   |
| 6.3741158685   | 3.7862409692   |
| 0              | 0.0137639327   |
| 9.9431133358   | 12.7038363383  |
| 0              | 0.0551675538   |
| 0.2761841448   | 0.4077576084   |
| 1.3213406734   | 2.1083441642   |
| 5.0755997078   | 3.4465352803   |
| 67.1222439773  | 33.0330399539  |
| 105.0516707527 | 54.8090798582  |
| 1.3191189293   | 2.3885532285   |
| 14.4651984442  | 5.1176588999   |
| 3.6847679707   | 8.9929548863   |
| 15.0069355886  | 17.4452500693  |
| 224.4331317262 | 370.1278337309 |
| 1.8877573579   | 1.1944630419   |
| 0.2017777532   | 0.2553464489   |
| 0              | 0              |
| 12.8584250634  | 16.8450889757  |
| 7.4881422998   | 0              |
| 3.6214785325   | 12.8576419836  |
| 403.7121208507 | 523.7275504229 |
| 2.1927851963   | 0              |
| 8.0370049972   | 14.620379052   |
| 10.8335017914  | 7.9004586715   |
| 0.9898653218   | 2.5053167738   |
| 0.7514845567   | 0.1584985708   |
| 0.3313681232   | 0.5146457043   |
| 1.0308735564   | 0.4348512125   |
| 0              | 0.7482818501   |
| 1.318090435    | 0.9147216888   |
| 3.0849401499   | 2.7199591309   |
| 9.3189734495   | 6.6040848134   |
| 2.654126865    | 2.2191768622   |
| 6.2138949691   | 6.3292249602   |
| 0              | 0.1633711721   |

gene\_expression\_table

|                |               |
|----------------|---------------|
| 2.8666136658   | 2.0611663315  |
| 0              | 0             |
| 0.3042787809   | 0.4331923022  |
| 0              | 0             |
| 1.5671779252   | 2.2159649653  |
| 9.4329918073   | 5.6910369246  |
| 0              | 0             |
| 7.1525200226   | 6.9069527985  |
| 0.4639737535   | 0.9384793803  |
| 0              | 0.1143395229  |
| 12.773676471   | 7.3247107095  |
| 0              | 0.1272164329  |
| 3.5549297143   | 1.3022568418  |
| 0              | 0             |
| 0.1641669823   | 0.1817818039  |
| 3.6998712371   | 1.6437252893  |
| 0              | 0.8595251578  |
| 1.5605810322   | 6.6299871549  |
| 1.4168774981   | 0.922885825   |
| 3.0621506614   | 3.0139679233  |
| 44.7867724762  | 54.1517189047 |
| 0.3948301909   | 0.2498255768  |
| 24.9930890506  | 18.9770074309 |
| 25.4807590808  | 16.0455997789 |
| 0              | 0.0257992482  |
| 0              | 0             |
| 7.9108681041   | 4.1769178221  |
| 3.3065564835   | 4.4305339649  |
| 0              | 0             |
| 0              | 0             |
| 1.529881486    | 3.5598155148  |
| 0              | 0             |
| 0              | 0             |
| 0.2879882215   | 0.3384126456  |
| 11.7649639744  | 7.3260231505  |
| 0.9551903785   | 0.4029259376  |
| 1.0523533149   | 1.3317359208  |
| 20.158799239   | 11.8139637891 |
| 85.7874374966  | 63.3281833812 |
| 0.600681337    | 0             |
| 3.0575124333   | 1.645327632   |
| 2.6301048887   | 2.1004180471  |
| 1.5462157858   | 1.565368645   |
| 0.7375165534   | 0.6787746507  |
| 0.875548713    | 0.498596664   |
| 0              | 0             |
| 10.7179505296  | 22.4090811561 |
| 15.323404731   | 9.6957591243  |
| 104.2028423348 | 32.966748483  |

gene\_expression\_table

|                |                |
|----------------|----------------|
| 0.8726032818   | 1.1233042467   |
| 37.841392053   | 38.1327688293  |
| 0              | 0              |
| 0.8323839349   | 0.4138232472   |
| 6.123492407    | 6.6298536249   |
| 0              | 0.6826247621   |
| 137.5349801284 | 113.6772830607 |
| 0              | 0              |
| 16.9837651012  | 5.7711818302   |
| 0.2570660424   | 0              |
| 0              | 0              |
| 2.2540882953   | 1.6639652738   |
| 0              | 0.2689451441   |
| 0.5803371796   | 1.8360180401   |
| 0              | 0              |
| 0              | 2.5527145482   |
| 83.4893059243  | 67.9206549452  |
| 37.440327137   | 22.2847184381  |
| 0              | 0              |
| 0              | 0              |
| 23.1169090071  | 8.776221161    |
| 78.9943254679  | 74.7777373555  |
| 7.8635848327   | 1.2979875766   |
| 0              | 0.9480332627   |
| 0.4983933099   | 0.3153542941   |
| 2.5522638336   | 4.6140688119   |
| 0.2090047937   | 0.2950104756   |
| 0.0375452547   | 0.0305440112   |
| 4.5039939586   | 6.079712793    |
| 4.1587765246   | 3.9977522509   |
| 29.416011981   | 26.5460407281  |
| 0.87734231     | 0.7401749029   |
| 1.8363633782   | 0.4979759662   |
| 2.8381866986   | 1.7958394405   |
| 6.826572577    | 6.8603156676   |
| 5.4216552161   | 6.8610160669   |
| 0.8124949354   | 1.0281990617   |
| 9.3974920974   | 3.6998492723   |
| 6.9121773609   | 6.7166364585   |
| 1.2595306339   | 2.390873148    |
| 0              | 0              |
| 0.1067167576   | 0.3376207816   |
| 1.914423717    | 3.4994150034   |
| 15.9603962523  | 6.0592861824   |
| 0              | 0.008806       |
| 77.573781537   | 69.2557556757  |
| 6.4006849273   | 11.9474441943  |
| 0              | 0              |
| 0              | 4.9285146557   |



gene\_expression\_table

|                |                |
|----------------|----------------|
| 2.4008783539   | 2.0255148787   |
| 0              | 4.9651148597   |
| 0              | 0              |
| 0              | 0              |
| 1.1881876673   | 0.107402291    |
| 0.7412046486   | 0.1172477961   |
| 0.5250986637   | 0              |
| 26.4242013615  | 12.1597799848  |
| 7.3432990949   | 0.4040358691   |
| 0              | 1.7519683004   |
| 16.3688194881  | 23.5391744748  |
| 14.8495470962  | 5.1250524971   |
| 78.3014119867  | 116.5215088677 |
| 35.3370602528  | 62.2864434457  |
| 8.9653657445   | 6.6738375435   |
| 0.5093911387   | 0              |
| 21.8303225165  | 5.4050705922   |
| 43.881647907   | 8.6382346159   |
| 6.2676008026   | 7.0163679524   |
| 6.053167937    | 5.319572982    |
| 0              | 0              |
| 0              | 0.1959651902   |
| 22.2433091256  | 15.3075845841  |
| 0.2694973828   | 0.4750263143   |
| 0              | 0.1230810382   |
| 0.8951782336   | 1.0114584146   |
| 1.3521780501   | 1.5167093113   |
| 0.8334180219   | 1.3183461072   |
| 0.2581972846   | 0.2764760679   |
| 0              | 0              |
| 3.6237295893   | 3.6031054484   |
| 104.1819348624 | 160.0920792675 |
| 0              | 0              |
| 2.0756484141   | 3.1977206979   |
| 1.5089002771   | 1.5912405333   |
| 3.2492963985   | 2.5699571796   |
| 1.3391570201   | 0.8104997629   |
| 11.3300444649  | 4.6681815201   |
| 0              | 0              |
| 6.3510925141   | 3.2088835976   |
| 16.3689304887  | 9.3847899141   |
| 0.5363646792   | 0.9025280108   |
| 31.887859007   | 13.5396827965  |
| 20.3685958498  | 19.4708883849  |
| 1.0982277279   | 0.9874818289   |
| 0.8496445489   | 0.7795281855   |
| 3.25254484     | 3.6015370449   |
| 4.2564869584   | 5.5514079863   |
| 5.889481155    | 4.9686947645   |

gene\_expression\_table

|               |                |
|---------------|----------------|
| 0             | 0              |
| 13.0482575732 | 9.6533777656   |
| 5.324651585   | 5.8669328903   |
| 44.0241003388 | 58.6269307207  |
| 0.1846792719  | 0.3895143337   |
| 0.006002      | 0.0113937996   |
| 1.1243016304  | 1.0994250341   |
| 12.5613456752 | 8.3160559029   |
| 5.8213682604  | 39.4652485275  |
| 0             | 5.6562100228   |
| 0             | 0              |
| 0             | 0              |
| 0             | 0              |
| 2.1590225463  | 1.1384198943   |
| 3.4551340986  | 1.648615768    |
| 2.050206411   | 1.7108677261   |
| 6.8285687806  | 8.8956022533   |
| 0.9525935919  | 2.8242946567   |
| 1.3033818101  | 0.9082185377   |
| 0             | 0              |
| 0             | 0              |
| 0             | 0              |
| 0.9081036387  | 0              |
| 3.2994630131  | 1.096046836    |
| 0             | 0.0128126592   |
| 5.3806014248  | 4.1212750736   |
| 0             | 0.0553933526   |
| 0             | 0              |
| 19.2253099281 | 16.8093452576  |
| 77.1675689188 | 95.418621972   |
| 61.7494882716 | 58.6072261521  |
| 0             | 0.3255321873   |
| 2.5756089452  | 1.3037564102   |
| 9.3856481257  | 3.493348326    |
| 0             | 0.006782       |
| 0.0818508954  | 0.0172634951   |
| 9.3897411318  | 7.8469761873   |
| 58.6173070289 | 50.014793324   |
| 1.7836421176  | 3.3857549232   |
| 0.317709476   | 0.0335046791   |
| 0.0811002554  | 0              |
| 0.0926741948  | 0              |
| 0.0391762353  | 0.0991537711   |
| 0.4066394265  | 0.6861273977   |
| 6.7474389549  | 7.9914164306   |
| 51.2608999827 | 108.8886451343 |
| 0.9283041758  | 1.4684422033   |
| 0             | 0.1188183438   |
| 0             | 0.0221116203   |

gene\_expression\_table

|                |               |
|----------------|---------------|
| 23.536626834   | 28.8894205992 |
| 79.9674863498  | 56.9834767945 |
| 0.5345712739   | 0.3382456052  |
| 0              | 0             |
| 75.2747629807  | 39.5566960384 |
| 8.2498191418   | 8.7300094431  |
| 0              | 0             |
| 0              | 0             |
| 0              | 0             |
| 3.6598350909   | 8.4910127369  |
| 5.3227280154   | 2.2452751037  |
| 106.7393041793 | 89.3890885642 |
| 2.3579864461   | 2.3208836853  |
| 0              | 0             |
| 13.2561859272  | 35.4866063494 |
| 0              | 0.3356489471  |
| 8.965203308    | 3.8597474504  |
| 0.5535802384   | 0.8173045349  |
| 11.144705329   | 9.1031310359  |
| 37.5022552147  | 21.092662691  |
| 9.4337450874   | 5.9691251137  |
| 12.0975571669  | 4.1977005633  |
| 2.7906702573   | 1.9262986915  |
| 2.1912305808   | 0             |
| 0.0542602337   | 0.0514990792  |
| 0.2662357425   | 0.0842292452  |
| 6.2206705434   | 1.9084016739  |
| 6.9305958774   | 8.1326972079  |
| 0.4226929341   | 1.0698219997  |
| 2.1732804094   | 7.1506521815  |
| 0.3667326077   | 0.1160235303  |
| 14.4741256342  | 11.7142130086 |
| 13.5889480255  | 14.3304930291 |
| 0.1152043363   | 0.3644730117  |
| 3.4605802483   | 5.0635745814  |
| 31.5238772955  | 51.5423638154 |
| 5.8246986747   | 0             |
| 0              | 0             |
| 0.5689595903   | 7.3800928924  |
| 0.9366093985   | 1.4731136873  |
| 0              | 9.4687479215  |
| 5.8540390107   | 7.6636455439  |
| 12.5410765478  | 7.7127796738  |
| 13.1714845923  | 11.1282570797 |
| 15.5962775249  | 34.4096124475 |
| 0              | 0.8422199033  |
| 7.3412502074   | 8.0678331877  |
| 0              | 0.0294341538  |
| 9.5876492475   | 2.6633444107  |

gene\_expression\_table

|                |                |
|----------------|----------------|
| 12.7883659615  | 3.4905519468   |
| 0              | 0              |
| 22.4769065063  | 48.3945740886  |
| 1.1086387058   | 0.2338273605   |
| 19.9564188952  | 25.950512716   |
| 7.7771245433   | 1.7116215659   |
| 18.4521237866  | 12.2248625649  |
| 2.2049742166   | 3.0616437207   |
| 0              | 0              |
| 40.3769990236  | 90.1364031546  |
| 0              | 0              |
| 2.3675596417   | 0.8988324097   |
| 1.8660026135   | 1.1806979052   |
| 0.8498314444   | 1.3443097545   |
| 0.4728129135   | 0.3390576416   |
| 12.9297345432  | 4.8644877085   |
| 100.0666966339 | 130.841108907  |
| 41.0626385345  | 32.2695199056  |
| 1.4280014943   | 0.6776672072   |
| 11.0774827911  | 8.0104991011   |
| 8.1408470574   | 5.3963427576   |
| 29.8489694025  | 13.7144025201  |
| 9.1393452908   | 5.6795809402   |
| 19.7519795703  | 11.0613630134  |
| 0              | 0              |
| 1.9358313496   | 2.0321897071   |
| 0.005458       | 0.0103610238   |
| 0.5979973729   | 0.9459448775   |
| 21.8928360696  | 4.8605309193   |
| 20.0683503582  | 18.6584101645  |
| 0              | 2.018719603    |
| 0              | 1.3368813595   |
| 0              | 0.006971       |
| 127.363289447  | 122.7136682084 |
| 12.8155446739  | 12.9005723108  |
| 32.938515818   | 38.2095573162  |
| 18.3722105467  | 29.4773390139  |
| 56.3441134849  | 107.6020371729 |
| 10.360842491   | 10.894094727   |
| 23.1825503775  | 25.1461188153  |
| 13.9063519766  | 10.1357073698  |
| 9.0913394851   | 30.8168076799  |
| 23.9698729577  | 17.2084179428  |
| 8.5867662171   | 11.2925461257  |
| 12.2052715133  | 6.9719594131   |
| 25.4865204854  | 38.4552318911  |
| 4.0352351726   | 3.1368648417   |
| 0.4574963156   | 0.4342155827   |
| 2.4641422219   | 1.3557963952   |

gene\_expression\_table

|                 |                 |
|-----------------|-----------------|
| 17.329858414    | 5.9212761998    |
| 14.7141202847   | 16.6292714755   |
| 46.7393269942   | 25.8185078841   |
| 1.3701565928    | 0.7947091052    |
| 0.4530100462    | 0.3968839452    |
| 0               | 0               |
| 0               | 0.0960563191    |
| 0               | 0.021300947     |
| 51.1615156559   | 23.7522593962   |
| 12.0967934804   | 6.6665153229    |
| 18.882150425    | 12.6994686007   |
| 0.2030553415    | 0.144541809     |
| 8.2723478215    | 3.4469520263    |
| 8.8122600165    | 6.6481711894    |
| 0               | 0.118498174     |
| 3.5263911755    | 2.9963106964    |
| 3.5204054883    | 5.2756763798    |
| 0               | 0               |
| 154.6013137994  | 136.0774121073  |
| 3.1459820439    | 1.7106670883    |
| 29.2292360243   | 19.1550802485   |
| 26.9243590548   | 12.3365355731   |
| 5.9702947394    | 5.0916222375    |
| 2.9600713355    | 4.4482822527    |
| 22.4284970203   | 34.0860017734   |
| 0.624916071     | 0.659017562     |
| 3.9638092746    | 2.7588747199    |
| 1.0147961259    | 0.847906506     |
| 0               | 0               |
| 2.3460185393    | 2.0280159688    |
| 189.3197353645  | 112.3852836094  |
| 39.0443574178   | 23.1053939015   |
| 0               | 0               |
| 0.0377334831    | 0.0636681416    |
| 1.136130986     | 6.0385718163    |
| 0               | 0               |
| 0               | 0               |
| 5.2402916513    | 9.097062411     |
| 5.7099174522    | 3.9139789084    |
| 3.9671582341    | 3.3673239626    |
| 0.1150071438    | 0.2546944065    |
| 12.82667353     | 7.6961811599    |
| 25.8805865512   | 18.8356032027   |
| 86.4150194018   | 54.9723672414   |
| 0               | 0.0322214836    |
| 3.0315267991    | 3.497846358     |
| 14.9849387273   | 5.4390559453    |
| 11.4350381975   | 5.0937405904    |
| 3249.0811998612 | 5381.8135978627 |

gene\_expression\_table

|                 |                 |
|-----------------|-----------------|
| 2.0842310431    | 5.3526959464    |
| 189.906650338   | 163.8571106297  |
| 19.2617111669   | 8.4878557716    |
| 14.745193216    | 14.5779695517   |
| 2.0818609284    | 2.7662890289    |
| 40.7282376497   | 15.8311570603   |
| 0               | 0               |
| 14.1889545115   | 15.0976055002   |
| 0.2612552064    | 0.0206633871    |
| 0               | 0               |
| 0.0695346271    | 0.0263984803    |
| 0.7507204997    | 0.803866904     |
| 0.0329436358    | 0.0208448164    |
| 23.4760269172   | 19.8941038275   |
| 0               | 0               |
| 28.8034852131   | 36.080910667    |
| 5.6777436946    | 3.8074845707    |
| 0.6307564233    | 1.0131151609    |
| 0               | 0.457255165     |
| 0               | 0.0622625198    |
| 529.0113566245  | 144.4372576413  |
| 0               | 0               |
| 2.1767412637    | 1.9894553564    |
| 6.6889884686    | 5.5021236304    |
| 0.909172153     | 3.4516275017    |
| 0.4450044508    | 1.8704487479    |
| 0.9916451672    | 0               |
| 58.6088862119   | 103.0353390584  |
| 0               | 0.2430567506    |
| 35.0033404367   | 26.0087517031   |
| 2.0267388829    | 2.2442043158    |
| 2.2957735808    | 1.6140355253    |
| 0               | 0.0120367115    |
| 0               | 0               |
| 0               | 0               |
| 0.7736523627    | 1.1113477209    |
| 35.2554836607   | 17.8682919854   |
| 6.7721899207    | 6.4887867164    |
| 0.0155598105    | 0.0196906859    |
| 0               | 0               |
| 14.4638346567   | 11.2638439187   |
| 0.614133806     | 1.2952938239    |
| 0               | 0.088181022     |
| 3148.4414741025 | 2730.5852617039 |
| 7.2523990636    | 2.8043254816    |
| 2.700400165     | 2.5092153066    |
| 2.1269221965    | 3.0082423699    |
| 65.1159476977   | 30.6850956223   |
| 200.0924745149  | 58.8869200652   |

gene\_expression\_table

|                |                |
|----------------|----------------|
| 0.0569546725   | 0.0360376036   |
| 0.487018602    | 0.0840428293   |
| 0              | 0              |
| 10.408002665   | 8.8434913092   |
| 0              | 0              |
| 0              | 0              |
| 0.2383829835   | 0.1508348848   |
| 2.6631794644   | 1.6148923331   |
| 1.265285405    | 1.1723056791   |
| 0              | 0              |
| 4.7130799782   | 3.7954799807   |
| 489.3357157837 | 226.7534431786 |
| 22.6773273073  | 9.0344885251   |
| 0              | 0              |
| 2.16632774     | 3.1330883995   |
| 1.8800065293   | 2.1961084956   |
| 2.6949669162   | 7.4227149251   |
| 1.9975101016   | 0.6319540968   |
| 113.5370473807 | 157.8016000468 |
| 0              | 0              |
| 0              | 0.3829321745   |
| 0              | 0              |
| 0.1478559137   | 0.436588232    |
| 7.328813377    | 3.8919749718   |
| 20.4840680832  | 28.4147777405  |
| 0              | 0.0278277674   |
| 0              | 0              |
| 0.7421167499   | 0.9391366182   |
| 15.6787385927  | 13.0771462693  |
| 9.3807929208   | 6.3922062217   |
| 5.123971376    | 6.9474664634   |
| 0              | 0              |
| 7.2385479954   | 5.7251651155   |
| 0              | 0              |
| 0              | 0              |
| 0.926458201    | 3.68474138     |
| 18.2883475399  | 7.8688256713   |
| 0.2650303327   | 0.4695481764   |
| 0              | 0              |
| 0              | 0              |
| 0              | 2.3376569797   |
| 11.6984509245  | 21.7128243947  |
| 0.2930713763   | 0.3708770369   |
| 32.2021001181  | 11.4612838322  |
| 0              | 0.1301702613   |
| 1.0186983303   | 1.2891460879   |
| 0              | 5.5022724813   |
| 10.0607887976  | 10.1735121909  |
| 3.084852839    | 2.3739511928   |

gene\_expression\_table

|                 |                 |
|-----------------|-----------------|
| 3.7240328287    | 3.2879321029    |
| 15.0327370343   | 1.4267762272    |
| 2.1115270796    | 1.6161913363    |
| 31.7619182793   | 32.7003567298   |
| 0.721852254     | 0.4567461149    |
| 656.1636183219  | 1030.3153682919 |
| 5.0083861376    | 2.8169025788    |
| 36.4080739334   | 25.4051918602   |
| 0.5210382612    | 0.9498001652    |
| 58.6704787714   | 40.250867166    |
| 0               | 0               |
| 0               | 0.0466460254    |
| 3218.9470826704 | 3305.581828601  |
| 0               | 0.1344587037    |
| 15.8157511314   | 24.2281692181   |
| 9.0072765764    | 2.2980970356    |
| 1.6389928327    | 1.7407781467    |
| 0.3002732651    | 0.4863883641    |
| 0.2840180648    | 0.4672462849    |
| 497.7581332315  | 508.8068087918  |
| 0               | 0.0808219236    |
| 3.5917846999    | 7.7270862199    |
| 317.0914786319  | 127.9925956991  |
| 0.3677865122    | 0.2792566922    |
| 2.2645576375    | 5.4350633575    |
| 5.1887954767    | 3.2049972711    |
| 360.4287895044  | 529.1499526913  |
| 250.6162638598  | 159.6773762525  |
| 195.8455721715  | 124.3529710003  |
| 0.0332934488    | 0.0421323153    |
| 0.3948319923    | 0.3122833958    |
| 6.0711101141    | 2.5986247705    |
| 4.0838090813    | 4.6804470779    |
| 57.2518182601   | 19.2105561431   |
| 0               | 0               |
| 3.3973085431    | 3.0391168264    |
| 35.5565740556   | 34.5728170214   |
| 3.444836131     | 4.284222033     |
| 0               | 0               |
| 2.689696923     | 1.7018837485    |
| 26.283612664    | 22.252400103    |
| 26.240024327    | 18.5084417321   |
| 0.3475073909    | 0               |
| 0               | 0               |
| 0.0127274105    | 0.008053        |
| 0.0128108677    | 0.008106        |
| 0               | 0               |
| 0               | 0               |
| 92.47235176     | 117.7702613673  |



gene\_expression\_table

|                |                |
|----------------|----------------|
| 8.1402666968   | 10.391737398   |
| 0              | 0              |
| 2.3191993675   | 4.108872454    |
| 108.3535091575 | 62.5104035845  |
| 0              | 0              |
| 5.6415209052   | 6.3955803674   |
| 0              | 0              |
| 0              | 0              |
| 13.6984678694  | 19.3082979465  |
| 30.9753019077  | 17.2092021885  |
| 123.2745746147 | 109.3635920113 |
| 0              | 0              |
| 11.2863322446  | 9.5217793313   |
| 0.0197833989   | 0.012517784    |
| 0              | 0              |
| 0              | 0.1048513318   |
| 11.409120466   | 21.1758147105  |
| 9.8094407396   | 2.375458611    |
| 17.9906109133  | 16.7193864342  |
| 0.4063453865   | 1.2855586139   |
| 0.0248143836   | 0              |
| 34.5465423851  | 24.7788422736  |
| 0.8690927191   | 1.2997903832   |
| 4.6753838665   | 5.5344477308   |
| 0.7040133786   | 0.8099249314   |
| 33.3790468908  | 26.3335624899  |
| 1.2040928442   | 1.6189948037   |
| 13.260608476   | 10.7617816823  |
| 2.0477314954   | 1.0527443632   |
| 26.8263747577  | 11.5664694203  |
| 8.5739001222   | 9.0755764269   |
| 1.9468020293   | 3.1565466303   |
| 0.1425383695   | 1.2626598388   |
| 0              | 0              |
| 10.7814659552  | 5.9899473479   |
| 0              | 0.0437706153   |
| 14.4984737726  | 12.2905274199  |
| 19.4910947205  | 35.2366597363  |
| 27.2212784853  | 26.2596042779  |
| 30.6660110405  | 29.2214600102  |
| 370.2630112507 | 402.0863821028 |
| 0.1043355074   | 0.198052319    |
| 34.2750950955  | 44.1960607858  |
| 4.8492814954   | 4.6314614929   |
| 2.2677423406   | 2.1310328236   |
| 5.3519146913   | 0              |
| 99.0692669197  | 56.1251827742  |
| 0              | 0              |
| 16.2298048212  | 9.9821783252   |

gene\_expression\_table

|                |                |
|----------------|----------------|
| 0.6311719581   | 1.9569076037   |
| 3.8932120061   | 1.8921753387   |
| 0              | 0.0893391784   |
| 0.0515264918   | 0              |
| 0              | 0.034123496    |
| 1.0967816658   | 0.8481973334   |
| 5.722796186    | 3.9405571555   |
| 0.1845487825   | 0.2189470013   |
| 5.6588949856   | 8.6874048317   |
| 0              | 0              |
| 34.377262251   | 73.5422454957  |
| 9.9864606615   | 5.7867375764   |
| 0.5517707528   | 0.4322542527   |
| 0.0503420069   | 0.0424713247   |
| 0.0379401845   | 0.0120031708   |
| 0.6005073021   | 0.5298118694   |
| 63.3346461937  | 24.0446878938  |
| 4.1462902798   | 4.4791997669   |
| 12.7885326644  | 18.1629779569  |
| 5.4997383464   | 2.667934447    |
| 0              | 0              |
| 2.2915802982   | 0.579991483    |
| 1.5194061514   | 1.0023021165   |
| 0              | 0.3693477192   |
| 15.5929953317  | 6.0877419328   |
| 0              | 5.1645280335   |
| 0              | 0              |
| 21.6001736823  | 17.2851569292  |
| 3.5920828723   | 4.5457221675   |
| 236.1740245225 | 169.3621419318 |
| 0              | 0.2552881164   |
| 0              | 0              |
| 6.615350643    | 0              |
| 2.6040911926   | 2.4715761332   |
| 31.0372306335  | 5.9372372722   |
| 9.8846760167   | 8.4164793728   |
| 1.9855687073   | 1.1516563428   |
| 32.5810804975  | 118.4375655854 |
| 3.7634468606   | 21.4316122232  |
| 69.9927103108  | 63.7115766627  |
| 192.5367607966 | 185.5671980541 |
| 17.9395647925  | 4.8647627248   |
| 8.6726923444   | 0.6859469012   |
| 42.1515065121  | 33.8794054265  |
| 2.7910425414   | 5.2980280809   |
| 2.7640231929   | 1.7489130883   |
| 5.0543429832   | 4.1575224857   |
| 54.501883683   | 12.8946237002  |
| 9.8412478895   | 5.8606768769   |

gene\_expression\_table

|                 |                 |
|-----------------|-----------------|
| 5.5143280366    | 2.7913168027    |
| 3.3162346934    | 4.6163048861    |
| 465.7265489968  | 435.620813667   |
| 0               | 1.8390106876    |
| 32.8542978334   | 8.0318387295    |
| 140.9565740871  | 166.4138465801  |
| 825.6825788253  | 453.4122774495  |
| 10.9736578528   | 21.5248262298   |
| 165.0120188053  | 109.1025910192  |
| 0               | 1.3485585211    |
| 42.2148588093   | 20.3513195745   |
| 1.2479579879    | 1.2359507773    |
| 20.8200825156   | 10.2462399471   |
| 0               | 36.5539180442   |
| 22.9784173889   | 21.9781716013   |
| 28.5598851994   | 14.2666057699   |
| 0               | 0               |
| 7.7786847339    | 19.687596799    |
| 29.9489412234   | 5.0533194196    |
| 270.7209402264  | 169.8689921376  |
| 3.1730719514    | 3.2123765562    |
| 24.4658957319   | 5.5633390419    |
| 46.891943313    | 34.0338018738   |
| 63.5209620983   | 87.4775104999   |
| 12.5919388244   | 6.4735501941    |
| 23.7881330176   | 10.9246549179   |
| 0               | 0               |
| 47.4766625845   | 33.0445173103   |
| 3.0734426195    | 3.2411595034    |
| 60.8720792642   | 33.5464641772   |
| 115.153198833   | 87.1958020594   |
| 17.1374035722   | 1.0843552067    |
| 34.5184703997   | 28.5616739358   |
| 45.4519225625   | 27.3898405513   |
| 0               | 0               |
| 5.52313894      | 4.1711186493    |
| 0               | 0.2582036725    |
| 5307.9439828343 | 7377.7446078571 |
| 1.7464222259    | 4.1438789703    |
| 6.0098794113    | 4.3731073991    |
| 132.214089423   | 56.1535869633   |
| 2.6811275641    | 7.0942937823    |
| 6.6237471291    | 6.0961772628    |
| 0               | 0               |
| 163.4396992785  | 47.8975358063   |
| 0.7029180656    | 0               |
| 14.2830246884   | 23.2043075576   |
| 0               | 5.3652527171    |
| 16.7193165861   | 8.288014943     |

gene\_expression\_table

|                 |                 |
|-----------------|-----------------|
| 1.1926556991    | 1.8789074284    |
| 0               | 5.6156055       |
| 1.3671188435    | 1.5315343255    |
| 0               | 0.030690101     |
| 2.9797522857    | 3.3981297196    |
| 3.601200972     | 8.4309328015    |
| 12.8332700139   | 12.6204690153   |
| 0.2410670533    | 0.4448885233    |
| 0               | 0               |
| 14.5153405835   | 43.298183366    |
| 1.9285594071    | 4.2031873731    |
| 7.801031772     | 8.6681662341    |
| 7.4274638125    | 1.6047643523    |
| 0               | 0.5739888317    |
| 0.7994688887    | 0.1821086662    |
| 0               | 0               |
| 0.9981120479    | 0.3886444566    |
| 0               | 0               |
| 0               | 0               |
| 0.7088975422    | 0.7124015545    |
| 2.2472593802    | 4.6923855289    |
| 1.3761869947    | 1.4736125885    |
| 0.6536387299    | 1.6543382598    |
| 43.9440388756   | 49.7123835875   |
| 2.3038873715    | 5.83106363      |
| 0               | 0.0690859979    |
| 1.7533708809    | 1.0406291683    |
| 80.1335071286   | 95.5118503736   |
| 0.0403385207    | 0.0187175042    |
| 0.1285902409    | 0.5695509687    |
| 0               | 0               |
| 0.0452797928    | 0.0859512566    |
| 7.436386822     | 13.1393645848   |
| 15.7979166039   | 20.1586053124   |
| 0.0654423457    | 0.1739140597    |
| 0.4555675038    | 0.3391254297    |
| 0.9230268652    | 0.6883301537    |
| 0               | 0               |
| 0               | 0.0350480179    |
| 0.1523841111    | 0.1285597348    |
| 276.8935524632  | 324.3607049699  |
| 6.3296497389    | 5.5756357744    |
| 72.0570029634   | 52.9210033301   |
| 0.9476540884    | 2.1531822753    |
| 3620.0824069684 | 6012.2749777273 |
| 0.4009856727    | 0.5920142845    |
| 0.0231678251    | 0.014659252     |
| 0.2860982811    | 0.2506518684    |
| 0.7689136337    | 1.088886641     |

gene\_expression\_table

|                |                |
|----------------|----------------|
| 3.7407391772   | 10.5815342993  |
| 70.0528271589  | 66.4880308941  |
| 4.0015144658   | 3.8287655094   |
| 36.4654586116  | 38.8375333991  |
| 1.9283922847   | 1.8302616896   |
| 3.3192873795   | 2.0252429662   |
| 3.2235990789   | 2.7491689224   |
| 0.051905362    | 0.8867527288   |
| 0              | 0              |
| 0.1510296287   | 0.0764502107   |
| 0              | 0              |
| 4.9775686215   | 5.2969130536   |
| 3.9197599673   | 5.1375490394   |
| 0.7833117894   | 0.6608455116   |
| 27.6209283657  | 15.2113904712  |
| 30.8145492606  | 19.8955655462  |
| 0              | 0.6292260667   |
| 2.9756854823   | 2.1043513396   |
| 119.8039114943 | 54.7923469249  |
| 13.4745754082  | 9.1990270162   |
| 17.6454469154  | 15.0934426095  |
| 0.7385258624   | 0.9345924088   |
| 64.3745071978  | 26.4124437516  |
| 53.2171658041  | 52.5567559944  |
| 4.7463139318   | 6.0063827091   |
| 1.9078584779   | 0.6035909307   |
| 31.5356672801  | 10.42369779    |
| 9.9990707598   | 10.8730556879  |
| 1.7486866174   | 1.7211711491   |
| 11.9371640847  | 6.3911210227   |
| 17.7408339321  | 23.7807552624  |
| 0.0766997316   | 0.1455933852   |
| 9.1364506502   | 18.7194754849  |
| 2.403601232    | 3.8021475948   |
| 2.5502247635   | 2.8686824521   |
| 1.0229634879   | 0.1294543575   |
| 15.4691227941  | 19.5759220757  |
| 166.9639684556 | 165.6707040642 |
| 64.6577858147  | 40.3512515565  |
| 0              | 1.6639450484   |
| 89.5863980942  | 62.9834014611  |
| 6.1660463526   | 19.5075772106  |
| 5.7247533666   | 17.7089777889  |
| 0              | 4.8287274453   |
| 9.7911216502   | 2.0650840711   |
| 0.0716670412   | 0.2040603059   |
| 0              | 0              |
| 2.7276167539   | 8.197916755    |
| 151.6172558091 | 96.87281513    |

gene\_expression\_table

|                |                |
|----------------|----------------|
| 41.0163327737  | 22.1547860618  |
| 7.7922258742   | 7.0435246367   |
| 464.5133325746 | 269.90044984   |
| 1.0108685966   | 1.9188565318   |
| 0.4572011737   | 0.3535770413   |
| 0.5855240904   | 1.5877953575   |
| 0              | 1.8895020438   |
| 10.3933778369  | 5.7542842823   |
| 0.167605582    | 0.4242042494   |
| 3.7395411183   | 0              |
| 82.4962269229  | 7.2835553645   |
| 2.0820011682   | 10.5389538046  |
| 6.1324022505   | 4.8502842643   |
| 10.4026420218  | 12.8296860017  |
| 10.5463194174  | 28.3606640744  |
| 0.498746286    | 2.5246210946   |
| 1.5500154134   | 0              |
| 3.2656038187   | 3.5815591596   |
| 0              | 0.8734410966   |
| 109.6424133915 | 135.0006637645 |
| 0.1557082412   | 0.886708055    |
| 1.3414783144   | 1.6976188823   |
| 16.2563089244  | 14.1433141151  |
| 139.6199388604 | 138.5091334125 |
| 3.7513660375   | 3.2481474383   |
| 0.7369264005   | 0.8030449387   |
| 4.5997404604   | 1.9029853539   |
| 0.4574884151   | 0.4631552899   |
| 1.2467808375   | 1.1340299306   |
| 32.3037279891  | 40.3623734864  |
| 6.7905761491   | 6.1585769132   |
| 14.2678556668  | 13.6518995837  |
| 2.6940544422   | 9.816380546    |
| 589.3373484283 | 453.4000291125 |
| 0.1288466601   | 0.1630533426   |
| 4.9894391072   | 3.3005280418   |
| 113.7692294816 | 40.7196647929  |
| 10.3153299433  | 12.1797376069  |
| 2.2133298807   | 1.1670553293   |
| 0.3628659319   | 0.4081785834   |
| 48.4053130656  | 37.796337118   |
| 0              | 0              |
| 0              | 0.0662074147   |
| 0              | 0              |
| 1.3724991049   | 1.1579167905   |
| 0.1820999684   | 0.0493809715   |
| 0              | 12.6088627683  |
| 0              | 0              |
| 1.1717299722   | 5.5605192362   |

| gene_expression_table |                |
|-----------------------|----------------|
| 0                     | 7.1200289394   |
| 0                     | 0.1768684648   |
| 0                     | 0              |
| 9.0174492611          | 0              |
| 0                     | 0              |
| 15.2554245026         | 10.6353599701  |
| 0                     | 0              |
| 0                     | 0.2723725091   |
| 4.1149390684          | 5.5545473476   |
| 0.2643735988          | 0.3345604685   |
| 20.7431592903         | 11.1058238353  |
| 7.8444942494          | 1.7553981629   |
| 1.4727052732          | 3.8532935333   |
| 3.5477128498          | 5.8828882728   |
| 0                     | 0              |
| 17.9256789236         | 25.157792647   |
| 3.0291172014          | 3.3847208498   |
| 2.0563060006          | 4.6839989457   |
| 0                     | 0              |
| 4.1608129002          | 0.4993090341   |
| 2.387355979           | 4.7583269583   |
| 0.8956043855          | 1.1963378632   |
| 0                     | 0.1106042158   |
| 86.3070291124         | 62.5327714672  |
| 0                     | 0.0248689035   |
| 0.2347865948          | 0              |
| 12.9173764814         | 6.2872033929   |
| 0.4883545344          | 0.350202653    |
| 73.5421335878         | 47.7740689667  |
| 7.1330042332          | 7.3854820462   |
| 1.5596810107          | 2.1147330303   |
| 5.6843928902          | 3.7299662294   |
| 0.026207125           | 0.091202893    |
| 111.8040634006        | 36.4565707259  |
| 3.1024353768          | 3.6286508658   |
| 0.0209651222          | 0.4642928423   |
| 1.442106667           | 1.1568958185   |
| 1.5690183183          | 2.5067783861   |
| 2.9178482268          | 3.5078647809   |
| 56.7243958011         | 20.2558235699  |
| 1.7933451491          | 1.9920718795   |
| 1.9096687901          | 1.8988000767   |
| 1.7007735503          | 2.690376414    |
| 25.9848973537         | 23.002225291   |
| 0.3153123159          | 0.4489004052   |
| 0.4179251655          | 0.5288774665   |
| 0.6619684588          | 2.3037032308   |
| 881.4666708235        | 374.8043034489 |
| 10.058473678          | 6.3644170243   |

| gene_expression_table |               |
|-----------------------|---------------|
| 0                     | 0.2047527657  |
| 0                     | 0             |
| 2.0580860558          | 2.7031285955  |
| 4.1348053572          | 4.8653336125  |
| 7.4283370559          | 4.0136706436  |
| 0                     | 0.0992884327  |
| 11.3138229873         | 15.1851828148 |
| 2.4998046828          | 3.1048793414  |
| 2.1858067428          | 0             |
| 11.871287877          | 16.9285375892 |
| 0                     | 0             |
| 0                     | 1.8759085039  |
| 10.8126131945         | 5.9322670365  |
| 0                     | 0             |
| 3.5972715318          | 4.5522883314  |
| 0.2100894358          | 0.3766417254  |
| 94.2535420864         | 58.9281804594 |
| 3.9795121311          | 4.5863640302  |
| 3.9626196265          | 2.450330751   |
| 12.3143037688         | 12.8786334225 |
| 0.5841210932          | 1.3991918547  |
| 11.1906100622         | 9.7665752687  |
| 0.0271632595          | 0             |
| 5.5701387416          | 4.0809534189  |
| 12.651465124          | 16.9464926574 |
| 11.3835037845         | 9.1420394953  |
| 1.2375383668          | 0.7695415596  |
| 0.8653872978          | 0             |
| 0                     | 0             |
| 1.1725968337          | 0.2967804257  |
| 0.435866695           | 0.4596518158  |
| 1.0829090551          | 0.4111211132  |
| 1.9649740078          | 1.974686685   |
| 0.3726241165          | 0.2357748647  |
| 0.3475933708          | 0.7477853407  |
| 15.1179981178         | 11.8433587607 |
| 3.3762664076          | 2.7466778306  |
| 0                     | 0             |
| 33.9880159695         | 20.9542127122 |
| 23.3385016115         | 23.4498399955 |
| 2.3414399362          | 1.8234178288  |
| 3.3413305235          | 4.2283991684  |
| 1.0137890027          | 1.2335898212  |
| 0.9679707906          | 1.0499581846  |
| 0                     | 0             |
| 111.4892850031        | 47.0292893475 |
| 6.2104435383          | 2.710074068   |
| 0                     | 0.1053540534  |
| 0.4691132616          | 0.3895862024  |



gene\_expression\_table

|                |                |
|----------------|----------------|
| 0.3674780571   | 0.3756071916   |
| 1.5039239083   | 0.8987291431   |
| 1.0459641705   | 0.7090985159   |
| 0              | 0              |
| 0              | 0              |
| 7.7497452897   | 8.4915792246   |
| 2.1014147093   | 4.5588102345   |
| 0              | 0.1888741681   |
| 2.6339584412   | 3.8887699191   |
| 1.8028511428   | 1.6296276117   |
| 0.4048704929   | 0.7685354877   |
| 0.4652262714   | 0.5887362431   |
| 0              | 2.7469534078   |
| 2.2783785405   | 1.4416254031   |
| 0.3688076132   | 0.3500400051   |
| 4.9670979926   | 1.9788570853   |
| 0              | 0.6789387644   |
| 18.3954958609  | 9.5481091144   |
| 10.1956767023  | 3.2256155584   |
| 168.4291055962 | 167.982543862  |
| 24.1106725965  | 20.2917364566  |
| 6.9110317019   | 4.7854364599   |
| 2.5863855517   | 3.3821295998   |
| 3.37820509     | 2.7581053739   |
| 0.3816478077   | 0.046439333    |
| 3.7356586803   | 3.151610004    |
| 0.1455591746   | 0.1228018377   |
| 67.539445414   | 28.8539450777  |
| 33.4736180605  | 34.594258539   |
| 248.5345165565 | 133.7868135812 |
| 0              | 0.2605254933   |
| 1.7295893955   | 2.2463662469   |
| 2.4751835301   | 3.9806367198   |
| 0.5176822862   | 1.3873097064   |
| 6.8004212372   | 4.917612533    |
| 12.0997533027  | 3.5090091785   |
| 0.4554200196   | 0.4034286142   |
| 0              | 0              |
| 0.0208560479   | 0.0131964939   |
| 31.3671208181  | 23.0048126822  |
| 2.6124002487   | 4.2977347646   |
| 0              | 0              |
| 10.6880436294  | 14.3211647993  |
| 0.0365271996   | 0.0462245742   |
| 25.5764914159  | 24.2338995015  |
| 56.1725087206  | 75.4889115702  |
| 0.4407773437   | 6.135761771    |
| 0              | 0.026563002    |
| 10.0741209201  | 5.4867544663   |

gene\_expression\_table

|                 |                |
|-----------------|----------------|
| 1.289544891     | 0.56761669     |
| 1.5795790493    | 0.7196153296   |
| 0               | 0              |
| 8.8858461545    | 6.0989250616   |
| 0               | 0.0514285425   |
| 31.3119639737   | 24.6057093295  |
| 5.0782184995    | 7.2297028294   |
| 5.55113059      | 3.0441081825   |
| 49.1402183639   | 38.5075732983  |
| 2.4368670785    | 5.3966770565   |
| 2.5945521241    | 5.3354653769   |
| 0               | 0              |
| 0.3799253524    | 0.69714452     |
| 9.9270534821    | 6.3128260997   |
| 0               | 0              |
| 342.1028640297  | 187.1945831841 |
| 0.66848291      | 0.1057442746   |
| 0.576002895     | 0.0546691687   |
| 0               | 0.02825143     |
| 0.1489437007    | 0.2120465464   |
| 5.2818949615    | 3.4366629275   |
| 0               | 0              |
| 5.3751838857    | 2.7208829431   |
| 0               | 2.4134326144   |
| 80.5100444837   | 48.2371839198  |
| 0.0563102844    | 0.7482273181   |
| 3.0419790179    | 3.3430517396   |
| 0.4128926319    | 0.2612544387   |
| 6.2374384805    | 7.117531761    |
| 2.4561483085    | 3.0242097167   |
| 1.1091304837    | 2.434345336    |
| 2.5428453608    | 2.1040306602   |
| 0.0494394308    | 0.4379535414   |
| 0               | 0.6522043073   |
| 0               | 0              |
| 8.4388552471    | 5.6362620693   |
| 1.7559099438    | 1.7359963564   |
| 5.1793928283    | 11.834400093   |
| 27.3707219533   | 13.2168268109  |
| 15.0313444695   | 14.2664405706  |
| 0               | 0              |
| 0.4558767999    | 1.1538092793   |
| 3.7028384062    | 6.3079173844   |
| 3.4398783909    | 0              |
| 3.7022128979    | 9.8907453762   |
| 1361.1525395792 | 628.6961921376 |
| 0               | 0.4108260313   |
| 0.0807954968    | 0.0255613452   |
| 0.617069703     | 0.9761145301   |

gene\_expression\_table

|                 |                |
|-----------------|----------------|
| 0.1953117762    | 0.2965966329   |
| 0               | 0              |
| 0               | 0              |
| 8.5231463845    | 6.584417194    |
| 0.1195270606    | 0.1512595418   |
| 151.7806651465  | 139.8509206078 |
| 2.7617223858    | 3.2190002369   |
| 0               | 0              |
| 0               | 0              |
| 0               | 0.1101455711   |
| 0.0874309447    | 0.4544242728   |
| 3.9740805212    | 5.3085302796   |
| 13.925346854    | 8.8111494272   |
| 0               | 0              |
| 1.4217535865    | 1.5947507083   |
| 1.6872880648    | 0.8609820443   |
| 23.8816875016   | 14.1464143593  |
| 6.2223909736    | 6.7369302695   |
| 12.0113896013   | 10.7245977136  |
| 0.9232607399    | 0.5841856885   |
| 0.4025699426    | 0.6368071037   |
| 3.0656942314    | 4.2219023525   |
| 37.6808222789   | 17.6367198413  |
| 0.7506157533    | 0.682734852    |
| 18.3566726242   | 19.4832838393  |
| 0               | 0.0357768581   |
| 0.5782616608    | 0.2392359918   |
| 23.2759571271   | 19.5892331875  |
| 0               | 0              |
| 6.3499801731    | 7.1085888824   |
| 3.465533425     | 3.123061633    |
| 11.7408951065   | 15.0095222049  |
| 0               | 0              |
| 21.0971381178   | 11.1759419245  |
| 0.8857389577    | 0.8406661312   |
| 11.7228550512   | 12.6098192533  |
| 0.4571072594    | 0.867692649    |
| 1.1775435743    | 1.0837542895   |
| 2.3079559886    | 2.2568895417   |
| 0               | 0              |
| 0.7972384706    | 0.7033826284   |
| 3.1546847988    | 3.447810865    |
| 11.4064738128   | 14.8883683825  |
| 37.9805644261   | 29.5194891061  |
| 0               | 0.2987183893   |
| 0.8516554795    | 1.0007735124   |
| 0.1638167559    | 0.8292297092   |
| 0               | 0.8605652873   |
| 2491.9631587449 | 3232.089734139 |

gene\_expression\_table

|                 |                |
|-----------------|----------------|
| 79.9599908195   | 19.5363089137  |
| 0.8856807912    | 1.0585470902   |
| 0.8305439092    | 0.8758664526   |
| 13.3986067295   | 8.9288088602   |
| 11.0163569106   | 10.4557647181  |
| 1067.1055042721 | 810.3623559085 |
| 1.9762854198    | 2.0083441767   |
| 1.5577298478    | 1.1595774492   |
| 2.6125973304    | 1.9730543747   |
| 3.2588532587    | 3.7767391766   |
| 6.8805628695    | 5.6138783299   |
| 2.941918681     | 3.7229500094   |
| 0.0200441043    | 0.0507309729   |
| 0.0365366993    | 0.3005378727   |
| 0.8461573465    | 0.8923319106   |
| 1114.9323957555 | 2266.226226266 |
| 1.3072146292    | 0.7519357949   |
| 5.2022615861    | 3.1324132566   |
| 2.0730276941    | 2.5262203453   |
| 1.9948471845    | 1.6228584702   |
| 0               | 0              |
| 27.19587085     | 28.3425306575  |
| 0.1528060087    | 3.0939761052   |
| 10.3955626967   | 5.7554939279   |
| 36.0899270077   | 13.4327096445  |
| 10.260461167    | 3.3444784932   |
| 0.9148684956    | 0.5788755645   |
| 3.4654303958    | 4.7508993225   |
| 6.0688505745    | 9.8133732199   |
| 0.558246317     | 2.1193547715   |
| 56.5266387975   | 16.1527342862  |
| 2.166110847     | 1.3705889375   |
| 15.2302762857   | 17.9887546749  |
| 6.9253325106    | 2.3814932358   |
| 20.6844270503   | 8.054093654    |
| 27.4487631816   | 28.6571679872  |
| 5.9686858826    | 6.9408467781   |
| 0.2382341492    | 1.1305553332   |
| 9.1899422199    | 17.0569251353  |
| 5.4498227626    | 6.8966616367   |
| 30.6703094964   | 15.8779535754  |
| 11.2031320306   | 12.1520404165  |
| 5.3100270322    | 0.5599793687   |
| 31.9555694816   | 13.794697741   |
| 2.9567882275    | 11.2253015328  |
| 4.5552405811    | 4.0691170635   |
| 39.2812893106   | 21.8390464891  |
| 2.2101689425    | 1.3020203831   |
| 18.6525693075   | 11.1278459017  |

gene\_expression\_table

|                |                |
|----------------|----------------|
| 947.36320385   | 522.5081610203 |
| 2.6840909546   | 2.7597970039   |
| 51.0395901069  | 55.0209127259  |
| 1.5915939365   | 4.577582078    |
| 3.9921605971   | 3.704810259    |
| 118.5683837233 | 80.5126765624  |
| 3.6204474521   | 3.4362128098   |
| 0.6230055905   | 1.7344874637   |
| 4.9890730174   | 2.9390851696   |
| 0              | 0              |
| 16.8279350322  | 0              |
| 4.7866680283   | 4.2797202208   |
| 1.5031274848   | 1.3315282859   |
| 2.0908038114   | 1.433183945    |
| 1.9865435892   | 0              |
| 5.4094549668   | 10.0238803888  |
| 8.6219658359   | 6.0730797572   |
| 75.272409026   | 67.8338206068  |
| 0.4437676491   | 0.701975884    |
| 46.569297344   | 29.9832957154  |
| 0              | 0              |
| 0              | 0.4983270348   |
| 20.152071921   | 18.4181960877  |
| 40.765363931   | 19.8683135328  |
| 482.3839952321 | 144.0659786572 |
| 5.4594786999   | 8.7624833052   |
| 14.0572056676  | 13.4944186228  |
| 2.3592272907   | 5.0211751088   |
| 1.3370071309   | 1.6315335058   |
| 0              | 0              |
| 1.529848334    | 7.3982783144   |
| 5.152444663    | 4.0585755635   |
| 0.3358759763   | 0.2125227793   |
| 27.2017612893  | 12.6453248591  |
| 2.4185930542   | 1.6878805046   |
| 0              | 2.3109419384   |
| 1.1812462199   | 1.3880729437   |
| 0              | 0              |
| 2.2661392974   | 2.2225157392   |
| 10.8842234384  | 6.5589556546   |
| 4.4089052156   | 2.510728872    |
| 0              | 0              |
| 4.1319929602   | 8.3663512957   |
| 0              | 0              |
| 1.7412674147   | 2.347254941    |
| 1.4344226214   | 0.7118581898   |
| 1.7067455826   | 1.5494638073   |
| 3.8274499842   | 3.0374964379   |
| 15.4023126292  | 9.9955768738   |

gene\_expression\_table

|                 |                 |
|-----------------|-----------------|
| 0               | 0               |
| 3.2741214646    | 3.0317174654    |
| 21.3316354196   | 14.2821515989   |
| 0.0403389595    | 0.025524147     |
| 1.5460095378    | 4.2389745727    |
| 1.3756451471    | 3.1915701597    |
| 14.8822422074   | 9.4166171425    |
| 1.2505485471    | 1.582548748     |
| 26.1656783389   | 10.8602065978   |
| 3.9343726386    | 4.6232496817    |
| 110.0623589959  | 54.7179743398   |
| 8.5191034571    | 10.2417468831   |
| 5861.9961497693 | 7607.0046339919 |
| 15.8465151938   | 45.1203884767   |
| 22.7407152055   | 9.3105305211    |
| 104.516559585   | 50.0138056896   |
| 0               | 1.0541084034    |
| 61.2278478102   | 16.1422584842   |
| 0               | 0.2841528477    |
| 2.2845648964    | 0.7227698846    |
| 0.7668355624    | 0.9704178714    |
| 0               | 0               |
| 0               | 0.101743363     |
| 2.1187666489    | 0.5769809826    |
| 25.3862107446   | 17.0860331563   |
| 52.6698989043   | 19.8026720746   |
| 13.3786143381   | 4.2840125989    |
| 0               | 0               |
| 9.5939588217    | 10.2731522297   |
| 0.5497075561    | 0.6956459281    |
| 9.1364506502    | 9.0844513383    |
| 195.2734892931  | 135.2455955984  |
| 0               | 0               |
| 0               | 0               |
| 2.308727344     | 1.0265280371    |
| 22.1916468319   | 15.8311967315   |
| 2.4377869204    | 1.8509877034    |
| 297.2270671266  | 67.2320378802   |
| 17.4815086779   | 15.4857944656   |
| 0               | 0               |
| 2.0339416105    | 2.3759260305    |
| 0               | 0               |
| 0               | 0               |
| 61.4266568523   | 30.6846435465   |
| 5.0844840374    | 2.4128742941    |
| 1.2538461397    | 1.1107052582    |
| 52.6930248438   | 20.72553676     |
| 31.8704511228   | 21.0554337237   |
| 10.9921960852   | 4.1731333483    |

gene\_expression\_table

|                 |                |
|-----------------|----------------|
| 6.2569621451    | 4.3989351854   |
| 9.7499392248    | 2.6657012711   |
| 4.4718667934    | 4.2443057557   |
| 35.8358107066   | 21.8552447062  |
| 15.2666373636   | 21.25164808    |
| 0               | 2.4481134346   |
| 0               | 1.7337186306   |
| 120.9618651639  | 74.5751283331  |
| 2.1681730861    | 1.3718938024   |
| 25.6430494395   | 11.0521044817  |
| 116.5266524583  | 105.3304101633 |
| 0.7330085934    | 0              |
| 241.520516766   | 212.0958214155 |
| 2.4814073692    | 1.1339540589   |
| 126.7043000223  | 61.254331573   |
| 0               | 9.0486274858   |
| 67.4052886238   | 7.5264962747   |
| 0               | 0              |
| 0.5700088956    | 0.5410027061   |
| 0.6070969818    | 1.1524069625   |
| 83.4392999123   | 11.7323411496  |
| 43.8401522589   | 33.5185601924  |
| 0               | 0              |
| 91.4417376997   | 37.4926399632  |
| 35.8776783987   | 21.0402365187  |
| 10.2442924991   | 10.8617169357  |
| 86.3959135498   | 85.6789254951  |
| 0               | 0              |
| 0               | 0              |
| 482.2168923987  | 176.8804626674 |
| 24.4675770056   | 7.7408297035   |
| 202.475616502   | 168.3076676037 |
| 2.2568314963    | 1.427991687    |
| 17.2185556226   | 3.6316334547   |
| 0               | 0              |
| 0               | 0              |
| 1797.1419214267 | 557.3838144244 |
| 0               | 0              |
| 77.5688901467   | 36.8643929906  |
| 65.487024282    | 38.1864673545  |
| 77.8283969708   | 11.9382502273  |
| 0.9030312623    | 1.2772149865   |
| 1.1206420356    | 4.2544625425   |
| 9.4389469319    | 7.2996202134   |
| 0.0681415584    | 0.3018120996   |
| 1353.0237549083 | 520.3834598828 |
| 8.7435907114    | 6.5087477318   |
| 35.2932259413   | 31.6362921006  |
| 24.799608813    | 8.4494037491   |

gene\_expression\_table

|               |                |
|---------------|----------------|
| 1.4803168295  | 1.1167849881   |
| 1.8549640137  | 3.3907273727   |
| 4.9329190924  | 3.121264245    |
| 0.0297528234  | 0.1223680632   |
| 10.7321332512 | 4.9443585209   |
| 39.7921055023 | 19.4497720602  |
| 7.1122812812  | 3.9377081282   |
| 65.0379227233 | 104.4633127875 |
| 1.9659573725  | 6.0123934002   |
| 0.0551754617  | 0.041894187    |
| 0             | 1.166568012    |
| 7.8459651415  | 7.5031199274   |
| 8.4496696707  | 10.915688014   |
| 89.2004993301 | 56.8620876749  |
| 0             | 0              |
| 0             | 0              |
| 0             | 0.2655263306   |
| 12.4942454315 | 12.6153697288  |
| 3.1198118375  | 3.525063296    |
| 2.6609821216  | 3.1198242832   |
| 64.0811164484 | 60.4560113259  |
| 2.8524421089  | 3.4708835286   |
| 1.9307413382  | 2.0361013403   |
| 2.2783071253  | 3.5384241658   |
| 0             | 0              |
| 54.4899497294 | 32.4176279572  |
| 6.3588914212  | 2.9553410303   |
| 0.6589728071  | 0.6045915052   |
| 2.7868316338  | 1.2374350477   |
| 2.3347666476  | 2.5325220293   |
| 32.9502210475 | 35.7411138964  |
| 1.4037786888  | 1.2435212916   |
| 0             | 0              |
| 2.5527421037  | 2.1610927946   |
| 0.2860274344  | 0.3102540373   |
| 2.9761489978  | 3.766267916    |
| 0             | 0.360253222    |
| 1.2631467946  | 1.5984916242   |
| 3.0116987398  | 2.7949207245   |
| 3.9834871004  | 8.9298384263   |
| 1.993129597   | 2.4252624329   |
| 22.866814012  | 9.6458598026   |
| 19.2360916298 | 11.6703012065  |
| 0.4578558878  | 0.7081667304   |
| 0             | 0.0192532044   |
| 5.1788654796  | 8.8066279315   |
| 6.4861875489  | 3.7883835397   |
| 5.2584628566  | 10.8573401525  |
| 22.2261093908 | 10.2624731201  |



gene\_expression\_table

|                |                |
|----------------|----------------|
| 0              | 0              |
| 3.2585458453   | 1.2370909533   |
| 0.0629616867   | 0.045529706    |
| 6.8002080593   | 4.394324507    |
| 0              | 0              |
| 15.4619368517  | 10.9481063572  |
| 1.2104847586   | 1.6850335463   |
| 7.8661227595   | 7.3275810968   |
| 0              | 0              |
| 18.3400241366  | 10.4993098875  |
| 2.6982761107   | 3.5975506215   |
| 0.9005953697   | 1.4246109017   |
| 2.0926005258   | 2.342595792    |
| 2.9923569979   | 4.2601262346   |
| 4.3857153402   | 3.4817090657   |
| 0.6627694683   | 0.1797265565   |
| 9.5995363938   | 54.261318658   |
| 6.5386045589   | 6.4198685214   |
| 1.7005396062   | 1.5064035552   |
| 0              | 0              |
| 0              | 0.0384135654   |
| 0.2440823373   | 0.2123565185   |
| 0.4877619563   | 0.4115031893   |
| 13.3024053122  | 12.9761902297  |
| 0              | 0.008258       |
| 0              | 0              |
| 0.7349014025   | 0.8742053711   |
| 3.3005000135   | 3.7179214922   |
| 391.1521996587 | 594.3936467542 |
| 0              | 3.6256220109   |
| 416.8696766906 | 609.3754416506 |
| 3.0823826147   | 5.36346913     |
| 3.0608445109   | 2.393704255    |
| 0.0559388028   | 0.0353948204   |
| 3.9630730489   | 11.0629503811  |
| 9.92846365     | 1.2564308483   |
| 0.0289834239   | 0.0137542685   |
| 1.7435528389   | 1.0204774001   |
| 0.1662890127   | 0.3156540417   |
| 0              | 0.1948304121   |
| 2.8150469808   | 2.9887898194   |
| 3.3802422208   | 0.5545090555   |
| 3.5633621294   | 4.7826720845   |
| 0.7617140019   | 1.1808223599   |
| 27.6624965027  | 32.4684705227  |
| 1.8459838346   | 3.7376997964   |
| 2.6204133339   | 3.8490333227   |
| 18.6756008007  | 10.8920381058  |
| 0              | 0              |

gene\_expression\_table

|                |                |
|----------------|----------------|
| 0              | 0.0385924659   |
| 0.7847170553   | 1.0706283747   |
| 14.2459828522  | 16.259756084   |
| 47.6806945229  | 30.1695698238  |
| 1.193571283    | 0.6573232659   |
| 0.6504861499   | 0.8917778908   |
| 10.0059065705  | 9.9913549574   |
| 11.5570415404  | 7.3126235932   |
| 2.8311082333   | 2.9994875154   |
| 0.1170066528   | 0.1110525051   |
| 1.4017032946   | 1.6788058636   |
| 32.9702270846  | 18.8826717932  |
| 2.8380088303   | 2.18304054     |
| 0.2405882211   | 0.3760982174   |
| 20.5523370904  | 17.1818779947  |
| 0.1963428348   | 0.0496937297   |
| 0              | 0.0768588345   |
| 0.0262755423   | 0.005542       |
| 1.2535388997   | 1.3549927626   |
| 1.6509163447   | 1.3171091722   |
| 2.0497953225   | 1.6212390499   |
| 0              | 0              |
| 1.4545299705   | 3.6813678109   |
| 3.1952614296   | 3.4659009577   |
| 6.7288672828   | 10.3287090376  |
| 9.1672110688   | 9.2947416815   |
| 2.3605693593   | 1.0219580335   |
| 21.103173689   | 7.2359077544   |
| 0              | 0              |
| 12.7945067097  | 15.607019165   |
| 0              | 0              |
| 242.2153571358 | 137.7020988477 |
| 4.5021569326   | 2.1365272564   |
| 0.7214590883   | 0.1521657808   |
| 7.0701835394   | 8.2761615885   |
| 0              | 3.650842468    |
| 85.0722777019  | 70.3247075892  |
| 0.171817035    | 0              |
| 2.5109447753   | 2.0068797319   |
| 0.3175625797   | 0.6028053818   |
| 3.1943109648   | 2.0211741598   |
| 0              | 0              |
| 2.0643656613   | 1.5437033214   |
| 18.5700664122  | 8.8750436364   |
| 93.8302771002  | 57.5388652587  |
| 0              | 0              |
| 0.0245922118   | 0.0855828658   |
| 0              | 0.2336899821   |
| 0.259582987    | 0.3732932131   |

gene\_expression\_table

|                |                |
|----------------|----------------|
| 1.1349940727   | 1.7953955615   |
| 0              | 0              |
| 1.4438096587   | 1.2082551383   |
| 1.1195971024   | 0.7477723573   |
| 0              | 1.4038555662   |
| 0              | 0              |
| 9.6765058284   | 5.1985443301   |
| 1.1627621239   | 2.1612016817   |
| 0.6735819406   | 0              |
| 0              | 0.0698316235   |
| 0              | 0              |
| 0.2228437027   | 0.7050126592   |
| 0.4495499359   | 0.853347145    |
| 3.3843575996   | 2.4840525534   |
| 2.7415051546   | 3.7362015032   |
| 4.5215042286   | 2.4437237277   |
| 0.4271204213   | 0.2702569563   |
| 0              | 0.005984       |
| 63.1682193862  | 46.6307037241  |
| 297.9201646955 | 90.8698239468  |
| 2.4466657158   | 2.0974362903   |
| 11.5261261766  | 12.7628587615  |
| 4.4924667556   | 1.9679342041   |
| 63.183592523   | 26.6526012316  |
| 0.1552799394   | 0.2456302819   |
| 0              | 0              |
| 0.8336990314   | 1.5166092169   |
| 5.1900999524   | 4.0137696287   |
| 103.26131009   | 109.1329811989 |
| 0.0315872223   | 0.0999327839   |
| 0              | 0              |
| 0              | 0.0131073388   |
| 111.2131896857 | 100.8275634131 |
| 0.8618881021   | 0              |
| 7.0937129544   | 6.1043449091   |
| 0.2090361912   | 0.6503075471   |
| 0              | 0              |
| 0.5955882422   | 2.6379751526   |
| 8.9820180285   | 3.9435132508   |
| 1.6918956121   | 2.4469328521   |
| 0              | 0.0315145374   |
| 0.2457886427   | 0.0777603776   |
| 197.9424989914 | 69.2922187595  |
| 1.3569227239   | 1.5331817233   |
| 3.2779996839   | 1.4719614608   |
| 1.1696729226   | 0.5756340983   |
| 1.7606612222   | 1.2811506007   |
| 25.9462753612  | 19.1077532119  |
| 0.361457268    | 0              |

gene\_expression\_table

|                |                |
|----------------|----------------|
| 8.0869487732   | 10.8024515866  |
| 259.4560985329 | 59.3169306765  |
| 2.8432579376   | 3.8748731012   |
| 232.6483022862 | 249.0674533406 |
| 14.6346075671  | 9.4933719193   |
| 2.7810693577   | 4.1962050927   |
| 0              | 0.0827659232   |
| 4.7339506102   | 3.3512539378   |
| 0.4860785931   | 1.2302490307   |
| 0              | 0.1196777775   |
| 0              | 0.0655329608   |
| 0              | 0.1892427536   |
| 7.0564628636   | 10.7158061116  |
| 39.8391937604  | 32.905000416   |
| 114.5201324176 | 154.1248388258 |
| 0.5909548374   | 0.7478436884   |
| 62.0314726789  | 31.2722839693  |
| 0              | 0              |
| 0.4499330514   | 0.1423457308   |
| 0              | 0              |
| 0              | 0.0869905527   |
| 1.799414247    | 0.7790179255   |
| 49.3984933705  | 63.1140724184  |
| 2.8009703514   | 2.3039784313   |
| 0              | 0.0373378382   |
| 0              | 0.2994387713   |
| 15.2012885297  | 10.8208024827  |
| 118.5456805717 | 102.4265928545 |
| 0              | 0              |
| 1.3860930126   | 2.3387707384   |
| 26.1438378407  | 28.5551602868  |
| 533.3368452315 | 577.1934319751 |
| 7.4775743571   | 4.3809019161   |
| 1.0029180413   | 1.7828906431   |
| 2.3706285929   | 1.8199949888   |
| 0.6262720264   | 0.7925370139   |
| 6.4047317963   | 16.0794396727  |
| 1.728757752    | 6.1985249298   |
| 3.3142590979   | 4.3106446306   |
| 1.9188794172   | 2.2171531028   |
| 299.9928306581 | 109.0908115675 |
| 242.3787799906 | 218.3648103369 |
| 0.3456323335   | 0.4009427301   |
| 14.1118396998  | 9.7317715886   |
| 0              | 0              |
| 7.0530291769   | 4.9877755849   |
| 1.0553808306   | 2.2765349872   |
| 1.5767693568   | 0.8314066046   |
| 12.1369549039  | 8.9362141499   |

gene\_expression\_table

|                |                |
|----------------|----------------|
| 16.3458654963  | 21.8346159494  |
| 606.9352411225 | 560.1505027127 |
| 4.5726505747   | 1.928871523    |
| 13.7075045164  | 5.5193800252   |
| 5.4755178813   | 11.149677954   |
| 55.7223089108  | 80.3878651989  |
| 0              | 0              |
| 2.3298174273   | 4.1981881507   |
| 12.6320046877  | 9.6421052105   |
| 2.1818786124   | 1.611828164    |
| 0.5357145574   | 0.2824741737   |
| 2.2169330808   | 1.4027462906   |
| 0              | 0              |
| 1.048568562    | 0.2369547103   |
| 100.1457716193 | 112.9575288518 |
| 148.3308579611 | 63.2085624947  |
| 121.6523782239 | 59.6552748599  |
| 0.3843748526   | 0.9346214661   |
| 0              | 0.0101826933   |
| 2.0938059818   | 2.7936814481   |
| 2.8411629782   | 3.3797185955   |
| 366.2651325572 | 631.6324865973 |
| 1.5982125113   | 1.7222952154   |
| 394.2438898727 | 106.8381253471 |
| 1.8553270446   | 0.8650106508   |
| 37.0243785874  | 29.5382311696  |
| 0              | 0              |
| 3.1113993154   | 10.6872963808  |
| 0.9869021264   | 7.4934510687   |
| 16.8503831234  | 17.391820649   |
| 0              | 0.6677483578   |
| 14.6477986967  | 9.2110633533   |
| 0              | 0              |
| 172.4000721024 | 158.3666737438 |
| 0              | 0.3391960134   |
| 0.5206427718   | 0.6588649185   |
| 0              | 0.0051         |
| 6.6412809068   | 4.7444376709   |
| 0.0867111108   | 0.10973149     |
| 0.2154019468   | 0.4543127388   |
| 10.0621390358  | 7.151676335    |
| 5.2897825766   | 4.0326104801   |
| 0.9175391819   | 0              |
| 1.3419395333   | 1.8525845971   |
| 0              | 0              |
| 5.2295464034   | 3.3960304561   |
| 1.4452797448   | 1.8289778961   |
| 15.6113338406  | 32.8423609744  |
| 0.2427654767   | 0.0384019679   |

gene\_expression\_table

|               |               |
|---------------|---------------|
| 0.4724924685  | 0.0996552495  |
| 0             | 0             |
| 0.5781209092  | 0.1219337603  |
| 2.240928594   | 0.7089646278  |
| 0.5487413419  | 0.4166539199  |
| 2.0336681573  | 1.2063627262  |
| 11.8902068745 | 14.335186544  |
| 3.3741601902  | 1.0674861438  |
| 3.2905118083  | 3.5692190699  |
| 0             | 5.8913107047  |
| 0.9606000728  | 0             |
| 1.8710156391  | 0.7103219137  |
| 8.0898151563  | 9.9176060871  |
| 0             | 0             |
| 2.8723683006  | 1.3433455951  |
| 0             | 0             |
| 1.8250999587  | 2.8549644591  |
| 4.054505003   | 4.3146287093  |
| 25.4555722794 | 22.8179742356 |
| 1.0952883326  | 2.7356634552  |
| 0.4805024318  | 0.3840429312  |
| 9.7443502656  | 5.4183055169  |
| 0.7574577821  | 0.9905021252  |
| 4.4629342524  | 3.3886622138  |
| 44.2457961258 | 24.5819993552 |
| 1.7535005713  | 0.8237294653  |
| 0             | 0             |
| 0.1404271217  | 0.0444270568  |
| 13.1305865015 | 6.3817156429  |
| 3.0292546833  | 5.8629576246  |
| 0.1658418859  | 0.0582972767  |
| 11.0119813731 | 4.9957389926  |
| 0             | 0             |
| 4.8281523195  | 3.0549739256  |
| 0             | 0.0742218576  |
| 0             | 0             |
| 0             | 0             |
| 0             | 0             |
| 17.0080697612 | 15.4507510589 |
| 7.6393760831  | 8.2682613503  |
| 1.9692572871  | 1.2460314561  |
| 0             | 0             |
| 0.101105047   | 0.0639733923  |
| 6.1735730141  | 7.5955403138  |
| 9.0270150671  | 10.4536168237 |
| 0.9001472905  | 1.1865850881  |
| 0             | 1.1424100332  |
| 0             | 0             |
| 49.0442745931 | 25.5860989957 |

gene\_expression\_table

|                |                |
|----------------|----------------|
| 7.3860133417   | 3.4128407497   |
| 1.6366433021   | 1.4498017452   |
| 4.0801725865   | 1.7211305746   |
| 0.0328995389   | 0.0624507432   |
| 7.5403992325   | 9.0429481087   |
| 34.9762059704  | 22.1309085104  |
| 313.9789952255 | 168.5127332968 |
| 6.227127067    | 2.4516574538   |
| 0.9885988515   | 0.4691458835   |
| 618.1461468503 | 557.3024327395 |
| 22.6247971446  | 17.0240227671  |
| 13.1988501107  | 7.6555091705   |
| 28.1038005042  | 47.5487252976  |
| 4.4440818532   | 2.3793477879   |
| 0              | 1.7088733095   |
| 0              | 0.1374400601   |
| 3.976995546    | 5.4704596363   |
| 4.9397354658   | 2.7348800934   |
| 0              | 0              |
| 17.9308379084  | 10.3590180156  |
| 0              | 0              |
| 3.4758229522   | 0.9163744039   |
| 0.5604734308   | 1.2412224415   |
| 0              | 0.3803811554   |
| 14.4495103348  | 6.7953314493   |
| 40.5855560241  | 26.824345306   |
| 0.007937       | 0.0150665418   |
| 11.4863164381  | 6.6910575561   |
| 2.7860393409   | 2.964782462    |
| 0.1194716171   | 0.6047575154   |
| 15.1782420217  | 14.9738359988  |
| 13.94489365    | 16.0130502825  |
| 0.8688661684   | 0.6597215615   |
| 0.505987187    | 0.9604777733   |
| 0              | 0              |
| 44.1680270631  | 82.2097291602  |
| 16.7580104198  | 4.8283768007   |
| 5.2405992216   | 2.9843516993   |
| 66.2545925913  | 20.9610260225  |
| 323.6966689181 | 505.1260313136 |
| 0.3002458456   | 1.5198248419   |
| 2.048506497    | 2.2388490159   |
| 386.1542515433 | 476.6760725105 |
| 26.0401902115  | 9.5391522727   |
| 0              | 0              |
| 4.0530482263   | 2.6357701764   |
| 86.6857867309  | 91.5506408926  |
| 51.2350303482  | 16.4936466033  |
| 5.1646076139   | 3.2678632637   |

gene\_expression\_table

|                 |                 |
|-----------------|-----------------|
| 0.5266420846    | 0.6664569509    |
| 22.2465873104   | 19.1594713892   |
| 78.5816412936   | 25.1402821573   |
| 0.4859782791    | 0.6342162437    |
| 10.5339635207   | 17.4963582587   |
| 1.7394601262    | 3.6687639347    |
| 1.6068644521    | 2.0796757182    |
| 6545.4249728711 | 1874.1888463201 |
| 31.9292228653   | 44.4008442745   |
| 0               | 1.3073880437    |
| 0.7923483289    | 1.4112128406    |
| 166.5663269956  | 80.5089100637   |
| 3.2408212693    | 3.8448809529    |
| 17.4677976907   | 5.8646482122    |
| 252.6281277312  | 99.3200206504   |
| 21.7882738886   | 11.3534665624   |
| 0               | 0               |
| 1.3496444306    | 2.8465882816    |
| 4.4048419015    | 11.1485108714   |
| 0.7045203406    | 0.2228897442    |
| 33.1403346537   | 21.9678128864   |
| 20.3380710596   | 26.1526174417   |
| 3.6212428052    | 4.5826235861    |
| 2.5725272719    | 2.645086615     |
| 4.9920418201    | 4.6548875105    |
| 1.1361240255    | 1.8271360321    |
| 14.7550255668   | 8.2044707191    |
| 8.6555949518    | 7.2062591767    |
| 3.2570930241    | 3.1706138381    |
| 7.8990943181    | 4.9449162379    |
| 0.8826876294    | 1.1170267687    |
| 21.8466830174   | 16.369709392    |
| 0               | 0.3616299717    |
| 1.118327974     | 1.4152257736    |
| 6.8102339286    | 9.5840769449    |
| 5.8041891723    | 0               |
| 4.4757059806    | 4.045666264     |
| 4.9772578489    | 5.1871140274    |
| 450.5245228919  | 404.0177621777  |
| 13.1888431324   | 5.432209032     |
| 21.9395260639   | 16.6584669987   |
| 0               | 0               |
| 0.1879568268    | 0.0792854308    |
| 2.3644081842    | 1.1669267666    |
| 1.6087867576    | 2.3540016842    |
| 17.729333098    | 15.88179124     |
| 0.2264561929    | 0.2149324582    |
| 7.1412447649    | 22.592821342    |
| 0               | 0               |



gene\_expression\_table

|                |                |
|----------------|----------------|
| 97.8153046783  | 129.6781298713 |
| 1.6562070221   | 1.152746605    |
| 5.1515756387   | 1.0865391293   |
| 0              | 0.0187999008   |
| 0              | 0              |
| 10.1993903934  | 13.2398206592  |
| 3.0193324033   | 4.9728095466   |
| 0              | 0              |
| 4.6499879403   | 9.2680618925   |
| 73.576490237   | 62.6196498801  |
| 12.6539641116  | 2.5735796956   |
| 32.7946743132  | 35.3606518803  |
| 0              | 0              |
| 20.5961072607  | 60.8622994574  |
| 5.391593082    | 11.371621546   |
| 4.9164309968   | 6.5534851053   |
| 3.1128033398   | 0.8355882505   |
| 0              | 0.144266058    |
| 14.4686245449  | 14.059316775   |
| 0.335797671    | 0.59315444     |
| 0.511663324    | 0.6295154193   |
| 0              | 0              |
| 3.4641412728   | 2.3430730879   |
| 2.1985788466   | 1.7885993129   |
| 1.4952995345   | 1.689533145    |
| 2.1598397863   | 5.4664839004   |
| 0.8095307904   | 1.0976228408   |
| 0              | 0              |
| 0              | 0              |
| 0.6014726907   | 0.5308046655   |
| 2.3749275659   | 2.2540740149   |
| 10.018576124   | 8.4192130422   |
| 0              | 0.0217232393   |
| 0.1944650791   | 0.1230461897   |
| 0              | 0              |
| 4.6734027474   | 6.8318222655   |
| 5.7272513843   | 7.124201949    |
| 0              | 0              |
| 4.7090122124   | 2.048467435    |
| 9.4997624039   | 7.513621289    |
| 8.0738135386   | 7.1626286323   |
| 35.2308477809  | 32.5412407064  |
| 9.4762970626   | 12.7992595699  |
| 29.1860771515  | 24.6230024211  |
| 196.5092523792 | 214.7047585241 |
| 0.3241131712   | 0.1577538157   |
| 14.5395344275  | 23.1360592596  |
| 26.2510031669  | 36.3448892062  |
| 4.670012064    | 3.3981487669   |

gene\_expression\_table

|                |                |
|----------------|----------------|
| 0.6441241701   | 0.4702665058   |
| 11.0420679709  | 7.428979432    |
| 5.4591872586   | 5.18138419     |
| 0              | 0              |
| 2.5424162881   | 3.0833284997   |
| 1.5094262561   | 0.8720269438   |
| 13.6298141635  | 10.5645880771  |
| 0.0232935708   | 0.0147388166   |
| 0              | 0.0579997217   |
| 0.855891373    | 0.2707791361   |
| 0.5789619988   | 1.538600589    |
| 0              | 0              |
| 1.0117620578   | 3.4569945407   |
| 3.6824160912   | 1.4978691578   |
| 2.3848230974   | 1.8862216583   |
| 6.1746008009   | 10.2014236318  |
| 5.0074620021   | 4.1189598606   |
| 214.4373260395 | 100.1807972282 |
| 0              | 0              |
| 76.1488517159  | 61.5365326049  |
| 0.4462563244   | 0.7957560291   |
| 0              | 1.810772792    |
| 2.1746914048   | 1.7200227691   |
| 10.1481000919  | 11.8102879061  |
| 3.7209966989   | 3.1392403388   |
| 2.4321415479   | 1.5938790356   |
| 1.4631691629   | 1.3774221512   |
| 0              | 0              |
| 2.2161236751   | 2.6291890233   |
| 8.7178803129   | 6.4355287821   |
| 30.7423235395  | 15.6912428938  |
| 0              | 0.1300570014   |
| 0              | 0              |
| 0              | 0              |
| 1.0371869686   | 1.8813118591   |
| 47.3786672545  | 44.4417588324  |
| 0              | 0              |
| 0.8622420932   | 0.9396042106   |
| 17.9450207137  | 11.6068888855  |
| 4.6213600664   | 5.0206722902   |
| 9.4893693606   | 46.3970252756  |
| 3.7065639852   | 5.6287153739   |
| 0.3604771092   | 0.2280889451   |
| 10.4679287496  | 9.2728949248   |
| 0              | 0              |
| 0              | 0.1373338915   |
| 0.3522171596   | 0.4298063069   |
| 108.256768275  | 87.6781894105  |
| 3.070008179    | 8.7413516455   |

gene\_expression\_table

|                 |                 |
|-----------------|-----------------|
| 1.2799823582    | 2.9696273839    |
| 12.5544800029   | 10.6343678105   |
| 105.5794775856  | 28.3690561892   |
| 0               | 0.7318991824    |
| 14.1048749994   | 11.8996591922   |
| 63.3879952822   | 47.6285302772   |
| 5.1213433873    | 3.0931932607    |
| 0               | 0.9896936313    |
| 0               | 0.3327606968    |
| 0               | 0               |
| 76.9419520418   | 118.2335219781  |
| 66.129137693    | 66.8462190771   |
| 3.6658454948    | 4.9959189116    |
| 118.6264524611  | 60.1918195533   |
| 0               | 0.5161347626    |
| 4.6776098891    | 11.8388777321   |
| 2574.0288170222 | 2690.4973159252 |
| 414.669022068   | 204.4111064423  |
| 0               | 3.1491700731    |
| 18.4301176759   | 16.3261088939   |
| 0               | 0.4872439038    |
| 5.1588606469    | 5.4403781956    |
| 72.1138238966   | 140.8693897695  |
| 0               | 0.3263924254    |
| 70.6240336149   | 17.6395184789   |
| 3.1266876421    | 3.95677211      |
| 26.180307396    | 48.7758280538   |
| 21.249853567    | 12.0245839961   |
| 3.5886568758    | 3.4060399687    |
| 0               | 0               |
| 0               | 0               |
| 13.0742078212   | 14.1924390443   |
| 21.7950523622   | 18.6579264351   |
| 0               | 0               |
| 145.4626867481  | 159.8478131584  |
| 30.66380069     | 22.4457625341   |
| 9.5160407469    | 5.5194306014    |
| 0               | 9.3403444316    |
| 1.1972615666    | 8.7119109342    |
| 3686.5975572097 | 6822.4451389509 |
| 25.9141969034   | 31.6227786285   |
| 14.4112406011   | 5.471156835     |
| 57.7804861944   | 59.1609383982   |
| 523.7407723402  | 339.7471314698  |
| 6.3613607505    | 3.5420871476    |
| 24.7520385074   | 22.870981095    |
| 4.2193299934    | 2.3982469224    |
| 0               | 0               |
| 0               | 0               |

gene\_expression\_table

|                |                 |
|----------------|-----------------|
| 0              | 0               |
| 9.8076736715   | 9.0869550055    |
| 0              | 0               |
| 5.3497531749   | 4.9646851532    |
| 0.3289936382   | 0               |
| 0              | 1.5055751782    |
| 972.7786974274 | 1047.6676144234 |
| 6.9247141171   | 1.4605187568    |
| 13.6862408449  | 10.9492445508   |
| 0              | 0.2041798513    |
| 3.0951859261   | 8.1898968795    |
| 0              | 7.0437058439    |
| 30.2148829418  | 31.863700454    |
| 0              | 2.0815695746    |
| 5.2827360056   | 12.325867141    |
| 78.381643981   | 55.2311793389   |
| 0              | 0               |
| 0.8412857091   | 1.3646663405    |
| 16.7260263933  | 51.4043888075   |
| 0              | 0.8614656089    |
| 1.4529800521   | 4.7500331487    |
| 344.6110923207 | 57.9194920927   |
| 84.8294328496  | 39.8076955159   |
| 9.4039569484   | 7.9567656383    |
| 4.3455191376   | 7.1489384817    |
| 4.6442234925   | 6.4281753886    |
| 0.9110481162   | 0               |
| 0              | 0               |
| 1.6220051085   | 0.5131552389    |
| 6.7461768875   | 2.0705838756    |
| 4.0996847215   | 4.2323843254    |
| 72.8217294233  | 72.6067399679   |
| 2.8108435867   | 2.3713844133    |
| 51.9767560924  | 64.5380199009   |
| 12.6438984583  | 9.3337106642    |
| 2.5788324858   | 0               |
| 1.5582992509   | 2.1692024573    |
| 0              | 0.1599374047    |
| 1.4526158454   | 2.7573924172    |
| 0              | 1.4798597165    |
| 5.0238586663   | 3.8480277315    |
| 0              | 0               |
| 59.2094010393  | 14.1531666502   |
| 0              | 0               |
| 0              | 0.3916360499    |
| 0.2391558583   | 0.151323915     |
| 6.3660777225   | 5.1789647016    |
| 82.1647119461  | 102.7690524304  |
| 0.6617381473   | 0.9420961616    |

gene\_expression\_table

|                 |                 |
|-----------------|-----------------|
| 11.7510575278   | 11.794059955    |
| 51.7493634868   | 81.314234042    |
| 95.2325996548   | 68.4746013784   |
| 228.9430173519  | 330.6120646049  |
| 0               | 0.2265694972    |
| 168.0079020276  | 242.4286861607  |
| 0               | 0               |
| 0               | 0               |
| 0               | 0.2947008161    |
| 0.3622775581    | 1.0442616381    |
| 0               | 0               |
| 99.8586748753   | 219.1583301449  |
| 0               | 0               |
| 0.3853899104    | 0.1828892374    |
| 1.2549208972    | 2.4703495998    |
| 0               | 0.0386443231    |
| 0.5210487182    | 1.6484465928    |
| 2621.6056786956 | 5523.7130173003 |
| 0.0284074516    | 0.0718983314    |
| 26.8969092125   | 58.9112290694   |
| 0               | 0.3024722938    |
| 16.6588148048   | 8.7839407798    |
| 6.0566419773    | 12.3299788308   |
| 0               | 0.0542448301    |
| 1.5146928372    | 2.9988942889    |
| 7.4289878414    | 12.6114499599   |
| 18.0072807557   | 17.1217341061   |
| 2.5618845636    | 1.7946913285    |
| 21.5181104144   | 13.8585408188   |
| 3.0589248677    | 4.0029859978    |
| 0.2158205924    | 0.8724584648    |
| 15.3069619525   | 82.3255182696   |
| 3.5625531089    | 3.6203438626    |
| 2036.5280031889 | 2452.8812462497 |
| 10.4593256658   | 12.7066614602   |
| 0.8180729499    | 0.9382025153    |
| 19.1230168131   | 17.6740588827   |
| 838.2866011497  | 210.7322704798  |
| 34.5333042933   | 25.4924437757   |
| 43.6543889019   | 71.8170903948   |
| 4.7709811763    | 4.9096956494    |
| 1.1242845397    | 0.1835824142    |
| 0               | 0.0541389609    |
| 0               | 0               |
| 0.7264090313    | 1.0960392873    |
| 1.6417788288    | 2.1815264892    |
| 70.3289007552   | 54.9149395745   |
| 9.8999665524    | 5.5271672963    |
| 0.0202341151    | 0               |

gene\_expression\_table

|                 |                 |
|-----------------|-----------------|
| 20.413856193    | 28.6935279588   |
| 14.2108707071   | 14.0655622059   |
| 0               | 0.6679518674    |
| 5.3214551836    | 9.9142603295    |
| 3.3109059821    | 0               |
| 0               | 0               |
| 0               | 0               |
| 51.3192103288   | 48.1137199083   |
| 88.8035503635   | 140.603374892   |
| 1791.1547399592 | 2074.8079618233 |
| 1.1199683122    | 1.5139357945    |
| 27.4762341979   | 61.8328464393   |
| 1.4510472931    | 1.989299687     |
| 10.589875252    | 10.5296039006   |
| 0               | 0.0810692955    |
| 0.9336103322    | 0.8861014627    |
| 9.6026431605    | 4.5569954919    |
| 0               | 0.2231695327    |
| 0               | 0               |
| 1.1282870188    | 1.1601108855    |
| 8.5594776337    | 6.28947816      |
| 669.0996253325  | 523.7650481067  |
| 0               | 0.3290375394    |
| 3.578001536     | 1.9285510506    |
| 2.5047708934    | 2.5754191359    |
| 8.4817576354    | 3.715451192     |
| 0               | 0               |
| 0               | 0.1727974036    |
| 1.1462202244    | 1.1208586515    |
| 16.1625207498   | 8.8927851548    |
| 0.3343904082    | 0.3929394824    |
| 26.1418092852   | 30.5522299231   |
| 1.7254319532    | 0.8669802986    |
| 0.0136435623    | 0.0172657051    |
| 13.0765277363   | 7.0920566287    |
| 0               | 0               |
| 0               | 0               |
| 37.5027997199   | 36.3853714232   |
| 0               | 0               |
| 1.2703953511    | 1.0717763694    |
| 0.9330176506    | 1.9273494598    |
| 22.4999572464   | 16.0162470937   |
| 0               | 0               |
| 0               | 0               |
| 0.9810909228    | 0.1241554528    |
| 4.4016673024    | 3.8485280951    |
| 0.8098072863    | 0.7543651103    |
| 2.4226409132    | 0.707495188     |
| 5.4311299737    | 12.1599340777   |

gene\_expression\_table

|                |                |
|----------------|----------------|
| 7.1183681407   | 1.8016357086   |
| 72.7915858279  | 88.6366031772  |
| 0.0641966307   | 0.4874387214   |
| 4.7938575968   | 3.171150321    |
| 2.5448294684   | 3.175711766    |
| 1.3895087971   | 1.5630228206   |
| 6.2692306983   | 4.1193738972   |
| 5.0510188179   | 3.7806233596   |
| 7.5439773838   | 2.9106036841   |
| 21.8186484769  | 17.6340073284  |
| 13.8369189328  | 10.5215968546  |
| 15.547837688   | 12.3918029705  |
| 0.1791537557   | 0.1133580749   |
| 58.3895895594  | 70.8221130625  |
| 6.8849997304   | 3.0953562514   |
| 2.8482450104   | 3.3608664623   |
| 10.7724356042  | 17.8976749463  |
| 0              | 0              |
| 11.502533436   | 0              |
| 4.9164371826   | 5.4835065582   |
| 0.9867822553   | 0.3121892041   |
| 7.2053403293   | 10.7139325005  |
| 0.1828510166   | 0.3239529624   |
| 3.4927457727   | 2.9466751277   |
| 0.2850920781   | 1.2627277791   |
| 15.3701614363  | 8.5246842885   |
| 1.9537287532   | 4.7148318168   |
| 0.4565151885   | 0.6888110696   |
| 11.2763238423  | 4.0629871155   |
| 0              | 0.1400072032   |
| 37.2377196898  | 23.5618628357  |
| 1.1135390484   | 0.9394436444   |
| 0              | 0.4746781971   |
| 6.8842157555   | 5.7126967385   |
| 0.6323591721   | 0.5525468029   |
| 22.8230551609  | 10.7276755102  |
| 0              | 2.3309113413   |
| 0.6880522561   | 1.0883986061   |
| 22.8047209011  | 13.1177279957  |
| 1.539762343    | 1.94854408     |
| 0.2947764172   | 0              |
| 5.8488103782   | 3.7007869717   |
| 0.1608783617   | 1.7915826496   |
| 0.4235328173   | 0.0893289764   |
| 11.0267413394  | 10.2604124626  |
| 4.0481083618   | 8.9649262001   |
| 120.5906941411 | 174.4119995126 |
| 1.2679920961   | 1.0697488494   |
| 3.3672675846   | 2.3303558334   |

gene\_expression\_table

|                 |                 |
|-----------------|-----------------|
| 16.7696805555   | 19.8953968754   |
| 7.2017026818    | 9.1136370425    |
| 0               | 0               |
| 6.1949942229    | 6.2032292348    |
| 0               | 0.1224031179    |
| 0.2170285518    | 0.3089768459    |
| 24.3401481419   | 14.2163352321   |
| 24.2057676659   | 17.0664018795   |
| 14.0042171919   | 18.366548268    |
| 7.1229914261    | 4.5070146174    |
| 1.1925265686    | 1.6977632428    |
| 1.3248318236    | 1.7410358288    |
| 0               | 0               |
| 5.4565042509    | 10.6453886328   |
| 7.9173377759    | 7.5144461686    |
| 68.1926313852   | 25.8889981528   |
| 0               | 0               |
| 7.1969079557    | 4.9070955792    |
| 126.984703972   | 78.4006905065   |
| 2.7195167041    | 0               |
| 249.306332183   | 166.9014777968  |
| 0               | 18.6472907305   |
| 0               | 0               |
| 46.5874501747   | 24.173859273    |
| 0               | 0               |
| 10.1874230092   | 7.8272962298    |
| 5.4391105993    | 6.938614485     |
| 0.9745481512    | 0.9455106477    |
| 7.5669446187    | 2.0078384141    |
| 403.6413735624  | 214.6789843614  |
| 0               | 0               |
| 4.7905927165    | 6.0624167875    |
| 161.8262080279  | 104.8592565373  |
| 4.3626146928    | 2.990442863     |
| 25.1790691181   | 31.6147652942   |
| 400.9742093195  | 192.4133317687  |
| 28.5423682583   | 37.7617142089   |
| 43.4891757852   | 14.2331485834   |
| 21.3141061669   | 7.2708890713    |
| 17.2205542941   | 13.1661993838   |
| 35.4145098368   | 16.3593911798   |
| 1279.2004861066 | 1398.2151176239 |
| 3.1985208882    | 5.6667462724    |
| 0.9688979818    | 0.7492983427    |
| 0               | 0               |
| 40.9137203234   | 8.5277531944    |
| 22.2862974452   | 13.3641406899   |
| 0               | 0               |
| 50.7831143907   | 42.3132265892   |



gene\_expression\_table

|                 |                 |
|-----------------|-----------------|
| 2.1626298264    | 0.4210419539    |
| 0               | 0               |
| 5.0343663001    | 3.0917643092    |
| 69.6071763197   | 28.7975893864   |
| 28.7034650277   | 15.0066405634   |
| 266.1498817169  | 193.9949913934  |
| 0.3801169271    | 0.2405158794    |
| 0               | 0               |
| 15.7853595372   | 23.2154844256   |
| 0               | 0               |
| 1.4199375502    | 1.4974231358    |
| 0               | 0               |
| 0               | 0.2751314878    |
| 15.9224823173   | 7.1643168508    |
| 0               | 0               |
| 23.6889468299   | 8.1368789427    |
| 6.1238968382    | 17.0493209978   |
| 0               | 0               |
| 104.4178805687  | 30.2310904825   |
| 96.4942649352   | 52.0409840024   |
| 0               | 0               |
| 0               | 0.2607860535    |
| 0.1268330318    | 0.2407576932    |
| 0               | 0.154017296     |
| 8.7205202031    | 5.267027083     |
| 1.669266687     | 0.3168644566    |
| 78.1698764156   | 37.7620615181   |
| 5.4959894509    | 14.2965632538   |
| 26.9116164877   | 6.6380749931    |
| 16.1974579922   | 10.2488091827   |
| 12.9193147593   | 8.719563563     |
| 9.4942907909    | 4.5770932669    |
| 14.4851888044   | 10.5754440535   |
| 0.6297332384    | 0.7969171212    |
| 0               | 0.1170705707    |
| 2.066111571     | 0.6536576064    |
| 243.0712460347  | 168.3956327812  |
| 806.2192583702  | 218.1415347869  |
| 22.338786928    | 36.5706926295   |
| 13.0512558375   | 11.8518675861   |
| 2.6441926932    | 3.1370462229    |
| 0.7566511376    | 0.3191765494    |
| 0               | 0.2204277069    |
| 1735.7895355866 | 1866.4261643096 |
| 27.0789690386   | 14.2783303134   |
| 0               | 0.7418947706    |
| 3.0860052887    | 2.4408057853    |
| 5.8367650361    | 6.4544105238    |
| 761.7272159894  | 1428.2602542581 |

gene\_expression\_table

|                 |                 |
|-----------------|-----------------|
| 5.5880143451    | 6.3643867432    |
| 144.5537412176  | 26.715082729    |
| 9.7273761885    | 9.4134036841    |
| 2.5972527179    | 4.9301712992    |
| 22.4617059175   | 11.369968694    |
| 92.0120742766   | 130.3696880706  |
| 20.1100992779   | 5.4533575641    |
| 97.873139918    | 42.3720833329   |
| 0               | 1.7474675442    |
| 22.4780417036   | 14.2227972027   |
| 206.3521746972  | 151.6888901462  |
| 200.5435972606  | 204.5205666451  |
| 0               | 0               |
| 0.708639398     | 2.2419289412    |
| 38.1080545785   | 39.7459782271   |
| 5.2662962151    | 12.2180882823   |
| 1.9185169052    | 2.4278517882    |
| 105.0740987499  | 114.0818338498  |
| 2.6976452793    | 3.1699812967    |
| 122.4250485645  | 66.0344155838   |
| 203.6246130801  | 62.1201583704   |
| 17.5727938807   | 4.6817017799    |
| 0.9799399918    | 3.2552573655    |
| 43.0376879334   | 14.4943160712   |
| 19.5568262571   | 7.9719834041    |
| 0               | 0               |
| 59.9526245197   | 21.5205525145   |
| 0               | 0.8099542826    |
| 10.8417255832   | 17.4767004651   |
| 11.406797319    | 16.0777321802   |
| 14.8355075244   | 11.1750549449   |
| 5.6018821255    | 3.8172024559    |
| 2.1435720072    | 1.5190869913    |
| 0               | 0               |
| 1.347237284     | 0.4262266911    |
| 1439.2561292177 | 1302.4102497791 |
| 22.624699837    | 13.0707596826   |
| 1.2135005471    | 1.0935796991    |
| 0               | 0.0940050768    |
| 33.9905024465   | 20.8985179626   |
| 109.4413274449  | 25.4288125525   |
| 10.0675268217   | 33.4432629664   |
| 37.8221904165   | 47.8633638238   |
| 1.5449791223    | 19.5514582891   |
| 0               | 7.5200647461    |
| 119.9532428943  | 89.3654628618   |
| 511.9846283291  | 269.9617414634  |
| 10.6874124665   | 8.2893603328    |
| 9.1411005113    | 3.9436068065    |

gene\_expression\_table

|                 |                 |
|-----------------|-----------------|
| 0.9676677315    | 1.4286623155    |
| 0               | 0.8980069408    |
| 0               | 0               |
| 9.3691908849    | 0.6974445847    |
| 1978.9989635507 | 751.3172533609  |
| 86.0374722597   | 48.1580258602   |
| 8.2034281793    | 3.38520792      |
| 7.0980572631    | 5.3894852754    |
| 28.6641694323   | 17.0825411242   |
| 0               | 0               |
| 196.488283521   | 62.5694731509   |
| 6.8644769223    | 5.3086509394    |
| 36.5437896866   | 36.6948533406   |
| 51.5369930119   | 27.6819366017   |
| 5.1695835161    | 2.7545361896    |
| 0.3652050968    | 0.9243221625    |
| 0               | 0               |
| 0               | 0               |
| 26.7993498573   | 29.0692622128   |
| 13.1470505977   | 15.1518975137   |
| 223.6350391153  | 80.7166389017   |
| 0               | 0               |
| 23.5127991886   | 19.9494172996   |
| 39.9185505022   | 19.6452173751   |
| 0               | 0               |
| 7.8514689045    | 9.9359055779    |
| 2.821296882     | 13.3886441034   |
| 32.3878969158   | 20.4931771071   |
| 3844.7590709429 | 3871.5104583738 |
| 53.0597550944   | 29.757998439    |
| 22.6914408337   | 29.7058422587   |
| 17.4651580852   | 14.7345814096   |
| 0.2111948296    | 0.4008954078    |
| 5.8449588382    | 3.0819582844    |
| 2.4080488775    | 0               |
| 9.9664693152    | 13.4261075169   |
| 4.4106039732    | 8.3723208649    |
| 0               | 2.7576516315    |
| 46.7806106089   | 6.5294225917    |
| 2.9428524011    | 11.1723948509   |
| 9.9649851474    | 10.0311001008   |
| 0.623445433     | 1.7751600139    |
| 134.0037101564  | 128.5522054856  |
| 83.5332630879   | 52.8549896045   |
| 0.3719962369    | 4.0014188435    |
| 10.4929324715   | 7.1135542238    |
| 2.939862344     | 1.5219604426    |
| 6.7483203805    | 4.5749406161    |
| 67.8991715107   | 38.3744021785   |

gene\_expression\_table

|                 |                |
|-----------------|----------------|
| 0.8121746772    | 2.0555875605   |
| 263.0811831359  | 244.304630456  |
| 54.4825555186   | 22.7874962651  |
| 0               | 0.3839848057   |
| 0               | 0.1857908622   |
| 1698.4543575108 | 1201.24703595  |
| 31.9043172568   | 27.1265446648  |
| 0               | 3.0114484376   |
| 0               | 1.9909744112   |
| 92.7219220275   | 74.1511458326  |
| 50.1742002314   | 19.0483891107  |
| 2.2100327024    | 2.7967602651   |
| 21.9687657699   | 55.602228069   |
| 93.214627918    | 47.1846352695  |
| 0               | 0              |
| 2.6805990757    | 2.1201589499   |
| 52.3021594374   | 20.6836024893  |
| 173.1167383743  | 198.301916575  |
| 0               | 0              |
| 50.4903503845   | 46.5518624895  |
| 0.070890352     | 0              |
| 1.1698450924    | 1.8505248064   |
| 76.5185929524   | 66.3000917889  |
| 0               | 2.6014427873   |
| 35.0300780691   | 23.8699953053  |
| 0               | 0              |
| 16.7292597253   | 34.0241862329  |
| 30.1961095003   | 3.5195892294   |
| 31.9868640026   | 33.7323780141  |
| 0               | 1.5714219489   |
| 0               | 0.2228643436   |
| 148.5771245731  | 149.7976858046 |
| 8.982234447     | 5.6834354456   |
| 7.2975731574    | 6.3325437      |
| 0.807471236     | 3.5764457827   |
| 2.4903156347    | 5.6726167233   |
| 0               | 0              |
| 5.3117784668    | 9.1663211407   |
| 13.4248770004   | 8.7873943625   |
| 1.2407590262    | 1.9627003366   |
| 30.5241975165   | 12.8759576946  |
| 28.2105682736   | 16.3372941259  |
| 0.1318965021    | 0.3338257356   |
| 0.3754646016    | 0.9106932741   |
| 3.9612056831    | 1.253210263    |
| 0.1687433179    | 0.071180637    |
| 246.2370310557  | 50.7807158903  |
| 0.1402137066    | 0.5323144623   |
| 0.9515796596    | 0              |

gene\_expression\_table

|                 |                |
|-----------------|----------------|
| 3.0713014144    | 2.5066280813   |
| 107.1965243482  | 126.1323592917 |
| 23.8937801193   | 13.9328220285  |
| 0               | 0              |
| 43.6543889019   | 63.5305030415  |
| 2.4701144729    | 3.1258894951   |
| 4.7836723948    | 13.9234162369  |
| 378.3552254547  | 221.5510893113 |
| 41.7076483831   | 25.1627237502  |
| 0               | 0.3938841119   |
| 151.3100719432  | 69.270858946   |
| 0               | 0              |
| 1.0703829383    | 9.4818648018   |
| 0               | 0              |
| 15.0461536759   | 32.5277968479  |
| 26.0111002387   | 19.362718964   |
| 0.4534522791    | 0.5738364482   |
| 190.4961327944  | 97.8254028231  |
| 4378.9561955689 | 7920.991462695 |
| 120.5873854137  | 85.2367987014  |
| 39.8070195764   | 17.9911188166  |
| 0               | 0              |
| 22.3037531874   | 20.1178441931  |
| 5.6639548564    | 16.2215062617  |
| 56.3721407341   | 79.7688800166  |
| 149.8485377657  | 43.1701574085  |
| 5.4118116544    | 4.9081340937   |
| 4.7113201803    | 4.6371878688   |
| 15.0668414907   | 12.833451118   |
| 0.7397533836    | 0.5720891103   |
| 5.9966448735    | 2.9089848311   |
| 13.8370276119   | 33.8536957741  |
| 2.6162876278    | 6.4474821918   |
| 14.456982419    | 15.8992913456  |
| 20.6737841756   | 16.5071881851  |
| 1.1773891943    | 1.9156715777   |
| 4.5921374949    | 1.3122233754   |
| 3.9247374403    | 1.2416727717   |
| 0.4623381801    | 1.1701628215   |
| 13.6407535253   | 10.301606032   |
| 0               | 0              |
| 177.862806405   | 92.2469158191  |
| 3.204377513     | 2.7492117775   |
| 0.1623325578    | 0.1027145994   |
| 0               | 0.0149500206   |
| 34.8288607098   | 33.1959944695  |
| 6.1344308321    | 6.4691849665   |
| 0               | 0              |
| 0               | 1.424974217    |

| gene_expression_table |                |
|-----------------------|----------------|
| 0                     | 1.5638821394   |
| 0                     | 1.9207411511   |
| 2.0635675541          | 1.4192451162   |
| 4.9690204731          | 0.7860267747   |
| 6.1949633116          | 3.3670183536   |
| 0.40138057            | 1.1428662406   |
| 89.2336957395         | 64.8028530682  |
| 15.1228415132         | 12.5591213831  |
| 0                     | 0              |
| 0                     | 0              |
| 30.7314104537         | 27.1207260063  |
| 0                     | 0.7669155354   |
| 0.3041630134          | 0.4948885572   |
| 0                     | 0              |
| 8.539325271           | 8.5986222152   |
| 0                     | 0.4013925372   |
| 15.3825357832         | 26.9328919246  |
| 0.4858430004          | 1.4217859961   |
| 4.4140684579          | 4.65494291     |
| 4.8911133151          | 3.5533026449   |
| 0.5848118702          | 1.1101047959   |
| 2.6347692738          | 3.1490209293   |
| 0.3751797444          | 0.4747838348   |
| 0                     | 0              |
| 3.1803962232          | 4.0704751171   |
| 2.7387241325          | 3.3129072192   |
| 126.5320228351        | 68.876956652   |
| 2.9067572249          | 4.2915293883   |
| 1.2382115216          | 0              |
| 51.4239515364         | 34.9305913682  |
| 2.760505289           | 1.3100153726   |
| 0.2727694129          | 0.2712169696   |
| 1.106295229           | 1.6799982378   |
| 0.6348890788          | 1.6642722025   |
| 13.4285763921         | 80.1128929252  |
| 1.9043319373          | 4.8198018863   |
| 7.1187656067          | 3.753617304    |
| 5.6332643701          | 2.0368011408   |
| 0                     | 0              |
| 1.9160561639          | 3.9715532282   |
| 1.8268417129          | 1.733878748    |
| 60.1854566347         | 29.9402177138  |
| 1.9734366719          | 3.3298024738   |
| 0.1115505372          | 0              |
| 10.5147529068         | 6.2692899021   |
| 288.045482247         | 428.9845526605 |
| 1.5254079465          | 1.6086490214   |
| 0.7449420572          | 0.6427581807   |
| 0                     | 0.7277456937   |

gene\_expression\_table

|                |               |
|----------------|---------------|
| 2.8265431663   | 4.0538700721  |
| 1.182293389    | 1.0093230292  |
| 16.7443651517  | 10.720989507  |
| 0.691438643    | 1.1666724029  |
| 2.0037337822   | 1.2316220002  |
| 0              | 0             |
| 5.4627231763   | 2.2220315034  |
| 1.1548910985   | 0.683602879   |
| 0              | 0.330282315   |
| 1.4202094126   | 1.2580762603  |
| 2.6425362577   | 1.6977669648  |
| 0.2002611679   | 0.8025195774  |
| 0              | 0.5662488028  |
| 63.6528402048  | 46.4165216244 |
| 2.068021356    | 2.3405985765  |
| 2.2360840059   | 3.6591307293  |
| 0.1027170626   | 0.2924702189  |
| 0.0958291833   | 0.1212702653  |
| 127.5547932101 | 151.535740431 |
| 9.101655913    | 7.3755593574  |
| 1.754900485    | 0.6662393648  |
| 2.2056954393   | 6.2803609414  |
| 0.3052076189   | 0.540729355   |
| 1.2015453813   | 0.5913195721  |
| 8.5503902243   | 13.7488303056 |
| 5.0629291567   | 2.7289304507  |
| 0.1251421986   | 0.1979567587  |
| 13.7844436928  | 13.7643969444 |
| 1.4868575236   | 1.2543959304  |
| 14.7096831577  | 16.4669947477 |
| 54.3118241239  | 53.020845603  |
| 32.9296152346  | 47.1073537923 |
| 65.1966931418  | 77.3487652749 |
| 0              | 0             |
| 14.0947697865  | 8.7795433931  |
| 14.4606160532  | 7.3389314708  |
| 3.6749822372   | 4.471759576   |
| 0              | 0             |
| 0.1330565522   | 0.1178666245  |
| 0              | 0.4022284277  |
| 0.2549135115   | 0.6586189686  |
| 0              | 0.0427442432  |
| 43.4979300549  | 27.5229597873 |
| 0              | 0.0209011245  |
| 0              | 0.0294901906  |
| 0              | 0.0639681609  |
| 0.2997120665   | 0             |
| 17.2485844953  | 11.9370790962 |
| 0              | 0.005822      |

gene\_expression\_table

|                |                |
|----------------|----------------|
| 3.4460789039   | 2.1804782659   |
| 1.0265839962   | 1.6599933996   |
| 3.1477499767   | 8.6497253546   |
| 55.1030617624  | 130.3988850324 |
| 0.7814742691   | 7.4170718661   |
| 4.2495953998   | 3.4955657912   |
| 0              | 0              |
| 1.9634422071   | 0.9662737869   |
| 1.7494335512   | 2.7058528042   |
| 26.5298775472  | 39.8680876523  |
| 0.315461162    | 0              |
| 101.1846371332 | 136.454663969  |
| 0.3426910671   | 2.0960713991   |
| 0.8709554953   | 0.5970141368   |
| 37.1191390157  | 41.6357474293  |
| 116.4973202522 | 60.2286919005  |
| 2.8857016332   | 1.9171993335   |
| 0.184441405    | 1.1086860222   |
| 13.829417408   | 6.0159349622   |
| 10.5383284572  | 17.4109965046  |
| 2.436630747    | 1.7130646596   |
| 0.0674366387   | 0.1600124326   |
| 0.6651023745   | 5.1552666319   |
| 5.1945054357   | 20.816278819   |
| 0              | 0.002923       |
| 0.0201833095   | 0.0127708242   |
| 0              | 0              |
| 0              | 0.0295081006   |
| 0              | 0              |
| 2.8156424654   | 3.7413069985   |
| 12.1709362332  | 9.8126415328   |
| 23.7580853338  | 16.4118842897  |
| 0              | 0              |
| 0              | 0              |
| 3.7540189591   | 0.8907468073   |
| 0              | 0              |
| 32.6668633935  | 12.2139082391  |
| 0              | 0              |
| 21.2835642395  | 9.7000079641   |
| 0.2503068626   | 0.1689382633   |
| 1.9217227586   | 1.9759258539   |
| 6.7429666951   | 7.3695076739   |
| 3.5669137152   | 2.2569355053   |
| 6.8835873814   | 8.711067329    |
| 0              | 2.0210013787   |
| 11.702880478   | 10.5519853347  |
| 0.3409877303   | 0.0794894947   |
| 3.0084221836   | 2.0225267121   |
| 0.1961901601   | 0.4965508823   |



gene\_expression\_table

|                |                |
|----------------|----------------|
| 1.3595988449   | 2.0646601412   |
| 0              | 0              |
| 4.3045954617   | 3.5526490464   |
| 43.1620929928  | 25.8421572419  |
| 2.0189158436   | 2.0323107985   |
| 1.4756010571   | 2.2674952401   |
| 3.0523416679   | 1.1885195368   |
| 0.3027634825   | 0.8429129254   |
| 2.240422995    | 1.3750810616   |
| 0.6226839562   | 0.7879963697   |
| 4.4648708415   | 5.4897034338   |
| 21.7557445526  | 10.9678489359  |
| 0              | 0.0861797781   |
| 0.2978371663   | 0.5653620994   |
| 9.7829042736   | 5.2896814285   |
| 0.9681548834   | 1.2689407597   |
| 25.1744080539  | 13.0327371627  |
| 17.6829710991  | 43.9558250287  |
| 0              | 0              |
| 0              | 0.4892144128   |
| 0              | 0.1228580909   |
| 0.1566314828   | 0.1982145816   |
| 17.5990632916  | 16.6151169418  |
| 17.5690204019  | 22.2333081787  |
| 909.1294005702 | 344.3638742415 |
| 61.2775752614  | 33.1094298881  |
| 0              | 2.436694302    |
| 2.3843631508   | 0              |
| 0              | 0.3601122551   |
| 29.2459735663  | 15.9349909519  |
| 0              | 0              |
| 0.0389763957   | 0.1356409771   |
| 0.173091999    | 0.1095225479   |
| 0              | 0              |
| 7.6162015087   | 5.9756706908   |
| 0.4772960751   | 1.0570181691   |
| 0              | 0.0871359019   |
| 0.0313479021   | 0.3371971911   |
| 6.1115185342   | 5.5856860375   |
| 10.4230157672  | 14.7419391755  |
| 32.342877153   | 31.953640677   |
| 0              | 0.0111933801   |
| 5.2281884425   | 2.3629239382   |
| 25.7299411379  | 14.6920773134  |
| 0.5816659946   | 1.5028479863   |
| 61.9833154519  | 25.7864795501  |
| 4.7489689162   | 6.4390098733   |
| 1.1302727132   | 0              |
| 7.4299117997   | 2.2793774428   |

gene\_expression\_table

|                 |                 |
|-----------------|-----------------|
| 1.0484161242    | 1.8427131533    |
| 0               | 1.4073455738    |
| 0.5740051508    | 0.5246179878    |
| 0               | 0               |
| 0               | 0.4827416295    |
| 6.9624888998    | 6.7377592261    |
| 0               | 0.1246897867    |
| 0               | 0               |
| 0               | 0               |
| 0               | 0               |
| 5.1471885257    | 4.638531802     |
| 944.1362119997  | 504.456168664   |
| 3.4211070412    | 3.5500711391    |
| 4.3634779024    | 6.5258936019    |
| 0               | 1.1319877505    |
| 21.363337213    | 20.9138324098   |
| 0               | 0.0755903065    |
| 49.8768528412   | 33.5372387546   |
| 4.9427966324    | 0               |
| 0.2065099211    | 0.3920023951    |
| 0               | 0               |
| 0               | 0.3955571633    |
| 4.5331414842    | 4.4127818929    |
| 1564.1254929785 | 1966.0211421547 |
| 97.3645486779   | 44.3267162146   |
| 28.2861263049   | 39.375193598    |
| 42.1183640099   | 52.4017849777   |
| 8.2552729248    | 5.4983752453    |
| 21.3669597943   | 14.8717461245   |
| 337.3821504139  | 164.400902421   |
| 21.9571533895   | 28.4480001559   |
| 6.0242824624    | 2.7722294539    |
| 4.1109253836    | 3.7572230843    |
| 2.3649026851    | 0.7481864243    |
| 2.2450681659    | 1.3437621285    |
| 48.3098231997   | 80.587429976    |
| 0.699471349     | 0.8851695604    |
| 2.1144161355    | 0.9063054889    |
| 16.023467807    | 11.1732814082   |
| 0               | 0               |
| 0.3218233107    | 0.1272694187    |
| 12.2245765102   | 12.0741477314   |
| 3.4386847781    | 10.1465510447   |
| 5.4499943673    | 3.2513857199    |
| 0.1806124607    | 0               |
| 0.0751792256    | 0.0951380813    |
| 2740.1309196788 | 1340.6627455493 |
| 0.8946239411    | 1.9739737019    |
| 0.243163584     | 0               |

gene\_expression\_table

|                |               |
|----------------|---------------|
| 3.8245163481   | 0.4399875393  |
| 0.9809041018   | 1.861977164   |
| 0              | 0             |
| 23.1897564094  | 34.922046703  |
| 1.3731495302   | 2.9927026077  |
| 0.5900874869   | 0.5600595529  |
| 16.9960447306  | 20.9705114103 |
| 3.9123173851   | 2.4754868549  |
| 0              | 0             |
| 0.8987817652   | 1.0236542712  |
| 1.5390169223   | 4.8690019056  |
| 0.0707511986   | 1.701155224   |
| 5.4144188045   | 4.2824115665  |
| 24.8765265491  | 20.2376814284 |
| 0              | 0.0365092198  |
| 0              | 0             |
| 139.8159179253 | 57.3774147199 |
| 23.5169900687  | 29.7603665812 |
| 8.3061507561   | 7.5407138041  |
| 0              | 0             |
| 0              | 0             |
| 2.1774654383   | 2.0666601935  |
| 37.2449573418  | 16.7245720265 |
| 1.2766459103   | 0.4038936337  |
| 0              | 0.9294289148  |
| 41.2140362521  | 25.6703783244 |
| 0.1163525414   | 0.2208633594  |
| 31.7295954499  | 20.0766422341 |
| 13.5960881304  | 9.8932357095  |
| 0.9056422927   | 2.5786699199  |
| 9.4642435448   | 10.2263834883 |
| 3.4487794489   | 3.7247674889  |
| 5.4697678965   | 2.0947860946  |
| 5.7466029823   | 12.2833501094 |
| 0.2105402408   | 0.5328704674  |
| 1.8626340303   | 6.6785432827  |
| 0.6494186046   | 0.5727896514  |
| 0              | 0             |
| 0.2795586671   | 0.1768884621  |
| 6.7983644858   | 4.3016095738  |
| 0.5978665147   | 0.5296132121  |
| 27.2841240425  | 36.8224997253 |
| 0              | 0.0773344913  |
| 11.9100604049  | 8.3782514803  |
| 1.1193838449   | 0.2360936602  |
| 1.8006504396   | 1.1936014631  |
| 17.3277124139  | 15.3495558046 |
| 68.7633301531  | 86.2555470478 |
| 9.0262275033   | 3.8075144617  |

gene\_expression\_table

|                 |                 |
|-----------------|-----------------|
| 0.0553567018    | 0.1050795022    |
| 0.5057030694    | 0               |
| 0               | 0               |
| 5.1983514941    | 4.4332890119    |
| 0.9279209605    | 2.34853762      |
| 0               | 0.0385285988    |
| 1.1810205328    | 0.904603426     |
| 4.3569498271    | 2.4860648599    |
| 1.8558999618    | 5.8715276741    |
| 0.5009446482    | 0.5720897271    |
| 19.5109433875   | 5.5484898829    |
| 0               | 0               |
| 8.035349456     | 5.9250130109    |
| 1.1355153099    | 2.424897112     |
| 0.4227507501    | 0.735603227     |
| 0.0933661912    | 0.0698179117    |
| 57.792713596    | 45.1501218201   |
| 5.4634704001    | 3.7450467702    |
| 1.2133597936    | 2.6871022294    |
| 0               | 0               |
| 30.1534705781   | 14.0584773377   |
| 39.1136525143   | 19.3548651801   |
| 1.2295543359    | 2.6451675587    |
| 0               | 0               |
| 139.0762350377  | 158.5184828994  |
| 0.8398064218    | 0.6991850667    |
| 1.0527663986    | 0.9689153975    |
| 25.4131745013   | 13.6061356497   |
| 2.2283566938    | 1.2085495615    |
| 3.1650485079    | 1.6945572594    |
| 19.4769525202   | 20.233240001    |
| 4.1526381784    | 7.2257566508    |
| 0               | 0               |
| 12.8589572114   | 13.425060157    |
| 0               | 0.0868186995    |
| 0               | 0               |
| 20.75071639     | 2.1374168275    |
| 0               | 0.2164390034    |
| 78.1877844605   | 46.2525663091   |
| 22.8886502166   | 15.9308670222   |
| 4.5106986781    | 7.4206800933    |
| 2.3177583309    | 1.8331783046    |
| 2.8541897581    | 8.5783349168    |
| 1304.7375417947 | 1021.8021692742 |
| 16.9914627388   | 14.9896666699   |
| 1505.2816016223 | 1740.4212366415 |
| 6.3399604805    | 5.6633762617    |
| 33.433709417    | 15.3543675637   |
| 41.3663838301   | 21.5675748576   |

gene\_expression\_table

|                 |                |
|-----------------|----------------|
| 0               | 0              |
| 2.9421520555    | 22.029201601   |
| 3.4793470337    | 0.6773933548   |
| 0               | 0.7035922343   |
| 57.177735327    | 29.2403553742  |
| 139.3182178688  | 91.3291292455  |
| 8.9884150975    | 6.4998242305   |
| 15.3851110292   | 29.7036305215  |
| 2.1990257803    | 6.2613701666   |
| 0               | 0.3406435491   |
| 2.8325010548    | 10.7534513752  |
| 39.3428846741   | 35.144313567   |
| 8.94505863      | 8.3551092994   |
| 1111.1558182678 | 891.5963882927 |
| 15.3069619525   | 17.7564843327  |
| 7.1499554315    | 7.814312869    |
| 5.3478632798    | 8.459541972    |
| 4.8457618321    | 0.8760332002   |
| 320.395313839   | 278.9408687545 |
| 18.0315340306   | 15.6546288999  |
| 615.6287060449  | 500.3122988589 |
| 84.0290569144   | 40.4381655102  |
| 5.2541108955    | 3.6938841486   |
| 1.0101252502    | 0.6391484975   |
| 1.9790809594    | 7.7639332876   |
| 0               | 0              |
| 0.2163241109    | 0.1368773134   |
| 2.6344621542    | 2.0516115691   |
| 1.228281171     | 0.604477124    |
| 0               | 0.5534814949   |
| 0.9273119515    | 0              |
| 0               | 0.2982476379   |
| 15.2101108253   | 70.1182485561  |
| 2.4354573925    | 1.8834637105   |
| 3.8456273911    | 6.326552196    |
| 10.3242755946   | 5.7788393593   |
| 0               | 0.2192661302   |
| 1.9441614935    | 8.6110660843   |
| 0               | 0              |
| 0               | 0.4407063922   |
| 0               | 0              |
| 0               | 0              |
| 0.1218141978    | 0.2697692838   |
| 1.6143198881    | 2.772500947    |
| 59.1779100271   | 23.7147480217  |
| 0.0272818255    | 0.1208364652   |
| 0               | 10.043202019   |
| 0.2262945332    | 0.4295580499   |
| 0               | 2.7875691382   |

gene\_expression\_table

|                 |                 |
|-----------------|-----------------|
| 0.9477861804    | 1.7991118817    |
| 8.6981165129    | 11.6625221635   |
| 66.822808319    | 91.461746349    |
| 57.2901609486   | 102.707996672   |
| 2.0950555731    | 0               |
| 331.49681879    | 622.9944586827  |
| 0               | 0.5453146366    |
| 11.3186243638   | 14.3235341461   |
| 13.5193944725   | 33.6825026021   |
| 2.7427884305    | 4.9585056171    |
| 1.9526056917    | 8.9573408901    |
| 0               | 0               |
| 0               | 0               |
| 0               | 0               |
| 0               | 0               |
| 1.2016838003    | 4.9423114307    |
| 37.4037477393   | 15.3627347704   |
| 0               | 0               |
| 5.1114620743    | 5.3903930964    |
| 0.3190014623    | 0.4844293643    |
| 0               | 0.6971959413    |
| 0.6334032476    | 0.7681630637    |
| 16.1480184653   | 14.3045374165   |
| 52.3636198778   | 64.6490781939   |
| 0               | 0               |
| 0               | 0               |
| 0.7041477332    | 1.4957539308    |
| 0               | 0.7845761917    |
| 2602.7206183169 | 3922.7056904709 |
| 0               | 0               |
| 0.2198146053    | 0.4868006332    |
| 3.2440283282    | 4.9787254327    |
| 4.6440839257    | 5.5243915688    |
| 0.2183683288    | 0.5526831025    |
| 169.2226448163  | 258.5078216635  |
| 2.5461397353    | 18.4375620488   |
| 14.4912837985   | 6.3479363567    |
| 0.1984163019    | 0.3515296221    |
| 0               | 0.5082540746    |
| 17.2476524508   | 28.743509634    |
| 0               | 3.1004908686    |
| 12.6045616058   | 0.778091059     |
| 0.0139010459    | 0               |
| 2.4761141756    | 1.5382548102    |
| 0.116923289     | 0.2959290226    |
| 1.6856998823    | 8.5329026032    |
| 49.8446274976   | 27.3949993206   |
| 0               | 0               |
| 0               | 0               |

gene\_expression\_table

|                |                |
|----------------|----------------|
| 1.0082716582   | 1.5949391309   |
| 499.9987561585 | 572.3567192775 |
| 0              | 0              |
| 0              | 0              |
| 0              | 0.0461681016   |
| 48.5738510661  | 27.5871770594  |
| 1.8611483702   | 2.0453511546   |
| 0              | 0.0438478182   |
| 84.9621800616  | 48.682597587   |
| 3.3726441031   | 2.5733686126   |
| 1.4650616741   | 1.5560454536   |
| 0.4122767389   | 0.2857089982   |
| 0              | 0              |
| 0              | 0              |
| 22.0458102125  | 15.111748447   |
| 0.3773786      | 0.358174838    |
| 15.9746885718  | 21.3910391247  |
| 0              | 0.0569574666   |
| 287.9036848344 | 312.6595686431 |
| 0.0427839056   | 0              |
| 24.0906144098  | 23.6669796024  |
| 0              | 0              |
| 1.7385179285   | 1.1407749759   |
| 7.3574228945   | 10.4446937479  |
| 0              | 0              |
| 5.7631457508   | 5.161318013    |
| 0.6595317651   | 1.3910444494   |
| 0              | 0              |
| 3.1422638616   | 16.3035826007  |
| 14.4278222712  | 5.6114569263   |
| 0              | 0.0226710017   |
| 3.6757947285   | 24.0335671264  |
| 0              | 0              |
| 0.4718085249   | 0.4477994829   |
| 21.4401034165  | 27.8398943917  |
| 8.0883429761   | 6.9159904352   |
| 36.7752117425  | 13.3083578877  |
| 23.5065389504  | 19.1917037818  |
| 0              | 0              |
| 1.5865980278   | 1.0039069368   |
| 1.1304307763   | 0.7152708361   |
| 0              | 0              |
| 0.2523737134   | 0.3649997824   |
| 0              | 0              |
| 16.8343411687  | 14.9468691502  |
| 28.1170271267  | 10.1661823706  |
| 0.8935230899   | 0.5979869008   |
| 0.4968647691   | 1.0898753577   |
| 13.2574176694  | 7.1350652798   |

gene\_expression\_table

|               |               |
|---------------|---------------|
| 4.9809582825  | 4.0271219417  |
| 0.4080801093  | 1.5492561264  |
| 2.3755055922  | 2.8809066902  |
| 0             | 0.0427311676  |
| 14.4913977724 | 6.1700053594  |
| 0             | 0             |
| 0.2819623897  | 1.2488657855  |
| 0.8519984106  | 1.6172850959  |
| 0             | 0             |
| 4.32421229    | 6.4982612263  |
| 0.7813275144  | 0.8192559656  |
| 1.2286545757  | 1.1740645825  |
| 11.6278563688 | 9.3586523557  |
| 17.0794897111 | 12.4695087058 |
| 0             | 0             |
| 3.0794394562  | 6.4949671716  |
| 10.8961997069 | 9.2925617836  |
| 0.5545122498  | 0.2135688403  |
| 2.3048722076  | 0.6250238805  |
| 0.1760774064  | 0.2228230801  |
| 0             | 0.0270880403  |
| 0             | 0             |
| 0             | 0.0102935181  |
| 0.3041561492  | 0.1924523179  |
| 4.4134381469  | 4.7783922885  |
| 4.7160599403  | 4.9092408975  |
| 18.9250867316 | 38.7088944871 |
| 6.5601325015  | 4.1508702325  |
| 0.0940625485  | 0.1785519267  |
| 0             | 0             |
| 3.834403131   | 1.9154109847  |
| 4.0360820532  | 3.4476272152  |
| 13.1905049909 | 4.636769024   |
| 0.0624435251  | 0.0460957352  |
| 0             | 0.0189144832  |
| 0.7161546675  | 1.1328525341  |
| 1.1437202683  | 0.8113983995  |
| 11.7847091499 | 16.4690667101 |
| 7.3000089126  | 4.3020293492  |
| 51.3893219187 | 57.5696186602 |
| 0             | 0.3468359697  |
| 0             | 0             |
| 0.1967853722  | 0.1245143362  |
| 8.5445082615  | 5.4064677787  |
| 0.3902684177  | 0.2469391521  |
| 0             | 0.3201104252  |
| 3.6050926263  | 4.0254580576  |
| 26.9092457669 | 17.2329884582 |
| 8.3724023355  | 2.9567827872  |



gene\_expression\_table

|                 |                 |
|-----------------|-----------------|
| 66.080889667    | 79.2230076742   |
| 3.8015169243    | 2.4670551474    |
| 0.4509053518    | 0.0951022256    |
| 15.7561721771   | 21.1355290812   |
| 1.8143414935    | 0.4592039015    |
| 0               | 0.1407589603    |
| 0               | 0               |
| 12.1321983233   | 7.2725204345    |
| 12.9949086616   | 11.648431541    |
| 5.5374172471    | 5.6599127512    |
| 24.2637320678   | 25.4714888125   |
| 2.1222687578    | 2.2380803563    |
| 0               | 0               |
| 8.611676607     | 2.1795872002    |
| 65.2811970638   | 28.0827249497   |
| 0.9482223452    | 4.7998395223    |
| 0               | 0               |
| 0               | 0.5904693887    |
| 32.5651705716   | 44.2546626322   |
| 3.3944612209    | 4.8559354407    |
| 26.755118725    | 36.4626397405   |
| 1.6500397647    | 7.3083442416    |
| 11077.046727782 | 3620.5385232069 |
| 382.0770885609  | 271.9756749847  |
| 286.2531316641  | 93.6196607537   |
| 0               | 4.2444592846    |
| 20.6113125969   | 11.8189859009   |
| 0               | 0.8170606289    |
| 1.0011274546    | 0.7796371888    |
| 48.1533351557   | 10.156209774    |
| 0.5413786537    | 1.198935217     |
| 4.2236560847    | 1.0689935491    |
| 0.3486638541    | 0.1103071022    |
| 73.3595000317   | 100.8498021499  |
| 0.4930443583    | 0.2079798591    |
| 6.105577858     | 1.6556804984    |
| 0               | 0               |
| 1.4365469367    | 0.9089633351    |
| 8.1529224599    | 17.3438885729   |
| 7.3741747681    | 4.8164633027    |
| 9.5638908744    | 1.0085789662    |
| 91.8796915219   | 88.5883794149   |
| 4.8509951882    | 5.8319123719    |
| 2.3512159662    | 2.2859975465    |
| 9.8345157649    | 2.8644218264    |
| 0.7102708072    | 1.0432918997    |
| 6.6674311694    | 4.8311636085    |
| 0               | 0.08698088      |
| 12.0690071166   | 39.979667111    |

gene\_expression\_table

|                |                |
|----------------|----------------|
| 0              | 0.3226232525   |
| 1.4004505623   | 2.0944740799   |
| 8.3392397551   | 28.0789744822  |
| 2.7513515238   | 2.0890742319   |
| 6.3069781195   | 5.0253119053   |
| 1.9813011534   | 0.3760956342   |
| 234.2985770523 | 230.9380881793 |
| 1.2328403407   | 0.3120278604   |
| 11.6142300121  | 7.9761464962   |
| 0              | 2.5736267351   |
| 11.4111697019  | 10.8304865692  |
| 0.3477000673   | 0.2514335729   |
| 0.1663867389   | 0.280746265    |
| 0.2002936125   | 0.1267341465   |
| 0              | 0.4755631626   |
| 2.7223312569   | 1.6364062137   |
| 0              | 0.8745151997   |
| 1.5168816997   | 0.2132876666   |
| 67.3863122065  | 19.2391600023  |
| 0              | 0              |
| 0              | 0.4011969669   |
| 24.7853306676  | 3.7436159437   |
| 3.3097241488   | 1.3961339392   |
| 0.8114283891   | 1.5402740473   |
| 0              | 0              |
| 0              | 0              |
| 0              | 0              |
| 0              | 0              |
| 0              | 0              |
| 0.5523600633   | 0              |
| 31.6363181521  | 66.6891421462  |
| 0              | 0              |
| 8.1846560324   | 3.625141955    |
| 1.2766339258   | 0.8077796842   |
| 0.2796661751   | 0              |
| 0              | 0              |
| 10.9557213896  | 3.8511906565   |
| 1.9246097106   | 0.7306686402   |
| 5.1296070459   | 0.7212704312   |
| 80.3041572271  | 52.0511114356  |
| 6.8185046139   | 4.3143530752   |
| 299.8008812224 | 352.0142307659 |
| 13.194154682   | 19.305891347   |
| 6.5421521222   | 6.0712568317   |
| 6.8205466937   | 5.5024476103   |
| 421.9976698217 | 398.565773462  |
| 55.729083815   | 76.5807161586  |
| 0              | 0              |
| 6.7299526059   | 14.1944083859  |

gene\_expression\_table

|                  |                  |
|------------------|------------------|
| 0                | 0                |
| 1.0810341667     | 0.4788108745     |
| 276.4615850125   | 335.6485987138   |
| 0                | 1.43042883       |
| 0                | 2.3747839895     |
| 28.9869236507    | 38.9751330143    |
| 1.9049187884     | 2.4106435937     |
| 0                | 1.1014557113     |
| 21.9680150603    | 2.1384741557     |
| 5.3090135716     | 7.8382148912     |
| 2.6713316631     | 6.7610531214     |
| 0.4733245975     | 3.8933995252     |
| 5.0372794272     | 6.8299229873     |
| 16.3377788579    | 6.6796774566     |
| 1223.15258192    | 1130.9546853476  |
| 24.9168752509    | 42.918417267     |
| 12.4728689672    | 18.5610639079    |
| 37.8003039441    | 8.4415882678     |
| 0                | 0.3479622108     |
| 13.6473155807    | 15.4782378122    |
| 24.1641176889    | 21.4941428464    |
| 60.3102616572    | 43.501617917     |
| 3.3136792139     | 4.0623629227     |
| 0                | 0                |
| 0.5892718273     | 2.3614272445     |
| 148.0589573294   | 109.651804781    |
| 4.2377478075     | 0.8938000984     |
| 685.2057264778   | 500.1173845015   |
| 5.3299947993     | 7.3071064165     |
| 16.2489852942    | 12.2213018435    |
| 64.6760394612    | 17.3613726158    |
| 7.836357745      | 4.5076284784     |
| 2.4549092409     | 7.248844219      |
| 6.2978551621     | 4.8704533646     |
| 1.6162092039     | 3.9201321382     |
| 0                | 1.5511061353     |
| 102.6650302027   | 51.3187625358    |
| 21.7169609363    | 18.3788945452    |
| 0                | 2.6820131868     |
| 0.200768504      | 0.3811038907     |
| 212.9702486995   | 131.3863049083   |
| 541.3289859823   | 229.1631888732   |
| 22647.1243182309 | 26176.8694533054 |
| 13.0044771427    | 2.7428255475     |
| 38.2706567397    | 29.2009781718    |
| 0                | 0                |
| 35.5256406236    | 28.8006534591    |
| 574.976397883    | 684.060031022    |
| 6.9138874846     | 12.2774001686    |

gene\_expression\_table

|                |                |
|----------------|----------------|
| 7.2988148147   | 7.4293835175   |
| 65.6088621337  | 38.5124975405  |
| 6.9066608587   | 2.6600810896   |
| 10.5305987538  | 11.422543385   |
| 31.6688682212  | 32.8517716728  |
| 159.8383648269 | 129.560380129  |
| 3.4666936619   | 4.6063963796   |
| 0.9887174454   | 9.3840432599   |
| 5.301140778    | 12.3688098094  |
| 11.9723258075  | 7.1019293622   |
| 32.5471847268  | 17.4256628344  |
| 1.769063439    | 0.6716162608   |
| 2.9991807421   | 7.4010577132   |
| 602.9548176776 | 433.53947009   |
| 183.9408256355 | 123.1800730327 |
| 285.2158190753 | 430.6943156088 |
| 3.5691448598   | 3.0111296585   |
| 0.1749041217   | 0.8853532298   |
| 0              | 0              |
| 0              | 0              |
| 7.242957065    | 2.5460677195   |
| 0              | 0              |
| 0              | 0              |
| 8.7876558186   | 6.0335359114   |
| 13.1460520369  | 7.1297631428   |
| 15.4247322982  | 16.1037909687  |
| 0              | 0              |
| 1.9207026831   | 0.8102059515   |
| 96.8194598833  | 175.033491586  |
| 1.0548569059   | 0              |
| 0              | 1.010533324    |
| 0.8021711942   | 1.544769946    |
| 2.2928269542   | 0              |
| 0.5094331192   | 3.2233964321   |
| 44.0466457297  | 25.5082775917  |
| 24.1202551814  | 15.2618943609  |
| 9.4373457534   | 44.7855255427  |
| 4.5841964487   | 10.3593315784  |
| 41.4911196821  | 33.4954198674  |
| 0              | 0              |
| 21.1590368115  | 5.419036424    |
| 0              | 0              |
| 3.4992705737   | 8.3030057262   |
| 6.9164964046   | 4.7742071782   |
| 14.1083241863  | 26.7807805169  |
| 4.3585723865   | 1.4849967248   |
| 4.4642234968   | 0              |
| 470.0581798755 | 228.661365745  |
| 22.1057345947  | 32.3914636085  |

gene\_expression\_table

|                |                |
|----------------|----------------|
| 2.5438113039   | 0.8047879076   |
| 48.6861441028  | 6.3736054819   |
| 9.3262846537   | 49.9629040739  |
| 43.3366182905  | 7.7789761948   |
| 0.2897605338   | 0.3666872199   |
| 26.9773079844  | 21.6987345443  |
| 7.4494334582   | 11.4117965631  |
| 0.2040961953   | 0.5488458491   |
| 2.5655742395   | 1.7542611456   |
| 2.2922023003   | 2.2199575625   |
| 0.3396944005   | 0.3492756411   |
| 2.4928598475   | 1.7087814222   |
| 0.1018389524   | 0.0902128709   |
| 1.8895672128   | 1.8477581471   |
| 15.3369736775  | 13.3016449786  |
| 2.34613999     | 1.5626325333   |
| 5.5384985876   | 3.4595110076   |
| 12.2272142948  | 17.258725222   |
| 0              | 0.1609125525   |
| 0              | 0              |
| 2.196709283    | 1.3899498478   |
| 3.2833832462   | 4.7160019939   |
| 0              | 0              |
| 0              | 0              |
| 113.413931953  | 39.1890345825  |
| 22.7581947417  | 23.3705920175  |
| 8.4088661933   | 8.548895682    |
| 0.3008083636   | 1.4275052547   |
| 0.1370166084   | 0.4388992051   |
| 17.1510645871  | 14.383466078   |
| 11.8631862176  | 7.9754800195   |
| 2.942307659    | 2.1720079819   |
| 46.8264306393  | 27.9000256578  |
| 5.3228235023   | 4.0696341313   |
| 8.7797055922   | 5.0344788145   |
| 14.0502787684  | 5.3341194451   |
| 0.8825458524   | 1.8148769475   |
| 29.6451687221  | 22.5766789781  |
| 106.1781646801 | 225.4966444248 |
| 15.4729949149  | 10.669037727   |
| 0.7342409346   | 0.4288476474   |
| 180.6594311538 | 108.2561824234 |
| 0              | 0              |
| 1.7412976272   | 1.1017918441   |
| 0.046058472    | 0              |
| 4.0841434333   | 3.8064691043   |
| 0              | 0.6894838008   |
| 0.6663764219   | 1.0378935027   |
| 0              | 0.0276676799   |

gene\_expression\_table

|                |                |
|----------------|----------------|
| 2.5011890954   | 3.165213922    |
| 2.2139904973   | 3.2687302549   |
| 6.8824377537   | 1.9596628111   |
| 11.0457564957  | 9.420107693    |
| 4.0432771847   | 6.8671516049   |
| 0              | 0              |
| 0              | 0              |
| 134.3066044216 | 45.6775059537  |
| 30.0269067749  | 16.4168534963  |
| 6.6229944305   | 3.9112692307   |
| 11.7184103668  | 3.0894701665   |
| 124.8732853212 | 185.0531153528 |
| 6.2486342871   | 12.849759919   |
| 3.4174213577   | 3.3469346775   |
| 0.6896797283   | 0.5673059758   |
| 0              | 0.384853806    |
| 0              | 0              |
| 0              | 0              |
| 4.0473332118   | 3.9380139018   |
| 0              | 0              |
| 0              | 0              |
| 0              | 0              |
| 0              | 0              |
| 96.0011181147  | 97.1902767813  |
| 0.2559759766   | 0.2591467319   |
| 0.5658189357   | 0.1309819419   |
| 0              | 0              |
| 0.007132       | 0.009025       |
| 0              | 0              |
| 10.534187915   | 8.2651224371   |
| 0.7958621692   | 2.3080533849   |
| 1.5026472524   | 0.8828743575   |
| 148.5515069888 | 117.2992361153 |
| 2.2046603389   | 1.9823411559   |
| 4.5831039618   | 3.6249019747   |
| 5.095801054    | 1.5799199728   |
| 0              | 0              |
| 71.4937714329  | 219.9218998063 |
| 0              | 0              |
| 0              | 0.10985477     |
| 0.8842856284   | 1.3698703403   |
| 60.2867007313  | 33.9761206176  |
| 24.5537951674  | 8.4843150341   |
| 21.4663656542  | 16.4932390459  |
| 0.5478561968   | 0.8319636758   |
| 0.1989445022   | 0.2697439458   |
| 0.7387581325   | 1.2793181532   |
| 1.3368364681   | 1.2465487276   |
| 34.3562979167  | 29.8302816029  |

gene\_expression\_table

|                |                |
|----------------|----------------|
| 1.6206078756   | 2.2705870066   |
| 0.2196431631   | 0.4447277331   |
| 2.6893300527   | 2.4834915452   |
| 85.4879822174  | 66.9128941947  |
| 10.9594112396  | 4.0264710411   |
| 0              | 0              |
| 161.7195098665 | 105.9626723864 |
| 0              | 0.0512926434   |
| 0.2443265403   | 0.3091912435   |
| 0.260777146    | 5.2801474596   |
| 13.1526607191  | 17.6504620635  |
| 7.946586827    | 4.5616096205   |
| 2.1728700146   | 1.2789448796   |
| 4.2566551967   | 5.8917332935   |
| 112.4160401518 | 67.3097442816  |
| 411.0642356681 | 461.3579274072 |
| 11.5238317316  | 17.054953041   |
| 2.2591809826   | 1.4294783052   |
| 0.0147784744   | 0.0374038357   |
| 1.7492601957   | 2.5490632474   |
| 5.0794703714   | 9.1598811024   |
| 0              | 0.1278401448   |
| 4.2266119871   | 1.7304644797   |
| 0              | 0              |
| 0.3394666546   | 2.362742268    |
| 2.0315997427   | 0.6243750943   |
| 32.7973603526  | 45.4953430688  |
| 8.4553646503   | 8.0873043643   |
| 0              | 0              |
| 2.6790605046   | 4.6273112919   |
| 6.0082892214   | 4.3930708253   |
| 0.8779594254   | 3.7299310915   |
| 16.5491970621  | 7.0660458862   |
| 1.7581403013   | 1.9215026602   |
| 186.5269034947 | 107.8708256367 |
| 0              | 0              |
| 0              | 0.3486853751   |
| 1.7933913974   | 4.822703444    |
| 134.1886844899 | 133.1391867482 |
| 8.3619357665   | 11.8416422214  |
| 53.870696981   | 11.5316643986  |
| 0.9042632642   | 0.3641051216   |
| 2.0837791767   | 1.4942934787   |
| 19.2596165284  | 16.0638447375  |
| 31.8425974896  | 28.7249143305  |
| 2.4515056905   | 1.9229382552   |
| 0.2374562642   | 0.3004970214   |
| 21.3204546368  | 17.6770017564  |
| 0              | 0              |

gene\_expression\_table

|                |                |
|----------------|----------------|
| 3.3211479536   | 3.311343026    |
| 1.8662053564   | 1.6780161634   |
| 9.3743270075   | 7.8449251992   |
| 165.3717687745 | 99.9697854101  |
| 0              | 0              |
| 0.8915121332   | 0.3333300555   |
| 0              | 0              |
| 1.0210008337   | 0.8160378115   |
| 6.3474986706   | 30.4395378709  |
| 3.129536993    | 6.7326424587   |
| 2.1105576232   | 1.526214959    |
| 0.0902469008   | 0.2626737493   |
| 17.3516289262  | 17.6806308414  |
| 6.9965608019   | 3.3202625049   |
| 0              | 0              |
| 0              | 0              |
| 11.1991570151  | 10.4795547023  |
| 134.9902592844 | 126.3929466129 |
| 53.5726660604  | 40.4164487176  |
| 3.790026351    | 3.1673127201   |
| 0.9901295784   | 0.6264963996   |
| 0.5711412241   | 1.2648472981   |
| 20.4383369642  | 17.9613759677  |
| 54.4337651704  | 22.767089552   |
| 0.8742046677   | 1.9360105088   |
| 0.1966801829   | 0.497791114    |
| 0              | 0.0650847696   |
| 9.8424100918   | 5.8215499107   |
| 2.3337189736   | 2.1854295827   |
| 14.9559025399  | 18.5321491854  |
| 5.6696469735   | 6.6856515659   |
| 1.6519726701   | 0.6271633245   |
| 13.3897493395  | 10.3255601434  |
| 3.4705956966   | 2.091420063    |
| 3.0629782946   | 2.7602879042   |
| 10.1325366809  | 14.7653716241  |
| 1.6316690026   | 10.9142095507  |
| 0.3926357842   | 0.6624988905   |
| 13.7135776206  | 10.2446400908  |
| 8.0198001602   | 10.5295107571  |
| 107.126216662  | 168.3241751146 |
| 16.2570546266  | 28.945784521   |
| 67.5446527245  | 60.9021160495  |
| 42.4982753061  | 48.9921649734  |
| 7.5953326393   | 6.7282385243   |
| 0.3797899649   | 0.3204119956   |
| 2.2891692995   | 3.1197452843   |
| 0              | 0              |
| 54.6526209004  | 71.4221945629  |



gene\_expression\_table

|                 |                 |
|-----------------|-----------------|
| 0               | 0               |
| 0.7811459113    | 0.6425427996    |
| 6.5674835576    | 3.2320723191    |
| 5.7139783126    | 0.9248884633    |
| 2.431286256     | 1.6179477094    |
| 4.0854729611    | 3.3873064125    |
| 1.3919271479    | 1.3761414505    |
| 0.1434247075    | 0.3630032465    |
| 4.1211116827    | 2.4120297599    |
| 0.6271138753    | 0.297600885     |
| 305.9138405119  | 411.2750461219  |
| 3.2358550716    | 1.9046147478    |
| 4.4058884309    | 3.0665688908    |
| 0.6685521969    | 0.9694229859    |
| 761.0387455369  | 1391.6908221127 |
| 4.7454794016    | 3.9892526865    |
| 0.2432305607    | 0.1539021496    |
| 3.5506255025    | 0.7863202451    |
| 0.1858806636    | 0.2352289419    |
| 0               | 0               |
| 59.8895920824   | 44.4682117187   |
| 0.8734887439    | 0.9672125133    |
| 23.4864822711   | 12.0030182442   |
| 1.1931480599    | 0.7549546847    |
| 0.6408897208    | 2.2303475351    |
| 7.3068929034    | 4.0857748239    |
| 5.4293964499    | 5.4492650639    |
| 1.9301384714    | 0.4885117381    |
| 1.2806267661    | 0.758028307     |
| 1.2803519191    | 2.234000954     |
| 1.0649735488    | 0.6738533103    |
| 22.7268794648   | 6.9530865885    |
| 0.1071858484    | 0.6782096966    |
| 2.4448115284    | 1.237547613     |
| 1.3222486255    | 1.4802127917    |
| 35.924488788    | 14.335982189    |
| 2.103074413     | 1.7465478831    |
| 0               | 0               |
| 35.5467015915   | 24.1150106709   |
| 1.6625770491    | 1.1834797968    |
| 2.2720392558    | 2.491864739     |
| 1145.8474169847 | 918.4732176031  |
| 29.2244761339   | 36.2118854165   |
| 5.5133779013    | 1.9186996472    |
| 0               | 0               |
| 0               | 0.0627479703    |
| 10.3316338766   | 9.6637710809    |
| 0.9682285401    | 1.1844348134    |
| 0.7085446329    | 0.1494419421    |

gene\_expression\_table

|                 |                 |
|-----------------|-----------------|
| 28.4257402212   | 15.288231611    |
| 9.9817676785    | 5.562611608     |
| 3341.4416049818 | 6999.0221119081 |
| 3.9099841215    | 3.5343007163    |
| 0.2937398531    | 0.557584475     |
| 0               | 1.3774499844    |
| 0               | 0               |
| 612.7871715854  | 659.0038997878  |
| 355.4592443144  | 189.8209781636  |
| 8.2105344061    | 2.4846362635    |
| 304.9459849076  | 197.7879717321  |
| 181.9537001274  | 67.7394300933   |
| 11.2203564291   | 11.9333514551   |
| 18.9930780232   | 15.0899127092   |
| 125.7855531381  | 68.2198121639   |
| 0.4599529839    | 0.1940209946    |
| 48.6432080826   | 62.8838482928   |
| 4.2127179476    | 6.5158203147    |
| 22.9568676218   | 27.1330428031   |
| 2.8762537236    | 1.5993289438    |
| 0.5151647194    | 0               |
| 9.2188545443    | 3.3332313592    |
| 0               | 0               |
| 0.6545846949    | 3.7966785685    |
| 5.6088489774    | 7.0979067125    |
| 7.2402752407    | 7.0976725239    |
| 24.0722637412   | 22.3792844051   |
| 19.3568632718   | 12.5702101359   |
| 4.155777518     | 2.1079737492    |
| 29.1296034601   | 44.1851472066   |
| 0               | 0.7262255453    |
| 2.3185273616    | 2.1441196608    |
| 13.9650212028   | 13.9907339913   |
| 24.9458813402   | 7.2850627228    |
| 0.3778014547    | 0.2390507832    |
| 34.5830863005   | 16.3780623357   |
| 0.1448140813    | 0.0458149633    |
| 3.694192466     | 3.4088105549    |
| 4.2338777182    | 3.02094534      |
| 0.1728935046    | 0               |
| 91.5772069408   | 61.4565311226   |
| 0.9331446891    | 2.1649454807    |
| 4.5952251088    | 3.0194215648    |
| 1.4278247906    | 0.5678793801    |
| 6.5012826301    | 2.7866549227    |
| 29.013162317    | 31.9950949544   |
| 1.7430804979    | 2.4815698672    |
| 0               | 0               |
| 59.2937819002   | 40.7334550449   |

gene\_expression\_table

|                 |                 |
|-----------------|-----------------|
| 0.2299650844    | 0.5092798478    |
| 3.4746832313    | 2.1985774203    |
| 6.2139342864    | 4.6928128133    |
| 1.140280662     | 1.0822549061    |
| 13.8935264323   | 19.04719985     |
| 311.8887356217  | 333.0197698206  |
| 0.3406836492    | 0.5851044436    |
| 4.8539685       | 4.3936780138    |
| 10.5267559371   | 20.4579220194   |
| 29.3274960013   | 16.4559711614   |
| 12.1848614944   | 11.1022150157   |
| 2.1749541896    | 1.9878220415    |
| 54.6449357637   | 38.3253561857   |
| 10.5955801654   | 5.363413412     |
| 0.1973457673    | 0.0624344608    |
| 64.4658878178   | 52.5677342262   |
| 38.3331208891   | 21.5599724384   |
| 42.6508239947   | 27.906970362    |
| 5.9960133416    | 4.6069131104    |
| 6.8769040165    | 2.9272414244    |
| 0.2846533723    | 0.6303923331    |
| 4.9009591434    | 5.5604888317    |
| 23.4229445817   | 22.6941613151   |
| 0.2885078717    | 0.2966453721    |
| 2.7721382905    | 2.3816429524    |
| 3.794240125     | 4.9374417593    |
| 880.72633228    | 1060.4294852823 |
| 3.7993002265    | 1.4793699516    |
| 21.242865626    | 14.1133121147   |
| 1.902793172     | 2.1571251545    |
| 0.0259928409    | 0.2795948805    |
| 0               | 0               |
| 0               | 0               |
| 0               | 0               |
| 8.0270901776    | 11.8088510359   |
| 0               | 0               |
| 0               | 0               |
| 0               | 0               |
| 1.9910092299    | 3.5431729317    |
| 2247.7072822538 | 987.2583023778  |
| 4.811181263     | 5.0737260472    |
| 0.5288046083    | 0.1672983973    |
| 9.7845779339    | 8.3923959012    |
| 41.3165478048   | 12.2710670177   |
| 2.2728224355    | 2.6365346757    |
| 44.7121986872   | 11.619632176    |
| 26.1015511586   | 2.9145076235    |
| 0.0462905993    | 0.1757399906    |
| 0               | 0               |

gene\_expression\_table

|                |                |
|----------------|----------------|
| 2.28341356     | 1.6512128807   |
| 0              | 0              |
| 0              | 0              |
| 2.1327753134   | 1.5948590875   |
| 12.7995290962  | 7.8738308453   |
| 47.1471790825  | 17.3746768275  |
| 13.3110815124  | 7.5586341492   |
| 22.4787881972  | 18.1200557158  |
| 1.5952616051   | 2.9160119286   |
| 3.3004256344   | 1.3424897249   |
| 9.0278464124   | 12.7775043089  |
| 1.389984911    | 1.5077170179   |
| 0              | 0              |
| 0.6430537626   | 0              |
| 0.9619454511   | 0.912994685    |
| 0              | 0.1030302641   |
| 19.8735857124  | 23.0866367574  |
| 4.3380279198   | 2.6003858371   |
| 1.6933402105   | 1.6558729155   |
| 1.6093484639   | 2.1820759057   |
| 0.2678740453   | 0.3389902263   |
| 12.3337703888  | 19.8649625359  |
| 0              | 0              |
| 1.1128016587   | 2.1443537478   |
| 0.2967291412   | 1.1578097921   |
| 8.8193635042   | 4.2333918664   |
| 5.6284960515   | 3.474521836    |
| 1.8232073907   | 1.4654086527   |
| 1.4659923526   | 2.5619281676   |
| 224.2690756771 | 198.9399655389 |
| 15.3139474837  | 16.8296094333  |
| 409.6410299954 | 438.8520875997 |
| 0              | 0.3241562432   |
| 4.2728996326   | 3.199310085    |
| 3.5472126639   | 2.6653079185   |
| 0              | 0              |
| 0.0749913437   | 0              |
| 6.1280764944   | 4.3248930544   |
| 0.2335756001   | 0.5911722089   |
| 1.3196640081   | 0.7613295627   |
| 0              | 1.2165689676   |
| 0.4719407807   | 0.2508380048   |
| 3.827156149    | 3.7386132723   |
| 0              | 0              |
| 0              | 0              |
| 7.1530601      | 5.8742225496   |
| 501.1308268704 | 592.3238999627 |
| 11.8052375384  | 7.6587730912   |
| 5.2100962135   | 5.6284196643   |

gene\_expression\_table

|                |                 |
|----------------|-----------------|
| 0.0283622232   | 0.0119639767    |
| 19.1258089991  | 13.3118692878   |
| 2.1870392724   | 2.3784599225    |
| 1.3088084626   | 1.2422067891    |
| 0              | 0.0298017359    |
| 0              | 0               |
| 3.5073116789   | 2.071274617     |
| 665.7337840031 | 1187.2660090096 |
| 0              | 1.1626840757    |
| 138.3991910376 | 80.9155644187   |
| 12.5557138988  | 14.607675675    |
| 5.1790312062   | 1.8205498188    |
| 21.8496388668  | 31.7560205323   |
| 0              | 0               |
| 0              | 0               |
| 0.1270350388   | 0.482282296     |
| 2.0439781023   | 4.3524870621    |
| 0              | 0.0602404095    |
| 154.5830045496 | 106.0437332778  |
| 0              | 0               |
| 0              | 0.0228184088    |
| 8.6663364968   | 2.1752939897    |
| 3.4390809784   | 3.4454131107    |
| 0.9430596758   | 1.2680157697    |
| 164.4446357022 | 86.97860146     |
| 1.7101843875   | 1.6231577939    |
| 14.5586028973  | 12.7430412024   |
| 0              | 0               |
| 50.0914563129  | 15.5694538613   |
| 0.5606683015   | 0.2956319051    |
| 0.3900974641   | 0.6098177217    |
| 0              | 0               |
| 1.1013020326   | 1.4865917046    |
| 3.2053763621   | 4.3267748257    |
| 3.1966404807   | 6.6002202527    |
| 1.4195867544   | 2.2251654339    |
| 0.123424345    | 0               |
| 0.043098837    | 0.0340880461    |
| 3.6478624171   | 1.9569141361    |
| 0.0169250544   | 0.0107091899    |
| 0              | 0.0215278091    |
| 0              | 1.3274084147    |
| 1.0474982012   | 0               |
| 11.7238812265  | 22.9963891278   |
| 17.45471169    | 22.7197567255   |
| 16.6391964159  | 9.4002817505    |
| 0.3258073536   | 0.1030759703    |
| 11.2168138265  | 12.2232092174   |
| 48.8256532353  | 50.3615060006   |

gene\_expression\_table

|                 |                 |
|-----------------|-----------------|
| 0.8585022475    | 1.5520293761    |
| 44.3634388085   | 39.5943247653   |
| 6.345346451     | 9.2759561948    |
| 3.6672794542    | 9.9447475991    |
| 0.2137040703    | 0.1502438935    |
| 0.2271944615    | 1.178794599     |
| 1.1144394809    | 1.7276235627    |
| 7.3736299605    | 3.4525470354    |
| 5.3635240508    | 3.3937260137    |
| 3.9142509453    | 4.9534205986    |
| 9.0879545781    | 5.2275718133    |
| 55.5716696671   | 44.140184509    |
| 10.3299824006   | 13.0724238995   |
| 0.5182203147    | 1.3935735947    |
| 1.5964033203    | 1.6042941882    |
| 9.6355916596    | 13.0646611775   |
| 0.6114251732    | 0.337275015     |
| 0.761781589     | 1.1182656948    |
| 1.9094054499    | 2.1142812167    |
| 0               | 0               |
| 2.1577036949    | 0.7281436697    |
| 0               | 0               |
| 0.3212150004    | 0.1354974444    |
| 7.7785130076    | 2.331374467     |
| 0               | 0               |
| 1.4980380646    | 1.1103635741    |
| 12.7985664488   | 4.2826957533    |
| 7.9934504799    | 13.4874412548   |
| 4.0638793165    | 4.9046815209    |
| 4539.1893916391 | 6399.4851695556 |
| 4.7081227863    | 4.1321976591    |
| 4.0461351599    | 2.7235733599    |
| 8.424950281     | 9.3886056171    |
| 0               | 0.075374713     |
| 189.6019350468  | 125.7941630536  |
| 0.7619205557    | 1.2052475135    |
| 1.7625625485    | 2.4652829512    |
| 70.1747688092   | 61.7194910019   |
| 3.8262453355    | 4.267570318     |
| 90.207624411    | 22.2645215991   |
| 77.053346831    | 53.3886033864   |
| 71.2941790283   | 76.8504503707   |
| 11.4507493073   | 10.0556926289   |
| 31.2799062255   | 19.2099843152   |
| 0               | 0               |
| 2.6355793572    | 2.9350486896    |
| 7.1827031884    | 4.3732949831    |
| 1.8673871765    | 16.7437678074   |
| 8.2889191666    | 19.1278966934   |

gene\_expression\_table

|                |                |
|----------------|----------------|
| 0              | 0              |
| 7.5918856966   | 15.6999094425  |
| 3.3405210776   | 6.2681764688   |
| 18.8526811921  | 37.1900375366  |
| 61.5899218107  | 62.2005037991  |
| 10.5649077067  | 4.7629620499   |
| 15.3237910354  | 13.4758015513  |
| 30.5314251741  | 19.6830099678  |
| 16.3559573166  | 1.379879778    |
| 0.8836372986   | 0.6473954819   |
| 17.9998137686  | 30.0495637205  |
| 2.1964685258   | 0.6317261412   |
| 0              | 0.2853274898   |
| 5.8067413311   | 3.2832991764   |
| 2.7419601708   | 3.3413907538   |
| 2.5051007957   | 2.6946394976   |
| 0              | 1.8380024581   |
| 2.1781596375   | 0.541440708    |
| 8.5963075237   | 0.9065405564   |
| 43.7073033126  | 23.2656867821  |
| 0.4742566724   | 1.2003281359   |
| 0.0960883784   | 0.1823974086   |
| 3.1794136654   | 3.7361034571   |
| 0.4215399256   | 1.2002667443   |
| 11.2015348196  | 10.2719994504  |
| 29.9309200478  | 31.8094009457  |
| 9.865908481    | 7.4316344874   |
| 17.2328847164  | 15.7863402564  |
| 0              | 0              |
| 0              | 0              |
| 1.339473957    | 1.2948546118   |
| 0.8710062208   | 0.8156606615   |
| 126.2106666836 | 97.3593040359  |
| 9.3395236523   | 9.4826977133   |
| 125.1233080578 | 51.8048904733  |
| 1.5032288087   | 2.1359286898   |
| 1.6434957598   | 1.5598627676   |
| 0              | 0.00811        |
| 1.9669975327   | 1.1655792902   |
| 129.1100265443 | 164.1938746658 |
| 22.0840667239  | 9.6846127996   |
| 0.8519494834   | 1.257816172    |
| 0              | 0              |
| 0              | 0              |
| 35.0092210789  | 18.0906354829  |
| 19.4733901753  | 14.1303079145  |
| 7.7922179908   | 7.7973321657   |
| 0              | 0              |
| 0.3724388961   | 2.4154910973   |

gene\_expression\_table

|               |               |
|---------------|---------------|
| 12.3852163264 | 18.8079466114 |
| 4.1495601713  | 0             |
| 35.6617481254 | 14.0266927907 |
| 26.0509076172 | 17.3118154411 |
| 0.0820301166  | 0.051903886   |
| 25.2549982176 | 27.3941035615 |
| 0             | 0             |
| 0             | 0             |
| 4.1725282165  | 5.4562751396  |
| 8.6701801302  | 4.8896828412  |
| 1.2067938633  | 0.9996073598  |
| 0             | 0.1070341654  |
| 0.0929473193  | 0.2352466269  |
| 5.6123102658  | 5.1109915192  |
| 0.7361716377  | 1.3197853325  |
| 0             | 0             |
| 0             | 0.1704992908  |
| 11.7121657287 | 8.5687110863  |
| 17.322369944  | 17.4926556402 |
| 0.0402423178  | 0.0254629977  |
| 11.0528443861 | 10.7214614251 |
| 0             | 0             |
| 0.3587493     | 0.3605225633  |
| 6.7769347821  | 7.9665244576  |
| 10.3209605819 | 6.0281570471  |
| 10.7519937817 | 7.6906148377  |
| 23.7691617696 | 15.5389874504 |
| 0.5716241103  | 1.00756635    |
| 0.8122022758  | 1.0012469288  |
| 29.2050832655 | 68.4467111964 |
| 2.9522361277  | 2.7470636541  |
| 0             | 0.0145798715  |
| 0             | 0             |
| 4.0588883534  | 6.0876525922  |
| 41.2928482267 | 21.197955246  |
| 0             | 0             |
| 7.9930041203  | 15.9506022804 |
| 0.4092779608  | 0.2589672852  |
| 66.1597694693 | 46.1112092948 |
| 0.008847      | 0.0111954467  |
| 1.6971158054  | 10.3804161885 |
| 12.3440438112 | 6.6619762534  |
| 69.6798466956 | 57.9805197885 |
| 0.0260352817  | 0.0658944469  |
| 89.5179718331 | 90.2205331094 |
| 0.1953685673  | 0.1977885831  |
| 1.8927991704  | 2.3953064151  |
| 17.5827668994 | 14.2606785667 |
| 6.0461782306  | 3.6662669563  |



gene\_expression\_table

|                |                |
|----------------|----------------|
| 13.1141130464  | 5.857304375    |
| 3.5865746844   | 0              |
| 28.5230711396  | 20.8243155919  |
| 0              | 0              |
| 17.0730586392  | 15.9368605168  |
| 1.0673529608   | 1.7395607098   |
| 0              | 0.1018268004   |
| 0              | 0.0669783758   |
| 7.2265058126   | 7.6959893479   |
| 0              | 0              |
| 1.0661206276   | 1.8848534097   |
| 0              | 0.0190457301   |
| 0              | 0.1463196001   |
| 0              | 0              |
| 0              | 0.2367166514   |
| 24.394391914   | 12.1277766801  |
| 26.8400130563  | 12.5136413176  |
| 113.3824654775 | 61.9182586188  |
| 1.2364468496   | 0.293381865    |
| 0              | 0              |
| 0.587126307    | 0.4953324972   |
| 1.8768410984   | 3.670627228    |
| 3.1305407778   | 5.678362406    |
| 69.4558464434  | 22.0426930458  |
| 0              | 0.4163139149   |
| 0.3594499894   | 0.6823171304   |
| 1.2457828943   | 1.504857988    |
| 0.5676924779   | 3.2328249869   |
| 0              | 0              |
| 9.2218314221   | 7.9063508323   |
| 0              | 0              |
| 7.1894558593   | 8.891363005    |
| 22.701579215   | 17.4307616126  |
| 42.368456206   | 23.1526179247  |
| 4.7651209138   | 4.174741826    |
| 13.5206265887  | 28.8733477047  |
| 4.5745476422   | 13.9462640762  |
| 1.033257245    | 0.8172313478   |
| 0              | 0              |
| 16.1035468104  | 9.7041787141   |
| 201.2133559013 | 151.0028241993 |
| 26.3040913553  | 38.4885536003  |
| 330.2797562563 | 139.62342641   |
| 0.8390744494   | 5.8400925123   |
| 0              | 0              |
| 1.8857417537   | 7.8750387196   |
| 4.088268167    | 0              |
| 0              | 2.5698220964   |
| 215.6323768082 | 326.6281915727 |

gene\_expression\_table

|                 |                 |
|-----------------|-----------------|
| 1652.6601646359 | 1171.3542048513 |
| 47.8785397284   | 36.7864879239   |
| 0               | 0               |
| 2.5602297871    | 5.8048727064    |
| 2.1084185376    | 2.9349861203    |
| 0               | 0               |
| 119.5440397346  | 78.2979787671   |
| 0.6831422526    | 0.3087519128    |
| 47.121981007    | 34.1095593837   |
| 3.3217718284    | 2.4771496903    |
| 1.3771775579    | 4.3569892288    |
| 21.9140984703   | 19.9101060741   |
| 7.9339256296    | 8.2684438249    |
| 20.3245619777   | 16.0752506298   |
| 3.3808499178    | 4.278410316     |
| 68.0570928575   | 98.004468196    |
| 0.6633892969    | 0.0839508313    |
| 247.1152035496  | 155.6047627522  |
| 0               | 0               |
| 21.0844391983   | 25.5048655696   |
| 0               | 0               |
| 7.6672390539    | 6.5388203717    |
| 40.188013955    | 22.4116804406   |
| 23.2194155024   | 40.8506360333   |
| 4.3117701411    | 5.1154449787    |
| 0.7958621692    | 0.503575284     |
| 49.3113694618   | 33.5048226211   |
| 0               | 0.740840843     |
| 0               | 0               |
| 14.6816174794   | 8.7618511282    |
| 109.164882446   | 72.9978002123   |
| 345.7972807619  | 86.502485155    |
| 0.5295430104    | 1.6753200625    |
| 0.0694530625    | 0.1318375732    |
| 3.4710597048    | 9.7264035098    |
| 13.3836492534   | 18.6304683335   |
| 4.947148034     | 5.4779681103    |
| 0               | 0.402725415     |
| 442.1218689543  | 313.0058737498  |
| 135.1854007221  | 39.0896983671   |
| 3.4341452603    | 6.5187820512    |
| 0.1761351038    | 0.557240238     |
| 7.8130964422    | 13.1831278053   |
| 11.5318354832   | 20.8835861146   |
| 10.3207650083   | 7.3868229621    |
| 0               | 0.4407659887    |
| 0.6824311623    | 0.323852056     |
| 16.6866086432   | 28.5465560731   |
| 140.088117862   | 84.1890873674   |

gene\_expression\_table

|                |                 |
|----------------|-----------------|
| 0              | 11.3042463316   |
| 268.3766189172 | 360.5048863913  |
| 26.6979332069  | 13.5143192539   |
| 128.2590689315 | 114.8044612259  |
| 1.7934174131   | 2.8369255318    |
| 1.1547658264   | 0               |
| 0              | 11.4284397812   |
| 17.7628203118  | 0               |
| 41.2472406148  | 10.0836483049   |
| 0              | 0               |
| 114.902460238  | 53.3773212665   |
| 0              | 25.6596856749   |
| 4.3592817126   | 0               |
| 84.0391990885  | 79.1326377867   |
| 37.128614153   | 88.2413509424   |
| 59.0845031597  | 37.3852365495   |
| 0              | 0.5549080273    |
| 11.1652013388  | 5.7802008336    |
| 68.9357439645  | 36.8428348932   |
| 23.3313007007  | 12.2319430272   |
| 59.9075574399  | 53.0684243873   |
| 92.6557393566  | 56.8324528785   |
| 0.3696383106   | 1.6371993431    |
| 9.235251198    | 10.7131378332   |
| 4.4257861481   | 2.3695523235    |
| 12.3876983337  | 5.2254765942    |
| 86.6192052911  | 133.2821043593  |
| 0              | 1.3436170494    |
| 441.6939292113 | 2252.9367059994 |
| 0              | 0               |
| 0              | 0               |
| 0.0176002206   | 0               |
| 5.7816170081   | 3.9791718733    |
| 3.864263828    | 4.0636563436    |
| 0              | 0               |
| 2.2820131994   | 1.5028609264    |
| 0.2599254945   | 0.3837533761    |
| 5.2110591743   | 4.2755615699    |
| 0.7679132225   | 0.6073635204    |
| 31.8827018657  | 16.4123544956   |
| 0.4740558429   | 0.9389894422    |
| 0.9614965731   | 1.9655324753    |
| 0.0367414155   | 0.007749        |
| 25.0841914664  | 14.137921175    |
| 4.932914776    | 10.1851691505   |
| 18.4314580091  | 41.870696908    |
| 8.3495652434   | 8.8051986284    |
| 4.9283925243   | 3.4684245967    |
| 10.2754298434  | 7.5853099758    |

gene\_expression\_table

|                 |                 |
|-----------------|-----------------|
| 5.3015627118    | 5.1842589279    |
| 7.835819754     | 8.122764268     |
| 1.2588376703    | 1.6187326672    |
| 28.4281795093   | 37.3822556352   |
| 274.308305536   | 192.8514874937  |
| 0.3422066632    | 0.4186217082    |
| 3.1995142177    | 1.6027026265    |
| 3.6330303852    | 3.0060842227    |
| 7.16465999      | 7.8105222734    |
| 4.8987939256    | 3.4440798052    |
| 2.1861932691    | 7.0893916207    |
| 103.0756392209  | 74.9546368259   |
| 0               | 0.2010831952    |
| 1.3667842186    | 1.3199907796    |
| 7.8705499211    | 3.6808888907    |
| 0.0206140792    | 0               |
| 0               | 2.3576065285    |
| 1.8050937416    | 2.6996469245    |
| 0.4956536164    | 0.8363220678    |
| 10.7920001513   | 10.5532134912   |
| 20.2446046721   | 14.0492476726   |
| 0.3806787454    | 1.1441389855    |
| 7.1400785688    | 15.7344987276   |
| 0               | 0               |
| 2485.271014222  | 2650.5923037202 |
| 44.8829200267   | 36.2335907704   |
| 1887.2329808742 | 1763.7905790237 |
| 104.8864727227  | 38.9539908631   |
| 17.2099951395   | 10.8894837885   |
| 4.2710583855    | 4.3588343409    |
| 0.3088260126    | 0.1302714239    |
| 23.8824540675   | 30.4387328366   |
| 4.7890631315    | 8.8152452694    |
| 601.7622881153  | 347.8190869043  |
| 6.1339235609    | 2.9108925061    |
| 0.6492336165    | 1.50625664      |
| 1.8596987312    | 1.5129117966    |
| 12.8057541783   | 11.2392793987   |
| 0.4545125416    | 0.747731651     |
| 0.9967722547    | 1.6453030403    |
| 0.1236453033    | 0.508531109     |
| 3.3320406236    | 3.1070000698    |
| 6.4390801852    | 4.8118597025    |
| 0               | 1.0705703317    |
| 16.8239399992   | 17.3109031426   |
| 0.2854892798    | 0.3612820177    |
| 48.7786872515   | 43.38896562     |
| 0               | 0.0647486091    |
| 3.980887389     | 1.8492998727    |

gene\_expression\_table

|               |               |
|---------------|---------------|
| 72.8283816799 | 78.5188649624 |
| 0.5756444018  | 0.2428228608  |
| 12.9599443745 | 18.5873441673 |
| 0.4053616715  | 0.9297736585  |
| 0.0730962972  | 0.1387532542  |
| 15.5593135487 | 22.7622644772 |
| 44.5328860418 | 39.2610954912 |
| 2.8959440232  | 3.5775134068  |
| 27.3881213402 | 9.4956766951  |
| 1.0073657712  | 1.5096374048  |
| 22.5697691075 | 27.385605009  |
| 71.6098142814 | 95.745454207  |
| 26.3656171606 | 8.6103890605  |
| 2.0995385736  | 1.0627727004  |
| 0             | 0.0866459883  |
| 5.8948498055  | 1.2218697038  |
| 1.6125307796  | 2.0406313471  |
| 6.6336556629  | 4.7220653385  |
| 46.2271019595 | 20.8326063293 |
| 18.2996268958 | 18.3333206819 |
| 5.8177793129  | 8.9784202895  |
| 0.6759060761  | 2.5660442778  |
| 1.2235671949  | 2.2365839711  |
| 0             | 0             |
| 9.9492759653  | 13.4899779941 |
| 0.5396977114  | 1.1098402789  |
| 1.1469949162  | 1.6934205405  |
| 5.2113971191  | 7.2426549949  |
| 5.7973847301  | 4.9783363178  |
| 10.861281189  | 10.044257801  |
| 0             | 0             |
| 10.7891056542 | 9.5794274836  |
| 47.2613117239 | 22.4281565886 |
| 2.379094382   | 3.3221573049  |
| 4.0865306965  | 11.0816524458 |
| 20.0434397284 | 18.8189304549 |
| 2.1886324335  | 2.9307063986  |
| 0             | 0.3803626598  |
| 0.4057963162  | 0.6633077828  |
| 0             | 1.8648772556  |
| 3.2716531536  | 1.6560894382  |
| 6.4866278229  | 8.0221596433  |
| 0             | 0.028413255   |
| 7.7715130356  | 5.9008336395  |
| 21.6084647    | 18.3820234956 |
| 4.7517609159  | 2.9333052578  |
| 0             | 0             |
| 0.1840135331  | 0.3659324724  |
| 10.1647876152 | 22.9128824411 |

gene\_expression\_table

|                |                |
|----------------|----------------|
| 0.6023642047   | 0.3811410281   |
| 0              | 0              |
| 2.5727341097   | 4.9576238381   |
| 2.1770819917   | 5.5101233586   |
| 0              | 0              |
| 0              | 0              |
| 0              | 0              |
| 2.4073668314   | 2.3771802134   |
| 8.9516541262   | 4.7926881517   |
| 0.0931452004   | 0.0757759685   |
| 1.0307159896   | 1.250006146    |
| 12.8864759603  | 10.9840612765  |
| 10.1902720228  | 6.9851289624   |
| 0              | 0              |
| 0              | 0              |
| 0              | 0.5835102537   |
| 0.6014444959   | 0.2634639853   |
| 25.3049165219  | 31.2782383265  |
| 0.8336709219   | 0.316499078    |
| 0              | 0              |
| 0              | 1.8044714631   |
| 32.944207984   | 9.3681638287   |
| 0.1482671528   | 0.1993565124   |
| 0.1912168311   | 0.261085599    |
| 1.7611558839   | 2.2287139876   |
| 13.4015424791  | 13.0728962545  |
| 46.9507951234  | 32.3948634759  |
| 2.1220590202   | 2.9295610997   |
| 0.5459497517   | 0.2763561952   |
| 6.7452521253   | 13.5153433453  |
| 12.223612559   | 11.0491299402  |
| 10.4165841825  | 7.9092102235   |
| 38.7276989971  | 43.8612375564  |
| 0              | 0              |
| 3.9157693518   | 3.5395300837   |
| 0.1431987738   | 0.5209951601   |
| 2.1590853889   | 3.1876684847   |
| 31.4229968991  | 20.6259209366  |
| 4.2225569685   | 2.3282727626   |
| 0.5882176337   | 0.5955038415   |
| 0              | 0.097490073    |
| 228.8045082115 | 179.8383608454 |
| 2.8004496436   | 5.6824976326   |
| 2.2086881406   | 0.6043370258   |
| 402.1280077091 | 283.0680719944 |
| 36.3665295345  | 36.9959705376  |
| 0              | 0.0268982135   |
| 5.8869362633   | 5.0794238372   |
| 0              | 0              |

gene\_expression\_table

|                |                |
|----------------|----------------|
| 0              | 0              |
| 17.3378140788  | 13.6569789968  |
| 3.6822907419   | 3.9608969394   |
| 0.5700943217   | 0.6763547313   |
| 1.3671985862   | 1.7301674659   |
| 0.367234149    | 0.1394186441   |
| 0              | 0              |
| 1.5554324717   | 1.3122495811   |
| 1.4980691829   | 3.3176186177   |
| 17.0992066313  | 8.7674312666   |
| 3.4712586034   | 2.9584304896   |
| 0.6372804937   | 3.1250636911   |
| 1.4158257395   | 1.8130341472   |
| 0.198206351    | 0.1003307591   |
| 165.3065060459 | 63.3917217299  |
| 0              | 0              |
| 0              | 0              |
| 0.7352130744   | 0.5316572169   |
| 37.4208791131  | 29.5971943302  |
| 2.7139086326   | 2.3416411498   |
| 1.1026837762   | 2.9071422854   |
| 3.518807159    | 1.2845171971   |
| 2.01744826     | 5.5316035683   |
| 2.3451936674   | 2.6710238316   |
| 0.9286586412   | 1.0446242959   |
| 0.5238349097   | 0.1988713551   |
| 2.3037647095   | 14.7226517704  |
| 2.3892271083   | 0.8398688492   |
| 7.6451625988   | 9.0151809343   |
| 0              | 0.2197712665   |
| 193.6273391434 | 145.6323649741 |
| 86.9215782483  | 112.1131796803 |
| 0.1083051357   | 0.171322974    |
| 2.9794770608   | 1.2065534481   |
| 33.9334433435  | 22.8513945567  |
| 5.7646520608   | 4.4933420456   |
| 0.261582729    | 1.6551433417   |
| 3.9593933549   | 6.8000288588   |
| 0              | 0              |
| 0              | 0              |
| 30.5234518121  | 29.2628253085  |
| 9.8824324037   | 16.5945752272  |
| 0.5937432973   | 1.5027448778   |
| 7.4241880585   | 8.8732337256   |
| 52.8131239479  | 45.1043907393  |
| 46.4905982589  | 87.1182327933  |
| 10.2090764632  | 8.8396027554   |
| 50.6058062548  | 30.4273551267  |
| 29.4977248005  | 32.2130319119  |

gene\_expression\_table

|                |                |
|----------------|----------------|
| 44.9844372344  | 49.7163079008  |
| 0.4837894131   | 0.6388461866   |
| 0.7750724904   | 1.3077887589   |
| 0.1261561368   | 0.7184183817   |
| 7.0121549196   | 9.8111372482   |
| 0              | 0              |
| 6.1437214652   | 4.9980722812   |
| 2.8017955665   | 2.5114854362   |
| 0              | 0              |
| 205.2060819469 | 47.9852611901  |
| 8.2916988176   | 2.6232523345   |
| 0              | 0              |
| 14.5995783385  | 5.3373746916   |
| 0              | 0              |
| 0.5566233618   | 0.5031412623   |
| 2.2880344227   | 1.3625741964   |
| 4.6169070813   | 5.8426204548   |
| 8.4629582941   | 7.9399762497   |
| 0              | 0              |
| 0.1932129362   | 0.8557773455   |
| 1.7965882974   | 4.2944892413   |
| 63.4351427002  | 43.5110150711  |
| 12.6675010007  | 6.2144729632   |
| 1.0415852845   | 2.0870061611   |
| 546.9114208593 | 195.3992604774 |
| 16.2960907083  | 13.987391683   |
| 1.3870664128   | 0              |
| 0.3231653929   | 0.1752687956   |
| 0              | 0              |
| 0.2055429942   | 0.5283510779   |
| 0              | 0.1022211974   |
| 13.9076131773  | 3.5028841953   |
| 8.2329551957   | 7.8453842203   |
| 0              | 0              |
| 0.9172517512   | 1.0317929778   |
| 1.91416024     | 0.8074461665   |
| 0.1459389106   | 0.2770249594   |
| 0              | 0              |
| 7.874169245    | 4.5293784035   |
| 0.2423559442   | 0.2628835598   |
| 0.5740158113   | 1.0169706788   |
| 1.789100233    | 2.7371678429   |
| 0.3481554578   | 0.8322161899   |
| 4.9545277272   | 3.0913961414   |
| 85.3623069176  | 56.4452887242  |
| 4.0595820366   | 1.013947642    |
| 187.2009051827 | 80.3519402754  |
| 12.1437088278  | 16.6435782005  |
| 1.0274181781   | 1.6658567944   |



gene\_expression\_table

|                |                |
|----------------|----------------|
| 2.2753709708   | 2.6336385146   |
| 6.3646873155   | 1.8305472219   |
| 2.3520264325   | 2.1526118911   |
| 8.7351548807   | 7.811631655    |
| 0              | 0.0258488645   |
| 0.3520755854   | 0.6683188488   |
| 4.2562277727   | 3.9604313857   |
| 5.0151237211   | 7.6484149717   |
| 419.5611265768 | 325.9964155736 |
| 12.2909331855  | 6.0179070207   |
| 0              | 0.0655882734   |
| 0.6702798045   | 1.4509165516   |
| 0              | 0              |
| 2.7032827361   | 2.651244094    |
| 0.9669055117   | 0.8303021188   |
| 82.1456673555  | 82.2969162612  |
| 72.3485658767  | 34.7912525206  |
| 140.5210279366 | 29.6378440406  |
| 18.4104899333  | 21.8861635655  |
| 6.2110285523   | 2.169675112    |
| 0.6881853963   | 2.2808954971   |
| 387.6689752583 | 628.3568265867 |
| 2.8991002103   | 2.0178201641   |
| 3.0106658396   | 0.8334262158   |
| 17.9580934676  | 15.7530238734  |
| 8.9452574701   | 14.0588054694  |
| 1.035941255    | 1.9664500909   |
| 245.242764783  | 342.236057689  |
| 0.0586342908   | 0.2597025783   |
| 0.8864852242   | 10.657409348   |
| 2.8417345118   | 3.3782189697   |
| 0.7168470211   | 1.3323885906   |
| 0.2457568842   | 0.1166254951   |
| 0              | 1.4059199248   |
| 154.330128105  | 63.0914691488  |
| 1.355517597    | 1.0959406499   |
| 6.7418095634   | 4.5939652863   |
| 0              | 0              |
| 31.6993127623  | 20.3595516096  |
| 8.8719288982   | 7.2838145473   |
| 0              | 0.1527436801   |
| 6.3408180721   | 3.7916557195   |
| 9.8528973397   | 7.1435148997   |
| 1.5930746335   | 0.7140035106   |
| 0              | 0.2056019781   |
| 3.4453106188   | 9.1741335881   |
| 0.2722284633   | 0.1531114094   |
| 2.8620692862   | 2.9427952981   |
| 0              | 0.3821278131   |

gene\_expression\_table

|                |                |
|----------------|----------------|
| 21.1830564354  | 19.2309736202  |
| 10.0107881527  | 15.9622958824  |
| 8.134266431    | 5.1468906129   |
| 2.0886843955   | 1.1691059081   |
| 0.1229945774   | 0.0778238137   |
| 4.3531418792   | 3.0987168201   |
| 0              | 0              |
| 4.7629227657   | 5.9339528408   |
| 24.7198271335  | 25.5247368977  |
| 227.6200733928 | 115.9223528189 |
| 2.1047844003   | 0.8266252528   |
| 0.4592979506   | 0.4843617083   |
| 5.9902526053   | 1.8193360248   |
| 5.9132531984   | 8.5521431762   |
| 0.3986039494   | 0.8126875954   |
| 12.0751322842  | 5.7303309583   |
| 4.3475236187   | 3.7434384087   |
| 4.5200282335   | 2.8891947131   |
| 0.098882025    | 0.1877003798   |
| 46.365711599   | 25.2495093284  |
| 0              | 1.1588945869   |
| 137.3782710253 | 53.9289661712  |
| 7.4615000675   | 9.9376374924   |
| 0              | 10.9935737279  |
| 36.7664754517  | 9.8994412319   |
| 90.6864064906  | 50.5203010189  |
| 12.8996322253  | 11.9086915102  |
| 14.2654367536  | 4.8644938197   |
| 8.2991203426   | 14.4408015903  |
| 27.5881125512  | 18.9835661408  |
| 0.85840964     | 0.1357879213   |
| 419.0256777334 | 490.2258988405 |
| 0.4972018072   | 0.5033606088   |
| 11.3307908938  | 7.0391114301   |
| 0              | 0.6764268634   |
| 467.0247822197 | 289.5635784078 |
| 54.3322243111  | 18.37459309    |
| 12.0145023683  | 1.9005195485   |
| 0              | 0              |
| 0              | 0              |
| 0              | 0              |
| 97.1556552448  | 31.9259558604  |
| 7.6493768946   | 3.3880565048   |
| 0.2220033569   | 1.2642372891   |
| 7.3702891004   | 11.6587255     |
| 2.0354415327   | 1.2879089967   |
| 169.5541938853 | 88.8924825166  |
| 3.3658059919   | 2.8529759021   |
| 1.2072380968   | 3.055480162    |

gene\_expression\_table

|                 |                |
|-----------------|----------------|
| 31.7085246611   | 20.6782772168  |
| 0               | 0              |
| 23.1391605773   | 41.8317564784  |
| 28.294958819    | 10.4089557982  |
| 10.3397738531   | 25.07922841    |
| 0               | 0              |
| 0               | 0              |
| 25.1464778674   | 11.3088069474  |
| 3.217142237     | 4.7731790113   |
| 4.0339713624    | 2.2765205322   |
| 1.2754567887    | 4.4891314106   |
| 8.8191720838    | 17.7255288036  |
| 8.8607441548    | 6.489789206    |
| 0.0320442369    | 0              |
| 0.0536951088    | 0.1359005653   |
| 0.0109245719    | 0.006912       |
| 2.9569786836    | 2.7972437509   |
| 0               | 1.0809836884   |
| 2.80720321      | 7.4996584301   |
| 0.2654845007    | 0.5879410191   |
| 0               | 0.0347304093   |
| 159.3542225094  | 79.7261114178  |
| 2.3161590052    | 2.8294899333   |
| 21.5045517896   | 91.3601403558  |
| 0.6853061495    | 3.2521639945   |
| 3.1383287198    | 1.9857518518   |
| 0.7570019293    | 3.6950409108   |
| 0               | 0              |
| 5.1755271848    | 4.5648344399   |
| 1.548785602     | 2.8310574741   |
| 0               | 0              |
| 0               | 0              |
| 7.7260457097    | 5.3558841972   |
| 0.1794703528    | 0.4769452765   |
| 0               | 0              |
| 16.3008699378   | 5.6999759782   |
| 0               | 0              |
| 49.0769225215   | 106.7094745014 |
| 65.2883538155   | 50.7711316736  |
| 1.5612848971    | 6.350723101    |
| 0.0144015485    | 0.0364498486   |
| 0.0779179089    | 0.007043       |
| 0.7998977223    | 0.243691619    |
| 58.2404535196   | 50.2316557589  |
| 0               | 6.7493860755   |
| 3.5590583211    | 3.3779476033   |
| 153.0715937257  | 128.6352813357 |
| 1.0867849976    | 0.3257309966   |
| 1513.3038449861 | 984.5795297278 |

gene\_expression\_table

|                 |                |
|-----------------|----------------|
| 0               | 0              |
| 15.6229017738   | 6.5901756204   |
| 7.7789566493    | 15.8600073676  |
| 2.1178091916    | 4.4220873172   |
| 3.3238351044    | 1.7928317055   |
| 104.928383706   | 82.1067968283  |
| 0.357128468     | 0.178397463    |
| 0.7235797573    | 0.3560971388   |
| 0.4409471323    | 0.8370170839   |
| 0.2938990647    | 0.2603471241   |
| 16.7494340648   | 11.6462280572  |
| 0.1611644236    | 0.1529632081   |
| 1.79641426      | 0              |
| 0               | 0.4384830976   |
| 0               | 0.0849371155   |
| 3.9587273927    | 4.7784876706   |
| 2378.9740692899 | 2456.0944842   |
| 5.0052319583    | 9.8736494036   |
| 9.6636737966    | 8.1311311509   |
| 1.7496644183    | 1.8234355388   |
| 7.3326945059    | 4.6397025276   |
| 16.2250301024   | 10.7882681869  |
| 228.0897075594  | 91.841208176   |
| 3.247930574     | 5.7542842823   |
| 0.5067394736    | 0.9619057829   |
| 44.8861309954   | 32.4586658152  |
| 6.8989525318    | 6.4194938792   |
| 22.3227870155   | 12.4789811372  |
| 67.4954846424   | 64.0608245252  |
| 15.4000285718   | 9.8602451171   |
| 125.5930479378  | 29.6198815035  |
| 11.6895021443   | 5.7280677193   |
| 26.4917426579   | 17.387120652   |
| 12.7105566617   | 12.465876333   |
| 124.4132029779  | 125.0915993286 |
| 1.8530023637    | 0.9770600861   |
| 4.9670240808    | 3.1428438977   |
| 24.7456423879   | 36.5344070124  |
| 0               | 0              |
| 4.9857806243    | 2.8679199521   |
| 35.7309911474   | 15.0723284421  |
| 30.3709689546   | 17.1726225895  |
| 0               | 0              |
| 3.008010447     | 1.6313948825   |
| 2.7283914095    | 1.2169474893   |
| 12.9138318781   | 9.7128426471   |
| 53.7311243515   | 25.6240555066  |
| 34.5140227164   | 32.9194651634  |
| 24.1683623166   | 13.5082281525  |

gene\_expression\_table

|                |                |
|----------------|----------------|
| 26.2288915757  | 16.1841564618  |
| 23.57390995    | 28.6229762298  |
| 6.8424412979   | 7.5044646151   |
| 32.5548248821  | 25.411603015   |
| 0.8308136781   | 1.3405109423   |
| 0.4628401384   | 1.3178624191   |
| 26.0189896601  | 29.2223629782  |
| 3.9726616121   | 6.7031177905   |
| 0              | 0.085153471    |
| 0.5917862945   | 0.4814330681   |
| 0              | 0.2897987797   |
| 0              | 0              |
| 3.487355103    | 4.4919978673   |
| 22.8134338961  | 13.8154853793  |
| 0.7725957665   | 3.3730902389   |
| 0.2340664724   | 0.4443109429   |
| 8.6332164591   | 7.5483160837   |
| 0.8869091973   | 1.2158998517   |
| 36.8357494826  | 34.7702339664  |
| 38.2292253977  | 21.0501695923  |
| 1.3608715815   | 1.1032592273   |
| 7.6911984897   | 6.5841464032   |
| 0.4754395653   | 0.9884430707   |
| 1.8939229461   | 1.7016772598   |
| 2.7323739507   | 1.5033802513   |
| 48.0183692425  | 50.6387179054  |
| 0              | 0.1366143636   |
| 4.5103037303   | 9.1323450503   |
| 0              | 0              |
| 43.4243868528  | 15.1120342599  |
| 3.5753133881   | 5.9788044428   |
| 11.0546313487  | 14.597692487   |
| 14.0513163337  | 15.7610621753  |
| 0.5177777974   | 0.6916415258   |
| 0.2989824169   | 0              |
| 0.5440373756   | 0.6196233665   |
| 3.71888406     | 7.487115679    |
| 2.8187238798   | 0.594508167    |
| 29.7106292211  | 36.2555187133  |
| 5.2552276034   | 6.6504046431   |
| 507.6908439962 | 473.2071544815 |
| 0              | 0              |
| 521.5340934698 | 191.1454764673 |
| 23.8465796797  | 18.377297439   |
| 18.3183096571  | 10.2714871621  |
| 0.0761887687   | 0.0241039104   |
| 3.111490208    | 3.0762031293   |
| 2.5846861167   | 3.5823902318   |
| 81.903884083   | 34.1947302189  |

gene\_expression\_table

|                 |                 |
|-----------------|-----------------|
| 3.1218574898    | 5.3062781321    |
| 0.1353861638    | 0.7709803994    |
| 4791.9526714467 | 2914.842182591  |
| 28.8942241535   | 23.6244092342   |
| 0               | 0.3110848032    |
| 0               | 0               |
| 0               | 0.1151660453    |
| 0               | 0               |
| 0               | 0               |
| 5.8257660837    | 4.5053627455    |
| 2.1162141282    | 0               |
| 0               | 0.2427550416    |
| 0               | 0               |
| 57.4536119494   | 33.2373060237   |
| 29.3929535969   | 29.0677398064   |
| 1.078911568     | 0.8616254577    |
| 0               | 0               |
| 0               | 0.1200045787    |
| 584.2019963714  | 470.3465361382  |
| 0.0260290693    | 0.1152877663    |
| 5.888999053     | 12.29651289     |
| 931.2101207931  | 1152.2438288526 |
| 6.0826451629    | 9.9257082643    |
| 39.6717017627   | 43.2525823304   |
| 3.5842667865    | 6.1399664061    |
| 0.2103002864    | 0.1995986815    |
| 3.8785350874    | 9.1152708476    |
| 2.6912516467    | 2.8864207762    |
| 2.2811083523    | 1.1546821354    |
| 0               | 0.3245193305    |
| 4.5824888823    | 6.6989196671    |
| 8.7011774337    | 10.3994646213   |
| 0.5358409733    | 1.0171469913    |
| 14.0641621281   | 9.1403120279    |
| 7.5017736268    | 4.3151690542    |
| 7.1765210408    | 2.6521983441    |
| 0               | 0               |
| 0               | 0.0544365933    |
| 6.1775784192    | 10.6989775656   |
| 0               | 0               |
| 42.240349591    | 17.083387975    |
| 3.5293747872    | 1.8710452626    |
| 9.9639366304    | 15.2163641583   |
| 19.3982744882   | 12.0425128781   |
| 18.0455883905   | 13.4999696033   |
| 2.4570350655    | 2.3320032891    |
| 0.0597352313    | 0.0755939589    |
| 0.8362065043    | 0.6349233988    |
| 34.4916830445   | 42.4264986639   |

gene\_expression\_table

|                |                |
|----------------|----------------|
| 0.2886352896   | 1.217544139    |
| 0.0591664713   | 0.149748405    |
| 0.0156287741   | 0              |
| 197.7910380825 | 161.9743173795 |
| 21.5103620465  | 28.6396962589  |
| 181.3556572062 | 143.9253719911 |
| 4.8826709862   | 6.924674511    |
| 16.0081384674  | 19.3772533575  |
| 2.4269577811   | 0              |
| 0.204955619    | 0.3458239815   |
| 0              | 0              |
| 0.0935805233   | 0.0888184671   |
| 1.4079933813   | 1.9224604503   |
| 3.1080017821   | 3.0618634907   |
| 0.1529860234   | 0.0968006561   |
| 1.1885140297   | 1.9337722458   |
| 1.2492487883   | 2.9359644311   |
| 2.4018734335   | 2.3687383998   |
| 0              | 0.2244746776   |
| 36.964433897   | 38.9815724726  |
| 0              | 0              |
| 0              | 0              |
| 0.1294736709   | 0.1638468144   |
| 0              | 0.0247237292   |
| 7.1489685212   | 5.7364439695   |
| 3.5435954135   | 4.2256488839   |
| 42.3885703842  | 21.6549672439  |
| 0.8442159118   | 1.2820097267   |
| 69.9869892231  | 66.817434381   |
| 0.1304634254   | 0.2311390657   |
| 0.7982903409   | 1.0102233795   |
| 52.9930218296  | 34.9363884059  |
| 52.6834881155  | 43.7602928181  |
| 53.5827913044  | 31.2901538459  |
| 9.2381460018   | 6.7648564408   |
| 0.0333673125   | 0.1794596014   |
| 2.4954356481   | 3.966213506    |
| 0              | 0.5281216893   |
| 0.1905736791   | 0.5081751679   |
| 14.9752767743  | 6.9750090588   |
| 21.9611776242  | 27.4055181468  |
| 313.2646425865 | 258.7039843311 |
| 6.0828715504   | 6.7980346511   |
| 8.6049197866   | 11.7555864629  |
| 0              | 0              |
| 4.8008687762   | 5.7716499244   |
| 12.193193681   | 14.504470084   |
| 0.9326491585   | 1.2323222203   |
| 0.0886644167   | 0.3366101106   |

gene\_expression\_table

|                 |                 |
|-----------------|-----------------|
| 110.949308409   | 116.5175309295  |
| 36.8442903094   | 30.5641005192   |
| 359.0890479628  | 159.5884402581  |
| 0               | 0               |
| 1.7825498265    | 1.0663723542    |
| 389.9668735351  | 475.0260989797  |
| 3.113625036     | 2.8392917379    |
| 2.1086950282    | 2.6858471408    |
| 20.4632032316   | 24.1528593953   |
| 0               | 0               |
| 18.2059675961   | 30.4932632334   |
| 11.1228441432   | 3.2943308988    |
| 1.8491946529    | 2.6744292695    |
| 100.09348586    | 42.4159034158   |
| 17.3611865761   | 11.1242014526   |
| 0               | 0               |
| 0.4448054593    | 1.1257880782    |
| 33.4275167515   | 28.7558377032   |
| 21.6007201469   | 24.7069584759   |
| 7.0749039183    | 10.2961515717   |
| 0               | 0               |
| 0.2972356631    | 0               |
| 10.3502165424   | 7.224706955     |
| 26.9898979864   | 24.0230880113   |
| 15.200470829    | 6.3719075778    |
| 0.8725419991    | 5.3631971061    |
| 2.3672911887    | 3.7006549705    |
| 77.9095130278   | 59.3642247775   |
| 0               | 0               |
| 11.5592508146   | 11.6446921145   |
| 7.6355580557    | 3.849971643     |
| 1.4173329567    | 1.008906577     |
| 143.7741338751  | 102.4741036256  |
| 2074.9897728596 | 2351.2791567529 |
| 3.0626793754    | 1.1451140689    |
| 89.9339689889   | 33.7214719753   |
| 2.3277956952    | 1.7183759879    |
| 1.5274889727    | 5.1345640027    |
| 36.3922150134   | 7.9625648267    |
| 0.1000912666    | 0.4591565001    |
| 160.5967930542  | 293.3451923049  |
| 1.3086810513    | 2.2623706762    |
| 1.2481077134    | 3.6854064632    |
| 5.6282700608    | 4.643859422     |
| 21.2655756089   | 26.1495995564   |
| 23.0945551766   | 16.3320547193   |
| 63.994535493    | 44.1731120561   |
| 0.0458293407    | 0.2029869856    |
| 0.2066055668    | 0.3735085259    |



gene\_expression\_table

|                  |                  |
|------------------|------------------|
| 92.8940019684    | 53.5183578802    |
| 0                | 0                |
| 0.0488028096     | 0.0617591579     |
| 0.6089837101     | 0.3853294661     |
| 0.1501520955     | 0                |
| 21.7007599386    | 15.3329260113    |
| 11911.6717146164 | 19250.7334074578 |
| 31.9267443134    | 27.9231520879    |
| 1.8902030724     | 1.3848543184     |
| 0                | 0.1719844003     |
| 0                | 0                |
| 0                | 1.4104829537     |
| 2.2123990532     | 1.7981689057     |
| 1.376959097      | 2.4685689132     |
| 0.6300969864     | 0.5315849588     |
| 0                | 0                |
| 222.4461376412   | 169.5491294338   |
| 5.3161159309     | 7.4749531404     |
| 0.5229957811     | 0.6618426134     |
| 22.8256999049    | 34.4495700882    |
| 11.4510249679    | 7.5242171839     |
| 0                | 0.2498096207     |
| 1.6547565979     | 3.9637704927     |
| 29.1731270144    | 19.9068269555    |
| 0.41454896       | 0.3857389218     |
| 0                | 0                |
| 0                | 0.1004108208     |
| 20.5459283247    | 10.2829990673    |
| 1.4162350761     | 2.944365277      |
| 9.7559234049     | 3.0864904057     |
| 5.4665115438     | 9.419957129      |
| 0                | 0                |
| 0.3768954008     | 0                |
| 0.1386309462     | 0                |
| 2.0040400287     | 2.2190699153     |
| 8.1270858119     | 11.0560463398    |
| 1.4109208865     | 1.7168243485     |
| 2.7277457152     | 14.0542360305    |
| 2.7373317644     | 3.4640486102     |
| 55.0006457899    | 10.311469384     |
| 39.77661508      | 21.837225892     |
| 0                | 0                |
| 146.3480167289   | 99.214833925     |
| 38.7774648614    | 20.3148553637    |
| 17.6669270297    | 35.1919005623    |
| 24.860384425     | 59.6822487301    |
| 337.076338467    | 357.8767595905   |
| 84.7864410596    | 62.0304164325    |
| 3.8096908245     | 7.0809927909     |

gene\_expression\_table

|                 |                 |
|-----------------|-----------------|
| 2.8674100896    | 1.4941543667    |
| 39.6478578155   | 31.9287284141   |
| 0               | 0               |
| 124.1489225341  | 129.7057988706  |
| 1.4793494001    | 5.1482543422    |
| 7.1938802101    | 9.1037378324    |
| 5.1487746062    | 2.3528880971    |
| 4.2983836691    | 2.1269973797    |
| 13.9812529681   | 13.1315584153   |
| 4375.4170362202 | 2137.1503383418 |
| 1.2849935492    | 5.2849495894    |
| 12.3068465233   | 10.5633115196   |
| 16.5304273411   | 15.5730226391   |
| 0.9189390954    | 0.7038619829    |
| 0.042620481     | 0.1887743277    |
| 32.6013432776   | 32.2983895796   |
| 5.3723809043    | 4.0791961384    |
| 0.4215104246    | 0.8773265679    |
| 47.0905326463   | 40.9172478537   |
| 10.2552519923   | 5.6663868657    |
| 71.7823689566   | 53.0375696803   |
| 1.0067652951    | 1.2617945939    |
| 3.4461998689    | 5.2898644355    |
| 0               | 0               |
| 7.9954593241    | 10.6854944895   |
| 1.3550388664    | 1.4289829494    |
| 32.0479220217   | 7.7425322944    |
| 0.0919313127    | 0.5816878689    |
| 7.5333565426    | 3.9000025567    |
| 125.5480533496  | 144.1767729044  |
| 18.8527688156   | 19.0368502878   |
| 0               | 0.2624132325    |
| 379.3297021847  | 276.8411978195  |
| 4.7789450009    | 2.3664822236    |
| 1.7508742299    | 0.9693699411    |
| 0               | 0.363219554     |
| 0.5913915913    | 0.5987171147    |
| 314.2864138599  | 200.2725300243  |
| 15.61977929     | 18.2589552508   |
| 0.0944260766    | 0.0597473284    |
| 0               | 0               |
| 19.3706772846   | 25.1243102454   |
| 1.6280928343    | 0.7082366751    |
| 13.1131321277   | 12.6641888786   |
| 0               | 2.3105788568    |
| 18.1785412626   | 21.0875929607   |
| 433.9846651436  | 333.5773220217  |
| 15.9190708409   | 13.8933268795   |
| 42.5649727144   | 39.7024242227   |

gene\_expression\_table

|                 |                 |
|-----------------|-----------------|
| 0.0319310157    | 0.0202040893    |
| 51.9640026617   | 13.4242962438   |
| 0.2152319453    | 0.5447450182    |
| 143.4396435563  | 89.376721721    |
| 326.1931486165  | 67.9440410452   |
| 0               | 0               |
| 2.706918224     | 2.8546339765    |
| 2.6833918512    | 15.2810483923   |
| 0.4451471328    | 2.1594179483    |
| 7.0790900922    | 6.27093097      |
| 2.052030304     | 1.7410436128    |
| 0               | 0.176844474     |
| 0               | 0               |
| 3.6996278116    | 14.0454555917   |
| 2454.6673077822 | 3953.5253673485 |
| 0.1216057103    | 0.307780078     |
| 6.0238952668    | 5.0073573291    |
| 6.486561523     | 7.0359750806    |
| 0.3727989038    | 0.6552373888    |
| 148.9662187054  | 70.8942723593   |
| 8.2412618528    | 7.658930666     |
| 3.5196415335    | 1.7662607458    |
| 3.7580253165    | 3.6184823186    |
| 0.3243805936    | 0.6567973436    |
| 0               | 0               |
| 0               | 0.0101392048    |
| 0               | 0.2627128715    |
| 1.9325119222    | 6.9290930515    |
| 0               | 0.5302157767    |
| 0.2364209236    | 0.2991868149    |
| 3.5352161845    | 3.0972172871    |
| 11.5460405669   | 7.0012601998    |
| 113.5841326397  | 105.558227875   |
| 76.6688810559   | 53.0960382742   |
| 10.1463247837   | 2.9058965897    |
| 0.0677086529    | 0.0428420968    |
| 0.5845058848    | 1.3067726717    |
| 0               | 0               |
| 1.2740338708    | 1.9941222352    |
| 3.6429907905    | 2.0855419242    |
| 0.5916048835    | 0.3349296655    |
| 68.6395721424   | 38.9893084199   |
| 35.7470922324   | 21.4436841039   |
| 0.1806177381    | 0.3428531934    |
| 32.1567303011   | 8.1952825181    |
| 0.298174785     | 0.1886676586    |
| 0               | 0               |
| 0               | 0               |
| 8.3606701407    | 17.9864954142   |

gene\_expression\_table

|                |                |
|----------------|----------------|
| 6.1700414794   | 5.7875730008   |
| 3.8856396992   | 2.5655027136   |
| 52.818717864   | 35.3243178591  |
| 2.7113224207   | 2.8344152176   |
| 1.0561485551   | 0.6682693677   |
| 0              | 0              |
| 0.6679772497   | 4.649228608    |
| 0              | 0.2160245907   |
| 0              | 24.3946105867  |
| 5.1576649716   | 9.7904110907   |
| 39.2041417657  | 48.1760580192  |
| 5.8144714144   | 4.4148711275   |
| 0              | 0              |
| 3.1401303458   | 2.9561073358   |
| 93.8349644247  | 144.0118508812 |
| 1.10528803     | 1.0490429532   |
| 235.685488544  | 293.1137866838 |
| 0              | 0              |
| 106.6582907224 | 62.1120781793  |
| 0              | 0.3435760041   |
| 14.0434771045  | 8.0281834688   |
| 36.4056279108  | 12.8049520978  |
| 3.1494362255   | 2.9094588514   |
| 34.0942920843  | 28.9392355809  |
| 11.4310224409  | 14.4657720756  |
| 9.4081552201   | 21.8914322616  |
| 17.1749986891  | 17.0309060806  |
| 112.2541428905 | 229.6568495042 |
| 49.451691748   | 56.8911888106  |
| 44.2859998967  | 28.1582952936  |
| 1.7875828423   | 2.4237395051   |
| 0.6128693418   | 0.1551152271   |
| 2.2885107467   | 1.497122456    |
| 0              | 0.3318759954   |
| 0.483505877    | 0.4079125234   |
| 3.0498960154   | 3.8902252563   |
| 0              | 0              |
| 0.1956398599   | 0.5415791615   |
| 10.3484287977  | 14.1870814731  |
| 1.1932870123   | 1.7576401642   |
| 0.7096410551   | 1.9363969328   |
| 1.0641180011   | 1.5279002384   |
| 4.7240821311   | 5.124213196    |
| 0.2995160165   | 0.1474015759   |
| 0              | 0              |
| 4.6521926881   | 5.5340373847   |
| 2.389480955    | 2.3872492863   |
| 0.1673605379   | 0              |
| 0.4885854896   | 0.7728711899   |

gene\_expression\_table

|                |                 |
|----------------|-----------------|
| 21.7377204246  | 21.1447700179   |
| 114.0560041073 | 48.5063637205   |
| 78.0929569099  | 67.3034783768   |
| 42.0269334969  | 21.9587095622   |
| 1.6576259001   | 4.7474228874    |
| 3.6634500999   | 5.7950452846    |
| 187.6548266663 | 50.5514207759   |
| 185.0736966618 | 52.9513147613   |
| 0.3378401633   | 0.4275312052    |
| 97.9740298415  | 100.5160325344  |
| 2.4539810737   | 3.0315331101    |
| 8.5442524124   | 4.3443529492    |
| 5.6764529001   | 3.839434647     |
| 0              | 0               |
| 0              | 0               |
| 5.6537479317   | 3.6927616028    |
| 79.5479975545  | 39.2845622672   |
| 18.2539801754  | 10.850053347    |
| 67.9960761535  | 71.3806634609   |
| 12.2117300883  | 9.566603951     |
| 0.9572382106   | 0.6460636324    |
| 4.6058128817   | 3.7885776022    |
| 4.943191898    | 6.2555285577    |
| 4.3626660092   | 2.2083530133    |
| 3.5617309361   | 4.1153720894    |
| 1.9908088465   | 1.2596680292    |
| 245.3466665334 | 197.5795796968  |
| 46.645498555   | 44.2718370517   |
| 14.0556213349  | 15.8813920364   |
| 122.7768939082 | 48.1525266423   |
| 11.8600565397  | 7.5043538579    |
| 60.4657630478  | 141.2648029158  |
| 113.3601348053 | 0               |
| 2.0468415459   | 3.2378056546    |
| 5.5663768289   | 12.0337714588   |
| 9.6520701047   | 5.234801558     |
| 63.990284353   | 70.1815044852   |
| 0              | 0.9089633351    |
| 35.1844124853  | 45.916714555    |
| 6.0248162461   | 5.1983907904    |
| 65.2588307525  | 14.9109970673   |
| 15.6939675494  | 10.7577488627   |
| 0              | 2.3228823083    |
| 0.7244918975   | 0.5500995933    |
| 0              | 0.4496228567    |
| 0              | 0               |
| 0              | 0               |
| 941.3727263002 | 1853.5833947558 |
| 99.6451865515  | 40.2817384112   |

gene\_expression\_table

|                 |                  |
|-----------------|------------------|
| 293.4609508404  | 106.9545706847   |
| 38.3204194764   | 23.5639201013    |
| 1.0793123138    | 0.1517613437     |
| 245.6209855034  | 107.3101302661   |
| 1.2238094374    | 4.6461325251     |
| 15.7857698685   | 20.7549441801    |
| 12.6402869477   | 2.7421845506     |
| 0.7902971921    | 0.2692598947     |
| 0               | 0                |
| 4.4942582869    | 2.2873280997     |
| 42.34233566     | 17.5872334715    |
| 1.6384945032    | 2.1344729567     |
| 0               | 8.1997258506     |
| 920.1225305451  | 514.0702235166   |
| 0               | 0                |
| 28.3168407957   | 37.1617029048    |
| 56.2040682253   | 28.0757880656    |
| 6.1486685695    | 5.8357796878     |
| 11.4259916238   | 10.2420790084    |
| 0               | 0                |
| 0               | 0                |
| 311.4547864984  | 155.337900687    |
| 0               | 0                |
| 268.8684459877  | 311.6295809851   |
| 6217.2182955077 | 10779.3222508566 |
| 11.0911389985   | 4.0937327475     |
| 4.8355630784    | 0                |
| 10.2995747878   | 24.9817251616    |
| 139.1717701208  | 48.2079198529    |
| 0               | 0                |
| 26.8492369568   | 28.1525956047    |
| 1.3596586557    | 1.6250354846     |
| 2.0958102921    | 2.735095349      |
| 8.5631113381    | 13.2834239671    |
| 80.165145194    | 28.5898010263    |
| 0               | 22.7339294785    |
| 268.7591942827  | 100.8184304816   |
| 16.1409030593   | 4.4681982236     |
| 0               | 0                |
| 36.8885168623   | 43.6808413662    |
| 96.5790214403   | 37.3305424388    |
| 2.2869949474    | 1.8691415954     |
| 18.1258257956   | 6.3196355124     |
| 33.1172466889   | 12.0892310861    |
| 11.9068307751   | 6.129315151      |
| 504.1819911213  | 260.6308982621   |
| 11.1740084391   | 6.0097231492     |
| 67.4832038046   | 19.9264080168    |
| 4.2645800985    | 2.6983782081     |

gene\_expression\_table

|                |                |
|----------------|----------------|
| 41.2299310369  | 12.2333099503  |
| 0              | 0.4808543436   |
| 157.0954104079 | 75.2167159756  |
| 177.573854866  | 214.0793289641 |
| 0              | 0              |
| 0              | 9.2552513742   |
| 0              | 0              |
| 1.499263029    | 1.1858080375   |
| 0.9428708768   | 1.8892138342   |
| 23.7292186891  | 24.3985124758  |
| 129.5995455116 | 64.4967835456  |
| 0              | 0              |
| 0              | 0              |
| 77.5666014387  | 18.8767820016  |
| 103.8277871134 | 114.9683217192 |
| 1.6594527432   | 3.1500154878   |
| 0              | 0.4216547252   |
| 92.0919295098  | 56.6812226841  |
| 363.3734004333 | 510.1655518346 |
| 3.1908434474   | 4.5427052622   |
| 0              | 0.2129740937   |
| 7.1097249296   | 7.3102580691   |
| 0              | 0              |
| 5.0892980969   | 6.0110619936   |
| 6.524461743    | 1.1795142433   |
| 7.7294618795   | 4.0015258698   |
| 2.6047770212   | 0.8240756873   |
| 6.8052786809   | 7.6550835097   |
| 1.1121737079   | 2.1111564757   |
| 3.992363184    | 2.3456969529   |
| 1.137160341    | 2.3384689677   |
| 7.861317014    | 2.9259906469   |
| 1.4225205562   | 1.0286722942   |
| 14.9455064519  | 14.7669181267  |
| 0.8302696689   | 0.5910146417   |
| 2.4221716509   | 1.6079835475   |
| 0.7593979654   | 0.6967291426   |
| 13.2892627208  | 5.1935917702   |
| 3.7332174589   | 3.6219830216   |
| 16.1178189702  | 11.6050966206  |
| 0              | 0              |
| 3.5650851148   | 2.3184389865   |
| 18.3621599271  | 14.3968451875  |
| 12.241353632   | 19.2304960812  |
| 14.3912176905  | 6.2534668355   |
| 5.0521876897   | 4.1696484461   |
| 3.0032850836   | 1.9003040945   |
| 13.295664972   | 14.2369164587  |
| 1.3278830254   | 3.2032896952   |

gene\_expression\_table

|                |               |
|----------------|---------------|
| 239.3264949088 | 87.3978301557 |
| 0.3264741454   | 1.6525907809  |
| 1.1630766204   | 4.2315815564  |
| 0              | 0.2791968899  |
| 0              | 0             |
| 31.9962106401  | 22.8576428578 |
| 15.8082909958  | 7.5240547823  |
| 26.9834622125  | 17.2924570741 |
| 0              | 0             |
| 14.9474777212  | 14.1868415711 |
| 0              | 0             |
| 0              | 0             |
| 21.9411484499  | 8.3876956068  |
| 0              | 0             |
| 0.7142620038   | 1.6571259692  |
| 0.337204346    | 0.7112109812  |
| 75.1088878311  | 80.7917095048 |
| 4.5588653237   | 3.8714164147  |
| 16.5392846211  | 21.9036917905 |
| 20.6568004628  | 13.6150225941 |
| 27.018019813   | 10.4778449607 |
| 2.0903431687   | 1.7635300776  |
| 5.2009619393   | 3.7396206432  |
| 0              | 0.0743554322  |
| 8.9695866734   | 6.5715536182  |
| 0              | 0             |
| 0.1640624104   | 0.6228548971  |
| 55.6099459163  | 53.7498215458 |
| 0.5721119398   | 0.9049978868  |
| 0              | 0             |
| 10.5007839216  | 4.4295234776  |
| 93.806560382   | 85.3232933672 |
| 0.2443088367   | 0.07729221    |
| 22.7997868187  | 26.426302441  |
| 24.2026085277  | 13.8555263138 |
| 1.550234071    | 2.4522448507  |
| 4.1056993449   | 5.0280923413  |
| 124.0557822028 | 95.5888109868 |
| 31.9675868671  | 32.2346284597 |
| 0.1137902994   | 0.1636360956  |
| 1.0725075246   | 0.868634076   |
| 0.0323033505   | 0.020439681   |
| 1.3433370674   | 0.6071325371  |
| 0.2211003877   | 0.4796553036  |
| 1.5248905348   | 1.2663814076  |
| 10.6910468488  | 7.7310543187  |
| 0.8385053538   | 1.2379672913  |
| 3.9642541323   | 8.4029705143  |
| 1.8378609349   | 1.162891488   |



gene\_expression\_table

|                 |                 |
|-----------------|-----------------|
| 7.0883158448    | 9.6820643498    |
| 14.2437801984   | 37.5526480155   |
| 30.8046252583   | 12.7662806389   |
| 0               | 0               |
| 0.1931054978    | 0.1221859257    |
| 1.9001172595    | 4.7289824299    |
| 5.5054117813    | 3.8130249942    |
| 0.0803319272    | 0.1270734263    |
| 21.8349997361   | 33.4311093813   |
| 0.9264301573    | 0.4244832187    |
| 0               | 0               |
| 1.0887327192    | 3.4444336559    |
| 0.7378626916    | 0.7003148827    |
| 0               | 1.6058938715    |
| 111.836815759   | 80.8409591374   |
| 0.0993229235    | 0               |
| 1217.8651727917 | 1789.2201792616 |
| 192.6304412877  | 163.2950997249  |
| 3.6102806257    | 3.4748248009    |
| 6.9226830301    | 4.3802711167    |
| 3.2115659013    | 1.5240690599    |
| 0               | 0.0778354291    |
| 0.2791515199    | 0.5298925291    |
| 35.0584036741   | 29.8322006549   |
| 5.4384812595    | 6.3529007538    |
| 1.2299390225    | 0.9124121184    |
| 29.1039046777   | 26.6363551109   |
| 0.1305832212    | 0.0550836441    |
| 0.9132353047    | 0.2889210881    |
| 0               | 0               |
| 0               | 0               |
| 42.7581877838   | 25.0508276947   |
| 0               | 0               |
| 4.2337166178    | 5.0600492312    |
| 1.1436561459    | 2.8041014374    |
| 2.5850193226    | 1.0330420119    |
| 6.3322169411    | 7.0887035426    |
| 1.6655635356    | 7.2014567298    |
| 0               | 0               |
| 0               | 0               |
| 16.619865532    | 9.8669431077    |
| 0               | 0.1453841293    |
| 54.5476548843   | 84.8803075205   |
| 0               | 0               |
| 2.0195574583    | 1.124515461     |
| 0               | 0.1202782795    |
| 0               | 0               |
| 3.3724420611    | 3.8884129497    |
| 6.2243769093    | 2.7983536284    |

gene\_expression\_table

|                |                |
|----------------|----------------|
| 7.5430985077   | 11.0457014047  |
| 5.1066467195   | 13.7750688156  |
| 0.8696484902   | 4.9523667806   |
| 2.0569177988   | 2.5264371554   |
| 2.0395060309   | 1.51297746     |
| 1.3375857519   | 2.5390393621   |
| 8.1624307509   | 17.3267735819  |
| 3.4960051288   | 3.4287064489   |
| 14.2996024243  | 10.9039476745  |
| 115.4131074547 | 127.1583807876 |
| 5.6642358204   | 3.8911988367   |
| 7.8265678528   | 2.8988469377   |
| 44.2446793623  | 45.5347832139  |
| 5.7212986998   | 8.1452362481   |
| 30.0927595005  | 31.3823026296  |
| 3.6063868028   | 2.2275805461   |
| 0.0784001708   | 0.2976424045   |
| 1.4776197154   | 1.7886034438   |
| 1.4867547088   | 3.9393148003   |
| 1.1268215775   | 1.0694807175   |
| 0.0138702595   | 0              |
| 0.6565894597   | 1.454080653    |
| 7.1947996187   | 10.3545936683  |
| 7.2565140207   | 5.2802249402   |
| 0.3717501485   | 1.1761093429   |
| 2.1454276352   | 2.2770998007   |
| 0              | 0.1868624656   |
| 0              | 0.0283444819   |
| 3.6347815872   | 3.5013073338   |
| 1.1383382843   | 0.6002285393   |
| 0.8258465556   | 0              |
| 58.7499526527  | 33.472289652   |
| 14.7005516405  | 17.2309326734  |
| 40.0464879959  | 74.2073292272  |
| 0.2258563144   | 0              |
| 0              | 14.9285085142  |
| 2.4480389172   | 3.5110136721   |
| 0              | 0.7613917132   |
| 71.7736359398  | 95.1742179478  |
| 0              | 0              |
| 0.3931143749   | 10.1983362385  |
| 0              | 3.2409212593   |
| 16.1179756402  | 12.6792378163  |
| 95.5041563172  | 101.2478742097 |
| 8.282540535    | 8.7817300031   |
| 1.4252850976   | 2.4048999958   |
| 1.7838857588   | 1.6931087046   |
| 0.811961312    | 26.7156180215  |
| 31.1690474202  | 24.020335957   |

gene\_expression\_table

|                |                |
|----------------|----------------|
| 8.0334898621   | 3.9100962019   |
| 46.6877754419  | 42.6707787844  |
| 0.2786073587   | 2.8205844725   |
| 4.3986383587   | 1.3916012384   |
| 44.5926324842  | 42.8099119782  |
| 242.4102536668 | 267.0002234487 |
| 48.137052252   | 32.5589006855  |
| 0              | 13.8180267229  |
| 120.2268901654 | 176.4676908811 |
| 37.820552525   | 90.2964474511  |
| 33.0187708467  | 30.7887372675  |
| 24.8556005344  | 18.1262391937  |
| 283.0740019971 | 132.9893036393 |
| 1.5206547278   | 0              |
| 210.3407146223 | 103.8610210737 |
| 0.670780019    | 2.6880603119   |
| 63.9072643206  | 64.2231517716  |
| 5.6560970678   | 19.1330784118  |
| 4.364668292    | 7.5946975354   |
| 4.6565850757   | 3.7321271286   |
| 23.5526972401  | 59.611106846   |
| 3.6515802671   | 2.5205537172   |
| 27.8296729249  | 24.8597620597  |
| 3.225222513    | 2.8570264651   |
| 10.4375439891  | 8.5855518657   |
| 0              | 0              |
| 193.3155683993 | 292.0306032293 |
| 63.1163902336  | 16.2241544351  |
| 0              | 3.191830611    |
| 3.1675436682   | 18.0381363447  |
| 15.5455135239  | 9.3891922548   |
| 12.0875943979  | 33.5676555381  |
| 721.006887362  | 349.9229751158 |
| 233.4320961236 | 230.0746606313 |
| 38.1776621309  | 34.6594749232  |
| 18.1736421065  | 14.5656831407  |
| 2.3239371186   | 1.8714846451   |
| 88.767723438   | 50.2099400812  |
| 7.5165970129   | 7.1340980041   |
| 7.0064737529   | 0              |
| 0              | 11.6061401505  |
| 11.9108768031  | 8.0748321046   |
| 3.86963247     | 2.098695706    |
| 226.6373756351 | 114.4761726068 |
| 378.6178015586 | 495.7712593612 |
| 4.159799104    | 6.5027831403   |
| 23.6413011823  | 51.8884767075  |
| 10.7410277472  | 11.8935206842  |
| 12.2056062344  | 9.4392192931   |

gene\_expression\_table

|                |                |
|----------------|----------------|
| 27.1613100044  | 12.889572712   |
| 3.2203498143   | 9.1694251307   |
| 24.4763450662  | 15.4872073257  |
| 29.0816274002  | 13.6304904364  |
| 13.1738463691  | 13.5840118519  |
| 15.7289095891  | 39.809356038   |
| 2.7145406434   | 0.3816896466   |
| 2.4696210422   | 3.9065813331   |
| 8.6400300072   | 7.5929283094   |
| 12.2356719487  | 20.903457884   |
| 6.562400834    | 7.3931293072   |
| 9.0555554531   | 8.815121097    |
| 3.779773167    | 3.7490268614   |
| 0              | 1.516583649    |
| 12.2528872049  | 11.401344487   |
| 31.6727316917  | 66.8022071859  |
| 7.2730854801   | 5.5781641255   |
| 6.2375998673   | 0              |
| 42.8175872147  | 46.9971564337  |
| 4.1277009361   | 4.6431449541   |
| 5.7118227122   | 8.0313536565   |
| 0              | 1.7746230629   |
| 120.4180805552 | 211.6487678967 |
| 22.4588255962  | 22.5698374075  |
| 21.1601375834  | 19.3711804581  |
| 0              | 0.3501897422   |
| 179.8986387968 | 88.4776355669  |
| 766.0990201088 | 266.6085920251 |
| 1.1866887058   | 0.9654011759   |
| 0.8873760362   | 1.8248097904   |
| 0              | 0              |
| 116.7493565721 | 11.4326025856  |
| 6.3880070291   | 10.1048981159  |
| 12.7592089564  | 34.1927373255  |
| 0              | 2.8903546704   |
| 1.5345912577   | 2.0229168291   |
| 2.2379369031   | 6.283661026    |
| 8.9367955978   | 6.8362602268   |
| 43.1163563107  | 34.4147641406  |
| 42.3920091565  | 45.1523822498  |
| 3.8214832543   | 2.6866803343   |
| 19.3672968982  | 17.423062987   |
| 23.5766524707  | 16.4097276067  |
| 4.054649477    | 1.5017832134   |
| 1.6113921609   | 1.3764535496   |
| 1.1571292262   | 1.2690843743   |
| 0              | 0.2354370865   |
| 2.3642135419   | 1.7808771415   |
| 5.0627371827   | 2.6695046507   |

gene\_expression\_table

|                 |                 |
|-----------------|-----------------|
| 1.988748112     | 1.4224985662    |
| 2.0807747096    | 1.9748897908    |
| 11.5250377267   | 3.5988336465    |
| 3.4511090451    | 1.9937774773    |
| 3.3493150306    | 1.9018925654    |
| 25.7090975874   | 18.4157223506   |
| 0.3675066271    | 0.1550245434    |
| 2.4637152126    | 14.030061011    |
| 1.4085412365    | 1.1883239428    |
| 2.9921946684    | 2.9378587111    |
| 1.3156292757    | 1.4783229024    |
| 3.1852257653    | 0               |
| 2.1602549297    | 3.6222416822    |
| 11.54636407     | 20.1641943306   |
| 0.5904200226    | 0.2988667556    |
| 0.7529094004    | 0.9623224865    |
| 206.4640168     | 222.9862676893  |
| 69.6832747347   | 97.1574260228   |
| 31.9698341845   | 24.9883339962   |
| 2.2185993355    | 3.930641679     |
| 5.0935178831    | 3.4243119311    |
| 34.4365436503   | 29.2674747948   |
| 1.7361759239    | 1.9529797835    |
| 83.4806176533   | 51.413100539    |
| 7.1280690366    | 6.6150002365    |
| 4.3536674729    | 5.2733738169    |
| 4742.2156115659 | 2828.5359029113 |
| 472.1949732884  | 540.5156784136  |
| 363.3482126967  | 307.4987565675  |
| 1063.5271797799 | 672.9381321094  |
| 218.3376662297  | 49.8250857418   |
| 22.2292773496   | 11.613315289    |
| 66.0502158269   | 37.4807855387   |
| 0               | 0               |
| 3.2887811341    | 1.4566645712    |
| 6.022642164     | 3.669637702     |
| 9.5164163887    | 8.1057774862    |
| 1.3687912906    | 1.4434858395    |
| 25.4231670267   | 27.1169077101   |
| 0               | 0               |
| 0               | 0.1956808701    |
| 15.3259375252   | 9.091276621     |
| 4.9091095339    | 9.3185968244    |
| 71.2408322056   | 52.1725166835   |
| 2.1291889875    | 5.9277985035    |
| 0.4731675956    | 1.3472681827    |
| 0.3796655558    | 0               |
| 0               | 0               |
| 0.8752718368    | 0.7384281363    |

gene\_expression\_table

|                |                |
|----------------|----------------|
| 9.7599001546   | 5.9938648005   |
| 0              | 0              |
| 0              | 0.1762289436   |
| 15.3920853299  | 11.6870594544  |
| 19.0855148864  | 4.0845982704   |
| 3.186917705    | 1.8331783046   |
| 47.3360444079  | 28.2187641481  |
| 18.6012643046  | 20.0378378894  |
| 0.2842900852   | 0.1798822283   |
| 1.232103143    | 1.8190741223   |
| 21.1278226325  | 10.8085397984  |
| 0.7165665645   | 0.4534016381   |
| 66.0334162807  | 62.6731568129  |
| 4.1606693469   | 4.4114332652   |
| 2.8284688198   | 0.9942725179   |
| 29.7414864794  | 22.4100341571  |
| 0              | 0.0575254329   |
| 1.7490577133   | 1.0144768106   |
| 100.8850542036 | 55.2849712759  |
| 5.8201284913   | 4.2964118658   |
| 0.7002108596   | 0.4430526994   |
| 1.6938948508   | 1.4290641663   |
| 79.5104634249  | 33.4055717381  |
| 11.3894266778  | 10.999496479   |
| 0              | 0              |
| 31.8972211008  | 28.2557883928  |
| 29.4492792988  | 29.9602126969  |
| 1.602245067    | 0              |
| 182.6518796096 | 204.7266292152 |
| 10.4445983698  | 20.5605066104  |
| 3.9954864419   | 4.4944202594   |
| 0              | 0              |
| 9.2835387501   | 4.1336141609   |
| 0.6395056351   | 1.1127654029   |
| 4.2660189569   | 10.7971545362  |
| 16.1959689131  | 14.3470137721  |
| 0              | 0              |
| 4.7177725384   | 14.1793771005  |
| 0              | 5.6015313007   |
| 0              | 0              |
| 118.9798624379 | 39.3790802028  |
| 0              | 0.7982182104   |
| 0              | 0              |
| 0              | 0.2349251745   |
| 225.3509257091 | 122.7347981956 |
| 71.2432693789  | 41.6276034814  |
| 0.2508404605   | 0.4761517547   |
| 10.0545987417  | 13.7284511994  |
| 0              | 0              |

| gene_expression_table |                |
|-----------------------|----------------|
| 0                     | 0              |
| 0                     | 0              |
| 3.4362929434          | 1.0871431397   |
| 0                     | 0              |
| 7.2217352344          | 8.70379801     |
| 0                     | 0              |
| 8.0509793935          | 3.1583986807   |
| 0                     | 1.2450323829   |
| 24.3217309596         | 27.2273584464  |
| 6.7520059732          | 4.2722766037   |
| 21.2646200292         | 15.5250167931  |
| 0                     | 2.1039640832   |
| 3.1708286225          | 3.1403205385   |
| 2.8101922046          | 2.0588829142   |
| 45.7225704081         | 74.6008738649  |
| 3.8429974936          | 2.43162526     |
| 435.914302922         | 232.2704951442 |
| 20.0976452761         | 15.1388343038  |
| 40.8798356775         | 39.4802672089  |
| 0                     | 15.739514007   |
| 8.9987490821          | 2.2560676201   |
| 10.7223963027         | 18.6573987589  |
| 221.3244417956        | 212.5331637592 |
| 0                     | 4.624342907    |
| 1.4705510809          | 1.0855590427   |
| 0.4666662742          | 3.8386305299   |
| 183.4897968677        | 51.2656722609  |
| 1.6445888973          | 1.3874669141   |
| 17.9995854956         | 7.9913905641   |
| 35.3823734375         | 34.5994936503  |
| 7.4717073543          | 7.4647291127   |
| 3.4166102763          | 2.9853873688   |
| 18.5127336029         | 13.6031004064  |
| 3.099836504           | 2.5334701133   |
| 0.0683964003          | 0.1731090534   |
| 1.4514220734          | 3.1224765513   |
| 0.14939366            | 0.0945276175   |
| 0                     | 0.079616281    |
| 0.2302353673          | 0.4370386417   |
| 55.9131890204         | 46.0813872578  |
| 0                     | 0              |
| 14.7585594489         | 4.9375225614   |
| 0.3549475028          | 1.860889664    |
| 41.1795749366         | 24.6243890075  |
| 215.9599196591        | 102.9802531636 |
| 5.056180425           | 0.7109459658   |
| 156.2536093427        | 39.1126923073  |
| 1.4435921225          | 0.4567105594   |
| 13.4008821745         | 8.9931955772   |

gene\_expression\_table

|                |                |
|----------------|----------------|
| 6.5271011426   | 6.3826807701   |
| 1.1586201794   | 1.8045721859   |
| 21.1203513228  | 17.8938075763  |
| 53.7313463522  | 46.8219038677  |
| 2.5144974713   | 1.1551297196   |
| 3.0904216921   | 3.7544430172   |
| 0              | 0.282892321    |
| 3.0492607875   | 9.2610952582   |
| 269.0753815701 | 126.5410633472 |
| 5.6625091586   | 6.5335351952   |
| 2.5842798843   | 1.8933686069   |
| 18.3895859918  | 10.0156771866  |
| 2.1760601274   | 2.0981093537   |
| 0.9563644262   | 2.1179612141   |
| 0.7190086852   | 1.273851236    |
| 12.1607786727  | 9.9449506247   |
| 0              | 0.0484139876   |
| 0              | 0.1564257411   |
| 1.0870319383   | 0.1375621152   |
| 0.0432634091   | 0.0364994247   |
| 16.4755287268  | 15.3889257714  |
| 2.1088501189   | 0.8006146078   |
| 0              | 0              |
| 0              | 0              |
| 0.9297994136   | 0.3922153206   |
| 5.3265834269   | 6.154556074    |
| 3.8147077739   | 4.4826324605   |
| 2.0958053576   | 2.6522074271   |
| 16.2077401056  | 18.6754685614  |
| 0              | 0              |
| 7.189265823    | 5.9963421279   |
| 1.4818910345   | 1.562757404    |
| 0.9561425319   | 0              |
| 0              | 0              |
| 16.6997088717  | 12.3954396859  |
| 0              | 0.2050898868   |
| 0.0708436361   | 0.2241286591   |
| 1.076007523    | 2.2268977056   |
| 109.153408315  | 57.1438325701  |
| 0              | 0              |
| 0              | 0              |
| 6.1149708362   | 5.2405590815   |
| 8.0160499954   | 4.2124138362   |
| 3.7932126422   | 4.2668876482   |
| 0              | 0              |
| 1.2188188633   | 1.6475586711   |
| 1.3800615899   | 3.0038860655   |
| 0              | 1.5922121843   |
| 1.0762065669   | 0.7660810245   |



gene\_expression\_table

|                |                |
|----------------|----------------|
| 4.1562582923   | 2.6857924805   |
| 18.2327188674  | 12.9786793535  |
| 0              | 1.1779157448   |
| 4.7628211645   | 2.1525972651   |
| 92.2046112724  | 74.6231229521  |
| 3.2724696751   | 1.7748243815   |
| 62.2357120401  | 64.8482325873  |
| 117.1841036683 | 65.6848222346  |
| 0.4100915798   | 0.6555337161   |
| 8.4988012858   | 1.3443867658   |
| 29.4830492701  | 32.7182779794  |
| 0              | 0              |
| 1.5631066273   | 3.1649374244   |
| 0              | 0.0408393814   |
| 0.4164451183   | 0.3829565968   |
| 0              | 0              |
| 0.9549193415   | 0.4531630575   |
| 8.5065076054   | 6.5089768617   |
| 11.1503250841  | 2.939698783    |
| 28.5033459049  | 15.9935317422  |
| 1.0401685194   | 0.493618598    |
| 53.5506745833  | 39.0340820033  |
| 0              | 0              |
| 0              | 0              |
| 0.5683405684   | 0.7791611756   |
| 2.596931219    | 1.3350894434   |
| 3.9089902219   | 2.9424712371   |
| 0              | 0              |
| 47.9096184161  | 23.5778818695  |
| 344.2225602068 | 243.1122247337 |
| 7.2475805704   | 8.0252329157   |
| 0              | 0              |
| 4.2432425609   | 1.1932786914   |
| 0              | 0.1145488133   |
| 6.8483975562   | 5.7570555127   |
| 6.4342748512   | 5.2586783256   |
| 0              | 0              |
| 30.1567396013  | 27.9860981384  |
| 0              | 0              |
| 0.175879516    | 3.2273034681   |
| 0.1271186359   | 0.1608665562   |
| 1.959051807    | 1.1018435751   |
| 91.3661473031  | 36.3554862688  |
| 18.0518274007  | 17.7451201019  |
| 11.5167149174  | 10.221512857   |
| 34.1636321871  | 14.1663227041  |
| 0.557541397    | 0.41157639     |
| 0.6709763877   | 0.6098151141   |
| 58.4858411115  | 36.6605834696  |

gene\_expression\_table

|                 |                 |
|-----------------|-----------------|
| 6.6685493383    | 11.2219949467   |
| 24.8768630663   | 15.3702640098   |
| 772.1631980959  | 903.0051457801  |
| 7.1205878941    | 24.36304056     |
| 6.2787825988    | 18.871029808    |
| 5.6733285625    | 5.7748188961    |
| 0               | 2.4522064143    |
| 2.1136092007    | 5.0820020094    |
| 3.7969081977    | 0.8408619221    |
| 54.0509349392   | 47.569490644    |
| 1.4258933298    | 0.6766667643    |
| 4.1800639234    | 2.806834021     |
| 5.6554999712    | 0               |
| 8.1421550322    | 3.8639115456    |
| 0               | 0               |
| 1.0133306077    | 1.3739499885    |
| 0               | 1.8132912521    |
| 1.549918252     | 0.4903490542    |
| 0.074131576     | 0.0938122979    |
| 3.9146043984    | 2.7309784509    |
| 21.4083452603   | 16.5561678571   |
| 31.9569271034   | 16.3855650098   |
| 16.1689541426   | 4.8929786805    |
| 36.1161242242   | 23.2461856163   |
| 16.6242800587   | 5.6977252353    |
| 3.0074508812    | 3.0782852438    |
| 82.3292623975   | 151.2842687311  |
| 225.600783522   | 271.2193992113  |
| 7.4342807402    | 3.1661406452    |
| 147.8871338653  | 87.2895293415   |
| 0               | 0               |
| 2.778347803     | 0.6114702151    |
| 0               | 0.6810498399    |
| 2.315223478     | 2.4024995275    |
| 0               | 0.1647682716    |
| 0.9556399525    | 1.2093467413    |
| 5.7394155635    | 3.8596378032    |
| 1.5539118825    | 0.9832250454    |
| 5.6320260393    | 7.7607690749    |
| 2133.9210091332 | 3190.8556367999 |
| 4.8924458757    | 1.4567788931    |
| 6.7872810372    | 3.4633843647    |
| 39.3428846741   | 16.1078103849   |
| 5.8338606073    | 8.9207084303    |
| 29.1548474881   | 17.2443942296   |
| 2.193174195     | 2.0815695746    |
| 5.7754060005    | 1.1244126005    |
| 17.3593020529   | 9.022535711     |
| 1.0939533367    | 1.6810329403    |

gene\_expression\_table

|                |                |
|----------------|----------------|
| 0.6888317666   | 0.5811368952   |
| 0              | 0              |
| 45.9497029959  | 32.9025875714  |
| 5.9839898049   | 8.8347481817   |
| 10.9685951247  | 3.3313386875   |
| 15.0035472536  | 9.2913852827   |
| 16.1712530242  | 10.2322282034  |
| 2.0244519121   | 0.2561910808   |
| 0.7317359589   | 0.9259998968   |
| 0.0355530205   | 0.2024629489   |
| 0              | 0              |
| 458.193186161  | 229.5730724059 |
| 1.3191019143   | 1.3657924749   |
| 25.5015679886  | 14.6348939843  |
| 82.6829007979  | 42.1313328594  |
| 17.4518957326  | 9.3436914255   |
| 9.7145057947   | 8.8359878506   |
| 1.2674369886   | 2.1891351386   |
| 29.3714264985  | 18.5845301005  |
| 2.2682156266   | 2.0749805818   |
| 0              | 0              |
| 112.0463169236 | 76.9852226641  |
| 6.9046827229   | 4.0328137564   |
| 1.5170826127   | 1.782711591    |
| 2.2161733328   | 1.0516991747   |
| 21.5112873447  | 7.3290491519   |
| 7.2231162138   | 2.2529981909   |
| 3.1083446875   | 3.9335594007   |
| 1.5653232384   | 2.971336463    |
| 25.0838776237  | 26.9474963056  |
| 0              | 0              |
| 7.8398750337   | 2.1259786551   |
| 0              | 0.752118947    |
| 2.0865899878   | 1.5532620749   |
| 23.3661660086  | 11.9177457301  |
| 0.4772329052   | 0.1294136661   |
| 0              | 0.2941909914   |
| 345.5475355064 | 170.0551839449 |
| 0              | 0.852314062    |
| 1.1653670422   | 0.9778253226   |
| 0              | 2.6454306599   |
| 32.4641763199  | 20.8986847511  |
| 23.5372164436  | 3.723245341    |
| 4.824499918    | 3.9505049274   |
| 8.4101516578   | 4.8587195413   |
| 2.063539475    | 2.284953545    |
| 8.4285358955   | 5.9256524576   |
| 74.1842058653  | 27.0736902882  |
| 0.4383331302   | 0.8459227038   |

| gene_expression_table |                |
|-----------------------|----------------|
| 0                     | 0              |
| 0                     | 0              |
| 0                     | 0              |
| 0.7029820166          | 0.8896122528   |
| 2.4231522809          | 2.3695369703   |
| 0.4628054856          | 0.7320909727   |
| 28.8404112061         | 25.007251      |
| 1116.1878681246       | 508.0106814995 |
| 3.4670376689          | 5.0624763535   |
| 4.4380150096          | 7.5468164018   |
| 6.6300981071          | 0              |
| 12.6746248215         | 10.4950014798  |
| 3.0391544947          | 2.488588457    |
| 12.9319277584         | 29.2234700443  |
| 11.5723487931         | 5.4917318492   |
| 0.8921402651          | 0.8467416935   |
| 3.3905856529          | 9.1178028005   |
| 5.7112930831          | 3.9246363089   |
| 11.9242623087         | 4.2540842051   |
| 2.9608518299          | 3.5307417385   |
| 6.0160208939          | 1.3323058207   |
| 23.989663088          | 9.0126875731   |
| 0                     | 1.0657409348   |
| 0                     | 0              |
| 5.8149331044          | 7.1213252972   |
| 120.742637933         | 38.3771306368  |
| 56.1185789242         | 19.5297147245  |
| 3.8634134178          | 0.6111358173   |
| 5.3751838857          | 3.4011036789   |
| 0                     | 0              |
| 426.9399234601        | 233.6817633615 |
| 0                     | 1.2060651344   |
| 1.1354631647          | 1.1974250645   |
| 0.2865236613          | 0.2417273404   |
| 1.7049955781          | 0.5394110096   |
| 0                     | 1.4191833203   |
| 97.6662773167         | 79.8218210353  |
| 33.1826919321         | 35.9932751294  |
| 832.2235126248        | 445.832375239  |
| 0                     | 4.4278519593   |
| 91.8749498338         | 80.8413751823  |
| 3.6529861924          | 7.1268079157   |
| 1.2610080515          | 3.9894626996   |
| 25.779771657          | 7.8348687467   |
| 2.8508440832          | 3.7955974587   |
| 10.9791907367         | 6.3867518306   |
| 44.8132856835         | 52.0333275837  |
| 212.4180231605        | 128.8822435986 |
| 8.7839162578          | 4.7242585472   |

gene\_expression\_table

|                |                |
|----------------|----------------|
| 6.6023620491   | 6.527485365    |
| 33.4057814105  | 30.8251346714  |
| 0              | 7.4595090224   |
| 0              | 0.2352954515   |
| 21.9427710759  | 19.0906499947  |
| 0              | 0.0371458211   |
| 0.1969339557   | 1.2460835117   |
| 354.9245733289 | 225.6501479268 |
| 13.8304013073  | 6.4481593535   |
| 0              | 2.5072238659   |
| 0              | 0              |
| 2.1886444477   | 1.3848468892   |
| 481.7860851691 | 482.2112750217 |
| 126.3785163933 | 95.3968105057  |
| 0              | 0              |
| 0              | 0              |
| 0              | 0              |
| 0              | 0              |
| 9.0177482383   | 16.8583601338  |
| 42.5103576368  | 67.7255264071  |
| 9.3994200672   | 25.0640691445  |
| 93.8467023573  | 30.5636131002  |
| 576.4458115469 | 485.02842643   |
| 241.2205456945 | 186.8082862176 |
| 39.9663457015  | 17.3547696597  |
| 7.5131710343   | 1.188474394    |
| 0              | 0.6194598085   |
| 599.4829969454 | 178.9235695669 |
| 57.6413788559  | 55.4376093875  |
| 2.7095827594   | 0.8572331745   |
| 16.5434536826  | 15.7016026926  |
| 2.0227295381   | 2.5597311719   |
| 0              | 0              |
| 50.7370298372  | 42.0402203811  |
| 320.2829776426 | 560.6828085505 |
| 1.2902236419   | 3.8097661748   |
| 0              | 0              |
| 1.046640953    | 2.6490140405   |
| 4.9345106318   | 3.4344984065   |
| 3.7261662927   | 6.4443834777   |
| 35.7723464612  | 16.9436596966  |
| 0              | 0.8856038109   |
| 33.544258798   | 34.195600751   |
| 0              | 3.5279036958   |
| 743.6197100659 | 284.2979380535 |
| 9.4193698568   | 17.8800879119  |
| 0              | 0              |
| 121.8422102859 | 56.536086121   |
| 0              | 3.9289495035   |

gene\_expression\_table

|                |                 |
|----------------|-----------------|
| 8.0963877608   | 9.2543128664    |
| 0              | 0               |
| 150.309093459  | 356.6506897324  |
| 4.1965115197   | 3.2680718414    |
| 1.4184170419   | 2.6924753768    |
| 0              | 0               |
| 6.3042441279   | 2.6593059701    |
| 51.9757366102  | 47.5641649267   |
| 21.3089948704  | 4.1035498524    |
| 22.9646350191  | 32.9734778328   |
| 0.8158191195   | 0.5162028812    |
| 44.8202644242  | 63.8092261207   |
| 3.1139120797   | 8.975822146     |
| 0              | 0               |
| 0.4102376871   | 0.7787236323    |
| 0              | 3.5929351743    |
| 8.5336440956   | 12.5172396315   |
| 53.2745438654  | 27.580117323    |
| 50.6232585897  | 81.222613449    |
| 35.5256406236  | 77.653203118    |
| 171.9916407268 | 249.3936160702  |
| 1.8590861559   | 1.3443675122    |
| 20.3749259686  | 12.1553783128   |
| 214.3130760664 | 299.1283402157  |
| 3.1172271652   | 1.4793000116    |
| 0.6979970041   | 0.4416519005    |
| 1368.505687985 | 3073.3350689491 |
| 8.0424511557   | 8.0572591423    |
| 0.1573241235   | 0.2737502722    |
| 0              | 0               |
| 0              | 0.465301855     |
| 4.7003520504   | 2.0728640922    |
| 0.2500827263   | 0.2109837353    |
| 0.5317582249   | 0.985363752     |
| 0              | 0               |
| 0              | 0               |
| 0              | 0               |
| 2.2326362951   | 1.4534328242    |
| 0              | 0.1475839269    |
| 1.5715989809   | 1.6063649739    |
| 24.6577765191  | 18.0192188842   |
| 3.10203099     | 4.7667629882    |
| 0              | 2.6419255949    |
| 0              | 0               |
| 0.0166285434   | 0.010521575     |
| 0.3084715539   | 1.6590542672    |
| 1.6582521376   | 2.1620816142    |
| 0.0305811593   | 0.0193499786    |
| 12.3848885885  | 6.9492932312    |

gene\_expression\_table

|                 |                 |
|-----------------|-----------------|
| 1.4202298065    | 0.7582264911    |
| 0               | 0               |
| 0               | 0.2885321159    |
| 3.7146852981    | 2.8490142628    |
| 19.2341924907   | 14.5674541147   |
| 0.1284699781    | 0.3251533154    |
| 11.7574160124   | 8.6229512284    |
| 16.6453391408   | 14.9489323245   |
| 1.7221046346    | 3.4575357646    |
| 0.8725299608    | 1.1041724052    |
| 55.246988045    | 43.874702725    |
| 3301.2106050426 | 3510.7296269703 |
| 4.0322644935    | 2.5513824075    |
| 0.9853486311    | 11.5342189441   |
| 0               | 0               |
| 1.3707136082    | 1.7346156689    |
| 2.5102632269    | 0.9373860257    |
| 52.0617192743   | 39.5299529215   |
| 11.6500232676   | 5.4315999104    |
| 27.2711535375   | 10.6014794605   |
| 1.9535974662    | 4.2381354254    |
| 15.9914617602   | 9.1548032503    |
| 1.291646523     | 1.2259181736    |
| 2.6136654989    | 1.2328144533    |
| 6.0203567226    | 12.9517271655   |
| 0.3834564313    | 0.4246006159    |
| 0.2802367154    | 0.7979287124    |
| 4.3583777099    | 3.0821664545    |
| 1.0617783965    | 1.612395849     |
| 4.3014295223    | 4.8601685356    |
| 0               | 0.0546862396    |
| 29.5001948728   | 16.7401493475   |
| 14.1048749994   | 5.6793827963    |
| 11.3968230167   | 11.6489368665   |
| 3.5275602826    | 6.6961048272    |
| 4.1088304357    | 2.5998288818    |
| 25.1573919044   | 20.2037856483   |
| 3.982008004     | 2.3004888485    |
| 1.0211103136    | 0.2153664022    |
| 3.1126489708    | 3.1183800673    |
| 5.1887825138    | 2.0519748338    |
| 0               | 0               |
| 3.6051915715    | 6.6913894845    |
| 0               | 0               |
| 3.7918525057    | 5.737369686     |
| 1.8202183358    | 0.7329179948    |
| 0.4027404286    | 0.1274153576    |
| 0.2887049399    | 0.8220406118    |
| 1.0613773126    | 0.6715778212    |

gene\_expression\_table

|                 |                 |
|-----------------|-----------------|
| 1.6361729668    | 8.2822005945    |
| 0               | 0.3869478859    |
| 0               | 0               |
| 0               | 0               |
| 1.1789450386    | 2.6108874369    |
| 0.4789881225    | 0.3788447755    |
| 0               | 0               |
| 5.2032503944    | 0               |
| 286.9197460909  | 143.878391342   |
| 0.2821490047    | 0.0892637385    |
| 2.5228983896    | 2.5655517956    |
| 37.1348159828   | 27.0212640595   |
| 0               | 1.3583625862    |
| 41.4320615021   | 15.4737151191   |
| 0.684977077     | 0.433413648     |
| 2870.1062252469 | 2495.1633934958 |
| 22.4470010364   | 33.4074243828   |
| 0.5454294876    | 0.621208892     |
| 37.9354339836   | 17.4183499115   |
| 0.4101832428    | 1.0381603798    |
| 0.2814598516    | 1.0431068947    |
| 0               | 0               |
| 50.6309441173   | 51.0958966379   |
| 6.9018411372    | 1.0917708948    |
| 3.7665590424    | 3.4046563638    |
| 57.5177038667   | 44.2435125534   |
| 32.411398819    | 14.0992828242   |
| 0.8414731103    | 0.6655440428    |
| 0               | 0               |
| 47.9748991988   | 19.1373051613   |
| 61.5403587385   | 38.3042815043   |
| 0               | 15.2426704237   |
| 10.0750280058   | 8.5605687736    |
| 1.9844178069    | 3.1390603778    |
| 18.9146281914   | 15.1510754706   |
| 22.8164243246   | 11.8892167396   |
| 5.1910413202    | 3.4778000915    |
| 1.3939477886    | 6.1740635055    |
| 1032.8339047944 | 733.0836043886  |
| 3.450439        | 1.0916185405    |
| 0.7945833882    | 1.2569153643    |
| 22.2162933744   | 6.7474454814    |
| 0.7488217893    | 0.8291690189    |
| 24.276726435    | 26.8815754689   |
| 11.0923452126   | 17.0147655497   |
| 16.3561634018   | 14.0453818529   |
| 3.3419808549    | 1.4379355317    |
| 0               | 0.2729808229    |
| 0.4048487114    | 0.2561647138    |



gene\_expression\_table

|                 |                |
|-----------------|----------------|
| 82.8534806693   | 110.4666752576 |
| 0               | 0              |
| 23.7171413324   | 17.4569216312  |
| 2.9183194907    | 2.3324751283   |
| 9.7131701265    | 11.0626722428  |
| 9.7135517085    | 19.2067827084  |
| 9.2008853414    | 10.6732725225  |
| 2.2259493945    | 2.190924228    |
| 1.5156212991    | 0              |
| 1.3000687934    | 1.6580690589   |
| 6.0986934855    | 3.4730086193   |
| 0               | 0              |
| 15.0561309381   | 13.7080214184  |
| 6.4348488172    | 6.376276121    |
| 0               | 1.2819630386   |
| 3.2319830859    | 6.0420776195   |
| 2.8315063298    | 3.4040637343   |
| 24.5894142851   | 18.0682269096  |
| 7.7095298136    | 9.0058005952   |
| 0.4206220379    | 1.4637983648   |
| 0.7870267934    | 0.8991391719   |
| 2.9764356069    | 9.4165765378   |
| 16.2060787564   | 63.7229256692  |
| 1.8553576859    | 1.0405575944   |
| 152.8132352821  | 80.926435783   |
| 12.1402452802   | 4.4472658385   |
| 14.7692486208   | 16.4913906599  |
| 0               | 0              |
| 3.3868052491    | 4.2002277566   |
| 0               | 0              |
| 3.4551672907    | 5.4303104149   |
| 0               | 0.2674783629   |
| 3.719118762     | 2.1722233891   |
| 78.364790613    | 51.9899079392  |
| 68.7235595747   | 15.0987051139  |
| 31.0314330748   | 22.252870456   |
| 0               | 0.0203366639   |
| 0               | 0.6503606968   |
| 0               | 0.00684        |
| 2376.9916700366 | 257.7743603025 |
| 24.3964932156   | 9.6479260748   |
| 0               | 0              |
| 21.2713746335   | 6.7296442373   |
| 0.1158379677    | 0.3664776372   |
| 96.993360399    | 106.2203472438 |
| 5.1742143989    | 2.5918706537   |
| 3.9603718061    | 4.7969949744   |
| 1.2314894847    | 0.779214908    |
| 2.7108700662    | 1.2864606614   |

gene\_expression\_table

|                |                |
|----------------|----------------|
| 9.5723538706   | 10.6715553084  |
| 0              | 1.5792473341   |
| 0.8073745592   | 0.383144741    |
| 14.923477497   | 13.9155703253  |
| 0              | 0              |
| 2.0999189679   | 2.3621450078   |
| 2.6989352941   | 1.9923507943   |
| 4.8254968529   | 10.1776456694  |
| 3.6330524188   | 3.1117688961   |
| 0              | 0              |
| 20.9385801833  | 25.0483527532  |
| 1.3297278363   | 3.0850395481   |
| 84.2009273544  | 162.0338936068 |
| 0.899645098    | 22.4851018213  |
| 0              | 2.3883182764   |
| 0              | 0              |
| 58.4075099386  | 4.1063194023   |
| 10.3311333735  | 6.5369402185   |
| 16.4400570971  | 12.4827741406  |
| 0              | 0              |
| 0              | 0              |
| 76.025543132   | 58.2805017824  |
| 4.5037404866   | 4.1271589501   |
| 99.3935434363  | 17.2302609283  |
| 11.1362820878  | 14.5277454134  |
| 4.8003361748   | 7.3764784693   |
| 3.3596928085   | 1.5353131228   |
| 5.838209115    | 4.0924601894   |
| 1.2484657956   | 1.0330200777   |
| 3.2244167498   | 0.6979711458   |
| 7.4353010727   | 2.6659547301   |
| 2.6891962156   | 3.5614191557   |
| 12.8299324792  | 4.2909613217   |
| 0              | 0              |
| 0.1537447512   | 0.5836844099   |
| 2.2103713874   | 5.5943777309   |
| 0              | 0.7060052763   |
| 17.9336949002  | 20.3058717125  |
| 7.9399985354   | 4.004613122    |
| 0.5975184811   | 0.8401665247   |
| 0              | 0.2027825192   |
| 210.3838989899 | 41.1457777985  |
| 1.8662424239   | 3.8377613404   |
| 12.0132603796  | 11.8062625638  |
| 79.738426122   | 54.8411277444  |
| 0              | 0.4913346185   |
| 26.8315889769  | 13.5819749309  |
| 14.4279188178  | 14.9489794085  |
| 11.6598582903  | 8.4764834635   |

| gene_expression_table |                 |
|-----------------------|-----------------|
| 0                     | 0               |
| 1809.894825897        | 2694.8257330411 |
| 48.225687601          | 26.2197891103   |
| 0                     | 0               |
| 0                     | 0.2656300201    |
| 0                     | 0               |
| 0                     | 0               |
| 1472.703643452        | 2110.9414813331 |
| 0.2884374352          | 0.9125321504    |
| 13.6790006325         | 7.6565901914    |
| 6.5850119815          | 2.617960079     |
| 0                     | 0               |
| 18.6888813663         | 16.7283839969   |
| 5.1128713553          | 3.2351275688    |
| 3.2823855812          | 2.7692035382    |
| 59.8978824467         | 87.1697599872   |
| 0                     | 0.4171130672    |
| 0                     | 0.0367345007    |
| 0                     | 2.6457885617    |
| 10.9665194592         | 24.8646624662   |
| 0.3584079242          | 0.2267796852    |
| 0                     | 0               |
| 116.1293581298        | 67.7926034292   |
| 0                     | 0               |
| 25.5676656125         | 25.4221494738   |
| 26.7359185852         | 21.1152971888   |
| 71.1344307864         | 35.3466239563   |
| 21.2986926088         | 11.0262875729   |
| 0                     | 0               |
| 7.4368607737          | 4.2833142903    |
| 35.5554883149         | 14.6612560837   |
| 1.7853332899          | 1.2910343427    |
| 158.1597174918        | 184.2004469519  |
| 0.8641170712          | 3.5539596002    |
| 0                     | 0.6051317755    |
| 0.5276085241          | 0               |
| 38.3808207611         | 33.8049297709   |
| 0                     | 0               |
| 0                     | 0               |
| 185.2380240284        | 62.5108511904   |
| 6.8351142351          | 2.2762435144    |
| 0                     | 0               |
| 32.8060837022         | 5.0321894252    |
| 4.7632143853          | 0               |
| 1625.6440874958       | 1770.7946914028 |
| 5.7507316667          | 5.8219655495    |
| 23.1819293775         | 23.8357866114   |
| 0                     | 1.7849896088    |
| 7.7302778525          | 11.1800460369   |

gene\_expression\_table

|                 |                |
|-----------------|----------------|
| 0               | 0              |
| 14.984032175    | 5.5498676562   |
| 33.3229805538   | 14.261468583   |
| 0               | 0.5445478282   |
| 78.1396093236   | 48.375101435   |
| 2.0627332435    | 2.3493196865   |
| 17.6262848718   | 19.3963264604  |
| 0               | 0              |
| 21.6422048275   | 26.9156520767  |
| 0               | 0              |
| 36.798084501    | 16.5197110746  |
| 0.2534736322    | 0              |
| 0               | 14.0390137499  |
| 14.7556002737   | 12.2092502612  |
| 2.3995114649    | 2.8341063729   |
| 8.1078315773    | 8.1761991543   |
| 3.1243587003    | 2.1329844705   |
| 0.0969854002    | 0              |
| 23.224934483    | 21.5838503985  |
| 9.512867757     | 15.6498922744  |
| 91.0766661234   | 98.5253180745  |
| 36.219500792    | 16.5515950519  |
| 0               | 7.083066336    |
| 6.4045890884    | 5.8825907548   |
| 37.7237858732   | 33.1519683907  |
| 0               | 0              |
| 6.10213373      | 10.2962006732  |
| 0               | 19.3467562938  |
| 0               | 1.5620864583   |
| 0.1379113263    | 2.6178679426   |
| 72.192250727    | 45.0446253661  |
| 1.0678558336    | 0              |
| 223.1574537366  | 208.2715565101 |
| 22.0065960492   | 15.7407321413  |
| 6.5366176967    | 3.8602586697   |
| 62.2861264836   | 26.5195766657  |
| 0               | 0.6395142627   |
| 0.8820578579    | 1.6743447049   |
| 0               | 0.2868130256   |
| 20.3497622237   | 22.6732131746  |
| 0               | 0              |
| 0.4968621066    | 14.4617301353  |
| 8.9090319276    | 8.3073305363   |
| 1568.8988498738 | 1571.068196851 |
| 0               | 1.0113171896   |
| 261.0441115175  | 419.6705056195 |
| 5.6341148268    | 5.7809839718   |
| 6.2985851592    | 6.6422971482   |
| 6.7721428139    | 10.4744885059  |

gene\_expression\_table

|                |                |
|----------------|----------------|
| 25.8518369965  | 9.0875214469   |
| 2.7395147916   | 1.3482043538   |
| 3.9901849178   | 2.7351533082   |
| 11.5182511835  | 41.9064560436  |
| 0              | 0.6062103581   |
| 0              | 0.8451838185   |
| 1.4691427828   | 0.6561798284   |
| 11.3482043329  | 24.2341320041  |
| 35.6064174326  | 7.1146325252   |
| 12.0453633576  | 15.2432104652  |
| 2.1090839659   | 2.6690112889   |
| 2.4033676005   | 1.3306223083   |
| 2.2134619725   | 3.2679499421   |
| 12.9427585186  | 35.2145261561  |
| 114.9757884499 | 24.8881546743  |
| 55.148369241   | 25.9352351185  |
| 0              | 0.3867948211   |
| 82.4823299266  | 87.9774626814  |
| 67.8180537624  | 112.6422132277 |
| 15.6668975546  | 6.9758861714   |
| 3.7661914676   | 2.9968368273   |
| 16.186073497   | 25.604014341   |
| 0.2987223442   | 1.1340847332   |
| 22.5035002089  | 31.3255929004  |
| 2.5200739815   | 1.5945562184   |
| 0              | 0.857358446    |
| 0              | 0.2417049333   |
| 1.9940198285   | 3.1542493796   |
| 11.4009808394  | 10.3848126072  |
| 3.1156559821   | 0.9857029311   |
| 0              | 0              |
| 14.2219768115  | 10.3571550215  |
| 0              | 0.4556464621   |
| 0.2397123151   | 2.1234641188   |
| 2.2899148116   | 2.6908604996   |
| 14.6357362012  | 8.2772114215   |
| 3.2543350318   | 1.1231748533   |
| 0.5337127844   | 2.7016192234   |
| 105.9310011321 | 46.5919218708  |
| 0              | 1.5855961207   |
| 6.5207837331   | 5.1956692262   |
| 0              | 0              |
| 1.0312748529   | 0.5075239057   |
| 6.0206468231   | 4.2105166651   |
| 1.0936961851   | 0.9688382532   |
| 0.7457911749   | 0.6170912011   |
| 1.0613693891   | 2.2483089648   |
| 1.6761441419   | 3.0616353931   |
| 1.6921787998   | 2.0985961227   |

gene\_expression\_table

|                |                |
|----------------|----------------|
| 2.1147902708   | 0              |
| 1.8852166515   | 5.2381912392   |
| 0              | 4.6128688394   |
| 71.9334798818  | 76.2809588214  |
| 0              | 0.13905499     |
| 4.0082711586   | 4.8486192165   |
| 0              | 0              |
| 9.837045723    | 5.5145205247   |
| 0              | 0              |
| 0.6320943624   | 2.0997508482   |
| 11.4600439876  | 7.8360273444   |
| 187.8157725556 | 67.11446862    |
| 1.7171680284   | 1.9557432678   |
| 0              | 0              |
| 8.5521049647   | 4.8701470776   |
| 23.1711373064  | 29.7956422656  |
| 0              | 0              |
| 20.3059232472  | 32.1210174985  |
| 2.7291220611   | 1.0792685515   |
| 50.8108828647  | 41.6947529092  |
| 28.9415108732  | 46.767319189   |
| 29.9208541812  | 23.6652199712  |
| 11.5890126038  | 13.919992178   |
| 8.7556111452   | 3.0218407654   |
| 0              | 0              |
| 0.1489508788   | 0              |
| 0              | 0              |
| 0              | 0              |
| 0              | 0              |
| 15.1568323707  | 16.5547912446  |
| 669.0240215424 | 515.8414053493 |
| 11.9494712324  | 6.9938605034   |
| 29.7608845368  | 18.0352822737  |
| 0              | 0.3896462673   |
| 0.3157350837   | 0              |
| 0              | 0              |
| 0              | 0              |
| 2.8532016933   | 1.2035600372   |
| 0.8355584575   | 0              |
| 37.1218409966  | 42.4929069671  |
| 126.9539424826 | 96.8991916621  |
| 5.3019598872   | 9.8669758596   |
| 57.2041323743  | 33.4942945173  |
| 1.837260059    | 4.8680160213   |
| 6.5666002062   | 9.0829415408   |
| 0              | 0              |
| 0              | 0              |
| 6.1917811037   | 5.8766983433   |
| 0.1790793635   | 0.4532440154   |

gene\_expression\_table

|                 |                |
|-----------------|----------------|
| 2.9731071814    | 2.8218139102   |
| 0               | 0.2105776478   |
| 8.221454564     | 4.9758817485   |
| 0               | 0              |
| 0               | 0              |
| 1.2264804501    | 0.7760454823   |
| 9.3819198743    | 10.5821590643  |
| 126.2941518401  | 88.7091990475  |
| 29.9344381041   | 42.1432156822  |
| 42.4191951763   | 31.154034679   |
| 0.8887247428    | 3.2936665803   |
| 37.8755472238   | 33.2248186986  |
| 0               | 0              |
| 3.5266211025    | 2.2314406839   |
| 0               | 0              |
| 15.5376409195   | 6.9084918478   |
| 46.3097531137   | 57.8153325275  |
| 7.5174131827    | 10.1926752017  |
| 2.1813440012    | 1.799225253    |
| 3.7342015571    | 5.1551684078   |
| 277.5172596925  | 124.2473287456 |
| 1074.6534438902 | 942.7956418294 |
| 1.4878416879    | 3.294968844    |
| 11.2396219011   | 8.889723638    |
| 0               | 0              |
| 25.5312101224   | 49.0774619844  |
| 0.2528748082    | 0.6000167568   |
| 0.2056853382    | 0.1301457169   |
| 7.1532517589    | 1.8637135983   |
| 0               | 0.3130267492   |
| 3.0002101092    | 6.0205081625   |
| 0               | 0              |
| 3.2671572244    | 78.5561473403  |
| 1.3221434768    | 1.8590566238   |
| 2.9628907143    | 4.30088533     |
| 28.6134979988   | 16.758307339   |
| 26.2384807651   | 30.2947074146  |
| 2.8036773111    | 2.7292367809   |
| 15.0442117713   | 9.1945872176   |
| 1.0234231594    | 0.8299746525   |
| 82.6265146503   | 44.5618724592  |
| 0.6570361145    | 0.5820279252   |
| 29.9675831308   | 20.3663169185  |
| 818.3608758083  | 230.6115492295 |
| 6.3269820558    | 4.0033461932   |
| 0               | 5.0261270333   |
| 4.3623581288    | 3.5883203952   |
| 0               | 0.1299727256   |
| 0.5578936343    | 0              |

gene\_expression\_table

|                 |                |
|-----------------|----------------|
| 0               | 0              |
| 289.6466231702  | 233.6573634441 |
| 1.0240989842    | 2.3563282311   |
| 0               | 0.114641144    |
| 18.3856191764   | 62.1357768477  |
| 0               | 0.1155650206   |
| 11.0898124659   | 9.4495441288   |
| 0               | 0.1021445812   |
| 1.7361905114    | 0.9295510725   |
| 16.9846500245   | 15.1316330998  |
| 24.2618530232   | 41.4719336136  |
| 169.8398113842  | 61.9414894392  |
| 0.1113696575    | 1.0570236102   |
| 1.4120380837    | 2.0102750069   |
| 8.226938071     | 7.3060039801   |
| 64.0002222757   | 53.1504981657  |
| 30.0275015472   | 17.0996906036  |
| 1.7649110074    | 2.0571397691   |
| 10.1541240299   | 6.1913048572   |
| 3.5549786246    | 2.9310150907   |
| 2.4935302414    | 2.5244174139   |
| 2.3035071617    | 4.8931207603   |
| 1.5375515804    | 3.0781070035   |
| 1.1961032253    | 0.7568245416   |
| 1.5622525735    | 1.9770050991   |
| 2.0574321811    | 1.6568661451   |
| 1.8846235394    | 4.3487234604   |
| 0               | 0              |
| 1717.9646159215 | 2539.785214761 |
| 0.8022011801    | 1.6285058576   |
| 0.986665837     | 1.5607618638   |
| 3.3066928482    | 2.0922828782   |
| 0.1336185523    | 0.3381841884   |
| 10.1416629076   | 5.0739499349   |
| 2.4636080954    | 2.9192595037   |
| 9.0572916186    | 22.6873821332  |
| 0.0402103811    | 0.2629088306   |
| 0               | 0.3050436149   |
| 26.3640847214   | 35.4150732033  |
| 23.9207876417   | 36.0124869123  |
| 0.2502548434    | 1.7945960142   |
| 61.4205957688   | 44.7295506327  |
| 1.7372972266    | 1.698857327    |
| 33.643264427    | 14.1458875229  |
| 5.7107338365    | 4.0435892359   |
| 41.2647628071   | 25.6352152518  |
| 108.4232089538  | 81.3083252816  |
| 54.9538779621   | 68.4678235789  |
| 3.4274807144    | 3.2530656202   |



gene\_expression\_table

|                 |                 |
|-----------------|-----------------|
| 10.3802879404   | 9.8520635535    |
| 3.0838776728    | 3.0353530615    |
| 0.8765352548    | 1.1945672731    |
| 2.506913298     | 2.733713642     |
| 1.3092156028    | 3.1064830277    |
| 0.7421315994    | 1.0956813116    |
| 4.8087294901    | 10.1422809634   |
| 353.9300078152  | 158.498787267   |
| 3.5643998729    | 4.7612836612    |
| 1.3909795199    | 1.3038976658    |
| 0.8824198667    | 1.9193073615    |
| 8.5864472981    | 13.0886014161   |
| 0.068404726     | 0.2596951883    |
| 0               | 0               |
| 0               | 0               |
| 0               | 0               |
| 1.9718478983    | 2.6513001188    |
| 27.9879489727   | 14.9846620013   |
| 1.4681750956    | 1.8335048569    |
| 51.3246914468   | 26.8402991645   |
| 4.124554114     | 4.8010065339    |
| 58.1556547409   | 114.9922353214  |
| 281.67434121    | 125.7665181671  |
| 11.0043626057   | 19.8291866803   |
| 0.192257448     | 0.2635735465    |
| 1.2751065367    | 1.2909011859    |
| 12.4352900401   | 13.6630535825   |
| 0.5116539125    | 2.6978736003    |
| 0               | 0.1767299408    |
| 0               | 0               |
| 0               | 0               |
| 0               | 0.1405333948    |
| 3.5004885109    | 2.2936966048    |
| 0               | 0               |
| 0               | 3.033167298     |
| 10.6142817325   | 16.0874023946   |
| 0               | 6.7810610206    |
| 6.3441011526    | 0               |
| 1.3068168426    | 1.9293812491    |
| 0               | 0               |
| 1134.0126902859 | 2052.0811739069 |
| 0.1275474882    | 0.8877509396    |
| 0               | 0               |
| 6.6931859586    | 4.4275613893    |
| 8.3628192387    | 5.2915055343    |
| 3.000418148     | 0               |
| 7.3258664657    | 3.3109872435    |
| 0.6010755998    | 0.3803256739    |
| 0               | 0               |

gene\_expression\_table

|                 |                 |
|-----------------|-----------------|
| 2.6763435424    | 5.9526788696    |
| 16.4821391545   | 8.7603086439    |
| 64.6477969379   | 34.119221686    |
| 15.7235750428   | 10.6122278602   |
| 2.538948803     | 4.2634014774    |
| 0.6567987535    | 0.207792022     |
| 15.2556239375   | 15.5930999232   |
| 9.1859463729    | 2.798530464     |
| 54.6395756695   | 43.6708357932   |
| 7.2699749977    | 4.181833883     |
| 65.4686805777   | 101.1535145879  |
| 2.2937993151    | 6.427552277     |
| 3.04295632      | 2.6955680432    |
| 138.4704177321  | 83.1228957709   |
| 69.6332524871   | 76.8532918132   |
| 142.8608025652  | 172.3375796964  |
| 9.585242132     | 3.0970129178    |
| 7.6996270661    | 13.6624351683   |
| 157.5229085199  | 97.1795497973   |
| 24.40853492     | 34.7496772721   |
| 14.5634620533   | 7.6023020741    |
| 45.1438407449   | 66.0551665048   |
| 2.8147782179    | 3.4960918344    |
| 1.6135373188    | 0.5104762765    |
| 52.691464052    | 22.8617782605   |
| 0.6165431347    | 1.4044054688    |
| 0.157265086     | 1.3931147721    |
| 0.3063314073    | 1.066057821     |
| 0               | 0.4905643084    |
| 0               | 8.6287061504    |
| 6.7933124791    | 5.4446564132    |
| 0               | 1.3933601885    |
| 40.0011963403   | 42.5430633661   |
| 2730.6456001638 | 1306.7347230029 |
| 9.4902418062    | 6.1001883945    |
| 14.4880763853   | 16.0985185281   |
| 30.5194559235   | 66.3813436608   |
| 0               | 0               |
| 25.2759699253   | 19.0506799573   |
| 42.1158725014   | 24.2258856038   |
| 0.4313801227    | 0.4094283713    |
| 6.682132467     | 5.8780411873    |
| 2.6033295843    | 3.4774972103    |
| 2.4269577811    | 5.3747319621    |
| 13.3694799479   | 17.4982713273   |
| 0               | 1.7461023351    |
| 105.7826693478  | 66.9331195985   |
| 1.8627676731    | 3.0308169165    |
| 0.1262604982    | 0.0798902984    |

gene\_expression\_table

|                 |                |
|-----------------|----------------|
| 130.8514160546  | 83.4369871997  |
| 0.1653018176    | 0.1045933743   |
| 11.6892244636   | 6.1334849455   |
| 18.98483252     | 17.6183298682  |
| 3.7860541385    | 3.1941264232   |
| 0               | 0              |
| 5.6658675238    | 6.2738049072   |
| 0               | 0.1288933673   |
| 0.7138358414    | 2.9358796697   |
| 0.5975890824    | 0.7562392171   |
| 0.3309487883    | 1.4658359897   |
| 16.8166907076   | 29.9617559914  |
| 24.7011447293   | 54.2146459305  |
| 1362.2696211864 | 435.1095405909 |
| 1.8385989109    | 1.1633584363   |
| 0               | 0              |
| 0.9142821282    | 0.9438758371   |
| 2.4817558032    | 3.2476880472   |
| 1.2468955238    | 0.5259753022   |
| 13.6239284032   | 13.6323069036  |
| 18.535794647    | 16.8774142188  |
| 0.6105448633    | 0.5794759095   |
| 148.0505141863  | 133.825361453  |
| 28.2473486756   | 26.5120305815  |
| 5.1965739525    | 5.5378352897   |
| 43.7673408172   | 34.5313105161  |
| 1.8714688067    | 0              |
| 2.4166262637    | 2.2936507804   |
| 0.1608352471    | 0.1272089853   |
| 1.1986656094    | 0.7223293992   |
| 4.3890940581    | 2.3386639146   |
| 9.4752702931    | 10.1543709142  |
| 0.7083145948    | 0              |
| 9.5614253186    | 2.8088885206   |
| 1.7927672472    | 9.9256397242   |
| 0.0118473954    | 0.007496       |
| 39.0510858763   | 24.0228872643  |
| 18.0480626818   | 1.4274705222   |
| 103.6992257857  | 126.855352906  |
| 2.209093471     | 1.3222298502   |
| 0               | 0.3056538738   |
| 14.8163809236   | 25.3549620557  |
| 174.54753353    | 88.550873979   |
| 0               | 0              |
| 0.558179105     | 0.1177277558   |
| 1.4785291299    | 2.0978489282   |
| 2.1528816608    | 5.448873112    |
| 0.4692378988    | 0.4731946482   |
| 1.0410005841    | 6.5868461279   |

gene\_expression\_table

|                |                 |
|----------------|-----------------|
| 15.6530436318  | 3.3014451483    |
| 0.3004866669   | 0.2851957245    |
| 0              | 0               |
| 1.4807225723   | 0.7026863306    |
| 26.8610104493  | 6.8707577093    |
| 939.0348910904 | 432.8366351917  |
| 39.5629163778  | 32.759381187    |
| 0.6370998679   | 2.015598676     |
| 2.1253090832   | 6.9479884335    |
| 7.7593025683   | 6.1232530057    |
| 9709.761125766 | 6600.2668268601 |
| 0              | 0.6488502373    |
| 5.4314303182   | 6.8733862989    |
| 4.3895314967   | 2.3388969973    |
| 1.6007237294   | 9.4532186845    |
| 0              | 0.905386396     |
| 81.0303937819  | 139.1650100822  |
| 23.145119907   | 23.8657393083   |
| 97.3280275158  | 48.6939413566   |
| 20.3896475047  | 16.3417515962   |
| 104.0900415673 | 81.8572102655   |
| 33.0860595626  | 11.135603094    |
| 0              | 0               |
| 29.3978412623  | 9.6583381406    |
| 7.9300339557   | 70.2472985635   |
| 435.6075296746 | 800.9714728687  |
| 226.2736708915 | 142.1122768216  |
| 215.8239478608 | 76.0987883378   |
| 192.2190912311 | 160.5611342665  |
| 22.9313228642  | 11.5332774805   |
| 40.5893530123  | 41.3426920609   |
| 318.7939992757 | 96.922270464    |
| 0              | 0               |
| 0              | 0               |
| 1.344445462    | 0.7561661152    |
| 68.7153947539  | 44.4041918342   |
| 2.3623419625   | 2.9895051445    |
| 4.8501070761   | 13.8098952831   |
| 251.7491186952 | 150.6818085587  |
| 19.1524755027  | 25.24702576     |
| 39.1884444116  | 26.1012294343   |
| 84.7521132159  | 38.3747169808   |
| 136.8429314374 | 56.4181878419   |
| 2.3852725189   | 1.4741625853    |
| 89.1503366649  | 68.0435335795   |
| 19.58546887    | 10.8008423033   |
| 2.7291220611   | 11.2243929359   |
| 7.141827169    | 2.9240153281    |
| 2.0375645549   | 5.8016354473    |

gene\_expression\_table

|                |               |
|----------------|---------------|
| 13.4933672609  | 13.7553732344 |
| 17.1951391533  | 18.6170322536 |
| 10.5585099886  | 4.2849338963  |
| 14.3737992586  | 20.722566125  |
| 1.4839306387   | 1.3145229794  |
| 16.9400022563  | 16.5966162549 |
| 0              | 0             |
| 0.3557415083   | 0.1432407024  |
| 8.9977605073   | 0             |
| 3.2119684559   | 5.9900747583  |
| 19.622415908   | 21.0310537802 |
| 15.3258450727  | 7.8569391138  |
| 5.6391795494   | 6.1896389003  |
| 0              | 0.0215645443  |
| 0.579863555    | 0.1467615704  |
| 29.0608783636  | 44.8488617215 |
| 183.1572943926 | 79.7213909636 |
| 8.1747984942   | 10.3450738893 |
| 1.4987838464   | 0.6897041681  |
| 2.001120579    | 1.6115179738  |
| 9.7259559948   | 8.0608983592  |
| 3.2330903336   | 4.1438771178  |
| 1.9356529061   | 2.5078594295  |
| 1.0909744914   | 1.6242475159  |
| 180.7279734967 | 90.2325701928 |
| 101.673803526  | 60.4635980511 |
| 1.5956962875   | 1.177941084   |
| 0.0128877642   | 0.0652370201  |
| 26.926092271   | 9.7355799147  |
| 1.6343052992   | 0.6401530094  |
| 0              | 0             |
| 0              | 0.0222141592  |
| 6.4005245841   | 5.0950098533  |
| 0.0971912622   | 0.1229939539  |
| 17.7359374963  | 21.5812875324 |
| 4.4321053462   | 5.844639178   |
| 2.2842187707   | 2.4281388786  |
| 16.7928863583  | 23.5637454654 |
| 9.2969238254   | 2.3415985991  |
| 4.1586689139   | 3.5422204618  |
| 0              | 0             |
| 57.7029444133  | 35.916700343  |
| 0              | 0.1147874987  |
| 10.3430417968  | 8.5805341196  |
| 0.2199472896   | 0.1590512573  |
| 60.6025634167  | 74.1351684256 |
| 4.8813214897   | 5.5595093105  |
| 32.9951237931  | 23.1707451547 |
| 0.2655609172   | 0             |

gene\_expression\_table

|                |                |
|----------------|----------------|
| 81.4598225834  | 47.4831403135  |
| 0.6390296353   | 1.8599675869   |
| 4.0629085773   | 0.6426930503   |
| 0.2337135878   | 0.2587906349   |
| 5.8122454929   | 6.5380459366   |
| 2.861439101    | 2.9540588659   |
| 3.3760029866   | 2.7690681691   |
| 28.0394905582  | 9.560836535    |
| 0.878133849    | 1.023532663    |
| 0.4972858048   | 0.2966733276   |
| 5.1800502456   | 6.4315846061   |
| 15.9795099951  | 17.3329789175  |
| 0.9080739936   | 1.4045200861   |
| 0              | 0.0368546103   |
| 4.5375660947   | 4.6082487605   |
| 2.2410653027   | 3.2723440542   |
| 176.3774255154 | 104.8574319602 |
| 2.5226242799   | 2.974680266    |
| 4.1315802847   | 5.16835023     |
| 0.1867962489   | 0.3545814001   |
| 0              | 0              |
| 2.6955806201   | 1.5315651189   |
| 0              | 0              |
| 0.2945727308   | 0.4970359685   |
| 1.2318698808   | 0.5066461404   |
| 5.7088502249   | 6.9664403476   |
| 3.7082661079   | 8.2813238      |
| 2.3823918433   | 1.8478284154   |
| 0              | 0              |
| 0              | 0.0294496674   |
| 2.547186944    | 3.7697664048   |
| 0.8387400122   | 0.746305156    |
| 3.4485781987   | 2.6184716091   |
| 5.1123939311   | 3.9652699464   |
| 0.9348695696   | 0.525805405    |
| 0.860641144    | 1.1128039822   |
| 0.5494849497   | 0.3283664388   |
| 0              | 0              |
| 0              | 0              |
| 5.2164231802   | 3.3006491399   |
| 2.3306634441   | 1.1660483826   |
| 2.3857106386   | 1.7790994309   |
| 13.0768570618  | 10.4413463233  |
| 0.0298624212   | 0.037790406    |
| 0              | 0              |
| 0.8536751096   | 1.2447071881   |
| 2.0919831243   | 3.7504414757   |
| 0.7883712719   | 1.1972051517   |
| 49.4113559472  | 36.6880882165  |

gene\_expression\_table

|                 |                 |
|-----------------|-----------------|
| 0               | 1.1026978378    |
| 2.7088824908    | 0.5273917722    |
| 5.9560304432    | 3.4396222464    |
| 31.5428020305   | 24.6545561595   |
| 4.6894887123    | 3.0175277911    |
| 19.7490781741   | 13.2311306433   |
| 6.8909541029    | 9.6796326721    |
| 0.0128106553    | 0.0810583748    |
| 8.8397037252    | 9.1457200788    |
| 0.1709513644    | 0.3048373132    |
| 1.6875801579    | 2.0440791755    |
| 0.114159098     | 0.1123628121    |
| 0.217672423     | 0.9641131282    |
| 2.4466354238    | 3.5183831161    |
| 3.2769719748    | 0               |
| 9.0502521726    | 5.50622414      |
| 261.8428924687  | 254.845765208   |
| 7.2111041212    | 15.6437732752   |
| 3.3077169673    | 1.3394757639    |
| 0.1943901654    | 0.4919951547    |
| 0               | 0.0217105783    |
| 1.4271742       | 1.2374894098    |
| 0.1651084295    | 0.3969898361    |
| 5.3042527502    | 7.2566974758    |
| 40.5227854275   | 31.5011382134   |
| 69.0616802361   | 56.0182394232   |
| 0.0160243613    | 0.0101392837    |
| 0.1334833518    | 0.1447894286    |
| 0.8012523372    | 0.6337323359    |
| 0.9731427094    | 2.0431641403    |
| 0               | 0               |
| 17.9125595768   | 35.3758983812   |
| 1245.3715516714 | 1745.4697203487 |
| 0               | 0               |
| 14.0404516863   | 22.0168226498   |
| 0               | 0.0525290257    |
| 0               | 1.0939222359    |
| 18.6776180812   | 15.4948556109   |
| 38.2465007248   | 31.3948031898   |
| 20.0162224394   | 12.6651011806   |
| 0               | 0               |
| 9.0011950583    | 7.2990010244    |
| 2.1523194528    | 0.7782071689    |
| 8.5681391867    | 9.91549194      |
| 12.2923753913   | 12.6813588235   |
| 0.0103392089    | 0               |
| 8.2770840017    | 5.8251126708    |
| 1.1936088415    | 2.3412633458    |
| 0.1856350482    | 0               |

gene\_expression\_table

|               |               |
|---------------|---------------|
| 3.3313572295  | 3.4050515648  |
| 1.7047508764  | 0.990612722   |
| 0             | 0             |
| 0.3138078359  | 0.2363801712  |
| 9.312696052   | 10.574270338  |
| 0.3429944033  | 0.4443884261  |
| 0             | 0             |
| 2.5443120631  | 1.7498833331  |
| 5.1638816955  | 10.8291102171 |
| 50.520164186  | 52.7258933405 |
| 0.4758020373  | 1.5052992549  |
| 0.3141724856  | 0.1242437956  |
| 0.3634331549  | 0.2299593589  |
| 3.3144565515  | 0             |
| 1.6483060015  | 3.3275140115  |
| 0             | 0             |
| 45.5932040246 | 19.5759220757 |
| 24.5654824049 | 29.2219835068 |
| 29.8621326981 | 20.6945461943 |
| 0             | 0.0176031056  |
| 1.4275393013  | 1.1496085076  |
| 0.8250267645  | 0.6525361791  |
| 0             | 0.1245428827  |
| 4.2583625352  | 2.6235376722  |
| 0.1166291479  | 0.3689807014  |
| 2.0139871304  | 1.2942453661  |
| 7.660772218   | 5.836534084   |
| 20.0299381518 | 14.4340268641 |
| 0             | 0             |
| 0             | 0             |
| 64.9232948008 | 63.5526879824 |
| 1.5375130682  | 0.555913617   |
| 0             | 0.3897433342  |
| 1.6151913308  | 1.2578450654  |
| 10.5936364446 | 6.2309920401  |
| 0.0247689438  | 0.0861979074  |
| 0             | 0             |
| 0.0606864535  | 0.0383988575  |
| 0.3367426007  | 0.6392133864  |
| 2.5444888488  | 1.6100045261  |
| 0             | 0             |
| 0             | 0.262420275   |
| 51.4186009905 | 44.8754477185 |
| 0.6384982795  | 1.1110125639  |
| 17.505426005  | 12.514910742  |
| 0             | 0             |
| 0.4755600376  | 0.2340385659  |
| 14.7580710574 | 21.9718796755 |
| 3.1221079188  | 2.0742626861  |



gene\_expression\_table

|                |                |
|----------------|----------------|
| 0              | 0              |
| 2.2016631919   | 1.7058176243   |
| 0              | 1.5230799185   |
| 1.1263063891   | 1.0821891746   |
| 17.8008975887  | 12.0209984364  |
| 0.6244531234   | 5.5316465532   |
| 0.279960211    | 0.4302033012   |
| 0              | 0.7666149021   |
| 1.2034113917   | 0.8785946816   |
| 2.3167035352   | 1.4658752304   |
| 0              | 0              |
| 0.4163321237   | 0.7902922473   |
| 33.8909677232  | 13.8196167434  |
| 3.96184039     | 22.5613991838  |
| 41.0957008664  | 30.3581459557  |
| 18.5743307755  | 6.7158605789   |
| 15.1990207266  | 8.6178814957   |
| 1.027014189    | 0.7798018027   |
| 0              | 0              |
| 0              | 0              |
| 1.8912709421   | 2.1939247616   |
| 0              | 0              |
| 0.2294358796   | 0.5806947117   |
| 0              | 0              |
| 2.0337099748   | 0.6434066838   |
| 82.8646102924  | 41.4928744701  |
| 127.5049758584 | 96.6852179488  |
| 0.9068047777   | 0.4303299847   |
| 4.5307560238   | 6.2113975079   |
| 43.4597303651  | 26.0123682054  |
| 7.0604928252   | 16.194575627   |
| 0              | 3.9344826785   |
| 1.2558202994   | 1.9865250804   |
| 160.1650768821 | 93.7489545127  |
| 2.103074413    | 1.330703149    |
| 22.1135039417  | 231.3366966901 |
| 8.5722666322   | 77.563652752   |
| 22.3539718122  | 562.0495373435 |
| 37.9327730105  | 246.0169344822 |
| 1.4678157674   | 4.4889507555   |
| 5.5445746593   | 7.4843398543   |
| 20.1936114265  | 17.0624270254  |
| 51.7299424075  | 43.8672245704  |
| 1.3157644675   | 17.483323509   |
| 88.5442436238  | 48.2160110048  |
| 65.7088291165  | 73.982113009   |
| 7.2808733433   | 5.6818595028   |
| 131.760578109  | 41.238906034   |
| 301.5689166617 | 280.4540678265 |

gene\_expression\_table

|                 |                 |
|-----------------|-----------------|
| 507.207906808   | 565.3859851686  |
| 3.2460787907    | 4.1078596572    |
| 0               | 0               |
| 12.5611709834   | 6.2201569248    |
| 12.0896958117   | 8.0321390422    |
| 239.1397642236  | 157.6714514339  |
| 77.0348294791   | 16.2477196141   |
| 298.7613478014  | 146.0113130318  |
| 184.2487172405  | 67.2183756087   |
| 12.6501876141   | 8.8380843841    |
| 18.0007614109   | 33.1932325097   |
| 48.9620710376   | 66.2635271213   |
| 214.9958859204  | 69.4094152045   |
| 3713.5115288755 | 5868.7366807889 |
| 10.5403576213   | 8.2641637748    |
| 10.7046719385   | 3.6945238326    |
| 1.3086612615    | 5.7963130338    |
| 6.400921639     | 8.6788518433    |
| 0               | 0               |
| 0               | 0               |
| 30.0070945073   | 6.42628253      |
| 51.8611210147   | 11.1813053641   |
| 394.0403409094  | 235.7091421161  |
| 50.3927368509   | 33.240504305    |
| 3.478824278     | 8.0278972525    |
| 3.8829437001    | 1.6379339305    |
| 61.9972852577   | 15.4111082791   |
| 57.8044322011   | 75.4365193537   |
| 6.1232902115    | 0               |
| 0               | 0.9474973912    |
| 25.6855950545   | 21.3129624665   |
| 4.4932317553    | 15.5075764121   |
| 22.8876531794   | 20.445141906    |
| 10.1944234373   | 5.8361106832    |
| 13.521242731    | 18.5368209987   |
| 12.0862813853   | 13.3638057574   |
| 2.0720183889    | 1.8810756181    |
| 108.6068086154  | 74.4948664941   |
| 3.1264240758    | 4.2861417853    |
| 8.3533263088    | 5.2854989604    |
| 0               | 0.4567638947    |
| 4399.4463461814 | 2178.8984223163 |
| 0.8186281908    | 2.5899014904    |
| 3.3625966755    | 8.2978567154    |
| 255.2738844639  | 204.5216186894  |
| 9.5522357986    | 12.2356153381   |
| 0.4522138218    | 0.0953782001    |
| 2224.0321463213 | 1183.7858029341 |
| 48.5005656118   | 20.5041540703   |

gene\_expression\_table

|                 |                 |
|-----------------|-----------------|
| 205.5661659315  | 283.9563141749  |
| 34.1517208205   | 81.4501454764   |
| 0.4841117424    | 1.1844286294    |
| 3.6223038198    | 2.2919831414    |
| 37.6469254007   | 26.9278432408   |
| 26.5446971555   | 12.835921785    |
| 38.4350952918   | 35.0200691471   |
| 3.6659123879    | 1.8556608852    |
| 1.6224308316    | 1.4372117908    |
| 0               | 0               |
| 0               | 0.4407312221    |
| 0.5259027964    | 0.6655213937    |
| 1.7388077267    | 4.1808222438    |
| 0.1236341747    | 1.2516562201    |
| 74.5557717813   | 65.9676708851   |
| 1.671060445     | 1.4538560314    |
| 10.6968833545   | 19.6000585144   |
| 267.4111857848  | 112.8014950556  |
| 49.2972791066   | 18.154336275    |
| 0.0853781228    | 0               |
| 8.8503894082    | 7.1694415702    |
| 13.0963166706   | 29.959200431    |
| 27.4867357789   | 6.1838248707    |
| 2.8241510478    | 0.8934792486    |
| 91.8118015557   | 36.4347389914   |
| 95.5481352925   | 112.6414991604  |
| 0               | 0.4882373275    |
| 75.5106919067   | 90.0657334794   |
| 10.6919274227   | 8.4565371309    |
| 1.7582948767    | 1.0569193791    |
| 0               | 0.0920796956    |
| 13.0136030916   | 12.1723710613   |
| 147.6282898173  | 54.2899178791   |
| 0.2592459935    | 0               |
| 0               | 0.0601678188    |
| 0               | 0               |
| 66.8345214415   | 14.1992253661   |
| 2283.2247664803 | 4298.3219150231 |
| 7.000302396     | 2.9529227575    |
| 40.2649972993   | 26.1390973038   |
| 48.1899901868   | 37.4217821509   |
| 0               | 0               |
| 38.5613768633   | 23.4786641675   |
| 0               | 0.0926906944    |
| 0               | 0               |
| 4.2194276236    | 3.5597444648    |
| 0               | 0               |
| 0               | 0               |
| 0               | 0.263651448     |

gene\_expression\_table

|                  |                  |
|------------------|------------------|
| 2.9862132698     | 12.2817632849    |
| 11.5320036351    | 7.2967810633     |
| 22.0044460133    | 8.7019583748     |
| 54.8304710744    | 73.9370364978    |
| 9.6762261122     | 9.6397642989     |
| 0.3414040356     | 0.2160206136     |
| 0                | 0.6176013312     |
| 195.7829433084   | 160.0697372008   |
| 0.9535123226     | 0.2011090434     |
| 17.7008981294    | 16.3131871551    |
| 125.4655450097   | 129.8788367309   |
| 7.1200346011     | 3.7006537623     |
| 45.026254193     | 10.1749979988    |
| 7.0337130307     | 6.1812839477     |
| 81.9014769056    | 83.8461316321    |
| 0                | 0                |
| 8.9988266829     | 3.972512126      |
| 1.7757813771     | 4.430843989      |
| 0                | 0                |
| 9.8050174956     | 6.5305733642     |
| 9.1135885571     | 6.7993633753     |
| 0                | 2.1253047803     |
| 214.0981418813   | 149.6458223599   |
| 3.9834137573     | 5.0409450067     |
| 16558.5844170479 | 20476.4812747485 |
| 30.4548050966    | 21.5933658917    |
| 0                | 0                |
| 10.2682084194    | 0                |
| 26.3342615404    | 12.8175298402    |
| 1.0779425353     | 0.5115444979     |
| 0                | 0.4284913706     |
| 1.3110204599     | 1.6590749653     |
| 139.2745675507   | 135.4113464243   |
| 2.2843538317     | 1.4454062198     |
| 26.4782228012    | 44.1693176368    |
| 4.2753509377     | 4.2150687372     |
| 1.1048658681     | 2.0972845479     |
| 0.4302316973     | 1.8375227372     |
| 7.7303810338     | 6.0157803543     |
| 0                | 0                |
| 156.7551613507   | 119.6524063608   |
| 63.613336617     | 180.4347054631   |
| 0                | 0                |
| 26.146788592     | 31.9473566104    |
| 616.1398645151   | 266.2522699772   |
| 8.4586512129     | 3.8229588806     |
| 14.3391674842    | 14.4195750605    |
| 0                | 1.1353466562     |
| 7.6183708616     | 14.4613857213    |

gene\_expression\_table

|                  |                  |
|------------------|------------------|
| 5.0153845586     | 11.1070525822    |
| 13.0040211812    | 48.9577194128    |
| 7.3771792762     | 8.1687373292     |
| 0.4327946323     | 0.2738472669     |
| 28.8665991524    | 29.4271131642    |
| 0.5218625132     | 4.6228593694     |
| 2.8181731327     | 2.0379154517     |
| 17.1506563844    | 8.8662639736     |
| 0.8178854603     | 0.2217901463     |
| 0                | 0                |
| 31.3932345367    | 8.8753205301     |
| 2.0361551027     | 4.5522071079     |
| 0                | 0                |
| 4.0054750713     | 7.1758003687     |
| 0.6827326561     | 1.0799837726     |
| 0                | 0                |
| 0                | 0                |
| 1.1191811755     | 1.2746749376     |
| 1.2327174132     | 0.7799918697     |
| 426.6552209238   | 376.247094478    |
| 3.4636504306     | 0.7305321686     |
| 6.3111264297     | 8.3496558666     |
| 352.1942984245   | 302.8448053014   |
| 574.2949437788   | 338.0283094619   |
| 481.318498282    | 630.1702139622   |
| 1.3246935071     | 1.3969816525     |
| 0                | 2.4331379351     |
| 0                | 0.5134920875     |
| 0                | 1.1944630419     |
| 1.9594281642     | 0.9016815701     |
| 0.4572425082     | 0.5786329212     |
| 23.0996317956    | 23.7511677875    |
| 1.5902910904     | 3.0187310759     |
| 42.0078930921    | 41.1992341667    |
| 25.8948116574    | 35.1101367211    |
| 14.0931250597    | 7.0881179792     |
| 51.7386998617    | 23.2650433286    |
| 0                | 0                |
| 0.8148052025     | 1.1784259051     |
| 25.7974314897    | 18.8343622668    |
| 47.2945680718    | 65.6800973762    |
| 25993.8379701136 | 33919.4686130027 |
| 4.7827933409     | 2.0805629643     |
| 0.6031282533     | 1.144873421      |
| 51.6800661246    | 28.8204619524    |
| 1.2002837803     | 1.8227274085     |
| 163.1959116146   | 32.2251214008    |
| 37.7755978631    | 27.3168009765    |
| 3.4465912844     | 8.7232098818     |

gene\_expression\_table

|                |                |
|----------------|----------------|
| 10.6919274227  | 16.6369424372  |
| 1.9037454476   | 1.7208276786   |
| 4.0250877769   | 6.2822087835   |
| 0              | 0              |
| 0              | 0              |
| 4.3110720613   | 1.3638978089   |
| 0              | 0.1339659279   |
| 0              | 0.1995749174   |
| 5.3396635153   | 6.7572569097   |
| 0              | 0              |
| 0              | 0              |
| 1.3090769734   | 0.6212308181   |
| 0.887885876    | 1.6854075973   |
| 0.2289599774   | 0.434617664    |
| 0.3373055478   | 0.6402819869   |
| 9.0363436339   | 9.5294543191   |
| 981.534470467  | 957.7550435646 |
| 46.9488891483  | 49.4208568131  |
| 0              | 0              |
| 0              | 0              |
| 4.332395198    | 3.2895451899   |
| 14.6105057361  | 12.3262374811  |
| 78.2867955432  | 29.3168280412  |
| 107.0110437521 | 141.7934670204 |
| 73.326826392   | 25.5088280034  |
| 9.4229595556   | 3.1798936835   |
| 80.9231710092  | 41.0593904671  |
| 3.1348140569   | 3.2232329635   |
| 57.3065031073  | 70.1030949884  |
| 0              | 0.5325802329   |
| 2.5999837933   | 0.8225592494   |
| 22.3618761134  | 12.1279666069  |
| 13.1241220138  | 10.0996795423  |
| 114.2636878152 | 101.9938172067 |
| 6.5836833747   | 5.3373951892   |
| 269.7076547053 | 131.7559413625 |
| 0              | 0.5179606995   |
| 89.8978404655  | 46.2308895689  |
| 11.6753731829  | 4.924997982    |
| 45.357135978   | 21.7510917288  |
| 152.2043729337 | 119.6059296133 |
| 0              | 0              |
| 5.8710307192   | 4.8293007242   |
| 54.9153656496  | 51.4546281042  |
| 1.0361148958   | 1.9667797003   |
| 5.3205152375   | 4.4314297701   |
| 72.8774047218  | 75.6246349729  |
| 6.3266011418   | 14.8350368173  |
| 0              | 0.3797201304   |

gene\_expression\_table

|                |                |
|----------------|----------------|
| 272.4985210925 | 273.2389313209 |
| 144.8133543491 | 170.1690093692 |
| 12.3188920456  | 8.9523037611   |
| 15.4296751221  | 12.6655146107  |
| 25.3049165219  | 26.8099185656  |
| 4.8262213802   | 4.1108201879   |
| 0.1955880165   | 1.0519321129   |
| 1.602556606    | 3.6757666631   |
| 23.1502273688  | 18.643058241   |
| 76.5758273642  | 124.7400044593 |
| 0              | 1.3624950873   |
| 14.3852492237  | 8.3436364856   |
| 63.3290039089  | 33.1020558503  |
| 3.4639739246   | 9.8631053731   |
| 0              | 0              |
| 0.4072645585   | 0              |
| 8.6553050094   | 12.4467579899  |
| 0              | 0              |
| 0              | 0.173857369    |
| 14.6184108341  | 12.1086719961  |
| 46.9048577687  | 35.9932751294  |
| 1.1263339426   | 1.6926116703   |
| 0              | 0              |
| 0              | 0              |
| 3.4699694822   | 1.2807636532   |
| 0              | 4.5177813812   |
| 0.133725505    | 0.8461372051   |
| 4.0879500881   | 7.4555431536   |
| 0              | 0.2548722293   |
| 0              | 0              |
| 0              | 0              |
| 1.8174755319   | 1.2937418897   |
| 0              | 0              |
| 3.8424855945   | 3.8206164229   |
| 0              | 0.134899263    |
| 0              | 0              |
| 2.3617703238   | 1.7932690471   |
| 0.5343587023   | 1.1270370075   |
| 8.2403790287   | 4.0967398151   |
| 41.4740384665  | 70.8157773892  |
| 1.3692460889   | 3.4655170945   |
| 353.2860967795 | 428.5597669114 |
| 33.1707212641  | 39.5077700074  |
| 15.4826837032  | 9.7965415923   |
| 39.3771282516  | 26.334796659   |
| 203.2178206034 | 116.1098078799 |
| 18.8320004118  | 16.6098951822  |
| 3.9924184386   | 8.8415954967   |
| 347.1966243322 | 167.9950440513 |

gene\_expression\_table

|                 |                 |
|-----------------|-----------------|
| 97.1355170851   | 106.7897118585  |
| 38.9173512032   | 37.7802633758   |
| 0               | 0               |
| 0.602731294     | 4.5764796108    |
| 121.4547967191  | 118.9928208367  |
| 8.8877950661    | 5.6236796991    |
| 38.032694339    | 39.2467449753   |
| 0               | 2.3709083279    |
| 118.9691475534  | 113.4354801285  |
| 1313.7310742769 | 1649.8903477116 |
| 71.0512812472   | 54.9475881712   |
| 420.8739496141  | 273.877193633   |
| 0               | 3.046159837     |
| 4.3689469642    | 2.4993345522    |
| 297.6314619482  | 180.7530663126  |
| 22.444330851    | 11.7316465994   |
| 6.6139093902    | 9.6574548907    |
| 104.7041914089  | 78.0148683033   |
| 727.9676532373  | 555.7331422184  |
| 0               | 0.0912571691    |
| 3.7238900378    | 3.2243571451    |
| 49.8759530193   | 35.5533614069   |
| 141.2987036208  | 127.3352485646  |
| 0.3356662305    | 1.0619503219    |
| 0               | 0               |
| 0.7798967283    | 0.1644910939    |
| 1.2493858575    | 1.8972928599    |
| 0.5567379509    | 0.8806784722    |
| 0.6915933619    | 1.3128001446    |
| 3.09173891      | 2.721770477     |
| 0               | 0               |
| 23.9320037968   | 15.696783976    |
| 0               | 0               |
| 0               | 0               |
| 9.2536848331    | 13.6621180714   |
| 24.9061187334   | 20.4118424935   |
| 60.2981346519   | 57.3439589319   |
| 7.923731565     | 7.2865430301    |
| 34.7373840772   | 46.2284739765   |
| 116.7855935859  | 50.6181640478   |
| 2.2469870842    | 1.7264261547    |
| 9.4111750921    | 11.9096882671   |
| 56.6503973073   | 34.2865943988   |
| 1.1321061793    | 8.4936382133    |
| 262.7121124114  | 86.0479230761   |
| 0               | 0               |
| 3.7663469039    | 2.4532171441    |
| 5.6246237202    | 2.4022809197    |
| 1.0786714309    | 2.218191733     |



gene\_expression\_table

|                |                |
|----------------|----------------|
| 0              | 0              |
| 0              | 1.0259066835   |
| 22.2683352366  | 23.4835119155  |
| 0.4484844713   | 0.0945916281   |
| 0              | 0              |
| 13.8861350747  | 9.9714725237   |
| 21.1685830891  | 10.5665733945  |
| 2.6893802775   | 3.903861903    |
| 15.2092197819  | 3.9868825199   |
| 68.7465594273  | 43.4988236967  |
| 0              | 0              |
| 0              | 0.4461761346   |
| 0              | 0              |
| 0              | 0.1515878316   |
| 0              | 0              |
| 16.7165357046  | 13.5521033094  |
| 16.8923159096  | 15.3201472874  |
| 12.3387490613  | 11.9498611824  |
| 0.5084274937   | 3.8604401027   |
| 507.9912965519 | 258.1677053069 |
| 17.9712818752  | 12.9360232746  |
| 0              | 1.0193560674   |
| 1.3234380419   | 1.5073102911   |
| 0              | 0              |
| 9.620375804    | 7.8041207365   |
| 17.8669501817  | 11.7828498239  |
| 24.1270562063  | 19.0827470674  |
| 7.4226712819   | 6.7514122336   |
| 36.1798601297  | 28.7552270354  |
| 3.3240812371   | 4.6272275261   |
| 0.753545761    | 0.1986666344   |
| 7.2767307208   | 3.6834335199   |
| 63.7688204737  | 24.7301548699  |
| 0.3232305725   | 0.1168694305   |
| 8.1546459446   | 4.5527519855   |
| 6.2482139703   | 4.0672762971   |
| 22.1432443253  | 32.4464264993  |
| 18.4460057084  | 28.5304784735  |
| 68.4379371977  | 30.2252935054  |
| 0              | 0              |
| 100.6332431423 | 47.3479744912  |
| 48.4053130656  | 24.7631174222  |
| 6.539499041    | 4.8274503421   |
| 312.3651571896 | 154.048007849  |
| 22.8926392342  | 18.4614407086  |
| 2.1293356764   | 6.7365987439   |
| 51.8445155423  | 31.7948337466  |
| 435.6675795144 | 411.3327419773 |
| 13.2095950787  | 16.1195078706  |

gene\_expression\_table

|                 |                 |
|-----------------|-----------------|
| 0               | 0               |
| 2.3123703556    | 6.4795909768    |
| 37.7191257257   | 23.4619521546   |
| 0               | 0.233822701     |
| 214.8006850747  | 92.3586734813   |
| 0               | 0               |
| 22.0125902993   | 8.5117307184    |
| 2.1184416675    | 3.6383009172    |
| 0               | 0               |
| 1.2211500333    | 0               |
| 6.6353171624    | 7.893072299     |
| 1608.5787459376 | 2418.0199392775 |
| 0               | 0               |
| 11.832165786    | 4.9911374743    |
| 0               | 0.0817914937    |
| 29.0701680347   | 19.6000693854   |
| 1.6984582144    | 4.2987422229    |
| 1.8339554506    | 2.3933669197    |
| 9.2600828636    | 10.8170617121   |
| 947.4921376347  | 390.6768345541  |
| 33.4323278968   | 18.927292036    |
| 0.8507378845    | 3.2297846662    |
| 0               | 0.4859926977    |
| 1297.382641377  | 103.6097809465  |
| 101.6759668501  | 75.8641420181   |
| 16.410401094    | 25.8257455758   |
| 10.2375976623   | 12.9555125231   |
| 0               | 1.2029122653    |
| 20.2875534185   | 6.1715305963    |
| 45.8003021427   | 37.973487677    |
| 7.5452925421    | 2.2148453494    |
| 3.0089865983    | 2.855867522     |
| 0               | 0               |
| 798.9183497079  | 1115.2615075581 |
| 155.6787448952  | 63.1713344137   |
| 0               | 0.2870445641    |
| 0               | 0               |
| 3.3248560117    | 1.7531462262    |
| 1.2523347012    | 1.22822705      |
| 15.152727317    | 8.9413982469    |
| 0.895896441     | 2.1257668198    |
| 1.3160445962    | 1.3878607731    |
| 18.5899297334   | 14.7032826578   |
| 37.9484742457   | 25.7578842073   |
| 247.094412657   | 198.8396117464  |
| 13.8906028459   | 20.2060195166   |
| 16.3324659751   | 10.4932226019   |
| 2.6454186028    | 4.5433532943    |
| 5.8914702125    | 13.2543275848   |

gene\_expression\_table

|                 |                |
|-----------------|----------------|
| 0.2500287776    | 0              |
| 1.9717580442    | 1.5803108003   |
| 3.9402482589    | 2.493159887    |
| 8.3092750585    | 6.4709241745   |
| 223.681246293   | 122.4064698126 |
| 0               | 0              |
| 1.9668286491    | 2.4000970279   |
| 9.2553863696    | 8.7330343485   |
| 7.8837485829    | 2.4147559832   |
| 0               | 0              |
| 169.0303761291  | 162.3853336311 |
| 2.834232677     | 3.1383407399   |
| 2.208979679     | 10.7158061116  |
| 0.5402430929    | 0.3418344023   |
| 7.029713573     | 23.7226336966  |
| 7.4029478665    | 7.4395399246   |
| 6.6837448976    | 6.3436274489   |
| 15.7012503108   | 10.6990561216  |
| 0               | 0              |
| 5.5341757578    | 4.4444710793   |
| 0.4482568142    | 0.1418154181   |
| 0.1783405403    | 0.7899046368   |
| 0               | 0.117536714    |
| 4.0763435763    | 4.0673152525   |
| 2.1589345727    | 1.7303277308   |
| 0.5620404581    | 0.6223463873   |
| 3.3240471894    | 1.9029528676   |
| 0               | 0              |
| 0               | 0.1089459689   |
| 2.2690507364    | 2.8714466225   |
| 0               | 0              |
| 0               | 0              |
| 0               | 0              |
| 4.2758158572    | 5.5191945871   |
| 0.5121131244    | 1.0126106082   |
| 1099.6167637437 | 796.0120796213 |
| 0               | 0              |
| 41.0485479124   | 28.8195040198  |
| 20.8957735066   | 15.5548587422  |
| 16.0899375659   | 14.1142583456  |
| 13.0410579504   | 5.0779217536   |
| 13.098429684    | 8.8348432107   |
| 0.2779303464    | 0.2078323656   |
| 3.9081071969    | 2.3675963866   |
| 2.9393540031    | 4.6496305644   |
| 3.08513892      | 2.3425157287   |
| 239.7133818046  | 220.6771419119 |
| 9.4837994786    | 15.3020313828  |
| 12.815745961    | 5.4060390197   |

gene\_expression\_table

|                 |                 |
|-----------------|-----------------|
| 20.3355875259   | 28.0257687105   |
| 0               | 0.0356191646    |
| 1.4793570967    | 1.3837277337    |
| 12.8682960169   | 19.9856679087   |
| 0.3580259634    | 0.3624608042    |
| 1.2479481292    | 1.1844434712    |
| 0.2828526342    | 1.4317815432    |
| 14.8267858857   | 16.2797096729   |
| 2408.2090479723 | 1074.8185685364 |
| 71.9731042573   | 49.8775739115   |
| 3.4355449267    | 2.9274014769    |
| 6.1136005029    | 2.9012480695    |
| 33.9997705491   | 20.8279471367   |
| 0.1223857897    | 0.8131053877    |
| 111.7288117468  | 184.5937862619  |
| 12.492963328    | 3.7727552177    |
| 64.1587040573   | 72.5663355047   |
| 0.9086041919    | 0.1437279694    |
| 4.2247145245    | 10.2470887694   |
| 2.901867523     | 3.3662437632    |
| 0               | 0.5082210539    |
| 5.6571062417    | 10.8618938495   |
| 1.2664334088    | 0               |
| 0               | 0.3634333052    |
| 0.5592564434    | 0               |
| 45.6557428431   | 80.990407442    |
| 0.9604010775    | 1.2153718672    |
| 176.1408699527  | 106.7627897728  |
| 2.3780078193    | 2.7943778852    |
| 0               | 0               |
| 19.5050059485   | 8.2277554157    |
| 0               | 0               |
| 4.1271650599    | 1.3057149827    |
| 650.8488994326  | 712.061981321   |
| 0               | 0.2904551634    |
| 25.9890098232   | 13.3416291386   |
| 77.7049129359   | 44.656401089    |
| 1.6720209544    | 2.1159151911    |
| 221.8115789209  | 299.9553187742  |
| 0               | 0               |
| 0.4918413008    | 0.9336256916    |
| 11.4455204516   | 9.6560793808    |
| 28.9665485872   | 31.7691346451   |
| 6.3595282598    | 2.6826263585    |
| 121.35864821    | 183.3020412123  |
| 3.010940803     | 8.2556421496    |
| 0               | 0               |
| 0.5161110018    | 0.6531300377    |
| 5.5739057426    | 4.4085541374    |

gene\_expression\_table

|                |                |
|----------------|----------------|
| 7.1729181558   | 2.5214474154   |
| 0              | 1.3780566302   |
| 5.8983410959   | 3.4655466194   |
| 557.5308718314 | 648.1180266971 |
| 6.3253634879   | 6.0034830863   |
| 3.8270563822   | 4.3587695736   |
| 136.6370793215 | 169.4537509336 |
| 0              | 0              |
| 12.0543320369  | 22.1191122643  |
| 2.5511603254   | 2.1109107249   |
| 0              | 0              |
| 2.497307936    | 2.3702267836   |
| 3.0761738402   | 1.5293330325   |
| 2.4413354931   | 0              |
| 271.1167310747 | 193.6029255813 |
| 58.6401525791  | 32.8228376564  |
| 119.7406229994 | 99.0194741957  |
| 0              | 0              |
| 1.1230512888   | 0.3553007628   |
| 60.0936352583  | 33.4932664858  |
| 1.2431711742   | 1.4858120919   |
| 0              | 0              |
| 1.6563401577   | 0.5240178498   |
| 12.5004276411  | 12.0840246989  |
| 1.4817169099   | 1.3787415683   |
| 0              | 0.2587417213   |
| 3.2770877934   | 2.6956156782   |
| 4.0034007534   | 3.1997294044   |
| 0              | 2.9623346862   |
| 0              | 0              |
| 0.211389832    | 0.4012655664   |
| 0              | 0.4151502863   |
| 0              | 0              |
| 0.403660918    | 0.542752938    |
| 0.9771516706   | 1.70028302     |
| 0              | 0.1350063591   |
| 1.7662439906   | 3.1043790326   |
| 1.0621980357   | 0.5880849861   |
| 2.2465787638   | 1.24381631     |
| 0.3190541508   | 1.1439804711   |
| 1.458717545    | 0.9229916063   |
| 0              | 0              |
| 0              | 0.0622724328   |
| 0              | 0.1279112182   |
| 0              | 0              |
| 0              | 0              |
| 0.7994621016   | 0.6096178526   |
| 6.2776079909   | 4.5992796556   |
| 1.5367485982   | 0.6945465125   |

gene\_expression\_table

|                 |                 |
|-----------------|-----------------|
| 12.4455614651   | 20.159557926    |
| 0               | 0               |
| 26.8729984502   | 22.5298629745   |
| 0.1746817043    | 0.4421136836    |
| 252.590177527   | 197.3556873297  |
| 1.8876612791    | 1.9906704147    |
| 10.3628859489   | 28.1952350246   |
| 1.7919357225    | 1.5873657592    |
| 0               | 0.025420136     |
| 2.2370073744    | 3.4742817881    |
| 172.7823532117  | 141.9059554307  |
| 8.3495988093    | 7.9247106234    |
| 412.0108743271  | 172.2459109522  |
| 0               | 0               |
| 83.8686972181   | 138.2603688887  |
| 115.791064972   | 61.2590720262   |
| 10.055003824    | 12.3501946813   |
| 15.0852260354   | 31.3885413204   |
| 24.3520096182   | 18.7401102409   |
| 0               | 0               |
| 3.5586997516    | 8.7567596159    |
| 384.838068078   | 295.9239582266  |
| 0               | 0               |
| 0               | 0               |
| 0.1152677097    | 0.2188041041    |
| 2.6395821515    | 1.3918116969    |
| 337.4614152274  | 325.854771616   |
| 9.7285374116    | 7.127597687     |
| 33.3112707122   | 34.4264760743   |
| 37.7443281955   | 22.2064562645   |
| 31.3168351873   | 10.6698692966   |
| 4.2943082072    | 3.458239815     |
| 2527.0260302929 | 3663.0853648429 |
| 14.4978855326   | 13.3203064565   |
| 25.0043254199   | 13.3395127634   |
| 19.3877516001   | 13.4941855321   |
| 13.8909246483   | 43.9468452891   |
| 230.7508947323  | 174.0837704992  |
| 0               | 0               |
| 2.0866866665    | 0               |
| 153.9939406131  | 170.6807004215  |
| 0               | 0               |
| 44.2353655274   | 21.4465506146   |
| 1.7013419683    | 3.8446793838    |
| 6.4291860432    | 4.4493913308    |
| 3.0146786147    | 2.7745647392    |
| 0               | 0               |
| 0               | 1.4832268603    |
| 168.7125316134  | 69.3494988117   |

gene\_expression\_table

|                 |                 |
|-----------------|-----------------|
| 8.0890326647    | 3.7160037506    |
| 5.5455694993    | 11.6963792785   |
| 0               | 0               |
| 0.8848778167    | 1.8663306918    |
| 33.3185157168   | 18.8628587014   |
| 13.9891631536   | 1.1064410837    |
| 28.1053418585   | 67.8806359423   |
| 0               | 0               |
| 26.7669305461   | 24.4639150455   |
| 1.5063264077    | 4.3419716367    |
| 17.2303805982   | 6.6362328388    |
| 0.2437773186    | 0.9254886376    |
| 4.6833195737    | 3.7864800196    |
| 1.8811507817    | 13.8866324889   |
| 43.7919066824   | 56.7630378764   |
| 0               | 0               |
| 3.3010047359    | 3.5507624118    |
| 39.8846852468   | 24.3954850395   |
| 0               | 0               |
| 0               | 0               |
| 1.7250991331    | 2.4559703535    |
| 0               | 0.1837613865    |
| 33.4258422306   | 30.8184672767   |
| 5.7582314565    | 5.4652108487    |
| 7.1315412404    | 9.0248488852    |
| 20.1489755492   | 6.1813816369    |
| 1.8435614281    | 1.1664984285    |
| 23.6406284536   | 24.574538055    |
| 36.3388262836   | 49.0040345255   |
| 11.8031179159   | 7.4683264089    |
| 22.4712322393   | 18.0100855217   |
| 2.6496472659    | 1.6765426552    |
| 15.297617968    | 10.840975892    |
| 0.2829173632    | 0.1790136496    |
| 115.9645263878  | 107.6175561073  |
| 0.8261776889    | 0.2613785907    |
| 0               | 0               |
| 2041.1348113666 | 2355.8092609835 |
| 45.056502592    | 34.9466801711   |
| 11.2135355438   | 8.3853226138    |
| 0.8758505836    | 0.5541872995    |
| 89.4202512135   | 118.962936543   |
| 0               | 0               |
| 8.9716421894    | 5.6767332812    |
| 0.7739126519    | 1.1892396295    |
| 13.7620663492   | 17.4156700441   |
| 13.6697511466   | 6.3429104435    |
| 29.4141645811   | 18.9270226505   |
| 33.3298159138   | 12.8592491805   |

gene\_expression\_table

|                |               |
|----------------|---------------|
| 4.3084287565   | 2.8696032507  |
| 68.5876445881  | 64.4193094521 |
| 0.7113304337   | 1.8003540763  |
| 0              | 0             |
| 0.9302250098   | 1.4714806835  |
| 13.1161655894  | 26.083032154  |
| 0.953929239    | 1.9616705247  |
| 0              | 0.2695382283  |
| 0.8745701002   | 0.7378361122  |
| 0              | 0             |
| 0.4120287598   | 1.042831323   |
| 2.5302748541   | 8.805559054   |
| 0.2021671072   | 3.3259092098  |
| 26.4859581862  | 30.8513786824 |
| 8.5576300902   | 16.2443115259 |
| 1.5325779201   | 0.6060788469  |
| 0              | 0             |
| 3.1251069103   | 5.2730289595  |
| 48.9136416894  | 34.8184204516 |
| 117.867886218  | 75.1988624945 |
| 0.3151073797   | 0.3987632391  |
| 18.8614608556  | 23.7075942981 |
| 5.7237874259   | 4.4908828532  |
| 35.2502127697  | 31.8274615431 |
| 0              | 0             |
| 0              | 0.150462367   |
| 6.0027434256   | 1.8990934248  |
| 0              | 0             |
| 2.3683760416   | 3.2469029374  |
| 1.1243109255   | 5.6911884041  |
| 0              | 0             |
| 0              | 0.2237952298  |
| 2.7910875495   | 4.0366579173  |
| 0.5285333221   | 1.337700562   |
| 9.3035304105   | 17.9700265671 |
| 11.0153136249  | 6.0493034972  |
| 2.0020279403   | 2.2801802744  |
| 0              | 0.5158624678  |
| 0              | 0             |
| 4.7345752669   | 1.4978819052  |
| 0.2353676834   | 0             |
| 19.6245646693  | 8.7445654416  |
| 0.4790345217   | 0.3031051791  |
| 2.1286024341   | 4.489519319   |
| 0              | 0             |
| 1.0041127394   | 1.724505497   |
| 217.1194966483 | 39.2067886    |
| 1.6949441921   | 0             |
| 0              | 0             |



gene\_expression\_table

|                 |                 |
|-----------------|-----------------|
| 8.6236906648    | 20.7349652299   |
| 1.1163054094    | 1.1099520545    |
| 8.7465577241    | 3.0864437467    |
| 2.9050951539    | 4.4116205253    |
| 8.7751430297    | 7.9320000623    |
| 5.4782845198    | 5.4471053413    |
| 0.7996272666    | 0.2891186392    |
| 0               | 0.2989809839    |
| 45.4312290043   | 99.4670744206   |
| 10.1103393335   | 0               |
| 1.8306627086    | 2.3890697926    |
| 2.8668312163    | 6.893063295     |
| 8.9108569533    | 9.2091774689    |
| 1.3882605484    | 2.6352315524    |
| 139.9425300114  | 100.3538245919  |
| 2.2467357925    | 2.2417597011    |
| 10.3239439975   | 13.6091483324   |
| 5.7780486194    | 6.9796612717    |
| 1.3065866558    | 8.2673202932    |
| 75.8461529878   | 26.1951057886   |
| 4.979985771     | 1.9865285595    |
| 0               | 0               |
| 16.5608397074   | 16.3122591239   |
| 0               | 2.7689510579    |
| 1035.9636226259 | 1083.3805580497 |
| 4.8005136954    | 1.6874921178    |
| 29.2830150988   | 10.0363187761   |
| 0               | 0               |
| 1.3875334385    | 1.7559008892    |
| 0               | 0.6088052348    |
| 3.7857271421    | 2.7946192319    |
| 5.4258475972    | 6.4576118462    |
| 0               | 0               |
| 13.2607229977   | 7.7690871419    |
| 0               | 0               |
| 1.0676099255    | 0.8444018201    |
| 0               | 0               |
| 1.9676335901    | 2.6678658752    |
| 0.0513354992    | 0.3248211763    |
| 446.3523814368  | 293.5093933641  |
| 1.3290607329    | 1.6819046359    |
| 0               | 0               |
| 0.9107125552    | 1.4406148179    |
| 2.5989513789    | 2.5580570508    |
| 0               | 2.7133327997    |
| 7.5643649075    | 5.9466028279    |
| 3.4448077605    | 1.5569099716    |
| 101.037779895   | 36.2229647466   |
| 50.0757121611   | 54.5347555929   |

gene\_expression\_table

|                 |                 |
|-----------------|-----------------|
| 3.6039504383    | 3.6105861329    |
| 1.1907577185    | 3.3151457496    |
| 106.8906140617  | 105.0488056819  |
| 12.1784016991   | 4.047482587     |
| 42.8069399797   | 28.0163546425   |
| 23.3511725015   | 72.9127137535   |
| 4.7902833466    | 2.020675095     |
| 73.6765371693   | 13.9854680479   |
| 0               | 1.279865586     |
| 0               | 0               |
| 3.3289344912    | 3.3935737102    |
| 0               | 1.0186658065    |
| 0               | 0.0888238459    |
| 5.3050647687    | 2.3497154665    |
| 15.6634317754   | 8.7782332056    |
| 0.7055925883    | 0.0744096574    |
| 0.3250594996    | 0.493628981     |
| 1.8674483306    | 3.5448380125    |
| 12.3296863911   | 27.1356810735   |
| 99.3412961485   | 78.8924426665   |
| 0               | 0               |
| 0               | 0               |
| 0               | 0.1282257231    |
| 0               | 0.0614950432    |
| 12.9996832855   | 12.1963470637   |
| 2.9806750405    | 2.466304782     |
| 9.6059085824    | 8.7794202286    |
| 1.0590739238    | 1.3402407415    |
| 0               | 0.2969606887    |
| 96.5853354454   | 79.9757983136   |
| 0.1938856241    | 2.0855522528    |
| 0               | 0.3233255543    |
| 277.2850591949  | 469.3174789324  |
| 0.2469473051    | 1.3281580593    |
| 132.9755079272  | 39.9060044439   |
| 12.4769983505   | 5.6390848194    |
| 16.5065347828   | 10.7427857104   |
| 0.215712642     | 1.0919232917    |
| 0               | 0.1655353492    |
| 2.6041826156    | 1.3731460577    |
| 2122.4226205391 | 2918.1585927235 |
| 8.3405524897    | 4.9255886687    |
| 18.5682578799   | 33.5683241087   |
| 6.6459387429    | 15.4189325784   |
| 0               | 0.6678509743    |
| 0               | 0.7850801346    |
| 0.435897431     | 2.4822948365    |
| 0               | 0.1931586365    |
| 0               | 0               |

gene\_expression\_table

|                  |                  |
|------------------|------------------|
| 0                | 0                |
| 15.0654291508    | 12.2211886974    |
| 0                | 1.4868605312     |
| 0                | 0                |
| 97.6640602487    | 112.9377658561   |
| 0                | 0                |
| 3.9907860045     | 8.7538090728     |
| 0                | 0                |
| 9.7499392248     | 1.6825075555     |
| 12201.5989903416 | 18515.6647160745 |
| 11.2706499485    | 11.4722709213    |
| 20.012714529     | 27.7542609951    |
| 0                | 0                |
| 81.369668304     | 50.1530220009    |
| 7.4981337561     | 0.9488765722     |
| 8.3084159523     | 26.2854114969    |
| 2.344274623      | 2.1013708654     |
| 2.6279294981     | 9.3261442628     |
| 1.5928242909     | 0.5497344839     |
| 73.5471336196    | 315.4130238947   |
| 0.5654723934     | 2.1467882161     |
| 0.4230111181     | 1.3382841411     |
| 0                | 0                |
| 0                | 0                |
| 87.7354394559    | 111.730472096    |
| 22.5284550296    | 13.5967867847    |
| 2.8824721233     | 1.2159071208     |
| 4000.075065948   | 6922.6586426582  |
| 2422.3648287561  | 4128.5619657726  |
| 21.84262003      | 46.4376841529    |
| 0.3848979744     | 0.243541048      |
| 15.2495070447    | 15.2516466899    |
| 0.5948288557     | 1.1291192929     |
| 1.0517757653     | 2.5510929957     |
| 15.2880333104    | 32.244593823     |
| 0.3402576908     | 0.64588582       |
| 39.2038146092    | 24.8058933295    |
| 90.1535929267    | 73.405392007     |
| 241.5223040196   | 144.5434457267   |
| 34.8477879838    | 6.7845086396     |
| 0                | 0                |
| 0.4613949145     | 0.5838877235     |
| 1.7642835511     | 0.7442239998     |
| 7.8295902071     | 15.0392601381    |
| 26.5298775472    | 39.038519121     |
| 12.6291056248    | 12.9084793093    |
| 3.3148120273     | 2.5169042669     |
| 2.1831048803     | 8.6333860823     |
| 2.0147169205     | 0.8825508468     |

gene\_expression\_table

|                |                 |
|----------------|-----------------|
| 75.0183912448  | 51.2236770079   |
| 152.3225462153 | 21.6670119754   |
| 5.3710564813   | 5.6904983958    |
| 5.65106834     | 4.0864769291    |
| 0              | 0               |
| 0              | 0.3601537045    |
| 13.1002816468  | 17.7623489134   |
| 6.0480380829   | 8.1175535505    |
| 0              | 0.7742021439    |
| 7.1415844891   | 5.4491161256    |
| 4.6138917473   | 11.6776091979   |
| 0              | 0               |
| 0              | 0.1524356151    |
| 0.1709900547   | 0.3245776795    |
| 0.6265418071   | 2.7750744593    |
| 1.838413602    | 1.5509882448    |
| 647.5321437346 | 610.4673473292  |
| 0              | 3.2526147449    |
| 69.0569637593  | 48.0647524514   |
| 0              | 1.6851655453    |
| 0              | 0.3541853872    |
| 1.7194607701   | 2.1759495025    |
| 0.7924442624   | 0.2507063157    |
| 1.098243132    | 4.8643305703    |
| 18.3527475762  | 21.334686821    |
| 0              | 0.2141166711    |
| 0              | 0.2058454413    |
| 1.1680766191   | 7.3909093551    |
| 39.2446058243  | 60.331842912    |
| 9.8666583695   | 15.6076186382   |
| 872.5435986704 | 1143.6250088025 |
| 15.0902952462  | 23.1168424276   |
| 0              | 0               |
| 14.0447860687  | 15.9220464756   |
| 17.0553234716  | 54.7882071231   |
| 2.0045816026   | 1.6911768374    |
| 17.4277414788  | 12.2302349331   |
| 31.7340631996  | 14.2669912496   |
| 2.8496742028   | 2.9505404699    |
| 0              | 0               |
| 0              | 1.2765239004    |
| 18.0422095724  | 1.2684511856    |
| 0              | 0               |
| 1.4812991777   | 1.1715999373    |
| 0.7815730773   | 0.7418009668    |
| 0.6506459101   | 0               |
| 4.5018588555   | 4.920161241     |
| 1.741649236    | 0.661208593     |
| 0.6902547609   | 2.7661027091    |

gene\_expression\_table

|                 |                 |
|-----------------|-----------------|
| 22.4479678711   | 14.4173587306   |
| 2.6330982572    | 9.1633927283    |
| 10.5320634221   | 8.9761038015    |
| 0               | 0.1525575018    |
| 0               | 0               |
| 0               | 0.2683914932    |
| 0               | 0.2314086635    |
| 2.6869734579    | 5.6505334203    |
| 2.3006493897    | 2.1835756514    |
| 1.0184046243    | 0.6443872039    |
| 0.9699960459    | 1.0229284524    |
| 0               | 0               |
| 2.7478713337    | 4.2677013227    |
| 0.6911100951    | 0               |
| 0.4567694871    | 0               |
| 2.0843773271    | 5.0725873871    |
| 0               | 0               |
| 0               | 0.3241159503    |
| 0.2053232402    | 0.2598332047    |
| 0               | 0               |
| 0.8278373468    | 1.5714219489    |
| 2.5865823248    | 2.5293509176    |
| 0               | 0               |
| 0               | 0.0511604718    |
| 1.2033993774    | 0.1269068537    |
| 66.6449494853   | 86.8610288063   |
| 0               | 0               |
| 13.875334385    | 26.3385133383   |
| 122.6427550361  | 107.9668884049  |
| 19.9793283064   | 27.9924613073   |
| 47.3747813343   | 21.1031080505   |
| 7.5467343123    | 7.3797532655    |
| 10.540859995    | 6.6696430244    |
| 1.8794349251    | 1.7837956358    |
| 35.6644209974   | 18.3351763926   |
| 131.7562504243  | 73.2389059141   |
| 1171.6096761624 | 1474.9307464359 |
| 0               | 1.1486840619    |
| 6.7208061631    | 3.7209682815    |
| 0               | 0               |
| 0               | 0               |
| 24.0935721326   | 19.1717561065   |
| 0.2903594095    | 1.6535028924    |
| 0               | 0.5869251547    |
| 106.4656724742  | 104.1099847429  |
| 0.7827607279    | 1.4858563622    |
| 73.8515720626   | 43.5062905368   |
| 0.701960194     | 0.4441595765    |
| 0.8832341591    | 0.7451455955    |

| gene_expression_table |                 |
|-----------------------|-----------------|
| 0                     | 0.4991410453    |
| 0                     | 0               |
| 0                     | 0               |
| 0                     | 0               |
| 1.4633275655          | 0.2314771398    |
| 59.5743343283         | 15.5746524077   |
| 0                     | 0               |
| 2.6697933207          | 1.8769887853    |
| 1.2066769927          | 0.5453678617    |
| 0.5033763411          | 0               |
| 15.213441438          | 4.9397506476    |
| 2.5604595595          | 0.9720659177    |
| 12.044214492          | 7.913989001     |
| 19.297352246          | 23.4812345004   |
| 2.0722297917          | 4.5891526341    |
| 9.2008853414          | 8.7326775184    |
| 0                     | 1.5970882935    |
| 0.2187353669          | 1.3840301595    |
| 25.8441946612         | 29.7321872348   |
| 120.6681527148        | 70.2598896148   |
| 14.9754600052         | 9.2602453982    |
| 0                     | 0.6871037226    |
| 1.2277959458          | 2.7967602651    |
| 23.2863274498         | 32.5939102561   |
| 0                     | 1.5299312461    |
| 2.0327068295          | 0               |
| 2.4646975552          | 7.0178275671    |
| 660.9362441135        | 1313.7136008974 |
| 177.3849831457        | 60.3925037811   |
| 12.0717800074         | 16.1752662041   |
| 8.3369392047          | 7.1933593012    |
| 15.5900667554         | 3.288162447     |
| 0                     | 0               |
| 26.2482440276         | 22.8364976317   |
| 19.286931259          | 5.1630819078    |
| 55.0768767612         | 30.2028512026   |
| 4.9920948665          | 8.6864448896    |
| 11.2829805162         | 22.4375288334   |
| 0                     | 0               |
| 16.9179296514         | 26.5771408657   |
| 55.620512191          | 43.1919301553   |
| 1.1089812466          | 8.4203858573    |
| 57.1277466727         | 23.8457407012   |
| 11.7181255661         | 15.5895628698   |
| 0.2062480888          | 0               |
| 0.0995644917          | 0               |
| 7.815202233           | 5.2900057221    |
| 12.3982579722         | 10.7867325723   |
| 1.6390764087          | 2.4997063366    |

gene\_expression\_table

|                |                |
|----------------|----------------|
| 0.5882064391   | 0              |
| 0              | 0.301717863    |
| 0              | 0              |
| 0.4020724254   | 0.5088160831   |
| 4.6535999831   | 1.7399479862   |
| 0              | 0              |
| 0.3921500646   | 0.4962594977   |
| 3.9240255989   | 2.128195827    |
| 14.6688691706  | 14.2317975489  |
| 6.5168896102   | 2.9107119857   |
| 4.9821275025   | 2.0060730228   |
| 4.8718958611   | 0.9247956882   |
| 4.3359952026   | 4.2208700488   |
| 0              | 0              |
| 0              | 0.4669335917   |
| 14.1898685073  | 28.0578854428  |
| 6.9726215993   | 12.6473587699  |
| 8.2079010352   | 1.4426339742   |
| 7.2253704211   | 4.9693414021   |
| 3.12037429     | 1.4807934998   |
| 3.3683816191   | 2.4357896502   |
| 6.4764335797   | 4.8429850461   |
| 2.8407451602   | 2.5164416007   |
| 2.3644503896   | 2.9921733245   |
| 1.4334377681   | 0.3023320113   |
| 0.7833559078   | 0              |
| 2.1758048112   | 2.7534454282   |
| 0.563744776    | 0              |
| 7.1033137406   | 4.4945637228   |
| 6.978131479    | 6.1324384301   |
| 5.2484487682   | 3.320913069    |
| 1.2553739782   | 1.9858190652   |
| 1.1116736748   | 0              |
| 0              | 0              |
| 0              | 0.2977179243   |
| 0              | 0              |
| 0              | 0              |
| 5.0545082983   | 2.9423429158   |
| 0.6331259058   | 0.4807262918   |
| 0.7299358173   | 1.3855827705   |
| 1.2083393761   | 2.0388449759   |
| 10.1577645882  | 22.2032014891  |
| 0.7279158583   | 3.2240796768   |
| 0              | 0.8756572905   |
| 1160.664540596 | 1531.083363941 |
| 0              | 0              |
| 21.9092855042  | 8.0867041297   |
| 0.8343179199   | 1.0558156919   |
| 2.9766267104   | 2.5112483022   |

gene\_expression\_table

|                |                |
|----------------|----------------|
| 5.6762731575   | 6.5846283346   |
| 1.8075770067   | 5.4327155043   |
| 9.4524641985   | 8.8290501822   |
| 3.7286607162   | 2.6368419041   |
| 188.9961806441 | 130.8556537895 |
| 175.1337937615 | 215.8473288209 |
| 162.8195057554 | 179.690776297  |
| 4.1434178256   | 9.8314266378   |
| 11.7943129044  | 7.4627551099   |
| 394.3230222749 | 218.316586275  |
| 66.3531716241  | 99.0832480091  |
| 0              | 0              |
| 0              | 0.6026608984   |
| 65.7175042425  | 34.420832519   |
| 37.9766001386  | 48.0587668035  |
| 18.4916489622  | 15.6005863618  |
| 10.1095125824  | 11.8339162268  |
| 60.3872789996  | 36.4727592564  |
| 0              | 0              |
| 8.3513347345   | 22.3803055402  |
| 0              | 0.0841694297   |
| 13.4065381404  | 12.9231336201  |
| 0              | 0.5161347626   |
| 0              | 0.8112983262   |
| 0              | 0              |
| 2.5586843146   | 2.2261065627   |
| 124.1606163702 | 74.8436788655  |
| 29.9894840211  | 19.1286299871  |
| 0              | 1.8221613001   |
| 6.3272518976   | 2.5021980834   |
| 1.3183602172   | 0.2780605514   |
| 0.2155133433   | 0.2045464602   |
| 0.2200983254   | 0.2785308336   |
| 23.7649843478  | 14.2681570487  |
| 0              | 5.0370498786   |
| 13.091909842   | 7.9741242407   |
| 1.8410600707   | 1.9415261917   |
| 2.0553260042   | 1.5605888802   |
| 0              | 0              |
| 493.4977373704 | 344.0762931038 |
| 3.0396359022   | 1.5569610107   |
| 596.8453072625 | 184.8211492516 |
| 232.0432056226 | 150.8460022137 |
| 0.2758308579   | 0.4654125901   |
| 0              | 0              |
| 13.5512646021  | 80.4679335834  |
| 2.8490373952   | 6.9103696656   |
| 2.8343138987   | 2.6004139892   |
| 0              | 1.7164727461   |



gene\_expression\_table

|                |                |
|----------------|----------------|
| 258.7200344603 | 158.4222460692 |
| 4.2518363878   | 2.0924670117   |
| 79.5340643763  | 29.5510317403  |
| 1.6887700943   | 0.712370318    |
| 36.6200323963  | 15.5382176019  |
| 101.7935211152 | 33.8884052388  |
| 1.7577199029   | 0              |
| 0.3513058974   | 0.5433656208   |
| 2.6427502461   | 2.063077521    |
| 0.241567137    | 0.3056992638   |
| 0.6047804978   | 0.3826699179   |
| 48.8226145202  | 29.7985843398  |
| 0              | 0              |
| 319.9559281232 | 174.9053494024 |
| 54.3074134184  | 46.0862731063  |
| 12.9211151097  | 13.0811679958  |
| 24.2410253667  | 24.0077906746  |
| 34.6393172633  | 18.5824359222  |
| 8.6123009031   | 7.4430324158   |
| 2.3793764794   | 1.0036873491   |
| 0              | 0              |
| 52.4531320361  | 44.843545397   |
| 44.7542002485  | 31.0062583933  |
| 5.4011174173   | 3.5413358406   |
| 37.5557910092  | 34.2855345638  |
| 327.347316841  | 167.5779447614 |
| 3.9977396425   | 4.5641647497   |
| 5.5694695855   | 5.7559260675   |
| 1.1374729749   | 0.7539994311   |
| 0.4404632655   | 0.2786995319   |
| 90.3395798807  | 13.2147856464  |
| 11.4312172712  | 6.999686434    |
| 30.62102791    | 26.9418533598  |
| 3.1732348401   | 2.0881519507   |
| 13.5338163376  | 11.6020416478  |
| 0.4270740418   | 0.6859623947   |
| 0.0149996517   | 0              |
| 3.4411550205   | 52.9824928268  |
| 0              | 0              |
| 0              | 0              |
| 34.6212200374  | 20.9769361322  |
| 0.5106377513   | 0.6865914617   |
| 1.8699248179   | 1.828550365    |
| 0              | 0              |
| 0              | 0.0244263496   |
| 0.1733944182   | 0.2194278024   |
| 0.1177825058   | 0.1117888771   |
| 6.6531336261   | 5.2067539184   |
| 1.4807669106   | 1.0540610575   |

gene\_expression\_table

|                |                |
|----------------|----------------|
| 0              | 0.0267709956   |
| 0.0330443452   | 0.0190077631   |
| 0.1435860492   | 0.337453626    |
| 264.3439784566 | 151.0321593034 |
| 0              | 0              |
| 0.3282947299   | 0.1038629038   |
| 30.3772869709  | 36.5398840342  |
| 1.8020177444   | 1.9383604035   |
| 15.1174594244  | 22.7000951849  |
| 14.2676548609  | 11.1110671031  |
| 0              | 0              |
| 17.4453286976  | 5.1512482813   |
| 1.8746308933   | 2.2875892303   |
| 0.8594614298   | 1.6314515892   |
| 0              | 0.2333163859   |
| 5.7302076185   | 1.3596532668   |
| 5.1940204665   | 5.112292898    |
| 6.0814051424   | 6.4616676852   |
| 6.8829225839   | 3.9551536604   |
| 0              | 0              |
| 0.2180614803   | 0.0536575743   |
| 0.3029509398   | 0.1757155872   |
| 54.4755478252  | 27.0485571036  |
| 5.7008774956   | 5.7714938386   |
| 0.0601697736   | 0.0253812884   |
| 0              | 11.0604997688  |
| 1.6836911153   | 1.0653417945   |
| 1.0247101433   | 3.9226806654   |
| 8.2141395955   | 3.7511883958   |
| 4.5993016879   | 4.8502842643   |
| 512.3931553705 | 378.5279885433 |
| 277.1475169183 | 124.9823459907 |
| 12.9251677334  | 7.49676974     |
| 0.6575882926   | 1.4146843029   |
| 32.2712231906  | 84.3743066913  |
| 3.0286435416   | 0.9581747258   |
| 0              | 0.0396240406   |
| 399.2326268563 | 594.7878342276 |
| 113.7161477909 | 66.9996795506  |
| 34.3857402729  | 26.3496666363  |
| 9.5375261811   | 4.7071375671   |
| 0.9901626203   | 0.7831466333   |
| 7.2579503942   | 10.119555678   |
| 23.58528565    | 15.1147223611  |
| 0              | 0.1472228415   |
| 42.9655653615  | 13.0634556361  |
| 1.5642669258   | 4.2890341628   |
| 21.6291755216  | 18.2239419902  |
| 1.2247793676   | 0              |

gene\_expression\_table

|                |                |
|----------------|----------------|
| 30.0801044696  | 34.8937238751  |
| 0              | 0              |
| 3.0103846072   | 3.0870835938   |
| 21.5900619056  | 30.3160480708  |
| 0.4034106551   | 0              |
| 0              | 0              |
| 0.1664860747   | 0              |
| 103.2267632265 | 42.2632235148  |
| 0              | 0.1284404713   |
| 0              | 0              |
| 8.7117176266   | 18.8992050449  |
| 3.2109820105   | 5.485651095    |
| 18.6579545637  | 10.0091535432  |
| 22.900253718   | 7.8804982551   |
| 2.1552837184   | 1.6364857924   |
| 6.3900509901   | 7.7495673798   |
| 2.4375019698   | 2.2032992181   |
| 27.5276855173  | 18.2698814447  |
| 2.8951748341   | 0.832681008    |
| 44.0004767235  | 22.7325123447  |
| 0              | 0              |
| 4.0806369813   | 7.2117643453   |
| 1.3761045121   | 3.7005552606   |
| 1.3138561797   | 2.88521023     |
| 1.4233160185   | 1.5760352645   |
| 3.0480579233   | 3.8572674859   |
| 19.814190988   | 5.731322254    |
| 5.9751432856   | 4.2255140379   |
| 41.4753488054  | 159.786110368  |
| 29.7130439341  | 22.524493062   |
| 3.5909973127   | 4.1585075069   |
| 250.7629740745 | 201.2615365413 |
| 1.7906034283   | 5.0512456873   |
| 19.837861141   | 21.1406223606  |
| 0.6242261092   | 1.0532639188   |
| 0              | 2.4583716095   |
| 11.570589117   | 22.1227435634  |
| 0              | 0.289230883    |
| 0.8471817267   | 2.4792188299   |
| 15.5602072645  | 14.5543563363  |
| 5.0176010333   | 4.656440875    |
| 1.3989163154   | 3.1717977732   |
| 5.6001644034   | 7.3703931871   |
| 3.4176645225   | 4.1952486386   |
| 4.828964962    | 3.9110247917   |
| 4.7708371718   | 7.5467705857   |
| 1.4757000283   | 3.0346456849   |
| 133.8567193315 | 84.0350519883  |
| 2.933425777    | 4.1405334218   |

gene\_expression\_table

|                 |                 |
|-----------------|-----------------|
| 0               | 0.1827695902    |
| 3.269356484     | 1.504478981     |
| 26.9344726296   | 41.6039146675   |
| 0               | 4.479407403     |
| 17.944436776    | 18.1868090932   |
| 27.7610544993   | 3.659495912     |
| 6.0448479058    | 5.3547593615    |
| 1330.1411408613 | 1316.2250907962 |
| 49.9586201105   | 34.135741582    |
| 3.2574315252    | 3.1355232398    |
| 159.5902272419  | 112.1993468368  |
| 0               | 0               |
| 0.3313291915    | 0.2329398204    |
| 11.2897979334   | 8.0834651986    |
| 0.4726844566    | 0.6685479197    |
| 12.9786544505   | 4.9654785156    |
| 491.8718606971  | 189.7171915844  |
| 1.2840592996    | 2.089229217     |
| 4.4540215937    | 6.6726112993    |
| 27.7698727314   | 33.367455433    |
| 0.5733994846    | 2.0408278397    |
| 0               | 1.4792300783    |
| 0               | 0.3849548142    |
| 2.9710530054    | 3.6423246764    |
| 0.4732943967    | 0.4991219365    |
| 15.3109164182   | 20.9382721131   |
| 2.686326644     | 0.283291872     |
| 21.1633488223   | 18.9704927026   |
| 1.5265009379    | 1.2732067652    |
| 0               | 0               |
| 2.8174391379    | 2.5578035871    |
| 5.1420356838    | 2.3903860845    |
| 0               | 0               |
| 0               | 0               |
| 2.0386183412    | 2.3453074478    |
| 0               | 0               |
| 1.1074127621    | 1.4014127515    |
| 5.667992844     | 3.2603419587    |
| 0.2107340357    | 0               |
| 19.1805787837   | 11.9901333478   |
| 0.9585394984    | 0.9603043882    |
| 7.2873108971    | 8.0692262349    |
| 10.5968649346   | 8.2995803508    |
| 1.9416678696    | 2.8666737811    |
| 1.9100795006    | 1.7988274534    |
| 0.2570919398    | 1.0664107351    |
| 387.5524431663  | 117.1609731254  |
| 1.0839598086    | 3.0864001996    |
| 0               | 0.5872997081    |

gene\_expression\_table

|                |                |
|----------------|----------------|
| 2.944383947    | 3.6570684713   |
| 25.3615077025  | 21.5017832321  |
| 0.1597638088   | 0.0758169334   |
| 0              | 0.1030881956   |
| 5.225978415    | 13.9616016878  |
| 0              | 0.2313060251   |
| 2.6343326096   | 0.8334262158   |
| 0              | 0              |
| 8.2560389311   | 1.0447882334   |
| 16.2318265314  | 24.3170507471  |
| 0.3542100616   | 0.9861434965   |
| 13.996485335   | 31.5424937962  |
| 0              | 0              |
| 258.7513303289 | 187.5990299906 |
| 0              | 0.6684102178   |
| 29.5779788608  | 18.502551415   |
| 5.718331109    | 4.4452506587   |
| 37.2057010142  | 97.5294993046  |
| 0.8175995594   | 1.5519883198   |
| 7.2135306932   | 3.5500131324   |
| 14.553420651   | 8.1561513623   |
| 0              | 0              |
| 1.3385581352   | 0              |
| 112.9533189057 | 199.4251626633 |
| 0              | 0              |
| 0              | 0              |
| 0              | 0              |
| 7.9286099591   | 13.0435842182  |
| 1.410648441    | 33.0253221217  |
| 13.1680554716  | 10.3157841346  |
| 2.363998267    | 2.9916011708   |
| 1.434147248    | 1.4519119227   |
| 32.706145336   | 44.0883810227  |
| 0              | 2.7778900786   |
| 69.8148235465  | 69.4174785678  |
| 2.6983462212   | 7.6831043456   |
| 0              | 0              |
| 8.8002223814   | 7.9128030294   |
| 4.586788129    | 4.6758515826   |
| 19.3826855558  | 22.9954423024  |
| 1.2857619861   | 1.5254163558   |
| 10.4524678017  | 1.2147637199   |
| 0              | 0              |
| 0              | 0.1160906825   |
| 26.076876424   | 23.8332328912  |
| 3.1655739469   | 3.910601567    |
| 0.6476803718   | 0              |
| 0.0976048486   | 0.0926380055   |
| 41.0299926792  | 26.703146654   |

gene\_expression\_table

|                |                |
|----------------|----------------|
| 0.0210095862   | 0.026587288    |
| 2.4548266213   | 2.8432766154   |
| 0.518374924    | 0.6812255709   |
| 0              | 0              |
| 1.791006456    | 3.0924135016   |
| 0.4838801564   | 0.9865516921   |
| 32.7874028399  | 14.2676684942  |
| 9.509312451    | 7.8995405247   |
| 24.9423454324  | 17.5180924267  |
| 5.3505911067   | 4.9574019556   |
| 0              | 0.0325513223   |
| 13.3649092783  | 7.8766602991   |
| 1.8653976518   | 1.3770343073   |
| 6.6122767292   | 4.8275354613   |
| 34.2453459618  | 42.2199945518  |
| 17.7778455362  | 23.159266296   |
| 16.5023514919  | 15.4941771111  |
| 0.5103373761   | 4.4131279934   |
| 6.7855840749   | 0.9107472761   |
| 149.5514871412 | 131.7362976195 |
| 0              | 0              |
| 8.9680266328   | 7.1981392844   |
| 0.2334895783   | 0.0369346557   |
| 0.8354078929   | 1.5857925523   |
| 0.0746165816   | 0.188852129    |
| 18.2490450803  | 14.4336676846  |
| 26.8532488931  | 14.5167310124  |
| 12.1602520692  | 5.1295334174   |
| 2.5653446382   | 2.6905110086   |
| 0.7202947463   | 1.6635262434   |
| 0              | 0              |
| 1.0304821156   | 1.0867152297   |
| 0.0236374817   | 0.007478       |
| 4.4253393164   | 4.3868190871   |
| 0              | 0              |
| 31.4460136418  | 40.4467838054  |
| 22.8543301701  | 40.570832115   |
| 31.7840626295  | 31.0188243493  |
| 16.7808677575  | 12.2267382994  |
| 0              | 0              |
| 2.9492878065   | 0.6220459196   |
| 9.6938758001   | 18.8555117704  |
| 0              | 8.2400334917   |
| 0              | 0              |
| 0              | 0              |
| 31.9246236962  | 23.4718829995  |
| 419.7714132826 | 93.1150736799  |
| 0              | 0              |
| 1.2726106436   | 0.6813518337   |

gene\_expression\_table

|                 |                 |
|-----------------|-----------------|
| 5.5618499881    | 2.9101202035    |
| 7.5793535583    | 3.1551144917    |
| 10.712725895    | 10.9284243201   |
| 12.4952803511   | 8.6383501016    |
| 25.3253567072   | 46.9794209575   |
| 26.1888716531   | 40.4439730881   |
| 1.5366576405    | 4.2133327809    |
| 0               | 0.367980923     |
| 1633.312989645  | 1587.8269126386 |
| 45.8735544972   | 22.5758685757   |
| 0.054683358     | 0               |
| 1.4980793988    | 1.2351391636    |
| 0.7899743442    | 0.7775441502    |
| 48.8980661851   | 16.7809365668   |
| 23.184939149    | 24.8262905586   |
| 0               | 0.1506923136    |
| 5.963438169     | 5.1317108067    |
| 0               | 0.0113667966    |
| 2.377145588     | 0.9454465085    |
| 45.9197013833   | 44.188292787    |
| 432.4819298373  | 248.6665523995  |
| 1.9122357666    | 3.0248788874    |
| 3.6106667456    | 2.2846198778    |
| 1.392004003     | 4.9459137322    |
| 140.7560639956  | 48.2659931514   |
| 0.3183093497    | 0.1342717599    |
| 3519.5271685362 | 4738.6531064636 |
| 9.9412374855    | 3.5644675095    |
| 6.8459461131    | 2.7073227872    |
| 0               | 0.4345693749    |
| 2.9704283847    | 0               |
| 0               | 0               |
| 67.214991596    | 48.3959072419   |
| 28.2935245943   | 19.6074961436   |
| 8.9779712589    | 23.3721789869   |
| 30.3859792669   | 23.1848730304   |
| 0               | 0               |
| 4.7221992452    | 5.0015399945    |
| 223.763311077   | 87.7371455435   |
| 36.4276457927   | 49.2862588789   |
| 33.3521381864   | 22.4222486972   |
| 78.855400355    | 36.3642328479   |
| 2.1887477758    | 1.9388771769    |
| 17.4473803651   | 15.4095635928   |
| 0               | 0               |
| 284.2051249886  | 699.6451425663  |
| 2.0701478461    | 3.05636131      |
| 0               | 0               |
| 3.4439243046    | 4.8424776906    |

gene\_expression\_table

|                |                |
|----------------|----------------|
| 5.7890572627   | 6.0389648445   |
| 40.0065822066  | 33.7517839557  |
| 0.321582638    | 0.610436359    |
| 15.0914586633  | 17.1881948616  |
| 25.7231111045  | 17.1107595455  |
| 0.6461232851   | 0.4088292287   |
| 23.5864394161  | 17.220146305   |
| 283.0528504537 | 260.2537837763 |
| 0.3485852066   | 0.1764515527   |
| 0              | 0              |
| 52.847056403   | 38.3428627376  |
| 27.3355613437  | 13.8561944407  |
| 10.4038470169  | 9.5751988104   |
| 0              | 0              |
| 22.2221502762  | 7.6163121629   |
| 9.8604955006   | 12.4782959006  |
| 0.8242498125   | 2.7380709996   |
| 104.1717568695 | 52.7310623135  |
| 3.0062549696   | 2.8532748984   |
| 1.0331576124   | 0.1508589315   |
| 9.9351367846   | 11.2392793987  |
| 5.7712041313   | 0              |
| 19.1615033377  | 29.248274319   |
| 6.984117657    | 5.2375032591   |
| 45.2169716315  | 24.4144378003  |
| 0              | 0.6116455219   |
| 0              | 0              |
| 0              | 0              |
| 0.9776926008   | 0              |
| 0.4824185046   | 0.5341811415   |
| 0              | 0.5896682091   |
| 540.0663034478 | 114.7078003829 |
| 0              | 0.2038605874   |
| 0.2710572887   | 1.0290557064   |
| 16.0745619259  | 2.5785754735   |
| 0              | 0              |
| 0              | 0              |
| 0              | 0.1531713702   |
| 45.0528912728  | 31.7462634265  |
| 3.3370762193   | 2.151347476    |
| 0.0590572325   | 0.0373679813   |
| 0.4941018719   | 0.1823727044   |
| 5.2833004004   | 2.0572093258   |
| 0              | 0              |
| 8.6306042212   | 2.8185518935   |
| 287.0853245774 | 233.1011461    |
| 5.7672109452   | 3.4406324203   |
| 3.4249388167   | 4.0919193959   |
| 0              | 0              |



gene\_expression\_table

|                |                |
|----------------|----------------|
| 2.6558373656   | 4.2011484755   |
| 4.9592075469   | 3.5603074027   |
| 4.0867665626   | 8.332241805    |
| 23.1763418744  | 11.129414991   |
| 200.9081090701 | 171.2131472597 |
| 0              | 0.0397409975   |
| 2.3496707022   | 5.2035722755   |
| 0.0306680962   | 0.009702       |
| 0.0139991427   | 0.0354313727   |
| 549.0943753439 | 529.3447079186 |
| 2.1239007647   | 2.2398014214   |
| 17.5054144046  | 26.9426138457  |
| 12.3779917966  | 6.2997110194   |
| 0.678577218    | 0.9064355112   |
| 0              | 0.1508555373   |
| 0              | 1.462840292    |
| 72.9225907121  | 30.0454152155  |
| 1.0575107675   | 0.9052952834   |
| 7.00218238     | 4.9457566669   |
| 0              | 0.1690555511   |
| 135.6178470492 | 291.757687242  |
| 12.498983298   | 9.9422771398   |
| 19.8207185549  | 35.9773428835  |
| 13.9396525223  | 13.0669647732  |
| 14.6387061866  | 21.3489829783  |
| 15.3482967192  | 5.3495602222   |
| 28.0636796862  | 17.155129619   |
| 105.7824713988 | 59.6724661474  |
| 23.8217281901  | 15.7740737931  |
| 1.8833717389   | 4.6177912996   |
| 0.9843779673   | 1.4583971466   |
| 353.8814419156 | 415.0322776684 |
| 19.8306178426  | 14.4044902041  |
| 3.4737069225   | 1.0989798344   |
| 3.8453178046   | 8.0148959646   |
| 0              | 0              |
| 0.2827405075   | 0.298169576    |
| 4.1960863455   | 4.1212551038   |
| 1.8435614281   | 1.7946129669   |
| 3.2932666321   | 1.3395777105   |
| 113.9790067948 | 85.3411540817  |
| 0              | 0              |
| 2.742460704    | 5.3195969696   |
| 4.0510481125   | 5.5422001923   |
| 8.7625329543   | 9.0629960639   |
| 0              | 0              |
| 0.1209608334   | 0.6888328097   |
| 0.593956618    | 0.5719018205   |
| 13.4810577248  | 20.5724231507  |

gene\_expression\_table

|                 |                 |
|-----------------|-----------------|
| 13.3205772977   | 21.6130473519   |
| 8.0206882589    | 8.4875417311    |
| 4.2149990961    | 3.6867439118    |
| 0               | 0.7435873062    |
| 0.0211537406    | 0               |
| 0.1688647071    | 0               |
| 0.3145408417    | 0.145950308     |
| 47.818318653    | 32.0481625603   |
| 146.3203792891  | 117.3041459706  |
| 3.4186513725    | 4.3547095932    |
| 1650.0243114837 | 1039.4426382245 |
| 27.0392849557   | 29.5517132129   |
| 0               | 0.6852773162    |
| 0.0887605392    | 0               |
| 0               | 0               |
| 0.007393        | 0.009356        |
| 7.7666473581    | 11.8275955272   |
| 0               | 0.1005829664    |
| 0               | 0.0896915527    |
| 0.8367923916    | 1.3477508487    |
| 3.0526622404    | 3.6358533402    |
| 7.8617875214    | 3.8137693873    |
| 0.0772315834    | 0.2443382662    |
| 0.3542350962    | 0.1494262416    |
| 80.2174389042   | 60.7092679579   |
| 1.4530939042    | 0               |
| 0               | 0.0892596643    |
| 1.2845144784    | 1.4342930108    |
| 7.747810489     | 37.5847889312   |
| 3.4014842424    | 1.2528088503    |
| 32.0909771543   | 7.0164923277    |
| 16.3666032593   | 14.4550189453   |
| 0               | 0.9370553979    |
| 11.1308333131   | 3.817670482     |
| 6.5263117831    | 8.0937620806    |
| 457.4829660114  | 97.9347538211   |
| 4.4024019321    | 0               |
| 0.0300782017    | 0.114190418     |
| 56.6889209107   | 17.345824287    |
| 40.1978818507   | 16.9264156383   |
| 2131.9315651236 | 2089.088102582  |
| 33.9500835837   | 11.546380401    |
| 8.9868104822    | 5.8780049696    |
| 2.6896455428    | 1.2452570035    |
| 22.2243179888   | 7.1946423977    |
| 2.7789797349    | 3.3569010072    |
| 0.7786196585    | 1.2316630655    |
| 35.938729468    | 27.0304916121   |
| 21.8363637898   | 11.2027951997   |

gene\_expression\_table

|                |                |
|----------------|----------------|
| 6.9148326635   | 2.6504244545   |
| 11.0023046013  | 5.8013486068   |
| 0.0289273733   | 0.2196427087   |
| 0              | 0              |
| 61.5227995933  | 19.4052206474  |
| 556.7415547832 | 307.8878120571 |
| 61.5121376445  | 41.8162753399  |
| 771.8726492993 | 306.2498750027 |
| 8.6192045789   | 4.824454579    |
| 0              | 0.2168710413   |
| 1.5048364608   | 2.4705028499   |
| 7.9893810933   | 11.5780744374  |
| 0.1707837656   | 0.1440827095   |
| 15.5997097775  | 4.9030376158   |
| 1.8712664726   | 1.2686020382   |
| 0              | 0              |
| 1.2871608922   | 2.2804335012   |
| 8.5728185997   | 5.8118366934   |
| 6.7675824484   | 7.187865253    |
| 0.4394455955   | 2.3634726806   |
| 3.4233193785   | 4.4987760599   |
| 2.8451580316   | 1.0930092288   |
| 2.1532614374   | 3.8777667236   |
| 13.0627110278  | 17.7114078373  |
| 40.0854606741  | 39.7109180731  |
| 0              | 0              |
| 38.8151374096  | 19.4698136486  |
| 7.3167821683   | 2.314817063    |
| 22.0384862209  | 8.169605855    |
| 4.1626003155   | 7.8107315417   |
| 0              | 0              |
| 0.4354061751   | 0.4132495489   |
| 0              | 0              |
| 24.2628301977  | 21.6422071534  |
| 4.8481575424   | 3.8728854845   |
| 20.8967137439  | 13.99432558    |
| 0.6262059391   | 0.2971700181   |
| 29.2289971818  | 24.1620506169  |
| 0.5874517908   | 0              |
| 6.7584038797   | 3.8486923441   |
| 0              | 0              |
| 0              | 0              |
| 8.4302236188   | 5.334155105    |
| 0              | 0.4934317785   |
| 5.8103858395   | 2.5871484821   |
| 2.9948941223   | 2.9778489437   |
| 127.8015749037 | 99.892555604   |
| 2.0376507816   | 4.6345355448   |
| 1.3465102807   | 0.9681742917   |

gene\_expression\_table

|                |                |
|----------------|----------------|
| 45.8763001014  | 44.0099721916  |
| 78.2463477026  | 54.8333647428  |
| 10.9798803198  | 9.7531222491   |
| 5.0845455408   | 2.7440863116   |
| 28.7064774079  | 12.974134998   |
| 0              | 0.4415023401   |
| 0              | 3.1747315185   |
| 0.9194840606   | 0.2908980128   |
| 4.3669480831   | 2.527988951    |
| 5.6769247788   | 6.7350520561   |
| 1.7667960572   | 0.7648965777   |
| 24.3002628915  | 13.9905862128  |
| 1.7200759373   | 1.9435071309   |
| 1.8483389221   | 0.935617079    |
| 2.1486467849   | 1.8539164021   |
| 29.5437496656  | 28.0403492644  |
| 97.9723752889  | 31.8518422468  |
| 9.9411145037   | 6.7740173477   |
| 0              | 0              |
| 5.5193673591   | 12.2231710771  |
| 38.9764952854  | 33.9936487334  |
| 0              | 0.5765007341   |
| 7.32349606     | 12.2661589925  |
| 0.4656117406   | 0.294612024    |
| 2.9365076133   | 2.143905226    |
| 1.9295118891   | 2.295259815    |
| 7.4444884747   | 7.1433034746   |
| 4.7976323837   | 5.9498988639   |
| 4.7649190926   | 4.7377999712   |
| 0              | 0.4819504936   |
| 1.8431216735   | 5.3646128157   |
| 129.2199709713 | 56.7334274082  |
| 0              | 0.2135555136   |
| 0              | 4.3306173435   |
| 9.4367916259   | 2.8706984548   |
| 2.2348016878   | 7.0702625284   |
| 0              | 0              |
| 20.7186862113  | 11.0644850068  |
| 196.1053459623 | 104.859764899  |
| 0              | 0              |
| 446.9254017286 | 206.3590996185 |
| 6.0937120155   | 13.1095380368  |
| 5.7425399949   | 4.1180179557   |
| 0.4842002247   | 1.6339932555   |
| 7.4389949539   | 5.5397336916   |
| 21.9842771892  | 9.8190859349   |
| 1.6236484157   | 1.9079362101   |
| 2.9950150451   | 2.6846843349   |
| 0              | 0.5975052293   |

gene\_expression\_table

|                  |                  |
|------------------|------------------|
| 5.6334777261     | 7.1290739914     |
| 43.3588331124    | 20.2780045509    |
| 0.339939588      | 0.1433959976     |
| 0                | 0                |
| 0.9877910143     | 0.5113772937     |
| 0.8326322021     | 7.3757771054     |
| 0.1087117966     | 0                |
| 34.1927883058    | 23.9868603616    |
| 0                | 0.4113228763     |
| 14.5360645938    | 0                |
| 0                | 0                |
| 445.0421066617   | 618.0500233695   |
| 0                | 0                |
| 5.1958153051     | 4.6848437873     |
| 11.4897053318    | 25.8489498933    |
| 0.6305469026     | 1.8618758664     |
| 10000.0684348439 | 13057.6218933665 |
| 0                | 0                |
| 247.579801255    | 277.7259933447   |
| 2.2520061252     | 1.5417367083     |
| 0                | 0                |
| 0.2425148679     | 0.7672465045     |
| 1.6408278925     | 1.3842939207     |
| 21.0836460235    | 3.5435715691     |
| 4.9018758077     | 3.2256867347     |
| 44.230143944     | 52.6948539433    |
| 109.7717465025   | 69.0521774621    |
| 1.2292989486     | 1.9877848751     |
| 0                | 4.1820574507     |
| 0                | 0.0324247611     |
| 0                | 0                |
| 0                | 0.0159799528     |
| 11.0383240509    | 0                |
| 0.5724317475     | 0.6519627188     |
| 1.128010779      | 1.2133573244     |
| 0                | 0.0243151189     |
| 0                | 0                |
| 3.9374873995     | 3.4879781661     |
| 11.5179650229    | 21.960866715     |
| 46.5592690114    | 20.3674053302    |
| 0                | 0.7605773905     |
| 16.8472997446    | 19.0103177134    |
| 0                | 0                |
| 0                | 0                |
| 0                | 0                |
| 19.466147621     | 11.3918217341    |
| 0.017614715      | 0.0222911339     |
| 7.4236012758     | 4.0468383143     |
| 6.3862196356     | 5.3035871276     |

gene\_expression\_table

|                |                |
|----------------|----------------|
| 19.3310077196  | 10.3497622175  |
| 229.2476147474 | 170.4228402547 |
| 1.0349288373   | 0.9898785977   |
| 1.4925423467   | 0.5748485054   |
| 1.6119744544   | 1.3113818529   |
| 21.4891372077  | 5.1575115725   |
| 45.8139500541  | 20.2076830816  |
| 11.0168626302  | 3.8022708011   |
| 22.9379070649  | 14.706433959   |
| 0              | 0              |
| 2.8165832937   | 3.3946096431   |
| 5.8249731139   | 15.0376728811  |
| 2.8616371678   | 1.4814634363   |
| 9.4743108339   | 9.6582772217   |
| 0.1714405777   | 0.1084776245   |
| 619.1611651538 | 312.1308450141 |
| 3.1095747573   | 2.3610696203   |
| 1.2555099663   | 0.8738550386   |
| 0              | 0              |
| 3.078417066    | 0              |
| 2.741224598    | 12.1414122462  |
| 0.7069172849   | 1.3418884058   |
| 64.3902236302  | 50.3011788087  |
| 1.1228302926   | 0.5328462691   |
| 0              | 0              |
| 0.4358820624   | 1.1032032523   |
| 124.2776344192 | 126.5008405044 |
| 0              | 0              |
| 0              | 0              |
| 5.0852787756   | 3.9899090511   |
| 0.3094134282   | 0.3915576365   |
| 1.4182136496   | 0.1121703872   |
| 1.1707313387   | 0.9876942502   |
| 0              | 0.1461862983   |
| 0              | 4.8760257551   |
| 2.4230964067   | 2.5252614476   |
| 0.2649689857   | 1.0059417628   |
| 8.8654879434   | 4.2071737871   |
| 2.5059266003   | 2.1697746863   |
| 6.6538874796   | 2.0185856507   |
| 6.7791571579   | 33.6007409695  |
| 5.438235896    | 4.5879990976   |
| 14.0998861238  | 13.8905732916  |
| 4.2763905637   | 2.6285411497   |
| 0.3534687482   | 0.5431608362   |
| 36.5855916329  | 20.929444562   |
| 2.1553839204   | 2.6139529945   |
| 0.8883498753   | 0.4343470051   |
| 0.5219947195   | 0.6605757863   |

gene\_expression\_table

|                |                |
|----------------|----------------|
| 58.4624530619  | 36.3950000877  |
| 0              | 0              |
| 0.857940523    | 0.2714274275   |
| 0.678610327    | 0.2003797315   |
| 41.0213118939  | 23.8984200154  |
| 37.1143649248  | 27.3707867492  |
| 0.0112314651   | 0.0355330889   |
| 0              | 0              |
| 0              | 0.00602        |
| 6.897878319    | 5.8871026985   |
| 1.5225274553   | 2.7295392825   |
| 12.6939047497  | 2.6773214996   |
| 14.6440089459  | 9.1233250393   |
| 1.3724381591   | 0.5789326866   |
| 0              | 0.2357464427   |
| 19.6891222806  | 14.599372533   |
| 0              | 0              |
| 1.2569272037   | 4.0304714344   |
| 1.3490749604   | 2.5608484706   |
| 0              | 0.5409403542   |
| 14.6445838276  | 13.2584156111  |
| 25.9794578062  | 26.6143736848  |
| 29.4857822609  | 19.4424409441  |
| 89.1185076521  | 100.6490586005 |
| 5.1707518418   | 8.2884358001   |
| 150.6345572184 | 70.2788246978  |
| 5.2899841411   | 5.2390866314   |
| 58.334435306   | 19.2941967414  |
| 71.0373236239  | 72.6087697287  |
| 4.7688284945   | 2.6821664534   |
| 0              | 2.0334126492   |
| 90.5839460955  | 64.5064624429  |
| 4.6877551633   | 5.3390497902   |
| 0              | 0.0657234668   |
| 63.3156946365  | 43.8886810906  |
| 0              | 0              |
| 13.1470505977  | 7.2788527272   |
| 23.4160573744  | 17.2060478165  |
| 23.3603932127  | 11.4434306397  |
| 382.9354257352 | 445.4578728353 |
| 49.3339825966  | 27.3821704756  |
| 4.3504611373   | 1.5238264419   |
| 0              | 0              |
| 336.9294448497 | 147.7217563538 |
| 25.9641354089  | 27.3809908452  |
| 0              | 0              |
| 7.4963977899   | 4.7432844428   |
| 45.8870268226  | 78.2077878624  |
| 1.361892863    | 0.86172658     |

gene\_expression\_table

|                |                 |
|----------------|-----------------|
| 3.4923511121   | 5.1560987976    |
| 7.0042508113   | 3.3682306724    |
| 0.3187306109   | 0.2016741895    |
| 0              | 0.4503303536    |
| 0.6901948169   | 0.2911434202    |
| 2.5438113039   | 1.6095758151    |
| 3.1455059236   | 1.1667235817    |
| 11.0568596027  | 8.8522556876    |
| 0.515924338    | 0.6891656965    |
| 0              | 0.2709291886    |
| 0.8035176743   | 1.5252577268    |
| 218.3470430956 | 128.7646596503  |
| 1.1122646713   | 1.2795934211    |
| 0              | 0.0498187394    |
| 0.7188581775   | 1.3645549125    |
| 703.4380049505 | 283.7478389293  |
| 7.3978185879   | 5.9127274841    |
| 20.9093409118  | 16.2476319596   |
| 36.8462220267  | 20.9276585142   |
| 14.6152517308  | 10.4973677354   |
| 79.3177122944  | 63.3465871811   |
| 272.5781964017 | 84.2636843805   |
| 0              | 0               |
| 29.1774985027  | 32.4023845336   |
| 48.5985177694  | 62.3548053818   |
| 0.348065062    | 2.642823884     |
| 2.3386279769   | 3.2554450316    |
| 1.7268259992   | 5.098963519     |
| 0              | 0               |
| 5.3653617132   | 7.6831693431    |
| 0              | 0               |
| 903.8929505829 | 1735.3951038477 |
| 6.0704587934   | 8.3405292238    |
| 3.4732886723   | 6.0698243534    |
| 1.5100507707   | 0.8686111685    |
| 66.1503777888  | 31.4463009956   |
| 689.135395414  | 692.1554347198  |
| 298.9704988752 | 136.1616447584  |
| 0.2597580144   | 0               |
| 0.081959964    | 0.0777892462    |
| 4.1055215853   | 1.2988676169    |
| 0.8807759067   | 0               |
| 0.9346796634   | 1.3306745678    |
| 22.5143063582  | 17.2096228588   |
| 1.2437548226   | 1.7706953258    |
| 0.7916586038   | 1.2781982038    |
| 4.8438215244   | 3.7721704456    |
| 43.5904008218  | 49.3816710168   |
| 1.8771519795   | 2.0656566528    |



gene\_expression\_table

|                |                |
|----------------|----------------|
| 45.9280675817  | 32.670623045   |
| 2.0494624615   | 1.9675292239   |
| 4.5033653336   | 1.0498038579   |
| 5.4865602359   | 0.5985476128   |
| 19.2642652447  | 8.3758921145   |
| 19.6052831979  | 7.7365032102   |
| 0              | 0.1222424438   |
| 0              | 0              |
| 21.3833368306  | 12.2036481458  |
| 93.5334623627  | 50.4792201563  |
| 1.2390802242   | 1.3720313012   |
| 67.3755636454  | 35.5607740565  |
| 0              | 0              |
| 16.1893152002  | 24.102722112   |
| 5.8998764558   | 4.2421575171   |
| 53.1865709527  | 39.5814682213  |
| 139.2321937048 | 105.5759266991 |
| 0              | 1.700921605    |
| 0.4947445      | 0.8217445409   |
| 3.1343173347   | 2.7269188108   |
| 6.162308348    | 7.2186970849   |
| 20.308061433   | 23.7226336966  |
| 0              | 0              |
| 16.8718435385  | 11.8840706877  |
| 7.3059300563   | 7.3420425647   |
| 1.6621858676   | 2.2349358651   |
| 18.7361837603  | 18.0947288332  |
| 63.1858827794  | 57.8439120682  |
| 339.1210434297 | 294.8596322477 |
| 1.1551974338   | 0              |
| 6.5865332643   | 6.251362649    |
| 1.8956182529   | 0.7891032625   |
| 1.3915219154   | 3.0477950334   |
| 31.2059156735  | 12.5961320861  |
| 3.0122613267   | 9.5299186948   |
| 17.8071676642  | 20.0308263529  |
| 14.2980572624  | 19.2093387441  |
| 0              | 0              |
| 2.6400446504   | 4.4331615704   |
| 3.0499587167   | 2.4390988521   |
| 0              | 0.4701704042   |
| 2.9334644459   | 3.299778945    |
| 5.523107102    | 2.7957607082   |
| 105.4047483759 | 114.7136682899 |
| 11.1513444337  | 4.7675149083   |
| 0.130750789    | 0.1378858221   |
| 4.656524726    | 2.7562890671   |
| 1.017985338    | 0.8051523798   |
| 5.334141218    | 4.193348634    |

gene\_expression\_table

|                |                |
|----------------|----------------|
| 21.1389071097  | 20.415192169   |
| 1.2517604767   | 0.4525949786   |
| 0              | 0              |
| 0              | 0.5677402786   |
| 16.6257704909  | 7.4447959868   |
| 32.0995773587  | 17.2480138348  |
| 0.7548493673   | 0.716437153    |
| 0.5328157108   | 2.4161326398   |
| 0.3299947399   | 1.4616103254   |
| 3.1350850627   | 4.0350250262   |
| 0              | 0              |
| 0.9283166231   | 1.4684618933   |
| 2.7815185849   | 4.6932884125   |
| 0              | 0              |
| 3.5600661174   | 1.5017351625   |
| 11.9311146506  | 5.8946708483   |
| 2.8174391379   | 1.782711591    |
| 0.0349889424   | 0.0221389674   |
| 2.8376845573   | 1.9420949159   |
| 4.4771570269   | 2.9781606519   |
| 0.1795705406   | 0.2556490323   |
| 0              | 0              |
| 1.2923516358   | 0.908583263    |
| 1.1310999942   | 0.2862777113   |
| 2.9004925466   | 0              |
| 2.9684415442   | 5.9701744479   |
| 73.5310196006  | 64.0831901792  |
| 822.3520567376 | 436.1644558586 |
| 36.1025859157  | 39.4973493288  |
| 0              | 0.1091009548   |
| 1.2925167733   | 0              |
| 36.0671663249  | 32.8054818419  |
| 5.9444274249   | 4.9366903381   |
| 0.4531364929   | 0.860155239    |
| 2.9799749969   | 10.6848106898  |
| 16.7481457715  | 23.8438178437  |
| 5.551379855    | 2.9271585322   |
| 1.0269914385   | 3.0324953885   |
| 1.6399027222   | 1.4603752507   |
| 4.7277738021   | 5.8528569893   |
| 0              | 4.975114561    |
| 17.6829710991  | 12.7871490992  |
| 5.970623815    | 3.5417469641   |
| 118.3775699052 | 39.4940138201  |
| 0              | 4.5123087572   |
| 0              | 5.4047939623   |
| 0              | 0              |
| 5.6728003688   | 8.774133076    |
| 6.1172305478   | 12.5795398316  |

gene\_expression\_table

|                  |                  |
|------------------|------------------|
| 1.394943915      | 0.882639363      |
| 5.7024552292     | 12.2678186204    |
| 14.8684468528    | 16.4034974522    |
| 4.574455316      | 4.6311187517     |
| 8.347389332      | 7.2276474768     |
| 0.8160652977     | 1.4753104241     |
| 0                | 0.3503779657     |
| 1.8665822048     | 1.8063341504     |
| 0.2680889719     | 0.932971084      |
| 215.5004915625   | 429.29360364     |
| 0                | 0                |
| 1.830423287      | 3.0884943389     |
| 6.7658854521     | 6.787044329      |
| 26.5857145882    | 12.1690294514    |
| 0                | 0.1642458786     |
| 0.3294214355     | 0.2223346361     |
| 8.0697930398     | 8.0622562129     |
| 11.3337675649    | 12.3160120863    |
| 5.8393716147     | 10.7765427911    |
| 0                | 0                |
| 0                | 0.0539515177     |
| 0                | 0                |
| 6.5043010365     | 5.0818013282     |
| 0                | 0                |
| 0                | 13.0288781837    |
| 4.171993013      | 3.0731935812     |
| 0.2682512017     | 0.2263116744     |
| 6.5690345043     | 12.4695087058    |
| 0                | 0                |
| 0                | 0                |
| 0.060807042      | 0.0192375795     |
| 0                | 0.0226156826     |
| 1.3739473562     | 1.3879159745     |
| 0.6097168119     | 0.9644833257     |
| 1.8957118796     | 3.2386397413     |
| 0                | 0                |
| 4.32189438       | 2.6738734991     |
| 0                | 0                |
| 0.0556926051     | 0.140956163      |
| 49.2379779713    | 24.8576554788    |
| 11.2422146628    | 10.2255404725    |
| 0                | 0                |
| 22.0007602535    | 27.2466964937    |
| 0                | 0                |
| 36654.5218714557 | 17068.6977839012 |
| 0                | 0                |
| 0.4370377169     | 0.5530640881     |
| 4.5215501639     | 3.8146318895     |
| 12.5390669731    | 11.1453699403    |

gene\_expression\_table

|                |                |
|----------------|----------------|
| 11.041281537   | 20.609527964   |
| 4.1032530167   | 10.4980818626  |
| 0.1104470105   | 0.1630637012   |
| 6.8794622969   | 9.2081075118   |
| 0.0218399961   | 0.3040197399   |
| 6.3229371881   | 2.6005114435   |
| 2.6621281087   | 5.1335308389   |
| 8.8284658331   | 11.1722792234  |
| 0.3184432665   | 0              |
| 2.1591647744   | 2.8402451441   |
| 0              | 0              |
| 10.0893762422  | 1.1926098492   |
| 0.8956970809   | 0.2428907179   |
| 2.8812162078   | 3.4876045426   |
| 3.4345268744   | 8.0407246104   |
| 49.7327346057  | 38.9667344361  |
| 0.4945920955   | 1.2205015162   |
| 0              | 0              |
| 9.8958456028   | 9.4376464582   |
| 9.1517298976   | 6.7333515196   |
| 161.2429977034 | 100.5069571751 |
| 0.0749013846   | 0.458134644    |
| 0              | 0.0433892447   |
| 5.2863125443   | 9.5886303832   |
| 0              | 0              |
| 0.8542576116   | 1.1823973939   |
| 0.162652204    | 0.3259033675   |
| 0              | 0              |
| 4.095684023    | 8.0294344714   |
| 0.1387533438   | 0.2048551037   |
| 107.2170414688 | 89.7956281431  |
| 0.3977774433   | 0.4782118107   |
| 6.0300631864   | 8.5599311902   |
| 0.8697263549   | 1.1506528735   |
| 0              | 0.1418617109   |
| 201.5189965786 | 114.6457082229 |
| 6.4650841861   | 5.32127374     |
| 4.0414035666   | 4.0914641301   |
| 13.5311086505  | 7.1347486879   |
| 80.9917829928  | 98.0249913166  |
| 0.1977010252   | 0.0357410595   |
| 22.0567053302  | 17.136093739   |
| 2.9271055349   | 2.8707582667   |
| 247.9842663489 | 441.3891565014 |
| 382.1098337815 | 797.2187388099 |
| 0              | 0              |
| 4.6925129042   | 3.239071848    |
| 216.5570878627 | 209.1430054232 |
| 11.5795567338  | 3.8378842322   |

gene\_expression\_table

|                |                |
|----------------|----------------|
| 6.8167219385   | 7.5252012417   |
| 0.0538567424   | 0.1363096547   |
| 24.468599333   | 19.3657847672  |
| 0              | 0.319157016    |
| 0.004516       | 0.005715       |
| 0.9712661397   | 22.3290392369  |
| 2.6905164172   | 2.6537447255   |
| 1.3968727997   | 1.8308525445   |
| 0.0528950837   | 0.0722224322   |
| 0              | 0.008401       |
| 1.5998606195   | 2.0245974666   |
| 0.5544740441   | 0.1169463068   |
| 10.5353848458  | 2.2220595561   |
| 0              | 0              |
| 0.0863453201   | 0.7102458444   |
| 1.5876497727   | 1.6073158717   |
| 69.0733784953  | 161.0206897576 |
| 7.3014210536   | 6.0151906993   |
| 0              | 0              |
| 87.6393228377  | 73.5819521089  |
| 7.4446737023   | 3.0147561274   |
| 4.9263206436   | 4.2916444551   |
| 1.8697705591   | 3.5492461259   |
| 2.167355503    | 2.5357527429   |
| 70.2604277633  | 50.9063898699  |
| 0.2269303413   | 0.4690551756   |
| 1.7274694369   | 0              |
| 0              | 0              |
| 0              | 0.085103445    |
| 0              | 0              |
| 5.7540624933   | 8.2930153829   |
| 0.7228632093   | 0.4900562021   |
| 2.4769981477   | 6.1267194973   |
| 0.6474768481   | 1.3109941907   |
| 1.2457600702   | 2.3647335131   |
| 0.30922382     | 0.0244573557   |
| 8.0248691144   | 7.057101171    |
| 0.6639281418   | 0.7876783242   |
| 0              | 0.2604734437   |
| 540.7488830543 | 539.3503146218 |
| 13.961013408   | 11.6529885779  |
| 31.75973873    | 28.2947669287  |
| 12.2435483407  | 13.8800509137  |
| 8.0205806001   | 6.0899481989   |
| 0              | 0.090748706    |
| 2.5372202739   | 1.6054053947   |
| 33.7004460027  | 12.2882234194  |
| 0              | 0              |
| 218.3631134174 | 344.115222255  |

gene\_expression\_table

|                |                |
|----------------|----------------|
| 2.0290370814   | 4.4934982135   |
| 43.0264139339  | 23.3353815556  |
| 51.867723785   | 99.5153086179  |
| 1.3231613161   | 0.5728344017   |
| 2.1209337686   | 4.0260105309   |
| 37.0505231097  | 41.9712765479  |
| 6.775061048    | 12.2010759242  |
| 359.7911588064 | 362.3319572627 |
| 6.2022254406   | 5.6306715794   |
| 401.9356275571 | 180.2639862689 |
| 23.2717619871  | 16.24829487    |
| 95.8428553423  | 93.2589275862  |
| 17.9066327915  | 9.2966363651   |
| 6.0227744546   | 10.2727566002  |
| 0              | 0              |
| 47.3776054644  | 48.2975549037  |
| 53.8128742527  | 46.6332251204  |
| 90.1272431904  | 43.6615086697  |
| 134.9437432251 | 110.343111799  |
| 12.4095010643  | 17.102324002   |
| 2.7801841632   | 2.8146220964   |
| 21.8716976114  | 15.0723284421  |
| 10.0294128748  | 10.8411329408  |
| 12.8334840177  | 21.6540857065  |
| 3.474162465    | 4.8361454013   |
| 17.7198572957  | 15.4166304893  |
| 0              | 0.6998155718   |
| 730.33101394   | 528.8074112195 |
| 2.1317222066   | 2.0232447094   |
| 2.9932022283   | 1.2626161668   |
| 0              | 0.1380025838   |
| 12.7241238727  | 18.699295127   |
| 0              | 1.2169474893   |
| 0.7813754858   | 1.6068290987   |
| 0              | 0              |
| 0              | 0              |
| 0              | 0              |
| 36.6444547966  | 42.0254937722  |
| 0.7699659288   | 0.4428996813   |
| 1.4309370631   | 1.5352667653   |
| 180.112513651  | 159.5506096452 |
| 178.91176356   | 170.9470817628 |
| 19.6792193904  | 18.9083879802  |
| 0              | 0              |
| 8.9442368515   | 18.864642592   |
| 4.1503200094   | 3.3422849988   |
| 0.1293639325   | 0.2455619135   |
| 43.0081098467  | 24.717160433   |
| 0.7412713117   | 0              |

gene\_expression\_table

|                |                |
|----------------|----------------|
| 319.0815313975 | 152.9896909744 |
| 4.1973528085   | 6.121080447    |
| 4.3501946979   | 2.4041260772   |
| 0.9678865884   | 1.497032361    |
| 0              | 0.0471598058   |
| 68.429462751   | 25.6581827354  |
| 4.2661871985   | 3.3935252529   |
| 23.8408984005  | 13.39728652    |
| 30.8448831742  | 108.736723297  |
| 0              | 0              |
| 40.1127813477  | 16.0573892402  |
| 0              | 0              |
| 0              | 4.1334417234   |
| 8.1991309409   | 9.7273745652   |
| 132.3417263551 | 59.3145200022  |
| 79.3565999335  | 81.925233887   |
| 2.3099631796   | 8.7696619523   |
| 1.8893329671   | 2.4828784527   |
| 148.2972031648 | 196.8222082171 |
| 45.7643895077  | 84.8027702062  |
| 0.0504834386   | 0.1171242719   |
| 15.3386140658  | 36.7418059604  |
| 0              | 3.7579450718   |
| 220.9812344042 | 321.5002431876 |
| 0.5319709457   | 0.491954239    |
| 7.4915908819   | 2.6545360302   |
| 0              | 0              |
| 0.1698659596   | 0.0413389607   |
| 27.5349689711  | 9.5031963311   |
| 79.1452507136  | 40.5264040775  |
| 0.336168233    | 0.4254154047   |
| 3.8404541809   | 5.0185113036   |
| 1.4233160185   | 2.0013146216   |
| 9.3886109789   | 2.9702834377   |
| 12.9184147722  | 12.2610320713  |
| 0.0583974858   | 0              |
| 17.6742115233  | 46.0415254986  |
| 0              | 0              |
| 0              | 0.2895949379   |
| 0              | 0.9514155268   |
| 28.5556643925  | 45.7023306852  |
| 7.2725298416   | 4.9303219584   |
| 0.0311023971   | 0.00984        |
| 51.8754523802  | 30.0654686989  |
| 3.3476639418   | 20.6525182776  |
| 1.9882474971   | 18.8707103445  |
| 409.3683091724 | 560.6029219072 |
| 3.8797406598   | 2.618532478    |
| 0.5997730976   | 2.5300101754   |

gene\_expression\_table

|                 |                 |
|-----------------|-----------------|
| 38.3426117435   | 40.7684412719   |
| 200.466820723   | 206.4746342529  |
| 0               | 0.9546666416    |
| 15.9823728667   | 15.2082703137   |
| 12.6988656557   | 18.9920627508   |
| 0.3476637496    | 0.8799255862    |
| 26.102140558    | 3.0028938432    |
| 0               | 1.0230889957    |
| 0.3062479362    | 1.0496193449    |
| 0               | 0               |
| 39.0585884331   | 28.4990300867   |
| 8.8640335073    | 8.6030907018    |
| 9.1771813837    | 5.0097766113    |
| 3144.1214763017 | 6783.2035368547 |
| 1.1137768412    | 0.7047331947    |
| 1.395718922     | 1.814430198     |
| 0               | 0               |
| 44.3332518199   | 49.4299608952   |
| 2.0970558152    | 4.7389104658    |
| 8.6190487093    | 7.1024052959    |
| 0               | 0               |
| 141.2708585332  | 85.0275919724   |
| 1.6702138526    | 4.2272566666    |
| 4.2616830787    | 5.7544829331    |
| 13.3981536056   | 8.8731922437    |
| 945.8544317621  | 895.7407662342  |
| 0.6192962685    | 0.671750834     |
| 582.0446436373  | 0               |
| 620.355857689   | 554.9552308929  |
| 46.6642788261   | 36.2191010798   |
| 3.5181909326    | 3.4782915043    |
| 0.5590541258    | 4.2448431554    |
| 0               | 0               |
| 1.1018726459    | 2.2310429198    |
| 1.7512809854    | 1.7286496226    |
| 6.900664006     | 16.4546284721   |
| 1.4509499792    | 2.4044867066    |
| 9.5520411934    | 11.4345492044   |
| 1.3929231899    | 0.7344673048    |
| 0               | 0               |
| 0.1098703813    | 0.0556156687    |
| 0.5264057691    | 0.5124291519    |
| 0               | 0               |
| 0               | 0               |
| 0               | 0               |
| 15.4814033565   | 5.3599285366    |
| 3.5866902983    | 1.8912074805    |
| 1.0524920915    | 0.6659557702    |
| 0               | 0.3584867083    |



gene\_expression\_table

|                 |                 |
|-----------------|-----------------|
| 3.4129847548    | 4.6646025411    |
| 4.2101507212    | 2.8041457521    |
| 0.414751843     | 0.1749538929    |
| 0               | 0               |
| 110.0501589142  | 54.2903997024   |
| 6.4281219624    | 4.6348776858    |
| 2324.652176189  | 3930.5841405133 |
| 5.0512996388    | 2.8597297717    |
| 27.8144602906   | 38.6421003917   |
| 172.8504538463  | 144.5242625204  |
| 0               | 0.7846391492    |
| 0               | 0               |
| 24.765470627    | 19.587686452    |
| 0.1566433903    | 0.2643062004    |
| 0               | 1.0135447605    |
| 0               | 0               |
| 0.7793067913    | 0.4931000039    |
| 3339.8576448207 | 2344.7911257284 |
| 35.4269240119   | 51.8513751209   |
| 36.5434284177   | 67.5890089895   |
| 315.3956329399  | 325.9133590097  |
| 0               | 0               |
| 2.4591554602    | 3.720894726     |
| 7.6414574284    | 5.3387228419    |
| 0               | 0               |
| 1.2581115425    | 1.781657642     |
| 0               | 0               |
| 2.3882154489    | 2.9535601728    |
| 0.0744628794    | 0               |
| 0               | 0               |
| 109.1183969355  | 50.0091495678   |
| 12.3419031332   | 32.3961372275   |
| 0               | 0               |
| 110.5019321654  | 166.6495088901  |
| 1.8796635251    | 1.6650784294    |
| 0               | 0               |
| 33.2709296354   | 35.9636776093   |
| 0               | 2.6698083486    |
| 17.1196284996   | 9.8977532285    |
| 3.008010447     | 0               |
| 0.6112660083    | 0.4512358336    |
| 214.6340787675  | 83.424889346    |
| 3.8940634657    | 2.4798332033    |
| 0               | 0.0138148326    |
| 3.5566521683    | 2.1097899331    |
| 0               | 0               |
| 0               | 0               |
| 0               | 0               |
| 0               | 0.0119983473    |

gene\_expression\_table

|                 |                 |
|-----------------|-----------------|
| 0               | 0               |
| 0               | 0               |
| 0.6540285303    | 0.827662416     |
| 3.95875201      | 3.3671995855    |
| 1.0976255937    | 1.852036333     |
| 3.4546170651    | 2.509714898     |
| 0               | 0               |
| 175.9258068146  | 137.955251388   |
| 0               | 0.2710981966    |
| 3.3604639761    | 3.8273510159    |
| 3359.8934708678 | 2251.2310387095 |
| 15.6314901901   | 11.1807886827   |
| 141.4607261687  | 98.9300257096   |
| 28.9841253764   | 22.0073621764   |
| 6.4483930989    | 12.1901316707   |
| 89.4173671544   | 482.1438800147  |
| 3153.0728592246 | 4781.3673315173 |
| 13.731399381    | 17.8686594639   |
| 100.085343746   | 253.3127335247  |
| 1409.0095994381 | 1150.3733031564 |
| 20.4695086817   | 23.397006561    |
| 74.4618464904   | 174.8970544861  |
| 0               | 0.4546401524    |
| 102.1636385096  | 198.191811728   |
| 48.5137590726   | 48.0914725558   |
| 0               | 0.2582846635    |
| 195.7372179277  | 102.3039264554  |
| 12.1841417677   | 13.8922152181   |
| 54.7602110289   | 56.6161373217   |
| 85.6043357264   | 52.4181715086   |
| 2.6473068388    | 0               |
| 0               | 0               |
| 10.4972967109   | 10.1254799926   |
| 11.1834150036   | 4.3323761971    |
| 6.5687571289    | 9.2760419344    |
| 0               | 0               |
| 0               | 0.004714        |
| 0               | 0               |
| 2.4798173881    | 1.8305982191    |
| 7.0113503974    | 7.6628289734    |
| 16.9842589086   | 5.3733255165    |
| 0.6083067846    | 4.715039051     |
| 11.5042849426   | 3.970495793     |
| 1.0329052956    | 0.3519182074    |
| 6.0742841002    | 2.3914822566    |
| 1.4987379638    | 2.2127331316    |
| 12.1848881819   | 8.6736244782    |
| 1.0263558665    | 0.2361521045    |
| 0.5539936788    | 1.986364848     |

gene\_expression\_table

|                |                |
|----------------|----------------|
| 21.7370073618  | 34.384784446   |
| 0.4839785055   | 0.1809561262   |
| 8.6754063131   | 8.9015553263   |
| 15.0245159349  | 9.744305673    |
| 0.8192995477   | 1.004409869    |
| 0              | 0              |
| 0              | 0              |
| 0              | 0              |
| 2.0334568358   | 2.2777239009   |
| 6.0164546295   | 5.6397962989   |
| 14.0335222363  | 16.3114327311  |
| 0              | 0              |
| 10.0540631829  | 9.3303852687   |
| 0.4210446296   | 0.3996188231   |
| 4.4600898074   | 2.5398768409   |
| 1.6957869708   | 0.7376843019   |
| 2.8801591021   | 3.0373285598   |
| 2.3964571325   | 2.5272311122   |
| 51.9275997018  | 25.2997085657  |
| 3.8276356567   | 0.9687620733   |
| 0              | 0              |
| 10.4303142917  | 11.7528835262  |
| 72.1805426098  | 44.6567229717  |
| 0              | 0              |
| 5.5367495713   | 5.9624033575   |
| 157.377330906  | 97.2163233323  |
| 0.777399405    | 0.4918931208   |
| 11.0448044208  | 8.3862116901   |
| 2.2251258673   | 3.8014115652   |
| 21.5746407679  | 17.2363354078  |
| 68.9210470348  | 43.3433193697  |
| 0              | 0              |
| 0              | 0              |
| 2.9721086338   | 5.088621337    |
| 8.8312600067   | 3.991362573    |
| 0              | 0              |
| 0.7283876119   | 0.2048361374   |
| 1.6784374858   | 1.274421124    |
| 5.7436575976   | 3.8512227021   |
| 3.8727161018   | 2.9523246584   |
| 51.7730508659  | 36.1872396688  |
| 394.7256425632 | 210.6772653556 |
| 54.0495027849  | 68.3987624144  |
| 13.8449797195  | 11.5106238267  |
| 0.5742565399   | 1.3496084937   |
| 0              | 0              |
| 14.2320678477  | 21.0121908021  |
| 0              | 0              |
| 31.9412828918  | 14.5849587764  |

gene\_expression\_table

|                 |                 |
|-----------------|-----------------|
| 4.1152130141    | 1.3019337031    |
| 0               | 0               |
| 23.4156462646   | 10.8991697116   |
| 3.315574018     | 0.7192808111    |
| 74.7070789759   | 22.9399954882   |
| 0               | 0               |
| 0               | 0               |
| 5.2151657562    | 1.8856305801    |
| 81.5529857729   | 51.1182167034   |
| 2.7963384376    | 2.1625514721    |
| 0               | 0.2581525464    |
| 0               | 0               |
| 27.5264897547   | 27.2422268868   |
| 512.9843542326  | 934.989901399   |
| 0               | 0               |
| 48.7708635852   | 56.9552045778   |
| 185.6294735286  | 107.9122704425  |
| 1.2988992369    | 2.4656036336    |
| 65.9444155343   | 32.8651010408   |
| 6.9611052573    | 14.6819415568   |
| 651.6145426323  | 857.4753626783  |
| 6.1869972028    | 5.2540359998    |
| 0               | 0               |
| 0               | 0.4870416608    |
| 0               | 0               |
| 78.5999696493   | 105.6087632197  |
| 1516.3095250678 | 552.4005078821  |
| 2.6878841041    | 0.4251841755    |
| 3091.4537122008 | 6375.1401168982 |
| 1.1377620962    | 3.2395935097    |
| 15.5719405272   | 16.6743383541   |
| 131.6872339219  | 180.5353791512  |
| 19.8033090524   | 59.0718007387   |
| 38.8175708698   | 26.3586837421   |
| 0.4022817564    | 2.7999454339    |
| 875.9492074238  | 483.3267551744  |
| 272.0345263728  | 116.5171605634  |
| 40.1749342118   | 18.4875355072   |
| 18.3771523194   | 27.1319835647   |
| 27.0966082771   | 13.0399789133   |
| 14.0937429895   | 8.0602294841    |
| 0               | 0               |
| 0               | 0               |
| 0               | 1.1346729489    |
| 292.3664208076  | 99.1685200995   |
| 21.8759812065   | 25.6438453512   |
| 0.2976053474    | 0.4812298985    |
| 446.7213634699  | 255.0827759173  |
| 33.4432494479   | 31.936146799    |

gene\_expression\_table

|               |                |
|---------------|----------------|
| 21.7769857972 | 12.9686680534  |
| 29.9225430525 | 13.2108833565  |
| 41.8495115178 | 44.4680311747  |
| 0             | 5.5382981555   |
| 0.2114223675  | 0.5351031013   |
| 0             | 0              |
| 1.4960577956  | 2.8398550342   |
| 3.0664955277  | 8.1993322008   |
| 0             | 0.5067395518   |
| 2.9733959554  | 4.0522289077   |
| 8.7867256127  | 5.5597288283   |
| 0.6994845409  | 1.1802483392   |
| 0             | 0              |
| 2.0861801112  | 1.5284365888   |
| 0.5361779437  | 0.8481555309   |
| 242.309165154 | 412.3306344992 |
| 0             | 0              |
| 1.9524515062  | 3.6289808482   |
| 6.9309070485  | 5.5340515298   |
| 19.7978725657 | 11.0952915586  |
| 0.2196142903  | 0.2362305509   |
| 8.4945189893  | 4.568611854    |
| 8.0075531708  | 13.0955065222  |
| 0.0249862021  | 0.0368895688   |
| 0             | 0              |
| 1.4099315477  | 0.6573535428   |
| 3.4621723699  | 8.8878257443   |
| 0             | 1.2668488796   |

gene\_expression\_table

| LZ1_U937_2H_R1_001 trimmed (GE) - TPM | LZ2_U937_24H_R1_001 trimmed (GE) - TPM |
|---------------------------------------|----------------------------------------|
| 0.0420672991                          | 0.412194451                            |
| 1.8015687679                          | 1.6608616618                           |
| 0.7307832735                          | 0.5469861162                           |
| 0.1675301552                          | 0.8207681715                           |
| 17.9806230538                         | 10.8122205765                          |
| 2.9970310643                          | 7.9533642141                           |
| 0.9122646399                          | 0                                      |
| 11.5730942199                         | 4.1086383761                           |
| 663.2237547329                        | 165.3172241938                         |
| 12.2688930967                         | 23.3435635063                          |
| 0.6065635985                          | 0.2641504391                           |
| 2.3755956407                          | 1.1771214457                           |
| 0.0437682607                          | 0.0238256246                           |
| 108.8234631806                        | 96.8678167679                          |
| 256.9148008139                        | 41.0128313374                          |
| 0.4408737557                          | 0.4799867502                           |
| 96.2298990936                         | 60.7120903008                          |
| 5.163347174                           | 12.1797516003                          |
| 6.1604178894                          | 5.0117880446                           |
| 27.6880320525                         | 24.630205844                           |
| 22.5637492373                         | 11.5833938984                          |
| 17.0233589968                         | 8.5752571255                           |
| 0                                     | 0.2865870351                           |
| 29.5951413645                         | 17.5974774454                          |
| 0                                     | 0.474956022                            |
| 738.1639065986                        | 298.9396238423                         |
| 37.2126500641                         | 28.4522906059                          |
| 279.4457306563                        | 86.789032795                           |
| 0                                     | 0                                      |
| 9.7309839958                          | 1.3356695028                           |
| 23.2876674997                         | 12.2703678682                          |
| 0.1884551707                          | 0.3077615205                           |
| 19.1990364982                         | 11.3307116105                          |
| 8.0585560019                          | 17.2728022721                          |
| 4.3660308599                          | 4.196336214                            |
| 0.7075623524                          | 0.1925837894                           |
| 7.9507195315                          | 9.5868451339                           |
| 0.6045460441                          | 0.7861589094                           |
| 5.5019089072                          | 2.3237153255                           |
| 19.5394136033                         | 40.6241862125                          |
| 24.1091910417                         | 18.8743688485                          |
| 17.1491926057                         | 13.5348446917                          |
| 0                                     | 0                                      |
| 0                                     | 0.1616095343                           |
| 4.3019956343                          | 1.3381873589                           |
| 0.0642437272                          | 0.0209829713                           |
| 0.187150625                           | 0.0254692582                           |
| 6.6704050169                          | 0.9682911067                           |

gene\_expression\_table

|                |                 |
|----------------|-----------------|
| 8.5628038689   | 4.1951115407    |
| 3.936558244    | 2.1850543183    |
| 0.2984851467   | 0.495572924     |
| 62.2456586402  | 43.0845002882   |
| 1.2107539908   | 1.9040210881    |
| 0.0113073102   | 0.006155        |
| 0.1162719878   | 3.0697417612    |
| 17.6140382477  | 16.3873641918   |
| 32.0993456338  | 12.2557549051   |
| 0.002847       | 0               |
| 0.0461413234   | 0.0460486061    |
| 74.9192898417  | 82.5687635239   |
| 29.1582563903  | 18.6561625285   |
| 0.2390181276   | 0.27391905      |
| 0              | 0.2678043281    |
| 52.9787582902  | 49.9766345385   |
| 1.2540190649   | 1.2641406176    |
| 10.5262875771  | 10.9337102697   |
| 25.5471153191  | 27.7109454707   |
| 0.7789701304   | 0.9275853333    |
| 10.6764294913  | 9.1095443031    |
| 0.0537165068   | 0.0292410369    |
| 810.0797531158 | 1189.9741265835 |
| 0              | 0               |
| 41.5395353779  | 9.9897242377    |
| 3.39650694     | 10.547233426    |
| 2.8193705598   | 1.9770389031    |
| 14.1437781921  | 9.5767403294    |
| 0              | 0.023396413     |
| 4.7567383375   | 2.8359776881    |
| 29.7279634489  | 38.2456695003   |
| 20.8637811655  | 22.4931457717   |
| 41.3473262418  | 60.8756619023   |
| 1.0561991589   | 0.7186887335    |
| 0.3409590825   | 0.3764444232    |
| 22.0490880985  | 13.5240658707   |
| 2.8162252744   | 3.4140621186    |
| 0.0469211942   | 0               |
| 0.192735889    | 0.0629504513    |
| 153.4870103022 | 110.9420693182  |
| 3.5995388915   | 4.0756343292    |
| 0.8593508533   | 1.9013990673    |
| 537.7320969882 | 774.8016793948  |
| 0.2154048967   | 0.2149720574    |
| 0.0621633168   | 0.1522760836    |
| 3.8383819737   | 8.9461167629    |
| 0.1224326308   | 0.6886881765    |
| 3.5099318202   | 6.0138844663    |
| 0.4941517769   | 0.6724892965    |

gene\_expression\_table

|                |                |
|----------------|----------------|
| 6.0740400531   | 2.7112933581   |
| 4.4858121451   | 4.0918156048   |
| 11.1330846058  | 3.5913417508   |
| 11.2079242882  | 26.8749818283  |
| 5.442168426    | 6.4527123745   |
| 5.8502441731   | 9.4431206342   |
| 19.2510736579  | 15.7998397138  |
| 1.1339246454   | 1.6815055087   |
| 0              | 0.0608525488   |
| 1.114192242    | 1.444831117    |
| 1.1635914183   | 0.9920085673   |
| 47.1314121816  | 28.7170530022  |
| 19.1991262054  | 13.5595407486  |
| 0.4323489618   | 0.3399540894   |
| 15.6555524778  | 15.5405425632  |
| 13.2108704405  | 7.7153300116   |
| 0.9386135002   | 0.8454439849   |
| 0.591554394    | 0.1932105965   |
| 88.6629325937  | 72.1567482994  |
| 0              | 0.1105843876   |
| 417.0440126256 | 195.2489346547 |
| 7.141114159    | 7.1382316864   |
| 1.9961093989   | 0.8369749921   |
| 11.5659798044  | 6.0572240971   |
| 0.2881158926   | 0.7449820879   |
| 0.1175187332   | 0.5117785677   |
| 4.1011312337   | 5.1347169602   |
| 19.5730983994  | 16.3461568938  |
| 0.0898450317   | 0.1141184483   |
| 21.8495466391  | 55.2192941044  |
| 7.7978761126   | 6.6905427079   |
| 2.2718998472   | 2.7980970693   |
| 192.40369357   | 313.1213666426 |
| 8.2367763421   | 21.6061146003  |
| 12.751362474   | 10.9274127674  |
| 6.6539477403   | 6.9312421449   |
| 48.681160175   | 37.2978061275  |
| 0.3768201264   | 0.7148919175   |
| 0.7924664688   | 3.4624391072   |
| 6.0993925681   | 17.8463769231  |
| 1.9674836294   | 2.4642454338   |
| 0.0764626684   | 0.067812921    |
| 0.1700424224   | 0.7489272127   |
| 0              | 0.0729331707   |
| 23.3078284391  | 11.5114608018  |
| 0              | 0              |
| 0.068481204    | 0.2236699517   |
| 1.1002825809   | 0.8235537367   |
| 0.7221096925   | 0.7349009356   |



gene\_expression\_table

|                |                |
|----------------|----------------|
| 1.5927044105   | 1.9762549674   |
| 0.1568960957   | 0.0854077229   |
| 0.2171859395   | 0.105090677    |
| 6.8085324719   | 0.7412565008   |
| 3.4963522001   | 4.0431025702   |
| 0              | 0.0908396811   |
| 0              | 0.1079427421   |
| 0              | 0.0941394132   |
| 786.1754231121 | 703.6875638344 |
| 2.8294470287   | 1.3546632271   |
| 1.4432297819   | 1.5545531647   |
| 9.1435417085   | 4.4371855165   |
| 0.2145264997   | 0.1751689845   |
| 0              | 0.1989040422   |
| 1.3742857692   | 1.3769452937   |
| 15.3837229406  | 6.3681188216   |
| 12.2449569631  | 10.9127838798  |
| 1.247208651    | 0              |
| 5.0573032616   | 5.1030960056   |
| 2.1819685151   | 0.2375546203   |
| 8.5479453072   | 26.9300863001  |
| 0.3215493552   | 0.6418064538   |
| 1.3750888876   | 0.7485413203   |
| 18.016083594   | 14.8966160635  |
| 0.7787308277   | 0.434778198    |
| 0.1496437517   | 0              |
| 0.0754090821   | 0.0205247873   |
| 89.687409037   | 103.0939541327 |
| 0.675063203    | 2.7109442504   |
| 1.3344094833   | 0.2793835157   |
| 0              | 0.004231       |
| 10.2631953046  | 7.9968745635   |
| 1.727033931    | 0.5247212624   |
| 4.6631530913   | 2.9305760316   |
| 10.9622885985  | 16.6098367896  |
| 110.1626076399 | 19.0959398741  |
| 3.0053304354   | 4.2231038294   |
| 85.6073235958  | 122.8132471452 |
| 2.9447253965   | 2.024824789    |
| 13.9909688957  | 18.667836206   |
| 72.043677737   | 92.3854077223  |
| 0              | 0.0279478297   |
| 0.3454640196   | 0              |
| 0.8102122722   | 0.5719057177   |
| 0.9431748392   | 1.0451870917   |
| 0              | 0.0828023984   |
| 1.1788741938   | 2.2861637821   |
| 5.9287225715   | 19.5851544581  |
| 0.0756547125   | 0.0741299141   |

gene\_expression\_table

|                 |                 |
|-----------------|-----------------|
| 11.7665134912   | 9.3843651356    |
| 13.1576371883   | 8.9372433308    |
| 4.9168946699    | 6.4237281432    |
| 16.0236991166   | 8.4688873362    |
| 139.9919133373  | 358.3019234959  |
| 0.6230850656    | 0.4111292726    |
| 22.3096841252   | 24.6442562261   |
| 0.7061015696    | 0.6313586635    |
| 1.8452213574    | 2.8348147661    |
| 2.4048533844    | 2.2373749667    |
| 0               | 0.0156423376    |
| 5.2845515255    | 8.6463855141    |
| 0.8085339414    | 3.917177659     |
| 0.009144        | 0.0447977483    |
| 0               | 0               |
| 74.9761443387   | 35.9554417229   |
| 0.8329140213    | 1.3098332718    |
| 0               | 0.0714429934    |
| 4.1287582132    | 9.5519796177    |
| 0               | 0               |
| 0.019971342     | 0.005436        |
| 3.1605787961    | 3.351831395     |
| 1.4022320907    | 0.5801208847    |
| 48.4698182401   | 21.6841067714   |
| 0.8080216707    | 2.9690108707    |
| 0.3990110582    | 0.8304899352    |
| 0.0375303721    | 0.0510749424    |
| 6.2953430978    | 4.7708150792    |
| 10.7189057061   | 6.4491302853    |
| 1136.8240024869 | 1841.7293792949 |
| 13.226389549    | 7.5062761559    |
| 52.8904115881   | 24.8361703027   |
| 137.9681058327  | 88.4854210031   |
| 42.8457138331   | 29.7043663463   |
| 5.6214348246    | 7.8444800598    |
| 37.220094433    | 21.5642748595   |
| 4.40012135      | 1.4986998093    |
| 122.6156674147  | 112.31061918    |
| 81.7933288702   | 45.0430265528   |
| 0               | 0               |
| 0               | 0.0243565464    |
| 0               | 0.0518790027    |
| 0               | 0.2282809374    |
| 0.2875941486    | 0               |
| 0.8293778553    | 2.4879368226    |
| 0.9711175938    | 0.859033685     |
| 0               | 0               |
| 29.7534293559   | 29.6494927368   |
| 3.2183815322    | 3.9028663382    |

gene\_expression\_table

|                 |                 |
|-----------------|-----------------|
| 18.1746995675   | 12.833699472    |
| 52.160610007    | 93.2309269344   |
| 7.2431001385    | 7.8677913112    |
| 31.3929632032   | 17.2556323753   |
| 0.0154852486    | 0.1770200601    |
| 2.3211762942    | 2.0068179444    |
| 5.5055547384    | 7.4986050755    |
| 0.16770917      | 0.0946751677    |
| 8.4535411209    | 11.9010955344   |
| 0.2421136499    | 8.0835261863    |
| 9.1670243345    | 3.8049875373    |
| 0.4146657454    | 0.112863411     |
| 525.0525492942  | 484.7073601966  |
| 1.6987318954    | 0.9545487913    |
| 2.7374155458    | 3.0512296542    |
| 7.288343156     | 3.8087726658    |
| 488.5518285642  | 150.2070571605  |
| 0               | 0               |
| 0               | 0               |
| 2.0732853953    | 2.8343514243    |
| 635.026014415   | 244.8711971195  |
| 0.3801102666    | 0.1750829837    |
| 373.7459011698  | 110.4138184302  |
| 0               | 0.0906193011    |
| 3.8823551926    | 2.6123886164    |
| 2249.7311147551 | 1053.7302127668 |
| 12.7125692314   | 12.1830856735   |
| 4.681361739     | 5.4825884323    |
| 2.5192635236    | 2.1942120089    |
| 5.2224642857    | 3.3167082781    |
| 0.8001104319    | 0.4355469123    |
| 5.1664855662    | 3.6978118999    |
| 9.0629495941    | 2.9256764494    |
| 19.1036886325   | 9.7583150034    |
| 0.0962709505    | 0               |
| 1.8920857427    | 3.0106901654    |
| 0.6538312317    | 0.5796388411    |
| 0.8375370067    | 0.9736604859    |
| 7.0113493062    | 2.5310664946    |
| 3.7888153734    | 4.4606992409    |
| 2.1273641549    | 1.0244277441    |
| 0.3682048007    | 0               |
| 0               | 0               |
| 9.1552618955    | 11.646504775    |
| 0.9779140214    | 0.9745840159    |
| 11.2569999261   | 3.6176425848    |
| 116.7910261484  | 44.7732740468   |
| 1.6521217923    | 0.6512509398    |
| 1.6622540015    | 2.9715224194    |

gene\_expression\_table

|                 |                |
|-----------------|----------------|
| 27.9975581131   | 11.1911128204  |
| 25.4952885745   | 8.2138516774   |
| 45.1616856912   | 27.9801556933  |
| 0.2608301164    | 0.1656492719   |
| 15.2308224956   | 6.9644632207   |
| 3.2366038414    | 4.2885145697   |
| 10.5279759257   | 8.7189468477   |
| 39.9605743172   | 16.7343283102  |
| 1048.4901229457 | 688.1457484292 |
| 4.2926063581    | 7.8802043451   |
| 43.4995438965   | 20.0616684279  |
| 2.6384876564    | 1.4669355601   |
| 61.4125779795   | 51.8766313572  |
| 10.5919276519   | 6.6407724599   |
| 7.6583401819    | 4.658600683    |
| 2.3567550109    | 1.3073561799   |
| 38.5887071357   | 13.2842793492  |
| 0               | 0              |
| 0.9710469869    | 2.2741993141   |
| 61.6296715091   | 70.1042661587  |
| 11.7183790419   | 12.8079644592  |
| 2.884320607     | 2.6018873426   |
| 0.4311210998    | 0.6342822539   |
| 1.96598749      | 1.5820377323   |
| 86.5004108595   | 99.7725660406  |
| 3.4885451525    | 3.0042910433   |
| 0               | 0.0377936712   |
| 4.8325767466    | 1.3230190789   |
| 2.6769029142    | 0.8160291145   |
| 18.77757742     | 10.916811724   |
| 3.8540117875    | 3.9222806424   |
| 0.9308548332    | 0.253359369    |
| 0.1419994896    | 0              |
| 11.7011467402   | 13.0372311634  |
| 0               | 0.0551553504   |
| 0               | 0.0309934895   |
| 1.231539467     | 0.1787730596   |
| 77.3795916886   | 47.8914261229  |
| 56.8435142122   | 36.0656763881  |
| 5.5275497897    | 7.3552568132   |
| 8.3986141646    | 6.2518263701   |
| 14.0723080669   | 6.7374430643   |
| 59.9123650607   | 120.0416892943 |
| 0.3594005868    | 0.2608570178   |
| 1.3785066728    | 0.9380022758   |
| 0               | 0              |
| 120.3231633393  | 58.6975633915  |
| 0               | 0              |
| 32.2793673295   | 28.6882414493  |

gene\_expression\_table

|                |               |
|----------------|---------------|
| 130.0453235018 | 81.9563440154 |
| 3.2406936899   | 16.4649253691 |
| 2.5475671138   | 0.8320738832  |
| 5.1145213252   | 8.582810445   |
| 0.9922035256   | 0.6429933572  |
| 11.2204663243  | 5.0267341277  |
| 3.4207322283   | 5.880330489   |
| 43.3656003217  | 29.1697325191 |
| 0.2858054739   | 0.5013153899  |
| 26.4044294824  | 17.8798541298 |
| 4.3971590332   | 7.5752977376  |
| 0              | 0.168042305   |
| 2.7683984686   | 3.1814470408  |
| 4.1419247802   | 3.6354722891  |
| 168.0338231281 | 179.600336972 |
| 0.36290255     | 0.2116597358  |
| 0.2095280729   | 0.1425729836  |
| 1.895202248    | 2.0117554225  |
| 0              | 0.0399598262  |
| 1.9397993683   | 1.9145692451  |
| 0.0664589722   | 0.2713312966  |
| 0              | 0.007029      |
| 48.8309282905  | 16.8935013115 |
| 0.0311903838   | 0             |
| 23.9499303939  | 32.3685884247 |
| 4.4333251915   | 6.7397851325  |
| 1.2253027789   | 1.3542202003  |
| 259.4313497835 | 60.6463130119 |
| 14.273660395   | 14.0786657074 |
| 3.4992146547   | 4.3123812604  |
| 4.5653831221   | 1.6568033968  |
| 8.1940769271   | 4.9275850769  |
| 28.9250399142  | 14.5812569078 |
| 23.9573901727  | 13.3647496262 |
| 12.7903600742  | 2.2900052411  |
| 2.5120356969   | 7.7602672676  |
| 2.3575315488   | 2.6241477511  |
| 1.1679356479   | 2.039942871   |
| 91.1127525916  | 91.7563019791 |
| 0              | 0             |
| 54.7536695431  | 25.8962089331 |
| 13.6988165815  | 12.1752733097 |
| 17.8464085231  | 15.2621404025 |
| 0.2759845811   | 0.8513291268  |
| 4.9512716141   | 7.5467469692  |
| 9.0426007204   | 5.1079347495  |
| 95.2492697349  | 35.8280506286 |
| 0.2583536447   | 0.9492997618  |
| 33.2167058107  | 21.1174260491 |

gene\_expression\_table

|                |                |
|----------------|----------------|
| 7.736361897    | 21.1230922181  |
| 0.1718925066   | 0.5206394565   |
| 53.7810537393  | 10.9785650953  |
| 18.1988110916  | 26.7249903446  |
| 8.302513029    | 6.8512825257   |
| 0.2117205389   | 0.0576259372   |
| 18.0683058277  | 13.192709105   |
| 8.6970302221   | 2.2341651309   |
| 63.0594570287  | 83.9985127115  |
| 0              | 0.0930138145   |
| 13.5046235143  | 9.2627092662   |
| 41.4687852485  | 24.3187270157  |
| 450.3741320079 | 197.0323119089 |
| 2.5642597906   | 1.9793987935   |
| 2.6669576002   | 2.6450257143   |
| 23.8777524123  | 18.0451754578  |
| 23.8058225532  | 32.2663564719  |
| 61.1449755216  | 31.677283065   |
| 1.4373568552   | 0              |
| 35.8061164491  | 28.2306980229  |
| 49.471792783   | 32.6636184919  |
| 0.6958632394   | 0.7575981344   |
| 0.1690193121   | 0.2249062414   |
| 44.6498004398  | 10.5491272276  |
| 398.3067128303 | 304.4291221293 |
| 0.945168818    | 2.5355995808   |
| 0.0825341401   | 0.2545929093   |
| 57.4064392185  | 163.0340603382 |
| 0.1942900193   | 0              |
| 0              | 0.1315343006   |
| 16.7453506973  | 15.6265267533  |
| 0              | 0              |
| 0              | 0              |
| 5.2506952806   | 7.6310164857   |
| 4.1498446098   | 3.1278505501   |
| 12.1099032293  | 9.3677618684   |
| 61.1652253801  | 29.498611117   |
| 58.0016244321  | 88.0824633131  |
| 4.4570655848   | 10.3169261214  |
| 6.9298619588   | 1.9178648663   |
| 4.90310581     | 5.5049100768   |
| 5.6613686384   | 8.0219506215   |
| 0.7561230456   | 0.1715008353   |
| 2.4757652588   | 0.7786733388   |
| 7.9199499696   | 1.0230184556   |
| 2.3143316727   | 1.1236286938   |
| 1.0311538713   | 0.6334867481   |
| 1.9719342117   | 1.4598772357   |
| 0              | 0.0202935262   |

gene\_expression\_table

|                |                 |
|----------------|-----------------|
| 202.1161998938 | 187.2176979258  |
| 13.1569546604  | 2.2381562705    |
| 0              | 0               |
| 1.4781926424   | 3.3492254095    |
| 1.1657580551   | 1.322063131     |
| 0.0635788914   | 0.0713825264    |
| 1.82247962     | 1.9554085262    |
| 0              | 0.050891369     |
| 0.0405622891   | 0.728654083     |
| 21.4244698459  | 26.3164544614   |
| 0.0867423451   | 0.2017536212    |
| 70.1467084092  | 64.6067751951   |
| 274.9265357051 | 385.0070937637  |
| 8.3664559503   | 13.966677588    |
| 8.6667645634   | 9.6378464482    |
| 0              | 0.3914861173    |
| 6.7177696031   | 6.2056060016    |
| 0.9809508254   | 0.9447496225    |
| 2.3163230879   | 3.6857373761    |
| 12.6996996906  | 9.5056354766    |
| 115.401422624  | 24.2139082193   |
| 0.0256530061   | 0               |
| 0              | 0               |
| 0.0473597956   | 0               |
| 0.1196299281   | 0.1302431358    |
| 75.0294189345  | 55.8051528607   |
| 27.6643569503  | 24.4867118267   |
| 43.4756025726  | 93.3073514683   |
| 0.2942469109   | 0.1423784944    |
| 58.1791441038  | 81.3028890914   |
| 0.2696877376   | 1.1631616608    |
| 5.2226482365   | 10.0486877911   |
| 0.2728336186   | 0.6785795539    |
| 6.4466643889   | 2.5644859318    |
| 68.8406243428  | 28.6962900785   |
| 702.1982046191 | 346.8136182461  |
| 35.159405781   | 27.9912573877   |
| 3.7846950288   | 2.7108301289    |
| 0.0300527055   | 0               |
| 2.0647487669   | 1.0360557731    |
| 5.9484216682   | 2.3693223509    |
| 1.0111580442   | 0.7765791484    |
| 5.3089759396   | 11.0817622054   |
| 1.6253530659   | 4.1021374877    |
| 21.1272479722  | 18.0839341545   |
| 37.1535031013  | 43.5109254662   |
| 8759.017578926 | 14035.397477959 |
| 0.0957104719   | 0.6252097039    |
| 19.8724361049  | 4.466035095     |

gene\_expression\_table

|                |                |
|----------------|----------------|
| 0              | 0              |
| 0.1556888455   | 0.1695010919   |
| 0.5920907248   | 0.6198261868   |
| 1.5913386459   | 0.7274891139   |
| 3.7030542414   | 3.2512726477   |
| 317.1011598483 | 153.0232567703 |
| 0              | 0.0301146334   |
| 0              | 1.905970681    |
| 1.440801394    | 3.4313671066   |
| 54.445373952   | 12.285755505   |
| 0.0998917201   | 0.5981459732   |
| 20.8853151637  | 19.6892119686  |
| 394.0219945936 | 511.3925431328 |
| 31.608575791   | 31.5004846679  |
| 66.2882522292  | 56.3083365213  |
| 7.4231973857   | 13.6174782069  |
| 17.1381047965  | 35.213432291   |
| 0.5401347375   | 0.5779150081   |
| 0.4265459294   | 0.526459439    |
| 1.1034114096   | 0.3990341314   |
| 0.0982716311   | 0              |
| 1.8630871844   | 0.8874139223   |
| 4.1357103394   | 8.726148359    |
| 10.4089345474  | 21.609525639   |
| 537.3013521144 | 650.7487723834 |
| 8.425249984    | 4.4487657266   |
| 2.4715902374   | 5.0599910533   |
| 0.1725535413   | 0.0234827466   |
| 4.0195357586   | 3.6506194577   |
| 3.6688075598   | 7.1148346537   |
| 2.8045441433   | 3.5165042042   |
| 0.4939648911   | 0              |
| 6.5660226331   | 6.3919430811   |
| 0.0206980744   | 0.112671727    |
| 7.388728812    | 9.541454504    |
| 12.6837655878  | 17.8398441055  |
| 0              | 0              |
| 13.2784102378  | 5.5130456755   |
| 0              | 0.007255       |
| 0.0837514806   | 0.0375453895   |
| 0.0006996      | 0.002666       |
| 0              | 0.0661821716   |
| 0.3831496723   | 0.5606029424   |
| 51.6955079345  | 24.5750914277  |
| 17.0664039395  | 12.7567502088  |
| 0              | 0.0692927518   |
| 2.0712523675   | 2.5256085701   |
| 2.3442595924   | 2.8446788804   |
| 5.263891459    | 4.3077388184   |



gene\_expression\_table

|                |                |
|----------------|----------------|
| 0.0127056868   | 0.04841514     |
| 26.6240237178  | 30.0189721207  |
| 111.0459870408 | 101.648585541  |
| 17.4280975528  | 30.4185348018  |
| 0.3920140024   | 0.5016195289   |
| 3.8891954292   | 5.2607139232   |
| 9.9282999037   | 12.5413378082  |
| 47.3489611841  | 44.9832690278  |
| 1.7779685531   | 2.9123555257   |
| 0.4724495815   | 0              |
| 8.6621518987   | 4.1437625362   |
| 17.7705741108  | 17.6042951365  |
| 0.7072905528   | 0.4620235468   |
| 0.7394561159   | 0.2378581754   |
| 2.968935931    | 3.8815598795   |
| 0              | 0.0516413775   |
| 4.5001427524   | 2.6753203748   |
| 42.6262777509  | 44.3940229537  |
| 69.9395106083  | 79.1744677186  |
| 8.241922767    | 3.518478399    |
| 0.0180673089   | 0.0762219718   |
| 19.4759071313  | 13.0466539303  |
| 2.5408798839   | 2.1198270353   |
| 0.3735426809   | 0.1355607549   |
| 14.5399088635  | 11.5020956136  |
| 26.6227221102  | 44.1250502781  |
| 33.6461119056  | 57.2893269659  |
| 1.7574908617   | 1.4936314069   |
| 1.706919562    | 1.5692753051   |
| 34.6103134143  | 45.1672450611  |
| 4.089988005    | 2.8812490542   |
| 0.0242958797   | 0.2975775425   |
| 4.7654824869   | 4.4698870628   |
| 15.5649743458  | 9.0705127661   |
| 5.6345289887   | 3.5160628151   |
| 0              | 0              |
| 0.0581263587   | 0.1740286748   |
| 55.0934580685  | 69.6482023162  |
| 0              | 0.0980726352   |
| 1.228547726    | 1.4989681239   |
| 0.5580816946   | 0.3172985798   |
| 0              | 0.00506        |
| 0.0232909465   | 0.0760717479   |
| 0.0134391398   | 0.0118880287   |
| 2.4201521335   | 1.9328090417   |
| 3.4102561472   | 4.205318615    |
| 145.3309223774 | 145.4697851473 |
| 0.1737307844   | 0.1793180129   |
| 0.0171030466   | 0              |

gene\_expression\_table

|               |                |
|---------------|----------------|
| 0.2891820443  | 0.185635263    |
| 5.8561838079  | 17.7332969003  |
| 0.019972195   | 0.002718       |
| 1.0616240037  | 1.2658850558   |
| 91.8361705663 | 62.406614817   |
| 0.202644782   | 0.178949619    |
| 0.4277803511  | 2.0746231966   |
| 1.9716697053  | 1.3718810285   |
| 4.4375535491  | 4.3536532034   |
| 2.0500736132  | 0.5257072272   |
| 11.8301530409 | 8.8857878606   |
| 0.007746      | 0.001406       |
| 0             | 0.007731       |
| 0.3218881964  | 0.7203594743   |
| 1.1170889089  | 1.6191494164   |
| 0.5181449906  | 0.3666736169   |
| 2.8039340039  | 5.4029922138   |
| 0.0695973711  | 0.3599162434   |
| 12.9827687568 | 30.2936033459  |
| 0.2367945841  | 0.2578022878   |
| 0.004829      | 0.0105154348   |
| 0.1596963359  | 0.1431822122   |
| 2.9554177171  | 1.6088067469   |
| 0.993563203   | 0.6552661161   |
| 0.1164135006  | 0.247145645    |
| 315.536635347 | 217.3193564721 |
| 25.2887528677 | 71.3666068035  |
| 1.1132633774  | 0.2250910551   |
| 0.3627461534  | 0              |
| 4.5150575025  | 5.4121470888   |
| 0.0107857572  | 0.004893       |
| 4.1825179091  | 4.1396166604   |
| 45.4789026877 | 40.9235419809  |
| 1.9074900801  | 1.676889194    |
| 1.7802795567  | 1.1306286879   |
| 0.958612069   | 3.4850697468   |
| 0.0161485898  | 0              |
| 76.6939566648 | 48.7177817833  |
| 0.060982904   | 0.0878732523   |
| 4.9142232086  | 2.8388807416   |
| 0.003039      | 0.0132341872   |
| 0             | 0              |
| 0             | 0.0241162218   |
| 1.5823432218  | 3.650534098    |
| 8.0318823858  | 7.104863065    |
| 11.7966094917 | 14.8089604365  |
| 15.728370686  | 31.0931149364  |
| 0.0542492035  | 0.0541401939   |
| 0.20545404    | 0.1846909857   |

gene\_expression\_table

|                |                |
|----------------|----------------|
| 43.1206395535  | 63.5402009753  |
| 0.0529739161   | 0.1071081193   |
| 4.1252135849   | 3.2979241366   |
| 9.0405478641   | 10.8913995335  |
| 1.1899117231   | 1.4617109036   |
| 0.2183817801   | 0.3863534272   |
| 28.3224192429  | 16.3548848731  |
| 1.0031533761   | 0.7379392759   |
| 0              | 0.0222304064   |
| 0.0677710285   | 0.0368917352   |
| 0              | 0              |
| 0.004597       | 0.003337       |
| 0.2752865563   | 0.5780105076   |
| 0.2207311693   | 0.4369341366   |
| 23.1192315349  | 11.8659986969  |
| 145.2640848389 | 109.8042935907 |
| 1.3624751304   | 4.062096454    |
| 5.9601859259   | 8.4195540984   |
| 2.102009532    | 2.3615305262   |
| 0              | 0.0161698505   |
| 0.6209741826   | 0.5720551232   |
| 42.9734209408  | 31.7012730472  |
| 11.1558213428  | 20.3283273342  |
| 0              | 0.0198349913   |
| 5.9358637457   | 4.5606059996   |
| 0.002456       | 0              |
| 0.849840651    | 0.8789741612   |
| 0.0937100512   | 0.0170039542   |
| 10.1801050555  | 9.8751262318   |
| 23.8645481342  | 19.9986668752  |
| 1.777390602    | 1.9819862715   |
| 12.7043346131  | 11.3115297521  |
| 0.8646139177   | 1.0166254549   |
| 6.7721459321   | 5.4058588636   |
| 2.5205269439   | 4.5869210123   |
| 4.2849305435   | 0              |
| 0.5194496263   | 0.1767292612   |
| 0.0805809311   | 0              |
| 0.0525337137   | 0.2001802141   |
| 0.6806574872   | 1.1115650604   |
| 1.0768283616   | 0.4187004776   |
| 0.8723414452   | 0.7122997172   |
| 1.6955528167   | 2.1635646356   |
| 5.8543579902   | 3.2435249753   |
| 3.7277328424   | 2.6503045083   |
| 0.5502141479   | 0.237277124    |
| 6.5782795883   | 6.2666491831   |
| 0.36367689     | 0.6345211708   |
| 0.0161724187   | 0.0176071871   |

gene\_expression\_table

|                 |                 |
|-----------------|-----------------|
| 0               | 0               |
| 5.0730241948    | 7.7323227143    |
| 0               | 0.0205336174    |
| 3.0681824956    | 1.4745569269    |
| 0               | 0.7960933014    |
| 136.3666601031  | 144.6971911771  |
| 0.0445024395    | 0.1493892334    |
| 1240.8035383342 | 1456.1882005665 |
| 0.3267683954    | 0.2801596654    |
| 6.4327739971    | 6.7929835564    |
| 15.8426932786   | 13.1397303423   |
| 2.5763965494    | 3.4340641786    |
| 28.6512673327   | 21.8489266196   |
| 0.1989995478    | 0.2354936843    |
| 0.0221186059    | 0.064215739     |
| 54.9330101508   | 13.2772783727   |
| 20.2667316581   | 9.1310446625    |
| 1.874919974     | 1.2521998186    |
| 4.5630016551    | 4.471035702     |
| 0               | 0               |
| 0.5012935521    | 0.2030760221    |
| 0               | 0.021799933     |
| 7.0835268291    | 6.5726898052    |
| 1.5087747789    | 2.562010501     |
| 0.2008679774    | 0.2574002989    |
| 0               | 0.0859810274    |
| 1.351695075     | 0.6351173618    |
| 2.8489169807    | 4.8314386711    |
| 1.7651884452    | 0.6321679797    |
| 8.152123895     | 7.7177007163    |
| 4.7717706081    | 2.1043474445    |
| 1.2346638044    | 0.2496370437    |
| 5.4493643625    | 3.6852612173    |
| 10.3585618185   | 12.6334300057   |
| 0.28814877      | 0.4346224744    |
| 5.8909172362    | 2.9333252767    |
| 2.4937296168    | 1.7266728182    |
| 2.3843662358    | 4.3053951906    |
| 0.005335        | 0               |
| 0               | 0               |
| 0.009796        | 0               |
| 3.3413982131    | 3.9507692359    |
| 0.6763217021    | 1.4726458614    |
| 0               | 0.0633706782    |
| 59.1583537666   | 8.6451953151    |
| 0.0061          | 0               |
| 0.8470302874    | 0.5861782906    |
| 9.0407834445    | 8.3419937731    |
| 0.3596895489    | 0.7614446867    |

gene\_expression\_table

|                |                |
|----------------|----------------|
| 21.13986162    | 13.4977103379  |
| 74.2209252812  | 71.3521724881  |
| 0              | 0              |
| 3.364106465    | 1.8312799395   |
| 0.0255331671   | 0              |
| 1.4983249977   | 1.5147338959   |
| 10.9882193572  | 11.3227846384  |
| 6.6765303761   | 9.1854750065   |
| 0.995407018    | 0.8866771664   |
| 25.819514552   | 43.7371652717  |
| 9.7460960909   | 8.2999569678   |
| 0.8481133724   | 1.0112940551   |
| 39.1401500219  | 62.1827530209  |
| 0.0238093078   | 0.0259215981   |
| 14.4470697547  | 7.9895478084   |
| 0.8274369763   | 1.3512670466   |
| 11.6106408712  | 7.2985005772   |
| 0              | 0              |
| 18.7819493229  | 15.7601563178  |
| 0.5689663499   | 0.9979920386   |
| 18.8205344067  | 21.8936764474  |
| 0              | 0.0962595277   |
| 0              | 0.0279537405   |
| 31.7515748316  | 45.1123057928  |
| 10.5374179648  | 10.6528184413  |
| 1.222713792    | 1.1093244037   |
| 1.0823335483   | 0.5254826028   |
| 45.0367908233  | 42.4168478525  |
| 1.0839408152   | 3.73699849     |
| 124.7372403229 | 108.2479650957 |
| 0.4074923385   | 5.1019040904   |
| 3.0753774901   | 1.1559316236   |
| 4.8159190906   | 4.80185061     |
| 11.585780858   | 20.0716993699  |
| 3.4935774456   | 3.702761715    |
| 19.5638753811  | 10.8323291456  |
| 0              | 0.181454882    |
| 0.0371061618   | 0.0403981089   |
| 0              | 0.1701683695   |
| 51.1606868927  | 7.6009155646   |
| 321.1188640015 | 308.7036583873 |
| 10.0432345861  | 6.1550358579   |
| 0.0521793899   | 0.0355053678   |
| 0              | 0              |
| 4.432357644    | 4.7008401274   |
| 0.3288981613   | 0              |
| 0.6861681033   | 0.1867607187   |
| 17.1707296192  | 10.0146777537  |
| 0.0600539508   | 0.4004632604   |

gene\_expression\_table

|               |                |
|---------------|----------------|
| 0.0960898314  | 0.0627687795   |
| 0.9565419072  | 0.4930048153   |
| 69.2394527839 | 37.735000666   |
| 3.6363602275  | 4.7344349745   |
| 26.4838210042 | 31.9357123417  |
| 2.366587182   | 2.0397637494   |
| 0.1277960911  | 0.0695668881   |
| 15.247796203  | 9.445575644    |
| 0.8546643391  | 1.4441942809   |
| 0.2172308624  | 0.3741398836   |
| 2.9540025582  | 1.4435781256   |
| 1.9528413563  | 6.75147164     |
| 2.2876274347  | 6.1770309143   |
| 0.6861390466  | 0.2667897287   |
| 14.0489914657 | 11.4455192768  |
| 12.001656479  | 14.6997082889  |
| 12.0836845245 | 9.7667634498   |
| 2.9389531229  | 0.7999220526   |
| 4.6215325834  | 4.5187109163   |
| 24.9443854919 | 11.9524979948  |
| 0             | 0.1673966207   |
| 30.0467824301 | 85.1905724896  |
| 74.5028688809 | 130.5652926811 |
| 13.4228536153 | 25.8038911376  |
| 0.1267617889  | 0.0690038569   |
| 6.0099399066  | 9.51099628     |
| 3.7208007247  | 3.4809232452   |
| 1.1920796211  | 2.7548434145   |
| 0.0336702631  | 0.2657660608   |
| 30.9630736262 | 34.9424339472  |
| 3.2584243357  | 2.6947370572   |
| 0.2254001195  | 0.2331270936   |
| 0.6412912747  | 0.0775760788   |
| 0.2906540265  | 0.1095369155   |
| 5.6660493867  | 4.0315284518   |
| 1.9430197932  | 1.5865490017   |
| 2.9775312222  | 2.7315570046   |
| 29.3462496094 | 60.3722677569  |
| 1.3563233302  | 1.6161138615   |
| 13.8900454165 | 7.6545119547   |
| 0.2998846282  | 0.0989362094   |
| 0.009878      | 0              |
| 1.4510889787  | 1.5589003937   |
| 0.5845860155  | 0.5568926385   |
| 19.2358959523 | 23.0049605252  |
| 1.8001829891  | 2.5471492154   |
| 21.1611967642 | 17.672431585   |
| 2.0044679329  | 6.164992706    |
| 0.1555196347  | 0.4481917127   |

gene\_expression\_table

|                |                |
|----------------|----------------|
| 0.4179221839   | 0.8175762991   |
| 1.2055681123   | 1.156269814    |
| 5.3612495184   | 10.214546057   |
| 14.273287841   | 24.9743105942  |
| 0.232069527    | 0.1894935284   |
| 2.3548460564   | 1.0255043682   |
| 1.5827682858   | 1.292390048    |
| 34.9239413173  | 83.4229238851  |
| 0.8757204501   | 1.6560706748   |
| 3.8829664036   | 2.6421571948   |
| 2.8457470364   | 5.5281842656   |
| 0              | 0.7296104326   |
| 8.8141580541   | 11.7469789674  |
| 0              | 0.7296104326   |
| 0.8927249475   | 1.4856565129   |
| 3.2858653325   | 25.7995609449  |
| 0.3863446333   | 0.210309984    |
| 0.0453984423   | 0.247130278    |
| 1.381085181    | 1.447225498    |
| 5.2926153497   | 2.9719659464   |
| 0.8610965883   | 0.7499923915   |
| 0.7373496046   | 1.376168649    |
| 5.544832759    | 4.1251149976   |
| 9.8173776231   | 4.4804682129   |
| 30.7427821883  | 56.5530786734  |
| 9.2642402786   | 7.6535971888   |
| 0.1662857262   | 0              |
| 33.4653553566  | 22.7525407255  |
| 450.1654594301 | 269.2788264887 |
| 17.695325002   | 33.6443003818  |
| 9.0812049403   | 13.0379380942  |
| 0.8184715815   | 4.7895760704   |
| 143.087747193  | 761.2078031408 |
| 0.0402160314   | 0.072973128    |
| 0.0409262321   | 0              |
| 0              | 0              |
| 1.9562379594   | 1.2440359294   |
| 3.971721825    | 8.0257564893   |
| 6.7768272786   | 6.153030379    |
| 0.2852821071   | 0.195807671    |
| 1.6315835319   | 1.6796017291   |
| 1.5736542297   | 3.2323582743   |
| 27.0877495148  | 27.9387409574  |
| 7.1888954857   | 9.8171412663   |
| 0.5441145403   | 0.6565619777   |
| 0.3711457633   | 0.577246714    |
| 0.1817692295   | 0.3392489986   |
| 0.914188465    | 1.4307329943   |
| 0.3745641896   | 0.4595295089   |

gene\_expression\_table

|                |                |
|----------------|----------------|
| 0              | 0              |
| 1.3584677877   | 1.8552204933   |
| 0.909395401    | 0.8181863409   |
| 6.7015618981   | 5.8368834612   |
| 14.5388894175  | 8.6126945808   |
| 0.5316549864   | 0.2894109094   |
| 16.1160099037  | 0              |
| 18.5985265807  | 0              |
| 6.2257113491   | 2.2593459157   |
| 126.0998014077 | 210.2207137954 |
| 120.1888732167 | 199.4951671732 |
| 6.2257113491   | 2.2593459157   |
| 18.5985265807  | 0              |
| 13.2523914098  | 42.7690218074  |
| 103.5291633268 | 26.2125487243  |
| 14.0912305982  | 3.8353405555   |
| 24.2669407775  | 40.1015289277  |
| 72.0472211675  | 31.9093703702  |
| 1.6583278169   | 1.5276881877   |
| 0.3883722428   | 0.3577770823   |
| 1.1056052781   | 1.1890120935   |
| 123.0075720437 | 56.1323782534  |
| 254.3178520161 | 197.2964905753 |
| 2.286102851    | 2.4157155237   |
| 478.0836259596 | 460.6567989375 |
| 1.338916867    | 3.0479214163   |
| 0              | 0.3767227733   |
| 36.8368982387  | 30.3813967677  |
| 14.5809101077  | 12.8258620102  |
| 2.8348865428   | 4.5277227056   |
| 3.9495720917   | 6.7894204045   |
| 2.3668260657   | 3.6669899665   |
| 0.9094521722   | 0.8911224318   |
| 0.9851546985   | 0              |
| 409.4605233488 | 355.3707683899 |
| 396.0274600536 | 185.1109220872 |
| 3.3645858615   | 6.5508487513   |
| 5.1780537545   | 5.3331417467   |
| 0.6880138748   | 1.2172101463   |
| 4.8948662176   | 13.0922229914  |
| 7.4608598798   | 11.0386292813  |
| 41.3109606496  | 93.0978755999  |
| 2.2409085871   | 1.9770106428   |
| 1.2652493602   | 1.9186585978   |
| 7.2009353206   | 11.4242793012  |
| 0.3809359949   | 2.2291817663   |
| 229.9217834818 | 120.4368623046 |
| 30.0647556243  | 6.2692358583   |
| 0.4770011189   | 0              |



gene\_expression\_table

|                 |                 |
|-----------------|-----------------|
| 3.2115836766    | 4.4999408028    |
| 0.1887368844    | 0.5137026336    |
| 2.205755174     | 0               |
| 10.450657404    | 0.7340521495    |
| 0               | 4.0224919309    |
| 69.1423775156   | 35.2272502039   |
| 1.0372775728    | 0               |
| 63.5189006121   | 57.2579536992   |
| 10.3920114092   | 14.1146645094   |
| 132.7119007362  | 86.1805224297   |
| 14.4338345044   | 15.3823673767   |
| 5.0675442722    | 5.5649578824    |
| 12.9155550712   | 38.926027259    |
| 0               | 0.1358340305    |
| 620.1091967783  | 493.0622408164  |
| 5.4329870091    | 9.2560435284    |
| 0.1134021576    | 0.864239993     |
| 0.145827473     | 0.7673634326    |
| 3.5290258527    | 3.3947413976    |
| 0               | 0.034165127     |
| 177.7372127733  | 94.0726301164   |
| 0.5032983583    | 0.4794557914    |
| 1.4376954871    | 1.7811391658    |
| 0               | 0.0217113036    |
| 0               | 0               |
| 8.952132557     | 2.1136638469    |
| 27.3971965141   | 42.921689204    |
| 464.7555366908  | 239.5916643138  |
| 0               | 0.062677193     |
| 0               | 0               |
| 0.5618933073    | 0.3976328152    |
| 612.9226553479  | 50.3451886911   |
| 0               | 0.6054378326    |
| 18.3912088056   | 0.8973320739    |
| 3998.5360567046 | 4662.8279247958 |
| 1.6437200719    | 0.0894772988    |
| 3333.3960928458 | 4304.2197029355 |
| 7.1017070789    | 0               |
| 0.8910821241    | 0.7276021888    |
| 0.1673791311    | 0.2733427567    |
| 2.6829909443    | 2.1345899574    |
| 2.022800474     | 4.5618185936    |
| 81.3545146247   | 26.7667872799   |
| 121.3634215194  | 152.3617709821  |
| 196.1742463593  | 112.8630201612  |
| 0.4950318612    | 0.3307190727    |
| 5.8380437497    | 15.6545370366   |
| 4.0572867832    | 4.1750639864    |
| 9.3083099433    | 9.3007175895    |

gene\_expression\_table

|                 |                 |
|-----------------|-----------------|
| 5.1721294285    | 10.9491378991   |
| 69.8264986189   | 80.7489882139   |
| 9.2845599554    | 19.4455475688   |
| 1056.4026170435 | 901.0639638251  |
| 43.0041632078   | 47.5806537682   |
| 9004.036714808  | 5363.1552114024 |
| 1.2299356534    | 3.1996291518    |
| 147.1723545589  | 66.8657693145   |
| 0.8670335542    | 0.7079656238    |
| 117.5518704932  | 203.8346881857  |
| 10.3085187606   | 7.5973196427    |
| 361.0893790707  | 278.160398765   |
| 2.1641516884    | 3.5342230819    |
| 31.4212498574   | 33.2907894465   |
| 2.7258488823    | 2.2964175015    |
| 0.0229080803    | 0.0124702081    |
| 60.6002210961   | 32.0782247219   |
| 0               | 0               |
| 32.1412507847   | 24.7491288207   |
| 0               | 0.016570829     |
| 49.7330766026   | 26.0178453237   |
| 10.7965911148   | 38.5336830657   |
| 49.3227630046   | 33.47128121     |
| 217.7166295247  | 152.235901485   |
| 3.7099011377    | 2.1134471942    |
| 870.8510984019  | 2080.7965448202 |
| 40.2940112005   | 8.8087566341    |
| 4.6988495709    | 6.0884242072    |
| 0.0689072774    | 0.0375102619    |
| 1.4745392836    | 0.9364576531    |
| 274.810637121   | 214.5114917948  |
| 9.2245841702    | 5.9076244417    |
| 4.7344713859    | 9.2516656914    |
| 0.4484847477    | 4.1503202147    |
| 118.1693880445  | 160.8956916504  |
| 1806.9785369093 | 1904.3953947892 |
| 264.5792361499  | 183.319040546   |
| 0.841118046     | 1.9841022735    |
| 7.2694748564    | 14.698172943    |
| 1.4706657207    | 2.3174376833    |
| 45.638666332    | 42.0004978582   |
| 8.7889230884    | 4.5093637589    |
| 7.8793336775    | 13.8360717388   |
| 58.5133548744   | 43.5200417694   |
| 12.3352234336   | 15.793171239    |
| 2.0328035125    | 1.3371100869    |
| 35.662947233    | 42.671099957    |
| 262.4657268319  | 178.5943107565  |
| 11.679119265    | 11.5441136565   |

gene\_expression\_table

|                |                |
|----------------|----------------|
| 1.9620961722   | 2.1964827632   |
| 83.7681269851  | 28.1716608486  |
| 18.7381477437  | 25.3748650806  |
| 21.8253943506  | 17.0112011062  |
| 1.6586126014   | 1.4665274075   |
| 0              | 0.1557216394   |
| 14.2401412366  | 19.8849030896  |
| 17.79797051    | 22.0265639281  |
| 6.34721257     | 8.7926063551   |
| 241.7864063121 | 246.3591164754 |
| 6.6993921716   | 4.5740416612   |
| 98.1260929861  | 127.4109927781 |
| 2.3179646301   | 6.5957922899   |
| 20.3320151955  | 11.7944853452  |
| 1.798602887    | 3.5083870727   |
| 16.3725835557  | 5.1614796508   |
| 9.165975321    | 7.3786534581   |
| 2.3022871291   | 7.9373738898   |
| 9.7722466068   | 25.0464757847  |
| 5.2513930455   | 2.9805729561   |
| 2.0617665019   | 3.8580441432   |
| 53.2554356095  | 86.207250653   |
| 62.7607926674  | 32.2976777786  |
| 2.0647344703   | 0.3549333958   |
| 0.3413578516   | 0.2295436464   |
| 7.2274400784   | 20.5047418785  |
| 1.1145606123   | 1.9051024952   |
| 139.9900302459 | 52.6751203318  |
| 4.2442914622   | 1.5933904288   |
| 0.2514587257   | 0.296581337    |
| 0.8974795718   | 0.3582704627   |
| 0.7122457286   | 0.2584780096   |
| 123.2651872626 | 43.0262440858  |
| 8.427075951    | 7.623096988    |
| 249.1085122789 | 208.0999438354 |
| 603.1878744437 | 326.6890325473 |
| 2.7772745571   | 3.0408459285   |
| 11.0011415974  | 3.9384255692   |
| 0.031834472    | 0.008665       |
| 0              | 0.0503777104   |
| 0              | 0.0834052992   |
| 0.1502206194   | 0.1226608059   |
| 4.6557773568   | 3.7522462857   |
| 0              | 0              |
| 0.037708595    | 0              |
| 2.6334981618   | 0.6143859007   |
| 0.7408728021   | 0              |
| 0.0232785791   | 0.0126718923   |
| 5.2586226409   | 0.801521257    |

gene\_expression\_table

|                 |                 |
|-----------------|-----------------|
| 0               | 0               |
| 67.2447670122   | 31.2584245346   |
| 0.1772392261    | 0.4824083938    |
| 15.3280560134   | 12.7027413224   |
| 0.4668102898    | 0.0163943321    |
| 208.9832475469  | 72.9792721323   |
| 0.1335887783    | 0               |
| 7.565203448     | 1.319930378     |
| 0               | 0.3292579417    |
| 0               | 0.3432894927    |
| 1904.2187121822 | 1513.0428807176 |
| 0               | 0               |
| 58.6689027156   | 25.4435179103   |
| 4.2844018008    | 6.2900089927    |
| 0.6465077709    | 0.1508279994    |
| 32.6376325328   | 17.5957401665   |
| 13.9699083293   | 19.671805514    |
| 35.3111184273   | 34.8740319226   |
| 14.9655782399   | 16.6162279904   |
| 4.8315154377    | 15.5282597804   |
| 0.3641901066    | 0.2973749687    |
| 0.0273832136    | 0.0745314251    |
| 0               | 0               |
| 6.6422506664    | 6.885524904     |
| 0.9343503363    | 0.0726602207    |
| 0.6211589703    | 0.2847437167    |
| 10.1541669635   | 5.2826175142    |
| 0.1219030492    | 0.3317948034    |
| 15.4602901967   | 26.760060289    |
| 1.5541288301    | 0.8460032343    |
| 0.9381589104    | 0.8511579575    |
| 28.09680022     | 22.8799242056   |
| 0               | 0.030784423     |
| 42.2755683733   | 42.1361372312   |
| 27.5341053659   | 27.2587404147   |
| 0.6237839016    | 0.2910532005    |
| 49.3363117966   | 68.216744648    |
| 4.8671576522    | 6.4866545643    |
| 15.1743652954   | 20.9017401473   |
| 31.9167043152   | 27.1793308187   |
| 0               | 0.1842608653    |
| 146.7649537295  | 302.1722826637  |
| 132.8493076366  | 72.3176494493   |
| 61.273016023    | 18.4640909717   |
| 3.9934067216    | 4.2837531486    |
| 0.1574831938    | 0.5143638883    |
| 28.0352174074   | 41.2950356157   |
| 31.30787839     | 27.3661121254   |
| 0.6673930974    | 1.4532044139    |

gene\_expression\_table

|               |                |
|---------------|----------------|
| 11.2362830515 | 16.0444599648  |
| 4.9082262078  | 17.7312662607  |
| 1.1868530378  | 0.2584294144   |
| 0             | 0              |
| 1.3063053451  | 3.6284252431   |
| 8.837962812   | 1.7071361837   |
| 10.3620362378 | 3.0372797935   |
| 60.4001469986 | 23.2991079414  |
| 0.5158956368  | 0.6745762519   |
| 0.1019668768  | 0.2359027771   |
| 0.0105132869  | 0.0572299704   |
| 0             | 1.2304626847   |
| 8.2664847975  | 8.329284493    |
| 3.6985627651  | 5.4434858143   |
| 0.0762029039  | 0.2169811909   |
| 13.5281145019 | 17.1322156509  |
| 0             | 0.0128897734   |
| 94.578126586  | 203.6252498109 |
| 27.6804363014 | 22.0600472467  |
| 25.8840170586 | 20.4166518573  |
| 6.6412570819  | 8.993807647    |
| 0             | 0.0155021975   |
| 26.0847052452 | 8.2153850469   |
| 25.2624781094 | 19.2180590049  |
| 1.3500994241  | 3.0534597771   |
| 0.0956810965  | 0.2343816806   |
| 97.0237762515 | 68.8259005102  |
| 12.4508675675 | 17.7797002716  |
| 5.8043169093  | 7.5798359239   |
| 0.0395257274  | 0.1452341174   |
| 70.6760945651 | 80.5689178739  |
| 4.597581488   | 5.149064507    |
| 0             | 0.0788279516   |
| 58.055627843  | 40.4637493659  |
| 3.1250600511  | 0.8845995563   |
| 0.5042179138  | 0.617569438    |
| 2.0222672753  | 1.7833581671   |
| 0.2367091148  | 0.3428019082   |
| 1.9452904679  | 1.4984934843   |
| 0.2030806484  | 0.0340149774   |
| 0.9538076493  | 0.8567019426   |
| 1.2002797429  | 0.5444853975   |
| 20.5882472335 | 12.6083107378  |
| 5.1409767859  | 4.0240994604   |
| 0.7662367466  | 1.1261902063   |
| 0.562376773   | 0.6906694679   |
| 1.7444493091  | 1.3980307673   |
| 0             | 0              |
| 0             | 0              |

gene\_expression\_table

|                |                |
|----------------|----------------|
| 1.4586635207   | 0.6260667531   |
| 21.8679391735  | 19.3824140869  |
| 16.2863539151  | 11.8985887417  |
| 0              | 0              |
| 2.2000945534   | 4.314226502    |
| 6.2941869891   | 3.8174852367   |
| 0.1203516608   | 0.1538596912   |
| 0.1465091809   | 0.1709003948   |
| 95.4679981401  | 164.386715018  |
| 4.1696640079   | 5.4619122569   |
| 0              | 0              |
| 0.2304878443   | 0.1471004332   |
| 114.5691677915 | 117.9870021558 |
| 0              | 0              |
| 0              | 0.0117976042   |
| 2.0775168039   | 2.285720398    |
| 4.5289630747   | 5.5242763607   |
| 8.3212807184   | 6.4904021961   |
| 0.0913796437   | 0.323331356    |
| 2.6817490917   | 2.1250732164   |
| 0.3474025807   | 0.3713712258   |
| 230.9322149242 | 160.593959626  |
| 47.3054432172  | 54.7211299481  |
| 2.780919675    | 4.9627499631   |
| 0.0124389984   | 0.025730843    |
| 1.2467600524   | 1.0562162809   |
| 0.005502       | 0.001498       |
| 0.0257821857   | 0              |
| 0.0981819658   | 0.1989385862   |
| 0              | 0.0569611327   |
| 0.5242111246   | 0.8968418799   |
| 9.449847736    | 4.1852257066   |
| 71.9691343836  | 70.4695953713  |
| 2.7442072916   | 2.0650038289   |
| 2.2673100269   | 3.2089966448   |
| 0.0333959578   | 0.021209269    |
| 0.0118972502   | 0              |
| 21.3162312588  | 12.8188709384  |
| 11.369010532   | 6.7760775405   |
| 4.3963146803   | 5.6162613843   |
| 53.9199461285  | 78.536562644   |
| 0.3118329665   | 0.282914875    |
| 3.4700486528   | 2.4465643794   |
| 0.4929320919   | 0.4523940631   |
| 0.2236771199   | 0.2957041705   |
| 3.2811479317   | 5.6547491213   |
| 4.494457864    | 4.7327601104   |
| 422.7449402793 | 371.7212503124 |
| 0.004291       | 0.009344       |

gene\_expression\_table

|                |                |
|----------------|----------------|
| 0.0208220518   | 0.0226693216   |
| 183.0854935098 | 731.2897152652 |
| 0.0653384598   | 0.0355675458   |
| 5.251972802    | 7.2206966182   |
| 59.2297256202  | 18.7914688359  |
| 3.3926902671   | 1.5530243563   |
| 28.3358816079  | 6.6476399913   |
| 0.2161107928   | 0.1925046759   |
| 1.0596142059   | 2.0680748661   |
| 0              | 0.0387716285   |
| 0              | 0.0571859489   |
| 6.5381628368   | 7.5152128199   |
| 8.2422009441   | 2.688787768    |
| 194.0462716131 | 146.93129739   |
| 0.0611492751   | 0.0254548622   |
| 0.0949036695   | 0.2677011161   |
| 16.4829936649  | 11.1938610242  |
| 1.1477663263   | 4.3167747985   |
| 19.7470166036  | 8.171009365    |
| 2.3887973424   | 2.1216434773   |
| 5.8135668629   | 3.1546497593   |
| 14.4011264267  | 25.6174350463  |
| 0.3279194648   | 0.3697619046   |
| 35.7216296937  | 28.2278935593  |
| 0.002305       | 0              |
| 14.8991586365  | 22.5778327349  |
| 9.269929128    | 6.6202802331   |
| 3.1598030353   | 3.2141372385   |
| 7.4490318359   | 1.8612856673   |
| 0.6208425977   | 1.3625162247   |
| 10.1143143801  | 5.8249905392   |
| 30.80880722    | 8.6517249188   |
| 0.0435238363   | 0              |
| 7.4712380407   | 27.4082585341  |
| 20.4592968607  | 12.1082497441  |
| 24.1932266717  | 12.2316180935  |
| 47.3261626206  | 20.4165588398  |
| 3.0568581052   | 2.1813406792   |
| 0              | 0              |
| 4.7589358249   | 2.2335631995   |
| 0.6286960051   | 2.0411933602   |
| 0.003798       | 0.002068       |
| 0.7472218203   | 0.6029081815   |
| 16.3851518583  | 2.7352816365   |
| 1.5771716788   | 1.9628872513   |
| 5.5666240681   | 8.4962685143   |
| 7.945463392    | 2.8543278793   |
| 10.5981291891  | 6.562650791    |
| 1.0452251069   | 0.4316378519   |

gene\_expression\_table

|                |                |
|----------------|----------------|
| 0.5355615503   | 0.2068975669   |
| 7.0817056395   | 4.2265516163   |
| 4.4166272614   | 1.9718892288   |
| 0.0720075295   | 0.0391979105   |
| 0.7409473366   | 0              |
| 8.2218918134   | 16.2087149581  |
| 0.0562524176   | 0              |
| 0.4305013167   | 2.2262969728   |
| 18.710715634   | 5.961559833    |
| 0.7181878621   | 0.2792511895   |
| 1.2603151173   | 0.7630049153   |
| 8.072139788    | 3.7916319799   |
| 0              | 0.1073559868   |
| 0.230857866    | 0.0571224732   |
| 97.4401180729  | 31.9009188738  |
| 18.3935212504  | 20.6831057845  |
| 0.630971645    | 0.0858686941   |
| 0.141038233    | 0.1535507211   |
| 153.4610397324 | 238.5929058019 |
| 49.7309497976  | 22.160096244   |
| 0              | 0.004554       |
| 55.821865591   | 60.4964522311  |
| 15.3215236983  | 10.0285390149  |
| 0.0438946181   | 0.0621254617   |
| 7.389957633    | 10.7161045374  |
| 24.0605365996  | 10.3319378231  |
| 12.2449988086  | 18.0293385213  |
| 11.4415160623  | 12.7792821215  |
| 11.8765466872  | 9.8566265054   |
| 20.2821724325  | 15.561920265   |
| 0.1409680459   | 0.2959861639   |
| 1.3145242604   | 1.1449159213   |
| 115.3292443937 | 104.2942115392 |
| 3.3905368091   | 1.1745156957   |
| 22.5071635027  | 17.6033989927  |
| 4.9514826747   | 6.9142399293   |
| 11.0505899161  | 8.8695435683   |
| 9.5352456096   | 10.0292793992  |
| 15.3885184945  | 15.5848759082  |
| 650.4430355816 | 275.597225025  |
| 0.2117844642   | 0.7022006424   |
| 0              | 0.0271160018   |
| 0              | 0              |
| 0.0197863399   | 0.0143611496   |
| 37.7104408663  | 27.8191274949  |
| 3.6147177301   | 2.0470451462   |
| 8.9733050071   | 13.0075581373  |
| 0.1072570016   | 0              |
| 0              | 0.00295        |



gene\_expression\_table

|                |                |
|----------------|----------------|
| 11.8484821846  | 11.1796913891  |
| 9.4713889081   | 2.7614822554   |
| 4.7808864803   | 7.1444870911   |
| 0.9263064824   | 0.8193945575   |
| 110.7889999354 | 38.5443274194  |
| 0.0306841808   | 0              |
| 0.2980792458   | 1.1155510457   |
| 0.0620094426   | 0.236287569    |
| 4.871229056    | 6.6182799031   |
| 4.5054779333   | 2.5031641697   |
| 123.3022210797 | 88.1780585856  |
| 53.8554737017  | 41.2265878963  |
| 9.2559092028   | 8.1034467985   |
| 0              | 0.0315231543   |
| 15.3542309545  | 28.8019263805  |
| 4.881431026    | 4.6287553769   |
| 0.2526209531   | 0              |
| 0              | 2.1088233236   |
| 1.6247012141   | 2.2648172415   |
| 11.9238913177  | 1.9988445525   |
| 0.2573898154   | 0.9527638651   |
| 45.1122986454  | 32.3326053217  |
| 12.4929845484  | 13.5429498031  |
| 49.1188627107  | 61.8286249991  |
| 0.8602986247   | 0.1170777166   |
| 0.1431100677   | 0.0129838636   |
| 1.0933813132   | 3.6561757948   |
| 18.0108049796  | 20.6165917234  |
| 0.1172633288   | 0.0957499342   |
| 14.9779761651  | 7.3380497357   |
| 7.2194291449   | 11.0647883703  |
| 0.5418289962   | 0.766867967    |
| 19.2865461198  | 19.1665584743  |
| 0              | 0.0692807777   |
| 0              | 0.4347204475   |
| 0.004736       | 0              |
| 0.6058206343   | 0.0599606564   |
| 0              | 0.02348708     |
| 1.1605131341   | 1.7427177533   |
| 131.0657088505 | 144.2489892758 |
| 3.4835714505   | 3.9087241564   |
| 0.009025       | 0              |
| 0.0845518592   | 0.2202697887   |
| 3.5047527379   | 6.155300553    |
| 2.0451127066   | 2.1554888857   |
| 33.9492944769  | 10.4723325879  |
| 12.7771304171  | 20.0419261751  |
| 5.3621858767   | 4.3292313568   |
| 3.1012640561   | 1.5980820329   |

gene\_expression\_table

|                |               |
|----------------|---------------|
| 32.2215117729  | 36.2428472573 |
| 11.4550902846  | 10.4528234589 |
| 4.5149368618   | 2.8393118443  |
| 107.6863963575 | 99.6667425511 |
| 1.4801840957   | 0.4338658099  |
| 14.655129059   | 1.6039707573  |
| 6.8843284182   | 5.1095697348  |
| 5.3874145093   | 4.5364969016  |
| 6.2449447369   | 5.2106917444  |
| 0.0563216754   | 0.0102197275  |
| 5.7283165832   | 4.3027123218  |
| 0.0931610838   | 0.078692629   |
| 0.0180557595   | 0             |
| 9.8792094763   | 4.814439739   |
| 0.1762335206   | 0.172117267   |
| 30.6762866113  | 20.1226376686 |
| 2.2338130807   | 2.4739211295  |
| 0.001314       | 0.007155      |
| 0              | 0.0009027     |
| 0.6848797431   | 0.3868359012  |
| 0              | 0.0241839727  |
| 7.864044009    | 2.5207089576  |
| 0.0317913468   | 0.0576862991  |
| 4.5291435906   | 3.29871798    |
| 0.0213170415   | 0             |
| 16.754205229   | 11.1674074304 |
| 11.613010268   | 6.5688558206  |
| 24.075120974   | 32.1159010816 |
| 7.850818754    | 7.3117848958  |
| 0.0540452506   | 0.0294199914  |
| 0              | 0.0206744464  |
| 28.8182556617  | 69.2272531727 |
| 0.4904865211   | 1.2787918948  |
| 0.1806955851   | 0.0983631771  |
| 3.431441152    | 1.5299270169  |
| 4.420338112    | 4.0370237367  |
| 8.8407618857   | 9.5478811212  |
| 19.2828239475  | 16.4913094699 |
| 0.240641596    | 0.1801185341  |
| 0.2527583795   | 0.2602267811  |
| 10.6167341885  | 4.7865918624  |
| 5.6516447879   | 3.7264900595  |
| 0.4091827397   | 0.8167210378  |
| 6.4496297844   | 3.3317826756  |
| 28.7864628727  | 11.6406870669 |
| 1.5853570478   | 1.1191194746  |
| 62.4075182302  | 48.4158810593 |
| 7.4057050965   | 9.1346389053  |
| 0.4027448938   | 0.3935033938  |

gene\_expression\_table

|                |                 |
|----------------|-----------------|
| 0.2860104272   | 0.3162497941    |
| 98.1217537145  | 39.8245027663   |
| 0.6863903012   | 0.5125183264    |
| 176.27215601   | 133.5226299508  |
| 4.0911817437   | 6.1647867128    |
| 2.5179737127   | 1.8481083857    |
| 418.1240180834 | 224.7866980791  |
| 18.6259505106  | 12.7513258732   |
| 1659.36973333  | 1278.3236280511 |
| 13.8637724948  | 23.9755916122   |
| 4.4120412896   | 3.5191543817    |
| 38.0600938381  | 64.7161068093   |
| 0.9677100706   | 1.1493407993    |
| 9.6840876637   | 2.1310785686    |
| 10.4980988208  | 22.2054658123   |
| 0.0320162986   | 0.003486        |
| 0.0106336371   | 0               |
| 2.4784816872   | 1.3923564085    |
| 31.3034940891  | 13.5240658707   |
| 0.0342016454   | 0               |
| 0              | 0.3535457961    |
| 0.0175089066   | 0.0476556105    |
| 294.6743931993 | 280.5418890527  |
| 164.9745243129 | 82.2691763608   |
| 190.6174569737 | 82.0661216944   |
| 89.7029209802  | 55.9644811081   |
| 0.2080777649   | 0.1132688994    |
| 5.0528554542   | 0.5918936914    |
| 0.0970731205   | 0.1948570064    |
| 0.1163491339   | 1.9000691904    |
| 154.4930156609 | 108.6358567365  |
| 0.3356125097   | 0.5480805642    |
| 0              | 1.1547261888    |
| 210.1428104861 | 151.7882470354  |
| 1.6036082916   | 2.8127995765    |
| 73.5131222787  | 34.8794443092   |
| 5.3680878469   | 23.9925063324   |
| 21.4760500099  | 16.6727703121   |
| 132.103718377  | 94.8623501963   |
| 14.8682599069  | 21.7223488065   |
| 0              | 0               |
| 11.4088981055  | 8.8587623931    |
| 14.1155446685  | 8.7855047371    |
| 8.3693732615   | 4.7993865967    |
| 4.3033157364   | 0.9606125882    |
| 3.8832507533   | 5.7238166422    |
| 0.8273247593   | 0.5547132625    |
| 2.817699206    | 1.2781987543    |
| 0              | 0               |

gene\_expression\_table

|                |                |
|----------------|----------------|
| 4.3743526356   | 3.2278706138   |
| 0.507009068    | 0.5441038259   |
| 18.0240049811  | 11.451181332   |
| 15.2198350152  | 7.9353529936   |
| 0.0179421432   | 0              |
| 27.1716125164  | 12.8518208404  |
| 10.5783465302  | 10.2095102958  |
| 43.3789938186  | 27.8463725022  |
| 11.3868530086  | 5.4949132502   |
| 3.9480764861   | 6.587670142    |
| 62.0641216995  | 49.7854317768  |
| 0.2538605161   | 0.8567850001   |
| 0.4524830312   | 0.1280827511   |
| 15.4301773492  | 5.8796837065   |
| 8.9536235786   | 10.7145322368  |
| 0.2532401321   | 0.3106297012   |
| 0.8795821876   | 2.0349341603   |
| 0.0802002991   | 0.0245574643   |
| 78.8142323854  | 73.2862159156  |
| 1.4010879742   | 1.7665821626   |
| 461.5268922766 | 879.1084013874 |
| 144.6625867302 | 337.9310521415 |
| 12.134552524   | 13.549839539   |
| 2.8236143406   | 3.6101349947   |
| 17.1271852821  | 9.4300845139   |
| 0.7477658425   | 0.5123249377   |
| 15.5609620509  | 8.3810094803   |
| 0.0102080646   | 0.0777958538   |
| 3.9169939811   | 7.9065540328   |
| 0.0235505689   | 0.0640997616   |
| 0.4911617526   | 0.367631101    |
| 0.6760848258   | 1.4464533914   |
| 0.4309731434   | 1.4520078759   |
| 29.4448141138  | 21.2999953171  |
| 1.4777054397   | 1.0106583104   |
| 0              | 0              |
| 4.1250063252   | 3.8173198145   |
| 0.0451803433   | 0.0311045607   |
| 0.005968       | 0.003249       |
| 0.0319236804   | 0.0211017681   |
| 0.2204838291   | 0.4368022718   |
| 40.2322837418  | 20.5352071228  |
| 0.594012826    | 0.1616779646   |
| 6.8806957113   | 8.3638834041   |
| 24.5654395032  | 0.6483590657   |
| 5.0385054396   | 2.5926523248   |
| 0.0118086943   | 0.001286       |
| 3.2002227011   | 5.565908602    |
| 1.0531553874   | 1.6730827348   |

gene\_expression\_table

|                 |                 |
|-----------------|-----------------|
| 0.2986684676    | 0.380411991     |
| 15.2806286052   | 12.7455371315   |
| 0.2224761258    | 0               |
| 18.5631560126   | 9.1601274972    |
| 0.005586        | 0.0790625325    |
| 7.8741287502    | 5.3604936032    |
| 66.0960256847   | 69.7881575595   |
| 260.7316231868  | 167.276380721   |
| 1.7187271553    | 2.740508567     |
| 0.0479868911    | 0.0449299637    |
| 0.9091720188    | 1.4054089399    |
| 19.321189857    | 7.6431255901    |
| 2.0168063171    | 1.8652513437    |
| 45.0114324343   | 59.2866018085   |
| 5.3580892552    | 3.0832150258    |
| 3.0962259675    | 2.3207445206    |
| 4.2664144906    | 1.9353824835    |
| 5.6151706936    | 1.3294792117    |
| 0.7021322776    | 0.4299881303    |
| 0               | 0.0601053825    |
| 2.5223643438    | 8.1341389477    |
| 0.0595837763    | 0.0162174675    |
| 0.7797065696    | 0.5243081073    |
| 0               | 0               |
| 0               | 0               |
| 96.5794916014   | 74.7749358679   |
| 13.5461377273   | 8.8891514439    |
| 5.354996338     | 10.0204422954   |
| 0.727263138     | 0.5814661824    |
| 1.350895831     | 3.4194780532    |
| 110.5870113585  | 79.6248910662   |
| 0.451758359     | 3.4428590188    |
| 0.3650324568    | 2.0533213691    |
| 75.3516909054   | 53.0576375095   |
| 0.008139        | 0               |
| 0.1321790475    | 0.1439055753    |
| 0               | 0.0101401163    |
| 1.5315879361    | 1.4370523563    |
| 2.0659703564    | 1.5299514868    |
| 60.5222723615   | 30.3016869633   |
| 37.7773208835   | 13.6812781201   |
| 3056.7450340747 | 3021.9672214887 |
| 0.4013161051    | 0.2529534895    |
| 0.0550822919    | 0               |
| 3.3312865572    | 0.6346949503    |
| 0.582601099     | 0.1938101358    |
| 1.9064545472    | 1.7488098081    |
| 1180.7360135582 | 419.9969532993  |
| 2.6988251783    | 2.6749721734    |

gene\_expression\_table

|                |                |
|----------------|----------------|
| 0              | 0.0113744287   |
| 56.0508912041  | 22.0273912719  |
| 7.5132006126   | 5.3145263087   |
| 27.9411354349  | 29.2735069896  |
| 17.5630983148  | 23.518789401   |
| 156.1158367801 | 79.3271805462  |
| 1.7694775307   | 0.944343264    |
| 0.2909808592   | 0.0565706797   |
| 0              | 0              |
| 355.1524978955 | 281.9723427915 |
| 2.048982855    | 3.1995972441   |
| 10.2620503516  | 20.8342807277  |
| 165.5868818156 | 80.0610157542  |
| 3.3710723607   | 2.1905570133   |
| 0.2630116472   | 0.5547939218   |
| 86.1191278877  | 163.5647530013 |
| 0              | 0.1331220225   |
| 7.7445910187   | 11.4290526713  |
| 2.0833426794   | 1.8567189046   |
| 28.1337734299  | 6.2783039637   |
| 0.9294483536   | 0.4690606947   |
| 2.9135378636   | 2.2433429818   |
| 19.8525641411  | 9.8103729654   |
| 0.3399548178   | 0.5775414441   |
| 21.394054596   | 10.6743238602  |
| 0.5874977593   | 2.2731067934   |
| 0              | 0              |
| 0.009078       | 0              |
| 3.506371533    | 2.4240783853   |
| 7.0177831442   | 2.8607003329   |
| 29.2507295574  | 20.9107742989  |
| 0              | 0.0657231269   |
| 13.5545220392  | 12.5114022006  |
| 119.2275606955 | 174.0487400128 |
| 10.7819223261  | 8.7513934037   |
| 0.1837808241   | 0.0750319899   |
| 3.5501469508   | 3.5020196664   |
| 1.9057587722   | 1.918396219    |
| 0.017055361    | 0              |
| 0.0325545017   | 0              |
| 1.131506596    | 0.7274943662   |
| 1.8818857558   | 1.6530421733   |
| 0.9364610615   | 0.2378929168   |
| 15.5864749557  | 6.5217678991   |
| 0.487400431    | 0.1824078892   |
| 244.6020933384 | 151.3140895965 |
| 1.8260699628   | 3.6674397525   |
| 0.135098256    | 0              |
| 0.568522272    | 0.3782532472   |

gene\_expression\_table

|                |                |
|----------------|----------------|
| 4.2175765891   | 2.9170673162   |
| 0.4644265872   | 0.4357454189   |
| 85.7653675773  | 94.2932507311  |
| 14.0947619935  | 13.0943155922  |
| 1.6483945745   | 1.3630140657   |
| 1.404881348    | 1.549643438    |
| 0.4854644101   | 1.3213333835   |
| 1.439585722    | 0.8515671158   |
| 0.6637916222   | 0.4540911407   |
| 3.5767470514   | 3.2490117993   |
| 1.4093999062   | 0.9513513304   |
| 18.3017103415  | 9.6088556549   |
| 34.563051166   | 31.592268621   |
| 5.6213482216   | 4.9023988722   |
| 30.5163077795  | 50.1736838762  |
| 0.0272259081   | 0.7706740293   |
| 7.1402056717   | 3.3693540449   |
| 0.1535922365   | 0.0104511549   |
| 0              | 0              |
| 18.861430963   | 10.7064458139  |
| 69.0715668997  | 37.9336170368  |
| 0.0205796563   | 0.0168040662   |
| 0.1110463035   | 0.0302244994   |
| 35.0635292166  | 36.5456654209  |
| 16.0013751904  | 23.1185805708  |
| 717.9948637463 | 836.728889405  |
| 2.0138035307   | 0.0730820709   |
| 5.0302361642   | 2.6973823687   |
| 0.8976071816   | 1.3029869236   |
| 161.8891468363 | 91.4870790268  |
| 48.2195316478  | 16.0283728879  |
| 157.7809068168 | 165.4371814246 |
| 13.7188063546  | 17.07268066    |
| 0.0420672991   | 0.1373981503   |
| 51.2996234396  | 71.1823562633  |
| 18.552263046   | 16.4110082987  |
| 9.7839451427   | 5.7667439089   |
| 41.8721401856  | 22.5120546201  |
| 43.3535256065  | 55.5817393456  |
| 0.2893688718   | 0.3150408084   |
| 67.1880692131  | 55.4145334952  |
| 86.8183407247  | 71.7612450444  |
| 0.2556232308   | 1.3915067775   |
| 0.0463020757   | 0.0126024642   |
| 0              | 0              |
| 7.5289542769   | 7.6845941908   |
| 4.6500230613   | 4.5563032174   |
| 24.4563688673  | 21.8271807029  |
| 20.2646140053  | 14.8108342468  |

gene\_expression\_table

|                |                |
|----------------|----------------|
| 15.2262208634  | 9.7971792513   |
| 144.8748244094 | 162.2239928997 |
| 0.1929957385   | 0.2573942319   |
| 0.5726765068   | 0.8087387589   |
| 9.2985058363   | 14.951902971   |
| 0.0135274558   | 0.0699559621   |
| 27.5403784133  | 15.4057927669  |
| 0.687728478    | 0.6911461674   |
| 18.3839127357  | 10.1472078107  |
| 26.6875462178  | 7.5470789853   |
| 0.029665888    | 0.1857120996   |
| 0.0244292929   | 0.0265965864   |
| 0              | 0.003143       |
| 14.3892121321  | 33.5050839843  |
| 0.5167888662   | 0.783672715    |
| 1.4633897956   | 0.9536045391   |
| 0.0426907365   | 0.0232390651   |
| 1.1016406897   | 1.0563532425   |
| 0              | 0.0142370974   |
| 0.0146982554   | 0              |
| 5.2729760691   | 2.8345592258   |
| 16.533070785   | 12.1082412393  |
| 3.4778148182   | 2.8488981554   |
| 4.3537535731   | 3.312175977    |
| 0.3312238245   | 0.4715656241   |
| 9.9116905793   | 11.3248576491  |
| 2.088282944    | 1.8297698286   |
| 0.5614144673   | 0.7922142372   |
| 0.134896078    | 0.1025513436   |
| 0.0819529862   | 0.0356894435   |
| 30.8232582014  | 10.3226726318  |
| 0.1024914849   | 0.0616649644   |
| 9.4565074761   | 6.1448692191   |
| 0.4988581171   | 0.4655274084   |
| 3.4116569787   | 3.8031884751   |
| 1.0176863579   | 1.5179222328   |
| 18.4911286115  | 8.3236447729   |
| 7.2924196698   | 3.722203666    |
| 87.4261213189  | 50.4877118641  |
| 12.6388027121  | 8.3707149073   |
| 11.8238795177  | 8.9195187546   |
| 0.3681701121   | 0.4702080101   |
| 44.6202382526  | 20.029417736   |
| 0.0142911795   | 0.00389        |
| 3.6792582515   | 0.3338059154   |
| 4.525730113    | 3.8375613665   |
| 0.290421756    | 0.0287442819   |
| 0.229198906    | 0.1663551627   |
| 598.6940811113 | 175.972315607  |



gene\_expression\_table

|                 |                 |
|-----------------|-----------------|
| 47.5844570953   | 41.8083566085   |
| 1.3462289271    | 0.923367256     |
| 8.263736893     | 4.6681876748    |
| 2.3770495334    | 2.8235640367    |
| 0.0290667924    | 0.0474682663    |
| 0.464394822     | 0.465999782     |
| 0               | 0.0433265268    |
| 3.1649322799    | 2.8890999685    |
| 0.0183984205    | 0.002862        |
| 4.6415042917    | 3.7618896476    |
| 58.786806503    | 72.6627281326   |
| 0.080808373     | 0.0549859056    |
| 0.7819540341    | 0.8840699782    |
| 1.7903775689    | 7.1471197798    |
| 0.3736045799    | 0.7524868623    |
| 1435.4713711395 | 1214.4083697281 |
| 0.6770171934    | 0.8641088261    |
| 0.8501559039    | 1.819604525     |
| 11.3665649063   | 11.623709301    |
| 10.7320741597   | 7.2862093194    |
| 9.6998203394    | 10.5862424782   |
| 0.525212128     | 0.8632625818    |
| 0.5624271433    | 0.5094123942    |
| 0.6347784121    | 2.9371496904    |
| 0.3842550491    | 0.5400065588    |
| 0.4123657099    | 0.429708861     |
| 4.0068024121    | 3.59794384      |
| 4.2802501773    | 3.1021385862    |
| 17.3209542291   | 13.2482751528   |
| 23.3001017134   | 16.9555181089   |
| 3.939631        | 2.3958184936    |
| 26.5233426634   | 20.0530652097   |
| 2.1344219059    | 3.7323504361    |
| 0.2615439654    | 0.2009981364    |
| 259.4313572228  | 205.0393616259  |
| 4.3450425687    | 3.3333511126    |
| 0.1061550556    | 0.2427029074    |
| 53.2419329482   | 34.6208891434   |
| 4.522540988     | 4.1649278106    |
| 3.5312347238    | 2.6132073735    |
| 1.9598009394    | 2.363920594     |
| 0.0923650096    | 0.0502796778    |
| 0               | 0.0166089836    |
| 1.1687505626    | 2.2659195061    |
| 0.8539554633    | 0.4105238709    |
| 18.7295860249   | 0               |
| 8.5228024059    | 8.935256121     |
| 8.9276749724    | 5.052962581     |
| 0.368055631     | 0.595925343     |

gene\_expression\_table

|                  |                  |
|------------------|------------------|
| 2.3035392445     | 3.6154260657     |
| 0.2277717536     | 0.2158335558     |
| 21.5707395956    | 14.456478957     |
| 0.6661698899     | 1.3646536667     |
| 17439.0872920499 | 25723.6216637182 |
| 12.602409442     | 11.4959772415    |
| 5.8379504545     | 8.3762293203     |
| 7.3071373925     | 17.8434782454    |
| 15.1552152281    | 11.9155760507    |
| 8.8428860555     | 3.5600327253     |
| 0.005207         | 0                |
| 1.2108201158     | 0.8400989904     |
| 1.279982017      | 0.0774187875     |
| 2.9205618557     | 0.9274023865     |
| 8.6674590428     | 6.772275236      |
| 3.6710477109     | 2.8226919959     |
| 5.3647527023     | 6.9573013587     |
| 5.6337656171     | 7.380354743      |
| 4.1700690577     | 5.0407631074     |
| 0.6627830378     | 0.3234683117     |
| 33.25855978      | 30.3957621117    |
| 0.7763127535     | 0.5317790082     |
| 29.8682892101    | 15.9092982413    |
| 2.1189434688     | 2.8347865748     |
| 344.9110753566   | 270.5515872632   |
| 1.8503613121     | 1.1508233834     |
| 12.6529611953    | 11.853331944     |
| 0.0507865626     | 0.0967613392     |
| 0.5138792704     | 0.842277648      |
| 3.6537518824     | 5.0828744803     |
| 0.2396316693     | 0.3698608167     |
| 118.5212806758   | 166.0092363067   |
| 10.685054078     | 11.9724843938    |
| 0.8729908643     | 1.167683416      |
| 5.5439741622     | 8.8703194679     |
| 3.2760922826     | 4.8083838103     |
| 38.9716418512    | 21.1660355219    |
| 2.5747484779     | 3.2516800116     |
| 85.0472750322    | 69.510221688     |
| 86.0141215658    | 49.7941239724    |
| 1.0254580914     | 0.988318314      |
| 4.1125400664     | 7.56080087       |
| 5.219770964      | 4.1091401179     |
| 33.4920433806    | 21.1190482827    |
| 4.7978313239     | 3.3848153626     |
| 33.0413271312    | 5.4148977954     |
| 26.4239666222    | 27.0965545911    |
| 0.1466159274     | 0.3990581294     |
| 34.860626024     | 53.2909142468    |

gene\_expression\_table

|                 |                 |
|-----------------|-----------------|
| 4.1250160311    | 6.6640275004    |
| 0.3550630376    | 0.2746633001    |
| 2.5777010645    | 2.289420937     |
| 0.004455        | 0.0169749404    |
| 3.5702405672    | 11.5166681285   |
| 11.7709231501   | 10.3339624321   |
| 2.524908487     | 3.473119336     |
| 2.0562198181    | 2.1006859637    |
| 12.6766931712   | 11.1914641521   |
| 34.4690747882   | 32.9122524409   |
| 5.3540448291    | 8.7435593901    |
| 1.9332020542    | 4.7355973419    |
| 4019.9037740672 | 4104.0670172698 |
| 0.4858966298    | 0.3341077379    |
| 11.6310843667   | 10.479690382    |
| 30.1237921382   | 43.2404869632   |
| 832.6444952407  | 206.6217354518  |
| 98.6224783104   | 46.8464084432   |
| 0.128146903     | 0.0858558222    |
| 0               | 0.069034435     |
| 0.1919039187    | 0.6093764177    |
| 0.6050084125    | 0.678055968     |
| 63.0062336722   | 25.9638903961   |
| 16.342272519    | 13.8562794629   |
| 3.9813383304    | 8.5023879118    |
| 21.8521241395   | 11.9822171158   |
| 3.9226706189    | 4.4079757716    |
| 0.8557358296    | 0.3432409991    |
| 0.006474        | 0.007049        |
| 0               | 0.02242099      |
| 1.2687255603    | 0.4794899859    |
| 16.192158412    | 36.2543878642   |
| 0.1174924867    | 0               |
| 1.7009276042    | 2.645469698     |
| 33.4398058946   | 10.5271763745   |
| 125.0201136941  | 110.1521083356  |
| 2.7918672653    | 2.8087011852    |
| 0.4928366444    | 0.3628165118    |
| 61.6746614586   | 16.619809074    |
| 11.8922872635   | 8.4189569076    |
| 3.9503060972    | 7.091142919     |
| 0               | 0.1287644311    |
| 19.4805328824   | 21.1909646958   |
| 0.9091717107    | 1.3530713131    |
| 44.3158991275   | 24.2610630197   |
| 34.7124133355   | 28.4743129541   |
| 78.7097163558   | 88.6015001758   |
| 1.2079738439    | 0.9278054123    |
| 7.1766548457    | 5.9062971646    |

gene\_expression\_table

|                 |                 |
|-----------------|-----------------|
| 0.5645313041    | 1.9206713267    |
| 51.3686760707   | 77.785332321    |
| 0               | 0               |
| 27.5749427453   | 18.5196385345   |
| 56.5760269709   | 96.5299195999   |
| 77.086431911    | 41.1733880002   |
| 665.8681274728  | 512.6661277773  |
| 2.5294384508    | 0.3855379678    |
| 4.0140804294    | 3.1783255125    |
| 0.9070217397    | 1.4812349732    |
| 15.0759872865   | 14.901715341    |
| 0               | 0.070266739     |
| 285.5360253145  | 142.745474953   |
| 59.8040152811   | 54.3500025801   |
| 0.1345913207    | 0.1709538345    |
| 120.8511853769  | 126.8737128919  |
| 0.185606495     | 0.3473128748    |
| 0               | 0               |
| 18.7028779278   | 40.6299255442   |
| 93.5872967924   | 24.4908205578   |
| 0.0824904618    | 0.0336782879    |
| 20.6664074324   | 20.7548296383   |
| 3.0290415745    | 1.5065347766    |
| 0.001358        | 0               |
| 0.003705        | 0               |
| 28.6895468457   | 15.6014624831   |
| 0.002923        | 0.0334098921    |
| 0               | 0.0379766064    |
| 1646.7036536231 | 2451.1463004444 |
| 4.2983582153    | 3.3444916183    |
| 0.0297335433    | 0.0485571209    |
| 123.7516848484  | 138.296631837   |
| 28.7308957833   | 22.9654959902   |
| 2.1122324299    | 1.2417966048    |
| 252.4793668142  | 122.9033695277  |
| 0.0581327818    | 0.3480958111    |
| 454.0433115895  | 78.6921256888   |
| 11.1377846449   | 9.4690981098    |
| 744.3527912477  | 599.8496267315  |
| 3.8660274127    | 5.2931486181    |
| 289.6524319923  | 387.85175971    |
| 9.1204497587    | 5.7922600444    |
| 7.4306920634    | 4.6739023721    |
| 24.5258891162   | 18.8927492546   |
| 0.0279840741    | 0.1523336852    |
| 1.6872455237    | 1.3662188259    |
| 0.5403862547    | 0.3587364018    |
| 15.383266196    | 11.3988447791   |
| 14.6337063249   | 13.6007272021   |

gene\_expression\_table

|                 |                 |
|-----------------|-----------------|
| 42.7707231969   | 17.2537203939   |
| 5.0515902535    | 14.332354121    |
| 11.0700502393   | 6.5314272141    |
| 0.0386652843    | 0.0499884682    |
| 1.6949373783    | 2.0130623214    |
| 10.038475786    | 6.7141316406    |
| 0.044222647     | 0               |
| 0               | 0.0614690682    |
| 0               | 0.1006315013    |
| 0.4411906746    | 1.852708314     |
| 0.1027040769    | 0.121538776     |
| 7.2107578142    | 15.3805216138   |
| 1.7229533335    | 3.678848713     |
| 6.0702733654    | 8.3189842314    |
| 1.2468285976    | 1.3089633587    |
| 0               | 0.3791752331    |
| 25.530395469    | 24.1372663914   |
| 0.8338777238    | 1.0213389551    |
| 1.4473189603    | 1.9696509352    |
| 0               | 0               |
| 10.8878858557   | 9.48306109      |
| 1.5623037004    | 1.929566201     |
| 0               | 0.8206679891    |
| 1.4249596651    | 1.1839462185    |
| 0.3118545328    | 0               |
| 97.3108690548   | 19.1495017808   |
| 142.9001634246  | 91.4222737235   |
| 11.9637105526   | 7.9852341163    |
| 98.3521357624   | 59.313314136    |
| 33.4063518057   | 35.0091963338   |
| 14.12019335     | 9.2791344952    |
| 27.8897790197   | 16.045471644    |
| 9.8642249294    | 12.7783059665   |
| 0               | 0.0644888824    |
| 3.9727998221    | 4.7946621658    |
| 2.3110465663    | 3.5382314127    |
| 10.4639253864   | 9.070609338     |
| 6.0289919171    | 3.4694720066    |
| 60.2873443296   | 18.8917116857   |
| 68.7161223745   | 21.7180835645   |
| 0.019005685     | 0.0155188592    |
| 13.0169963343   | 9.8392957285    |
| 0.71609503      | 1.7257714653    |
| 3.1160137319    | 3.1811621981    |
| 1754.7241726425 | 1641.3127829998 |
| 121.4608817833  | 107.4597247938  |
| 0.0651523449    | 0.0531993488    |
| 1.917003174     | 1.8530542018    |
| 0               | 0               |

gene\_expression\_table

|                 |                 |
|-----------------|-----------------|
| 2.3228339127    | 2.1534041222    |
| 59.0372914839   | 56.3028215987   |
| 31.4152136066   | 16.9859792842   |
| 3.6912103148    | 1.1197094967    |
| 0.7242107614    | 0.177001351     |
| 1.0741485847    | 1.2457118936    |
| 2.3440197262    | 4.9879493983    |
| 11.5437120102   | 7.1915947253    |
| 21.4745372024   | 30.9008419099   |
| 42.8738215894   | 29.0106911353   |
| 0.8715222348    | 0.1976752225    |
| 17.2026126196   | 4.6442816727    |
| 57.998051845    | 37.6274583279   |
| 4.0607507661    | 2.114673078     |
| 0.0229216702    | 0.0460711605    |
| 0.0851198526    | 0.0115839288    |
| 6.4003564348    | 2.7073808026    |
| 7.1027231083    | 7.3383219171    |
| 0               | 0.006483        |
| 1372.7588366716 | 1673.9936961727 |
| 0.2562240859    | 0.3759835224    |
| 62.6434975496   | 73.8844603917   |
| 9.5263222861    | 7.3128171898    |
| 0.9295272895    | 1.301132773     |
| 1.3922986466    | 1.5894026538    |
| 5.1008116392    | 4.614215226     |
| 0.0572751888    | 0.0311782357    |
| 0.0858995343    | 0               |
| 4.8001783647    | 0.6132592985    |
| 1.2062338615    | 0.0336730078    |
| 0.1040131697    | 0               |
| 0.0114785322    | 0.006248        |
| 3.8753046703    | 5.0166247575    |
| 0.3837324633    | 1.1140694775    |
| 8.9015127588    | 8.082188416     |
| 4.5591081653    | 5.6767363741    |
| 11.8739717778   | 9.7207949659    |
| 0.0539921598    | 0.0440866364    |
| 2.025168238     | 1.7263552425    |
| 0.2123258209    | 1.0787594047    |
| 7.3206655804    | 8.5143241864    |
| 0.0317599981    | 0               |
| 0.1655748238    | 0.9013206226    |
| 0.1483496571    | 0.0269184655    |
| 2.9227216845    | 2.8713464913    |
| 13.0269137539   | 6.4394949505    |
| 1.176904602     | 0.4998764809    |
| 3.7150491304    | 1.8920465068    |
| 0               | 0               |

gene\_expression\_table

|                 |                 |
|-----------------|-----------------|
| 0.3252918333    | 0.3480446997    |
| 0.9277007842    | 0.6172244279    |
| 19.8944519088   | 9.7221295618    |
| 0.1842066808    | 0.1828534488    |
| 0               | 0               |
| 0.0614032809    | 0               |
| 0               | 0.1121282689    |
| 0.0122513416    | 0.0400147315    |
| 0.3358993817    | 0.1828496826    |
| 12.1070904818   | 14.0457681742   |
| 0.1608063763    | 0.1735889683    |
| 10.5586398423   | 7.5069349099    |
| 6.5241024953    | 5.0700353931    |
| 2.9451855284    | 2.1740862232    |
| 5.531904307     | 8.45319526      |
| 1.2269430049    | 0.815060563     |
| 7.0746360856    | 5.4206587686    |
| 1.2566338109    | 4.5218984414    |
| 0.1934179361    | 0.2544476845    |
| 13.5579282841   | 4.6594984548    |
| 11.8832485815   | 4.3070805145    |
| 6.5819572055    | 9.378883694     |
| 131.6864931422  | 77.1669922135   |
| 4.8841537328    | 2.1448582877    |
| 13.3333380374   | 10.5535835005   |
| 75.5881321044   | 19.5630337176   |
| 0.1374634463    | 0.2244881851    |
| 0.5625442263    | 0               |
| 0.0341860876    | 0               |
| 0               | 0.0937848681    |
| 12.3578178381   | 3.2891635039    |
| 10.8586914558   | 4.9987492276    |
| 0.4011100999    | 0.1728585889    |
| 2.445427584     | 2.3393694043    |
| 9.1623676458    | 0               |
| 6.5023497806    | 11.5745225887   |
| 4.9549749864    | 4.4743160694    |
| 46.4071535394   | 20.3200595613   |
| 69.3147253621   | 43.5892662538   |
| 5.733339185     | 5.482823612     |
| 2.7080323994    | 4.4166176388    |
| 4.1863833047    | 17.1976949693   |
| 2.1243717615    | 2.3892069854    |
| 4.0451190724    | 0.8622269339    |
| 0.5532382334    | 0.9477680254    |
| 1007.0906697483 | 1164.6205590053 |
| 0.0124352348    | 0               |
| 0.009076        | 0               |
| 59.878183138    | 19.595922477    |

gene\_expression\_table

|                |                |
|----------------|----------------|
| 0.5137678685   | 0.3712035464   |
| 0              | 0.0103449406   |
| 85.2276608043  | 27.3929521478  |
| 16.6172783414  | 32.6926014319  |
| 0.7429092448   | 0.10110224     |
| 0.0153320299   | 0.033384483    |
| 2.8894238601   | 2.0267398602   |
| 174.3211650371 | 57.0850915234  |
| 95.2221766876  | 68.0276224903  |
| 0              | 0.001918       |
| 137.467636911  | 115.0240043082 |
| 3.0654640223   | 4.3984531387   |
| 10.0402612502  | 9.0211829147   |
| 8.5473074867   | 6.8635218523   |
| 0              | 0.259724374    |
| 10.4346867323  | 6.4756884287   |
| 7.8608829643   | 10.9355760045  |
| 0.9316516098   | 0              |
| 62.5073822146  | 31.173910001   |
| 4.2300656706   | 5.2961460398   |
| 31.5909035176  | 17.4857982199  |
| 2.7689949639   | 2.5188209738   |
| 9.3839175583   | 5.3624703173   |
| 3.4515624058   | 2.7754791698   |
| 5.2859981956   | 3.8585610203   |
| 13.5286566492  | 5.035421826    |
| 2.7355091791   | 5.3979790378   |
| 0              | 0              |
| 55.1955256625  | 67.5802684394  |
| 403.7933352122 | 233.7374165739 |
| 0              | 0              |
| 112.1047547496 | 168.9649630799 |
| 82.3449891721  | 39.8335247796  |
| 12.526183856   | 8.5307978561   |
| 0.8206158631   | 1.1074256053   |
| 9.6461452662   | 6.1177465915   |
| 19.052978551   | 17.5109097659  |
| 6.8861426866   | 7.6532493296   |
| 92.1931037685  | 64.3577572619  |
| 0.8572611771   | 2.2295853842   |
| 5.8798692995   | 6.3250015152   |
| 2.3042200322   | 2.3186984671   |
| 3.5788871792   | 5.4817357275   |
| 0.1140307259   | 0.2039560965   |
| 6.5668230746   | 4.3942037442   |
| 3.5490396319   | 3.2090802098   |
| 0.6715454176   | 1.0263840832   |
| 2.8170539312   | 2.0594231393   |
| 1.4973603672   | 0              |



gene\_expression\_table

|                |                 |
|----------------|-----------------|
| 13.6346589419  | 11.3111868961   |
| 0.1492071985   | 0.208857102     |
| 66.4942530314  | 29.0008861891   |
| 29.4909351201  | 32.2930386587   |
| 764.7191537153 | 1185.6571994861 |
| 0.00346        | 0               |
| 0.9254580574   | 1.9713167894    |
| 2.5767663058   | 3.2782743724    |
| 0              | 0               |
| 1.0364847927   | 1.9718930845    |
| 0.3178391001   | 0.2913216045    |
| 3.6433710321   | 11.7482100697   |
| 0.0121901637   | 0.0265432767    |
| 3.3107367508   | 3.1900057926    |
| 0.3394612258   | 0.5532108794    |
| 3.0968703185   | 1.5582761227    |
| 84.7481772165  | 21.1353366398   |
| 0.2975591128   | 0.2850827433    |
| 35.7581249847  | 32.0011051837   |
| 3.7081314513   | 8.9623747161    |
| 36.0234790862  | 31.7700483553   |
| 0.1405546446   | 0.0510080767    |
| 13.0553916246  | 6.23529779      |
| 0.0295600975   | 0.045975115     |
| 48.001975801   | 29.0012858823   |
| 0.3898029945   | 0.9087843499    |
| 2.5062926702   | 1.4610821164    |
| 0.2307152688   | 0.4040780198    |
| 24.1907061338  | 15.4019592362   |
| 8.2014963604   | 12.376589693    |
| 0.003614       | 0               |
| 0              | 0               |
| 0.7183980224   | 1.3407979468    |
| 0.7658851859   | 2.5924601672    |
| 0              | 0.009398        |
| 0.1156076495   | 0.0629320063    |
| 1.6800990323   | 1.3535727527    |
| 0.1810986139   | 0.1766271033    |
| 0.0149265863   | 0.008125        |
| 0.5950676584   | 0.5866451285    |
| 0.1394572545   | 0.1214635864    |
| 2.7847080681   | 5.7940283068    |
| 0.2013533082   | 0.2754631762    |
| 11.3412057813  | 8.8778563788    |
| 3.018507612    | 5.5287173698    |
| 0              | 0.5974456209    |
| 0.6951907221   | 0               |
| 0              | 0.005691        |
| 3.155875664    | 1.5319265354    |

gene\_expression\_table

|                |                |
|----------------|----------------|
| 3.2448089809   | 3.4576381204   |
| 18.460829352   | 8.2000149342   |
| 0.5382367598   | 0              |
| 0.7365536446   | 0.2122672421   |
| 5.8282690751   | 6.3675220772   |
| 2.0310914916   | 4.6176809262   |
| 8.1443818489   | 10.3580219237  |
| 0              | 0.003536       |
| 0              | 0.003108       |
| 2.7305931507   | 2.3122113526   |
| 1.2812385074   | 1.9713724484   |
| 0.0127467199   | 0.006939       |
| 2.218430287    | 1.7772909119   |
| 1.7388048703   | 2.7551839431   |
| 0.5874847983   | 0.5741905684   |
| 12.4688259623  | 5.7051175233   |
| 3.1781409118   | 0.8453643687   |
| 0.008935       | 0.002432       |
| 1.8982001356   | 0.5482823612   |
| 0.5082520225   | 0.4841747874   |
| 6.6954487951   | 5.6972143181   |
| 40.9486135449  | 30.4603118355  |
| 3.6255865541   | 1.4210055704   |
| 0.8976566727   | 0.8077634698   |
| 38.082746375   | 19.4290473949  |
| 292.2316869722 | 144.255648153  |
| 36.4158041295  | 52.6446461964  |
| 1.2133720259   | 0.8635713755   |
| 0.0396885331   | 0.2340518943   |
| 2.1821193598   | 2.1579369744   |
| 0.4828166283   | 1.1827140039   |
| 19.8748812433  | 14.3711460057  |
| 2.2968591032   | 1.8695182744   |
| 2.6776865146   | 2.0300865798   |
| 1.9427976908   | 1.3899602238   |
| 5.9222931433   | 8.9054882774   |
| 56.0696989479  | 61.8654998771  |
| 6.4228085389   | 4.1212048775   |
| 48.2947398551  | 21.9984179131  |
| 1.8994552243   | 1.9777557618   |
| 308.7463083082 | 71.8148852785  |
| 24.4537222414  | 26.9689386     |
| 41.2733762919  | 35.0226750932  |
| 123.2233442084 | 202.3902151885 |
| 0.0231887225   | 0.091967412    |
| 1.5844326274   | 2.0551277945   |
| 65.4077990087  | 93.4304256982  |
| 5.487692802    | 6.4289191496   |
| 13.0121540261  | 8.6338607968   |

gene\_expression\_table

|                 |                 |
|-----------------|-----------------|
| 6.0386756194    | 8.8862887765    |
| 2.9104561544    | 2.918505465     |
| 0.4718820154    | 0.5871382508    |
| 10.9372733201   | 17.2297888808   |
| 0.0561645172    | 0.0166765266    |
| 3.9802069066    | 5.8792274329    |
| 3802.2483136799 | 2686.1234310205 |
| 10.5826853278   | 12.9490620807   |
| 0.942360249     | 0.5129818089    |
| 8.8916703303    | 8.3869958266    |
| 0.6074741443    | 0.9920511368    |
| 487.3152625157  | 375.8474874761  |
| 22.8077073584   | 11.1329012138   |
| 3.4887206257    | 1.7474887912    |
| 1.9889323592    | 1.5157691219    |
| 0               | 0               |
| 0.0108448231    | 0.0129876375    |
| 6.0390988278    | 2.1916231746    |
| 29.6109866163   | 33.8556609796   |
| 18.0245268385   | 14.3729674404   |
| 6.1642797231    | 5.898752986     |
| 8.8179231691    | 6.7137770801    |
| 0.1719710769    | 0.2584558142    |
| 0.2904125252    | 0.1826800742    |
| 6.6007445979    | 4.4547992471    |
| 6.8794159135    | 3.5724528306    |
| 13.3895633383   | 11.324049826    |
| 0.7250992485    | 0.8560061288    |
| 2.7501425374    | 2.5097828569    |
| 0.0603827788    | 0.00747         |
| 14.3717265067   | 4.9589791522    |
| 0.1962042365    | 0.1602081649    |
| 3.8805220168    | 3.1880319187    |
| 2.5523209244    | 5.0231343371    |
| 0.0462654952    | 0.057086035     |
| 0               | 0.0242701071    |
| 117.0763210164  | 90.4384895186   |
| 0.9265920018    | 0.6052778754    |
| 0               | 0               |
| 0               | 0.005923        |
| 25.8335098939   | 20.1375044697   |
| 1.5608919266    | 4.3900380473    |
| 31.6770106976   | 23.7403772017   |
| 0.1422330414    | 0.4129374114    |
| 5.2165129618    | 7.6185816384    |
| 60.2199123289   | 39.4443262899   |
| 3.5654501481    | 3.373585424     |
| 0.7728577924    | 0.6876338394    |
| 4.2117898547    | 3.8162433874    |

gene\_expression\_table

|                 |                |
|-----------------|----------------|
| 2.5747630884    | 2.2750513987   |
| 0.5150932837    | 0.3535420334   |
| 2.0212540208    | 1.4932463729   |
| 3.9539016778    | 1.8523168271   |
| 16.5274664253   | 11.0585079336  |
| 24.991793965    | 15.4538960819  |
| 0               | 0.003182       |
| 21.3429132346   | 11.727801797   |
| 1.294415584     | 0.7648203133   |
| 8.0384609185    | 17.1790843521  |
| 0.003117        | 0.003393       |
| 7.5501672175    | 12.2098957039  |
| 0.0368886233    | 0.0301209533   |
| 0.4922997287    | 0.383709433    |
| 10.9118144665   | 8.6838477182   |
| 0.213284815     | 0.4827457215   |
| 1.3285471651    | 1.1521418739   |
| 44.6771311259   | 45.1208722672  |
| 9.5181958771    | 7.2224332406   |
| 651.9903607827  | 381.5226798182 |
| 1935.8622283228 | 503.1955008945 |
| 38.4113442118   | 29.0961078262  |
| 0.2634583257    | 0.2284029061   |
| 86.2302365251   | 28.0156697873  |
| 0.3858844416    | 0.9168812207   |
| 38.9500227604   | 26.5539526158  |
| 4.667310853     | 4.5262718333   |
| 51.9563139775   | 26.2022827131  |
| 0.8768721875    | 0.2013240491   |
| 3.6327200924    | 3.8466478232   |
| 6.5778653105    | 6.3863868068   |
| 189.8922906849  | 61.9472221999  |
| 17.7509162545   | 32.7951683222  |
| 6.0523901399    | 8.0501842467   |
| 30.2547577405   | 17.2536932381  |
| 6.1337803056    | 5.0136966471   |
| 1.6863711459    | 1.5260860556   |
| 80.5703553318   | 60.8223918187  |
| 6.6647869086    | 6.4779091921   |
| 0.8367229735    | 0.9355749132   |
| 5.835665124     | 6.8494164084   |
| 0.0913214806    | 0.0331410826   |
| 1.1739219397    | 1.0316940639   |
| 4.2903498935    | 3.6896791848   |
| 0.007985        | 0.0260808514   |
| 3.6053978172    | 1.7908989053   |
| 0               | 0.0206804185   |
| 0.7542259627    | 0.6300115298   |
| 1.639281046     | 3.2719740773   |

gene\_expression\_table

|                 |                 |
|-----------------|-----------------|
| 15.0584633297   | 15.8820797802   |
| 23.9842305794   | 7.3355209023    |
| 0.8958309594    | 0.8975212173    |
| 0.7192551646    | 0.1915105404    |
| 0.4258145688    | 0.3361038791    |
| 10.7395241849   | 4.8717927043    |
| 0.3477522237    | 0.2574505539    |
| 17.563151817    | 21.1177507266   |
| 4.1523832046    | 1.1896763583    |
| 0.6657870028    | 1.043349914     |
| 0.2546598156    | 0.3020071537    |
| 2.2758435206    | 2.4281945268    |
| 15.5234081006   | 8.7858705485    |
| 4816.0244240994 | 4750.3773929155 |
| 1.9827853498    | 1.5830408779    |
| 0.1135939703    | 0.1442836336    |
| 11.4772025598   | 6.4336565681    |
| 0.6014368693    | 0.9994232462    |
| 0.954006939     | 2.0697607315    |
| 14.9583098677   | 10.026626835    |
| 4.1487074799    | 0.9752113456    |
| 9.2374470412    | 5.447523021     |
| 0.0772167557    | 0.2634105418    |
| 41.8255116526   | 47.8674506422   |
| 2.3981100633    | 2.4128830336    |
| 0               | 0.0255191898    |
| 10.4466635658   | 7.1514938868    |
| 0.3648652973    | 0.4545285666    |
| 11.2543460885   | 12.2775010673   |
| 0.1880453757    | 0.1734502774    |
| 0.0162782442    | 0.005415        |
| 4.0550400351    | 3.3792227397    |
| 0.0660607961    | 0.1300119629    |
| 15.3451604299   | 8.9285294261    |
| 0.4168122298    | 0.1210108155    |
| 2.3254937737    | 0.2580183023    |
| 0.7510304579    | 0.8835999149    |
| 0               | 0               |
| 31.6087215609   | 14.8327618827   |
| 0               | 0.0100335334    |
| 0.8340902068    | 1.4269957159    |
| 4430.7485630911 | 5581.8435043648 |
| 148.4566950002  | 108.0837448549  |
| 0.0897543372    | 0               |
| 0.0117515452    | 0.0575734812    |
| 10.7289967064   | 4.2606346437    |
| 134.8259635139  | 77.5291624825   |
| 0               | 0.2623656389    |
| 227.5235917883  | 324.0935300943  |

gene\_expression\_table

|                |                |
|----------------|----------------|
| 9.6949063306   | 7.7063562071   |
| 3.3762954347   | 9.4699354752   |
| 1.1753792072   | 0.3937400977   |
| 0.9736289941   | 0.530003216    |
| 72.089381717   | 37.8113602304  |
| 0              | 0.0376669093   |
| 1.9414409446   | 3.7425705661   |
| 25.6832662612  | 17.2910888996  |
| 0.8329974676   | 0.1889371873   |
| 2.9140003767   | 1.6902779717   |
| 41.3858599476  | 24.7967389384  |
| 1.4122754604   | 0.4193368075   |
| 3.6680417804   | 3.3403235352   |
| 3.5860898105   | 6.1264598204   |
| 0.0306855232   | 0.0501117758   |
| 2.8475824776   | 1.1923890138   |
| 0.1592872252   | 0.2312249453   |
| 1.248590053    | 3.8515234271   |
| 0.7871840026   | 0.629374504    |
| 0.1218183649   | 0              |
| 80.779546842   | 47.1660952591  |
| 45.9212433877  | 60.5288259693  |
| 176.8249634149 | 173.34098905   |
| 3.6497178294   | 3.2905628239   |
| 16.9420997369  | 17.0006520541  |
| 22.3731154413  | 45.2362689912  |
| 1.191287611    | 1.1672775604   |
| 66.5559102778  | 51.5222746059  |
| 593.0937008751 | 363.0809940362 |
| 9.8512871525   | 3.6254412636   |
| 0              | 0.3731980585   |
| 13.1170494063  | 8.2042730599   |
| 0              | 0              |
| 0.0354150331   | 0              |
| 0              | 1.0068014759   |
| 6.5985496948   | 8.3108478082   |
| 0.2138245779   | 0.0931177807   |
| 25.1082589893  | 23.413696899   |
| 1.2140720819   | 1.1565582944   |
| 0.3021669207   | 0              |
| 5.0341876459   | 5.5731787712   |
| 0.0303712961   | 0.0165328731   |
| 7.0380093015   | 4.2493945505   |
| 7.1515429684   | 5.2277471306   |
| 0.9719231895   | 0.382882968    |
| 3.3647016751   | 7.7189023486   |
| 10.9978839495  | 15.0839084688  |
| 10.0840405509  | 16.2986856302  |
| 3.916513072    | 2.2313805111   |

gene\_expression\_table

|                 |                 |
|-----------------|-----------------|
| 0.9172159321    | 1.2296669201    |
| 0               | 0.0131906184    |
| 0.3898335722    | 0.0424418435    |
| 0.4334449043    | 0.4287373548    |
| 0               | 0.0206376241    |
| 0.0560292472    | 0.0152499984    |
| 13.487390514    | 14.7540417202   |
| 3.1899657383    | 1.7043278264    |
| 9.3260253005    | 8.9226868113    |
| 0               | 0.0107468794    |
| 0.002948        | 0               |
| 4.6799267215    | 3.481782204     |
| 0               | 0.0168325454    |
| 1.9728595784    | 1.6346741108    |
| 0.0833213692    | 0.0655152265    |
| 0.7332478652    | 0.4419157458    |
| 2.2595840043    | 2.2963393081    |
| 6.6589008475    | 4.7413825037    |
| 10.5523195091   | 15.8259805416   |
| 3.3737604299    | 2.8238055019    |
| 8.4197747775    | 4.5734979786    |
| 23.0678631986   | 42.2926769429   |
| 0               | 0.3100943095    |
| 685.9939325293  | 362.5558274334  |
| 3736.3004193368 | 6559.5591771435 |
| 2.7323976583    | 2.7054354089    |
| 7.1330586146    | 3.7791191137    |
| 0.1210671667    | 0.2141878079    |
| 0               | 0.0487524846    |
| 1.6057157085    | 5.6815524343    |
| 26.2248603899   | 14.8820974285   |
| 0.041139598     | 0.0223946897    |
| 1.6625741319    | 1.8100727116    |
| 0               | 0.7449292693    |
| 7.8731132598    | 10.6970683192   |
| 1.5506402859    | 0.740214466     |
| 0.2403804473    | 0               |
| 3.9368655684    | 2.8980100077    |
| 0.899161037     | 0.4016130878    |
| 0               | 0.00368         |
| 21.3774047986   | 19.7475887613   |
| 0.0102968773    | 0               |
| 181.6936546402  | 113.7495936038  |
| 0.0101430162    | 0               |
| 0.0164987521    | 0.0287399548    |
| 0.0151444457    | 0               |
| 0.1861051062    | 0.063317435     |
| 24.6437116553   | 16.2347301252   |
| 0.0854545755    | 0.082698532     |

gene\_expression\_table

|                 |                |
|-----------------|----------------|
| 1.3436384098    | 0.9558342424   |
| 1.7530536212    | 0.4771448173   |
| 22.5550413105   | 15.8317053935  |
| 0.023505847     | 0.9852617815   |
| 7.5472322396    | 3.4589102936   |
| 6.9158934828    | 3.0802298585   |
| 0               | 0.0868373142   |
| 0.0741730855    | 0.2422604961   |
| 7.0263669319    | 7.3020103099   |
| 20.6358751532   | 15.1899176861  |
| 2266.2460508176 | 619.5994731693 |
| 2.8550559481    | 1.1438720383   |
| 1.3084430408    | 1.1894776858   |
| 7.2590183601    | 5.8599072322   |
| 0.084148729     | 0.2015511328   |
| 0               | 0.009722       |
| 3.9592123562    | 6.1710321911   |
| 85.6695521235   | 24.4624041986  |
| 2.2744870529    | 0.7605694745   |
| 0.4892164099    | 0.340627931    |
| 10.0937940631   | 5.3500467095   |
| 11.6481247804   | 12.1764954589  |
| 2.8014194121    | 0.7393825265   |
| 2.4419276296    | 1.1077367121   |
| 0               | 0.0266983736   |
| 0.0107186758    | 0.0175044068   |
| 3.2036472984    | 1.1197883195   |
| 0.689557082     | 0.5436338892   |
| 4.9399388133    | 3.0420417373   |
| 0               | 0.1569346431   |
| 3.4446326242    | 4.8106399607   |
| 0.6715106167    | 0              |
| 14.3298272526   | 10.1599018216  |
| 0.5086347865    | 0.4173857682   |
| 20.0988869519   | 26.7234875485  |
| 4.197572145     | 5.1735488252   |
| 7.3730862818    | 5.1355145845   |
| 51.1687261981   | 15.0493930649  |
| 4.5837010557    | 2.1849654708   |
| 6.4226400655    | 6.6076860477   |
| 0.1260205076    | 0.2058010024   |
| 0               | 0.006718       |
| 0               | 0.002692       |
| 0.001096        | 0.0005964      |
| 10.4341701483   | 6.3710232255   |
| 12.3650984695   | 9.0052964361   |
| 0               | 0.0113630702   |
| 0.4426818142    | 0.3508739883   |
| 3.1541307123    | 0.9245265369   |



gene\_expression\_table

|                |                |
|----------------|----------------|
| 0.9497690216   | 0.9726341625   |
| 26.9874336678  | 83.8767487407  |
| 18.7934310823  | 19.8652581451  |
| 3.5840447783   | 5.001667951    |
| 0.002386       | 0.002598       |
| 0              | 0.0883455483   |
| 0.2000656433   | 0.245041724    |
| 3.017428222    | 2.4327348963   |
| 0.0412725739   | 0.2066971021   |
| 15.5076101024  | 12.5788494256  |
| 13.718231728   | 23.7341262596  |
| 0.0379548075   | 0.020661022    |
| 12.6745336105  | 9.3651385563   |
| 0.4433988736   | 0.7899314545   |
| 26.1631247798  | 20.1499613591  |
| 11.1249461736  | 13.9660881161  |
| 0.1664391708   | 0              |
| 18.7076709515  | 25.9859411602  |
| 95.2698736163  | 52.1353618645  |
| 0.1921331631   | 0.0915156549   |
| 3.9459929758   | 6.292223169    |
| 72.1324841511  | 132.5573262214 |
| 0              | 0.1268536411   |
| 141.7586036471 | 112.3266574393 |
| 0.6614030147   | 0.7200807022   |
| 0.5720253088   | 1.5569341871   |
| 3.9819705481   | 9.9513440826   |
| 0.3061231359   | 0.2499610953   |
| 17.698586405   | 14.6225533805  |
| 20.4671258738  | 46.4023189116  |
| 2.2421328652   | 1.4706936081   |
| 13.2655752452  | 11.6715206506  |
| 189.7908805984 | 193.7763005103 |
| 77.2762024517  | 52.0114156914  |
| 1.0806284493   | 2.0044049494   |
| 26.4884711161  | 16.1341320756  |
| 1.7540626029   | 1.5118282305   |
| 76.7037752705  | 78.2505388393  |
| 0.0602885732   | 0.0104422809   |
| 0.008449       | 0.009198       |
| 1.9181315949   | 0.7490650145   |
| 1.5077889683   | 1.5553640167   |
| 2.0633805625   | 1.4048927919   |
| 1.9608222085   | 2.6936714831   |
| 0.837162013    | 0              |
| 1.2347437126   | 1.3317814731   |
| 2.2494362641   | 1.5565674713   |
| 0.4401258174   | 0.3460689968   |
| 17.693378385   | 25.3337411217  |

gene\_expression\_table

|                 |                 |
|-----------------|-----------------|
| 3.3025984808    | 3.7021838786    |
| 0               | 0.0159414437    |
| 0.2205466198    | 0.1200564265    |
| 2116.3366903705 | 2541.800404067  |
| 0.4361720893    | 0.4036377711    |
| 18.6189979013   | 20.4248864626   |
| 2.5648394131    | 0.5235720481    |
| 0.0117824052    | 0               |
| 42.4311787797   | 25.0673502298   |
| 16.8424078437   | 21.5760844072   |
| 3.2638281534    | 5.3642449306    |
| 147.0924940748  | 67.8825207947   |
| 4.8500482541    | 4.8249014983    |
| 6.2627691547    | 8.1500986805    |
| 0.1586068868    | 0.1841898806    |
| 0.009101        | 0.0148630892    |
| 1.4173998472    | 1.3685576432    |
| 82.9785275336   | 67.4317270682   |
| 6.9793444603    | 8.4646847066    |
| 5.520883648     | 7.041082111     |
| 5.1856609283    | 4.3296991886    |
| 2.1358279811    | 3.6363925139    |
| 26.1341775606   | 54.5470656787   |
| 0.7639250944    | 2.5110888946    |
| 4.3211874369    | 5.2195453379    |
| 1.6679027674    | 2.0674710997    |
| 4.2997330268    | 4.3689146509    |
| 0               | 0               |
| 54.13989771     | 24.5595944599   |
| 4.9057501545    | 2.4260055972    |
| 0.2658664529    | 0.2026173278    |
| 0.2667673937    | 0.2486594135    |
| 0.7097216103    | 1.1443577147    |
| 0.1854599521    | 0.480479113     |
| 7.1192349158    | 14.1241194456   |
| 17.2614122545   | 18.1613550259   |
| 0.1562785322    | 0.4040898479    |
| 0.9935184313    | 1.2619371336    |
| 13.8244190379   | 14.2817051386   |
| 0.0132314382    | 0.001801        |
| 0.1844921591    | 0.2968588937    |
| 1.300641334     | 2.5582057264    |
| 100.6595984793  | 78.6323581192   |
| 3005.1697449443 | 3396.0830579429 |
| 2.1721938096    | 3.9199098925    |
| 0.0232711892    | 0.005961        |
| 45.3462157595   | 48.8394466509   |
| 8.3318014759    | 10.4324255312   |
| 11.6109459407   | 18.8035383204   |

gene\_expression\_table

|               |                |
|---------------|----------------|
| 0.0441529705  | 0.06992013     |
| 3.1554937156  | 3.9687019048   |
| 0.7774089094  | 0              |
| 4.3878754155  | 3.8329971478   |
| 26.8370311794 | 21.6888601517  |
| 0.0593701101  | 0.1551293949   |
| 1.7285079962  | 1.6727609157   |
| 18.0158424725 | 13.9914297574  |
| 0.006555      | 0.005352       |
| 2.9938060218  | 3.8394715388   |
| 0.6233892683  | 0.8092126617   |
| 6.6070066776  | 8.9152138258   |
| 94.4982279126 | 96.9422572812  |
| 10.2627740398 | 4.8085818522   |
| 2.2885353154  | 1.2199642948   |
| 0.2900323873  | 0.2224695195   |
| 14.3251438404 | 31.1749791457  |
| 42.3770341528 | 106.9576400961 |
| 0.1724137315  | 0.0208566399   |
| 15.6801361468 | 6.3907120064   |
| 1.5537369953  | 1.0984954653   |
| 13.1634626708 | 13.4617468414  |
| 0.2951354213  | 0.6392196109   |
| 43.8452772656 | 61.6706675481  |
| 9.8266341211  | 8.0786047583   |
| 2.6262965213  | 2.3289407994   |
| 8.4553383622  | 11.4466414698  |
| 0.4291652334  | 0.9243215858   |
| 0.1259817552  | 0.0981930012   |
| 2.8213642432  | 3.048255101    |
| 4.5995419366  | 8.0777348628   |
| 0.2373117146  | 0.3358748857   |
| 0.100030444   | 0.1020982916   |
| 40.8318931363 | 20.5719718561  |
| 80.5602939191 | 22.682938203   |
| 3.6879412869  | 4.47110062     |
| 0             | 0.0930938164   |
| 3.0886632545  | 2.4303986519   |
| 2.1940006863  | 2.3001774684   |
| 5.2643867563  | 1.4613241857   |
| 0.072481046   | 0.2818262376   |
| 0.0108579397  | 0.005911       |
| 0.005102      | 0.0111092204   |
| 3.9556101827  | 5.6523337874   |
| 10.5527527177 | 9.2495874228   |
| 0.1007351648  | 0.1462294478   |
| 7.9207921054  | 7.8150477568   |
| 0.1118351635  | 0.0608784215   |
| 1.5572810485  | 1.0047042028   |

gene\_expression\_table

|                 |                 |
|-----------------|-----------------|
| 32.679983565    | 42.8177912559   |
| 2963.2248392717 | 2865.6777099676 |
| 0.004662        | 0.097697211     |
| 274.2558625107  | 164.9536674461  |
| 0               | 0.0690535784    |
| 1020.2557545887 | 875.6301643409  |
| 1.1222882325    | 1.6582307966    |
| 0.3264490282    | 0.6041980282    |
| 5.4122017361    | 5.2456340057    |
| 53.6363604471   | 26.3894281234   |
| 0.123363667     | 0.1942671032    |
| 1.6222033499    | 2.0523722782    |
| 7.527491487     | 5.9308149319    |
| 36.6199946684   | 29.1181596519   |
| 12.055898998    | 17.9254269426   |
| 8.025285537     | 3.0910134721    |
| 0.3348066824    | 0.1905391744    |
| 90.386804838    | 27.1436468636   |
| 0.4367862249    | 0.2972103662    |
| 0.1475302094    | 0.4818559384    |
| 16.4495604362   | 14.0712911388   |
| 6.3813733979    | 10.3237866833   |
| 0.3881607219    | 0.8187820254    |
| 4.1302060814    | 2.4101912951    |
| 0.0110535711    | 0.006017        |
| 2.9353273291    | 3.4848027239    |
| 3.1091597693    | 2.4782999683    |
| 5.0484219182    | 9.6676039205    |
| 0.1487656724    | 0.0404909289    |
| 4.8446678126    | 3.3209639646    |
| 1.7435499511    | 0.9965720426    |
| 105.9626850401  | 109.3428774445  |
| 3.1600783625    | 3.0088133071    |
| 38.9061413412   | 64.4508625198   |
| 0               | 0.1574652858    |
| 20.8080582256   | 8.1968313368    |
| 15.9402816065   | 18.0932774052   |
| 1.2795928465    | 1.1028822948    |
| 0.3772364341    | 0.1428534667    |
| 462.9665348685  | 385.1157810827  |
| 1.0568584127    | 0.8933382876    |
| 1.8727249726    | 1.585055059     |
| 35.6738745267   | 19.9596533468   |
| 0               | 0.0557347466    |
| 2.3714597751    | 4.0889563291    |
| 1.0126388028    | 1.675765152     |
| 22.2071959173   | 7.6849438982    |
| 0               | 0.0613566836    |
| 0.7309609685    | 0               |

gene\_expression\_table

|                 |                |
|-----------------|----------------|
| 2.2310119126    | 0.9715762335   |
| 0.3633245725    | 0.0116340481   |
| 0.0325162704    | 0.0619517782   |
| 0.1330313842    | 0              |
| 0               | 0.1974223557   |
| 11.4522332584   | 6.6181708877   |
| 11.1445666286   | 9.1762692429   |
| 3.25726107      | 3.4919167762   |
| 6.0262959843    | 4.1580421632   |
| 2.8122111427    | 0.8325681047   |
| 4.4082486028    | 7.5871842742   |
| 10.3652274715   | 7.7819975956   |
| 20.0275539503   | 6.7187786742   |
| 0               | 0.1908829161   |
| 10.9708043013   | 12.318084679   |
| 16.843045382    | 9.7500226833   |
| 2.4298252865    | 3.4879806678   |
| 35.2597822492   | 11.6073438894  |
| 1.9620423646    | 4.8062449479   |
| 1.7498913815    | 3.0248219632   |
| 18.3641823015   | 10.1744177662  |
| 0.089674015     | 0              |
| 0               | 0.1013168565   |
| 0.5962063492    | 0.6058266522   |
| 68.8692720196   | 27.4053527177  |
| 2055.4232865309 | 968.0476521081 |
| 4.2205761938    | 1.5719781411   |
| 58.8924181286   | 70.8521739754  |
| 24.5781850324   | 44.5153198235  |
| 2.353792434     | 8.6231955172   |
| 0.7748748003    | 3.4845147624   |
| 75.4561818475   | 86.7143401375  |
| 0               | 0              |
| 10.2296382877   | 10.1993131711  |
| 0.5568379031    | 0.7794499991   |
| 4.089139947     | 6.2896257266   |
| 14.1958382671   | 29.8149386866  |
| 21.470895635    | 14.3671423838  |
| 2.1757655859    | 1.429444033    |
| 6.5841377847    | 5.734610159    |
| 22.9124876615   | 13.7258769103  |
| 0               | 0.2325257701   |
| 4.7329969321    | 1.1594011936   |
| 94.707126336    | 66.1888742855  |
| 112.8417910065  | 110.3399928376 |
| 105.2920850298  | 165.6165929826 |
| 4.6370078576    | 3.1795995496   |
| 84.6474735069   | 98.07263521    |
| 17.1372446893   | 29.1414091674  |

gene\_expression\_table

|                 |                 |
|-----------------|-----------------|
| 127.3156340267  | 30.0023148049   |
| 0               | 0.5334800574    |
| 0.0694668703    | 0.0756297623    |
| 0.2115679846    | 0.0767792201    |
| 8.0657435039    | 4.7959473362    |
| 6.6176859328    | 4.9760335407    |
| 0               | 11.823331807    |
| 4640.8231170769 | 3315.4287494167 |
| 142.2607134562  | 170.9624427665  |
| 34.2421412553   | 15.6897846374   |
| 6.9536796309    | 12.1323544659   |
| 20.0136318641   | 11.2222474226   |
| 2.279889064     | 1.3780234104    |
| 120.5109157155  | 84.8632209478   |
| 9.2359576642    | 27.9087100642   |
| 6.1311205003    | 2.9705742513    |
| 21.9491936459   | 0               |
| 23.9985103745   | 9.8551421184    |
| 3.5665366609    | 1.6746368042    |
| 0               | 0.0476889417    |
| 137.8138660079  | 22.8977161555   |
| 3.4855164864    | 7.720335204     |
| 3.4206936348    | 3.9697167841    |
| 0.5156731995    | 2.0117627964    |
| 0.1225776452    | 0.0333630914    |
| 8.1110324694    | 2.1399352526    |
| 3.1208866843    | 2.8300772568    |
| 19.2527487739   | 16.8448568929   |
| 0.3091725832    | 1.0939546979    |
| 65.4470592025   | 73.6377872602   |
| 0.1094388619    | 0               |
| 130.0039629966  | 61.4663789031   |
| 20.5961268392   | 16.1275656468   |
| 17.4196228145   | 89.7046363222   |
| 0.2416317579    | 0.0876895337    |
| 15.7998491539   | 3.0555410235    |
| 147.8690576643  | 38.5269364794   |
| 68.4068947222   | 112.8949626758  |
| 1.4960423575    | 2.7921715521    |
| 140.3253358829  | 86.3368938131   |
| 72.9487351144   | 24.7764893883   |
| 40.4501207759   | 24.5461795554   |
| 0.081715978     | 0.0970533534    |
| 2.6912286226    | 3.3728912482    |
| 7.825392847     | 6.4472937573    |
| 31.106561856    | 29.3933425691   |
| 22.7089789545   | 18.6651327958   |
| 201.7812746841  | 247.4871552386  |
| 81.9092121222   | 82.2764578984   |

gene\_expression\_table

|                 |                 |
|-----------------|-----------------|
| 2.2240436847    | 3.2249932503    |
| 2.2503529105    | 3.0184321185    |
| 7.5858308577    | 4.5613582932    |
| 53.8674630162   | 10.0210056663   |
| 15.3364623334   | 22.9584673643   |
| 15.2362984729   | 16.8740173714   |
| 53.6300127454   | 98.248880756    |
| 33.225638463    | 15.8606083281   |
| 1.5585137602    | 0.5251939384    |
| 26.4858316407   | 25.6423737542   |
| 2371.0762860838 | 3777.1427831631 |
| 40.3972323636   | 31.5020718089   |
| 7.56091167      | 12.4124127783   |
| 24.2877474145   | 23.0225888474   |
| 6.0016151302    | 0.7885934948    |
| 56.3044182769   | 62.1675356423   |
| 5.1797918424    | 9.8688229597    |
| 69.6738885998   | 33.1511581973   |
| 5.6030593503    | 1.1902723775    |
| 0.3848373146    | 0.1898498251    |
| 50.0526125458   | 41.7193361593   |
| 29.960584097    | 78.1450881537   |
| 4.9140613952    | 3.5504692462    |
| 6.2459306166    | 5.488830248     |
| 8.0563925554    | 4.5460132709    |
| 240.9492865639  | 98.8093029431   |
| 4.4306523527    | 3.1452000568    |
| 193.7968575931  | 81.725214281    |
| 31.3829521919   | 26.1191100269   |
| 911.5297383917  | 497.1771722929  |
| 3.7735236498    | 2.0359713473    |
| 2.6137302163    | 1.7461713098    |
| 0               | 2.7208750101    |
| 7.9223113445    | 7.1750743513    |
| 0.8634259861    | 0.6953088903    |
| 0.1282895324    | 0.1513102436    |
| 7.3431467194    | 7.1545953997    |
| 14.8584501288   | 14.9043266      |
| 140.6634542271  | 183.4685204989  |
| 3.9657214042    | 5.1650009469    |
| 0.006615        | 0.007202        |
| 2.3634270858    | 2.0013025145    |
| 15.3634016759   | 17.7155919856   |
| 76.9976172247   | 69.1797757133   |
| 0.6454580292    | 0.4211513594    |
| 0               | 0.0289652408    |
| 5.836850915     | 6.1511166503    |
| 5.6349144156    | 5.6447669336    |
| 0.914932285     | 1.3037221637    |

gene\_expression\_table

|                |               |
|----------------|---------------|
| 1.1223234427   | 2.659413317   |
| 0.2470984542   | 0.5956877769  |
| 1.8864306959   | 3.5690848156  |
| 17.8929016301  | 33.7426730334 |
| 7.7676981994   | 3.3655878014  |
| 48.1652637496  | 49.0622941278 |
| 0.3731838503   | 1.2442680245  |
| 2.0946887701   | 1.4862947847  |
| 5.1240838539   | 6.7845942295  |
| 0.2156919266   | 0             |
| 0              | 0.0311646637  |
| 2.5552229458   | 1.5110399691  |
| 18.6714391046  | 6.4965495347  |
| 12.3874699695  | 22.2194775688 |
| 107.6999042043 | 95.4420254929 |
| 1.6399730626   | 2.0086498613  |
| 1.2796227742   | 0.2500520365  |
| 0              | 0.00902       |
| 0.0319791258   | 0.3829783949  |
| 0.0136609858   | 0.001859      |
| 0.0111915683   | 0.0719644115  |
| 1.2965252109   | 1.5453894017  |
| 0.008822       | 0.001201      |
| 0              | 0             |
| 38.5673146653  | 28.6100776222 |
| 2.0072457833   | 3.8387459184  |
| 40.9541000022  | 20.1239044491 |
| 0.0119688786   | 0.004887      |
| 0.1467802392   | 0.1165223944  |
| 0.004606       | 0.003343      |
| 0.7677137186   | 1.0856359834  |
| 0.20642441     | 0.0608664775  |
| 6.5208876232   | 2.2629341239  |
| 1.2870184556   | 3.2786945763  |
| 2.226475042    | 0.753805256   |
| 8.0111760174   | 11.4474983097 |
| 24.9455737226  | 12.1499313351 |
| 71.0882040906  | 44.2488891654 |
| 0.3247719155   | 0.3766445756  |
| 0.1562798977   | 0.2627232492  |
| 0.9597241197   | 1.7602566485  |
| 6.0864336903   | 7.3845735633  |
| 8.8506902931   | 13.6508539883 |
| 8.7933170612   | 9.0486441642  |
| 2.8637305705   | 2.1593597407  |
| 0.2322378352   | 0.2573563007  |
| 18.8476861806  | 11.7696365994 |
| 0.00299        | 0.001628      |
| 0.0945782516   | 0.1029689498  |



gene\_expression\_table

|                 |                 |
|-----------------|-----------------|
| 0.004493        | 0.002935        |
| 4.6400941621    | 7.9501905697    |
| 0.006603        | 0.006162        |
| 18.3379619767   | 10.9340968111   |
| 0               | 0.033780253     |
| 0.005206        | 0.008502        |
| 4.7064310128    | 5.5685168921    |
| 2.9182475501    | 4.7120958397    |
| 34.803785837    | 18.5987450406   |
| 0               | 0.003058        |
| 0.8849955819    | 0.5327642035    |
| 1.6574699622    | 1.2434478038    |
| 9.7233995735    | 8.68853435      |
| 0.7753829849    | 1.0058227113    |
| 0.048887789     | 0.006653        |
| 0.5228802872    | 0.8239414739    |
| 0.3508662589    | 0.5264064469    |
| 12.1579698766   | 8.0952581723    |
| 0               | 0               |
| 51.124780806    | 43.6685390826   |
| 22.67760678     | 29.3798486717   |
| 7.2116855061    | 3.0253426775    |
| 1.6819196164    | 1.0130832715    |
| 0               | 0               |
| 3.8784839757    | 1.3890037553    |
| 3.428991492     | 3.8931956524    |
| 19.7179770261   | 15.1694928074   |
| 47.4214107215   | 56.821537421    |
| 0.0763336756    | 0.0623293274    |
| 0.074413524     | 0.7696450476    |
| 0.0121514473    | 0.0132294872    |
| 30.887742641    | 37.5969815033   |
| 0.0214657802    | 0.005843        |
| 1.0351542189    | 3.4627676299    |
| 176.6125349661  | 63.4726265233   |
| 1017.3353870057 | 1671.4785149148 |
| 10.3672722339   | 7.6693890981    |
| 980.1956782216  | 847.51897758    |
| 1.7155124313    | 0.8171220478    |
| 3.4871486833    | 6.6069274861    |
| 22.095328451    | 10.7082272491   |
| 3.9810555833    | 2.1151105199    |
| 0.2102278255    | 0.4686561939    |
| 0.2162359621    | 0.8239691834    |
| 1.262308666     | 2.0098099125    |
| 31.7864914119   | 34.2030498119   |
| 6.3886147241    | 4.1917837677    |
| 0.4044462794    | 0.2675836575    |
| 4.0989869063    | 3.4970369494    |

gene\_expression\_table

|                |                |
|----------------|----------------|
| 0.1997295325   | 0.385971862    |
| 0.0663786098   | 0.0361337603   |
| 0              | 0              |
| 0              | 0.1006315013   |
| 0              | 0              |
| 0              | 0              |
| 3.4250698965   | 2.3318807514   |
| 0.0428767001   | 0.003334       |
| 0.0129341974   | 0              |
| 17.7136157587  | 19.5222265697  |
| 0.0480240513   | 0.007469       |
| 0.1284137498   | 0.0559224927   |
| 23.0738300175  | 10.8688597617  |
| 5.4618422297   | 5.0141258077   |
| 12.3164187867  | 10.5514185769  |
| 26.592681334   | 23.5524071038  |
| 0              | 0              |
| 0.1196669674   | 0.2750428622   |
| 1.0453215909   | 1.2408008524   |
| 0              | 0.0936947328   |
| 1.9398198662   | 1.2339277799   |
| 66.6405650808  | 38.0038034672  |
| 10.7899886286  | 9.1230470549   |
| 1.1610820322   | 1.1525524102   |
| 0.1478370929   | 0.198095699    |
| 4.3828316327   | 3.9583115857   |
| 0.0586275806   | 0              |
| 0.0416925845   | 0.145115011    |
| 0              | 0.002334       |
| 3.6437617274   | 4.7918523614   |
| 0.4034170245   | 0.6450852377   |
| 6.7874471915   | 8.1318689481   |
| 7.716248737    | 3.0669627942   |
| 24.5055366949  | 20.8545495078  |
| 0.0567530729   | 0              |
| 197.5445416918 | 168.1417457096 |
| 0              | 0.0150714223   |
| 1.5063833738   | 0.9689151313   |
| 0.0263823378   | 0              |
| 19.9647237741  | 8.7502261306   |
| 155.6509073107 | 127.2349675862 |
| 0.1160368963   | 0.126331341    |
| 3.9368091835   | 2.3276031839   |
| 4.8411589785   | 3.556273293    |
| 0.0957312238   | 0.2727569758   |
| 2.7178910743   | 4.1186278745   |
| 0              | 0.1766794169   |
| 0.0284594325   | 0.0464764016   |
| 14.4909852027  | 9.6713935442   |

gene\_expression\_table

|               |               |
|---------------|---------------|
| 2.6452272809  | 4.7293834595  |
| 2.5128163935  | 6.2431124637  |
| 4.9792838525  | 5.7556624895  |
| 0.5697080235  | 1.872238547   |
| 0.0287345755  | 0.1094933725  |
| 0             | 0.0261201023  |
| 0.0511639265  | 0.0334218218  |
| 57.34648457   | 61.3776202259 |
| 11.2785349386 | 6.6713397905  |
| 27.0956091453 | 49.8576036152 |
| 11.5703275228 | 4.244578025   |
| 4.4442983122  | 1.7667599869  |
| 1.8314601124  | 1.059281554   |
| 32.0504387223 | 31.6785623012 |
| 3.2751602117  | 1.8514328788  |
| 0.4299815131  | 0.7128315477  |
| 0.403326815   | 0.3260049868  |
| 2.5225463175  | 3.6256493528  |
| 1.8358994248  | 2.0463647822  |
| 0.0189761487  | 0             |
| 1.7095981991  | 0.8265502063  |
| 0.038680814   | 0.0779080502  |
| 3.1693689533  | 4.6033066706  |
| 0             | 0.002479      |
| 14.356540419  | 6.7246250316  |
| 0.6186249346  | 0.3038997163  |
| 0.9676345787  | 0.4632774418  |
| 0.0808533941  | 0.0484145553  |
| 3.0646507693  | 2.8697282459  |
| 6.6786072883  | 6.1812247565  |
| 0.9940784153  | 0.2233255688  |
| 0.1706998685  | 0.3451385744  |
| 0.6029859058  | 0.9935928694  |
| 0.6963164562  | 1.1190875399  |
| 0.3913527861  | 0.1909979854  |
| 0.7841721931  | 0.2716450523  |
| 0.0505062029  | 0.0274934807  |
| 0             | 0.6234515852  |
| 9.8423058147  | 11.5020794216 |
| 2.9889672668  | 1.3298166057  |
| 7.7510171816  | 6.7207932165  |
| 0             | 0.0331765974  |
| 3.0611397973  | 3.1925540113  |
| 0.6784786004  | 1.1794910818  |
| 0.4804859876  | 0.3174447989  |
| 2.169999545   | 0.7564193987  |
| 24.4111400941 | 15.8141198915 |
| 71.5266495789 | 77.3727927265 |
| 0.8195028272  | 0.4067412691  |

gene\_expression\_table

|                |                |
|----------------|----------------|
| 2.3676226933   | 5.4417500202   |
| 5.5277435459   | 4.0120988922   |
| 31.8122085068  | 34.6344920261  |
| 13.501880338   | 6.2788099128   |
| 0.2738976984   | 0.312896935    |
| 2.5986442984   | 1.7474397766   |
| 28.0168089562  | 32.2443100252  |
| 23.2470419685  | 16.9698632592  |
| 11.9842860518  | 4.8033862149   |
| 0.7832175682   | 1.0588500798   |
| 0.0537645427   | 0.2780382637   |
| 0.3955204394   | 3.7264311684   |
| 3.6851221287   | 0.5831475418   |
| 13.0681943386  | 11.4836776746  |
| 159.3883085765 | 127.3631603502 |
| 4.0296352191   | 6.7634956965   |
| 5.6801859776   | 13.3628778764  |
| 986.5170491228 | 948.2393849484 |
| 0.076992808    | 0.2095584463   |
| 46.70631652    | 33.1144864942  |
| 0.6406590576   | 1.6725679064   |
| 0              | 0.1708154458   |
| 0              | 0              |
| 3.3896036289   | 11.0264955481  |
| 0.582113914    | 0.3588184774   |
| 2.033130856    | 2.0751601073   |
| 0.006518       | 0.0106440222   |
| 1.5801000049   | 1.0034976747   |
| 1.7281178037   | 2.7463382475   |
| 4.2954626832   | 2.6912182689   |
| 0.0455170111   | 0.0566344497   |
| 20.278776548   | 25.3575290659  |
| 44.7501984134  | 20.2486736973  |
| 0.005595       | 0.0152296622   |
| 0.3070522436   | 0              |
| 1.0304452533   | 1.1030084142   |
| 0.5467350683   | 2.2237258965   |
| 10.7606771513  | 9.0527566106   |
| 1.1313119115   | 2.4223010577   |
| 0.0136057366   | 0.0148127967   |
| 142.0950070019 | 136.0233178929 |
| 9.1970735839   | 6.4899140886   |
| 30.6992718438  | 16.4514882018  |
| 0.2203814708   | 0.1119687578   |
| 1.7196322945   | 2.4901389264   |
| 19.7277228374  | 12.5287791481  |
| 2.1565907068   | 1.8796165764   |
| 0.0374889176   | 0.0204074109   |
| 0.002172       | 0.005912       |

gene\_expression\_table

|               |               |
|---------------|---------------|
| 0.0519612099  | 0.0565710522  |
| 6.6543297585  | 9.6477381424  |
| 2.8330584977  | 4.5620412113  |
| 0.7280966865  | 0.5105702232  |
| 1.1984080695  | 1.9881557811  |
| 2.0830364035  | 1.825801081   |
| 0             | 0.5754240215  |
| 0.7420750266  | 0.7866489111  |
| 11.3790236297 | 6.8506145013  |
| 1.505201361   | 1.1234117916  |
| 0.7926721994  | 0.4966295977  |
| 1.6903245107  | 2.1173171742  |
| 0.0231903288  | 0.0757431152  |
| 0.0946504769  | 0.4980633165  |
| 0.0834572236  | 0.0681459732  |
| 2.1419212794  | 2.2848043298  |
| 5.3664532282  | 4.3165099553  |
| 25.1877749775 | 23.0367976289 |
| 0.0469791578  | 0             |
| 0.4373859192  | 0.7920294467  |
| 0             | 0.004459      |
| 9.5488995233  | 19.2296863582 |
| 1.1342265227  | 0.6446652208  |
| 0.3770228923  | 0.1687492835  |
| 1.6727138608  | 1.4684947309  |
| 76.7533509812 | 56.7080052789 |
| 42.6650756561 | 23.4201689145 |
| 1.0823219967  | 1.770305807   |
| 1.375434033   | 1.0852367101  |
| 1.0338775683  | 2.1499771285  |
| 1.5750676916  | 0.649680504   |
| 0.2870840821  | 0.1269747858  |
| 0.214299032   | 0.6518983767  |
| 1.7549517961  | 2.0471205477  |
| 18.0564768333 | 8.977848856   |
| 79.1777127956 | 25.9417042718 |
| 0.4689749133  | 0.4006096747  |
| 8.5415512812  | 8.0464280201  |
| 0             | 0.0324804599  |
| 3.7242195216  | 1.3129249223  |
| 0             | 0.0380704267  |
| 15.6391338729 | 9.9663996375  |
| 3.9112512751  | 5.8196025003  |
| 3.2568180228  | 4.1498444024  |
| 0             | 0             |
| 2.0409024083  | 0.1307038315  |
| 0.1419427032  | 0.1021037683  |
| 29.1720947826 | 9.8383000499  |
| 0             | 0             |

gene\_expression\_table

|                |                |
|----------------|----------------|
| 1.7177651232   | 1.1803469368   |
| 0.1738795601   | 0.47326408     |
| 481.6678870192 | 443.4906650036 |
| 3.1451536834   | 2.109738105    |
| 49.3700894151  | 42.8352931557  |
| 9.3074693272   | 12.1132506106  |
| 84.3063837306  | 45.365876406   |
| 0.0235489876   | 0              |
| 12.7552721695  | 14.8861221335  |
| 0.1139032409   | 0.0293704091   |
| 0.3553944327   | 0              |
| 0              | 0.0768772681   |
| 0.5520353434   | 0.7930857036   |
| 0.0726569448   | 0.0395514253   |
| 123.6464727352 | 16.331322889   |
| 11.2023565135  | 8.8338619861   |
| 74.661915505   | 52.3523453967  |
| 6.2917551435   | 2.7446680396   |
| 0.0114308941   | 0              |
| 1.0117707472   | 0.8392624814   |
| 5.8726485387   | 3.8730778146   |
| 9.664148669    | 6.7109420199   |
| 0.2316551299   | 0.7945872567   |
| 246.495677989  | 168.2948481532 |
| 7.0240570881   | 4.9565252077   |
| 1.0075300831   | 1.5990241591   |
| 18.2256728273  | 24.7028316586  |
| 0.0172564154   | 0.0234841909   |
| 4.0005521597   | 7.1195168351   |
| 8.3536328816   | 26.3298397309  |
| 0.8106752963   | 0.6204517952   |
| 0.0894199738   | 0              |
| 9.9795785716   | 4.8487163071   |
| 28.7698915477  | 16.2999443763  |
| 0.0606890147   | 0.0339542636   |
| 0.5858269588   | 0.0797249707   |
| 206.1029228425 | 61.5400079622  |
| 1.1735854817   | 1.5147604614   |
| 213.8281049613 | 195.0051096848 |
| 41.0260307519  | 31.1221905496  |
| 11.7892011706  | 4.5190598864   |
| 0.1333987493   | 0.2373327687   |
| 10.4983037462  | 14.3758418889  |
| 0.0120370353   | 0.0720770869   |
| 11.3745428973  | 4.6549286454   |
| 0.1049405105   | 0.1840702776   |
| 4.8113088452   | 1.9101537945   |
| 2.2501300495   | 3.5147368771   |
| 4.9512716141   | 0.1925190553   |

gene\_expression\_table

|                |                |
|----------------|----------------|
| 6.5043894415   | 5.6389239047   |
| 0.211497104    | 0.3166081756   |
| 0              | 0.020748594    |
| 45.9409871324  | 28.526585089   |
| 21.3303721445  | 9.7178229417   |
| 3.1609033619   | 5.7943228526   |
| 0.9066852066   | 1.3710049901   |
| 6.8492042936   | 0.8626546306   |
| 339.5719516274 | 167.1834117248 |
| 4.0581183308   | 2.803821133    |
| 0.583659955    | 1.0500440746   |
| 0.7862630918   | 1.2485867498   |
| 0              | 0              |
| 1.3753684623   | 1.1928337264   |
| 3.682508263    | 2.3227958802   |
| 0.6790224059   | 0.4264980189   |
| 3.6279946315   | 1.4064997531   |
| 0.0047         | 0.002559       |
| 0.006913       | 0.001672       |
| 5.1010450562   | 6.5446182463   |
| 0.9172851856   | 0.2184577435   |
| 0.9379855172   | 1.2889546342   |
| 0.8092831872   | 0.7342336326   |
| 14.5830360486  | 10.6601365882  |
| 2.6051465622   | 2.3029521095   |
| 9.1382080704   | 7.0591939186   |
| 26.4211033744  | 8.5038802738   |
| 13.4590322658  | 4.8489651451   |
| 39.5475097157  | 50.1158429089  |
| 2.1620956064   | 2.3665204632   |
| 0.0130379505   | 0.0165604113   |
| 19.0732947398  | 10.7005481229  |
| 8.4850420806   | 9.2133708606   |
| 76.6647191484  | 51.9303172262  |
| 2.6566041193   | 2.7905734291   |
| 5.0635320716   | 2.2811393451   |
| 2.6188277324   | 3.8083381579   |
| 0.1034939351   | 0              |
| 0.1123397761   | 0.1494853841   |
| 19.9639147135  | 24.1469063845  |
| 0.663551148    | 1.4448388228   |
| 1.4695063061   | 7.3037839699   |
| 1.1270137493   | 2.7782051017   |
| 3.027756023    | 1.2950022787   |
| 8.6086409716   | 13.4507288161  |
| 1.1907798892   | 1.7577617696   |
| 44.8874393295  | 43.8602936273  |
| 9.714408973    | 13.4862732588  |
| 91.7184777963  | 78.0507980672  |

gene\_expression\_table

|                |                |
|----------------|----------------|
| 4.241452126    | 6.7101549049   |
| 46.9276941749  | 34.7768807651  |
| 5.9672097666   | 1.8750357332   |
| 39.2975537179  | 17.0626325945  |
| 81.4707204052  | 36.5263192139  |
| 73.5251019861  | 38.6788996924  |
| 1.9047046036   | 1.4441729744   |
| 85.4123114812  | 71.3642919981  |
| 0              | 0              |
| 0.0510502289   | 0.2778962589   |
| 68.8085457667  | 148.804524891  |
| 1.1856858177   | 1.6933820093   |
| 0.0140351526   | 0              |
| 0.2394789848   | 0.540072884    |
| 2.0006156738   | 2.5698296706   |
| 23.2524426944  | 8.4788184993   |
| 2.6494720692   | 2.0931953269   |
| 0.7137791041   | 0.95084608     |
| 73.4345489246  | 27.6056429808  |
| 7.2884127943   | 1.8059008463   |
| 0.381648144    | 1.3450701552   |
| 0.7089927345   | 0.7718924388   |
| 3.3098493192   | 1.1231654656   |
| 36.520743104   | 23.6671152738  |
| 0              | 0.0466062486   |
| 0.1164650452   | 0              |
| 159.6679432937 | 370.9347051689 |
| 11.2703010735  | 14.0084421528  |
| 3.5423852736   | 4.3938043978   |
| 10.167575124   | 9.1834489186   |
| 4.6235795444   | 6.0922725826   |
| 0.2653107019   | 0.3129189591   |
| 0.0105156686   | 0.001908       |
| 0              | 0.0235969096   |
| 0              | 0.0269882287   |
| 0.5880082533   | 0.4321178403   |
| 0              | 0.009036       |
| 0              | 0.002921       |
| 0.329480896    | 0.1085574127   |
| 0.0172710272   | 0.0188032608   |
| 3.7796327623   | 3.113572858    |
| 33.6379895677  | 7.1853783401   |
| 7.4606955802   | 4.9170169837   |
| 0.6383961277   | 1.0797829653   |
| 8.8647135754   | 3.1628347486   |
| 332.8726524343 | 69.2027955669  |
| 1.2393980369   | 0.6323331172   |
| 4.197562271    | 3.0738403798   |
| 10.7102429023  | 9.8224245081   |



gene\_expression\_table

|                 |                 |
|-----------------|-----------------|
| 0.2490874096    | 1.2203356313    |
| 4.7483221949    | 5.6463849041    |
| 0.1771586493    | 0.8679403446    |
| 58.4347335014   | 19.3713589289   |
| 1.2437439778    | 0.6431904724    |
| 1.9777165752    | 0.8704318991    |
| 6.2951516219    | 4.251794287     |
| 6.3659206467    | 2.4257400972    |
| 3.1663489896    | 6.6797334824    |
| 5.2327579012    | 4.2891150083    |
| 0               | 0               |
| 6.0834589407    | 3.511075492     |
| 28.5869407443   | 9.3539336126    |
| 5.8952957214    | 9.2423644388    |
| 9.2599961066    | 6.0869525301    |
| 13.2664498165   | 13.1105444101   |
| 7.4156219091    | 6.2526523487    |
| 3.5565117526    | 2.6384661811    |
| 37.2997401069   | 44.6697470291   |
| 1.7331274994    | 3.5503237729    |
| 8.1692366536    | 12.4026237594   |
| 0.7992128077    | 0.9548971543    |
| 11.6075258151   | 6.8684954989    |
| 1.5589489537    | 1.3232829505    |
| 14.9255425835   | 6.746084196     |
| 1.9549057273    | 1.6514980897    |
| 2.1652435242    | 1.8971722399    |
| 1545.1005775822 | 1674.0976348515 |
| 0.4409080666    | 0.8160409785    |
| 0.7867934926    | 0.6608022015    |
| 0               | 0               |
| 0               | 0               |
| 67.9692584123   | 71.3697253535   |
| 1.9020669447    | 1.2870003585    |
| 4.0564510394    | 2.630105679     |
| 0               | 0.006876        |
| 641.3496862192  | 501.4145138819  |
| 4.5657865235    | 8.6258856893    |
| 0               | 0.3886231685    |
| 6.8702308839    | 13.0544238193   |
| 0               | 0.0278024412    |
| 7.0129511859    | 6.0433208324    |
| 0.8410753551    | 1.0029018928    |
| 7.0969800764    | 5.0339988051    |
| 1.3913390271    | 0.9168371632    |
| 0.4793099336    | 0.4892183158    |
| 5.7921372351    | 3.3429388265    |
| 8.8865730625    | 26.3268010363   |
| 45.6137011453   | 63.3273339006   |

gene\_expression\_table

|                 |                |
|-----------------|----------------|
| 10.8983987152   | 3.5527493571   |
| 0.8935837465    | 1.1350031124   |
| 3.7889541949    | 14.3089365403  |
| 0.658431693     | 1.3349953903   |
| 64.8290966863   | 21.8954227707  |
| 100.426735569   | 130.7373899369 |
| 45.9396067195   | 39.5693161769  |
| 0.4729046183    | 0.0735513278   |
| 11.7508233152   | 6.8956000404   |
| 7.8400009929    | 11.3359442138  |
| 18.3340907057   | 34.2692605481  |
| 16.4849926513   | 3.6991013324   |
| 9.8865180225    | 3.6476712849   |
| 0.7294243816    | 0.4441781656   |
| 7.9453313006    | 8.8720176532   |
| 9.2280890074    | 9.8910133373   |
| 0.9807810487    | 1.816784485    |
| 0               | 0.0259907059   |
| 4.1598321365    | 2.2889204022   |
| 1.3201223312    | 1.2481291406   |
| 10.8667577044   | 2.2571966432   |
| 6.0405225312    | 4.4915039208   |
| 5.117852702     | 4.2452519701   |
| 425.9964708211  | 528.5230103341 |
| 25.1813723911   | 18.1201380238  |
| 1.0622639632    | 1.1416778441   |
| 2.0179709524    | 4.5427184901   |
| 2.6940403627    | 0.5332813684   |
| 1.1098880383    | 1.3213935338   |
| 112.8195574744  | 100.018681881  |
| 5.910928191     | 2.0476043551   |
| 7.4420834344    | 11.2532259829  |
| 37.9763127774   | 14.809932537   |
| 1.2989447136    | 0.9246582359   |
| 0               | 0.0451323204   |
| 0.9807547971    | 0.9563455193   |
| 24.3825787878   | 7.1056746372   |
| 4.0922741335    | 10.3176025972  |
| 0.009359        | 0.007642       |
| 0.005923        | 0              |
| 0.0434153607    | 0.0519937451   |
| 0               | 0.0133513028   |
| 0.129882178     | 0.0306377358   |
| 8.7103277628    | 13.9457086189  |
| 577.7882214078  | 486.6707690383 |
| 1215.3982425167 | 949.5314836419 |
| 603.0882869558  | 477.8563270952 |
| 216.417968514   | 292.2995896604 |
| 1.0994311285    | 0.6831759047   |

gene\_expression\_table

|               |               |
|---------------|---------------|
| 4.040986283   | 5.1497193359  |
| 2.4434398932  | 0             |
| 6.1575560128  | 3.5885239091  |
| 69.5707872784 | 41.9905841042 |
| 0.2294625824  | 0.4548802428  |
| 0.0232243694  | 0             |
| 0.0326207805  | 0.0858274288  |
| 0.9624583577  | 2.7069323232  |
| 0.0563322296  | 0             |
| 1.5966642444  | 1.8383070964  |
| 1.5289389486  | 0.7522629363  |
| 0             | 0             |
| 0.1720456574  | 0.0468272578  |
| 0.5903372717  | 0.7427346583  |
| 25.7824305969 | 10.8652843102 |
| 0.9593300369  | 1.9583229643  |
| 0             | 0.007014      |
| 1.1078868064  | 1.2061751939  |
| 0             | 0.4693342171  |
| 4.6199920565  | 5.8552276269  |
| 1.0256795768  | 1.1758923882  |
| 0.1582887345  | 0.1184779992  |
| 0.1104929268  | 0.0515552259  |
| 6.6541414995  | 5.9974768049  |
| 19.4283037157 | 11.6926787193 |
| 6.0614757922  | 3.977797767   |
| 3.0590919794  | 3.7124218269  |
| 65.6493679564 | 64.5937724704 |
| 0.2814800583  | 0.0395422094  |
| 6.0228199473  | 7.3897999449  |
| 12.4586501318 | 7.5133612059  |
| 6.9653495713  | 4.5200917652  |
| 55.0891414931 | 54.9263812431 |
| 0.2112175893  | 0.206960561   |
| 27.1309999531 | 32.1899975648 |
| 16.0356904866 | 15.2718328541 |
| 1.3694315234  | 1.9029718145  |
| 1.1541675553  | 0.5125449577  |
| 0.3433974368  | 0.5741461745  |
| 0.5299701299  | 2.000952232   |
| 27.7879258247 | 17.7546887043 |
| 0.1087875897  | 0.0131598775  |
| 0.7000818396  | 1.9195921383  |
| 8.6166964886  | 5.4258507971  |
| 0.8709378822  | 0.7775279961  |
| 4.0787738928  | 4.6071540948  |
| 0.9509873365  | 2.1002937512  |
| 6.706688029   | 12.5954070258 |
| 4.3651692136  | 5.6274383736  |

gene\_expression\_table

|                 |                 |
|-----------------|-----------------|
| 0.0793887506    | 0.1362964291    |
| 0.8816270475    | 0.2921259324    |
| 0.002467        | 0               |
| 0.2797700507    | 0.0659945885    |
| 0.0319228501    | 0.0260662121    |
| 0.1474697733    | 0.0361243909    |
| 3.0162567718    | 1.3363112252    |
| 14.2397337864   | 6.4727560778    |
| 1.2892481268    | 2.0084784877    |
| 0               | 20.8812985801   |
| 3.0431623873    | 0.9356560141    |
| 0.3738435254    | 0.0407009799    |
| 0.1618435961    | 0.8883511119    |
| 0.2840990958    | 0.1890188139    |
| 2.0228210506    | 1.870189865     |
| 0.2848943118    | 0.3544791758    |
| 8.0510776439    | 10.5358286564   |
| 0.1648355347    | 0.0256370354    |
| 1599.4787925387 | 1555.9649404393 |
| 6.6634357945    | 8.3919688583    |
| 7.295418236     | 7.7043664393    |
| 0.9293555501    | 3.3789296481    |
| 17.1324782692   | 11.0360153118   |
| 7.9575376269    | 7.9470869026    |
| 0.7319019305    | 0.5385197285    |
| 1.761600432     | 2.8022421005    |
| 0.4560071157    | 0.4909464442    |
| 0.0173255371    | 0.009431        |
| 0.4113499529    | 0.4605185056    |
| 0.006181        | 0               |
| 34.7738745748   | 15.7633969973   |
| 0.8819322867    | 1.5602838359    |
| 4.4660048609    | 3.0978920861    |
| 0.2580010544    | 0.6561777685    |
| 0               | 0.030717556     |
| 5.9000561774    | 5.4985086618    |
| 1.4824912492    | 1.2220387299    |
| 0.007753        | 0               |
| 22.7380724881   | 15.2613478878   |
| 0.2430457884    | 0.3598669891    |
| 0.0689623221    | 0.075080452     |
| 1.7318620775    | 1.6392026188    |
| 0.0457918998    | 0.3406718667    |
| 0.0942114138    | 0.2863400418    |
| 2.7198125892    | 2.0416759554    |
| 0.9296211504    | 1.2630937421    |
| 50.8038275854   | 73.6611373693   |
| 1.9379147546    | 1.7530294273    |
| 0.38469098      | 0.2680445488    |

gene\_expression\_table

|                |                |
|----------------|----------------|
| 0              | 0.8893543317   |
| 0.3179073216   | 0.1730555518   |
| 5.8150076724   | 5.1724781001   |
| 0.184148838    | 0.0235865846   |
| 1.8173893451   | 1.9618546765   |
| 0.2033425555   | 0.006918       |
| 0.0222266983   | 0              |
| 21.9497446078  | 8.3194027618   |
| 9.7005647654   | 2.9192667228   |
| 0.2117738073   | 0.6916852288   |
| 3.9867150673   | 4.0510441487   |
| 1.3438630439   | 1.1989181319   |
| 2.3361828969   | 2.0164225035   |
| 7.3171068975   | 6.1508187366   |
| 109.5676597039 | 53.675206842   |
| 53.1432674977  | 44.2104671302  |
| 0.4742716098   | 0.0573719513   |
| 10.9457406849  | 8.4769088555   |
| 8.37777152     | 15.2417081964  |
| 24.6995612168  | 22.5289777006  |
| 8.3969983356   | 3.9066331285   |
| 0.0743752035   | 0.1292964719   |
| 2.5549137173   | 3.2853925178   |
| 1.3966529442   | 1.8485236729   |
| 0.951678273    | 0.211931245    |
| 4.7303481251   | 3.2388737234   |
| 0.0562283678   | 0              |
| 0              | 0              |
| 0.0274453573   | 0              |
| 15.6020527039  | 9.1852479555   |
| 0              | 0.1118073224   |
| 0.3417568994   | 0              |
| 315.6943201126 | 205.0053973481 |
| 0.8766281421   | 1.3822344189   |
| 40.2978545284  | 56.1640539494  |
| 0.9275916312   | 1.3553716685   |
| 11.1220424735  | 6.9433756497   |
| 0              | 0.001488       |
| 16.3437321436  | 15.0562067905  |
| 3.1761459407   | 2.2702292141   |
| 360.7635892287 | 16.0532472957  |
| 1.4314900925   | 0.5194958636   |
| 0              | 0              |
| 16.2145667157  | 3.2690878403   |
| 0.6814412034   | 0              |
| 0              | 0.2621254872   |
| 25.7649096125  | 2.8050694951   |
| 0.7723455054   | 0.26754817     |
| 4.6150563406   | 4.9608891248   |

gene\_expression\_table

|                |                |
|----------------|----------------|
| 0.8505620194   | 1.0328699396   |
| 0.1931073172   | 0              |
| 0.1362781535   | 0              |
| 9.8835271282   | 4.2803270651   |
| 1.6174587836   | 3.3432621353   |
| 11.332767426   | 10.8289194257  |
| 6.2272277072   | 2.3435960703   |
| 0.3416627357   | 0.3550661164   |
| 53.8893048457  | 28.3888074164  |
| 0.8363634483   | 0.4552815498   |
| 3.2629957731   | 4.4490569711   |
| 6.5421715601   | 6.1362111573   |
| 0.0452574509   | 0.0739088338   |
| 0.1593327886   | 0.5300420728   |
| 11.1294499063  | 12.7899779858  |
| 0.009663       | 0.0315613705   |
| 0.003022       | 0.00329        |
| 3.5598504739   | 1.6401935528   |
| 80.9370520098  | 93.0195785293  |
| 5.9739131145   | 25.6592247977  |
| 0.031538495    | 0.0400592447   |
| 2.1170518275   | 1.9082182037   |
| 7.8068813788   | 1.368240446    |
| 1.2791329838   | 0.6927783264   |
| 1.9616674422   | 1.0555761988   |
| 18.2407740262  | 7.9199745532   |
| 4.0405056902   | 5.3109482173   |
| 1.6958629631   | 1.713006898    |
| 10.817292553   | 2.3553940469   |
| 0              | 0.005112       |
| 110.7949661459 | 77.7301619823  |
| 550.378234629  | 317.9171284886 |
| 15.0815707557  | 10.1129577397  |
| 2.2393865172   | 4.3294002441   |
| 0.9880114673   | 1.6067321246   |
| 5.2054026602   | 5.8207554458   |
| 0.2679395992   | 1.2835257382   |
| 2.4056110882   | 4.4730952342   |
| 6.9225178215   | 6.4258486892   |
| 5.0667832521   | 16.8038338181  |
| 4.6089413744   | 2.1532911781   |
| 0.9857777322   | 0.6036935454   |
| 0.9103664769   | 0.8495412466   |
| 172.3905061944 | 96.413257059   |
| 5.2970664294   | 7.7787526047   |
| 1.6177170858   | 0.5463093406   |
| 0.1229913898   | 0.016737852    |
| 0.2658230158   | 0.2276660807   |
| 0.0638219793   | 0.0445132346   |

gene\_expression\_table

|                 |                 |
|-----------------|-----------------|
| 0               | 0.088811318     |
| 0.1499351916    | 0.136030826     |
| 2.6858545358    | 4.2083090423    |
| 3.8256032122    | 2.1960905033    |
| 0.1651028169    | 1.8873775472    |
| 4.7246855468    | 10.0995014271   |
| 3.1201934075    | 1.5533325296    |
| 0.0374602207    | 0               |
| 177.8426341163  | 42.3544402017   |
| 0.9001285141    | 1.0779837313    |
| 6.0679131332    | 7.3426044954    |
| 0.0489203009    | 0.0443836358    |
| 1.2736036694    | 3.2353859038    |
| 205.2875407633  | 91.6715204359   |
| 203.424677417   | 96.5390347953   |
| 0.4680961947    | 0.7105338549    |
| 0.008189        | 0.0445778923    |
| 10.0925200767   | 16.2071497304   |
| 0.1794831561    | 0.5536513596    |
| 1.2027973724    | 0.9922264759    |
| 0.007685        | 0.0007606       |
| 2.1499292857    | 1.7383882914    |
| 0               | 0.0258452738    |
| 1.3226518309    | 0.4341156953    |
| 0.1659676662    | 0.4102592933    |
| 0.0389670092    | 0.037528963     |
| 2.9404670012    | 2.0651758314    |
| 0.5587749106    | 0.6935164249    |
| 25.5676530552   | 9.0335083952    |
| 7.3617115874    | 8.2450334415    |
| 27.2916226329   | 32.3497083131   |
| 4.1840827642    | 1.8815295262    |
| 0.4742212568    | 1.6314850625    |
| 11.3594554352   | 6.8549801214    |
| 3.6684078204    | 4.0052041233    |
| 5637.7177436724 | 3320.8561298906 |
| 0               | 0.009332        |
| 2.5813180029    | 1.9672273442    |
| 0               | 0.0161148574    |
| 6.9840040196    | 3.2500252561    |
| 4.2004521352    | 2.2223505728    |
| 2.1853852909    | 6.2135109253    |
| 50.7073247953   | 43.2915311293   |
| 27.7275365884   | 8.8927969015    |
| 0.0546804304    | 0.0807927687    |
| 3.102940952     | 2.1717157799    |
| 3.310119787     | 3.5008184175    |
| 4.4765368223    | 2.9872947561    |
| 0               | 0.0131817856    |

gene\_expression\_table

|                 |                 |
|-----------------|-----------------|
| 0.3770876394    | 0.4746888654    |
| 5.331173743     | 4.3803796814    |
| 0.00816         | 0.008884        |
| 7.1357844887    | 3.9283167271    |
| 0.7707137888    | 0.5264873409    |
| 0.0552075358    | 0               |
| 0.3630910704    | 0.4331516185    |
| 14.4288120388   | 18.2304938987   |
| 0               | 0.007787        |
| 3.5434073178    | 2.4178210223    |
| 0.4949754863    | 0.2193149747    |
| 0.0480146588    | 0.156823125     |
| 17.2186890631   | 23.1808831312   |
| 0               | 0.0141520819    |
| 1889.2403053062 | 2598.2635071647 |
| 68.8490431546   | 84.4596664363   |
| 1.7249090182    | 1.0731072924    |
| 1.6209394042    | 1.3012760823    |
| 27.7831542913   | 9.2210078357    |
| 11.7265662668   | 6.5259438464    |
| 104.8952753095  | 53.2525481902   |
| 0               | 0.1713366608    |
| 0               | 0               |
| 0.0280334708    | 0.0114451935    |
| 1.999039787     | 1.127526618     |
| 5.3644558524    | 6.227887235     |
| 13.4102961235   | 28.0855294388   |
| 0.6129694482    | 1.1586960475    |
| 0.7864452343    | 0.9148612431    |
| 18.5141652107   | 9.3009502896    |
| 0.6303636325    | 0.683752054     |
| 0.1421378826    | 0.3444983643    |
| 0.0922656911    | 0.0645757881    |
| 0.0186767473    | 0.007625        |
| 0.3747109878    | 0.2902751184    |
| 4.5369631347    | 5.961427943     |
| 2.9059516987    | 4.5380168139    |
| 0.0199875611    | 0.0353612959    |
| 0.0202312275    | 0               |
| 0.6469977587    | 0.5110334479    |
| 63.3095976444   | 110.1678122316  |
| 0.406215578     | 0.5102928497    |
| 109.359722134   | 73.4702106902   |
| 22.751243333    | 14.2218173724   |
| 39.3375334254   | 19.4835722929   |
| 222.0883297265  | 138.483274688   |
| 0.7516624566    | 0.5703635418    |
| 0               | 0.0156845314    |
| 0.6950067496    | 1.8072877621    |



gene\_expression\_table

|                |               |
|----------------|---------------|
| 0.3545999117   | 0.1286863167  |
| 0.1176764588   | 0.3122836287  |
| 2.0792698883   | 1.3959708189  |
| 0.2654378535   | 0.3193303057  |
| 3.0190680574   | 1.0682459778  |
| 0.6051158694   | 0.5058642324  |
| 0              | 0.003217      |
| 0.0450072279   | 0.006125      |
| 0              | 0.0130391392  |
| 3.8861697333   | 4.0117193922  |
| 4.4689243631   | 5.925800263   |
| 1.5504838206   | 1.2719723597  |
| 3.3914641173   | 3.8384999278  |
| 1.7570657214   | 1.1470625019  |
| 56.7072602564  | 81.9667589298 |
| 5.4369871178   | 6.1114132609  |
| 1.5367731273   | 1.47642869    |
| 3.4306076001   | 3.8554434011  |
| 5.8971177874   | 1.8500386847  |
| 1.6384753734   | 2.4290532544  |
| 2.7909995992   | 2.4970270188  |
| 0              | 0.0404023836  |
| 121.8273410311 | 83.7244573201 |
| 4.8652071324   | 2.1738821058  |
| 2.1798909079   | 3.5346787105  |
| 5.759161641    | 4.4530870158  |
| 36.5799719336  | 33.3038061407 |
| 0.2091362451   | 0.3938778472  |
| 1.4446198841   | 1.8333885739  |
| 0.617188401    | 0.3797941526  |
| 3.0898441845   | 2.7259723456  |
| 0.00298        | 0.0113558929  |
| 18.9917909386  | 23.2215083825 |
| 0.2964595647   | 0.105036305   |
| 4.7802685863   | 3.2049446414  |
| 0.404859271    | 0.6362161019  |
| 19.0464882627  | 10.0689123213 |
| 0.008535       | 0             |
| 0.054430689    | 0.005926      |
| 0.82458404     | 0.780073882   |
| 47.9325063622  | 20.2416492892 |
| 5.7860045415   | 2.5444318107  |
| 0              | 0.0294201533  |
| 0.3882645707   | 0.3804392128  |
| 0              | 0             |
| 21.5126708457  | 14.5785084779 |
| 0.231311363    | 0.5378120185  |
| 4.4670920702   | 1.8316697727  |
| 4.3293703034   | 2.8045081191  |

gene\_expression\_table

|                 |                 |
|-----------------|-----------------|
| 0.0123521668    | 0.001681        |
| 0               | 0.009376        |
| 0.011671698     | 0               |
| 0.1750748488    | 0.2439769129    |
| 3511.0168770599 | 3697.9206054229 |
| 0.0683528216    | 0.0106309826    |
| 1.2798557736    | 0.9540401401    |
| 1.3859610343    | 0.8984201673    |
| 1.6156303762    | 1.5046561631    |
| 0.0951048737    | 0.1553134384    |
| 0.908836113     | 0.5641688235    |
| 1.0501838452    | 0.2942452572    |
| 5.5258943443    | 6.2519025369    |
| 1.1242508592    | 1.4146125679    |
| 1.4258857043    | 2.0051652475    |
| 0.0207017397    | 0.0112691679    |
| 0.371914181     | 0.3374244077    |
| 19.3566911907   | 10.7966936051   |
| 0.1075373281    | 0               |
| 0               | 0               |
| 0.11191546      | 0.0152305329    |
| 5.1618946916    | 1.1308219611    |
| 2.1199070848    | 0.6154610319    |
| 0.054818645     | 0               |
| 0.006536        | 0               |
| 0.5682928484    | 0.1173415672    |
| 0               | 0.0087          |
| 59.1048838978   | 60.300076512    |
| 2.6150606298    | 2.3464788038    |
| 25.6512915695   | 11.7566237607   |
| 3.2686596348    | 1.9729063603    |
| 0.1500270443    | 0.1966093431    |
| 0.0903841295    | 0.1923326239    |
| 0               | 0.002202        |
| 6.6366188969    | 4.7252614462    |
| 18.8843467006   | 18.0062549335   |
| 0.024475523     | 0.0386380309    |
| 1.4924045645    | 11.3736434819   |
| 0.0476601385    | 0               |
| 6.1695994974    | 4.2291893685    |
| 0.9743856042    | 0.351957672     |
| 23.5559965575   | 46.4137494142   |
| 0.0439837976    | 0.1436577236    |
| 0.006294        | 0.002284        |
| 0.3386832642    | 0.1396705399    |
| 1.054015245     | 0.8837788029    |
| 2.0709732005    | 5.5576468838    |
| 0.6485064648    | 0.233187526     |
| 0.3837145215    | 0.443866303     |

gene\_expression\_table

|                |                 |
|----------------|-----------------|
| 1.721686585    | 1.8353788305    |
| 13.1855177037  | 16.8282685687   |
| 0.266421063    | 0               |
| 0.001714       | 0.0014          |
| 1.6743218687   | 0.7453810927    |
| 685.3171361269 | 1253.1695123296 |
| 34.4808628565  | 69.6052337871   |
| 0.1392420706   | 0.3381739267    |
| 1.4115175986   | 0               |
| 0.2210667769   | 0.5174601873    |
| 3.0933845869   | 4.9500178586    |
| 0.005691       | 0               |
| 0              | 0.008963        |
| 124.7322558752 | 93.8673137626   |
| 2.7540993805   | 4.465294989     |
| 24.84605502    | 20.4098099969   |
| 0.0316622381   | 0.1009514203    |
| 0.00621        | 0.002958        |
| 10.2959403521  | 8.38611093      |
| 0.1136937035   | 0.1547253339    |
| 8.5477085657   | 5.9220226402    |
| 0              | 0.2496705273    |
| 68.6692900435  | 58.119325456    |
| 48.1942110967  | 50.3741671049   |
| 21.4887968955  | 13.803178836    |
| 2.8662474647   | 3.9955464561    |
| 0.7779947034   | 0.2798178039    |
| 0              | 0.0354486718    |
| 0.533032315    | 0.96940042      |
| 11.8354260059  | 6.0745595869    |
| 0.1392125457   | 0.3662774053    |
| 16.5694227951  | 9.0340003954    |
| 7.6318650582   | 5.743656432     |
| 3.8475363773   | 3.9284885116    |
| 0.1251495235   | 0.1470091826    |
| 0.5057934528   | 0.3441662047    |
| 14.7773204775  | 35.0725374546   |
| 5.4107142724   | 11.175073805    |
| 0.0471792842   | 0.3467129976    |
| 0              | 0               |
| 12.2743882522  | 8.7174881214    |
| 0.295242321    | 0.2678627769    |
| 0.0849086243   | 0.0231103656    |
| 0              | 0.004117        |
| 0              | 0.2081381629    |
| 42.0181285128  | 33.1580661912   |
| 3.8408042674   | 5.7176280571    |
| 18.0423236721  | 25.0515658338   |
| 45.1397819226  | 17.2666110588   |

gene\_expression\_table

|                |               |
|----------------|---------------|
| 3.9382094562   | 4.7573520478  |
| 12.6235472164  | 12.2496149059 |
| 1.4443450913   | 2.795525416   |
| 2.2602916565   | 1.6778304125  |
| 0.3851190403   | 0.6289284659  |
| 0.1855908072   | 0.2104748602  |
| 9.1868300231   | 4.7646646232  |
| 13.2237915679  | 9.2521046673  |
| 0.0897445549   | 0.1899847095  |
| 0.3469155217   | 0.4181599124  |
| 51.2077117845  | 35.6720683113 |
| 9.0013223255   | 5.3853615335  |
| 205.0440483889 | 69.1502171202 |
| 91.3723931647  | 64.1457875634 |
| 0.0116924512   | 0.0254595406  |
| 2.9277300995   | 2.0345550089  |
| 72.2044817076  | 46.4199578018 |
| 18.254204591   | 7.8218976721  |
| 2.4967437087   | 1.9280591356  |
| 2.5878226584   | 2.9237237329  |
| 0              | 0.0184819216  |
| 8.9462696945   | 6.6672316841  |
| 6.3744471532   | 3.5594170618  |
| 0.002059       | 0.001121      |
| 6.3379644734   | 1.2204523157  |
| 232.2222043115 | 93.4199533164 |
| 7.1558003299   | 8.3782406529  |
| 0.3340469847   | 0.2517802817  |
| 0              | 0.2897036872  |
| 2.3182441109   | 1.874555822   |
| 10.951563954   | 13.3332691683 |
| 0.003273       | 0.001781      |
| 0.1692128167   | 0.3106843132  |
| 0.6117301189   | 2.0812530511  |
| 4.887204065    | 4.0059942602  |
| 0.762428637    | 0.5007854382  |
| 0              | 0.001303      |
| 9.8083208799   | 5.9815577384  |
| 2.7614784816   | 3.6984335364  |
| 0.1917383858   | 0.1962239087  |
| 11.9898593724  | 7.2233535736  |
| 0.0009539      | 0.005712      |
| 0.1096548768   | 0.1027733014  |
| 0              | 0             |
| 0              | 0             |
| 1.9495711881   | 2.1529774295  |
| 10.3506211321  | 7.0056639222  |
| 0.1271825116   | 0.1882648515  |
| 13.128220483   | 10.0789307896 |

gene\_expression\_table

|                 |                 |
|-----------------|-----------------|
| 1.5170113141    | 2.0112177073    |
| 6.6581892121    | 3.9349272783    |
| 58.1501520167   | 29.5632391315   |
| 0               | 0.0167389119    |
| 50.2722328207   | 27.7424273483   |
| 0.1826611273    | 0.0357337835    |
| 0               | 0.028594318     |
| 14.3406447129   | 9.3243729878    |
| 3.3954861614    | 1.1946728344    |
| 0               | 0.003249        |
| 0.1200530828    | 0.1307038315    |
| 31.4148581794   | 18.5306059816   |
| 59.8481479337   | 20.0529416312   |
| 13.5518449489   | 9.6544135278    |
| 0.005345        | 0.005819        |
| 0               | 0.0166085019    |
| 0               | 0               |
| 0.0579024389    | 0.047279527     |
| 2.7800104141    | 2.2216859166    |
| 8.2513104048    | 8.7026124294    |
| 6.7120813448    | 5.8898448592    |
| 0               | 0.0728708664    |
| 1.0395677319    | 0.8663122654    |
| 2.0201348461    | 2.5386495941    |
| 2.6562263011    | 2.8885699288    |
| 1.6476222674    | 1.0691014401    |
| 0.5579235635    | 0.4770401239    |
| 0               | 0.002766        |
| 0.8478701703    | 1.0153997296    |
| 1.5042011836    | 1.6985537076    |
| 0               | 0               |
| 0.6482597497    | 0.620223357     |
| 1.9317126111    | 4.5723393988    |
| 0.4636022111    | 1.400630206     |
| 5.2855274109    | 3.7035008269    |
| 2209.0264683034 | 2023.9951946187 |
| 3.1939459494    | 0.2021687927    |
| 0               | 0.0389924288    |
| 0               | 0               |
| 2.012636897     | 0.6231456783    |
| 4.1298704008    | 4.5954422973    |
| 1.5189865039    | 1.1755546847    |
| 0.0458829396    | 0.0153703188    |
| 0.0873657077    | 0               |
| 595.0521138112  | 1147.297997545  |
| 7.9465156072    | 3.5308057907    |
| 0.0592444124    | 0.0387002392    |
| 46.9451577511   | 56.6960227645   |
| 4.5565446596    | 2.8772568115    |

gene\_expression\_table

|                |               |
|----------------|---------------|
| 2.1970804677   | 2.2723989008  |
| 14.9954250567  | 10.3690727361 |
| 4.7707302128   | 11.1275632659 |
| 110.1639150861 | 98.3833721786 |
| 0              | 0.001298      |
| 10.0729704788  | 12.6201169405 |
| 0.4601795565   | 0.4249032322  |
| 15.2682198823  | 8.7406116962  |
| 0.1654376409   | 0.0831298944  |
| 0              | 0             |
| 3.4339917715   | 2.8446213477  |
| 2.0123418911   | 0.3370570485  |
| 4.4406611391   | 3.7332998053  |
| 0.1997514647   | 0.2684849558  |
| 1.5160932613   | 1.5290409423  |
| 0.0174754633   | 0             |
| 3.2802656835   | 3.5712809953  |
| 6.3600295982   | 2.8164644595  |
| 6.5985650669   | 4.1558148084  |
| 0.3522095836   | 0.3264562599  |
| 1.6542398803   | 0.8011797335  |
| 0              | 0.0723591259  |
| 0.4845011365   | 0.4303164014  |
| 1.5106176856   | 1.1378580371  |
| 1.2846864403   | 2.4511868994  |
| 6.7496714764   | 3.4701165198  |
| 0              | 0.1232503098  |
| 9.2413309701   | 9.8909859062  |
| 0              | 0.2790244509  |
| 35.8977247407  | 9.5379820368  |
| 0.0797059583   | 0.1260335979  |
| 0.1904728875   | 0.1229144885  |
| 2.6595312759   | 3.1506338648  |
| 0.0909924084   | 0.1919384013  |
| 1.0632651999   | 0.7315356612  |
| 2.3734235037   | 1.3222958651  |
| 63.1242987931  | 45.0553956597 |
| 0.8165315857   | 0.4123543955  |
| 3.5061551517   | 2.2620507841  |
| 51.4573194765  | 25.7450686522 |
| 1.0772784658   | 0.5705046273  |
| 0              | 2.3213655438  |
| 0.0488302417   | 0             |
| 0              | 0.1437868711  |
| 9.2344408901   | 7.8622136401  |
| 1.6844699823   | 1.8132795962  |
| 0.0126278009   | 0.0120295888  |
| 5.042863073    | 3.5547831253  |
| 4.1975029261   | 3.9103206168  |

gene\_expression\_table

|                |                |
|----------------|----------------|
| 1.5775655643   | 1.8496395501   |
| 5.1837324173   | 2.7941439961   |
| 0.8136954616   | 0.765081703    |
| 2.4857382728   | 2.3051391914   |
| 2.7381345213   | 1.4312023435   |
| 14.2871060592  | 12.8943398614  |
| 0.005506       | 0.0359683607   |
| 7.6632985036   | 9.4076817579   |
| 7.2553920862   | 6.3717096842   |
| 73.6014721738  | 45.2649377348  |
| 9.6063234704   | 23.17398403    |
| 38.7360319523  | 46.0022522402  |
| 1.1598373498   | 2.1627688932   |
| 2.6486492492   | 2.8931778913   |
| 48.0392200911  | 32.7273446063  |
| 214.1817148377 | 117.2435933611 |
| 8.4162368828   | 13.7695229854  |
| 0              | 0              |
| 1.0917034122   | 1.7828340864   |
| 4.8901362467   | 1.2187411359   |
| 0.4122679228   | 13.0980575549  |
| 1.4996368558   | 0.163268013    |
| 2.3553732214   | 0.5128669708   |
| 12.9667763286  | 9.8738446226   |
| 1.4862907444   | 4.1970765414   |
| 5.5618761439   | 2.850011543    |
| 2.1000902555   | 17.964602469   |
| 1.2000515746   | 0.1633145679   |
| 2.4014922562   | 1.8255129705   |
| 6.8945793419   | 3.4403626115   |
| 0.0102845979   | 0.0167955248   |
| 7.0734906425   | 8.7460069215   |
| 1.2414055975   | 2.2917406721   |
| 16.471035489   | 9.2004041177   |
| 0.1251231845   | 0.1575086963   |
| 27.3224330377  | 23.1921062701  |
| 450.2930152306 | 500.3456325266 |
| 3.7392988645   | 17.8107922141  |
| 15.1525137705  | 2.792765227    |
| 0.0766199547   | 0.1233127474   |
| 1.6511302372   | 0.735387361    |
| 13.3353379585  | 15.5332881394  |
| 3.783055497    | 3.2378754439   |
| 201.6520049468 | 153.2604401534 |
| 0.0814525003   | 0.0823445269   |
| 0.0124808894   | 0.0407644692   |
| 22.947283938   | 25.8499492601  |
| 2.7495850529   | 2.8179001357   |
| 1.6232335723   | 2.4488924522   |

gene\_expression\_table

|                 |                 |
|-----------------|-----------------|
| 0.0173741738    | 0.0378311166    |
| 0.9235526618    | 1.3891603315    |
| 0.0457023612    | 0.009047        |
| 1.2009608298    | 0.9355434188    |
| 1.3326390946    | 1.770057532     |
| 0.0633059698    | 0.1033834277    |
| 6.9740472125    | 4.6674131952    |
| 5.4115479352    | 3.4367924513    |
| 0.0848487101    | 0.050806928     |
| 1.0018216677    | 1.3799467566    |
| 0.2107240573    | 0               |
| 68.0863050581   | 86.4296280426   |
| 1.0146187172    | 0.9949528035    |
| 4.5065561122    | 8.9124344319    |
| 1.0102958487    | 0.8181043573    |
| 15.6007659582   | 17.3808381184   |
| 0.3289238665    | 0.1587056265    |
| 1.9417764992    | 3.0861971879    |
| 0.0379534384    | 0.0154952075    |
| 0.0723024476    | 0.2755091621    |
| 0.0457494225    | 0.2677189338    |
| 1.4236238936    | 3.6454833962    |
| 1.4852786968    | 0.8560843191    |
| 0.4433493948    | 0.3777511464    |
| 217.1540502436  | 101.1006227063  |
| 3638.8381429333 | 2322.4887457717 |
| 0.8524456233    | 0.4047425271    |
| 0.0351377484    | 0.0191275319    |
| 14.8538896824   | 18.664960743    |
| 18.2863111818   | 17.382897584    |
| 0               | 0.0470951407    |
| 0.2899044609    | 0.3842378074    |
| 1.2744060382    | 0.9516347773    |
| 6441.4737154322 | 7390.2766065005 |
| 0.3525848408    | 1.0730774611    |
| 30.2286520287   | 19.6205848446   |
| 0.3520021554    | 0.2776467523    |
| 0               | 0.0207084585    |
| 2230.1720960018 | 1528.8178833092 |
| 0.525538594     | 1.0289701939    |
| 13.6369769032   | 10.641943159    |
| 1.0058370114    | 0.7492596853    |
| 0.4811682863    | 0.2496020195    |
| 57.6850830678   | 70.1134693598   |
| 5.3985478407    | 3.4919209919    |
| 2.9262942635    | 1.719825522     |
| 9.2497935683    | 10.6025834546   |
| 3.3849562082    | 3.9988984422    |
| 0.8397008923    | 0.5078870175    |



gene\_expression\_table

|               |               |
|---------------|---------------|
| 1.3560483709  | 1.6170677928  |
| 0.0742287446  | 0.0367336799  |
| 2.0978719468  | 1.9373119627  |
| 0.8676014905  | 0.8440021387  |
| 0             | 0.0523460394  |
| 4.2842892283  | 3.2248331077  |
| 1.4310606025  | 3.1504080838  |
| 1.3918492169  | 1.2122639167  |
| 0             | 0.0455964167  |
| 0.0127000123  | 0.006913      |
| 85.8037540659 | 63.7792698697 |
| 0.2799934051  | 0.9526049325  |
| 0.2453474359  | 0.2893734165  |
| 0.8125971749  | 0.8643506905  |
| 1.8395083845  | 2.5276847097  |
| 0.4327441259  | 0.353351913   |
| 0             | 0.2872337962  |
| 0.7854342035  | 0.6352287056  |
| 0.0413035201  | 0.1686294158  |
| 13.6471699771 | 8.7819924774  |
| 5.7445979983  | 3.4530241344  |
| 0             | 0.2949249174  |
| 1.7795873392  | 3.3849997793  |
| 3.9311712227  | 3.0672852575  |
| 0.8744893443  | 0.3753358445  |
| 0.415035407   | 0.9783306402  |
| 0.5237618948  | 0.486371347   |
| 6.0017891023  | 5.4337445635  |
| 4.269941513   | 3.6443966172  |
| 0.010682545   | 0.0116302682  |
| 0.4284486689  | 0.4149955223  |
| 0.0490176516  | 0.1232508567  |
| 5.8851690906  | 8.362950926   |
| 1.4358577811  | 2.3480414742  |
| 0.0129761506  | 0.00883       |
| 13.1586281241 | 4.9166229554  |
| 8.3444769578  | 4.9906488048  |
| 7.3678747532  | 19.6043438284 |
| 5.26435888    | 6.0598305401  |
| 1.6559250465  | 4.6308486783  |
| 1.1072418772  | 1.3664780104  |
| 33.2548093484 | 17.4739776905 |
| 1.3280325269  | 0.5484264617  |
| 7.8646039247  | 8.6001029221  |
| 0.009017      | 0.004909      |
| 2.3336595118  | 2.723175609   |
| 0.0788222164  | 0.4160731465  |
| 0.3772143831  | 0.3798787311  |
| 3.7959933473  | 1.737223161   |

gene\_expression\_table

|                 |                 |
|-----------------|-----------------|
| 2.1346017813    | 4.2606249313    |
| 4.3817475345    | 4.4842540251    |
| 0               | 0               |
| 1.6548714737    | 2.5463838646    |
| 27.982585585    | 21.9878666693   |
| 30.4333158398   | 35.3141921255   |
| 10.5394534503   | 14.6275938931   |
| 0               | 0.008789        |
| 727.0508209451  | 879.9398293795  |
| 1.242712278     | 1.1739546992    |
| 0.0640712004    | 0.4185324286    |
| 55.3954987228   | 66.2360518      |
| 0.7017013912    | 0.8442015226    |
| 5.8492900066    | 11.2126184542   |
| 4.0029108446    | 4.0649526991    |
| 0.009434        | 0.005135        |
| 1.2306549583    | 0.5591040652    |
| 0               | 0               |
| 0               | 0               |
| 10.1602764401   | 13.9088421705   |
| 0.0686726567    | 0.0841107244    |
| 0.0788241847    | 0               |
| 1.6976983621    | 2.2921992648    |
| 2.2256590317    | 1.9210263728    |
| 0               | 0.00853         |
| 6.7911263976    | 3.0009377389    |
| 0               | 0.2511485155    |
| 17.2634178455   | 16.6423731381   |
| 0.626090579     | 1.6693113142    |
| 0.0136227068    | 0               |
| 15.5796429121   | 23.7618317246   |
| 0.1319017666    | 0.0359009237    |
| 2.3845101165    | 2.0119439323    |
| 10.8597976339   | 10.1002606054   |
| 0               | 0.002057        |
| 1086.1413377991 | 1022.6495743226 |
| 6.7982610498    | 11.7160895279   |
| 1.4089577229    | 2.3798235026    |
| 4.476781391     | 6.4998262395    |
| 0.033887697     | 0.1844705584    |
| 0               | 0.2246055646    |
| 1.8372364965    | 1.3334870641    |
| 3.8989400497    | 10.0372833355   |
| 14.6688364997   | 18.153638948    |
| 1.6196447402    | 2.3184586572    |
| 0               | 0.1317713539    |
| 0.8188571311    | 0.7507399364    |
| 0               | 0.4907833673    |
| 6.2591120633    | 11.2040469212   |

gene\_expression\_table

|                 |                 |
|-----------------|-----------------|
| 0               | 0.2008219459    |
| 1377.5607362758 | 797.6586121529  |
| 7.7300464996    | 7.0131941587    |
| 1.7757423483    | 1.9008432735    |
| 7.384222605     | 4.7926766888    |
| 6.1088208253    | 3.4441523995    |
| 21.5064886713   | 35.9889225066   |
| 9.8406729398    | 15.232650448    |
| 0               | 0.017083073     |
| 101.5294905899  | 78.4356839642   |
| 35.656365808    | 17.776343838    |
| 0.7521935676    | 0.5039544123    |
| 21.1605186441   | 32.3952190569   |
| 16.668808087    | 8.0706728416    |
| 2.6536492625    | 1.7838571845    |
| 6.8715589249    | 5.7283454208    |
| 2.7656691053    | 2.5500118617    |
| 42.8722935533   | 85.585702637    |
| 10.8840103346   | 5.9168932234    |
| 15.8226407482   | 12.2513298129   |
| 14.0089676958   | 12.1274430046   |
| 210.0010672037  | 130.5841220842  |
| 0.4563891864    | 0.7060907319    |
| 26.2191821638   | 9.5442771242    |
| 0.1858310891    | 0.051498991     |
| 49.4696333434   | 33.6003163133   |
| 0               | 0.2663616741    |
| 0.0645621282    | 0.0684401524    |
| 0.0301267099    | 0               |
| 2.9314128142    | 2.9733562861    |
| 0.0662570076    | 0.0961801735    |
| 0.0532322968    | 0.0772732082    |
| 1216.6869709954 | 1014.2224375786 |
| 0.8183920023    | 0.6682479607    |
| 0.9667550945    | 0.9988225629    |
| 1.2915077246    | 1.170064761     |
| 0               | 0.0471938192    |
| 6.2202704128    | 5.741575004     |
| 13.110843838    | 31.0969252935   |
| 11.3420075259   | 7.3331584055    |
| 0               | 0               |
| 2.556492308     | 5.0056187299    |
| 21.9142997434   | 29.6352262119   |
| 1.0218389695    | 2.1978529164    |
| 33.0171093513   | 35.4969594512   |
| 29.7195394569   | 12.5453266648   |
| 58.3679943085   | 35.527365146    |
| 1.4190861409    | 1.4882287131    |
| 0.8110887926    | 1.1288425041    |

gene\_expression\_table

|                |                |
|----------------|----------------|
| 31.622843361   | 19.9727801513  |
| 3.3576293306   | 5.9556031049   |
| 30.4890566109  | 72.9211118259  |
| 21.9476865397  | 9.7529874777   |
| 2.7080729649   | 2.4355728744   |
| 0.6817433121   | 2.75404736     |
| 1.0380572975   | 0.2825376552   |
| 34.7672934488  | 41.9523487376  |
| 25.1974304091  | 20.6214813253  |
| 19.2674254806  | 7.2792535102   |
| 0.0327797647   | 0.0107063661   |
| 0.0267181627   | 0.002909       |
| 81.6833556094  | 67.400761265   |
| 20.5225120891  | 31.120896406   |
| 0.4593049757   | 2.0002125303   |
| 12.1891780574  | 8.2127644075   |
| 13.9919028336  | 7.2836445887   |
| 3.9709920719   | 4.1739215662   |
| 0.8971698133   | 0.9806400702   |
| 56.0997450264  | 104.7885344324 |
| 21.2342749863  | 7.6346864694   |
| 1.9923848218   | 3.2537148219   |
| 52.3755108518  | 29.7726054519  |
| 0.8891426287   | 0.9792807912   |
| 5.8630179321   | 0.5802879328   |
| 352.1625141538 | 325.7290521275 |
| 32.3913389548  | 37.3325289111  |
| 12.4166906962  | 23.2882789259  |
| 47.4992108447  | 36.732787511   |
| 7.6148301796   | 7.6155954298   |
| 10.3974821999  | 23.2203396276  |
| 158.271132919  | 207.372896244  |
| 0              | 0              |
| 0              | 3.3034992913   |
| 0.2934035745   | 0              |
| 0.696477417    | 0              |
| 0              | 0.1298150928   |
| 0              | 0              |
| 0.530984213    | 0              |
| 353.0073280422 | 268.5284305175 |
| 0              | 0.0219929747   |
| 0.0275351396   | 0              |
| 0              | 0.0385299726   |
| 0              | 0              |
| 5.0870288331   | 5.8906741279   |
| 52.538131779   | 74.2585545902  |
| 14.2594705246  | 19.6828835738  |
| 1.904805365    | 3.8647978563   |
| 1.0947302237   | 1.6487277681   |

gene\_expression\_table

|                 |                 |
|-----------------|-----------------|
| 16.8799512059   | 16.5585573084   |
| 1.3595363975    | 0.6290639116    |
| 5.6670206455    | 5.9374468084    |
| 69.7353050758   | 114.3453928268  |
| 19.6910180888   | 15.7086236095   |
| 0.3596094121    | 0.0783025757    |
| 0.009936        | 0               |
| 0.562049513     | 0.6718553403    |
| 3.6922764374    | 2.9512779504    |
| 27.0661759647   | 31.7481647005   |
| 0.006681        | 0.005455        |
| 0               | 0.007831        |
| 0.0217368908    | 0               |
| 0.2079852173    | 0.1698277805    |
| 14.1015994213   | 15.2787611722   |
| 4.1509102374    | 4.1113719054    |
| 13.7595134512   | 13.6636650659   |
| 0.2205773671    | 0.3794311984    |
| 0.1119246724    | 0.0638284391    |
| 0               | 0               |
| 0               | 0.0660185799    |
| 2.1971047131    | 1.5168940542    |
| 0.00517         | 0.002815        |
| 54.1014926002   | 224.3855786978  |
| 39.9287389163   | 29.0431895503   |
| 27.7212995129   | 47.2862950927   |
| 0.1405859458    | 0.2104551739    |
| 10.5859128277   | 7.3266473169    |
| 0.0380660354    | 0.006907        |
| 0.8657256319    | 0.3500826486    |
| 0.0605809218    | 0.072551027     |
| 11.3608961751   | 7.7090268475    |
| 2.3540850123    | 2.1357769657    |
| 2.2229266283    | 2.4092364747    |
| 258.894758877   | 250.4433166316  |
| 0               | 0.032216458     |
| 0               | 0               |
| 0               | 0.0325654123    |
| 6.1151163361    | 5.0737591675    |
| 20.7635737711   | 162.4464714825  |
| 3298.9332865213 | 6929.1581178491 |
| 22.8793538271   | 17.2307996686   |
| 0               | 0.0391191988    |
| 46.7030926383   | 43.9077974408   |
| 2.047910214     | 3.5832771203    |
| 34.6590330445   | 19.872769498    |
| 0.0188286546    | 0.0409981524    |
| 0.1229716244    | 0.2677625945    |
| 4.4478920474    | 7.3629749593    |

gene\_expression\_table

|                |                |
|----------------|----------------|
| 64.8286479353  | 49.8547988137  |
| 8.2133914141   | 4.0585237172   |
| 0.5012204294   | 0              |
| 30.2727592562  | 78.2350795839  |
| 0.1535474068   | 0.1253772534   |
| 0.587851441    | 1.0785250131   |
| 0              | 0.1323804899   |
| 22.8669418114  | 33.8334481489  |
| 26.4383566873  | 21.362815126   |
| 0.0202259771   | 0.0275254563   |
| 0.8838295758   | 1.6780531699   |
| 4.3232610601   | 2.8178915039   |
| 0.5986146517   | 0.5248600391   |
| 26.5527805562  | 15.2129840392  |
| 11.3522059906  | 8.5225116364   |
| 3.9375756644   | 1.190807095    |
| 15.5803044329  | 39.5488663396  |
| 4.2457780297   | 2.8749388468   |
| 21.3109621063  | 14.3898466076  |
| 3.8035073402   | 8.2818861582   |
| 0.002025       | 0.0005512      |
| 0              | 0.024112499    |
| 0.2247597236   | 0.1712898115   |
| 4.9418585502   | 8.4547341792   |
| 2.2177104866   | 1.7776786744   |
| 0.0890026831   | 0              |
| 23.5297360152  | 53.9669507768  |
| 5.3179246987   | 5.2511368546   |
| 4.2554046511   | 6.5126223678   |
| 0.0625272014   | 0.0538922545   |
| 7.1748529444   | 9.3780129444   |
| 12.6477386832  | 3.3676160975   |
| 5.7490307608   | 8.0767259779   |
| 11.2398321662  | 6.2402593031   |
| 3.5038786221   | 3.0725664037   |
| 0              | 0.1449815886   |
| 7.1022338727   | 7.1144857904   |
| 1.6652658127   | 2.0602308979   |
| 19.9968242448  | 16.1483722205  |
| 172.8805921757 | 246.7472445651 |
| 0.005745       | 0.009382       |
| 0              | 0.0132326456   |
| 102.3036714785 | 128.3020827688 |
| 57.5968486216  | 47.2483389124  |
| 8.7023304177   | 6.0308040963   |
| 16.4054564377  | 20.5330022555  |
| 0.0642107221   | 0.012710419    |
| 13.8048217284  | 6.3988893906   |
| 6.0092506302   | 4.2740321817   |

gene\_expression\_table

|                |                |
|----------------|----------------|
| 0.001646       | 0.003583       |
| 25.9739798436  | 8.8302012683   |
| 0.8301395017   | 1.0308820276   |
| 2.3216554252   | 1.6587543762   |
| 7.9542897751   | 12.1492936575  |
| 0.0384016629   | 0.0507675165   |
| 3.4715219488   | 2.6854377216   |
| 0.007204       | 0              |
| 893.9408288028 | 859.1779042901 |
| 0.0554285754   | 0              |
| 2.0995844708   | 1.5212747786   |
| 3.9201981487   | 2.0595970804   |
| 0.4784342293   | 0.2976454149   |
| 1.8871160168   | 1.3748393963   |
| 0.366054095    | 0.7262089723   |
| 38.8419994948  | 28.5489197256  |
| 2.3674112909   | 16.3851600375  |
| 1.6963494727   | 2.1949408445   |
| 29.2861794136  | 13.4156296669  |
| 14.3816634866  | 12.9583680902  |
| 0.4566822745   | 0.9322457873   |
| 6.1189634657   | 4.3072108916   |
| 0.3559113788   | 0.0387486767   |
| 17.5834195296  | 23.2949413681  |
| 1.6506737153   | 0.7251522824   |
| 0.0330988177   | 0              |
| 13.7151528075  | 11.3665887569  |
| 1.7868302598   | 2.9072211909   |
| 0.0601342671   | 0.0392815191   |
| 8.5288322149   | 20.0374982162  |
| 0.0205939561   | 0              |
| 1.0752833609   | 2.2136480715   |
| 14.9117702519  | 12.647119404   |
| 2.4597695451   | 1.4775133273   |
| 182.5601600449 | 52.098950529   |
| 979.3211171634 | 995.7938751455 |
| 15.1550718486  | 3.0581126019   |
| 3.6297322962   | 3.2560203842   |
| 10.7361756938  | 29.8710121574  |
| 0.2370675319   | 0.1720663005   |
| 0              | 0              |
| 18.6595322246  | 4.6616430787   |
| 0.2542858787   | 1.7424972502   |
| 2.7860100341   | 0.2476062425   |
| 1.0554008613   | 1.8160561625   |
| 2.8052410529   | 2.2220634258   |
| 0              | 0.1524201693   |
| 1.1771990054   | 0.8430015894   |
| 93.8900625061  | 59.6281622077  |

gene\_expression\_table

|                 |                 |
|-----------------|-----------------|
| 641.8809631988  | 177.8408318633  |
| 37.6430047074   | 18.1301532346   |
| 127.201732058   | 146.0112998304  |
| 7.9627894738    | 6.712894862     |
| 0               | 0.1660669609    |
| 24.4684934418   | 9.3930355067    |
| 23.2895052534   | 10.1913023836   |
| 30.4912974192   | 23.8333082809   |
| 6.6874575038    | 1.1813135199    |
| 4.3678981045    | 2.7001027797    |
| 46.5908098624   | 39.8737528575   |
| 50.1370069097   | 83.0728094171   |
| 1.0885199255    | 1.7447160416    |
| 1710.8162104731 | 2453.5678965248 |
| 18.2042721002   | 12.2610926225   |
| 0.0589291837    | 0.288707417     |
| 0.3110784886    | 0.1270036639    |
| 5.3660047705    | 2.8892799632    |
| 287.0124905471  | 202.9689280267  |
| 327.6037004962  | 77.7154763818   |
| 4.1914693066    | 2.7285854038    |
| 0.4262955918    | 0.6182794136    |
| 3.623624367     | 5.3540662253    |
| 0               | 0               |
| 1.6455195777    | 0.9554694019    |
| 0.1973529978    | 0.4604176341    |
| 0               | 0.0907569131    |
| 0.7144388867    | 2.0174751831    |
| 4.7763670869    | 3.9482331991    |
| 219.3947688517  | 164.0660431583  |
| 53.1322319627   | 63.3669365256   |
| 4.8064783683    | 4.820449781     |
| 2.497180106     | 4.7577642334    |
| 190.276796585   | 102.0483715377  |
| 58.8638247927   | 28.753778855    |
| 0.1950674796    | 0.4778398801    |
| 8.6633195122    | 6.3171234823    |
| 2.4126959136    | 3.9115630099    |
| 3.6344152337    | 4.2702634611    |
| 4.7953972665    | 5.4116702553    |
| 47.7638399377   | 25.8409989983   |
| 5.2168570647    | 6.5832665474    |
| 0.3963628623    | 0.0431526984    |
| 0.2353397569    | 0               |
| 0               | 0.0264534751    |
| 4.1817479891    | 8.3941145619    |
| 6.2897251195    | 8.7650952023    |
| 1185.2651818144 | 1800.1352341954 |
| 5.3468701084    | 13.1786141882   |



gene\_expression\_table

|                |                |
|----------------|----------------|
| 0              | 0              |
| 8.303748158    | 7.4854002084   |
| 0              | 0.029065932    |
| 1.3556225766   | 0.8233039398   |
| 0              | 1.6746906129   |
| 245.053521225  | 95.402059396   |
| 0.6294242381   | 0.705528073    |
| 0.0690241657   | 0.0483092885   |
| 13.6642236103  | 13.416894028   |
| 400.1573086759 | 359.9247546869 |
| 0              | 0.035676105    |
| 9.5980256901   | 8.6602299677   |
| 11.8006417451  | 5.0248231581   |
| 3.3225638463   | 1.2839294699   |
| 1.5711326231   | 1.7434133791   |
| 58.7836025502  | 19.759969467   |
| 13.4885407353  | 3.4322147171   |
| 18.2813174642  | 8.6950765482   |
| 0              | 0.0603110819   |
| 0              | 0.0333042442   |
| 17.5489682178  | 19.9690764934  |
| 1.4686642834   | 1.4070845925   |
| 24.326478399   | 4.8500697314   |
| 2.0180584769   | 1.7412348038   |
| 0.4286126797   | 0.4924376004   |
| 0.4916195909   | 0.7855862726   |
| 2.4994861603   | 3.6772347614   |
| 40.4218416462  | 46.5893181727  |
| 0.3504036028   | 0.7720638182   |
| 10.364126235   | 4.6270879185   |
| 12.1314001432  | 17.8645461324  |
| 11.9218213438  | 13.8318738844  |
| 3.7038623746   | 4.9223019758   |
| 14.1792726738  | 7.7381979376   |
| 4.9479766241   | 4.827923515    |
| 0.0145648617   | 0.007929       |
| 0.2628270163   | 0.2490514675   |
| 0.2251348521   | 0.0490216279   |
| 11.1788343809  | 3.2091597474   |
| 73.2595331337  | 92.6569723692  |
| 52.88745936    | 37.4171262364  |
| 0.345047099    | 0.7588304538   |
| 0.0360822101   | 0.1113027266   |
| 5.8836913278   | 1.293946297    |
| 0.6290110622   | 0.8689669746   |
| 2.2065829774   | 1.6310653994   |
| 0.2546565136   | 0.138624437    |
| 0.3358514913   | 0.2531403873   |
| 0.1033262349   | 0.0703081424   |

gene\_expression\_table

|                 |                 |
|-----------------|-----------------|
| 0.0770063591    | 0.0688670368    |
| 0.3222133255    | 0.1846311175    |
| 3.810248457     | 9.9136914728    |
| 6.0992635241    | 5.1378059578    |
| 1.742660097     | 1.2486642246    |
| 3.1098901086    | 5.3025392156    |
| 79.4755049758   | 36.9156748447   |
| 0.7942040831    | 0.8710213019    |
| 5.2954658482    | 2.8621876333    |
| 12.5210792357   | 4.4274585172    |
| 4.169432417     | 5.4646253658    |
| 2.8505695421    | 1.8947461392    |
| 12.5700887877   | 33.1684961617   |
| 1.5882831095    | 3.3377404065    |
| 0.4027641904    | 0.7989549748    |
| 0.0191790812    | 0.0208805917    |
| 4.9694604891    | 9.5682795608    |
| 8.2750419106    | 4.3298961612    |
| 3.8003383409    | 3.8389109712    |
| 2.7353593527    | 3.4966782722    |
| 67.4258408265   | 37.1007807983   |
| 1.3154030886    | 1.6860204374    |
| 5.3874802601    | 2.8208796156    |
| 0.2261225517    | 0.2945995462    |
| 74.6141105609   | 163.641197036   |
| 6.777248366     | 2.9514021881    |
| 0.0758773162    | 0.1073916008    |
| 5.0815034558    | 6.2374186706    |
| 0               | 0               |
| 21.9624659661   | 15.5116101265   |
| 9.2392928306    | 8.8994824785    |
| 34.2230206488   | 13.5714619222   |
| 67.919840825    | 28.9218124227   |
| 0.0309444074    | 0.0360961096    |
| 0.2128331326    | 0.030223702     |
| 0               | 0.0637302982    |
| 3.5769481035    | 4.0036741931    |
| 0               | 0               |
| 5.8943709692    | 8.0216273057    |
| 0               | 6.0672053986    |
| 41.9093483059   | 1.2007215715    |
| 0               | 0               |
| 27.5070645228   | 12.47808692     |
| 405.3346331623  | 225.3419762464  |
| 8144.6831105878 | 1101.4311338964 |
| 2.402158032     | 0               |
| 0               | 2.0979640646    |
| 13.4031237961   | 7.2961043264    |
| 3.8574721797    | 2.9997825121    |

gene\_expression\_table

|                |                |
|----------------|----------------|
| 0              | 0              |
| 5.4493577028   | 2.053664425    |
| 0              | 0              |
| 0              | 0              |
| 111.0372044732 | 36.8561254586  |
| 0              | 3.6871943538   |
| 17.3294506493  | 0              |
| 14.0661125401  | 10.7198110358  |
| 0.7781149996   | 2.1377225673   |
| 0.4389791464   | 2.3418278781   |
| 2.7560044231   | 5.3832658809   |
| 1.5444035184   | 3.0531017525   |
| 5.0589309552   | 6.1809128275   |
| 51.7869940903  | 30.856476588   |
| 346.3142078538 | 220.7681914968 |
| 0.0414720228   | 0              |
| 0              | 1.190736361    |
| 4.2254828032   | 11.5008873419  |
| 18.5470380478  | 13.5730878466  |
| 2.8436357243   | 0              |
| 17.499296765   | 0              |
| 0.179706432    | 0.723902952    |
| 2.256914263    | 2.8666643982   |
| 34.839245629   | 0              |
| 49.354359906   | 1.221202963    |
| 17.7952679576  | 0              |
| 45.5370367697  | 0              |
| 0              | 0              |
| 390.1212606052 | 82.0504316599  |
| 202.1069910274 | 32.3584287924  |
| 0              | 0              |
| 0              | 1.2755995315   |
| 11.193034234   | 1.2186046588   |
| 3.9954881696   | 0              |
| 6.6034218703   | 0              |
| 19.4441621396  | 9.4085287824   |
| 15.7709133318  | 1.2264329542   |
| 0              | 0              |
| 0              | 3.0400434694   |
| 1.7430722358   | 0.754219017    |
| 1.6611070698   | 3.255255893    |
| 6.9635501556   | 10.0549066887  |
| 8.3826730321   | 11.0168185803  |
| 4.8378611863   | 9.2336143196   |
| 1.8991790939   | 0              |
| 2.2515813849   | 1.4299453687   |
| 2.4230935253   | 1.3448949135   |
| 0.3143922841   | 0.9241674009   |
| 1.4199727832   | 2.7648694334   |

gene\_expression\_table

|                 |                 |
|-----------------|-----------------|
| 0               | 0.0458268675    |
| 33.8350653715   | 18.5275514415   |
| 0               | 0.5092191061    |
| 1.2595241706    | 3.6505307803    |
| 0.068356628     | 0               |
| 1.7313155914    | 2.7263915938    |
| 0.2526765653    | 0               |
| 942.7714105614  | 1107.2495285247 |
| 166.5657688435  | 226.7567595441  |
| 92.3465587018   | 52.2474555717   |
| 0.8124673498    | 1.5479572693    |
| 0               | 0.2242757473    |
| 9.2382422212    | 4.0034112835    |
| 1.1838658736    | 2.1029337769    |
| 2.338366965     | 0               |
| 62.6421719385   | 83.0975673966   |
| 242.8701878207  | 351.2831029707  |
| 23.2253044791   | 23.9438007502   |
| 22.1282419408   | 28.1066252295   |
| 51.4579463618   | 27.5849982094   |
| 15.7752440967   | 15.0357932031   |
| 165.0447614372  | 303.4113827655  |
| 0.1579639503    | 0.917216198     |
| 8.6940061759    | 11.4140530337   |
| 5.2778791974    | 4.1659346624    |
| 91.435232293    | 49.5246779072   |
| 48.9587431018   | 54.4904815857   |
| 17.1866202698   | 26.6810212635   |
| 1823.2351883218 | 1651.5987251562 |
| 27.1669273087   | 22.5043117498   |
| 1084.8302025785 | 335.5128684792  |
| 0.0546625737    | 0.1190241458    |
| 53.9972901512   | 65.2874050844   |
| 19.4937124131   | 10.7050619837   |
| 0               | 0               |
| 4.6614028645    | 7.829920567     |
| 59.7053593487   | 26.2625146684   |
| 0.3310194173    | 1.4415458603    |
| 1877.5885442746 | 1971.4707023082 |
| 3253.8680366005 | 4601.2709245883 |
| 2.5063979569    | 6.2318933844    |
| 7.7077863175    | 13.6451613756   |
| 18.5415164467   | 15.4669435234   |
| 1.7550378949    | 7.1652734315    |
| 1.58098455      | 3.251240078     |
| 0.3055231123    | 0.0831570511    |
| 46.3399698901   | 16.7481152923   |
| 61.3939126132   | 31.5806485715   |
| 216.5161525132  | 125.8317516572  |

gene\_expression\_table

|                 |                 |
|-----------------|-----------------|
| 0.2540186427    | 0.2765544131    |
| 1045.1965429182 | 1029.4895560369 |
| 8.8560270862    | 15.2660363847   |
| 15.7295060707   | 20.6337686383   |
| 7.0735499917    | 3.455619141     |
| 42.9360270778   | 31.2405921614   |
| 58.487202029    | 36.2568032998   |
| 112.971927487   | 92.6558245208   |
| 1.7108052325    | 0.9312913652    |
| 27.5024554302   | 27.9532108147   |
| 0               | 0               |
| 0               | 0               |
| 0               | 0.185534237     |
| 0               | 0.1861372082    |
| 49.202207469    | 96.3146779086   |
| 375.230774539   | 300.5674465002  |
| 1.8977587408    | 4.2834240569    |
| 14.7470488776   | 34.889538236    |
| 0.0797260906    | 0               |
| 20.8509612644   | 9.9821307889    |
| 102.0009436814  | 98.2137174956   |
| 3.2879538062    | 2.3162448845    |
| 110.0225958711  | 129.9226218543  |
| 36.7415790411   | 21.5915468311   |
| 468.3911110616  | 778.6110211818  |
| 281.9456394526  | 213.5431183687  |
| 0.2654418715    | 0.7224776911    |
| 14.5960309366   | 18.7628048081   |
| 1.9773036045    | 1.9733303673    |
| 0.5139937557    | 0               |
| 55.304876478    | 63.0746707901   |
| 20.1744426387   | 12.7601883007   |
| 27.576386762    | 9.0068642723    |
| 12.303222428    | 27.5668272518   |
| 0               | 0.1388538086    |
| 0.051015575     | 0.0555415234    |
| 0               | 0               |
| 0.0616913057    | 0.2098886652    |
| 28.4670447481   | 36.555321746    |
| 26.5693236868   | 36.5196737072   |
| 0               | 1.9192768153    |
| 14.3988592883   | 21.386928684    |
| 17.1498813039   | 16.181851595    |
| 21.8798621953   | 43.5947020975   |
| 213.573686841   | 323.5802582321  |
| 36.8742482942   | 124.4514243814  |
| 59.6099875982   | 28.1436455482   |
| 2.8747137104    | 4.2131245559    |
| 0.0677012559    | 0               |

gene\_expression\_table

|                 |                 |
|-----------------|-----------------|
| 69.5365907763   | 702.6982507114  |
| 3.487146938     | 31.608204083    |
| 14.6395341138   | 74.0510422258   |
| 0               | 1.3461655454    |
| 0.1456054827    | 1.1096621443    |
| 0               | 0               |
| 3.9277469641    | 3.6080478581    |
| 44.0277352713   | 25.214092981    |
| 349.8837973093  | 366.2630537121  |
| 71.5598025705   | 52.9410925022   |
| 50.4719108264   | 68.63671364     |
| 1.9599103719    | 1.6892486189    |
| 1.4000601703    | 9.0185933607    |
| 40.378918922    | 36.2925245489   |
| 0.3894430171    | 4.3105978491    |
| 0.7640296405    | 2.5786173667    |
| 0.2776291887    | 0.09445613      |
| 38.1798278215   | 46.9753766751   |
| 83.3093943374   | 142.0760780468  |
| 0.4793372292    | 1.0437251747    |
| 55.4286280007   | 30.1730446362   |
| 5.2379313886    | 4.9369947202    |
| 2310.4443974408 | 3825.103745887  |
| 33.8956691319   | 24.5661021585   |
| 54.2586098966   | 47.5146525026   |
| 19.99551998     | 11.2549601581   |
| 86.1392879576   | 90.7020368354   |
| 14.2744404929   | 18.4547308133   |
| 67.9564527434   | 57.0303700816   |
| 70.6568140834   | 92.8186728737   |
| 9.4089788037    | 12.1518581352   |
| 803.4125476854  | 633.0675616303  |
| 0.5007234827    | 1.243614689     |
| 18.0915057713   | 8.6896454933    |
| 32.183585011    | 10.7186251285   |
| 2.8805974709    | 2.8468983669    |
| 27.9336799921   | 15.2441419292   |
| 9.4438496282    | 9.8346500343    |
| 0.007681        | 0.0459934741    |
| 1126.3263640907 | 1356.0168043407 |
| 221.686881769   | 224.7742862183  |
| 5.5456382417    | 5.3915172514    |
| 0.2877776055    | 0.5895144324    |
| 2139.8391616457 | 2674.6334694754 |
| 0.0149873966    | 0.0163170334    |
| 6.4336119599    | 7.9452699002    |
| 230.3999698916  | 158.7311802078  |
| 2.3996855775    | 1.8288049284    |
| 62.5522511573   | 47.1815691474   |

gene\_expression\_table

|                 |                 |
|-----------------|-----------------|
| 12.0268786596   | 25.0298106574   |
| 0.3234632904    | 0.3228133162    |
| 3.6305709289    | 5.7878298226    |
| 12.5621412852   | 13.1984133203   |
| 1.5972496712    | 1.2908380853    |
| 27.5717903145   | 32.8878028713   |
| 6408.7619053308 | 9235.8308108762 |
| 0.134385033     | 0.2682299934    |
| 0.0700076664    | 0.3048741445    |
| 4.1678795595    | 3.163046383     |
| 0.0692747707    | 0.2639721706    |
| 0.3555745921    | 2.5162806574    |
| 0               | 0               |
| 8.2598896259    | 3.5152030879    |
| 0.1034786672    | 0.0281647459    |
| 7.1298207367    | 6.2363208731    |
| 1.1989404948    | 1.1421435303    |
| 2.3661436687    | 1.7014722719    |
| 0.3976862359    | 0.9300788991    |
| 1.8486172681    | 0.324066099     |
| 0               | 0.0547148579    |
| 13.5495477357   | 9.0332971595    |
| 7.1601194102    | 10.4543033773   |
| 574.5096242035  | 140.0981356013  |
| 19.4376092663   | 4.7377736274    |
| 11.9264538788   | 14.3121286643   |
| 0.3732070155    | 0.2612036701    |
| 6.7549156737    | 4.9859957196    |
| 32.299962129    | 21.0142327448   |
| 0               | 0               |
| 87.8073084682   | 60.8600955149   |
| 119.6932190073  | 290.8712210424  |
| 0.830812324     | 0.281134438     |
| 1.1183070594    | 1.8491083487    |
| 9.9879853647    | 9.1179380152    |
| 0               | 0               |
| 3.8095132003    | 3.8825037596    |
| 27.3477322172   | 37.1500641669   |
| 0.2249443833    | 0.0962110179    |
| 1.7769700425    | 1.8953098845    |
| 0.1226079017    | 0.1043612394    |
| 307.3196805829  | 291.1008282149  |
| 0.0200110036    | 0.025417373     |
| 16.4575034099   | 14.1589942599   |
| 4.0522072339    | 4.1430452428    |
| 0.008087        | 0               |
| 0               | 0.0305430988    |
| 0.0694622841    | 0.0189061923    |
| 0               | 1.6298924008    |

gene\_expression\_table

|                 |                 |
|-----------------|-----------------|
| 1.4399387125    | 2.1065777225    |
| 26.5918639402   | 86.4481332522   |
| 8.4700549139    | 10.6416804255   |
| 0.224099088     | 0.3659707282    |
| 3.5728048325    | 0.4986888895    |
| 0.1045973972    | 0               |
| 5.2713230797    | 1.3312064735    |
| 4.2036192231    | 0.7877670934    |
| 2.2750508654    | 1.6376109355    |
| 8.0900190818    | 5.4226765209    |
| 1.9464145862    | 5.2388728548    |
| 0.3183013819    | 1.1262554024    |
| 4678.058872678  | 2375.4646951976 |
| 3.2821551658    | 2.753316748     |
| 20.4500526701   | 18.0580314298   |
| 98.1824175507   | 29.9939639068   |
| 29.6268405657   | 5.9002270811    |
| 13.9057102555   | 9.0032127971    |
| 0               | 0               |
| 0               | 0.0463629085    |
| 3.785667708     | 5.446295301     |
| 153.2700965803  | 66.1592504988   |
| 2.272941791     | 2.7039057543    |
| 2.1494284331    | 6.4353279733    |
| 3.2311000437    | 4.2778711241    |
| 0               | 0.2200661606    |
| 449.2806654676  | 376.7414839091  |
| 2.5351228907    | 3.560723069     |
| 564.8884750615  | 138.0903635879  |
| 41.9333239056   | 36.3153018785   |
| 0.2136335468    | 0.0581466182    |
| 48.5780771057   | 61.1761612271   |
| 50.319857049    | 35.9953184122   |
| 16.7018042542   | 9.6134279438    |
| 67.7763140181   | 53.7902760802   |
| 2.6825981426    | 2.2418614813    |
| 199.4338628886  | 210.3617138941  |
| 105.5717193462  | 20.4525776253   |
| 9.0824339254    | 11.5362335244   |
| 87.8140053409   | 88.8317894793   |
| 9.4995698774    | 20.204506109    |
| 391.824154332   | 234.7735191711  |
| 3.9190660673    | 6.4541402858    |
| 1080.6037622537 | 658.5440994375  |
| 0.0234979725    | 0.025582642     |
| 124.6569912397  | 201.4947550357  |
| 15.8422410272   | 21.0122187511   |
| 2.8836508879    | 1.7103135827    |
| 5.0253712052    | 1.8237356778    |



gene\_expression\_table

|                 |                |
|-----------------|----------------|
| 12.3572886732   | 10.4354093929  |
| 1.8682661462    | 0.3390021839   |
| 117.9690319945  | 99.3762188042  |
| 71.9653325546   | 31.930605314   |
| 1.1549988439    | 0.106564989    |
| 11.9952567493   | 11.6141263696  |
| 38.6482728947   | 74.0921641611  |
| 119.7736077624  | 66.0028577126  |
| 0.2834661122    | 0.3086143736   |
| 52.6199251417   | 25.5418539067  |
| 48.4094089489   | 80.0413435346  |
| 17.4037105557   | 30.0476830751  |
| 243.4369331849  | 82.047910339   |
| 5.7538053594    | 8.5439826156   |
| 0               | 0              |
| 92.880710512    | 45.9462294539  |
| 4347.8133480664 | 4234.954933135 |
| 199.0469977053  | 121.0469910001 |
| 104.4830027578  | 20.511499904   |
| 1.4507345302    | 2.1717290886   |
| 1.1328776574    | 0.7140639336   |
| 22.6588756729   | 13.0362176116  |
| 0               | 0.0165974322   |
| 20.5709433666   | 10.8975345326  |
| 0.2958026503    | 0.3199676603   |
| 1.694628802     | 1.9711521988   |
| 0.003878        | 0              |
| 0               | 0              |
| 0               | 0.0217645186   |
| 0.0471169574    | 0.0256485161   |
| 3.4602098947    | 2.8107904781   |
| 2.469956604     | 1.1913177208   |
| 0.1021301901    | 0.1806851695   |
| 0.8517942453    | 1.4886614499   |
| 6.5741124968    | 7.5742808904   |
| 6.8892353349    | 5.2118355794   |
| 0               | 0.1087316924   |
| 0               | 0.0180676401   |
| 0.002218        | 0.001207       |
| 184.685064861   | 59.8049448531  |
| 4.3560886353    | 6.5115933059   |
| 0.5428451317    | 0.6819285232   |
| 6.8546673881    | 11.2732747867  |
| 21.5139027353   | 22.609781594   |
| 0               | 0              |
| 5.2507677374    | 5.9794322556   |
| 2.1541129847    | 1.1158705276   |
| 18.9824421107   | 8.41821051     |
| 0.2147861337    | 0.2129626252   |

gene\_expression\_table

|                 |                  |
|-----------------|------------------|
| 26.6696465837   | 31.7109595098    |
| 11.8448623592   | 4.4583657022     |
| 0.8035422365    | 0.583220059      |
| 0               | 0.00463          |
| 0               | 0                |
| 0.0106517227    | 0                |
| 0.007264        | 0                |
| 0               | 0.004696         |
| 0.003117        | 0.003394         |
| 0.694813879     | 0.6319172432     |
| 7.7885209731    | 3.3650041136     |
| 48.1052494327   | 33.1529814369    |
| 15.8550328008   | 13.5881946951    |
| 17.8481644261   | 6.5659287424     |
| 4.2594560534    | 1.5403759028     |
| 0.9157410013    | 0.9486860463     |
| 1028.1874521211 | 449.9356631978   |
| 31.1470429672   | 22.0777795526    |
| 5.6486766762    | 11.4518663622    |
| 0.0550626861    | 0.0449607616     |
| 8.3683089136    | 4.9247135823     |
| 0               | 0.003797         |
| 1.7072260536    | 2.0002103337     |
| 0.4556867988    | 0.5852594395     |
| 3.5419318593    | 3.7258856845     |
| 1.7387248834    | 1.2796776149     |
| 13.2759606586   | 7.5854677397     |
| 0.004075        | 0.003327         |
| 0.5889733183    | 0.3374869794     |
| 1.1022998617    | 0                |
| 1.2826942369    | 0.9309940094     |
| 0.0914710035    | 0.049793018      |
| 4.3012225893    | 10.0260251224    |
| 2.9660272946    | 2.3497936801     |
| 8742.7830635617 | 19417.9035676945 |
| 7.4438098606    | 6.5929291416     |
| 0.0352770549    | 0.0345660563     |
| 420.4206747316  | 247.4503998033   |
| 34.8906415469   | 32.8484321914    |
| 0.0105777789    | 0.0172743114     |
| 3.1444435212    | 2.5013447572     |
| 0               | 0.006724         |
| 0.003801        | 0.002069         |
| 0.2933562131    | 0.3109771079     |
| 3.8904421583    | 2.9577478724     |
| 6.2705517544    | 7.3788148495     |
| 0.5970589693    | 0.53053776       |
| 55.3046827563   | 66.8557024556    |
| 4.4070035182    | 4.3371980442     |

gene\_expression\_table

|               |                |
|---------------|----------------|
| 0             | 0              |
| 0.5459544502  | 0.4396008547   |
| 0.3246672868  | 0.5412521512   |
| 5.574950577   | 6.3060191536   |
| 0.5613437051  | 1.324146268    |
| 0.2001082237  | 0.3553212818   |
| 0.9813910961  | 0.8468091356   |
| 0.1203424997  | 0.005039       |
| 0.3755885061  | 0.2265580158   |
| 4.1534702552  | 5.5038635878   |
| 84.3080968216 | 34.5116513276  |
| 8.2715819025  | 24.3146118238  |
| 2.4893789566  | 5.0619066307   |
| 0             | 0              |
| 5.1698539155  | 4.3809519596   |
| 0.3745288664  | 0.1274237318   |
| 6.7268957233  | 7.0766566116   |
| 1.9446116182  | 1.6141252444   |
| 2.6855731538  | 1.442335353    |
| 5.566296578   | 10.1141341134  |
| 0.4549720715  | 0.540660673    |
| 40.1852812984 | 143.4755721036 |
| 10.6760014695 | 6.4952864818   |
| 0.05868617    | 0.0106487718   |
| 23.0893314108 | 20.0404919353  |
| 5.135874905   | 8.3521782483   |
| 0.1153570261  | 0.2654540317   |
| 68.9403174069 | 21.1315599663  |
| 2.5501800455  | 2.7918832868   |
| 3.4491142607  | 2.3019334473   |
| 0.0454508781  | 0.060307581    |
| 8.9903767491  | 6.5796949452   |
| 0.005858      | 0              |
| 3.8192779224  | 2.5092059878   |
| 4.2147457239  | 7.944554841    |
| 0.4610840286  | 0.805826081    |
| 19.6181371494 | 6.2740885474   |
| 0.0730456481  | 0.0210510102   |
| 0.6926074681  | 1.0135127969   |
| 1.0458963185  | 2.1260259707   |
| 7.7142339635  | 2.1919469047   |
| 31.6086857943 | 41.2745125845  |
| 0.7769783392  | 1.1314039857   |
| 0.0756349525  | 0              |
| 28.9679279186 | 18.5909743727  |
| 0             | 0.0650476081   |
| 0.7584217323  | 0.4727093711   |
| 0.3329573475  | 0.144998529    |
| 0.003111      | 0.003387       |

gene\_expression\_table

|                |                |
|----------------|----------------|
| 0.4549316712   | 0.4388111931   |
| 0.00719        | 0.007828       |
| 0              | 0              |
| 2.9412938364   | 3.2934683964   |
| 0.3328994061   | 0.6342581714   |
| 1.6525256528   | 0.9157747841   |
| 1.6461569318   | 1.6091543092   |
| 5.4745992802   | 5.2624073012   |
| 2.8164084905   | 1.105626846    |
| 7.3388065027   | 8.0714127791   |
| 13.9297466401  | 6.017299622    |
| 2.2722701077   | 0.3092323852   |
| 0.7947776997   | 0.8485043851   |
| 0.3810205455   | 0.3178083596   |
| 0.0212321536   | 0.0192631721   |
| 7.2411041482   | 8.3264071402   |
| 6.0927128649   | 1.3747647745   |
| 18.3543037189  | 16.5148642321  |
| 0.1412513988   | 0.2951637582   |
| 3.8482745854   | 5.436501948    |
| 1.0866748663   | 1.1428405304   |
| 0.5062649912   | 0.7525717359   |
| 1.4788927782   | 2.5729960701   |
| 0.7750609341   | 0.7835490097   |
| 0.115162956    | 0.0716456385   |
| 68.2589537538  | 35.0157079661  |
| 0.9704422404   | 1.2138935275   |
| 19.0999757883  | 9.5009208295   |
| 7.588393867    | 5.9870552529   |
| 0.8123889339   | 0.4698702453   |
| 0.1272762727   | 0.1789834614   |
| 0.3370853279   | 0.8918723225   |
| 2.6870838808   | 4.5344845233   |
| 3.5951680229   | 4.8650085605   |
| 0.009367       | 0.0152967013   |
| 2.6111173096   | 0.759705185    |
| 3.1935250109   | 1.6944117799   |
| 1.3294823721   | 2.6758045983   |
| 18.5146834632  | 6.2152699601   |
| 103.4212846931 | 37.2661296069  |
| 11.3980313148  | 7.9879776485   |
| 1.0776007089   | 0.8737484952   |
| 0.5377965743   | 0.8782624049   |
| 0.8431518113   | 0.9861799946   |
| 3.5550278255   | 4.0817352      |
| 0.1481053324   | 0.2714287337   |
| 5.8549402375   | 3.0176552733   |
| 3.5712500872   | 3.2525290142   |
| 416.5062733997 | 213.5782762162 |

gene\_expression\_table

|                |                |
|----------------|----------------|
| 29.0060582358  | 24.5671951201  |
| 0.019763668    | 0.0143446942   |
| 0.8933842923   | 0.3953831957   |
| 0              | 0              |
| 9.9234978239   | 16.8983775416  |
| 0.9446870644   | 1.5733553176   |
| 51.6169359656  | 32.6722298703  |
| 0              | 0.017836386    |
| 24.6533689488  | 23.3888789827  |
| 0.181050571    | 0              |
| 1.3313077804   | 1.2251028067   |
| 1.4194318692   | 2.4216915655   |
| 0.0761607275   | 0.0538963609   |
| 0.8698037842   | 1.0877359963   |
| 9.3332652871   | 10.0935426331  |
| 25.502754476   | 12.40507345    |
| 1.1176372211   | 1.7512296425   |
| 0.2025547285   | 0.2228219083   |
| 0              | 0.0425737151   |
| 0.5705307885   | 0.1741092645   |
| 24.116743652   | 8.8406357193   |
| 0.1027931269   | 0.2215869958   |
| 0              | 0              |
| 3.8551598741   | 10.8512408652  |
| 8.8127394372   | 13.3280346924  |
| 0.00827        | 0.0517695185   |
| 0.0905019255   | 0              |
| 1.1202468937   | 0.1524539789   |
| 0.0275067376   | 0.0190572154   |
| 0              | 0.0005605      |
| 0.0323170199   | 0.004398       |
| 0              | 0.0464701168   |
| 36.1752247648  | 21.7021447893  |
| 1.9011777931   | 1.4140146987   |
| 14.6665376754  | 18.2557646502  |
| 2.2099290253   | 2.2000694551   |
| 197.5924134885 | 132.3301117862 |
| 0.0260396535   | 0.0212623599   |
| 16.3043646331  | 10.8207168372  |
| 6.66957878     | 5.9363081332   |
| 0.701931525    | 1.8013398387   |
| 0.0649873513   | 0.1981079346   |
| 0              | 0              |
| 0              | 0.002713       |
| 1.8048299173   | 2.0461099397   |
| 0.19695557     | 0.181798395    |
| 0.009516       | 0              |
| 0.0226885503   | 0              |
| 0.4708006166   | 0.1537705897   |

gene\_expression\_table

|                 |                 |
|-----------------|-----------------|
| 1.996737986     | 3.9678633471    |
| 0.0286482511    | 0.0155949189    |
| 0               | 0               |
| 0.0241483869    | 0.0591542082    |
| 2.8535954722    | 3.4359507739    |
| 0               | 0.0286558358    |
| 0.0359523396    | 0.0587128846    |
| 5313.052404225  | 7997.5811658912 |
| 0               | 0.001963        |
| 1.9952373158    | 2.1560379616    |
| 0.2424744695    | 0.2199883963    |
| 0.4947380229    | 0.161588908     |
| 0.0321432566    | 0.3324516422    |
| 5.3207796596    | 4.247666412     |
| 66.4486440801   | 133.2958888189  |
| 0.5314759478    | 0.4527219699    |
| 0.00272         | 0.008884        |
| 13.5295739477   | 8.8581735028    |
| 66.212613843    | 22.6500381062   |
| 0.5746259844    | 0.1646329144    |
| 2.2197062463    | 2.3414154575    |
| 0.9406957191    | 1.1178238014    |
| 8.603776271     | 7.1630592196    |
| 9.3466247745    | 14.6235426696   |
| 0.1036324005    | 0.209982384     |
| 143.5777752066  | 114.0162254652  |
| 0.1944283667    | 0.5545949636    |
| 0.1302455447    | 0.1536172495    |
| 14.5046530583   | 40.4330847396   |
| 0.0877080042    | 0.1379288367    |
| 4.1327676835    | 2.9837506437    |
| 278.705863436   | 181.212955421   |
| 6.4236622132    | 11.9065819105   |
| 0.2381241336    | 0.4570983157    |
| 223.0758642495  | 431.7095185579  |
| 0               | 0.0157516072    |
| 10.822749542    | 8.0726138373    |
| 1.1133237138    | 1.2209634311    |
| 1.5732279182    | 1.1485835096    |
| 6.4065577943    | 5.2722252493    |
| 8.6631095367    | 5.147163869     |
| 13.3120528987   | 16.8750191765   |
| 0.7312920226    | 0.4648605792    |
| 21.8295934836   | 6.6141920509    |
| 0.9903539059    | 1.5850683929    |
| 4224.2845319532 | 3897.3027285959 |
| 1.0948019457    | 0.9160198809    |
| 0.3278230242    | 0.6250904759    |
| 0.0894396105    | 0.0827682603    |

gene\_expression\_table

|               |               |
|---------------|---------------|
| 1.5240428658  | 1.1148095128  |
| 1.0067525233  | 1.5903740197  |
| 0.002566      | 0             |
| 40.1617792932 | 23.8452751828 |
| 0.1749541698  | 0.0793648241  |
| 3.761433415   | 1.1375379116  |
| 0.1672353739  | 0.1676978888  |
| 0.0540213492  | 0.2404453107  |
| 1.3851878289  | 2.3123855454  |
| 3.2366771011  | 2.5739246143  |
| 4.5516761017  | 4.7627737361  |
| 0.9003687685  | 1.493709378   |
| 6.3930073638  | 6.272620405   |
| 3.5711038279  | 2.8968826309  |
| 23.1152399856 | 19.8651502557 |
| 40.3628861959 | 26.9916381425 |
| 5.8161448425  | 8.0659348003  |
| 0.0929593772  | 0.0168677423  |
| 1.3366231861  | 0.3638010944  |
| 2.0183657238  | 2.9037455489  |
| 0             | 0.3527473966  |
| 0             | 0             |
| 1.8427562719  | 0.9337553515  |
| 0.0474711033  | 0.04463497    |
| 2.5255868261  | 1.1226522266  |
| 0.008861      | 0.009647      |
| 4.4616356966  | 1.6606696086  |
| 2.6402918737  | 2.2344040632  |
| 11.2030705794 | 4.0121622788  |
| 0.0661965942  | 0             |
| 0.00612       | 0.0299856765  |
| 0             | 0             |
| 22.5982424717 | 13.5273220664 |
| 12.8136765385 | 7.0326430341  |
| 0.008739      | 0.009514      |
| 0.7279338709  | 0.1783156446  |
| 0.3796158248  | 0.7015125233  |
| 2.9624083388  | 2.4643439212  |
| 4.2548840216  | 3.6360655512  |
| 0             | 0.0567672978  |
| 1.2977655813  | 1.217104389   |
| 6.4493832535  | 9.6058747962  |
| 1.4651066288  | 0.6314688628  |
| 0.3307592638  | 0.2800802911  |
| 3.389937798   | 2.4604552601  |
| 1.1098389424  | 0.4190074375  |
| 12.8513016088 | 10.0782599354 |
| 0.7637954893  | 0.3789114998  |
| 2.8481164238  | 1.4520503373  |

gene\_expression\_table

|                |                |
|----------------|----------------|
| 59.8658352114  | 21.9093771564  |
| 0.2079715135   | 0.0943425505   |
| 12.0924968241  | 8.1616367086   |
| 0.0872226663   | 0.0712205993   |
| 2.5576420291   | 3.9482401868   |
| 37.3198912139  | 15.6519703669  |
| 14.6982163298  | 7.3492083853   |
| 57.1864354316  | 22.4150897425  |
| 5.8874994712   | 8.1458138417   |
| 436.8759324767 | 262.1457209167 |
| 99.099850192   | 101.6506158192 |
| 0.2971042596   | 0.4043280706   |
| 4.0635919125   | 6.94986138     |
| 0.3655918487   | 0.0459260837   |
| 0.0197382088   | 0.005372       |
| 2.2402964956   | 2.2024247231   |
| 1.3286044424   | 1.38289295     |
| 0.005335       | 0.0107878151   |
| 0.003575       | 0.004865       |
| 4.3241656926   | 4.6728683975   |
| 0              | 0              |
| 0.003184       | 0.0026         |
| 0              | 0              |
| 37.1578013086  | 32.6688739657  |
| 28.433214236   | 15.2246452175  |
| 0.255381815    | 0.3829348735   |
| 38.9683414073  | 53.4231314573  |
| 4.5891907796   | 4.6641271996   |
| 0              | 0.021872988    |
| 0.4940293185   | 0.3884530828   |
| 0.3320731718   | 0.4010115239   |
| 114.2074277128 | 49.3582230759  |
| 18.4339518539  | 28.3699970839  |
| 0.9677123182   | 1.075514114    |
| 4.5649260201   | 2.6569917017   |
| 11.2611306568  | 31.1021518026  |
| 2.3102141126   | 1.8154238022   |
| 202.0645642116 | 114.1777837121 |
| 8.0593710732   | 9.39228793     |
| 191.7186001874 | 69.9525301221  |
| 0              | 0.1189845832   |
| 0.1651460082   | 0.2696958984   |
| 4.4669176069   | 3.2759116925   |
| 1.3475220517   | 1.0024979412   |
| 1.1199806794   | 0.3882641628   |
| 5.9489968665   | 5.8252641779   |
| 3.3320413211   | 6.2036674404   |
| 29.1601033708  | 9.9677827881   |
| 9.2575899059   | 5.4278636598   |



gene\_expression\_table

|                 |                 |
|-----------------|-----------------|
| 43.260296405    | 29.6228622728   |
| 6.7616133141    | 3.8061807642    |
| 3.2215101592    | 3.3904024289    |
| 0.3002269134    | 0.3268621427    |
| 12.7701002712   | 6.2966599563    |
| 3.1883188424    | 0               |
| 1.830949952     | 2.6578484379    |
| 1.5424635225    | 1.175514375     |
| 11.1093955766   | 3.628496328     |
| 719.8683313055  | 343.7313333521  |
| 1.5419812672    | 1.2101214559    |
| 2.1008604597    | 2.5206345754    |
| 25.6783038788   | 19.3377211217   |
| 80.2903287153   | 77.7864139205   |
| 4.1691633278    | 1.8066936428    |
| 70.0198908717   | 34.0070960489   |
| 7.9792497011    | 15.2025033141   |
| 7.5202883622    | 3.5433150058    |
| 19.9303233672   | 7.6901972088    |
| 1.7170025794    | 0.5032811235    |
| 24.4819073688   | 46.3477283254   |
| 1.0525638513    | 1.5496290244    |
| 7.2110238929    | 5.5003563303    |
| 0.2174858055    | 0.4143658619    |
| 0               | 0               |
| 4.7148271348    | 6.619726853     |
| 58.3809210901   | 30.9566724783   |
| 0.5845527595    | 0.3926800676    |
| 5.7790636446    | 0               |
| 1.1902529562    | 8.882833288     |
| 12.2925424076   | 9.3944112474    |
| 0.2828062273    | 0.2501654559    |
| 6.1141482556    | 3.4771730365    |
| 2.552115881     | 0.6656899418    |
| 6606.8261821396 | 5115.8956972629 |
| 0.3038247814    | 1.6952434143    |
| 5.6636546647    | 7.5755152734    |
| 2.3360760298    | 2.0899194253    |
| 0.0395915416    | 0.0215519921    |
| 28.4791186826   | 18.0656520476   |
| 4.904977445     | 4.6951163206    |
| 27.5400488745   | 7.2603587146    |
| 29.7581023179   | 23.8340131367   |
| 2.7694049591    | 1.1410348855    |
| 2.5916075944    | 5.1159559674    |
| 17.7052721968   | 16.9617352459   |
| 180.4921868214  | 94.7156780863   |
| 4.4090719216    | 4.2701446125    |
| 51.4295203368   | 79.0128556179   |

gene\_expression\_table

|                |                |
|----------------|----------------|
| 0.0384985169   | 0.0733494818   |
| 12.3525336367  | 9.7402110978   |
| 10.8154810879  | 3.6390069386   |
| 0              | 0.1321209203   |
| 38.3547545829  | 46.3759371026  |
| 22.0061719378  | 14.1460354893  |
| 0              | 0.0512901417   |
| 29.4174588563  | 14.7786045055  |
| 4.5043052219   | 3.5349766185   |
| 4.6297376519   | 3.2519187488   |
| 13.4395537627  | 13.2706039915  |
| 0.7805493302   | 0.715366106    |
| 3.8645164981   | 5.006954474    |
| 0.4292919139   | 0.6091230077   |
| 0              | 0              |
| 299.0065351117 | 121.5185935483 |
| 4.6940144871   | 2.7712740207   |
| 0.002279       | 0.00124        |
| 2.9896227828   | 2.9689538686   |
| 69.6649219316  | 23.1439959781  |
| 0              | 0.0980922313   |
| 3.7934083269   | 10.673179156   |
| 9.3384639319   | 15.0986711357  |
| 0              | 0.0371779033   |
| 3.1232100155   | 3.1591363723   |
| 0.6885123423   | 0.7342972289   |
| 0.002295       | 0.006247       |
| 62.542810174   | 18.5627168117  |
| 0.3560731254   | 0.0484578579   |
| 0.8738445248   | 0.7597741612   |
| 0.193779292    | 0.39317287     |
| 17.7359352476  | 23.9523233036  |
| 0              | 0.002398       |
| 515.1095461159 | 545.678790586  |
| 2.1069930769   | 1.2969838343   |
| 3.064881748    | 2.8683234155   |
| 13.7436300011  | 5.5963690424   |
| 20.7480634581  | 30.1381737561  |
| 69.9487125537  | 30.2502009664  |
| 1.7768957541   | 1.6382883791   |
| 54.6874687807  | 50.3162766545  |
| 1.3547124767   | 0.7978959075   |
| 0              | 0.0247555407   |
| 0              | 0.00468        |
| 0.003849       | 0              |
| 0.5664143843   | 0.6214085426   |
| 0.0352678315   | 0.0671942032   |
| 1.0195982666   | 0.5550269801   |
| 847.8619190763 | 279.5018955485 |

gene\_expression\_table

|                |                |
|----------------|----------------|
| 0.891028913    | 0.5845343723   |
| 0.81346193     | 2.4281017768   |
| 3.5261376215   | 4.7248811725   |
| 506.6601569681 | 313.6995874349 |
| 469.6758599975 | 305.4758878606 |
| 11.703832851   | 7.6703089105   |
| 0              | 0              |
| 2.9814756477   | 2.1794458666   |
| 16.7561282229  | 4.7506983214   |
| 0.4344117333   | 3.5471357739   |
| 0.793780881    | 1.8642087565   |
| 6.0149023016   | 24.4310406305  |
| 20.9062099105  | 24.7306432662  |
| 0              | 0              |
| 22.3785107136  | 3.867280146    |
| 221.1103755892 | 587.0026127109 |
| 364.2905359692 | 502.5654434867 |
| 144.3460311388 | 229.0976758505 |
| 35.8648819273  | 71.7039518466  |
| 0              | 0.4343083902   |
| 1.0784408175   | 2.2732900622   |
| 35.127764455   | 30.7486868992  |
| 0.6608839158   | 0.6066824299   |
| 0.00999        | 0.004351       |
| 1.6454148981   | 2.0456776195   |
| 0.1630616398   | 0.2444902859   |
| 1.2007363401   | 3.1047473903   |
| 0              | 0              |
| 0              | 0              |
| 2.7894595458   | 7.2038852385   |
| 0.4121090129   | 0.5888794876   |
| 11.0393964662  | 11.6483367348  |
| 2.1828738963   | 3.695301058    |
| 3.4481321354   | 4.2812928709   |
| 0              | 0.6247209747   |
| 273.7548499322 | 264.9490515933 |
| 23.5600852906  | 13.510111295   |
| 0              | 0.009469       |
| 0              | 0              |
| 259.0613452329 | 160.1791124725 |
| 4.1830540944   | 6.008793365    |
| 10.5306665132  | 12.4919809489  |
| 0.0849737698   | 0.0462561936   |
| 10.0276344079  | 8.8937990625   |
| 17.6631203514  | 15.7373180787  |
| 0.0932027575   | 0.152207139    |
| 3.3252727642   | 1.7471790763   |
| 0              | 0              |
| 4.0888433842   | 4.1218456289   |

gene\_expression\_table

|                 |                 |
|-----------------|-----------------|
| 15.2810301486   | 12.8343241363   |
| 2.3255745241    | 1.4743642335    |
| 0.0478421798    | 0.1909841787    |
| 2.8610115478    | 5.889538464     |
| 0.3069672837    | 0.8624528991    |
| 0.3086742304    | 0.3274173663    |
| 1.9895921914    | 0.3040144323    |
| 0.06092917      | 0.0331673114    |
| 0.3828767169    | 0.1042110971    |
| 22.1620722442   | 14.0900071505   |
| 6.7380931126    | 6.0149820547    |
| 3.0008716025    | 0.8321858264    |
| 0.0679148418    | 0.078561295     |
| 0.8973374669    | 0.9274809017    |
| 0.002144        | 0.001167        |
| 3.8206262018    | 2.0296749075    |
| 6.6214610408    | 5.7429087465    |
| 1.5037365444    | 1.7224922456    |
| 375.136593432   | 333.4510674682  |
| 0.0695747243    | 0.1009962463    |
| 18.9478810098   | 4.2338749469    |
| 0.0114334199    | 0.008299        |
| 16.5031777572   | 4.7127318252    |
| 203.69630149    | 92.3720754154   |
| 224.4245961546  | 105.2487510476  |
| 0.0139227283    | 0.0353684588    |
| 4.6564559064    | 3.0650162111    |
| 8.2197487507    | 5.6806158373    |
| 7.9354721666    | 5.8450413334    |
| 755.4043619334  | 612.4089762614  |
| 0.236289631     | 0.8718002637    |
| 3.228205962     | 1.4171785048    |
| 0.1300871931    | 0.5665125516    |
| 3.7550046499    | 1.9476503536    |
| 1.1968889936    | 0.7818440326    |
| 13.1233197537   | 3.9911318478    |
| 0.7355087158    | 1.6015216767    |
| 5.8234967691    | 4.5364794102    |
| 120.0913331476  | 105.3864600781  |
| 0               | 0               |
| 71.7640881787   | 27.9345481546   |
| 41.3741004994   | 41.5346422281   |
| 0               | 0.0196071408    |
| 38.8700875317   | 15.3828465751   |
| 136.9557496392  | 157.1728716648  |
| 2.3290033495    | 2.0553087966    |
| 9.6165135931    | 8.2951935596    |
| 3854.7305536004 | 2690.0791754744 |
| 253.8465061216  | 231.4924250754  |

gene\_expression\_table

|                 |                 |
|-----------------|-----------------|
| 32.3986210314   | 25.509886374    |
| 11.6442949027   | 8.8114490712    |
| 7.4894124952    | 6.8849733478    |
| 0.1167493584    | 0               |
| 40.3767953678   | 25.8147922007   |
| 0.586184801     | 0.2844940496    |
| 0.896753569     | 1.1607665261    |
| 0.2458550395    | 0.4139494469    |
| 11.9781497458   | 8.5185970179    |
| 0.1726526449    | 0.223214219     |
| 7.262923516     | 1.5702376686    |
| 0.0397808196    | 0.0781987093    |
| 13.3214384358   | 7.8207255871    |
| 35.9198382751   | 23.0605820379   |
| 0.0393233438    | 0.0107029982    |
| 3.4605956285    | 2.9115904232    |
| 0.087501723     | 0.009526        |
| 224.8584637317  | 629.0367614066  |
| 1.648430168     | 0.6205881841    |
| 1.9120910091    | 1.5509273209    |
| 0               | 0               |
| 0.0151943104    | 0.0248134559    |
| 0.4021010315    | 0.312695876     |
| 126.2943004078  | 38.9747068291   |
| 19.9755706163   | 16.9059749283   |
| 6.4288976028    | 3.4301880325    |
| 237.6197936457  | 106.3568040062  |
| 4.797974113     | 3.8489949141    |
| 35.553857189    | 31.2121020227   |
| 8354.0620899376 | 6164.9375565954 |
| 0               | 0.021180193     |
| 0               | 0               |
| 2.2667401465    | 10.0770072861   |
| 0.0803900686    | 0               |
| 0               | 0.0297854381    |
| 0               | 0.0133937653    |
| 3.0645714757    | 5.9314685257    |
| 3.3888424706    | 3.455822664     |
| 2.7311755544    | 1.9531664226    |
| 2.8019334931    | 4.6906854871    |
| 0.2537582678    | 0.4144064079    |
| 0.4594119369    | 2.9009835821    |
| 6.1580727541    | 7.9824244155    |
| 0.9210711536    | 1.1051109013    |
| 5.3989738293    | 2.8834375516    |
| 49.9539151626   | 67.8364668218   |
| 13.6050677576   | 4.5023468054    |
| 16.7015580125   | 9.5671088001    |
| 0.4203699157    | 1.0445070606    |

gene\_expression\_table

|                |                 |
|----------------|-----------------|
| 22.070925543   | 35.8439112331   |
| 2.8870681311   | 3.9622029907    |
| 22.7698022322  | 13.8829411724   |
| 92.3074612066  | 43.8676078901   |
| 1.4261761759   | 1.6352927842    |
| 0.006165       | 0.002397        |
| 0.0145167329   | 0.033189689     |
| 0.2819786339   | 0.1331816244    |
| 26.1044544836  | 19.166667539    |
| 24.4665776499  | 13.2849566377   |
| 2.2779869402   | 0.1550051934    |
| 279.9315835033 | 121.4556711943  |
| 0              | 0               |
| 4.4925073356   | 0.7336603625    |
| 15.248853784   | 9.734434402     |
| 15.9915444909  | 4.3659590754    |
| 25.1693876584  | 27.225930164    |
| 1.3997497357   | 2.7092112444    |
| 22.8366168073  | 6.1026413259    |
| 62.1062927232  | 35.6841439285   |
| 0.3079749882   | 0.1955902687    |
| 22.3779985082  | 8.8781543453    |
| 1.7238862119   | 4.6920605376    |
| 0              | 1.3708918623    |
| 5.7564010998   | 2.0988844855    |
| 145.6040090908 | 95.5665742789   |
| 173.034341559  | 140.9182337261  |
| 28.2778063119  | 10.5282941161   |
| 0.0993706256   | 0.4032405494    |
| 30.3303111528  | 11.9576498805   |
| 16.3128580669  | 1.0403397541    |
| 4.4034724907   | 2.0871020205    |
| 0.92873381     | 0.676941816     |
| 13.972204101   | 6.3688595386    |
| 1.3964415593   | 0.5201127774    |
| 3.5826677428   | 0               |
| 8.0226299928   | 5.4960633953    |
| 0.8868052971   | 0.9654799975    |
| 1.5602190379   | 2.6287103448    |
| 0.1430841185   | 0.1557781114    |
| 0.3358267533   | 0.0457025367    |
| 11.4455765052  | 8.5957780272    |
| 4.7508856737   | 3.6797261674    |
| 56.2450684282  | 178.2975022567  |
| 4.814126352    | 4.4831933164    |
| 105.4304571958 | 138.2637974444  |
| 0              | 0.106044101     |
| 0.1848030242   | 0.2682642574    |
| 1546.169725526 | 1327.5156992887 |

gene\_expression\_table

|               |               |
|---------------|---------------|
| 80.2287248591 | 47.2800461795 |
| 0.3558494722  | 0.1383640599  |
| 0.1180911846  | 0.4371307903  |
| 4.0338442313  | 6.1742342897  |
| 0.3609417557  | 0.4715561081  |
| 0             | 0.4276870115  |
| 26.6711947511 | 20.5047579148 |
| 3.543530978   | 2.3147414373  |
| 0.1188999003  | 0             |
| 0.0426739781  | 0.2721221843  |
| 0.4883855259  | 0.1772378739  |
| 1.6527040016  | 2.1136671804  |
| 9.4671804247  | 3.5061881944  |
| 2.7256994302  | 2.1500747362  |
| 52.5737032169 | 43.4764354022 |
| 3.2483234317  | 2.6956828341  |
| 14.494463893  | 1.6716492757  |
| 0             | 0.009718      |
| 0             | 0             |
| 0.007377      | 0.004016      |
| 0.0115108689  | 0.0156650983  |
| 1.2920913711  | 1.4588226425  |
| 4.4170664064  | 3.9845463594  |
| 0             | 0.0105746499  |
| 0.0137708133  | 0             |
| 9.6976540545  | 5.538847556   |
| 13.8020430542 | 7.1178247082  |
| 0.1879201273  | 0.5562340547  |
| 43.2803462771 | 40.209108061  |
| 0.003643      | 0             |
| 3.6235748443  | 2.410862369   |
| 0             | 0             |
| 3.9933175651  | 2.0331389375  |
| 0.5001878859  | 0.4084222888  |
| 0             | 0             |
| 0.3047230117  | 0.3364166315  |
| 9.4330260924  | 4.8716172451  |
| 6.9625288032  | 3.352791133   |
| 2.1252705117  | 2.7792800783  |
| 33.8034884394 | 46.6366911056 |
| 7.8531619325  | 9.0235142683  |
| 1.3459731957  | 2.6178089126  |
| 14.5065980928 | 19.9688940916 |
| 0             | 0.120122523   |
| 1.4194543884  | 1.3384130283  |
| 7.5963937424  | 5.4973323221  |
| 18.4605565124 | 10.2230885823 |
| 9.0135742887  | 7.657781161   |
| 5.3996972454  | 1.2066891792  |

gene\_expression\_table

|                |                |
|----------------|----------------|
| 0.5160947766   | 0.280940577    |
| 0.9150225526   | 0.6759932664   |
| 15.7713177816  | 30.8452126179  |
| 0.595836558    | 0.5838276478   |
| 0              | 0.002943       |
| 0              | 0              |
| 5.6070762337   | 2.2370598251   |
| 0.0436035873   | 0.0118679916   |
| 0.9952049079   | 0.7488038611   |
| 107.9289319478 | 91.8830796991  |
| 5.3115001568   | 4.2447629097   |
| 6.9538629408   | 10.0663450541  |
| 1.2669121689   | 1.1034470468   |
| 0              | 0.1059656225   |
| 0.3788156887   | 0.618634617    |
| 2.8298072912   | 1.8983072383   |
| 80.3341752913  | 59.1558186624  |
| 18.3485760067  | 17.2399841487  |
| 0.66882493     | 0.5916308673   |
| 0.7261343283   | 1.0243209827   |
| 0.5860980681   | 0.7853476025   |
| 0.0142275996   | 0.0387245737   |
| 10.1854117414  | 6.0124668582   |
| 170.0515920972 | 96.0976364271  |
| 75.5501848183  | 52.4913304411  |
| 55.2048550317  | 59.4253996875  |
| 0              | 0.9070198922   |
| 0.6594121213   | 0              |
| 17.1006374146  | 10.4259425569  |
| 159.7648689433 | 97.2974210956  |
| 3.6300504748   | 4.6882726928   |
| 9.9993487781   | 7.396145223    |
| 3.5273528384   | 3.9624799928   |
| 5.7283323503   | 2.1014403928   |
| 22.977754921   | 7.0339151866   |
| 0.5710200439   | 0.2664339539   |
| 3.0203458404   | 2.5505418157   |
| 1.0905456434   | 0.0359786538   |
| 0.5232123813   | 0.1139260422   |
| 0              | 0.0439153649   |
| 10.8840123256  | 10.3389801991  |
| 25.1865692209  | 46.6387245759  |
| 1.9979184993   | 2.2501736104   |
| 9.5076752134   | 5.114334278    |
| 234.0625430963 | 195.8039377062 |
| 189.80411943   | 115.630543005  |
| 15.5049139268  | 20.0579622581  |
| 9.0496500101   | 5.2397427622   |
| 22.5959259362  | 15.228923399   |



gene\_expression\_table

|                 |                |
|-----------------|----------------|
| 10.4923068831   | 2.2211686024   |
| 43.3640990724   | 47.2358721181  |
| 7.8262777722    | 2.795822404    |
| 0.4425892178    | 0.9637088058   |
| 3.2286773088    | 2.34341057     |
| 2.3172785611    | 0.9049391103   |
| 0.0873802191    | 0.0815419967   |
| 1.0249498811    | 1.7110165426   |
| 37.7868818753   | 31.0000924693  |
| 2.6446719042    | 4.4478727163   |
| 1.3330480695    | 1.5924118737   |
| 61.705350053    | 35.306883715   |
| 378.582986985   | 264.4755778184 |
| 2.0611438252    | 1.4212014631   |
| 36.6902767815   | 45.5107443211  |
| 1.2693927139    | 0.7699766769   |
| 20.5296627902   | 17.8109473603  |
| 21.4265079704   | 16.1786829719  |
| 239.3291697587  | 137.6552558758 |
| 0.4518553653    | 1.3528421915   |
| 1.7781734291    | 6.4853575638   |
| 199.2626350642  | 109.86767163   |
| 3.6694534766    | 2.4328503472   |
| 354.5903773356  | 381.0911154916 |
| 9.6128589895    | 7.9849284693   |
| 1797.6569539513 | 969.0768401824 |
| 0               | 0              |
| 13.6592960144   | 20.3100776463  |
| 15.1631394226   | 7.2524624543   |
| 1.8889501221    | 1.4956597085   |
| 51.7851523973   | 19.1137793675  |
| 8.4509656064    | 4.0253105697   |
| 0.1090644986    | 0              |
| 0.0213300062    | 0              |
| 33.1311671802   | 47.6221452312  |
| 5.4421304379    | 4.9374499106   |
| 5.2056078888    | 3.9171968732   |
| 2.2602475145    | 1.7686783514   |
| 0               | 0.1060048472   |
| 43.2351659258   | 68.5597307133  |
| 79.6244300302   | 66.2080983692  |
| 13.2905845638   | 12.086442997   |
| 78.7332614306   | 80.28244892    |
| 4.3543907568    | 2.6412467063   |
| 0.00535         | 0.0116496662   |
| 1.2116231479    | 1.1832875012   |
| 0.1967913996    | 0              |
| 1.0036560835    | 2.2878352534   |
| 4.0592557708    | 3.2106612226   |

gene\_expression\_table

|                |                |
|----------------|----------------|
| 28.5486767033  | 10.4260491328  |
| 16.4112772304  | 9.9262424545   |
| 0.5079146599   | 0.1382438305   |
| 100.9346090484 | 52.4206546437  |
| 0.1518729204   | 0.3637625847   |
| 0              | 0.2467661308   |
| 8.4493844862   | 5.7534892113   |
| 6.161328837    | 18.6252471334  |
| 0.3968968569   | 1.1574330887   |
| 7.7297273176   | 0.3274507973   |
| 0              | 7.051298329    |
| 1.0925123533   | 0.655492524    |
| 0.799745529    | 0.6547638045   |
| 5.8329595339   | 10.8395478442  |
| 31.5597339424  | 22.2353857218  |
| 1.9786265978   | 2.0166645468   |
| 18.7819465833  | 12.9211625064  |
| 10.4289987858  | 3.430648708    |
| 220.5248550223 | 215.1314356377 |
| 0.0900732145   | 0              |
| 0              | 0.003319       |
| 1.2619510123   | 0.9533235805   |
| 0.1270042839   | 0.1935804111   |
| 2.8437495882   | 3.9904496274   |
| 1.4580093724   | 2.1645812476   |
| 3.2154658479   | 1.010161563    |
| 4.9060703985   | 3.1854873468   |
| 0.3050714868   | 0.4876941191   |
| 0.059309572    | 0.0573967458   |
| 39.8568475758  | 33.4186466119  |
| 21.2407013674  | 19.6074036291  |
| 19.977440848   | 6.9910005063   |
| 7.3913315925   | 8.9513805523   |
| 0.970514191    | 0.6016837085   |
| 4.1372447429   | 14.1441488635  |
| 0.3509364623   | 0.4641682818   |
| 0              | 0              |
| 6.5005196416   | 7.7849488258   |
| 3.811328747    | 3.3433534061   |
| 0.0184021901   | 0.0100173885   |
| 10.814571098   | 7.8848555941   |
| 33.2160692907  | 13.951265818   |
| 0.0102210554   | 0              |
| 2.0044332175   | 1.8152439678   |
| 43.6036575589  | 25.9894412604  |
| 25.5515094069  | 40.8301772471  |
| 0.1075661278   | 0.2501297013   |
| 0.0591462021   | 0.0262343789   |
| 0.6128391406   | 1.4428381371   |

gene\_expression\_table

|                |                 |
|----------------|-----------------|
| 4.6126233197   | 3.2525428453    |
| 1.4553834627   | 1.0035171157    |
| 2.191040797    | 1.6778825264    |
| 0.540316932    | 1.8833559175    |
| 1.7650012351   | 1.8571433785    |
| 0.0514968026   | 0.0662591612    |
| 3.703662713    | 0.8183076383    |
| 5.3023476652   | 4.491042702     |
| 0.2281510572   | 0.1200561011    |
| 0              | 0               |
| 0.00646        | 0.003517        |
| 36.9681171657  | 21.3261905873   |
| 8.365448065    | 5.3127698592    |
| 0.003408       | 0               |
| 4.8490036142   | 2.6275433687    |
| 0.0111076393   | 0.0110853194    |
| 13.6206874559  | 10.3998403622   |
| 0              | 0               |
| 0.3604042001   | 0.2388388906    |
| 1.8285763282   | 3.6515782271    |
| 4.2563702168   | 2.9249147529    |
| 35.7555885464  | 31.5567882481   |
| 103.2068505428 | 120.0474553689  |
| 1.6457347521   | 2.0426869273    |
| 7.730521958    | 4.1793521965    |
| 5.1070661182   | 6.6819342569    |
| 16.9298434467  | 11.6411420656   |
| 203.6016818138 | 1491.9222923286 |
| 2.4901894761   | 0.9838711457    |
| 0.4121345721   | 0.0934787318    |
| 0.0463847471   | 0.0504998624    |
| 13.1934300159  | 22.8211677573   |
| 0.3186387698   | 0               |
| 3.86969176     | 10.9612545079   |
| 594.9610143114 | 482.894592435   |
| 2.4260177073   | 0.7111048825    |
| 12.2262933669  | 14.9399386372   |
| 6.5945296056   | 11.7618021792   |
| 2.8642409554   | 1.6967480697    |
| 0.1705466982   | 0.0928385443    |
| 0.3179027257   | 0.3181943178    |
| 0.2144569348   | 0.3926758022    |
| 0.1006452284   | 0.1643612559    |
| 0.9335933383   | 0.8982306851    |
| 2.453275304    | 2.6943516599    |
| 7.8991786553   | 4.9734766512    |
| 2.1781206592   | 2.7841487473    |
| 5.494702384    | 2.4434239444    |
| 0.3076319505   | 0               |

gene\_expression\_table

|               |                |
|---------------|----------------|
| 2.0625949678  | 1.2073022547   |
| 0.1568571115  | 0.0853865015   |
| 0.5632295763  | 0.4792808916   |
| 0.0560038973  | 0              |
| 1.9434571113  | 2.0077103174   |
| 5.4141903829  | 4.8274095052   |
| 0.002003      | 0.003271       |
| 4.1866813082  | 4.8509398665   |
| 0.3495520569  | 0.7470315937   |
| 0.007689      | 0.020929043    |
| 9.5800894861  | 5.0670597642   |
| 0             | 0              |
| 1.9426375173  | 1.1094990053   |
| 0.0109989726  | 0.0359243051   |
| 0.2933996784  | 0.0760545752   |
| 1.875863819   | 1.1451382733   |
| 2.716779763   | 1.0698441076   |
| 2.8080479724  | 5.7218646275   |
| 1.0214106867  | 1.2162797202   |
| 2.8492704054  | 2.1058626083   |
| 52.0034472883 | 40.6344335395  |
| 0.2464145247  | 0.4389965684   |
| 20.8138072196 | 18.4920168518  |
| 21.0835774029 | 18.6388685433  |
| 0             | 0              |
| 0             | 0              |
| 5.1540290456  | 4.8683912336   |
| 3.592040973   | 4.9154276636   |
| 0             | 0.3719923293   |
| 0             | 0.0410343794   |
| 2.0916063972  | 2.6978489632   |
| 0.009577      | 0.0156403442   |
| 0             | 0.0122451882   |
| 0.0560210432  | 0.1829731854   |
| 9.1066615799  | 7.6046364563   |
| 0.7406547386  | 0.4326828004   |
| 0.8429215522  | 1.0955079786   |
| 12.1675538153 | 16.2658550346  |
| 63.4775353186 | 103.0012199154 |
| 1.1630009333  | 0              |
| 2.0135819727  | 1.3158620698   |
| 2.5252041559  | 1.8454401801   |
| 3.0002640165  | 0.5730593723   |
| 0.3081253079  | 0.496979643    |
| 0.7153293928  | 0.4218452693   |
| 0             | 0.0494982447   |
| 11.1837524114 | 19.7535218058  |
| 11.3337858701 | 12.0295124337  |
| 67.8837422407 | 30.2865932102  |

gene\_expression\_table

|                |               |
|----------------|---------------|
| 0.6862907757   | 1.0705811541  |
| 60.1157680388  | 35.0619955105 |
| 0.00257        | 0.001399      |
| 0.7286394307   | 0.440712295   |
| 4.4007306701   | 4.1607357587  |
| 0              | 0.0999597172  |
| 135.0166646738 | 72.9802120115 |
| 0.0782380442   | 0.1277686324  |
| 16.3812168875  | 3.3803971709  |
| 0.3500412433   | 0.0619280757  |
| 0.009395       | 0             |
| 2.1101733435   | 1.3923524727  |
| 0.217041577    | 0.1969140444  |
| 1.4816859851   | 2.1239633376  |
| 0              | 1.2160173877  |
| 0              | 0.074761022   |
| 66.2550663498  | 65.1005498821 |
| 28.7852069188  | 33.8966251226 |
| 0.0293215511   | 0             |
| 0.218400668    | 0.1387029693  |
| 32.2647374255  | 9.8527422299  |
| 63.5225529078  | 56.0180471238 |
| 4.7137036868   | 2.6609796421  |
| 0.1700161942   | 0.2776492799  |
| 0.2167913999   | 0.6721566749  |
| 1.5928743396   | 7.3534133388  |
| 0.1559812045   | 0.1713090319  |
| 0.008673       | 0.0216180142  |
| 5.6423514357   | 3.2829031689  |
| 3.9068672622   | 1.9488908394  |
| 28.2355934774  | 48.9481031116 |
| 2.3395384986   | 0.3793546225  |
| 0.1339572913   | 0.4132178086  |
| 2.4711765411   | 1.3553202785  |
| 5.5705223157   | 4.8927054234  |
| 4.9436719302   | 6.0998942637  |
| 0.8758657177   | 0.4015031123  |
| 6.9669075246   | 2.9604682775  |
| 5.2523223742   | 1.7154877884  |
| 2.1438443645   | 1.0211424093  |
| 0.4330172105   | 0.8014364329  |
| 0              | 0.009888      |
| 1.5568563102   | 3.1337345544  |
| 16.9788474373  | 11.2389771267 |
| 0.0118440807   | 0.006447      |
| 57.3371212145  | 83.6913462579 |
| 5.5562418967   | 5.8416052475  |
| 0              | 0.0787385468  |
| 0.9280514776   | 2.3816227643  |

gene\_expression\_table

|                |                |
|----------------|----------------|
| 1.4983942773   | 0.8898148984   |
| 5.008625284    | 4.5441462205   |
| 0.2088833071   | 0              |
| 0.229826391    | 0              |
| 1.2712301835   | 0.2988203203   |
| 0.4731010603   | 0.4807349534   |
| 0.4021961842   | 0.1946123648   |
| 19.2172642556  | 6.0652012697   |
| 1.9563673285   | 1.2424593753   |
| 2.5920710858   | 1.0261933969   |
| 20.7693567346  | 23.8528514216  |
| 9.5357122836   | 3.2833664507   |
| 206.8256375042 | 126.8286453219 |
| 29.2143221003  | 35.3141578741  |
| 7.540200518    | 9.0496044704   |
| 0.0867033554   | 0              |
| 12.4396327852  | 3.9574401474   |
| 15.1041512601  | 6.5957289545   |
| 4.4587060767   | 6.9240341144   |
| 6.7542439803   | 8.5219125677   |
| 0              | 0.6474256085   |
| 0.158145982    | 0.0573920727   |
| 22.7356885902  | 12.2382599085  |
| 0.5275175484   | 0.4494657284   |
| 0.0662184667   | 0              |
| 1.4039631454   | 0.6635429302   |
| 1.4123082259   | 1.0991020946   |
| 0.9929913073   | 0.7335944184   |
| 0.2603056308   | 0.171143651    |
| 0              | 0.003997       |
| 3.1720846047   | 1.9186124535   |
| 123.7072828542 | 165.4798621713 |
| 0.0322872685   | 0.0351516979   |
| 2.3501842203   | 2.9266010624   |
| 1.0273183577   | 0.9320491288   |
| 1.8804109237   | 1.5655328985   |
| 0.9315711688   | 0.6500701714   |
| 7.2206044372   | 3.5155653583   |
| 0              | 0.2961959264   |
| 3.3882656287   | 2.3889775355   |
| 12.1387284587  | 6.7359889028   |
| 0.7684791118   | 0.7361701373   |
| 17.3398353943  | 14.8272968738  |
| 17.4306788556  | 27.4377862536  |
| 1.3085037262   | 0.8247627727   |
| 0.8604759973   | 0.6809620486   |
| 0.7612205602   | 3.3903562922   |
| 4.0808330546   | 7.3082029817   |
| 5.3102614369   | 3.741176865    |

gene\_expression\_table

|               |                |
|---------------|----------------|
| 0             | 0              |
| 9.3621209278  | 11.2528897712  |
| 4.3987179966  | 5.2270254485   |
| 39.7030451333 | 45.8815115744  |
| 0.2724298969  | 0.4391947597   |
| 0.0117490604  | 0.006674       |
| 0.9133431541  | 0.6487094916   |
| 10.9872729597 | 5.1081104462   |
| 7.9268306482  | 42.9962676996  |
| 0             | 1.6565269404   |
| 0.8526298363  | 0              |
| 0             | 0              |
| 0.1562669268  | 0.0850652294   |
| 1.2402678153  | 0.5751280537   |
| 3.3743306452  | 2.1622296292   |
| 1.7852856783  | 1.2333775414   |
| 4.5807869001  | 5.9176246768   |
| 1.1535156143  | 2.0249983897   |
| 1.0109544409  | 0.6848447077   |
| 0.0729744221  | 0              |
| 0.0215784823  | 0.1644500227   |
| 0             | 0.0408228218   |
| 0.7728406185  | 0.5889833006   |
| 3.7767659515  | 1.2075632443   |
| 0.006893      | 0              |
| 6.1216072332  | 4.1719958838   |
| 0.0149010072  | 0              |
| 0.0126636322  | 0              |
| 18.9200508552 | 16.5177299655  |
| 62.4739038145 | 101.1079380868 |
| 41.3845701697 | 48.6096153446  |
| 0             | 0.0476690961   |
| 2.0166116678  | 0.715930237    |
| 9.7104712132  | 6.1215029943   |
| 0.002737      | 0.002979       |
| 0.0232197053  | 0.007584       |
| 9.3933460034  | 4.4567380552   |
| 65.5071256415 | 62.5684624778  |
| 2.5137528436  | 2.8425341529   |
| 0.2613734287  | 0.2354993327   |
| 0.165648683   | 0              |
| 0             | 0.1373878508   |
| 0.2533907843  | 0.1597147044   |
| 0.9459247859  | 1.0047262339   |
| 8.3436590161  | 8.7739626385   |
| 70.3140950563 | 104.5507599112 |
| 1.8565758197  | 1.0213943424   |
| 0.0564045063  | 0.0706198262   |
| 0.005948      | 0.0275221574   |

gene\_expression\_table

|                |               |
|----------------|---------------|
| 21.7477482792  | 23.9066999277 |
| 68.0991803682  | 94.8496539954 |
| 0.8371011991   | 0.3467154407  |
| 0.0106391209   | 0.005791      |
| 82.738354604   | 30.9719252182 |
| 6.8515272431   | 6.5697844732  |
| 0.1547158618   | 0.126331341   |
| 0              | 0             |
| 0              | 0.0511790001  |
| 5.9525352771   | 7.4602558743  |
| 8.153823446    | 10.5211332193 |
| 116.7565922458 | 87.1187835414 |
| 2.6533850624   | 3.350020055   |
| 0              | 0.2719583047  |
| 22.5633253612  | 44.5005795635 |
| 0              | 0.0140430107  |
| 5.6004500173   | 2.1665985852  |
| 0.5862874733   | 0.5813099629  |
| 6.89795593     | 6.852803685   |
| 39.5543315036  | 23.9670500922 |
| 6.0214339069   | 4.8074674444  |
| 9.5649565272   | 4.8813425252  |
| 3.3681774231   | 1.6219387693  |
| 1.3053910893   | 0.3045431707  |
| 0.0415603018   | 0.002514      |
| 0.1359477842   | 0.1850108288  |
| 8.695149856    | 4.5935509231  |
| 5.447862305    | 6.8652244114  |
| 1.5828224013   | 0.783293476   |
| 5.2527729478   | 5.8597390986  |
| 0.7802684717   | 0.0849491545  |
| 10.713959691   | 8.6703814374  |
| 18.6322736455  | 5.8757342365  |
| 0.3039380295   | 0.0693827818  |
| 4.7858249944   | 4.2284473062  |
| 33.5467244719  | 67.2040794187 |
| 0              | 0.1349220706  |
| 0.0816439216   | 0.0444435625  |
| 1.0168461309   | 5.1399105793  |
| 1.0521725472   | 1.5050422223  |
| 2.3651889735   | 3.9615714309  |
| 8.6928593871   | 4.9564760712  |
| 11.8102003992  | 5.4516037769  |
| 11.7279396759  | 11.2164461326 |
| 19.6303569655  | 25.8592423442 |
| 0.1132800622   | 1.2332992886  |
| 6.0943092114   | 8.2857668993  |
| 0              | 0             |
| 6.965476778    | 1.9500256135  |



gene\_expression\_table

|                |                |
|----------------|----------------|
| 6.103310101    | 3.5082566142   |
| 0              | 0.0293173725   |
| 21.785745133   | 37.5735923602  |
| 0.398369103    | 0.131254709    |
| 23.2692648242  | 32.2057589977  |
| 3.6546808896   | 2.3184218605   |
| 17.4403000138  | 10.8816367546  |
| 2.6167320603   | 2.6389034033   |
| 0              | 0.1302826378   |
| 43.9637937258  | 154.9979505246 |
| 0.0169944795   | 0              |
| 1.2895418046   | 0.6032580802   |
| 1.0815972837   | 1.7896941692   |
| 0.7292751984   | 1.594510375    |
| 0.2038760385   | 0.1577107714   |
| 12.7287623185  | 7.4470667428   |
| 99.3638389959  | 100.6721092344 |
| 28.5042533232  | 35.1762228942  |
| 2.4305982512   | 0.2646233622   |
| 10.0046723724  | 7.5617398404   |
| 5.7009674666   | 5.7685328149   |
| 26.6467281562  | 17.2021787704  |
| 8.9169557233   | 3.8862408051   |
| 20.2878113434  | 8.8350739943   |
| 0.0277508366   | 0.1812768443   |
| 1.6999072205   | 1.2800119256   |
| 0.009291       | 0.003034       |
| 0.7570259624   | 0.4224824273   |
| 14.5786245565  | 7.4733614901   |
| 25.6535771697  | 8.9177025483   |
| 0.7602597704   | 2.2466352729   |
| 0              | 0.1305102403   |
| 0.007501       | 0              |
| 161.3568526779 | 203.8330995626 |
| 13.8316220996  | 10.36299151    |
| 35.0403602796  | 38.5623169414  |
| 21.0857907139  | 36.3071957843  |
| 97.1237796526  | 107.353940747  |
| 6.7687922577   | 8.329284493    |
| 24.0981559439  | 27.4826688901  |
| 17.318029844   | 14.4344061915  |
| 9.2846095505   | 23.7063988563  |
| 29.8147041639  | 17.8955865364  |
| 13.6984641881  | 9.5784968249   |
| 7.3576588671   | 6.6753402054   |
| 28.6979031867  | 28.1558355192  |
| 3.2968152236   | 2.724021381    |
| 1.1291200578   | 0.9749558792   |
| 0.9117850304   | 1.7768897853   |

gene\_expression\_table

|                 |                 |
|-----------------|-----------------|
| 11.1246260323   | 5.4364430902    |
| 12.5369129418   | 15.7059793875   |
| 28.9175774029   | 16.1539707828   |
| 1.3409808275    | 1.0473544419    |
| 0.1838699229    | 0.3196459463    |
| 0.0144627754    | 0               |
| 0.0258394886    | 0               |
| 0.002865        | 0.006238        |
| 27.721931891    | 36.5766405442   |
| 11.3576688515   | 3.1455554888    |
| 15.5751834082   | 11.7573197383   |
| 0.1684897778    | 0.1834376844    |
| 4.764994908     | 4.3604981633    |
| 4.9613164134    | 6.720432974     |
| 0.127505707     | 0               |
| 3.7728508925    | 2.7072599914    |
| 7.1904894701    | 6.0773168014    |
| 0               | 0.1579635362    |
| 139.5852849639  | 84.0270223708   |
| 2.5853495162    | 1.516666257     |
| 22.5656409162   | 13.9280863474   |
| 27.0226542922   | 9.7206508603    |
| 4.0427189387    | 4.4134024312    |
| 2.9442746841    | 3.479747714     |
| 25.5454722308   | 20.2956147223   |
| 0.2127336582    | 0.4053118107    |
| 2.9517211425    | 2.010788527     |
| 0.5979054076    | 0.7606468704    |
| 1.6820866794    | 1.8313163537    |
| 2.215918749     | 1.7634579167    |
| 171.0219340311  | 79.9571045435   |
| 29.1487844971   | 18.9298205329   |
| 0.001186        | 0.003229        |
| 0.025690432     | 0.009323        |
| 2.4623797559    | 4.4353076489    |
| 0               | 0               |
| 0               | 0.0182257499    |
| 5.7290564425    | 6.4365169937    |
| 4.2924868412    | 4.4087767657    |
| 3.8703304593    | 2.0037462355    |
| 0.0880890347    | 0.0799200242    |
| 5.9285860091    | 12.140705592    |
| 23.8973523485   | 14.387816519    |
| 108.4962975641  | 39.3021755076   |
| 0               | 0.0188733288    |
| 4.3707855813    | 3.7837069993    |
| 10.8350355069   | 3.6594321884    |
| 7.2404419965    | 5.2424806506    |
| 4059.0257097875 | 4375.3827057242 |

gene\_expression\_table

|                 |                |
|-----------------|----------------|
| 2.2120112082    | 4.0440494954   |
| 198.6454873244  | 112.6932779197 |
| 17.8270160465   | 9.576809336    |
| 12.9671767456   | 10.8016608256  |
| 1.7008948695    | 3.1827694762   |
| 23.7050349081   | 21.9218585063  |
| 0.003352        | 0.007299       |
| 16.1860912348   | 15.3093097204  |
| 0.0889363842    | 0.003026       |
| 0.7226272102    | 0.3933682621   |
| 0.0355064215    | 0.0115969333   |
| 0.8059967571    | 0.4226993108   |
| 0.001402        | 0.009157       |
| 33.4414543924   | 35.8256436544  |
| 0               | 0              |
| 34.3515707783   | 28.4911472706  |
| 4.5181616756    | 3.6420379463   |
| 0.2890486152    | 0.9440764187   |
| 0.0369009756    | 0.0937410117   |
| 0.0669953497    | 0              |
| 446.514148786   | 115.1531401183 |
| 0.0579263478    | 0.0788317491   |
| 1.0497575342    | 1.5462614087   |
| 5.607266548     | 5.1440841595   |
| 1.5474999529    | 4.5910513803   |
| 0.7357999375    | 2.1322808711   |
| 0.4711990215    | 0.9111534851   |
| 57.0963735236   | 84.1919971319  |
| 0.0653831232    | 0              |
| 26.3459917437   | 12.6754129971  |
| 2.1247064343    | 1.8693419802   |
| 1.5320395499    | 2.7146514677   |
| 0.003238        | 0.0370143501   |
| 0.005415        | 0.0176873891   |
| 0.1041624807    | 0.0850525972   |
| 0.7082420817    | 0.7652630659   |
| 27.5560421148   | 17.7956667511  |
| 7.0478942201    | 2.7071203128   |
| 0.005297        | 0.0115335716   |
| 0               | 0              |
| 17.6390085658   | 9.3810405696   |
| 0.3484386071    | 0.3034808264   |
| 0               | 0              |
| 2047.5357146889 | 1555.588666482 |
| 4.9034273945    | 1.1386193315   |
| 1.7549681952    | 1.9229115427   |
| 1.6397510836    | 1.9591104104   |
| 44.7985219891   | 27.5085975423  |
| 204.0293647664  | 45.6160307606  |

gene\_expression\_table

|                |                |
|----------------|----------------|
| 0.1260251521   | 0.0316628596   |
| 0.3767969581   | 0.0369202727   |
| 0              | 0.003078       |
| 10.7811098972  | 6.2820837656   |
| 0.5201650206   | 0.3236071415   |
| 0              | 0              |
| 0.2109906032   | 0.0220874092   |
| 2.3798207997   | 1.274912568    |
| 1.3921741363   | 1.3230829575   |
| 0.008221       | 0.013425475    |
| 4.0110616125   | 3.0687474169   |
| 488.959686873  | 170.9564728989 |
| 14.0457580309  | 10.5642207605  |
| 0.7988953819   | 0.4348854895   |
| 3.2658958404   | 3.7276832208   |
| 1.1076767455   | 2.0501090448   |
| 4.4251997987   | 4.6855947604   |
| 0.736657484    | 0.4164290594   |
| 219.5134999555 | 93.5092554492  |
| 0.1636009876   | 0.0890575877   |
| 0              | 0              |
| 0.0190206309   | 0.0207080841   |
| 0.1090549332   | 0.1689618649   |
| 6.1926274131   | 5.1656474241   |
| 17.5893934608  | 18.1278962219  |
| 0.005614       | 0.005094       |
| 0              | 0.007893       |
| 1.7999963211   | 2.1659693827   |
| 10.9173055939  | 11.9298778209  |
| 6.5096342138   | 4.8584860632   |
| 6.9564349891   | 6.0475673295   |
| 0.043344534    | 0              |
| 5.2803072293   | 7.0422312639   |
| 0.0188207957   | 0.0170754335   |
| 0.2356692167   | 0.0427628469   |
| 2.0274717829   | 3.2496993952   |
| 25.3386451908  | 4.8801871779   |
| 0.3608860443   | 0.3536124925   |
| 0.0111537588   | 0              |
| 0              | 0              |
| 0.7943216493   | 1.7656159353   |
| 9.6904618867   | 11.8508764949  |
| 0.2494180775   | 0.3711124561   |
| 19.4122733948  | 7.0241039101   |
| 0              | 0.0508303956   |
| 1.2137469555   | 0.760653321    |
| 1.4801307038   | 1.9833150166   |
| 7.6499865261   | 8.8078302411   |
| 2.9233745823   | 2.5183718296   |

gene\_expression\_table

|                 |                 |
|-----------------|-----------------|
| 2.6386549075    | 2.0863536155    |
| 12.2178828208   | 0.9053592492    |
| 1.4434070835    | 1.5051953591    |
| 32.3913202318   | 28.6060346397   |
| 0.9829305267    | 0.6019499074    |
| 903.8184616247  | 1061.804693102  |
| 4.546540373     | 1.9077723277    |
| 32.4763885115   | 30.0058779075   |
| 0.8678539941    | 1.5689984062    |
| 51.0410351555   | 30.4595381357   |
| 0.0273206413    | 0               |
| 0.0125479454    | 0.020491742     |
| 2160.6795638821 | 2875.6746403131 |
| 0               | 0.0393787473    |
| 17.7813391945   | 24.4106566141   |
| 7.04743677      | 0.8480313038    |
| 1.0959638452    | 0.6182916765    |
| 0.2412365919    | 0.4640686581    |
| 0.2779702565    | 0.4302622526    |
| 480.4927849474  | 481.5770433373  |
| 0               | 0.0197251772    |
| 3.3013272383    | 6.4562680295    |
| 263.3464888203  | 126.1320488357  |
| 0.4882867283    | 0.2726184919    |
| 2.3924474386    | 2.4527574568    |
| 4.7523697265    | 3.0219739395    |
| 379.6691925915  | 448.5160518972  |
| 212.8716876688  | 126.883823938   |
| 192.0832302268  | 82.4188215713   |
| 0.0226674829    | 0.0215936646    |
| 0.4080259123    | 0.2142731122    |
| 5.5315278085    | 2.5809721411    |
| 3.1541995167    | 4.7012664477    |
| 38.0933856642   | 26.0411335165   |
| 0.0870260726    | 0.1894935284    |
| 3.648989404     | 1.1180049943    |
| 42.0869191926   | 25.1318923282   |
| 7.1170128893    | 2.9826987084    |
| 0.0234819773    | 0.0766956834    |
| 0.4578127308    | 2.3924568012    |
| 40.2635521799   | 9.5011462766    |
| 24.0521714761   | 12.4951498572   |
| 1.1829831549    | 0.3219834662    |
| 0.0120036647    | 0               |
| 0.008665        | 0.0117926003    |
| 0.0152637452    | 0.009496        |
| 0               | 0               |
| 0.0285335255    | 0.006213        |
| 82.1191964662   | 110.4230351143  |

gene\_expression\_table

|                |                |
|----------------|----------------|
| 9.3828678991   | 10.9430608267  |
| 0              | 0.1009507693   |
| 3.4286893808   | 2.0137864247   |
| 94.5646930764  | 59.695712495   |
| 0.0181057841   | 0.009856       |
| 5.4013615405   | 4.944021411    |
| 0.0008663      | 0.003301       |
| 0              | 0.0153528377   |
| 12.0277122517  | 11.1083727323  |
| 28.9333505315  | 15.1201106037  |
| 130.0771936809 | 122.4947653339 |
| 0.004646       | 0              |
| 16.1687884086  | 21.5537956435  |
| 0.006735       | 0.003666       |
| 0              | 0.002648       |
| 0              | 0              |
| 14.758773822   | 16.4909733447  |
| 3.8649601484   | 4.4715395909   |
| 18.9950728306  | 12.4758738895  |
| 0.2939468311   | 1.7381745133   |
| 0.008447       | 0.002299       |
| 37.2763901784  | 18.7432627628  |
| 1.3716967744   | 1.1346832663   |
| 3.6020243417   | 6.3549576962   |
| 0.3268089947   | 0.759045347    |
| 22.9415122721  | 26.2882927774  |
| 1.0588999751   | 0.8925231469   |
| 15.6033287937  | 9.5087875534   |
| 0.3267599385   | 0.1660162458   |
| 20.6889297033  | 12.5379901716  |
| 8.865281253    | 8.3153817246   |
| 2.13316059     | 2.2773128812   |
| 2.2320511      | 1.3603120237   |
| 0.0371566125   | 0              |
| 9.5336253641   | 8.0038484831   |
| 0              | 0.002137       |
| 14.569405749   | 11.0913159664  |
| 42.6545358647  | 16.2535513272  |
| 24.913632075   | 23.2372389958  |
| 36.3504267429  | 21.7686940735  |
| 404.2325495322 | 335.0172030638 |
| 0.207187448    | 0.1031170266   |
| 38.7162568665  | 39.5767534208  |
| 5.4662962036   | 2.5687017386   |
| 3.3669197301   | 3.099760423    |
| 6.6369086107   | 0.9917648305   |
| 72.1560641488  | 69.5917278487  |
| 0.0792138845   | 0              |
| 19.4382945331  | 14.2616068222  |

gene\_expression\_table

|                |                |
|----------------|----------------|
| 0.929283706    | 1.7149649247   |
| 3.0155958053   | 2.2114078975   |
| 0              | 0              |
| 0.0350812521   | 0.004774       |
| 0.009179       | 0.009994       |
| 1.1615829234   | 0.643608919    |
| 5.5722871314   | 2.2847385645   |
| 0.2905610768   | 0.2714528739   |
| 8.8898557431   | 6.3090996231   |
| 0.0776452734   | 0              |
| 38.2427280189  | 111.4166949812 |
| 8.1858467138   | 7.2221860367   |
| 0.24597252     | 0.1728491531   |
| 0.0342748084   | 0.0373155664   |
| 0.319660634    | 0.0580033274   |
| 0.3800566974   | 0.5015444669   |
| 35.3949125589  | 26.5050675186  |
| 3.1586131175   | 3.7574200205   |
| 12.7158813016  | 20.280090302   |
| 3.5052091667   | 1.9873582443   |
| 0              | 0.0531253306   |
| 2.1322699786   | 2.080801638    |
| 1.524194221    | 1.2969804934   |
| 0.3311861305   | 0.126198789    |
| 4.2352346152   | 3.0125016414   |
| 8.7987496223   | 6.5542909024   |
| 0.7206474096   | 0              |
| 23.1407067473  | 18.3654868616  |
| 1.8342229435   | 3.4708887467   |
| 155.9726227391 | 130.4211170468 |
| 0              | 0              |
| 0              | 0.287955852    |
| 3.3779922013   | 2.0551727295   |
| 0.443241798    | 0.8444885366   |
| 25.1856340132  | 5.1496149698   |
| 9.2639627122   | 11.0695416284  |
| 2.3845182723   | 0.7716651585   |
| 60.5668547358  | 127.7960629809 |
| 8.3274811774   | 7.7586351411   |
| 76.7058591586  | 45.3962915496  |
| 250.6445279869 | 211.9717357902 |
| 49.7282565719  | 9.4982452674   |
| 4.7975755293   | 1.20535431     |
| 63.4079407086  | 30.1888754576  |
| 2.4940794196   | 2.0688355422   |
| 3.5755247973   | 0.9731836526   |
| 8.258866797    | 2.9503584584   |
| 50.5784751731  | 16.9061192215  |
| 4.3354925634   | 3.5937311018   |

gene\_expression\_table

|                 |                 |
|-----------------|-----------------|
| 4.5223097085    | 1.7278752274    |
| 2.4836045918    | 1.2290647846    |
| 490.3535634793  | 728.8076004385  |
| 1.4841010833    | 0.5385886902    |
| 34.8872213976   | 5.5347629607    |
| 189.304214695   | 177.429651625   |
| 619.9764641941  | 524.2688490681  |
| 18.4914568758   | 11.8961601609   |
| 164.4174140899  | 99.9811392809   |
| 0.4836893313    | 0.0658250994    |
| 43.4544529058   | 13.5968539326   |
| 1.3483713129    | 0.8647092439    |
| 21.3700777445   | 5.6313772259    |
| 0               | 27.6001142781   |
| 26.4230115261   | 16.5869292003   |
| 13.6453947377   | 15.6916216336   |
| 0               | 0               |
| 4.8546968951    | 0               |
| 26.1676943752   | 10.3597140242   |
| 321.0194898702  | 67.5169245435   |
| 2.8084570266    | 0.7938038663    |
| 5.1403507867    | 7.7924379541    |
| 44.8370675228   | 27.7299172577   |
| 82.4671549064   | 101.9006889865  |
| 8.3721530492    | 3.1719870455    |
| 23.1836355526   | 13.0112577371   |
| 0               | 0.0727663816    |
| 47.2738058777   | 36.291394504    |
| 3.8798808536    | 1.8984684139    |
| 82.8881874406   | 30.0199464067   |
| 110.8535960325  | 61.4810147056   |
| 17.3558748186   | 2.7787699802    |
| 29.6028830665   | 28.9078360314   |
| 43.4709858976   | 29.2789396658   |
| 0               | 0.04011235      |
| 3.5177646718    | 4.1104857535    |
| 1.1807808758    | 0.4915285493    |
| 5156.7669241441 | 6135.1110454026 |
| 1.5606052817    | 2.5081324874    |
| 4.6032312294    | 4.5104544611    |
| 141.4985804454  | 60.4125134091   |
| 3.2774524751    | 5.5781639067    |
| 5.1246662023    | 7.3925873192    |
| 0               | 0.8062561177    |
| 134.9955317273  | 47.5028579206   |
| 1.1964353173    | 0.3907738387    |
| 23.1941086587   | 18.7063767673   |
| 0               | 0.7856573246    |
| 14.5370992804   | 7.6963178842    |



gene\_expression\_table

|                 |                 |
|-----------------|-----------------|
| 0.7995779995    | 1.1005463945    |
| 2.2659265283    | 0               |
| 1.3237026197    | 1.0465897966    |
| 0.008256        | 0               |
| 2.2292461711    | 2.0353565251    |
| 2.6357264418    | 4.0874548925    |
| 22.3435125961   | 12.9937962428   |
| 0.0991605964    | 0.3257348213    |
| 0.002162        | 0.001177        |
| 7.0590085072    | 10.1829728447   |
| 3.6473297674    | 3.1568733716    |
| 6.7362166136    | 9.1144036579    |
| 3.222237128     | 1.9722596062    |
| 0.2499890803    | 0.6243839437    |
| 0.2231669793    | 0.3170405863    |
| 0.0958034314    | 0               |
| 0.7841004717    | 0.6473614942    |
| 0.0524368412    | 0.0285444401    |
| 0               | 0               |
| 0.4471565718    | 1.1011562164    |
| 2.0782800598    | 4.0949960237    |
| 1.2522856985    | 1.2849165362    |
| 0.1112557067    | 0.3028149464    |
| 44.6515743096   | 35.7810889685   |
| 3.7309716804    | 7.6909114669    |
| 0.009292        | 0.0202331272    |
| 1.1544340938    | 0.8828189015    |
| 109.1160551675  | 70.967097358    |
| 0.0187670964    | 0.0122093998    |
| 0.1094365853    | 0.3931800515    |
| 0               | 0.003236        |
| 0.053949446     | 0.0629310844    |
| 6.5675489139    | 11.7393318329   |
| 19.2708797435   | 16.3940918954   |
| 0.0289612115    | 0.0885281195    |
| 0.2052583575    | 0.2147778296    |
| 0.7490694672    | 0.7712358665    |
| 0.004822        | 0.002625        |
| 0.001048        | 0               |
| 0.2939556877    | 0.0753022477    |
| 324.8148070084  | 238.1811490758  |
| 6.0417124914    | 5.899244454     |
| 74.8481740737   | 105.0945052364  |
| 1.4590317927    | 1.4807119965    |
| 3409.2992837266 | 5146.6430419897 |
| 0.4550112301    | 0.6068386121    |
| 0.0262892699    | 0.0143107875    |
| 0.1423442774    | 0.1875984515    |
| 0.6419186751    | 1.0432128128    |

gene\_expression\_table

|                |                |
|----------------|----------------|
| 2.9962842603   | 3.9756911924   |
| 58.9029621135  | 113.4583911453 |
| 3.9536845062   | 4.1597563349   |
| 53.0081956157  | 38.8866694774  |
| 3.9387747983   | 2.858807373    |
| 2.966119727    | 2.3176017185   |
| 3.292128607    | 2.2336296167   |
| 0.5035836245   | 0.8368179711   |
| 0.0837828649   | 0.5929028878   |
| 0.1388162902   | 0.1651253259   |
| 0.4815309922   | 0              |
| 3.3889235088   | 5.9117111919   |
| 3.3200222025   | 4.8078897459   |
| 0.7110790936   | 0.5644945056   |
| 17.4994777672  | 16.6349367446  |
| 28.6865983441  | 14.1590964016  |
| 0.846320156    | 0.2764209409   |
| 2.3164504863   | 2.1854275029   |
| 112.0475628277 | 25.3947100739  |
| 10.5018366804  | 7.6552070089   |
| 16.7784078216  | 25.3314992857  |
| 0.1257043271   | 0.2737128744   |
| 63.688556032   | 39.1894771358  |
| 33.5393856938  | 81.1257112291  |
| 4.0654056252   | 3.177695728    |
| 0.1623680892   | 1.3257967352   |
| 23.473581731   | 5.4513838196   |
| 9.100791163    | 14.668109622   |
| 1.4138069598   | 1.0621626217   |
| 12.0606876763  | 11.8970160456  |
| 14.6832926681  | 18.2451732492  |
| 0.1174954024   | 0.1421324903   |
| 12.5149593075  | 18.2207470236  |
| 3.4774897844   | 2.7281486626   |
| 3.376124926    | 2.546696603    |
| 1.3581234714   | 0.2938267642   |
| 5.2659920821   | 10.8930326355  |
| 169.2216372713 | 137.1210767061 |
| 49.7503828541  | 38.489328691   |
| 0.4476070867   | 1.1208301167   |
| 73.8704211024  | 44.0856236137  |
| 10.4952141446  | 14.4257264719  |
| 7.903539917    | 18.7417835255  |
| 0              | 0              |
| 5.5551489863   | 3.6287910642   |
| 0.0304960789   | 0.1361265573   |
| 0              | 0.0852932524   |
| 1.3928011711   | 9.0981978275   |
| 124.9954828695 | 73.7440344904  |

gene\_expression\_table

|                |                |
|----------------|----------------|
| 28.2660796548  | 44.6775690888  |
| 3.2210460482   | 3.8162317695   |
| 404.2452679668 | 433.744868752  |
| 1.5485375244   | 3.652824758    |
| 0.2334603383   | 0.3271290838   |
| 0.5837341534   | 0.6897731106   |
| 4.0662617121   | 0.8300640429   |
| 11.2777230176  | 7.7039991879   |
| 0.2282248785   | 0.4192970126   |
| 1.2730129679   | 0              |
| 45.0639478844  | 16.5317224194  |
| 13.820701752   | 13.4071139033  |
| 0.9133205017   | 1.9176702778   |
| 11.2540134273  | 9.8509582802   |
| 19.7459541872  | 27.4829265656  |
| 1.3582639574   | 2.2643589875   |
| 0.2638277879   | 0.5744675924   |
| 2.1121833316   | 6.0414138726   |
| 0.4699174712   | 1.1511160578   |
| 126.6004073427 | 98.2945445284  |
| 0.3180367923   | 1.226309381    |
| 1.5622765969   | 1.8055464396   |
| 23.1350508157  | 13.9953927555  |
| 150.2284962555 | 143.9219968179 |
| 1.2938415387   | 2.7806668207   |
| 0.5435390266   | 0.9104002696   |
| 3.6937803154   | 2.0544524556   |
| 0.1401642073   | 0.3334574117   |
| 0.9284375466   | 1.7087430284   |
| 30.8328591369  | 28.112468658   |
| 4.1609609852   | 5.8094452571   |
| 11.3133894408  | 10.7048961862  |
| 2.8145754254   | 7.2905670065   |
| 498.3190741489 | 241.4549670958 |
| 0.124275452    | 0.1392802318   |
| 4.4006660864   | 3.0049317257   |
| 75.6981222094  | 41.1004382219  |
| 10.5659734926  | 6.2039606928   |
| 1.7580751987   | 0.991202572    |
| 0.3431296205   | 0.2988568393   |
| 62.5817798775  | 17.081174599   |
| 0              | 0              |
| 0              | 0.0775603209   |
| 0              | 0.0504931843   |
| 0.513948106    | 0.6104116769   |
| 0.1195528996   | 0.1084660612   |
| 8.1403885338   | 0.369274139    |
| 0              | 0.00438        |
| 3.9887980968   | 4.1255386609   |

gene\_expression\_table

|               |                |
|---------------|----------------|
| 3.1921881614  | 3.8229284502   |
| 0.2854694451  | 0.0258996197   |
| 0             | 0.1327979294   |
| 0             | 1.6710260821   |
| 0.0204920773  | 0.0446201457   |
| 13.480668913  | 5.4508372956   |
| 0.3517031912  | 0.1641022462   |
| 0.0488461104  | 0              |
| 5.9145132744  | 2.8468179665   |
| 0.2838396759  | 0.1695847383   |
| 13.5795717346 | 11.5317622072  |
| 4.5429694785  | 1.6752607998   |
| 1.8698540918  | 3.1310595935   |
| 3.8521812292  | 5.4181108401   |
| 0.0123152986  | 0              |
| 17.9397028241 | 14.8669848082  |
| 3.5213384663  | 2.7767750456   |
| 1.8200176753  | 3.6962300917   |
| 0             | 0.001872       |
| 0.9035796318  | 0.6580439701   |
| 2.9460472455  | 2.4442689178   |
| 1.0162708568  | 1.6504267675   |
| 0.1264499276  | 0.060735964    |
| 61.4252471188 | 44.4588378405  |
| 0.0133796455  | 0.0236708021   |
| 0.0599444632  | 0.0652625558   |
| 14.1503750585 | 2.8233652385   |
| 0.2327436147  | 0.3197564814   |
| 81.4477897179 | 37.0684691256  |
| 7.3508666595  | 3.1963987672   |
| 2.3513319942  | 2.1883316188   |
| 5.8410704858  | 6.5153284743   |
| 0.0423767362  | 0.0485644977   |
| 106.358665512 | 50.207269175   |
| 2.6083203378  | 3.3885034412   |
| 0.0963486608  | 0.2467008499   |
| 0.6794000508  | 1.0140697161   |
| 1.5556377122  | 1.6300465076   |
| 4.1966613604  | 2.2304175428   |
| 41.2649703899 | 22.0813275203  |
| 1.3837768324  | 1.824096639    |
| 1.8043276052  | 1.5455222617   |
| 2.1711622328  | 2.5738951063   |
| 27.1037802321 | 26.0095671626  |
| 0.3354327563  | 0.7888132992   |
| 0.1067024279  | 0.2516989509   |
| 1.0703983263  | 2.0240477894   |
| 590.44401328  | 560.0265627384 |
| 7.2987421451  | 6.6464126831   |

gene\_expression\_table

|               |                |
|---------------|----------------|
| 0.0550792161  | 0.173900468    |
| 0             | 0              |
| 2.3566065691  | 2.3258676627   |
| 5.7537455299  | 4.5771679904   |
| 3.3385199529  | 2.6602935584   |
| 0.1068357544  | 0.0290784753   |
| 12.6630899781 | 7.5285841898   |
| 2.7420544886  | 2.908114735    |
| 4.8365940007  | 1.0126311698   |
| 11.7354601505 | 8.718210855    |
| 0             | 0              |
| 3.4062255259  | 2.7469745306   |
| 6.9889084194  | 6.1251994108   |
| 0.0212885745  | 0.1274747807   |
| 3.8268175529  | 2.8747616996   |
| 0.1430371095  | 0.1946586649   |
| 70.6650445922 | 75.478722394   |
| 3.5077151866  | 4.8065580487   |
| 2.8741901785  | 2.4324156806   |
| 10.1108287276 | 10.6649448095  |
| 0.987129596   | 1.2177410127   |
| 10.9687403337 | 15.5887675059  |
| 0.009247      | 0.005034       |
| 6.5243706977  | 7.8773462488   |
| 12.6811518195 | 8.7745369566   |
| 11.1783675815 | 4.7868976432   |
| 1.2529515934  | 0.7492718457   |
| 0.1472973846  | 0.2138202211   |
| 0             | 0              |
| 0.319339925   | 0              |
| 0.4698622466  | 0.4038529048   |
| 0.1658895442  | 0.3511798227   |
| 2.223160673   | 1.2958740243   |
| 0.2536970807  | 0.1898904722   |
| 0.899289644   | 0.7536277265   |
| 19.2992338944 | 12.8736538284  |
| 4.6794848179  | 1.6088319933   |
| 0             | 0.0125954432   |
| 28.3321213361 | 8.8015108796   |
| 27.6691571487 | 26.5048110826  |
| 1.849615723   | 1.3739941807   |
| 2.5592721519  | 6.191829077    |
| 0.3451136133  | 1.0404860004   |
| 0.5648849097  | 0.8456247263   |
| 0             | 0              |
| 83.2860443103 | 103.8744472168 |
| 6.2452669013  | 2.1297506647   |
| 0.0283406119  | 0.0462823588   |
| 0.3144001875  | 0.2757358885   |

gene\_expression\_table

|                |                |
|----------------|----------------|
| 0.235759205    | 0.201673256    |
| 0.8106114488   | 1.1147702653   |
| 1.0300500095   | 0.4222679627   |
| 0              | 0.0218376829   |
| 0.166993924    | 0.0272713684   |
| 8.3970859523   | 8.3889694166   |
| 2.2993800597   | 3.490816172    |
| 0.270975026    | 0.3365016164   |
| 5.155743203    | 4.5149211738   |
| 0.9205887079   | 1.1454406526   |
| 0.5857598109   | 0.4782949955   |
| 0.8710466921   | 0.3879504558   |
| 0              | 1.7239215099   |
| 0.9132119101   | 0.8920824774   |
| 0.062774664    | 0.3588051783   |
| 3.1939172119   | 1.7897723255   |
| 0.8088206556   | 0.6107226145   |
| 15.2885418313  | 5.6459484888   |
| 5.6211996659   | 2.3206315547   |
| 159.346793867  | 203.1731152558 |
| 22.2724723316  | 14.4015655664  |
| 7.901354237    | 3.8420557389   |
| 2.978876977    | 2.4044072675   |
| 3.6911518648   | 3.5339621037   |
| 0.1549050701   | 0.0666430753   |
| 3.6031253785   | 1.7572651555   |
| 0.0825853186   | 0.0449560199   |
| 55.8430978029  | 26.1049390387  |
| 38.5533356053  | 28.5338260536  |
| 244.4734928036 | 144.1484116234 |
| 0.0233607589   | 0.0254332552   |
| 2.1072343664   | 1.7796778442   |
| 2.7472300351   | 4.1185368926   |
| 0.7204663522   | 0.9818907143   |
| 6.3869098552   | 3.0154498324   |
| 10.211669598   | 4.4610610969   |
| 0.3953364089   | 0.2109850328   |
| 0.1020410453   | 0              |
| 0.0248493238   | 0.003865       |
| 30.2138345382  | 10.3702961332  |
| 2.8457989161   | 3.9212475158   |
| 0              | 0.1128856559   |
| 8.3112908799   | 14.0195723118  |
| 0.0808247276   | 0.1489150461   |
| 25.3467731883  | 16.1314365767  |
| 68.7892289691  | 61.258526112   |
| 2.8509354167   | 7.9638560309   |
| 0.007146       | 0.1050228743   |
| 5.0247630023   | 7.3048906427   |

gene\_expression\_table

|                |                |
|----------------|----------------|
| 0.7825408194   | 0.4675420365   |
| 1.3012814704   | 0.5620075046   |
| 1.6038799055   | 0.8730856549   |
| 7.4341153464   | 7.3680103335   |
| 0              | 0              |
| 29.6136790048  | 26.672455572   |
| 3.025268649    | 10.4691379907  |
| 4.1888648614   | 3.2232023004   |
| 32.0411128577  | 41.3280831504  |
| 1.896130824    | 2.2659465166   |
| 2.5292676162   | 2.9503463965   |
| 0              | 0.0153766117   |
| 0.7954042471   | 0.4717073018   |
| 7.5313949753   | 6.1473572385   |
| 0.1227277753   | 0.1336158147   |
| 269.9869091622 | 188.935490724  |
| 0.6826939881   | 0.0929075683   |
| 0.3774591129   | 0.0613750745   |
| 0              | 0              |
| 0.0633791876   | 0.0379510993   |
| 3.8760075502   | 5.2540679209   |
| 0.0209866601   | 0              |
| 3.8883627622   | 3.5609747442   |
| 1.0820364756   | 0.0883523625   |
| 93.742306767   | 44.4939584841  |
| 0.0670919292   | 0.4121775539   |
| 4.0059402483   | 2.6998741877   |
| 0.1483654382   | 0.1955338632   |
| 7.4498596289   | 7.6118912998   |
| 2.3162809919   | 2.1219809644   |
| 1.1386086836   | 1.4001955024   |
| 2.8299583422   | 1.1236674817   |
| 0.3702632914   | 0.6779609862   |
| 0.3508905179   | 0              |
| 0              | 0.0379980223   |
| 3.3515433565   | 6.0380312748   |
| 1.6624813479   | 0.6914498614   |
| 7.9832268373   | 6.5852584586   |
| 17.2864688578  | 30.899622442   |
| 9.2592677823   | 7.7263429935   |
| 0              | 0.4632353523   |
| 0.9699336425   | 2.1119664797   |
| 4.1209263446   | 8.2076971235   |
| 1.4637523901   | 3.3465854152   |
| 6.7916474443   | 5.4122363031   |
| 987.4899215272 | 650.1420530891 |
| 0.2210273028   | 0              |
| 0.027504368    | 0.0262014138   |
| 0.4259602744   | 0.6384506035   |

gene\_expression\_table

|                 |                 |
|-----------------|-----------------|
| 0.0864343354    | 0.2750689333    |
| 0.6087042048    | 0               |
| 0               | 1.9818138049    |
| 6.6800728905    | 4.1689518067    |
| 0.1322403882    | 0.143972358     |
| 207.430726731   | 186.9797547099  |
| 3.0430987799    | 1.9258922359    |
| 0.4895064753    | 0.1065868037    |
| 0.0161355261    | 0.004392        |
| 0               | 0.0368665045    |
| 0.2402315779    | 0.2979983711    |
| 2.7808681381    | 2.4547932979    |
| 7.9007675752    | 5.6341134521    |
| 0.005187        | 0               |
| 1.292480613     | 1.392175974     |
| 1.3433217981    | 0.6656884127    |
| 16.1154421542   | 12.5860598444   |
| 6.9901380133    | 5.7781771099    |
| 12.3803170285   | 7.8151505461    |
| 0.4714440318    | 0.2566345646    |
| 0.2141291961    | 0.4382770582    |
| 2.4965082531    | 2.5063441243    |
| 27.9828192503   | 38.8110650813   |
| 0.5509742495    | 0.4781453129    |
| 21.8713969063   | 16.7340720218   |
| 0.0433084545    | 0.0314337669    |
| 0.4353448495    | 0.173101114     |
| 19.4628017952   | 20.7707185826   |
| 0.0260251612    | 0               |
| 8.8544816844    | 7.196074765     |
| 2.7884654617    | 1.9363272355    |
| 11.7457873782   | 12.1440061914   |
| 0               | 0.0206970464    |
| 17.1195943876   | 18.6838528404   |
| 1.0553300533    | 1.13869723      |
| 10.3757920227   | 11.8393925032   |
| 0.1556082553    | 0.3388267039    |
| 0.9474846103    | 1.3720839031    |
| 1.7856213138    | 2.1967609847    |
| 0               | 0               |
| 0.5752821693    | 1.0830541074    |
| 2.5871623158    | 2.2586645689    |
| 13.7235850423   | 22.5867885868   |
| 30.965908543    | 27.4230756664   |
| 0.0803563003    | 0.0656139523    |
| 0.5425649261    | 0.8251758546    |
| 0.752846793     | 0.4249970136    |
| 0               | 0.2520326467    |
| 3015.4796328647 | 1800.1533640638 |



gene\_expression\_table

|                 |                 |
|-----------------|-----------------|
| 44.1313471944   | 18.3017002192   |
| 0.6867569959    | 0.7476840123    |
| 0.5654667958    | 0.6412846982    |
| 12.1792353502   | 9.601425643     |
| 11.0942927017   | 9.7819202494    |
| 1088.986388473  | 1191.6407015662 |
| 1.4882404409    | 1.6091749016    |
| 1.637634724     | 0.7195358759    |
| 2.1756320405    | 2.701819982     |
| 3.0361908199    | 3.318266207     |
| 4.8386537164    | 4.9323879361    |
| 4.0476753449    | 2.4305397117    |
| 0.0921159718    | 0.1132885492    |
| 0.0497512294    | 0.1997334704    |
| 0.3360566037    | 0.2090688774    |
| 1129.9575006781 | 1549.410924264  |
| 0.6270474807    | 1.1451360297    |
| 6.498249955     | 2.48782599      |
| 2.1170975694    | 2.9878593919    |
| 2.4738096961    | 1.2146158648    |
| 0               | 0.0368632419    |
| 28.0463140408   | 18.97289241     |
| 0.5461906306    | 2.2370054622    |
| 17.4730864456   | 7.9464192801    |
| 38.302530474    | 28.7183486513   |
| 8.8115375885    | 2.7656275944    |
| 0.3633456599    | 1.2432532977    |
| 3.8340260221    | 2.3546595976    |
| 12.0514069913   | 9.8091892409    |
| 1.80536071      | 1.2413854015    |
| 31.9678340571   | 11.3197229218   |
| 2.7388642038    | 1.0751855782    |
| 11.0606593219   | 12.1360053321   |
| 5.0225398263    | 0.976450797     |
| 18.2805153706   | 9.8774416229    |
| 34.339553074    | 13.9879797644   |
| 5.9033696565    | 8.2954415627    |
| 0.68934631      | 1.2471594679    |
| 15.0164935221   | 47.7688919739   |
| 3.4785493211    | 11.108990233    |
| 20.0114824953   | 6.0279797435    |
| 14.5286299197   | 7.6122037803    |
| 3.5148499217    | 0.8473355864    |
| 25.8232568723   | 24.0741832532   |
| 2.9189908468    | 11.5794450149   |
| 3.375037762     | 3.1034298714    |
| 26.1287857912   | 58.0358443676   |
| 1.3620758481    | 1.3205006098    |
| 22.2239484791   | 8.1721841006    |

gene\_expression\_table

|                |                |
|----------------|----------------|
| 768.1917958772 | 504.5803419907 |
| 3.3122244162   | 1.4610821164   |
| 54.6986810579  | 21.3684376558  |
| 2.0441003018   | 2.0243521519   |
| 3.2163226762   | 3.452345929    |
| 129.2108162451 | 53.4561243651  |
| 5.931267427    | 3.3545307248   |
| 1.2300831011   | 3.8213732466   |
| 4.7437456602   | 2.3113163423   |
| 0              | 0.0270839452   |
| 26.7332723266  | 4.417718341    |
| 6.9252706928   | 6.5851505204   |
| 4.7587542687   | 2.9804312951   |
| 4.0925655359   | 1.8565190204   |
| 3.7194206956   | 0.7976084055   |
| 2.4333899904   | 5.2985460723   |
| 5.6486558364   | 3.4064999962   |
| 112.5911856896 | 23.2479191361  |
| 0.6798023592   | 0.9251404764   |
| 52.9827290585  | 24.7538131123  |
| 0.0184476842   | 0.0200843072   |
| 0.8043103797   | 0.627560905    |
| 25.0268785251  | 11.4797797003  |
| 41.7257483297  | 13.3220063713  |
| 287.0442378975 | 157.3991711034 |
| 6.4821320138   | 8.9202113028   |
| 10.5366036772  | 10.8046785803  |
| 2.4823929551   | 7.3792217252   |
| 1.6417672226   | 1.1857141751   |
| 0.006249       | 0.006803       |
| 1.9901629601   | 6.0749277644   |
| 5.7989155689   | 4.2868615561   |
| 0.1715081316   | 0.2178444538   |
| 20.6932916696  | 8.79562249     |
| 1.997801559    | 2.191518088    |
| 1.2433030641   | 0.5076019406   |
| 1.6946457334   | 2.5016808261   |
| 0.0394401626   | 0              |
| 1.3210878459   | 1.82148505     |
| 7.6309530337   | 6.7472065268   |
| 2.5364831509   | 3.1455095861   |
| 0              | 0.0273883029   |
| 10.8309066558  | 7.4272976462   |
| 0              | 0.0910852719   |
| 1.8169428562   | 1.9956732368   |
| 2.1159906194   | 0.7635616284   |
| 1.0357127511   | 1.0107129071   |
| 2.5396266032   | 2.1758833487   |
| 11.1923191155  | 8.5626207751   |

gene\_expression\_table

|                 |                |
|-----------------|----------------|
| 0.0322196396    | 0.0210468415   |
| 2.7728451493    | 1.4946235651   |
| 18.4920189993   | 13.1229457998  |
| 0.0137321711    | 0.0523265682   |
| 5.5260649215    | 3.8198862168   |
| 1.892698456     | 2.0499912577   |
| 14.4802766356   | 14.7564621065  |
| 0.8514223896    | 0              |
| 31.012144248    | 12.4110699913  |
| 1.5306713482    | 3.5412443076   |
| 132.0916325645  | 37.5655255187  |
| 12.0352884638   | 5.1307018089   |
| 5552.5882908613 | 8016.457202062 |
| 35.7383229356   | 29.3652222838  |
| 18.8980854996   | 2.6028192993   |
| 89.13999241     | 75.1117160385  |
| 0.2835588783    | 1.0805037939   |
| 32.0463545555   | 14.0881360717  |
| 0.0764381182    | 0.1525690436   |
| 2.6247732501    | 1.0054642523   |
| 0.3915687451    | 1.0657688679   |
| 0               | 0.0132102636   |
| 0               | 0              |
| 1.0590794494    | 0.9666631513   |
| 17.118792686    | 23.9261416943  |
| 36.5959788098   | 26.0038215674  |
| 10.3532918563   | 2.5544740153   |
| 0.005182        | 0.002821       |
| 12.310199542    | 8.8892961618   |
| 1.4034840614    | 2.9031942026   |
| 6.2204531469    | 5.4420372747   |
| 132.9498333092  | 114.3043366703 |
| 0               | 0.0326145544   |
| 0.022788257     | 0              |
| 1.4869058751    | 1.3124002528   |
| 28.4773923919   | 13.4860574004  |
| 2.5370322669    | 1.2068098059   |
| 251.243968432   | 91.5326370413  |
| 5.3559428518    | 3.887404002    |
| 0.3554544655    | 0              |
| 2.529899408     | 1.1162343416   |
| 0               | 0.043817932    |
| 0               | 0.0178258385   |
| 84.7439140018   | 14.6780676212  |
| 2.0553937016    | 2.6499576941   |
| 3.4146700787    | 1.4173385626   |
| 38.9054964839   | 29.4916084279  |
| 24.0918838301   | 11.5512892896  |
| 7.0161724326    | 1.9860428021   |

gene\_expression\_table

|                 |                |
|-----------------|----------------|
| 6.555643102     | 4.9084629248   |
| 6.1054499155    | 1.8402225978   |
| 2.2073508878    | 3.2318633286   |
| 36.4506550343   | 23.2826093708  |
| 20.7016306167   | 19.6148499946  |
| 0.2195170494    | 0.4779838845   |
| 0               | 1.6501938088   |
| 168.9345056491  | 98.5706257109  |
| 4.6130533935    | 3.013385775    |
| 19.0402038488   | 6.9557101127   |
| 84.5305179629   | 76.0916876703  |
| 1.2476523396    | 0.6112531373   |
| 188.3546731719  | 134.4043314988 |
| 1.6190459421    | 1.3539447837   |
| 136.4250939041  | 52.4993522504  |
| 6.0852817698    | 8.281437097    |
| 53.3158898151   | 16.8994436965  |
| 0.3167204148    | 0              |
| 0.3395738174    | 0.2904784031   |
| 0.8266707664    | 1.6875197102   |
| 29.5878857704   | 2.3622744979   |
| 30.7808441435   | 23.5258399403  |
| 0               | 1.0581434474   |
| 121.5258855342  | 16.3350709704  |
| 25.1716508835   | 18.8103980738  |
| 10.2735670305   | 8.4657163207   |
| 98.4132605463   | 64.8099190519  |
| 0               | 3.1273083677   |
| 0.0761210547    | 0.1657485717   |
| 510.3112476203  | 127.888046864  |
| 17.583955265    | 8.2495314833   |
| 179.7499216358  | 101.8947594903 |
| 2.7657705621    | 1.3382850725   |
| 3.9076888319    | 0              |
| 0.6273972677    | 4.439877439    |
| 0               | 0.296349184    |
| 1576.7141486503 | 484.8095978338 |
| 0.5529603038    | 1.3545388797   |
| 55.7523385282   | 29.5018652117  |
| 84.801068671    | 26.7693067441  |
| 58.6086233603   | 7.2112011666   |
| 0.6871506722    | 0.7284254403   |
| 3.6241405261    | 1.1940823388   |
| 8.5685392711    | 3.7897901926   |
| 0.1971721182    | 0.1578416441   |
| 1440.4906632646 | 303.9886900591 |
| 14.6635873041   | 6.5525919269   |
| 86.6045546394   | 13.6254119097  |
| 13.2045794255   | 12.3728299374  |

gene\_expression\_table

|               |               |
|---------------|---------------|
| 1.0708487297  | 1.4217054352  |
| 1.2804728159  | 2.2343354012  |
| 4.1631708238  | 3.9421452477  |
| 0.0177247757  | 0.1061349549  |
| 4.9582239225  | 6.4154021256  |
| 28.4537909771 | 20.8926780344 |
| 12.2571210496 | 2.9654524416  |
| 61.1896224595 | 68.174371976  |
| 1.7010113248  | 5.0624204829  |
| 0.0807660692  | 0.0378309478  |
| 0.5648596374  | 0.956623557   |
| 6.4041378603  | 8.6244960259  |
| 8.6592615122  | 7.0461480825  |
| 49.9672669757 | 89.4951345194 |
| 0             | 0             |
| 0.1390852597  | 0.0189280607  |
| 0.1428550388  | 0             |
| 10.6105901871 | 9.8893386718  |
| 4.4757610485  | 1.5898663471  |
| 2.118091333   | 2.2842472935  |
| 51.9236538843 | 53.8517960119 |
| 4.8177883402  | 1.179155296   |
| 1.3145242604  | 2.0751601073  |
| 1.3043850918  | 3.818934285   |
| 0.020360029   | 0.0664989287  |
| 36.5815749742 | 35.6632523779 |
| 4.4060083596  | 2.6330788803  |
| 0.5888589987  | 0.6227836334  |
| 1.1484166532  | 1.4088533552  |
| 2.5547150925  | 0.7571484728  |
| 31.7812166061 | 27.5061429275 |
| 0.8230047629  | 0.7601711886  |
| 0             | 0.0192318656  |
| 2.3085158548  | 2.2093108791  |
| 0.1947386707  | 0.1476535127  |
| 0.5065696765  | 1.3787775388  |
| 0             | 0             |
| 1.3759996312  | 2.1885927511  |
| 2.1530064794  | 1.9952030252  |
| 3.409514626   | 5.1778133213  |
| 4.1231942171  | 3.4803890684  |
| 16.5245898533 | 3.3639451706  |
| 16.3901147836 | 10.2011769666 |
| 0.3398681552  | 0.3499872937  |
| 0.005179      | 0.0140966529  |
| 7.1070419228  | 8.4873206265  |
| 4.9892876128  | 2.6119455749  |
| 5.6057882669  | 9.5649690052  |
| 20.8922619491 | 8.0519250526  |

gene\_expression\_table

|                |                |
|----------------|----------------|
| 0              | 0.0126869096   |
| 3.2168910197   | 2.0047556242   |
| 0.024495303    | 0.0475031813   |
| 4.6749969895   | 3.8027885151   |
| 0.0558789749   | 0.0912545844   |
| 18.923700544   | 9.9772303892   |
| 1.4422544405   | 0.6056512404   |
| 7.1221565658   | 4.3527748593   |
| 0.316387075    | 0.0861139963   |
| 15.4596076111  | 5.745244061    |
| 2.6408197069   | 2.8751052936   |
| 0.7792248928   | 1.2169032136   |
| 2.1233872217   | 2.3714262763   |
| 4.2019596023   | 3.2577728322   |
| 4.2934861841   | 1.9863639367   |
| 0.4351236982   | 0.1666815691   |
| 15.9036341057  | 53.1888951335  |
| 4.6436231171   | 2.7367044369   |
| 1.85247026     | 1.7962266195   |
| 0              | 0              |
| 0.0103333846   | 0              |
| 0.1376184809   | 0.2318087069   |
| 0.4612325387   | 0.6728832823   |
| 7.2643068178   | 12.4023960363  |
| 0.0133283605   | 0.0133015782   |
| 0.0861848966   | 0.0938309616   |
| 0.4152901965   | 0.5583576287   |
| 3.111055106    | 3.2596384401   |
| 460.6978934198 | 522.9656603118 |
| 6.1304892527   | 7.3948961781   |
| 542.9667274262 | 634.8899439501 |
| 2.7981422793   | 3.2923171784   |
| 2.7629802429   | 2.1158694428   |
| 0.009521       | 0.036281124    |
| 8.2136845725   | 8.5319789901   |
| 4.055811955    | 3.6796928341   |
| 0.0160331025   | 0.009399       |
| 1.1944982484   | 0.7027387404   |
| 0.0990640589   | 0.0693338943   |
| 0.039307551    | 0.0356623323   |
| 2.4850754632   | 2.5640775416   |
| 1.8539065107   | 0.8815910564   |
| 3.7402010946   | 4.3471570135   |
| 0.6417733179   | 0.7551708928   |
| 26.4613627725  | 19.9150736302  |
| 2.262272463    | 3.5747337882   |
| 2.3893927828   | 2.0724267811   |
| 18.1051680797  | 10.9089832251  |
| 0.1297591943   | 0              |

gene\_expression\_table

|                |               |
|----------------|---------------|
| 0.0674798113   | 0.045210103   |
| 0.588527479    | 0.570303925   |
| 15.6162125048  | 14.2922370475 |
| 50.6266385886  | 22.8256178419 |
| 0.6395699377   | 0.6410154019  |
| 0.7012210092   | 0.5123025356  |
| 12.8264959045  | 10.0242546214 |
| 9.9112662106   | 9.3490764064  |
| 2.2301065476   | 2.2449432217  |
| 0.0647259504   | 0.0921507782  |
| 1.1332721677   | 2.4305181882  |
| 29.0574321283  | 14.1513722276 |
| 3.1635489032   | 1.5519566547  |
| 0.2818355808   | 0.2307850291  |
| 21.9861519678  | 15.7769080625 |
| 0.2473040883   | 0.0800455622  |
| 0.1033764878   | 0.0337643217  |
| 0.008945       | 0.006492      |
| 1.1468346426   | 0.6291286335  |
| 1.979232278    | 0.864589803   |
| 2.2355138041   | 1.7374535888  |
| 0              | 0             |
| 1.6463752882   | 1.8598215956  |
| 3.6905108444   | 8.1415785337  |
| 7.8899756303   | 7.643208691   |
| 7.5573530408   | 5.577314906   |
| 1.1630821037   | 1.1856866087  |
| 15.6521450648  | 12.8351850551 |
| 0.0197463585   | 0.0429963921  |
| 9.7212973581   | 14.5923643397 |
| 0.0436050072   | 0.0237367562  |
| 235.7888064703 | 206.999328182 |
| 1.9157778915   | 3.9629059005  |
| 0.1637325269   | 0.1782583846  |
| 8.6946691067   | 6.0759491694  |
| 0.6547263335   | 8.5537402309  |
| 87.581455438   | 60.2620967553 |
| 0.0584898806   | 0.0795986588  |
| 2.0244664728   | 1.5020336066  |
| 0.468452902    | 0.4707808943  |
| 3.4701042983   | 3.5342220684  |
| 0              | 0             |
| 1.2457849141   | 0.6781536036  |
| 22.4619049416  | 5.3997934145  |
| 98.9863082135  | 51.2691759083 |
| 0              | 0             |
| 0.043951268    | 0.0296217334  |
| 0.1257268588   | 0.2053214517  |
| 0.4739691411   | 0.4045058384  |

gene\_expression\_table

|                |                |
|----------------|----------------|
| 0.4829677384   | 0              |
| 0.0266726014   | 0              |
| 1.3555916297   | 0.9752730283   |
| 0.7163884299   | 0.4322351184   |
| 0              | 0              |
| 0              | 0.004986       |
| 8.3905605594   | 4.601306069    |
| 1.2369593082   | 1.7843756716   |
| 1.8344037799   | 0.4992866424   |
| 0              | 0              |
| 0.1078275426   | 0              |
| 0.1896508919   | 0.4335999128   |
| 0.7481740175   | 0.5414904704   |
| 3.6636829237   | 1.7936669247   |
| 2.584417839    | 2.3056705232   |
| 3.8319878562   | 2.5398274844   |
| 0.2742775535   | 0.1816847831   |
| 0.008049       | 0.002629       |
| 45.8233562095  | 21.3211340664  |
| 189.0532806433 | 113.2465031391 |
| 1.397110643    | 2.7934817027   |
| 15.8910614689  | 8.1164569106   |
| 3.4997982094   | 1.0086061201   |
| 47.7976248948  | 29.8405902318  |
| 0.244479025    | 0.1007123938   |
| 0.0144200595   | 0              |
| 1.6851068128   | 0.9655812759   |
| 5.9696815439   | 4.4980164498   |
| 111.3152064554 | 99.6287859209  |
| 0.005376       | 0.0117068743   |
| 0              | 0              |
| 0.003526       | 0.001919       |
| 130.8118249012 | 42.9096747867  |
| 3.0807375318   | 0.3194334577   |
| 10.7218837914  | 7.5980294148   |
| 0.4091700556   | 0.6569074275   |
| 0.0101391065   | 0              |
| 0.2027498915   | 1.9452470369   |
| 7.2697300217   | 4.6706794421   |
| 1.3164671349   | 2.224539179    |
| 0.0762976953   | 0.004615       |
| 0.1045890791   | 0.0341603724   |
| 107.7260886096 | 80.1737063246  |
| 1.0063323502   | 1.4189062195   |
| 1.9798141226   | 3.1744007226   |
| 1.6812025433   | 0.6382154627   |
| 0.6667919279   | 1.0481379765   |
| 24.1346167028  | 18.6937451341  |
| 0.3076178166   | 0.108845342    |



gene\_expression\_table

|                |                 |
|----------------|-----------------|
| 9.3868138827   | 11.6557371197   |
| 157.4564923604 | 37.7911839633   |
| 2.7920210646   | 2.3304525991    |
| 220.521339483  | 188.7336781251  |
| 13.5432507569  | 5.9138595101    |
| 3.7505089965   | 3.0723429449    |
| 0.0222643252   | 0.1454372955    |
| 4.5394071187   | 3.5350558477    |
| 0.6618826566   | 0.4954144913    |
| 0.2575499539   | 0.1401995058    |
| 0              | 0               |
| 0.4072557453   | 0.6650793764    |
| 9.7287400294   | 11.5725709548   |
| 39.1849813059  | 29.1923142996   |
| 140.3662448971 | 74.0890131263   |
| 0.917849941    | 0.8897688203    |
| 38.0701969635  | 34.5319373528   |
| 0.107647352    | 0.1757962522    |
| 0.1340202627   | 0.0416886107    |
| 0.1938366282   | 0               |
| 0.093603062    | 0.2292912996    |
| 1.1122724076   | 0.701999926     |
| 48.9933918938  | 43.7457910318   |
| 1.8593349722   | 2.6341717       |
| 0.0677970686   | 0.009568        |
| 0.0402750428   | 0.0438481235    |
| 14.3924571607  | 6.228111649     |
| 101.8176035196 | 207.0124327136  |
| 0              | 0.0190921094    |
| 1.7388663598   | 1.5221172717    |
| 35.8643730217  | 20.6477438081   |
| 476.7145471447 | 1007.7705401626 |
| 5.4209991071   | 2.6943611071    |
| 1.2355896343   | 1.258919456     |
| 1.3772942659   | 2.840818678     |
| 0.692884569    | 0.9574508375    |
| 6.1423393372   | 22.84391585     |
| 3.38389205     | 3.2836550445    |
| 4.4816146245   | 2.405484652     |
| 1.4484534394   | 1.7856706231    |
| 223.8107343598 | 83.0681420432   |
| 242.8868083091 | 124.6324671272  |
| 0.3137600248   | 0.2508594678    |
| 15.0595621814  | 8.7413823991    |
| 0.1053936911   | 1.1474390256    |
| 6.9028437713   | 4.2957976536    |
| 1.7473697511   | 1.4445727139    |
| 1.6550196865   | 0.2434929809    |
| 8.1506323113   | 11.7566724631   |

gene\_expression\_table

|                |                |
|----------------|----------------|
| 12.674586143   | 28.5236198448  |
| 492.1855053539 | 320.2209540499 |
| 3.2429577672   | 4.5898622027   |
| 14.2110129232  | 7.5049636782   |
| 6.4900165643   | 8.3018435951   |
| 35.6616528215  | 187.0367744248 |
| 0              | 0.5812846019   |
| 2.8879746985   | 2.1586956437   |
| 8.1225651783   | 5.6291637567   |
| 1.6400917003   | 1.1401131205   |
| 0.2431569568   | 0.2261227825   |
| 1.8645218099   | 2.67033324     |
| 0.1422779199   | 0              |
| 0.5354298836   | 0.4718970205   |
| 84.1419725873  | 76.3838224249  |
| 164.3654870424 | 41.5113320591  |
| 95.7672154141  | 35.7877058217  |
| 0.4607744241   | 0.6369873108   |
| 0.00137        | 0.009692       |
| 1.3480697765   | 1.5351453935   |
| 2.1858436835   | 1.526840482    |
| 452.4580416071 | 665.9573500095 |
| 1.6406894142   | 1.4900812334   |
| 283.655463421  | 102.673364447  |
| 1.5124909536   | 1.0404812064   |
| 75.6229375434  | 24.0134933671  |
| 0              | 0              |
| 5.976808242    | 6.1775816814   |
| 2.8556667528   | 2.7432466973   |
| 14.1777712314  | 14.7490625535  |
| 0.8622079842   | 1.2711569067   |
| 9.3571899735   | 7.3975443493   |
| 0.009683       | 0.0368971675   |
| 164.7444766905 | 99.9778559934  |
| 0              | 0              |
| 0.5704815515   | 0.5577776583   |
| 0.002744       | 0.001494       |
| 5.8465342343   | 4.7970741729   |
| 0.1180726314   | 0.1687188304   |
| 0.4888469163   | 0.3625721128   |
| 6.7333915525   | 6.768818189    |
| 5.0117133622   | 3.005709731    |
| 0.3123482909   | 0              |
| 1.7649959252   | 1.8085468786   |
| 0.0478318487   | 0.0260376733   |
| 4.0172519288   | 3.6468338988   |
| 3.1980097811   | 1.0713007989   |
| 20.2781345417  | 24.9436949479  |
| 0.1368760087   | 0.0520161487   |

gene\_expression\_table

|               |               |
|---------------|---------------|
| 0.0804228408  | 0             |
| 0             | 0             |
| 0.4264079507  | 0.0178552916  |
| 1.7164258683  | 1.609160066   |
| 0.5230464119  | 0.3050622415  |
| 1.3196977011  | 1.413223588   |
| 9.7636100654  | 9.9747499948  |
| 5.0252569091  | 0.7034249054  |
| 10.8014908311 | 3.4408206069  |
| 4.9807476967  | 3.3275196786  |
| 3.7605811987  | 0.6230317525  |
| 1.4171699922  | 0.6240931905  |
| 6.9995755703  | 4.2319076094  |
| 0             | 0             |
| 2.2744719544  | 1.2959845897  |
| 0             | 0.1248352636  |
| 1.8380117235  | 2.4003500472  |
| 3.999538335   | 3.7225554795  |
| 15.164756059  | 18.6721681587 |
| 1.2951894878  | 1.3994122697  |
| 0.2884040209  | 0.407718824   |
| 6.2825141994  | 6.411247497   |
| 1.4353842058  | 0.7766847652  |
| 5.3005647293  | 1.90216351    |
| 37.1042831765 | 17.2983143864 |
| 0.7371130494  | 0.4480256615  |
| 0             | 0.2597479318  |
| 0.1135348324  | 0.0487923558  |
| 9.4580674093  | 6.3475635953  |
| 3.3362921297  | 4.2596714017  |
| 0.072137996   | 0.0358542414  |
| 8.9119893427  | 4.2160255967  |
| 0.007857      | 0.008555      |
| 4.6132794072  | 2.3486039764  |
| 0             | 0             |
| 0.0116227033  | 0.006327      |
| 0             | 0             |
| 0.0321501319  | 0             |
| 12.5516321553 | 19.7548455798 |
| 7.1858493489  | 5.3459601412  |
| 1.6632857214  | 0.788372741   |
| 0             | 0.1492784752  |
| 0.0860453408  | 0.1873580496  |
| 12.31774072   | 4.862112912   |
| 8.5811309213  | 8.3324313813  |
| 0.4341059803  | 0.8270824766  |
| 0.4916997251  | 1.2044741552  |
| 0.007046      | 0.0383565734  |
| 33.8490940852 | 40.8895305011 |

gene\_expression\_table

|                |                |
|----------------|----------------|
| 4.9128947928   | 2.4852787312   |
| 1.3769450701   | 1.4731074836   |
| 6.4818627291   | 3.5284570538   |
| 0.0783975275   | 0.060966229    |
| 6.3724771008   | 10.5123470784  |
| 27.7820314069  | 31.5430598587  |
| 336.8773351043 | 115.5878296524 |
| 5.8648793213   | 1.6668176551   |
| 0.2944710938   | 0.3663950675   |
| 640.9174217272 | 452.5618022948 |
| 24.3547315275  | 11.4446855579  |
| 10.764830967   | 6.5733096496   |
| 39.7241949321  | 60.1033968358  |
| 5.4404500481   | 3.6663103291   |
| 0.0919385895   | 0.500475524    |
| 0.1848593046   | 0              |
| 4.3558558914   | 3.5246782209   |
| 2.3121760859   | 2.6889398574   |
| 0.4734061723   | 0.2577026725   |
| 14.1542216235  | 5.7305720407   |
| 0              | 0.4364596606   |
| 4.1413335041   | 1.2882114757   |
| 0.7154854597   | 0.9659118621   |
| 0              | 0              |
| 16.2855342205  | 6.0427886197   |
| 43.7738373215  | 28.5385439348  |
| 0.002702       | 0.005883       |
| 8.7202927754   | 5.9463766738   |
| 1.9615097689   | 1.3141717045   |
| 0.284693333    | 0.2324628524   |
| 10.7784117381  | 16.195617877   |
| 17.5379513715  | 11.9396478516  |
| 0.931703991    | 0.780897706    |
| 0.6811623045   | 0.814047463    |
| 0              | 0.0144712767   |
| 37.7354129008  | 102.5009549773 |
| 5.6283516854   | 2.8697515855   |
| 6.4521424378   | 5.8106359599   |
| 50.7473093607  | 26.5589601888  |
| 278.3752908813 | 709.9430559518 |
| 1.1754099482   | 1.2796887858   |
| 1.5531924105   | 5.6078649603   |
| 495.7565603438 | 480.6613465482 |
| 21.8115576482  | 15.0162408787  |
| 0              | 0.0590445753   |
| 3.1044080742   | 3.3068009855   |
| 110.4437855145 | 70.3380418483  |
| 45.2864598701  | 12.6591706883  |
| 4.7860300484   | 10.5276039311  |

gene\_expression\_table

|                 |                 |
|-----------------|-----------------|
| 0.9412161695    | 0.8295336506    |
| 16.303359871    | 21.9867808474   |
| 64.9231158655   | 21.1885080864   |
| 0.7341245367    | 0.5994403942    |
| 10.8699633769   | 22.8146050613   |
| 2.023166398     | 5.7215323324    |
| 2.2253284103    | 1.9151929018    |
| 3678.2271551092 | 4158.6327756101 |
| 23.5809241375   | 33.1943257536   |
| 0.117230665     | 0.6381550859    |
| 0.8541477707    | 0.8972962394    |
| 186.2517545329  | 56.8028481478   |
| 5.5161948646    | 5.7052963381    |
| 13.0456298656   | 3.600295079     |
| 160.1246997292  | 61.113607101    |
| 31.4138319285   | 25.0568160919   |
| 0.1864513943    | 0               |
| 1.5238271523    | 2.33846298      |
| 4.6234409817    | 6.8021875253    |
| 0.2398325092    | 0               |
| 41.3659340238   | 13.7446907901   |
| 25.5721985694   | 27.0506436408   |
| 1.2327419074    | 1.3421070642    |
| 4.761828745     | 3.4263945173    |
| 3.8012642296    | 2.2153152232    |
| 1.1361041181    | 1.4737482594    |
| 13.3182938987   | 4.184243266     |
| 4.9884301735    | 7.0349594618    |
| 3.2410439595    | 1.5785751011    |
| 6.8226382407    | 4.1344095254    |
| 0               | 0.4089277378    |
| 33.1731053665   | 15.6609739351   |
| 0.2918392135    | 0.2294718916    |
| 0.9123689778    | 1.4649559733    |
| 6.4054049267    | 7.4741240056    |
| 0               | 0.8066819572    |
| 4.7667474036    | 1.6943341632    |
| 8.8206177988    | 5.1813640988    |
| 467.4321466873  | 246.6237708278  |
| 8.8100563734    | 4.5422034724    |
| 16.6177328131   | 17.177243664    |
| 0               | 0               |
| 0.1812885145    | 0.1044909988    |
| 1.6580750687    | 1.1172803369    |
| 1.4204995867    | 2.6551733826    |
| 16.9364507948   | 14.0092115798   |
| 0.0770901191    | 0               |
| 20.1774614357   | 21.5705413376   |
| 0.0308017063    | 0.1229592507    |

gene\_expression\_table

|                |                |
|----------------|----------------|
| 97.9919741875  | 107.8939397231 |
| 1.8887476785   | 1.4731785281   |
| 6.9417178769   | 3.2219098104   |
| 0.0151717189   | 0.0211059604   |
| 0.00866        | 0.008485       |
| 11.5974365731  | 11.1064907153  |
| 3.3329217988   | 3.4517036483   |
| 0              | 0.1235694045   |
| 3.7990725139   | 7.7839382851   |
| 62.7935788108  | 49.8330652835  |
| 6.1537956894   | 1.3399483892   |
| 26.9700498441  | 27.9364722203  |
| 0.0532629275   | 0.005799       |
| 26.6280903746  | 40.3795616463  |
| 6.1689960448   | 7.8541748153   |
| 4.853583001    | 6.0980632292   |
| 2.6652033539   | 0.6991932975   |
| 0.1552323137   | 0.1901295652   |
| 16.0515362411  | 8.5941552383   |
| 0.3929478359   | 0.4044739512   |
| 0.5031872651   | 0.3160549193   |
| 0.0419476611   | 0.0608921753   |
| 2.6025080757   | 1.31708585     |
| 2.3522376704   | 1.5714743275   |
| 1.9452188048   | 2.0782078587   |
| 4.0438844857   | 1.6009620954   |
| 1.3779006054   | 1.0072394123   |
| 0              | 0              |
| 0.008457       | 0              |
| 0.4633885334   | 0.5528956749   |
| 1.9133832918   | 2.4132067823   |
| 8.4730089982   | 12.1545692592  |
| 0              | 0              |
| 0.033099859    | 0.0630636632   |
| 0.0173043085   | 0              |
| 5.4859232389   | 4.5391895731   |
| 5.6496073993   | 7.598076195    |
| 0              | 0              |
| 2.5548448373   | 1.4861952261   |
| 11.9827730033  | 6.0199518271   |
| 5.6528100987   | 8.1054890365   |
| 26.1002962756  | 21.6245513356  |
| 8.3749766763   | 5.9098014849   |
| 28.2779949631  | 26.0947615048  |
| 165.7314801159 | 128.4789285407 |
| 0.2418870971   | 0.2517963041   |
| 14.7016099394  | 18.1533498389  |
| 31.9408336792  | 37.0623263606  |
| 1.9474602683   | 4.5000865577   |

gene\_expression\_table

|                |                |
|----------------|----------------|
| 0.7084187525   | 0.6840408494   |
| 10.8723655087  | 5.9443659251   |
| 5.1106389462   | 4.6293688099   |
| 0              | 0.0160017934   |
| 1.5146044405   | 1.7471289031   |
| 1.1170396356   | 0.8208945233   |
| 15.0215319696  | 5.8723565002   |
| 0.003965       | 0              |
| 0              | 0.008493       |
| 0.2367317635   | 0.376687999    |
| 0.27592599     | 1.9955495892   |
| 0              | 0.5418582683   |
| 1.9287721686   | 3.4685634111   |
| 2.1489711273   | 1.4135212543   |
| 2.6384814494   | 0.1657245919   |
| 10.8601004743  | 10.6475751124  |
| 3.5371239456   | 2.9461911006   |
| 153.1837200641 | 77.8277356623  |
| 0.0240147268   | 0              |
| 53.495618263   | 51.4502600905  |
| 0.4488379548   | 0.3383013524   |
| 0              | 1.1932170617   |
| 2.1872721774   | 1.3784181491   |
| 11.4125569657  | 15.1283314723  |
| 3.7699407284   | 2.9223317593   |
| 1.7889603083   | 1.9798644068   |
| 1.9802170799   | 1.2432774405   |
| 0.009868       | 0.0107433516   |
| 2.4518385505   | 2.0276856295   |
| 8.9306901682   | 2.9318566995   |
| 28.57023751    | 14.5460047496  |
| 0.2099147525   | 0.2951946045   |
| 0              | 0.010131596    |
| 0.005594       | 0.00609        |
| 1.2181216484   | 1.2685293162   |
| 38.8714019759  | 33.0010939261  |
| 0              | 0.001885       |
| 0.9947204931   | 1.0696539115   |
| 26.2679955722  | 6.4167843536   |
| 3.7994297778   | 3.07006139     |
| 20.8505506881  | 53.4337437395  |
| 4.6265519907   | 8.8468137831   |
| 0.5113060891   | 0.6902678594   |
| 12.3703932636  | 6.456812279    |
| 1.0142788091   | 0              |
| 0.184716506    | 0.1407727994   |
| 0.2183922236   | 0.5361420079   |
| 71.8628082344  | 159.2850741027 |
| 9.4058176925   | 8.9602393709   |

gene\_expression\_table

|                 |                 |
|-----------------|-----------------|
| 3.7037138403    | 2.8067944135    |
| 13.2349645792   | 10.7505624744   |
| 104.6237055798  | 22.2450948708   |
| 0.5906503844    | 0               |
| 16.4053827487   | 12.7421696494   |
| 69.1668436661   | 73.1006592509   |
| 4.7151194148    | 2.609853391     |
| 2.1298486194    | 0.2898502984    |
| 0.2685414033    | 0.7309139735    |
| 0               | 0.1710960985    |
| 77.876051921    | 77.4013041326   |
| 82.2224377794   | 23.3879884348   |
| 3.2158081112    | 6.3228910127    |
| 108.3109638881  | 74.1652807168   |
| 0.1388420715    | 0.6802187525    |
| 7.2982705246    | 8.2346875542    |
| 2686.0363732423 | 2816.2850796648 |
| 332.3859698037  | 126.4326097225  |
| 1.6942757134    | 1.8445867621    |
| 15.6849316934   | 12.1974654917   |
| 0               | 0.0713492471    |
| 4.7319216499    | 5.0056694985    |
| 92.2645352455   | 114.799962844   |
| 0.0585338091    | 0.1274535053    |
| 42.705834164    | 7.9212966695    |
| 3.5479521767    | 10.1396290526   |
| 71.5458748237   | 29.5131711831   |
| 14.8206034061   | 10.5968880249   |
| 12.5219024493   | 9.3102103394    |
| 0               | 0.067357896     |
| 0               | 2.8620373967    |
| 11.065542023    | 16.9483824426   |
| 19.4215336309   | 13.3044382947   |
| 0.2336957972    | 0               |
| 169.9651400866  | 134.1275542125  |
| 33.8741432892   | 17.2697888128   |
| 13.3627166878   | 4.2615988452    |
| 3.7688783928    | 5.1290524444    |
| 3.9738198239    | 3.605304312     |
| 4650.4031583567 | 6909.1527914168 |
| 29.4581757397   | 33.014899387    |
| 8.1764471402    | 4.7179735857    |
| 65.6249651605   | 40.8824880427   |
| 568.9599808243  | 183.0987120984  |
| 5.6736929798    | 2.7348753137    |
| 21.8230967885   | 31.1611669271   |
| 2.2518928853    | 2.5775708292    |
| 0.0440541481    | 0               |
| 0               | 0.1494440156    |



gene\_expression\_table

|                |                 |
|----------------|-----------------|
| 0.0269008289   | 0.0585747791    |
| 12.7288853403  | 15.3510696525   |
| 0              | 0.0629467038    |
| 8.4380443862   | 4.9898668725    |
| 0.1679938078   | 0.0304829522    |
| 1.1571572373   | 0.8503763057    |
| 980.3548628492 | 2593.5259087582 |
| 6.6790398454   | 1.7109609847    |
| 11.2460169888  | 8.68721782      |
| 0              | 0.029898945     |
| 4.1348245423   | 5.5097460925    |
| 1.3534155107   | 5.451899927     |
| 44.1429561929  | 24.2628903141   |
| 0.933249262    | 1.5240664971    |
| 7.0247918091   | 10.3707018632   |
| 85.2025378262  | 21.4572751157   |
| 0              | 0.1177093335    |
| 0.8773951759   | 1.7333122437    |
| 38.6369523423  | 37.1940563808   |
| 0.8690148268   | 0.094611121     |
| 2.6792070504   | 3.2310257505    |
| 359.2690988278 | 73.8381011016   |
| 63.6141025063  | 40.9717312592   |
| 9.287466191    | 6.5653322993    |
| 3.7923866134   | 8.7115506174    |
| 7.5096766123   | 5.0023675465    |
| 0.1550693026   | 0.506479755     |
| 0              | 0.1118313364    |
| 0.8282434148   | 1.0520097946    |
| 3.3333970485   | 3.0786930206    |
| 3.6359388642   | 5.737837979     |
| 74.219582706   | 65.7146874717   |
| 2.8484487898   | 3.7594868031    |
| 44.2585441263  | 72.4199497473   |
| 6.9345934822   | 8.1355708754    |
| 1.6460344462   | 0               |
| 1.6709980018   | 1.559351933     |
| 0.0860474519   | 0.117101654     |
| 1.7307459994   | 1.6958633241    |
| 0.619247196    | 1.227979723     |
| 6.2107981899   | 8.4522519215    |
| 0.5661260253   | 0.6163510246    |
| 28.4424101076  | 26.8207155636   |
| 0.0851698076   | 0.0695443627    |
| 0.2107029574   | 0.0573489726    |
| 0.0407066668   | 0.3102262798    |
| 6.9657988539   | 7.2467265423    |
| 99.5228552416  | 75.2445998736   |
| 1.0137087608   | 1.2492613798    |

gene\_expression\_table

|                 |                 |
|-----------------|-----------------|
| 9.1730785968    | 6.7580435354    |
| 48.445363742    | 61.453925188    |
| 127.4657722082  | 82.2216798833   |
| 143.7743241437  | 253.3554793418  |
| 0.0609479939    | 0.0829438959    |
| 207.4996369597  | 183.9539674338  |
| 0.0153418667    | 0.016702951     |
| 0.0091          | 0.0321976504    |
| 0.0396377795    | 0.0215771621    |
| 0.5344142676    | 0.7123637562    |
| 0               | 0.0425073616    |
| 147.9802074565  | 238.5571426967  |
| 0.01210364      | 0               |
| 0.0655971332    | 0.0803438029    |
| 2.9429307731    | 5.1419333094    |
| 0               | 0               |
| 0.8129695704    | 1.8265117243    |
| 4219.2086014578 | 9047.3526272137 |
| 0.0386818095    | 0.0736987009    |
| 46.3681090158   | 31.4392660154   |
| 0.0813661138    | 0               |
| 16.1859406957   | 9.9364412214    |
| 6.0061114089    | 9.4180479337    |
| 0.0145920506    | 0.0158866135    |
| 1.6716426937    | 3.6444188462    |
| 5.798132815     | 10.4928951639   |
| 16.3191358254   | 14.0331615762   |
| 1.9311131887    | 2.026137675     |
| 21.5831368147   | 12.8526544698   |
| 2.5796283813    | 2.9115489367    |
| 0.3448987331    | 0.5621347298    |
| 20.4089249879   | 131.1898577146  |
| 3.5096620031    | 2.9607970822    |
| 2452.5586593126 | 1455.3918244919 |
| 7.7620188671    | 10.3694802521   |
| 0.5656788298    | 0.7295621532    |
| 19.4929751188   | 10.9297007232   |
| 505.4509137327  | 241.4219461527  |
| 28.9976708125   | 10.772283641    |
| 40.8672224504   | 31.5494680726   |
| 3.6944617207    | 3.8181974424    |
| 0.7284186745    | 0.2318639131    |
| 0.0582542857    | 0.0713502347    |
| 0.0155691149    | 0.002119        |
| 0.7133187919    | 0.6834100161    |
| 1.6068192089    | 1.9243085174    |
| 75.3897323957   | 62.3904345998   |
| 5.1708556279    | 6.5648671402    |
| 0.0103321331    | 0.001875        |

gene\_expression\_table

|                 |                 |
|-----------------|-----------------|
| 17.6958351716   | 36.0996502885   |
| 13.4893328924   | 11.4293751113   |
| 0.1935030549    | 0.3912444052    |
| 5.2333015769    | 4.8484251549    |
| 0               | 0.3067724636    |
| 0               | 0.003619        |
| 0.004127        | 0.001123        |
| 58.9614638211   | 38.0689035628   |
| 123.4402985539  | 138.5572655105  |
| 1289.3747918278 | 1337.1011520157 |
| 1.1957672644    | 1.5046769322    |
| 31.9870264899   | 39.1799231784   |
| 1.070257264     | 1.0307602787    |
| 4.1200008536    | 28.3148130946   |
| 0               | 0               |
| 0.6449860742    | 0.8701264369    |
| 9.2347205432    | 7.5849846077    |
| 0               | 0.0980390602    |
| 0               | 0.1044581779    |
| 1.2482956795    | 0.7709942547    |
| 6.321095782     | 5.0015182165    |
| 615.3109561207  | 224.9149453261  |
| 0.2212806465    | 0.2409120003    |
| 3.0901662493    | 1.7558294198    |
| 1.9007502799    | 2.5238689408    |
| 7.477512368     | 5.4406970129    |
| 0               | 0.094652816     |
| 0               | 0.0506069529    |
| 1.8977704448    | 1.1778900093    |
| 8.7913003493    | 8.8224677649    |
| 0.2696758875    | 0.3585174641    |
| 24.1324914422   | 21.2296343734   |
| 1.4770648015    | 0.6912032632    |
| 0.0336728828    | 0.008217        |
| 16.8521295116   | 4.6733433424    |
| 0.005365        | 0.0009735       |
| 0.0196981141    | 0.0321685074    |
| 33.0231632893   | 19.829680728    |
| 0               | 0.0170545868    |
| 0.7928569646    | 0.8174212608    |
| 1.05094014      | 1.469631008     |
| 20.6530943019   | 22.93210405     |
| 0.0326034278    | 0               |
| 0               | 0               |
| 0.9518502591    | 0.0818128068    |
| 4.3181557776    | 3.900405802     |
| 0.5245468286    | 0.6482001003    |
| 0.8881539374    | 0.6043426782    |
| 8.746543783     | 7.0064002651    |

gene\_expression\_table

|                |                |
|----------------|----------------|
| 4.1855821993   | 1.151220498    |
| 86.508616605   | 59.1718757692  |
| 0.524490941    | 0.4877481299   |
| 2.1882602884   | 2.8063819218   |
| 2.6470575557   | 2.3644651204   |
| 1.6029986088   | 1.5306366025   |
| 4.5829906905   | 2.9043823003   |
| 5.4939024058   | 3.4015818022   |
| 4.008768802    | 1.7559949853   |
| 17.1019629668  | 15.5952769199  |
| 10.9081973591  | 12.7081553228  |
| 12.8248328787  | 9.8347773685   |
| 0.2490320627   | 0.0774644111   |
| 60.8374649227  | 51.2489896862  |
| 3.0222537551   | 5.8588891807   |
| 1.9916073865   | 2.3466106898   |
| 10.5627357157  | 14.7758730028  |
| 0.006231       | 0.006784       |
| 4.3072561957   | 0.2131537736   |
| 4.8011102074   | 2.6675714471   |
| 0.5842086747   | 0.5187684223   |
| 10.3019231043  | 6.7428794909   |
| 0.3983748089   | 0.5523120328   |
| 2.1401982059   | 1.6828284473   |
| 1.1646110612   | 1.2591267717   |
| 13.1130574198  | 6.4349328771   |
| 2.1112661211   | 2.8879485633   |
| 0.3108134055   | 0.4327459834   |
| 6.2645145869   | 4.527507339    |
| 0.0301299452   | 0.0123011188   |
| 24.5606187936  | 31.9149623737  |
| 1.3056872109   | 1.6316953935   |
| 0.0425633697   | 0.2664519177   |
| 18.92105672    | 7.9679965037   |
| 0.4817890223   | 0.3710784159   |
| 18.8130823831  | 10.0295939109  |
| 4.3891636031   | 1.0239765011   |
| 0.5270095148   | 0.669391584    |
| 17.9964469931  | 14.2145567465  |
| 2.1257812104   | 1.9339290674   |
| 0.4515644712   | 0.0546251015   |
| 3.7332178048   | 2.5063908949   |
| 0.6243340214   | 2.9842227291   |
| 0              | 0.0130808311   |
| 18.7906732532  | 12.8371625293  |
| 11.0244423628  | 7.5015610953   |
| 125.6241950475 | 137.8529180568 |
| 0.4316493202   | 0.1958099794   |
| 2.2925675457   | 2.0279652636   |

gene\_expression\_table

|                 |                |
|-----------------|----------------|
| 11.7742502459   | 17.6744423741  |
| 13.0752027091   | 16.2370197447  |
| 0               | 0.0281543622   |
| 3.8185372543    | 4.4303734444   |
| 0.0164634352    | 0.2061262496   |
| 0.1800843661    | 0.2488465394   |
| 16.0936948383   | 14.4422092341  |
| 18.7168370621   | 14.7383266518  |
| 14.2585894765   | 21.1620685461  |
| 4.7393928739    | 2.8199221572   |
| 1.6238375121    | 1.2706777623   |
| 1.5438031588    | 1.5107997616   |
| 0.296420684     | 0.2420386771   |
| 6.8882321851    | 4.2271534972   |
| 9.65785983      | 11.4316536941  |
| 47.3840870402   | 17.4685119484  |
| 0               | 0.4011515949   |
| 5.2273030312    | 5.323147146    |
| 82.7883189459   | 58.187158707   |
| 1.0800728151    | 0.2519772062   |
| 185.2715202016  | 199.4395503668 |
| 2.9261090687    | 10.9224160119  |
| 0               | 0.4291504493   |
| 37.0964464281   | 31.6647807335  |
| 0.0561343705    | 0.0713001837   |
| 5.4909970372    | 4.8094824925   |
| 6.1818869781    | 3.9178947433   |
| 0.4257525831    | 0.7283949712   |
| 1.454157425     | 1.4022326551   |
| 296.5107518217  | 295.7798508845 |
| 0               | 0.0471303884   |
| 1.0872076652    | 3.2550690188   |
| 130.1728121552  | 77.5524565679  |
| 2.7845988831    | 4.6821997505   |
| 23.2366592824   | 42.2668589531  |
| 232.6903660173  | 176.2865224491 |
| 18.0447069049   | 21.6032678865  |
| 34.4589045195   | 13.6169166869  |
| 12.4293960149   | 9.6682351511   |
| 24.6701490464   | 11.10252811    |
| 28.253451427    | 18.9633062679  |
| 1412.7503035561 | 899.2456495692 |
| 0.6533034573    | 1.4817970341   |
| 0.6413396721    | 0.7082122201   |
| 0.006672        | 0.007263       |
| 23.5544199945   | 4.6159375208   |
| 15.0246247875   | 10.635116088   |
| 0.0357313461    | 0              |
| 58.4525121109   | 35.266581385   |

gene\_expression\_table

|                 |                 |
|-----------------|-----------------|
| 1.7272420017    | 1.1252038819    |
| 0               | 0               |
| 3.3519849089    | 4.1844199065    |
| 22.1983925344   | 24.6284431115   |
| 26.9122615968   | 15.9458725862   |
| 215.1812402359  | 148.2026965981  |
| 0.1293992397    | 0.0704395757    |
| 0.4587509126    | 0               |
| 12.7805616928   | 10.0800447481   |
| 0               | 0.1683386469    |
| 1.5306859986    | 1.8857580516    |
| 0               | 0.0273569063    |
| 0.1850283515    | 0.0805774043    |
| 9.0338742243    | 6.1634749656    |
| 0               | 0               |
| 8.5249913645    | 3.6372673818    |
| 17.3029627687   | 2.9505347593    |
| 0.6453295007    | 0               |
| 63.6153376211   | 24.8832949055   |
| 83.3338695448   | 57.6644490551   |
| 0               | 0.1350917972    |
| 0.77167605      | 0.6110086034    |
| 0.2374704516    | 0.3878071744    |
| 0.2071559791    | 0.045106847     |
| 8.2986861915    | 8.1901923298    |
| 0.1420627607    | 0.2319992127    |
| 56.3371010524   | 51.7176163647   |
| 6.080562633     | 11.1182250691   |
| 20.8068859521   | 9.5513715212    |
| 20.1693815062   | 6.5560292013    |
| 11.2881680069   | 13.8856749331   |
| 6.0793177708    | 8.0638695559    |
| 14.4138141983   | 7.6053876048    |
| 0.5359337907    | 1.4003525419    |
| 0.078730991     | 0.0342863072    |
| 1.3187715116    | 0.5743075825    |
| 202.9396057673  | 184.2842240445  |
| 372.8630948323  | 206.5757038105  |
| 30.3578870333   | 30.0942854183   |
| 10.6136012763   | 14.522388449    |
| 3.8818318919    | 3.4299726895    |
| 0.7298067489    | 0.3037996803    |
| 0.296479153     | 0.0968345677    |
| 4442.3216638957 | 2395.6518666205 |
| 18.4364218251   | 18.9448113006   |
| 0               | 0               |
| 3.4470731658    | 1.876443568     |
| 2.9061450704    | 9.2088697703    |
| 675.3970832228  | 1122.6789254953 |

gene\_expression\_table

|                 |                 |
|-----------------|-----------------|
| 4.0581747696    | 4.5217554897    |
| 70.5246678883   | 26.0579377776   |
| 10.2263489669   | 6.8392113729    |
| 10.6098677445   | 6.4975181176    |
| 18.3513700813   | 9.1572472179    |
| 158.6312729931  | 339.1066118845  |
| 14.5067272504   | 4.2589808059    |
| 84.6100112805   | 31.2622870171   |
| 1.4102247979    | 1.3434187403    |
| 18.1734174017   | 34.6249896456   |
| 179.747931204   | 118.6539263732  |
| 185.9325327985  | 191.0604663104  |
| 0.9023543894    | 0               |
| 2.4123471695    | 2.4293861076    |
| 37.1362142521   | 45.2421736403   |
| 6.3742232063    | 6.3433425015    |
| 2.6124027759    | 2.1331254735    |
| 109.5434175197  | 159.0894619823  |
| 1.2463066797    | 0.6784376311    |
| 67.9795124614   | 91.1183938042   |
| 222.1883136826  | 60.3065940842   |
| 15.1127314921   | 3.7277432855    |
| 2.0849421726    | 2.2018146161    |
| 64.1566370996   | 25.6625414555   |
| 18.4682340832   | 9.112472961     |
| 0.1059028906    | 0.0192163795    |
| 52.7887836689   | 9.1335686306    |
| 0.4357611174    | 0.1186051335    |
| 13.6645089177   | 13.8961591119   |
| 12.0376007099   | 14.0093708396   |
| 21.1631495277   | 6.1529090086    |
| 8.2147273904    | 4.1922718655    |
| 1.7221246962    | 1.3902907798    |
| 0.1870812977    | 0               |
| 1.9491602142    | 1.2482846175    |
| 1365.0185507606 | 1513.3220250422 |
| 23.1056715601   | 17.2260744493   |
| 1.4208113343    | 0.9880833021    |
| 0.4551785499    | 0               |
| 51.5784214871   | 25.7893840637   |
| 56.67793361     | 69.7852240103   |
| 28.2742607442   | 37.0791230255   |
| 37.2267395566   | 26.9688006288   |
| 5.7853523609    | 16.0328291023   |
| 1.5733852865    | 1.2235509285    |
| 107.3550363276  | 57.5433129484   |
| 692.886538201   | 648.0869088462  |
| 8.2739807996    | 14.1509021754   |
| 8.2745842916    | 4.0423566519    |

gene\_expression\_table

|                 |                 |
|-----------------|-----------------|
| 1.0980434335    | 0.5678428096    |
| 0               | 0               |
| 0.4807608947    | 0               |
| 3.9399161159    | 1.3787529529    |
| 1637.3308194674 | 1500.7120197737 |
| 86.1767764204   | 47.3709728572   |
| 4.978126356     | 1.6523691352    |
| 9.2625507211    | 5.0421481901    |
| 28.1388993921   | 22.4823557666   |
| 0.5875034371    | 0.3597890491    |
| 97.272428395    | 46.3668945757   |
| 6.1016503481    | 3.0034706717    |
| 56.6570937335   | 56.9726259826   |
| 53.6072803477   | 32.7682598578   |
| 5.9278396014    | 7.9411250377    |
| 1.3053910893    | 1.6242302435    |
| 0               | 0               |
| 1.2716841444    | 0.6922520697    |
| 17.2034149356   | 23.8377366177   |
| 11.1088632967   | 21.8830480351   |
| 134.2993004372  | 56.6177695732   |
| 0.1481581663    | 0.2419534702    |
| 19.8741067761   | 17.8000031269   |
| 18.3703900774   | 24.794713782    |
| 0               | 2.3282284131    |
| 6.4147047458    | 9.4936005012    |
| 3.1213801538    | 4.4439302709    |
| 24.41354922     | 7.2879125925    |
| 4411.7906218374 | 7374.3543500404 |
| 54.8035062827   | 26.1455599634   |
| 18.2460626412   | 31.1021844746   |
| 15.4787536942   | 22.5623117049   |
| 0.1078422787    | 0.2739560168    |
| 4.1452882424    | 3.1720264453    |
| 0.819746956     | 0.148745407     |
| 14.9391815943   | 22.103094019    |
| 4.5043676832    | 4.903981645     |
| 2.5963630526    | 1.4806547793    |
| 25.8001183074   | 18.4852146081   |
| 2.421027638     | 3.6356054249    |
| 8.1723010997    | 5.455905668     |
| 2.7059710599    | 4.4190550183    |
| 114.0437124401  | 44.8582861805   |
| 111.4705203931  | 36.8413830084   |
| 2.9759177496    | 1.7923029344    |
| 10.1419272302   | 4.2013972079    |
| 1.7286315139    | 0.5200236924    |
| 3.6920254842    | 3.6622756979    |
| 46.0040033463   | 49.9631808803   |



gene\_expression\_table

|                 |                 |
|-----------------|-----------------|
| 1.5206408354    | 1.3545388797    |
| 277.6941757233  | 324.6018049596  |
| 50.4539311289   | 18.7378215608   |
| 0.4131730681    | 0.1124571352    |
| 0               | 0.2176493215    |
| 1531.7776960262 | 1068.2662702337 |
| 28.6794422325   | 20.9698275879   |
| 0.6480722008    | 2.9986606787    |
| 0               | 0.7288676376    |
| 73.6501652597   | 66.1042252194   |
| 70.8831599786   | 9.2977952861    |
| 9.9057886094    | 1.4333962558    |
| 40.1974627933   | 51.1424176432   |
| 78.4235772138   | 99.4467507192   |
| 0               | 0               |
| 1.9391227999    | 1.3970884938    |
| 37.0930801338   | 28.5715856979   |
| 210.8354734274  | 202.4378304232  |
| 0               | 0.5278207768    |
| 41.5578945498   | 40.8005049903   |
| 0.0965298517    | 0.0262734225    |
| 1.493393099     | 0.4335686523    |
| 78.9666255951   | 55.5051523124   |
| 0.3498986425    | 0.0952351496    |
| 24.7671498569   | 34.8290385583   |
| 0               | 0               |
| 19.3222106533   | 32.1082186336   |
| 27.8624392476   | 9.8660138077    |
| 32.213156739    | 41.2454849795   |
| 0               | 0.1725826204    |
| 0.1199025889    | 0.0326349966    |
| 232.8837011834  | 159.5998732318  |
| 5.3510246306    | 5.7217201761    |
| 8.6238502369    | 3.3228320105    |
| 0.595571185     | 1.6210211759    |
| 4.8321873681    | 6.0223283173    |
| 0               | 0.1964817117    |
| 2.9589272594    | 8.7247181452    |
| 13.710272443    | 11.2378475011   |
| 1.3023341719    | 1.5328360488    |
| 21.064817425    | 19.1818991924   |
| 19.2882438633   | 15.4173095599   |
| 0.0224500751    | 0.2321968933    |
| 0.4260516569    | 0.5856102201    |
| 3.7082977885    | 3.8537737847    |
| 0.2202001876    | 0.2032541689    |
| 155.2294508698  | 32.786182587    |
| 0.0238657446    | 0.4027371474    |
| 0.6478726712    | 0.6171812388    |

gene\_expression\_table

|                 |                  |
|-----------------|------------------|
| 2.1440963808    | 3.0148121133     |
| 106.3908332234  | 122.6312900919   |
| 17.8627049288   | 9.159392452      |
| 3.560753467     | 0.500213266      |
| 32.3222577562   | 49.3466039085    |
| 2.4175164849    | 1.8309504563     |
| 14.8189467323   | 11.878613436     |
| 317.7619785893  | 199.1150941116   |
| 38.136755901    | 14.3792672745    |
| 0               | 0                |
| 204.3691719332  | 79.9120402805    |
| 0.9683803203    | 0.5271460558     |
| 1.6397068332    | 3.6695298729     |
| 0               | 0.0611318379     |
| 26.03685935     | 40.3128263287    |
| 24.2201745727   | 24.3132743864    |
| 0.8490021565    | 0.7982790202     |
| 170.5800420422  | 133.017855563    |
| 6094.8065586417 | 10644.3543394693 |
| 91.9009091993   | 111.3277809713   |
| 22.3834941731   | 13.6336300888    |
| 0               | 0.1387125671     |
| 21.8894022783   | 13.4985771699    |
| 7.9154443483    | 10.7444777086    |
| 88.7981953175   | 61.4434572522    |
| 69.3925678716   | 76.5184375767    |
| 5.7264407849    | 4.9056781304     |
| 5.3817258195    | 2.9004863097     |
| 19.2339287062   | 8.8593598283     |
| 0.4546867839    | 0.8301192297     |
| 4.8584730968    | 2.8781115057     |
| 15.3872901602   | 40.6844104256    |
| 1.7109576733    | 5.6137631916     |
| 14.6237065191   | 16.2400096534    |
| 37.450940631    | 13.6367664197    |
| 1.3741930958    | 1.8545497691     |
| 3.277789507     | 1.9215458446     |
| 6.3462727435    | 1.0909413136     |
| 1.9673620381    | 0.556894126      |
| 16.4772172522   | 8.4394965299     |
| 0.0378319808    | 0                |
| 198.5179656596  | 68.6212378137    |
| 3.1523219201    | 2.8784402448     |
| 0.3591976636    | 0.6467606858     |
| 0.004022        | 0.0211622341     |
| 36.394724394    | 38.4797822286    |
| 4.763889405     | 5.5417689535     |
| 0               | 0                |
| 3.2199139577    | 0.8763937615     |

gene\_expression\_table

|                |               |
|----------------|---------------|
| 0              | 0.9160242937  |
| 0.516686144    | 0.65627915    |
| 1.9394522648   | 1.5628533557  |
| 2.5373276961   | 2.5322291342  |
| 5.150550277    | 7.6164748331  |
| 0.8198267989   | 0.7066094999  |
| 133.9344962541 | 73.941876187  |
| 15.7660904226  | 7.7066496463  |
| 0.2515288592   | 0             |
| 0              | 0.6639229401  |
| 29.801719068   | 42.0369582495 |
| 0              | 0             |
| 0.3106291238   | 0.2777966335  |
| 0.0428075439   | 0.0233026503  |
| 10.0493066825  | 16.4112764485 |
| 0.539880041    | 0.3232771166  |
| 24.3175202932  | 69.7601837237 |
| 0.6787900285   | 1.0672508282  |
| 2.5795238849   | 4.130760008   |
| 4.8717564236   | 1.9805941557  |
| 0.5972442108   | 1.1379023635  |
| 6.9262697277   | 4.3399985953  |
| 0.3459043415   | 0.6575874557  |
| 0              | 0             |
| 5.4502546986   | 7.6884707456  |
| 3.5784454248   | 1.9927377982  |
| 87.5731946947  | 44.7402520193 |
| 2.2470282684   | 3.1196928703  |
| 0.1580667862   | 0.1434083303  |
| 16.4759711162  | 23.4731225257 |
| 0.2349325037   | 0.3197187617  |
| 0.2719355616   | 0.1949669126  |
| 1.7449343813   | 2.0159108484  |
| 0.7410125666   | 1.4874507962  |
| 18.2854006386  | 66.2995058517 |
| 7.4551263136   | 3.3524767723  |
| 5.6545232445   | 3.2979511879  |
| 3.1915564729   | 2.0803471971  |
| 0.0300974088   | 0.065535121   |
| 2.2941664472   | 4.5301385272  |
| 1.1368975277   | 0.4813509786  |
| 40.4467441533  | 33.7473913982 |
| 1.735474181    | 1.6456414941  |
| 0.0379739856   | 0.0310071926  |
| 7.4112507995   | 5.0585845992  |
| 407.3073128231 | 602.872763515 |
| 3.3753116313   | 2.2613902362  |
| 0.507185705    | 0.5333573202  |
| 0.3915323167   | 1.4386541185  |

gene\_expression\_table

|                |                |
|----------------|----------------|
| 2.5338212481   | 3.5792146956   |
| 0.8720309075   | 1.1354484416   |
| 19.0682235574  | 9.3087091768   |
| 0.7453676041   | 1.3667273727   |
| 1.1985650417   | 0.9335856537   |
| 0.0779309102   | 0              |
| 5.3131938795   | 2.8199751793   |
| 0.9955509973   | 0.7352388874   |
| 0.0888471076   | 0.4159362307   |
| 0.7735473171   | 0.84217411     |
| 2.013655193    | 1.6574094104   |
| 0.659003927    | 0.4576955976   |
| 0.4061944669   | 0.9673799168   |
| 57.3296710951  | 74.5022341234  |
| 1.6856216739   | 2.3884132229   |
| 2.6904721296   | 3.2077904044   |
| 0.4108610511   | 0.3093110804   |
| 0.5708872588   | 0.0887906658   |
| 167.5740425529 | 106.994576989  |
| 8.0992786465   | 3.2696958542   |
| 1.0155841873   | 1.1056837638   |
| 4.7163512225   | 15.4298613084  |
| 0.3065010041   | 0.7833298303   |
| 1.0831708675   | 0.8823882435   |
| 10.9886361139  | 16.1718229708  |
| 5.7131501296   | 2.0154201728   |
| 0.2343046917   | 0.1159506817   |
| 13.3076207015  | 15.1268326041  |
| 0.8942078631   | 0.7622996382   |
| 12.5186599249  | 14.6776837905  |
| 70.3895319683  | 32.6378639501  |
| 42.7681495676  | 23.08222096    |
| 70.1892525123  | 110.2447616156 |
| 0.0485934425   | 0              |
| 10.9124908823  | 8.9130014693   |
| 10.9221888263  | 7.2854367275   |
| 3.656874057    | 2.4359275437   |
| 0              | 0.0828794255   |
| 0.081531097    | 0.1084896888   |
| 0.5410043285   | 0.5301005457   |
| 0.2964899529   | 0.3779047613   |
| 0.0287458805   | 0.0312961286   |
| 31.80527675    | 26.9291887511  |
| 0.005622       | 0.00204        |
| 0              | 0              |
| 0.0172076609   | 0              |
| 0.4931346175   | 0.0462831068   |
| 17.523520809   | 6.8671369091   |
| 0.0125285586   | 0.0008525      |

gene\_expression\_table

|                |                |
|----------------|----------------|
| 1.5445983725   | 1.5539117255   |
| 1.5531967973   | 1.3422247005   |
| 5.0975434673   | 6.0080975487   |
| 44.8320034054  | 75.8689486347  |
| 5.0545535125   | 5.3822989586   |
| 4.5930992261   | 1.9884216675   |
| 0              | 0.006159       |
| 2.0237489414   | 1.3037816171   |
| 2.2829087454   | 2.9537131433   |
| 34.4317909323  | 23.6594971037  |
| 0.2147783043   | 0.1753745924   |
| 82.111862251   | 125.7612903147 |
| 1.2054736947   | 2.4449108882   |
| 0.3706128656   | 0.4539290907   |
| 43.8433727452  | 31.1619529976  |
| 59.2451340862  | 44.3610185943  |
| 2.6032256456   | 1.042762868    |
| 0.2354529871   | 0.6152200041   |
| 8.9742519177   | 6.4602234393   |
| 8.3458112857   | 19.7455908909  |
| 1.5552689693   | 1.6054497257   |
| 0.1004357871   | 0.1421499927   |
| 4.1603547193   | 2.4804124847   |
| 7.3679637115   | 14.7597942425  |
| 0.001573       | 0              |
| 0.003435       | 0              |
| 0.5668885873   | 0.9257718582   |
| 0              | 0              |
| 0.0283200156   | 0.0154162411   |
| 3.7860741651   | 3.1306050267   |
| 10.4583014142  | 12.4228867704  |
| 21.7218274026  | 20.1046135674  |
| 0.7188187123   | 0.1117985925   |
| 0.0867784418   | 0              |
| 1.4376841968   | 0.0434786449   |
| 0.519475273    | 0.1696684674   |
| 136.4781209987 | 24.1452330722  |
| 2.532720023    | 0.9433262974   |
| 16.0866852891  | 7.4330424301   |
| 0.1221334071   | 0.1515224901   |
| 2.6167681169   | 1.5134887069   |
| 4.9038898498   | 3.5782312521   |
| 4.4522398146   | 1.321971586    |
| 6.1511830673   | 6.9360724523   |
| 0.6116135612   | 1.1652796366   |
| 11.5034809427  | 9.7047718613   |
| 0.4184949653   | 0.0698399576   |
| 1.4401768737   | 2.1515690231   |
| 0.6845664356   | 0.3908275832   |

gene\_expression\_table

|                 |                |
|-----------------|----------------|
| 1.3422187449    | 0.5962760999   |
| 0.0300544224    | 0.0327207604   |
| 3.9182680067    | 3.6358287861   |
| 16.4706267702   | 28.9833759147  |
| 1.8275358973    | 1.2499205136   |
| 1.6791956091    | 2.2383348724   |
| 1.6385442298    | 2.8499065158   |
| 0.0824532909    | 0.4825046071   |
| 1.9562840128    | 0.9528230015   |
| 1.0996141014    | 0.6346435736   |
| 3.4371130709    | 2.5855827591   |
| 17.1002198644   | 7.4895300063   |
| 0.0154551095    | 0.008413       |
| 0.2957196642    | 0.5519228983   |
| 6.9179248201    | 4.2355300118   |
| 0.9416539031    | 0.8137482193   |
| 11.6861742095   | 6.3614682298   |
| 20.2087557196   | 22.235675527   |
| 0               | 0.4217556625   |
| 0               | 0              |
| 0.0330492598    | 0.0359812908   |
| 0.6131848477    | 0.2612288208   |
| 13.1232863416   | 11.1297903805  |
| 18.6177708878   | 17.4338563268  |
| 1068.4616270792 | 238.3807732711 |
| 34.5714902327   | 36.9368329019  |
| 0.4033719147    | 1.7840788003   |
| 0               | 0              |
| 0.2421786668    | 0.0922824106   |
| 39.9618830334   | 14.979116012   |
| 0               | 0.0450695774   |
| 0.0630245567    | 0.1047295406   |
| 0.2356956134    | 0.1603786373   |
| 0               | 0.1543368875   |
| 6.1706355655    | 6.9438934796   |
| 1.2456870776    | 1.4299072502   |
| 0               | 0.0510387586   |
| 0.0747000748    | 0.2585044443   |
| 5.6635302298    | 7.0468361241   |
| 12.0012596776   | 14.2021471342  |
| 28.7809138023   | 25.183079386   |
| 0.006022        | 0              |
| 5.6783382018    | 5.3055364136   |
| 16.0225160101   | 12.9666958667  |
| 0.9529254637    | 0.6804161091   |
| 40.8133360144   | 24.3597617679  |
| 4.4457653397    | 10.1203769445  |
| 2.6933686326    | 1.1519813651   |
| 5.0585747141    | 2.0652585967   |

gene\_expression\_table

|                 |                 |
|-----------------|-----------------|
| 1.5267447193    | 1.2736283427    |
| 0.2753315804    | 1.1428280255    |
| 0.8141774368    | 0.9986872612    |
| 0.3936687022    | 0               |
| 0.1038873608    | 0.2968978298    |
| 8.0864536731    | 9.6387082863    |
| 0               | 0.1278120801    |
| 0.0409729825    | 0               |
| 0.1814669227    | 0               |
| 0.2220652634    | 0               |
| 6.796426429     | 3.8297597903    |
| 663.5766329362  | 714.3221658064  |
| 1.642102606     | 2.8338294363    |
| 3.4434580067    | 3.5651791307    |
| 0.3721772968    | 1.2524232207    |
| 13.5501731638   | 21.5495678272   |
| 0.0203340591    | 0.1106901783    |
| 43.87465634     | 44.0410407646   |
| 4.5430866601    | 1.6487118844    |
| 0.5975501522    | 0.2870130907    |
| 0.4651393537    | 0               |
| 0               | 0.1158463167    |
| 3.6798670681    | 1.7446937575    |
| 850.9763295778  | 1117.0249919833 |
| 70.5337458856   | 37.1854660188   |
| 18.6163583416   | 27.6937016644   |
| 62.3457662478   | 66.6929958981   |
| 5.2507422842    | 11.2721145073   |
| 34.5502231972   | 13.6603349755   |
| 278.5478557053  | 140.1318908119  |
| 25.8053208067   | 27.3196653374   |
| 5.8726985677    | 5.2266015355    |
| 2.1769057935    | 5.0786449978    |
| 1.9455596073    | 2.5929246613    |
| 2.3031233054    | 4.0479005098    |
| 41.1140227281   | 63.6834569638   |
| 0.3174849783    | 0.950541051     |
| 1.253825347     | 1.2449861561    |
| 14.5829787396   | 13.7557986611   |
| 0.1120376124    | 0               |
| 0.2601930111    | 0.2087300917    |
| 9.2364667989    | 9.2271155381    |
| 3.7841530478    | 7.4037817419    |
| 5.2411793402    | 4.2706034418    |
| 0.368904094     | 0               |
| 0.4606646297    | 0.2507667055    |
| 3236.9382522053 | 755.3174143808  |
| 1.0424895006    | 1.5196776508    |
| 0.041388821     | 0.0450607128    |

gene\_expression\_table

|                |                |
|----------------|----------------|
| 3.1364922973   | 0.9986540232   |
| 2.1036893819   | 1.5268815871   |
| 0              | 0              |
| 24.3932227161  | 20.8848796637  |
| 1.0647403169   | 1.498479183    |
| 0.8537286385   | 0.7107703179   |
| 29.0735755866  | 12.9918602266  |
| 1.9977440848   | 0.7249926451   |
| 0.9144119222   | 0.5599888872   |
| 1.1626590172   | 0.6995247169   |
| 1.8991790939   | 3.95708982     |
| 0.7586804099   | 0.9833193518   |
| 3.8399460511   | 6.9607231805   |
| 14.9407766382  | 15.27844682    |
| 0.0163685148   | 0.0106924082   |
| 0.020807365    | 0.0792866615   |
| 111.3068193007 | 53.5212678169  |
| 21.5941701674  | 38.705389087   |
| 6.2083739251   | 6.2460904808   |
| 4.5451690678   | 0              |
| 0.1557118866   | 0              |
| 1.8531296037   | 1.445899146    |
| 24.9488273266  | 14.5829910284  |
| 0.2963149417   | 0.3494867055   |
| 0              | 0              |
| 28.388958377   | 21.2414763524  |
| 0.1980434088   | 0              |
| 23.5804668579  | 18.5090119117  |
| 24.5303844952  | 9.0071944481   |
| 0.7707458926   | 0.5454306985   |
| 10.2354542571  | 20.6681136879  |
| 3.3095557421   | 4.4791695236   |
| 4.3773709907   | 2.3384027675   |
| 6.4934551167   | 10.9756767091  |
| 1.0392442548   | 0.6047367125   |
| 3.4874238845   | 4.544675671    |
| 0.4120030366   | 0.4777289975   |
| 0.0136565972   | 0              |
| 0.1427508606   | 0.2201716578   |
| 4.9922677199   | 6.5329983922   |
| 0.926040843    | 0.8697078862   |
| 29.7442074669  | 30.2674350721  |
| 0              | 0.0679465584   |
| 8.526201728    | 8.315410587    |
| 1.1431804911   | 0.3042355624   |
| 1.7367671546   | 1.3347161762   |
| 20.1463031219  | 12.7205130955  |
| 99.588296395   | 139.2738603189 |
| 7.425702439    | 6.4582982362   |



gene\_expression\_table

|                 |                 |
|-----------------|-----------------|
| 0.0376890089    | 0.0359035815    |
| 0.043037805     | 0.0234279948    |
| 0               | 0.0135368516    |
| 2.9910434537    | 3.3506364899    |
| 2.2309198137    | 2.5148169623    |
| 0.1036432895    | 0.0620610159    |
| 0.8993055883    | 0.979089277     |
| 3.151780818     | 2.3608878749    |
| 3.8038701478    | 5.6459764743    |
| 0.3930539887    | 0.51622645      |
| 14.7763771439   | 7.8811485468    |
| 0.1395556876    | 0               |
| 7.4523228575    | 6.8647933556    |
| 1.8763860375    | 2.2532760311    |
| 0.8095085284    | 0.8911181996    |
| 0.0447860922    | 0.0715661864    |
| 61.6310974861   | 37.9206704446   |
| 3.8747338072    | 2.488908241     |
| 1.0326285386    | 1.5739363342    |
| 0               | 0.0716377973    |
| 18.9629253667   | 12.0871816142   |
| 21.2528724978   | 21.3263229527   |
| 1.9044678131    | 2.8367208342    |
| 0.025862354     | 0.0211175883    |
| 116.6155695946  | 87.5199990352   |
| 0.3987364878    | 0.4054434704    |
| 1.1565973629    | 1.1350600154    |
| 16.1709805492   | 10.8857802715   |
| 3.3865009849    | 0.575162823     |
| 3.1908931561    | 1.398615166     |
| 21.3259306319   | 19.8241028765   |
| 8.2167783746    | 7.8876472351    |
| 0.1568493169    | 0.1024587101    |
| 16.7984284746   | 16.829210138    |
| 0.1167726818    | 0.2669780467    |
| 0.0239393231    | 0.006516        |
| 6.1056621113    | 4.5756340745    |
| 0.1164457106    | 0.15847053      |
| 40.9486949598   | 76.9460235296   |
| 23.3103019786   | 21.4902781593   |
| 9.2131805429    | 4.0122184913    |
| 1.4793942885    | 1.3422014193    |
| 8.6231456167    | 5.7519040168    |
| 1143.1612403137 | 774.3937442783  |
| 9.3159415364    | 11.5653907988   |
| 1575.1708186817 | 1755.8770497378 |
| 6.5382176443    | 7.1528233637    |
| 28.6372946013   | 5.4461412082    |
| 24.1082581135   | 30.5091529888   |

gene\_expression\_table

|                 |                |
|-----------------|----------------|
| 0.0608281909    | 0.0331123426   |
| 7.5117459638    | 22.3990865846  |
| 1.6855461147    | 2.3062525821   |
| 0.0946343963    | 0.0515150377   |
| 45.3281011301   | 42.4550622062  |
| 132.0255319231  | 62.2168815127  |
| 12.6764484096   | 8.0902793715   |
| 9.3333026134    | 23.6671152738  |
| 1.8714785094    | 4.5843985296   |
| 0.0916343161    | 0              |
| 3.0534228107    | 4.1116506663   |
| 65.5867385984   | 61.4343730168  |
| 8.4827033149    | 7.8144535244   |
| 1132.6893656734 | 929.9988585169 |
| 26.0539467931   | 5.9094530502   |
| 3.8722484364    | 9.274721893    |
| 4.0961639286    | 13.9980736299  |
| 1.178280103     | 2.4052754478   |
| 211.5771365884  | 296.8627327369 |
| 15.5598438046   | 15.1529905674  |
| 672.7340953272  | 924.0032603835 |
| 91.2544100617   | 24.6730696278  |
| 6.409157724     | 4.4489974592   |
| 0.3438664002    | 0.6551530889   |
| 3.1664740504    | 5.3177887876   |
| 0.6386313918    | 0              |
| 0.1841024003    | 0.0200435412   |
| 0.9313156373    | 2.5724012057   |
| 0.8827208823    | 0.7713556154   |
| 0               | 0.0810487061   |
| 0.3156751329    | 0.3436808819   |
| 0.160459333     | 0.0582316009   |
| 22.7454206714   | 121.2329226738 |
| 1.3817955846    | 3.1341340325   |
| 4.5819438385    | 1.7815857584   |
| 6.4884654029    | 3.5320512754   |
| 0               | 0.385297134    |
| 1.9854918408    | 2.7020483863   |
| 0               | 0.0256422005   |
| 1.1855157386    | 0.3872073395   |
| 0.2622495558    | 0.071378887    |
| 0               | 0.053007329    |
| 0.4768812694    | 0.3216712859   |
| 0.3925329123    | 2.3290970254   |
| 35.2543073789   | 26.3799844812  |
| 0.1393090086    | 0.1314456737   |
| 2.4014726802    | 2.124300846    |
| 0.1925877175    | 0.3878960136   |
| 0.6665474932    | 1.9956243541   |

gene\_expression\_table

|                |                 |
|----------------|-----------------|
| 3.3877720911   | 2.3710661024    |
| 3.8775118594   | 9.479215682     |
| 75.3071622803  | 52.2365120602   |
| 55.8827129805  | 80.2359077435   |
| 0.2971657962   | 0.2911765072    |
| 536.2084771148 | 526.7700976797  |
| 0.2200373408   | 0.6388223795    |
| 10.2043139578  | 9.7036220304    |
| 15.3169178999  | 32.4903866626   |
| 4.8018797982   | 2.5776392915    |
| 1.4124985158   | 3.7088386282    |
| 0.0355911379   | 0.0193743383    |
| 0.2339313462   | 0.0424475053    |
| 0.8331123955   | 0.164913386     |
| 0.2480772465   | 0.1350429571    |
| 5.6248043342   | 4.4536873221    |
| 30.3804139379  | 10.7617538815   |
| 0              | 0.0103390893    |
| 2.0300486566   | 1.7365452276    |
| 0.4922943397   | 0.2443389063    |
| 0.5626445016   | 0               |
| 0.0224607145   | 0.46461387      |
| 4.9473913072   | 14.0642512604   |
| 59.1288221684  | 38.6957334727   |
| 0              | 0               |
| 0              | 0.5691867723    |
| 0.5821423326   | 1.3141785785    |
| 0.0422107525   | 0.2297778182    |
| 3181.047238034 | 3105.7137417009 |
| 0.006968       | 0.007586        |
| 0.2619021745   | 0.4277060224    |
| 2.8548123894   | 3.2743587964    |
| 1.9287431872   | 4.2685586918    |
| 0.2230105558   | 0.283261279     |
| 165.207784523  | 353.4573059171  |
| 3.0175942179   | 13.9450759213   |
| 7.8423904203   | 9.1578477062    |
| 0.4728135409   | 0.4412229746    |
| 0              | 0               |
| 17.283529872   | 26.2445855971   |
| 0.7297876066   | 1.6458166369    |
| 11.093389676   | 2.1933308102    |
| 0              | 0.003864        |
| 1.5708921058   | 3.5498259728    |
| 0.225550194    | 0.2058373348    |
| 2.8692261194   | 3.2799639984    |
| 31.3352254447  | 33.1038725258   |
| 0              | 0               |
| 0              | 0.1212670315    |

gene\_expression\_table

|                |                |
|----------------|----------------|
| 1.2013239042   | 0.3503308259   |
| 447.3587685343 | 436.3710033536 |
| 0              | 0.3551534867   |
| 0              | 0.006224       |
| 0.0248387643   | 0.0439438754   |
| 48.6601599045  | 23.04532834    |
| 1.1170862785   | 1.6518412568   |
| 0              | 0.012841654    |
| 59.1411499333  | 51.3693287754  |
| 4.896368721    | 1.6084189162   |
| 1.6297968909   | 1.3186705455   |
| 0.5914626475   | 0.2128261186   |
| 0              | 0              |
| 0.0193759881   | 0              |
| 14.6031389664  | 8.1706306958   |
| 0.4817514734   | 0.5944231516   |
| 20.4877126408  | 19.2417814773  |
| 0              | 0.0250215898   |
| 222.8892697778 | 219.632084736  |
| 0.0218467179   | 0.007928       |
| 14.621370908   | 20.1771836456  |
| 0              | 0.008105       |
| 0.9644564034   | 1.5630980686   |
| 8.7982478974   | 8.7223032861   |
| 0.002037       | 0.004435       |
| 4.3614270059   | 3.7502183448   |
| 0.9916190371   | 1.5888342417   |
| 0.0716386708   | 0.1039923178   |
| 10.375974598   | 4.3089741798   |
| 12.796969675   | 7.8982282253   |
| 0.006099       | 0              |
| 2.711176974    | 23.2730542861  |
| 0.0373253354   | 0.0304775453   |
| 0.3486989587   | 0.3600775543   |
| 13.1692684723  | 33.1146884882  |
| 9.413754647    | 8.2639470017   |
| 24.6207032538  | 22.0585122609  |
| 27.7491685315  | 18.5481435306  |
| 0              | 0              |
| 1.234534888    | 0.9100400241   |
| 0.7696415106   | 0.5052175511   |
| 0.03482195     | 0.1042559339   |
| 0.2638754899   | 0.3540963652   |
| 2.7712341124   | 0              |
| 14.1650930913  | 10.0757290673  |
| 20.5561208333  | 5.9050908478   |
| 0.5615496799   | 0.3821054248   |
| 0.693484207    | 0.4972004175   |
| 9.129917829    | 5.8735753207   |

gene\_expression\_table

|               |               |
|---------------|---------------|
| 4.2390391533  | 2.9998240776  |
| 0.3241430595  | 0.7940251292  |
| 3.6727031564  | 2.8063107991  |
| 0             | 0             |
| 12.9091915796 | 9.1102993223  |
| 0.005039      | 0.008229      |
| 0.4799275729  | 0.2612526523  |
| 0.7613469411  | 1.0854529627  |
| 1.9908140359  | 2.1674330733  |
| 5.2134979322  | 5.2419749196  |
| 0.562355968   | 0.4447060721  |
| 1.4681711442  | 0.9897211407  |
| 11.7167154944 | 6.8435220924  |
| 18.2252572299 | 7.4255888559  |
| 0.016335883   | 0             |
| 3.1449043381  | 2.6630417319  |
| 5.6445558905  | 10.8860023779 |
| 0.1805595669  | 0.321673531   |
| 0.5674509955  | 0.5110144114  |
| 0.1918086222  | 0.1207271304  |
| 0.0291471135  | 0.007933      |
| 0.047456991   | 0             |
| 0.002769      | 0             |
| 0.2860993153  | 0.175022762   |
| 3.8061324465  | 3.3713820165  |
| 4.1948569572  | 4.6656820714  |
| 26.9684783538 | 45.2649377348 |
| 6.630878627   | 5.2366892991  |
| 0.0720466471  | 0.1655921968  |
| 0.005284      | 0.002876      |
| 4.362469562   | 2.9170125231  |
| 3.3662051962  | 4.5436596285  |
| 15.9655324315 | 4.3454866201  |
| 0.0336569131  | 0.0347142821  |
| 0             | 0.00277       |
| 0.6188593106  | 1.2403357848  |
| 0.8376811469  | 0.757857244   |
| 15.4986142385 | 15.6638583749 |
| 6.2004829857  | 1.9628379911  |
| 53.4855422572 | 41.4483359034 |
| 0.031100033   | 0.0507887017  |
| 0             | 0             |
| 0.1272802232  | 0.0364663532  |
| 7.319478403   | 4.0363345337  |
| 0             | 0.2892830051  |
| 0.0861108334  | 0.8203153676  |
| 2.923728521   | 2.9276779394  |
| 18.5706975923 | 30.6597884271 |
| 6.4625031108  | 1.7048374177  |

gene\_expression\_table

|                 |                 |
|-----------------|-----------------|
| 89.3889316864   | 134.700152624   |
| 2.5716303266    | 1.6618035021    |
| 0.1534970046    | 0.2785246624    |
| 24.029417703    | 13.6645738553   |
| 1.8529120364    | 0.3025945234    |
| 0.0252431045    | 0.006871        |
| 0               | 4.3389711335    |
| 10.7960634585   | 6.8629907716    |
| 10.2851517403   | 7.70588868      |
| 5.43763033      | 1.9338799126    |
| 29.6134364849   | 20.9743066008   |
| 0.8428721133    | 2.8184939522    |
| 0.3011808605    | 0.3606907933    |
| 6.7426414082    | 2.8724980254    |
| 43.4558601417   | 26.7697172733   |
| 6.617265522     | 5.7986066138    |
| 0               | 0.1376458038    |
| 1.9060601775    | 0               |
| 61.0979921849   | 67.4784821111   |
| 4.0946344794    | 5.1963229887    |
| 18.2159318581   | 64.3586362573   |
| 3.1595952492    | 6.459377247     |
| 7772.0898228795 | 4866.1816496151 |
| 294.9722796589  | 345.0372833311  |
| 203.371957888   | 99.7727365321   |
| 0.2854436294    | 3.1076733024    |
| 10.7440066024   | 12.4730161125   |
| 0.4395843819    | 0.2392914935    |
| 0.7799154148    | 0.6707233077    |
| 20.9457645821   | 10.9475771964   |
| 0.8754054625    | 0.8025842559    |
| 1.8212325552    | 2.6350459232    |
| 1.1424104826    | 0.6299572281    |
| 83.2733077551   | 94.1329831403   |
| 0.3356838939    | 0.5786525366    |
| 1.3361516808    | 2.8285659146    |
| 0.0281472771    | 0               |
| 0.489028686     | 0.7986207617    |
| 11.2452132452   | 11.3181284999   |
| 6.8831173347    | 5.3117582429    |
| 5.8331929311    | 2.473817735     |
| 88.2476406742   | 89.4553859933   |
| 4.706414991     | 6.6521507846    |
| 2.1669363713    | 3.4431282285    |
| 6.6160122045    | 2.1551039624    |
| 0.4706271211    | 0.7850221777    |
| 6.5346087024    | 3.8361634802    |
| 0               | 0               |
| 11.8422225064   | 26.9696930914   |

gene\_expression\_table

|                |                |
|----------------|----------------|
| 0.3471471712   | 0.0472431281   |
| 2.6654143269   | 3.6922318158   |
| 8.1616661092   | 25.6362010196  |
| 1.6859050095   | 0.7647805977   |
| 5.433812911    | 6.1467482436   |
| 1.5175657813   | 0.403871027    |
| 222.4325016779 | 170.0894053256 |
| 0.6295244623   | 0.2056121941   |
| 10.4628697525  | 5.4462076093   |
| 1.9615582284   | 0.3454617583   |
| 9.1865196402   | 5.5436996851   |
| 0.2367278127   | 0.1150578539   |
| 0.1746440133   | 0.0950689526   |
| 0.4091031889   | 0.1299076316   |
| 1.1513535123   | 0.487471497    |
| 2.293668698    | 1.7656659227   |
| 0.3528715097   | 0.2561181396   |
| 1.3196280954   | 0.5309549146   |
| 54.2717820503  | 26.3453190123  |
| 0.3658840141   | 0              |
| 1.2411190899   | 0.3524941161   |
| 15.6772549749  | 1.3482608908   |
| 6.7601691679   | 0.2044419738   |
| 2.3479218569   | 2.6314054393   |
| 5.7504410716   | 1.1107521308   |
| 0.1512463477   | 0              |
| 1.9654020261   | 0.4457847055   |
| 0.1389153971   | 0              |
| 0.163796251    | 0              |
| 0.7521366941   | 0.2047160002   |
| 36.2889427658  | 67.94487007    |
| 0.2418724639   | 0.3620796601   |
| 7.8014077733   | 2.9575668183   |
| 2.8248425927   | 1.4194403708   |
| 0.5712230293   | 0.2332125823   |
| 0.5431127722   | 0.3202853902   |
| 10.1526419224  | 8.515593997    |
| 4.6517411095   | 1.2126099039   |
| 1.4066761017   | 1.0825924012   |
| 98.3469072588  | 50.2693727904  |
| 4.1863641277   | 3.8583066666   |
| 416.1234337173 | 559.2847011699 |
| 8.4216532924   | 12.3014693876  |
| 6.8297015491   | 4.4047919755   |
| 4.6146720088   | 6.1457985701   |
| 455.8242746232 | 581.6879427374 |
| 64.6254159913  | 85.4750886208  |
| 0.3068224208   | 0.5845748716   |
| 20.6190679629  | 9.1456158024   |

gene\_expression\_table

|                  |                  |
|------------------|------------------|
| 11.063566961     | 0.6022546684     |
| 0.7912111431     | 0.4006534965     |
| 258.131050092    | 415.8602762168   |
| 1.0261077342     | 1.8153540083     |
| 0.3194126345     | 0.3477499633     |
| 27.5473738201    | 43.8678629022    |
| 4.5393014028     | 6.0010177033     |
| 0                | 0.1612909574     |
| 2.0133998157     | 6.1063486592     |
| 5.4218763023     | 8.8953255904     |
| 1.8187471357     | 9.4054793456     |
| 2.1752408856     | 5.7012745081     |
| 4.9606381058     | 3.6004873387     |
| 10.9522699877    | 9.0710308567     |
| 744.1320899392   | 732.6255779776   |
| 24.9753427629    | 27.7041193504    |
| 12.4235067965    | 21.4227985134    |
| 32.5483772474    | 3.2963694367     |
| 0.2340076549     | 0.2292912996     |
| 11.0447635981    | 15.317077803     |
| 16.7499182062    | 15.4453704754    |
| 45.8351115779    | 44.7801315532    |
| 2.3970876411     | 2.8592114536     |
| 1.0294962994     | 6.7249807001     |
| 1.3373310683     | 2.493357292      |
| 129.1555507121   | 116.7624926592   |
| 2.6447891677     | 0.261766083      |
| 671.672000427    | 790.6874997888   |
| 8.0893539071     | 8.4777827882     |
| 12.9067692521    | 10.4157688196    |
| 48.0370676574    | 32.1419535713    |
| 4.2439878564     | 2.3762580185     |
| 4.317778893      | 3.5635394377     |
| 8.9726734564     | 6.6565492021     |
| 2.1090587427     | 2.1214596531     |
| 0                | 0.1362811365     |
| 82.4800768799    | 135.2669386561   |
| 19.7759498178    | 79.5568869082    |
| 0.6012258389     | 1.4400425339     |
| 0.410073163      | 0.3534424503     |
| 77.0304423167    | 144.7893364817   |
| 494.8109964949   | 193.2832508152   |
| 25256.5639698776 | 20737.2101803098 |
| 4.4269784768     | 5.0874892954     |
| 26.6309290382    | 20.371963285     |
| 0                | 0.4415915109     |
| 23.0534692161    | 32.6077421177    |
| 813.9714660593   | 585.3300794042   |
| 6.757174513      | 8.0179227008     |



gene\_expression\_table

|                |                |
|----------------|----------------|
| 6.6977774543   | 7.1155651671   |
| 43.3236266234  | 17.3581039567  |
| 7.2579364078   | 2.5319271924   |
| 16.8998745164  | 11.7085694642  |
| 30.1419638655  | 25.7099123911  |
| 172.3050052793 | 75.0171957006  |
| 1.888208568    | 5.171432591    |
| 3.029208881    | 15.7568778976  |
| 5.6394126494   | 8.2886279251   |
| 10.5074422569  | 6.5691214099   |
| 20.8809703045  | 31.7804592867  |
| 0.4817790478   | 0.5245210368   |
| 3.4458068564   | 6.4331423254   |
| 537.8016157351 | 386.5696785316 |
| 138.1879651424 | 106.1709896864 |
| 287.2525864136 | 342.1411423769 |
| 3.3918938366   | 4.8502611449   |
| 0.6847190316   | 1.571959323    |
| 0.1324452691   | 0.0720977077   |
| 0              | 0.8817262651   |
| 6.4380712467   | 4.2502823602   |
| 0.1602902526   | 0.698042888    |
| 0.0945791018   | 0.0772274066   |
| 4.0735182815   | 8.575311511    |
| 16.3024171708  | 8.9613628333   |
| 15.2275539972  | 12.5410611702  |
| 0.0123815293   | 0.0269599628   |
| 1.5256378096   | 0.8304939052   |
| 125.7551901427 | 166.2805711818 |
| 0.5386408966   | 0.0977379163   |
| 1.4951036556   | 2.441617137    |
| 0.4452306041   | 1.3604758843   |
| 2.7318310556   | 2.9741908957   |
| 1.2139470127   | 0.8496287632   |
| 35.8974666768  | 28.6372094813  |
| 25.8426777231  | 8.2211129891   |
| 37.2132787026  | 65.4356593237  |
| 5.9077970711   | 11.4682330585  |
| 38.172378873   | 43.6468057943  |
| 0              | 0.0165017918   |
| 13.4626568236  | 9.9425030473   |
| 0              | 0              |
| 10.8698840806  | 13.7795799938  |
| 4.9230678494   | 2.0390648598   |
| 17.1526771763  | 16.6409752592  |
| 3.6522912595   | 2.5162596605   |
| 7.0919754704   | 2.7575550776   |
| 369.7328779189 | 178.8233288517 |
| 22.9717382435  | 30.1841470159  |

gene\_expression\_table

|                |                |
|----------------|----------------|
| 3.8968341407   | 3.5354579607   |
| 26.860850215   | 10.8886728066  |
| 14.4984806745  | 25.0597186167  |
| 17.8914908788  | 8.2585429093   |
| 0.2466003886   | 0.5638038711   |
| 16.0323925518  | 30.1009502722  |
| 11.078022719   | 7.374544621    |
| 0.458122794    | 0.8486114673   |
| 2.5778550949   | 1.1080523142   |
| 1.4013739849   | 2.0761651796   |
| 0.209595       | 0.3206457851   |
| 3.9602185917   | 0.8276650139   |
| 0.0762695386   | 0.0358564298   |
| 1.228014427    | 2.0850212267   |
| 11.6797503506  | 8.4282934242   |
| 0.7356189099   | 1.0068215878   |
| 3.9883742684   | 4.1645749473   |
| 9.239575439    | 19.2097442581  |
| 0.103886506    | 0.0801146282   |
| 0              | 0.008073       |
| 2.4971272831   | 1.8536351659   |
| 4.4876775293   | 2.9692100448   |
| 0.0296729995   | 0              |
| 0              | 0.0185108493   |
| 92.5504446799  | 35.7732219936  |
| 27.655445118   | 15.5211480304  |
| 7.252846669    | 11.8269377178  |
| 0.3840039483   | 1.0591147817   |
| 0.091828671    | 0.3245234348   |
| 16.4499054166  | 11.3635716298  |
| 9.90684894     | 10.0644145112  |
| 2.8379207805   | 0.8027142493   |
| 32.4309434847  | 16.3190720938  |
| 4.5488581084   | 3.8530231798   |
| 6.9582617613   | 3.5081534917   |
| 9.9598729054   | 4.7019057176   |
| 1.0327483267   | 1.3032478036   |
| 35.4421440672  | 16.8918580997  |
| 121.1398490788 | 140.0690722249 |
| 15.1266345002  | 12.5168894816  |
| 0.6056480308   | 0.3663218354   |
| 208.7351875206 | 83.1277015779  |
| 0              | 0              |
| 1.8524118254   | 0.719308297    |
| 0.0627168204   | 0.004268       |
| 3.9736915493   | 2.7665342862   |
| 0.1545613118   | 0.3617880827   |
| 0.549669119    | 0.588935157    |
| 0              | 0.002026       |

gene\_expression\_table

|                |                |
|----------------|----------------|
| 2.6317660085   | 3.5078224632   |
| 3.140357026    | 3.0086848548   |
| 2.3429164794   | 1.6261177794   |
| 10.6811240859  | 7.9205831372   |
| 4.3948551157   | 5.1133766284   |
| 0              | 0.0367159402   |
| 0.001816       | 0.0148283285   |
| 61.151297298   | 96.4425305726  |
| 21.187795137   | 12.3711016246  |
| 6.5383309975   | 4.745594714    |
| 17.9512928189  | 9.3195342072   |
| 110.2535467144 | 183.3601862025 |
| 3.1907360667   | 6.5133910875   |
| 3.3130386937   | 2.3046006101   |
| 0.7865145893   | 1.1885841397   |
| 0.1035270312   | 0.0845337287   |
| 0              | 0.000974       |
| 0.0203692919   | 0              |
| 3.3989854349   | 3.6191639292   |
| 0              | 0.1801648914   |
| 0              | 0.009211       |
| 0.008219       | 0.008949       |
| 0              | 0.001141       |
| 71.725446445   | 58.4260870241  |
| 0.235275924    | 0.1328179465   |
| 0.2395953095   | 0.0741636575   |
| 0.0133360753   | 0.009679       |
| 0.002428       | 0.001322       |
| 0.0426306281   | 0              |
| 12.5511529072  | 4.7631077801   |
| 0.7789152831   | 0.9401942085   |
| 1.8086257915   | 1.2928313768   |
| 130.3949584964 | 109.4299722781 |
| 1.3726424074   | 1.9137165658   |
| 9.3610695948   | 3.8218333321   |
| 3.5301356393   | 1.2417602067   |
| 0.0264039655   | 0              |
| 137.9770508297 | 264.0534155376 |
| 0              | 0.2739092251   |
| 0.0886539617   | 0              |
| 0.877133691    | 1.0905646073   |
| 71.0403665313  | 32.5654123455  |
| 21.8449735376  | 6.7282961116   |
| 16.2970430371  | 12.6283755947  |
| 0.7646539739   | 0.5076169367   |
| 0.2708984051   | 0.3291648408   |
| 1.1118404618   | 0.943885883    |
| 1.059869692    | 0.9094281993   |
| 35.379057074   | 18.0209451377  |

gene\_expression\_table

|                |                |
|----------------|----------------|
| 2.1279341488   | 1.5766553535   |
| 0.4486249828   | 0.2320021803   |
| 2.622785422    | 3.1383243267   |
| 77.5376195489  | 50.1017552106  |
| 10.0791720912  | 2.0636479237   |
| 0              | 0              |
| 140.4257561867 | 137.823701408  |
| 0.1241811179   | 0.0225330156   |
| 0.0415867675   | 0.3169335437   |
| 0.6658023232   | 3.1169423077   |
| 8.6596314238   | 26.9980426086  |
| 5.9541708602   | 5.5867114211   |
| 1.2471474774   | 1.3296984325   |
| 6.6112847785   | 7.912669889    |
| 124.53926791   | 74.5569547274  |
| 389.0274283826 | 278.7136242737 |
| 12.5666990774  | 9.6458750338   |
| 0.8040271122   | 2.137649562    |
| 0.009223       | 0.019170223    |
| 1.4616386138   | 1.9547583264   |
| 7.0462907487   | 4.7063904813   |
| 0.2751155988   | 0.1872018923   |
| 2.9904915833   | 1.6970084452   |
| 0.0116781755   | 0              |
| 0.5392850938   | 1.3629776791   |
| 1.4424722923   | 0.5163103885   |
| 27.2680312942  | 35.4531809101  |
| 6.1249069504   | 7.3788458073   |
| 2.8500547666   | 1.4997364785   |
| 2.8839064906   | 3.5154555454   |
| 7.6132070767   | 4.1072007032   |
| 1.3235873697   | 1.9755810538   |
| 8.7024178403   | 9.486936602    |
| 1.0201795908   | 0.8811449071   |
| 128.0189671474 | 119.1203846692 |
| 0              | 0              |
| 0.0410364481   | 0.2233853922   |
| 2.3046583486   | 2.7999128453   |
| 112.0486525274 | 248.242310296  |
| 10.3018599031  | 10.8099747205  |
| 32.7997056772  | 7.0525212389   |
| 0.4057744707   | 0.2056532099   |
| 1.8206886259   | 1.3257669401   |
| 14.1060870467  | 15.1141954398  |
| 23.0718164343  | 25.6849132604  |
| 1.8518522786   | 1.766471701    |
| 0.060626069    | 0.1430100351   |
| 22.3993808303  | 11.2396278887  |
| 0              | 0.0441754998   |

gene\_expression\_table

|                |                |
|----------------|----------------|
| 3.7514824366   | 3.5154842723   |
| 1.7554143689   | 1.7382359332   |
| 9.3934643878   | 5.2535056407   |
| 118.9745512542 | 139.4978140621 |
| 0.0694791031   | 0.1765005207   |
| 0.9311568983   | 0.1839798172   |
| 0              | 0.0159185814   |
| 0.4664737301   | 0.6273538484   |
| 8.9844319539   | 18.9129708621  |
| 3.1960668833   | 2.9576704811   |
| 2.0014663835   | 1.0448171718   |
| 0.1105985192   | 0.2307867674   |
| 18.0657065975  | 9.8759797927   |
| 5.4706192362   | 4.0921875461   |
| 0.0173628486   | 0              |
| 0.9719586309   | 0              |
| 8.6181993666   | 8.4474250837   |
| 130.9536966604 | 119.6530716778 |
| 39.543124443   | 56.0334732184  |
| 4.9782211675   | 3.3526359866   |
| 0.7864721253   | 0.7415698225   |
| 1.1179589769   | 0.8026074295   |
| 22.6122319077  | 18.7267571186  |
| 41.7717355204  | 34.7920724146  |
| 0.5951927487   | 1.4690374301   |
| 0.1339075654   | 0.2186811631   |
| 0              | 0              |
| 6.0091367591   | 5.3923994316   |
| 2.3992196789   | 2.1882583545   |
| 15.2208114101  | 17.2928962945  |
| 8.5536695368   | 7.4261420401   |
| 1.668346002    | 0.1224510098   |
| 11.751435793   | 7.5213140721   |
| 3.7131558638   | 1.9447240083   |
| 2.6225428119   | 3.07880747     |
| 10.1388919278  | 14.1678226919  |
| 2.4598591016   | 6.2632759528   |
| 0.3898443022   | 0.551759152    |
| 12.499184607   | 7.3368836463   |
| 11.3299021237  | 4.2355316154   |
| 165.1899172952 | 184.5312261513 |
| 15.5086848646  | 18.9163218592  |
| 55.2323545961  | 65.9996150038  |
| 66.8862330144  | 33.1736369015  |
| 6.9811195886   | 5.6651603201   |
| 0.4525077738   | 0.4691932413   |
| 0.449583474    | 2.5778709538   |
| 0.3927310625   | 0.0916227818   |
| 53.6864621491  | 50.7377545621  |

gene\_expression\_table

|                |                |
|----------------|----------------|
| 0              | 0.0363376014   |
| 0.4287917314   | 0.5880646303   |
| 5.9618664224   | 2.2988197907   |
| 4.3200424919   | 1.0957958828   |
| 1.8479592268   | 1.6895337982   |
| 1.9422891348   | 2.01017834     |
| 0.7107588553   | 0.8947238766   |
| 0.2685351725   | 0.7441860512   |
| 4.0508941191   | 2.3674215645   |
| 0.6582356543   | 0.522947926    |
| 326.4727495572 | 307.384114724  |
| 2.5361230192   | 0.8715657293   |
| 1.7248282262   | 4.6946245051   |
| 0.4788836079   | 0.6220290201   |
| 982.8745013757 | 925.7758313079 |
| 4.6040440216   | 3.4107619373   |
| 1.7388092845   | 0.5408774908   |
| 3.3239315885   | 0.904705202    |
| 1.0440773476   | 0.2238963905   |
| 0.0529714395   | 0.0865063597   |
| 63.1391149109  | 48.5261265951  |
| 2.0071304544   | 0.6474657883   |
| 33.5185821311  | 12.8057666247  |
| 0.4467880404   | 0.3316539084   |
| 0.9681355928   | 2.2119693694   |
| 5.0615887277   | 3.3221272785   |
| 3.3141443096   | 3.9377572476   |
| 1.4455251855   | 0.536511762    |
| 1.0547187317   | 0.7157675626   |
| 1.2613432962   | 1.648254547    |
| 0.6646526961   | 0.9209692362   |
| 17.93888255    | 6.618109904    |
| 0.5108342411   | 0.3475961997   |
| 1.6645233634   | 0.9060974365   |
| 1.0993298397   | 1.2015711224   |
| 32.1369147618  | 13.6926031333  |
| 2.0135466024   | 1.3762033986   |
| 0              | 0.0294089493   |
| 30.7509836656  | 28.0803559889  |
| 1.3441876776   | 0.7894873512   |
| 3.4289466796   | 2.4139181724   |
| 895.5972844784 | 920.1086718662 |
| 19.689708404   | 27.3295098864  |
| 2.3460771467   | 2.8607197466   |
| 0.005795       | 0              |
| 0              | 0              |
| 13.3802349502  | 6.8674363265   |
| 0.5493399005   | 0.6877870381   |
| 0.3115531737   | 0.0547085863   |

gene\_expression\_table

|                 |                 |
|-----------------|-----------------|
| 33.1426227503   | 12.4578314032   |
| 7.1233072788    | 6.9152533228    |
| 4647.4410892411 | 7336.6347357763 |
| 4.4494601957    | 7.4733216148    |
| 0.5499713647    | 0.6259796788    |
| 0               | 0               |
| 0               | 0.0193979608    |
| 751.5322985684  | 473.2209814024  |
| 411.9328749086  | 297.5840528482  |
| 6.3191904985    | 2.414548732     |
| 286.4519992615  | 237.5812013101  |
| 152.6472076809  | 50.2768564796   |
| 12.7591858205   | 14.023860357    |
| 18.9593233386   | 28.9904939119   |
| 140.6938372901  | 37.5803911798   |
| 0.1043846637    | 0.1846737057    |
| 57.7427231096   | 52.1029752587   |
| 7.8875039059    | 6.8958296343    |
| 25.8778622042   | 25.8860628063   |
| 1.3945228244    | 1.7201344076    |
| 0               | 0.2147969709    |
| 8.4434635064    | 3.4166971045    |
| 0.6717689619    | 0.3094241975    |
| 1.1327366449    | 3.03253189      |
| 3.4281725737    | 9.7795964079    |
| 8.2620572408    | 6.6517958575    |
| 24.6526792077   | 15.4634077956   |
| 14.1759986108   | 10.4542923776   |
| 3.419851942     | 2.008009688     |
| 42.2460993863   | 21.1114151621   |
| 0.3418751579    | 0.2658609245    |
| 1.79104049      | 0.8179817189    |
| 17.6953196375   | 25.3394825031   |
| 15.0244246775   | 8.0008759933    |
| 0.2143516793    | 0.4550682163    |
| 36.4738860537   | 22.3121556625   |
| 0.1478926405    | 0.0201266539    |
| 3.3011354234    | 2.5100967996    |
| 3.1125834925    | 2.2118509218    |
| 0.2354253278    | 0.1762141942    |
| 66.6004380415   | 60.6813148156   |
| 0.8470952291    | 2.0174152505    |
| 3.4896024385    | 2.472748324     |
| 1.0762746002    | 0.377986596     |
| 4.6048085877    | 6.1792248448    |
| 21.916752563    | 32.924278211    |
| 1.6423874959    | 1.5977495622    |
| 1.5285402683    | 0               |
| 58.3628020506   | 28.6623243329   |

gene\_expression\_table

|                 |                 |
|-----------------|-----------------|
| 0.2935673041    | 0.5220324645    |
| 2.328736254     | 1.4890061141    |
| 3.0365433686    | 3.045918902     |
| 1.1257041624    | 1.4368789852    |
| 26.8012267555   | 21.3478355002   |
| 434.645834624   | 203.4907527263  |
| 0.2899384508    | 0.4238875193    |
| 2.8572505402    | 4.22260715      |
| 11.4331151289   | 21.7133283583   |
| 35.4137142571   | 9.5363368786    |
| 8.9734315402    | 7.3158556602    |
| 3.6197184872    | 0.9404298825    |
| 40.3047782944   | 47.4795925295   |
| 9.2578198818    | 4.2541849304    |
| 0.2519263524    | 0.237706301     |
| 58.649986814    | 46.5228461903   |
| 31.0619010136   | 15.8766741493   |
| 57.4167376294   | 19.983625873    |
| 6.7795680228    | 6.5873716814    |
| 5.0864255654    | 2.8151793778    |
| 0.2785920359    | 0.3791348549    |
| 3.3942952053    | 3.0377661587    |
| 22.0022315569   | 16.8330500728   |
| 0.2455343118    | 0.409329735     |
| 1.7531857665    | 2.0501100372    |
| 3.168157838     | 4.1589721226    |
| 1795.4918542012 | 1508.4905106227 |
| 4.2034074474    | 1.7872023316    |
| 16.1081375517   | 17.2616465962   |
| 1.6598543206    | 1.5867321426    |
| 0.0707877732    | 0.2456537771    |
| 0               | 0               |
| 0.0522805077    | 0               |
| 0.004777        | 0.005201        |
| 7.8903205972    | 8.162669196     |
| 0.4056854513    | 0.1104191613    |
| 0.011382172     | 0.004819        |
| 0               | 0.001789        |
| 2.0121549212    | 2.2483163961    |
| 1808.0571358214 | 935.9430050477  |
| 4.1657601804    | 3.708378433     |
| 0.3150270125    | 0.2694805632    |
| 10.4737098277   | 8.9047427562    |
| 35.9517633485   | 7.3438758457    |
| 1.8859259961    | 2.2155684601    |
| 38.0522682819   | 7.3978841336    |
| 11.8908612565   | 4.3389711335    |
| 0.1260658061    | 0.0300234343    |
| 0               | 0.5162648185    |



gene\_expression\_table

|                |                |
|----------------|----------------|
| 2.4207923833   | 1.765098348    |
| 0              | 0              |
| 0.6443020318   | 0              |
| 1.5840838876   | 1.3473586319   |
| 10.2878573024  | 5.336739832    |
| 47.884909343   | 18.193784919   |
| 9.759836377    | 6.7517467001   |
| 11.8277454226  | 22.3113738748  |
| 1.2369660474   | 1.0839340631   |
| 2.6884455057   | 1.1576767496   |
| 7.4405134752   | 6.00942249     |
| 2.7376730696   | 1.9502372021   |
| 1.4787158179   | 0.2541952169   |
| 0.3648468056   | 0.0595822376   |
| 1.1461276884   | 0.7798804325   |
| 0.0554310089   | 0.0301743407   |
| 15.7241706153  | 17.4788182351  |
| 4.3816714682   | 1.8827743546   |
| 1.2577006715   | 1.5689667752   |
| 1.3461548231   | 1.9810914514   |
| 0.1367843497   | 0.3474787075   |
| 9.7332497946   | 26.8035554006  |
| 0.80670517     | 0              |
| 1.6616398985   | 3.3041041322   |
| 0.4629735262   | 0.3803264828   |
| 5.1763515596   | 4.4239318002   |
| 2.9441746795   | 2.7220231096   |
| 1.1071151633   | 0.949657952    |
| 1.2001023966   | 2.2703303356   |
| 217.2535039492 | 156.749634725  |
| 10.2434165869  | 8.6130689156   |
| 369.6527028162 | 287.1753825966 |
| 0              | 0.1898704424   |
| 4.7879880312   | 3.8402893821   |
| 2.6886646145   | 1.6587437527   |
| 0              | 0.0514040737   |
| 0.006382       | 0.003474       |
| 5.0046752691   | 2.2056760587   |
| 0.0496960654   | 0.5843334701   |
| 0.8324142752   | 0.7875861957   |
| 1.3090453723   | 1.0688849573   |
| 0.1606578762   | 0.1906529465   |
| 2.6285344993   | 1.8787880742   |
| 0.0335345089   | 0.0182547949   |
| 0.0149054403   | 0.0162278061   |
| 3.8598000168   | 5.203432292    |
| 235.5419747283 | 342.4680277888 |
| 11.827286331   | 2.8245374144   |
| 5.7101870231   | 5.4161320456   |

gene\_expression\_table

|                |                 |
|----------------|-----------------|
| 0.0337926951   | 0.0183953407    |
| 27.0198184077  | 11.7844952383   |
| 2.7104852208   | 1.595793419     |
| 0.9189345206   | 0.9246672331    |
| 0.008017       | 0.013091994     |
| 0              | 0.2050274529    |
| 3.1838867274   | 2.616012214     |
| 762.9836483113 | 1420.7802613821 |
| 0.6255322342   | 0.8512844673    |
| 104.0272542242 | 59.7057349745   |
| 15.7870039917  | 9.7946686864    |
| 3.35817821     | 3.4047484209    |
| 22.4493709752  | 29.557428295    |
| 0              | 0               |
| 0              | 0.1355447141    |
| 0.0648678193   | 0.1000488211    |
| 2.3951925985   | 2.7897879261    |
| 0.0648195305   | 0.0382254841    |
| 201.3175524861 | 79.2209062528   |
| 0.0555690936   | 0               |
| 0.0122764649   | 0.0217190935    |
| 4.1083231579   | 2.515121172     |
| 3.0731674502   | 2.2902863533    |
| 0.6922338025   | 1.7366641459    |
| 131.4901489856 | 117.9297366686  |
| 1.9163432522   | 2.3504510941    |
| 15.4050034862  | 12.8035883885   |
| 0              | 0.0295183317    |
| 40.6483456057  | 14.2697496776   |
| 0.4373931383   | 0.1255429359    |
| 0.5311872391   | 0.386959149     |
| 0.1285612436   | 0               |
| 0.7748031727   | 0.455784456     |
| 4.6920431819   | 5.4647006719    |
| 4.6009816016   | 5.352118118     |
| 1.960478109    | 1.5484905071    |
| 0.0420160621   | 0               |
| 0.0110037656   | 0.0179699799    |
| 2.598339356    | 1.5724031941    |
| 0.0216060739   | 0.00392         |
| 0.005791       | 0.011033438     |
| 0.1947695702   | 1.6698854103    |
| 0.267441663    | 0               |
| 12.9708753513  | 15.1577544021   |
| 21.4758160672  | 16.5423493252   |
| 10.2159841394  | 6.5522551976    |
| 0.0415916993   | 0.2188610178    |
| 17.4798915204  | 10.9241502356   |
| 66.8263625799  | 37.8648236163   |

gene\_expression\_table

|                 |                 |
|-----------------|-----------------|
| 0.8558778211    | 1.0227168975    |
| 36.4836938173   | 36.4752853256   |
| 6.9271533945    | 4.7237052204    |
| 5.0828271401    | 3.8347987949    |
| 0.161664549     | 0.20460807      |
| 0.6341998094    | 0.917812049     |
| 0.976895789     | 1.0945406115    |
| 5.3214711856    | 3.8259464905    |
| 4.3820364828    | 3.2302275337    |
| 2.8112238635    | 5.2809087726    |
| 7.734293904     | 4.2357451429    |
| 50.5142405732   | 37.5767515382   |
| 28.8355307071   | 41.5392677637   |
| 0.385901983     | 0.8102662335    |
| 1.1987799859    | 1.3660383097    |
| 7.419373197     | 10.7559590243   |
| 0.3522387722    | 0.2425854255    |
| 0.6949919611    | 0.7425329627    |
| 2.6406208413    | 1.5590743028    |
| 0               | 0.005409        |
| 0.9426398486    | 0.6130951823    |
| 0.0110084667    | 0.003995        |
| 0.2186957427    | 0.2182562906    |
| 5.8533809068    | 1.9345621346    |
| 0.0440726016    | 0               |
| 1.034493266     | 1.0826472499    |
| 7.3522391303    | 4.0364611413    |
| 10.7412905941   | 11.0835271615   |
| 4.7010798291    | 2.8345042865    |
| 5678.5411157583 | 4733.1656059776 |
| 2.6626116669    | 8.5276277957    |
| 3.8244373837    | 4.4189777875    |
| 7.3626728845    | 7.6488615497    |
| 0.1013803182    | 0.1765991604    |
| 163.0580715312  | 105.2024716238  |
| 0.2917942488    | 0.5647668578    |
| 1.0158077231    | 1.592993484     |
| 68.4017817497   | 37.6685613248   |
| 3.4770895398    | 1.9829157713    |
| 56.0810171049   | 27.3271653299   |
| 83.2979911435   | 42.9248375351   |
| 75.1713959748   | 74.4434935513   |
| 8.510762412     | 10.7576009211   |
| 30.3118399929   | 10.5578894054   |
| 0               | 0.0205830586    |
| 1.6912272466    | 2.0390698278    |
| 5.8129570055    | 5.2864444408    |
| 4.1010088515    | 14.8757599778   |
| 10.9133794377   | 16.4783532698   |

gene\_expression\_table

|                |                |
|----------------|----------------|
| 0              | 0.2299091198   |
| 11.1571580496  | 10.8602304177  |
| 6.0976308219   | 3.5647757176   |
| 18.6871863261  | 33.6001704355  |
| 60.9187027426  | 59.3711846575  |
| 9.1148829973   | 3.1508119175   |
| 13.8370358501  | 10.6607426893  |
| 18.2866672714  | 17.5338023664  |
| 24.8698993141  | 3.8391743175   |
| 0.6491107624   | 0.4266042311   |
| 22.2943660571  | 23.0661804097  |
| 1.0196193604   | 0.3792762828   |
| 0.3837705055   | 0.480490092    |
| 5.4254885024   | 2.3238076968   |
| 2.4833498842   | 2.2959198866   |
| 1.7482099223   | 1.5319291003   |
| 0              | 0              |
| 0.4369483803   | 0.8721407332   |
| 2.499591722    | 1.5597970166   |
| 41.8024026005  | 27.6408531469  |
| 0.5247003159   | 1.3182695787   |
| 0.1144862745   | 0.106836988    |
| 3.9814452204   | 2.8617219512   |
| 0.4663764264   | 0.527280862    |
| 11.2462406105  | 6.3626544164   |
| 31.0618276091  | 23.3976448282  |
| 10.1955930302  | 6.9865432214   |
| 17.2489999538  | 16.9085009171  |
| 0              | 0.0313411688   |
| 0              | 0.0245591608   |
| 1.0175179425   | 0.8434825536   |
| 0.9784749495   | 0.7682945116   |
| 105.409323424  | 85.039728217   |
| 10.0186702065  | 8.1504355867   |
| 80.7798102042  | 36.4300191703  |
| 1.3511427939   | 1.7862290046   |
| 0.9324635246   | 0.2537972214   |
| 0.004363       | 0              |
| 1.0894358086   | 1.2468380908   |
| 137.4138309972 | 130.9514598505 |
| 20.1530441819  | 5.1458949847   |
| 0.7030794525   | 0.8683125032   |
| 0.1686941186   | 0              |
| 0              | 0.2271892858   |
| 31.0856572808  | 9.1366592455   |
| 25.0264599541  | 7.5648582271   |
| 7.1531419516   | 4.9951097307   |
| 0.009601       | 0.03135747     |
| 0.3486600912   | 1.0956410261   |

gene\_expression\_table

|               |               |
|---------------|---------------|
| 14.5457864239 | 14.2296693075 |
| 2.1188872146  | 0             |
| 29.1780816235 | 12.8980348312 |
| 19.875550026  | 15.5559551286 |
| 0.2652842394  | 0.2508168992  |
| 34.7985772489 | 17.9400417373 |
| 0.007126      | 0.004364      |
| 0.0279424555  | 0.0253511884  |
| 7.5281743165  | 6.5465315527  |
| 7.9562146013  | 6.3743026349  |
| 1.0755916215  | 0.5875404505  |
| 0.021594426   | 0.003918      |
| 0.189846517   | 0.4306023529  |
| 5.0709665919  | 5.8221613662  |
| 0.6557555854  | 0.7525846328  |
| 0.00281       | 0.004589      |
| 0.0458649106  | 0.2473998148  |
| 8.5347797303  | 12.3271071661 |
| 16.1866204139 | 11.5592902854 |
| 0.00685       | 0.0205076172  |
| 10.0363745559 | 8.3958389081  |
| 0.0763807781  | 0.008316      |
| 0.4094788845  | 0.3636843482  |
| 5.0663555842  | 7.7196959698  |
| 8.9187752874  | 4.2665249163  |
| 11.0601365274 | 9.3558757437  |
| 21.1352346144 | 16.3667306521 |
| 0.4830052225  | 1.186013339   |
| 0.6125673583  | 0.7227047834  |
| 43.9134105722 | 54.6573153381 |
| 2.5568355487  | 3.869784453   |
| 0.0352983317  | 0.0106749705  |
| 0.004631      | 0.002521      |
| 4.6825125523  | 4.3597060118  |
| 47.8730052554 | 18.2637106095 |
| 0.0152803709  | 0             |
| 10.1164455164 | 13.9953074419 |
| 0.4644207539  | 0.0252811384  |
| 64.0524570405 | 36.3884873222 |
| 0.028610339   | 0.007377      |
| 4.8144285623  | 2.5159440928  |
| 9.5784393744  | 4.1376445039  |
| 94.7190645602 | 70.693873107  |
| 0.0369288305  | 0.0458337517  |
| 65.5762501821 | 85.1128208225 |
| 0.0332536415  | 0.0362038047  |
| 2.4086262427  | 3.1484450505  |
| 15.0182085316 | 13.8772575941 |
| 4.1593546948  | 2.1474697577  |

gene\_expression\_table

|                |                |
|----------------|----------------|
| 11.1899301451  | 4.9000688455   |
| 1.2209402007   | 0.6646291728   |
| 25.394891679   | 22.904346438   |
| 0              | 0.4088109847   |
| 12.6885813043  | 15.6624422891  |
| 1.2882332249   | 1.2376951711   |
| 0.0547835369   | 0.1789313029   |
| 0              | 0              |
| 7.5966851042   | 12.3352307254  |
| 0              | 0              |
| 1.291597853    | 1.3945631725   |
| 0.0102467372   | 0.005578       |
| 0.236162931    | 0.3428194618   |
| 2.1678816305   | 0.5244910161   |
| 0.7641313694   | 0.1733172516   |
| 15.5541387777  | 14.4764645774  |
| 17.7373565387  | 17.8611291424  |
| 92.1297719236  | 90.6042163131  |
| 0.710286808    | 0.2004855271   |
| 0.3479973788   | 0.05412438     |
| 0.5662963022   | 0.2901347802   |
| 1.568242065    | 2.1658327301   |
| 2.699766584    | 5.1534117709   |
| 44.7496645262  | 25.4795058734  |
| 0              | 0.1219253198   |
| 0              | 0.1332195591   |
| 2.2553817355   | 2.0357335481   |
| 0.6280742892   | 1.9724860164   |
| 0              | 0              |
| 5.0622779975   | 7.39043852     |
| 0              | 0.057330603    |
| 7.6482232811   | 4.9203526639   |
| 22.4026959019  | 17.5127277591  |
| 29.5016962753  | 13.8736227879  |
| 5.3655413157   | 6.6226943179   |
| 7.6231984352   | 23.4369688897  |
| 7.0076948723   | 6.6275565538   |
| 1.1871258206   | 0.634254953    |
| 0.0987188232   | 0              |
| 13.7049060774  | 11.865560063   |
| 155.7111204528 | 157.8189894201 |
| 43.3730076567  | 54.6848840627  |
| 352.3003633275 | 78.6627103277  |
| 0.2856373607   | 0.6997010597   |
| 0.7357658867   | 0              |
| 1.0271094257   | 9.8544149771   |
| 0              | 2.6515934705   |
| 0              | 0.7526204857   |
| 323.6514359797 | 316.0385486098 |

gene\_expression\_table

|                 |                |
|-----------------|----------------|
| 1782.6501880032 | 724.6846171332 |
| 34.3438826344   | 43.9658402825  |
| 0               | 0.0317544367   |
| 3.9946147786    | 5.9699977658   |
| 4.2347068601    | 5.9388168922   |
| 0               | 0.2392415161   |
| 100.743985642   | 80.7046905142  |
| 0.2491660605    | 0.2622289469   |
| 38.6914814119   | 49.0923591108  |
| 2.9481470459    | 3.2536662533   |
| 4.5123750577    | 11.4204310954  |
| 22.6190659082   | 22.465150243   |
| 6.5932844918    | 4.6701677976   |
| 22.0971684845   | 14.2415122569  |
| 1.2228391814    | 5.1686766275   |
| 64.1113543995   | 80.8887010406  |
| 1.6485640892    | 0.9219964418   |
| 249.1174270496  | 72.3396485159  |
| 0.4753095491    | 0.2587387918   |
| 23.3270558966   | 12.2386148064  |
| 0               | 0.5073022052   |
| 6.1280096826    | 2.8416364906   |
| 50.8971626116   | 27.0751798732  |
| 18.7005196785   | 46.8060299722  |
| 3.7612654929    | 3.7453844469   |
| 0.7676266558    | 0.6390862594   |
| 46.585506761    | 41.3045520627  |
| 0.7971551988    | 0.5966650332   |
| 0.8574940652    | 0              |
| 7.9228230229    | 9.6304993155   |
| 106.2069124326  | 48.0447664587  |
| 315.2785540482  | 65.073277399   |
| 0.9013340112    | 2.6396906934   |
| 0.1536806795    | 0.0321759168   |
| 5.4016760751    | 7.1213981543   |
| 10.1751919177   | 14.302070555   |
| 6.1048842181    | 6.3027071688   |
| 0.2708363926    | 0.5307555299   |
| 558.3491545316  | 380.1424839783 |
| 97.8538350893   | 62.0220339384  |
| 1.4613128028    | 3.0228165564   |
| 0.3297790967    | 0.1305585843   |
| 12.7445439298   | 10.9191803584  |
| 22.8094524583   | 26.2331208114  |
| 4.9821027156    | 6.8349929294   |
| 0.0711405633    | 0.3872597013   |
| 0.4646258415    | 0.4268076043   |
| 17.8828921275   | 18.61046407    |
| 78.3172763253   | 93.4660298072  |

gene\_expression\_table

|                |                 |
|----------------|-----------------|
| 0              | 0.413832507     |
| 235.5157801136 | 210.345908788   |
| 20.2976474534  | 9.8948031608    |
| 149.6218655146 | 69.5640716145   |
| 1.2973430555   | 2.0771168116    |
| 1.1793146475   | 0.7489649407    |
| 7.5012690858   | 6.6271242138    |
| 7.2561739172   | 3.5549639356    |
| 21.5407346723  | 15.3739341164   |
| 0              | 0.4034830501    |
| 82.191108794   | 46.4933518638   |
| 33.0336127487  | 5.6361893075    |
| 4.6231833925   | 1.3360095559    |
| 96.3336568796  | 127.132972504   |
| 59.3430865702  | 98.0864280212   |
| 51.3241569754  | 34.1683250898   |
| 0.7463610825   | 0.2031439986    |
| 15.5489441083  | 7.9939665219    |
| 77.1223811805  | 66.0429365474   |
| 18.9483717681  | 15.811766693    |
| 53.0236323719  | 24.3307578536   |
| 116.9944284923 | 37.9318192273   |
| 1.8874817042   | 0.4794844618    |
| 4.7157903197   | 1.4261558507    |
| 4.5198726113   | 1.0094076151    |
| 1.4056716339   | 2.4868652188    |
| 108.5653027486 | 109.4415648967  |
| 2.5300640763   | 1.9675169688    |
| 714.5995410595 | 1666.2408433163 |
| 2.2502341968   | 0.349981173     |
| 0              | 0               |
| 0              | 0.003262        |
| 4.4888214479   | 2.9040391617    |
| 2.5938865159   | 2.581950474     |
| 0.1957722294   | 0.1065702766    |
| 2.0689362005   | 1.9504284918    |
| 0.5161550582   | 0.1525284127    |
| 3.9085304913   | 3.2471739949    |
| 0.7842380599   | 0.5158455375    |
| 32.5604866833  | 12.2670099186   |
| 0.5542979519   | 0.7887170786    |
| 1.0322924713   | 1.0073751855    |
| 0.1917816167   | 0.0476599349    |
| 13.8492090075  | 12.2458859981   |
| 6.0099857049   | 8.1067996096    |
| 23.506153346   | 22.3176298      |
| 16.8172693556  | 8.8967467547    |
| 4.1857433195   | 2.2785449427    |
| 6.5923042877   | 8.9470300491    |



gene\_expression\_table

|                 |                 |
|-----------------|-----------------|
| 4.3204757243    | 3.3789778581    |
| 9.1942457758    | 5.1285452155    |
| 1.4307471892    | 1.0459775378    |
| 44.1705278815   | 22.411217327    |
| 265.5491320612  | 253.4547477051  |
| 0.3533646604    | 0.3297549523    |
| 2.1783544886    | 0.5929028878    |
| 2.5210767464    | 1.424157079     |
| 6.0093198458    | 7.4302381254    |
| 3.1036732094    | 2.7486072588    |
| 3.5350590879    | 4.4057245356    |
| 92.0430672288   | 69.9181246918   |
| 0               | 0               |
| 2.2162025423    | 2.3994868878    |
| 10.0473344832   | 2.7426025466    |
| 0.007017        | 0               |
| 2.2197156498    | 3.5674241267    |
| 2.1227809755    | 4.9871271921    |
| 0.2905908818    | 0.7347976988    |
| 13.5262931558   | 6.4723020508    |
| 18.6741742775   | 9.4090878968    |
| 0.6317536566    | 1.0757912171    |
| 7.2709137204    | 10.5166021316   |
| 0               | 0.7044823981    |
| 2294.6374877439 | 2123.5908732244 |
| 56.1108992071   | 35.2408323988   |
| 1513.9727235925 | 1349.3027530382 |
| 112.5496544518  | 49.2251553607   |
| 15.7973479087   | 6.7770268038    |
| 3.4238220886    | 3.3956660821    |
| 0.1752173624    | 0.3147574983    |
| 26.3065340408   | 25.5740175189   |
| 5.602272012     | 3.9451748634    |
| 553.5686011947  | 292.543601439   |
| 3.3931748534    | 3.5166010154    |
| 1.1050591328    | 1.9399933603    |
| 1.296302237     | 1.6902854225    |
| 9.7030232614    | 5.2436483546    |
| 0.7426798204    | 0.6822293696    |
| 0.8778081028    | 0.8673440061    |
| 0.1683651223    | 0.091650985     |
| 2.8954291349    | 1.088681931     |
| 4.9319749979    | 4.6494737509    |
| 0.7999644308    | 0.801260081     |
| 15.3885002886   | 14.6995698055   |
| 0.2510641872    | 0.2821551972    |
| 57.9377770431   | 28.6568598995   |
| 0               | 0.0805920773    |
| 4.3571351654    | 0.8964448065    |

gene\_expression\_table

|               |               |
|---------------|---------------|
| 96.8142575369 | 58.69562978   |
| 0.097980309   | 0.1688986435  |
| 15.000183414  | 16.4510351483 |
| 0.4312282645  | 0.6478900452  |
| 0.1741838688  | 0.0406364867  |
| 15.3829539879 | 21.1237569982 |
| 53.8175235179 | 35.8429316115 |
| 2.3472285956  | 2.5299129849  |
| 16.5395491297 | 8.5167714529  |
| 1.0287810587  | 1.1691764843  |
| 25.4901161061 | 15.5487254228 |
| 84.0874574305 | 63.4276078154 |
| 20.8460252327 | 5.9890696769  |
| 2.751687446   | 0.9532119181  |
| 0.032631307   | 0.1015035958  |
| 4.9303088972  | 0.8569503659  |
| 2.1838147048  | 2.0527534244  |
| 7.1040032158  | 3.3805326878  |
| 41.6057855074 | 16.9786435941 |
| 17.715285834  | 16.1430920599 |
| 5.8206964061  | 4.1677549322  |
| 0.9459323541  | 1.8787852021  |
| 1.36528037    | 0.8439751189  |
| 0             | 0             |
| 13.3763504214 | 8.1485094713  |
| 0.4593091529  | 1.206389154   |
| 0.6637811714  | 1.1477697488  |
| 6.6527308135  | 4.7596470052  |
| 9.3390883527  | 3.587444765   |
| 8.4850420806  | 6.0897291743  |
| 0             | 0.003609      |
| 15.816833129  | 10.2385158609 |
| 42.5808448819 | 16.6107394087 |
| 2.471561714   | 3.2609226048  |
| 9.5888948894  | 6.6802575831  |
| 12.215691564  | 13.209569982  |
| 1.5420870734  | 2.5890846221  |
| 0             | 0             |
| 0.3626201413  | 0.6391849596  |
| 0.4180487993  | 1.5474652294  |
| 2.5615899242  | 2.8494735802  |
| 6.2230387327  | 12.1296646885 |
| 0.003822      | 0.008321      |
| 4.1922190075  | 3.9991615724  |
| 13.6084967604 | 18.1971858585 |
| 4.9711375982  | 3.1248792407  |
| 0             | 0.0317230712  |
| 0.2774137179  | 0.4140665721  |
| 23.6813774657 | 10.7132006693 |

gene\_expression\_table

|                |                |
|----------------|----------------|
| 0.5023885761   | 0.5692838369   |
| 0              | 0.004242       |
| 2.2492368307   | 3.3047726562   |
| 2.8100849624   | 4.7403692614   |
| 0              | 0.0101470627   |
| 0.0117708055   | 0              |
| 1.0443128715   | 0              |
| 2.2164149574   | 1.9365222202   |
| 7.5245319144   | 4.4150493397   |
| 0.0520924516   | 0.030822792    |
| 1.3742639056   | 0.7003416661   |
| 11.8733868197  | 8.0915584489   |
| 8.8169603047   | 5.5273935256   |
| 1.1395074563   | 0              |
| 0              | 0.0284968624   |
| 0.2354494744   | 0.9541464196   |
| 0.3779879535   | 0.3215014911   |
| 29.4989305693  | 19.8475709276  |
| 0.3334625257   | 0.3012512006   |
| 0.5605462003   | 0              |
| 0              | 2.3856791617   |
| 23.7061046691  | 13.4450338571  |
| 0.1735010748   | 0.1476804264   |
| 0.1541698836   | 0.1296154708   |
| 1.3989078209   | 2.0125551631   |
| 13.4488300223  | 8.2781454689   |
| 54.5348551923  | 17.7506977854  |
| 3.5791161352   | 2.2879380907   |
| 0.1300963846   | 0.1112871138   |
| 13.3945922087  | 4.3227941929   |
| 12.1862451879  | 9.4741262417   |
| 8.8206975768   | 8.2037757287   |
| 34.0670374364  | 45.6229313944  |
| 0              | 0              |
| 3.5348423084   | 2.2092912905   |
| 0.2144897241   | 0.357575368    |
| 5.5124618477   | 9.2023167037   |
| 27.772218992   | 33.4033658539  |
| 1.5606502443   | 2.9287229479   |
| 0.3404093466   | 0.3706094406   |
| 0.008742       | 0.0808967441   |
| 276.8955487905 | 218.4252673451 |
| 3.9283682294   | 6.7195351873   |
| 1.9508254969   | 1.5652677463   |
| 357.6309828195 | 463.8773839135 |
| 24.7460010482  | 25.885600815   |
| 0              | 0.0196941128   |
| 5.5869879689   | 2.1322328493   |
| 0              | 0.0339605212   |

gene\_expression\_table

|                |                |
|----------------|----------------|
| 0.0718580261   | 0.1695049507   |
| 13.0087788831  | 8.9501524767   |
| 5.5468429018   | 5.1006884106   |
| 0.1819418082   | 0.2575080801   |
| 1.5176776649   | 1.5228896175   |
| 0.2700295703   | 0.1252161665   |
| 0.001502       | 0              |
| 2.000332005    | 1.4091617605   |
| 1.0927972767   | 7.2574564951   |
| 10.9560128102  | 6.5285298395   |
| 2.9662688796   | 2.756828216    |
| 1.4914814039   | 2.2733216114   |
| 0.9926385454   | 1.6710283603   |
| 0.1484413044   | 0.0991701229   |
| 281.7941608976 | 62.1942637033  |
| 0              | 0.0676749274   |
| 0              | 0.1410352597   |
| 0.804474374    | 0.3308747485   |
| 36.2259609677  | 23.8372534464  |
| 2.3376649913   | 1.5849448066   |
| 0.8133127893   | 1.4814551657   |
| 1.7737702366   | 1.6301778835   |
| 7.3256412045   | 3.489303157    |
| 3.4329041941   | 1.6079774654   |
| 0.6147041686   | 0.296377216    |
| 0.2496531143   | 0.3300447857   |
| 6.038698702    | 20.3850142029  |
| 1.1567497351   | 0.7034779396   |
| 5.0276784085   | 5.216132152    |
| 0.0886788687   | 0.3218206381   |
| 113.096283406  | 304.2280380771 |
| 104.1333558103 | 151.7818566343 |
| 0.0553037811   | 0.1003502772   |
| 2.6168225099   | 1.2036384728   |
| 30.2404597416  | 18.6625268235  |
| 4.7637979704   | 3.4911625988   |
| 0.7123830345   | 1.3572711531   |
| 10.1089122834  | 4.9787892222   |
| 0              | 0.0589152075   |
| 0.1510075663   | 0.2055056296   |
| 30.385160418   | 28.1958459355  |
| 8.6045203218   | 10.353980923   |
| 1.3137919349   | 0.6051470642   |
| 6.2013407791   | 7.7578615129   |
| 38.6819807231  | 41.6193181465  |
| 35.9135480832  | 118.7901602435 |
| 11.2263576947  | 9.148075263    |
| 44.0965065704  | 27.4334949088  |
| 23.1229074255  | 32.4351703553  |

gene\_expression\_table

|                |                |
|----------------|----------------|
| 35.7316928293  | 52.7951659368  |
| 0.4045679613   | 0.5807835594   |
| 0.4837247094   | 0.3830104085   |
| 0.118101548    | 0.2279357878   |
| 8.892693929    | 9.6450235004   |
| 0.0645027836   | 0.0175563192   |
| 6.8718841442   | 5.0690124218   |
| 2.6626526763   | 3.0503089986   |
| 0              | 0.0260735297   |
| 116.4269425735 | 69.0269037774  |
| 7.7623054312   | 3.4572083881   |
| 1.9217264256   | 1.9178648663   |
| 6.9579749891   | 4.4189049428   |
| 0              | 0              |
| 0.460179032    | 0.3020763829   |
| 3.2301096442   | 2.7310350446   |
| 4.4203654943   | 10.2132518176  |
| 6.4076448457   | 7.4222585239   |
| 0              | 0.0828503095   |
| 0.2630938563   | 0.6265760209   |
| 2.9560367489   | 5.5302755505   |
| 75.2180394721  | 52.3550225081  |
| 8.7955012762   | 11.2717438083  |
| 1.8615240601   | 1.9462493525   |
| 557.4337804831 | 170.3565316331 |
| 10.9985378801  | 10.8451400814  |
| 0.1180461369   | 0.578334759    |
| 0.432189305    | 0.1454371145   |
| 0              | 0              |
| 0.177113732    | 0.3570865368   |
| 0.010999145    | 0.0508935636   |
| 7.2625139556   | 6.067735517    |
| 8.0703073623   | 7.3157735316   |
| 0.0106675983   | 0              |
| 1.2663490225   | 1.6525462175   |
| 0.6516175999   | 0.8867839435   |
| 0.0248402304   | 0.3245277714   |
| 0.0236431815   | 0              |
| 4.0817028645   | 2.8409491379   |
| 0.2121498143   | 0.1603966029   |
| 0.7425436127   | 2.0104125221   |
| 1.622604234    | 1.6787237981   |
| 0.5267508007   | 0.4910444321   |
| 2.9398691942   | 3.595989346    |
| 81.9411428795  | 61.6351983113  |
| 1.1273893663   | 0.7720792021   |
| 141.0562171297 | 55.6869848764  |
| 8.2907938756   | 18.2913932075  |
| 0.923567179    | 1.4547074126   |

gene\_expression\_table

|                |                |
|----------------|----------------|
| 1.4263622057   | 1.6146095987   |
| 5.6136297122   | 0.7684243418   |
| 2.4091763498   | 3.097681517    |
| 7.9692952789   | 6.0971561808   |
| 0.0278137429   | 0.0302812945   |
| 0.4554429896   | 0.5154214907   |
| 3.7358975055   | 2.690936532    |
| 4.5964321984   | 5.3974020782   |
| 394.4388262295 | 211.7955039184 |
| 10.8088582259  | 4.4603711212   |
| 0.0117623179   | 0.006403       |
| 0.6364919537   | 0.8694681857   |
| 0              | 0.0382713954   |
| 1.6334443504   | 4.2079471654   |
| 1.3812693848   | 0.7103109416   |
| 64.0841494903  | 57.9298294417  |
| 52.7057763696  | 45.3154344788  |
| 82.9657488971  | 55.7418569586  |
| 27.6805352929  | 19.3327009856  |
| 3.8763186914   | 2.8054831934   |
| 0.73628272     | 1.5971342659   |
| 357.0424064505 | 514.1904451541 |
| 4.1450238398   | 2.3906872187   |
| 4.2596972388   | 1.3424645399   |
| 21.570175312   | 12.5360469355  |
| 12.3770233841  | 11.4965923602  |
| 2.2922553769   | 1.151823408    |
| 319.0744737183 | 271.4309420402 |
| 0.3393244177   | 0.1086553706   |
| 5.1302075738   | 4.763970027    |
| 3.7815843061   | 1.9707704448   |
| 0.7168344603   | 1.2661229096   |
| 0.2091511302   | 0.4383348004   |
| 0              | 0              |
| 96.1016232198  | 68.0843550187  |
| 1.3074266877   | 1.9955757301   |
| 7.0616735131   | 2.1382706018   |
| 0.0216230508   | 0.0353120743   |
| 25.7750469678  | 15.9063661814  |
| 7.1510830773   | 6.406397775    |
| 0.061632883    | 0.0671007671   |
| 4.7559008535   | 5.0939001681   |
| 5.1010560479   | 6.238297609    |
| 1.4009772567   | 0.6088770445   |
| 0.0276538286   | 0.2483843438   |
| 3.2986438558   | 10.162019528   |
| 0.0205937546   | 0.1149064492   |
| 2.5697278204   | 1.9855759513   |
| 0              | 0.2518048804   |

gene\_expression\_table

|                |                |
|----------------|----------------|
| 23.1748897036  | 14.4217186064  |
| 22.8327167214  | 24.8954687594  |
| 5.908983624    | 3.5530704498   |
| 1.517773522    | 0.7889961155   |
| 0.2093488038   | 0.2051294404   |
| 3.2416445977   | 1.4116934251   |
| 0              | 0.2724758276   |
| 5.3920714194   | 7.1259475988   |
| 16.561917748   | 25.5929437587  |
| 233.9744746112 | 66.6965713941  |
| 2.0754076791   | 1.0490682476   |
| 0.5342095322   | 0.7092719466   |
| 3.9560464434   | 3.1081551495   |
| 5.6794992977   | 7.5139654532   |
| 0.7010783497   | 0.9438358072   |
| 15.2435169138  | 6.1535270251   |
| 3.8143868748   | 3.2807023725   |
| 2.5749774776   | 1.8376087623   |
| 0.1262301604   | 0.155752777    |
| 29.6916480209  | 27.466367532   |
| 0.3117467313   | 0              |
| 122.8329912519 | 34.3937457849  |
| 7.5313092553   | 7.619313594    |
| 2.9573101068   | 15.9194980877  |
| 65.7757197785  | 4.4938167245   |
| 72.4807421742  | 33.4275830654  |
| 12.2740077088  | 14.3817945053  |
| 11.3409052849  | 5.3978710039   |
| 14.3024886984  | 11.3741433943  |
| 27.8224174801  | 35.4989564672  |
| 0.273955723    | 0.2137531801   |
| 762.3205410697 | 364.4847979031 |
| 0.6177888672   | 0.2718029937   |
| 6.522213316    | 6.2227830634   |
| 0.045490303    | 0.4952606595   |
| 843.6053854234 | 294.7575760424 |
| 23.1994134068  | 20.3102315397  |
| 14.0592776943  | 4.4528216881   |
| 0              | 0              |
| 0.1620679633   | 0.2205576824   |
| 0.7976290419   | 0.7499751622   |
| 95.7492348437  | 72.1649721386  |
| 5.1428952      | 2.409763946    |
| 0.377871433    | 0.9667783692   |
| 15.5557418662  | 13.9993512428  |
| 1.464997293    | 1.2231676048   |
| 193.3605435893 | 63.962419296   |
| 3.664354037    | 2.1535939407   |
| 1.6438698803   | 1.8642802865   |

gene\_expression\_table

|                |                |
|----------------|----------------|
| 16.7909812506  | 32.5651803343  |
| 0              | 0.3167394938   |
| 42.1983376202  | 71.6695937821  |
| 23.520384903   | 4.1459021604   |
| 24.9323511373  | 22.0347639165  |
| 0              | 0              |
| 0              | 0              |
| 22.5328302805  | 4.987249365    |
| 2.5585627867   | 3.1093325203   |
| 4.3795310413   | 0.9192677083   |
| 2.9307855215   | 4.505522135    |
| 15.4084461869  | 20.5006417587  |
| 8.6978908187   | 4.7685102334   |
| 0.0109084852   | 0.005938       |
| 0.0913943284   | 0.1641792216   |
| 0              | 0.007086       |
| 2.5065670378   | 2.5878834923   |
| 0.363485531    | 0.4353061622   |
| 6.4770267734   | 11.0109767004  |
| 0.2259402969   | 0.5141087354   |
| 0.009343       | 0.022885763    |
| 105.9714608053 | 82.4092359174  |
| 3.5090633418   | 1.3981134574   |
| 32.4943677549  | 43.7538337265  |
| 1.6038799055   | 2.2541484182   |
| 0              | 2.0354760505   |
| 1.4173404791   | 1.5931827528   |
| 0              | 0              |
| 7.4478235099   | 4.4030417988   |
| 0.6151097445   | 2.1684890185   |
| 0              | 0              |
| 0              | 0.8240923592   |
| 7.0683860488   | 2.9160680543   |
| 0.2199427912   | 0.1962204419   |
| 2.5328853366   | 0.334253977    |
| 2.5555227363   | 10.5327696219  |
| 1.4125124591   | 0              |
| 67.0547980866  | 64.198608913   |
| 66.9732040319  | 40.2671074219  |
| 2.4296773874   | 7.1503902149   |
| 0.002451       | 0.006672       |
| 0.0492603072   | 0.007219       |
| 1.0589476963   | 0.1894040723   |
| 53.9319572233  | 34.6261138701  |
| 0.9078043296   | 1.9766840022   |
| 4.1799271684   | 3.1657445168   |
| 157.9540896043 | 102.2717908735 |
| 0.632831239    | 0.4345836785   |
| 1325.73207966  | 714.5439267535 |



gene\_expression\_table

|                 |                 |
|-----------------|-----------------|
| 0               | 0.1191314268    |
| 6.2047316984    | 57.0055897004   |
| 7.2087413125    | 9.6501800049    |
| 2.9378455278    | 3.904895633     |
| 2.8101971109    | 1.4540242464    |
| 82.4300190877   | 76.9718487063   |
| 0.3423254335    | 0.2333700901    |
| 0.4196575018    | 0.3302507488    |
| 0.4603282309    | 0.4821010256    |
| 0.730357644     | 0.2069575726    |
| 14.5052178398   | 7.7937141097    |
| 0.1920223315    | 0.1866589068    |
| 0               | 0               |
| 0               | 0               |
| 0.0856814386    | 0.009328        |
| 3.9081219672    | 3.4253145257    |
| 2799.7305715413 | 2877.5789771994 |
| 4.9612944311    | 11.4848918234   |
| 5.914467198     | 7.1631125366    |
| 3.2408735486    | 1.5734730484    |
| 6.7397202576    | 2.1741179203    |
| 9.6892098997    | 9.6060396605    |
| 127.0574173055  | 67.8839553862   |
| 3.538109182     | 3.0093746828    |
| 0.7762681446    | 0.9625163657    |
| 53.1165981422   | 38.7671767356   |
| 8.2544218455    | 7.990292824     |
| 20.9528954429   | 9.7592621891    |
| 76.589278835    | 108.9204145877  |
| 8.831067316     | 9.8523483698    |
| 89.2010814666   | 34.9105250419   |
| 7.9885903287    | 6.0995208092    |
| 21.0613890897   | 18.3866024087   |
| 17.4699483582   | 8.3616588626    |
| 138.6615423772  | 99.1682798691   |
| 1.8398282646    | 1.4593666744    |
| 0               | 0               |
| 21.4809472049   | 30.1122512293   |
| 0               | 0.0858108008    |
| 2.2372936884    | 5.7114833399    |
| 28.3815665741   | 10.2078685049   |
| 25.8471802456   | 6.3465277128    |
| 0               | 0               |
| 2.2673967159    | 1.6324304327    |
| 2.2306373922    | 1.3095842602    |
| 9.5802260729    | 6.7276756936    |
| 57.0809279438   | 22.636074635    |
| 38.163300295    | 23.0248920453   |
| 22.0768122113   | 14.1823792557   |

gene\_expression\_table

|                |                 |
|----------------|-----------------|
| 17.604355739   | 23.0183528512   |
| 25.5933077146  | 15.4668086665   |
| 5.9008956216   | 7.6923800835    |
| 39.5130580957  | 25.8787796464   |
| 0.7989812818   | 0.9122030371    |
| 0.8074941773   | 2.3372062697    |
| 33.7687352929  | 25.7954870209   |
| 4.0571152365   | 2.5152647574    |
| 0.0687197521   | 0.1122245429    |
| 0.6619256548   | 0.3446585566    |
| 0.0779568939   | 0.5941109662    |
| 0              | 0.0369321763    |
| 3.6886878751   | 2.7465317469    |
| 13.5490799143  | 15.4859476295   |
| 1.1046282082   | 2.0330131592    |
| 0.4382444393   | 0.4988116309    |
| 7.7480507667   | 6.2756724222    |
| 0.8051233195   | 1.2737388119    |
| 39.41754419    | 27.1083436598   |
| 32.2369108903  | 17.7917891027   |
| 0.5428913841   | 1.5682661347    |
| 4.0043585842   | 4.9045648969    |
| 0.4335239221   | 1.0855651812    |
| 1.2507731524   | 1.4319306667    |
| 3.3768618263   | 1.7941941251    |
| 34.2746938706  | 33.0098138024   |
| 0              | 0               |
| 6.78644874     | 6.7533097688    |
| 0              | 0.0440928588    |
| 32.5215241249  | 4.8281912719    |
| 3.6513199055   | 4.3065252019    |
| 10.2261217829  | 7.0362788244    |
| 13.4803303316  | 12.5014553311   |
| 0.763800672    | 0.842223833     |
| 0.2035589297   | 0.3878316157    |
| 0.9630450324   | 0.846852052     |
| 3.337586012    | 5.2625806091    |
| 2.8786462873   | 0.4352821019    |
| 53.2594584887  | 56.9139276741   |
| 11.628384981   | 7.4255888559    |
| 556.9822136963 | 1005.4534199692 |
| 0              | 0.1933640073    |
| 373.0288947159 | 207.8145123263  |
| 20.6068305221  | 13.7952628888   |
| 12.2943774569  | 7.3411051145    |
| 0.035662203    | 0.090005835     |
| 1.8784465456   | 2.6937617023    |
| 2.6920068597   | 3.4326105784    |
| 58.0118924594  | 29.0867522475   |

gene\_expression\_table

|                 |                 |
|-----------------|-----------------|
| 2.3026063117    | 2.1438985144    |
| 0.5761012407    | 0.6272112112    |
| 2757.9985243791 | 2399.2085018163 |
| 32.706241532    | 49.0709541145   |
| 0               | 0.1366605081    |
| 0.266103891     | 0.2736167268    |
| 0.1239202895    | 0.2698282502    |
| 0               | 0.0966452967    |
| 0.0766236747    | 0.0556143312    |
| 5.0131009392    | 2.0092078488    |
| 6.1234059247    | 0.5882343611    |
| 0.0653019624    | 0.1777383905    |
| 0.2148550578    | 0.2209209998    |
| 36.5554570296   | 30.4953200018   |
| 33.7787822493   | 24.7392123406   |
| 0.4118557408    | 0.726942346     |
| 0.049117465     | 0               |
| 0.0645633098    | 0               |
| 742.6050206532  | 329.0689282421  |
| 0.0221520113    | 0.1929381689    |
| 8.4825159585    | 15.0939336649   |
| 1224.2320972662 | 811.045215439   |
| 5.1221377529    | 9.5810019637    |
| 46.5750170552   | 32.064174123    |
| 3.0603063236    | 4.0392090949    |
| 0.2613047133    | 0.2006996497    |
| 5.658553863     | 9.1210568906    |
| 2.8979078378    | 2.0213939052    |
| 1.4560010951    | 1.0779177324    |
| 0.0436484222    | 0               |
| 4.9757628091    | 6.046763729     |
| 9.2838359411    | 10.9435383772   |
| 0.5472322562    | 0.5337205304    |
| 11.7096172204   | 13.8307089244   |
| 7.6280859961    | 3.2767958144    |
| 3.8375000245    | 1.8947892683    |
| 0.016119643     | 0.004387        |
| 0.0146436356    | 0.0557997123    |
| 6.9397962811    | 7.0615881754    |
| 0.1856383658    | 0               |
| 43.9165932837   | 18.2172597123   |
| 3.4582801943    | 1.6704265518    |
| 10.7623294347   | 9.0724467749    |
| 13.8300810229   | 8.0202499169    |
| 16.0025312587   | 8.4709346928    |
| 2.1508015188    | 1.8456472757    |
| 0.1728478533    | 0.0276738817    |
| 1.0390128546    | 0.4054725559    |
| 39.7806892082   | 26.5893204719   |

gene\_expression\_table

|                |                |
|----------------|----------------|
| 0.7533044356   | 0.9672248313   |
| 0.0604242737   | 0.1233467505   |
| 0.00133        | 0.000724       |
| 190.4837971003 | 187.1620166736 |
| 21.5263833522  | 19.131939821   |
| 177.8863123414 | 108.5109578556 |
| 2.3786036143   | 3.837638793    |
| 16.3287061868  | 13.5855850414  |
| 2.1687327815   | 1.4616557647   |
| 0.3139690637   | 0.1772417917   |
| 0.0210559591   | 0              |
| 0.103534084    | 0.1083839584   |
| 1.2361113872   | 1.1432225328   |
| 2.035692941    | 3.8019640138   |
| 0.161446251    | 0.0680397202   |
| 0.8091868625   | 0.9753657197   |
| 2.1162182114   | 2.1330946809   |
| 1.7057760413   | 2.3651259907   |
| 0.096615168    | 0.1413444606   |
| 36.2249871195  | 38.4527901162  |
| 0.0280572058   | 0.0254552973   |
| 0.0510923721   | 0.0185417112   |
| 0.639092879    | 0.1559532175   |
| 0.006651       | 0.0362040335   |
| 5.2615758277   | 4.7107307601   |
| 4.4888621787   | 4.1357246161   |
| 29.5260857463  | 18.9743728167  |
| 1.580631883    | 1.0950932317   |
| 76.6931161858  | 74.6596053007  |
| 0.2664738167   | 0.2079154438   |
| 0.5010457961   | 0.9014570276   |
| 51.6350527928  | 18.8464592172  |
| 60.6933616488  | 31.7573450762  |
| 53.2121797721  | 17.8887570971  |
| 5.9186702047   | 6.0590549346   |
| 0.0397561012   | 0.1136182504   |
| 3.0339111521   | 2.8406407421   |
| 0              | 0.0773351593   |
| 0.176089311    | 0.3972967039   |
| 9.9125390659   | 3.989167135    |
| 22.2203766556  | 20.7155576333  |
| 443.3378969951 | 203.9966813872 |
| 5.0289120684   | 7.7587777452   |
| 9.7198938134   | 13.4270894872  |
| 0              | 0              |
| 3.5721339921   | 4.2004206074   |
| 11.0411325543  | 15.9974312078  |
| 0.9991660712   | 0.8260232514   |
| 0.2112817162   | 0.451836776    |

gene\_expression\_table

|                 |                 |
|-----------------|-----------------|
| 128.0723153467  | 107.6598868332  |
| 28.1262805465   | 40.6003974625   |
| 215.5587972554  | 283.8965407431  |
| 0               | 6.631692701     |
| 1.1860471872    | 1.3212992572    |
| 442.40167942    | 476.0673838698  |
| 2.353687821     | 2.0618790827    |
| 1.6128117058    | 2.692203958     |
| 30.677521635    | 16.0797165537   |
| 0               | 0               |
| 35.8188730659   | 25.848901836    |
| 13.3330806722   | 6.2493144733    |
| 2.7877947612    | 1.3584607587    |
| 56.8547609071   | 45.5838519783   |
| 15.3737089234   | 7.5543264488    |
| 0.0338538955    | 0               |
| 1.0599433728    | 0.9066972852    |
| 35.92815728     | 36.9231732406   |
| 19.033754414    | 18.3360660675   |
| 4.415465501     | 12.7281342333   |
| 0.1033257275    | 0               |
| 0.0505924179    | 0.0688510314    |
| 9.493649294     | 5.9595048634    |
| 25.2776861031   | 15.231858136    |
| 10.0580076475   | 9.4010818941    |
| 3.2673340641    | 3.0374810323    |
| 2.7020422206    | 3.6513941999    |
| 49.7286050311   | 66.5697879834   |
| 0.008806        | 0.0127829705    |
| 11.9344260985   | 6.9475637391    |
| 7.2495916549    | 2.5867007715    |
| 0.8242501135    | 1.0068110946    |
| 107.0288077656  | 83.8330286914   |
| 1519.0690748901 | 1924.6520142283 |
| 2.8197482364    | 0.8642177489    |
| 56.1280184188   | 27.4983873778   |
| 2.1527605665    | 1.6104273957    |
| 2.3805661004    | 5.785026796     |
| 23.8123981917   | 11.4288327766   |
| 0.2768433334    | 0.2341677555    |
| 168.6526893552  | 302.9367551993  |
| 1.0898854862    | 3.1071857311    |
| 4.3904296349    | 4.8184832214    |
| 3.793627048     | 3.3208366107    |
| 17.7565725483   | 16.6923368261   |
| 20.2557955906   | 6.6460580221    |
| 52.7732695291   | 35.1643307477   |
| 0.101407828     | 0.1825919347    |
| 0.055261311     | 0.1969001292    |

gene\_expression\_table

|                  |                  |
|------------------|------------------|
| 62.0296050715    | 49.7374578186    |
| 0.1290026015     | 0.1404473246     |
| 0.0332268626     | 0.004522         |
| 0.3392344978     | 0.4206262465     |
| 0.0255573557     | 0.0788367277     |
| 19.9151002295    | 9.5004960365     |
| 15667.5461607125 | 18670.9143107587 |
| 23.3105997925    | 29.4789764572    |
| 2.0065857944     | 1.013951249      |
| 0.0462644103     | 0.0251844248     |
| 0.0106585747     | 0.0232083429     |
| 0.7588497786     | 0.3614505344     |
| 1.2021941772     | 1.4297848416     |
| 1.1825128172     | 1.7397591892     |
| 0.0357495572     | 0.1362240266     |
| 0                | 0.0150686466     |
| 217.9111659924   | 127.6181448415   |
| 5.1610244807     | 8.8661785685     |
| 0.6824789896     | 0.7753319731     |
| 21.2091381454    | 35.3295395883    |
| 7.8900115206     | 8.2635292139     |
| 0.0335998345     | 0.219484265      |
| 1.8106441856     | 2.5517112735     |
| 18.4991139226    | 15.8119019623    |
| 0.4067593114     | 0.6981599206     |
| 0.0324225823     | 0.0176495082     |
| 0.0810325948     | 0.088221563      |
| 20.0510987601    | 10.4000545535    |
| 1.5840892884     | 2.2307648534     |
| 12.9154169679    | 5.2729627278     |
| 4.3949091839     | 10.8412639427    |
| 0.1708721426     | 0.0930157027     |
| 0.3528320651     | 0.122224539      |
| 0.1258471644     | 0.0342529866     |
| 3.5816258029     | 1.5318980595     |
| 10.2364904196    | 8.9985446569     |
| 1.496335048      | 1.7899827189     |
| 4.8750345787     | 12.8355644842    |
| 3.4381730493     | 2.8336354361     |
| 60.3306205079    | 6.5116739305     |
| 28.5251577909    | 28.7252822808    |
| 0                | 0.6626427184     |
| 161.469298534    | 161.4273364223   |
| 29.1335994595    | 55.574537388     |
| 21.1609602434    | 39.589494636     |
| 37.3365939672    | 42.2071954267    |
| 361.4836730508   | 215.7080186209   |
| 101.0203724094   | 81.5049596896    |
| 3.4448728296     | 10.1704507306    |

gene\_expression\_table

|                 |                 |
|-----------------|-----------------|
| 2.4977252228    | 1.8128772647    |
| 25.3578244959   | 18.3678894632   |
| 0               | 0.490825426     |
| 135.6338534175  | 68.4831912865   |
| 2.140297799     | 1.0280199646    |
| 8.5712815493    | 10.9758565317   |
| 2.9090675386    | 2.7894784169    |
| 3.3110809563    | 1.7156131952    |
| 16.4723046216   | 10.1813092798   |
| 3363.6377792423 | 2286.8163890884 |
| 1.5310293163    | 5.5958792043    |
| 9.6904756756    | 7.7143274043    |
| 11.6609765655   | 9.2408288506    |
| 0.913777848     | 0.3136900137    |
| 0.1015619199    | 0.2329913965    |
| 36.0468314288   | 53.8848766912   |
| 0.9144317904    | 2.1902263466    |
| 0.3776063057    | 0.7944631222    |
| 48.881854012    | 35.4277924163   |
| 5.4824839614    | 3.4260798333    |
| 74.274987644    | 44.38914802     |
| 0.7315809469    | 1.1409103866    |
| 2.9437472029    | 6.0018103703    |
| 0               | 0.0165312427    |
| 6.8935581954    | 11.6592671453   |
| 1.9988875575    | 1.3392140636    |
| 24.5469144039   | 9.7450465407    |
| 0.093885653     | 0.0766611795    |
| 3.8467529574    | 4.822574608     |
| 152.3932900322  | 95.839333295    |
| 18.1562013567   | 19.9298795145   |
| 0.1764752127    | 0.4611157515    |
| 453.9882496887  | 169.8222903451  |
| 8.8061902279    | 1.4631448206    |
| 0.7450398088    | 0.4258471882    |
| 0               | 0               |
| 0.2617176502    | 0.3287728309    |
| 289.3936825009  | 434.2566226405  |
| 26.8567625991   | 13.9083453475   |
| 0.0562528472    | 0.0656179615    |
| 0.0681617788    | 0.074208887     |
| 24.8489515544   | 32.2325848414   |
| 0.8140321533    | 0.3394151384    |
| 14.194631144    | 9.7626244943    |
| 0               | 0               |
| 26.9450251882   | 16.2819080987   |
| 444.827434654   | 359.3128166191  |
| 17.3920434761   | 14.2048929379   |
| 39.8161329973   | 27.9470333535   |

gene\_expression\_table

|                 |                 |
|-----------------|-----------------|
| 0.0489147414    | 0.005917        |
| 30.7212238048   | 31.7943251955   |
| 0.2808651348    | 0.4088181019    |
| 125.5726199334  | 79.7020036077   |
| 214.4983040293  | 140.0416799283  |
| 0               | 0.0460331289    |
| 2.9665444747    | 3.3177308548    |
| 3.927960095     | 19.0450620443   |
| 0.631403309     | 1.402335806     |
| 7.2295823499    | 6.9526894297    |
| 1.6193688471    | 1.7111804313    |
| 0               | 0.258961066     |
| 0.1109506715    | 0.5435724672    |
| 5.5624634966    | 7.3699751084    |
| 2867.2689972364 | 4049.9579258545 |
| 0.0620954449    | 0.0225347887    |
| 4.5637055162    | 6.1724256305    |
| 6.9399077453    | 7.7273135804    |
| 0.4723799318    | 0.4605564712    |
| 83.8682182007   | 66.1811514686   |
| 7.1013884391    | 4.6054340721    |
| 1.6113116902    | 3.0924497791    |
| 5.311898304     | 3.1035250284    |
| 0.6183828067    | 0.510944009     |
| 0               | 0.0100117851    |
| 0               | 0.0133625513    |
| 0               | 0.3077615205    |
| 0.8771531621    | 4.1183148274    |
| 0               | 0.0776418056    |
| 0.4426526963    | 0.8543189549    |
| 3.5640834889    | 5.8960072312    |
| 12.7741189203   | 4.8141001229    |
| 146.5088804846  | 76.7934357035   |
| 47.9389326587   | 91.018528302    |
| 7.2170577525    | 8.1245223436    |
| 0.0230493503    | 0               |
| 0.6566248926    | 1.1300859932    |
| 0.0795452648    | 0.2381562745    |
| 1.2611715649    | 1.3233554252    |
| 2.3031270733    | 0.5786431349    |
| 0.6333307487    | 0.1976233452    |
| 65.9831133557   | 31.7267759301   |
| 25.6023320038   | 13.8508170529   |
| 0.7070868401    | 0.4016438917    |
| 37.1354314505   | 3.6829762564    |
| 2.0808428893    | 0.7183131026    |
| 0               | 0.0477864244    |
| 0               | 0.0312258309    |
| 17.4325812138   | 38.5780221051   |



gene\_expression\_table

|                |                |
|----------------|----------------|
| 5.9050799374   | 5.5914909372   |
| 2.8467832734   | 2.0427476939   |
| 39.090571887   | 47.6383410116  |
| 1.9462991046   | 2.938157923    |
| 0.2696502253   | 0.1304767924   |
| 0              | 0.1141455237   |
| 0.113696263    | 1.0521559567   |
| 0.0387409179   | 0.1054447391   |
| 1.4582747304   | 7.9382424065   |
| 1.3168275569   | 10.991336138   |
| 34.0319352506  | 50.2427308344  |
| 5.0308729285   | 5.396385752    |
| 0              | 0.3267183332   |
| 2.1900681034   | 2.2850158476   |
| 91.6952741527  | 174.8107635883 |
| 1.3639485627   | 2.3042389337   |
| 265.5954271039 | 176.9588279807 |
| 0.6722113583   | 0.3659239647   |
| 119.689752238  | 39.0050249768  |
| 0.1848463138   | 0.3018679847   |
| 11.7117293548  | 7.8122261245   |
| 29.3153574077  | 7.8227748748   |
| 2.294357592    | 2.0718613691   |
| 41.5422911794  | 64.7982596994  |
| 14.91681755    | 19.921975599   |
| 14.2056134598  | 13.638105458   |
| 18.3254952127  | 19.8087689371  |
| 223.5490142352 | 324.8555119127 |
| 81.1108313509  | 76.1576213357  |
| 42.8006232525  | 25.2204403065  |
| 3.0426408849   | 3.6438323227   |
| 0.4798552466   | 0.0993746177   |
| 1.7693765118   | 1.1572477414   |
| 0              | 0              |
| 0.3017572456   | 0.7167888904   |
| 2.7686514152   | 4.4182495225   |
| 0.0689042689   | 0.1125258728   |
| 0.1581741364   | 0.4622394941   |
| 13.797663294   | 14.622235868   |
| 1.1753691927   | 1.2397688097   |
| 0.7096286207   | 0.928745484    |
| 0.8986501922   | 1.3045009814   |
| 6.5475492577   | 4.7835504674   |
| 0.1897609596   | 0.1603431499   |
| 0.0291074008   | 0.0118836457   |
| 3.4207864273   | 4.3277377204   |
| 2.0763770782   | 2.9480851232   |
| 0.1994048064   | 0.1240545151   |
| 0.4643213363   | 0.4376095929   |

gene\_expression\_table

|                 |                |
|-----------------|----------------|
| 17.7405406787   | 22.726393248   |
| 156.8988482976  | 48.2484140384  |
| 62.6413329526   | 63.99864284    |
| 35.7127838609   | 22.2135655312  |
| 2.3165519316    | 3.6699344007   |
| 2.2863685101    | 2.4326353372   |
| 146.8955376492  | 74.2828728054  |
| 135.5927838865  | 45.3304435424  |
| 0.2300148042    | 0              |
| 110.6580898356  | 111.4623867279 |
| 1.750326651     | 2.3170489731   |
| 6.7262085072    | 4.0855771043   |
| 1.7657915312    | 3.6635315486   |
| 0               | 0.2997483656   |
| 0               | 0.1399668108   |
| 4.7340093453    | 4.0049086976   |
| 62.4153942879   | 27.1451263759  |
| 14.6876647881   | 6.560291389    |
| 89.6953798341   | 100.6597913268 |
| 19.3998553836   | 8.5130368731   |
| 0.6300010597    | 0.6208512957   |
| 6.2716353058    | 2.7098767634   |
| 1.2620694338    | 10.9922915242  |
| 2.8217600596    | 0.8892915641   |
| 4.6127066951    | 4.161029511    |
| 0.6777102853    | 0.3689173524   |
| 240.2579028722  | 95.6541842468  |
| 89.5577879489   | 24.1164547096  |
| 19.3101201289   | 27.8139536622  |
| 98.4443161946   | 48.9822263288  |
| 4.844874373     | 2.6373485324   |
| 70.8555282247   | 81.2357259176  |
| 129.7683602203  | 41.3957504908  |
| 8.0130264947    | 3.6981826814   |
| 6.9479798277    | 7.4354453553   |
| 15.2552842226   | 3.0662191727   |
| 145.2236325736  | 37.5505162281  |
| 0               | 0              |
| 59.5130165995   | 32.1926652298  |
| 6.5257988003    | 2.7404028212   |
| 49.9846115294   | 8.9018891643   |
| 20.1458039202   | 11.6330143244  |
| 0.8748089471    | 0.6802995482   |
| 0.2630732992    | 0.3624906577   |
| 0.4838005371    | 0.9217632664   |
| 0.0153526122    | 0              |
| 0               | 0              |
| 1207.3338364115 | 1099.437062621 |
| 66.1933966768   | 42.4765505012  |

gene\_expression\_table

|                 |                 |
|-----------------|-----------------|
| 266.9323986408  | 152.9203058516  |
| 37.5733339876   | 18.703075781    |
| 2.0208046674    | 1.300049863     |
| 243.874719403   | 133.2971340095  |
| 1.9788912237    | 0.8504417783    |
| 16.5051966076   | 17.1906835902   |
| 7.4995160432    | 2.0746751435    |
| 0.2690326279    | 0.3661254925    |
| 0.0392006415    | 0.1066960115    |
| 2.2450110549    | 2.3627089648    |
| 31.6580927923   | 11.6493607236   |
| 1.5748957812    | 2.5272722486    |
| 16.1755379426   | 2.0012026192    |
| 858.0440020076  | 320.6097720235  |
| 0               | 0.1639691353    |
| 49.4476120436   | 36.2459420988   |
| 74.853528031    | 33.3468861403   |
| 7.3259448203    | 7.7226780653    |
| 11.6688933604   | 6.5726189352    |
| 0               | 0.0749743677    |
| 0               | 0.4022887144    |
| 377.9490231805  | 96.3061263331   |
| 0               | 0.0542731157    |
| 295.1139026086  | 236.0823610898  |
| 6057.6328982584 | 6540.7966239736 |
| 8.1805549246    | 2.2265772922    |
| 0.2743533815    | 0.1493465944    |
| 15.4856141499   | 11.451702764    |
| 93.1109613625   | 26.1193940216   |
| 0.8512501764    | 0.4633852667    |
| 29.5091609912   | 12.7939878546   |
| 1.1571360268    | 1.1338142914    |
| 1.7613416164    | 1.6020477004    |
| 14.1991176975   | 18.5812977777   |
| 43.6636544134   | 47.6724119165   |
| 30.8555136585   | 16.3425026366   |
| 336.229015316   | 56.5629354972   |
| 12.4488826283   | 3.5519019512    |
| 2.1385065406    | 0.2328228413    |
| 50.4993825858   | 29.2475506893   |
| 63.5537805732   | 37.366719046    |
| 1.3137825873    | 0.8476073657    |
| 10.3889148122   | 6.9919999212    |
| 26.0163664042   | 8.143282317     |
| 7.9692357354    | 4.0950368112    |
| 440.0939831506  | 429.2496465804  |
| 16.4516560659   | 2.8989221456    |
| 130.1780837404  | 32.0970179048   |
| 2.7421878526    | 2.5025234036    |

gene\_expression\_table

|                |                |
|----------------|----------------|
| 19.4672834923  | 18.4317570916  |
| 0.7761090863   | 0.4928951718   |
| 61.6379351142  | 97.92833215    |
| 190.4699400247 | 159.760872884  |
| 0.2002433327   | 0.0363347199   |
| 0.9958781051   | 1.6263441258   |
| 0              | 0.0970095172   |
| 1.020756942    | 1.0765868226   |
| 2.0060730972   | 1.4269099701   |
| 28.2726162225  | 21.0244388226  |
| 100.8770562366 | 42.6353743043  |
| 1.6293383167   | 0.5173840918   |
| 1.0264831395   | 4.1908111436   |
| 133.0415285304 | 7.4633654054   |
| 85.837882212   | 82.8022493701  |
| 7.3438323941   | 4.9202185418   |
| 0.2268532165   | 0.061744738    |
| 95.5459292566  | 34.2087340184  |
| 517.4369894181 | 328.8070014979 |
| 5.7026841084   | 3.3260405902   |
| 0.5156170412   | 0.2183070693   |
| 6.5801620276   | 3.4172789691   |
| 0.4282525818   | 0.3108305757   |
| 4.8509906313   | 4.8726795868   |
| 11.1052722044  | 2.2453783067   |
| 7.2957665452   | 2.4740569746   |
| 3.6022880785   | 1.4179076593   |
| 6.6925445059   | 5.3946547524   |
| 2.4609369978   | 2.4731667058   |
| 3.4219656249   | 2.2062666867   |
| 0.8951956462   | 1.9360589573   |
| 6.5067082455   | 2.4708180341   |
| 0.7609703069   | 0.884968667    |
| 16.5743006927  | 11.3232233591  |
| 0.5476150796   | 0.423108147    |
| 1.4125566926   | 1.1736410479   |
| 0.3554566489   | 0.7458385383   |
| 9.1143784297   | 8.2932924075   |
| 1.5250323247   | 4.2200018803   |
| 16.3658624989  | 10.6597776706  |
| 0.3291768486   | 0.1717239556   |
| 2.7475115433   | 1.605739077    |
| 14.9476573542  | 8.3772922379   |
| 12.6452853296  | 7.3137915501   |
| 12.660803302   | 3.5022364965   |
| 3.6640571182   | 5.271338798    |
| 3.6975968437   | 1.4933812903   |
| 13.7523944774  | 6.6333708262   |
| 1.7092662842   | 2.6606359874   |

gene\_expression\_table

|                |                |
|----------------|----------------|
| 243.2503877888 | 110.6207251203 |
| 1.6115037141   | 1.2099803309   |
| 2.8705217858   | 1.7781229839   |
| 0.751049481    | 0.0817680334   |
| 0.1299425982   | 0              |
| 34.0818454318  | 18.6483748501  |
| 9.8342455763   | 5.3792793802   |
| 26.1144698313  | 21.4917300917  |
| 0.0172939269   | 0.0188281921   |
| 16.5373451499  | 13.1571263609  |
| 0              | 0.098013894    |
| 2.9731160229   | 2.7219234495   |
| 20.6958979507  | 6.1835873464   |
| 0              | 0.0217670001   |
| 0.5673471113   | 0.8713706232   |
| 0.1913182624   | 0.3853391706   |
| 53.267781389   | 73.7677814099  |
| 6.8815708581   | 2.9679320452   |
| 27.7586691824  | 31.1835707749  |
| 16.7449001541  | 18.5414756663  |
| 24.2916855054  | 13.687718032   |
| 2.350415608    | 1.1620862577   |
| 4.4866312958   | 4.5780107326   |
| 0              | 0.0217763796   |
| 5.3033133029   | 5.2051747797   |
| 0              | 0.1749497111   |
| 0.1815126778   | 0.767661909    |
| 81.3871628569  | 40.1655272175  |
| 0.5754216554   | 0.7517656022   |
| 0.2175801788   | 0.2368832383   |
| 23.2353700463  | 14.9185915758  |
| 65.1977435116  | 96.0609524492  |
| 0.2425718995   | 0.1622280346   |
| 19.9021784265  | 20.0979874338  |
| 22.7554479887  | 6.9944522085   |
| 1.5502069075   | 1.4543262233   |
| 5.2750408376   | 4.3686270758   |
| 125.2409776453 | 78.7152739049  |
| 39.8442960889  | 23.9671051639  |
| 0.0968411111   | 0.1476055888   |
| 1.0587973864   | 0.5525157532   |
| 0.0256589493   | 0.009977       |
| 1.7638645733   | 1.1557658044   |
| 0.4569775964   | 0.3248508209   |
| 1.3193857126   | 1.0714411959   |
| 10.0517909148  | 6.8711692436   |
| 0.3330175676   | 0.699226493    |
| 7.2198767604   | 4.5729911889   |
| 1.8769314705   | 1.9072173764   |

gene\_expression\_table

|                 |                 |
|-----------------|-----------------|
| 6.5878768655    | 13.187502728    |
| 25.3987982618   | 38.5244075537   |
| 22.5367702753   | 15.3559670821   |
| 0.1768806755    | 0.4172414943    |
| 0.2169317368    | 0.178922173     |
| 2.6304708512    | 7.1361217118    |
| 5.204564909     | 3.7637455623    |
| 0.2666289588    | 0.1116474918    |
| 20.1885611582   | 28.4486342499   |
| 0.3914999416    | 0.6926280394    |
| 0.4054509511    | 0.137944169     |
| 1.7295876301    | 3.1271772228    |
| 0.4709679336    | 0.523627325     |
| 0               | 0.2351580343    |
| 78.7331844681   | 81.8159139538   |
| 0.1859630664    | 0.0276083387    |
| 1302.9207516617 | 1263.5295597972 |
| 158.2631540453  | 105.4302378627  |
| 2.8561503882    | 1.795052328     |
| 4.6290686337    | 1.6035554465    |
| 5.0564194137    | 4.4635214155    |
| 0.0418760099    | 0.0113977809    |
| 0.1781786991    | 0.2909792665    |
| 41.2051200124   | 33.855557877    |
| 5.0556517649    | 10.8339199378   |
| 1.2849614667    | 1.4343263365    |
| 26.5380498906   | 21.8619356054   |
| 0.0666796254    | 0.0604960345    |
| 0.1165811876    | 0.4653877072    |
| 0               | 0.0179961098    |
| 0               | 0.0153645462    |
| 40.7919666072   | 20.200115313    |
| 0               | 0.4144313963    |
| 4.2036166009    | 5.884134211     |
| 2.2142741637    | 1.7484327713    |
| 0.9031488203    | 1.1219402403    |
| 8.3322638516    | 5.9573880486    |
| 2.6459552815    | 7.1503001938    |
| 0.0235806544    | 0               |
| 0               | 1.7771755582    |
| 18.9289399085   | 10.0379709599   |
| 0.4399744899    | 0.1596692347    |
| 58.2519200995   | 73.6778484939   |
| 0               | 0.1050954979    |
| 1.0999950005    | 1.4670394821    |
| 0.0161776407    | 0               |
| 0               | 0.0205181697    |
| 2.8190889306    | 3.8191278618    |
| 5.2136084521    | 1.9881681287    |

gene\_expression\_table

|                |                |
|----------------|----------------|
| 6.7863770075   | 5.0920357142   |
| 4.4832484614   | 11.0320307841  |
| 0.8881360872   | 0.4834644257   |
| 2.9862113119   | 2.3094297751   |
| 1.7237489208   | 0.8992399814   |
| 0.9757293479   | 1.7173738819   |
| 10.1286315791  | 19.8343460978  |
| 3.5703256556   | 2.5913828109   |
| 13.9795082052  | 14.574248612   |
| 159.8343074994 | 99.8320267856  |
| 2.5066817163   | 4.1085953492   |
| 6.1409253969   | 5.2353863297   |
| 51.4458725943  | 59.4674029243  |
| 5.5283490641   | 6.370227316    |
| 33.1354445551  | 31.772268355   |
| 2.070499878    | 1.5964957871   |
| 0.0266889522   | 0.0508492527   |
| 1.1919165724   | 2.2084027349   |
| 2.5147857081   | 2.2987943813   |
| 0.7671842268   | 0.8613479587   |
| 0.002361       | 0.005141       |
| 1.1175794976   | 1.3079823758   |
| 7.3717639712   | 11.084443773   |
| 8.131270394    | 6.9700629208   |
| 0.5905714478   | 1.8829694311   |
| 0.9306015834   | 2.3341194947   |
| 0.1325212006   | 0.1467656364   |
| 0.0152495312   | 0              |
| 3.8690296582   | 3.558822273    |
| 1.033367002    | 0.588890332    |
| 0              | 0.2550630994   |
| 14.7183449545  | 27.7594180366  |
| 14.9720469617  | 21.9272824255  |
| 40.410945439   | 35.7799470613  |
| 0.2691006805   | 0              |
| 0              | 7.4950166581   |
| 3.444556105    | 3.1604059466   |
| 0.819268225    | 1.8953963838   |
| 88.9647234328  | 149.8998820738 |
| 0              | 0.194348215    |
| 18.9137673004  | 4.4680190317   |
| 1.4624064828   | 1.9442561767   |
| 14.3845082658  | 26.8410772446  |
| 112.0726045521 | 101.0783968049 |
| 6.8964396486   | 12.0298265367  |
| 1.981212654    | 1.6287399136   |
| 5.6172439612   | 1.9558865597   |
| 8.9832443412   | 35.2839911907  |
| 20.1328453376  | 13.9585338088  |

gene\_expression\_table

|                |                |
|----------------|----------------|
| 10.2027477902  | 4.4660648596   |
| 58.4525121109  | 52.679391728   |
| 0.8852050331   | 1.3767682328   |
| 1.778141796    | 3.4387576429   |
| 45.1916436917  | 26.9275253332  |
| 207.0670690464 | 101.904376513  |
| 48.3127906223  | 36.142557616   |
| 3.0975816035   | 8.0937353588   |
| 158.9772213484 | 120.3384193075 |
| 56.1777878561  | 90.275665347   |
| 29.2837718812  | 26.0850600842  |
| 16.2773096494  | 20.3756877929  |
| 158.6075829801 | 149.7149709518 |
| 0              | 0.1408964796   |
| 188.0443989549 | 126.8616085465 |
| 0.7992132525   | 1.574497519    |
| 53.9616339252  | 72.9137139844  |
| 6.7020335899   | 21.2851615078  |
| 5.5718193363   | 8.8969971204   |
| 2.5363082796   | 4.6597307513   |
| 26.0578467307  | 56.4794460785  |
| 4.0117238858   | 2.7989754179   |
| 37.8950608176  | 31.0944276677  |
| 10.10094543    | 3.586001396    |
| 11.0147470337  | 11.0248501633  |
| 3.8427509788   | 5.8571356134   |
| 244.9602420295 | 449.6096416747 |
| 17.7931386579  | 34.357341305   |
| 1.2020591686   | 1.0282660496   |
| 6.4697630622   | 22.1584352123  |
| 7.5771774959   | 9.1005306765   |
| 19.6598563276  | 37.0837085298  |
| 956.1580858793 | 217.090968646  |
| 184.1445152774 | 106.4796750503 |
| 46.9001359257  | 35.834961381   |
| 21.4470997004  | 11.5626522014  |
| 0.683234531    | 0.8612988941   |
| 91.5705150562  | 47.4794465291  |
| 6.6368789401   | 5.7892519547   |
| 4.3230676285   | 0.7303340474   |
| 2.0070595511   | 6.5553595252   |
| 14.3845150692  | 4.3355870665   |
| 4.0459885865   | 2.4073490353   |
| 289.2364588259 | 80.3013490097  |
| 493.1790855939 | 338.3843808553 |
| 4.6022502806   | 6.2008366662   |
| 30.8086026544  | 52.5032620346  |
| 13.4831815512  | 5.2248601139   |
| 11.7725770333  | 5.5289039806   |



gene\_expression\_table

|                |                |
|----------------|----------------|
| 8.4757212728   | 7.9693442716   |
| 4.7961816397   | 8.7276725952   |
| 21.77130225    | 8.5593396585   |
| 10.8166175051  | 19.5605264274  |
| 13.4539052266  | 15.3708283584  |
| 18.7405000661  | 18.9457365525  |
| 1.6941517087   | 0.88030652     |
| 8.1968964247   | 4.2332271307   |
| 2.2059264549   | 5.7817009358   |
| 16.6610485827  | 13.3776354663  |
| 7.5464584512   | 4.7901702032   |
| 6.8767661307   | 9.8748998211   |
| 4.712136078    | 2.1864800496   |
| 0.1359887835   | 0.3701332491   |
| 15.0487558872  | 3.9178738923   |
| 35.7603583913  | 127.3634389228 |
| 4.539151117    | 3.1856559911   |
| 6.3702031362   | 3.3231877804   |
| 44.0253017425  | 92.6236009234  |
| 6.1670479464   | 2.3797057886   |
| 6.8054567488   | 6.1155437085   |
| 1.4321395889   | 2.3387920629   |
| 145.2456361543 | 203.4495353723 |
| 13.4919241461  | 17.1982386498  |
| 17.3952632546  | 15.6847644064  |
| 1.0362250334   | 0.5127980926   |
| 175.4030010815 | 47.5183149288  |
| 215.9709394027 | 283.4884098924 |
| 1.2840540329   | 0.5968866853   |
| 1.6992009335   | 1.3977391937   |
| 0.0632108872   | 0.0516140754   |
| 67.7773142115  | 7.5335660693   |
| 1.9933857041   | 7.4971681729   |
| 17.7571861706  | 34.0753585377  |
| 0.3332209717   | 1.2092777823   |
| 1.1318772645   | 2.9148493007   |
| 3.118772312    | 5.1320699437   |
| 8.2186429216   | 9.9364807729   |
| 30.3988971604  | 25.6556557713  |
| 44.4957973092  | 28.1495029763  |
| 2.0236341602   | 3.462116272    |
| 17.6710522993  | 24.9762268634  |
| 21.383434115   | 9.5805844393   |
| 3.9051881511   | 1.218682642    |
| 1.1039557109   | 1.4874388022   |
| 1.1423373472   | 1.1793536994   |
| 0.0506667253   | 0.248227762    |
| 2.1845237786   | 1.8619806006   |
| 2.501403146    | 1.9219603679   |

gene\_expression\_table

|                 |                 |
|-----------------|-----------------|
| 2.1929197147    | 2.0830266097    |
| 2.1250092764    | 4.4342729484    |
| 15.1074387823   | 1.5116374893    |
| 2.7455150543    | 1.6335718394    |
| 2.7773429578    | 2.4110351699    |
| 20.2077603519   | 21.1690513263   |
| 0.437872564     | 0.2156587317    |
| 3.7741358956    | 6.7721845193    |
| 0.9057127734    | 0.5800381696    |
| 2.7572491942    | 2.4569396884    |
| 1.0540293437    | 0.9836054219    |
| 0.9035943129    | 0               |
| 1.7097888356    | 2.7822063065    |
| 9.66929631      | 20.3695632294   |
| 0.6934173229    | 0.3829381569    |
| 0.6176952718    | 0.7841128234    |
| 139.659932478   | 341.7005358207  |
| 81.1360987142   | 68.1076490457   |
| 15.0443642366   | 21.7806582608   |
| 2.1147129498    | 1.829525263     |
| 4.2806474686    | 3.4363176563    |
| 48.9377934662   | 52.4864467023   |
| 2.7252969586    | 3.0564469058    |
| 52.7161982367   | 55.2788125758   |
| 9.4230410437    | 2.531733618     |
| 4.5309107065    | 6.3044043894    |
| 2664.2303803326 | 1737.2830730398 |
| 515.8434193785  | 379.0452866068  |
| 248.1547501665  | 247.8665155693  |
| 584.1737912088  | 620.9390425474  |
| 123.6742786642  | 53.3942180254   |
| 22.1979682636   | 19.6440395219   |
| 29.5335877847   | 36.8650644442   |
| 0.2879696792    | 0.1567587418    |
| 3.2915224211    | 1.5723680108    |
| 4.1004504743    | 3.3998419166    |
| 11.8369062628   | 7.4948317439    |
| 1.4561354323    | 1.6804385546    |
| 29.0545389223   | 22.6136366292   |
| 0               | 0               |
| 0               | 0               |
| 14.836551886    | 7.6622285699    |
| 10.7105967611   | 7.6911717039    |
| 81.0637976089   | 39.8494516739   |
| 8.7702928753    | 5.6422168033    |
| 1.4899484486    | 0.7891453929    |
| 0.4739004749    | 0.035177966     |
| 0.2080937691    | 0.0125864013    |
| 0.8442190355    | 2.3788874634    |

gene\_expression\_table

|                |                |
|----------------|----------------|
| 7.2312386117   | 6.4897177612   |
| 0.0702520725   | 0.010926375    |
| 0              | 0.006451       |
| 13.0994175547  | 8.7470892174   |
| 9.6023060669   | 4.2128840683   |
| 2.0711520039   | 0.9395409935   |
| 26.3019657685  | 34.869939271   |
| 14.6792705122  | 21.2945178685  |
| 0.0604861923   | 0.1119489873   |
| 0.4194320183   | 0.1522142554   |
| 17.2156697003  | 5.3729910888   |
| 0.8334387051   | 0.0553279806   |
| 36.216274566   | 42.6017438772  |
| 3.4643724263   | 3.8915410052   |
| 2.888598392    | 0.9318121952   |
| 30.5669690908  | 14.2202619527  |
| 0.0154745443   | 0.1684739939   |
| 1.7366226187   | 1.6881165693   |
| 69.9130374362  | 70.4402325748  |
| 7.0996068064   | 11.0998677786  |
| 2.7412029921   | 0              |
| 1.0251288027   | 0.959127081    |
| 63.4448546764  | 25.401599684   |
| 8.3325439103   | 7.979465533    |
| 0.0652263939   | 0              |
| 37.5926618814  | 26.8027974861  |
| 25.8490604701  | 23.3805895251  |
| 0              | 0.2969124881   |
| 225.174177089  | 248.0521479765 |
| 14.6172432426  | 10.0538030095  |
| 2.871410391    | 3.167286886    |
| 0              | 0              |
| 7.7251734773   | 4.1654412501   |
| 0.653100694    | 1.1406295935   |
| 21.4204858046  | 23.9137498084  |
| 18.9294248827  | 9.8041800146   |
| 2.010308513    | 0.1367910651   |
| 12.4466711535  | 13.5509024067  |
| 2.6369554336   | 1.9139321291   |
| 0.1805947851   | 0.3932332232   |
| 92.0666011009  | 36.0403139756  |
| 4.5091937914   | 0.4675462772   |
| 0              | 0.4311966896   |
| 0.126391401    | 0              |
| 130.1222512334 | 127.9225601195 |
| 68.3482445571  | 55.9036735215  |
| 0.1280865014   | 0.4415915109   |
| 10.8988589485  | 12.6012547499  |
| 0.1693866567   | 0.0461035329   |

gene\_expression\_table

|                |                |
|----------------|----------------|
| 0              | 0              |
| 0              | 0.3071837971   |
| 3.168157838    | 1.18069703     |
| 1.6929126597   | 0              |
| 5.7363132887   | 10.1006902983  |
| 0.4063121135   | 0.8847178059   |
| 6.2214137846   | 2.4467640136   |
| 0              | 0.1823155148   |
| 34.073710147   | 25.3089139484  |
| 2.8731436865   | 8.4457089677   |
| 16.4267181428  | 14.2466138727  |
| 0.565973759    | 2.7728336238   |
| 3.4259601639   | 2.2737068057   |
| 2.0895127973   | 2.6860124461   |
| 75.3769834255  | 63.7329783023  |
| 3.8156753321   | 3.3530252527   |
| 379.3524646008 | 247.5008030463 |
| 23.9049869548  | 13.0793881359  |
| 39.6431325611  | 45.951108844   |
| 2.1169923903   | 10.3716251643  |
| 4.0748338434   | 3.114877621    |
| 37.4136634326  | 13.660420828   |
| 293.3951703088 | 206.2747607963 |
| 0.2487929104   | 1.7606229523   |
| 0.4171703017   | 1.3171231513   |
| 1.5091921442   | 4.0212297777   |
| 189.0129805652 | 43.4967638228  |
| 0.5785119148   | 1.767603565    |
| 7.6482959541   | 11.8255312062  |
| 35.3133168002  | 21.5328568755  |
| 4.0830115337   | 11.295292244   |
| 3.1846265218   | 1.6582055287   |
| 14.4338345044  | 9.2404868774   |
| 3.1437507297   | 2.4533015498   |
| 0.2211929932   | 0.2344792925   |
| 1.1117080657   | 1.5599879311   |
| 0.0127141313   | 0.0622894084   |
| 0.0107085302   | 0.0174878382   |
| 0.2307756152   | 0.2275465668   |
| 71.1773520839  | 57.8577856501  |
| 0              | 1.2176018295   |
| 7.1607896502   | 2.106197245    |
| 0.2848161058   | 1.4141715837   |
| 35.4309517041  | 31.8657089397  |
| 264.2349509498 | 82.0691674249  |
| 1.5299757782   | 0.8849087725   |
| 118.074074464  | 28.3190182648  |
| 3.439989036    | 0.9362936309   |
| 11.5430463412  | 9.4629591178   |

gene\_expression\_table

|                |                |
|----------------|----------------|
| 8.1050783532   | 8.5217518015   |
| 0.9632876234   | 1.9571116742   |
| 38.325187753   | 12.1726382669  |
| 54.7933803958  | 56.9468870204  |
| 1.7061053753   | 1.1585225559   |
| 3.682140049    | 3.4933902177   |
| 0              | 0              |
| 9.5498579376   | 7.7413135338   |
| 228.3774032003 | 105.7892209074 |
| 3.9403002829   | 6.9594684104   |
| 2.291952749    | 2.6717224063   |
| 12.9958061195  | 5.8665569414   |
| 3.3158430446   | 1.507373148    |
| 1.7906084007   | 2.4589852653   |
| 1.3706819013   | 1.1058895394   |
| 10.1150910882  | 11.1612887494  |
| 0.0651176671   | 0              |
| 0.2103953803   | 0.114530513    |
| 0.8233544452   | 0.2971213406   |
| 0.0417285145   | 0.021379079    |
| 17.4934666274  | 13.3754195826  |
| 1.0768407662   | 0.8206623896   |
| 0              | 0.1118095051   |
| 0.1994084057   | 0.10854966     |
| 0.3428987399   | 0.179480618    |
| 4.112713905    | 3.9768934914   |
| 6.7712775204   | 3.9889615605   |
| 1.7043603079   | 3.7974374599   |
| 19.369089766   | 23.3321490364  |
| 0              | 0.008082       |
| 8.0095639348   | 5.3592578539   |
| 1.7446071019   | 0.7322923952   |
| 5.370578839    | 0.8859152198   |
| 0              | 0.0816980514   |
| 17.0000604113  | 17.645329616   |
| 0.1655097087   | 0.140150292    |
| 0.1085245196   | 0.210048869    |
| 1.4384671214   | 2.1061124285   |
| 95.5490296771  | 45.0899093998  |
| 0.0614212036   | 0.6687030819   |
| 0.3090454451   | 0.1261736355   |
| 4.1369613751   | 4.9737424148   |
| 8.4870935447   | 4.8717937751   |
| 4.0173273929   | 1.1910611109   |
| 0.0170038175   | 0.009256       |
| 0.9146874907   | 1.6374826039   |
| 1.6349038912   | 2.9103167041   |
| 0              | 0.9326182611   |
| 0.709825936    | 0.6481544692   |

gene\_expression\_table

|                |                |
|----------------|----------------|
| 2.7921137306   | 3.6543408736   |
| 9.8920464776   | 11.4559396395  |
| 1.4258857043   | 0.776192999    |
| 3.5901487901   | 2.2064993546   |
| 75.5507970255  | 79.9686189661  |
| 4.8539125202   | 1.7759509756   |
| 66.8262941504  | 49.4308875339  |
| 124.22814958   | 82.0229160911  |
| 0.5437177185   | 0.6179527315   |
| 3.6164478162   | 2.4279943877   |
| 28.4885225595  | 26.0567506287  |
| 0.0343867524   | 0.003744       |
| 2.0752371164   | 3.4759167934   |
| 0.005493       | 0.023921154    |
| 0.2958185261   | 0.2526082498   |
| 0.0997010535   | 0              |
| 0.8533172252   | 0.2681995047   |
| 7.9802354359   | 5.2055989328   |
| 8.1846696778   | 2.5182664482   |
| 34.6016088744  | 14.6998030224  |
| 0.4868788607   | 1.1083350605   |
| 61.9080525385  | 22.1095372945  |
| 0              | 0.0287589557   |
| 0              | 0              |
| 0.5804227504   | 0.4476072462   |
| 1.2510832396   | 1.9700683134   |
| 1.7494073764   | 4.2057525427   |
| 0.0166262953   | 0              |
| 42.5378930541  | 17.4447761152  |
| 314.6120504791 | 227.5254368985 |
| 12.8912152985  | 3.9620010773   |
| 0.1040388824   | 0.1132688994   |
| 4.6544445613   | 0.3931582417   |
| 0.0308140348   | 0.0670955267   |
| 5.9948447918   | 4.8406279737   |
| 6.0234709102   | 7.799873164    |
| 0              | 0.0512874625   |
| 31.9384931742  | 31.6052463703  |
| 0              | 0.0307662328   |
| 0.9879016728   | 3.079970746    |
| 0.1081841775   | 0.1943402217   |
| 1.8524987992   | 1.1899396855   |
| 58.0773097989  | 84.6227058328  |
| 14.1010284222  | 24.3123576531  |
| 9.7486633973   | 5.9584760768   |
| 17.9812868259  | 20.5907014219  |
| 0.3954125019   | 0.3099544636   |
| 0.5814161597   | 1.1427868357   |
| 49.2160951737  | 22.7902454091  |

gene\_expression\_table

|                 |                 |
|-----------------|-----------------|
| 9.2977691585    | 23.1111686681   |
| 33.8244686814   | 13.1518835268   |
| 801.7355049593  | 617.0265493189  |
| 6.4639665255    | 40.514094731    |
| 9.8855695952    | 12.5078720944   |
| 3.3168185244    | 2.902574305     |
| 0               | 0               |
| 5.0365975012    | 8.4601480516    |
| 3.053630107     | 1.3808270415    |
| 72.8472563493   | 44.2533666388   |
| 1.5532863673    | 1.4400682022    |
| 3.2089550679    | 2.2447847788    |
| 0.9626214254    | 0               |
| 7.2758408357    | 2.9886342536    |
| 0.0866730002    | 0.0353858881    |
| 1.1909249324    | 0.9031351827    |
| 0               | 0               |
| 0.3957168751    | 0.6462355302    |
| 0.3028300681    | 0.0274746868    |
| 4.5103653149    | 3.357376144     |
| 41.7025233916   | 11.6811603579   |
| 26.7279960004   | 29.6097361604   |
| 9.2135996572    | 8.8585476844    |
| 48.86057676     | 33.7519241393   |
| 19.4536038737   | 3.5299115228    |
| 3.236999297     | 4.1470537892    |
| 91.1820796475   | 224.2490477901  |
| 434.3405644443  | 275.6883021437  |
| 5.0615492597    | 5.9742264616    |
| 147.8375801754  | 138.9679260314  |
| 0               | 0.2281849361    |
| 1.4803888004    | 0.9961352473    |
| 0.2748072135    | 0               |
| 1.6078206423    | 0.8580694397    |
| 0.1329697386    | 0               |
| 1.7567201092    | 0.6552326701    |
| 4.2379729606    | 2.7925206628    |
| 4.2318560804    | 0               |
| 8.1802746246    | 6.1112813916    |
| 2405.8042689147 | 2755.3514011547 |
| 7.6906187078    | 2.4532085035    |
| 9.9501566679    | 2.3532152445    |
| 33.7190680121   | 18.6983501817   |
| 11.336523387    | 3.1531335646    |
| 24.2728057058   | 10.570486428    |
| 1.1198991144    | 0.1016044331    |
| 2.6466208588    | 2.0581579331    |
| 11.9771809079   | 7.0081531653    |
| 2.4472205101    | 1.4697258241    |

gene\_expression\_table

|                |               |
|----------------|---------------|
| 0.1563278744   | 0.3723055297  |
| 0              | 0             |
| 34.819154217   | 29.0447757133 |
| 8.8272912772   | 8.131895561   |
| 3.733924402    | 3.6586682565  |
| 18.2022644097  | 6.0634455109  |
| 7.5693900575   | 13.6724414136 |
| 0.6202467388   | 0.3001214068  |
| 1.7851968738   | 0.6553912914  |
| 0.1452353262   | 0.1251784662  |
| 0              | 0.1319687073  |
| 318.6607854604 | 198.630720132 |
| 1.0817977012   | 0.6916630044  |
| 23.8229177249  | 8.7370551809  |
| 58.9091723617  | 26.5761981929 |
| 14.6239182452  | 7.6621296271  |
| 13.2280314216  | 6.5257171198  |
| 1.4459752295   | 2.1773001102  |
| 20.8304339338  | 15.1945597723 |
| 2.1861936217   | 1.8003020337  |
| 0              | 0.0537157505  |
| 84.92694196    | 52.1645479225 |
| 5.6351469502   | 2.3785738936  |
| 1.9551117227   | 1.7871899894  |
| 2.3104380963   | 1.8737261738  |
| 15.7723205696  | 9.1862914326  |
| 9.3333926779   | 2.6676092504  |
| 2.3808180427   | 2.016028827   |
| 2.1314666356   | 2.175528702   |
| 23.5898735161  | 35.8487634308 |
| 0.2776475044   | 0.2267096674  |
| 2.1446090868   | 1.0636640746  |
| 0.6069679483   | 0.4038321957  |
| 1.0236907923   | 1.2623526677  |
| 17.7988806712  | 19.0075073854 |
| 0.0696254652   | 0.1516048545  |
| 0.3956920715   | 0             |
| 427.6835979293 | 173.127643241 |
| 1.1463774439   | 0.6240403025  |
| 1.3669375737   | 1.2370436968  |
| 0              | 0.7747638683  |
| 27.3403036507  | 21.8404986225 |
| 18.1712711886  | 5.5299976152  |
| 5.0961283887   | 3.7601826833  |
| 8.8378953538   | 4.4044214523  |
| 1.8549577692   | 1.5415301897  |
| 8.049808124    | 5.4604323334  |
| 60.2023041401  | 30.2487604643 |
| 0.6005991267   | 0.7229259672  |



| gene_expression_table |                |
|-----------------------|----------------|
| 0                     | 0.0259868143   |
| 0                     | 0.0239792418   |
| 0                     | 0              |
| 0.9093735678          | 0.6513489852   |
| 1.6122819705          | 0.367392303    |
| 1.6542544512          | 0.6217789653   |
| 22.5446703009         | 14.8456244071  |
| 918.8216423258        | 590.8881449469 |
| 5.5834783766          | 11.2433603538  |
| 5.1461187212          | 5.9174956659   |
| 7.523383754           | 0.8190835747   |
| 7.7238283014          | 10.0038854506  |
| 2.829901532           | 1.7723813023   |
| 12.0014572087         | 17.4310968251  |
| 9.5894603079          | 8.7472016348   |
| 0.8807358077          | 0.690222547    |
| 6.9253301973          | 5.3013689132   |
| 4.013906411           | 3.7099548128   |
| 7.643485546           | 3.6377583511   |
| 3.3533118902          | 2.1841537048   |
| 2.7647611568          | 1.4771504647   |
| 29.5399451781         | 6.4599126354   |
| 0                     | 0              |
| 0                     | 0.1598802055   |
| 5.1084309911          | 3.6498233848   |
| 76.4709888613         | 40.6389762967  |
| 30.0885831746         | 14.2991059598  |
| 1.3151815225          | 3.3111773463   |
| 10.9789066226         | 1.4941152773   |
| 0                     | 1.0264232789   |
| 345.5137898079        | 172.0659451038 |
| 0.3244357749          | 0.2649140563   |
| 0.3865338788          | 1.7183728442   |
| 0.0650255071          | 0.3008760923   |
| 0.2902069281          | 0.7108947327   |
| 0.3817653186          | 0              |
| 120.5222303695        | 70.1319415869  |
| 41.1498513173         | 69.9459449371  |
| 750.1773988152        | 570.579119994  |
| 2.6469062088          | 3.7462513032   |
| 104.8235714167        | 193.264586049  |
| 4.7151194148          | 4.5411117172   |
| 4.2927181477          | 6.5429772785   |
| 19.5903828518         | 11.435323371   |
| 3.3663632813          | 2.1461810753   |
| 10.6097664289         | 3.8722212952   |
| 57.7972148899         | 71.2719787539  |
| 177.3111508124        | 64.886443576   |
| 7.7371864054          | 4.0286812869   |

gene\_expression\_table

|                |                 |
|----------------|-----------------|
| 14.1878060104  | 6.7674046438    |
| 44.0664288555  | 16.3788588342   |
| 0              | 1.8205473288    |
| 0.0126590613   | 0.2549694999    |
| 37.6599826586  | 25.9221597435   |
| 0              | 0.0163182731    |
| 0.770961977    | 0.6295195547    |
| 406.4055429951 | 166.4734485232  |
| 15.3634016759  | 8.2283079527    |
| 2.6978082513   | 5.8742993808    |
| 0.2599558279   | 0.1415091638    |
| 1.49011479     | 5.6105001462    |
| 477.1182849674 | 602.5041616899  |
| 119.6305717736 | 86.2814058978   |
| 0.2599815216   | 0               |
| 0.1725111031   | 0               |
| 0.1481790322   | 0               |
| 1.0291606306   | 0.2801161671    |
| 8.8954951954   | 29.4338216213   |
| 56.2057190014  | 56.3389531979   |
| 22.2839488986  | 33.4054121678   |
| 73.5256649325  | 15.0890409413   |
| 439.4376356907 | 646.0418091319  |
| 193.57759158   | 222.8862054674  |
| 19.4742902925  | 26.5024884906   |
| 2.5576304296   | 0.8701674106    |
| 0.3332737466   | 0.997812177     |
| 501.1407140792 | 155.3169055857  |
| 93.4019253573  | 33.7536672738   |
| 4.2276437018   | 0.836855917     |
| 13.9384954612  | 14.2170543524   |
| 1.3771534267   | 0.5622488773    |
| 0.4566602509   | 0.2485868879    |
| 52.0212507627  | 62.2329039344   |
| 455.2027238479 | 1026.2903225166 |
| 0.9516376424   | 3.3871325484    |
| 0.9406752061   | 0               |
| 1.7814852997   | 1.5516266566    |
| 1.8477843694   | 6.7666751868    |
| 1.8604078762   | 4.3501306799    |
| 21.2238288022  | 28.2394704607   |
| 0              | 0               |
| 67.2459409753  | 33.6705206443   |
| 2.952502115    | 1.6072196141    |
| 591.4455423173 | 283.6906230476  |
| 8.8179789699   | 18.5460023308   |
| 1.2570432712   | 1.0264232789    |
| 126.5062909942 | 41.2686899665   |
| 0.5284506369   | 0               |

gene\_expression\_table

|                |                 |
|----------------|-----------------|
| 12.0915793178  | 18.3429143036   |
| 0.1089177244   | 0               |
| 246.2467531479 | 402.8358829164  |
| 2.362642664    | 2.033871476     |
| 0.7242853726   | 0.821397702     |
| 0              | 0.0344460425    |
| 3.6790080956   | 5.7021300021    |
| 69.2753965499  | 46.5462860754   |
| 14.1926063579  | 5.0647342908    |
| 24.3924500421  | 37.113594341    |
| 0.1388603957   | 0.1511796726    |
| 75.652737729   | 87.2093871817   |
| 2.473418737    | 5.3536482519    |
| 0              | 0               |
| 0.4887852752   | 0.4941382045    |
| 0.9665122341   | 4.5247106658    |
| 3.8293437904   | 20.306254213    |
| 20.8835300516  | 29.1682206783   |
| 48.9298302607  | 98.8356454751   |
| 100.0472464343 | 152.3128487564  |
| 257.5473057631 | 437.0992424308  |
| 0.6780742543   | 0.8366617593    |
| 14.8629074445  | 4.85444499756   |
| 293.2559751042 | 348.2798624205  |
| 1.3264564019   | 1.3719288455    |
| 0.9504473514   | 0.3880380689    |
| 1649.070592895 | 2246.6120655189 |
| 6.1885862441   | 7.9174785653    |
| 0.2543919975   | 0.3789991138    |
| 0              | 0               |
| 0.1408138201   | 0.4939872857    |
| 4.7033001669   | 2.9232078989    |
| 0.1655364927   | 0.139028703     |
| 0.6206431016   | 0.7566484833    |
| 0.0157428997   | 0.0514186874    |
| 0              | 0.0864998273    |
| 0              | 0.029093985     |
| 1.739306473    | 1.1457151354    |
| 0              | 0.1080567862    |
| 2.2634744188   | 1.2433428195    |
| 29.7927518327  | 11.680776495    |
| 1.2068480528   | 3.7775084555    |
| 0.710687303    | 1.3986790456    |
| 0.0163052002   | 0               |
| 0.00283        | 0.007704        |
| 1.1026024042   | 1.6863070606    |
| 1.7704818974   | 1.8064996307    |
| 0.06246255     | 0.0425025248    |
| 13.5232062193  | 4.1787180508    |

gene\_expression\_table

|                 |                 |
|-----------------|-----------------|
| 0.9216223423    | 0.8882432614    |
| 0.033298896     | 0               |
| 0.2328484705    | 0.0211255072    |
| 3.8128145533    | 1.9190904121    |
| 36.9051926919   | 29.999471721    |
| 0.1968016244    | 0.0357102122    |
| 11.5525390296   | 14.8057331689   |
| 18.4157972096   | 15.7585808217   |
| 1.4712321897    | 2.1203314977    |
| 1.0552249114    | 1.302020133     |
| 45.4826113388   | 35.4145518073   |
| 3131.6539437836 | 2835.8608877035 |
| 4.8043160639    | 2.5618974096    |
| 1.7190887655    | 9.5862498114    |
| 0               | 0.1271465146    |
| 2.2067130284    | 1.7674676559    |
| 2.3745080513    | 1.0714336319    |
| 50.4115994398   | 28.7283254389   |
| 12.3151503495   | 18.7480739231   |
| 14.2895155039   | 12.3533060508   |
| 2.8026803856    | 3.4650648521    |
| 13.0910584561   | 11.0774053306   |
| 1.0381846874    | 0.8177975613    |
| 1.3750571738    | 0.7881518008    |
| 4.508783902     | 14.949495775    |
| 0.4976687755    | 0.7949660751    |
| 0.3577427298    | 0.6361516296    |
| 2.6618911824    | 3.2068543652    |
| 1.6265256385    | 2.9513768403    |
| 4.7066489199    | 3.786220847     |
| 0.044132374     | 0.0720714984    |
| 16.9765117365   | 22.1270764873   |
| 14.404726316    | 19.9894642752   |
| 13.3551265084   | 13.5245933304   |
| 2.4017010873    | 10.1322445568   |
| 3.4501914844    | 3.2867468396    |
| 12.9284494972   | 10.1307182324   |
| 3.123666623     | 4.6038982305    |
| 1.5062923665    | 0.1261481614    |
| 4.2825767339    | 2.7157942775    |
| 2.7323429144    | 2.3737889397    |
| 0.0893238151    | 0.0162080592    |
| 4.3363813954    | 4.7433614211    |
| 0.3138389912    | 1.0250455295    |
| 2.8622547903    | 5.1860046774    |
| 1.3237719575    | 0.4906257112    |
| 0.5141277086    | 0.0186579858    |
| 0.9090974982    | 1.4979998421    |
| 0.1806568025    | 1.9668413105    |

gene\_expression\_table

|                 |                 |
|-----------------|-----------------|
| 0.5569852927    | 5.0027946685    |
| 0.2081806921    | 0.0566624643    |
| 0               | 0.0194407586    |
| 0               | 0               |
| 1.0606736071    | 2.5280174026    |
| 0.2072181809    | 0.3106649873    |
| 0               | 0               |
| 3.5425764916    | 0               |
| 196.8411877684  | 175.6029706748  |
| 0.3361716469    | 0.4182808971    |
| 2.4231669355    | 2.2708066524    |
| 39.1883957201   | 36.5405700699   |
| 1.827021633     | 1.5515054105    |
| 30.7198195086   | 48.4636901341   |
| 1.2436245328    | 0.296177692     |
| 2074.5191243569 | 1846.041079361  |
| 32.4490367457   | 20.974060954    |
| 0.2475664933    | 0.4582007423    |
| 31.1420813451   | 22.955803614    |
| 0.8378064111    | 1.7102513957    |
| 0.9102371873    | 0.3613763059    |
| 0               | 0               |
| 41.0167549991   | 37.1140610178   |
| 2.2026766601    | 8.3933202946    |
| 2.7475937099    | 1.5953877148    |
| 53.5574741509   | 32.3416031179   |
| 20.860162441    | 7.9769385742    |
| 0.7519415184    | 0.253392134     |
| 0.9653513552    | 2.3408512213    |
| 38.3437433925   | 29.3764524458   |
| 39.0526793391   | 44.3766734955   |
| 1.6401328418    | 6.6961518662    |
| 7.8883943419    | 6.4011644552    |
| 3.2087895894    | 1.6547986217    |
| 16.2000223995   | 9.7135326431    |
| 18.8848530117   | 18.5705577877   |
| 4.0020343214    | 3.3809830642    |
| 4.2707439224    | 5.5537264977    |
| 642.5901765679  | 1030.4158894966 |
| 4.6983878001    | 2.078055949     |
| 0.3381146661    | 0.5521667745    |
| 16.9408085704   | 6.0106851413    |
| 0.849711964     | 0.9135321572    |
| 24.7928180971   | 17.7137378235   |
| 12.701263643    | 14.2641021669   |
| 16.5050185397   | 8.3351545268    |
| 1.4562248643    | 0.6936198313    |
| 0               | 0.3597639382    |
| 0.1082859038    | 0.166121537     |

gene\_expression\_table

|                 |                |
|-----------------|----------------|
| 63.4611285148   | 93.7666409058  |
| 0.1377514032    | 0              |
| 19.2232832876   | 14.1866790895  |
| 3.078397302     | 1.5298794977   |
| 18.0207147645   | 5.9398360332   |
| 28.726809134    | 28.8003363866  |
| 8.091416958     | 3.5876434602   |
| 1.3892206695    | 0.4583236823   |
| 1.2898678656    | 0.3510752664   |
| 1.0960494315    | 1.4078535594   |
| 5.3830685572    | 3.2612917915   |
| 0.0252615899    | 0.0412540833   |
| 13.3701086291   | 12.227009669   |
| 6.1170032119    | 5.9959667093   |
| 1.2069840259    | 1.0324788735   |
| 4.5759577654    | 4.5463450183   |
| 2.6025304279    | 2.9208703119   |
| 23.7620375167   | 12.0531306427  |
| 11.6755481498   | 6.6853734958   |
| 0.7517368528    | 1.1496974411   |
| 0.606539572     | 0.7535281521   |
| 4.4582424491    | 5.2398592079   |
| 16.5505989348   | 72.7192060986  |
| 1.7369001648    | 1.3596393985   |
| 135.4232324117  | 81.8755633162  |
| 9.1356124053    | 5.8166903513   |
| 16.3648047524   | 11.6273259809  |
| 0               | 0.1212670315   |
| 2.9976304179    | 2.7614833049   |
| 0               | 0              |
| 4.5340865499    | 3.4853844448   |
| 0.0359763115    | 0.068544038    |
| 3.9929609791    | 2.783271158    |
| 83.7635005623   | 38.4719370515  |
| 27.5918361463   | 16.9949829024  |
| 36.0926656106   | 34.8860249371  |
| 0.0136765858    | 0.0163789245   |
| 0               | 0.0952351496   |
| 0.0404770307    | 0.009014       |
| 1906.0918297993 | 146.529779702  |
| 178.5584385745  | 33.3417929827  |
| 3.126068135     | 0.9724010011   |
| 68.0672061195   | 12.2195938599  |
| 0.9858377696    | 0.5688481167   |
| 81.2761544378   | 101.9671309232 |
| 4.7337727791    | 4.8141514265   |
| 5.1808940973    | 5.8816652397   |
| 2.0437126956    | 0.7987268308   |
| 1.2688956691    | 1.3186742662   |

gene\_expression\_table

|                |                |
|----------------|----------------|
| 4.7327526213   | 8.0668195722   |
| 1.4160770094   | 0.3083414211   |
| 0.7901825311   | 0.617161086    |
| 13.3244989488  | 10.1400707863  |
| 2.5953261421   | 1.4127878382   |
| 1.3899929276   | 1.5565463199   |
| 2.2203617612   | 2.1672753501   |
| 6.8445564533   | 8.6440705174   |
| 2.2020398917   | 1.9458335129   |
| 1.5091731551   | 0.9584531024   |
| 25.0868752359  | 16.6572950249  |
| 0.7544422903   | 1.1499237996   |
| 85.7540400573  | 123.6013296762 |
| 5.2829297076   | 16.0461732649  |
| 1.0707767332   | 1.7486592396   |
| 0              | 0.0794374743   |
| 160.1690883038 | 34.875761678   |
| 58.6153324789  | 11.8058690898  |
| 88.4249704486  | 17.6697675523  |
| 6.3731263205   | 0.6307755392   |
| 0              | 0.3131460851   |
| 59.6414704935  | 62.9458688378  |
| 4.3351459878   | 2.9642314163   |
| 72.0742649332  | 24.2217807067  |
| 10.9518018287  | 8.6623084216   |
| 10.1549405331  | 5.527928167    |
| 1.620248992    | 1.5737581151   |
| 6.2058807547   | 3.2456405646   |
| 0.9676972838   | 0.6371120864   |
| 2.0942093455   | 0.8255177135   |
| 8.5214439692   | 1.4926575649   |
| 2.6718512532   | 3.0131926893   |
| 7.1128835232   | 1.9020147435   |
| 0              | 0.009766       |
| 0.1308443041   | 0.1709429009   |
| 3.1710547539   | 3.3060938612   |
| 0              | 0.3101502832   |
| 13.4148916938  | 23.2412228421  |
| 6.0913876689   | 5.4269852288   |
| 0.3729128013   | 0.5720859832   |
| 0.1500103354   | 0.1781659653   |
| 135.0990920384 | 42.1760882212  |
| 3.0971140087   | 5.8359472866   |
| 10.0933547211  | 8.8573572163   |
| 64.7141104357  | 43.5795261129  |
| 0.0660853727   | 0.0359741341   |
| 20.003455399   | 13.6237440713  |
| 12.555139144   | 8.5890740618   |
| 8.9519117958   | 3.9306199152   |

gene\_expression\_table

|                 |                 |
|-----------------|-----------------|
| 0               | 0.7270633953    |
| 2742.6801811725 | 2254.3076287643 |
| 39.3601867265   | 45.4779540306   |
| 0.3035228849    | 0.0917918119    |
| 0.0357277061    | 0.1944868042    |
| 0               | 0.1235960703    |
| 0.3905190928    | 0.0708607955    |
| 1313.2287220339 | 1547.11799434   |
| 0.5680978206    | 1.1949987425    |
| 8.8878364905    | 10.444108571    |
| 2.9756640622    | 1.7764113918    |
| 0               | 0.1378445703    |
| 26.9223796656   | 19.9136409858   |
| 6.9620858097    | 0.473733821     |
| 2.234776556     | 3.3116367091    |
| 79.0128434057   | 37.1839735513   |
| 0               | 0               |
| 0.0296451308    | 0.0215167718    |
| 0.7828991002    | 2.0146585849    |
| 29.3990902131   | 28.1122221993   |
| 0.0610045352    | 0.6973750787    |
| 0               | 0               |
| 114.9263490604  | 67.2249040113   |
| 0.8578436347    | 0               |
| 43.281831984    | 40.5948962765   |
| 18.1364258572   | 26.200673426    |
| 63.4803174241   | 43.6419082142   |
| 15.7203843065   | 14.6931085765   |
| 0.225697478     | 0.3378659348    |
| 6.3615893982    | 5.3976632249    |
| 30.9394476952   | 8.4025677661    |
| 1.2155247707    | 0.8625487559    |
| 160.7354706119  | 199.5749801093  |
| 1.4708117956    | 5.0040556164    |
| 0.0813912909    | 0               |
| 0.4490206632    | 0.0488856427    |
| 31.2528730559   | 29.5305219964   |
| 0               | 0.1800138888    |
| 0               | 0               |
| 140.8309803444  | 89.6303337817   |
| 2.1431113676    | 1.9999215141    |
| 0               | 0.1199966875    |
| 25.7198573714   | 0.552664062     |
| 2.229550645     | 0.3310022286    |
| 1472.3200940136 | 1563.6825494555 |
| 5.3183139682    | 16.7842980493   |
| 20.912693251    | 19.1702302359   |
| 0               | 0.888704931     |
| 15.4132930551   | 10.8972320134   |



gene\_expression\_table

|                 |                 |
|-----------------|-----------------|
| 0.083088148     | 0.0452297394    |
| 6.7182028818    | 7.3819459228    |
| 24.1593060099   | 14.5195652454   |
| 0.0585941146    | 0.2073253269    |
| 66.5963142711   | 39.3253786075   |
| 1.615047942     | 0.6753007063    |
| 16.9574607413   | 15.1955438359   |
| 0.0928636556    | 0.05055112      |
| 33.7885582503   | 27.5204862334   |
| 0               | 0.9297795286    |
| 50.4570622352   | 37.8858024266   |
| 0.0862873841    | 0.2113707183    |
| 0.7553088428    | 5.3450642248    |
| 15.8420690187   | 12.9356473235   |
| 1.1027348825    | 3.0162373218    |
| 7.2451693496    | 18.0530508596   |
| 3.2747463623    | 2.9558238086    |
| 0.0660314559    | 0.008986        |
| 23.5951316939   | 26.2263982569   |
| 20.7255444604   | 11.6346926794   |
| 74.2602494641   | 46.5490762481   |
| 33.3932808446   | 33.6524499439   |
| 0               | 0.3111612765    |
| 3.0945447588    | 5.5130456755    |
| 51.1892994685   | 24.9525778495   |
| 0               | 0               |
| 3.4621428694    | 13.94638698     |
| 2.168477366     | 11.5682049842   |
| 0.4202067667    | 1.0579369485    |
| 1.0797974215    | 2.9773190885    |
| 55.1245588666   | 25.8269074965   |
| 0.1211730068    | 0.2968270014    |
| 208.9097003241  | 158.1766444274  |
| 22.9630022038   | 9.5302221786    |
| 2.5218849074    | 6.339149649     |
| 65.9882018255   | 14.5087284122   |
| 0               | 0.374587436     |
| 0.450404631     | 0.081727196     |
| 0               | 0.0419992806    |
| 24.0202050054   | 19.592909371    |
| 0.4208160056    | 1.7562398909    |
| 0.6765663326    | 6.3991192314    |
| 7.1829681878    | 6.2127299641    |
| 1184.7373432387 | 1281.2480922646 |
| 0.8161436727    | 0.4442747431    |
| 253.7068719076  | 518.0857749999  |
| 4.9892954579    | 4.1480198488    |
| 5.4114555476    | 5.474689117     |
| 5.251120382     | 10.945932778    |

gene\_expression\_table

|                |               |
|----------------|---------------|
| 28.8459887833  | 25.0176365357 |
| 1.5715774804   | 1.5981897188  |
| 3.2826478022   | 1.6637001743  |
| 17.481294771   | 43.1336850883 |
| 0              | 0             |
| 0.3247963259   | 0.6541808673  |
| 0.676639638    | 0.4884436244  |
| 13.7624747401  | 26.1553033892 |
| 14.0668801315  | 20.4545294946 |
| 10.8103494497  | 10.7548067494 |
| 1.189143527    | 1.9175339654  |
| 1.3806337911   | 1.9206526577  |
| 2.7628544755   | 2.4610635983  |
| 18.2847682357  | 38.2548987627 |
| 81.6275169125  | 42.4722196419 |
| 60.8238751014  | 35.2851022845 |
| 0.7283441976   | 0.3398403024  |
| 143.6019779041 | 78.2801341902 |
| 76.0808161623  | 117.03375225  |
| 9.8765157045   | 6.6129292522  |
| 2.9041173881   | 2.2153482585  |
| 8.8160898078   | 26.3951236905 |
| 0.6609910518   | 0.4705287403  |
| 16.6831536872  | 20.9896543889 |
| 1.8587454023   | 1.1026285586  |
| 0.1845059567   | 1.0043738529  |
| 0              | 0.0176969531  |
| 3.054615149    | 1.3856714265  |
| 9.041723027    | 6.9533993309  |
| 1.0606302601   | 1.443407736   |
| 0              | 0.0576955968  |
| 13.8848821962  | 8.5528738163  |
| 0.2451410107   | 0.5337783687  |
| 0.6528220998   | 1.1549500857  |
| 2.7840421729   | 2.0762583081  |
| 11.5739060354  | 9.1325132696  |
| 2.3163913098   | 1.1238878039  |
| 1.7260196116   | 1.6813419485  |
| 57.3897391634  | 79.7173731016 |
| 1.2795928465   | 1.9155324068  |
| 5.1795388735   | 4.6097012332  |
| 0.1362882407   | 0             |
| 0.5461028826   | 0.414062644   |
| 5.0699295395   | 3.1855821902  |
| 1.0610994077   | 0.9525638073  |
| 0.4540580291   | 0.741511039   |
| 1.0368052136   | 2.2575749115  |
| 1.6256496546   | 2.0892699093  |
| 1.359479827    | 3.3866438439  |

gene\_expression\_table

|                |                |
|----------------|----------------|
| 0.179978997    | 2.2207235169   |
| 2.7344754058   | 0.2658098076   |
| 1.6704126751   | 4.0399048099   |
| 60.4430290824  | 55.4284078092  |
| 0.149625131    | 0.0203624279   |
| 3.9329530977   | 4.2272571497   |
| 0              | 0.5240111524   |
| 6.7708825939   | 5.9644196418   |
| 0.1072340973   | 0.009729       |
| 0.4572517394   | 0.8492184964   |
| 9.9103654152   | 11.3490431188  |
| 139.7008295129 | 67.4225357393  |
| 3.1566110213   | 1.9728951473   |
| 0              | 0.0444573616   |
| 6.9143466872   | 4.9128582951   |
| 19.8469956478  | 29.7799276347  |
| 0.8642559701   | 0.2822790486   |
| 34.2746457546  | 43.9004580058  |
| 2.2645509659   | 0.9956645681   |
| 54.4585824367  | 44.7985116212  |
| 30.1630625054  | 39.0272998189  |
| 26.3394393554  | 20.5325023357  |
| 9.8628166288   | 14.1229580918  |
| 9.8901108568   | 5.6787667527   |
| 0.0177215941   | 0.0154350405   |
| 0              | 0.0138010648   |
| 0              | 0.9960768515   |
| 0.1136594164   | 0              |
| 0.0191219166   | 0.0208183556   |
| 11.8242719636  | 20.2628862697  |
| 616.4220849437 | 641.4141021866 |
| 13.7797870712  | 12.8986464511  |
| 21.0471851433  | 16.3508038132  |
| 0              | 0.1141152002   |
| 0.0537412002   | 0.117017916    |
| 0              | 0.011369386    |
| 1.211869636    | 0.6596915338   |
| 1.5378690008   | 0.5727882503   |
| 0.5688808965   | 0              |
| 39.1890634371  | 50.8737673485  |
| 154.8469385114 | 79.1756335079  |
| 7.0072234498   | 11.1615763493  |
| 62.9252595846  | 21.8338945217  |
| 2.4040322079   | 7.4050742306   |
| 4.1588822293   | 3.7354727521   |
| 0.1083680315   | 0              |
| 0              | 0.3912187088   |
| 3.5130057362   | 6.0238537473   |
| 0.3048105968   | 0.4645934675   |

gene\_expression\_table

|                 |                |
|-----------------|----------------|
| 2.6567726301    | 3.4434208479   |
| 0.2832306498    | 0.0308358022   |
| 3.4071666112    | 5.8953603049   |
| 0.1010124057    | 0.2749348068   |
| 0.1198820963    | 0.4568118643   |
| 1.148174345     | 0.681838321    |
| 7.7761821576    | 12.8124772524  |
| 134.3038225783  | 75.0418347795  |
| 38.4682634182   | 31.2027706213  |
| 33.1353864377   | 22.2135329963  |
| 1.7287959546    | 2.1880220849   |
| 33.5526047794   | 31.983069216   |
| 0               | 0.6211976026   |
| 6.8430257218    | 4.3132264394   |
| 0.0185034859    | 0              |
| 8.9346570822    | 7.0425746143   |
| 50.0530688636   | 46.4400561766  |
| 11.3330443912   | 6.7662621429   |
| 1.9956627342    | 1.920071011    |
| 5.8359419527    | 2.4219508266   |
| 315.6065658013  | 95.3342807724  |
| 1080.9916716746 | 800.4803499704 |
| 1.1142789306    | 2.867408601    |
| 8.0181129239    | 5.3448773244   |
| 0.001986        | 0              |
| 27.3941715147   | 36.6218509914  |
| 0.2421099357    | 0.3807399577   |
| 0.1750482844    | 0.0381156084   |
| 4.0823850397    | 3.0605097775   |
| 0               | 0              |
| 3.6184270865    | 4.4159885932   |
| 0.0129548369    | 0              |
| 31.6978210496   | 60.5437832586  |
| 1.1502134138    | 0.8030777886   |
| 5.2507881576    | 6.8793251411   |
| 17.0259153486   | 17.2655861295  |
| 20.9489792661   | 25.4892718734  |
| 2.055688096     | 2.9374571166   |
| 11.6394183085   | 5.480654063    |
| 0.6796122213    | 0.8534287627   |
| 76.2656621639   | 30.1606566171  |
| 0.6933706435    | 0.3043888722   |
| 28.4635886123   | 15.1858795789  |
| 502.9935057407  | 293.0547043685 |
| 14.3075749779   | 4.2710854907   |
| 0.8450286868    | 1.5639950564   |
| 4.1580897818    | 6.5883770578   |
| 0.0349631216    | 0.1141948339   |
| 0.4747947735    | 0.0516917139   |

gene\_expression\_table

|                |                 |
|----------------|-----------------|
| 0.1135245164   | 0.0823973802    |
| 254.695402431  | 301.2096070868  |
| 1.6004980273   | 2.0702844375    |
| 0              | 0.0419685051    |
| 24.409415618   | 71.1871846019   |
| 0.0544029467   | 0.0296147063    |
| 14.7735735669  | 7.0008917809    |
| 0.0274772526   | 0.0124645633    |
| 1.7806770149   | 1.0683217272    |
| 14.1772364678  | 17.0590723176   |
| 24.469449037   | 33.2165012046   |
| 99.3726164678  | 151.1362744234  |
| 0.1706058475   | 0.3508450282    |
| 0.7060066708   | 4.0394561866    |
| 5.0853194201   | 8.6791580057    |
| 49.3746254653  | 54.4443504789   |
| 26.2704091154  | 15.5246894886   |
| 1.9684440784   | 1.6352807987    |
| 6.8190523955   | 6.4147622935    |
| 5.9042324148   | 3.4835175786    |
| 3.9046938304   | 3.3269529369    |
| 2.9405959139   | 3.8875074757    |
| 1.4114980294   | 2.5689879652    |
| 1.4251192968   | 3.4909910939    |
| 1.1776044056   | 1.7094372386    |
| 2.0693345992   | 1.5423835177    |
| 2.789914987    | 4.0242715092    |
| 0              | 0.017518863     |
| 1389.651541171 | 1638.6434412291 |
| 0.7851193126   | 0.9662648345    |
| 0.8564949101   | 1.654695903     |
| 2.8909071147   | 1.7779445824    |
| 0.0909727394   | 0.4456960535    |
| 5.0983418935   | 2.1197369756    |
| 2.6608407264   | 2.5358272756    |
| 8.6300033741   | 24.553224425    |
| 0.1117886043   | 0.2458961056    |
| 0.0410289041   | 0.0223344326    |
| 25.0527906851  | 37.3077296287   |
| 30.6068398083  | 24.0745155768   |
| 1.0932927827   | 1.4221604126    |
| 59.3730241126  | 38.118520307    |
| 0.8602326829   | 1.2292217974    |
| 17.6964626363  | 13.2532188969   |
| 5.1609780391   | 4.308620669     |
| 27.9669623426  | 13.9727615141   |
| 99.1085252984  | 49.9817904763   |
| 68.3687067692  | 122.9896101452  |
| 0.5833907502   | 1.5878685601    |

gene\_expression\_table

|                 |                 |
|-----------------|-----------------|
| 6.1838929689    | 4.5203991457    |
| 4.2575721127    | 4.000319728     |
| 0.7918804952    | 3.3110933976    |
| 2.2696870723    | 1.512280695     |
| 3.0194996725    | 4.0030833967    |
| 0.8842264118    | 0.6417815475    |
| 2.7283093507    | 9.5645487532    |
| 319.1766654478  | 80.2559018133   |
| 3.4716477913    | 5.5226807111    |
| 1.1925604411    | 1.2363068092    |
| 1.1264737082    | 1.3950425917    |
| 10.7840788223   | 10.0893817973   |
| 0.0931452288    | 0.1330990415    |
| 0.0636506484    | 0.051973157     |
| 0.022777964     | 0.001127        |
| 0               | 0.0934177442    |
| 1.642178897     | 3.5757361456    |
| 24.4054303143   | 10.2332742156   |
| 1.4928103336    | 1.8203493337    |
| 38.853102909    | 37.9136849821   |
| 2.6293364779    | 3.8252167617    |
| 73.8275162765   | 120.5659074203  |
| 222.0551641462  | 82.7218024811   |
| 16.959247791    | 14.4075436157   |
| 0.1308963944    | 0.142509129     |
| 0.7379210655    | 0.0945161417    |
| 11.5840352556   | 11.1558958021   |
| 2.7578025524    | 2.3071584727    |
| 0.0158469925    | 0.043132225     |
| 0.0596846689    | 0.006498        |
| 0.0403325527    | 0               |
| 0.1436551197    | 0.1975576043    |
| 2.1830937623    | 3.1126217182    |
| 0.4551457324    | 0               |
| 9.111248495     | 2.7759993681    |
| 8.9492425299    | 16.1014259842   |
| 2.3902384339    | 3.6637549046    |
| 0.7853295152    | 0.6946887913    |
| 1.7053197572    | 1.2108330002    |
| 0               | 0.009235        |
| 1294.5189115871 | 1381.9466230016 |
| 0.434196607     | 0.2009048206    |
| 0               | 0               |
| 5.0748219       | 18.7174988637   |
| 9.2807874091    | 5.4240074238    |
| 3.779183872     | 0.7228108402    |
| 7.3034714193    | 2.2302745046    |
| 0.2046178954    | 0               |
| 0.0747474579    | 0               |

gene\_expression\_table

|                |                 |
|----------------|-----------------|
| 3.2578001738   | 4.8393085467    |
| 14.8687330828  | 15.424264919    |
| 66.0221251063  | 26.7201491907   |
| 8.5641801702   | 6.2159789954    |
| 3.8893853337   | 3.0943983958    |
| 0.4471742944   | 0.638985708     |
| 18.9755663426  | 7.8830476977    |
| 6.42787821     | 5.7687372283    |
| 61.1854627818  | 29.0435527654   |
| 5.5683939154   | 5.6337501813    |
| 72.4321646379  | 73.4974686688   |
| 1.6732589345   | 5.2829457695    |
| 2.4861164942   | 1.3533386385    |
| 99.1107500008  | 48.3592164704   |
| 73.494841111   | 63.3109029117   |
| 178.9625033621 | 135.2177260568  |
| 10.9692474064  | 3.8737234864    |
| 9.9715902058   | 7.6458945433    |
| 146.1250738096 | 81.733721688    |
| 43.830728726   | 36.8636931526   |
| 12.5801318915  | 10.1878163074   |
| 52.2626849617  | 32.9853701194   |
| 1.9341557116   | 4.047286664     |
| 1.7164989852   | 2.7284211591    |
| 41.1274494614  | 23.9224618901   |
| 1.3432534201   | 1.2339192595    |
| 0.5085930683   | 1.5591418178    |
| 0.5735466276   | 1.0785608408    |
| 0.2639270583   | 0.7183546841    |
| 0.3315931982   | 0.7220223002    |
| 3.751512976    | 3.1751515629    |
| 0.2883221577   | 1.0044839454    |
| 44.7628903154  | 29.0196698034   |
| 1858.529502719 | 1518.2136814105 |
| 4.7434352462   | 5.5131949531    |
| 10.7061023726  | 9.6259527668    |
| 32.0340449009  | 78.6477569585   |
| 0              | 0.5164510276    |
| 29.1665030364  | 15.7737124984   |
| 51.6460257208  | 16.9393218053   |
| 0.4405507037   | 0.3797110717    |
| 5.9364869398   | 5.3305921466    |
| 3.2987238936   | 2.3585160827    |
| 6.1963793757   | 6.6336684703    |
| 10.6922792656  | 11.1826979427   |
| 0.3131384577   | 0.0852297901    |
| 72.8922025164  | 47.2675994199   |
| 1.2682451291   | 2.0957964664    |
| 0.0644723161   | 0.0467947375    |

gene\_expression\_table

|                |                |
|----------------|----------------|
| 126.2090834189 | 204.3232471689 |
| 0.0844079597   | 0.1225285069   |
| 5.3865331826   | 4.517180842    |
| 22.835256574   | 13.3687218709  |
| 3.7013039471   | 3.7328439528   |
| 0.0603052226   | 0              |
| 6.1996248278   | 3.787296265    |
| 0.2080366224   | 0.1887441719   |
| 0.30375461     | 1.2897409432   |
| 0.7120085582   | 0.2491636556   |
| 1.4082680399   | 1.3645527593   |
| 21.5430650306  | 26.8986389172  |
| 27.8539942826  | 35.3316220873  |
| 989.3400467075 | 302.5166777887 |
| 0.8293109346   | 1.7035564302   |
| 0.0256924708   | 0.0209788722   |
| 0.4914308307   | 0.6687863711   |
| 3.1441422976   | 1.9623923244   |
| 1.0375875502   | 0.8129979084   |
| 26.9642546898  | 15.9111917364  |
| 14.3897576073  | 15.4569301523  |
| 0.0519603545   | 0.7919816934   |
| 128.6381927112 | 136.6538372146 |
| 22.1968183842  | 18.3644557374  |
| 5.8656828223   | 2.7622280726   |
| 41.8466848067  | 41.7041879334  |
| 0              | 1.5606108709   |
| 2.1937783095   | 1.6669067679   |
| 0.0684393314   | 0.1713754454   |
| 0.9229684911   | 1.0736044775   |
| 3.2438424636   | 1.4661600579   |
| 7.6280310361   | 10.5905552781  |
| 0.4822482952   | 0.0656289893   |
| 8.4278564031   | 6.4228853438   |
| 6.1029304988   | 6.2706186654   |
| 0.00605        | 0.0120749431   |
| 40.8044385675  | 21.3076718787  |
| 8.0638867073   | 10.2425055809  |
| 93.8004524112  | 77.4151756549  |
| 1.5345245276   | 1.3000191684   |
| 0.1644439402   | 0.1342746842   |
| 11.4631499482  | 38.9067932921  |
| 136.0669003724 | 120.2427860092 |
| 0              | 0.0419685051   |
| 0.3483609968   | 0.2585908209   |
| 1.7768729899   | 3.0968794383   |
| 4.1682723046   | 3.6902977825   |
| 0.4717255792   | 0.3274384465   |
| 4.075335132    | 4.3404325586   |



gene\_expression\_table

|                 |                 |
|-----------------|-----------------|
| 9.1347468583    | 2.4862885357    |
| 0.1406508689    | 0.1461685825    |
| 0.0647102311    | 0.0704511283    |
| 0.9136213229    | 0.9089272105    |
| 16.537045771    | 12.7088207757   |
| 1388.2177599612 | 346.2970402066  |
| 33.7531128938   | 24.5964456521   |
| 0.2711015764    | 2.0365549644    |
| 2.170490393     | 6.8594083796    |
| 4.7782962426    | 7.8679422399    |
| 6340.8461635636 | 8856.7690069158 |
| 0               | 0.2375349161    |
| 8.3203432049    | 5.7187493972    |
| 3.2769351119    | 2.3403816442    |
| 2.4521295542    | 9.3438629123    |
| 1.2989447136    | 0.4419322451    |
| 126.0998014077  | 64.710797954    |
| 29.7653064029   | 10.7225718485   |
| 53.9364080994   | 37.7495254971   |
| 11.8576014123   | 10.6740121101   |
| 150.0895151002  | 59.3824262037   |
| 29.475882431    | 12.8494027282   |
| 0.1058922321    | 0               |
| 35.4115090747   | 22.8385281395   |
| 21.5963097985   | 55.8416400405   |
| 473.8889460529  | 692.9122070259  |
| 221.0988459725  | 132.3150893605  |
| 157.5974446998  | 92.964075555    |
| 222.5442625502  | 135.8386517063  |
| 26.3211445194   | 9.6428918067    |
| 57.6287098902   | 43.9372944957   |
| 161.7827868823  | 115.1796268241  |
| 0.2772816492    | 0               |
| 0               | 0.1320447699    |
| 1.3221737877    | 0.6782132743    |
| 100.5361088151  | 34.9498583074   |
| 5.4952807564    | 1.9699481681    |
| 26.8299094428   | 11.9087650256   |
| 241.4664589456  | 212.4543664326  |
| 14.3980626268   | 23.6610044772   |
| 29.8406217983   | 13.8551730891   |
| 73.7163379149   | 25.6474127682   |
| 102.1791834966  | 47.2171159033   |
| 2.5492817235    | 0.7401190228    |
| 120.2560065277  | 60.0415983897   |
| 15.5977577227   | 12.0868636029   |
| 10.6840353262   | 11.5054572309   |
| 4.826682222     | 2.3355070938    |
| 4.4218711263    | 2.6430716621    |

gene\_expression\_table

|                |               |
|----------------|---------------|
| 18.118435721   | 13.2663279431 |
| 12.0323215262  | 11.134823987  |
| 6.3086572736   | 8.2379627227  |
| 18.2408174898  | 31.7610541372 |
| 1.9448622476   | 1.3749380392  |
| 18.5092731949  | 12.9616789732 |
| 0.0673502252   | 0             |
| 0.3577995028   | 0.4524684791  |
| 4.5945206026   | 0             |
| 3.6255402828   | 5.4508777266  |
| 18.676327399   | 20.8898016818 |
| 15.1565881884  | 7.2244729205  |
| 4.4270334239   | 2.7617803305  |
| 0.005801       | 0             |
| 0.2171365903   | 0.2256548279  |
| 28.4722246815  | 26.2696566736 |
| 100.6739353656 | 55.1990499816 |
| 9.7897087234   | 7.6149481346  |
| 0.7653230219   | 0.3661118973  |
| 2.7868115489   | 1.3990337485  |
| 6.4352815549   | 4.1884893646  |
| 4.3953736702   | 2.3388913873  |
| 2.5259141419   | 1.6397549231  |
| 1.7258668263   | 1.0821976549  |
| 117.9998405747 | 92.8190960575 |
| 72.216249813   | 95.4809754658 |
| 0.7242749855   | 1.6263441258  |
| 0.0438724712   | 0.0316441171  |
| 13.3564172042  | 14.1849525495 |
| 1.14360731     | 0.4110155713  |
| 0.0169701754   | 0             |
| 0              | 0.0130116644  |
| 9.8751730604   | 6.4086744222  |
| 0.0744430666   | 0.1350790529  |
| 26.1410780609  | 16.7763700392 |
| 4.0469021941   | 3.5308856249  |
| 2.1150523199   | 3.2931901996  |
| 14.0225500073  | 21.8290249174 |
| 5.3771804553   | 1.7228155929  |
| 4.4648756227   | 3.9050908612  |
| 1.5323990941   | 0             |
| 39.1036951461  | 36.9528423838 |
| 0              | 0.1344706673  |
| 10.0934582525  | 6.495388482   |
| 0.090918867    | 0.0553150999  |
| 56.7333205782  | 84.9757719249 |
| 3.6141917308   | 3.0981148173  |
| 25.8042449186  | 17.1734089491 |
| 0.226005331    | 0.1230279223  |

gene\_expression\_table

|               |                |
|---------------|----------------|
| 80.2950430378 | 47.2246427677  |
| 1.8273208103  | 1.6223370545   |
| 1.080541858   | 0.2823370281   |
| 0.4723915276  | 0.2463229592   |
| 7.6160477408  | 7.1548145834   |
| 1.9994476064  | 2.0372920377   |
| 3.4158486051  | 2.8384069919   |
| 17.76466146   | 9.3239440174   |
| 0.7237348132  | 1.0877030824   |
| 0.4546533406  | 0.1790385088   |
| 5.7227011193  | 5.2252062963   |
| 14.2654350316 | 26.3483478425  |
| 1.3567203497  | 1.1685795104   |
| 0.009914      | 0              |
| 4.6275386179  | 2.9465348287   |
| 2.7728570899  | 2.5077274704   |
| 190.309597248 | 147.2397599673 |
| 2.5762519946  | 2.3479653844   |
| 3.079685999   | 4.6861488261   |
| 0.1907672945  | 0              |
| 0.9753373979  | 0.2654666001   |
| 2.0506185389  | 1.223311371    |
| 0             | 0.8361229046   |
| 0.4930350804  | 0.1865068009   |
| 1.2003968499  | 0.7247831493   |
| 6.7325078267  | 11.1836057873  |
| 8.0939959603  | 7.1749660286   |
| 1.1641957928  | 1.6733580894   |
| 0             | 0.008952       |
| 0             | 0.006469       |
| 3.4757975144  | 4.4921897259   |
| 0.7271926939  | 0.7382789612   |
| 2.9349087421  | 2.8331527214   |
| 4.9544088835  | 2.9185390574   |
| 0.6718566651  | 0.4331023632   |
| 0.7897697087  | 0.9673151664   |
| 0.3221510159  | 0.3479028076   |
| 0.1020377466  | 0              |
| 0.020628276   | 0              |
| 15.0940664185 | 2.4166421503   |
| 2.1956978928  | 1.1299602149   |
| 2.4509302932  | 1.5552330888   |
| 12.0564654642 | 10.0969837242  |
| 0.0660773912  | 0.0581050444   |
| 0.0131994984  | 0              |
| 0.9413162816  | 0.8081689687   |
| 5.459831917   | 3.0690223935   |
| 0.5635917146  | 1.300230407    |
| 41.8798422824 | 38.3542397784  |

gene\_expression\_table

|                |                 |
|----------------|-----------------|
| 0              | 0.0538242825    |
| 3.1566129918   | 1.0811958409    |
| 5.0447357683   | 2.4833558069    |
| 24.9495639267  | 18.5671236619   |
| 3.544535201    | 2.8500598087    |
| 12.7044409427  | 11.4365852561   |
| 6.7324908045   | 8.3896578209    |
| 0.008722       | 0.0486658966    |
| 9.2919466756   | 7.4156686774    |
| 0.1745855683   | 0.3844684203    |
| 1.953250042    | 2.4660675549    |
| 0.058292986    | 0.1363312868    |
| 0.3334497839   | 0.8672441775    |
| 2.2147104739   | 2.5039311199    |
| 0.8056716637   | 0               |
| 4.4909793407   | 6.7793736293    |
| 236.8766959181 | 197.2247040236  |
| 15.9562061224  | 8.5427222684    |
| 2.1619422288   | 3.6102988837    |
| 0.2729686407   | 0.6844274379    |
| 0              | 0               |
| 1.7184270817   | 1.2782719378    |
| 0.3091337703   | 0.406930656     |
| 3.9529563607   | 6.5218905148    |
| 37.1965555154  | 34.7840987987   |
| 48.3498368253  | 41.9140922673   |
| 0.0109100123   | 0.0103931763    |
| 0.0681605172   | 0.1201454979    |
| 2.3866672692   | 0.8352016764    |
| 1.0465335894   | 1.5437627834    |
| 8.8009522909   | 0               |
| 21.6194222876  | 32.3891164488   |
| 884.4716471475 | 1412.8624721818 |
| 0.0979955186   | 0               |
| 15.6550674348  | 12.7829534718   |
| 0.005652       | 0.0353834486    |
| 0.7757999319   | 1.3106274362    |
| 19.286620863   | 18.382577227    |
| 37.4760754905  | 39.7472974406   |
| 13.9575330533  | 10.020854626    |
| 0.0347311421   | 0               |
| 7.7794547037   | 4.9797505672    |
| 3.4541178068   | 0.5412922604    |
| 8.4048806398   | 6.9569146506    |
| 10.5978659776  | 9.2601732198    |
| 0.0008799      | 0.001916        |
| 7.0873311536   | 3.3102529405    |
| 1.1174014635   | 1.139118165     |
| 0.094790704    | 0               |

gene\_expression\_table

|                |               |
|----------------|---------------|
| 2.7479126413   | 2.1131843494  |
| 1.9423308372   | 0.7091809299  |
| 0              | 0.0197392494  |
| 0.3789791146   | 0.271375156   |
| 11.2694947506  | 7.7540024434  |
| 0.3391658276   | 0.3616888872  |
| 0.6287094222   | 0.1711216581  |
| 1.2803714244   | 0.7379799505  |
| 5.901475672    | 8.8583486855  |
| 49.9633074398  | 40.9179855529 |
| 0.4589215832   | 0.4849405582  |
| 0.2807449614   | 0.1491871932  |
| 0.2680594739   | 0.3062725978  |
| 0              | 2.7639129794  |
| 2.6853390154   | 1.2727002207  |
| 0.008493       | 0             |
| 33.5360548384  | 12.7336835795 |
| 16.9927440307  | 35.1796838036 |
| 25.4141357004  | 22.7938221314 |
| 0              | 0.0103107977  |
| 1.4063454749   | 1.3828107731  |
| 0.7635752214   | 0.8599834344  |
| 0.1675123735   | 0.0364747136  |
| 3.0137043281   | 1.9312633794  |
| 0.2779199082   | 0.3911877071  |
| 1.4247638023   | 0.7289307164  |
| 4.1513140272   | 4.8093244715  |
| 19.6034257538  | 14.5548853469 |
| 0              | 0             |
| 0              | 0             |
| 107.0606186852 | 29.5466080772 |
| 1.0094133847   | 1.1600191454  |
| 0.1048423315   | 0.1712154421  |
| 1.945597364    | 0.702230977   |
| 7.8220745647   | 9.6496522812  |
| 0.0653467068   | 0.0550792802  |
| 0.004696       | 0             |
| 0.0309882843   | 0.0393603837  |
| 0.3074269294   | 0.5389252142  |
| 2.3183422077   | 1.7057927631  |
| 0              | 0.005467      |
| 0.0282367918   | 0.007685      |
| 34.8066015323  | 26.230468193  |
| 1.0596168755   | 1.4198435689  |
| 12.6149077259  | 6.3404193114  |
| 0              | 0.0679559639  |
| 0.2495803273   | 0.1542207897  |
| 14.9240456453  | 20.6318214506 |
| 1.8068052635   | 1.7863000005  |

gene\_expression\_table

|                |                |
|----------------|----------------|
| 0              | 0.0124029666   |
| 1.537217707    | 1.2905832409   |
| 1.2291416098   | 0.446062453    |
| 0.4757207615   | 0.5643066457   |
| 18.3355713175  | 19.4038376699  |
| 2.444624711    | 4.5708446288   |
| 0.2620858179   | 0.2705145679   |
| 0.2062221125   | 2.8064689809   |
| 0.7090352044   | 0.9391920565   |
| 2.2673722406   | 2.7138461133   |
| 0              | 0.0712722984   |
| 0.4859232042   | 0.3526885669   |
| 43.1788467199  | 26.831028824   |
| 6.9120259474   | 16.8859046453  |
| 33.6478345928  | 25.6412028106  |
| 13.8075106795  | 17.3505629285  |
| 6.4171585336   | 6.2549020581   |
| 0.6293083058   | 1.1418977452   |
| 0              | 0.1652782386   |
| 0.2840564843   | 0.1546285609   |
| 1.2876512701   | 2.0590227362   |
| 0              | 0.6132164771   |
| 0.0390522314   | 0.4251682797   |
| 0.4753310224   | 0.1293752405   |
| 4.3269666804   | 0.8479515885   |
| 90.1055987636  | 48.3869138888  |
| 81.5569715513  | 48.9905605435  |
| 0.2701073285   | 0.2100503134   |
| 6.6835513481   | 2.6237365149   |
| 58.3118232674  | 22.3467456809  |
| 9.0132371616   | 8.9133518945   |
| 0.7408728021   | 4.3210757692   |
| 1.4695511958   | 2.8944104255   |
| 117.7816553621 | 92.4535512312  |
| 1.9688011224   | 1.0230184556   |
| 28.1040458897  | 144.6544471295 |
| 9.921768801    | 61.4760785981  |
| 43.0550479385  | 362.4618253725 |
| 100.8832668751 | 212.9302101039 |
| 2.6649237752   | 2.4933457677   |
| 7.5499268169   | 4.7263468378   |
| 16.4522129821  | 22.8518109203  |
| 82.9661572986  | 61.9636971608  |
| 19.4841707036  | 28.4055760287  |
| 92.8927586337  | 22.2255970799  |
| 68.1747995716  | 61.2855084882  |
| 3.4699724504   | 2.6309803764   |
| 101.1853564433 | 54.8196889701  |
| 383.6617575038 | 302.5524105854 |

gene\_expression\_table

|                 |                 |
|-----------------|-----------------|
| 581.5453491925  | 270.5736342752  |
| 3.5676642051    | 3.3084248013    |
| 1.219373597     | 1.8016787422    |
| 9.946506898     | 4.4277171527    |
| 11.6264824598   | 2.4643794586    |
| 140.9245220462  | 58.6522820976   |
| 35.2635529068   | 17.6819628028   |
| 230.9216826512  | 165.5741994537  |
| 175.1691823731  | 71.9775189971   |
| 11.2593668607   | 9.1814886079    |
| 24.9489464289   | 17.8699618196   |
| 71.7634802153   | 53.8089700705   |
| 129.6893675299  | 153.5791169594  |
| 4013.8304684647 | 4001.6944083064 |
| 12.4414992231   | 9.7024908129    |
| 24.3490785651   | 7.9347431812    |
| 1.7819755994    | 9.0940646178    |
| 6.2257113491    | 8.387821712     |
| 0.2575000534    | 1.4017234205    |
| 0.0924312763    | 0.4025260052    |
| 37.0097384373   | 13.4738177545   |
| 46.0325792971   | 7.795101456     |
| 448.6458360529  | 196.0256524159  |
| 41.3558846454   | 44.3238211459   |
| 3.6224419066    | 10.4662757862   |
| 1.9198007328    | 1.147852613     |
| 36.4628100085   | 24.5161388593   |
| 106.0139307905  | 41.240259592    |
| 0.1302804876    | 0               |
| 1.8861130361    | 1.3597124657    |
| 18.2207780972   | 18.8824595983   |
| 6.2573891244    | 9.6321546461    |
| 23.6797602424   | 14.0961434793   |
| 7.8496717878    | 3.8232423229    |
| 32.9874184279   | 41.5516200276   |
| 11.2834486081   | 7.5335775145    |
| 1.7327213716    | 1.7195013271    |
| 119.6149147876  | 69.5952263491   |
| 2.3946658422    | 3.331311564     |
| 5.6872714486    | 0.3869893173    |
| 0.1228710987    | 0               |
| 3446.8729424923 | 3029.2630484049 |
| 1.1147082167    | 1.0619015567    |
| 7.9556212425    | 4.8292090188    |
| 348.3423702709  | 175.0926211838  |
| 12.8484490664   | 15.6936916123   |
| 0.2822277945    | 0.3212328414    |
| 2040.9690055147 | 1424.2422020272 |
| 32.3635836392   | 25.4517623497   |

gene\_expression\_table

|                 |                 |
|-----------------|-----------------|
| 303.0769597505  | 450.1474239778  |
| 57.6824195161   | 113.9159714174  |
| 0.8240055485    | 2.3324829944    |
| 2.1579304207    | 4.0275008939    |
| 66.4468779272   | 20.8532572683   |
| 15.611553177    | 7.7584312249    |
| 52.635298168    | 28.2658262352   |
| 2.4334991995    | 2.8192247503    |
| 1.3807680026    | 2.4052249433    |
| 0.0940843439    | 0.2560780603    |
| 0.592791266     | 0.2904218664    |
| 1.6112484196    | 1.0232795629    |
| 1.4206180159    | 4.0277369172    |
| 0.3577436839    | 0.4696690223    |
| 98.6321659545   | 45.0984099107   |
| 1.7065850189    | 1.0451183131    |
| 13.8829457707   | 38.0342777883   |
| 322.5699132288  | 123.885106847   |
| 34.6290252769   | 17.8114041839   |
| 0.0145321918    | 0.0237321663    |
| 5.6898647054    | 4.5963694029    |
| 16.6326737525   | 37.0566237421   |
| 12.0601625778   | 5.8859086681    |
| 2.8841888298    | 1.663487024     |
| 100.4610012525  | 26.3800822216   |
| 117.2664292755  | 176.8741412155  |
| 0.1313375631    | 0.2144841554    |
| 72.0930730668   | 75.8753359888   |
| 12.8040899398   | 8.2437235102    |
| 1.2868996579    | 0.7982838005    |
| 0.1238488144    | 0.1752872017    |
| 10.6899880272   | 4.8755340627    |
| 153.773418266   | 47.1149027188   |
| 1.1472813147    | 0.2161842689    |
| 0.2751510431    | 0.079295722     |
| 0.0221676931    | 0               |
| 29.3115982916   | 9.9442602571    |
| 2294.2983787397 | 3433.6647303672 |
| 5.659719786     | 4.1439228543    |
| 30.9742437918   | 23.7654195932   |
| 41.4470151431   | 37.3947969308   |
| 0.0540837472    | 0               |
| 38.7619412939   | 27.4372510803   |
| 0.0498682474    | 0.1900234295    |
| 0               | 0.6864144171    |
| 5.218831798     | 2.6584713239    |
| 0               | 0.1121598335    |
| 0               | 0.0892449264    |
| 0               | 0.5405068187    |



gene\_expression\_table

|                  |                 |
|------------------|-----------------|
| 5.9723218896     | 6.2946523256    |
| 12.3005883403    | 8.6477220811    |
| 14.5133164651    | 7.7985058858    |
| 70.0716169612    | 63.2542114325   |
| 12.3348914816    | 13.0667700214   |
| 0                | 0.2846955543    |
| 0                | 1.0400376095    |
| 226.90391534     | 264.5629744252  |
| 0.5139408988     | 0.2355941855    |
| 17.2257340845    | 10.838784465    |
| 174.5256824003   | 124.0448377097  |
| 4.7393928739     | 2.8980021936    |
| 44.6148986819    | 13.4097234824   |
| 4.6558041128     | 5.4309139923    |
| 91.9711107832    | 115.969266865   |
| 0                | 0.0478722994    |
| 11.3986109102    | 2.9085612677    |
| 2.2982813502     | 5.0074603661    |
| 0.007776         | 0.0126993338    |
| 8.3738286447     | 6.0406302454    |
| 8.1265507331     | 9.0617699221    |
| 0                | 0               |
| 254.2437095439   | 69.1998618155   |
| 2.1696511777     | 6.4958742991    |
| 12223.4298033823 | 14433.804886826 |
| 28.6022914707    | 12.3678643275   |
| 0.0721264931     | 0               |
| 2.9129158859     | 0               |
| 21.8945506612    | 7.5077068933    |
| 0.5045600051     | 0.1997538372    |
| 0                | 0               |
| 0.4462970172     | 0               |
| 137.6924225466   | 89.6570822825   |
| 1.3608677986     | 0.9524570781    |
| 27.0411154158    | 23.6413100079   |
| 4.5523968352     | 2.2386134706    |
| 1.5223822203     | 2.359419421     |
| 0.9702927834     | 0.6278450688    |
| 6.2613287754     | 3.9517768373    |
| 0.0194058287     | 0               |
| 194.5332229167   | 218.9384403924  |
| 128.4378832472   | 108.3295433182  |
| 0                | 0               |
| 26.3957085028    | 24.560500547    |
| 696.8170499094   | 340.0362881868  |
| 7.8157596098     | 8.1172815459    |
| 14.1209995705    | 16.2753205784   |
| 0                | 1.3300300485    |
| 7.6362473884     | 8.27449668      |

gene\_expression\_table

|                  |                  |
|------------------|------------------|
| 3.8415038385     | 26.7203171631    |
| 47.3670088674    | 123.0192106045   |
| 16.4283241398    | 3.8163958931     |
| 2.5783058227     | 0.6282434866     |
| 27.1600594605    | 21.5457017761    |
| 1.243565475      | 6.382628369      |
| 1.7816709436     | 2.051643248      |
| 9.8507793229     | 7.276033342      |
| 0.7358354232     | 0.2381697793     |
| 0                | 0.4780836307     |
| 14.4954903338    | 10.459102928     |
| 1.6635528917     | 4.1033602202     |
| 0                | 7.081844694      |
| 3.7456336904     | 6.0274741792     |
| 1.1620777756     | 0.4111814924     |
| 0.0965359407     | 0.1576504788     |
| 0                | 0.2404467631     |
| 1.6763611527     | 1.1406767971     |
| 0.4196411279     | 0.399761624      |
| 434.0099024233   | 311.5852901173   |
| 0.5895471898     | 1.9255501332     |
| 5.0781094613     | 6.3260217714     |
| 398.1090014038   | 166.0916313233   |
| 710.7758116529   | 373.5108849164   |
| 643.5501357868   | 373.0410245851   |
| 1.5031719666     | 1.554702422      |
| 0                | 0                |
| 3.3151483828     | 0.9775074787     |
| 0                | 0                |
| 0.9399026499     | 1.5184273369     |
| 0.4669628899     | 0.6354880423     |
| 29.0951966112    | 13.0558279399    |
| 0.8120493064     | 0                |
| 61.1338200059    | 59.9406083605    |
| 18.8895012207    | 8.2261283968     |
| 13.2855937734    | 7.7678388865     |
| 37.0585425071    | 29.4931683907    |
| 0                | 0                |
| 1.4859408973     | 0.5716117513     |
| 26.5147350281    | 17.2834522712    |
| 52.1681700894    | 39.0403928938    |
| 35832.7583774279 | 72622.9416273127 |
| 1.8316759924     | 1.6064201846     |
| 0.513291647      | 0.2794146695     |
| 43.2368022132    | 23.0493623146    |
| 1.5935403302     | 1.000912176      |
| 85.5765563218    | 34.6135811439    |
| 30.8128242413    | 15.8186490468    |
| 8.5063315645     | 3.6724606527     |

gene\_expression\_table

|                 |                |
|-----------------|----------------|
| 16.1745646665   | 22.7852272127  |
| 1.0183991727    | 3.2254501418   |
| 2.4207195934    | 4.3758889293   |
| 0.3263477723    | 3.5530036577   |
| 0               | 0.3083414211   |
| 4.2454798574    | 1.1412656962   |
| 0               | 0.3138754293   |
| 0.2684317833    | 1.0520864796   |
| 4.1807696651    | 2.6716353164   |
| 0               | 0.1080598443   |
| 0.0172530905    | 0              |
| 1.7268372383    | 1.4251893749   |
| 2.4180298029    | 4.8126307229   |
| 0.3507410535    | 0.2545718303   |
| 0.7176588031    | 0.5469291345   |
| 8.7157531946    | 13.8427598701  |
| 1276.4652064891 | 621.5372940948 |
| 84.0524765049   | 32.0717764128  |
| 0               | 0              |
| 0.1165166354    | 0              |
| 5.6043619686    | 4.4958893495   |
| 32.3290632278   | 4.1740269876   |
| 88.6532285      | 26.6461499438  |
| 152.357484724   | 94.4852940116  |
| 42.891536188    | 27.5471862307  |
| 3.7423864461    | 5.9369824534   |
| 85.7621148422   | 50.434309893   |
| 2.8679711172    | 3.7396292571   |
| 51.3717380851   | 78.584184238   |
| 0.1432659611    | 2.2616532542   |
| 2.6552560707    | 0.1204509337   |
| 29.9059364288   | 9.9650582519   |
| 5.3129499732    | 4.4368201985   |
| 141.0037823094  | 104.8313758533 |
| 7.2489286113    | 6.0048067809   |
| 258.0574331594  | 179.24669778   |
| 0.2189522579    | 0.8668256148   |
| 57.3653543157   | 47.2557926895  |
| 4.7473498818    | 10.1567437615  |
| 29.7431953183   | 12.4750028172  |
| 116.1621805412  | 200.3922283799 |
| 0.5029031428    | 0.0391085141   |
| 3.2977126624    | 4.5014443017   |
| 45.1088754066   | 74.0864624334  |
| 1.2344982444    | 1.3920199044   |
| 4.2045888228    | 4.1299072501   |
| 79.3884625698   | 46.8621159633  |
| 7.0628652502    | 12.7927811169  |
| 0.1634336869    | 0.0667248871   |

gene\_expression\_table

|                |                |
|----------------|----------------|
| 306.1822712592 | 310.0267318187 |
| 150.7088866473 | 123.0594945582 |
| 9.6847060348   | 5.8483069056   |
| 17.4139036283  | 19.8346275388  |
| 33.9563241528  | 21.5924123279  |
| 2.6539803103   | 5.2456976618   |
| 0.7490473637   | 1.8394068961   |
| 1.1592759548   | 5.7352373645   |
| 20.8363321274  | 14.9824134039  |
| 82.6408210234  | 113.2203854032 |
| 0.6108599733   | 1.1305911779   |
| 7.9576580048   | 17.6049556978  |
| 46.3974951366  | 16.0725540964  |
| 2.5058095693   | 6.3388611629   |
| 0              | 0.0679492454   |
| 0.0693204123   | 0.0754703109   |
| 6.8973369051   | 9.1860702511   |
| 0.0354651707   | 0.038611534    |
| 0.4676824545   | 0.2036695345   |
| 13.3457814554  | 11.9193441879  |
| 43.6553634202  | 36.1548237236  |
| 1.677489244    | 1.3566882068   |
| 0              | 0.0322763702   |
| 0              | 0.0515335783   |
| 0.9351526941   | 1.8218929174   |
| 0              | 0              |
| 0.3869436172   | 0.5141997592   |
| 3.9702048606   | 6.5950470758   |
| 0              | 0.4105425574   |
| 0.0500425787   | 0              |
| 0              | 0.1228932925   |
| 1.2374084669   | 0.8840918801   |
| 0              | 0.0246172178   |
| 5.5125271168   | 2.2378780165   |
| 1.1249397033   | 0.2370466398   |
| 0              | 0              |
| 1.3265881708   | 0.8096716088   |
| 0.5154007811   | 0.82518469     |
| 5.9610208028   | 4.7174226245   |
| 49.7264488821  | 96.6911996498  |
| 2.2140612628   | 0.5074707628   |
| 523.7598109198 | 739.3184213064 |
| 31.2189553319  | 58.4857150707  |
| 11.72710387    | 8.0334814325   |
| 35.3359257586  | 30.1808916599  |
| 264.843227101  | 90.0709091144  |
| 36.4248944561  | 14.7521813982  |
| 7.2711708536   | 8.7670588995   |
| 239.8612996973 | 144.7629862546 |

gene\_expression\_table

|                 |                 |
|-----------------|-----------------|
| 73.7803659054   | 61.5382187636   |
| 32.3038980256   | 34.4782616955   |
| 0.1057219873    | 0.1151013243    |
| 1.8979291161    | 4.9842692074    |
| 137.0406225943  | 109.630008092   |
| 11.7241199705   | 5.3527494358    |
| 21.0715790861   | 25.1404828663   |
| 0.4415418708    | 0.5341268205    |
| 166.5702185474  | 156.558544783   |
| 1600.8109979454 | 2495.5351993421 |
| 62.6180934337   | 62.7604744188   |
| 492.9702667086  | 175.3902019862  |
| 0.204856935     | 0.3345468397    |
| 3.7996821059    | 1.9463930925    |
| 234.2060490095  | 141.4884630071  |
| 24.4163465223   | 6.3743729369    |
| 13.2925342356   | 5.1617686226    |
| 102.0998921373  | 109.7978808987  |
| 880.380911973   | 877.8810400327  |
| 0.0210415717    | 0.106905478     |
| 2.8022511275    | 1.8704667723    |
| 40.6200482486   | 25.9141738336   |
| 169.0817528804  | 112.5387451794  |
| 0.4856362495    | 0.9485866679    |
| 0               | 0               |
| 0.5752328974    | 1.0839216306    |
| 2.4242977373    | 1.6206683351    |
| 0.4264301073    | 1.031692677     |
| 1.7657393455    | 1.0252748975    |
| 1.6016128142    | 2.5408245011    |
| 0               | 0               |
| 26.775555831    | 16.7117993007   |
| 5.1224207303    | 5.0191798507    |
| 0.1908826593    | 0.3117257926    |
| 13.6505866606   | 5.7160098765    |
| 25.2337206925   | 35.4064040479   |
| 89.1742237916   | 60.519523308    |
| 7.0491877396    | 7.919295312     |
| 38.3368118369   | 51.4767908811   |
| 84.282934523    | 30.5146158085   |
| 1.2293330947    | 1.100458795     |
| 12.1856849238   | 5.481103658     |
| 50.7975543554   | 40.5842774825   |
| 2.9179611498    | 2.5174910091    |
| 307.2264036548  | 75.029488841    |
| 0.0673179064    | 0.1465802974    |
| 3.7898496258    | 1.5395797363    |
| 3.2550443505    | 1.9152273857    |
| 3.3277578059    | 1.0868959428    |

gene\_expression\_table

|                |                |
|----------------|----------------|
| 0.1112792404   | 0              |
| 0              | 0.0751139921   |
| 25.4629638939  | 19.7333810023  |
| 0.0254454816   | 0.0831087847   |
| 0              | 0              |
| 10.8833510868  | 10.5622674666  |
| 15.2531230949  | 5.2739277002   |
| 3.3120198038   | 2.7117181522   |
| 8.284025618    | 2.4359243214   |
| 61.5132785004  | 52.7713792264  |
| 0.2906478503   | 0.158216627    |
| 0.2400459077   | 0.0522684118   |
| 0              | 0              |
| 0.0815553227   | 0.0887906658   |
| 0              | 0.0443575116   |
| 24.6001445375  | 10.0354062353  |
| 12.6510447054  | 9.7822495495   |
| 11.4438151053  | 10.3359001142  |
| 0.0865393336   | 1.7901200202   |
| 576.7405376803 | 212.0563872709 |
| 14.9296184779  | 21.2495243724  |
| 0.5484207548   | 2.089762485    |
| 1.2704782582   | 1.2066136616   |
| 0              | 0.1002703413   |
| 15.241179382   | 4.4797422549   |
| 7.881237588    | 12.6841247011  |
| 17.639975712   | 13.8702354092  |
| 7.2448740104   | 5.6309421623   |
| 47.0123416463  | 35.6074367712  |
| 3.3193080657   | 3.511122694    |
| 1.3039854182   | 0.1629130753   |
| 6.5644250294   | 4.8431938184   |
| 84.3816963517  | 8.7674651324   |
| 0.1336127283   | 0.136909598    |
| 9.7568271874   | 4.6667551244   |
| 4.5141670263   | 3.0320893724   |
| 23.4074539449  | 29.2635134594  |
| 20.931270915   | 33.4227378562  |
| 82.245264477   | 24.6835807686  |
| 0              | 0.1162853661   |
| 91.1777205109  | 56.8536351198  |
| 38.9164009322  | 16.8903234861  |
| 5.8437052573   | 5.6552366427   |
| 241.3392300877 | 120.3089107761 |
| 25.4421870302  | 17.63441554    |
| 4.2585967315   | 2.7127911152   |
| 50.5029704638  | 33.3300167124  |
| 488.4127986121 | 833.1208839507 |
| 14.6146150663  | 15.0369391395  |

gene\_expression\_table

|                |                 |
|----------------|-----------------|
| 0.0789247032   | 0.1288899984    |
| 3.064364162    | 7.8508421985    |
| 29.2715961982  | 15.2826560062   |
| 0.0314495656   | 0.0684793531    |
| 167.3494425228 | 213.1923854309  |
| 0.0120912605   | 0.0394918825    |
| 12.6279629171  | 5.3255691597    |
| 2.755857588    | 2.8461254435    |
| 0.2805870228   | 0               |
| 0              | 0.3394374889    |
| 7.3636612509   | 9.0743926995    |
| 1751.438717975 | 2737.7737198927 |
| 0              | 0.0963323841    |
| 10.6451662745  | 2.0360061431    |
| 0.0220022003   | 0.0479083387    |
| 23.6856374724  | 14.4830848969   |
| 3.8896311201   | 1.630934646     |
| 2.3606885234   | 2.0603455059    |
| 12.851739238   | 12.3419178912   |
| 830.3350868832 | 265.0836744162  |
| 47.3210772682  | 5.0541047192    |
| 0.8688234666   | 1.5765047884    |
| 0.0522934999   | 0               |
| 507.0450210005 | 131.2964265572  |
| 94.6570924809  | 63.9196292278   |
| 9.668806673    | 24.4840782196   |
| 112.9165454225 | 28.4569819291   |
| 0.161793821    | 0.9688122537    |
| 20.4532142857  | 6.145323923     |
| 90.053308132   | 28.0957803802   |
| 4.2235685824   | 3.6541118218    |
| 4.6094306159   | 3.763774084     |
| 2.1719839353   | 2.8573166178    |
| 952.0396890401 | 827.729317348   |
| 165.0367396418 | 53.7780610572   |
| 0.1544320003   | 0.0420331858    |
| 0.2576261552   | 1.0518074001    |
| 1.8549699047   | 2.4816347675    |
| 1.1510619389   | 0.8354537962    |
| 12.4610252496  | 11.4369002528   |
| 1.0293097897   | 0.7885894129    |
| 1.8293632702   | 1.0364755401    |
| 20.6199579087  | 13.1767622194   |
| 46.8585714902  | 31.5172324462   |
| 421.0151498449 | 247.4703290722  |
| 13.5277902976  | 23.4054753857   |
| 17.3639672577  | 5.2615823282    |
| 3.2376997741   | 6.4896223646    |
| 8.5236798874   | 9.4921598726    |

gene\_expression\_table

|                |                |
|----------------|----------------|
| 1.1064909464   | 2.6873084171   |
| 1.2305792023   | 0.4019257471   |
| 7.2432230714   | 1.8254213081   |
| 5.7660734726   | 3.4349253436   |
| 257.762715998  | 152.6384270642 |
| 0.4416448376   | 0.7212393601   |
| 2.5825382624   | 1.4188435607   |
| 7.2411160554   | 7.9437056955   |
| 5.5726944121   | 2.1216194189   |
| 0              | 0.7943747429   |
| 187.886207332  | 99.794527413   |
| 0.8442247279   | 0.722167135    |
| 10.7783786477  | 19.7850881467  |
| 0.1103455918   | 0.6407206456   |
| 9.9710502085   | 21.0599645162  |
| 8.1532915801   | 4.9628415163   |
| 6.4845409986   | 2.8796674939   |
| 16.9258739641  | 6.7144688116   |
| 0.0464707927   | 0              |
| 3.8765723744   | 4.7529819806   |
| 0.4196373241   | 0.0830665975   |
| 0.1517765238   | 0.5783458826   |
| 0              | 0.017211413    |
| 4.8301489958   | 4.4887502116   |
| 1.4453890254   | 2.2404075593   |
| 1.5067203586   | 1.9919046442   |
| 2.128430611    | 2.4785867061   |
| 0.0346362451   | 0              |
| 0              | 0              |
| 1.7379658552   | 1.8395931575   |
| 0.0223148509   | 0              |
| 0.033901892    | 0              |
| 0.0289138261   | 0.00787        |
| 3.1440341858   | 4.8967393779   |
| 0.6646458131   | 0.7354736705   |
| 795.0129109512 | 514.7982113122 |
| 0.0268918906   | 0.0146388291   |
| 50.2479977666  | 20.3193153783  |
| 39.9601782933  | 12.4138231595  |
| 12.5729610764  | 6.7764338574   |
| 10.1594677817  | 1.2083210752   |
| 9.608270392    | 9.2655321795   |
| 0.2386826142   | 0.1556805849   |
| 2.1512788961   | 2.3036119545   |
| 2.7767027864   | 2.7779318755   |
| 2.5074519513   | 2.0367096393   |
| 335.9440150911 | 136.632077023  |
| 7.654166452    | 16.6151833569  |
| 6.1805351437   | 8.3121133256   |



gene\_expression\_table

|                 |                 |
|-----------------|-----------------|
| 20.4359886866   | 12.6731589503   |
| 0               | 0               |
| 0.5692893329    | 0.733026745     |
| 14.1374546703   | 8.8881573712    |
| 0.1340669477    | 0.1326917858    |
| 2.3577840873    | 1.2834798023    |
| 0.5295871418    | 1.3759069258    |
| 28.0572058132   | 10.4245503297   |
| 2777.3274568532 | 1479.4258885212 |
| 64.986126239    | 49.2847073797   |
| 4.0543592824    | 1.5406731693    |
| 5.3070325505    | 1.5577554361    |
| 18.0063389501   | 25.031473394    |
| 0.3333001403    | 0.5499741268    |
| 125.3571739343  | 249.6577236832  |
| 9.2306158025    | 3.0253815538    |
| 77.6788741413   | 45.5801023433   |
| 0.2319799841    | 0.3367474014    |
| 5.5130060403    | 4.1101360003    |
| 2.9635574562    | 3.226475366     |
| 0               | 0.0744210226    |
| 4.748067602     | 15.995916682    |
| 0.1077796781    | 0.1760123508    |
| 0               | 0.3193147313    |
| 0               | 0.3109079108    |
| 35.3860499326   | 32.6710448448   |
| 1.7436763673    | 1.2458053739    |
| 156.0171072056  | 215.8089965707  |
| 3.5271959935    | 2.9273032334    |
| 0               | 0               |
| 12.4497856455   | 3.162668415     |
| 0               | 0               |
| 1.9318306456    | 1.0038080439    |
| 919.5356287982  | 571.2588571842  |
| 0               | 0               |
| 14.0219257991   | 11.2676946714   |
| 73.6538054807   | 46.1709362875   |
| 2.8459432459    | 0.9295280329    |
| 254.4195120963  | 195.8674505709  |
| 0               | 0.1853691042    |
| 0.0837162013    | 0.6380027574    |
| 9.1912225282    | 8.5382744881    |
| 30.5684177674   | 70.1392447152   |
| 7.2163595199    | 7.2673302525    |
| 121.2732296867  | 141.463099401   |
| 1.5374747462    | 5.2076107516    |
| 0.4270069878    | 0.6973346465    |
| 0.1756942837    | 0.6216643955    |
| 2.0555887938    | 4.2607209778    |

gene\_expression\_table

|                |                |
|----------------|----------------|
| 5.1549146833   | 4.2091824147   |
| 0.6487286643   | 1.261217717    |
| 5.1631989978   | 2.4202657959   |
| 556.1417827686 | 431.5854223874 |
| 15.3421021811  | 10.4028747668  |
| 2.9964512152   | 1.6311436802   |
| 194.428249833  | 127.6140899963 |
| 0.5744195913   | 0.1042300618   |
| 16.8244750148  | 22.2262273275  |
| 1.2692948438   | 2.9092691939   |
| 0              | 0              |
| 3.400529944    | 2.4585019755   |
| 2.5992745988   | 0.946684611    |
| 1.6621567425   | 0.2262022866   |
| 203.0455683851 | 139.5974246645 |
| 65.2612193959  | 41.4290014023  |
| 116.6359677794 | 123.0839786107 |
| 0.540115615    | 0              |
| 1.1469259      | 0.4335686523   |
| 25.462497519   | 50.4672619825  |
| 1.0815105814   | 3.6091676493   |
| 0.029577073    | 0.032201062    |
| 1.2451700731   | 1.4451610715   |
| 10.4020648448  | 5.4050681866   |
| 1.6022290089   | 1.0498546926   |
| 0.730825574    | 0.5683301587   |
| 2.9191135793   | 1.9635324236   |
| 2.9408565251   | 2.3622744979   |
| 0.7968784787   | 0              |
| 0.0291671116   | 0.0635094602   |
| 0.0719612351   | 0.352554388    |
| 0.0372256304   | 0.1215845294   |
| 0              | 0.0210557395   |
| 0.5153027809   | 0.696598461    |
| 0.9979246456   | 1.4938790909   |
| 0.0726343735   | 0.0197695692   |
| 2.0710204939   | 2.1092871292   |
| 0.6327877417   | 0.6643222407   |
| 2.0075458457   | 0.858647931    |
| 0.6878777469   | 0.8967142311   |
| 0.5958911939   | 1.4597029564   |
| 0.0289058825   | 0.0786758138   |
| 0.0335030081   | 0.0364752943   |
| 0.0344085688   | 0              |
| 0              | 0.0240912      |
| 0.0449097327   | 0              |
| 0.373337462    | 0.5090232195   |
| 3.2617682743   | 6.6736989331   |
| 0.4484051076   | 1.4035355004   |

gene\_expression\_table

|                 |                 |
|-----------------|-----------------|
| 17.9636616103   | 12.2694656069   |
| 0               | 0               |
| 23.5563433222   | 28.2606088567   |
| 0.1783952103    | 0.3884437944    |
| 259.4346214077  | 198.0984755063  |
| 0.4283978901    | 1.5741137133    |
| 26.9871279721   | 19.6835806996   |
| 1.9520319443    | 1.2286372342    |
| 0.006838        | 0.0223342874    |
| 5.2614183819    | 4.786058171     |
| 127.1067652107  | 118.2117368124  |
| 5.4436400077    | 5.5950262744    |
| 219.5192011221  | 464.5551660589  |
| 0.0886091644    | 0               |
| 95.8939849451   | 146.8101284312  |
| 90.3703228839   | 124.8325420191  |
| 11.4768495696   | 7.9464077596    |
| 17.7266816811   | 24.5408036948   |
| 33.2716279541   | 20.7949072256   |
| 2.3415694763    | 0.3186633103    |
| 6.7975863249    | 6.4114522603    |
| 473.5335806025  | 274.1149234398  |
| 0.0305740627    | 0.0332865016    |
| 0               | 0.0201111061    |
| 0.0784787676    | 0.256323504     |
| 0.8236849618    | 1.7527578218    |
| 462.3722258126  | 302.1540498442  |
| 6.1442317555    | 4.5425766127    |
| 34.0194250475   | 39.3009305617   |
| 27.2757517681   | 13.2525704295   |
| 18.8615276804   | 29.6862732737   |
| 5.0500844112    | 1.4468717687    |
| 2968.1877578411 | 3943.8720047801 |
| 15.7864037527   | 17.7941728954   |
| 23.616520994    | 14.5820816045   |
| 24.5298885116   | 25.8079190516   |
| 8.6693613468    | 30.4605524071   |
| 251.5178446465  | 78.9424870124   |
| 0               | 0.0845129393    |
| 0.5919574761    | 0.1933422492    |
| 187.3490481802  | 137.607992057   |
| 0               | 0               |
| 43.1223086558   | 25.5499266748   |
| 0.7032779737    | 2.0492950598    |
| 2.5305927173    | 2.6992526894    |
| 2.4723430084    | 1.2950544744    |
| 0.2199392153    | 0.5986289034    |
| 0               | 2.6063444352    |
| 163.171592895   | 149.2257160547  |

gene\_expression\_table

|                 |                 |
|-----------------|-----------------|
| 7.2425161551    | 4.0657291224    |
| 6.1528960117    | 7.1745268304    |
| 0               | 0               |
| 1.7069684312    | 2.8422672959    |
| 45.6675796747   | 19.6601551616   |
| 6.5480041855    | 7.7770073839    |
| 43.3459327403   | 73.2642553628   |
| 0.0577535868    | 0.1676728304    |
| 25.0941226644   | 20.4706150667   |
| 0.9970780232    | 1.6127960285    |
| 12.2836700332   | 13.3271654369   |
| 1.2033052539    | 1.0390122145    |
| 3.4543028455    | 2.8687835073    |
| 4.6961239188    | 9.1216106483    |
| 53.9858540907   | 80.0478845395   |
| 0.4540980656    | 0.7415764216    |
| 4.6634654007    | 3.6396752411    |
| 52.0471878996   | 26.9157125354   |
| 0.1522641415    | 0.0828862793    |
| 0               | 0.1625959374    |
| 2.0554012491    | 2.8371476637    |
| 0               | 0               |
| 28.8185798431   | 32.3865677987   |
| 10.2211192912   | 4.2301287543    |
| 6.833571471     | 3.8912244648    |
| 13.1985818536   | 6.3927393745    |
| 0.5752856844    | 3.0177395417    |
| 35.3525391951   | 26.9630983461   |
| 38.8895943456   | 99.6836251703   |
| 6.3140193115    | 9.8425760901    |
| 13.833111924    | 14.8174352602   |
| 3.0442222398    | 1.5190525564    |
| 21.6636512911   | 8.6745061387    |
| 0.8667954563    | 0.0786412453    |
| 145.4994459047  | 58.5671951395   |
| 0.2109352883    | 0               |
| 0.0949075607    | 0.1033274742    |
| 1486.2157384038 | 2635.7987451801 |
| 53.436013893    | 38.1111228931   |
| 6.0729882713    | 5.8089082931    |
| 1.1429339259    | 0.9467740347    |
| 103.8095801138  | 147.2224493364  |
| 0.0143170436    | 0.023380813     |
| 5.3849002831    | 4.9438616934    |
| 1.0444109316    | 0.6709725174    |
| 18.93470986     | 14.1592139643   |
| 10.3927067088   | 2.1109545541    |
| 29.3606133903   | 24.6207478886   |
| 29.7489771001   | 11.2982152083   |

gene\_expression\_table

|                |                |
|----------------|----------------|
| 1.8140434793   | 2.6473135691   |
| 69.3160857903  | 64.8408383887  |
| 0.4843015963   | 0.5931758005   |
| 0.0896358168   | 0.5367342039   |
| 0.8708336862   | 1.1096979276   |
| 15.308569404   | 11.8055789314  |
| 0.811840446    | 0.7954780411   |
| 0.2900269363   | 0.9867414197   |
| 0.2977207748   | 0.8373453065   |
| 0              | 0.1550681439   |
| 1.7532831495   | 1.1643857879   |
| 0.430677535    | 4.5716380261   |
| 0.7226272102   | 1.9293776665   |
| 35.2969157269  | 27.2177587436  |
| 8.011258005    | 12.2900806726  |
| 0.3586821644   | 0.7987568889   |
| 3.6086102019   | 1.1103003974   |
| 5.58519959     | 3.3781676166   |
| 50.7340053188  | 32.0079591631  |
| 163.5782382595 | 101.0085290511 |
| 0.4827092298   | 0.8174969317   |
| 58.8285055089  | 61.5206421729  |
| 3.7410993343   | 3.1183894172   |
| 31.2131246192  | 39.4502469307  |
| 0              | 0.0176964063   |
| 0              | 0              |
| 2.9258507497   | 2.5281138364   |
| 0              | 0.2410032357   |
| 1.2429557173   | 1.5726692308   |
| 5.7410615751   | 6.875430432    |
| 0.1351156052   | 0              |
| 0              | 0              |
| 1.6288128254   | 3.6944087572   |
| 0.9895769653   | 0.9304552694   |
| 10.2514149092  | 19.871827872   |
| 4.7757247135   | 8.7234590108   |
| 1.0222942266   | 1.0016901878   |
| 0.5088190186   | 0.3776999404   |
| 0.047122233    | 0              |
| 4.9964003918   | 1.9082699333   |
| 0.0801237648   | 0              |
| 11.291130939   | 8.7842629691   |
| 0.9784363466   | 0.5770051507   |
| 4.2873226858   | 5.2922299432   |
| 0              | 0.0926545644   |
| 1.3672784955   | 1.6879426376   |
| 110.9519616411 | 15.4324015809  |
| 2.884960839    | 0.942271768    |
| 0.3228429635   | 0              |

gene\_expression\_table

|                 |                |
|-----------------|----------------|
| 22.3111151137   | 15.0217505092  |
| 0.6514494926    | 0.6501404557   |
| 7.1001908589    | 3.8806341011   |
| 6.230392775     | 6.9984720981   |
| 8.3215703715    | 5.5752831276   |
| 5.5947457309    | 3.1180604107   |
| 0.8944002371    | 1.0690067664   |
| 0.0804269392    | 0.96318393     |
| 67.405726161    | 208.9445307065 |
| 14.4553808164   | 12.9274939759  |
| 1.9085298072    | 3.7104443484   |
| 3.3181464996    | 1.3812585966   |
| 2.9828728971    | 3.5502378772   |
| 1.1814776366    | 1.8865656793   |
| 184.204811775   | 71.1299381683  |
| 1.4708323566    | 1.4652079669   |
| 3.8073452565    | 6.2973961003   |
| 3.4868850698    | 4.4289362046   |
| 4.4478766349    | 6.9005324051   |
| 64.0108798269   | 47.1430544631  |
| 3.685401303     | 1.5949127141   |
| 0.0845436093    | 0.0460220321   |
| 22.8120752396   | 29.5974252552  |
| 0.7448576006    | 2.2116521674   |
| 1029.6440658939 | 867.1839334192 |
| 2.3604949235    | 2.0262759319   |
| 9.3454793604    | 29.9302293024  |
| 0               | 0.0364317912   |
| 1.6532023627    | 1.9284316149   |
| 0.2456561331    | 0.2228750057   |
| 2.3626819226    | 0.7015341712   |
| 5.3432942794    | 6.2362791865   |
| 0.2206217693    | 0              |
| 11.8706992655   | 14.1525061953  |
| 0               | 0.3659707282   |
| 1.4537412338    | 1.4096035755   |
| 0.0226814094    | 0              |
| 3.0381165633    | 1.3543130308   |
| 0.1223292589    | 0.0856169634   |
| 408.3577892683  | 475.7239207285 |
| 0               | 3.2017520813   |
| 0               | 0.3197306604   |
| 1.0850853077    | 1.3079241163   |
| 2.605049825     | 2.9164307516   |
| 0               | 0              |
| 10.3782633584   | 7.1149665712   |
| 2.5128856413    | 0.5015672387   |
| 72.3899761224   | 44.8093456809  |
| 50.0748347247   | 41.6687235637  |

gene\_expression\_table

|                |                 |
|----------------|-----------------|
| 2.8042405655   | 2.7071739439    |
| 1.3782145713   | 2.8023775652    |
| 144.3893179957 | 53.3128329564   |
| 12.1860401368  | 4.1032419555    |
| 40.22540042    | 29.327543565    |
| 37.2402553138  | 133.249921098   |
| 3.4652506372   | 3.3658199067    |
| 53.9240099807  | 64.8518450709   |
| 0.6025046242   | 0.2342703655    |
| 0              | 0.1641571194    |
| 3.6515331884   | 1.7478430871    |
| 0.8768790232   | 0.8353389577    |
| 0.0955757113   | 0.0520274506    |
| 4.5148696275   | 2.2119368806    |
| 11.3498380077  | 6.6967012941    |
| 0.7406090302   | 0.0435845209    |
| 0.1438535983   | 0.3132317143    |
| 1.5892898798   | 1.9417664111    |
| 12.1355748845  | 12.9141869138   |
| 116.6366296106 | 131.3047519018  |
| 0              | 0.0359492964    |
| 0              | 0.022989772     |
| 0              | 0               |
| 0.066169534    | 0.018009974     |
| 19.7042370273  | 28.4300583984   |
| 2.3805956342   | 6.0333586741    |
| 8.0136146793   | 7.4938902871    |
| 2.343441662    | 0.6214814165    |
| 0.2396504179   | 0.1087131178    |
| 68.3975575742  | 78.001041257    |
| 0.660024602    | 2.1377755023    |
| 0.3479028579   | 0.3314217845    |
| 367.0328487532 | 857.2674886357  |
| 0.693541981    | 1.269892037     |
| 100.6231075108 | 29.9925045828   |
| 15.8772394488  | 2.8626199405    |
| 14.2886891587  | 15.512641132    |
| 1.2116412686   | 1.6788983783    |
| 0.0890591855   | 0.0484801244    |
| 0.4432573591   | 0.0804303033    |
| 1924.561817375 | 3039.2393288227 |
| 3.7857163551   | 4.1215737312    |
| 14.8994960065  | 35.0642988356   |
| 10.1808341486  | 12.2471879038   |
| 0.1796542676   | 0.8312687803    |
| 1.0559466258   | 1.7819219067    |
| 0.222582022    | 1.0097034582    |
| 0.4156828359   | 1.0182621772    |
| 0              | 0.2598657848    |

gene\_expression\_table

|                  |                  |
|------------------|------------------|
| 0                | 0.0776076138     |
| 16.1089600306    | 14.3883992145    |
| 0.3555295351     | 0.8951017958     |
| 2.101888278      | 0.490363176      |
| 154.7693864663   | 188.4704388636   |
| 0                | 0.0591647322     |
| 7.1097012665     | 13.6320709677    |
| 0.0863830228     | 0.1410699974     |
| 4.6768714881     | 4.681161286      |
| 15552.4610135569 | 14208.1391203758 |
| 9.5918744357     | 11.5779276511    |
| 22.8179444563    | 19.8128644629    |
| 0                | 0                |
| 59.1646795499    | 48.871373086     |
| 5.1050228918     | 7.5031989907     |
| 5.6566947204     | 4.618904755      |
| 1.9618408401     | 2.0815871881     |
| 3.7339768554     | 7.0083113719     |
| 1.4295116457     | 0.684250127      |
| 133.3313392399   | 348.0813601921   |
| 0.4812446682     | 0.550136211      |
| 0.9360082005     | 2.2340668452     |
| 0.2825973391     | 0.0769171314     |
| 0.1731356291     | 0.5654871051     |
| 77.3135814158    | 116.174665844    |
| 37.3427486959    | 8.8312112222     |
| 2.4531247797     | 1.557942538      |
| 3714.7032428419  | 6289.9477565253  |
| 2476.689505085   | 3338.6127851685  |
| 43.721652875     | 47.640983123     |
| 0.3930804052     | 0.0713255529     |
| 20.8905166234    | 12.010034535     |
| 1.0124569072     | 0.9369371847     |
| 2.2377815657     | 1.4942706362     |
| 14.745646089     | 38.2459021927    |
| 0.6370670665     | 0.3467928709     |
| 29.5274621191    | 15.6194705273    |
| 141.1980072087   | 92.0146403006    |
| 585.2959234663   | 259.8211940404   |
| 8.6690195759     | 8.9413663602     |
| 0.1338834261     | 0.3401093763     |
| 0.9685851181     | 0.6982599844     |
| 0.7006960828     | 0.871839695      |
| 7.4724870725     | 13.8094930368    |
| 31.8195429736    | 29.1545600069    |
| 7.2755602062     | 5.6707345508     |
| 4.1751794365     | 2.2727944033     |
| 3.5300651849     | 3.0341383876     |
| 1.820137894      | 0.8328527052     |



gene\_expression\_table

|                |                |
|----------------|----------------|
| 60.3076208682  | 36.2543796638  |
| 90.2412994995  | 22.6471914523  |
| 4.9962440638   | 7.3143858682   |
| 6.687266633    | 4.3134711073   |
| 0.017197676    | 0.0234042526   |
| 0.0968826168   | 0.6328665079   |
| 17.3605553681  | 9.2769646216   |
| 6.6445366293   | 3.4302160313   |
| 0.1041315536   | 0.2834244802   |
| 8.7949887399   | 5.6439503548   |
| 4.90830947     | 1.1756271853   |
| 0.340389912    | 0              |
| 0.0820114362   | 0.1785744886   |
| 0.1164167208   | 0.0792155389   |
| 2.772732178    | 1.5674126414   |
| 1.3212008091   | 1.4857300162   |
| 913.6002229463 | 872.9710555387 |
| 3.9373417721   | 2.7386936302   |
| 51.2775703227  | 20.5551259229  |
| 0              | 0.4935322616   |
| 0.4763855918   | 0.4667841806   |
| 2.6340214081   | 1.5931688168   |
| 0.2023226494   | 0.0367120178   |
| 3.3647710623   | 4.1720728035   |
| 19.6509895372  | 13.3863086507  |
| 0.1727944191   | 0              |
| 0              | 0.210999912    |
| 2.1869987524   | 2.7598217754   |
| 40.2273355075  | 35.1500737144  |
| 26.8704285522  | 71.5358864138  |
| 771.5088674579 | 1377.525896956 |
| 13.6536897106  | 12.0686171269  |
| 0.5643042199   | 0.0767959493   |
| 10.657913313   | 14.3687598458  |
| 25.308056181   | 29.6603287447  |
| 0.9667316347   | 1.9192595264   |
| 22.8140981757  | 6.8407523161   |
| 24.022229376   | 12.6124429761  |
| 4.2771923283   | 3.6965175476   |
| 0.0966956362   | 0.4210967298   |
| 2.0603365888   | 0.5607808645   |
| 11.715145933   | 1.0525540483   |
| 0.067744847    | 0.3134586061   |
| 1.3236909644   | 0.3431249638   |
| 0.9312196897   | 0.4345005864   |
| 0.7198509465   | 0.2712856011   |
| 6.1997434058   | 2.7681624631   |
| 1.1857829573   | 0.8714128885   |
| 1.4881827694   | 2.2810849509   |

gene\_expression\_table

|                 |                 |
|-----------------|-----------------|
| 18.9319489586   | 21.9877220024   |
| 3.0476177724    | 7.7338519386    |
| 10.4998670873   | 5.1580633928    |
| 0               | 0               |
| 0.0996271018    | 0               |
| 0.0721982583    | 0.1375560738    |
| 0.0622497467    | 0.4066341424    |
| 2.7575464687    | 3.9760681041    |
| 1.4358411262    | 1.4566411373    |
| 0.9100477605    | 0.5189823375    |
| 1.3208225354    | 1.6177521833    |
| 0.0488824205    | 0.0266095609    |
| 3.1464435697    | 1.8516684247    |
| 1.1763369964    | 0.8164450253    |
| 0               | 0               |
| 2.046815847     | 4.3676702656    |
| 0               | 0               |
| 0               | 0.0711925655    |
| 0.0349480242    | 0.2853638094    |
| 0.0538925994    | 0               |
| 1.1742167961    | 1.406228759     |
| 2.6815934877    | 2.1351540849    |
| 0.0396168845    | 0               |
| 0               | 0               |
| 0.7851829985    | 0.1672517101    |
| 68.7404127865   | 126.6666103117  |
| 0.1502420703    | 0               |
| 17.3192628477   | 30.640635659    |
| 114.8124822743  | 86.8318234434   |
| 35.3427517531   | 20.9580870497   |
| 30.899911675    | 16.8908617541   |
| 4.4958480458    | 5.6257337161    |
| 8.2018628443    | 7.3947483679    |
| 0.5598218703    | 1.6543234422    |
| 30.6051015993   | 16.6257253194   |
| 145.036751166   | 144.6692494912  |
| 1487.9300868794 | 1927.0245206742 |
| 1.2360002561    | 0.3364136209    |
| 3.1458541446    | 1.4011138099    |
| 0               | 0.283069616     |
| 0               | 0.0956966065    |
| 30.8193484985   | 17.115015647    |
| 0.4942201221    | 0.2421296306    |
| 0.94730962      | 0.7305410582    |
| 49.4222701564   | 68.1553628574   |
| 0.66616767      | 1.1604289014    |
| 68.9197018654   | 46.2474022934   |
| 0.2389609852    | 0.7154424354    |
| 1.1024573631    | 0.9547555076    |

gene\_expression\_table

|                |                |
|----------------|----------------|
| 0.5370828065   | 0.1461827947   |
| 0              | 0              |
| 0.0695909265   | 0.0757648243   |
| 0.1929479586   | 0              |
| 0.4358771691   | 0.4745468814   |
| 50.9435502019  | 9.453187802    |
| 0.0981173657   | 0.3204661303   |
| 3.9131036757   | 0.9894803161   |
| 0.5281411619   | 0.3194423657   |
| 0.5569172571   | 0.8395273138   |
| 11.1756357352  | 4.210263311    |
| 1.3074458015   | 1.5183343607   |
| 15.0599323019  | 9.2495783022   |
| 25.2029742439  | 16.8484512767  |
| 1.9399258126   | 4.0320576541   |
| 16.1828339161  | 6.3227775833   |
| 0              | 0.1559123968   |
| 0.1116926983   | 0.9930808667   |
| 23.194383369   | 18.9390895087  |
| 101.2742576231 | 57.6471031231  |
| 13.671747134   | 4.951042714    |
| 0.3326999846   | 0.0402462364   |
| 1.1703041395   | 1.183120719    |
| 17.8960773381  | 38.1175642183  |
| 0              | 0.2240344962   |
| 1.0379597678   | 1.6950666579   |
| 9.6488596547   | 4.3389711335   |
| 676.5256138462 | 889.1774435633 |
| 137.6294837233 | 75.2534973114  |
| 10.8780091464  | 10.5929712269  |
| 9.675195114    | 3.9325250882   |
| 34.4965645245  | 9.1484990356   |
| 0              | 0              |
| 27.6439428295  | 44.2326324791  |
| 10.8585729926  | 5.0174397987   |
| 35.9360558567  | 40.1448258841  |
| 7.4349046295   | 7.0537846895   |
| 22.4969772818  | 13.1425003095  |
| 0.3564177568   | 0.7760761377   |
| 17.277582855   | 43.2963472905  |
| 62.3971601674  | 49.8955060901  |
| 2.4538729519   | 1.952303481    |
| 54.4221821279  | 16.5446499834  |
| 12.0183797321  | 9.7717012861   |
| 0.1404217701   | 0.0573298378   |
| 0.0169468506   | 0              |
| 10.1158885738  | 3.603753391    |
| 9.443614001    | 7.1510456409   |
| 2.0673640239   | 1.9392484851   |

gene\_expression\_table

|                 |                 |
|-----------------|-----------------|
| 0.7508886797    | 0.4360028087    |
| 0               | 0               |
| 0               | 0.0256009382    |
| 0.2737466419    | 0.1490163106    |
| 2.1602406693    | 2.822268874     |
| 0.0158975147    | 0.008654        |
| 0.1334955552    | 0               |
| 3.4349531013    | 2.8307389439    |
| 10.7639177499   | 10.8127627425   |
| 3.1319671605    | 3.5519019512    |
| 4.8567664664    | 4.3644047275    |
| 4.8096171693    | 1.8507654299    |
| 4.8255729526    | 3.7084823156    |
| 0.6718679553    | 0               |
| 0.251213566     | 0.1025626795    |
| 19.3220355672   | 51.3579797011   |
| 11.7889635645   | 15.0744823559   |
| 2.9493595665    | 0.4225023529    |
| 4.3311359789    | 9.6636210274    |
| 1.5933546966    | 0.867356168     |
| 2.7847530291    | 1.3375623298    |
| 5.2111202339    | 1.9093291396    |
| 2.2242040454    | 2.5268126013    |
| 5.3660345174    | 1.4605232427    |
| 0.8132837737    | 0.2213589664    |
| 0.2666696789    | 0.1451639056    |
| 2.962746126     | 2.0663949115    |
| 0.5757292575    | 0.2089354089    |
| 4.8362139744    | 2.1207330821    |
| 5.7407735319    | 0.7543197229    |
| 4.4666866416    | 4.4140692558    |
| 1.6025769974    | 2.7334460715    |
| 0.1892177355    | 0               |
| 0               | 0               |
| 0.0800871717    | 0.108990331     |
| 0               | 0               |
| 0.0608176427    | 0               |
| 5.7469827764    | 2.4352961553    |
| 1.5518048159    | 0.7626108185    |
| 0.4348477609    | 0.2028969202    |
| 2.4680542026    | 1.082268945     |
| 17.7610411762   | 37.2189606345   |
| 3.2213584159    | 2.2256898561    |
| 0               | 0.2991947259    |
| 1191.7610908721 | 1374.6316557548 |
| 0               | 0.1478431052    |
| 14.2951698418   | 7.8944753911    |
| 0.1420090725    | 0.0773038453    |
| 2.533254939     | 1.562865365     |

gene\_expression\_table

|                |                |
|----------------|----------------|
| 6.924126779    | 3.0679593873   |
| 2.0767542135   | 5.0244391224   |
| 9.0404963026   | 9.0918396081   |
| 4.0319229161   | 2.4996464296   |
| 168.7609265938 | 69.037357898   |
| 162.5264970888 | 265.7002485997 |
| 232.9865214735 | 87.1834187578  |
| 4.4959703492   | 7.7261679539   |
| 5.8640349065   | 10.467909471   |
| 445.0356902505 | 224.8212966166 |
| 117.9089316861 | 107.3434258359 |
| 0.4339936277   | 0.2362481189   |
| 0              | 0              |
| 63.8209874716  | 30.2085264507  |
| 49.8775358635  | 47.7643452453  |
| 17.757889154   | 21.6177775159  |
| 10.4965014797  | 13.1418774723  |
| 65.5644074565  | 43.4899007221  |
| 0              | 0              |
| 14.0475559583  | 20.437267833   |
| 0.1132093673   | 0.2465059242   |
| 14.8503332304  | 10.4227059483  |
| 0.5553682861   | 0.1511597228   |
| 0              | 0.356405843    |
| 0              | 0.0133081811   |
| 2.1775655156   | 3.6746665035   |
| 106.1885692819 | 81.7360591329  |
| 30.5035254327  | 16.4255835907  |
| 0.3063548853   | 0.2001202619   |
| 7.4489745463   | 0.6839611596   |
| 1.3276870253   | 0.1628704707   |
| 0.5502371924   | 0.0698894679   |
| 0.1498515532   | 0.4690445562   |
| 20.4320124686  | 14.4878169376  |
| 0.3387460457   | 4.0936642014   |
| 10.3504715533  | 8.8086584854   |
| 2.3328390233   | 1.1182708051   |
| 2.8919825113   | 0.6220926405   |
| 0.1014683117   | 0              |
| 799.2377656605 | 357.2894928452 |
| 1.6014011888   | 2.0251105848   |
| 469.1756396863 | 85.6869079328  |
| 192.0697046907 | 216.5707374555 |
| 0.4381916988   | 0.5367000929   |
| 0.1599491058   | 0              |
| 44.7117360767  | 96.7773487362  |
| 10.0219701207  | 4.1576529359   |
| 1.9297118198   | 2.1665634913   |
| 0              | 0              |

gene\_expression\_table

|                |                |
|----------------|----------------|
| 417.1646881432 | 129.6536126831 |
| 1.6685401256   | 1.4663862091   |
| 62.6501790488  | 17.5233672619  |
| 0.8623355762   | 1.043154885    |
| 23.4657422469  | 19.1606642752  |
| 78.7608437322  | 68.4568316198  |
| 2.8422206785   | 1.4657560835   |
| 0.2524707364   | 0.5497383625   |
| 1.4020424326   | 1.4819066232   |
| 0.6989905313   | 0.1342946242   |
| 0.3602884515   | 0.2241440914   |
| 40.2267026102  | 23.2188180599  |
| 0              | 0.1445228841   |
| 456.7940330242 | 117.5738952648 |
| 43.2276717471  | 41.2020626336  |
| 23.7524422123  | 8.5001750551   |
| 21.9578132451  | 20.9566757193  |
| 43.348054859   | 16.4661861358  |
| 5.5418090274   | 6.4162296653   |
| 1.8089694271   | 0.6319895341   |
| 0              | 0              |
| 63.2459361511  | 30.347502728   |
| 33.6042348414  | 18.699547959   |
| 2.058484167    | 4.0615525863   |
| 36.0897249979  | 24.7433707748  |
| 307.7096511585 | 93.6905448155  |
| 4.0531414193   | 3.7685306669   |
| 5.4350750828   | 4.885178618    |
| 0.8113140252   | 0.4968513939   |
| 0.2249134711   | 0.2040559319   |
| 45.3033377435  | 10.5755389771  |
| 8.1384865739   | 3.4280374046   |
| 36.8232322162  | 20.1625563296  |
| 2.8302058225   | 1.4348006393   |
| 10.5766887512  | 8.6564910361   |
| 0.3117376188   | 0.4565839149   |
| 0.002553       | 0.008339       |
| 8.9159333745   | 42.5120942383  |
| 0              | 0              |
| 0              | 0.006455       |
| 26.7143456572  | 16.311350139   |
| 0.7170532138   | 0.7510972614   |
| 2.6041049864   | 1.6695785304   |
| 0.0879891744   | 0              |
| 0              | 0.0178842838   |
| 0.1602157432   | 0.2203321293   |
| 0.050119337    | 0.005457       |
| 7.3160836973   | 4.1366840864   |
| 1.3862255837   | 0.9089544272   |

gene\_expression\_table

|                |                |
|----------------|----------------|
| 0              | 0.00392        |
| 0.0102263106   | 0.0125252529   |
| 0.1291815375   | 0.2166649111   |
| 188.8854146965 | 159.8581462451 |
| 0              | 0.008864       |
| 0.0838184623   | 0.2889728505   |
| 24.2637021094  | 21.8132417242  |
| 1.7023018278   | 1.9702012762   |
| 23.0046351869  | 27.5751783515  |
| 9.2936614311   | 11.3384486028  |
| 0              | 0.0326936775   |
| 3.1673233279   | 7.5431972293   |
| 1.253530608    | 1.3895535317   |
| 1.1703099508   | 1.8116625971   |
| 0.1506310337   | 0.1024966039   |
| 3.5355980674   | 2.4223827255   |
| 2.5539889523   | 4.3847468536   |
| 6.9137846594   | 6.283260619    |
| 4.1123471665   | 6.6734744094   |
| 0              | 0.0274657934   |
| 0.1319687016   | 0.0426539812   |
| 0.2578260693   | 0.261986315    |
| 63.0385659986  | 20.1196551313  |
| 9.849003009    | 5.0444591081   |
| 0.0580350768   | 0.0334502335   |
| 1.4876567239   | 2.2270010908   |
| 0.9639532641   | 0.6133740134   |
| 1.8836894693   | 2.7961203475   |
| 5.2156212997   | 2.2964830233   |
| 13.5693331686  | 3.2671419547   |
| 489.3943898738 | 366.2774939241 |
| 223.3560693144 | 130.8075657259 |
| 12.0999450057  | 4.940030909    |
| 0.9625804637   | 1.1698355823   |
| 45.9121682006  | 136.3031877597 |
| 0              | 0              |
| 0.00533        | 0.002901       |
| 447.2526826287 | 635.9125365519 |
| 97.0234559153  | 69.4790658615  |
| 25.3350849366  | 45.2766998401  |
| 7.2402759863   | 5.5142932532   |
| 0.4845391749   | 0.7683531367   |
| 7.3794474454   | 9.1886640563   |
| 18.6311485063  | 10.2400822437  |
| 0.0316827709   | 0.0172467855   |
| 20.0399567609  | 14.5796950239  |
| 5.7688265854   | 7.4401185325   |
| 17.587256445   | 15.4820984578  |
| 2.7101026023   | 3.1774989716   |

gene\_expression\_table

|                |                |
|----------------|----------------|
| 45.2260312683  | 71.5349596127  |
| 0.2941417998   | 0              |
| 1.9082367761   | 1.5196745812   |
| 20.9247725247  | 39.259585452   |
| 0.6179799623   | 0.149512286    |
| 0              | 0.0227577458   |
| 0.1275190143   | 0.1079805362   |
| 90.3610543662  | 44.7682449652  |
| 0              | 0              |
| 0.0965093761   | 0.1050713978   |
| 10.8033997298  | 23.8350327157  |
| 2.6051766345   | 8.1618005656   |
| 14.774217628   | 11.387236841   |
| 11.2148586866  | 10.0321434489  |
| 2.5312675874   | 2.5761057325   |
| 5.72310648     | 6.2801825415   |
| 1.1113036137   | 1.7503149547   |
| 28.5203215101  | 14.9153576659  |
| 1.4335624191   | 0.7194053306   |
| 34.0454486722  | 26.144334131   |
| 0.1043794859   | 0.0189399534   |
| 6.3229305156   | 4.4849533629   |
| 4.2453544248   | 8.0805126931   |
| 0.9208342535   | 2.0122167148   |
| 1.1507459787   | 1.7803468938   |
| 0              | 0              |
| 23.4152658644  | 6.6616459458   |
| 4.0681113791   | 2.5076080401   |
| 91.2172172138  | 86.4369515727  |
| 28.0725166143  | 19.9630556527  |
| 4.1286375329   | 3.4465222025   |
| 229.5048881517 | 195.6600230491 |
| 2.0572529971   | 3.2490437059   |
| 15.5842986879  | 21.7816181776  |
| 0.6233297598   | 0.7133323577   |
| 0              | 1.1999668754   |
| 10.874664715   | 14.5429246928  |
| 0.0778041276   | 0.8470667598   |
| 1.0093903277   | 2.217504743    |
| 6.5636726963   | 7.0832979564   |
| 3.8716696936   | 3.641767864    |
| 1.9247163818   | 3.0243917604   |
| 4.4228608548   | 9.1531142462   |
| 2.7224493112   | 3.6923044712   |
| 3.6822781206   | 6.7830150574   |
| 3.3914743821   | 9.3088970053   |
| 1.7791816244   | 2.4155844547   |
| 131.8963976544 | 95.4412158318  |
| 2.4292756706   | 2.5820713259   |



gene\_expression\_table

|                 |                |
|-----------------|----------------|
| 0.0491656644    | 0.0802912415   |
| 3.136503679     | 2.5243557417   |
| 31.1477054155   | 36.1497518122  |
| 0.8033175934    | 2.7330797367   |
| 17.352854903    | 19.0689120319  |
| 16.5382107619   | 2.89373        |
| 5.0758684485    | 7.0384170901   |
| 1203.0805750304 | 1467.635589317 |
| 43.712602142    | 35.7447507314  |
| 2.5952824936    | 3.1690866927   |
| 170.8302333292  | 105.8081635454 |
| 0               | 0.0225667529   |
| 0.1315894299    | 0.1739630018   |
| 13.0468838913   | 6.6342088676   |
| 0.4164756278    | 0.626034402    |
| 8.2198845156    | 11.0465798292  |
| 509.5750213183  | 130.9321418254 |
| 2.0294806567    | 1.7676240644   |
| 4.6713450493    | 8.0534849971   |
| 25.0658546739   | 36.2042317988  |
| 1.0491806726    | 0.6242588248   |
| 1.0942747977    | 0.3790676809   |
| 0.1208132365    | 0.0563706102   |
| 2.7813625878    | 2.4201993454   |
| 0.5102091329    | 0.4092961553   |
| 16.4938869707   | 13.8385569164  |
| 2.400505151     | 1.7215720037   |
| 17.6107996545   | 26.9622799681  |
| 1.2400757445    | 1.2825869604   |
| 0               | 0.0271095844   |
| 1.8139715819    | 1.6457514069   |
| 2.1791310856    | 3.3350523222   |
| 0.080537754     | 0.0146138036   |
| 0.0418614314    | 0.0797566907   |
| 2.6182182975    | 2.7989837174   |
| 0               | 0.0748660749   |
| 1.3888920054    | 0.7506547707   |
| 3.7274348156    | 3.7239233769   |
| 0.1434759783    | 0.009763       |
| 13.294892657    | 9.421191201    |
| 1.0197050028    | 0.6142941584   |
| 20.1560386589   | 7.0896716665   |
| 7.6546847545    | 4.2626833255   |
| 2.1757315452    | 2.9384566962   |
| 1.0660722038    | 2.0784706288   |
| 0.3841117232    | 0.6828655181   |
| 411.183188642   | 118.5985443165 |
| 1.1992536679    | 2.8791208971   |
| 0.3554678089    | 0.1720017087   |

gene\_expression\_table

|                |                |
|----------------|----------------|
| 2.2088293159   | 3.3040602288   |
| 34.0663858529  | 26.5894620553  |
| 0.0611850674   | 0.3145624406   |
| 0.1109243529   | 0.0528347873   |
| 7.6102749317   | 11.3521228699  |
| 0.0622221366   | 0.1862913181   |
| 1.5693621406   | 0.4881689236   |
| 0              | 0.0148677835   |
| 4.0471447642   | 1.3463374476   |
| 12.1076334168  | 19.5736255723  |
| 0.3737981108   | 0.7088986841   |
| 15.2404409679  | 25.8303365917  |
| 0              | 0.1655569272   |
| 242.1392892902 | 114.0044137806 |
| 0.1438437649   | 0.1566051513   |
| 23.6276425987  | 25.0075354396  |
| 4.9500065761   | 3.350561583    |
| 64.2324251743  | 92.8308510271  |
| 0.9045623857   | 0.568161024    |
| 10.8684231794  | 6.0648453325   |
| 13.1642008978  | 9.1309278179   |
| 0.4505010567   | 0              |
| 4.1010424261   | 0.124024294    |
| 118.8689459372 | 259.4482226512 |
| 0.0373432198   | 0              |
| 0              | 0.0264217461   |
| 0              | 0.027585844    |
| 14.0890617155  | 13.4583571314  |
| 7.9235034673   | 61.9536161303  |
| 8.7518673033   | 20.5671985319  |
| 4.5602571753   | 3.0300062298   |
| 2.1969530328   | 4.1458908441   |
| 28.5606477395  | 68.9084911835  |
| 0.3736311143   | 0.8135570875   |
| 58.8095460099  | 31.8814617482  |
| 4.6693967477   | 12.2507669516  |
| 0.4319151141   | 2.1160499617   |
| 5.1243398149   | 6.694747009    |
| 4.3806854241   | 5.2887582849   |
| 246.7468861122 | 73.407636533   |
| 1.5319448846   | 1.5487219709   |
| 5.7004209823   | 2.2927160603   |
| 0              | 0.0497865255   |
| 0              | 0.0637487411   |
| 26.7016899438  | 25.9640964495  |
| 3.0276083528   | 1.4525665306   |
| 1.4331399658   | 0.5400982509   |
| 0.1245997511   | 0.1130448887   |
| 54.4729081193  | 25.5252957637  |

gene\_expression\_table

|                |                |
|----------------|----------------|
| 0.028608297    | 0.0369862777   |
| 1.7563255236   | 2.9645902645   |
| 0.4818851025   | 0.5763612258   |
| 0.2709126926   | 0.0867491919   |
| 2.2062642811   | 6.2890705194   |
| 1.6929789197   | 0.7372699683   |
| 22.6756329147  | 8.5942685262   |
| 7.2984959486   | 7.0973425161   |
| 27.2132140877  | 17.6794296519  |
| 6.8304221522   | 3.0984986146   |
| 0              | 0              |
| 7.7344502682   | 5.9015153712   |
| 1.2832652602   | 1.4043143088   |
| 4.8481965118   | 4.3828856772   |
| 29.8655647578  | 37.945243016   |
| 12.4598486313  | 21.4137144151  |
| 16.0980997012  | 14.1393961155  |
| 2.6059324285   | 2.6716240837   |
| 2.6599373484   | 2.9530752908   |
| 133.2650726778 | 142.6426468471 |
| 0.2560379343   | 0.2322940419   |
| 10.3317771467  | 15.0106648661  |
| 0.0596133158   | 0.0811275376   |
| 1.3745477666   | 0.8514532056   |
| 0.0889033054   | 0.0898769294   |
| 15.4623116891  | 12.5696132961  |
| 18.7264986079  | 15.315049187   |
| 14.143591455   | 4.5068395249   |
| 1.9080865063   | 3.4774719559   |
| 0.747867398    | 2.269126406    |
| 0.0531198676   | 0.0289162513   |
| 1.1985539413   | 1.3579301926   |
| 0.0100583266   | 0.00657        |
| 6.6284772116   | 6.8611760695   |
| 0.0372374878   | 0              |
| 64.0535409171  | 58.5115196641  |
| 27.0141013145  | 29.3518897631  |
| 28.4252052446  | 27.7774318294  |
| 10.2998750363  | 9.8001638238   |
| 0.1296517079   | 0.1411540177   |
| 0.3137485243   | 0.4212861321   |
| 16.6221466745  | 13.6724087783  |
| 2.9554640955   | 6.033119975    |
| 0              | 0.3046187584   |
| 0.182703283    | 0.0351021475   |
| 31.761430476   | 36.8081099498  |
| 267.2012415238 | 65.8770775646  |
| 0              | 0.0578763328   |
| 0.8331183926   | 0.2811793472   |

gene\_expression\_table

|                 |                 |
|-----------------|-----------------|
| 4.3328874065    | 2.8442472691    |
| 5.6695626674    | 2.8737467205    |
| 6.9959433042    | 16.3473353975   |
| 13.58801004     | 11.8562378103   |
| 22.7595034991   | 37.1920132086   |
| 24.7056933997   | 20.5638442347   |
| 2.1796180353    | 2.2780677082    |
| 0.2969644984    | 0.5927355429    |
| 1416.2615983157 | 944.0190139041  |
| 29.8227102607   | 27.2735328393   |
| 0.0558458551    | 0               |
| 1.2440312419    | 1.133572201     |
| 0.747007567     | 0.5936942781    |
| 42.5315791682   | 11.9409695632   |
| 16.9994611101   | 12.2282371703   |
| 0.0945857823    | 0.0367775531    |
| 4.5879605477    | 6.8957392592    |
| 0               | 0.002497        |
| 0.9941930136    | 0.9439489792    |
| 32.8108429043   | 27.2566491233   |
| 459.3367195023  | 156.2880386725  |
| 2.3868623955    | 2.3919094305    |
| 4.762923738     | 1.7284920053    |
| 1.6767544918    | 3.2144869552    |
| 138.0293344601  | 25.8311247562   |
| 0.2708968274    | 0.1671269885    |
| 3290.1216878673 | 3513.9586853918 |
| 7.6708346546    | 4.2984982603    |
| 6.578790385     | 4.1098138708    |
| 0.0974172455    | 0.0212119621    |
| 4.8031617352    | 2.0641909765    |
| 1.2230691287    | 0.3328940364    |
| 65.4878538385   | 35.6488696955   |
| 41.5079085565   | 32.3947509172   |
| 5.1520099479    | 20.107128576    |
| 25.8092489619   | 20.7015972154   |
| 0               | 0               |
| 4.0013494133    | 4.6607100044    |
| 123.5792014975  | 282.2641288819  |
| 39.5766491629   | 39.7125618285   |
| 33.5542987915   | 11.3401031861   |
| 116.7028101258  | 42.352110887    |
| 1.9372406818    | 0.2839182301    |
| 12.9306333389   | 9.9689686069    |
| 0               | 0.0158063803    |
| 371.8789132571  | 503.6198908782  |
| 2.3490627774    | 3.1968307079    |
| 0               | 0.1550891388    |
| 5.7316317434    | 3.8646227974    |

gene\_expression\_table

|                |                |
|----------------|----------------|
| 6.8708480875   | 8.7706346746   |
| 66.5062308801  | 24.259048446   |
| 0.602101623    | 0.5363331294   |
| 12.3298267734  | 10.9067497048  |
| 18.0746244235  | 12.4669029752  |
| 0.1832941741   | 0.4190665127   |
| 29.9554112549  | 17.9875633372  |
| 350.5477866778 | 458.2773088948 |
| 0.3322626302   | 0.1421121319   |
| 1.7772723277   | 5.1598575642   |
| 67.4031779596  | 59.8032157874  |
| 22.3384850828  | 13.1676589895  |
| 10.2493872922  | 9.0262638137   |
| 0              | 0.4784466955   |
| 13.2384958526  | 13.8124347708  |
| 10.3532124772  | 14.1116630362  |
| 1.6133968941   | 3.4939724882   |
| 99.2938922024  | 47.9245211425  |
| 3.8377050554   | 2.5069048277   |
| 0.8792676674   | 0.2724548086   |
| 7.9940899088   | 8.2290831843   |
| 2.6479806582   | 0.5114825318   |
| 28.8825496056  | 29.2485368472  |
| 8.9817811638   | 2.3727528465   |
| 33.5561773417  | 18.8252015902  |
| 0.2742246711   | 0.3731913246   |
| 0              | 0              |
| 0              | 0              |
| 1.3313027669   | 0.5888236034   |
| 0.3996134328   | 0.4700798035   |
| 0              | 1.5542583165   |
| 99.0288092234  | 47.227371795   |
| 0.4112941277   | 0.4328568096   |
| 0.2306830121   | 0.9543643589   |
| 1.194612378    | 1.4893908165   |
| 0.0812091091   | 0.221034343    |
| 0.9302787073   | 0              |
| 0.0206018194   | 0.0785034282   |
| 26.1424188669  | 27.8924617774  |
| 4.683345661    | 1.5459863535   |
| 0              | 0              |
| 0.4134964487   | 0.3052071938   |
| 8.0242501833   | 1.939271911    |
| 0.004697       | 0.006392       |
| 5.8760531023   | 6.7327042964   |
| 341.7706614161 | 151.3479724354 |
| 4.2350569899   | 3.908474504    |
| 2.9147904717   | 3.8198845735   |
| 0.0294454612   | 0.005343       |

gene\_expression\_table

|                |                |
|----------------|----------------|
| 3.0513341446   | 1.2303849401   |
| 3.3277241682   | 4.5419420123   |
| 5.4875714742   | 5.2170924494   |
| 18.6323252651  | 7.2283261746   |
| 191.5125851708 | 154.7877550701 |
| 0.0106904685   | 0.0756528157   |
| 3.4883388779   | 3.1325916525   |
| 0.018270035    | 0.005683       |
| 0.0190623284   | 0.0168622032   |
| 524.2644109863 | 429.4658633491 |
| 1.2566730626   | 2.2209194022   |
| 20.4008155342  | 31.2995727671  |
| 9.0686380447   | 4.9864547242   |
| 0.898337077    | 0.5798349422   |
| 0.0304355037   | 0.0773165169   |
| 2.0659232892   | 2.4634158694   |
| 61.9644737439  | 20.8984848341  |
| 1.2599907511   | 0.5417928331   |
| 4.4624704978   | 3.3797338903   |
| 0.090953079    | 0.3960886512   |
| 185.5912144073 | 439.7991802746 |
| 9.3911687906   | 8.3713729441   |
| 27.6369156857  | 33.2609014413  |
| 10.7795161397  | 11.4966608402  |
| 21.3917355013  | 22.6940746308  |
| 14.080556322   | 8.4000231498   |
| 27.1220135965  | 12.2666888537  |
| 70.8611885079  | 38.9891989748  |
| 30.5516266921  | 14.6291534364  |
| 2.6847594777   | 2.8793172499   |
| 0.7151556857   | 1.0366531464   |
| 344.6916643055 | 393.1901330815 |
| 17.8455405112  | 11.5517803236  |
| 0.8868883546   | 0.4023210099   |
| 8.4316379809   | 10.269491105   |
| 0.2003322959   | 0.4362103501   |
| 0.401043338    | 0.4016928817   |
| 5.0314844114   | 5.8434402788   |
| 1.6976962154   | 1.6796852166   |
| 3.3232381876   | 2.528287008    |
| 131.5989870081 | 86.774088963   |
| 0.6315397467   | 0              |
| 2.7242383075   | 3.7657244181   |
| 2.6276608406   | 6.350523623    |
| 8.9774951131   | 4.1375353774   |
| 0              | 0.009879       |
| 0.0617661518   | 0.1569070046   |
| 0.571419111    | 0.4306940979   |
| 21.4613328623  | 12.8582723778  |

gene\_expression\_table

|                 |                 |
|-----------------|-----------------|
| 10.283791333    | 13.0562842165   |
| 6.3552395718    | 6.4834129743    |
| 3.3761603925    | 2.8907716791    |
| 0.100013804     | 0               |
| 0               | 0.0235200341    |
| 0.2155681892    | 0.0547616419    |
| 0.1391986143    | 0.1515478969    |
| 33.8952579262   | 63.1945342312   |
| 178.7694997983  | 53.3775722641   |
| 3.3764811609    | 4.1845085605    |
| 1462.0598820364 | 696.0941208722  |
| 23.1910665558   | 20.1727772293   |
| 0.4740223243    | 0.3010444268    |
| 0.0302158243    | 0.0904653239    |
| 0               | 0               |
| 0.0125837381    | 0.0116451101    |
| 8.1558170993    | 9.8795262489    |
| 0.1082286908    | 0.117830415     |
| 0               | 0               |
| 0.6862548494    | 0.9515428093    |
| 2.8883256769    | 3.4024572037    |
| 5.9324789721    | 2.5980849707    |
| 0.5915506985    | 0.1288062597    |
| 0.2813733021    | 0.0875245416    |
| 87.277186022    | 53.9224809572   |
| 2.4733079878    | 2.4234591945    |
| 0.0720334936    | 0.0261413629    |
| 2.0834813445    | 1.0151439022    |
| 6.593765728     | 42.1153028511   |
| 2.1862443548    | 1.6510883109    |
| 24.079429033    | 5.6665729397    |
| 12.0716093189   | 9.2250705152    |
| 0               | 0               |
| 7.0471171748    | 2.7855519976    |
| 8.4424000768    | 4.0877472886    |
| 469.746890168   | 158.871529908   |
| 1.83170015      | 0.8158103516    |
| 0.1689469386    | 0.1365581024    |
| 24.8281961705   | 17.3725139507   |
| 41.1741816582   | 20.4253267967   |
| 2381.0073450402 | 2335.3427783576 |
| 20.0807614035   | 7.4709183049    |
| 7.5880608281    | 4.3270990763    |
| 2.1438625659    | 1.8477971903    |
| 14.4274093438   | 5.076160878     |
| 3.8270771784    | 1.0767628218    |
| 0.4638503921    | 0.829645822     |
| 36.3949603709   | 38.1997002296   |
| 31.6427099168   | 15.4751389788   |

gene\_expression\_table

|                |                |
|----------------|----------------|
| 5.2397895658   | 1.6756633277   |
| 5.9302162984   | 4.9271971223   |
| 0.1871014338   | 0.0911291758   |
| 0              | 0.4630106626   |
| 43.6271538508  | 13.0024314631  |
| 625.6703082479 | 474.6549385777 |
| 58.2337868918  | 32.5479036993  |
| 517.7510411118 | 493.6474498218 |
| 14.3886000369  | 5.0066931011   |
| 0.3500344501   | 0.1905442272   |
| 1.9867992944   | 2.0273997212   |
| 5.5710837059   | 11.7963572931  |
| 0.038758757    | 0.1898879285   |
| 11.2803600986  | 3.9016172714   |
| 1.7290426745   | 1.7957469132   |
| 0.3612360733   | 0.1474814445   |
| 0.6134446548   | 1.3595876565   |
| 7.9733633004   | 4.7233417159   |
| 8.0016518045   | 6.9199591239   |
| 1.1219690947   | 1.9951278066   |
| 4.2132423316   | 4.2698403844   |
| 1.6344238471   | 0.9179573506   |
| 2.1238562265   | 4.6143254141   |
| 12.0698923121  | 3.976789845    |
| 46.0031397512  | 61.1517393699  |
| 0              | 0.0362427507   |
| 35.6694207819  | 12.1309366035  |
| 1.8680818627   | 0.9039166536   |
| 11.5566224247  | 14.1082190184  |
| 4.0556392938   | 10.6662217597  |
| 0.0371582059   | 0.005779       |
| 0.185275977    | 0.2218844152   |
| 0.4657570686   | 0              |
| 25.9544640414  | 24.8537288381  |
| 2.9913639398   | 2.9872247221   |
| 23.7035133995  | 12.9880054845  |
| 0.248701547    | 0.2224146006   |
| 29.6898818379  | 19.8311365231  |
| 0.3999601684   | 0.1360760726   |
| 6.0968362426   | 6.7629694026   |
| 1.6211790724   | 6.177518224    |
| 6.9085410715   | 6.9643019167   |
| 7.5332593174   | 9.8614325183   |
| 0.1769798516   | 0.3131065797   |
| 5.2990034536   | 4.1340894009   |
| 2.6216242973   | 1.1496111226   |
| 69.7378101317  | 108.4887899474 |
| 2.230948308    | 2.7656476139   |
| 0.5313022904   | 0.5387411186   |



gene\_expression\_table

|                |                |
|----------------|----------------|
| 53.4007149186  | 25.092694925   |
| 95.3761692099  | 33.8329901045  |
| 16.3886667602  | 5.7323329653   |
| 4.3526510772   | 1.8982933102   |
| 20.7078559048  | 16.9720746152  |
| 0.5938284332   | 0.3232555535   |
| 2.5620419269   | 0              |
| 0.5086418443   | 0.1277923892   |
| 4.5704875769   | 2.5998999724   |
| 11.3536506132  | 8.0871926672   |
| 1.0762824344   | 0.9391367682   |
| 16.6936201184  | 14.8277377326  |
| 2.2167155571   | 0.6488793689   |
| 1.0277108678   | 0.9704625958   |
| 4.1559170906   | 1.8098470253   |
| 32.2993109201  | 13.6869015903  |
| 87.9858741844  | 32.09774793    |
| 6.6381401766   | 11.3365584636  |
| 0.2831391868   | 0              |
| 9.1204968858   | 11.3572920522  |
| 35.8604368778  | 29.964632961   |
| 0.1163105481   | 0.3798878109   |
| 7.332533403    | 6.3465277128   |
| 0.4755100413   | 0.8628264381   |
| 2.1915286556   | 2.5010663302   |
| 0.9327179143   | 2.0166293525   |
| 5.8134570547   | 4.9724088934   |
| 5.5529069901   | 4.2852239825   |
| 4.547593856    | 5.0614162777   |
| 0.3889391478   | 0.21172233     |
| 3.388147282    | 2.1517612229   |
| 74.5119906942  | 30.7874436403  |
| 0              | 0              |
| 2.5240612353   | 0.8455348804   |
| 5.2511504627   | 2.5390280264   |
| 1.9019255568   | 0              |
| 0              | 1.6798915155   |
| 17.6044032828  | 8.8075506181   |
| 163.1342228081 | 103.3908188601 |
| 0              | 0.1099950431   |
| 577.2149876938 | 300.5018366676 |
| 8.9200008623   | 10.5018157798  |
| 4.1378144702   | 3.7777385932   |
| 0.6318530514   | 1.0019546386   |
| 5.2498173785   | 4.4854993744   |
| 12.860950214   | 10.1676643347  |
| 1.0659632603   | 1.6118504398   |
| 1.869196495    | 2.9600378032   |
| 0              | 0              |

gene\_expression\_table

|                  |                 |
|------------------|-----------------|
| 7.3223030913     | 6.9279744561    |
| 28.236895146     | 18.8644014881   |
| 0.4243143202     | 0.0944914523    |
| 0                | 0               |
| 0.565533882      | 0.5200222535    |
| 1.2754993214     | 5.8632217688    |
| 0.0925190568     | 0.1007270695    |
| 67.4354739288    | 31.6125039729   |
| 0.5532365222     | 1.3853314083    |
| 0.6185451017     | 4.0405233836    |
| 0                | 0.3427553499    |
| 473.6866970219   | 356.1242506792  |
| 0                | 0.0996250112    |
| 6.5444016249     | 7.7508459721    |
| 12.1685527071    | 26.7327936505   |
| 2.2896053707     | 3.9727920668    |
| 10893.7497186332 | 9159.8402113702 |
| 0                | 0.7228196115    |
| 239.0448079166   | 316.1461311358  |
| 1.9417026844     | 1.4435163555    |
| 0                | 0.0750549325    |
| 0.6191760473     | 0.5392859881    |
| 1.324813273      | 1.0642179887    |
| 19.7375355326    | 4.4259170484    |
| 3.6043799893     | 2.9067775912    |
| 60.4306961409    | 75.6865589334   |
| 98.5960571873    | 90.4410964722   |
| 1.697158408      | 1.8350695487    |
| 3.2343410871     | 1.3778929983    |
| 0.1221132513     | 0.033236693     |
| 0                | 0.1251899868    |
| 0.0687786187     | 0.0374402255    |
| 3.1313845774     | 5.1137874074    |
| 0.6040875995     | 0.530387448     |
| 0.8063935758     | 0.7873538577    |
| 0                | 0.003561        |
| 0                | 0.00535         |
| 4.6913921434     | 5.5818753432    |
| 9.4363972        | 19.8498955188   |
| 29.8404585725    | 12.8353496094   |
| 1.8413820052     | 0.3898113104    |
| 20.6146797905    | 13.944834609    |
| 0.2318419677     | 0.025241029     |
| 0.6189089518     | 0.3369083468    |
| 0                | 0.1721826882    |
| 14.591091021     | 11.3553026152   |
| 0.0179891809     | 0.078340508     |
| 5.3069921756     | 7.3545416412    |
| 6.8616689493     | 3.9571013295    |

gene\_expression\_table

|                |                |
|----------------|----------------|
| 18.0967965087  | 15.2933858669  |
| 232.7212938524 | 186.5014341074 |
| 1.0118671694   | 0.9656048861   |
| 0.9388631008   | 0.8417757049   |
| 1.2738784631   | 1.2482038182   |
| 20.5585795413  | 3.2269212314   |
| 25.4324243117  | 12.1710562177  |
| 8.5235354666   | 8.2589489431   |
| 18.2083452609  | 20.4632102428  |
| 0.0533258264   | 0.0290283667   |
| 2.9221182933   | 2.1001945853   |
| 7.5351523339   | 19.7535218058  |
| 2.3800433676   | 1.4944558791   |
| 10.5716225923  | 7.9981307134   |
| 0.1750851816   | 0.1111939574   |
| 316.507395627  | 185.2719299776 |
| 2.7522562396   | 2.3625683416   |
| 0.5627435426   | 0.9849227114   |
| 0              | 0.008994       |
| 11.2654990971  | 0.5704623403   |
| 5.3657073202   | 28.8277008969  |
| 0.6016211899   | 2.4071074099   |
| 47.0851846355  | 46.8796626365  |
| 0.1433375257   | 0.1560540002   |
| 0              | 0.1347316372   |
| 0.6677225231   | 0.2827070005   |
| 145.3137626253 | 161.8769999818 |
| 0.0436774137   | 0.0951046851   |
| 0              | 0              |
| 3.8431050445   | 2.1485681535   |
| 0.7899778892   | 0.4013624314   |
| 0.5431361359   | 0.5913215414   |
| 3.5868586977   | 0.7593199484   |
| 0.0589869448   | 0.0294342075   |
| 0.7495246433   | 3.9780985566   |
| 2.5231300192   | 4.9260649034   |
| 0.3157021958   | 0.8347251253   |
| 7.9222121111   | 15.8125860886  |
| 2.4469537587   | 1.5275459525   |
| 4.3285388003   | 2.5843036705   |
| 8.942561257    | 57.8397303543  |
| 6.0166662026   | 2.1554888857   |
| 18.9260977886  | 13.8580478982  |
| 2.6411773143   | 1.5169932284   |
| 0.6016383909   | 0.5614405205   |
| 23.544031147   | 15.6954383082  |
| 2.1400600105   | 1.772403202    |
| 0.5086014615   | 0.2693787832   |
| 0.0888486082   | 0              |

gene\_expression\_table

|                |                |
|----------------|----------------|
| 57.297817531   | 23.5894945007  |
| 0.1838932479   | 0.2502596302   |
| 0.5111045473   | 0.3179704037   |
| 0.254113457    | 0.2053973381   |
| 31.8883489774  | 18.7028916371  |
| 31.4990059052  | 25.9691464862  |
| 0.030587284    | 0.0208130599   |
| 0              | 0              |
| 0.0161926789   | 0.001763       |
| 4.7782585029   | 5.9453385543   |
| 2.2891501048   | 2.3981899566   |
| 16.164689233   | 3.5284666383   |
| 17.6587835221  | 6.9616469154   |
| 0.2336024019   | 0.720592897    |
| 0.3170831228   | 0.1726068922   |
| 16.180404736   | 11.9434537129  |
| 0              | 0.1310267637   |
| 3.3722951807   | 2.4397544032   |
| 1.2246707033   | 1.5833172709   |
| 0.1455148631   | 0.0396061261   |
| 11.8622621988  | 10.2437602624  |
| 46.2550832995  | 33.6234080634  |
| 16.7468384266  | 9.3463477419   |
| 112.5928754582 | 148.2572686057 |
| 8.3317321523   | 6.4837759589   |
| 176.8197072169 | 74.2583188899  |
| 5.7547755263   | 2.0031981629   |
| 57.9949213994  | 25.2437385455  |
| 76.9912766336  | 62.781899187   |
| 6.5837991526   | 4.3203744803   |
| 0.7110937267   | 0.7741798248   |
| 79.0808239378  | 67.2047124127  |
| 4.915075034    | 2.6060677196   |
| 0.0530395331   | 0.5389537164   |
| 87.4264987217  | 32.8920877688  |
| 0              | 0              |
| 12.427541314   | 10.8545138862  |
| 27.6423561886  | 14.5924315436  |
| 34.6311360306  | 19.0612170874  |
| 381.8006116292 | 361.7690842742 |
| 83.2346749045  | 28.9499653395  |
| 4.0462546558   | 1.9506802321   |
| 0.4985879483   | 0              |
| 199.5914962893 | 157.0744794726 |
| 22.663332644   | 20.2943283131  |
| 0              | 1.625574805    |
| 5.6838229074   | 3.5676144329   |
| 43.207143222   | 62.1287656022  |
| 2.4339786376   | 0.6309318825   |

gene\_expression\_table

|                |                 |
|----------------|-----------------|
| 3.4675219049   | 3.7751500258    |
| 7.2604493644   | 4.0236750883    |
| 0.1627532048   | 0.08859609      |
| 0              | 0.0219812784    |
| 0.1827434161   | 0.2558003948    |
| 2.7422166175   | 3.1033464321    |
| 2.1231216015   | 1.0853899365    |
| 10.6773881362  | 8.2167068162    |
| 0.3219896895   | 1.0304211439    |
| 0              | 0               |
| 1.0257492701   | 2.2335013244    |
| 163.0381774731 | 104.005723471   |
| 1.6006004167   | 1.5739620803    |
| 0.0268028332   | 0.0802469251    |
| 2.4471338946   | 2.8973569309    |
| 648.0496150671 | 393.710710721   |
| 7.1574504626   | 9.6683952393    |
| 14.4232119967  | 19.6794781196   |
| 30.2715206342  | 37.0969201954   |
| 9.2110610816   | 15.0789575133   |
| 106.1529816607 | 113.5540080207  |
| 198.6999586607 | 91.256820826    |
| 0.3716514369   | 0               |
| 33.4464812579  | 18.4827380334   |
| 56.5249451031  | 63.5409583599   |
| 0.9182832219   | 1.8705010275    |
| 2.06989828     | 2.4268821594    |
| 3.9189690586   | 1.6533261829    |
| 0.9197073584   | 0.6675340205    |
| 4.3258597359   | 11.3554581223   |
| 0.0484926588   | 0               |
| 887.5924355233 | 1281.4138134059 |
| 9.8306497641   | 6.6209485445    |
| 5.8555735362   | 5.057140862     |
| 0.8178081376   | 0.4070224537    |
| 59.2725002209  | 22.0713729853   |
| 854.6471733821 | 645.8277329633  |
| 293.8625097299 | 145.5071605853  |
| 0.0618986975   | 0.0240679157    |
| 0.0767271325   | 0.0531580847    |
| 3.5813496925   | 1.9336882327    |
| 0.4497500291   | 0.2285035666    |
| 0.9762440509   | 1.084504208     |
| 20.3438575236  | 10.7523414807   |
| 2.196379605    | 2.4488559416    |
| 0.7155585547   | 1.2545591442    |
| 4.8410941314   | 2.773384563     |
| 41.7631085175  | 51.8880767962   |
| 2.3060260393   | 2.0266367766    |

gene\_expression\_table

|                |                |
|----------------|----------------|
| 54.0906259102  | 30.7398353655  |
| 1.5397012382   | 1.3096085188   |
| 1.734748634    | 1.0541304104   |
| 1.8999347431   | 0.9115385138   |
| 17.8786101775  | 9.8819487773   |
| 9.0781052145   | 5.4495908911   |
| 0.7234402674   | 0.3759103632   |
| 0              | 1.7421876491   |
| 18.5550943959  | 17.9868791831  |
| 152.9988651447 | 42.5033794482  |
| 1.4763250365   | 0.6792756613   |
| 52.5848843533  | 61.5742636869  |
| 0              | 0              |
| 15.8040608157  | 22.9856511166  |
| 6.7556395776   | 4.6714059718   |
| 55.7401934264  | 47.5840028829  |
| 144.7970381529 | 80.654556172   |
| 0.4575539108   | 0.684951738    |
| 1.0947346046   | 0.6589589392   |
| 2.5007412882   | 2.3595862669   |
| 5.2869482192   | 9.5830295503   |
| 30.710834642   | 63.0351515244  |
| 0              | 1.6034271826   |
| 19.1269575627  | 10.1759576383  |
| 6.4737269644   | 3.9421333315   |
| 0.4243804449   | 0.7893015957   |
| 15.5257928794  | 14.070767361   |
| 58.5796380615  | 49.2026870166  |
| 381.4738120108 | 188.5278504386 |
| 0.7865036203   | 0.5351749109   |
| 0              | 1.830828523    |
| 0.8575771054   | 0.7626420634   |
| 2.0041208329   | 2.6678935914   |
| 33.0598332054  | 7.9762442632   |
| 4.2555456895   | 4.8005458124   |
| 20.7115200393  | 31.7519024529  |
| 18.1691743919  | 17.4763198546  |
| 0              | 0              |
| 3.1455299978   | 4.0643509029   |
| 3.3959938165   | 1.711265833    |
| 0.252954994    | 0.2409718507   |
| 3.4951304368   | 3.9562082173   |
| 5.8285385557   | 1.2793606809   |
| 117.6924312397 | 96.4909641659  |
| 9.2338439415   | 4.858970697    |
| 0.1780405079   | 0.1070134741   |
| 4.781083684    | 2.5330346645   |
| 0.8168493014   | 1.2295491152   |
| 6.2454098762   | 4.6428193814   |

gene\_expression\_table

|                 |                 |
|-----------------|-----------------|
| 13.6347112483   | 12.3702848731   |
| 0.7761539903    | 0.5302036325    |
| 0.0196556113    | 0.1319629548    |
| 0               | 0.1818614916    |
| 14.6717812912   | 6.0907541993    |
| 36.2292832853   | 23.0617817864   |
| 1.1242240393    | 1.4512690114    |
| 0.6046029783    | 1.8677603621    |
| 1.2918716642    | 0.5809384798    |
| 3.6383328384    | 2.8024887153    |
| 0.0185344517    | 0               |
| 0.9367651019    | 1.1304606255    |
| 7.1016251402    | 2.5772199923    |
| 0               | 0               |
| 2.3430379207    | 1.5393393463    |
| 6.6209397394    | 3.225576066     |
| 2.58960081      | 1.5140912944    |
| 0.0655100634    | 0.0129676217    |
| 1.3602904288    | 2.8385283384    |
| 3.106843399     | 1.8720606428    |
| 0.183387977     | 0.3230571003    |
| 0.004009        | 0               |
| 0.1955296818    | 0.7184581453    |
| 0.3272912846    | 0.7440958365    |
| 2.0038095512    | 1.280493496     |
| 3.0135018335    | 3.7916417788    |
| 79.1086630072   | 44.4132235475   |
| 1014.2115307064 | 1035.6777269092 |
| 28.2670613222   | 40.7021945678   |
| 0.0146742708    | 0.1837254723    |
| 0               | 0.0598791625    |
| 52.5650553809   | 34.1282184322   |
| 6.4502231179    | 6.0930232939    |
| 1.812514212     | 0.650774104     |
| 3.7196199254    | 4.5097967687    |
| 22.2116906486   | 26.7685814524   |
| 9.9214412115    | 4.8864569389    |
| 2.2141838779    | 3.4573360286    |
| 1.8918640802    | 1.4181572483    |
| 6.3677317663    | 8.9324629201    |
| 2.23053894      | 1.4570553902    |
| 12.4692322525   | 9.1283299532    |
| 9.2733596032    | 8.2981349538    |
| 104.408560978   | 34.5002593333   |
| 3.3987155173    | 4.2288449626    |
| 3.8770897024    | 2.3743425641    |
| 0               | 0.7288058063    |
| 7.5099587294    | 7.3585977254    |
| 12.7548529643   | 5.1011357809    |

gene\_expression\_table

|                  |                  |
|------------------|------------------|
| 0.7122993051     | 1.0770727201     |
| 12.2297322387    | 10.0388741724    |
| 15.5738776563    | 19.039664377     |
| 3.5037767194     | 2.1404263728     |
| 7.9266093182     | 3.7450224197     |
| 0.6349819319     | 0.8641445254     |
| 0.0471264543     | 0.1282684291     |
| 1.7380636128     | 0.6307531308     |
| 0.296603878      | 0.5713158999     |
| 297.8299307654   | 479.7867089746   |
| 0                | 0.252699841      |
| 1.6200909469     | 2.0125644692     |
| 5.5614814572     | 5.290374404      |
| 13.190327129     | 19.2871396214    |
| 0.0220913603     | 0.0601280985     |
| 0.2878298562     | 0.1709265032     |
| 5.1327683439     | 5.3520138649     |
| 9.8552773673     | 14.3251680647    |
| 5.2180704348     | 4.824342934      |
| 0                | 0.0340119475     |
| 0                | 0.0237010672     |
| 0                | 0.0297266928     |
| 4.4283826838     | 5.5601652929     |
| 0                | 0.0101413432     |
| 1.4019256735     | 2.2894504582     |
| 3.4233855347     | 2.9712933048     |
| 0.2080020152     | 0.1436058183     |
| 0                | 6.6952030668     |
| 0.0705545829     | 0.0384069867     |
| 3.7554261202     | 7.8364761222     |
| 0.0310498604     | 0.025353383      |
| 0.006084         | 0.006623         |
| 1.472903197      | 0.942491004      |
| 0.1816145914     | 0.2824669887     |
| 2.7039637774     | 2.1639766239     |
| 0                | 0.6242443484     |
| 3.2531136133     | 2.8120189541     |
| 0                | 0                |
| 0.0568765575     | 0.0782631278     |
| 43.0629726542    | 35.3324099693    |
| 7.8933315587     | 8.5936042092     |
| 0.005375         | 0.0009754        |
| 24.2928306044    | 18.3811979453    |
| 0                | 0.0346068997     |
| 21572.2013649138 | 24839.7075771527 |
| 0.5729390209     | 0.1247536897     |
| 0.0743880952     | 0.3374482641     |
| 3.4204981079     | 3.4912072677     |
| 8.7911674819     | 11.5627660596    |



gene\_expression\_table

|                |                |
|----------------|----------------|
| 16.9140072554  | 11.4068013117  |
| 6.7108457149   | 5.6366927952   |
| 0.025065549    | 0.0750455452   |
| 10.6736759124  | 9.1690063745   |
| 0.0557607152   | 0.2569956687   |
| 4.5470538765   | 1.8600821399   |
| 2.5245271011   | 2.0672445218   |
| 7.578790691    | 5.9394113057   |
| 0.1626064783   | 0.0590108121   |
| 2.6983042175   | 2.2848697334   |
| 0              | 0.0159768708   |
| 2.6608877681   | 1.1402902991   |
| 0.6533845979   | 0.3082520634   |
| 2.28147813     | 3.7258260182   |
| 3.8582944987   | 5.1393591857   |
| 44.0540108052  | 30.6088424803  |
| 0.5556171289   | 0.8661208651   |
| 0              | 0              |
| 10.2770965123  | 6.0196542517   |
| 7.8791345859   | 5.1863283939   |
| 131.6713059086 | 101.4452192091 |
| 0.0509957938   | 0.1896932902   |
| 0.0262616847   | 0.0540062468   |
| 5.5786491034   | 9.992002396    |
| 0              | 0.009879       |
| 0.8724180185   | 0.6925744021   |
| 0.1015116535   | 0.2235466851   |
| 0.1298303576   | 0.1943542104   |
| 3.8741892022   | 5.3314698366   |
| 0.1338306675   | 0.2314117938   |
| 115.5204067583 | 80.9204111866  |
| 0.3046752562   | 0.1953374649   |
| 5.566229063    | 6.44548149     |
| 1.1708296641   | 0.9596895517   |
| 0.0286209754   | 0.0467402135   |
| 188.6224218056 | 75.7115537726  |
| 4.9653123702   | 3.6087500809   |
| 3.2559957494   | 4.1689526072   |
| 19.192725611   | 4.3880437731   |
| 66.0971721763  | 136.1012867452 |
| 0.2884341316   | 0.0968238017   |
| 23.9987956228  | 9.9337745626   |
| 5.1067754922   | 3.1596125623   |
| 281.7388206049 | 594.6003769015 |
| 588.0435716253 | 518.8351505023 |
| 0.0333073291   | 0.0362622552   |
| 2.5897618717   | 6.6271842696   |
| 184.6534037198 | 164.4812442488 |
| 7.9151003584   | 6.14791866     |

gene\_expression\_table

|                |                |
|----------------|----------------|
| 5.492780643    | 6.5041808489   |
| 0.0458347223   | 0.0848317699   |
| 18.3945112233  | 19.2083567293  |
| 0.7726892666   | 0.8879754878   |
| 0.014604726    | 0.003347       |
| 4.7391446471   | 15.448764346   |
| 3.3538265286   | 3.1747837689   |
| 1.8681254173   | 1.0816436684   |
| 0.069182951    | 0.0515894894   |
| 0.00452        | 0.0184523651   |
| 3.063509208    | 2.7300003431   |
| 2.6740123645   | 0.7021232404   |
| 7.2924506644   | 6.0521769839   |
| 0              | 0.0143242151   |
| 0.058787273    | 0.3440145293   |
| 2.1078214874   | 0.8237819241   |
| 114.888234939  | 146.0772771424 |
| 5.7217616199   | 5.8570692823   |
| 0              | 0              |
| 103.3539861255 | 87.5379060564  |
| 5.169997699    | 12.1126649603  |
| 2.9773109079   | 4.895249484    |
| 6.6833180816   | 0.5197315695   |
| 2.5475334069   | 1.6406339912   |
| 93.9990751295  | 30.3911963989  |
| 0.262655197    | 0.2747431696   |
| 1.5681717269   | 0.2667648764   |
| 5.8051817746   | 0.5745636412   |
| 0.0114465634   | 0              |
| 0              | 0.0116043478   |
| 7.2910719973   | 6.0422927385   |
| 0.5273073871   | 0.3635893919   |
| 4.8293431011   | 5.3203806184   |
| 1.102068941    | 2.2197061921   |
| 2.7989352837   | 3.6012935744   |
| 0.282901942    | 0.0859535308   |
| 7.5009362693   | 8.5192657862   |
| 0.6286018004   | 0.6728351459   |
| 0              | 0.0381422609   |
| 555.4062068953 | 444.044076231  |
| 10.2383184356  | 8.0228222622   |
| 26.5533792531  | 25.4955796525  |
| 18.0610881689  | 15.9292557485  |
| 5.5972432773   | 13.6739238214  |
| 0.024411722    | 0              |
| 2.6451407446   | 1.7778416907   |
| 21.6806859742  | 15.453825852   |
| 0.0877573842   | 0.0119428694   |
| 473.3601569521 | 281.9820315955 |

gene\_expression\_table

|                |                |
|----------------|----------------|
| 8.1160061129   | 2.0680079061   |
| 27.0621375262  | 39.8282170976  |
| 64.9314141841  | 57.1271440999  |
| 0.5452573711   | 0.4387707141   |
| 3.1768323618   | 5.6399925347   |
| 42.3136514585  | 20.2099409526  |
| 17.6525502387  | 19.5566475675  |
| 365.3176740196 | 292.7670918879 |
| 4.5899106487   | 4.8472003135   |
| 357.8189446787 | 157.5403803551 |
| 22.8103662736  | 27.3620487839  |
| 79.0993864213  | 89.1018322363  |
| 16.1772309385  | 10.6780651858  |
| 6.2399530001   | 9.0984949212   |
| 0              | 0              |
| 51.5208431209  | 62.1885324057  |
| 47.7885791671  | 26.6644721136  |
| 44.4635921946  | 82.9856030532  |
| 105.6562284402 | 302.7705640543 |
| 16.0297129161  | 19.6411738433  |
| 0.3785716355   | 1.1849524477   |
| 19.0930538771  | 31.6017550766  |
| 14.1547389387  | 17.2690581783  |
| 14.5625635709  | 34.2853788254  |
| 3.3114840688   | 1.909934163    |
| 17.1540293537  | 12.9294576535  |
| 0.3765057141   | 0.4099081694   |
| 646.2170842562 | 527.0502256548 |
| 1.6327798883   | 2.1726652594   |
| 2.4624494651   | 0.6008937507   |
| 0              | 0              |
| 12.7151679731  | 22.8184936106  |
| 0              | 0              |
| 1.7622202172   | 1.8642602557   |
| 0.6495124501   | 0              |
| 0              | 0              |
| 0              | 0              |
| 24.5591510684  | 12.3079522039  |
| 0.4706092267   | 0.3956199497   |
| 0.9424693218   | 1.5333590431   |
| 141.4305537788 | 109.1418123588 |
| 150.6276273626 | 107.0279546271 |
| 14.5769441239  | 13.2363944307  |
| 0.033623457    | 0.0183032145   |
| 8.7960693466   | 15.2854558646  |
| 4.8165345686   | 4.1950744306   |
| 0.4954276561   | 0.7491395953   |
| 29.4332101947  | 16.6352830705  |
| 0.1261716295   | 0.6868259859   |

gene\_expression\_table

|                |                |
|----------------|----------------|
| 354.8755271983 | 164.1658562122 |
| 4.9601889877   | 5.1557866443   |
| 2.8118191045   | 5.1021254064   |
| 1.0342247572   | 1.3651238536   |
| 0              | 0.006906       |
| 32.5694809179  | 29.1186057867  |
| 3.7552163046   | 2.8234584309   |
| 18.0195866286  | 6.7196300264   |
| 38.8757470354  | 83.2204044093  |
| 0.0321752028   | 0.0613019576   |
| 29.8184447955  | 14.1839707933  |
| 0.0206396064   | 0.0898827612   |
| 0              | 0              |
| 16.4561233941  | 9.5594531484   |
| 55.376064105   | 36.2755017515  |
| 50.4745341066  | 41.79484627    |
| 4.1283724921   | 7.1700038686   |
| 1.6573890769   | 1.723632386    |
| 100.3508897211 | 125.1725891313 |
| 86.7978075131  | 45.4318500497  |
| 0.0945205267   | 0.0779591695   |
| 12.3079731279  | 17.5619895082  |
| 4.650142201    | 3.4118120443   |
| 347.2181568143 | 542.9369774228 |
| 0.2786051061   | 0.3526119572   |
| 3.6214034554   | 2.7487722888   |
| 0              | 0.008993       |
| 0.1312198495   | 0.013317577    |
| 18.8415656586  | 15.8744846259  |
| 52.686060444   | 72.5973309195  |
| 1.4876971758   | 0.4983634454   |
| 3.8084132688   | 4.4557084444   |
| 1.4804919024   | 1.6484693461   |
| 7.2710521596   | 3.5231074848   |
| 14.0725797182  | 7.3014410799   |
| 0.0745486756   | 0.0216433093   |
| 24.3546207232  | 37.0029401012  |
| 0              | 0.0811798575   |
| 0.233706179    | 0.0848132963   |
| 0.2559341323   | 0.2786398393   |
| 34.5949922221  | 29.1041205055  |
| 5.2488298141   | 3.951136805    |
| 0.002647       | 0.0144089851   |
| 47.4875133651  | 36.2307149573  |
| 16.2394469065  | 16.9822606997  |
| 1.3536767038   | 4.6055338503   |
| 418.568651057  | 499.8642525356 |
| 3.5659970148   | 5.2723428477   |
| 0.9528143247   | 0.9632490656   |

gene\_expression\_table

|                 |                 |
|-----------------|-----------------|
| 27.7199021495   | 53.9854799533   |
| 231.007241221   | 196.7981787462  |
| 1.0272347747    | 1.3979599454    |
| 17.376538986    | 33.3994592371   |
| 10.0704906942   | 19.5879689467   |
| 0.4142304008    | 0.5637245961    |
| 12.1168355239   | 0.2198634125    |
| 0               | 0.2996307558    |
| 0.8166468535    | 0.4303609309    |
| 0               | 0.8366463538    |
| 24.676030615    | 20.4423411451   |
| 8.8478957194    | 6.9462346273    |
| 7.8714869884    | 4.1348555842    |
| 4182.776500034  | 6169.8559407968 |
| 1.7061814346    | 2.3735344795    |
| 1.4426675485    | 2.0150490603    |
| 0.0187152844    | 0.0509391205    |
| 35.2033675352   | 38.4531737688   |
| 3.3246357052    | 6.4175506519    |
| 5.0152516958    | 7.6702665558    |
| 0.0339235348    | 0.0184665644    |
| 207.8094326885  | 90.4556969867   |
| 0.5685734764    | 1.2380312124    |
| 3.9372438255    | 3.7960137945    |
| 12.2234629762   | 7.8622495505    |
| 1511.8479166877 | 520.2192622546  |
| 0.414111829     | 0.8033337711    |
| 0               | 503.7964385508  |
| 633.9152882333  | 372.5276431753  |
| 42.2552533448   | 27.1527441685   |
| 2.2830413453    | 2.7402565988    |
| 1.7128166703    | 1.139583266     |
| 0.1143884777    | 0               |
| 0.8402217799    | 1.8826164281    |
| 1.9673620381    | 1.1293657101    |
| 10.0598933954   | 12.1482580533   |
| 1.9051653736    | 1.4660141218    |
| 6.5912872828    | 8.2763736055    |
| 1.1007710746    | 1.1738450336    |
| 0.003076        | 0               |
| 0.0710638525    | 0.0461495862    |
| 0.4514431911    | 0.5408933856    |
| 3.3722603141    | 4.7728682469    |
| 0               | 0.0572916064    |
| 0               | 0               |
| 13.1257129549   | 3.3830934554    |
| 4.273428453     | 3.7478908676    |
| 0.4030750147    | 0.3575689484    |
| 0.1928683778    | 0.5511950865    |

gene\_expression\_table

|                 |                 |
|-----------------|-----------------|
| 3.973516029     | 2.4413001303    |
| 3.8973463368    | 2.7648633943    |
| 0.0470632143    | 0.089667412     |
| 0.2119636605    | 0.0461536879    |
| 124.1366265046  | 44.9346678645   |
| 3.2823877418    | 7.4519074732    |
| 3015.5501119765 | 2438.3781596335 |
| 10.8151351383   | 4.3600585594    |
| 20.7897225898   | 26.667928618    |
| 184.2304875718  | 192.1857999811  |
| 0.2954989779    | 0.8272665233    |
| 0               | 0               |
| 25.081186086    | 16.8656642378   |
| 0.1777482503    | 0.1741657867    |
| 0               | 0.3710444348    |
| 0.378605692     | 0.7213402892    |
| 0.2984526904    | 0.1444135627    |
| 3432.0605977444 | 1978.2757431357 |
| 52.4428061071   | 40.6166280127   |
| 48.8034616806   | 71.365124128    |
| 308.7212293543  | 414.776990339   |
| 1.0103827318    | 0               |
| 2.0746627954    | 2.0308672445    |
| 7.831001777     | 5.6494121566    |
| 0               | 0               |
| 2.610503841     | 1.520967522     |
| 0.034274064     | 0               |
| 1.6998991984    | 1.921116559     |
| 0.0380229317    | 0.0482955806    |
| 0.0127047663    | 0               |
| 79.9710429818   | 59.5220148401   |
| 20.2029475324   | 107.8233886755  |
| 0               | 0.0103498322    |
| 87.5373507983   | 109.0061522192  |
| 2.3035472753    | 2.0899258881    |
| 0               | 0.005247        |
| 40.7030836744   | 39.3689379055   |
| 5.7455028969    | 4.300468318     |
| 12.1927900124   | 15.7564679749   |
| 0               | 1.1148305394    |
| 0.2601086373    | 0.3838725849    |
| 125.2553830947  | 100.8552516455  |
| 2.8778682684    | 1.6713418851    |
| 0               | 0               |
| 3.0647210392    | 1.6202487144    |
| 0.003409        | 0.001856        |
| 0.005623        | 0               |
| 0               | 0.0173374963    |
| 0               | 0               |

gene\_expression\_table

|                 |                 |
|-----------------|-----------------|
| 0               | 0               |
| 0.0191710437    | 0.005218        |
| 0.94117737      | 0.7767703625    |
| 2.8830587236    | 2.2939953317    |
| 1.6035951088    | 1.7204360831    |
| 2.8747137104    | 1.9679486562    |
| 0               | 0               |
| 166.8690542771  | 73.9092173672   |
| 0               | 0.1190942692    |
| 2.3641998955    | 3.2900824172    |
| 2509.4207601714 | 2380.6053954531 |
| 19.2799460895   | 9.4246918252    |
| 164.216181269   | 81.7466865049   |
| 24.7829880894   | 13.2696690006   |
| 7.5882045936    | 9.5743809566    |
| 133.0070369919  | 674.3252345787  |
| 4463.4546844883 | 3955.3340496545 |
| 12.6342095208   | 13.959124283    |
| 128.9831069093  | 303.8149594933  |
| 869.4811176493  | 892.924101188   |
| 15.0603492188   | 14.9587090064   |
| 68.7475794931   | 134.0131504108  |
| 0.244599609     | 1.730948382     |
| 73.5699071791   | 130.4433733729  |
| 42.8014601435   | 43.0026376515   |
| 0.1736987136    | 0.0472771853    |
| 111.0059234208  | 200.2523259179  |
| 11.2111646733   | 28.3683915863   |
| 78.7083331394   | 58.2659684542   |
| 65.3331182941   | 52.9631660722   |
| 0.4505975238    | 0               |
| 0               | 0.001868        |
| 9.3307669113    | 9.3934300727    |
| 5.5163425253    | 3.7535849084    |
| 5.6569733812    | 11.2253782142   |
| 0               | 0.0639247207    |
| 0.001268        | 0               |
| 0               | 0.0222961768    |
| 2.1280329524    | 2.5465934716    |
| 5.3160564737    | 7.4413041754    |
| 9.9116126777    | 3.1848263848    |
| 1.9672555556    | 3.1422233938    |
| 13.1729542563   | 2.9070849655    |
| 0.7573379119    | 1.2441518277    |
| 3.7220492928    | 4.0772722588    |
| 1.2188104627    | 3.163053849     |
| 14.6331317621   | 8.5615267901    |
| 0.4605616803    | 0.8645195315    |
| 0.7857928676    | 1.2832590734    |

gene\_expression\_table

|                |                |
|----------------|----------------|
| 23.5865521397  | 32.526834857   |
| 0.3744448937   | 0.2038322596   |
| 6.205874842    | 8.6247821147   |
| 9.7817474846   | 3.8630737709   |
| 1.2289277876   | 0.4649629347   |
| 0.003137       | 0              |
| 0              | 0              |
| 0.073742897    | 0.005018       |
| 1.3844569908   | 1.9541196329   |
| 5.4616503449   | 5.605524323    |
| 16.8503170092  | 11.1936975171  |
| 0.0265044013   | 0.005771       |
| 13.0058793709  | 8.4254485552   |
| 0.3045801397   | 0.672956136    |
| 6.1491224545   | 3.6985897739   |
| 1.876156965    | 0.8347179692   |
| 1.5796340506   | 2.9058257705   |
| 1.6655935025   | 1.6838342408   |
| 31.6421360923  | 30.0228809078  |
| 1.4333022798   | 1.4580060694   |
| 0.1151503522   | 0.0358188987   |
| 7.8309585603   | 5.9176814544   |
| 47.7099907479  | 24.8566891249  |
| 0              | 0.0468924341   |
| 5.2738654455   | 4.7354613904   |
| 161.8126157304 | 82.5973540058  |
| 0.8193722494   | 0.2881202088   |
| 9.5070936307   | 6.9588338633   |
| 1.6117414172   | 3.4693720573   |
| 12.3890887647  | 20.3736607556  |
| 55.0786469411  | 37.6533844156  |
| 18.5710354972  | 0              |
| 0              | 0.6138737295   |
| 4.9695463813   | 4.8110706315   |
| 4.2947624382   | 0.8182616492   |
| 0              | 1.032591688    |
| 0.24106969     | 0.2474591444   |
| 1.0379942143   | 1.2544946318   |
| 4.1731528471   | 3.3519359843   |
| 3.84385901     | 3.220797105    |
| 56.8699450709  | 32.8541417696  |
| 287.3071016822 | 225.2525548272 |
| 66.2382299875  | 58.4262507634  |
| 20.6335221281  | 12.5297580354  |
| 0.9355504924   | 1.2541843568   |
| 1.3070126932   | 2.6426528714   |
| 37.5477763905  | 26.3734853243  |
| 0.7607702227   | 0              |
| 23.26018887    | 14.1874093424  |



gene\_expression\_table

|                 |                 |
|-----------------|-----------------|
| 4.7630567089    | 2.4021625688    |
| 0.5951047613    | 0               |
| 15.4383654141   | 7.7805628582    |
| 1.8220221236    | 1.5184703355    |
| 69.8438174569   | 15.8289738713   |
| 0.1184314743    | 0               |
| 0               | 0.0962811033    |
| 4.184740532     | 3.5895742872    |
| 68.7115244405   | 72.6585805599   |
| 2.9615547729    | 3.2818717073    |
| 0.138887891     | 0               |
| 0               | 0               |
| 21.7444946857   | 17.9186923907   |
| 632.5483468264  | 646.5487082986  |
| 0.2559860228    | 0               |
| 74.8229297203   | 66.2666695437   |
| 148.303502011   | 47.6211854363   |
| 6.0798473408    | 2.8282177887    |
| 43.6840917596   | 39.9868770663   |
| 10.7623713177   | 18.4357410888   |
| 691.7678536785  | 681.7367813974  |
| 5.8335502394    | 6.3058281426    |
| 0               | 0.0425863774    |
| 0.0436719748    | 0.0237732106    |
| 0               | 0.0825517713    |
| 116.6184703516  | 110.2932893696  |
| 1085.2691601452 | 990.2188569225  |
| 0.8006322998    | 0.4358309955    |
| 4176.0935810415 | 4424.5325993927 |
| 4.6477977603    | 1.5812926273    |
| 16.616574996    | 22.0862501183   |
| 130.8844102021  | 156.4406523529  |
| 24.5580806031   | 37.5713198382   |
| 44.7995666416   | 32.9838896155   |
| 1.3694458128    | 3.3546125905    |
| 987.8435290518  | 485.8132380778  |
| 278.8861562934  | 103.3421303557  |
| 25.4877128141   | 15.5664595113   |
| 17.8294353659   | 17.8219874683   |
| 19.0980239607   | 13.3665063702   |
| 13.0093809565   | 8.3122868754    |
| 0.6326790247    | 0               |
| 0               | 1.0685525926    |
| 0.5688396379    | 0.4758077925    |
| 188.9891564302  | 107.9738511083  |
| 16.8145693086   | 21.6347268768   |
| 0.7485733834    | 1.1550721075    |
| 361.6362823311  | 151.7671148774  |
| 42.3609980559   | 19.1054139198   |

gene\_expression\_table

|                |                |
|----------------|----------------|
| 19.2964152508  | 12.996681953   |
| 24.5153408571  | 9.2898685479   |
| 44.286630747   | 29.8974205207  |
| 0              | 2.6132129483   |
| 0.1079584661   | 0.2938405419   |
| 0              | 1.1078224171   |
| 1.4260045712   | 1.8713355395   |
| 6.1960224071   | 4.3902139035   |
| 0.20447209     | 0.3339183589   |
| 4.1656012109   | 1.9496953099   |
| 7.9266093182   | 3.9892630123   |
| 0.5952955612   | 0.7345228466   |
| 0.0471264543   | 0.2565368582   |
| 1.439041916    | 0.5798859428   |
| 0.3194195609   | 0.6830950977   |
| 289.7567564489 | 464.4052553416 |
| 0              | 0.1263499205   |
| 1.4539277728   | 1.9673383014   |
| 5.0278039436   | 5.4126951994   |
| 16.9452377715  | 20.7546393752  |
| 0.2691396058   | 0.1546477886   |
| 5.8556934628   | 6.2177808136   |
| 10.002058094   | 13.5718126127  |
| 0.0439465925   | 0.0362699016   |
| 0              | 0              |
| 1.326228161    | 0.9900940369   |
| 5.8424450415   | 4.4268753975   |
| 0.20447209     | 0.296816319    |

gene\_expression\_table

| LZ2_U937_2H_R1_001 trimmed (GE) - TPM | LZ3_U937_24H_R1_001 trimmed (GE) - TPM |
|---------------------------------------|----------------------------------------|
| 1.3325805905                          | 0                                      |
| 0.9204665456                          | 1.9155273612                           |
| 1.4468298815                          | 1.505455162                            |
| 0                                     | 0                                      |
| 12.1421774075                         | 4.5942458914                           |
| 2.9668126357                          | 3.0870273376                           |
| 0                                     | 0                                      |
| 7.9696731586                          | 0                                      |
| 930.9824901997                        | 193.7411458709                         |
| 6.9401076856                          | 6.2584769621                           |
| 1.9214327885                          | 0                                      |
| 3.3767181735                          | 2.5096729803                           |
| 0                                     | 0                                      |
| 113.2224549592                        | 60.6207866384                          |
| 226.7290690418                        | 31.0415906829                          |
| 0                                     | 3.6329001792                           |
| 66.0132547456                         | 27.8230277177                          |
| 1.4347470146                          | 11.9430615965                          |
| 7.5056045568                          | 8.9254060252                           |
| 48.132631313                          | 27.8238648194                          |
| 31.7953647534                         | 15.880179399                           |
| 28.1700328476                         | 8.3747078268                           |
| 0                                     | 0                                      |
| 21.6345155674                         | 10.0049520695                          |
| 1.5354820395                          | 0                                      |
| 750.8327479475                        | 415.9936423484                         |
| 46.4671477718                         | 26.7197302366                          |
| 267.5930291598                        | 83.2107136289                          |
| 0                                     | 0                                      |
| 7.9491866528                          | 0.4595159018                           |
| 25.8709483305                         | 8.4603308099                           |
| 0                                     | 0                                      |
| 23.5843290878                         | 18.2744396098                          |
| 0                                     | 0                                      |
| 3.2415068225                          | 2.2485680549                           |
| 0                                     | 0                                      |
| 4.7392583904                          | 8.4536438882                           |
| 0                                     | 0                                      |
| 5.2586262463                          | 3.9083605814                           |
| 14.9620614742                         | 29.4978722236                          |
| 25.6089333694                         | 23.0937222847                          |
| 17.9505718396                         | 14.5818893675                          |
| 0                                     | 0                                      |
| 0                                     | 0                                      |
| 0                                     | 0                                      |
| 0                                     | 0                                      |
| 0.1235090833                          | 0                                      |
| 7.0433586537                          | 0                                      |

gene\_expression\_table

|                |                 |
|----------------|-----------------|
| 11.7933452989  | 3.6813628439    |
| 4.4973675418   | 1.0635454652    |
| 0.4727609349   | 0.2459585605    |
| 95.5227169019  | 39.2664809125   |
| 0              | 0               |
| 0              | 0               |
| 0              | 0.9581076669    |
| 13.5264501417  | 28.1490788238   |
| 21.1837964931  | 29.3895467041   |
| 0              | 0.0469155122    |
| 0              | 0.2534766775    |
| 87.5377115785  | 60.7231490269   |
| 24.1253515376  | 8.0687913241    |
| 0.1992489756   | 0.2073225074    |
| 0              | 0.9008641186    |
| 53.212066434   | 27.6841047861   |
| 0.7356296632   | 1.9135931043    |
| 5.8912527219   | 2.4519860792    |
| 29.86217467    | 31.0721844914   |
| 0.7711159398   | 0.4011807079    |
| 11.7834738305  | 11.7832391374   |
| 0              | 0               |
| 811.542537981  | 1337.3048943448 |
| 0              | 0               |
| 55.2031329201  | 5.8612197659    |
| 2.4452804952   | 3.8165442162    |
| 3.860671047    | 2.2763593455    |
| 16.5382941465  | 5.7361409272    |
| 0              | 0               |
| 1.7938198681   | 1.866505119     |
| 21.9000727058  | 19.9390271685   |
| 30.6275048285  | 26.8366532102   |
| 45.689782237   | 50.7105320576   |
| 0              | 1.2799002462    |
| 0.3385793248   | 0.4403731209    |
| 32.7913942829  | 20.4720573264   |
| 3.831128168    | 5.1253261408    |
| 0              | 0               |
| 0.6105362365   | 0               |
| 182.6623184568 | 101.269494801   |
| 4.5609542455   | 0               |
| 1.0902851567   | 1.4638236266    |
| 627.2361386882 | 828.0337880897  |
| 0              | 0               |
| 0              | 0               |
| 6.1975369342   | 15.0468733104   |
| 0              | 0               |
| 4.5567762912   | 7.5862656446    |
| 0.8696343987   | 1.1310897807    |

gene\_expression\_table

|                |                |
|----------------|----------------|
| 5.7722849236   | 2.0020589488   |
| 9.6012597895   | 7.9922408552   |
| 19.5925903555  | 2.265164279    |
| 12.4279866821  | 18.1740933401  |
| 5.2346197855   | 4.9020530542   |
| 6.7145013355   | 6.4276459583   |
| 25.0183800322  | 27.6591276981  |
| 0.9289585024   | 2.2553993699   |
| 0              | 0              |
| 1.011630339    | 1.286537284    |
| 1.1701426517   | 1.0146305138   |
| 40.2675883772  | 37.8704521425  |
| 20.9716364003  | 12.2745393266  |
| 0              | 0              |
| 21.8791071001  | 15.1770963286  |
| 23.5571238789  | 8.6511720716   |
| 1.2834297452   | 1.5580064293   |
| 1.0410486693   | 0.216646354    |
| 106.0905159715 | 55.1946420763  |
| 0              | 0              |
| 427.1406298866 | 203.1763609573 |
| 6.005617121    | 3.1244818107   |
| 1.7089583145   | 0.8891024955   |
| 11.3704013624  | 5.2582790813   |
| 0.5704217623   | 0.2967675736   |
| 0              | 0              |
| 8.1195607945   | 3.3794255614   |
| 18.2926307075  | 17.0302821331  |
| 0              | 0              |
| 35.1741120591  | 35.4187360702  |
| 6.5434717089   | 9.36184147     |
| 2.6987913155   | 3.27617015     |
| 170.5190849613 | 202.7754135997 |
| 10.5998446751  | 23.3313139874  |
| 14.4974654466  | 8.8428724597   |
| 10.4088610709  | 9.4767979301   |
| 45.3324058208  | 20.5083767658  |
| 0.8863858906   | 0.737841667    |
| 1.3212230694   | 2.4058278738   |
| 12.0757873729  | 0              |
| 1.7165692759   | 1.2365476249   |
| 0.0816449922   | 0.0707943602   |
| 0.244840612    | 0.2547615085   |
| 0              | 0              |
| 31.782428305   | 17.8070557809  |
| 0              | 0              |
| 0              | 0              |
| 0              | 1.1333223892   |
| 1.4918166544   | 1.0348431938   |

gene\_expression\_table

|                |                |
|----------------|----------------|
| 1.1129262422   | 1.1580218086   |
| 0              | 0              |
| 0.3822152884   | 0              |
| 0              | 0              |
| 5.0058836211   | 2.604360552    |
| 0              | 0              |
| 0              | 0              |
| 0              | 0              |
| 712.4265635971 | 934.6749890483 |
| 3.2396163636   | 1.310899731    |
| 2.9181508127   | 2.0242624977   |
| 5.6132398863   | 2.3362749334   |
| 0              | 0              |
| 0              | 3.0109103239   |
| 0.3154618289   | 1.6412214208   |
| 17.1363723252  | 14.4874721695  |
| 18.8794945487  | 5.357587689    |
| 0              | 0              |
| 2.6049100724   | 5.0821135296   |
| 6.911898206    | 0              |
| 3.384703275    | 22.892030387   |
| 0              | 0              |
| 1.9217282231   | 1.999596297    |
| 17.8638125147  | 22.5008405752  |
| 0.9487742152   | 0.3290727906   |
| 0.4740317615   | 0              |
| 0              | 0              |
| 118.1670684379 | 37.8323619392  |
| 0.4689520589   | 1.268680166    |
| 1.8580464746   | 0.241666772    |
| 0              | 0              |
| 6.374722311    | 3.3165124429   |
| 1.9084137088   | 0.3309570468   |
| 5.0302074635   | 4.3404155731   |
| 18.10560721    | 15.4578404773  |
| 91.6279327334  | 18.2567259007  |
| 1.1069872841   | 6.9110532305   |
| 52.9651019427  | 67.970527021   |
| 4.0912762876   | 3.4056432398   |
| 15.8851910236  | 11.3340727133  |
| 71.5392512411  | 93.4434575221  |
| 0              | 0              |
| 0              | 0              |
| 0.5640742496   | 0.8803956516   |
| 0.5335228614   | 1.110282219    |
| 0              | 0              |
| 3.5009635661   | 2.428547977    |
| 9.0044080295   | 10.7077314121  |
| 0              | 0.2493648262   |

gene\_expression\_table

|                 |                 |
|-----------------|-----------------|
| 13.0022782116   | 13.5291281317   |
| 11.0654625329   | 3.837944346     |
| 3.893854931     | 8.6820711774    |
| 11.0746546433   | 8.6425482084    |
| 148.2735765993  | 258.9093427179  |
| 0.2990558211    | 0.6223470158    |
| 24.000135762    | 22.6674522139   |
| 0.5838886596    | 0.6075477206    |
| 1.6886053663    | 1.3515594961    |
| 0.6925398568    | 0.3603007222    |
| 0               | 0               |
| 6.9618393825    | 10.8658977494   |
| 1.2806106643    | 1.3325007727    |
| 0               | 0.150694667     |
| 0               | 0               |
| 69.440944131    | 47.7396982329   |
| 0.9772040603    | 1.5252002834    |
| 0               | 0               |
| 5.4495050931    | 11.3406360729   |
| 0               | 0               |
| 0               | 0               |
| 4.1500005478    | 1.8891940402    |
| 2.8428158606    | 1.2941277283    |
| 46.2870432595   | 18.657578257    |
| 0               | 4.9937119772    |
| 0               | 1.5472668307    |
| 0.2972156909    | 0               |
| 9.1237813165    | 1.3562107509    |
| 0               | 18.5949946975   |
| 1567.1238074218 | 2955.2716556734 |
| 18.7202481045   | 2.7826841589    |
| 54.1552524004   | 36.9794337021   |
| 129.7810362575  | 51.0961178228   |
| 64.0206937172   | 13.3229600887   |
| 4.2398134015    | 9.5584880304    |
| 41.495128207    | 23.8215189874   |
| 6.2294608942    | 0.4051173439    |
| 143.426309202   | 141.1710024286  |
| 86.4335350952   | 46.0136682009   |
| 0               | 0               |
| 0               | 0               |
| 0               | 0               |
| 0.369003932     | 0.3839559034    |
| 0               | 0               |
| 0.8384838274    | 2.326557434     |
| 0.4806630105    | 1.0002787745    |
| 0               | 0.325612314     |
| 29.7286975562   | 25.7777490913   |
| 3.0282119038    | 3.5010161031    |

gene\_expression\_table

|                 |                 |
|-----------------|-----------------|
| 19.2924168241   | 6.6033361852    |
| 63.4252831471   | 101.5311753027  |
| 5.3802639485    | 6.6818076251    |
| 42.2431757417   | 19.4554304769   |
| 0.2452658264    | 0               |
| 3.3640588886    | 1.7501849678    |
| 6.7625028282    | 8.5178904503    |
| 0.098381152     | 0.4094701527    |
| 7.3871941373    | 10.5689675907   |
| 1.2782531698    | 10.6403820237   |
| 8.4696221609    | 1.8884592197    |
| 1.094626023     | 0               |
| 525.0828221761  | 420.2762165299  |
| 0.8679246152    | 1.3546391413    |
| 3.0969311605    | 3.2224182411    |
| 0               | 4.8046086327    |
| 656.1835724015  | 180.3548705619  |
| 0               | 0               |
| 0               | 0               |
| 2.6121211434    | 1.9414027224    |
| 758.742975633   | 298.4646358794  |
| 0               | 0               |
| 249.5848219694  | 186.4498124242  |
| 0               | 0               |
| 1.7080934349    | 2.2216313332    |
| 2579.2306725771 | 1602.0497469707 |
| 17.6687611676   | 11.4904350739   |
| 6.9693902961    | 2.2158243275    |
| 1.5960718872    | 4.982233279     |
| 3.4465381906    | 1.7930956419    |
| 12.6726894103   | 0               |
| 4.5461271005    | 6.3071137785    |
| 11.68390485     | 3.4735241497    |
| 34.0340985884   | 12.6129041641   |
| 0               | 0               |
| 2.305240915     | 0               |
| 1.7752835384    | 0               |
| 0.8993543579    | 0.7018470232    |
| 8.1826673697    | 4.8652728831    |
| 2.7911542709    | 2.9042513283    |
| 1.295947319     | 0               |
| 0               | 0               |
| 0               | 0               |
| 12.4070349779   | 12.7080506618   |
| 0.7148705883    | 1.239728355     |
| 15.7530573901   | 5.9604975914    |
| 143.5434891033  | 47.9078747672   |
| 0.9023248545    | 3.2861041202    |
| 2.600286573     | 3.3820621329    |



gene\_expression\_table

|                 |                |
|-----------------|----------------|
| 31.0490577302   | 14.0826081331  |
| 14.1275195263   | 14.6999640173  |
| 53.7012972885   | 25.3310263335  |
| 0               | 0              |
| 5.7896652836    | 10.0404357588  |
| 4.3658490282    | 2.1981060132   |
| 9.6201457637    | 10.3806912735  |
| 39.6848553708   | 15.8818763102  |
| 1033.7832862639 | 937.9859794262 |
| 2.1698680436    | 6.0207751929   |
| 43.0609472211   | 19.9136750565  |
| 2.2933618638    | 1.458287395    |
| 68.654849363    | 40.1505715634  |
| 13.7081874757   | 6.1129888754   |
| 4.0189084522    | 6.0825511025   |
| 1.7775179809    | 1.1097256094   |
| 36.6917454364   | 16.735775653   |
| 0               | 0              |
| 2.5037368864    | 3.3495272283   |
| 51.4656781179   | 37.4857405461  |
| 14.5381411317   | 15.1272239346  |
| 3.9157558136    | 1.8108540082   |
| 0.3691020083    | 1.1521738614   |
| 0               | 0              |
| 140.5518278075  | 106.609934917  |
| 4.3458150546    | 2.7131440085   |
| 0               | 0              |
| 4.0285060213    | 2.7944935625   |
| 1.6959438527    | 1.2604737039   |
| 19.0343650195   | 8.6649648692   |
| 1.9905144021    | 2.0711696793   |
| 0               | 1.5340911754   |
| 0               | 0              |
| 13.0056606982   | 11.2772063966  |
| 0               | 0              |
| 0               | 0              |
| 0.6501984617    | 0              |
| 72.982829807    | 45.0216192355  |
| 54.0968393888   | 50.5450748577  |
| 6.4851160622    | 3.3739458857   |
| 7.7819626184    | 6.579045128    |
| 13.4269108137   | 3.7255911383   |
| 79.9101054525   | 72.7545421907  |
| 0               | 0              |
| 0               | 0              |
| 0               | 2.3482980167   |
| 129.7113813808  | 77.8657284697  |
| 0.4770988741    | 0              |
| 23.2756832184   | 15.8674959569  |

gene\_expression\_table

|                |                |
|----------------|----------------|
| 124.4141677073 | 14.3839340983  |
| 0              | 0              |
| 0              | 0              |
| 1.6760119254   | 4.0691551138   |
| 0.4988949069   | 0.778665055    |
| 8.2787573233   | 7.4656495735   |
| 2.8515719669   | 2.4725976151   |
| 32.811480895   | 37.9344400688  |
| 0.5029755697   | 0.5233560472   |
| 29.2046918659  | 27.9570157567  |
| 3.5614009729   | 3.7057082848   |
| 0              | 0              |
| 0              | 5.06938534     |
| 8.1367568493   | 4.7623819158   |
| 135.1711253978 | 209.4760939668 |
| 0.4105639777   | 0              |
| 0.4148308915   | 0              |
| 0.7504373303   | 1.5616898255   |
| 0              | 0              |
| 3.7241033362   | 1.6145847158   |
| 0              | 1.6429112108   |
| 0              | 0              |
| 47.5678018304  | 7.3326282082   |
| 0              | 0              |
| 30.5212208326  | 40.8316308213  |
| 3.2744144435   | 5.299922622    |
| 2.0583365275   | 0.9178885477   |
| 252.2229168122 | 52.6952365825  |
| 13.2665976854  | 21.6114273471  |
| 3.6232904995   | 3.2115714061   |
| 1.8540928543   | 1.9292203555   |
| 16.9873461515  | 8.4843217397   |
| 31.9078931671  | 13.526249866   |
| 25.087823221   | 13.0521886003  |
| 14.1336531195  | 1.4006043945   |
| 3.6471708148   | 9.3148858757   |
| 2.2292642944   | 2.6095428824   |
| 1.929297002    | 2.361731484    |
| 104.9531136364 | 71.6663026303  |
| 0              | 0              |
| 61.5781490054  | 24.0274816011  |
| 16.741597925   | 10.451978635   |
| 19.1461783341  | 13.0671038208  |
| 0              | 1.5161172122   |
| 7.842158388    | 0              |
| 10.4358334376  | 3.3699387376   |
| 88.0947307907  | 34.3741174007  |
| 0              | 0              |
| 36.4819846661  | 17.9811606175  |

gene\_expression\_table

|                |                |
|----------------|----------------|
| 4.8241623942   | 10.0392731331  |
| 0.2094268935   | 0.581100887    |
| 64.2245730055  | 7.0344148298   |
| 23.4618073254  | 18.1349817555  |
| 5.8630933867   | 3.4860942009   |
| 0              | 0              |
| 18.8500499404  | 16.0476958592  |
| 9.2864790051   | 1.6104609042   |
| 64.4683469309  | 24.0288689492  |
| 0              | 0              |
| 17.1116278522  | 6.6768704488   |
| 38.0759784644  | 29.7141075779  |
| 413.0883008208 | 52.417873505   |
| 2.6632444883   | 2.0783689986   |
| 2.3145794914   | 3.4118515873   |
| 26.1515723647  | 11.51244315    |
| 49.5119701679  | 25.7590930432  |
| 81.1631672362  | 27.1963693704  |
| 0              | 0              |
| 40.0683637064  | 24.0530344784  |
| 42.8513567902  | 36.6255991161  |
| 2.2043103935   | 0              |
| 0.2974491133   | 0.92850509     |
| 30.3564861364  | 8.1890991694   |
| 379.5578337532 | 284.7706856984 |
| 1.1165635268   | 1.8933142562   |
| 0.8714876359   | 0              |
| 73.7784901662  | 49.7370017803  |
| 0              | 0              |
| 0              | 0              |
| 13.9591670549  | 14.5247899348  |
| 0              | 0              |
| 0              | 0              |
| 5.8842493966   | 8.5717493389   |
| 0              | 2.6304357639   |
| 15.7033191118  | 7.0026920194   |
| 72.6326363901  | 39.3845183887  |
| 67.9747685486  | 116.9481053576 |
| 3.9800779973   | 6.538973724    |
| 13.3740974308  | 1.4395875928   |
| 3.8829350672   | 9.0906094833   |
| 7.0525849553   | 11.1822543233  |
| 0              | 1.0384376905   |
| 1.7427929904   | 2.7201159625   |
| 8.5045096068   | 0              |
| 1.9814026009   | 2.0616886696   |
| 0.6999476335   | 0.7283093828   |
| 3.1232825876   | 1.9499024539   |
| 0              | 0              |

gene\_expression\_table

|                 |                  |
|-----------------|------------------|
| 374.3400547348  | 349.2142884908   |
| 15.0280337042   | 1.5636966864     |
| 0               | 0                |
| 1.3954537807    | 1.9359964148     |
| 0.7693359759    | 0                |
| 0.0314689194    | 0.0654880685     |
| 2.405471926     | 3.0470588591     |
| 0               | 0                |
| 0               | 0                |
| 17.6024035175   | 38.666371522     |
| 0               | 0.1299593971     |
| 46.5123539129   | 38.3523601732    |
| 267.3256504614  | 314.3342078529   |
| 7.228013454     | 10.8635095528    |
| 0               | 8.1618416359     |
| 0               | 1.6931776736     |
| 9.6727792829    | 6.7098123461     |
| 1.1951509       | 2.4871563891     |
| 2.8221145766    | 2.9364661398     |
| 10.35312461     | 10.2596488702    |
| 123.0444644068  | 26.8450426606    |
| 0               | 0                |
| 4.1912944101    | 0                |
| 0               | 0                |
| 0               | 0                |
| 113.7380585226  | 53.0519706333    |
| 17.811657305    | 11.1200294285    |
| 62.0865206843   | 82.2210519141    |
| 0.5178312563    | 1.077627367      |
| 73.3516878111   | 90.6346130821    |
| 0               | 1.5385073495     |
| 8.7231820845    | 6.8857297922     |
| 0.5215389975    | 0.852769754      |
| 6.2834845924    | 4.9035676737     |
| 39.291686589    | 25.5523615612    |
| 675.1598174205  | 147.1488664711   |
| 38.9814890633   | 24.6263286084    |
| 0               | 0                |
| 0               | 0                |
| 3.1058606329    | 1.5208044866     |
| 6.8937892614    | 4.782082889      |
| 1.1173537698    | 1.0334477679     |
| 4.5927116204    | 9.0656788388     |
| 7.0209380756    | 2.4351417314     |
| 14.4066686828   | 16.0124986267    |
| 39.7850377885   | 31.5112407471    |
| 7545.6321906978 | 13496.2700502612 |
| 1.5159270968    | 1.5773521837     |
| 28.876427958    | 0                |

gene\_expression\_table

|                |                |
|----------------|----------------|
| 0              | 0              |
| 0              | 0              |
| 0.7213794457   | 0              |
| 2.3247049942   | 1.5277273343   |
| 5.6759491058   | 0              |
| 282.6901878639 | 235.3157937974 |
| 0              | 0              |
| 0              | 0              |
| 0              | 0              |
| 47.9079224833  | 11.5036483119  |
| 0.113010895    | 0.4703603026   |
| 6.0144677703   | 7.8227161217   |
| 364.0458774304 | 292.5072968193 |
| 31.1277495296  | 53.0820381244  |
| 72.5397966533  | 33.7669639386  |
| 5.8927109528   | 11.9709896742  |
| 26.6122430127  | 41.5358493024  |
| 0.2950006475   | 0              |
| 0.6689032193   | 0.6960070547   |
| 1.0999243097   | 0.1271658934   |
| 0              | 0              |
| 4.215547592    | 0.5482951006   |
| 7.0376384845   | 10.7025572086  |
| 12.0143612906  | 9.7231407769   |
| 540.5072895817 | 632.2156951473 |
| 12.0100319644  | 2.7770391665   |
| 0              | 3.5419941897   |
| 0              | 0              |
| 7.0365608651   | 3.8351662466   |
| 0              | 0              |
| 2.9946245604   | 5.1932769941   |
| 0              | 0              |
| 2.2773087835   | 5.9239622906   |
| 0              | 0.3411136969   |
| 7.7331064245   | 4.8278702841   |
| 16.2787072194  | 17.7082409598  |
| 0              | 0              |
| 3.5646174491   | 0              |
| 0              | 0              |
| 0              | 0              |
| 0              | 0              |
| 0.1069799424   | 0              |
| 0.4174157816   | 0.4677393455   |
| 92.5343020294  | 40.8476620859  |
| 10.7585764032  | 26.586965855   |
| 0.2880206463   | 0.2996911899   |
| 2.2207066644   | 3.9911905913   |
| 2.7073934068   | 2.3140435448   |
| 6.4990142191   | 6.1827228152   |

gene\_expression\_table

|                |                |
|----------------|----------------|
| 0              | 0              |
| 26.8179579181  | 42.8191531155  |
| 88.4323580019  | 20.4479157493  |
| 15.9252680691  | 17.0726950911  |
| 0.1612722736   | 0.2517104946   |
| 9.3332884764   | 1.9422943215   |
| 15.6243099387  | 14.1596745402  |
| 43.9206340504  | 21.7076377778  |
| 2.4320575849   | 3.7293113209   |
| 0              | 0              |
| 8.3149704322   | 4.3259457519   |
| 19.3257602833  | 25.9524300555  |
| 0              | 0.3330420159   |
| 1.5970916437   | 0.5539351677   |
| 4.1531179108   | 7.2488024896   |
| 0              | 0              |
| 11.2541526757  | 11.7101688708  |
| 38.2156854638  | 58.3207944076  |
| 48.3484890806  | 23.6741463339  |
| 6.0219870819   | 2.6276761152   |
| 0              | 0.2977574825   |
| 15.04744249    | 6.6424324019   |
| 4.3743664885   | 2.7309690081   |
| 0              | 0              |
| 10.1005656465  | 14.7137741904  |
| 20.3668222666  | 22.7618660197  |
| 32.2224557274  | 77.3725470068  |
| 1.7042649346   | 0.886660718    |
| 1.2015708829   | 0.6251291569   |
| 45.4075928463  | 47.2475001511  |
| 3.7219694661   | 2.2130188479   |
| 0.3848145518   | 0              |
| 2.3224286216   | 2.4165330019   |
| 12.4195756257  | 3.2307036361   |
| 0              | 9.0594736444   |
| 0              | 0.7644080654   |
| 0              | 0              |
| 59.3550210247  | 26.2710769141  |
| 0              | 1.4845747051   |
| 1.2301393966   | 2.2108821774   |
| 0.9821416449   | 0.4087751374   |
| 0              | 0              |
| 0.3688977415   | 0              |
| 0              | 0              |
| 3.2783950828   | 1.8368188721   |
| 2.9395341564   | 3.8233044243   |
| 140.4178224761 | 120.0168970133 |
| 0.1072077468   | 0.1859196416   |
| 0              | 0              |

gene\_expression\_table

|                |                |
|----------------|----------------|
| 0.3024700349   | 0.0899217329   |
| 3.0041844333   | 8.5962619424   |
| 0.0395416392   | 0              |
| 0.2001752141   | 1.2497176617   |
| 122.5574394879 | 59.2872153692  |
| 0.5705999863   | 0.2968602964   |
| 1.2319043855   | 2.1363682074   |
| 0.9392071111   | 1.221579513    |
| 3.8264023894   | 5.8673963305   |
| 1.3417541525   | 1.1168974271   |
| 12.1929930141  | 8.0265015562   |
| 0              | 0              |
| 0              | 0              |
| 0.7553011342   | 0.5894293479   |
| 2.1317118812   | 1.9223433271   |
| 0              | 1.7078531031   |
| 1.7685637372   | 4.7027987922   |
| 0.110233017    | 0              |
| 9.6388996897   | 22.2877025134  |
| 0.1431493341   | 0.1489497187   |
| 0              | 0              |
| 0              | 0              |
| 4.1841253071   | 1.3605204045   |
| 1.8157759679   | 0.3148918127   |
| 0              | 0.1918547528   |
| 344.616964204  | 213.0031130049 |
| 36.8918741373  | 49.3543621123  |
| 1.6373144601   | 0.2621012524   |
| 0              | 0              |
| 3.6117439477   | 3.7580911477   |
| 0              | 0              |
| 4.1061287287   | 3.13317276     |
| 38.1200754635  | 52.387331573   |
| 1.5626956653   | 1.626015806    |
| 0              | 2.4449848499   |
| 1.6267655774   | 2.2569090922   |
| 0.1705148476   | 0              |
| 78.6982531718  | 51.0590102472  |
| 0.056816966    | 0.059119179    |
| 1.5884650247   | 1.6528293352   |
| 0              | 0              |
| 0              | 0              |
| 0              | 0              |
| 0              | 2.4835940209   |
| 13.9140725835  | 6.7218673989   |
| 12.710385611   | 17.1930305256  |
| 16.8575114276  | 21.4384801742  |
| 0              | 0              |
| 0.0895629316   | 0.2485120136   |

gene\_expression\_table

|                |                |
|----------------|----------------|
| 40.2350385231  | 84.926862754   |
| 0.1797935702   | 0.0623595909   |
| 6.2877495175   | 2.4178907718   |
| 8.0854269452   | 9.2272127915   |
| 1.6678429671   | 1.9089660229   |
| 0.2882398439   | 0.5998385386   |
| 24.4514249966  | 9.7854585527   |
| 0.4294221809   | 0.4468222886   |
| 0              | 0              |
| 0              | 0              |
| 0              | 0              |
| 0              | 0              |
| 0.2076273526   | 0.8641614989   |
| 0.3178263036   | 0.3307045669   |
| 27.8992764668  | 8.1646171915   |
| 102.9301096407 | 149.1011398131 |
| 1.3279877736   | 3.4544939845   |
| 3.1207090964   | 8.1178991364   |
| 1.7709067368   | 4.053859814    |
| 0              | 0              |
| 1.1348548277   | 0.3936129788   |
| 53.1483728201  | 32.1108010286  |
| 10.4818138217  | 10.9065349886  |
| 0              | 0              |
| 6.4936127271   | 5.5816487684   |
| 0              | 0              |
| 1.0095262656   | 0.350144028    |
| 0              | 0              |
| 13.7550181517  | 15.1075005642  |
| 20.5181519964  | 20.6823704971  |
| 2.0473827486   | 2.0415780574   |
| 11.4051726654  | 14.410302769   |
| 0.7668829943   | 1.4819200538   |
| 11.446913718   | 5.734801008    |
| 4.0796008261   | 6.0641507153   |
| 1.2339567993   | 0              |
| 0              | 1.0700958131   |
| 0              | 0              |
| 0              | 0              |
| 1.1978569993   | 3.7391818334   |
| 1.3290027175   | 0.460951221    |
| 0.8032984293   | 1.1701871073   |
| 2.0213674702   | 1.5023377915   |
| 6.5937973933   | 4.2881105313   |
| 4.3619678429   | 4.538713977    |
| 0.4527097811   | 0.2355267491   |
| 8.6826029205   | 5.5596433186   |
| 0.5169374547   | 0.768405236    |
| 0              | 0              |



gene\_expression\_table

|                 |                 |
|-----------------|-----------------|
| 0               | 0               |
| 64.2799867872   | 16.7211500053   |
| 0.5974469069    | 0               |
| 3.3983179437    | 1.4144068645    |
| 1.1207981017    | 0               |
| 103.5965335704  | 102.7805601812  |
| 0               | 0.244473493     |
| 1221.8674420071 | 1769.4064571649 |
| 0.2587789272    | 0               |
| 7.2378472669    | 8.4000992952    |
| 19.9234103418   | 14.5675212111   |
| 2.3510037894    | 3.8441323332    |
| 26.9879940927   | 12.4806856205   |
| 0.1370386627    | 0.2851828881    |
| 0.0583882365    | 0               |
| 54.6996379512   | 19.5648946671   |
| 17.75734635     | 8.5277865027    |
| 1.9963864777    | 1.4281297871    |
| 7.8842074947    | 1.3672790219    |
| 0               | 0               |
| 0.3692942255    | 0.3842579596    |
| 0               | 0               |
| 8.9244974388    | 0               |
| 1.4266862068    | 3.5256762647    |
| 0.1976076206    | 0.4317907544    |
| 0               | 0               |
| 1.5775096491    | 0.7034700213    |
| 1.4462522846    | 9.3300957982    |
| 0.7357433366    | 0.3827777606    |
| 3.3022722286    | 8.5901992289    |
| 1.9133803978    | 4.9772755484    |
| 0               | 0.5813663433    |
| 4.5008654142    | 4.6832396524    |
| 15.0289372385   | 20.850542679    |
| 0.4754057117    | 0.9893381273    |
| 5.063025435     | 2.2577906973    |
| 3.9662634899    | 1.2037012623    |
| 0.921102508     | 5.2713397665    |
| 0               | 0               |
| 0               | 0               |
| 0.3103130501    | 0               |
| 4.5525437985    | 6.5133915486    |
| 0               | 0               |
| 0               | 0               |
| 37.7311394141   | 13.0866660796   |
| 0               | 0               |
| 0.7617825864    | 0.6605415638    |
| 6.3472532926    | 9.510397672     |
| 0.2110002225    | 0.8781996508    |

gene\_expression\_table

|                |                |
|----------------|----------------|
| 16.363745409   | 7.8585237052   |
| 84.0937926387  | 67.4488860967  |
| 0              | 0              |
| 3.9763425588   | 1.654985291    |
| 0              | 0              |
| 2.82517658     | 2.351721772    |
| 11.2757558018  | 14.793337965   |
| 2.3139474263   | 11.7977699355  |
| 0              | 1.4913419244   |
| 21.5235215687  | 33.5934760519  |
| 15.7795591278  | 12.8496083161  |
| 1.2793326097   | 0              |
| 50.5126625297  | 33.4469076572  |
| 0              | 0              |
| 20.0295511714  | 10.1047975265  |
| 5.6166452897   | 0              |
| 10.9462602303  | 6.8338804081   |
| 0              | 0              |
| 20.7954866307  | 15.7701522818  |
| 0              | 2.0837388158   |
| 14.9726743707  | 12.7467526749  |
| 0              | 0              |
| 0              | 0              |
| 38.0274910296  | 40.9021228424  |
| 8.6700645521   | 6.0142493147   |
| 0              | 1.6792400305   |
| 1.1582925499   | 0.7231358105   |
| 61.1419809096  | 49.4817887844  |
| 1.7168186718   | 1.1909225656   |
| 147.3637002248 | 226.1039317032 |
| 6.4541388747   | 20.1469781822  |
| 5.798798307    | 3.0168822735   |
| 3.4497488079   | 4.3872057712   |
| 10.194634566   | 21.9731327991  |
| 2.5651355885   | 4.9568524765   |
| 16.8212901725  | 12.8968631874  |
| 1.0559236202   | 0              |
| 0              | 0              |
| 0              | 1.2879620111   |
| 42.4620530619  | 5.5228259546   |
| 355.4799292748 | 356.3350493892 |
| 12.6414462921  | 3.2884188423   |
| 0              | 0.2149850297   |
| 0              | 0              |
| 4.4891505792   | 4.571666089    |
| 0              | 0              |
| 1.4819991618   | 0              |
| 20.8133887276  | 5.7751315755   |
| 0.2377937582   | 0              |

gene\_expression\_table

|               |                |
|---------------|----------------|
| 0             | 0              |
| 1.4505660735  | 2.1801617411   |
| 46.9586947009 | 36.8953823999  |
| 5.9376421915  | 3.0891171801   |
| 13.2743241792 | 46.9614709961  |
| 3.1236338472  | 6.5004058315   |
| 0             | 0              |
| 22.0911453906 | 13.6359255722  |
| 3.1021721128  | 1.1737714749   |
| 0.1692122516  | 0.1760687009   |
| 2.1267039832  | 0.829829114    |
| 1.9742821492  | 8.2171187942   |
| 0.5751267994  | 10.4725395496  |
| 1.5525048048  | 0              |
| 16.6509630593 | 9.4503583734   |
| 12.32067026   | 18.3141450733  |
| 7.5323260255  | 9.9750438961   |
| 0             | 0              |
| 5.2083871407  | 3.3688348829   |
| 39.0354455537 | 13.539051541   |
| 0             | 0.2027173335   |
| 46.9198399252 | 47.4261368261  |
| 77.3721628602 | 103.6899900005 |
| 20.8140076763 | 27.8452124184  |
| 0.3543068519  | 0              |
| 4.8197208767  | 8.7762763892   |
| 6.2190133293  | 1.8488590299   |
| 0.3562445691  | 2.9654362676   |
| 0.2666461842  | 0.2774506385   |
| 41.6588298016 | 21.9477660344  |
| 2.1834629955  | 3.0980952466   |
| 0.1785019664  | 0.1857348332   |
| 0             | 0              |
| 0             | 0              |
| 3.5331778346  | 3.3087073951   |
| 0             | 0              |
| 2.8422412133  | 3.2860092268   |
| 35.6970794172 | 47.9770447357  |
| 1.6708506076  | 1.2418236905   |
| 15.2098710505 | 2.8261021832   |
| 0             | 0              |
| 0             | 0              |
| 1.0654522589  | 2.0588734927   |
| 0.5786917587  | 0.6021402422   |
| 16.9261728828 | 30.9544563932  |
| 1.8527987445  | 3.9628517178   |
| 20.1237980705 | 18.0510436763  |
| 2.6456764105  | 3.3034544781   |
| 0             | 0              |

gene\_expression\_table

|                |                |
|----------------|----------------|
| 0.2068541816   | 0              |
| 0              | 0              |
| 0              | 0              |
| 0              | 50.4064899868  |
| 0.9189184767   | 1.9123057685   |
| 7.4595284577   | 0              |
| 0              | 0              |
| 40.6854484964  | 38.7311204553  |
| 1.1224481342   | 1.6684707515   |
| 2.1964658725   | 2.2854662654   |
| 4.4189081922   | 5.5175538467   |
| 0              | 0              |
| 4.8139513202   | 8.6519293719   |
| 0              | 0              |
| 1.050368849    | 1.0929296014   |
| 11.467267916   | 20.1924791562  |
| 0              | 0              |
| 0.143810238    | 0              |
| 1.0937279936   | 0              |
| 6.0821589263   | 2.7515682115   |
| 0.4546209781   | 0              |
| 0.8341886457   | 0              |
| 5.2275479869   | 4.3514938154   |
| 13.3505170484  | 9.8057488532   |
| 58.7668040413  | 34.9417280714  |
| 21.5784256676  | 11.6754453421  |
| 0              | 0              |
| 50.5853888366  | 32.0387562064  |
| 370.5718131447 | 142.0584844034 |
| 16.9245476261  | 28.1765234895  |
| 6.7290880576   | 5.2513121004   |
| 3.2408764245   | 3.3721961407   |
| 118.8629570226 | 486.4717645133 |
| 0              | 0              |
| 0              | 0              |
| 0              | 0              |
| 0.8687163934   | 2.1091387841   |
| 1.9062670527   | 3.9670172856   |
| 8.6736135323   | 6.0637167269   |
| 0.1964561169   | 0.8176659305   |
| 1.2793129673   | 0.2662300987   |
| 2.9909518231   | 3.4579384895   |
| 22.580740616   | 23.4957080697  |
| 4.8080168998   | 8.8686653421   |
| 0              | 0.2989085175   |
| 1.6795592194   | 0.8738073249   |
| 0.2056417016   | 0.9985465725   |
| 0.4524854483   | 3.7665606029   |
| 0.1770925556   | 0              |

gene\_expression\_table

|                |                |
|----------------|----------------|
| 0.4937508985   | 0.3853181955   |
| 2.4536166157   | 0.5891623176   |
| 0.4001005156   | 1.0407812871   |
| 0              | 0              |
| 23.7049595655  | 26.427300176   |
| 0.5613807167   | 0              |
| 72.9303570003  | 0              |
| 42.0822893297  | 0              |
| 32.8690070504  | 0              |
| 124.8283638545 | 552.0171412783 |
| 156.0354548181 | 324.7159654578 |
| 0              | 0              |
| 0              | 0              |
| 29.9857608179  | 70.2017512366  |
| 114.4021961641 | 39.679250699   |
| 0              | 0              |
| 54.9080282523  | 85.6993371768  |
| 81.0271632475  | 35.1293204122  |
| 0              | 2.1023075358   |
| 0.2365885341   | 0.2461750579   |
| 2.5626326507   | 1.5554408648   |
| 123.824524021  | 26.0945561406  |
| 262.0867899834 | 165.1878073208 |
| 0              | 4.4324725346   |
| 281.1464614783 | 175.5230786113 |
| 0              | 4.0119927245   |
| 0              | 0              |
| 50.6388546988  | 43.5271262457  |
| 9.4476396328   | 6.0075010428   |
| 3.1119399415   | 2.7754587216   |
| 9.0541564912   | 2.5693716125   |
| 2.8836453668   | 12.0019605852  |
| 0              | 0              |
| 0              | 0              |
| 414.3661657903 | 183.8262896202 |
| 355.5111802576 | 154.902504162  |
| 1.6346804691   | 5.783119231    |
| 6.9897880045   | 8.2427479851   |
| 0              | 0              |
| 3.727317169    | 5.9467993078   |
| 6.9257223614   | 4.503969598    |
| 69.4993438671  | 33.5120352511  |
| 3.6716921066   | 0              |
| 0              | 2.9788408444   |
| 7.9288374435   | 5.0769922938   |
| 0              | 0              |
| 192.3893997065 | 42.8967820228  |
| 26.8814623855  | 0              |
| 0              | 0              |

gene\_expression\_table

|                 |                 |
|-----------------|-----------------|
| 6.3207802273    | 4.0714124773    |
| 0.9964474154    | 0               |
| 0               | 2.7962961709    |
| 32.0370136006   | 5.5558579159    |
| 0               | 0               |
| 81.8419827096   | 12.1654578266   |
| 0               | 0               |
| 50.3027624071   | 38.6326584173   |
| 7.1141557931    | 7.0659464366    |
| 100.4047860909  | 89.5484310375   |
| 9.6596965943    | 10.0511057224   |
| 6.0313378844    | 6.2757265854    |
| 24.9469858901   | 49.319883017    |
| 0               | 0               |
| 625.2732736666  | 358.2005882027  |
| 2.3495240315    | 4.2782710475    |
| 0               | 0.6229730745    |
| 0.3849523348    | 0               |
| 4.5941173919    | 2.7884909401    |
| 0               | 0               |
| 226.1455361079  | 89.2551044033   |
| 0               | 0               |
| 3.1408540875    | 0               |
| 0               | 0               |
| 2.5260855805    | 0               |
| 7.2603273134    | 2.2219160117    |
| 30.8903096536   | 42.8559724206   |
| 500.3054689055  | 267.9444324241  |
| 0               | 0               |
| 0               | 0               |
| 0               | 0               |
| 876.8071701178  | 71.0201081351   |
| 0               | 0               |
| 16.3819971242   | 0               |
| 3580.4011325775 | 4422.0266833429 |
| 0               | 0               |
| 3412.127415635  | 1592.9188042253 |
| 0               | 9.0030283258    |
| 0               | 0               |
| 0               | 0               |
| 3.2688478962    | 1.1337670038    |
| 4.5769257277    | 9.5247638316    |
| 75.7173913328   | 32.3583082171   |
| 114.6048467148  | 92.1466562809   |
| 160.4965052632  | 131.3481526763  |
| 0.3563931345    | 0               |
| 3.4246992549    | 7.1269348769    |
| 5.0733196056    | 3.9591671867    |
| 9.6994276087    | 8.0739573042    |

gene\_expression\_table

|                 |                  |
|-----------------|------------------|
| 13.6532798517   | 4.7355027461     |
| 45.8523733617   | 61.0691879567    |
| 4.9849197052    | 38.9018080065    |
| 813.6741758829  | 654.8628426659   |
| 35.0716819802   | 61.4615243436    |
| 9642.251815583  | 14041.1565847411 |
| 2.9733473446    | 4.2673473542     |
| 142.0688581781  | 50.8444264767    |
| 0               | 0                |
| 122.9422574843  | 193.1158197634   |
| 9.4133701604    | 7.0927848938     |
| 326.9538567303  | 256.4599442248   |
| 0.6467414357    | 2.6917891187     |
| 23.8591609583   | 17.540059076     |
| 1.0279484671    | 1.0696007498     |
| 0               | 0                |
| 74.4693541068   | 43.0482436828    |
| 0               | 0                |
| 36.9840694214   | 15.4685190334    |
| 0.0964290931    | 0                |
| 50.2197485924   | 24.1919646122    |
| 15.169683244    | 40.1783607706    |
| 42.038057367    | 21.8707158572    |
| 331.848910143   | 75.0642101967    |
| 2.7330195284    | 5.6875219534     |
| 744.9880282904  | 974.6129843448   |
| 30.5523078369   | 14.129014101     |
| 8.3857524592    | 11.9976197075    |
| 0               | 0                |
| 0               | 0                |
| 186.8519485546  | 84.4007495093    |
| 0               | 14.9044460679    |
| 5.7682888801    | 2.0006729613     |
| 0               | 0                |
| 97.0483411165   | 149.0667801494   |
| 1976.3272511574 | 2361.0606554269  |
| 250.7550644988  | 229.9595238162   |
| 0               | 6.1608927182     |
| 9.3990900026    | 9.7799393996     |
| 0               | 3.8269328085     |
| 42.1395886928   | 40.4742249884    |
| 8.0002816009    | 6.6595612311     |
| 8.0514973183    | 12.5666137616    |
| 71.8621577194   | 54.1466890207    |
| 12.5039103917   | 11.384245722     |
| 1.3415381239    | 1.3958970017     |
| 61.5187355719   | 33.460537694     |
| 239.4856530511  | 272.6980174121   |
| 19.471766202    | 13.5071723898    |

gene\_expression\_table

|                |                |
|----------------|----------------|
| 2.9248945282   | 2.5108138409   |
| 90.3041373362  | 54.2095640541  |
| 25.9055450113  | 28.1271995763  |
| 22.2600406048  | 17.3715100149  |
| 0.759255104    | 2.8440719317   |
| 0              | 0              |
| 6.1289395272   | 12.7545660577  |
| 14.7956609774  | 18.6362686344  |
| 10.1281674173  | 16.0029968435  |
| 237.1686661932 | 294.682796882  |
| 7.193864267    | 7.4853583231   |
| 110.0699245348 | 68.7179625711  |
| 0              | 0              |
| 21.4301996128  | 10.8479419574  |
| 1.186978637    | 3.7052243788   |
| 10.4775772239  | 1.8170211208   |
| 10.4576586108  | 9.601236188    |
| 12.1550595001  | 0              |
| 9.6737151168   | 23.4866153034  |
| 9.0664811642   | 1.6406701413   |
| 2.0409781475   | 8.4947128257   |
| 33.2958772719  | 11.5483400303  |
| 78.6412335381  | 45.3290479297  |
| 1.7211925816   | 0              |
| 0.3180386002   | 0.3309254658   |
| 8.9782805746   | 17.2828458745  |
| 1.7653163744   | 1.4694773352   |
| 173.7402596828 | 36.5864656128  |
| 4.63613481     | 0              |
| 0              | 0.6906923942   |
| 0.947659174    | 0              |
| 0              | 0              |
| 146.5509923834 | 41.3530065415  |
| 9.8142441546   | 2.0423831043   |
| 134.4595991897 | 113.6751503887 |
| 475.3483890446 | 266.5860932427 |
| 5.9984113893   | 2.0804886382   |
| 12.5580908625  | 0              |
| 0              | 0              |
| 0              | 0.7625926887   |
| 0              | 0              |
| 0.2974119534   | 0.309463031    |
| 3.8307192862   | 6.9753938215   |
| 0              | 0              |
| 0              | 0              |
| 1.9862439302   | 2.0667261687   |
| 0              | 0              |
| 0              | 0              |
| 0              | 0              |



gene\_expression\_table

|                 |                |
|-----------------|----------------|
| 0               | 0              |
| 65.3585398439   | 18.1990177624  |
| 1.1228938278    | 0              |
| 13.2862544263   | 10.3684582578  |
| 0               | 0              |
| 166.541777135   | 75.8143834404  |
| 1.057934648     | 0              |
| 3.0723795307    | 0              |
| 0               | 0              |
| 0               | 0              |
| 1454.4535619821 | 809.1610942362 |
| 0               | 0              |
| 100.2497109993  | 12.0359781736  |
| 8.225363561     | 10.6983172233  |
| 0               | 0              |
| 21.5390361374   | 12.0678890324  |
| 8.5375502239    | 10.3640718856  |
| 33.9563672261   | 47.8024869682  |
| 13.6401177899   | 17.9775629463  |
| 12.5794199468   | 6.5445678639   |
| 0               | 0              |
| 0               | 0.4512878369   |
| 0               | 0              |
| 7.0471881847    | 6.8089718849   |
| 0               | 0              |
| 0               | 0              |
| 5.5984623376    | 7.4140321833   |
| 0               | 0              |
| 12.1159891676   | 31.1855558147  |
| 0               | 0              |
| 0               | 0              |
| 31.1149467089   | 19.5760159115  |
| 0               | 0              |
| 46.604916509    | 23.7518395828  |
| 27.1152595112   | 32.9162923086  |
| 0               | 2.9372122564   |
| 37.6665750259   | 41.8499578973  |
| 0               | 5.5319293525   |
| 27.884965583    | 29.0148592561  |
| 0               | 0              |
| 0               | 0              |
| 129.251156228   | 142.6392007617 |
| 164.4531569859  | 96.5274079504  |
| 69.3202436546   | 39.670997943   |
| 9.3015107025    | 5.8070437225   |
| 0               | 0              |
| 20.8960333224   | 8.15352628     |
| 42.3429228511   | 25.8156154053  |
| 0               | 5.4994711562   |

gene\_expression\_table

|                |                |
|----------------|----------------|
| 12.5203505444  | 17.6804131455  |
| 14.1345093932  | 7.3536185562   |
| 0              | 0              |
| 1.9006143447   | 0              |
| 1.0610331449   | 1.656039019    |
| 15.8043769167  | 0              |
| 5.0498747196   | 2.6272473569   |
| 71.3591289156  | 20.8829777866  |
| 0.7581436264   | 1.1394694517   |
| 0              | 0              |
| 0              | 0              |
| 2.1059758087   | 0              |
| 8.7286779569   | 8.5481057705   |
| 4.3392840784   | 3.6120888565   |
| 0.2785276291   | 0.3864180231   |
| 14.2844942854  | 8.7129685931   |
| 0              | 0              |
| 100.261920493  | 144.8188991925 |
| 36.5732175454  | 33.2982628904  |
| 26.1364281283  | 17.8713097677  |
| 8.121915857    | 8.2448920905   |
| 0              | 0              |
| 30.4941965534  | 13.3060517809  |
| 13.39327834    | 20.90395727    |
| 1.5331771472   | 1.9311540879   |
| 0              | 0              |
| 131.4221319616 | 116.4383227741 |
| 12.3120608036  | 24.0757381604  |
| 8.0976982069   | 8.6736335492   |
| 0              | 0.3257009975   |
| 62.0989742421  | 150.4854308563 |
| 3.2231626576   | 3.4779781195   |
| 0              | 0              |
| 47.9814052641  | 58.8675020146  |
| 0.9899362347   | 0              |
| 0.4991339915   | 0.519358809    |
| 5.1248055892   | 5.9990194895   |
| 0.3536942294   | 0.5888413672   |
| 3.4880178416   | 1.8146758413   |
| 0.7422758006   | 0.2574508932   |
| 1.5107049746   | 0              |
| 3.1684735383   | 2.4726446272   |
| 13.5871068688  | 14.1376539384  |
| 7.0195053894   | 6.4274623211   |
| 0.8090783403   | 0.4209310229   |
| 0.9776308342   | 1.2432985347   |
| 1.5349870193   | 0              |
| 0              | 0              |
| 0              | 0              |

gene\_expression\_table

|                |                |
|----------------|----------------|
| 1.3328825777   | 0.4622969115   |
| 20.8650114513  | 8.0638843536   |
| 14.3479350414  | 14.9293107286  |
| 0              | 0              |
| 0.395983903    | 2.8842036852   |
| 7.0647579628   | 1.2251701092   |
| 0.1155279326   | 0.0601045516   |
| 0              | 0.3449340075   |
| 69.5939454519  | 85.5800391879  |
| 2.7255409885   | 2.3996748834   |
| 0              | 0              |
| 0.5664758507   | 0.1964764493   |
| 130.8622975056 | 137.6777560898 |
| 0              | 0              |
| 0              | 0              |
| 2.3172615692   | 2.4111565814   |
| 8.6345008158   | 6.9110532305   |
| 9.8356764295   | 7.6756621712   |
| 0.7236662574   | 0.7529890809   |
| 4.0324702547   | 2.7972434715   |
| 0.1993621995   | 0.3526485425   |
| 239.52117605   | 159.7252899573 |
| 44.4473636967  | 46.2483626931  |
| 2.4931745676   | 3.8912963134   |
| 0.0394034516   | 0.0410000722   |
| 1.5238863869   | 0.9249531567   |
| 0              | 0              |
| 0              | 0              |
| 0.0863929047   | 0.269680588    |
| 0              | 0              |
| 0.8472254939   | 0.528932949    |
| 11.1598342269  | 4.098363055    |
| 73.695033354   | 32.1566081627  |
| 3.4516012635   | 2.394306341    |
| 2.8215933061   | 1.8683151121   |
| 0              | 0              |
| 0              | 0              |
| 20.6970646755  | 15.2544583649  |
| 11.8294204836  | 8.2058309496   |
| 4.7878368503   | 6.2814493231   |
| 62.4893066312  | 35.3202459349  |
| 0.3292680756   | 0.3426099574   |
| 5.0458521521   | 4.2002473221   |
| 0.4516672708   | 0.4699687455   |
| 0.5061070421   | 0              |
| 1.5885731837   | 1.8890764305   |
| 1.750481783    | 4.8570959539   |
| 327.3146807986 | 148.0771354009 |
| 0              | 0              |

gene\_expression\_table

|                |                |
|----------------|----------------|
| 0              | 0.1143856334   |
| 112.167757162  | 675.7055339022 |
| 0              | 0              |
| 1.066465287    | 6.6580695848   |
| 83.4524280198  | 5.9885451754   |
| 0.4070887868   | 1.6943357979   |
| 35.9453068126  | 8.1927761206   |
| 0.3111735178   | 0              |
| 1.5009084549   | 0.7098749951   |
| 0              | 0              |
| 0              | 0              |
| 7.903478894    | 5.9042138286   |
| 9.8969546964   | 1.4711396399   |
| 191.4487328292 | 160.0764109129 |
| 0.0569719717   | 0              |
| 0              | 0              |
| 13.5098532704  | 8.3583767796   |
| 1.1017635315   | 2.2211631498   |
| 23.0241738227  | 7.5370680341   |
| 4.7067943918   | 2.5429393562   |
| 6.7019669735   | 4.851150916    |
| 17.08575032    | 16.8891586894  |
| 0.3709864256   | 0.1286729091   |
| 32.6926669398  | 20.8269598696  |
| 0              | 0              |
| 15.4892275433  | 13.2726985116  |
| 6.0194976162   | 10.3482369116  |
| 2.5571508181   | 2.6607660986   |
| 7.7365768684   | 0              |
| 0.7245607435   | 1.2924339625   |
| 13.9302036777  | 3.0197193681   |
| 23.2366998483  | 4.0297077749   |
| 0              | 0              |
| 10.289957749   | 48.1810722442  |
| 25.4634185232  | 14.1549653514  |
| 21.6316181275  | 23.0440351058  |
| 52.9507268778  | 18.9393464512  |
| 2.6340628194   | 1.4356542934   |
| 0              | 0.561195953    |
| 3.4624668436   | 3.87990116     |
| 1.7781628475   | 0.7400854715   |
| 0              | 0              |
| 0.841066264    | 1.3127191714   |
| 24.2217828119  | 10.8013907114  |
| 2.0145411501   | 1.886552988    |
| 6.4684621626   | 8.3400455295   |
| 8.0507296122   | 3.7475800738   |
| 13.2268166766  | 10.0092835301  |
| 1.1417228401   | 0              |

gene\_expression\_table

|                |                |
|----------------|----------------|
| 0.2736317919   | 0.5694386035   |
| 5.4055343063   | 3.5153534759   |
| 5.8294604606   | 1.5962287172   |
| 0              | 0              |
| 0              | 0              |
| 9.4954909257   | 7.5278068345   |
| 0              | 0              |
| 0              | 0              |
| 19.6632289965  | 5.1149948541   |
| 0              | 0              |
| 1.6790233489   | 0.3882349035   |
| 10.5787708372  | 8.4914388138   |
| 0              | 0              |
| 0              | 0              |
| 102.1558599588 | 42.2894868204  |
| 16.3030834205  | 5.9004109079   |
| 0              | 0              |
| 0              | 0              |
| 111.6850599354 | 59.6343447674  |
| 56.0173384204  | 24.9802074271  |
| 0              | 0              |
| 61.4213666182  | 43.7279967451  |
| 14.1726935699  | 19.9517809183  |
| 0              | 0              |
| 4.9428690929   | 9.669128089    |
| 24.2924002545  | 15.7979524011  |
| 7.9885631666   | 9.2358425287   |
| 11.2674689483  | 16.6090350148  |
| 12.3350011655  | 12.8348131424  |
| 19.0648513609  | 14.8780167219  |
| 0              | 0.3318882317   |
| 0              | 0              |
| 152.575055108  | 119.0680261946 |
| 2.4409823604   | 1.2699452582   |
| 40.9751329594  | 17.0541751222  |
| 4.5463725682   | 10.4959982219  |
| 12.7756720136  | 7.9760039353   |
| 9.1013580418   | 8.8782594324   |
| 17.0046801781  | 11.7958044595  |
| 501.609629335  | 284.5269346995 |
| 0.3049441256   | 0              |
| 0              | 0              |
| 0              | 0              |
| 0              | 0              |
| 45.4592041134  | 27.5923682401  |
| 5.5405491063   | 2.1618941761   |
| 10.7791633729  | 17.8624119564  |
| 0              | 0              |
| 0.0858242816   | 0              |

gene\_expression\_table

|                |               |
|----------------|---------------|
| 25.0219017636  | 0             |
| 10.217689157   | 4.3493351077  |
| 3.3761806585   | 3.7639102258  |
| 1.1003600767   | 0.763297643   |
| 105.4118717026 | 23.9158729244 |
| 0              | 0             |
| 0.590147552    | 2.4562408889  |
| 0              | 0.5109719333  |
| 10.2021574591  | 5.3077735008  |
| 5.1497486324   | 0.7654879285  |
| 126.4560088489 | 77.8360463131 |
| 64.4192229622  | 34.6704196657 |
| 9.4581510538   | 9.1384369085  |
| 0              | 0             |
| 14.2408956759  | 29.0659477511 |
| 3.1175565111   | 2.5951034617  |
| 0              | 0             |
| 0              | 0             |
| 2.1071781629   | 2.1261194029  |
| 17.5100729544  | 2.6027968411  |
| 0.2038356868   | 0.2120950713  |
| 44.1666997972  | 18.8931563859 |
| 11.8893243665  | 6.1855388008  |
| 52.6527221945  | 30.2026491629 |
| 3.4064976645   | 0             |
| 0.3777789847   | 0             |
| 0              | 15.4452190221 |
| 22.2170789443  | 25.8913882014 |
| 0              | 0             |
| 7.2994246932   | 15.1903920766 |
| 9.2827169171   | 12.7321216384 |
| 0.1144247145   | 0.9524894632  |
| 14.9478800434  | 33.8987963664 |
| 0              | 0             |
| 0              | 0             |
| 0              | 0             |
| 0.4361543806   | 0             |
| 0              | 0             |
| 1.2676545394   | 0.659509834   |
| 51.2942190418  | 91.0474640789 |
| 3.3780708621   | 1.1716498906  |
| 0              | 0             |
| 0.0478281947   | 0.1492985531  |
| 4.3824190224   | 6.9919905464  |
| 1.378377715    | 0.7171146632  |
| 44.8093212546  | 13.9874960114 |
| 6.7137902746   | 23.9514233859 |
| 6.8707352225   | 3.7731551898  |
| 2.971667437    | 1.2732089401  |

gene\_expression\_table

|                |                |
|----------------|----------------|
| 31.6716881367  | 64.6617420431  |
| 7.2049387106   | 13.1763371836  |
| 4.8979876285   | 4.0771625486   |
| 124.7404761011 | 133.6502323995 |
| 0              | 0.9382349337   |
| 8.5969567413   | 0              |
| 5.9558922711   | 7.1506429959   |
| 3.9998207636   | 4.1618927647   |
| 8.9182637535   | 2.9526095961   |
| 0              | 0              |
| 4.2199510191   | 1.4636475526   |
| 0.0508809712   | 0.0529426588   |
| 0              | 0              |
| 10.4315728026  | 3.1012166322   |
| 0.0820972214   | 0              |
| 35.0153381132  | 19.7704707118  |
| 3.050055196    | 2.538914297    |
| 0              | 0              |
| 0              | 0              |
| 0.2446824346   | 0.2545969218   |
| 0              | 0              |
| 8.8516982981   | 2.302591871    |
| 0              | 0              |
| 6.642188439    | 3.8012307806   |
| 0              | 0              |
| 16.6519908379  | 20.8809267376  |
| 6.1654089377   | 3.2076150866   |
| 33.0640427874  | 29.2592994965  |
| 7.9141829765   | 12.0033613968  |
| 0              | 0              |
| 0              | 0              |
| 32.3927288073  | 82.7311325317  |
| 1.22663002     | 1.7017771235   |
| 0              | 0.744486392    |
| 5.1761411942   | 1.0771754965   |
| 5.3089896102   | 4.4883384748   |
| 11.606429652   | 16.3620078034  |
| 19.1343954663  | 26.0357846178  |
| 0              | 0              |
| 0.0870295201   | 0.4527797014   |
| 12.0910390862  | 7.2224062723   |
| 7.0603038946   | 4.4603058518   |
| 2.1603041969   | 0              |
| 9.0339911791   | 6.1461844716   |
| 50.4790095575  | 11.8603505851  |
| 2.2679959953   | 2.3598947756   |
| 55.2002470229  | 54.3736468261  |
| 7.4581627162   | 10.5823174047  |
| 0.3271254174   | 0.2269203194   |

gene\_expression\_table

|                 |                 |
|-----------------|-----------------|
| 0.176954153     | 0.3314237448    |
| 89.5552470009   | 22.8205736637   |
| 0.8658727307    | 0.8008513194    |
| 201.4921563071  | 156.2147077067  |
| 6.1042441665    | 3.9086689333    |
| 2.2405263081    | 1.3987872131    |
| 414.3748005775  | 120.4155038573  |
| 12.0004224013   | 16.6489030777   |
| 1645.6637774806 | 1331.8244884455 |
| 12.6835403479   | 18.5589493149   |
| 4.0112897473    | 1.0983753867    |
| 44.2889244547   | 23.773235944    |
| 0.7741033173    | 1.2887517461    |
| 9.7904119779    | 0               |
| 12.4447718523   | 18.3444615995   |
| 0.0507095761    | 0               |
| 0               | 0               |
| 3.7685632236    | 1.9606323559    |
| 62.9594770232   | 8.1888229306    |
| 0               | 0               |
| 0               | 0               |
| 0               | 0               |
| 279.8740450512  | 244.0754537195  |
| 152.2714416536  | 69.7142390753   |
| 212.5266104784  | 97.5609483615   |
| 94.8376557986   | 61.4425506636   |
| 0               | 0               |
| 5.0652238828    | 1.0540931645    |
| 0               | 0               |
| 0               | 0               |
| 89.553863669    | 24.9361806353   |
| 0               | 0               |
| 33.5979568036   | 0               |
| 158.674367747   | 153.3106936437  |
| 0               | 0               |
| 74.7484259362   | 44.8714721525   |
| 0               | 23.2811930121   |
| 11.960344052    | 19.9119599867   |
| 59.3573876209   | 77.2031725532   |
| 10.6351922343   | 15.0183169327   |
| 5.8431229224    | 0               |
| 12.9250279943   | 8.017522697     |
| 15.4323710977   | 12.3520676417   |
| 15.6845548718   | 4.7380906883    |
| 6.8649172295    | 0.5102201723    |
| 5.645436787     | 6.4925245146    |
| 0.3196031295    | 0.1662766947    |
| 3.5573540136    | 3.0284978265    |
| 0               | 0               |



gene\_expression\_table

|                |                |
|----------------|----------------|
| 4.6189300967   | 2.6700490523   |
| 0.68831589     | 0.7162063232   |
| 12.3116491293  | 5.6046002626   |
| 16.4360472509  | 8.1438251716   |
| 0              | 0              |
| 38.2544311611  | 10.9462357595  |
| 13.5848916398  | 13.6641706505  |
| 35.6496406691  | 30.3497652662  |
| 18.5227065003  | 4.0575248755   |
| 2.446916161    | 10.7500511813  |
| 44.8824416616  | 69.1358976519  |
| 0.2814570017   | 0.5438858056   |
| 0.2866692741   | 0.0745712651   |
| 15.2745981435  | 3.1787044098   |
| 11.3690177708  | 12.4523034509  |
| 0.0534798433   | 0.1112936734   |
| 2.0316649428   | 2.1139876324   |
| 0.158783313    | 0              |
| 84.791074628   | 94.7621113932  |
| 2.0863688362   | 1.5788422673   |
| 453.3071866396 | 874.0832465652 |
| 130.0791666706 | 459.1282636742 |
| 12.0464252034  | 26.2085922833  |
| 3.2018282685   | 3.7614452136   |
| 17.6016136544  | 23.701541859   |
| 0              | 0              |
| 15.1429783375  | 7.3349545497   |
| 0              | 0              |
| 4.3405546184   | 5.4508675257   |
| 0              | 0              |
| 0.4862094728   | 0              |
| 0.7470898671   | 2.5912060366   |
| 1.475901345    | 1.1517784469   |
| 38.3446538761  | 22.442834359   |
| 1.8003766759   | 1.2488850716   |
| 0              | 0              |
| 4.1024073881   | 3.6362456352   |
| 0.0210469645   | 0.0218997836   |
| 0              | 0              |
| 0.0722326872   | 0              |
| 0.171746154    | 0.3276263404   |
| 49.4787311135  | 17.9412546122  |
| 0              | 0              |
| 3.8795862925   | 2.9358446655   |
| 28.2970197955  | 14.7218049148  |
| 8.3376532072   | 3.3049498593   |
| 0              | 0              |
| 2.2809279847   | 4.2192902522   |
| 0.8170083096   | 2.0544405618   |

gene\_expression\_table

|                 |                 |
|-----------------|-----------------|
| 0.2755638587    | 0.669035863     |
| 9.7590692051    | 6.0927029359    |
| 0               | 0               |
| 23.2921609662   | 8.7408362445    |
| 0               | 0.0920622491    |
| 9.8224830221    | 8.9816411686    |
| 56.3569744785   | 72.8564393086   |
| 272.851448473   | 117.3995212401  |
| 0.9645718642    | 1.4497255336    |
| 0.0912058549    | 0.1581691656    |
| 1.0113033622    | 1.6699244944    |
| 24.6373687832   | 5.3969832488    |
| 2.7706132142    | 1.3566484479    |
| 37.4425598221   | 58.242821892    |
| 5.7413978143    | 2.8003304048    |
| 2.6406217408    | 1.5700681416    |
| 3.7541307895    | 0               |
| 4.6286844704    | 1.3760679752    |
| 0.9267371024    | 1.4464324788    |
| 0               | 0               |
| 2.5285386117    | 5.788187968     |
| 0               | 0               |
| 0               | 0               |
| 0               | 0               |
| 0               | 0.1057990686    |
| 58.9152050616   | 9.8521775883    |
| 16.1649428854   | 16.8199433959   |
| 3.5340020304    | 7.3543982846    |
| 0               | 1.4982034825    |
| 2.4962467318    | 3.3395068156    |
| 89.4409417346   | 93.065072232    |
| 1.7888135009    | 0               |
| 0               | 4.0106007992    |
| 66.8907034788   | 69.6011024725   |
| 0               | 0               |
| 0               | 0               |
| 0               | 0               |
| 3.4402714258    | 1.8357285081    |
| 2.1593352285    | 0.8641658056    |
| 52.3148463631   | 28.0178264826   |
| 66.7572459219   | 19.2950659      |
| 2710.1678714175 | 3469.8056306817 |
| 0               | 0               |
| 0               | 0               |
| 0.6595395803    | 0.6862640027    |
| 1.5379382817    | 0.5334184193    |
| 2.5076026069    | 1.8481905605    |
| 755.3353688192  | 385.9533753742  |
| 4.4431134851    | 3.1883776729    |

gene\_expression\_table

|                |                |
|----------------|----------------|
| 0              | 0              |
| 57.7564071566  | 29.0790416828  |
| 9.7485175831   | 5.5964279842   |
| 22.2387223254  | 27.7677975132  |
| 19.0565555245  | 13.1333104675  |
| 154.2984507319 | 98.6870633239  |
| 3.1140200249   | 0.7623998925   |
| 0.6583930534   | 0              |
| 0              | 0              |
| 338.8641644175 | 340.8417153918 |
| 3.7901517462   | 3.4507619977   |
| 12.7480223051  | 9.1193917531   |
| 240.2762971407 | 61.4436881852  |
| 1.9568232772   | 3.4904801078   |
| 1.041439026    | 0.5418189718   |
| 79.0687878582  | 103.8731794316 |
| 0              | 0              |
| 2.1271224832   | 5.1643972211   |
| 1.710230498    | 1.6748505629   |
| 24.4584126215  | 6.3623657498   |
| 1.9934999997   | 0.638238847    |
| 4.0030768599   | 2.776853865    |
| 10.3094530872  | 0.6704493893   |
| 0.3254328246   | 0.8003728975   |
| 24.8970805475  | 14.9288269956  |
| 0.8589402743   | 1.3406165641   |
| 0              | 0              |
| 0              | 0              |
| 4.8131443117   | 1.9262200128   |
| 5.6868664243   | 0.5379361096   |
| 27.9092054506  | 11.6160325275  |
| 0              | 0              |
| 6.2227731795   | 3.2374594017   |
| 117.8104319478 | 136.9004789196 |
| 12.5307306599  | 9.193795459    |
| 0              | 0              |
| 4.0894272839   | 4.0778330362   |
| 2.9945133502   | 1.4956082304   |
| 0              | 0              |
| 0              | 0              |
| 1.4817042491   | 0.88099579     |
| 2.4838814678   | 1.6446995649   |
| 0              | 1.0288869967   |
| 17.501915036   | 2.8754351703   |
| 0              | 0              |
| 287.7419868988 | 215.255792924  |
| 0.538929119    | 2.616909996    |
| 2.1397774235   | 0              |
| 0              | 0              |

gene\_expression\_table

|                |                |
|----------------|----------------|
| 3.6994128623   | 3.8493123906   |
| 0.3588244858   | 0.6222733132   |
| 80.2210521883  | 72.3420485304  |
| 19.9323535681  | 12.4440053197  |
| 0.9914577184   | 1.2035699698   |
| 0.5855647273   | 1.2185834046   |
| 0.5695639412   | 0.5926425673   |
| 1.5200753968   | 1.2653348576   |
| 0.7871129436   | 0.4680037801   |
| 4.7209112926   | 4.073533158    |
| 0.8929211046   | 1.5485035056   |
| 17.2123245666  | 14.5621452032  |
| 41.4980324047  | 74.5290432197  |
| 4.9292572875   | 9.2962941675   |
| 30.9831982772  | 87.9925008282  |
| 0.8624446409   | 0.8973907391   |
| 11.7106479161  | 1.0444423898   |
| 0              | 0              |
| 0              | 0              |
| 21.6193480741  | 6.1350982034   |
| 87.4424435466  | 40.4380423401  |
| 0.3259544958   | 0              |
| 0              | 0.3050156125   |
| 32.2222442866  | 51.2779397682  |
| 18.2268915659  | 24.3841395311  |
| 787.0895939131 | 903.7046282969 |
| 4.2527973905   | 0              |
| 7.134830844    | 3.7119664383   |
| 2.3694847966   | 0              |
| 178.5947017433 | 79.6419969375  |
| 51.0902347621  | 8.1785233341   |
| 119.7726696308 | 131.3623678443 |
| 13.1879830444  | 11.1085752729  |
| 0              | 0              |
| 15.9317271267  | 116.0409444437 |
| 12.243469675   | 16.5614446566  |
| 11.2215839821  | 5.0041202142   |
| 68.230374118   | 28.3980225278  |
| 54.4594332502  | 83.7673070311  |
| 0              | 0              |
| 70.2036295927  | 27.3931004036  |
| 52.9765710042  | 43.1398736694  |
| 0              | 8.4255746139   |
| 0              | 0              |
| 0              | 0              |
| 7.0389835706   | 5.6008602684   |
| 0              | 0              |
| 18.0165808275  | 18.7466093667  |
| 20.4598975747  | 15.9666966441  |

gene\_expression\_table

|                |                |
|----------------|----------------|
| 14.2793982073  | 14.8579967946  |
| 205.5818156863 | 86.4290719275  |
| 0.1528398428   | 0              |
| 0.3345653101   | 0.5802030582   |
| 12.2164436891  | 8.4743011593   |
| 0              | 0.3344079512   |
| 21.810155695   | 23.3713290162  |
| 0.4189503124   | 0.8718522038   |
| 12.2001463526  | 6.7703968199   |
| 21.150320786   | 7.1200178472   |
| 0.4698683708   | 0              |
| 0              | 0.201302939    |
| 0.0228645962   | 0              |
| 20.2848325768  | 65.8034602204  |
| 0.5846607927   | 0.6083511404   |
| 0.9305099103   | 1.0562334552   |
| 0              | 0              |
| 1.8981663656   | 1.4433274858   |
| 0              | 0              |
| 0              | 0              |
| 4.8650654164   | 2.7721554845   |
| 9.457767636    | 12.9163054648  |
| 1.9483079737   | 3.5016189118   |
| 4.8044291925   | 2.6465843537   |
| 0.4035497415   | 0              |
| 8.3209213614   | 9.2352891344   |
| 2.5442796677   | 1.3898710411   |
| 0.5179841656   | 0.8084591829   |
| 0.0368375033   | 0.1533206086   |
| 0.3894080238   | 0.1350622551   |
| 32.9004065604  | 12.1473798312  |
| 0.0854383873   | 0              |
| 9.0664983214   | 9.0565163181   |
| 0.4232813456   | 0.1468108759   |
| 2.4561876109   | 3.6318010938   |
| 0.3223760775   | 1.6771934842   |
| 15.7701914319  | 12.8929402535  |
| 6.9128539441   | 5.6944278649   |
| 101.9180831377 | 49.9648218299  |
| 8.3409122299   | 8.1002921611   |
| 6.6544270406   | 16.8155820561  |
| 1.5699726255   | 0              |
| 35.8799084596  | 16.4042260099  |
| 0              | 0              |
| 1.9424859045   | 0              |
| 4.7262573744   | 2.6637890789   |
| 0              | 0              |
| 0.2420138049   | 0.2518201597   |
| 601.4953360884 | 217.4067151709 |

gene\_expression\_table

|                 |                |
|-----------------|----------------|
| 35.2596383487   | 50.446484557   |
| 2.1322482982    | 0.8874586427   |
| 9.8782374479    | 7.7088763584   |
| 1.2782175169    | 4.110942026    |
| 0               | 0              |
| 0.3544770525    | 0.1844201987   |
| 0               | 0              |
| 2.3136154626    | 4.0122712255   |
| 0               | 0              |
| 4.3904958778    | 2.443561701    |
| 56.3852526552   | 71.1308518758  |
| 0.6399487942    | 0              |
| 0.9527012399    | 0.7269566471   |
| 0               | 0              |
| 0               | 1.847152108    |
| 1557.4750353883 | 1698.93246441  |
| 1.0494905444    | 0.5222683821   |
| 1.2241221269    | 2.2290158278   |
| 13.2063455939   | 10.4245591141  |
| 12.5205099824   | 5.2994598275   |
| 10.9199432995   | 9.795187407    |
| 0.3634367945    | 0.756326373    |
| 0.7485799123    | 0.3894561163   |
| 0               | 0              |
| 0.3415663311    | 0.355406536    |
| 2.052702653     | 0.9708535394   |
| 4.8817263669    | 4.515140463    |
| 4.7297785926    | 0              |
| 16.2744644134   | 14.5147737566  |
| 14.0953827236   | 13.3332045794  |
| 4.6994713742    | 4.0749109078   |
| 19.5877449359   | 19.947789165   |
| 2.1844145542    | 3.4635072455   |
| 0               | 0              |
| 290.6786385598  | 159.4585610261 |
| 4.9525434831    | 4.6164259217   |
| 0               | 0              |
| 65.6196019609   | 35.5919820382  |
| 6.0675720279    | 3.8582065682   |
| 4.8971038251    | 2.6818597741   |
| 1.5631982475    | 3.7178028635   |
| 0.243823234     | 0              |
| 0               | 0              |
| 0.7119792606    | 2.5188169994   |
| 0.4391403696    | 0.0913868513   |
| 6.7935534344    | 0              |
| 9.5826164112    | 10.4044197543  |
| 6.2429380091    | 4.7095280134   |
| 0.5978988375    | 0.7776569855   |

gene\_expression\_table

|                  |                 |
|------------------|-----------------|
| 2.7886632115     | 3.3852692201    |
| 0                | 0.1390289731    |
| 22.0323249107    | 18.9472045189   |
| 0.555328876      | 1.4445767495    |
| 13893.4822011259 | 15865.222649441 |
| 11.8577508313    | 14.394595498    |
| 4.667421394      | 11.4194423551   |
| 7.8464662519     | 28.5754126708   |
| 17.9733286928    | 11.0733185507   |
| 10.581043474     | 2.8973119495    |
| 0                | 0               |
| 0.3900566802     | 0.6764361751    |
| 6.7577398924     | 0               |
| 4.4634749402     | 1.2666365791    |
| 9.4451981914     | 8.4723412791    |
| 3.2706299839     | 1.8906418383    |
| 6.4263461307     | 12.2590242374   |
| 7.7139281297     | 8.2434273771    |
| 4.3708480262     | 8.5905797471    |
| 0.5429795893     | 0.1883270074    |
| 36.2457476428    | 21.3715039109   |
| 0.2353256595     | 0.9794440475    |
| 31.0798706519    | 14.5955777505   |
| 1.1376697552     | 4.7350716973    |
| 373.9291511744   | 265.857739351   |
| 1.212714711      | 1.3319566706    |
| 12.2340960694    | 5.4556368816    |
| 0                | 0               |
| 0.7602518584     | 0.8841226678    |
| 6.4300655593     | 6.6906106323    |
| 0.1851438158     | 0.337130166     |
| 127.299547775    | 204.2833573427  |
| 9.8776519321     | 17.4724173696   |
| 1.0534871558     | 0.6851089134    |
| 4.1236367996     | 7.8242647009    |
| 2.7897291518     | 4.7895679649    |
| 49.3995536639    | 17.6232735382   |
| 0                | 3.3946422387    |
| 91.2854816044    | 85.8051924006   |
| 91.8180118437    | 42.992307353    |
| 1.0650424813     | 1.8008214358    |
| 5.448277736      | 9.0704655153    |
| 3.8157349812     | 2.6468985736    |
| 48.8064039298    | 38.2961540979   |
| 6.0793034345     | 1.2651271381    |
| 26.7193570334    | 4.7934518039    |
| 29.8620125143    | 24.7163761769   |
| 0                | 0.9665189128    |
| 35.1224859618    | 62.3425668371   |

gene\_expression\_table

|                 |                |
|-----------------|----------------|
| 8.4302954722    | 4.3859447465   |
| 0.1479928473    | 0.3079789804   |
| 2.4353168322    | 2.2358783135   |
| 0.0705576439    | 0              |
| 3.7040097001    | 6.1665527862   |
| 9.520127533     | 7.0166659552   |
| 2.6003250489    | 2.7989893875   |
| 2.006979163     | 2.6578383864   |
| 7.7223857       | 12.0529430209  |
| 26.5594615143   | 19.9590776714  |
| 2.9859499327    | 7.4566561787   |
| 0               | 0              |
| 3854.4589164493 | 3693.750738539 |
| 2.0252523668    | 0.421463044    |
| 11.4344050194   | 14.5416638966  |
| 22.3763236372   | 26.2872672691  |
| 674.1033408893  | 206.7925236266 |
| 98.1392306044   | 73.7503102309  |
| 0               | 0              |
| 0               | 0              |
| 0               | 1.0542213373   |
| 0.5636783444    | 0.5865184872   |
| 46.632489855    | 21.3496930949  |
| 10.9810887717   | 16.3229149538  |
| 6.4676026098    | 15.9829631084  |
| 16.84227255     | 14.0197746671  |
| 3.7845628391    | 3.5003667811   |
| 0.7133537909    | 0.8164846308   |
| 0               | 0.0266742443   |
| 0               | 0              |
| 1.4079251939    | 0.399538381    |
| 12.1924719495   | 11.3741112204  |
| 0               | 0              |
| 3.8486343128    | 1.3348600889   |
| 25.5249267847   | 16.5994950751  |
| 159.9092627613  | 76.1140057048  |
| 4.4779219601    | 1.1648416334   |
| 0.4460502648    | 0.1547080465   |
| 45.2842026483   | 16.8282536446  |
| 12.9902122519   | 1.9309390374   |
| 2.2345577135    | 8.5253724628   |
| 0               | 0.6497239417   |
| 11.9269819273   | 9.7123782051   |
| 1.3211078535    | 0.5498555602   |
| 69.2581922856   | 45.7332540225  |
| 39.8130054683   | 21.0418900938  |
| 68.7055732341   | 56.9843923608  |
| 1.1794133587    | 0.9544911996   |
| 7.5419994842    | 11.7713998728  |



gene\_expression\_table

|                 |                 |
|-----------------|-----------------|
| 0               | 0               |
| 37.170081579    | 55.8656315293   |
| 0               | 0               |
| 17.0162558624   | 35.4115028362   |
| 40.1234026675   | 83.4983911177   |
| 80.3758194915   | 95.5801518904   |
| 738.0586128599  | 788.1742070658  |
| 0               | 0               |
| 2.8898962238    | 6.0139885738    |
| 0               | 5.9792526053    |
| 25.1351230386   | 13.076796799    |
| 0               | 0               |
| 282.0160804928  | 160.0599928195  |
| 76.2589462709   | 83.5252049877   |
| 0               | 0               |
| 117.1911854752  | 85.3578255191   |
| 0               | 0.3823599501    |
| 0.409368836     | 0               |
| 20.8650507359   | 40.2786884731   |
| 103.7308501259  | 34.4137407505   |
| 0.217756608     | 0.1132900328    |
| 21.6058428297   | 12.3647191825   |
| 3.7966623653    | 1.4365463366    |
| 0               | 0               |
| 0               | 0.0152648105    |
| 33.3848145067   | 19.7811111512   |
| 0               | 0               |
| 0               | 0               |
| 1928.3996036152 | 2407.8456007564 |
| 5.6576427006    | 3.5321336049    |
| 0               | 0               |
| 121.5919829841  | 106.2758489146  |
| 37.9216110062   | 19.0487802712   |
| 3.1224632892    | 0.9282814077    |
| 161.5874752172  | 93.5707658979   |
| 0               | 0               |
| 438.8896353132  | 44.0167096442   |
| 19.8210961339   | 7.2184851554    |
| 605.2513283744  | 404.5833702129  |
| 1.8555379773    | 9.6536201734    |
| 184.3276679695  | 234.41805585    |
| 4.0126623103    | 0               |
| 6.8175429003    | 0.3733572886    |
| 56.1919793601   | 27.9633716625   |
| 0               | 0               |
| 2.3383267389    | 2.7806574948    |
| 0.8350246317    | 0.8688596761    |
| 22.2342716138   | 12.0495834414   |
| 21.2168968136   | 15.3867223046   |

gene\_expression\_table

|                 |                 |
|-----------------|-----------------|
| 42.7001179542   | 20.4139302938   |
| 5.1206718877    | 13.653411461    |
| 8.8777180926    | 5.7734009974    |
| 0.2296525829    | 0               |
| 0               | 2.5393945651    |
| 9.5224560087    | 7.206039399     |
| 0               | 0               |
| 0               | 0               |
| 0               | 0               |
| 0               | 0.519358809     |
| 0.5658074908    | 0.0735917383    |
| 8.1577751685    | 6.0630905121    |
| 0.9410102954    | 2.4478496486    |
| 7.5904017935    | 5.5578261506    |
| 2.1158692959    | 0               |
| 0               | 0               |
| 30.0205451844   | 30.2903972364   |
| 0               | 0.8589178004    |
| 0               | 0.9174029181    |
| 0               | 0               |
| 8.3251574381    | 9.8999900402    |
| 0.583604273     | 1.7003050701    |
| 2.387818681     | 0               |
| 2.3757340615    | 0               |
| 0               | 0.8565841306    |
| 94.0684435386   | 22.5877106671   |
| 122.9628073912  | 56.3826471288   |
| 7.6176614249    | 3.9631638319    |
| 114.0841749566  | 99.2820883185   |
| 42.7494756318   | 29.5329163756   |
| 20.9541410199   | 4.1929228764    |
| 32.4498859178   | 17.4269673924   |
| 8.1065982231    | 8.4350760911    |
| 0               | 0               |
| 2.4389103405    | 6.0905628927    |
| 1.9609240919    | 1.3602535835    |
| 12.5675615193   | 11.4421971991   |
| 0               | 5.6777447791    |
| 24.9096959261   | 8.6396774068    |
| 92.1845438636   | 17.0180369477   |
| 0               | 0               |
| 10.6031303762   | 11.0327672675   |
| 0.5505823655    | 1.6040972127    |
| 2.9031488248    | 3.1984770503    |
| 2199.0703856013 | 1525.4508752569 |
| 128.6604110537  | 80.7492202337   |
| 0               | 0               |
| 2.0844021282    | 2.2411571094    |
| 0               | 0               |

gene\_expression\_table

|                 |                 |
|-----------------|-----------------|
| 3.0101410093    | 3.2481154938    |
| 41.6795879964   | 71.6522006423   |
| 43.5587866632   | 17.4322233391   |
| 2.0826828188    | 1.7027000126    |
| 1.2875094982    | 0.3653670399    |
| 0.7396995981    | 1.8692036464    |
| 3.3751061417    | 1.7559324107    |
| 4.0630468303    | 29.5937651806   |
| 27.9906019729   | 26.4770691028   |
| 50.5014799597   | 40.3491963788   |
| 1.150313148     | 0               |
| 20.9589690155   | 7.4607077256    |
| 72.3337647644   | 34.461866117    |
| 3.3459665846    | 2.7078679715    |
| 0.027926838     | 0               |
| 0.3370464287    | 0               |
| 4.5198227759    | 1.3437043322    |
| 8.0355518373    | 1.1944501313    |
| 0               | 0               |
| 1503.7725989997 | 2800.7825730843 |
| 0               | 0.7343808125    |
| 64.0430939828   | 21.8811699105   |
| 7.6797411632    | 4.7005428598    |
| 1.2619269436    | 1.7507466548    |
| 0.2140987021    | 0.6683218262    |
| 4.6528329726    | 3.6970422936    |
| 0               | 0               |
| 0.1511705378    | 0               |
| 5.8185051237    | 1.2108539761    |
| 0.9797511067    | 0               |
| 0               | 0               |
| 0               | 0.1891714402    |
| 4.4911970286    | 7.7886325093    |
| 0.3116827654    | 1.4594044215    |
| 12.3768241803   | 11.1985485375   |
| 4.7725154862    | 3.4545369985    |
| 13.2235301685   | 6.8796725886    |
| 0               | 0.2224538481    |
| 2.1161238349    | 1.6224296297    |
| 0               | 0               |
| 5.2779355126    | 5.6634151284    |
| 0               | 0               |
| 0               | 0               |
| 0               | 0.8149566459    |
| 1.0956695864    | 4.8452801447    |
| 13.5154797847   | 6.3510885011    |
| 1.0388874978    | 0.5713767434    |
| 4.5123816908    | 3.1927513451    |
| 0               | 0               |

gene\_expression\_table

|                |                |
|----------------|----------------|
| 0.7106471388   | 0.1848606075   |
| 2.7987717302   | 1.213407269    |
| 7.1614037708   | 18.6289563337  |
| 0.3432458615   | 0              |
| 0              | 0              |
| 0              | 0              |
| 0.2039055217   | 0              |
| 0              | 0              |
| 0              | 0              |
| 13.1964060972  | 18.4511952458  |
| 0.3021816944   | 0.2695080351   |
| 8.4143330344   | 8.3904769161   |
| 7.4817711855   | 5.8754197562   |
| 1.2957732655   | 1.1031363488   |
| 4.6798951314   | 7.8453436113   |
| 2.1409404725   | 1.1995259157   |
| 12.2623889438  | 3.0798210623   |
| 1.2924295467   | 6.1860733485   |
| 0              | 1.0625385698   |
| 18.472225815   | 5.1484063407   |
| 12.768348634   | 6.3968280377   |
| 12.2646451331  | 15.9520078707  |
| 135.4015048076 | 38.5994380443  |
| 8.4509313622   | 0              |
| 17.647555411   | 18.3626311082  |
| 89.3795751353  | 2.4474005018   |
| 0              | 0              |
| 0              | 0              |
| 0              | 0              |
| 0              | 0              |
| 15.8701188088  | 4.0031934793   |
| 13.8171606518  | 4.5401145658   |
| 0              | 0              |
| 8.2591005685   | 3.2597012358   |
| 0              | 0              |
| 3.0896582241   | 6.4297012133   |
| 6.4630786205   | 5.7642526086   |
| 48.6295722496  | 25.4210694953  |
| 80.0321972337  | 42.1273970215  |
| 9.8171349482   | 10.2149234495  |
| 2.3641064796   | 2.8113138732   |
| 3.8550445486   | 16.8472510255  |
| 2.2219872002   | 3.963465793    |
| 4.2455578739   | 0.8031976541   |
| 0.7731671289   | 1.8771566769   |
| 879.4211465261 | 563.8218474852 |
| 0              | 0              |
| 0              | 0              |
| 39.5162960779  | 17.6217810523  |

gene\_expression\_table

|                |                |
|----------------|----------------|
| 0.5918110907   | 0.6157911672   |
| 0              | 0              |
| 72.96720292    | 26.281322499   |
| 14.6389252879  | 37.445559122   |
| 0              | 0              |
| 0              | 0              |
| 2.2989250041   | 1.6132612475   |
| 198.6462789116 | 41.6864651238  |
| 100.185182104  | 63.3920273779  |
| 0              | 0.0193543278   |
| 144.7991862595 | 94.4857226703  |
| 5.8937033593   | 4.6723924835   |
| 9.4872534515   | 7.9913561266   |
| 4.487669462    | 7.3933892541   |
| 0              | 1.5726312856   |
| 10.8493402178  | 6.3970736424   |
| 9.2226647094   | 1.1995456733   |
| 0              | 0              |
| 53.3551331096  | 37.0113821888  |
| 5.1417558666   | 4.7016020355   |
| 43.44845953    | 42.2922745255  |
| 1.7312057526   | 5.4040616732   |
| 14.7956295509  | 4.1986761101   |
| 3.8363632664   | 1.3971341999   |
| 4.943656183    | 1.9912150535   |
| 14.7452006665  | 9.4667559793   |
| 0              | 5.6353046979   |
| 0              | 0              |
| 52.135142086   | 41.6850351231  |
| 242.4513714793 | 194.0580434063 |
| 0              | 0              |
| 87.7268191965  | 87.6302340136  |
| 130.7140310015 | 75.5614108221  |
| 10.3063979227  | 6.2556732406   |
| 0.6155188722   | 0.8787701263   |
| 14.9858103121  | 9.8882645678   |
| 20.3651126872  | 17.7227991279  |
| 18.1778964544  | 18.9144614731  |
| 71.0179807057  | 52.0285461091  |
| 0              | 1.5697838634   |
| 5.1944652457   | 9.2656183224   |
| 2.6388499804   | 1.9168622783   |
| 2.8279572656   | 7.3890588845   |
| 0.2580136647   | 0.2684683309   |
| 4.9332701523   | 6.8442204679   |
| 3.1078797929   | 3.374410967    |
| 0.6363652066   | 1.0878188554   |
| 2.922978217    | 1.1628946421   |
| 0              | 0              |

gene\_expression\_table

|                |                |
|----------------|----------------|
| 11.5073678729  | 16.7631020216  |
| 0              | 0.3512860873   |
| 79.5877357301  | 37.6420982426  |
| 25.3608707195  | 40.8805273181  |
| 674.1125118163 | 901.8352629311 |
| 0              | 0              |
| 0.9559584627   | 2.3209520219   |
| 3.4982198642   | 2.9119736714   |
| 0              | 0              |
| 1.1470075935   | 1.9891402169   |
| 0.3011884815   | 0.3133925834   |
| 3.6755523004   | 11.4734550092  |
| 0.7723041825   | 0.4017989029   |
| 3.8369037592   | 3.6121482606   |
| 0.4368500634   | 0.6993094577   |
| 3.3627881503   | 2.0511658974   |
| 46.9573666322  | 21.1688829973  |
| 0.9425884395   | 0.2942345849   |
| 48.5714412919  | 28.6072908416  |
| 2.3492756149   | 8.5556374066   |
| 39.408337571   | 30.3081588981  |
| 0              | 0              |
| 13.83144549    | 4.3175679347   |
| 0.0668846841   | 0.0695948392   |
| 49.6366182025  | 37.7911352462  |
| 0.6236326361   | 0.3244510579   |
| 2.5338099603   | 0.8788264912   |
| 0.5825574891   | 0.2755284597   |
| 28.8553407525  | 15.6649846168  |
| 13.8355922761  | 13.5964185993  |
| 0              | 0              |
| 0              | 0              |
| 1.6254961544   | 3.3827219187   |
| 0              | 2.065440568    |
| 0              | 0              |
| 0              | 0              |
| 2.1288434561   | 2.7688797514   |
| 0              | 0              |
| 0.1182086779   | 0              |
| 1.0389855802   | 0.772203632    |
| 0.1893272731   | 0.1969987793   |
| 3.9205410805   | 6.4590510823   |
| 0.2517765543   | 0.0873261646   |
| 10.3917994924  | 10.1949948212  |
| 1.1249214645   | 4.6820123006   |
| 0              | 0              |
| 0.1643417938   | 1.0260053582   |
| 0              | 0              |
| 2.7059489445   | 1.0167420964   |

gene\_expression\_table

|                |                |
|----------------|----------------|
| 2.5192880472   | 3.4951588469   |
| 23.8426845029  | 9.8899888902   |
| 0              | 0              |
| 0.2287457664   | 0              |
| 5.4870806075   | 8.7320481589   |
| 1.5769509231   | 5.2507157895   |
| 11.2002706322  | 20.09328196    |
| 0              | 0              |
| 0              | 0              |
| 3.4324586147   | 1.4286164824   |
| 1.2424359686   | 1.508242453    |
| 0              | 0              |
| 2.3273293783   | 2.3035039297   |
| 1.8290565597   | 1.5769119501   |
| 0              | 0.4400916881   |
| 9.1855668351   | 2.0480923527   |
| 6.2921927821   | 0.5951955705   |
| 0              | 0              |
| 0.6135709343   | 0.6384327156   |
| 1.0062548502   | 0              |
| 6.8767705171   | 4.8958109424   |
| 37.6703115307  | 36.7659021713  |
| 9.1879181665   | 0              |
| 2.9015699292   | 0.9057423026   |
| 33.253429227   | 16.3392912501  |
| 296.7511077944 | 168.7797781372 |
| 51.8594345015  | 31.5867917519  |
| 1.7530120019   | 1.6213722005   |
| 0.1047689655   | 0.1816903078   |
| 1.7280940105   | 2.3974880823   |
| 0.3475989023   | 0.3616835459   |
| 17.2252690832  | 22.4040422702  |
| 2.3559866587   | 2.3793493103   |
| 2.9393767581   | 1.4564189349   |
| 2.0514227986   | 1.2197406131   |
| 9.2872553151   | 8.697215872    |
| 60.0190687785  | 56.6480585477  |
| 7.5132038081   | 3.9088187218   |
| 54.4043177649  | 24.3417714043  |
| 1.6152942133   | 1.8908388422   |
| 361.4963953007 | 57.8683327238  |
| 25.1502966716  | 31.4032584765  |
| 54.3534087158  | 31.3468187331  |
| 127.0265811677 | 179.5491787971 |
| 0              | 0.1637831621   |
| 1.9037824465   | 2.8813430704   |
| 64.5396648855  | 68.3126416113  |
| 6.7508959184   | 6.7317559377   |
| 11.8228134344  | 14.2701711242  |

gene\_expression\_table

|                 |                 |
|-----------------|-----------------|
| 4.9048524586    | 9.1135646026    |
| 0.9704793742    | 6.0588181191    |
| 1.0677122951    | 0.5554879004    |
| 11.3506095411   | 22.3556539279   |
| 0               | 0.0841469847    |
| 2.605008479     | 7.4088720445    |
| 3741.5856505312 | 1757.6070056203 |
| 7.8009830878    | 14.0403502473   |
| 0               | 0               |
| 8.7413139352    | 8.5902042355    |
| 0               | 0               |
| 585.7603660156  | 347.8432591453  |
| 19.6172169617   | 13.9399727685   |
| 4.8528850205    | 0.688571322     |
| 6.3004108032    | 0               |
| 0               | 0               |
| 0               | 0               |
| 7.729400081     | 0               |
| 35.3009853297   | 44.6023836348   |
| 7.7158008031    | 19.2682647157   |
| 4.1109063397    | 4.277479508     |
| 6.9600110989    | 7.7248314322    |
| 0.1776387433    | 0.369673265     |
| 0.6132999623    | 0.2127169213    |
| 8.5344531462    | 7.7702341648    |
| 5.8192711436    | 4.175908234     |
| 13.4069104663   | 15.2183520118   |
| 0.553475259     | 1.4397549367    |
| 0.4270452445    | 2.666094235     |
| 0               | 0               |
| 14.8453768032   | 4.6069727818    |
| 0               | 0               |
| 4.9019035065    | 3.1387862981    |
| 0               | 3.2356470527    |
| 0.0488522774    | 0.0508317627    |
| 0               | 0               |
| 122.0901447025  | 87.4314949572   |
| 0.7337994969    | 1.9088322936    |
| 0.0547712355    | 0               |
| 0               | 0               |
| 28.8078115412   | 12.1932605136   |
| 0.8240820183    | 5.1448420202    |
| 40.6324065743   | 20.220307231    |
| 0.3754638287    | 0.195338777     |
| 4.0303734384    | 8.3873668567    |
| 55.7833386956   | 32.352209125    |
| 2.1377416099    | 2.7804531331    |
| 0.8229273075    | 0.6422041279    |
| 5.0537251768    | 2.8546149322    |



gene\_expression\_table

|                 |                |
|-----------------|----------------|
| 4.1371863393    | 1.8449247293   |
| 0               | 0              |
| 2.6133866386    | 1.9261570805   |
| 3.4158853753    | 0.7898436493   |
| 14.5538805471   | 7.3671572959   |
| 19.1652881097   | 11.8884177644  |
| 0               | 0              |
| 30.2963491452   | 4.9774660479   |
| 1.0302426261    | 0.6431927206   |
| 0               | 9.8131480223   |
| 0.0987282407    | 0              |
| 9.7065460815    | 12.5238183924  |
| 0               | 0              |
| 0.3544261636    | 0              |
| 9.9796092397    | 6.1359888728   |
| 0.3555946265    | 0.5550048829   |
| 0.7739743372    | 1.4093373611   |
| 44.8305204696   | 63.5364922022  |
| 19.7961918463   | 5.5457042029   |
| 635.374639685   | 434.4140359739 |
| 1922.6520420622 | 595.16587081   |
| 36.2758185552   | 15.462097272   |
| 0.1545492926    | 0              |
| 86.3729786826   | 16.8511492278  |
| 0.5781525523    | 0.4296994195   |
| 33.2939207625   | 36.6808069101  |
| 8.696943713     | 4.5246711358   |
| 60.5365842191   | 31.4947577349  |
| 0.7558364048    | 0.0983078446   |
| 2.3645537399    | 4.1006083705   |
| 6.5397305835    | 7.7433012305   |
| 185.5231887467  | 52.1350401878  |
| 11.3596363835   | 38.4147619667  |
| 6.3304990515    | 9.4100138685   |
| 25.1007055074   | 13.0588907374  |
| 10.3546472621   | 3.1688869598   |
| 3.0622798287    | 1.7702015799   |
| 135.5811354197  | 58.1624414863  |
| 4.7046861911    | 6.7310639133   |
| 1.0745338031    | 1.118073715    |
| 12.2829509109   | 3.5146798008   |
| 0               | 0              |
| 1.7921319075    | 0.4661871906   |
| 1.713112419     | 2.3767032252   |
| 0               | 0              |
| 1.4276181423    | 0              |
| 0               | 0              |
| 1.0298224308    | 0.4286202584   |
| 0               | 0              |

gene\_expression\_table

|                 |                 |
|-----------------|-----------------|
| 17.4767410097   | 17.115195613    |
| 30.3024422507   | 10.0531364629   |
| 1.2186678579    | 0.7245988887    |
| 0.3714798612    | 0.1288440523    |
| 0.3372169366    | 0.3508809048    |
| 11.339989163    | 5.8997417184    |
| 0.6609521507    | 0.4584892068    |
| 18.1230574276   | 43.9731519754   |
| 3.2142377666    | 1.8008728173    |
| 0.3195510369    | 1.4962463375    |
| 0.5762105935    | 0.1498896352    |
| 3.0639394753    | 2.2504162863    |
| 16.420935398    | 13.853763793    |
| 3791.4931684958 | 4610.4410901324 |
| 1.6749169882    | 2.1784803954    |
| 0               | 0               |
| 19.4768234753   | 8.4441753241    |
| 0.5013664917    | 0.5216817697    |
| 0.8759539843    | 2.9622043052    |
| 12.5081889606   | 7.2730985596    |
| 2.2401146958    | 1.1654418655    |
| 19.5078566867   | 5.0745778623    |
| 0.0815340753    | 0.084837821     |
| 36.1182031801   | 36.6650791467   |
| 0.9000684088    | 2.8096170451    |
| 0               | 0               |
| 6.8942213818    | 7.8257170509    |
| 0.3334028658    | 0.3469122885    |
| 8.9845733096    | 13.4620222557   |
| 0.0827330463    | 0.5165122444    |
| 0               | 0.0298080979    |
| 3.5681368235    | 2.6814067734    |
| 0.0804858081    | 0.0837470783    |
| 22.3170860174   | 9.0708477482    |
| 0               | 0               |
| 3.5190516889    | 0.4882190688    |
| 1.1511607388    | 0.79853704      |
| 0               | 0               |
| 34.3610350311   | 16.2677687201   |
| 0               | 0               |
| 0.4718172869    | 2.9456114194    |
| 4685.5501750301 | 7699.3790380982 |
| 41.6496042074   | 29.0743498826   |
| 0               | 0               |
| 0.0930644547    | 0               |
| 15.3218365363   | 7.2466702422    |
| 105.1181813186  | 83.3131130701   |
| 0               | 3.9715603654    |
| 254.8604754868  | 165.3856747601  |

gene\_expression\_table

|                |                |
|----------------|----------------|
| 12.868911912   | 9.9860295861   |
| 1.8127473702   | 0.94309978     |
| 2.8640691887   | 1.4900603726   |
| 1.1014995422   | 2.2922642019   |
| 89.8537676956  | 18.2428538195  |
| 0              | 0.5701829126   |
| 2.3979243101   | 2.2015480251   |
| 20.3394458677  | 20.541137751   |
| 0              | 0.5720074076   |
| 1.5132428218   | 1.5745591424   |
| 35.1944806221  | 50.3532624366  |
| 0              | 0              |
| 4.3436951843   | 1.1299252284   |
| 6.4300655593   | 2.2302035441   |
| 0              | 0              |
| 4.6258394378   | 1.2033194001   |
| 0              | 0              |
| 0              | 0              |
| 0.3896234966   | 0.405410969    |
| 0              | 0              |
| 92.9054683195  | 44.1919912213  |
| 36.5953040342  | 104.7148823003 |
| 220.7999615878 | 211.6088352304 |
| 1.8064592493   | 3.7593132912   |
| 43.6457306735  | 26.912146754   |
| 19.2849258783  | 47.657575373   |
| 5.660525331    | 5.8898887756   |
| 27.3807132053  | 64.1028929961  |
| 799.5463138067 | 237.192482894  |
| 8.7904979953   | 13.7200310342  |
| 0              | 2.6073629225   |
| 13.6917014794  | 5.5747121883   |
| 0              | 2.0733986076   |
| 0              | 0              |
| 0              | 0              |
| 14.3448236623  | 4.2645923648   |
| 0              | 0              |
| 48.4134077701  | 25.1875550712  |
| 2.4036617012   | 0              |
| 0              | 0              |
| 5.3753840894   | 4.6609947195   |
| 0              | 0              |
| 7.0651739626   | 4.6967619655   |
| 6.2703571371   | 2.3151206257   |
| 0.8102092582   | 1.0537984853   |
| 2.3791257869   | 10.3972156089  |
| 11.5674317818  | 14.1601670454  |
| 11.1491352799  | 9.9821664885   |
| 4.4825262374   | 2.4073070325   |

gene\_expression\_table

|                 |                 |
|-----------------|-----------------|
| 0.900463972     | 1.0618773539    |
| 0               | 0               |
| 0.7409336889    | 0               |
| 0.586053073     | 0.6969140979    |
| 0               | 0               |
| 0.3327858969    | 0.1154234401    |
| 15.2951599228   | 21.2198893171   |
| 2.8069351025    | 1.7524029577    |
| 31.3328246097   | 4.6574892709    |
| 0               | 0               |
| 0.0933741985    | 0               |
| 4.0773339465    | 3.0459310126    |
| 0               | 0               |
| 2.7652639345    | 2.0141183441    |
| 0.1466333466    | 0               |
| 0.4147741043    | 0               |
| 2.1885248153    | 2.0092971512    |
| 7.3904702365    | 3.5245515847    |
| 7.9587982549    | 10.6473693798   |
| 3.7065361598    | 1.9283621614    |
| 12.5023199613   | 4.9344147695    |
| 28.0788519806   | 28.0691220622   |
| 0               | 0               |
| 634.3040544955  | 247.2798527965  |
| 3072.5020094641 | 4399.7621772143 |
| 3.7484500403    | 3.1911844467    |
| 6.041614971     | 5.0291360781    |
| 0.3050637472    | 0.2267320529    |
| 0               | 0               |
| 0               | 0               |
| 34.2778634281   | 15.2108395326   |
| 0               | 0               |
| 1.224789395     | 2.8674396808    |
| 0               | 0               |
| 9.2370137228    | 8.321975648     |
| 1.8892375493    | 1.5726312856    |
| 0               | 0               |
| 3.4011674076    | 2.2118638031    |
| 0.9129179353    | 0.5699455212    |
| 0               | 0               |
| 14.9240672335   | 13.5876892296   |
| 0               | 0               |
| 182.7166232946  | 64.8137274687   |
| 0               | 0               |
| 0               | 0               |
| 0               | 0               |
| 0               | 0               |
| 23.6183160463   | 28.4556404759   |
| 0               | 0               |

gene\_expression\_table

|                 |                |
|-----------------|----------------|
| 1.2091734443    | 0.7549013578   |
| 0               | 1.0318257992   |
| 25.7413232567   | 20.8197732496  |
| 0.3723014806    | 1.5495482724   |
| 5.713220957     | 3.2010028716   |
| 7.7932595049    | 3.6040181981   |
| 0               | 0              |
| 0               | 0              |
| 6.7447481836    | 3.5090220693   |
| 14.5153183956   | 4.6872857872   |
| 2080.8310469867 | 615.9466892678 |
| 3.9793867865    | 0.7528419649   |
| 2.2796405054    | 0.4312747489   |
| 6.5325701978    | 3.3986343699   |
| 0               | 0              |
| 0               | 0              |
| 4.409204015     | 5.8622708585   |
| 94.2511966188   | 37.1990557016  |
| 1.5439226622    | 0              |
| 0.3603972053    | 0              |
| 4.2071665172    | 0              |
| 11.4286377997   | 6.7952709143   |
| 2.68913774      | 0              |
| 2.5784599373    | 0.6707346648   |
| 0               | 0              |
| 0               | 0              |
| 4.8070922811    | 1.1115277279   |
| 1.1298280125    | 0.7837389571   |
| 5.3791435037    | 3.5617943508   |
| 0               | 0              |
| 4.5151794194    | 4.8938892275   |
| 1.7726397803    | 0              |
| 16.7328049331   | 8.4821919764   |
| 0.9619225406    | 0.1251124331   |
| 13.3103726634   | 19.6204175614  |
| 2.5088295338    | 4.2420411227   |
| 6.4366885186    | 3.827143973    |
| 48.9829301649   | 21.6226646278  |
| 2.3545865877    | 1.6333293353   |
| 3.893822437     | 7.0902989595   |
| 0               | 0              |
| 0               | 0              |
| 0               | 0              |
| 0.0173533407    | 0.0180564948   |
| 18.8513422789   | 11.1152772791  |
| 11.7401340028   | 7.7737176821   |
| 0.3306203193    | 0              |
| 0.6549197279    | 0.4008570322   |
| 5.7642983655    | 1.9992888914   |

gene\_expression\_table

|                |                |
|----------------|----------------|
| 0.7991637967   | 1.0761180509   |
| 20.2170027768  | 45.0775543036  |
| 20.1661038791  | 20.6876922362  |
| 1.5481778683   | 4.8327292518   |
| 0              | 0              |
| 0              | 0              |
| 0.7921936953   | 0              |
| 4.5257638382   | 3.3905858083   |
| 0              | 0.5441526578   |
| 15.3077621979  | 17.3760326234  |
| 12.2206277783  | 14.2244602406  |
| 0              | 0              |
| 11.3274634018  | 6.5480278522   |
| 0.6384409844   | 0              |
| 22.5100328262  | 15.9696376455  |
| 8.7014524056   | 11.3175420695  |
| 0              | 0              |
| 20.4348087978  | 35.881014638   |
| 88.9629561848  | 36.7897343932  |
| 0              | 0              |
| 3.1565303964   | 4.5982053979   |
| 67.5226360396  | 73.0689864573  |
| 0              | 0              |
| 146.1417371674 | 105.9835633206 |
| 0              | 0              |
| 0              | 0              |
| 10.0337266491  | 11.9317616071  |
| 0              | 0              |
| 22.3022530286  | 20.7068353933  |
| 10.686994383   | 44.4801177138  |
| 3.3086100597   | 2.0656045982   |
| 12.215647687   | 8.8974364381   |
| 167.4832821565 | 135.2092297687 |
| 81.6891498754  | 44.6605856779  |
| 2.5356627008   | 2.6384072867   |
| 21.3844374009  | 9.0063291611   |
| 0              | 2.408979238    |
| 57.577544927   | 81.3072108967  |
| 0              | 0              |
| 0              | 0              |
| 2.1134374743   | 0.6872104912   |
| 2.1658530815   | 1.8384738038   |
| 2.8330464966   | 1.3686404732   |
| 1.9993665106   | 1.1095362526   |
| 0              | 0              |
| 1.3644212692   | 2.2715317886   |
| 2.1135308105   | 1.5708362071   |
| 0              | 0              |
| 15.6035454818  | 24.0289814439  |

gene\_expression\_table

|                 |                 |
|-----------------|-----------------|
| 3.101311381     | 1.9361855684    |
| 0               | 0               |
| 0.87329158      | 0.454338597     |
| 2570.7346568792 | 4759.4418373041 |
| 0.4317742586    | 0.2695618032    |
| 17.1304713563   | 17.9911799019   |
| 1.2694893406    | 1.3209288151    |
| 0               | 0               |
| 23.4437325785   | 25.7488721027   |
| 26.676143068    | 20.3551740153   |
| 3.9765165125    | 6.7236718732    |
| 126.4139802266  | 99.7556806214   |
| 4.4170545465    | 3.596895222     |
| 5.4246701089    | 14.5143687685   |
| 0.1674748663    | 0.5227827513    |
| 0               | 0.1499933614    |
| 1.4748001806    | 1.0230392084    |
| 56.4531935547   | 40.1909823881   |
| 8.5914692771    | 8.939594031     |
| 7.1382435907    | 6.3133613211    |
| 3.8290909158    | 4.1834572237    |
| 3.2389167531    | 3.7446189598    |
| 27.6691681188   | 35.6999939708   |
| 1.1634193841    | 3.147458401     |
| 2.8348709816    | 3.7925221269    |
| 1.5914078627    | 1.9870696996    |
| 4.5862897224    | 4.3219248343    |
| 0               | 0               |
| 50.4414273918   | 28.4295400707   |
| 4.3774977047    | 2.8467956913    |
| 0.1684388978    | 0.0876320055    |
| 0               | 0.3613519059    |
| 0.6830005188    | 1.2732937369    |
| 0               | 0.4528095565    |
| 5.987216861     | 13.1518375487   |
| 14.8728460609   | 26.8545285797   |
| 0               | 0.643885353     |
| 1.0199269585    | 1.3644697       |
| 17.5410333804   | 15.1049319927   |
| 0               | 0.0181716774    |
| 0.3867500411    | 0.536561442     |
| 0.7773749393    | 2.022185072     |
| 76.3235763293   | 68.0710230813   |
| 3150.1459896519 | 4814.80335284   |
| 2.827781313     | 4.9039374856    |
| 0               | 0               |
| 38.5339974797   | 35.1804694406   |
| 5.859888944     | 14.6335933572   |
| 13.7926502824   | 20.7299819037   |

gene\_expression\_table

|                |               |
|----------------|---------------|
| 0.0635749607   | 0.0661510064  |
| 1.939477399    | 4.0361293325  |
| 0              | 0             |
| 4.5102034106   | 4.4796398399  |
| 26.1385754988  | 23.9598836521 |
| 0.0940343903   | 0.0978446465  |
| 3.2320396537   | 1.9782360621  |
| 14.4258801991  | 12.3712205024 |
| 0              | 0             |
| 3.2147743573   | 3.6237894578  |
| 0.506341552    | 1.3171460463  |
| 7.3069689638   | 7.8745833585  |
| 87.1804760614  | 37.7301912086 |
| 14.4735185375  | 6.950761313   |
| 1.8781019683   | 1.36794162    |
| 0.2088058562   | 0.434533262   |
| 13.4147412872  | 20.3343196043 |
| 52.2369936393  | 84.0942908414 |
| 0.1517113959   | 0             |
| 16.962225628   | 4.3291304632  |
| 1.5755849214   | 0.7806796821  |
| 14.7584091851  | 10.2376114726 |
| 0.2983757959   | 0.8279091418  |
| 42.5631328024  | 39.6259112035 |
| 8.9848545804   | 8.1426070751  |
| 1.4760246418   | 2.6528022623  |
| 8.7574329758   | 12.4768176429 |
| 0.295539514    | 0.3075147207  |
| 0.0453496392   | 0.0471871983  |
| 3.542236228    | 2.1264040316  |
| 1.734539326    | 7.219290161   |
| 0              | 0             |
| 0              | 0.2060684115  |
| 45.8668866017  | 13.1244862114 |
| 142.9964524551 | 22.89086806   |
| 6.2650207162   | 3.4511708131  |
| 0              | 0             |
| 5.0174702244   | 1.6314928732  |
| 1.2870394327   | 3.571173423   |
| 5.5219147667   | 1.723698521   |
| 0              | 0.1706458087  |
| 0              | 0             |
| 0              | 0             |
| 6.3397478353   | 6.2085960007  |
| 16.9974533697  | 7.3692446049  |
| 0              | 0             |
| 10.4545712513  | 5.4390942771  |
| 0              | 0             |
| 3.6541139293   | 0             |



gene\_expression\_table

|                 |                 |
|-----------------|-----------------|
| 39.2667873589   | 37.1435185051   |
| 2564.8774348636 | 3690.7125664652 |
| 0.0369169057    | 0               |
| 230.8619357761  | 158.0371177128  |
| 0               | 0               |
| 1161.0438196023 | 2368.4006678765 |
| 2.5393655733    | 1.3211300995    |
| 0               | 0               |
| 7.3177407956    | 8.7020049209    |
| 38.6149501094   | 20.7242254553   |
| 0.2326091758    | 0.0968137827    |
| 1.8857653051    | 2.2074481892    |
| 6.2750260099    | 9.1410044725    |
| 54.455294681    | 30.3074814785   |
| 13.5154797847   | 25.2415055812   |
| 8.3940495087    | 2.4954785285    |
| 0.2410406528    | 0               |
| 83.9855713255   | 24.8536530987   |
| 0.2882548013    | 0.2999348328    |
| 0               | 0.4420663757    |
| 12.4066308625   | 7.745607157     |
| 3.6097322076    | 13.9508493143   |
| 0.3586305143    | 0.5330887954    |
| 1.0466718949    | 2.7227071186    |
| 0.1750739245    | 0               |
| 4.205279102     | 2.4309312429    |
| 3.5174980237    | 2.2875164976    |
| 9.9950395015    | 11.8857561857   |
| 0               | 0.6129315149    |
| 3.5524592996    | 1.4785617186    |
| 0               | 2.8734497565    |
| 119.7871812827  | 75.0526065161   |
| 4.0041164321    | 4.3557426063    |
| 35.4659996267   | 55.354613106    |
| 0               | 0               |
| 17.7777470433   | 4.268791865     |
| 13.7213557633   | 20.4641910219   |
| 3.3778426218    | 0               |
| 0               | 0               |
| 277.8925141537  | 177.2226027722  |
| 0.8317633458    | 1.0818328044    |
| 2.6791016851    | 1.7920661093    |
| 27.5839913044   | 11.1103314407   |
| 0               | 0               |
| 3.2348998495    | 2.2439849307    |
| 0.6415542916    | 2.4476831624    |
| 27.6361303061   | 5.228352949     |
| 0.2975393975    | 0               |
| 0               | 0               |

gene\_expression\_table

|                 |                |
|-----------------|----------------|
| 0               | 0              |
| 0.3385047039    | 0              |
| 0               | 0              |
| 0               | 0              |
| 0               | 0.6641069535   |
| 10.6546080365   | 5.6783645526   |
| 12.2117415442   | 9.2411338647   |
| 2.3706886563    | 2.9366053861   |
| 4.2556676525    | 3.7955198764   |
| 2.8652555187    | 0.2710322859   |
| 5.6472720986    | 3.7393354248   |
| 10.7696486485   | 6.2863110995   |
| 27.6636563323   | 15.3517773842  |
| 0               | 0              |
| 13.2617560024   | 7.2533835449   |
| 14.8010623442   | 8.4337706982   |
| 3.7018445385    | 2.180288263    |
| 37.0547651034   | 12.1176683149  |
| 0               | 8.0838380212   |
| 1.4587348192    | 3.0356849712   |
| 11.6345728936   | 8.0706690973   |
| 0               | 0              |
| 0               | 0              |
| 1.259082511     | 0.6550501513   |
| 41.4227105354   | 34.7203717536  |
| 1669.0530404218 | 953.8257658938 |
| 7.0366669797    | 3.6608957153   |
| 39.1923484821   | 81.5608304584  |
| 26.5524482946   | 29.0331798979  |
| 2.9824763444    | 11.2495557966  |
| 0.5336082797    | 2.2209199559   |
| 117.1692128146  | 136.5469142831 |
| 0               | 0              |
| 18.7606644479   | 24.8447094234  |
| 0               | 1.3109917632   |
| 5.2716967653    | 7.8361499256   |
| 10.8152461032   | 15.3994960528  |
| 21.9504481757   | 12.7634602829  |
| 0.7922125252    | 1.2364692464   |
| 0               | 0              |
| 16.9837817672   | 10.6551532444  |
| 0               | 1.0056740839   |
| 3.7482201022    | 0              |
| 108.5368865077  | 92.6644358341  |
| 143.4224597613  | 126.2748481363 |
| 104.4224002093  | 226.8942335858 |
| 3.3500800326    | 3.7539650173   |
| 108.7057180338  | 158.3546352096 |
| 14.2178276833   | 14.7939314442  |

gene\_expression\_table

|                 |                |
|-----------------|----------------|
| 78.5653636308   | 9.0832019672   |
| 0               | 3.2302221601   |
| 0               | 0              |
| 0               | 0              |
| 11.7923716768   | 2.0450327345   |
| 10.0580414523   | 8.2623090321   |
| 24.0008448026   | 8.3244515389   |
| 5381.1260114011 | 5262.045551484 |
| 112.0160269731  | 114.2630860211 |
| 35.1161974177   | 16.2395996773  |
| 11.2961102014   | 20.5691963884  |
| 14.3002745205   | 7.4398595061   |
| 2.988448785     | 0.7773850449   |
| 116.8939002541  | 64.980635117   |
| 11.9416600319   | 15.5319173732  |
| 8.6431940619    | 2.645121969    |
| 11.2143920421   | 0              |
| 40.0110121839   | 0              |
| 4.2835424797    | 1.3928471352   |
| 0               | 0              |
| 96.4284336246   | 9.1214269098   |
| 5.7109618145    | 9.9039482268   |
| 5.3583879661    | 1.8585029534   |
| 0               | 2.8328430903   |
| 0               | 0              |
| 17.3392406659   | 1.6401657733   |
| 3.0362844676    | 2.0219610594   |
| 17.187416702    | 19.6145425986  |
| 0.4896884186    | 0              |
| 83.6621727808   | 81.2132849966  |
| 0               | 0              |
| 154.1748346743  | 14.2597307199  |
| 15.0560938785   | 15.6661640314  |
| 38.6265251729   | 74.6416633182  |
| 0               | 0              |
| 29.6347123436   | 6.8523345408   |
| 185.1620730508  | 52.0715692356  |
| 74.7223862191   | 55.9800889603  |
| 0               | 0              |
| 154.0855581286  | 72.8768529929  |
| 44.4388975322   | 30.8263689875  |
| 77.0211984539   | 29.1425757234  |
| 0               | 0.1224287771   |
| 3.9651624709    | 1.0314575311   |
| 7.5371264471    | 12.1994902144  |
| 24.7892697279   | 16.1210789842  |
| 31.1604087034   | 17.1378834424  |
| 180.2226377928  | 129.1840445131 |
| 62.733724494    | 44.3874647557  |

gene\_expression\_table

|                 |                 |
|-----------------|-----------------|
| 2.5812086281    | 2.2118342455    |
| 2.8206381437    | 3.0683357859    |
| 8.546199637     | 1.5692629541    |
| 45.0076903729   | 2.0361475523    |
| 25.3030467273   | 23.6954893712   |
| 4.9928852216    | 6.9269280158    |
| 100.7334917921  | 144.474997603   |
| 67.4679618404   | 33.6968405936   |
| 0               | 0               |
| 64.7551091764   | 35.1542474515   |
| 3512.8804528693 | 6029.6178000583 |
| 46.4934659315   | 9.2147376407    |
| 4.8237495433    | 6.1103389407    |
| 32.826517106    | 17.0783207687   |
| 0               | 0               |
| 67.8705458142   | 32.8468129484   |
| 6.8367534665    | 7.1137774586    |
| 72.9273460864   | 29.3507197908   |
| 4.3290262565    | 0               |
| 0.7619141631    | 0.1981966962    |
| 73.2348344301   | 41.9112630433   |
| 16.4945656669   | 51.4887672958   |
| 9.9059193293    | 2.9449443878    |
| 7.0979205429    | 3.2311680524    |
| 14.0051619359   | 9.7150990132    |
| 261.6903453368  | 147.492577898   |
| 5.5713787612    | 3.0835797889    |
| 155.4169883383  | 141.5001490885  |
| 31.6052504001   | 43.3495813886   |
| 910.7886770049  | 518.2699739032  |
| 5.0247110946    | 2.7517428755    |
| 6.5860493463    | 0.9789878362    |
| 0               | 0               |
| 10.1369431371   | 2.2805816665    |
| 1.2432294473    | 0.7056026595    |
| 0               | 0               |
| 8.1470188416    | 2.0462048903    |
| 23.2693919356   | 11.5558529931   |
| 111.9532529048  | 140.7812436844  |
| 8.0461363416    | 8.9123039379    |
| 0               | 0               |
| 3.3274270603    | 0               |
| 13.0825769937   | 18.1502408075   |
| 142.895627044   | 94.8512425416   |
| 1.0153178285    | 1.0382435215    |
| 0               | 0               |
| 4.6352751123    | 5.8948946304    |
| 5.2810402543    | 3.5717675718    |
| 0.8997875618    | 0.985522935     |

| gene_expression_table |                |
|-----------------------|----------------|
| 0                     | 1.0880236277   |
| 0                     | 0              |
| 1.8218636246          | 4.5496444881   |
| 18.2185624778         | 34.4030366124  |
| 4.6551910937          | 2.7678963315   |
| 66.9747221285         | 31.8576116765  |
| 1.2314037224          | 1.2812999745   |
| 1.1506507103          | 2.6938684469   |
| 6.5089684892          | 6.2435926714   |
| 0                     | 0              |
| 0.9067682324          | 0              |
| 1.7469646099          | 2.1207098434   |
| 14.2276016614         | 5.2871790936   |
| 13.0443364781         | 18.9648608262  |
| 109.7939980006        | 108.6700095874 |
| 3.2468751241          | 1.6892189533   |
| 2.0787209997          | 0              |
| 0                     | 0              |
| 0                     | 0              |
| 0                     | 0              |
| 0.0221574522          | 0.0922210724   |
| 1.6301404859          | 2.4264990037   |
| 0                     | 0              |
| 0                     | 0              |
| 60.4321967323         | 51.5510066499  |
| 1.799553645           | 2.4966283034   |
| 56.9433206381         | 36.06561518    |
| 0                     | 0              |
| 0.0968668568          | 0.100791884    |
| 0                     | 0              |
| 0.8830971452          | 1.979126324    |
| 0.2724574353          | 0              |
| 3.8730833378          | 4.0300199618   |
| 0.8057180847          | 1.8444043931   |
| 0.4300538471          | 0.8949590996   |
| 4.6047489844          | 9.5826651315   |
| 33.1420182227         | 20.2852510008  |
| 67.7614394995         | 77.8857727077  |
| 0.0447300604          | 0.2327125711   |
| 0.1456039158          | 0.1515037597   |
| 1.2181792766          | 1.7084230424   |
| 7.0591156081          | 8.7223652371   |
| 11.0670955705         | 8.9565250803   |
| 8.7914132781          | 4.3330925018   |
| 3.0238465946          | 1.2235892286   |
| 0                     | 0.5467693332   |
| 21.8487106444         | 9.8115228581   |
| 0                     | 0              |
| 0                     | 0              |

gene\_expression\_table

|                 |                 |
|-----------------|-----------------|
| 0               | 0               |
| 3.6746472614    | 10.9608241041   |
| 0               | 0.0155451734    |
| 25.9224283844   | 11.0343274411   |
| 0               | 0               |
| 0               | 0               |
| 4.0845826342    | 7.9689171951    |
| 1.7552345189    | 3.0439271643    |
| 26.2498031588   | 35.7175758443   |
| 0               | 0               |
| 0.8245386909    | 1.0295386163    |
| 1.544242865     | 0.6886351293    |
| 14.5288461853   | 6.0470209435    |
| 2.0903896857    | 0.5437729728    |
| 0.0703925292    | 0               |
| 1.7435223451    | 0               |
| 0.2710856967    | 0.1410350196    |
| 14.6872478379   | 7.3581793119    |
| 0               | 0               |
| 54.861030335    | 57.083989187    |
| 11.372556807    | 12.819484942    |
| 9.9552631636    | 2.4533641408    |
| 1.7339240666    | 0.6560663093    |
| 0               | 0               |
| 4.3878606221    | 1.5859646904    |
| 1.5517338048    | 5.1129309478    |
| 16.7307127249   | 21.5535519645   |
| 34.2603519456   | 41.1329712702   |
| 0               | 0               |
| 0               | 1.0219739822    |
| 0               | 0.2002613882    |
| 30.6550453569   | 50.6859332837   |
| 0               | 0               |
| 1.1459200619    | 2.2012662128    |
| 130.1073772901  | 41.3658985274   |
| 1276.1022509492 | 1846.1661502437 |
| 12.0295867859   | 10.6394699142   |
| 902.7884378766  | 1302.7973660665 |
| 1.6982152833    | 0               |
| 0.3586481561    | 4.1049856475    |
| 20.7258299396   | 12.0201909777   |
| 5.0443717685    | 1.5746306353    |
| 0.1585585851    | 0.4949500494    |
| 0.1556768733    | 0.8099243575    |
| 1.0978978235    | 3.0062748454    |
| 29.672596284    | 39.0177616349   |
| 7.5553105473    | 3.0884269193    |
| 0.1971044103    | 0.2050910447    |
| 3.0373110199    | 3.5554300913    |

| gene_expression_table |                |
|-----------------------|----------------|
| 0                     | 0.1645816847   |
| 0                     | 0              |
| 0                     | 0.1084363043   |
| 0                     | 0              |
| 0                     | 1.5167803145   |
| 0                     | 0              |
| 3.475535144           | 2.2012645494   |
| 0                     | 0              |
| 0                     | 0              |
| 18.3973908227         | 26.3214183551  |
| 0                     | 0.1130654635   |
| 0                     | 0              |
| 26.5891152869         | 15.893522049   |
| 8.0643373508          | 3.8141376436   |
| 15.9898163256         | 8.3188603701   |
| 30.8424968413         | 20.0576432105  |
| 0                     | 0              |
| 0                     | 0.1095647857   |
| 0.2299515189          | 1.914152897    |
| 0.1703840927          | 0.1772880248   |
| 1.3808618958          | 1.7960177071   |
| 70.9250165875         | 29.0546792149  |
| 11.5299261355         | 9.5976932964   |
| 0.5408823945          | 1.6883965487   |
| 0                     | 0              |
| 2.1035832586          | 2.7360250813   |
| 0                     | 0              |
| 0.020010767           | 0.1041079981   |
| 0                     | 0              |
| 2.8570474857          | 4.1619403336   |
| 0.665582427           | 0.5540413636   |
| 5.7591521152          | 9.4881438399   |
| 9.6996157937          | 1.3456856587   |
| 35.5790637631         | 22.885536543   |
| 0                     | 0              |
| 218.0452765728        | 118.9470221029 |
| 0                     | 0              |
| 1.7085812883          | 0.9523996541   |
| 0.1392870946          | 0              |
| 32.5017331916         | 15.500236326   |
| 154.9309141658        | 152.7240185931 |
| 0                     | 0              |
| 3.281781197           | 1.5521628941   |
| 2.4734692125          | 4.7184385046   |
| 0.0645215225          | 0.5706553432   |
| 5.8172695243          | 5.9016596094   |
| 0                     | 0              |
| 0                     | 0              |
| 16.3538631743         | 11.1487536311  |

gene\_expression\_table

|               |                |
|---------------|----------------|
| 2.8828139617  | 7.1991001268   |
| 1.2756308712  | 4.2474214377   |
| 3.5700323742  | 8.442475975    |
| 0.6684015151  | 3.1296825966   |
| 0             | 0              |
| 0             | 0              |
| 0             | 0              |
| 48.5876914289 | 100.0811470831 |
| 12.6593187737 | 5.8543431291   |
| 19.273587927  | 36.0981902924  |
| 7.9677679056  | 4.1453101973   |
| 2.3284818782  | 2.609203192    |
| 4.0792362491  | 0              |
| 41.4084150114 | 14.3620921221  |
| 3.3252691958  | 2.0760050949   |
| 0.9286824016  | 0.6442082944   |
| 0.3871613636  | 0.2014245354   |
| 1.7523593109  | 2.7350468814   |
| 1.3846769069  | 1.2006531336   |
| 0             | 0              |
| 3.5628645959  | 2.0389771675   |
| 0             | 0              |
| 1.8008468539  | 4.2160878833   |
| 0.0240475777  | 0              |
| 14.9829686782 | 3.6682531321   |
| 0.3584707145  | 0.1243319606   |
| 1.6618608425  | 0.9606661877   |
| 0.1280610664  | 0              |
| 3.2285785622  | 2.896034458    |
| 6.3422873699  | 4.0067030955   |
| 0.4998376297  | 0.2600454792   |
| 0             | 1.2056621162   |
| 0.7743647051  | 0              |
| 1.2254144801  | 1.0929154709   |
| 0.2137417153  | 0.2224024903   |
| 1.129113529   | 1.1748650014   |
| 0             | 0              |
| 0             | 0              |
| 10.3638174131 | 13.9290199585  |
| 1.3656139125  | 4.2628450108   |
| 7.8920900427  | 11.8615987803  |
| 0             | 0              |
| 4.9843775273  | 4.7148578066   |
| 0.6933033751  | 0              |
| 0.390269825   | 0.2707223244   |
| 1.5074525613  | 0.941120557    |
| 11.9169901213 | 7.5776948913   |
| 90.6586728102 | 32.4041721343  |
| 0.7635199567  | 0              |



gene\_expression\_table

|                |                |
|----------------|----------------|
| 2.0833337385   | 6.5032501146   |
| 8.3205575755   | 5.8148765174   |
| 36.236740157   | 32.3186110275  |
| 11.1964345484  | 3.8833706719   |
| 0.0611010808   | 0.3178844267   |
| 1.2105612796   | 0              |
| 29.6551674896  | 18.5140736509  |
| 27.8172271752  | 18.5791603348  |
| 11.8944261053  | 8.2509240413   |
| 1.4995210667   | 0.8510625733   |
| 0              | 0              |
| 0              | 7.5211812021   |
| 3.3934565803   | 0              |
| 8.8706952046   | 15.3835569027  |
| 122.7688851838 | 209.3275149082 |
| 5.3186736824   | 10.4534612377  |
| 11.3244698861  | 7.200927141    |
| 895.7077057336 | 747.9025322522 |
| 0.6097320469   | 0.6344382772   |
| 50.5206175929  | 28.1612698497  |
| 0.8283421103   | 2.3702425454   |
| 0              | 0              |
| 0              | 0              |
| 4.5278050739   | 14.8068514068  |
| 1.1524891657   | 0.3527022984   |
| 0              | 1.0470913379   |
| 0              | 0              |
| 0.736079149    | 1.5318098814   |
| 2.0052085667   | 2.1907822112   |
| 1.2836686623   | 0              |
| 0              | 0              |
| 9.309824902    | 12.1088216169  |
| 40.8285637362  | 19.5421476272  |
| 0              | 0              |
| 0.6484401087   | 0              |
| 0.9600522281   | 2.711444855    |
| 0.9803274648   | 1.360066871    |
| 9.1555923197   | 8.0609482761   |
| 1.1945654757   | 3.3145841305   |
| 0              | 0              |
| 160.5432287282 | 92.3435314406  |
| 7.8229896831   | 6.175154044    |
| 33.8096257252  | 13.423789218   |
| 0              | 0.2421324697   |
| 1.7801763208   | 1.2966161164   |
| 34.0502369913  | 8.3364579593   |
| 2.7997983739   | 2.1363801717   |
| 0              | 0              |
| 0              | 0              |

gene\_expression\_table

|                |               |
|----------------|---------------|
| 0              | 0.0951493791  |
| 5.166459265    | 7.167737658   |
| 2.7131842833   | 6.949223412   |
| 0.480503628    | 0.8332892443  |
| 1.355799743    | 3.2917184978  |
| 1.6775866489   | 1.7455621511  |
| 0.4783588304   | 0.9954836843  |
| 0.3093022491   | 1.287340477   |
| 17.9035094269  | 11.1773738002 |
| 1.1995167677   | 0.3120302416  |
| 2.6057293255   | 1.2324149992  |
| 1.4393817868   | 2.396328435   |
| 0              | 0             |
| 0              | 0.1733203314  |
| 0              | 0             |
| 2.2860644112   | 2.8544343845  |
| 10.148956501   | 7.9201427628  |
| 20.0448292424  | 24.9267087724 |
| 0              | 0             |
| 0.7068993465   | 0.5884342223  |
| 0              | 0             |
| 8.305192134    | 20.0123972416 |
| 0.5283719328   | 0.8246721994  |
| 0.1327009601   | 0.5523119145  |
| 2.9870203575   | 0.9459294395  |
| 91.1268841193  | 98.8541937425 |
| 41.7340837421  | 29.5290959713 |
| 0.8124429752   | 1.8597986331  |
| 0.7343276351   | 0.5093883038  |
| 1.0602680634   | 1.9612976536  |
| 1.4145198185   | 0.6690163187  |
| 0.1420947371   | 0.1478523897  |
| 0              | 0.2077497461  |
| 1.8686461734   | 2.9165450587  |
| 18.5781344198  | 8.200995094   |
| 125.8001345568 | 24.5432874104 |
| 0.371397071    | 0.6539855587  |
| 8.9111104137   | 8.4292608796  |
| 0              | 0             |
| 5.0560032083   | 1.1690825617  |
| 0              | 0             |
| 15.1654998886  | 9.0854563607  |
| 3.8349405298   | 5.2181259571  |
| 2.2926081546   | 3.9758403585  |
| 0              | 0             |
| 0              | 0             |
| 0.1605846      | 0             |
| 30.8823414782  | 14.8309330481 |
| 0              | 0             |

gene\_expression\_table

|                |                |
|----------------|----------------|
| 1.338055288    | 1.6243185489   |
| 0              | 0              |
| 478.6428734784 | 477.709337694  |
| 4.1780379825   | 3.0096909087   |
| 48.4807781364  | 48.4614099368  |
| 11.8612172167  | 11.0194924601  |
| 66.2437097447  | 42.7608223054  |
| 0              | 0              |
| 6.7093709927   | 13.962466941   |
| 0.0474756963   | 0.0987988055   |
| 0              | 0              |
| 0.2485359886   | 0              |
| 0.6309748481   | 0.8441252137   |
| 0              | 0              |
| 110.8239792242 | 15.7965132144  |
| 9.3779327938   | 7.8844033229   |
| 75.2709247395  | 37.0993683583  |
| 5.4604420478   | 5.3265920199   |
| 0              | 0              |
| 2.2893012054   | 0.7940210896   |
| 4.7699986617   | 7.4449171944   |
| 8.7531161806   | 7.2395260501   |
| 0.2367168003   | 0.8620798253   |
| 293.9305914227 | 192.8125552561 |
| 5.6655988972   | 1.0718487131   |
| 0.2996796607   | 0.4677339382   |
| 22.2054242876  | 26.753370939   |
| 0              | 0              |
| 2.4370556558   | 5.0716094049   |
| 9.8007762642   | 16.996503191   |
| 1.4181517794   | 0.7577482579   |
| 0              | 0              |
| 8.3191213452   | 4.3281053055   |
| 37.773222789   | 28.0741334459  |
| 0.1335046672   | 0              |
| 4.6393615185   | 0              |
| 103.4264488725 | 94.1651108519  |
| 0.8183413612   | 1.5813578905   |
| 221.0479668463 | 206.6639231629 |
| 33.7104499625  | 48.3812292284  |
| 14.3998042475  | 7.1231994802   |
| 0.1545994747   | 0.2144850893   |
| 7.7459266406   | 11.8210255716  |
| 0.0953253474   | 0.0991879129   |
| 5.469072814    | 5.6906786379   |
| 0              | 0              |
| 2.8648405645   | 1.9872822513   |
| 2.5559049725   | 4.990241032    |
| 0              | 0              |

gene\_expression\_table

|                |                |
|----------------|----------------|
| 8.5850760831   | 3.9701963493   |
| 0              | 0.8713921582   |
| 0              | 0              |
| 49.6001246916  | 35.6877055318  |
| 25.2950495903  | 14.4219179968  |
| 4.776473859    | 5.5222396673   |
| 1.1967243893   | 0.8301436275   |
| 2.9779461356   | 0.4426588521   |
| 504.7059850717 | 283.5201161054 |
| 3.2961650743   | 4.2871563456   |
| 0.8705489324   | 1.0783612082   |
| 0.5552456127   | 1.7332321883   |
| 1.0428402112   | 0              |
| 1.2461194804   | 1.4406800138   |
| 3.703241461    | 1.9266480617   |
| 0.2068233745   | 0              |
| 3.6046667825   | 1.3237860766   |
| 0              | 0              |
| 0              | 0              |
| 4.3065059714   | 5.3577231313   |
| 0.3026787979   | 0.3149432871   |
| 1.6305857705   | 0.7540696915   |
| 0.6103797002   | 1.2702243466   |
| 10.5589016788  | 8.2400598236   |
| 3.1740054424   | 1.4678291372   |
| 9.9093872885   | 8.1237502963   |
| 24.8082069198  | 16.9825203278  |
| 10.2982243076  | 6.4293038767   |
| 42.2658683539  | 84.4386692362  |
| 1.3453286974   | 1.3998411686   |
| 0              | 0              |
| 31.853630769   | 3.207516196    |
| 9.2438822952   | 10.1116961764  |
| 79.6691412237  | 57.1705656296  |
| 3.4742551619   | 2.2761308448   |
| 4.4939453911   | 1.4387813019   |
| 3.9503583204   | 3.4938621956   |
| 0              | 0              |
| 0.0659004907   | 0.2057122992   |
| 24.7677779161  | 13.7447273167  |
| 0.4888265693   | 1.5259011958   |
| 1.0119579727   | 8.7746860289   |
| 1.0158767038   | 3.3221252142   |
| 8.5635080034   | 5.3462998629   |
| 8.2722481755   | 11.5755202695  |
| 1.5292196863   | 1.5911833865   |
| 48.584800509   | 42.1278730696  |
| 10.9252097298  | 8.525922913    |
| 104.53666681   | 73.140111363   |

gene\_expression\_table

|                |                |
|----------------|----------------|
| 6.2980296956   | 0              |
| 46.3098140185  | 36.1397093694  |
| 6.9155633047   | 3.5978903285   |
| 14.8195523118  | 15.4200378439  |
| 93.7247010321  | 29.605016917   |
| 111.0226962167 | 16.6217720048  |
| 2.1548569955   | 0              |
| 91.9625747653  | 73.0257252553  |
| 0              | 0              |
| 0              | 0              |
| 79.2608160503  | 134.017730809  |
| 1.1087641497   | 2.307382138    |
| 0              | 0              |
| 0.1806204716   | 0.1879391799   |
| 2.748371113    | 2.8597346046   |
| 29.9564314019  | 9.1677236732   |
| 4.0850036172   | 2.7048809531   |
| 0.3676525377   | 1.3389241279   |
| 62.9279224887  | 25.0139720347  |
| 7.1651671685   | 1.104518285    |
| 0.3874872479   | 1.4514773757   |
| 0              | 0              |
| 6.8082635023   | 2.8336532345   |
| 35.257307133   | 10.3179168925  |
| 0              | 0              |
| 0              | 0              |
| 144.8865415115 | 337.1481827885 |
| 12.8921462431  | 16.5101952444  |
| 3.1482712085   | 3.2758385785   |
| 7.1973596392   | 8.425119743    |
| 3.4220268953   | 9.2577856676   |
| 0.3614769966   | 0.4231394752   |
| 0              | 0              |
| 0              | 0              |
| 0              | 0              |
| 1.0477430835   | 0.7267982936   |
| 0              | 0              |
| 0              | 0              |
| 0.2746600505   | 0              |
| 0              | 0.1897562643   |
| 3.8211304103   | 3.3133015927   |
| 13.4881315861  | 21.0520022931  |
| 8.2993921256   | 4.9346754098   |
| 0              | 0.7515042172   |
| 14.7241534897  | 1.6415114442   |
| 206.6514710361 | 33.080761632   |
| 0.5749496332   | 0.769174054    |
| 6.3317929766   | 4.8383239835   |
| 12.0757873729  | 9.5734065178   |

gene\_expression\_table

|                 |                 |
|-----------------|-----------------|
| 0               | 1.3683579984    |
| 5.1111644403    | 5.6981441601    |
| 0               | 0               |
| 68.9331399155   | 20.0411715161   |
| 0               | 0               |
| 0.3332384133    | 0.693482345     |
| 5.5392701718    | 2.5616535021    |
| 1.1203083411    | 1.1657030289    |
| 4.6869882083    | 4.7143406376    |
| 3.8105725889    | 4.9562203611    |
| 0               | 0               |
| 10.4480166612   | 2.4158596385    |
| 26.3915060074   | 12.8722898313   |
| 5.9759152179    | 10.1043445794   |
| 5.5345687727    | 5.7588284807    |
| 20.4482106568   | 8.8041800231    |
| 7.7224862617    | 5.0454837107    |
| 5.9819931167    | 2.593492657     |
| 37.0684533843   | 40.9811140613   |
| 0.7223801021    | 4.5099048651    |
| 3.5611895661    | 8.0285580091    |
| 0.7140676644    | 1.0807295341    |
| 11.8019293976   | 4.6391645307    |
| 1.4647610596    | 0.4354608309    |
| 20.5358291599   | 7.9508603453    |
| 1.3535788957    | 3.1689577427    |
| 0.4697888949    | 1.4664739634    |
| 1777.8301670989 | 2834.4251064891 |
| 0.997628535     | 1.0380522596    |
| 1.4242019122    | 0.7409551558    |
| 0.4123978959    | 0               |
| 0               | 0               |
| 73.5991172917   | 98.6471498027   |
| 0.2815534665    | 2.6366576502    |
| 2.8645966805    | 2.1290497219    |
| 0               | 0.2081612552    |
| 700.5606547378  | 656.0525191761  |
| 4.2538829801    | 19.9181229099   |
| 0               | 0               |
| 7.6630532992    | 6.3788470468    |
| 0               | 0               |
| 5.814440188     | 3.9638194638    |
| 1.2687161458    | 0               |
| 11.354218556    | 3.5442868206    |
| 2.3196807593    | 2.4136737967    |
| 0               | 1.9748115205    |
| 6.6317914338    | 2.300170134     |
| 10.3085639394   | 24.752919353    |
| 41.993558352    | 54.841846344    |

gene\_expression\_table

|                 |                 |
|-----------------|-----------------|
| 10.2708295322   | 2.413193922     |
| 1.965719847     | 0.8181481813    |
| 3.7507509733    | 7.8054614249    |
| 0.3022807494    | 0.3145291097    |
| 54.1301347932   | 31.1945416019   |
| 101.7261111655  | 76.9803887034   |
| 45.520176809    | 24.7753532898   |
| 1.070026106     | 0               |
| 10.0503437091   | 2.3239070637    |
| 8.7193261344    | 6.7262613768    |
| 14.6722212036   | 17.1750790197   |
| 27.9038646148   | 2.0738945767    |
| 12.1791716456   | 3.6207626969    |
| 0               | 0.2037499346    |
| 4.840135514     | 13.4300184378   |
| 4.5321149237    | 8.252571926     |
| 0.782301501     | 0.9302859587    |
| 0               | 0               |
| 1.4245671546    | 2.964580707     |
| 1.8341218495    | 1.0178347356    |
| 13.5880300941   | 7.0693072863    |
| 5.199667151     | 2.8855235771    |
| 4.2460004012    | 6.225430647     |
| 352.669157741   | 258.0812287322  |
| 43.0121119206   | 16.2745290106   |
| 1.0785162881    | 0.6733305418    |
| 2.5569589494    | 4.2978381203    |
| 0               | 0               |
| 1.9280365041    | 1.1800942285    |
| 115.3218682715  | 156.5930693392  |
| 8.5110248083    | 0               |
| 3.929091459     | 4.0882975217    |
| 36.3418372938   | 23.1516746034   |
| 2.1101090946    | 0.5489025817    |
| 0               | 0               |
| 1.485847179     | 0.8433018727    |
| 23.4053182227   | 4.0589495682    |
| 13.6455161307   | 14.1984299328   |
| 0               | 0               |
| 0               | 0               |
| 0.2750567223    | 0               |
| 0               | 0               |
| 0.0685720552    | 0.0713505823    |
| 16.5834336016   | 9.9126715858    |
| 1048.205633881  | 770.6592246865  |
| 1395.3840499119 | 1592.4336020309 |
| 458.8688363811  | 254.6464624939  |
| 194.024940713   | 123.375263978   |
| 0.8213930548    | 1.5384163504    |

gene\_expression\_table

|               |               |
|---------------|---------------|
| 5.9287795373  | 5.1875787714  |
| 0             | 0             |
| 5.7369135825  | 2.387748906   |
| 78.7077940405 | 33.5033261054 |
| 0.2120056958  | 0.2836235926  |
| 0             | 0             |
| 0.1722233179  | 0             |
| 1.9760825658  | 2.9373615252  |
| 0             | 0             |
| 1.5665781129  | 0.9314603256  |
| 0.4656993789  | 0.969138864   |
| 0             | 0             |
| 0             | 0             |
| 0.1857647765  | 0.3865838622  |
| 22.2741572224 | 10.9784377769 |
| 0             | 3.9525490211  |
| 0             | 0             |
| 1.309511903   | 0.8175438505  |
| 0             | 0             |
| 6.2155992242  | 6.4674541608  |
| 0.2461425133  | 1.0244646503  |
| 0.1566927427  | 0             |
| 0.1250044     | 0             |
| 4.5353453522  | 5.1685563979  |
| 13.3790693912 | 21.876150718  |
| 3.2254895398  | 5.1329900199  |
| 3.5561075127  | 2.3126252091  |
| 55.6042261414 | 46.2858393205 |
| 0.2876304047  | 0             |
| 5.2996383388  | 4.7266103219  |
| 6.4486442901  | 4.0259653019  |
| 12.4995268463 | 3.9583494615  |
| 62.1078128859 | 29.9478973324 |
| 0             | 0.3480962103  |
| 31.9295926704 | 29.0704521527 |
| 11.7449293099 | 10.6932277234 |
| 2.4710105361  | 2.0949992378  |
| 2.4053270077  | 1.0011161661  |
| 0.3884971809  | 0.8084780303  |
| 0.1713066297  | 2.1899032972  |
| 28.6022187171 | 23.0800951735 |
| 0             | 0.0996038357  |
| 3.2854426684  | 2.1366051254  |
| 9.5902797968  | 6.9084527324  |
| 0.8276701443  | 0.5741381241  |
| 9.6903563538  | 7.5622558573  |
| 1.1476098838  | 1.044846972   |
| 3.1867516397  | 22.1058548642 |
| 4.6624009441  | 5.8088180536  |



gene\_expression\_table

|                 |                |
|-----------------|----------------|
| 0.29017215      | 0.5032164535   |
| 1.0118699003    | 0.5264353412   |
| 0               | 0              |
| 0.1477062339    | 0              |
| 0               | 0              |
| 0.3503588804    | 0              |
| 2.7896941262    | 1.6327867605   |
| 10.5649409084   | 5.2575362637   |
| 1.5449328927    | 1.7473187926   |
| 0               | 0              |
| 3.1240521163    | 2.7862612569   |
| 1.1842372495    | 0              |
| 0               | 1.3336280999   |
| 0.2499862977    | 0              |
| 3.5598673333    | 1.2347041675   |
| 0.4834659136    | 0.5030558634   |
| 10.5561593849   | 14.2790609264  |
| 0               | 0              |
| 1644.0089553363 | 3669.216381163 |
| 3.5776270018    | 13.9597192106  |
| 6.3552368715    | 9.6185453088   |
| 0               | 1.1345335471   |
| 17.107211082    | 8.5932927507   |
| 6.9841394725    | 5.2546979903   |
| 0.6369426976    | 0.1325502997   |
| 3.1001574905    | 1.9354651809   |
| 0.5617537864    | 0.6680182245   |
| 0               | 0              |
| 0.450739762     | 0.6395504375   |
| 0               | 0              |
| 31.7877897133   | 12.1503030986  |
| 3.4921598019    | 0              |
| 3.0903903479    | 5.5379991265   |
| 0.3349504059    | 0.6970450694   |
| 0               | 0              |
| 7.4759259677    | 4.6673094672   |
| 2.6835083051    | 1.3961217839   |
| 0               | 0              |
| 18.0715888493   | 16.1175825457  |
| 0.1539809339    | 0.3204404261   |
| 0.1365339793    | 0              |
| 0.9884829287    | 1.0285360751   |
| 0.2417610123    | 0              |
| 0.3730460003    | 0.3881617555   |
| 1.770338167     | 2.6607705854   |
| 1.472396764     | 1.0417994467   |
| 46.5687878282   | 32.1160180556  |
| 2.9339855558    | 1.1741808117   |
| 0.4874396447    | 0.7607859142   |

gene\_expression\_table

|                |                |
|----------------|----------------|
| 0              | 0              |
| 0.304141462    | 0.2813024161   |
| 4.311158333    | 3.6702373706   |
| 0.0857845197   | 0              |
| 1.7075871128   | 1.7767782283   |
| 0              | 0              |
| 0              | 0              |
| 25.9351775348  | 13.4930330776  |
| 8.4069411266   | 2.1114869599   |
| 0.8385541476   | 0.2908440691   |
| 4.5334359063   | 1.3477513985   |
| 3.1533348928   | 0.4101384303   |
| 2.3334621436   | 1.7342954287   |
| 7.095506998    | 4.9220104238   |
| 113.829143269  | 74.4489297853  |
| 45.2780507392  | 65.9577926304  |
| 2.5039446922   | 0              |
| 13.7024700134  | 4.9591970701   |
| 8.1478037314   | 26.6449896081  |
| 26.3343808558  | 8.5835852187   |
| 4.6223400951   | 6.3399753402   |
| 0.1330005313   | 0.0988497774   |
| 2.9887295295   | 3.5047316396   |
| 0.8674953969   | 2.0309538391   |
| 0.3425755283   | 0              |
| 4.2924319425   | 4.872393267    |
| 0              | 0              |
| 0              | 0              |
| 0              | 0.2261559964   |
| 13.4256488013  | 11.350343566   |
| 0              | 0.3384967117   |
| 0              | 0              |
| 233.1273568078 | 133.8337293233 |
| 0.319186864    | 1.3284810278   |
| 36.9744946368  | 34.0577950022  |
| 0.7732538286   | 0.6034394486   |
| 11.1492671171  | 8.3527440254   |
| 0              | 0              |
| 16.5937864192  | 16.1150860181  |
| 3.5997098073   | 3.1837339782   |
| 477.4655761012 | 5.4001347105   |
| 0              | 0              |
| 0              | 0              |
| 28.5352509839  | 0              |
| 0              | 0              |
| 0              | 0              |
| 14.8393469052  | 0              |
| 0.6487159716   | 0.1928576638   |
| 5.0889884323   | 6.7393369361   |

gene\_expression\_table

|                |                |
|----------------|----------------|
| 0.5181452203   | 1.6174211077   |
| 0              | 0              |
| 0              | 0              |
| 10.3953657216  | 5.3022470723   |
| 3.3415310394   | 3.4769292621   |
| 19.2121127214  | 11.9943503957  |
| 4.4647795095   | 4.2233559577   |
| 0.3279687979   | 0.1706290166   |
| 68.8334844055  | 7.1622604525   |
| 0              | 0              |
| 3.9376404465   | 2.0485964563   |
| 6.3440407169   | 4.7150714851   |
| 0              | 0              |
| 0.2804022577   | 0.583528211    |
| 26.1149250924  | 16.9831856567  |
| 0.3061036089   | 0              |
| 0              | 0              |
| 3.6851840591   | 2.3007042234   |
| 79.6878944971  | 135.7913357196 |
| 2.592297826    | 21.5786980545  |
| 0              | 0.1732562554   |
| 1.8715142337   | 1.7850686755   |
| 6.421028338    | 2.2906996198   |
| 1.4031261093   | 0.71218562     |
| 1.666601509    | 0.9909325117   |
| 14.4454849363  | 5.7260241246   |
| 5.4630951995   | 5.8874751977   |
| 2.5211761646   | 1.3116668794   |
| 11.9533664221  | 0.8291809753   |
| 0              | 0              |
| 145.0285540504 | 80.4827116629  |
| 550.2663016663 | 237.6249567113 |
| 21.1727546393  | 15.2520028342  |
| 4.2992625607   | 7.1575486214   |
| 1.1810409748   | 2.150568941    |
| 3.2491303656   | 4.4372796957   |
| 0.8487616672   | 1.7663066676   |
| 2.6407114064   | 2.1589170009   |
| 8.5914692771   | 9.7909839387   |
| 5.3950343004   | 24.5596754255  |
| 4.8893763746   | 1.3014516991   |
| 1.1710060133   | 0.8123033076   |
| 1.0299285083   | 1.4288813626   |
| 178.3847319792 | 80.8314017605  |
| 6.503760908    | 5.4138336824   |
| 3.3214346409   | 0.740575406    |
| 0              | 0              |
| 0.3368227567   | 0.408882545    |
| 0.1263569517   | 0.0657384561   |

gene\_expression\_table

|                 |                 |
|-----------------|-----------------|
| 0               | 0               |
| 1.5831832201    | 0               |
| 3.5585107195    | 4.3759192678    |
| 4.957567156     | 1.4329019069    |
| 0               | 3.6279595262    |
| 4.8671714284    | 15.8262134966   |
| 6.7582537499    | 3.516048474     |
| 0               | 0               |
| 184.6372642893  | 13.403632483    |
| 0.9504562232    | 0.2472421336    |
| 4.8972079711    | 10.1912838735   |
| 0.5165551773    | 0               |
| 1.008609755     | 2.4487830187    |
| 241.9433603249  | 67.5418406905   |
| 295.052878445   | 110.523012039   |
| 0.1425773785    | 0.4450637629    |
| 0.0864693358    | 0.0899730574    |
| 15.9852149396   | 0               |
| 0               | 0.2464970155    |
| 1.4689165059    | 0.7994899831    |
| 0               | 0               |
| 1.3939428335    | 0.6216107745    |
| 0               | 0               |
| 1.001241504     | 0.5609754907    |
| 0.1723742945    | 0.5380766075    |
| 0               | 0.0740993152    |
| 2.7395942551    | 2.7555820398    |
| 0.7080203542    | 0.4604432554    |
| 19.1620389895   | 8.6400085558    |
| 6.9463686911    | 7.7441081486    |
| 25.2621322505   | 21.4180178665   |
| 2.8813186401    | 0.9993563803    |
| 0.6008829241    | 0.9378458843    |
| 12.3372841566   | 8.55812576      |
| 2.9711618529    | 1.7175293246    |
| 6088.5598370746 | 2055.7139521442 |
| 0               | 0               |
| 2.5713621343    | 1.9263983434    |
| 0.0586098124    | 0               |
| 5.469120496     | 3.6714375819    |
| 7.1846218008    | 2.0932075791    |
| 1.9301268531    | 5.7572276821    |
| 53.2293433822   | 32.8128248221   |
| 22.3779593112   | 9.4594134797    |
| 0.3711709658    | 0               |
| 3.9317179603    | 1.461082303     |
| 2.2469105494    | 3.8965915855    |
| 5.5786162996    | 4.8684251916    |
| 0               | 0               |

gene\_expression\_table

|                 |                 |
|-----------------|-----------------|
| 0.2488570298    | 0.3884110063    |
| 4.2854242863    | 4.6242195892    |
| 0               | 0               |
| 5.108310698     | 5.9797108207    |
| 0.9574184723    | 0.6226330579    |
| 0               | 0               |
| 0.4282571406    | 0.6365857731    |
| 17.8464158938   | 23.7277575426   |
| 0               | 0               |
| 2.3449670596    | 2.4399846933    |
| 0.1823199083    | 0.1897074774    |
| 0               | 0               |
| 21.9936473203   | 20.9777570399   |
| 0               | 0               |
| 1922.1266876083 | 3254.1662184747 |
| 55.1039235846   | 58.3426318724   |
| 2.4978536249    | 1.1370914599    |
| 2.0746289337    | 2.023774234     |
| 20.2063023471   | 7.0083526664    |
| 16.5833282661   | 13.8042253402   |
| 97.5170865872   | 54.4923216415   |
| 0               | 0               |
| 0               | 0               |
| 0               | 0               |
| 3.0517727503    | 0.7938575051    |
| 5.2348643309    | 4.6089831362    |
| 8.1069208866    | 16.8708236578   |
| 0.3200645313    | 1.7761785984    |
| 0.3412671447    | 0.8877380664    |
| 21.0034054457   | 12.6083420588   |
| 1.2541634797    | 2.0214426331    |
| 0.2144072175    | 0.7808323548    |
| 0               | 0               |
| 0               | 0               |
| 0               | 0.2375156846    |
| 4.336348315     | 6.4457947866    |
| 3.4519819248    | 4.6394801462    |
| 0               | 0               |
| 0               | 0               |
| 0.4018661757    | 1.2544491576    |
| 68.5101977029   | 138.2520597419  |
| 0.6186458346    | 0.5149705999    |
| 112.0383661058  | 88.5993864605   |
| 19.5404863959   | 25.7143330075   |
| 36.0269564148   | 34.1791065822   |
| 151.293976912   | 94.9176414918   |
| 0               | 0.7507721058    |
| 0               | 0               |
| 0.3959707303    | 0.7416277046    |

gene\_expression\_table

|                |                |
|----------------|----------------|
| 0              | 0              |
| 0.9319196161   | 0              |
| 2.1955253878   | 2.8556095905   |
| 0.3783765599   | 0.2624722056   |
| 0              | 9.9511234178   |
| 0.3422940654   | 1.0684912738   |
| 0              | 0              |
| 0              | 0              |
| 0              | 0              |
| 5.1027383154   | 9.6234693531   |
| 4.5372975862   | 12.2749849282  |
| 0.6917636602   | 0.7197937964   |
| 5.8192657535   | 2.5617567169   |
| 1.54038341     | 1.8165060572   |
| 51.0322663438  | 51.3300815708  |
| 5.3345373322   | 4.4934171739   |
| 1.5260470668   | 1.9054586557   |
| 7.8875245423   | 4.5595142139   |
| 5.3190509335   | 1.1069155797   |
| 0.5521548847   | 5.1707528909   |
| 2.649555195    | 3.4824185481   |
| 0              | 2.4463646382   |
| 139.8057916031 | 101.5550145709 |
| 5.0377186084   | 2.3297093508   |
| 1.469216361    | 3.0574974751   |
| 7.1220864445   | 3.4203101891   |
| 37.9120236067  | 36.9094655199  |
| 0.2284442137   | 0.3565510968   |
| 1.1972545854   | 2.9067899487   |
| 0.4250194235   | 0              |
| 0.5625176903   | 4.6824864285   |
| 0              | 0              |
| 21.9818900942  | 30.0955160987  |
| 0.3845474545   | 0.0631783021   |
| 8.9829128309   | 4.4509041931   |
| 0.2419786632   | 0.7553507822   |
| 15.8973501745  | 8.2707539388   |
| 0              | 0              |
| 0              | 0.1794085107   |
| 0.3803976391   | 0.9235596567   |
| 45.4666554174  | 32.4561441823  |
| 3.5938293238   | 4.4873407519   |
| 0              | 0              |
| 2.0498655007   | 0.4265851347   |
| 0              | 0              |
| 27.814874316   | 19.2946186026  |
| 0              | 0.4522850261   |
| 6.4320746594   | 1.9122003259   |
| 2.0571447268   | 1.7837498771   |

gene\_expression\_table

|                 |                 |
|-----------------|-----------------|
| 0.1467314706    | 0               |
| 0               | 0               |
| 0               | 0               |
| 0.1996526664    | 0.0923300247    |
| 3106.5676153784 | 5502.3248187758 |
| 0               | 0               |
| 0.3652472099    | 0.7600939192    |
| 1.6289311857    | 1.129956785     |
| 0.6166131346    | 1.9247945558    |
| 0               | 0               |
| 1.3889680875    | 0.9197037938    |
| 0.7338318101    | 1.2726108999    |
| 4.2578682216    | 7.3839937638    |
| 1.0703447465    | 1.2149617294    |
| 1.2546744899    | 0.6527568346    |
| 0               | 0               |
| 0               | 0               |
| 17.2723576597   | 7.8628508057    |
| 0               | 1.7722641614    |
| 0               | 0               |
| 0.4431481605    | 0               |
| 3.9881743627    | 0               |
| 1.1192173394    | 0               |
| 0               | 0               |
| 0               | 0               |
| 0.6207590313    | 0.3229560365    |
| 0               | 0               |
| 61.9962298161   | 35.4795681008   |
| 5.0067039664    | 3.3151838934    |
| 24.5170462425   | 14.5774128251   |
| 2.7563391095    | 1.2469675926    |
| 0               | 0               |
| 0.1952133938    | 0               |
| 0               | 0               |
| 5.8195295457    | 4.5415018588    |
| 23.0571934619   | 16.660740762    |
| 0.0193829932    | 0               |
| 0               | 49.1910143417   |
| 0               | 0               |
| 8.1431903123    | 6.1194978614    |
| 0.7211671632    | 0.3001554896    |
| 23.6544876857   | 58.1760947728   |
| 0               | 0.1449746046    |
| 0               | 0               |
| 0.3251087444    | 0               |
| 1.0770455049    | 0.8405153929    |
| 2.0141254903    | 3.8920838997    |
| 0.5654027553    | 0.1961042569    |
| 0.607752975     | 0.3952368836    |

gene\_expression\_table

|               |                |
|---------------|----------------|
| 1.623168747   | 0.6755756983   |
| 12.2847726355 | 12.7825493616  |
| 0             | 0              |
| 0             | 0              |
| 1.5031035148  | 1.1171492804   |
| 792.776031244 | 796.6491985396 |
| 42.9825476813 | 31.5700183076  |
| 0.3392938395  | 0.3530419634   |
| 0             | 0              |
| 0             | 1.0929843608   |
| 2.3017838951  | 4.7901035099   |
| 0             | 0              |
| 0             | 0              |
| 124.574791977 | 59.1755072177  |
| 1.5691110104  | 5.2246115191   |
| 17.0481704088 | 16.2607125413  |
| 0.1432822604  | 0              |
| 0             | 0              |
| 13.9951616174 | 6.9645509954   |
| 0.3001262772  | 0              |
| 0             | 6.4031877974   |
| 0             | 0              |
| 74.4952461984 | 31.0055119454  |
| 33.8757011273 | 51.6975628432  |
| 30.6318670761 | 6.1975403568   |
| 1.840441751   | 3.19169352     |
| 0.5867812174  | 0.3052787422   |
| 0             | 0              |
| 0.7675023465  | 0.5989510503   |
| 14.5375181321 | 3.9806778135   |
| 0.3674903869  | 1.9119051487   |
| 16.6363048563 | 8.6552024336   |
| 11.5010738483 | 8.5479251742   |
| 2.3058332876  | 5.484034807    |
| 0.2086529136  | 0              |
| 1.0013872893  | 2.6049082948   |
| 56.1727637345 | 24.3536974093  |
| 2.5205455002  | 11.8020489298  |
| 0.3736286842  | 0.3887680498   |
| 0             | 0              |
| 9.8723854115  | 15.0135261827  |
| 0.3896872737  | 0.4054773304   |
| 0             | 0              |
| 0             | 0              |
| 0             | 0              |
| 66.2533818073 | 30.9833513007  |
| 2.4829898792  | 5.1672003443   |
| 20.7440018313 | 28.655344181   |
| 42.2822466947 | 20.3979208453  |



gene\_expression\_table

|                |                |
|----------------|----------------|
| 2.2365904019   | 4.1372740148   |
| 15.6474991311  | 8.4422763268   |
| 1.2709173921   | 2.6448294618   |
| 2.603638243    | 4.0637057782   |
| 12.1995509331  | 0              |
| 0              | 0.2548850883   |
| 13.1758505059  | 3.5764522287   |
| 18.8691299203  | 4.5811975047   |
| 0              | 0              |
| 0              | 0.4083804182   |
| 62.8115935588  | 27.2848391658  |
| 11.1923344708  | 3.8819486012   |
| 246.0322821049 | 68.2670573049  |
| 119.2761820266 | 67.3735825263  |
| 0              | 0              |
| 4.1931554982   | 1.0266026793   |
| 73.2120906927  | 70.924932434   |
| 26.3726532743  | 3.5572014503   |
| 1.379480691    | 2.8707539895   |
| 0.7733525106   | 2.414065836    |
| 0              | 0              |
| 11.8080884727  | 8.7761071745   |
| 8.8472556063   | 3.2490863912   |
| 0              | 0              |
| 5.4631271809   | 2.1316845333   |
| 202.0929732546 | 105.1408716678 |
| 6.723464324    | 10.1940225974  |
| 1.2209680976   | 0.8469610001   |
| 0              | 0              |
| 1.7824231046   | 1.8546465608   |
| 10.96808711    | 9.0877410219   |
| 0              | 0              |
| 0.2271277013   | 0.2835970488   |
| 1.4533492172   | 3.5285568734   |
| 4.7818896536   | 2.798803655    |
| 0.0998004933   | 0.5192219547   |
| 0              | 0.0394444793   |
| 18.6888193168  | 10.9384238452  |
| 2.6613166914   | 3.1303465914   |
| 0.2429505642   | 0.5687884718   |
| 11.9383773338  | 11.2665723083  |
| 0              | 0.0157209946   |
| 0.0604100174   | 0.1100011853   |
| 0              | 0              |
| 0              | 0              |
| 2.7841383381   | 1.1851163637   |
| 8.7047855698   | 4.5287509395   |
| 0.1060211851   | 0.220634288    |
| 13.1008259874  | 10.13636929    |

gene\_expression\_table

|                 |                 |
|-----------------|-----------------|
| 1.1626185373    | 1.6129701686    |
| 12.1681035737   | 6.5224120953    |
| 57.1604861621   | 27.8197086724   |
| 0               | 0               |
| 50.4876874613   | 36.7101141851   |
| 0.2260242424    | 0               |
| 0               | 0               |
| 11.8300425281   | 9.0268886943    |
| 0.6558536965    | 1.3648575352    |
| 0               | 0               |
| 0.2716402584    | 0               |
| 22.3986378691   | 36.6240702976   |
| 65.2005293347   | 27.8327970392   |
| 23.7863257819   | 12.3750716623   |
| 0               | 0               |
| 0               | 0               |
| 0               | 0               |
| 0               | 0               |
| 1.5614071822    | 1.9496101367    |
| 9.8017370304    | 5.949359273     |
| 5.0304642414    | 3.4895318177    |
| 0               | 0               |
| 1.0163812256    | 1.4805907281    |
| 2.2917431461    | 3.5769062348    |
| 4.8136277064    | 6.5112775197    |
| 3.3403077458    | 1.9550567255    |
| 0.3124110683    | 0.6501398146    |
| 0               | 0               |
| 1.0987478511    | 0.5081195164    |
| 1.9689714276    | 2.2536291662    |
| 0               | 0               |
| 0               | 0               |
| 3.5512946162    | 4.5479291328    |
| 1.1014267399    | 2.2921126973    |
| 6.0103617499    | 3.5736574296    |
| 1970.4463155384 | 3513.528476369  |
| 4.7058486621    | 0               |
| 0               | 0               |
| 0               | 0               |
| 1.6590521745    | 1.2330547595    |
| 3.847745688     | 7.0063973614    |
| 1.5942534685    | 1.5080475688    |
| 0               | 0               |
| 0               | 0               |
| 592.3431246887  | 1821.6411768361 |
| 6.6085207318    | 3.7507073321    |
| 0.1876706035    | 0               |
| 40.9527911828   | 51.9336074694   |
| 4.5363768547    | 3.4328654617    |

gene\_expression\_table

|               |                |
|---------------|----------------|
| 1.7399422171  | 1.2069629037   |
| 9.0937621342  | 13.3584560502  |
| 4.6922898708  | 8.7546852008   |
| 93.5644466251 | 134.1929378343 |
| 0             | 0.039304286    |
| 13.0888533425 | 13.987298062   |
| 0.2767835931  | 0.5759976267   |
| 22.7068900049 | 12.9948329548  |
| 0.403125091   | 0.1048649114   |
| 0             | 0              |
| 2.3647774336  | 1.23029889     |
| 0             | 0              |
| 3.5302875447  | 3.2494878986   |
| 0.5468293891  | 0.2438514923   |
| 1.4891726531  | 1.3558244481   |
| 0             | 0              |
| 0             | 0              |
| 6.4780993118  | 1.6851476759   |
| 6.3640918229  | 3.8260234435   |
| 0             | 0              |
| 0.7706167202  | 1.0023024599   |
| 0             | 0              |
| 0.4038871699  | 0.8405052074   |
| 1.3910571608  | 1.7369070491   |
| 0.411065283   | 2.1386078633   |
| 6.7876733668  | 3.5313543212   |
| 0             | 0              |
| 9.7213451081  | 10.4969598537  |
| 0             | 0              |
| 37.2279553859 | 14.0859728314  |
| 0.2404641524  | 0.0625519289   |
| 0.1316438503  | 0.1598077074   |
| 3.8734209267  | 4.1983033644   |
| 0.5404497073  | 0.7497981733   |
| 1.4033926965  | 0.7301289551   |
| 2.6450579675  | 1.334417081    |
| 80.4039209598 | 14.5498909632  |
| 1.0128079732  | 0.3242605433   |
| 3.7021902218  | 1.4980786676   |
| 51.8842936745 | 37.1158120471  |
| 0.7720662411  | 0.7230152008   |
| 0             | 0              |
| 0             | 0              |
| 0             | 0              |
| 9.8603131481  | 8.8918710592   |
| 1.0671909304  | 1.5268458019   |
| 0.05000191    | 0.0520279782   |
| 3.1410443756  | 3.7352216178   |
| 3.4269529026  | 4.9921373648   |

gene\_expression\_table

|                |                |
|----------------|----------------|
| 0.4805105555   | 2.9998845285   |
| 3.6222112537   | 5.0253101161   |
| 1.4645293506   | 1.2190974483   |
| 3.4235479665   | 2.1049774318   |
| 2.2655146796   | 1.5715419449   |
| 13.1120633471  | 11.0027110811  |
| 0.0872113984   | 0.0604967922   |
| 6.581819638    | 7.0499406336   |
| 5.3866781299   | 6.5391028924   |
| 56.3594063576  | 46.2971677344  |
| 7.2071734345   | 14.1651683538  |
| 44.3028564377  | 43.3041818431  |
| 0.3908571764   | 0              |
| 3.8895055606   | 2.023553805    |
| 40.0941496764  | 47.407678684   |
| 240.2786150005 | 210.5386612689 |
| 6.225644913    | 8.0021202871   |
| 0              | 1.1995318429   |
| 3.559939759    | 6.3500363362   |
| 1.8663441118   | 2.9129520476   |
| 5.3425454768   | 3.7060162908   |
| 0              | 9.8858794501   |
| 2.7979493913   | 0              |
| 3.5614432573   | 0.6176253804   |
| 2.3540876642   | 5.8175027997   |
| 7.8654241806   | 3.507484166    |
| 0              | 0              |
| 4.7518068362   | 0              |
| 0.9509114076   | 2.1202332062   |
| 8.6334127229   | 4.1274332242   |
| 0              | 0              |
| 5.4530174514   | 7.5652969533   |
| 0.854879143    | 1.7790373771   |
| 14.995026673   | 7.801311197    |
| 0              | 0              |
| 14.6695304354  | 7.6319685543   |
| 412.0428407104 | 587.7092851131 |
| 2.4677308714   | 20.541782977   |
| 17.9524377682  | 1.966301815    |
| 0.105526834    | 0.054901381    |
| 2.3774287145   | 0              |
| 15.9948533559  | 18.1365610121  |
| 2.5266874463   | 3.0046495504   |
| 217.6670137745 | 197.7985079035 |
| 0.3685999176   | 0              |
| 0              | 0              |
| 26.5153698214  | 20.1876349217  |
| 2.4387879667   | 3.0209609598   |
| 2.203703112    | 2.4840798195   |

gene\_expression\_table

|                 |                 |
|-----------------|-----------------|
| 0               | 0               |
| 1.5397737705    | 2.0027064003    |
| 0               | 0.0684723395    |
| 2.077074403     | 1.0806185378    |
| 0.8442895215    | 0.8784999775    |
| 0               | 0               |
| 10.0417881798   | 7.9608987342    |
| 14.2852918536   | 6.6062796668    |
| 0               | 0               |
| 1.227322623     | 1.6419259411    |
| 0               | 0               |
| 52.4234291783   | 48.6450762475   |
| 0.9687719173    | 1.0673220463    |
| 4.4351303707    | 7.3549029028    |
| 2.2290992236    | 0.8283649693    |
| 18.6556163774   | 38.2521494353   |
| 0.2368053796    | 0.369601035     |
| 0.8979610995    | 3.9709718514    |
| 0               | 0               |
| 1.1451749983    | 0               |
| 0.181152563     | 0.376985663     |
| 1.9557213493    | 1.7955589574    |
| 2.7676290761    | 0.7199432242    |
| 0.3053072674    | 0               |
| 198.7742799791  | 156.1766807574  |
| 2155.4581090666 | 2828.6020288326 |
| 0.5250625924    | 0.3902414514    |
| 0               | 0               |
| 10.5794104437   | 20.9677832528   |
| 25.937099727    | 19.4913811691   |
| 0               | 0               |
| 0.3493686799    | 0.259660739     |
| 0.9888857651    | 1.0289552343    |
| 6035.4771074484 | 8345.0283026313 |
| 0.2538398564    | 1.0565016028    |
| 26.4108776174   | 18.320694345    |
| 0.2275611378    | 0.5919546831    |
| 0               | 0               |
| 2452.0748816874 | 2650.5172620469 |
| 1.8795756896    | 0.6984770538    |
| 12.8386645413   | 12.5730681087   |
| 0.8384803117    | 0.8724553796    |
| 0.4482981351    | 0.2798778558    |
| 43.5556298752   | 44.2665309585   |
| 5.0297556968    | 2.0934241888    |
| 2.0508241127    | 0.4267846256    |
| 7.1465598919    | 17.3509867612   |
| 0               | 0               |
| 2.9554999689    | 1.5376281418    |

gene\_expression\_table

|               |               |
|---------------|---------------|
| 1.0739004982  | 1.1174147487  |
| 0.0712536358  | 0             |
| 1.1866968851  | 2.0579693741  |
| 0.4590115534  | 0.6268639349  |
| 0             | 0             |
| 4.5726055511  | 6.0900949586  |
| 0.666650128   | 0.6936626685  |
| 0             | 0             |
| 0             | 0             |
| 0             | 0             |
| 75.7061550756 | 71.0885101996 |
| 0             | 0             |
| 1.2953261319  | 0             |
| 0             | 0.9235842529  |
| 1.5086278931  | 2.0603063481  |
| 0.7615659709  | 0.3962122419  |
| 0             | 0             |
| 0.355435354   | 0.5547562938  |
| 0             | 0             |
| 10.3991179873 | 10.0475963103 |
| 5.4185701019  | 3.5238309782  |
| 0             | 0             |
| 1.2959221241  | 3.3710816252  |
| 3.9780125916  | 3.9592356719  |
| 1.0654425276  | 0             |
| 0.4824668688  | 0.7530245063  |
| 1.9519281493  | 1.0155099593  |
| 6.8043226076  | 6.2470875065  |
| 2.5048228731  | 2.6063178349  |
| 0             | 0             |
| 0.50975094    | 0.3978044657  |
| 0.073940445   | 0.1538729964  |
| 3.3211383443  | 6.9114205174  |
| 2.0338450274  | 1.5390953117  |
| 0             | 0             |
| 9.2491970184  | 5.1327854823  |
| 11.3036250278 | 4.0713389423  |
| 6.0360712012  | 23.0290562161 |
| 4.5761679249  | 5.531851164   |
| 1.3203855934  | 3.8718644195  |
| 1.2011811421  | 2.1247497275  |
| 27.1716575278 | 13.592619274  |
| 0             | 0             |
| 9.1591844604  | 7.6242503432  |
| 0.0357048297  | 0             |
| 1.2252621708  | 2.1248492807  |
| 0.0378315     | 0.7479240821  |
| 1.1949152335  | 0             |
| 2.3942989284  | 2.7681283114  |

gene\_expression\_table

|                 |                 |
|-----------------|-----------------|
| 1.1269754903    | 5.8632016486    |
| 2.7760430742    | 2.8885278287    |
| 0               | 0               |
| 2.446357395     | 0               |
| 33.4011140101   | 20.0506851936   |
| 21.9656237802   | 45.711333626    |
| 8.0476368744    | 13.158711719    |
| 0               | 0               |
| 705.2999270644  | 1350.6488212933 |
| 1.0901307533    | 2.1425716737    |
| 0.3805511047    | 0.3959709654    |
| 38.8820497207   | 61.9823085529   |
| 0.747161046     | 1.0689743268    |
| 6.6175004069    | 7.711917142     |
| 3.1515020276    | 5.786824076     |
| 0               | 0               |
| 1.0258918108    | 0.6099775761    |
| 0               | 0               |
| 0               | 0               |
| 8.3961036752    | 18.9286765435   |
| 0               | 0               |
| 0               | 0               |
| 1.2703603121    | 2.6436701563    |
| 1.9054859967    | 0.9913479693    |
| 0               | 0               |
| 6.9599230131    | 2.6334319319    |
| 0               | 0               |
| 18.2102505699   | 7.7515063247    |
| 1.0118821885    | 1.1581718154    |
| 0               | 0               |
| 12.4491989031   | 25.9072763028   |
| 0.1392766176    | 0.0724600403    |
| 1.8883740854    | 1.4736679918    |
| 11.236495097    | 7.1949512678    |
| 0               | 0               |
| 1035.6988359075 | 846.1243713176  |
| 6.7598937225    | 11.5555341111   |
| 1.6577617841    | 1.8576212162    |
| 2.0381534916    | 6.6970708293    |
| 0.5367362334    | 0               |
| 0               | 0               |
| 1.337903103     | 0.6960573452    |
| 1.2865426214    | 2.0080096374    |
| 9.0755835827    | 16.9979842064   |
| 1.5201793952    | 3.558997765     |
| 0               | 0               |
| 0.6826111733    | 0.7102704524    |
| 0               | 0               |
| 12.1639318063   | 6.3284060421    |

gene\_expression\_table

|                 |                |
|-----------------|----------------|
| 0               | 0              |
| 1224.6743064273 | 961.5867467628 |
| 0               | 0              |
| 2.0763723021    | 0.5892290524   |
| 3.9360294909    | 2.9253690582   |
| 7.5393997472    | 2.6149649458   |
| 27.7553868302   | 35.4436731772  |
| 12.2740187457   | 15.0457114583  |
| 0               | 0              |
| 99.2948771338   | 83.1586214692  |
| 39.1410616455   | 15.7090051001  |
| 0.6873317164    | 0.2383940903   |
| 24.6788412464   | 23.1937759305  |
| 19.9003899864   | 11.0436000672  |
| 3.1029072621    | 1.4675620424   |
| 6.8351356829    | 3.2825049797   |
| 1.6767286203    | 4.3616733884   |
| 39.8058130909   | 90.1466635593  |
| 16.111056698    | 8.1424529644   |
| 7.6522036848    | 4.644657249    |
| 13.7555803623   | 11.8237445648  |
| 114.7144172916  | 95.8518044159  |
| 1.1413579226    | 1.1876055355   |
| 17.8339865498   | 5.3018904007   |
| 0               | 0              |
| 53.1683422243   | 22.2349662579  |
| 0               | 0              |
| 0               | 0              |
| 0               | 0              |
| 3.3402658999    | 3.1280515734   |
| 0               | 0.0992677884   |
| 0               | 0              |
| 1061.5459597555 | 806.5038397882 |
| 0               | 0.8429670664   |
| 1.874953485     | 1.6257718793   |
| 0.7305632721    | 1.064231786    |
| 0               | 0              |
| 5.9969209347    | 7.1313315054   |
| 22.2491142518   | 36.655186755   |
| 9.7279264718    | 12.1465203144  |
| 0               | 0.7816016478   |
| 0.6277744467    | 3.5926646345   |
| 20.4976464632   | 28.437609767   |
| 0.9868643746    | 1.0268519374   |
| 30.5052578509   | 9.0689500813   |
| 22.3938219934   | 11.6506077695  |
| 62.6488217089   | 32.593670217   |
| 2.2017741787    | 2.5773633711   |
| 0.5297555506    | 0.826831722    |



gene\_expression\_table

|                |                |
|----------------|----------------|
| 32.7963758848  | 30.2337998153  |
| 10.1580541349  | 11.1914011258  |
| 41.2822458064  | 46.950808279   |
| 7.0943323008   | 14.7635866798  |
| 0              | 1.9404467945   |
| 0              | 3.5480338073   |
| 0              | 0              |
| 29.8278432424  | 59.6855037706  |
| 23.0389414357  | 15.7238815187  |
| 16.3972207802  | 7.5829480659   |
| 0              | 0              |
| 0              | 0              |
| 81.8434550319  | 121.1888561677 |
| 5.8044537007   | 36.2378945777  |
| 0.4849854944   | 1.0092740348   |
| 10.9008863498  | 11.9395665878  |
| 21.7980203722  | 3.7802120243   |
| 5.6738521258   | 7.6623210585   |
| 0              | 0              |
| 78.4010868642  | 135.9631407902 |
| 18.6845993735  | 10.8009421673  |
| 0              | 2.7362841337   |
| 73.4122756589  | 38.1934637785  |
| 0.6550158825   | 0.3407785028   |
| 16.8840796095  | 0              |
| 419.53767274   | 436.5372620232 |
| 30.6459499737  | 35.4307980291  |
| 17.8785393998  | 29.7647592412  |
| 59.7083001597  | 37.2766016957  |
| 13.0893296703  | 9.7283620711   |
| 2.1113121214   | 28.5592073002  |
| 115.9825702754 | 120.6821626763 |
| 0              | 0              |
| 0              | 6.2508408635   |
| 0              | 0              |
| 0              | 0              |
| 0              | 0              |
| 0              | 0              |
| 0              | 0              |
| 0              | 0              |
| 239.6215063011 | 302.2193037986 |
| 0              | 0              |
| 0              | 0              |
| 0.2242139076   | 0              |
| 0              | 0.1248404026   |
| 5.4462050611   | 3.1667882785   |
| 43.7965481592  | 21.7005601094  |
| 16.1322232087  | 8.392948962    |
| 0              | 1.4269118298   |
| 2.8898461094   | 2.4055537135   |

gene\_expression\_table

|                 |                 |
|-----------------|-----------------|
| 14.5996487539   | 14.2417723447   |
| 2.1533255685    | 7.8420227347    |
| 7.1355812074    | 3.5169696211    |
| 52.4678191982   | 43.3950762266   |
| 17.8738041404   | 23.9117752215   |
| 0               | 0               |
| 0               | 0               |
| 0.7267036565    | 0.4158822552    |
| 4.441577313     | 3.8512910068    |
| 34.5077453758   | 26.2389947876   |
| 0               | 0               |
| 0               | 0.2370902504    |
| 0               | 0               |
| 0               | 0               |
| 16.9603171755   | 15.6590902066   |
| 2.7231623602    | 4.6550429392    |
| 15.2708023282   | 14.2736837064   |
| 0.2794922653    | 0.2908172405    |
| 0               | 0               |
| 0.5610027462    | 0               |
| 0               | 0               |
| 1.6975233345    | 0.8831533338    |
| 0               | 0               |
| 32.6436563655   | 254.7477848499  |
| 27.2594109726   | 45.3823316609   |
| 18.5924841632   | 31.2509855531   |
| 1.1133475798    | 0               |
| 12.5750127766   | 10.5922547456   |
| 0               | 0               |
| 0.7835398436    | 0.4076443669    |
| 0.1919043112    | 0.3993604771    |
| 8.7471585199    | 4.5507958866    |
| 4.1428431509    | 0               |
| 2.220337775     | 1.6502181807    |
| 232.7084340746  | 329.5843809847  |
| 0               | 0               |
| 0               | 0               |
| 0               | 0               |
| 7.8109147291    | 3.2509646225    |
| 14.7474217474   | 147.3118517985  |
| 2791.3630324664 | 4330.2985636498 |
| 21.6276786648   | 7.1821366671    |
| 0               | 0               |
| 37.1472660608   | 42.0135504833   |
| 4.3027592498    | 7.5766413677    |
| 33.6998717383   | 17.5326921693   |
| 0               | 0               |
| 0               | 0               |
| 5.1970365976    | 8.4118526552    |

gene\_expression\_table

|                |                |
|----------------|----------------|
| 65.5776270053  | 46.0964119913  |
| 9.2920886062   | 2.8200090119   |
| 0              | 0              |
| 21.1394167469  | 107.9802753842 |
| 0              | 0              |
| 1.1494800189   | 0.2392113475   |
| 0              | 0.667969974    |
| 28.427080965   | 28.4834247183  |
| 19.0148180906  | 10.9918305666  |
| 0              | 0              |
| 2.3900202021   | 0.7105323945   |
| 7.2078661655   | 4.6874547349   |
| 1.0856408192   | 0.3765435951   |
| 32.0111949833  | 18.3769835654  |
| 13.2136112007  | 9.7656621158   |
| 1.9798724694   | 0              |
| 9.7293377379   | 32.2113549939  |
| 4.5925121955   | 3.0719571071   |
| 21.1695937289  | 19.5798949072  |
| 0              | 7.8354417331   |
| 0.0160367016   | 0              |
| 0              | 0              |
| 0.7119792606   | 0              |
| 18.6363079564  | 7.7565790899   |
| 1.672647453    | 1.74042282     |
| 0              | 0              |
| 21.532613604   | 29.2989914961  |
| 4.8970280854   | 6.1145457145   |
| 4.9925905879   | 6.3755461304   |
| 0.2063225096   | 0.042936532    |
| 7.9136606395   | 3.6231011133   |
| 15.2419999158  | 1.5104383759   |
| 10.1174480052  | 10.048886721   |
| 9.7426098742   | 4.9150926706   |
| 2.8072309318   | 1.5728350683   |
| 0              | 0              |
| 6.5369478089   | 11.619782207   |
| 0              | 0              |
| 15.2179319213  | 20.782859635   |
| 175.3408503811 | 237.4292436967 |
| 0              | 0.0473388241   |
| 0              | 0              |
| 87.2842971271  | 221.2307403663 |
| 60.9865931366  | 63.4577586659  |
| 5.301284102    | 6.6193093897   |
| 13.2989334235  | 19.1600359729  |
| 0              | 0              |
| 21.3069693486  | 11.0851619125  |
| 3.4736704412   | 7.2288458563   |

gene\_expression\_table

|                |                |
|----------------|----------------|
| 0              | 0              |
| 29.1600710929  | 5.7403087202   |
| 1.2326540718   | 0.8550673253   |
| 1.149123333    | 0              |
| 9.7169601018   | 8.7161116696   |
| 0              | 0              |
| 2.8939110141   | 1.5055858779   |
| 0              | 0              |
| 775.9643100955 | 729.7997262653 |
| 0              | 0              |
| 1.6053962639   | 2.0283994732   |
| 3.8735511238   | 1.8967090364   |
| 0              | 1.1264020109   |
| 1.5731272642   | 0.7015157535   |
| 0.6442013319   | 0.2681217005   |
| 48.3944234687  | 17.9347845427  |
| 0              | 11.1474333368  |
| 2.6727258869   | 1.4636969726   |
| 26.9201150009  | 10.7734281177  |
| 11.0797438996  | 13.2240891248  |
| 0.2009233973   | 1.0453238821   |
| 10.8613068018  | 5.2160330559   |
| 0              | 0              |
| 30.1985863629  | 15.7111137621  |
| 0.9173503564   | 0.477260612    |
| 0              | 0              |
| 10.4062205169  | 7.4441665766   |
| 1.8867349646   | 4.9079627952   |
| 0              | 0              |
| 11.2755411649  | 8.2817110713   |
| 0              | 0              |
| 1.5482785553   | 1.7721159692   |
| 11.5982570275  | 15.359547977   |
| 0              | 0              |
| 176.9631513629 | 52.1133016092  |
| 757.4812079352 | 806.0872572264 |
| 13.1054281836  | 2.8708332045   |
| 1.8893477053   | 3.0892772847   |
| 10.9386831555  | 22.7638331674  |
| 0              | 0              |
| 0              | 0              |
| 24.2715877114  | 2.971184468    |
| 0              | 0.739543612    |
| 0.9005450729   | 0              |
| 0.8499738128   | 1.1792194604   |
| 0.8544481238   | 1.778140409    |
| 0              | 0              |
| 1.4956101273   | 0.8299797196   |
| 91.3128031484  | 47.5063905629  |

gene\_expression\_table

|                 |                 |
|-----------------|-----------------|
| 541.9377747829  | 178.9288537616  |
| 53.9783428505   | 35.7417043251   |
| 134.4777935457  | 91.2937107431   |
| 7.8127456983    | 8.1293167161    |
| 0               | 0               |
| 15.6811541904   | 9.3237438126    |
| 30.5697442361   | 7.4219657508    |
| 24.7662442126   | 6.4424419675    |
| 10.5219008553   | 1.4597661788    |
| 4.6902861172    | 4.8803356475    |
| 69.7263036593   | 48.3677337669   |
| 34.7782676339   | 54.2812149562   |
| 0.9578174311    | 1.4949420256    |
| 1749.4394016943 | 1571.0885246594 |
| 16.2899184502   | 5.0849948843    |
| 0.1866720425    | 0.3884719185    |
| 0               | 0               |
| 2.7714263387    | 0               |
| 300.0959343131  | 254.4306244241  |
| 469.2140596106  | 67.5206898969   |
| 0.6844053791    | 3.5606867952    |
| 0.3305154021    | 0.6878156508    |
| 2.0497646463    | 6.3984621976    |
| 0               | 0               |
| 0.8687616815    | 0               |
| 0               | 0.9292763769    |
| 0               | 0               |
| 0.707235351     | 1.4717847944    |
| 4.7632317534    | 2.9154335455    |
| 198.1280007168  | 75.730816227    |
| 42.1243628868   | 48.4106170079   |
| 4.8752081704    | 5.0727507082    |
| 0               | 0               |
| 190.5847331637  | 79.6935442373   |
| 58.3689094626   | 30.0934268578   |
| 0               | 0               |
| 12.0109063242   | 6.0594356547    |
| 4.1536855869    | 3.4575937299    |
| 3.4196627603    | 2.3721512439    |
| 6.3459208928    | 4.9522923296    |
| 63.0429963597   | 20.714995885    |
| 7.5116459656    | 5.8620123582    |
| 0               | 0.6532240556    |
| 0               | 0               |
| 0               | 0               |
| 2.759722874     | 25.8439170322   |
| 10.6262308781   | 16.5852056963   |
| 1492.3866756139 | 2596.3784239063 |
| 11.762130558    | 17.1342218927   |

gene\_expression\_table

|                |                |
|----------------|----------------|
| 0              | 0              |
| 4.7774493966   | 5.2634443414   |
| 0              | 0              |
| 1.1216332957   | 0.7502667881   |
| 0              | 0              |
| 226.8932702795 | 80.370023432   |
| 0.6163781248   | 0.5019289458   |
| 0.3123575298   | 0              |
| 17.9672092448  | 8.4978351166   |
| 406.4115062949 | 387.1932151196 |
| 0              | 0              |
| 6.2473978078   | 7.945105932    |
| 16.6139141365  | 9.5079087837   |
| 5.5223776173   | 0.6760168638   |
| 1.914204586    | 1.4938258526   |
| 77.2303188317  | 40.1798385682  |
| 15.1496241587  | 5.1472601278   |
| 18.2797887045  | 7.2277833038   |
| 0              | 0              |
| 0              | 0              |
| 17.5813272075  | 29.6184027574  |
| 2.0470293226   | 1.9363405218   |
| 14.2703405491  | 6.5993653874   |
| 2.5367756461   | 1.5083230448   |
| 0.5874799416   | 0.3056422604   |
| 0.2511807457   | 1.0454341732   |
| 3.9242294405   | 4.4435242447   |
| 35.2229232585  | 37.1891224147  |
| 0              | 0.5499820019   |
| 15.943017416   | 1.8432250608   |
| 12.2483065457  | 18.3203706544  |
| 16.9097783608  | 20.5274527124  |
| 2.9496003613   | 6.4792483196   |
| 21.6600865315  | 8.8964799676   |
| 2.2180017624   | 3.0771663807   |
| 0              | 0              |
| 0.3083579108   | 0              |
| 0              | 0              |
| 9.6897374099   | 0.916578526    |
| 77.0851235342  | 97.0946193001  |
| 77.6645179907  | 53.3932926558  |
| 0.4372071197   | 0.2274613359   |
| 0              | 0.198217087    |
| 5.5913926233   | 1.5514546196   |
| 1.2558027773   | 0.8711251164   |
| 4.0467670167   | 3.4451519493   |
| 0.252088866    | 0              |
| 0.5114848799   | 0.1064420306   |
| 0              | 0              |

gene\_expression\_table

|                 |                 |
|-----------------|-----------------|
| 0.2323197571    | 0.0604333277    |
| 0               | 0               |
| 6.1372157775    | 13.8361050344   |
| 6.3462649334    | 5.8697017071    |
| 2.1824384612    | 0.9350643095    |
| 1.6283153699    | 3.8121624203    |
| 73.8747421645   | 34.3883753433   |
| 0.9249368138    | 1.3473811166    |
| 8.9226770879    | 2.475792619     |
| 16.1026875307   | 5.2911048839    |
| 4.10475639      | 3.3917402886    |
| 2.495089892     | 1.854421768     |
| 6.8390916175    | 32.4182915993   |
| 0.8775453699    | 2.7393100404    |
| 0.3243687087    | 0.8625308433    |
| 0               | 0               |
| 1.4575865105    | 12.1331811811   |
| 9.4396350967    | 5.0999507516    |
| 4.9643154942    | 7.7482029665    |
| 1.2169794627    | 8.3575222272    |
| 64.7608933715   | 65.6681777471   |
| 1.329845268     | 2.61371289      |
| 5.7851221036    | 2.8216566499    |
| 0.1910123571    | 0.2732841961    |
| 58.0647615839   | 163.4827418632  |
| 2.8624703181    | 5.212299905     |
| 0               | 0               |
| 5.5234312376    | 4.9262054183    |
| 0               | 0.3269168382    |
| 29.5628642444   | 16.4057312333   |
| 11.391593294    | 12.3090700407   |
| 29.0197415317   | 6.470489168     |
| 70.1258455551   | 52.7848784032   |
| 0               | 0.0728539904    |
| 0.0488549986    | 0.1016691882    |
| 0               | 0               |
| 2.5462525802    | 2.6494262662    |
| 0               | 0               |
| 0               | 0               |
| 0               | 0               |
| 0               | 0               |
| 0               | 0               |
| 0               | 0               |
| 0               | 0               |
| 318.7216011531  | 284.2595500893  |
| 6708.5643389954 | 1022.6055096802 |
| 0               | 0               |
| 0               | 0               |
| 0               | 0               |
| 1.2468826468    | 6.4870305108    |

| gene_expression_table |                |
|-----------------------|----------------|
| 0                     | 0              |
| 6.6392775198          | 0              |
| 0                     | 0              |
| 0                     | 0              |
| 128.6840662129        | 0              |
| 0                     | 0              |
| 0                     | 0              |
| 0                     | 0              |
| 1.73310622            | 1.6029612134   |
| 1.3905696407          | 1.4469152666   |
| 2.5677329083          | 10.6871078924  |
| 0                     | 2.6792077496   |
| 4.4514869576          | 3.7054883119   |
| 62.0510554324         | 42.3710127606  |
| 289.5391489791        | 111.5819340762 |
| 0                     | 0              |
| 0                     | 0              |
| 0                     | 0              |
| 25.290640377          | 30.3639374658  |
| 45.0394231745         | 0              |
| 0                     | 0              |
| 0                     | 0              |
| 0.7447194251          | 1.5497906382   |
| 36.7871668313         | 0              |
| 0                     | 0              |
| 0                     | 0              |
| 37.9603338829         | 0              |
| 0                     | 0              |
| 0                     | 0              |
| 894.4269630421        | 195.930311361  |
| 0                     | 0              |
| 0                     | 0              |
| 0                     | 0              |
| 0                     | 0              |
| 34.8631518297         | 0              |
| 68.4377272056         | 35.605405658   |
| 0                     | 0              |
| 0                     | 0              |
| 0                     | 0              |
| 1.415792581           | 0.7365801179   |
| 2.6309735672          | 2.7375801319   |
| 10.2815891144         | 11.670760596   |
| 7.5868821191          | 3.9471505931   |
| 5.6759491058          | 3.9372916793   |
| 0                     | 0              |
| 2.9718388898          | 1.5461286273   |
| 3.010085631           | 0.7830134367   |
| 0.4979557334          | 1.5543984243   |
| 0.8650187685          | 0.9000691698   |



gene\_expression\_table

|                 |                 |
|-----------------|-----------------|
| 0               | 0               |
| 32.5511219418   | 14.8697944735   |
| 0               | 0               |
| 0.5391674186    | 0.5610143832    |
| 0               | 0               |
| 1.9586961183    | 4.076124249     |
| 0               | 0               |
| 790.530900463   | 1101.8283058659 |
| 104.4374635464  | 188.9900006043  |
| 81.5245961922   | 59.8785584649   |
| 0               | 3.3474580223    |
| 0               | 0               |
| 9.7547679832    | 2.9853027607    |
| 0               | 0               |
| 0.9496573156    | 1.9762745105    |
| 105.9597990291  | 40.0920983941   |
| 215.2509099216  | 379.3088371504  |
| 33.9087037218   | 26.7293016331   |
| 22.9482288834   | 19.5366165497   |
| 51.3011106069   | 28.4118408307   |
| 18.3046864835   | 12.380152857    |
| 166.8568341567  | 193.5739162019  |
| 0               | 0.8677726231    |
| 24.3002720627   | 2.8094349571    |
| 8.3594615373    | 7.8283668422    |
| 101.3749074668  | 22.6034142984   |
| 64.2085434112   | 97.6457672061   |
| 18.3308619234   | 18.119943821    |
| 1635.846328503  | 1884.6201476261 |
| 16.5072177652   | 32.062029423    |
| 875.137312718   | 89.7772395622   |
| 0               | 0               |
| 33.8711109239   | 38.1805256133   |
| 24.4827422741   | 8.4915928283    |
| 0               | 0               |
| 4.2188826771    | 5.4872887834    |
| 58.5544152304   | 27.4171632114   |
| 0               | 0               |
| 1770.7352912771 | 2257.0443202338 |
| 3219.5192405909 | 4781.2792726854 |
| 1.072919558     | 1.116394061     |
| 6.1553508648    | 9.6071468234    |
| 28.5515475293   | 15.5615695611   |
| 0               | 0               |
| 0               | 1.4475192049    |
| 0               | 0               |
| 90.2414435446   | 6.2598673485    |
| 44.6054244501   | 37.1302624314   |
| 189.1622789498  | 139.6837481581  |

gene\_expression\_table

|                 |                 |
|-----------------|-----------------|
| 0               | 0               |
| 1091.4066055995 | 1250.1475315155 |
| 11.6889781912   | 16.2168179148   |
| 18.2851039085   | 26.160767811    |
| 0               | 8.9673328161    |
| 33.6658314638   | 35.0299647585   |
| 75.8230447508   | 30.87210544     |
| 87.4781447484   | 107.5723327229  |
| 4.5161481232    | 0               |
| 28.4309300565   | 13.7349392652   |
| 0               | 0               |
| 0               | 7.0803726237    |
| 0               | 0               |
| 0               | 0               |
| 46.4482128124   | 48.3302858467   |
| 232.4831015153  | 110.6578806596  |
| 1.4662431547    | 7.6282752872    |
| 17.9672092448   | 37.3904745131   |
| 1.2627556698    | 1.3139222971    |
| 31.6679623254   | 12.2389957227   |
| 114.6526335789  | 75.9171236661   |
| 3.0633431203    | 0               |
| 89.1888124617   | 35.6933564336   |
| 19.8387935412   | 20.6426578041   |
| 401.845966452   | 675.4386547773  |
| 326.3356299066  | 272.5405271534  |
| 1.0510619095    | 1.0936507446    |
| 11.1412913753   | 15.4569792683   |
| 3.4797633273    | 1.0862288091    |
| 0               | 0               |
| 66.6488250376   | 71.8261882742   |
| 15.2160213427   | 9.4995430362    |
| 20.1587740821   | 20.9756038977   |
| 19.1386983003   | 7.2415253938    |
| 0.8080191318    | 0               |
| 0               | 0               |
| 4.9670898881    | 0               |
| 0               | 0               |
| 11.5610328506   | 16.0393116986   |
| 21.0411446649   | 43.7874559481   |
| 0               | 0               |
| 16.2899184502   | 16.9499829477   |
| 4.5271900501    | 0               |
| 28.5986242447   | 35.0087473359   |
| 172.9409150537  | 323.9072083832  |
| 73.9783048871   | 8.1027254932    |
| 24.4438380265   | 31.7928723056   |
| 3.5024351775    | 40.087885269    |
| 0               | 0               |

gene\_expression\_table

|                 |                 |
|-----------------|-----------------|
| 12.8065987124   | 619.6366676874  |
| 0               | 36.0856697238   |
| 7.5282736604    | 84.5998335737   |
| 0               | 0.9940284657    |
| 0               | 2.3996446935    |
| 0               | 0               |
| 0               | 0               |
| 47.0778739085   | 12.2463651736   |
| 371.2896748068  | 349.3448132764  |
| 76.0679519552   | 73.2139455154   |
| 46.8517633444   | 30.4688676075   |
| 0               | 2.6916846562    |
| 0               | 11.5368147408   |
| 54.4848696973   | 25.6466463143   |
| 0               | 7.4878980807    |
| 0               | 5.0366226288    |
| 0               | 0               |
| 26.9762631721   | 28.0693363908   |
| 87.6597854144   | 96.0123618796   |
| 0               | 0               |
| 11.8637303568   | 28.8037085639   |
| 4.6089941665    | 4.7957497618    |
| 3272.7291918465 | 6031.7566519061 |
| 32.7735828869   | 25.9821428064   |
| 99.6387837045   | 64.797580551    |
| 30.1621476463   | 15.6921561588   |
| 121.3495823792  | 135.7071419543  |
| 14.1305143368   | 14.703080177    |
| 85.9577239774   | 73.8858081528   |
| 54.3516965754   | 72.3149729629   |
| 0               | 12.1619025463   |
| 934.8193957117  | 1330.0157770063 |
| 0               | 0.5157594454    |
| 11.237077933    | 0               |
| 21.5082428686   | 4.4759505822    |
| 2.4362783063    | 1.843633349     |
| 37.7957403466   | 18.5069255478   |
| 5.7807949266    | 9.7744264687    |
| 0               | 0               |
| 1146.6620745228 | 726.1698324217  |
| 91.5972145909   | 82.6008879519   |
| 4.4233737246    | 4.9313657291    |
| 0.5997389577    | 0.8736563779    |
| 1625.7195851119 | 2255.4579246476 |
| 0               | 0               |
| 6.539843779     | 5.3805688265    |
| 204.7783842974  | 139.6371626691  |
| 2.7287680653    | 2.6365274418    |
| 69.6111543333   | 72.4317854949   |

gene\_expression\_table

|                 |                 |
|-----------------|-----------------|
| 11.8956346336   | 15.700500891    |
| 0               | 0.4442351998    |
| 3.1946352464    | 4.2738187868    |
| 11.1310589126   | 32.5746207312   |
| 0.583807363     | 1.4174139698    |
| 27.0822100345   | 27.0054271923   |
| 6103.1161247497 | 7726.8216469254 |
| 2.1284809147    | 0               |
| 0               | 0               |
| 3.9780237502    | 4.1392125404    |
| 0               | 0               |
| 0               | 0               |
| 0               | 0               |
| 12.6666511679   | 4.7211587613    |
| 0               | 0               |
| 9.4397112664    | 6.1843523223    |
| 2.3737036642    | 2.4698856998    |
| 5.0894123027    | 1.4442639143    |
| 1.3997384885    | 1.6991982401    |
| 0.4962652345    | 1.5491214314    |
| 0               | 0               |
| 22.3907668385   | 11.4698026288   |
| 4.0391465549    | 4.849398496     |
| 648.2040075782  | 148.5539569004  |
| 21.4434018423   | 1.5937346099    |
| 9.4214080589    | 13.7244264912   |
| 0.5066661234    | 0               |
| 9.3881003035    | 6.8195219396    |
| 23.104001985    | 25.7573270283   |
| 0               | 1.0461437439    |
| 95.0090454651   | 61.1983013577   |
| 176.6452485664  | 88.6192464503   |
| 1.778238745     | 0.3700585303    |
| 1.1070314065    | 2.0733986076    |
| 8.1755275466    | 8.932138339     |
| 0               | 0               |
| 5.6985551709    | 4.8830843581    |
| 35.2793364707   | 33.6497779671   |
| 0               | 0               |
| 2.1879390004    | 2.0178900354    |
| 0.2471568597    | 0.0734776029    |
| 334.4902706698  | 351.8614194614  |
| 0               | 0               |
| 19.4749753209   | 9.3526604938    |
| 5.7598867311    | 3.8528204666    |
| 0               | 0               |
| 0               | 0               |
| 0               | 0               |
| 0               | 0               |

gene\_expression\_table

|                 |                 |
|-----------------|-----------------|
| 1.4254201159    | 4.4495336298    |
| 47.1250238942   | 85.8104120807   |
| 10.754998129    | 5.8898887756    |
| 0               | 0               |
| 2.9019741532    | 0               |
| 0               | 0               |
| 2.5821889223    | 0.8956062474    |
| 6.548828887     | 2.2713954094    |
| 2.6801994169    | 1.5493336689    |
| 12.1122812791   | 5.3065552367    |
| 1.7127016007    | 3.5641999086    |
| 5.0414722658    | 0               |
| 4094.8434003539 | 1759.4206627165 |
| 3.4761999568    | 2.4661738222    |
| 13.7157091149   | 9.8802464703    |
| 101.5101720279  | 27.8728272888   |
| 44.0150274561   | 5.9340259882    |
| 15.259678812    | 11.6438653385   |
| 0               | 0               |
| 0               | 0               |
| 5.710472569     | 11.883719733    |
| 144.0353210731  | 39.0290640034   |
| 1.9796546942    | 2.8227847299    |
| 0               | 3.5423559868    |
| 3.9860972046    | 4.2814071016    |
| 0               | 0               |
| 363.3707551088  | 273.0682292196  |
| 2.8778592474    | 2.9944695745    |
| 703.2846765681  | 226.1576819231  |
| 0               | 0               |
| 0               | 0               |
| 49.2161446384   | 25.6051868805   |
| 57.5451178081   | 79.8357805206   |
| 17.3465217093   | 11.2808747352   |
| 72.5082578157   | 63.5836565807   |
| 5.9843381961    | 0.6226822478    |
| 266.3184346965  | 178.3140090471  |
| 152.9630101778  | 15.2620178408   |
| 6.1214350096    | 9.5542116444    |
| 185.6380680972  | 243.6788808135  |
| 9.6724673785    | 16.7739899608   |
| 447.1305054283  | 110.3690869667  |
| 1.1785977586    | 4.0878477428    |
| 840.8139910188  | 572.7330909081  |
| 0               | 0               |
| 130.5652684039  | 208.7539558558  |
| 15.7097809962   | 23.6113777334   |
| 4.0901382413    | 1.4186232967    |
| 5.3063482167    | 2.7606802349    |

gene\_expression\_table

|                 |                 |
|-----------------|-----------------|
| 17.7930076397   | 8.9583759844    |
| 0               | 0               |
| 100.0391525584  | 157.8179957603  |
| 91.4365495928   | 30.1854690703   |
| 0               | 0.6452510905    |
| 10.8886963626   | 10.5485316224   |
| 49.4272474263   | 21.7588590132   |
| 159.1832386845  | 34.9501488717   |
| 0               | 0               |
| 75.2193062767   | 24.0019348083   |
| 45.0421898938   | 83.0829251996   |
| 10.2855120199   | 23.5450139625   |
| 296.7763672634  | 76.5828193787   |
| 5.76788958      | 6.0016034042    |
| 0               | 0               |
| 122.8767221994  | 33.147764836    |
| 3892.6471812162 | 2402.3851915484 |
| 158.2915875157  | 114.378842714   |
| 100.5602758009  | 22.7467303626   |
| 1.9148094421    | 0               |
| 1.8887664711    | 1.9652989409    |
| 15.0431499158   | 11.1804968441   |
| 0               | 1.0049746468    |
| 21.4562081757   | 15.1593646667   |
| 0.2720393512    | 0.251610965     |
| 1.9349100643    | 1.6519485243    |
| 0               | 0               |
| 0               | 0               |
| 0.3166306279    | 0               |
| 0               | 0               |
| 3.1863454253    | 1.1051518518    |
| 2.4520185171    | 2.667345395     |
| 0               | 0.4207880158    |
| 3.5503401454    | 0               |
| 6.0655476021    | 9.9929272515    |
| 8.9531374095    | 7.5691824727    |
| 0               | 0               |
| 0               | 0               |
| 0               | 0               |
| 194.0528338902  | 53.179474964    |
| 4.7456653991    | 8.7363888012    |
| 0.2204602007    | 1.376359245     |
| 7.3215988616    | 6.7476094199    |
| 26.8731641853   | 23.4881302757   |
| 0               | 0               |
| 6.6914533369    | 15.9144909589   |
| 1.3757377551    | 2.2903718331    |
| 19.3472804869   | 8.0524914925    |
| 0.2429948465    | 0.1264204765    |

gene\_expression\_table

|                 |                  |
|-----------------|------------------|
| 29.1388799511   | 36.2562833751    |
| 12.2049118021   | 6.8939885445     |
| 0.7713360394    | 0.2675301446     |
| 0               | 0                |
| 0               | 0                |
| 0               | 0                |
| 0               | 0                |
| 0               | 0                |
| 0               | 0                |
| 1.0065486118    | 0.5934891399     |
| 7.5666825857    | 4.533102432      |
| 47.0546536641   | 26.3637766916    |
| 18.4710098279   | 14.6845249299    |
| 14.1991055244   | 14.7744506669    |
| 3.7742177221    | 1.9635741648     |
| 1.6561803021    | 0.8355337809     |
| 600.810521664   | 756.7668857216   |
| 29.9895381777   | 17.7866839847    |
| 5.4349450075    | 10.2228036541    |
| 0.0335430774    | 0.0349022367     |
| 0               | 0                |
| 0               | 0                |
| 0.6862994743    | 2.7136111701     |
| 1.1277305137    | 0.5867129733     |
| 2.2743044183    | 7.0993764443     |
| 3.5174550159    | 1.7853569004     |
| 8.8282822347    | 10.8561848979    |
| 0               | 0.0335756312     |
| 0.4332147308    | 0.5409222144     |
| 0               | 0                |
| 0.9674370308    | 0                |
| 0.7243897663    | 0                |
| 4.0758946898    | 4.2410491925     |
| 4.1944592435    | 4.3644179601     |
| 9415.8226244757 | 17474.4025222791 |
| 7.1454598832    | 8.8647988723     |
| 0.1117483643    | 0                |
| 463.6453572075  | 393.7090218858   |
| 39.0637284917   | 21.6781779096    |
| 0               | 0                |
| 2.9967914749    | 2.375787363      |
| 0               | 0                |
| 0               | 0                |
| 0               | 0.5089098996     |
| 4.8646934592    | 3.0129821088     |
| 5.0715183205    | 10.5540306188    |
| 0.6258059474    | 0.8682179857     |
| 54.8962319128   | 62.0876273111    |
| 3.830548071     | 4.4286235264     |

gene\_expression\_table

|               |                |
|---------------|----------------|
| 2.1860929522  | 0              |
| 0.7205996097  | 0.8435229449   |
| 0.4820906031  | 0.6688331008   |
| 6.3071308946  | 6.5626946776   |
| 0             | 3.0837333373   |
| 0.2263892285  | 0.3140833045   |
| 0.8268050535  | 0.8603070421   |
| 0.7331022266  | 0              |
| 0             | 0.3345875514   |
| 4.5110034603  | 3.7159158881   |
| 96.0734501375 | 24.0303674651  |
| 0             | 27.2638876658  |
| 2.1478541368  | 4.3101349542   |
| 0             | 0              |
| 5.9091285154  | 4.391832368    |
| 0             | 0              |
| 3.382384691   | 3.5194382962   |
| 2.8397229675  | 0.9091655445   |
| 2.2787100765  | 3.3589775683   |
| 7.296228798   | 8.2245265332   |
| 0.3767924159  | 0.3430524783   |
| 22.464057391  | 120.7672004536 |
| 9.2188829662  | 7.8254037533   |
| 0             | 0              |
| 21.5493075547 | 30.3362985415  |
| 7.487866195   | 14.5200999709  |
| 0.1661002265  | 0.2592458657   |
| 43.370785635  | 18.5821843062  |
| 2.3389272212  | 3.931361735    |
| 2.2450438837  | 3.504018973    |
| 0.1349778196  | 0              |
| 6.3286959553  | 3.7629334575   |
| 0             | 0              |
| 5.7363391013  | 3.255695185    |
| 5.9781483033  | 9.8489378061   |
| 0             | 0.7998815645   |
| 38.8406632667 | 8.0828959587   |
| 0.0680556652  | 0.1416265365   |
| 2.0052660502  | 1.3501005692   |
| 1.0484564736  | 1.3091276844   |
| 14.0980670373 | 4.8897727063   |
| 40.9059278438 | 40.0223283016  |
| 1.2306307702  | 1.4405576653   |
| 0             | 0              |
| 34.4736999888 | 28.6964543739  |
| 1.8926276632  | 0              |
| 0.4465574583  | 0.6040474497   |
| 1.0547206693  | 0              |
| 0             | 0              |



gene\_expression\_table

|                |                |
|----------------|----------------|
| 0.6320627252   | 0.5261390324   |
| 0              | 0              |
| 0              | 0              |
| 4.2471747749   | 2.4858391022   |
| 0.2636342816   | 0.5486333883   |
| 1.5327010186   | 1.3494510461   |
| 3.5770809087   | 2.7294839504   |
| 4.9392000517   | 0              |
| 2.5735488378   | 1.3389142815   |
| 9.4887325692   | 9.8732142664   |
| 21.3511679367  | 5.9243502218   |
| 0              | 0.3467411725   |
| 0.9224131117   | 1.0162473049   |
| 0.1946729271   | 0.2025610382   |
| 0              | 0              |
| 6.8114148146   | 7.6620671235   |
| 7.5000389636   | 0.5202626108   |
| 21.9779137144  | 20.4430125644  |
| 0.288675491    | 0.6007451375   |
| 2.667464857    | 3.4694375526   |
| 0.8195947841   | 0.7309753833   |
| 1.2336256706   | 0.8022574723   |
| 1.6075090058   | 4.3010870781   |
| 0.4384263766   | 0              |
| 0              | 0              |
| 98.6623285918  | 52.9510030672  |
| 0.9810969979   | 1.0208508677   |
| 15.6474991311  | 5.4271776386   |
| 9.8890594545   | 11.872802681   |
| 2.4125933657   | 0              |
| 0.0839953154   | 0.4369939505   |
| 0              | 2.3254826995   |
| 2.405556702    | 3.2731923143   |
| 4.1822321519   | 7.6991534513   |
| 0              | 0              |
| 1.4260910166   | 0              |
| 3.8416105829   | 3.3310599473   |
| 1.2101861916   | 2.0987045222   |
| 17.0564744884  | 4.7041830518   |
| 148.2646248997 | 29.7392347398  |
| 11.1705015204  | 10.4983093293  |
| 0.8354851386   | 0.9935301059   |
| 0              | 1.7726265135   |
| 1.3534872817   | 1.0327755806   |
| 5.8248550079   | 5.050730884    |
| 0.2345792283   | 0.3254457807   |
| 1.9730744228   | 6.1590691057   |
| 1.0877667477   | 1.1318428561   |
| 317.4982298038 | 296.4797945484 |

gene\_expression\_table

|                |                |
|----------------|----------------|
| 24.7305508527  | 22.2686205763  |
| 0              | 0.1085714177   |
| 0.4601633758   | 0.5985113889   |
| 0              | 0.1737632283   |
| 24.1807785846  | 4.1934298804   |
| 2.3156392012   | 4.4482494931   |
| 57.0379460624  | 59.349113139   |
| 0              | 0              |
| 27.7305915565  | 20.2759454213  |
| 0.4779335372   | 0              |
| 0              | 1.044788513    |
| 0.822509291    | 3.7086279362   |
| 0              | 0              |
| 1.67552511     | 0              |
| 10.2493081076  | 6.9730130445   |
| 23.1491960695  | 15.7304145199  |
| 0.9338154645   | 0.9716534952   |
| 0.0668374707   | 0.2086371382   |
| 0              | 0              |
| 0.4107478164   | 0.9972462321   |
| 25.3915529126  | 13.7845638069  |
| 0.0651242788   | 0.2032893077   |
| 0              | 0              |
| 4.9642785232   | 5.6819731928   |
| 9.3444096584   | 19.4460868359  |
| 0              | 0.068144451    |
| 0              | 0              |
| 0              | 0              |
| 0              | 0              |
| 0.0163088418   | 0              |
| 0              | 0              |
| 0              | 0              |
| 32.9720793091  | 27.1875524444  |
| 1.2133095869   | 1.6067833957   |
| 11.3316355798  | 28.7400539593  |
| 3.7840376728   | 0.9843415457   |
| 176.0855008425 | 154.8873931968 |
| 0              | 0              |
| 14.1501117216  | 15.4596452265  |
| 7.2853305729   | 7.2646753757   |
| 0.7941189695   | 0.826296524    |
| 0              | 0              |
| 0              | 0              |
| 0              | 0              |
| 1.6157369461   | 2.1985005589   |
| 0.5425244069   | 0.282253698    |
| 0              | 0              |
| 0              | 0              |
| 0              | 4.6554051966   |

gene\_expression\_table

|                 |                 |
|-----------------|-----------------|
| 1.5352274178    | 4.7923036506    |
| 0               | 0               |
| 0               | 0               |
| 0               | 0               |
| 3.5918282693    | 2.4915789931    |
| 0               | 0               |
| 0               | 0               |
| 4644.5026000567 | 6835.2277196205 |
| 0               | 0               |
| 1.8866815629    | 2.4539119407    |
| 0.5120632551    | 0.266405982     |
| 0.111942785     | 0.2329573721    |
| 0               | 1.0594710265    |
| 4.4076413111    | 5.870384801     |
| 55.4620541588   | 102.5944291297  |
| 0.2338298616    | 0.8110153484    |
| 0               | 0               |
| 5.8911485902    | 11.4934815878   |
| 56.7275687794   | 29.7697151886   |
| 0.558852641     | 0               |
| 2.0473072177    | 1.8364342495    |
| 1.6352971615    | 0.1890621224    |
| 6.5585656451    | 7.5825750199    |
| 3.9215405517    | 9.1809914695    |
| 0.0911888862    | 0.3795353723    |
| 131.5435575199  | 185.6232075032  |
| 0.246359023     | 0.4485975293    |
| 0               | 0               |
| 15.1473291088   | 27.1441099439   |
| 0               | 0               |
| 4.7461679142    | 2.0577007352    |
| 341.9311929671  | 132.8268412701  |
| 7.2933548841    | 7.5888802816    |
| 0               | 0.6196411915    |
| 250.3861088     | 354.6126023443  |
| 0               | 0               |
| 8.8080403921    | 9.3999390437    |
| 1.1182265748    | 0.7160227137    |
| 1.8761672521    | 1.6471596407    |
| 5.3720147273    | 5.5896877753    |
| 7.1116068824    | 3.9175241741    |
| 13.6658980813   | 18.282391401    |
| 0.2989083087    | 0.3110200184    |
| 27.7253838097   | 1.6969888976    |
| 1.3406747043    | 2.3714976142    |
| 3369.0955218611 | 2470.3967684151 |
| 0.3211150488    | 0.668253143     |
| 0.4986937962    | 0.7936129532    |
| 0.2124907437    | 0.2211008295    |

gene\_expression\_table

|               |               |
|---------------|---------------|
| 1.2572302206  | 0.5232691831  |
| 1.0943076954  | 2.2772976836  |
| 0             | 0             |
| 34.0244555007 | 24.6282575133 |
| 0.1539467947  | 0             |
| 3.3097846041  | 1.5823308092  |
| 0.2788196633  | 0.0967057949  |
| 0             | 0.4189630337  |
| 1.634710852   | 1.3428545012  |
| 1.337339425   | 0.9276854482  |
| 5.2066820196  | 7.0846268372  |
| 0.6790785075  | 2.8263785746  |
| 7.0787406496  | 5.7643590662  |
| 2.7726252121  | 2.5964743278  |
| 14.2253187581 | 21.8130699772 |
| 39.685943371  | 26.1247821481 |
| 7.6766691835  | 2.6625754686  |
| 0             | 0             |
| 0             | 0             |
| 0             | 2.375970479   |
| 0             | 0             |
| 0             | 0             |
| 2.3287355122  | 0.9692381786  |
| 0.2734106894  | 0             |
| 3.4569586347  | 1.1011328456  |
| 0.1403392696  | 0             |
| 4.8318905656  | 4.3992181468  |
| 3.8655965146  | 4.0222297739  |
| 19.611988235  | 1.9434916561  |
| 0             | 0             |
| 0.0323134954  | 0.0336228322  |
| 0             | 0             |
| 21.6538998523 | 22.5313118889 |
| 13.36307248   | 12.1664740027 |
| 0             | 0             |
| 1.0705971983  | 0.0856905846  |
| 0.9493597616  | 0.6585517629  |
| 4.6259770201  | 2.4067103788  |
| 4.7075103318  | 3.3514395364  |
| 0             | 0             |
| 1.0007997795  | 1.5620280036  |
| 10.4041348726 | 7.3811648882  |
| 1.6856185213  | 0.8184957543  |
| 0.2182828588  | 0.3028368535  |
| 4.5453650275  | 1.9213765926  |
| 0.5670444757  | 0.2950105068  |
| 9.1301031863  | 10.6177066149 |
| 0.8939045928  | 0.2480334513  |
| 2.1881906334  | 1.2259992312  |

gene\_expression\_table

|                |                |
|----------------|----------------|
| 74.1717434451  | 27.1163025648  |
| 0.8234983235   | 0              |
| 13.348059435   | 5.1679703615   |
| 0              | 0              |
| 1.2092436379   | 3.145604919    |
| 34.3117365129  | 11.3597405604  |
| 15.1739460339  | 9.3486265664   |
| 49.4765053496  | 16.3804086219  |
| 12.6276303025  | 2.0214307013   |
| 456.5436443329 | 276.9792992526 |
| 112.7113821427 | 136.8248310362 |
| 0              | 1.6321378535   |
| 5.6170397004   | 2.5570304879   |
| 0              | 0              |
| 0              | 0              |
| 2.3832086628   | 1.5154185684   |
| 1.7343407546   | 0.3609231846   |
| 0              | 0              |
| 0              | 0              |
| 4.1662482595   | 3.7006642811   |
| 0.5557826366   | 0              |
| 0.0252174697   | 0.0262392769   |
| 6.162938822    | 0              |
| 45.1595073047  | 34.105182263   |
| 24.8656445158  | 16.2905307235  |
| 0.3309471548   | 0.1913094848   |
| 36.3062888335  | 92.202499464   |
| 6.9593651882   | 5.6321668548   |
| 0              | 0              |
| 0              | 0              |
| 0.5440964665   | 0.3145239751   |
| 113.7916201231 | 61.2426391174  |
| 19.0235006559  | 6.0243611221   |
| 0.6386367201   | 0              |
| 2.7808608241   | 5.2083734272   |
| 15.019906782   | 9.7678191502   |
| 1.4237638684   | 1.6295999702   |
| 204.0300211996 | 116.1447003275 |
| 8.0904778925   | 10.2890364716  |
| 147.9916141367 | 85.5490039464  |
| 0              | 0.7204517432   |
| 0              | 0              |
| 4.9131984712   | 3.0673682214   |
| 0              | 0.740259245    |
| 1.2137217661   | 0.4857313649   |
| 6.411707978    | 2.9006561762   |
| 4.2107809214   | 8.1786151801   |
| 33.5286687281  | 11.3383543695  |
| 9.5626931377   | 2.4121628372   |

gene\_expression\_table

|                 |                 |
|-----------------|-----------------|
| 40.305046599    | 22.5821075141   |
| 6.7781644568    | 2.7126209358    |
| 1.1338767486    | 4.7192849032    |
| 0               | 0               |
| 14.6566284737   | 9.1503074171    |
| 0               | 4.3787455948    |
| 1.9333214635    | 1.3411061956    |
| 2.443057904     | 0.5084100321    |
| 12.1817153323   | 1.4083684662    |
| 573.7899116755  | 109.1363026444  |
| 1.6281960503    | 0.4235425636    |
| 2.356801879     | 2.9926361379    |
| 16.8584588514   | 10.9634753133   |
| 63.4912531976   | 124.3555898194  |
| 5.0296185822    | 1.6881992908    |
| 98.5656307357   | 52.9339313301   |
| 6.4261396219    | 10.029788425    |
| 8.0074894947    | 2.0829878738    |
| 32.4954331779   | 7.7284896342    |
| 2.3907733192    | 0.9328676303    |
| 21.3167032994   | 14.7869681292   |
| 1.8944564969    | 2.3654634305    |
| 5.6112867977    | 4.6222686255    |
| 0.2066812246    | 0.3584265163    |
| 0               | 0               |
| 3.155349994     | 2.3256029715    |
| 38.1584335005   | 18.467258699    |
| 0.1969902427    | 0.2049722511    |
| 3.5204889671    | 8.791532477     |
| 0               | 0               |
| 13.7433592203   | 10.3279493824   |
| 0.5599095042    | 1.1651938686    |
| 6.4280525805    | 1.3086227129    |
| 2.8070927087    | 0.5841671177    |
| 6431.3531858448 | 4201.9223650577 |
| 3.6091365668    | 0               |
| 1.2814969682    | 2.666845979     |
| 2.5766260397    | 3.6462014156    |
| 1.2541551514    | 0               |
| 34.8388569503   | 15.8993513254   |
| 2.1822568978    | 4.9954994005    |
| 44.5332928881   | 4.7525921764    |
| 29.2890822093   | 24.3806963438   |
| 1.8108869524    | 0.4187252796    |
| 1.6539338674    | 5.6322031525    |
| 15.3425685818   | 10.6428310913   |
| 178.672322382   | 92.9560460001   |
| 5.5695715729    | 5.3494611581    |
| 59.0585227381   | 87.68088897     |

gene\_expression\_table

|                |                |
|----------------|----------------|
| 0              | 0              |
| 12.947278934   | 5.9875112415   |
| 13.7730970191  | 8.9569877346   |
| 0              | 1.9999806869   |
| 34.9862491307  | 24.820831027   |
| 18.0128482674  | 22.4912706767  |
| 0              | 0              |
| 28.016921254   | 11.40736764    |
| 4.53766823     | 4.4592262831   |
| 5.51938046     | 5.3328086875   |
| 13.2024879925  | 15.2168681089  |
| 0.5587736709   | 0.7994457312   |
| 2.2157039771   | 5.6196169927   |
| 0.2229316483   | 0.5799119942   |
| 0.0522386095   | 0              |
| 321.7961216125 | 284.2940727454 |
| 4.1907478859   | 3.7145478902   |
| 0.0721779375   | 0              |
| 5.7589862601   | 1.9974464411   |
| 52.7360334638  | 25.3259482309  |
| 0              | 0              |
| 3.2574883622   | 11.6748796581  |
| 8.8303820233   | 10.9109726297  |
| 0              | 0              |
| 4.2100008188   | 2.555343745    |
| 0.8902141628   | 0.3473570538   |
| 0              | 0              |
| 57.6926612408  | 16.6041413687  |
| 0.2014188089   | 0              |
| 0.7689188762   | 0.4000376638   |
| 0.3255219867   | 0.725811595    |
| 16.2848534021  | 25.802176103   |
| 0              | 0              |
| 463.0410514802 | 658.2384337651 |
| 2.6753907537   | 1.7581876387   |
| 1.6739195561   | 3.9811347849   |
| 10.2841367393  | 4.4586866946   |
| 17.8724159769  | 28.7947401025  |
| 69.2434345204  | 44.8305920178  |
| 1.97317279     | 1.9450661573   |
| 50.7358479088  | 36.2545101482  |
| 1.4070066341   | 1.830022855    |
| 0              | 0.7494740904   |
| 0              | 0              |
| 0              | 0.0634410423   |
| 1.2421735713   | 0.7180590088   |
| 0              | 0              |
| 1.0887024254   | 0.1888027412   |
| 866.6280307743 | 348.8120093854 |

gene\_expression\_table

|                |                |
|----------------|----------------|
| 0.7237291138   | 1.1295817264   |
| 0              | 2.2343705374   |
| 4.7734486479   | 5.4635546994   |
| 613.4015487098 | 303.1718216191 |
| 490.6488747051 | 337.0895898897 |
| 11.5226531461  | 7.9930326205   |
| 2.8508402317   | 0              |
| 2.4603384442   | 2.4774492631   |
| 5.5290599119   | 5.7530964019   |
| 0              | 0              |
| 2.8737000473   | 1.1213031916   |
| 0              | 22.8757685428  |
| 12.7356412492  | 6.6258435443   |
| 0              | 0              |
| 33.7567587601  | 5.8540960687   |
| 167.0230144881 | 594.2522634586 |
| 275.8153677586 | 643.4161038994 |
| 110.8236052989 | 264.7954725216 |
| 10.328222234   | 134.3339987252 |
| 0              | 0              |
| 1.4537084289   | 2.1428676047   |
| 30.4182397788  | 43.1601562584  |
| 0.7136949419   | 0.5940909837   |
| 0              | 0              |
| 2.3190044137   | 3.2172933943   |
| 0.4984120034   | 0.2828768542   |
| 0              | 0              |
| 0              | 0              |
| 0              | 0              |
| 1.0274731225   | 11.760167588   |
| 0.8159076102   | 0.6791744291   |
| 11.3771881034  | 17.4457531999  |
| 2.5980335484   | 5.4066107793   |
| 2.1477355014   | 3.5117678335   |
| 0              | 0              |
| 231.0865915949 | 295.2896919794 |
| 28.4110868087  | 16.7666769411  |
| 0              | 0              |
| 0.1152062674   | 0              |
| 224.9702398744 | 143.2466521808 |
| 4.2859753717   | 4.0880054462   |
| 12.5093856434  | 6.5081318236   |
| 0.3364679893   | 0.3501016103   |
| 10.6111160278  | 10.6849127383  |
| 25.1213447061  | 26.13925697    |
| 0.2624370173   | 0.4096063754   |
| 3.2058731421   | 2.7003889067   |
| 0              | 0              |
| 3.1981166962   | 6.3780989425   |



gene\_expression\_table

|                 |                 |
|-----------------|-----------------|
| 13.9382138664   | 11.934750317    |
| 2.582873353     | 1.1684916982    |
| 0.2525855853    | 0               |
| 4.1668628232    | 4.6066847965    |
| 0.6273490532    | 1.3871343829    |
| 0.3073080018    | 0.5232437435    |
| 2.7642548145    | 0.2876261911    |
| 0.3216791154    | 0               |
| 1.5160650086    | 0               |
| 24.9589104555   | 15.4716328846   |
| 7.305407144     | 3.6354621681    |
| 2.2419731703    | 0.4665635021    |
| 0               | 0.1399084418    |
| 1.3493009674    | 1.4975726872    |
| 0               | 0               |
| 2.1872406582    | 0.7586224157    |
| 7.6308427428    | 3.868226119     |
| 2.0317986259    | 1.2919663364    |
| 314.0969197302  | 344.9809618361  |
| 0.1147886952    | 0.0955519296    |
| 24.2446407384   | 0.6818115978    |
| 0               | 0.0628093228    |
| 8.5701139494    | 8.9173733893    |
| 186.778892925   | 116.382298528   |
| 271.8036954896  | 75.4179016547   |
| 0               | 0               |
| 6.39686526      | 2.349199434     |
| 9.6335045026    | 7.4462903038    |
| 8.4694991739    | 8.8126817216    |
| 813.99452656    | 800.5677124964  |
| 1.2475049214    | 0               |
| 3.6286165787    | 2.4026847438    |
| 0               | 0               |
| 5.0497046958    | 2.3352523559    |
| 1.2638090835    | 0               |
| 12.6860470498   | 6.0923461576    |
| 0               | 12.1215187385   |
| 4.7708521542    | 4.9641662054    |
| 152.0187005357  | 81.0182408865   |
| 0               | 0               |
| 62.521897556    | 20.8176874681   |
| 55.4411183616   | 110.5811826409  |
| 0               | 0               |
| 42.0177034877   | 17.107925126    |
| 155.2130962193  | 145.7459801344  |
| 4.0625911941    | 1.014529594     |
| 14.8407379853   | 7.3146704007    |
| 3287.7112847496 | 2472.1555354175 |
| 218.91984435    | 150.2273844148  |

gene\_expression\_table

|                 |                 |
|-----------------|-----------------|
| 45.8170751528   | 24.7902587948   |
| 10.1335278654   | 11.5985502043   |
| 6.9906371064    | 5.6827315901    |
| 0               | 0               |
| 24.3215978509   | 20.8411448984   |
| 0.7830209094    | 0.581963409     |
| 0.9758053297    | 1.7486493468    |
| 0.3622342479    | 0.5653678694    |
| 8.1599150812    | 6.3679150038    |
| 0.3418236498    | 0               |
| 8.1585168778    | 0.848909848     |
| 0.0700083877    | 0.0728451146    |
| 20.3288643789   | 5.7999026738    |
| 21.6853928175   | 11.9456899111   |
| 0               | 0               |
| 3.6868554369    | 2.7279972555    |
| 0.1663093665    | 0               |
| 188.0717627702  | 222.9407042843  |
| 2.9281065802    | 1.0155843066    |
| 1.8098598894    | 1.3810097246    |
| 0               | 0               |
| 0               | 0               |
| 0               | 0.3155622951    |
| 146.0098122772  | 55.7062377657   |
| 18.7210993367   | 19.9666667071   |
| 6.8691618197    | 4.204411172     |
| 276.2759578394  | 104.2785541734  |
| 2.9997455732    | 7.2830209941    |
| 35.7344728381   | 32.053816466    |
| 5089.1260638077 | 3092.3670605887 |
| 0               | 0               |
| 0               | 0.8530863207    |
| 0               | 0               |
| 0               | 0               |
| 0               | 0               |
| 0               | 0               |
| 1.5409127881    | 4.8100508719    |
| 3.5783183901    | 2.6063178349    |
| 3.816900269     | 3.9715603654    |
| 2.4317213738    | 2.5302542763    |
| 0               | 0               |
| 0               | 2.2713954094    |
| 4.2671875488    | 10.7830834928   |
| 0.5954508986    | 0.9293676892    |
| 5.3866200907    | 2.9425645963    |
| 56.2394165755   | 85.7732921933   |
| 11.3913437138   | 4.9387161935    |
| 10.0613840605   | 12.6501256348   |
| 0.2147775045    | 1.1174012473    |

gene\_expression\_table

|                 |                 |
|-----------------|-----------------|
| 23.2275232763   | 36.2530473666   |
| 3.0914254625    | 4.0208618166    |
| 24.995094498    | 12.5395189361   |
| 113.9242530734  | 35.1230941749   |
| 1.9911048743    | 1.5002574353    |
| 0               | 0               |
| 0               | 0               |
| 0.0656789419    | 0.2050207217    |
| 27.7334811104   | 11.7833716364   |
| 23.1597566316   | 6.1093991935    |
| 0               | 0               |
| 288.5869841315  | 101.0034327065  |
| 0               | 0               |
| 0               | 0               |
| 17.0916749767   | 9.7389811791    |
| 14.8074238842   | 2.4327502065    |
| 25.6641477021   | 19.5829731119   |
| 4.9267070435    | 0               |
| 32.881978245    | 27.3714799612   |
| 68.2322365548   | 42.5981965331   |
| 0               | 0               |
| 30.0371062988   | 12.5016817271   |
| 0               | 0               |
| 0               | 0               |
| 7.3111040741    | 0.894982196     |
| 178.9210210418  | 138.8651555527  |
| 159.3585328378  | 188.269922158   |
| 40.6506446041   | 17.3723112243   |
| 0.1430817348    | 0.744396902     |
| 33.1583671214   | 19.8596521484   |
| 11.8916933065   | 2.2497350056    |
| 0.6012514774    | 3.4408774216    |
| 0.7479616954    | 0.5188459771    |
| 14.610868626    | 5.1912335773    |
| 2.0371643677    | 0.605631398     |
| 1.6689621006    | 3.4731762755    |
| 10.0695263298   | 5.2387708417    |
| 0               | 0               |
| 1.5394237862    | 1.1802743876    |
| 0               | 0               |
| 0               | 0               |
| 33.5708835104   | 20.9587017189   |
| 5.109414174     | 3.141536684     |
| 38.2702932307   | 73.0051638594   |
| 3.7809612194    | 5.9012476082    |
| 112.8643113311  | 152.135011133   |
| 0               | 0               |
| 0.1951356742    | 0.8121701431    |
| 1474.9116853359 | 1405.1243622518 |

gene\_expression\_table

|               |               |
|---------------|---------------|
| 92.0209837219 | 47.8748285229 |
| 0.8051691827  | 0             |
| 0             | 0             |
| 5.6374190618  | 2.3463384978  |
| 0             | 2.3793938327  |
| 0             | 0             |
| 34.6417090129 | 10.0126068573 |
| 2.2449934763  | 4.6719203975  |
| 0             | 0             |
| 0             | 0.1004695144  |
| 0             | 0             |
| 1.4192155411  | 1.8048823145  |
| 7.2868702956  | 5.3917389787  |
| 2.1985470066  | 2.7035647679  |
| 46.0641346948 | 58.9915630209 |
| 2.6249561433  | 2.0758023511  |
| 20.5362008637 | 1.3495783543  |
| 0             | 0             |
| 0             | 0             |
| 0             | 0             |
| 0             | 0             |
| 1.5159270968  | 5.520732643   |
| 8.6617738383  | 4.8530177877  |
| 0             | 0             |
| 0             | 0             |
| 6.7646785207  | 7.4528280522  |
| 14.507039614  | 5.2051248928  |
| 0.1240169124  | 0.4516471919  |
| 37.3218493603 | 38.8341238273 |
| 0             | 0             |
| 1.5942396034  | 0             |
| 0             | 0             |
| 1.488208486   | 3.87127605    |
| 2.6407711868  | 0             |
| 0             | 0             |
| 0.3253758787  | 0.4514133992  |
| 7.6618788849  | 3.9861684036  |
| 4.2414320628  | 2.2066470547  |
| 1.3739375411  | 3.3697932025  |
| 47.1980148149 | 61.3880871105 |
| 6.0071664921  | 11.3981087621 |
| 1.2855336202  | 2.7867150123  |
| 13.2049021986 | 34.3499060132 |
| 0             | 0             |
| 0.8029384748  | 2.9241568789  |
| 8.4929516221  | 7.3642370489  |
| 23.6161769454 | 10.5313286094 |
| 9.6374067292  | 8.3815389531  |
| 2.7007595335  | 2.8101938127  |

gene\_expression\_table

|                |                |
|----------------|----------------|
| 0.9082508488   | 0              |
| 1.1645955955   | 1.2117847947   |
| 13.4621020708  | 43.5791501259  |
| 1.0785442091   | 0.1402808277   |
| 0              | 0              |
| 0              | 0              |
| 9.3773119648   | 1.7218727505   |
| 0.0493302189   | 0              |
| 1.4854926426   | 1.2880704426   |
| 127.7946994121 | 79.6195861718  |
| 5.8812277119   | 3.9910004194   |
| 5.7109618145   | 10.1869181761  |
| 4.0132421189   | 0              |
| 0              | 0              |
| 1.2972840492   | 0.33746244     |
| 4.0745817374   | 3.7686071462   |
| 90.0080783268  | 71.5185080358  |
| 23.9009381197  | 32.9479945511  |
| 0              | 0              |
| 0.9893338424   | 0.9007437841   |
| 1.2853408221   | 0.4458075319   |
| 0              | 0              |
| 9.0770216549   | 4.2931004099   |
| 326.2208531019 | 167.1350681054 |
| 96.3477168123  | 34.6549116026  |
| 92.4379177093  | 74.108586897   |
| 0.7540195726   | 0.7845723069   |
| 0              | 0              |
| 17.1539248519  | 4.6971049289   |
| 145.0716403706 | 118.6035058512 |
| 2.2547133777   | 4.6921478976   |
| 14.5077654451  | 3.7739043577   |
| 3.0473779966   | 1.5854285961   |
| 3.9447476801   | 0              |
| 29.3641262794  | 7.4070194598   |
| 0              | 1.3443814976   |
| 3.0665562399   | 1.2763250137   |
| 2.0936725391   | 1.0892538825   |
| 0.5524660713   | 0              |
| 0              | 0              |
| 9.7039793029   | 10.0971827582  |
| 20.0295511714  | 32.9984794224  |
| 0              | 1.1354002459   |
| 5.3463543711   | 2.7814938331   |
| 226.2393734283 | 187.2552111819 |
| 215.2486489064 | 82.8126161337  |
| 17.3348681428  | 27.0559107141  |
| 0              | 5.4233583722   |
| 39.765504013   | 2.9554853512   |

gene\_expression\_table

|                 |                |
|-----------------|----------------|
| 9.2324579361    | 0              |
| 55.2044900294   | 57.4413658049  |
| 0               | 4.0306444806   |
| 0               | 0              |
| 2.1307488268    | 2.2170863771   |
| 1.5957662142    | 0.8302131837   |
| 0               | 0.4114473775   |
| 0               | 0              |
| 30.5181156112   | 17.6415022438  |
| 6.2519551959    | 3.2526416349   |
| 0.5864921016    | 1.2205133072   |
| 81.1840455198   | 12.995939708   |
| 374.7658150204  | 285.9642550374 |
| 0               | 0              |
| 35.259292964    | 55.7113968163  |
| 0               | 0.5977191505   |
| 10.1613332772   | 0              |
| 25.9999297846   | 7.1193268827   |
| 119.2030513203  | 124.0331370204 |
| 0               | 1.8616955718   |
| 2.8163911737    | 5.8610216513   |
| 137.2198345573  | 84.6103448878  |
| 5.9609520499    | 2.3259332737   |
| 248.5877555323  | 172.4403237558 |
| 7.8947012738    | 5.8675665117   |
| 1530.6560873055 | 383.2007194574 |
| 0               | 0              |
| 18.6964949348   | 13.200978425   |
| 12.8242935722   | 3.6392540693   |
| 5.4397214214    | 2.8300689661   |
| 65.7140116129   | 18.9935364635  |
| 16.7315126251   | 0              |
| 0               | 0              |
| 0               | 0              |
| 31.883775334    | 46.9989083933  |
| 2.736385316     | 9.9654210089   |
| 2.4249980464    | 10.0930340835  |
| 0               | 0              |
| 0               | 0              |
| 49.6223013536   | 73.7614112449  |
| 87.3298310012   | 136.3026295203 |
| 17.3357268572   | 10.3075241822  |
| 66.9138354883   | 82.2842939298  |
| 11.823048297    | 0              |
| 0               | 0              |
| 1.2461367363    | 1.407769679    |
| 0               | 0              |
| 1.9870728641    | 1.0337943454   |
| 4.9456334225    | 1.1435621286   |

gene\_expression\_table

|                |               |
|----------------|---------------|
| 17.8865990196  | 8.9334531455  |
| 15.4034306871  | 14.0241280056 |
| 0              | 0             |
| 124.2782727595 | 47.0232747266 |
| 0              | 0             |
| 0              | 0             |
| 0              | 1.4973086658  |
| 4.1526505294   | 15.123203076  |
| 0              | 0.4672172165  |
| 14.7676571897  | 0             |
| 0              | 6.0134671599  |
| 0.9472964522   | 0.7228325354  |
| 0.6080116719   | 0.421765462   |
| 0              | 23.2037522248 |
| 23.9615415858  | 18.6993441306 |
| 1.000175247    | 4.8566100986  |
| 14.8740577595  | 19.2125195284 |
| 8.6137605816   | 3.1633371441  |
| 290.0682309607 | 301.821742292 |
| 0              | 0             |
| 0              | 0.0334918434  |
| 0.8158217325   | 1.4855376882  |
| 0.143684259    | 0.2093088463  |
| 2.3354710103   | 5.9016808169  |
| 1.7494649372   | 2.3664588148  |
| 5.3209110243   | 0.2636434933  |
| 3.7448509156   | 1.9482957927  |
| 0.0611636487   | 0.5727778969  |
| 0              | 0             |
| 35.9021613815  | 45.9178689754 |
| 18.2452480655  | 11.1129027273 |
| 3.7668595331   | 7.8389839762  |
| 8.0079704827   | 5.9517514092  |
| 0.9963112468   | 0.8885842244  |
| 1.489283557    | 11.3639463856 |
| 0.4134323834   | 0.669176025   |
| 0              | 5.6380531801  |
| 3.4319873497   | 4.7614011273  |
| 2.3069961341   | 2.4004751928  |
| 0              | 0             |
| 16.2762810133  | 12.0969949459 |
| 25.4742450628  | 10.9483191065 |
| 0              | 0             |
| 0.2886142462   | 1.5015442116  |
| 34.9683128122  | 25.0148404079 |
| 22.846084219   | 20.37583144   |
| 0.1296297269   | 0.289033499   |
| 0.0346962036   | 0             |
| 0.6066600135   | 1.6412285905  |

gene\_expression\_table

|                |                |
|----------------|----------------|
| 5.5486969727   | 1.603758098    |
| 1.536756416    | 3.1980510062   |
| 3.5291373517   | 1.8360686738   |
| 0.6901535883   | 1.2926132725   |
| 1.1932132404   | 1.9510260335   |
| 0              | 0.3857685312   |
| 3.7957189779   | 1.0771420397   |
| 6.4601664225   | 3.6665079147   |
| 0.1204536845   | 0.1253344457   |
| 0              | 0              |
| 0              | 0              |
| 42.4777046833  | 23.3994141842  |
| 8.0301585711   | 2.0888847796   |
| 0.0539747191   | 0              |
| 3.8576243675   | 4.3788377421   |
| 0              | 0              |
| 6.9591499113   | 11.2639852653  |
| 0              | 0              |
| 0.2481880494   | 0.5164891669   |
| 1.5487821869   | 1.1280769892   |
| 2.3361725917   | 2.4308338752   |
| 46.9141789753  | 52.301928078   |
| 79.4971333313  | 93.0581353602  |
| 1.3619525497   | 2.5587225018   |
| 8.8057047473   | 1.7452400539   |
| 7.0955405665   | 1.4766101129   |
| 26.3441973853  | 11.7478540349  |
| 115.8603933342 | 482.2201405918 |
| 3.1807502242   | 0              |
| 0              | 0              |
| 0              | 0              |
| 12.694223923   | 23.3690465707  |
| 15.1404481295  | 0              |
| 5.96636025     | 10.7231095741  |
| 563.3253748543 | 552.006484371  |
| 0              | 3.0755290095   |
| 20.312757892   | 21.1358271032  |
| 9.4053254129   | 7.2110518182   |
| 2.6685754553   | 1.3883528208   |
| 0              | 0              |
| 0.0812122271   | 0.2535087948   |
| 0.6175843228   | 0.6426087259   |
| 0              | 0              |
| 1.2608969007   | 1.4312598666   |
| 1.6360686817   | 1.7023618836   |
| 8.0393591387   | 4.7053757764   |
| 2.8109926443   | 1.8612958947   |
| 8.1717190088   | 2.1257088897   |
| 0              | 0              |



gene\_expression\_table

|               |               |
|---------------|---------------|
| 1.4051084801  | 0             |
| 0             | 0             |
| 0.2050761019  | 0.6401572433  |
| 0             | 0             |
| 2.0693637867  | 2.3775071543  |
| 7.6882541511  | 4.6152581505  |
| 0             | 0             |
| 5.2690445514  | 10.0318913394 |
| 0.2870747477  | 0.6827587739  |
| 0             | 0             |
| 8.6091306446  | 2.2394927584  |
| 0             | 0             |
| 1.5132199202  | 0.5248451043  |
| 0             | 0             |
| 0.2212886793  | 0.1151276279  |
| 2.3344512801  | 0.6624662226  |
| 0.9155360166  | 0.9526333675  |
| 1.2020475763  | 5.0030172916  |
| 1.1234577993  | 0.8182860718  |
| 3.4855476103  | 3.4358981286  |
| 46.6225879776 | 39.804493671  |
| 0             | 0.7383679337  |
| 18.0772407716 | 18.8097272405 |
| 19.7206262963 | 15.0477817924 |
| 0             | 0             |
| 0             | 0             |
| 6.1603008856  | 7.4969767762  |
| 3.6705271594  | 4.0920602618  |
| 0             | 0             |
| 0             | 0             |
| 2.1287244836  | 3.8762150138  |
| 0             | 0             |
| 0             | 0             |
| 0.1109123898  | 0.2308130789  |
| 11.075825644  | 5.2384618457  |
| 0.5722434138  | 0.5954306116  |
| 1.5019605954  | 1.5628197623  |
| 15.6420384459 | 10.015908286  |
| 35.3335490209 | 63.5036273233 |
| 0             | 0             |
| 2.2340136862  | 1.0420331595  |
| 2.9601088191  | 2.2205025208  |
| 2.5010635712  | 0.4337343678  |
| 0.3615034616  | 0             |
| 0.9441558377  | 0.7368096439  |
| 0             | 0             |
| 8.7939770842  | 23.5293619297 |
| 11.2664532663 | 4.6891871516  |
| 76.9186215563 | 15.6590902066 |

gene\_expression\_table

|               |               |
|---------------|---------------|
| 0.648951452   | 1.1816819795  |
| 62.3434255709 | 17.6917008275 |
| 0             | 0             |
| 0.641149079   | 0.8339104021  |
| 5.5027693087  | 4.5805924067  |
| 0             | 0             |
| 128.610109853 | 71.1815786348 |
| 0             | 1.2893986136  |
| 16.9579592699 | 5.2935277975  |
| 0.2772094813  | 0.1442209792  |
| 0             | 0             |
| 1.0127985034  | 7.3768583863  |
| 0             | 0             |
| 1.5645295568  | 0             |
| 0             | 0             |
| 0             | 0             |
| 93.5391633725 | 97.3293530564 |
| 28.2276643548 | 16.9108314626 |
| 0             | 0             |
| 0             | 0             |
| 37.3924904441 | 12.9692090916 |
| 75.4584821751 | 90.7296531378 |
| 5.5302831553  | 0             |
| 0             | 0             |
| 0.1492908092  | 0.9320402717  |
| 4.2594448687  | 2.7274072559  |
| 0.1300281929  | 0.0901979409  |
| 0.00723       | 0.0376141071  |
| 4.8569224373  | 5.7275539126  |
| 4.3121674127  | 3.589516514   |
| 23.400753469  | 22.3198687182 |
| 3.9420415798  | 0.8203544758  |
| 0.707235351   | 0             |
| 1.471434702   | 0.9186341792  |
| 5.9541511781  | 3.3793157934  |
| 6.2640971963  | 6.5179172618  |
| 0.7301343575  | 0             |
| 6.1929206865  | 3.5148309234  |
| 3.993111799   | 0.6924853257  |
| 1.6977827492  | 2.6498648905  |
| 0             | 1.4272641827  |
| 0             | 0.2993548884  |
| 2.2938178355  | 1.193381456   |
| 10.7568981246 | 15.6698719195 |
| 0.0375189098  | 0             |
| 71.6201932894 | 95.3884548348 |
| 6.0394566928  | 4.488695976   |
| 0             | 0             |
| 2.0998723002  | 0             |

gene\_expression\_table

|               |                |
|---------------|----------------|
| 4.315014649   | 2.2449291242   |
| 0             | 0              |
| 0             | 0              |
| 3.6401456039  | 3.7876436338   |
| 2.7456275763  | 0              |
| 0             | 0              |
| 0             | 0              |
| 21.0472773214 | 6.7384951153   |
| 3.442918563   | 0.8956062474   |
| 0             | 0              |
| 12.0350890043 | 8.3484990638   |
| 8.1885389371  | 7.5736329135   |
| 86.0006813607 | 40.6751877913  |
| 47.6325463544 | 70.803726237   |
| 9.9522323672  | 7.1009108509   |
| 0             | 0              |
| 18.7645053046 | 3.5499708374   |
| 28.9178817353 | 13.6771040822  |
| 5.6322697969  | 8.5653291013   |
| 6.7994668177  | 2.3583266539   |
| 0             | 1.5892550918   |
| 0             | 0              |
| 25.9645219569 | 8.0406546452   |
| 0.3113731384  | 0.3779882407   |
| 0             | 0              |
| 1.0342751872  | 1.0761838274   |
| 1.4912727697  | 1.2068768972   |
| 0.5617023923  | 1.1689249397   |
| 0.2141764358  | 0              |
| 0             | 0              |
| 0.8373603062  | 2.6138699752   |
| 128.394888536 | 189.2630198668 |
| 0             | 0              |
| 1.8246963225  | 3.4175388271   |
| 0             | 0              |
| 2.62793102    | 1.8229428675   |
| 1.0202824124  | 0.4899803391   |
| 9.9447660718  | 2.217369892    |
| 0             | 0              |
| 4.216585956   | 1.5954331792   |
| 10.5660887576 | 5.6048988816   |
| 0.9057263686  | 0.87629106     |
| 23.0751914884 | 11.7697029414  |
| 20.4440285055 | 17.228899539   |
| 0.6233072412  | 0.4864226519   |
| 1.2598050425  | 0.3575051212   |
| 4.384263766   | 0              |
| 6.3229881607  | 5.11715126     |
| 4.4342393227  | 3.2743904983   |

gene\_expression\_table

|               |                |
|---------------|----------------|
| 3.9668142287  | 0              |
| 14.0707060351 | 12.9515197862  |
| 4.0836689065  | 4.8929472703   |
| 41.8615739603 | 47.3870541321  |
| 0.497876389   | 0.8634170811   |
| 0.008091      | 0              |
| 0.5510912663  | 0.8601320745   |
| 10.3473640462 | 6.8514964846   |
| 2.2419731703  | 27.9938101258  |
| 0             | 12.537839881   |
| 6.752263604   | 0              |
| 0             | 0              |
| 2.475061128   | 0              |
| 0.4850419587  | 0.7570436544   |
| 3.8174948399  | 0.7944358056   |
| 2.0025892595  | 1.08354158     |
| 5.4144475192  | 13.5212158467  |
| 0.7337413404  | 2.1377227325   |
| 1.0674786152  | 0.4165247446   |
| 0             | 0              |
| 0             | 0.3556232194   |
| 0             | 0              |
| 0             | 0              |
| 4.8922577649  | 0.694157884    |
| 0             | 0              |
| 6.1075999907  | 3.1775394091   |
| 0             | 0              |
| 0             | 0.2087024283   |
| 18.8470782341 | 16.669144619   |
| 72.012411976  | 116.9547660758 |
| 46.8197695153 | 81.8714535142  |
| 0             | 0              |
| 1.3887155479  | 0              |
| 4.9613226278  | 1.0324709015   |
| 0             | 0              |
| 0             | 0              |
| 8.119514252   | 4.4727434868   |
| 51.8773049496 | 48.9966532936  |
| 2.308087844   | 4.0026852311   |
| 0.1427520308  | 0              |
| 0             | 0              |
| 0.249840131   | 0.2599636071   |
| 0.1056151152  | 0.1098946203   |
| 0.7308388113  | 1.1406783981   |
| 6.6853621061  | 7.6033449341   |
| 57.484113968  | 124.460122175  |
| 2.502612915   | 1.3020091649   |
| 0             | 0.0929571962   |
| 0             | 0.0980274613   |

gene\_expression\_table

|               |               |
|---------------|---------------|
| 26.239686848  | 32.2670803351 |
| 61.2068556853 | 59.4411497983 |
| 0.5764597463  | 0             |
| 0             | 0             |
| 79.1094925109 | 25.052389657  |
| 5.5601667184  | 6.3839598902  |
| 0             | 0             |
| 0             | 0             |
| 0             | 0             |
| 12.0591048168 | 4.5628136453  |
| 14.3495291974 | 24.8849491324 |
| 76.1712946527 | 83.6609493534 |
| 2.4721238058  | 2.2048232635  |
| 1.3188181841  | 0             |
| 21.9921960733 | 42.9062171448 |
| 0             | 0             |
| 7.4750317315  | 2.3333755925  |
| 0.8291086587  | 1.3803263823  |
| 10.9254484853 | 8.5261092353  |
| 43.2060839372 | 8.0922215711  |
| 19.0743074108 | 6.6157316122  |
| 6.3123433995  | 6.5681183922  |
| 5.471535269   | 1.7791377722  |
| 0             | 0             |
| 0.1462800287  | 0             |
| 0             | 0             |
| 5.0819061279  | 1.5863472087  |
| 5.4353967015  | 5.302160602   |
| 2.2790736563  | 0             |
| 2.929470621   | 6.0963444628  |
| 0             | 0             |
| 10.8895142069 | 8.4980664887  |
| 18.3172055656 | 8.4708512728  |
| 0.6211581663  | 0             |
| 3.4985136266  | 3.6402727548  |
| 30.3518365261 | 42.3566159832 |
| 7.8513953237  | 0             |
| 0             | 1.3455290258  |
| 3.8346418553  | 2.3940125025  |
| 1.082144119   | 1.6514555193  |
| 5.7633015994  | 5.9968295194  |
| 9.795655357   | 11.8913357607 |
| 12.0070968873 | 6.5755906543  |
| 9.8522004629  | 11.7464070766 |
| 14.9373825614 | 42.5983536652 |
| 0             | 1.8669070365  |
| 5.9026559385  | 7.4665390036  |
| 0             | 0             |
| 8.1954916195  | 1.3119340664  |

gene\_expression\_table

|               |                |
|---------------|----------------|
| 4.8446840829  | 3.165272659    |
| 0             | 0              |
| 21.8816853158 | 58.6722277266  |
| 0.6641725167  | 0.1727711662   |
| 25.8411658206 | 24.6842905868  |
| 7.7484265567  | 2.3712915808   |
| 18.1423067186 | 17.6595309608  |
| 2.8070704574  | 2.7489999394   |
| 0             | 0              |
| 38.3225153638 | 105.2030157978 |
| 0             | 0              |
| 4.4678886982  | 0.6641323894   |
| 1.0876868751  | 0.7073498419   |
| 0.6682253882  | 1.2912746934   |
| 0             | 0.3536810528   |
| 15.0734007119 | 2.9407822752   |
| 98.6166662847 | 155.1909501466 |
| 33.879918806  | 43.0411200284  |
| 1.9248728356  | 1.0014341643   |
| 8.5325023605  | 9.5123976276   |
| 5.0164318406  | 6.3071335554   |
| 19.7000662786 | 20.1508803666  |
| 6.5996620187  | 2.2890263697   |
| 19.5859540304 | 10.1897866415  |
| 0             | 0              |
| 2.0163556709  | 1.3575669616   |
| 0.0294298634  | 0              |
| 0.8060698139  | 0.8387316144   |
| 12.4254404682 | 0              |
| 33.1238055547 | 19.530719767   |
| 0             | 0              |
| 0             | 0              |
| 0             | 0              |
| 93.643193114  | 69.0182986286  |
| 14.1338433936 | 9.804362751    |
| 29.599620914  | 24.0617125825  |
| 28.6564094884 | 23.191437054   |
| 91.1387731125 | 68.9685086726  |
| 8.2152263123  | 7.2658899049   |
| 25.6687309949 | 27.8700764352  |
| 18.5077707144 | 7.9005957651   |
| 5.2519970295  | 47.3616605149  |
| 32.3101603981 | 12.9305239041  |
| 12.2553749936 | 13.2242553672  |
| 8.2260402672  | 5.7062386032   |
| 23.7839009152 | 16.4984134686  |
| 3.7297990114  | 4.3660460035   |
| 0             | 0              |
| 0.577658685   | 2.4042612344   |

gene\_expression\_table

|                 |                 |
|-----------------|-----------------|
| 12.9479818471   | 2.916755314     |
| 13.9868981129   | 16.7009036969   |
| 34.0011968036   | 29.135580386    |
| 0.9234504364    | 0.9608684781    |
| 0.0939437427    | 0.4887516293    |
| 0               | 0               |
| 0               | 0               |
| 0               | 0               |
| 35.9097805613   | 20.3808208693   |
| 15.7798622952   | 3.2838518822    |
| 16.3748233954   | 7.7783672334    |
| 0.1368540973    | 0.3559985003    |
| 5.9833029448    | 2.5468957959    |
| 8.2235595554    | 2.8522588917    |
| 0               | 0.525338036     |
| 4.0743382224    | 1.6957718629    |
| 6.9931122848    | 4.1579839471    |
| 0               | 0               |
| 137.3774777001  | 87.2200603599   |
| 3.7105447555    | 0.9652238365    |
| 23.9211324637   | 5.8565676114    |
| 5.0058836211    | 7.8130816561    |
| 5.2484682768    | 6.5533622945    |
| 2.6184535583    | 3.3732558656    |
| 35.0357533952   | 23.5196101125   |
| 0               | 0.5843246017    |
| 4.007258831     | 1.6678528885    |
| 0.6313353111    | 0.9853753525    |
| 0               | 0               |
| 2.4942185213    | 1.9464628475    |
| 184.6671527086  | 83.0396257806   |
| 23.7275805149   | 18.648087845    |
| 0.0187890451    | 0               |
| 0               | 0               |
| 1.837735617     | 4.8867341662    |
| 0               | 0               |
| 0               | 0               |
| 4.5279773105    | 6.5960301649    |
| 8.9794554709    | 0.6673786681    |
| 3.7823964394    | 1.7642606831    |
| 0               | 0               |
| 8.6448493044    | 4.0323027963    |
| 24.5547447326   | 21.1875548287   |
| 117.7355233378  | 50.8270176372   |
| 0               | 0               |
| 5.2882082945    | 5.5024855213    |
| 13.7791146931   | 2.6068076154    |
| 6.7820920181    | 5.132291737     |
| 3430.7911754591 | 4853.6363541645 |

gene\_expression\_table

|                 |                 |
|-----------------|-----------------|
| 1.9831317449    | 5.1587196956    |
| 207.1146774385  | 116.2284544982  |
| 20.8637675168   | 11.0957946965   |
| 13.2505098866   | 13.3565612926   |
| 1.6837451072    | 2.9199502485    |
| 21.6105691609   | 11.3566795181   |
| 0.0530928984    | 0               |
| 16.3937001952   | 12.3467210776   |
| 0               | 0               |
| 0               | 0               |
| 0               | 0               |
| 0.8562507991    | 0.3239803359    |
| 0.0444063329    | 0.0231028347    |
| 18.0825607103   | 15.287400978    |
| 0.080140937     | 0               |
| 26.2335283902   | 35.4854579719   |
| 3.0089927086    | 4.3560577938    |
| 0.2616084108    | 0.2722087355    |
| 0               | 0               |
| 0               | 0               |
| 468.8746515707  | 30.4920853847   |
| 0               | 0               |
| 0.65203015      | 1.3569005834    |
| 8.1147723074    | 7.0363178231    |
| 1.2255174713    | 11.476576923    |
| 0.6855350803    | 1.5157897756    |
| 0.4455622894    | 0.5795204891    |
| 61.6453245648   | 103.9991393751  |
| 0               | 0               |
| 28.5693468212   | 24.3220675878   |
| 1.4901491743    | 1.1628973084    |
| 3.0454647398    | 1.9422084452    |
| 0               | 0               |
| 0.0857721568    | 0               |
| 0               | 0               |
| 0.5073293864    | 0.703848373     |
| 42.5575390645   | 24.601090397    |
| 9.3893811107    | 4.3421498245    |
| 0               | 0               |
| 0               | 0               |
| 13.2833350598   | 11.1464301223   |
| 0               | 0               |
| 0               | 0               |
| 2696.7588232714 | 3943.7326636741 |
| 1.6293103808    | 1.130219825     |
| 2.087273323     | 1.7480737897    |
| 1.5178140665    | 2.6321926886    |
| 62.6072865785   | 38.3200719457   |
| 173.119011389   | 65.2658557492   |



gene\_expression\_table

|                |                |
|----------------|----------------|
| 0.1535439597   | 0.1597655327   |
| 0.2387185883   | 0              |
| 0              | 0              |
| 8.8185140867   | 13.3466744065  |
| 0              | 0              |
| 0              | 0              |
| 0.2570624366   | 0              |
| 3.589829442    | 1.8676443351   |
| 1.2182427755   | 1.2676057485   |
| 0              | 0              |
| 5.0823922291   | 3.3653007989   |
| 484.9996092717 | 290.6793816047 |
| 16.9821528325  | 4.7120710773   |
| 0              | 0              |
| 1.6686278737   | 3.472480736    |
| 1.1696088275   | 3.6510034858   |
| 5.9832331968   | 6.6703636122   |
| 0              | 0.4669404216   |
| 172.6629064242 | 155.160197121  |
| 0              | 0              |
| 0              | 0              |
| 0              | 0              |
| 0.664340649    | 0.138251922    |
| 5.2922490339   | 4.0382393265   |
| 22.3015752018  | 18.7851869387  |
| 0              | 0              |
| 0              | 0              |
| 2.0006706975   | 0.5204343765   |
| 12.8085673683  | 11.9948113446  |
| 7.4572063352   | 7.4220070084   |
| 7.8935438105   | 7.1867151588   |
| 0              | 0              |
| 3.4847113409   | 5.0762756843   |
| 0              | 0              |
| 0              | 0              |
| 2.8544415501   | 1.8563143727   |
| 10.8467723266  | 8.20820476     |
| 0              | 0.1486891608   |
| 0              | 0              |
| 0              | 0              |
| 0              | 0.5454492782   |
| 7.3588257647   | 19.689438935   |
| 1.0534538577   | 0.2740349035   |
| 23.5120062372  | 13.1733045244  |
| 0              | 0              |
| 3.5540434356   | 0.8404665049   |
| 0              | 0              |
| 8.8719620655   | 10.0227196785  |
| 2.4724572412   | 0.9355057286   |

gene\_expression\_table

|                 |                 |
|-----------------|-----------------|
| 3.03523118      | 0.9717594427    |
| 12.158015497    | 4.2168853491    |
| 1.2853943276    | 1.2419441071    |
| 30.4773627752   | 40.0179022616   |
| 0               | 0.6749642879    |
| 803.5608215444  | 890.3139832019  |
| 6.0009314276    | 3.9025550404    |
| 27.9780307719   | 18.8510158928   |
| 0.7357772978    | 1.2527850412    |
| 61.4138364185   | 34.9654169668   |
| 0               | 0               |
| 0               | 0               |
| 3022.8984665036 | 4146.1903147269 |
| 0               | 0               |
| 19.0747355082   | 23.3501650356   |
| 4.3082199892    | 0.4075262064    |
| 1.1046391737    | 2.1345980495    |
| 0.4857035685    | 0.2695382334    |
| 0.4594101561    | 0.4979430948    |
| 461.8649462616  | 489.2387212898  |
| 0               | 0               |
| 0.9683083425    | 8.0603521466    |
| 265.2970740056  | 153.3593681201  |
| 0.7932117937    | 0               |
| 1.4736243813    | 2.84762283      |
| 2.3314101333    | 2.4258784429    |
| 401.6162875115  | 579.3470918043  |
| 247.4357514102  | 147.5397805693  |
| 228.9142278993  | 103.727811897   |
| 0               | 0               |
| 0.4181675867    | 0.1186668165    |
| 5.2952352048    | 3.0053439058    |
| 4.2584033952    | 5.6197454168    |
| 30.401294621    | 34.0664686747   |
| 0               | 0               |
| 0               | 4.9292629408    |
| 39.1342305902   | 31.1118661118   |
| 7.3654923559    | 2.9989333372    |
| 0               | 0               |
| 1.4502294469    | 1.5089924772    |
| 37.9239603446   | 20.7687538094   |
| 31.8911712457   | 18.1000339827   |
| 2.810532928     | 0               |
| 0               | 0               |
| 0               | 0               |
| 0               | 0               |
| 0               | 0               |
| 0               | 0               |
| 69.7603815383   | 134.4887140403  |

gene\_expression\_table

|                |                |
|----------------|----------------|
| 6.1600911467   | 8.0121211327   |
| 0              | 0.5093808218   |
| 3.2154808102   | 3.9034000843   |
| 70.1636657634  | 49.1677671705  |
| 0              | 0              |
| 5.0696540517   | 3.9563066256   |
| 0              | 0              |
| 0              | 0              |
| 12.3098884685  | 24.9925519681  |
| 50.9184385681  | 33.9082523695  |
| 101.3710032532 | 94.0916500607  |
| 0              | 0              |
| 10.1422649944  | 9.6737920632   |
| 0              | 0              |
| 0              | 0              |
| 0              | 0              |
| 16.40417037    | 25.6032965012  |
| 3.5913298197   | 2.7177089767   |
| 10.6095594381  | 7.0967936789   |
| 0.6390215506   | 2.3746949508   |
| 0              | 0              |
| 40.3468321554  | 20.2911445447  |
| 1.2779917616   | 1.5514050447   |
| 5.4277129891   | 5.0828786284   |
| 0.2588110791   | 0.5385961129   |
| 25.6290634264  | 30.8158336597  |
| 1.6230554496   | 1.5480862446   |
| 15.5431484163  | 11.3210677506  |
| 0              | 0              |
| 21.1203378509  | 13.984810034   |
| 8.4248587222   | 8.3166820651   |
| 2.6241893706   | 5.4610420819   |
| 4.611226022    | 0.3998393376   |
| 0              | 0              |
| 7.7981219348   | 7.3764549094   |
| 0              | 0              |
| 11.5254767246  | 10.4282494958  |
| 45.0394231745  | 15.6214707707  |
| 22.8578649233  | 11.2661343488  |
| 27.3378927896  | 24.6757178376  |
| 457.7594291041 | 409.4016505971 |
| 0.1875185562   | 0.1951167736   |
| 39.9009255965  | 42.2460845256  |
| 5.4265971676   | 2.3099244079   |
| 2.4212280899   | 2.0154686452   |
| 2.0611733549   | 0              |
| 124.2235301869 | 77.55422686    |
| 0              | 0              |
| 14.0200638018  | 5.3848891367   |

gene\_expression\_table

|                |                |
|----------------|----------------|
| 0.9358662003   | 1.8147854721   |
| 3.0422320432   | 1.7410264991   |
| 0              | 0              |
| 0.0926067606   | 0              |
| 0              | 0              |
| 0.9856036536   | 1.3673868429   |
| 9.7559866944   | 4.4854570259   |
| 0.2487623015   | 0.3882631562   |
| 8.0030430926   | 9.1080116375   |
| 0              | 0              |
| 29.2375685139  | 79.4997040214  |
| 9.4937146641   | 3.6859694906   |
| 0.4250049708   | 0.221113047    |
| 0.0904779274   | 0.1412161145   |
| 0.2557071221   | 0.0532136655   |
| 0.319220929    | 0.2135286657   |
| 45.5316573076  | 8.8831109403   |
| 3.680552295    | 4.397048722    |
| 14.6339412074  | 16.7754047078  |
| 5.7659509086   | 1.1999172356   |
| 0              | 0              |
| 2.0592885392   | 0              |
| 1.3072861464   | 0.997521903    |
| 0.6994066154   | 0.1819366107   |
| 8.0496607541   | 4.6532397369   |
| 0              | 0              |
| 0              | 0              |
| 32.5413304128  | 16.0388995888  |
| 0              | 2.8789361706   |
| 254.6803857551 | 189.9166581468 |
| 0              | 0              |
| 0              | 0              |
| 3.1472307034   | 0              |
| 0              | 1.8262066936   |
| 31.1342112556  | 0              |
| 7.5667369056   | 7.5310205753   |
| 1.6356051958   | 0.4641489865   |
| 48.2232765697  | 78.8500033526  |
| 15.2188005247  | 21.1139513613  |
| 56.2769113563  | 27.5563489161  |
| 190.9396982236 | 189.0320474369 |
| 6.9090325765   | 14.3779706098  |
| 8.7677586327   | 0              |
| 73.7099295595  | 25.5655474463  |
| 0              | 2.9359689393   |
| 1.4903046481   | 3.1013830362   |
| 7.4942948618   | 2.1267169937   |
| 52.3842712227  | 14.6237949942  |
| 7.8032340207   | 4.8716517762   |

gene\_expression\_table

|                 |                 |
|-----------------|-----------------|
| 7.0275935209    | 2.5311981866    |
| 1.7880457698    | 3.7209941106    |
| 506.190539192   | 444.0814770007  |
| 0               | 1.3588145565    |
| 30.1949385298   | 9.4255295645    |
| 171.4654347217  | 163.9472488557  |
| 855.6225758305  | 577.2988776984  |
| 20.7086998086   | 12.313035722    |
| 189.9382992903  | 46.8081862625   |
| 0               | 0               |
| 21.6775109913   | 22.5558797469   |
| 1.6090450061    | 0.9132235711    |
| 22.1113488384   | 5.8993068266    |
| 0               | 30.3852205995   |
| 38.8972411942   | 23.2347010685   |
| 18.9109355633   | 18.271688678    |
| 0               | 0               |
| 0               | 7.2734196961    |
| 48.4435656238   | 16.8021633289   |
| 304.0982951565  | 82.2692785477   |
| 0.8554276769    | 0               |
| 7.2141067422    | 20.3745713391   |
| 63.2079365836   | 30.9501696661   |
| 63.7975307106   | 66.3825949131   |
| 3.1824915478    | 11.0381517318   |
| 12.4123293957   | 8.6101831322    |
| 2.1172133877    | 0               |
| 25.5984432789   | 19.9767656169   |
| 4.8333170094    | 2.1553551965    |
| 47.6433542475   | 5.5082060214    |
| 89.0610062773   | 37.067896744    |
| 27.7204101601   | 0               |
| 85.8999307968   | 29.7935267276   |
| 0               | 36.4282196543   |
| 0.0972592042    | 0               |
| 1.4409499848    | 4.9977900434    |
| 0               | 1.1446945178    |
| 5921.4582421959 | 7034.2050038503 |
| 1.1770438321    | 1.2247374315    |
| 6.4808075736    | 10.1151130555   |
| 126.949677978   | 45.7247269262   |
| 3.2854750551    | 8.8883649391    |
| 12.1751886717   | 6.7565467071    |
| 0               | 0               |
| 162.3324603702  | 38.6080324085   |
| 0               | 0               |
| 13.5289842921   | 17.3257553792   |
| 22.8595151915   | 0               |
| 18.373936891    | 11.3515769753   |

gene\_expression\_table

|                 |                 |
|-----------------|-----------------|
| 1.3779760835    | 1.6386416237    |
| 5.9815457913    | 0               |
| 0.4833589881    | 1.0687572864    |
| 0               | 0.1360584457    |
| 2.2417972366    | 1.652282734     |
| 0.4854234365    | 7.0712978671    |
| 20.8416750976   | 7.8070233372    |
| 0.0541576724    | 0.394464919     |
| 0               | 0               |
| 5.5902672172    | 23.2671352639   |
| 4.0438210567    | 3.0054828154    |
| 7.1812426756    | 9.0734164443    |
| 3.9070597443    | 1.5245149073    |
| 0.6987345696    | 0.3635235829    |
| 0               | 0               |
| 0               | 0               |
| 1.0349260706    | 0.4307444338    |
| 0               | 0.8641830329    |
| 0               | 0               |
| 0.3372556091    | 0.8188160033    |
| 1.6155682574    | 3.5721904198    |
| 1.1415566434    | 1.1878123085    |
| 0               | 0               |
| 28.7196666516   | 41.0896506053   |
| 2.3069592839    | 7.2013105483    |
| 0               | 0               |
| 1.3191371693    | 1.0294412735    |
| 75.3599031108   | 115.0064263551  |
| 0.0217497035    | 0.0226309975    |
| 0               | 0.360712957     |
| 0               | 0               |
| 0.1220696805    | 0               |
| 3.0260734655    | 9.4460682162    |
| 19.520216842    | 14.7717617715   |
| 0.0705703427    | 0               |
| 0.5057142994    | 0.3382751249    |
| 0.5332255343    | 0.9709555359    |
| 0               | 0.0794763519    |
| 0               | 0.0172642669    |
| 0.5477492608    | 0.14248599      |
| 211.837964931   | 209.9253336011  |
| 2.6767195237    | 3.4814746327    |
| 80.6518813195   | 59.5560443724   |
| 2.322525724     | 2.2958023369    |
| 3686.9665424913 | 7206.7862579772 |
| 0.7206775174    | 0.7498792378    |
| 0.0208193606    | 0.0216629573    |
| 0.1186602528    | 0.2469366888    |
| 0.9871011189    | 0.8216786196    |

gene\_expression\_table

|                |                |
|----------------|----------------|
| 1.1864293446   | 4.3207613516   |
| 49.1023629804  | 58.9522865666  |
| 4.7360515085   | 4.3804048391   |
| 43.9634410585  | 42.5681071821  |
| 0              | 0              |
| 1.2783512254   | 2.992837009    |
| 1.8892375493   | 3.1452625713   |
| 0.2798630723   | 1.3104138264   |
| 0              | 4.1423393587   |
| 0.08143208     | 0.0847316929   |
| 0              | 0              |
| 3.659731322    | 3.173352468    |
| 2.7676186297   | 4.4505413148   |
| 0.9385459119   | 0.4882878097   |
| 16.5473759946  | 22.9571634991  |
| 29.6688809253  | 18.5226351119  |
| 0              | 2.7895483519   |
| 1.4156723081   | 0.8592704688   |
| 120.1255475624 | 20.046049197   |
| 10.5154425539  | 9.4495000302   |
| 15.8567721278  | 13.74940468    |
| 0              | 0              |
| 74.571008185   | 39.5016932351  |
| 41.6832774537  | 72.6233461691  |
| 5.778647183    | 4.5095976775   |
| 2.571695459    | 2.6759000857   |
| 11.4201842055  | 13.2032532974  |
| 10.653455191   | 7.5580440236   |
| 2.3571399478   | 1.6351005498   |
| 14.0277770676  | 7.2980900063   |
| 18.1336379163  | 33.727282137   |
| 0              | 0              |
| 11.7290164517  | 19.5268384633  |
| 11.3397595044  | 0              |
| 8.4029544955   | 1.5897164846   |
| 0              | 0.5739100917   |
| 0              | 8.6785948726   |
| 112.5294366607 | 117.0891087231 |
| 59.6954670246  | 62.1143163614  |
| 0              | 0              |
| 85.8722657627  | 27.922435677   |
| 12.4672717516  | 12.9724433083  |
| 5.1444494468   | 12.4901037135  |
| 0              | 0              |
| 0              | 9.1551386248   |
| 0              | 0              |
| 0              | 0              |
| 5.5150314091   | 1.9128331556   |
| 160.8994565821 | 65.511811154   |

gene\_expression\_table

|                |                |
|----------------|----------------|
| 21.5757715806  | 16.8375134055  |
| 6.0020120924   | 7.8065156471   |
| 462.9051826271 | 238.2959444754 |
| 4.0877971974   | 2.8356226583   |
| 0.7532356976   | 0.6412554568   |
| 0.6765055443   | 0.2346391415   |
| 0              | 0              |
| 7.004870355    | 0              |
| 0.4518474709   | 0.4701562473   |
| 0              | 0              |
| 20.6884997822  | 10.7633969928  |
| 22.4514470523  | 2.9201469443   |
| 2.0665409939   | 0              |
| 11.8832443699  | 11.3755711451  |
| 10.6619235922  | 18.489904623   |
| 2.68913774     | 1.3990505531   |
| 0              | 0              |
| 4.1084088267   | 3.053486283    |
| 0              | 0              |
| 175.7530702975 | 141.3121540952 |
| 0.4197734596   | 0.8735652059   |
| 1.1420488566   | 1.7824866992   |
| 17.043188841   | 9.5002369907   |
| 153.2321583459 | 106.2940647997 |
| 2.1291154433   | 4.7076969695   |
| 0.9933390237   | 1.3781185842   |
| 3.0206172837   | 1.8196386074   |
| 0.4933367515   | 0.4277722216   |
| 0.770273477    | 0.9472093286   |
| 36.3783394166  | 22.9408382026  |
| 1.8306697325   | 5.0795950216   |
| 17.825094011   | 12.6903013692  |
| 4.0071142951   | 8.5995562719   |
| 528.2835583139 | 340.4793238945 |
| 0              | 0.1204774159   |
| 4.2798688737   | 3.8171043195   |
| 92.9424795013  | 74.1431769428  |
| 12.1664691304  | 7.4923288651   |
| 1.9889701706   | 0              |
| 0.2173887471   | 0.4523945982   |
| 44.4240895024  | 11.5560363582  |
| 0              | 0              |
| 0              | 0              |
| 0              | 0              |
| 0              | 1.7966876547   |
| 0.0701318359   | 0.0729735649   |
| 32.2332428909  | 11.1797759867  |
| 0              | 0              |
| 0              | 3.2868604977   |



| gene_expression_table |                |
|-----------------------|----------------|
| 0                     | 0              |
| 0.3767881562          | 0              |
| 0                     | 0              |
| 0                     | 12.6475802738  |
| 0                     | 0              |
| 11.5746818142         | 6.6624644801   |
| 0.7957875256          | 0.8280326897   |
| 0                     | 0              |
| 1.4791271978          | 4.3606732857   |
| 0.274124664           | 0.228185716    |
| 38.7148371634         | 13.4278517466  |
| 4.6422334769          | 1.6101119743   |
| 2.2533922169          | 3.126265673    |
| 2.3086169531          | 5.1474893295   |
| 0                     | 0              |
| 20.6202162527         | 26.8433091987  |
| 4.3437178285          | 3.0734126433   |
| 2.2174360899          | 2.8841077402   |
| 0                     | 0.0377804173   |
| 0.5801961276          | 0.2012351893   |
| 4.1834435738          | 2.3438993509   |
| 0.8048192106          | 1.6748606738   |
| 0                     | 0              |
| 78.3620145661         | 55.1944319207  |
| 0                     | 0              |
| 0                     | 0.3293040215   |
| 18.751343196          | 4.6455105169   |
| 0.4388512576          | 0.2739800579   |
| 84.5918100232         | 30.2566875174  |
| 7.3423057312          | 4.0018076518   |
| 2.402708658           | 1.8750494779   |
| 7.0946947373          | 2.9528681849   |
| 0                     | 0.0367572589   |
| 73.9662076102         | 32.7094045098  |
| 3.5482990684          | 4.746954206    |
| 0.0565198208          | 0.1176199871   |
| 1.3884899183          | 1.0835634557   |
| 2.2735780095          | 2.1456375792   |
| 3.9331098831          | 1.2277436315   |
| 45.422720001          | 13.6538249626  |
| 0.966934944           | 1.7886488356   |
| 2.5216022861          | 1.5851986927   |
| 1.5283703925          | 1.5902996795   |
| 21.0502946936         | 27.6483631892  |
| 0                     | 0.6633701578   |
| 0.5633417063          | 0.3907788057   |
| 0                     | 3.713821494    |
| 610.1600596202        | 268.9722057813 |
| 4.2815706525          | 5.9400788097   |

gene\_expression\_table

|                |               |
|----------------|---------------|
| 0.174476365    | 0.1815461152  |
| 0              | 0.0483403611  |
| 2.1857290279   | 2.9740772477  |
| 6.0624097427   | 6.3080574697  |
| 5.1752675661   | 2.8095487593  |
| 0              | 0             |
| 8.3184292386   | 13.4640962716 |
| 1.7472044637   | 1.5582864575  |
| 0              | 6.1314825161  |
| 13.0852874852  | 19.11091395   |
| 0              | 0             |
| 0              | 2.0791166134  |
| 9.4090794038   | 5.7590197467  |
| 0              | 0             |
| 6.061172101    | 8.8294775506  |
| 0              | 0.0982215305  |
| 81.6743215672  | 84.9837500448 |
| 4.5978672176   | 5.5815339428  |
| 3.1562866577   | 2.0210331152  |
| 16.5130449847  | 11.0968055495 |
| 1.1248075714   | 0.819269197   |
| 9.362711728    | 21.6490824089 |
| 0              | 0.0761966039  |
| 3.3589591274   | 3.9062474781  |
| 14.1614081005  | 10.3769195425 |
| 7.0820214221   | 6.1408196889  |
| 1.6106162898   | 0.478822333   |
| 1.555330307    | 0             |
| 0              | 1.6818460287  |
| 0.6322401766   | 0             |
| 0.3916839791   | 0             |
| 1.1677647297   | 0.3037705854  |
| 2.4928793096   | 1.6211814502  |
| 0              | 0.5226304345  |
| 0.9370761024   | 0.9750462536  |
| 16.4967083077  | 14.1360074405 |
| 0              | 6.764915947   |
| 0              | 0             |
| 18.7955297613  | 17.1124810219 |
| 21.4096681215  | 13.790637673  |
| 0.8092669348   | 0.3368233128  |
| 4.5039423175   | 18.7457649248 |
| 0.8409449991   | 0.8750199357  |
| 0.7455857266   | 1.551593446   |
| 0              | 0             |
| 100.1878952379 | 0             |
| 5.3884613725   | 1.4017002089  |
| 0              | 0             |
| 0.4742554775   | 0.1644907407  |

gene\_expression\_table

|                |               |
|----------------|---------------|
| 0.0762063984   | 0.5550598732  |
| 2.7029498121   | 0.7031182102  |
| 0.6042454718   | 0.4191529247  |
| 0              | 0             |
| 0.2644962554   | 0             |
| 13.2489145014  | 9.543986362   |
| 3.6419134372   | 3.3684294217  |
| 0.2682428422   | 0.2791119928  |
| 4.7339213336   | 8.6200431708  |
| 1.3886576871   | 0.7224629205  |
| 0.2728723383   | 0.5678581505  |
| 0              | 0             |
| 1.6719761788   | 1.7397243459  |
| 0.792551617    | 0.618499247   |
| 0.1657112543   | 0.1724258438  |
| 1.4878652339   | 2.5802554322  |
| 0.8264934075   | 0             |
| 14.3352948772  | 4.8376729905  |
| 8.9629889425   | 0.621744507   |
| 164.9303861124 | 181.677079956 |
| 24.6116134513  | 25.6088714986 |
| 8.788411863    | 4.3893680132  |
| 3.2538941708   | 4.1112573702  |
| 3.5254043949   | 3.3625653711  |
| 0.1978621873   | 0.2058795267  |
| 4.1316729971   | 1.6121578599  |
| 0.1308042054   | 0             |
| 53.8263986658  | 29.732341736  |
| 30.0804811815  | 28.1694030684 |
| 182.0064064194 | 93.6500798122 |
| 0              | 0             |
| 2.2086927203   | 3.0642513904  |
| 2.9193679869   | 4.4841651169  |
| 0.2462855975   | 1.3667469045  |
| 6.5475852404   | 3.0658014852  |
| 6.7957697474   | 7.0711330868  |
| 0.2455531393   | 0             |
| 0              | 0             |
| 0              | 0             |
| 30.7500155914  | 17.997750317  |
| 2.8171053291   | 1.4656269593  |
| 0              | 0             |
| 11.2995569396  | 20.5754725875 |
| 0.0984735865   | 0.2049274363  |
| 28.3506576607  | 12.7466634344 |
| 69.6870528249  | 59.9608202561 |
| 0              | 8.6550789994  |
| 0              | 0.2355235499  |
| 6.2740260032   | 4.3819749414  |

gene\_expression\_table

|                |                |
|----------------|----------------|
| 0.3023026834   | 0.629103865    |
| 2.0440239477   | 0.8861864258   |
| 0              | 0              |
| 5.0752818883   | 9.2944392223   |
| 0              | 0              |
| 30.6340568989  | 20.5418878698  |
| 13.6903566026  | 14.2450873325  |
| 3.7413197824   | 2.3357504228   |
| 28.5335060287  | 57.2586655656  |
| 1.4077594043   | 4.8826718541   |
| 3.4973233041   | 4.4660874281   |
| 0              | 0              |
| 0.5121199056   | 0.8525934558   |
| 5.782812595    | 3.2184654705   |
| 0              | 0              |
| 284.4761446591 | 179.7644188849 |
| 0.9010807059   | 0              |
| 0.5434956695   | 0.0807882877   |
| 0              | 0              |
| 0              | 0              |
| 3.7613634824   | 3.2148851602   |
| 0              | 0              |
| 2.8981889695   | 3.0156230531   |
| 0              | 0              |
| 76.8307357057  | 65.953719955   |
| 0              | 0.789789686    |
| 3.0213708208   | 6.2875924208   |
| 0.2473591595   | 0              |
| 5.7488871322   | 4.336827461    |
| 2.3264814428   | 2.6069615844   |
| 1.7753731267   | 1.6528571381   |
| 2.1093078381   | 0.5486941509   |
| 0.7997018295   | 0.9707898672   |
| 0              | 0              |
| 0              | 0              |
| 12.639049355   | 3.9453543926   |
| 2.6627361995   | 0.6156955067   |
| 10.8601983961  | 7.668027896    |
| 17.476261847   | 24.2458623474  |
| 16.4021521403  | 10.0392731331  |
| 0              | 2.8048904166   |
| 0              | 0              |
| 1.5357650516   | 12.7839517504  |
| 13.9103393778  | 0              |
| 7.762833967    | 8.0773825706   |
| 933.9754068823 | 419.3131627918 |
| 0              | 0              |
| 0              | 0.113321129    |
| 0.2772594459   | 0.5769878952   |

gene\_expression\_table

|                 |                 |
|-----------------|-----------------|
| 0.2106162124    | 0.3287255139    |
| 0               | 0               |
| 0               | 4.9999517173    |
| 6.1451531331    | 5.8381402499    |
| 0               | 0.1676447575    |
| 146.3508812894  | 153.8348797374  |
| 5.4860256318    | 2.4464221632    |
| 0.7753134165    | 0               |
| 0               | 0.132960411     |
| 0               | 0.1395166959    |
| 0.2862130517    | 0.2978103519    |
| 4.7616505678    | 6.1932397155    |
| 8.7596385088    | 9.114577449     |
| 0               | 0               |
| 1.3937825281    | 1.2689760472    |
| 1.9075427091    | 1.06875784      |
| 15.0682638361   | 7.6018555701    |
| 7.0827475151    | 4.2666910816    |
| 14.0319726323   | 9.7336970538    |
| 0               | 0               |
| 0.4069827395    | 0.705789342     |
| 3.2410970359    | 3.0351831221    |
| 32.0058027819   | 18.0992782717   |
| 0.6323697311    | 0.9211905306    |
| 20.220783914    | 17.1643136066   |
| 0               | 0               |
| 0.5396310592    | 0.0623885345    |
| 16.4489229185   | 22.8205736637   |
| 0               | 0               |
| 6.5841906656    | 10.2764712893   |
| 2.5480153439    | 2.9458449518    |
| 20.6708570582   | 17.4756045601   |
| 0               | 0               |
| 11.9042209041   | 17.8917234083   |
| 2.0893787685    | 1.8634628671    |
| 28.4432541572   | 19.7305130538   |
| 0               | 2.5644949428    |
| 0.769584676     | 1.3012481714    |
| 2.4888051202    | 2.8250738679    |
| 0               | 0               |
| 0.7870577941    | 0.7874511837    |
| 4.6389310312    | 1.6089665543    |
| 11.0702463616   | 17.5524734579   |
| 38.1617393215   | 36.0728023295   |
| 0.6363686781    | 0               |
| 1.3119862204    | 0.4778016812    |
| 0               | 0.9190561592    |
| 0               | 0               |
| 3624.3333035078 | 4255.3299585006 |

gene\_expression\_table

|                 |                 |
|-----------------|-----------------|
| 60.8274484343   | 6.6623332052    |
| 0.7959015462    | 1.1042017738    |
| 0.5804973627    | 0.6903074388    |
| 13.0651403956   | 9.5961441034    |
| 10.8896220228   | 4.6353548875    |
| 988.6635460145  | 681.3970897171  |
| 1.291603137     | 2.3518926522    |
| 2.4085253035    | 0.706853881     |
| 0.9845465618    | 2.1276835075    |
| 2.8668585878    | 2.0207576314    |
| 2.4406963553    | 3.5554300913    |
| 3.3046296848    | 5.5016522743    |
| 0.0540368509    | 0               |
| 0.3939967863    | 0.2049807318    |
| 0.7603844942    | 0               |
| 1423.0732350195 | 2836.9239216813 |
| 1.2814969682    | 0.6667114947    |
| 7.464793769     | 1.4122301525    |
| 2.0698778505    | 2.5844987041    |
| 6.146175492     | 0.799402174     |
| 0               | 0               |
| 25.8766872276   | 8.9750686105    |
| 0               | 2.5718486968    |
| 14.012685789    | 3.6451193095    |
| 68.678643048    | 25.3092773626   |
| 6.7057337456    | 3.4887244214    |
| 0.8221305661    | 0.8554431453    |
| 4.6712225857    | 4.8604996652    |
| 14.543110352    | 3.7830986267    |
| 4.5149245664    | 0               |
| 58.9896869896   | 15.3449845623   |
| 1.2513456078    | 0               |
| 8.2118527798    | 8.5445955431    |
| 5.6821698542    | 1.6892600945    |
| 25.7368132426   | 13.3898320891   |
| 40.6994787567   | 15.3994960528   |
| 5.2186914819    | 4.9776392419    |
| 0.9633822739    | 0               |
| 7.4325427014    | 16.3267168122   |
| 13.4678166424   | 7.6437436877    |
| 18.791820675    | 11.7319570741   |
| 18.6967830732   | 5.9859610099    |
| 3.976469069     | 0               |
| 20.1282570473   | 8.3775401273    |
| 2.6570660057    | 12.7177572236   |
| 2.8895204083    | 4.5099048651    |
| 23.9268193307   | 29.5067610622   |
| 2.0546168781    | 1.9240826182    |
| 18.677439906    | 5.9797681026    |

gene\_expression\_table

|                |                |
|----------------|----------------|
| 790.4913801283 | 448.0404092615 |
| 3.6180170592   | 1.8823092223   |
| 45.8658346089  | 31.8162065238  |
| 1.170211126    | 2.0293797757   |
| 5.0224793775   | 2.98627961     |
| 89.6574248457  | 36.504910643   |
| 9.7603552673   | 6.3474019165   |
| 1.0077355316   | 1.0485687899   |
| 6.9569118204   | 2.412934869    |
| 0              | 0              |
| 60.4885175121  | 0              |
| 6.1716535021   | 2.6270704498   |
| 7.2940997554   | 0.8432950372   |
| 3.288012459    | 1.4662466223   |
| 1.7851726379   | 0              |
| 3.1250006078   | 5.4193750955   |
| 7.4556021835   | 4.5633540069   |
| 116.8365848402 | 31.9923109879  |
| 0              | 0              |
| 35.24099725    | 18.3344779862  |
| 0              | 0              |
| 0.8492807346   | 0.8836934337   |
| 16.0971616272  | 10.4683847835  |
| 37.1281226597  | 6.181207577    |
| 341.2401296329 | 114.7472999674 |
| 4.3077643982   | 5.2293665886   |
| 11.998982293   | 8.5315388788   |
| 2.8910158982   | 6.0163186605   |
| 1.2872979263   | 0.2678918003   |
| 0              | 0.1029791341   |
| 3.2405326743   | 10.7285769241  |
| 6.8034919503   | 3.2446187546   |
| 0              | 0              |
| 22.4489266833  | 17.1296055779  |
| 1.5341832918   | 0.9977175727   |
| 0              | 0              |
| 1.3647937464   | 4.2602848134   |
| 0              | 0              |
| 1.2218558574   | 0.9535239239   |
| 17.4659231277  | 8.7233467767   |
| 2.6149104493   | 2.9682176067   |
| 0              | 0              |
| 8.9115436228   | 11.5907971627  |
| 0              | 0              |
| 2.1430401782   | 1.4865838479   |
| 1.1373695211   | 0.3944851749   |
| 1.0002632966   | 0.4163175125   |
| 2.0986602464   | 2.9115967644   |
| 7.9852031248   | 9.4165970305   |

gene\_expression\_table

|                |                 |
|----------------|-----------------|
| 0              | 0               |
| 2.3681379245   | 0.6720257556    |
| 21.39828941    | 7.6537120545    |
| 0.1087497003   | 0.2263124363    |
| 0              | 2.8911767496    |
| 2.4723988835   | 1.6078625195    |
| 17.9646267289  | 6.2308500325    |
| 0              | 0               |
| 30.0927467707  | 4.0402708814    |
| 6.0609516547   | 1.5766350751    |
| 84.7762398416  | 28.3536506176   |
| 18.3733038308  | 0               |
| 6054.66143603  | 8221.8446394602 |
| 10.6801452091  | 14.8172036364   |
| 21.6376367556  | 3.7523983024    |
| 81.8030126987  | 54.6434333      |
| 1.1227992571   | 2.3365897528    |
| 49.5192007169  | 25.7628548079   |
| 0              | 0               |
| 6.1589528133   | 3.2042562239    |
| 0              | 0               |
| 0              | 0               |
| 0              | 0               |
| 1.3014632805   | 0.6018659258    |
| 16.1288472955  | 10.8858714936   |
| 37.0415606745  | 19.2712389478   |
| 13.726044811   | 2.7348935018    |
| 0              | 0               |
| 15.9165105774  | 2.0701805821    |
| 0              | 1.5420037844    |
| 0              | 21.9676932713   |
| 160.0653993289 | 133.2409758796  |
| 0              | 0               |
| 0              | 0               |
| 1.5139683962   | 1.575314117     |
| 26.3940023883  | 9.7647937803    |
| 3.1921257903   | 0.1953805965    |
| 185.8072370684 | 16.1113426764   |
| 0              | 9.8075975992    |
| 0              | 0               |
| 2.9525451422   | 2.1944155199    |
| 0              | 0               |
| 0              | 0               |
| 87.1578795741  | 18.1379001626   |
| 6.8536239254   | 1.7828328764    |
| 3.3802406845   | 1.406882966     |
| 46.0718900806  | 7.9897857645    |
| 37.9056484371  | 7.888315667     |
| 4.4450751066   | 3.0834591545    |



gene\_expression\_table

|                 |                |
|-----------------|----------------|
| 7.8717933749    | 3.5103244258   |
| 8.4371081306    | 1.6882650383   |
| 7.2334167292    | 3.7632567219   |
| 32.5912149255   | 20.5893101517  |
| 16.4629158553   | 21.4124877197  |
| 0               | 3.617740988    |
| 0               | 3.8430479954   |
| 217.4005273151  | 43.501837821   |
| 1.4612931055    | 1.5205044331   |
| 21.5408291561   | 6.7762226664   |
| 127.1534882261  | 70.0442069116  |
| 1.9761160411    | 0              |
| 240.7150795759  | 221.7264878035 |
| 2.6015188676    | 0.7734091238   |
| 84.4359522434   | 27.9545895643  |
| 0               | 10.0288216052  |
| 106.8927939357  | 22.2448140545  |
| 0               | 0              |
| 0.7683427809    | 0              |
| 0               | 0              |
| 31.242194553    | 13.0032490105  |
| 9.8490464389    | 35.8684479575  |
| 0               | 0              |
| 108.4677232665  | 24.6246142799  |
| 25.9499507815   | 17.1827332797  |
| 15.6748328436   | 10.8733161236  |
| 76.1451341937   | 83.8911399     |
| 12.9988974841   | 0              |
| 0               | 0              |
| 659.4240023857  | 196.0410690271 |
| 31.1487599525   | 9.5326182273   |
| 214.0602000588  | 100.2302459852 |
| 3.6505118455    | 2.532286609    |
| 0               | 0              |
| 9.9371416664    | 0              |
| 0               | 0              |
| 1905.3018541776 | 460.2242205407 |
| 0               | 2.2782594344   |
| 62.0961086674   | 32.3061157809  |
| 76.1572298797   | 39.6215534088  |
| 38.1486148216   | 0              |
| 0.8592281402    | 1.3410658595   |
| 6.0422721445    | 1.5717759749   |
| 11.3095260092   | 2.9419464804   |
| 0               | 0.1911462554   |
| 1597.3208876917 | 595.3590576978 |
| 16.6389348833   | 7.2138089426   |
| 41.6267774552   | 14.4378289388  |
| 13.7142981788   | 5.3512496313   |

gene\_expression\_table

|               |                |
|---------------|----------------|
| 1.6116621445  | 0.8784109704   |
| 1.6669309546  | 0.289079115    |
| 4.7099365204  | 3.891797694    |
| 0             | 0.0834606798   |
| 5.5998834769  | 3.6070603058   |
| 26.1093658866 | 19.4895938123  |
| 9.5869906944  | 2.4938634482   |
| 71.2902882714 | 128.3095483349 |
| 1.5458390451  | 4.3658638593   |
| 0.0594989559  | 0.0309549213   |
| 0             | 0              |
| 5.5283421733  | 9.0036776045   |
| 9.491434757   | 9.3822246491   |
| 62.8107398352 | 46.6827281807  |
| 0             | 0              |
| 0             | 0              |
| 0             | 0              |
| 6.4499754514  | 8.9484363594   |
| 4.2053464805  | 2.5004264834   |
| 1.8989298723  | 4.1712898958   |
| 55.5164384727 | 66.0182335334  |
| 1.7745903636  | 1.2309976257   |
| 1.0410161528  | 1.8053298929   |
| 2.2334845468  | 4.6479698591   |
| 0             | 0              |
| 33.9448627283 | 32.8844193999  |
| 4.8546320827  | 1.8942528304   |
| 0.3553046298  | 0.5545522621   |
| 1.7793976877  | 0.7543142259   |
| 3.1471457946  | 1.4034289555   |
| 36.3781715254 | 22.0070978722  |
| 1.3455799005  | 0.7000512752   |
| 0             | 0              |
| 2.2304319562  | 1.8645813073   |
| 0.1101572354  | 0              |
| 8.0233926695  | 16.6969981275  |
| 0             | 0              |
| 1.3621257187  | 2.4803079038   |
| 2.0298077826  | 3.3792883526   |
| 3.0683065574  | 5.108214039    |
| 2.4799722071  | 0.4300767041   |
| 22.1711409144 | 12.3787622488  |
| 15.557559452  | 7.9352690675   |
| 0.171435076   | 0.5351447813   |
| 0             | 0              |
| 7.4171481023  | 9.5336165379   |
| 4.7077953073  | 1.749483681    |
| 3.7305991884  | 13.197992095   |
| 17.2740361629 | 7.3019281274   |

gene\_expression\_table

|                |                |
|----------------|----------------|
| 0              | 0              |
| 1.7569411254   | 0.7312528226   |
| 0              | 0.0504617192   |
| 6.6959730093   | 3.7880425804   |
| 0              | 0              |
| 21.3381342001  | 5.679773632    |
| 2.6106742764   | 0              |
| 7.9523477821   | 6.4357809061   |
| 0              | 0              |
| 30.6074633328  | 9.7992837273   |
| 1.8185689613   | 2.7032243441   |
| 0.4046521356   | 0.8420971313   |
| 1.5188483005   | 1.8061620047   |
| 10.0838597208  | 4.1969823443   |
| 3.5250004653   | 2.5980482584   |
| 0.765753668    | 0.2655939552   |
| 10.3517465004  | 61.036785059   |
| 4.254891524    | 5.6922415013   |
| 2.5214642685   | 2.3851213969   |
| 0              | 0.3552734763   |
| 0              | 0              |
| 0.2056315516   | 0.1711709634   |
| 0.4383187477   | 0.7601322378   |
| 3.7356168067   | 8.5513632867   |
| 0              | 0              |
| 0              | 0              |
| 0.6339900353   | 0.6596791948   |
| 2.6963059893   | 5.1201466564   |
| 444.6713063101 | 625.7322040339 |
| 0              | 0              |
| 429.7504322949 | 568.6574125327 |
| 2.3082743368   | 3.842888301    |
| 2.5960477144   | 1.5435651943   |
| 0              | 0              |
| 7.541674419    | 7.8472616784   |
| 5.3532240843   | 0              |
| 0              | 0              |
| 1.6451539143   | 0.9781801418   |
| 0.4482981351   | 0.6996946395   |
| 0              | 0              |
| 2.7011973052   | 2.8106493228   |
| 5.0626592125   | 0              |
| 3.4932578502   | 4.2406046846   |
| 0.5133757201   | 0.7478486537   |
| 31.3216072734  | 25.6070202421  |
| 3.4836082549   | 3.1069400744   |
| 2.5229877783   | 3.6753062902   |
| 13.5719363128  | 10.477515468   |
| 0              | 0              |

gene\_expression\_table

|                |                |
|----------------|----------------|
| 0              | 0.0855460027   |
| 0.6610989858   | 1.1694072115   |
| 15.0682688711  | 12.2371374458  |
| 73.4527231937  | 41.39904926    |
| 0.5362909748   | 0.8680332677   |
| 1.1690959941   | 0.3041168872   |
| 6.3222418589   | 5.2627343484   |
| 16.7766304997  | 8.1047647942   |
| 2.2187144284   | 2.5856502881   |
| 0              | 0.1641097156   |
| 0.8097532329   | 1.2638464273   |
| 25.9977949681  | 17.5467378391  |
| 4.200538553    | 2.3414697868   |
| 0.3052240875   | 0.1984948196   |
| 22.6795469162  | 19.416502138   |
| 0              | 0              |
| 0              | 0              |
| 0              | 0.0245688125   |
| 2.5345592979   | 0.8790863914   |
| 1.9350875049   | 0.6040490683   |
| 2.4048499156   | 1.7036895262   |
| 0              | 0.1623367026   |
| 1.1763791172   | 3.0601144563   |
| 4.3070486642   | 3.8413452715   |
| 6.7186431651   | 5.2431610122   |
| 8.0394489166   | 4.647336615    |
| 1.6746981725   | 2.7880906147   |
| 11.7597975141  | 5.291373987    |
| 0              | 0              |
| 7.1118925293   | 15.910139977   |
| 0.2302151847   | 0              |
| 201.6787305488 | 121.0677205335 |
| 0              | 0              |
| 1.9449797589   | 0              |
| 10.9597818602  | 10.9080497604  |
| 0              | 5.3950941367   |
| 81.3808889324  | 34.6411749165  |
| 0              | 0              |
| 0.9500701424   | 0.9885668097   |
| 0.5707441117   | 0.2969352791   |
| 4.3057674864   | 1.0541732688   |
| 0              | 0              |
| 1.5178140665   | 0              |
| 19.7056472758  | 7.7583143425   |
| 94.9400881839  | 60.2194988658  |
| 0              | 0              |
| 0.0662980825   | 0              |
| 0              | 0              |
| 0.3180950582   | 0.2978857903   |

gene\_expression\_table

|                |               |
|----------------|---------------|
| 0.7649569233   | 0             |
| 0              | 0             |
| 1.2556009233   | 0.783886585   |
| 0.7825271583   | 0.4071175074  |
| 0              | 1.1315843349  |
| 0              | 0             |
| 9.3518960604   | 6.145789369   |
| 0.5877539087   | 1.2231391779  |
| 9.0795393781   | 1.8894881285  |
| 0              | 0             |
| 0              | 0             |
| 0              | 0.6251066208  |
| 0.4039801841   | 0.7005823114  |
| 5.1093734844   | 2.2784590104  |
| 3.4111462694   | 4.7324870512  |
| 3.8092224958   | 4.7562857883  |
| 0.2616983818   | 0.2178418816  |
| 0.0254966135   | 0.0132648658  |
| 48.655727225   | 37.9704362528 |
| 148.2761039755 | 59.9994206071 |
| 0.6383187105   | 1.3283665343  |
| 20.9744470219  | 8.891392789   |
| 3.2607157518   | 1.9387653451  |
| 52.0472607383  | 23.3856344799 |
| 0.5232735023   | 0.2177905793  |
| 0              | 0             |
| 0.8428376783   | 0.8769893059  |
| 4.8053256173   | 3.3823776505  |
| 127.0873930757 | 97.6034637245 |
| 0.2554677418   | 0             |
| 0.1518427191   | 0             |
| 0              | 0             |
| 67.1237375453  | 69.8435790364 |
| 6.9706859626   | 0             |
| 12.2393107732  | 7.1635755336  |
| 0.3756934314   | 1.5148012828  |
| 0              | 0             |
| 0              | 0.8353526463  |
| 2.9650530647   | 2.5709970576  |
| 1.0859945633   | 2.8249971579  |
| 0              | 0             |
| 0.3313104947   | 0             |
| 88.707771835   | 50.4777625751 |
| 0.5225892273   | 1.6312933398  |
| 2.8506939298   | 1.4831017616  |
| 1.0511061061   | 0.7291311547  |
| 0.5933202754   | 1.1112507067  |
| 23.8620297977  | 19.9605001761 |
| 0              | 0             |

gene\_expression\_table

|                |                |
|----------------|----------------|
| 7.5699948099   | 9.7671447119   |
| 203.7953379417 | 52.713761871   |
| 1.7688766134   | 1.8405511682   |
| 231.9814243478 | 247.617563149  |
| 15.2508949234  | 8.6243795537   |
| 5.1905616602   | 3.6005881756   |
| 0.3526374204   | 0              |
| 5.1807135837   | 3.812888273    |
| 0              | 0              |
| 0.1699687549   | 0              |
| 0              | 0              |
| 0.806298944    | 0              |
| 11.4141003935  | 17.8148964611  |
| 44.27273812    | 38.3888844335  |
| 144.8384260362 | 143.3418603669 |
| 0              | 0.4144269919   |
| 42.1475225432  | 17.6836017739  |
| 0              | 0              |
| 1.3645950666   | 0.1577653564   |
| 0              | 0              |
| 0              | 0              |
| 1.7872239317   | 0              |
| 48.659465947   | 29.3127644245  |
| 3.7755644965   | 2.357129805    |
| 0              | 0              |
| 0.6379033293   | 0              |
| 10.24527897    | 6.6627598676   |
| 115.3932276415 | 117.5983856666 |
| 0              | 0              |
| 1.1071895407   | 1.7280789857   |
| 30.2061888467  | 21.8264847634  |
| 400.7043447917 | 727.602591907  |
| 13.4391827214  | 5.438119529    |
| 0.965630089    | 1.4066601395   |
| 1.0225554749   | 2.3939757777   |
| 2.5325477938   | 0.8783887214   |
| 4.6415323911   | 21.057084032   |
| 0.7767589529   | 1.6164661653   |
| 2.4819174572   | 5.6814654507   |
| 2.2491748872   | 0.4680622079   |
| 235.498062415  | 125.7444160771 |
| 281.2771039593 | 117.069760177  |
| 0              | 0              |
| 14.1062294975  | 12.0091183531  |
| 0              | 0              |
| 6.9905308046   | 4.0733200627   |
| 1.1639448623   | 2.1530803446   |
| 0              | 2.2115252813   |
| 11.898176906   | 11.7612744022  |

gene\_expression\_table

|                |                |
|----------------|----------------|
| 19.5852346991  | 15.2841186033  |
| 531.5158944986 | 477.1436100311 |
| 1.0272831078   | 1.0689084302   |
| 15.1175566144  | 15.730117226   |
| 4.2942356411   | 8.9364745579   |
| 56.0827432798  | 154.224472248  |
| 0              | 0              |
| 2.048135543    | 2.2732006595   |
| 7.5676866601   | 7.8743279307   |
| 2.0303768319   | 1.1805970359   |
| 0.401175428    | 0.2504585895   |
| 2.8125291153   | 2.1948692081   |
| 0              | 0              |
| 0.2019166696   | 0.2100982959   |
| 98.6023906267  | 109.1118836548 |
| 244.8274227411 | 118.8822995966 |
| 90.189644438   | 46.9220561156  |
| 0.3256739224   | 0.7855626663   |
| 0.0216924947   | 0              |
| 1.4725268688   | 1.787558951    |
| 5.5148286208   | 2.2315566239   |
| 438.7700204202 | 635.5581898739 |
| 0.8751878541   | 1.1208003752   |
| 309.113154604  | 92.5261043487  |
| 1.3162556731   | 0.2739180221   |
| 60.7563052198  | 18.0623255786  |
| 1.7484615019   | 0              |
| 2.3965753325   | 7.4810523717   |
| 0              | 2.768393479    |
| 17.3975384249  | 15.755865251   |
| 0              | 1.7761975507   |
| 8.287807263    | 6.3409027117   |
| 0              | 0              |
| 219.4105686183 | 154.655546258  |
| 0              | 0              |
| 0.9649746916   | 0.4563978584   |
| 0              | 0              |
| 5.7755524686   | 2.4038307167   |
| 0              | 0              |
| 0.0967835953   | 0.3021157463   |
| 7.8035124218   | 6.5730980119   |
| 6.5290005241   | 3.3967772118   |
| 0              | 0              |
| 1.3155387073   | 1.0266330702   |
| 0              | 0              |
| 2.7825633793   | 2.3162498683   |
| 3.8963260637   | 0              |
| 14.8992552306  | 31.0059406207  |
| 0.3681398497   | 0.0425618676   |

| gene_expression_table |               |
|-----------------------|---------------|
| 0                     | 0             |
| 0                     | 0             |
| 2.5975911985          | 0             |
| 2.6430747937          | 1.9644083557  |
| 0.5917401667          | 0.6157173693  |
| 2.3986204022          | 2.4958120595  |
| 10.396144571          | 7.2115962904  |
| 2.2740975129          | 0             |
| 15.2072272924         | 2.6372368906  |
| 2.3905589692          | 3.731135968   |
| 0                     | 0             |
| 1.2610166002          | 1.836957865   |
| 6.8154101649          | 5.9096411087  |
| 0                     | 0             |
| 3.0301084747          | 0.3503208792  |
| 0                     | 0             |
| 0.820047072           | 4.5508012185  |
| 3.9747381592          | 3.360332477   |
| 34.3128069483         | 17.8515777853 |
| 1.8649168973          | 1.45536224    |
| 0.4772472191          | 0.7094074123  |
| 5.8377265794          | 5.7981669957  |
| 1.3613523653          | 0.4249542338  |
| 3.4757994075          | 3.3384352244  |
| 49.4584447919         | 18.1632324254 |
| 1.5041274889          | 0.7452735514  |
| 0                     | 0             |
| 0.0946442819          | 0             |
| 7.6953729218          | 4.8043128097  |
| 3.3627012402          | 5.9982124723  |
| 0.0993539394          | 0             |
| 15.1236542474         | 5.2454873113  |
| 0.1244517458          | 0             |
| 6.8039247194          | 2.4624759989  |
| 0                     | 0             |
| 0                     | 0             |
| 0                     | 0             |
| 0                     | 0             |
| 16.0482045154         | 22.1510380116 |
| 8.1295953759          | 3.3836020337  |
| 2.1035326814          | 0.9380431879  |
| 0                     | 0             |
| 0                     | 0             |
| 11.09554674           | 5.7725681259  |
| 7.3466890363          | 9.5554694048  |
| 0.8089016127          | 1.8937758537  |
| 0                     | 1.0129294363  |
| 0                     | 0.2322490816  |
| 36.4990292381         | 24.1449302369 |



gene\_expression\_table

|                |                |
|----------------|----------------|
| 7.990973902    | 3.1350759665   |
| 1.5127620347   | 1.0493725826   |
| 10.9997271119  | 3.8151446767   |
| 0.088693785    | 0              |
| 8.0367078983   | 10.8218696535  |
| 56.5753599288  | 26.1634591557  |
| 347.6512391975 | 102.2303053156 |
| 11.1917975652  | 3.8817623809   |
| 0.6662902953   | 1.3865765108   |
| 653.3792823638 | 551.9372930901 |
| 18.1333912672  | 24.0140128377  |
| 11.8609157114  | 6.1707589165   |
| 32.117757229   | 35.5614168689  |
| 5.0687954298   | 1.4384132966   |
| 1.4561854749   | 0              |
| 0              | 0              |
| 3.7292425689   | 1.4551315468   |
| 3.3292551343   | 8.6603898489   |
| 0              | 0              |
| 12.610356848   | 12.3923636206  |
| 6.3496233852   | 0              |
| 3.1234874794   | 0.8125126543   |
| 0.3021957852   | 0.786101757    |
| 0              | 0              |
| 14.2130914968  | 4.381926918    |
| 35.2076359406  | 20.289734512   |
| 0              | 0              |
| 10.3219772908  | 3.0686348317   |
| 2.7312278251   | 3.1971337581   |
| 0.3220832349   | 0.3351339883   |
| 11.8797052809  | 15.5657902808  |
| 18.1008167665  | 13.0391020595  |
| 0.9369496556   | 0.2437286708   |
| 0.6200407259   | 0.9032305268   |
| 0              | 0              |
| 37.9919956382  | 81.9553918602  |
| 6.4539826494   | 2.5183113144   |
| 6.1221846343   | 4.9001957145   |
| 52.0962140776  | 19.3596939584  |
| 255.3422088376 | 690.0118584392 |
| 0              | 1.6844601278   |
| 2.0082049317   | 2.0895770259   |
| 470.7510331801 | 411.4536538581 |
| 16.6267146135  | 6.7279434559   |
| 0              | 0              |
| 3.0351673936   | 2.2107062724   |
| 85.9176457753  | 105.4908353033 |
| 41.1949937135  | 15.1285437448  |
| 6.188112356    | 4.8291401473   |

gene\_expression\_table

|                 |                 |
|-----------------|-----------------|
| 0.709886542     | 1.4773020282    |
| 23.3234241772   | 13.8677057326   |
| 61.8881946778   | 12.3838255645   |
| 0.81884227      | 0.1704043216    |
| 5.3247161278    | 22.161890581    |
| 3.1262708141    | 3.2529467321    |
| 2.1659709368    | 2.0488506186    |
| 3837.0828828963 | 1485.7970452011 |
| 28.2063215725   | 32.3853644483   |
| 0               | 0.9660073847    |
| 0.6329155218    | 0.5762409995    |
| 168.3921547581  | 6.4894582917    |
| 8.7369219868    | 2.2727351144    |
| 16.3378299751   | 3.9999613738    |
| 226.5449098288  | 77.0922788033   |
| 6.9104650942    | 3.595237934     |
| 0               | 0               |
| 2.0618183998    | 2.5239563551    |
| 3.9583341032    | 10.2968126814   |
| 0               | 0               |
| 29.7809818795   | 4.4268145406    |
| 51.2919773575   | 31.286048975    |
| 0               | 10.1580741391   |
| 0               | 0               |
| 4.9582227238    | 3.68509214      |
| 1.0209579767    | 1.062327006     |
| 12.053950506    | 2.5084748724    |
| 10.234472311    | 11.501104945    |
| 4.0526718323    | 0               |
| 7.4759564568    | 4.4787495725    |
| 4.7592707624    | 2.4760577689    |
| 26.3483976719   | 9.6762458457    |
| 0               | 0               |
| 0.6237719171    | 1.6226176009    |
| 5.0647428093    | 8.5636935405    |
| 0               | 0               |
| 2.7579530523    | 2.5109917021    |
| 9.4716543786    | 3.2851480236    |
| 551.4674281779  | 446.0407088218  |
| 12.7464078789   | 3.4902342053    |
| 41.4026995642   | 9.2314991422    |
| 3.0271728564    | 0               |
| 0.3378082275    | 0               |
| 1.0198723414    | 0.4642738542    |
| 1.3553513163    | 3.1025937848    |
| 17.9908042168   | 11.4553928357   |
| 0               | 0.3176200714    |
| 3.8504127945    | 44.0707389348   |
| 0               | 0.1692087177    |

gene\_expression\_table

|                |                |
|----------------|----------------|
| 113.0143012367 | 111.0606410378 |
| 1.785985754    | 1.3937651761   |
| 8.1014032934   | 1.8063579994   |
| 0              | 0              |
| 0              | 0              |
| 10.2048907376  | 10.3234357257  |
| 2.5137650706   | 4.7330309527   |
| 0              | 0              |
| 4.5964933318   | 8.9132926464   |
| 67.0494681961  | 52.3247252302  |
| 6.0917482726   | 3.8031508749   |
| 38.3415401375  | 28.6306243472  |
| 0              | 0              |
| 27.1718057008  | 64.5357443046  |
| 7.2675911795   | 9.2425332224   |
| 5.3016776309   | 4.2293171517   |
| 2.5429693241   | 0.2646009973   |
| 0              | 0              |
| 17.413361102   | 8.6970946987   |
| 0.9429959424   | 0.3532341472   |
| 0.8429617048   | 0.3986901627   |
| 0              | 0              |
| 0.3220334423   | 3.0157396034   |
| 0.846734748    | 2.6431328523   |
| 2.0155871451   | 2.0972583652   |
| 0              | 0              |
| 0.6235462975   | 0.9732184181   |
| 0              | 0              |
| 0              | 0              |
| 0.384041541    | 0.6660047226   |
| 2.5610245235   | 2.886863163    |
| 7.1742800792   | 5.708514567    |
| 0              | 0              |
| 0              | 0              |
| 0              | 0              |
| 5.2133854449   | 3.6164205757   |
| 2.9827432566   | 6.2072069287   |
| 0              | 2.441542179    |
| 2.7770343766   | 4.1279418548   |
| 10.061222993   | 8.5654651883   |
| 6.0586256987   | 7.4715497445   |
| 41.1210700731  | 22.3402655538  |
| 10.8083993113  | 6.1343747248   |
| 35.6425782265  | 18.1935289121  |
| 195.4921501987 | 164.5940942847 |
| 0.0672135301   | 0.2797480397   |
| 10.0903411956  | 21.4022153106  |
| 31.5311943765  | 45.2032804288  |
| 5.035949556    | 3.2750033157   |

gene\_expression\_table

|                |                |
|----------------|----------------|
| 0.6678818253   | 0.4169665643   |
| 12.8116663321  | 7.057478485    |
| 5.7589862601   | 5.9923393234   |
| 0              | 0              |
| 2.2846979126   | 2.3772734515   |
| 1.1500078324   | 0.9204661062   |
| 7.3489164102   | 1.9116732876   |
| 0              | 0              |
| 0              | 0              |
| 0              | 0.3001113323   |
| 0              | 0.9744398634   |
| 0              | 0              |
| 2.1820854491   | 2.8381289373   |
| 1.4182023382   | 0              |
| 0              | 1.6724375536   |
| 12.0221767741  | 10.5848034467  |
| 4.3873714097   | 3.1604863097   |
| 127.3020453706 | 109.0849536156 |
| 0              | 0              |
| 74.5808294608  | 45.6016635444  |
| 0.2187384206   | 0.9104066446   |
| 0              | 0              |
| 2.5316399472   | 0.8318594311   |
| 5.8624795197   | 11.6917167124  |
| 3.8214955167   | 3.4792990853   |
| 1.4050295015   | 2.4366017306   |
| 2.020381369    | 1.0010699287   |
| 0              | 0              |
| 1.1202079304   | 4.2738613482   |
| 6.9637072055   | 0.9057344175   |
| 29.2836142188  | 13.2229086826  |
| 0              | 0              |
| 0              | 0              |
| 0              | 0              |
| 1.0252549138   | 1.1637796955   |
| 50.9791702789  | 40.8037206737  |
| 0              | 0              |
| 1.0331183605   | 0.9406076105   |
| 23.2930806044  | 11.9320181875  |
| 6.1118215164   | 3.4243307535   |
| 9.3026789894   | 42.3483455056  |
| 4.5299408652   | 5.1293896972   |
| 0              | 0.3370622921   |
| 13.707082048   | 7.5507302593   |
| 0              | 0              |
| 0              | 0              |
| 0.4069462986   | 0.2822904584   |
| 81.7177625373  | 97.1759442687  |
| 0              | 4.3058933587   |

gene\_expression\_table

|                 |                 |
|-----------------|-----------------|
| 8.0516362522    | 1.1968410102    |
| 18.5604855877   | 8.5202439916    |
| 109.1737070866  | 12.1711506005   |
| 0               | 0               |
| 12.675099125    | 9.8915188565    |
| 50.3507926168   | 44.4529675474   |
| 5.648161451     | 1.3060053141    |
| 4.216747615     | 0               |
| 0               | 0               |
| 0               | 0               |
| 88.8975500755   | 80.9372046376   |
| 58.7010877382   | 45.2441814884   |
| 2.2806331702    | 10.2831906948   |
| 104.2175248686  | 53.157058723    |
| 0               | 0               |
| 6.305178424     | 10.9344384887   |
| 2415.3426860388 | 2420.1300039044 |
| 376.968027038   | 202.884156265   |
| 0               | 0               |
| 14.1959166663   | 23.633812155    |
| 0               | 0               |
| 6.5675531289    | 6.4316886333    |
| 83.5056013759   | 114.0421182789  |
| 0               | 0.4823319209    |
| 80.1663815975   | 0               |
| 0               | 0               |
| 66.6583462983   | 57.1194484179   |
| 15.8355490088   | 3.3923652288    |
| 4.8373255659    | 10.0666662151   |
| 0               | 0               |
| 0               | 0               |
| 12.6112132805   | 13.7951515431   |
| 17.281537462    | 12.5872475255   |
| 1.4805727488    | 0               |
| 165.7649434747  | 132.0717082038  |
| 22.6927547947   | 28.6720312657   |
| 27.7921264233   | 2.2244814054    |
| 0               | 0               |
| 1.6138472375    | 6.7169601222    |
| 4306.3875541233 | 5489.0799418978 |
| 32.4359373363   | 31.1540635822   |
| 15.5404910549   | 13.4751574102   |
| 70.804667635    | 70.7267133465   |
| 694.1105835618  | 191.3616266354  |
| 2.0579491921    | 3.5688948577    |
| 21.8899230429   | 23.1442680295   |
| 5.205454117     | 2.2066725836    |
| 0               | 0               |
| 0               | 0               |

gene\_expression\_table

|                |                |
|----------------|----------------|
| 0              | 0              |
| 12.7480900273  | 9.8256594733   |
| 0              | 0              |
| 5.7689545031   | 3.0013557389   |
| 0              | 0              |
| 1.832783786    | 1.9070478477   |
| 993.2633222102 | 908.5634174147 |
| 12.4455463589  | 6.4749188034   |
| 11.874800837   | 17.2100949168  |
| 0              | 0              |
| 8.0914463301   | 4.4727585683   |
| 0              | 13.3829425434  |
| 47.5161327992  | 28.2522730028  |
| 2.9562864244   | 0              |
| 11.5713933057  | 15.7449606582  |
| 100.8519648605 | 4.9970699007   |
| 0              | 0              |
| 0.9896814753   | 1.8021205764   |
| 32.2083234916  | 53.6214381305  |
| 1.8352058339   | 0              |
| 3.9170853031   | 4.7551056918   |
| 348.3885695033 | 15.1043837591  |
| 72.9866351185  | 32.185807488   |
| 6.1906300737   | 5.8279996206   |
| 4.047025639    | 3.3244818734   |
| 5.4776533632   | 5.6996068693   |
| 0              | 5.1112255138   |
| 0              | 0              |
| 0              | 0              |
| 4.4788884207   | 0.9885637905   |
| 2.9085078495   | 2.4210880418   |
| 97.5650506294  | 87.9000507951  |
| 2.2452581403   | 1.7521766902   |
| 55.371583519   | 72.5089627892  |
| 7.5748120794   | 5.911306553    |
| 0              | 0              |
| 0.8402030137   | 3.0598675983   |
| 0              | 0.7090506054   |
| 2.3496620634   | 0              |
| 0              | 2.9158502637   |
| 8.5539840403   | 2.9668632998   |
| 0              | 0              |
| 17.735830752   | 18.4544833498  |
| 0              | 0              |
| 0              | 0              |
| 0.6447396825   | 0.6708644158   |
| 9.8070246135   | 17.8577060303  |
| 87.5727887999  | 107.2014377462 |
| 1.560980945    | 1.1601654326   |

gene\_expression\_table

|                 |                 |
|-----------------|-----------------|
| 8.7392128874    | 6.8199931388    |
| 55.8043920455   | 89.5177625996   |
| 35.0096356609   | 121.4273988477  |
| 176.7003654114  | 380.6683670327  |
| 0               | 0               |
| 259.6074143205  | 206.9055260179  |
| 0               | 0               |
| 0               | 0               |
| 0               | 0.6532486647    |
| 0.7596269073    | 0.7904068498    |
| 0               | 0               |
| 112.9547214725  | 262.4872980603  |
| 0               | 0               |
| 0               | 0               |
| 1.8795211782    | 5.0847654791    |
| 0               | 0               |
| 1.1705782846    | 2.1924178222    |
| 3173.565712653  | 5324.5546432888 |
| 0               | 0.0796867305    |
| 46.4816093233   | 52.2342384243   |
| 0               | 0               |
| 14.0345179169   | 6.8148238666    |
| 3.5495839172    | 14.0349671361   |
| 0               | 0               |
| 1.5806928954    | 3.9747938449    |
| 9.2811708901    | 13.215173573    |
| 18.3686747744   | 16.928630656    |
| 0.4933270152    | 2.0532661404    |
| 30.0412140649   | 18.3239356898   |
| 2.6239016144    | 3.3152691159    |
| 0.1292955995    | 0.8408414584    |
| 13.7553335325   | 35.7817427888   |
| 4.0745422037    | 2.7254840811    |
| 2519.0654124357 | 3414.1995884369 |
| 12.4067988034   | 12.9095200074   |
| 0.2756801035    | 0.2868506105    |
| 20.8531793488   | 14.465430892    |
| 690.7672666859  | 231.3905929     |
| 52.7556744446   | 29.0611718806   |
| 47.075103318    | 12.2456444601   |
| 3.8162204313    | 5.7356765278    |
| 0.7821821652    | 0.305203516     |
| 0.2306676805    | 0               |
| 0               | 0               |
| 0.4519209919    | 0.9404654945    |
| 1.9917303547    | 2.7632465362    |
| 44.3743530187   | 67.1598452886   |
| 2.8782573219    | 5.7175053961    |
| 0               | 0               |

gene\_expression\_table

|                |                 |
|----------------|-----------------|
| 18.4755872197  | 31.4949898986   |
| 12.8504152054  | 11.4966567581   |
| 0              | 0.5315030844    |
| 4.7820325911   | 5.8050996168    |
| 8.9258631894   | 0               |
| 0              | 0               |
| 0              | 0               |
| 65.8012429289  | 46.5227865465   |
| 95.4688091314  | 153.4309404588  |
| 1584.202014402 | 2646.9397045335 |
| 1.0979344665   | 3.2844648859    |
| 28.4179861074  | 60.8355647231   |
| 2.6079165218   | 2.0351916145    |
| 8.1569195177   | 12.7311545928   |
| 0              | 0               |
| 0.5181889524   | 1.3864779601    |
| 10.3550967103  | 6.0607593693    |
| 0              | 0               |
| 0              | 0               |
| 1.5208730817   | 0.7912492895    |
| 10.0489969294  | 5.0344572467    |
| 666.3424711309 | 524.0817070265  |
| 0              | 0               |
| 2.8580519787   | 0.7434649297    |
| 2.8135856716   | 1.4637958226    |
| 6.44937031     | 4.2704439323    |
| 0              | 0               |
| 0              | 0               |
| 0.5618349541   | 0.5846004031    |
| 7.5778259874   | 9.8560976272    |
| 0.3004940895   | 0.2233357533    |
| 40.6271328003  | 21.568028951    |
| 1.3681140308   | 0.9964848316    |
| 0.0183908228   | 0.0191360155    |
| 5.0361397929   | 0               |
| 0              | 0               |
| 0              | 0               |
| 39.0934323461  | 23.845425776    |
| 0.2481104513   | 0               |
| 1.5221580722   | 0.7919178186    |
| 0.9617399847   | 1.2316424761    |
| 20.5802499134  | 19.1600359729   |
| 0              | 0               |
| 0              | 0.1617717872    |
| 2.11593646     | 0               |
| 5.3938381435   | 3.1429414645    |
| 0.7883624111   | 0.6941056784    |
| 0.5023993541   | 0.5227564834    |
| 15.7680597489  | 5.8596352242    |



gene\_expression\_table

|                |               |
|----------------|---------------|
| 4.5359105854   | 0             |
| 81.9841491605  | 77.1385234319 |
| 1.0384052202   | 0.9904411079  |
| 5.2869881265   | 0.6112462125  |
| 3.8114441248   | 1.5863532557  |
| 1.2486577682   | 2.1654219186  |
| 7.1505091403   | 2.2546201378  |
| 3.3212265973   | 3.6285921921  |
| 5.4564802      | 1.5484297564  |
| 11.3687337965  | 22.6301427431 |
| 14.0703978697  | 9.1928895499  |
| 14.1061364542  | 13.8389879639 |
| 0              | 0.1675168103  |
| 56.3264635548  | 60.701972973  |
| 4.3960863842   | 2.541230553   |
| 2.0752909806   | 3.0231339449  |
| 8.7302314921   | 18.7241197021 |
| 0              | 0             |
| 0              | 0             |
| 4.9422480775   | 4.2075057764  |
| 0.5783182226   | 0.6017515705  |
| 10.6836724747  | 8.0847803033  |
| 0.2957685602   | 0.1025843493  |
| 1.8832169256   | 2.6126993717  |
| 0.2561930077   | 1.5994434076  |
| 12.7890061507  | 4.7905971574  |
| 2.5722814432   | 4.4608496897  |
| 0.4733531383   | 0.3940266563  |
| 5.4888551894   | 3.5146231332  |
| 0.1193046053   | 0             |
| 75.2918068128  | 39.1713084837 |
| 0.6671082548   | 0.9255191447  |
| 0              | 0             |
| 17.0378991141  | 2.8491865152  |
| 1.2176967976   | 0.5912842356  |
| 13.1847037617  | 9.1459636877  |
| 19.8624393022  | 10.3336308435 |
| 0              | 0             |
| 18.6300576574  | 5.8154832495  |
| 3.6898146355   | 1.9196626227  |
| 0.7946870088   | 0             |
| 7.8838966645   | 4.1016753532  |
| 0.6939385194   | 1.3538564634  |
| 0              | 0.3960222121  |
| 11.191327815   | 5.8223991792  |
| 10.9132852486  | 0             |
| 135.9923612745 | 175.716058083 |
| 1.1394589111   | 0             |
| 4.2552226375   | 2.066233622   |

gene\_expression\_table

|                 |                 |
|-----------------|-----------------|
| 14.8343146991   | 19.8455122291   |
| 3.2358420533    | 13.467831111    |
| 0.8191803851    | 0               |
| 3.0807798095    | 5.230209771     |
| 0               | 0.2713249132    |
| 0.146271683     | 0.1521985847    |
| 22.7141116419   | 7.8781610883    |
| 24.2380426795   | 11.6400755575   |
| 10.9829626887   | 15.7134866837   |
| 1.7457140765    | 0               |
| 0               | 0               |
| 1.0989571732    | 0.8576150367    |
| 0               | 0.8141913206    |
| 5.3120080786    | 6.8027688225    |
| 7.1147770625    | 3.7015332598    |
| 60.5591724968   | 15.7532547551   |
| 0               | 0               |
| 7.1921674817    | 3.6547778714    |
| 78.841420547    | 75.5595293128   |
| 0               | 0               |
| 174.0270114018  | 184.2005979063  |
| 0               | 6.889087229     |
| 0               | 0               |
| 44.7622285814   | 18.9921495679   |
| 0               | 0               |
| 4.2504193818    | 7.14427365      |
| 8.0411561343    | 4.4295788652    |
| 0.5254563867    | 0.9112463046    |
| 1.3161101386    | 2.0541580187    |
| 347.0034200306  | 185.7901800139  |
| 0               | 0               |
| 0               | 8.95883883      |
| 149.4617984339  | 67.2510110261   |
| 2.9402905207    | 5.0990509191    |
| 24.9247571603   | 39.7297589101   |
| 348.2368983803  | 113.2335604404  |
| 22.9842582883   | 30.1544221701   |
| 32.3427201836   | 8.4133103132    |
| 15.4893914551   | 5.7189421357    |
| 27.0811621641   | 8.0509959631    |
| 38.6581390433   | 12.798723548    |
| 1366.4238015595 | 1459.4045621504 |
| 0               | 0               |
| 0.8706832185    | 0               |
| 0               | 0               |
| 29.1968461857   | 4.7257617586    |
| 23.9540915015   | 16.3440700855   |
| 0               | 0               |
| 81.3303395538   | 26.7981794821   |

gene\_expression\_table

|                 |                 |
|-----------------|-----------------|
| 2.6908746285    | 0.9333027911    |
| 0               | 3.8430479954    |
| 2.7942632051    | 3.738196589     |
| 29.9008823302   | 27.3575084401   |
| 30.8214846925   | 12.6234417707   |
| 277.8603502303  | 146.3894685981  |
| 0               | 0               |
| 0               | 0               |
| 10.3513892726   | 14.361100881    |
| 0               | 0               |
| 1.2760020348    | 1.3277054024    |
| 0               | 0               |
| 0               | 0               |
| 11.4467681108   | 3.9701963493    |
| 0.9154354304    | 0               |
| 29.1945018278   | 1.8985911043    |
| 0               | 6.8713424036    |
| 0               | 0               |
| 97.6420331615   | 15.131687077    |
| 101.2620242352  | 30.8828866886   |
| 0               | 0               |
| 0               | 0               |
| 0               | 0               |
| 0               | 0               |
| 5.34309743      | 6.11555863      |
| 0               | 0.468251804     |
| 67.1202918362   | 27.2170563715   |
| 10.700895306    | 9.4214945967    |
| 31.9716094258   | 14.0745394119   |
| 17.2368499944   | 7.1741135935    |
| 6.9658296954    | 0               |
| 7.9224584191    | 7.6093615164    |
| 15.019455544    | 2.0837388158    |
| 0               | 0               |
| 0               | 0               |
| 0               | 0               |
| 210.4597615618  | 204.0565828856  |
| 372.4940141452  | 112.8895348662  |
| 26.7658133476   | 35.8076046576   |
| 14.9861390059   | 10.1695921306   |
| 5.3463543711    | 0.927164611     |
| 0.3399756528    | 0               |
| 0               | 0.9772223036    |
| 4827.5964662126 | 1607.6325799333 |
| 18.5150317475   | 12.1095903822   |
| 0               | 0               |
| 4.4197630467    | 2.4346858404    |
| 2.5000041632    | 7.6508937404    |
| 732.000188708   | 2056.0018306639 |

gene\_expression\_table

|                 |                 |
|-----------------|-----------------|
| 2.008628527     | 1.0450088926    |
| 79.097945075    | 40.1477947568   |
| 16.9684765639   | 12.8407535355   |
| 7.0019271322    | 7.2856439309    |
| 41.1770307802   | 7.560973498     |
| 93.5913496495   | 115.5936054562  |
| 28.3982110488   | 0               |
| 124.9843993093  | 86.6991627772   |
| 1.8613410672    | 0               |
| 15.1496241587   | 63.0539365653   |
| 179.9808073837  | 68.099489663    |
| 165.3737599004  | 231.6389845193  |
| 0               | 0               |
| 1.9104191877    | 4.969572554     |
| 25.966092488    | 31.717057042    |
| 3.1549766328    | 11.4898549686   |
| 0               | 10.7633969928   |
| 151.2913983011  | 53.5903652477   |
| 4.1557572505    | 1.0810369424    |
| 108.2116011336  | 73.1876049418   |
| 156.8431677607  | 81.5992120256   |
| 9.9735686838    | 3.8916359442    |
| 1.9813633372    | 2.7488637532    |
| 48.655727225    | 13.6304130138   |
| 21.2920612111   | 8.4399282334    |
| 0               | 0               |
| 73.0425784766   | 8.085345778     |
| 1.7254697219    | 0               |
| 14.6140904962   | 8.6892861448    |
| 13.3610210901   | 15.4471191173   |
| 17.1407176196   | 0               |
| 5.808500026     | 3.6263156268    |
| 1.849232139     | 0.2405203356    |
| 0               | 0               |
| 3.632013638     | 0               |
| 1737.8660237811 | 1539.7270002772 |
| 27.8450284903   | 23.4545793637   |
| 1.6853043252    | 1.0315250272    |
| 0.2002618138    | 0.4167527713    |
| 45.8174554367   | 10.7941064826   |
| 75.4535178973   | 30.1964925212   |
| 6.7852551199    | 56.4815392686   |
| 35.4659996267   | 18.451537702    |
| 4.1651053673    | 26.0032480212   |
| 0               | 0               |
| 99.10082783     | 65.1261316637   |
| 778.0866650735  | 147.8426649064  |
| 10.2236727451   | 2.9012547499    |
| 8.9612618536    | 6.993277901     |

gene\_expression\_table

|                 |                 |
|-----------------|-----------------|
| 0.8695776756    | 0               |
| 0               | 0               |
| 7.6146157526    | 0               |
| 7.4289348139    | 0               |
| 1391.3308313989 | 751.0661935504  |
| 75.8292215652   | 69.6192420588   |
| 3.8461915815    | 6.0030578347    |
| 8.9299629505    | 2.654800973     |
| 20.666747073    | 11.2195616664   |
| 0               | 0               |
| 107.3273235066  | 37.2254023005   |
| 11.3091771436   | 2.13953144      |
| 36.4089412373   | 17.8278705107   |
| 56.8103888858   | 32.1262692323   |
| 7.3350880649    | 2.289691345     |
| 0               | 1.0244495188    |
| 0               | 0               |
| 0               | 0               |
| 35.0920316819   | 25.7745560096   |
| 13.9240753756   | 11.854044284    |
| 135.8641453214  | 75.1024594758   |
| 0               | 1.2208570411    |
| 21.6095784412   | 26.2327270128   |
| 35.8721069532   | 33.1783449997   |
| 0               | 0               |
| 14.8167288228   | 7.7085499738    |
| 19.0148180906   | 3.957059004     |
| 0               | 0               |
| 4351.4263546062 | 3679.4816223122 |
| 52.0158769398   | 40.5926630248   |
| 27.4227374012   | 24.1440706468   |
| 19.4831487622   | 17.4569631469   |
| 0               | 1.1848599238    |
| 8.2538814139    | 2.732649554     |
| 2.1639509901    | 0               |
| 19.0680243741   | 3.6073922204    |
| 0               | 0               |
| 0               | 0               |
| 24.1103604544   | 2.5730572126    |
| 3.9668142287    | 9.6309472259    |
| 13.4322893178   | 3.811789966     |
| 2.5211174848    | 2.6232727013    |
| 81.5748993161   | 60.6287851589   |
| 162.1419234283  | 37.4915298496   |
| 1.0028637284    | 2.0869991642    |
| 9.0925298073    | 4.204869974     |
| 1.4410122854    | 1.499401838     |
| 5.1979371724    | 2.7042783149    |
| 46.2065960263   | 33.2853776259   |

gene\_expression\_table

|                 |                |
|-----------------|----------------|
| 4.3790793784    | 4.5565188689   |
| 362.2736211864  | 164.5850609978 |
| 59.7475467269   | 10.3614177206  |
| 1.6360285269    | 0              |
| 0               | 0              |
| 1788.0254684045 | 757.9716757136 |
| 29.5662019871   | 19.5772303045  |
| 0               | 0              |
| 0               | 0              |
| 45.1332553061   | 54.1869767358  |
| 108.2116011336  | 42.2236182357  |
| 13.902050533    | 6.1994395979   |
| 14.8063852284   | 61.625348931   |
| 157.9581665836  | 97.1209923399  |
| 0               | 0              |
| 1.8066550926    | 0.9399302122   |
| 61.6880518361   | 30.5655430204  |
| 177.0260283151  | 184.1990904007 |
| 0               | 0              |
| 40.8350429482   | 33.3847417929  |
| 0               | 0              |
| 1.5768912353    | 0              |
| 118.9398394974  | 67.6808452594  |
| 2.7709655096    | 0              |
| 39.9543270097   | 45.3526570761  |
| 0               | 0              |
| 35.4360047014   | 30.167889619   |
| 21.4225306268   | 2.2290567625   |
| 35.9305445765   | 22.4318661778  |
| 0               | 0              |
| 0               | 0.988024647    |
| 171.6637285812  | 146.5595989895 |
| 10.5941427683   | 3.149547281    |
| 10.117804781    | 2.9243823246   |
| 0               | 3.0200875303   |
| 3.3568178581    | 6.9856709997   |
| 0               | 0              |
| 5.2072764861    | 5.4182743709   |
| 12.4800318839   | 12.9857204789  |
| 12.822343477    | 2.3203308652   |
| 23.5114594421   | 7.5722336397   |
| 11.6012746884   | 5.3650472016   |
| 1.0667383545    | 0              |
| 0.3374046947    | 0.5266144063   |
| 5.3395022668    | 5.5558579159   |
| 0               | 0.3155651666   |
| 157.3522485649  | 46.0485373264  |
| 0.3780017823    | 0.7866366899   |
| 0               | 0              |

gene\_expression\_table

|                 |                 |
|-----------------|-----------------|
| 1.5599837655    | 2.4972215701    |
| 106.8189648755  | 165.4284646284  |
| 10.104342322    | 10.5137684132   |
| 0               | 0               |
| 41.1907154033   | 85.7195112204   |
| 3.3295877272    | 0               |
| 41.2681295764   | 5.3675383239    |
| 389.2131629498  | 195.5095214305  |
| 36.6082240772   | 35.370755252    |
| 0               | 0               |
| 208.7572400271  | 69.9086121746   |
| 0               | 0               |
| 0               | 3.0025684079    |
| 0               | 0               |
| 6.760481369     | 24.6204519043   |
| 22.6869371684   | 21.4601888062   |
| 1.2224608696    | 1.2719947591    |
| 208.4003680608  | 92.933448265    |
| 5502.2008631318 | 7266.9713422959 |
| 108.3637439823  | 67.0432893181   |
| 21.0798588225   | 13.9580068869   |
| 0               | 0               |
| 12.7933260975   | 14.642880248    |
| 6.4292386476    | 17.5605943125   |
| 135.3945850032  | 103.5042235112  |
| 83.5034809398   | 16.438086117    |
| 4.62006836      | 5.8193300859    |
| 5.0804945351    | 3.8179232279    |
| 21.8715863921   | 3.2511170067    |
| 0.3323832174    | 0.2305675494    |
| 7.0054139898    | 2.0185676516    |
| 4.9737611027    | 18.113539455    |
| 1.1136699945    | 8.8841003492    |
| 11.8779559285   | 10.4281159358   |
| 37.1562688396   | 22.0924765796   |
| 0               | 2.3590966988    |
| 1.9967632312    | 0               |
| 5.2903449443    | 0               |
| 2.4928326963    | 0               |
| 8.3038230369    | 4.9373099531    |
| 0               | 0               |
| 172.9343889814  | 53.1645809483   |
| 2.4891092718    | 3.0470206134    |
| 0.4376319382    | 0.4553647038    |
| 0               | 0.0220926455    |
| 29.7136198819   | 28.4442014675   |
| 6.8907486663    | 5.0189723738    |
| 0               | 0               |
| 9.7141279945    | 0               |

gene\_expression\_table

|                |                |
|----------------|----------------|
| 0              | 0              |
| 5.4557494106   | 2.8384076863   |
| 1.4512608597   | 1.7617432963   |
| 0              | 3.4846930377   |
| 3.2117281077   | 2.8962845075   |
| 2.1641617577   | 0              |
| 114.8150649823 | 45.5113715366  |
| 20.3848153817  | 7.9540516309   |
| 0              | 0              |
| 0              | 0              |
| 28.3429875671  | 30.6257263686  |
| 0              | 0              |
| 0.7028505514   | 0.8532182475   |
| 0.3390073962   | 0              |
| 10.8917248597  | 5.9240972174   |
| 0.8550984722   | 0              |
| 15.3381229764  | 26.5993681607  |
| 0.927762912    | 0.9653556945   |
| 1.189987616    | 3.3018818538   |
| 5.8604178676   | 2.5407837171   |
| 0.2627654774   | 0              |
| 5.5246083837   | 4.9272552845   |
| 0.0842871782   | 0.4385123957   |
| 1.0013572031   | 0              |
| 2.9229621326   | 3.0414000202   |
| 4.1259726989   | 3.1633783656   |
| 87.787557211   | 49.5871189876  |
| 1.9590798904   | 3.397435745    |
| 0.8345228391   | 0              |
| 26.5035020149  | 25.4560791125  |
| 1.860509833    | 0              |
| 0.2101023945   | 0.1093078524   |
| 1.5906445611   | 0.827548593    |
| 0.9780547921   | 0.5088426961   |
| 16.8081019062  | 83.4098547938  |
| 0              | 0              |
| 3.1985770777   | 3.3281828321   |
| 3.4712464874   | 1.5802065808   |
| 0              | 0              |
| 1.603083426    | 2.9654045714   |
| 2.1546778851   | 0.8007089416   |
| 41.9621955042  | 30.2726638537  |
| 0.886697168    | 1.845251948    |
| 0              | 0              |
| 7.8135124055   | 3.97052103     |
| 360.1455892191 | 471.2737236708 |
| 1.370781161    | 0              |
| 1.2780010958   | 0              |
| 0              | 1.6131577408   |



gene\_expression\_table

|               |                |
|---------------|----------------|
| 4.0640376965  | 3.7001227865   |
| 0.8094836323  | 1.0528547001   |
| 21.4957582387 | 3.9141834211   |
| 0.6213492384  | 1.2930523904   |
| 1.3890499488  | 1.2847413307   |
| 0             | 0              |
| 7.3634709015  | 3.2836445945   |
| 0.6026067166  | 0.2090080766   |
| 0             | 0.2928481626   |
| 0.7657478035  | 0.5975818227   |
| 2.8496027658  | 1.0263697426   |
| 0.1799611945  | 0.187253189    |
| 0             | 1.6735674699   |
| 44.6317889419 | 44.8388725113  |
| 1.7275185872  | 3.3499186462   |
| 0.831483214   | 2.5955242823   |
| 0.2769146732  | 0              |
| 0             | 0              |
| 175.446249627 | 105.1518524376 |
| 11.6228517647 | 5.3750255907   |
| 1.8924127384  | 1.9690929543   |
| 4.8313921826  | 5.8005684285   |
| 0.082280846   | 0.6849188055   |
| 0.4798878815  | 1.2483321255   |
| 6.7672589229  | 13.8628881739  |
| 6.571807234   | 3.6820515058   |
| 0             | 0              |
| 7.5484190059  | 12.0835070073  |
| 1.0689107984  | 0.5561114336   |
| 12.2017840561 | 7.6177188602   |
| 66.9344509083 | 47.8820529961  |
| 46.3173222686 | 40.1617430352  |
| 48.3349907239 | 102.8731001971 |
| 0             | 0.2669473575   |
| 7.5404700101  | 9.5382848031   |
| 12.1826058737 | 4.2254142738   |
| 5.3347406317  | 3.5684378615   |
| 0             | 0              |
| 0.2152240966  | 0.0746483125   |
| 0             | 1.7831995635   |
| 0.5154155255  | 0.1787666892   |
| 0             | 0              |
| 35.8207920306 | 27.8560980957  |
| 0             | 0              |
| 0             | 0              |
| 0             | 0              |
| 0             | 0              |
| 10.1719659942 | 6.8040849755   |
| 0             | 0              |

gene\_expression\_table

|                |                |
|----------------|----------------|
| 3.406434362    | 3.2222385958   |
| 1.0762753704   | 1.9198043149   |
| 3.1519470621   | 7.5684539467   |
| 59.4208827762  | 197.8515392313 |
| 2.8090327138   | 3.6535677529   |
| 5.7282368261   | 1.1920687856   |
| 0              | 0              |
| 2.6466194775   | 0.6119688915   |
| 1.5720978509   | 0.7270217629   |
| 20.860533981   | 15.5041421275  |
| 0              | 0              |
| 82.6616397548  | 108.9473606328 |
| 0.6159066628   | 1.6021577185   |
| 0.3913344584   | 0.4071912586   |
| 42.4536824755  | 39.4409802462  |
| 80.4312383512  | 47.8230270433  |
| 1.9448889611   | 0.4047391008   |
| 0.2486175622   | 0.5173830001   |
| 6.9905047388   | 4.8491724695   |
| 7.8917370656   | 25.045101837   |
| 3.1019837483   | 1.7087694135   |
| 0.1818022662   | 0.2364610757   |
| 5.3791435037   | 4.1978290564   |
| 14.0038542643  | 4.8570959539   |
| 0              | 0              |
| 0.0544121338   | 0              |
| 0              | 0              |
| 0              | 0              |
| 0              | 0              |
| 4.5544101051   | 4.7389539643   |
| 8.4675088187   | 8.2599475478   |
| 21.1539180777  | 18.3425591207  |
| 0              | 0              |
| 0              | 0              |
| 2.5301125901   | 0              |
| 0              | 0              |
| 118.0891914365 | 18.7435134517  |
| 2.1113121214   | 0              |
| 17.2536170352  | 8.350107173    |
| 0.2699206589   | 0.1404288972   |
| 1.9427878492   | 2.6953456737   |
| 11.568039074   | 3.4390782538   |
| 3.2053445998   | 3.3352245731   |
| 3.4795211389   | 7.2410213901   |
| 0              | 3.3598900479   |
| 12.6199065313  | 12.3105588949  |
| 0.1935300995   | 0.0503429759   |
| 2.6612243013   | 1.9778975858   |
| 0.7933628457   | 0              |

gene\_expression\_table

|                 |                |
|-----------------|----------------|
| 1.7104915983    | 1.5255432026   |
| 0               | 0              |
| 3.0273256128    | 4.7249884341   |
| 26.9005639578   | 29.9434003135  |
| 1.979196434     | 2.0593931092   |
| 1.136591204     | 2.601820475    |
| 3.1649231919    | 1.3172661188   |
| 0.3264877273    | 0.3397169499   |
| 2.717977847     | 0.8170095004   |
| 1.4688556105    | 0.6550171584   |
| 2.7356441317    | 4.9813608746   |
| 16.6893822282   | 9.4270578732   |
| 0               | 0.1273536231   |
| 0               | 0.1392455657   |
| 6.4735463278    | 3.7421406853   |
| 1.1185912879    | 1.163916401    |
| 12.339567993    | 9.6296737627   |
| 17.0255277632   | 42.5169576349  |
| 0               | 0              |
| 0               | 0              |
| 0               | 0              |
| 1.2667872729    | 0              |
| 18.0743889095   | 9.4033799108   |
| 30.5575989265   | 19.0774723265  |
| 1200.4504585987 | 268.9018555372 |
| 53.8285821634   | 44.4214912871  |
| 0               | 1.6619382331   |
| 3.2139993394    | 0              |
| 0               | 0              |
| 35.0418432374   | 15.9520078707  |
| 0               | 0              |
| 0               | 0.1640010646   |
| 0               | 0.2427731933   |
| 0               | 0              |
| 10.2662493375   | 2.9910260439   |
| 1.7156550665    | 1.785173094    |
| 0               | 0              |
| 0               | 0.1758701809   |
| 1.8306697325    | 5.7145443992   |
| 21.4877628912   | 25.7982035639  |
| 21.4158446892   | 30.2420431938  |
| 0.0476911818    | 0              |
| 6.7117429516    | 1.3967403081   |
| 16.9183620046   | 12.3227236435  |
| 1.1760839293    | 0.8838112354   |
| 53.1451658568   | 13.2929322586  |
| 4.5724048111    | 0.9515355625   |
| 0               | 0              |
| 4.2488474239    | 1.8947185455   |

gene\_expression\_table

|                 |                 |
|-----------------|-----------------|
| 1.5702346765    | 2.2874044152    |
| 0               | 1.1343974718    |
| 0.6877595805    | 0.178906868     |
| 0               | 0               |
| 0.4113595462    | 0               |
| 11.0412685182   | 12.6375245551   |
| 0               | 0               |
| 0               | 0               |
| 0               | 0               |
| 0               | 0               |
| 14.2967864433   | 8.3131088934    |
| 697.3949222602  | 424.3226550393  |
| 2.3979680271    | 2.8789999041    |
| 0               | 0               |
| 2.1435619609    | 2.7880233713    |
| 12.4966740965   | 31.094218987    |
| 0               | 0               |
| 39.4577691819   | 23.5178529407   |
| 9.32769119      | 1.3865210743    |
| 0.5567295819    | 0               |
| 0               | 0               |
| 0               | 0               |
| 0.9400680642    | 2.9344783475    |
| 1194.8432710905 | 2512.8285417985 |
| 76.8248324606   | 43.2996202883   |
| 33.0444822254   | 39.6731983422   |
| 48.4806530266   | 27.8775443014   |
| 10.5420172328   | 4.875190147     |
| 28.8015668416   | 11.9874404116   |
| 365.9099937956  | 87.0255084339   |
| 45.10036962     | 2.9329892685    |
| 10.3350851442   | 1.5362658417    |
| 4.9256148894    | 2.5625999491    |
| 3.1877676289    | 2.2112902577    |
| 2.6172859139    | 1.7020861609    |
| 65.1191660108   | 61.5979842112   |
| 0               | 0               |
| 0.919395031     | 1.5306379976    |
| 16.7501002442   | 16.5115053694   |
| 0               | 0               |
| 0.1084503327    | 0.1128447202    |
| 11.2533384162   | 10.0365613865   |
| 2.2946390414    | 8.4999179193    |
| 5.5622085046    | 3.8219921874    |
| 0               | 0               |
| 0.2026754871    | 0               |
| 2936.3856138584 | 999.4857329396  |
| 0.8657795477    | 1.3512911634    |
| 0               | 0               |

gene\_expression\_table

|               |               |
|---------------|---------------|
| 1.8746371083  | 2.9258955884  |
| 2.1155335396  | 1.1006272846  |
| 0             | 0             |
| 8.7524089152  | 22.1171333615 |
| 0.8226378662  | 2.5679130034  |
| 0             | 0             |
| 13.7458783953 | 7.151429429   |
| 14.062942257  | 0             |
| 0             | 1.8837406361  |
| 0.4846047044  | 0.5042407978  |
| 1.0372579718  | 1.0792874739  |
| 0.9536899     | 2.7785330698  |
| 9.1229488547  | 3.7970436253  |
| 23.9516306982 | 23.9252605111 |
| 0             | 0.0539521164  |
| 0             | 0             |
| 100.155522259 | 30.2556209769 |
| 27.2506171251 | 25.4614594507 |
| 11.3585302845 | 4.7275103364  |
| 1.9456610128  | 2.0244988389  |
| 0             | 0             |
| 0             | 0             |
| 24.2924002545 | 26.9618387645 |
| 0.4693236177  | 0.3255603495  |
| 0             | 0             |
| 12.1525269322 | 9.0321036334  |
| 0.6273490532  | 0.6527691214  |
| 26.505270723  | 10.0288216052 |
| 27.4902450917 | 13.3486008895 |
| 1.2207594004  | 0             |
| 7.8506555682  | 8.1687626869  |
| 3.2060537673  | 2.8355681045  |
| 5.1740118058  | 1.0767323624  |
| 5.7282278761  | 11.5142827797 |
| 0             | 0             |
| 3.3476469615  | 1.7416465001  |
| 0.530535151   | 0.3312194026  |
| 0             | 0             |
| 0.3768307572  | 0             |
| 10.4729679327 | 2.1794661332  |
| 0.3223573695  | 0.3354192308  |
| 25.1109904245 | 34.6838271702 |
| 0             | 0             |
| 7.7437669956  | 7.4679666913  |
| 0.8047317651  | 0.209334837   |
| 1.3869625813  | 1.6836890581  |
| 17.9668218201 | 10.4691071147 |
| 87.8110533789 | 77.8329720483 |
| 10.8150152183 | 1.4066547056  |

gene\_expression\_table

|                 |                 |
|-----------------|-----------------|
| 0.1492359946    | 0               |
| 0               | 0               |
| 0               | 0               |
| 2.8942416742    | 5.389028299     |
| 0.9380924272    | 1.6268395995    |
| 0.4924717259    | 0               |
| 0.5027226809    | 0.6974572152    |
| 4.6144568586    | 2.4007169006    |
| 1.8762435314    | 4.9891308002    |
| 0.2305723904    | 0.2741887328    |
| 9.4560905484    | 6.1495309981    |
| 0               | 0               |
| 8.5285348748    | 4.4370547691    |
| 1.4030650771    | 1.5926367445    |
| 0.8547695206    | 0.5929364162    |
| 0.091529339     | 0.0476190455    |
| 66.7728139794   | 43.0104604505   |
| 3.6822390604    | 1.2771475698    |
| 0               | 5.1054566362    |
| 0               | 0               |
| 26.5264279236   | 5.3421820453    |
| 22.981907339    | 11.2532376445   |
| 0.6629504943    | 4.4837853209    |
| 0               | 0               |
| 155.0879501969  | 189.5521105794  |
| 0.1191595811    | 0.2479758108    |
| 2.3221229822    | 1.6108099853    |
| 21.0804042561   | 8.2254668838    |
| 2.1455075928    | 0               |
| 4.5945019013    | 0.6829528961    |
| 21.1598870162   | 17.9400073467   |
| 4.1981575953    | 8.7365323368    |
| 0               | 0               |
| 19.4998672766   | 16.6828874991   |
| 0               | 0               |
| 0.0947917918    | 0               |
| 4.7702314021    | 2.2561455912    |
| 0               | 0               |
| 52.384749355    | 44.1250136131   |
| 24.6821820408   | 16.0514371965   |
| 2.432076266     | 2.5306235487    |
| 3.1242194553    | 0               |
| 3.8473015294    | 6.0047902189    |
| 1182.0900511376 | 1079.9895709275 |
| 10.1304477657   | 8.2494247654    |
| 1808.7224411084 | 2349.2394648276 |
| 6.0324295293    | 2.0922874878    |
| 40.7056114532   | 3.0253568098    |
| 28.1029218427   | 15.7812063517   |

gene\_expression\_table

|                 |                 |
|-----------------|-----------------|
| 0               | 0               |
| 3.9658701986    | 24.7593991748   |
| 1.4430712309    | 1.5015442116    |
| 0               | 0               |
| 40.1200132941   | 26.3656855886   |
| 64.2897756176   | 77.4571200446   |
| 20.7701536035   | 14.4078376032   |
| 9.571542115     | 30.4314365662   |
| 5.9283481233    | 9.2528455472    |
| 0               | 0               |
| 2.5453775125    | 2.6485157409    |
| 40.5540294776   | 32.4594394524   |
| 10.3349834048   | 8.3640316902    |
| 1200.1148256144 | 1189.7475130191 |
| 13.7553335325   | 0               |
| 1.7523224579    | 3.6466524827    |
| 10.8129684706   | 13.1262926234   |
| 2.7993594111    | 0.9709296464    |
| 298.7416143532  | 405.4520472825  |
| 20.3488608875   | 17.6444941545   |
| 650.9122116318  | 561.7309694934  |
| 82.9560120503   | 16.5994950751   |
| 4.7215148249    | 2.4564148683    |
| 1.3615970728    | 1.4167687356    |
| 2.1341597713    | 1.1103177662    |
| 0               | 0               |
| 0               | 0               |
| 3.8242830548    | 1.1369263715    |
| 1.2877356135    | 1.722747116     |
| 0.7860654045    | 0               |
| 0               | 0               |
| 0               | 0.2203702428    |
| 24.4076785028   | 102.6025594997  |
| 2.91810823      | 2.2772620788    |
| 2.0734834608    | 2.157500629     |
| 3.2115217912    | 3.3416520631    |
| 0               | 0               |
| 0               | 5.4536350229    |
| 0.7460864333    | 0               |
| 0               | 0               |
| 0               | 0               |
| 0               | 0               |
| 0.4925978887    | 0.341705243     |
| 0               | 1.2938242468    |
| 38.9980751665   | 33.2004027229   |
| 0.1470980111    | 0.1530583954    |
| 0               | 4.9471704866    |
| 0.3050334342    | 1.269573331     |
| 0               | 1.3731257963    |

gene\_expression\_table

|                 |                 |
|-----------------|-----------------|
| 2.5551344027    | 0               |
| 2.2332600609    | 17.4281351067   |
| 75.8515547318   | 75.9653565527   |
| 49.5026930091   | 105.0774073583  |
| 0               | 0               |
| 422.0691700038  | 689.9847612253  |
| 0               | 2.4175437512    |
| 8.0476091148    | 10.4671209438   |
| 12.9082777495   | 30.8130254551   |
| 9.5069269252    | 3.2973819515    |
| 2.6320124101    | 4.1079916028    |
| 0               | 0               |
| 1.2350542188    | 0               |
| 0               | 0               |
| 0               | 0.8176852096    |
| 8.0990409091    | 1.6854425112    |
| 33.6122234519   | 9.2037327789    |
| 0               | 0               |
| 4.5933259577    | 4.7794466801    |
| 0               | 0.2982806989    |
| 0               | 0               |
| 0.2845983729    | 0.8143581781    |
| 0               | 18.1189472889   |
| 99.8497955915   | 71.6522006423   |
| 0               | 0               |
| 0               | 0               |
| 0.61017111      | 1.4814219724    |
| 0               | 0.3478262167    |
| 2777.4310957624 | 2788.5695630105 |
| 0               | 0               |
| 0.5925976468    | 0.4624571958    |
| 2.0468350379    | 5.227623205     |
| 1.0015979429    | 2.6054562681    |
| 0.5886986337    | 0.306276297     |
| 202.0344872162  | 308.5500122303  |
| 1.7795897181    | 13.2264168997   |
| 13.0223386312   | 2.0846155994    |
| 0.5349100139    | 0.3339506816    |
| 0               | 0               |
| 13.0980009232   | 21.1245307403   |
| 1.651267001     | 1.718176036     |
| 13.2607243842   | 0.862377906     |
| 0               | 0               |
| 0.6068500034    | 1.5154546893    |
| 0.1050710679    | 0               |
| 4.5444741136    | 14.1858461048   |
| 28.4445562485   | 34.7000769208   |
| 0               | 2.8632484405    |
| 0               | 0               |



gene\_expression\_table

|                |                |
|----------------|----------------|
| 0              | 0.707084474    |
| 562.6280241568 | 594.2026037679 |
| 0              | 0              |
| 0              | 0              |
| 0.0983532813   | 0.1023385382   |
| 49.6979386603  | 17.2372299959  |
| 1.8485398308   | 1.9234423245   |
| 0              | 0              |
| 75.4254450926  | 41.5491195418  |
| 4.5461514181   | 0.5565130161   |
| 1.8337689118   | 1.4677483774   |
| 0.5292646826   | 0.110142078    |
| 0              | 0              |
| 0.153444993    | 0              |
| 11.3913719266  | 10.8222570709  |
| 7.1216181943   | 0.5292989181   |
| 15.023066207   | 21.8845173186  |
| 0              | 0              |
| 256.2649636744 | 361.6615539625 |
| 0              | 0              |
| 15.3819064839  | 24.0077677553  |
| 0              | 0              |
| 1.7358763528   | 1.8062137431   |
| 7.3744985071   | 8.9962966274   |
| 0              | 0              |
| 4.9000835477   | 3.2332801173   |
| 0.5926766809   | 2.1584214082   |
| 0              | 0              |
| 5.0827327901   | 8.8144736455   |
| 18.5558565713  | 8.1686577349   |
| 0              | 0              |
| 9.9095658521   | 41.2443985462  |
| 0              | 0              |
| 0.3347230071   | 0.3831145139   |
| 11.0574527881  | 39.7462683742  |
| 8.8400041949   | 7.3585596303   |
| 24.3507162138  | 14.4785158588  |
| 30.6634934517  | 29.7789077253  |
| 0              | 4.9655877879   |
| 2.444174669    | 0              |
| 0.7170648268   | 0.3730600808   |
| 0              | 0              |
| 0.1943924758   | 0.5056730578   |
| 0              | 0              |
| 24.1558181921  | 10.6631668179  |
| 27.4326065601  | 3.0046495504   |
| 0.694859617    | 0.3374070937   |
| 0.803697896    | 0.7433454105   |
| 8.6270508583   | 8.9766173712   |

gene\_expression\_table

|               |               |
|---------------|---------------|
| 4.9733900096  | 3.3636920573  |
| 0.7334281     | 0.7631464716  |
| 2.1347065362  | 5.5530111303  |
| 0             | 0             |
| 8.7627640723  | 4.1790052607  |
| 0             | 0             |
| 0             | 0             |
| 0.5742250982  | 2.3899703739  |
| 0             | 0             |
| 3.4001429994  | 4.0433327633  |
| 0.6620047971  | 0.9393124222  |
| 1.6223641518  | 0.7033758536  |
| 9.5296427418  | 6.0016575939  |
| 15.9384993806 | 12.8989190104 |
| 0             | 0             |
| 0             | 2.8794142404  |
| 10.2174043989 | 10.6314117446 |
| 0.2599840336  | 0.2705185387  |
| 0.9986302354  | 0.3463648496  |
| 0.1424059924  | 0.0987841713  |
| 0             | 0             |
| 0             | 0             |
| 0             | 0             |
| 0.1294695481  | 0.1347156304  |
| 3.9660589687  | 1.9258227091  |
| 5.9468776307  | 3.627356838   |
| 32.0358730875 | 39.5069164667 |
| 5.0335496935  | 4.8128453736  |
| 0.1267914951  | 0.1319290631  |
| 0             | 0             |
| 5.9846703337  | 1.6983185657  |
| 5.9844749541  | 5.0947893637  |
| 2.634092559   | 2.7408255047  |
| 0.0280568906  | 0.0583875013  |
| 0             | 0             |
| 1.0395966992  | 0.8499236162  |
| 0.8409143516  | 0.4861044702  |
| 16.4565935176 | 15.2208103628 |
| 7.138851041   | 3.0113983667  |
| 57.9144064943 | 53.1715478702 |
| 0             | 0             |
| 0             | 0             |
| 0             | 0             |
| 10.1958721394 | 3.1434094821  |
| 0             | 0             |
| 0             | 0.7095728836  |
| 2.286814172   | 4.1640820573  |
| 19.7848823538 | 19.214124669  |
| 11.0231142    | 2.4578075911  |

gene\_expression\_table

|                 |                 |
|-----------------|-----------------|
| 78.1347832641   | 71.5446954651   |
| 4.730076926     | 1.367149659     |
| 0               | 0               |
| 13.5926481032   | 14.1434197026   |
| 0.9782557426    | 0               |
| 0               | 0               |
| 0               | 0               |
| 13.7714371527   | 2.9853027607    |
| 5.2549412835    | 6.0754117079    |
| 6.8899889366    | 1.19486167      |
| 34.1929159387   | 20.8829777866   |
| 1.9071396858    | 3.9688332697    |
| 0.9540611768    | 0               |
| 0               | 0               |
| 43.5622318181   | 22.9658651531   |
| 7.6689307752    | 0               |
| 0               | 0               |
| 0               | 0               |
| 37.9103382324   | 30.1038759643   |
| 5.9681214454    | 2.8979760264    |
| 13.8709726774   | 25.9794394871   |
| 6.672507137     | 3.471437949     |
| 7053.4867774202 | 2614.8838399124 |
| 261.1888845022  | 298.5666532726  |
| 189.7164084966  | 58.0374462913   |
| 0               | 0               |
| 10.4186224286   | 12.6475802738   |
| 0               | 0               |
| 0.9342474269    | 0.8640915206    |
| 16.8280591492   | 5.0028368596    |
| 0               | 0               |
| 8.3501322061    | 0.7898616387    |
| 0.2349905039    | 0               |
| 74.6971863535   | 100.6709595535  |
| 0               | 0.9220372517    |
| 0               | 4.8934196572    |
| 0               | 0               |
| 0               | 0               |
| 13.6424131139   | 19.7155571978   |
| 7.0542004279    | 0.6672759392    |
| 11.8173318927   | 1.1178334551    |
| 100.2588079867  | 92.0481850885   |
| 7.8466715063    | 2.7215390638    |
| 1.3914081804    | 1.6086530931    |
| 4.8396465929    | 1.3136734388    |
| 0.6838633214    | 0.7115733373    |
| 5.2184645073    | 6.0332396985    |
| 0               | 0               |
| 17.2253679994   | 33.8551916208   |

gene\_expression\_table

|                |                |
|----------------|----------------|
| 0.4581959465   | 0              |
| 2.4025725706   | 1.4285282109   |
| 12.0437869727  | 25.8990512753  |
| 0.7417361719   | 0              |
| 6.2973950375   | 2.839444541    |
| 2.1365539376   | 1.6673450324   |
| 223.0561375381 | 160.5138365153 |
| 0              | 0.6916566636   |
| 9.5459676091   | 5.5623503374   |
| 0.9137789425   | 0              |
| 11.2244633417  | 6.4884869613   |
| 0.1339091065   | 0              |
| 0.1495205317   | 0.077789538    |
| 0              | 0              |
| 1.0131063636   | 0              |
| 2.2017378162   | 1.5273012182   |
| 0              | 0              |
| 2.2718653308   | 0.4727841792   |
| 64.2479407954  | 36.8834513277  |
| 0              | 0              |
| 0.854681843    | 0              |
| 21.9855114288  | 0              |
| 0              | 0              |
| 6.5625833189   | 2.2761659957   |
| 14.6902208873  | 3.0570931868   |
| 0              | 0              |
| 0              | 0              |
| 0              | 0              |
| 0              | 0              |
| 0              | 0              |
| 36.1548106591  | 64.62888191    |
| 0              | 0              |
| 1.1032496905   | 1.1479531649   |
| 3.4416742203   | 0              |
| 0              | 0              |
| 0              | 1.4917909886   |
| 8.2043061119   | 0              |
| 3.1131303147   | 0              |
| 2.3048158095   | 1.5988043479   |
| 110.8860323403 | 32.965461132   |
| 3.2824981434   | 2.7324034912   |
| 358.2886113534 | 446.5006883028 |
| 17.7850443699  | 11.566056934   |
| 5.8789905364   | 1.2234412302   |
| 2.7581242262   | 6.6963934618   |
| 410.3591889235 | 350.6152328529 |
| 60.2106462383  | 77.567125433   |
| 2.4298303632   | 0.8427622141   |
| 24.1910166207  | 9.4392120607   |

gene\_expression\_table

|                |                  |
|----------------|------------------|
| 0              | 0                |
| 0.5828714634   | 0.151622327      |
| 247.5404803198 | 302.3656924176   |
| 0              | 1.056920185      |
| 0              | 0                |
| 22.7925177847  | 10.1640284616    |
| 0              | 5.3435539462     |
| 0              | 0                |
| 4.5556551598   | 9.4804989368     |
| 5.9635651927   | 3.723124654      |
| 0              | 7.4934453567     |
| 1.7013794711   | 5.3109571624     |
| 7.7599937483   | 1.0093034083     |
| 11.8582631259  | 8.1083265314     |
| 971.5365414686 | 1338.836711846   |
| 27.9888924665  | 38.8306629839    |
| 15.5673964713  | 26.5650225982    |
| 53.9501004213  | 0                |
| 0              | 0                |
| 11.801131874   | 22.391685796     |
| 27.3793558814  | 24.5592778815    |
| 49.5478292604  | 33.9884395427    |
| 2.7916686057   | 2.9047865037     |
| 0              | 5.6555226861     |
| 2.6476940856   | 1.101991265      |
| 136.0744684914 | 113.270544728    |
| 0              | 0                |
| 775.9214264219 | 422.1230804091   |
| 17.9613996277  | 11.2135153409    |
| 17.9079492676  | 8.3134416339     |
| 63.4036267898  | 10.995455013     |
| 11.5232821767  | 0                |
| 11.0303061786  | 6.8863512929     |
| 6.9171145361   | 6.5430861309     |
| 2.1785671834   | 3.0224564329     |
| 0              | 0                |
| 52.587135844   | 31.6788171583    |
| 14.6366752225  | 29.6980136868    |
| 0              | 3.9633902984     |
| 0              | 0.5631827132     |
| 186.5974379582 | 343.5108947246   |
| 512.5159549103 | 131.9649475133   |
| 22308.82707972 | 26993.2228437573 |
| 7.7908305631   | 4.0532567918     |
| 36.4142711189  | 18.9448853413    |
| 0              | 0                |
| 32.9221358334  | 24.9135525222    |
| 827.711253704  | 741.196936446    |
| 9.0189348614   | 9.384380442      |

gene\_expression\_table

|                |                |
|----------------|----------------|
| 3.4220620308   | 6.2312658703   |
| 57.5375751296  | 35.477918272   |
| 7.2859499233   | 1.6847056163   |
| 4.0556307069   | 8.4399282334   |
| 26.7163065009  | 32.6334282924  |
| 140.8195586832 | 84.9848139442  |
| 0.9345850807   | 2.9173628886   |
| 0              | 2.7734856934   |
| 6.2524578454   | 21.3762206558  |
| 10.5906160896  | 8.3959968795   |
| 20.2485863604  | 21.0690553529  |
| 3.8153709747   | 0              |
| 3.2341935566   | 9.2544168317   |
| 582.6483271577 | 470.0689342368 |
| 149.8590764908 | 137.1928087174 |
| 316.4695118141 | 448.2388659723 |
| 4.0091869736   | 0.8343276984   |
| 0              | 0.9812592697   |
| 0              | 2.1827583781   |
| 0              | 0              |
| 19.526269909   | 2.2574967524   |
| 0              | 0              |
| 0              | 0              |
| 4.5365015932   | 6.8182397151   |
| 12.6572889067  | 7.9020959542   |
| 14.5542240826  | 9.7354019338   |
| 0              | 0              |
| 5.1780175788   | 1.7959432994   |
| 114.9710429348 | 171.3613882974 |
| 0              | 2.9590157944   |
| 2.1527692255   | 4.4799980766   |
| 0.6581738813   | 0.489173547    |
| 0              | 0              |
| 0              | 0              |
| 21.1326279025  | 20.9418267578  |
| 26.1264117289  | 6.6452342302   |
| 21.2017640898  | 75.0069092729  |
| 19.420537379   | 3.6740825417   |
| 43.3923386099  | 55.1840522248  |
| 0              | 0              |
| 10.8652561203  | 1.4131892873   |
| 0              | 0              |
| 4.7168374114   | 4.9079627952   |
| 5.0853178439   | 1.763791329    |
| 16.3005411554  | 25.1274608636  |
| 5.423198972    | 0              |
| 0              | 0              |
| 310.6298704856 | 135.8978615869 |
| 25.0925451904  | 19.5819678774  |

gene\_expression\_table

|                |               |
|----------------|---------------|
| 3.4289272787   | 0             |
| 22.6298025184  | 4.7093515903  |
| 13.4094440351  | 31.3937825385 |
| 22.3719091842  | 3.4486540484  |
| 1.5623294028   | 0             |
| 20.9555419608  | 18.5980895077 |
| 10.5699521594  | 6.5989468053  |
| 0.2407223108   | 0.429388002   |
| 2.9004783102   | 0.6964627287  |
| 1.0089048933   | 1.7059014925  |
| 0.5151269746   | 0.5955553609  |
| 0.5600412211   | 1.7482019649  |
| 0              | 0.0571343975  |
| 3.2416869813   | 1.4455883748  |
| 17.4655047196  | 8.9011610235  |
| 0.9986767823   | 0.6927619878  |
| 2.8713893357   | 4.3820150045  |
| 9.0558561975   | 15.4533884311 |
| 0.1371187205   | 0.4280242374  |
| 0              | 0             |
| 3.5955625867   | 0.8802950873  |
| 2.7440160615   | 3.3157197142  |
| 0              | 0             |
| 0              | 0             |
| 88.9067078149  | 20.3068956407 |
| 22.1275857586  | 16.744866517  |
| 7.1319590996   | 9.5412147038  |
| 0.4054742591   | 0.8438080029  |
| 0.0692592625   | 0.3122844185  |
| 17.9812547819  | 11.8368450898 |
| 4.9971772144   | 8.3194590646  |
| 3.9660799442   | 1.3755949245  |
| 34.489770675   | 21.2536376692 |
| 6.5769855343   | 4.6660116666  |
| 8.1362828371   | 3.8481652365  |
| 18.2706185035  | 3.7094518249  |
| 0.8922199369   | 1.3925587868  |
| 34.9352369176  | 29.3794187804 |
| 102.0280810688 | 206.426578041 |
| 11.7653767415  | 13.3550265181 |
| 0.7613224256   | 0.7921710702  |
| 193.9902338093 | 70.8624736012 |
| 0              | 0             |
| 1.3691883145   | 0.407047878   |
| 0              | 0             |
| 3.719740577    | 4.3349194342  |
| 0              | 0.5094481676  |
| 0.4145728929   | 0.7189521836  |
| 0              | 0             |

gene\_expression\_table

|                |                |
|----------------|----------------|
| 2.4519816188   | 3.8270031941   |
| 0              | 3.1052708731   |
| 8.3494560581   | 0.9653082756   |
| 11.2207813472  | 5.8377226711   |
| 4.3983508855   | 4.377589895    |
| 0              | 0              |
| 0.0287630405   | 0              |
| 49.7855655406  | 56.5122190835  |
| 25.1493477828  | 6.5420986815   |
| 8.3322932873   | 12.3855946825  |
| 7.8979083292   | 2.7393100404   |
| 97.0850545693  | 171.4260513413 |
| 4.2114194022   | 0              |
| 3.6852070901   | 2.9175779372   |
| 0.7437223446   | 1.3542512149   |
| 0              | 0              |
| 0              | 0              |
| 0              | 0              |
| 4.735047114    | 2.8918821629   |
| 0              | 0              |
| 0              | 0              |
| 0              | 0              |
| 0              | 0              |
| 81.7292132152  | 76.5367793031  |
| 0.1380169995   | 0.143609423    |
| 0.0372046307   | 0.077424311    |
| 0              | 0              |
| 0              | 0              |
| 0              | 0              |
| 12.4956000218  | 4.7279707036   |
| 0.1787969033   | 0.9302086045   |
| 2.0254914923   | 0.6021611528   |
| 152.2484572851 | 68.8771898925  |
| 1.0948623213   | 3.7431709491   |
| 6.177789277    | 0              |
| 2.8849290472   | 1.4294408768   |
| 0              | 0              |
| 91.9220967637  | 188.2081469541 |
| 0              | 0              |
| 0              | 0              |
| 1.1508692386   | 0.8553587488   |
| 55.2722606122  | 35.602593891   |
| 19.717515174   | 5.373359949    |
| 14.238133115   | 12.4255338986  |
| 1.7723569875   | 0.9220862832   |
| 0.2298574234   | 0.4783424077   |
| 0.419287623    | 0.5453463503   |
| 1.2329385093   | 1.1842125699   |
| 36.5338617549  | 28.3768024899  |



gene\_expression\_table

|                |                |
|----------------|----------------|
| 1.8724254578   | 0.9741478964   |
| 0.4737083651   | 0.3696772056   |
| 3.1352035416   | 2.6505711473   |
| 79.3475792779  | 63.8927648356  |
| 11.9134876856  | 3.9667904044   |
| 0              | 0              |
| 123.9331803687 | 110.5327971662 |
| 0              | 0              |
| 0              | 0              |
| 0.7030284583   | 4.389090252    |
| 10.1309215053  | 23.5154856018  |
| 5.0797239539   | 5.9749734466   |
| 0.408686153    | 1.7009841628   |
| 4.303314803    | 5.2239650479   |
| 133.577144089  | 54.3006219595  |
| 515.2970299445 | 509.2644231901 |
| 12.1108914059  | 14.7932090179  |
| 1.4764897899   | 0.7681584422   |
| 0.0398412524   | 0.0138185375   |
| 1.4290382437   | 2.6764966985   |
| 4.7928060324   | 7.8367294511   |
| 1.0893666661   | 0              |
| 4.4684363636   | 1.3948489748   |
| 0              | 0              |
| 0.9151673084   | 2.2219160117   |
| 2.9732202578   | 0.6513041254   |
| 32.87347872    | 46.0005081057  |
| 7.9516731969   | 6.0675072563   |
| 6.0188123068   | 0              |
| 3.1232313689   | 5.0777877018   |
| 6.1191431792   | 4.119881593    |
| 2.028761681    | 1.4073111539   |
| 7.2544616479   | 6.038728879    |
| 1.0772195588   | 1.1208682971   |
| 108.1413794586 | 73.140111363   |
| 0              | 0              |
| 0.1857037089   | 0.2898425835   |
| 1.4504398202   | 3.0184227496   |
| 112.6945389768 | 154.7055584023 |
| 3.2204174004   | 6.7018162415   |
| 32.5141517454  | 6.0145100782   |
| 0              | 0              |
| 1.1235310184   | 1.1690562884   |
| 14.94722867    | 11.4600224603  |
| 34.5607241138  | 41.8901915611  |
| 1.5839771442   | 1.420827247    |
| 0.1066929585   | 0.1110161375   |
| 43.6038183445  | 16.4984134686  |
| 0              | 0              |

gene\_expression\_table

|                |                |
|----------------|----------------|
| 5.6976655878   | 4.5169782466   |
| 1.0591786045   | 2.479716735    |
| 8.559947119    | 2.9689315336   |
| 142.5315211749 | 82.7759286585  |
| 0              | 0              |
| 0.6554796379   | 0.2273465174   |
| 0              | 0              |
| 0.7243456853   | 0.6029568313   |
| 5.4038544802   | 33.736906015   |
| 0              | 3.5115092255   |
| 1.7882376408   | 0.1691542455   |
| 0.291955674    | 0.1012618881   |
| 20.6553149187  | 8.8497559614   |
| 5.3049405479   | 2.4532870056   |
| 0              | 0              |
| 0              | 0              |
| 12.7570899292  | 3.0972678019   |
| 136.7329118086 | 144.4621242943 |
| 41.6614664364  | 49.1295255738  |
| 3.6628854598   | 2.4071399397   |
| 0.667321966    | 0.2314539097   |
| 0.7698691017   | 0.801064056    |
| 39.794200123   | 12.7405088578  |
| 34.8215241857  | 20.7042776781  |
| 0.8570058858   | 1.0031980573   |
| 0              | 0              |
| 0.2773040448   | 0              |
| 6.3451177681   | 6.6022207722   |
| 2.2649281803   | 2.6185585037   |
| 13.4398601337  | 26.2208264864  |
| 4.8633413667   | 5.7833177872   |
| 1.7814196025   | 0              |
| 21.4328264345  | 11.1506403085  |
| 2.6732486551   | 2.3179734988   |
| 1.7515857236   | 2.6036566497   |
| 8.6915437628   | 12.9196050234  |
| 2.5136070854   | 11.115696423   |
| 0.1764176388   | 0.550698147    |
| 12.402972818   | 6.4527694969   |
| 14.0533635282  | 6.748986107    |
| 130.9805155327 | 113.9455560273 |
| 21.4040561508  | 29.6951260888  |
| 45.5233652556  | 42.6311672735  |
| 54.9312987484  | 27.7620223623  |
| 9.2143072539   | 5.3264829377   |
| 0              | 0.3551206798   |
| 3.7977635767   | 2.9637361934   |
| 0.5924133158   | 0              |
| 60.6685324587  | 81.1630417215  |

gene\_expression\_table

|                |                 |
|----------------|-----------------|
| 0              | 0               |
| 0.579119562    | 0.7121463583    |
| 0              | 2.0469640604    |
| 7.1647906507   | 1.1182659974    |
| 2.2601719176   | 1.1758768339    |
| 2.6585556776   | 3.5566455399    |
| 1.1726540409   | 1.2201697668    |
| 0              | 0               |
| 5.5550473598   | 0.8670205285    |
| 0.1408862278   | 0.5863796475    |
| 303.5751020568 | 445.7360053723  |
| 2.4344745005   | 0.2110932466    |
| 2.3755647291   | 1.853866631     |
| 0.4505870505   | 0.7814079248    |
| 959.4023141324 | 1270.9957732669 |
| 5.117330439    | 4.3738473468    |
| 3.9343479754   | 0               |
| 2.8716367342   | 0.4979991544    |
| 1.002230436    | 0               |
| 0              | 0               |
| 65.9004906558  | 32.5711140438   |
| 3.5322541932   | 0               |
| 24.352749634   | 15.2037111402   |
| 1.2866419529   | 0.669388224     |
| 0.8638865009   | 2.2472275574    |
| 4.5810777619   | 1.4300106569    |
| 4.5425471476   | 8.9280417192    |
| 1.0406910994   | 2.1657194224    |
| 1.7819037464   | 0.9270530791    |
| 0.9413720589   | 1.8501974206    |
| 1.9140396916   | 2.9873943414    |
| 22.2185510469  | 6.3051389034    |
| 0.722405154    | 0               |
| 3.2954806547   | 0               |
| 1.0968143925   | 0.7132856936    |
| 38.7945236266  | 11.1651939913   |
| 1.7717728348   | 0.3687129488    |
| 0              | 0               |
| 22.7226399819  | 17.4755248662   |
| 4.4821373251   | 1.1659381761    |
| 2.4500739879   | 0.4248917558    |
| 839.6685043758 | 854.0381207114  |
| 26.5856725097  | 46.0012586728   |
| 2.97270035     | 1.9332210132    |
| 0              | 0               |
| 0              | 0               |
| 18.1650169769  | 7.5604240486    |
| 0.7830734728   | 0.9958709026    |
| 0.9550818555   | 0               |

gene\_expression\_table

|                 |                 |
|-----------------|-----------------|
| 43.6807428838   | 10.3659442298   |
| 6.9126149848    | 7.7064780768    |
| 4417.2973278349 | 6990.5043037142 |
| 5.7222117889    | 4.0738406235    |
| 0               | 0.8239798781    |
| 0               | 0               |
| 0               | 0               |
| 885.6791206238  | 568.6262466355  |
| 285.4456101681  | 148.5059068778  |
| 18.2852359042   | 5.0068816573    |
| 239.007423671   | 122.2020840332  |
| 156.5268964894  | 48.436977703    |
| 13.5154797847   | 12.723779344    |
| 23.4842623723   | 14.0205641418   |
| 89.9666218727   | 14.4018542819   |
| 0.4133287012    | 0               |
| 66.6990440201   | 58.8149805151   |
| 5.0475803649    | 1.3130268481    |
| 26.8576477623   | 24.3007953969   |
| 1.762292102     | 0.7334799414    |
| 0.6944156419    | 0               |
| 7.1008820004    | 2.4628694774    |
| 0.8184561944    | 0.8516198888    |
| 1.7646932483    | 4.2844626858    |
| 3.4365640878    | 10.01227649     |
| 7.1478174594    | 7.4374457073    |
| 26.1035621314   | 13.9578767443   |
| 12.3593967179   | 12.8601971981   |
| 4.722157547     | 1.1561172945    |
| 41.9546108326   | 34.6998133896   |
| 1.5470999002    | 0               |
| 1.6828301912    | 1.2507272577    |
| 21.9614884259   | 10.8816018547   |
| 13.7951875617   | 2.9904512547    |
| 0.3395046669    | 0               |
| 52.6219998236   | 16.0691772438   |
| 0.3904039211    | 0               |
| 3.3197214223    | 2.1588974521    |
| 2.6713851985    | 1.7688549678    |
| 0.4661031683    | 0.4849895828    |
| 74.8129588084   | 73.9521478235   |
| 1.6771082951    | 2.6175966219    |
| 2.8588282901    | 3.4704454007    |
| 1.6496868412    | 1.3732254787    |
| 7.3499448845    | 2.353157938     |
| 35.7561197792   | 33.3294354246   |
| 1.5104463339    | 2.2701601597    |
| 0               | 0               |
| 63.0265552316   | 19.9592459803   |

gene\_expression\_table

|                 |                |
|-----------------|----------------|
| 0               | 0.3225415282   |
| 0               | 2.4367386953   |
| 2.7019564457    | 2.2491513789   |
| 0.3074079796    | 0.6397281887   |
| 28.0916424745   | 29.2299106572  |
| 490.4783715011  | 267.3274815836 |
| 0.2624137717    | 0.1365233647   |
| 2.3627141755    | 5.4842366656   |
| 8.1083014595    | 16.1706259893  |
| 22.3765820982   | 9.3133108345   |
| 10.7307183315   | 10.2540536296  |
| 1.3029896849    | 2.0336798806   |
| 47.92244515     | 30.7804035848  |
| 9.5215327246    | 5.9444060869   |
| 0.2660119812    | 0              |
| 70.9860473946   | 34.384215555   |
| 20.3151264756   | 16.5430108654  |
| 50.9580426853   | 21.7529654138  |
| 5.7730847968    | 3.6042054782   |
| 7.0786908464    | 2.1044337419   |
| 0.2877736189    | 0.1996227687   |
| 3.1892201663    | 4.7406382578   |
| 22.4957118946   | 18.4793952634  |
| 0.2430586414    | 0.3034887994   |
| 2.8110956806    | 2.0689029767   |
| 3.8599556608    | 3.8155423361   |
| 966.4184737095  | 877.9662053391 |
| 5.5152052396    | 2.4594344318   |
| 13.4581183031   | 7.7465831548   |
| 2.1373897386    | 2.2239963774   |
| 0               | 0.1458268441   |
| 0               | 0.1344287695   |
| 0               | 0              |
| 0               | 0              |
| 9.1970902759    | 12.9473151568  |
| 0               | 3.3429405351   |
| 0               | 0              |
| 0               | 0              |
| 2.6837784116    | 3.4906557736   |
| 1881.9490010942 | 792.2509702058 |
| 5.6393267748    | 3.9118875052   |
| 0               | 0              |
| 9.9651050606    | 9.1490199561   |
| 39.7804208232   | 10.6437384394  |
| 2.2977361283    | 1.4610688726   |
| 30.1348762651   | 8.95883883     |
| 20.6962078671   | 2.1534814401   |
| 0.1247947113    | 0              |
| 0               | 0              |

gene\_expression\_table

|                |                |
|----------------|----------------|
| 1.5829325816   | 1.2810565588   |
| 0              | 0              |
| 0              | 0              |
| 3.1362238115   | 1.6316515116   |
| 12.4605789411  | 5.9840673722   |
| 39.1089115823  | 7.266713836    |
| 16.1023833612  | 8.1380695004   |
| 18.8165964344  | 31.3840517501  |
| 1.9114052388   | 0.4972137568   |
| 3.1777175879   | 1.3225912479   |
| 6.4047759616   | 8.6635851962   |
| 2.1412896337   | 2.2280542956   |
| 0              | 0              |
| 1.1557380245   | 0              |
| 0              | 0.6745966603   |
| 0              | 0.1522547135   |
| 18.4171453867  | 20.470000505   |
| 4.7702794546   | 0.9606910258   |
| 1.2450195424   | 1.7272900068   |
| 0.867727703    | 1.4188237954   |
| 2.166482914    | 0              |
| 18.136680473   | 31.4526257128  |
| 0              | 0              |
| 0.8181816054   | 2.8377805781   |
| 0.2666504508   | 0.277455078    |
| 9.8383862489   | 2.5592589622   |
| 2.9607509238   | 1.9254500039   |
| 1.1955843883   | 1.3822547196   |
| 1.3173883772   | 1.7624169151   |
| 221.6242264934 | 184.078950367  |
| 5.7943625085   | 9.0437235164   |
| 461.6067108665 | 547.189666897  |
| 0              | 0              |
| 5.9516380623   | 2.9965148425   |
| 2.6895717519   | 2.0211769531   |
| 0              | 0              |
| 0              | 0              |
| 3.0181986246   | 2.8099170061   |
| 0              | 0.1638027599   |
| 0.7324633054   | 1.5242851675   |
| 0              | 0              |
| 0.305352954    | 0.0529542999   |
| 2.3531415697   | 4.3319446122   |
| 0              | 0              |
| 0              | 0              |
| 4.5132571479   | 5.9768971779   |
| 425.1869825612 | 606.5373527626 |
| 13.6971412159  | 2.0959039496   |
| 4.4535734206   | 7.1292790706   |

gene\_expression\_table

|                |                 |
|----------------|-----------------|
| 0.0509744313   | 0               |
| 33.5147935442  | 5.3650472016    |
| 2.3952637014   | 2.3006024729    |
| 0.6615775264   | 0.9178460346    |
| 0              | 0               |
| 0              | 0               |
| 2.2062489909   | 1.6397469957    |
| 744.4889095941 | 1144.6917781917 |
| 0              | 0               |
| 146.2591334684 | 93.174812227    |
| 13.1028068992  | 15.9060185936   |
| 2.8810759565   | 3.4590191815    |
| 21.4197770881  | 31.9457069359   |
| 0              | 0               |
| 0              | 0               |
| 0              | 0               |
| 1.9074307411   | 2.0949816772    |
| 0              | 0.0890212829    |
| 192.9196902239 | 66.9122535216   |
| 0              | 0               |
| 0              | 0               |
| 5.9857041667   | 3.4154885343    |
| 2.5110068324   | 1.8088285618    |
| 0.1588995144   | 1.8187190285    |
| 117.8236635481 | 79.7048953276   |
| 2.6894477342   | 0.7995496175    |
| 18.6430381102  | 11.9113293054   |
| 0              | 0.8936676058    |
| 34.3526450571  | 8.0117224631    |
| 0.5038347591   | 0               |
| 0.4330376159   | 0.2574766974    |
| 0              | 0               |
| 0.5937994812   | 1.4416736295    |
| 4.0326375366   | 3.5966050863    |
| 3.9309332076   | 6.4499526848    |
| 2.0874874881   | 1.2670420565    |
| 0              | 0               |
| 0.0580950236   | 0.0302245116    |
| 3.3137191228   | 1.1122549715    |
| 0              | 0               |
| 0              | 0               |
| 0.5141486664   | 1.2037092203    |
| 0              | 0.4897289393    |
| 12.3994268606  | 21.2501048197   |
| 33.6115098317  | 22.3830028953   |
| 17.6226160662  | 11.6687971436   |
| 0.2195858083   | 0.4569667696    |
| 13.4397246458  | 8.7401873843    |
| 82.9442742297  | 50.6573770826   |

gene\_expression\_table

|                 |                 |
|-----------------|-----------------|
| 0.6612668773    | 1.0320919342    |
| 32.7324356681   | 48.468218218    |
| 5.8987598933    | 2.4551106234    |
| 2.8247455843    | 5.878407511     |
| 0.1280276157    | 0.0666076356    |
| 0.3674957896    | 0.8922355199    |
| 1.2017658481    | 0.9378458843    |
| 5.5659941799    | 4.1368051712    |
| 5.0608288947    | 1.5045407857    |
| 3.2172010283    | 5.4900007319    |
| 10.394021743    | 6.180106052     |
| 66.9388519637   | 29.8505151108   |
| 27.8485738211   | 17.3861957441   |
| 1.2224352485    | 0.5451291856    |
| 1.772128126     | 1.3170960225    |
| 13.6067734798   | 12.8710158517   |
| 0.2535907079    | 0.3078438495    |
| 1.1500636494    | 1.4530920204    |
| 1.6086129363    | 1.0042761818    |
| 0               | 0               |
| 1.5511861376    | 1.0087749465    |
| 0               | 0               |
| 0.8659627195    | 0               |
| 5.5184404843    | 0               |
| 0               | 0               |
| 1.6154228346    | 1.4407538319    |
| 7.9623746325    | 1.7260434556    |
| 7.1831744122    | 7.0808545112    |
| 3.5504914297    | 4.6443341233    |
| 5184.4906530318 | 5900.5137912636 |
| 4.5038316582    | 9.3726521761    |
| 3.9454344015    | 4.3467910701    |
| 8.4749262969    | 7.7601293005    |
| 0               | 0               |
| 170.4809484332  | 99.6082718337   |
| 0               | 1.0686449251    |
| 0.5001776825    | 1.8215567656    |
| 68.7368476738   | 69.553555244    |
| 5.769499218     | 1.6372577085    |
| 67.2654601954   | 25.124990248    |
| 66.0952491111   | 42.8717401185   |
| 70.7809022643   | 83.8280519964   |
| 8.7932859822    | 8.2735638989    |
| 24.8021827275   | 18.0650138247   |
| 0               | 0               |
| 2.8421007294    | 2.4397412555    |
| 5.8456850213    | 4.181753883     |
| 3.1924730579    | 18.142310383    |
| 5.5865191333    | 18.80638896     |



gene\_expression\_table

|               |                |
|---------------|----------------|
| 0             | 0              |
| 9.4846821711  | 14.5437891008  |
| 5.2792048854  | 3.2312454681   |
| 17.9381986809 | 49.7734698398  |
| 61.6565905979 | 46.7092724296  |
| 8.188548656   | 3.7044987567   |
| 14.0038542643 | 3.6428219654   |
| 30.2837182055 | 13.7354807997  |
| 17.6375938344 | 0              |
| 0.5015148615  | 0.1304590378   |
| 24.3999046662 | 28.2412342352  |
| 1.6149420074  | 0              |
| 0             | 0              |
| 5.6622223686  | 1.9061235396   |
| 2.2814949364  | 2.9436864573   |
| 0.6753494995  | 4.5676444899   |
| 0             | 0              |
| 0             | 0.6546462166   |
| 5.7936910098  | 0              |
| 48.6284232255 | 23.353309839   |
| 1.2785473818  | 1.3303538864   |
| 0.5180888397  | 0              |
| 7.346891469   | 3.185244233    |
| 0.5682142176  | 1.1824763063   |
| 14.0049575961 | 5.9200520845   |
| 26.6357626709 | 33.4210762868  |
| 12.0321924726 | 5.930400646    |
| 12.4812781734 | 14.7907696662  |
| 0             | 0              |
| 0             | 0              |
| 1.1368228994  | 0.7306065246   |
| 0.8453316603  | 0.5863895624   |
| 99.4184346148 | 98.9879352836  |
| 4.0988090661  | 7.9205138166   |
| 91.0326501249 | 43.4679829841  |
| 1.4930450319  | 1.2576300005   |
| 2.2153480624  | 0              |
| 0             | 0              |
| 1.1784052774  | 0.875824316    |
| 136.200286542 | 164.6231935835 |
| 22.9892954284 | 5.8268657886   |
| 0.8351885418  | 0.5793534852   |
| 0             | 0              |
| 0             | 0              |
| 44.0445935518 | 13.0940778217  |
| 27.9348561077 | 18.5425955073  |
| 8.9692898953  | 6.3241484126   |
| 0             | 0              |
| 1.0040570923  | 1.3059266261   |

gene\_expression\_table

|               |               |
|---------------|---------------|
| 0             | 0             |
| 29.831437144  | 3.8800251858  |
| 28.9534849382 | 7.7247884151  |
| 18.35170855   | 14.6887049253 |
| 0.2211447871  | 0.4602110663  |
| 25.937099727  | 16.8675413963 |
| 0             | 0             |
| 0             | 0             |
| 6.749225055   | 6.242402144   |
| 10.6707012461 | 4.2297432749  |
| 1.4196622124  | 0.553944999   |
| 0             | 0             |
| 0.2505764465  | 0.782189274   |
| 5.9389622161  | 5.591073789   |
| 0.5292382091  | 0.6195181995  |
| 0             | 0             |
| 0             | 0.0687158748  |
| 7.4003433779  | 10.7802855013 |
| 13.9154581055 | 15.460958036  |
| 0             | 0             |
| 8.4010109314  | 10.6536036118 |
| 0             | 0             |
| 0.7964775776  | 0.1775894362  |
| 6.7168829402  | 7.175424462   |
| 21.4032707097 | 2.22705273    |
| 8.8219092507  | 10.4907101598 |
| 22.8664450804 | 10.7898439515 |
| 0.3302228604  | 1.3171464813  |
| 0.5662795065  | 0.9427600767  |
| 42.6356919986 | 64.1788818594 |
| 2.1067745353  | 2.9228542024  |
| 0.0621198687  | 0             |
| 0             | 0             |
| 5.0659013894  | 6.7470986001  |
| 60.9116474241 | 28.4116237989 |
| 0.2420208344  | 0             |
| 6.6302522759  | 12.0730905363 |
| 0             | 0             |
| 66.3820895217 | 37.6755706753 |
| 0             | 0.0496327813  |
| 3.0501668481  | 4.7606385711  |
| 17.6179113322 | 5.092162738   |
| 79.7718010827 | 58.0136460832 |
| 0             | 0.0243441581  |
| 71.7884179223 | 82.114021756  |
| 0.1053387268  | 0             |
| 1.9439209784  | 2.1069669778  |
| 21.1151412431 | 14.7966092866 |
| 2.0374846038  | 3.5334051749  |

gene\_expression\_table

|                |                |
|----------------|----------------|
| 10.6293987968  | 6.9726717894   |
| 0              | 0              |
| 31.5467800749  | 20.5156561233  |
| 4.7579119413   | 0              |
| 12.3043053356  | 14.2254150258  |
| 1.3079428128   | 1.1794816929   |
| 1.3015479869   | 1.3542864717   |
| 0              | 0              |
| 6.7226340275   | 9.2791266299   |
| 0              | 0              |
| 1.0989404493   | 1.847142738    |
| 0              | 0.0844354484   |
| 0              | 0.6486787833   |
| 0              | 0              |
| 0              | 0              |
| 22.9654788675  | 8.146375856    |
| 19.3345060985  | 10.3637855867  |
| 98.9297323097  | 65.9861197787  |
| 0.4166667477   | 0              |
| 0              | 0              |
| 0.5276107828   | 0              |
| 3.2198544266   | 3.8289398119   |
| 3.0945262643   | 4.9762336621   |
| 49.3061155057  | 23.2089479617  |
| 0              | 0              |
| 0              | 0              |
| 1.2212738187   | 1.9061394136   |
| 1.1478305527   | 2.3886808709   |
| 0.6356889786   | 0              |
| 6.1345601924   | 8.1748876367   |
| 0              | 0              |
| 7.9290147853   | 9.6253465059   |
| 23.3802072929  | 19.3189518444  |
| 44.1308469145  | 18.9078320567  |
| 3.9527008004   | 2.0564317547   |
| 13.6688338274  | 34.7665815648  |
| 12.3325115931  | 4.6662627975   |
| 1.3927778165   | 0.7246064586   |
| 0              | 0              |
| 31.0096512366  | 4.302154213    |
| 157.6891235293 | 170.6418041036 |
| 35.4565671799  | 27.6699455672  |
| 341.8673880041 | 88.427518827   |
| 0              | 0              |
| 0              | 0              |
| 0              | 9.5215676021   |
| 0              | 0              |
| 0              | 0              |
| 334.7009988551 | 384.9222871717 |

gene\_expression\_table

|                 |                |
|-----------------|----------------|
| 1554.2101468515 | 826.5619663736 |
| 78.3673504199   | 43.1697076069  |
| 0               | 0              |
| 1.1503528509    | 2.9924123417   |
| 3.41044817      | 2.3657592681   |
| 0               | 3.621518913    |
| 104.1122421221  | 90.5151672903  |
| 0.2630973567    | 0              |
| 37.0945211143   | 33.3102439699  |
| 2.8784431277    | 2.3295044216   |
| 2.7845471607    | 5.7947529984   |
| 28.0242570339   | 16.5501537889  |
| 3.7745382955    | 18.3282488317  |
| 32.1908499036   | 19.2419332949  |
| 1.1393031089    | 7.1128047674   |
| 91.7374735502   | 115.2038989067 |
| 2.1461154636    | 1.1165378336   |
| 296.0876718542  | 180.8325527219 |
| 1.5056547321    | 0              |
| 36.7797857786   | 26.0932472243  |
| 0               | 0              |
| 6.2908971591    | 0.9351147363   |
| 62.4348147147   | 26.7501549065  |
| 19.8478813989   | 44.4814760928  |
| 4.3590338934    | 4.5356611445   |
| 0.7151876132    | 0.7441668836   |
| 47.2868127451   | 29.7073906079  |
| 0               | 0              |
| 0               | 0              |
| 8.095936907     | 6.551986607    |
| 127.0829399626  | 62.6363608264  |
| 354.1043981588  | 112.7916254691 |
| 1.142074946     | 0.8912637095   |
| 0               | 0              |
| 1.3368030302    | 8.3458202577   |
| 16.8377751187   | 12.5143133339  |
| 0               | 6.9387085056   |
| 1.7158758829    | 0              |
| 419.5319394399  | 260.1842164038 |
| 76.41609364     | 32.620496283   |
| 0               | 0              |
| 0.4748421876    | 0              |
| 12.2869292208   | 12.7847933314  |
| 19.2964013086   | 36.8101945532  |
| 3.6490130723    | 0.9492176026   |
| 0               | 0              |
| 0               | 0.4785778471   |
| 16.6612543237   | 24.2709113953  |
| 127.9946437076  | 65.768376846   |

gene\_expression\_table

|                |                 |
|----------------|-----------------|
| 0              | 0               |
| 284.6619770746 | 425.7823652405  |
| 9.5966522169   | 14.9782601976   |
| 156.0196617559 | 87.7521890458   |
| 2.4174347682   | 1.25769439      |
| 0              | 0               |
| 0              | 10.1331419796   |
| 21.0701669334  | 0               |
| 35.3812878441  | 18.4074655578   |
| 0              | 0               |
| 133.3166925966 | 48.9595272154   |
| 0              | 8.1255072893    |
| 3.6160543723   | 0               |
| 100.9324186862 | 63.6836633802   |
| 63.474838989   | 121.9326051365  |
| 38.4482880758  | 22.8606889327   |
| 0              | 0               |
| 19.1546972122  | 0               |
| 68.5636953047  | 33.7935238196   |
| 7.1884337645   | 7.4797077776    |
| 72.6770856911  | 33.6097545898   |
| 107.0530186804 | 21.2172928179   |
| 0.9965070008   | 0               |
| 4.1495484498   | 0               |
| 1.835610131    | 0               |
| 0              | 0               |
| 116.7582498856 | 82.8335950101   |
| 0              | 0               |
| 631.8326663346 | 2553.8798222387 |
| 0              | 0               |
| 0              | 0               |
| 0              | 0               |
| 4.1017491815   | 4.2679513034    |
| 2.6410967056   | 2.9007864279    |
| 0              | 0               |
| 0.7533151469   | 0.391919669     |
| 0.2335774977   | 0               |
| 3.550715091    | 2.7307834792    |
| 0.258776918    | 0.4038937666    |
| 20.3955076531  | 16.6743734688   |
| 0.2778273839   | 0.6359867764    |
| 1.5951361331   | 1.2448280667    |
| 0              | 0.0343548741    |
| 18.7529874496  | 15.9650632224   |
| 8.3991364146   | 5.8263119175    |
| 23.7539196577  | 36.8224277562   |
| 11.2547860702  | 0               |
| 4.4740056864   | 2.6803193908    |
| 8.1683927118   | 6.6516843765    |

gene\_expression\_table

|                 |                 |
|-----------------|-----------------|
| 5.6303668547    | 3.6052358667    |
| 8.5397185564    | 9.3534172427    |
| 1.0947410773    | 0.9112798274    |
| 46.2405670329   | 38.758682296    |
| 267.0442224585  | 138.9324026014  |
| 0.2460144243    | 0.3199786043    |
| 3.5939843372    | 1.1218835763    |
| 2.2602178997    | 3.1357353507    |
| 4.6542624143    | 7.5064210197    |
| 5.869620596     | 3.0537282711    |
| 2.2101573706    | 4.599425081     |
| 101.6133327718  | 69.0486114702   |
| 0               | 0               |
| 2.3271853706    | 1.008951039     |
| 7.3802420614    | 2.8797330418    |
| 0               | 0               |
| 5.0224793775    | 0               |
| 2.6543714844    | 1.8412840856    |
| 0.7423507499    | 0.6179445325    |
| 11.1086664148   | 8.8066952635    |
| 20.2464471615   | 10.0754401833   |
| 1.0262708815    | 1.0678551888    |
| 9.9563379451    | 13.8130225682   |
| 0               | 0               |
| 2719.0038638865 | 3585.4040635429 |
| 51.1119643311   | 19.5366165497   |
| 1826.5988287447 | 1683.6474052837 |
| 98.3524106209   | 51.1688160987   |
| 34.7972872692   | 5.1724667064    |
| 2.6000112785    | 1.9324023264    |
| 0               | 0.2887661963    |
| 6.4384648428    | 29.6685511215   |
| 8.4507207489    | 6.5948567987    |
| 598.5546329733  | 266.3040917606  |
| 2.067053656     | 2.1508102897    |
| 0.2917112149    | 2.4282503972    |
| 0.7162224539    | 0.9936582078    |
| 13.363742241    | 9.270159078     |
| 0.980255383     | 0.764981363     |
| 0.8178422117    | 1.094118464     |
| 0               | 0.1734208703    |
| 1.4183431606    | 2.459690274     |
| 3.5915379789    | 2.8027998276    |
| 0               | 0.5273511315    |
| 19.0747925893   | 19.8476996743   |
| 0.1282749731    | 0               |
| 47.645775888    | 34.7034617704   |
| 0               | 0.0717625133    |
| 3.5320718264    | 0.565413958     |

gene\_expression\_table

|               |               |
|---------------|---------------|
| 85.555041981  | 77.6086759541 |
| 0.2586463848  | 0             |
| 15.1400954273 | 13.3299432602 |
| 0.4098050701  | 0.7106838269  |
| 0             | 0             |
| 18.1469871833 | 20.4300292529 |
| 41.6194468026 | 29.9809793956 |
| 2.602389426   | 3.8683396666  |
| 14.1602459362 | 9.471867747   |
| 1.1434757361  | 1.6359875984  |
| 27.2016447523 | 15.641601532  |
| 73.5438933094 | 95.6548479131 |
| 17.1965326513 | 1.1928888659  |
| 2.2640563242  | 0             |
| 0             | 0             |
| 5.753967742   | 0.2851008312  |
| 0.3780189315  | 0.9833404725  |
| 5.9612185922  | 5.4274203134  |
| 41.2423189557 | 19.590922885  |
| 17.472429491  | 20.3192807792 |
| 8.41587826    | 6.3686458896  |
| 1.2147823379  | 4.4240178312  |
| 1.0995372509  | 1.5254537306  |
| 0             | 0             |
| 11.9742090584 | 10.9642735889 |
| 0.1818712145  | 1.892406026   |
| 0.8245815299  | 2.1449835544  |
| 5.2685221918  | 5.2209540393  |
| 10.0473139622 | 2.3232065055  |
| 10.5110926313 | 7.8121429787  |
| 0.1050101552  | 0             |
| 14.0740272855 | 11.2272999486 |
| 37.978473355  | 18.4839236945 |
| 2.4328186482  | 2.0711421917  |
| 9.4430296499  | 0             |
| 4.3576660673  | 28.1122749448 |
| 1.7838203123  | 2.9983160034  |
| 0             | 0             |
| 0.3646617593  | 0.5691566801  |
| 0             | 1.3779269354  |
| 0.8820041587  | 0             |
| 3.1795061435  | 6.6166782945  |
| 0             | 0             |
| 3.2232619436  | 4.0246415092  |
| 21.3598755908 | 21.5518776421 |
| 3.436899136   | 2.6008448411  |
| 0             | 0             |
| 0.2834752146  | 0.2212211836  |
| 13.7016128054 | 10.6925997259 |

gene\_expression\_table

|                |                |
|----------------|----------------|
| 0.1623912159   | 1.0138276684   |
| 0              | 0              |
| 1.2610595414   | 6.5607872095   |
| 0.4890991599   | 1.0178347356   |
| 0              | 0              |
| 0              | 0              |
| 0              | 0              |
| 1.278336139    | 1.9440421228   |
| 7.79673205     | 4.2494855321   |
| 0.0717456897   | 0              |
| 0.9262348896   | 1.4456486352   |
| 15.5040776511  | 7.7674037153   |
| 6.2956503871   | 7.7417942515   |
| 0              | 0              |
| 0              | 0              |
| 1.2430692656   | 0.4311460678   |
| 0.2494511874   | 0.3893383554   |
| 25.3839856429  | 19.8094050519  |
| 0              | 0.2338559298   |
| 0              | 0              |
| 0              | 0              |
| 21.2532054734  | 8.6300025161   |
| 0.049964131    | 0.1039773368   |
| 0.1492239675   | 0.1976169939   |
| 1.9343279023   | 1.2808132355   |
| 14.3011357234  | 10.9646637659  |
| 52.7923925836  | 23.1638984519  |
| 3.3805044155   | 1.3528776278   |
| 0              | 0              |
| 21.2152598021  | 15.7677844462  |
| 11.5076086707  | 8.7082871681   |
| 11.9348684235  | 5.8439845155   |
| 35.9717831714  | 37.4293532049  |
| 0              | 0              |
| 3.7701831575   | 2.5499176854   |
| 0.2316295305   | 0.3213534886   |
| 11.6413458432  | 6.0565255171   |
| 30.2433966378  | 19.7710074366  |
| 3.0898290778   | 1.6921202018   |
| 0.3171548907   | 0.3300059485   |
| 0.1384573366   | 0.1440676024   |
| 220.8868861771 | 96.3218066274  |
| 2.6033535235   | 7.0429864157   |
| 1.4483668029   | 0.1674504844   |
| 396.3725613387 | 253.8052335825 |
| 30.3925352781  | 49.6463348517  |
| 0              | 0              |
| 7.2138985489   | 2.5020681301   |
| 0              | 0              |



gene\_expression\_table

|                |                |
|----------------|----------------|
| 0.3793786499   | 0              |
| 21.9396388789  | 11.9105890478  |
| 6.452600985    | 5.6811270063   |
| 0.5763434482   | 0.3997978524   |
| 1.0416468351   | 1.3339743669   |
| 0.1980051255   | 0.123616954    |
| 0              | 0              |
| 0.4659207251   | 2.4239987356   |
| 3.1732179117   | 3.001632834    |
| 11.9218211799  | 10.1995771923  |
| 4.3926045041   | 1.5897711409   |
| 0.8590214477   | 1.7876576773   |
| 1.4540651749   | 1.7966680585   |
| 0.1068688016   | 0              |
| 114.7884812673 | 7.0258640824   |
| 0              | 0              |
| 0              | 0              |
| 0.2831512994   | 0.5892490759   |
| 25.2207136959  | 32.8033154662  |
| 1.7736774599   | 1.1534665901   |
| 0.4954537409   | 0              |
| 0              | 3.4167905811   |
| 8.1582506077   | 4.7160119004   |
| 2.5289607064   | 2.6314337287   |
| 0              | 0.2894458503   |
| 0.5648820913   | 1.7633130289   |
| 1.2421427083   | 14.8634521756  |
| 1.2882222819   | 0.595742583    |
| 5.6210658561   | 6.8236354783   |
| 0              | 0.7307340797   |
| 96.028202779   | 243.3930397115 |
| 72.1020511609  | 65.6456613781  |
| 0              | 0              |
| 2.5703567316   | 1.0029401675   |
| 30.7115072346  | 27.1965377492  |
| 3.3784589414   | 4.2184241711   |
| 0              | 0              |
| 9.149244585    | 0.7933308576   |
| 0              | 0              |
| 0              | 0              |
| 34.9101020566  | 15.5677084143  |
| 8.1975461229   | 17.0594183661  |
| 0              | 0              |
| 6.3009713255   | 4.6279662522   |
| 32.8282654582  | 46.4401544791  |
| 43.3848073969  | 65.2061970555  |
| 7.9670753122   | 4.1449498687   |
| 51.584741759   | 38.8437109217  |
| 27.5455630212  | 43.8648689831  |

gene\_expression\_table

|                |               |
|----------------|---------------|
| 42.0414565243  | 57.2049589448 |
| 0.3402382627   | 0.9440657453  |
| 0              | 0             |
| 0.1700520075   | 0.5308274505  |
| 7.9876271747   | 6.0949418623  |
| 0              | 0             |
| 7.0983614545   | 0             |
| 1.888338422    | 1.9648535474  |
| 0              | 0             |
| 68.1496203435  | 41.7123708334 |
| 0              | 0             |
| 0              | 5.2784878403  |
| 11.3703682081  | 4.550420552   |
| 0              | 0             |
| 0.4287427242   | 0.2230576502  |
| 2.9027323767   | 0.7550876396  |
| 1.5558385374   | 11.3321658004 |
| 5.1137670066   | 6.9581992598  |
| 0              | 0             |
| 0              | 0.5419883273  |
| 0.5381575462   | 1.6798907727  |
| 56.0468158338  | 14.9532878195 |
| 8.2742979805   | 6.8876568095  |
| 1.4040035869   | 0.9739290359  |
| 563.1818720627 | 169.248995346 |
| 9.5505631187   | 12.7200642285 |
| 1.8696944435   | 1.9454541182  |
| 0.2489202222   | 0.1295032119  |
| 0              | 0             |
| 0.0692653558   | 0.5045038266  |
| 0.2613178321   | 0             |
| 8.0083203285   | 3.7876436338  |
| 9.8942473003   | 4.4519612453  |
| 0              | 0             |
| 1.0990296494   | 0.2858905321  |
| 1.7201266076   | 3.5796516423  |
| 0              | 0.6140674709  |
| 0              | 0             |
| 5.7894417962   | 2.6773461832  |
| 0.280014337    | 0.0971201555  |
| 0.6189951183   | 1.2881533731  |
| 1.3677818861   | 2.0599007526  |
| 0.4171517472   | 0.4340546593  |
| 3.3392247394   | 1.9302941729  |
| 93.2951475312  | 36.6729476789 |
| 1.7280342789   | 0.8990269549  |
| 146.0899735131 | 67.5597832675 |
| 11.1744759409  | 18.4150716177 |
| 0.9521235993   | 1.4410232324  |

gene\_expression\_table

|                |                |
|----------------|----------------|
| 1.4961382761   | 2.1794661332   |
| 6.2394707924   | 1.0820488334   |
| 1.2455186465   | 1.2959868328   |
| 7.8496940944   | 5.2273678428   |
| 0              | 0.1145957886   |
| 0              | 0.197523894    |
| 2.4748606343   | 2.5751415317   |
| 5.5467731474   | 7.214409218    |
| 486.4289381712 | 259.1675342383 |
| 9.0727049002   | 2.8731436796   |
| 0              | 0.096924179    |
| 0.7608444864   | 1.0885514268   |
| 0              | 0              |
| 2.550720618    | 3.7915362114   |
| 1.2102434316   | 0.4843393356   |
| 79.9703305535  | 115.2148342555 |
| 23.4053182227  | 48.7073948187  |
| 71.0306792191  | 32.8483685635  |
| 24.8163969748  | 21.1270523013  |
| 3.4883950838   | 2.5408209474   |
| 0.4417326894   | 1.3788948501   |
| 501.0829296479 | 789.5284582807 |
| 5.0801900729   | 2.4397100491   |
| 5.0727790857   | 2.1113308643   |
| 23.1062901896  | 11.448834674   |
| 14.002546837   | 12.1416062147  |
| 5.5855828975   | 2.9059548442   |
| 326.0462590678 | 433.4958138862 |
| 0              | 0.1644770883   |
| 8.3645565769   | 9.9468421371   |
| 2.3215227247   | 1.9324723186   |
| 0.1207841311   | 0.6283914096   |
| 0.4969015289   | 0.5170358874   |
| 0              | 0              |
| 107.8669427924 | 64.1358236922  |
| 0.2030186952   | 0.4224899507   |
| 7.6895193725   | 2.9094899208   |
| 0              | 0              |
| 29.086641895   | 16.0700321794  |
| 7.9067143855   | 2.6738052241   |
| 0              | 0              |
| 5.6354491139   | 3.1273581199   |
| 7.7473670733   | 10.940320733   |
| 2.5052801293   | 0.5585986327   |
| 0              | 0.2278738475   |
| 2.7090595918   | 7.6511105098   |
| 0              | 0.2545458435   |
| 3.9543707978   | 2.3081909029   |
| 0              | 0              |

gene\_expression\_table

|                |                |
|----------------|----------------|
| 26.4845676874  | 12.4870907402  |
| 17.2723576597  | 4.4930576033   |
| 4.3075113338   | 4.0745917275   |
| 2.3822949864   | 0.4506954801   |
| 0.3315807747   | 0.6900327333   |
| 2.9339060871   | 0              |
| 0              | 0              |
| 5.0764180821   | 5.3856844635   |
| 21.0550467321  | 22.5111711492  |
| 212.6420675567 | 75.5157758888  |
| 1.5653194542   | 1.2215594328   |
| 0              | 0              |
| 1.2919285661   | 1.3442772739   |
| 6.8320819575   | 8.2937361044   |
| 0.7163969295   | 0.6211876677   |
| 27.127765871   | 8.4680933854   |
| 6.0414835535   | 3.8974956802   |
| 2.8598699558   | 1.0350439513   |
| 0.1332879024   | 0.1386887037   |
| 32.7861524984  | 14.9251555965  |
| 0              | 0              |
| 137.5614457807 | 33.0312485182  |
| 8.1587097049   | 9.0747680254   |
| 0              | 10.8306262058  |
| 54.8315933864  | 2.1943599792   |
| 90.3517690218  | 16.5904951894  |
| 16.5328935261  | 18.9824036733  |
| 11.7447061426  | 5.2716311456   |
| 6.5256268753   | 8.7300566681   |
| 20.4530490734  | 12.5756107794  |
| 0.4339095769   | 0.6019886842   |
| 607.0298806128 | 398.0368934487 |
| 0.5361620454   | 0              |
| 8.8862984567   | 4.6231848173   |
| 0              | 1.499401838    |
| 609.9606964451 | 193.9953642253 |
| 36.618527044   | 16.4234064742  |
| 20.2436668787  | 4.212787307    |
| 0              | 0              |
| 0              | 1.3354769374   |
| 3.4454693125   | 1.195026365    |
| 88.2719504211  | 30.1143323297  |
| 7.2176776403   | 5.3643832927   |
| 0              | 0              |
| 11.9217264156  | 20.6746542929  |
| 2.3517178962   | 0.6525357527   |
| 130.6002082647 | 67.9460523333  |
| 3.5953061843   | 3.2065605679   |
| 2.1697267853   | 1.1288218577   |

gene\_expression\_table

|                 |                |
|-----------------|----------------|
| 25.8741443641   | 25.5593923401  |
| 0               | 0              |
| 17.8230872455   | 74.1811018415  |
| 24.8354494405   | 5.537523703    |
| 13.9374852868   | 0              |
| 0               | 0              |
| 0               | 0              |
| 26.3325567847   | 5.8296908807   |
| 2.9907192216    | 2.6451172219   |
| 3.2331596437    | 0.9175000029   |
| 2.7937818833    | 4.1368638542   |
| 13.9856376775   | 10.1866331995  |
| 7.3626343442    | 6.8097483846   |
| 0               | 0              |
| 0               | 0.1506220172   |
| 0               | 0              |
| 2.052123744     | 2.2174013981   |
| 0               | 0              |
| 3.363525396     | 11.3743981845  |
| 0               | 0.5957758451   |
| 0               | 0              |
| 109.89835271    | 93.5602476013  |
| 3.0293290824    | 2.3158116289   |
| 24.8460289717   | 62.7853361965  |
| 0.9237575707    | 1.4417820861   |
| 5.6404083854    | 0              |
| 0.8746284066    | 3.3369166919   |
| 0               | 0              |
| 5.9193233887    | 2.6396456927   |
| 0               | 2.1722761793   |
| 0               | 0              |
| 0               | 0              |
| 6.8918252369    | 2.2310028929   |
| 0.2903002063    | 0.3020631172   |
| 0               | 0              |
| 0               | 21.6597492018  |
| 0               | 0              |
| 49.3141861824   | 97.6186892331  |
| 77.9284061377   | 43.3390961234  |
| 2.1045320324    | 2.189807283    |
| 0               | 0              |
| 0.0600167704    | 0              |
| 1.0382870222    | 0.1662089571   |
| 71.0284661358   | 26.2562659973  |
| 0               | 0              |
| 4.3176854079    | 3.244682441    |
| 193.436872601   | 134.1832660511 |
| 0.7710160441    | 0.4813544834   |
| 1659.5438912439 | 899.3689084776 |

gene\_expression\_table

|                 |                 |
|-----------------|-----------------|
| 0               | 0               |
| 2.0056067607    | 6.2606207325    |
| 4.6602821896    | 9.0920924365    |
| 2.2837586096    | 4.1585181543    |
| 2.3503524664    | 0.9170956184    |
| 80.3435270771   | 55.7326880047   |
| 0.7094181297    | 0.4218077838    |
| 0.5057362243    | 0.375877545     |
| 0.3169995401    | 0.4947664547    |
| 0.6338574052    | 0.1648852976    |
| 16.8710083235   | 7.2283723135    |
| 0               | 0               |
| 0               | 0               |
| 0               | 0               |
| 0               | 0.094137943     |
| 4.1047397372    | 4.6127480787    |
| 2196.3289450692 | 2078.0158001262 |
| 8.7311480029    | 15.6921561588   |
| 4.711581489     | 5.1908758981    |
| 5.5493128786    | 1.7322510045    |
| 3.9536385705    | 4.1138392777    |
| 15.5688369991   | 4.628480974     |
| 217.3911778271  | 58.165670145    |
| 0               | 0               |
| 0.6830588423    | 1.4214725217    |
| 36.0144073621   | 40.4716008815   |
| 6.0172811292    | 7.9686730494    |
| 19.8652248628   | 7.2953506299    |
| 53.0719317662   | 31.5556552419   |
| 6.9194831107    | 8.7426862841    |
| 76.9513602446   | 12.8111064318   |
| 7.8191886503    | 5.9171059893    |
| 15.9694709901   | 12.9239841231   |
| 14.5632021677   | 8.9137061407    |
| 142.4323638853  | 81.2729951593   |
| 3.3303363043    | 0.4331601148    |
| 0               | 6.9665860006    |
| 24.4609624126   | 30.0797735816   |
| 0               | 0               |
| 0               | 5.0857405941    |
| 48.1635450132   | 0               |
| 15.6785782115   | 5.437957105     |
| 0               | 0               |
| 1.1584696958    | 1.2054106747    |
| 1.4469764468    | 1.3801403606    |
| 11.8237473479   | 7.1766586583    |
| 48.5223896151   | 11.1371708629   |
| 28.9477277801   | 27.9692069261   |
| 22.8043997176   | 18.0788036548   |

gene\_expression\_table

|                |                |
|----------------|----------------|
| 21.8149117061  | 15.1325652756  |
| 18.8940890868  | 33.9576188985  |
| 4.304188105    | 7.0377890233   |
| 41.8316638925  | 18.7762128375  |
| 1.2318836889   | 1.165272172    |
| 1.2477695762   | 0.3245822424   |
| 35.072264705   | 25.545370491   |
| 5.354944272    | 5.5719256284   |
| 0              | 0              |
| 0.6837407988   | 0.2371486167   |
| 0              | 0.6423825642   |
| 0              | 0              |
| 4.3650062556   | 2.0962502334   |
| 15.5736399015  | 9.6129463108   |
| 0.833135601    | 3.2508528832   |
| 0              | 0.3282940012   |
| 11.42554913    | 8.8063039095   |
| 0.7970054319   | 0.8292999453   |
| 37.4430216593  | 43.1950110061  |
| 25.962201726   | 11.4605634867  |
| 0.8025435046   | 0.8350624197   |
| 2.4393744528   | 6.3455436418   |
| 0.5493155742   | 0.8573606103   |
| 1.940212418    | 1.2750501904   |
| 4.1635044197   | 1.9994810088   |
| 23.6633788647  | 55.0378915058  |
| 0              | 0              |
| 5.3500993001   | 10.6276882837  |
| 0              | 0              |
| 29.266924086   | 6.0905628927   |
| 2.0654310979   | 3.5818699763   |
| 15.5489494514  | 16.1789900214  |
| 13.3444110199  | 14.3330313273  |
| 0              | 0.6455273367   |
| 0.8060259528   | 2.5160579282   |
| 0.2933338011   | 0.9156588982   |
| 2.7342900746   | 7.5868880138   |
| 0              | 0              |
| 38.1413387173  | 21.8277503082  |
| 14.167555005   | 7.3708108631   |
| 524.6616179633 | 506.6656348464 |
| 0              | 2.9270480343   |
| 330.3721635347 | 111.9214641661 |
| 18.1324944182  | 13.721614367   |
| 15.2569336923  | 3.3421351237   |
| 0.1026985559   | 0.0534299413   |
| 2.621330844    | 3.5458106935   |
| 3.9817422077   | 3.1073112518   |
| 58.276841456   | 36.3829250075  |

gene\_expression\_table

|                 |                 |
|-----------------|-----------------|
| 2.970426293     | 3.0907874196    |
| 1.0949616655    | 0.3797764369    |
| 3770.9464600041 | 4401.8696761468 |
| 24.6830524803   | 24.0154646249   |
| 0               | 0               |
| 0               | 0.4872792625    |
| 0.49068331      | 0               |
| 0               | 0               |
| 0               | 0               |
| 8.7253712627    | 2.7236765101    |
| 5.7050963966    | 0               |
| 0               | 0               |
| 0               | 0               |
| 36.8783450796   | 39.1401018114   |
| 30.477073224    | 27.3876351733   |
| 0.9601319446    | 1.4104042084    |
| 0               | 0               |
| 0               | 0               |
| 624.5486250859  | 310.8003228123  |
| 0.1403434063    | 0.2920601905    |
| 5.556648257     | 9.9116616372    |
| 1227.3296664201 | 1086.3309731055 |
| 2.5891875699    | 7.4836138157    |
| 38.3926099335   | 54.7862008071   |
| 4.3993308168    | 5.3950178368    |
| 0               | 0.1769761943    |
| 3.4853776934    | 4.1446909213    |
| 2.9330092255    | 2.1416520838    |
| 2.7673354461    | 0               |
| 0               | 0               |
| 4.4729711658    | 5.9839908867    |
| 9.3395532448    | 11.751988177    |
| 0.7222861726    | 0.3757765377    |
| 11.9530345327   | 6.6867576838    |
| 9.4553826233    | 3.5527963564    |
| 4.7939878364    | 1.7815140504    |
| 0.2553137929    | 0               |
| 0               | 0               |
| 6.2809817482    | 10.5954090768   |
| 0               | 0               |
| 32.8713225846   | 18.3231763531   |
| 2.5715764046    | 1.3378881036    |
| 10.5023391048   | 13.4497131722   |
| 17.760824107    | 10.2669385727   |
| 15.5892005181   | 12.0258189365   |
| 2.1291154433    | 1.4769245395    |
| 0               | 0.5026961246    |
| 0.751442344     | 0.3909453247    |
| 46.8649653691   | 31.7352528691   |



gene\_expression\_table

|                |                |
|----------------|----------------|
| 0.5187541055   | 1.2144913344   |
| 0.119630057    | 0.0829849633   |
| 0.0421335731   | 0              |
| 183.3952593767 | 207.372043284  |
| 17.7558135408  | 28.3025502192  |
| 182.3077596423 | 137.9598810975 |
| 5.4468333305   | 10.39048636    |
| 12.5090726427  | 18.2223131494  |
| 1.6357073591   | 0              |
| 0.3683595618   | 0.1916427117   |
| 0              | 0              |
| 0.1261417499   | 0.5250119614   |
| 1.1986755313   | 0.7275599586   |
| 1.6969831417   | 2.4278988061   |
| 0              | 0              |
| 1.3731908623   | 0.9525548689   |
| 1.1226155655   | 2.16933552     |
| 1.7862633396   | 2.3233030018   |
| 0.1912820355   | 0.0995163742   |
| 37.7470929025  | 25.1370228221  |
| 0              | 0              |
| 0              | 0              |
| 0.6980954936   | 0              |
| 0              | 0              |
| 7.3215434474   | 4.9294306732   |
| 5.3277294498   | 4.0143368758   |
| 32.8654387926  | 14.431820687   |
| 0.9103678295   | 1.5787596106   |
| 70.9628705395  | 80.78775751    |
| 0.1406864095   | 0.1463869969   |
| 0.4035204265   | 0.5598279999   |
| 39.3516931432  | 16.9125676876  |
| 45.5151760732  | 34.806337355   |
| 58.9606994285  | 25.5624067156  |
| 4.7571529381   | 6.4057683406   |
| 0.0899548545   | 0.1169997608   |
| 3.3637193738   | 3.2500154734   |
| 0              | 0              |
| 0.2201859029   | 0.3054770602   |
| 7.2893548274   | 2.9171992859   |
| 18.0904423488  | 18.8234637432  |
| 356.8433956012 | 226.9071593028 |
| 5.7502279613   | 7.7560338851   |
| 6.3267223138   | 12.0689798855  |
| 0              | 0              |
| 4.6223750623   | 5.194446677    |
| 11.8337761694  | 13.6814206687  |
| 0.8134585875   | 1.1542087906   |
| 0.23903018     | 0.3730734584   |

gene\_expression\_table

|                 |                |
|-----------------|----------------|
| 104.1051096034  | 111.5569646924 |
| 28.5693813375   | 22.1224241199  |
| 342.8571580869  | 221.8443307578 |
| 0               | 16.5343724136  |
| 1.0484883572    | 0.8182296843   |
| 365.2346273534  | 365.3364248529 |
| 2.9625931688    | 2.0550912658   |
| 1.1812624777    | 1.3059474543   |
| 33.9487376105   | 17.6621671051  |
| 0               | 0              |
| 20.2099975783   | 18.0247739662  |
| 14.6740234003   | 3.9831162072   |
| 2.8487081475    | 0.7410343193   |
| 62.5092194916   | 46.3666323996  |
| 15.4038414014   | 4.9316929907   |
| 0               | 0              |
| 0               | 0              |
| 32.4016751966   | 26.3395196188  |
| 20.1576903354   | 22.8388741255  |
| 2.8609823774    | 14.2230089824  |
| 0               | 0              |
| 0.4006584419    | 0.4168930482   |
| 13.2872014256   | 4.8389587336   |
| 30.6366310519   | 17.0257615916  |
| 17.9282737562   | 9.5938581132   |
| 5.3766486901    | 3.4965684409   |
| 2.2524615595    | 3.6458036025   |
| 58.4255243151   | 50.7890182692  |
| 0               | 0              |
| 12.3010087406   | 3.4131848935   |
| 6.7543487622    | 2.0080096374   |
| 0.3184153656    | 1.9879049857   |
| 118.0621692892  | 111.2567788613 |
| 1747.3605486064 | 2957.253521909 |
| 2.6271221769    | 0.3905103834   |
| 65.5520433206   | 17.7528191914  |
| 1.045916436     | 1.9589341994   |
| 1.2868605364    | 3.4814101101   |
| 21.0889970223   | 6.3604403769   |
| 0.2023768473    | 0.2105771199   |
| 187.8850447133  | 342.8300227466 |
| 1.1340224955    | 2.9499321959   |
| 0               | 3.5011103558   |
| 5.8265238668    | 4.041742361    |
| 28.1240588692   | 25.8870666478  |
| 34.4264238497   | 6.0972555247   |
| 57.200042497    | 44.1583511903  |
| 0.1235512053    | 0.1285574774   |
| 0.2387088998    | 0.1655875603   |

gene\_expression\_table

|                  |                  |
|------------------|------------------|
| 68.0139067048    | 50.7251872435    |
| 0                | 0                |
| 0                | 0                |
| 0.8955041821     | 0                |
| 0.1349315534     | 0.1403989551     |
| 18.0384326037    | 12.1747112905    |
| 14708.3621784396 | 16754.6291089684 |
| 30.905885842     | 28.7003171161    |
| 1.475098192      | 1.1162682904     |
| 0                | 0                |
| 0                | 0                |
| 0                | 0                |
| 1.6720287592     | 2.7784531206     |
| 0.4499564363     | 2.0483250737     |
| 0.566225632      | 0                |
| 0                | 0                |
| 217.7909522877   | 201.0816267628   |
| 7.4312537679     | 5.5231191449     |
| 0.4699810078     | 0.9780491035     |
| 28.2459168914    | 36.2132160878    |
| 9.0534527444     | 4.7873640407     |
| 0                | 0                |
| 1.5932336394     | 3.6471405811     |
| 30.3282213486    | 16.0459908283    |
| 0.3944405324     | 0.068403865      |
| 0                | 0                |
| 0.1426054406     | 0                |
| 17.9335559105    | 9.9206234482     |
| 3.272592526      | 1.7025986864     |
| 24.8398046267    | 4.5611133421     |
| 6.5846862112     | 9.4615903834     |
| 0                | 0                |
| 0.5080356861     | 0                |
| 0                | 0                |
| 3.3766790757     | 0.7027002981     |
| 6.5729371186     | 9.1190284278     |
| 2.6333294561     | 0.3044479423     |
| 4.2021273592     | 14.2102895556    |
| 3.3080812587     | 3.9716816567     |
| 71.3921982104    | 2.857115267      |
| 30.7508339914    | 30.3559879135    |
| 0                | 0                |
| 131.5130845795   | 53.7593455778    |
| 29.2262563871    | 19.2989704664    |
| 19.4040914915    | 56.9000539027    |
| 39.4241461428    | 41.0216052885    |
| 363.489304479    | 353.9730918757   |
| 100.0018054196   | 44.5945115014    |
| 3.2095425012     | 8.0150221742     |

gene\_expression\_table

|                 |                 |
|-----------------|-----------------|
| 2.7283213121    | 3.7851631861    |
| 40.4873337575   | 30.3320686101   |
| 0               | 0               |
| 186.8052675338  | 72.8904684722   |
| 0               | 0               |
| 1.2929309159    | 6.7266011931    |
| 3.2773564832    | 5.0149328893    |
| 2.8227183935    | 0.9275035021    |
| 19.4349504156   | 12.2560309269   |
| 3254.9071437022 | 1567.4424908879 |
| 1.7321054542    | 1.8022900484    |
| 8.0781209807    | 7.2046671052    |
| 14.8547792969   | 9.789238406     |
| 0.3911629923    | 1.2210385344    |
| 0.1149004487    | 0.1195561937    |
| 33.7903324007   | 30.969516977    |
| 0               | 3.014050505     |
| 0.3887509407    | 0.6223123958    |
| 56.3234417488   | 35.3494440508   |
| 7.3985219394    | 2.025870707     |
| 83.8985874143   | 39.5071886829   |
| 0.6785340128    | 1.0318872028    |
| 2.4086744997    | 3.7594103207    |
| 0               | 0               |
| 6.6477848866    | 9.6420905366    |
| 2.4353639362    | 2.5340444347    |
| 22.7776316474   | 8.9898740684    |
| 0.495674794     | 0               |
| 3.6925740249    | 2.8816473336    |
| 127.3031349822  | 109.333247591   |
| 14.4838460454   | 16.7148083292   |
| 0               | 0.5816783816    |
| 478.2373415798  | 200.619659784   |
| 7.842158388     | 0               |
| 3.5401331061    | 2.4557190986    |
| 0               | 0               |
| 0               | 0.6635732485    |
| 215.660141175   | 179.2410272569  |
| 22.8389554322   | 10.396918745    |
| 0               | 0               |
| 0               | 0               |
| 22.2055639077   | 23.9020647624   |
| 0.2743232135    | 0.5708774793    |
| 13.6445004425   | 15.1653757998   |
| 3.5608090971    | 0               |
| 19.7391255427   | 19.8307115775   |
| 406.5314051039  | 334.7393722287  |
| 16.2785523335   | 12.3186591113   |
| 48.966937875    | 33.9673794568   |

gene\_expression\_table

|                |                 |
|----------------|-----------------|
| 0              | 0               |
| 25.9732244203  | 11.2127716281   |
| 0.0967072109   | 0.1006257692    |
| 130.8644577133 | 58.8830536018   |
| 240.3283544023 | 56.8332761568   |
| 0              | 0               |
| 2.9446351619   | 2.7975206944    |
| 2.8936597629   | 19.5709171055   |
| 0.8000473643   | 1.2486977044    |
| 3.816900269    | 7.9431207309    |
| 1.2572871329   | 1.4390553938    |
| 0              | 0               |
| 1.7573116708   | 0               |
| 4.9869087006   | 13.8372728622   |
| 2744.4971302   | 4103.0750025801 |
| 0              | 0               |
| 3.8211304103   | 2.6506412742    |
| 4.996315729    | 5.8486112131    |
| 0.6700184241   | 0.6971674473    |
| 82.3790067538  | 42.8584944728   |
| 9.7201988186   | 7.2243282041    |
| 1.9631571399   | 1.0213519529    |
| 2.6429350668   | 3.6667017457    |
| 0.3497987337   | 1.4558900562    |
| 0              | 0               |
| 0              | 0               |
| 0              | 0               |
| 0              | 10.8419128108   |
| 0              | 0               |
| 0.637366579    | 1.3263851109    |
| 2.199364732    | 7.6282752872    |
| 15.5634710012  | 5.3980333272    |
| 153.1055901195 | 79.654700226    |
| 45.8130523425  | 55.4295218506   |
| 10.3655185425  | 2.3967838769    |
| 0              | 0               |
| 0.420204789    | 1.3116942292    |
| 0              | 0               |
| 1.7625253263   | 1.1285800173    |
| 2.3383642374   | 0.4866228652    |
| 0.293798498    | 0.0873437597    |
| 100.9337735747 | 45.9478212826   |
| 23.7797330016  | 10.4182245921   |
| 0              | 1.013314198     |
| 40.9375343041  | 0.6264164068    |
| 2.4115459806   | 0               |
| 0              | 0               |
| 0              | 0               |
| 10.1427794124  | 18.7622452754   |

gene\_expression\_table

|                |                |
|----------------|----------------|
| 4.9609577321   | 4.7065064593   |
| 2.732683405    | 2.6064602975   |
| 46.8637987063  | 27.194588941   |
| 2.8602185322   | 0.9920380202   |
| 0              | 0.4937731741   |
| 0              | 0              |
| 0              | 0              |
| 0              | 0              |
| 0              | 24.0330319549  |
| 6.9522680745   | 21.7019180919  |
| 46.7262591716  | 48.0407938481  |
| 0.7837609501   | 5.1649523971   |
| 1.8203378868   | 0              |
| 1.4453240741   | 3.0077766792   |
| 71.7643820835  | 112.9417957264 |
| 0.3724679058   | 1.1626807105   |
| 315.5009816906 | 291.8089096894 |
| 0              | 0              |
| 96.6948068154  | 47.6587243851  |
| 1.4638603808   | 0              |
| 9.0629577083   | 9.5822868784   |
| 30.3097451989  | 12.6151561983  |
| 2.5471671825   | 1.9436104805   |
| 44.8364473655  | 20.9939453823  |
| 14.6746975824  | 24.4309018041  |
| 15.5453232972  | 17.0265441432  |
| 16.5858040055  | 14.3815481094  |
| 211.837964931  | 94.4664001205  |
| 40.3989977565  | 52.5449471377  |
| 47.1738139561  | 18.179736376   |
| 1.3768971804   | 1.4326888007   |
| 0.413058233    | 0.0859590553   |
| 1.8822479251   | 1.2512742802   |
| 0              | 0              |
| 0              | 0              |
| 4.0458479235   | 3.5307873663   |
| 0              | 0              |
| 0.1318562527   | 0.4801966534   |
| 6.9745758543   | 14.5143687685  |
| 1.0547473717   | 1.0974855411   |
| 0.9565597764   | 1.2441492531   |
| 1.3240398777   | 1.2628822524   |
| 7.2775092853   | 9.4654907776   |
| 0.3140139656   | 0.0466768219   |
| 0              | 0              |
| 0.5016733872   | 2.6100055024   |
| 1.695209409    | 2.4694585752   |
| 0              | 0              |
| 0.1097647004   | 0.9136987666   |

gene\_expression\_table

|                 |                 |
|-----------------|-----------------|
| 15.3066665821   | 22.7526998497   |
| 128.5380997131  | 36.7147089801   |
| 61.7072471722   | 73.0204231624   |
| 24.8917337452   | 19.6485354736   |
| 3.9983906365    | 4.4051343768    |
| 0               | 5.1382356446    |
| 172.8068039744  | 59.9363012887   |
| 229.9461308129  | 76.7448980585   |
| 0               | 0               |
| 124.5174588387  | 102.0798474905  |
| 2.8352920559    | 5.2447601211    |
| 6.5812653698    | 2.5679763867    |
| 4.2215545471    | 3.2944583703    |
| 0               | 0               |
| 0               | 0               |
| 5.4084249877    | 3.3253842657    |
| 83.6890725653   | 10.8850172978   |
| 26.8422871      | 6.206651474     |
| 99.9875194474   | 91.0341209161   |
| 18.8123272714   | 13.0497328733   |
| 0.6881642953    | 1.0740728788    |
| 10.5542795532   | 1.9379888856    |
| 0               | 13.8663195166   |
| 4.7045201707    | 0               |
| 6.2622140596    | 3.9095746925    |
| 0               | 0               |
| 163.2098685139  | 169.8231023472  |
| 105.6312460205  | 36.6371348893   |
| 18.0440545445   | 11.2651177882   |
| 98.4775306442   | 31.3096122964   |
| 25.5787975051   | 13.3076228361   |
| 181.8182884359  | 97.8545855274   |
| 47.9384007899   | 0               |
| 2.7590375123    | 0               |
| 5.0021271423    | 5.2048124135    |
| 22.3037072156   | 0               |
| 126.5082486683  | 47.8670325892   |
| 0               | 0               |
| 47.4267849863   | 12.3371273963   |
| 7.3828577771    | 6.1456078524    |
| 58.6437064208   | 20.3399795372   |
| 28.2062186812   | 22.0118471031   |
| 0               | 0               |
| 0.3906311804    | 0.4064594839    |
| 0               | 0               |
| 0               | 0               |
| 0               | 0               |
| 1109.1977219498 | 1745.0630207559 |
| 68.0910567527   | 40.7630676888   |

gene\_expression\_table

|                 |                  |
|-----------------|------------------|
| 329.1145088788  | 105.3692825246   |
| 49.471399942    | 25.7379859812    |
| 1.6165085435    | 2.354812841      |
| 346.8504301236  | 82.0238058441    |
| 3.2992648138    | 6.8659008337     |
| 22.6601236919   | 21.2779850276    |
| 7.7890098502    | 3.0392321609     |
| 0               | 0                |
| 0               | 0                |
| 2.3705334235    | 1.0962608896     |
| 49.0217288712   | 12.3876766449    |
| 1.5590164411    | 1.8925520837     |
| 0               | 12.117283407     |
| 1068.7502078706 | 535.4342594319   |
| 0               | 0                |
| 42.4107225345   | 41.1872507255    |
| 63.7980663247   | 22.12771741      |
| 5.5253934266    | 1.9164271171     |
| 15.401651178    | 5.3419077497     |
| 0               | 0                |
| 0               | 0                |
| 424.7642102589  | 92.5065163005    |
| 0               | 0                |
| 304.8399983154  | 380.6304707293   |
| 6814.0446188879 | 13164.7318750683 |
| 7.4751434994    | 0                |
| 0               | 0                |
| 27.7665980137   | 14.4458477274    |
| 116.3919358126  | 34.1952326484    |
| 0               | 0                |
| 14.4765582058   | 8.607511817      |
| 2.0363891017    | 0.8475612853     |
| 0.7062612182    | 1.837196982      |
| 9.6809198976    | 10.0731889901    |
| 94.305606647    | 36.7975696767    |
| 35.2223758511   | 0                |
| 310.5202467312  | 75.390576328     |
| 14.9580132452   | 11.3193521374    |
| 0               | 0                |
| 32.6756599501   | 35.477918272     |
| 53.3807113914   | 28.3386163226    |
| 2.5689599924    | 1.0692215114     |
| 15.9560387297   | 7.7824567886     |
| 37.7726050526   | 7.1460261922     |
| 10.3371578491   | 1.6983185657     |
| 494.9623282384  | 282.8596877312   |
| 15.0619907579   | 3.1344599703     |
| 121.2852006883  | 0                |
| 3.3213182496    | 2.3925443911     |



gene\_expression\_table

|                |                |
|----------------|----------------|
| 20.7231924091  | 13.0684196069  |
| 0              | 2.1317718903   |
| 90.8151856925  | 71.7798559988  |
| 198.2867686929 | 247.5855744786 |
| 0              | 0              |
| 7.8866950187   | 0              |
| 0              | 0              |
| 2.0209297325   | 0              |
| 2.5418832481   | 2.6448798895   |
| 19.9911067353  | 20.8011427009  |
| 125.6223251794 | 65.3562593374  |
| 17.2043738026  | 0              |
| 0              | 0              |
| 104.555803798  | 0              |
| 89.970773348   | 114.4200108638 |
| 8.9474290333   | 0              |
| 0              | 0              |
| 115.107187012  | 27.0072559609  |
| 432.5103436613 | 442.3426672308 |
| 4.3010934507   | 8.9507459313   |
| 0              | 0              |
| 3.5938293238   | 4.9859341688   |
| 0              | 0              |
| 4.5734086872   | 2.8552334193   |
| 15.0765258515  | 0              |
| 10.4189185131  | 2.9566612292   |
| 5.2666589122   | 0.913343827    |
| 6.1154446145   | 8.4843217397   |
| 2.9983063286   | 3.1197971492   |
| 3.4595363451   | 3.5997161211   |
| 2.2992507979   | 1.1962080085   |
| 9.5577649797   | 3.8915389008   |
| 1.6435584103   | 0.5700516982   |
| 23.2451270848  | 18.0596381324  |
| 0.8393707245   | 0              |
| 1.8198155875   | 1.3366264801   |
| 0.4094518166   | 0.3195320467   |
| 8.4297624152   | 3.2892505638   |
| 5.3676648789   | 5.5851616718   |
| 19.4784773844  | 15.5905705408  |
| 0              | 0              |
| 4.0046267001   | 1.1111715832   |
| 17.2182612892  | 7.2783514649   |
| 25.0355711992  | 18.9454603173  |
| 13.0882282149  | 4.3773945471   |
| 1.7765452444   | 1.2323536872   |
| 2.6988495918   | 3.0890271286   |
| 19.3004808111  | 5.7378664975   |
| 2.0136580539   | 3.2592795008   |

gene\_expression\_table

|                |                |
|----------------|----------------|
| 202.7770490269 | 42.1987075464  |
| 0.4400704176   | 0.45790199     |
| 1.5677676819   | 4.0782333495   |
| 0              | 0              |
| 0              | 0              |
| 41.7379860776  | 8.6858403183   |
| 7.5429260737   | 10.9879896699  |
| 34.5070768816  | 14.5562016024  |
| 0              | 0              |
| 25.6434614249  | 20.9648448131  |
| 0              | 0              |
| 0              | 0              |
| 23.4139721154  | 12.8224747138  |
| 0              | 0              |
| 0.6418590523   | 1.0018005944   |
| 0.1515113927   | 0.3153012129   |
| 67.4952878679  | 70.2301845097  |
| 4.5279808257   | 3.7018565378   |
| 21.7756404745  | 20.5000820455  |
| 18.0988004959  | 10.62327006    |
| 16.4472479411  | 6.7232343359   |
| 2.0492185241   | 1.4215016544   |
| 3.505315084    | 3.6473498061   |
| 0              | 0              |
| 6.9997881595   | 6.6212893522   |
| 0              | 0              |
| 0              | 0.4602171735   |
| 62.5645029718  | 38.0771275213  |
| 1.1217128387   | 0.1458955546   |
| 0              | 0              |
| 0              | 0              |
| 84.2976241521  | 65.7850112758  |
| 0.2195438614   | 0.2284397383   |
| 24.0600419774  | 30.1201747602  |
| 17.0886969628  | 6.4658646613   |
| 1.5672270639   | 1.0871538774   |
| 5.7127972317   | 3.7151742025   |
| 133.2016983247 | 115.6653580467 |
| 37.4253618343  | 27.1521020751  |
| 0.3346548924   | 0.0580358412   |
| 1.3878577747   | 0.7220467581   |
| 0              | 0              |
| 1.0347140154   | 2.1532808737   |
| 0.1703039956   | 0.4430117053   |
| 0.8564476238   | 1.1584959411   |
| 5.4898983939   | 6.1883770719   |
| 1.5070163298   | 0              |
| 7.4810559881   | 5.5601335713   |
| 3.963747773    | 2.0621790516   |

gene\_expression\_table

|                 |                 |
|-----------------|-----------------|
| 5.7631442468    | 11.0464896149   |
| 22.8570068779   | 19.0265348718   |
| 19.9116410083   | 8.0852515267    |
| 0               | 0               |
| 0.4164741044    | 0.4333495584    |
| 0.6830028515    | 1.0660170021    |
| 6.4181733651    | 3.5478131771    |
| 0.1082833213    | 0               |
| 21.0750953148   | 34.0278428762   |
| 0.430613923     | 0.6272872479    |
| 0.5351505001    | 0.27841735      |
| 3.913482434     | 1.0180140055    |
| 0.4973005481    | 0.3292870476    |
| 0.9774524356    | 0               |
| 96.3656958681   | 82.4004409769   |
| 0               | 0               |
| 1454.1996956675 | 1980.6881902767 |
| 128.1635203997  | 154.1395422927  |
| 2.8787588374    | 2.852767253     |
| 3.9991808434    | 1.3870756384    |
| 0               | 2.2522188019    |
| 0               | 0               |
| 0               | 0.1957644093    |
| 30.9614379227   | 21.1947300585   |
| 4.5112578708    | 11.7351330234   |
| 1.4863884175    | 1.189705079     |
| 26.6207453268   | 18.9522299664   |
| 0.1173463269    | 0.1221011785    |
| 0               | 0.6404370288    |
| 0               | 0               |
| 0               | 0               |
| 25.6159315408   | 11.8461708321   |
| 0.5024296483    | 0               |
| 6.340925602     | 7.9174304884    |
| 2.6977822854    | 2.0050685194    |
| 0               | 0               |
| 4.5960405824    | 4.7822713009    |
| 2.2450942933    | 4.6721302018    |
| 0               | 0               |
| 10.7726598267   | 0               |
| 17.4243432559   | 16.4036721103   |
| 0               | 0.3222657799    |
| 47.9290001818   | 89.541247304    |
| 0               | 0               |
| 1.3066847811    | 1.1330261733    |
| 0               | 0.2666148893    |
| 0               | 0               |
| 3.8387423307    | 2.9431591835    |
| 7.9485547285    | 4.1353143516    |

gene\_expression\_table

|                |               |
|----------------|---------------|
| 3.4860720817   | 4.8364361078  |
| 0              | 13.5708937779 |
| 0              | 0             |
| 1.1416669703   | 1.8667425948  |
| 1.5167722009   | 0.5918368242  |
| 1.5454260413   | 2.9480851035  |
| 5.6787294783   | 16.2492840168 |
| 3.7699486072   | 0.4903382789  |
| 12.8500875182  | 14.3992915224 |
| 124.0216000458 | 86.0312883023 |
| 4.3629140681   | 1.3619095629  |
| 7.2047499242   | 3.2128650279  |
| 45.9871309405  | 40.3738771125 |
| 5.372416655    | 6.7622249867  |
| 32.5509549343  | 21.3640993711 |
| 2.2377065614   | 1.6057779445  |
| 0              | 0.2199230459  |
| 1.3855691513   | 3.4240663759  |
| 2.5050864475   | 1.5639552536  |
| 0.7594488709   | 0             |
| 0              | 0             |
| 2.6551468333   | 0             |
| 8.3670927868   | 11.0805238047 |
| 9.4553620681   | 4.0710999719  |
| 0.3340667664   | 1.3904123611  |
| 1.8657590379   | 1.3589514755  |
| 0              | 0.2259320446  |
| 0              | 0             |
| 4.2413576144   | 3.9566769915  |
| 0.5114738908   | 1.0643974375  |
| 0              | 0             |
| 42.5099513525  | 22.1162233787 |
| 19.4907445317  | 18.2524553215 |
| 69.4036460764  | 80.2398544907 |
| 0              | 0             |
| 0              | 9.4546524294  |
| 0              | 2.7468316436  |
| 0              | 0             |
| 90.7294157949  | 89.5891348698 |
| 0              | 0             |
| 7.7718378021   | 7.7191716377  |
| 3.1180398274   | 2.780899052   |
| 17.615842045   | 8.5538286038  |
| 132.135248026  | 80.8760846803 |
| 7.8452823013   | 5.0234902746  |
| 3.8424225443   | 0.6663527998  |
| 4.8091731734   | 1.6680133284  |
| 4.3779289569   | 13.6659654975 |
| 20.468494726   | 8.9675260485  |

gene\_expression\_table

|                |                |
|----------------|----------------|
| 6.6638354792   | 3.4669264332   |
| 47.5491728378  | 72.7586126026  |
| 0.2503656281   | 0.5210207946   |
| 2.2234271614   | 0              |
| 42.8360019744  | 31.6315353416  |
| 399.3691771685 | 125.9247099161 |
| 26.8494950181  | 41.9061474219  |
| 3.2707726349   | 13.6132149601  |
| 143.3180904138 | 96.3578945923  |
| 34.3819728701  | 71.5502481656  |
| 28.1100701286  | 19.4993899977  |
| 18.1717021191  | 18.9080161444  |
| 245.6454388941 | 187.4392277024 |
| 4.0995292926   | 0              |
| 68.8947767434  | 85.4722228047  |
| 0.6027847274   | 0.6272094536   |
| 57.4291448951  | 77.3315054165  |
| 7.0376575363   | 17.086584957   |
| 17.6500475635  | 3.0608707071   |
| 7.5322056635   | 1.7416465001   |
| 30.2360275326  | 51.9109565753  |
| 4.4746755208   | 4.6559885493   |
| 22.0664546803  | 18.3684666901  |
| 27.8235818839  | 0              |
| 12.1933711639  | 12.6874443193  |
| 0              | 0              |
| 260.579479644  | 314.1600266811 |
| 37.2214760759  | 11.0656238388  |
| 0              | 2.8300689661   |
| 0              | 4.4426934551   |
| 3.8099191986   | 13.8750374815  |
| 18.1038420147  | 33.9073314501  |
| 838.0813788166 | 266.201770306  |
| 363.062888335  | 201.4795358658 |
| 31.3244108545  | 41.9061474219  |
| 0              | 0              |
| 0.5695542081   | 1.7778973193   |
| 90.647228974   | 49.0465237643  |
| 12.6649844768  | 7.9069003901   |
| 9.4443675685   | 0              |
| 0              | 11.0257519428  |
| 4.587214729    | 0.7955146376   |
| 8.9418278883   | 1.5506915181   |
| 207.1600848767 | 100.9557520931 |
| 467.8276111961 | 361.4001681059 |
| 6.9265362613   | 7.8935980678   |
| 23.9004468621  | 26.9412959509  |
| 21.7175324603  | 3.7662538131   |
| 0              | 3.8042633952   |

gene\_expression\_table

|                |                |
|----------------|----------------|
| 0              | 25.3970451197  |
| 0              | 15.8086517177  |
| 40.4428592307  | 15.503746058   |
| 26.1336956214  | 18.128418772   |
| 3.9461488455   | 20.5302303522  |
| 0              | 0              |
| 3.2524992705   | 0              |
| 6.6578452156   | 0              |
| 0              | 8.078816224    |
| 23.0902822688  | 10.2968126814  |
| 7.7670263683   | 6.7347873726   |
| 9.3895574569   | 5.8620123582   |
| 4.4064350553   | 3.7252986816   |
| 0              | 0              |
| 17.4878089904  | 8.7612353073   |
| 42.6932192346  | 97.7309093646  |
| 11.883329108   | 1.8547259124   |
| 0              | 0              |
| 44.7592797451  | 39.2192989662  |
| 4.945714965    | 0              |
| 8.5547159007   | 5.3408108487   |
| 0              | 0              |
| 180.352668556  | 254.384267889  |
| 14.2462804655  | 22.235305692   |
| 10.9236182936  | 13.8920726956  |
| 0              | 0              |
| 176.0647920441 | 52.8242241448  |
| 516.3311099791 | 577.5467078886 |
| 1.1425682592   | 0.7133189489   |
| 4.7845496912   | 0.6223023455   |
| 0.5005883621   | 0              |
| 69.3186850207  | 3.8987819124   |
| 0              | 5.9730735637   |
| 20.2338350833  | 29.4751888995  |
| 0.8796298007   | 1.8305444767   |
| 1.3790335829   | 2.5110955973   |
| 1.5083121306   | 3.5312144861   |
| 10.068584772   | 7.4832585527   |
| 37.8570949893  | 31.6238067339  |
| 45.7138047537  | 35.6745897815  |
| 1.717054531    | 1.1910861764   |
| 14.2074142756  | 15.1526734894  |
| 15.4360579615  | 16.0615241891  |
| 2.3994701176   | 0.8322320684   |
| 1.5747536908   | 1.1865452011   |
| 1.3171229816   | 1.2983613749   |
| 0              | 0.8350107173   |
| 3.0350844753   | 1.1053229389   |
| 1.5165133955   | 1.3807169593   |

gene\_expression\_table

|                 |                 |
|-----------------|-----------------|
| 2.5641770387    | 3.1531819332    |
| 5.6095553562    | 5.8368535068    |
| 16.9474475443   | 3.3588866666    |
| 2.0225731039    | 1.2627164363    |
| 3.2413266838    | 1.6863323222    |
| 17.6542027157   | 18.0293709501   |
| 0.1651267001    | 0               |
| 0               | 6.9110532305    |
| 0.4219203123    | 0.4390164457    |
| 2.781603501     | 2.026019494     |
| 0.6726692855    | 0.6362961101    |
| 0               | 0               |
| 4.0766781185    | 1.5149515591    |
| 1.2451125653    | 12.9556429733   |
| 0.1591711868    | 0.331241548     |
| 0.9336926255    | 1.1404866664    |
| 105.5631743854  | 224.6739029643  |
| 54.8614681725   | 74.3827613612   |
| 15.2095405305   | 15.8258283135   |
| 5.3830047797    | 6.8458171743    |
| 3.2183442593    | 3.3487509763    |
| 31.3120198692   | 28.57962908     |
| 1.3001534301    | 1.3528354078    |
| 53.2630614385   | 56.2018521649   |
| 8.3271688757    | 5.3320518313    |
| 1.341376148     | 5.5829138505    |
| 3737.0156588906 | 3851.2289044824 |
| 567.0588487182  | 421.4542635005  |
| 183.6655390291  | 420.4367923069  |
| 851.3838370181  | 1459.099358535  |
| 289.4832641791  | 60.2426145528   |
| 16.1065175085   | 6.4922835787    |
| 36.7434914297   | 55.8780221427   |
| 0               | 0               |
| 2.6598650601    | 2.0296043554    |
| 3.908769224     | 1.5642891667    |
| 9.8674166294    | 9.7538804084    |
| 1.2300403436    | 0.6399406759    |
| 23.4988294824   | 12.225498864    |
| 0               | 0               |
| 0               | 0               |
| 16.3547078986   | 9.8521775883    |
| 18.0469856775   | 3.7556492431    |
| 69.354271306    | 48.1096624097   |
| 1.1480150575    | 7.167194498     |
| 1.9134170133    | 0.6636494395    |
| 0               | 0               |
| 0               | 0               |
| 0.7865477215    | 1.6368369807    |

gene\_expression\_table

|                |                |
|----------------|----------------|
| 9.2864790051   | 4.8313827126   |
| 0.1589571103   | 0              |
| 0              | 0              |
| 5.5327312665   | 5.7569165191   |
| 14.3764595404  | 3.1492612705   |
| 3.1242194553   | 0              |
| 32.6942714899  | 25.2399309395  |
| 16.1631155536  | 18.5429694077  |
| 0              | 0              |
| 0              | 0              |
| 19.3901087334  | 10.0878961853  |
| 0.6439300054   | 0              |
| 23.0765788372  | 24.0116375644  |
| 2.4252406763   | 4.2584247824   |
| 1.6945026768   | 0.8815818067   |
| 32.4392363629  | 16.5584032924  |
| 0              | 0.2550275408   |
| 1.5717601108   | 3.2708950824   |
| 70.4222966357  | 66.9589162433  |
| 7.8452349508   | 2.721040809    |
| 1.8876967121   | 0              |
| 1.1839247541   | 1.0559118576   |
| 94.3149065241  | 32.1174095491  |
| 7.0028324757   | 8.9681057954   |
| 0              | 0              |
| 30.2453350642  | 14.192745508   |
| 34.2476323812  | 25.9166110123  |
| 0              | 0              |
| 203.9987381438 | 161.0284154579 |
| 10.9501648383  | 26.0431165763  |
| 0              | 3.7359593268   |
| 0              | 0              |
| 8.3424896635   | 2.4112571692   |
| 1.2930312364   | 0.4484748747   |
| 11.5007498789  | 17.950137221   |
| 26.1976033487  | 15.1439585637  |
| 0              | 0              |
| 6.3593156171   | 9.9254908732   |
| 7.9554059313   | 4.1388787577   |
| 0              | 0              |
| 123.368274908  | 25.6734269403  |
| 6.8018720713   | 0              |
| 0              | 1.7405975261   |
| 0              | 0              |
| 115.3524682135 | 88.0194545962  |
| 56.0571181785  | 25.8175515053  |
| 0              | 1.4072826      |
| 21.3996060798  | 8.9066856718   |
| 0              | 1.3957846378   |



| gene_expression_table |                |
|-----------------------|----------------|
| 0                     | 0.2971031742   |
| 0                     | 0              |
| 7.3339157556          | 0              |
| 0                     | 0              |
| 5.5625880082          | 5.7879830505   |
| 0                     | 0              |
| 7.8136615049          | 2.710089877    |
| 0                     | 0              |
| 25.2188053489         | 26.2406667001  |
| 18.2027160836         | 9.4701433946   |
| 35.2782991788         | 32.1192981974  |
| 0                     | 0              |
| 2.6016349084          | 3.0937744869   |
| 2.1930497843          | 2.0744652345   |
| 81.4003344962         | 59.6923897052  |
| 6.0435242991          | 2.695031482    |
| 344.6017372261        | 202.2673999045 |
| 28.3806242948         | 13.4230008944  |
| 47.8534073234         | 45.2658350734  |
| 0                     | 11.6296663685  |
| 2.2886514372          | 0.9525548689   |
| 21.6798611118         | 0              |
| 294.8241938215        | 233.72984068   |
| 0                     | 0              |
| 0                     | 1.3750313275   |
| 0                     | 1.3090617964   |
| 218.4255757654        | 33.4229617491  |
| 1.1823048297          | 3.0755290095   |
| 14.1290085903         | 7.350756709    |
| 69.3725472078         | 24.8130815806  |
| 2.1203112888          | 12.1342425161  |
| 1.7544440253          | 2.7383006615   |
| 25.7591909181         | 15.0766585836  |
| 2.0892103773          | 1.4492431982   |
| 0                     | 0              |
| 1.1738655457          | 2.0357172692   |
| 0                     | 0.2095346757   |
| 0.1696089338          | 0              |
| 0.0689656615          | 0.5023209616   |
| 49.4009483436         | 22.4062901674  |
| 0                     | 0              |
| 8.2319097215          | 2.8551550628   |
| 0.2734005968          | 1.7068724318   |
| 31.718832426          | 34.2734611272  |
| 354.386144877         | 96.5762825873  |
| 4.5436480709          | 1.5759186181   |
| 171.274917572         | 28.8997209257  |
| 0                     | 0              |
| 10.4003135237         | 7.4043431619   |

gene\_expression\_table

|                |               |
|----------------|---------------|
| 6.3986893495   | 5.8257176812  |
| 1.201354329    | 1.2500329853  |
| 30.8817911968  | 9.0374387885  |
| 52.0966869659  | 58.1740474601 |
| 1.3929097539   | 0.8696101205  |
| 4.3323592735   | 2.7740957993  |
| 0              | 0             |
| 4.1102472806   | 3.4214349952  |
| 343.0944294765 | 71.3993105224 |
| 4.938852579    | 9.3435890481  |
| 0.7333635476   | 3.4338568662  |
| 15.6887465398  | 9.1416929308  |
| 5.0283729229   | 1.7440405561  |
| 2.5782604741   | 2.0120483355  |
| 1.163024234    | 3.2270660318  |
| 7.7321256911   | 6.1145268008  |
| 0.2062755183   | 0             |
| 0.6664768267   | 0             |
| 0.1465263347   | 0.6098542194  |
| 0              | 0.0404532312  |
| 16.9205092774  | 13.2045938993 |
| 0              | 3.5493652884  |
| 0              | 0             |
| 0              | 0             |
| 0.4177739872   | 0             |
| 4.1622965194   | 4.1144044078  |
| 0              | 18.3441762025 |
| 0.6277862714   | 1.9596721667  |
| 14.258174647   | 21.0574252716 |
| 0              | 0.244691699   |
| 16.7385887564  | 5.5000526186  |
| 0.3329188624   | 1.3856346936  |
| 2.5776622698   | 2.6821086706  |
| 0              | 0             |
| 12.9867414079  | 13.5129617795 |
| 0.5825454556   | 0             |
| 0              | 0             |
| 1.2691026254   | 1.9493485399  |
| 98.088800523   | 47.3865510239 |
| 0              | 2.0244988389  |
| 0              | 0             |
| 4.6951902469   | 5.3196996908  |
| 8.0581336053   | 3.0489627985  |
| 7.3855257038   | 0             |
| 0              | 0             |
| 0.7467751676   | 2.3311030798  |
| 2.8275834978   | 1.8582042068  |
| 0              | 3.5293776828  |
| 1.088003476    | 1.5094522355  |

gene\_expression\_table

|                |                |
|----------------|----------------|
| 3.3376138144   | 5.0852494923   |
| 21.5046743519  | 6.3931542282   |
| 0              | 2.6110273386   |
| 3.6685936323   | 3.817244371    |
| 56.3627505341  | 88.7217171773  |
| 3.1508010162   | 3.9341650721   |
| 70.9522069144  | 61.6674069043  |
| 109.8839419712 | 96.4713535951  |
| 0.4073133726   | 1.0898167769   |
| 0              | 0              |
| 30.5704919551  | 26.7197302366  |
| 0              | 0              |
| 2.5283851577   | 1.753889906    |
| 0              | 0              |
| 0.2095694266   | 0.2492127328   |
| 0              | 0              |
| 0.6435911685   | 0              |
| 5.866497658    | 6.1042070634   |
| 4.383769486    | 3.9097705875   |
| 33.3465713603  | 15.0859862149  |
| 0              | 1.4589064453   |
| 65.8314113764  | 26.4381673172  |
| 0              | 0              |
| 0              | 0              |
| 1.021458615    | 0.2657119825   |
| 1.0001514863   | 1.0406774405   |
| 2.5437123797   | 4.7263984593   |
| 0              | 0              |
| 46.8297315698  | 14.1466249376  |
| 333.2917314915 | 299.1971107607 |
| 8.7924304825   | 8.1321761311   |
| 0              | 0              |
| 1.2710385611   | 0              |
| 0.4880534946   | 0.5078293324   |
| 4.2200178085   | 4.665450413    |
| 7.227560643    | 11.280630105   |
| 0              | 0              |
| 32.5197916676  | 24.4381855183  |
| 0              | 0              |
| 1.422459447    | 4.9336574732   |
| 0              | 0.5348773602   |
| 0.5868225429   | 0.6106004844   |
| 46.6599536478  | 33.6881758568  |
| 13.0355026397  | 19.8934249176  |
| 9.3768774334   | 7.1550063062   |
| 25.4844373877  | 13.0259252422  |
| 0              | 0.5213262546   |
| 0.4933318833   | 0.4448787204   |
| 85.4669750929  | 27.5989907152  |

gene\_expression\_table

|                 |                 |
|-----------------|-----------------|
| 8.7976103752    | 11.5421108662   |
| 33.138233802    | 13.95659076     |
| 820.1208398943  | 1002.572004685  |
| 6.398791722     | 28.1118493582   |
| 0               | 22.0160393035   |
| 7.979849916     | 2.7677306553    |
| 0               | 0               |
| 2.2792295117    | 4.743166944     |
| 2.0472150704    | 0.5325419621    |
| 60.9356901773   | 33.080761632    |
| 2.3064373654    | 0.3999822972    |
| 4.8295816793    | 2.6322871353    |
| 0               | 0               |
| 5.0654804928    | 0.4392277358    |
| 0               | 0               |
| 1.1707866262    | 0.8121511232    |
| 0               | 0               |
| 1.0446051887    | 2.1738647973    |
| 0               | 0               |
| 4.6001879022    | 1.4078196086    |
| 53.43954135     | 15.5693724844   |
| 29.7077931626   | 18.5469284843   |
| 1.8952105737    | 3.9440083147    |
| 31.8955520214   | 13.9738753343   |
| 33.6130163987   | 1.9430560909    |
| 4.0538896694    | 2.2331395761    |
| 115.5362688987  | 167.6721630065  |
| 304.0982951565  | 239.0731171473  |
| 7.7084842031    | 7.2187475079    |
| 154.7149619493  | 58.821070979    |
| 0               | 0               |
| 0.9769749028    | 0.508280873     |
| 0               | 0               |
| 2.7463062911    | 2.0782444484    |
| 0               | 0               |
| 1.5457844204    | 1.6084193206    |
| 5.3071217611    | 2.0999783756    |
| 0               | 0               |
| 4.3863054357    | 4.5640377247    |
| 2291.9543174816 | 3921.3358573472 |
| 5.4309840319    | 0.8072923579    |
| 5.3122685925    | 1.2283379418    |
| 31.1954072905   | 11.6853982028   |
| 3.9318725697    | 5.4549217634    |
| 34.1732524855   | 14.2231785547   |
| 8.8688592733    | 0               |
| 8.3837937345    | 3.738644363     |
| 10.0283355346   | 5.2173409224    |
| 1.2639368894    | 0.8767675864    |

gene\_expression\_table

|                |                |
|----------------|----------------|
| 0              | 0              |
| 0              | 0              |
| 40.9980041118  | 27.9807890028  |
| 5.3774077362   | 5.595299308    |
| 2.3656166619   | 2.4614710136   |
| 18.0725221063  | 11.6410774231  |
| 59.9445560236  | 0              |
| 1.0915429734   | 0              |
| 0              | 0.684205996    |
| 0.0958472995   | 0              |
| 0              | 0              |
| 326.9757889024 | 212.2770042844 |
| 0.8890408912   | 0.9250646645   |
| 31.976564472   | 4.9908373469   |
| 120.3290460522 | 43.1032769489  |
| 18.8194088928  | 9.7909839387   |
| 18.0051519812  | 10.2189367776  |
| 2.3087028515   | 2.2100709808   |
| 29.6933833243  | 0              |
| 3.0942750364   | 1.8398025665   |
| 0              | 0              |
| 86.7729787997  | 61.1234837602  |
| 5.2501919611   | 0.4966298885   |
| 2.337085278    | 1.2158917716   |
| 3.7341101045   | 2.3312493352   |
| 14.4980564917  | 6.1889292604   |
| 5.2110259034   | 0.5707553383   |
| 4.18988935     | 1.4532209651   |
| 0              | 4.3909426577   |
| 27.244025462   | 14.6801875433  |
| 0              | 0              |
| 5.2838748934   | 0              |
| 0              | 1.1114564807   |
| 0.3308960441   | 2.7544311275   |
| 17.4846904097  | 11.9626302556  |
| 0.5513875715   | 0.1912432315   |
| 0              | 0              |
| 310.5202467312 | 179.5013722096 |
| 0              | 0              |
| 1.2293648241   | 0.6395892302   |
| 0              | 0              |
| 31.9638597128  | 6.3350532239   |
| 16.9965865655  | 1.1790190083   |
| 4.20793913     | 2.7862825767   |
| 17.7440140989  | 6.1543327615   |
| 3.1292386482   | 1.6280174112   |
| 9.9185380227   | 4.5034627016   |
| 66.6643385984  | 14.0289907407  |
| 0.1772551791   | 0.6147917543   |

| gene_expression_table |                |
|-----------------------|----------------|
| 0                     | 0              |
| 0                     | 0              |
| 0                     | 0              |
| 1.1371004805          | 2.3663511653   |
| 0                     | 0              |
| 1.8715142337          | 0.649115882    |
| 14.3982949495         | 17.978053453   |
| 967.8482171083        | 439.4466539923 |
| 7.1898293962          | 7.4811599601   |
| 5.6083282542          | 6.2246151284   |
| 0                     | 0              |
| 10.1242931802         | 6.1451411446   |
| 2.409779127           | 1.0029691735   |
| 13.281200697          | 28.5024145412  |
| 7.799466571           | 7.2612364135   |
| 0.1202559359          | 1.0010294744   |
| 3.4277517809          | 3.5666436521   |
| 4.966793805           | 1.8949507045   |
| 9.0626022333          | 3.0246583497   |
| 3.6840706489          | 1.2777828379   |
| 2.4327863613          | 1.6875749446   |
| 39.4105194596         | 4.2058898928   |
| 0                     | 0              |
| 0                     | 0              |
| 7.5853856472          | 6.314195262    |
| 62.0739574414         | 39.3836480318  |
| 60.5159748509         | 15.7420177535  |
| 5.2076833046          | 0              |
| 0                     | 0              |
| 0                     | 0              |
| 501.3498503368        | 301.2428537175 |
| 0                     | 0              |
| 1.0203641057          | 2.123418143    |
| 0.2574794749          | 0              |
| 0                     | 0              |
| 0                     | 0              |
| 120.6783754577        | 51.368825872   |
| 22.36428413           | 36.5678984106  |
| 896.4665647852        | 423.537637295  |
| 2.0961744119          | 0              |
| 71.5965749256         | 76.5111050984  |
| 8.2067303135          | 4.2696327577   |
| 3.3995484648          | 5.3059463144   |
| 20.7951625454         | 3.9859066034   |
| 4.4832570196          | 3.1654799146   |
| 11.9349890957         | 6.9544118881   |
| 46.0829374633         | 47.9502096077  |
| 198.7303592763        | 111.5539204101 |
| 13.6163093259         | 3.6960103497   |

gene\_expression\_table

|                |                |
|----------------|----------------|
| 8.8996457007   | 10.4177899198  |
| 45.0292814445  | 11.7134649102  |
| 0              | 0              |
| 0              | 0.2086270972   |
| 32.0425418532  | 25.6468459628  |
| 0.1582656971   | 0.164678594    |
| 0.5309137606   | 0.5524262885   |
| 434.9273968639 | 142.9107078746 |
| 19.6238654905  | 10.2095104542  |
| 0              | 0              |
| 0              | 0              |
| 0.9833935191   | 5.1162022175   |
| 558.8973296149 | 425.9193636671 |
| 137.4768619854 | 93.2917820415  |
| 0              | 0              |
| 0              | 0              |
| 1.1734797954   | 0              |
| 0              | 0              |
| 7.7352943219   | 39.6687260477  |
| 90.0456599879  | 53.2353940668  |
| 10.8599456335  | 15.066651509   |
| 93.0151070249  | 0              |
| 636.4946261122 | 653.6841637966 |
| 139.6362293776 | 188.8825427993 |
| 19.0138538503  | 10.9912731716  |
| 0              | 0              |
| 0              | 0              |
| 667.8031948457 | 136.4341811316 |
| 118.1003897489 | 19.4030203903  |
| 0              | 0              |
| 12.2648502824  | 20.8829777866  |
| 0              | 0              |
| 0              | 0              |
| 9.7701308821   | 44.0527307447  |
| 316.5983632475 | 613.9318953138 |
| 1.1594369008   | 6.0320853529   |
| 0              | 15.5027559727  |
| 2.821636738    | 0              |
| 0              | 5.5367869579   |
| 3.3484541421   | 4.1809594652   |
| 24.7984919265  | 12.0415503857  |
| 0              | 0              |
| 60.2879224887  | 31.3653890059  |
| 3.3402658999   | 1.7378064297   |
| 692.9251995776 | 222.9053224871 |
| 0              | 39.6339029839  |
| 0              | 0              |
| 120.4405074378 | 22.7855881149  |
| 0              | 0              |

gene\_expression\_table

|                 |                 |
|-----------------|-----------------|
| 11.9696624881   | 8.0589047706    |
| 0               | 0.897506861     |
| 233.0002986111  | 326.7688809841  |
| 1.740517685     | 3.6220862824    |
| 6.6918371972    | 1.9894254882    |
| 0               | 0               |
| 3.2372563886    | 4.2105367771    |
| 50.3741715711   | 45.7880988921   |
| 19.9815186745   | 7.7966873001    |
| 27.9786943275   | 24.1570861493   |
| 0               | 0               |
| 40.2769464038   | 62.8634412886   |
| 4.6637710105    | 3.8821969227    |
| 0               | 0               |
| 0               | 0               |
| 0               | 0               |
| 6.2743172344    | 3.264275707     |
| 21.7610166813   | 18.1142152577   |
| 29.24466787     | 71.002531669    |
| 43.5334027549   | 81.5352627999   |
| 195.9565496513  | 244.1016507474  |
| 1.4319730676    | 0.7449981764    |
| 27.4643560818   | 4.0824581051    |
| 300.2117907724  | 223.9679255972  |
| 0               | 2.1860605844    |
| 0               | 0               |
| 1543.7710172887 | 3194.4981120991 |
| 6.7755075114    | 9.8700697602    |
| 0.6361945691    | 0.1103288427    |
| 0               | 0               |
| 0.2478115987    | 0.515705758     |
| 5.7598488109    | 1.1986473649    |
| 0               | 0.0779461948    |
| 0.9727767073    | 1.5982001692    |
| 0               | 0               |
| 0               | 0               |
| 0               | 0               |
| 2.0834856784    | 1.4452720897    |
| 0               | 0               |
| 3.9109567178    | 0.678237994     |
| 37.4506131234   | 9.7420262686    |
| 7.1680779588    | 4.9723514389    |
| 1.7317454614    | 1.8019154687    |
| 0               | 0               |
| 0.0448288487    | 0               |
| 1.6632153875    | 0.8653042844    |
| 2.8448495136    | 1.6914984527    |
| 0               | 0               |
| 10.7094836793   | 5.8994629342    |



gene\_expression\_table

|                 |                 |
|-----------------|-----------------|
| 2.0340468112    | 0.9959840064    |
| 0               | 0               |
| 0               | 0               |
| 3.9450709376    | 0.947290266     |
| 32.211967826    | 4.9049547561    |
| 0               | 0               |
| 9.3649602503    | 8.2452841443    |
| 10.494755818    | 9.4137943036    |
| 2.1427465821    | 1.8579752327    |
| 0.7428162151    | 0.9017341566    |
| 33.4355590188   | 15.8138007802   |
| 3251.0022964224 | 3063.1040612541 |
| 3.1058776581    | 2.4237954369    |
| 1.660249325     | 6.9100892882    |
| 0               | 0               |
| 1.8476517009    | 1.7623083571    |
| 1.8860001715    | 1.1543650302    |
| 62.379137468    | 22.717355023    |
| 12.1221037112   | 8.5999698562    |
| 18.2599276192   | 6.9999324042    |
| 1.8809637652    | 3.9143601416    |
| 11.2910657419   | 10.6805251342   |
| 1.3541681393    | 1.8116212925    |
| 2.5622452028    | 0.7998200721    |
| 4.5444741136    | 10.1327472177   |
| 0.7753194284    | 0.6722793575    |
| 0.3777447315    | 1.9652543924    |
| 0.6911611536    | 3.5958343817    |
| 2.8624457341    | 2.9784315084    |
| 4.9698056289    | 4.3093176986    |
| 0               | 0.2424405435    |
| 22.7227148203   | 21.0163867046   |
| 14.6915921676   | 7.1938318956    |
| 20.0892052026   | 11.0664085235   |
| 0               | 0               |
| 4.0615614366    | 2.3051646319    |
| 22.1724952468   | 14.9282427886   |
| 6.0676569984    | 4.3708966222    |
| 2.7528087508    | 0               |
| 6.9928188387    | 2.1828499713    |
| 3.9342447713    | 2.2742553585    |
| 0               | 0               |
| 0               | 4.7194225237    |
| 0               | 0               |
| 3.1111791335    | 4.1621702649    |
| 1.3383060211    | 0               |
| 0               | 0               |
| 1.1674783925    | 0               |
| 8.5840933592    | 0               |

gene\_expression\_table

|                |                 |
|----------------|-----------------|
| 4.4109546254   | 9.1793713899    |
| 0              | 0               |
| 0              | 0               |
| 0              | 0.4278271047    |
| 0.454044999    | 2.5984355032    |
| 0.2690214347   | 0.2799221337    |
| 0              | 1.9622964472    |
| 0              | 0               |
| 236.787621047  | 49.2764423742   |
| 0.3803223994   | 0.395732993     |
| 2.6720082258   | 1.7692675046    |
| 37.0413134242  | 22.9169960483   |
| 1.1575041033   | 2.408811913     |
| 37.595438079   | 14.7404167547   |
| 0              | 0               |
| 2700.627534915 | 3690.9868655003 |
| 40.0591023427  | 21.2845735132   |
| 0.1960562662   | 0.102000215     |
| 28.9614278166  | 7.5337348853    |
| 1.1058119824   | 1.1506192804    |
| 0.7587869127   | 0.338371208     |
| 0              | 0               |
| 41.4670894546  | 53.9341603591   |
| 4.6516640822   | 7.260222982     |
| 7.2530408141   | 0               |
| 53.207492256   | 28.4726314539   |
| 24.5750088762  | 5.6823963806    |
| 0.5671313155   | 1.180222744     |
| 4.1699691153   | 0               |
| 47.797869372   | 23.4045318785   |
| 35.1649646363  | 37.5280436218   |
| 0              | 22.5251137379   |
| 13.9686392075  | 12.919685242    |
| 0              | 2.7832797039    |
| 12.4767412505  | 12.9822965096   |
| 14.473115647   | 21.3343818081   |
| 3.7044305375   | 5.995940815     |
| 3.7579403709   | 5.8653171346    |
| 769.4277687004 | 947.2502813147  |
| 0              | 0               |
| 0              | 0               |
| 11.9785699932  | 7.4783636668    |
| 0.6729155988   | 0.5251365112    |
| 5.4539638601   | 36.8872235675   |
| 22.6544135054  | 12.257630409    |
| 15.748050061   | 0               |
| 1.8019275723   | 1.8749413459    |
| 0              | 0               |
| 0.3118373236   | 0               |

gene\_expression\_table

|                 |                |
|-----------------|----------------|
| 111.6822460718  | 116.2075901275 |
| 0               | 0              |
| 20.4430759535   | 19.0085080085  |
| 2.0703921698    | 1.8311414675   |
| 5.2371422296    | 0              |
| 19.6400548905   | 17.0298885832  |
| 11.3687951079   | 6.4524308691   |
| 4.0006209518    | 1.3875751255   |
| 0               | 0              |
| 0.9857396874    | 0.9686993626   |
| 5.1673136665    | 3.4215314415   |
| 0               | 0              |
| 15.2441277326   | 14.7151796104  |
| 4.9097244047    | 5.7898209385   |
| 0               | 0              |
| 5.5446969138    | 4.9451717248   |
| 2.5444836203    | 3.4418613168   |
| 27.7992590106   | 13.3503137858  |
| 10.1255882609   | 7.7632764879   |
| 0.566976952     | 0.5899507538   |
| 0.942997143     | 0.5519290577   |
| 3.2096661353    | 5.0095818246   |
| 24.9656727709   | 87.6733106736  |
| 1.8188560595    | 0.2365694715   |
| 141.0545417437  | 74.5498645404  |
| 9.4741428183    | 2.2404621231   |
| 17.6961691403   | 9.4773898969   |
| 0               | 0              |
| 2.1913151603    | 5.7002671181   |
| 0               | 0              |
| 5.2583417938    | 6.0967127024   |
| 0               | 0              |
| 1.5425173855    | 4.8150597183   |
| 88.2892003951   | 36.0904745714  |
| 33.0229602451   | 6.6937099707   |
| 30.6744398126   | 8.7047352186   |
| 0.0433238007    | 0              |
| 0               | 0              |
| 0               | 0.015160907    |
| 1902.5475072166 | 44.9917814101  |
| 254.8604754868  | 34.2177258124  |
| 7.0732540639    | 0              |
| 97.4872580068   | 0              |
| 0.6245745769    | 0.6498822238   |
| 70.3995811841   | 52.3229708975  |
| 9.8806491269    | 0.6047653654   |
| 3.660602224     | 6.348215254    |
| 1.6599847171    | 0              |
| 0               | 0              |

gene\_expression\_table

|                |                |
|----------------|----------------|
| 6.1443059415   | 12.7865441748  |
| 0              | 0              |
| 1.0882995314   | 0              |
| 9.1757571143   | 10.2819845733  |
| 0              | 0              |
| 1.2580369588   | 1.3090123848   |
| 4.8507019574   | 1.261812877    |
| 4.336348315    | 13.5361690519  |
| 1.9110901396   | 2.3613760029   |
| 0              | 0              |
| 35.7211684276  | 14.6838848781  |
| 3.5848099615   | 4.9734210685   |
| 97.552459966   | 203.0105353784 |
| 0              | 8.8326901389   |
| 0              | 3.5293776828   |
| 2.3113157524   | 0              |
| 271.1822487201 | 18.2045486146  |
| 37.1355689684  | 0              |
| 124.0979851298 | 27.6699455672  |
| 0              | 0              |
| 0              | 0              |
| 51.2392680864  | 65.6190446753  |
| 4.6054431154   | 2.1782067376   |
| 66.071048093   | 7.6386927557   |
| 10.7487157906  | 11.5699156305  |
| 9.2437245255   | 5.7709671252   |
| 2.0127527719   | 1.0471545719   |
| 5.7093225114   | 3.8534031624   |
| 0.517805512    | 1.0236951026   |
| 1.3725311184   | 0.7140729134   |
| 5.3452825707   | 3.4761702729   |
| 1.5173994514   | 2.9823368181   |
| 10.3764549032  | 3.084830556    |
| 0              | 0              |
| 0              | 0.8625494979   |
| 0.8512763882   | 3.5430798029   |
| 0              | 0              |
| 22.2652515693  | 15.8862414617  |
| 5.8942467128   | 3.8735245293   |
| 1.0738990564   | 0.9311777071   |
| 0              | 0              |
| 123.7469300092 | 32.1902832094  |
| 3.7733987262   | 1.3087653827   |
| 11.0251978661  | 5.7359684272   |
| 93.4637497172  | 45.383745705   |
| 2.0934095314   | 0              |
| 18.8071556098  | 12.0425957499  |
| 9.7240476      | 14.6711931177  |
| 13.3760778381  | 6.2631333226   |

gene\_expression\_table

|                 |                 |
|-----------------|-----------------|
| 0               | 0               |
| 1977.6083183864 | 2113.4807963377 |
| 37.2378648993   | 23.0476276454   |
| 0               | 0               |
| 0               | 0.3925392499    |
| 0               | 0               |
| 0               | 0               |
| 1492.1272118517 | 2098.7243902881 |
| 0.1110853947    | 1.0402789902    |
| 6.7371777968    | 3.6895615796    |
| 4.87015964      | 0.6538706596    |
| 0               | 0               |
| 25.1916543602   | 8.9505809224    |
| 13.7837771502   | 0               |
| 6.8825361981    | 1.0230593283    |
| 64.5914208317   | 50.4064899868   |
| 0               | 0               |
| 0               | 0               |
| 0               | 2.345915248     |
| 24.6371770765   | 10.2541883829   |
| 0               | 0               |
| 0               | 0               |
| 132.7894120117  | 42.3586905909   |
| 0               | 0               |
| 22.9759353448   | 16.1005760926   |
| 21.5705777287   | 13.1383103814   |
| 45.5050150271   | 34.9479753734   |
| 11.4838184696   | 10.8628551639   |
| 0               | 0               |
| 6.940043458     | 3.7443532734    |
| 32.3103210261   | 12.3271607387   |
| 1.3751644482    | 1.7886073232    |
| 132.5012999813  | 143.7621183666  |
| 2.3295710596    | 1.2119824251    |
| 0               | 0               |
| 0               | 0               |
| 24.8329821795   | 32.7296660594   |
| 0               | 0               |
| 2.2154462343    | 0               |
| 122.0713333987  | 26.9431360462   |
| 3.879319461     | 2.0182543858    |
| 0               | 0               |
| 42.8808917969   | 0               |
| 0               | 0               |
| 1707.3385956635 | 2264.4370076017 |
| 2.5838971958    | 8.6035079507    |
| 23.436039623    | 19.5085309081   |
| 0               | 1.5826791307    |
| 7.4428702879    | 23.2333620663   |

gene\_expression\_table

|                |                 |
|----------------|-----------------|
| 0              | 1.3693305343    |
| 8.8672862227   | 15.3776450474   |
| 26.976793141   | 14.1712055084   |
| 0.4640265802   | 0               |
| 77.2911890963  | 50.4614988882   |
| 0.741455655    | 1.1572489526    |
| 14.4622001019  | 15.0482057883   |
| 0              | 0               |
| 38.2261432955  | 18.8408176988   |
| 0              | 0               |
| 32.1442688924  | 13.2633658843   |
| 0              | 0.7110277015    |
| 0              | 0               |
| 21.4197770881  | 12.7358300077   |
| 0.4312557987   | 1.7949208173    |
| 10.9289414761  | 6.3966263475    |
| 3.7681622166   | 2.7676570278    |
| 0              | 0               |
| 27.3927688205  | 10.1795424184   |
| 20.5165731912  | 5.3369752402    |
| 75.2440933738  | 74.1722875471   |
| 29.835685599   | 22.5779069732   |
| 0              | 0               |
| 5.0127432878   | 6.3749384395    |
| 50.8497301818  | 11.7578115311   |
| 0              | 0               |
| 5.4835757073   | 1.9019230619    |
| 6.8691618197   | 7.1474989924    |
| 0              | 0               |
| 1.1153844033   | 3.481738722     |
| 64.8743029667  | 39.3767487066   |
| 0              | 0.9984931795    |
| 406.0864959508 | 172.1463520848  |
| 33.5329503087  | 13.4198843398   |
| 12.922837668   | 0               |
| 69.0499867484  | 9.797438114     |
| 0              | 0               |
| 0              | 0               |
| 0              | 0               |
| 22.6599259226  | 18.6142910135   |
| 0              | 0               |
| 0              | 8.3625910564    |
| 6.320483416    | 6.5765882407    |
| 1849.98610616  | 1848.4085465197 |
| 0              | 0               |
| 244.5046511962 | 544.2203124062  |
| 5.952444428    | 3.4171786928    |
| 5.6601133469   | 5.0481086554    |
| 8.1142235299   | 6.3322577804    |

gene\_expression\_table

|                |                |
|----------------|----------------|
| 0              | 8.057543009    |
| 1.6412113561   | 1.4230941151   |
| 6.2749922551   | 0              |
| 21.9951841435  | 43.0803293303  |
| 0              | 0              |
| 0              | 0.5352791429   |
| 0              | 0.2424202068   |
| 16.571531054   | 13.2638511095  |
| 6.5678225093   | 5.2568842066   |
| 20.6646777718  | 18.4302914673  |
| 1.4214685524   | 1.4790661966   |
| 0              | 1.6854425112   |
| 1.9890888726   | 0              |
| 27.9138803594  | 29.044945654   |
| 91.7653445736  | 12.7311545928  |
| 54.246047081   | 19.8599565105  |
| 0              | 0              |
| 85.7689358585  | 39.6641232683  |
| 103.8809785225 | 138.3554773156 |
| 14.0787833635  | 3.255389572    |
| 4.9227957313   | 1.7607791122   |
| 4.363599522    | 22.7020588576  |
| 0.8053248236   | 2.5138693117   |
| 20.2223767186  | 35.0696395022  |
| 3.019493853    | 1.1781911956   |
| 0              | 1.520371114    |
| 0              | 0              |
| 5.3756730886   | 0              |
| 12.1592475868  | 7.3802972023   |
| 0              | 4.3699174787   |
| 0              | 0              |
| 13.7448838738  | 6.7745482288   |
| 0              | 0              |
| 0              | 0.6724253521   |
| 2.2047770129   | 3.2117598404   |
| 17.458603879   | 8.7196911816   |
| 4.7854656575   | 0.8298953075   |
| 1.4388349659   | 0              |
| 41.7920666447  | 39.8616840355  |
| 1.6889213109   | 1.7573560916   |
| 6.5108757861   | 7.4521648021   |
| 0              | 0              |
| 0.9267371024   | 0.3214294397   |
| 6.4069921471   | 6.222162137    |
| 1.7690956926   | 0              |
| 0.4639792086   | 0.6437060809   |
| 0.9952497712   | 1.4239185245   |
| 2.1314683098   | 3.9921030241   |
| 0              | 3.6075600998   |

gene\_expression\_table

|                |                |
|----------------|----------------|
| 1.1402515646   | 0              |
| 3.3145766574   | 2.5291806419   |
| 0.3779589162   | 1.1798212258   |
| 70.1368124856  | 78.8004093445  |
| 0              | 0              |
| 8.5811465369   | 2.6455860786   |
| 0              | 0              |
| 8.6072603615   | 3.6308209327   |
| 0              | 0.2945444633   |
| 0.2840102695   | 0.7387957834   |
| 10.6305734326  | 4.8393285113   |
| 161.2177098277 | 64.6377001268  |
| 8.3327562182   | 0.9633775518   |
| 0              | 0              |
| 8.0694594647   | 2.3989807077   |
| 30.2259732308  | 29.3540091628  |
| 0              | 0              |
| 18.247562633   | 18.9869505124  |
| 4.1385562685   | 0.4784722008   |
| 36.3855602065  | 28.9516854894  |
| 34.8104163843  | 51.2088982765  |
| 32.7695697276  | 18.3601312794  |
| 12.1793927936  | 12.1219039155  |
| 8.5833564639   | 4.465576244    |
| 0              | 0              |
| 0              | 0.4178272905   |
| 0              | 0              |
| 0              | 0              |
| 0              | 0              |
| 12.1610912594  | 17.7153990146  |
| 648.0072550061 | 303.4189753708 |
| 16.9126386075  | 12.5699540079  |
| 25.9907432844  | 17.6373152731  |
| 0              | 0              |
| 0              | 0              |
| 0              | 0              |
| 0              | 0              |
| 0              | 0              |
| 0              | 0              |
| 0              | 0              |
| 38.6659894862  | 51.829220528   |
| 125.8515471648 | 103.8026446955 |
| 6.5161728533   | 8.0925051028   |
| 78.2591082231  | 14.3700269797  |
| 1.2382662041   | 8.374863398    |
| 4.1169491019   | 13.7080547896  |
| 0              | 0              |
| 0              | 0              |
| 2.7820678756   | 2.8947967538   |
| 0              | 0.5023417508   |



gene\_expression\_table

|                |                 |
|----------------|-----------------|
| 4.0075961221   | 4.1699831793    |
| 0              | 0               |
| 5.781964925    | 4.0108327197    |
| 0              | 0               |
| 0              | 0               |
| 0              | 1.7202214837    |
| 16.4952354902  | 6.8654477585    |
| 184.2943969822 | 78.0048699776   |
| 38.3325841304  | 14.6947733521   |
| 38.7999687417  | 32.9351638514   |
| 3.4227297434   | 1.7807090613    |
| 32.4890979034  | 26.5615037056   |
| 0              | 0               |
| 5.7044454272   | 1.978529502     |
| 0.5861414152   | 0               |
| 2.2642101324   | 8.2458442859    |
| 39.8547957265  | 46.4660546796   |
| 8.6855037741   | 3.0124795962    |
| 2.4152792278   | 1.8575426199    |
| 6.40628843     | 0               |
| 283.2452295526 | 138.2145837265  |
| 1022.059430168 | 1074.4650600919 |
| 2.00553435     | 3.1301973491    |
| 9.3576212115   | 7.4185068957    |
| 0              | 0               |
| 30.4940936953  | 42.6084660483   |
| 0.3408622828   | 0.5320109396    |
| 0              | 0               |
| 3.4031353408   | 0.5901716264    |
| 0              | 0               |
| 3.0042104708   | 5.7709671252    |
| 0              | 0               |
| 17.615842045   | 100.8129799735  |
| 0.3960403673   | 0.4120878501    |
| 4.6986174682   | 2.93340275      |
| 20.400412027   | 14.5935851653   |
| 26.9818704384  | 29.592747666    |
| 1.7442523105   | 4.8398109149    |
| 12.4438253641  | 4.3160156258    |
| 0.8549150255   | 0.7278185659    |
| 92.6890075916  | 45.1112536205   |
| 0.3542604049   | 0.9215374281    |
| 29.9220491523  | 21.7941395538   |
| 562.5723843626 | 132.1798063499  |
| 12.1834965452  | 2.5354339166    |
| 0              | 1.3926457759    |
| 0              | 1.2237002509    |
| 0              | 0.5762081732    |
| 0              | 0               |

gene\_expression\_table

|                 |                 |
|-----------------|-----------------|
| 0               | 0               |
| 238.2677299026  | 191.46474226    |
| 2.2588902821    | 0               |
| 0               | 0               |
| 27.9900677297   | 64.9227406898   |
| 0               | 0               |
| 11.5601724833   | 15.7615987826   |
| 0               | 0               |
| 0.9601213692    | 1.2487816379    |
| 11.721952177    | 12.9592312418   |
| 27.0090544158   | 36.5683528146   |
| 85.8507608307   | 52.9359513236   |
| 0.3002411822    | 0.6248137992    |
| 0.9516774881    | 1.7329187483    |
| 5.8365741715    | 6.8828138938    |
| 55.4278452874   | 47.7996626587   |
| 35.6184693132   | 16.8462377883   |
| 1.5025323753    | 2.4754066251    |
| 6.4703310874    | 3.6251964604    |
| 4.0658791594    | 2.4175016198    |
| 4.0333811798    | 2.7978753619    |
| 3.5485824109    | 2.7692777378    |
| 1.2910909514    | 2.4746947457    |
| 0               | 3.3552307576    |
| 2.206114335     | 1.4607763429    |
| 3.5296712767    | 0.787005623     |
| 2.563682154     | 3.3708284504    |
| 0               | 0               |
| 1666.4586574575 | 2409.5611473154 |
| 0.7208840544    | 0.5625706077    |
| 1.8619649804    | 1.9374114587    |
| 2.5662968975    | 2.5297415768    |
| 0               | 0               |
| 7.6300140751    | 1.9847952103    |
| 2.0528689775    | 2.6386510508    |
| 12.0829014      | 26.978486023    |
| 0.1806717771    | 0.2255910772    |
| 0               | 0               |
| 21.2844531458   | 28.0790993599   |
| 28.908410124    | 18.5106298964   |
| 0.4497742726    | 1.1699976084    |
| 53.1117307401   | 32.5081225261   |
| 0.8515591392    | 0.8860641588    |
| 15.2139910439   | 12.7861400914   |
| 3.6656078867    | 4.9583789367    |
| 20.2264675016   | 29.4644563389   |
| 101.0412351858  | 41.3031957795   |
| 41.2376351859   | 63.5682615909   |
| 0               | 0               |

gene\_expression\_table

|                 |                |
|-----------------|----------------|
| 0               | 0              |
| 7.3900605652    | 7.6895044592   |
| 0.7270920646    | 1.7022458278   |
| 1.7255441656    | 2.244328622    |
| 4.4118888527    | 2.203515733    |
| 0               | 0              |
| 6.9140489885    | 5.3956537357   |
| 432.5015070009  | 104.611397318  |
| 3.2030855794    | 5.5547900293   |
| 2.0832990125    | 1.8786853844   |
| 1.4868209502    | 0.6188266646   |
| 9.4697107697    | 15.3275448779  |
| 0               | 0              |
| 1.0081419585    | 0              |
| 0               | 0              |
| 0               | 0              |
| 1.9934624389    | 3.1607423543   |
| 21.4749826992   | 7.8509969079   |
| 1.7707063923    | 1.4089362449   |
| 44.8584185166   | 21.0371034946  |
| 3.2518927359    | 4.0385605403   |
| 52.2605615824   | 74.7699561387  |
| 217.5958630718  | 86.2524980552  |
| 16.7680973292   | 12.4145940237  |
| 0.3455375834    | 0.3595387027   |
| 0.6875113072    | 0              |
| 9.1979939552    | 12.46708951    |
| 1.3793665082    | 3.3489357656   |
| 0               | 0              |
| 0               | 0              |
| 0               | 0              |
| 0.1197529899    | 0              |
| 2.126113125     | 1.7077116641   |
| 0               | 0              |
| 8.6155287965    | 1.1205785547   |
| 6.6546548097    | 15.925890455   |
| 5.9776122106    | 4.1465493048   |
| 0               | 0              |
| 1.7615221354    | 3.0548311468   |
| 0               | 0              |
| 1239.4704552655 | 1891.364868297 |
| 0               | 0              |
| 0               | 0              |
| 5.7413183395    | 3.4136888582   |
| 9.9199335635    | 3.7534136166   |
| 0               | 0              |
| 7.0534946985    | 5.8714408044   |
| 0               | 0              |
| 0               | 0              |

gene\_expression\_table

|                 |                 |
|-----------------|-----------------|
| 2.6236901415    | 5.4600031663    |
| 8.8868315777    | 17.5691562795   |
| 81.9214338333   | 26.742235374    |
| 8.4778293579    | 14.7022490719   |
| 4.2121512329    | 4.3828268256    |
| 0               | 0.9212045134    |
| 4.7454921427    | 3.2918524073    |
| 4.5859944341    | 4.7718180845    |
| 58.1458010278   | 20.1672860612   |
| 7.1269481769    | 2.780899052     |
| 82.0915594807   | 89.6887890799   |
| 1.7668136741    | 4.5960115976    |
| 2.4610495089    | 1.7071805214    |
| 86.1466278984   | 9.9596970451    |
| 83.1472093891   | 67.7859819049   |
| 145.1086823634  | 157.799968915   |
| 7.6972686257    | 7.4370776384    |
| 9.9274547696    | 3.286726994     |
| 141.5552055602  | 77.327773129    |
| 29.6113088196   | 37.6580766258   |
| 12.7600203481   | 6.127871088     |
| 52.4844911174   | 63.7130118773   |
| 4.7778522577    | 5.5563264167    |
| 0               | 1.1315474129    |
| 36.5273451464   | 12.6691421496   |
| 1.3297096808    | 0.3458973181    |
| 0.8479411069    | 2.6468985736    |
| 0               | 0.4296504424    |
| 0               | 0               |
| 10.503994059    | 5.4648069825    |
| 4.0697942644    | 4.234701579     |
| 0.4566641065    | 1.9006722082    |
| 48.1834390839   | 23.8742015083   |
| 2012.8841008124 | 1133.8725457445 |
| 7.3099197841    | 4.2256202158    |
| 18.1002197975   | 13.8774170112   |
| 34.2822188327   | 108.7975504919  |
| 0               | 0               |
| 27.0561537891   | 16.682941725    |
| 61.9309504165   | 32.2201905645   |
| 1.1629565982    | 1.8151190783    |
| 7.4693622592    | 5.4861313717    |
| 3.8990609674    | 5.6798702802    |
| 9.8142441546    | 13.615887362    |
| 18.2682419785   | 19.0084677812   |
| 0               | 0               |
| 41.3969856945   | 43.0743839357   |
| 3.5870219498    | 0               |
| 0               | 0               |

gene\_expression\_table

|                 |                |
|-----------------|----------------|
| 172.2791194943  | 85.36182748    |
| 0               | 0              |
| 6.5331727917    | 3.1990097651   |
| 17.0603875661   | 14.2013370642  |
| 4.9725503717    | 2.7231774724   |
| 0               | 0              |
| 6.000734985     | 1.7028773624   |
| 0               | 0              |
| 0               | 0              |
| 0               | 0.8381589596   |
| 0               | 0.9283559565   |
| 14.3166551328   | 45.9316870383  |
| 37.4578619309   | 60.6287851589  |
| 1125.3745531217 | 282.2885010534 |
| 0.2478337112    | 1.2893794378   |
| 0               | 0              |
| 0.3891806703    | 0.674916999    |
| 3.7254250578    | 2.3732930177   |
| 1.4940011273    | 1.0363585187   |
| 24.7705284809   | 15.1090288797  |
| 25.5946989005   | 15.2181665081  |
| 0               | 0              |
| 193.8626631622  | 118.65761329   |
| 43.152775593    | 29.0537940761  |
| 3.6866923089    | 4.6032916832   |
| 53.8977013339   | 34.8615514664  |
| 0               | 0              |
| 3.2574883622    | 2.6362631486   |
| 0               | 0              |
| 0.6155199296    | 0.8005758549   |
| 2.8024455169    | 1.6200000519   |
| 8.7449152075    | 8.1414409767   |
| 0               | 0              |
| 6.4441556746    | 7.6631676303   |
| 1.208279189     | 5.0289537574   |
| 0               | 0              |
| 36.5547656721   | 16.7358215416  |
| 6.0819659031    | 6.3284060421   |
| 53.2499970429   | 85.8818995397  |
| 1.2876734239    | 0.8374060713   |
| 0               | 0.2710111056   |
| 21.7873333219   | 34.9498177563  |
| 136.4352117217  | 50.701264782   |
| 0               | 0              |
| 0.5015978862    | 0              |
| 1.0870808177    | 3.5190684117   |
| 1.4509870766    | 2.2646712088   |
| 0.513913271     | 0.1645344437   |
| 11.2257235262   | 5.8402938887   |

gene\_expression\_table

|                 |                 |
|-----------------|-----------------|
| 10.0473812701   | 2.090899862     |
| 0               | 0.2107264001    |
| 0               | 0               |
| 0.4989845368    | 0               |
| 13.8666123494   | 6.4126599687    |
| 880.1718261219  | 200.6117448568  |
| 42.7947030934   | 21.5793108072   |
| 0               | 0.8935754989    |
| 4.7746795526    | 6.955408165     |
| 6.3459964107    | 4.8912111239    |
| 6203.1851959224 | 6137.1990225599 |
| 0.691132489     | 0               |
| 11.9802922894   | 4.1552438427    |
| 7.2663236132    | 1.7281722763    |
| 2.8769247431    | 1.4967486021    |
| 0               | 0               |
| 83.2189092363   | 97.4147896373   |
| 23.1099522598   | 28.8556359264   |
| 79.3261169789   | 38.0955676795   |
| 30.2326199539   | 11.4391418728   |
| 188.4136562437  | 62.5685562501   |
| 30.3648086998   | 19.7469907248   |
| 0               | 0               |
| 25.9098199897   | 4.7575907871    |
| 32.0678381807   | 44.4896281089   |
| 531.9801207919  | 747.6199862579  |
| 262.078639188   | 84.6304191969   |
| 168.7777957979  | 50.8363960847   |
| 189.836731299   | 167.2767097919  |
| 31.7028185572   | 13.1949643721   |
| 56.0468158338   | 22.2163133318   |
| 259.4190645412  | 62.4329457678   |
| 0               | 0               |
| 0               | 0               |
| 0.8054415937    | 0.4190389694    |
| 94.5955718519   | 41.0119029221   |
| 6.3686318119    | 0               |
| 26.1507831692   | 0               |
| 330.1734269041  | 190.862218552   |
| 4.3027592498    | 26.8626375762   |
| 47.2635922202   | 20.2500547027   |
| 81.750802064    | 26.1733321592   |
| 119.3546969931  | 30.3963808194   |
| 2.0936349625    | 1.4004441423    |
| 124.6764634658  | 43.7637742521   |
| 20.8295221995   | 10.5847475049   |
| 11.0361500494   | 11.4833328182   |
| 9.6268170371    | 1.1784581049    |
| 2.746532604     | 5.0011877993    |

gene\_expression\_table

|                |               |
|----------------|---------------|
| 12.1255783953  | 18.9253569002 |
| 22.6630960401  | 17.6860503904 |
| 7.6560122088   | 3.6767226528  |
| 13.7342798637  | 22.9673416435 |
| 1.2001574737   | 2.0813127227  |
| 16.2049551203  | 16.8615769192 |
| 0              | 0             |
| 0.4359284755   | 0.7257475473  |
| 0              | 0             |
| 4.5574409258   | 4.9001778464  |
| 26.9898072275  | 15.7267203794 |
| 17.4918294755  | 3.1380336528  |
| 3.4128398183   | 4.5196167668  |
| 0.0918791817   | 0             |
| 0              | 0             |
| 24.8411449913  | 33.800843188  |
| 115.3186036238 | 99.2655235623 |
| 7.4773206971   | 12.2846847718 |
| 0.5509864961   | 0.76441649    |
| 3.4330647171   | 0.5103102668  |
| 6.2780713965   | 6.9167199113  |
| 3.9110616177   | 3.8369921366  |
| 3.4788812317   | 1.0342413883  |
| 1.7300914199   | 0.3600388812  |
| 142.7414336561 | 93.0758485731 |
| 81.4062787158  | 72.9105004805 |
| 1.7924306861   | 1.8650596476  |
| 0              | 0.0361519157  |
| 8.2959982947   | 17.2643012375 |
| 1.3987046301   | 0.3638449711  |
| 0              | 0             |
| 0              | 0             |
| 7.2360341184   | 6.3708927523  |
| 0              | 0.136317295   |
| 18.3901037366  | 17.495101582  |
| 4.1317249084   | 5.9258438839  |
| 2.4632078775   | 4.1008265718  |
| 12.5163489622  | 22.4447710339 |
| 4.8667094722   | 2.0255630577  |
| 5.2822683953   | 3.2529151677  |
| 0              | 0             |
| 42.3271237675  | 42.9129235698 |
| 0.4890704518   | 0             |
| 5.576756123    | 7.7369670062  |
| 0.1694158143   | 0.088140256   |
| 16.3378299751  | 101.999015032 |
| 7.2377483445   | 4.1078294047  |
| 28.302741104   | 23.1389423292 |
| 0              | 0             |

gene\_expression\_table

|               |               |
|---------------|---------------|
| 77.464230399  | 25.8242835242 |
| 1.3782067216  | 1.4340514043  |
| 2.0537222086  | 0             |
| 0.0787584849  | 0.0819497642  |
| 7.7102501987  | 6.4698936433  |
| 4.8720925544  | 2.1122953533  |
| 4.5506790209  | 2.4552223616  |
| 16.7981317218 | 7.8654550173  |
| 0.7475870072  | 0.6482325793  |
| 0.3064300714  | 0.2391349211  |
| 5.7967445315  | 7.6766168857  |
| 12.7479032092 | 22.8697343121 |
| 0.2720082686  | 1.1321199742  |
| 0.1570249472  | 0             |
| 3.5978862151  | 3.9575960111  |
| 3.0208411834  | 2.6596689411  |
| 184.451456051 | 83.9070822807 |
| 3.4003682561  | 3.8598006022  |
| 2.9446125396  | 4.6624986705  |
| 0             | 0             |
| 0             | 0             |
| 2.5212072314  | 0.9258939122  |
| 0             | 0             |
| 0.6617815759  | 0.8263162122  |
| 1.1623482301  | 0.0863890262  |
| 6.5959179001  | 10.2947749191 |
| 4.7045201707  | 7.9546130009  |
| 1.864650262   | 1.2934703649  |
| 0             | 0             |
| 0.1254750066  | 0             |
| 1.8622250677  | 3.3909436482  |
| 1.0599173951  | 1.1028650528  |
| 3.7188053501  | 3.2245755487  |
| 5.7797538977  | 2.5443628108  |
| 0.5600694542  | 0             |
| 0.5043913731  | 0.8397267499  |
| 0.4937850357  | 0.4281609287  |
| 0             | 0.5605428511  |
| 0             | 0             |
| 14.062942257  | 0             |
| 1.168972981   | 1.0642971072  |
| 2.526712323   | 2.8681028087  |
| 10.4922221363 | 11.354059648  |
| 0             | 0.0837681164  |
| 0             | 0             |
| 2.1012970708  | 0.8329299967  |
| 6.5797341092  | 1.9560982069  |
| 0.4250736296  | 2.653785209   |
| 51.6520627923 | 29.7011813756 |



gene\_expression\_table

|                 |                 |
|-----------------|-----------------|
| 0               | 0               |
| 4.4940735748    | 1.1690431522    |
| 4.4602354542    | 2.2541822102    |
| 27.5116992827   | 10.4096248269   |
| 2.3570540731    | 4.682162807     |
| 15.6592619569   | 23.6259699355   |
| 5.5731918001    | 11.9846341126   |
| 0.0690724276    | 0.0718712297    |
| 9.3391503017    | 9.7175709531    |
| 0.2094851625    | 0.3051628478    |
| 0.6499347348    | 2.0288099119    |
| 0               | 0.1423251805    |
| 0.5868225429    | 3.0530024219    |
| 2.4984387668    | 2.5996750458    |
| 0               | 0               |
| 5.2550728003    | 4.6868634712    |
| 248.8489782166  | 245.1225707191  |
| 12.4973984811   | 7.2243282041    |
| 2.6751797797    | 2.4124338958    |
| 0.5240559628    | 0.5452906139    |
| 0               | 0               |
| 1.2825051236    | 1.6310213274    |
| 0.0890230807    | 0.3705211183    |
| 7.3431003715    | 6.4342243764    |
| 37.4555232993   | 22.7343749556   |
| 64.722448597    | 71.2336774059   |
| 0               | 0.0449504932    |
| 0.2056328203    | 0.1069825122    |
| 0               | 2.2476207985    |
| 1.0732471389    | 2.1093881736    |
| 27.3324365665   | 0               |
| 0               | 19.7943294012   |
| 1195.2812402326 | 2360.0849206435 |
| 0               | 0               |
| 20.8458190083   | 22.2612900672   |
| 0               | 0.0465753931    |
| 0.4237118376    | 0.4408805633    |
| 19.0222233108   | 24.4501768391   |
| 30.6539217927   | 26.0967379597   |
| 14.7959456713   | 11.7730100392   |
| 0.5500952854    | 0               |
| 9.6594007063    | 5.8833938605    |
| 3.3156758008    | 0               |
| 10.0297529995   | 12.9661341378   |
| 11.5266031987   | 10.494451659    |
| 0.0278734475    | 0               |
| 9.5632157749    | 7.1076539414    |
| 1.287138841     | 2.3437635724    |
| 0               | 0               |

gene\_expression\_table

|               |               |
|---------------|---------------|
| 5.5267677886  | 2.1565167758  |
| 1.313095326   | 0.1951859581  |
| 0             | 0             |
| 0.402854173   | 0.2934244249  |
| 12.0371588094 | 16.4613001249 |
| 0.3522581933  | 0.2748987228  |
| 0             | 0             |
| 0.8946788547  | 0.9309310773  |
| 7.159523554   | 9.1050986042  |
| 60.2711679776 | 57.8265904855 |
| 1.710284703   | 0.4448962811  |
| 0.2117442053  | 0.2203240415  |
| 0.3732489665  | 0.5340128006  |
| 0             | 0             |
| 2.7508396459  | 1.7614173305  |
| 0             | 0             |
| 49.1658420619 | 12.7895082333 |
| 14.834629112  | 27.5637956308 |
| 7.667166586   | 11.9667581473 |
| 0             | 0             |
| 0.8163484098  | 1.0921200392  |
| 1.2511055245  | 0.4339333634  |
| 0.5306348217  | 0             |
| 2.4168650423  | 3.7721939534  |
| 0.5659564128  | 0.1962962875  |
| 1.8663916177  | 0.7061881682  |
| 3.7933451154  | 2.6313671742  |
| 19.9995038399 | 11.9656810314 |
| 0             | 0             |
| 0             | 0             |
| 88.5428422966 | 52.4930060062 |
| 0             | 0.6161330546  |
| 0             | 0             |
| 2.6796247909  | 0.6970506736  |
| 5.229178244   | 5.8596069366  |
| 0.100161801   | 0             |
| 0             | 0             |
| 0             | 0             |
| 0.4951764754  | 0.2576204675  |
| 2.4210639349  | 3.3588866666  |
| 0             | 0             |
| 0             | 0             |
| 65.3263265664 | 23.210407857  |
| 0.4303314803  | 1.343305298   |
| 9.1934092909  | 7.0150113317  |
| 0             | 0             |
| 0.3205152802  | 0.1482233335  |
| 10.5316536178 | 25.5695866628 |
| 4.4188635545  | 2.4084317151  |

gene\_expression\_table

|                |                |
|----------------|----------------|
| 0              | 0              |
| 1.453581628    | 1.5124804881   |
| 6.4893249901   | 0              |
| 1.2370545361   | 0.9361307332   |
| 16.3551302935  | 9.5165536766   |
| 0              | 3.5033503496   |
| 0.431282306    | 0.2243788929   |
| 0              | 0              |
| 0.499119042    | 1.4281939478   |
| 4.4611394926   | 2.7851424263   |
| 0              | 0              |
| 0.4810237436   | 0.1668382457   |
| 32.1474987732  | 16.1968951296  |
| 2.6701789096   | 16.6702444052  |
| 33.2915155332  | 32.9368513719  |
| 15.3289261433  | 6.3800205637   |
| 6.9178575      | 5.5370521636   |
| 0.738326665    | 1.5364870512   |
| 0              | 0              |
| 0              | 0              |
| 2.1244469257   | 1.7684232993   |
| 0              | 0              |
| 0              | 0              |
| 0              | 0              |
| 1.3706684138   | 0              |
| 83.5720418438  | 33.4455252299  |
| 152.7734874644 | 112.1262807465 |
| 0              | 0              |
| 7.1250980957   | 2.1182302169   |
| 50.6650719268  | 16.4743785363  |
| 11.8964781372  | 12.3785212418  |
| 1.6763491172   | 5.2328234248   |
| 0.4231953521   | 1.3210294496   |
| 161.7812703075 | 103.3238549434 |
| 2.8348365356   | 1.4748517951   |
| 19.8719133968  | 223.3128924384 |
| 16.1769665819  | 60.11590818    |
| 44.4050651016  | 561.0528234538 |
| 46.8704812888  | 257.1491404285 |
| 4.6165943495   | 2.0587105298   |
| 13.9510980114  | 4.1475411243   |
| 18.9211870991  | 13.1252467453  |
| 57.5087104635  | 23.9355811308  |
| 0              | 12.9181383448  |
| 122.9698636026 | 28.6011649061  |
| 96.3873226918  | 94.8716803878  |
| 4.5799806055   | 5.4463549448   |
| 103.4453317879 | 26.9092293982  |
| 385.7017995477 | 188.8613484596 |

gene\_expression\_table

|                 |                 |
|-----------------|-----------------|
| 622.594540321   | 520.6793295281  |
| 4.500563516     | 4.4227629924    |
| 0               | 0               |
| 14.7233172016   | 2.2979854957    |
| 17.9259194524   | 6.7826452398    |
| 173.3637094884  | 152.2026914815  |
| 58.2127740993   | 16.3706878356   |
| 282.5015578016  | 159.4826799509  |
| 201.3712126358  | 27.9374316146   |
| 17.7622964982   | 4.4356851559    |
| 26.3438842597   | 24.5259300643   |
| 80.6646654875   | 45.78173612     |
| 138.6789451421  | 53.649327228    |
| 4498.0327399039 | 5509.0939421711 |
| 17.9142606911   | 5.7848720391    |
| 15.7411082254   | 2.7298225056    |
| 0               | 1.8354856098    |
| 14.7910531727   | 10.26025595     |
| 0               | 0               |
| 0               | 0               |
| 31.1138658973   | 9.0648863247    |
| 36.247624766    | 7.54327437      |
| 470.1293931603  | 297.6705948894  |
| 37.3308906892   | 27.2305169343   |
| 2.7583981485    | 9.758570975     |
| 5.483247654     | 0               |
| 71.6307115232   | 9.3166468463    |
| 132.4596010603  | 62.8328239882   |
| 0               | 0               |
| 1.6147855208    | 0               |
| 21.1469001071   | 14.2377326283   |
| 7.1578545387    | 15.4686935504   |
| 30.2464545059   | 6.2944070551    |
| 11.1241203034   | 4.085247392     |
| 0               | 6.3214847085    |
| 14.4815003907   | 8.9039884352    |
| 2.1858062139    | 2.5270829771    |
| 118.1013074826  | 33.2818283214   |
| 5.6190125852    | 1.4616734852    |
| 11.2598557936   | 0               |
| 0               | 0               |
| 3742.5589134505 | 2300.1376684842 |
| 2.2069377002    | 0               |
| 6.3456512007    | 4.7162684424    |
| 378.1534092328  | 200.4039844322  |
| 12.5618774119   | 9.1496176608    |
| 0.8127480772    | 0               |
| 2042.1931214372 | 862.0762805586  |
| 39.9200275533   | 13.8458599075   |

gene\_expression\_table

|                 |                 |
|-----------------|-----------------|
| 288.8007977795  | 332.989758676   |
| 35.4113611869   | 88.4309352594   |
| 0.7830693843    | 1.4485319317    |
| 4.8826799222    | 5.080525214     |
| 24.2698864452   | 16.0702804036   |
| 16.872290286    | 6.0537766838    |
| 59.209758659    | 22.7953030574   |
| 1.9765848149    | 2.0566756678    |
| 6.9982515799    | 10.0125017381   |
| 0               | 0               |
| 0               | 1.9538940284    |
| 1.4177800387    | 0               |
| 0.9375294838    | 6.8286260415    |
| 0.3333050637    | 0.3468105235    |
| 107.8508250561  | 69.7129961535   |
| 2.2525038454    | 1.1718874433    |
| 12.6164942702   | 28.7559412196   |
| 449.2647164305  | 76.0995786132   |
| 50.6287283586   | 11.7067100252   |
| 0               | 0               |
| 6.0789153525    | 4.9020547099    |
| 10.8634853811   | 45.2146872372   |
| 14.8202845031   | 8.5671109464    |
| 4.8944711409    | 1.1317320468    |
| 81.0676984945   | 14.3578802923   |
| 108.4580968082  | 98.7461990629   |
| 2.0802130289    | 0               |
| 74.8759857324   | 71.8232322923   |
| 3.0883221969    | 4.2846139252    |
| 2.6071005279    | 1.4796762335    |
| 0               | 0               |
| 13.7282635397   | 3.1743400559    |
| 176.8847727858  | 53.0919551606   |
| 2.7956025121    | 0.7272199528    |
| 0               | 0               |
| 0               | 0               |
| 38.1400844971   | 15.0531258867   |
| 2497.5624011639 | 4664.8720448381 |
| 5.2422493864    | 6.0001308034    |
| 26.0802683047   | 14.6686680953   |
| 65.9418438753   | 29.1864651447   |
| 0               | 0               |
| 49.0365659563   | 20.4094074334   |
| 0               | 0               |
| 0               | 0               |
| 7.583429613     | 2.3672126356    |
| 0               | 0               |
| 0               | 0               |
| 0               | 0               |

gene\_expression\_table

|                  |                  |
|------------------|------------------|
| 5.031578072      | 8.3767307031     |
| 16.1663319339    | 4.7444942568     |
| 15.2011936182    | 11.1877354241    |
| 72.6970477297    | 88.2498385111    |
| 14.4306161845    | 8.0851842057     |
| 0                | 0                |
| 1.315694503      | 0                |
| 225.3573985174   | 141.9274550802   |
| 2.1421429126     | 0                |
| 11.4112582371    | 7.5559529313     |
| 177.5447826982   | 133.4974277152   |
| 6.5125497741     | 3.5665458381     |
| 73.6987439562    | 22.5544127932    |
| 5.2672692884     | 4.3845584564     |
| 78.1285186781    | 92.4869614814    |
| 0                | 0.3623335121     |
| 8.7448528787     | 1.7611340725     |
| 2.348498856      | 4.6993453796     |
| 0                | 0.1281574604     |
| 6.956137432      | 5.3078658163     |
| 8.8009435303     | 9.1575561423     |
| 0                | 0                |
| 214.7671246018   | 118.7181447614   |
| 2.1477750451     | 6.7044074837     |
| 16214.5124524467 | 30957.8247187514 |
| 34.9374609342    | 13.3294774877    |
| 0                | 0                |
| 9.2273458331     | 0                |
| 27.3055654179    | 14.2059909515    |
| 0.7265056489     | 0                |
| 0                | 0                |
| 0                | 0                |
| 177.9230471143   | 148.3782186013   |
| 0                | 0                |
| 25.9572999604    | 20.256813733     |
| 5.628931786      | 4.7413931486     |
| 1.7020600808     | 1.6234416385     |
| 1.1598605609     | 0.3017144744     |
| 6.4676839569     | 4.7357523366     |
| 0                | 0.6396337953     |
| 190.0563342062   | 146.5731183407   |
| 94.6179507428    | 166.1375014184   |
| 0                | 31.1867492004    |
| 40.1058457527    | 40.4663536883    |
| 592.1137696467   | 183.6470137406   |
| 1.6288326238     | 5.0844978659     |
| 9.6642314753     | 15.8020097022    |
| 0                | 0                |
| 11.4101927933    | 5.9362658526     |

gene\_expression\_table

|                  |                  |
|------------------|------------------|
| 0                | 14.0688296596    |
| 15.7758787389    | 56.5409497443    |
| 16.5734326948    | 0                |
| 3.5003099134     | 0.4046824252     |
| 32.4255803111    | 31.4901616002    |
| 1.4068878493     | 8.7833681159     |
| 2.1707159795     | 2.2586729915     |
| 15.7400550888    | 7.9841966217     |
| 1.2599630715     | 0                |
| 0                | 0                |
| 7.2028036413     | 6.5578274293     |
| 1.6467796408     | 3.7125981722     |
| 0                | 0                |
| 4.5535211969     | 8.1223354932     |
| 0                | 0                |
| 0                | 1.5909562855     |
| 0                | 0                |
| 2.4137581945     | 3.1394540403     |
| 0                | 1.7289692447     |
| 507.183069661    | 216.7479069431   |
| 0                | 0                |
| 9.2804454657     | 22.5318039518    |
| 499.085500042    | 189.9908607244   |
| 804.1248113046   | 355.9130196833   |
| 571.2639863958   | 679.3274262663   |
| 1.1904126419     | 0                |
| 0                | 0                |
| 2.1878149632     | 0                |
| 0                | 0                |
| 1.44065932       | 0.4996781902     |
| 0                | 0                |
| 29.5802639123    | 16.1993951377    |
| 0                | 0                |
| 56.6244871715    | 76.5945712609    |
| 19.9456452119    | 20.7538390849    |
| 15.5871264582    | 5.0683481104     |
| 33.2774868398    | 33.5208030622    |
| 0                | 0.2053387715     |
| 1.2552178947     | 1.3060790928     |
| 32.098722134     | 25.0495173353    |
| 51.3316955298    | 53.411646385     |
| 26232.3258007795 | 31702.7038917875 |
| 4.0293502042     | 0                |
| 0                | 0                |
| 48.4092425647    | 28.2567768723    |
| 4.5301788746     | 0                |
| 101.0110985797   | 16.7387931008    |
| 50.2582769709    | 19.2664806172    |
| 9.2916568579     | 4.8340765418     |

gene\_expression\_table

|                 |                |
|-----------------|----------------|
| 13.2356665582   | 16.2203241456  |
| 2.9327443486    | 0              |
| 4.3404896444    | 5.2690930669   |
| 0               | 10.7567199475  |
| 0               | 0              |
| 3.3206309803    | 2.5913867523   |
| 0               | 0              |
| 0               | 0              |
| 4.3185556709    | 2.2467713759   |
| 0               | 0.8178780508   |
| 0               | 0              |
| 0.8822843379    | 1.8360686738   |
| 4.7872986425    | 3.7359593268   |
| 1.8517578978    | 0              |
| 0.454670593     | 0.4730937617   |
| 8.1203520975    | 6.759509816    |
| 1248.7290564356 | 1044.102317121 |
| 50.6277573211   | 49.0874221345  |
| 0               | 0              |
| 0               | 0              |
| 2.3359386844    | 2.43059049     |
| 22.976581844    | 10.2461094478  |
| 167.9811001314  | 0              |
| 220.6106165677  | 155.3875015152 |
| 40.9926391658   | 12.6277263237  |
| 10.1613332772   | 5.2865343157   |
| 111.1384062032  | 23.5566454378  |
| 6.3383530553    | 3.2975909773   |
| 72.0964808542   | 117.8851409826 |
| 2.2691430521    | 2.3610883109   |
| 0               | 0              |
| 31.5780279622   | 26.8834613263  |
| 15.300016365    | 4.9749906913   |
| 126.5177393019  | 123.0587225424 |
| 6.6558508535    | 2.8856436271   |
| 244.5957124757  | 98.7430310745  |
| 0               | 0.656078721    |
| 89.7970074416   | 51.2388585855  |
| 1.7486449711    | 7.277998974    |
| 61.7826643685   | 18.7501085793  |
| 66.1818370714   | 96.4089181002  |
| 1.1379028047    | 0              |
| 3.5612318455    | 3.2938064928   |
| 46.7284458052   | 64.0718150454  |
| 0               | 0              |
| 6.5863303049    | 4.721098291    |
| 55.0116038774   | 57.2406639416  |
| 3.5115022884    | 11.4833328182  |
| 0.6471432789    | 0.6733654054   |



gene\_expression\_table

|                |                |
|----------------|----------------|
| 270.9093599557 | 236.1752237341 |
| 122.6977592505 | 127.6694498728 |
| 8.7136382677   | 5.4742419843   |
| 12.3666229724  | 17.546885808   |
| 38.0759784644  | 28.0633238236  |
| 3.0025380453   | 3.64490039     |
| 0.5272852465   | 1.0973014954   |
| 0              | 0              |
| 8.5105418584   | 20.6625707124  |
| 131.7705844062 | 146.2505645162 |
| 0              | 2.0134501342   |
| 4.8476446935   | 6.7254271523   |
| 74.2297842965  | 0              |
| 4.6692593372   | 4.8584568662   |
| 0              | 0              |
| 2.1958870173   | 0              |
| 9.5456516784   | 18.7612750409  |
| 0              | 0              |
| 0              | 0              |
| 12.8977322244  | 23.1128180427  |
| 40.3566029413  | 33.5934760519  |
| 0.3795601087   | 1.579759258    |
| 0              | 0              |
| 0              | 0              |
| 3.1182273611   | 0              |
| 0              | 0              |
| 0              | 0.9377951625   |
| 3.8896568679   | 8.0945300967   |
| 1.0859237961   | 0              |
| 0              | 0              |
| 0              | 1.8602974526   |
| 0              | 0              |
| 0              | 0              |
| 2.9596992407   | 0              |
| 0.5747598322   | 0              |
| 0              | 0.7336506264   |
| 0.6367090733   | 1.3250168155   |
| 0.4801920982   | 0.9992987872   |
| 7.1406055595   | 3.3021962589   |
| 51.7942256635  | 73.5681104967  |
| 11.0740413609  | 9.6022995655   |
| 456.486815198  | 363.567676171  |
| 28.9315739142  | 35.5773079578  |
| 6.2609592641   | 13.0293043623  |
| 38.2970380499  | 21.672169061   |
| 143.0963027748 | 85.0825935007  |
| 41.5383897261  | 6.4031877974   |
| 4.3052603693   | 6.7195630907   |
| 238.5898958915 | 114.5803913356 |

gene\_expression\_table

|                 |                 |
|-----------------|-----------------|
| 111.2936443794  | 136.2391086659  |
| 28.7444356612   | 28.4136971586   |
| 0               | 0               |
| 0.4062254485    | 3.3814850314    |
| 163.7148419622  | 175.8436513308  |
| 11.9802922894   | 12.465731528    |
| 33.0305221778   | 46.5412361607   |
| 0               | 0               |
| 113.8069327044  | 52.2886303224   |
| 1731.2386663792 | 1512.9305607706 |
| 46.8225931853   | 50.9343740454   |
| 446.324842107   | 285.3602647073  |
| 3.244662495     | 3.3761356222    |
| 5.324406806     | 1.3430668581    |
| 290.3097588602  | 234.9457108892  |
| 30.2538078156   | 13.6868202348   |
| 16.4588509379   | 11.4171736991   |
| 87.0557791611   | 82.348421191    |
| 589.1330988985  | 343.5949707001  |
| 0               | 0.0577957815    |
| 1.5851409279    | 3.298741093     |
| 30.6365599369   | 31.8779477069   |
| 211.6260128381  | 104.0950465116  |
| 0               | 1.4123835265    |
| 0               | 3.9588658802    |
| 1.401681098     | 0               |
| 1.3472864884    | 2.8037565778    |
| 0.7504542274    | 1.5617249892    |
| 1.8644648215    | 0               |
| 2.1743507545    | 3.7707584115    |
| 0               | 0               |
| 32.25911471     | 15.5550905833   |
| 0               | 8.4419827436    |
| 0               | 0               |
| 33.2626478534   | 8.6526110556    |
| 15.9867484407   | 13.9730039779   |
| 70.0847098931   | 50.6420343325   |
| 7.1205227292    | 5.3345123998    |
| 37.4593708804   | 40.8632120986   |
| 138.5304759647  | 37.6739229903   |
| 0.4326890631    | 0.9004430885    |
| 22.6531816848   | 4.7142168875    |
| 48.6945018782   | 23.0307246055   |
| 3.924054294     | 3.175710418     |
| 308.2948516296  | 63.5793860366   |
| 0               | 0               |
| 2.6877402095    | 0               |
| 2.6535965883    | 0               |
| 4.3619814352    | 1.13468203      |

| gene_expression_table |                |
|-----------------------|----------------|
| 0                     | 0              |
| 0                     | 0              |
| 21.5503613564         | 20.821893887   |
| 0                     | 0              |
| 0                     | 0              |
| 13.5812863378         | 7.6093217634   |
| 13.3159437642         | 8.5772163624   |
| 4.6913664411          | 3.9939216103   |
| 5.8574996747          | 2.4379377934   |
| 48.9074984425         | 36.158130908   |
| 0                     | 0              |
| 0                     | 0              |
| 0                     | 0              |
| 0                     | 0              |
| 0                     | 0              |
| 21.1247188894         | 8.7922754443   |
| 14.4209849206         | 7.8975371449   |
| 12.8982868224         | 11.3018299204  |
| 0                     | 0              |
| 398.2212149541        | 181.9128579327 |
| 23.1131575237         | 18.9622622099  |
| 0                     | 0              |
| 1.2844271953          | 1.7819625985   |
| 0                     | 0              |
| 7.3151543286          | 0              |
| 25.1013557751         | 11.2944683637  |
| 25.8698008565         | 19.2271717327  |
| 5.9406946774          | 6.5067479288   |
| 33.3053835894         | 32.1795607738  |
| 4.1819784191          | 2.4865322371   |
| 0.6771607133          | 0              |
| 5.55824073            | 8.5050876785   |
| 72.0930534008         | 0              |
| 0.1244852136          | 0.1295293315   |
| 9.6988630978          | 3.3639530818   |
| 6.9074750736          | 2.774070583    |
| 18.8513422789         | 39.2303903969  |
| 33.1523605595         | 34.4956881077  |
| 71.8194398369         | 29.6341320237  |
| 0                     | 0              |
| 93.2148355733         | 37.6386413793  |
| 36.0945727207         | 20.2230636268  |
| 0                     | 3.0573627004   |
| 309.5972239517        | 158.9234095991 |
| 24.2024349351         | 8.8140896005   |
| 1.4351176864          | 0              |
| 45.155653944          | 20.1365797418  |
| 399.7041060322        | 351.915420867  |
| 15.262163343          | 10.5870555951  |

gene\_expression\_table

|                 |                 |
|-----------------|-----------------|
| 0               | 0               |
| 1.7811181376    | 3.2432552542    |
| 37.917148065    | 28.6934864916   |
| 0               | 0               |
| 177.1092120262  | 86.7966517702   |
| 0               | 0               |
| 23.0781006374   | 8.0044070092    |
| 2.0396791479    | 1.6978612573    |
| 0               | 0               |
| 3.2920953328    | 0               |
| 8.5863048044    | 9.6787386527    |
| 2049.8360045314 | 2837.1527592899 |
| 0               | 0               |
| 10.632768756    | 3.161030454     |
| 0               | 0               |
| 25.6951454392   | 8.0208924009    |
| 2.0813042132    | 3.0318935877    |
| 3.7081169481    | 2.2507153459    |
| 16.3227685969   | 6.9934793667    |
| 908.9774495222  | 287.3343944746  |
| 71.155365391    | 24.6795225668   |
| 0               | 2.3864344282    |
| 0               | 0               |
| 398.9992710163  | 105.9999952447  |
| 109.0537147611  | 85.871119836    |
| 10.2094060223   | 19.4756636714   |
| 77.2786392991   | 0               |
| 0               | 0               |
| 26.2947907324   | 5.4720501627    |
| 42.5768691226   | 35.4416608185   |
| 2.7261583484    | 2.4002184317    |
| 1.3519865791    | 8.440612959     |
| 0               | 4.4744106026    |
| 949.1330798224  | 1123.0691111122 |
| 164.2280636969  | 52.2141139091   |
| 0               | 0               |
| 0               | 0               |
| 3.9837649065    | 1.0362965818    |
| 1.0128498004    | 0.526945144     |
| 15.1467033068   | 8.5966063293    |
| 1.8114337376    | 1.8848326992    |
| 0.5913202248    | 1.2305608229    |
| 27.5640998928   | 16.513298509    |
| 53.9427403352   | 27.0965125322   |
| 275.025106016   | 126.5471276231  |
| 9.6514540232    | 14.4612419959   |
| 20.3218404633   | 7.0484258995    |
| 1.3584337945    | 7.0673864094    |
| 5.2942666233    | 7.3450524433    |

gene\_expression\_table

|                 |                |
|-----------------|----------------|
| 4.7183637108    | 0              |
| 0               | 0              |
| 8.4980043726    | 2.2105854864   |
| 1.7231503024    | 3.585944071    |
| 277.0640310687  | 135.666171583  |
| 0               | 0              |
| 2.6511842278    | 2.7586097247   |
| 10.0681786024   | 6.8322647911   |
| 8.7993349094    | 0.9860180982   |
| 0               | 0              |
| 233.4014626535  | 167.6882514741 |
| 0               | 0              |
| 7.940243752     | 2.0654952419   |
| 0.2912880017    | 0.6061818757   |
| 12.6342582067   | 9.8596470179   |
| 7.0438548396    | 4.8861803608   |
| 11.7121492928   | 2.8123207907   |
| 17.365727836    | 7.9053554701   |
| 0               | 0              |
| 3.4429778399    | 7.1649733365   |
| 0               | 0              |
| 0               | 0              |
| 0               | 0              |
| 4.2266940357    | 3.0785712301   |
| 3.4921598019    | 2.0187008191   |
| 0.3788008677    | 1.9707490459   |
| 3.8405530875    | 2.2200953287   |
| 0               | 0              |
| 0               | 0              |
| 1.5292820569    | 0.3978120711   |
| 0               | 0              |
| 0               | 0              |
| 0               | 0              |
| 2.3054322637    | 3.3583871365   |
| 2.4160578688    | 0.7182731683   |
| 1122.1379904487 | 888.7753370129 |
| 0               | 0              |
| 54.573375483    | 22.0829305718  |
| 36.4506765401   | 5.1719524425   |
| 22.6742481788   | 5.1289140308   |
| 6.7610299313    | 2.8139942479   |
| 7.7077006605    | 7.0874553572   |
| 0.442751476     | 0.1771891094   |
| 3.1383402212    | 3.7320059307   |
| 1.9810492837    | 2.4735852433   |
| 1.871374124     | 1.5144903349   |
| 344.3096399705  | 187.3980632184 |
| 10.2269405559   | 12.8582789518  |
| 28.7916146762   | 0              |

gene\_expression\_table

|                 |                |
|-----------------|----------------|
| 24.7828461902   | 17.1913617044  |
| 0               | 0              |
| 0.6935991499    | 1.0825554896   |
| 28.3840422353   | 9.8447194675   |
| 0               | 0              |
| 1.6821701264    | 1.0501988102   |
| 0               | 3.9671988092   |
| 14.1075865182   | 14.6792233274  |
| 2406.8958184486 | 790.8703560067 |
| 59.1335961839   | 55.7612712473  |
| 3.0872923366    | 3.0838932997   |
| 4.94449211      | 0.85747367     |
| 20.7256454385   | 20.6542288006  |
| 0.9898186371    | 0.1716543177   |
| 116.7478392502  | 176.1437383032 |
| 12.247181351    | 3.1858587213   |
| 72.3018881537   | 49.0459811483  |
| 0.6123759444    | 0.6371893049   |
| 9.4911644689    | 3.9502978825   |
| 0               | 2.713376505    |
| 0               | 4.5061934915   |
| 8.4143330344    | 19.1521755693  |
| 0               | 0              |
| 0               | 0              |
| 0               | 0              |
| 51.6509871409   | 81.187556808   |
| 0               | 0.898018155    |
| 124.477269692   | 121.5259382344 |
| 2.7475137241    | 0              |
| 0               | 0              |
| 8.7639161581    | 0              |
| 0               | 0              |
| 0               | 5.7886271258   |
| 942.1368965916  | 539.6213450865 |
| 0               | 0              |
| 13.2195673287   | 8.2531330583   |
| 92.2500467743   | 59.9925010568  |
| 4.5075971259    | 0              |
| 325.0241274723  | 287.3007666354 |
| 0               | 0              |
| 0               | 0              |
| 20.5706333827   | 16.4647320471  |
| 26.0302820596   | 37.9190340169  |
| 0               | 5.9464446349   |
| 189.9699546183  | 153.7413906119 |
| 2.7057292701    | 5.6307298443   |
| 0               | 0              |
| 0               | 0              |
| 1.2522232172    | 2.605926143    |

gene\_expression\_table

|                |                |
|----------------|----------------|
| 4.2972115974   | 3.3535003653   |
| 0              | 0              |
| 9.0864703242   | 4.7273262147   |
| 533.0570430252 | 745.6037071561 |
| 25.5787975051  | 4.4358742787   |
| 6.1904110604   | 2.1470817924   |
| 176.8125896507 | 306.6283387347 |
| 0              | 0              |
| 19.4983462261  | 20.2884156265  |
| 0              | 0              |
| 1.8276581021   | 0.950857236    |
| 1.6831215609   | 3.5026426736   |
| 2.3694426837   | 1.5409075407   |
| 0              | 0              |
| 261.0367571205 | 173.832907824  |
| 63.8431666635  | 45.8683885896  |
| 131.0410528496 | 79.8151095763  |
| 0              | 0              |
| 0              | 0              |
| 35.8481984809  | 39.4527278596  |
| 0.7447693493   | 3.0997890649   |
| 0              | 0              |
| 1.4884411017   | 2.3231286918   |
| 13.105505676   | 5.8442307231   |
| 1.6448175579   | 0.488990075    |
| 1.1024103843   | 0              |
| 2.355918085    | 1.5321121577   |
| 4.5443192077   | 3.5463406392   |
| 8.4143330344   | 0              |
| 0              | 0              |
| 0              | 0.59297697     |
| 0              | 0.6134953494   |
| 0              | 0              |
| 0.4080856738   | 0.8492424604   |
| 1.9757255661   | 0.6852605341   |
| 0              | 0              |
| 0.5290680861   | 4.9545524477   |
| 1.0738413894   | 0.3724510816   |
| 1.5141365232   | 2.3632335847   |
| 0              | 0.59665993     |
| 0              | 0              |
| 0              | 0              |
| 0              | 0              |
| 0              | 0              |
| 0              | 0              |
| 0              | 0              |
| 0.6631593502   | 0.1150050742   |
| 8.9072567078   | 1.853635422    |
| 1.1836904908   | 0              |

gene\_expression\_table

|                 |                 |
|-----------------|-----------------|
| 13.4207832605   | 25.1362636706   |
| 0               | 0               |
| 25.3563973529   | 32.0375126011   |
| 0               | 0               |
| 273.1015805213  | 170.1266590346  |
| 0               | 0               |
| 25.1435505735   | 34.8831501535   |
| 0               | 3.0159727311    |
| 0               | 0               |
| 6.0307426082    | 10.8388215079   |
| 185.389799214   | 130.8630028503  |
| 11.6567895766   | 10.4561384007   |
| 263.6838595431  | 163.8925572349  |
| 0               | 0               |
| 81.1126141376   | 126.5989235005  |
| 82.4772797514   | 49.9706990071   |
| 12.7563575348   | 14.9323981436   |
| 21.8982740796   | 28.4819851436   |
| 24.8407380796   | 22.1548116126   |
| 3.0906132371    | 0               |
| 12.7918530605   | 4.4367255307    |
| 547.5609942359  | 172.423756496   |
| 0               | 0               |
| 0               | 0               |
| 0.6214998629    | 0               |
| 3.5580214735    | 2.4681278991    |
| 413.9198735211  | 331.9916194316  |
| 8.6273486097    | 7.18154175      |
| 32.9280496354   | 15.5737673392   |
| 28.562762206    | 14.8600600368   |
| 32.4719146036   | 40.5452047282   |
| 3.1573676723    | 0               |
| 3461.1953391713 | 4196.6723729896 |
| 11.7789848881   | 12.8133702418   |
| 18.5044584426   | 13.7530397807   |
| 17.4224637476   | 5.4385256316    |
| 0               | 51.9545544732   |
| 299.0772895652  | 112.0305046655  |
| 0               | 0               |
| 0               | 0               |
| 165.7821269332  | 144.9576371464  |
| 0               | 0               |
| 44.9138485746   | 14.5035774163   |
| 1.3104695926    | 0               |
| 1.0832766649    | 5.072268762     |
| 3.6942111671    | 0.7687799847    |
| 0               | 0               |
| 0               | 0               |
| 127.063134074   | 56.2135294291   |



gene\_expression\_table

|                 |                 |
|-----------------|-----------------|
| 8.0656778258    | 3.108332447     |
| 8.3057149993    | 8.6422610424    |
| 0               | 0               |
| 2.3855399019    | 3.3096020529    |
| 37.8203383253   | 19.6764057367   |
| 9.4283375245    | 4.9051860129    |
| 27.7204101601   | 81.7236355538   |
| 0.1524567189    | 0               |
| 30.926100592    | 27.4119285707   |
| 2.2560564501    | 2.8169657307    |
| 6.7320782801    | 9.1063191089    |
| 0               | 0               |
| 4.9100137226    | 1.4597047357    |
| 6.7618529416    | 10.5537629674   |
| 56.1637486866   | 41.7424953188   |
| 0               | 0               |
| 6.2294193112    | 0.9259763193    |
| 75.2675165214   | 27.9704794421   |
| 0               | 0               |
| 0               | 0               |
| 2.3253452277    | 0               |
| 0               | 0               |
| 35.677251208    | 22.9626104292   |
| 7.7618009197    | 6.9225494266    |
| 4.27242317      | 2.9636939803    |
| 18.1065243303   | 1.7127452149    |
| 0               | 2.5857191404    |
| 25.7965736449   | 45.7890315159   |
| 43.4723021198   | 56.7015136655   |
| 0               | 4.7299052252    |
| 29.2804005249   | 15.758708775    |
| 4.4644859149    | 1.3936158187    |
| 19.7955888829   | 6.8659008337    |
| 0.7627162147    | 0               |
| 144.9008182888  | 73.3207141586   |
| 1.1136451868    | 0               |
| 0               | 0               |
| 1837.6115989704 | 3059.6156409255 |
| 27.4281932805   | 48.924991927    |
| 13.0540979145   | 5.7191779198    |
| 0               | 0               |
| 92.7183971137   | 154.3605271998  |
| 0               | 0               |
| 7.6378824725    | 5.2982453763    |
| 0.8941667959    | 0.3101327566    |
| 23.1882002429   | 11.2596315295   |
| 9.8272661504    | 0               |
| 26.8805332278   | 22.3757819894   |
| 26.2986637158   | 2.2803567274    |

gene\_expression\_table

|                |               |
|----------------|---------------|
| 3.6679207428   | 4.4526349189  |
| 95.3417747852  | 87.1801567455 |
| 0              | 1.9953777394  |
| 0              | 0             |
| 0              | 1.6308790801  |
| 15.1542163455  | 26.2804373377 |
| 0.6429238648   | 0             |
| 0              | 0             |
| 0.7859171182   | 0.8177623352  |
| 0              | 0             |
| 1.1107873071   | 0.5778981022  |
| 0              | 0             |
| 0              | 0.5671059836  |
| 38.9473247434  | 37.9926217253 |
| 7.6901645476   | 0             |
| 0              | 0.5373859533  |
| 0              | 0             |
| 8.4249679346   | 2.9221153616  |
| 74.174717691   | 12.8633772667 |
| 134.4875251687 | 57.621090856  |
| 0.8494972001   | 1.7678373406  |
| 47.4128514616  | 23.5945272278 |
| 4.3206083937   | 5.1379184579  |
| 22.4230356933  | 29.9977881077 |
| 0              | 0             |
| 0              | 0             |
| 2.9423238269   | 0.7653865617  |
| 0              | 0             |
| 0.5320749226   | 1.6609035015  |
| 4.5465405351   | 4.7307655208  |
| 0              | 0             |
| 0              | 0             |
| 1.0749265674   | 5.5924119704  |
| 0.7124358332   | 0             |
| 7.9204308815   | 15.1091696855 |
| 5.042743567    | 3.4980497388  |
| 1.0794524274   | 0             |
| 0              | 0             |
| 0              | 0             |
| 5.1055718672   | 1.3281121749  |
| 0              | 0             |
| 11.1772848604  | 2.3260372772  |
| 3.8742839216   | 5.3750255907  |
| 3.8256626663   | 4.9758472668  |
| 0              | 0             |
| 1.9335607378   | 1.2071449578  |
| 153.6830357719 | 30.5915249575 |
| 0              | 0             |
| 0              | 0             |

gene\_expression\_table

|                 |                 |
|-----------------|-----------------|
| 9.2994344724    | 24.1906146142   |
| 2.5795242621    | 0.4473410184    |
| 7.2553302093    | 1.8873287135    |
| 4.6991032732    | 2.716394485     |
| 10.138665529    | 7.0329882602    |
| 3.1647629122    | 2.1953323486    |
| 1.2318360893    | 0.6408749304    |
| 0               | 0               |
| 65.0325329739   | 130.8241025322  |
| 0               | 17.0165187001   |
| 3.3930043372    | 1.2838139085    |
| 4.6372098807    | 3.216739181     |
| 11.2106199627   | 1.6664103172    |
| 1.2475360514    | 1.2980859826    |
| 136.5360693906  | 56.0796654445   |
| 3.2614450757    | 2.4239987356    |
| 2.3193579088    | 4.8266757287    |
| 7.0804667635    | 10.314312363    |
| 0               | 0               |
| 58.7861182845   | 14.1839121108   |
| 5.5453281186    | 1.2147418512    |
| 0               | 0               |
| 13.3478708132   | 14.3676456019   |
| 1.07250525      | 1.1159629653    |
| 1017.7631529197 | 1098.2250518358 |
| 0               | 1.496231992     |
| 10.6903343434   | 10.267850514    |
| 0               | 0               |
| 0               | 11.6766549195   |
| 0               | 0               |
| 1.7009887286    | 0               |
| 4.5275685065    | 2.8990921533    |
| 0               | 0               |
| 9.2684018768    | 11.0216637886   |
| 0               | 0               |
| 0               | 1.4973948666    |
| 0               | 0               |
| 6.8201209209    | 0.7884967739    |
| 0.4151857335    | 0               |
| 398.774741709   | 269.3424872173  |
| 0               | 0               |
| 0               | 0               |
| 0               | 3.8320071946    |
| 6.2280058206    | 3.645204452     |
| 0               | 0               |
| 9.8873951568    | 4.5010133826    |
| 1.3266926658    | 1.3804500084    |
| 77.1668602182   | 29.3611097939   |
| 80.4801657286   | 49.9745914123   |

gene\_expression\_table

|                 |                 |
|-----------------|-----------------|
| 3.7012880035    | 2.7680956493    |
| 1.2840643069    | 2.6721887125    |
| 85.8367226063   | 44.657405404    |
| 9.9490069102    | 1.3802851785    |
| 34.8504909893   | 21.7141475868   |
| 19.1594162802   | 84.0149561281   |
| 4.3047043137    | 1.1197825351    |
| 0               | 20.6672616871   |
| 1.3632678808    | 0               |
| 0               | 0               |
| 4.9858145568    | 2.5939194225    |
| 0               | 0.9032103633    |
| 0               | 0               |
| 0               | 0               |
| 22.9232322112   | 6.9045487099    |
| 0.6340684337    | 0               |
| 0.1752654191    | 0.1823671416    |
| 1.1187665117    | 3.4922961744    |
| 15.8971860481   | 18.0450950191   |
| 147.5709535958  | 85.3058341527   |
| 0               | 0               |
| 0               | 0               |
| 0               | 0               |
| 0               | 0               |
| 18.127145062    | 10.373909504    |
| 2.4724905897    | 3.85901318      |
| 8.9518921051    | 6.9859658442    |
| 0.951718251     | 4.9514084967    |
| 0               | 0.6582580121    |
| 83.5801024188   | 110.3808785358  |
| 0               | 2.1755012302    |
| 0               | 1.4333994011    |
| 343.1598971835  | 480.5897491436  |
| 0               | 1.0390807116    |
| 135.2013170156  | 21.3150984087   |
| 14.4157323309   | 3.3333011448    |
| 13.9856910292   | 14.5523886557   |
| 0               | 0.6051030345    |
| 0               | 0               |
| 0               | 0               |
| 2398.6904917948 | 2648.4348355705 |
| 10.493128184    | 4.6792747743    |
| 9.5348800312    | 24.803079038    |
| 7.9630087562    | 12.4285026081   |
| 0               | 0               |
| 3.3449591679    | 0               |
| 0               | 1.222751044     |
| 0.822983188     | 1.7126606307    |
| 0               | 0               |

gene\_expression\_table

|                  |                  |
|------------------|------------------|
| 0                | 0                |
| 17.7039102467    | 16.2540612631    |
| 0                | 2.19723327       |
| 0.5284305738     | 0                |
| 127.1066260115   | 113.3631112315   |
| 1.7214592815     | 0                |
| 7.8897500353     | 6.716815572      |
| 0                | 0                |
| 7.1685918732     | 0                |
| 16017.5211506095 | 19823.2586057181 |
| 12.5501266367    | 7.5602742126     |
| 21.4330765772    | 33.0678020172    |
| 0                | 0                |
| 77.3809293954    | 42.1049014084    |
| 0                | 0                |
| 22.3986378691    | 23.306226553     |
| 4.2132827443     | 2.7400026161     |
| 4.6204099484     | 15.0639014086    |
| 0.3903719125     | 1.6247588424     |
| 160.5087658741   | 298.0027880162   |
| 0                | 0                |
| 0                | 3.5598095987     |
| 0.5594959401     | 0                |
| 0                | 0                |
| 77.843918602     | 99.690018285     |
| 34.5718925293    | 12.6390705478    |
| 0                | 1.3476204675     |
| 4289.6853769252  | 8183.0881712773  |
| 2941.6877734688  | 4671.6036335165  |
| 44.7529533451    | 67.3986424417    |
| 0                | 0                |
| 20.5555540272    | 20.0085605645    |
| 1.6035976303     | 1.6685751112     |
| 1.4177398328     | 0.4917287966     |
| 17.1729045492    | 14.2949979847    |
| 0.917299861      | 0.9544686825     |
| 26.4223665365    | 27.4929959655    |
| 120.5803890077   | 35.2873924249    |
| 354.0461616576   | 119.9744214256   |
| 50.5863425941    | 0                |
| 0                | 0                |
| 2.4877468015     | 0                |
| 0                | 1.6496843835     |
| 6.0307922101     | 7.8439485006     |
| 34.9292662008    | 39.8059835089    |
| 7.8569479371     | 16.3506200429    |
| 0                | 1.8596989013     |
| 4.4140702564     | 4.5929275708     |
| 4.1780540978     | 1.7389392324     |

gene\_expression\_table

|                 |                 |
|-----------------|-----------------|
| 80.7512598672   | 37.0913605106   |
| 111.415574042   | 33.1228893132   |
| 3.7041394342    | 4.2046150716    |
| 7.980081508     | 5.2840027813    |
| 0               | 0               |
| 0               | 0               |
| 17.6585083291   | 13.1243055975   |
| 4.9408760005    | 7.1975111414    |
| 0               | 0               |
| 6.7951693532    | 2.946045152     |
| 0               | 6.4712941054    |
| 0               | 0               |
| 0               | 0               |
| 0.4609716626    | 0               |
| 0               | 0               |
| 2.478087325     | 1.145999541     |
| 848.3024718231  | 620.0613240273  |
| 3.4645710134    | 3.6049547932    |
| 60.5054113865   | 58.1142272491   |
| 0               | 3.7354227823    |
| 0               | 0               |
| 1.5451633356    | 1.6077730696    |
| 1.0681742564    | 0               |
| 4.4411263857    | 3.0807200063    |
| 15.5335164508   | 14.3670503808   |
| 0               | 0               |
| 0               | 1.8251494717    |
| 3.1490148478    | 3.2766123499    |
| 51.7241682619   | 56.2663866782   |
| 19.94962479     | 55.354613106    |
| 1206.6932533377 | 2368.1347852994 |
| 4.2823041435    | 6.6837334789    |
| 0               | 0               |
| 14.1987389161   | 16.4156324486   |
| 16.505427099    | 44.1622902014   |
| 0               | 1.8743738575    |
| 23.0645805574   | 7.1108601827    |
| 20.2622641409   | 11.7129374192   |
| 5.5872215161    | 1.4534036759    |
| 0               | 0               |
| 8.1582506077    | 0               |
| 11.7096170731   | 2.8117127542    |
| 0               | 0.5582329713    |
| 2.9950730724    | 1.0388109607    |
| 1.0535204561    | 0               |
| 0.8770373441    | 0.9125747358    |
| 1.103322734     | 11.4802916813   |
| 0.9390615674    | 1.9542243385    |
| 0.6202853635    | 0.6454192122    |

gene\_expression\_table

|                 |                 |
|-----------------|-----------------|
| 22.7509100243   | 13.2567527182   |
| 0.7098563032    | 7.3861954998    |
| 6.9534767862    | 8.4411021168    |
| 0               | 0               |
| 0               | 0               |
| 0               | 0               |
| 0               | 2.0518083724    |
| 2.9827432566    | 4.2120332731    |
| 2.5842978994    | 1.6134079048    |
| 2.7455144898    | 0.7141905579    |
| 0.8716699746    | 0.9069898815    |
| 0               | 0               |
| 4.7141687623    | 0.700740859     |
| 0               | 2.4233212057    |
| 1.2314037224    | 0               |
| 1.2967540716    | 5.3971932318    |
| 0               | 0.6881158997    |
| 0               | 0               |
| 0.5535304117    | 0               |
| 0               | 0               |
| 0.743921547     | 1.5481302224    |
| 3.8035422797    | 2.6384407419    |
| 0               | 0               |
| 0               | 0.2268097547    |
| 1.0814137946    | 0               |
| 90.6017884169   | 116.6428102237  |
| 0               | 0               |
| 8.3125509787    | 32.4351525541   |
| 150.9408316006  | 108.4440681708  |
| 21.1601584117   | 30.0239510945   |
| 43.9348389152   | 15.9471176169   |
| 12.9469596029   | 2.8867645764    |
| 8.1191652008    | 4.2240761402    |
| 0               | 0               |
| 24.0369059312   | 33.3478359141   |
| 142.7444666746  | 82.8995978746   |
| 1332.5088968811 | 1503.8777353829 |
| 0               | 0               |
| 4.5296511483    | 0               |
| 0               | 0               |
| 0               | 0               |
| 36.4134945526   | 14.3363642459   |
| 0               | 0.8144972782    |
| 1.2503441307    | 0               |
| 34.7903686317   | 45.2500849568   |
| 0               | 0               |
| 48.0577201409   | 61.9109649055   |
| 0               | 0               |
| 0.7937029232    | 0               |

| gene_expression_table |                 |
|-----------------------|-----------------|
| 0                     | 0               |
| 0                     | 0               |
| 0                     | 0               |
| 0                     | 0               |
| 0                     | 0               |
| 59.626290837          | 1.0262077621    |
| 0                     | 17.0116085782   |
| 4.3984655994          | 0               |
| 0.4647253569          | 1.2481883498    |
| 2.714102048           | 0.9671118857    |
| 11.3327823208         | 0               |
| 2.7610946193          | 2.8076153749    |
| 11.864026713          | 1.4364868325    |
| 23.0104755487         | 8.4464112418    |
| 2.7932595666          | 17.6968934047   |
| 12.4023219359         | 2.9064419302    |
| 0                     | 4.3016205794    |
| 0                     | 0               |
| 57.005427279          | 1.8407465558    |
| 127.4703597183        | 26.3623452002   |
| 14.6808382994         | 56.4150719996   |
| 0                     | 11.4567773739   |
| 0                     | 0.6092274807    |
| 30.4376010495         | 0               |
| 0                     | 27.7120611617   |
| 0                     | 0               |
| 3.3222859997          | 0               |
| 706.7691088664        | 0               |
| 131.0834195232        | 1411.6438268247 |
| 5.7431085266          | 98.5074245685   |
| 16.345842643          | 15.9355152721   |
| 0                     | 0               |
| 0                     | 7.2887064125    |
| 39.8039488246         | 4.4234266723    |
| 11.998982293          | 41.416797505    |
| 54.4432587824         | 4.1617262824    |
| 6.7290880576          | 46.3494187701   |
| 34.7631532195         | 3.5008747336    |
| 2.822592577           | 13.5644061711   |
| 15.7272428979         | 2.9369635087    |
| 74.973600131          | 40.9112697137   |
| 2.9896997802          | 70.919560554    |
| 70.9577402895         | 3.110841865     |
| 15.3904216651         | 20.975265587    |
| 0.5560237087          | 12.6426621461   |
| 0                     | 0               |
| 8.3295984172          | 0               |
| 9.1917190152          | 6.1179615614    |
| 2.3793441578          | 14.780983475    |
|                       | 1.2968239141    |



gene\_expression\_table

|                 |                 |
|-----------------|-----------------|
| 2.3786164109    | 0               |
| 0               | 0               |
| 0               | 0               |
| 0               | 0               |
| 4.5620467644    | 1.1867250149    |
| 0               | 0               |
| 0               | 0               |
| 2.2668794651    | 0.7862443346    |
| 10.545538095    | 14.6304551436   |
| 5.1673136665    | 3.2260153592    |
| 8.5471941693    | 2.5410071154    |
| 10.5073055325   | 1.3666324524    |
| 2.6975535382    | 0.9356193037    |
| 0               | 0               |
| 0               | 0               |
| 9.5636077903    | 27.3655893988   |
| 10.0253190402   | 2.6078857806    |
| 2.4586288838    | 1.2791260368    |
| 0.8469068748    | 6.1685636981    |
| 2.1030523189    | 0               |
| 6.4862940116    | 0               |
| 3.1745093008    | 0               |
| 0               | 1.5937346099    |
| 0               | 0               |
| 2.5762675388    | 1.3403287126    |
| 4.2236944809    | 0               |
| 1.4664366926    | 3.0517128749    |
| 0               | 0               |
| 4.2555124041    | 4.4279449835    |
| 3.1353878786    | 2.1749554789    |
| 6.5304369047    | 2.2650163354    |
| 2.5382696854    | 0.880373302     |
| 1.4984791453    | 0               |
| 1.0351960849    | 0               |
| 0               | 0               |
| 0               | 0               |
| 0.4816354501    | 0               |
| 5.9956319854    | 3.4028584854    |
| 1.7068425522    | 0.3552006997    |
| 0               | 0               |
| 4.3434121521    | 0               |
| 19.915848909    | 18.1324810111   |
| 9.8119327453    | 2.0419020908    |
| 0               | 0               |
| 1271.5150318976 | 1677.3802989545 |
| 0               | 0               |
| 13.1255973808   | 5.1215415641    |
| 0               | 2.3403742145    |
| 0               | 0               |

gene\_expression\_table

|                |                |
|----------------|----------------|
| 25.5044177756  | 7.9613556269   |
| 2.4365211747   | 0              |
| 12.1347022315  | 10.101118506   |
| 7.6868901632   | 3.0762928992   |
| 245.4205162255 | 105.4768108063 |
| 201.1738709421 | 252.0448683842 |
| 204.1603255691 | 132.7705402408 |
| 8.3776723458   | 8.7171340874   |
| 5.0204619124   | 11.318428561   |
| 416.7656664174 | 207.3992295505 |
| 110.9064370571 | 59.5614686318  |
| 2.2912947305   | 0              |
| 0              | 0              |
| 73.819856659   | 26.6278215369  |
| 38.0470013118  | 33.8303084311  |
| 19.6944554562  | 21.7732506144  |
| 8.1762629363   | 10.4926617802  |
| 66.5991470565  | 7.6997480264   |
| 1.142662272    | 0              |
| 10.5949847093  | 15.158400867   |
| 0              | 0.3731483904   |
| 13.8358592659  | 9.9893982664   |
| 0              | 0              |
| 0              | 0              |
| 0.7744306794   | 0              |
| 1.7244876675   | 3.5887271807   |
| 118.4620966617 | 74.5306077768  |
| 34.5562458802  | 17.639017428   |
| 0.9704511166   | 0              |
| 9.9502798671   | 2.2185992948   |
| 1.4809016773   | 0              |
| 0.5810018853   | 0.3022719874   |
| 0              | 0.9261082013   |
| 20.0212381573  | 12.8782696626  |
| 0              | 2.2330756672   |
| 9.2359300902   | 6.8644059126   |
| 2.7573940325   | 1.1476492525   |
| 3.6939655032   | 0              |
| 0              | 0              |
| 601.9424372853 | 261.4423175189 |
| 2.3412991019   | 2.0301400922   |
| 577.0916196927 | 103.5302182601 |
| 239.9426246596 | 148.6101521722 |
| 0              | 0.7737427328   |
| 0              | 0              |
| 30.9123865633  | 32.1649507774  |
| 7.6807128167   | 5.3279559242   |
| 3.2474334061   | 2.782721373    |
| 0              | 0              |

gene\_expression\_table

|                |                |
|----------------|----------------|
| 329.9918133579 | 117.0555753068 |
| 2.2288223857   | 1.3252193477   |
| 66.0699497645  | 18.1596091993  |
| 1.5175836968   | 3.1581518178   |
| 27.8749705736  | 16.9192678963  |
| 96.8558470592  | 28.9277154891  |
| 3.5539745307   | 1.2326603082   |
| 0.5261581631   | 0.6569735941   |
| 2.0355953729   | 1.4441436292   |
| 3.9074414572   | 0              |
| 0              | 0              |
| 58.239276489   | 24.2396485014  |
| 4.2050432941   | 0              |
| 457.6893495834 | 116.0059220259 |
| 43.9221661655  | 43.013538122   |
| 31.3506018334  | 3.6245469388   |
| 23.8674385723  | 24.2432441525  |
| 40.1957428828  | 19.4335907209  |
| 7.3617670039   | 5.8923572677   |
| 2.9934590578   | 0.8899295622   |
| 0              | 0              |
| 65.8465980729  | 40.4348990799  |
| 43.9084327562  | 21.4533051825  |
| 2.5323233028   | 2.08598829     |
| 36.9867519534  | 26.8231912639  |
| 268.4612061714 | 93.6083505564  |
| 4.9201613742   | 1.462721545    |
| 4.5044157545   | 3.1246225679   |
| 1.1681944988   | 0.6077647625   |
| 1.1874438203   | 1.2355588254   |
| 41.9004298253  | 2.7248892206   |
| 12.9234216824  | 2.068780977    |
| 37.1235953707  | 25.9213114177  |
| 3.4218863603   | 1.4242162263   |
| 11.7696070164  | 10.2054244388  |
| 0.3321195708   | 0.2303846631   |
| 0              | 0              |
| 3.0923337492   | 56.8448769369  |
| 0              | 0              |
| 0              | 0              |
| 26.5864076376  | 20.0120267103  |
| 0.6022743307   | 0.9847803048   |
| 2.2914207539   | 4.2916836619   |
| 0.4645439906   | 0              |
| 0              | 0.1082893524   |
| 0.1335581658   | 0.1389699181   |
| 0              | 0              |
| 6.844063483    | 5.893558904    |
| 0              | 1.5576565357   |

gene\_expression\_table

|                |                |
|----------------|----------------|
| 0              | 0              |
| 0.0242956822   | 0.0421335646   |
| 0.1105980778   | 0.6329372038   |
| 193.3312186228 | 114.5318773245 |
| 0              | 0              |
| 0.4425244722   | 0.6906832236   |
| 29.0041435135  | 29.7355715694  |
| 2.9148330889   | 1.2637256621   |
| 20.6817032974  | 21.5197221085  |
| 14.0542032455  | 6.9270048826   |
| 0              | 0              |
| 15.6769393928  | 13.0497328733  |
| 3.2488796285   | 1.8780686851   |
| 2.3170199276   | 3.616357723    |
| 0.1988163373   | 0              |
| 2.8965098334   | 0              |
| 4.6675156123   | 1.6188808286   |
| 6.1867339525   | 7.4030321647   |
| 4.4495700554   | 3.5462801988   |
| 0              | 0              |
| 0.0326595223   | 0.0679657603   |
| 0              | 0.3540909241   |
| 53.0329560513  | 20.1625959947  |
| 6.1475925757   | 4.7975189215   |
| 0              | 0              |
| 5.8906279868   | 6.1293151486   |
| 1.2379250955   | 0.8050534954   |
| 1.2431310852   | 3.7367850809   |
| 7.7024272952   | 2.0036320579   |
| 16.532327951   | 4.3005537092   |
| 510.5542629862 | 307.822367484  |
| 214.6540752732 | 163.2186368856 |
| 17.4224637476  | 7.5535078217   |
| 2.4819068961   | 0.3689247581   |
| 32.8301547962  | 75.1529385776  |
| 8.1649125794   | 0              |
| 0              | 0              |
| 482.8509055162 | 774.6929583609 |
| 103.8551519511 | 67.6118246013  |
| 21.4911035069  | 19.6918391772  |
| 7.1994140605   | 5.3508092808   |
| 4.0040654125   | 2.4303471535   |
| 6.9262620842   | 8.1077770677   |
| 21.6020908979  | 13.1471606227  |
| 0              | 0              |
| 34.5987986293  | 17.2177431043  |
| 1.4057011029   | 5.8506394114   |
| 19.3359719492  | 11.0028307669  |
| 0              | 0              |

gene\_expression\_table

|                |                |
|----------------|----------------|
| 40.5464393542  | 70.3156226904  |
| 2.3294082436   | 0              |
| 2.5186619059   | 4.0766718576   |
| 24.9827938185  | 31.5259626698  |
| 0              | 0              |
| 0              | 0              |
| 0              | 0              |
| 74.8339559902  | 80.2995333048  |
| 0              | 0              |
| 0              | 0              |
| 8.7233334865   | 16.0589562413  |
| 4.0396899216   | 3.9031361699   |
| 18.589105759   | 12.5156271726  |
| 9.7479058346   | 6.1984322797   |
| 4.0672968052   | 1.5114653297   |
| 6.152472338    | 6.6151616975   |
| 1.6428138721   | 1.7093803878   |
| 27.4261069527  | 18.885049252   |
| 0.3547770283   | 0              |
| 43.53055985    | 18.1177640493  |
| 0              | 0              |
| 5.3108174834   | 4.3418656524   |
| 1.8549183632   | 3.8601586277   |
| 1.1459481653   | 2.2763652051   |
| 0              | 0.9981483166   |
| 8.2172517626   | 0              |
| 16.7882088397  | 4.7641265378   |
| 0              | 0.9859460144   |
| 78.4896244216  | 127.519839484  |
| 23.992299081   | 10.0663155742  |
| 6.0277679892   | 2.8509145631   |
| 225.8055290457 | 184.5046400181 |
| 1.4079576356   | 4.3950234595   |
| 13.8573837559  | 28.1618796782  |
| 0.4487598967   | 0.7004153477   |
| 0              | 0              |
| 11.5278930526  | 20.4620607979  |
| 0              | 1.2822474714   |
| 0.9992128591   | 2.2279302434   |
| 7.2954302614   | 7.5910397528   |
| 3.6071835004   | 3.5969564989   |
| 1.5713895874   | 3.2701240086   |
| 9.0584815589   | 7.5404236516   |
| 2.7641019818   | 4.9852450012   |
| 4.1658862758   | 4.3346872209   |
| 1.5131397702   | 8.265872555    |
| 1.9891680151   | 3.7945760178   |
| 155.0587483677 | 61.6031946649  |
| 2.1291348736   | 2.3736503859   |

gene\_expression\_table

|                 |                 |
|-----------------|-----------------|
| 0               | 0               |
| 3.205036364     | 3.6128125015    |
| 33.10279276     | 46.6662160277   |
| 3.18087165      | 0               |
| 17.9805948757   | 11.1364078992   |
| 12.473492945    | 2.1631527639    |
| 4.8888871234    | 4.5217634932    |
| 1185.3471622082 | 1347.3868692218 |
| 50.3448830104   | 34.4754985222   |
| 2.7092483457    | 3.1106500304    |
| 162.5346940722  | 129.3274946763  |
| 0               | 0               |
| 0.2977431807    | 0               |
| 9.6114120396    | 9.1674592959    |
| 0.3747967203    | 0.8579635117    |
| 11.3918072287   | 2.5400145345    |
| 634.934424002   | 139.7553913467  |
| 1.978109867     | 0               |
| 4.5911357161    | 5.3283793469    |
| 27.979747845    | 29.9003329449   |
| 0.5796848408    | 1.2063471277    |
| 2.3634359062    | 0               |
| 0.2733602338    | 0               |
| 4.3385627979    | 1.7362925246    |
| 0.2126588642    | 0.2212757622    |
| 17.3095676971   | 22.7215038759   |
| 1.207010218     | 0.6279590249    |
| 23.7725914045   | 18.1396251174   |
| 1.8705863982    | 1.3624675503    |
| 0               | 0               |
| 3.3024031102    | 2.0617295258    |
| 3.1119676143    | 2.0605861623    |
| 0               | 0               |
| 0               | 0               |
| 1.9985113119    | 1.5596179669    |
| 0               | 0               |
| 1.414170619     | 0.653987801     |
| 9.0292846026    | 0.7227038118    |
| 0.5681173618    | 0.1477843432    |
| 12.4599697743   | 9.0753918194    |
| 0.6460310615    | 0.2240693737    |
| 19.6458432945   | 0               |
| 10.4517299195   | 5.8001237825    |
| 6.1069605016    | 3.6310933812    |
| 1.3172828894    | 1.7444750268    |
| 0.3850519556    | 1.2019625698    |
| 380.1917173928  | 93.6145609925   |
| 0.487040758     | 1.5203266795    |
| 0               | 0               |

gene\_expression\_table

|                |                |
|----------------|----------------|
| 2.9399101289   | 3.3649382208   |
| 42.4378088928  | 10.1632067607  |
| 0              | 0.1120397542   |
| 0              | 0              |
| 3.9135283863   | 16.2884153449  |
| 0              | 0              |
| 0              | 0              |
| 0              | 0              |
| 5.3417843492   | 0              |
| 12.870394327   | 26.1142056558  |
| 0.3819656091   | 0.7948855705   |
| 12.4053994352  | 44.6403877823  |
| 0              | 0              |
| 262.3142824375 | 116.4356071134 |
| 0              | 0              |
| 28.0899452891  | 17.9140241723  |
| 3.6704844267   | 1.8332216544   |
| 50.1513783414  | 141.6409366094 |
| 1.1020823077   | 1.14673848     |
| 12.2443692686  | 6.7449752777   |
| 2.2419731703   | 8.1648612867   |
| 0              | 0              |
| 0              | 0              |
| 116.2379061592 | 158.4246416796 |
| 0              | 0              |
| 0              | 0              |
| 0              | 0              |
| 18.8097534575  | 21.3511867698  |
| 3.8029636181   | 59.3558850597  |
| 13.5237058832  | 14.0716839565  |
| 4.2487313594   | 2.2104445861   |
| 0.7732627987   | 1.6091905299   |
| 53.6701661017  | 59.8337907365  |
| 0              | 0              |
| 99.8684455316  | 87.9281586308  |
| 0              | 6.307687361    |
| 0              | 0              |
| 3.7459733046   | 9.0947720582   |
| 6.1827553455   | 3.5740441412   |
| 226.4328460616 | 20.3891420171  |
| 1.7331412677   | 2.7050517494   |
| 9.201234909    | 0.5983792034   |
| 0              | 0              |
| 0.1236557186   | 0              |
| 37.9399988975  | 35.9940276697  |
| 2.0319197423   | 2.1142527563   |
| 0              | 0              |
| 0.2631326682   | 0              |
| 37.9243388763  | 26.3073507384  |

gene\_expression\_table

|                |                |
|----------------|----------------|
| 0              | 0.058934721    |
| 1.9068701109   | 1.5172805752   |
| 0.3224966922   | 0.5592736647   |
| 0              | 0              |
| 2.1277562021   | 2.8951947969   |
| 1.8842652229   | 0.3016331235   |
| 25.6302425873  | 11.9667581473  |
| 7.0774596851   | 7.0369376245   |
| 28.9140629749  | 14.6929945392  |
| 8.7578203217   | 1.6081209863   |
| 0              | 0              |
| 8.2355258585   | 5.3557674066   |
| 2.7239988114   | 0.6540864789   |
| 8.2273940136   | 5.7071776699   |
| 24.7460877799  | 42.5845450845  |
| 22.5539997626  | 11.7339418409  |
| 19.1349024854  | 15.9281961699  |
| 0              | 3.3403186209   |
| 9.4237898931   | 5.1912212427   |
| 173.9188352185 | 148.0630863368 |
| 1.3517672432   | 1.4065406031   |
| 13.8793203786  | 3.0281000406   |
| 0              | 0              |
| 0.7507246858   | 0.7811439119   |
| 0              | 0              |
| 18.0873364606  | 10.5393299228  |
| 16.8684132345  | 10.9699488963  |
| 27.3189943845  | 11.3703820036  |
| 1.1368612964   | 2.1686989626   |
| 0.2912761218   | 1.2123143067   |
| 0              | 0              |
| 1.0803621766   | 0.8029558951   |
| 0.031862114    | 0.033153161    |
| 7.5558321183   | 6.2068366145   |
| 0              | 0              |
| 51.4210410524  | 36.1517649809  |
| 49.6326394847  | 33.8355570046  |
| 26.1416670306  | 27.2009225673  |
| 9.5962574878   | 9.985096075    |
| 0              | 0              |
| 0              | 0              |
| 11.1310185054  | 12.5891797028  |
| 11.7026591114  | 24.3536974093  |
| 0              | 0              |
| 0              | 0              |
| 25.4559969497  | 33.4246635912  |
| 303.8202391774 | 58.0056842845  |
| 0              | 0              |
| 1.3195491784   | 0              |



gene\_expression\_table

|                 |                 |
|-----------------|-----------------|
| 5.1902922212    | 2.1002340749    |
| 5.3771474677    | 3.9165199454    |
| 8.2515460156    | 12.2655673449   |
| 9.9810356065    | 7.7890989992    |
| 21.9037856984   | 53.341394404    |
| 28.7196666516   | 26.1479594761   |
| 2.7617810034    | 0               |
| 0               | 1.6313700777    |
| 1445.1673994211 | 1564.8141574428 |
| 32.6352447863   | 14.2979447994   |
| 0.1474207285    | 0               |
| 1.162646998     | 0.8914000719    |
| 0.2366322074    | 0.2462205009    |
| 40.2175448605   | 18.5987343894   |
| 24.0400844988   | 15.0085105789   |
| 0               | 0               |
| 3.2153636209    | 5.3530393009    |
| 0               | 0               |
| 1.4648093415    | 0.7620815732    |
| 37.3963484224   | 55.0130105063   |
| 465.3806114112  | 164.8468929811  |
| 1.2887979099    | 1.341019764     |
| 3.244662495     | 0               |
| 2.0206846823    | 3.3040267129    |
| 171.3708036169  | 45.8523558099   |
| 0               | 0.2976335426    |
| 4063.1375233338 | 4966.1470986411 |
| 5.3601114746    | 0.9295503675    |
| 4.2294929125    | 3.6007127893    |
| 0               | 0               |
| 0               | 4.1662259864    |
| 0               | 0               |
| 43.7390723742   | 39.0097470314   |
| 27.2415865975   | 17.0072464036   |
| 2.7661360403    | 20.8670903854   |
| 24.8964907861   | 15.0417824577   |
| 10.2488232316   | 0               |
| 3.044265587     | 3.4555840017    |
| 97.8665428949   | 93.4851856267   |
| 34.4762934588   | 30.4379231116   |
| 34.520532937    | 13.3653204012   |
| 79.2693847872   | 18.7457649248   |
| 1.1801279353    | 1.227946502     |
| 14.6988591449   | 12.2355633697   |
| 0               | 0               |
| 419.0090015159  | 597.9252605327  |
| 5.5809064215    | 1.9356812408    |
| 0               | 0               |
| 7.2212520752    | 1.0734079829    |

gene\_expression\_table

|                |                |
|----------------|----------------|
| 5.4834369107   | 5.2667305524   |
| 59.9186918401  | 37.4079517232  |
| 0              | 0.4510413213   |
| 0              | 16.9334302299  |
| 39.1187478276  | 12.9512193649  |
| 0              | 0.6041542997   |
| 44.0215084154  | 0              |
| 337.822527746  | 235.7191642405 |
| 0.187949998    | 0.1955656973   |
| 0              | 0              |
| 53.1888924791  | 40.1903558736  |
| 26.4646500696  | 11.4384431712  |
| 13.598887397   | 10.6124338586  |
| 0              | 0              |
| 19.9695465244  | 15.5840316556  |
| 11.8502018615  | 14.9963957756  |
| 1.1110465081   | 3.4681977243   |
| 85.4719416926  | 53.3611494233  |
| 1.6209110568   | 6.7463602978   |
| 0.6427585462   | 0.8917373389   |
| 4.8698382743   | 7.6007448373   |
| 0              | 0              |
| 21.8345918943  | 26.5982347776  |
| 6.2761551312   | 0              |
| 42.2587780102  | 21.9855479587  |
| 0.434335555    | 0              |
| 0              | 0              |
| 0              | 0              |
| 1.3178795235   | 0              |
| 0.1950826267   | 0.563853719    |
| 0              | 0              |
| 454.6333808368 | 16.5569264613  |
| 0              | 0              |
| 2.1922280081   | 1.5207044556   |
| 1.2207146888   | 1.2701778233   |
| 0              | 0              |
| 0              | 0              |
| 0.4894582951   | 0.1697636851   |
| 35.8853114907  | 40.2116375313  |
| 4.9225669535   | 1.5895950395   |
| 0              | 0.1656634969   |
| 0.9990360042   | 0.3465055864   |
| 6.0259846259   | 1.7100426583   |
| 0.0371941679   | 0              |
| 9.0066675177   | 3.9048400116   |
| 378.7744957442 | 224.991115932  |
| 4.8864544522   | 1.8488918863   |
| 2.5233819694   | 3.0433426377   |
| 0              | 0              |

gene\_expression\_table

|                |                |
|----------------|----------------|
| 3.5799326691   | 5.5874863229   |
| 3.8565909439   | 2.942763486    |
| 4.8966683537   | 1.2737701135   |
| 20.6410586254  | 13.9313062845  |
| 225.0424829251 | 125.0182479965 |
| 0.1693228602   | 0              |
| 2.4634055417   | 4.7602699502   |
| 0              | 0              |
| 0              | 0.0392694822   |
| 549.519664704  | 446.9989058332 |
| 2.7265803718   | 2.2696487253   |
| 22.5335005728  | 26.5432685306  |
| 3.627151875    | 6.7934221225   |
| 0.6097915439   | 0.4230001233   |
| 0.3213720424   | 0              |
| 1.5581661126   | 3.2426054335   |
| 77.722351651   | 26.9572156783  |
| 0.3354047816   | 0.6979906433   |
| 5.7070501968   | 5.0247143865   |
| 0              | 0              |
| 212.0548532965 | 334.77517878   |
| 10.5901644947  | 12.0210283755  |
| 30.2256469045  | 25.8342444551  |
| 15.310319245   | 8.6894675798   |
| 17.8071305741  | 21.533321778   |
| 20.338061218   | 2.554053276    |
| 22.2268577187  | 15.1218177055  |
| 105.8544670311 | 46.7733395497  |
| 29.8702035751  | 10.8781885542  |
| 2.2213525159   | 3.3019447301   |
| 1.3592542514   | 1.0775855112   |
| 361.4557158975 | 339.7499847584 |
| 15.5828939945  | 13.2208989159  |
| 0              | 0              |
| 17.0743714903  | 12.6901584861  |
| 3.1729982054   | 0              |
| 0.7622394298   | 0.2643750771   |
| 5.2340116494   | 4.9190515958   |
| 2.0389959638   | 1.8564137418   |
| 3.8049897042   | 1.3197223956   |
| 66.5764061062  | 101.2467174411 |
| 0              | 0              |
| 2.9088759267   | 3.9095430983   |
| 3.5420142211   | 5.2211759794   |
| 7.7228681342   | 3.7815516845   |
| 0              | 0              |
| 0.3260980094   | 0              |
| 0.626574587    | 0.3622018189   |
| 14.964991151   | 6.6734442163   |

gene\_expression\_table

|                 |                 |
|-----------------|-----------------|
| 13.5948449371   | 20.1509579087   |
| 7.8290004042    | 6.9824829082    |
| 2.4508874745    | 3.1297872074    |
| 0               | 0               |
| 0               | 0               |
| 0               | 0.2368441315    |
| 0.2261252991    | 0.1176439273    |
| 35.620776433    | 28.2393323718   |
| 181.7429196384  | 49.4257217468   |
| 2.3040834298    | 3.0283509047    |
| 1417.4813613455 | 876.2894665894  |
| 27.4540141262   | 25.6112961678   |
| 0.4171047625    | 0               |
| 0               | 0.2489852755    |
| 0               | 0               |
| 0               | 0.0207385737    |
| 6.0330076189    | 12.1856653676   |
| 0               | 0               |
| 0               | 0               |
| 0.4101648225    | 0.4267846256    |
| 0.7261468703    | 2.0148538875    |
| 7.7713435781    | 6.6160120824    |
| 0.4164168664    | 0               |
| 0.7958179279    | 0               |
| 118.7298789028  | 66.1825670055   |
| 3.9173922366    | 0               |
| 0.3803050406    | 0               |
| 1.8333102614    | 1.0597753643    |
| 0               | 43.4673053406   |
| 1.5055310725    | 1.9937717093    |
| 19.0240177253   | 2.356531836     |
| 13.788339049    | 12.4341013415   |
| 0               | 0               |
| 8.1328970863    | 3.5016995501    |
| 5.6301656572    | 5.1260115667    |
| 172.7744695721  | 104.0209047406  |
| 1.3187138225    | 0               |
| 0.4054387453    | 0               |
| 33.7589150132   | 14.2406027174   |
| 36.2516752218   | 13.6436163682   |
| 2249.8113929525 | 1675.7787272324 |
| 44.6188985589   | 4.7617280119    |
| 8.0304701099    | 5.5233672533    |
| 1.9453925831    | 1.2881397025    |
| 18.1136810593   | 7.9740032655    |
| 8.8539980983    | 2.8346955297    |
| 0               | 1.0920665421    |
| 40.8266527898   | 19.0213169761   |
| 35.0029506054   | 6.6220479494    |

gene\_expression\_table

|                |                |
|----------------|----------------|
| 6.632136208    | 1.3055698385   |
| 4.9435142612   | 0              |
| 0.0779852336   | 0              |
| 0              | 0              |
| 51.1106783717  | 6.2566674885   |
| 414.1841624465 | 225.8765049579 |
| 61.6724697443  | 45.6330146613  |
| 516.3401314894 | 277.5181121862 |
| 12.5119573134  | 4.1846591317   |
| 0              | 0              |
| 1.8639741277   | 2.3958554318   |
| 4.1687521137   | 9.3982832279   |
| 0              | 0              |
| 20.0655618774  | 3.7181094763   |
| 0.9008468968   | 0              |
| 0              | 0              |
| 0.6940107686   | 1.4442639143   |
| 10.3176072801  | 6.4414048969   |
| 9.1223543321   | 6.4409935201   |
| 0.5923501431   | 4.3144644328   |
| 7.0991678344   | 4.4320948851   |
| 2.4654389304   | 1.8527441559   |
| 1.190763517    | 2.7877793299   |
| 12.5770464714  | 2.6173332159   |
| 37.6594659433  | 24.9878044227  |
| 0              | 0              |
| 39.0372928608  | 12.9755384167  |
| 6.5750982737   | 0              |
| 19.2043636699  | 9.9912604756   |
| 5.4174901206   | 10.0660818271  |
| 0              | 0.0874834519   |
| 2.3476208459   | 0              |
| 0              | 0              |
| 24.074551979   | 22.214193859   |
| 3.9210407524   | 3.2299371433   |
| 22.2051935801  | 17.9705119511  |
| 0.4923878842   | 0.1463826716   |
| 20.3350659848  | 10.5795195579  |
| 0              | 0              |
| 4.2513249762   | 7.5832935116   |
| 0              | 0              |
| 4.0526718323   | 0              |
| 5.6817547135   | 8.8679675531   |
| 0              | 0              |
| 2.9007786501   | 2.6158753115   |
| 3.4602546874   | 1.2001545235   |
| 116.5355704516 | 100.1692972191 |
| 3.5632201079   | 3.8620845113   |
| 0              | 0.51506493     |

gene\_expression\_table

|                |                |
|----------------|----------------|
| 87.7713441802  | 33.2101174153  |
| 79.3875772574  | 59.0031051975  |
| 11.3848584626  | 5.3307768744   |
| 5.2410699279   | 2.9364661398   |
| 11.0556744192  | 15.3381977492  |
| 0              | 1.9573126262   |
| 0              | 0              |
| 0              | 0              |
| 1.7534023662   | 1.3031785053   |
| 9.565254606    | 17.9151065319  |
| 0.501379062    | 0.5216948494   |
| 22.4271954184  | 7.983348322    |
| 1.6561244409   | 0              |
| 1.3287819455   | 1.0369679591   |
| 2.6329688704   | 0.5479312569   |
| 67.3935486472  | 31.8746921975  |
| 72.9622879797  | 22.775611938   |
| 8.2462233313   | 4.2901793915   |
| 0              | 0              |
| 4.9598829047   | 7.7412846708   |
| 34.0789091505  | 59.099633795   |
| 0              | 0              |
| 6.9682569829   | 2.4168698244   |
| 0              | 0              |
| 3.9582617798   | 0.3168192168   |
| 2.28877717     | 1.299009818    |
| 9.042337311    | 6.310734311    |
| 4.6562130692   | 5.3832021842   |
| 5.9640905591   | 5.2510229631   |
| 1.026713485    | 0              |
| 0.9937734256   | 2.0680818839   |
| 113.751444195  | 29.5901579444  |
| 0              | 0              |
| 6.1504287044   | 0              |
| 6.8493985099   | 2.0362671077   |
| 0              | 0              |
| 0              | 0              |
| 23.0124472728  | 7.2067197032   |
| 81.9081556391  | 131.7145457742 |
| 0              | 0              |
| 537.3046965911 | 160.9461741834 |
| 6.5712092171   | 10.2562101077  |
| 8.7727362514   | 3.7586730216   |
| 0.4351180599   | 0.9054979271   |
| 6.0164303896   | 4.9760683665   |
| 23.9061612546  | 6.2187086272   |
| 5.0025025365   | 0              |
| 2.6914178664   | 1.4002368115   |
| 0              | 0              |

gene\_expression\_table

|                  |                  |
|------------------|------------------|
| 5.5226467521     | 7.1830292276     |
| 66.0688092313    | 31.7288793329    |
| 0                | 0.3178587871     |
| 0                | 0                |
| 0.9683575763     | 0.6297470294     |
| 0                | 16.3495188427    |
| 0.2930758617     | 0                |
| 26.0509410136    | 16.6809355993    |
| 3.5050134766     | 3.6470359776     |
| 0                | 0                |
| 0                | 0                |
| 381.7506975943   | 453.9647606849   |
| 0                | 0                |
| 3.5018463845     | 2.9149924444     |
| 6.8833484406     | 50.1358231673    |
| 2.2665197653     | 2.9479484113     |
| 14554.3963219361 | 18858.3504360425 |
| 0                | 0                |
| 255.9541888817   | 311.3958587462   |
| 2.6872425898     | 0.932043055      |
| 0                | 0                |
| 0.6537952283     | 3.4014344532     |
| 1.7013476261     | 0.7081143675     |
| 16.8741816733    | 3.6964042966     |
| 3.7001873381     | 3.3001013555     |
| 66.6024861486    | 45.828217287     |
| 94.0429685026    | 55.6598301029    |
| 0.7364586607     | 0.7662998301     |
| 2.2272903735     | 0                |
| 0.1381508678     | 0                |
| 0                | 0                |
| 0.0680851385     | 0                |
| 9.9193967706     | 0                |
| 0.9259303933     | 0                |
| 0.9123004347     | 0.6328444536     |
| 0                | 0                |
| 0                | 0                |
| 1.0615062472     | 3.3135548549     |
| 4.9682005141     | 26.7091406037    |
| 41.8396724487    | 22.5737079948    |
| 0                | 0                |
| 22.204645669     | 19.428677989     |
| 0                | 0                |
| 0                | 0                |
| 0                | 0                |
| 15.7682595697    | 9.7417670113     |
| 0.0237437331     | 0.1235291241     |
| 4.6184465047     | 4.805585107      |
| 6.4562226027     | 4.4785517028     |

gene\_expression\_table

|                |                |
|----------------|----------------|
| 21.0462062825  | 7.2996648958   |
| 171.8284329991 | 196.0932336222 |
| 0.6488516452   | 0.8101715934   |
| 0.3498905386   | 1.2742381361   |
| 2.1728589581   | 2.2609028031   |
| 9.9883640461   | 2.0786181438   |
| 34.3367254204  | 11.7315962795  |
| 8.1000906876   | 2.8094349571   |
| 22.7105064641  | 9.6800588941   |
| 0              | 0              |
| 1.4463275972   | 2.6336319191   |
| 5.6532709827   | 12.4182743518  |
| 3.6820066081   | 1.4595050812   |
| 7.0949363822   | 5.9059375189   |
| 0              | 0              |
| 476.1310449878 | 472.6456821353 |
| 4.0238855242   | 0.3489110521   |
| 1.1282420635   | 0.7043749345   |
| 0              | 0              |
| 0              | 4.3176873893   |
| 7.3900605652   | 38.4475222959  |
| 0.4764441368   | 2.4787478279   |
| 52.7444847513  | 34.7352414973  |
| 0              | 0.7874225764   |
| 0              | 0              |
| 3.525280099    | 0.6113539666   |
| 145.6694630645 | 80.8383802119  |
| 0              | 0              |
| 0              | 0              |
| 7.6772586148   | 3.4235741661   |
| 2.5024406709   | 0              |
| 0              | 0              |
| 2.1041144665   | 1.0946863987   |
| 0              | 0              |
| 0              | 3.0881269021   |
| 0.768519949    | 0.399830118    |
| 0              | 0              |
| 11.950223431   | 37.303332855   |
| 1.4222571114   | 0.369971677    |
| 4.1773887339   | 1.2784281637   |
| 7.6149637062   | 34.8634907896  |
| 5.7014714576   | 3.3899965895   |
| 13.9537163095  | 9.5125257999   |
| 2.3057421336   | 2.3991703805   |
| 0.6806539413   | 0              |
| 41.8843995307  | 22.493702034   |
| 1.2105612796   | 1.7634581997   |
| 0.5442955036   | 0.4530802058   |
| 0              | 0              |



gene\_expression\_table

|                |                |
|----------------|----------------|
| 69.9071208605  | 29.0958978125  |
| 0              | 0              |
| 0              | 0              |
| 0.1219642593   | 0.2538124574   |
| 35.7392096651  | 16.137909148   |
| 27.6017997094  | 23.6941811317  |
| 0.0302788789   | 0              |
| 0              | 0              |
| 0              | 0              |
| 5.622038342    | 7.649793778    |
| 3.7625298095   | 2.135447359    |
| 21.5468490849  | 0              |
| 18.2209602638  | 7.583708088    |
| 0              | 1.2832913377   |
| 0              | 0              |
| 12.4405911819  | 10.3557453175  |
| 0              | 0              |
| 1.7804229566   | 3.645370561    |
| 3.6369678251   | 3.784337092    |
| 0              | 0              |
| 13.1080828184  | 11.2036449357  |
| 27.7928395173  | 30.0757602696  |
| 30.9595151265  | 8.7064835085   |
| 98.8216058228  | 70.7517241531  |
| 7.4345690719   | 4.8348852764   |
| 137.9745570766 | 64.1461803284  |
| 3.7203274091   | 3.2258953258   |
| 64.3351331565  | 20.4544941673  |
| 90.0257599059  | 83.4546503503  |
| 5.7138990484   | 5.9454251862   |
| 0.8663679009   | 1.8029459377   |
| 98.9074154592  | 68.306499378   |
| 7.5826244803   | 2.1039656076   |
| 0              | 0.8741156705   |
| 78.6336804647  | 27.9385033693  |
| 0              | 1.7744404989   |
| 10.7595127903  | 9.2198122209   |
| 25.4545527198  | 8.4755092835   |
| 34.5358980578  | 10.5692018502  |
| 448.6772177572 | 710.6150106116 |
| 53.6664087392  | 21.8508111172  |
| 4.1887133367   | 1.0896098076   |
| 0              | 0              |
| 228.8698585349 | 215.8176584154 |
| 19.7426442994  | 42.9527354631  |
| 0              | 0              |
| 9.1861455127   | 0.9558366438   |
| 39.9860109265  | 73.2443125764  |
| 3.2125831297   | 0.4775366295   |

gene\_expression\_table

|                |                 |
|----------------|-----------------|
| 6.2766804424   | 3.2655051893    |
| 5.4759952711   | 2.1612654313    |
| 0              | 0               |
| 0.6395681062   | 0               |
| 0              | 0.6453631619    |
| 3.4289272787   | 0               |
| 2.3392997473   | 1.2170438712    |
| 6.6916278134   | 3.7978752768    |
| 2.1635897697   | 1.4472373043    |
| 0              | 0               |
| 0              | 3.3809630616    |
| 154.9821831369 | 82.5237631989   |
| 1.0903823843   | 1.7018467167    |
| 0              | 0               |
| 3.8759359401   | 1.0082470378    |
| 634.1076683782 | 240.4884316012  |
| 8.3973729275   | 1.0922041166    |
| 16.8119382688  | 19.5511731383   |
| 32.0683398835  | 13.8354056812   |
| 5.3244892883   | 5.5402366143    |
| 73.0159493135  | 38.6656151968   |
| 244.4383802651 | 79.4821807639   |
| 2.9432332346   | 0               |
| 30.5006401037  | 31.7365204271   |
| 47.311558303   | 79.5231455917   |
| 0              | 1.4645541166    |
| 0              | 3.936100005     |
| 3.1035639398   | 4.8439796691    |
| 4.8556487688   | 0               |
| 3.8064382308   | 7.1292139333    |
| 0              | 0               |
| 913.801032686  | 1947.6639751254 |
| 10.2867818362  | 7.784436613     |
| 4.9047587178   | 8.35117959      |
| 0.3700856465   | 0               |
| 47.1246972722  | 26.920727006    |
| 884.1520076504 | 751.1210207027  |
| 305.5690868046 | 179.7112595436  |
| 0              | 0               |
| 0              | 0               |
| 3.2281857459   | 0.9597117823    |
| 0              | 0.9882780517    |
| 0.687218339    | 1.1917738326    |
| 26.8855927527  | 13.9874960114   |
| 2.9339060871   | 2.1805624441    |
| 1.1039123058   | 1.4549473304    |
| 4.3528154605   | 2.7871943027    |
| 40.0270294025  | 50.1922849114   |
| 0.8801059731   | 2.9762450418    |

gene\_expression\_table

|                |                |
|----------------|----------------|
| 45.3740646961  | 29.6079101274  |
| 3.0483535144   | 0.9912100743   |
| 3.1948977329   | 0              |
| 9.6907888751   | 3.1842498495   |
| 22.6306693041  | 6.0378615023   |
| 17.3337843132  | 4.73079241     |
| 0              | 0              |
| 0              | 0              |
| 20.3461004098  | 9.4091202905   |
| 100.121014133  | 40.513627466   |
| 0.2783694408   | 0.5792978387   |
| 60.2505256843  | 40.5653249915  |
| 0              | 0              |
| 14.1203552858  | 36.0634323677  |
| 5.0608288947   | 6.7704335357   |
| 64.1154872174  | 28.3026693765  |
| 144.9094484746 | 86.9085810448  |
| 1.8117619672   | 1.8851742287   |
| 0              | 0.5204343765   |
| 1.0562247869   | 3.2970684625   |
| 6.5104810813   | 4.4383243777   |
| 23.1628067122  | 15.3372286945  |
| 0              | 0              |
| 18.8804668164  | 12.5016817271  |
| 8.1101335573   | 7.8359864852   |
| 1.120270685    | 0.5828319235   |
| 13.2923239807  | 13.8309265019  |
| 76.1105519935  | 52.796358368   |
| 351.3898643267 | 275.0299994799 |
| 3.1142938842   | 0              |
| 8.8783093098   | 0              |
| 1.0758721107   | 1.3993328133   |
| 1.4428463328   | 2.1018342809   |
| 42.0639751643  | 12.0740412955  |
| 4.8724486842   | 7.6048191121   |
| 18.1357129356  | 17.2055185077  |
| 13.7287468612  | 12.6367601006  |
| 0.5709592138   | 0              |
| 3.0111610677   | 5.1270099709   |
| 3.6543893808   | 2.0200593006   |
| 0              | 0              |
| 6.1509151607   | 3.6572280634   |
| 16.3787037456  | 4.6479179473   |
| 112.2433574381 | 94.6158482009  |
| 13.0001650509  | 5.0725985048   |
| 0.293742272    | 0.3667735857   |
| 3.6445684091   | 2.9495243946   |
| 0.6860960342   | 2.1416895577   |
| 6.1007324942   | 3.173966526    |

gene\_expression\_table

|                |                |
|----------------|----------------|
| 23.9950850606  | 15.6046009318  |
| 1.6873089755   | 1.2540560176   |
| 0              | 0              |
| 0              | 0.1573102103   |
| 17.2389897118  | 10.7625062412  |
| 25.4117088386  | 12.1487451963  |
| 1.5262473966   | 1.0587271068   |
| 0.7182082737   | 2.7401364495   |
| 0              | 0              |
| 4.4180219148   | 3.8974898834   |
| 0              | 0              |
| 0.3575209245   | 0.3720076066   |
| 2.499563008    | 5.2016896822   |
| 0              | 0              |
| 3.1991911259   | 1.9972930569   |
| 8.3717285349   | 3.6677681829   |
| 6.0764217227   | 1.5806593031   |
| 0              | 0              |
| 1.248997017    | 3.5739169022   |
| 5.5707491428   | 1.2881055273   |
| 0.2420518865   | 0.3777896766   |
| 0              | 0              |
| 1.1613491852   | 2.0140114007   |
| 0              | 0.95186638     |
| 5.0596315849   | 0.478604266    |
| 1.7148458924   | 3.2712737426   |
| 100.9861603666 | 15.5671260738  |
| 554.2442153087 | 378.0064112143 |
| 30.1405537352  | 50.3096238279  |
| 0              | 0              |
| 1.7422463748   | 1.8128418772   |
| 47.4012746268  | 30.3519788003  |
| 8.0127835435   | 10.4218250724  |
| 1.2216095425   | 0              |
| 0              | 2.7864105022   |
| 24.4569457518  | 15.6602687338  |
| 4.9886503741   | 10.3815791381  |
| 1.8457757739   | 3.8411325371   |
| 2.4561164798   | 1.1926310049   |
| 5.5415624417   | 2.8830527659   |
| 0              | 7.3520595953   |
| 30.6459499737  | 10.6292394087  |
| 9.0541068018   | 2.0935505651   |
| 133.4559509802 | 24.1501846176  |
| 0              | 4.0008842998   |
| 0              | 7.9870255898   |
| 0              | 1.4709732402   |
| 5.0977627943   | 3.5362154697   |
| 4.1228566488   | 0              |

gene\_expression\_table

|                  |                  |
|------------------|------------------|
| 1.2535419418     | 0                |
| 9.2239409084     | 9.5976932964     |
| 7.1945297904     | 4.2777433219     |
| 3.6996788074     | 5.1327854823     |
| 13.02846143      | 4.9295899234     |
| 0.9428693157     | 1.3080989424     |
| 0                | 0.7766654374     |
| 1.1840268979     | 1.5400043124     |
| 0.3613701957     | 0.752025699      |
| 336.3494537988   | 433.8573616876   |
| 0                | 0                |
| 0.986926716      | 3.0807504145     |
| 7.1181009702     | 5.3234399239     |
| 18.2993263996    | 17.4540774259    |
| 0                | 0                |
| 0.4736460946     | 0.308023842      |
| 4.5800705166     | 2.3828270655     |
| 10.2955972619    | 17.6242393991    |
| 9.1830359775     | 4.0950561022     |
| 0                | 0                |
| 0                | 0                |
| 0                | 0                |
| 5.4891951532     | 3.9664002295     |
| 0                | 0                |
| 0                | 0                |
| 3.8610016139     | 1.7467168212     |
| 0.3214123317     | 0.0836089751     |
| 0                | 0                |
| 0                | 0                |
| 0                | 51.5759445433    |
| 0.1639295531     | 0                |
| 0                | 0                |
| 1.0397252646     | 1.0818547409     |
| 0.8218670172     | 0.4275844587     |
| 3.2708127577     | 2.658863663      |
| 0                | 0                |
| 2.8481161605     | 1.8858771929     |
| 0                | 0                |
| 0.0500471851     | 0.1562252635     |
| 64.9581376519    | 38.2031731583    |
| 19.8895321436    | 6.8984841084     |
| 0                | 0                |
| 20.7844750877    | 23.2090965972    |
| 0                | 0                |
| 26807.9063613618 | 15549.4396607546 |
| 0                | 0                |
| 0.3927362975     | 0                |
| 0                | 1.4092841804     |
| 9.6582969763     | 11.7245909576    |

gene\_expression\_table

|                |                |
|----------------|----------------|
| 11.1623112717  | 19.3576767833  |
| 5.2904976282   | 3.0026550646   |
| 0.0992512735   | 0              |
| 6.419881824    | 11.1333570898  |
| 0.1177567824   | 0.3675847966   |
| 3.6222730056   | 1.3302518263   |
| 1.0252606481   | 3.2004120627   |
| 9.3132935402   | 3.2302221601   |
| 0              | 0              |
| 1.5318123517   | 3.8253146551   |
| 0              | 0              |
| 5.6791050691   | 1.8660699036   |
| 0.6899164369   | 0              |
| 3.3771580858   | 3.8653999009   |
| 3.2406963558   | 8.1891641694   |
| 40.5075711868  | 20.7776418036  |
| 0.1333369598   | 0.4162192467   |
| 0              | 0              |
| 5.7996055455   | 9.2530602254   |
| 6.5983592345   | 3.8806263466   |
| 129.37339162   | 84.1347360232  |
| 0.1346176374   | 0.7703977564   |
| 0              | 0.0961787842   |
| 2.850271364    | 3.95435178     |
| 0              | 0              |
| 0.4318108063   | 1.3479231022   |
| 0.1461645572   | 0.0760435591   |
| 0.5140852226   | 1.0698317223   |
| 4.1632052486   | 6.2153312804   |
| 0              | 0.5189624409   |
| 96.3487183374  | 69.1062650259  |
| 0.2144734437   | 0.3347458022   |
| 5.6544112428   | 6.8150853787   |
| 1.0657695971   | 0.665372631    |
| 0              | 0              |
| 174.0401690611 | 68.0346554596  |
| 6.093136481    | 3.9809485987   |
| 5.8107785641   | 4.9125620717   |
| 24.3189880694  | 25.3043889901  |
| 57.7341246848  | 106.4067859756 |
| 0.1522804861   | 0.1584508634   |
| 27.849580093   | 17.2301859178  |
| 4.3401470859   | 3.284370216    |
| 239.1525796743 | 446.7862921984 |
| 521.431569518  | 876.1388991123 |
| 0              | 0              |
| 3.8334951058   | 5.1854759086   |
| 179.474447876  | 172.9405417674 |
| 8.9192280438   | 3.0935445075   |

gene\_expression\_table

|                |                |
|----------------|----------------|
| 3.9100390837   | 9.5609118971   |
| 0              | 0.4532262639   |
| 20.0643042801  | 22.5932491717  |
| 0              | 1.4149190172   |
| 0              | 0.0126680284   |
| 0              | 25.4289693371  |
| 2.7733421938   | 1.3318696196   |
| 2.1519005149   | 0.8396606729   |
| 0.0975682326   | 0.0780935995   |
| 0              | 0.0372430283   |
| 0.7188433765   | 1.1219561666   |
| 3.9861471848   | 0              |
| 7.5739514031   | 5.9106348899   |
| 0              | 0              |
| 0              | 0.2422102606   |
| 1.712056427    | 0.296904773    |
| 75.1392846923  | 122.3748229751 |
| 5.0200506547   | 6.0482193701   |
| 0              | 0              |
| 94.7662865112  | 68.8892623142  |
| 5.6196216409   | 17.5419830265  |
| 5.9667611898   | 4.2057805921   |
| 10.0814195853  | 0              |
| 1.9844043288   | 2.2942355855   |
| 91.2724706381  | 39.8264705337  |
| 0.2447123768   | 0.2546280772   |
| 0              | 0              |
| 2.7862542342   | 0              |
| 0              | 0              |
| 0              | 0              |
| 11.2033730915  | 5.3803069418   |
| 0.3479937724   | 0.5793510656   |
| 6.0706664874   | 3.7899892657   |
| 0.3491062444   | 1.0897558954   |
| 2.0150648821   | 4.8923348605   |
| 0.2084089315   | 0.2168536231   |
| 4.7668630596   | 8.7754119914   |
| 0.3356029169   | 0.5820024756   |
| 0              | 0              |
| 695.5169688888 | 619.4865053198 |
| 18.0179335862  | 11.2488101633  |
| 27.3987201686  | 22.8071290137  |
| 20.6295946702  | 12.8793012296  |
| 11.8924647931  | 8.9995238383   |
| 0              | 0              |
| 2.1375268175   | 0              |
| 9.2392828911   | 20.8295900223  |
| 0              | 0              |
| 644.2208540271 | 339.0147222571 |

gene\_expression\_table

|                |                |
|----------------|----------------|
| 2.7350380067   | 8.5375837299   |
| 37.5602216464  | 34.4842543363  |
| 83.4469756746  | 79.7881048701  |
| 0              | 0.5860493411   |
| 2.2871280253   | 2.379802032    |
| 51.553245397   | 40.231630059   |
| 9.8349301089   | 14.619199524   |
| 333.7238919271 | 354.7408475542 |
| 5.8158483879   | 4.5386291207   |
| 428.0497065244 | 162.8870223908 |
| 25.9606697254  | 18.0083941897  |
| 69.4810124282  | 47.4444929856  |
| 13.6158695922  | 15.4555441332  |
| 8.4713648604   | 10.2837268396  |
| 0              | 0              |
| 53.2188202296  | 44.3001896243  |
| 75.6907792941  | 26.2525852467  |
| 43.6593565571  | 29.6272341191  |
| 89.549415682   | 145.590533631  |
| 16.0399452771  | 8.5833673239   |
| 0              | 3.1195165162   |
| 19.2654180053  | 7.8969284716   |
| 11.2659454939  | 9.3779516254   |
| 11.5325858648  | 17.9998261821  |
| 8.1171878103   | 3.2484979871   |
| 20.8997771248  | 20.1933013725  |
| 0              | 0              |
| 679.9800855642 | 438.2478995439 |
| 1.4367261466   | 2.9898840513   |
| 1.3448944052   | 0              |
| 0              | 0              |
| 16.5981937994  | 16.1193662534  |
| 0              | 0              |
| 0.5266270565   | 3.2877953272   |
| 0              | 0              |
| 0              | 0              |
| 0              | 0              |
| 18.5230677005  | 12.8490793297  |
| 1.3209313278   | 0.785402984    |
| 1.8449676653   | 1.5706844309   |
| 168.3291573189 | 175.1498237924 |
| 119.7726696308 | 171.7815579502 |
| 17.6843861775  | 14.311853306   |
| 0              | 0              |
| 13.3959699153  | 11.1510177205  |
| 4.0686681362   | 4.2335298203   |
| 0.3487519034   | 1.0886497989   |
| 39.4488978196  | 18.2036117811  |
| 0              | 0              |



gene\_expression\_table

|                |                |
|----------------|----------------|
| 315.2326411991 | 172.3420356585 |
| 3.8796455934   | 3.5883094389   |
| 2.9690326708   | 3.0893373282   |
| 1.1596991301   | 0.7541812034   |
| 0              | 0              |
| 27.3301952843  | 74.6487256385  |
| 5.5862988143   | 1.3676834386   |
| 15.2816016273  | 9.3534172427   |
| 47.5169392646  | 148.3269506941 |
| 0              | 0              |
| 33.1040655037  | 27.5563489161  |
| 0              | 0              |
| 0              | 4.5811975047   |
| 7.3680055597   | 7.6665557889   |
| 59.4632884017  | 92.8090948552  |
| 45.0394231745  | 23.432206156   |
| 0              | 16.1993951377  |
| 1.5672147814   | 0.815359018    |
| 136.5150450814 | 142.0466095824 |
| 105.7509460047 | 36.6786516244  |
| 0              | 0.0944085663   |
| 26.5829987896  | 24.5867884515  |
| 16.0113245336  | 3.3320200914   |
| 214.7916071139 | 193.976726058  |
| 0.6619103757   | 0.1147884771   |
| 6.4628995829   | 0.8405968856   |
| 0              | 0              |
| 0.0352262475   | 0              |
| 23.9940054167  | 11.7029241094  |
| 51.3340895459  | 33.5391095341  |
| 1.8125502039   | 0              |
| 3.1510563485   | 4.2155184495   |
| 1.2790380363   | 1.3308644221   |
| 6.3276832376   | 1.3168159596   |
| 10.4480166612  | 3.6237894578   |
| 0.0787168183   | 0              |
| 17.7412255174  | 49.0511141154  |
| 0              | 0              |
| 2.4677308714   | 0              |
| 0              | 0              |
| 36.2273621186  | 28.271466123   |
| 4.0739730044   | 3.9741090382   |
| 0              | 0              |
| 41.1326184845  | 19.5653963954  |
| 11.2811986018  | 18.7812971085  |
| 0              | 11.1546044101  |
| 299.5526441977 | 467.5356933115 |
| 2.789168848    | 1.4510927282   |
| 0.5389755999   | 0.5608147921   |

gene\_expression\_table

|                 |                 |
|-----------------|-----------------|
| 28.7724669084   | 44.353069588    |
| 181.6909923022  | 172.6556170343  |
| 0               | 0               |
| 14.5292829855   | 8.5147394947    |
| 9.3367746239    | 20.2397896109   |
| 0               | 0.4876218379    |
| 31.9857707765   | 0               |
| 0               | 0               |
| 0.2752043495    | 0.8590667371    |
| 0               | 0               |
| 28.4589057458   | 24.6767128073   |
| 10.9356982711   | 10.3252171641   |
| 8.7320260347    | 3.5333846032    |
| 3571.7444033797 | 6234.7958388748 |
| 3.0026282116    | 0               |
| 0.957782042     | 1.4948867911    |
| 0               | 0               |
| 50.0185057213   | 47.1146440798   |
| 2.2613790193    | 4.5379472419    |
| 2.7018688308    | 4.4981568937    |
| 0               | 0               |
| 145.5287196219  | 48.327292518    |
| 0               | 4.6851749677    |
| 3.9086495491    | 4.6832435685    |
| 9.1504123955    | 7.0156103107    |
| 1305.9226770145 | 705.7759915323  |
| 0.2385084668    | 0.9926911439    |
| 278.0741502313  | 0               |
| 653.0805807062  | 544.8590308256  |
| 55.3529297394   | 36.651885623    |
| 3.2603594963    | 4.0092811472    |
| 0               | 1.568222172     |
| 0               | 0               |
| 1.4258571462    | 2.1018128717    |
| 1.8885096184    | 0.9825158403    |
| 10.8520316939   | 17.0272481267   |
| 1.1176035527    | 1.9381477383    |
| 11.135707701    | 6.5176450467    |
| 0.8940900376    | 0.9303184014    |
| 0               | 0               |
| 0.0592398574    | 0.0205467485    |
| 0.4548512826    | 0.8329759202    |
| 0               | 0               |
| 0               | 0               |
| 0               | 0               |
| 16.5370153136   | 2.4581560186    |
| 2.6859304001    | 0               |
| 0               | 1.7222229332    |
| 0               | 0.7946396845    |

gene\_expression\_table

|                 |                 |
|-----------------|-----------------|
| 3.6804228394    | 3.0636423164    |
| 2.3895020719    | 1.864743192     |
| 0               | 0.3878116066    |
| 0               | 0               |
| 105.5993717761  | 47.0906738078   |
| 2.4180778585    | 10.902917689    |
| 2538.4612407994 | 3652.3977785358 |
| 8.6007070188    | 18.6441793422   |
| 32.6021453088   | 28.8347015008   |
| 246.862217899   | 98.1282135295   |
| 0               | 0.6957082553    |
| 0               | 0               |
| 23.3678096999   | 27.7881931978   |
| 0.1407648419    | 0.1464686074    |
| 0               | 0               |
| 2.9983063286    | 0               |
| 0               | 0               |
| 3431.5615931271 | 1681.5706634376 |
| 47.2713177118   | 38.144820951    |
| 45.469540449    | 70.967936789    |
| 296.1481699139  | 308.1480392525  |
| 0               | 0               |
| 2.0177138067    | 2.0994711988    |
| 8.1543986432    | 7.1451060003    |
| 0               | 0.1268765141    |
| 2.0996484311    | 1.8486141377    |
| 0               | 0               |
| 2.926538218     | 3.3496331087    |
| 0               | 0               |
| 0               | 0.2093803364    |
| 79.6255076784   | 49.0974332411   |
| 14.0368384318   | 43.8168256248   |
| 0               | 0               |
| 98.5540066238   | 149.1598499393  |
| 1.5202140645    | 0.7909064293    |
| 0               | 0.1588609592    |
| 42.9788619887   | 40.8316308213   |
| 22.750288839    | 0               |
| 9.0495615345    | 8.28629833      |
| 0               | 0               |
| 0.2746517515    | 0.0952601967    |
| 165.3232795097  | 120.4155038573  |
| 3.5219083345    | 1.7618343327    |
| 0.0588602985    | 0               |
| 2.5968501327    | 2.90992587      |
| 0               | 0               |
| 0               | 0               |
| 0               | 0               |
| 0               | 0               |

gene\_expression\_table

|                 |                 |
|-----------------|-----------------|
| 0.6697984958    | 0               |
| 0               | 0               |
| 0.4808710597    | 0.5003558666    |
| 4.1114943858    | 3.0037662892    |
| 0.9863620346    | 0.769746932     |
| 2.7594943823    | 1.4356542934    |
| 0               | 0               |
| 192.548738091   | 107.5567331948  |
| 0               | 0               |
| 3.3218043694    | 2.8279663127    |
| 2891.4197593523 | 1967.1481711218 |
| 18.3221284628   | 13.9806610064   |
| 150.538270773   | 87.0211409989   |
| 30.3360192498   | 19.1304419191   |
| 9.6578927178    | 10.0492287531   |
| 73.3661044164   | 545.2777533159  |
| 3552.0521034634 | 5478.391627778  |
| 11.5246103559   | 11.9915854464   |
| 141.3341960835  | 387.7063562899  |
| 973.4623693481  | 1253.7378931022 |
| 10.6807156382   | 23.1531172294   |
| 39.5399936977   | 129.7560019663  |
| 0               | 0               |
| 51.4525920392   | 192.1049375013  |
| 39.23643667     | 52.1669259353   |
| 0               | 0               |
| 92.5767505647   | 108.3689363912  |
| 7.154835086     | 11.8439167745   |
| 74.2964024227   | 45.1793448553   |
| 74.4453275612   | 27.1116434863   |
| 0               | 0               |
| 0               | 0               |
| 8.5527788962    | 8.6375907487    |
| 8.6140973285    | 3.5212331655    |
| 5.2774259545    | 8.7860260526    |
| 0               | 0               |
| 0               | 0               |
| 0               | 0               |
| 1.9498889431    | 1.1593703338    |
| 1.7183529155    | 8.9399012969    |
| 14.1724208733   | 2.2687207321    |
| 1.6399327453    | 2.1329781479    |
| 10.5730817451   | 0               |
| 1.0710026205    | 1.5601592294    |
| 3.6390327498    | 1.1359457061    |
| 1.1223455398    | 3.7370328783    |
| 11.8622146126   | 3.7978059586    |
| 0.5030818589    | 0               |
| 0               | 1.5540269363    |

gene\_expression\_table

|                |                |
|----------------|----------------|
| 23.4402975994  | 38.1095220999  |
| 0.0593071112   | 0              |
| 6.0050286365   | 9.5369572346   |
| 3.0378416311   | 8.4291584398   |
| 1.380467256    | 0.7182017676   |
| 0.0496877824   | 0              |
| 0              | 0.2932096546   |
| 0              | 0              |
| 1.9631455038   | 3.0833083748   |
| 6.3076786299   | 9.0635558859   |
| 16.8603309041  | 8.5578089801   |
| 0              | 0              |
| 12.6488711485  | 5.6406004626   |
| 0              | 0.2952717336   |
| 2.4047890003   | 2.502230608    |
| 0.5714584838   | 1.1892277527   |
| 1.7254697219   | 4.4884635938   |
| 1.6151507034   | 1.4004969272   |
| 27.9982973363  | 17.4796699148  |
| 1.1465459369   | 0.9544030138   |
| 0              | 0              |
| 10.4001996513  | 12.8256163875  |
| 60.5395295606  | 23.6222175585  |
| 0              | 0              |
| 5.8844892736   | 5.973587996    |
| 171.1474758241 | 110.7402786833 |
| 0.3224290953   | 0.8387346572   |
| 6.3804987268   | 6.1964330035   |
| 1.6329825159   | 3.1555655242   |
| 15.2751366451  | 17.1167040914  |
| 69.1100537799  | 30.6503260889  |
| 30.4283382372  | 21.1075259348  |
| 0              | 6.1950098447   |
| 4.2419119035   | 5.3946363693   |
| 3.4011674076   | 0              |
| 0              | 0              |
| 0.3272763914   | 0              |
| 1.8099581747   | 1.4124730101   |
| 4.1599644742   | 2.1642627345   |
| 4.1510205762   | 1.3088542927   |
| 58.426676732   | 18.5759795588  |
| 266.685421373  | 182.7382822003 |
| 87.4271519506  | 90.9696840566  |
| 16.9262931065  | 9.031868404    |
| 0.2211623965   | 1.8409908486   |
| 2.9573356832   | 0              |
| 19.1840981288  | 19.9614342542  |
| 0              | 0              |
| 22.1934085001  | 9.2370725311   |

gene\_expression\_table

|                 |                 |
|-----------------|-----------------|
| 2.2188385027    | 3.4631181457    |
| 0               | 0               |
| 19.590884204    | 3.7749450419    |
| 2.5538422103    | 2.6573234266    |
| 71.08328051     | 13.8681678663   |
| 0               | 0               |
| 0               | 0               |
| 12.0510448894   | 2.0898918351    |
| 79.0116452722   | 57.1917791975   |
| 5.8633880886    | 4.357836782     |
| 0               | 0               |
| 0               | 0               |
| 26.6389828778   | 33.6580444671   |
| 822.0888720514  | 1103.2258610658 |
| 0               | 1.406255428     |
| 68.8291105542   | 39.4817474125   |
| 184.5365255067  | 74.8528807761   |
| 5.2525488258    | 0               |
| 36.3795653865   | 18.5697193526   |
| 18.7664263227   | 11.3906557703   |
| 735.6455088234  | 1007.0788825948 |
| 6.5840172422    | 5.9373603545    |
| 0               | 0               |
| 0               | 0               |
| 0               | 0.4998510394    |
| 114.884166351   | 78.364620511    |
| 983.6988139779  | 439.7508912182  |
| 0               | 0               |
| 4217.7971166525 | 6956.2135280917 |
| 4.6009350013    | 6.3831520543    |
| 16.1462906449   | 15.1204818331   |
| 101.4329388257  | 167.109722827   |
| 17.7958971811   | 52.9056675986   |
| 28.0763443591   | 23.902357635    |
| 2.1690207698    | 1.1284545461    |
| 996.0699833023  | 407.5850499937  |
| 214.3717975064  | 129.1389019025  |
| 9.846136824     | 20.4902009518   |
| 21.4685983024   | 29.211887171    |
| 29.8371927309   | 13.9172577157   |
| 6.5761072991    | 6.0822844058    |
| 0               | 0               |
| 0               | 0               |
| 1.0987398018    | 0.4573042146    |
| 195.0965112758  | 67.2805919331   |
| 12.4158743664   | 18.7324968003   |
| 0.4457297304    | 0.7420649872    |
| 332.9000843335  | 112.06707292    |
| 31.5281941965   | 29.9280168907   |

gene\_expression\_table

|                |                |
|----------------|----------------|
| 20.7206547399  | 26.9503148204  |
| 30.1000407748  | 14.0938599992  |
| 43.5726321081  | 31.9796141445  |
| 0              | 2.7281045556   |
| 0              | 0              |
| 0              | 0              |
| 0.941084313    | 2.6578743782   |
| 6.9335773874   | 6.9370429491   |
| 0              | 3.3697932025   |
| 5.549518211    | 1.2831963706   |
| 7.1064335073   | 7.3943848851   |
| 1.5714488594   | 1.3080989424   |
| 0              | 0              |
| 2.3680537958   | 1.2320034499   |
| 1.0841105871   | 0              |
| 330.7899586946 | 456.9964209776 |
| 0              | 0              |
| 2.9607801479   | 4.1076672194   |
| 9.1200668681   | 5.0919860141   |
| 15.2494386663  | 20.6275460488  |
| 0.3552345709   | 0.2464190736   |
| 1.1450176291   | 7.1484811964   |
| 10.2955972619  | 15.8963727913  |
| 0.0449068267   | 0.0700896645   |
| 0              | 0              |
| 1.73380359     | 1.1101889184   |
| 6.9335773874   | 8.0469698209   |
| 0              | 0              |

gene\_expression\_table

LZ3\_U937\_2H\_R1\_001 trimmed (GE) - TPM

1.407186299  
2.9159990493  
0  
0  
20.981402181  
0  
0  
0  
229.3910201828  
4.885770521  
0  
0  
0  
97.5063149115  
264.6250866556  
7.3737977216  
82.9449639815  
3.0301452023  
2.2645178565  
79.0648124764  
51.0346938853  
8.4991877627  
0  
22.8457431465  
0  
556.0378503102  
30.9907277885  
272.8305156992  
0  
13.9903815523  
32.7832276349  
6.303982899  
23.3150558131  
16.8478394089  
4.5639806166  
0  
1.4298828522  
0  
7.9329072996  
19.9575483557  
26.4417239885  
17.9578899999  
0  
0  
0  
0  
0.2608476982  
0



gene\_expression\_table

8.7175243507  
5.6126396892  
0.4992288759  
44.8313960409  
4.5000813867  
0  
0  
14.2837404729  
29.8263868858  
0.1904514188  
0  
136.9460565183  
27.2957472663  
0.4208082132  
0  
32.4179949572  
2.3304436307  
6.2210797407  
22.0738245387  
0.8142875509  
15.5135776632  
0  
728.0089883978  
0  
45.2073819618  
0  
4.3486017561  
23.2856069877  
0  
3.7884969349  
26.0169387045  
23.8311042442  
32.1651768646  
0  
0.2502744924  
27.701799705  
1.1558906523  
0.5231843815  
1.2894353004  
137.0329916762  
0  
1.1141862001  
579.6800245679  
0  
0  
4.9862945119  
0  
5.7742697534  
0.4591608267

gene\_expression\_table

1.6254537132  
13.5183931343  
13.7929992914  
13.8331719961  
3.6851230839  
5.6723349276  
13.2095281352  
1.3079560929  
0  
1.1869637361  
2.4713082558  
52.3347755021  
27.6821901252  
0  
30.805371138  
11.7063484202  
1.3552837  
0.2198665408  
84.5139258716  
0  
444.610842226  
11.6267193759  
1.1278974153  
10.6728741216  
0.6023573316  
0  
0  
24.4001177597  
1.001797123  
16.7744233456  
8.637267234  
1.899923697  
216.0788969534  
7.7491982759  
21.1160261138  
2.7479026019  
31.6360777755  
0.7488087939  
0  
0  
1.6732365528  
0.0574773064  
1.0341929249  
0  
20.6534127978  
0  
0  
2.3003357206  
1.0502248903

gene\_expression\_table

0.7834896045  
0  
0  
15.1834066114  
1.321535616  
0  
0  
0  
915.8585712875  
2.6607693502  
1.0271753597  
11.8550042189  
0  
0  
1.332492959  
10.1788691387  
16.3116653137  
0  
6.1891836247  
0  
7.1483977912  
0  
2.7057571805  
21.8424498168  
0  
0  
0  
101.319332421  
0.7923308106  
1.4715531432  
0  
16.8290420108  
4.0305158924  
5.700498447  
20.5899784664  
123.5206008137  
2.3379259018  
52.2017068919  
1.7281320105  
18.6916275658  
75.008663625  
0  
0  
0.5956544477  
0  
0  
0  
10.866888931  
0

gene\_expression\_table

9.153481541  
15.5799630479  
2.3496319197  
15.5929053664  
143.976831766  
0.631597454  
25.7337093774  
0.8537236408  
5.4865951947  
3.6565615806  
0  
6.0149488474  
0  
0  
0  
53.2505724145  
2.0638273959  
0  
11.5092009566  
0  
0  
6.5735130244  
0.7504933582  
41.3925735476  
3.3786249904  
0.7851325434  
0  
12.3873226986  
0  
1567.762698669  
5.6480908086  
71.4839779124  
162.9747429076  
47.3234644019  
7.4619718707  
27.1975467932  
6.578222798  
147.3627488843  
70.0464088614  
1.2539462555  
0  
0  
0  
1.2025330665  
4.722277811  
2.0302934252  
0  
37.2066193857  
4.9742762816

gene\_expression\_table

21.4447578145  
27.4774170198  
6.5978510014  
23.4010216258  
0  
2.5374276535  
7.5169553246  
0  
7.8007727656  
0  
5.1107437051  
0  
539.7456156693  
1.8330322921  
4.3604208047  
0  
549.1068848656  
0  
0  
6.304829867  
625.3439027241  
0  
567.6634923418  
0  
4.5093064094  
2919.0673252227  
24.8772832834  
8.1773086722  
6.7417175606  
6.0658261565  
0  
12.8017228427  
7.0503077975  
30.5239825504  
0  
0  
1.8746743648  
0  
4.9375892993  
8.8422585693  
0  
0  
0  
9.4168137093  
2.0130486759  
13.6104597055  
34.3199771089  
0  
4.1187988912

gene\_expression\_table

21.8582445456  
37.2961531528  
45.3662497102  
0  
0  
3.2718080402  
9.0299894871  
45.130235515  
925.728156742  
7.6378334473  
50.5241695739  
2.9599261581  
67.7358735073  
12.4077021711  
6.1729608919  
0  
26.5383324726  
0  
3.3237736034  
54.3470298412  
25.58678647  
2.756655255  
0  
5.7186020839  
109.5816728605  
3.9335308905  
0  
3.7813737873  
2.558418252  
25.1250260745  
4.2039102395  
0  
0  
0  
18.3117255594  
0  
0  
0  
104.5934235272  
55.9596725035  
3.4240955239  
6.6768347026  
13.2333864573  
56.2559624778  
0  
0  
0  
87.8034540595  
0  
37.2919618338

gene\_expression\_table

175.1728072594  
0  
0  
5.8994831414  
1.0536519632  
9.325067636  
5.0186995958  
27.7187686481  
1.0622702078  
26.31658026  
5.0143855615  
0  
5.1447356417  
4.296150206  
168.856964552  
0  
0  
0.7924512311  
0  
2.6217337139  
0  
0  
59.5329510945  
0  
46.0428264327  
1.5367713093  
0.6210212363  
274.7326233345  
13.3203560142  
4.8181068032  
15.6631671229  
17.2208619084  
35.7741790512  
6.6230968245  
14.924938249  
0.7002474389  
2.9425895461  
0.2396835775  
62.3413164194  
0  
84.8946069635  
18.3860468084  
21.3050884508  
1.5386524668  
0  
15.9601344669  
124.0357234368  
0  
16.2208256828

gene\_expression\_table

10.1884948255  
0.1474345628  
78.528702186  
14.1573356899  
8.8447769716  
0  
19.3021931995  
0  
73.1580873553  
0  
4.5174093859  
40.2076959541  
446.8548168253  
2.1092614482  
4.4809660152  
30.8021173114  
24.1310500687  
63.9172035293  
0  
42.3116266544  
45.250428079  
0  
0  
33.243281025  
341.7413160562  
0.7860502187  
0  
83.3955969294  
0  
0  
14.0387461209  
0  
19.2955792353  
6.6279299499  
0  
18.9514095848  
69.1371619893  
58.2771534887  
5.3089341483  
2.9219706538  
4.1003246374  
7.8020697241  
0  
1.8403648047  
0  
0  
1.9710261967  
4.3975231183  
0



gene\_expression\_table

299.8811012991  
12.6955132204  
0  
0.9823863338  
6.4992634736  
0.0664614697  
3.3132318383  
0  
0  
26.8491740407  
0.2637821737  
53.7500110185  
218.6540078064  
6.7846046314  
4.1415787862  
0  
6.8095456177  
1.2620624852  
0  
15.6182192734  
108.9762474282  
0  
0  
0  
0  
82.8315757242  
15.0470870138  
65.5624897167  
0.5468224993  
58.0937604267  
0  
12.7055961175  
0  
6.635271061  
51.8643332231  
712.9592397657  
35.2833448874  
0  
0  
2.7009664709  
0  
0.5244043616  
5.9909771703  
1.6475581184  
15.9047496872  
32.6066686736  
7201.2783291205  
0  
30.4931004377

gene\_expression\_table

0  
0  
3.0470660599  
1.2920292995  
11.9874443206  
457.7258354987  
0  
19.5203197588  
0  
70.0478170559  
0  
0  
332.4776729775  
23.7397797347  
64.5061066357  
13.0378696631  
11.2408612345  
0.6230330417  
0.2825409442  
0.7743363664  
0  
1.1128896925  
9.1466423741  
5.6386648817  
529.3305759201  
7.0457912647  
1.7973208316  
0  
4.953672652  
7.6702923668  
2.1081875184  
0  
7.2144178182  
0  
4.3552273384  
16.4087176038  
0  
0  
0  
0  
0  
0  
0  
0.3390655193  
5.9221161913  
6.6271945037  
0  
3.4109598551  
1.8379087924  
4.3138023063

gene\_expression\_table

0  
31.2489766878  
20.7518493663  
22.4224778048  
0  
1.9711641851  
5.3222744564  
39.4226343104  
2.1627103073  
5.2679443983  
11.7073219211  
11.860902991  
0.6759845679  
2.2486749848  
4.5271059692  
0  
9.9035220117  
53.8069660987  
63.0683391952  
5.3334667058  
0.1510916443  
15.4083752043  
4.6192692835  
0  
12.7992657478  
30.2692193545  
36.6438784332  
0.5998932405  
1.2688418965  
36.1360640388  
6.1762599393  
0  
7.3573555554  
14.4263862639  
0  
0  
0  
85.1299086649  
0  
0.9447344319  
1.2445532612  
0  
0  
0  
3.1956359491  
3.1041065883  
169.4619874821  
0.1509464903  
0

gene\_expression\_table

0.091258311  
5.5516586447  
0  
0  
133.9599416158  
0.1506363834  
0.8672490981  
2.4794736396  
6.8052664041  
0.5667493804  
9.4596454749  
0  
0  
0  
1.5007051101  
0  
1.2450522331  
0  
9.0475929371  
0.0604654707  
0  
0  
4.4183772805  
1.917433799  
0  
320.3657869378  
0  
0.7979912147  
0  
7.6279012842  
0.0601320979  
2.8906759963  
34.1781467799  
1.4668307296  
2.4813266022  
2.2904553251  
0  
86.0373358025  
0.0799972191  
0  
0  
0  
0  
1.260254826  
5.2475229648  
8.0531927065  
15.8233726088  
0  
0.1261029225

gene\_expression\_table

35.6086828188  
 0  
 5.1963454657  
 6.0592944732  
 0.3522437275  
 0  
 22.841087474  
 1.8138550532  
 0  
 0  
 0  
 0  
 0.2192515544  
 0  
 23.9372593297  
 85.249210428  
 1.4023363492  
 8.2385619207  
 2.244063029  
 0  
 3.1957084898  
 50.6925834725  
 3.1624707094  
 0  
 4.1739255515  
 0  
 0.7106969938  
 0  
 6.4556022516  
 31.8232284856  
 2.5223418397  
 13.7642301624  
 0.6941293887  
 8.953910633  
 1.8462861016  
 15.6364916069  
 0  
 0  
 0  
 2.5298401758  
 1.4034081156  
 1.6965436113  
 0.3049336463  
 6.0925873748  
 2.961113457  
 0.4780551405  
 7.0528508928  
 0.1559653307  
 0

gene\_expression\_table

0  
33.9393794843  
0  
4.1268621627  
0.7890313196  
127.2052064666  
0  
1139.0011820451  
0  
6.467208489  
25.0191612884  
1.0639829253  
29.5544572548  
0  
0.1233143076  
54.1519179278  
24.5212016774  
1.317597468  
2.7752039525  
0  
0.7799389818  
0  
10.7704495525  
1.8832006274  
0.2921392023  
0  
0.4759508368  
3.0544440079  
3.1077383245  
6.2768751729  
0  
2.3600306126  
7.2690652627  
10.5802304299  
0  
6.1102667578  
2.4431856609  
0.9726712504  
0  
0  
0  
2.4037110043  
0  
0  
53.1247343776  
0  
0.8044316614  
9.1155494756  
0

gene\_expression\_table

34.559768474  
59.2012388986  
0  
3.3591693044  
0  
0  
9.318552269  
1.4660974975  
0  
28.4106688127  
11.5916464472  
1.3509571828  
48.4915080259  
0  
23.07373461  
0  
32.365469742  
0  
16.3767555743  
0  
17.2482903824  
0  
0  
21.6574349163  
10.6813767907  
0  
1.4677687052  
38.2607816553  
1.2086241939  
121.3261600838  
0  
3.6740695099  
8.0953023565  
13.8412160248  
3.8696385484  
22.4375305904  
0  
0  
0  
44.8393288356  
360.2565154556  
11.1243240803  
0  
0  
4.841340933  
0  
1.0433134679  
17.5829158327  
0

gene\_expression\_table

0  
1.7019747824  
66.1169586035  
8.7780929123  
11.2139992115  
0  
0  
15.8155510482  
1.1912181728  
0.1191238332  
3.3686540934  
4.1696281795  
1.8219773529  
0  
22.3785953017  
0  
7.9540299915  
0  
5.648631521  
32.4770567027  
0.4114609646  
19.8186755431  
79.5650662853  
12.5595990812  
0  
3.3930381553  
3.1272334843  
1.1285677135  
0  
59.0260817618  
3.3537543441  
0  
0  
0.7478938466  
3.7309859353  
0  
2.2232345284  
26.7010585919  
2.0164510442  
8.0307045986  
1.3679170013  
0  
2.5716629724  
1.2221806621  
11.9158664751  
1.3043528858  
13.1899324891  
0  
0



gene\_expression\_table

0  
4.8008643466  
0  
34.1038144624  
1.9407298883  
15.7543135744  
4.4120767864  
0  
0.8466352789  
4.6388739324  
0  
0  
2.7727989069  
0  
0.6825690353  
40.9852320323  
0  
0  
0  
5.0264405206  
0  
1.7617828766  
5.2994082301  
6.6343329925  
44.3263684196  
3.6458420806  
0  
13.9349887258  
382.4918699444  
15.7274334489  
12.4351885562  
0  
133.8854456498  
0  
0  
0  
0  
6.0389733228  
7.4418609635  
0.4149097744  
2.7018728812  
3.5093365764  
95.379773781  
5.5387614528  
0  
0  
0.1447698234  
0  
0.5610217191

gene\_expression\_table

0  
 1.5944520137  
 0.4225004985  
 0  
 21.4560881072  
 0  
 0  
 88.8766073868  
 0  
 0  
 197.7254860966  
 0  
 0  
 15.8322701418  
 161.0761397034  
 0  
 28.9910515035  
 85.5635409851  
 0  
 0  
 1.3530519584  
 125.7914962338  
 303.5431729625  
 0  
 418.7664974583  
 0  
 0  
 44.1741045038  
 13.3020988442  
 2.8167125696  
 0  
 6.0901776302  
 3.0421934934  
 0  
 617.3395188497  
 305.0245165517  
 6.2143182282  
 3.9365959986  
 0  
 3.1487954663  
 9.1418313528  
 53.7002388239  
 5.1696734026  
 3.0231177225  
 3.8643417478  
 3.185656818  
 222.5091094226  
 4.0552064207  
 0

gene\_expression\_table

5.7211326216  
 2.1044688188  
 0  
 0  
 0  
 65.84684102  
 0  
 83.4727256958  
 6.8294982973  
 82.6176913737  
 3.400167764  
 10.7783207154  
 26.3436650638  
 0  
 712.2118689752  
 3.7215963334  
 0  
 0  
 1.2128307841  
 0  
 172.9288411392  
 0  
 1.6583487973  
 0  
 0  
 9.0197684585  
 40.38633373  
 551.6235526024  
 0  
 0  
 0  
 765.1116635911  
 0  
 12.974368343  
 4519.8866748725  
 0  
 4407.4348299372  
 18.2736949767  
 7.4518603695  
 0  
 2.3012381669  
 9.6663379635  
 91.3788534528  
 121.0211008994  
 167.5777520948  
 0  
 50.6300772043  
 5.9526154578  
 10.2424586826

gene\_expression\_table

0  
65.850464553  
5.2640048647  
807.0101442248  
27.2890956664  
9676.7676160435  
4.1142375118  
158.62273738  
0  
162.2816112746  
7.5409825236  
329.3236439122  
6.8294982973  
30.1243815383  
4.341996302  
0  
73.3960146007  
0  
38.288877856  
0  
58.9237176045  
8.7376207858  
36.9929961375  
274.2478170794  
2.8860300554  
771.421178178  
46.6018308034  
4.4276181312  
0  
0  
229.433745275  
0  
4.0608211059  
0  
68.3211191559  
1545.9064359528  
251.3297175989  
0  
9.9253064087  
0  
54.7677673996  
10.1378213707  
4.2511337752  
104.6695510043  
13.2039529264  
0  
47.2457575638  
305.3807941448  
44.5508057281

gene\_expression\_table

2.0076207759  
73.353765163  
26.1665034488  
19.3581201545  
1.9242304215  
0  
5.1776589224  
9.8677952874  
8.7146089314  
232.768169568  
1.8991547877  
148.7773274513  
0  
23.2416096892  
2.5068653816  
16.5962605432  
12.991929319  
0  
13.620408872  
3.33011345  
0  
35.1599765486  
66.9131775729  
3.6351101555  
0.6716885478  
6.6366563137  
0.7456596721  
144.1528491165  
0  
1.4019174079  
0  
0  
99.6732141867  
4.1454813339  
150.8616542936  
503.6627543733  
2.1114125937  
16.5764584237  
0  
0  
0  
0  
0  
1.1088574835  
0  
0  
0  
0  
0

gene\_expression\_table

0  
 56.380652888  
 0  
 15.3055605676  
 1.0074318823  
 263.7986497828  
 0  
 3.2443894289  
 0  
 0  
 1869.5641376346  
 0  
 48.8595139174  
 0  
 0  
 31.4929636833  
 15.0258875999  
 59.0593205505  
 16.6443586463  
 13.283689951  
 0  
 0  
 0  
 8.5048357458  
 0  
 0  
 2.1497808097  
 0  
 16.1612382161  
 0  
 0  
 29.0363696908  
 0  
 44.1922837483  
 28.6333314103  
 0  
 40.4495305427  
 0  
 19.6307534403  
 21.1413945188  
 0  
 186.119177817  
 106.8678234571  
 80.5213190052  
 0  
 0  
 11.0329581584  
 38.4256889965  
 0

gene\_expression\_table

5.6662772124  
0  
0  
0  
0  
0  
5.3325964432  
65.9349540148  
0.8895433011  
0  
0.1172260762  
0  
8.6751630577  
2.7493336521  
0  
8.3223306988  
0  
80.7994742899  
29.9311212631  
22.0797594261  
5.4388376067  
0  
22.8526357226  
19.4467802781  
1.533802199  
0  
82.4435149337  
17.484590906  
5.5330356121  
0  
60.3986162482  
2.2690761888  
0  
62.0111988626  
0  
0  
0  
0  
0  
0  
0  
0  
0  
14.3477931207  
6.5229988  
0  
0.2294143034  
4.8627738947  
0  
0

gene\_expression\_table

0  
 27.6988267709  
 17.2691289794  
 0  
 1.6726136548  
 9.9470462871  
 0.0609979333  
 0  
 26.7237179386  
 2.6567379902  
 0  
 0.1329312232  
 119.7635742503  
 0  
 0  
 3.4257937242  
 1.4027555411  
 22.8499381324  
 0  
 2.2710568988  
 0.2526284033  
 257.1232081567  
 40.2306761576  
 3.5103428817  
 0  
 0.8046012602  
 0  
 0  
 0.3649187531  
 0  
 0.3578632664  
 12.4778408433  
 60.2484505424  
 1.6199298789  
 2.1669547016  
 0  
 0  
 19.1238322042  
 5.5518671561  
 2.8576759114  
 60.2851743638  
 0.6954048828  
 5.5742724535  
 0.5450905878  
 0  
 4.3135993671  
 3.6969681224  
 375.6953087659  
 0



gene\_expression\_table

0  
104.7325870808  
0  
4.5046891751  
24.3102307202  
0.8597600285  
39.7652480307  
0  
1.1526822898  
0  
0  
10.6999515168  
7.9627005713  
238.2684388822  
0  
0  
15.4229344983  
0.7271542136  
14.2054667193  
3.2498170689  
7.3848861392  
13.5317334259  
0.2611709535  
31.0002403633  
0  
9.6214151244  
12.7130090787  
1.5430372452  
0  
0.2186074059  
14.7100985094  
40.8960452303  
0  
0  
23.5739271336  
30.4569113211  
34.9470127348  
2.9139871274  
0  
6.1876119067  
0  
0  
0.6343957902  
36.5398012097  
1.0636635133  
6.8306047649  
7.6065666674  
10.6659624364  
0

gene\_expression\_table

0  
 19.9785878179  
 3.8878913588  
 0  
 0  
 12.4145102382  
 0  
 0  
 25.2135407049  
 0  
 2.1670305104  
 6.3834472704  
 0  
 0  
 99.7555118702  
 16.4673118578  
 0  
 0  
 198.6321638106  
 57.9463042193  
 0  
 64.8600964092  
 13.3521662906  
 0  
 8.3513600183  
 19.2393239023  
 7.498497755  
 5.949144105  
 19.5383807505  
 8.0528856024  
 0  
 0  
 116.3623537201  
 0  
 8.653832438  
 6.0011315956  
 18.8873011098  
 10.2115872632  
 11.9711348725  
 511.3005828806  
 0  
 0  
 0  
 0  
 37.3366607072  
 4.8756180596  
 7.5884296087  
 0  
 0

gene\_expression\_table

0  
4.9044252564  
5.0931416183  
0.7746431423  
75.3248903088  
0  
0  
0  
5.3866671552  
1.5537319674  
130.7145828302  
37.5314705681  
8.5608634674  
0  
9.2542676155  
5.2673530924  
0  
0  
2.4274368053  
14.5281635311  
0  
37.3115293865  
14.348524293  
44.9081217055  
0  
0  
5.2249311944  
18.7687374814  
0  
19.2702236778  
6.2379024098  
0.9666470708  
15.3800132013  
0  
0  
0  
0  
0  
1.3386253052  
146.5667463479  
9.5125204298  
0  
0.1010117974  
4.9362908221  
2.9110948325  
9.4636021848  
18.2305743152  
8.0615549327  
1.4767241784

gene\_expression\_table

33.4448557414  
12.4499677202  
4.8273920971  
138.2451816375  
0  
25.9379000112  
7.2569286836  
5.6316723778  
11.9859863133  
0  
5.9416116359  
0.3223775256  
0  
4.4062374703  
0  
36.1158028649  
3.2208152466  
0  
0  
0.1722541321  
0  
12.0179166342  
0  
4.9098400828  
0  
18.0351459922  
10.8509747264  
33.2836129501  
12.1817768935  
0  
0  
49.7545665668  
0.8635359944  
0  
3.2795592351  
7.0077726391  
9.4886910425  
12.4342471384  
0  
0.3676077806  
13.7137419616  
7.4555812821  
0  
8.0721107103  
20.6342406831  
1.7106941189  
73.0576546544  
10.0236367425  
0.1151466082

gene\_expression\_table

0.1494888708  
128.6654110009  
1.015943761  
186.3500985608  
5.9501498775  
4.731928329  
346.9054675422  
16.8963689511  
1586.3556587839  
18.4162544847  
4.904686216  
46.7684792467  
1.3079074871  
9.6493010997  
13.871586989  
0  
0  
2.6530330563  
24.9316197345  
0  
0  
0  
276.4071617396  
154.3646338824  
224.4251016235  
86.9202340899  
0  
2.1395219772  
0  
0  
101.2273075959  
0  
70.9579365427  
223.4105243041  
0  
97.1486559826  
0  
25.2599090842  
31.3402818568  
16.0437327461  
0  
16.2733870129  
15.8785105661  
7.479914858  
4.1424318405  
4.3926853764  
0.6749927893  
7.5130312784  
0

gene\_expression\_table

6.5033666703  
0.9691358224  
9.7506958097  
14.8767719673  
0  
24.2376836902  
14.3454538702  
54.7571163364  
16.4713403651  
2.8710099296  
45.5365887657  
0.5944292442  
0  
6.4519040376  
6.318695965  
0.3388437592  
0  
0  
56.3758900338  
1.2017323907  
461.9487198475  
158.0109185356  
6.9386481945  
3.9264218354  
24.0538367056  
2.5875922895  
13.2337418782  
0  
3.6352407516  
0  
0  
0.5259442381  
1.9481637417  
40.4914133976  
3.1686206065  
0  
2.8880562075  
0.044450595  
0  
0  
0.4231768685  
34.8325612288  
0.5519507022  
4.4692236857  
14.9406267972  
0.8385184887  
0  
2.676253072  
0.8627492458

gene\_expression\_table

0.0969971821  
53.5882847069  
0  
15.3222187746  
0.1868612869  
11.315349232  
75.742761532  
306.816616314  
0.9053993575  
0.0642080638  
1.1143534743  
12.3237065217  
2.0652200873  
41.535724645  
5.6839078808  
5.576918591  
0  
7.6808686171  
2.9358639077  
0  
0  
0  
1.534225655  
0  
0  
99.9861833102  
21.7253929168  
7.4637125491  
0  
0  
99.695504134  
0  
0  
66.917973746  
0  
0  
0  
1.6767129594  
5.262063531  
69.8670823408  
73.1056248298  
2799.6838317724  
0  
0  
1.3929289795  
0  
0.8826643224  
854.5965971313  
5.824384314

gene\_expression\_table

0  
64.9247864795  
8.5194182092  
14.0902661741  
17.7713617265  
137.524796038  
4.6423922869  
0  
0  
345.9079165942  
4.5026401047  
15.4249008629  
206.4230881243  
3.8375587106  
0.5498724577  
71.5675921794  
0  
5.9898968685  
1.4872770477  
29.0562059099  
1.2954509961  
3.2878165251  
13.6082962244  
0.3124113368  
21.3892602518  
0.3023429363  
1.7747534933  
0  
3.1277615219  
10.9186376265  
29.4717271187  
0  
0  
108.9688937258  
14.2501420397  
3.0738110502  
1.4394591681  
2.2767579656  
0  
0  
1.639166339  
1.9075954756  
0  
11.6727001908  
0  
377.3319004507  
0.3794010298  
0  
0



gene\_expression\_table

3.125222223  
0.1263045312  
79.0648124764  
26.4607000053  
3.4898845328  
2.4733923557  
0.6014514846  
1.6051781686  
0.7124401382  
5.5931688414  
0  
16.9868895821  
48.023382603  
3.2532663356  
26.944087195  
0  
7.0664451121  
0  
0  
0  
14.5280077649  
57.454747126  
0  
0  
52.0401245254  
9.1654001368  
859.8160388891  
0  
10.0457075853  
0  
152.6709162869  
49.8005233436  
61.5299589601  
27.8526479887  
0  
67.2947161094  
20.6862899274  
13.5426678093  
46.1121998365  
60.0087579287  
0  
63.0139358534  
77.8330593508  
0  
0  
0  
8.7447850834  
0  
31.7087585253  
32.4080446825

gene\_expression\_table

17.8712213394  
157.884724599  
0  
0.6280822156  
10.0336383349  
0  
20.6249701279  
0  
12.0243035617  
28.9033933164  
0.4961743691  
0  
0  
2.5200584652  
0  
1.4292441229  
0  
2.3128118034  
0  
0  
3.669600305  
6.2420432259  
3.3666311895  
4.1781018837  
0.8522856647  
7.0294204305  
3.224068111  
1.6409519081  
0.1555995346  
0.2741395853  
29.1387577906  
0  
11.488913144  
1.1919443409  
3.549272941  
0.6808491774  
16.6530996131  
8.516522251  
109.6937510047  
2.3487694968  
10.0385443597  
0.9473536789  
55.1108029363  
0  
4.102475408  
3.3272407289  
0  
0  
615.1125684494

gene\_expression\_table

46.5421006681  
1.8012992912  
5.2156396747  
2.4541448372  
0  
1.122968296  
0  
4.0719088004  
0  
4.0971968432  
45.3151741349  
0  
0.6706927103  
19.9632084658  
0  
1791.143689986  
0.6745852553  
0  
14.7471924374  
13.8937605985  
11.9289372713  
0.7675682528  
0.7904898238  
0  
0.5246388737  
0  
5.7278157285  
0  
20.6227257186  
29.7690505019  
3.8597809096  
22.0046619599  
2.1968675658  
0  
265.1902900445  
6.1014520361  
0  
67.8190465884  
2.847675751  
1.6330334319  
1.4148988204  
0.5149477889  
0  
1.5036801045  
0.5564712401  
14.3477931207  
8.7992240925  
8.2405680515  
0.3156863676

gene\_expression\_table

1.6359938886  
0  
19.7600150735  
1.1728389131  
13976.50448191  
10.4346812906  
5.0619400778  
13.8095960626  
14.4844174386  
8.8211309965  
0  
2.1967698667  
0  
1.7139514731  
14.4450976631  
6.1399806398  
5.2781017562  
5.7240751492  
3.0770358913  
0  
61.2399968538  
0.4970011512  
32.5294631932  
0  
286.0836115701  
2.1343493696  
7.3823044625  
0  
0.9444885109  
9.0534113248  
0.2932638853  
92.7732363083  
10.430661053  
0.5562337852  
2.0491775389  
5.597237773  
45.7066790932  
1.1483665011  
85.8655052401  
57.3671271904  
1.124669831  
3.5798338529  
8.0587245898  
42.2449785447  
3.8517951837  
35.0258449413  
36.7895077914  
0.9808850513  
34.9071525169

gene\_expression\_table

0  
0.3125567167  
0.9076447797  
0  
3.6506231763  
15.0796804992  
1.8937286603  
1.7340068249  
16.3094606516  
18.6976110458  
5.044993589  
32.3336118743  
4381.8045473969  
0.8554551681  
14.3106018908  
41.1603363876  
743.0399492023  
63.3316705017  
0.3297400739  
0  
0  
0  
78.7892019816  
16.5655354068  
1.7074242723  
19.5637223598  
3.3303707939  
0.7532915368  
0.0541414495  
0  
1.6219081495  
7.1034914903  
0  
0  
67.3849062324  
161.67631111  
1.1821556001  
0.1570075951  
71.7292184617  
5.878920355  
4.7193228255  
0  
15.3327082198  
1.1160570005  
87.2002263652  
32.031978635  
44.1621574468  
2.2141224242  
18.203988634

gene\_expression\_table

0  
 26.1673877511  
 2.1897055015  
 71.875704272  
 70.6162450345  
 105.0842385915  
 984.479343362  
 0  
 12.2067585278  
 0  
 26.5423352377  
 0  
 346.5367288634  
 101.7200477607  
 0  
 90.751641298  
 0  
 0  
 17.9744519321  
 92.0756841886  
 0  
 22.8154651401  
 4.3736965981  
 0.0454300204  
 0  
 22.5233205364  
 0  
 0  
 1595.1508357609  
 3.5846345128  
 0  
 136.9593794151  
 38.6638348519  
 0.9420791918  
 219.5986596007  
 0  
 463.4612615566  
 29.3031169404  
 658.5046455297  
 11.7565315194  
 273.9482154767  
 33.8985182039  
 5.3046951247  
 15.4794618935  
 0  
 1.4109943081  
 0.8817742277  
 22.5007821903  
 20.3679487597

gene\_expression\_table

41.4347175158  
2.0277589701  
13.4761959792  
0  
1.7180930693  
12.7980098531  
0  
0  
0  
2.1083138063  
0  
3.691926626  
1.9873871861  
8.9059524255  
2.9791041582  
0  
32.6619166923  
0  
0  
0  
22.6060682791  
1.972089206  
0  
0  
0  
122.258398698  
158.4573430349  
12.0662144535  
83.2347017648  
33.3020973051  
15.3188842329  
35.3719965077  
14.7862375672  
0  
2.0603639226  
4.1414163395  
11.6122716665  
5.7621376105  
66.6375280497  
84.7848577962  
0  
7.464504035  
0  
4.328024741  
1646.9413441831  
138.020143236  
0  
2.7880590292  
0

gene\_expression\_table

5.1800489949  
42.0994456043  
28.3061317183  
3.7702005722  
1.2359926015  
1.3390497213  
7.1281289165  
0  
17.9137458773  
55.233451985  
0  
22.1323755206  
86.176182922  
5.4962343289  
0  
0  
2.7273537545  
16.9708586951  
0  
1358.2320079003  
0.1863241245  
86.8068642069  
6.6785750678  
0  
0.4521704163  
6.4319903492  
0  
0  
4.9154074428  
2.0692066862  
0  
0  
1.5808802284  
1.6456630098  
9.092001169  
4.8205912238  
3.1030802791  
0  
1.8817658174  
0  
3.483390889  
0  
0  
0  
1.1570116219  
11.9701952967  
1.3791492472  
3.4308082005  
0



gene\_expression\_table

0.6566291816  
0.4925772421  
15.1246826494  
0.362462786  
4.3856867944  
0  
0  
0  
0.3624553204  
10.4514139644  
0.1823426315  
5.1831598855  
4.7702006303  
2.7366365664  
4.941903219  
1.3912633399  
11.6093673042  
0.5459149453  
0  
17.4164373145  
20.9738604112  
6.4756460948  
156.6926886313  
0  
21.1203120805  
19.8702252789  
0  
0  
0  
0  
2.0313480622  
15.3586596518  
0  
1.8044469627  
17.0271584544  
8.7003612942  
5.1999389108  
42.7525010499  
71.5873730102  
10.3667559721  
5.7062013295  
3.2566981147  
2.0111889669  
4.8908173136  
1.6329071554  
831.7258631575  
0.4159689933  
0  
47.6898868905

gene\_expression\_table

0.9374162408  
0  
106.6878506995  
12.8820821072  
0  
0  
3.161567729  
193.9028857944  
100.0755364678  
0  
139.0838953525  
1.1854604913  
4.7706694127  
11.8472890617  
0  
12.9843168604  
4.8695018944  
0  
100.1640313773  
4.6069516928  
53.2811150087  
6.0937628169  
4.2610843688  
3.6460309256  
6.3992382053  
15.9020158252  
34.3144002521  
0  
86.9273279124  
333.2872777007  
0  
96.3438144509  
134.9647905794  
23.5807233329  
0.9976425594  
19.2985417307  
15.6401975404  
0  
85.7074119591  
0  
6.2688937125  
5.0474052979  
3.3180921845  
0  
1.7364878886  
3.4245675181  
0.3839958161  
2.905057647  
0

gene\_expression\_table

10.5314023438  
0  
77.3582453745  
28.9758627181  
758.0775400751  
0  
1.345971529  
1.4776283248  
0  
1.362626812  
0.1817433065  
3.8813313621  
0  
3.8587773578  
0.6387334648  
3.4286065976  
45.2896099462  
0.9953600909  
30.9680039817  
0  
34.3773182181  
0  
15.0926716321  
0  
49.8587113869  
0.9219661687  
2.9729639584  
0  
20.667173447  
5.681740635  
0  
0  
3.4330020021  
0.4658090782  
0  
0  
0  
0  
0  
0.9404178096  
0  
2.0700180284  
0.0886241628  
11.9141873604  
7.1274071537  
0  
0.3470852303  
0  
3.6511783176

gene\_expression\_table

2.8376881357  
20.0739833047  
0  
0  
8.1801595643  
3.3304758436  
5.7097444245  
0  
0.1910131965  
0.7249255721  
2.186658084  
0  
2.7573375892  
2.5384875475  
0.8932662409  
6.9284492549  
1.2080848703  
0  
0  
0  
8.408368303  
35.7705489768  
0  
0  
35.1151520123  
183.2388455624  
74.7980131086  
0.8227359718  
0.0737563661  
3.6496857786  
0.7341190715  
22.7370513497  
2.4878886654  
2.9561336933  
1.2378705868  
5.8843263341  
63.3792896788  
3.4908883679  
49.4071649826  
2.5585918428  
427.8788945852  
53.11671676  
36.0396204716  
123.6334723534  
0  
1.827606726  
49.3521545826  
1.7822127064  
9.7880237341

gene\_expression\_table

5.9193771223  
5.124062622  
0.5637445584  
10.5591688  
0.3415909129  
3.6678029248  
3151.8986933551  
12.0226301389  
0  
10.2563379596  
0  
584.190531707  
17.1787108711  
5.5904488372  
0  
0  
0  
10.2026717663  
19.526226952  
0  
0  
9.7995646736  
0  
0.2158787019  
8.4489957089  
9.3235517665  
11.5834158511  
1.4611551581  
1.8038150078  
0  
10.4510056104  
0  
3.1854405725  
0  
0.2063492623  
0  
144.0931722933  
1.1623228707  
0  
0  
21.6553726056  
1.7404379648  
11.1931951209  
0  
2.1280087384  
46.3525915933  
1.1287124868  
1.1948744831  
6.4039949661

gene\_expression\_table

0  
0  
2.0697745589  
0.801583723  
24.0914638916  
21.0166689413  
0  
20.2058003207  
0.217584335  
9.9590086376  
0  
8.1999805515  
0.0881396619  
0  
11.4963562159  
0  
1.1237957201  
45.7079695132  
1.6080384029  
712.0774828338  
1999.8390237851  
35.9991168004  
0.3264037442  
102.6097274787  
0.8721727667  
22.7492362074  
3.9359356436  
31.9628893406  
1.3967670109  
3.3292471764  
7.1439964259  
145.8599027129  
11.9956157209  
1.9099764761  
19.2770842258  
9.6479659328  
5.7488431754  
77.8653462947  
6.8311130638  
0  
6.4853114163  
0  
3.3118155085  
1.2060150267  
0  
7.5377230629  
0  
0.8699823637  
0

gene\_expression\_table

20.6263909309  
24.1151517856  
1.2868960608  
0.5230366552  
1.424385306  
10.9769628222  
0  
21.5612435319  
2.6109151725  
1.3497655427  
0.3042351278  
1.522577341  
15.9343077293  
3397.1324823477  
0  
0  
15.9967505796  
0.3529572935  
1.3874925698  
13.9854399191  
7.0965885231  
36.0500374124  
0  
39.0705644145  
3.0414705231  
0  
11.913055351  
0.469424962  
5.3130462729  
0.1747298587  
0  
4.186557927  
0  
16.2019879379  
0.4647572434  
0  
0  
0  
27.9392714459  
0  
1.9929295881  
4005.7362424779  
74.6013523739  
0  
0  
5.8835066074  
102.0285799147  
0  
324.1124231887

gene\_expression\_table

10.5951171446  
3.8284712852  
3.0244166473  
0  
78.6845503588  
0  
2.681125659  
29.0586976372  
0  
7.9898153292  
37.1648748946  
0  
2.2934404096  
6.7900584936  
0  
4.8848211694  
0  
0  
1.234310743  
0  
128.9404492003  
57.9661869753  
233.1616436467  
0  
27.312163372  
10.1823047954  
0  
72.2841169135  
747.3038380196  
4.6413209185  
0  
18.8585785482  
0  
0  
0  
21.6399019461  
0  
65.7306969759  
5.0764656751  
0  
9.460549574  
0  
5.8027853374  
6.835002481  
0.4277847717  
4.5221818649  
14.3706408579  
9.3091442763  
5.1915635927



gene\_expression\_table

0.7607017981  
0  
0  
0.3536364429  
0  
0  
10.7676486952  
1.9760559057  
9.4534344682  
0  
0.0986018359  
3.7536061991  
0  
0.5840159386  
0  
2.1899780054  
2.4469955173  
6.1783505551  
16.8087572952  
1.3046832935  
10.0155177929  
33.5027973601  
0  
733.0063316522  
3360.269163956  
3.5984639516  
10.2077762463  
0.2761225818  
0  
13.4281329741  
24.4861653432  
0  
1.0778002647  
0  
9.7541561444  
3.1920131077  
0  
2.9929873227  
2.69927968  
0  
21.6694560493  
0  
166.6353336603  
0  
0  
0  
0  
10.5013088245  
0

gene\_expression\_table

0.5107480376  
4.1886505832  
20.7865978517  
0  
7.4253301037  
12.8015565433  
0  
0  
7.1223589042  
23.2562324609  
3049.740032592  
3.8201602654  
1.3130553845  
8.2779623344  
1.1259381136  
0  
4.1387175288  
75.5039496396  
4.3476281184  
0.3805743631  
8.8854169465  
24.1369604856  
5.679383012  
2.7228173082  
0  
0  
1.1280492476  
0.7953882918  
4.1311270057  
0  
3.1786438343  
0  
9.0613363521  
0.2539441572  
23.4259428416  
3.3116107308  
7.7680597087  
47.0229845798  
4.144017017  
7.195687706  
8.4309825189  
0  
0  
0  
18.5796346664  
7.8892646239  
0  
0.650904462  
6.0870177318

gene\_expression\_table

1.191396271  
24.398708163  
20.9951898415  
6.5394159281  
0  
0  
0  
4.2056456186  
0.0920401385  
19.1038319343  
19.6853041282  
0  
11.297105867  
0  
19.4484084685  
8.2697498558  
0  
43.1577394546  
115.6229247286  
0  
5.3332024889  
39.9296524597  
0  
140.2941928987  
0  
0  
3.0272782148  
0  
22.4639015067  
15.0470870138  
1.8633842848  
16.7694170513  
186.00791267  
90.6488228881  
1.3388120152  
26.8829334901  
0  
97.2817199117  
0  
0  
0.836910056  
1.0833680326  
4.0601060945  
1.6890422571  
0  
1.3447556326  
0.6376739174  
0  
11.8635291658

gene\_expression\_table

2.6199528437  
0  
0.9221835851  
2317.0043177929  
0.9118950483  
19.9492079449  
0  
0  
30.2576398419  
18.7797537619  
6.2987179846  
89.5915296945  
5.6783358074  
4.9100357876  
0  
0  
2.0764909058  
98.3104372212  
4.8386508369  
2.2613653504  
3.639119376  
1.5201112826  
14.0247605201  
0.4914217809  
2.5659289309  
2.6888067936  
3.8378944071  
0  
44.3878629401  
3.4669318528  
0.3557381984  
0  
0.3606194549  
0  
8.0786433277  
21.2486387043  
0  
1.2308896864  
12.7745404977  
0  
0.2722683905  
0.8208969661  
76.7586853081  
2823.576163997  
3.9814628836  
0  
51.9799277359  
8.415625646  
6.4732640289

gene\_expression\_table

0  
3.7810352579  
0  
7.3605536055  
17.0869318754  
0.595793935  
2.4091681876  
16.4053356075  
0  
2.8289636304  
0  
6.0626155184  
74.9526055629  
9.4054346673  
2.3798990111  
0.8819841503  
16.0895250605  
62.4470129971  
0  
18.925750388  
0.9507402533  
17.3163020423  
0  
33.1181550849  
6.1212126763  
1.9837506093  
10.5281799629  
0.6241711126  
0  
1.4386736427  
0  
3.1753100438  
0.4182627401  
38.7478280054  
178.1052013376  
2.7241420164  
0  
4.6360805344  
4.5303182635  
8.1634897007  
0  
0  
0  
1.5752198239  
5.9830236337  
0  
2.7599699283  
0  
3.8586927448

gene\_expression\_table

30.1564897038  
2561.1766586491  
0  
218.1251625695  
0  
1239.8995154516  
5.3630684229  
0  
6.6235123001  
60.0921888083  
0  
3.6507928443  
6.6263389173  
34.7698742175  
15.3700140793  
10.1302832338  
0  
66.7190955027  
0  
1.794548638  
6.5506135581  
2.7227330521  
0.2164050071  
0  
0  
3.9473025684  
1.8572141382  
6.0312118114  
0  
3.0010775123  
2.9161601231  
92.4899243976  
3.0751203264  
37.4515951319  
0  
22.5276600112  
14.489558059  
3.5669541426  
0  
283.9844259698  
1.0979129448  
2.8290935737  
33.2000041975  
0  
1.518226041  
0.4516481858  
5.3060661126  
0  
0

gene\_expression\_table

0  
 0.7149123812  
 0  
 0  
 0  
 8.2325237089  
 19.9292958806  
 3.576305382  
 2.5679571358  
 3.3007302492  
 1.0842617537  
 9.9856949253  
 7.7899815239  
 0  
 13.465603074  
 12.652624787  
 4.1303651566  
 43.6012300906  
 0  
 2.0538711791  
 8.1906298639  
 0  
 0  
 0  
 48.6019975491  
 1680.3075040569  
 5.5729657751  
 82.7731338786  
 15.2075990279  
 3.1494529329  
 0  
 89.0849054261  
 0  
 18.0099971984  
 0  
 4.7715749085  
 21.6393106112  
 23.8611095086  
 1.6731304949  
 0  
 21.6270585044  
 0  
 0  
 135.1850601335  
 139.8019325728  
 116.7549682  
 4.3540150649  
 99.4861436894  
 13.6489321823

gene\_expression\_table

73.7457025148  
 0  
 0  
 0  
 0  
 6.7080946363  
 33.7927379022  
 5474.1378872657  
 123.6036288978  
 16.4809817491  
 0  
 20.1345174629  
 1.0519199153  
 121.7473733936  
 6.3051122403  
 7.5164278511  
 47.3689589841  
 14.0836880853  
 4.5233604119  
 0  
 55.5420355474  
 8.0409267821  
 3.7722547187  
 0  
 0  
 9.9872691615  
 1.0260075365  
 21.0770355476  
 2.0684162396  
 86.1912915791  
 0  
 166.4243709045  
 31.7980453473  
 23.3080374339  
 0  
 6.954186233  
 190.2439812173  
 44.1872398307  
 0  
 128.1974712321  
 93.8536974005  
 51.7575537135  
 0  
 0  
 5.3060661126  
 19.6328392666  
 29.1443859462  
 118.416705444  
 100.6938102663



gene\_expression\_table

5.7721127016  
3.5201093633  
10.6172543742  
28.9297740343  
10.6878641133  
3.514944225  
109.2480957325  
34.1977035063  
0  
29.7306441335  
2903.7888018625  
18.7034072141  
8.8588025184  
10.8326058865  
20.7681765491  
33.3350412248  
0  
85.7283896865  
0  
0  
77.3349517143  
32.1563604616  
2.9887174359  
4.6845649574  
9.8595022482  
268.6651643144  
8.5120046795  
168.221100202  
15.1703174678  
796.4740545838  
2.792644216  
13.9095503431  
0  
8.6792991135  
1.6708780489  
0.7152320055  
5.3398780952  
11.1691588732  
127.7459743973  
3.8371770995  
0  
1.7568580105  
18.4200222563  
72.8462317198  
0.9612480615  
0  
8.1579751808  
1.6730111958  
0.4000686181

gene\_expression\_table

2.2083915746  
0  
3.0781796458  
17.100928789  
9.480502486  
59.2737505592  
2.600689908  
2.4301418256  
4.725447976  
0  
0  
3.689539952  
10.7315332739  
9.8120689433  
130.080048221  
0  
2.1951000421  
0  
0  
0  
0  
0.0467959137  
1.5301380885  
0  
0  
49.4426760294  
0.2533737673  
49.6737181681  
0  
0  
0.1027127397  
0.5738696145  
0  
10.9064569337  
0.9359096205  
5.4495695265  
5.4028332758  
23.3316690426  
64.8988333089  
0.0944686252  
0.3075113609  
0.894873131  
3.2612678299  
5.1940874447  
7.3291644969  
2.4835528148  
0  
27.2005913056  
0  
0.6327443059

gene\_expression\_table

0  
 4.3977590742  
 0  
 12.4425993513  
 0  
 0  
 1.4377538742  
 1.2356685888  
 59.7033698477  
 0  
 0  
 1.3977417206  
 12.2738052398  
 0  
 0.1115002762  
 1.8411349929  
 0.5725253406  
 12.6373919301  
 0  
 69.5189686434  
 8.0061730039  
 3.8730695752  
 2.3303628044  
 0  
 4.0970061837  
 1.6386090008  
 10.0956551681  
 40.816710783  
 0  
 0  
 0  
 30.1540833045  
 0  
 0.5584963453  
 152.6572826944  
 1090.1301368249  
 17.7843034488  
 706.4032730634  
 0  
 1.5149095674  
 20.0922344426  
 3.1960712428  
 0.1674356284  
 0  
 1.4644605585  
 28.2348914539  
 5.6987866587  
 0.8325579033  
 4.8110363646

|                | gene_expression_table |
|----------------|-----------------------|
|                | 0                     |
|                | 0                     |
|                | 0                     |
|                | 0                     |
|                | 0                     |
|                | 0                     |
| 3.5105458037   | 0                     |
|                | 0                     |
| 7.2852694111   | 0                     |
|                | 0                     |
| 17.92195566    |                       |
| 7.7416604032   |                       |
| 16.8850204016  |                       |
| 24.4269310759  |                       |
|                | 0                     |
| 0.2223866684   |                       |
|                | 0                     |
|                | 0                     |
| 2.9163413523   |                       |
| 68.4087774283  |                       |
| 9.7403514369   |                       |
| 1.142328352    |                       |
|                | 0                     |
| 3.3320313549   |                       |
|                | 0                     |
|                | 0                     |
|                | 0                     |
| 3.6204021936   |                       |
| 0.5622765205   |                       |
| 5.0679861367   |                       |
| 5.4627506151   |                       |
| 28.6905736202  |                       |
|                | 0                     |
| 250.3719061751 |                       |
|                | 0                     |
| 1.80423773     |                       |
|                | 0                     |
| 21.450857254   |                       |
| 97.5888633059  |                       |
|                | 0                     |
| 5.6708421277   |                       |
| 5.2238971688   |                       |
| 0.0681338173   |                       |
| 3.6857727168   |                       |
|                | 0                     |
|                | 0                     |
| 11.9099646459  |                       |

gene\_expression\_table

4.0589478175  
4.8493735165  
5.4834964497  
0  
0  
0  
0  
48.1666154992  
11.8827217642  
17.6389519576  
0  
3.026269545  
0.9572479812  
32.3901495722  
2.8091498773  
0.6537836741  
0.4088369366  
0.3700933408  
1.462199274  
0  
3.3861012628  
0  
3.3279205143  
0.0507878054  
9.3069432318  
0  
3.509803197  
0  
3.9971495058  
7.6541325305  
0.5278214836  
0  
0.5451454675  
1.4788804557  
0  
0  
0  
0  
9.1200374505  
3.8455173892  
14.8158857189  
0  
2.8709630904  
0  
0.6868657133  
1.273478906  
18.1771393599  
68.6948262743  
1.6125325999

gene\_expression\_table

4.3999420584  
4.1964854377  
54.6649803653  
13.3997138042  
0.1290437582  
0  
31.8848100011  
18.6568401327  
15.7004326506  
0.2879041975  
0  
7.1241095274  
0  
17.693843588  
143.8048047213  
6.2404937276  
6.6436002199  
840.7597311924  
0  
80.0235888944  
1.7494351588  
0  
0  
3.4152130461  
0.5727116686  
0  
0  
1.5545783886  
1.2704831701  
0  
0  
14.7465655832  
36.2160852131  
0  
0  
1.7379456089  
0.6901413127  
13.3867056346  
1.6819257139  
0  
221.1278922418  
6.8366621067  
39.4606442621  
0.982925908  
1.1279046444  
25.3811080711  
2.7594444022  
0.627017807  
0

gene\_expression\_table

0  
10.1839884123  
0.8815644051  
1.0148101012  
2.8634107929  
1.9683420313  
1.0102803492  
0  
12.6039022078  
0.6333363899  
1.0005866899  
1.2159734841  
0  
0  
0  
1.3518689849  
2.6792887123  
18.5857084273  
0  
1.791541763  
0  
10.1549287005  
1.11590661  
0  
2.4685445321  
53.2328999218  
49.3590759274  
1.201099644  
0.5169597468  
1.4928374841  
1.9010892314  
0.3001000744  
0  
3.4532119825  
20.2127401415  
74.7242813698  
0.4223585326  
3.4218206723  
0  
0  
0  
21.3527385019  
5.6071981152  
2.4209618594  
0  
0  
0  
35.1198796402  
0

gene\_expression\_table

1.648462086  
0  
495.1250155947  
2.7150456318  
39.1152943322  
9.8412898594  
77.7249141121  
0  
12.5955574931  
0.1002673306  
0  
0  
0.5711147449  
0  
76.9502848323  
10.1406358474  
75.3016114886  
5.7661497481  
0  
0.8058232559  
2.5185256378  
11.3762057455  
0.0833232003  
308.1373788312  
9.7900240682  
1.107601225  
29.6193027774  
0.2886207559  
5.1469927647  
3.4498271442  
0.8094855497  
0  
12.4452392239  
30.3908497015  
0.1127832357  
0  
122.8689793354  
0.9876079195  
216.1511791979  
34.3702505129  
8.9740269351  
0.2176731515  
14.1779546598  
0  
9.5121990609  
0  
5.2437340962  
2.4867187175  
0



gene\_expression\_table

4.0292085318  
0  
0  
40.1185775096  
19.0271671481  
1.8681070342  
0.4212413559  
4.4923844232  
392.3649556878  
6.9614076102  
1.0506141576  
0.5025698844  
0  
1.7545127825  
1.9552853625  
0.8736102595  
4.4782085359  
0  
0.0256928438  
3.7567209203  
0  
1.1479170426  
0  
8.3625383792  
0.7448233239  
11.415461609  
23.4395252264  
32.6243386403  
48.2027333966  
1.5497979491  
0  
8.6805121532  
5.0058509025  
98.634573183  
2.7176032774  
5.8406682059  
3.3372181131  
0  
0.4175399291  
26.1544239722  
0  
5.6992711415  
1.2260016729  
3.6171774435  
10.2414768821  
1.7942604548  
51.3048637393  
17.3053009575  
87.5500908587

gene\_expression\_table

8.867507313  
53.7927611195  
9.7369830156  
31.2984762341  
109.5761004601  
113.0211918706  
4.5509971585  
61.3333776216  
0  
0  
62.7737274528  
0.292709824  
0  
0  
2.3900809158  
26.051174334  
1.5686204272  
0.5823538375  
80.637166293  
5.0442102797  
0.3273448527  
0  
7.1894301845  
39.5581699787  
0  
0  
155.7799277119  
6.2833497724  
4.5118621019  
7.6003102144  
0  
0.0477143259  
0  
0  
0  
0.9834683654  
0  
0  
0.580074275  
0  
4.0350597919  
0  
9.1813762531  
0.7626744214  
13.3272842632  
290.9613830382  
1.3877455984  
4.3878738967  
20.6458702874

gene\_expression\_table

0  
5.3973175235  
0  
69.5809925828  
2.0802137553  
2.1113703723  
10.3989175728  
0  
3.9595147265  
6.0358663223  
0  
2.4517684796  
20.9017934427  
9.4657232127  
23.3777060944  
14.8917392423  
9.4823680436  
5.2640835976  
48.9297046089  
3.051292776  
12.5352197618  
0.6854957974  
12.1857226602  
1.7677337247  
15.1294505611  
1.0720201598  
0.9921808873  
1663.2510295806  
1.2641779861  
0  
0  
0  
77.2805353249  
0.594632975  
5.1856691506  
0  
573.3311782874  
4.4920403989  
0  
9.1710196341  
0  
8.0454737232  
0  
4.7959578286  
2.4495501479  
0  
16.340515731  
6.698891109  
44.344605033

gene\_expression\_table

6.9973232584  
0  
0  
0.3192042058  
45.728526793  
84.6349934938  
57.6823972299  
0  
11.0060959895  
8.8899858612  
9.0379674851  
29.4660872714  
14.6983238777  
0.6203352951  
3.4074098679  
11.9646235128  
0.472056769  
0  
2.256484219  
1.5494454328  
26.3060747283  
8.7852402193  
2.8532741407  
376.5061116648  
27.5273837747  
0  
1.2462058008  
5.4616909567  
2.1557428318  
118.1249175788  
0  
5.5320868477  
45.42520625  
1.1141227137  
0  
0.5705576922  
8.2385619207  
0  
0  
0  
0  
0  
0  
0.1448222453  
8.9422324434  
1087.0060998364  
1447.0989507657  
662.2306551321  
227.6528882613  
1.3878071598

gene\_expression\_table

4.8378194536  
 0  
 24.2323991498  
 60.4467780596  
 0.2558571693  
 0  
 0.1818653934  
 0  
 0  
 2.8359160812  
 3.9341757797  
 0  
 0  
 0.2615533102  
 19.8073227015  
 2.0056494487  
 0  
 0.7375072483  
 0  
 7.7569641738  
 2.5992302058  
 0  
 0  
 6.8418009885  
 24.2196145373  
 6.8121428758  
 1.8775996759  
 46.9738225228  
 0  
 5.8628358388  
 10.8954837939  
 9.1821384099  
 51.1882723755  
 0.2355134939  
 39.3367325046  
 15.5030995177  
 2.3194242283  
 2.0319931021  
 0.2734983605  
 0.5685346341  
 22.1903554399  
 0  
 0  
 6.232123159  
 1.7480159856  
 6.8219197103  
 0.3029649607  
 4.4868863495  
 4.0164820455

gene\_expression\_table

0  
 0.8548162687  
 0  
 0.467927096  
 0  
 0.2466493558  
 3.3141123347  
 7.7609937485  
 0.709316232  
 61.1026675785  
 4.7127927859  
 0  
 0  
 0.5279640054  
 1.4320646359  
 0  
 4.0129759255  
 0  
 1684.9899559211  
 5.6668854431  
 7.321135042  
 0  
 15.3656096406  
 8.1693999439  
 1.0761640009  
 3.928467075  
 0.1694868775  
 0.5795536906  
 0.3461635113  
 0  
 41.1030090219  
 0  
 6.5268171956  
 0.2829623216  
 0  
 7.8944723263  
 0  
 0  
 21.8095346399  
 0.6504067734  
 0  
 2.0876480478  
 0  
 0.2626208747  
 2.49260283  
 0.4975456657  
 77.76667047  
 2.8599206256  
 1.0294587728

gene\_expression\_table

0  
 0.6423381841  
 4.9663880327  
 0  
 2.0607861654  
 0  
 0  
 19.562272497  
 5.5102414321  
 0  
 3.4194602457  
 1.6649385744  
 2.1120883674  
 9.1578119876  
 75.5555233757  
 55.4630598685  
 0  
 18.873410835  
 12.2913796624  
 29.4839595436  
 3.5499097548  
 0.0802552482  
 1.8034606903  
 2.290157244  
 0.7235098474  
 3.7086116393  
 0  
 0  
 0  
 21.2659435198  
 0  
 0  
 288.6238885327  
 1.0111704726  
 42.2449170819  
 0  
 17.8956724912  
 0  
 16.3546173444  
 5.1316777255  
 317.8632697697  
 0  
 0  
 0  
 0  
 0  
 0  
 0.391448521  
 4.8853636108

|                | gene_expression_table |
|----------------|-----------------------|
|                | 0                     |
|                | 0                     |
|                | 0                     |
| 14.6364793456  |                       |
| 1.96033868     |                       |
| 9.2743862512   |                       |
| 7.7150358947   |                       |
| 0.3463304225   |                       |
| 72.6871881974  |                       |
|                | 0                     |
| 4.158092746    |                       |
| 3.190103559    |                       |
|                | 0                     |
|                | 0                     |
| 13.7884961901  |                       |
|                | 0                     |
|                | 0                     |
| 7.3938544905   |                       |
| 78.0515172949  |                       |
|                | 0                     |
|                | 0                     |
| 1.6469105176   |                       |
| 6.1993282884   |                       |
| 1.3732656613   |                       |
| 1.0056615289   |                       |
| 14.5278364258  |                       |
| 4.3267135792   |                       |
| 2.047943425    |                       |
| 16.8301150178  |                       |
|                | 0                     |
| 154.8497521536 |                       |
| 546.6224545155 |                       |
| 12.6122785307  |                       |
| 4.085964536    |                       |
| 0.4157208678   |                       |
| 3.4310358164   |                       |
|                | 0                     |
| 2.7885539811   |                       |
| 7.7764031308   |                       |
| 5.6970800899   |                       |
| 5.5233296038   |                       |
| 0.824377217    |                       |
|                | 0                     |
| 206.6012848509 |                       |
| 8.2414556902   |                       |
| 2.505277222    |                       |
|                | 0                     |
| 0.118560026    |                       |
|                | 0                     |



gene\_expression\_table

0  
0  
3.0745121763  
4.0717607457  
0  
5.139664346  
1.7841551479  
0  
4.5342871071  
0.5018341797  
10.3427650223  
0.5454749779  
0  
162.0172715395  
261.7202078715  
0  
0.0913103984  
33.7603228059  
0  
1.0261487596  
0  
1.2617005386  
0  
1.3012884915  
0.2730372338  
0  
2.1215134409  
1.1214892544  
22.2583270474  
6.2873719843  
21.7363708819  
4.0568424327  
0.6345238885  
6.5139989867  
3.486116655  
5894.2934683001  
0  
1.8464190473  
0  
4.4712108906  
4.2486411726  
1.9023076055  
48.6518643166  
16.2461813587  
0  
3.5587188721  
0  
5.320849114  
0

gene\_expression\_table

0.7883685354  
4.3577421074  
0  
2.6971520059  
1.0110203963  
0  
0.3876287119  
16.7516118635  
0  
1.6508347495  
0  
0  
18.5799849678  
0  
1918.0587146297  
55.1263885706  
2.3079859073  
1.3692367989  
21.3375701399  
12.2582324448  
118.2324699047  
0  
0  
0  
1.6113144798  
5.1027164883  
13.6972704904  
0.225322419  
0.720746578  
17.0609998183  
1.2464742932  
0.1132054981  
0  
0  
0  
5.2332830044  
1.8226221002  
0  
0  
0.4243650107  
105.2302574567  
0.5226250171  
146.7055576551  
23.0620635253  
42.5197173001  
178.5601052012  
0.7619314281  
0  
0.8362790071

gene\_expression\_table

0  
0  
3.4776657414  
0.5327470771  
5.0495174355  
0.7229154057  
0  
0  
0  
4.0413147408  
7.6661155577  
2.9219706538  
3.781576934  
1.9519477728  
88.019276769  
8.0474230645  
0.6445936672  
0  
4.0441267632  
5.8306776656  
3.5341805016  
0  
128.1342524859  
3.9405627862  
0  
4.6281986357  
39.6381801367  
0.0804112887  
2.2476159063  
0  
2.3760429722  
0  
26.8777077046  
0.2137245713  
9.0341230364  
0.2555260536  
17.5867763771  
0  
0  
1.3389817967  
42.4293387887  
6.0720528834  
0  
0.8658516169  
0  
24.4767623098  
0.1311450565  
1.9406228785  
5.7928421397

|  | gene_expression_table |
|--|-----------------------|
|  | 0                     |
|  | 0                     |
|  | 0                     |
|  | 0.0937023993          |
|  | 3069.1821812323       |
|  | 0                     |
|  | 0.3856958995          |
|  | 1.4743957248          |
|  | 2.6045390753          |
|  | 0                     |
|  | 1.8667481639          |
|  | 0                     |
|  | 3.4970823671          |
|  | 2.0550344514          |
|  | 0                     |
|  | 0                     |
|  | 0                     |
|  | 11.39960372           |
|  | 0                     |
|  | 0                     |
|  | 0                     |
|  | 0                     |
|  | 0                     |
|  | 0                     |
|  | 0                     |
|  | 0                     |
|  | 0                     |
|  | 45.8270006838         |
|  | 0.9612743158          |
|  | 29.5881769863         |
|  | 2.5310045252          |
|  | 0.5576144407          |
|  | 0.2748567855          |
|  | 0                     |
|  | 6.9135087135          |
|  | 17.5847178918         |
|  | 0.0409363347          |
|  | 49.9221794684         |
|  | 0                     |
|  | 6.6881842675          |
|  | 0.6092338782          |
|  | 31.7912066167         |
|  | 0                     |
|  | 0                     |
|  | 0                     |
|  | 0.8530086409          |
|  | 1.2153646261          |
|  | 0.3980382206          |
|  | 0.3208892827          |

gene\_expression\_table

0.6856173167  
17.2967287307  
1.6203649329  
0  
1.5872561007  
630.7372137131  
26.6993904758  
0  
0  
0  
3.4723590171  
0  
0  
145.8480509291  
1.3255672677  
6.0008757929  
0  
0  
10.2808300362  
0  
12.9967269295  
0  
47.1995572533  
62.0052547537  
30.5497738539  
1.9434805179  
1.2392653706  
0  
0.4052358237  
11.3115682129  
0  
16.6893180089  
12.3928282529  
2.08708064  
0.4406690647  
2.1149016931  
0  
2.6616604799  
0  
0  
16.0386148948  
0  
0  
0  
0  
47.1658221994  
2.6220022741  
26.4375193884  
47.0848807137

gene\_expression\_table

2.3618079031  
7.3437947888  
0.6710354158  
3.4367565547  
0  
0  
9.6789650121  
7.9702139706  
0  
0  
63.108343021  
14.0701753119  
230.9392160446  
105.5614183441  
0  
4.1674475623  
101.3039833326  
30.9434996705  
5.8268485735  
1.6332986763  
0  
3.5626213711  
3.2973801435  
0  
8.6534778163  
217.675474507  
5.2741991335  
0  
0  
1.5057709169  
10.2952401897  
0  
0  
0  
3.7872059964  
0  
0  
14.8013471053  
2.4437503229  
0.1282761837  
17.0044642759  
0  
0.0318960629  
0  
0  
3.2072845059  
7.6601089377  
0.1492758338  
19.1551671306

gene\_expression\_table

0.8184725129  
4.2831152217  
58.4135484914  
0  
46.2485368268  
0.1909427284  
0  
8.3282386477  
1.385144497  
0  
0  
27.0315948734  
63.554620531  
16.7453495787  
0  
0  
0  
0  
2.6381183214  
12.9381199852  
6.3745191026  
0  
0  
0.9307878549  
3.6598485104  
0.4409147304  
0.7540609819  
0  
0.7735081506  
2.0792060427  
0  
0  
1.1538821542  
0.7753940631  
7.2535510782  
1822.8911035029  
0  
0  
0  
3.5038713696  
8.1263302991  
0.9182777267  
0  
0  
583.8055821714  
7.61291415  
0  
41.8941455393  
5.2258363026

gene\_expression\_table

1.2249029522  
7.9082578139  
1.7086178927  
85.4510143252  
0  
8.2182750653  
0.3897060914  
9.5912621679  
0.2128472037  
0  
2.4971715996  
5.1780398007  
3.1544055485  
0.4949521015  
2.3588179611  
0  
0  
5.4726251667  
4.7789448241  
0.6368489089  
1.6275207642  
0  
0  
0  
0.8681582764  
7.1676872919  
0  
5.4233375674  
0  
28.5906876728  
0  
0.1390140483  
4.0902778394  
0  
0.9879752558  
2.3699402688  
88.596945312  
0.3290802854  
3.4750761167  
54.7890819618  
1.141407478  
12.9679942982  
0  
0  
7.6357244641  
1.4086732037  
0  
3.7907411843  
2.8950511249



gene\_expression\_table

2.0296494637  
7.6500079391  
0  
3.2865621288  
1.5949010214  
14.29280399  
0  
10.6298838317  
5.6882560918  
97.102993261  
13.5300861221  
36.8594839948  
2.4764379767  
2.3470074204  
53.8858170771  
327.1792240058  
3.8671724563  
0  
1.0740703285  
1.9708330454  
3.7611017553  
0  
1.9697300495  
0  
1.8644125155  
4.2715424277  
0  
0  
2.5820975001  
6.4063733016  
0  
4.5368498927  
1.805480623  
19.7931707078  
0  
15.4908171326  
288.4446527276  
2.6058889771  
19.9552852102  
0.2228696952  
0  
12.1263975427  
4.5739650657  
242.1121373642  
0  
0  
21.8535464298  
1.9621528977  
1.1635396945

gene\_expression\_table

0  
 1.6259793733  
 0  
 1.0389605965  
 0  
 0  
 5.0495174355  
 3.352237025  
 0  
 0.9257395505  
 0  
 57.8371358389  
 1.3238946133  
 4.9761497786  
 0.6725420927  
 8.1117925569  
 1.0002525568  
 2.370585624  
 0  
 0  
 0.7651782008  
 1.4577982213  
 0.9741924164  
 0.6448003321  
 204.3951801261  
 2276.1333467064  
 0.4752503042  
 0  
 22.3434162771  
 15.216228502  
 0  
 0.7378567919  
 1.7199402104  
 6028.1252082583  
 0  
 27.1743983249  
 0.2403013503  
 0  
 2891.0290717122  
 1.4177181463  
 12.7599516089  
 0  
 0.3787172036  
 29.9496663842  
 2.1245404156  
 2.5987695876  
 12.5777773301  
 2.4091407027  
 0

gene\_expression\_table

1.1340237719  
0.1504856678  
0.4177117216  
0.6058871539  
0  
1.9314427745  
2.1119193834  
3.1039012722  
0  
0  
54.5963336679  
0  
0  
0.3124374065  
1.5930897663  
0.8042029185  
0  
1.1260041546  
0  
21.9626436975  
4.2914501731  
0  
2.0527132137  
3.6528044883  
0.5625461372  
0  
1.0306042906  
6.3399429312  
0  
0.1191133511  
0.6728622492  
0.0780800665  
3.7408802408  
0.780986054  
0  
13.0226953767  
9.1818988613  
4.2493373408  
4.121726289  
1.3943085542  
0.7610582014  
30.9000320678  
0  
10.8326058865  
0  
1.725146083  
0.0798990602  
0  
1.1237092807

gene\_expression\_table

2.3801404291  
0  
0  
3.6904555538  
21.705295421  
15.4635924979  
10.1978291714  
0  
582.3598682129  
1.0232557265  
0  
41.4020063761  
0.5917436408  
2.5156753372  
0.7830450986  
0  
1.5476103935  
2.2992837607  
0  
8.2750892005  
0  
0  
3.1301259805  
1.6768052696  
0  
2.6725747228  
0  
18.647047399  
0.4274133248  
0  
10.3291401451  
0.1470741428  
2.3264457844  
9.1273694308  
0  
1119.7925073132  
4.0790585026  
1.6159135853  
4.3045226519  
0  
0  
1.4128067971  
1.3585708533  
38.3347527777  
1.6052879895  
0  
2.1624832994  
0  
10.2759522701

gene\_expression\_table

0  
1253.5688843508  
57.4614473881  
1.195974464  
3.5626213711  
5.9711248063  
18.6513707076  
8.8775278029  
0  
98.8866888757  
41.3324087636  
0  
26.9011696557  
8.4058124015  
2.3830009327  
12.2147500166  
1.7706017621  
27.1987144708  
8.2634807117  
13.4676985134  
17.6834593509  
158.4567309268  
0.8035052401  
32.2841796592  
0.2260438247  
51.0409264642  
0  
0  
0  
2.8218189236  
0.1343243791  
0  
1103.1842591314  
1.7109935112  
0  
0.9257574073  
0  
7.2373301512  
23.4947506844  
12.3270636958  
0  
2.6516838278  
28.8603005537  
1.2505378242  
27.6112472739  
37.8360960279  
62.7636423478  
3.1000566169  
0.4195607894

gene\_expression\_table

22.4807521913  
8.8338038537  
10.1380160517  
74.9151479889  
0  
3.6007710526  
0  
38.766500372  
29.8223963778  
19.2391486185  
0  
0  
99.7217695274  
36.7765271946  
0  
13.3287372367  
10.2304008503  
6.118986668  
0  
18.3978758626  
4.3845940607  
0  
54.2656290036  
0  
0  
334.0850763844  
23.9716227525  
26.4312794417  
25.2204489611  
9.8729624454  
8.918063227  
139.1772244748  
0  
12.6875041547  
0  
0  
0  
0  
0  
0  
276.0402864721  
0  
0  
0  
0.2533920093  
5.0745138451  
28.6300466071  
0  
2.8962423079  
1.2206546847

gene\_expression\_table

21.1984067118  
4.5477628279  
3.172662342  
65.3498135206  
16.1781299558  
0  
0  
1.1510832097  
1.5634143219  
25.2274791914  
0  
0  
0  
0  
10.59456247  
5.340439046  
18.0389765525  
0  
0  
0  
0  
1.7925606868  
0  
137.8849619009  
49.894959087  
15.1026160853  
0  
12.0143659422  
0  
0.5516046787  
0  
11.8759833806  
0  
4.6892907167  
258.9169858549  
0  
0  
0  
4.9489294387  
3.1146138518  
3095.810109973  
27.211857756  
0  
40.9325100119  
4.8931648231  
33.7136106356  
0  
0  
5.4879973098

gene\_expression\_table

76.9433874748  
8.9946215737  
0  
14.2054982227  
0  
0.2427669359  
0  
13.3415983795  
37.4815085465  
0  
0  
11.4171074368  
1.3757056622  
16.318868363  
11.2148717669  
5.2267934723  
24.2841024801  
0.6928040103  
17.3870606356  
23.8557183858  
0  
0  
0  
0  
3.2608469669  
0  
38.4799226495  
4.1369540435  
4.7928229168  
0.0871494635  
4.6797598191  
12.2631137718  
7.7700962345  
8.1057430965  
5.4727315387  
0  
5.7524372007  
0  
14.0611811926  
182.6210600904  
0  
0  
151.2549514916  
37.5672393529  
5.5980812033  
15.1237541852  
0  
4.2856874213  
4.4017763612



gene\_expression\_table

0  
41.611653494  
1.1044432894  
4.8538320956  
11.3224526873  
0  
9.1677875815  
0  
696.7234497391  
0  
2.664004829  
6.2559293216  
0  
0.9492572526  
0.8163210191  
49.7037233871  
0  
2.3767249017  
32.8006864168  
10.3235763596  
0.8486890891  
10.5871261983  
0  
14.1730138026  
0.4843545157  
0  
13.0492261485  
2.6564873309  
0  
5.603205815  
0  
0.6539841224  
28.9488626908  
0  
218.6033324546  
1127.1169754969  
16.0242757358  
5.7003557587  
21.0019910044  
0  
0  
30.1534754328  
0  
0  
0.8975603521  
6.6167578495  
0  
1.6846327352  
82.650027065

gene\_expression\_table

682.332227818  
10.3637033349  
161.0563251903  
0  
0  
23.6558250606  
34.4332997678  
35.960106054  
11.8517107464  
2.4764379767  
65.4488824271  
48.9671464698  
0  
1797.6981952036  
20.6423088124  
0  
0  
5.8531742101  
352.1078576331  
310.994916128  
2.8908896895  
0.1994397718  
4.329045083  
0  
0  
0  
0  
0  
0  
4.7340287209  
290.3466399419  
57.7611604703  
8.7122555928  
0  
169.2797289048  
68.8554625781  
0  
9.9929405239  
1.9738050145  
1.2037052062  
5.863552549  
50.4549583827  
9.915240175  
0  
0  
0  
2.9142284115  
16.8317247849  
1406.9985801015  
0

gene\_expression\_table

0  
8.9027984937  
0  
3.2148785311  
0  
234.4983024564  
1.0753778639  
0.3298451437  
20.6979484588  
456.3271457269  
0  
10.2622549955  
12.2808412181  
3.4303251974  
1.0106865154  
54.3694179071  
17.6302168122  
17.7589430056  
0  
0  
19.4497112171  
1.1790731336  
13.3949139963  
1.9899651831  
0.3446502934  
0  
2.6813670613  
45.9466534271  
0  
16.2120606203  
4.8502645769  
15.4756223517  
6.2294727173  
18.0574308345  
6.2458094987  
0  
0.651243205  
1.5061897773  
9.3020236085  
68.5480443583  
64.4384989642  
0  
0.4023266901  
4.7235453664  
1.0608880094  
2.3309066532  
0  
1.0802416308  
0

gene\_expression\_table

0.1226631926  
0  
8.6410843421  
11.9138954937  
1.8979258264  
0.8597390264  
65.6932086331  
0  
2.5125922916  
19.6890861912  
3.6971288205  
2.7602454176  
9.6293123188  
2.4711347393  
0.4567050388  
0  
6.1567631462  
4.984060728  
2.6211235543  
4.6264073017  
55.7546717231  
1.2482647441  
9.1635109581  
0.3025595304  
28.8543853455  
6.0454565251  
0  
1.6664758411  
0  
29.1367696383  
5.5520131235  
24.07777236  
94.5343446822  
0  
0.2063607563  
0  
4.0332101904  
0  
98.5858165972  
0  
0  
0  
0  
336.5655132191  
6948.7833652303  
0  
0  
0  
0

|                | gene_expression_table |
|----------------|-----------------------|
|                | 0                     |
|                | 0                     |
|                | 0                     |
|                | 0                     |
| 226.4809300205 | 0                     |
| 82.8120859416  | 0                     |
| 2.0334841242   | 0                     |
|                | 0                     |
|                | 0                     |
|                | 0                     |
| 7.5211318571   |                       |
| 32.7625194556  |                       |
| 396.3416275359 | 0                     |
|                | 0                     |
|                | 0                     |
| 32.8696115108  | 0                     |
|                | 0                     |
|                | 0                     |
| 1.5728264077   | 0                     |
|                | 0                     |
|                | 0                     |
|                | 0                     |
|                | 0                     |
| 790.9019443863 | 0                     |
|                | 0                     |
|                | 0                     |
|                | 0                     |
| 89.1016114562  | 0                     |
|                | 0                     |
|                | 0                     |
|                | 0                     |
|                | 0                     |
| 1.4950569868   |                       |
| 5.5565419206   |                       |
| 1.9740387304   |                       |
| 8.0116404565   | 0                     |
|                | 0                     |
|                | 0                     |
| 6.3572158998   |                       |
| 1.0516684553   |                       |
| 1.8268952258   |                       |

gene\_expression\_table

0  
 25.1513600704  
 0  
 0  
 0  
 2.068355461  
 0  
 814.1773896018  
 143.8493318468  
 70.8966778925  
 0  
 0  
 12.1187027495  
 0  
 2.0056494487  
 40.6880191043  
 175.975682626  
 19.5311523447  
 30.8420074707  
 83.8811595437  
 17.3965415601  
 157.9710351574  
 0  
 0  
 12.3584627879  
 122.3433962812  
 73.0189554465  
 19.3571315175  
 2485.075655912  
 27.890222433  
 208.2552457112  
 0  
 53.6511227518  
 25.8534303564  
 0  
 0  
 61.8326362003  
 0  
 1786.766080972  
 2561.5395222477  
 0  
 17.3332364074  
 20.1000208596  
 0  
 2.9380696657  
 0  
 88.9407782225  
 56.5232385308  
 141.7599786807

gene\_expression\_table

0  
1084.7152699014  
8.2289306816  
22.5269469827  
12.1341618773  
71.1012859095  
55.6995236798  
100.7734760922  
0  
12.8668546887  
0  
0  
0  
0  
21.7994032364  
360.4132413533  
4.6449962419  
56.9193582618  
0  
42.0400153955  
73.3767049415  
0  
144.8955805895  
41.8989720538  
442.4780148468  
362.7429685668  
0  
11.7650464734  
0  
0  
80.4345356953  
16.067903819  
0  
0  
0  
0  
0  
0  
0  
37.981339039  
66.6574555401  
0  
6.8807696041  
0  
21.3174660964  
292.1970653814  
98.6779528744  
0  
7.3970442466  
0

|                 | gene_expression_table |
|-----------------|-----------------------|
|                 | 0                     |
|                 | 0                     |
| 6.3598006009    |                       |
|                 | 0                     |
|                 | 0                     |
|                 | 0                     |
|                 | 0                     |
| 60.0705643712   |                       |
| 275.2878656865  |                       |
| 76.3103496495   |                       |
| 49.4748009491   |                       |
|                 | 0                     |
|                 | 0                     |
| 41.0966096744   |                       |
|                 | 0                     |
|                 | 0                     |
|                 | 0                     |
| 42.7298298566   |                       |
| 58.4636819355   |                       |
|                 | 0                     |
| 50.1117273733   |                       |
| 6.4893770674    |                       |
| 3106.3878964673 |                       |
| 52.7366720737   |                       |
| 26.304287388    |                       |
| 18.2004584487   |                       |
| 117.3650258428  |                       |
| 19.8954983184   |                       |
| 63.1444476792   |                       |
| 95.9713395062   |                       |
| 18.5140118491   |                       |
| 664.8194077455  |                       |
|                 | 0                     |
|                 | 0                     |
| 27.2548811501   |                       |
| 4.2098326563    |                       |
| 18.7820086853   |                       |
| 12.208875735    |                       |
|                 | 0                     |
| 1347.0572821877 |                       |
| 193.4507320916  |                       |
| 3.6700873262    |                       |
| 0.7599790514    |                       |
| 1627.4503859089 |                       |
|                 | 0                     |
| 6.1029614951    |                       |
| 199.4475047658  |                       |
| 1.6465946116    |                       |
| 88.8938750393   |                       |



gene\_expression\_table

12.6459284994  
0  
2.8915626339  
14.6928014216  
0.4109948913  
19.0656210862  
6001.3546531827  
0  
0  
4.5413372377  
0  
11.8942671596  
0  
11.9783327369  
0  
10.7065872153  
2.5065975732  
3.9086164168  
0  
3.1442945079  
0  
19.6429850173  
5.2495775557  
609.9797172264  
9.7045413213  
10.9437613573  
0  
8.6043446474  
34.8535715243  
0  
87.9066232372  
186.5348897796  
0  
1.4028114522  
11.2232142377  
0  
3.5397610859  
37.2544814733  
0  
1.8903540352  
0.2982790356  
275.0830794021  
0  
6.3277843447  
6.0823591082  
0  
0  
0  
0

gene\_expression\_table

6.0208941109  
24.8816801168  
4.7819478974  
0  
6.1288875098  
0  
0  
4.6103139278  
3.7736703506  
12.117219262  
0  
0  
3700.2221774652  
2.0022644184  
15.5977179915  
125.0588607494  
48.4866572582  
17.1882725231  
0  
0  
3.0150892252  
152.0992665174  
2.4776147217  
14.3800353525  
3.5303491086  
0  
532.9366524105  
1.4471327404  
652.4904200217  
0  
0  
41.5772433848  
60.7668323649  
25.186812945  
68.3812137287  
11.3748780381  
244.5465294969  
79.6570423052  
8.6188653178  
259.3643308626  
13.6186520799  
468.7170551729  
5.80805214  
869.5807463962  
0  
147.9635015391  
18.4325633839  
4.3191282654  
0

gene\_expression\_table

6.0610209625  
0  
115.8631527746  
89.9635494353  
3.2742098505  
9.5158425141  
28.1047177363  
120.2883467253  
0  
61.426273425  
58.3738980392  
13.0336266604  
268.263257458  
12.1816200073  
0  
88.9069469128  
4402.2403060126  
157.8673669995  
96.9562989675  
0  
0  
18.1546903218  
0  
21.818288129  
0.2553508587  
1.8860655911  
0  
0  
0  
0  
4.0376829666  
2.5892969527  
0  
2.9992872747  
7.4726547871  
4.7271933817  
0  
0  
0  
210.8200146468  
2.3129333971  
0  
7.0688046446  
24.972360303  
0  
10.094400426  
2.9055193116  
19.6132369704  
0.2565991289

gene\_expression\_table

20.2265952983  
13.2564493388  
0.814519973  
0  
0.8546553958  
0  
0.2429898546  
0  
0  
0.4960205274  
7.7481794271  
19.1111731783  
22.3541890354  
16.3571509799  
4.9819008189  
1.0599412291  
667.8394027551  
29.7684173748  
3.5318309128  
0.0531315245  
0  
0  
0.5797780482  
0.7145205052  
0  
1.8118940784  
13.5600603064  
0  
0.731949828  
0  
1.0215998527  
0  
7.3784353302  
0.8858579543  
9086.913916404  
12.1888923764  
0  
377.0505511973  
35.2006366247  
0  
2.1097130058  
0  
0  
0  
2.4462131645  
3.5703011869  
0.5874153329  
75.6125820507  
2.2472248382

gene\_expression\_table

0  
0.1902357548  
0.6787744986  
3.6328588486  
12.5182772631  
0.3187517742  
1.7461889382  
0  
0  
3.969629998  
116.084737562  
0  
2.5921184677  
0  
3.5656893293  
1.5660379338  
7.1435010073  
3.2293771799  
4.8125713702  
3.8523573254  
1.293134291  
31.6289701417  
7.6855344642  
0  
17.401467114  
7.188255489  
0  
53.8811030698  
3.7998063694  
3.1609795474  
0.0950231152  
11.4565947809  
0  
4.4054495588  
2.1042800828  
0  
28.7106346202  
0  
0.7473644654  
1.3285862892  
11.3427503606  
29.6570119099  
0.6497643637  
0.8433507824  
42.3607164707  
0  
1.3203634485  
0  
0

gene\_expression\_table

0.8009391822  
0  
0.8721814122  
3.0834076823  
2.2271526491  
2.4900163801  
2.3503492208  
9.8519260498  
0.9058770855  
0  
24.0496341833  
1.4075802482  
0.5729736644  
0.2055718639  
0  
6.2207636115  
6.3359482478  
12.659109133  
0  
3.6618468217  
0.4945603008  
1.3026913  
1.4550058508  
0  
0  
65.8017010941  
0  
11.0156921832  
11.2459924077  
0  
0  
0.5244551548  
1.1724156607  
6.7944279006  
0  
1.5059319894  
4.7328009927  
1.3631355103  
15.6243438386  
116.9524313732  
10.6543540414  
1.2603721665  
0  
0.3811369253  
4.7840836491  
0.3302831399  
0  
2.2973326714  
315.2145430525

gene\_expression\_table

15.0664111837  
0  
1.4577780941  
0  
25.5345609614  
1.6928877597  
66.9236290648  
0  
37.9889038275  
0  
1.0603180347  
0  
0  
0.7863692765  
4.1627402807  
23.9463422522  
0.943222216  
0.1411588518  
0  
0.2891625986  
25.6473336719  
0  
0  
5.2422080677  
12.3344559211  
0  
0  
1.561383103  
0.0836475776  
0  
0  
0  
42.0444383024  
1.3977139662  
20.9405827179  
3.9958903845  
233.8674649277  
0  
14.9423183006  
1.9233015697  
0  
0.4347762387  
0  
0.0555631384  
1.837441216  
0.2864490589  
0  
0  
0

gene\_expression\_table

1.9454141868  
 0  
 0  
 0  
 3.160766639  
 0  
 0  
 4863.4133916654  
 0  
 2.9884636601  
 0  
 0.4728400052  
 0  
 5.2129358698  
 64.1449700266  
 0.8230701139  
 0  
 10.8866971134  
 71.8842145528  
 0.843057861  
 2.5346736577  
 1.1512338175  
 7.6952808565  
 8.2821829686  
 0  
 137.0052892417  
 0.5203033037  
 0  
 12.4408400584  
 0  
 5.8472007328  
 303.3025923107  
 4.621007903  
 0  
 190.9585871567  
 0  
 4.7698289028  
 1.2716646743  
 1.733555375  
 8.8243116042  
 6.1845053639  
 16.4925663192  
 0.473464434  
 27.5554014681  
 1.1325868552  
 4106.8951711893  
 2.7127436816  
 0.4956363403  
 0



gene\_expression\_table

2.1241877948  
1.6508192631  
0  
49.988653742  
0  
3.2117004983  
0.09814321  
0.1062976035  
2.1805030632  
0  
2.5376228027  
0  
5.2000349463  
4.6845649574  
26.8810010301  
31.929749468  
1.5440865389  
0  
0  
0  
0  
0  
2.6230526286  
0  
3.8739995074  
0  
6.3780103159  
2.9687384513  
7.8895172664  
0  
0  
0  
16.1408560079  
22.9307259474  
0  
1.565356893  
0.3341701705  
5.9317449803  
3.6628896175  
0  
3.0079020343  
6.9914852056  
1.4239914977  
0.1536690791  
2.0999305809  
2.3951638583  
10.2083930751  
0.8810205934  
2.8439365299

gene\_expression\_table

42.3374672503  
0  
11.8007685242  
0.7294177639  
6.3847210879  
23.0571788186  
14.3367915302  
59.3710130317  
12.3088609904  
518.2221601514  
119.0216290306  
0  
6.9201004361  
0  
0  
2.5166347176  
1.7093434054  
0  
0  
3.862975057  
0  
0  
0  
27.6896917459  
17.5051798136  
0.3106449114  
45.4868645317  
0.8165546036  
0  
0.9180940792  
0.1276795979  
66.2964662589  
27.9492845147  
4.0463481864  
9.3969593232  
11.8956072077  
1.8041694646  
175.8404207638  
7.5941604327  
108.043396854  
0  
0  
6.7447487297  
3.0050492252  
0.7887218817  
4.7100334934  
4.1500902176  
42.4869612497  
11.6280794668

gene\_expression\_table

42.5615604491  
6.3868226  
4.789431384  
0  
9.2863157059  
8.8876607387  
0  
1.0319338687  
14.2930216558  
755.7637610001  
0.8596760265  
2.1091097683  
13.3517209883  
118.3162366378  
4.7972185465  
112.8135338516  
1.1309854599  
4.2278979549  
17.6475697101  
5.0492457759  
33.2292511507  
0.8002077309  
7.4067995942  
0.2182524566  
3.6268689742  
3.3320050674  
73.0928337229  
0  
4.4611040044  
0  
8.8689292994  
0  
5.9025502751  
3.5571003462  
6358.3570329241  
7.6223945694  
0  
4.3534091812  
1.3243701421  
33.5622061124  
3.6870919832  
19.2929349186  
46.6312005444  
5.0993895137  
1.9053063542  
7.2006826301  
154.0451468038  
2.7144872246  
57.8016763747

gene\_expression\_table

0  
27.3442877009  
19.9982696305  
0  
40.3036204125  
15.2170508675  
0  
21.8675238817  
2.6620631212  
4.9957610398  
18.4458634967  
0.8850856671  
3.2171591831  
0  
0  
406.0648493919  
4.7531758621  
0.0762188835  
1.3514240497  
51.4047758401  
0  
3.8220686031  
9.3247588078  
0  
1.4819004853  
1.4100803907  
0  
82.958483265  
0  
1.2179512242  
0.2946399638  
16.4149128732  
0  
475.1911594244  
2.6764814676  
1.5151160828  
9.0499193945  
20.6994402674  
94.2436712124  
1.7546464186  
74.877775602  
0.7428895754  
0  
0  
0  
0.5829856722  
0  
0.9580453317  
781.4148923042

gene\_expression\_table

0.7642477314  
0.4535163524  
3.0244166473  
641.2659457061  
536.571816025  
15.369800996  
0  
3.184746509  
11.6772184888  
0  
0.7586466745  
0  
0  
0  
11.8822202988  
193.4423927993  
319.4433106931  
121.362539742  
10.9064569337  
0  
1.0233970581  
35.8200404925  
0.9043821449  
0  
2.0990022313  
0.2870814776  
0  
0  
0  
2.1699942367  
0  
17.7050632897  
3.3765990958  
0.6479938234  
0  
325.3655730343  
22.389333396  
0  
0  
265.9314164205  
3.7716079263  
11.7419864132  
0  
10.8437310851  
26.527785513  
0.0692824467  
2.2569045325  
0  
2.2514440676

gene\_expression\_table

15.3318303705  
2.3717198373  
1.0669072549  
3.3001112559  
0.4968538106  
0.2950117394  
2.3352112613  
0  
0  
19.0662286392  
6.0373618863  
3.7879872488  
0  
1.1398742249  
0  
3.0795936934  
10.3308490446  
2.3839451973  
423.8157801463  
0  
0  
0  
36.199677578  
160.5408286696  
159.4560371747  
0  
1.5894116343  
7.8476231413  
11.4478996626  
1000.8653745873  
5.2693903718  
0  
0  
7.1098892007  
0  
26.7925733342  
0  
3.3586350344  
129.2067532908  
0.7613545444  
47.5360139156  
53.5176253493  
0  
69.448855235  
95.9431254662  
2.4024218245  
9.8978588775  
3547.7218383902  
185.6038841144

gene\_expression\_table

38.7057478557  
8.5606899423  
10.1502694382  
0  
18.1293629079  
0.2362454374  
0.8014507341  
0.3825142542  
8.6167551782  
0  
5.1691672171  
0  
15.9271245183  
37.7167721489  
0  
4.6719207777  
0  
216.1986957976  
1.030679743  
1.78377407  
8.2559550845  
0  
0  
71.9526739709  
14.8269125394  
4.2669046755  
268.8616687012  
6.3353779897  
26.0242062446  
6214.1738390308  
0  
0  
0  
0  
0  
0  
0  
4.8815464794  
1.51146149  
0.8956872939  
3.2098293197  
0  
1.5367713093  
9.0121796714  
0.6287877463  
8.8167019449  
58.574495627  
10.0242485119  
13.280849485  
0.226802014

gene\_expression\_table

26.9807304883  
3.5365434695  
20.7385098445  
22.2782228923  
2.1750813621  
0  
0.0485596843  
0.2774241434  
41.0006305733  
23.4230081792  
4.7625353891  
310.2845789375  
0  
0  
18.4782953881  
9.8756404224  
21.6807822537  
0  
0  
64.8470510564  
1.7170034406  
63.4375207736  
0  
0  
6.3579951915  
164.1593096748  
171.7862027826  
41.3934175276  
0.3021845858  
38.6016464199  
13.6990476258  
4.4443915299  
0  
16.5578128767  
0  
7.0496017076  
7.0888518063  
0  
2.3956354871  
0  
0  
24.8152654791  
6.3764636791  
40.4128896053  
4.6580819754  
139.0469734448  
0  
0  
1395.6692070335



gene\_expression\_table

108.0911591746  
0  
0  
3.968689985  
2.4147606535  
0  
28.4520101255  
0  
0  
0.4078514905  
0  
1.6651906493  
7.8658284756  
2.9548076912  
37.4177509305  
1.3305199899  
14.1529281655  
0  
0  
0  
0  
2.4011964335  
1.407186299  
0  
0  
11.7656083324  
13.7344812784  
0.6548005471  
45.0415385852  
0  
0  
0  
5.5003450621  
2.7886171084  
0  
0.2290615576  
0  
4.4788924059  
1.8653896996  
65.4155743708  
8.9555054771  
1.8100071498  
19.5218665354  
0  
2.5436750964  
5.9789580439  
20.1881877696  
10.3288605166  
1.9013093039

gene\_expression\_table

0  
0.2732881144  
12.6362576161  
0.2847318663  
0  
0.9641446561  
15.1447080476  
0  
1.394363794  
81.6360563188  
1.6201287317  
5.1691672171  
3.3903416362  
0  
1.0274352371  
3.8246229482  
101.9597886176  
28.6149777168  
0  
1.0447225767  
0.6032452312  
0  
15.6848838191  
320.0034771258  
120.5829088658  
99.2133520306  
0  
0  
13.3473808471  
131.3088043472  
4.7618910195  
2.5533325976  
2.1453254412  
16.6623915376  
16.913510718  
0  
3.8858881392  
0  
0  
0  
19.2889698021  
23.5010259917  
4.6091064072  
5.6456747714  
238.9055857927  
194.8281735357  
0  
0  
17.996490468

gene\_expression\_table

19.4986905957  
46.9389619808  
24.5433309102  
3.7012447708  
0  
1.6851066037  
0  
0  
42.9689325773  
1.3203952926  
0  
32.9727717118  
395.7474122023  
0  
46.8863976905  
1.2132070502  
21.4604491007  
17.340353026  
50.3506960303  
0  
0  
300.5379148232  
6.2946812475  
375.933318317  
21.4372109317  
2017.4007814855  
0  
16.9227727011  
27.0845460877  
0  
71.9631826132  
0  
1.8241492964  
0  
30.8630820932  
5.7791685591  
5.1215274338  
4.725447976  
0  
32.9374257084  
54.2465112904  
15.6910996546  
102.7782778615  
0  
0  
1.5790833706  
0  
4.1966418083  
2.321119602

gene\_expression\_table

33.2428732421  
16.265805442  
0  
95.4444380344  
0  
5.054593785  
1.0130429027  
4.3851403595  
1.8966473486  
8.0487419874  
0  
0.8002653487  
1.4981207399  
0  
23.8973247964  
1.4082279294  
17.3316359731  
10.7011877908  
271.8043035238  
0  
0  
0.8614962372  
0  
1.409271103  
1.1084461718  
6.4214936643  
2.9658822914  
0.2583517999  
0.4408788296  
39.4918497814  
21.6163250395  
23.8665030686  
6.4428981534  
1.8035839154  
3.1453248406  
0.2910525085  
0  
7.2482604226  
4.8723107254  
0  
21.2797904668  
31.5787812768  
0  
0  
27.6945336592  
27.5715914808  
0.1173318534  
0.0732774027  
0.7687492961

gene\_expression\_table

5.2083072919  
0  
3.7267192424  
0.2915169801  
2.520032688  
0  
5.1013781355  
3.1008384456  
0.2543947822  
0  
0.2161066961  
45.7353833294  
11.3063121793  
0  
5.9252318483  
0  
9.7983521376  
0  
0  
2.2896889875  
4.2290833547  
42.4634665496  
157.4022205957  
1.9176035647  
10.6270856601  
14.9855814209  
23.8449434453  
108.7528359218  
5.3741237632  
0  
0  
12.3737735352  
0  
6.8731551605  
565.9867705069  
0  
14.299990462  
8.0152102113  
1.4089890118  
1.4262323834  
0.1715179316  
1.9564809898  
3.366666972  
2.1788007286  
3.1673866413  
10.6118122551  
1.6191101266  
8.6292199591  
0

gene\_expression\_table

2.9675494541  
0  
0.8662298786  
0  
1.8210157977  
3.7470867193  
0  
4.4985828581  
0.3897602775  
0  
3.4091701778  
0  
3.1958777643  
0  
0  
3.5856692502  
5.8007586845  
2.5386905562  
1.1863555825  
3.874409569  
73.2180028142  
1.4986857658  
19.4363895449  
29.8487410868  
0  
0  
8.140999019  
4.1528838045  
0  
0  
2.2479030155  
0  
0  
0  
9.5693854786  
0.6042809698  
0.3524553764  
14.8236414203  
74.6234583225  
0  
2.1150434523  
2.9077517598  
2.6410878377  
1.9087127709  
0.4985076206  
0  
3.9798495882  
14.2766587969  
84.7564997596

gene\_expression\_table

0.3426417879  
51.8690369377  
0  
1.3540887599  
9.2973547815  
1.5356314204  
130.0312925808  
0  
19.6981022579  
0.2927293005  
0  
0  
0  
0  
0  
0  
86.4290319861  
27.0981956615  
0  
1.2176141334  
26.3239614998  
81.4538277399  
5.8399009721  
0  
0.3152979756  
2.0759601576  
0.1830772491  
0  
6.4965326375  
5.0089467309  
31.5749947373  
0  
0  
2.4861028502  
12.5749992457  
8.8197309924  
0  
7.1341492956  
2.811113141  
0  
2.8969574883  
0  
0  
22.7182652499  
0.1584777573  
60.5039307636  
0  
0  
0

|  | gene_expression_table |
|--|-----------------------|
|  | 0                     |
|  | 0                     |
|  | 0                     |
|  | 7.6878847805          |
|  | 2.899343976           |
|  | 0                     |
|  | 0                     |
|  | 13.6773094434         |
|  | 3.6356734182          |
|  | 0                     |
|  | 8.4725894379          |
|  | 3.8431029182          |
|  | 165.1191016899        |
|  | 57.4849106169         |
|  | 11.4102241064         |
|  | 0                     |
|  | 23.4177896831         |
|  | 44.4172727877         |
|  | 5.4900899322          |
|  | 9.5735213462          |
|  | 0                     |
|  | 0                     |
|  | 18.2787791944         |
|  | 0.1096018801          |
|  | 0                     |
|  | 0.3640600009          |
|  | 1.7497366676          |
|  | 1.1862995997          |
|  | 0.2261672939          |
|  | 0                     |
|  | 5.3054440025          |
|  | 127.1092410621        |
|  | 0                     |
|  | 1.7983966631          |
|  | 2.8637214422          |
|  | 1.8500387156          |
|  | 1.6575443537          |
|  | 3.0004378964          |
|  | 0                     |
|  | 5.9368736902          |
|  | 13.5641905649         |
|  | 0.5369455518          |
|  | 20.5447900653         |
|  | 16.4144769916         |
|  | 1.316407302           |
|  | 0                     |
|  | 2.3148603345          |
|  | 3.4621410297          |
|  | 6.0419279375          |



gene\_expression\_table

8.3777996965  
12.5725490136  
4.7043237154  
44.6910031513  
0  
0  
0.5819446006  
13.2444489906  
4.734984061  
0  
0  
0  
0  
2.5609873188  
5.1599624715  
1.691764799  
0  
0.6198564011  
1.3151160797  
0  
0  
0  
0  
3.7572037551  
0  
7.255731829  
0  
0  
23.8826983885  
74.8370417917  
56.3078236833  
0  
2.9329280438  
1.0478173368  
0  
0  
10.0871676149  
57.3100882115  
0.8124360643  
0.3014882603  
0  
0.5276553054  
0.2230561427  
0  
9.8506716899  
58.8629461049  
0.6606809807  
0.1257851904  
0

gene\_expression\_table

17.1290386753  
67.506179264  
0.6087333574  
0  
72.6421806506  
7.2887059776  
0  
0  
0  
0  
10.1019335606  
134.0596871198  
2.9834604044  
0  
40.6410352485  
0.4314715769  
7.8935280256  
1.40084327  
18.4593910838  
18.2500059762  
0  
11.1095759234  
3.6111650207  
0  
0  
0  
9.6595580851  
6.4571649929  
2.4066696202  
2.4747837095  
3.1320758677  
11.4991733365  
30.0886609277  
0.3279671291  
3.6943810208  
36.1989019094  
0  
0  
1.6197310748  
0.9141831353  
0  
11.4934153632  
11.3446590999  
11.2707667158  
18.6947143086  
0  
5.6220310455  
0  
6.6571719235

gene\_expression\_table

9.2800373503  
0  
15.9969814013  
0.3506784027  
24.1565073512  
1.9252303772  
18.5400192407  
2.4411279458  
0  
47.3562116862  
0  
2.696015667  
1.4357274892  
1.2096627092  
0.3589380953  
17.9069607511  
98.1133066922  
44.0968827176  
0  
12.8717172677  
3.9729609262  
33.1437499586  
13.009079928  
18.0971796875  
0  
1.2524959618  
0  
0.8511983488  
0  
48.9695797409  
0  
0  
0  
156.5693266164  
18.2418367703  
35.1638797432  
26.1512775642  
99.1576600809  
14.7477771981  
22.3917624558  
14.0315500442  
0  
31.494529329  
6.7104089905  
7.7214066146  
33.4872849907  
4.2668330504  
0  
0.6099994198

gene\_expression\_table

13.8138437056  
15.4963588542  
33.7927379022  
0.6501004198  
0  
0  
0  
0  
18.9601107683  
8.8870996844  
21.8024300259  
0.1445159956  
6.6054781806  
3.8595390421  
0  
4.0156140904  
2.1098936829  
0  
154.903842468  
4.198160251  
17.8308552859  
21.1445698559  
4.4338467498  
3.4233952475  
22.6757407249  
0  
3.9495015258  
0.5926054929  
0  
1.8813282583  
184.2266863441  
27.1884148925  
0  
0  
0.8624990571  
0  
0  
2.2951104691  
5.4183875799  
4.1318868261  
0  
2.5183003792  
15.8106487418  
89.9387179148  
0  
3.0459672737  
11.9049960058  
8.8545810131  
3446.9463607147

gene\_expression\_table

3.4902652299  
172.0192401036  
14.6878960542  
19.2394832539  
2.370681431  
29.0442168281  
0  
9.8922948963  
0  
0  
0.0791812974  
0.4931938696  
0  
22.2774170971  
0  
22.1617886312  
4.4208053415  
0.5525095804  
0  
0  
804.5781503414  
0  
2.7541385496  
2.856361682  
0  
1.4478307419  
0  
54.9845007487  
0  
38.3966890243  
1.31131375  
1.659854343  
0  
0  
0  
0.7143102306  
34.9534583276  
5.5083633088  
0  
0  
16.2894360508  
0  
0  
2838.611892981  
3.4410575406  
2.4729276596  
0.356175608  
44.0749407682  
174.8629185985

gene\_expression\_table

0  
 0.5041669213  
 0  
 16.9313207895  
 0  
 0.6551711038  
 0  
 0.9477023083  
 1.8010260518  
 0  
 3.1713703712  
 360.5555313407  
 15.5418585831  
 0  
 3.524094976  
 2.4701808342  
 6.3182098242  
 0  
 127.0782009544  
 0  
 0  
 0  
 0.5612274804  
 4.4708322391  
 19.4382179806  
 0  
 0  
 1.0563400122  
 4.0576999184  
 6.1628123415  
 8.3354708752  
 0  
 1.4719224008  
 0  
 0  
 3.767812496  
 4.1651049142  
 0.6035969837  
 0  
 0  
 1.1071134484  
 11.1011659492  
 0  
 15.2789826461  
 0  
 0.682367221  
 7.6171705498  
 10.7070477093  
 4.7470544672

gene\_expression\_table

2.9586104259  
4.2795642662  
1.9390832447  
36.7813314437  
1.3699936366  
632.4831990798  
4.7526741797  
30.5130747256  
0.8476041204  
55.4710167858  
0  
0  
2249.0064051141  
0  
16.5880659626  
3.3086687372  
1.6664048278  
0.5470891886  
0.4851306419  
445.9808186401  
0  
4.0900797821  
290.5258911278  
0  
2.6676455173  
4.9238724028  
331.2194793239  
208.2376432054  
284.6178094981  
0  
0.8028710376  
1.0166715733  
4.3871355058  
29.6338505685  
0  
0  
39.9322111555  
7.4396883389  
0  
0  
37.9394213351  
31.8397198906  
0  
0  
0  
0.0729407182  
0.141588165  
0  
66.5611379248

gene\_expression\_table

9.7574539854  
0  
1.5091121603  
130.0387412428  
0  
6.6918539235  
0  
0  
13.950219868  
8.6030644158  
160.5695234274  
0  
5.3550443564  
0  
0  
0  
12.991929319  
6.2057349998  
20.8065836666  
0.3855987086  
0  
42.605685407  
0.4498470887  
4.7126392886  
0.1822005649  
26.4625086656  
0.8569618256  
22.9786835495  
0  
33.7920889903  
8.2121833148  
2.7711069445  
0  
0  
0  
16.4694134418  
0  
14.2873913515  
63.4146604058  
22.8671837083  
32.6943653856  
426.803676741  
0.1980169492  
38.4387780247  
5.2094636657  
3.323817505  
0  
85.2658916935  
0  
17.8852222538



gene\_expression\_table

0.3593678186  
1.6062770538  
0  
0  
0  
2.7754227999  
3.3541995327  
0.13134474  
7.3947130004  
0  
40.7775883735  
8.0800350845  
0.4487992518  
0  
0  
0.4334050239  
24.0403938014  
4.3184569843  
16.2389931427  
4.8710102352  
0  
2.6094955656  
0.7362537189  
0  
9.4448090718  
0  
0  
36.1717744349  
0  
215.1511147745  
0  
0  
2.2156208074  
3.706702109  
8.2193219349  
8.3377746733  
3.4543520123  
36.3736425436  
5.3569461987  
20.9744556169  
229.0355956086  
29.1833636196  
12.3448391881  
38.9183227333  
1.9864057188  
3.1474813562  
5.7555415413  
51.2694620853  
0

gene\_expression\_table

7.4210395891  
3.7763022023  
461.1631944933  
0  
42.5139053273  
254.4698413946  
663.5264407076  
12.4960541542  
147.7900154027  
0  
45.7822914149  
2.7803926156  
23.947971643  
0  
38.0323498219  
34.233739021  
0  
0  
45.4717526165  
488.1077328311  
7.2265564448  
26.1188397218  
62.8204132534  
35.4575221894  
11.2022205504  
24.0299485927  
0  
40.5473923101  
11.6660904165  
78.2611040903  
145.1013416064  
4.8787269927  
45.3545573778  
36.9696812239  
0  
1.0144152335  
2.3234180436  
6482.6239535589  
2.4858833539  
5.1327310085  
195.9295616697  
2.7755322365  
6.8569746286  
0  
127.3411563672  
0  
21.9791023076  
0  
5.4569863337

gene\_expression\_table

0.415749514  
0  
1.7864709472  
0  
3.1564083293  
2.0504011958  
25.5298771663  
0.1143794756  
0  
11.8064865901  
6.1003113886  
8.6666182037  
3.094349967  
0.4919025636  
0  
0  
0.4371469305  
0  
0  
0.4748495521  
1.7060172819  
0.6027338532  
1.8607981667  
60.6551254204  
2.6235100224  
0  
1.6251552753  
106.1053256714  
0.0153115867  
0  
0  
0  
8.7875999132  
10.4939283416  
0  
0.5340271639  
0.4692321997  
0  
0  
0.8676232349  
255.6547447351  
5.6531560897  
43.9572895818  
1.2262771952  
3668.0014208827  
3.0441011547  
0  
0.250607105  
0.7296553965

gene\_expression\_table

2.5057052916  
47.8628329898  
4.4455142763  
34.8185800301  
5.4898044806  
2.0248812821  
2.3940098308  
0.2955314551  
0  
0.1719822547  
0  
0  
4.7823810841  
0  
37.8598903457  
23.2736545515  
0  
2.4915499671  
105.3101670934  
12.113627945  
17.3646952953  
0  
42.9523267332  
30.7095019416  
3.4869542175  
5.4313482292  
21.439205985  
11.2498983469  
1.9359717397  
12.19905205  
6.2233813685  
0  
14.8628110326  
0  
0  
1.1648811467  
17.615183446  
237.6589943383  
45.387050971  
0  
113.3498760876  
0  
10.8649320411  
0  
0  
0  
0  
0  
166.7415763412

gene\_expression\_table

51.2633482322  
3.1690200365  
349.8931701335  
0  
0  
0.4762535389  
0  
7.3970442466  
0  
0  
54.6169095673  
35.5626168998  
0  
8.0310645541  
7.505893906  
5.679383012  
0  
1.8593236053  
7.8595659949  
202.4648314009  
2.6596490989  
0.4019958256  
20.5684193295  
190.8539963407  
3.9345527609  
0.4662008852  
2.0145658273  
0  
0.2957810626  
44.2354696023  
3.8663228084  
11.8882406773  
2.6446600936  
432.9659567802  
0  
5.1651212981  
71.9736943255  
9.963460188  
0  
0  
46.9112116297  
0  
0  
0  
2.604847501  
0.4443493741  
0  
0  
0

|                | gene_expression_table |
|----------------|-----------------------|
|                | 0                     |
|                | 0                     |
|                | 0                     |
|                | 0                     |
|                | 0                     |
| 15.0833327308  | 0                     |
|                | 0                     |
| 9.8922705066   |                       |
| 0.8105209754   |                       |
| 9.0849603834   |                       |
| 3.2680886955   |                       |
| 1.5863669217   |                       |
| 6.9653340706   |                       |
|                | 0                     |
| 19.952108968   |                       |
| 4.0364761633   |                       |
| 2.3415812199   |                       |
|                | 0                     |
| 2.8591683089   |                       |
| 2.0389187907   |                       |
| 0.5665851529   |                       |
|                | 0                     |
| 45.8303159555  |                       |
|                | 0                     |
|                | 0                     |
| 3.7716483443   |                       |
| 0.1853682941   |                       |
| 55.8298485488  |                       |
| 7.3841630878   |                       |
| 1.2686132187   |                       |
| 3.5961108128   |                       |
| 0.0746072225   |                       |
| 93.7287257662  |                       |
| 1.6058373192   |                       |
| 0.1193682665   |                       |
| 1.1729806082   |                       |
| 1.786691196    |                       |
| 4.9839702419   |                       |
| 41.5703178316  |                       |
| 1.5883305762   |                       |
| 1.4423372334   |                       |
|                | 0                     |
| 32.0677974593  |                       |
|                | 0                     |
|                | 0                     |
| 1.8845114867   |                       |
| 579.1955538398 |                       |
| 6.0283709203   |                       |

gene\_expression\_table

0  
0  
2.3080990099  
3.3041647171  
6.1778368484  
0  
17.568287783  
2.1085980094  
12.4452392239  
12.8189961186  
0  
0  
11.2995998896  
0  
5.1204097658  
0.1993629503  
44.7206309088  
3.2368552664  
2.820225837  
12.3515925915  
0.9502247383  
8.7883479681  
0  
4.5902526858  
18.5348414974  
14.9570293693  
1.4578183492  
0  
0  
1.3352734094  
0  
1.2331430758  
4.6067794027  
0  
1.5832626251  
16.3955681711  
0  
0  
9.9239070986  
26.1456616382  
1.0254893559  
0  
0.4440130261  
1.574656012  
0  
35.2656678609  
3.6579466098  
0  
0.8346784864

gene\_expression\_table

0.4828372878  
0  
0.8507662553  
0  
0  
10.7620513486  
0.8546242661  
0.2832606561  
2.4994770631  
0  
0.5762986774  
0  
3.531166502  
1.2553849853  
0.3499774922  
3.1423293823  
0  
13.9104743078  
6.3098598955  
160.1880240173  
29.321505796  
14.1062671444  
2.9451997092  
4.3432401748  
0  
4.908361929  
0.2762547902  
54.0330079242  
50.8233018414  
228.1009808402  
0  
1.5548988966  
4.1104151972  
1.0402964622  
6.9141576184  
11.481979129  
0.5186013  
0  
0  
32.4715825397  
0  
0  
13.1253899436  
0.2079734356  
22.9154253609  
48.1155867252  
2.5096360899  
0  
5.0824088186



gene\_expression\_table

0  
1.4389736298  
0  
5.573803097  
0  
34.5057405831  
7.2284116914  
3.687395502  
43.0442567421  
0.991049377  
2.3501698545  
0  
1.0815827871  
7.952740368  
0  
213.9855521837  
0.9515285099  
0  
0  
0.6360260323  
3.4045257938  
0  
0  
0  
97.3586072619  
0.961834749  
0.9115785575  
0  
5.1601321339  
1.5118348146  
1.3814087139  
1.1136996559  
0.2814912824  
0  
0  
5.3386631058  
1.2496941563  
13.1065328617  
24.6062478619  
16.3015917208  
0  
3.8934108771  
6.4869848908  
9.7927480593  
4.6842532142  
1081.3868406033  
0  
0  
0

gene\_expression\_table

0.8896309929  
 0  
 0  
 6.2070560793  
 0  
 182.9301835703  
 2.4827852794  
 0  
 0  
 0  
 0.2489010125  
 5.0282358062  
 13.2143637926  
 0  
 0.9198841759  
 2.4791854557  
 25.0732559638  
 4.7237566918  
 9.8783767262  
 0  
 0.2865120199  
 4.1070632803  
 45.5533895153  
 1.0684376198  
 21.3528624702  
 0  
 0.379895189  
 16.7265034301  
 0  
 4.1716874585  
 2.3917051086  
 17.7353583544  
 0  
 13.9674325443  
 1.2607739974  
 0  
 0  
 1.0158381975  
 2.1502988889  
 1.4254236979  
 0.8311219241  
 3.2657638049  
 13.7311392329  
 33.4872849907  
 0  
 0.277087787  
 0  
 0  
 3482.4479931858

gene\_expression\_table

83.3901159985  
0  
1.4011360534  
9.738779217  
9.4085076997  
1054.7777918865  
4.0917440592  
0.9130041605  
1.9193857403  
6.2500381181  
4.1237454554  
0  
0.1141243041  
0  
1.6059105916  
1226.5397405693  
0.6766213574  
7.643846673  
3.4972188821  
3.2451372943  
0  
27.3254165568  
0  
14.797198455  
48.3491186059  
7.0811602083  
1.7363165528  
0  
3.8393298271  
3.1784644202  
31.1461385179  
1.7618710715  
11.5621342067  
4.2859222735  
9.0592372008  
23.4425864955  
10.103251697  
0.6782120578  
13.9531737054  
2.5857862409  
15.8751179636  
15.1873377601  
1.6796380894  
20.4049491884  
2.2446593657  
3.051292776  
32.7527194465  
1.7357171438  
24.2746005864

gene\_expression\_table

933.8316208767  
1.9102874797  
53.8151934636  
0.8238176238  
4.5460005845  
181.121170422  
0  
0.7094363339  
2.9385602843  
0  
0  
6.5171790078  
0  
6.9441895168  
0  
4.3999420584  
12.9673117362  
90.909946744  
1.2633309353  
60.4727431704  
0  
0  
33.9967510507  
47.0481283199  
338.37251997  
4.5489384161  
13.093114512  
1.2211487969  
2.7187368892  
0  
1.2443479184  
10.1778879483  
0  
41.0899663069  
1.6200759067  
0  
0.960801958  
0  
2.2579594508  
14.7550146838  
4.0164487775  
1.6830115018  
0  
5.5971909232  
2.370783053  
1.601394886  
0.8450111409  
1.8467963377  
15.7402220596

gene\_expression\_table

0  
4.09208765  
25.420828115  
0  
2.9341506065  
1.958113749  
12.6469282134  
0  
28.7022724619  
0  
121.4948390223  
14.5514621797  
5829.3314543594  
30.0748870115  
15.2326927181  
91.7151003323  
0  
52.2915771732  
0  
3.2518836298  
4.366100549  
0  
0  
1.527029843  
25.7779126502  
62.294841137  
11.7189652304  
0  
4.2019026415  
0  
22.2942165489  
187.8075588324  
0  
0  
1.4210926775  
28.4910650457  
2.7759857089  
310.6655488867  
0  
0  
1.781626289  
0  
0  
55.2224945479  
7.2373301512  
1.4277945852  
56.7598100856  
34.6907858691  
15.6464552882

gene\_expression\_table

3.9583346296  
14.3922161278  
7.6383859926  
49.1655186494  
26.0769102434  
0  
0  
141.275008631  
3.086209797  
23.2758072372  
47.3902197377  
0  
225.0221847455  
1.5698098361  
72.9516878689  
0  
90.3018255938  
0  
3.245436537  
0  
39.5895798934  
26.0011351398  
0  
112.457832684  
4.9823239702  
11.0349348596  
89.8679739254  
0  
0  
736.1334377796  
30.9577891371  
339.0668258689  
12.8496299836  
0  
0  
0  
1968.8581886286  
0  
54.0009766401  
80.42096007  
26.8562659483  
0  
0  
5.9713499364  
0  
1812.6250570914  
13.1778603289  
92.1009876953  
7.2410526747

gene\_expression\_table

1.1345949879  
1.7602555653  
2.9256626482  
0  
7.03975944  
33.5648440976  
25.3093172193  
65.1083575446  
5.1303503986  
0.0628300578  
0  
10.1527849087  
9.0205390496  
49.2716750837  
0  
0  
0  
7.5678700652  
2.5375923087  
5.347315063  
60.4452146083  
2.4985898428  
2.9314623126  
1.1792640819  
0  
28.4290278879  
3.2040143586  
0.7503933505  
1.9486121392  
2.8485784702  
32.1612578665  
1.2432992136  
0  
3.0196213734  
0.6979469168  
0  
0  
0.7191927688  
2.0005518167  
3.8881061119  
3.4917542066  
7.994482126  
12.8851476414  
0.3620660422  
0  
8.2931333611  
4.2611703523  
1.5757840396  
14.8209249725

gene\_expression\_table

0  
 2.2263660427  
 0.1536353154  
 4.5308378501  
 0  
 19.9126792323  
 0  
 6.2204200292  
 0  
 34.8072839328  
 4.3894472243  
 0.85461389  
 3.2077647446  
 4.2593654272  
 4.3427425402  
 0  
 10.9312982271  
 3.851233206  
 1.9364586809  
 0  
 0  
 0.1737152134  
 0.6171445497  
 9.4674207196  
 0  
 0  
 0.5021133981  
 2.4201719147  
 420.3739305423  
 0  
 393.873170533  
 4.3875092282  
 2.7413897526  
 0.3184964936  
 5.3092678421  
 0  
 0  
 2.7299789284  
 0  
 0  
 2.9882560574  
 2.8512515666  
 3.6888309952  
 0.8673880256  
 32.2876711164  
 5.2552016552  
 1.5985436947  
 22.1911327397  
 0.9645674338



gene\_expression\_table

0  
0.27924448  
17.8523523786  
71.1012859095  
0.8809355358  
0  
16.0228756501  
8.8579425332  
2.2492138822  
0  
0.8550879872  
26.7113234158  
6.3367277667  
0.2417342469  
21.8271932695  
0  
0  
0  
0.8921529508  
2.4521101181  
1.8370761182  
0  
1.2422397475  
5.1979229841  
5.6758338985  
13.8348134357  
0  
16.1100716472  
0  
9.7630755981  
0  
233.8200928595  
6.4084370949  
0  
12.0765652037  
10.9505714142  
132.8118359441  
0  
1.5048909954  
0  
1.6047634254  
0  
0  
13.4976554267  
83.7750547484  
0  
0  
0  
0.5374462283

|  | gene_expression_table |
|--|-----------------------|
|  | 0                     |
|  | 0                     |
|  | 0.7955381141          |
|  | 0.5902411691          |
|  | 1.1484039718          |
|  | 0                     |
|  | 5.1976159325          |
|  | 0.4137732224          |
|  | 11.5054385502         |
|  | 0                     |
|  | 0                     |
|  | 0                     |
|  | 0                     |
|  | 10.7908525985         |
|  | 4.802829766           |
|  | 5.8996449632          |
|  | 0.2210798386          |
|  | 0                     |
|  | 17.1265871169         |
|  | 173.9749704656        |
|  | 2.6962222029          |
|  | 18.0471052479         |
|  | 2.9513741321          |
|  | 37.4735269646         |
|  | 0                     |
|  | 0                     |
|  | 0                     |
|  | 4.1788814465          |
|  | 121.4213038334        |
|  | 0                     |
|  | 0                     |
|  | 0                     |
|  | 132.3125433278        |
|  | 0                     |
|  | 11.3089720301         |
|  | 0.396726962           |
|  | 0                     |
|  | 0                     |
|  | 10.4368473178         |
|  | 1.3761539208          |
|  | 0                     |
|  | 0                     |
|  | 146.3658676087        |
|  | 1.6555405487          |
|  | 2.4082340501          |
|  | 0.7399688103          |
|  | 1.2530756765          |
|  | 19.2690333897         |
|  | 0                     |

gene\_expression\_table

7.6740553884  
203.0465264002  
4.9810899799  
217.4193929372  
16.1047298281  
4.8721421042  
0  
6.4047927072  
5.5351319533  
0  
0  
0  
8.035419298  
43.2883210238  
134.5476547442  
2.1029347477  
45.942904822  
0  
0.6404413929  
0  
0.7827751551  
0.5392237862  
48.679303631  
0.797388566  
0  
1.3472338281  
29.7518925477  
87.2532094062  
0  
1.169176531  
28.3531637079  
381.6540028663  
9.4610582057  
0.9517122978  
1.2597715105  
2.6743347325  
5.881671248  
6.5619719447  
1.0483479246  
0.9500387768  
281.4040294874  
310.7334826945  
0.6559709343  
18.0557324741  
0  
9.4488344112  
1.3656770552  
0  
10.0514455305

gene\_expression\_table

15.5112986008  
638.3107937652  
2.1695929309  
28.3803136984  
5.6683152993  
38.0716621066  
0  
1.4418681543  
9.1329946544  
1.828747918  
1.3556338907  
3.7124888215  
0  
0.8528846151  
71.0678971863  
224.0630630889  
95.2389918271  
0.5002284601  
0  
1.5549675941  
1.9411937339  
422.8790152459  
1.4218246521  
357.7195937003  
3.3358737998  
45.8270006838  
0  
2.5307497322  
0  
17.0106991422  
0  
12.3554929658  
0.6478089532  
171.9023444637  
0  
0.185272665  
0  
4.4725280643  
0  
0.4088084436  
9.4175988561  
4.717311656  
0  
2.7783806217  
0  
2.7424578186  
0  
23.3568048613  
0.1727779939

gene\_expression\_table

|               |
|---------------|
| 0             |
| 0             |
| 0             |
| 1.5948855342  |
| 0             |
| 0             |
| 5.4890909815  |
| 0             |
| 0             |
| 0             |
| 5.4693296853  |
| 2.6632314702  |
| 12.9545585269 |
| 0             |
| 4.9773916738  |
| 0             |
| 1.4432635602  |
| 6.2959011106  |
| 36.2338399367 |
| 1.969325927   |
| 0.2879807593  |
| 6.7249711522  |
| 1.1500551098  |
| 9.5994949449  |
| 55.2996209369 |
| 0.6050809154  |
| 0             |
| 0             |
| 17.3359044547 |
| 6.0873686697  |
| 0             |
| 7.0979402088  |
| 0             |
| 6.8724637739  |
| 0             |
| 0             |
| 0             |
| 0             |
| 12.4506202086 |
| 5.7231586648  |
| 1.9039721381  |
| 0             |
| 0.5756577066  |
| 9.7639506534  |
| 5.8184999628  |
| 0             |
| 0             |
| 0             |
| 29.0982809268 |

gene\_expression\_table

5.8100153841  
1.3312128013  
7.743704406  
0  
4.9921471362  
53.1046948702  
510.7684212273  
14.1820563567  
0  
581.7775299929  
20.8893875904  
9.3937197131  
37.3944520912  
4.3793807287  
0  
0  
5.9070412921  
0  
0  
23.6735269014  
0  
4.9475380524  
0.3191144848  
0  
13.3411769372  
34.3188615925  
0  
7.2665749079  
2.8841380419  
0  
15.7971569882  
8.8219417283  
0.4947028073  
0.5238034056  
0  
37.1834738645  
7.6672289286  
8.9514561896  
28.8162636232  
329.8865016393  
1.7094975969  
1.0603180347  
426.0912412251  
23.4101013415  
0  
5.7691690871  
141.5354015758  
56.2958414682  
3.2672796626

gene\_expression\_table

0  
24.6292068056  
75.4073772144  
0.5188115293  
0  
0  
2.0793043131  
4329.8947280873  
21.5687940885  
0  
1.3366997194  
197.5774879782  
4.6130331641  
24.3564958652  
198.6045665751  
7.2973536233  
0  
1.7930303465  
4.1799449555  
0  
62.8965932286  
22.4125259129  
0  
5.4926603327  
5.9837865474  
1.3476465203  
10.1830413093  
6.9167733363  
5.7060856883  
8.6121867517  
0  
16.3667859585  
0  
0.6586943422  
4.6797598191  
0  
9.4651683905  
6.6679555772  
551.6922526055  
17.7105616459  
18.7374284961  
0  
0.3567207213  
1.6154562011  
0.5724927457  
16.4460604765  
0.6446822216  
8.1319631528  
0

gene\_expression\_table

76.9089713835  
1.8859757536  
6.1106911114  
0.0563896301  
0.05793667  
11.374899537  
1.7696669612  
0  
4.8538320956  
47.2021948368  
12.8656004259  
44.77510331  
0  
32.4356142654  
0  
4.4787974114  
2.1482717772  
0  
16.1816719656  
0.4779793959  
0.4855394536  
0  
1.3602510831  
0  
1.8243699279  
0  
0.6584560911  
0  
0  
0.3604821759  
3.1551400502  
4.4564344263  
0  
0  
0  
6.4228050387  
2.9644562714  
0  
0  
15.4538320043  
4.2652154949  
29.9735844102  
2.0751849366  
25.5654744735  
122.9166584116  
0.5678123141  
18.8516101556  
35.5162627341  
3.9884187503



gene\_expression\_table

0.8463285393  
10.3456591256  
8.1085442979  
0  
3.0157609444  
0.7473181802  
17.4607920581  
0  
0  
0.6091442508  
0.6592824915  
0  
0  
0  
0  
5.8593457034  
6.4149262572  
205.5975441842  
0  
51.962921879  
0  
0  
0.5628160125  
12.3813912903  
2.0177226696  
2.4728188779  
2.0318992527  
0  
3.9430792226  
10.1111677447  
31.5065377866  
0  
0  
0.0935607898  
1.1810778777  
49.6922625494  
0  
0.545479205  
14.3798807384  
2.9787679731  
24.5587443481  
4.5021681223  
0  
5.1086418413  
0  
0  
0.1432431829  
49.3101737656  
43.6989527256

gene\_expression\_table

4.8585224358  
11.5291828628  
131.7553075346  
0  
26.7694516259  
77.3377839777  
2.6508350173  
0  
0  
0  
70.4059188101  
64.2833543839  
4.8166328897  
116.5258965273  
0  
4.438786294  
2321.1516419989  
274.5330462183  
0  
5.9962750703  
0  
4.079554957  
82.6694406323  
0  
84.6545677094  
11.8681964341  
99.37450313  
23.6076935887  
10.2162950726  
0  
0  
9.561112086  
18.2490596937  
0  
192.0498554208  
23.9632288373  
22.5754563985  
0  
3.4083998184  
4092.7360393117  
47.42569677  
16.4105392564  
71.7779806768  
814.4122015441  
1.4487768709  
22.3697901643  
4.0717674752  
0  
0

gene\_expression\_table

0  
17.9490709011  
0  
12.1838690948  
0  
0  
861.0143710015  
26.2846426626  
22.3921823467  
0  
7.4763965003  
0  
43.0083134727  
0  
3.7597624746  
60.8561438476  
0  
1.0450896721  
40.8138421243  
0  
1.3787956016  
398.5511975849  
86.6152104357  
6.2259219043  
2.2492641925  
9.9159851217  
5.1871977193  
0  
4.6175723596  
4.013030398  
1.2285372984  
103.0273166881  
2.0745907984  
41.367670245  
23.9966839944  
0  
2.6617275783  
0  
0  
0  
4.5164432191  
0  
44.9490887933  
0  
0  
0  
31.0682388041  
97.9153720948  
0.9419279145

gene\_expression\_table

9.2284854868  
39.2857670157  
49.2929082986  
215.501881352  
0  
198.3153201618  
0  
0  
0  
0.4583744541  
0  
103.3747796718  
0  
0  
3.9694956832  
0  
0.98889132  
3251.6988089268  
0  
47.1205665851  
0  
11.8562022992  
2.9986484217  
0  
1.3909911599  
9.2849546747  
14.4092455777  
1.0418927331  
21.8779987103  
3.1666320891  
0.0682671642  
14.5254381037  
2.4586623256  
2537.3237960022  
11.9103676904  
1.7466857942  
18.3505526045  
736.7789214198  
32.7701457404  
99.4212896192  
5.0746573109  
1.032466661  
0  
0  
0.6362962536  
1.4021594324  
93.7173812097  
3.8683261474  
0

gene\_expression\_table

18.2646428315  
14.4576047819  
0  
8.416264892  
0  
0  
0  
57.0134842972  
100.9685750246  
1372.6317718539  
1.7391049549  
32.468745781  
1.3769615229  
8.6135919053  
0  
1.2507433632  
6.8342725009  
0  
0  
1.6060205127  
3.9302218342  
712.5551863379  
0  
3.0180625584  
1.7826640594  
4.9530502094  
0  
0  
0  
6.0015579819  
0.3173175181  
33.2706897845  
1.1557672884  
0.0388408986  
10.6361851089  
0  
0  
42.7056340299  
0  
1.6073774445  
0.4687310088  
25.1638935182  
0  
0  
2.7929988037  
1.8226614288  
0.5123074346  
0  
7.1360779654

gene\_expression\_table

5.1583081526  
77.3640934766  
0.9137843826  
6.2033165054  
1.6099324844  
0  
3.2033852873  
1.4028673679  
4.1905207948  
21.9225801456  
7.6018398872  
11.916704831  
0  
59.4799506703  
1.0316011527  
1.3148867942  
10.1597156745  
0  
0  
5.218944228  
0.8549742351  
4.102475408  
0  
3.9773009973  
2.1642896075  
15.1256112277  
3.1043347493  
0.5998250812  
4.4585797113  
0.2519679593  
79.5070855238  
1.6437327743  
0.7118901379  
11.566144952  
0.685797672  
22.276577789  
0  
0  
31.476924785  
0.9740980467  
0  
4.1626418126  
0.366394642  
0.8038172097  
15.5109730751  
11.5242752211  
141.2021940143  
0  
1.1982546822

gene\_expression\_table

16.4107711321  
47.8380496459  
0  
6.5065200095  
0  
0  
10.660347274  
35.4392737443  
11.5978536146  
7.3737977216  
0  
1.1604832671  
0  
8.6298547251  
11.2696562681  
77.653124066  
0  
3.8857256308  
122.6922090022  
0  
240.8021584367  
0  
0  
38.5488899509  
0  
4.8336431101  
5.9938922867  
0.7398327059  
5.5591749368  
480.2732670475  
0  
0  
194.5142562598  
0  
33.6002449006  
260.4777191677  
21.1052629679  
17.0767280569  
11.6078946323  
32.6826572492  
37.1113175549  
1557.4420501387  
0  
0.6129527948  
0  
32.2017445674  
19.9044059807  
0  
65.8441630128

gene\_expression\_table

0.9471752119  
0  
4.2152893052  
29.3973298122  
37.3944863128  
245.1328630923  
0  
0  
7.2872806664  
0  
0  
0  
0  
0  
8.0584170636  
0  
3.8536227445  
20.9204298743  
0  
118.4652105193  
110.6185537722  
0  
0  
0  
1.3859081128  
7.8991296828  
0  
72.9627304615  
8.6923034145  
20.7763497787  
31.5499086214  
14.7116357218  
11.5836982529  
19.0323997312  
0  
0  
0.9803113065  
242.4464054548  
511.7348409696  
38.3587216187  
11.6968509722  
3.763783181  
1.4360379674  
0  
1678.4410487429  
30.1653446188  
0  
4.9417490207  
4.6587690315  
890.3968373068



gene\_expression\_table

8.4843335202  
105.9358126482  
13.0316158568  
14.7878724896  
20.4622886774  
139.8099117708  
21.8095346399  
87.987841313  
0  
63.9911573185  
207.3351194415  
120.8993239415  
0  
2.0173757036  
33.3806592611  
3.3316108032  
0  
95.1771124884  
2.1942105066  
68.5619542699  
124.2181289124  
15.7979216841  
0  
51.3797613506  
23.5547883778  
0  
29.5398889049  
0  
16.9020136571  
11.197658515  
28.1561092202  
4.9069552492  
2.4409538045  
0  
3.835355149  
1544.4432651736  
28.0037687183  
1.4656003645  
0  
56.5984972911  
55.1615885633  
28.6605346296  
56.1773926978  
52.7795099103  
0  
165.2353827474  
757.3456093525  
3.9258378723  
7.0972245463

gene\_expression\_table

0  
 0  
 0  
 12.5517605297  
 1745.3959733146  
 94.2053975514  
 8.12304807  
 8.0827841672  
 43.6475865459  
 0  
 104.8054619517  
 23.8846629513  
 45.2321507842  
 59.990968991  
 15.4914989767  
 2.0793534518  
 0  
 0  
 39.2364955688  
 5.3467734941  
 134.5037064657  
 0  
 24.340703886  
 33.6715011004  
 0  
 11.1758975375  
 0  
 0  
 3957.775835425  
 34.3300200207  
 8.9101611456  
 35.4328797181  
 0  
 5.5465341906  
 0  
 21.9660705415  
 0  
 0  
 23.501723455  
 0  
 10.315860343  
 3.5496859834  
 123.0599179203  
 247.3171755824  
 2.1180198908  
 10.6684257427  
 1.5216886387  
 8.233422456  
 60.0535549113

gene\_expression\_table

0  
 377.1677214886  
 52.5771385199  
 0  
 0  
 1678.3374783515  
 45.4130793873  
 5.4196391323  
 0  
 80.6555212036  
 28.5674809458  
 4.1943911959  
 15.6353338628  
 151.637813551  
 0  
 1.9078022835  
 49.6317807512  
 101.9656297205  
 0  
 32.8542698018  
 0  
 0  
 82.424207319  
 0  
 15.3422565498  
 0  
 40.8217319063  
 18.0975120325  
 15.1768592174  
 0  
 0  
 130.1457769025  
 6.3927230088  
 15.4328186605  
 1.5324887453  
 2.8358018311  
 0  
 5.4988104875  
 15.8144850709  
 0  
 20.0986704602  
 19.0567725616  
 0  
 0  
 22.553756184  
 0  
 155.7766444019  
 0  
 5.4179705242

gene\_expression\_table

3.2946416858  
148.6502660691  
24.0075965383  
0  
37.2829836072  
0  
10.8946406207  
217.3122523703  
27.6126914524  
0  
202.7077697635  
0  
12.1887918702  
0  
71.38972926  
21.7791686418  
2.5818028554  
110.0339239287  
6258.958571332  
74.2252439899  
28.3309516647  
0  
35.1248867517  
10.1837779297  
81.6998692344  
59.5800658945  
3.0813012585  
4.7688271434  
16.4972047085  
0.2339946581  
6.1457136789  
10.5044430757  
1.5680263984  
19.206398077  
19.6182477844  
1.9153294618  
7.5907936621  
0  
0  
30.064182681  
0  
190.9170141697  
2.164617631  
0  
0  
17.5712114454  
4.3659200122  
0  
5.1289910413

|                | gene_expression_table |
|----------------|-----------------------|
|                | 0                     |
|                | 0                     |
| 4.0866959694   |                       |
|                | 0                     |
| 6.330873845    |                       |
| 1.1426621384   |                       |
| 121.2430884234 |                       |
| 26.9075967318  |                       |
|                | 0                     |
|                | 0                     |
| 29.9297949125  |                       |
|                | 0                     |
| 0.247400088    |                       |
|                | 0                     |
| 12.0243035617  |                       |
|                | 0                     |
| 13.1974263432  |                       |
| 1.0373342221   |                       |
| 5.0264405206   |                       |
| 11.3456173776  |                       |
| 1.6648598167   |                       |
| 8.3341549906   |                       |
| 0.3560242831   |                       |
|                | 0                     |
| 6.5847610987   |                       |
| 3.2103981714   |                       |
| 127.1347496395 |                       |
| 0.6895869063   |                       |
|                | 0                     |
| 21.5287108669  |                       |
|                | 0                     |
|                | 0                     |
| 1.2597736577   |                       |
| 0.5164060294   |                       |
| 8.1919008128   |                       |
| 10.842617537   |                       |
|                | 0                     |
| 3.2073888934   |                       |
|                | 0                     |
| 5.266593037    |                       |
|                | 0                     |
| 35.4491890467  |                       |
|                | 0                     |
|                | 0                     |
| 6.9077794946   |                       |
| 365.6517340203 |                       |
| 2.8950511249   |                       |
| 1.1567581053   |                       |
|                | 0                     |

gene\_expression\_table

2.1457832292  
1.1753545276  
24.969139102  
0  
1.3038374618  
0  
4.4432693505  
1.0605736485  
0  
0.4043094374  
1.1573616573  
0.3800729638  
0  
35.7542022328  
2.1559143868  
2.6341036218  
0.2924179872  
0.5456187354  
180.8223134875  
9.0915314438  
1.9983611472  
9.4188590166  
0  
1.0135096621  
5.806230566  
3.2029549393  
0  
11.0368023947  
1.693132079  
3.8654735338  
26.5056883584  
48.9104387148  
78.8816507486  
0  
10.616839899  
12.0070158967  
2.4143189257  
0  
0  
0  
0.2418984541  
0  
27.8719743502  
0  
0  
0  
0  
21.4829050991  
0

gene\_expression\_table

3.9241599456  
2.2730632069  
2.0482533041  
37.6485682209  
0  
7.2587247061  
0  
4.9685205704  
1.4756561299  
69.2322070417  
0  
116.3860334828  
1.3007774892  
0.4132436658  
32.0217782961  
88.9787409279  
0.8215101192  
0.5250732746  
4.9212495724  
9.1669192759  
0.7707414271  
0.2879709414  
1.893433211  
29.5757449792  
0  
0  
0  
0  
0  
0  
8.01565467  
13.4123547366  
19.8562124261  
0  
0  
0  
0  
0  
25.3628175776  
0  
19.4907093345  
0.0950108023  
1.3677043689  
10.4705880182  
0  
14.6973008875  
0  
6.6632216064  
0.2043650541  
0.5352791064  
0.5585199798

gene\_expression\_table

2.0642914176  
0  
4.6176189618  
34.3521867128  
1.5675026288  
2.4004485452  
4.0105370751  
0  
1.4031826121  
0.4431687992  
2.5999214394  
20.1414309976  
0  
0.2826305663  
9.6209998414  
0.7874777434  
13.0304096724  
21.5744604772  
0  
0  
0  
0  
17.4957746645  
35.4952325825  
862.7122009677  
31.3612265762  
5.0599228243  
0  
0  
23.1273074814  
0  
0  
0  
0  
0  
7.8055303893  
1.81170754  
0  
0  
0  
13.9635534716  
19.3841398156  
0.1007224299  
1.417501169  
39.3042133784  
1.1039360295  
46.4073739101  
7.7254319322  
0  
3.845762505



gene\_expression\_table

1.9897747922  
0  
0  
0  
0  
4.6637694991  
0  
0  
0  
0  
10.6568504025  
590.8156267381  
2.3374342135  
6.7756792386  
0  
19.5075909142  
0  
57.443614935  
0  
1.1757971645  
0  
0  
3.9707944407  
1335.1720988313  
94.6469288038  
32.2103140865  
64.6672237486  
9.8953079427  
48.6624770483  
176.6380754087  
23.8126769453  
6.2364023257  
10.4027596321  
6.7324752647  
2.0728627437  
87.5189895831  
0  
2.3300836292  
13.0331669934  
0  
0.6871321258  
22.0691093395  
5.0400614103  
5.5411449911  
0  
0.4280449087  
2757.8548005381  
0.7836437014  
0

gene\_expression\_table

5.9387709981  
0  
0  
26.40691516  
0  
0  
29.0309072245  
0  
3.8234803395  
1.0234714588  
2.1906595621  
2.0141661531  
5.1379761351  
18.2106604994  
0  
0  
129.6447448582  
21.141747287  
4.1123820672  
16.4367245885  
0  
0  
27.3625939943  
0.9911982349  
0  
25.6657939032  
0  
30.5336638449  
7.7411495711  
2.5782094004  
6.6321451972  
3.0469927828  
5.4636834546  
3.2994151658  
0  
0  
0.4481901063  
0  
0.795855924  
8.8474450792  
0.6808096666  
29.0981379707  
0  
10.770113861  
1.2746780821  
1.9528172185  
22.7672523667  
109.8989430919  
8.5653775919

gene\_expression\_table

0.3151822088  
0  
0  
1.9302810734  
2.6416329743  
0  
1.4156481518  
3.9868374488  
2.6417155904  
0.4869623811  
14.9782472711  
0  
9.3662529776  
1.0775395798  
0  
0  
80.5841706358  
2.5922616576  
0  
0  
16.2647614237  
8.5653775919  
4.2003982009  
0  
166.8829187562  
0.2516616722  
1.6347527339  
17.8084875369  
0.9062502968  
2.0793125027  
16.5515126623  
11.8218538104  
0  
17.3884492805  
0  
0  
7.3269775216  
0  
60.5858947743  
15.2040209625  
5.1364764339  
0  
8.1253922487  
1065.5966941018  
7.4418155729  
1976.458183107  
2.123386819  
36.8439010994  
31.0894455092

gene\_expression\_table

0  
5.5838706212  
3.0477257123  
0  
31.2171763401  
142.924412285  
7.31099637  
7.8613215379  
12.5205039222  
0  
0  
72.4722017554  
9.7009747864  
1017.8349661382  
29.0508762073  
0  
3.8061140397  
3.9414453805  
219.4552550285  
21.4881099469  
684.0965078018  
94.3388687254  
3.3239020187  
0  
2.2536426026  
0  
0  
2.3076508229  
0.7770460778  
0  
0  
0  
4.1238662517  
4.6222216686  
8.7582770997  
2.2608811284  
0  
0  
0  
0  
0  
0  
0  
0  
0  
59.9002429958  
0.1553334239  
0  
0  
0

gene\_expression\_table

0  
5.8957277749  
70.085899999  
71.0928375628  
0  
484.9367047379  
0  
12.0390623552  
9.6218535176  
2.2309290394  
2.7793679638  
0  
0  
0  
0  
0  
22.417284411  
0  
0  
0  
6.2736428744  
0.3005318657  
0  
50.9020569579  
0  
0  
0.1431849071  
0  
2418.3792641579  
0  
0  
2.3579224542  
3.1730198815  
0.6216574499  
151.4065317861  
2.1476818627  
8.4624035886  
0.2259429706  
0  
11.0650433153  
0  
5.2511766835  
0  
1.5379800964  
0.4438142598  
0  
39.3588931123  
0  
0

|                | gene_expression_table |
|----------------|-----------------------|
|                | 0                     |
| 523.7583588989 | 0                     |
|                | 0                     |
|                | 0                     |
|                | 0                     |
| 43.3170911079  |                       |
| 0.8365851325   |                       |
|                | 0                     |
| 55.0509656777  |                       |
| 7.3422038454   |                       |
| 1.1916517501   |                       |
| 0.4471168289   |                       |
|                | 0                     |
|                | 0                     |
| 9.4141001791   |                       |
|                | 0                     |
| 4.2304389116   |                       |
|                | 0                     |
| 278.3883976142 |                       |
|                | 0                     |
| 21.6574349163  |                       |
|                | 0                     |
| 0.7332243732   |                       |
| 6.4447169869   |                       |
|                | 0                     |
| 5.3006244229   |                       |
| 1.2517164231   |                       |
|                | 0                     |
| 7.1563921361   |                       |
| 13.5655772474  |                       |
|                | 0                     |
| 13.9524822697  |                       |
|                | 0                     |
| 0.3534627721   |                       |
| 8.4920102606   |                       |
| 6.2232797901   |                       |
| 29.3874430854  |                       |
| 38.8562596574  |                       |
|                | 0                     |
| 0.8603379866   |                       |
| 1.1358155075   |                       |
|                | 0                     |
| 0.4105514225   |                       |
|                | 0                     |
| 16.2324929067  |                       |
| 24.3944803502  |                       |
| 0.6848444868   |                       |
| 0.565795758    |                       |
| 10.4114788192  |                       |

gene\_expression\_table

4.7266467019  
0  
5.6355499464  
0  
9.2533552058  
0  
0  
0  
0  
2.0517160152  
0.6355161127  
0.9993629628  
6.8853256509  
14.9607381616  
0  
11.6888530472  
10.7894348636  
0.411809206  
1.1717104851  
0.100252479  
0  
0  
0  
0.2734360317  
3.3504818435  
2.1654547791  
20.0470695765  
8.6194985612  
0  
0  
2.2980826983  
2.2980076736  
8.344693715  
0  
0  
0.4704854761  
0.5919957925  
14.4816087746  
8.5572456847  
57.5593374177  
0  
0  
0.2240857789  
8.7728643049  
2.222055466  
1.4402396581  
4.829686991  
24.1425098186  
6.097275404

gene\_expression\_table

92.4103359626  
2.7749413811  
0  
17.9420557327  
2.0660485192  
0  
0  
9.6949621996  
14.7977169091  
16.9767058763  
29.8277172924  
0  
0  
0  
45.3877540494  
10.7977102394  
0  
0  
77.958575876  
5.0418016224  
17.5770616906  
0  
7029.6168407269  
170.9256078486  
208.4753644392  
0  
36.6730608786  
0  
0.8769351994  
27.9245889914  
0  
6.4128158384  
0  
81.1328654156  
0  
19.864617765  
0  
0  
13.6058515276  
5.4175535327  
4.5377948073  
83.0367736822  
6.4446467426  
4.2446658332  
6.6659980539  
0.7221500171  
6.1229165333  
0  
4.0421656742



gene\_expression\_table

0  
 1.4497615606  
 6.7829701807  
 0  
 7.9799523537  
 2.2561708084  
 224.5373983969  
 0  
 7.2578931037  
 1.9298753372  
 11.4138795297  
 0  
 0  
 0  
 0  
 1.5500027096  
 0  
 0  
 70.1843988139  
 0  
 1.8050639309  
 20.0298265141  
 0  
 0  
 0  
 0  
 0  
 0  
 0  
 0  
 0  
 37.2000219169  
 0  
 4.6600644191  
 14.5374376395  
 0  
 0  
 6.9309051842  
 0  
 3.2451372943  
 167.2772648536  
 1.3865086876  
 501.530695484  
 9.3903779416  
 2.4832524183  
 8.7376207858  
 352.3036689208  
 71.4535994971  
 0  
 19.1590291373

gene\_expression\_table

0  
 0.3077520201  
 258.5579578423  
 0  
 0  
 13.7534726554  
 0  
 0  
 0  
 12.5948813789  
 15.2096527767  
 0.8983163563  
 10.2430548676  
 20.751005555  
 1149.7004585441  
 23.6447003864  
 15.7813929565  
 12.6601210522  
 0  
 16.1270724726  
 9.969728776  
 45.7331363283  
 1.1791850613  
 0  
 0  
 114.9541748237  
 0  
 598.9245638889  
 2.5289312729  
 19.2014731319  
 66.9533351779  
 4.0561411231  
 0  
 5.3122729746  
 1.533690802  
 0  
 151.9803271309  
 10.819285744  
 0  
 0  
 121.2580069774  
 473.3290879639  
 20358.2487221345  
 41.1350356769  
 19.2264782232  
 0  
 31.6048280578  
 720.430247957  
 11.4286415329

gene\_expression\_table

3.6136492146  
72.0105095145  
13.6779738743  
17.1307551838  
28.2120426613  
83.273941415  
3.9476346279  
5.6294204295  
3.772861288  
6.3905949386  
0  
2.0144889546  
5.9767098245  
517.1821430102  
138.5528338699  
292.2550870386  
1.6934579476  
0  
0  
0  
9.1642068807  
0  
0  
4.2582059254  
21.3854695581  
24.1513725376  
0  
0  
118.1265070769  
0  
0  
0.7943112353  
0  
0  
25.5037221197  
19.6189312756  
8.9555054771  
3.7286933494  
30.5477981644  
0  
17.2103357091  
0  
4.9809137454  
10.7400477648  
20.4007602218  
5.7268215857  
8.4725894379  
417.4809670432  
39.7460604463

gene\_expression\_table

7.2417976389  
38.2348033951  
10.6201377565  
22.7494418669  
1.6497978027  
16.9219903405  
4.4646881295  
0.7989122845  
2.82725923  
2.6634733257  
0.1208815147  
1.182791253  
0  
1.9561004043  
14.3029879148  
0.7030590596  
3.2342897272  
6.8852565749  
0  
0  
2.6801388376  
5.2344504964  
0  
0  
73.2754956933  
18.0558686945  
9.6830333581  
0.8563501916  
0.0975157384  
16.2753868367  
4.2215588971  
4.6534716159  
29.7023275274  
3.788293044  
6.2485817177  
16.9406475948  
0.314057221  
38.4071905105  
95.7690789801  
11.2946107394  
0.3215782953  
169.9827027223  
0  
3.3047852321  
0  
2.1996763929  
0  
1.1674216658  
0

gene\_expression\_table

3.883886983  
2.1009513207  
3.9186256778  
12.7604472821  
3.6349015839  
0  
0  
66.9109059414  
11.6188434105  
32.681198202  
0  
107.4023736992  
0  
2.3687553728  
0  
0  
0  
0  
1.5217826322  
0  
0  
0  
0  
97.8122152899  
0  
0.4714507803  
0  
0  
0  
2.3991231442  
1.5104560545  
1.8333346572  
111.8415460582  
0.6606623779  
19.5709748982  
3.4816507011  
0  
68.8872778963  
0  
0  
0.8680726254  
79.2119869674  
28.7533864617  
19.4003453547  
0  
0.3236349273  
1.1069045328  
0.8012096415  
28.2552198374

gene\_expression\_table

0.6590849537  
0  
0.4138413372  
85.053088698  
13.0836938755  
0  
135.5456785167  
0  
0  
0  
11.5210416983  
6.5302291642  
0.8631336209  
8.3311061282  
121.3381326464  
479.0169011308  
8.8966472511  
0  
0.0841436007  
1.2072353757  
8.6762323494  
0  
2.3593028721  
0  
0.6442691756  
1.321969952  
59.851602825  
5.5979031246  
3.1778904312  
4.1226103156  
6.8418305447  
2.8564582754  
13.7890964337  
0.4550114612  
148.4545018908  
0  
0  
0.5105479942  
92.00297097  
15.8700048748  
30.519542599  
0.468051553  
2.3728658016  
14.9533224155  
29.562774029  
1.3842682859  
0.2253325172  
16.7436424953  
0

gene\_expression\_table

3.4380882622  
0.55923883  
4.304373031  
143.5107506249  
0  
0.9229029972  
0  
0.9178785866  
1.9021313584  
0  
1.7166851947  
0.1027670239  
17.9625938301  
1.2448760797  
0  
0  
13.4713069453  
146.6093796177  
43.9939206565  
4.071531955  
1.4093651584  
0  
12.9298811628  
23.6385245318  
0.9049861218  
0  
0  
12.1824633178  
2.1259841752  
21.2884539696  
13.2058796267  
0.6270513206  
11.9119801412  
2.8229128566  
2.642356867  
8.741092918  
5.3086672235  
0.7451781481  
12.0898747135  
12.5570530238  
136.0461404143  
10.7630386927  
38.4576250503  
46.4053410579  
3.2433928112  
0  
0  
1.8767403053  
51.8622352726

gene\_expression\_table

0  
0.7783262904  
20.7738971345  
9.8356931688  
2.625380616  
2.4063405254  
1.4859673433  
0  
2.9330258113  
0.297547737  
409.6185305533  
3.8561560781  
7.5256884943  
0.9516271339  
780.1116581663  
2.7019143655  
0  
2.0216052457  
0  
0  
66.1104887769  
1.243336861  
36.002623948  
0  
1.8245039087  
7.7400855541  
3.1979104575  
2.1979102308  
1.6464570597  
0.9940756102  
0  
17.0636191791  
0.3051398594  
0  
1.7373307814  
33.7029110828  
2.2451605336  
0  
47.9895743467  
0  
0.8624145191  
928.3827872694  
26.8123379309  
3.9239120259  
0  
0  
17.903201488  
0.183758786  
0.3361843206



gene\_expression\_table

38.8431562864  
9.3852306996  
4095.1787845137  
3.1803025794  
1.6724546914  
0  
0  
610.2436035276  
387.5484038255  
6.0975635006  
343.7704977114  
167.1335789457  
9.5147706205  
21.1401734892  
116.9273638711  
0  
52.5264909812  
7.9952604555  
27.1281971675  
2.9775289461  
0  
9.9979082523  
0  
0  
4.3547558185  
10.45106913  
29.8620760249  
10.1510488536  
4.4976560733  
34.079597694  
0  
5.0772712424  
24.2953562458  
27.9210865094  
0.7170242747  
42.280067904  
0  
6.1347632082  
7.1805874578  
0  
150.1027146978  
1.7710026934  
9.0566469972  
1.1613640167  
4.7762695878  
9.4394894797  
0.3544466698  
0  
65.5905854997

gene\_expression\_table

0  
1.2364789392  
3.423873454  
0  
13.1841680184  
456.2789248185  
0.2771052399  
3.838450505  
9.9892939089  
37.8069678903  
9.7127032568  
2.7518774405  
39.9845339868  
8.0436833562  
0  
90.4692845462  
39.1741064838  
30.3549084034  
7.3155552952  
8.5428544501  
0.8103596819  
2.8866612783  
25.8389397817  
0  
1.8824490641  
3.2608469669  
1015.3439445007  
4.9919819193  
24.1899285372  
0.902821361  
0.1479943844  
0  
0  
0  
6.8555276808  
0  
0  
0  
2.8340321309  
1632.3261595305  
7.1460593946  
0  
9.9040097155  
36.0064825998  
3.2351692364  
50.0060064295  
8.7419613823  
0  
0

gene\_expression\_table

2.971652389  
0  
0  
3.8637761033  
14.1703644125  
50.1481284828  
11.6598100133  
12.8570978456  
1.0092084798  
2.6844999447  
6.7633530353  
4.5223432734  
0  
1.2204430448  
0  
0  
22.9842902985  
5.8498232387  
2.6294461356  
1.0472093823  
0  
6.3840262153  
0  
2.0159725357  
0.2815791133  
6.9261313638  
1.5632555976  
1.1222402157  
0.3974695818  
275.0903111512  
9.1781475639  
555.3229816387  
0  
5.2711610003  
1.5778610091  
0  
0  
6.0388581917  
0  
1.1049584492  
10.9471653267  
0.3224484105  
4.205188801  
0  
0  
3.4661351709  
304.155500835  
7.6574053263  
6.5117224884

gene\_expression\_table

0  
16.3343764814  
1.9456651294  
1.6301052415  
0  
0  
4.3267116309  
547.5110987166  
0  
104.0157178337  
20.7545687804  
3.2764044429  
18.8491519522  
0  
0  
0.7232942493  
2.0142199461  
0.180688954  
167.5622917657  
0  
0.0513322509  
4.8935373937  
3.6714292356  
0.3355912899  
127.8364448379  
3.2457358348  
13.1245234437  
0  
36.2759084174  
1.3301059895  
0.2613037781  
0  
0.8360584971  
0  
4.7896269189  
2.3880537743  
0  
0  
2.2575746017  
0  
0  
0  
0.4970081696  
11.296456291  
19.8762368436  
16.9174853515  
0.4637590297  
19.1594154236  
60.9307708724

gene\_expression\_table

1.3965769821  
31.9061447686  
9.9664115324  
5.965782952  
0.5407814223  
0.5174271573  
0.9517858328  
8.3965875859  
6.1076158829  
3.8049971532  
9.4079488172  
114.4447821209  
23.5261607789  
1.1064637476  
2.1386769073  
10.4498623887  
0.7141018908  
0.3469859957  
2.0384070732  
0  
1.228523004  
0  
0  
11.6547905574  
0  
1.2184740839  
8.4081552519  
11.9768381288  
4.9276104853  
4981.5486302614  
1.7294482458  
3.9212452259  
6.8015459583  
0  
175.9694425748  
0  
2.1127222982  
67.923710088  
3.6924301568  
87.4232329336  
72.51496142  
77.7819930803  
9.2855859119  
27.687369537  
0  
1.9507918718  
4.6297206689  
2.0745886147  
5.5522685848

gene\_expression\_table

0  
11.5971153514  
3.9351288439  
18.9424846745  
45.690168149  
6.7672109967  
17.7454469875  
31.1592001295  
0  
1.8535741583  
19.1073374242  
1.1369039805  
0  
6.3309461501  
3.662024216  
0.7131595414  
0  
0  
2.0393519831  
39.5007143942  
1.3501279931  
0  
2.5860712389  
3.6001571732  
15.7133524418  
18.1998167439  
5.3498212465  
13.9122788245  
0  
0  
1.4123163996  
1.9836851212  
85.0736173979  
8.656569068  
94.8123556633  
1.3514009869  
0  
0  
0.5333054332  
129.2977441898  
28.0111979561  
0.8819473145  
0  
0  
33.221763758  
26.4472124178  
7.2282069277  
0  
0.5301350604

gene\_expression\_table

0  
7.8753941654  
30.5744715214  
20.4971728723  
0  
20.5419084777  
0  
0  
0  
5.365766637  
1.3742146576  
0.2407838634  
1.0584207661  
8.3619470578  
0.2794340403  
0  
0  
14.5873619324  
16.4379458975  
0  
9.4258083059  
0  
0.1201527261  
4.5394775043  
18.081241472  
15.9699628792  
18.5311448796  
0.4649475742  
1.0365041578  
45.6229916238  
1.9775326043  
0  
0  
2.995731413  
35.4879117975  
0  
5.8345440345  
0.7767631102  
58.0614250808  
0  
12.8837325982  
6.201421918  
74.2742741164  
0.0494120092  
67.7429226448  
0.222472418  
1.3685020812  
13.6514027689  
4.3031099798

gene\_expression\_table

7.3203229135  
0  
29.148835267  
0  
18.2866876498  
2.5781824199  
0  
0  
6.374618232  
0  
1.9638648732  
0  
0  
0  
0  
24.2512216097  
16.086094112  
125.8978169331  
0.8799884117  
0  
0  
0  
2.9707055156  
51.446722171  
0  
0  
1.934471878  
0.8080619108  
0  
8.1827482056  
0  
8.372927724  
26.1414730318  
43.8602838541  
2.0869981336  
9.6227304238  
9.4712423372  
0  
0  
13.0983016469  
133.2139913898  
56.1624519019  
379.3634326429  
0  
0  
0  
0  
0  
223.2249673902



gene\_expression\_table

1240.0358982969  
 43.8113732679  
 0  
 1.2147563775  
 0  
 0  
 115.481854567  
 0.5556541921  
 54.732488574  
 4.7282593931  
 7.8411800212  
 23.994502676  
 0  
 21.6977127072  
 0  
 60.1283653619  
 0.7554225483  
 278.6791420496  
 0  
 21.1848735103  
 0  
 5.6940845373  
 34.9042676283  
 29.0202683213  
 3.068718853  
 0  
 50.8763618257  
 0  
 0  
 12.3488374086  
 91.8195414063  
 518.9222211  
 1.2060150267  
 0  
 11.2931610862  
 10.1602588121  
 0  
 0  
 492.8962100894  
 120.0069323022  
 0  
 0  
 3.7070925348  
 24.9048891462  
 19.2665315589  
 0  
 1.9427653193  
 28.1504791243  
 86.7697278262

gene\_expression\_table

0  
325.6489500552  
40.5357172764  
169.2073871403  
5.1055540038  
0  
0  
24.2725079484  
32.0246920156  
0  
82.8120859416  
49.4776989576  
0  
120.1895770512  
67.0285342554  
23.2004855143  
2.4966401735  
17.3375056774  
68.5916476238  
49.3407500084  
11.369774358  
193.7939606771  
6.3137839847  
0  
5.8151351862  
11.7552226203  
145.7123486712  
0  
526.0665685501  
0  
0  
0  
4.620148538  
4.338383547  
0  
2.3864704944  
0.493309083  
7.825053977  
0  
21.5373682731  
0.469410875  
0.8422206235  
0  
14.4021019029  
2.9564565102  
23.0361464922  
15.8465270262  
7.7309785154  
9.7507997107

gene\_expression\_table

4.5735291895  
 11.390933417  
 1.8496498069  
 45.2123946935  
 206.0732184834  
 0.5195755208  
 3.795196744  
 3.1823442764  
 5.4063189747  
 0  
 4.6677899901  
 96.3530367788  
 0  
 2.4574749116  
 10.7159682733  
 0  
 0  
 0.9343262769  
 0.3135647665  
 12.2891947363  
 11.1547630422  
 1.6255913532  
 4.9064177738  
 0  
 2842.3368337944  
 48.4660117397  
 1585.3665101438  
 129.8234471604  
 17.497830628  
 9.4134007556  
 0  
 21.3680594865  
 0.4957689922  
 549.2429034152  
 8.7311179671  
 0.3080429265  
 1.5126416088  
 9.4079488172  
 2.5878396292  
 0.9870055253  
 0.3519971249  
 1.9970004837  
 7.2691757297  
 0  
 13.4284745352  
 0  
 52.3257976701  
 0.145658353  
 4.5905452385

gene\_expression\_table

57.9134083545  
0.5462538651  
7.3789509802  
0.5769978282  
0  
21.3619908574  
50.7110175186  
3.1406702978  
21.361456983  
1.5093678016  
24.1890972682  
89.7958937686  
9.684957767  
4.7816230589  
0  
5.7867702278  
1.596730629  
9.4424440686  
32.1900963538  
21.7066340972  
0  
0.4275976688  
2.3221916419  
0  
12.4760011825  
0  
0  
5.2985572271  
12.9675599322  
4.7569566397  
0  
15.8527724904  
34.929927814  
4.203854447  
6.6478040374  
20.2471890475  
2.0285882375  
3.4226525844  
0  
0  
1.8627678906  
8.3937840508  
0  
2.7229753022  
13.6701377011  
3.9592548963  
0  
0.7483645661  
14.468709774

gene\_expression\_table

|                |
|----------------|
| 0              |
| 0              |
| 2.6633221609   |
| 1.0329636219   |
| 0              |
| 0              |
| 0              |
| 2.2844544862   |
| 8.6252980233   |
| 0              |
| 0              |
| 13.3402192129  |
| 7.2524923293   |
| 0              |
| 0              |
| 0              |
| 0.2634169338   |
| 30.1557719656  |
| 0.7119957488   |
| 0              |
| 0              |
| 32.8435391239  |
| 0.3165685036   |
| 0.286506189    |
| 0              |
| 11.1276402745  |
| 49.7030553982  |
| 2.1967784365   |
| 1.2433807859   |
| 6.4008614213   |
| 3.3141470095   |
| 19.2752569755  |
| 27.7944112813  |
| 0              |
| 5.9718903178   |
| 0.1222987578   |
| 0              |
| 34.1102953667  |
| 1.3738172229   |
| 0.6698221781   |
| 0              |
| 228.414151907  |
| 2.7491045839   |
| 1.0196366036   |
| 329.1271152996 |
| 29.218274003   |
| 0              |
| 6.0942200557   |
| 0              |

gene\_expression\_table

0  
 28.2044597225  
 7.3379983224  
 0  
 1.3538022877  
 0.4181812368  
 0  
 3.9360456874  
 1.218499395  
 16.2261765799  
 4.4368532241  
 0  
 0.5758021147  
 0  
 285.2118032836  
 0  
 0  
 0  
 0  
 1.4047337765  
 0  
 0.7705726787  
 9.572219464  
 0  
 0  
 0  
 2.6233703433  
 1.8137927348  
 3.957177482  
 0  
 135.2059027268  
 57.1040614254  
 0.3083262799  
 3.3928255466  
 34.5009768706  
 6.1838486103  
 1.4893629777  
 12.8819642312  
 0  
 0  
 36.8645751424  
 4.3282465136  
 0  
 7.045133087  
 45.1828929029  
 40.7233283485  
 11.4724351409  
 81.7091390492  
 29.3406625913

gene\_expression\_table

34.1501421746  
0.7185736083  
0  
0  
4.4985715094  
0.2697089999  
6.6629062474  
0  
0  
67.7317999041  
47.2101093564  
10.7138923973  
7.3888913085  
0  
1.3582387997  
3.0652444283  
3.2858870811  
12.4616903002  
0  
0  
1.1365735492  
78.9128621641  
12.7091518629  
1.9768106339  
650.1200701547  
15.3295950204  
0  
0.262856242  
0  
0.1462864765  
0.3679305908  
5.3815193464  
6.7772014234  
0  
0.5802799005  
0  
0  
0  
6.1135688398  
0  
0.65365011  
2.0525092632  
0.4405063585  
2.7425799363  
96.3290623979  
1.2165198757  
130.8948670909  
8.4195228954  
1.6452475937

gene\_expression\_table

2.8438216326  
5.4906609244  
1.434818307  
7.957599546  
0  
0  
1.9006675681  
5.1251498997  
408.4541956502  
9.1640984182  
0  
0.8034410411  
0  
2.3087356958  
1.9661538239  
38.975787957  
32.9542476828  
41.6707749529  
26.9998791033  
4.4204351789  
0.7463415785  
241.8909726817  
4.9519467956  
3.2140698784  
32.5332218383  
11.5006047837  
0  
344.300248616  
0  
0  
5.3932895223  
1.5305560568  
0  
0  
112.0979381774  
0.8575395089  
5.9054719619  
0  
26.6378599301  
7.9319098757  
0  
4.7607637923  
8.1811103034  
3.0234748156  
0  
1.6347021145  
0  
2.240651579  
0



gene\_expression\_table

14.8576439267  
22.79920744  
7.4432801186  
1.600880838  
0  
6.196326853  
0  
2.3124268413  
25.7014941416  
212.917097192  
4.1323881371  
0.4358476864  
2.7285166699  
9.6194428494  
0.7565050482  
22.9172303599  
3.0622662619  
2.3634644217  
0  
45.4410001247  
0  
127.7036884078  
7.7242255263  
0  
62.3553418568  
95.4101930997  
18.0605195812  
11.1863376828  
11.8130912481  
27.4885306194  
0.9164047803  
663.7729164682  
0.849269331  
8.2108300509  
0  
651.4016981182  
28.0014346289  
8.5508106232  
0  
0  
0  
128.3601714187  
8.7105894135  
0  
12.589174863  
1.9867047299  
110.3295815837  
3.6158024724  
0

gene\_expression\_table

24.2100151015  
0  
56.4627858693  
29.9724390251  
9.8118585239  
2.4557030788  
0  
22.4821003893  
3.4739730243  
3.7245501376  
3.4040702823  
7.3843180154  
8.2931605019  
0  
0  
0  
2.1670137154  
0  
8.8795883856  
0.3023156674  
0  
126.6012105223  
2.8725074607  
49.9753447287  
0  
5.9561916611  
0  
0  
8.0366425313  
0.4899032102  
0  
0  
5.4986841489  
0.2043686142  
0  
0  
0  
38.1037205253  
86.5477436119  
4.4447122567  
0  
0.0633768627  
1.1807561702  
59.2145194188  
0  
4.0528132109  
197.4577208804  
0.65134565  
1679.4359752685

gene\_expression\_table

0  
0  
6.1514902865  
3.6174252972  
1.8614542783  
70.7013590301  
0.321058086  
0.6103432185  
1.5063616848  
0.3346722376  
20.9594667253  
0  
0  
0  
0  
4.1611653494  
2504.6353917729  
6.7054320601  
2.3413475602  
6.4459957006  
0  
18.7891110554  
170.5317833871  
3.6985221233  
0  
45.636847154  
2.3106050765  
18.5094680555  
16.0123460078  
6.2630370185  
136.516044889  
7.5063207956  
24.3584409097  
25.3293533827  
203.7766382765  
1.7583940709  
0  
32.8750941655  
0  
7.7420009954  
33.9066825869  
44.1502862536  
0  
4.8933106048  
3.3106378694  
11.0984092001  
46.7178741235  
32.0240297601  
27.5212849148

gene\_expression\_table

28.0671416767  
18.1380831402  
6.4930884299  
55.4335959446  
0.4730370152  
0.6588135323  
85.1823782047  
3.7698303904  
0  
1.4440412699  
0  
0  
3.5456807767  
15.0518538036  
0.439889719  
0.6663473915  
8.9371990008  
0.8416264892  
22.348301413  
28.2464980138  
1.4528136272  
15.4556699957  
0.3867129965  
1.9410034115  
4.0584017672  
26.4580879324  
0  
5.1360266943  
0  
49.4487341415  
4.3621321866  
8.2097356019  
14.546074559  
0  
1.7023040641  
0.6195127092  
7.6996579578  
0  
44.3043870048  
7.4803690808  
557.741186379  
0  
292.0758217858  
19.1476582312  
11.8713417663  
0  
3.3217060568  
4.5550522154  
75.2149715918

gene\_expression\_table

5.2278804143  
0  
3734.1760317453  
35.8816265117  
0  
0  
0  
0  
0  
3.6855475706  
0  
0  
0  
48.2893348801  
40.3754870607  
0.9542454444  
0  
0  
596.4305358677  
0  
10.4781109777  
1077.2303862326  
1.8227636912  
40.5420543175  
2.8205618376  
0  
4.2062967552  
2.8255307083  
0  
0  
3.5987767095  
6.4220516305  
0.7627240058  
10.5863913101  
8.3206255182  
6.5087787927  
0  
0  
5.0247182521  
0  
45.8689697581  
3.8017677527  
12.7965252603  
11.4614986612  
13.623704079  
1.9985029897  
0.3401120643  
1.2696200182  
40.8478506229

gene\_expression\_table

0.2738985076  
0.2526553042  
0  
212.6932550823  
21.94135893  
175.0131105181  
0  
15.1908148191  
3.4545677783  
0  
0  
0  
1.0548203718  
1.5679914695  
0  
0.9667134487  
3.0483416455  
1.791955436  
0  
25.5106543627  
0  
0  
0  
0.2224738243  
4.320514256  
3.8800049086  
29.9294616636  
0.3204451938  
93.4493380009  
0.1485628631  
0.2840745841  
45.1682963619  
47.4843067404  
56.7272962175  
4.1369887775  
0  
0.6765790842  
0  
0.3875220106  
9.4737917968  
22.5765703556  
385.1954033212  
5.3974751853  
6.6809294847  
0  
5.0764093512  
11.1078227948  
0.9370917703  
0

gene\_expression\_table

113.2151244866  
30.1688635393  
219.0568663394  
0  
0.9226574246  
349.4582787511  
2.08563772  
1.0914719438  
22.4058674084  
0  
24.3902540022  
14.8218415688  
2.2561467035  
64.0481946719  
32.5324783012  
0  
2.5325708085  
21.3848198598  
28.381648722  
7.3850504889  
0  
0  
11.2248777638  
17.6464636724  
8.654630443  
3.5485407156  
1.0571411651  
48.4200609009  
0  
16.4536094183  
6.7928542664  
1.0087263984  
84.6828575663  
1518.0721222741  
3.170518796  
66.3772916468  
2.650735193  
1.6306878805  
20.0104400316  
0  
161.0235004421  
1.1975117527  
2.3687667603  
4.358181613  
18.2760672596  
24.7515355107  
58.4539719734  
0.2609366587  
0

gene\_expression\_table

66.4247174204  
0  
0  
0.9456397795  
0.2849716327  
19.5631500199  
12394.4721438681  
41.40934581  
2.2657205456  
0  
0  
0  
2.002814133  
2.3757382361  
0  
0  
222.4260070005  
5.6052136527  
0  
33.0230706826  
11.2843101736  
0  
2.6918915848  
22.7982931932  
0.1388412121  
0  
0.6023573316  
20.1361631121  
1.1519371756  
3.0859391955  
7.2844469448  
0  
1.0729570308  
0  
2.8525803635  
2.313642948  
1.2358927759  
7.7654275886  
4.2994303109  
57.9916568219  
46.6271030379  
0  
198.3942306944  
30.8625143223  
18.6276789061  
20.815670999  
407.4604731943  
105.6004953606  
2.7113852722



gene\_expression\_table

1.9207125368  
34.2032424929  
0  
115.0705070884  
0  
2.7306336043  
3.6644211512  
2.8238691705  
14.9258424619  
3806.4150882774  
3.6581578344  
10.9676336944  
5.2288124387  
0.5507501334  
0.2426665048  
31.0600786707  
0  
0.3789373916  
41.539324225  
6.579145065  
71.1352531562  
0.9921078588  
6.9038570512  
0  
6.3817882099  
1.2858549752  
11.6117243567  
0  
3.8993060631  
170.7051607867  
15.0166509091  
1.180648659  
451.1173352254  
5.9151489958  
0  
0  
0  
291.8944373058  
24.1176146474  
0.268814962  
0  
19.7293033141  
1.1587257696  
16.3731817326  
0  
27.3131394837  
378.5877152153  
19.1991331614  
45.9630181381

gene\_expression\_table

0  
 38.5150140217  
 0  
 159.3554112212  
 253.7833508863  
 0  
 3.2446885337  
 0  
 0  
 8.0611856448  
 0.5310709881  
 0  
 0  
 0  
 2531.8240504288  
 0  
 2.017529896  
 3.9570291787  
 0.2358433337  
 57.9940457676  
 7.3317091337  
 0.691022079  
 3.7212028468  
 2.2162951601  
 0  
 0  
 0  
 0  
 0  
 0  
 0  
 1.5483320806  
 10.9565371703  
 80.8386713183  
 55.503369339  
 6.0810229496  
 0  
 0.6655954913  
 0  
 1.7180324981  
 3.9508474195  
 0.7977781747  
 62.1743736723  
 23.7894276175  
 2.0567517838  
 52.1296411811  
 0  
 0  
 0  
 0

gene\_expression\_table

6.1631780696  
1.9237834092  
64.7144363126  
3.3559448982  
1.0022250342  
0  
0  
0  
0  
14.6829939613  
39.9437426349  
3.862322349  
0  
3.4885527469  
92.8331641134  
0.786641705  
240.6188665935  
0  
118.2307227904  
0  
12.6575668845  
30.4825363981  
2.1518180805  
59.1833196428  
18.5955282803  
12.0957362371  
13.1357812361  
213.0456206125  
63.9911573185  
56.5798658055  
2.9079679852  
0.3489469322  
3.2022883438  
0  
0  
2.4807241828  
0  
0  
9.8200715751  
0.5568991703  
0.5050568128  
0.6990837134  
3.8424735548  
0.2842236998  
0.4868334374  
1.0595200351  
0  
0  
0.2318199493

gene\_expression\_table

17.5490773909  
95.8125313753  
71.5504118714  
50.7578584963  
1.986938395  
0  
111.0757239298  
146.6082229636  
0  
75.7056033034  
1.9960189341  
11.2933004598  
7.8013285521  
0  
0  
6.2304223273  
110.4680995769  
9.4483587987  
105.5854095756  
13.2437014206  
1.4533835698  
11.8007685242  
0  
0  
5.2902477428  
0  
253.9855213158  
79.67507514  
15.2434135781  
109.7681539689  
0  
0  
253.1113737878  
0  
5.2821756754  
15.7016000559  
121.4462958081  
0  
137.7255431438  
15.5923872609  
72.2480808435  
26.0621977866  
0  
0  
0  
0  
0  
1518.0010961345  
78.7980219975

gene\_expression\_table

294.0725421778  
30.7300589585  
0.6828040843  
199.7831780049  
10.4519312587  
14.0070853775  
22.6189823427  
0.6922589352  
0  
3.8939442014  
26.6226448753  
1.0975329079  
0  
1031.0530890199  
0  
53.7421494277  
61.7557029474  
9.7245624793  
13.5532719213  
0  
0  
354.6634978828  
0  
314.7532534773  
7227.3454614278  
15.7872921016  
0  
0  
109.894427934  
0  
39.309534466  
1.7203185241  
2.2374056404  
0  
49.7926949189  
37.1943318628  
306.0446654365  
11.487600661  
0  
39.0056926537  
57.519671382  
1.0851142002  
16.849351737  
43.5134595407  
9.1923307934  
465.8020531189  
6.362099878  
76.8452762559  
3.2374755723

gene\_expression\_table

29.1778650019  
0  
123.562887612  
179.4754539785  
0  
0  
0  
4.268146559  
0.8947309468  
8.4441306442  
157.5282906899  
0  
0  
152.8746277639  
147.7900154027  
0  
0  
119.1682011417  
569.9301167567  
9.0837879791  
0  
0  
0  
1.9317820147  
15.9205985488  
8.0016224907  
3.7076783276  
17.2208619084  
9.4985075185  
4.0591350685  
0.8093254657  
14.9198873106  
1.1570496589  
13.7460546613  
1.1818181872  
2.7129876428  
0.4323753405  
11.1271376937  
8.5022675505  
25.315688923  
2.7528101465  
0  
19.3186310073  
21.6304444637  
18.7570501242  
0  
4.5599153352  
0  
3.3077247614

gene\_expression\_table

155.7306925893  
0.929416302  
8.2777027436  
0  
0  
47.0130392723  
9.5582681913  
26.5906115841  
0  
30.947581029  
0  
0  
31.2313568219  
0  
4.0667646102  
1.2799511415  
128.2933287674  
3.4153456114  
24.0897580597  
28.4230902472  
14.8869100565  
2.1639458442  
6.0571035228  
0  
8.0636482034  
0  
0  
74.7930931328  
0.5922564644  
0  
19.9292958806  
50.0721196217  
0  
23.4221378698  
13.1239438893  
1.1033131091  
5.2785541036  
113.3368398741  
33.3568822532  
0.235593896  
0.977038817  
0  
3.277930197  
0.1798386161  
1.9896725312  
12.5607196735  
0  
6.2070560793  
6.2784925715

gene\_expression\_table

6.6196410161  
5.7928024127  
19.4878939785  
0  
0.6596861658  
2.8849654925  
2.5415626891  
0  
21.4875893486  
0.1818888905  
0  
0  
0.1909608586  
0  
104.7834134496  
0  
1459.3105388494  
161.7035837154  
1.7371021195  
8.4461570735  
4.5713906384  
0  
0  
37.8571849388  
5.9547808144  
0.4829554443  
20.7134652494  
0.2478321306  
0  
0  
0  
21.0389372909  
0  
5.3567423652  
2.4418457349  
0.7746431423  
1.386672571  
4.7415757848  
0  
0  
13.4348188485  
0.3270558723  
50.6123478481  
0  
0.9198937931  
0  
0  
2.5602048829  
9.3261795869



gene\_expression\_table

4.9083239  
0  
0  
1.7222631573  
1.6016900404  
0.5439826972  
8.9949872916  
1.990506265  
18.7885538126  
130.9650595336  
1.8428702757  
6.5212407866  
27.3159907491  
4.0261392213  
34.9021698269  
3.5852209751  
0  
2.1947122072  
2.1162687507  
3.2078691633  
0  
0  
7.2290715642  
6.1974179477  
1.4110791647  
1.1821291294  
0.305720336  
0  
2.1621859673  
2.1604368445  
0  
49.2340934728  
16.4655609475  
57.002766237  
0  
0  
5.5753199691  
0  
76.2561291379  
0  
5.2226052122  
2.8222337639  
2.4802774154  
131.325136288  
5.0981584016  
2.7050293233  
5.0784190071  
0  
25.0272481594

gene\_expression\_table

10.5553743453  
29.5360326663  
0.5287651406  
0  
20.4283545337  
255.5928578445  
18.901791904  
0  
144.3568711671  
46.3225687049  
0  
23.9863262627  
228.270343029  
0  
145.5038240825  
1.2730643321  
35.6731568267  
7.4316670474  
6.2127337202  
1.7675339758  
22.3501728818  
9.4503884123  
37.2829836072  
18.3633186503  
9.9046368338  
0  
239.6299180643  
37.4336699906  
0  
0  
8.046441821  
7.646960679  
956.4233324298  
255.5928578445  
56.7053757119  
34.4915097268  
4.8115296524  
99.5510824255  
13.3740448872  
0  
7.4597576357  
12.9174240584  
3.1474813562  
265.8326598284  
359.2868041704  
7.662625718  
29.4449570547  
15.2889385427  
7.7216183688

gene\_expression\_table

25.7745415783  
13.7516813722  
26.9728980906  
6.1326252875  
16.6683099811  
0  
1.7172966662  
7.0305905963  
5.4659320586  
20.8997247774  
9.1131891572  
7.93219214  
4.0714915828  
0  
17.7829210163  
18.0333748208  
6.274313924  
8.8786923626  
99.5056164128  
5.2226052122  
3.613463709  
0  
135.43102078  
15.0438711371  
28.1971232176  
0  
200.7500657387  
436.1906927987  
1.4478431503  
1.2631042393  
0  
55.3942564759  
0  
17.0933154566  
0  
2.1843600053  
3.1855126511  
7.5944881698  
37.1613075232  
28.159327429  
3.6263707094  
25.5048092812  
17.2590981707  
6.1937494285  
1.834943642  
1.7568799354  
0  
2.8845057391  
1.6014167455

gene\_expression\_table

2.4615770626  
0  
9.374234286  
3.4172938502  
1.9558829934  
22.0949202285  
0.3487429303  
4.6758518035  
0  
5.8746680897  
0.3874523308  
0  
0.6149877951  
15.7778555851  
0.6723301086  
0.857361945  
111.47322251  
56.1773926978  
32.1221203455  
3.7895847238  
4.0782313471  
41.7663803701  
1.0983549402  
57.037224944  
9.4697861192  
5.6658971345  
4040.643356433  
733.2320109415  
413.7561972102  
819.721436725  
224.1728441095  
23.5970387514  
35.8159462604  
0  
2.2470239753  
5.0801294061  
12.5038232615  
1.2989052452  
16.5429548885  
0  
0  
16.3613754508  
10.1639265108  
63.8477559416  
7.2737262039  
1.3470275767  
0.7205621269  
0  
4.9834997676

gene\_expression\_table

6.5375938563  
0  
0  
5.842486143  
11.1862493496  
3.2991316578  
35.6383889882  
11.3786812939  
0  
0  
10.2378406007  
0.679980999  
48.7370832199  
4.4817848787  
0  
29.7310809152  
0  
0.8298782486  
97.4437295415  
5.5229716007  
0  
1.4288089526  
76.0545242878  
4.5507029383  
0  
37.5748788525  
36.1650165135  
0  
118.8522972569  
13.2151080541  
2.5276599056  
0  
6.8518732806  
0.9102818261  
12.1446295808  
12.2952442009  
0  
0  
0  
0  
130.2751574074  
0  
0  
0  
129.9312838955  
62.1067811187  
0  
24.1041941787  
0

gene\_expression\_table

|                |
|----------------|
| 0              |
| 0              |
| 5.706482192    |
| 0              |
| 3.9160096273   |
| 0              |
| 9.6263023357   |
| 0              |
| 42.6091241225  |
| 0              |
| 55.8800791615  |
| 0              |
| 4.7096395725   |
| 4.2105993187   |
| 86.7762484106  |
| 9.1169662535   |
| 391.8864618394 |
| 24.5205317175  |
| 24.5006171425  |
| 0              |
| 6.7669941406   |
| 15.2624182676  |
| 311.330188302  |
| 8.3223306988   |
| 1.3954695105   |
| 0              |
| 135.6790151318 |
| 0.6242486081   |
| 4.8918143252   |
| 41.2067423867  |
| 0              |
| 0.9263340666   |
| 20.401006584   |
| 5.8831378048   |
| 0.389425811    |
| 0.8263903009   |
| 0              |
| 0              |
| 0              |
| 80.2564682089  |
| 0              |
| 18.3514255051  |
| 0              |
| 56.6832359849  |
| 249.4845120773 |
| 0              |
| 156.4228290009 |
| 0              |
| 13.8727380864  |

gene\_expression\_table

6.7569256588  
1.0148905749  
38.7252486668  
48.304419173  
0.9805953628  
2.8153293891  
0  
15.6253072576  
227.7332363395  
7.5859761882  
0  
18.5551463511  
3.5399272329  
1.3613033389  
1.637516239  
11.7576224913  
0  
0  
0.3094594836  
0  
13.400864269  
2.401414883  
0  
0  
0.8823268702  
3.9557937499  
6.2056134224  
1.3258668874  
17.4848878741  
0  
13.0242099639  
1.4062304829  
0  
0  
21.9421050656  
0.6151597806  
0  
1.0210700676  
85.0838911162  
2.0545905736  
0  
4.6275176688  
7.7357048872  
3.5995435031  
0  
0.3154336156  
0.9429120861  
0  
0

gene\_expression\_table

2.2657327005  
9.7322711379  
0  
0  
51.8877218739  
7.9852833863  
75.8059943189  
76.1485541963  
0.2457812421  
8.064880047  
46.4860916828  
0  
1.7799593651  
0  
0.5374485818  
0  
1.1893405859  
1.1263524986  
7.9357692278  
39.8065751546  
0  
63.4190553507  
0.2945396891  
0  
1.0786458833  
1.9802734801  
1.9186602698  
0  
74.9749089736  
338.1493509283  
6.1897883442  
0  
2.6843975688  
0  
6.1273839763  
4.5793212289  
0  
41.971650236  
0  
0  
0.3618851116  
1.239352649  
50.277808792  
25.6952394322  
12.3223025321  
16.9965513228  
0.5290751409  
0.4167612058  
56.0184328812



gene\_expression\_table

7.2705540599  
41.658937225  
861.3035965557  
1.5015630584  
8.9373124747  
5.6177392698  
0  
4.8136684025  
4.3236604506  
53.1564065166  
1.6237102073  
2.4285571911  
0  
8.0236138793  
0  
0.549481847  
0  
6.6185300304  
0.4220799487  
4.0004864198  
40.6306091235  
31.3710103621  
8.0052624872  
53.1809255443  
23.6632473276  
3.0217766717  
179.7963551734  
456.7089897835  
8.9540555954  
213.6466062947  
0  
3.7827962731  
0  
6.854688902  
0  
0  
6.4725091056  
0  
9.2637532866  
2086.7357797214  
9.831501427  
7.479574227  
52.7070558221  
8.304003899  
18.0432361967  
12.4871869878  
0  
15.8846712164  
1.3346995193

gene\_expression\_table

0  
4.7426406852  
45.6209113204  
11.3569333737  
0  
34.5335464769  
46.0368038263  
4.6106159069  
1.3887517865  
0  
0  
330.5261857137  
1.1948549907  
27.0134406794  
58.3252735976  
16.815640958  
10.3708289535  
1.9503661058  
27.8718166899  
2.9563192717  
0  
92.5756910354  
9.0722104748  
4.9358581481  
3.1545340616  
15.7023005823  
13.3224953519  
5.8992853713  
0  
22.6044550579  
0  
4.7825977069  
0  
0.6988431064  
19.2223638605  
0  
0  
412.9174057476  
0  
1.7309225416  
0  
36.9679928794  
23.9308740907  
5.6553946164  
6.2458094987  
2.5701136648  
6.4747350979  
112.3181721183  
0.4991439141

gene\_expression\_table

0  
0  
0  
2.4015241226  
0  
2.6350568282  
18.2452755444  
706.1326229975  
1.5184716768  
5.1326734292  
0  
7.1274071537  
8.1430168089  
12.2716654551  
10.4035283846  
0.2539771427  
4.8262100137  
4.5455489472  
9.0282830874  
3.890326618  
5.9943054909  
32.0130403176  
0  
0  
4.2720321084  
108.7157846694  
15.9760038698  
0  
91.8133996309  
0  
432.4826098435  
0  
2.1549801938  
0  
0  
0  
162.1895692405  
74.2228722732  
726.6224755128  
0  
69.4748398663  
0  
0  
16.1806091998  
5.4105784547  
22.1815969162  
44.7172885597  
187.7663018761  
7.5018941757

gene\_expression\_table

7.0484252053  
 31.7001905203  
 0  
 0  
 57.2617219017  
 0  
 1.1212748785  
 357.7527613824  
 16.5780200307  
 0  
 0  
 2.0768993583  
 382.3751252147  
 37.871380766  
 0  
 0  
 0  
 0  
 11.6690880691  
 51.8656070616  
 22.9358986805  
 86.4359235939  
 453.9055305828  
 176.944665317  
 31.2330065513  
 0  
 0  
 701.9707010514  
 91.8933068543  
 2.5712402488  
 9.419279145  
 0  
 0  
 34.3904011386  
 577.4676977363  
 4.8973960238  
 0  
 0  
 0  
 1.4143681291  
 43.0628323886  
 0  
 53.0526628357  
 3.5272736546  
 798.7469485959  
 0  
 21.0245737904  
 100.2051631247  
 17.6771152814

gene\_expression\_table

20.8184853538  
0  
192.5569779494  
3.6759242284  
2.0189958998  
0  
0  
70.925885774  
10.5501008769  
25.1447713976  
0  
85.063774079  
0  
0  
0  
6.4661283346  
8.8341206138  
36.7669224604  
51.4699276473  
55.1647907918  
192.3550025391  
1.5121433523  
19.8870668316  
346.9269066045  
0  
0  
1504.3280615269  
2.8619361281  
0.8957499831  
0  
0  
4.8658552519  
0  
0.6487821952  
0  
0  
0  
1.466754317  
0  
3.4415959209  
23.7283913873  
0  
0  
0  
0  
3.5126639578  
0.858320269  
0  
18.6266930538

gene\_expression\_table

1.010788108  
0  
0  
3.8454823752  
43.141461961  
0  
12.17140415  
13.7573553704  
1.3199142563  
1.8302746956  
22.4683954105  
2775.2437403377  
1.6398814894  
0.7012799435  
0  
1.9510941233  
2.5773512045  
52.6971911289  
6.9822384325  
12.1782479326  
2.3835254317  
13.0071339175  
1.6342656525  
2.7056947774  
5.4844577545  
0  
0.7977862119  
2.9194256999  
1.2090809209  
12.2454374311  
0  
22.6618180792  
1.8251898836  
2.4957549656  
0  
2.3394281252  
22.0365572671  
2.9572431541  
1.9379514633  
13.2917724278  
1.8464475382  
0  
4.1053466144  
0  
2.3466866157  
0  
0  
0  
6.0431209693

gene\_expression\_table

0  
0  
0  
0  
1.4383953351  
0.227266271  
0  
0  
266.7140121896  
0.8032301738  
1.5390561713  
40.1722692526  
0  
33.371226393  
1.3000087366  
2761.2904540665  
36.001571732  
0.6210979516  
43.9628599402  
0  
1.6025365445  
0  
51.0867715244  
0  
6.1272869995  
86.6875283872  
11.533716705  
1.1977653323  
0  
23.7524120298  
36.1815601114  
9.1439689595  
6.555860394  
11.2985992055  
29.7875504445  
10.1889372585  
3.4771789982  
7.9366640039  
498.7653633284  
0  
0  
25.2984017576  
0.3552946883  
23.0372354935  
17.2243735034  
33.2594372757  
1.522248071  
0  
0.3292958133

gene\_expression\_table

286.4132699513  
0  
22.9655316245  
2.8421963898  
22.1213931648  
13.8264138775  
15.2794564423  
1.4081997569  
0  
1.9661958217  
6.4487212802  
0  
16.2915305625  
6.2215196262  
5.7678034292  
3.3457838273  
3.2243265563  
27.0975002119  
4.5020961337  
0  
0.248947919  
0  
6.5908495366  
0.9603431662  
141.858672008  
13.6425833496  
14.2899860962  
0  
3.8566631446  
0  
3.4902904029  
0  
0  
91.5672899189  
35.3246602796  
29.4470687125  
0  
0  
0  
1479.4011720501  
0  
0  
0  
0  
127.4416530785  
1.2275089469  
5.1540590566  
7.0116817462  
0



gene\_expression\_table

12.9766007393  
0  
0  
11.9255015757  
0  
1.3284692759  
0  
0  
3.2793868565  
0  
30.7356701951  
2.5236724885  
95.089865654  
7.6834092254  
0  
0  
0  
0  
0  
0  
0  
77.693458113  
1.7684665239  
124.0357234368  
8.6107182175  
3.9044970629  
0  
7.82135871  
1.5310268786  
2.8987469856  
8.4668144481  
2.8486265032  
16.6969751647  
0  
0  
3.5957434129  
0  
14.7788403488  
7.2070163032  
0.7560148329  
0  
130.675011851  
7.9693116141  
18.9189867196  
85.5368806931  
0  
18.332391627  
16.4295312736  
14.1249494422

gene\_expression\_table

0  
2083.6124221986  
31.8649140215  
0  
0  
0  
0  
1417.3069601821  
0.9384368741  
14.2287293652  
3.649743123  
0  
20.7625611829  
0  
14.5357222064  
119.3633506184  
0  
0  
0  
20.8132090628  
0  
0  
153.5296480771  
0  
48.5245270043  
18.8892603292  
52.6290969429  
26.458364185  
0  
7.0571587745  
25.0207782445  
0  
162.6414735789  
2.4599941655  
0  
0  
38.4608088394  
0  
0  
218.7489062609  
8.1930132166  
0  
11.3204041573  
6.7800301532  
1460.1156927839  
4.3656943623  
23.0982519854  
0  
12.5753055919

gene\_expression\_table

0  
8.3233147748  
37.0609041317  
0  
73.6166005893  
2.3489001263  
26.1803643877  
0  
50.9889699749  
0  
42.1372481595  
0  
0  
19.3876991509  
2.2770001892  
4.3278029912  
1.4043974565  
0  
28.9263773249  
10.8326058865  
75.2747691841  
28.6418754274  
0  
2.3526160779  
53.6965975126  
4.5360402791  
0  
0  
1.7570334245  
0  
79.9240732121  
0  
95.2936909527  
13.6193547424  
19.8492134086  
76.2301666898  
0  
0  
0  
25.1879600123  
0  
0  
8.0092095559  
1576.829113797  
0  
251.4579797666  
7.3694382358  
5.1231427048  
4.2842527724

gene\_expression\_table

16.3546173444  
2.8884933872  
0  
16.3952499341  
0  
0  
0.492046982  
5.3844009065  
22.4070901024  
12.4694903544  
2.2515760988  
1.7104945823  
8.4017991227  
29.4766637564  
60.2951433373  
76.377413642  
0  
127.4699950398  
70.2059823467  
26.4302161083  
4.8735026483  
0  
0  
17.0836355595  
0.7971357249  
0  
0  
0  
14.2666598533  
17.7394841357  
0  
6.1113277522  
0  
0  
0.9312853653  
8.8492988791  
1.6844614016  
0  
66.1977489502  
0  
4.1252357717  
0  
0  
3.6083697578  
1.2454267246  
0.163318499  
2.101939428  
1.0803842195  
0.3853875928

gene\_expression\_table

4.4149950596  
1.8667446277  
2.394715692  
58.6599675892  
0  
4.0273642894  
0  
10.8087135456  
0  
0.5998216737  
9.1209101205  
165.5580221741  
3.910787991  
0  
0  
29.7903211217  
0  
38.5383372846  
2.9135046792  
31.6421725759  
22.8161225043  
23.9567560677  
7.828597257  
6.7979274772  
0  
0  
0  
0  
0  
0  
8.2188420866  
627.262640598  
8.5045274805  
31.0257526838  
0  
0  
0  
0  
8.1225793965  
0  
36.5074845214  
149.1044649253  
7.5468885082  
43.7508603214  
1.3075916379  
8.6948803116  
0  
0  
17.6269465068  
1.0196169107

gene\_expression\_table

0  
0  
6.1056733693  
0  
0  
3.4915810045  
11.6124906049  
125.343504026  
59.6527737715  
17.2514608297  
1.4457417238  
34.3080289203  
0  
4.0158759157  
0  
14.3458436923  
53.7485156558  
12.2290258948  
2.4396094433  
7.7313716349  
268.1612793503  
1215.9334013458  
2.5413791673  
9.4109675718  
0  
18.4007615022  
0.3599457606  
0  
2.3957752646  
0  
1.9522485315  
0  
18.6020806159  
0.8364260784  
3.969338994  
22.8889564242  
29.2625413084  
1.2279372174  
4.8668533278  
0.3282829829  
72.6193720355  
0  
14.7453887764  
607.7567134873  
30.8774410222  
0  
4.9675563197  
0  
0

gene\_expression\_table

0  
313.8864101199  
3.7105541851  
0  
18.4731978402  
0  
10.9445467008  
0  
1.5208119258  
16.246408613  
34.3628678655  
114.1609084007  
0.6341009031  
0  
6.574229294  
46.4604224979  
20.5159641651  
1.3222108213  
3.1534976876  
5.5202284506  
5.6789248125  
5.6208794259  
1.0045912399  
0  
0.8471365842  
2.1298760341  
2.2149917816  
0  
1234.1151768574  
0.3806216944  
1.6853217809  
1.9968224388  
0  
4.0285935967  
3.5704952236  
6.379686686  
0.0763147389  
0  
23.2787993895  
42.2679782128  
0.4749552849  
59.38436984  
0.8992344343  
14.8299321712  
3.0966641613  
34.1741828136  
99.0768243455  
48.3848453742  
19.5149079707

gene\_expression\_table

0  
9.7547495912  
0.76779896  
2.4295337188  
0.3727113897  
0  
3.6505690826  
344.5397542591  
6.7648263439  
1.466622906  
0.3140123885  
8.1480511381  
0  
1.0645836819  
0  
0  
2.0048268619  
33.0965688973  
1.8698409632  
60.0462975293  
3.5447255127  
41.3898116721  
243.8462114909  
9.5344707009  
0.5473242182  
1.4520044773  
8.9461398346  
1.9421220906  
0  
0  
0  
0.252914935  
2.4420880417  
0  
0  
11.2435545165  
0  
4.9256115682  
6.2004750582  
0  
1153.3827873316  
0  
0  
6.9288584556  
7.6184071703  
0  
14.8967817342  
0  
0



gene\_expression\_table

3.2323430598  
24.3993587259  
96.6852755283  
11.9366242242  
3.8919757299  
0  
16.7039091244  
1.9370981631  
49.1209162948  
5.6444675278  
73.6843991291  
3.7314606155  
1.7325557017  
40.4309437395  
76.0349639452  
138.2550865203  
9.2893794854  
14.2953438364  
119.5842396269  
48.6408599558  
12.4379090088  
51.8083462098  
2.9678497424  
2.2967330022  
77.1447220474  
0  
0.8954138433  
0  
0  
0  
0  
8.5952906257  
0  
33.9206878255  
2291.4023779965  
6.8614863458  
12.0717326446  
32.5813853864  
0  
21.1636419274  
43.5988064728  
0  
4.639730084  
8.2347067209  
13.8182711131  
11.4703277369  
0  
136.0010795895  
4.5454134735  
0

gene\_expression\_table

115.5075041851  
0  
11.3629571605  
36.0310570487  
4.9745776007  
0  
5.760628605  
0  
0  
1.7012343641  
0.9421548486  
22.6772786889  
17.5799882743  
1177.7691149522  
1.5702534105  
0  
0.2739795306  
4.0142819288  
0.5258813694  
19.8434906088  
18.0184272417  
0  
144.5055787987  
29.4856436997  
4.6717140647  
49.2239671681  
10.6555060627  
0.7644137206  
0  
0.9749705398  
1.9728952796  
7.7764269948  
0  
0  
0  
0  
55.5858960651  
0  
118.0856154384  
1.0198237236  
0.5500787178  
17.2553374041  
147.0139370309  
0  
1.0593605793  
2.2958840065  
1.5322218775  
1.0018802993  
11.8542056333

gene\_expression\_table

21.2197856778  
1.2831515638  
0  
2.1076825179  
3.2539882142  
1327.7843256486  
29.2000816636  
1.8137148428  
0  
5.9566956969  
6829.9954168363  
1.4596523111  
16.8680261324  
8.3308325005  
3.0379919314  
0  
197.7254860966  
48.8075669466  
38.6618123675  
29.022927316  
160.8630247723  
48.0972142469  
0  
48.2830663872  
0  
546.6893458313  
248.1218952427  
112.5644025326  
234.7787227153  
20.0866374157  
84.5494951758  
186.3556948279  
0  
0  
1.7010699142  
133.1887853366  
8.9669137644  
41.4222870049  
309.9186485432  
18.1746121999  
46.9738225228  
123.9577135478  
96.9514428972  
1.2633422722  
82.4836442811  
28.6455387101  
15.5386916226  
8.3718212477  
4.3504495087

gene\_expression\_table

21.3407327948  
14.141582952  
8.2919393392  
21.7548085898  
1.6897991418  
21.7791686418  
0  
0  
0  
5.1334328596  
27.3608213464  
12.7387069603  
6.5525648878  
0  
0.6603091223  
40.3567670281  
130.6311685321  
9.9738254411  
0.7757786196  
2.0715816549  
6.2395809906  
4.2480266172  
2.0992282794  
0.3653904251  
96.4690813847  
67.4653247762  
0  
0  
17.5209142627  
1.3293111166  
0  
0  
11.7556152594  
0.2766869745  
26.6327177641  
3.5376025938  
2.6011127594  
14.6231610601  
3.083505916  
4.0981230995  
0  
45.0788697244  
0  
13.0866128226  
0  
23.003357206  
2.7792582244  
30.5988974824  
0

gene\_expression\_table

84.183691481  
2.1830502745  
8.6748066857  
0.1663356973  
5.7781335151  
2.5724304928  
4.6274730953  
15.0778015455  
0.7894413301  
0.2426893735  
6.6777604639  
17.6393456602  
1.7234213593  
0  
3.9078689884  
1.4722918438  
185.9690733574  
1.9585859425  
4.0558295078  
0  
8.1564626941  
1.5660936816  
0  
0  
2.4548466573  
3.4825981125  
4.967906913  
1.3126962426  
0  
0  
4.9162084824  
0.4477031249  
1.3090019907  
5.6338509745  
0.5914254403  
0.6391562068  
0.3476200198  
0  
0  
29.7005371521  
1.2344189722  
3.8809782657  
13.2955662195  
0.1700264569  
0  
0.4226552485  
5.9555197459  
0  
74.6389518479

gene\_expression\_table

0  
4.7456782775  
7.5359131194  
63.3861081048  
4.0729350108  
13.2287677223  
7.8469491941  
0  
4.760970794  
0.1769707004  
1.0981150536  
0.0722203364  
1.239352649  
3.3770445841  
0  
8.3239240813  
240.0066552489  
17.5961019208  
1.1299808388  
0.5533957016  
0  
1.8057430835  
0.188014234  
5.7136286945  
54.384693076  
58.8385446348  
0  
0.2171453565  
1.1405144861  
0.8395065435  
17.3176003896  
0  
1111.4253639534  
2.185354643  
8.1100123667  
0  
0.8948674428  
21.2687993505  
105.9385380357  
12.8670786899  
0  
7.9611245568  
1.7506534284  
9.6284342126  
7.6074564511  
0  
6.2515272289  
0  
0

gene\_expression\_table

4.3771415959  
1.5846972968  
0  
0.4254083218  
6.537121633  
0.0929949203  
0  
2.5193819879  
9.2404349184  
39.6751186757  
0.9030182559  
0.4471977856  
0.1970728208  
0  
3.1282976824  
0  
38.9388265649  
11.1893992895  
24.2892591616  
0  
1.23150343  
0.5871776796  
0  
5.1043507587  
0.1328093301  
2.1500544119  
3.5606390334  
21.1191938345  
2.9343952414  
0  
73.930226236  
0  
0  
0.7074114915  
4.2476449498  
0  
0  
0  
0.6971991606  
1.7044062338  
0  
0  
33.6505751269  
0.9088479413  
10.3553178449  
0  
0.225639742  
14.8283701391  
2.6664328899

gene\_expression\_table

0  
0.7674808436  
0  
0  
20.2250003276  
0  
0.5692850365  
0  
1.0541253302  
1.4132701054  
0  
0.6772723805  
52.8863278817  
0  
40.9185461247  
12.9497037561  
12.3625782915  
0.7796625395  
0  
0  
0  
0  
0  
0  
0  
2.8948130059  
132.3763453064  
89.3058224017  
1.2907593987  
12.8982909328  
86.9401016267  
25.1250260745  
0  
0.8937766399  
155.5221619351  
0  
8.3937840508  
4.8807566947  
33.493658665  
152.9832065784  
1.3928738533  
10.5229733078  
19.6299713698  
69.8376447312  
0  
94.7173567394  
74.2745573066  
4.1454813339  
146.1845553787  
359.37852136



gene\_expression\_table

442.3969674954  
2.1122362506  
11.654018717  
18.6571382384  
0  
205.9533346728  
63.1332698243  
349.0951323509  
255.1741907036  
3.0010775123  
29.2829158209  
77.4370440598  
148.9463084213  
3908.7382176526  
20.874158891  
22.1631842098  
0  
15.6191434283  
0  
0  
28.9131069288  
78.7412165128  
490.1123453688  
50.3937198809  
0  
0  
44.1239286606  
127.5335163391  
0  
3.4103814462  
20.1415312286  
3.4885815627  
12.7759316557  
11.0559191189  
51.3235676634  
11.1216436791  
3.5905030266  
129.9097022191  
0  
11.8902488261  
0  
3182.7727759479  
0  
11.4872882093  
357.1599478244  
18.5712313943  
0  
2409.7847511798  
36.6565093652

gene\_expression\_table

313.211987812  
44.8726772527  
0.9187891329  
0  
18.6390237125  
20.888779839  
72.5286167512  
0  
0  
0  
0  
0  
1.9800358101  
0  
96.6330479217  
2.3786122749  
11.4195770685  
441.3183263347  
44.5526855882  
0  
9.6288732457  
5.7358436319  
13.9111211562  
4.5942155174  
98.3562268985  
131.7097526976  
0  
96.364105903  
6.522449319  
1.0011132246  
0  
6.4430455881  
165.2353827474  
0  
0  
0  
44.4418107808  
2876.8133490511  
8.8571862028  
23.8187202607  
47.808182145  
0  
82.8510746827  
0  
0  
11.2111925222  
0  
0  
2.3724392669

gene\_expression\_table

6.3759305299  
14.8827750094  
21.1419824722  
84.4437622024  
11.7219438885  
1.9438383147  
2.7787096578  
350.6988692902  
0  
13.1455938217  
172.4312622356  
3.6195582423  
36.6234511188  
11.1243240803  
95.6552037376  
0  
13.7027192565  
2.289213832  
0.2601247332  
11.7529327481  
9.2936721746  
12.7495513585  
311.8376977665  
0  
18860.7910021286  
30.7445547758  
0  
0  
23.0674334099  
1.5343594265  
0  
0  
176.8322136609  
0  
27.4105424651  
8.4915321915  
2.3964685693  
0.6123981926  
8.0945576185  
0  
141.6683343292  
162.3622337926  
0  
25.6673982827  
820.6587180883  
6.8800970629  
17.4947863925  
0  
16.8686036067

gene\_expression\_table

7.138972926  
22.2121404387  
7.0005244207  
0.8213950832  
41.089146287  
0  
9.1689817703  
16.2057441585  
0  
0  
13.3106032566  
1.1593173749  
0  
4.9458385311  
0  
0  
0  
1.274447296  
0  
497.3225813342  
0  
6.5333463013  
745.5507372028  
671.7112840602  
620.4823285538  
0  
0  
0  
0  
4.0568424327  
0  
19.728215541  
0  
23.9178637616  
21.0623198834  
28.8046247722  
53.8323418905  
0  
0.662746192  
11.2985992055  
38.4684520844  
31663.8519240023  
1.7019747824  
3.4340068812  
37.404495386  
1.3668014185  
135.1106399472  
39.1057072502  
0

gene\_expression\_table

21.7414977299  
0  
9.1669916284  
0  
0  
5.2598091848  
0.6027390143  
0  
0  
0  
0  
1.8633596212  
5.0553198111  
0  
0  
0  
1240.149770513  
80.193295956  
0  
0  
4.9334365749  
13.8645406836  
145.547217473  
186.3693583819  
45.5659457861  
17.8837075839  
99.9738347634  
0  
0  
0  
0  
48.503202791  
16.1566013773  
151.0271578899  
4.6856563854  
299.2207628866  
0  
46.9023778944  
29.5447106193  
43.4944144901  
125.7967548557  
0  
4.1784561944  
52.57272942  
2.9496426857  
8.3460862318  
165.9756497297  
4.237824988  
0

gene\_expression\_table

355.6626274514  
141.34592982  
9.7223174861  
16.6205191713  
16.7532066476  
3.1706378059  
0  
0  
7.9884552063  
83.4887266017  
0  
3.4126962596  
31.3542418933  
0  
0  
0  
8.9600653068  
0  
0  
10.5931958411  
68.1856051505  
1.6032404749  
0  
0  
3.2928040909  
0  
0  
4.1074227642  
0  
0  
0  
2.5870216859  
0  
0  
0  
0  
2.6894231861  
0  
5.026919138  
69.4526621119  
0  
368.9716713835  
22.2191518467  
13.2229692643  
36.893664059  
276.3111797856  
42.239362521  
2.2731470984  
484.514544675

gene\_expression\_table

103.6981040813  
39.4598339653  
0  
1.715873365  
128.2662240658  
37.9530587978  
23.2531768759  
0  
127.9823146371  
1380.0842874418  
44.9490887933  
272.5664009695  
0  
4.4298472656  
221.4066173857  
36.1146716258  
11.5868762223  
150.4303761564  
808.3548582683  
0  
2.2318486017  
35.9464166328  
162.526605981  
0  
0  
0  
2.8454310393  
1.5849381485  
0  
0.7653612379  
0  
29.9108808996  
0  
0  
0  
36.4646464382  
84.2874180802  
13.2337418782  
26.7963841284  
152.9356017531  
1.827654179  
9.5685760767  
49.0834019809  
5.5249946142  
199.4391069761  
0  
0  
8.8067903043  
0

gene\_expression\_table

0  
0  
13.0039299927  
0  
5.7423946036  
13.2384431281  
30.8012686001  
2.7021909601  
8.6596117988  
89.7003016166  
0  
0  
0  
0  
0  
10.9058424682  
19.2358188332  
10.0360907478  
0  
456.4136894568  
25.3459054246  
0  
2.109857545  
0  
32.3032898392  
0  
20.29347888  
5.2827703141  
52.7550226288  
7.5704746236  
1.4301443152  
11.738847553  
46.8487674212  
0.7887277734  
12.2902350804  
5.6306075959  
19.9067514283  
0  
49.6884822395  
0  
91.08776359  
41.047310176  
3.1028067112  
244.1079570734  
28.1131727382  
0  
45.4130793873  
363.6397869762  
8.9536828445



gene\_expression\_table

0  
 1.8808356192  
 50.9599660102  
 0  
 188.9397586321  
 0  
 20.8886988081  
 0.861548959  
 0  
 6.9528124309  
 10.5781861604  
 1562.1862165229  
 0  
 12.8320614439  
 0  
 35.2738242871  
 2.637393455  
 0  
 8.1113474361  
 785.7142101136  
 60.1112494025  
 0  
 0  
 358.5851912908  
 103.7470125138  
 5.9894381616  
 0  
 0  
 26.6562508396  
 62.9448021656  
 3.5431196874  
 2.8553574984  
 0  
 848.0755789203  
 77.0766745693  
 0  
 0  
 1.0516998812  
 1.4260734621  
 19.3875211531  
 0  
 4.9954065042  
 19.404867013  
 35.3562036753  
 382.3654739426  
 13.8608469844  
 18.5982998588  
 0  
 3.7271138966

gene\_expression\_table

2.8471574263  
0  
4.4868863495  
0  
240.944699928  
0  
2.3996683994  
9.2450908942  
4.8604169044  
0  
193.6539400302  
0  
4.1923926772  
0  
0  
14.8764226242  
3.8054967319  
20.6302089831  
0  
1.2119120046  
0  
0  
0  
7.1413268116  
3.277930197  
0.8000167419  
2.7037132433  
0  
0  
0  
0  
0  
0  
4.8690078752  
1.0934241495  
972.7299039626  
0  
54.4271191602  
41.9906182444  
22.9026562812  
22.84656704  
12.1141925675  
0.287716499  
1.4203041374  
2.5103521059  
2.6348595564  
262.9007337387  
9.8995461683  
0

gene\_expression\_table

30.1355382595  
0  
1.0986463719  
6.6606995695  
0.4076955822  
0  
0.8052332874  
24.8290204763  
2434.6312609597  
54.6387127248  
2.3472987419  
3.4808759297  
21.577735748  
0  
118.3527079452  
11.3162443469  
72.5533760287  
0  
4.0090142983  
0  
0  
4.4427084733  
0  
0  
0  
46.4193306848  
1.8227322246  
146.0513780555  
5.8026714429  
0  
0  
0  
8.8120021345  
876.2274653575  
0  
25.1274177952  
101.4736954365  
0  
289.9050253448  
0  
0  
11.6966223081  
10.9950442128  
0  
156.0265710427  
5.7144238554  
0  
0  
2.6446600936

gene\_expression\_table

4.5377948073  
0  
4.7975922199  
609.0401181601  
18.007232809  
4.3579911497  
124.4743997354  
0  
6.8633261555  
0  
1.929981165  
1.7773526172  
2.5020980379  
0  
352.8334488741  
64.2071267449  
114.7520753602  
0  
3.1971357934  
24.7514715148  
0.7864659231  
0  
4.7153183983  
9.8851636123  
0.496258323  
1.1641298093  
4.9756325052  
4.7987369568  
8.8854169465  
0  
0  
0  
0  
1.149153901  
1.3908922117  
0  
0  
0  
0  
1.2110571211  
3.3221763758  
0  
0  
0  
0  
0  
0  
1.881187478  
0

gene\_expression\_table

17.0065892849  
0  
15.3005701664  
0  
280.8021674247  
0  
5.9002743546  
0  
0.2287403667  
8.1052097538  
131.8243597489  
9.7626317894  
458.3277598324  
0  
79.2297427252  
88.1973099241  
13.4705335471  
23.1242684134  
26.2314688752  
0  
11.2566802678  
532.567997571  
0  
0  
0.656295085  
2.5048136449  
441.6466032269  
10.9324300658  
44.2547073247  
22.6214053724  
13.7159534393  
0  
2953.2673505882  
21.4845813326  
16.7489545647  
25.7570262077  
79.0901944386  
353.7199650773  
0  
3.9602944216  
152.9967479778  
0  
55.605698971  
1.3838373973  
3.4317746149  
1.5604139448  
0  
0  
226.9214634242

gene\_expression\_table

10.7254158094  
3.5082871337  
0  
1.6793976488  
49.9221794684  
0  
62.4477055063  
0  
31.4479878224  
3.8117820405  
12.7961633969  
0  
0  
3.5702106437  
65.3599756641  
0  
1.879479682  
71.9117748122  
0  
0  
7.36659524  
0  
24.0807193494  
4.6836298523  
9.0232371555  
10.4292186463  
1.7494351588  
57.6864375754  
40.0870497219  
0  
17.0591391822  
5.6573209514  
13.935908345  
0  
153.0132193639  
0  
0  
1701.756318637  
33.1014686341  
21.7656997682  
0  
117.4911827621  
0  
10.7539948133  
0.6294850123  
13.0594198609  
10.3774543787  
22.7083710139  
46.2850296228

gene\_expression\_table

2.5821816966  
85.4250886534  
4.050073248  
0  
1.3240961052  
0  
0  
0  
0  
1.6598347729  
0  
1.1729757216  
0  
0  
27.4185502193  
32.4828209739  
0  
5.2483054765  
20.7588435858  
60.9213540248  
217.2023616556  
0  
15.9634876207  
2.6071437109  
49.6119051422  
0  
0  
1.5535262205  
0  
2.2474544397  
3.2007217648  
0  
0  
6.810643719  
1.5046443728  
2.7879544142  
5.916740052  
0  
6.1892440913  
0  
2.6957059226  
0  
12.5899254249  
0  
4.0398457903  
0  
2.4501754247  
129.8296936775  
0  
0

gene\_expression\_table

0  
1.8159608134  
4.788453949  
4.4108326629  
21.4125754564  
4.4559266348  
0.6504007637  
0  
84.6972391175  
11.5129658244  
3.2572406365  
19.5873127865  
0  
0  
151.7685921742  
2.4600285546  
0  
2.9907491949  
0  
70.1743519674  
5.54758886  
0  
26.2461659996  
0  
991.5142307118  
3.0369433536  
13.8939596448  
0  
0  
0  
7.1848803767  
7.355459158  
0  
5.5927437669  
0  
4.5589555084  
0  
3.2008673116  
0.5845737009  
480.2023245461  
0  
0  
0  
6.5766862609  
0  
10.4409497609  
2.8019374672  
74.1897618369  
60.3125879073



gene\_expression\_table

3.1756626699  
2.7119075763  
51.795638742  
9.1052094493  
52.8885653124  
26.0126655766  
0  
83.8978224677  
0  
3.3624855761  
5.2649498153  
0  
0  
6.0410464341  
11.4662888227  
2.6782692737  
0.3701556186  
0  
6.1044378675  
150.0612577329  
0  
0  
0  
0  
19.1420093866  
2.6109151725  
4.7265358698  
4.0200041719  
0  
95.0485940109  
2.2078374334  
0  
344.7431004249  
0  
125.4651455723  
13.5313865918  
5.370433589  
1.2281943232  
0  
2.4712214945  
2391.0674374397  
12.6635374742  
15.1030481441  
21.022062194  
0  
0  
2.4818515285  
0  
0

gene\_expression\_table

0  
28.5924743674  
0  
0  
153.3974896222  
0  
9.0888705841  
2.8895842796  
10.0932424793  
14853.1989282001  
9.7651890949  
21.8525772287  
0  
71.9675621202  
17.0767280569  
0  
0  
5.2043602189  
0  
79.7623490656  
1.6098036191  
0  
0  
0  
126.4647377837  
5.9201238899  
0  
3804.4795318504  
2386.2891252146  
29.8474656044  
0  
33.6098709456  
0  
4.9903775239  
7.2537379483  
0  
39.0623046894  
99.4774915918  
464.1116904421  
0  
0  
0.8756751723  
0  
11.1447550745  
31.6155533214  
33.1873045971  
7.549364334  
3.1074639348  
0

gene\_expression\_table

87.5768447172  
161.3530614335  
7.1118526764  
6.1286207  
0  
0  
15.9832590941  
6.2609944008  
0  
9.5674705971  
19.7024462727  
11.386326925  
0  
0  
3.5673156827  
0.5815167213  
784.7464181048  
0  
63.8928606099  
0  
0  
6.5266827121  
0  
6.2530223905  
8.5053495711  
0  
0  
0  
38.0684791234  
0  
1225.8617671469  
13.5661582392  
0  
16.6596310353  
27.3892113037  
0  
21.6496636407  
9.5096288909  
4.4250203083  
0  
0  
34.2420656966  
0  
4.2170065331  
4.4500109401  
0  
4.6603729509  
1.9832715274  
0

gene\_expression\_table

17.2977407562  
4.497589435  
13.4617511658  
0  
0  
0  
2.0823060304  
2.2498105631  
2.183185691  
1.4496122791  
5.5228271564  
0  
7.1115652708  
0  
5.201379816  
0.9129026671  
0  
0  
0  
0  
3.1422826236  
6.6941449569  
0  
0  
3.4258731206  
71.3502583445  
0  
8.777936532  
136.6211898757  
28.4388728704  
49.6314003727  
7.8124609379  
0  
2.675215607  
42.3043891162  
105.1647505733  
1766.9536881919  
0  
4.783247693  
0  
0  
31.1774078945  
0  
0  
110.2144150058  
0  
55.5814432903  
0  
1.6762781732

gene\_expression\_table

0  
 2.4199076269  
 0  
 0  
 0  
 44.6844992818  
 0  
 0.8444941099  
 0.981486838  
 0  
 7.9781721398  
 0  
 9.2313382672  
 19.0164032375  
 0  
 8.7311179671  
 0  
 0  
 53.5083793618  
 110.8527420667  
 19.3784475967  
 0  
 0  
 36.159386841  
 0  
 0  
 0  
 674.8498716238  
 164.0559896294  
 8.0861887479  
 8.6304895844  
 29.5881769863  
 0  
 9.3405351712  
 21.1179266322  
 41.8118640038  
 7.1058220321  
 18.354699622  
 0  
 29.8939438209  
 14.3947388651  
 0  
 61.3066683557  
 15.3966960933  
 0  
 0.5668863095  
 8.2785302461  
 22.94222408  
 2.1536175898

|                | gene_expression_table |
|----------------|-----------------------|
|                | 0                     |
|                | 0                     |
|                | 0                     |
|                | 0                     |
| 3.6130927549   | 0                     |
|                | 0                     |
| 3.1917236352   |                       |
| 9.2799495136   |                       |
|                | 0                     |
| 2.5787761229   |                       |
| 8.3216747774   |                       |
| 5.6971569404   |                       |
|                | 0                     |
|                | 0                     |
| 10.0990348709  |                       |
| 5.2932977177   |                       |
| 2.5962774067   |                       |
| 8.9432170873   |                       |
|                | 0                     |
| 2.7397739783   |                       |
| 3.352237025    |                       |
|                | 0                     |
| 4.4874584375   |                       |
|                | 0                     |
|                | 0                     |
| 3.0970729079   |                       |
|                | 0                     |
| 4.4937610476   |                       |
| 8.8291342804   |                       |
| 9.1947322906   |                       |
| 3.5738359591   |                       |
|                | 0                     |
|                | 0                     |
|                | 0                     |
|                | 0                     |
|                | 0                     |
| 8.0580217072   |                       |
| 0.7209606597   |                       |
| 2.0780029831   |                       |
|                | 0                     |
| 5.257713852    |                       |
|                | 0                     |
|                | 0                     |
| 1260.972248116 |                       |
|                | 0                     |
| 6.930222807    |                       |
|                | 0                     |
|                | 0                     |

gene\_expression\_table

48.4781494837  
0  
17.9397040469  
6.2440365691  
185.9195622429  
251.4557672408  
280.2675496646  
11.7956050357  
14.1374318237  
382.6944892192  
98.2260143468  
0  
0  
78.992096625  
37.9856184996  
14.2979835941  
9.7852207201  
78.1419549849  
0  
8.3911157574  
0  
15.5049908444  
0  
0  
0  
0  
0  
133.8218118829  
30.2943387282  
0  
6.00420293  
1.2510490189  
0.6135297921  
0.6265824555  
23.8329634173  
0  
15.3261614686  
3.4941230252  
1.5603101778  
0  
618.46318658  
5.7688838963  
564.3710053511  
126.6880128607  
0  
0  
35.6105934488  
0  
3.0258033981  
0

gene\_expression\_table

253.430326014  
0  
94.7804394754  
3.2050939373  
24.5296463097  
119.3248090134  
5.0039292707  
0.2222462382  
1.5633163555  
0  
1.7217070994  
54.1198716401  
0  
520.4914556543  
69.1170639771  
36.7842145957  
34.8050795987  
42.8748861285  
11.9598801101  
3.6126291694  
0  
66.1134187868  
47.576251088  
3.3426220914  
36.2958475543  
334.7609386715  
3.4637473207  
6.3421326311  
1.2335969059  
0  
30.4193055533  
4.1990618244  
37.1387300653  
4.3361564507  
12.4285389241  
0.3740944855  
0  
6.5309216042  
0  
0  
31.0615597303  
0  
1.9357663848  
0  
0  
0.2820710767  
0  
7.974879403  
0



gene\_expression\_table

0  
0.0513117951  
0.1167900095  
223.527414632  
0  
0.9345991961  
30.627966262  
3.0780226096  
24.4089499919  
20.3087919938  
0  
6.6218507103  
0.7623935648  
1.2233701736  
0  
4.0782313471  
16.4294354053  
5.2264830005  
5.3984870682  
0  
0.2069279681  
0  
62.4638285943  
8.1147137612  
0  
0  
1.1982954794  
1.7503051783  
5.6935581724  
17.4579050224  
564.3314661162  
209.2353917772  
12.2652505751  
1.4976335195  
31.2013621677  
0  
0.1782763388  
578.9647657196  
107.9101699766  
25.0653485156  
5.4303426102  
4.9329426682  
6.2169297686  
20.6594745537  
0  
22.2392088533  
4.4532015848  
22.9708277114  
13.9469532495

|  | gene_expression_table |
|--|-----------------------|
|  | 0                     |
|  | 0                     |
|  | 2.364152383           |
|  | 26.3814777309         |
|  | 0                     |
|  | 0                     |
|  | 0                     |
|  | 64.2066762318         |
|  | 0                     |
|  | 0                     |
|  | 7.0859362027          |
|  | 5.4846714236          |
|  | 20.784529444          |
|  | 19.4435630095         |
|  | 4.2950080312          |
|  | 6.0637957045          |
|  | 1.7347882666          |
|  | 27.2579594561         |
|  | 2.2478372131          |
|  | 31.0281684249         |
|  | 0                     |
|  | 6.4093123652          |
|  | 1.9587676161          |
|  | 1.1000955379          |
|  | 2.025969176           |
|  | 0                     |
|  | 32.2329302365         |
|  | 4.0024036533          |
|  | 61.0723737423         |
|  | 25.3355292653         |
|  | 5.01503595            |
|  | 197.4871537014        |
|  | 2.5487715342          |
|  | 19.2060772307         |
|  | 0.7108261775          |
|  | 0                     |
|  | 21.4822806868         |
|  | 2.6026130685          |
|  | 1.8088365925          |
|  | 3.8519357038          |
|  | 3.1742790618          |
|  | 1.3274921839          |
|  | 8.9279201187          |
|  | 1.9459017916          |
|  | 0                     |
|  | 0.7989271224          |
|  | 0.7001777847          |
|  | 125.0377037775        |
|  | 2.8907182048          |

gene\_expression\_table

0  
2.8203943108  
38.3389286767  
6.717911152  
14.466479587  
30.7342759077  
2.2944870282  
1367.4141507098  
41.8037667878  
2.9595807123  
121.1536541315  
0  
0  
15.2242732254  
0.6332480764  
12.0295876795  
438.3919408912  
1.0444280529  
2.6105555156  
19.1651149568  
1.2242780234  
3.3276732875  
0  
2.8193606717  
0.4491295194  
16.3101882328  
1.2745857576  
13.388544565  
1.5802502719  
0  
3.4872910829  
1.7924693927  
0  
0  
1.0551998718  
0  
0.9955628119  
4.400675596  
0  
11.8417970289  
0.9095995794  
20.7457332892  
9.1973994223  
6.4488641121  
1.01165974  
0  
441.3183263347  
1.0286163352  
0

gene\_expression\_table

3.7254043319  
47.6590433564  
0  
0  
6.6122092011  
0  
0  
0.9136254533  
0  
17.6682412275  
0  
12.0082661842  
0  
273.1636130411  
0  
30.6194434453  
6.2015676144  
105.9182956476  
0  
15.2116248974  
14.2049521829  
7.5348183526  
0  
134.84726638  
0  
0  
0  
0  
18.057122018  
0  
7.1404212873  
2.2433001801  
3.2662184145  
24.2892591616  
0  
89.2351047083  
5.1211548236  
0  
10.5485198637  
8.7052031969  
4.5982671185  
0.9150863609  
9.7163742219  
0  
0  
23.5671196767  
0.8582714299  
0  
0  
60.0713500335

gene\_expression\_table

0  
1.6582818235  
0  
1.0661477523  
1.9012065971  
0.9183496088  
32.6170051599  
9.9649300731  
29.8227763801  
4.3520633764  
0  
9.1314290466  
3.9828521153  
8.6880119786  
42.2124545679  
0  
6.0618561015  
6.7799368607  
9.3660133125  
183.6558357576  
0  
10.8740783439  
0  
0  
0  
22.1559675957  
17.8128063392  
23.0787780493  
2.601103887  
0.4101112991  
0  
1.3038253864  
0  
9.2386708454  
0  
49.8971996438  
18.0728851418  
30.6724794328  
0  
0  
2.09903005  
14.3094590043  
24.7156857621  
0  
0  
37.1216206303  
368.9053114817  
0  
1.6721103741

gene\_expression\_table

4.2629030449  
4.5425534776  
9.9583041735  
7.9048745658  
15.7481454333  
32.8548596027  
2.9164017671  
0  
1697.759973302  
36.2761662803  
0  
1.2923566562  
0.9995210873  
54.2661486947  
0  
0  
5.4326057768  
0  
1.1601134956  
46.2986397066  
350.2783938188  
0.9073016041  
3.4263178081  
2.4386451541  
175.7947174756  
0  
3625.8725815789  
0  
6.4964143006  
0  
0  
0  
59.38436984  
49.8623337868  
4.3815009368  
28.8345696833  
0  
4.6759294561  
162.642394648  
37.5097060327  
32.2144519693  
91.3171109843  
0  
14.4870019803  
0  
303.4063493551  
3.9289056179  
0  
4.3574515941

gene\_expression\_table

9.7991926136  
70.8660882141  
0.9154910136  
0  
33.7981464711  
0  
10.3302425962  
377.720282288  
0.3969450914  
0  
76.2262627075  
29.2361261143  
12.5652040433  
0  
10.543779666  
14.2046791788  
1.1732494341  
82.5208359325  
5.134977608  
0.9049919394  
6.8566406634  
0  
23.6193872884  
4.418354169  
20.5960030382  
0.917304434  
0  
0  
2.7833243594  
0.7324604478  
0  
88.8159904128  
0  
0  
0  
0  
0  
0  
0  
26.23457253  
2.8679510283  
0  
0.2344373162  
4.6278943491  
0.0785530329  
4.7554569011  
321.2441991561  
1.8763734353  
2.0590521715  
0

gene\_expression\_table

3.7803583808  
2.1720029946  
2.5854063414  
25.9203603225  
201.3912595857  
0  
5.9458776915  
0  
0  
449.8626473145  
4.0309225556  
20.6523150342  
7.6604423919  
0.8585750204  
0  
6.5816057083  
38.622920741  
0.7083654327  
5.5629825909  
0  
262.5350245407  
12.1997064705  
23.9383924544  
7.8387787021  
13.2136768563  
14.0709450799  
26.1794690341  
103.1037732124  
25.2340107727  
1.3404096631  
0.8202018906  
312.1645716635  
21.2653316558  
0  
7.7272694362  
0  
0  
5.7053341344  
1.7494351588  
1.339338478  
129.7915299024  
0  
2.5597766086  
1.8701585174  
6.7160798102  
0  
0  
0.4411026147  
9.0301825594



gene\_expression\_table

14.3559644117  
3.9368161661  
3.5292308013  
0  
0  
0  
0.1193925625  
30.4502682543  
122.1296099523  
4.8661591761  
1432.2099041396  
25.99197721  
0  
0  
0  
0  
2.9980098407  
0  
0  
1.2993847938  
3.5784039577  
1.492078028  
0.4397303347  
0  
71.6440438172  
0  
0  
3.011477413  
0  
2.6015229285  
23.9155884083  
21.3550941462  
0  
13.6227010212  
10.4044070981  
598.9782624593  
2.7850863753  
0  
38.5393922913  
44.7972161923  
2245.9456358754  
31.4112848296  
9.7736320648  
3.7351038465  
22.0705287574  
8.6304895844  
0  
28.3126006858  
23.5216684816

gene\_expression\_table

9.4641111448  
0  
0  
0  
52.9138775674  
742.5490324183  
78.1503093203  
555.9068739448  
16.0436897254  
0  
3.9366607512  
1.4673811351  
0  
16.2545371321  
1.141537933  
0  
0  
13.0742972307  
11.697308327  
1.2510267844  
4.4979726325  
1.7356458132  
2.5148589412  
5.3124734378  
49.5657442958  
0  
42.3679090133  
0  
8.8722974531  
1.6345123198  
0  
1.2395272426  
0  
28.7800609414  
2.0702818517  
17.3691637592  
0.2971169471  
42.9470854487  
0  
5.1306733518  
0  
8.5591285324  
17.9995584002  
0  
2.8589692325  
4.8719734946  
64.2051745671  
4.3898285107  
0.3484804995

gene\_expression\_table

84.2593644367  
57.4849106169  
18.0333748208  
3.4058436216  
23.349272352  
0  
0  
0  
5.2901947309  
0  
2.6472460718  
23.6828018834  
0  
1.4031749836  
5.5607559447  
45.2878594993  
61.637717207  
8.7078954723  
0  
7.856349535  
71.9736943255  
0  
9.811174723  
0  
4.5013969355  
1.3183180329  
7.6854429225  
6.555860394  
1.9378447597  
0  
4.1976428559  
60.0599599406  
0  
6.4947659209  
2.0665337634  
0  
0  
15.0995383816  
204.4400244984  
6.7591965672  
618.966739085  
20.8173126135  
4.359475617  
0  
5.8645528536  
23.1408548582  
1.3206430216  
0  
0

gene\_expression\_table

2.9159185191  
75.1344787058  
0  
0  
0.7669289518  
0  
0.6189679486  
50.7866327925  
0  
0  
0  
312.6262711448  
0  
7.3958007324  
14.5374376395  
1.1967064442  
12620.2678900985  
0  
245.3347182167  
2.5223913371  
0  
1.3807970703  
1.6768258125  
24.3837547872  
6.6983067675  
68.0625343748  
94.7526326332  
1.5553799065  
0  
0  
0  
0  
0  
62.8484580807  
0  
1.284501847  
0  
0  
2.2418712354  
10.4926992696  
32.7274842154  
0  
17.5858443664  
0  
0  
0  
18.2120964307  
0  
4.5518800472  
6.8176799623

gene\_expression\_table

19.049568723  
234.1269684031  
0.9592494536  
1.4779178855  
1.3111476558  
8.4380571866  
25.9766668698  
5.7023876418  
26.0045504997  
0  
5.3455553653  
1.3266165294  
4.4435965943  
0  
0  
589.4751930328  
4.249166331  
0.4765630792  
0  
17.5274584289  
0  
0  
53.5823392611  
0  
0  
0  
123.0599179203  
0  
0  
6.9489229376  
7.0467787617  
3.0280595823  
0  
0.1644302151  
0  
1.6230924426  
0  
0  
3.0037668793  
6.2276661944  
6.4330353729  
5.1605772031  
23.3726436473  
4.1739962672  
0  
8.5605164242  
2.5566712571  
1.3794440905  
0

gene\_expression\_table

64.4255416524  
0  
0  
0.2575850736  
18.5140118491  
33.519177643  
0.0639481377  
0  
0  
4.566763965  
4.3343764194  
26.7684336212  
12.8273846105  
2.6047318328  
0  
5.2548354937  
0  
1.3342655934  
0  
0  
16.8080827297  
44.6102464295  
24.7405056915  
107.2263557701  
7.8508000279  
200.4655456808  
7.8572264902  
64.162715381  
69.13885969  
15.0844919103  
0  
83.1861517744  
4.27047704  
0  
91.1371356677  
0  
12.0302403618  
25.8044625345  
25.743120706  
494.7612711428  
68.990746479  
3.9808999576  
0  
226.5781321364  
22.7432223103  
0  
1.9400880065  
53.6605095863  
3.8770770869

gene\_expression\_table

6.6280859746  
5.1843764498  
0  
0  
0  
0  
2.4702675224  
11.5629783429  
0  
0  
0  
189.0146178491  
0.5757142055  
0  
2.046466829  
713.4149295647  
6.6506304847  
21.9303859423  
28.0821046151  
13.4942053263  
92.2492037864  
290.3889152244  
0  
23.7323914533  
15.3724116729  
1.9817639306  
0  
3.2773197249  
0  
3.2156360462  
0  
996.0887695809  
5.9251071591  
1.8834021793  
2.3448313215  
91.7200674624  
945.4704237795  
383.4707939232  
0  
0  
2.9219302231  
2.005935227  
1.2094881139  
24.949496669  
2.6555686513  
0.6217151025  
4.9500895253  
35.7652123339  
1.8587589762

gene\_expression\_table

56.8475600342  
3.6213955815  
0  
4.3087731797  
33.0890779874  
9.6022198722  
0  
0  
7.1617316405  
97.8947945182  
0.5879084027  
80.4652738507  
0  
27.1107198623  
7.6345198536  
55.8053743346  
144.5210920117  
0  
0.3521133374  
8.9228677611  
4.7413628621  
26.6831967591  
0  
25.3750083094  
12.2345522735  
0  
11.2292052405  
53.5811125873  
334.9415866365  
0  
18.7507386922  
2.2722115337  
0.6094501468  
27.5703915682  
3.4301580357  
23.6571879851  
15.6125447197  
0  
4.0469463948  
3.1354241893  
0  
9.278970874  
6.2893381925  
123.0284421121  
10.2959931327  
0.1240750776  
4.2762364557  
0  
5.5219606493



gene\_expression\_table

25.3384712204  
2.545392097  
0  
0  
21.8449558438  
41.3394902311  
2.1489276179  
1.5168356042  
0  
4.2596845544  
0  
0.3775370512  
15.8370195854  
0  
4.0539608207  
12.0974266896  
8.0207694907  
0  
2.3081156435  
5.2290066523  
0.340804502  
0  
0.8175789009  
0.6440098175  
4.8571814139  
4.8289415028  
82.9421913398  
757.4135026383  
30.5018327774  
0  
0  
69.3070298432  
10.5767329382  
1.2900024383  
0  
35.7593394363  
21.0717775933  
0  
2.7665326331  
10.5332611308  
0  
14.3829736515  
16.9973493632  
122.5457399902  
0  
0  
0  
7.1775540992  
17.414713768

gene\_expression\_table

0  
 0  
 19.5359706875  
 2.6045390753  
 15.0085870043  
 0.6637711281  
 0  
 3.1257892399  
 0  
 270.054425381  
 0  
 3.4739356172  
 5.1676722476  
 12.8825536329  
 0  
 0.250081796  
 7.2547347517  
 13.3269743902  
 6.9265402907  
 0  
 0  
 0  
 3.8643417478  
 0  
 0  
 3.1908233898  
 0.3394068867  
 0  
 0  
 0  
 0  
 0  
 1.921386613  
 0.8678799725  
 5.1808981747  
 4.7949777282  
 5.1948944562  
 0  
 0  
 35.788631328  
 12.0017515857  
 0  
 11.7770359194  
 0  
 26184.7833270878  
 0  
 0  
 2.8604629816  
 3.3996751051

gene\_expression\_table

12.5730593999  
2.0315239415  
0  
6.0260485447  
0  
2.2500406933  
2.8870954042  
8.7419613823  
0  
1.941086673  
0  
6.3126892768  
1.4570840434  
2.1397387694  
3.9110052812  
36.1482452585  
0.844811688  
0  
5.7160148413  
7.876614358  
112.0255102502  
0  
0  
8.0262569043  
0  
0.3039907454  
0  
0  
4.2051431247  
0  
98.779501895  
0.45296186  
5.6724295569  
2.2508753102  
0  
148.2456272771  
5.6860956598  
1.5340250414  
51.3610164541  
66.1550525305  
0.1608060444  
27.024269238  
5.8330797347  
195.1458972369  
529.8639056988  
0  
0.8096233472  
179.9357438743  
8.3720701793

gene\_expression\_table

4.9547353156  
0  
15.3247459091  
2.8719001653  
0  
1.8433528793  
4.5055541862  
3.9766590105  
0.0634034934  
0  
3.0363538467  
0  
7.9979858028  
0  
0  
3.6158148548  
96.5951600378  
10.0441944977  
0  
93.2176242001  
5.0864924162  
3.252033867  
0  
2.3283366317  
91.2005893468  
0.0861376055  
6.5570817932  
0  
0  
0  
3.6401858122  
0.2939812104  
11.5389686615  
1.4746050707  
1.4185867201  
0.2200768908  
2.3232646726  
1.4175677778  
0  
540.5596928744  
13.5300861221  
30.3792949578  
14.5230405732  
13.6999363664  
0  
4.5143963117  
16.2609205901  
0  
211.1239027283

gene\_expression\_table

0  
34.996821205  
52.3949792634  
0.3965068387  
0  
71.4518432936  
26.7056933418  
324.5193398087  
6.1414538281  
470.0950277106  
9.1380336298  
105.4707674371  
7.8426360823  
4.472820875  
10.4841038204  
52.4517682939  
66.6069956949  
40.0901429835  
135.9341964869  
15.4861310784  
0  
28.3583163454  
14.2760153564  
12.1782479326  
0  
22.0698697193  
0  
943.1096267408  
3.0343250733  
5.6807580543  
0  
18.6959556575  
4.3802285657  
4.4488859215  
0  
0  
0  
13.0400654039  
0.1992692631  
1.7711452905  
150.406566347  
205.0998632004  
10.3747012514  
0  
22.633528312  
2.8643040916  
0.7365541772  
42.7441962739  
0

gene\_expression\_table

338.5232753305  
6.1452764992  
6.8975645271  
0.9184694373  
0  
93.7959767994  
2.7760248082  
22.781866834  
37.6329130007  
0  
32.6269309597  
0  
0  
3.8902549492  
188.3771803311  
47.5609953043  
0  
0  
102.9699722797  
111.6715066902  
0.0958118358  
18.7141810662  
0  
316.6877556985  
0.4659786775  
1.7061826898  
0  
0  
19.0029983488  
74.9515444073  
0  
6.1795890711  
0  
5.3455553653  
0  
0.0831238493  
31.0457160004  
0  
0  
0  
76.5111663591  
5.1086938789  
0  
47.1585045119  
14.2953438364  
11.3204041573  
341.296262425  
5.890645889  
1.1383012557

gene\_expression\_table

18.0049297993  
236.892224484  
0  
19.7515447599  
7.3946266861  
0  
0  
0  
0.8718357285  
0  
26.0452424903  
8.5540318937  
3.0736320906  
3760.4528469015  
0  
1.5893496469  
0  
47.8149464656  
1.3645624761  
1.1412541433  
0  
183.1036459876  
0  
3.8773285391  
13.222650815  
1313.6505948434  
0.2518615752  
482.4124791892  
632.1735542501  
49.5955622902  
3.1299032909  
0  
0  
1.7566325298  
1.1965437045  
8.0035248031  
1.1801735808  
10.2892564182  
0.5664878777  
0  
0.2085215116  
0.4611038744  
0  
0  
1.2970861843  
4.9893870889  
5.6726092008  
0  
0

gene\_expression\_table

5.4410644157  
4.6260141928  
0  
0  
138.0617908351  
3.4046081282  
2239.3866544994  
0  
20.6564432311  
117.1609072077  
0  
0  
28.2012311901  
0  
0  
6.3323383457  
0  
2836.8875788568  
36.6743346911  
0  
272.42108676  
0  
1.8262948347  
11.7833777544  
0  
1.3644302242  
0  
2.4723064486  
0  
0  
107.4399159509  
16.4696703389  
0  
94.610582057  
2.1404327997  
0  
74.984031619  
24.0239839762  
10.7029543922  
0  
0.1933522493  
104.7474301345  
4.2912525026  
0  
2.53129578  
0  
0  
0  
0  
0



gene\_expression\_table

0  
0  
1.0155861066  
3.5102945106  
0.5207921948  
2.1854903456  
0  
166.9436055075  
0  
2.5511116646  
2372.1780374003  
18.0580484993  
190.759547562  
21.3562721633  
7.252336657  
44.2706119814  
3802.1123049907  
11.8010433045  
135.6790151318  
1099.8480164123  
9.398904162  
57.8127812971  
0  
63.9214248551  
36.829443061  
0  
134.4196455409  
8.2422598759  
71.323593213  
62.8905723032  
0  
0  
7.4377996189  
5.8476633571  
6.4397809219  
0  
0  
0  
7.0596178571  
14.5164514437  
9.209770123  
1.7317458373  
8.9320200978  
0.9047709232  
5.3798741249  
1.8962896835  
18.3077148874  
0  
1.0514171155

gene\_expression\_table

3.0940779363  
0.6262747257  
8.677466475  
8.5544477183  
2.0408555189  
0  
0  
0  
1.1734267638  
9.5154566046  
9.5535115432  
0  
19.0814706285  
0  
2.5394232494  
0.6034520948  
0  
0.5685254503  
35.4789682714  
1.9371781281  
0  
11.3892219992  
61.6457143159  
0  
4.8499025442  
167.0607153608  
0.510720862  
10.7803465886  
1.8299824009  
18.6119177817  
81.3539086176  
21.421263862  
0  
4.9771101232  
16.7607290072  
0  
0.2303995007  
2.5483870554  
5.8571517093  
3.719264735  
54.8424410209  
357.1715650488  
30.7739462476  
21.998678975  
0.4670887396  
0  
67.5271230338  
0  
28.1231114361

gene\_expression\_table

9.372248592  
0  
18.3890642357  
2.1574570687  
53.1695833047  
0  
0  
0  
87.0627990728  
5.3071329266  
0  
0  
40.1862714378  
778.8688580955  
0  
70.8189138447  
217.9878951448  
3.6977449596  
40.5908156646  
6.6056937923  
804.9095152554  
9.2701723977  
0  
0  
0  
126.7078833155  
1261.9156952627  
0  
4066.9935540222  
6.4780299144  
20.4603060896  
182.9825764054  
32.2152279407  
64.6870329763  
0  
780.0130996181  
381.2607883569  
10.3973815436  
24.4144243064  
26.0753002594  
15.4317255778  
0  
0  
1.3923044712  
228.3869576494  
17.0442845637  
0.3765474443  
454.9312594326  
49.0638520333

gene\_expression\_table

18.2339325071  
27.3352877426  
41.0822184256  
0  
0  
0  
2.5554130832  
5.0689106853  
0  
6.5113476884  
7.5042935022  
1.9913133843  
0  
0.625157848  
1.5264073089  
240.7006834917  
0  
1.3895742469  
3.288518703  
9.6619152247  
0.3751226941  
7.2547347517  
14.028394095  
0.0474209753  
0  
0.985854221  
3.9424860886  
0
